# Supplementary material for: Proteome-wide Analysis of Lysine Acetylation Suggests its Broad Regulatory Scope in Saccharomyces cerevisiae
Source: PubMed Central journal article supplement — Mol Cell Proteomics. 2012 Aug 2;11(11):1510–22. doi: 10.1074/mcp.M112.017251 (PMC3494197; doi:10.1074/mcp.m112.017251), 2012-08-02

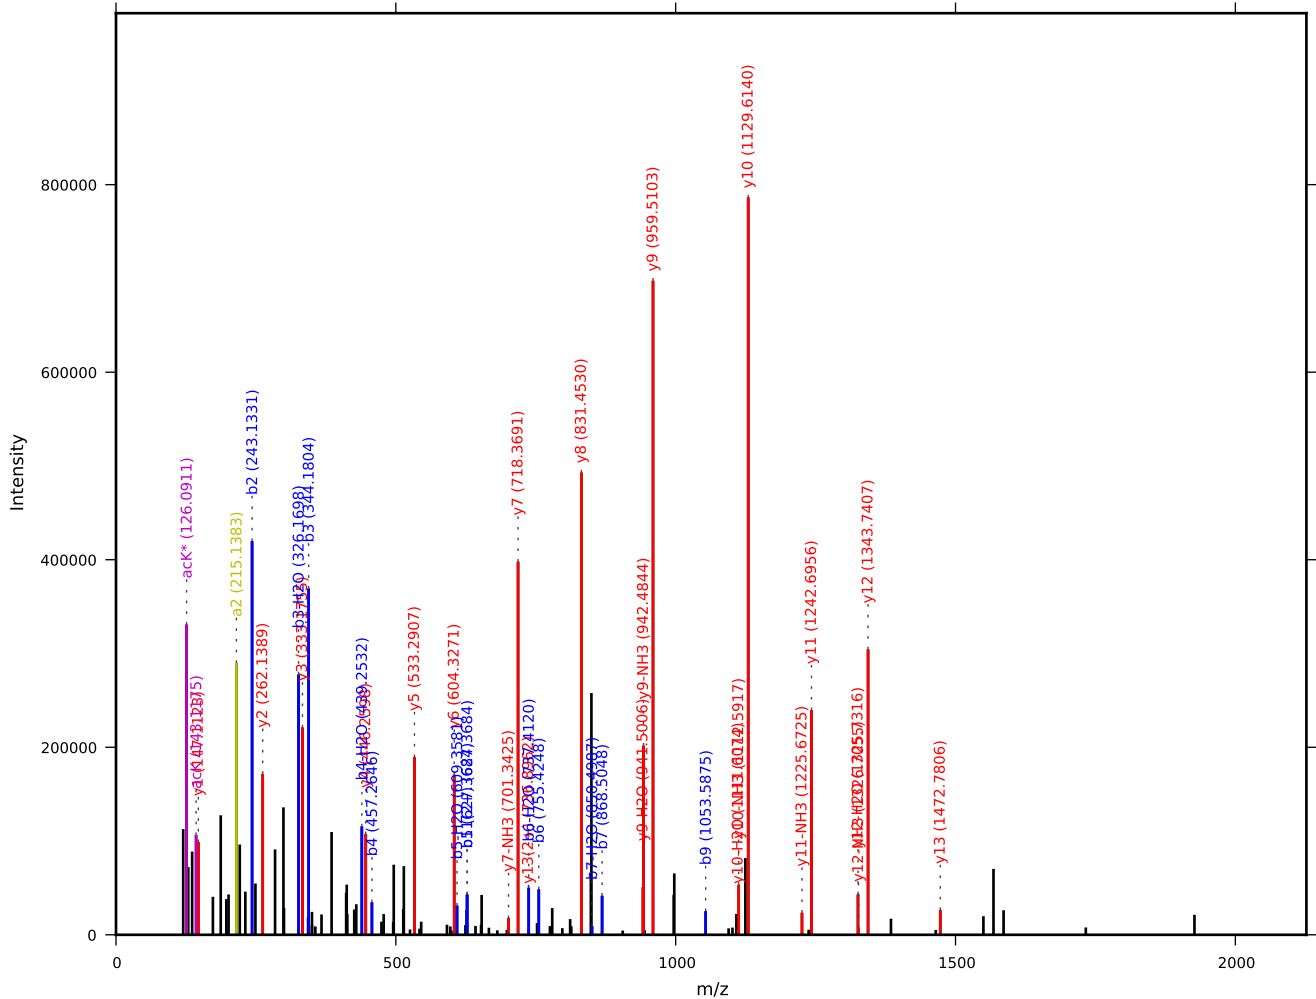

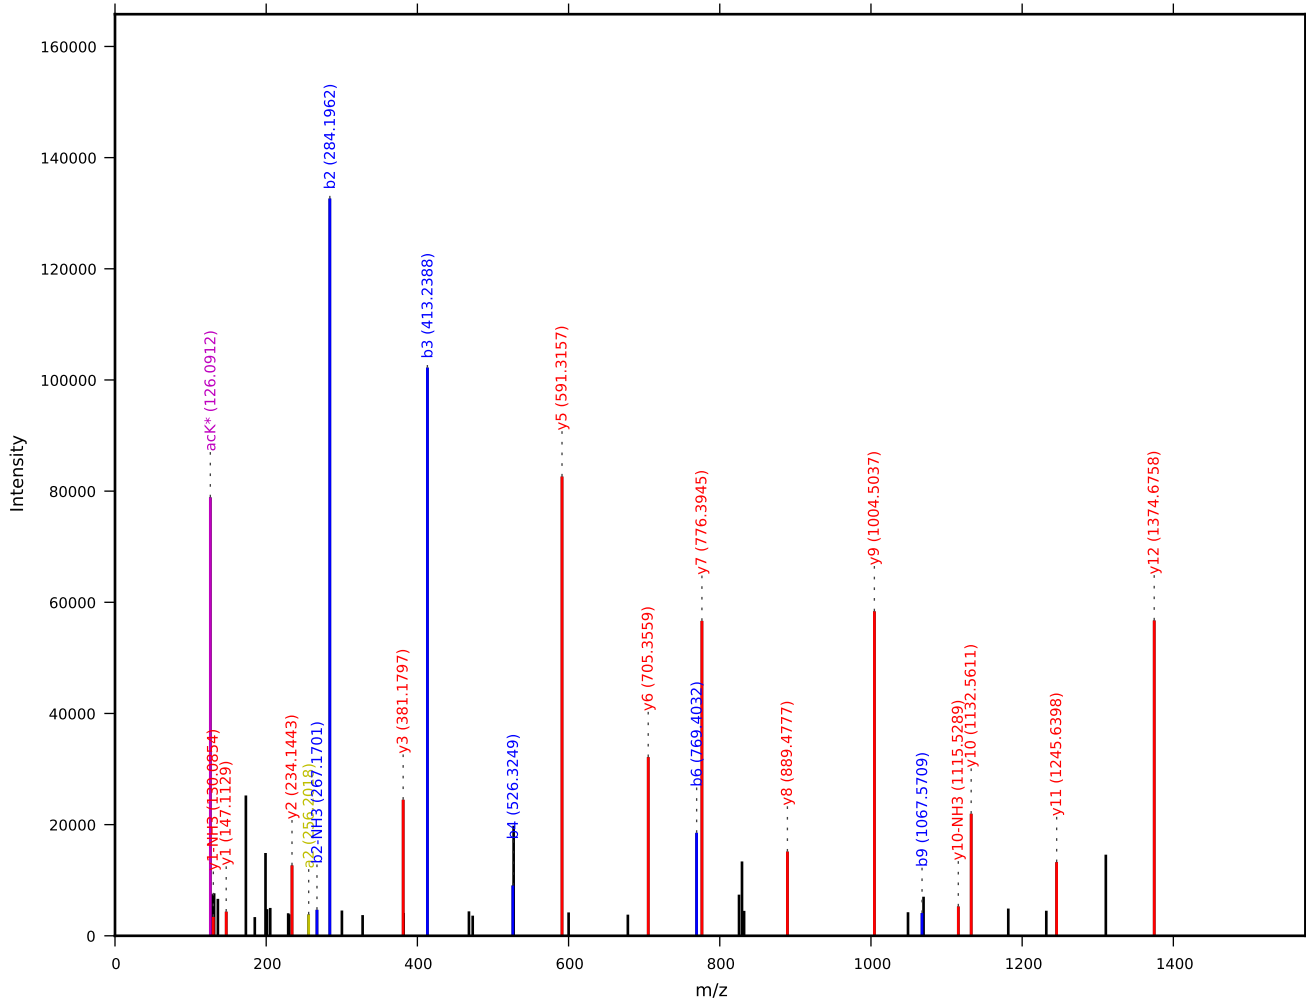

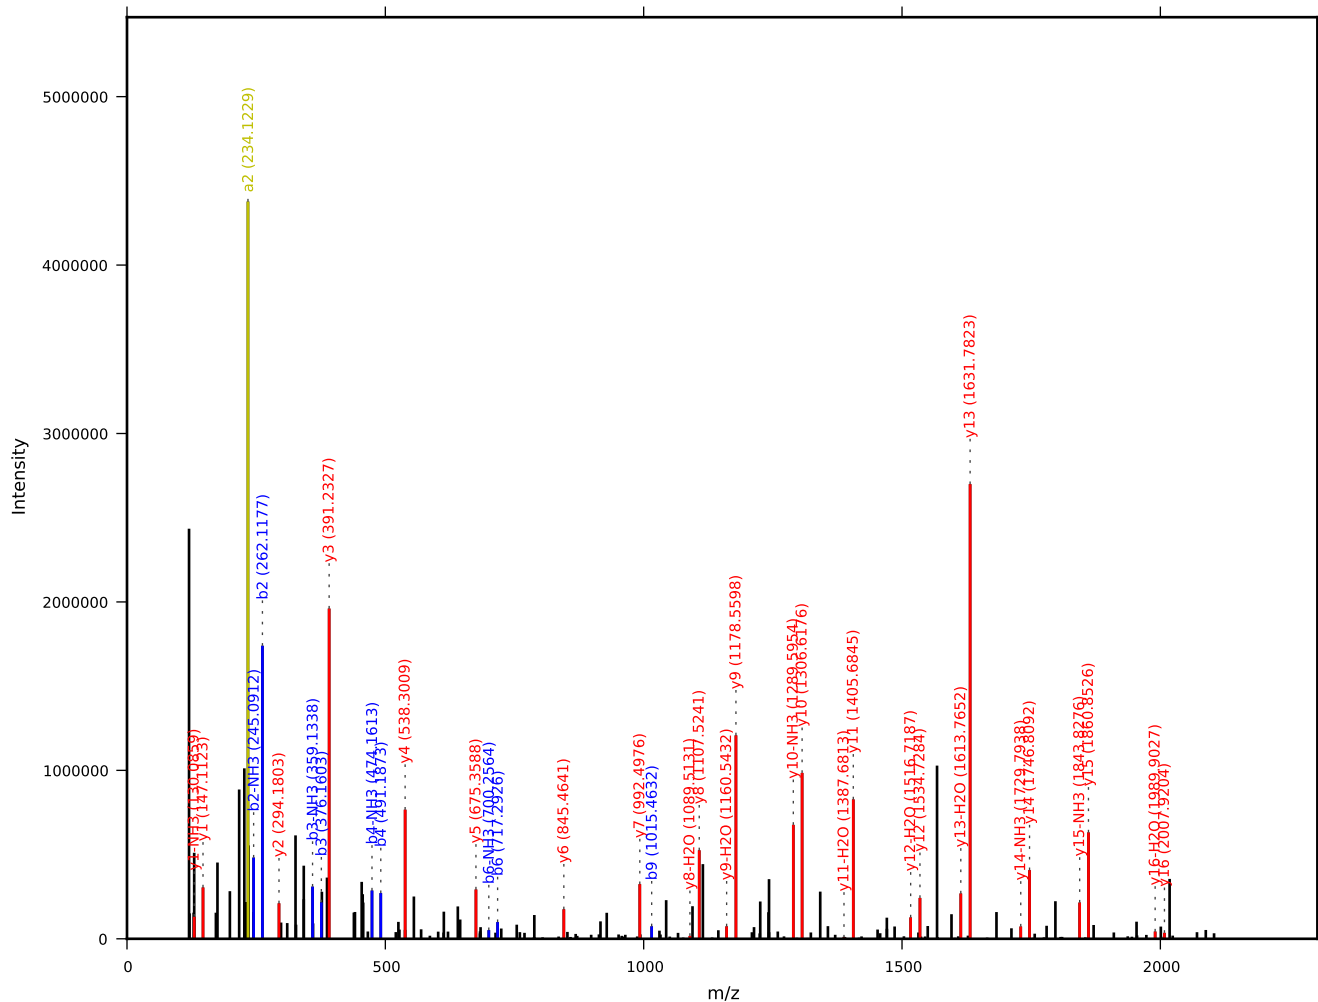

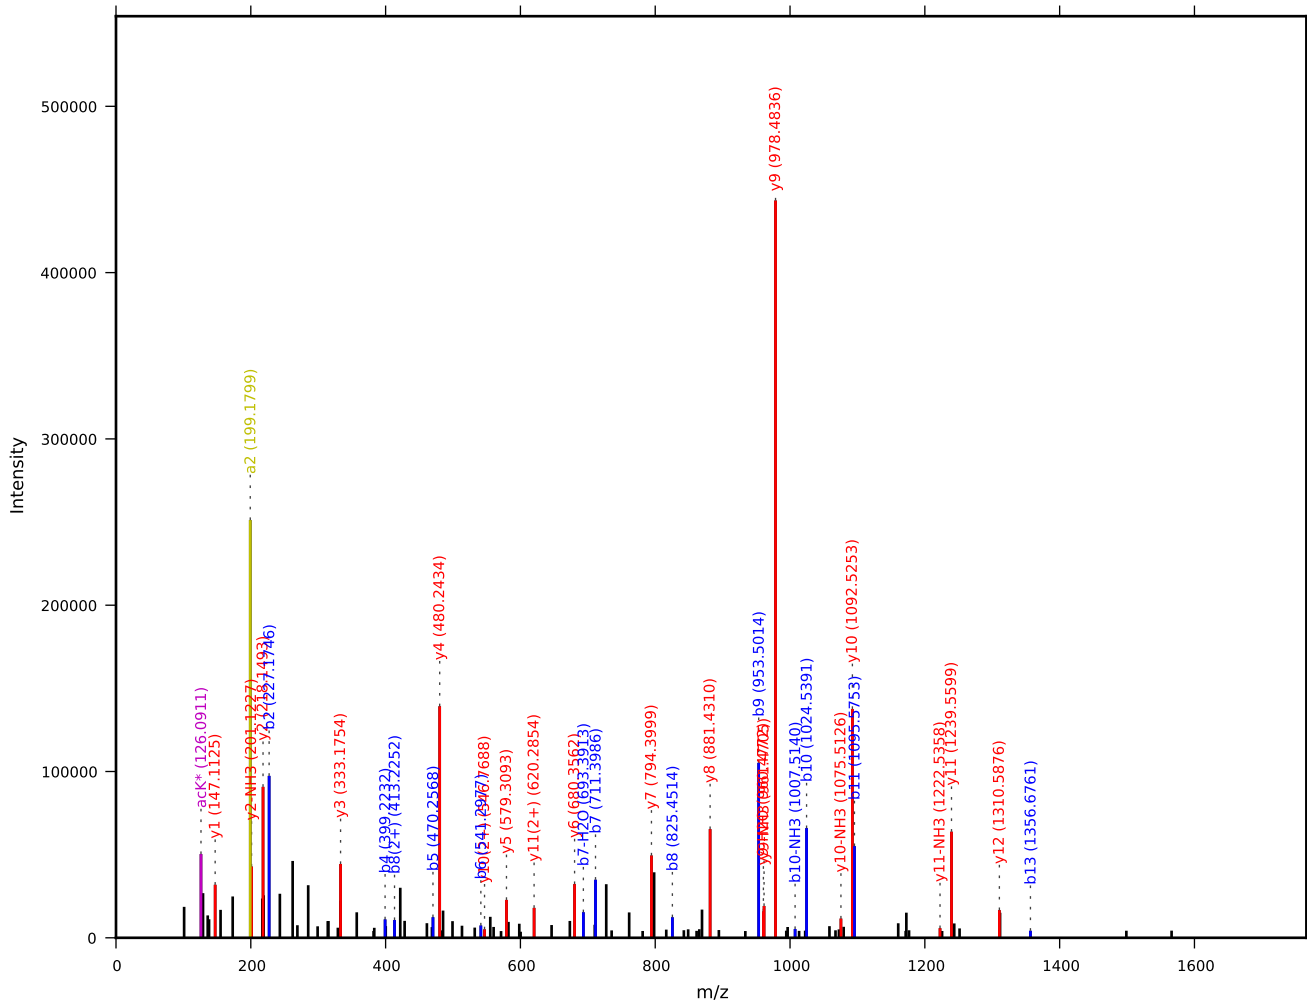



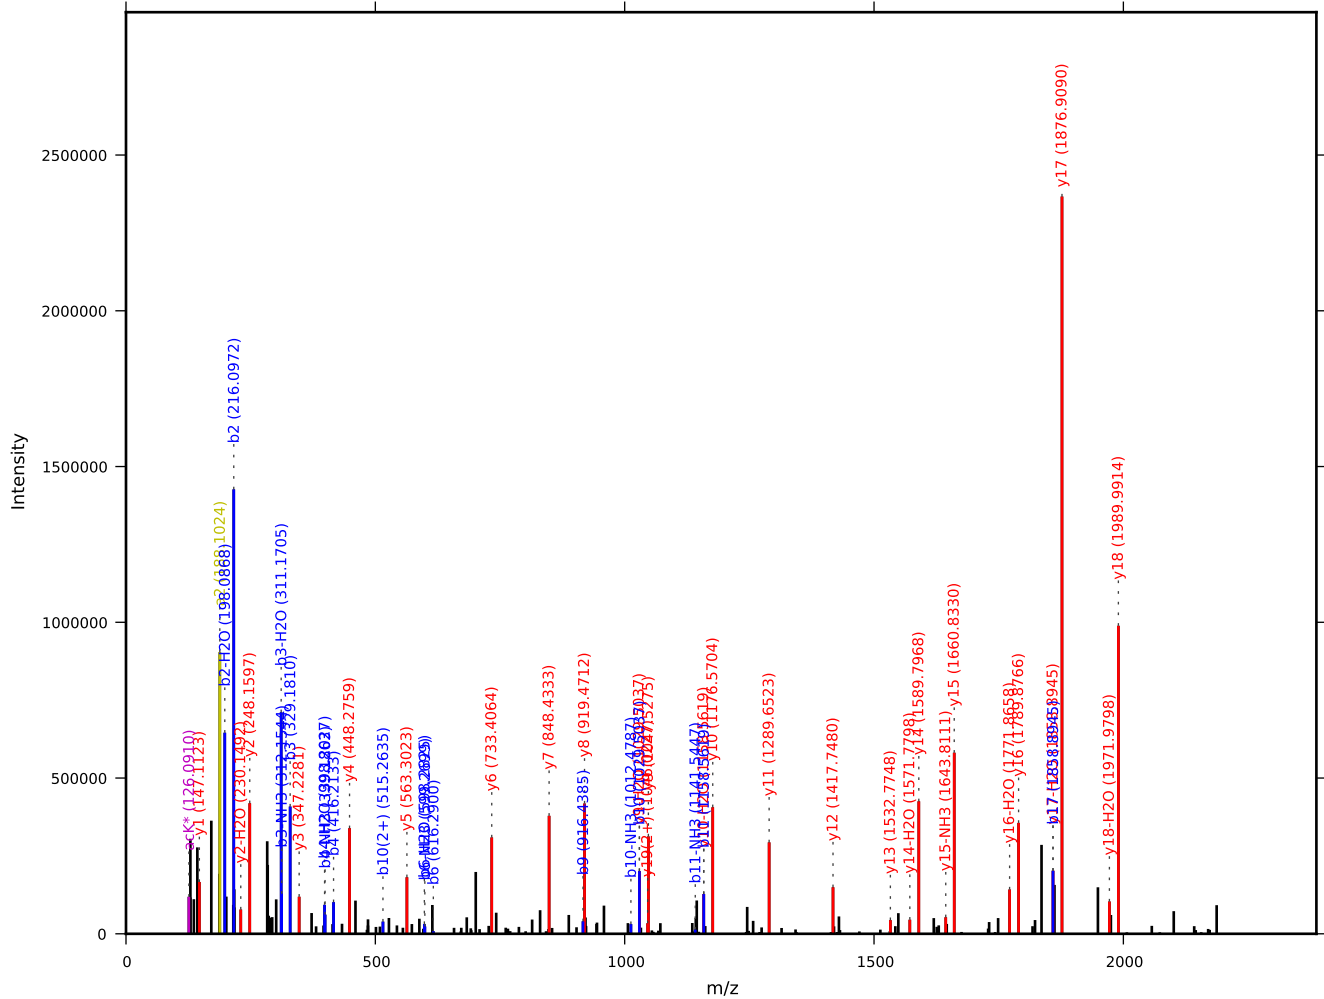

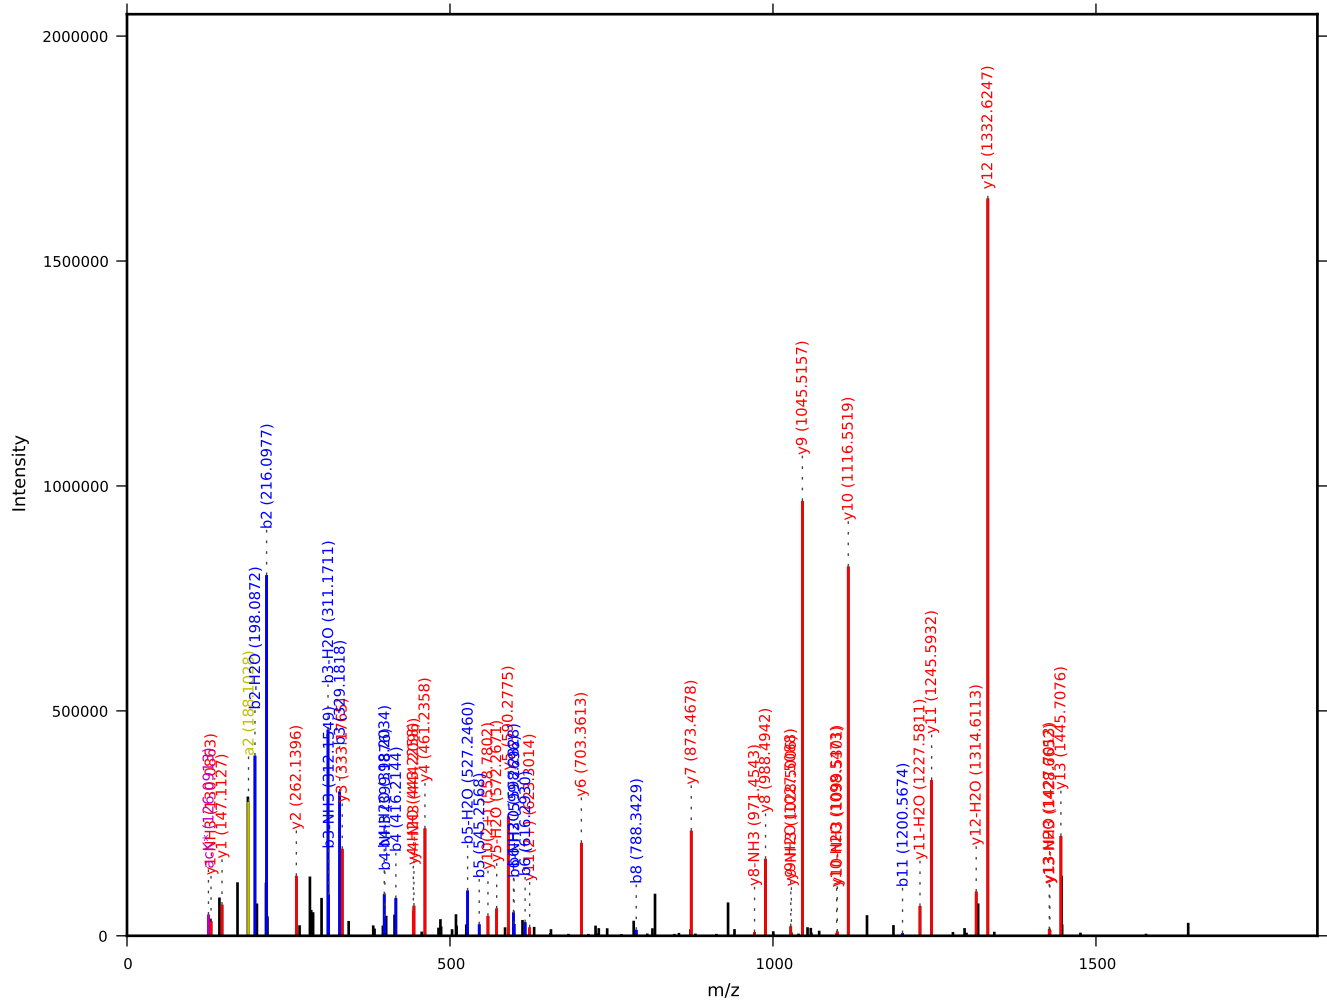

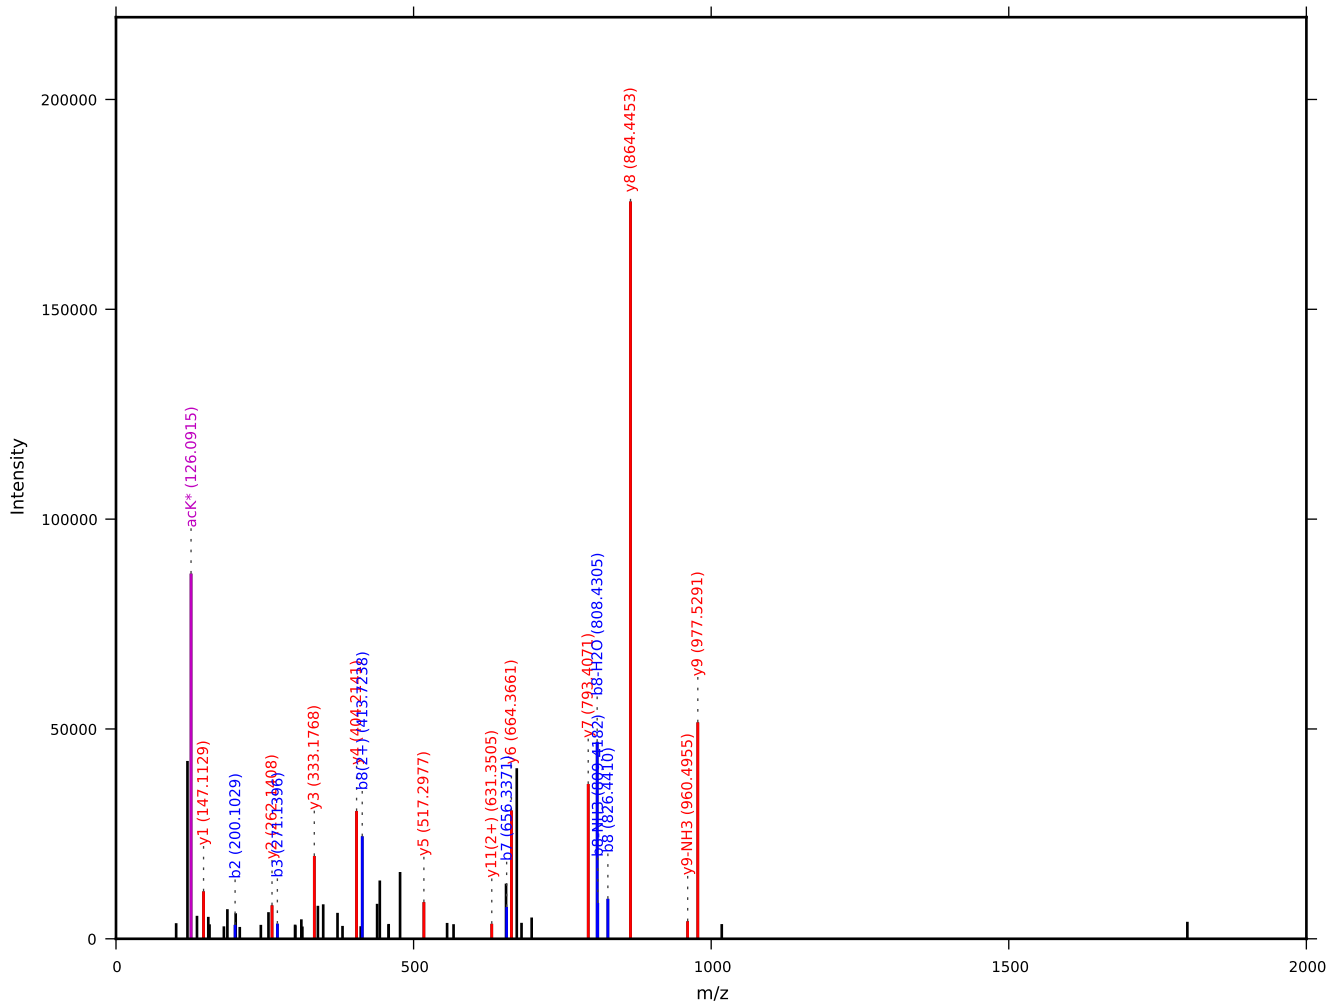

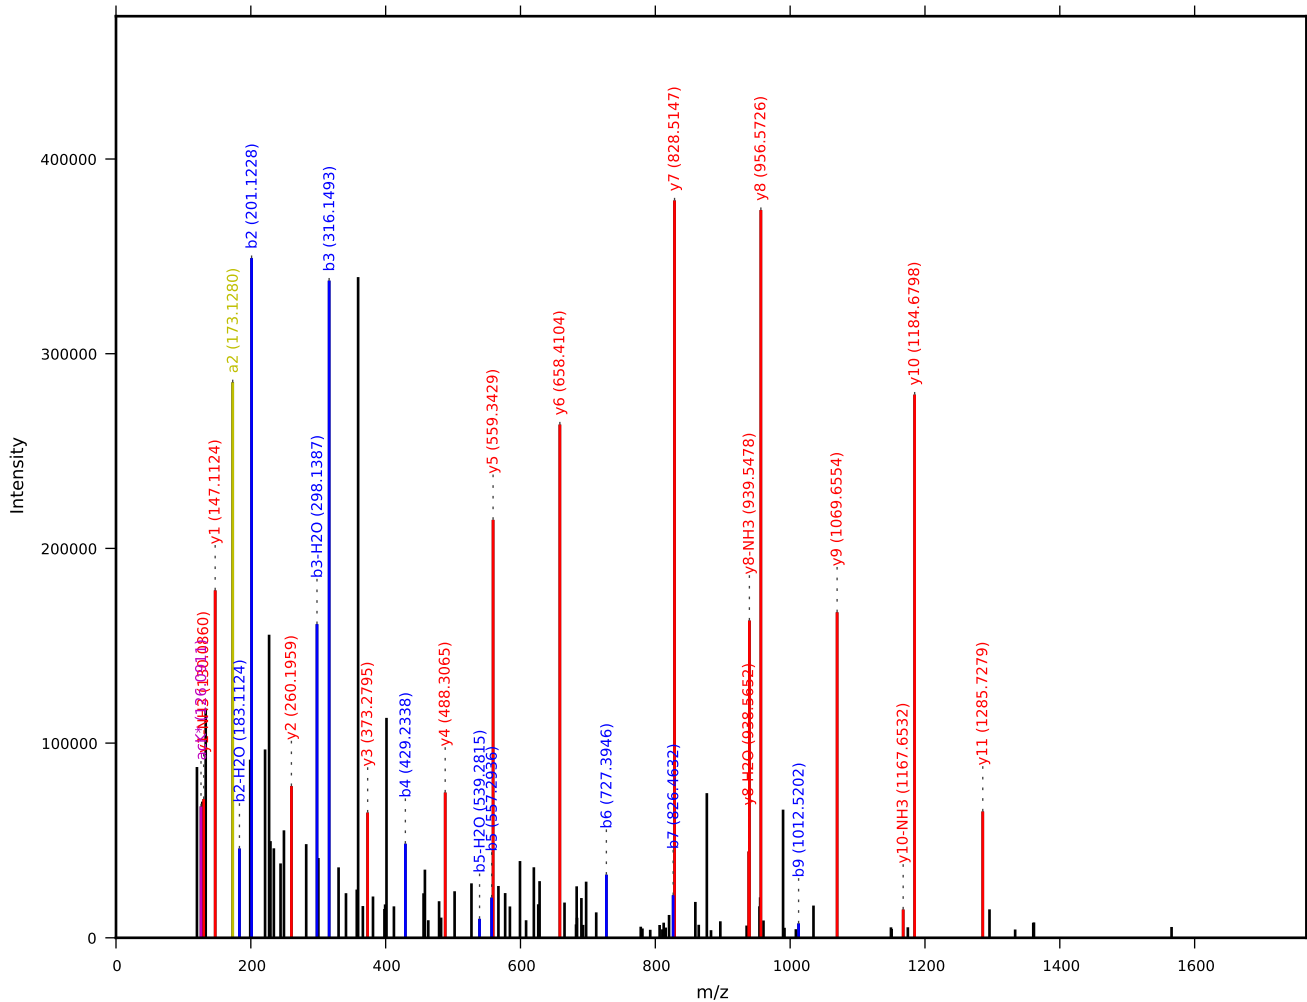

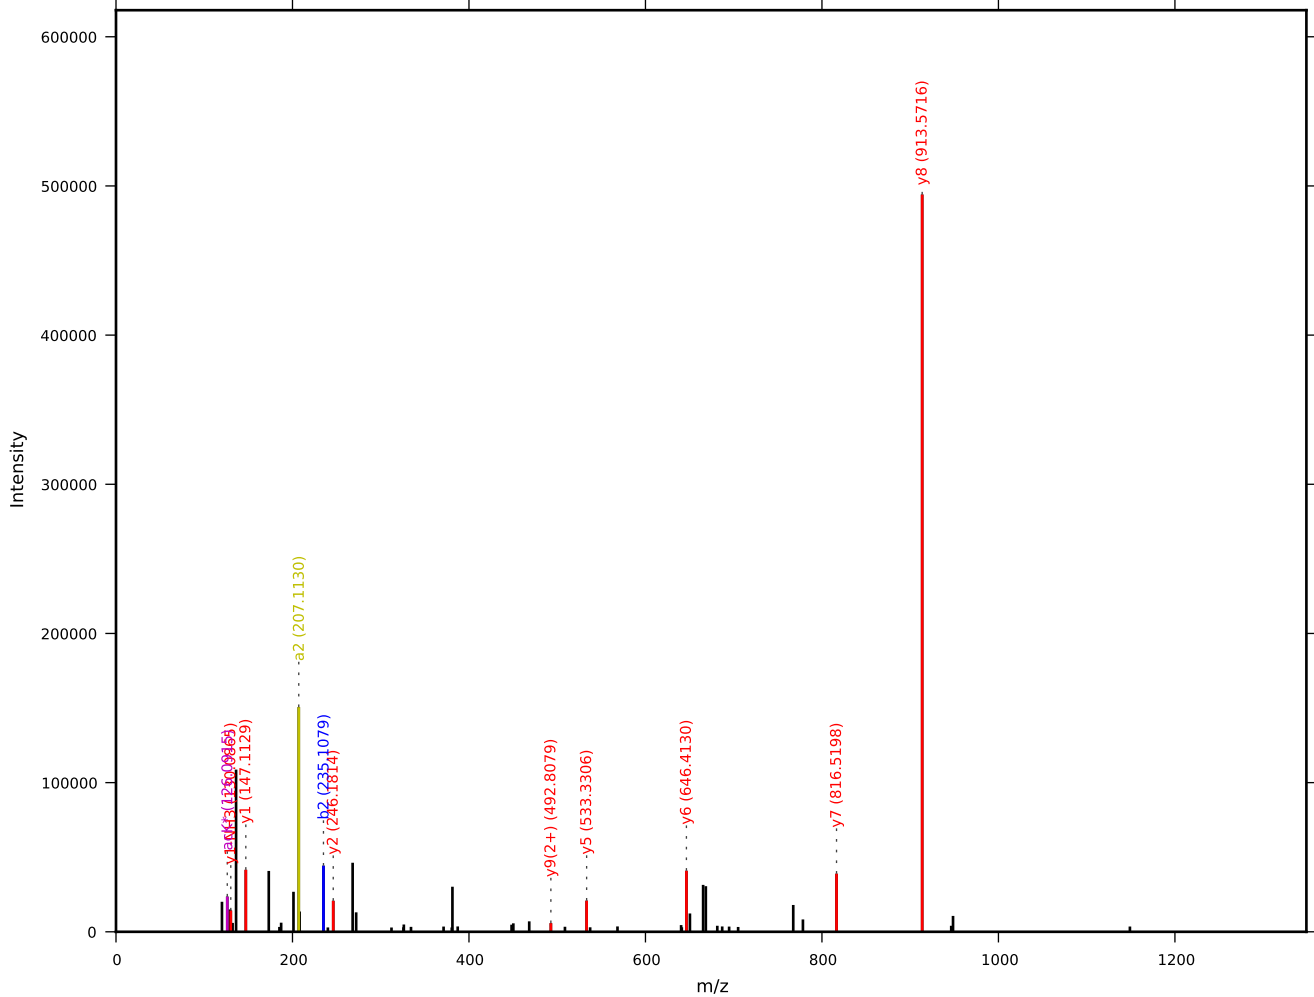

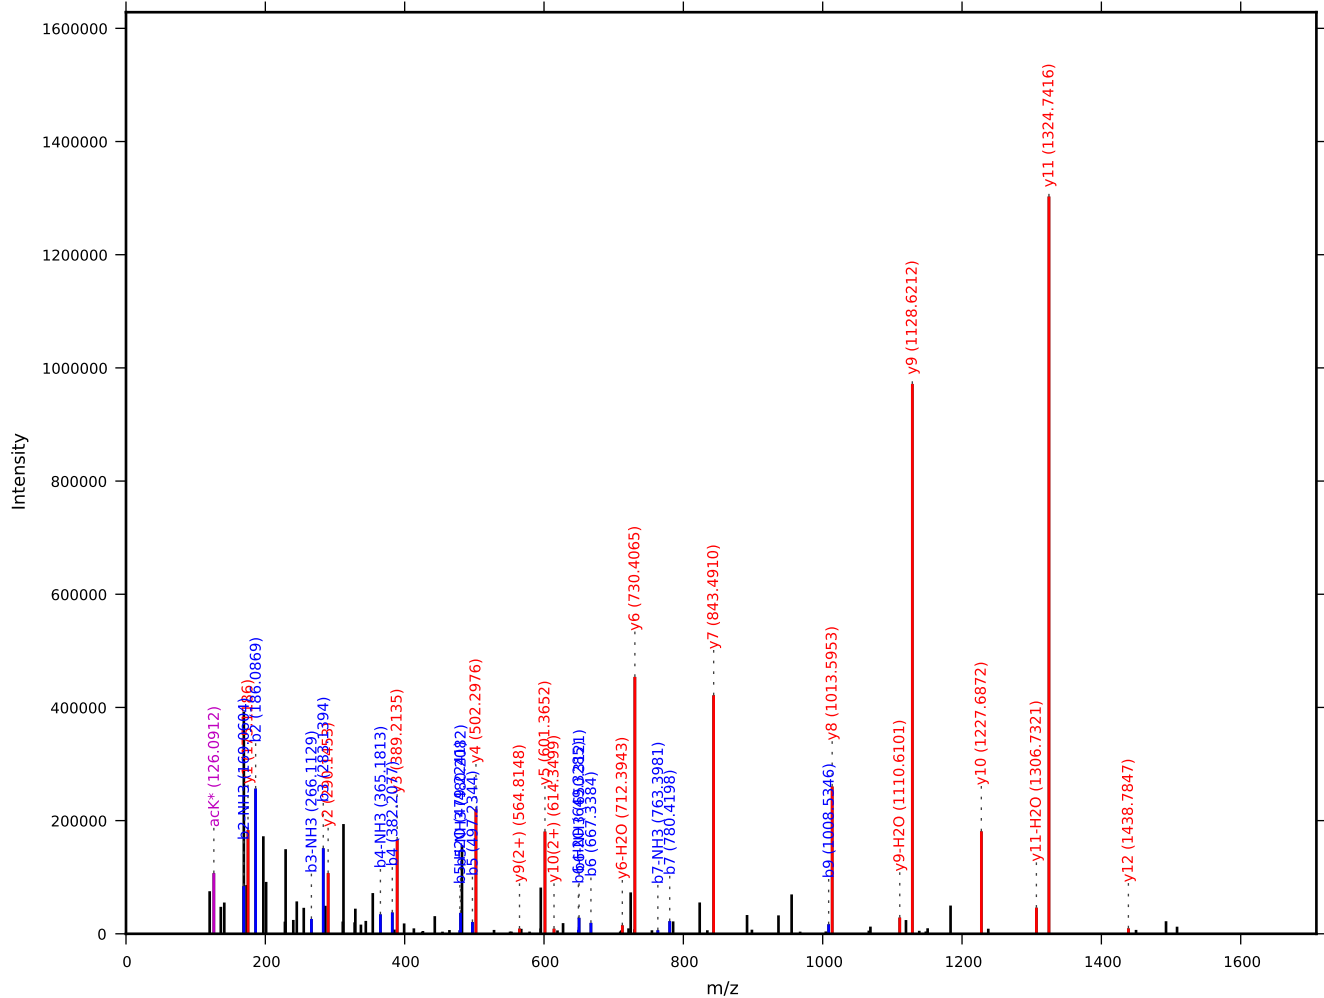

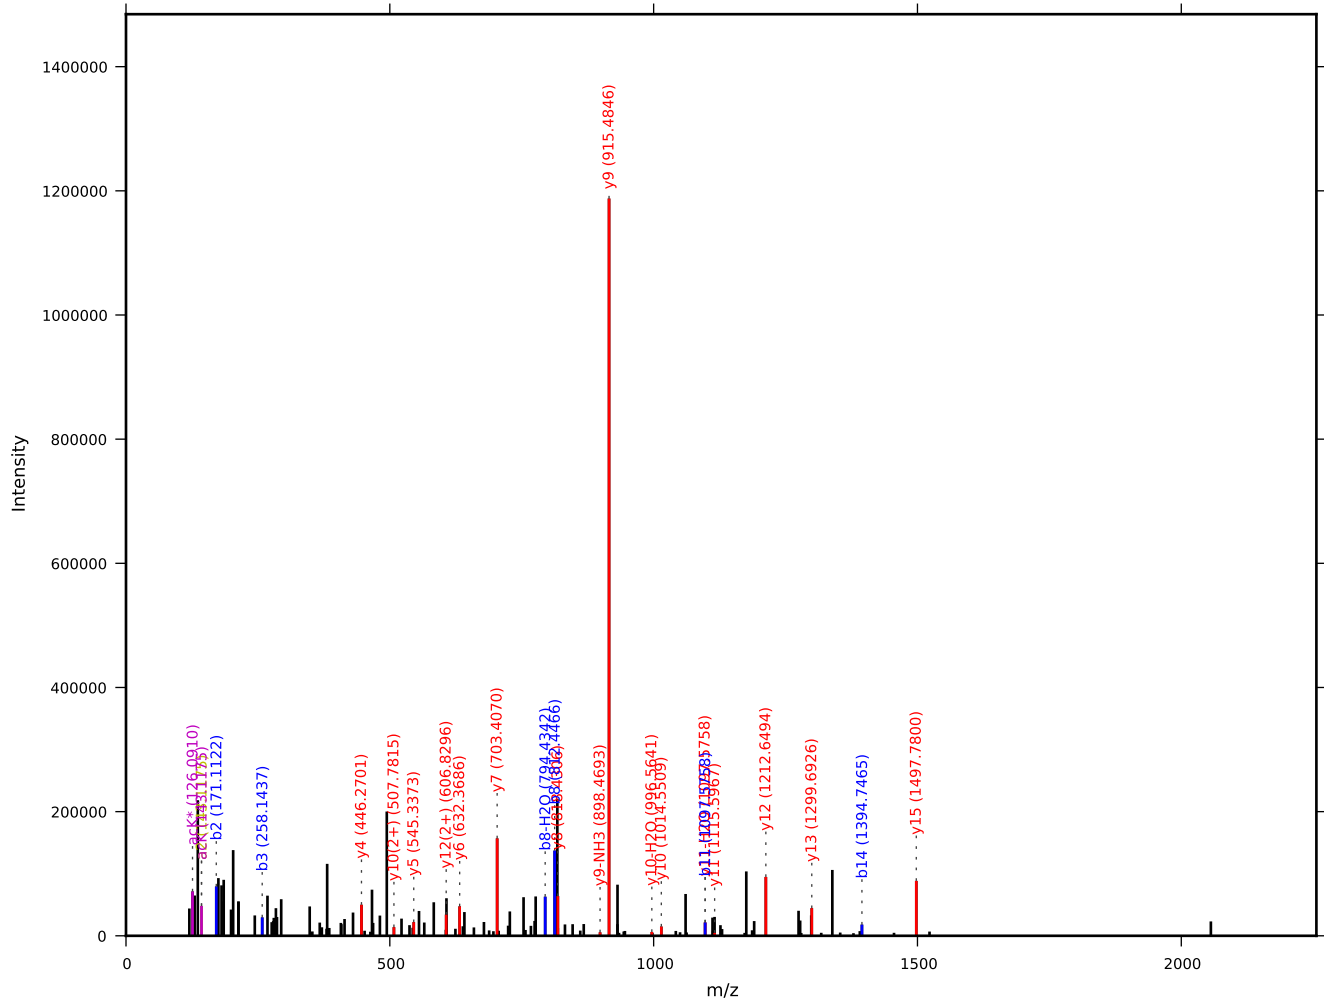

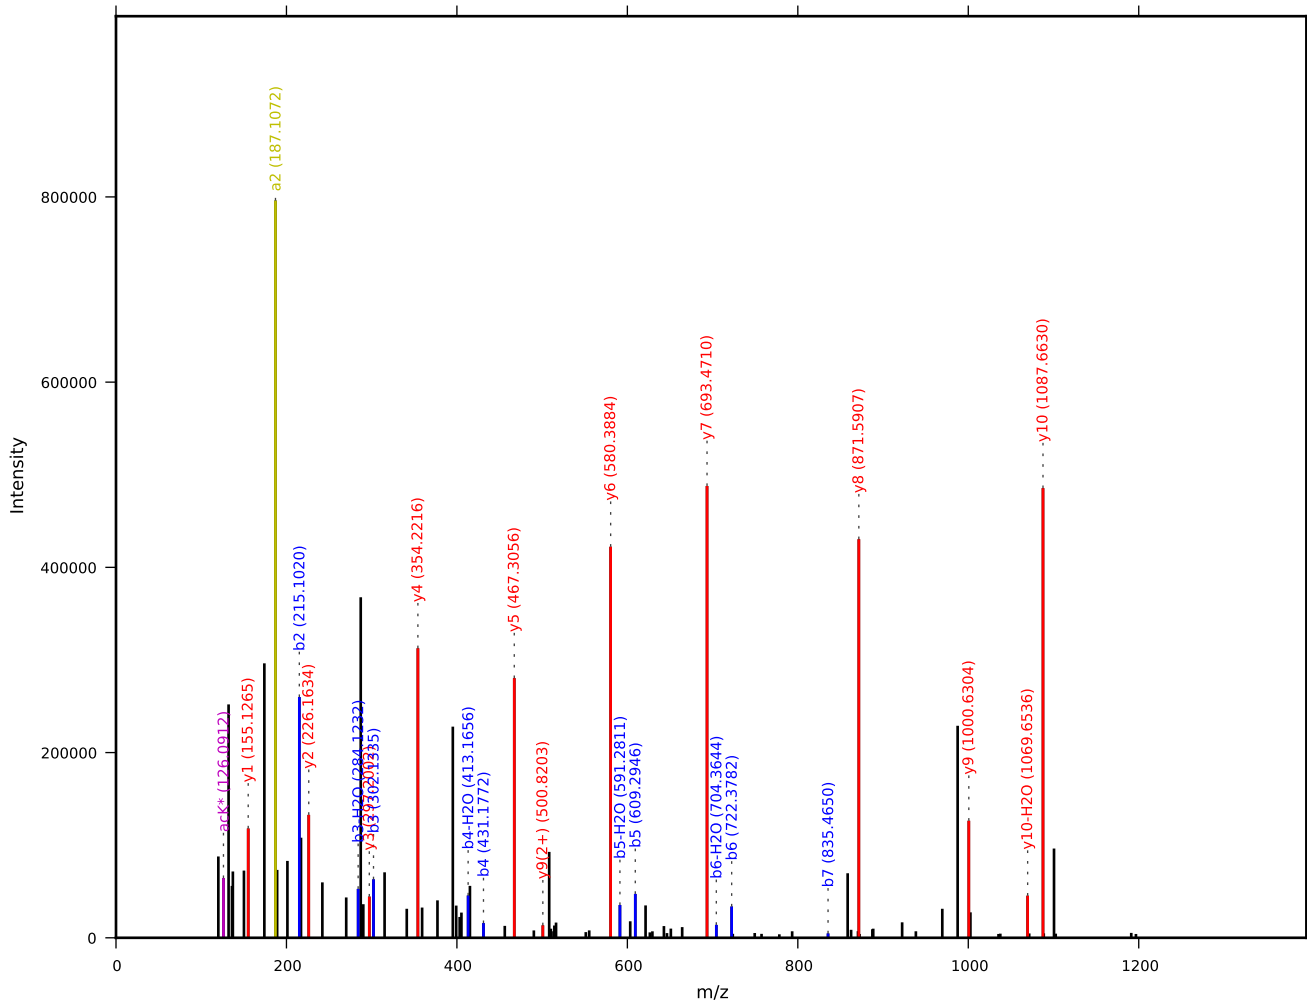



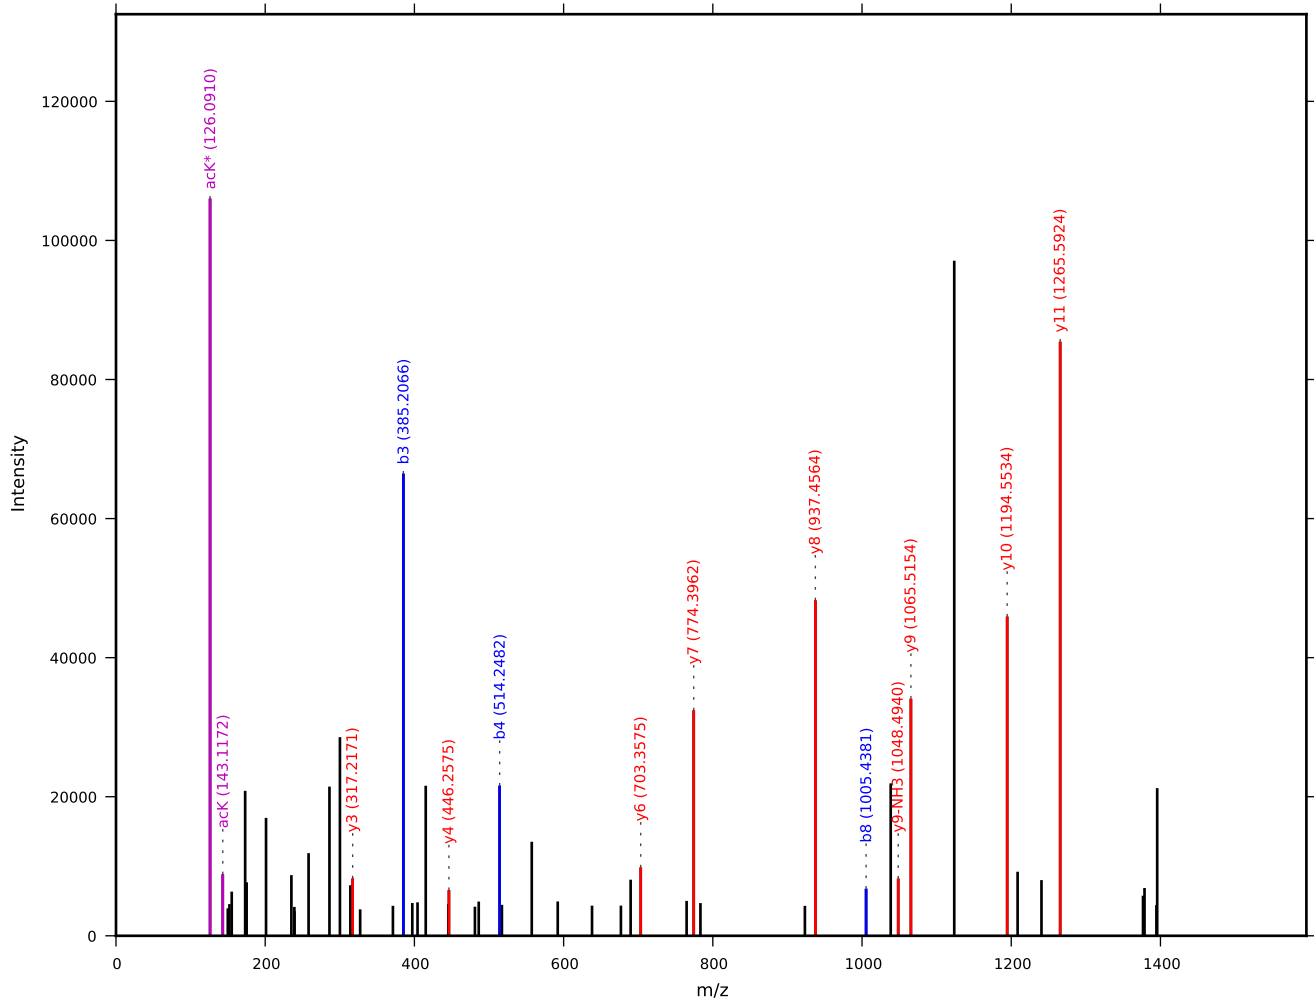

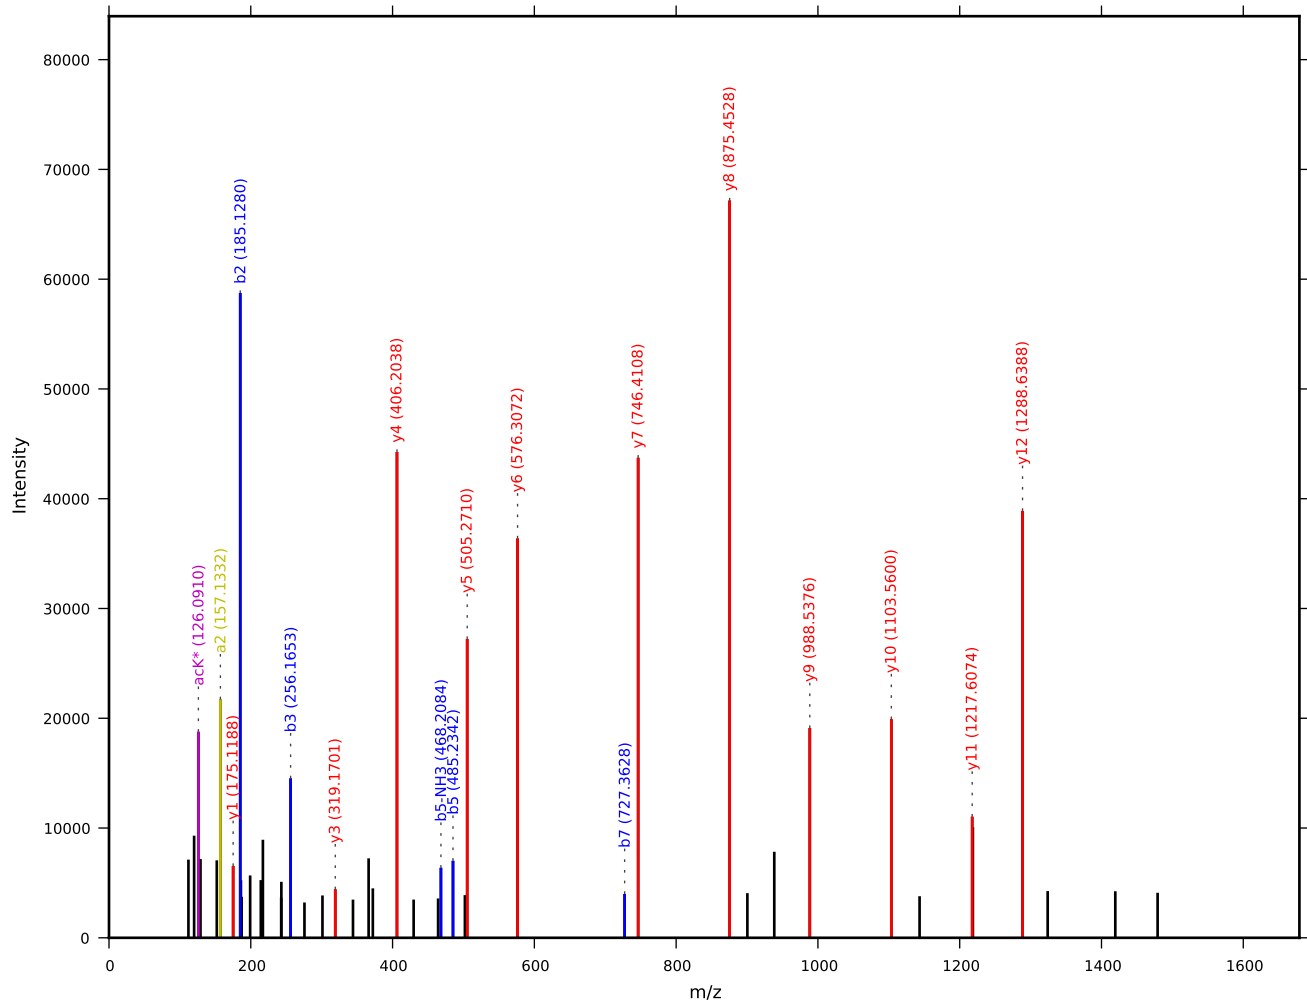

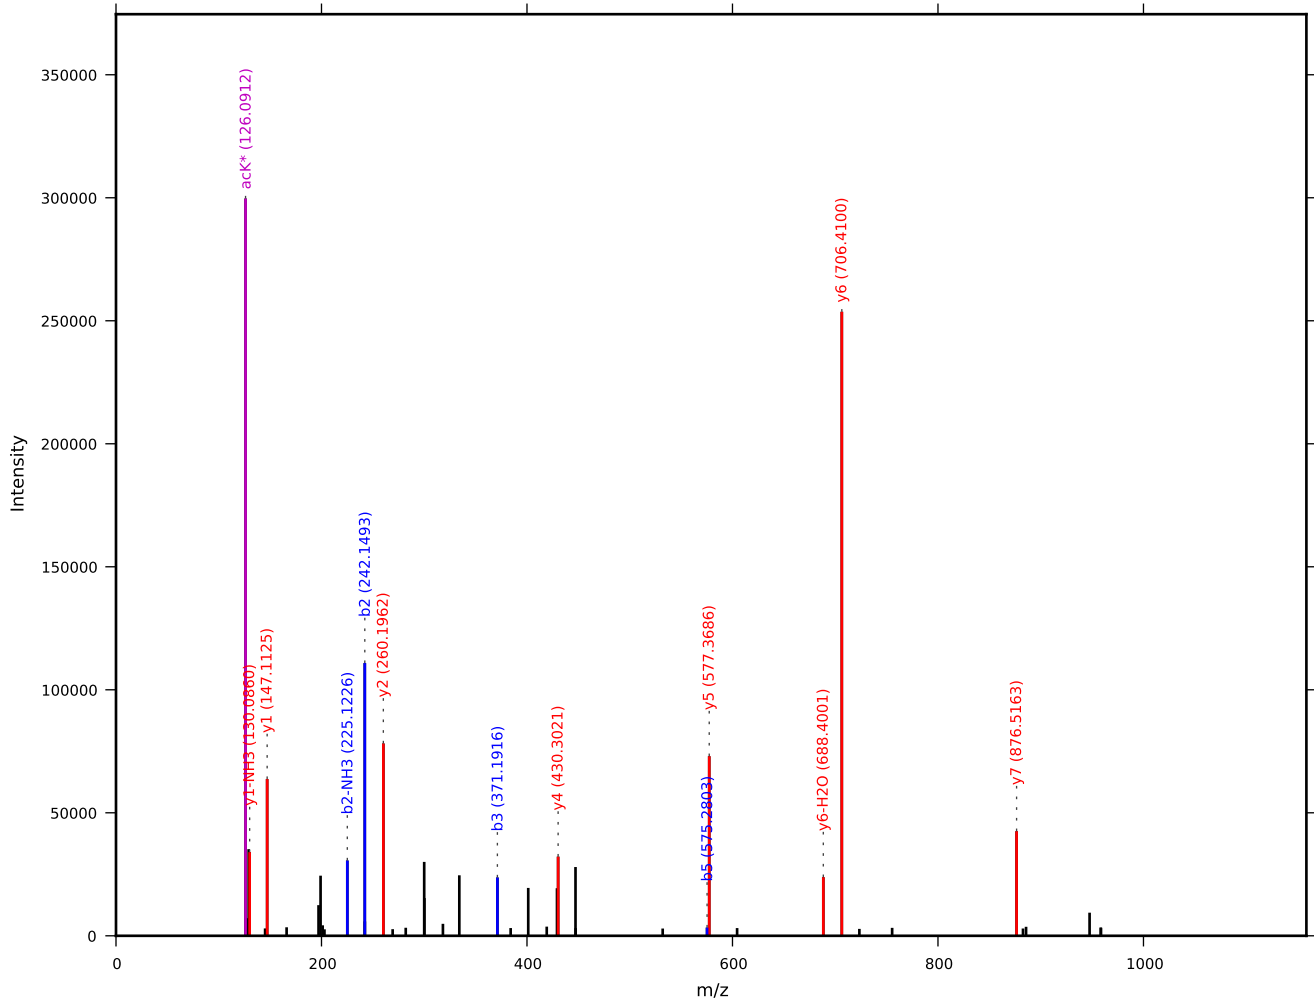

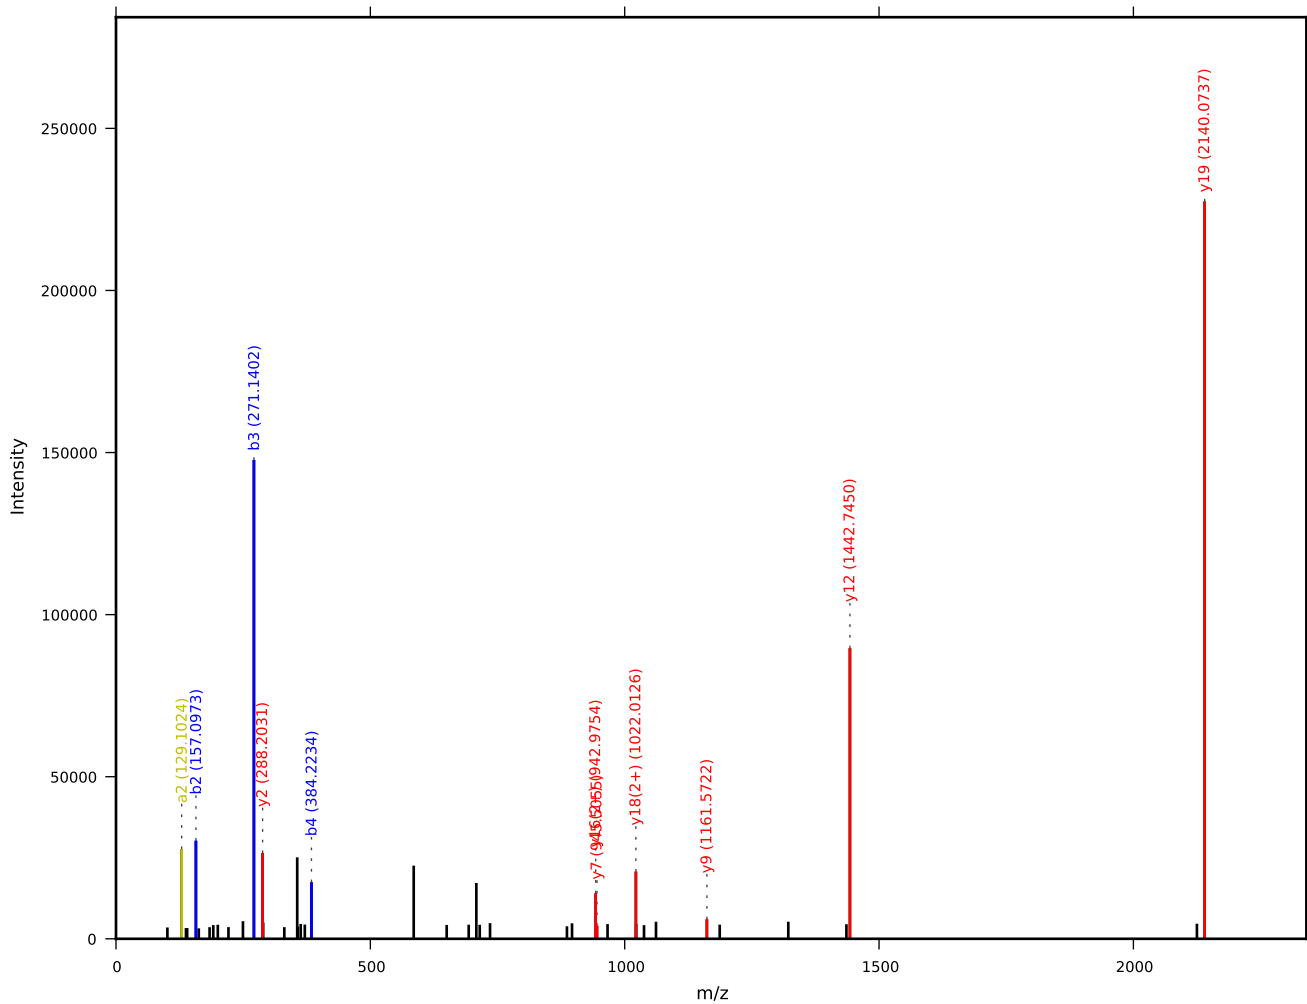

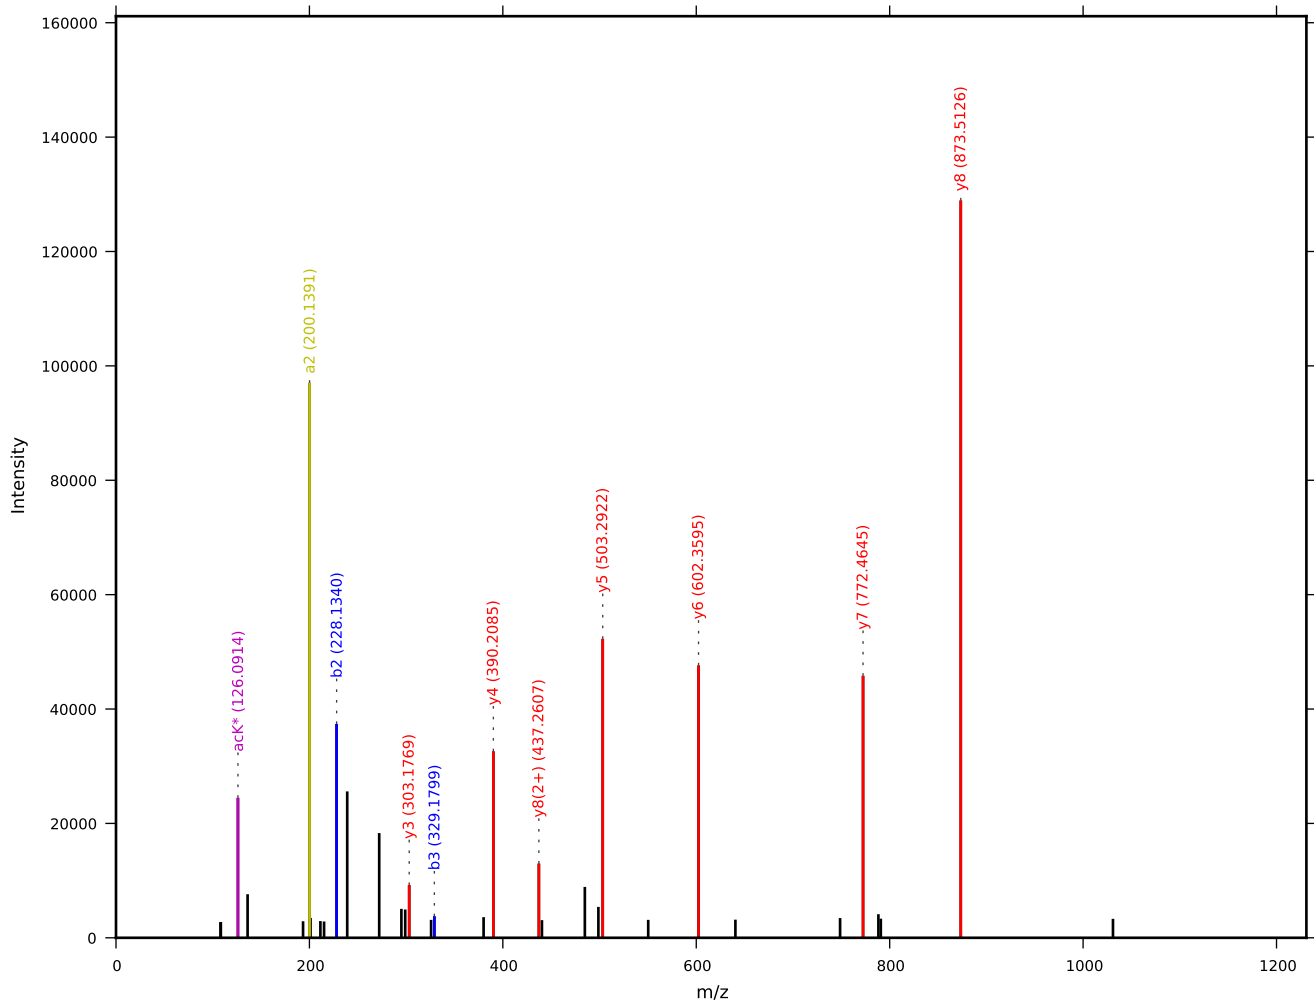

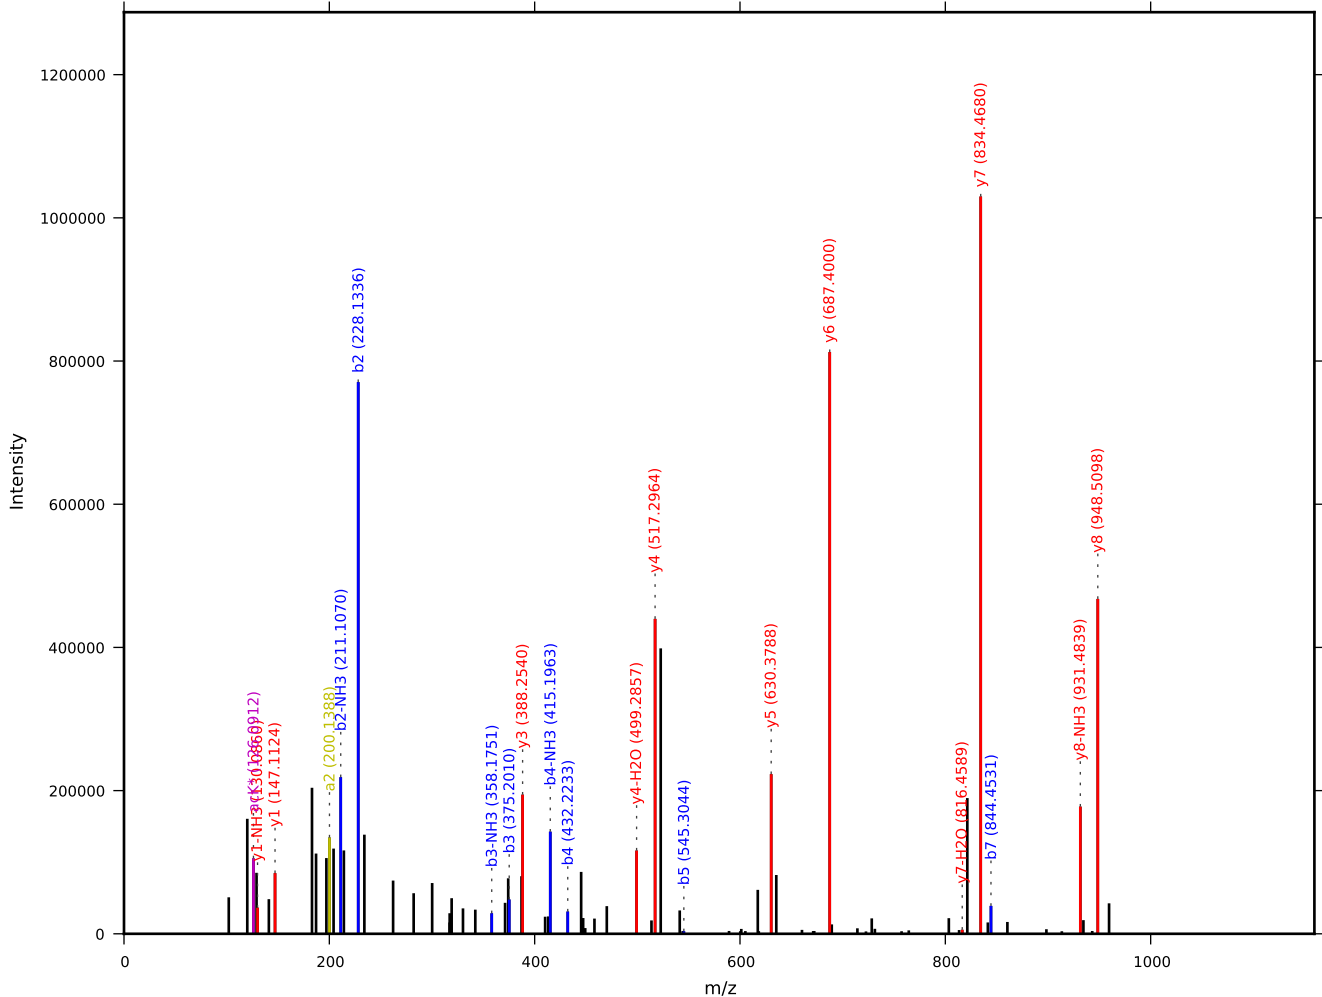

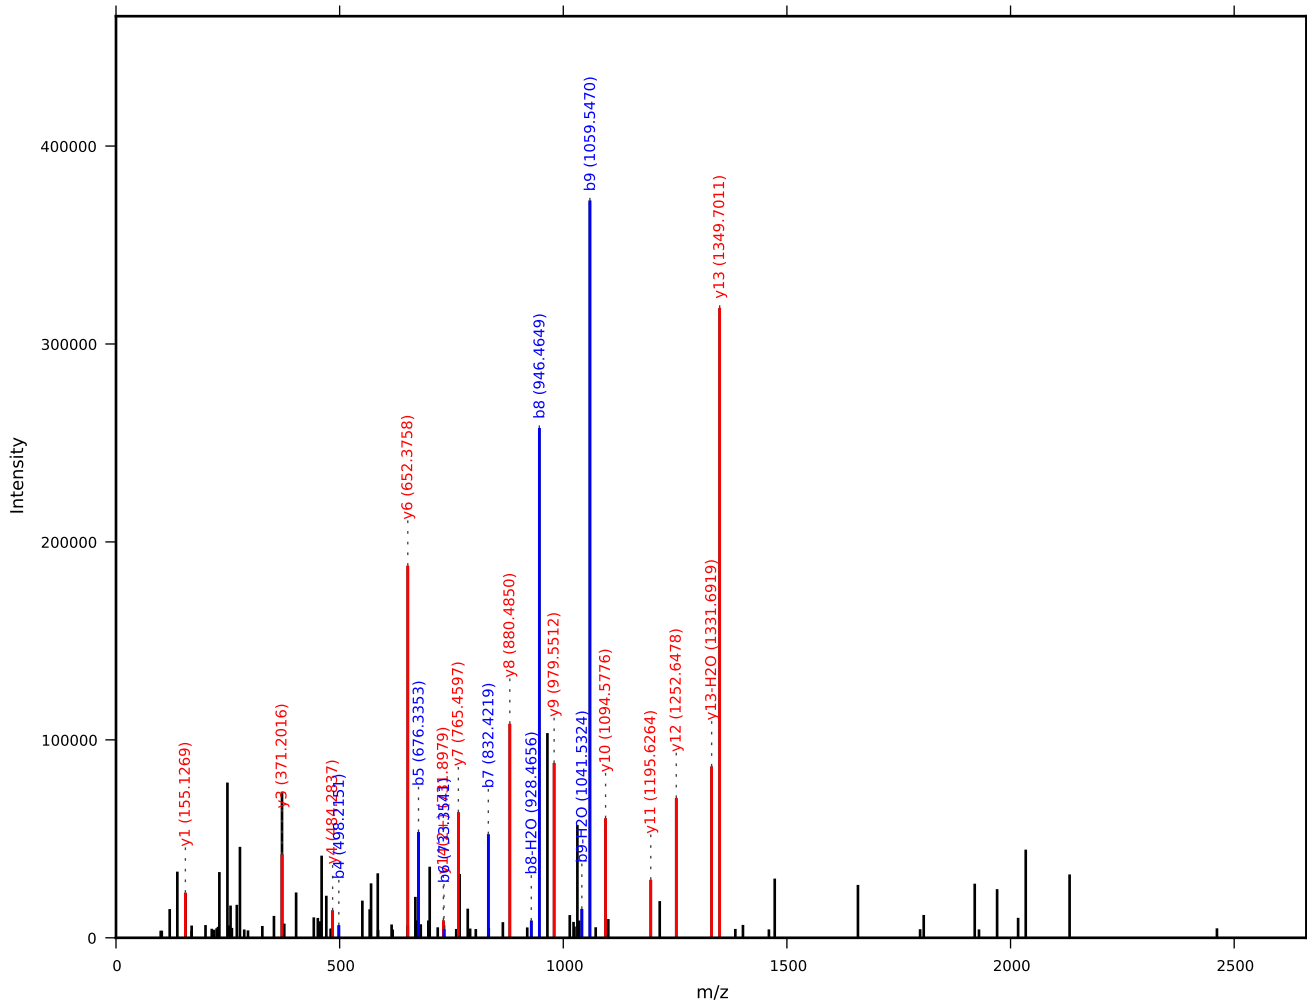

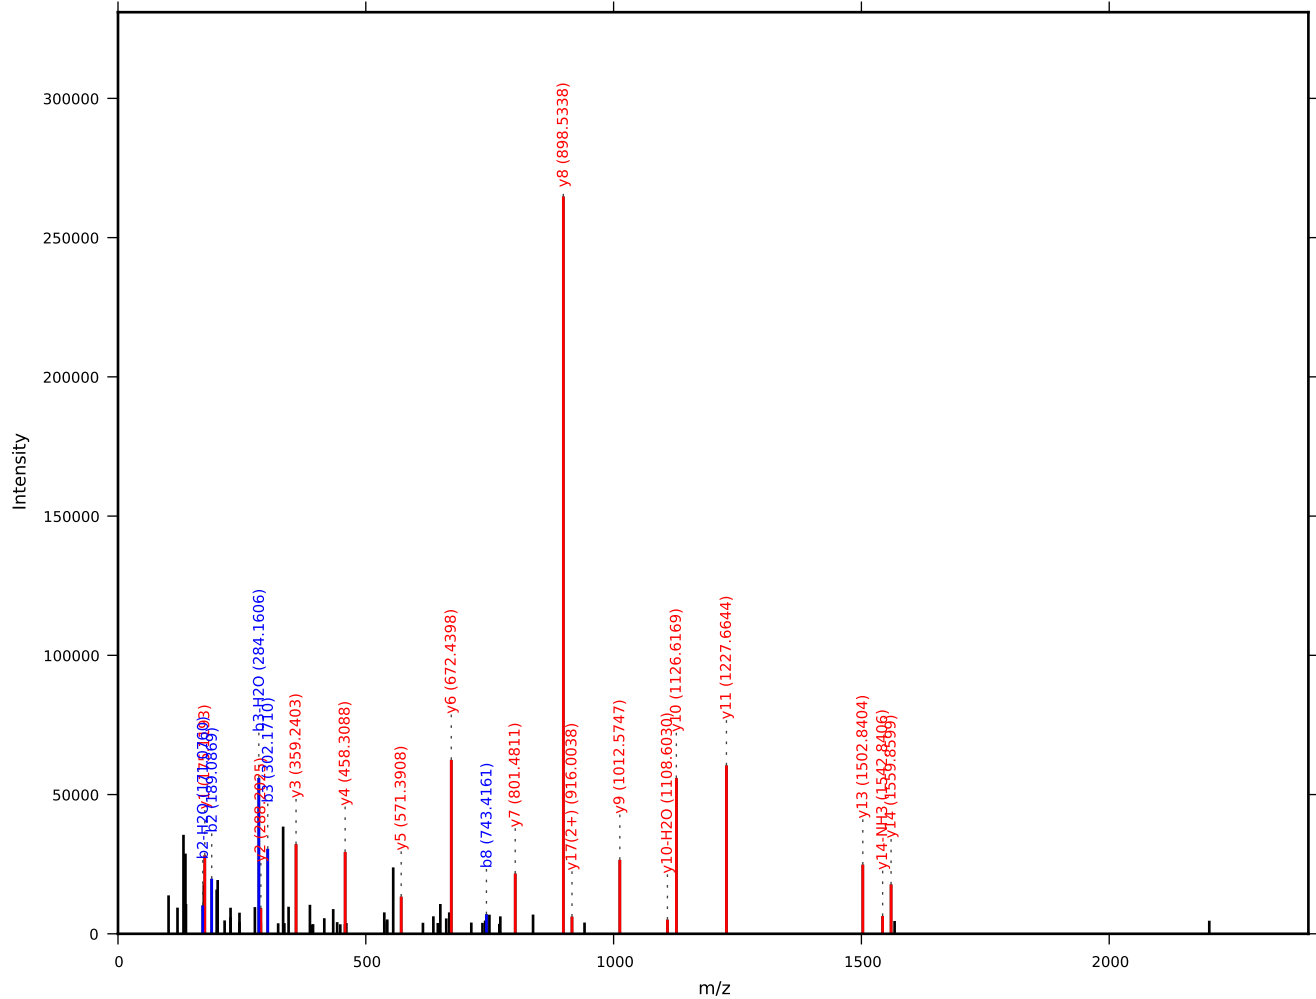



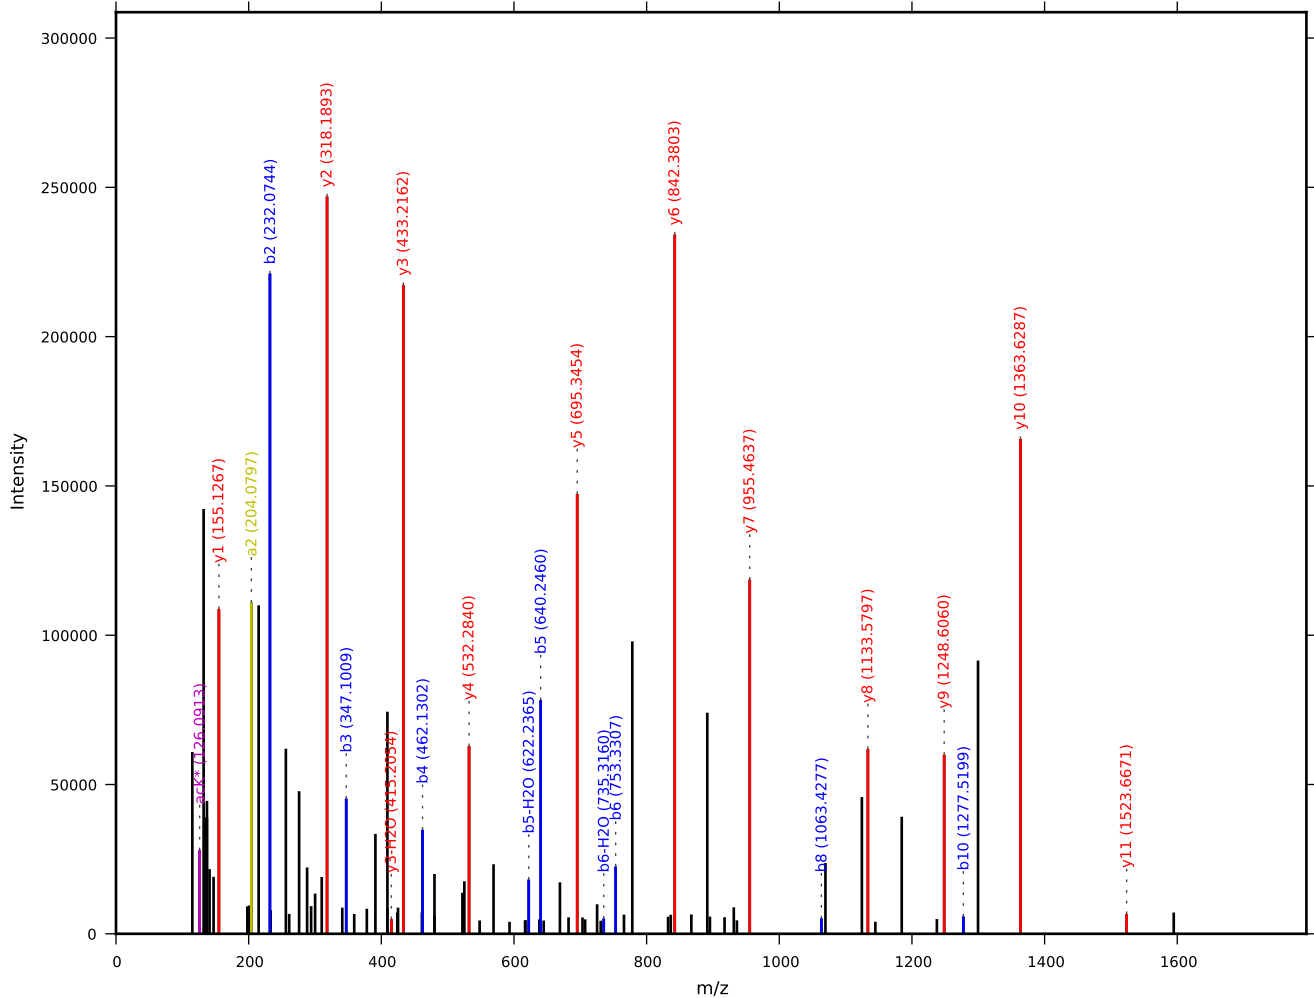

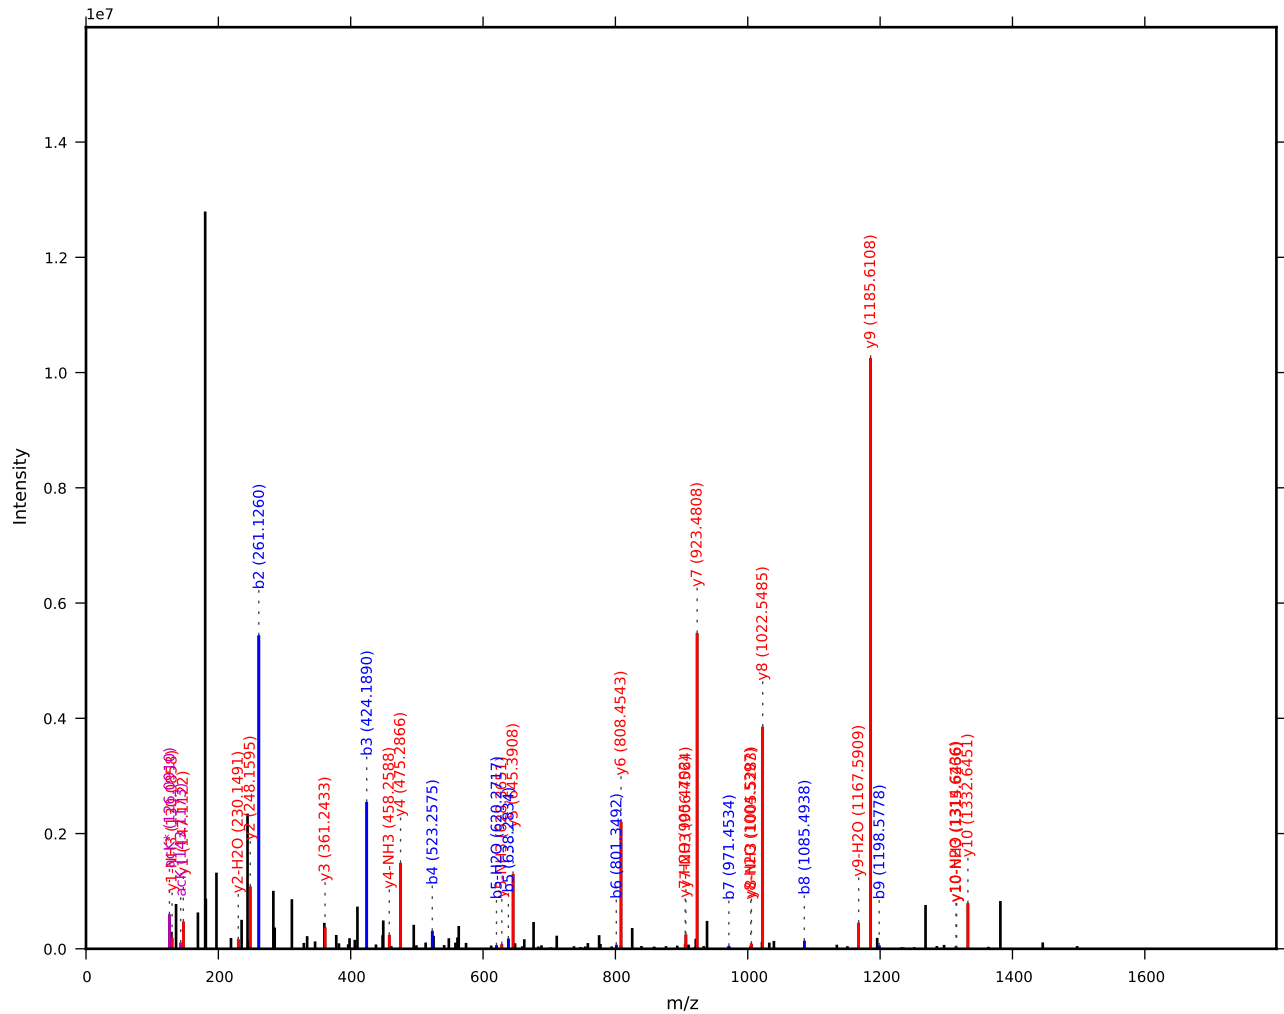

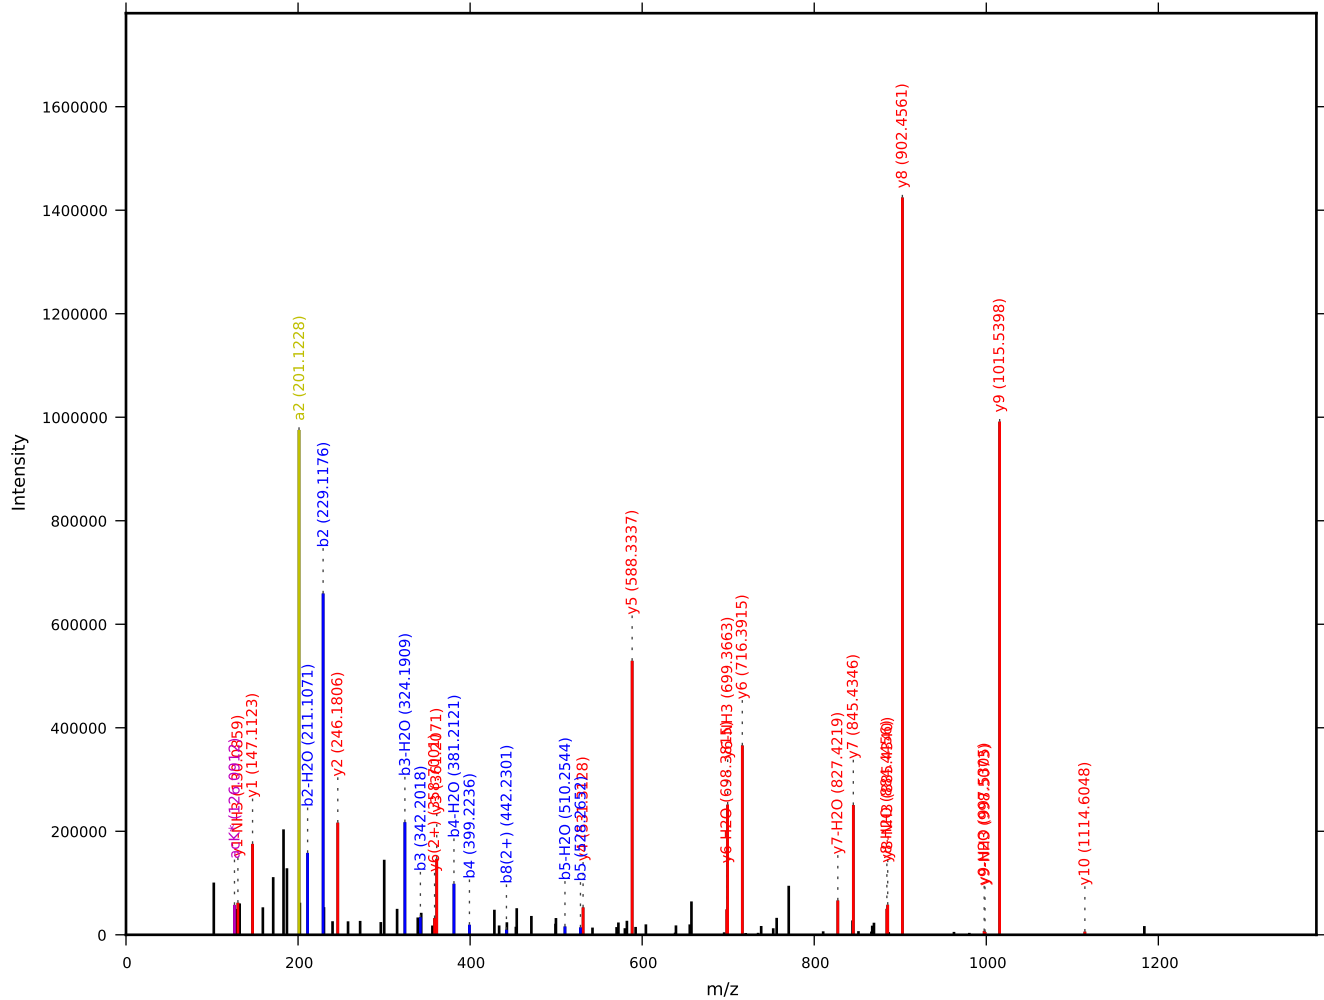

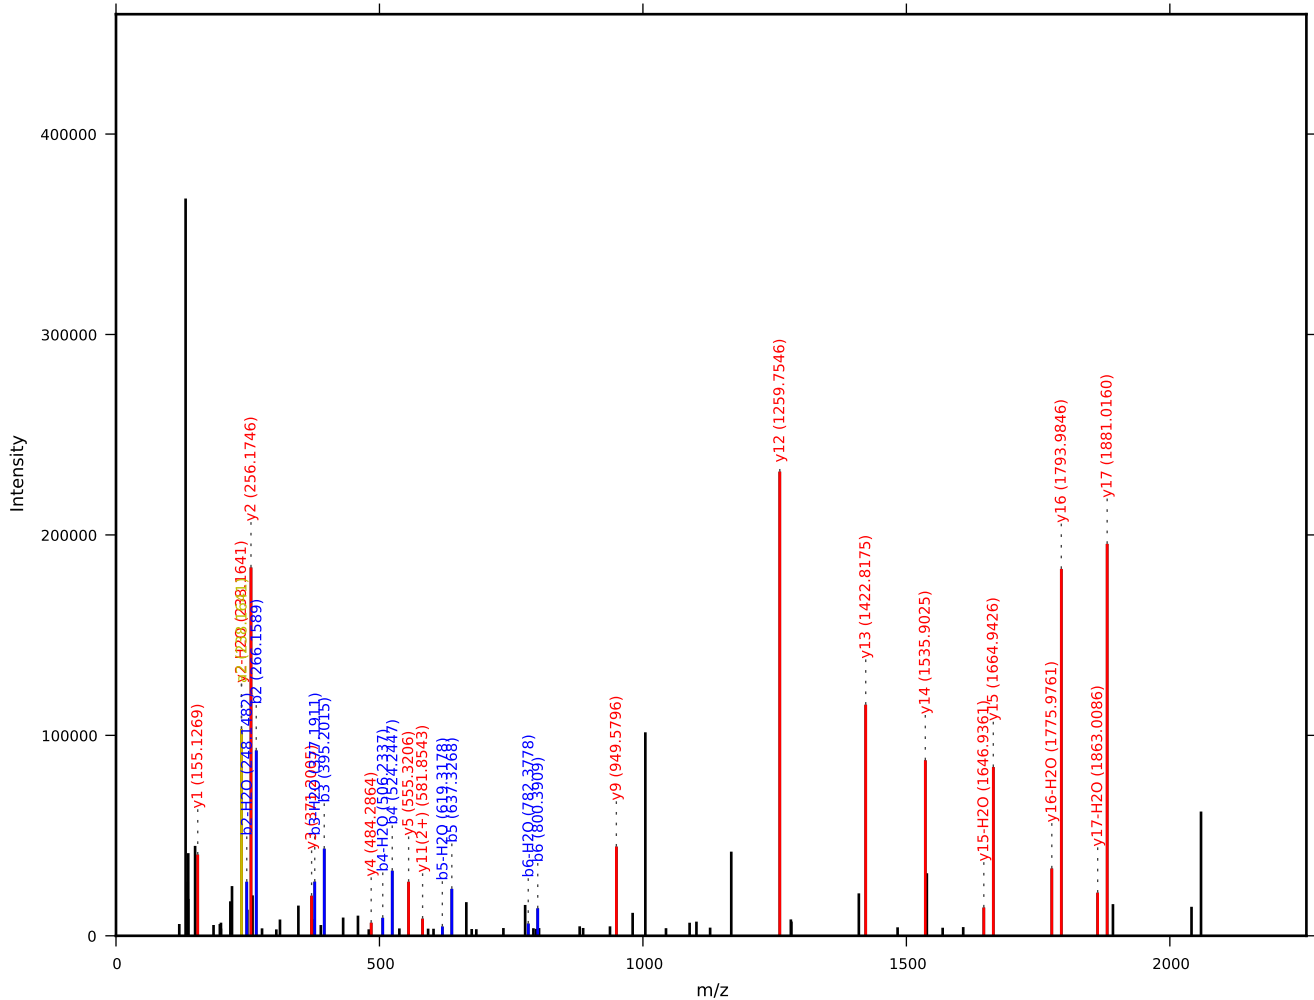

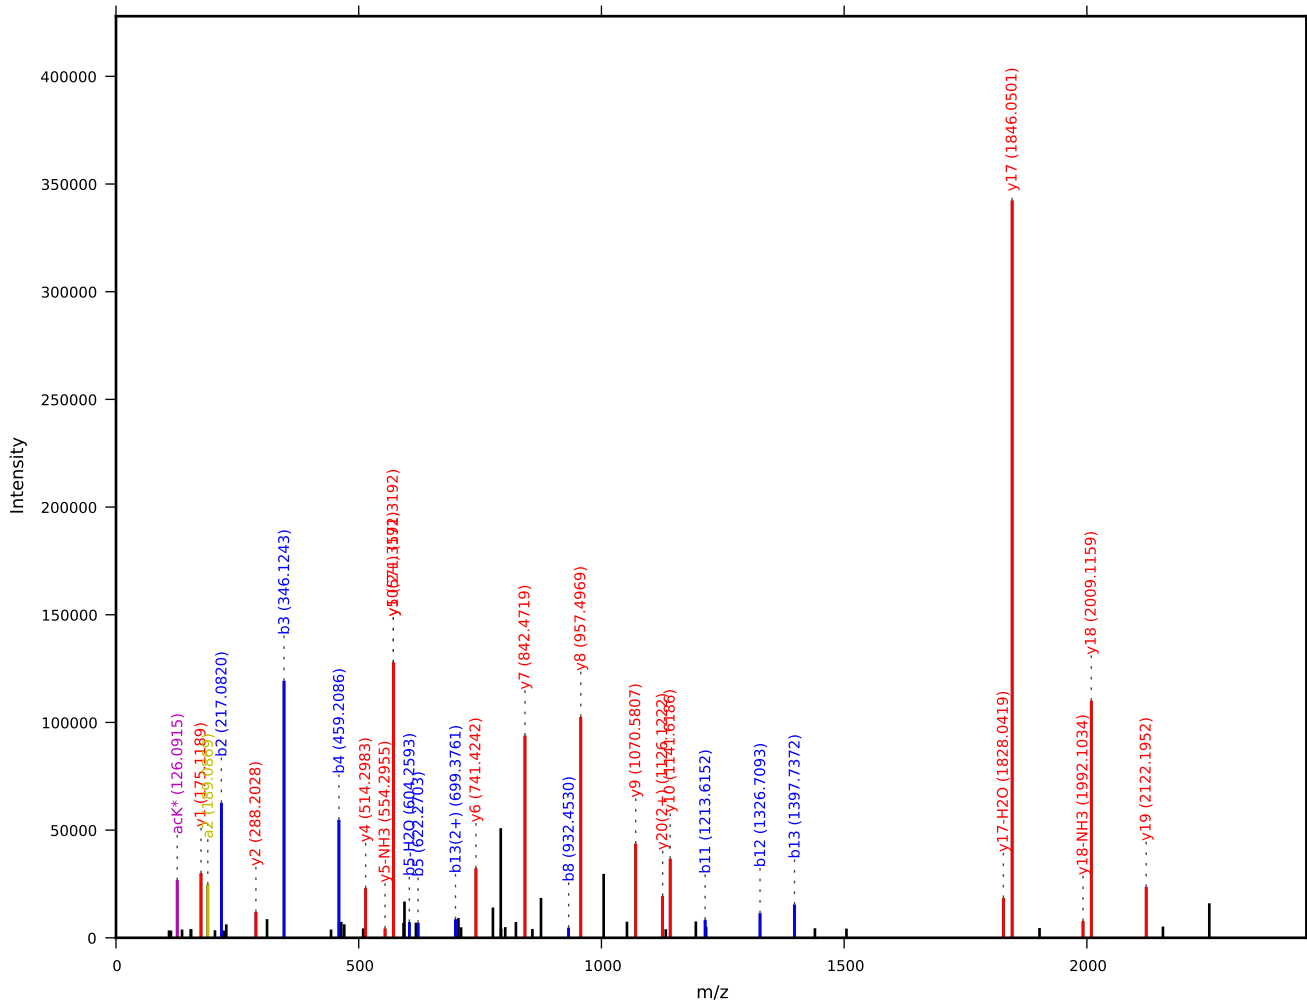

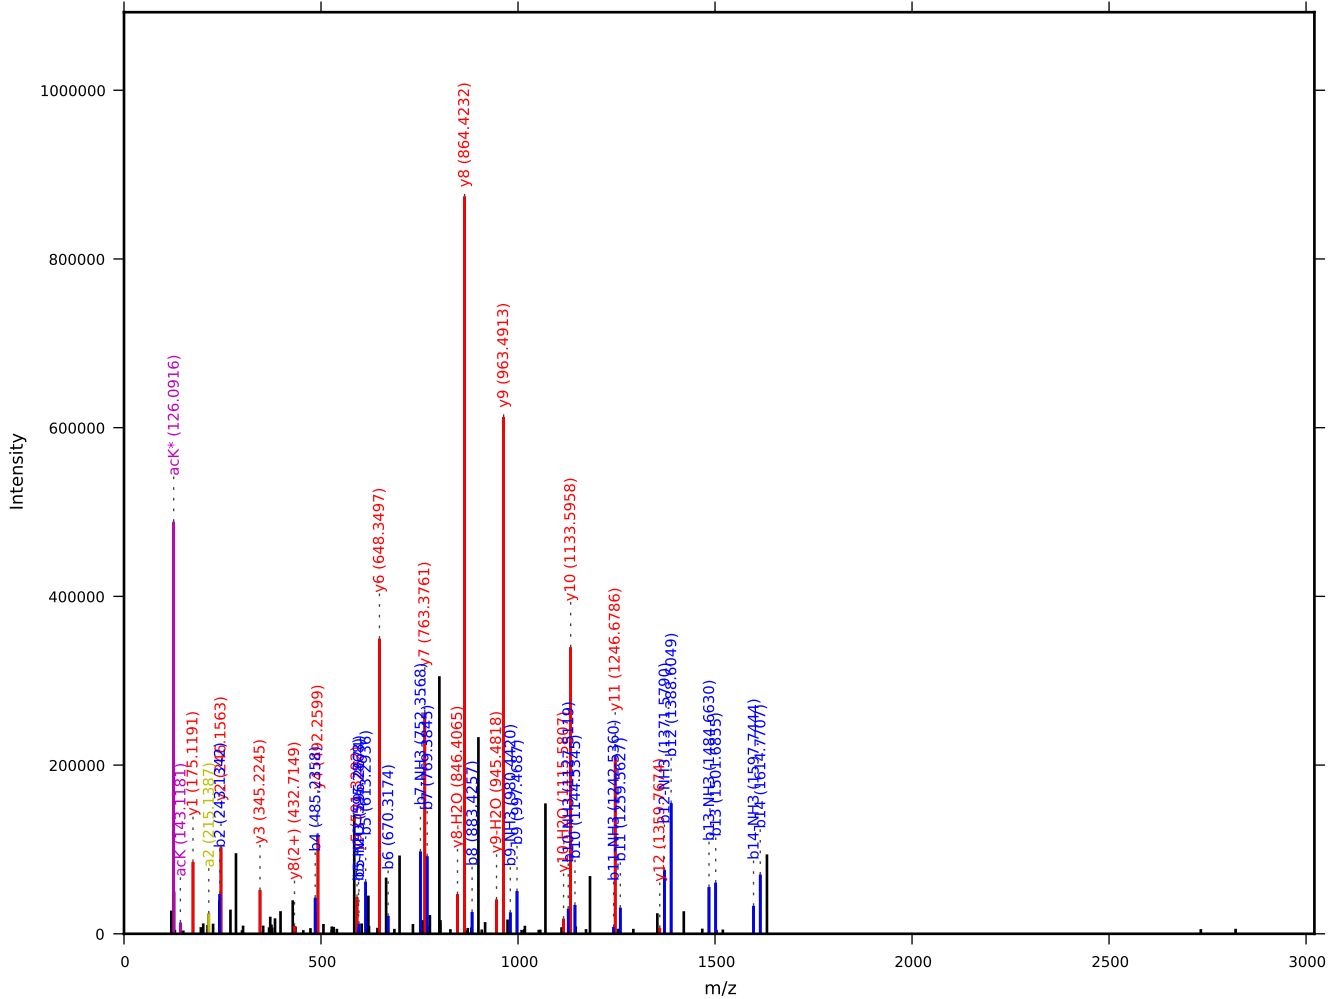

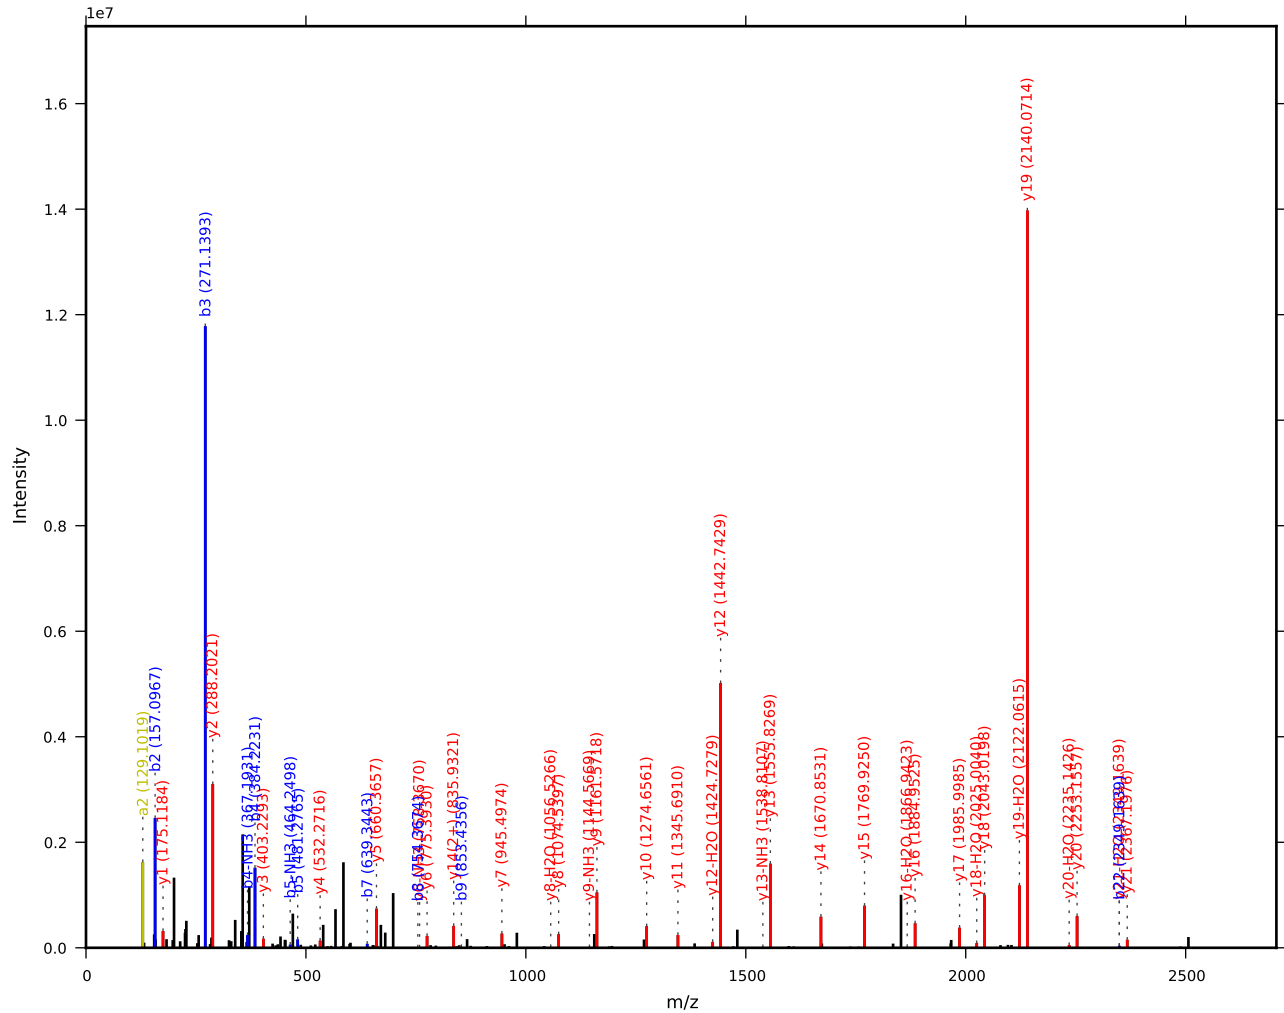

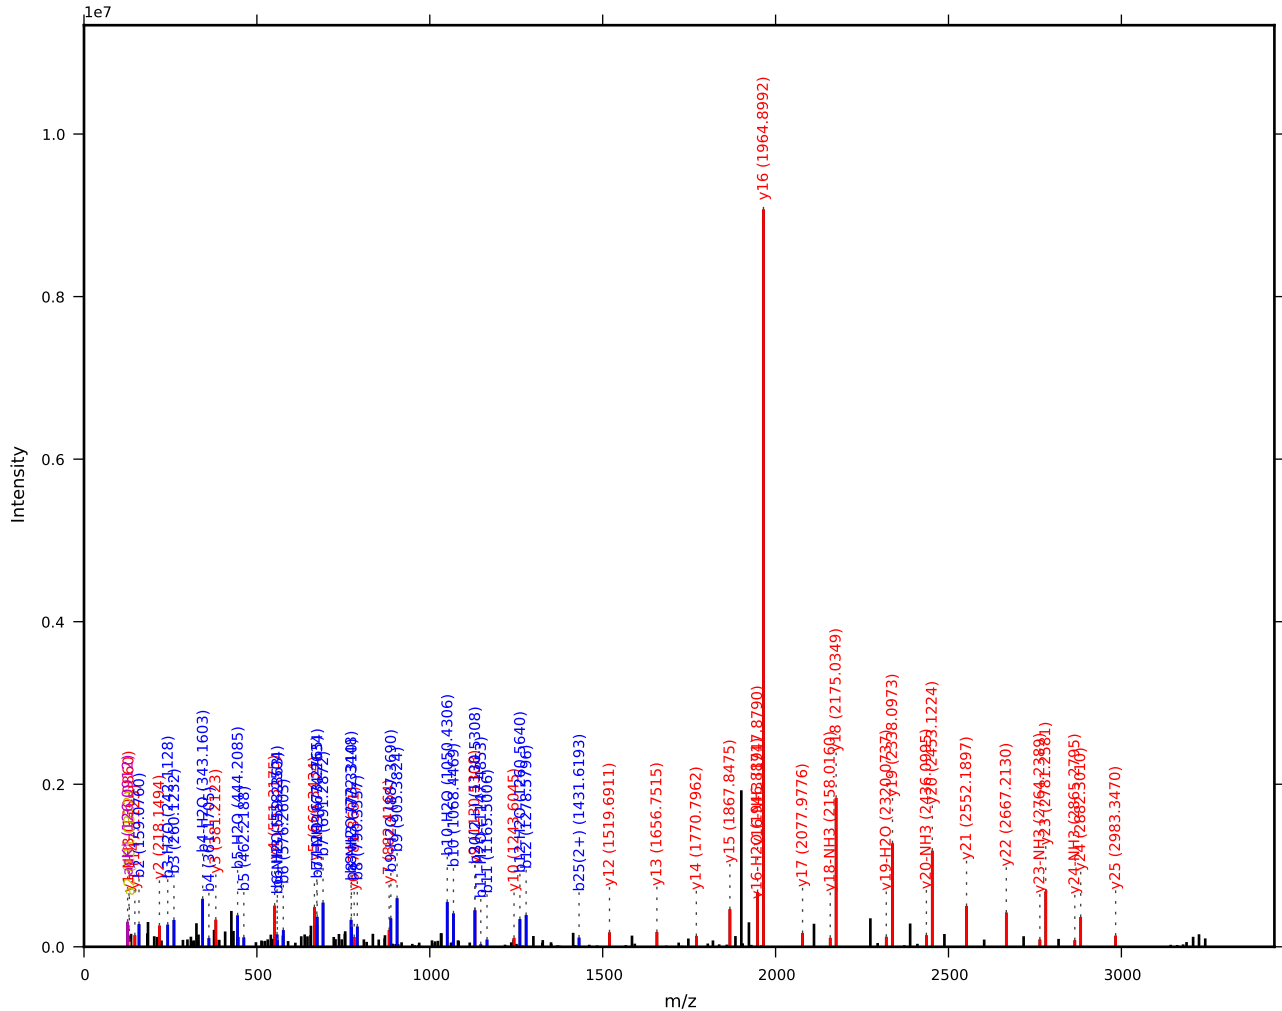



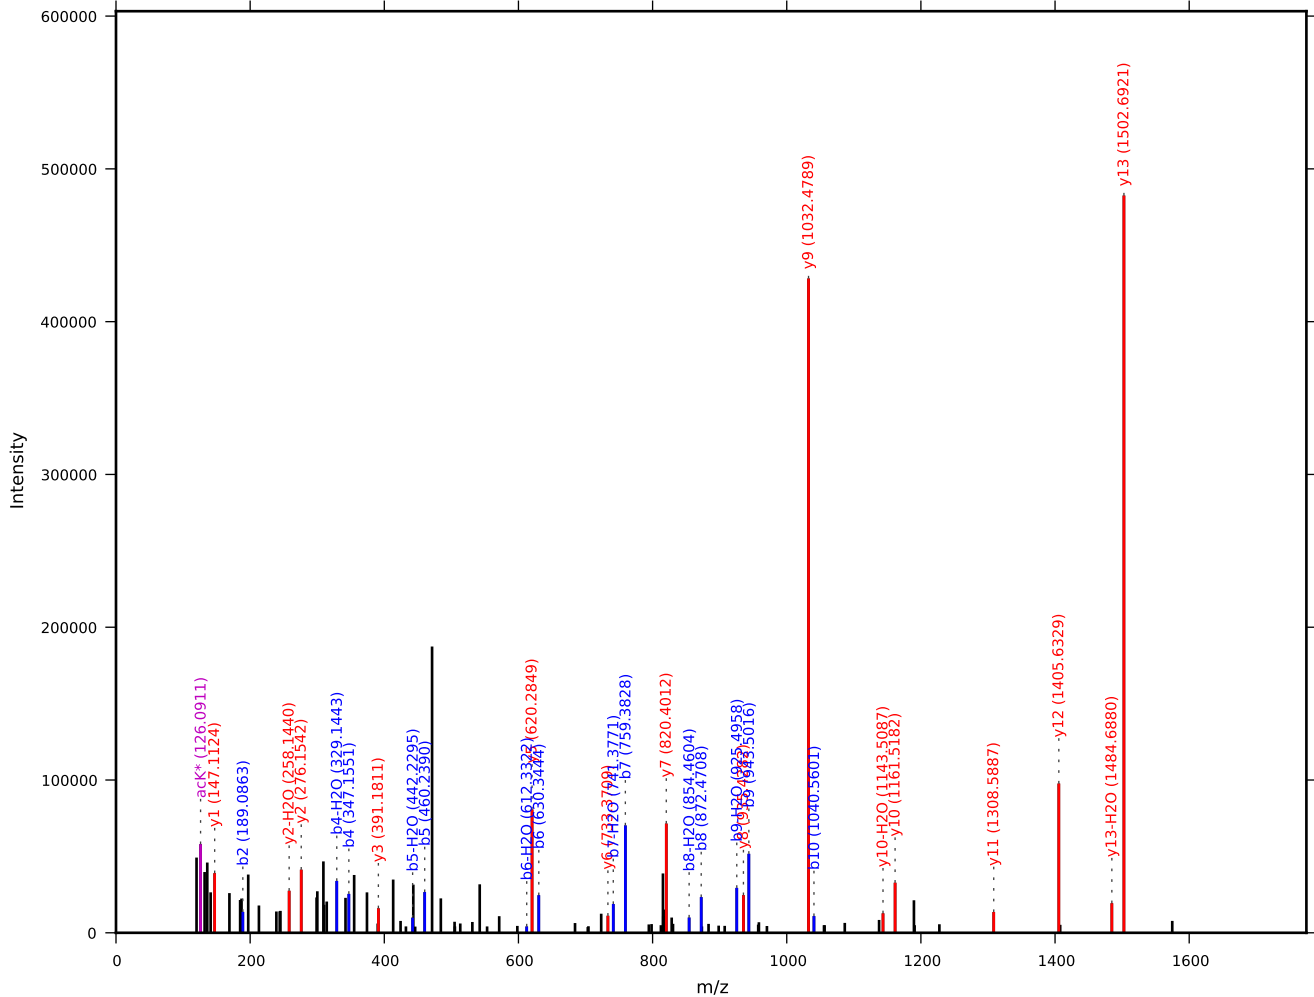

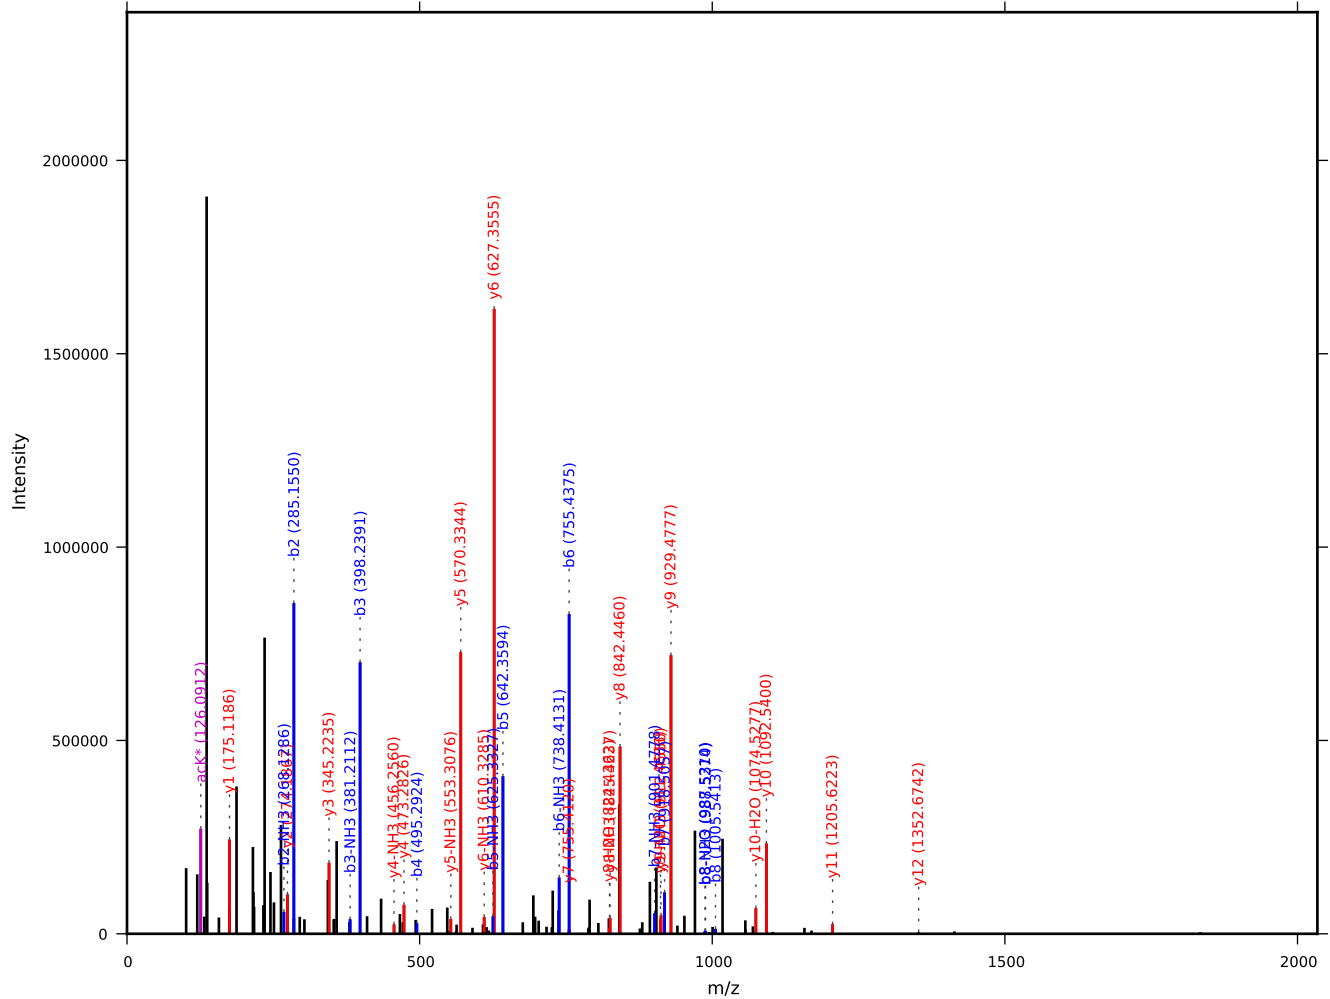

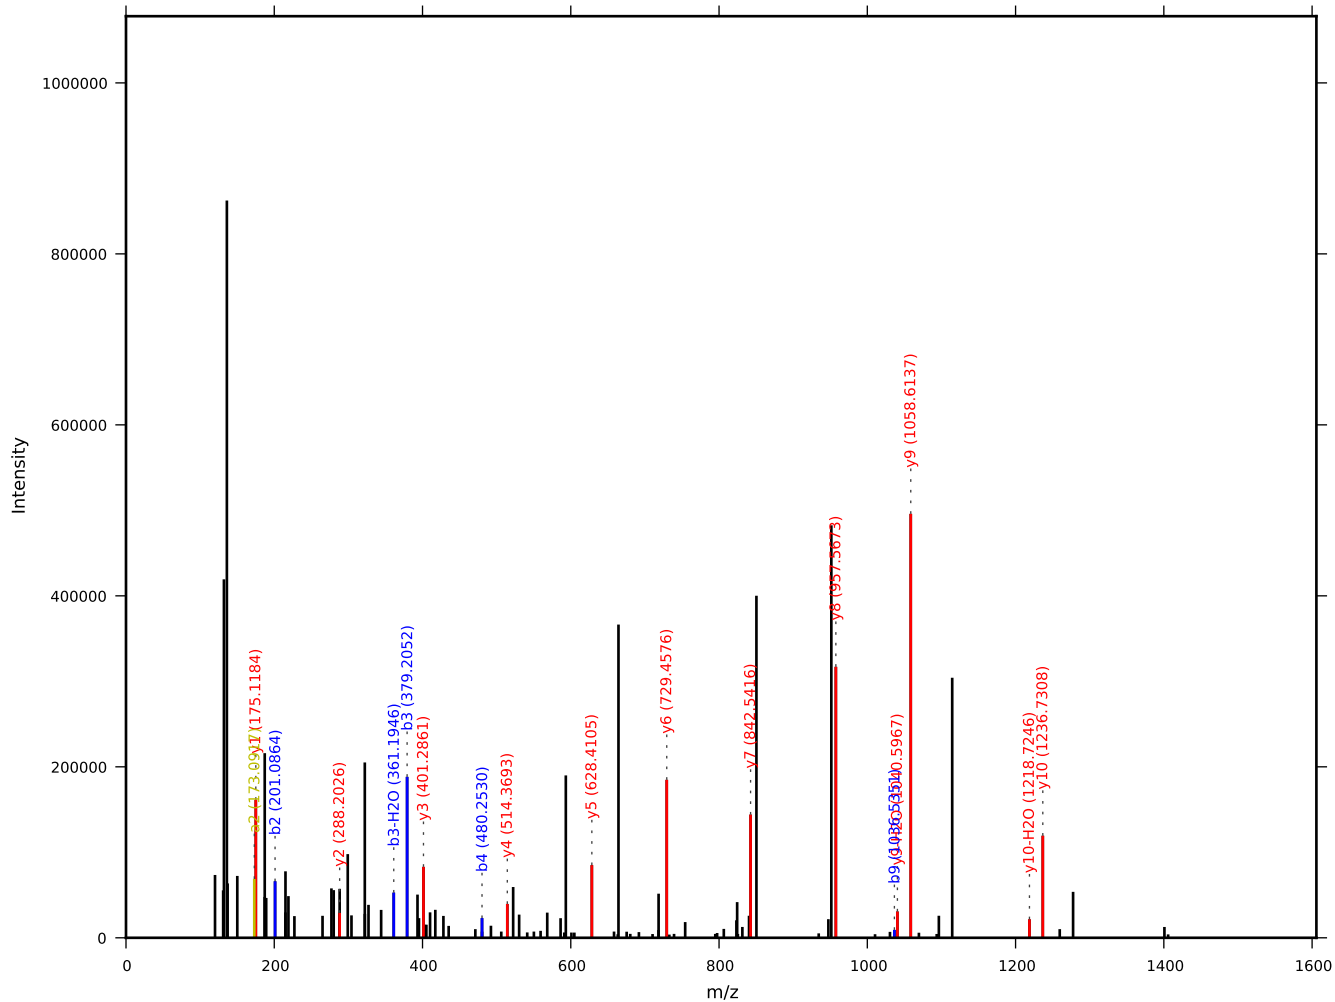

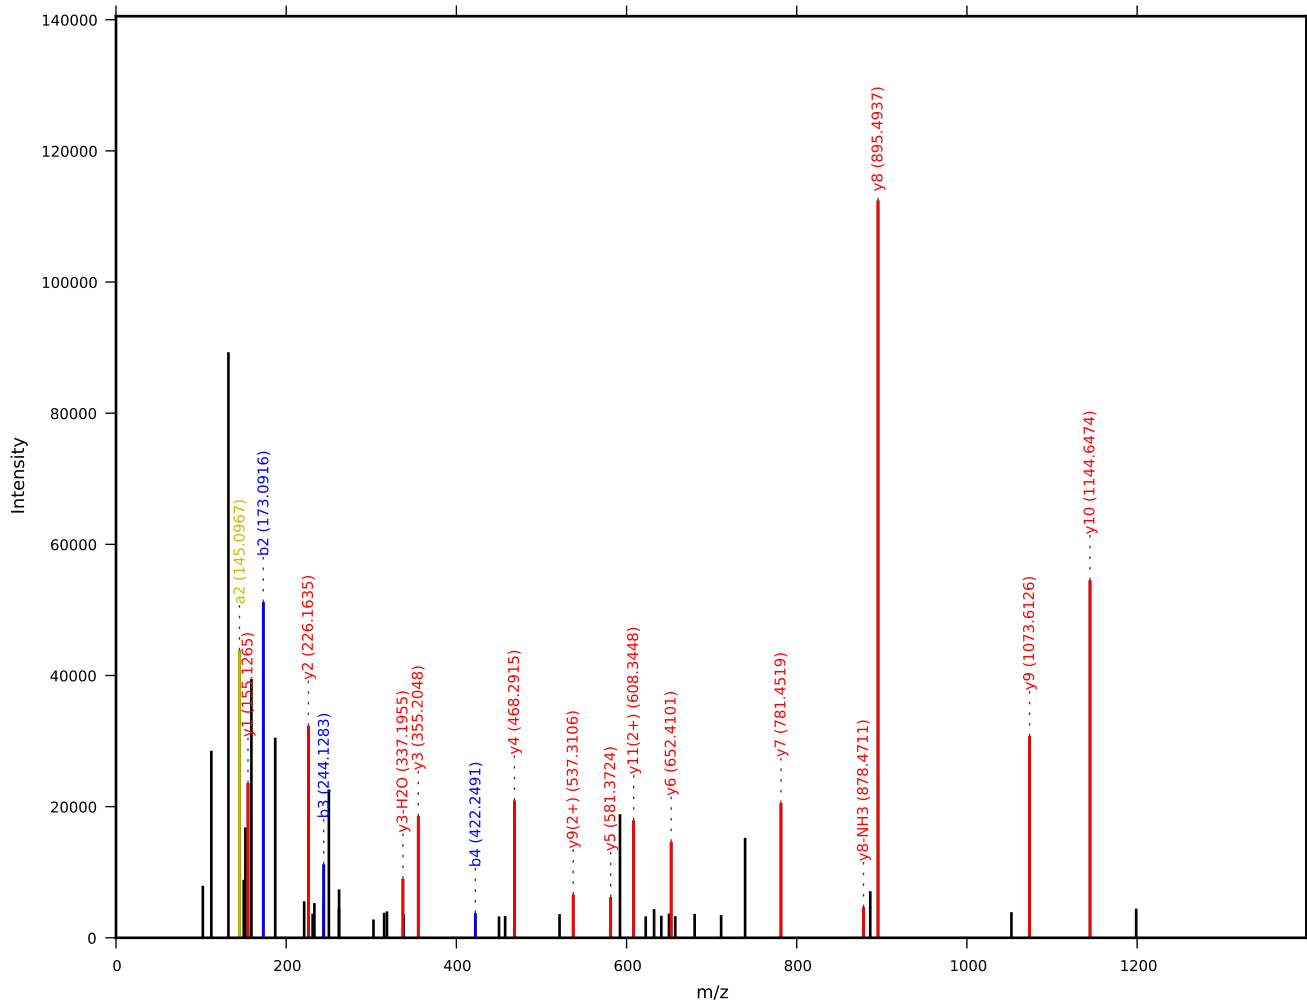

Mass: 1421.7373 Charge: 2 m/z: 711.87593  
Modified Peptide: \_ISPSAPSK(ac)DSFTK\_ Score: 66.285 PEP: 7.8674E-05

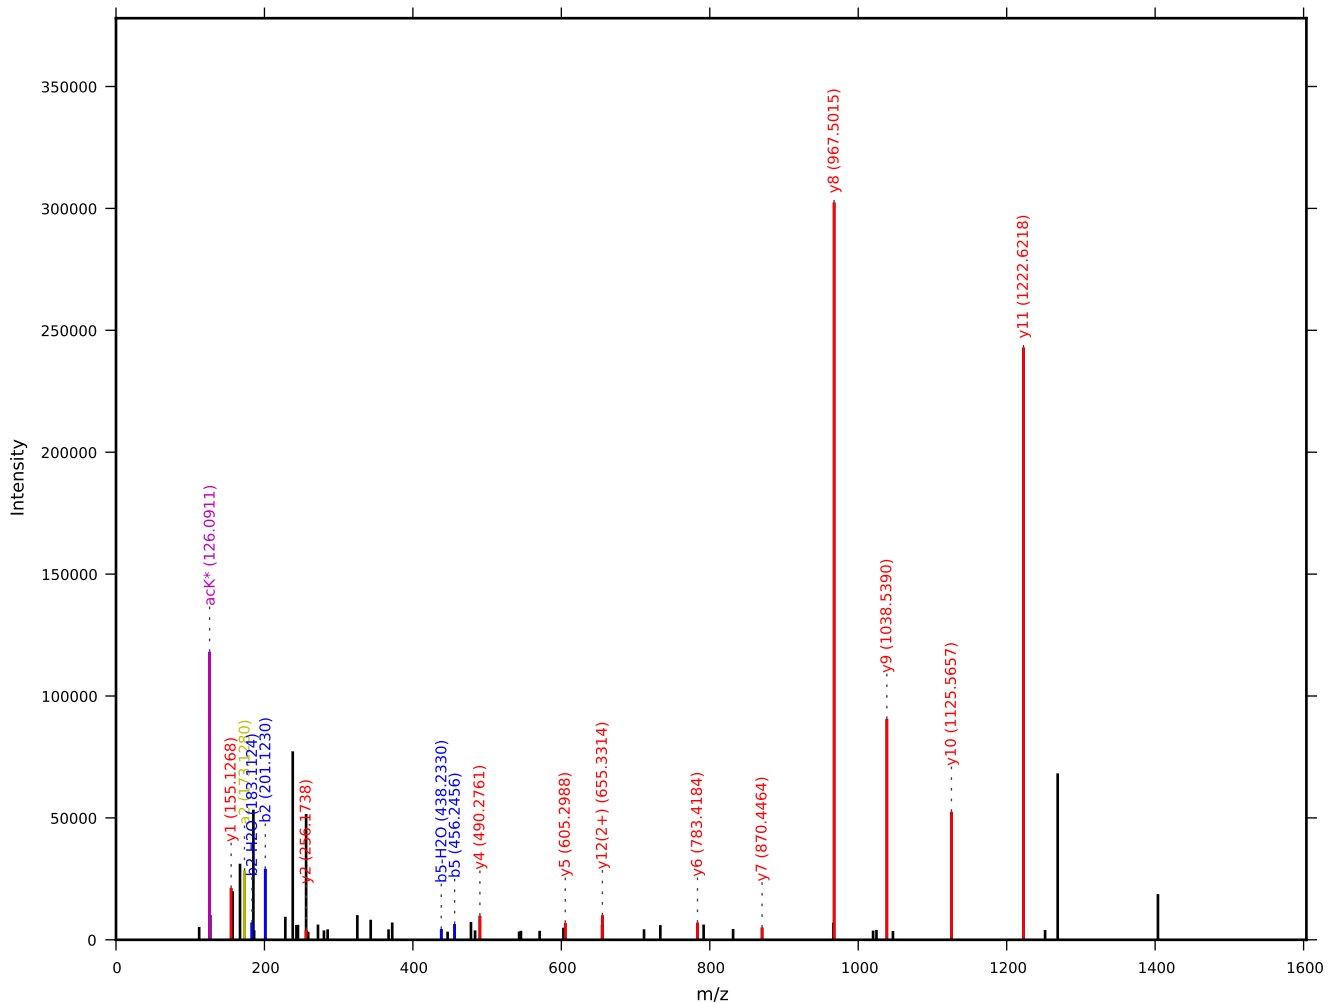

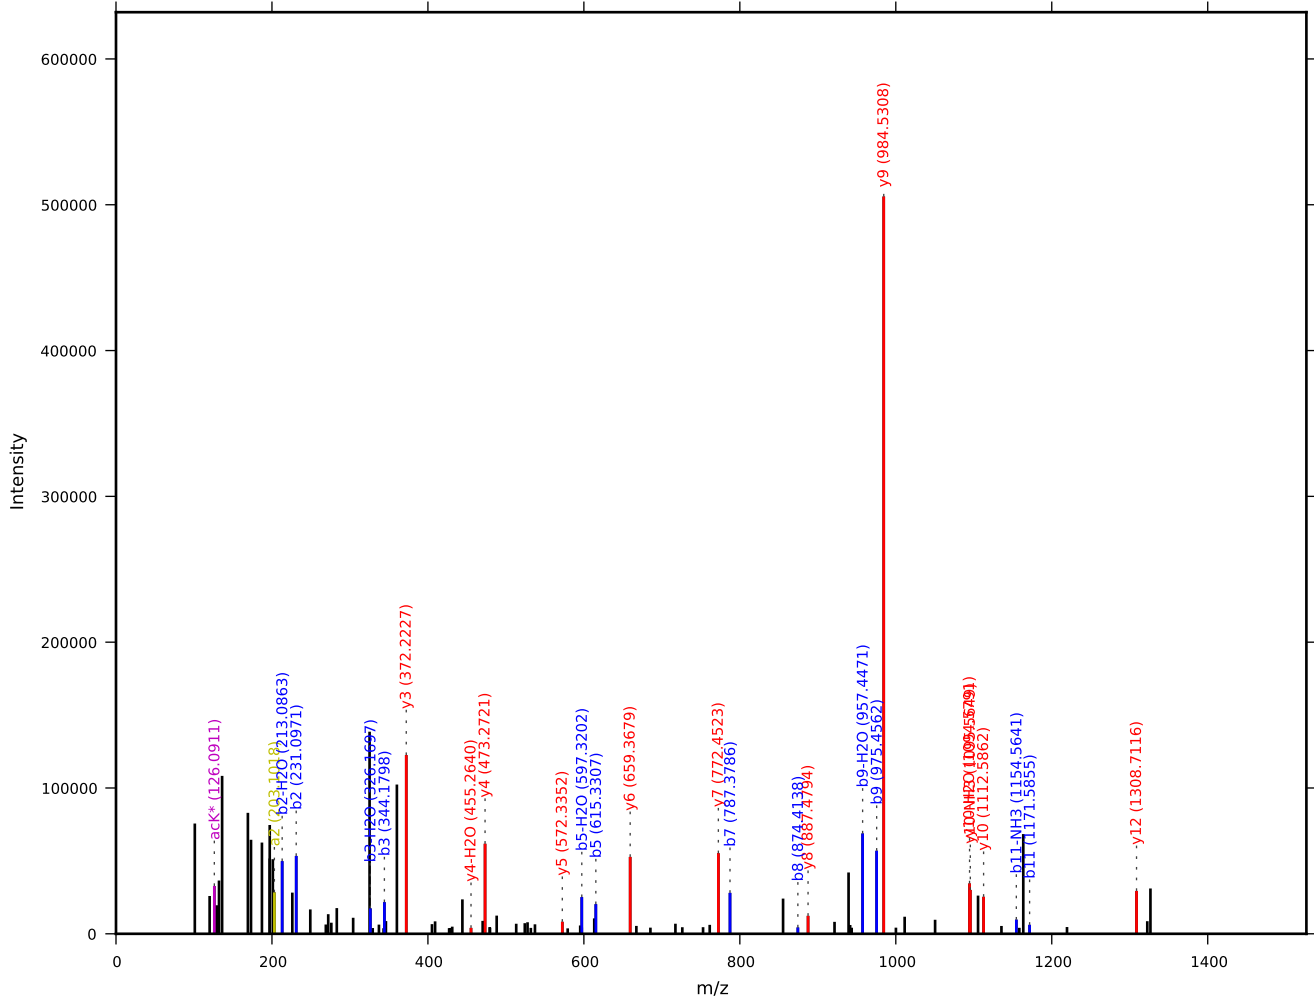

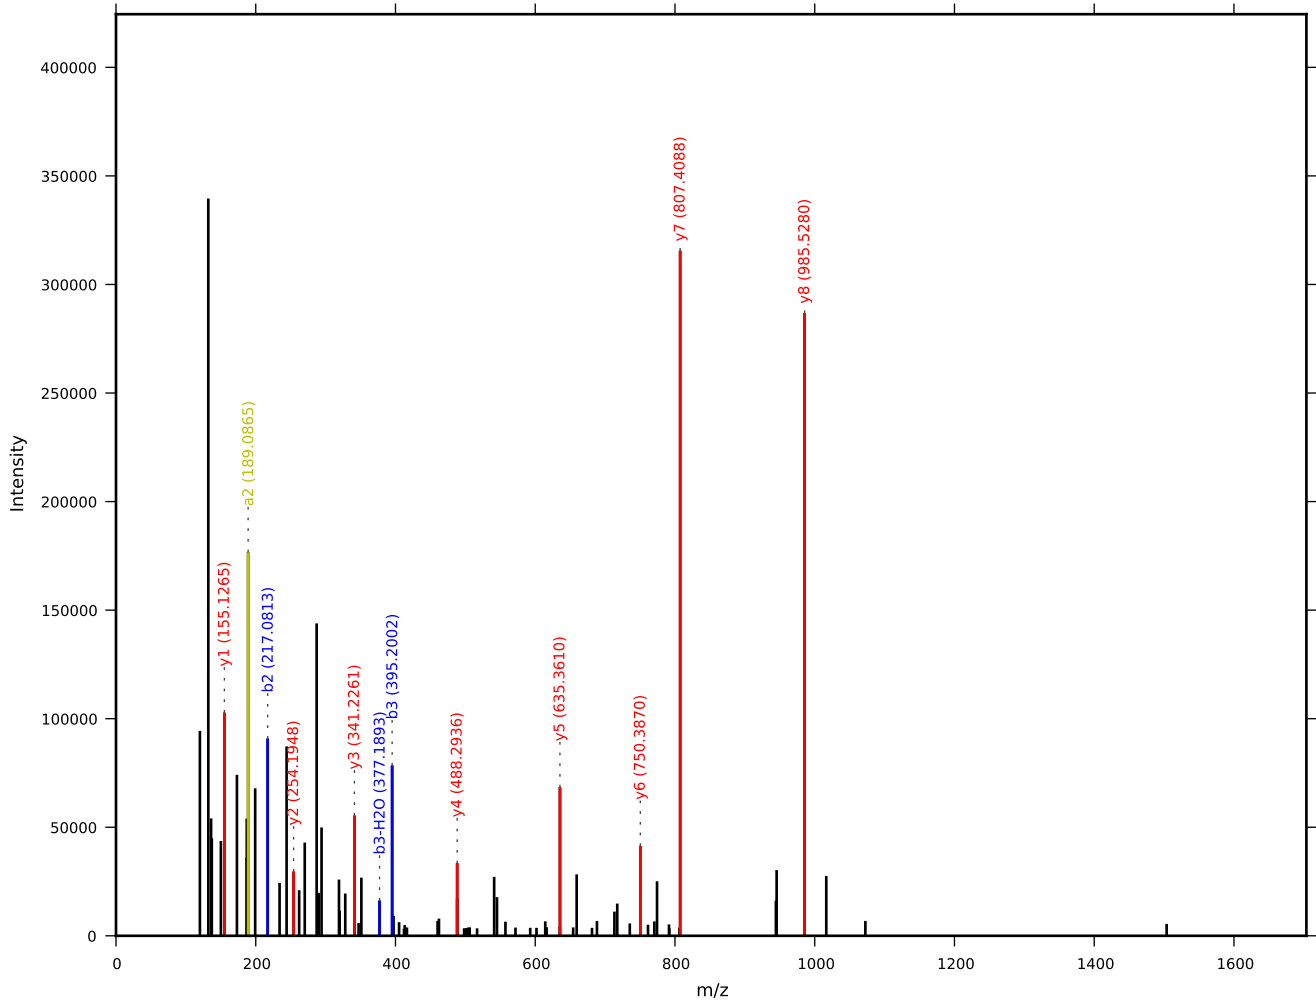

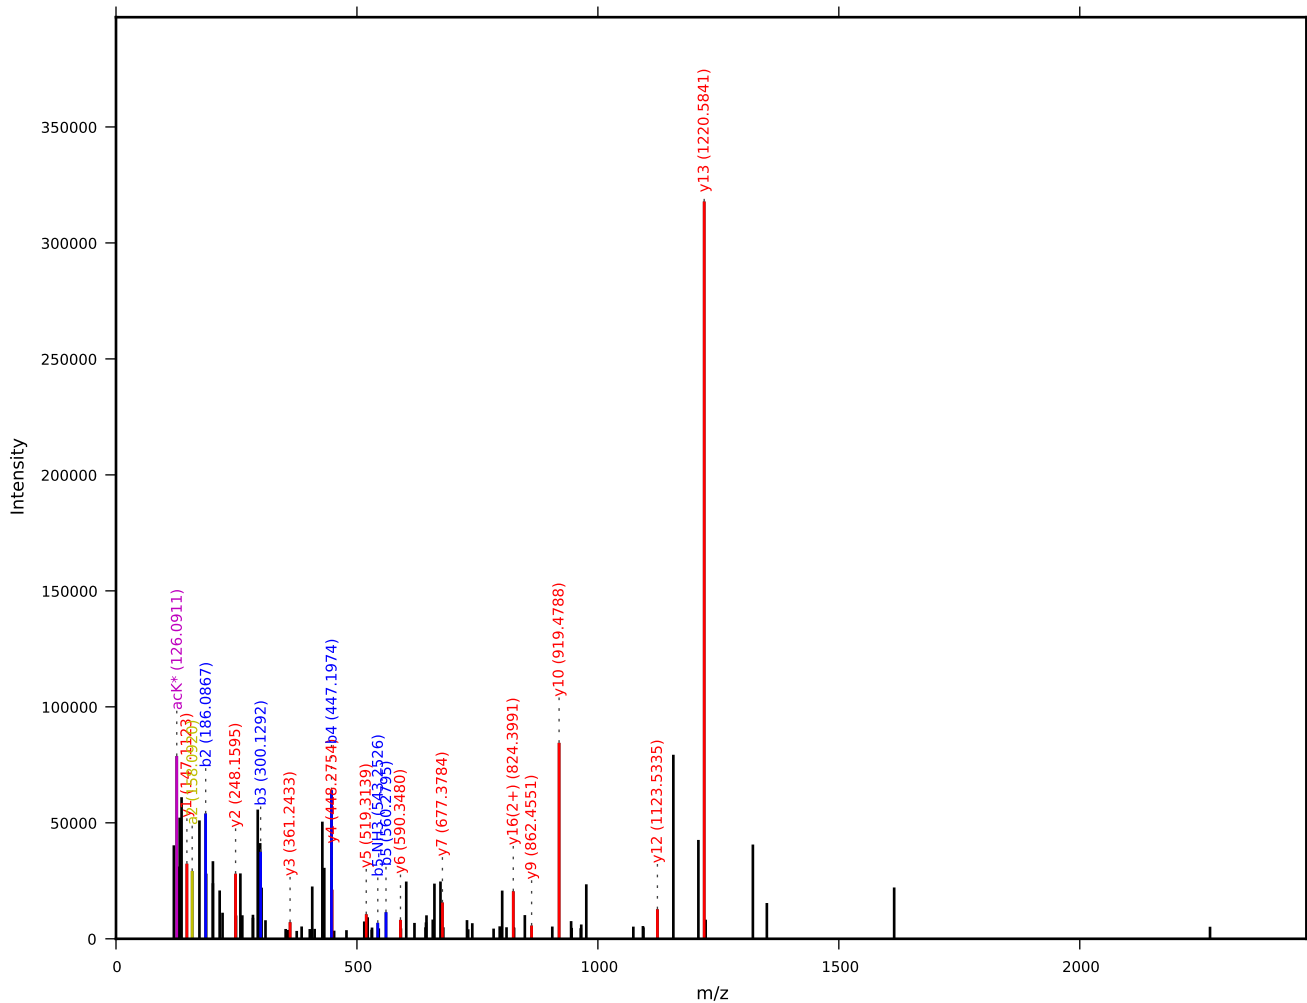



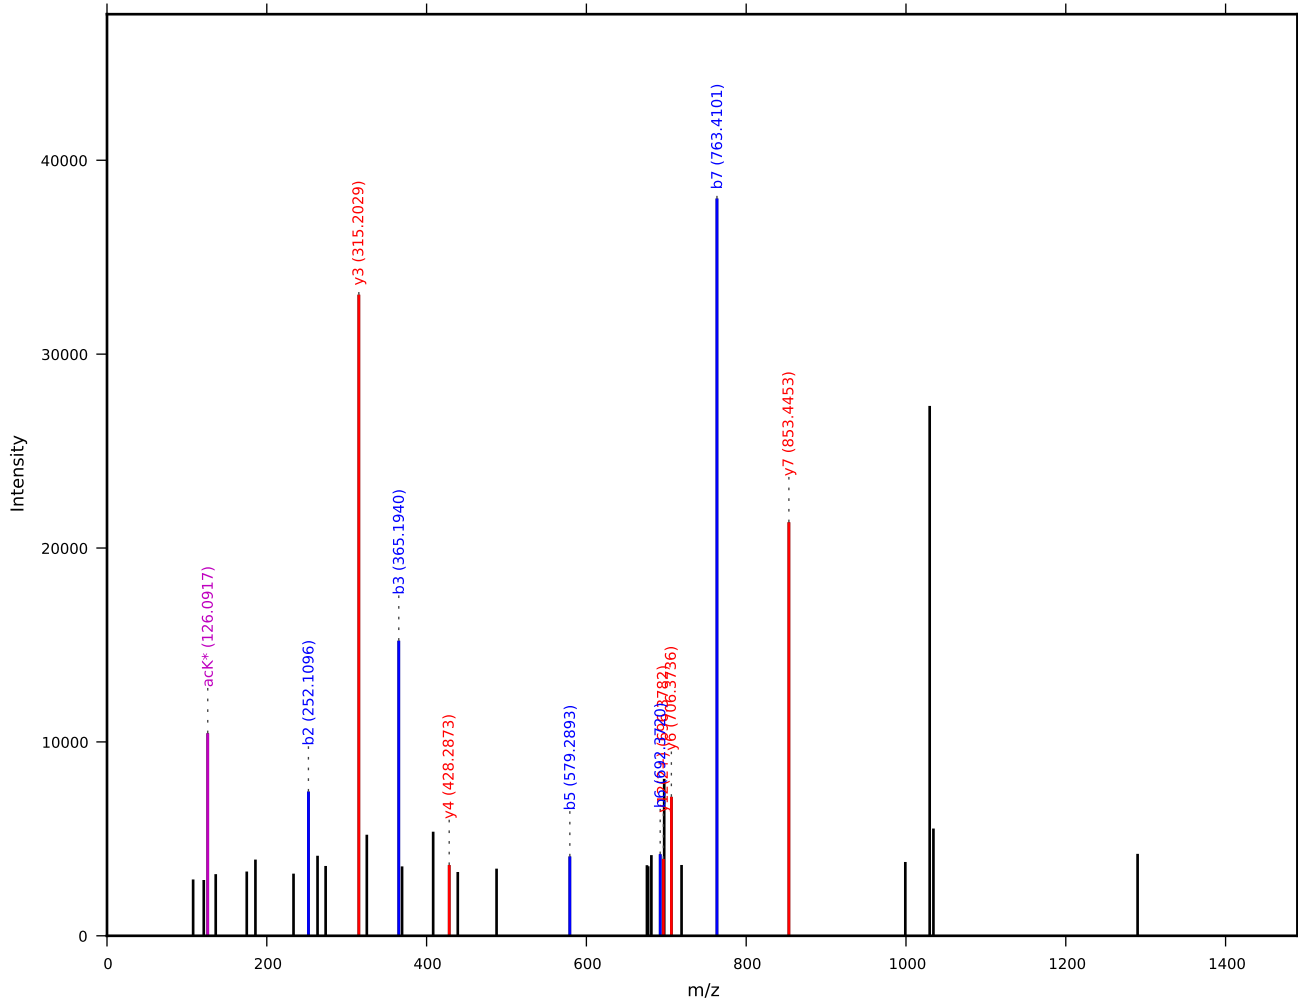

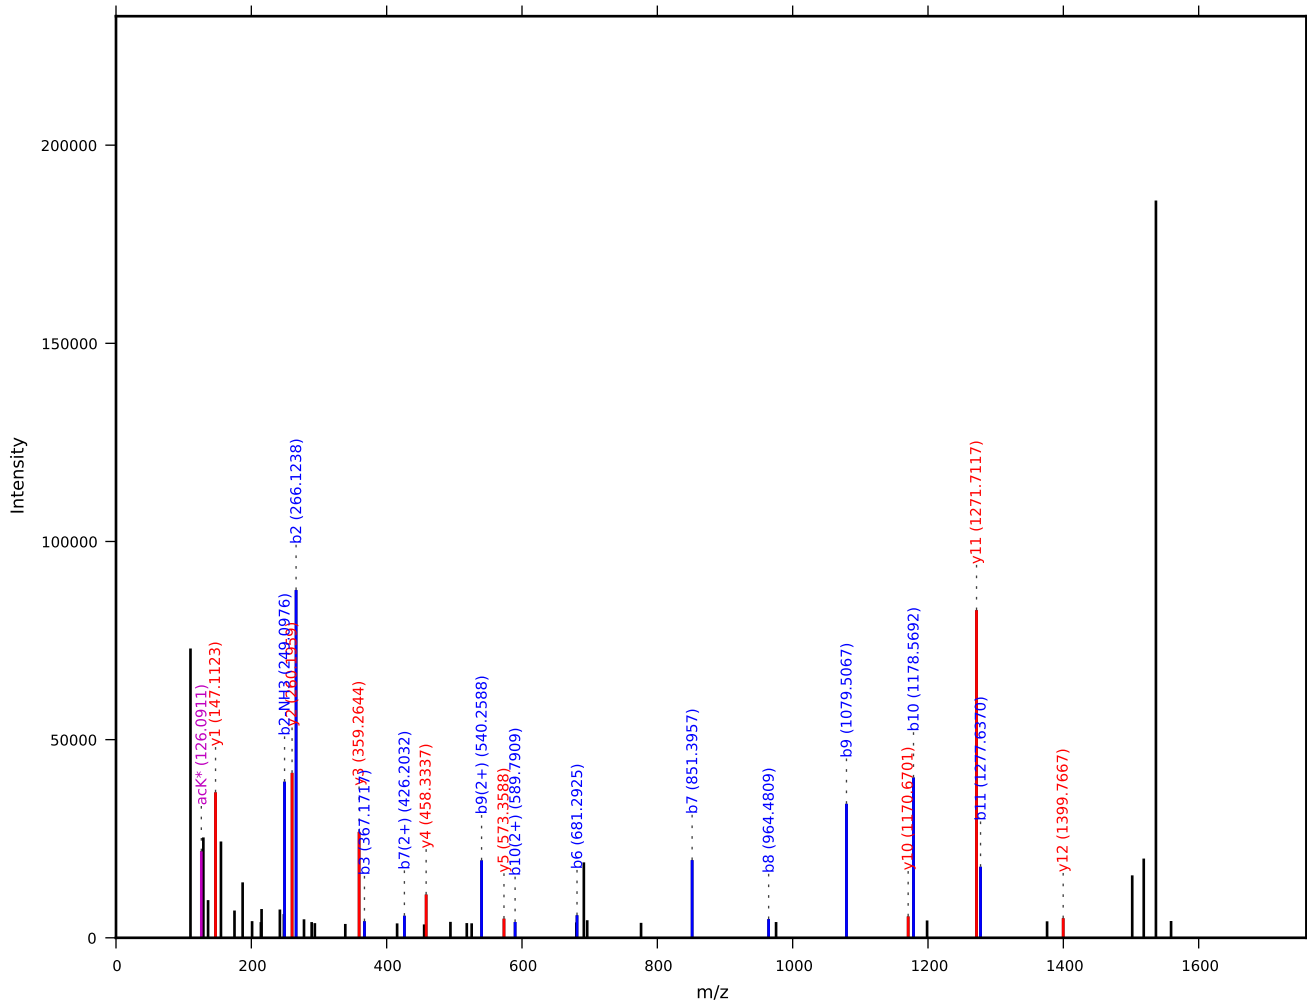

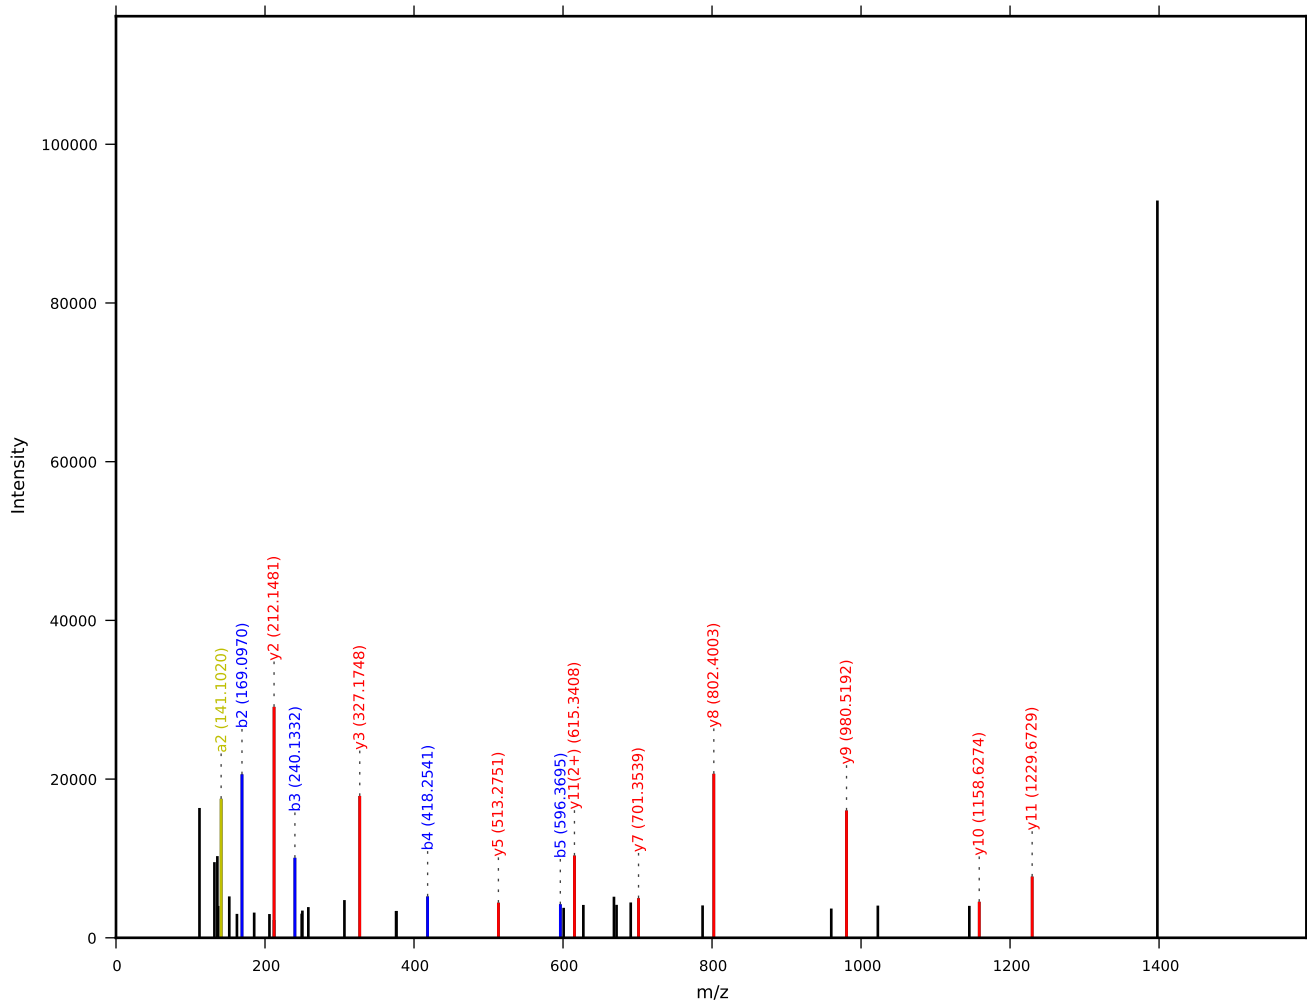



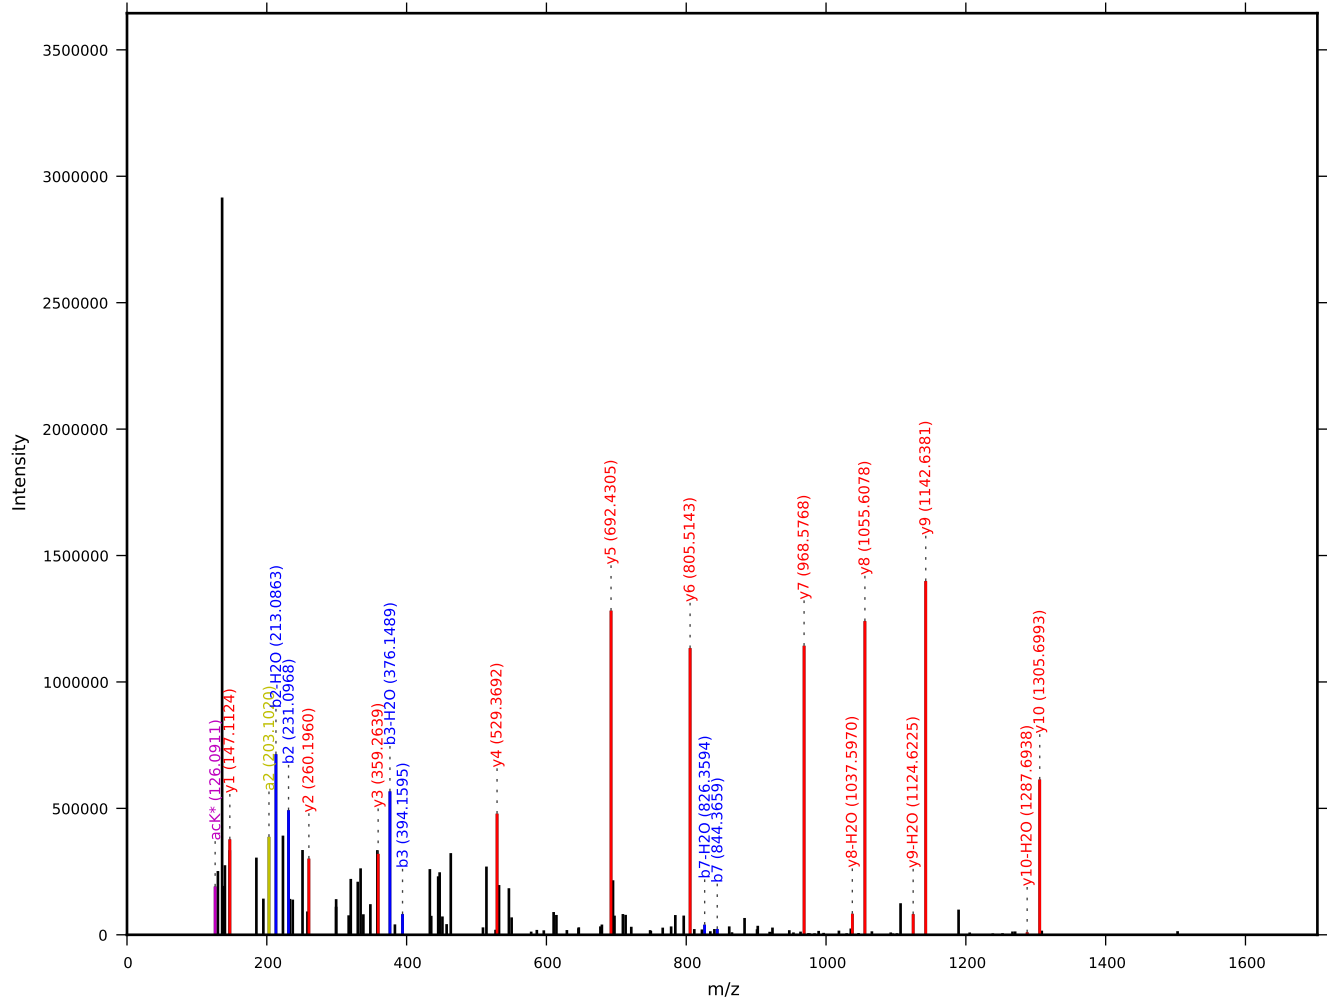

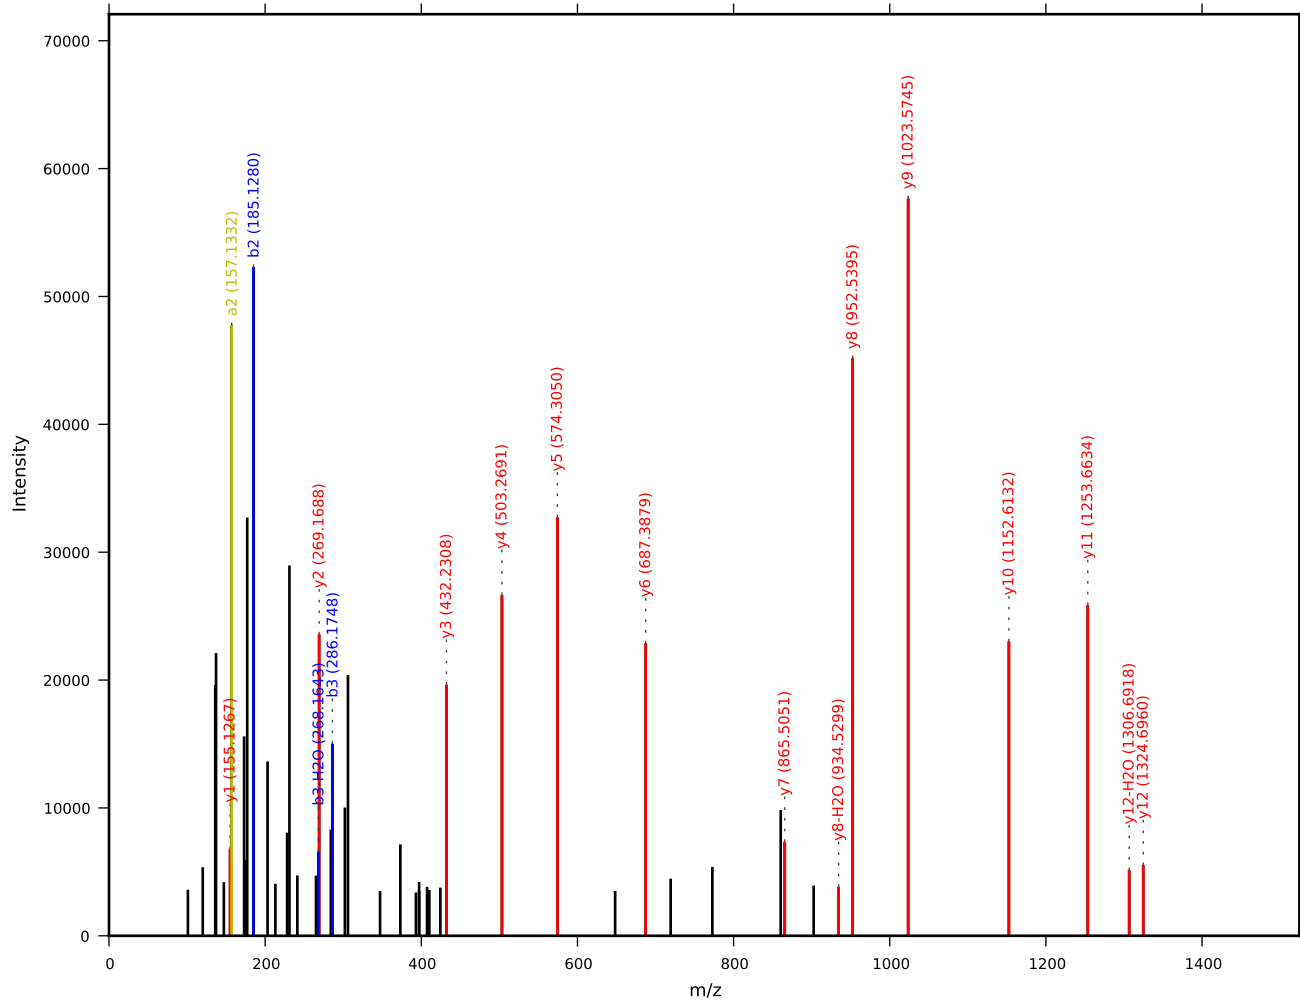

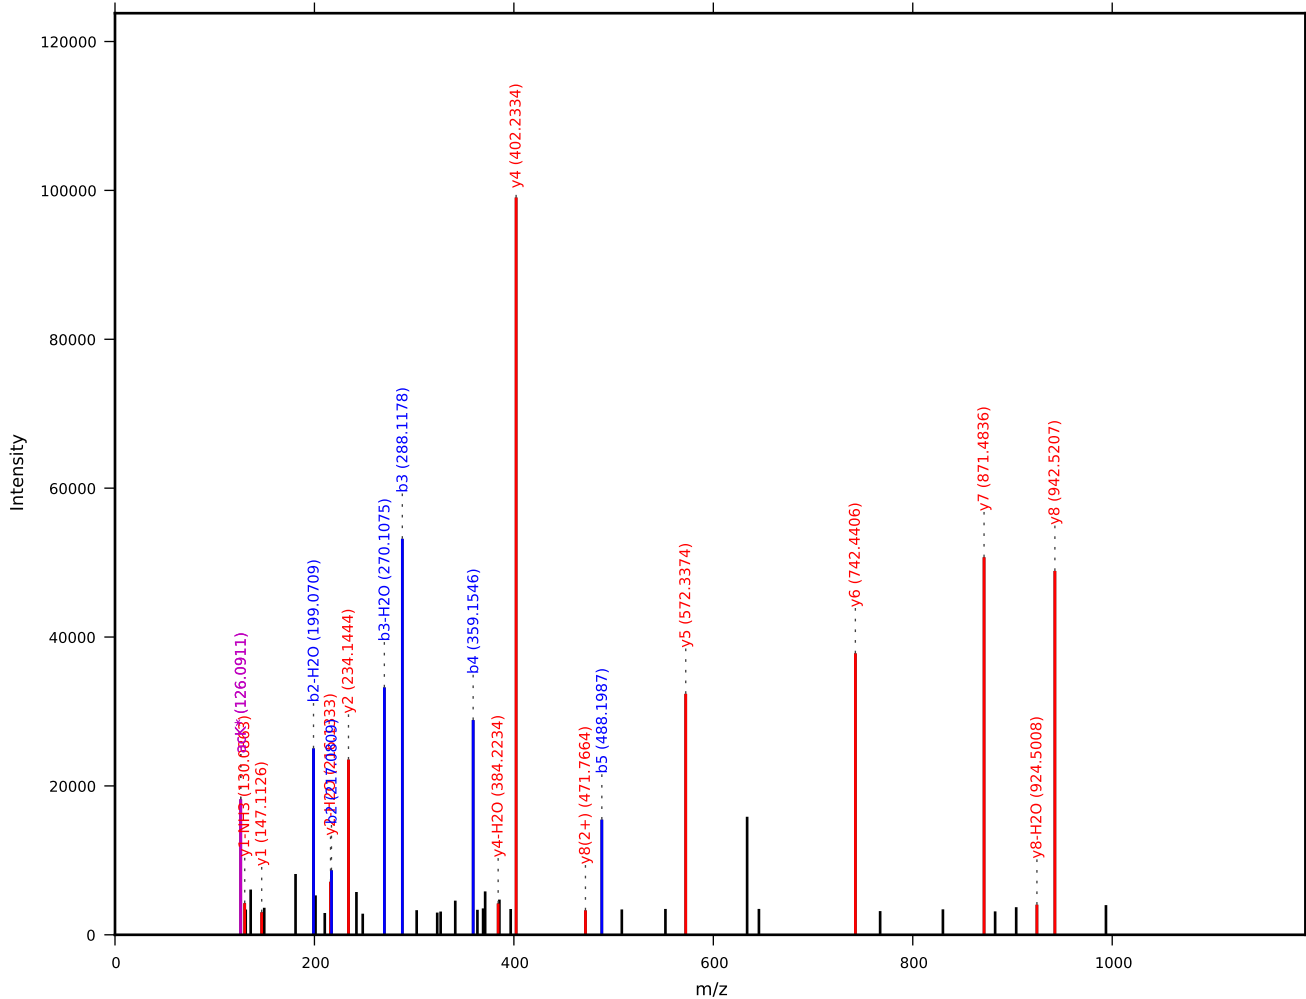





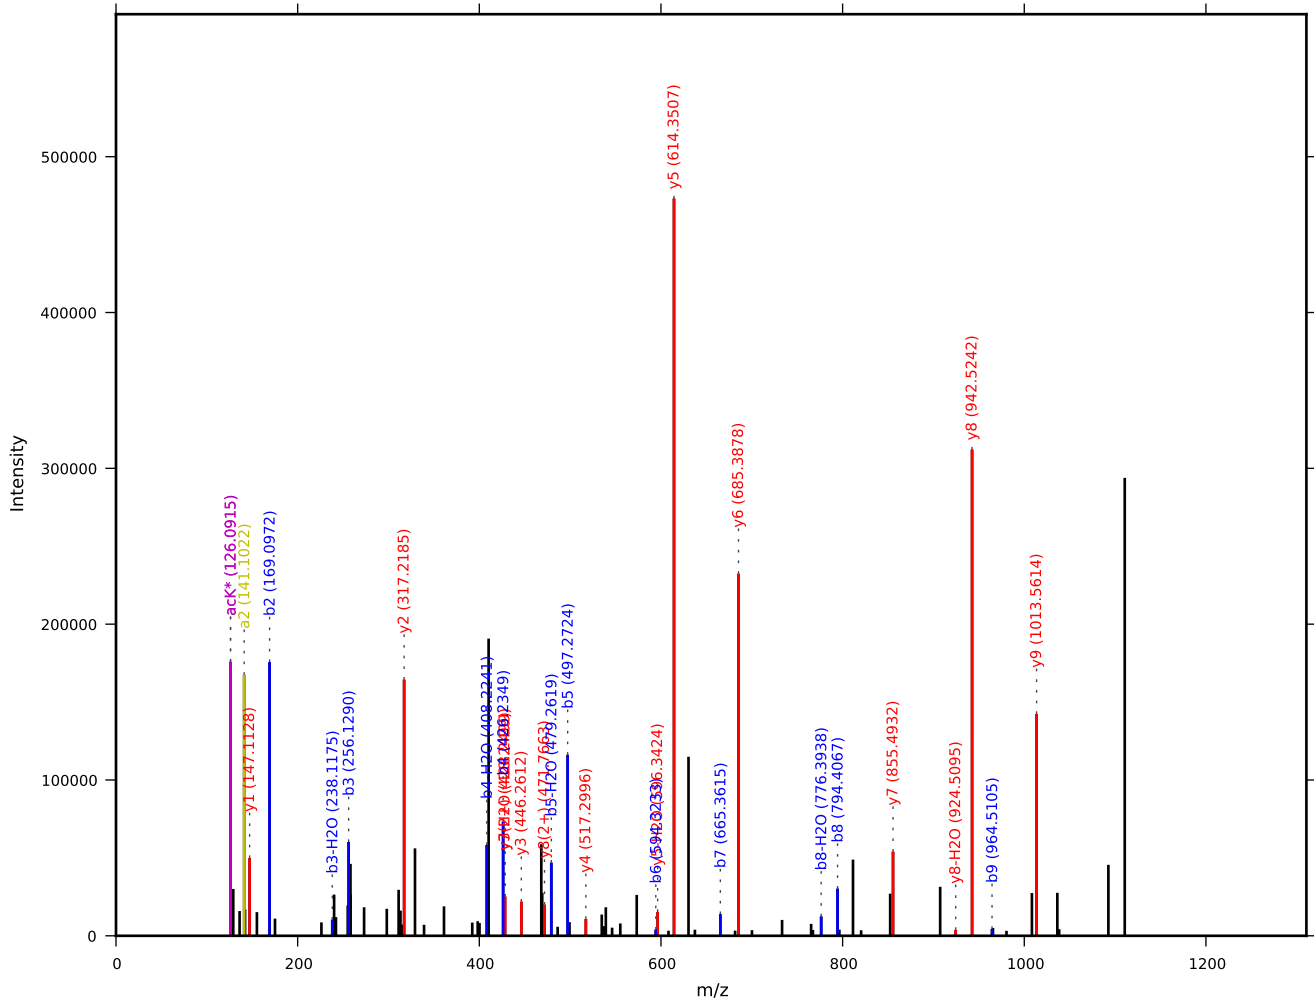

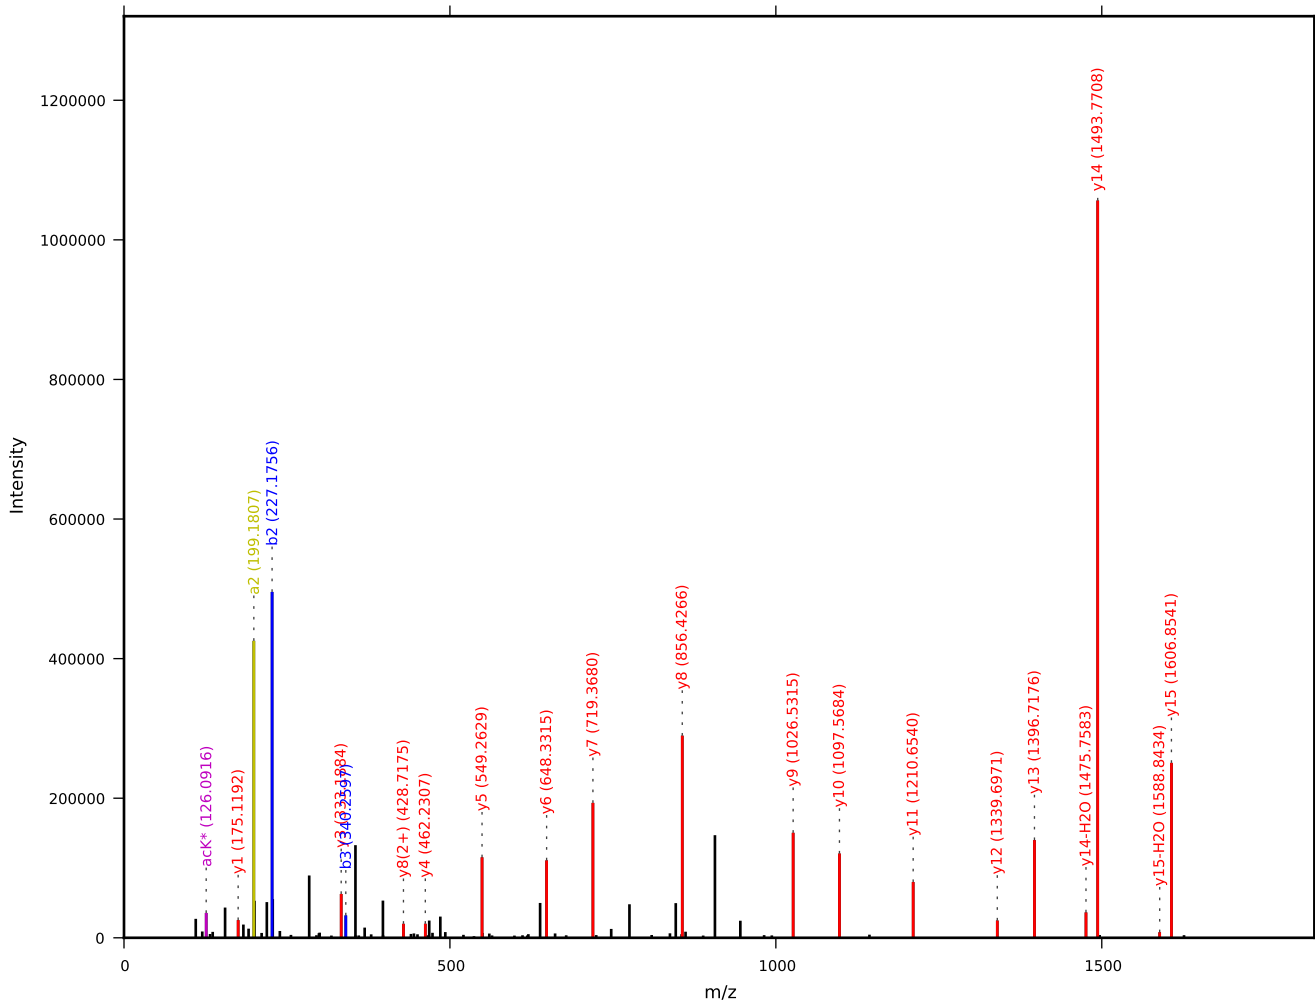

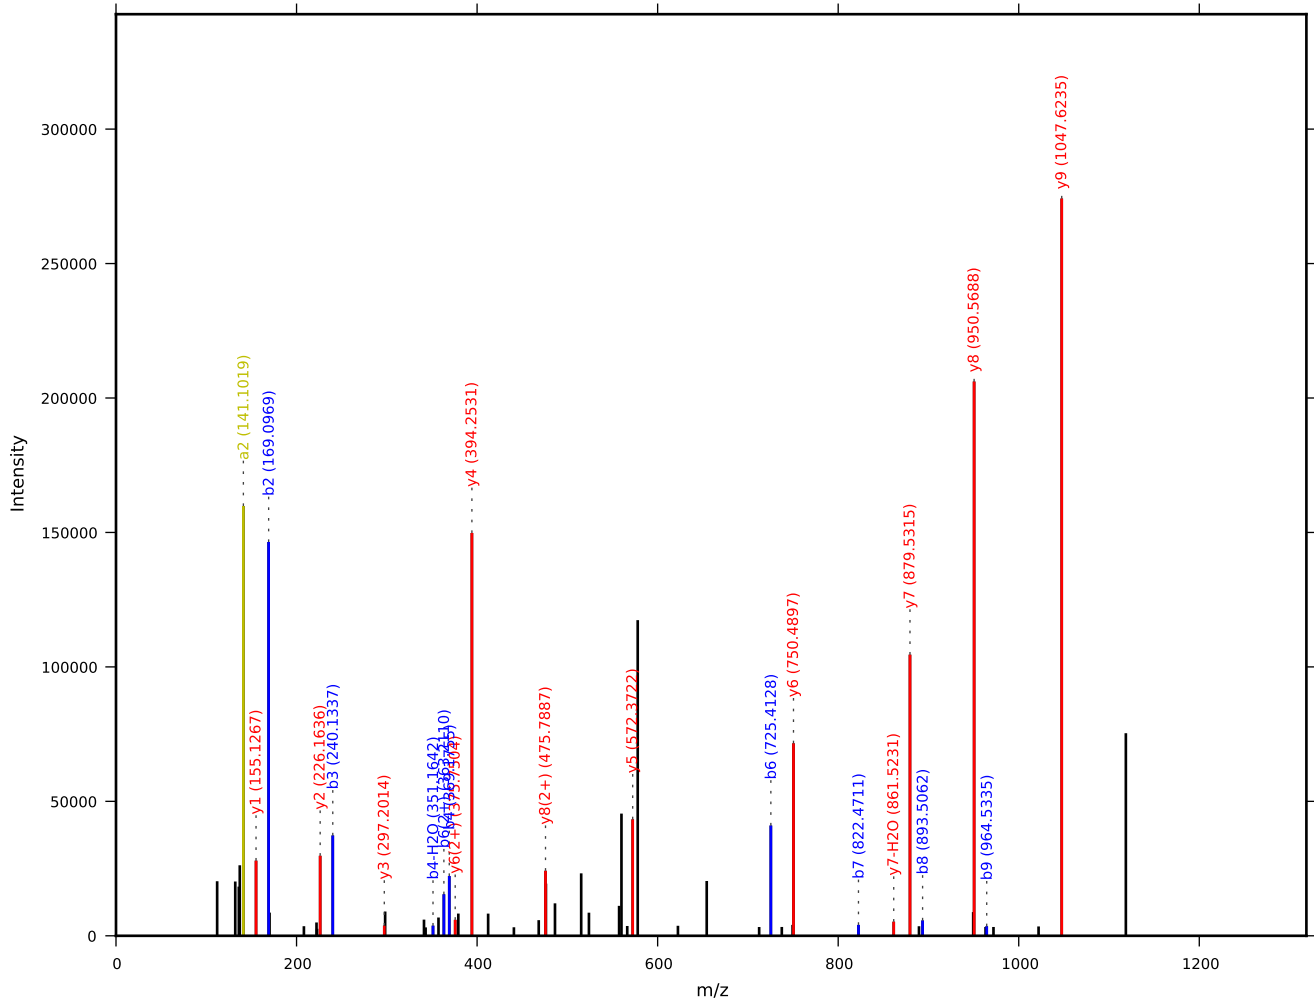

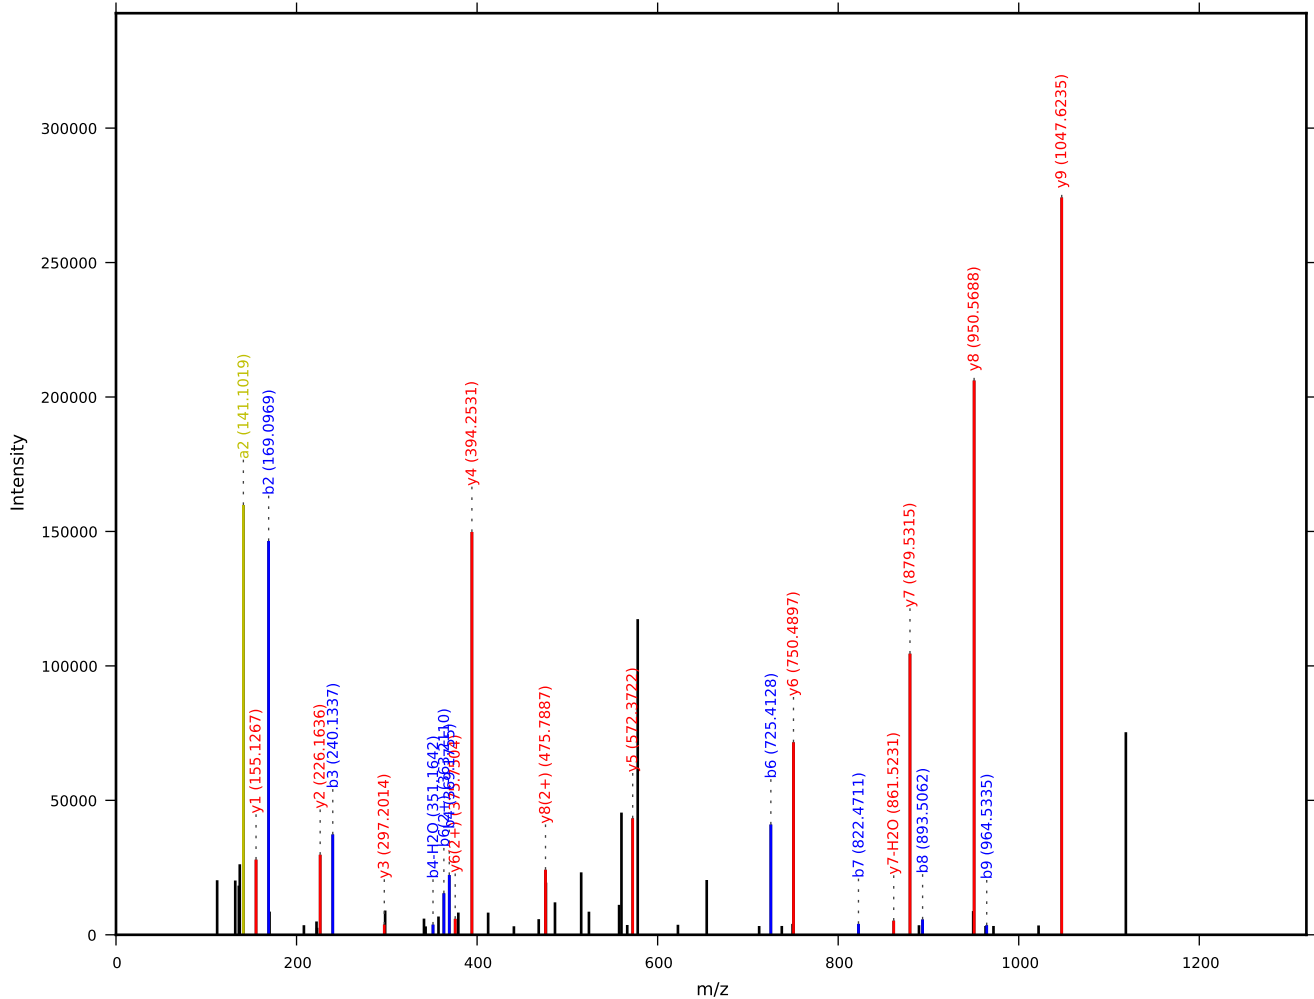

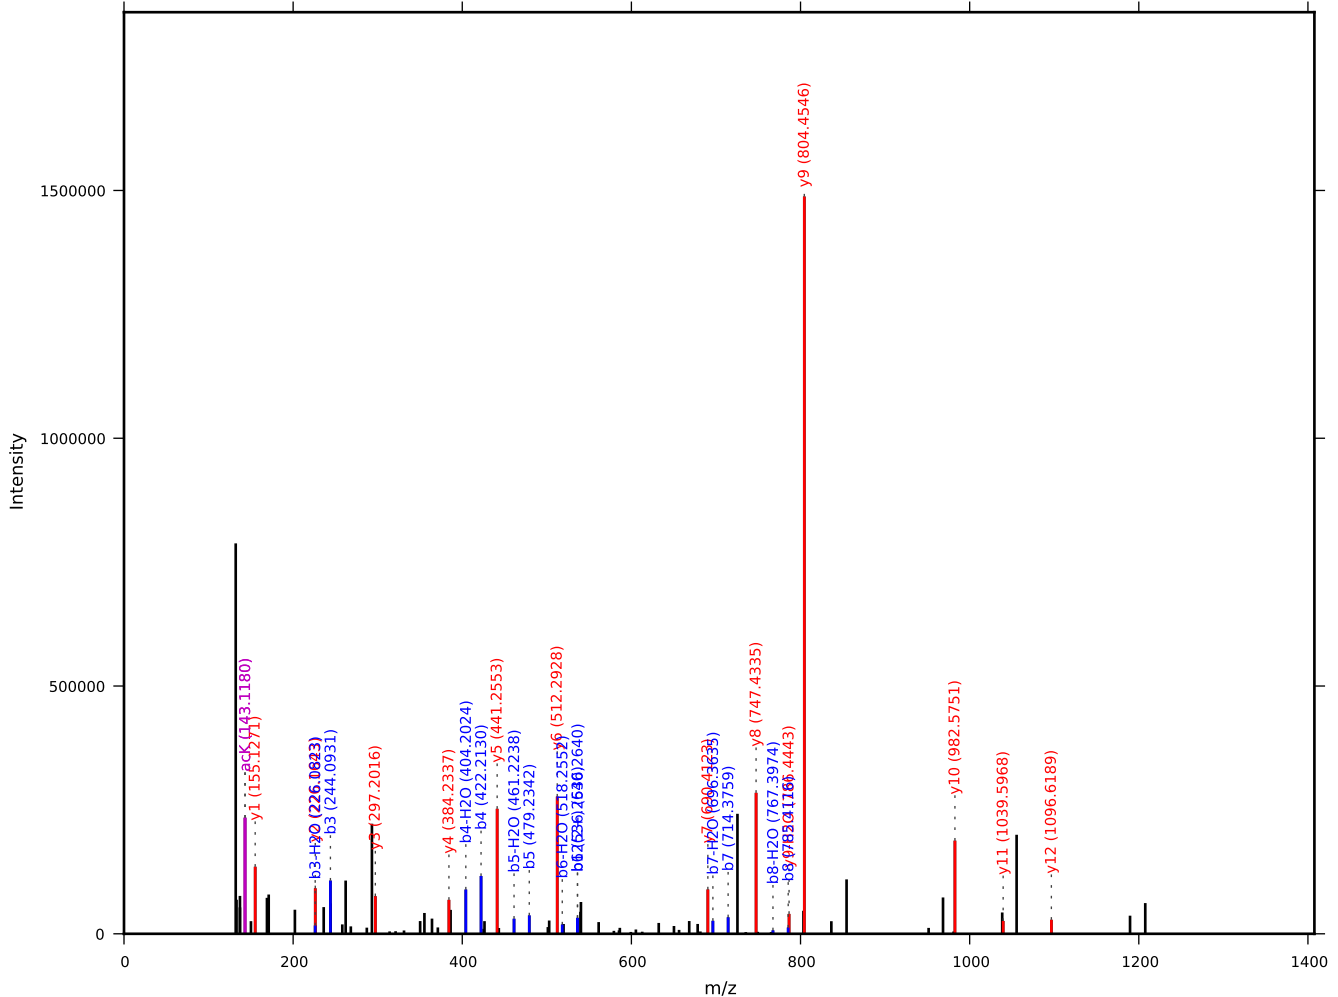



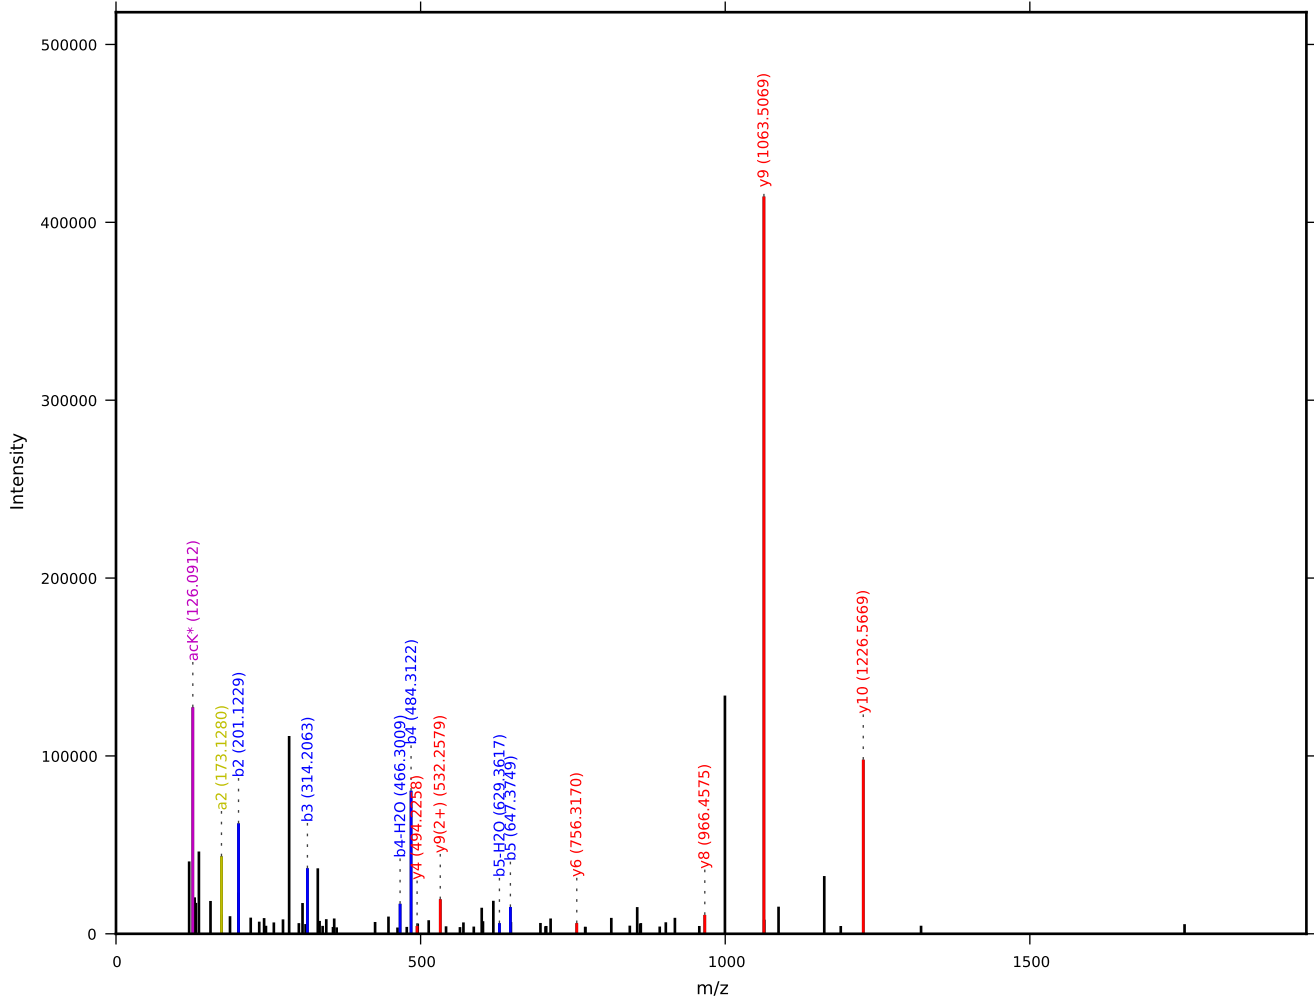

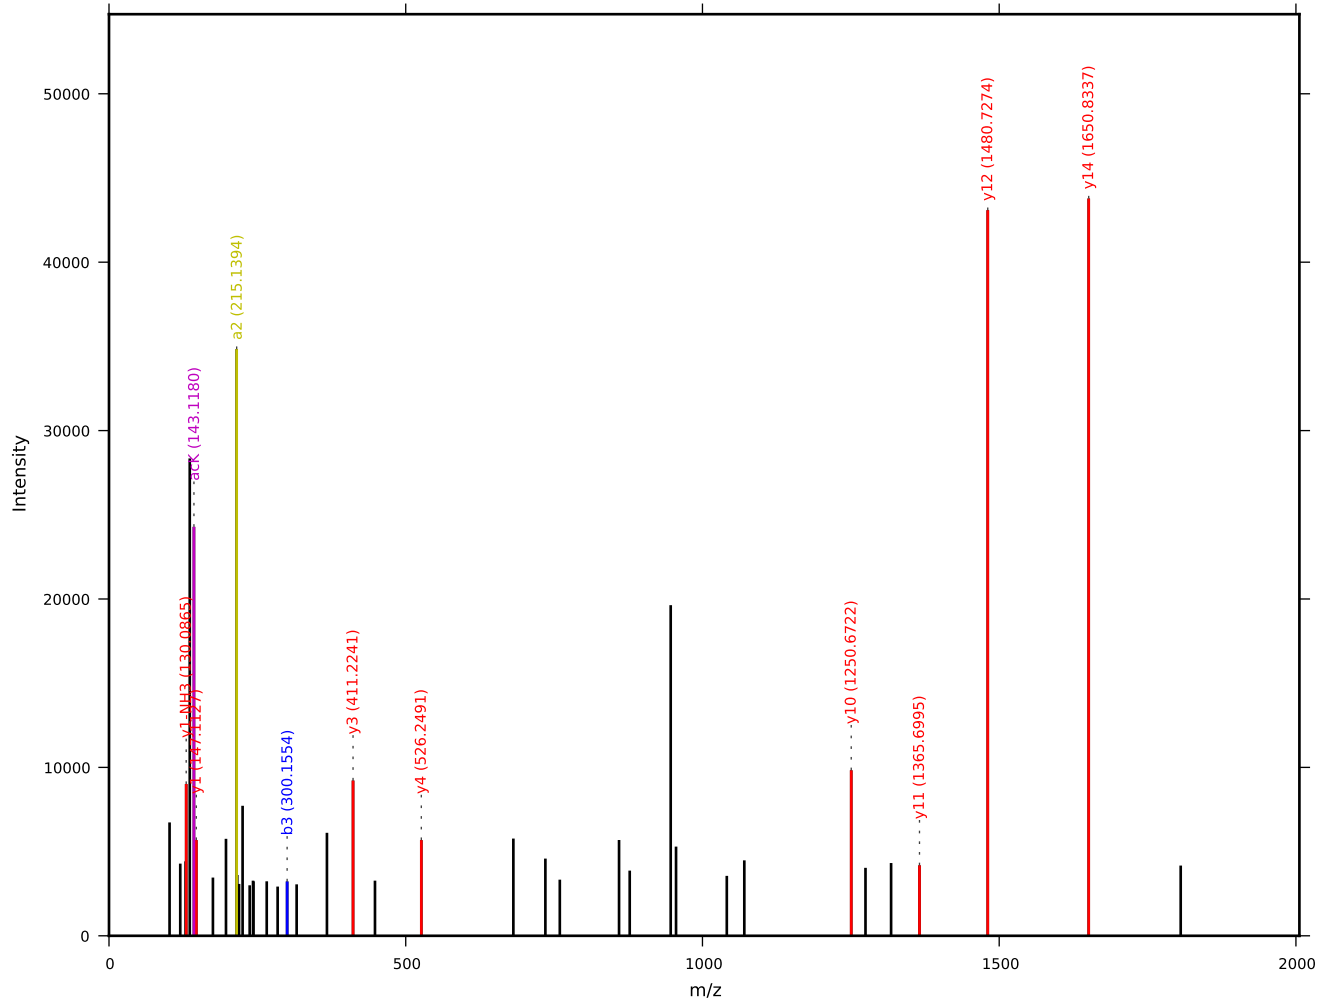



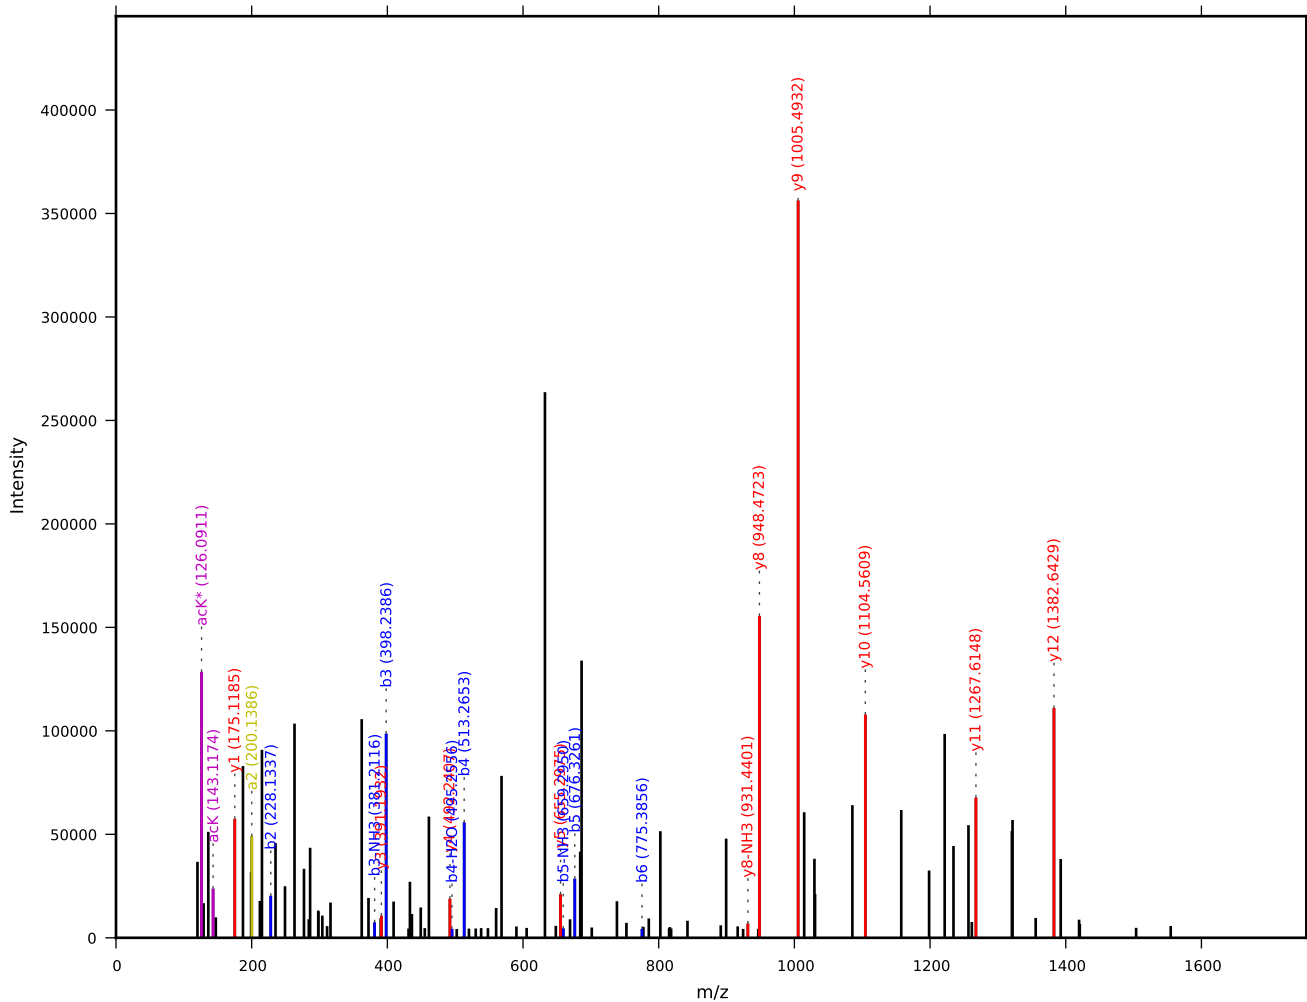

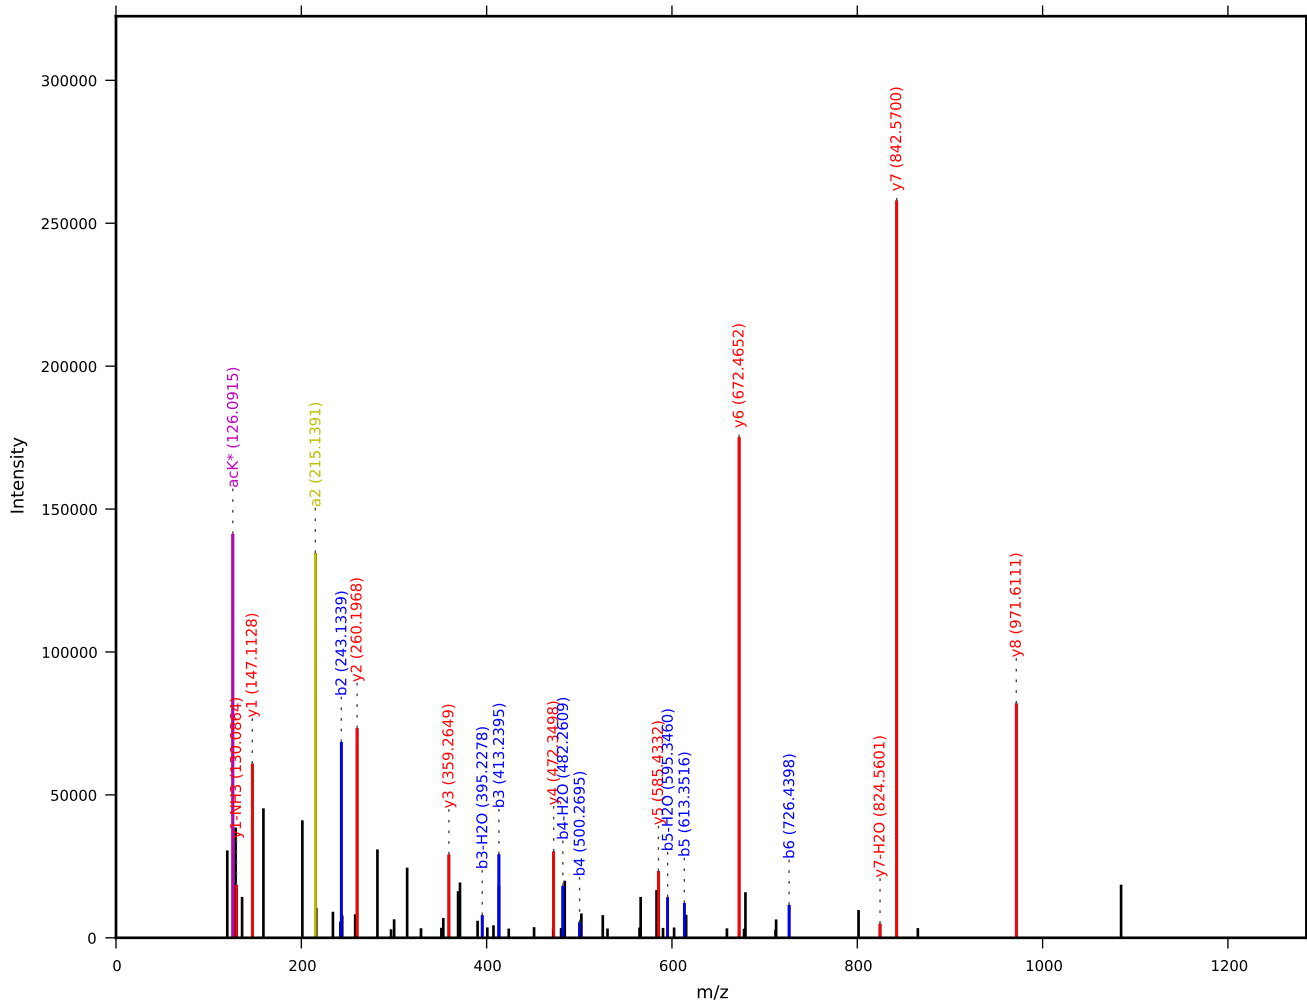

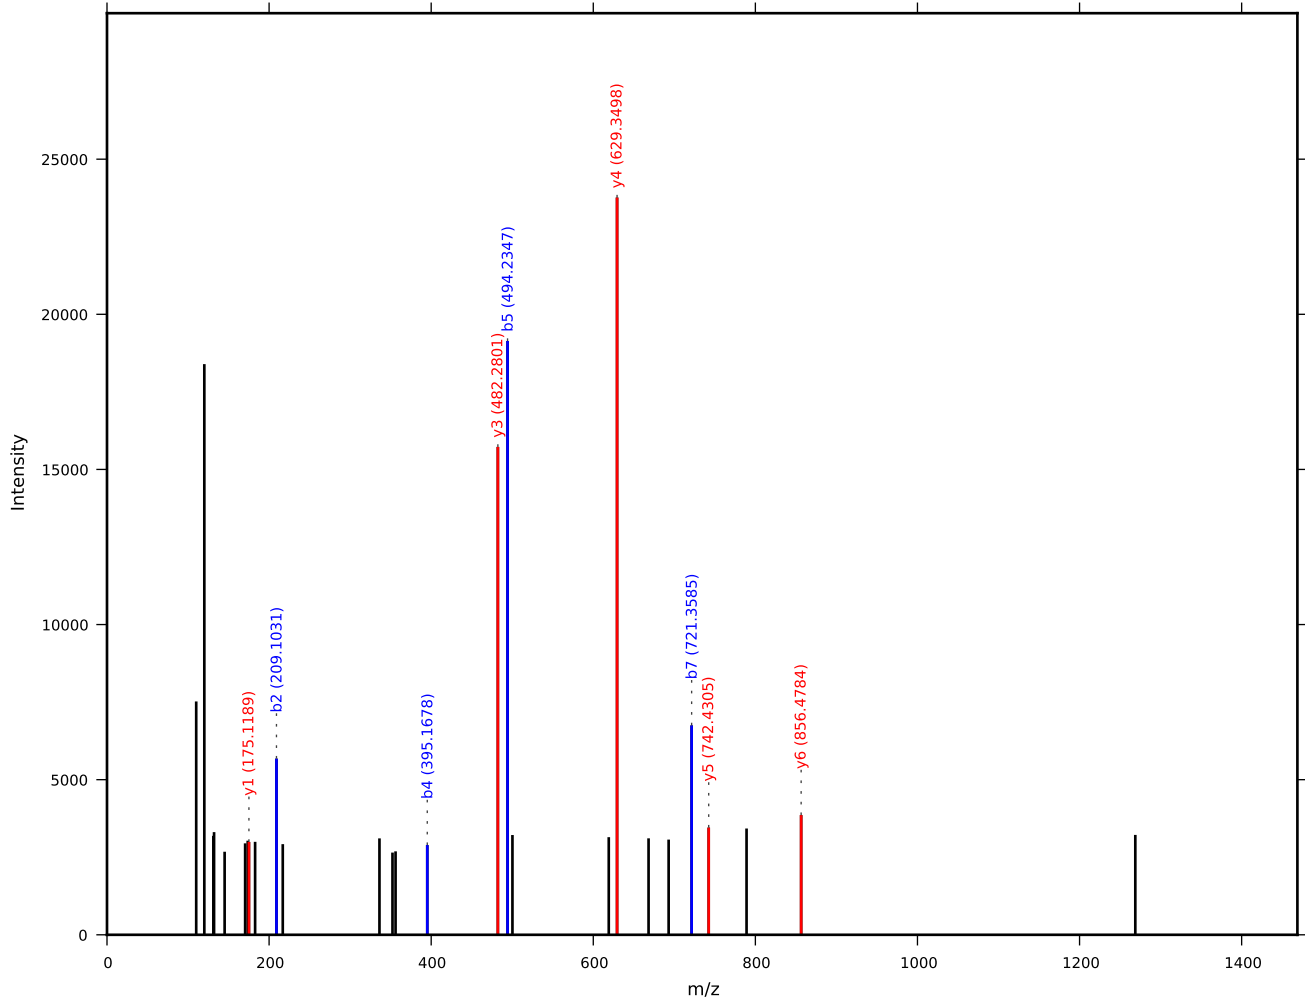

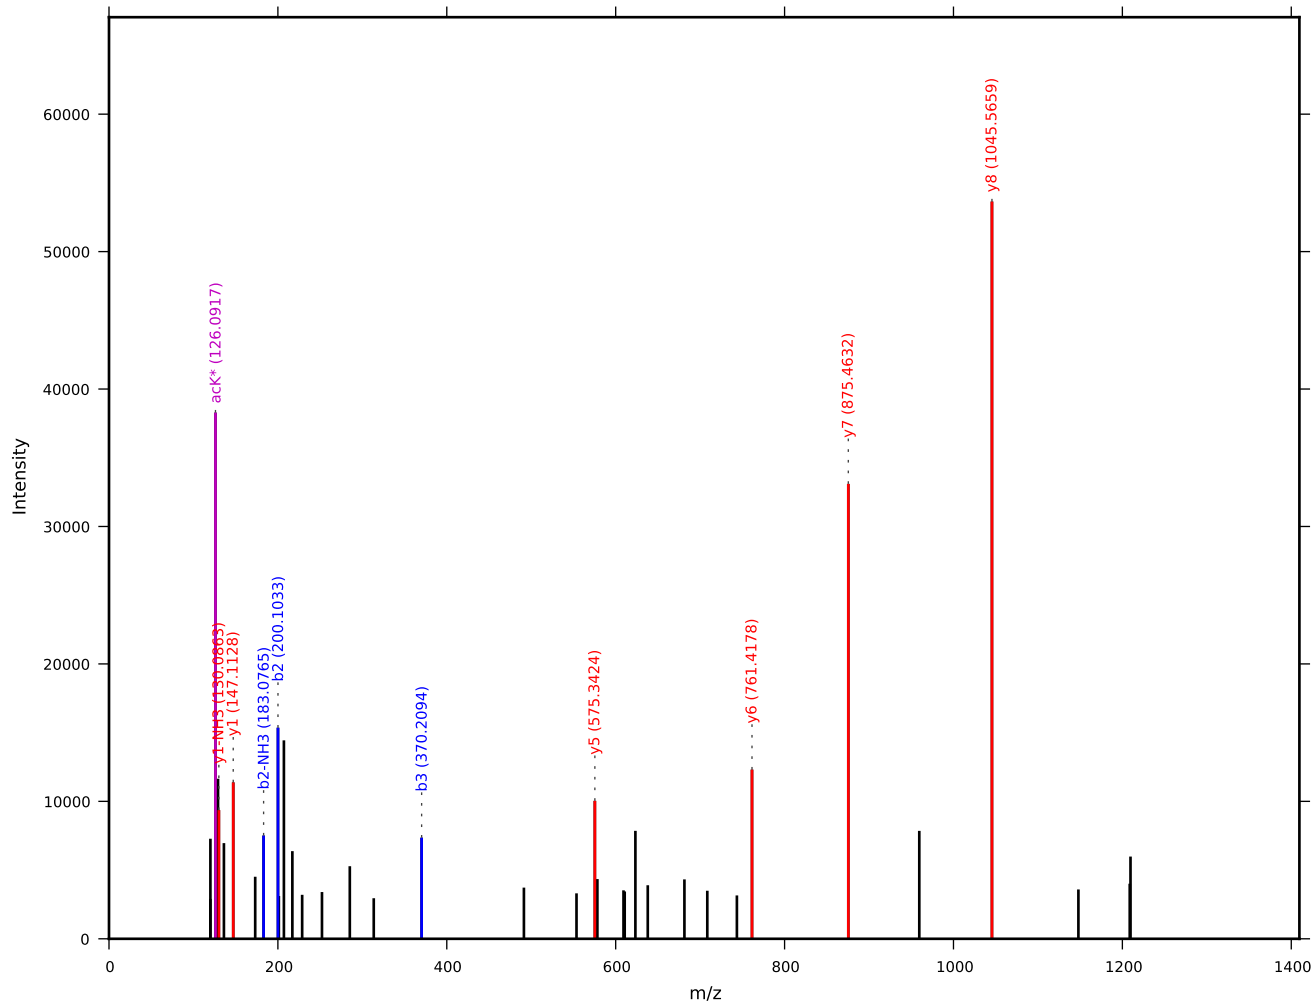

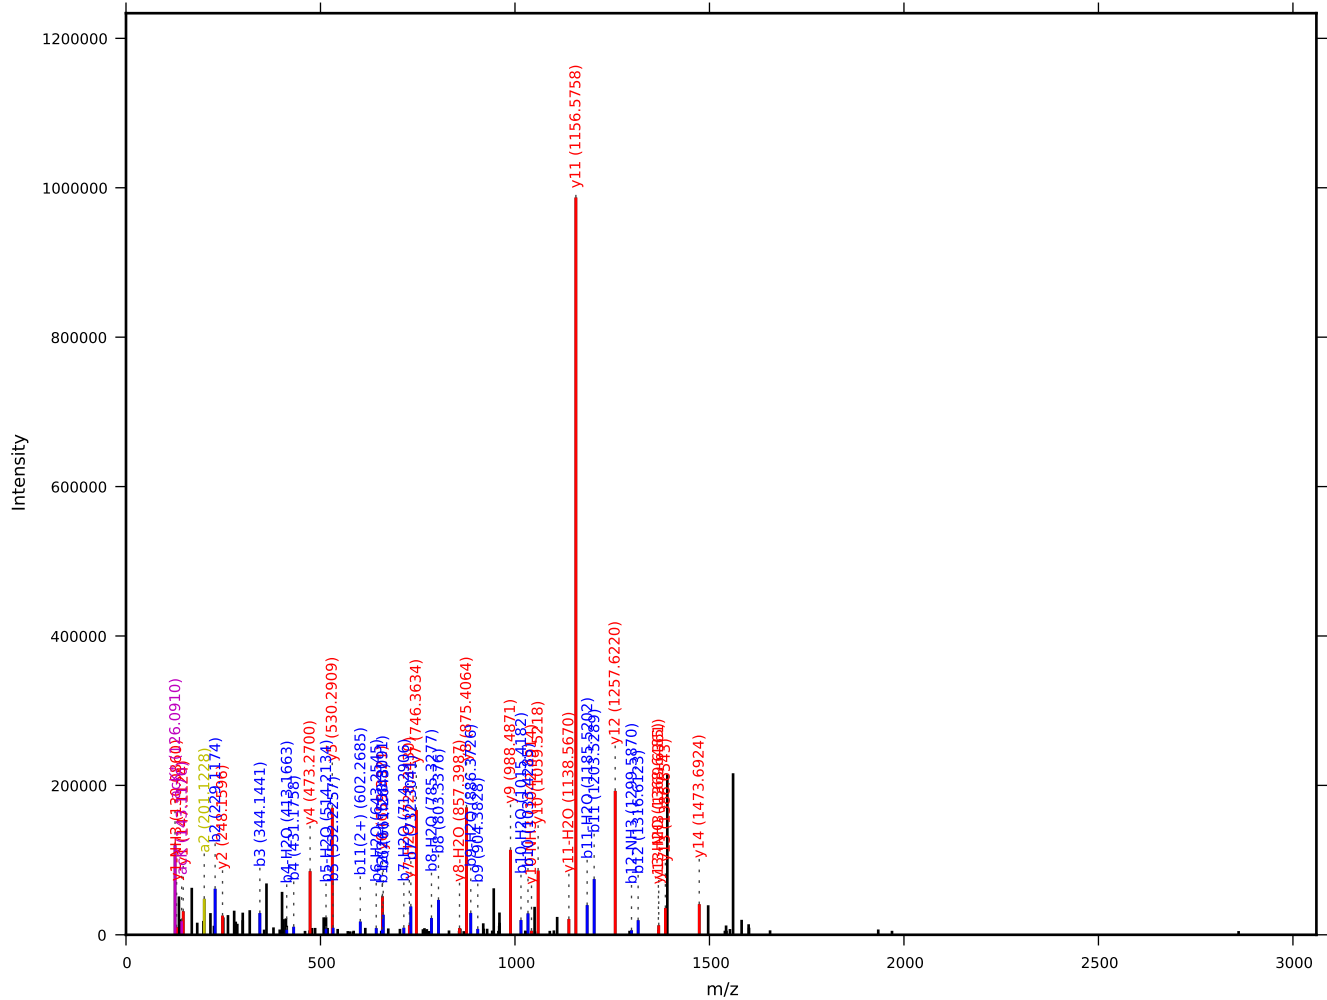

Mass: 1485.8315 Charge: 4 m/z: 372.46515  
Modified Peptide: \_IDK(ac)HLYHVLYK\_ Score: 63.727 PEP: 0.00017585

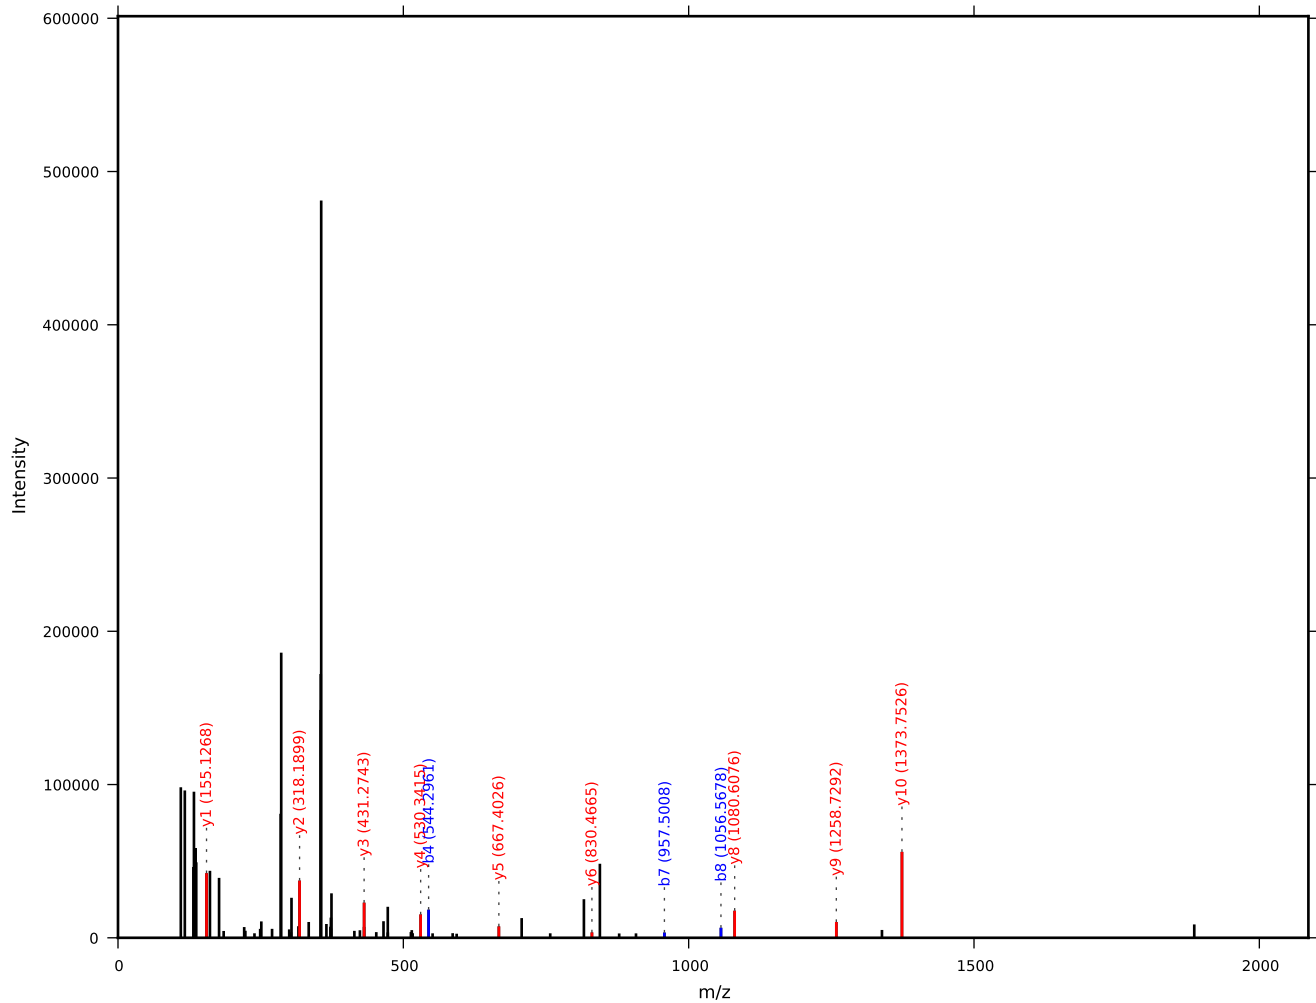

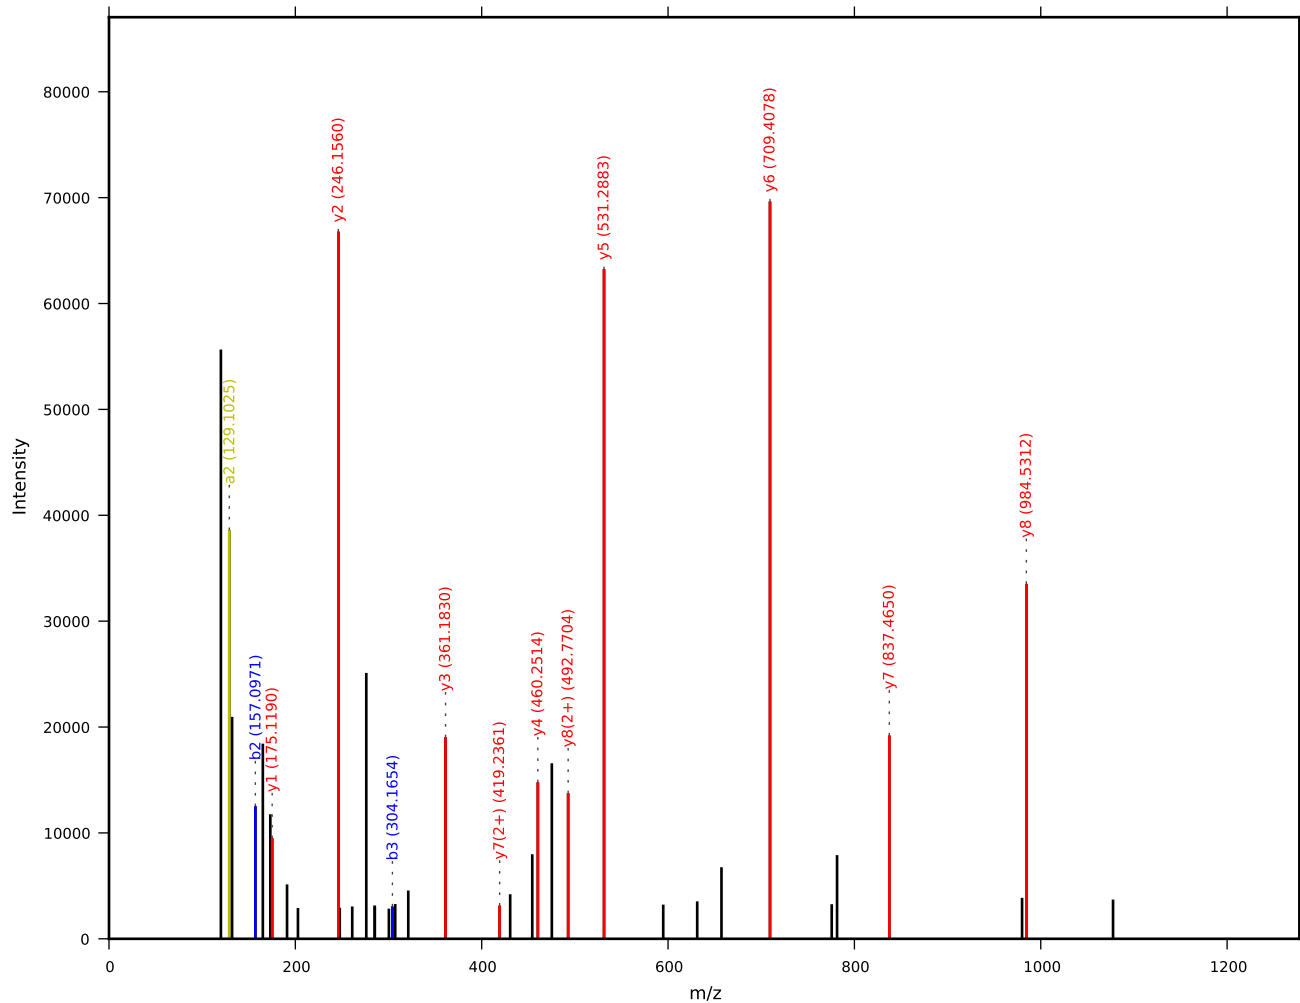

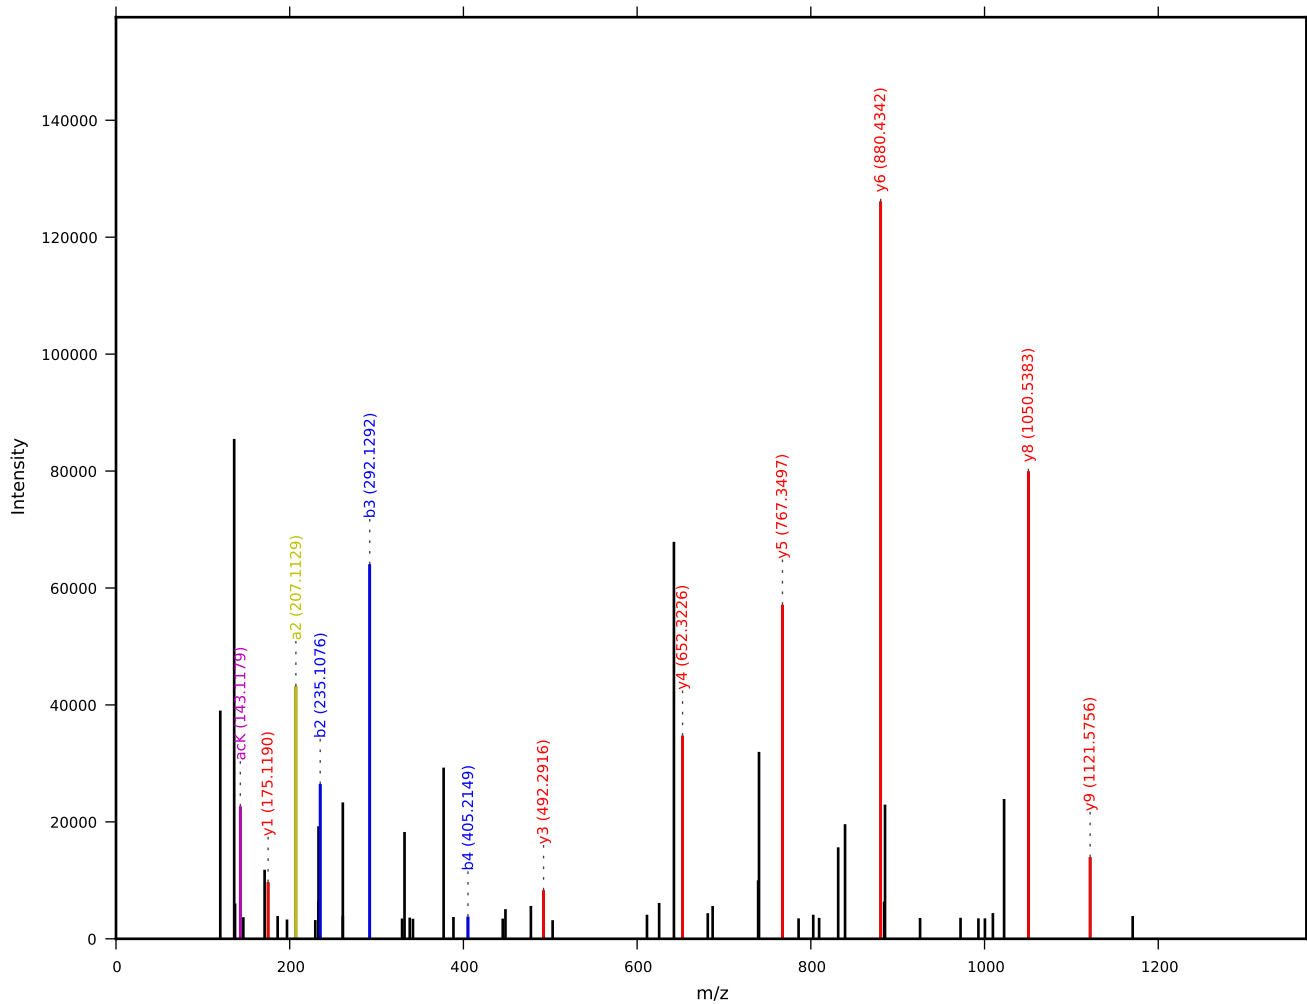



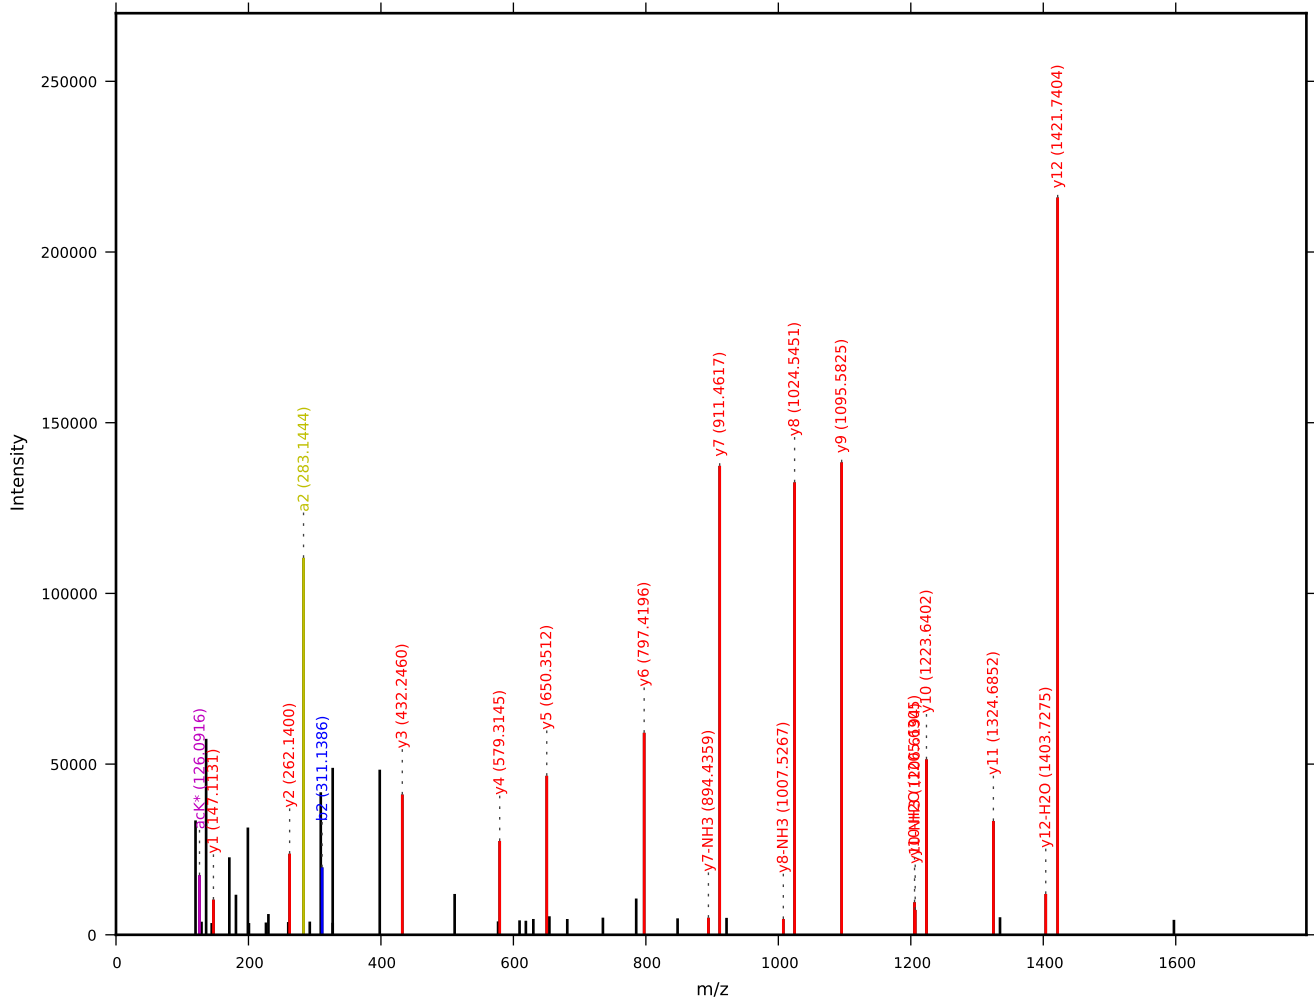

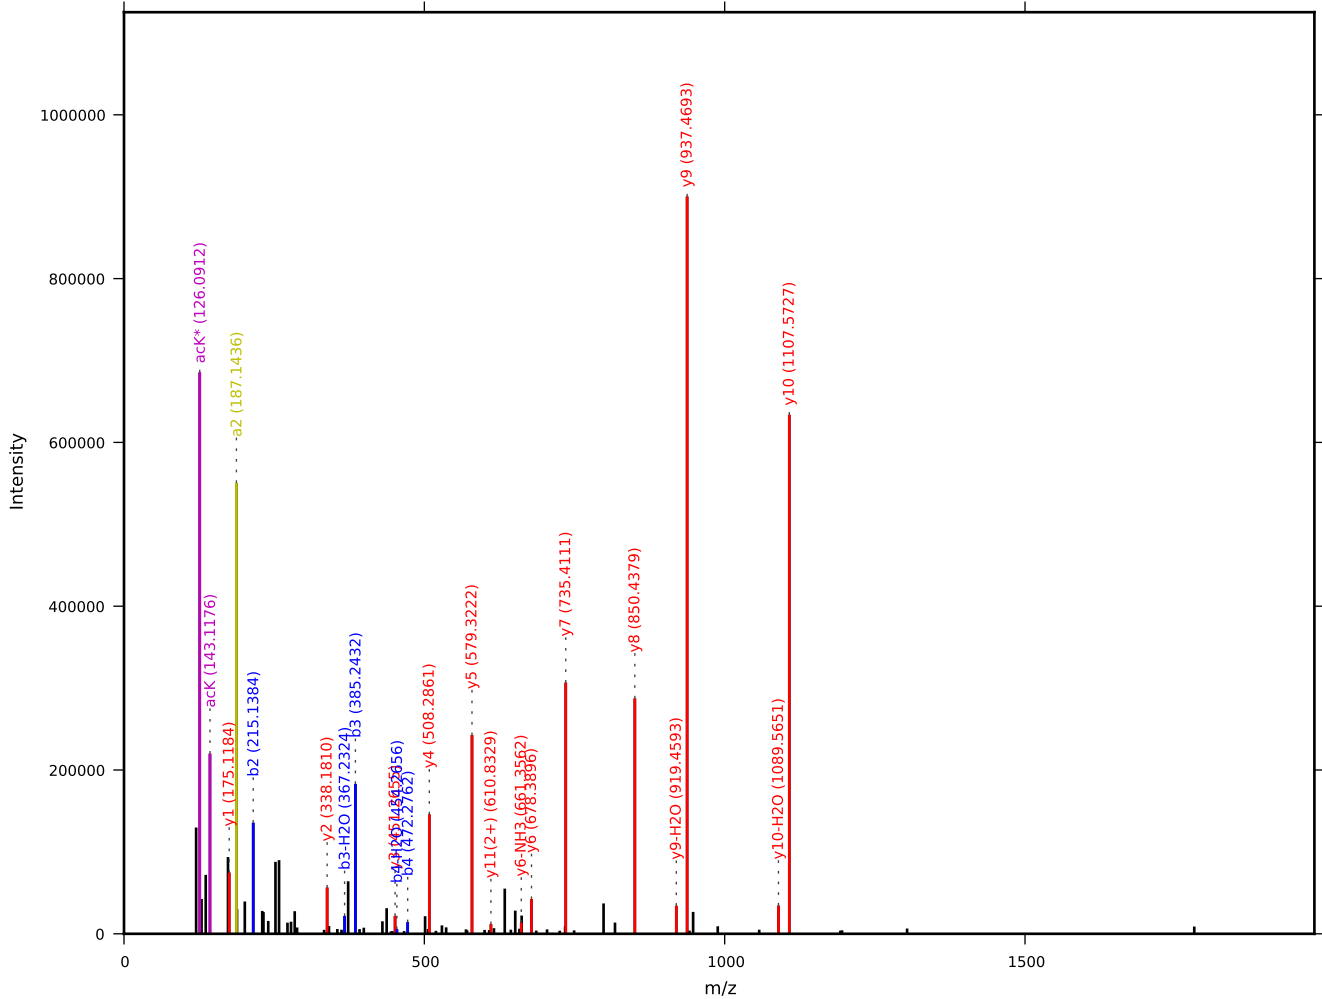

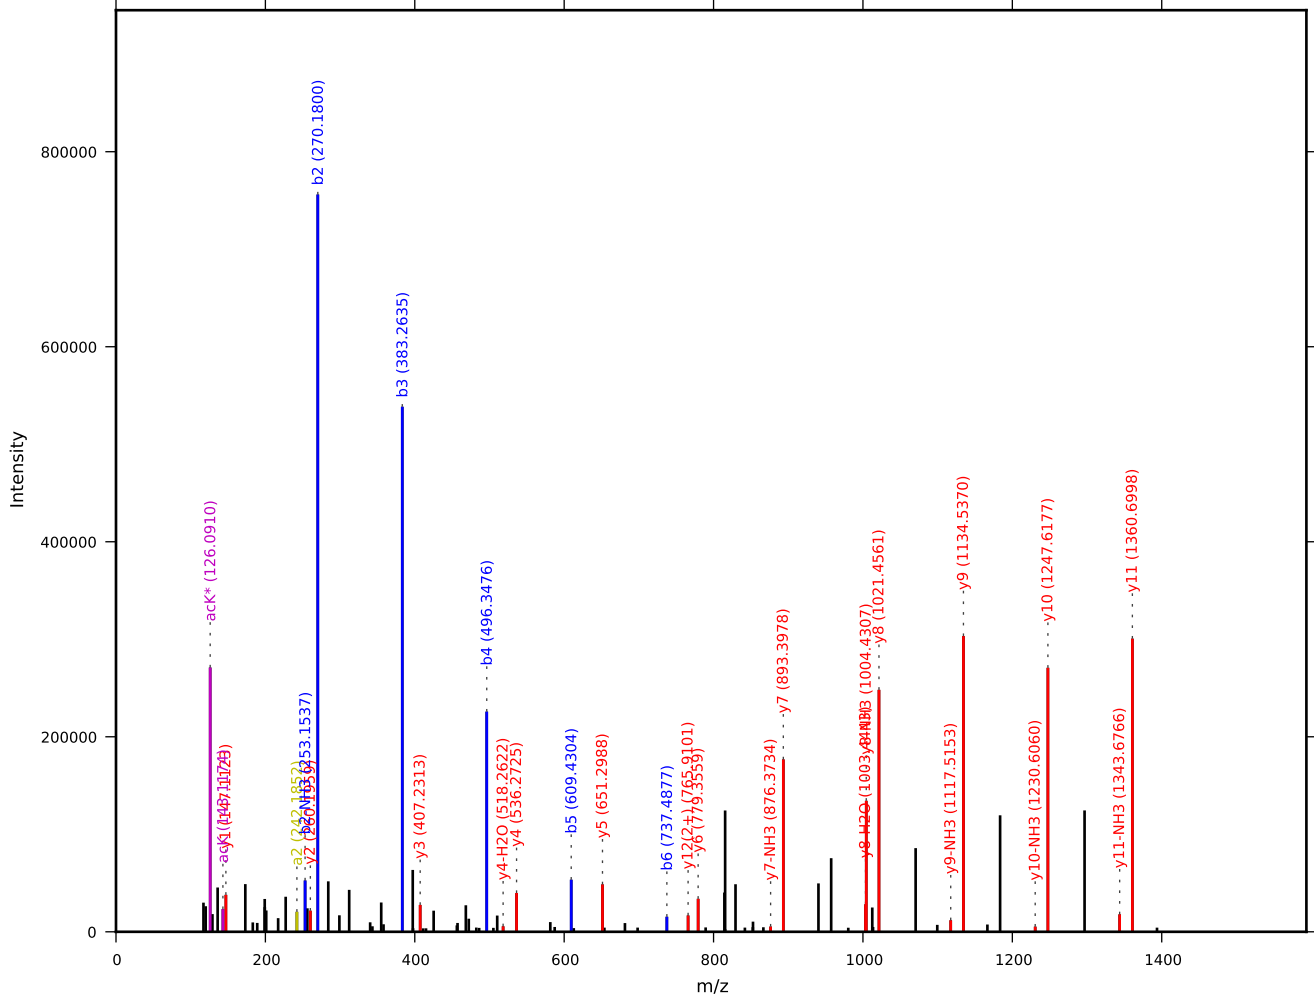

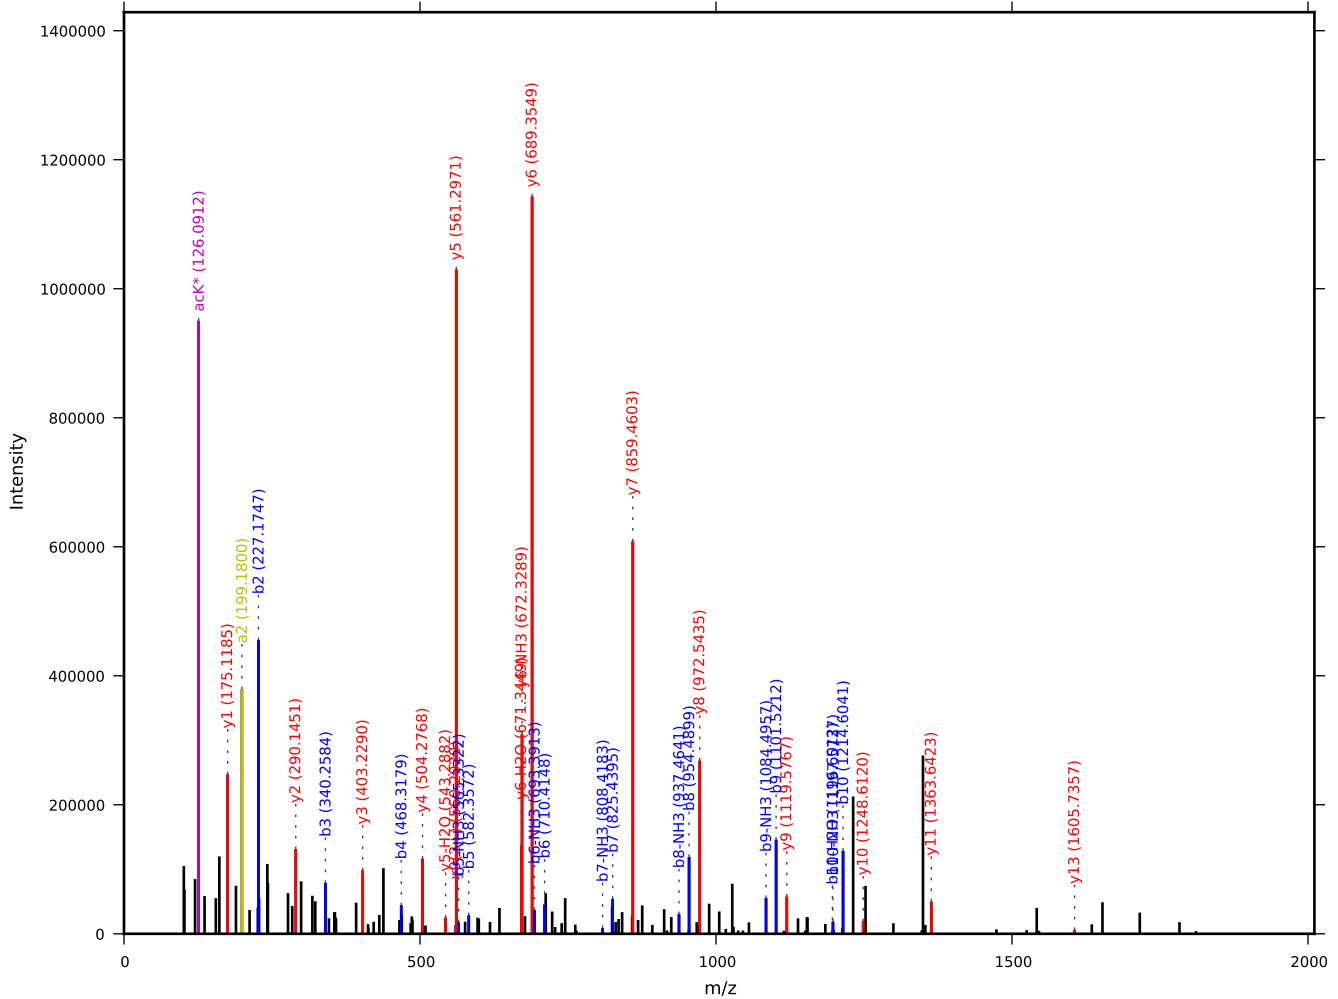

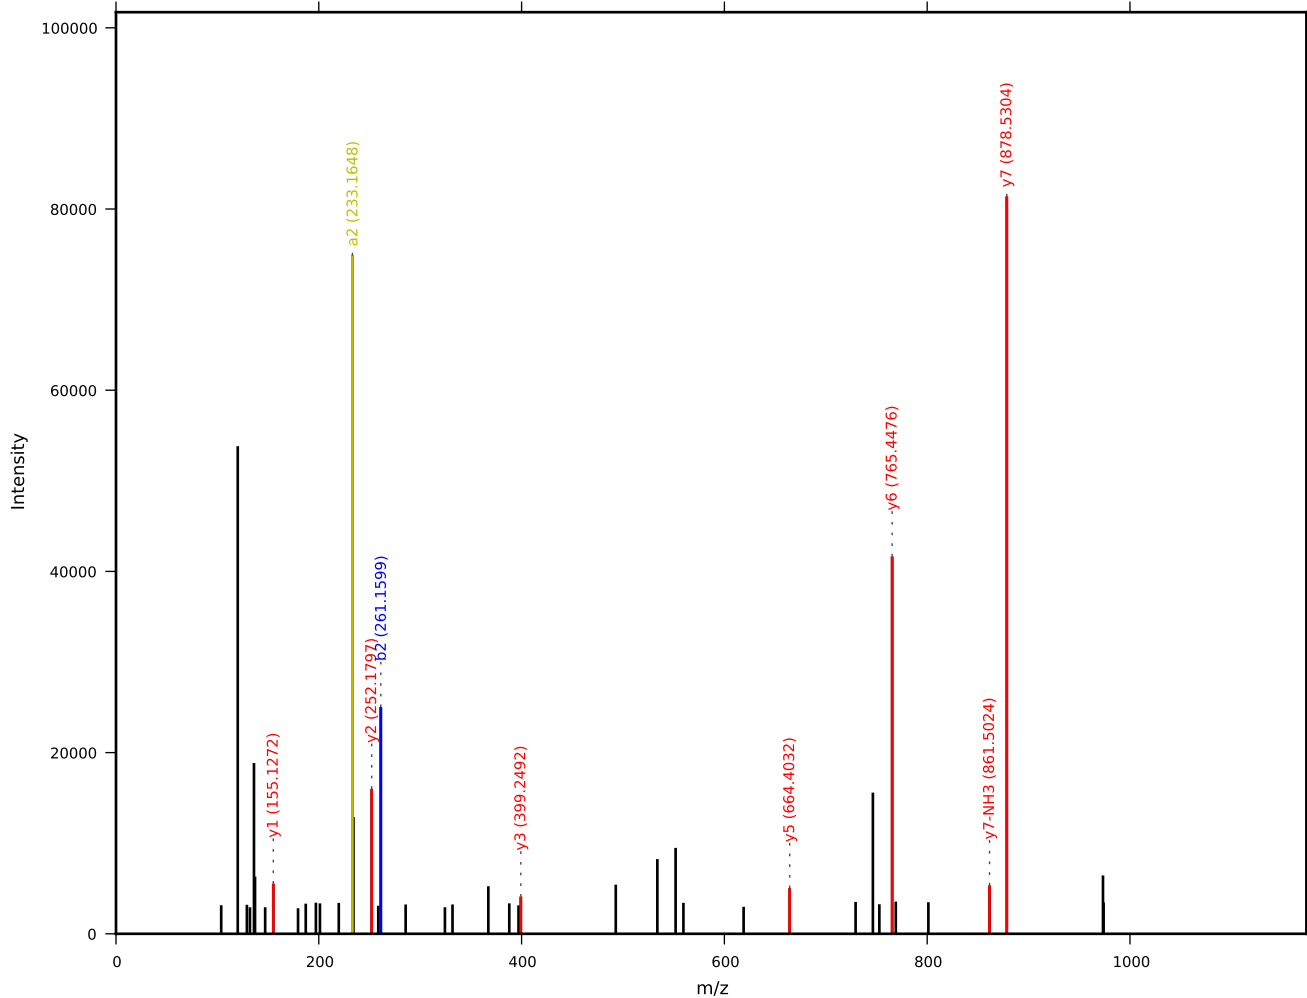

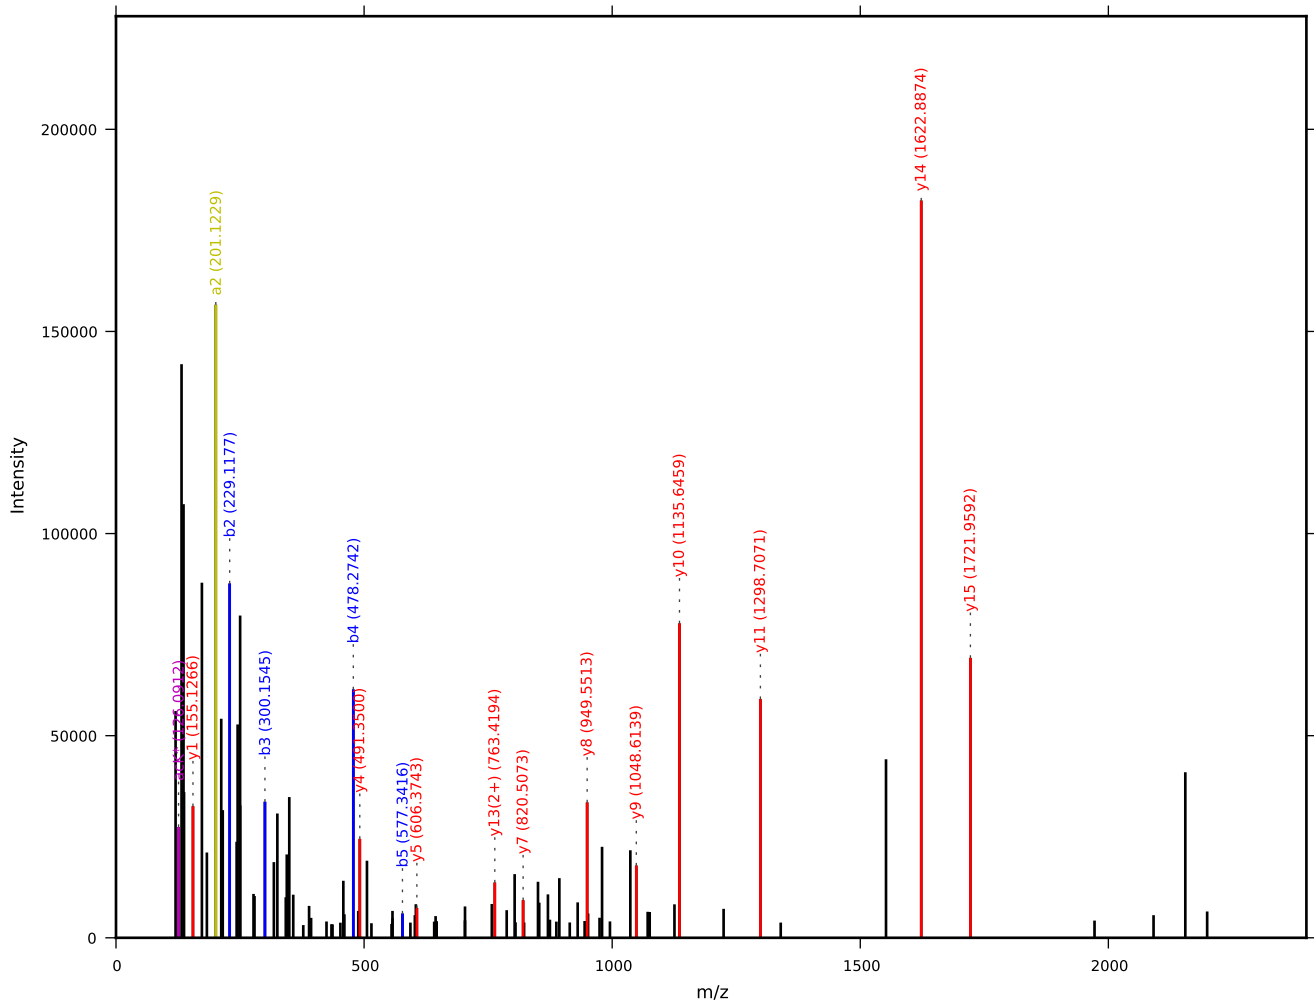

Mass: 1746.9404 Charge: 3 m/z: 583.32073  
Modified Peptide: \_VPNLYSVETIDSLK(ac)\_ Score: 111.35 PEP: 1.6997E-12

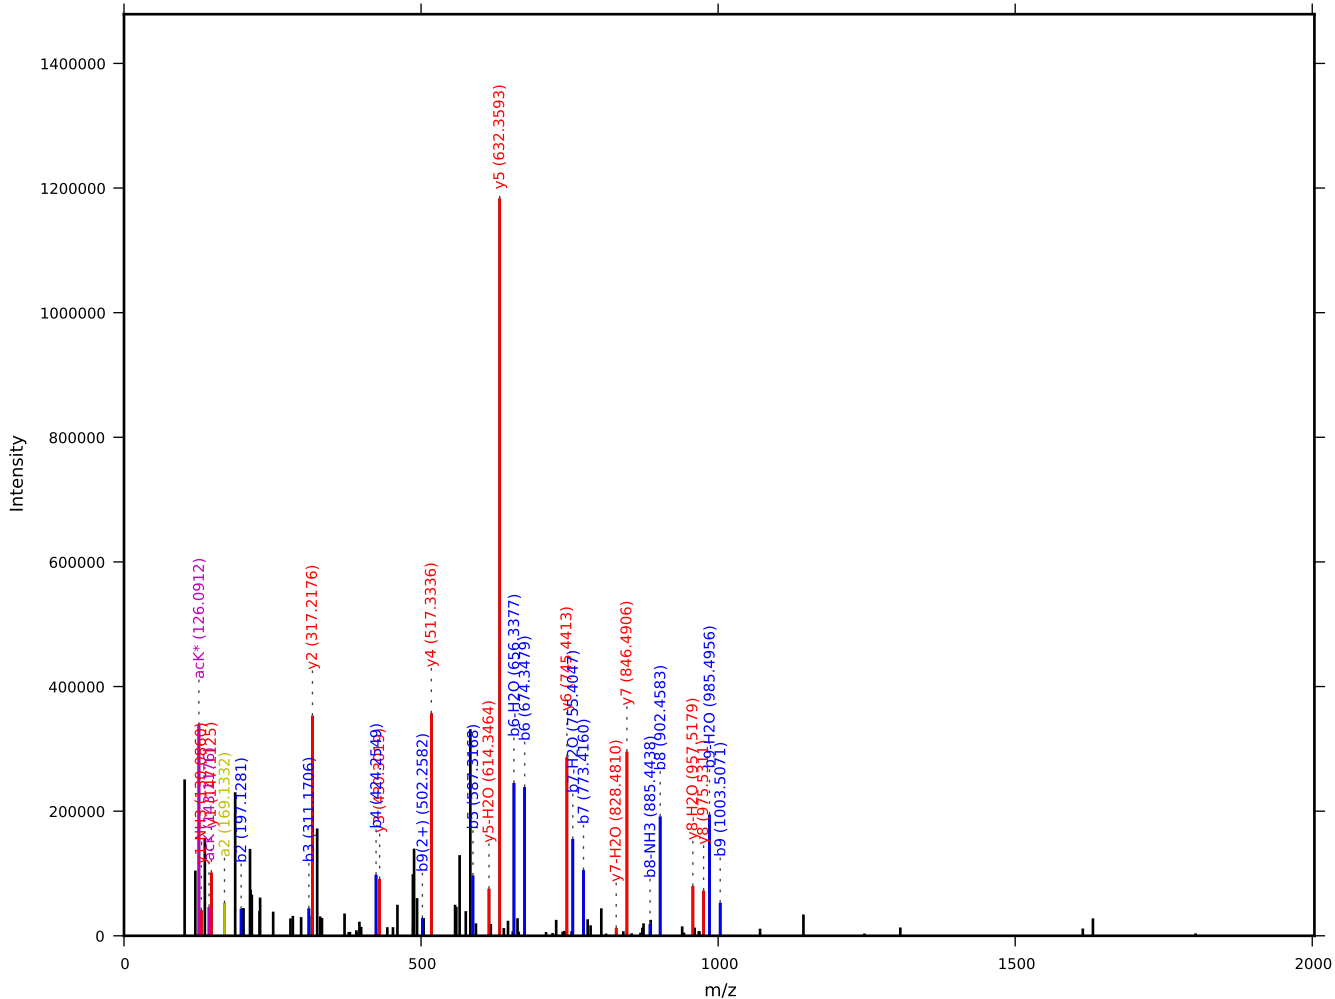

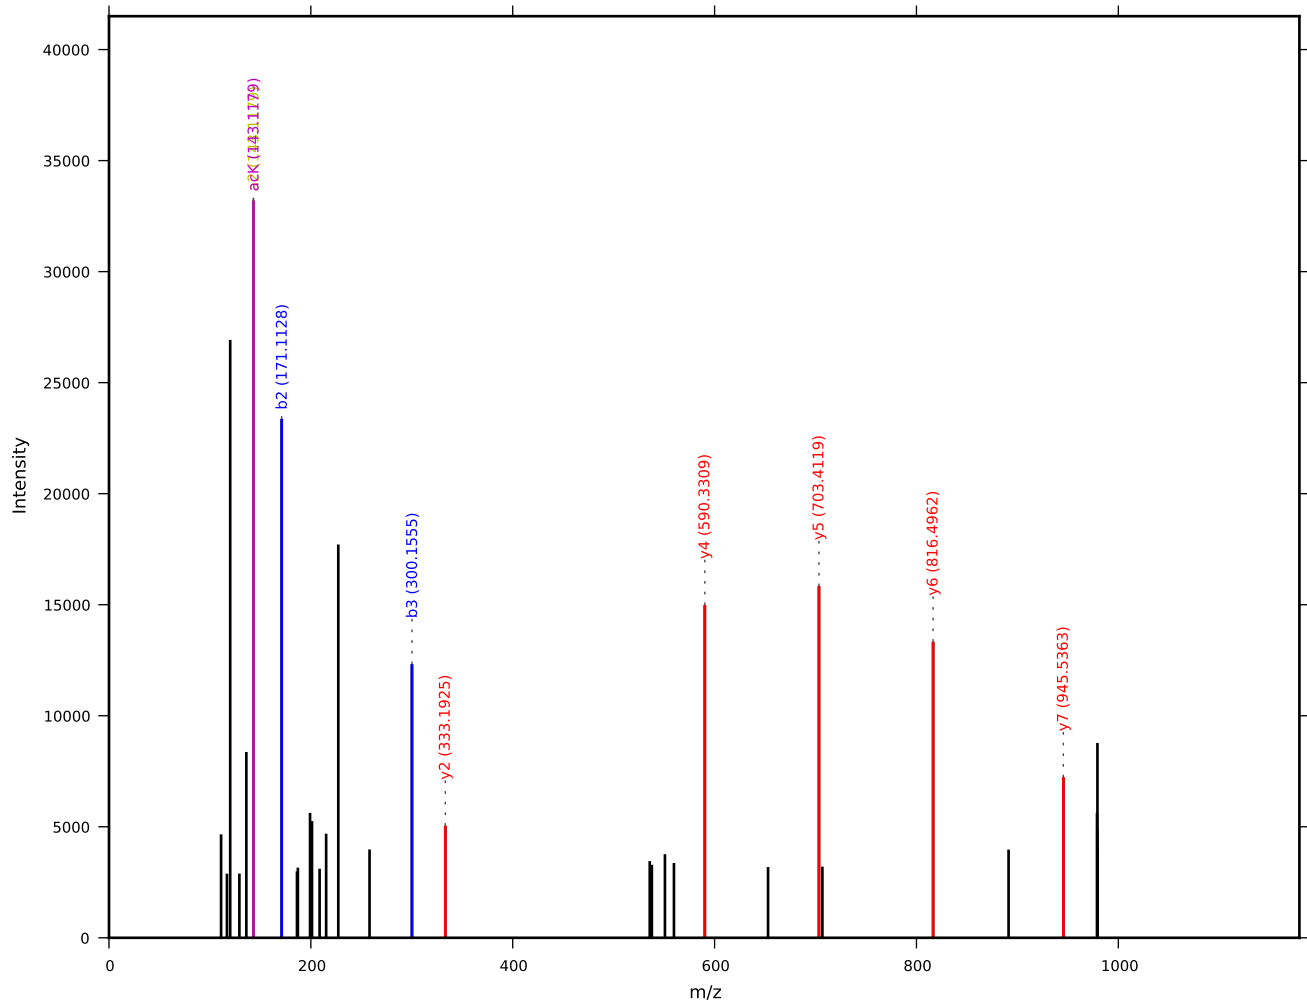



Mass: 1260.7442 Charge: 2 m/z: 631.37936  
Modified Peptide: \_IALVGK(ac)YTNLK\_ Score: 50.284 PEP: 0.00093348

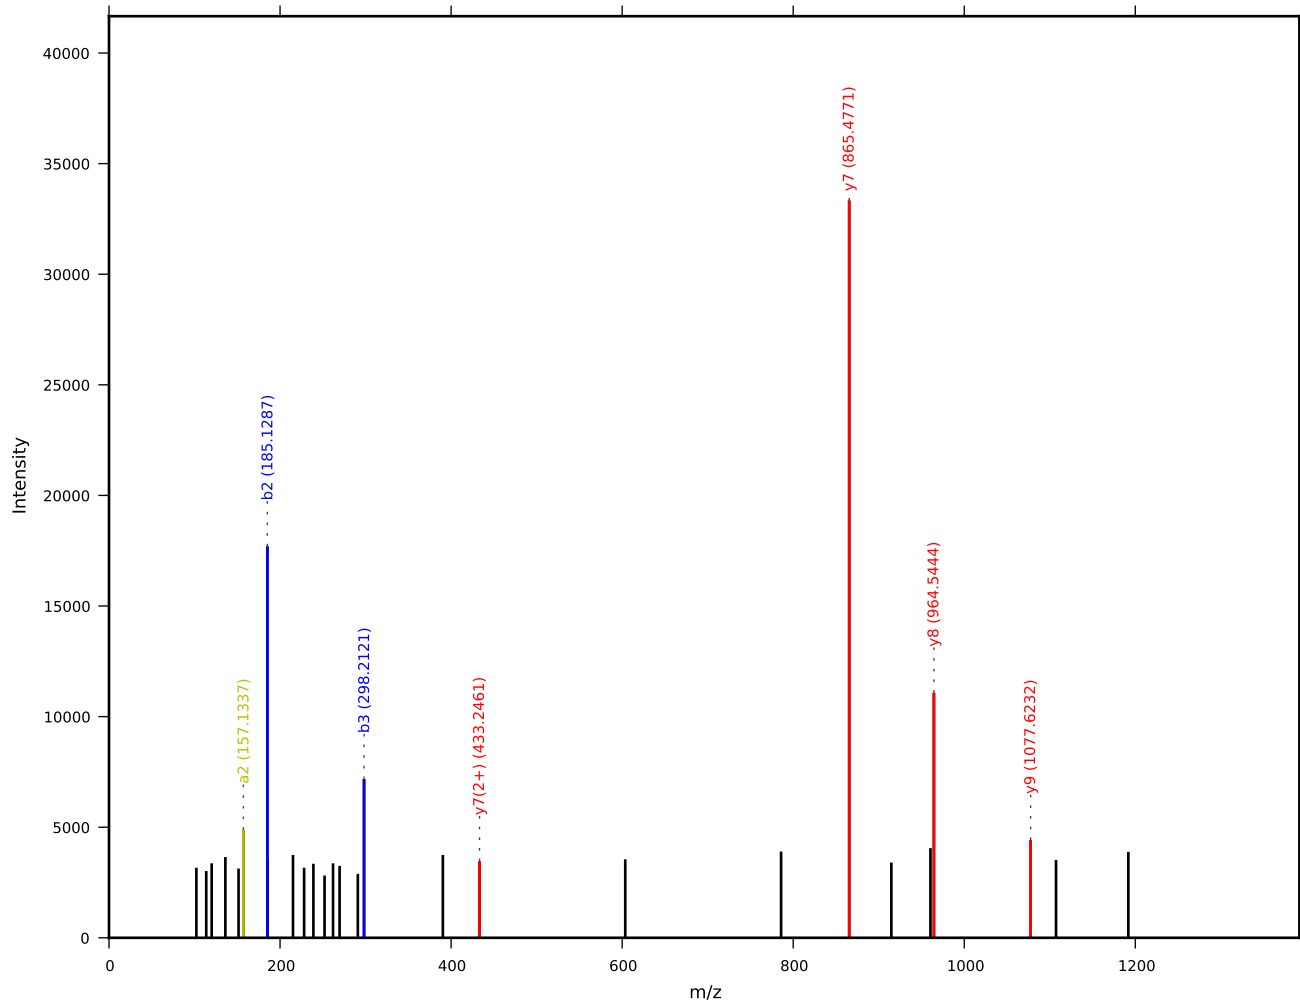

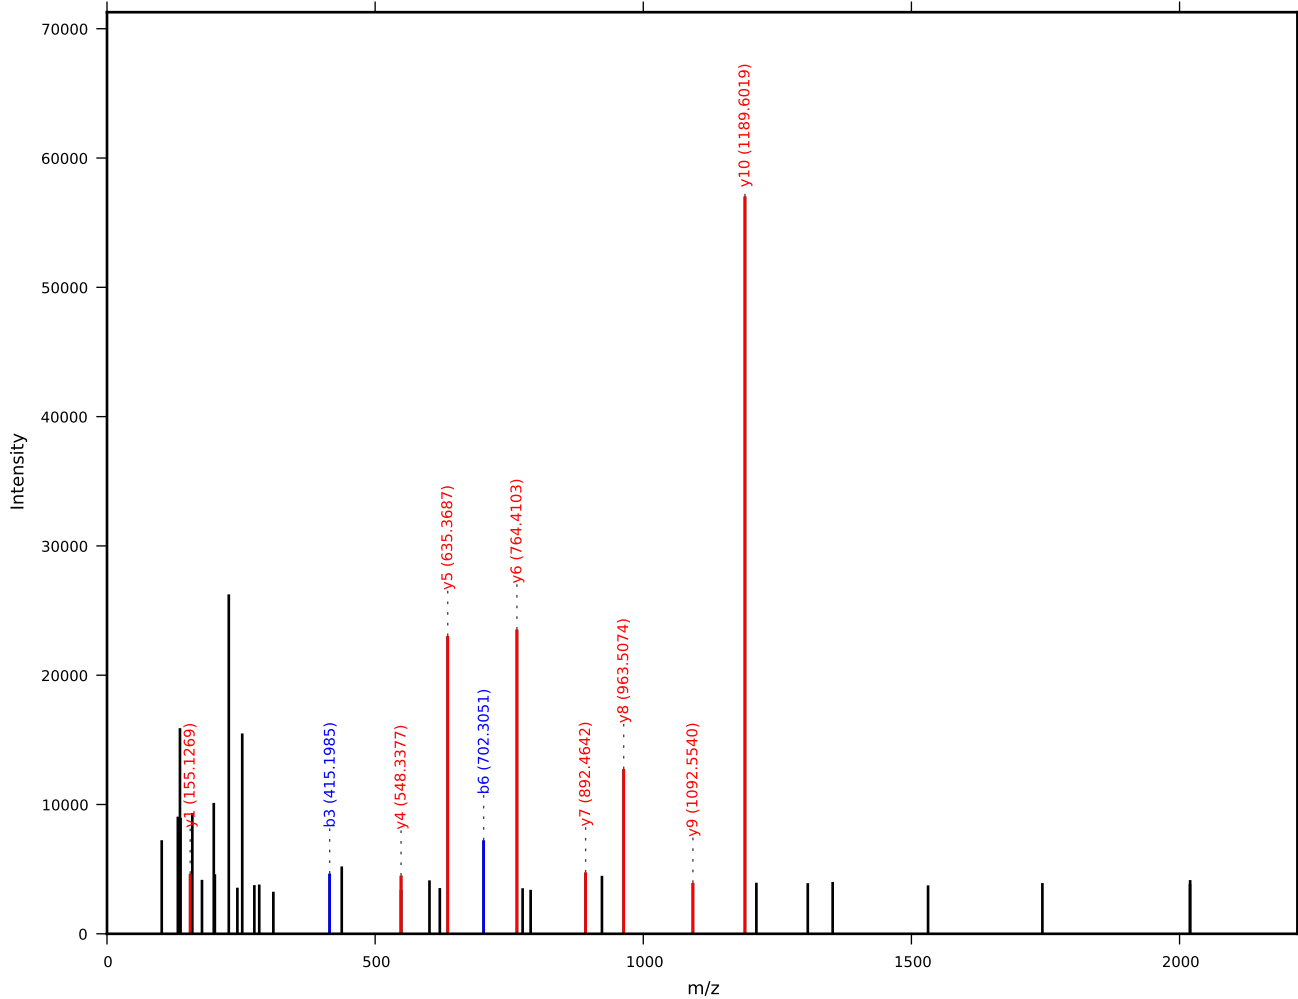

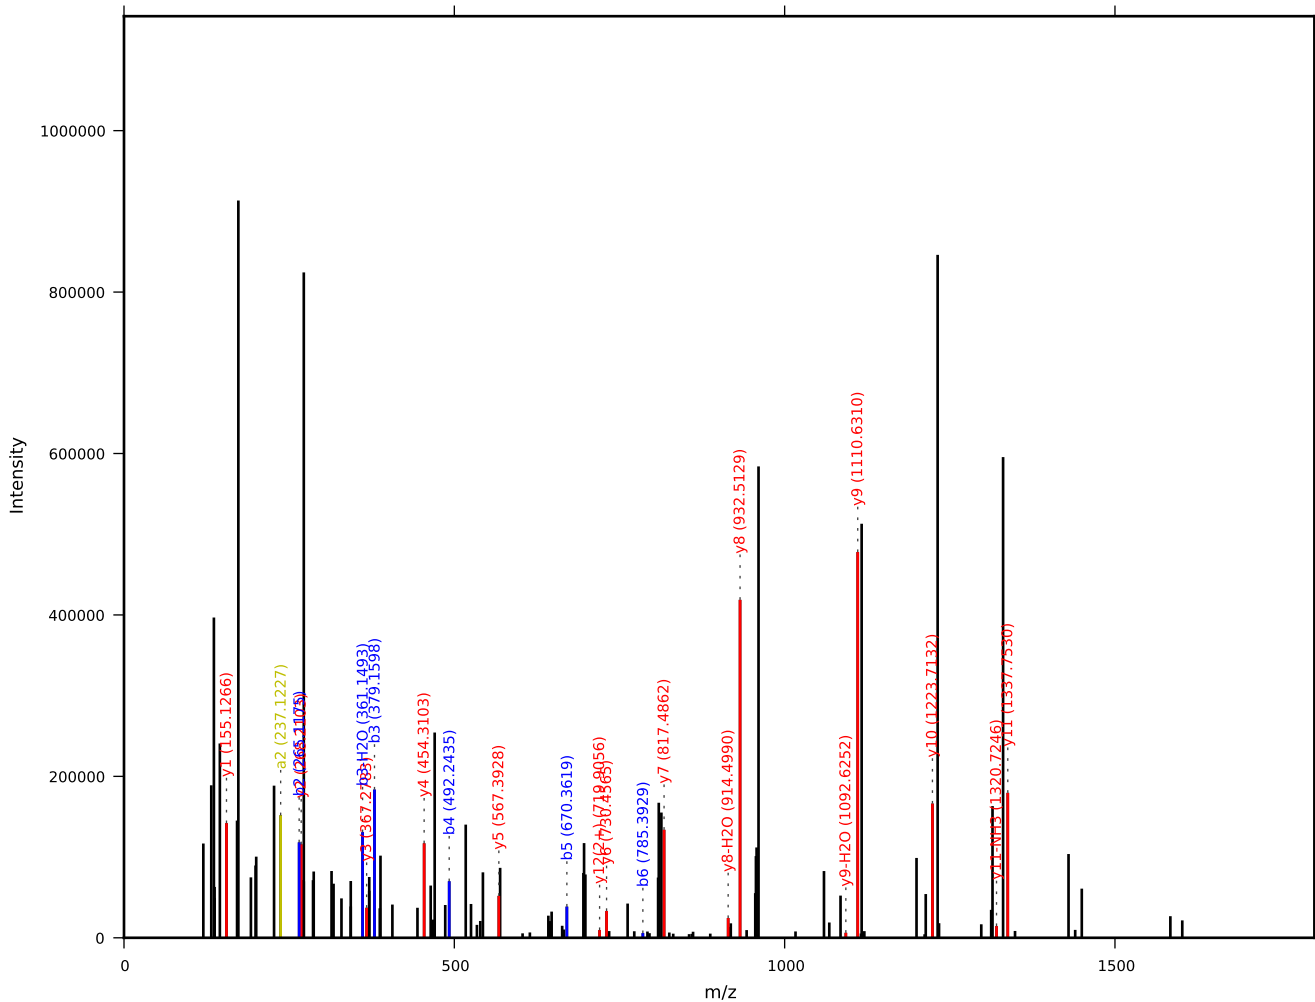

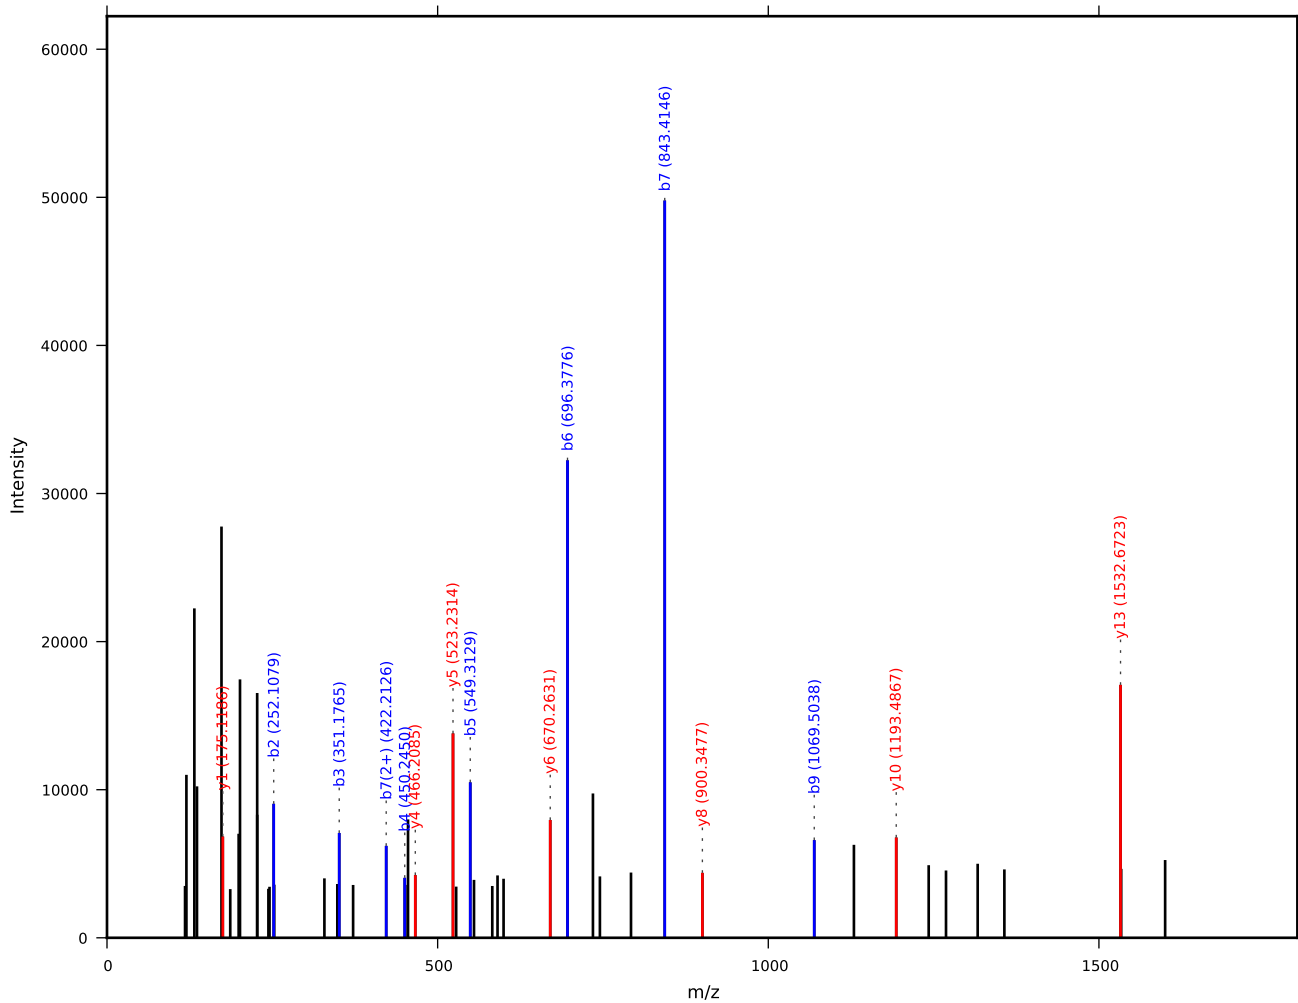

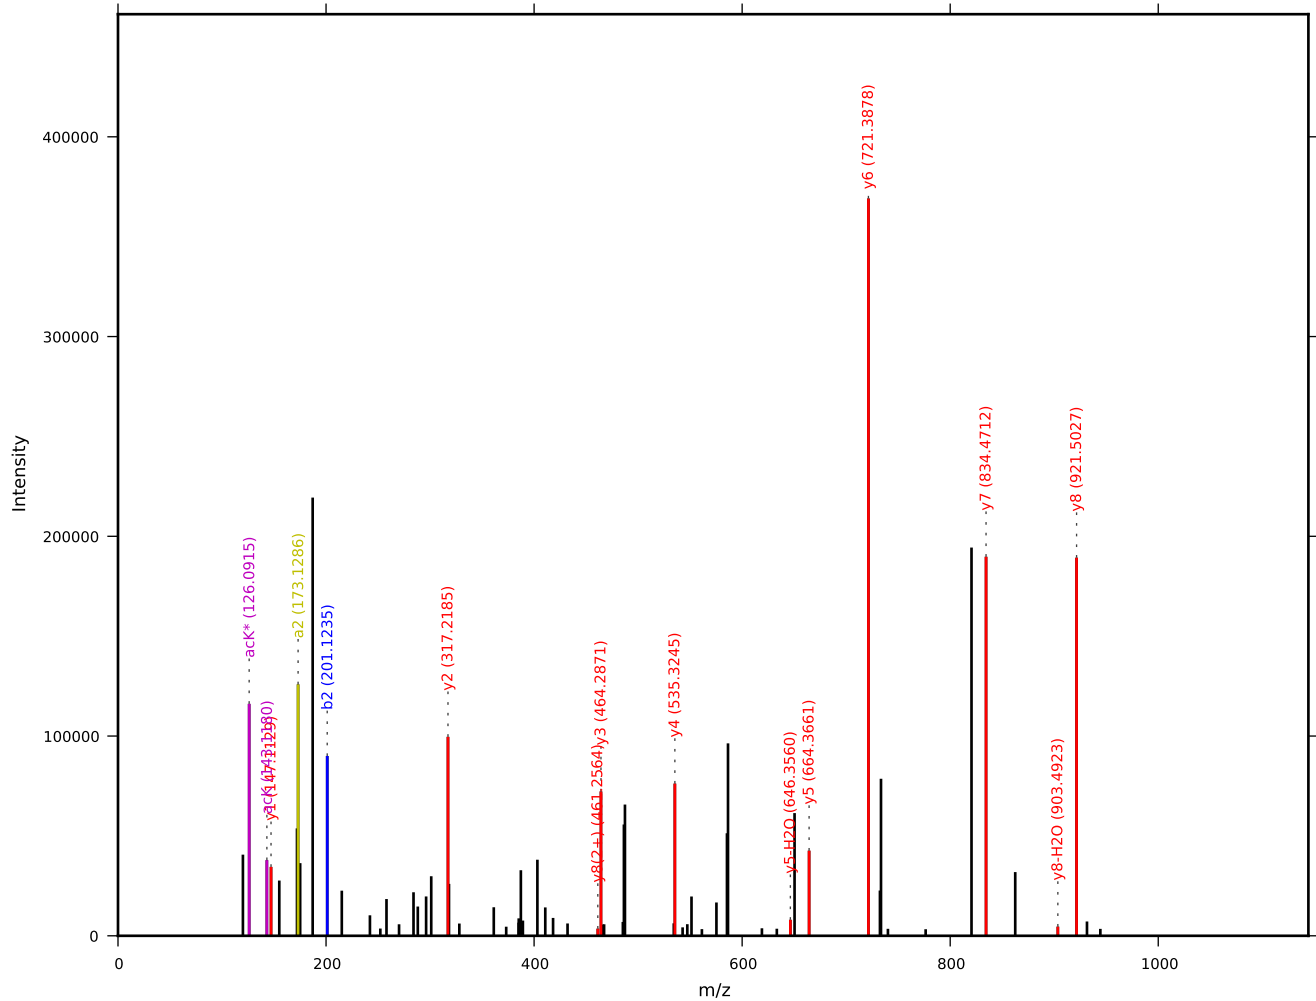

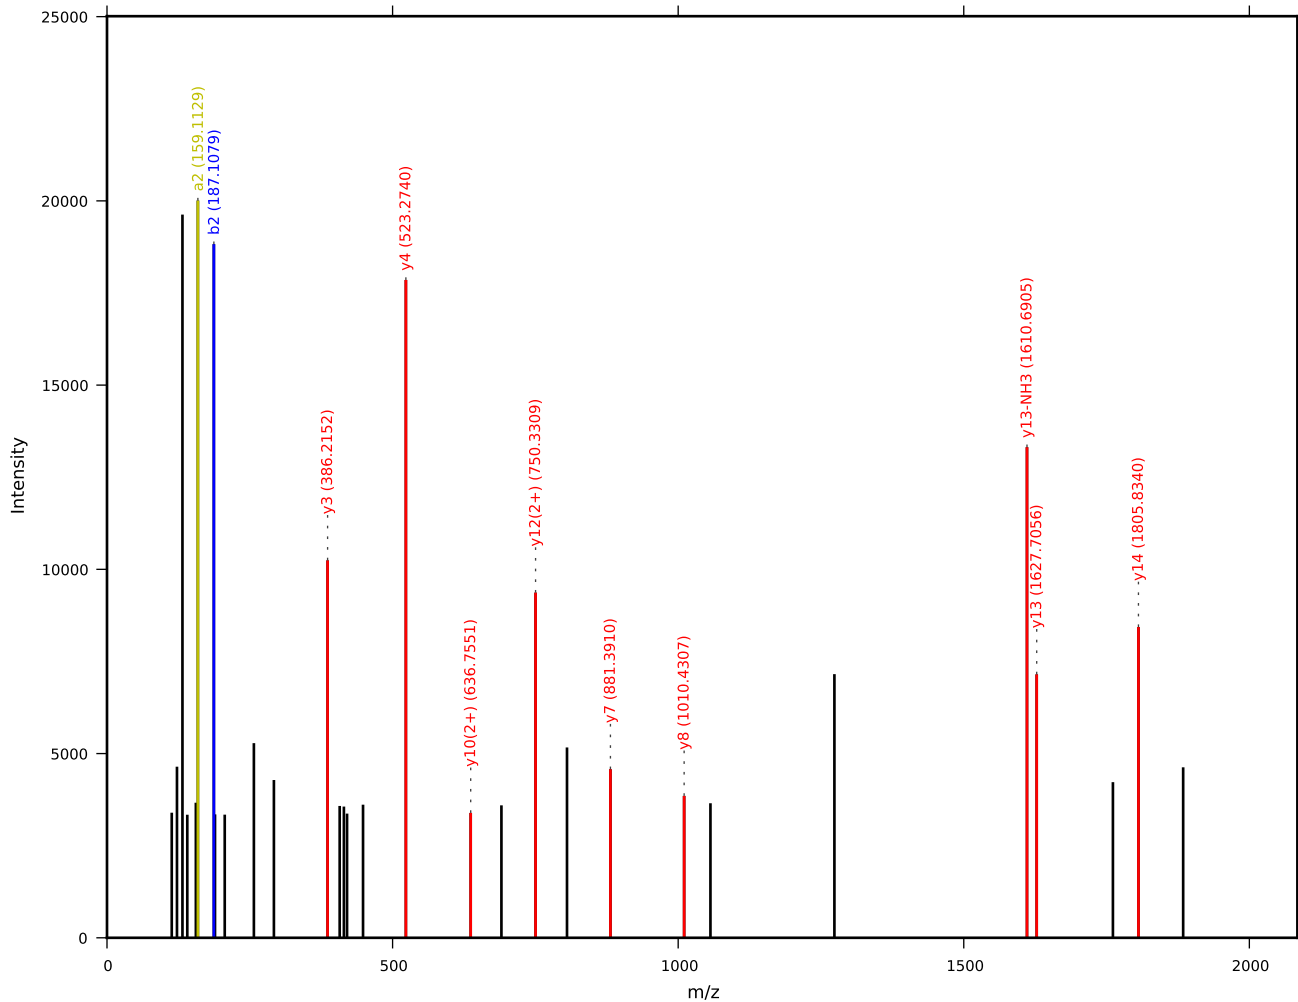

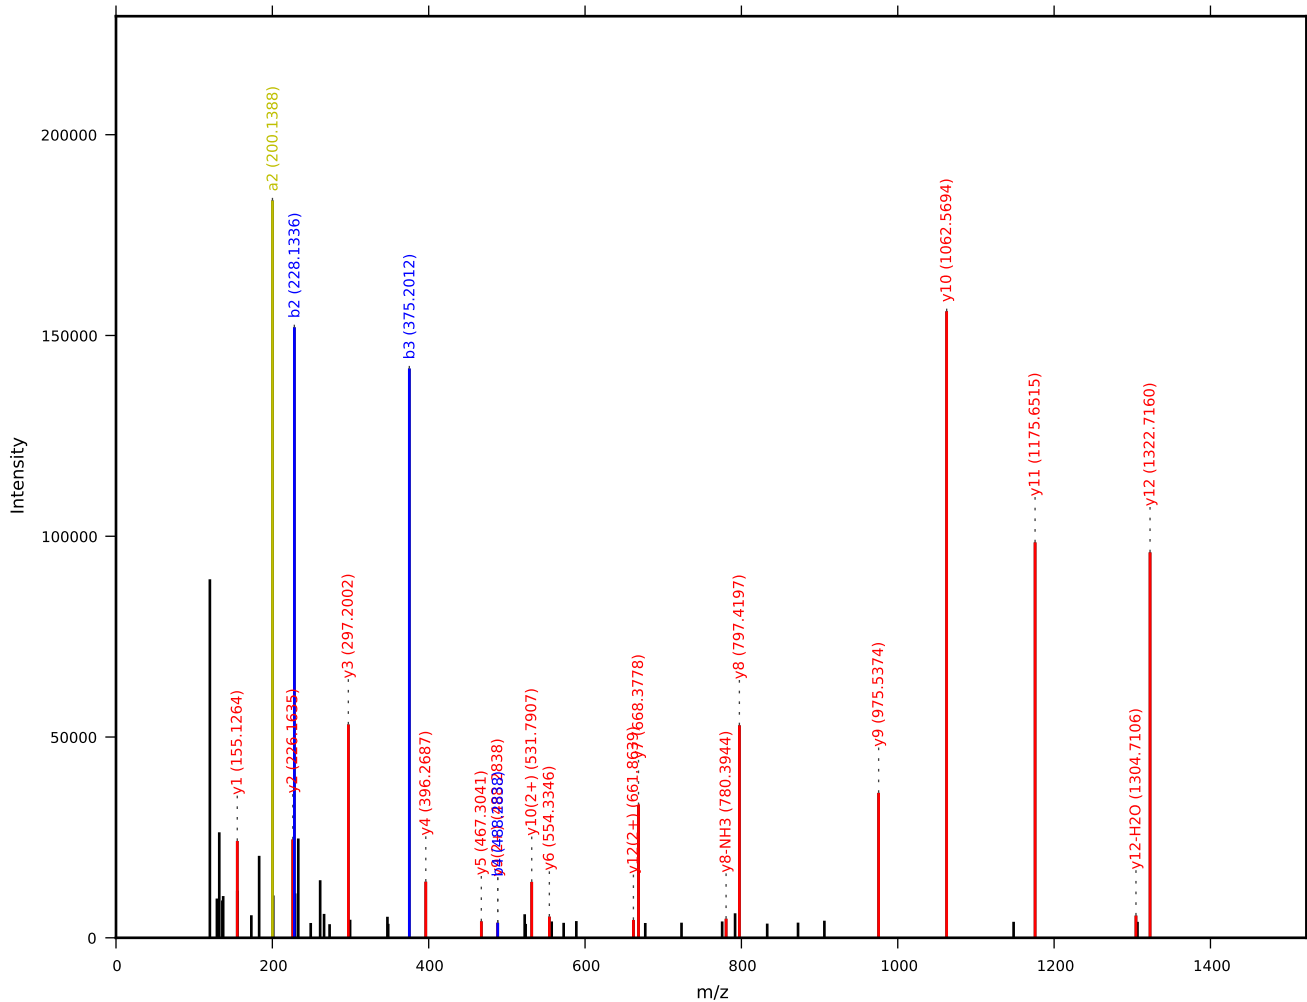

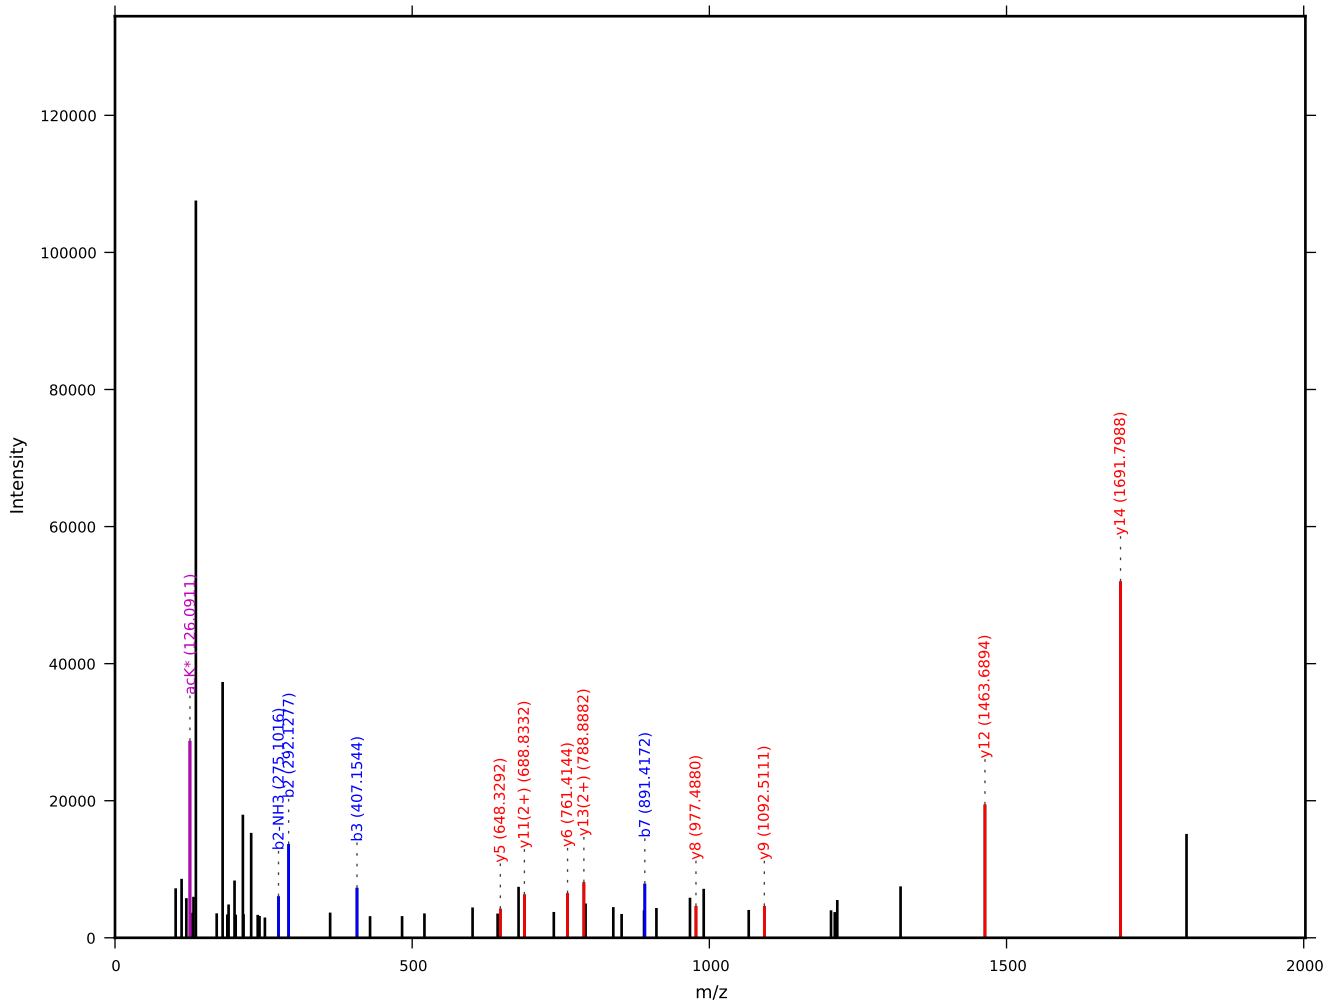



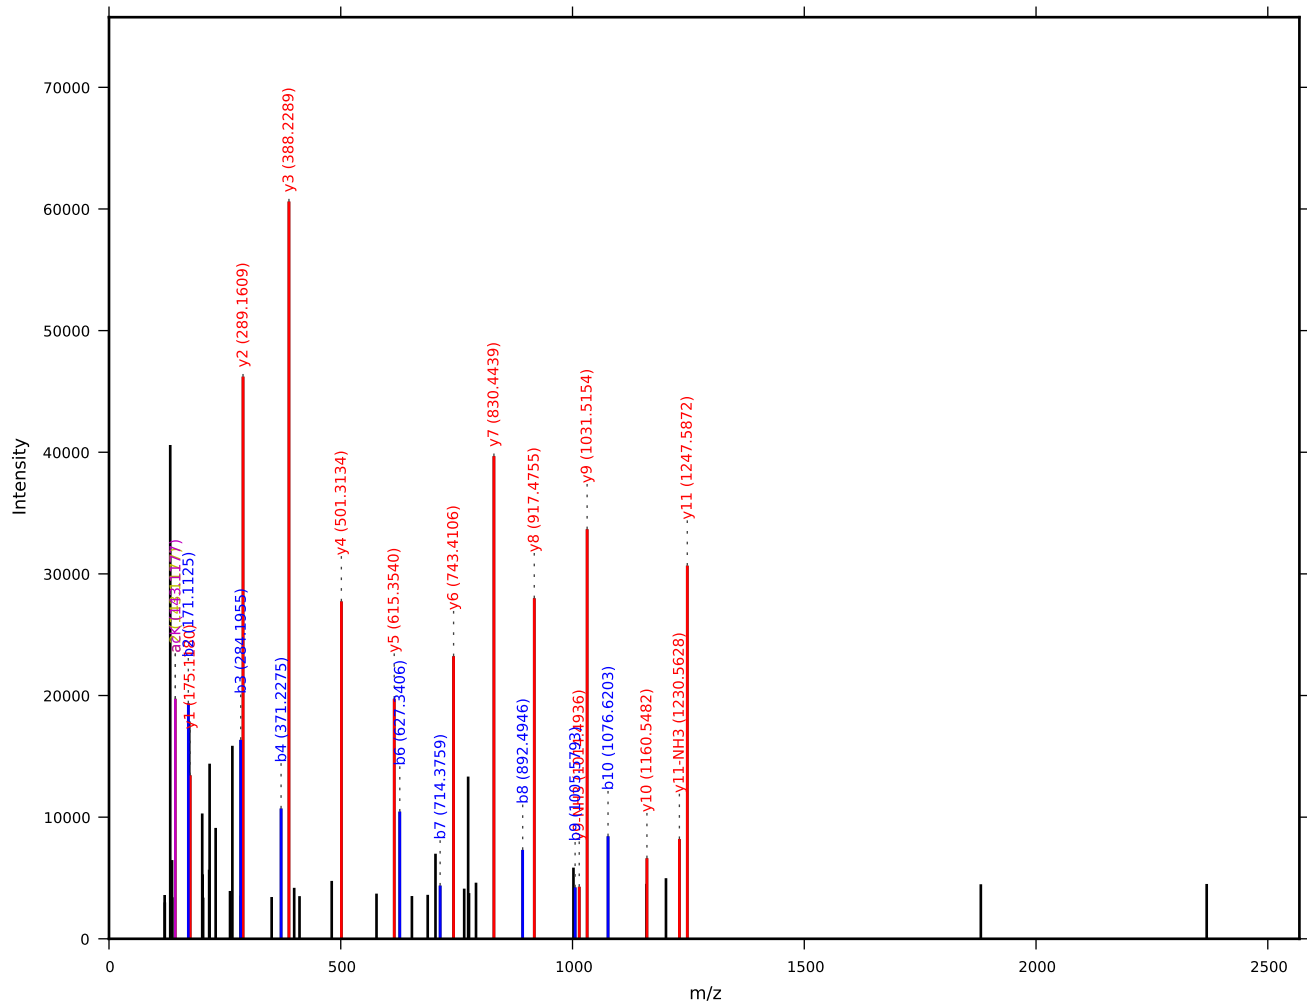

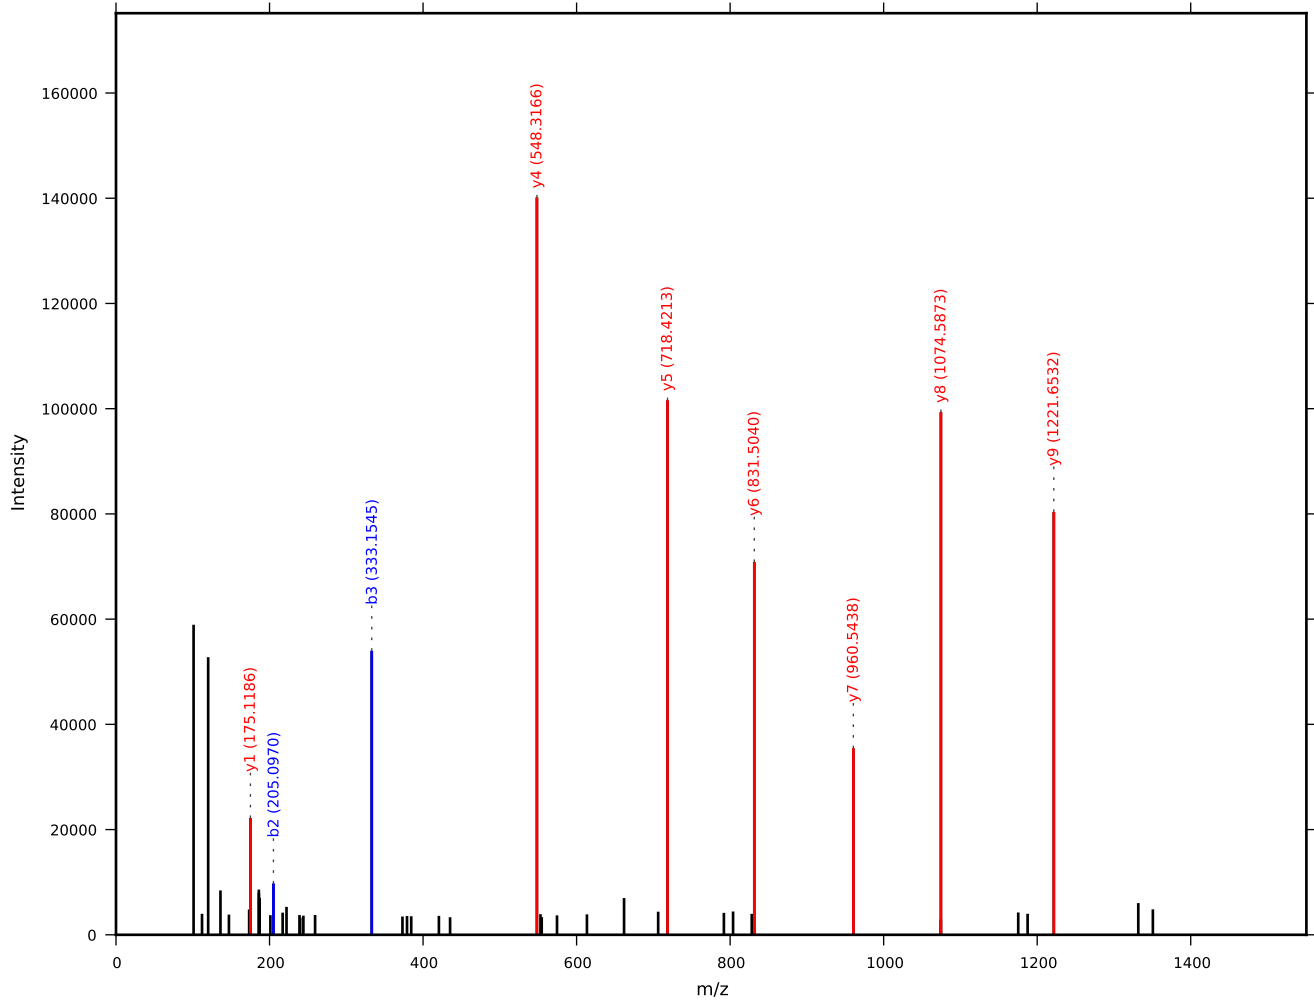

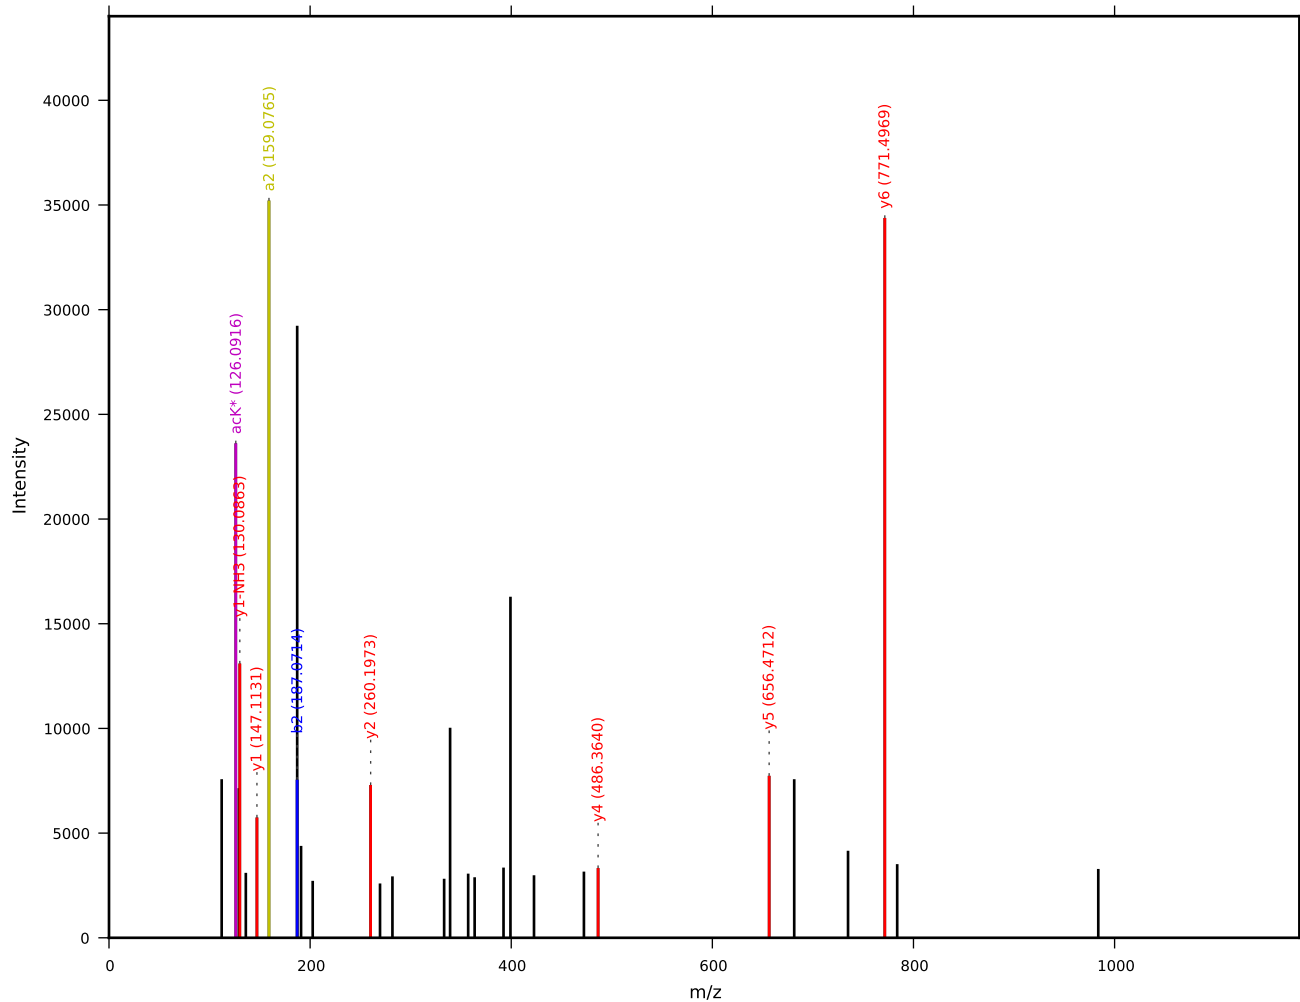

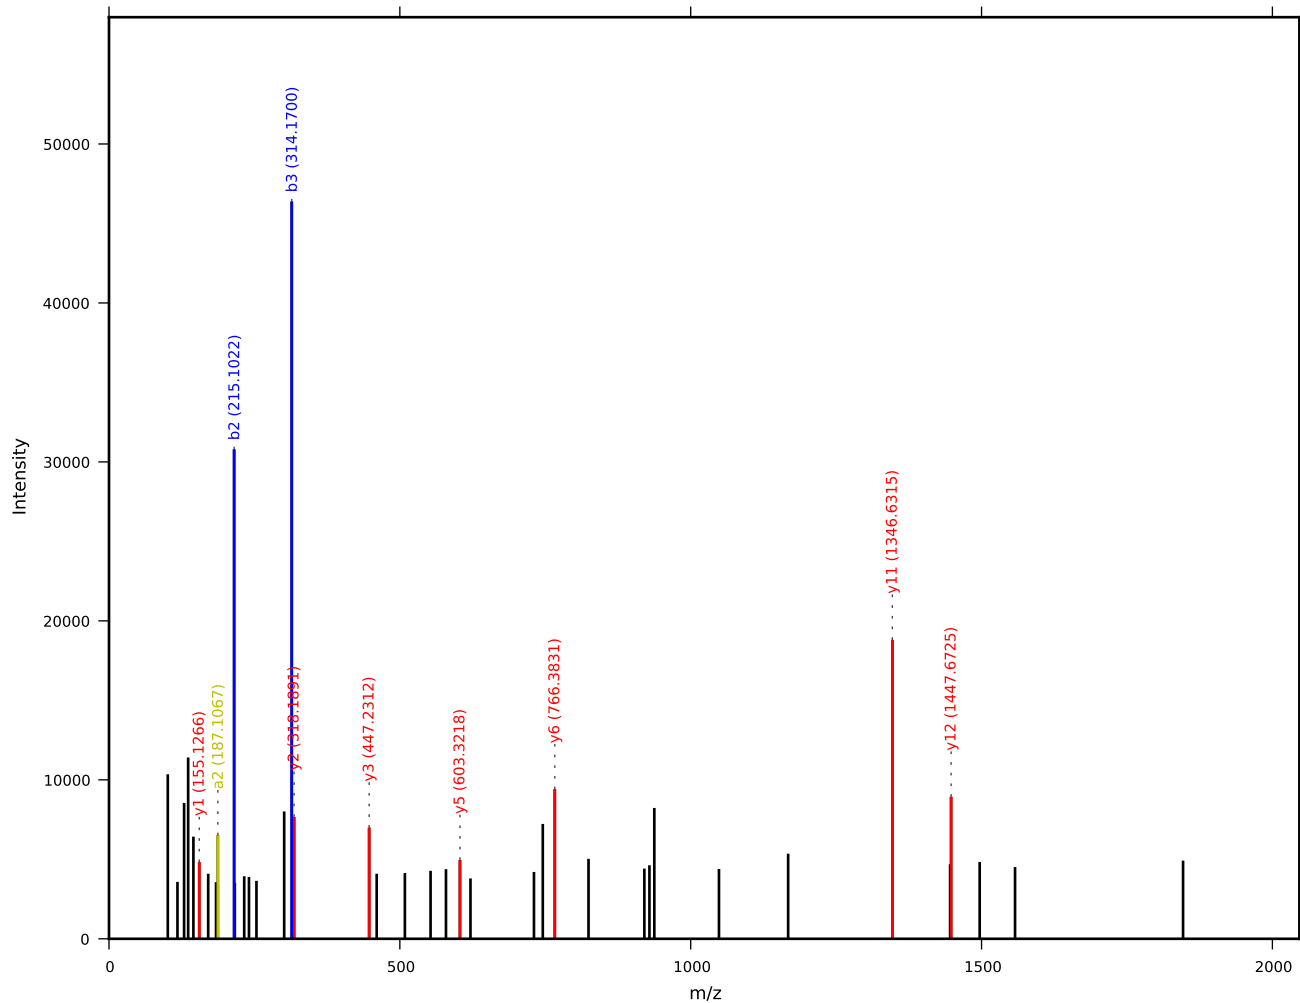

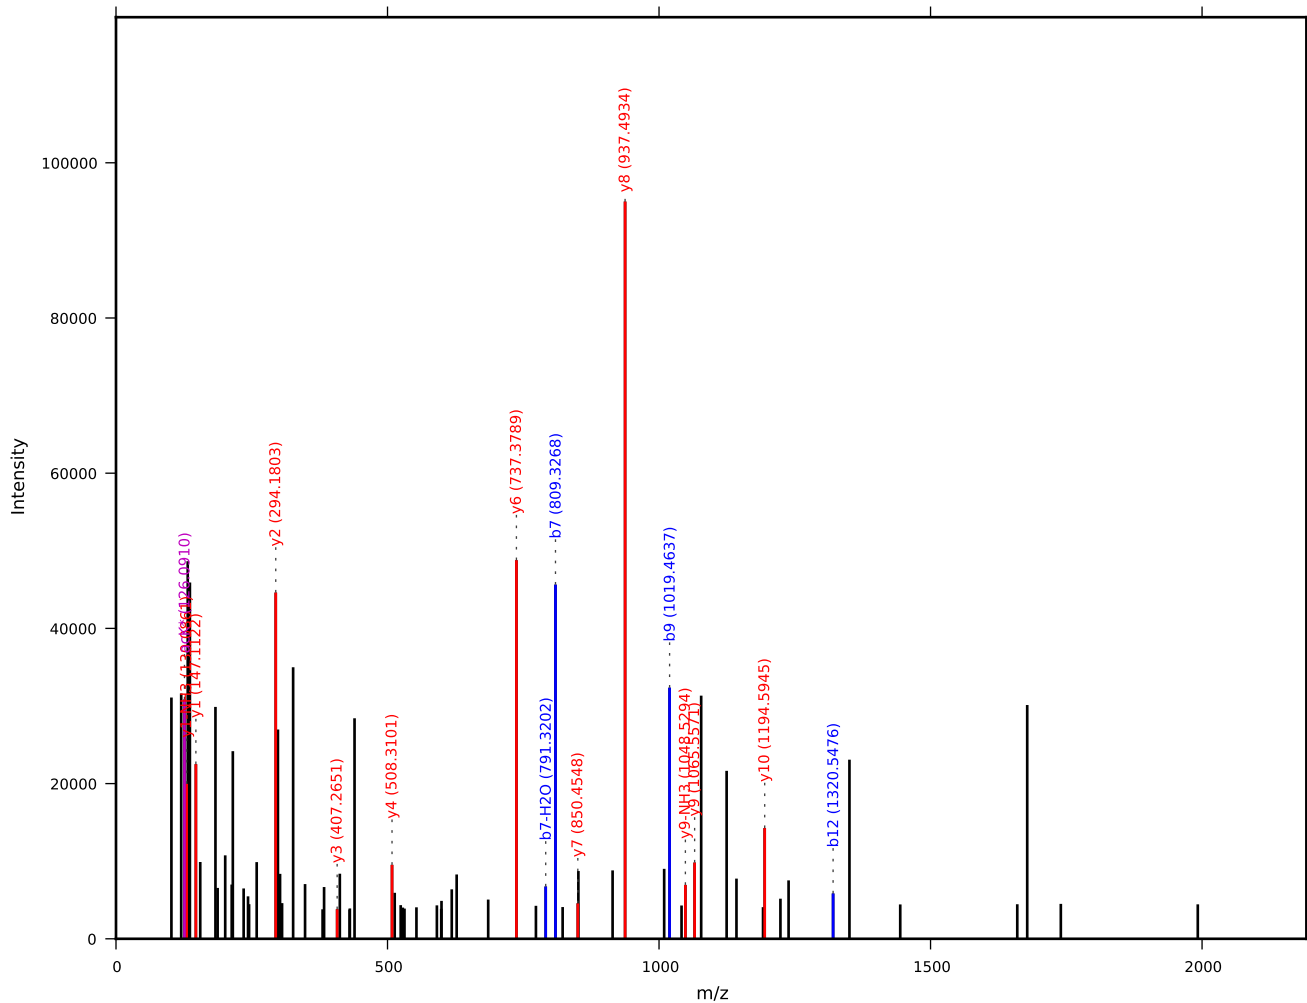

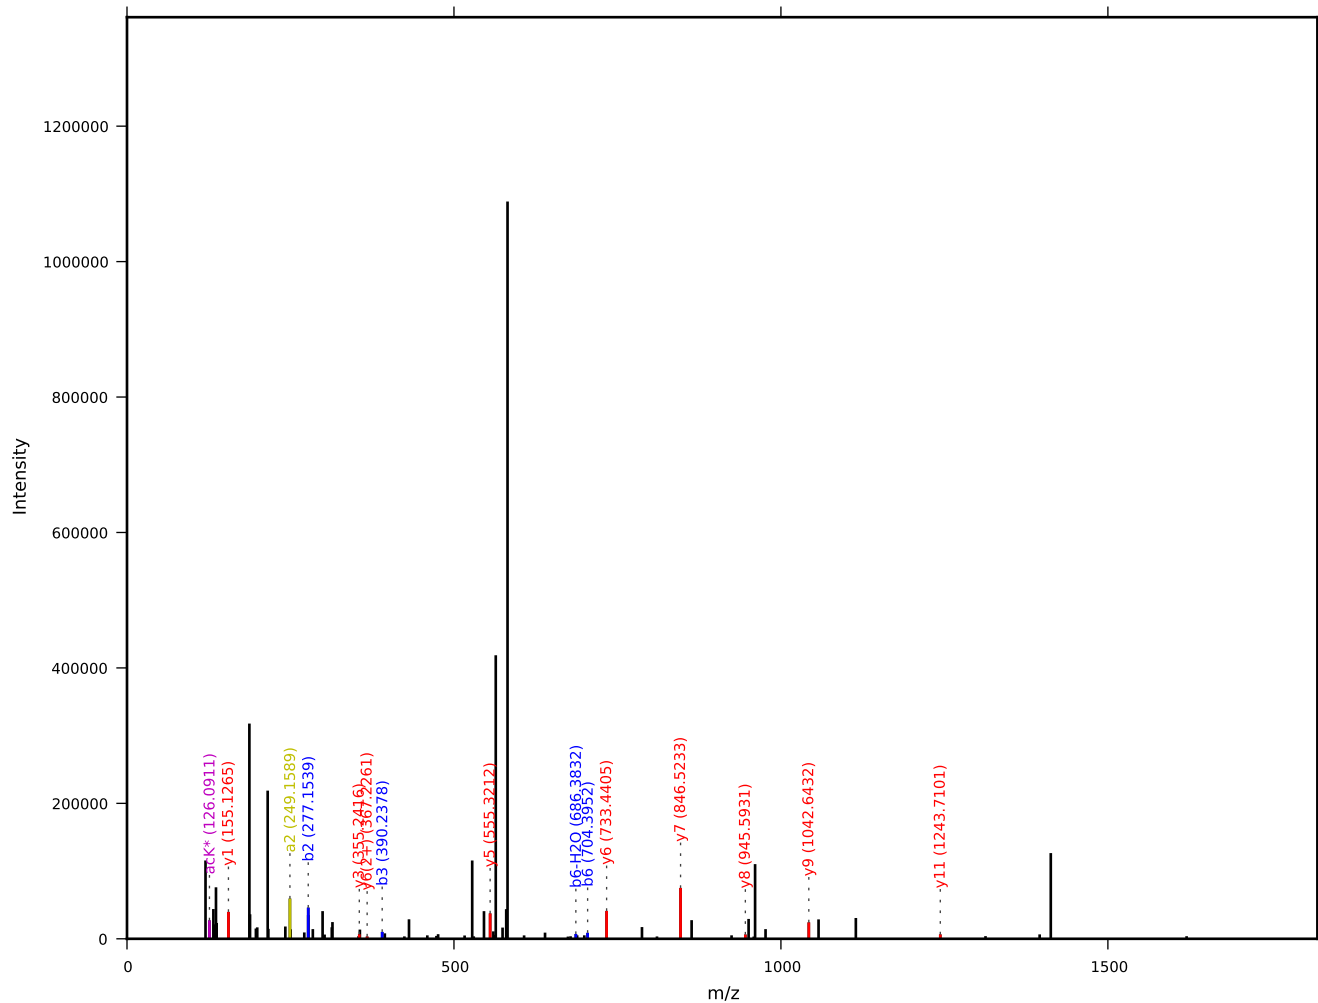

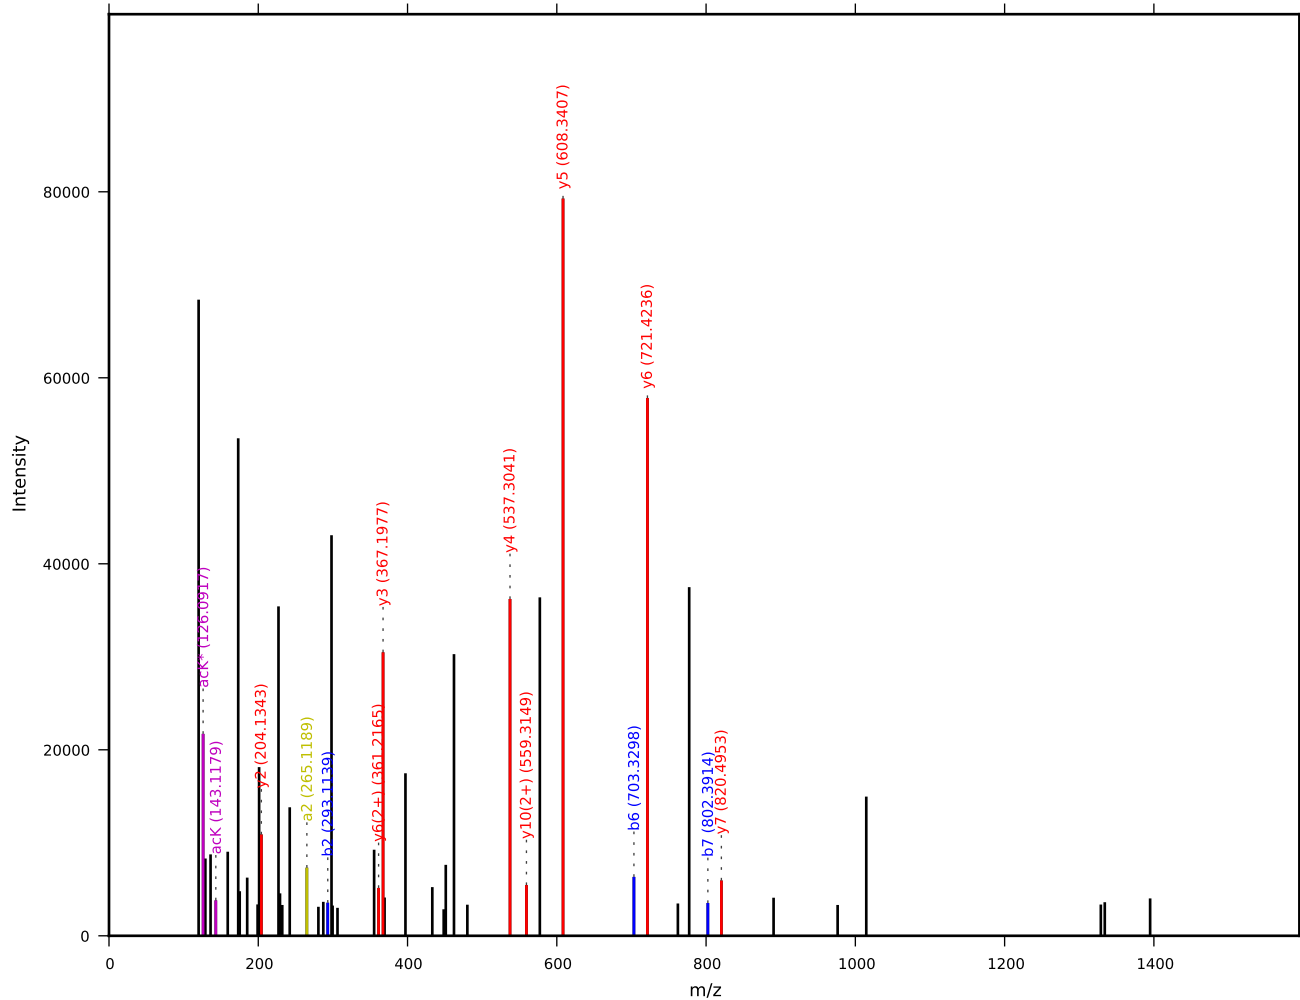

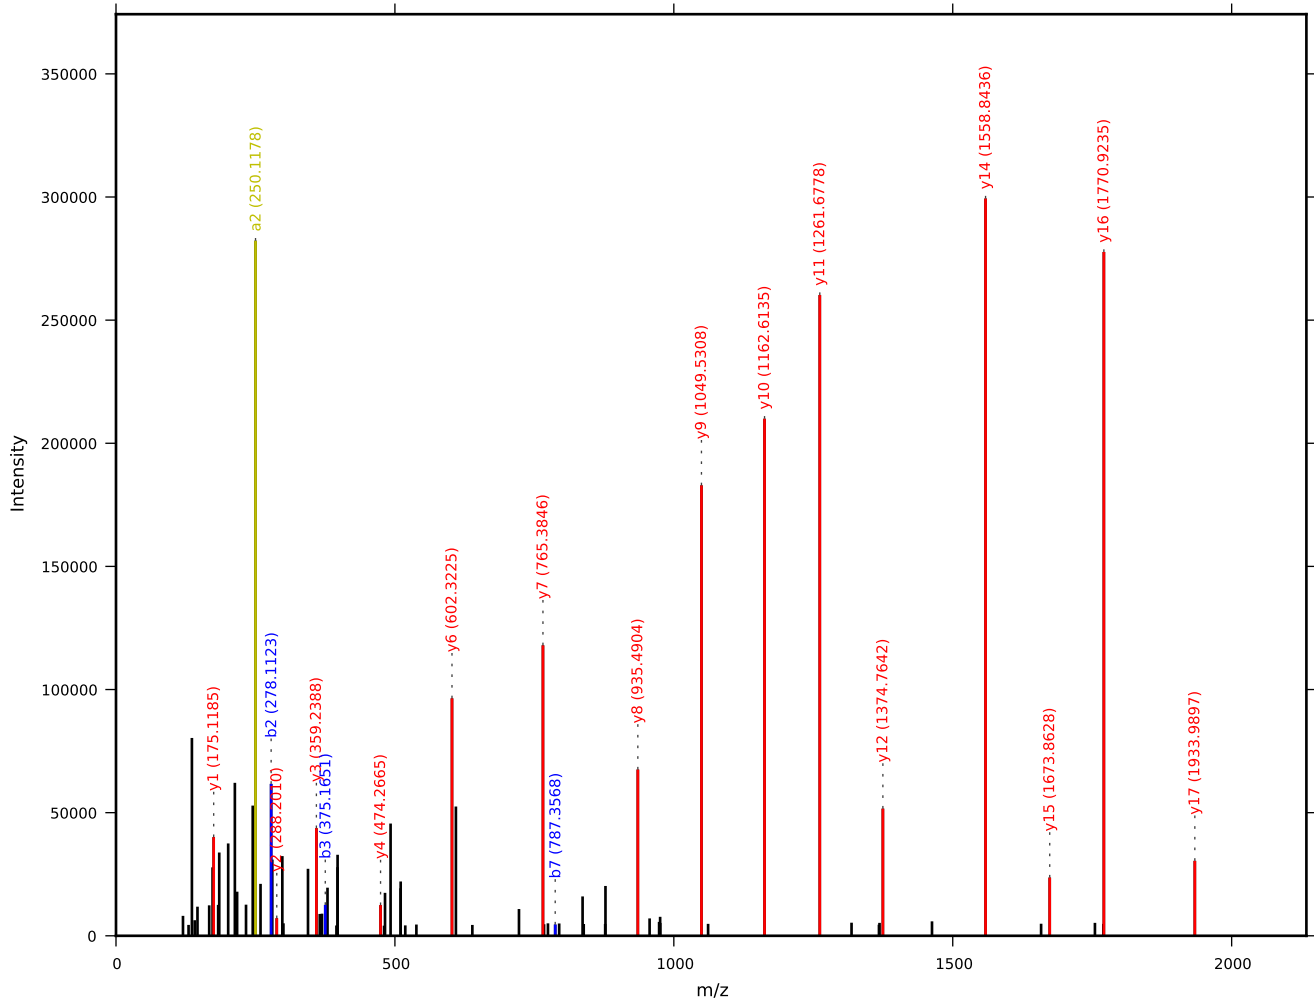



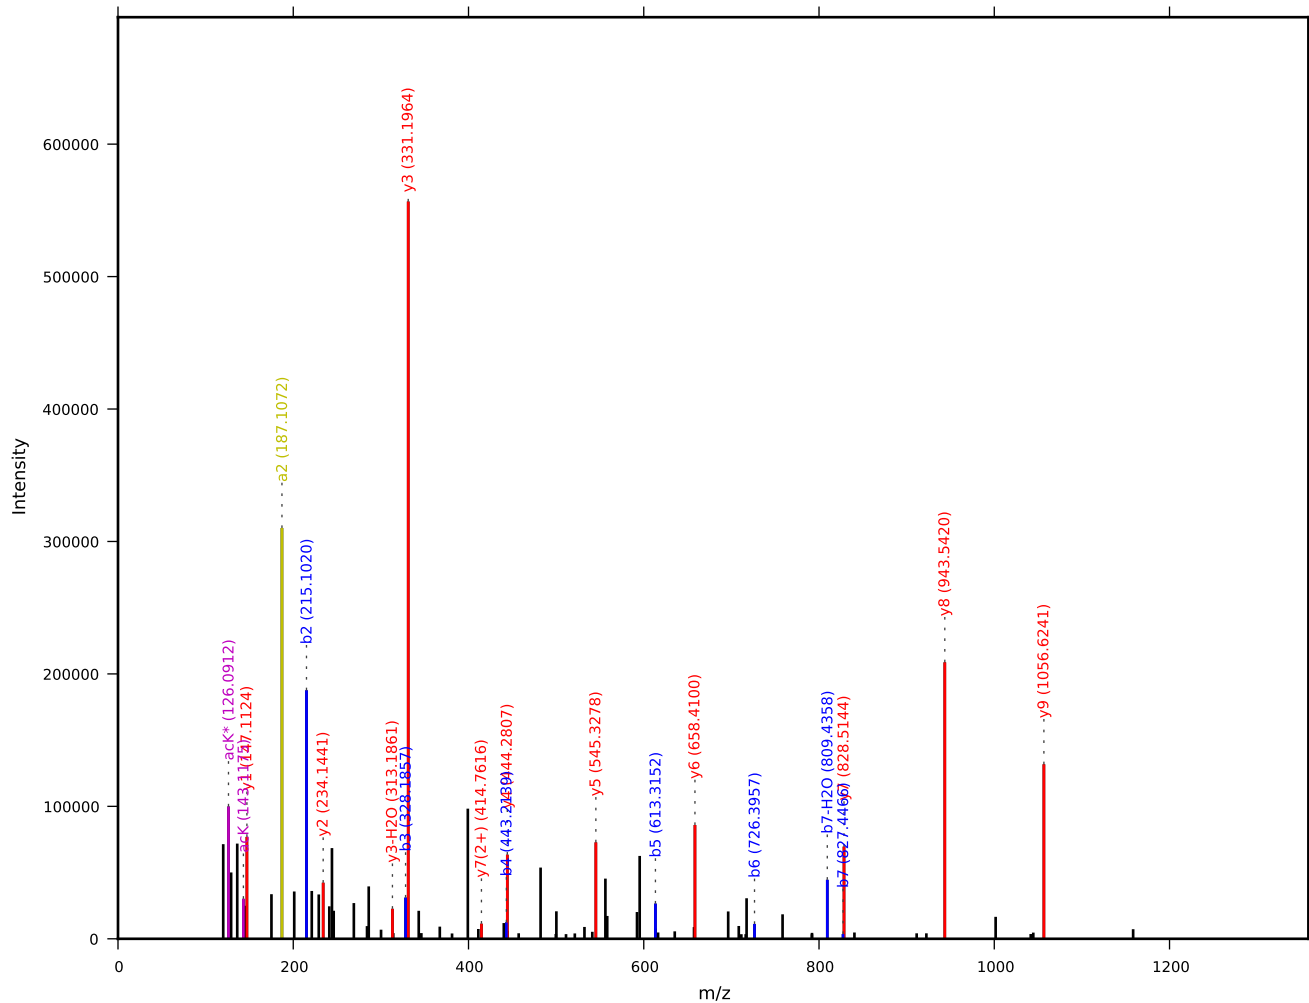

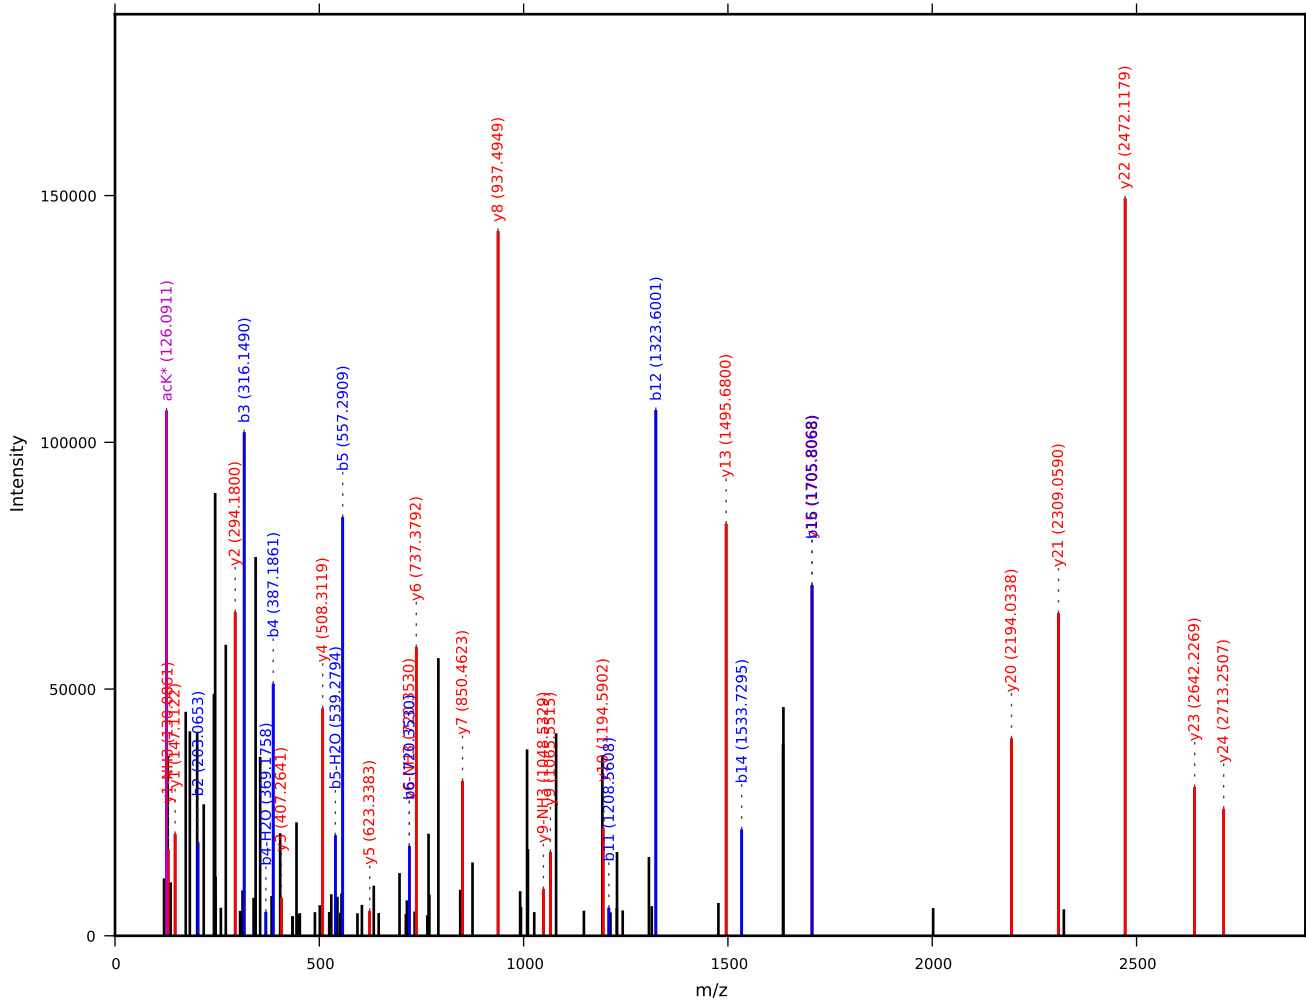

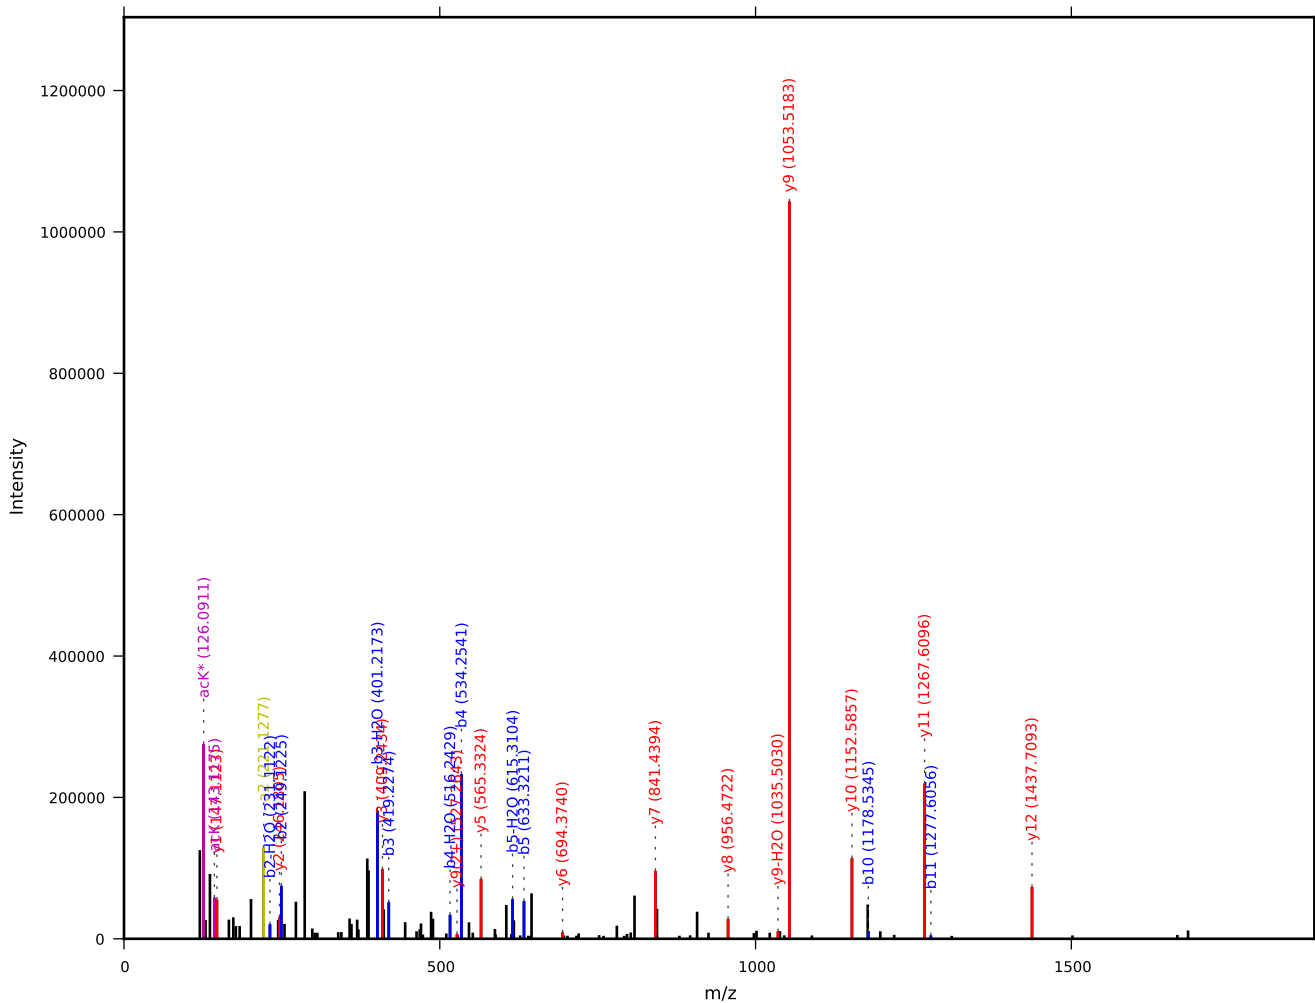

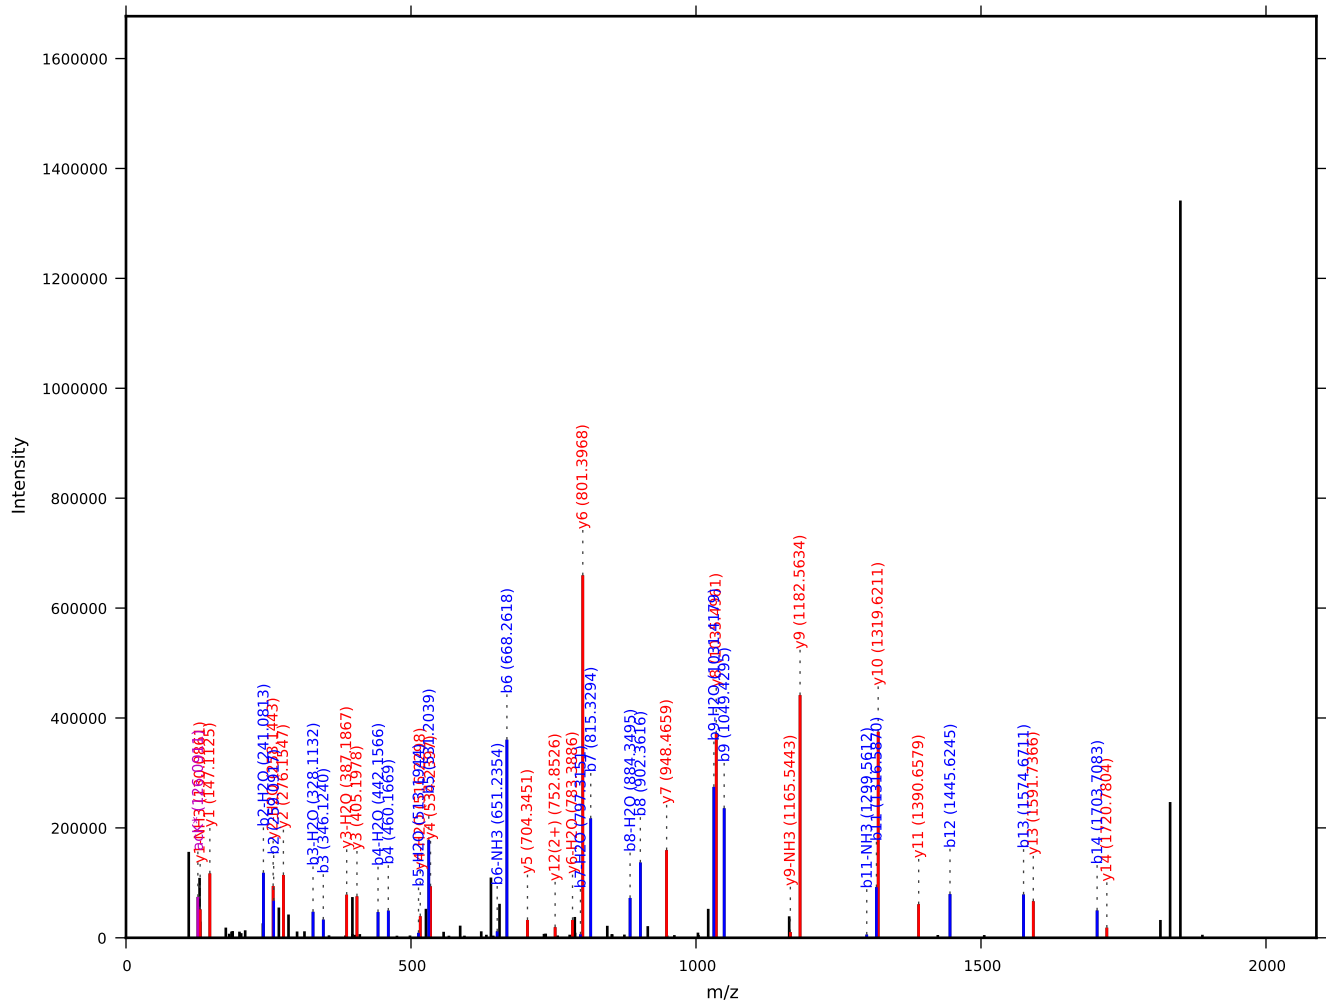

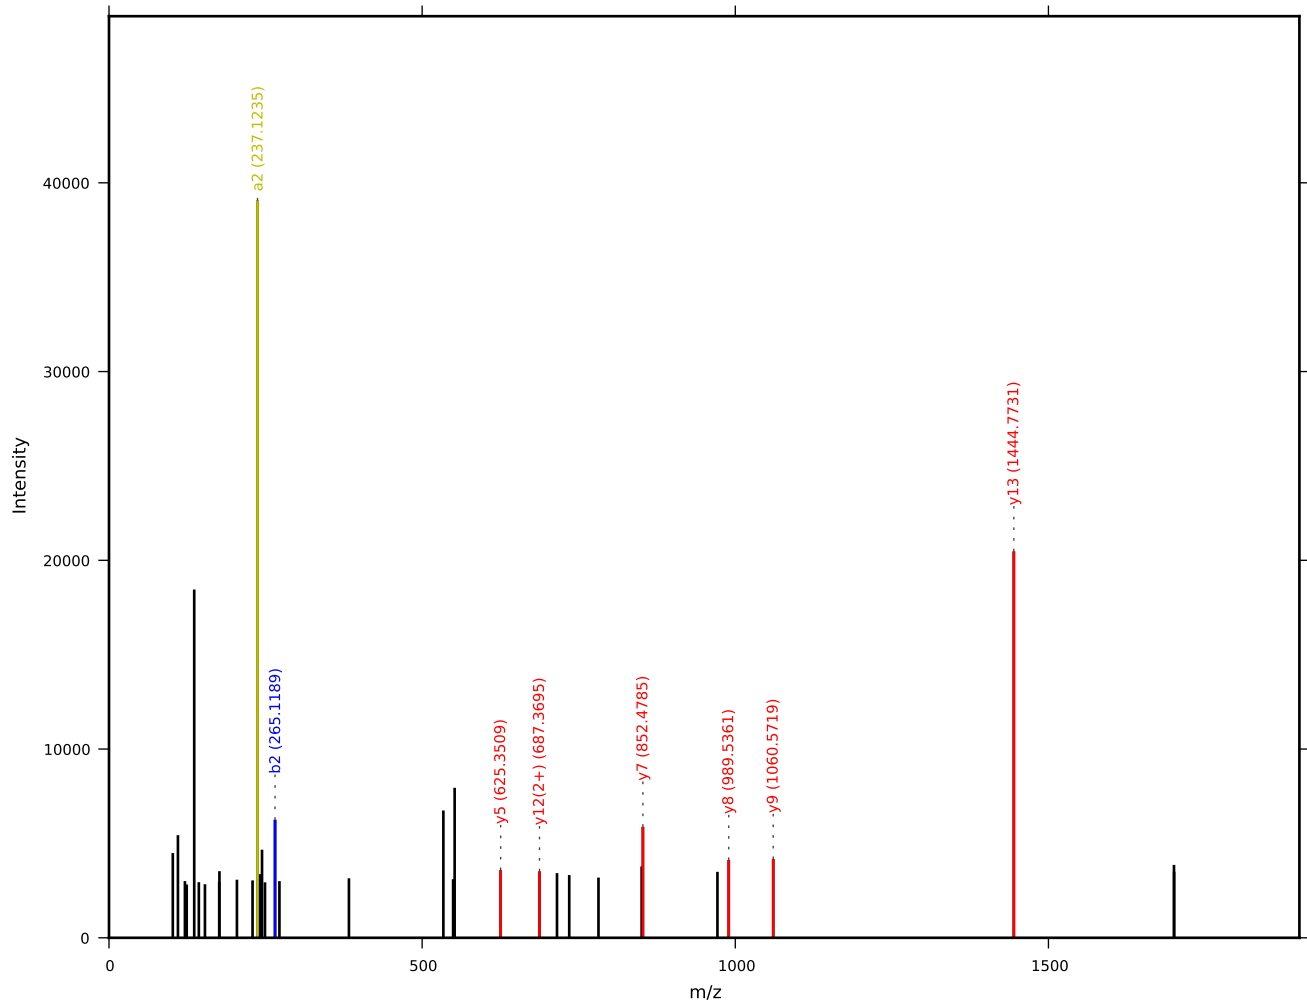

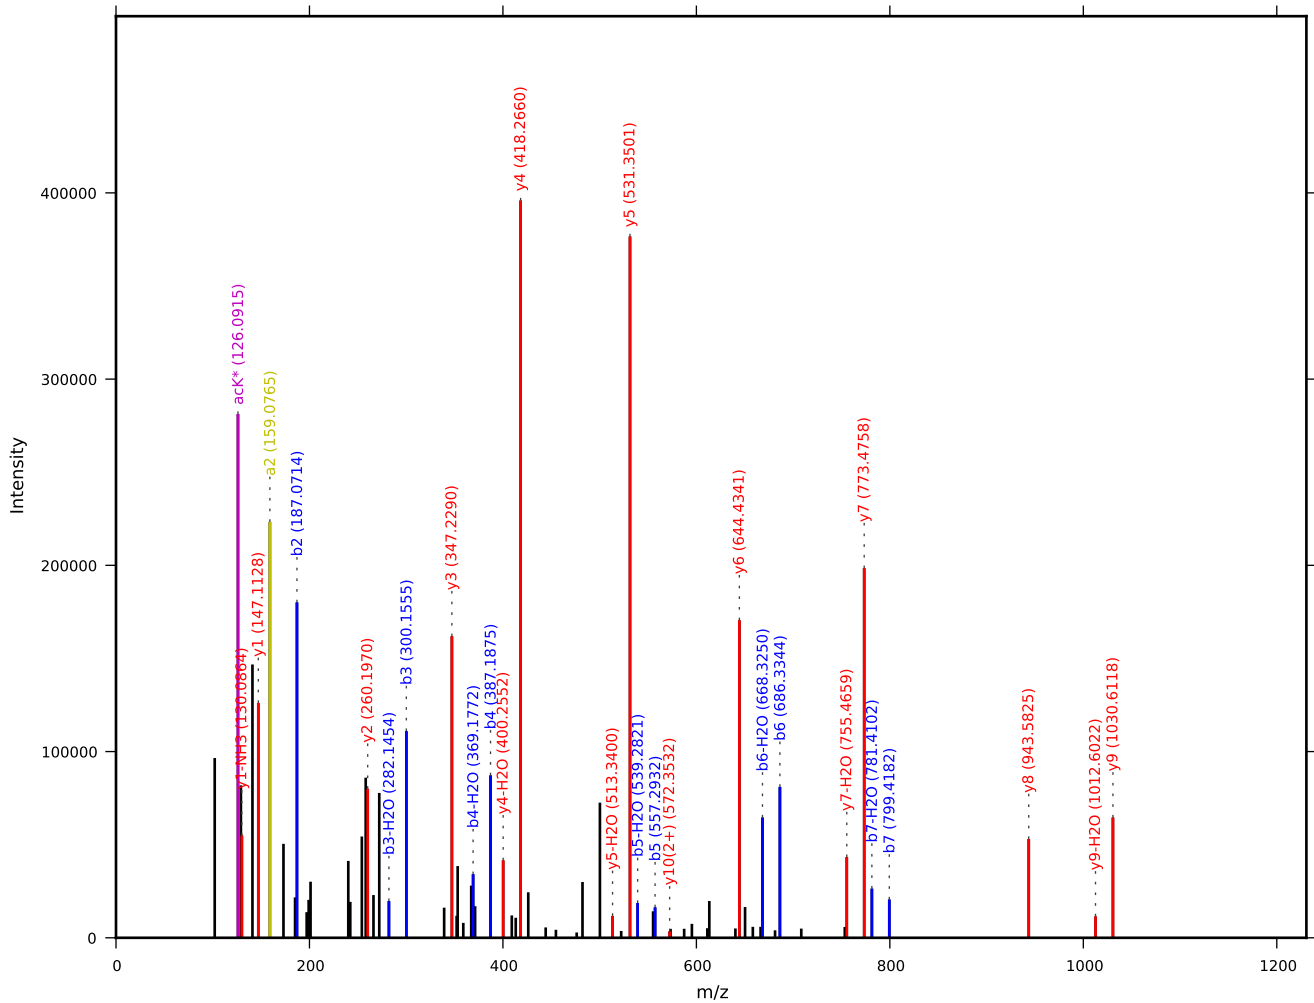

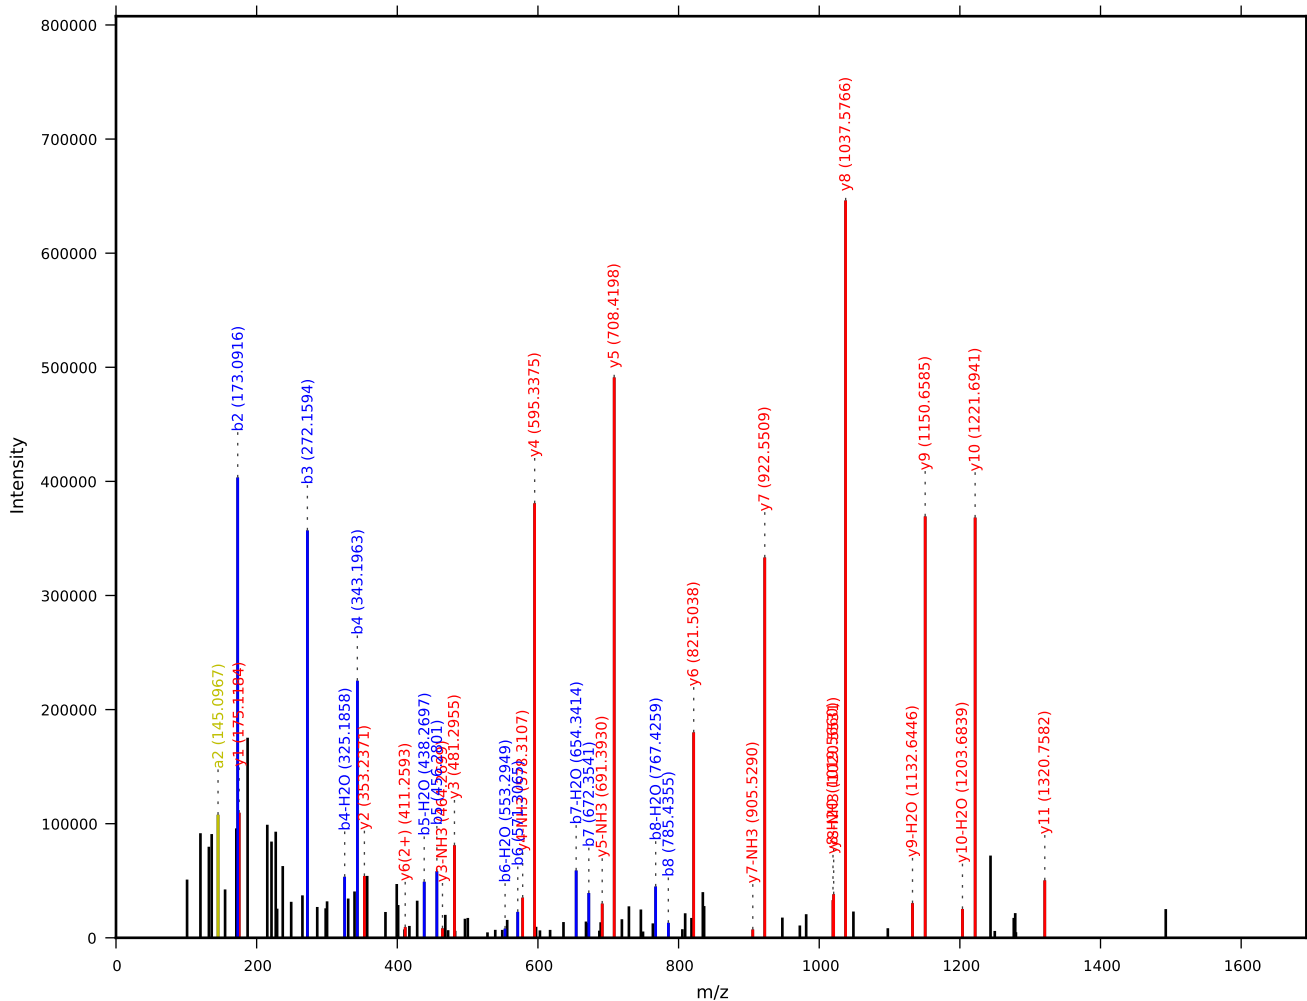

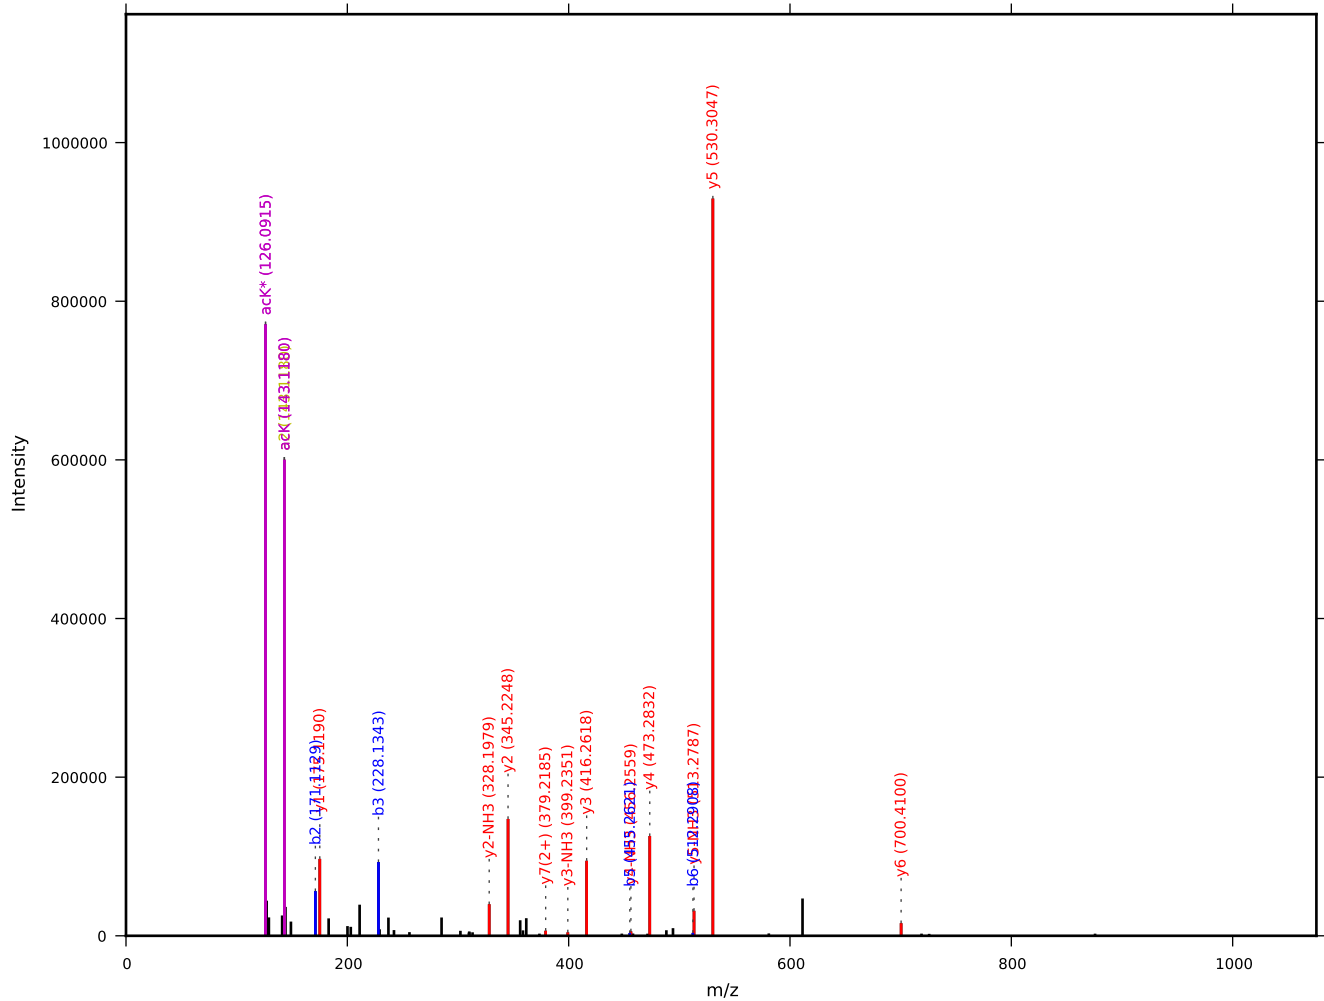



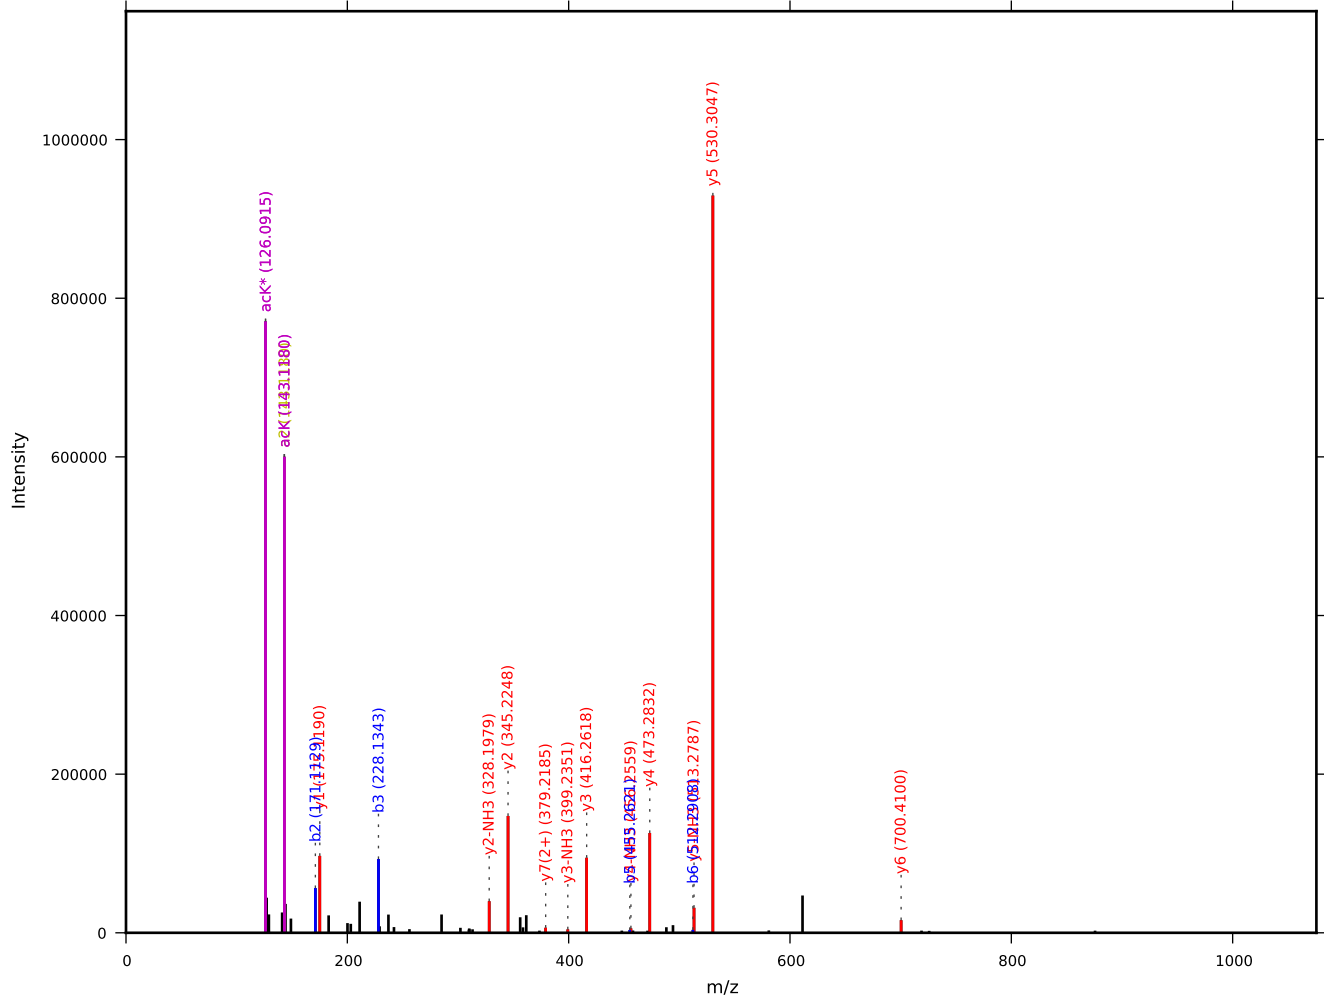

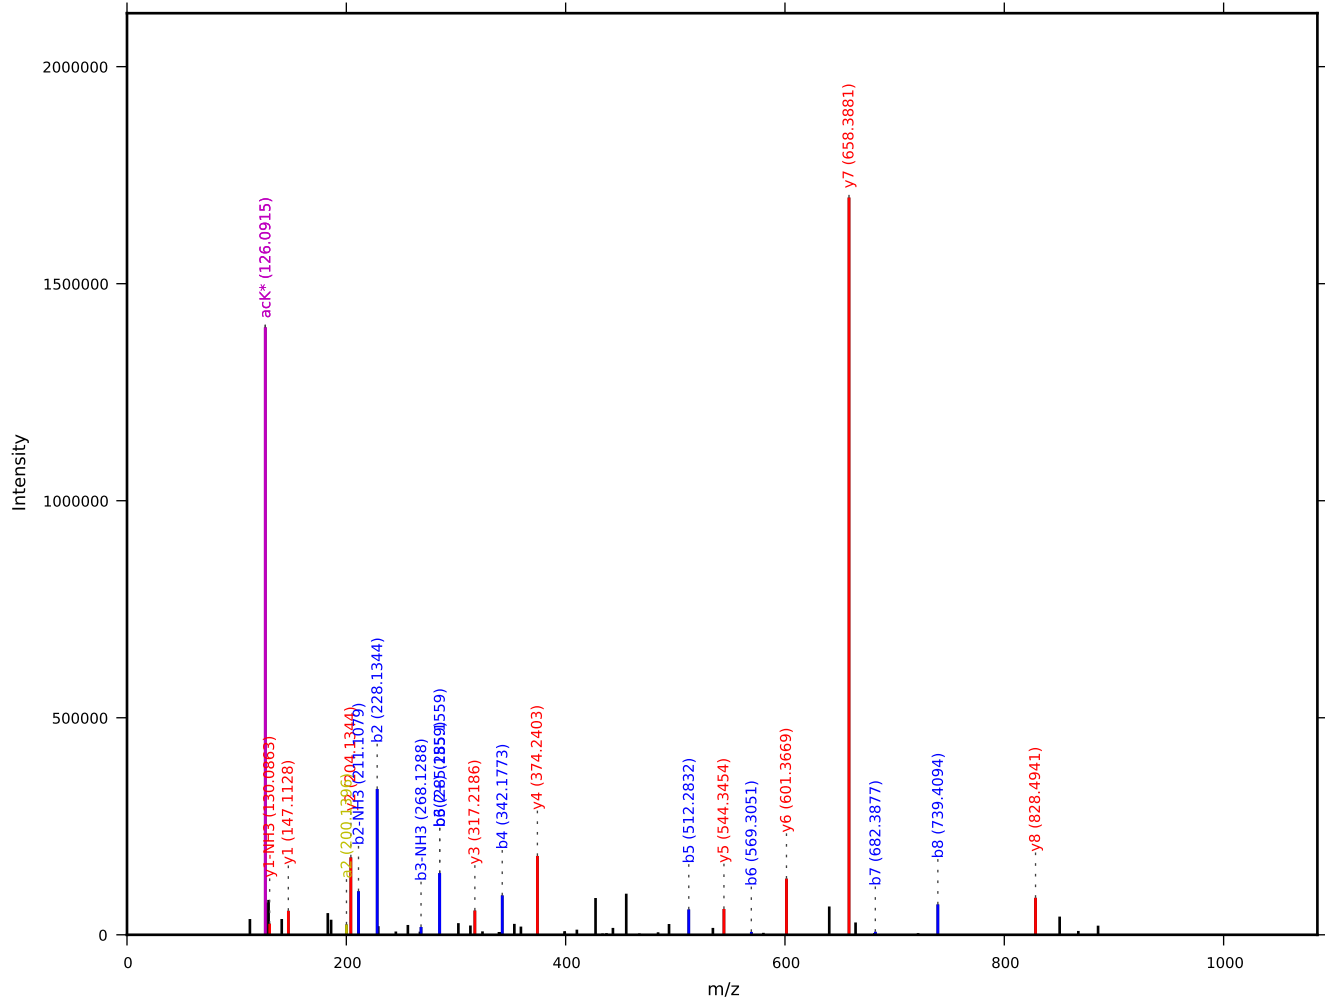

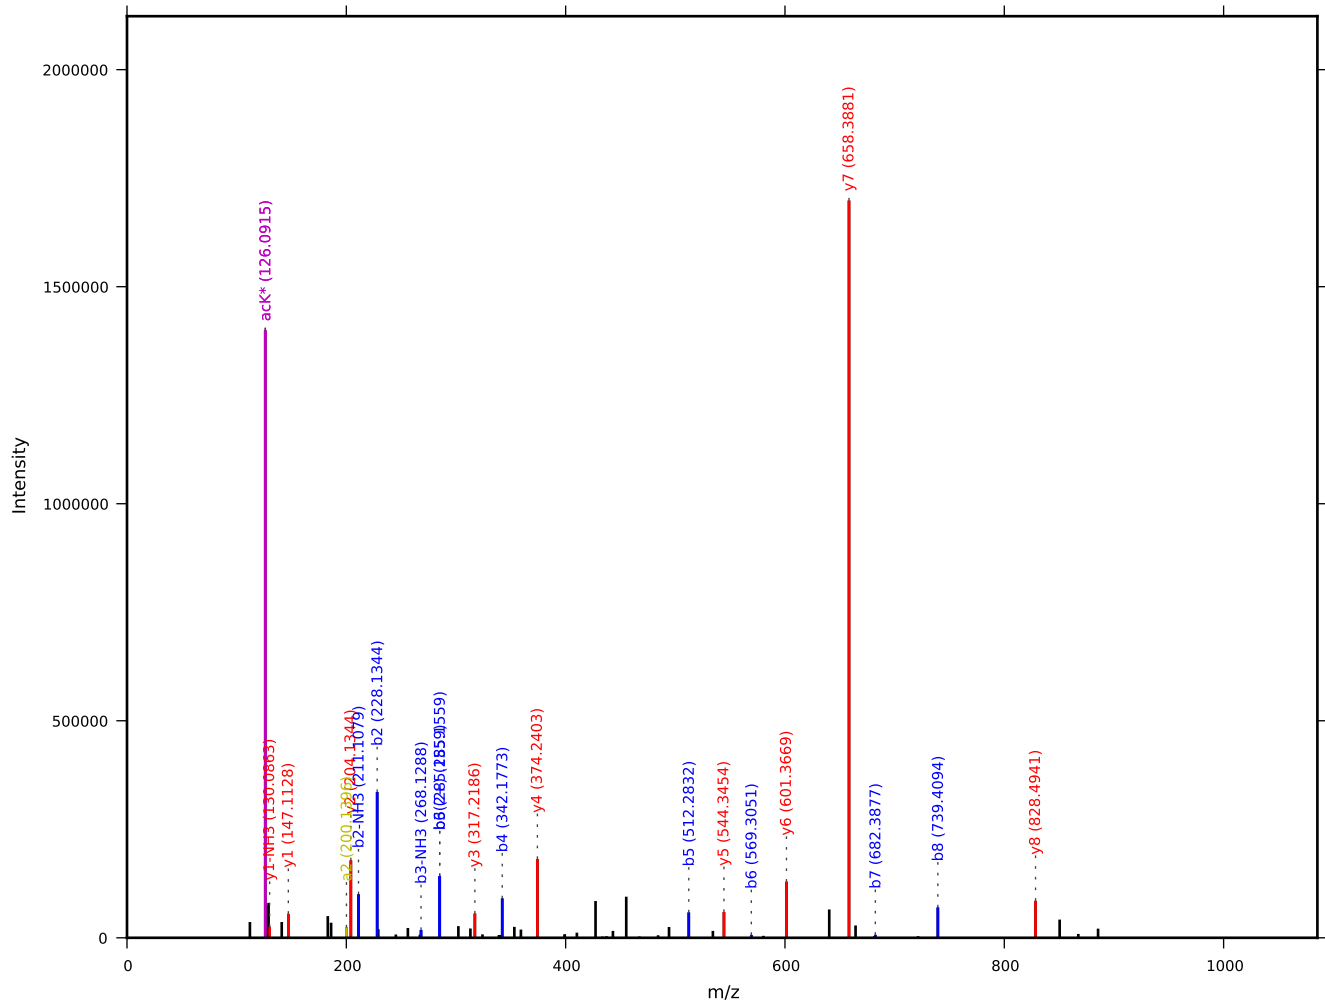

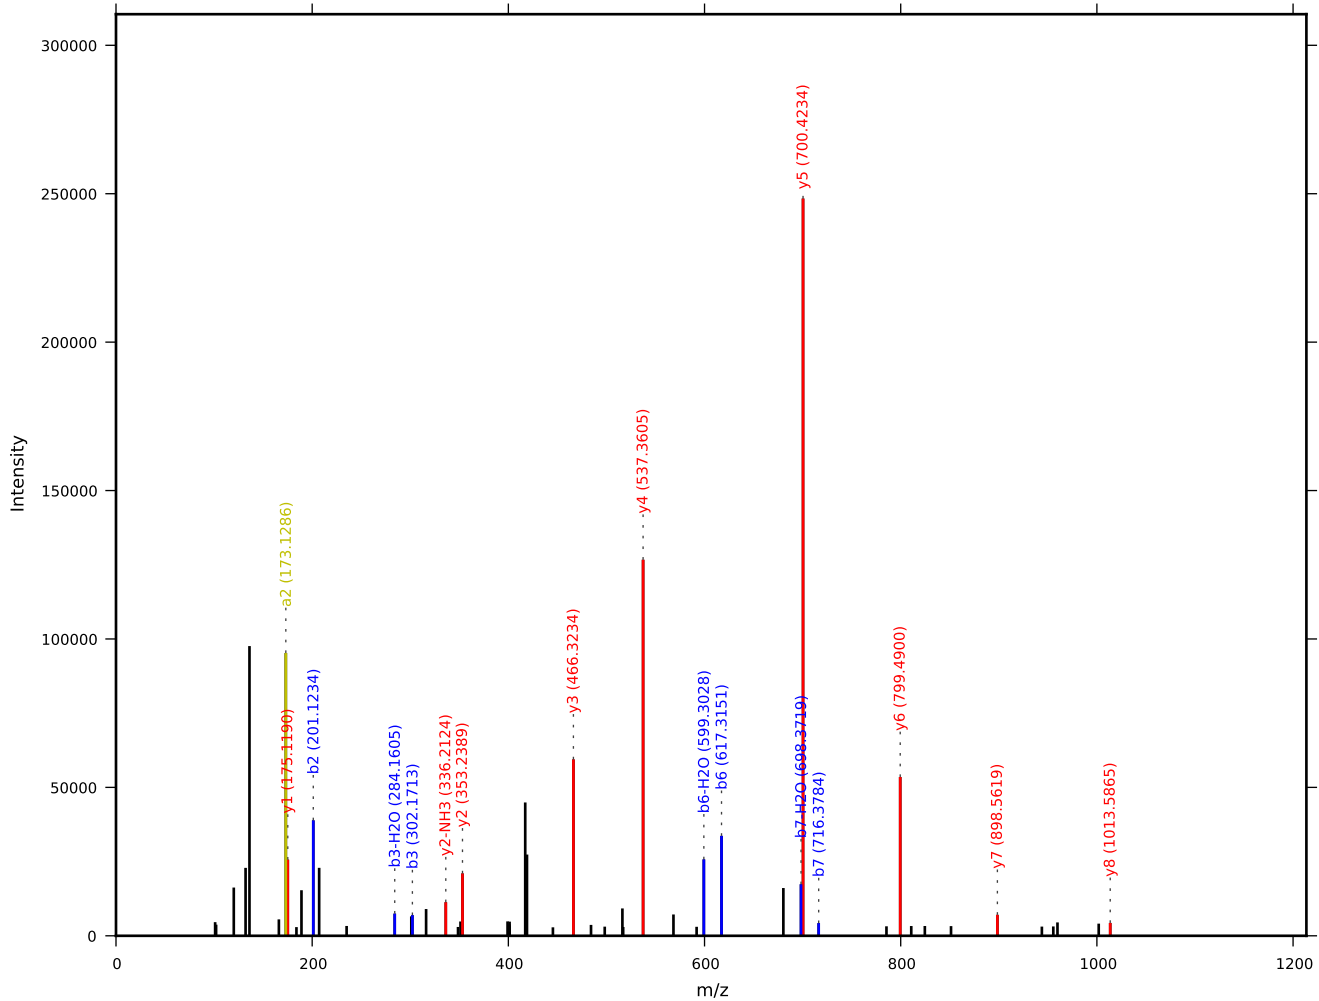

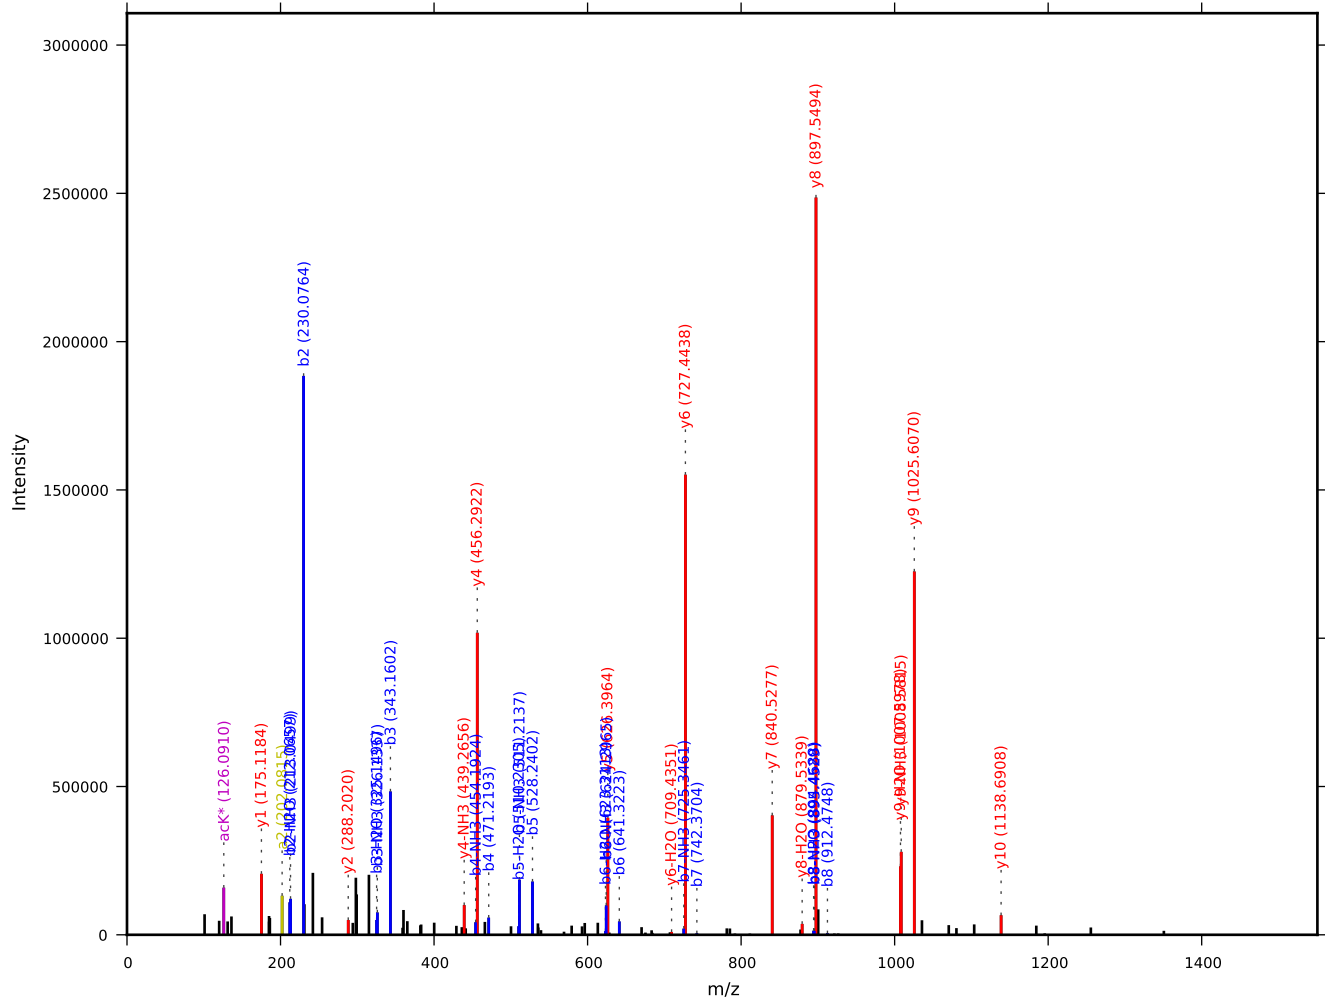

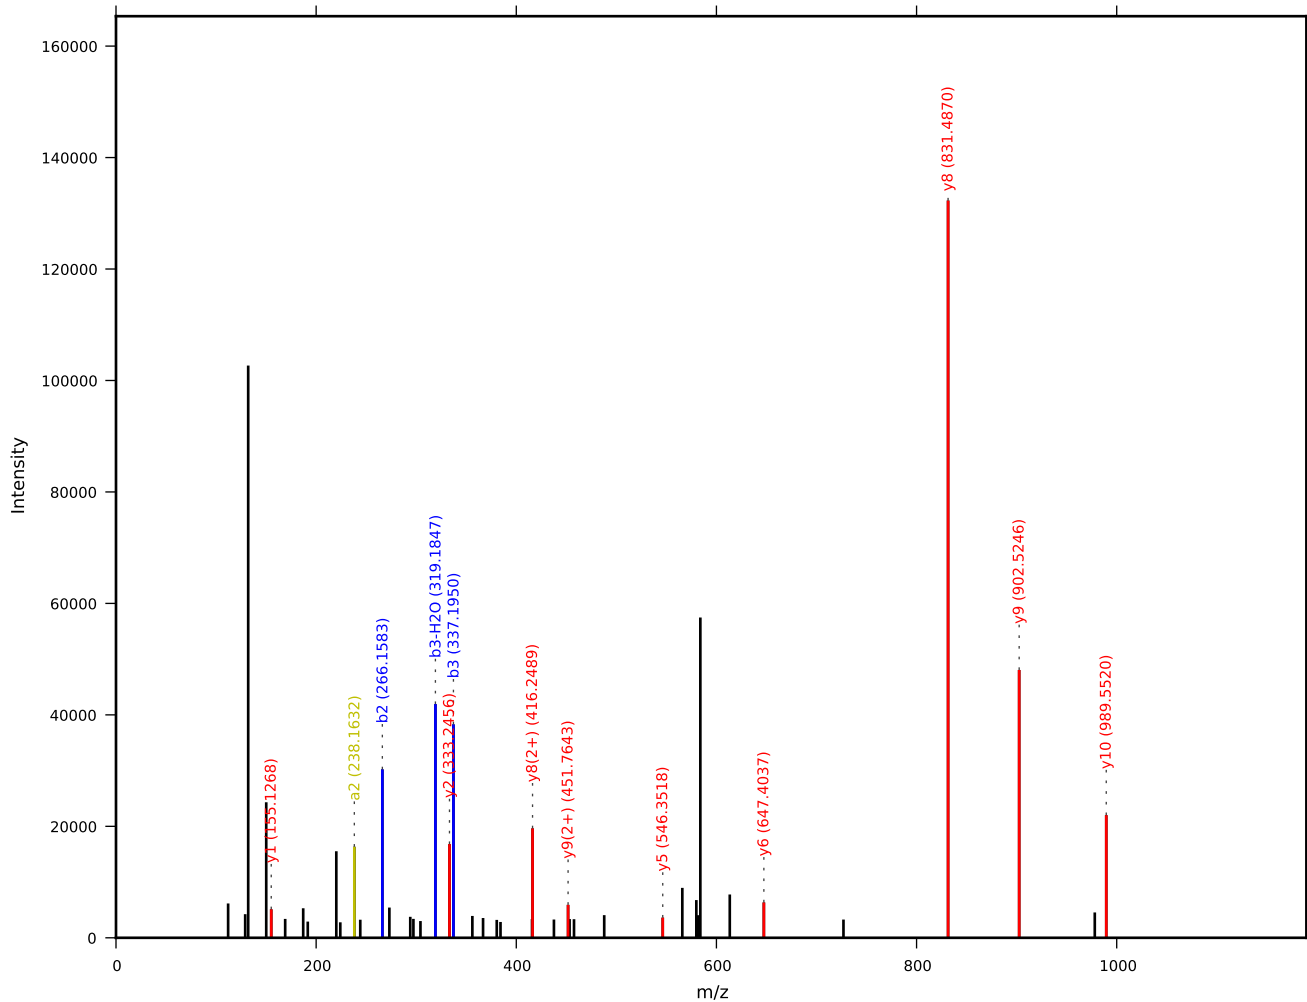

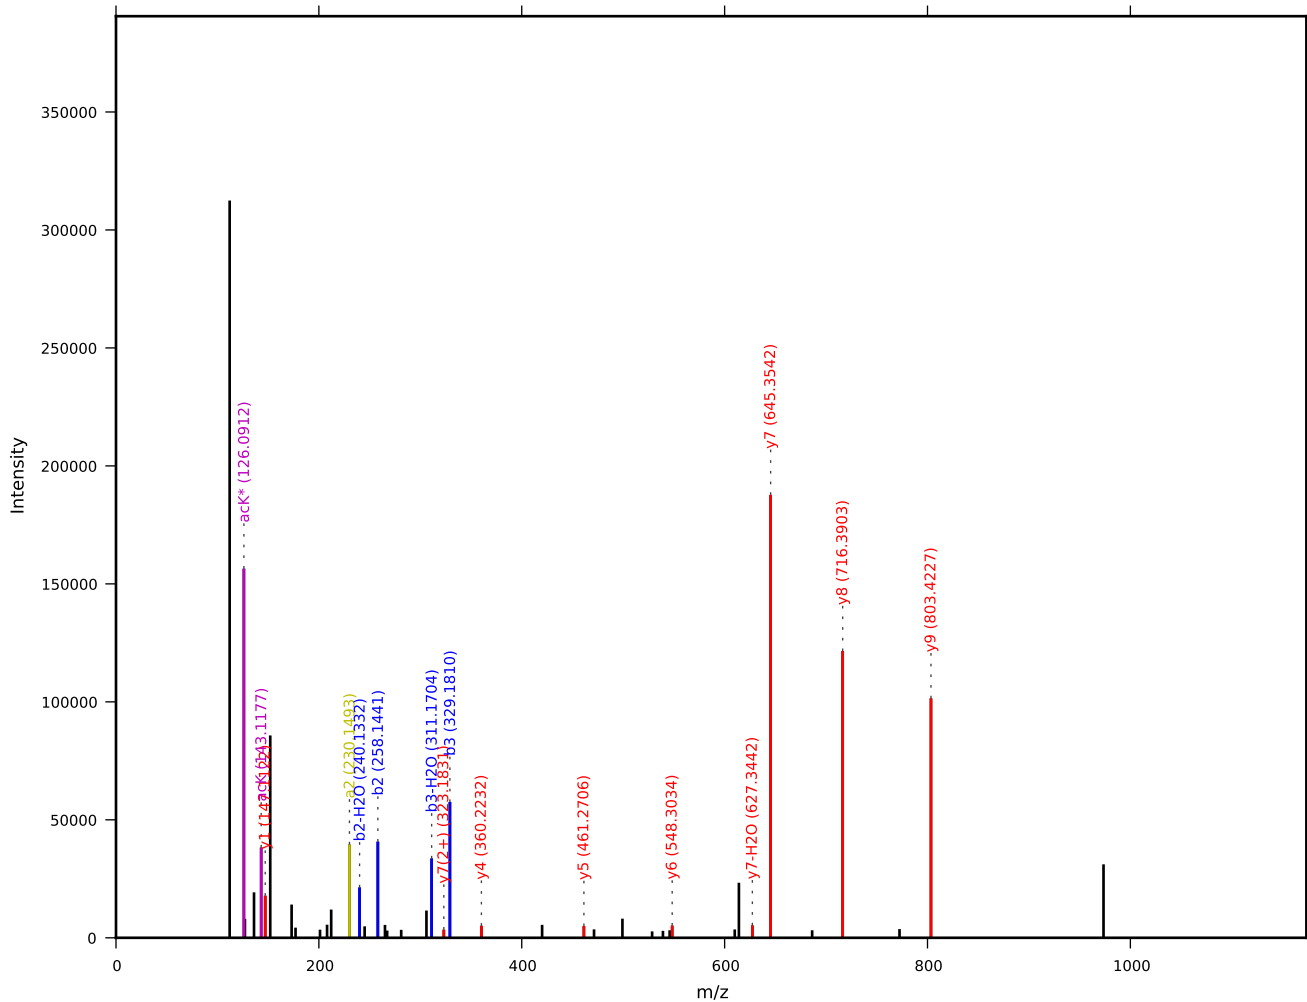

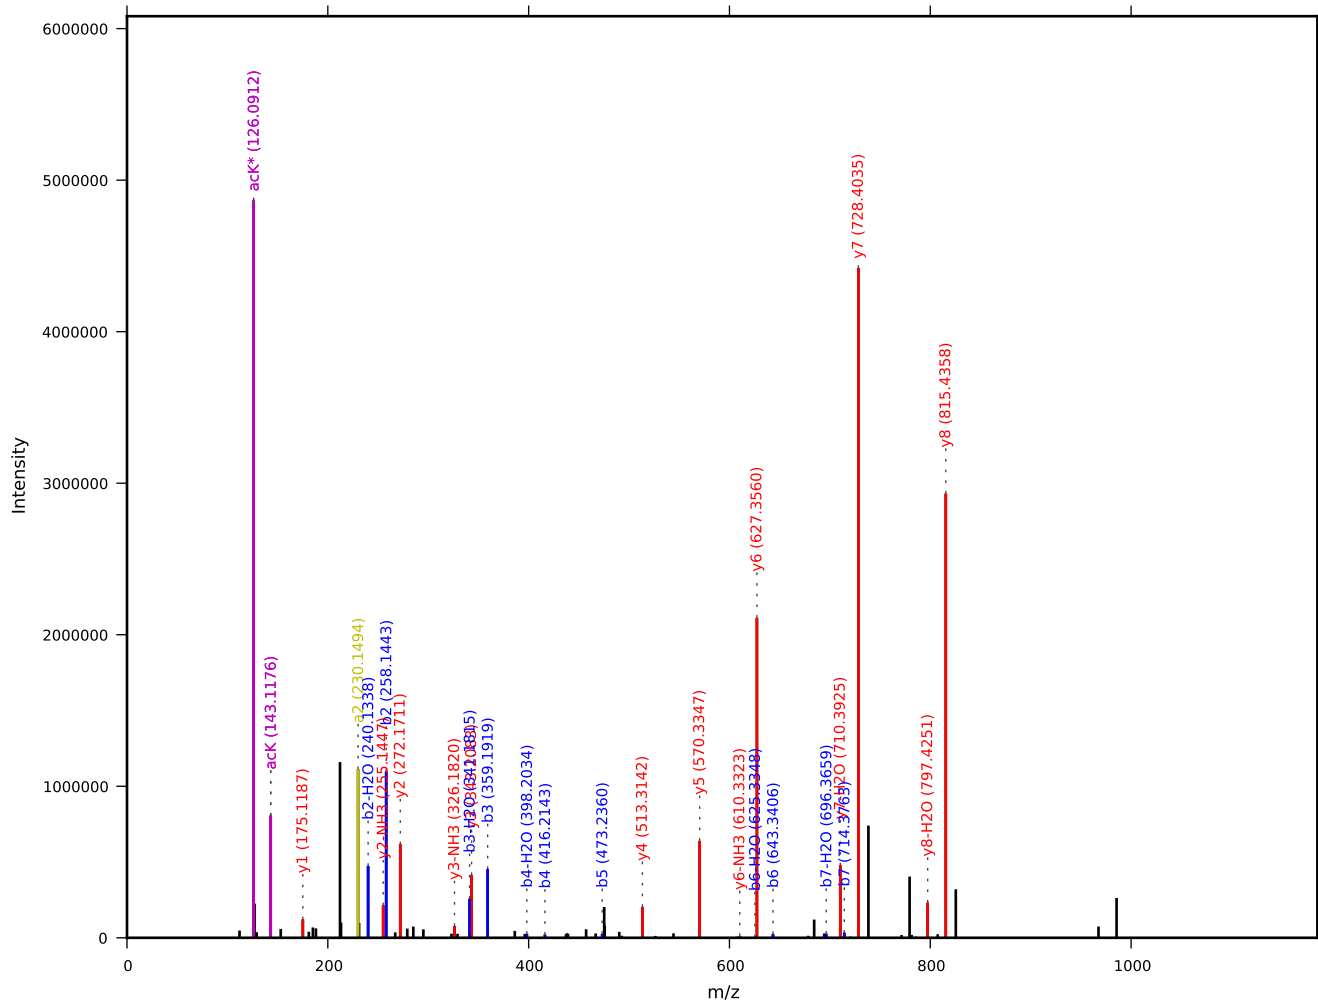





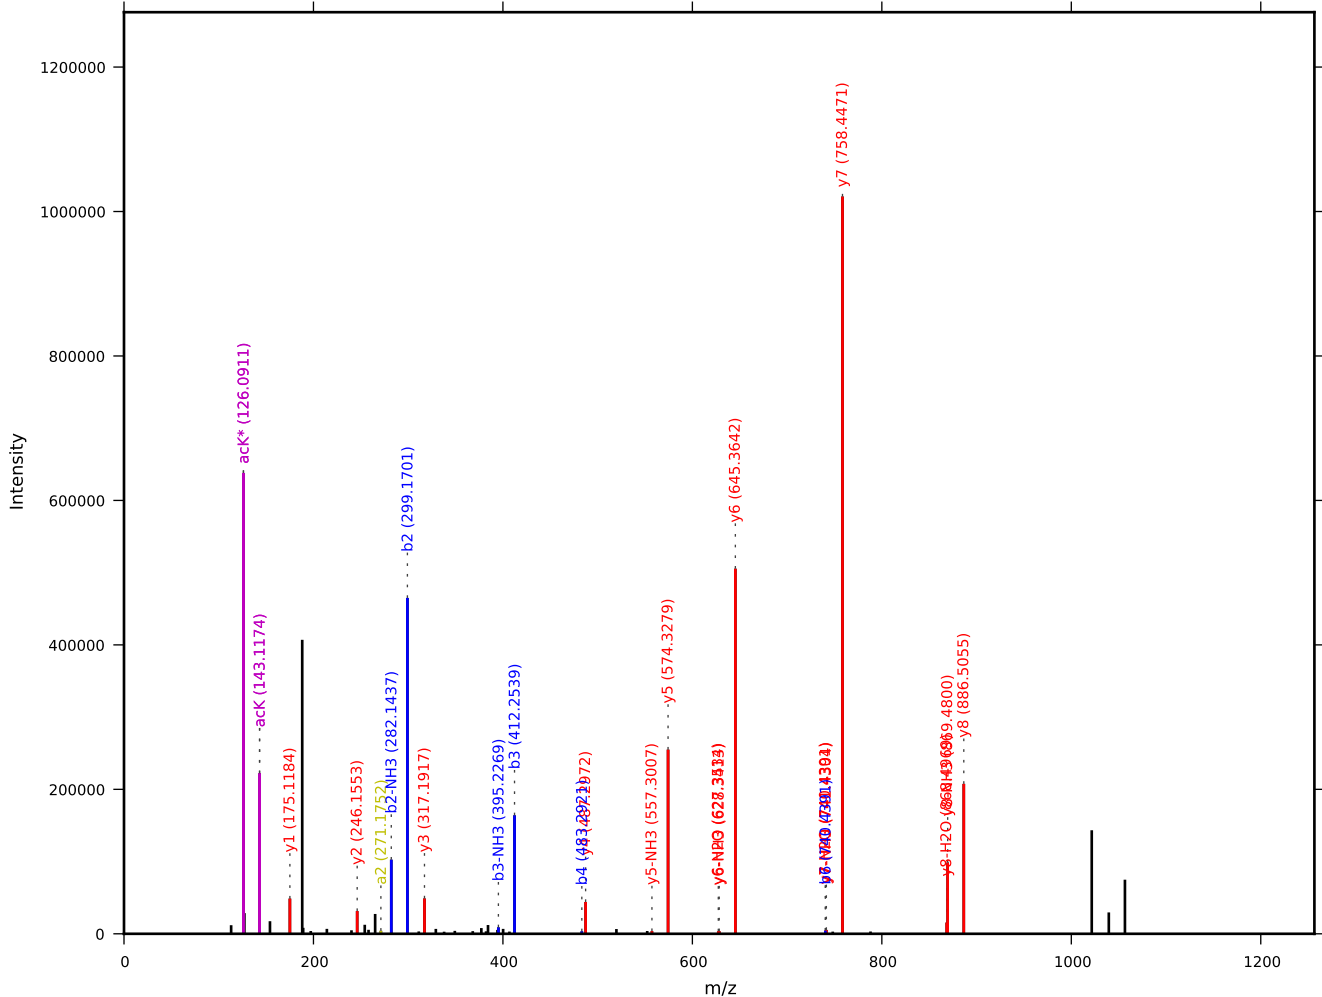



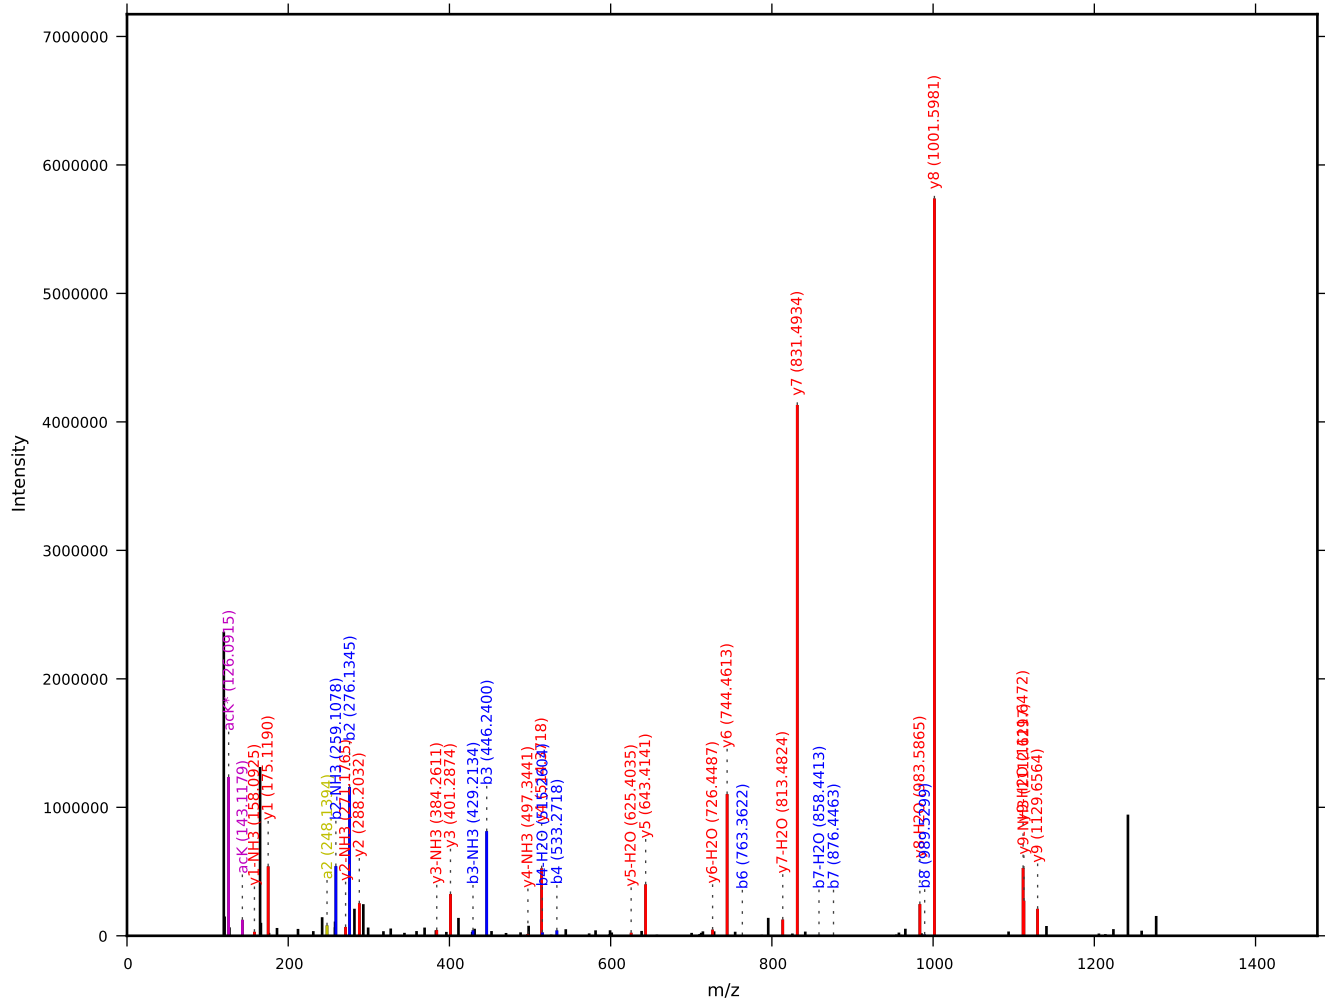

Mass: 1213.619 Charge: 2 m/z: 607.81679  
Modified Peptide: \_ADAPIDK(ac)SIDK\_ Score: 54.7 PEP: 0.0006014

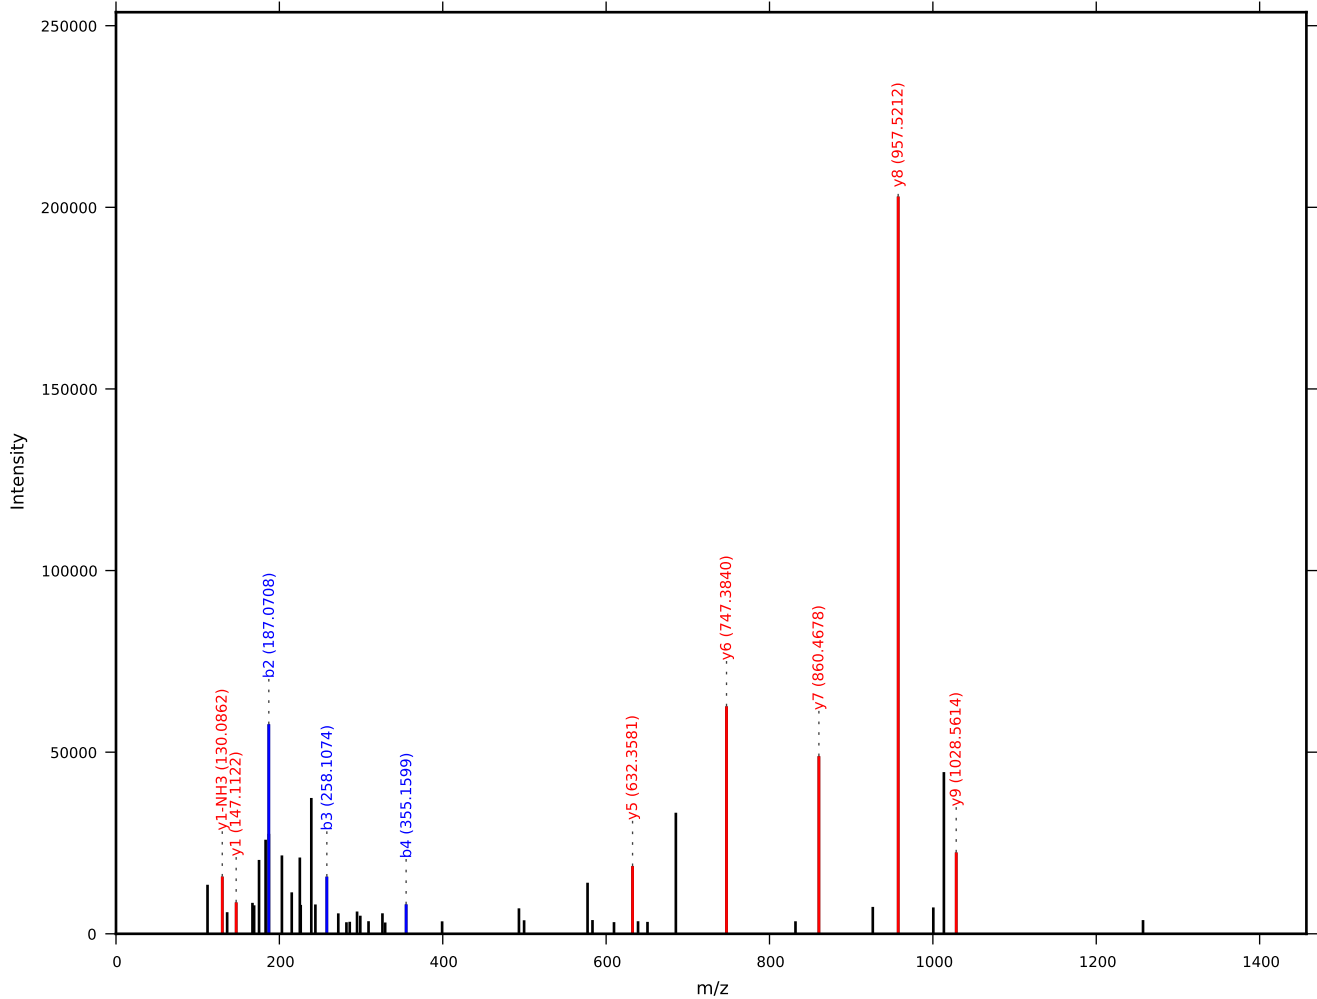

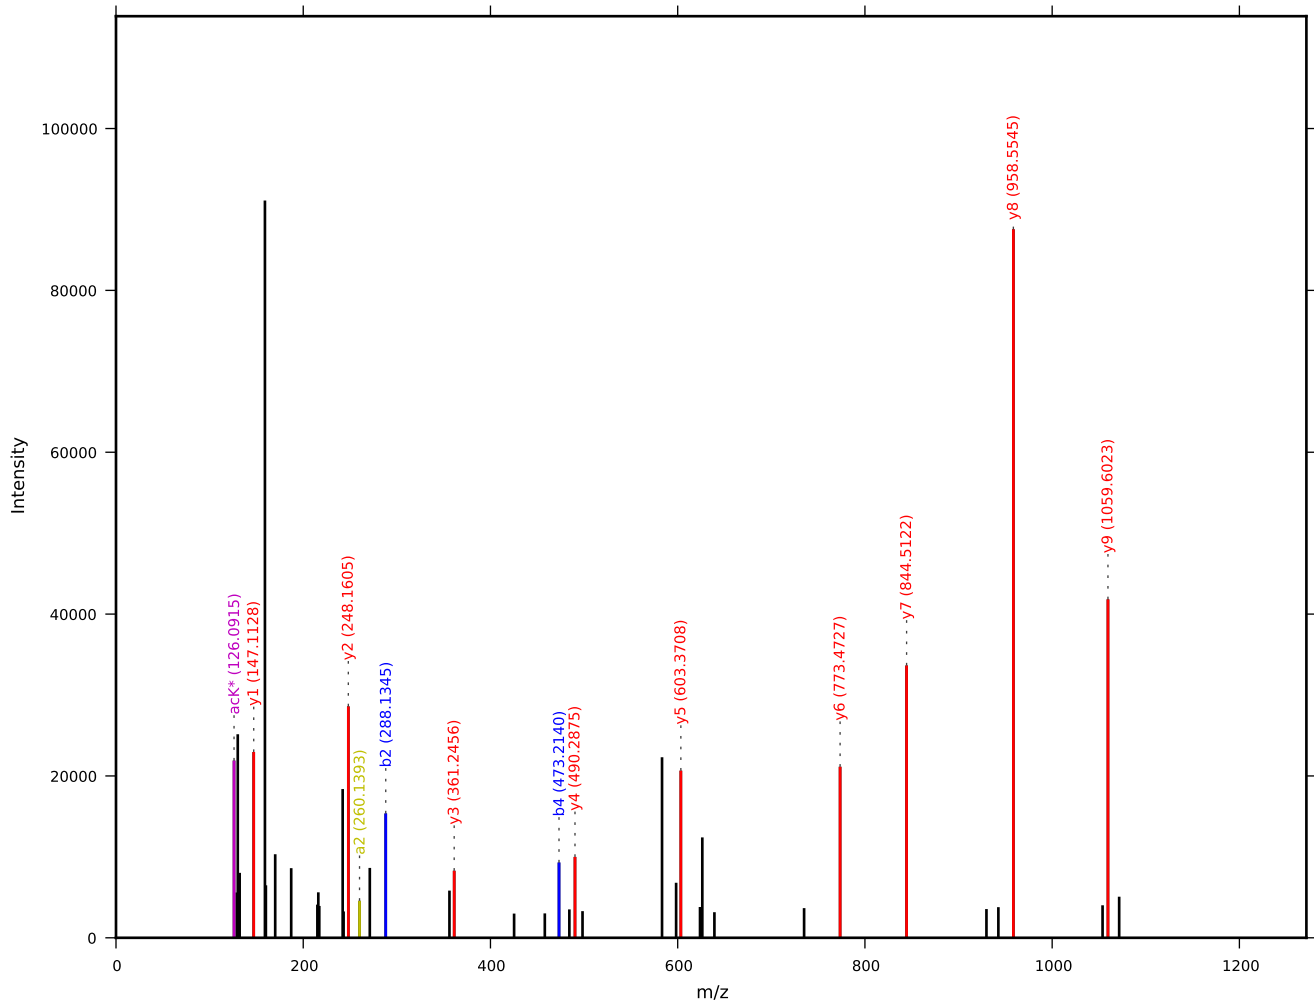

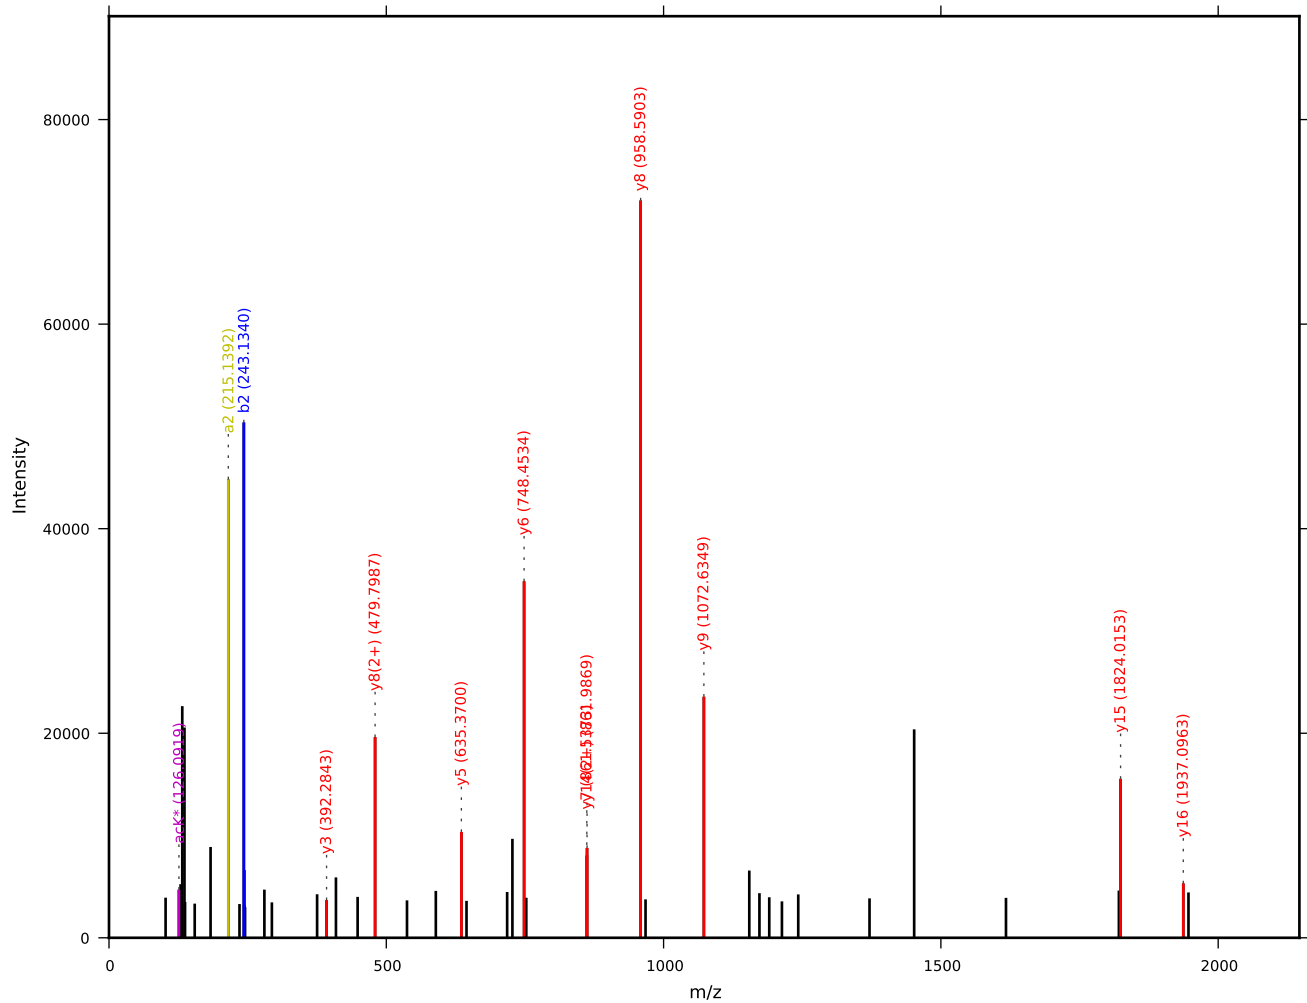

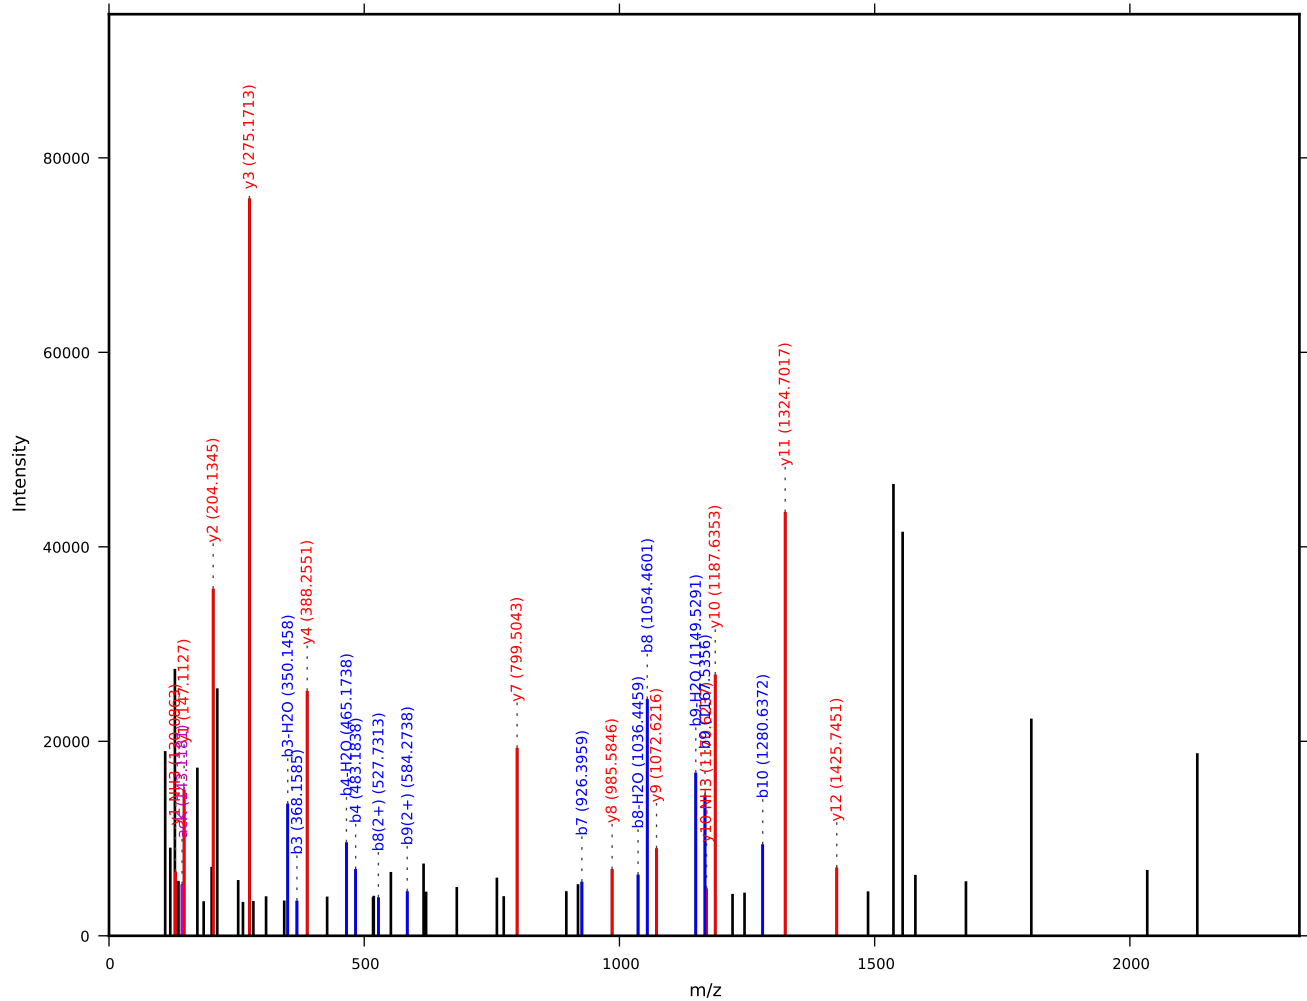



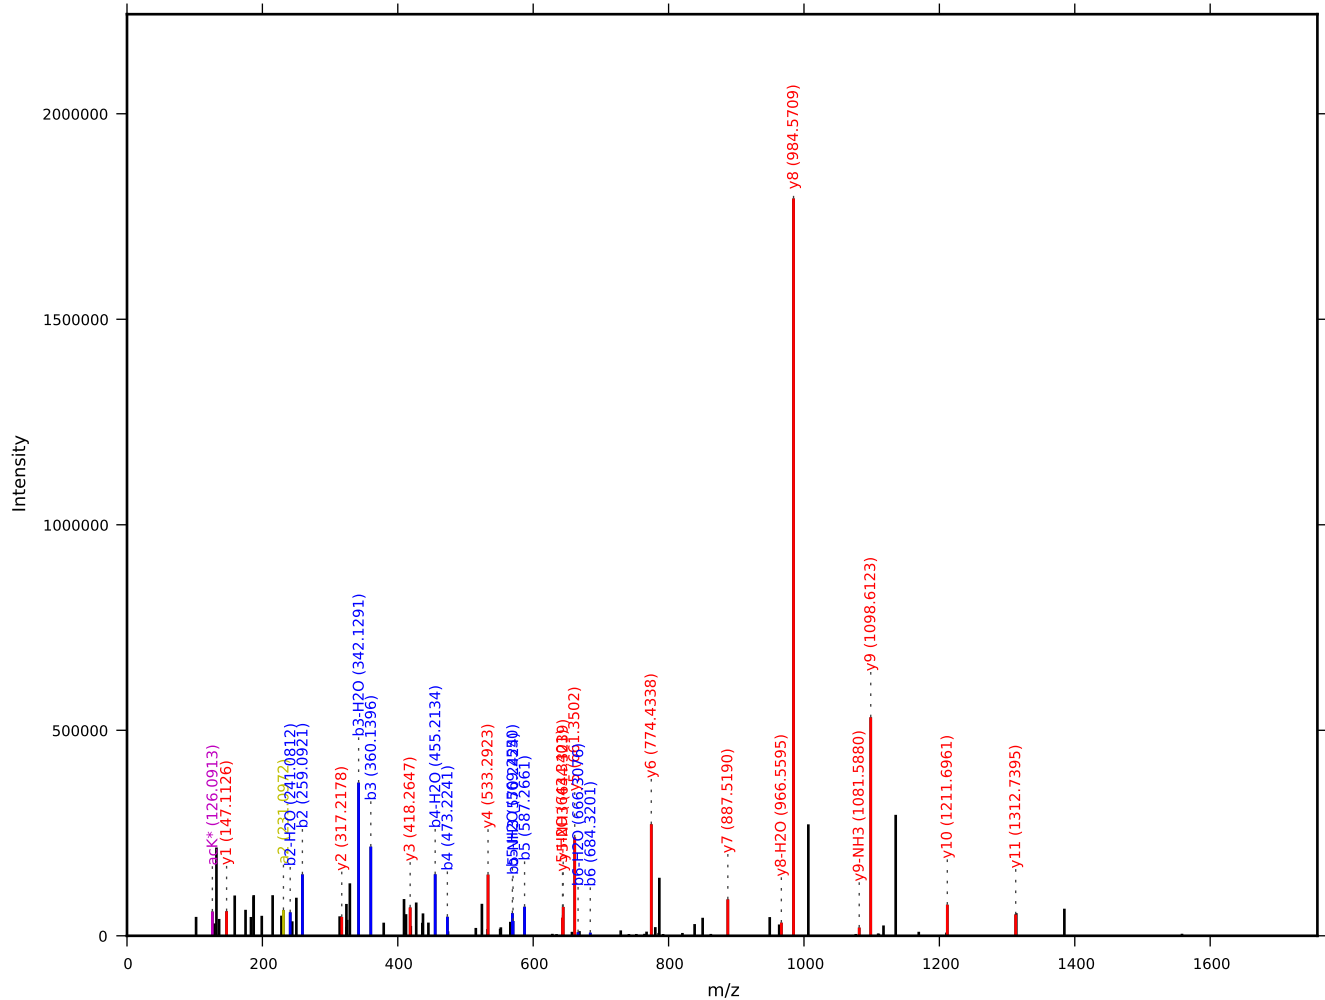

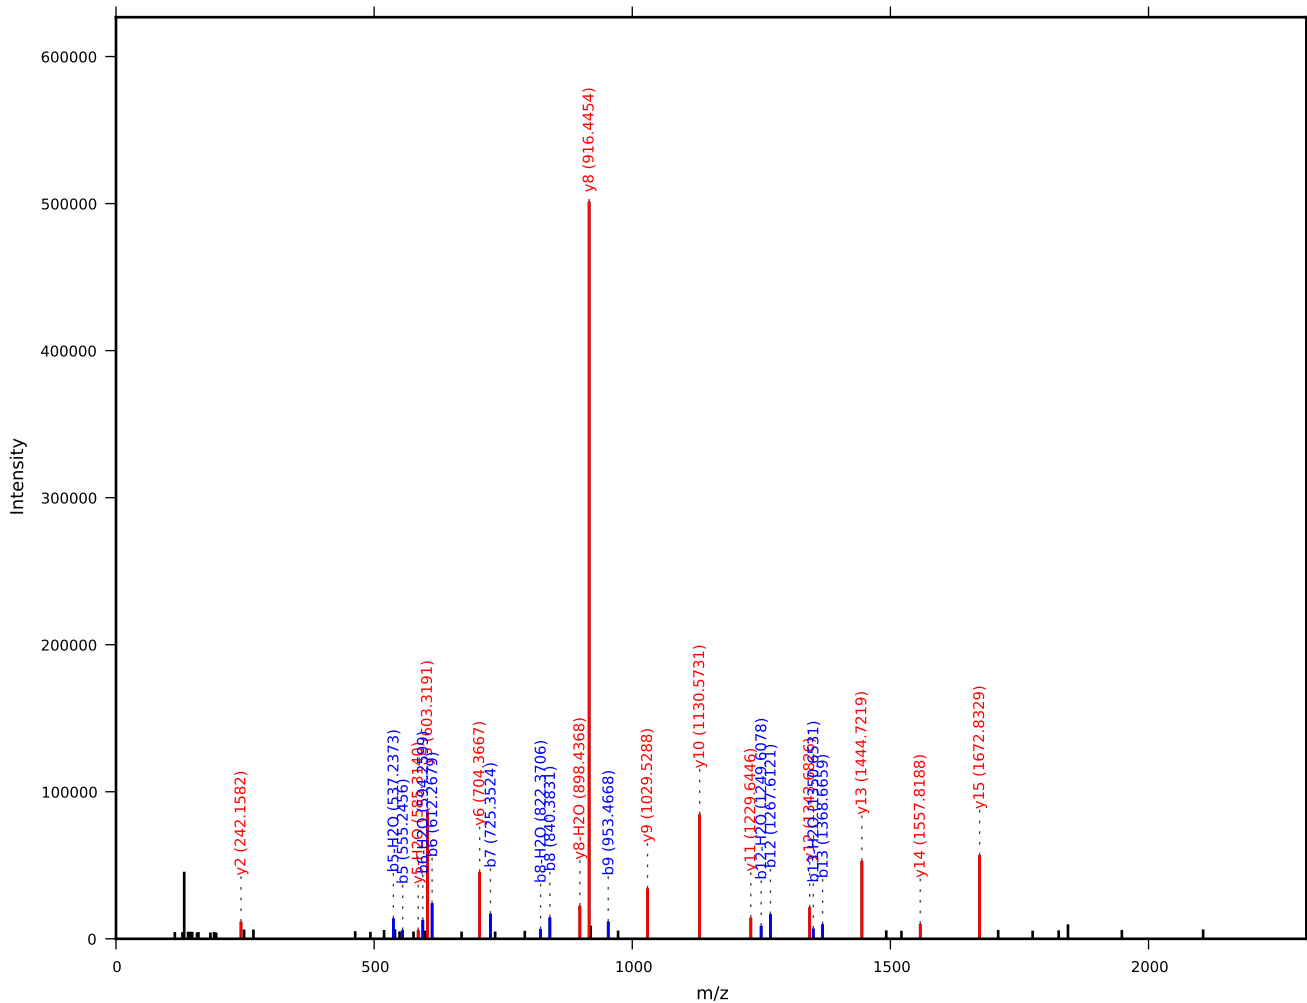

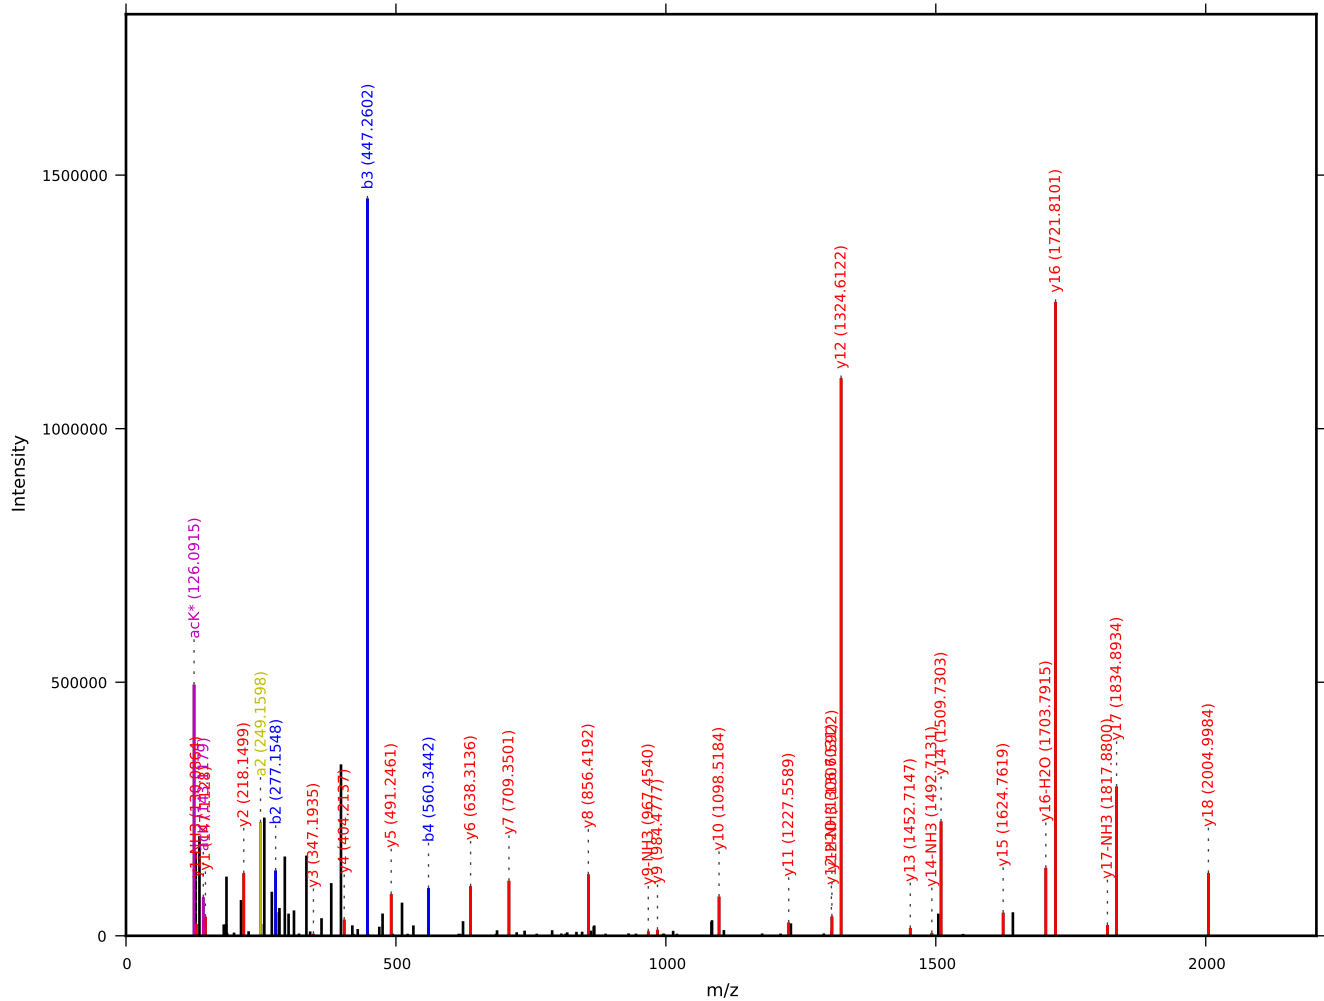

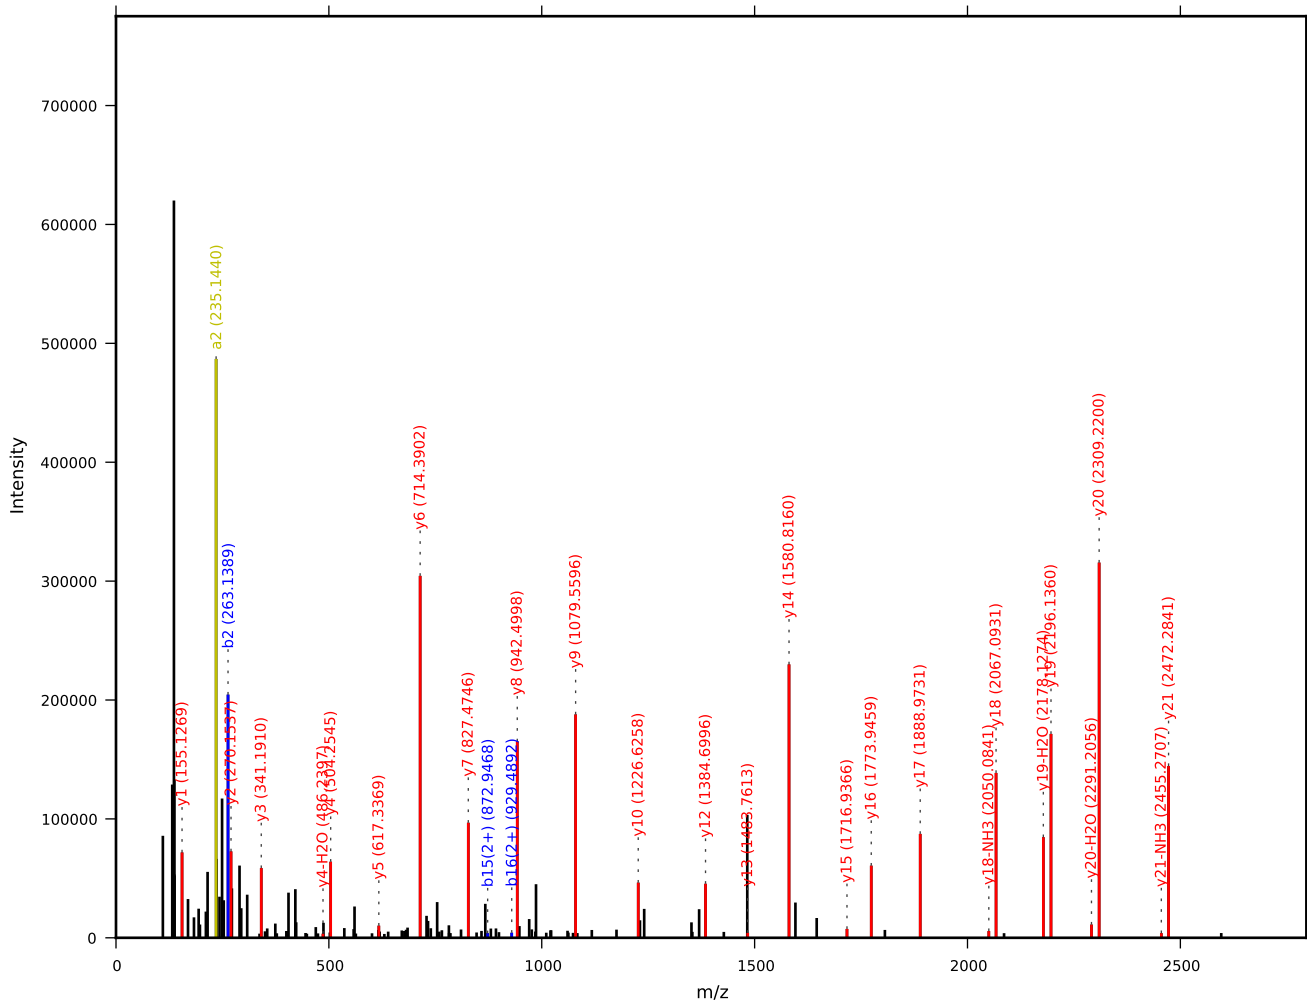

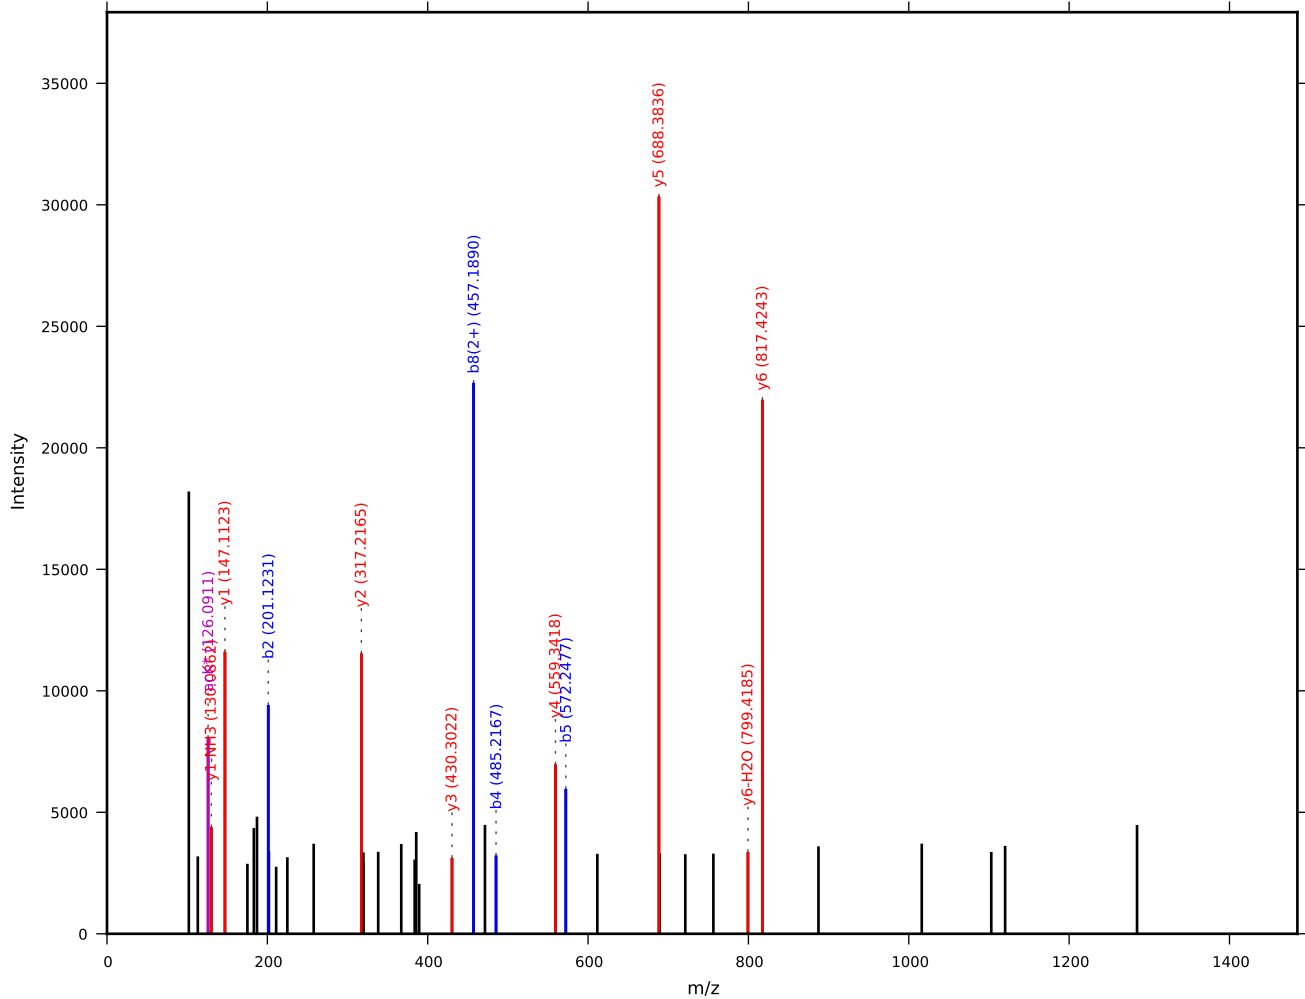

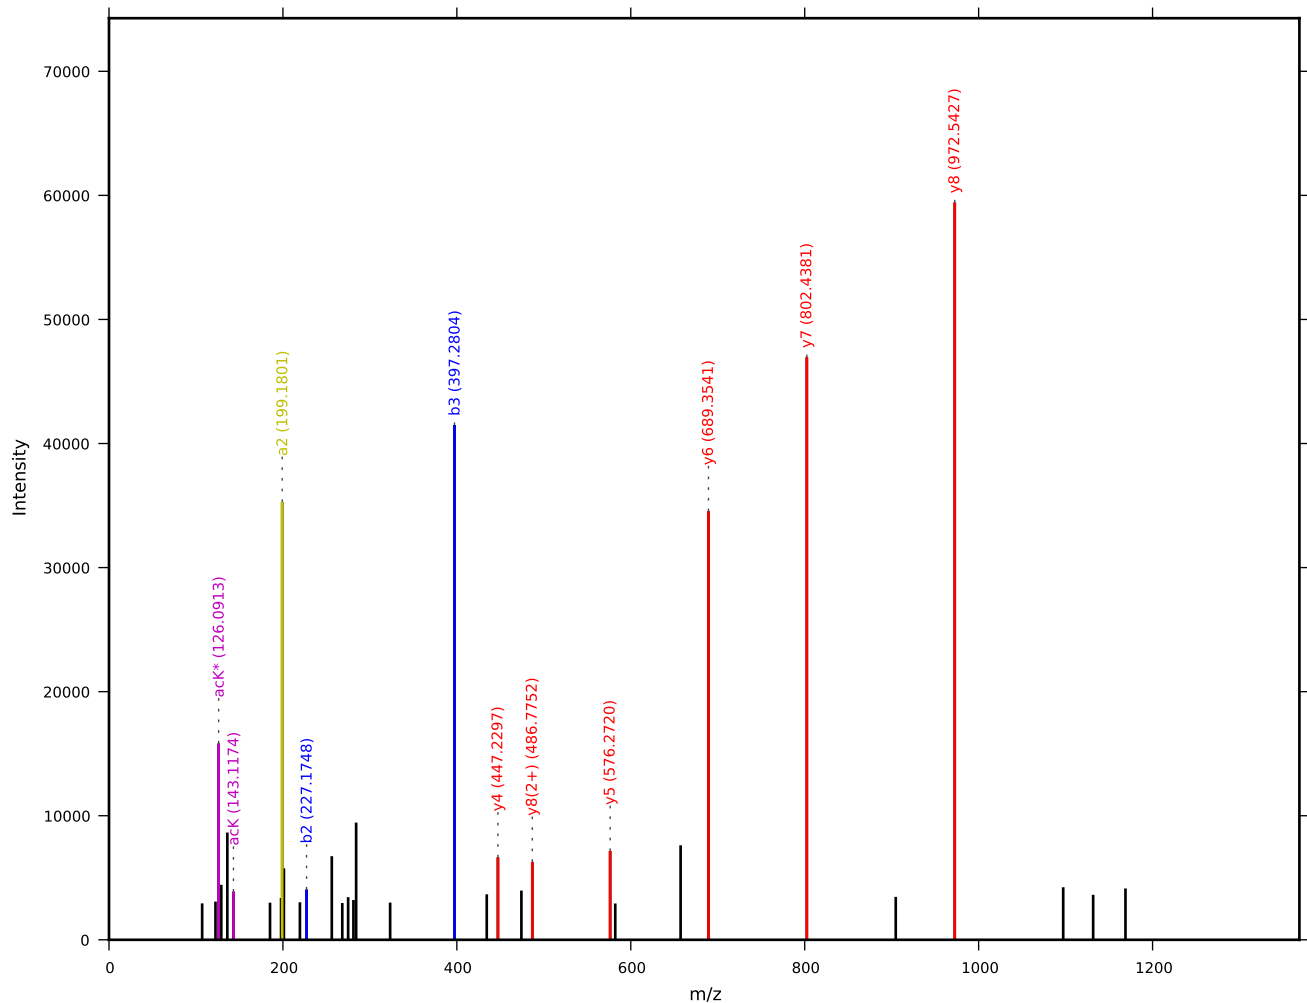

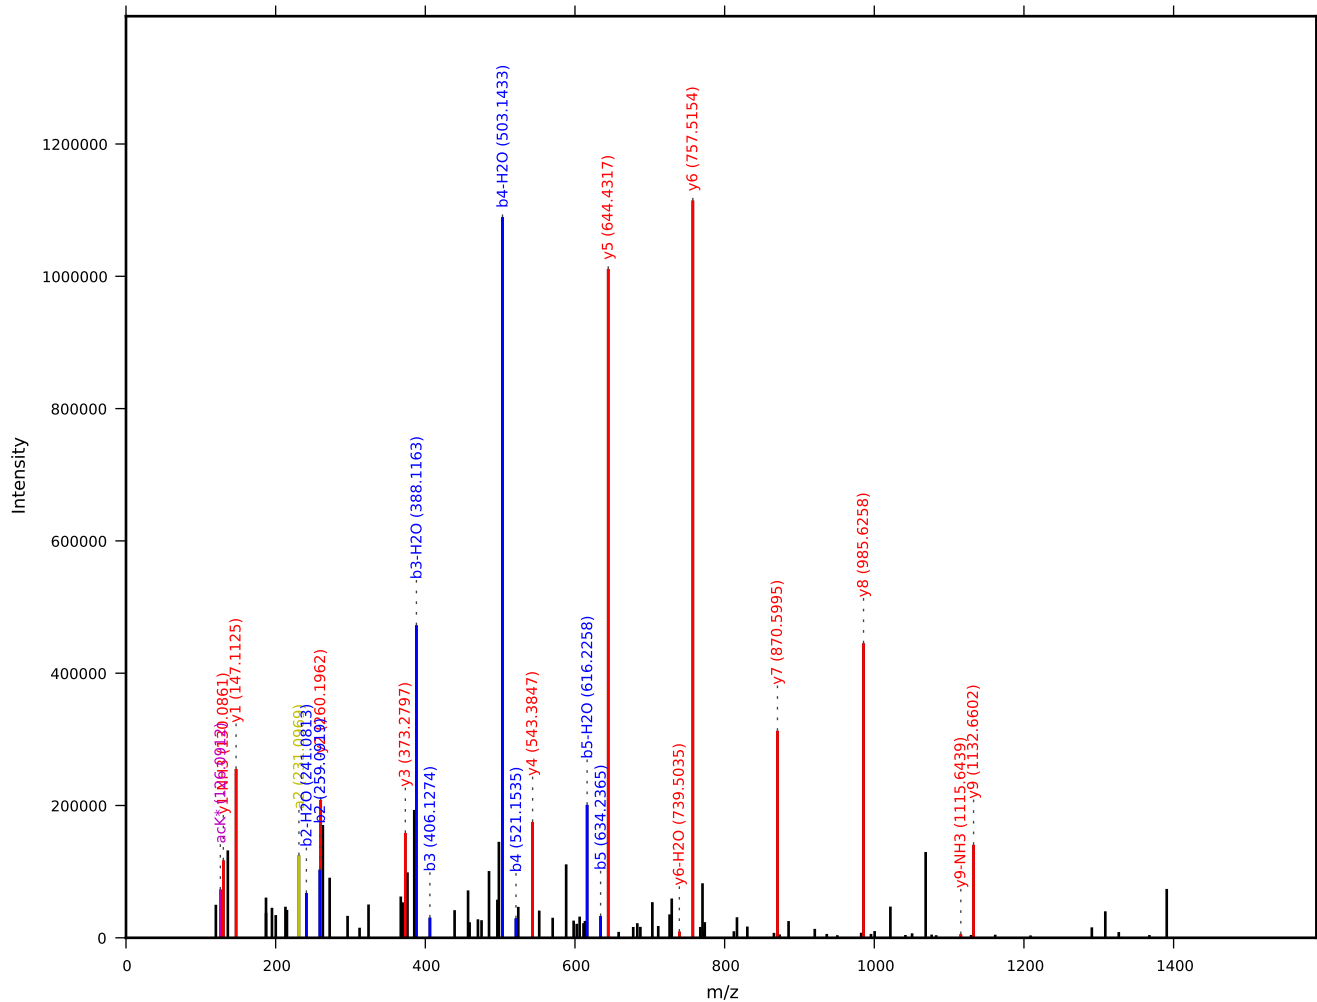

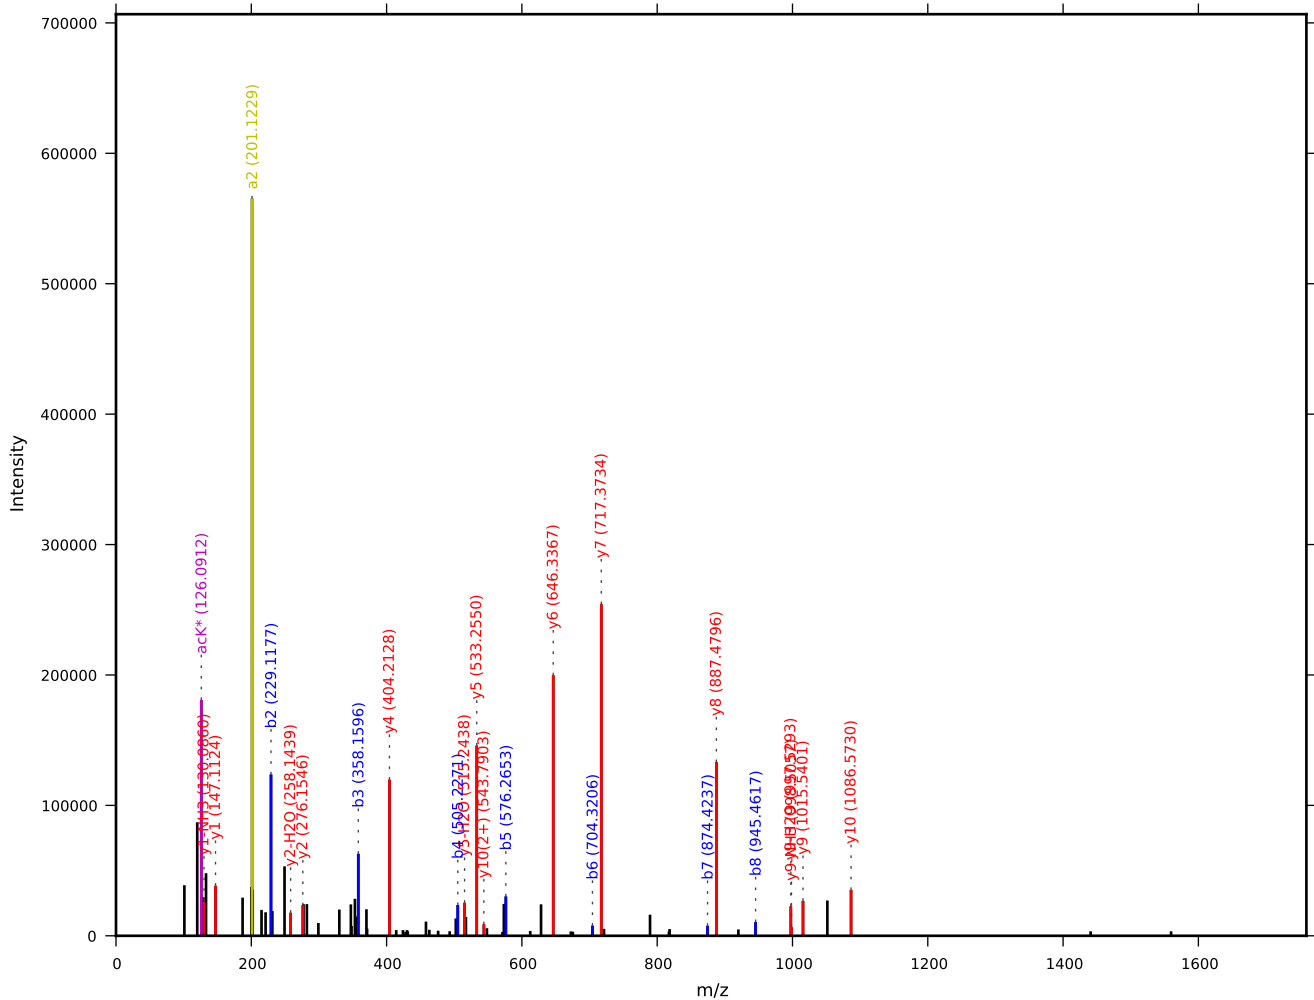



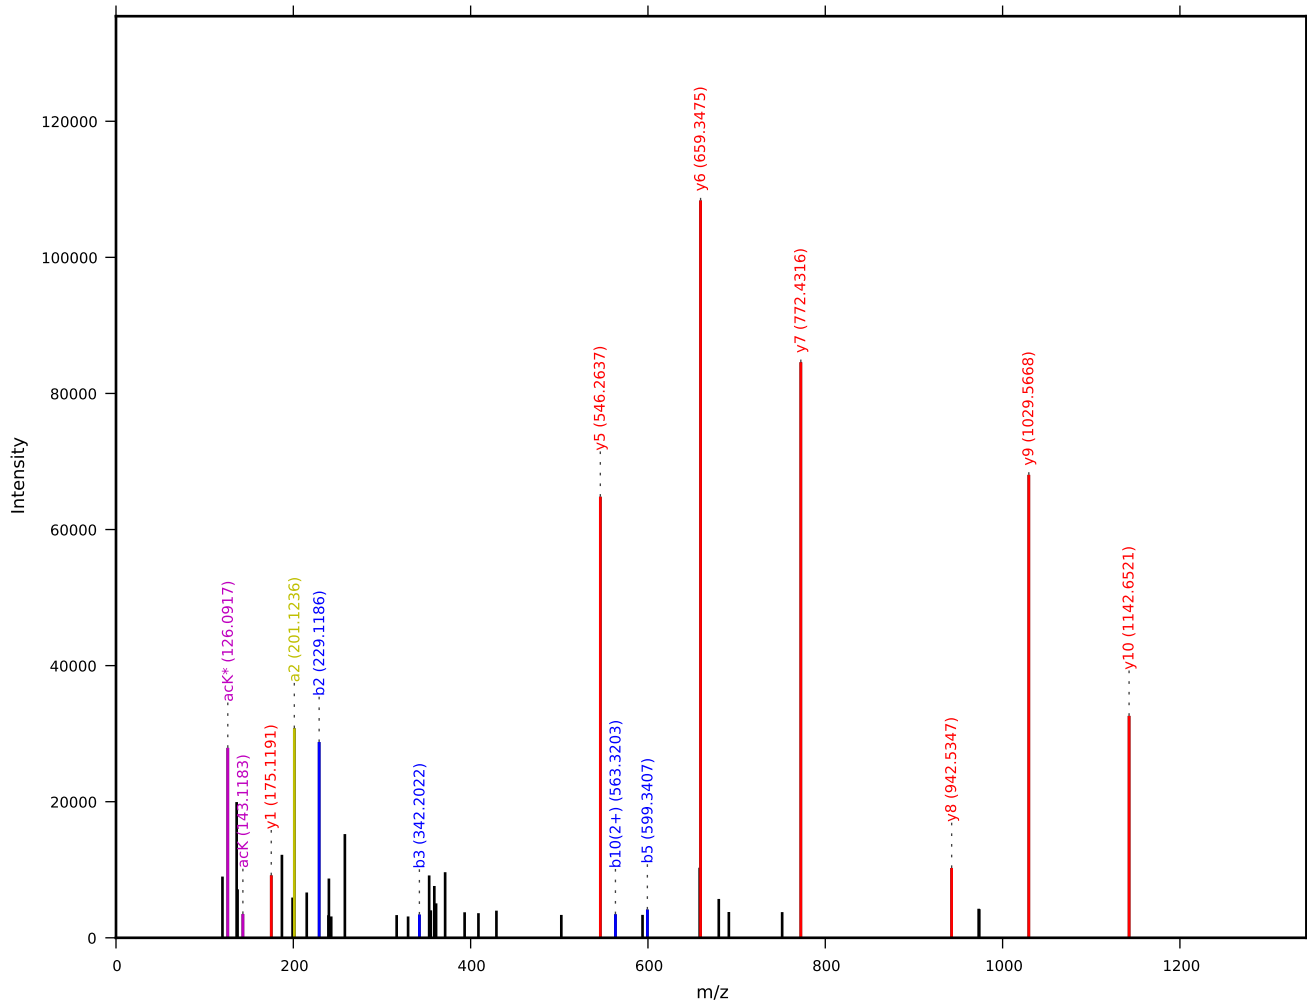

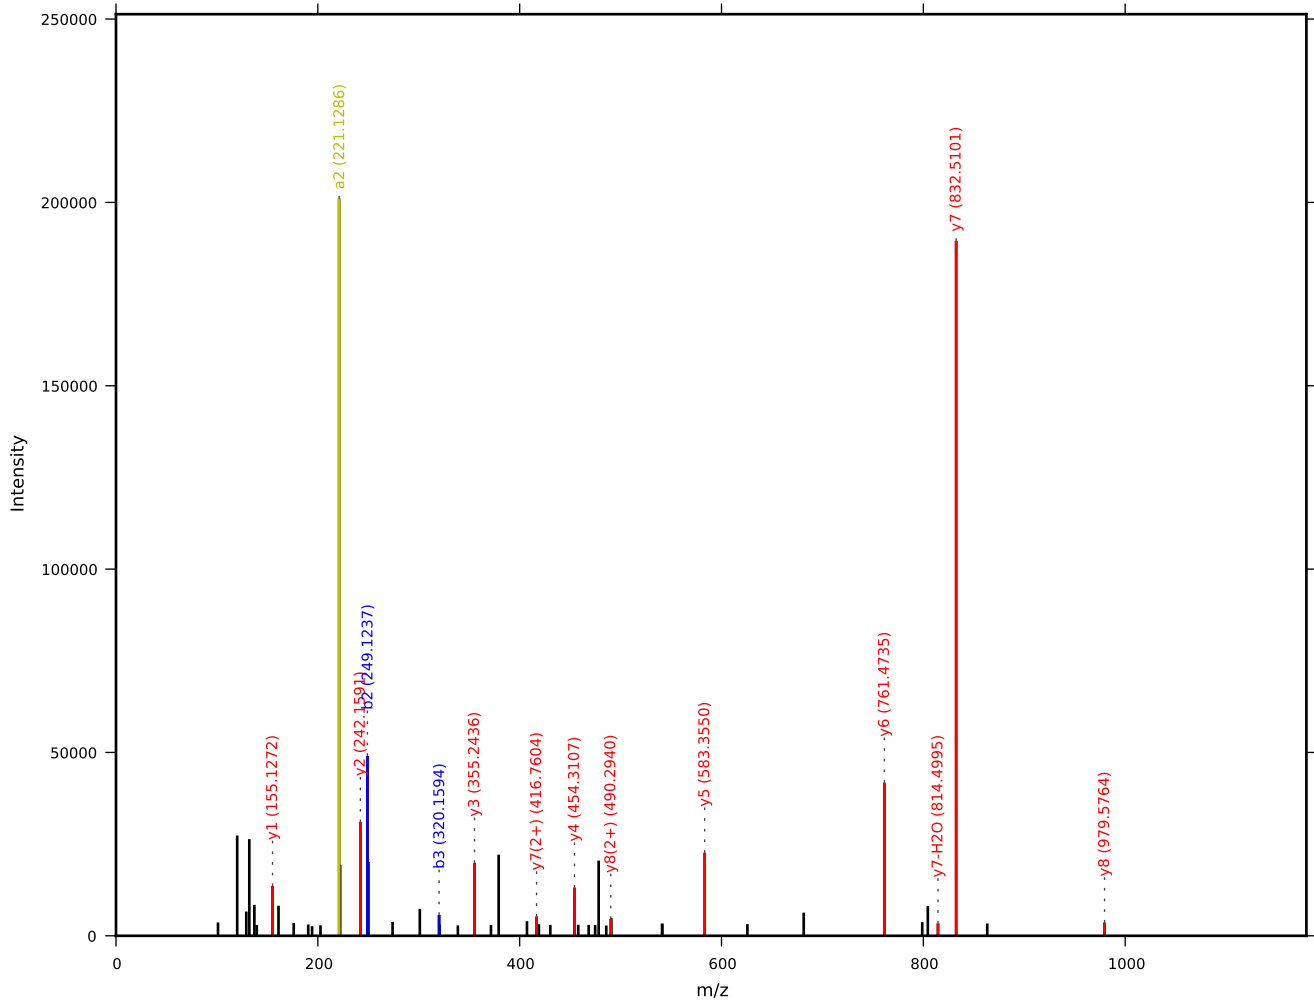

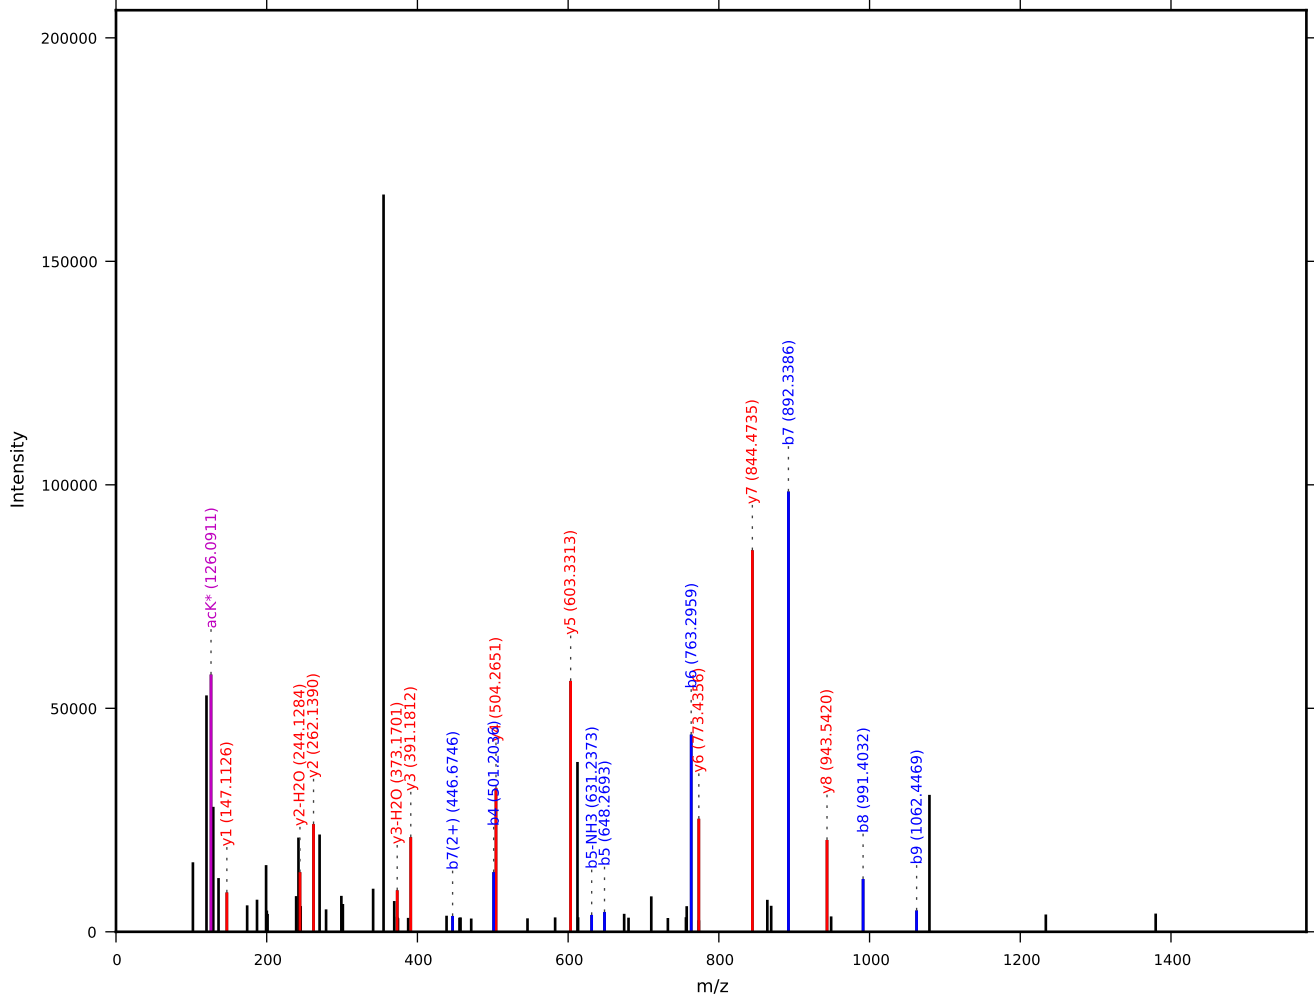

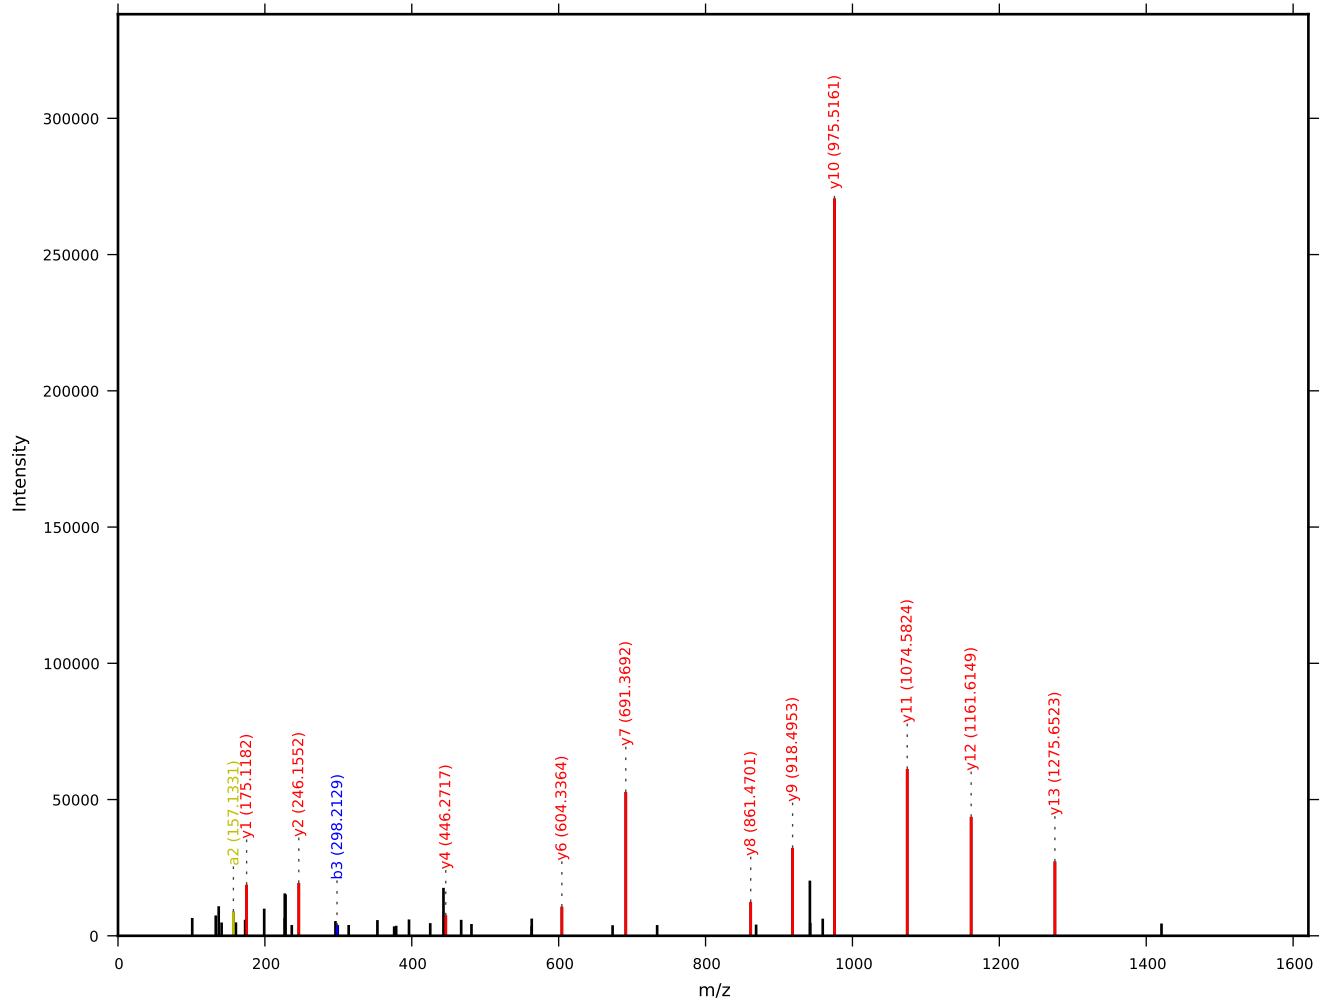

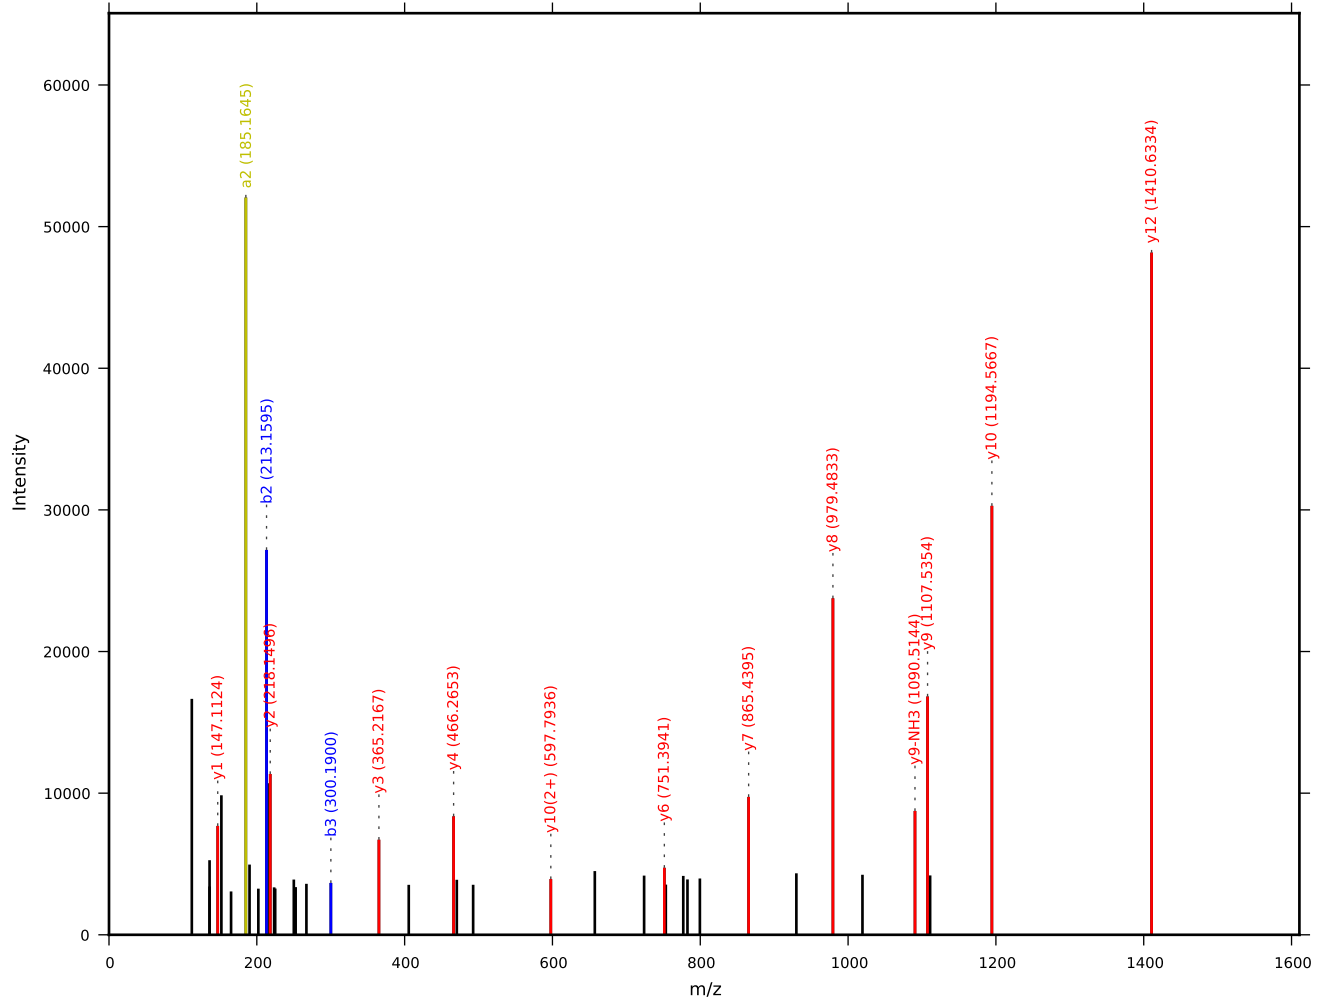

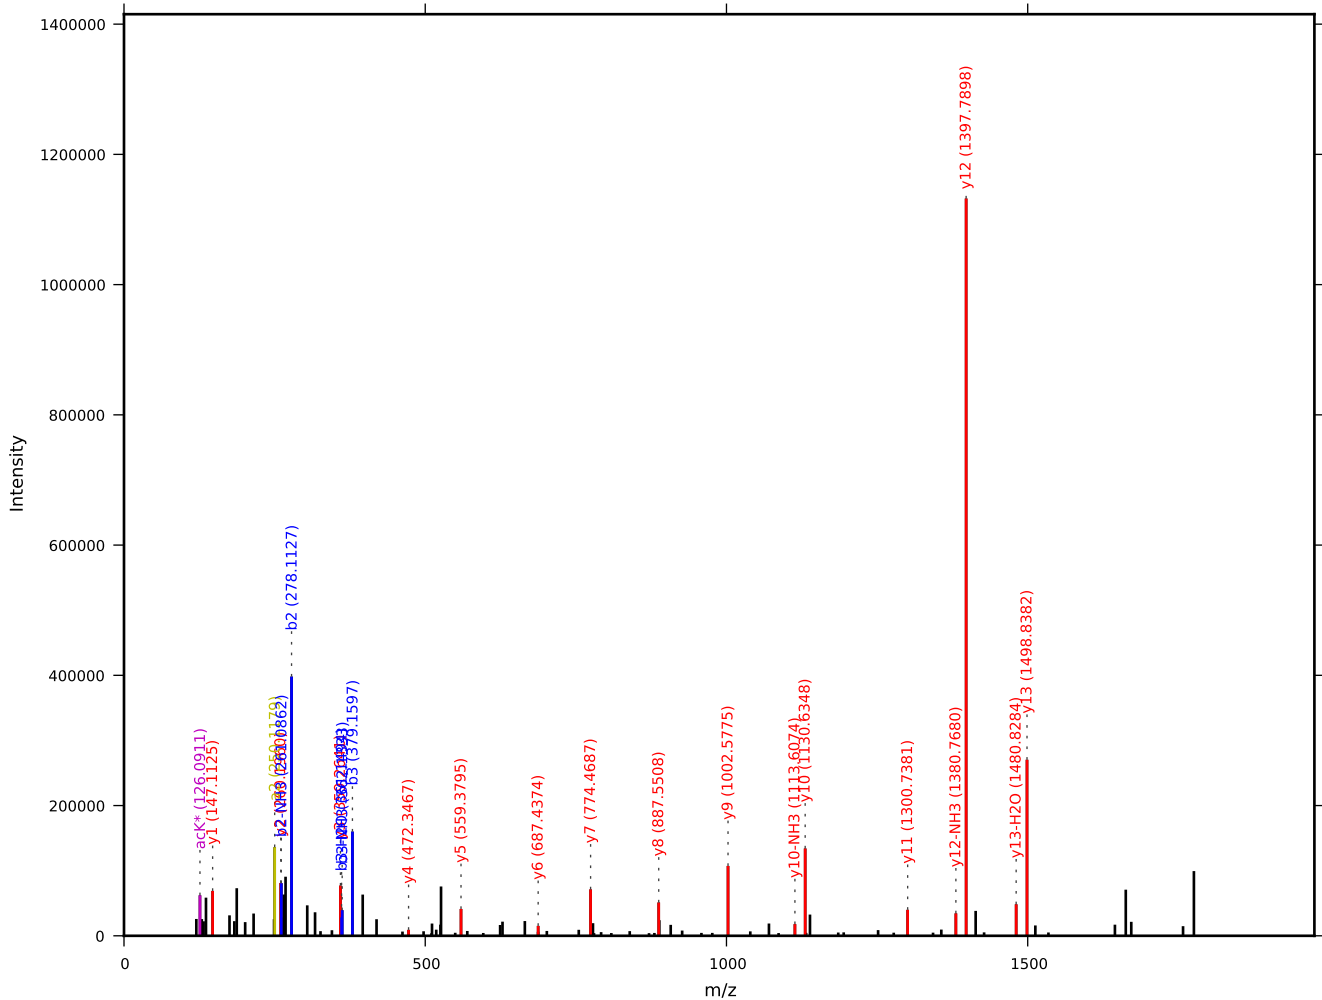

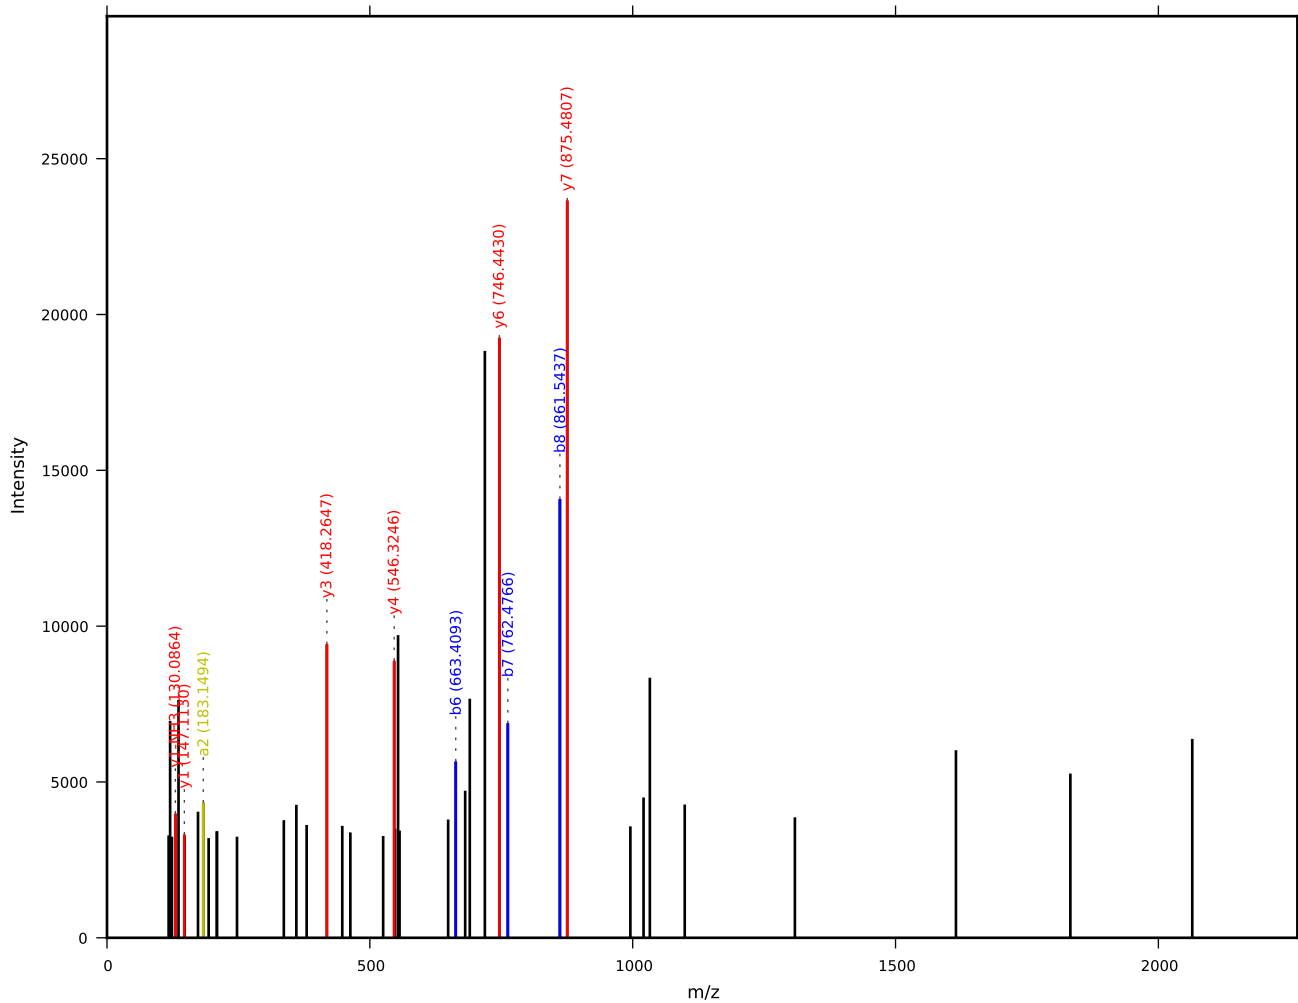

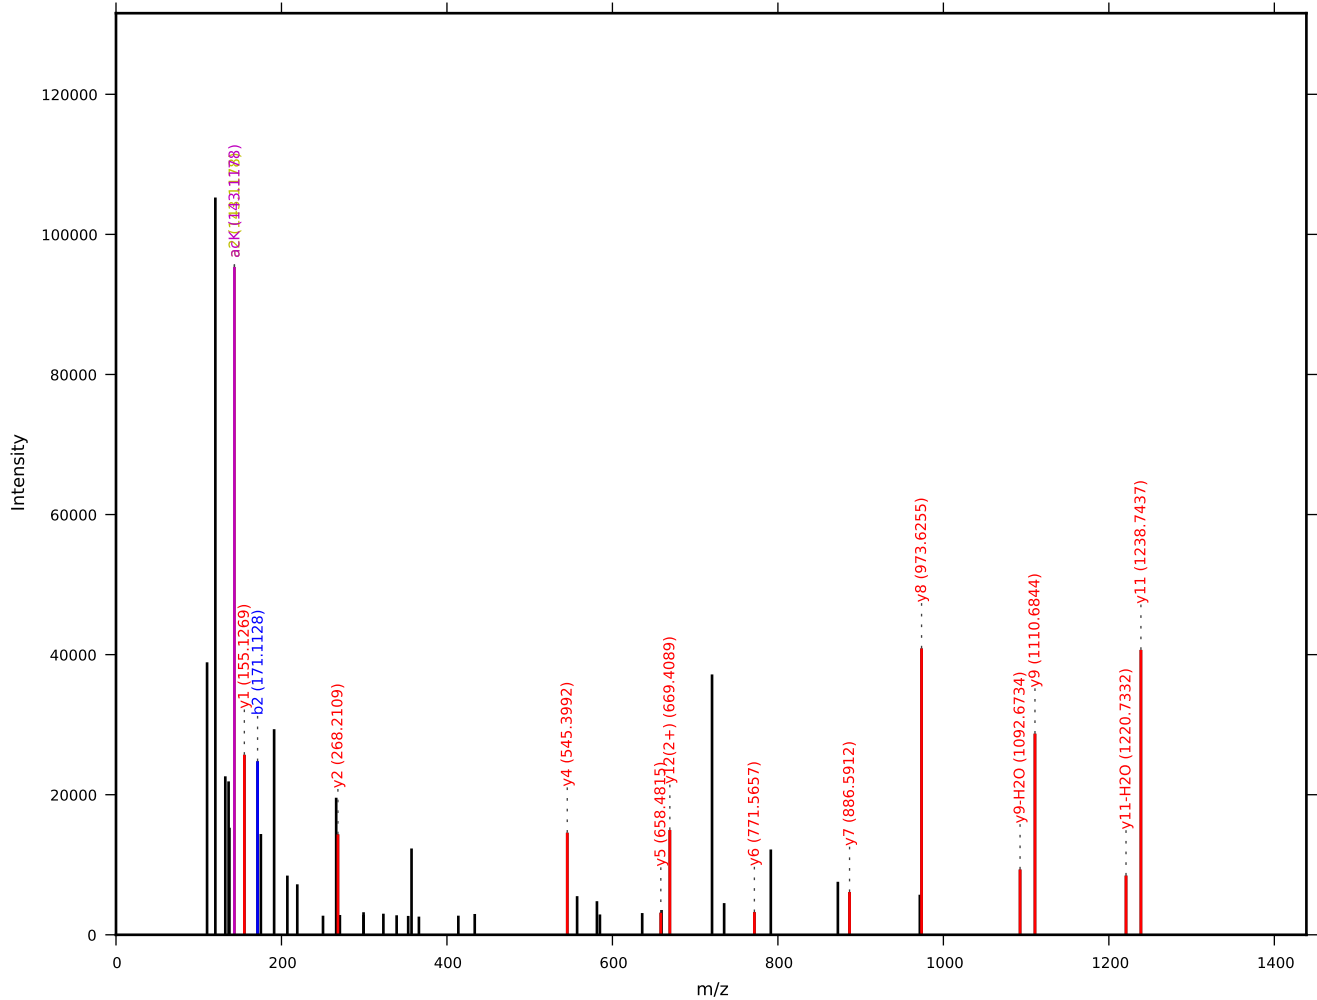



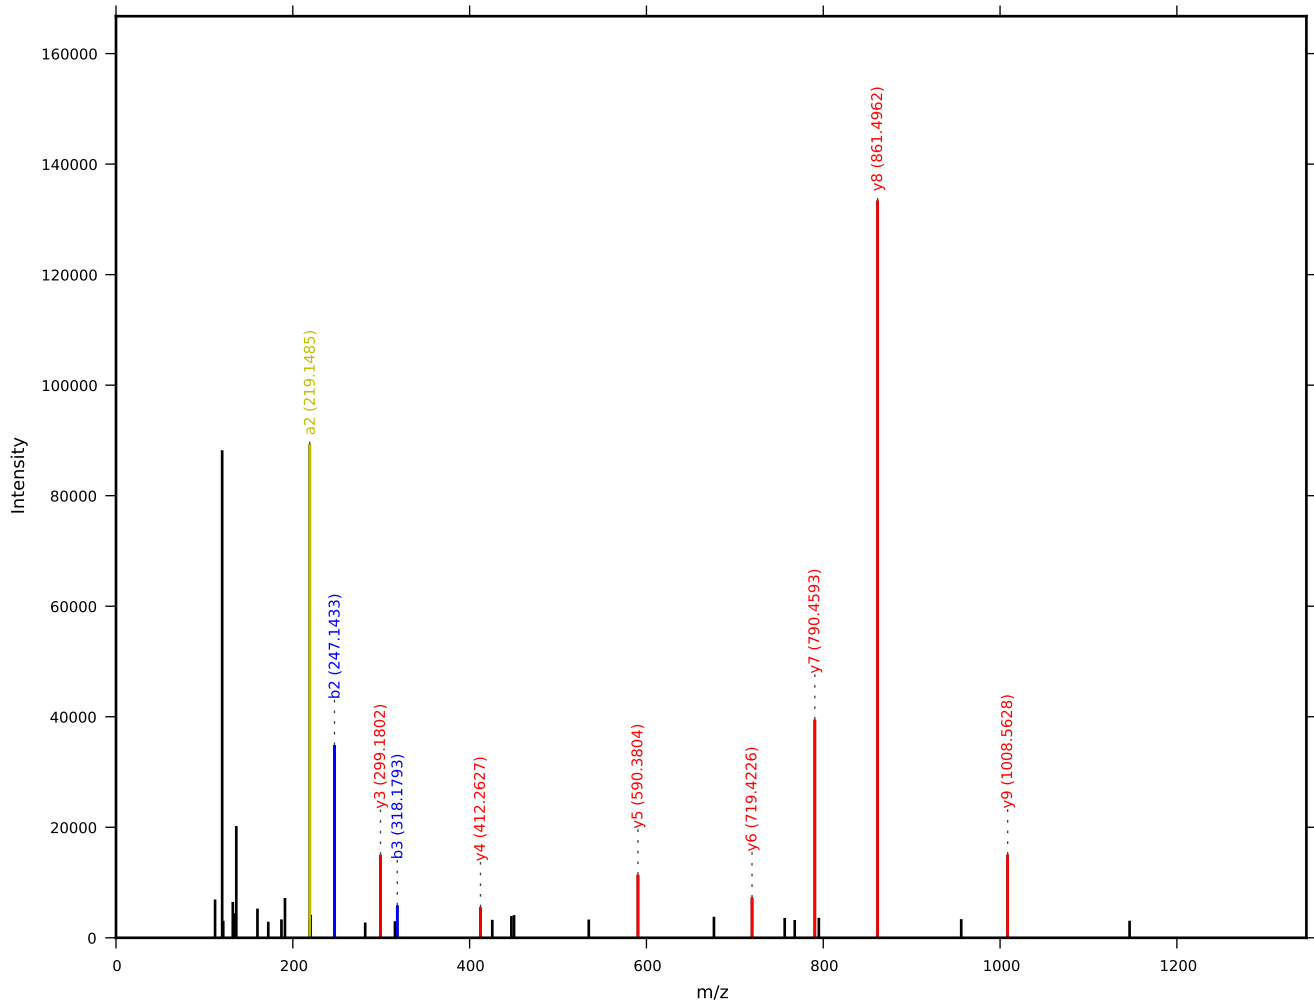

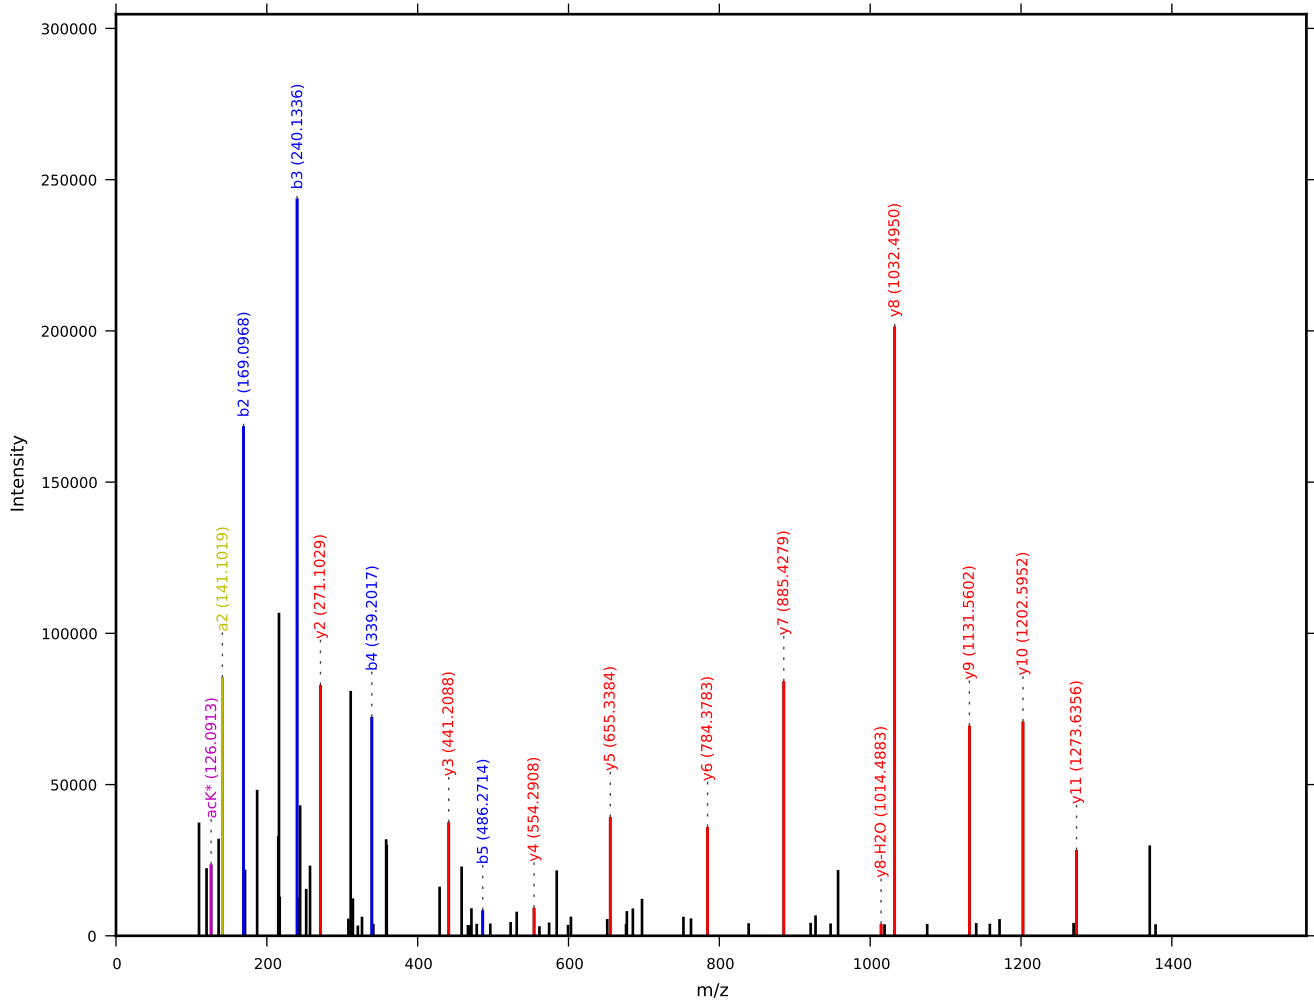

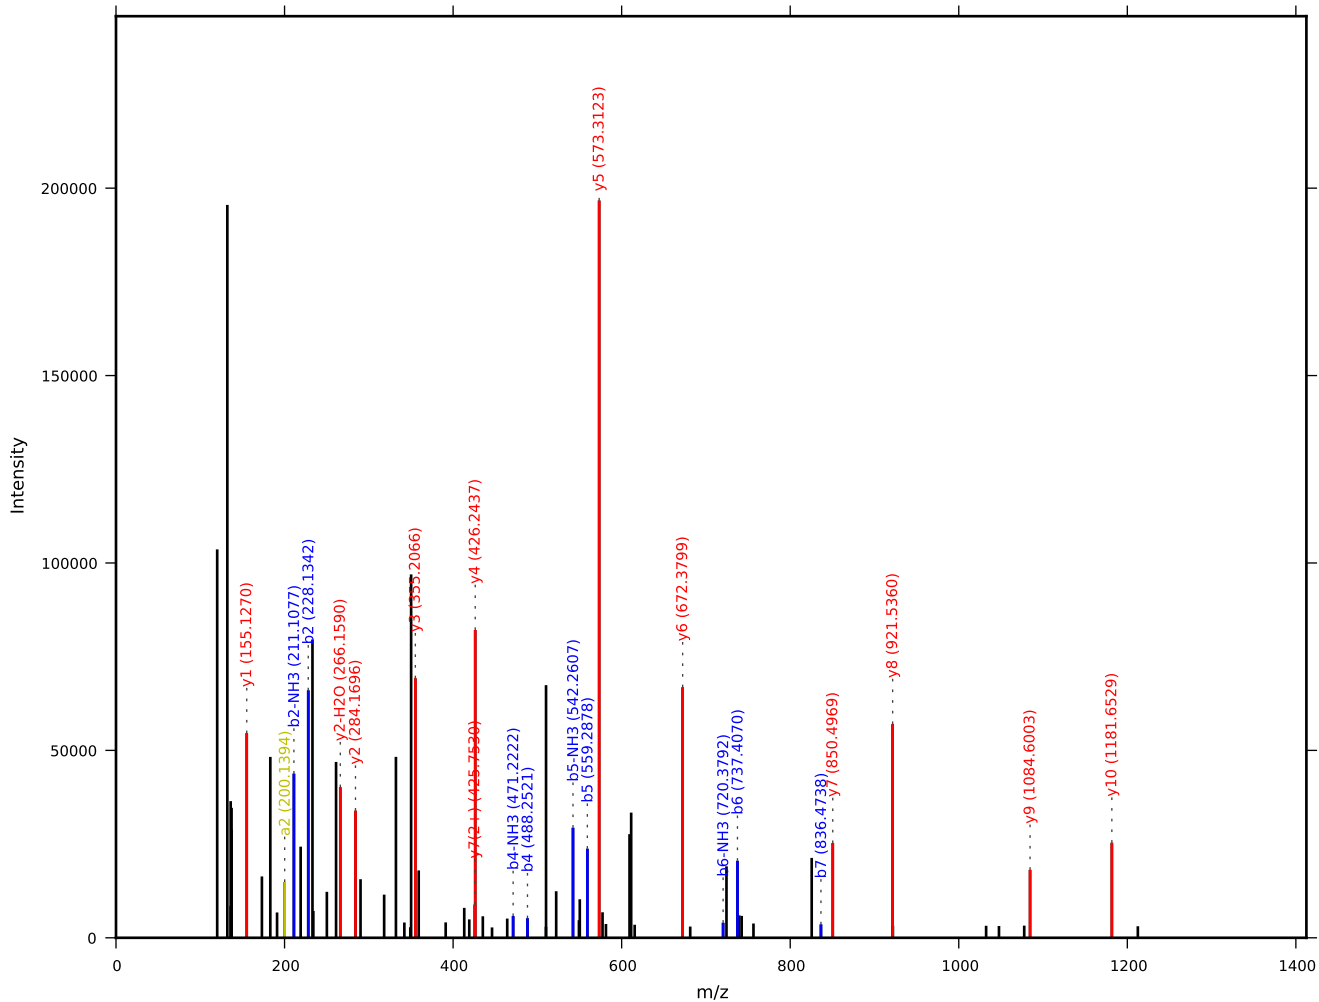

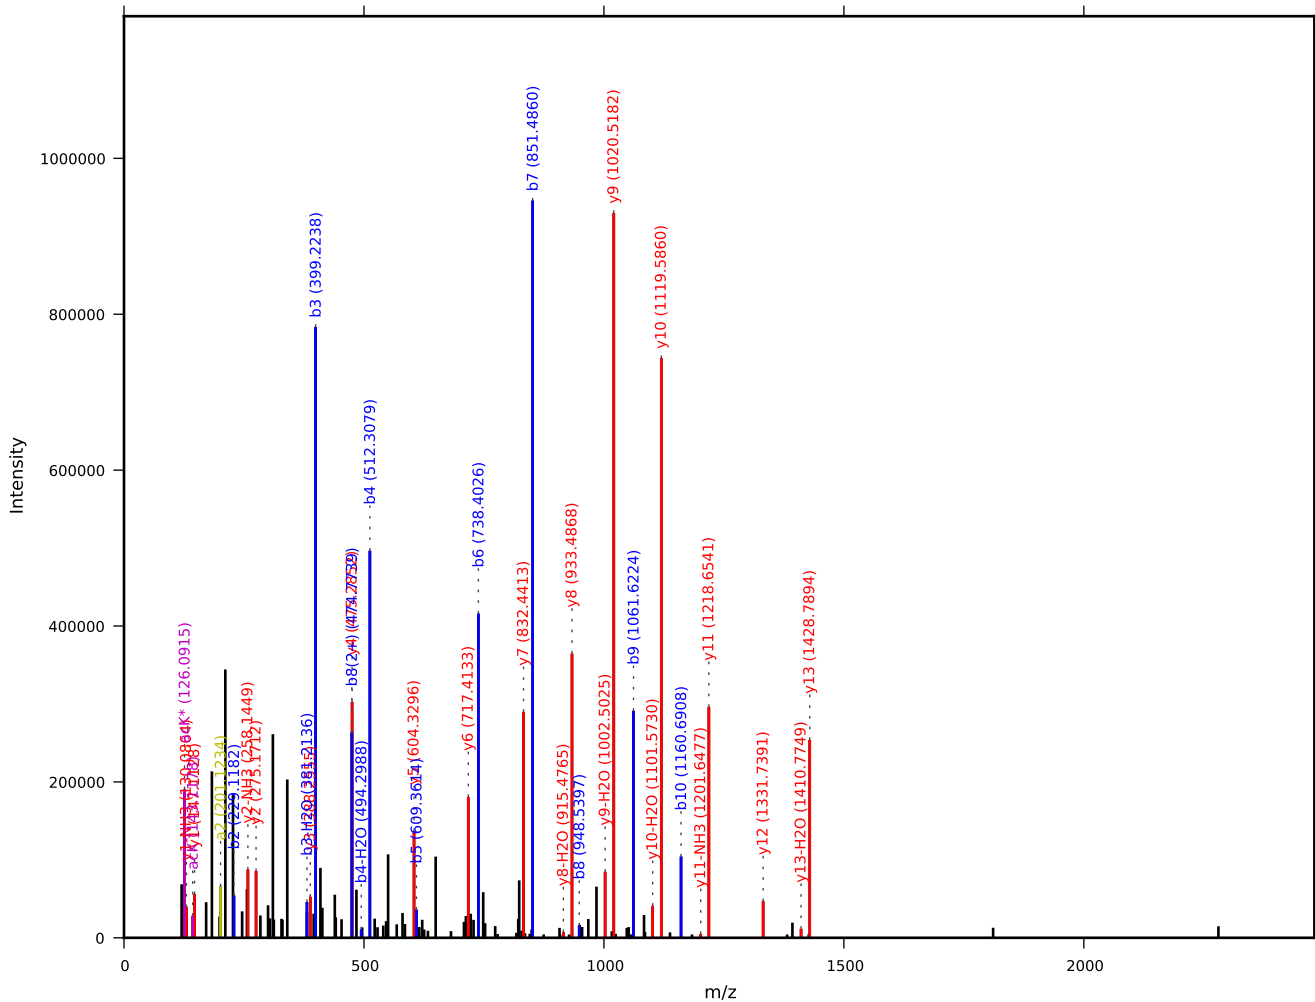

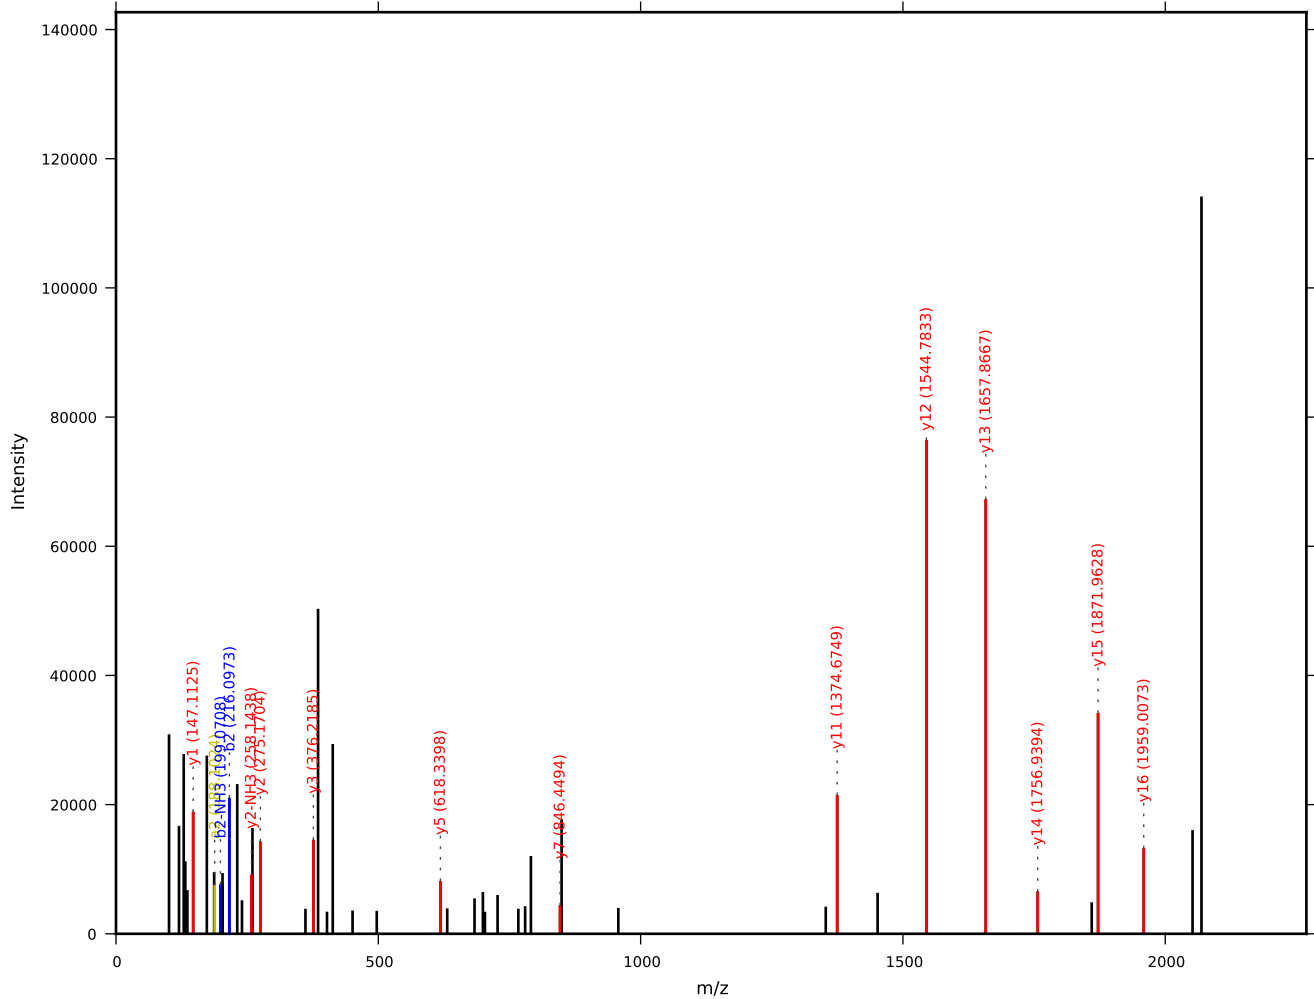

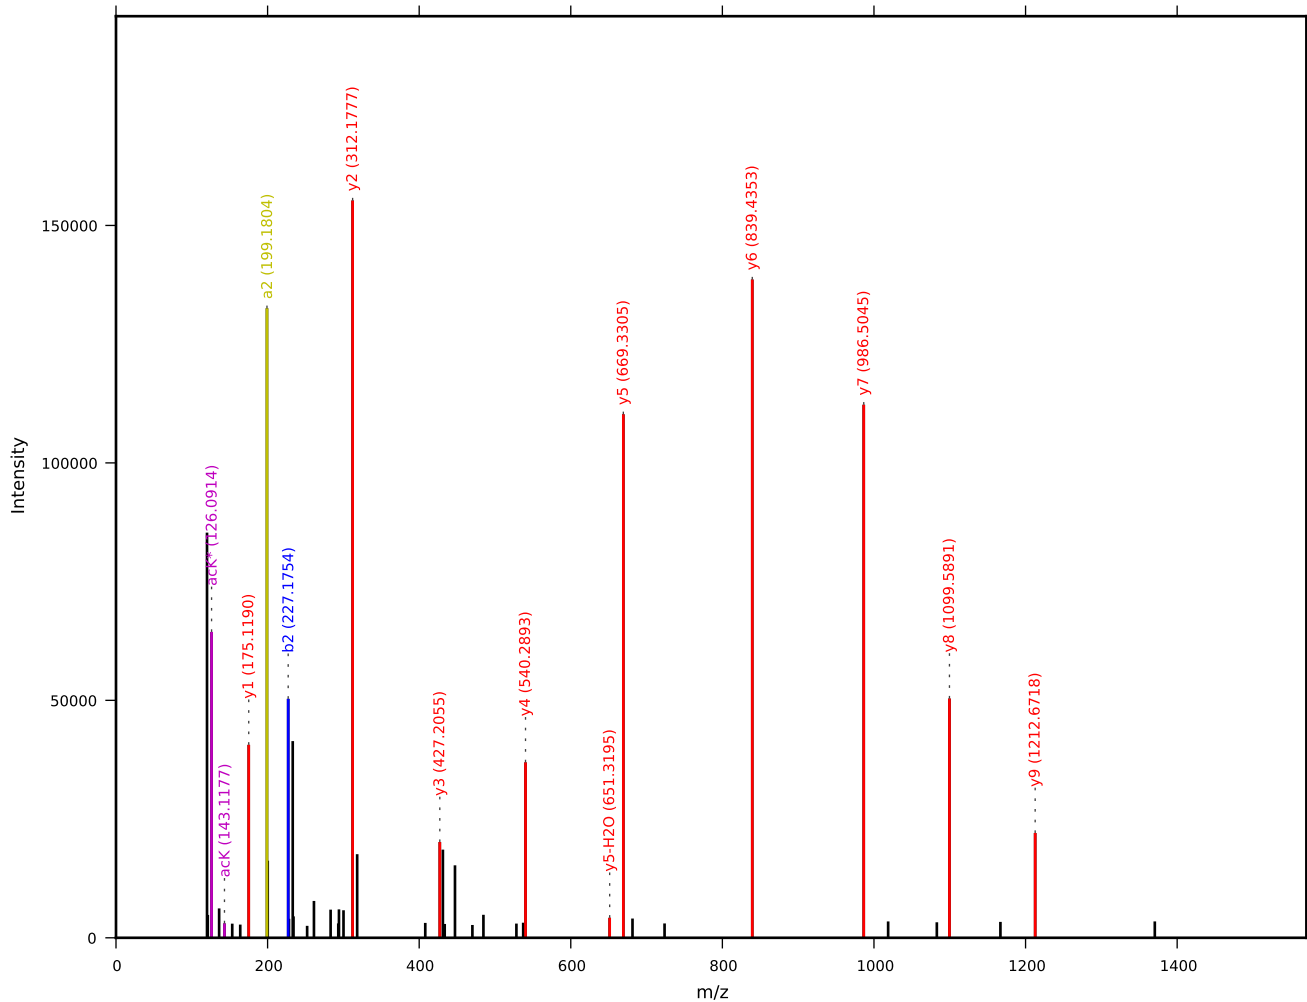



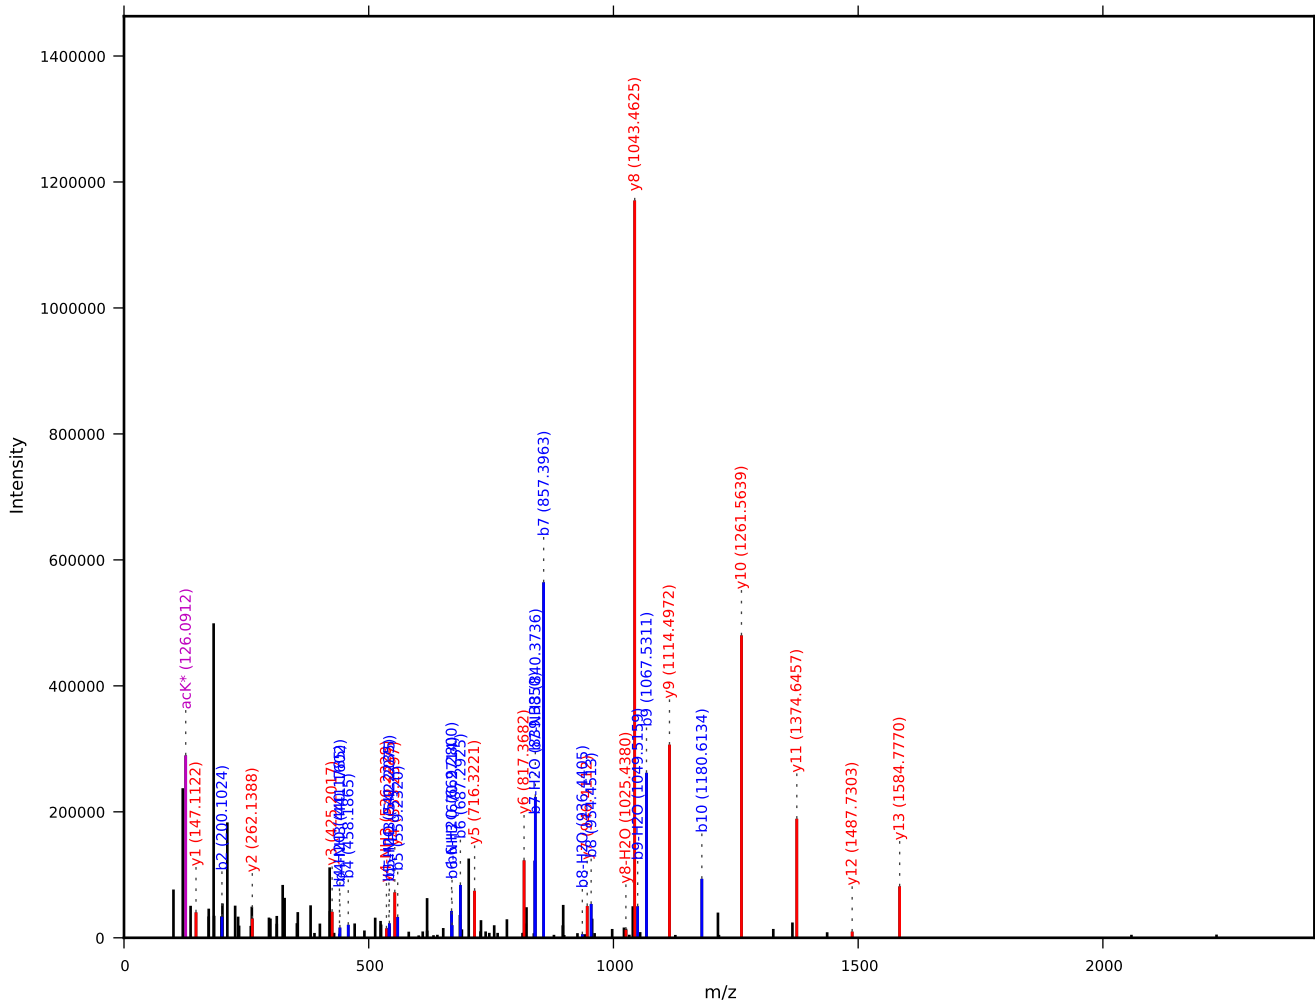



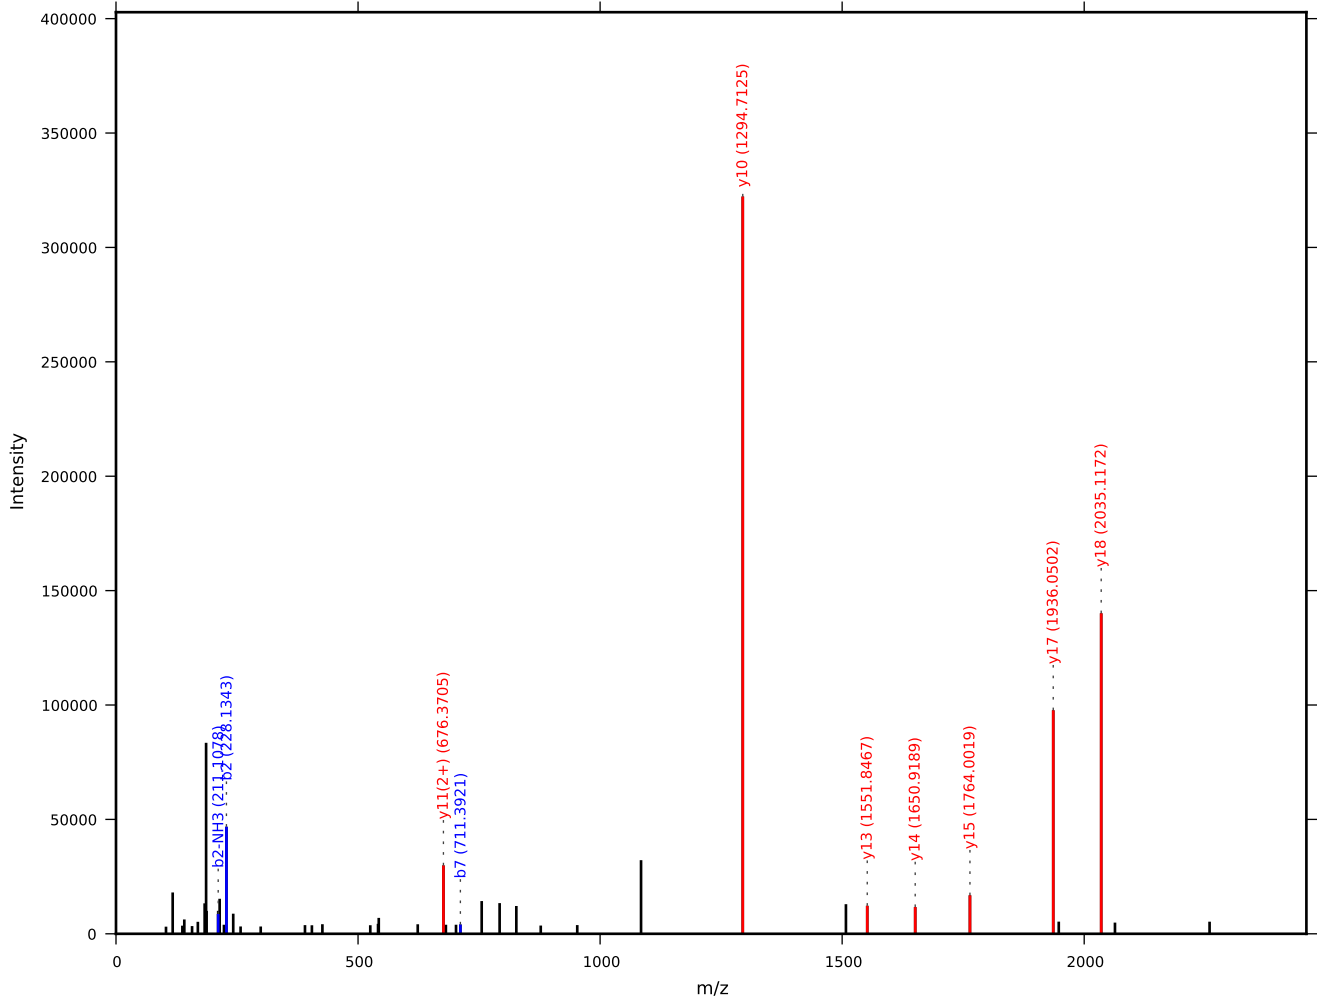

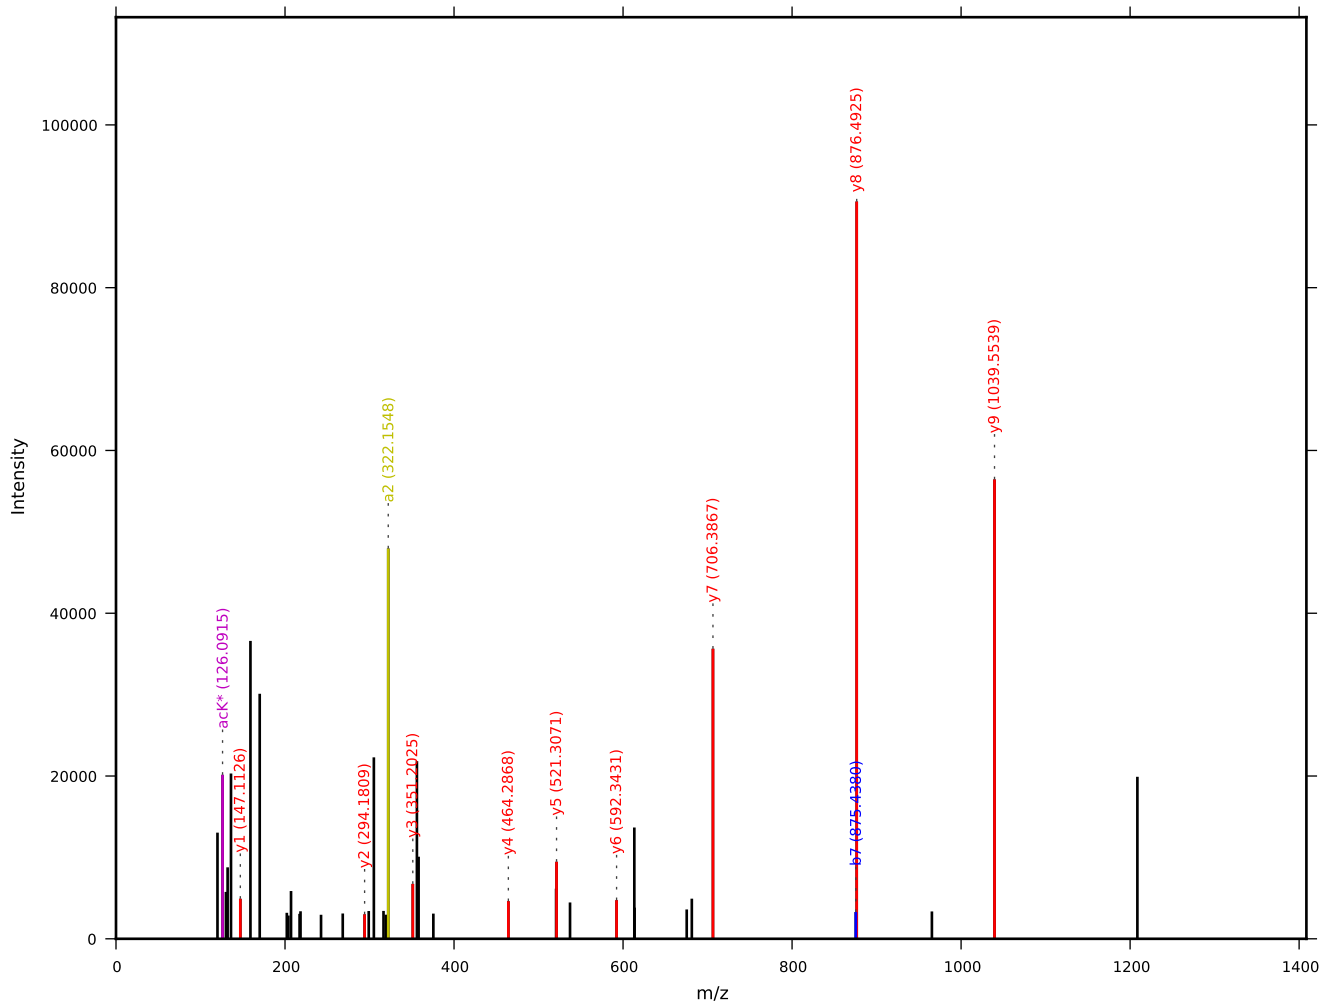

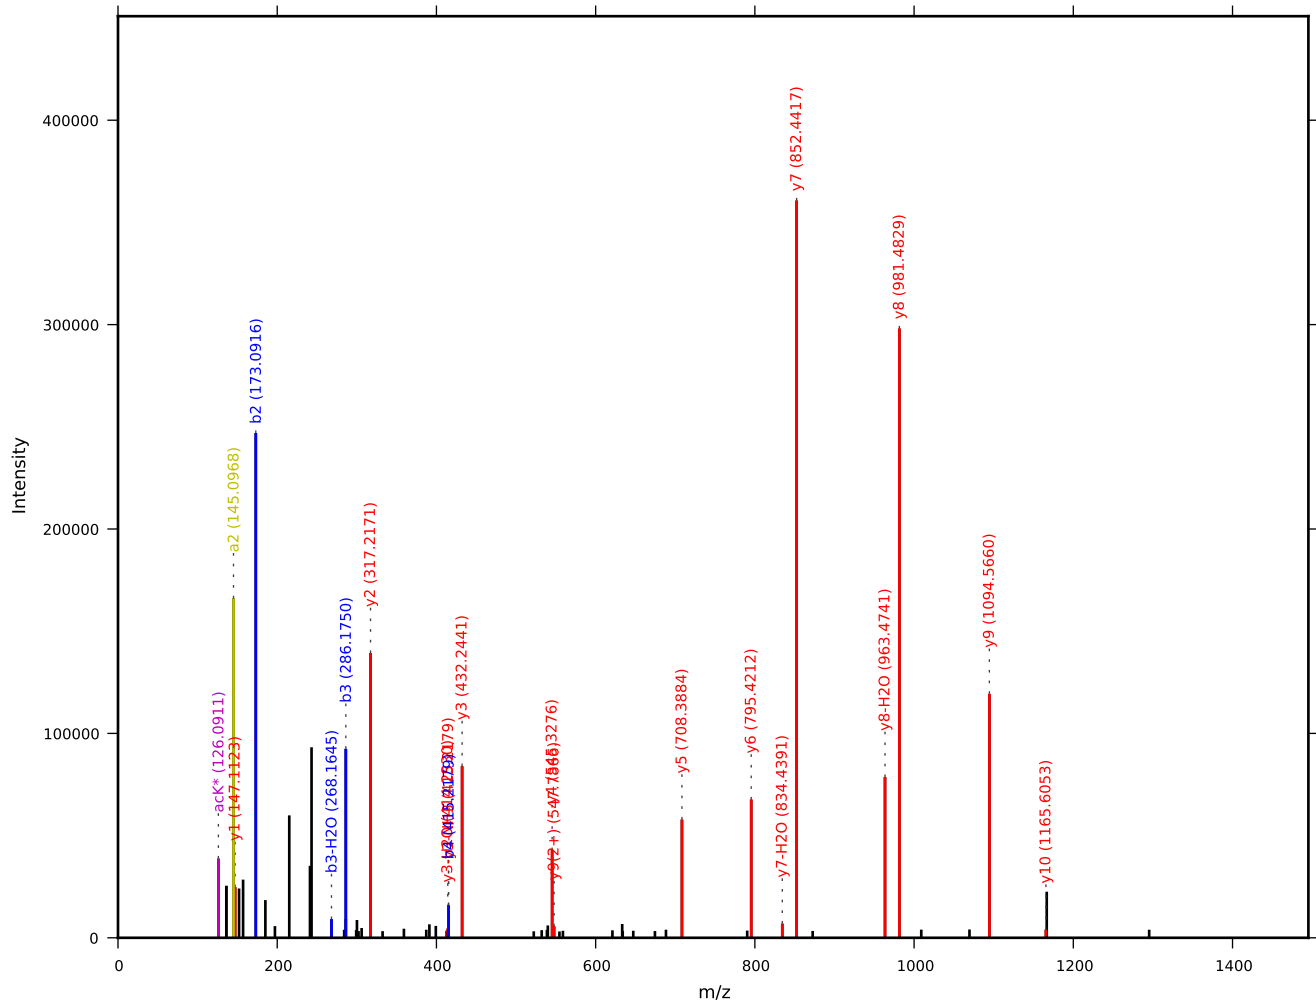

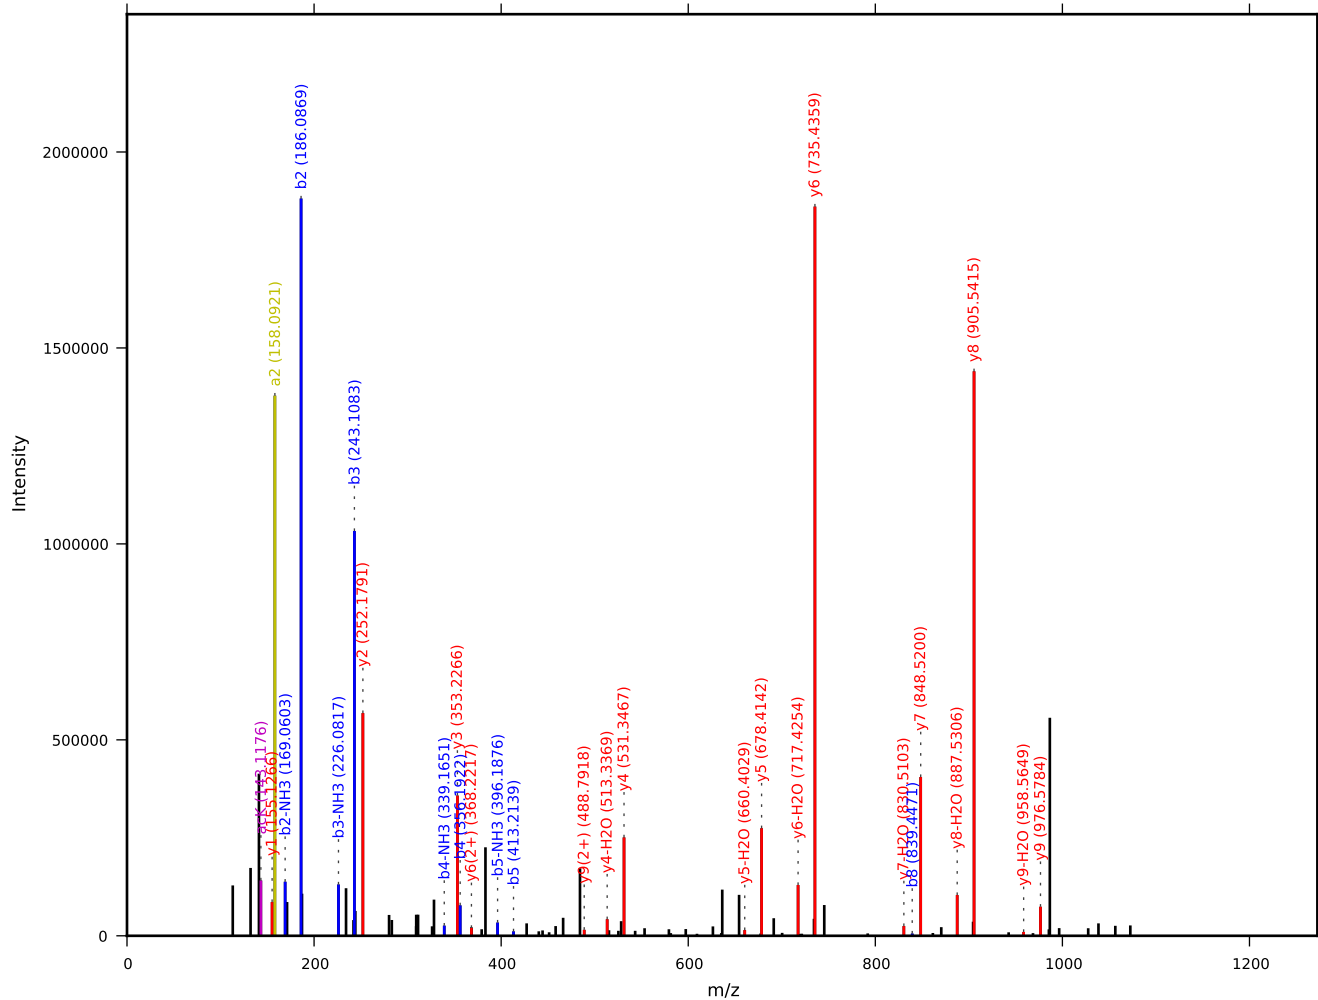

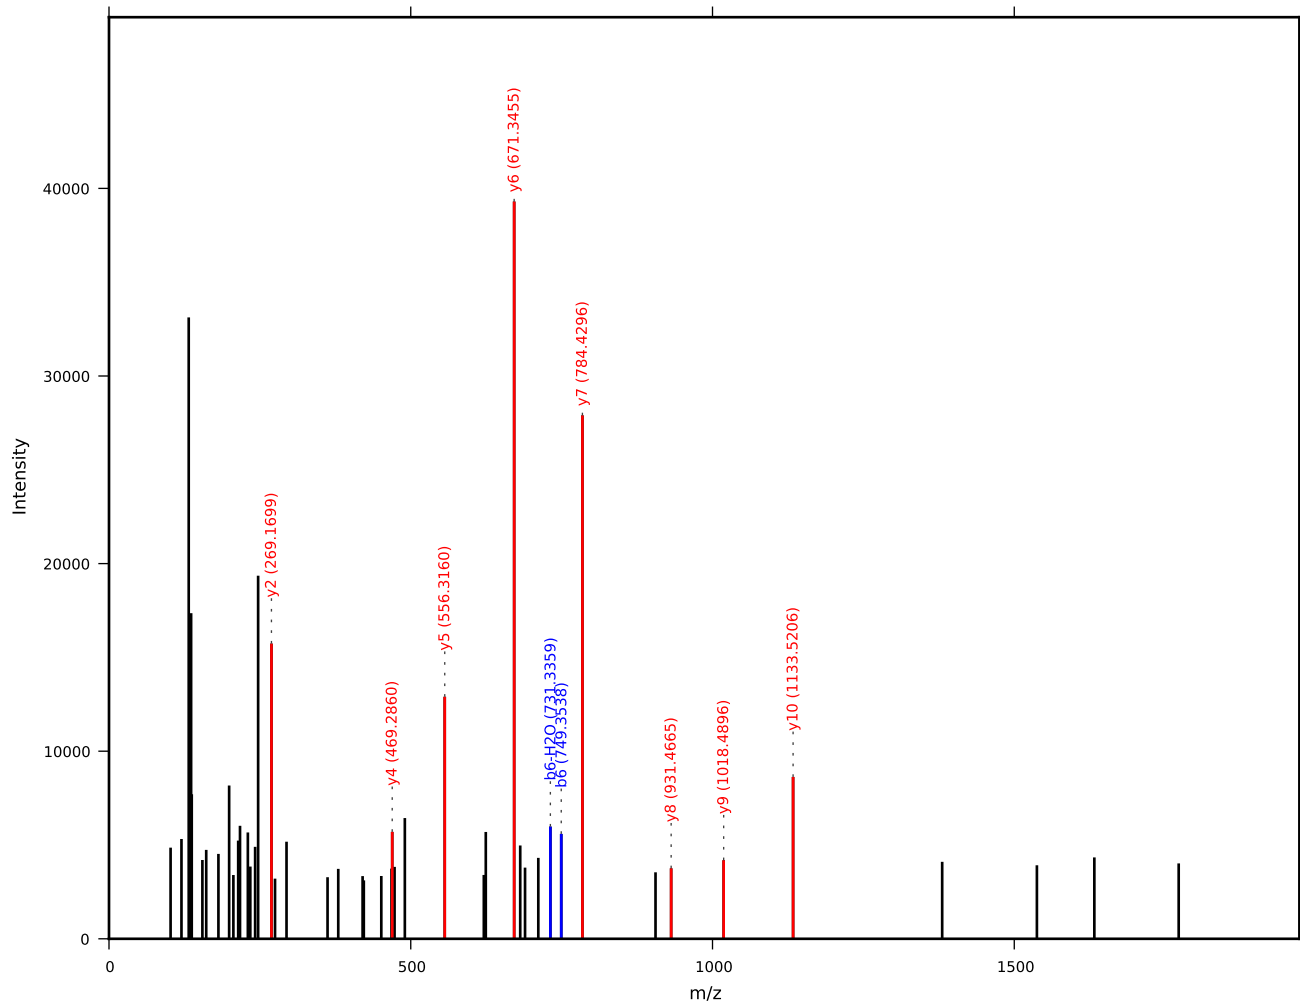

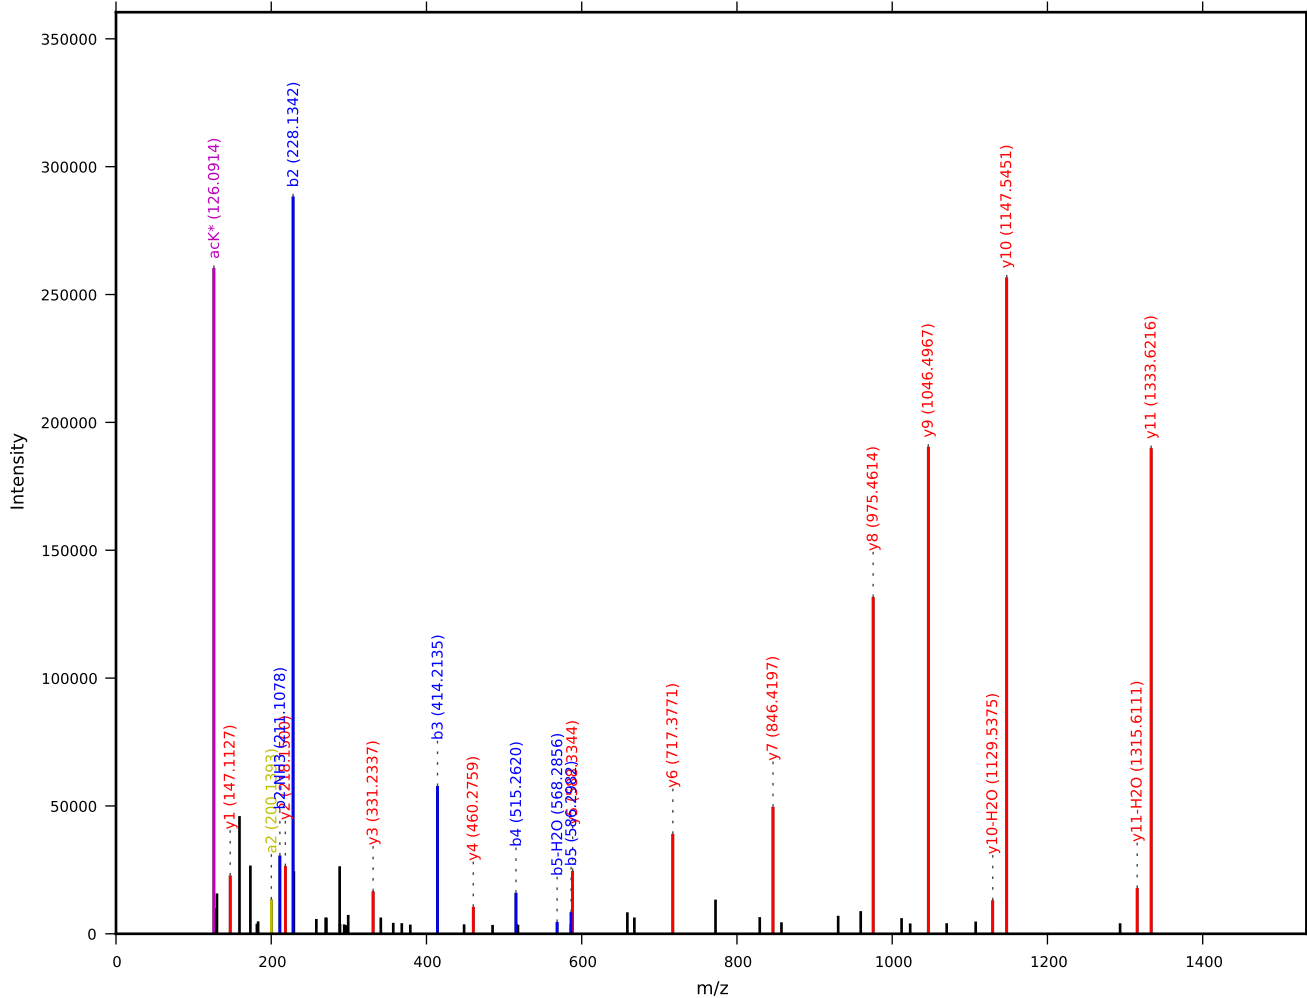

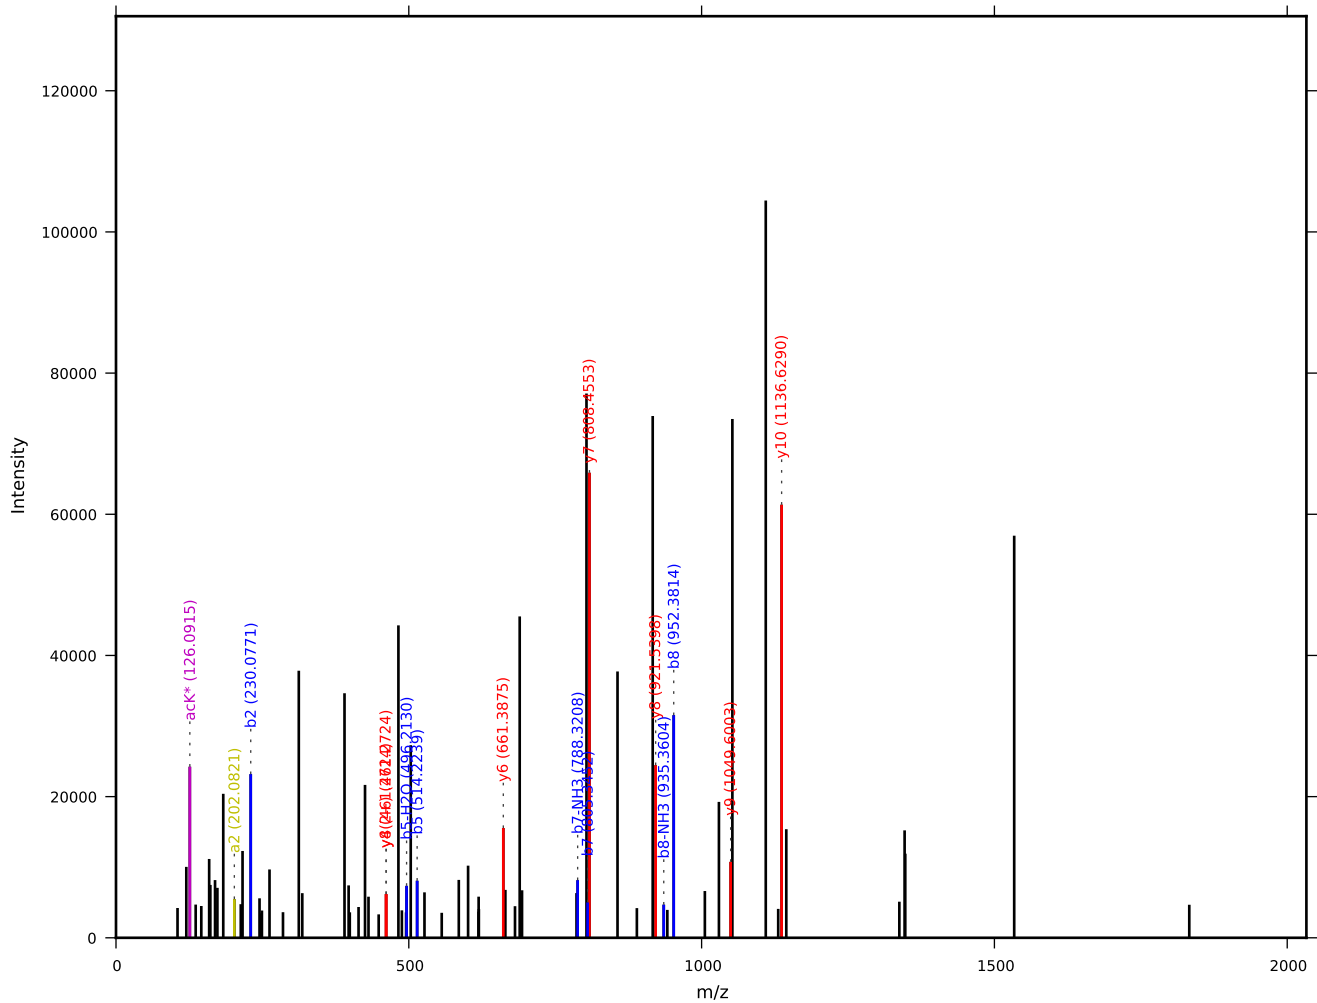

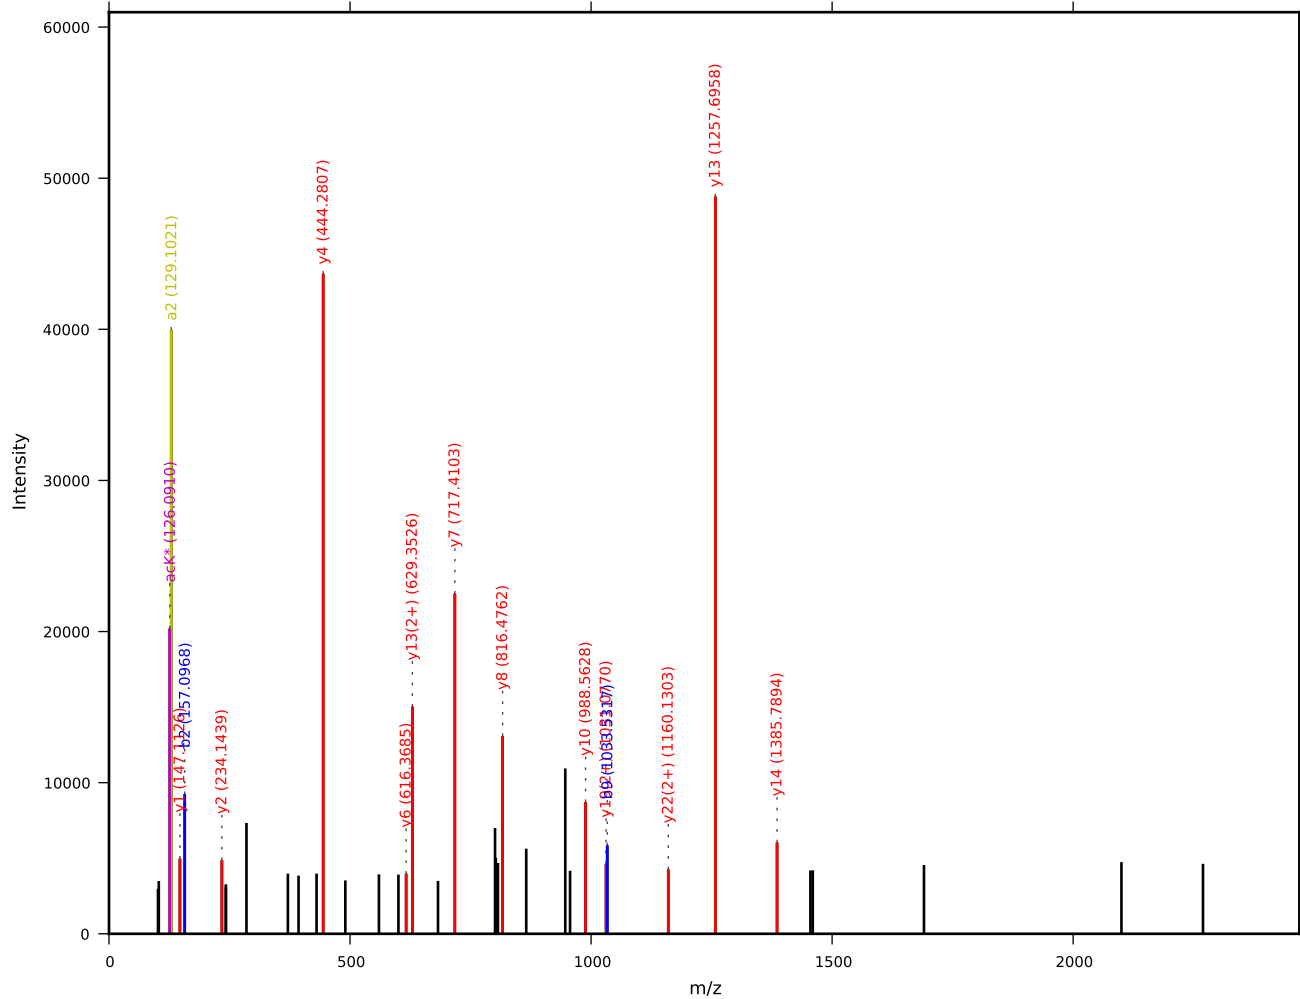



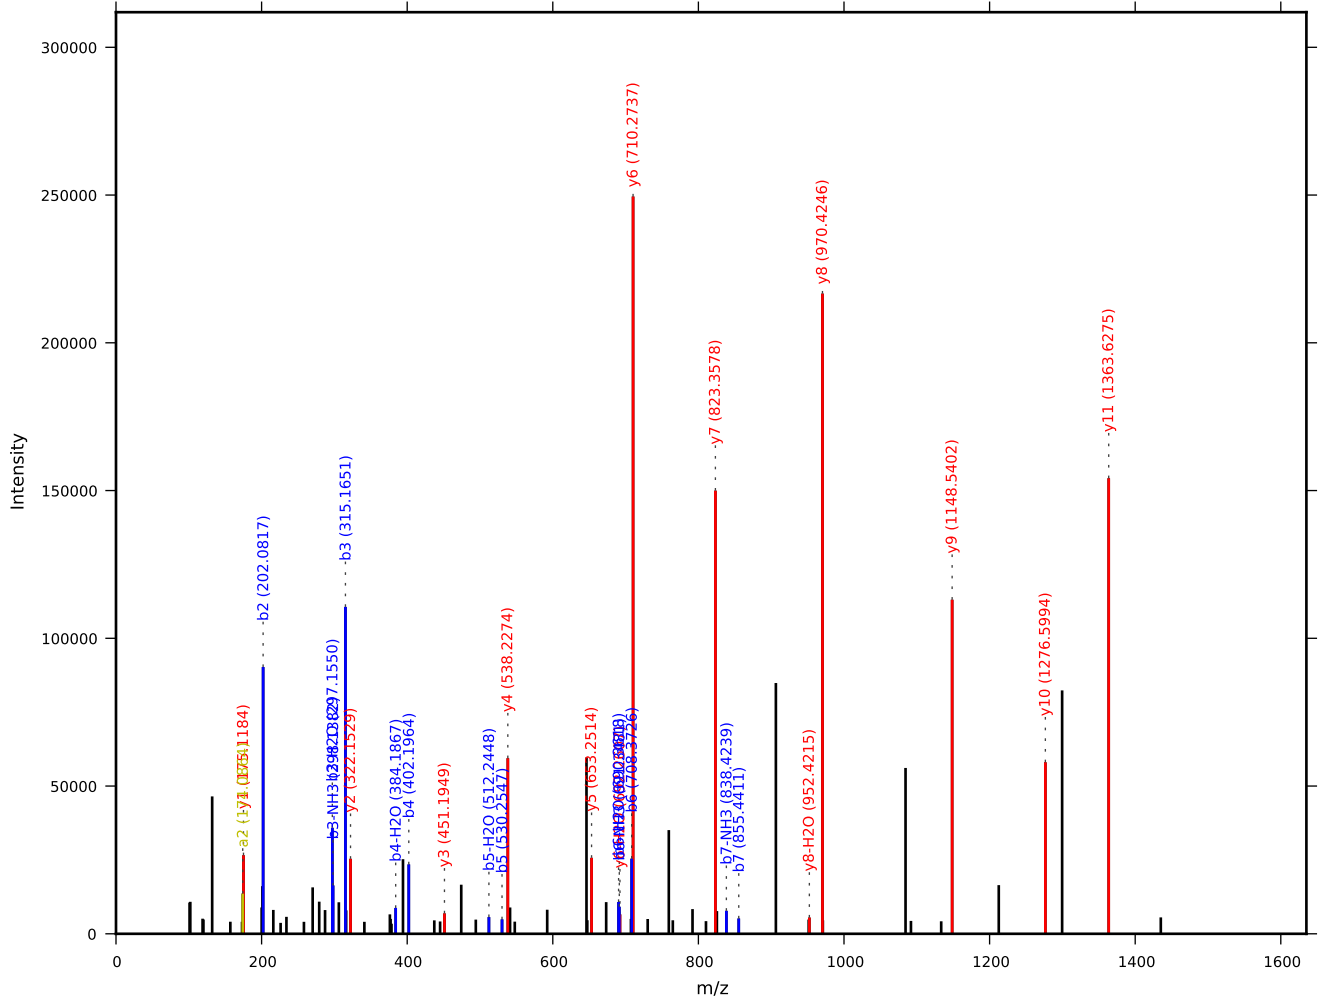

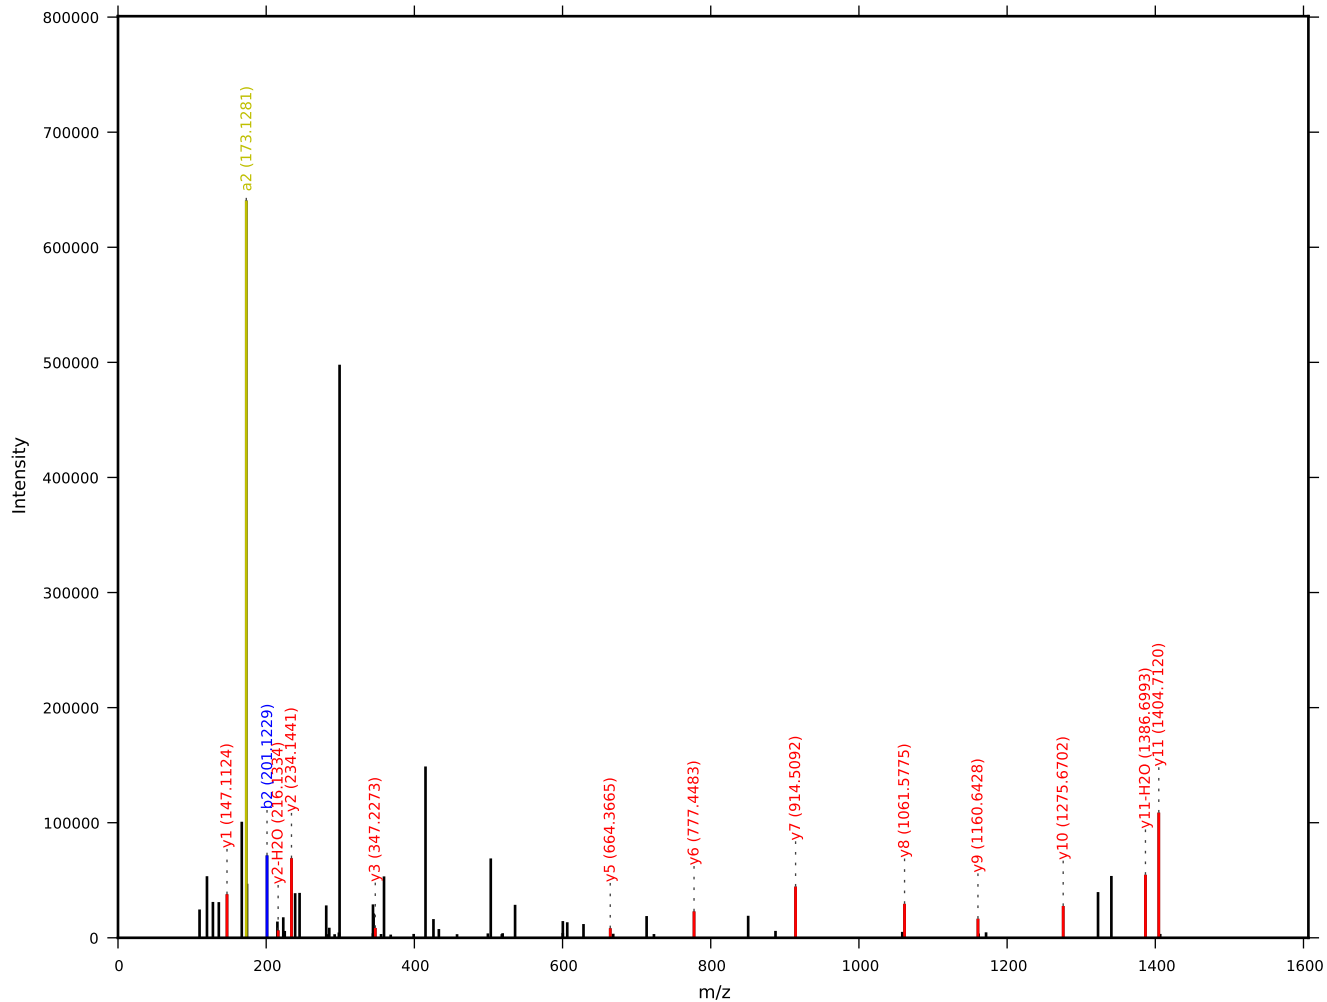

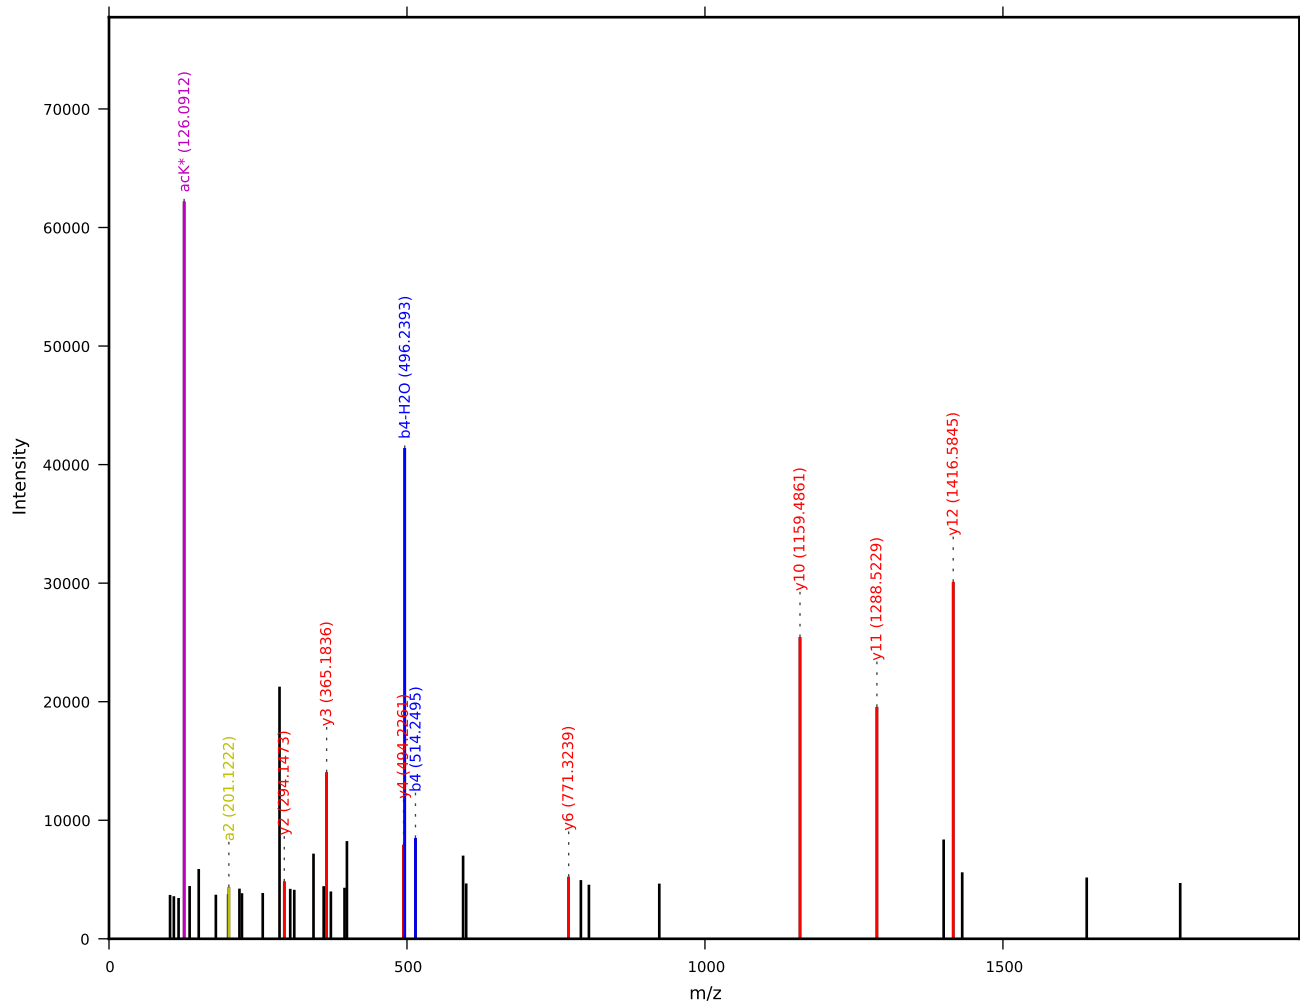

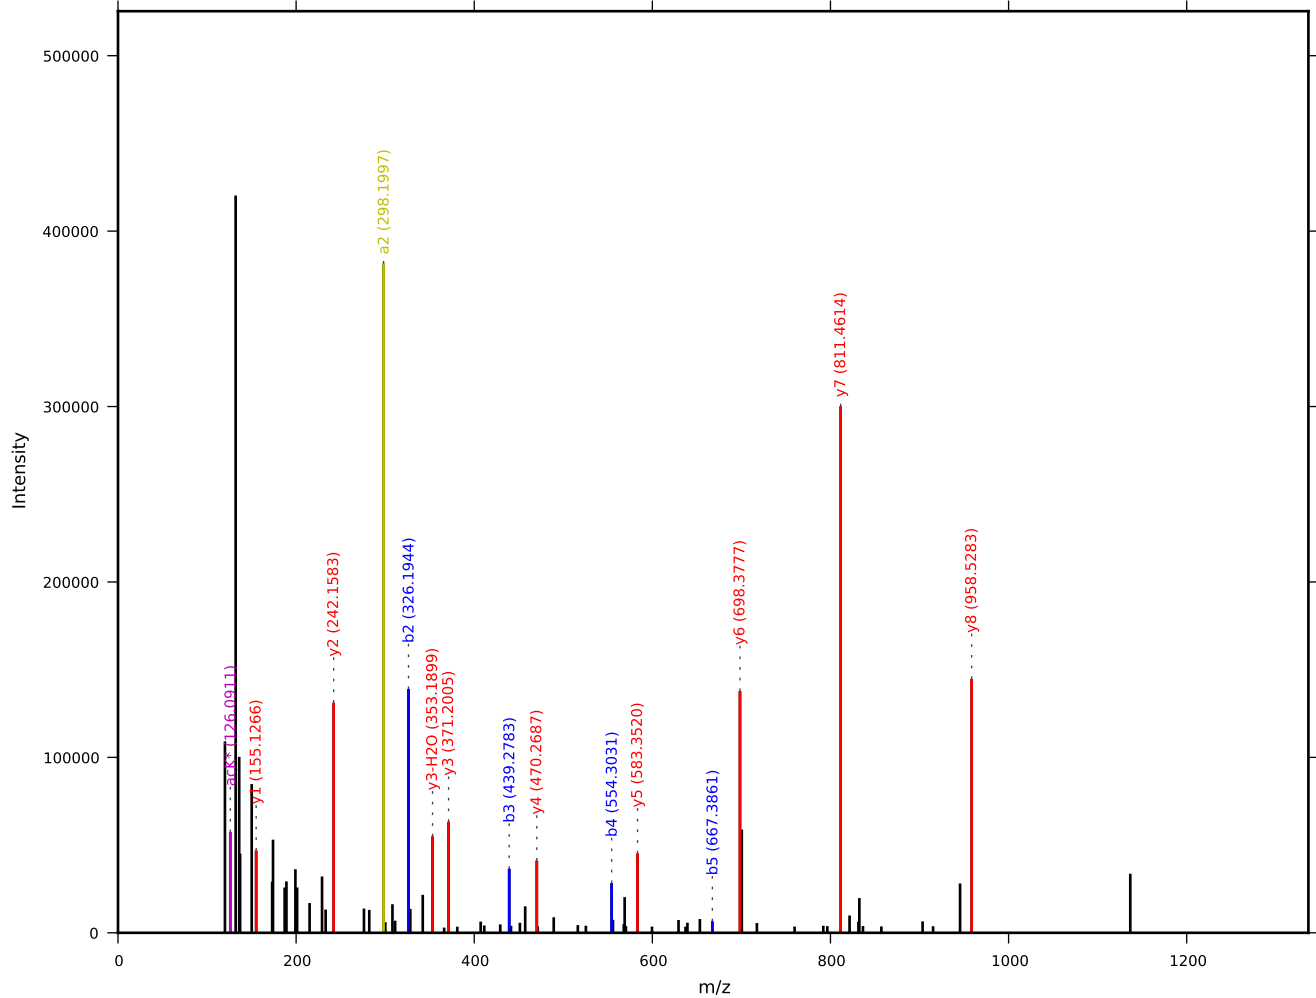

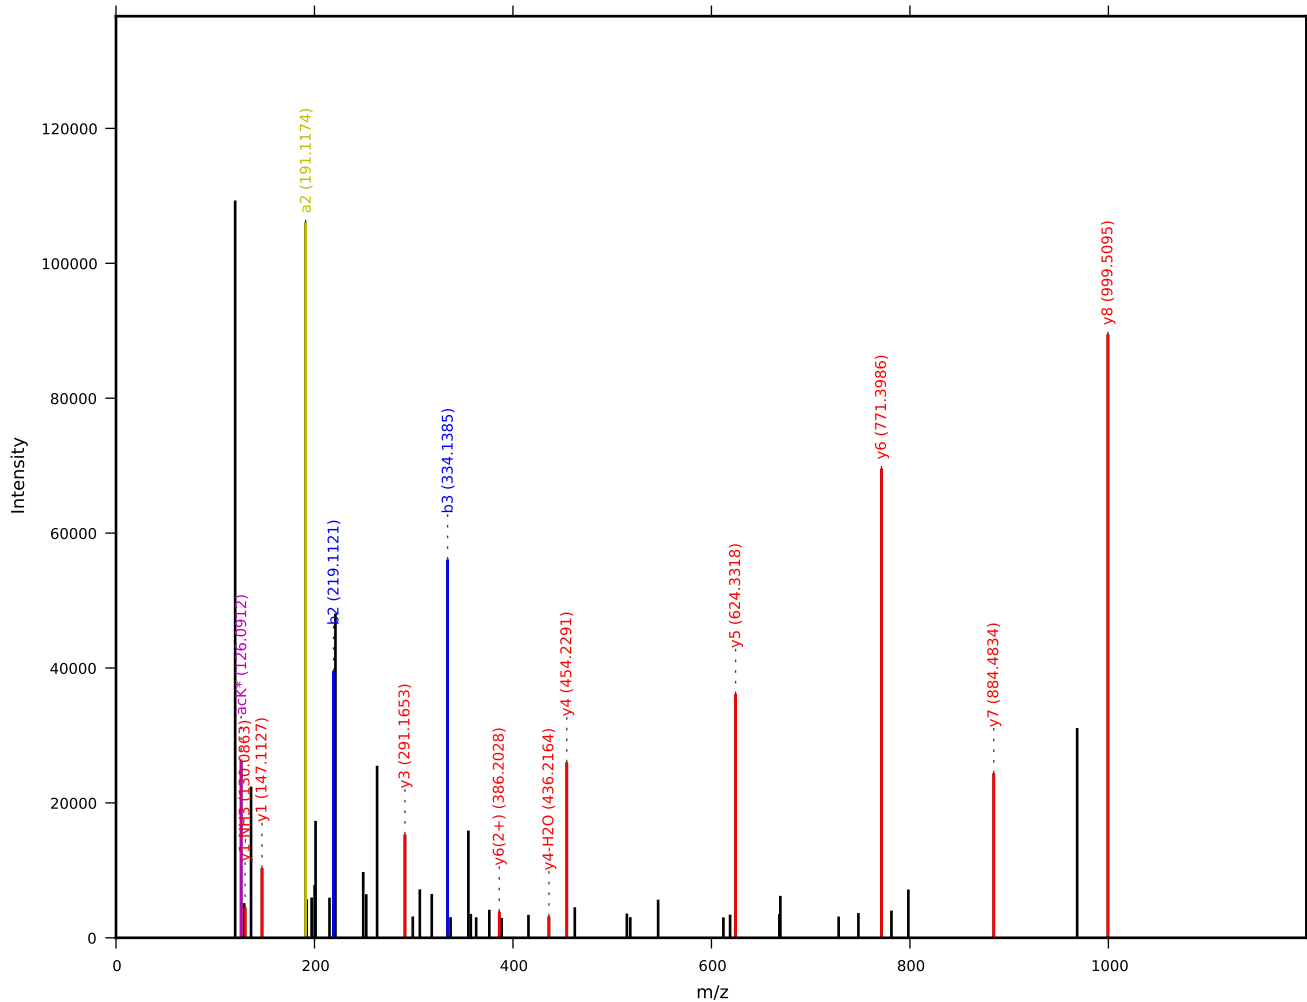

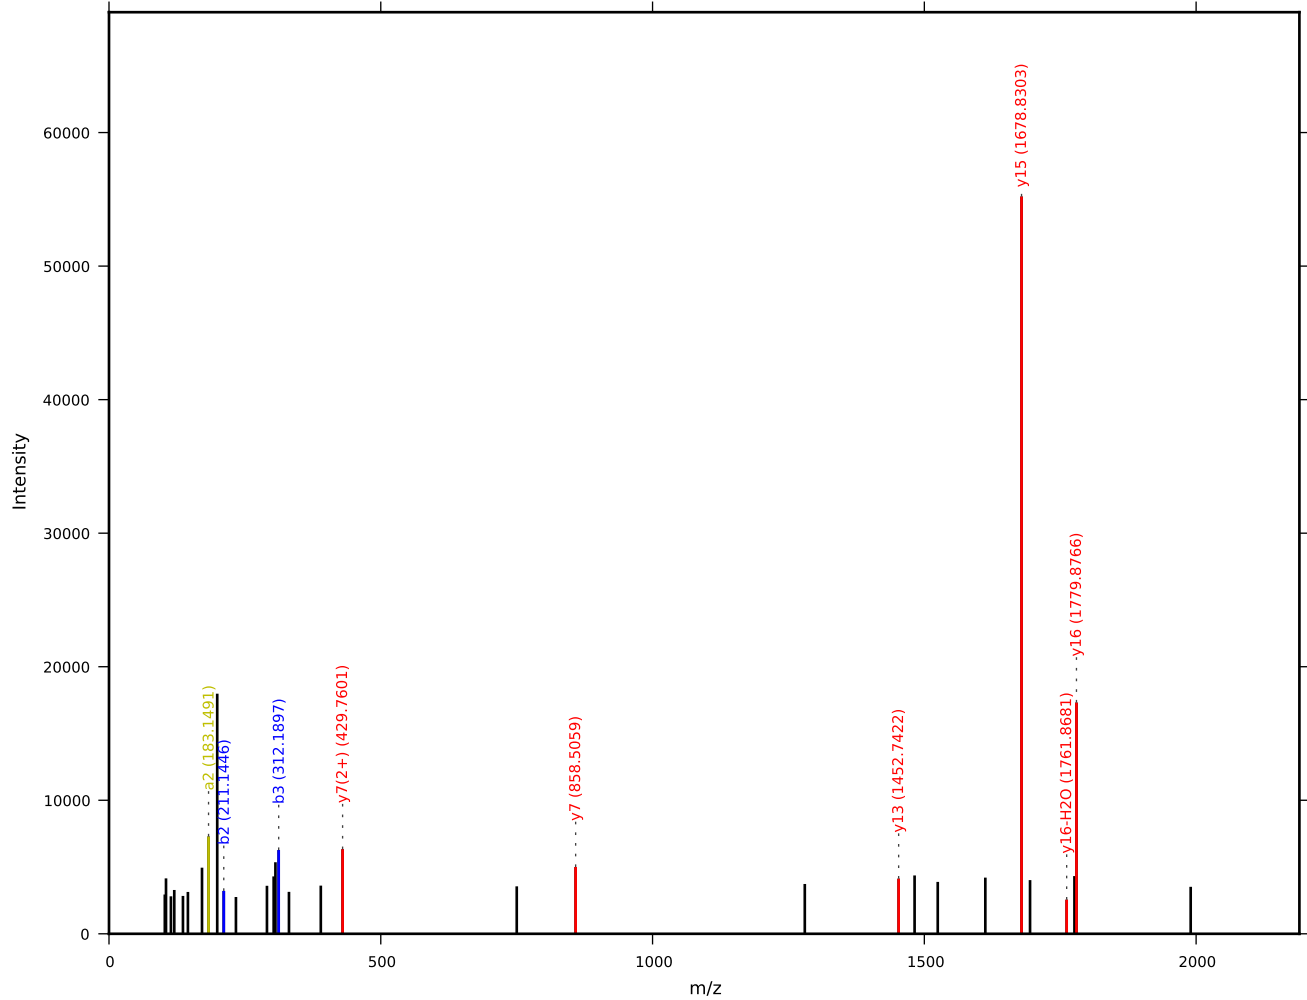

Mass: 1805.8948 Charge: 3 m/z: 602.97221  
Modified Peptide: \_NYTEHSTPFLNK(ac)VSK\_ Score: 38.028 PEP: 0.0014602

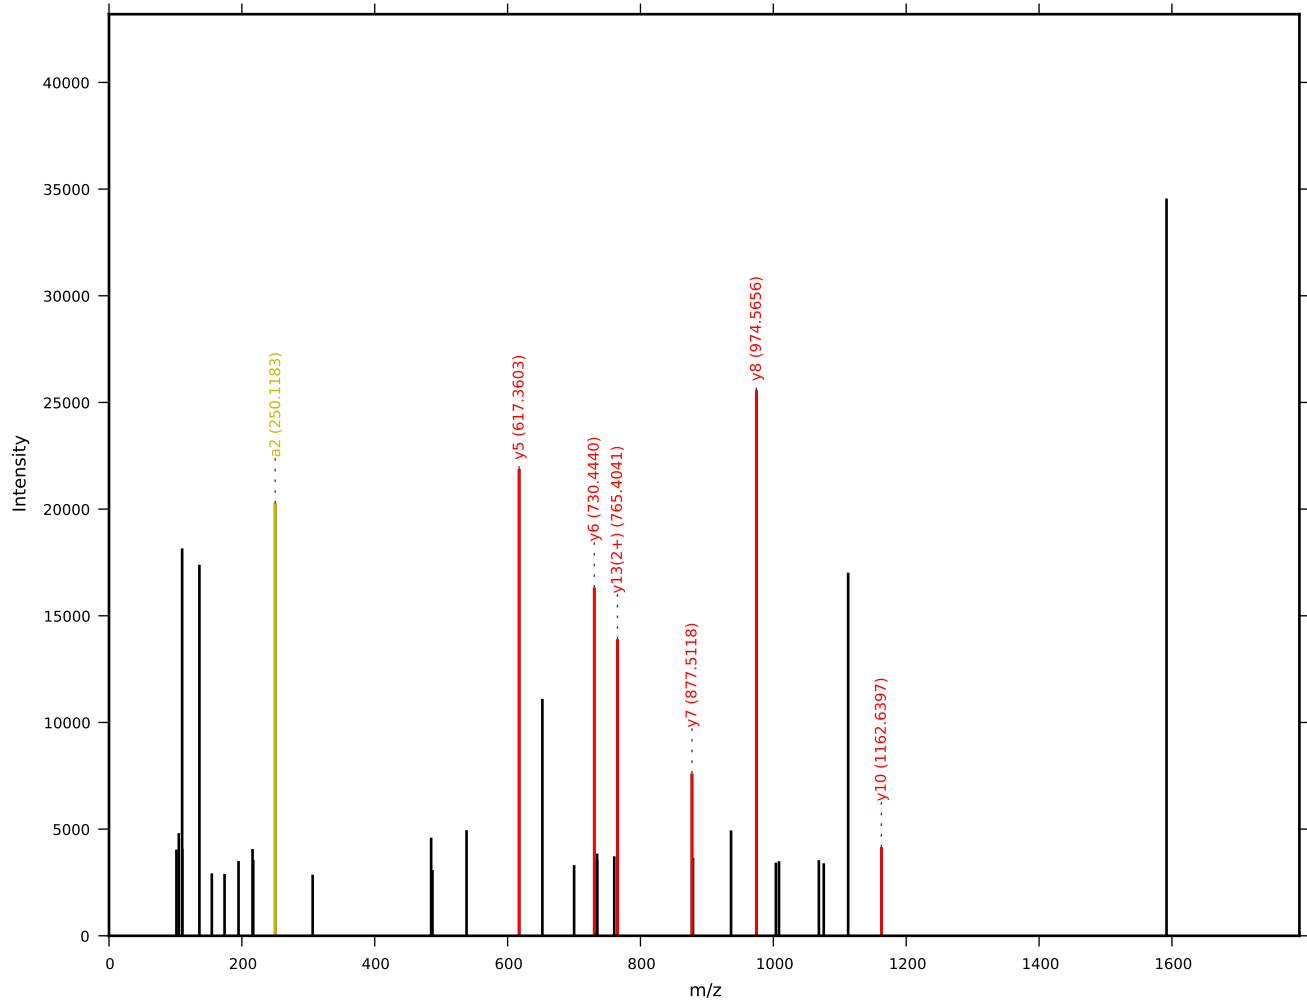

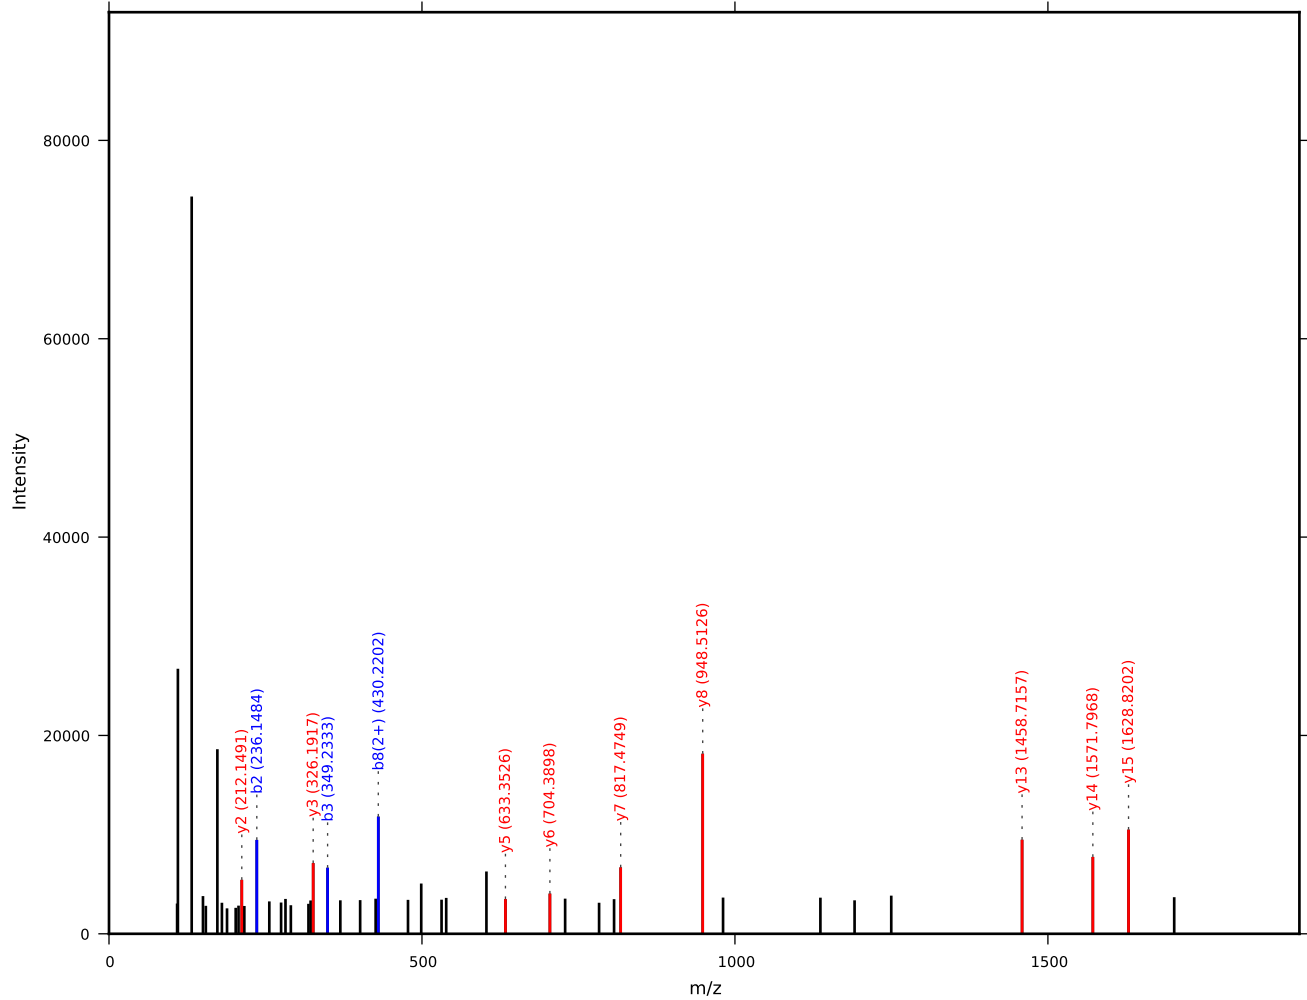





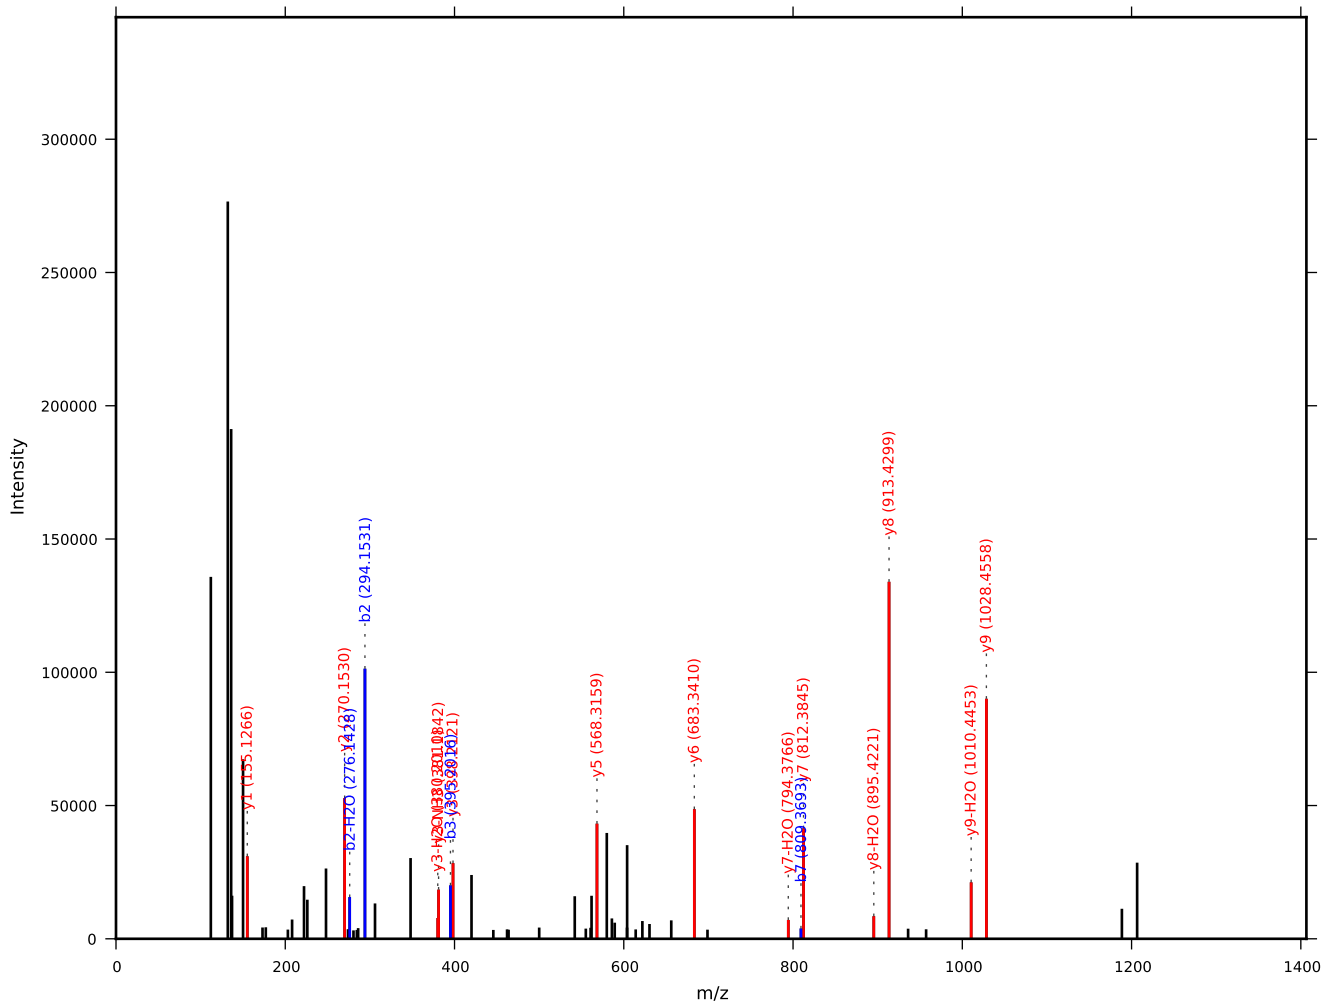

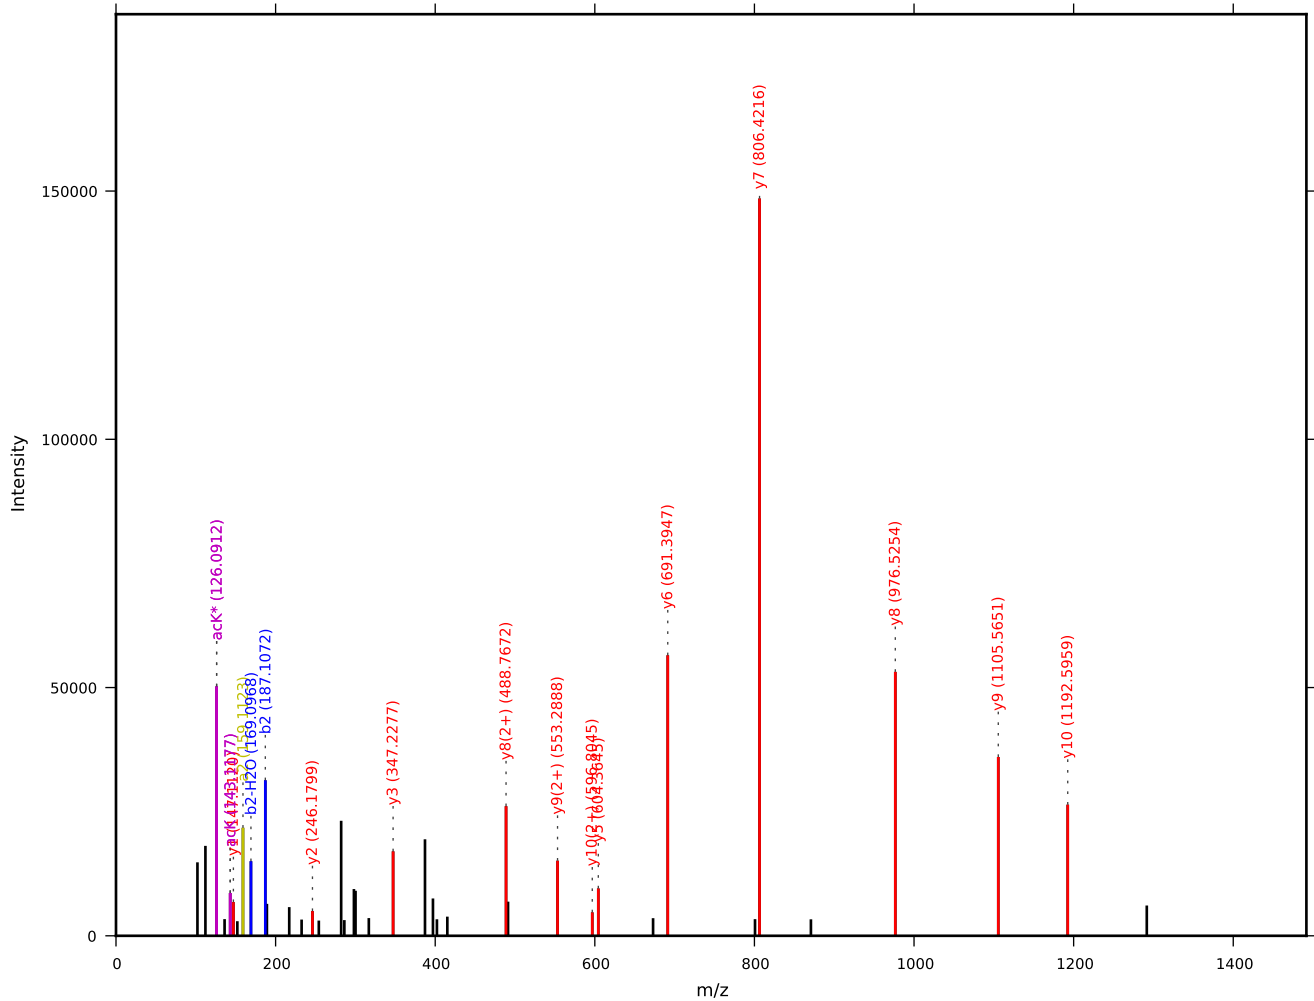

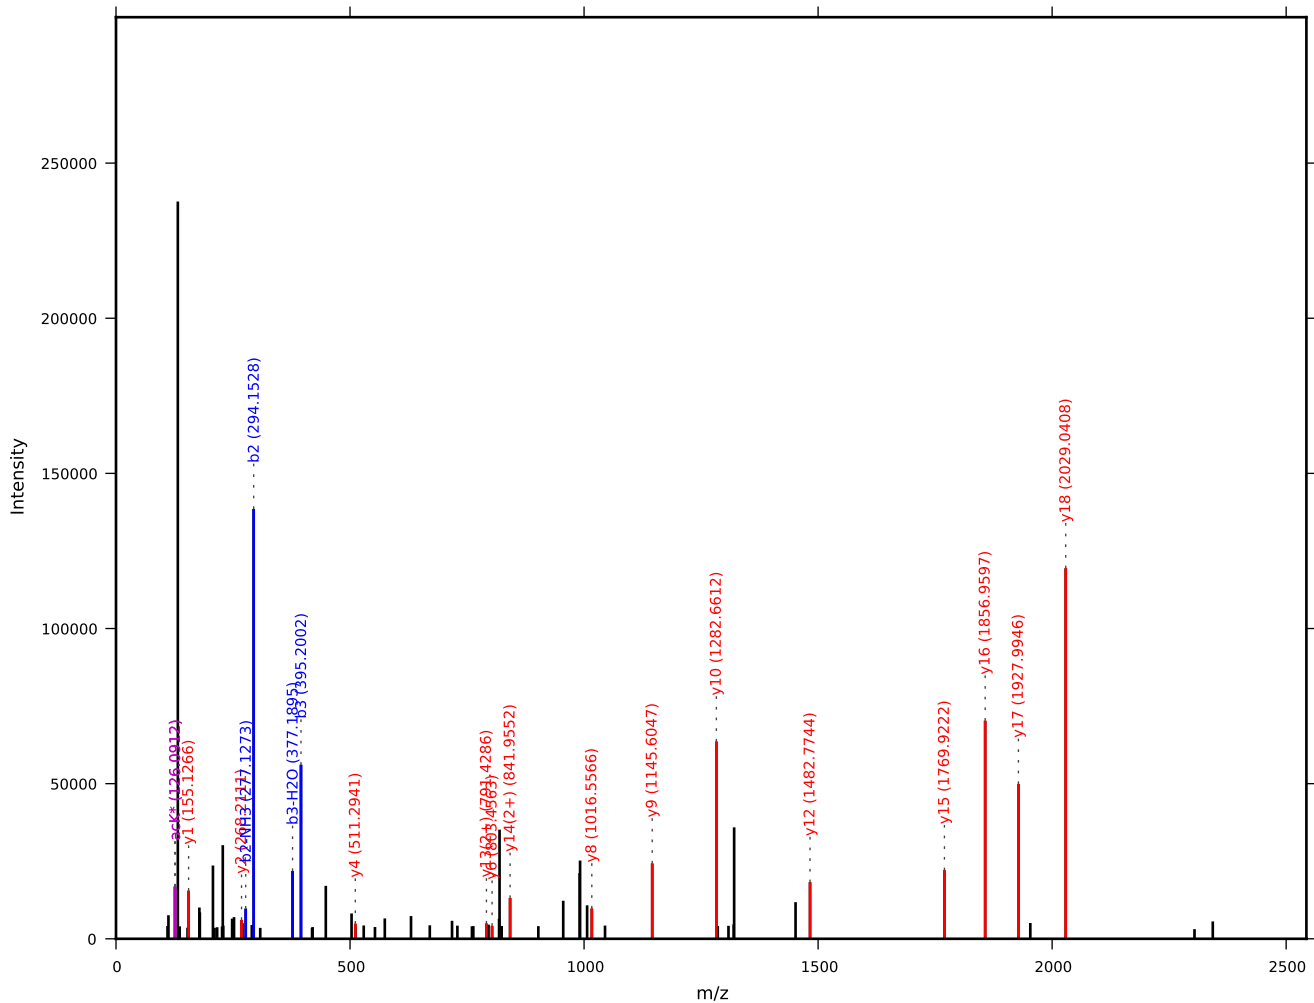

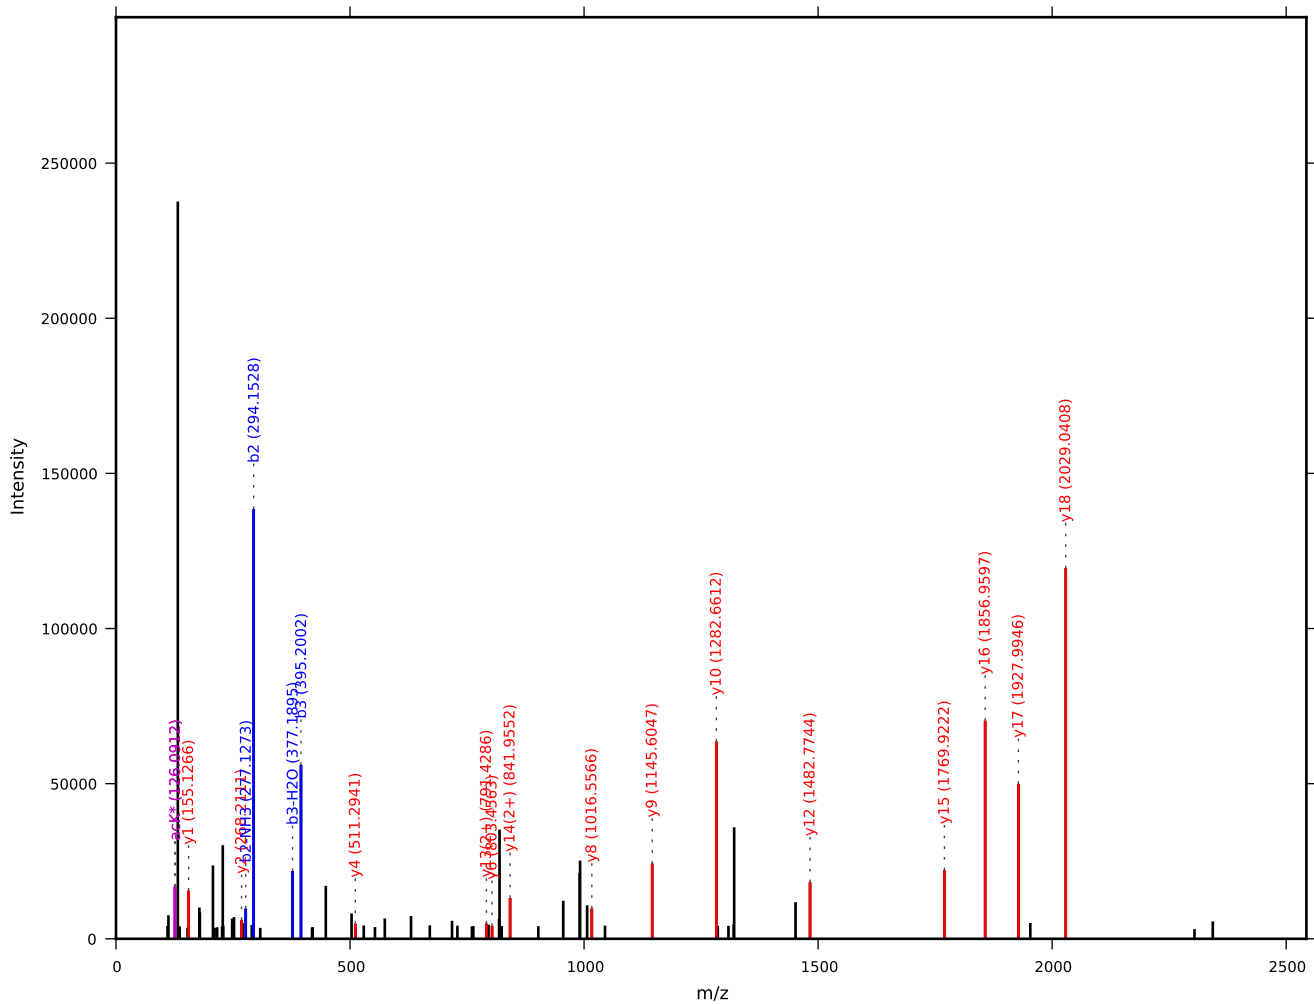

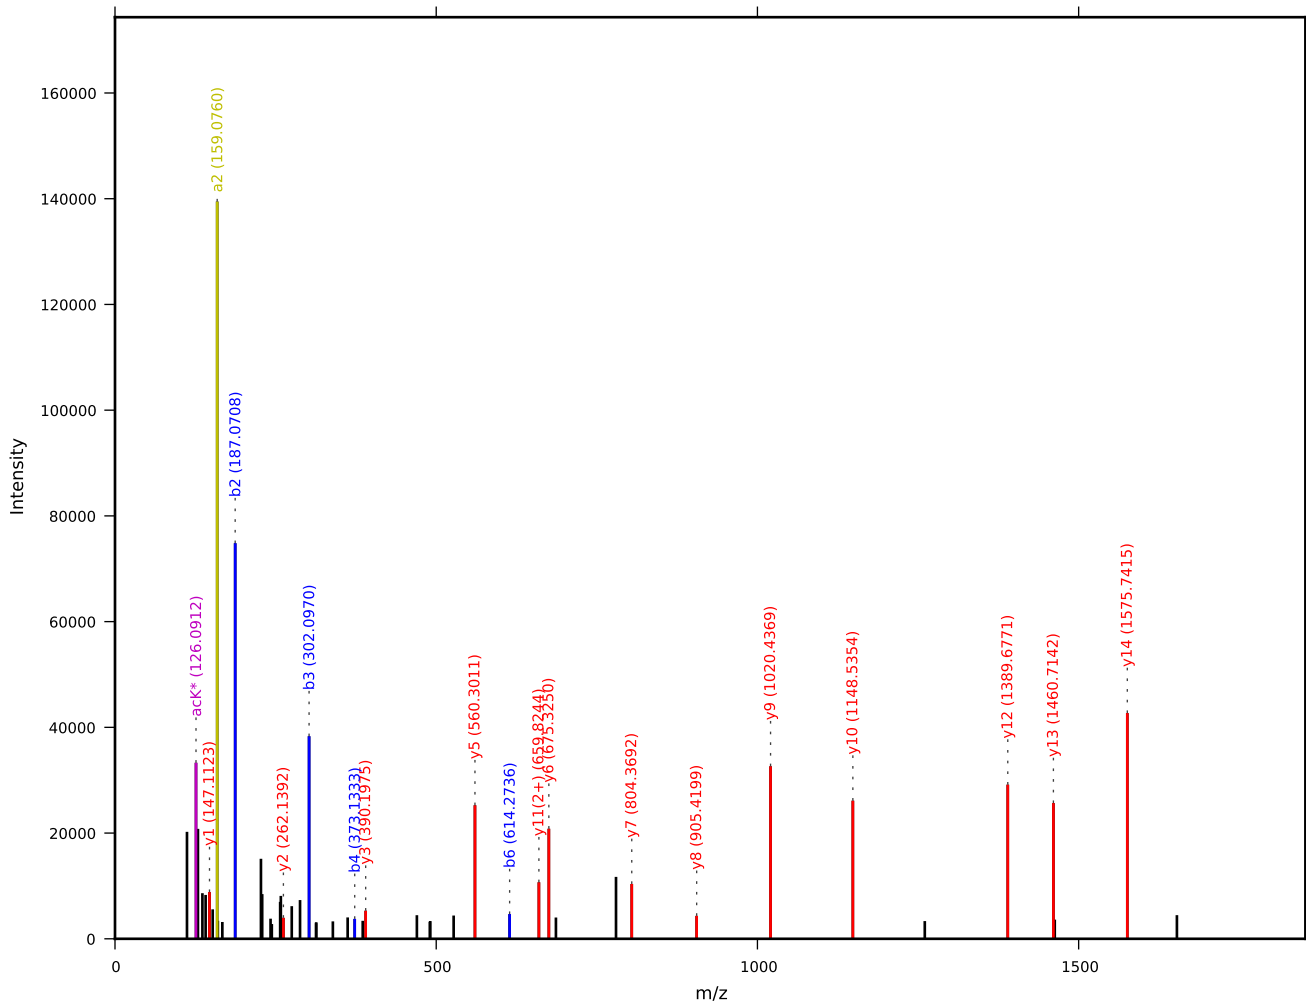

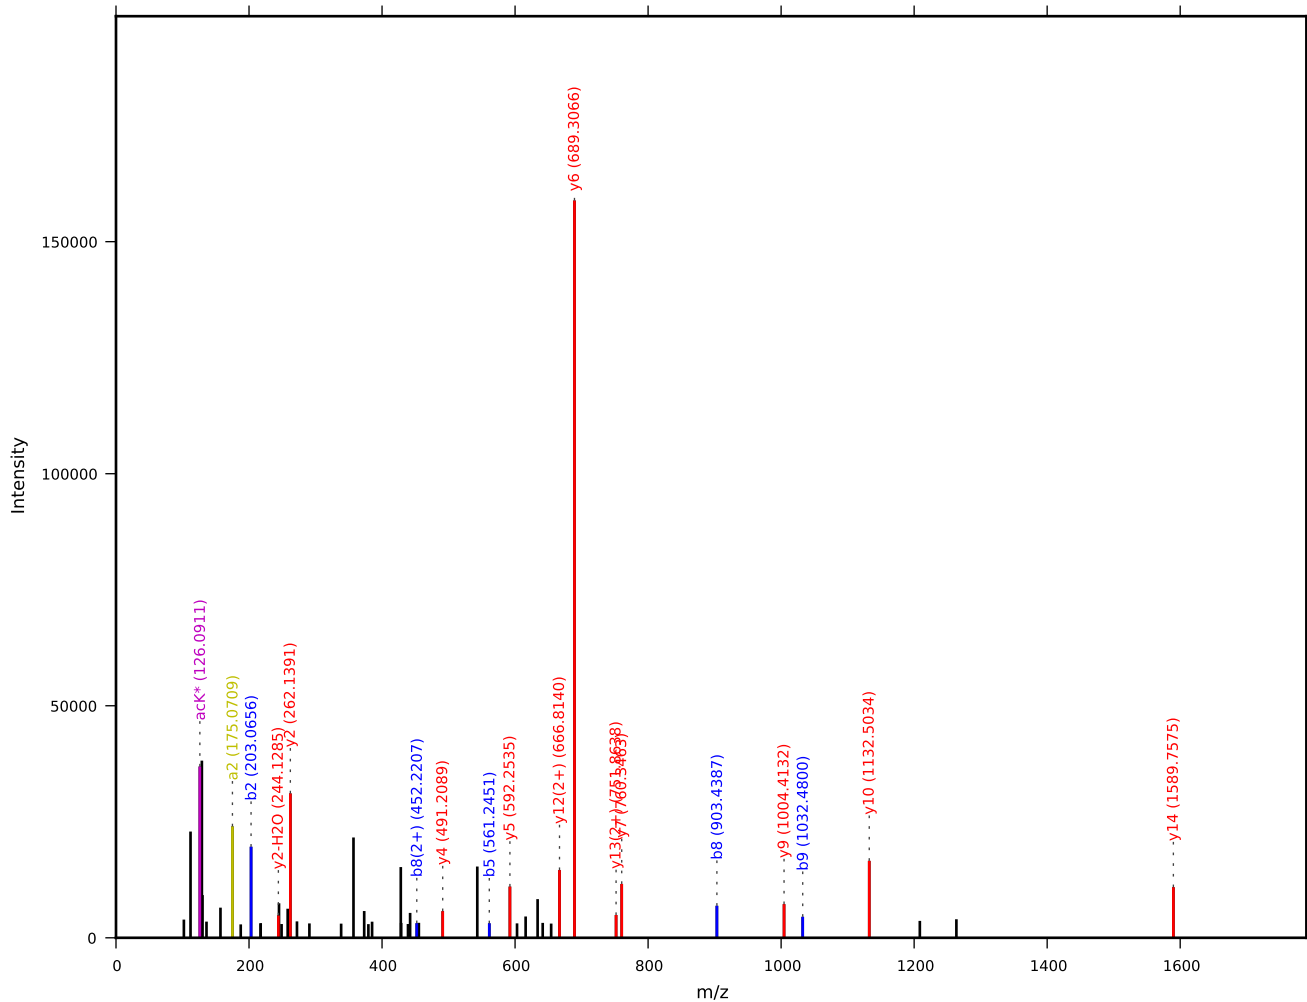

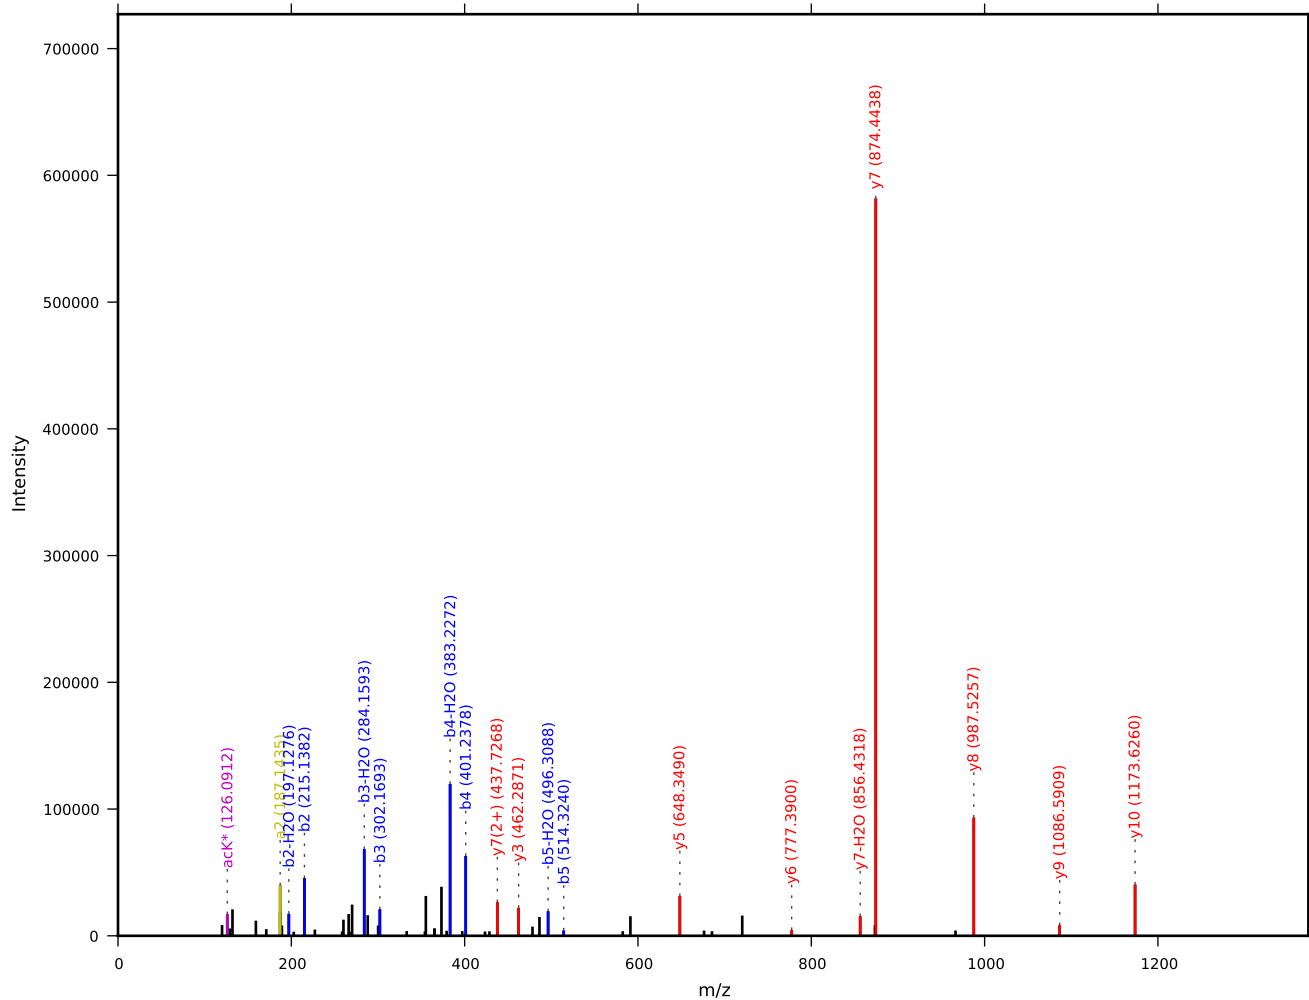



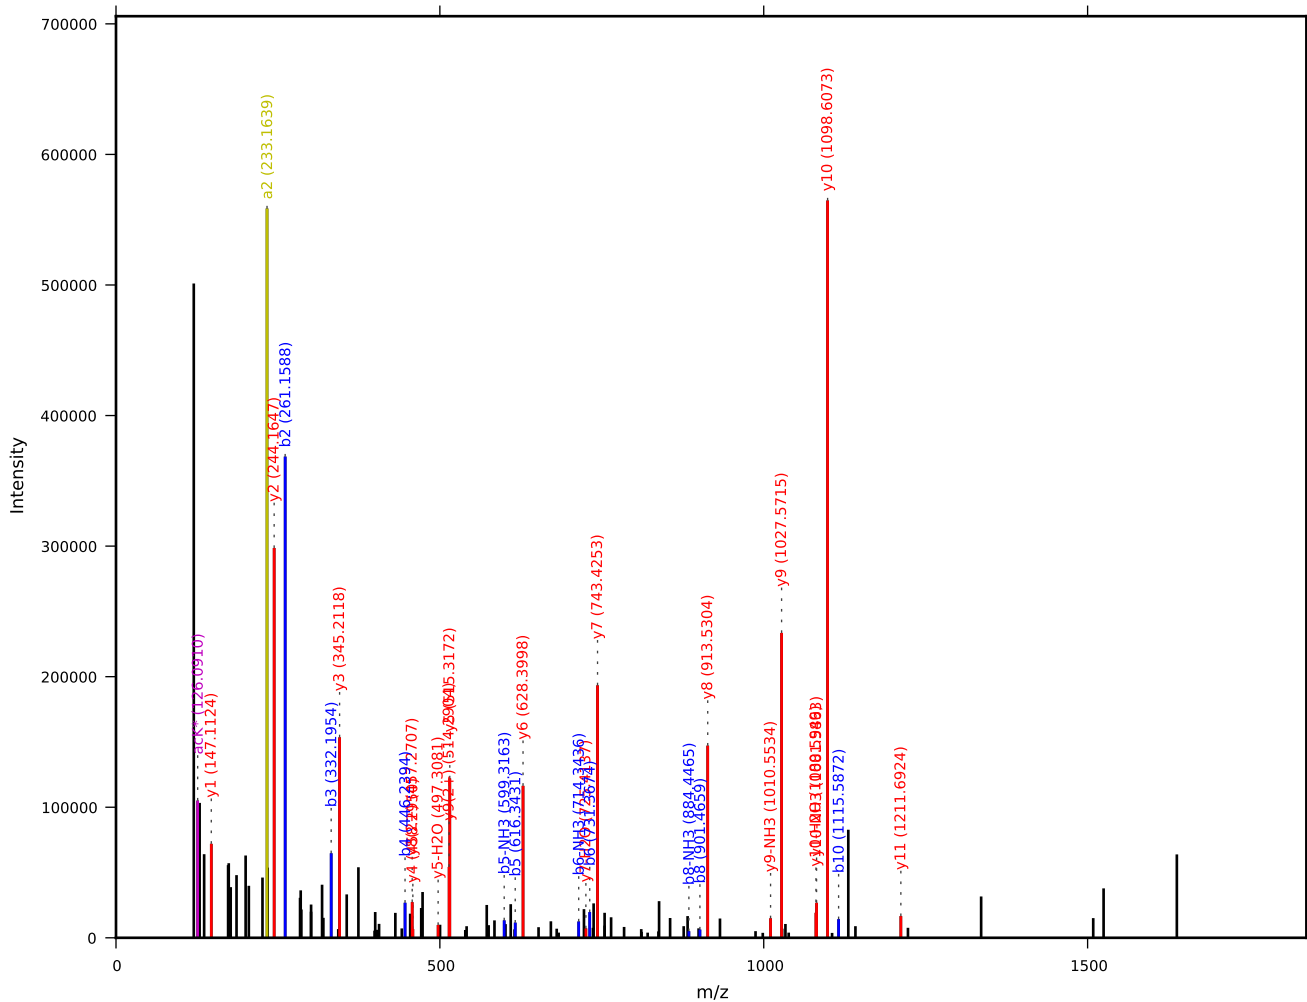

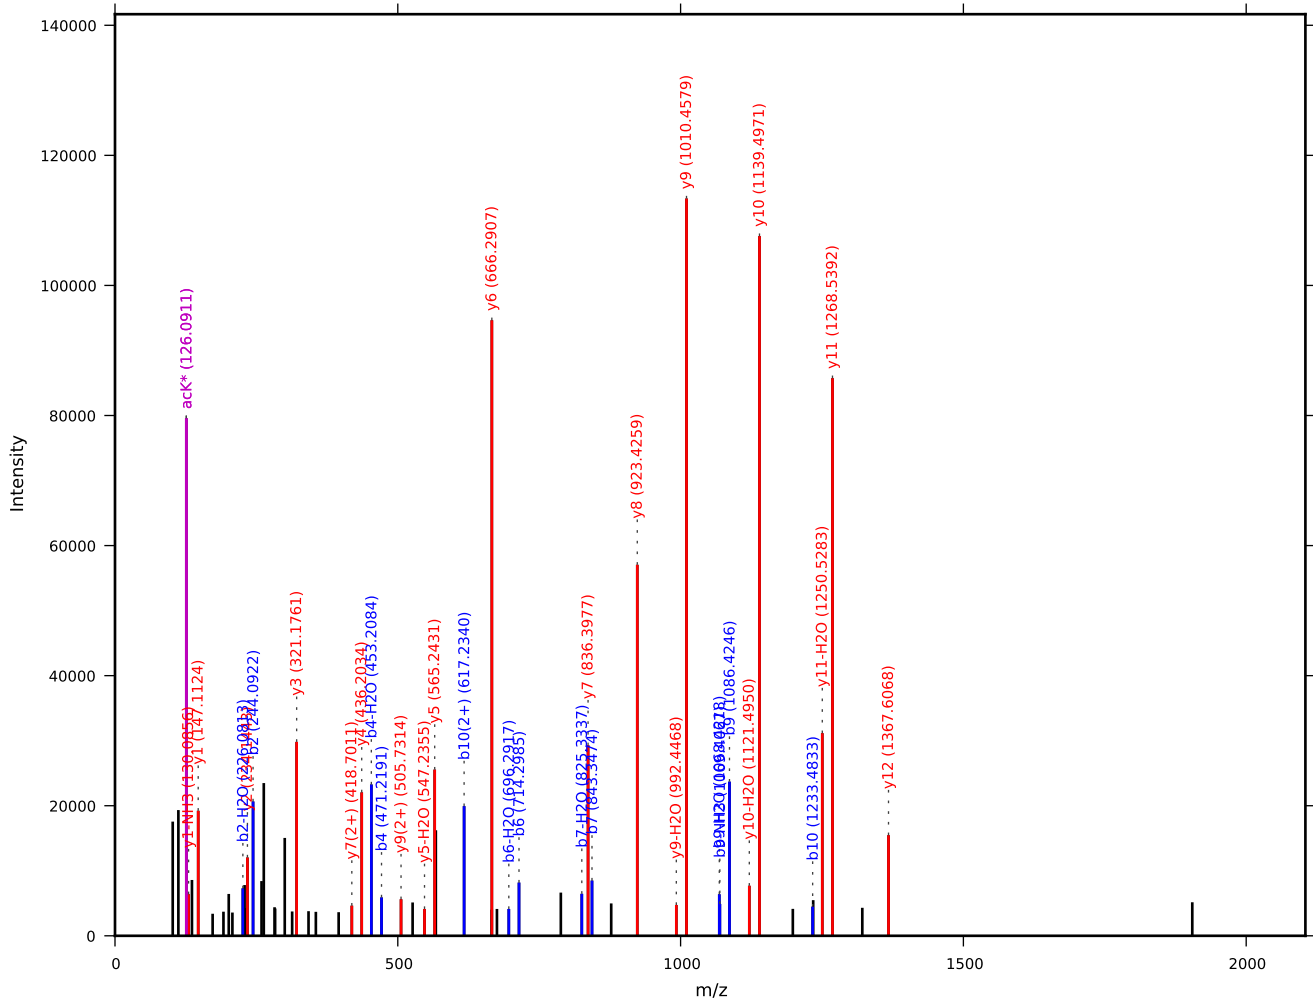

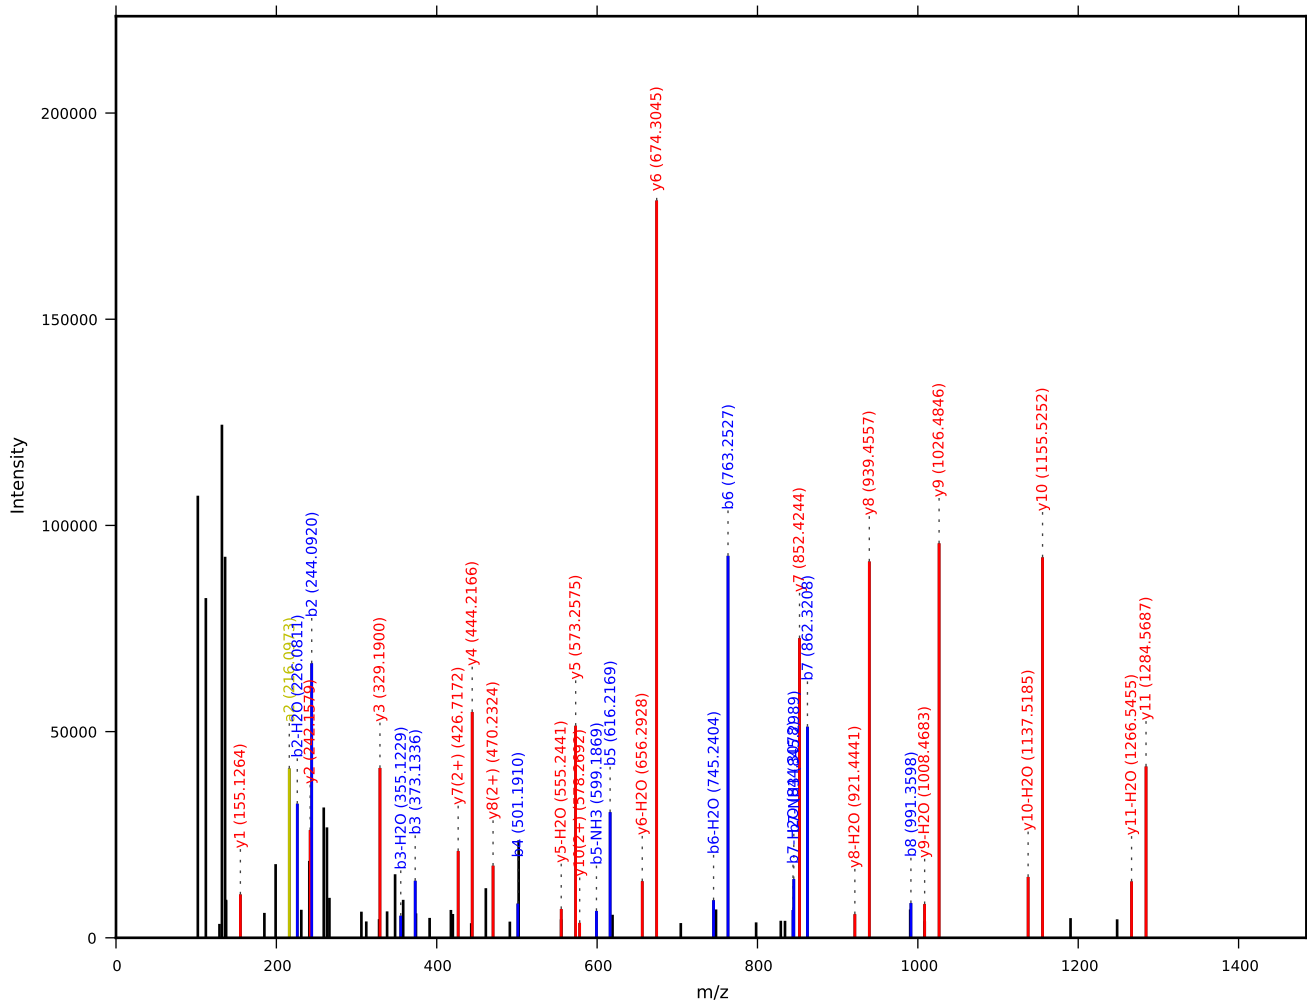

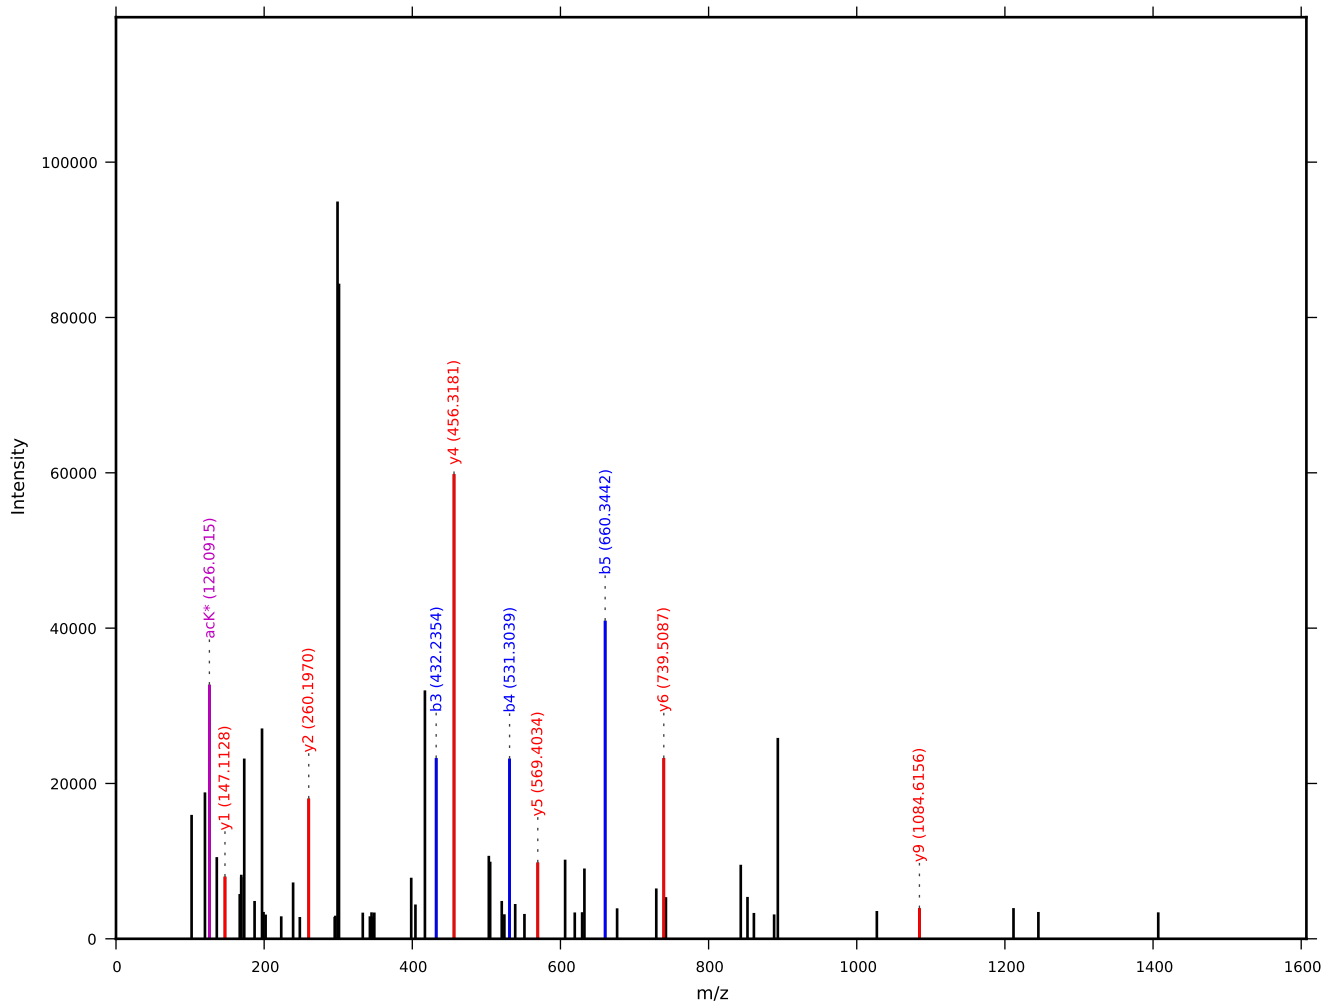

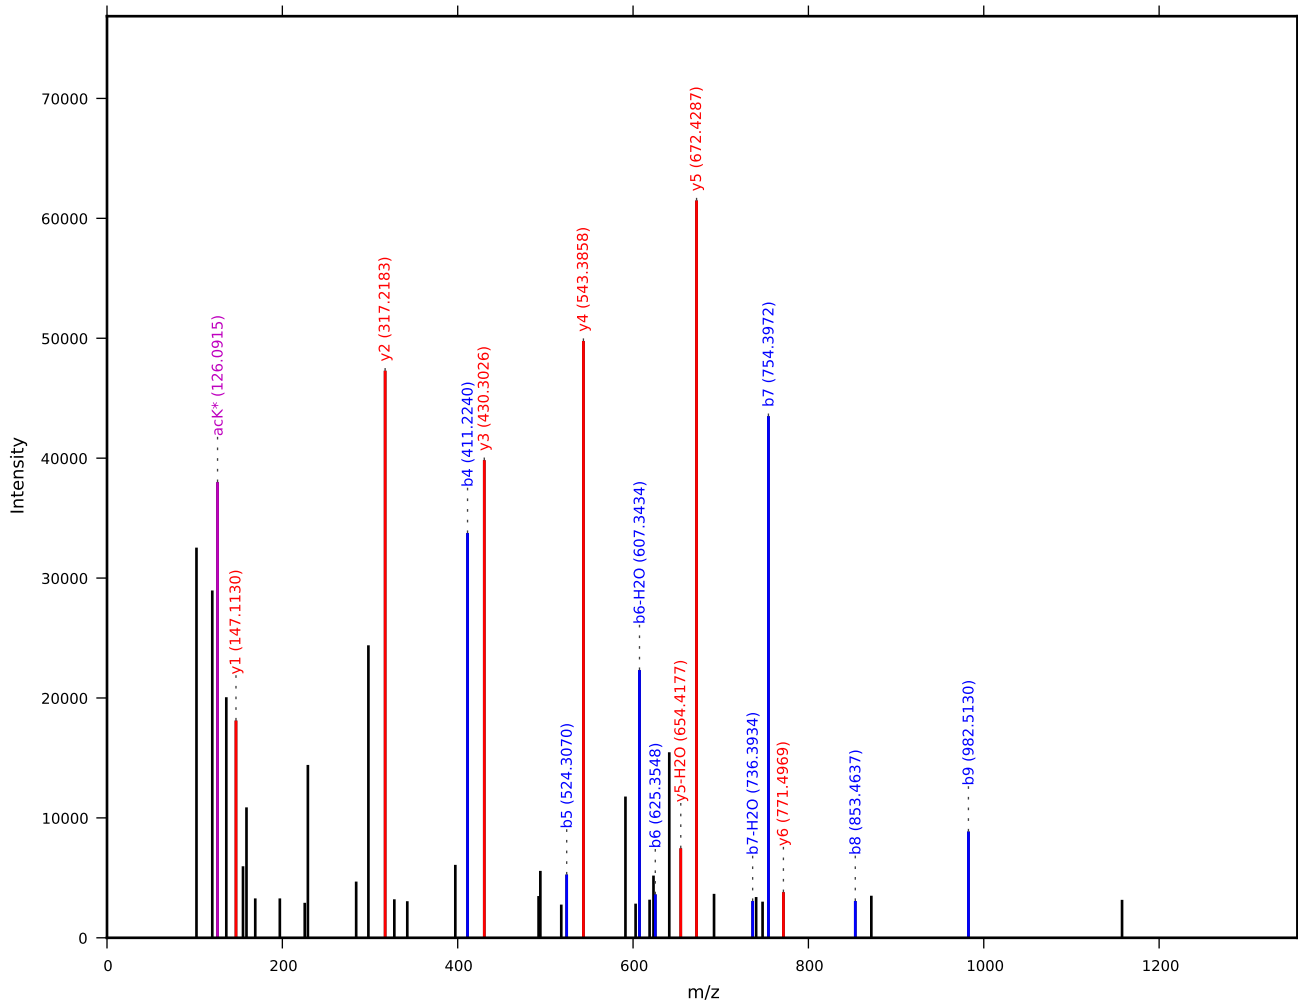

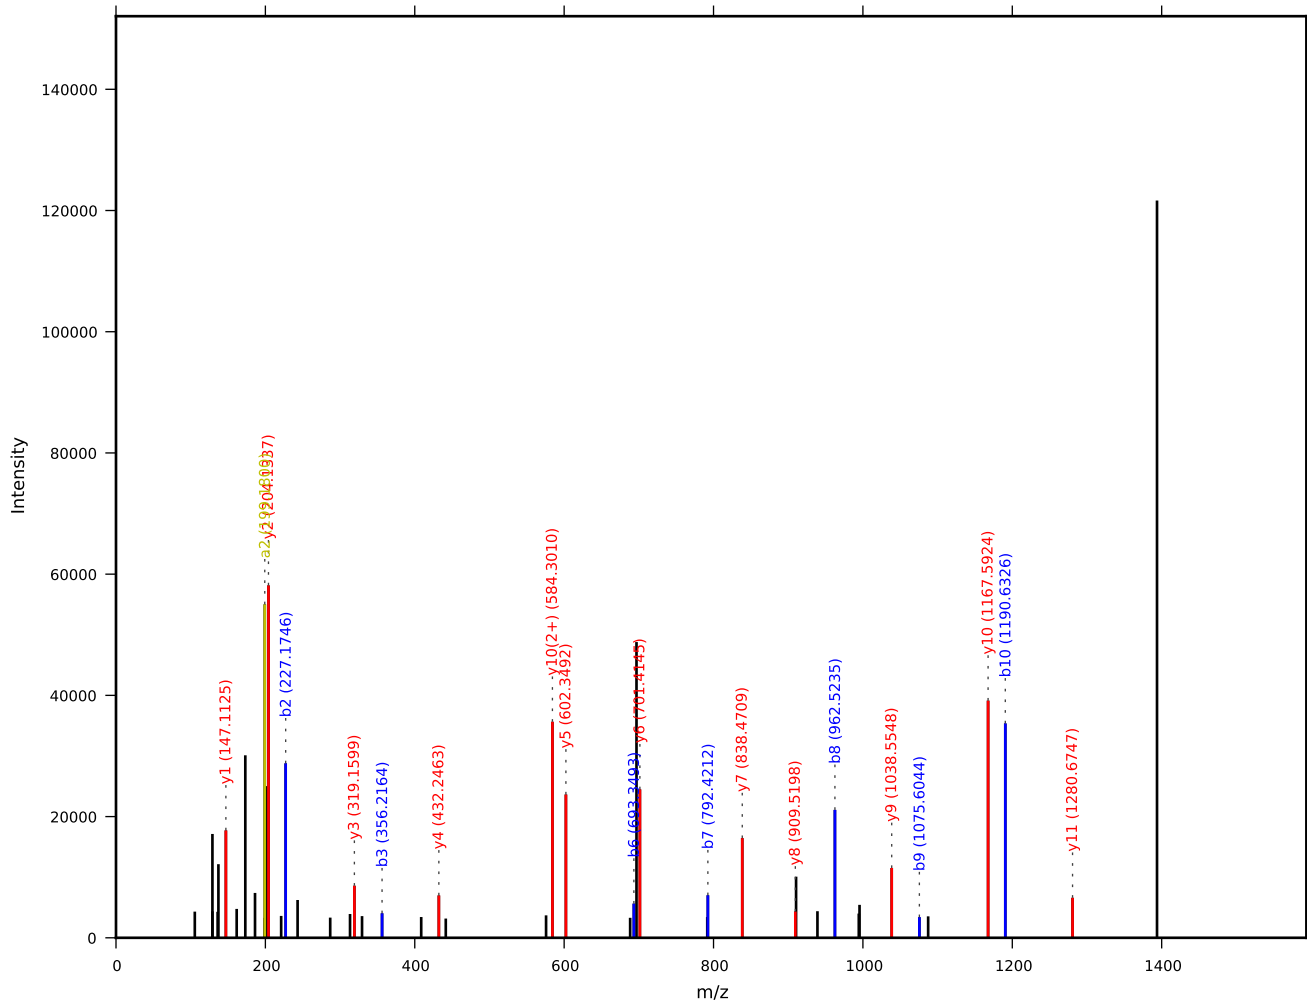

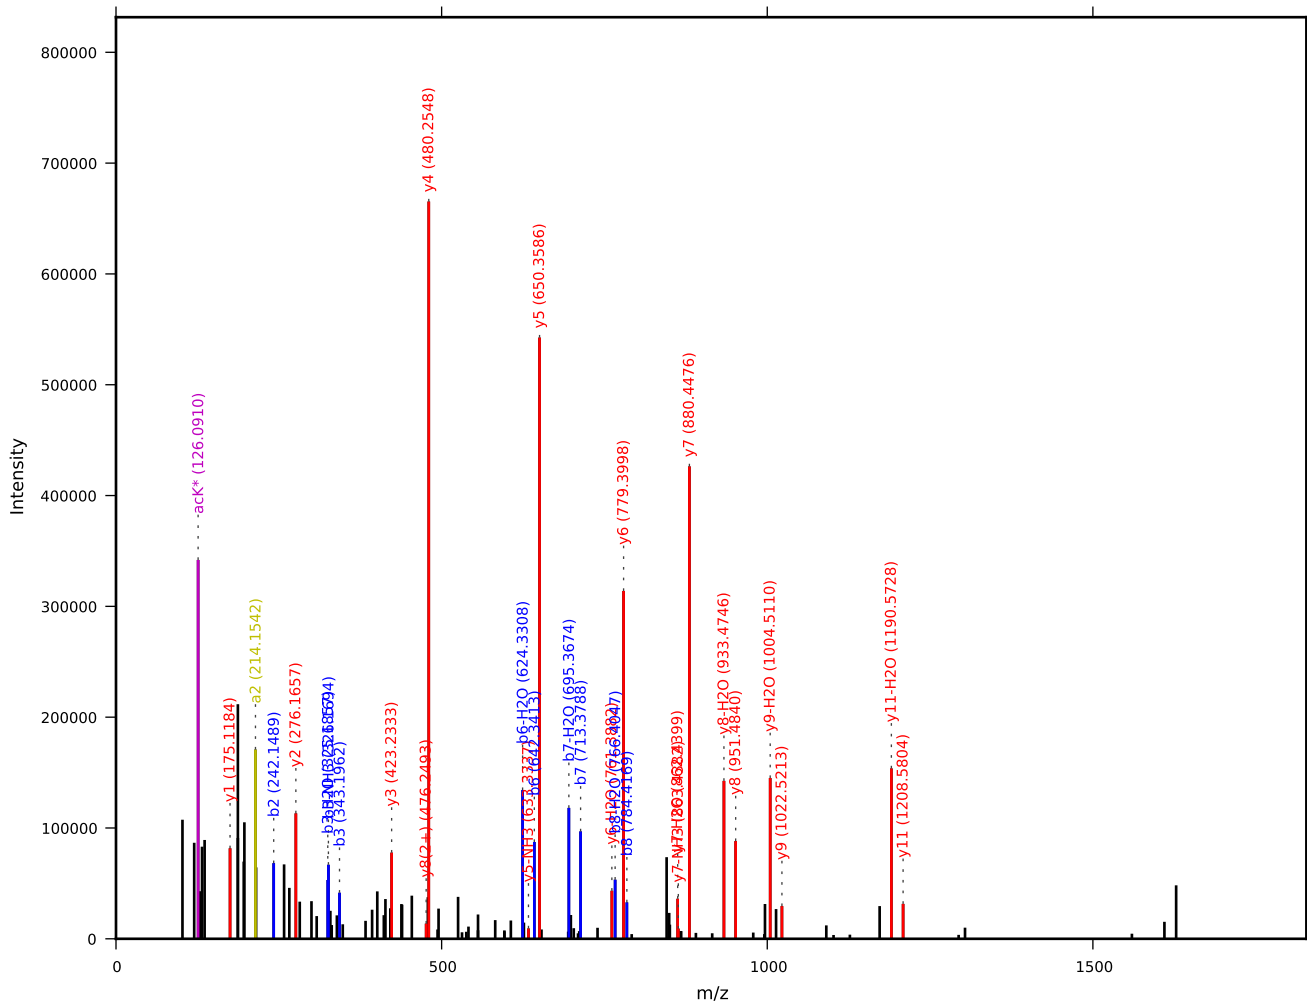

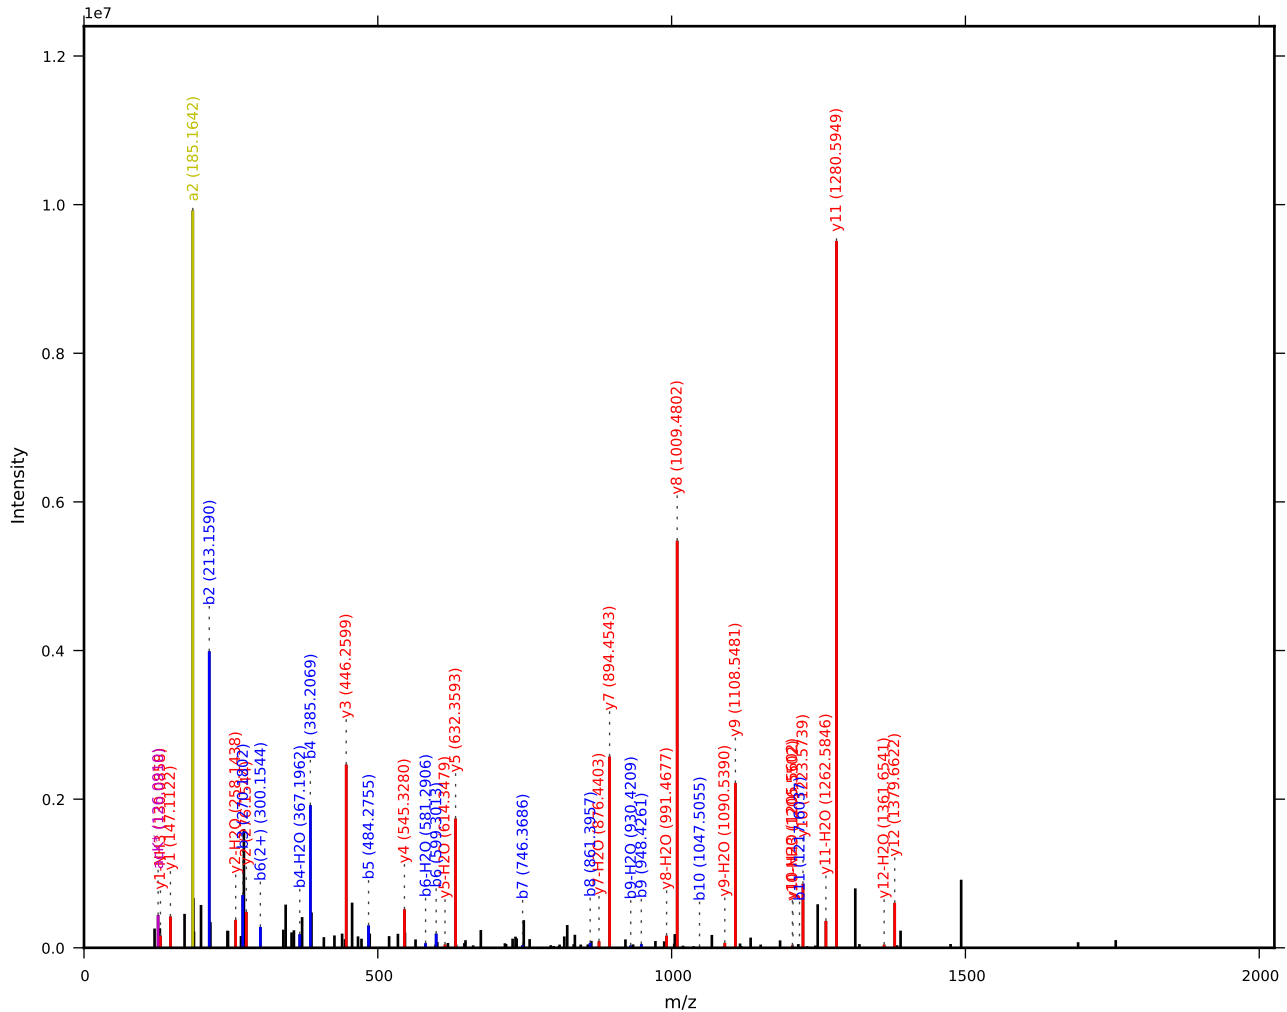



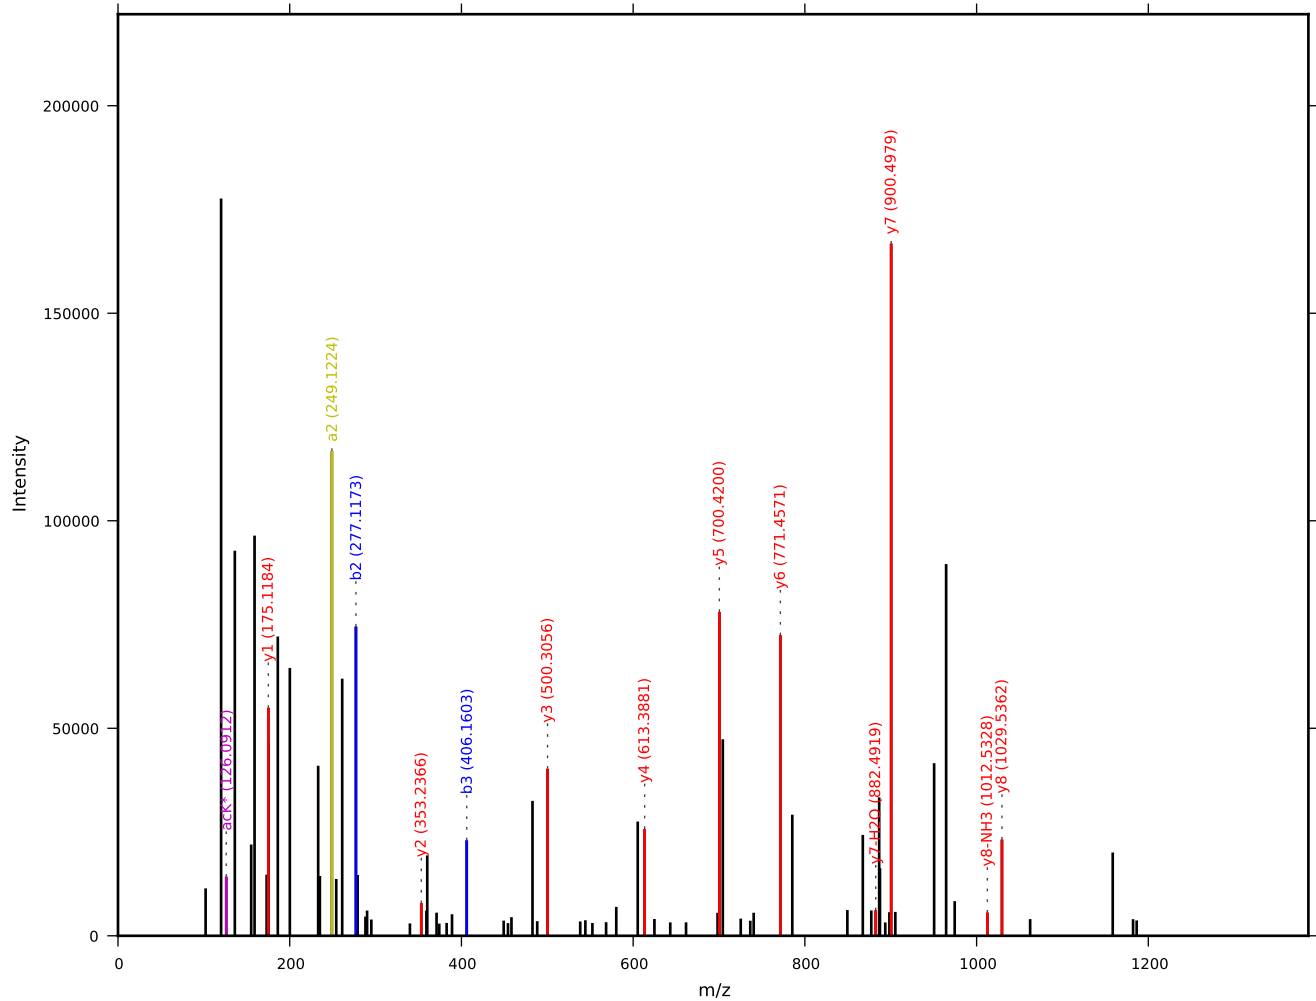

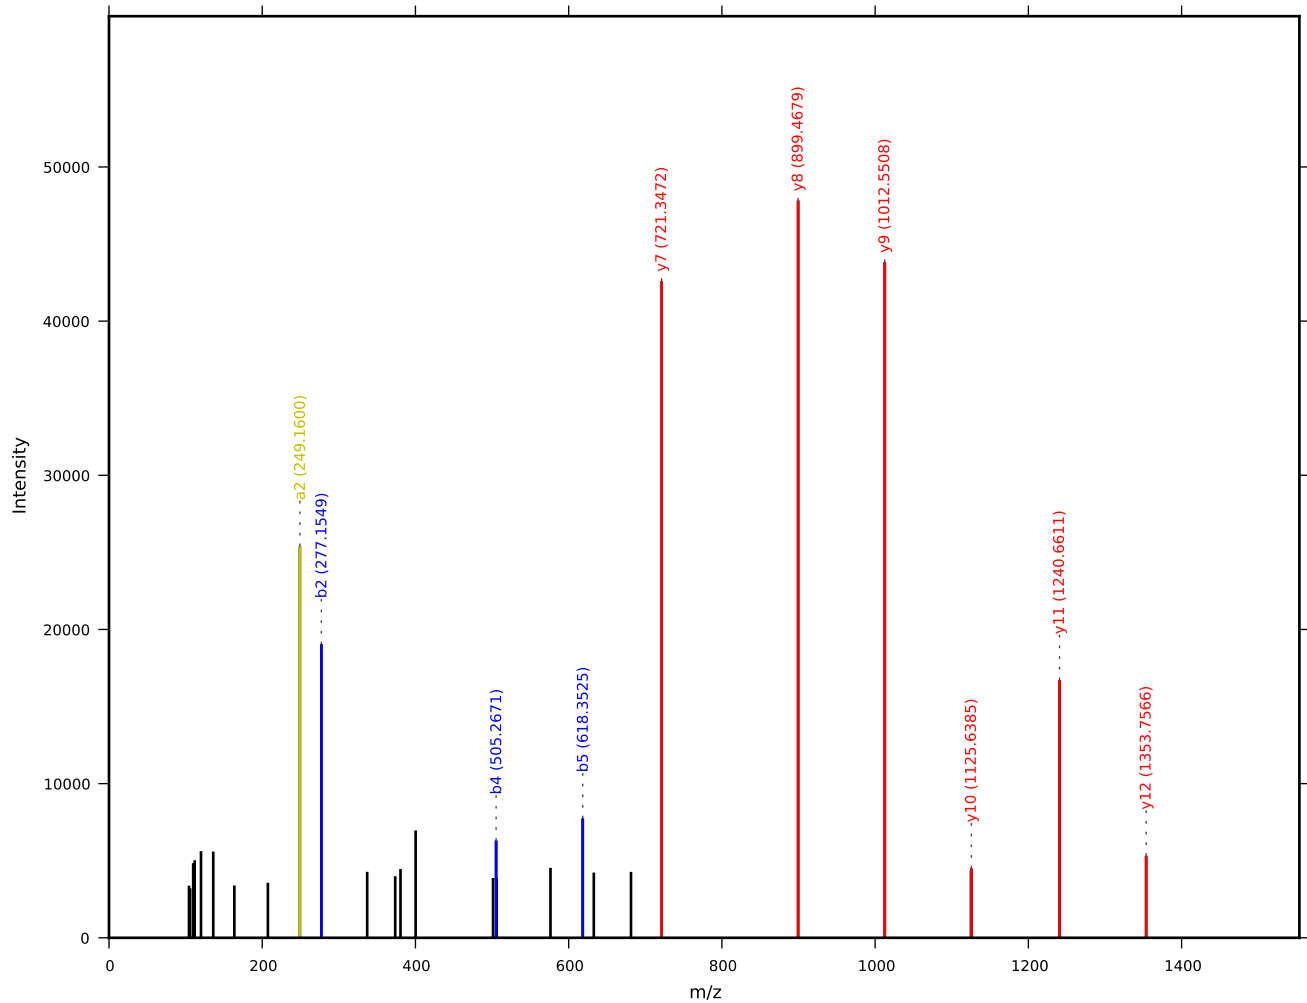

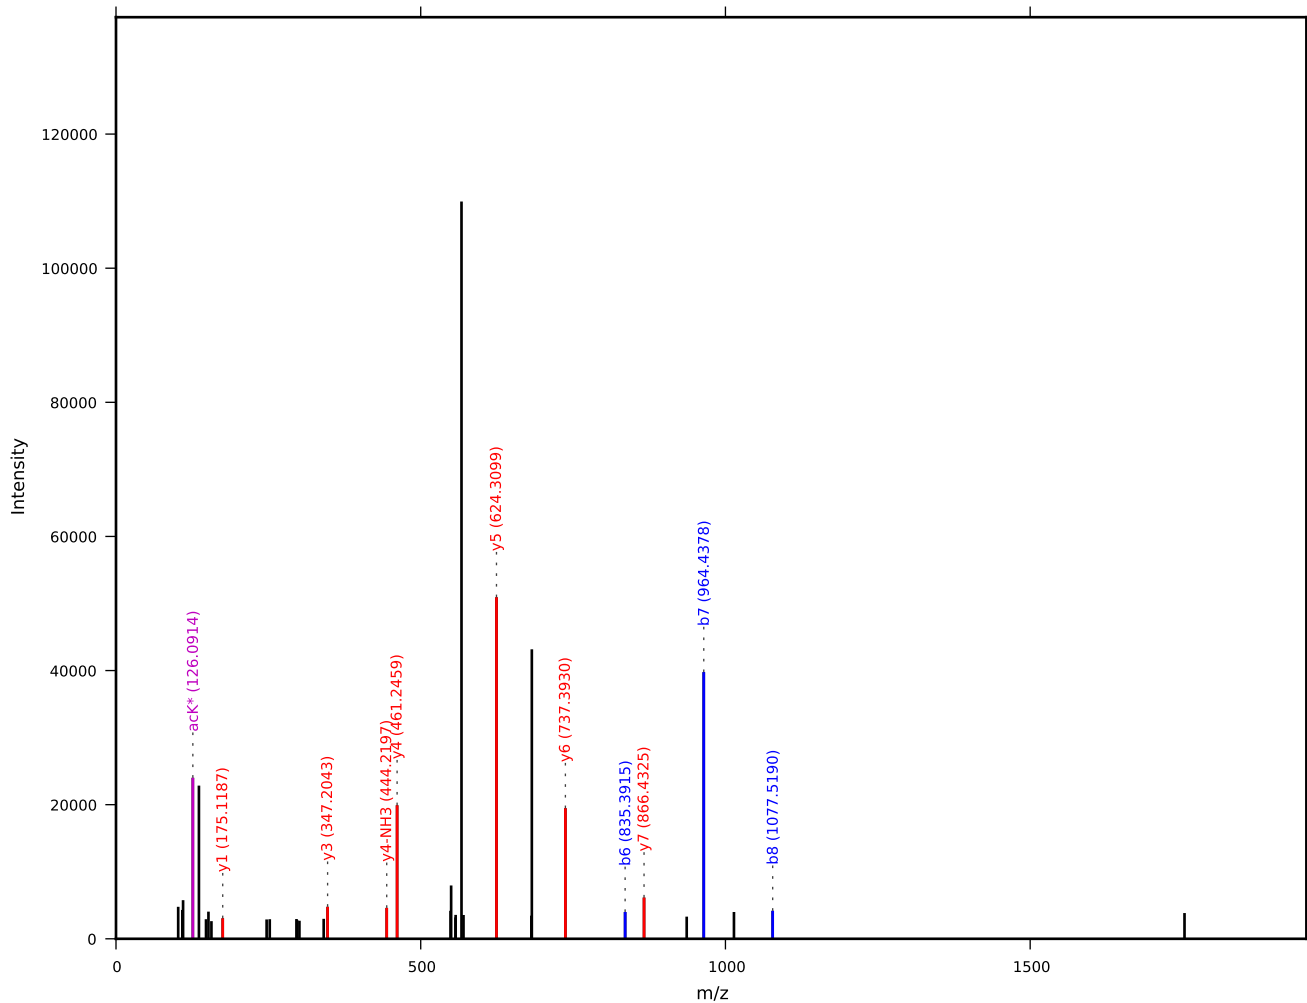

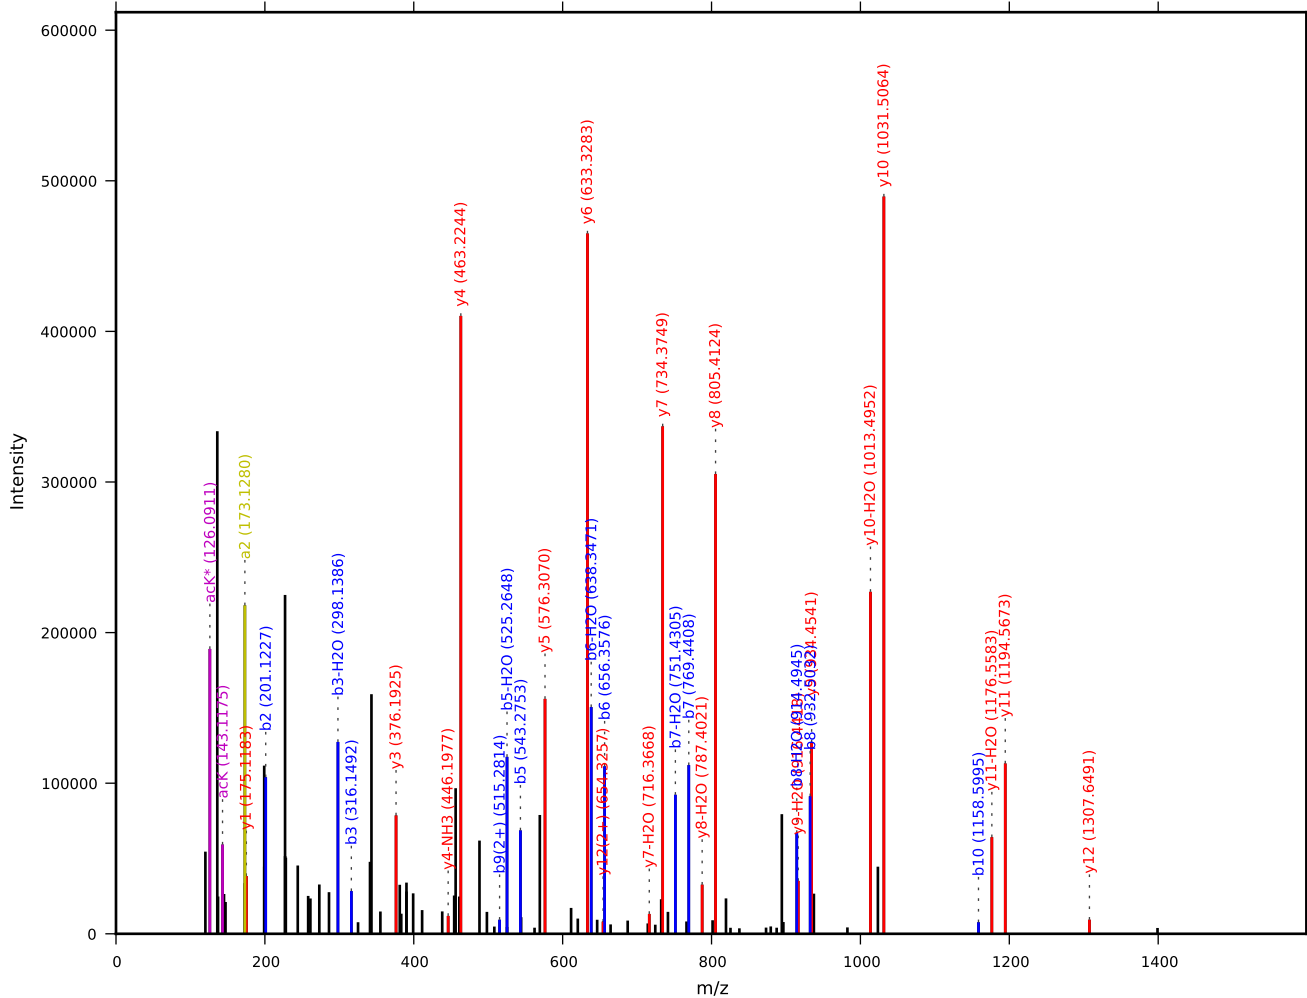

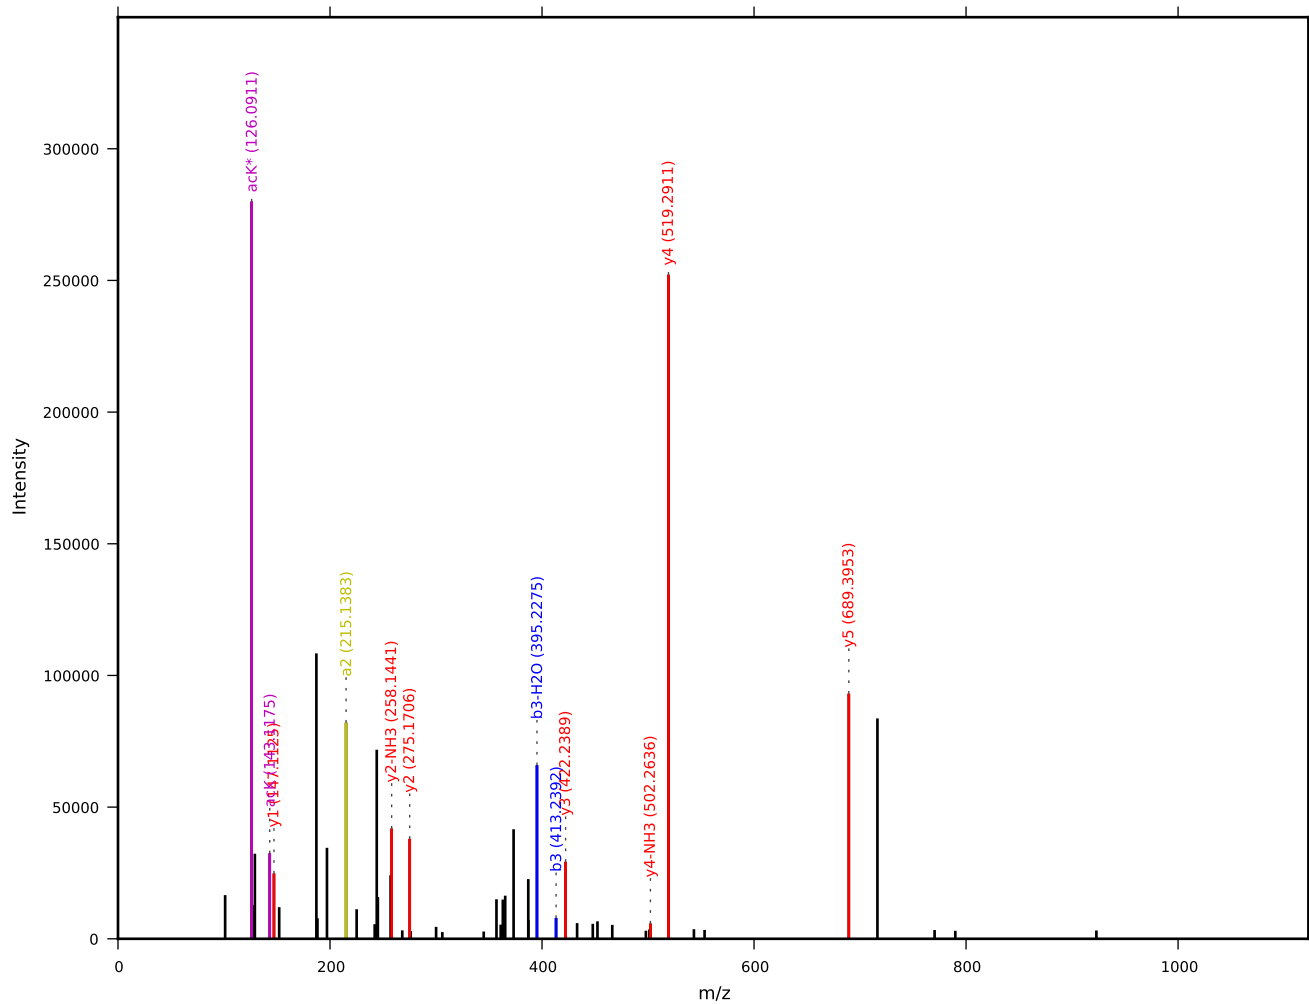

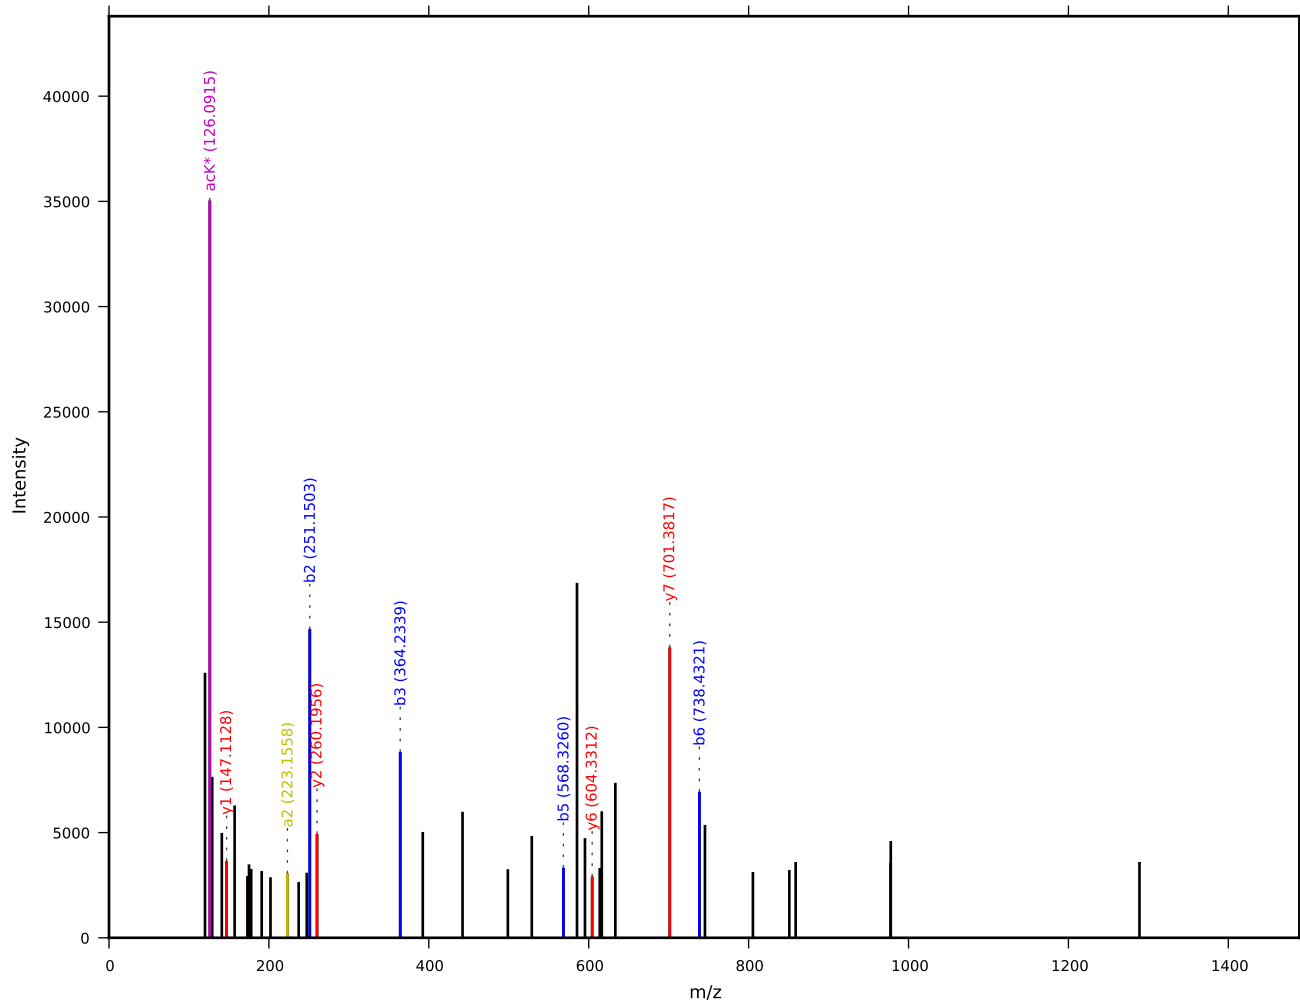

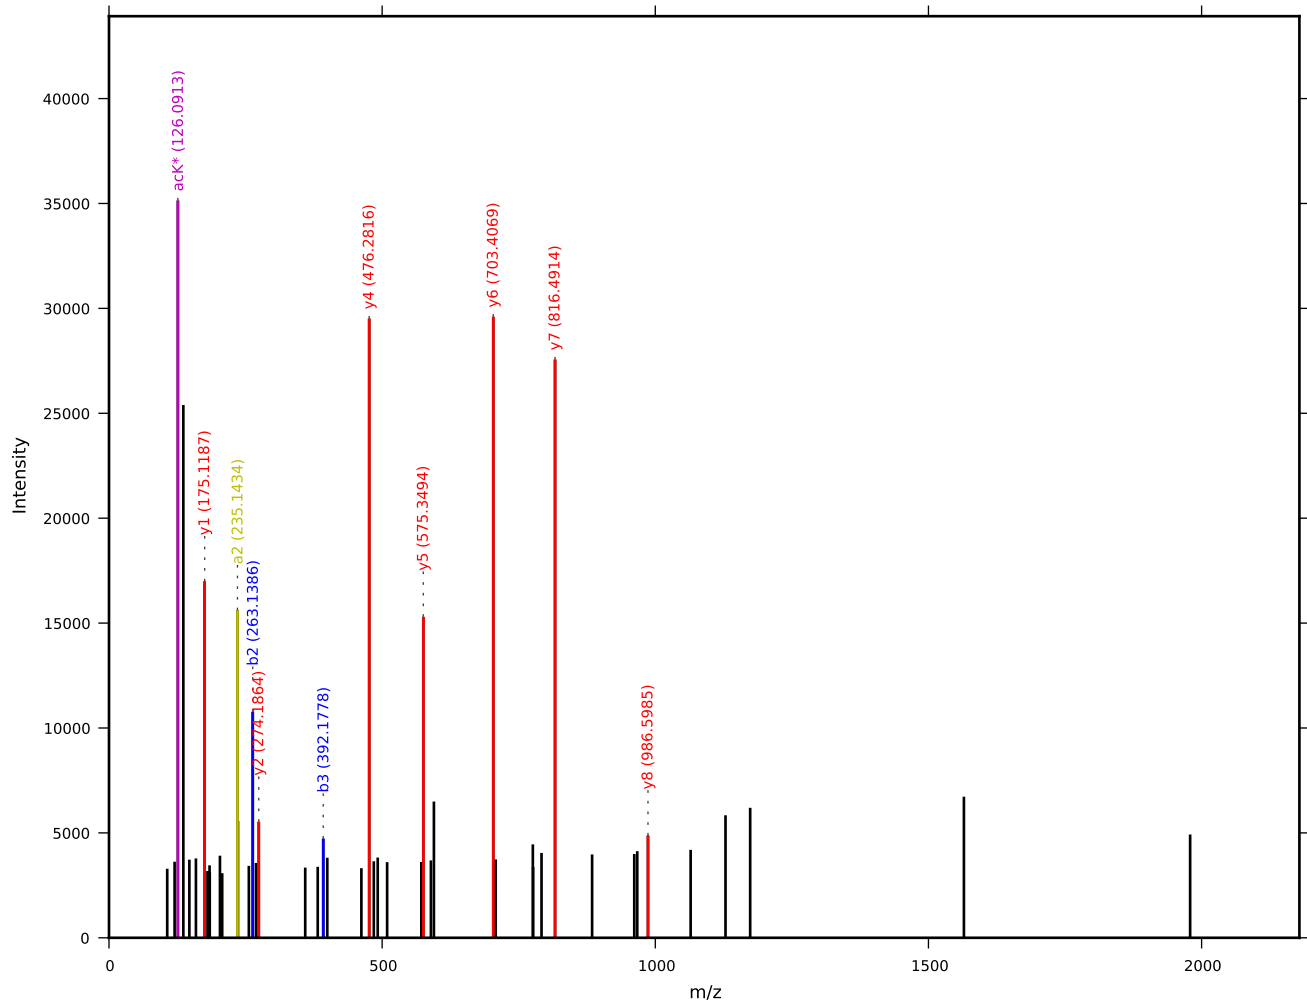

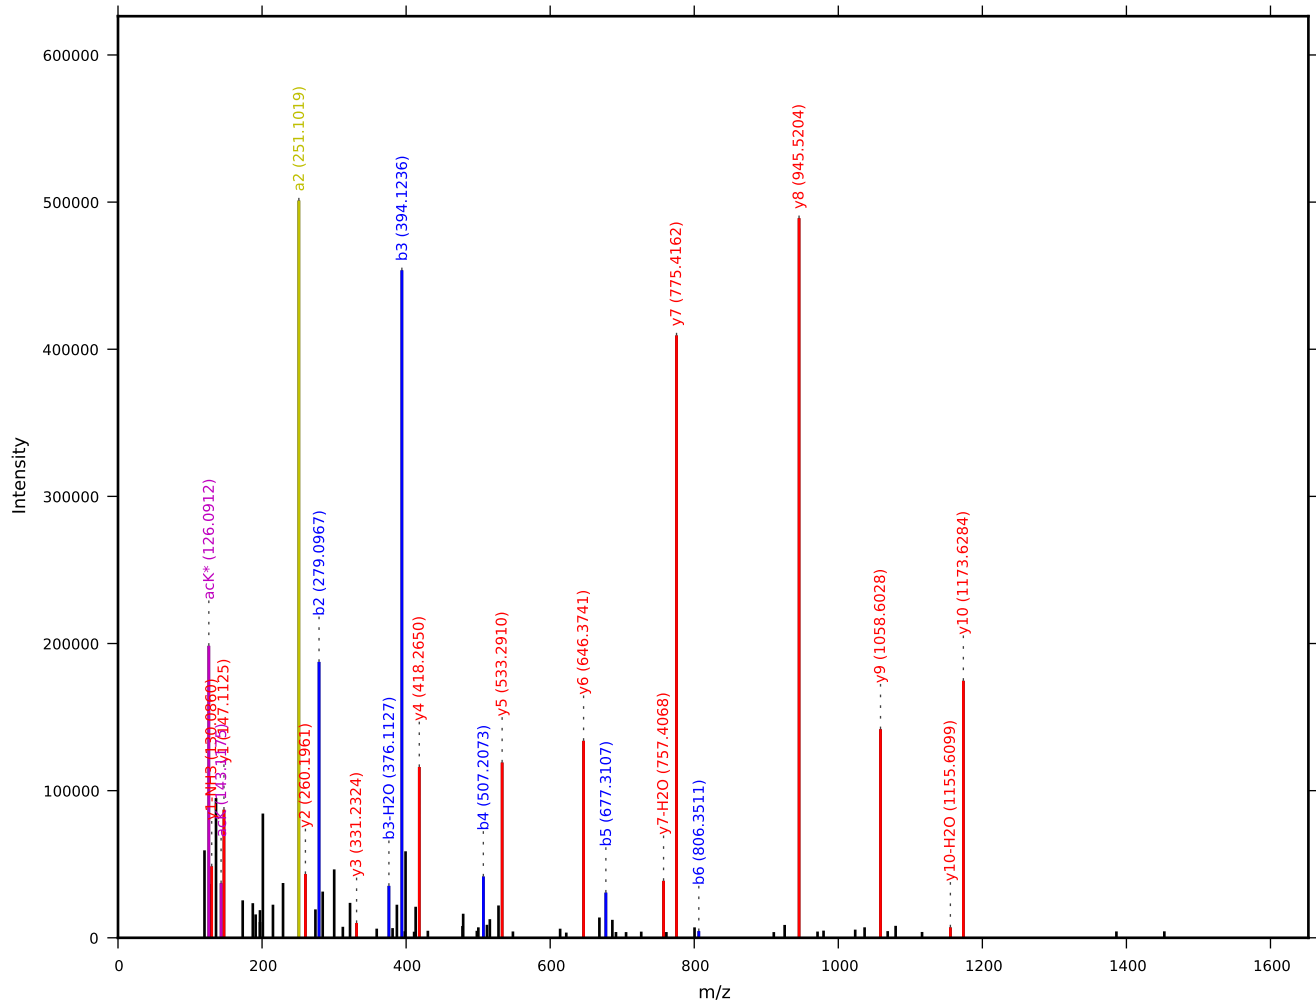



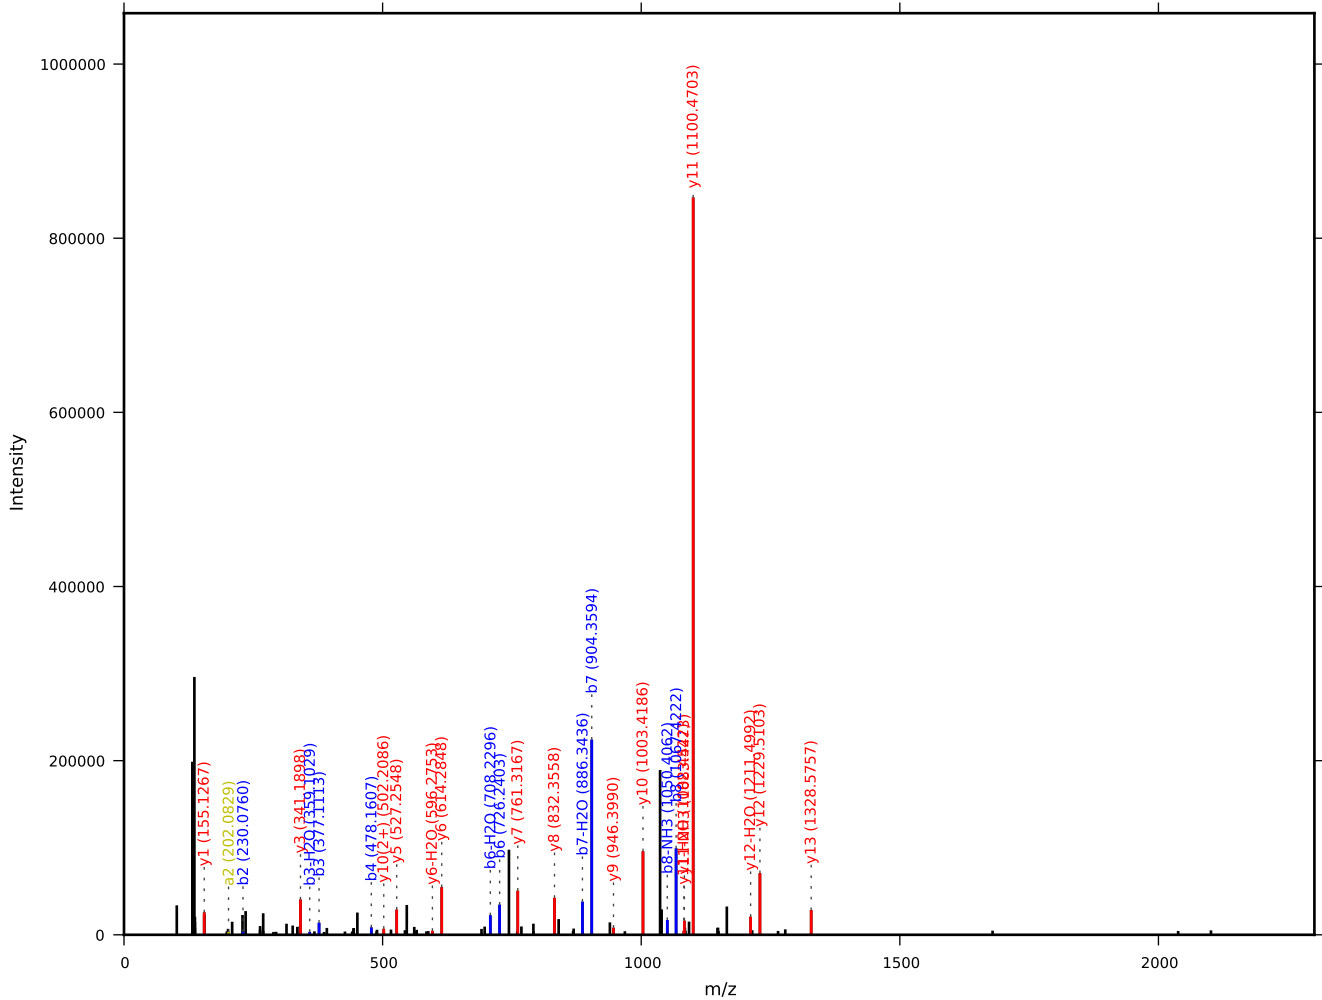

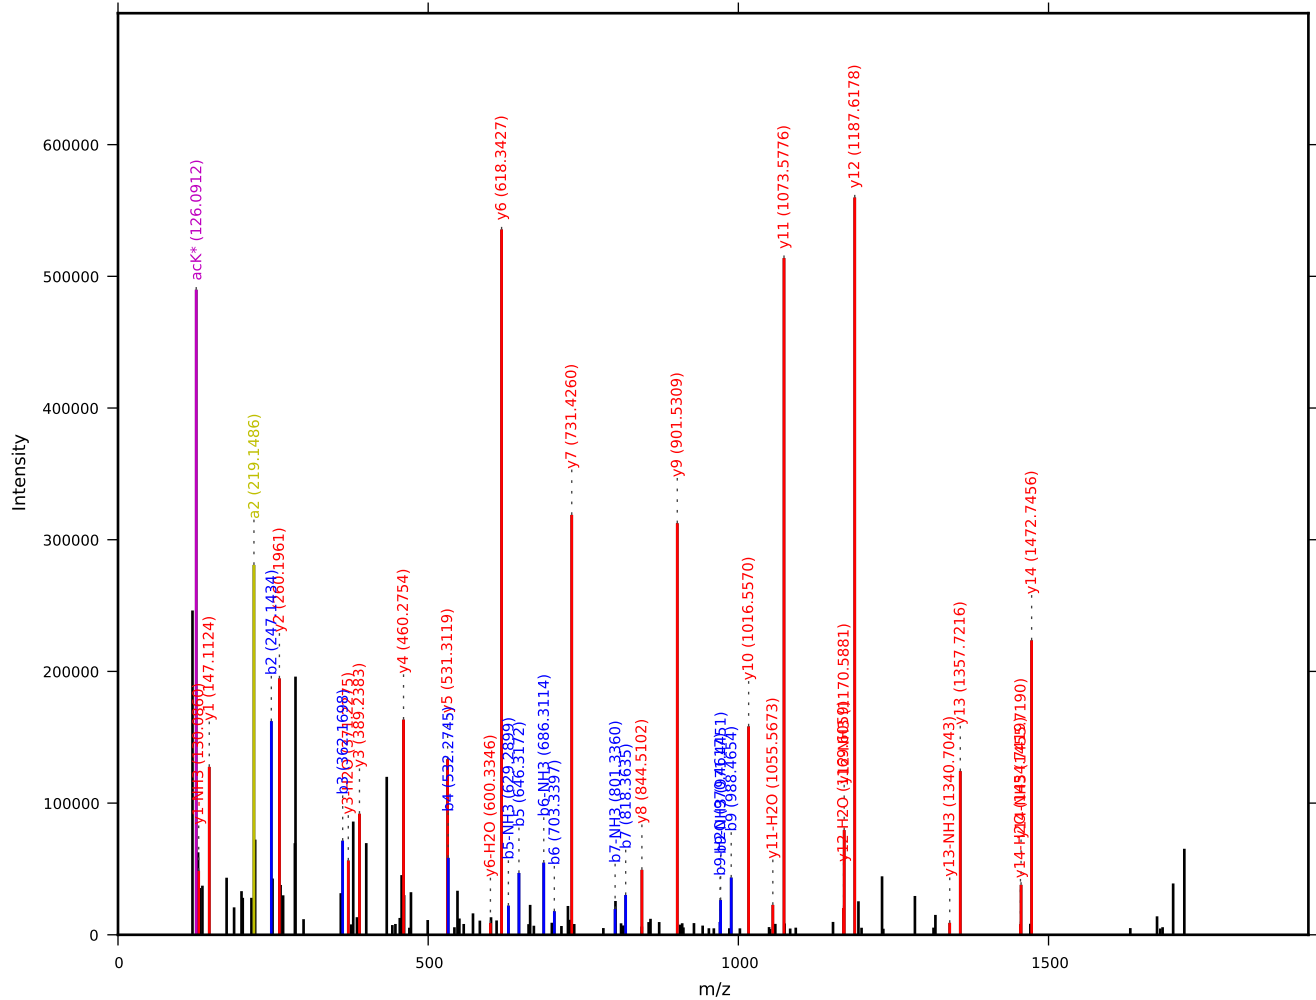

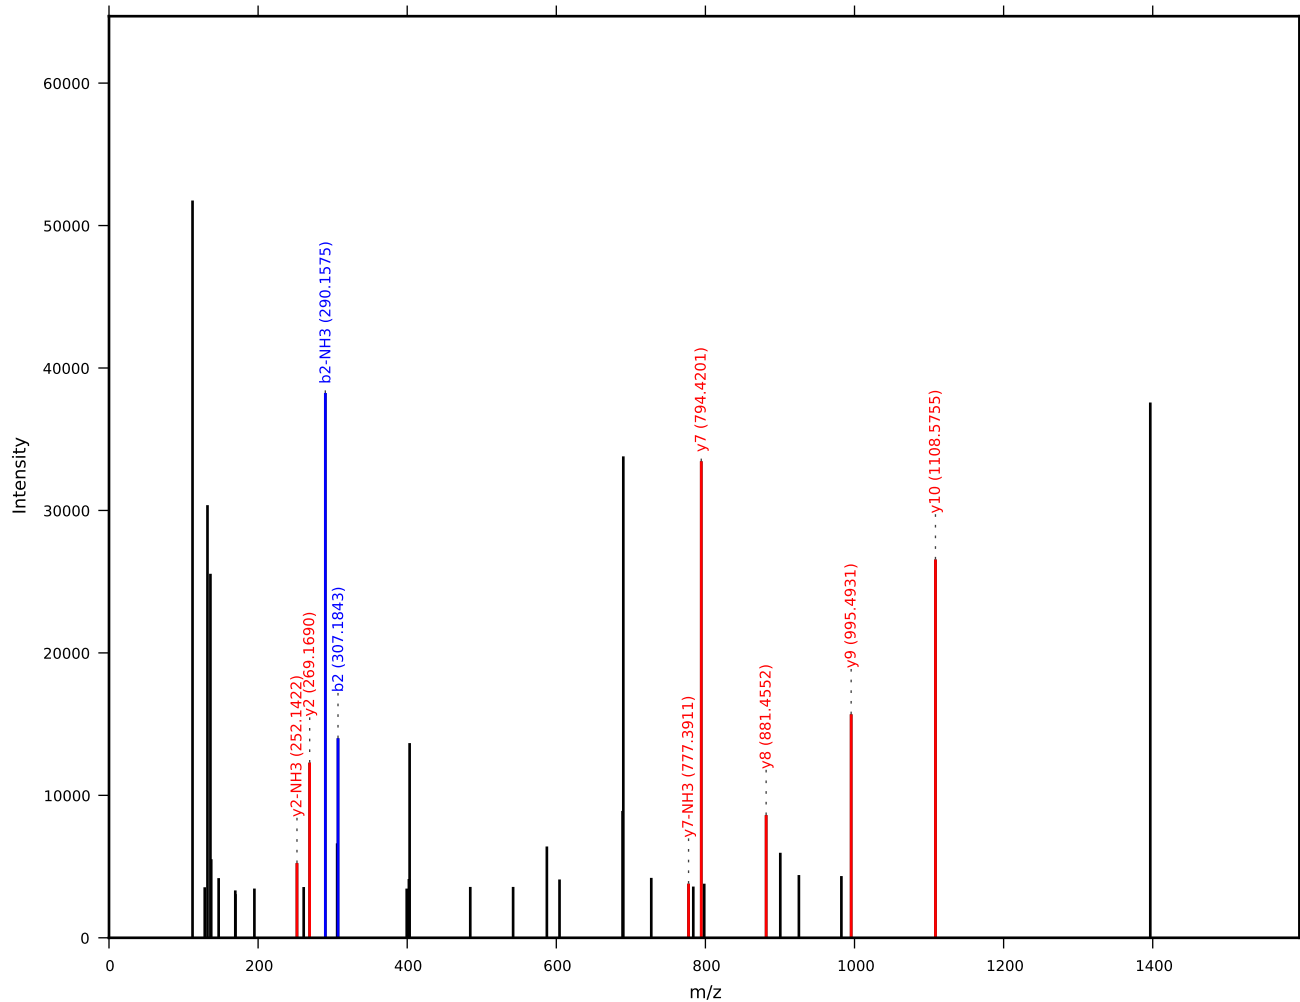

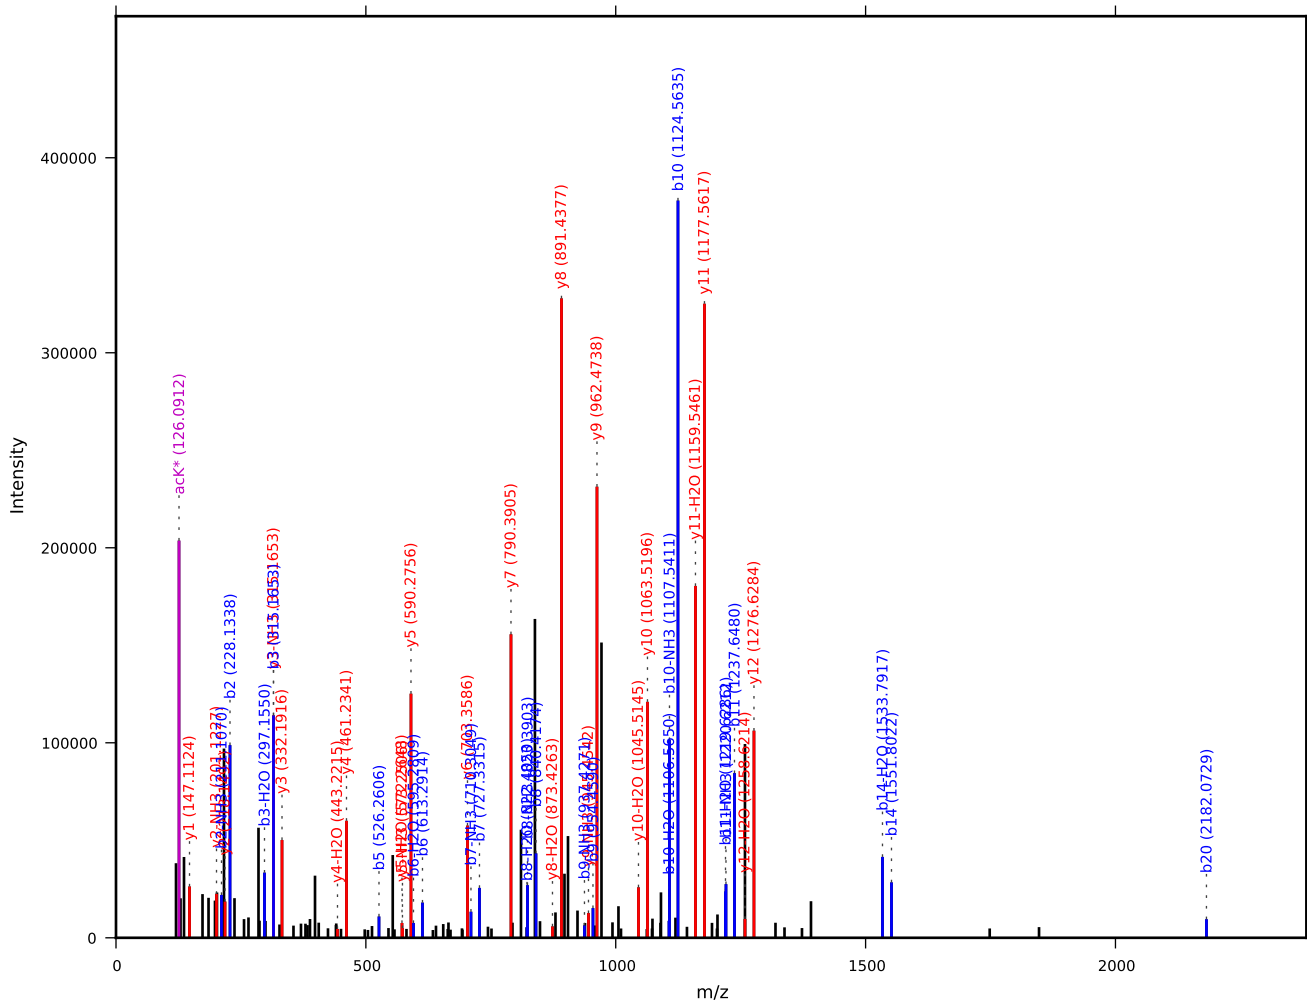

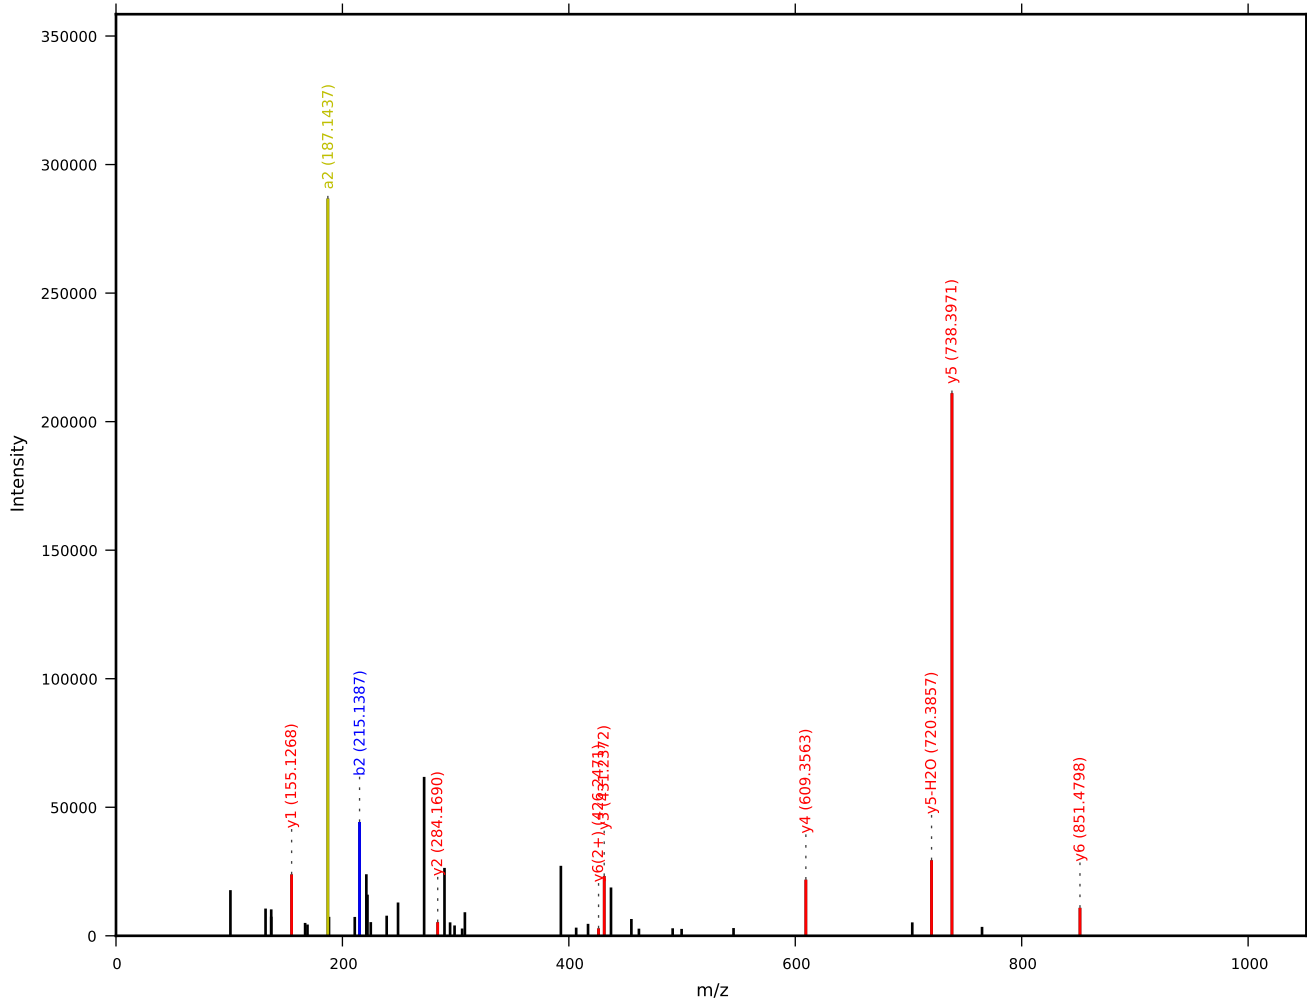

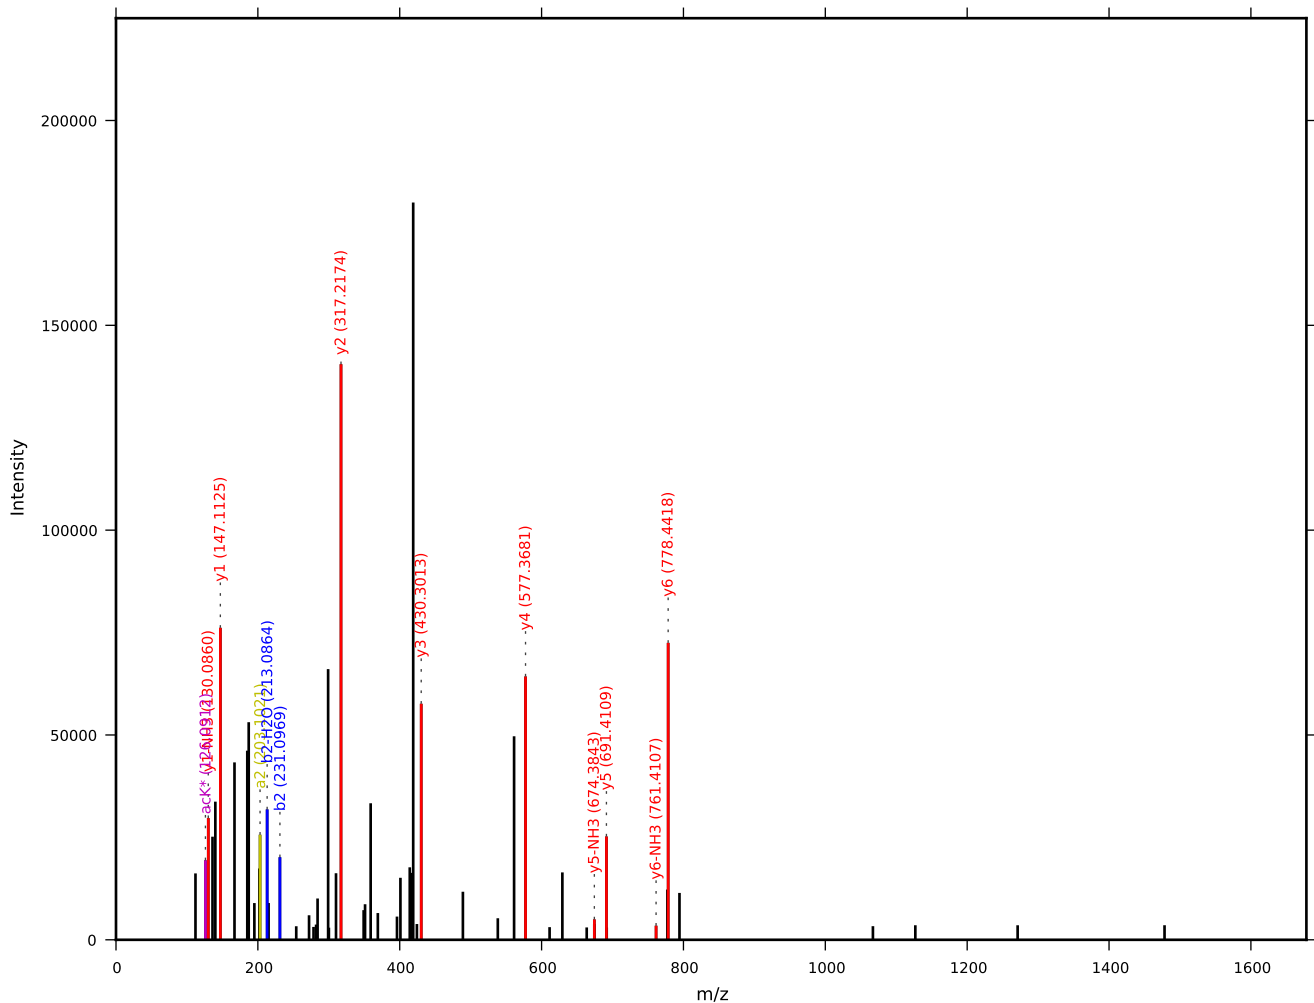

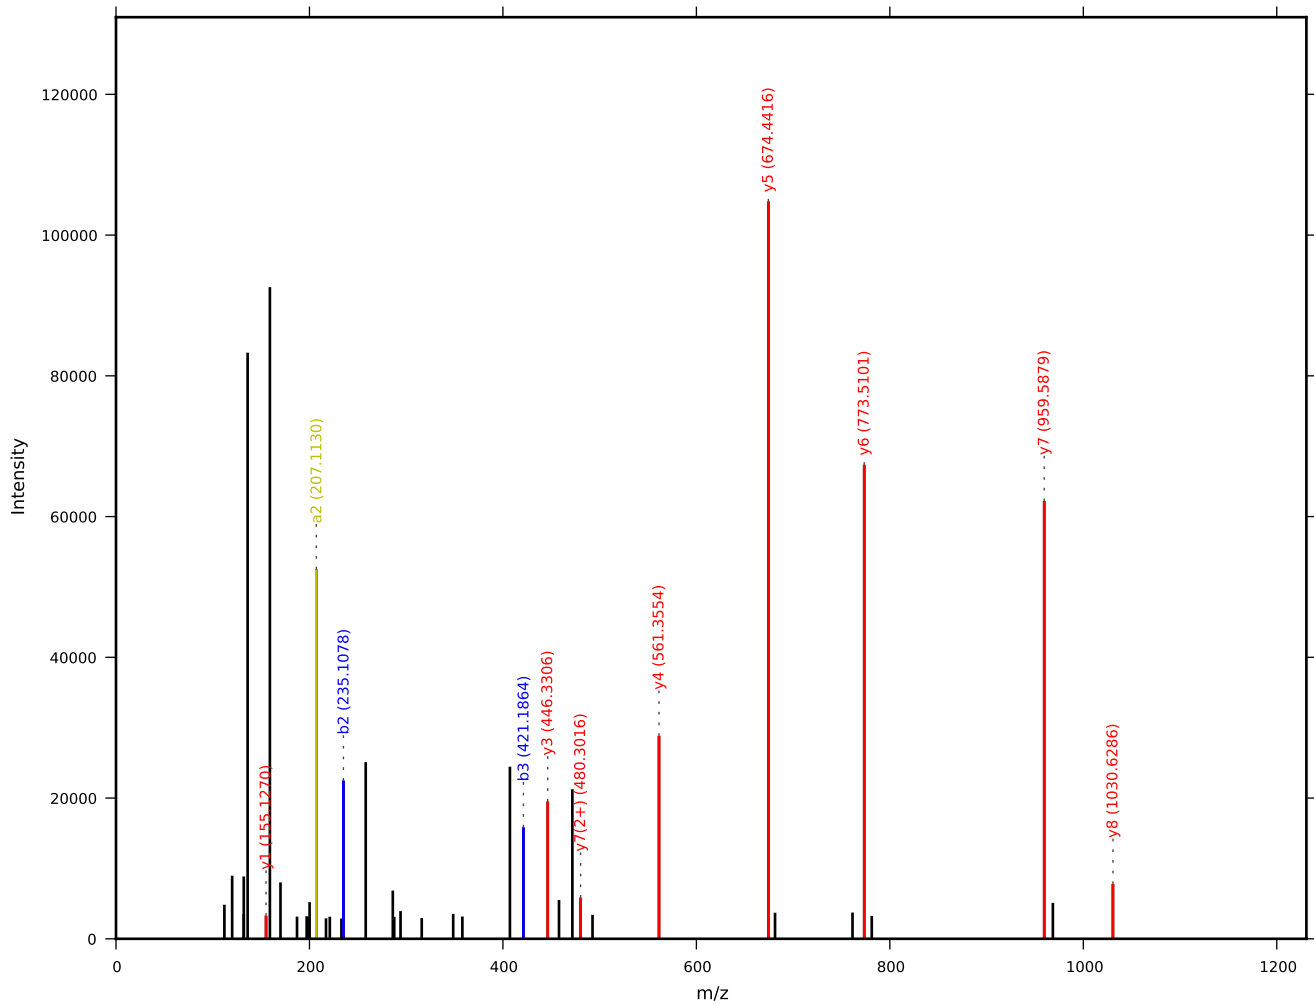

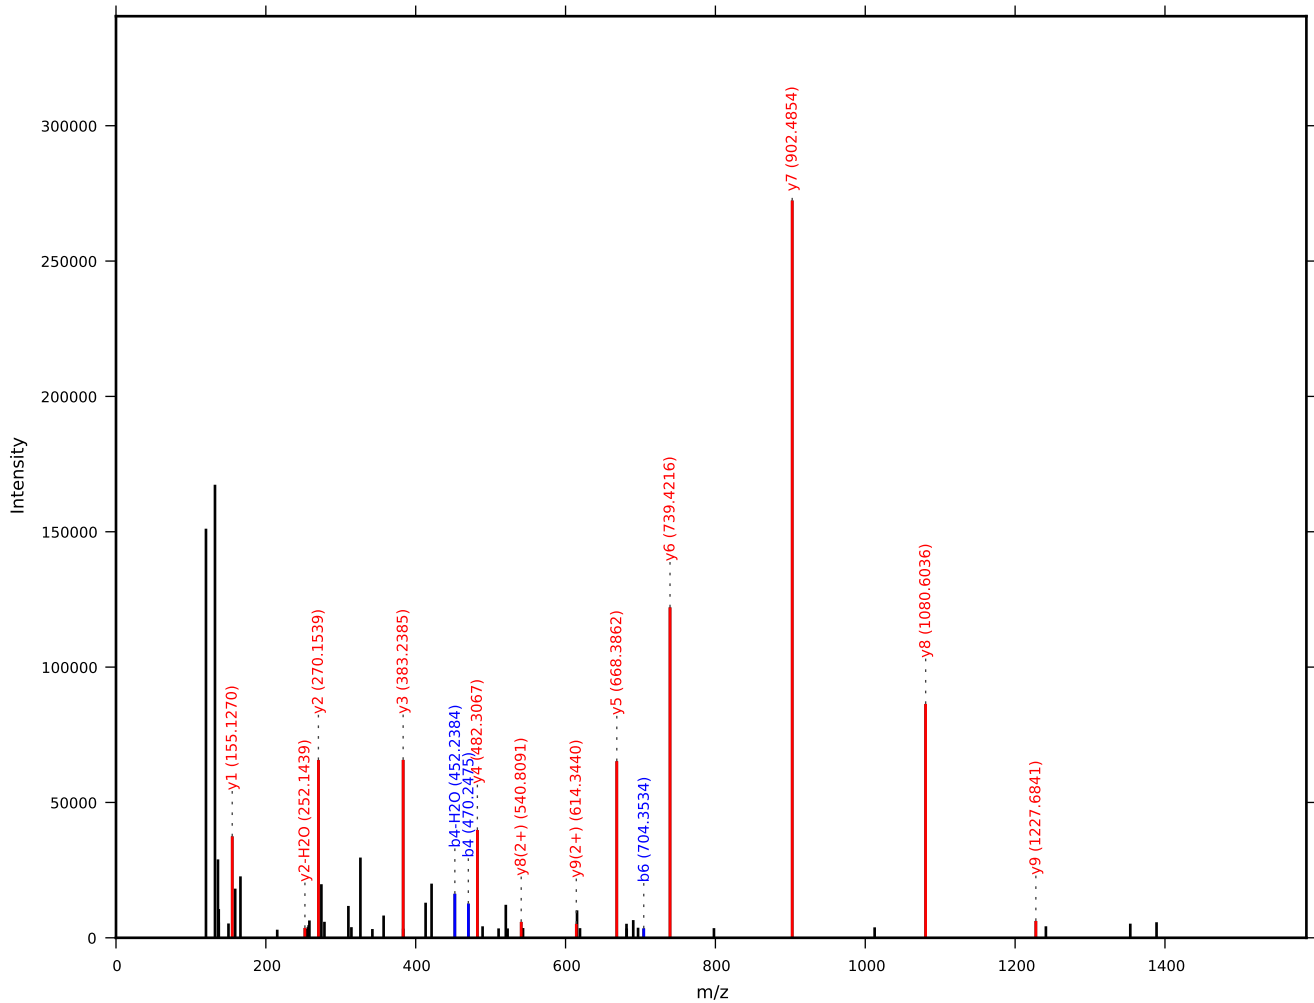



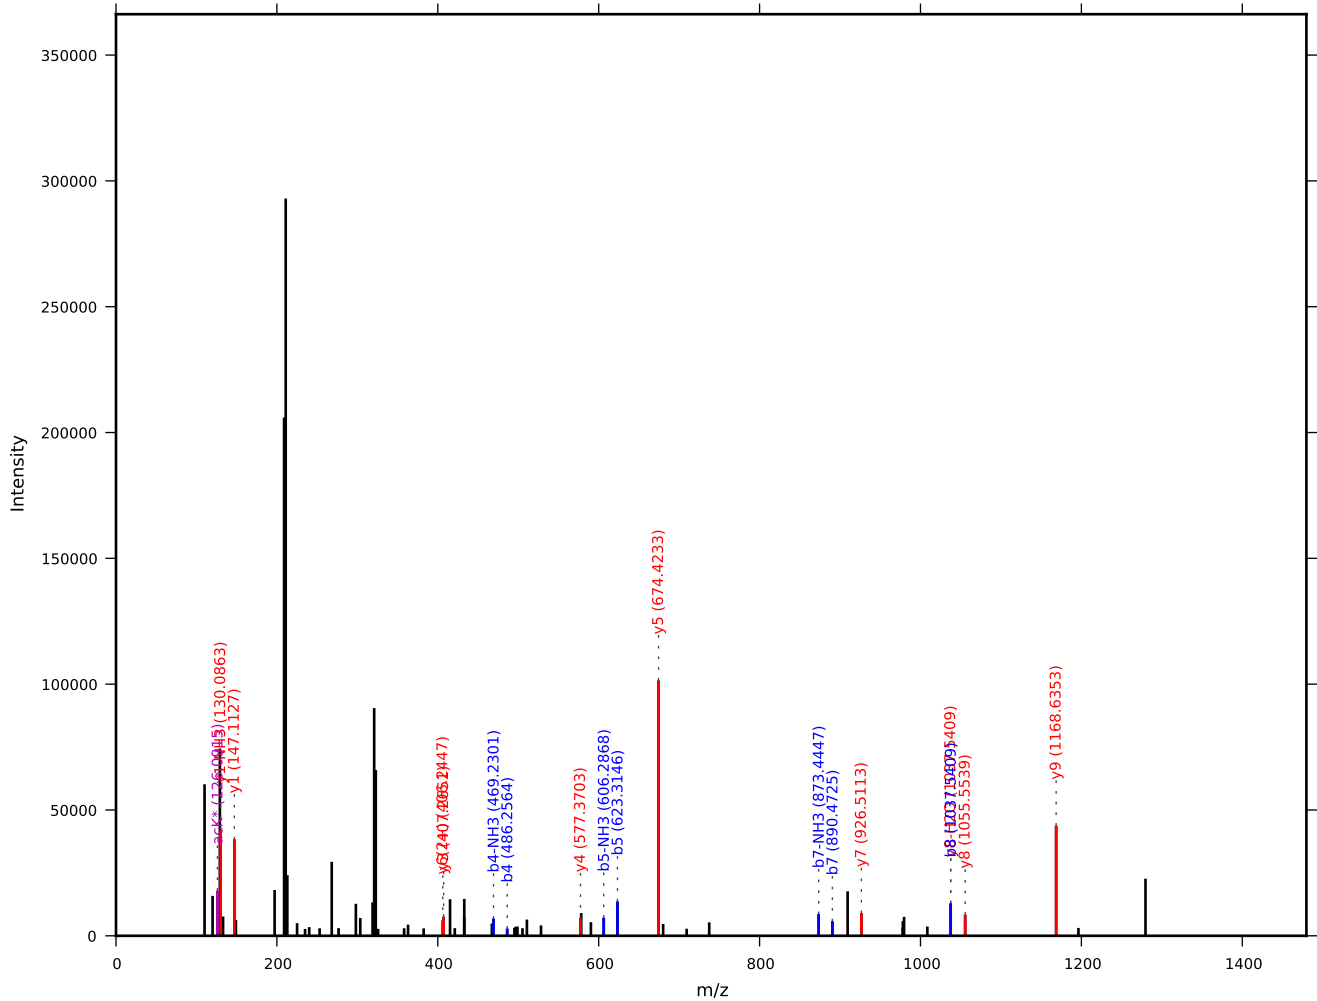

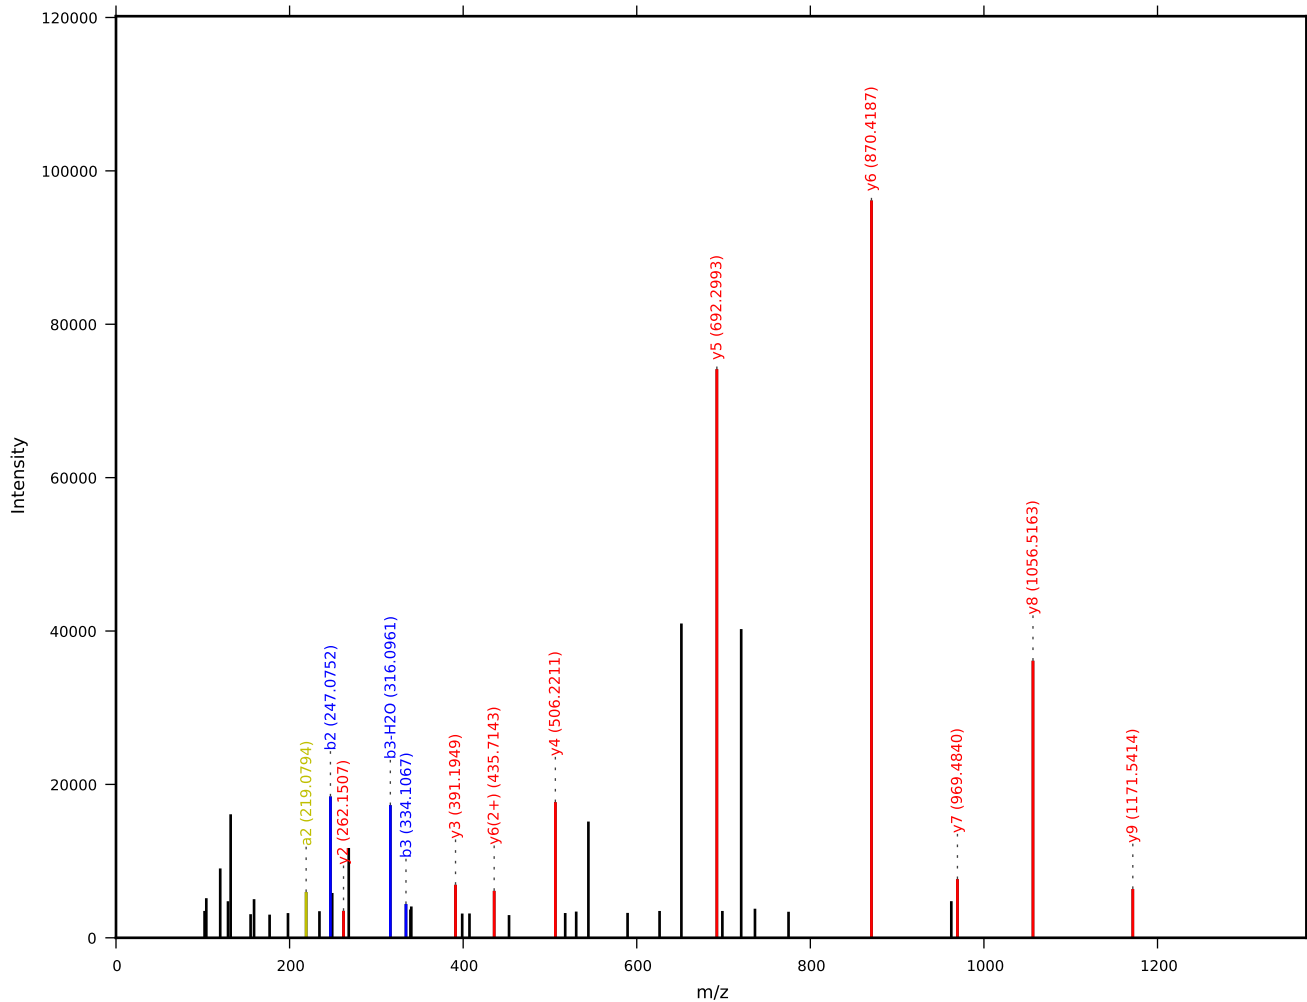

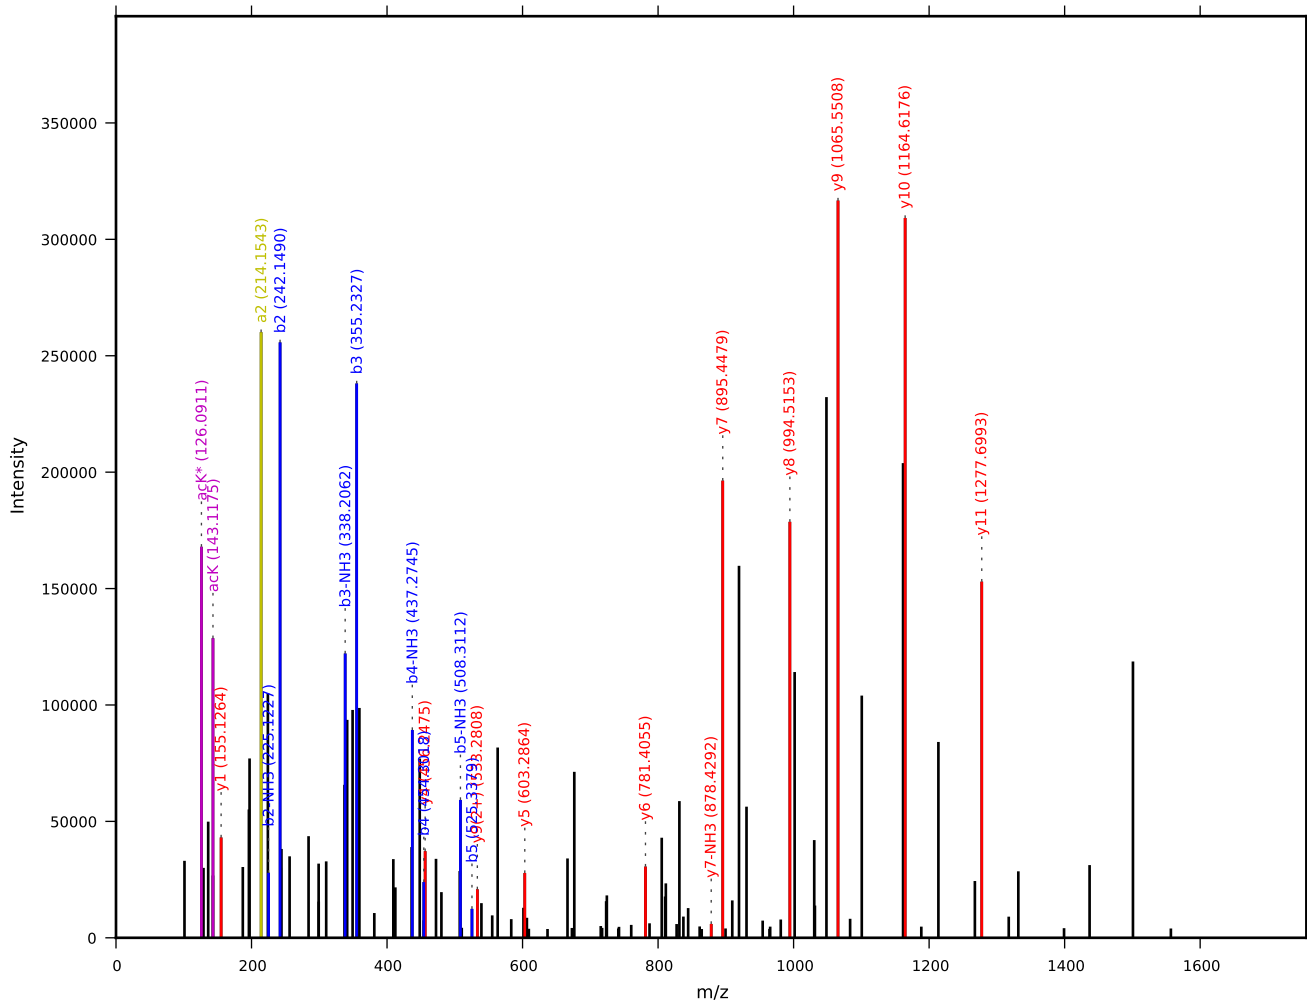

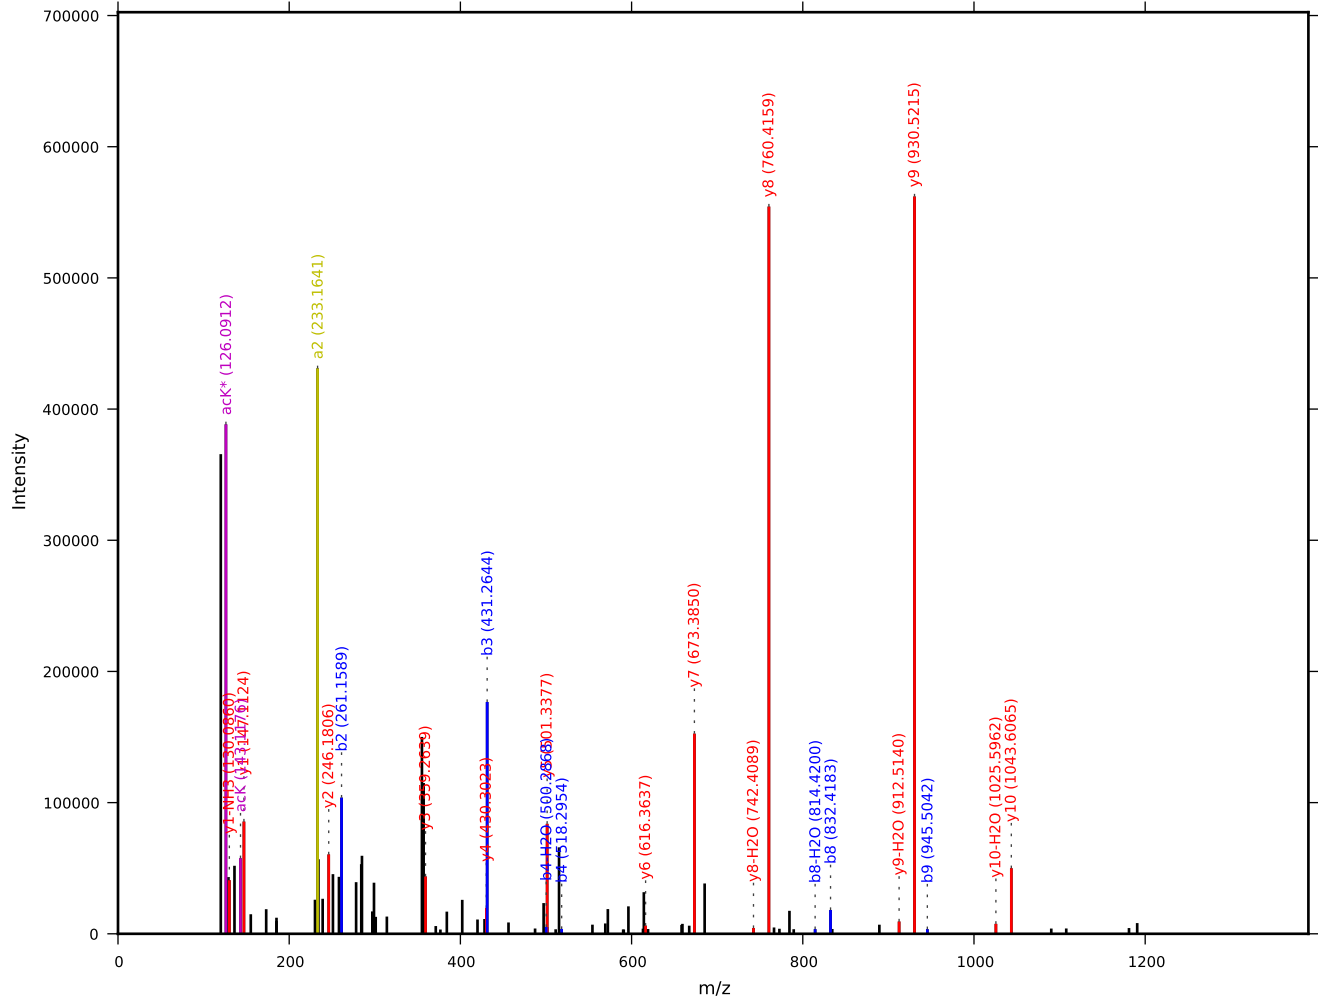

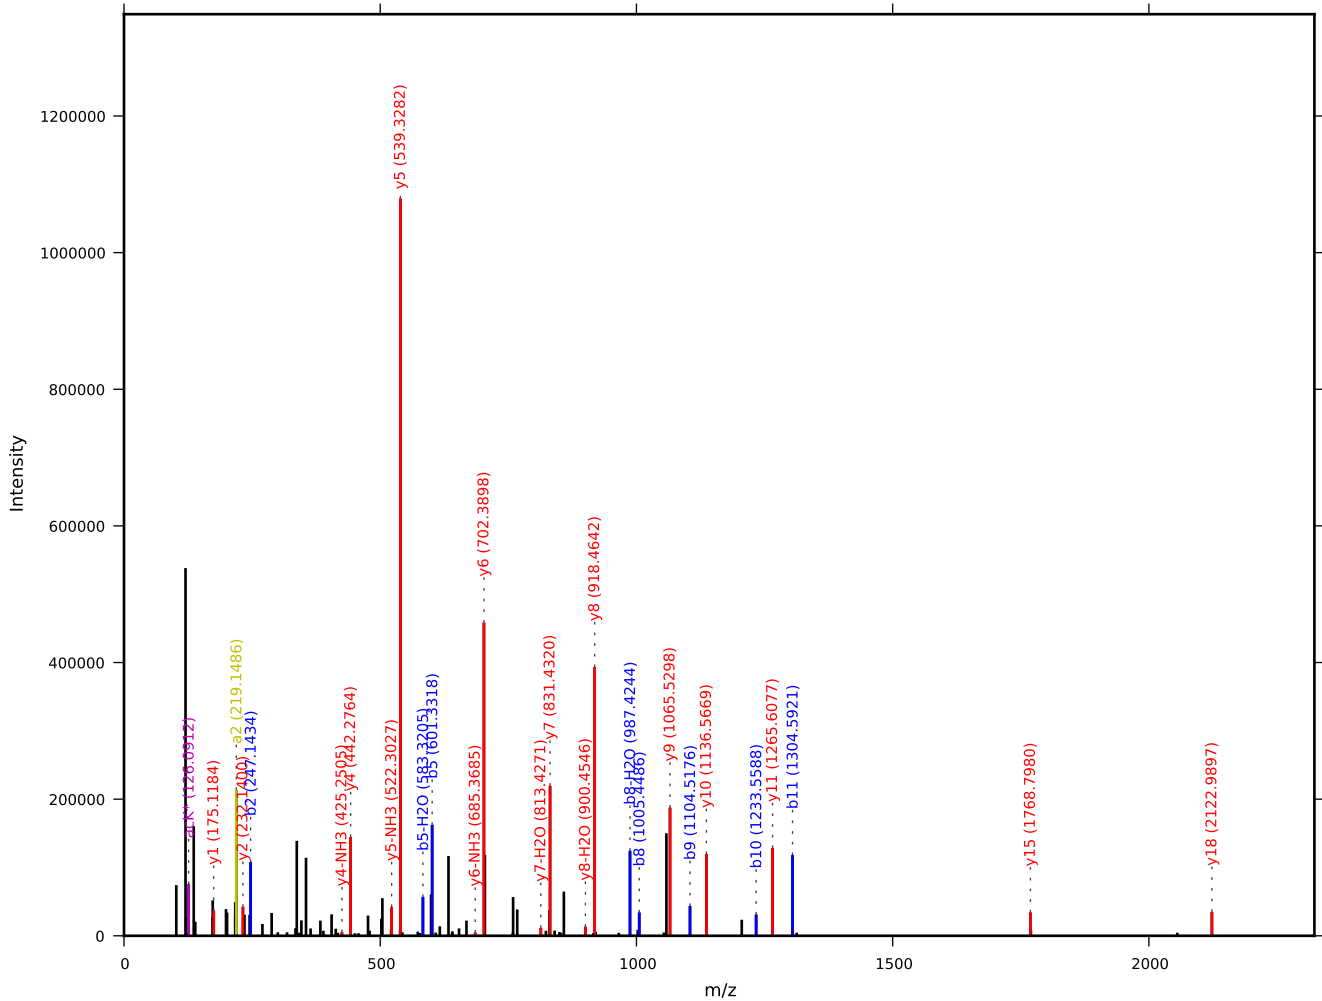

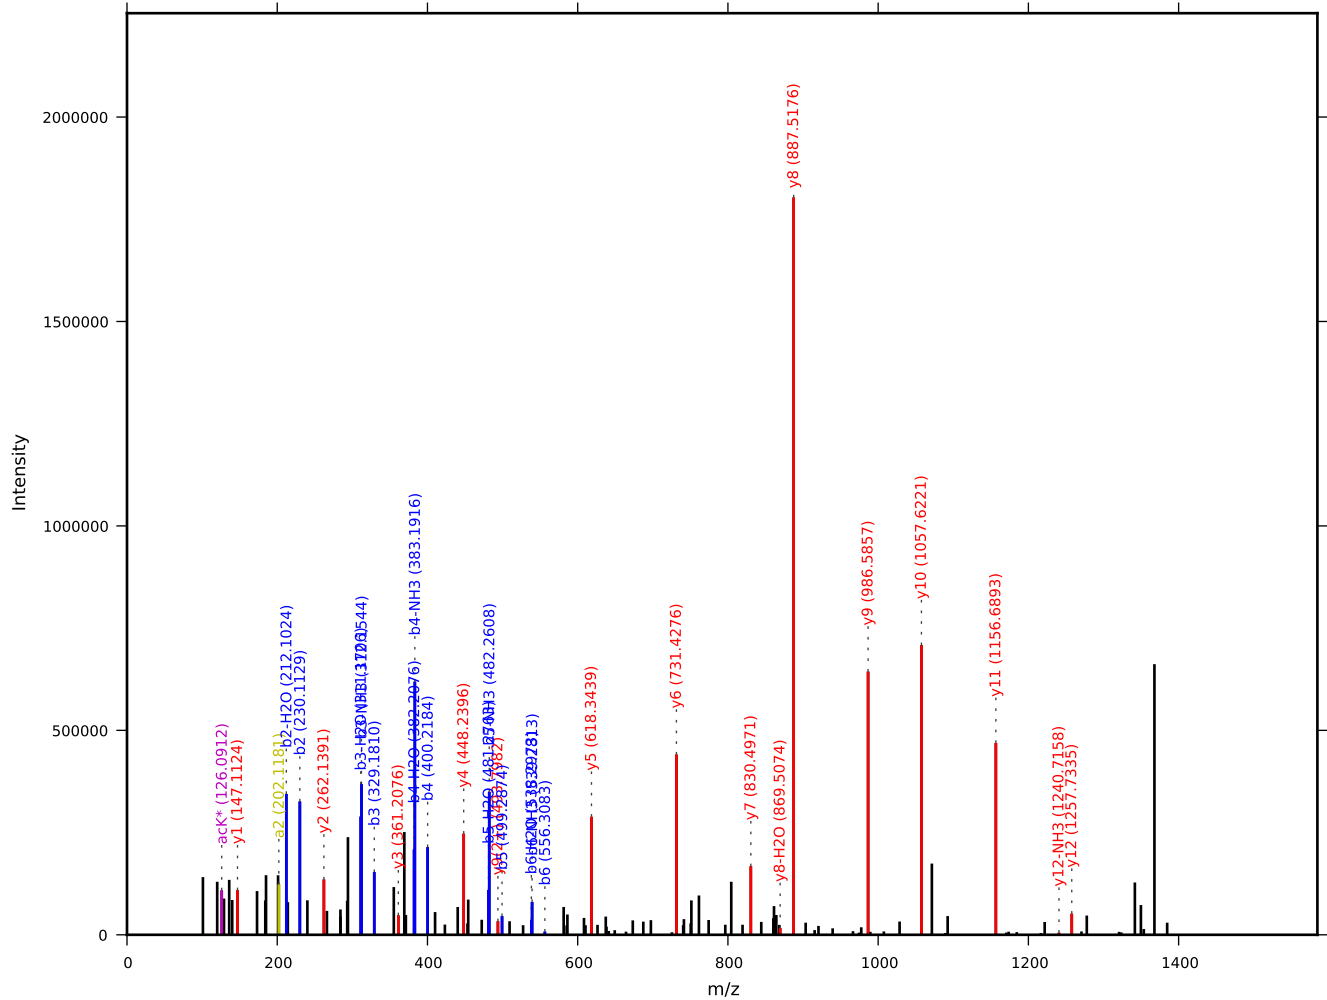

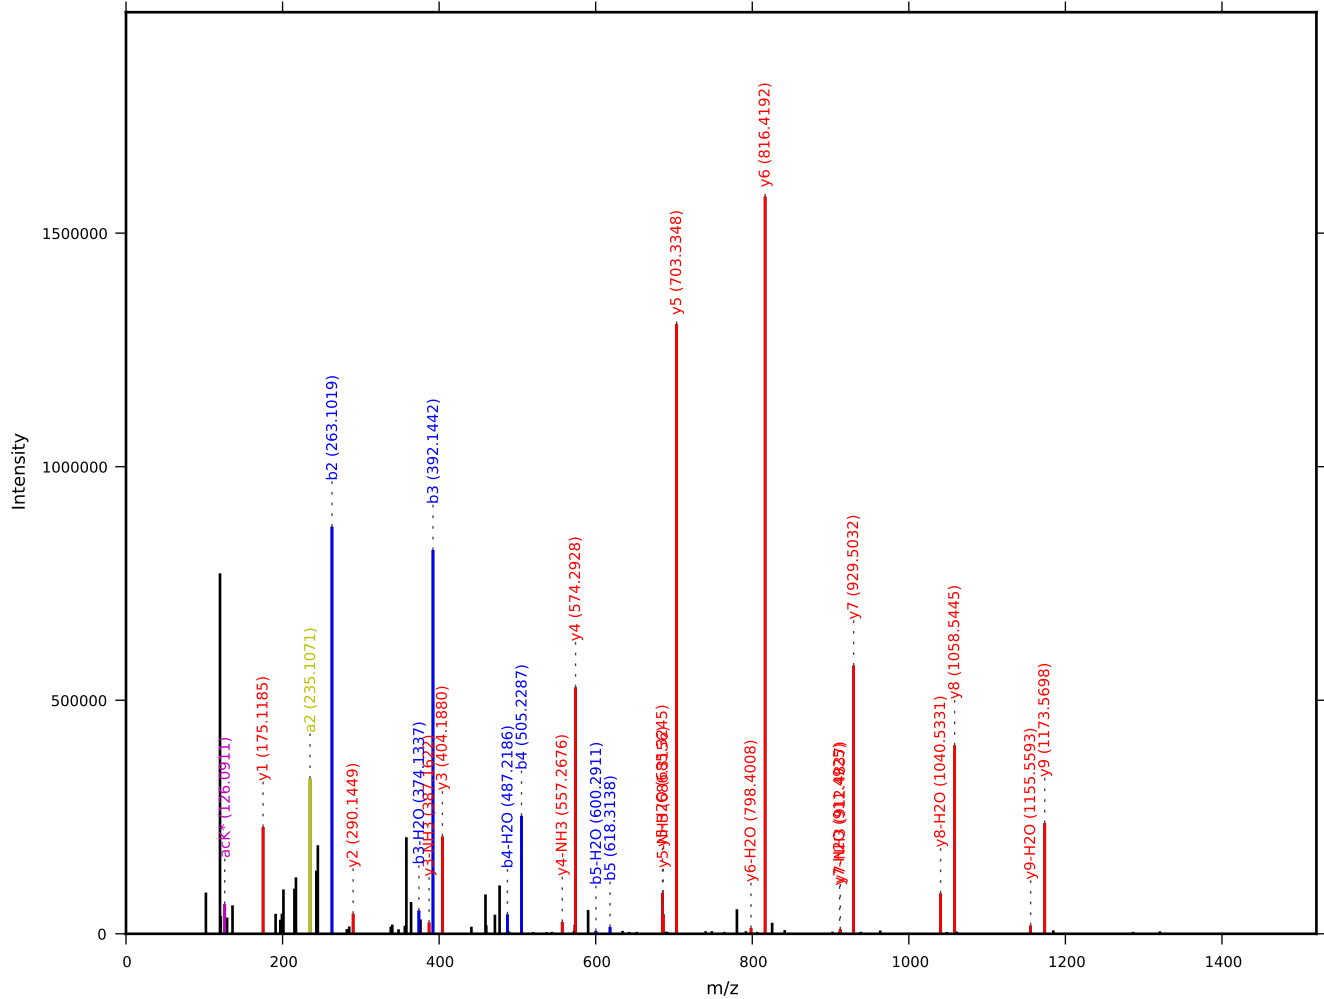

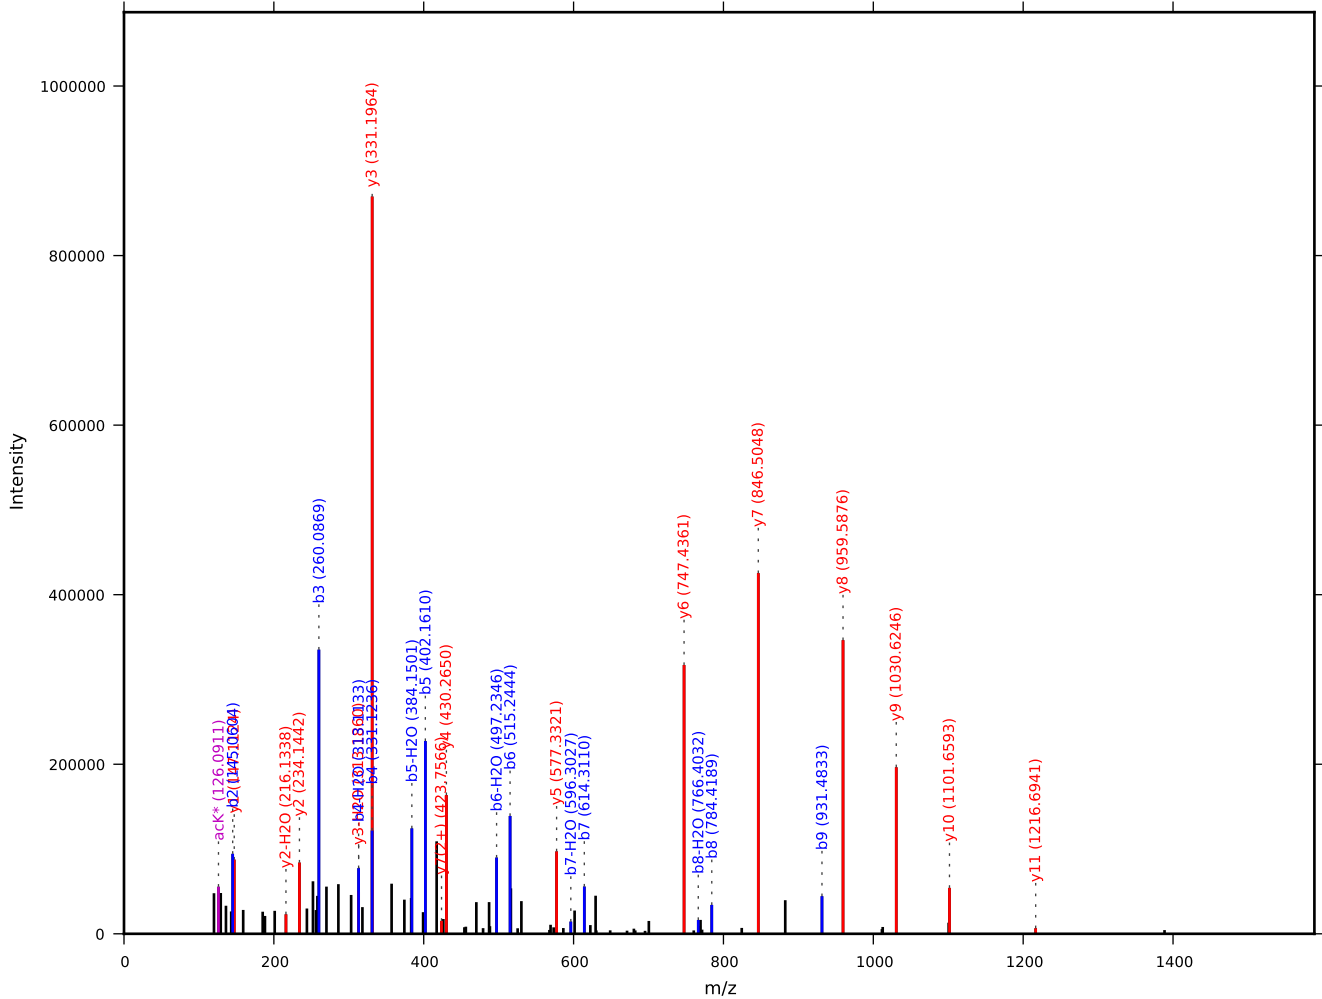



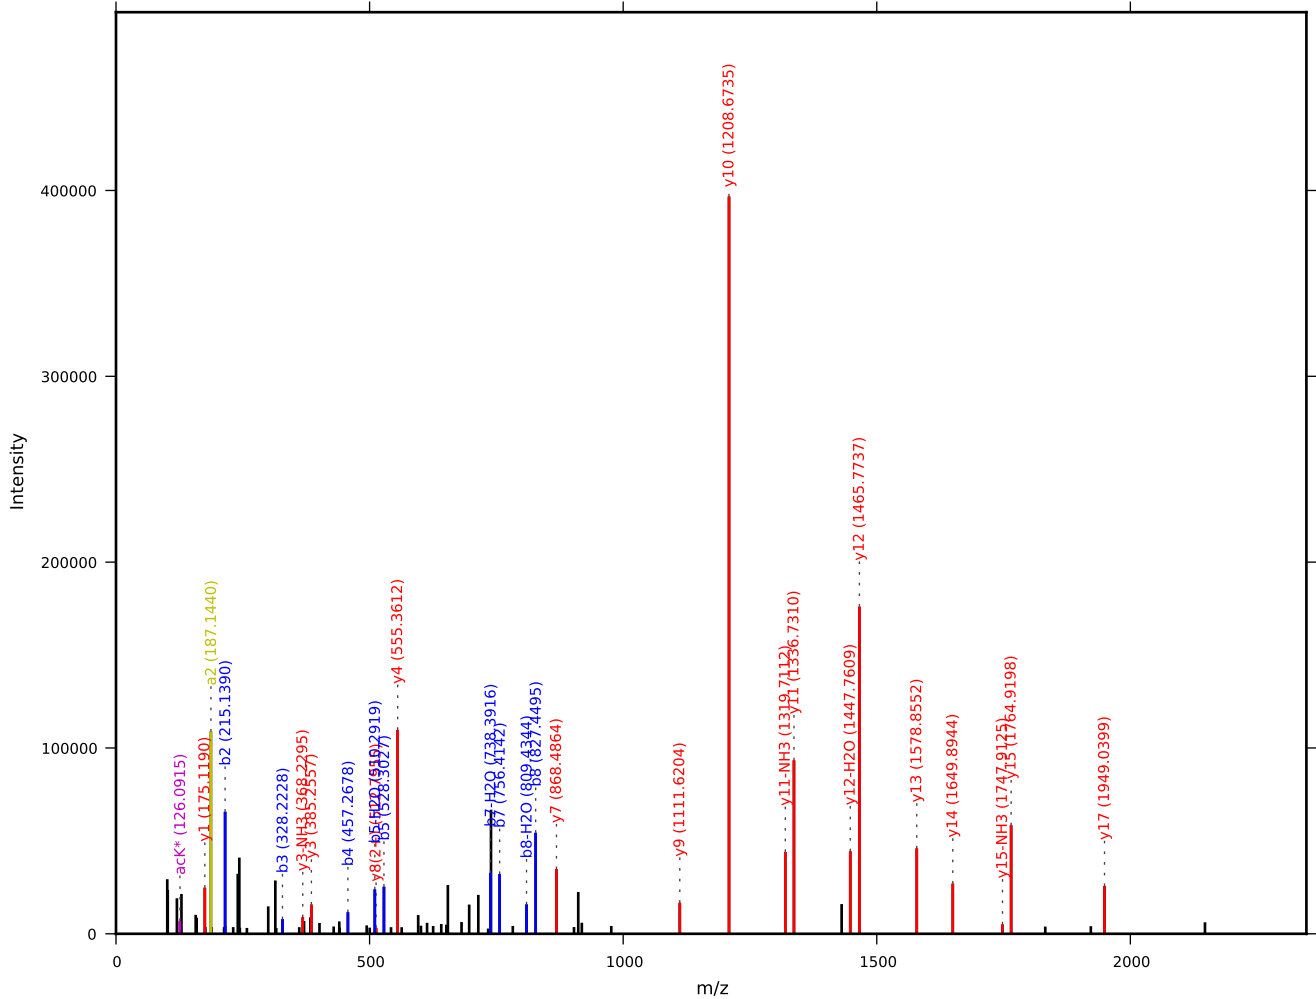

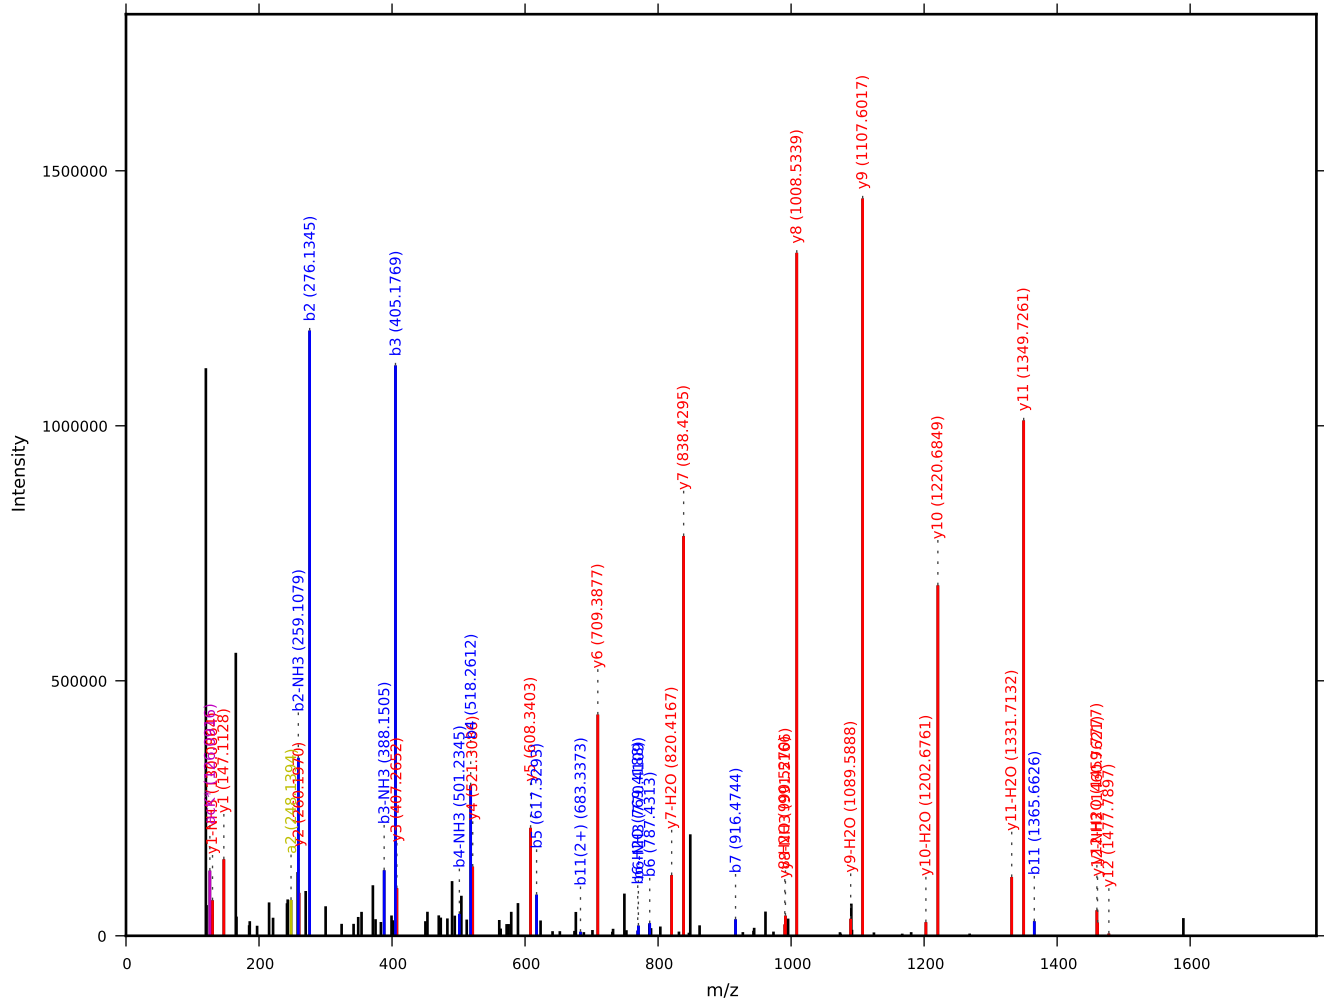

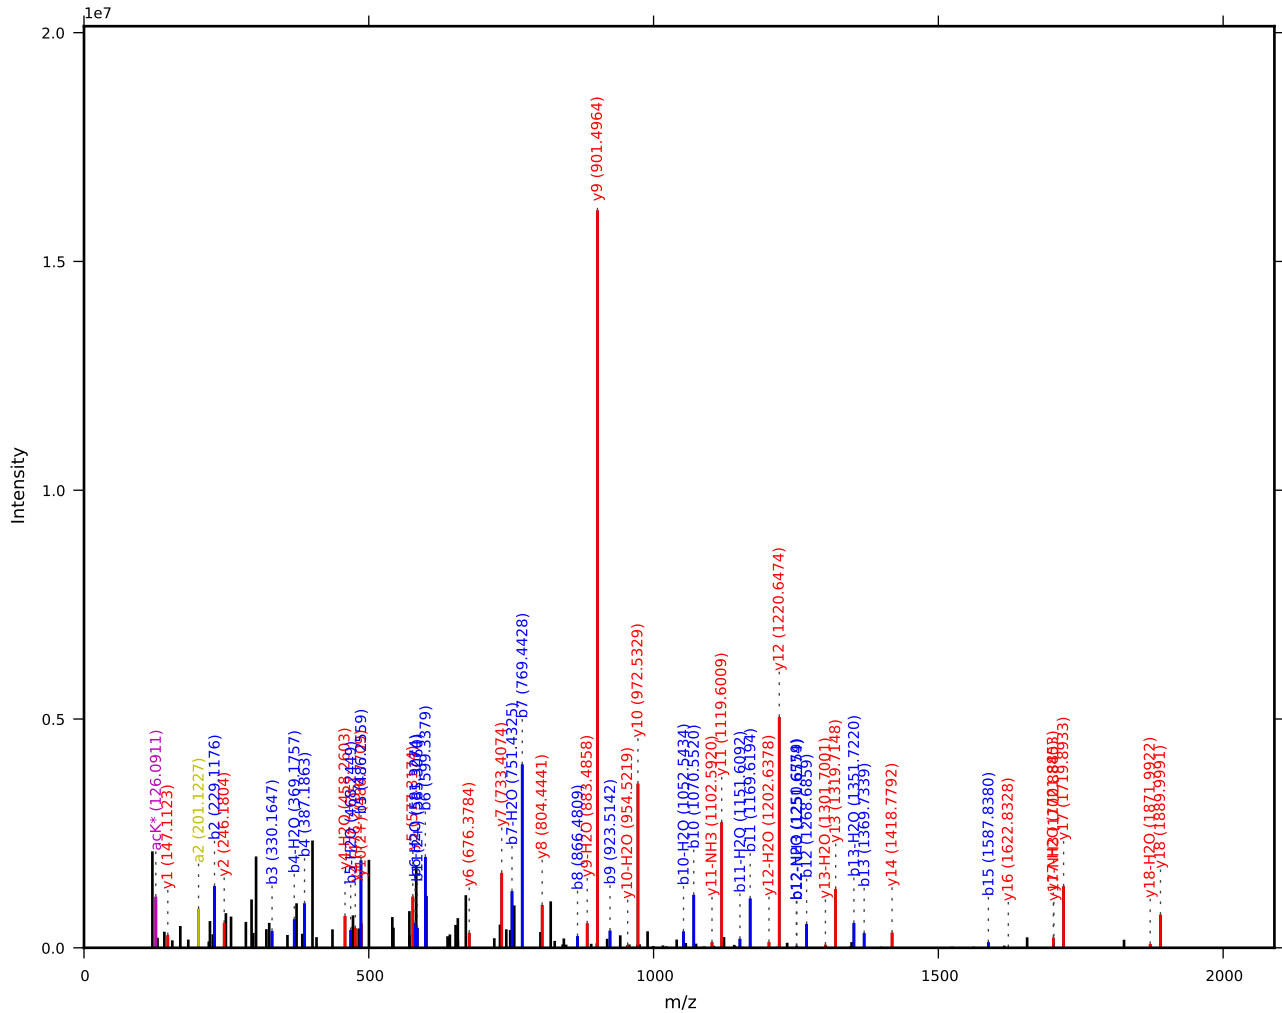

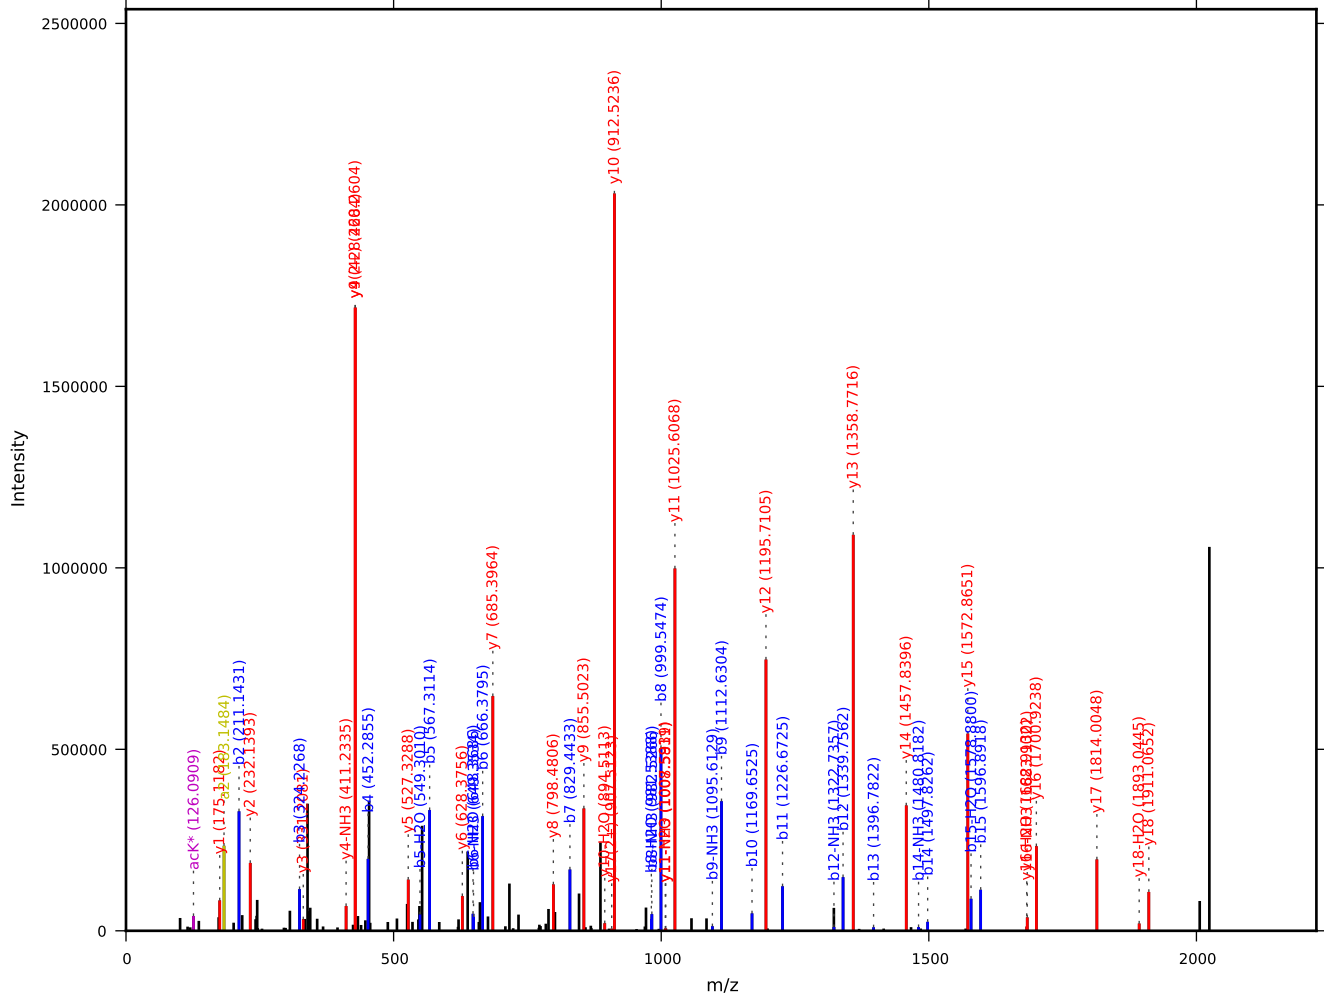

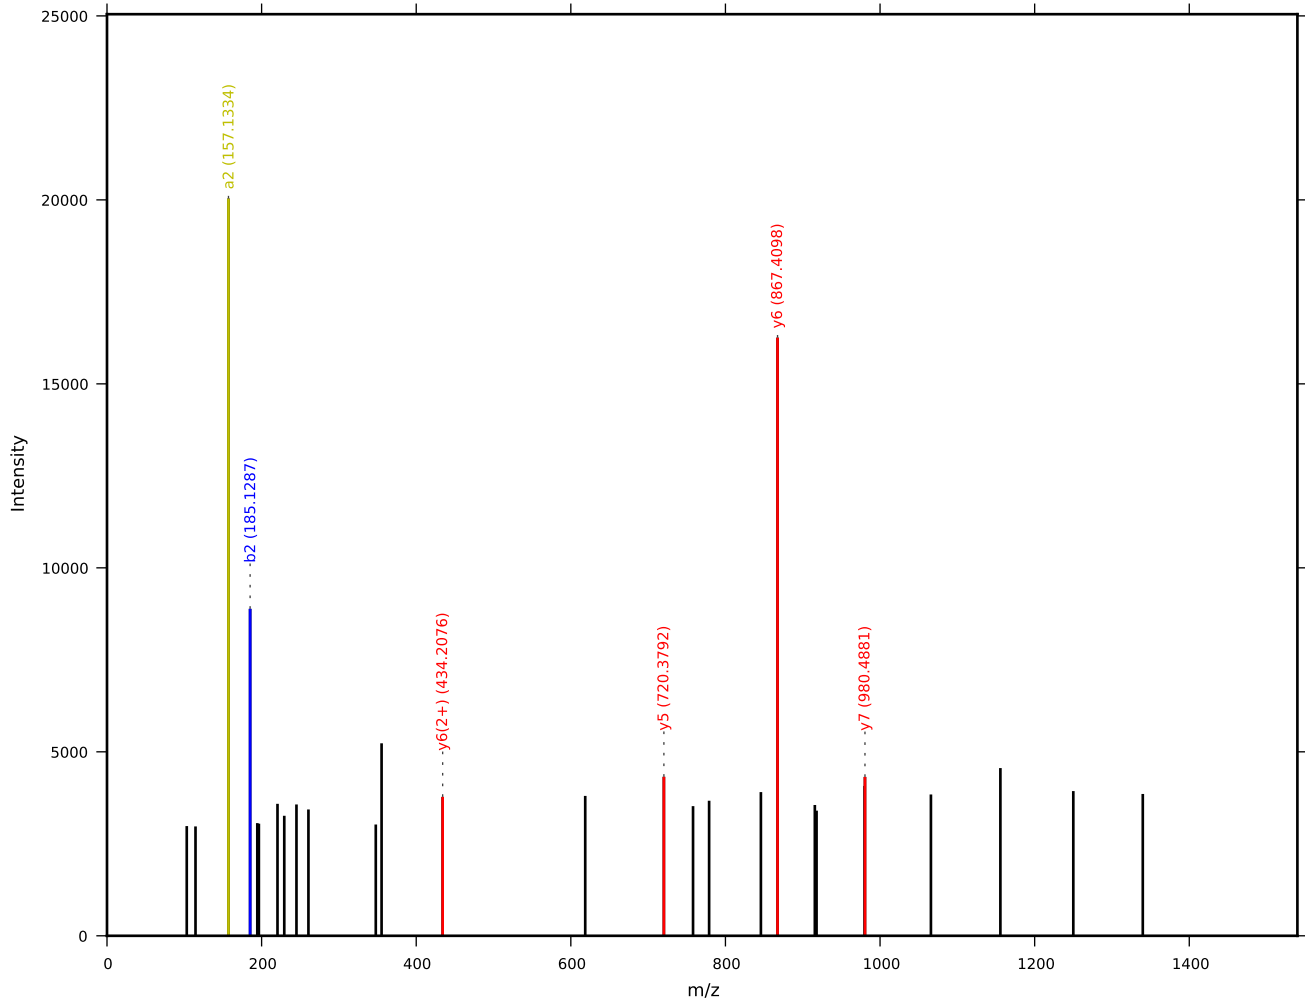

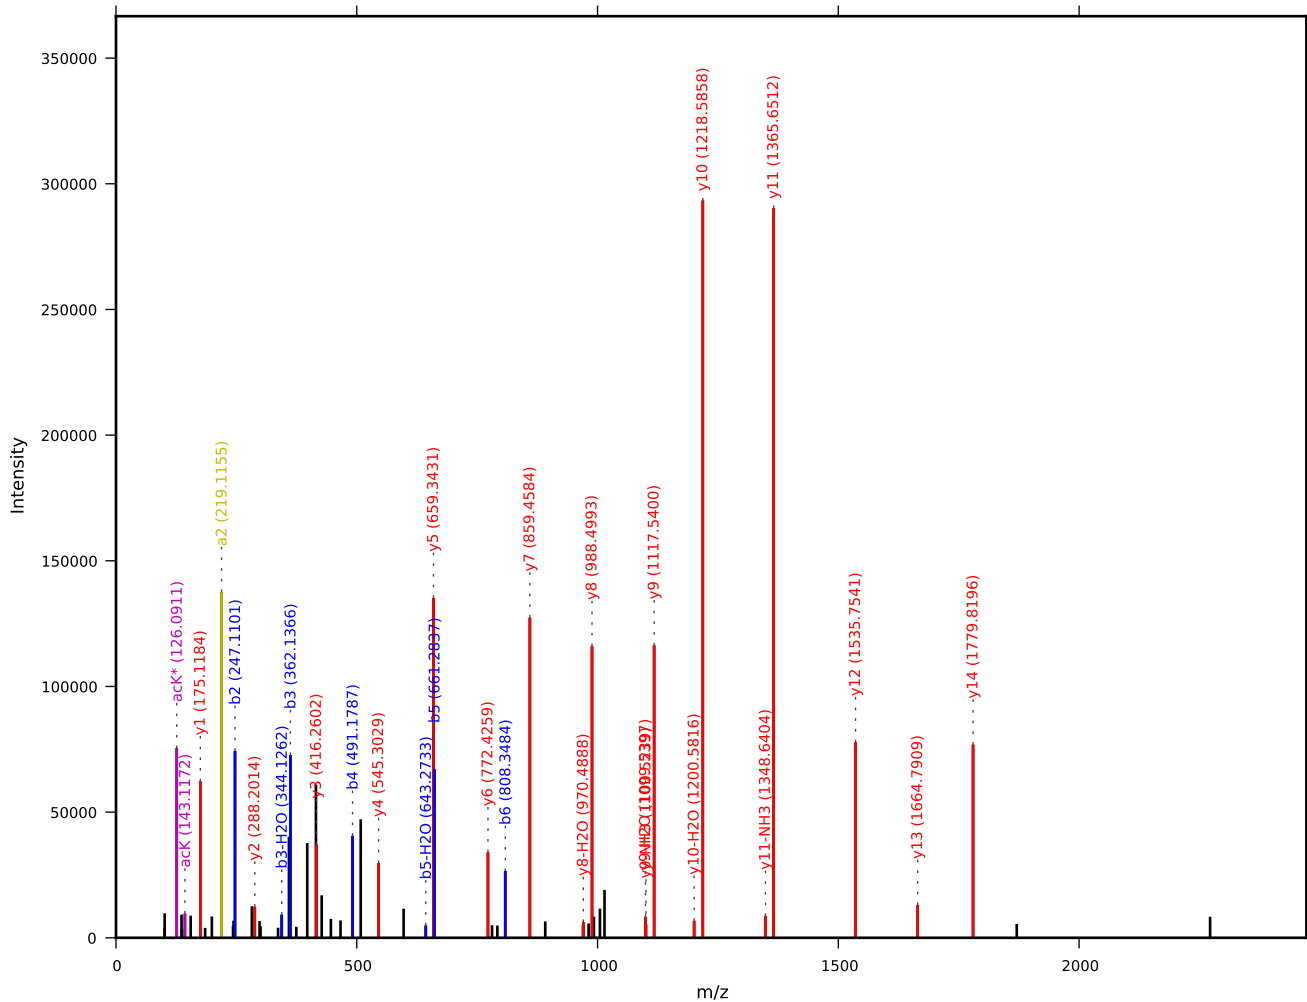

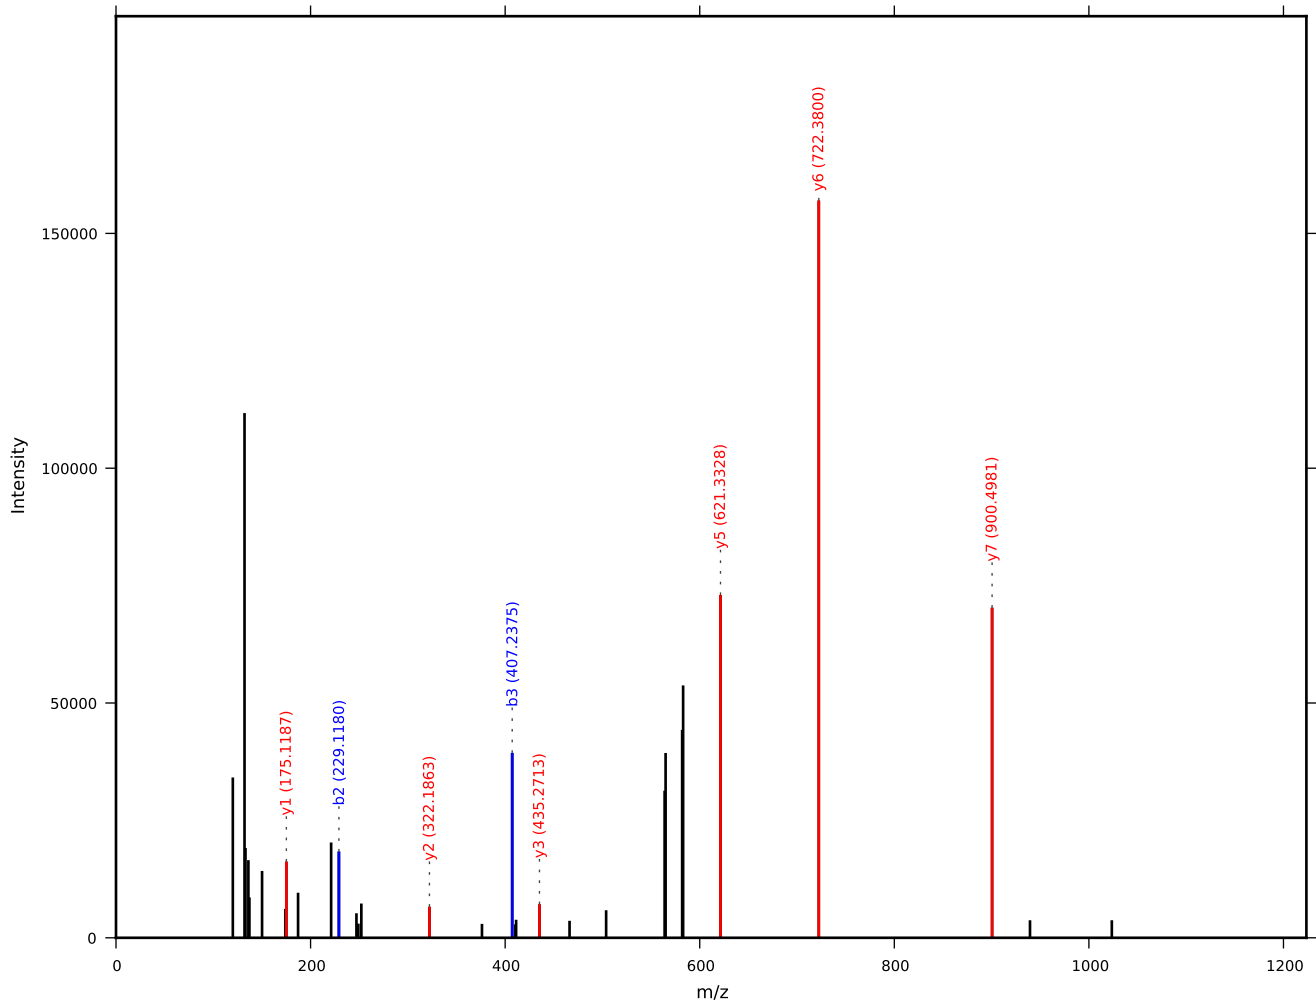

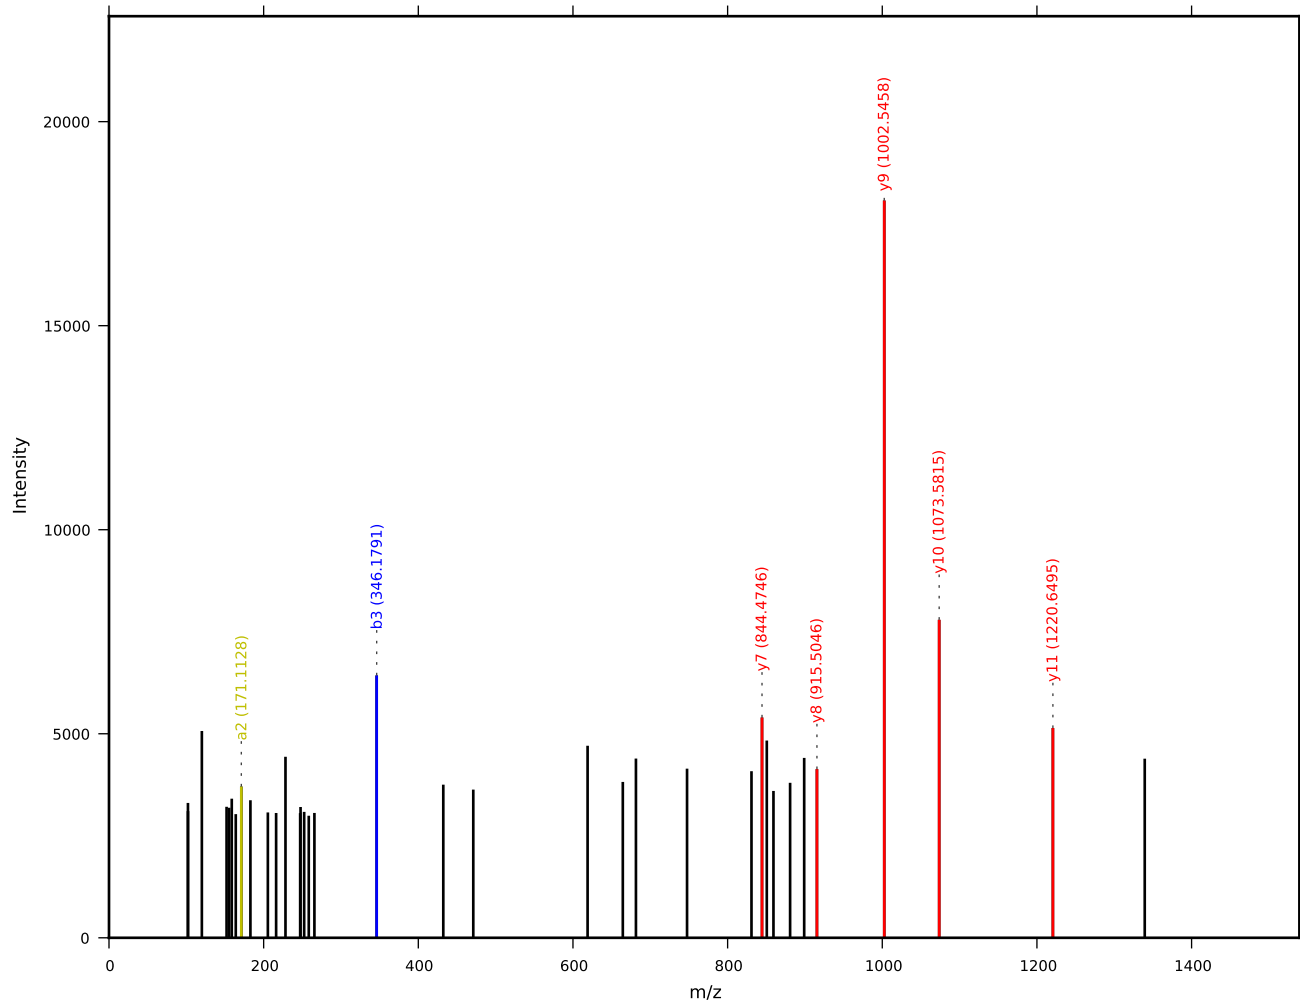



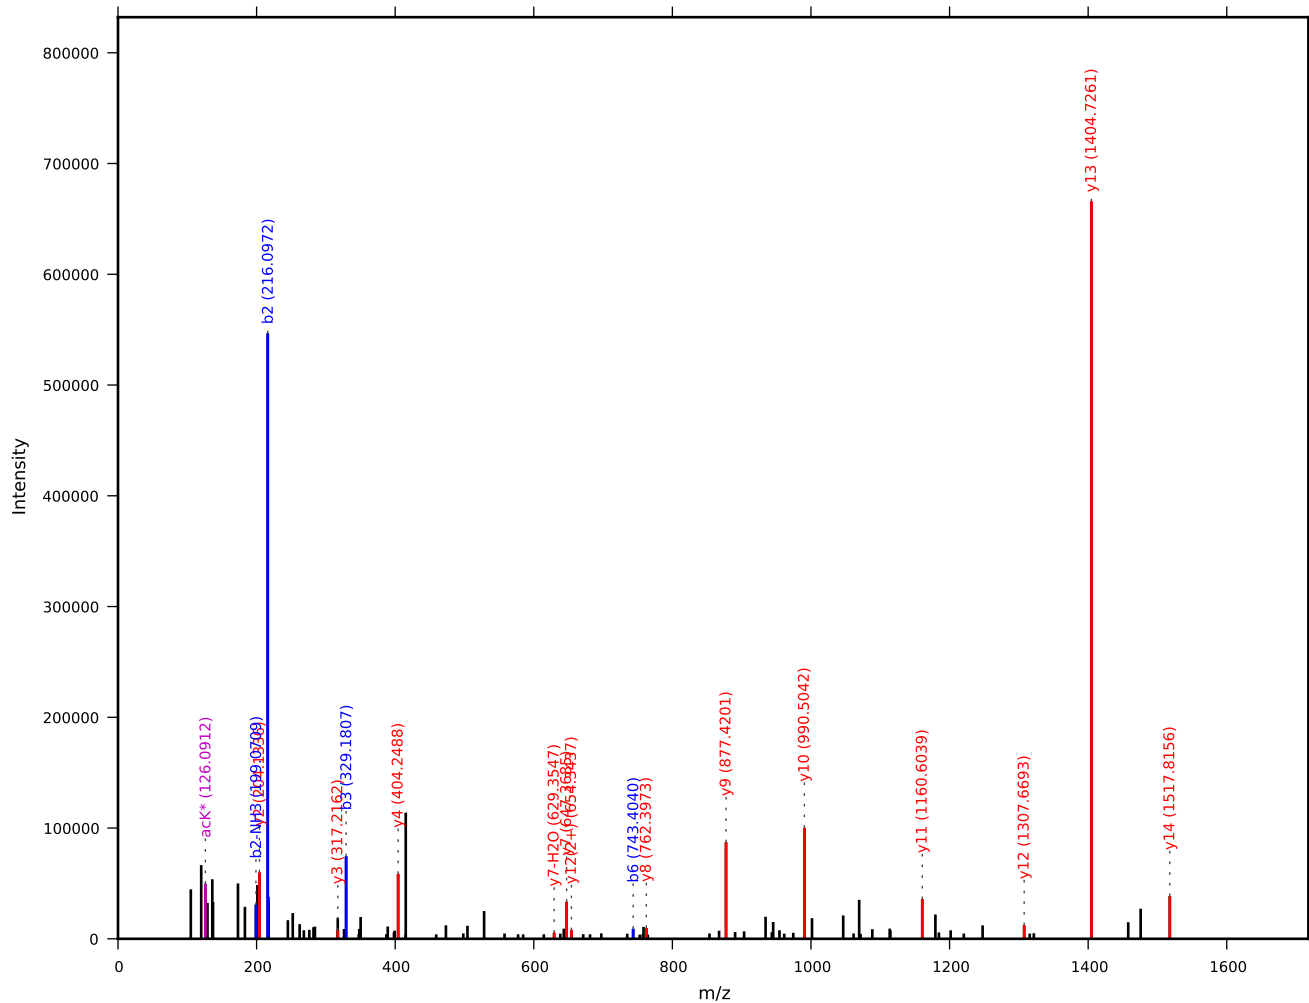

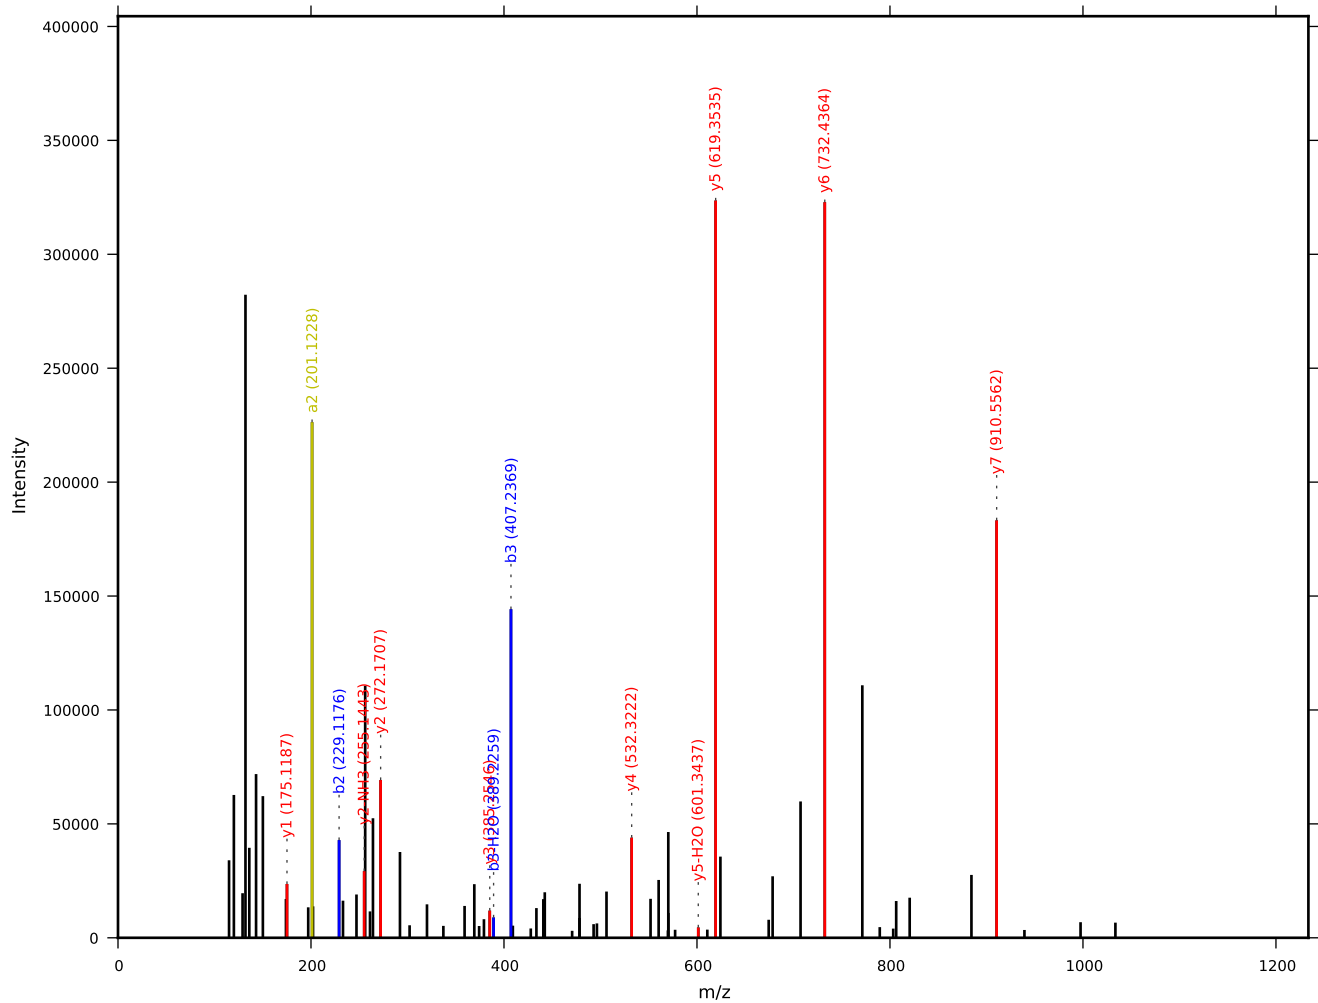

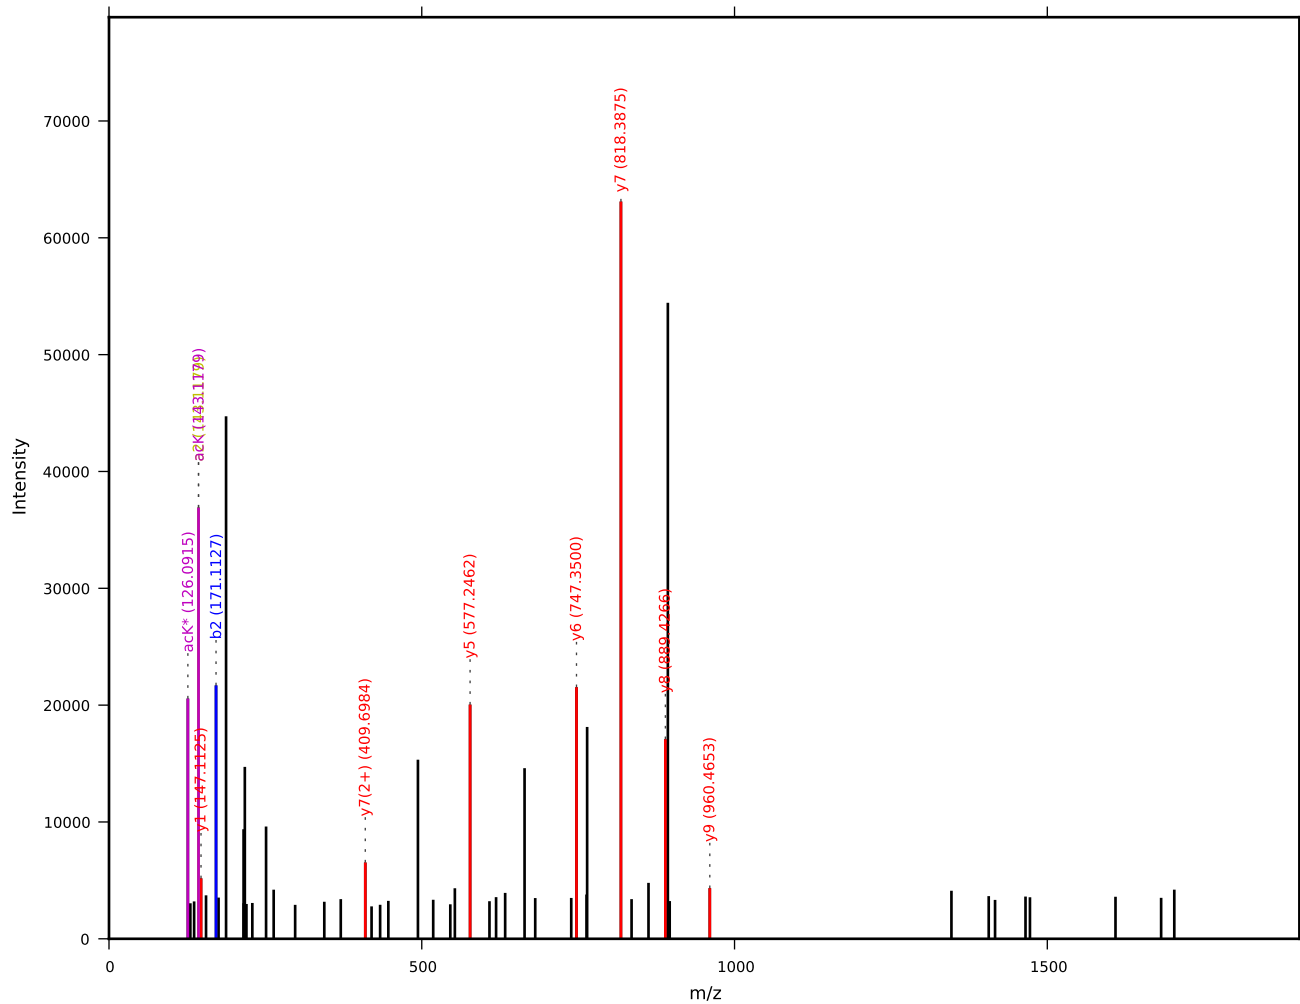

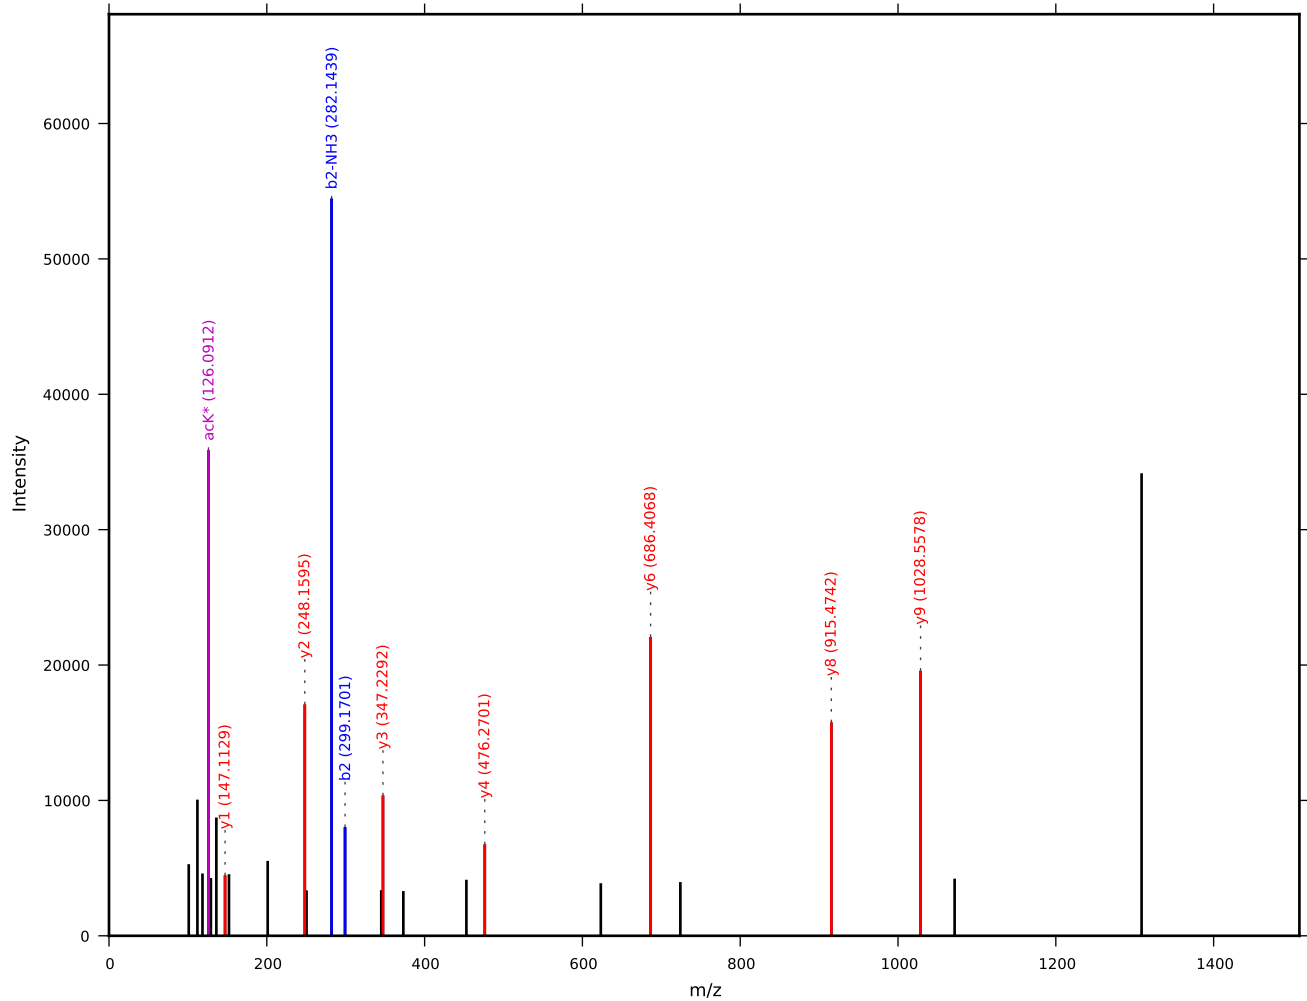

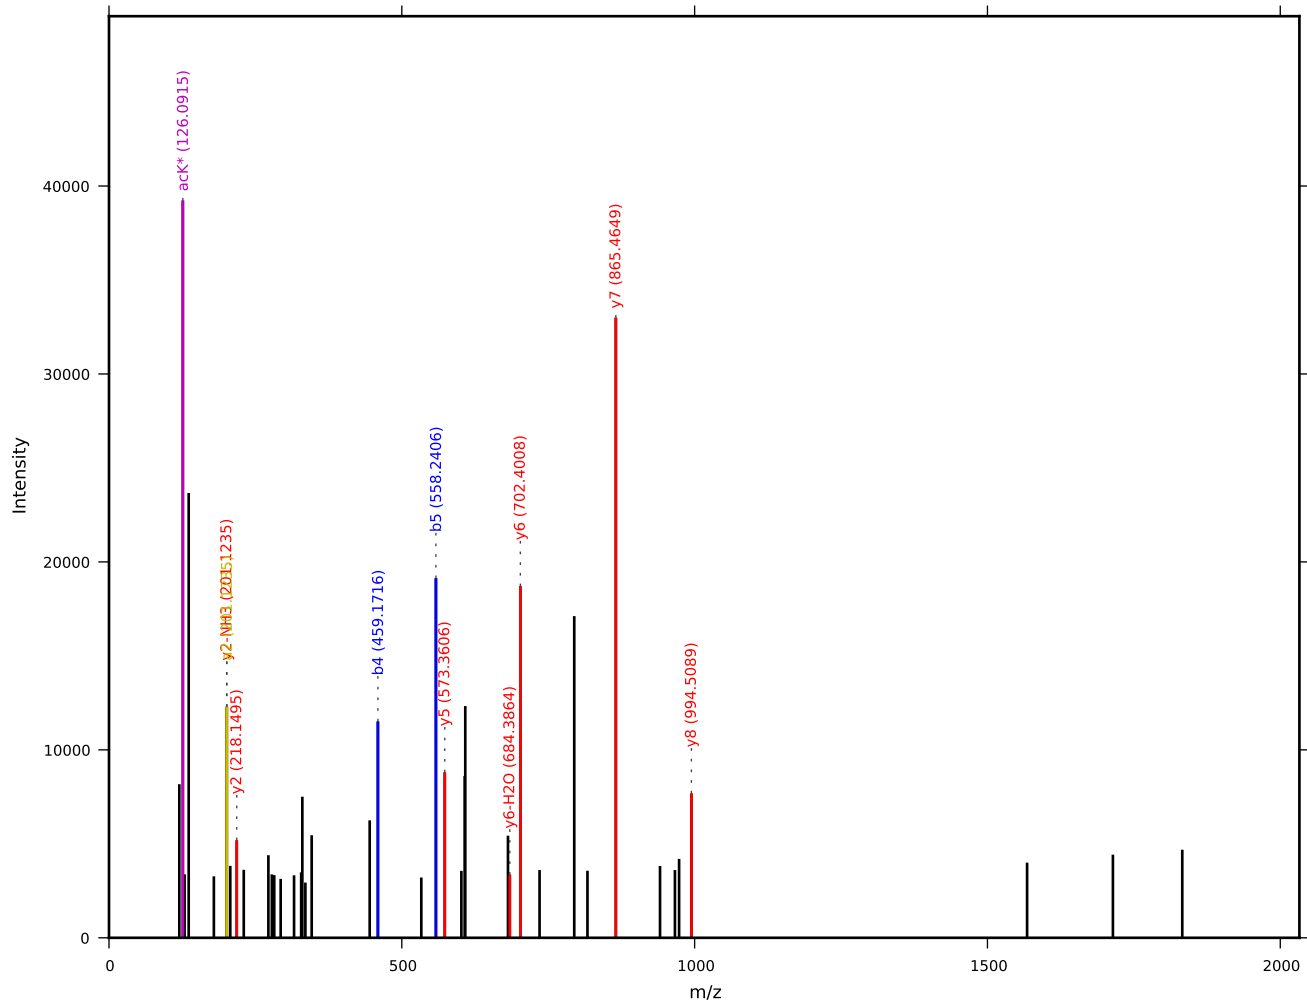

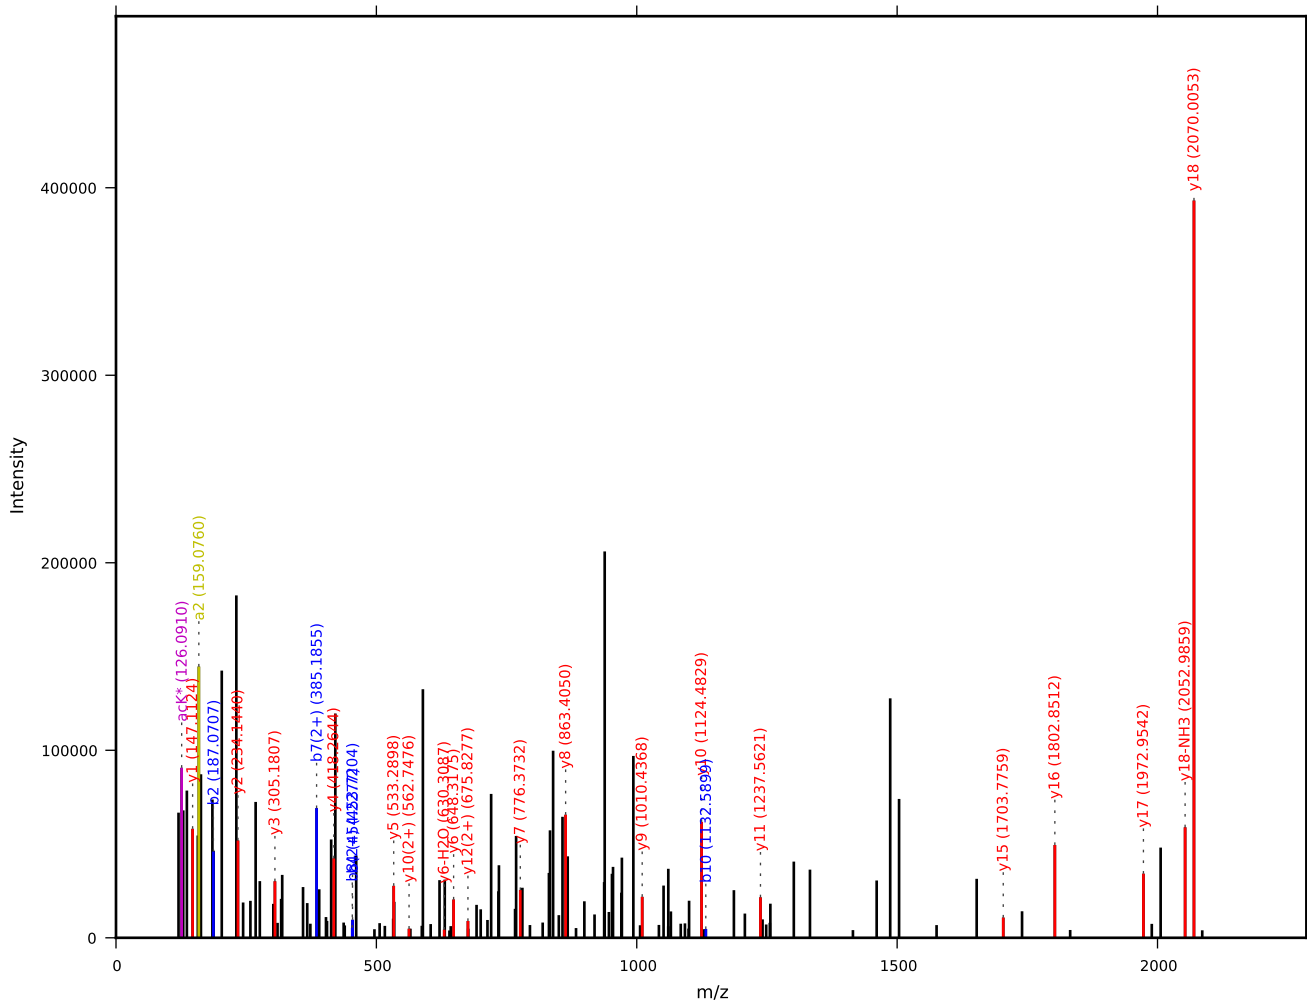

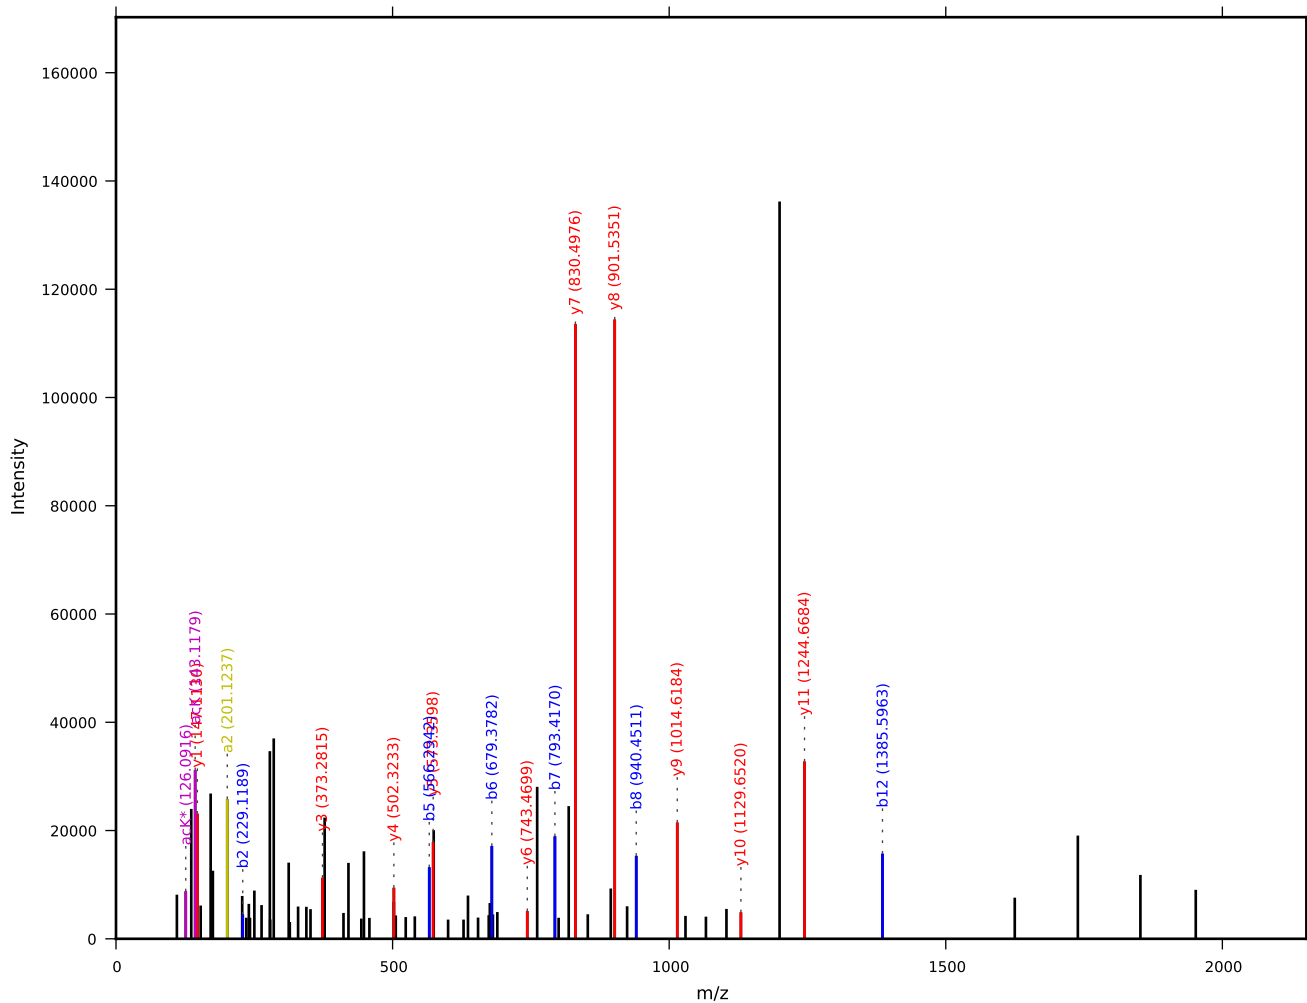

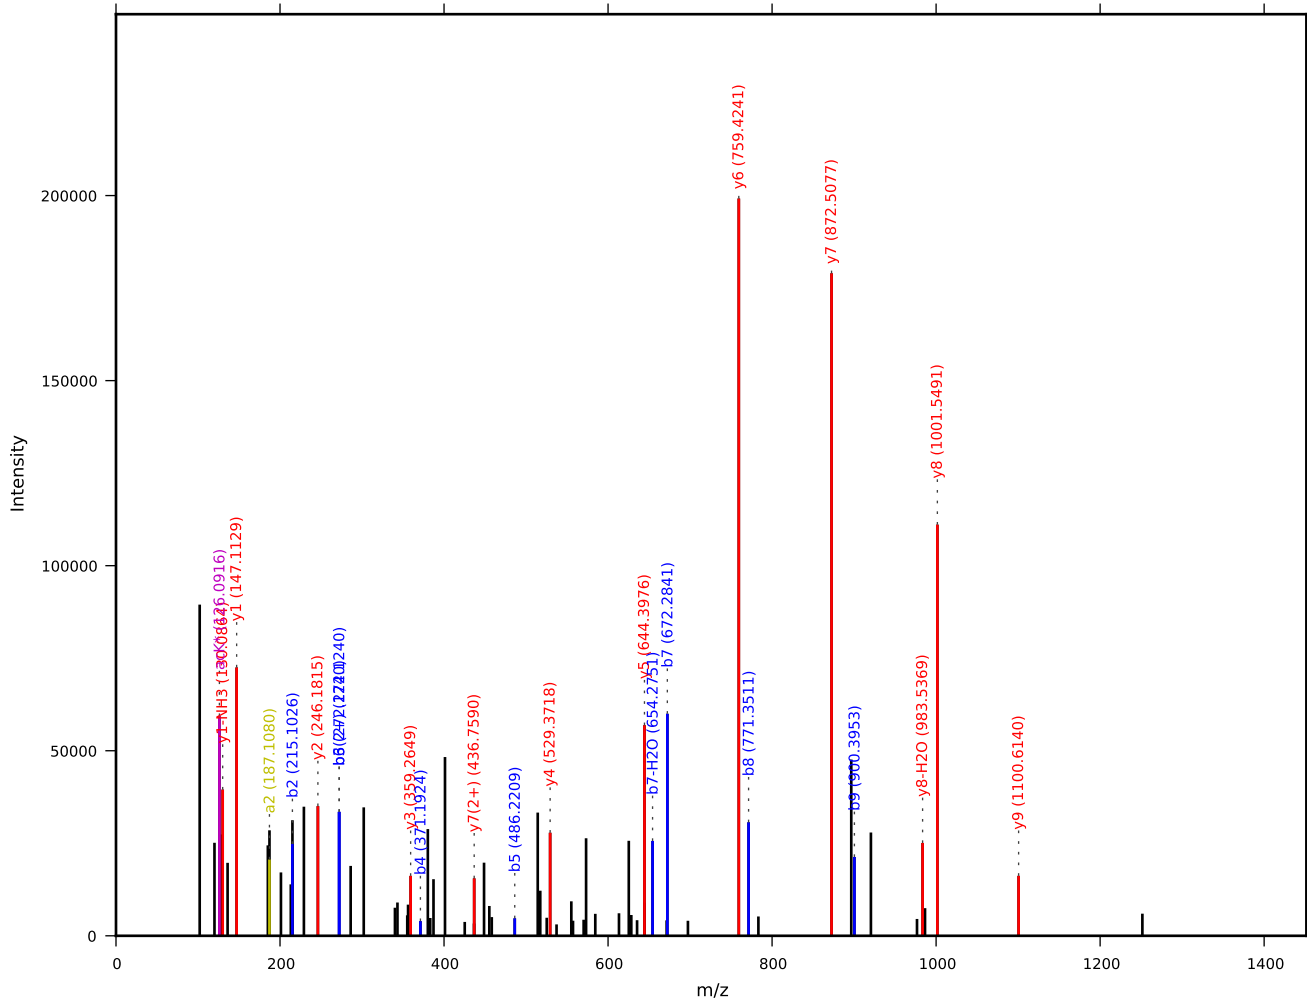



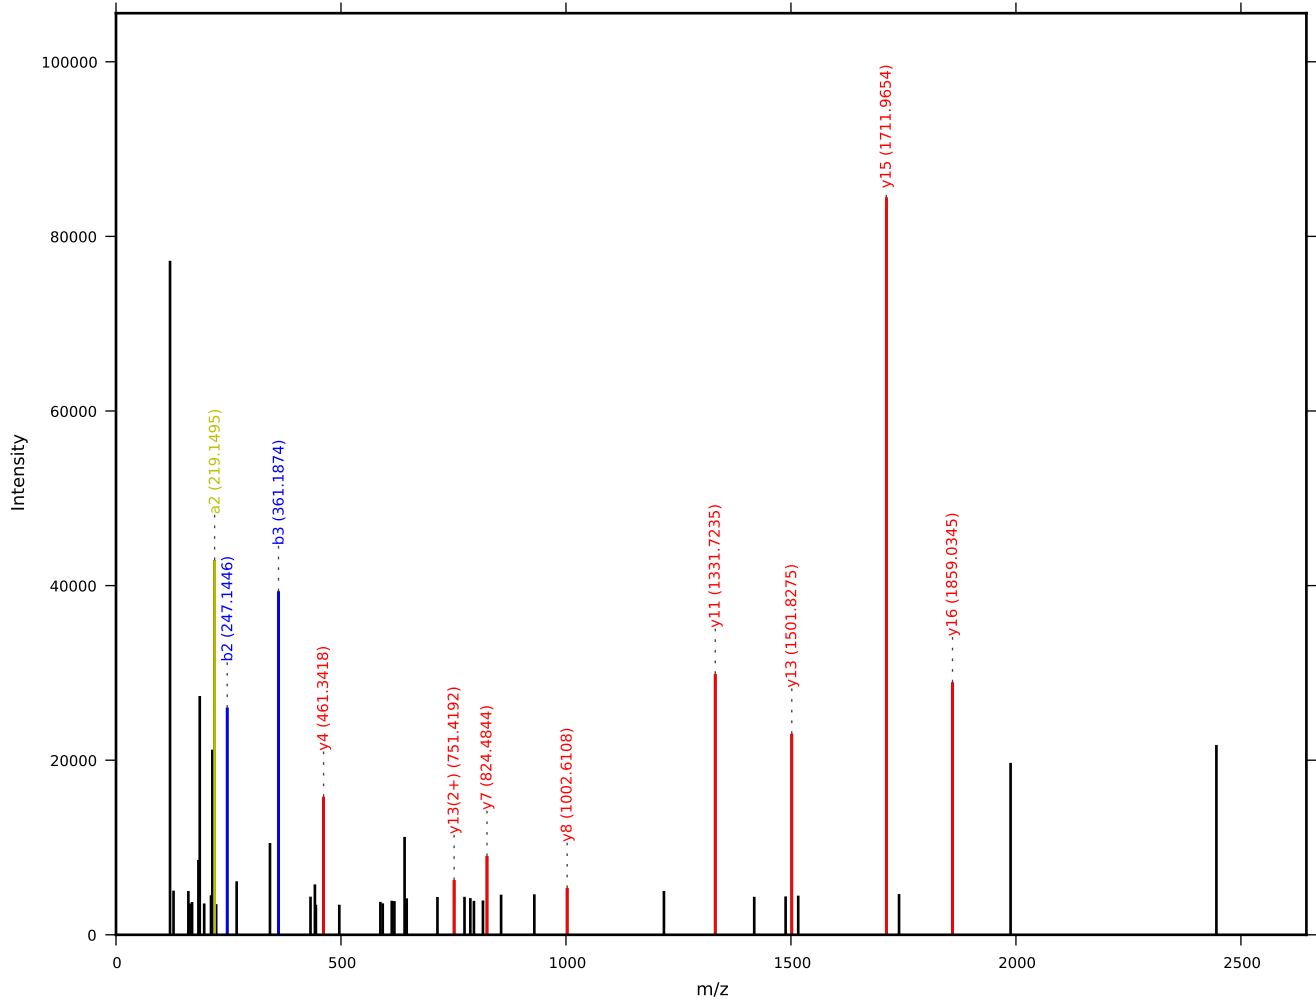

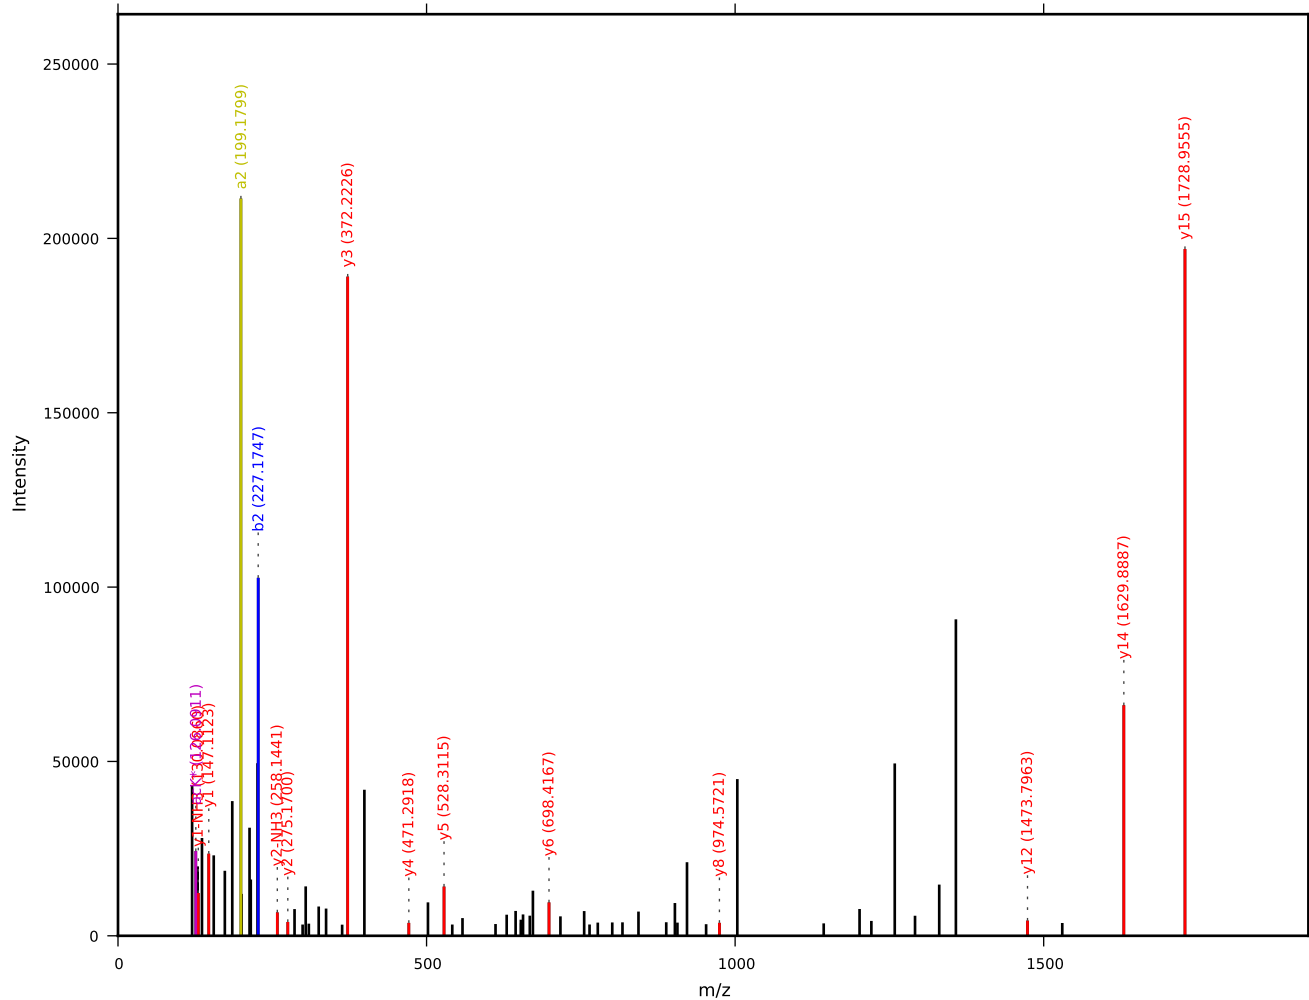

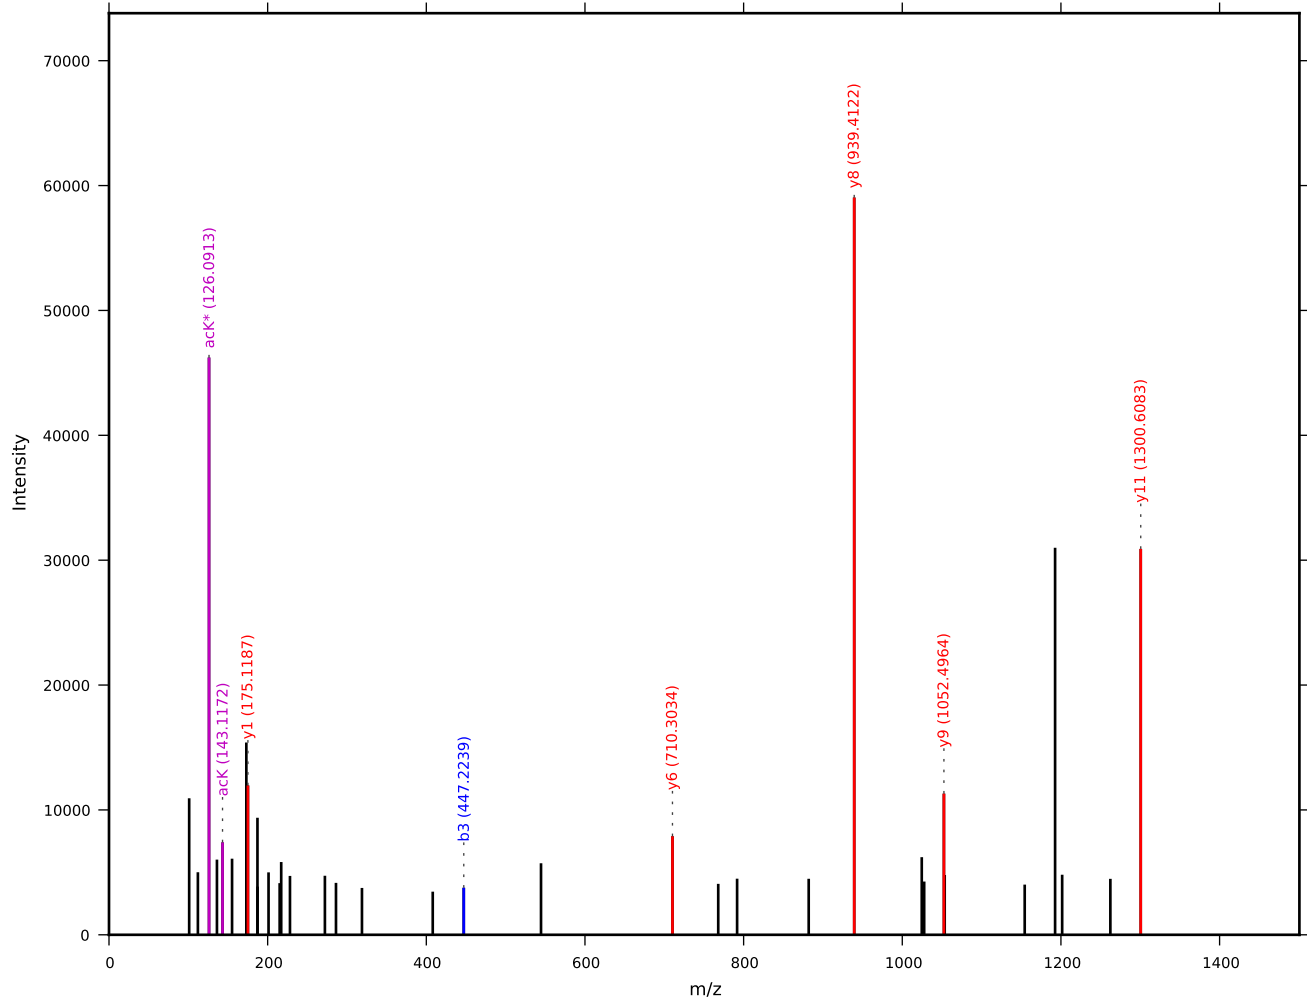

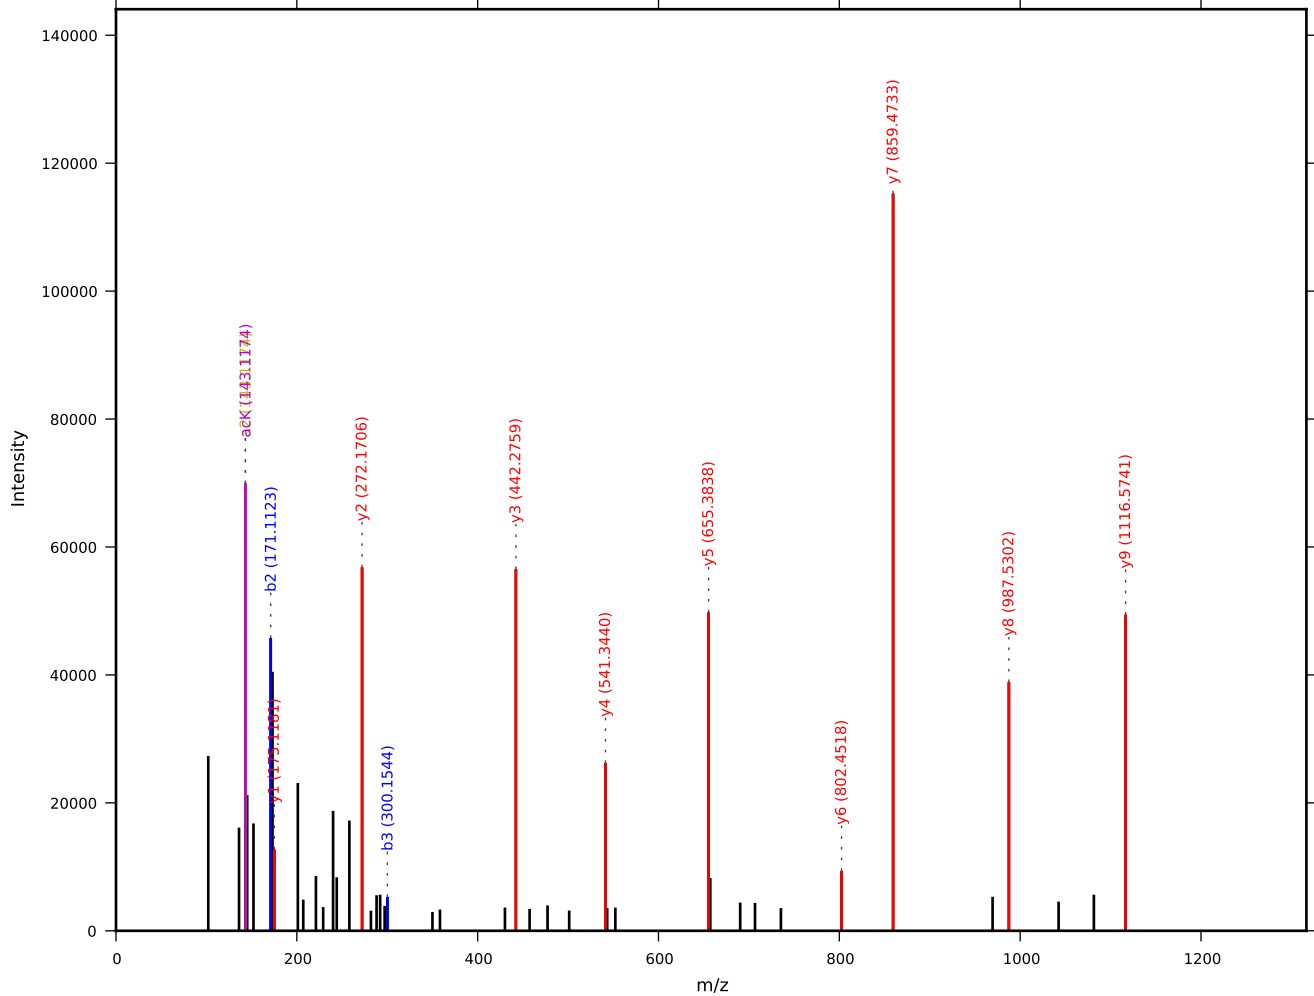

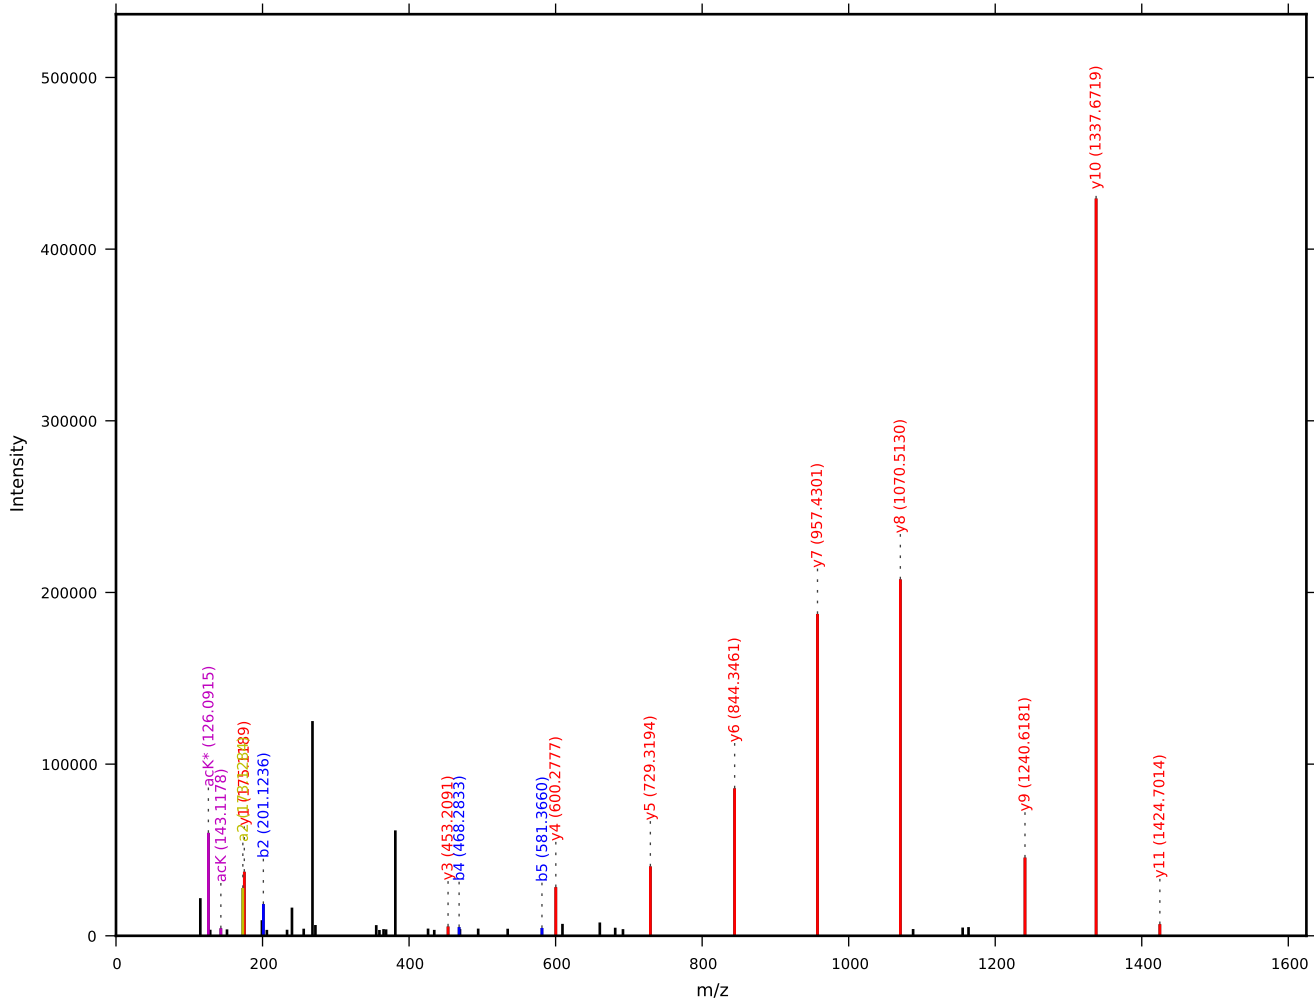

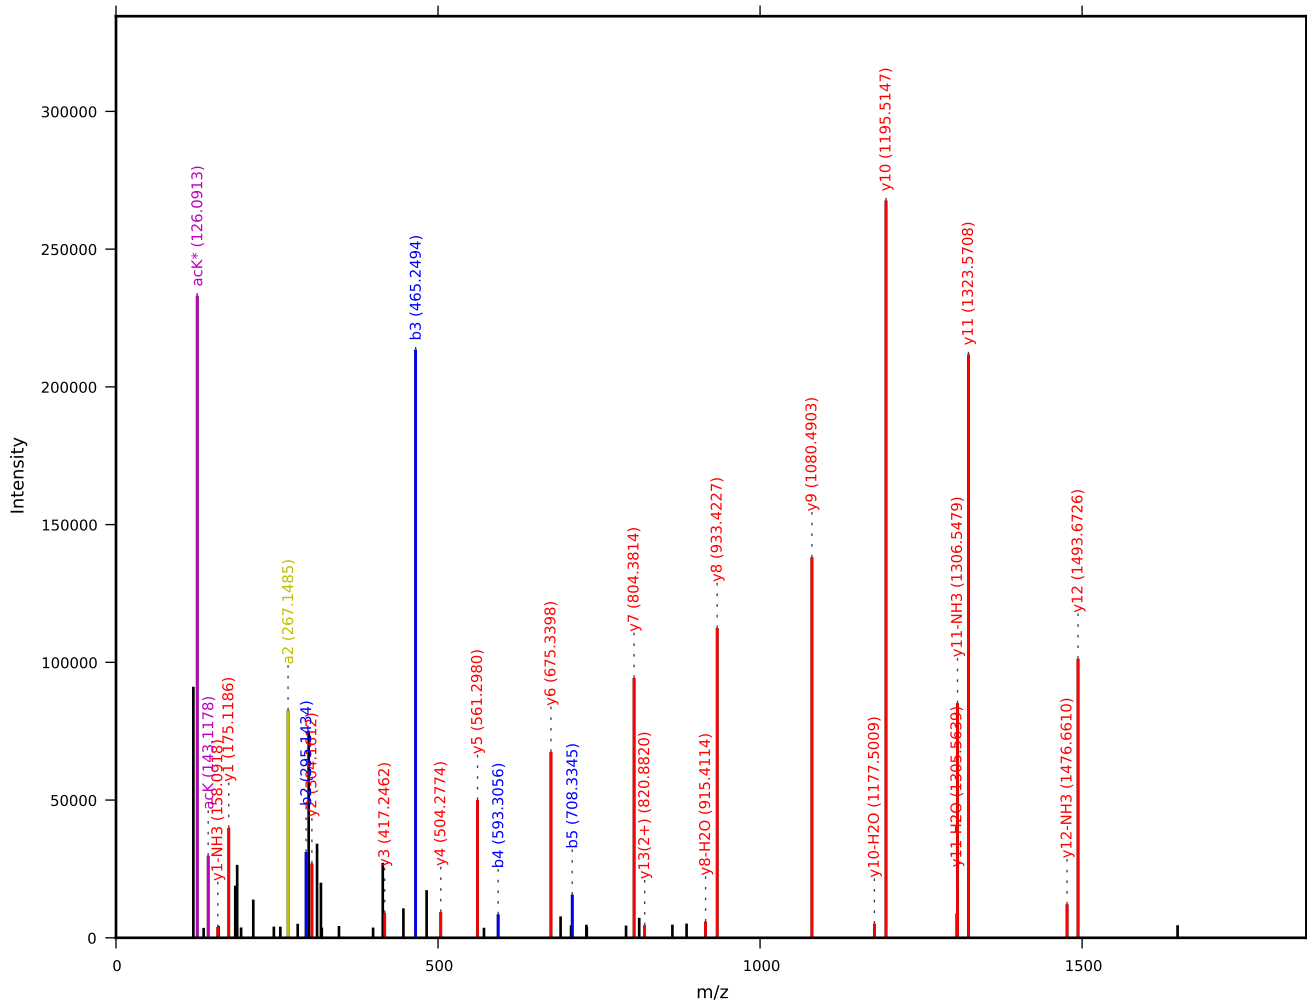

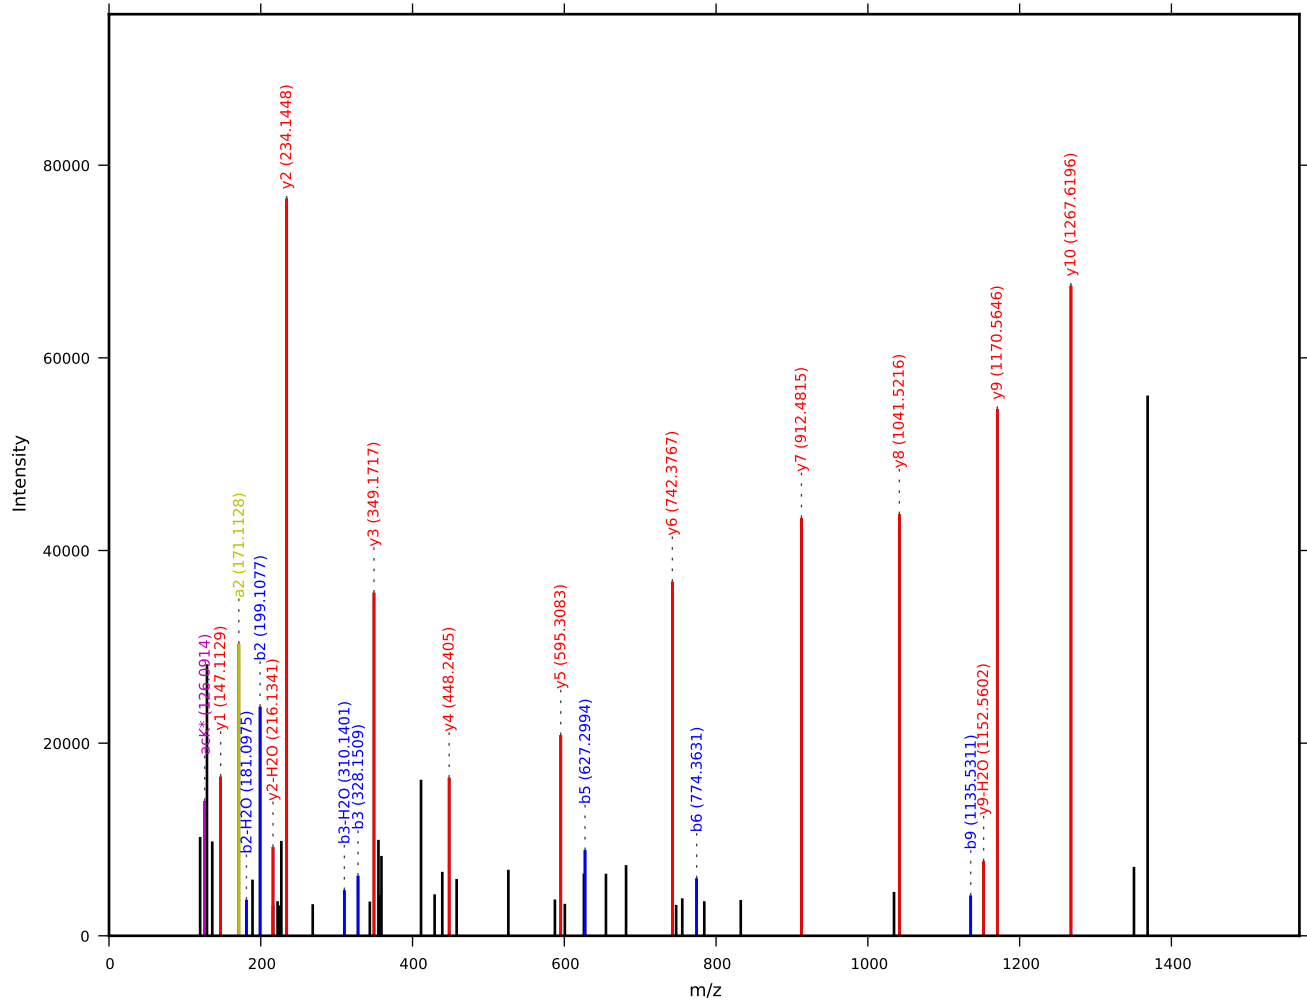

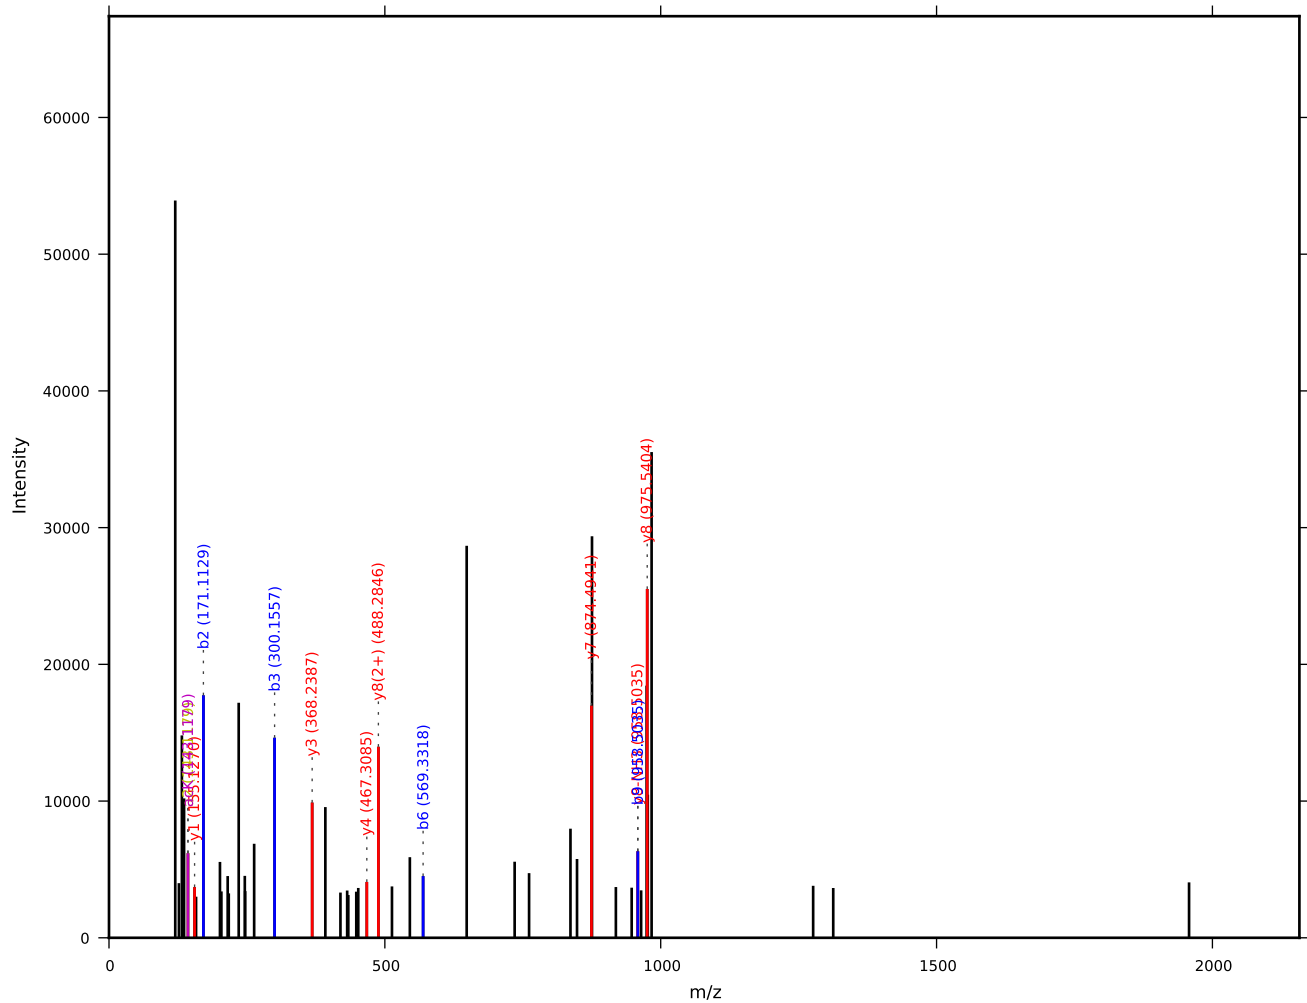



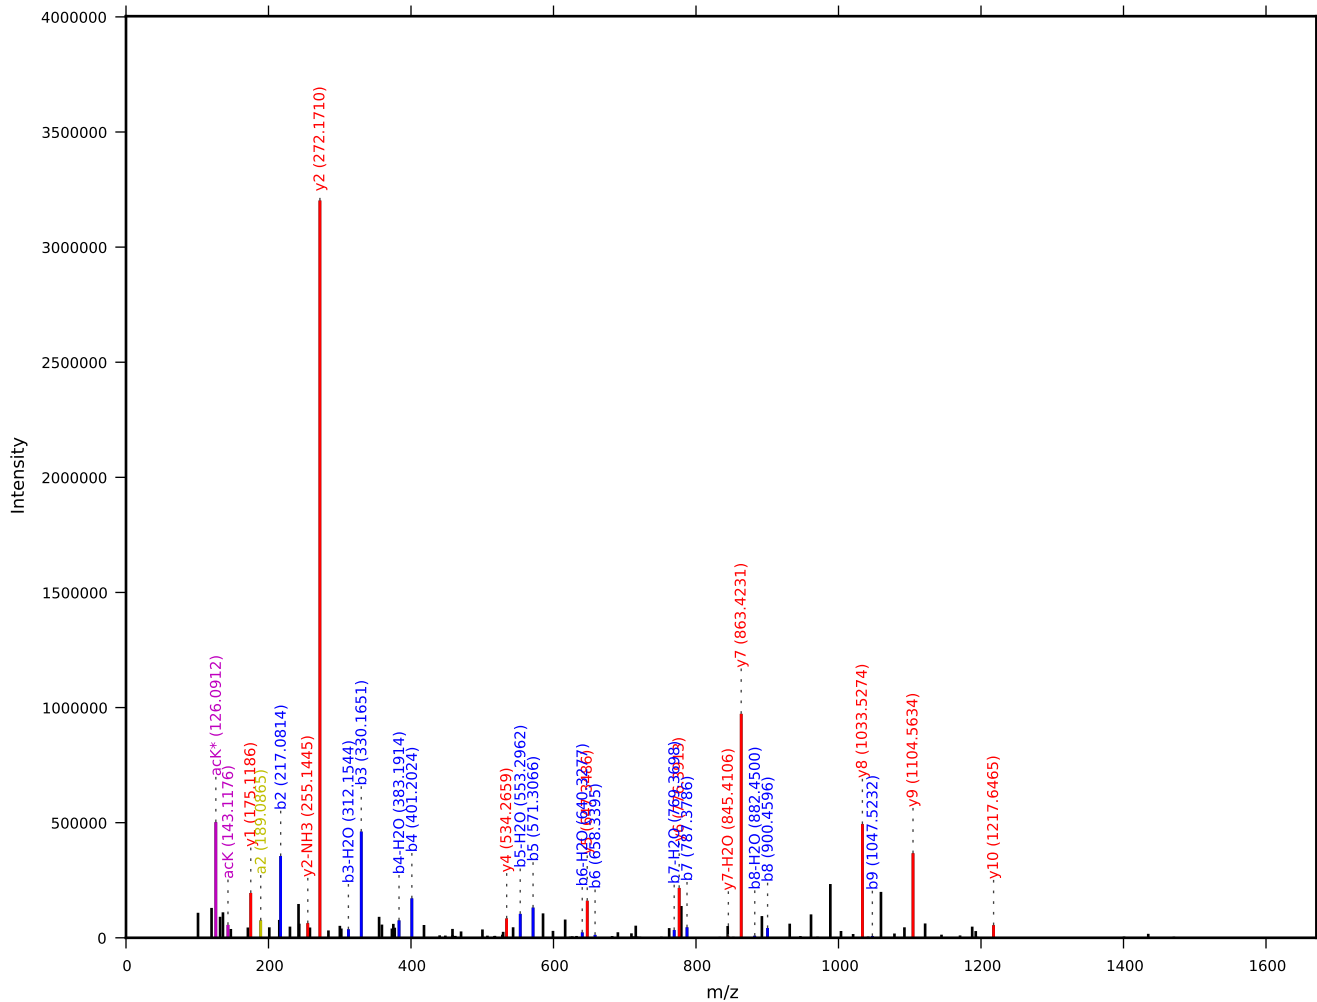

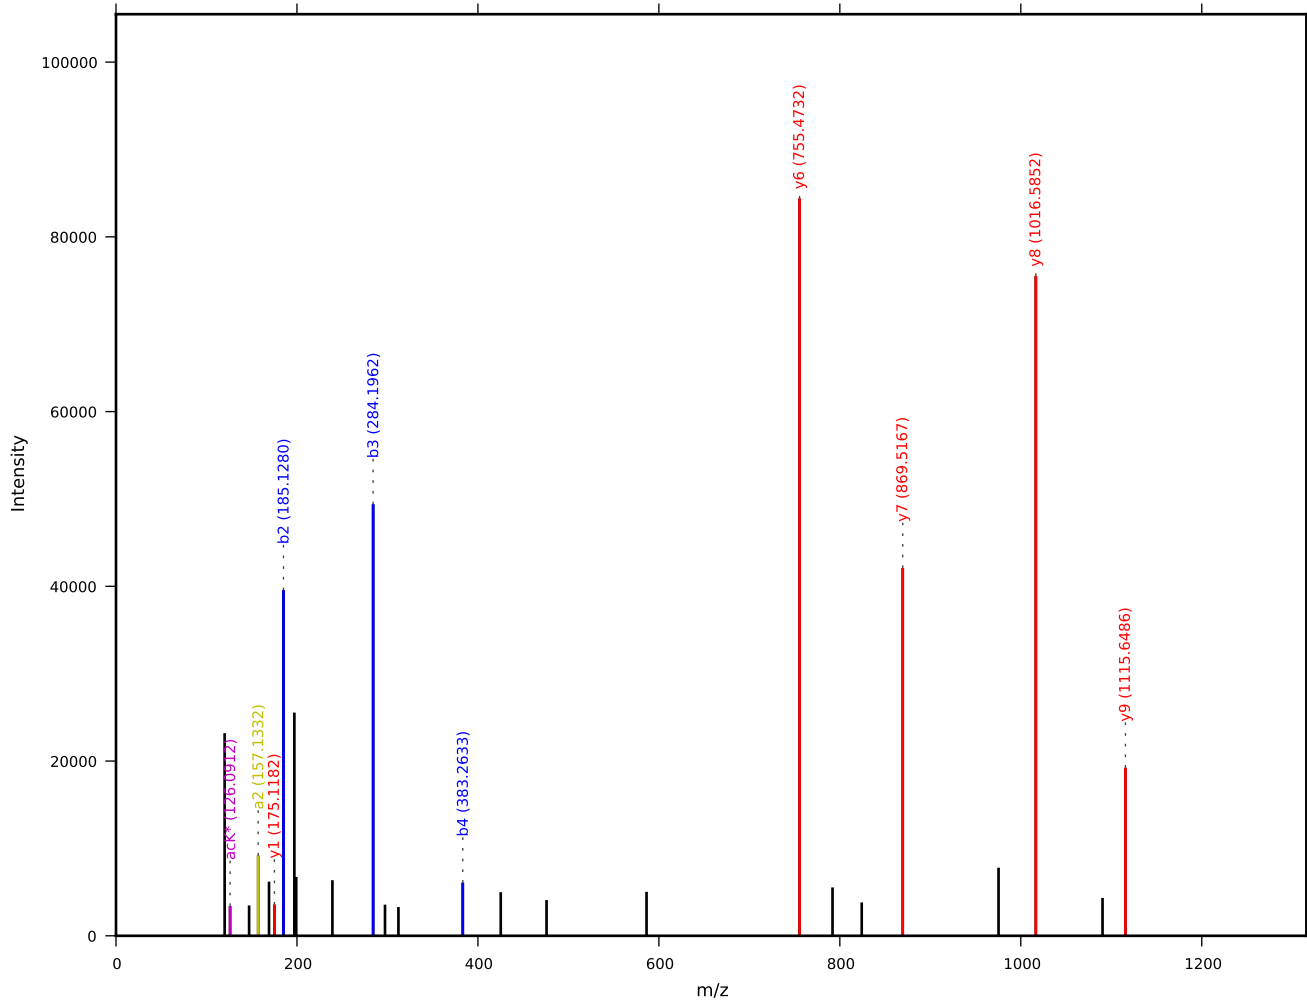

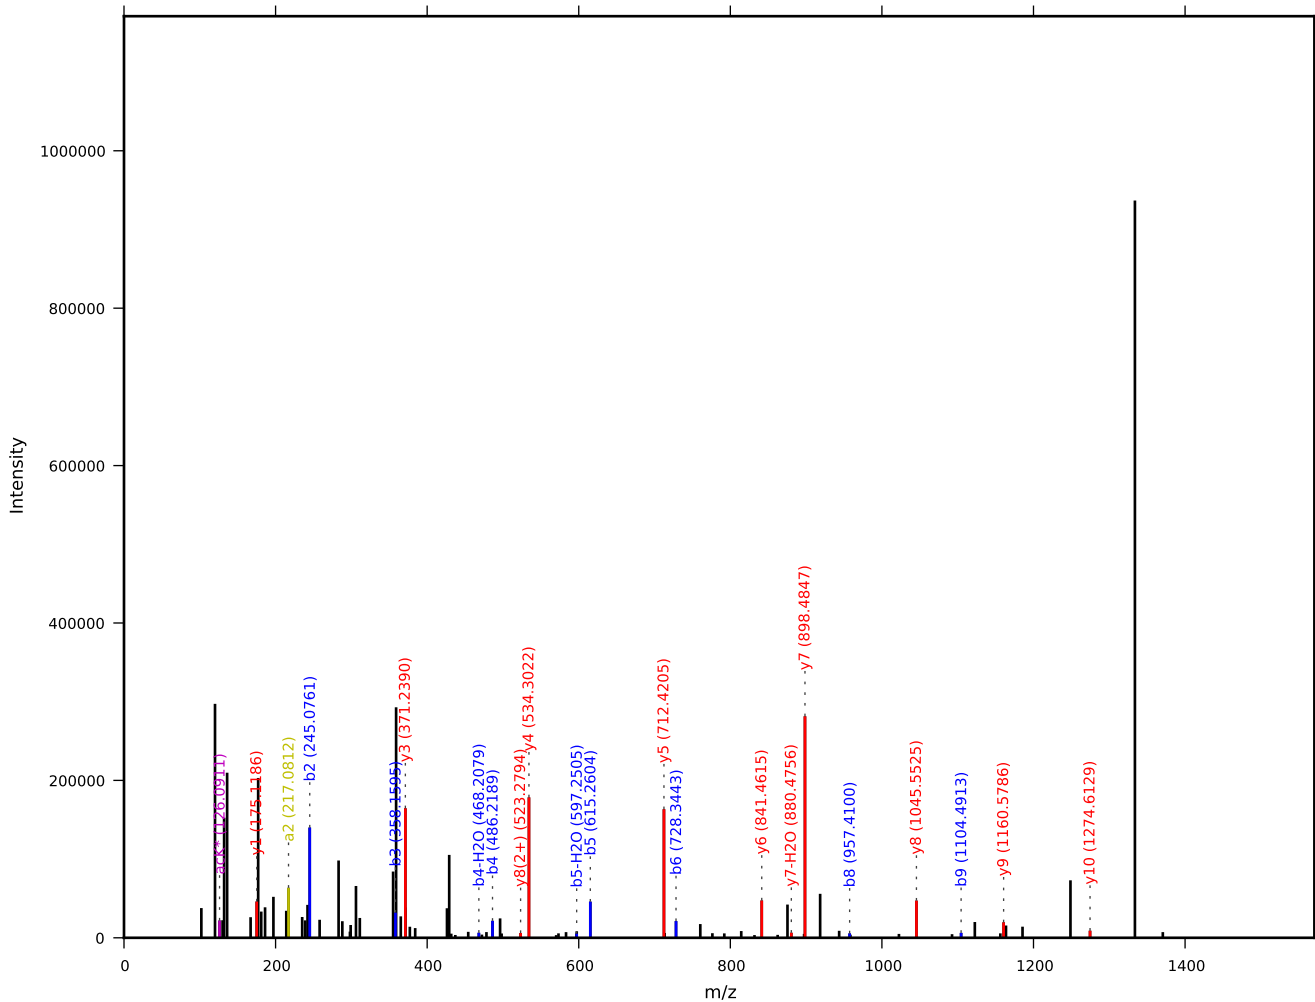

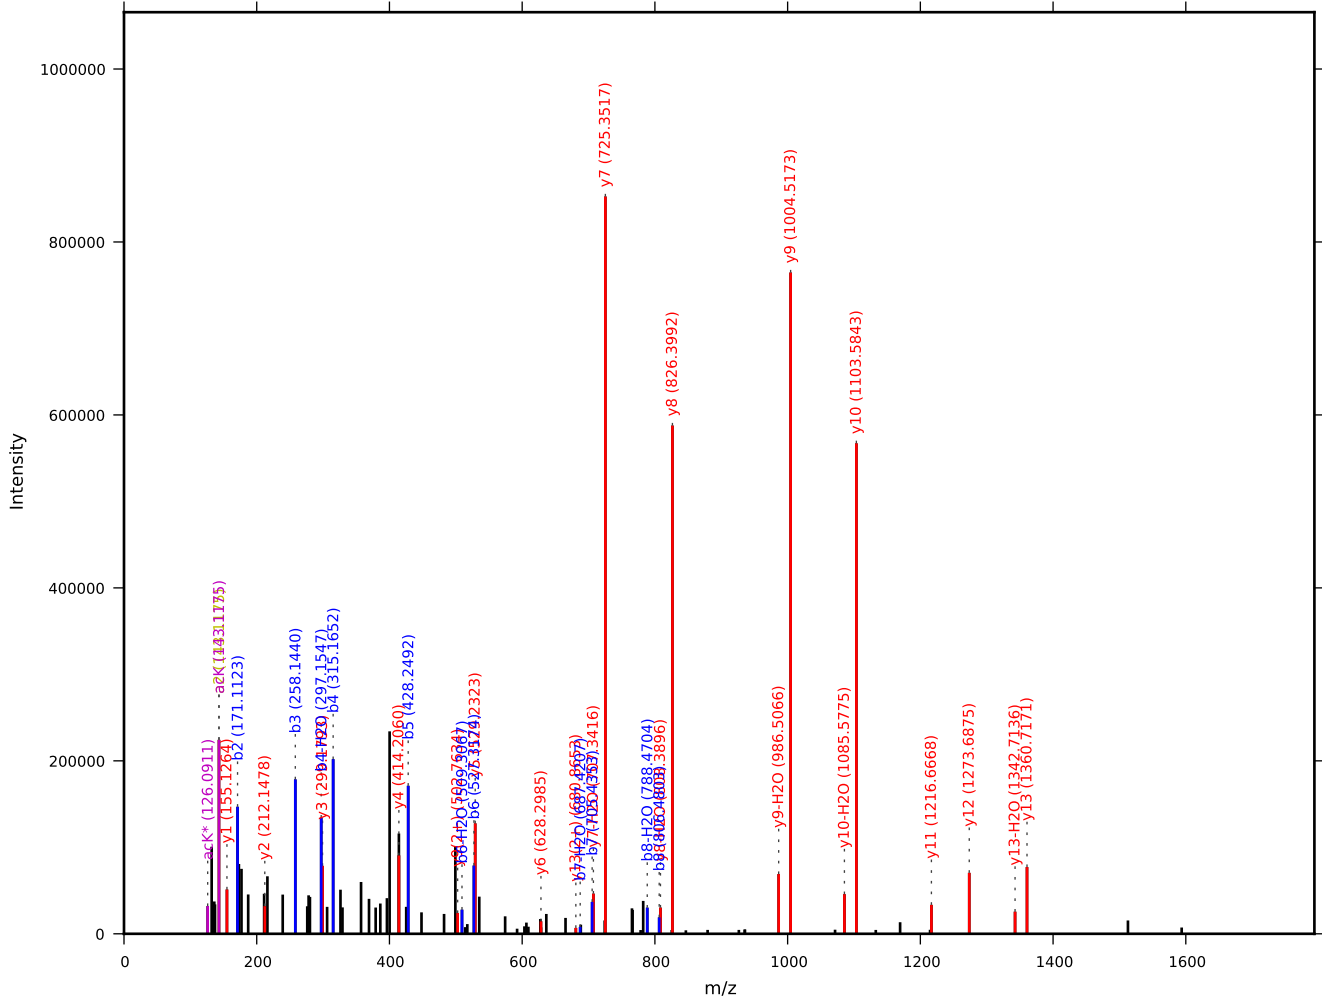

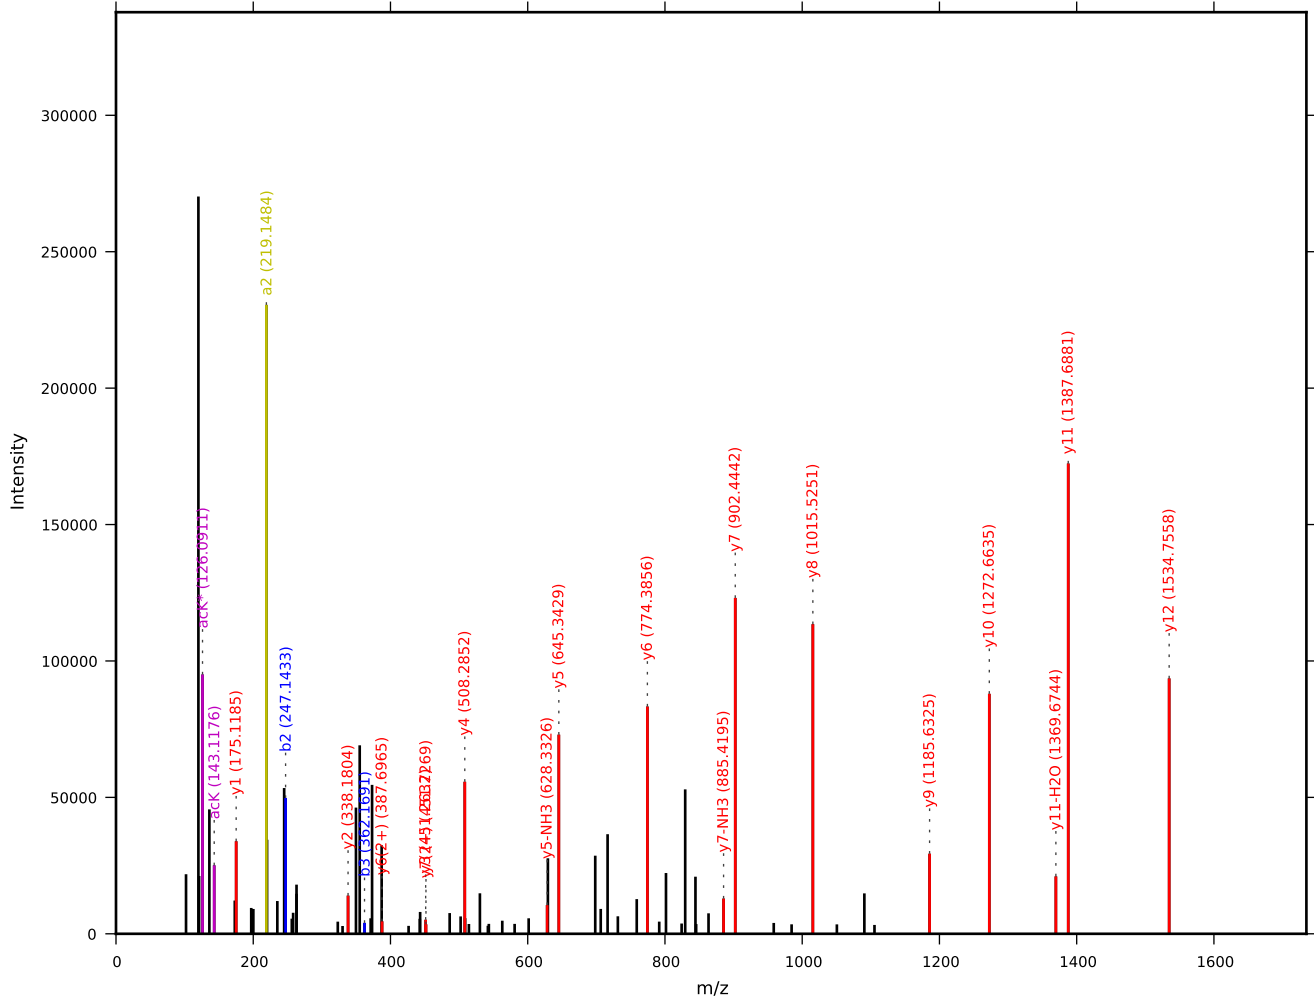

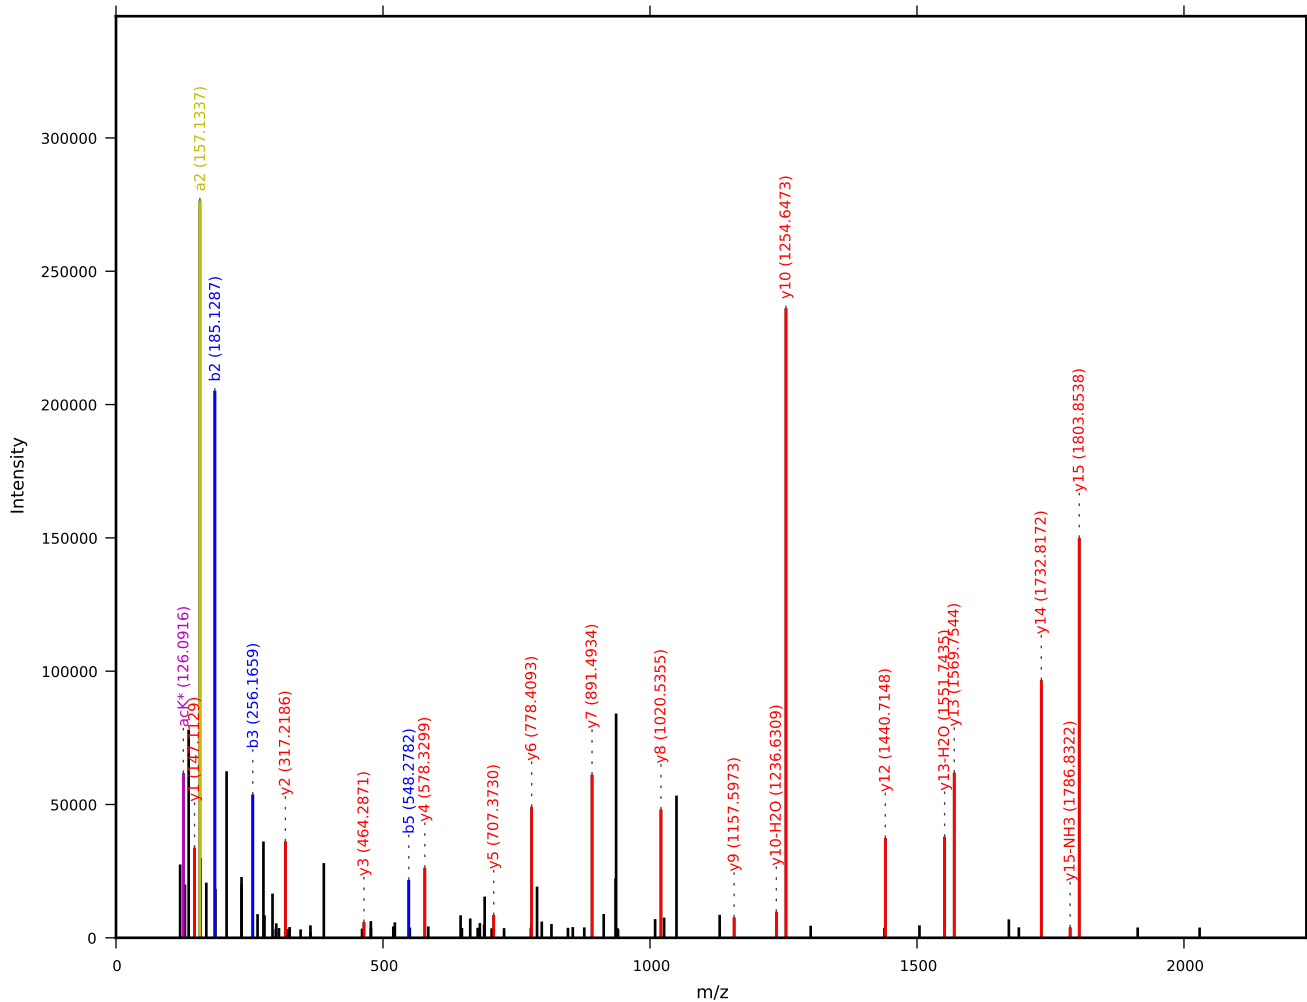

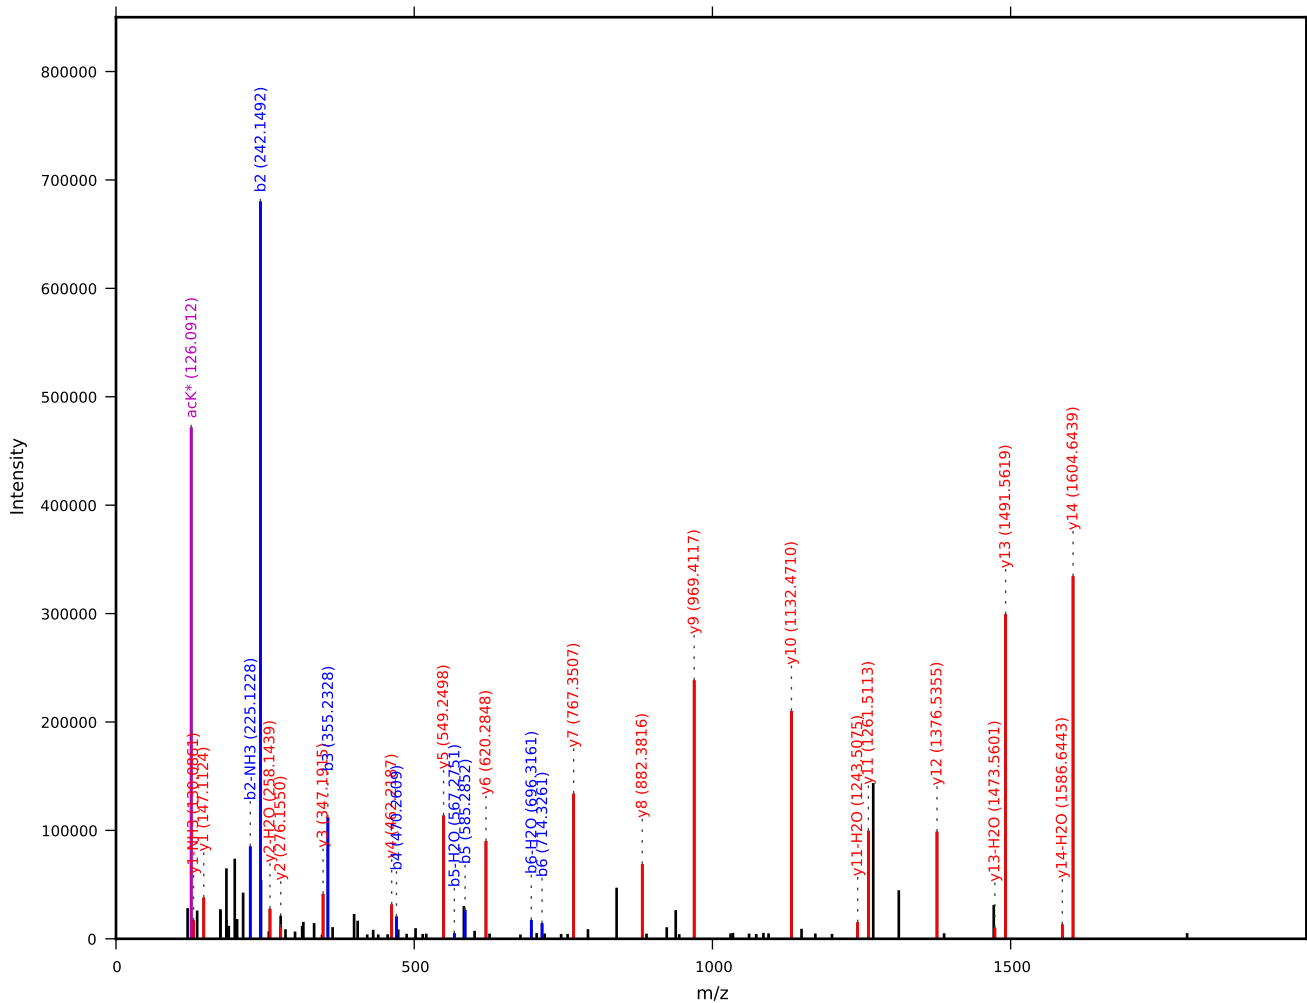

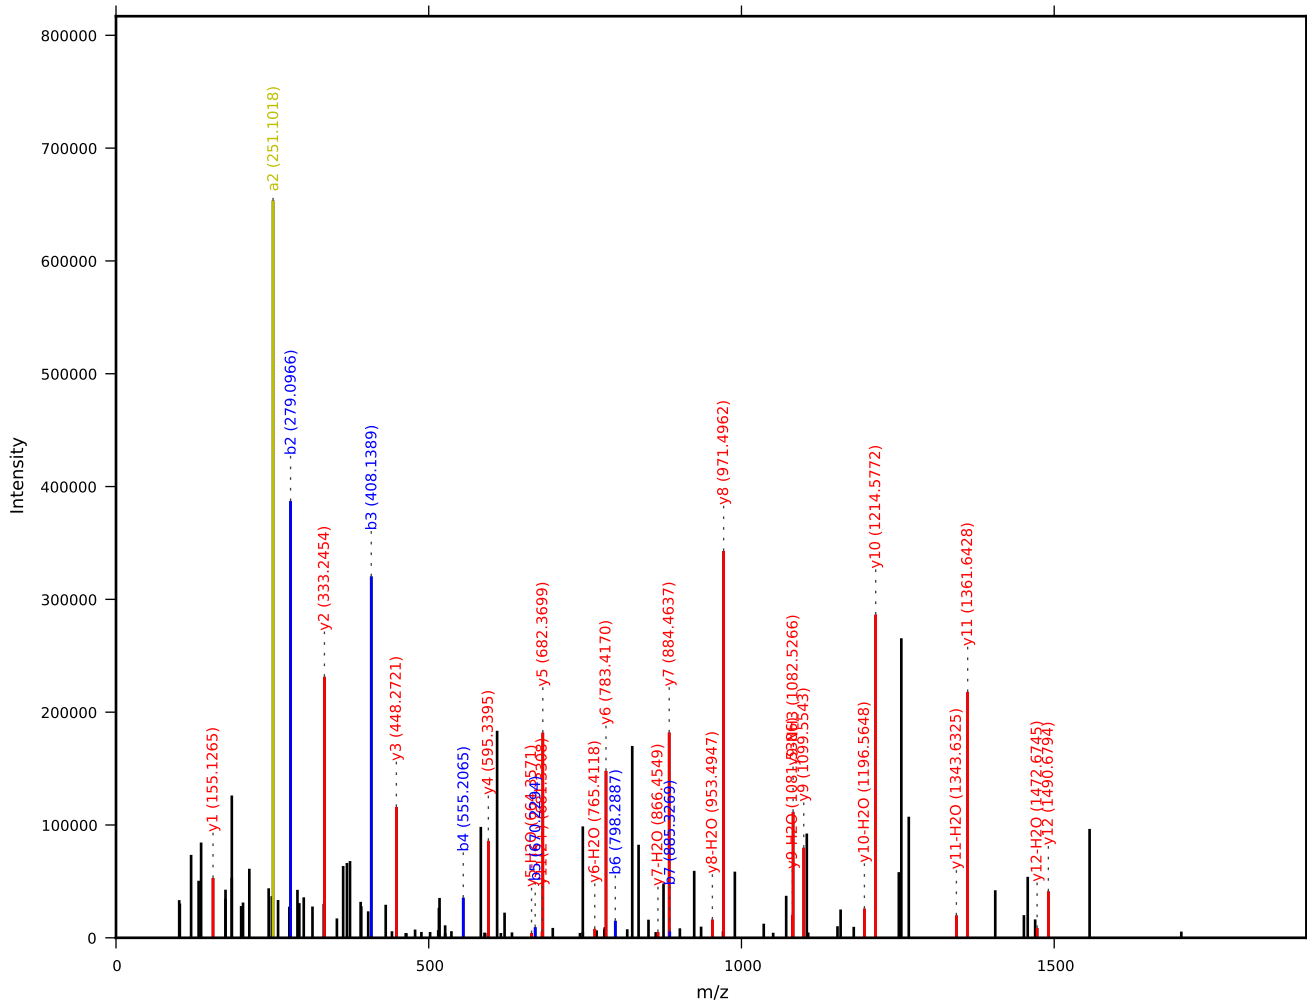



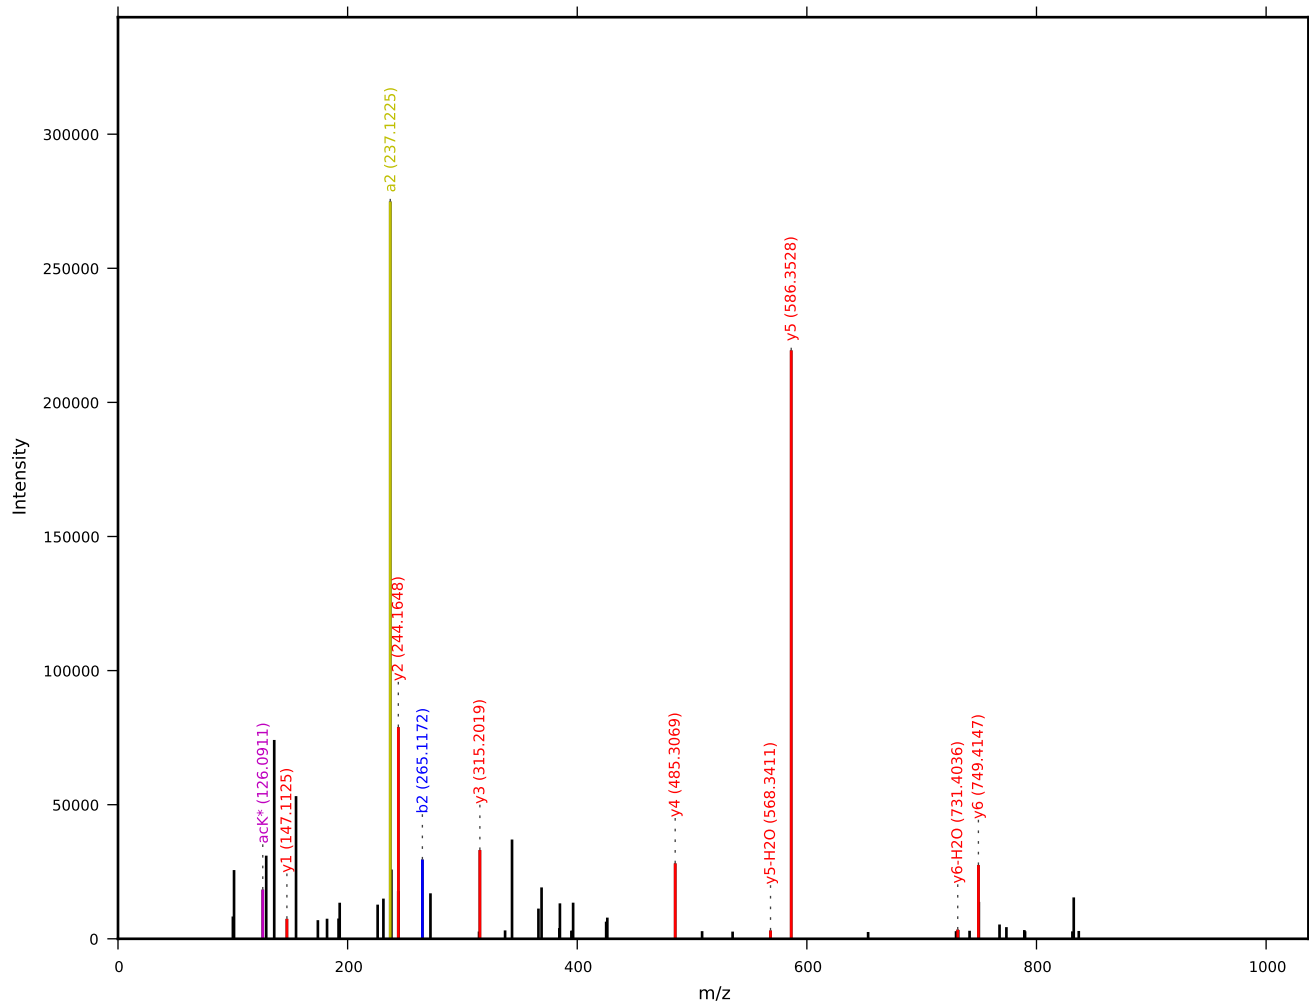

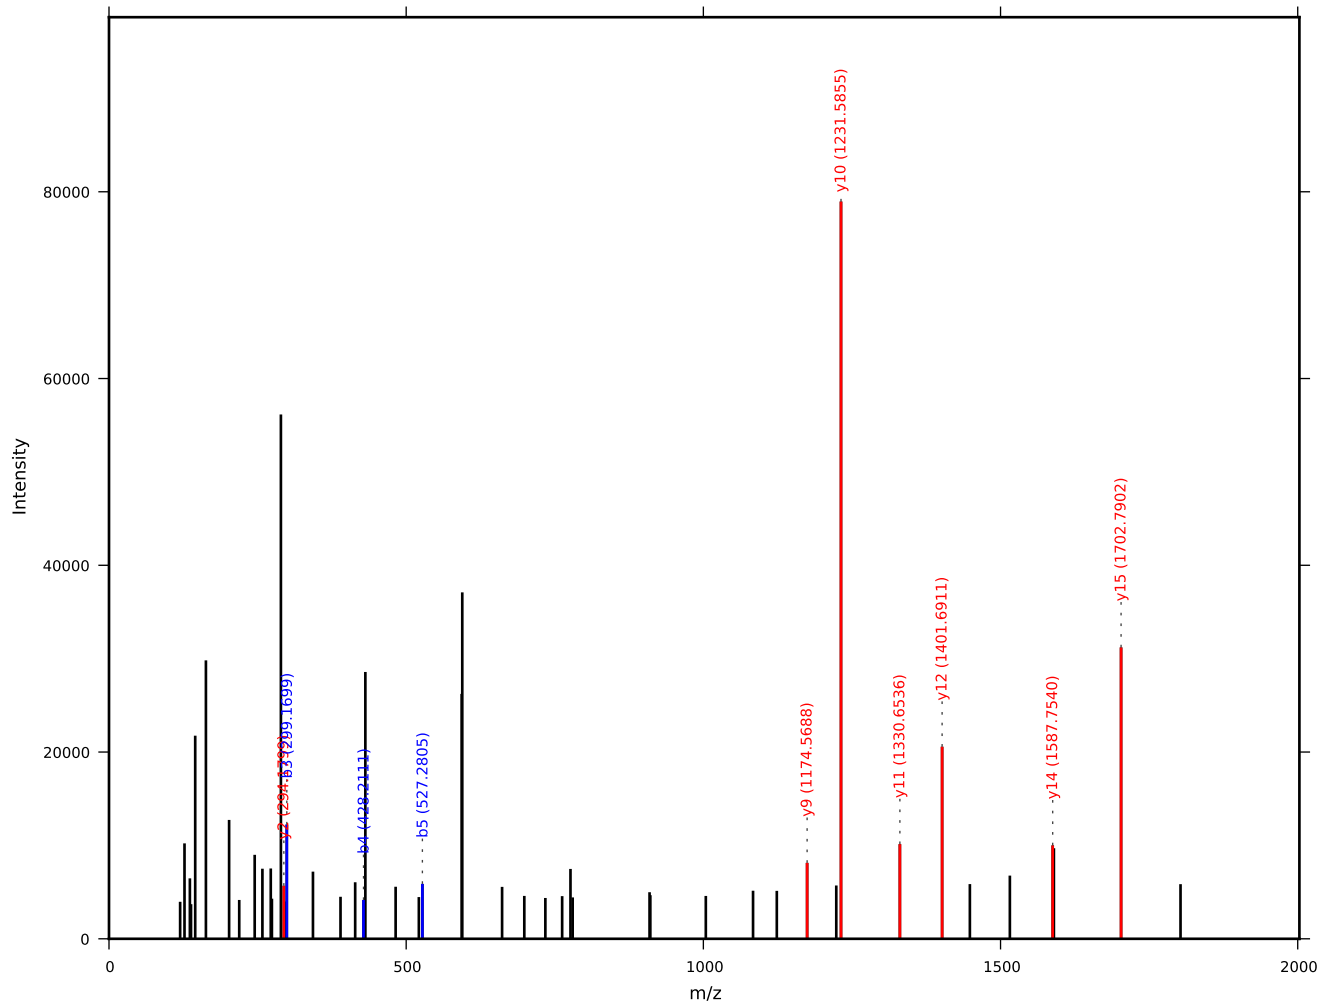

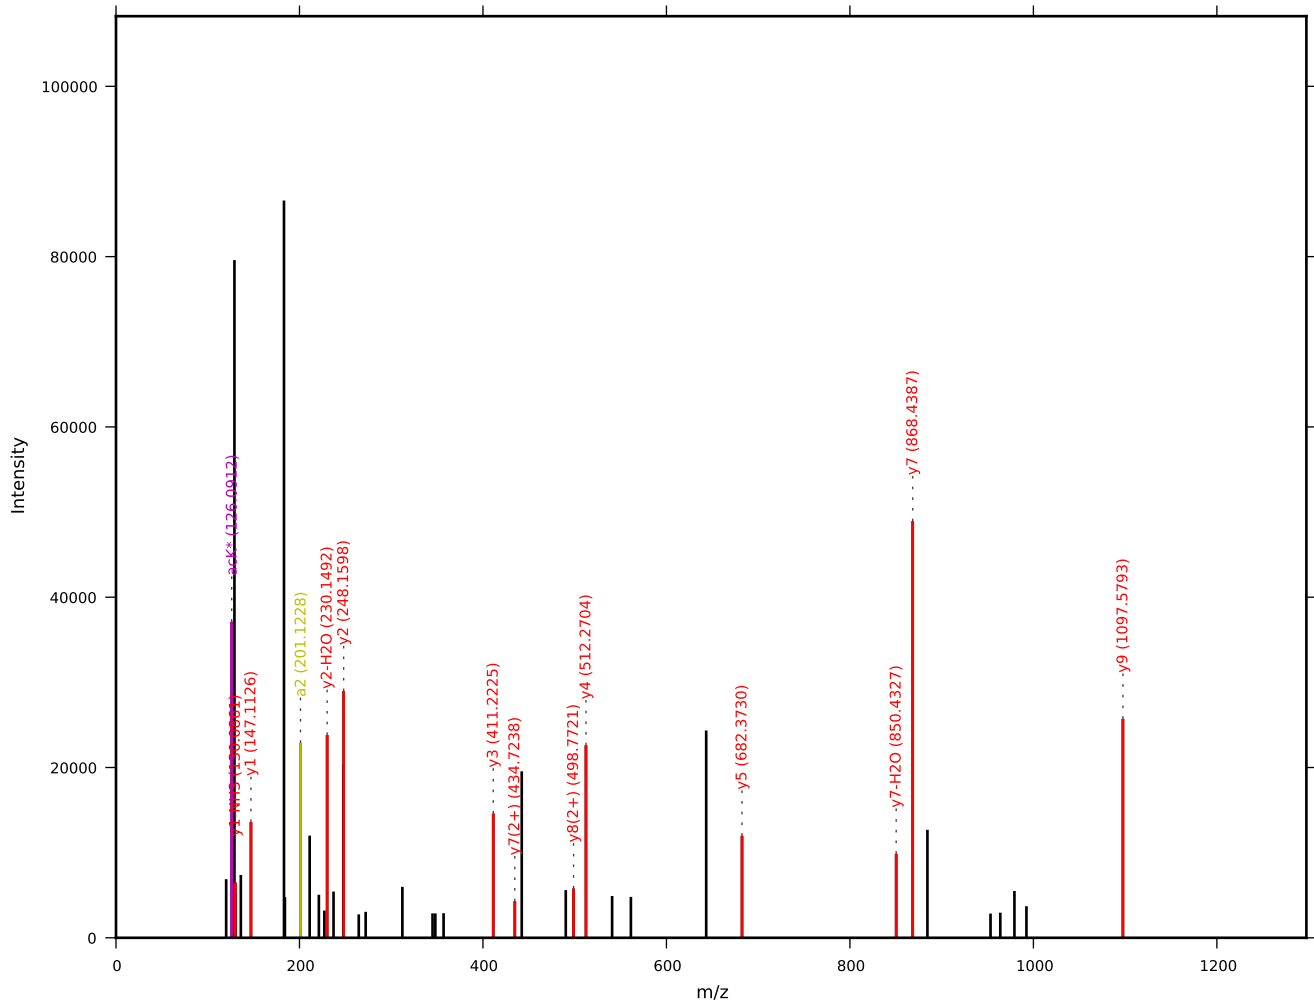

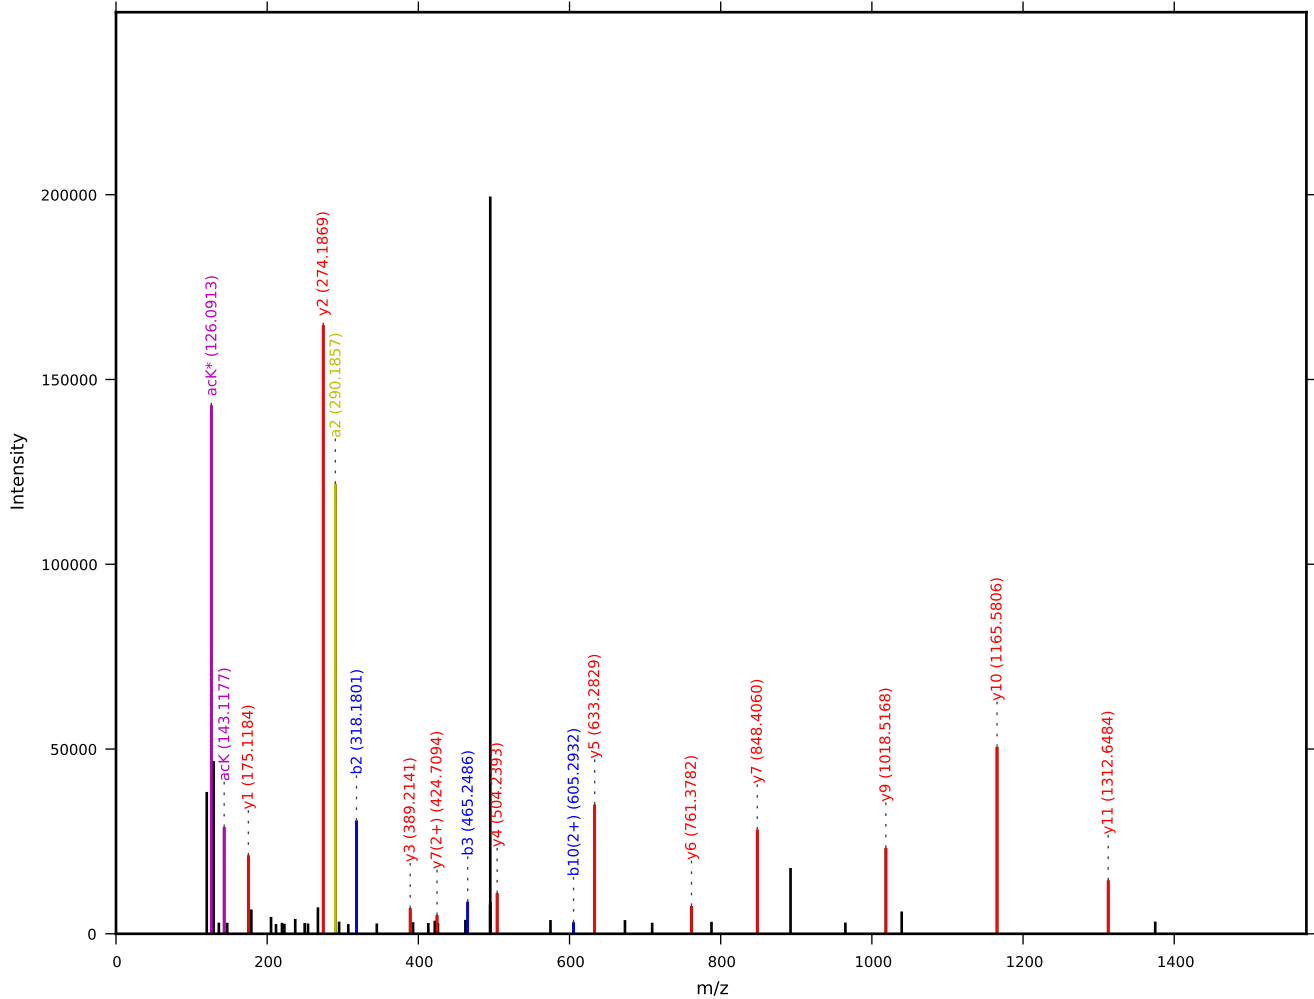

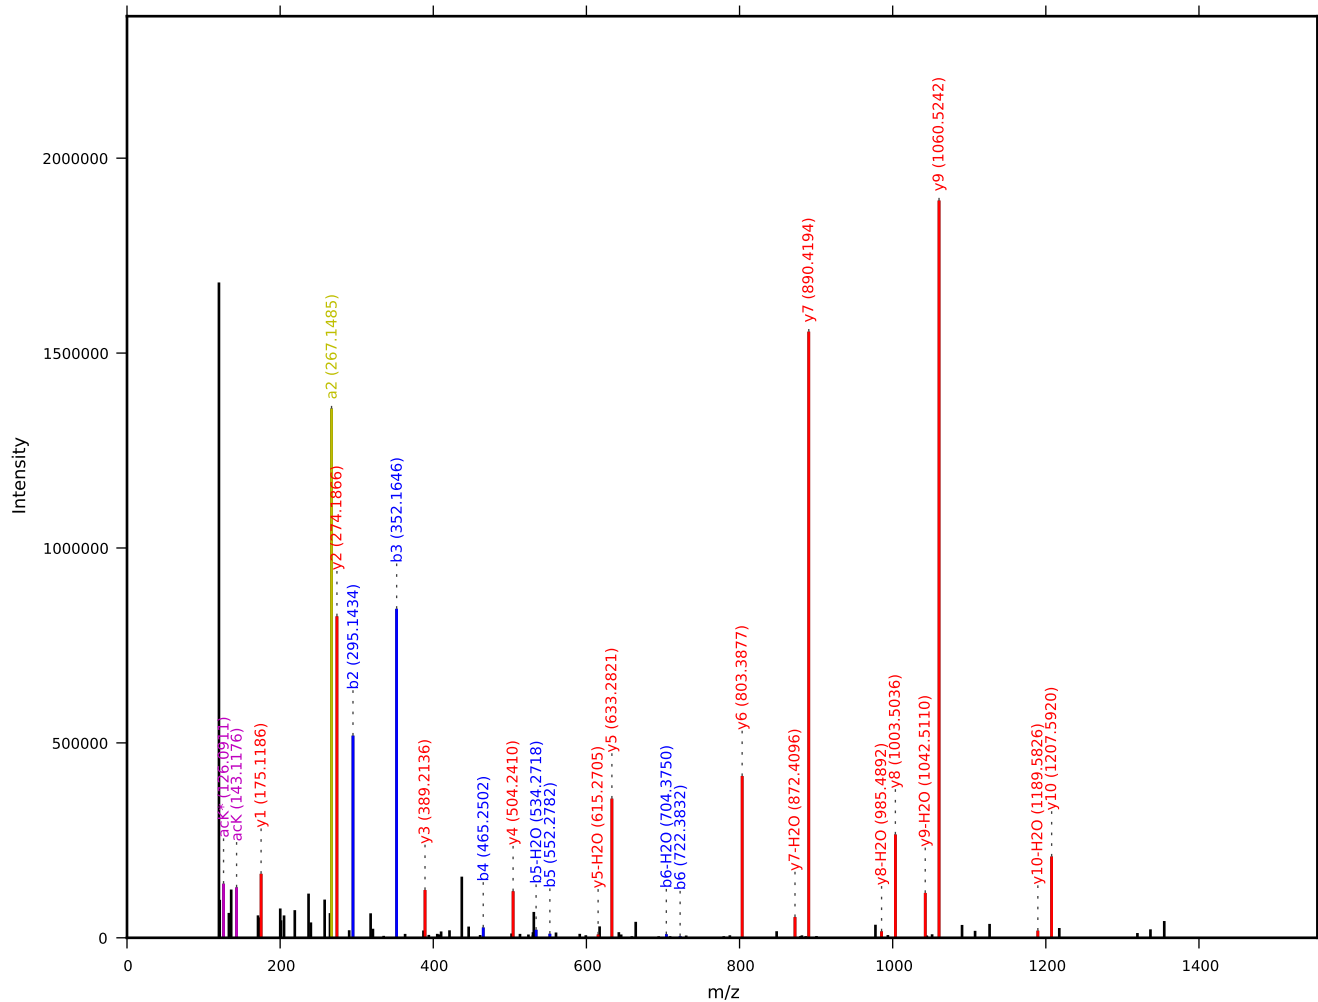

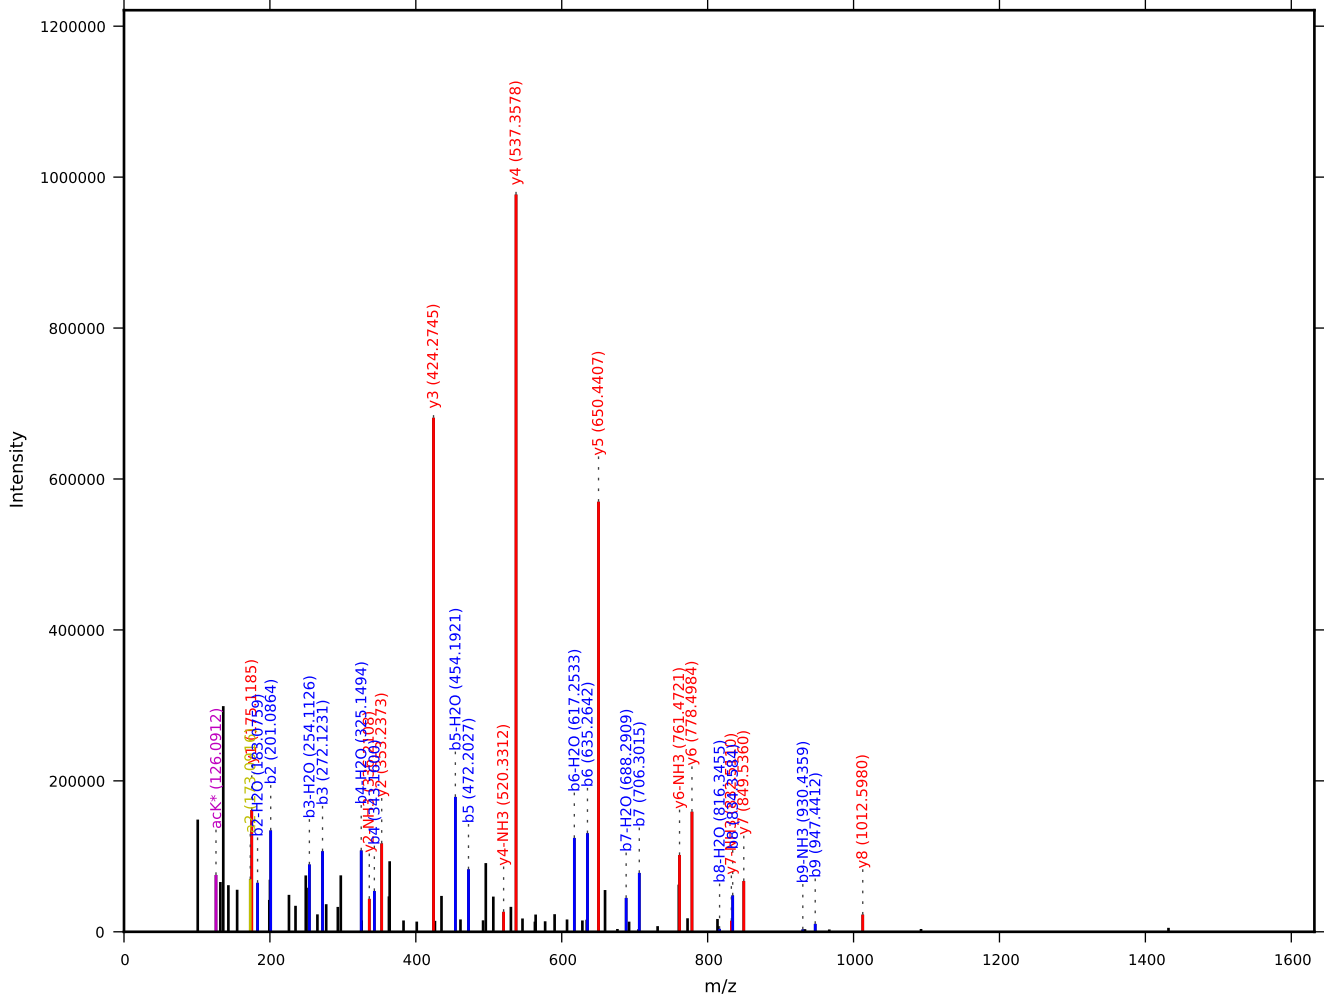

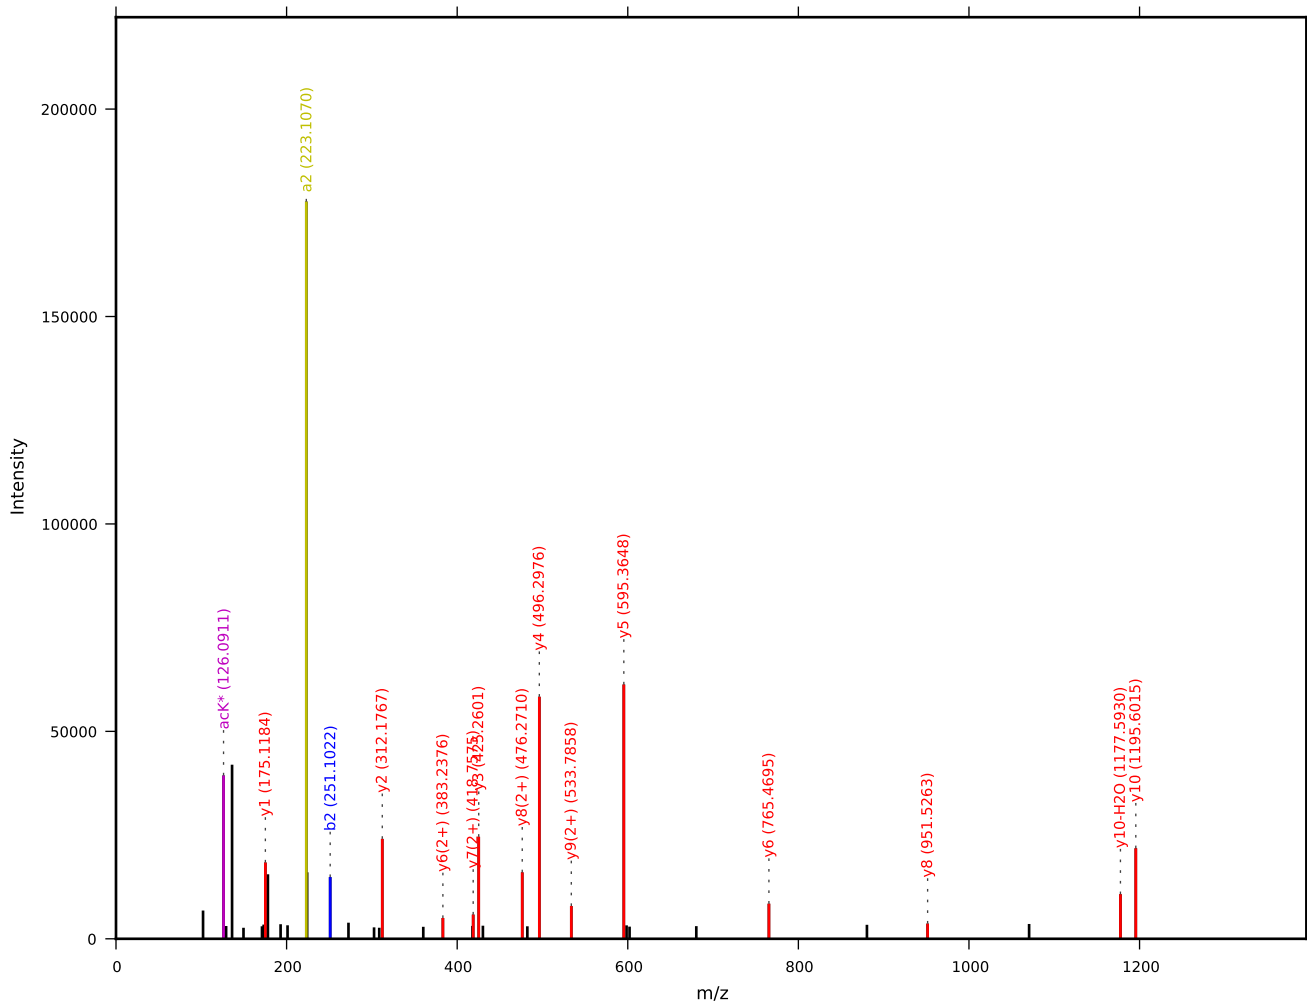

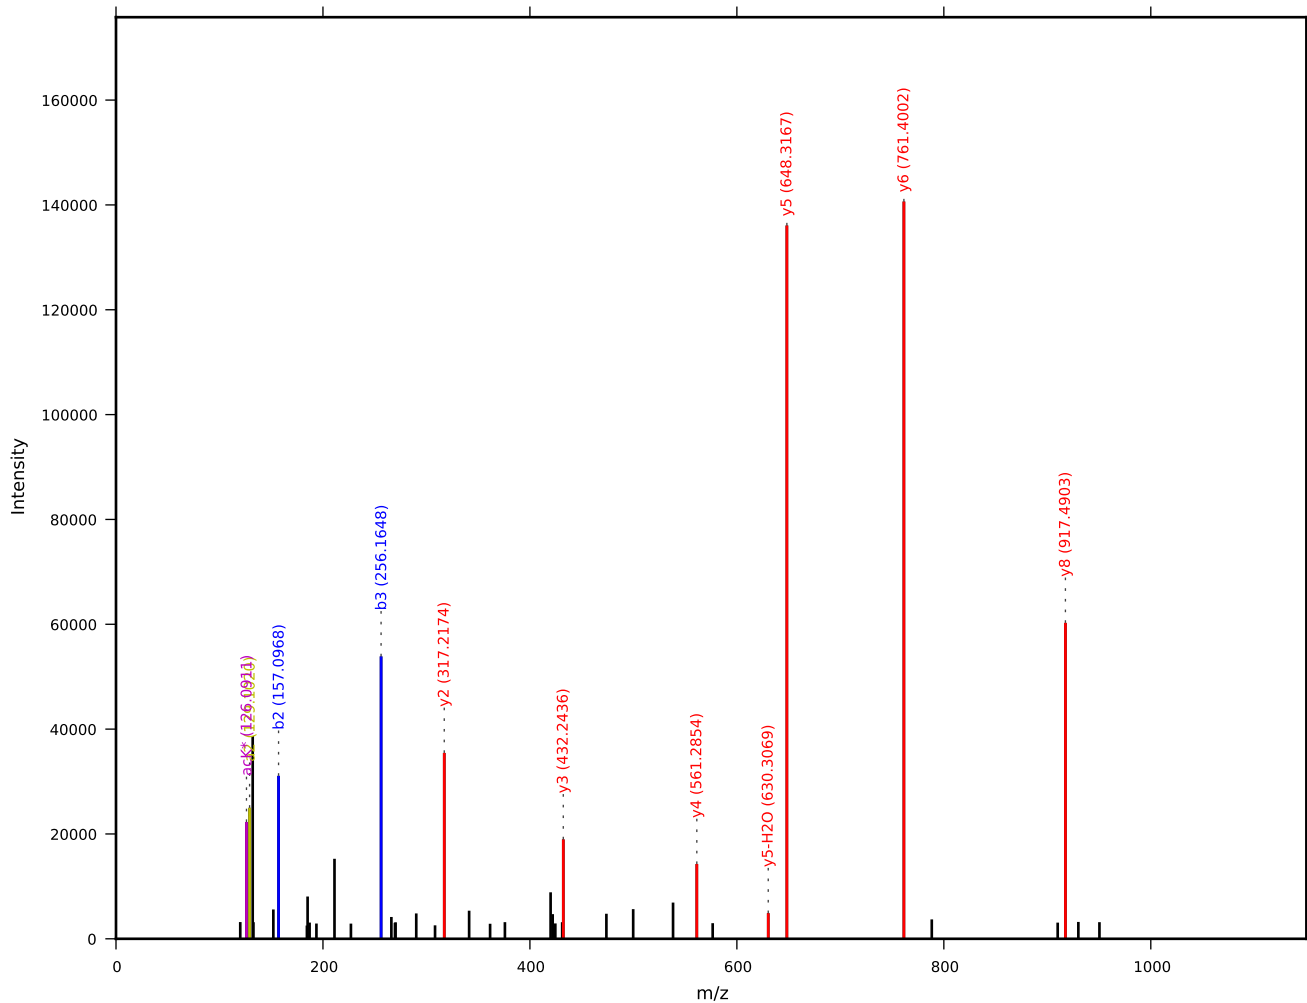



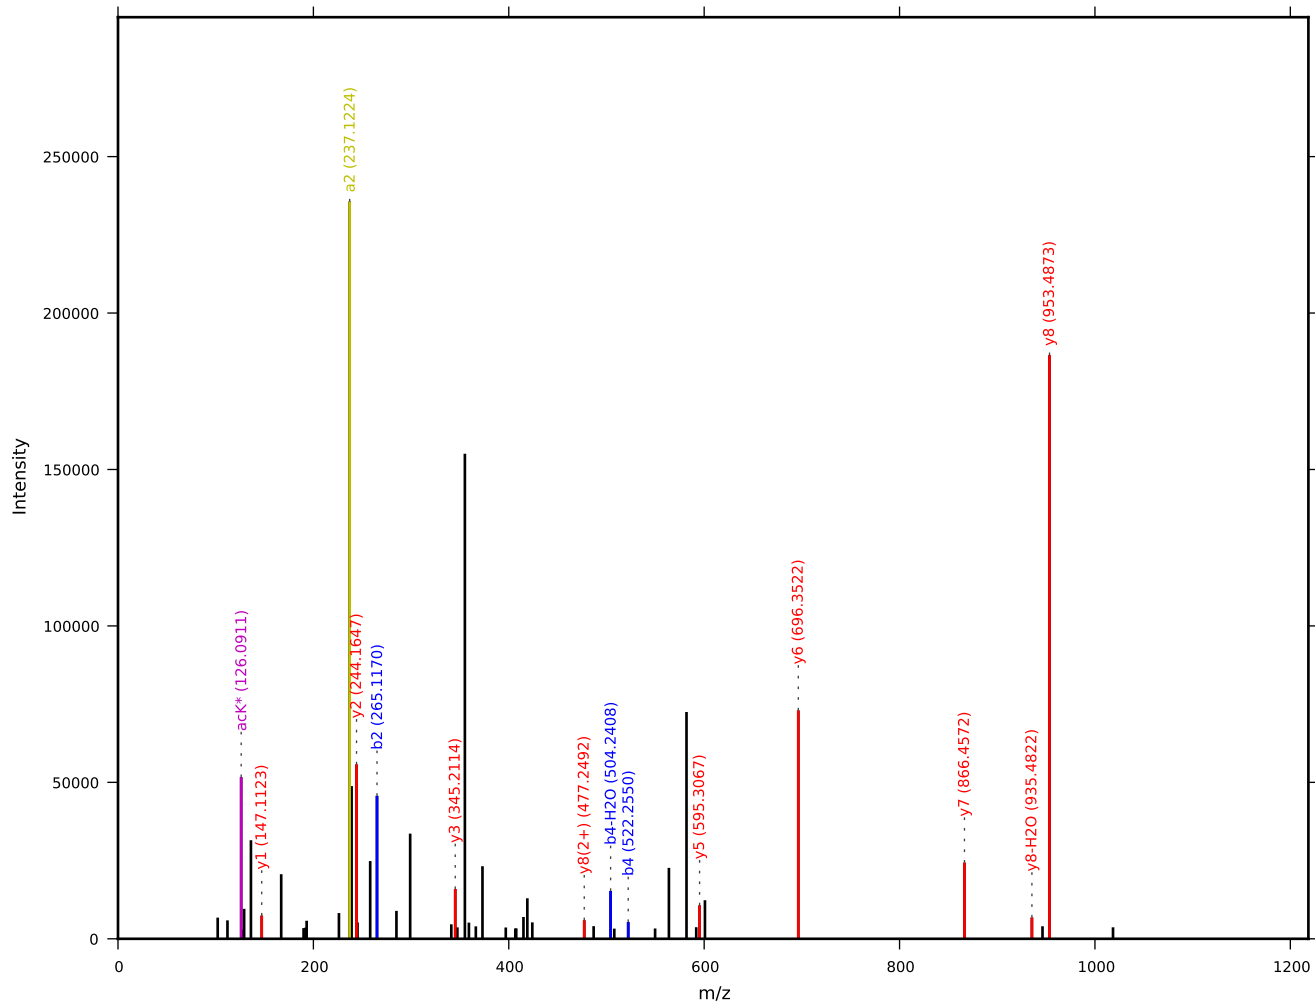

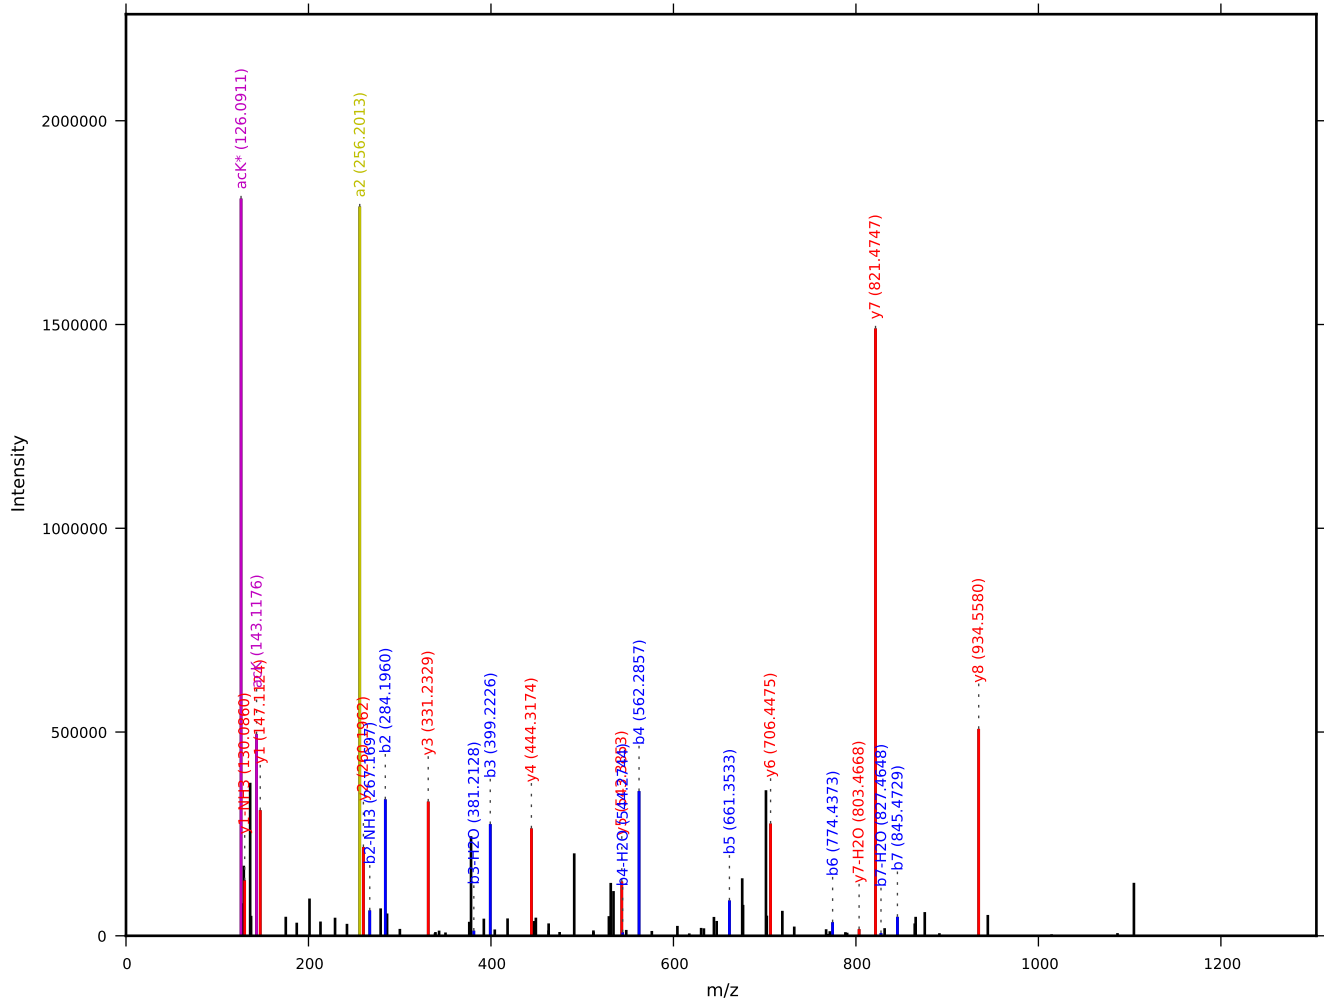

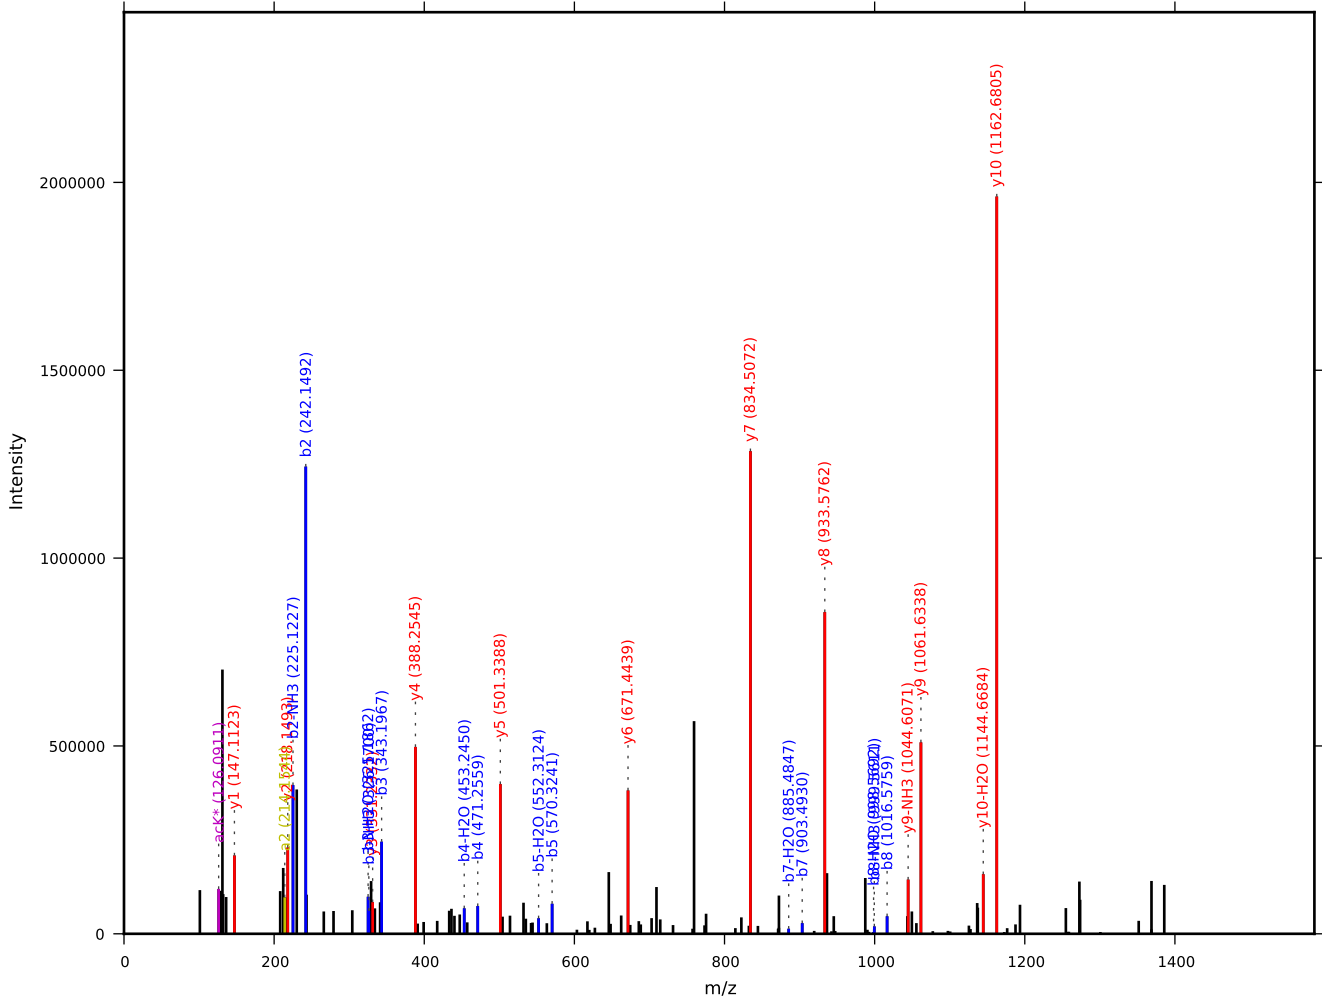

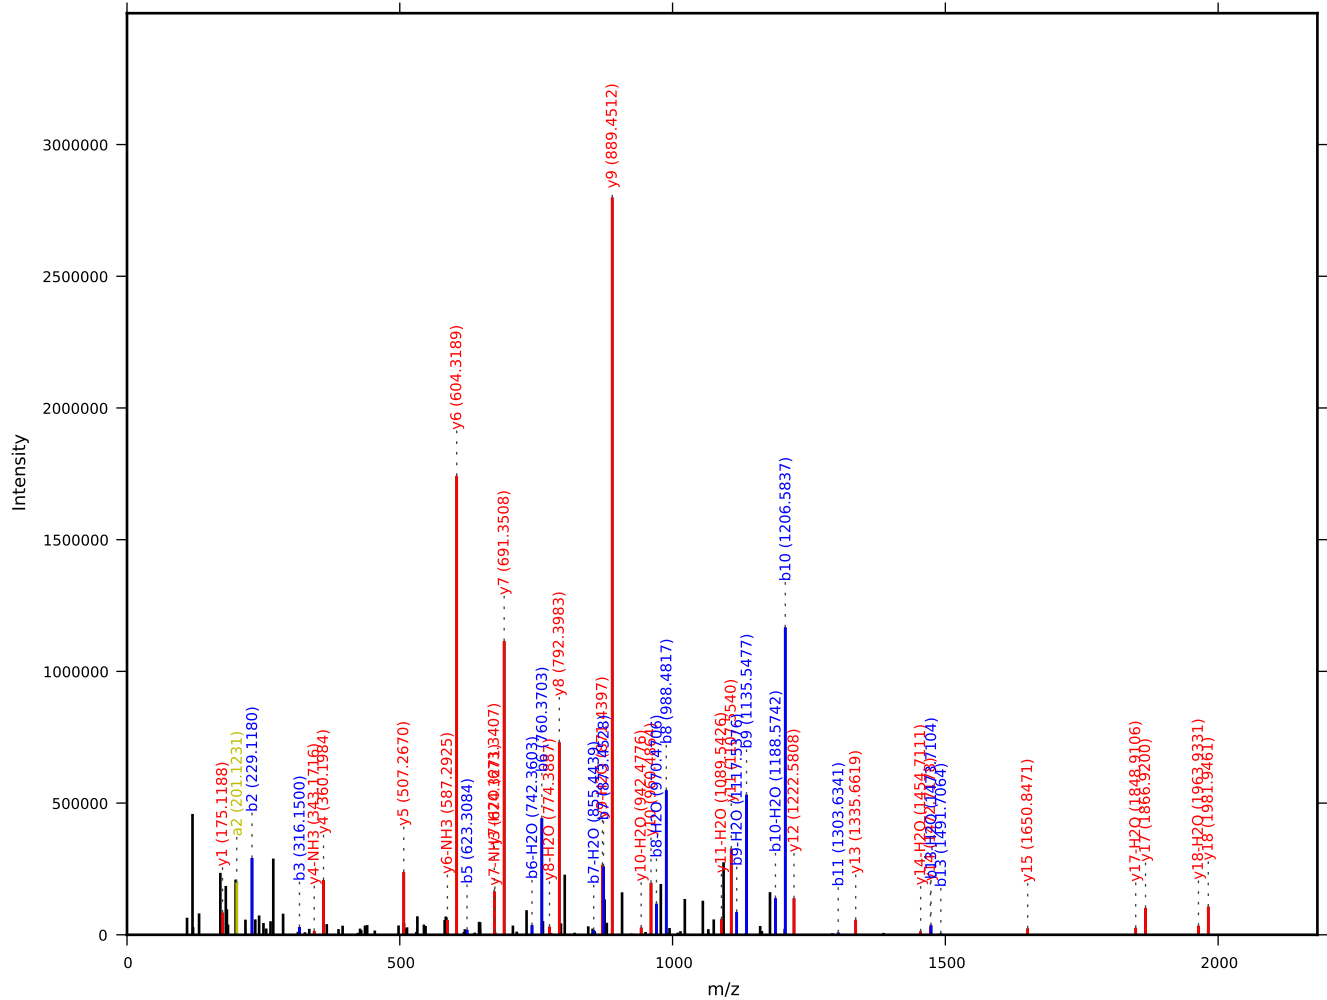

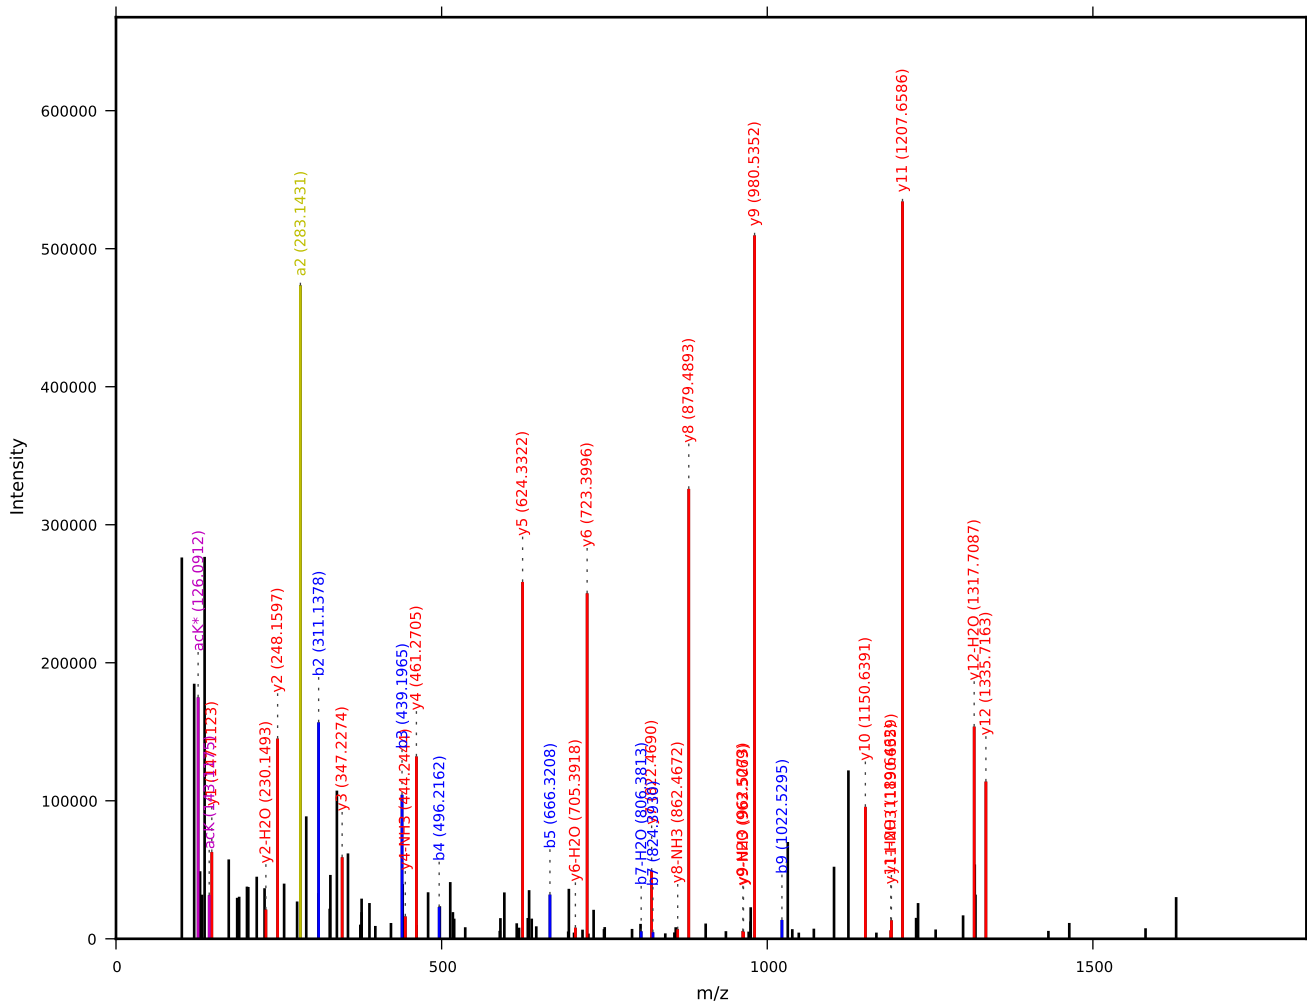

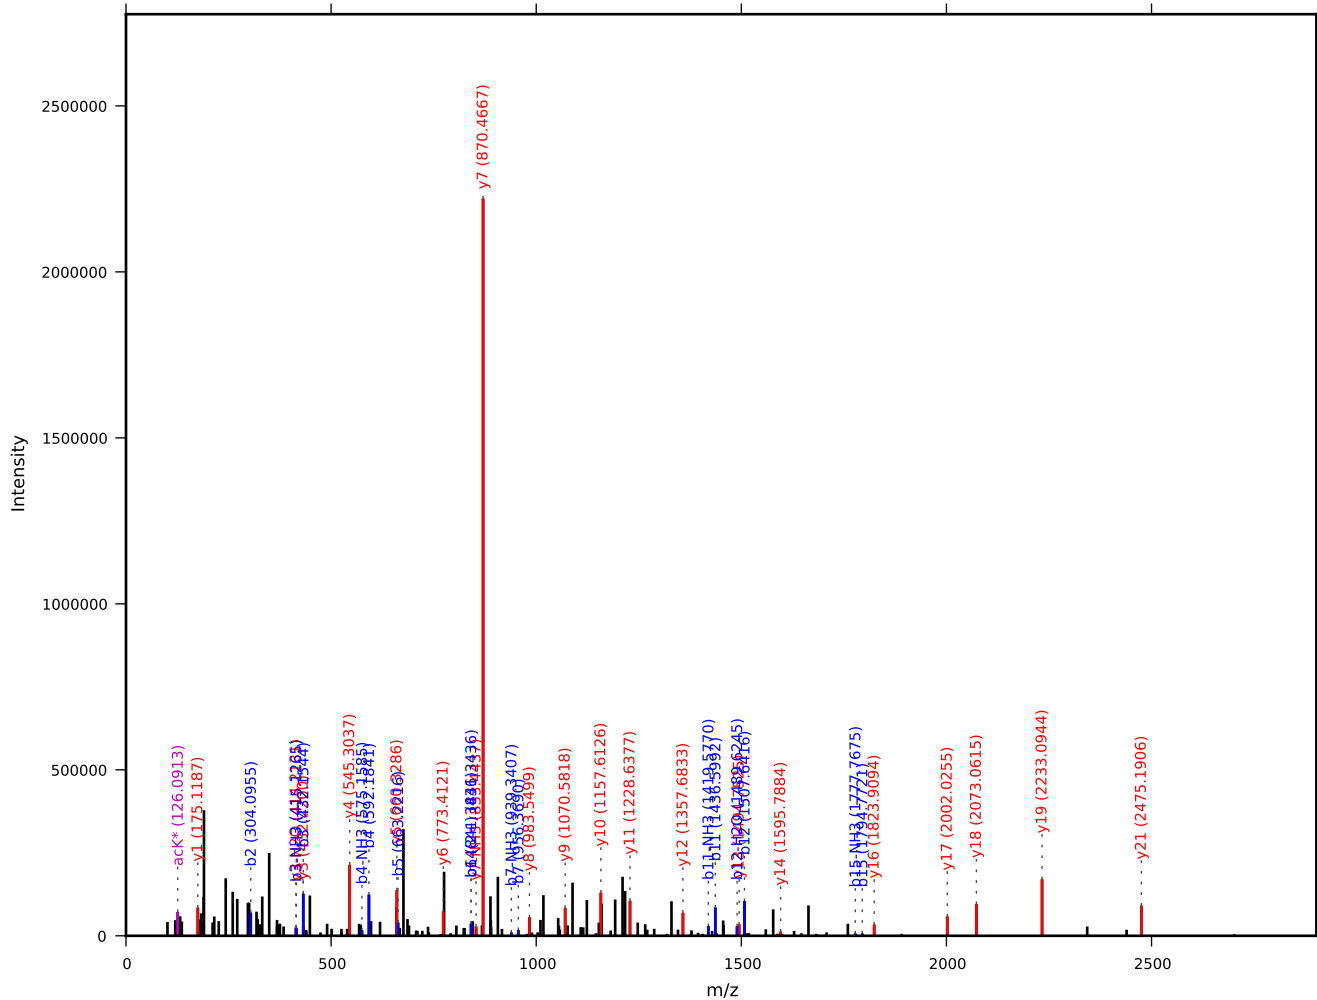

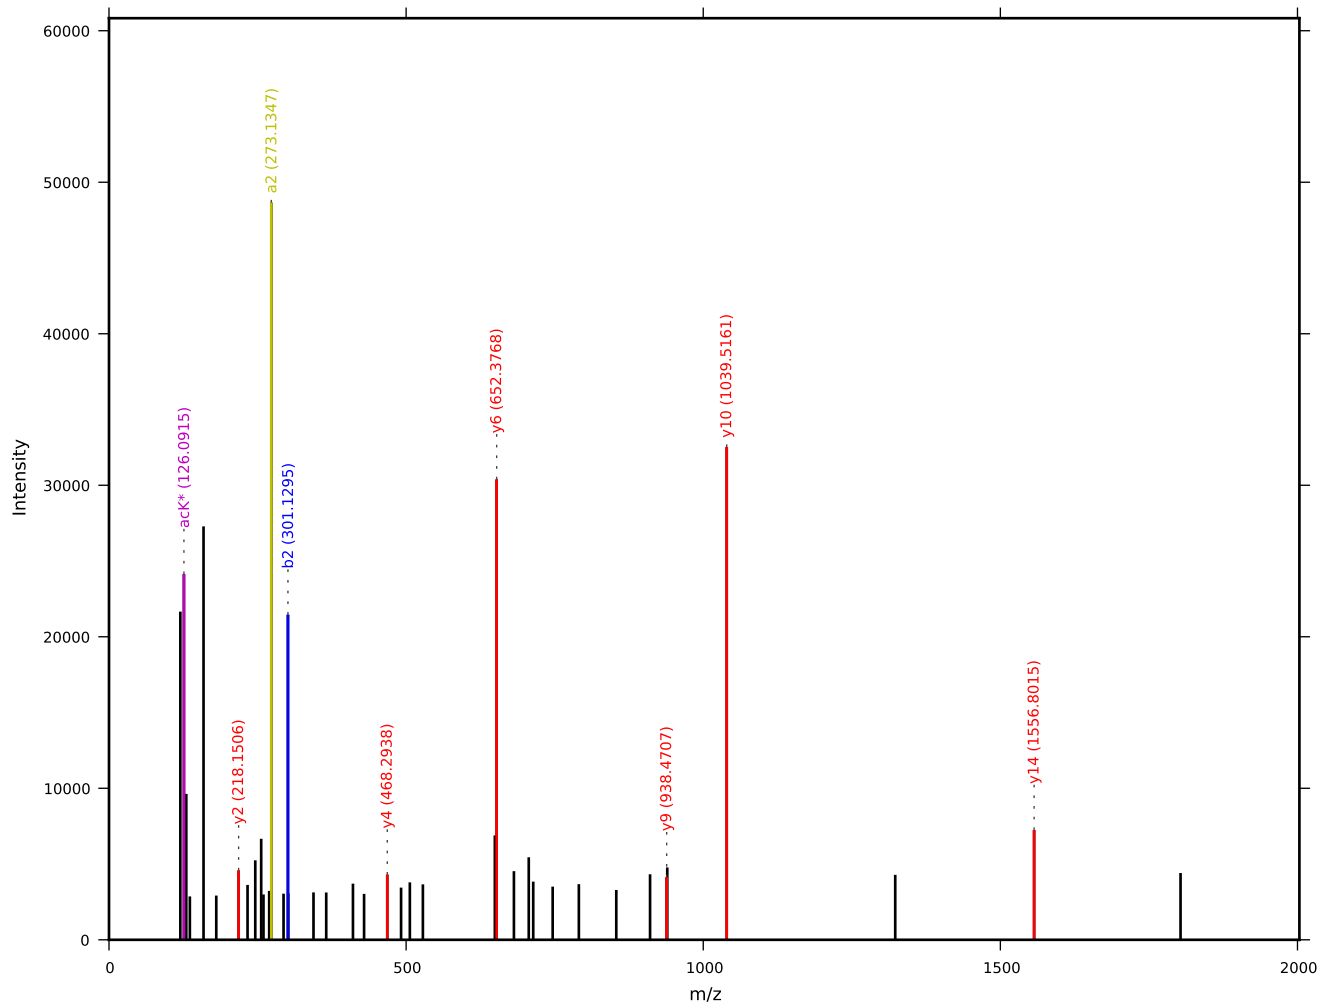

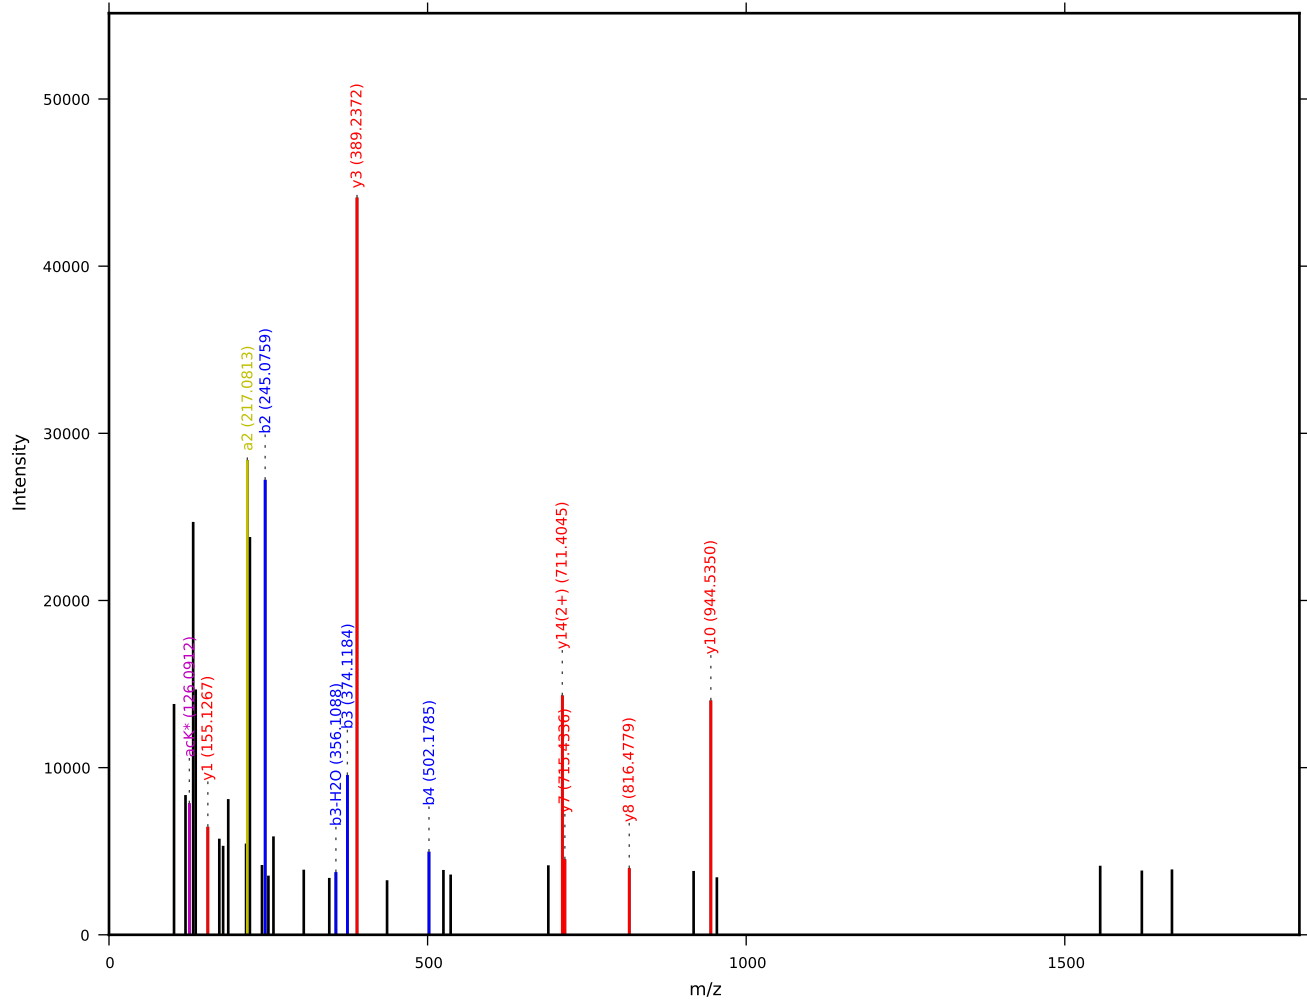



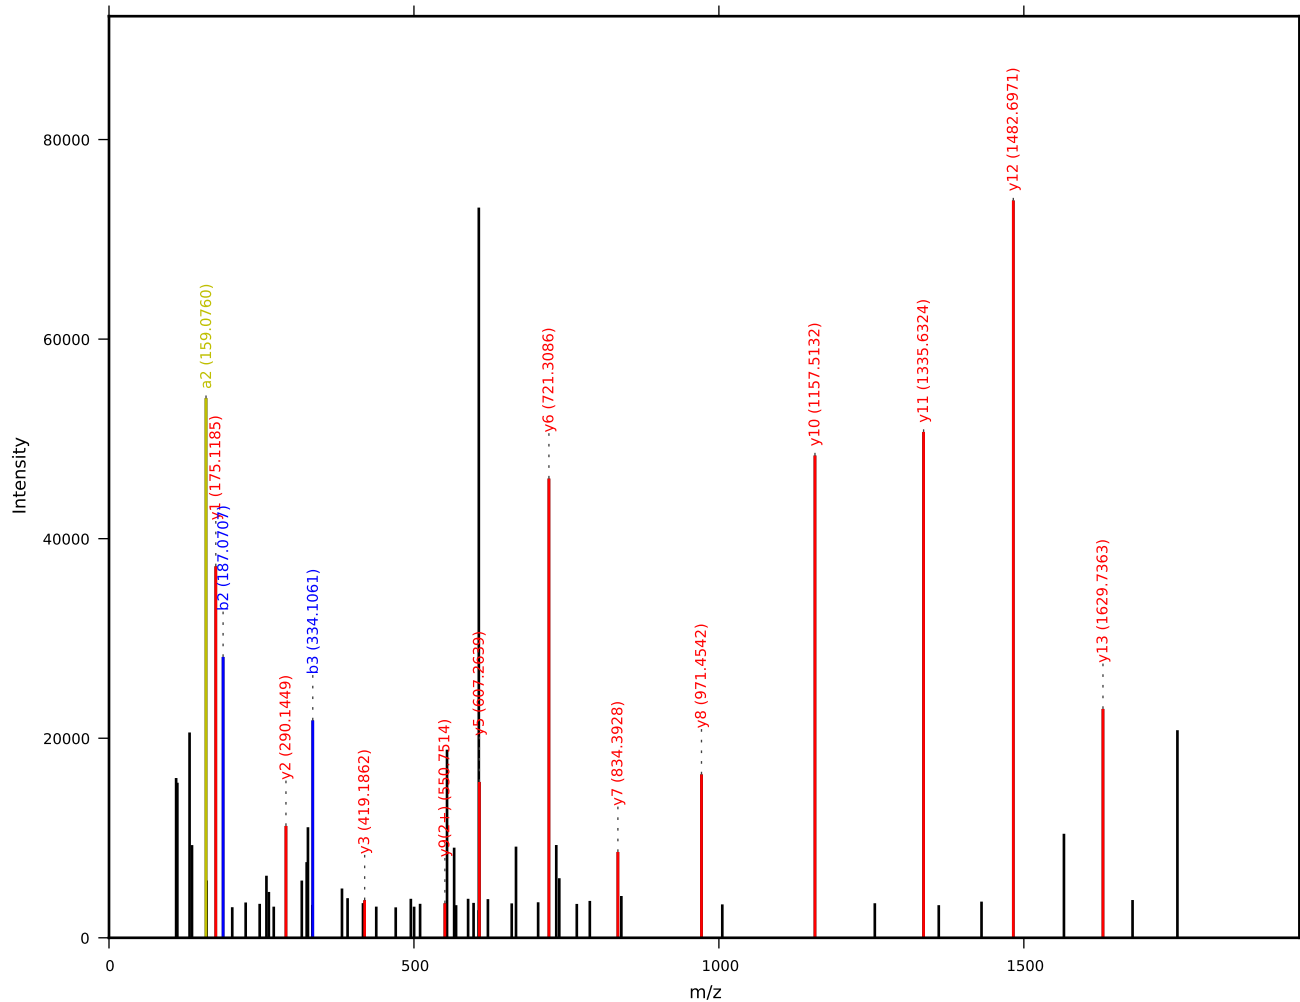

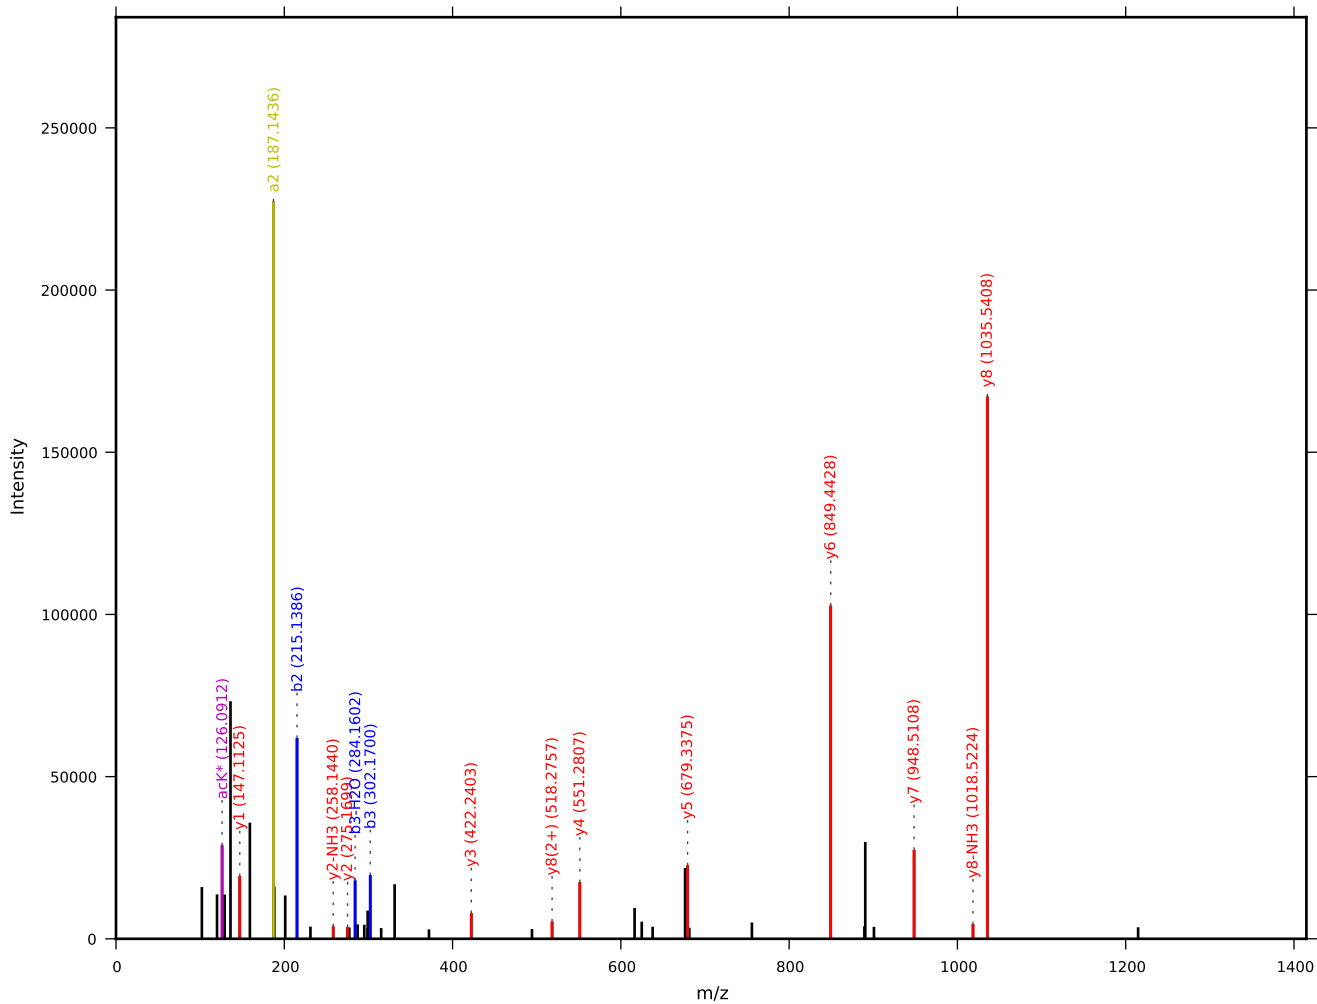

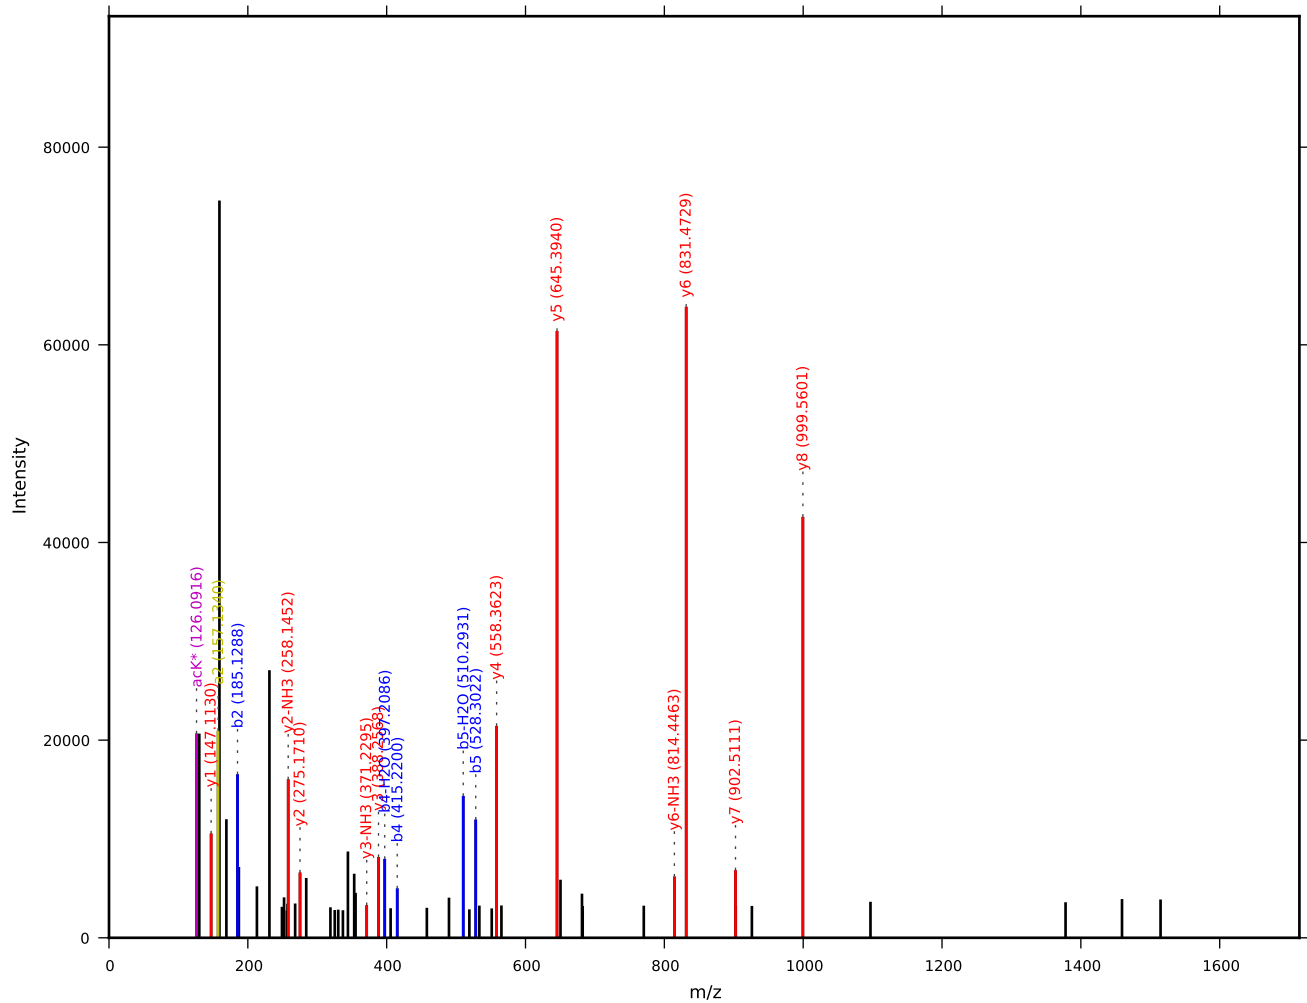

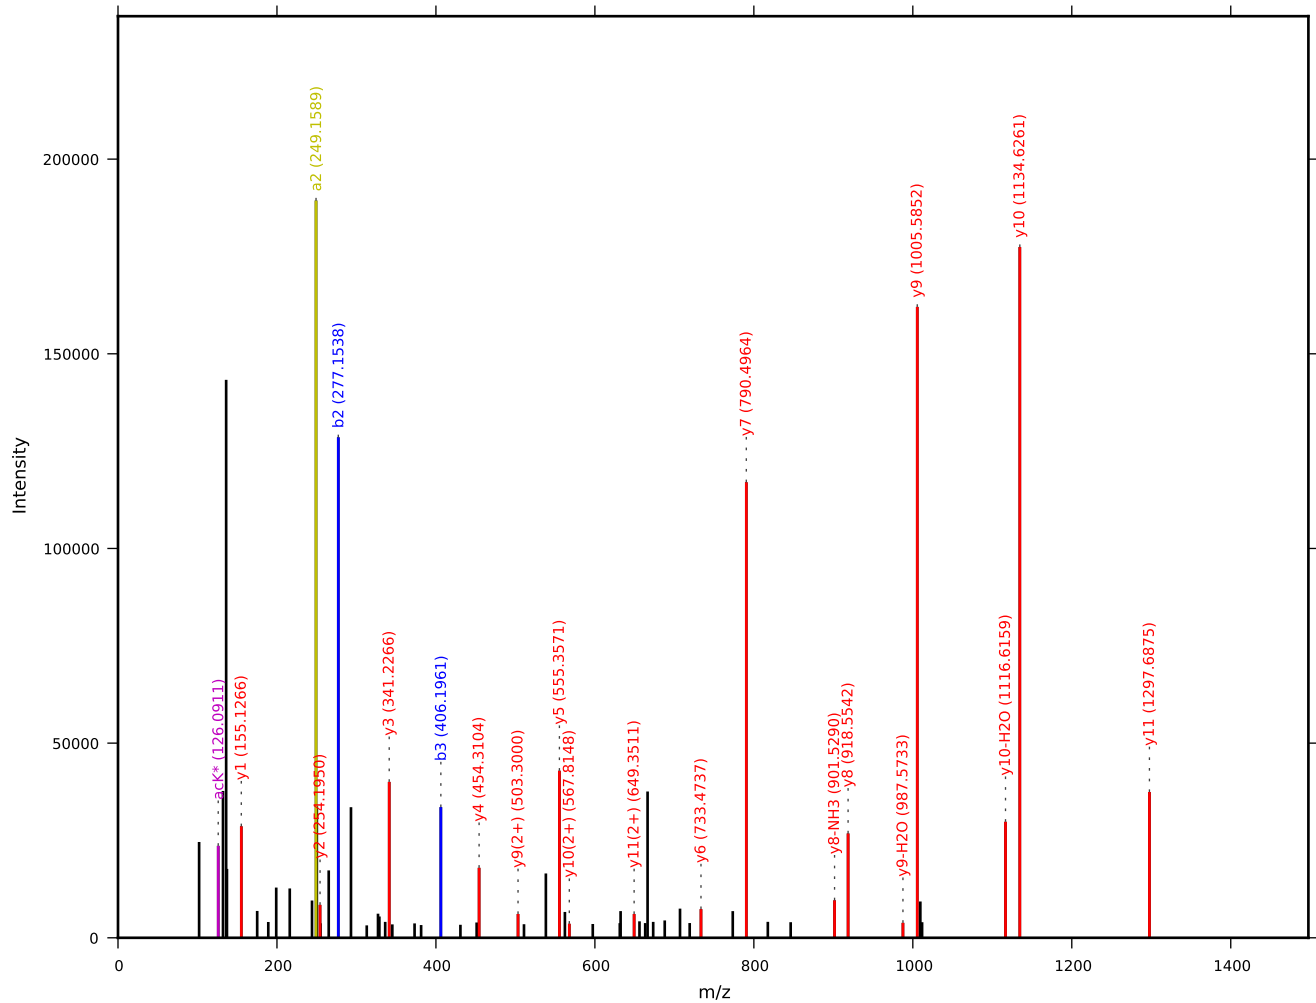

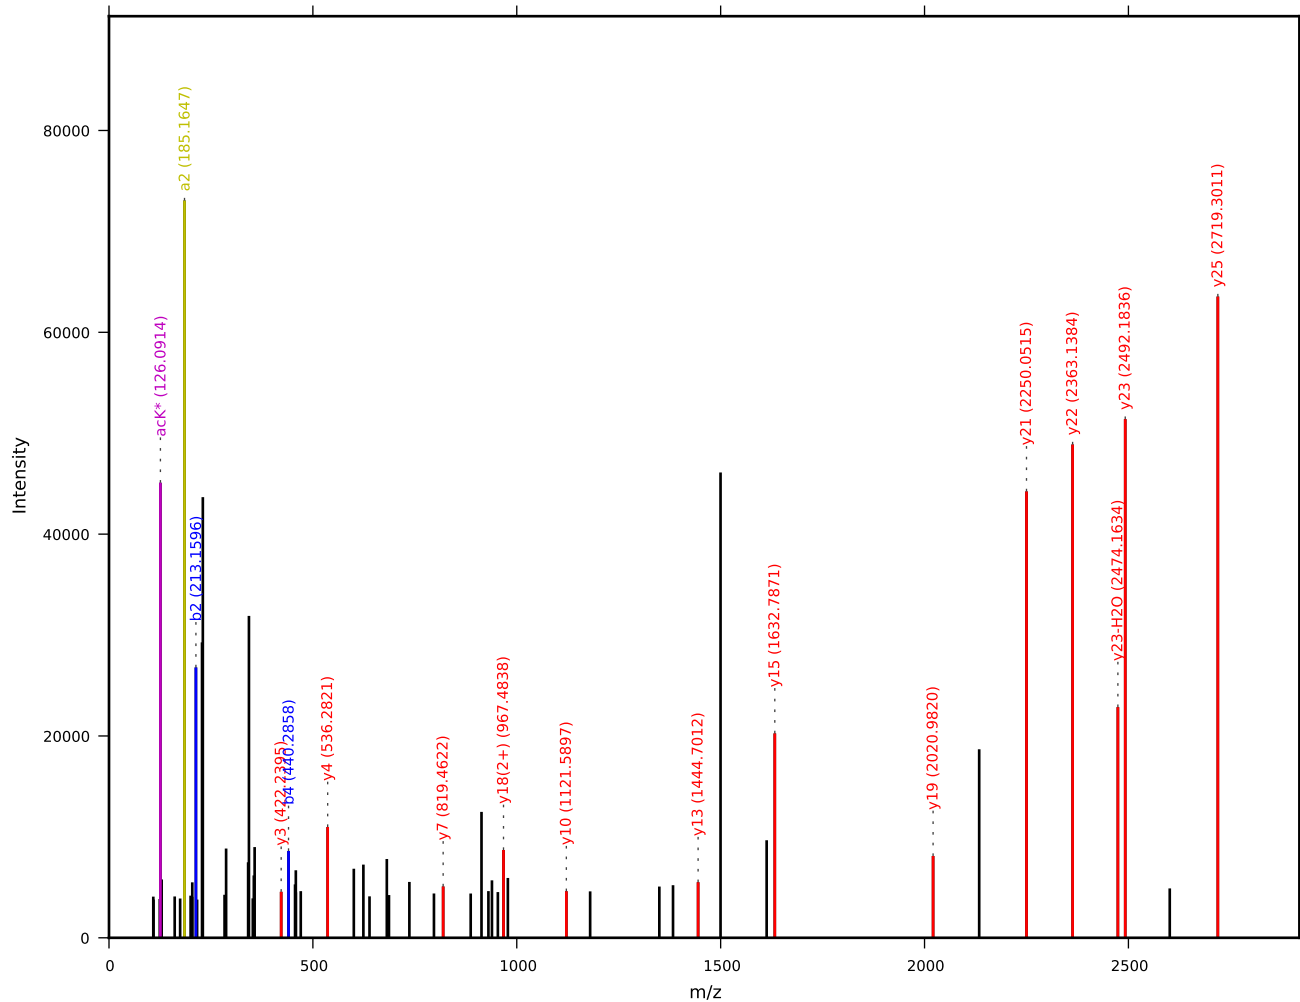

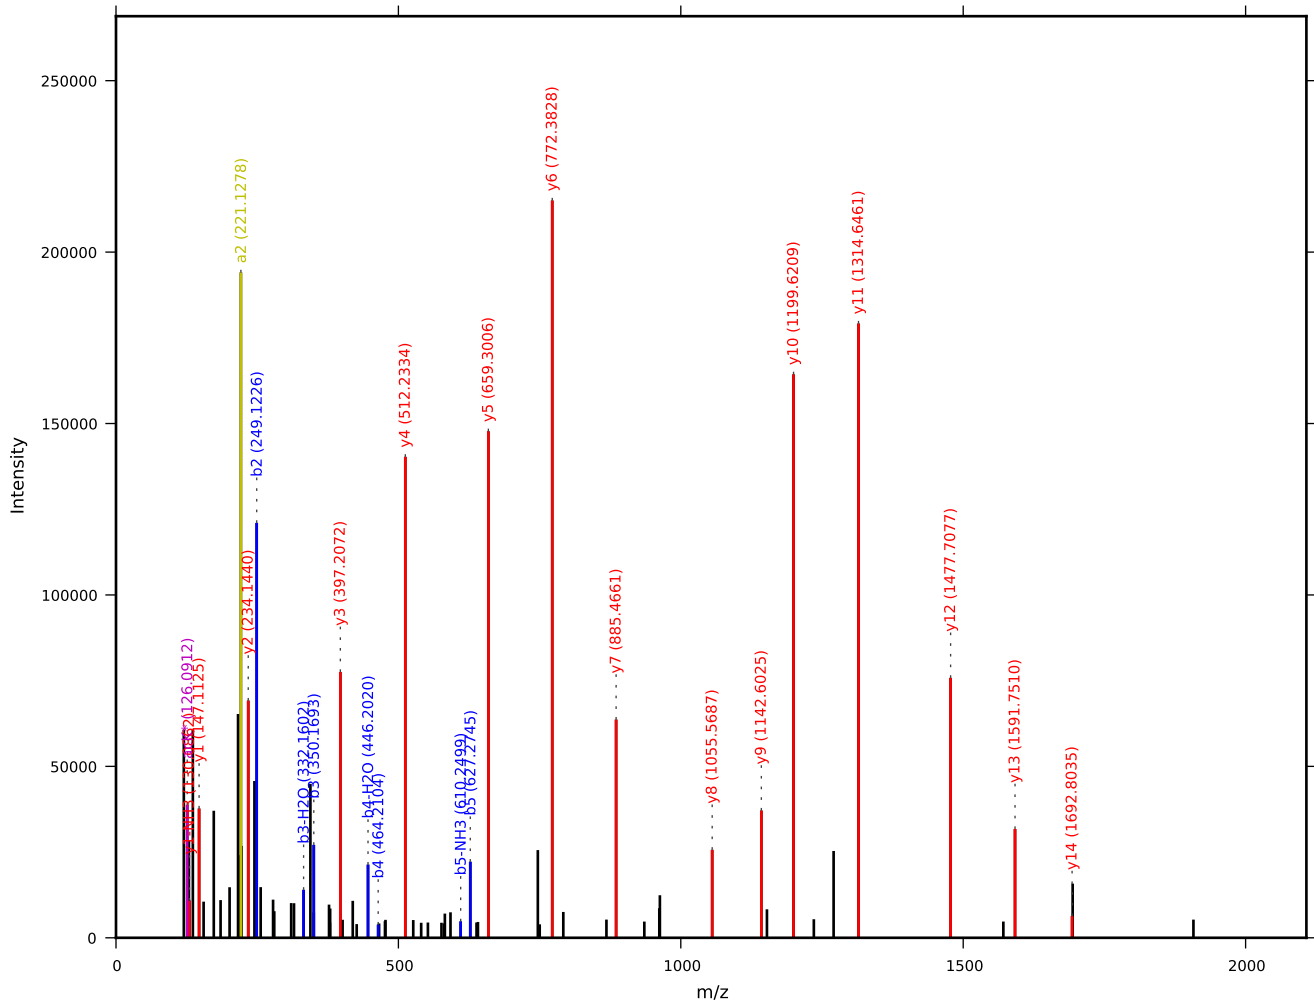

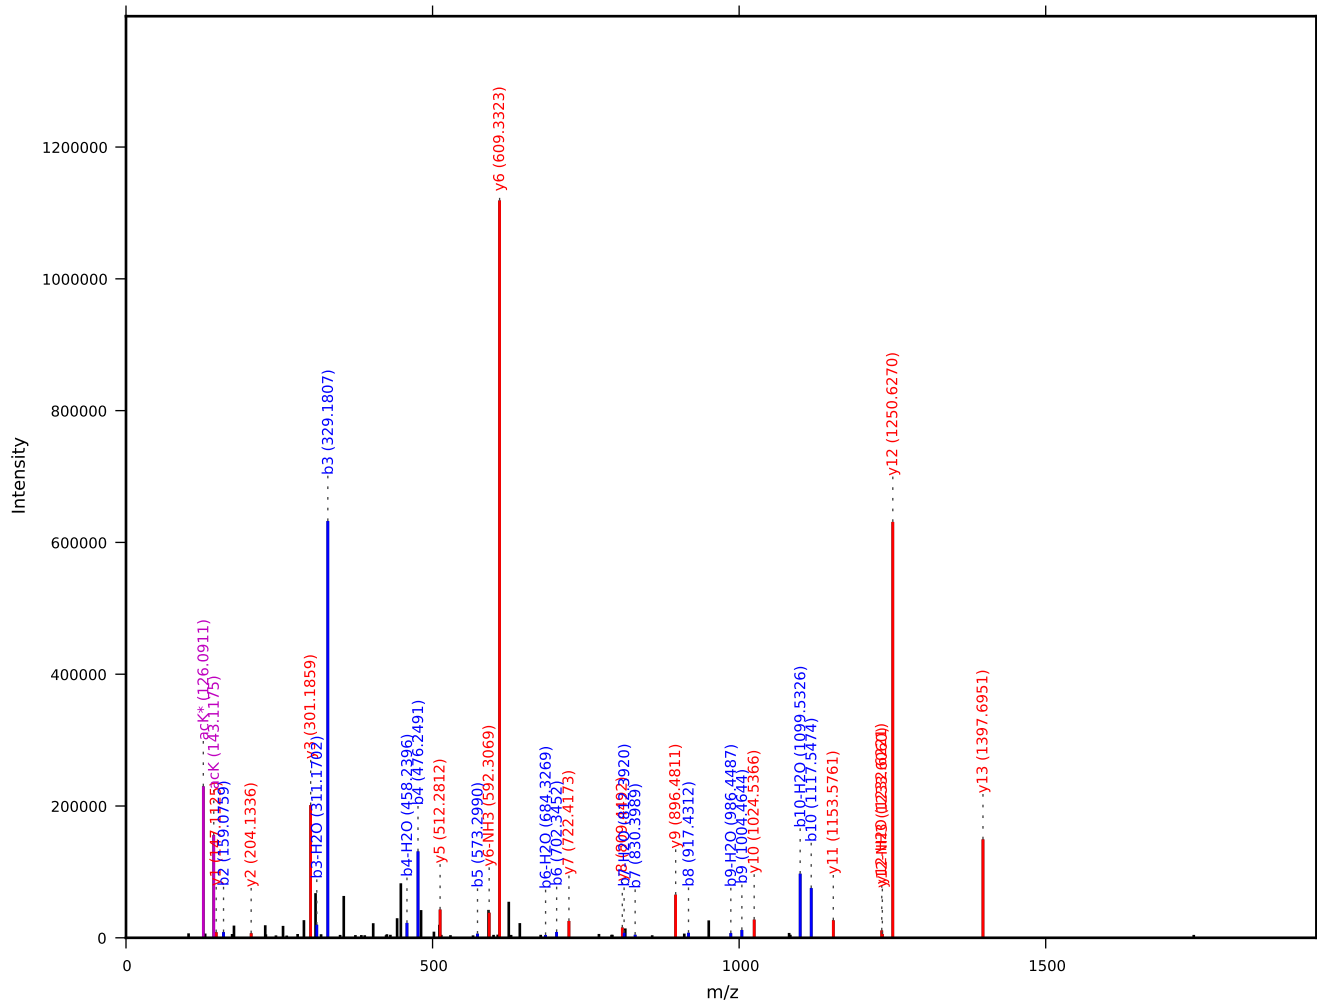

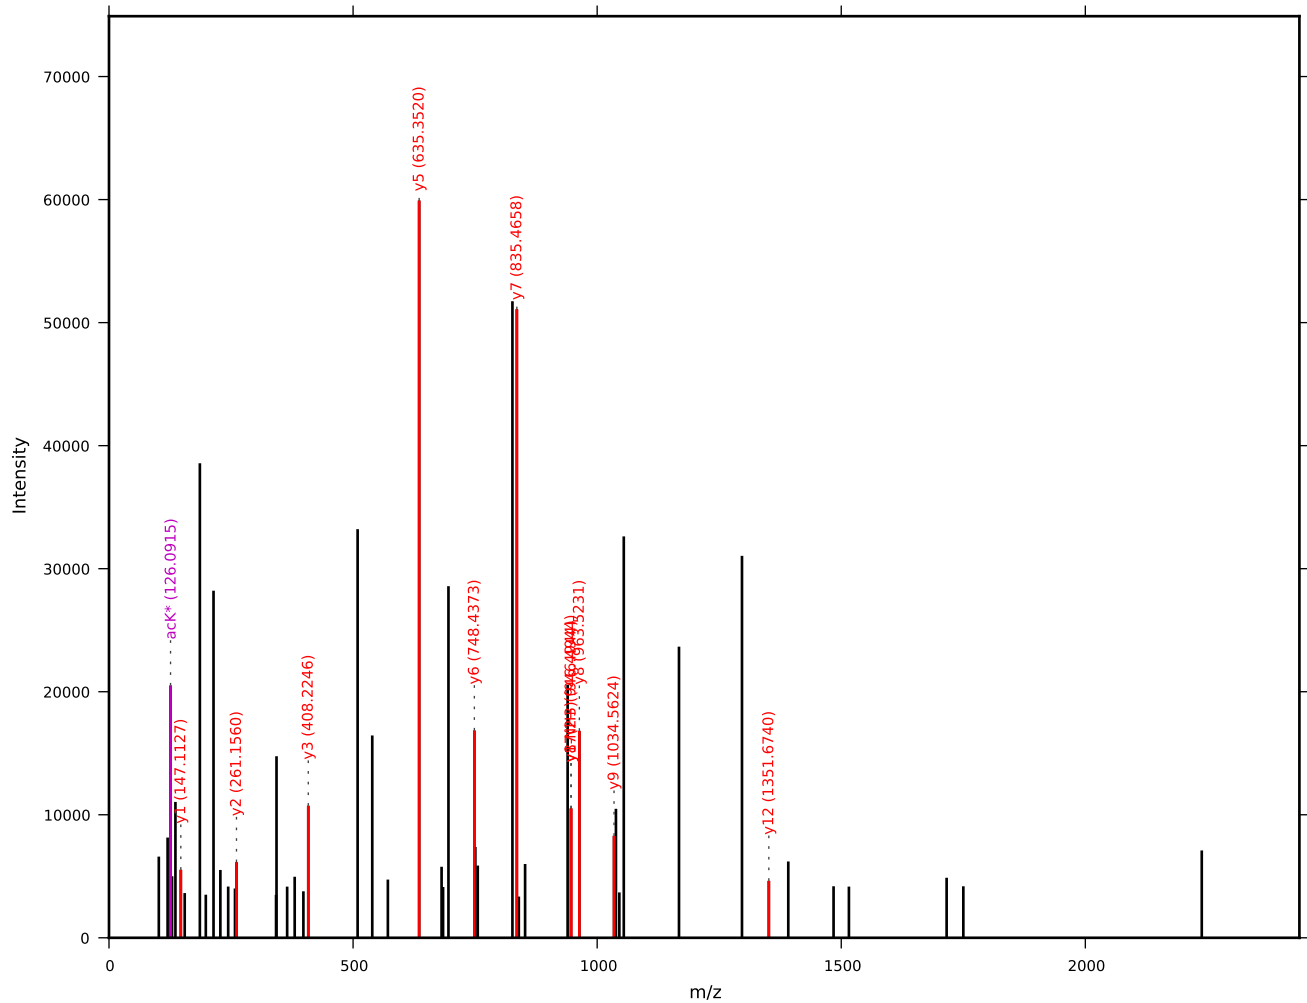



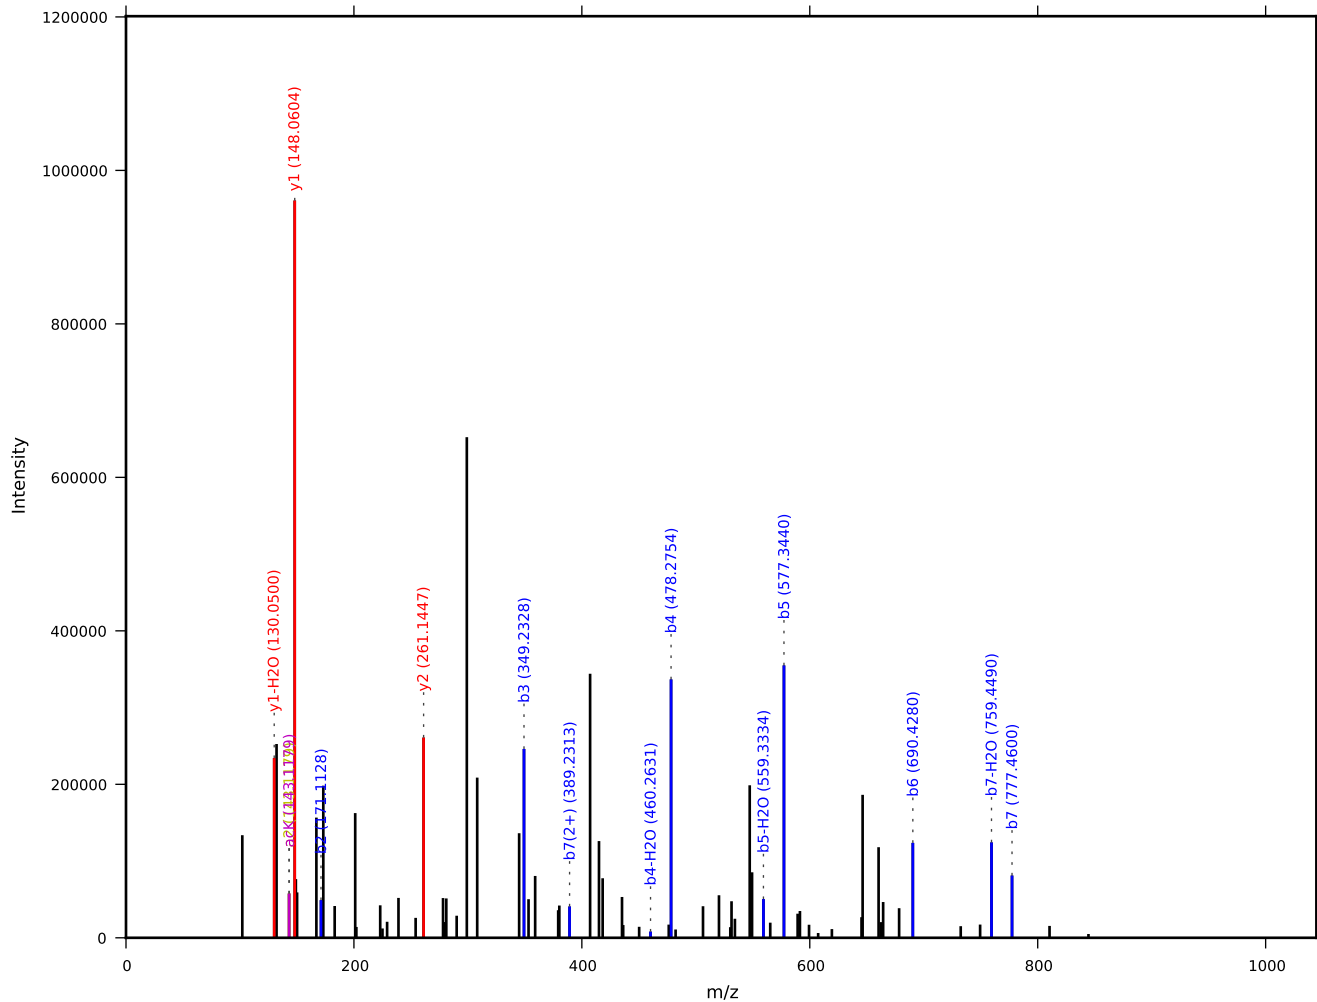

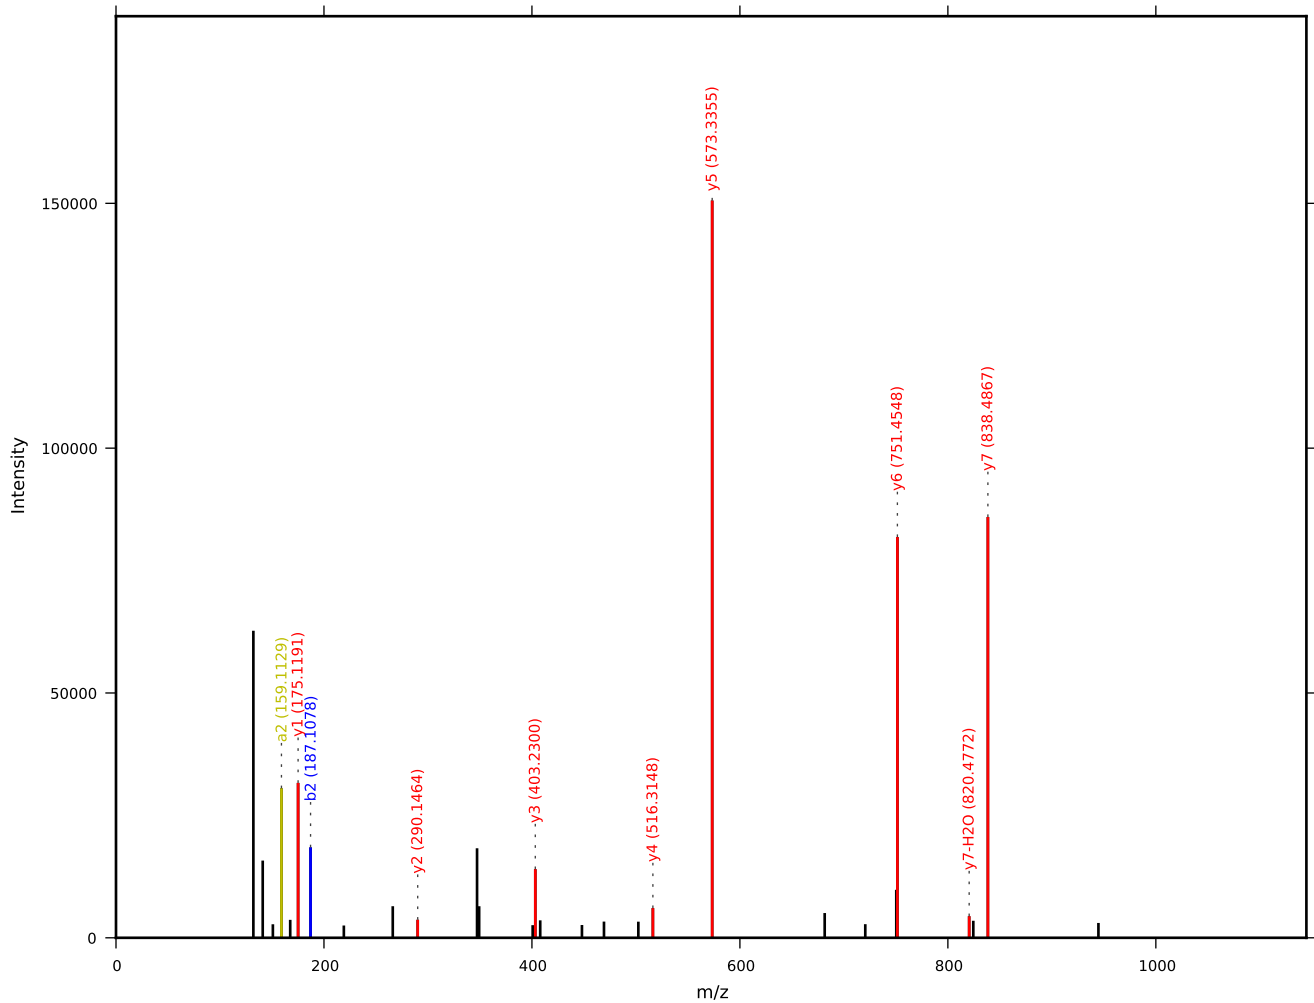

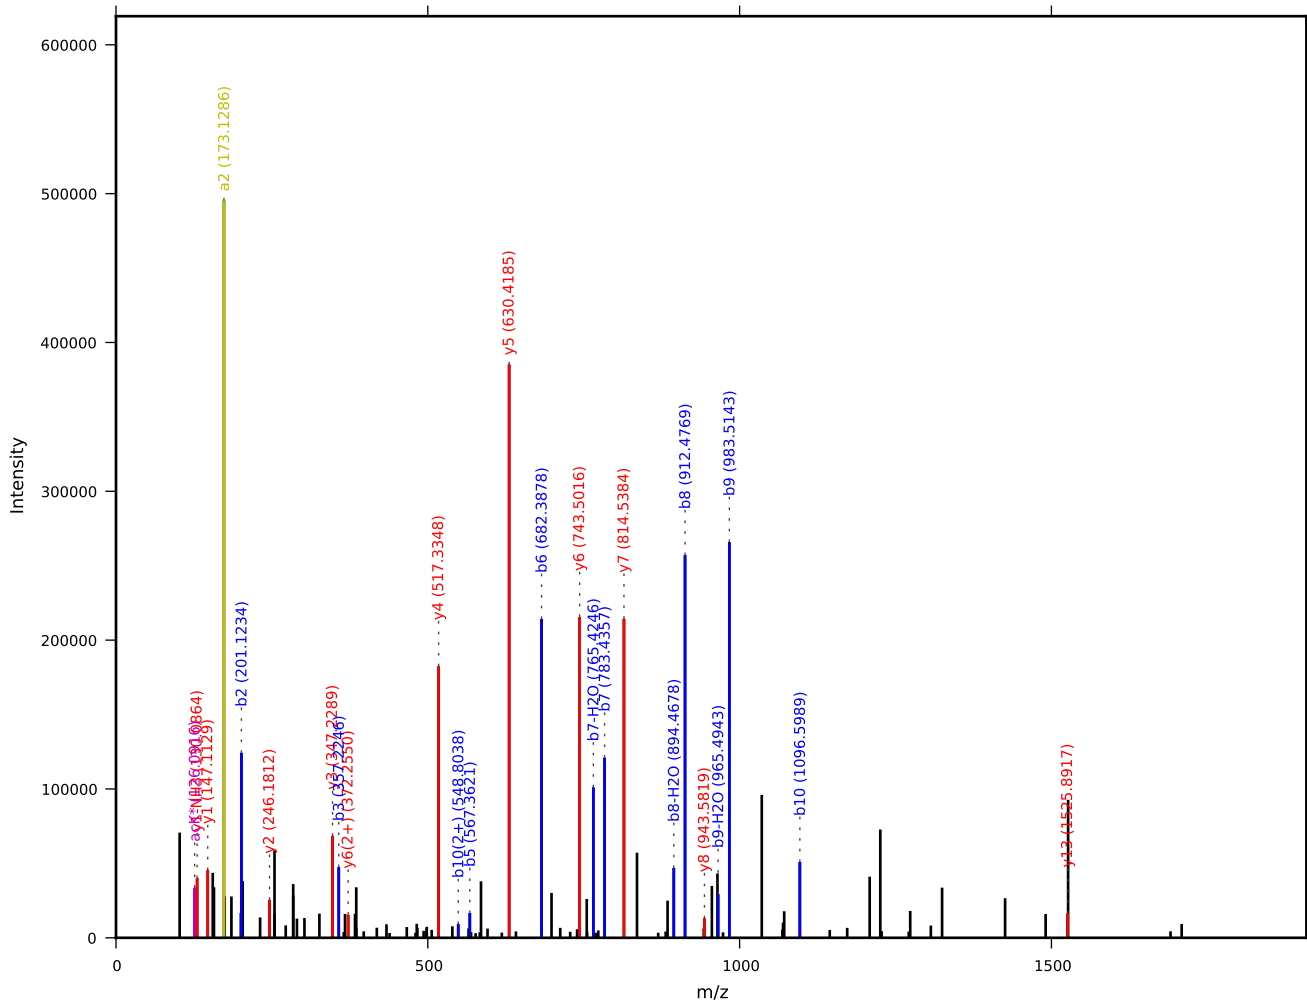

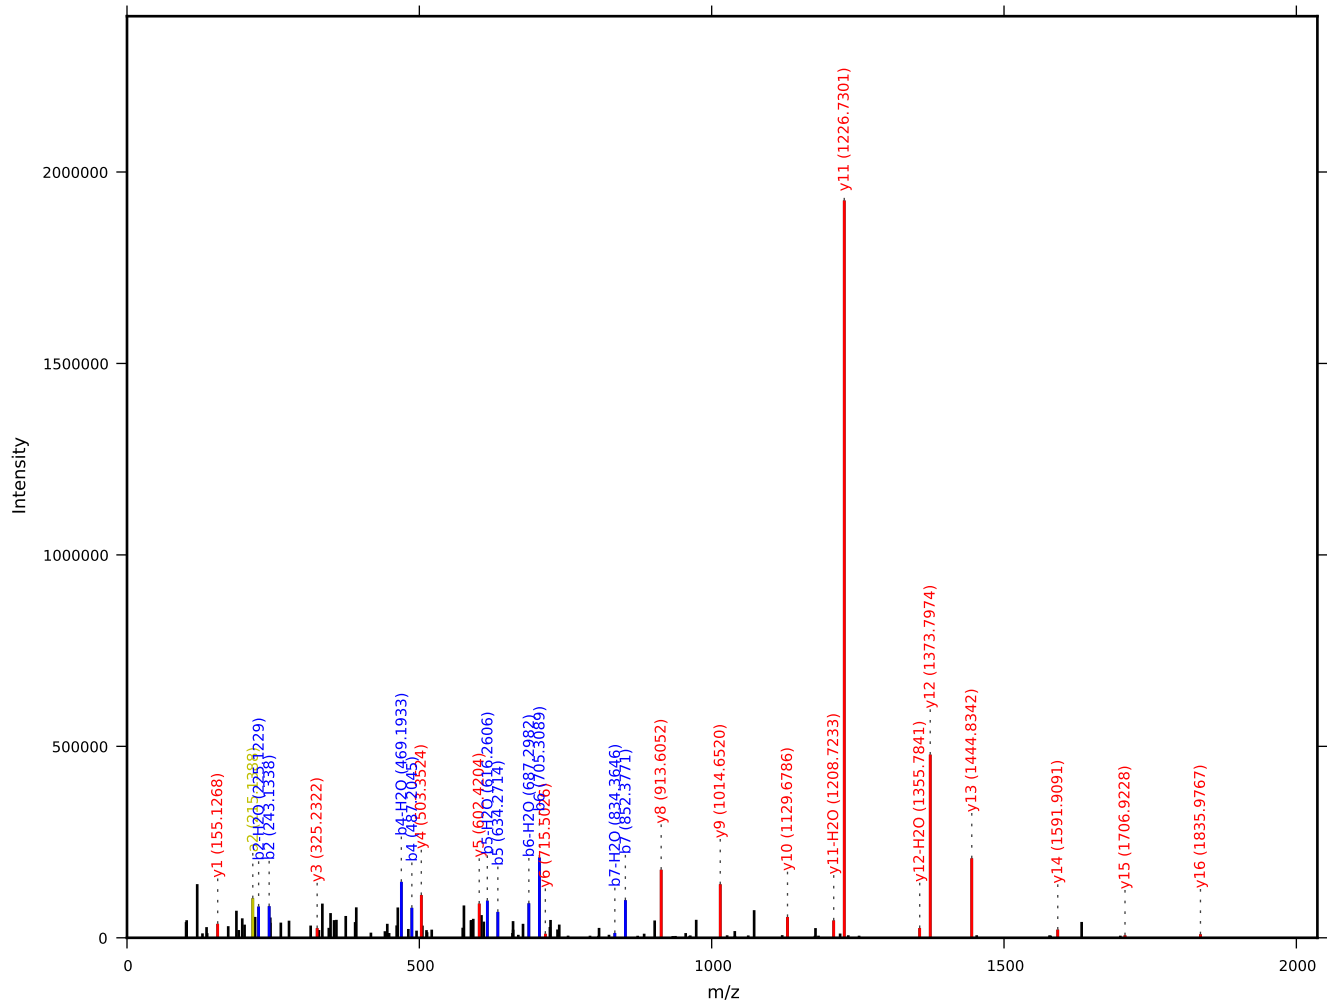

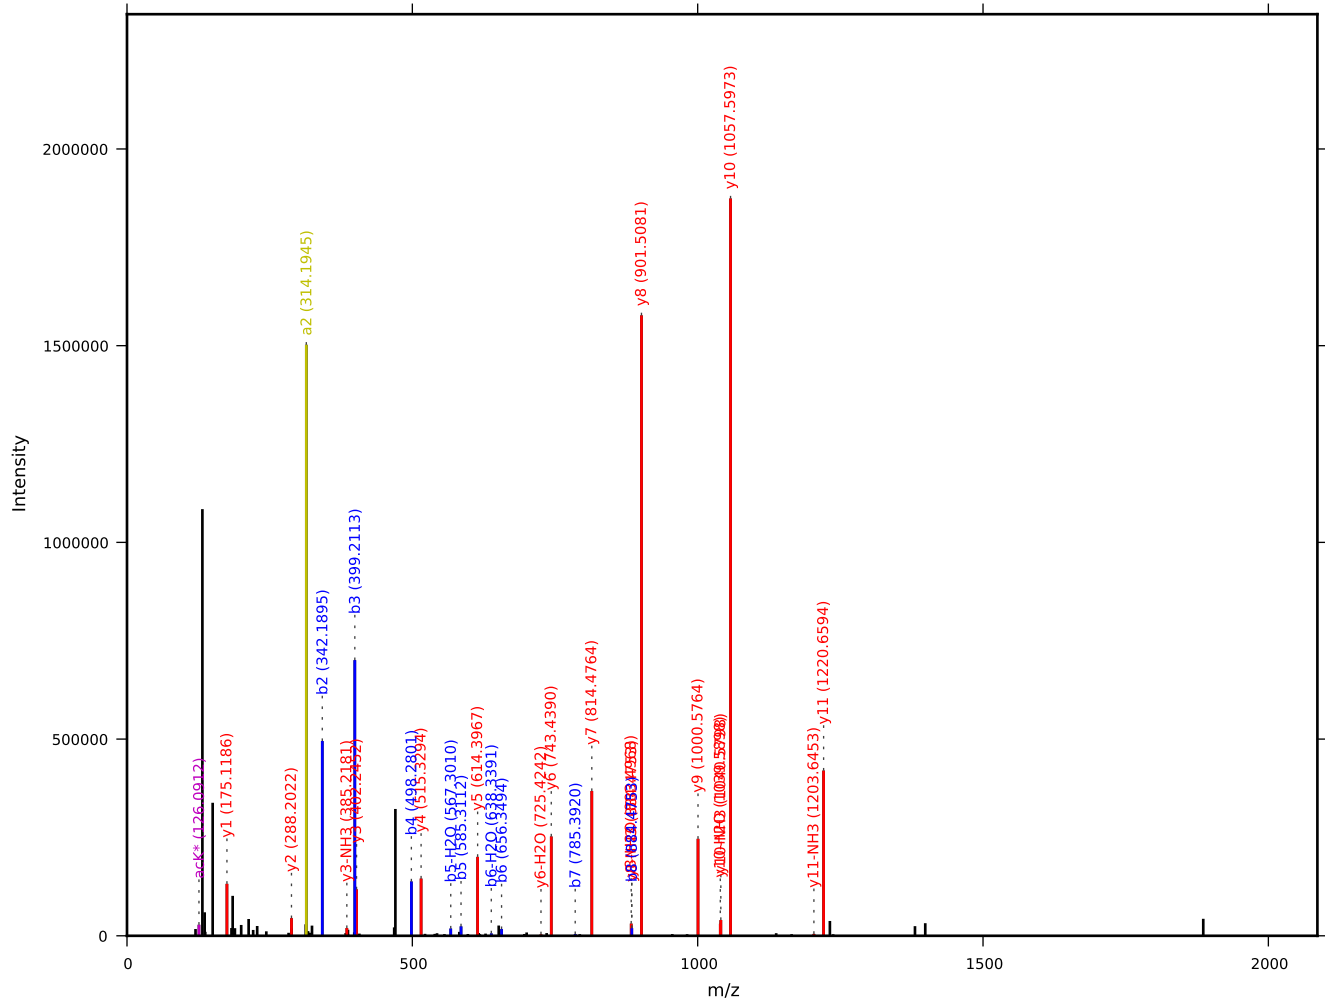

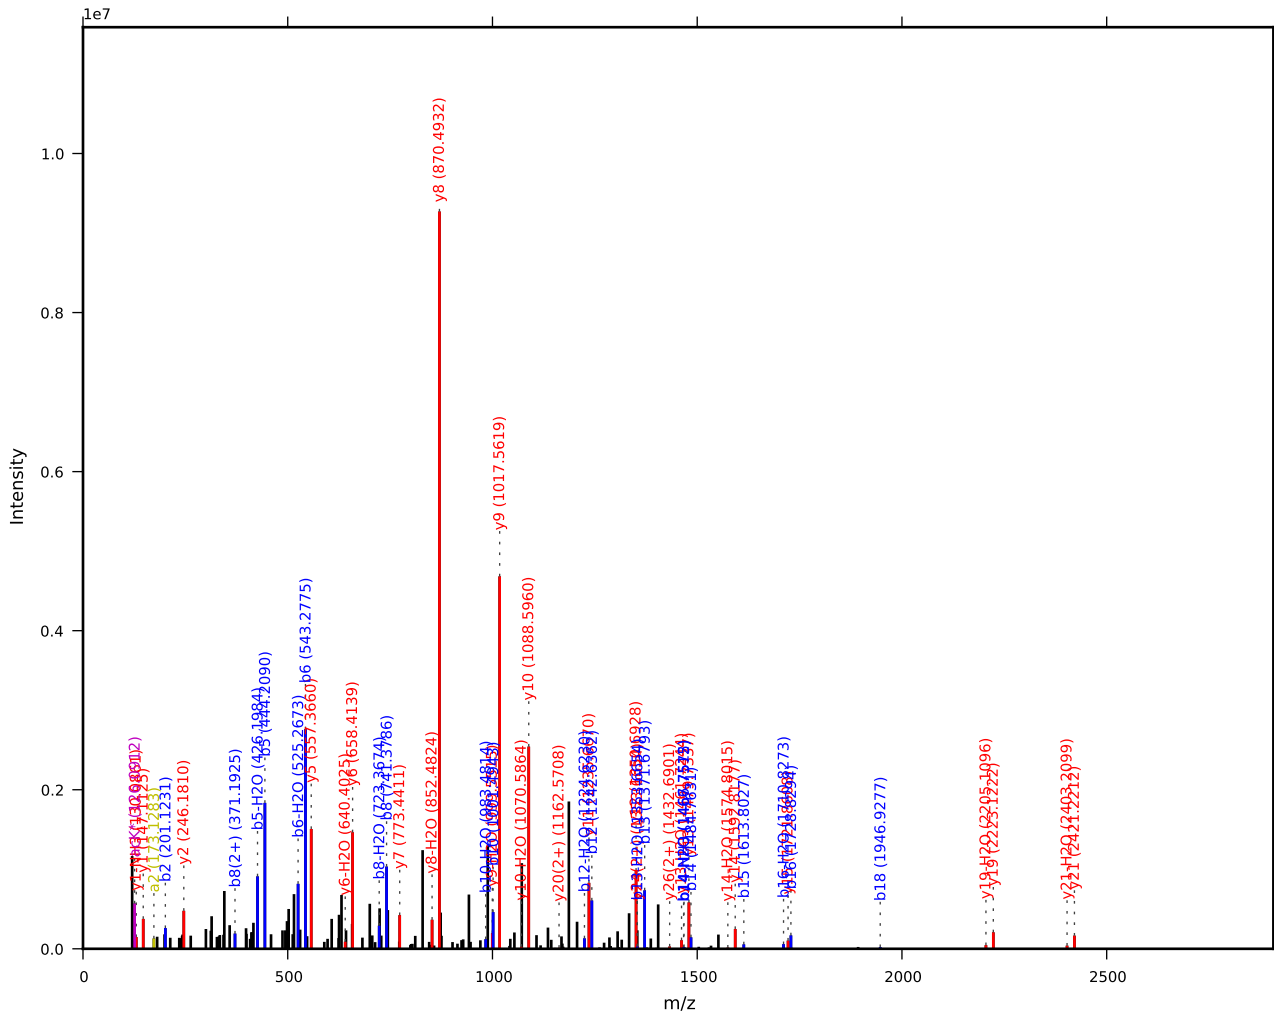

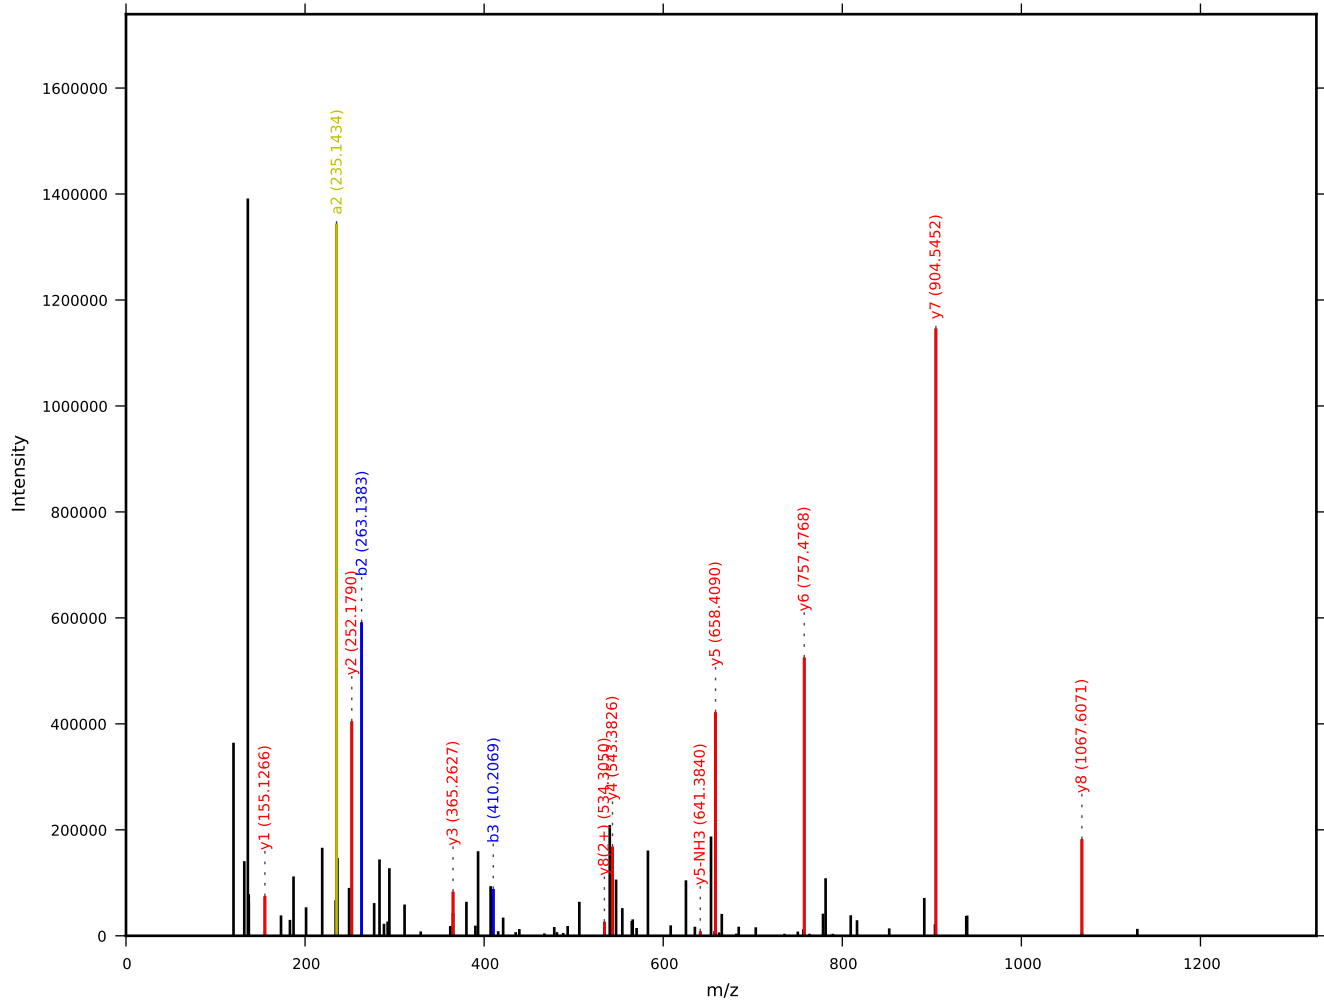

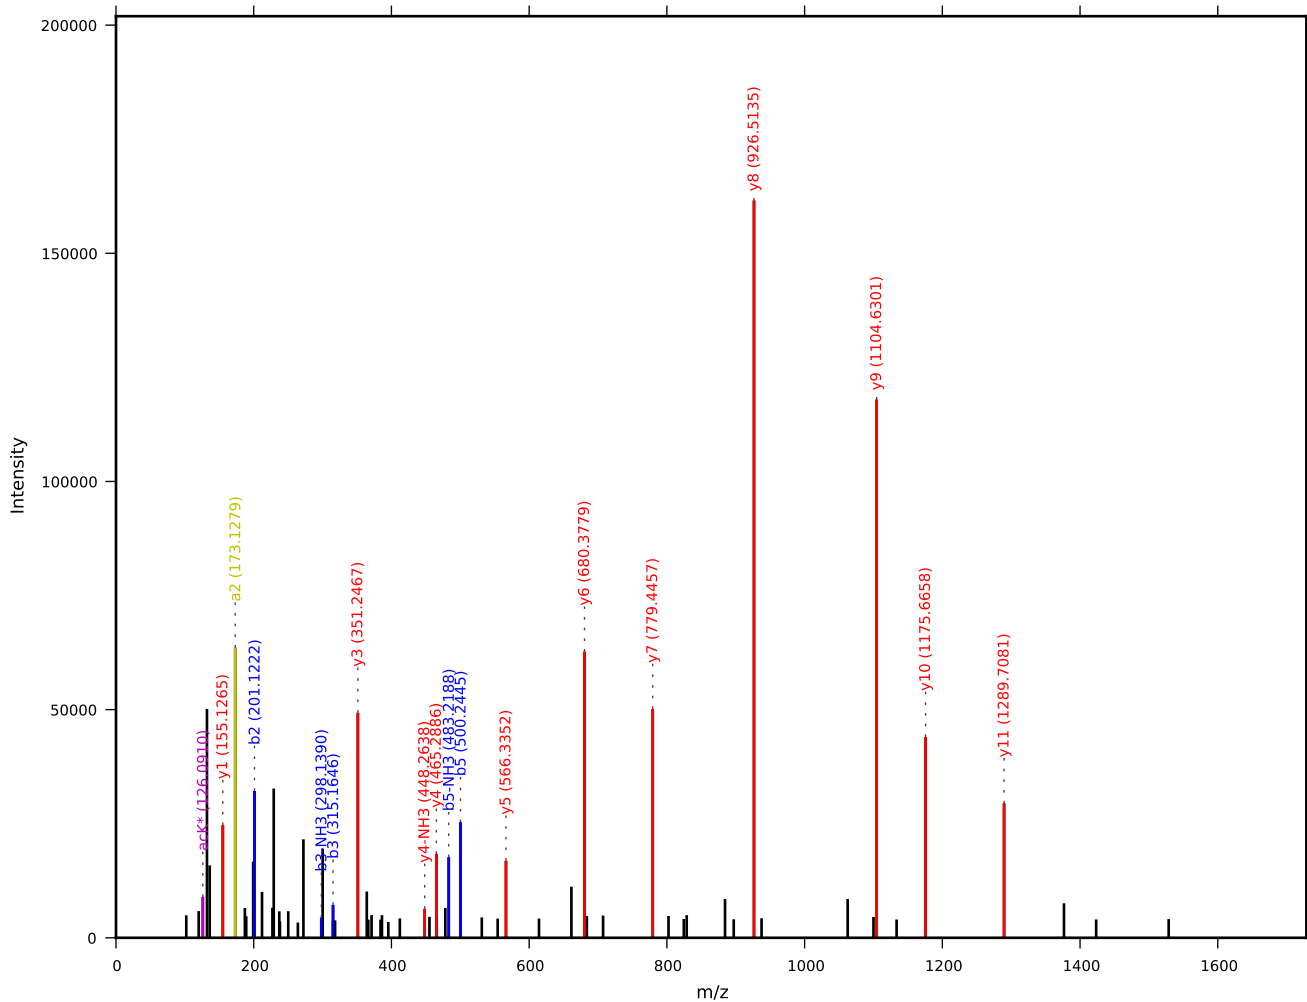



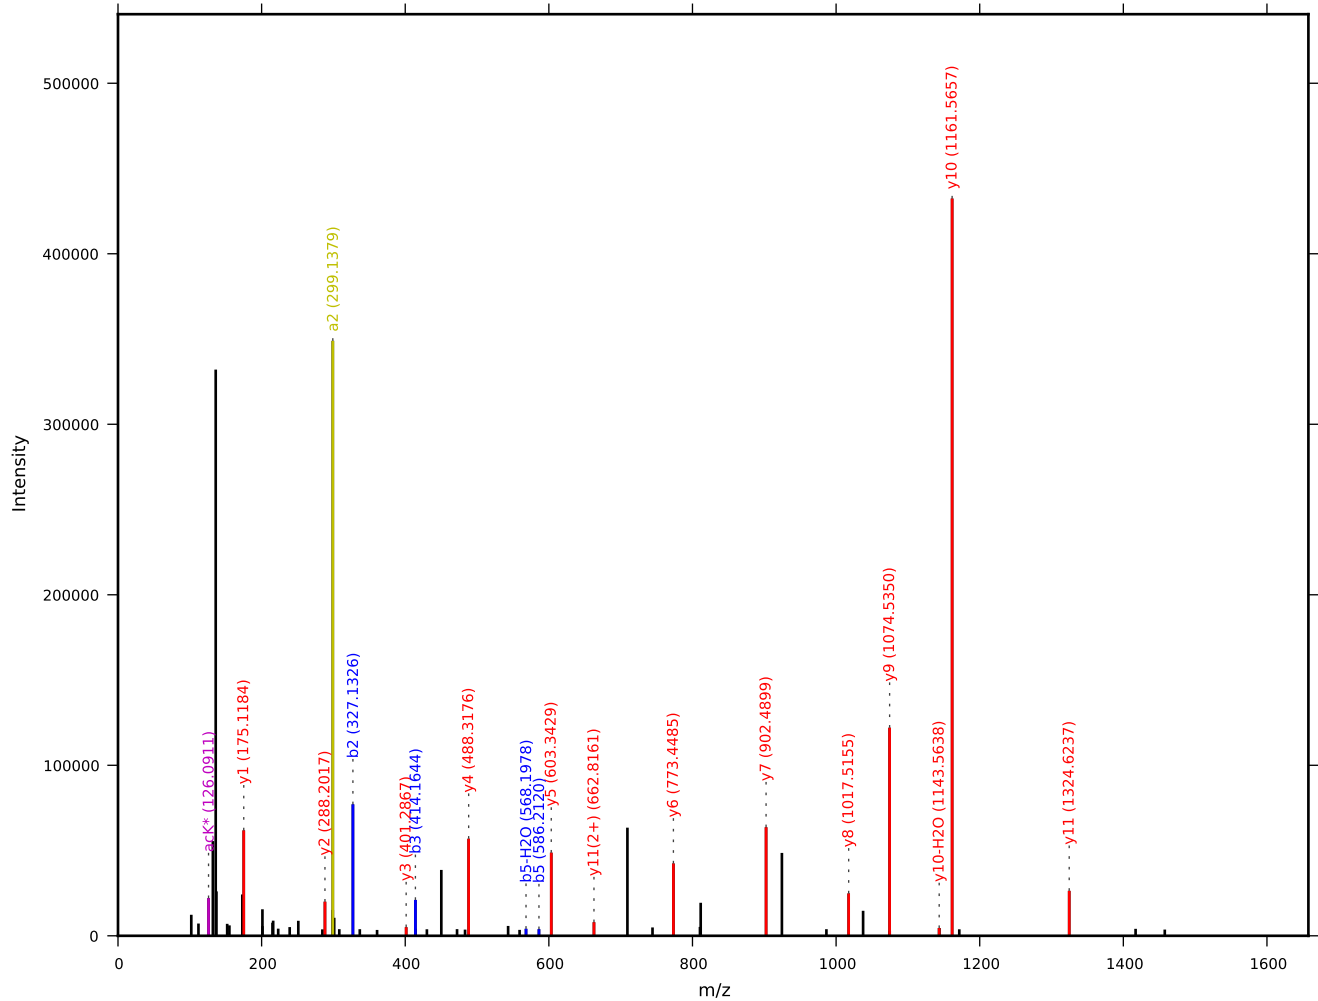

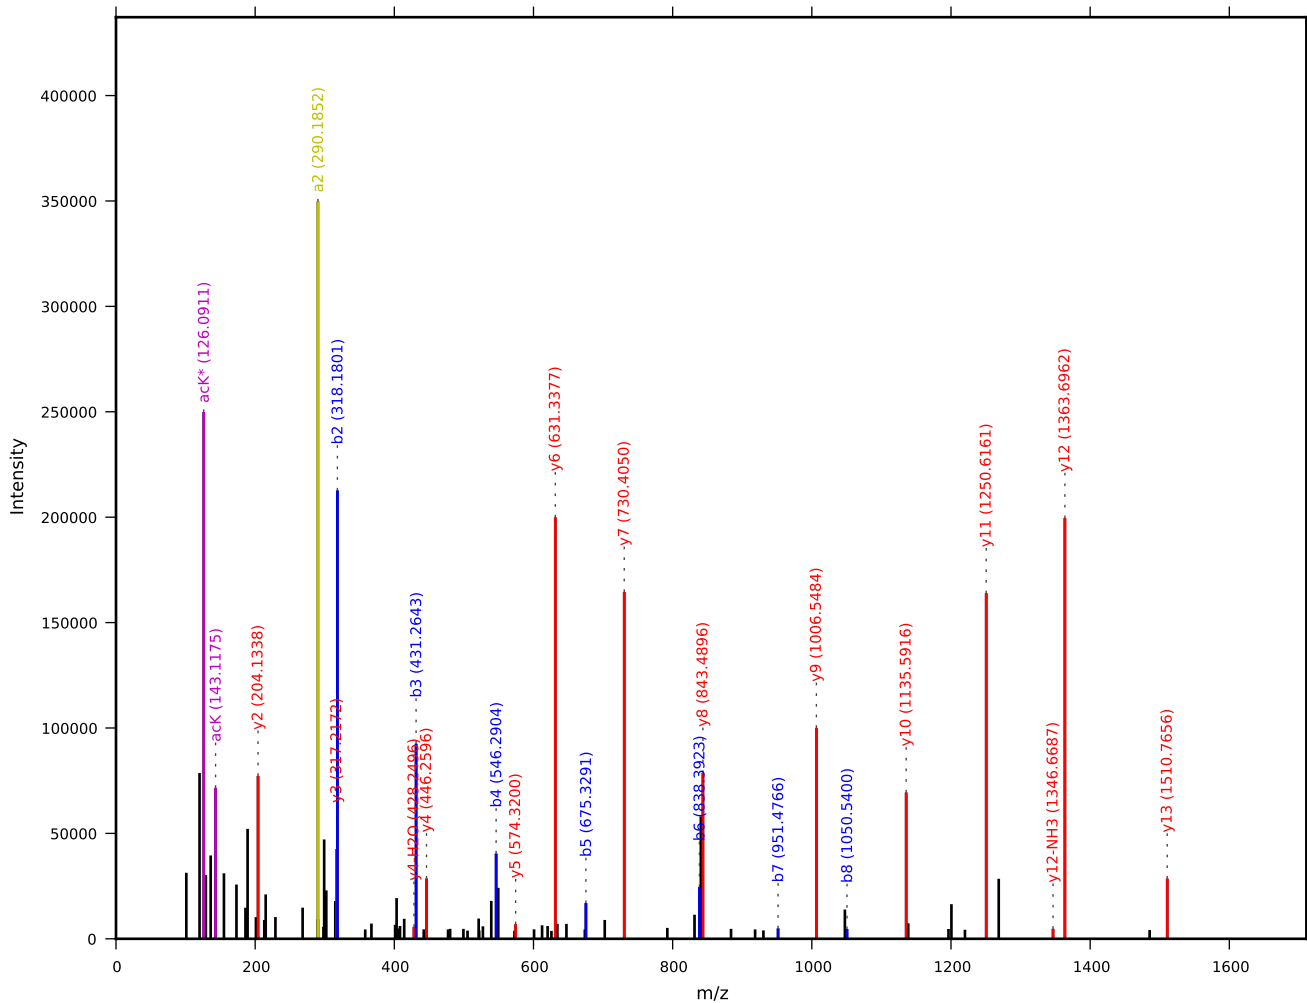

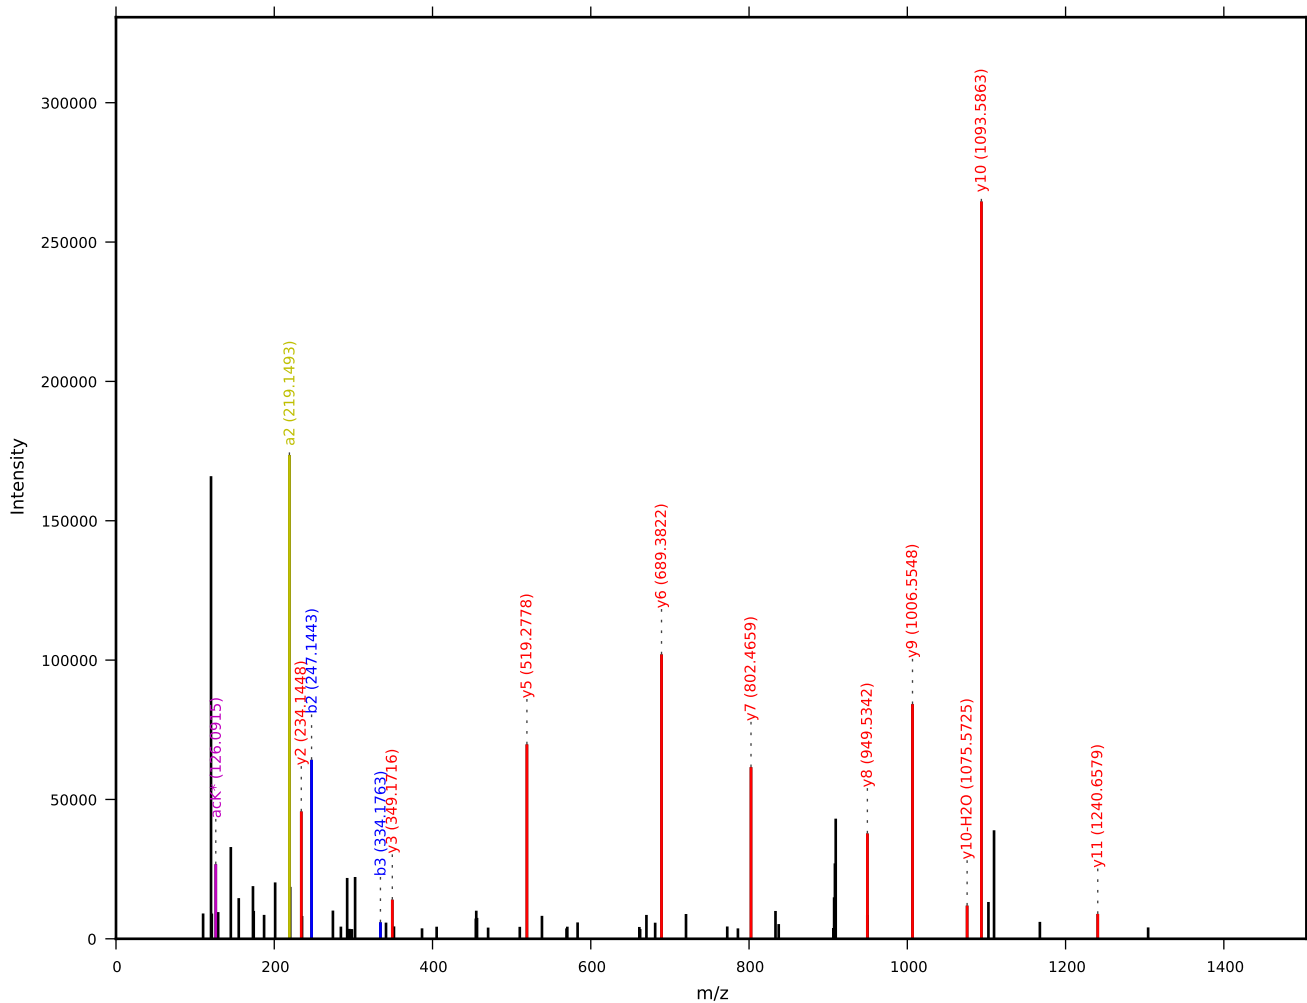

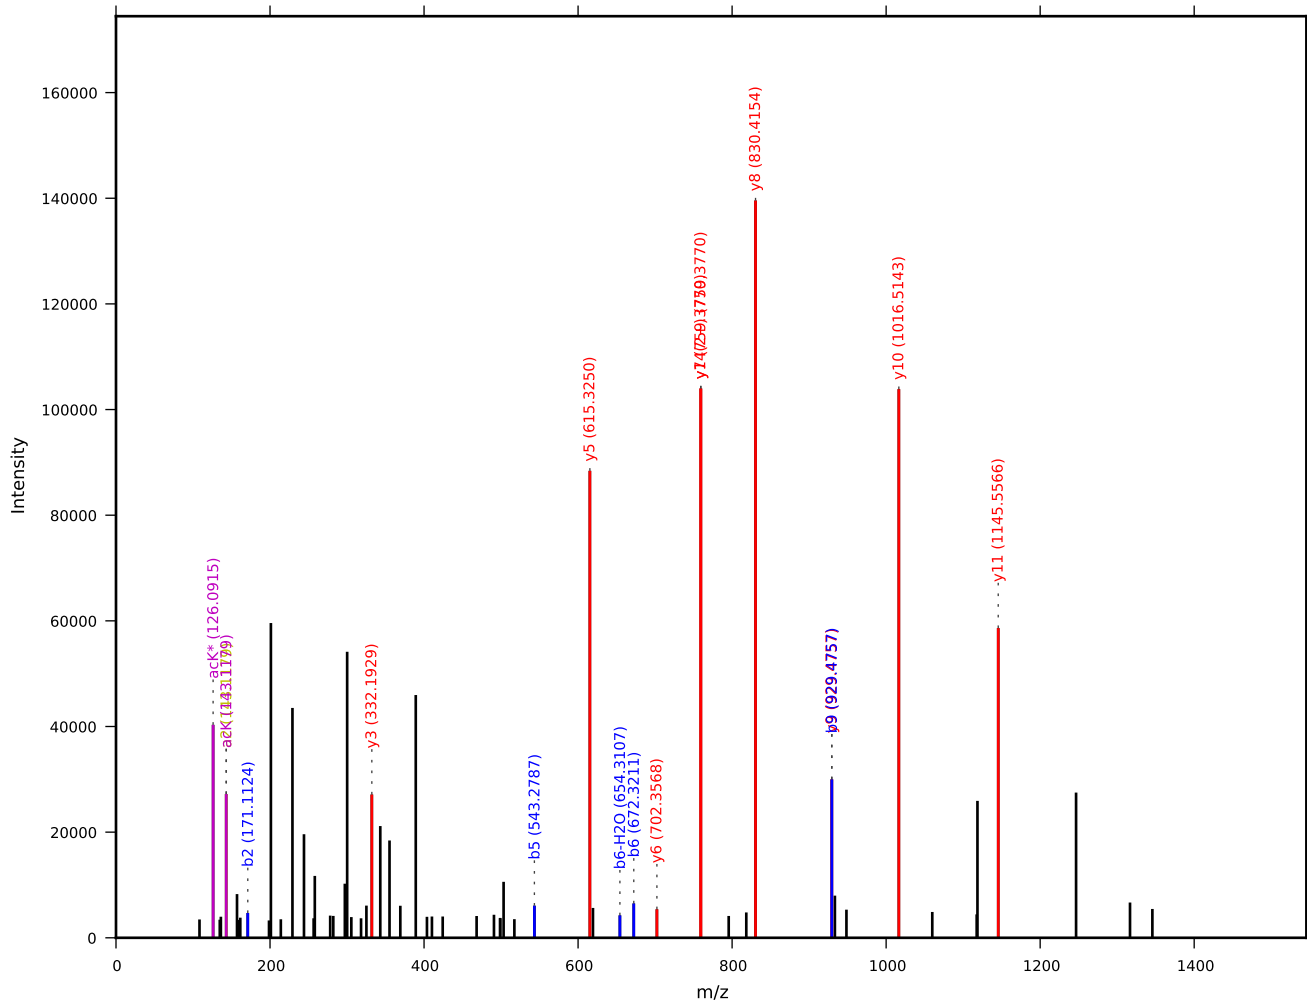

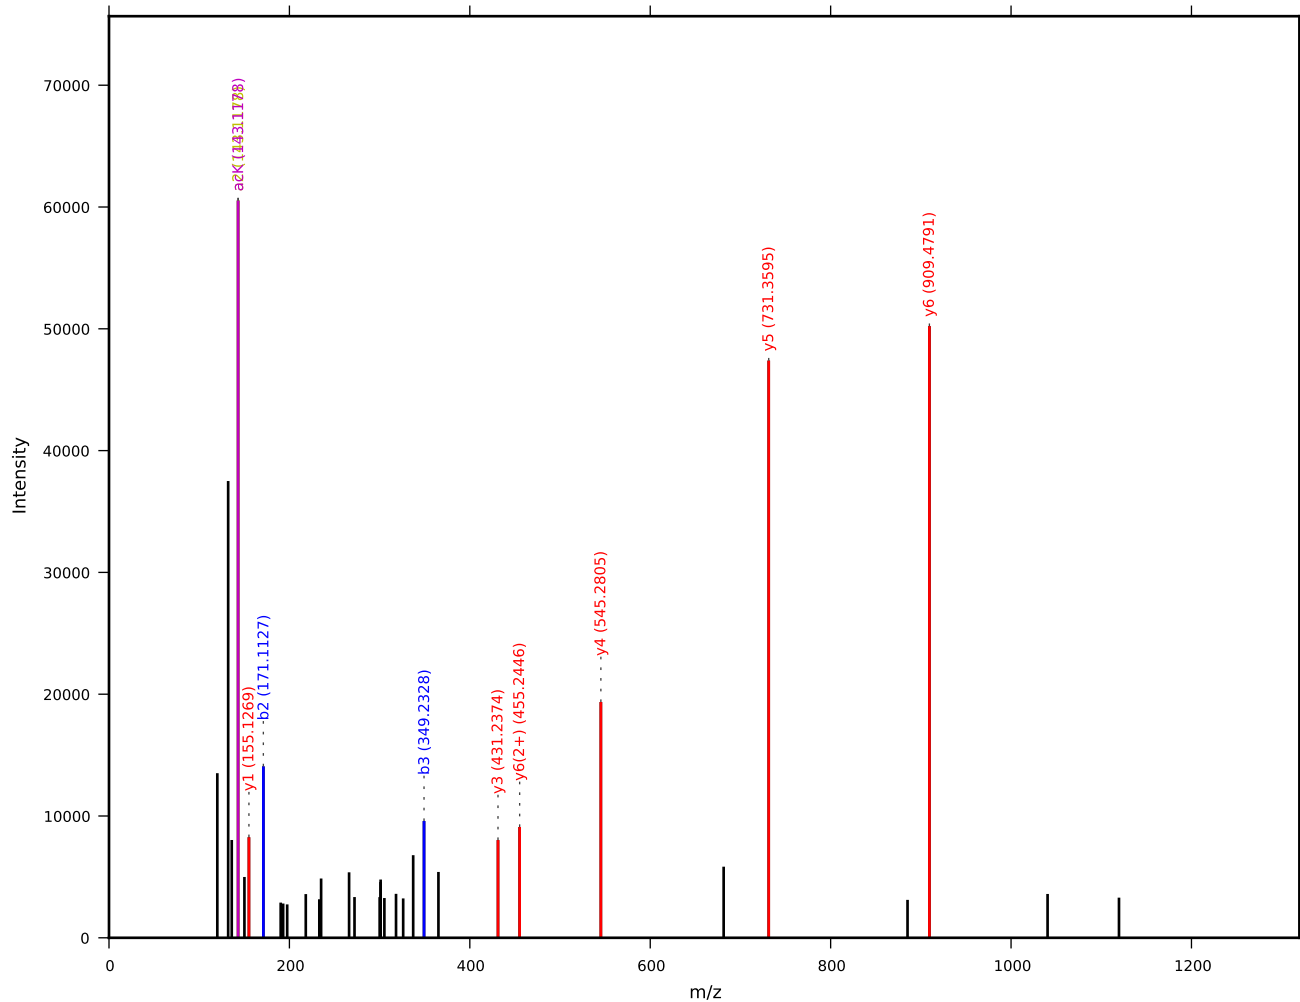

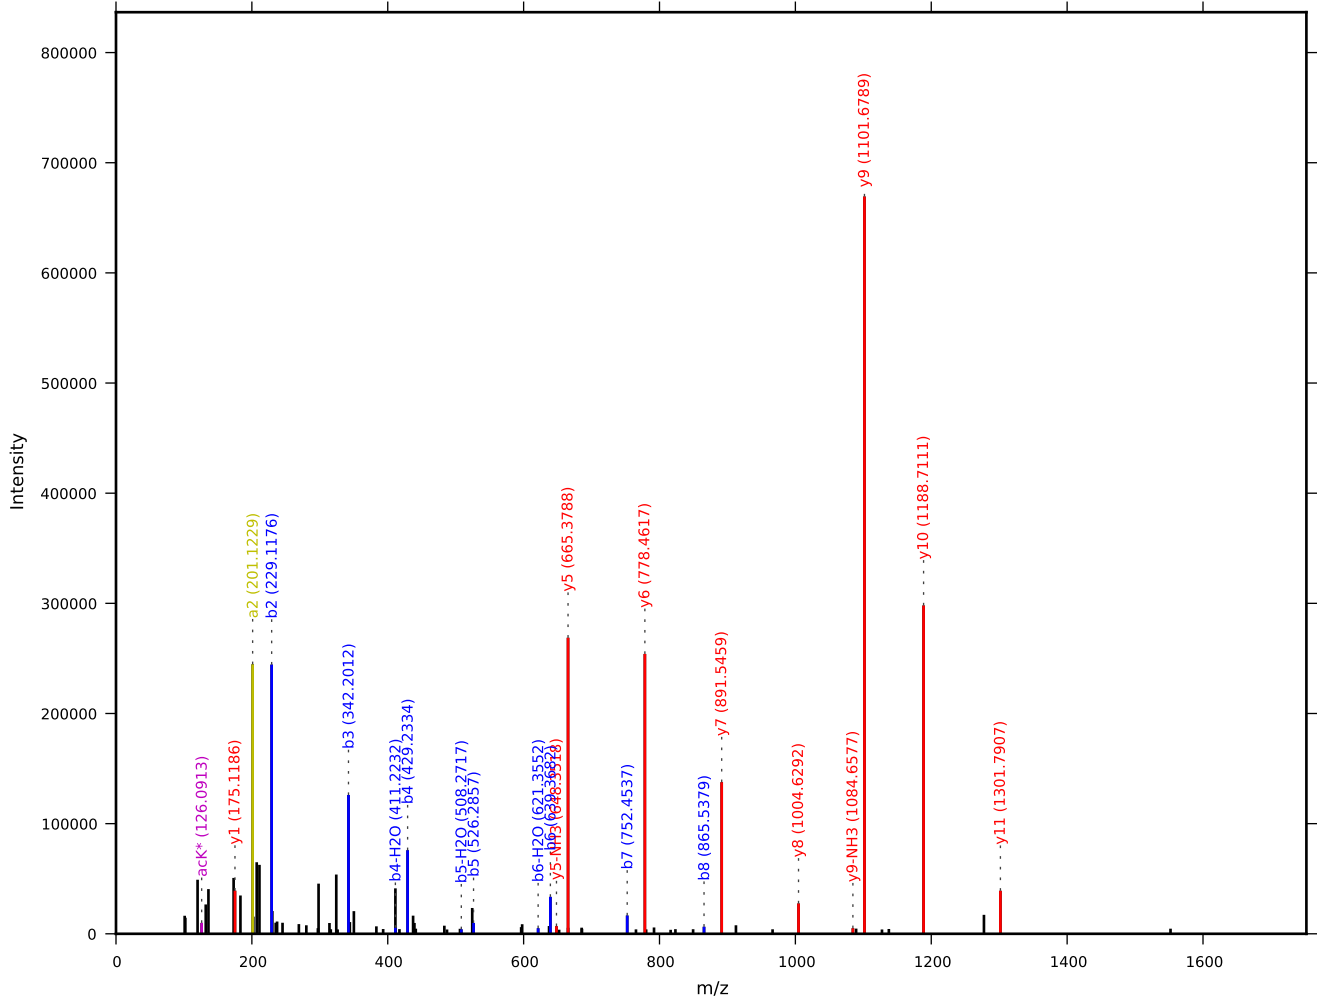

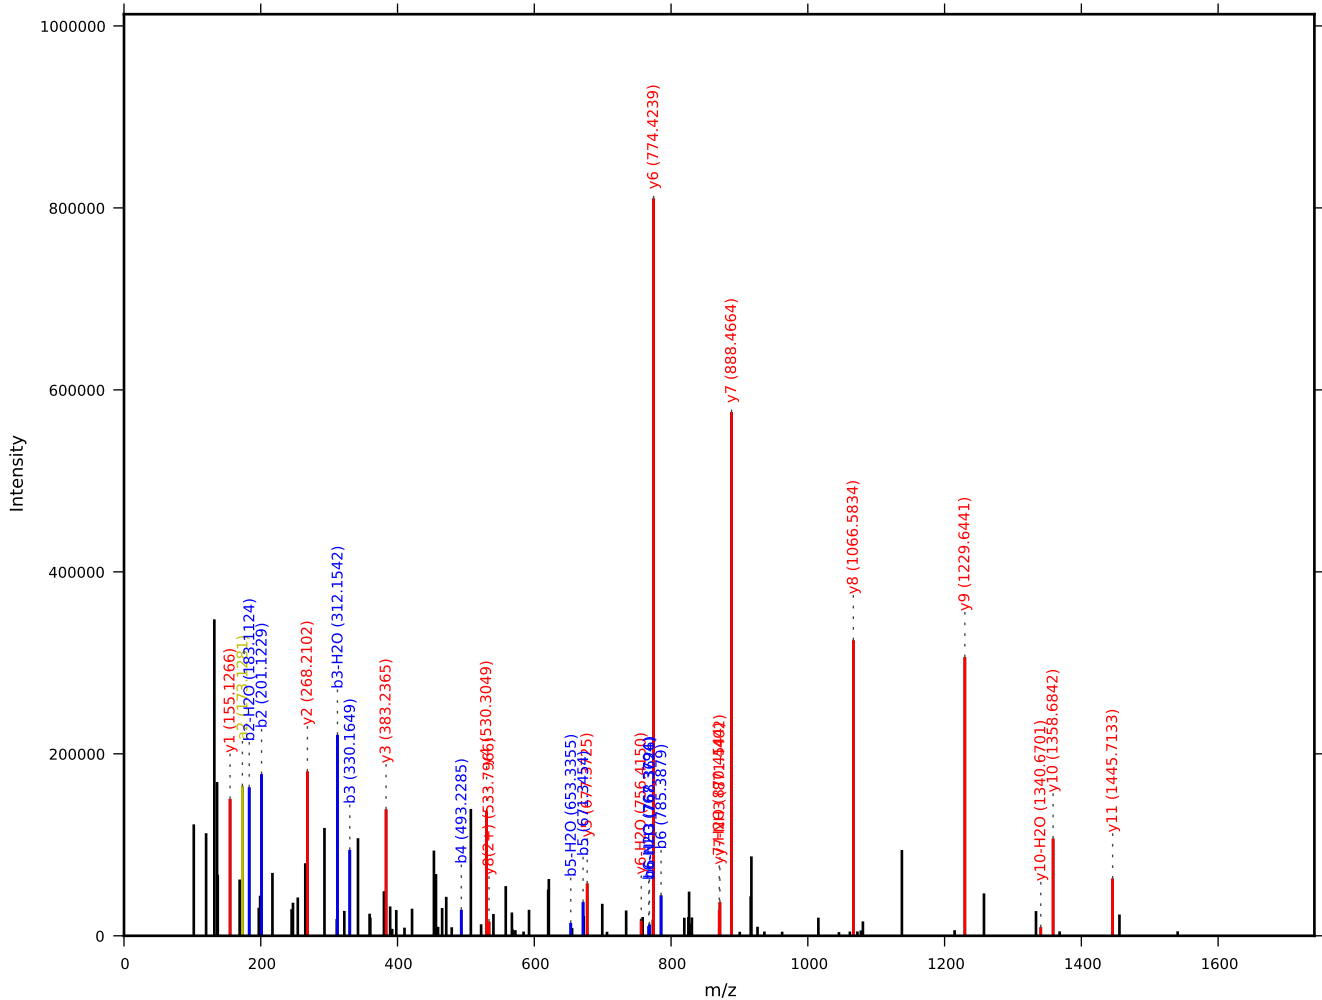

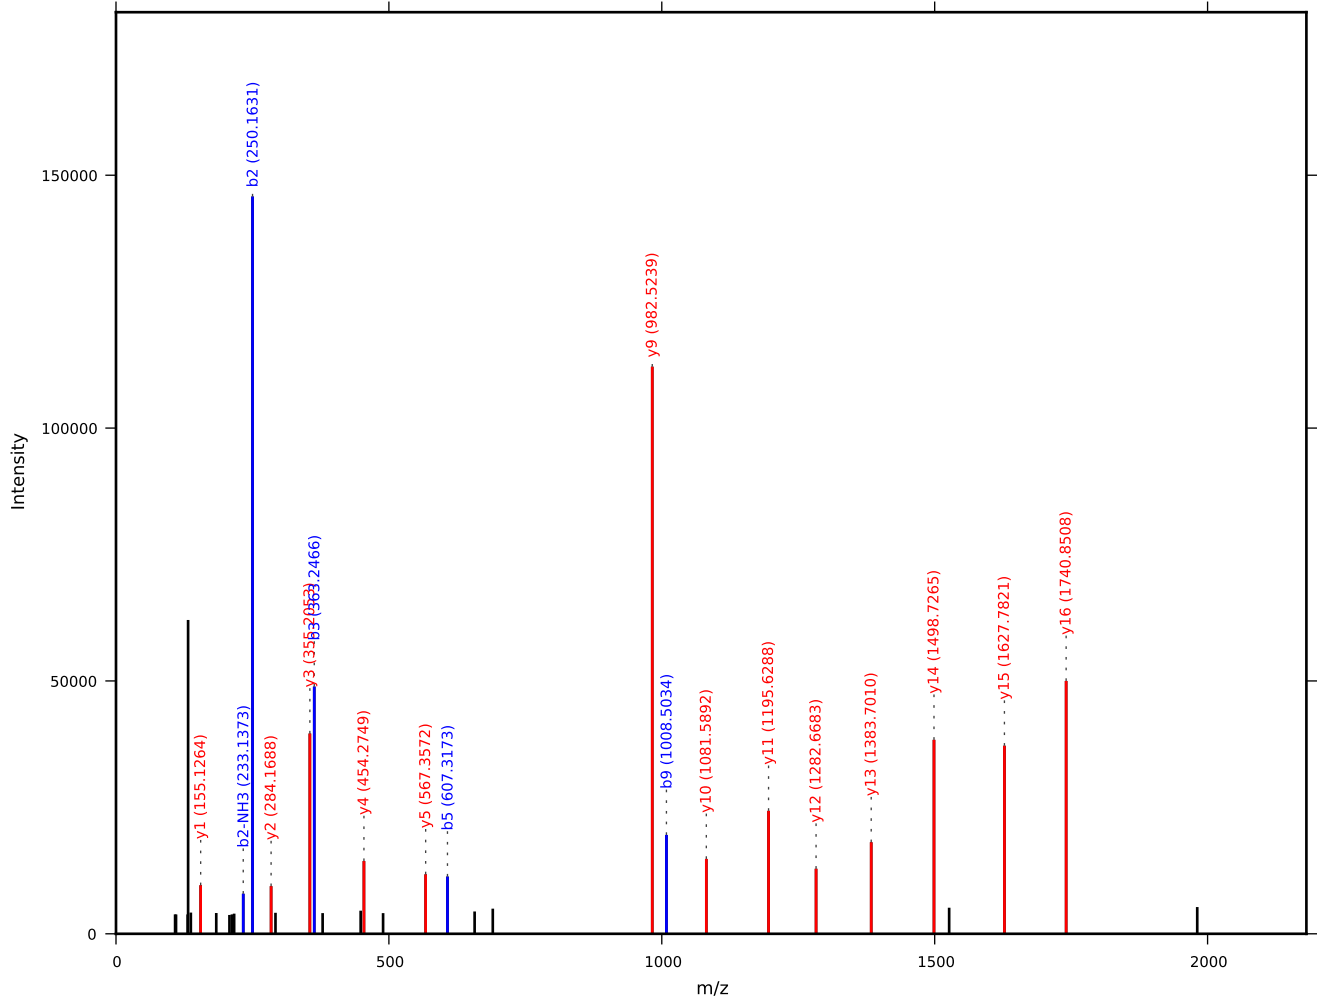



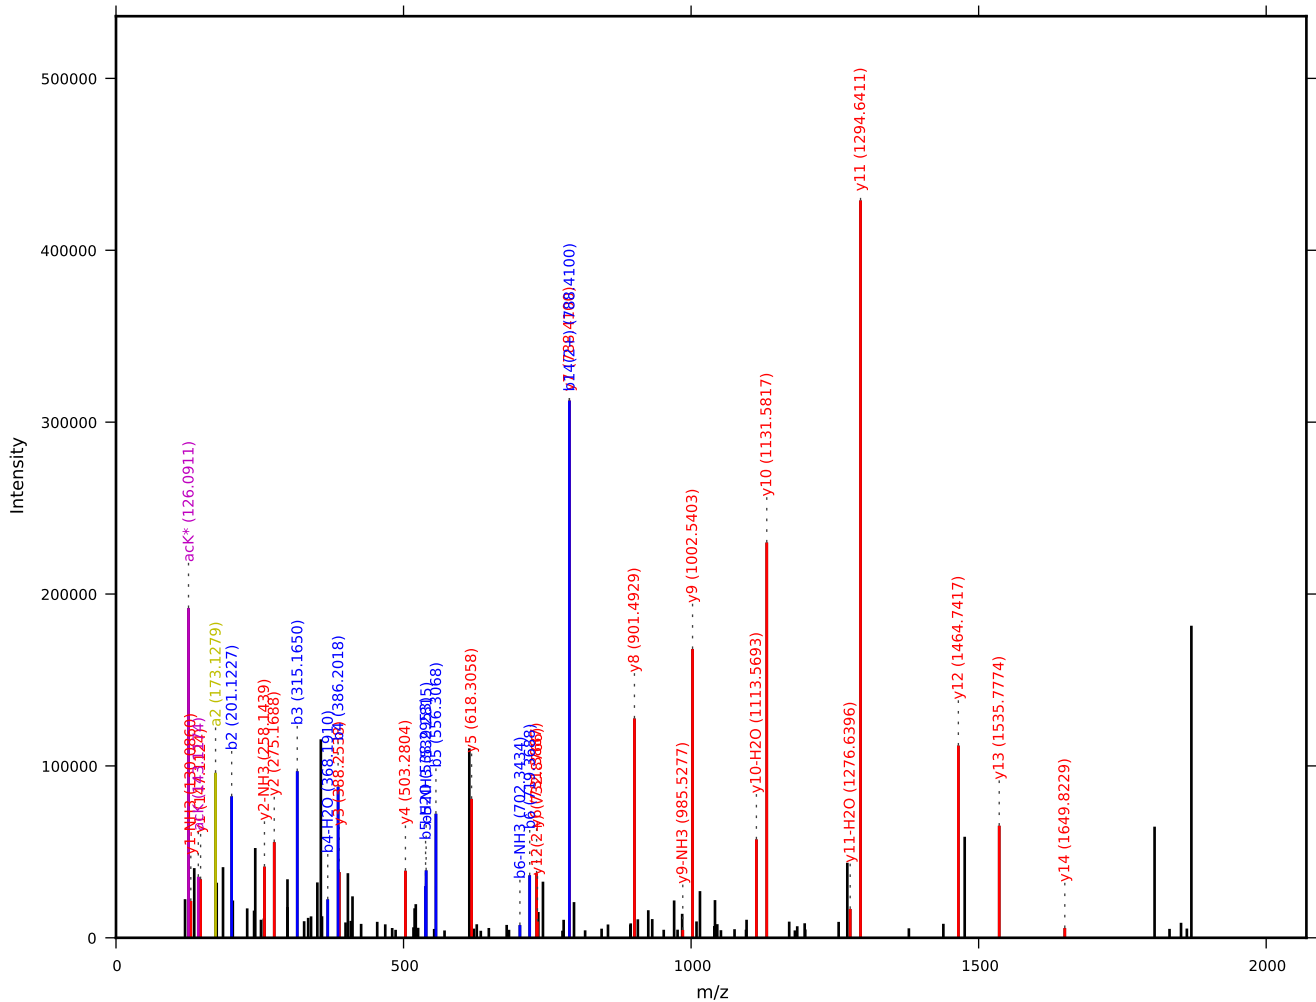

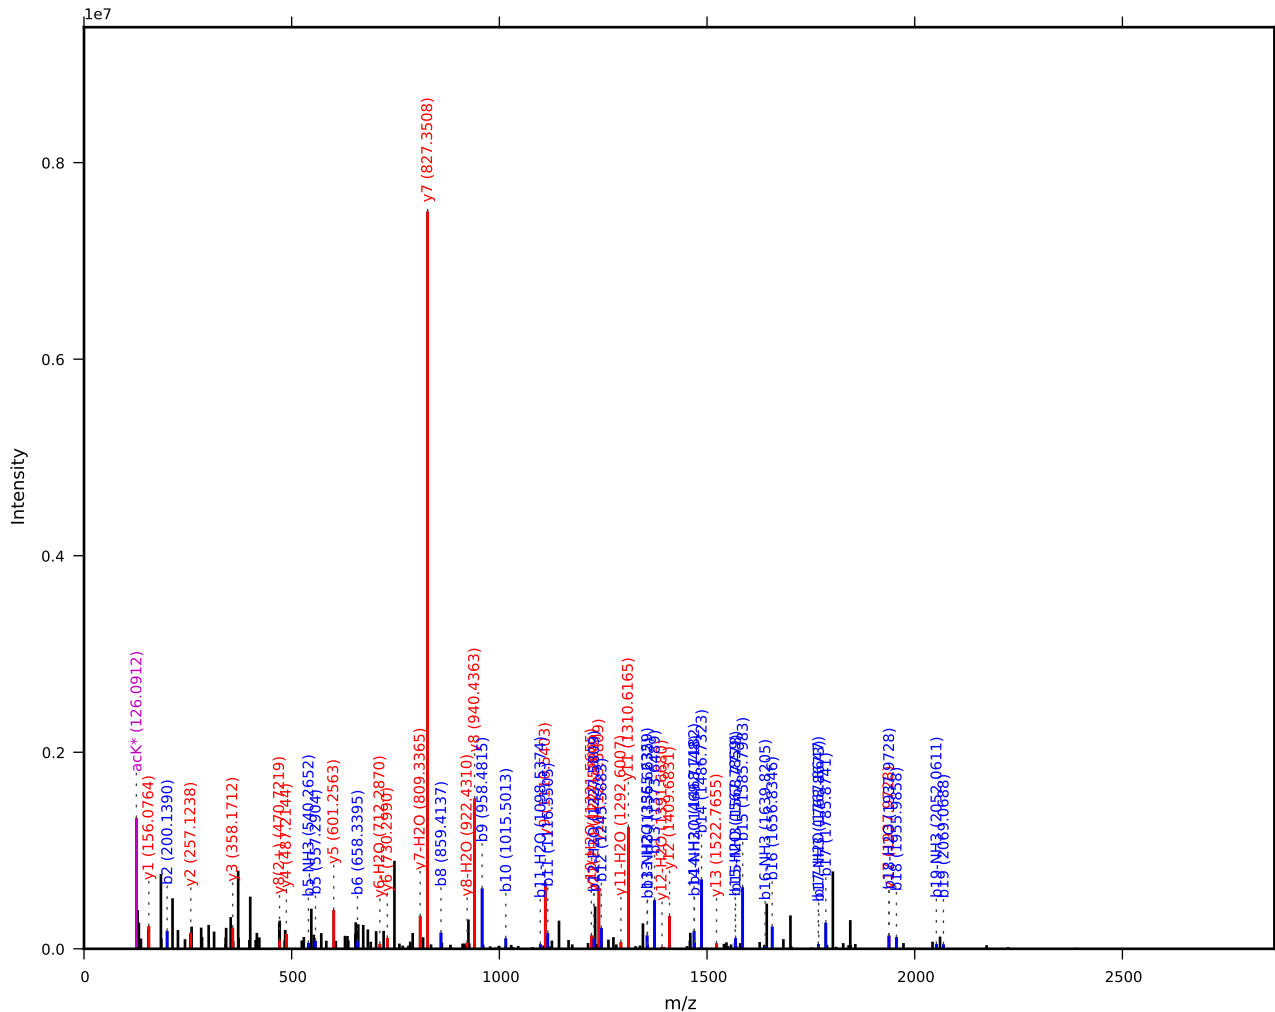

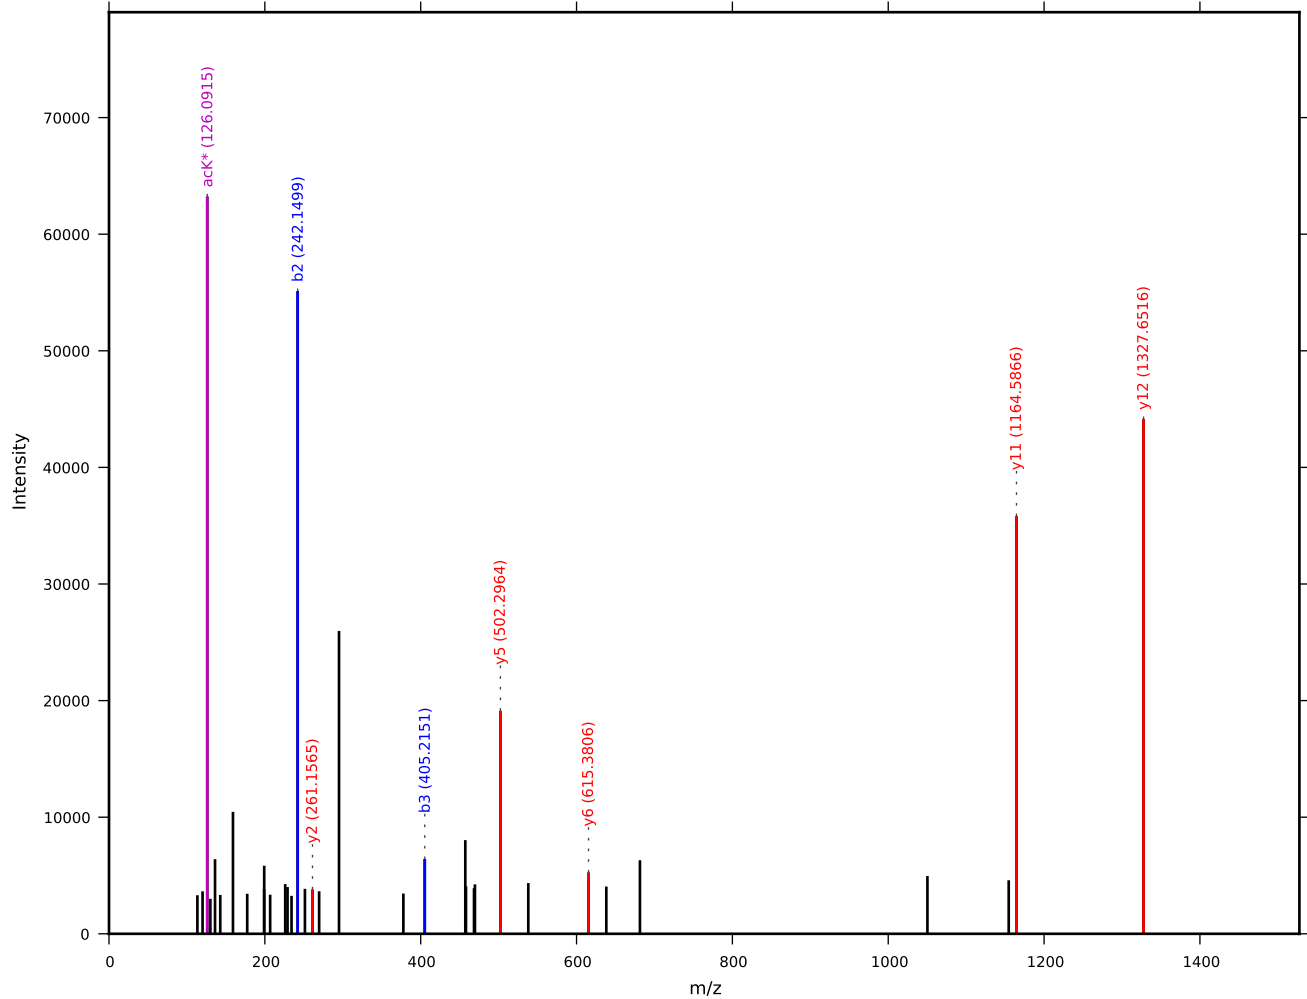

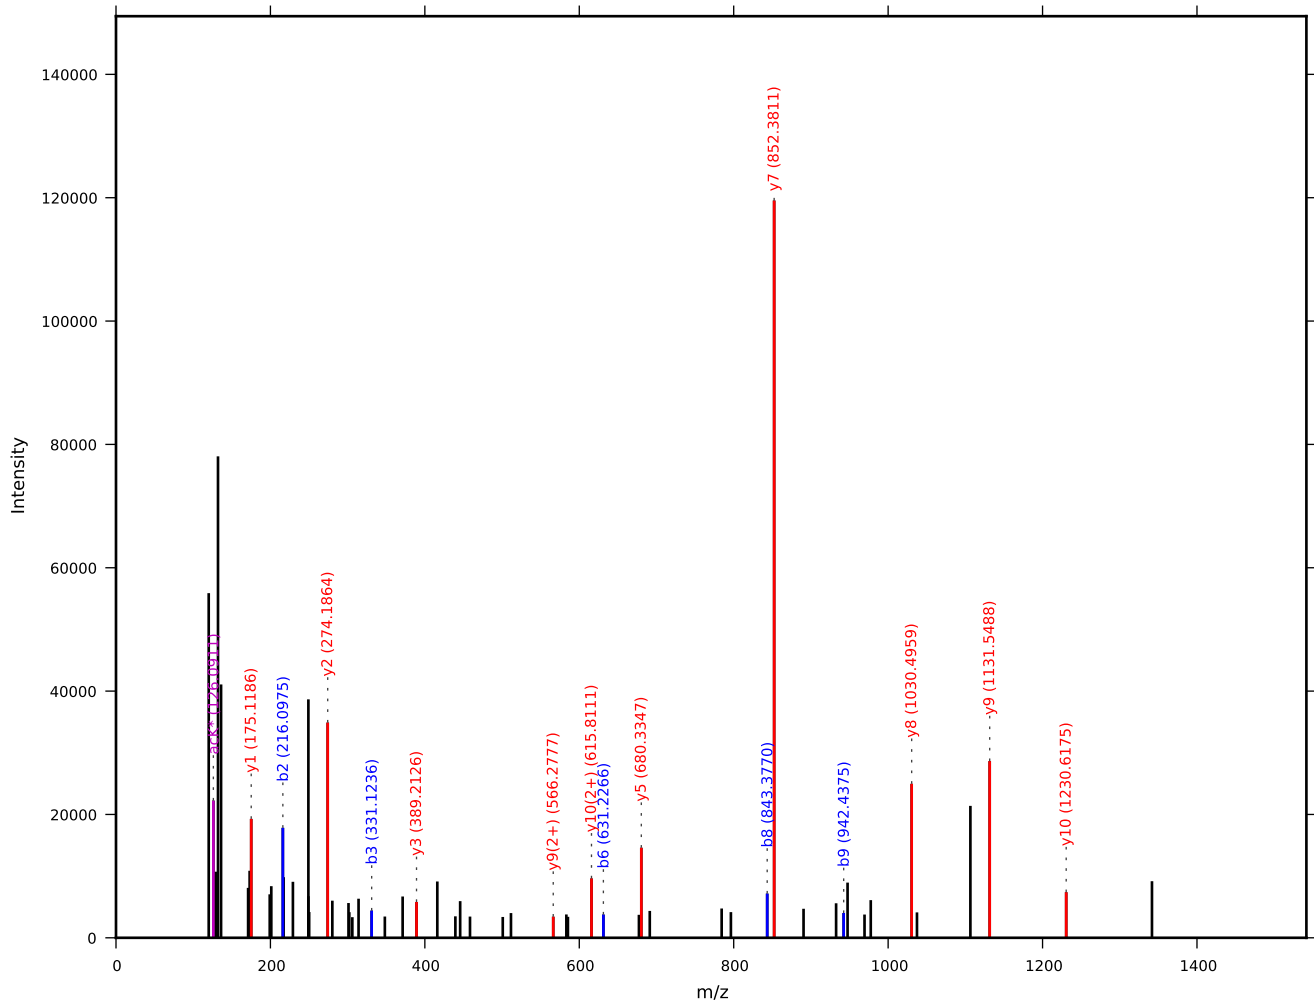

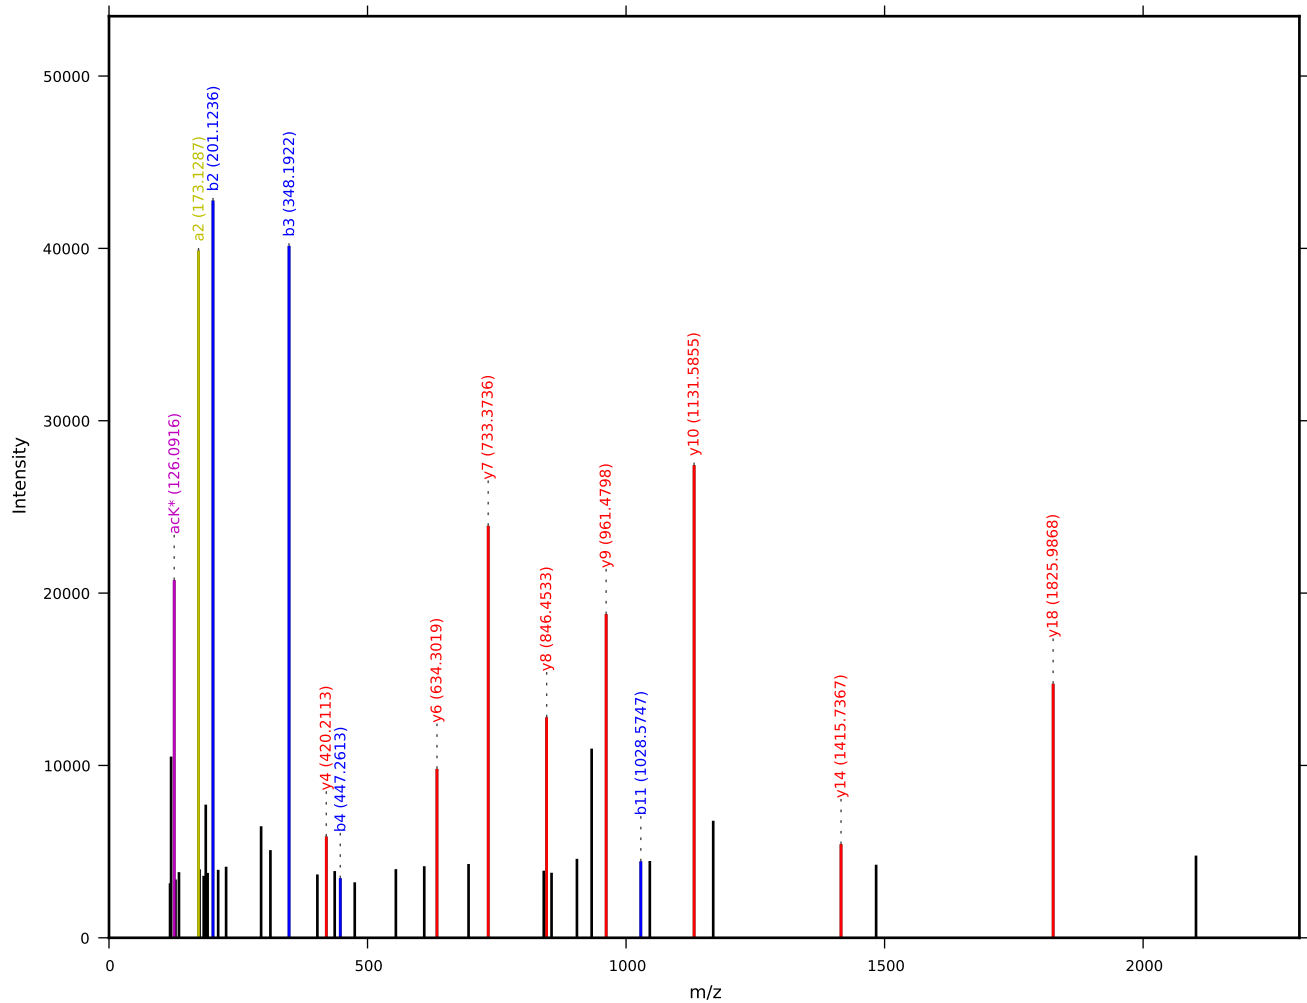

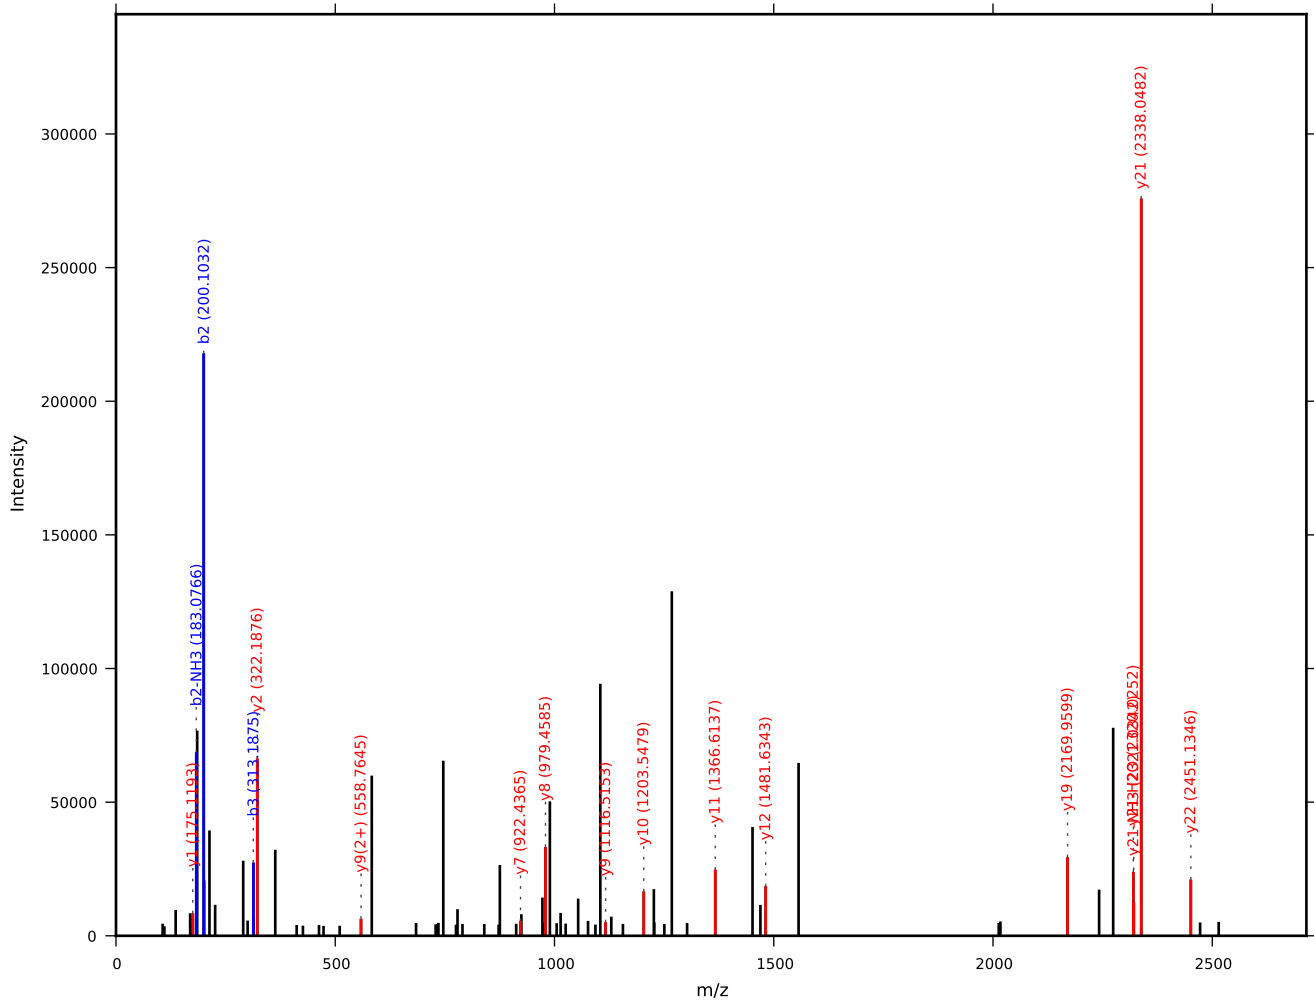

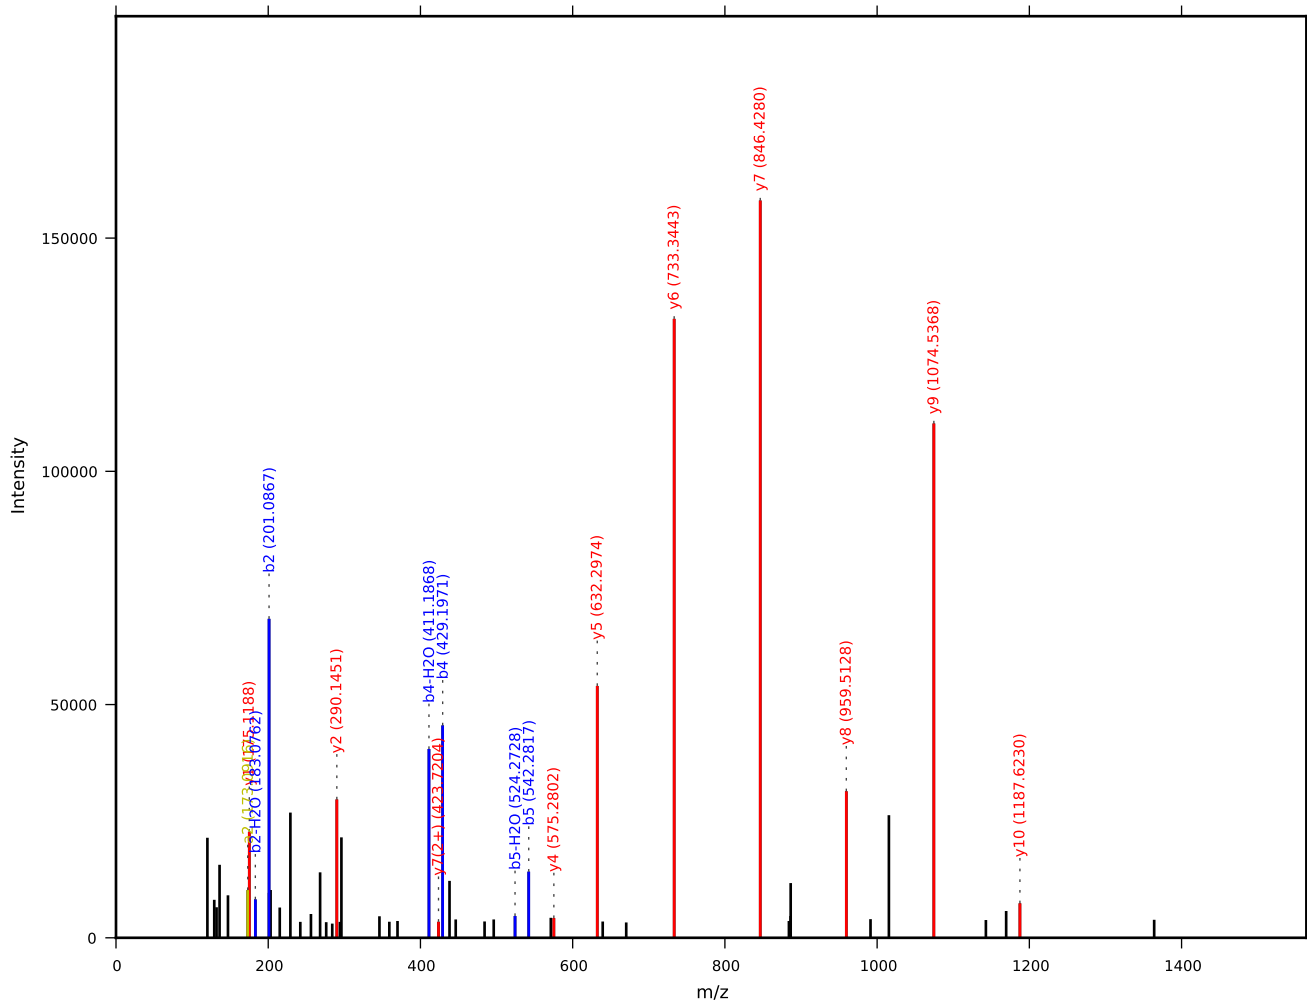

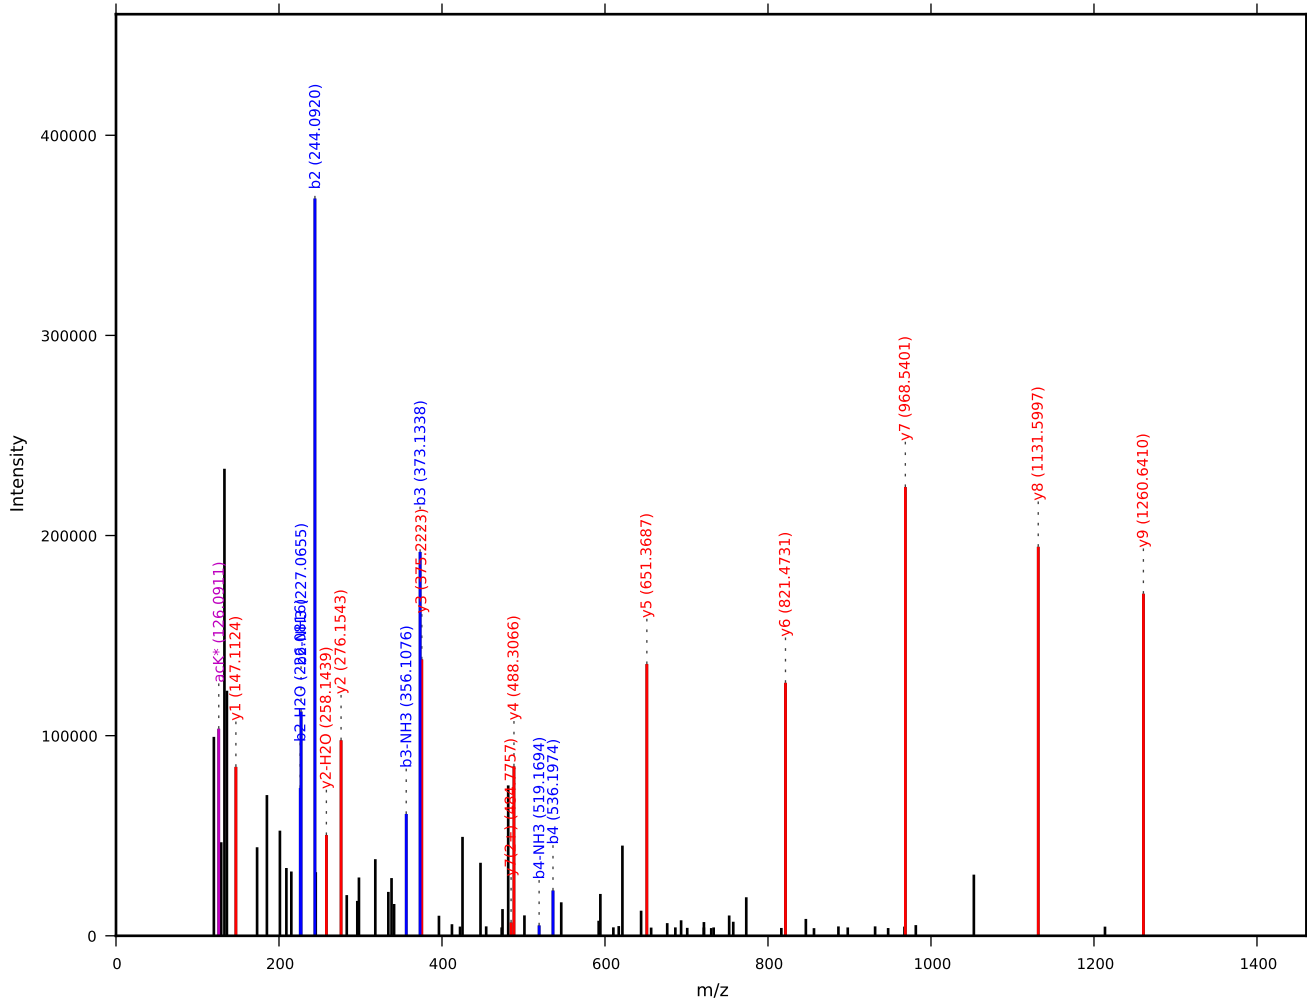



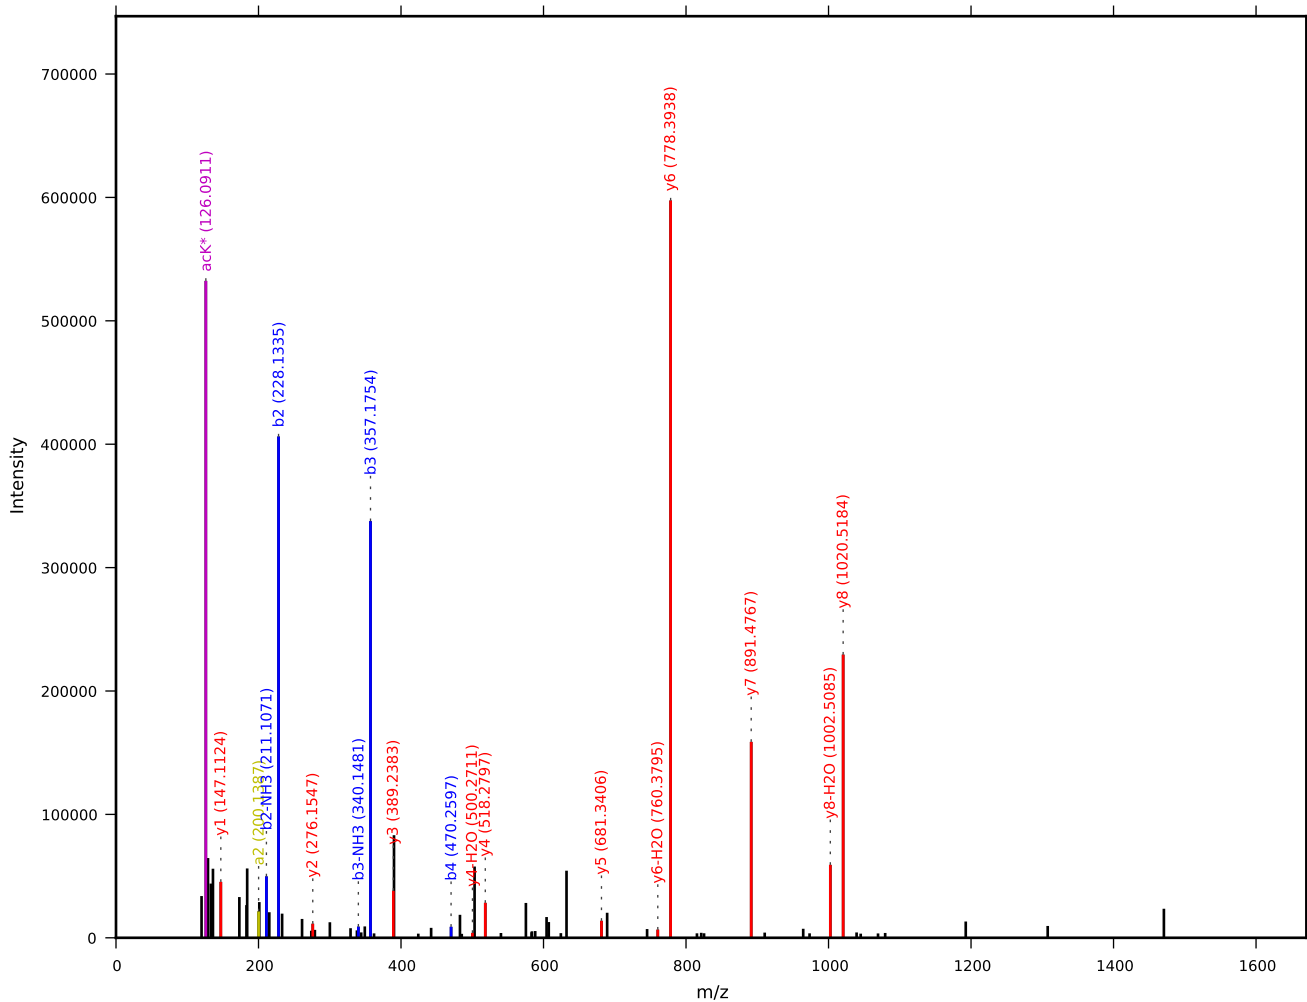

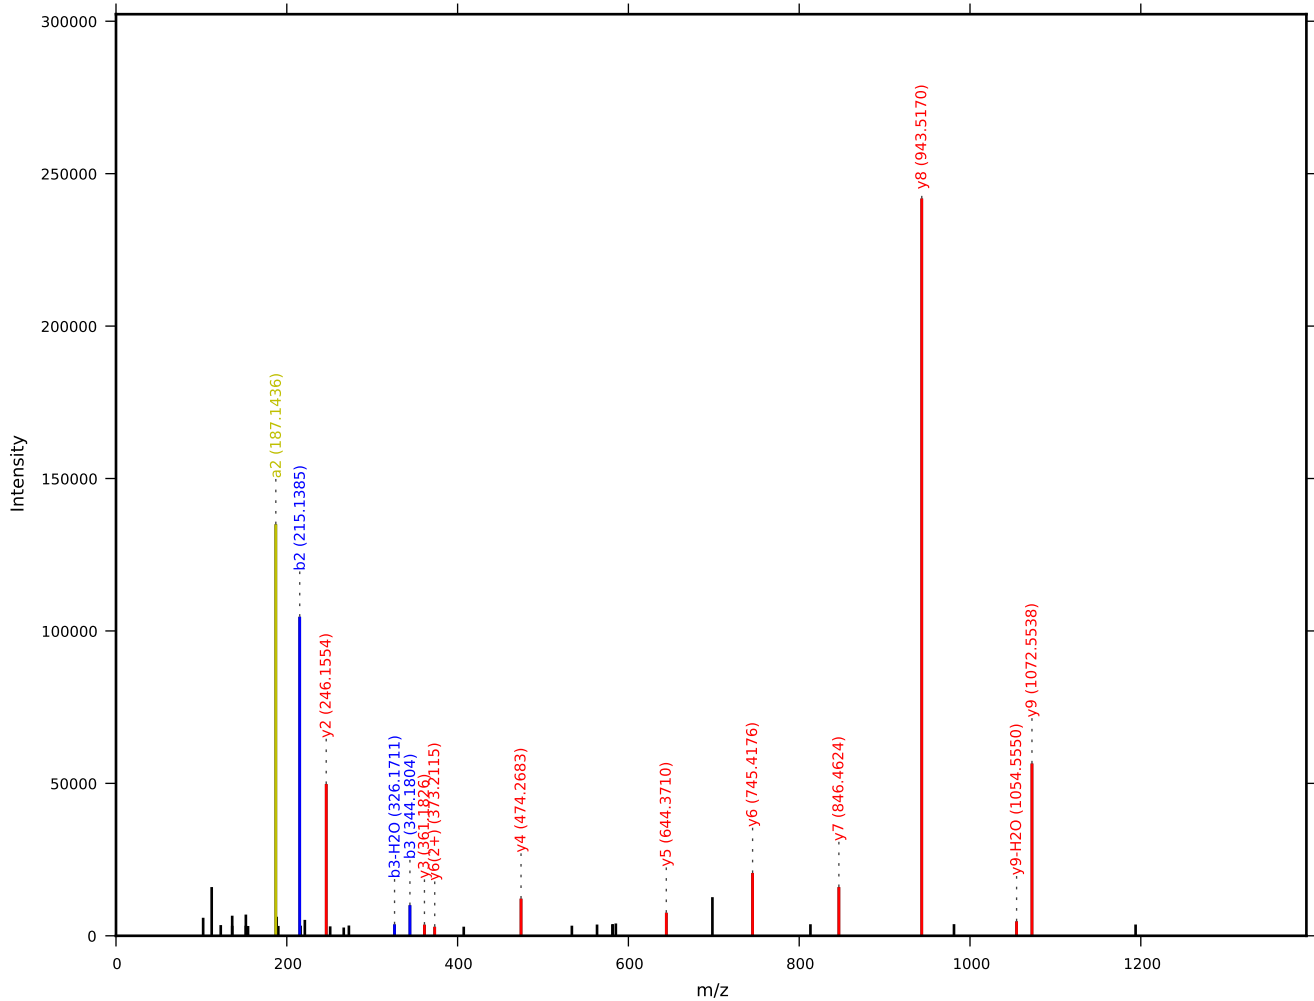

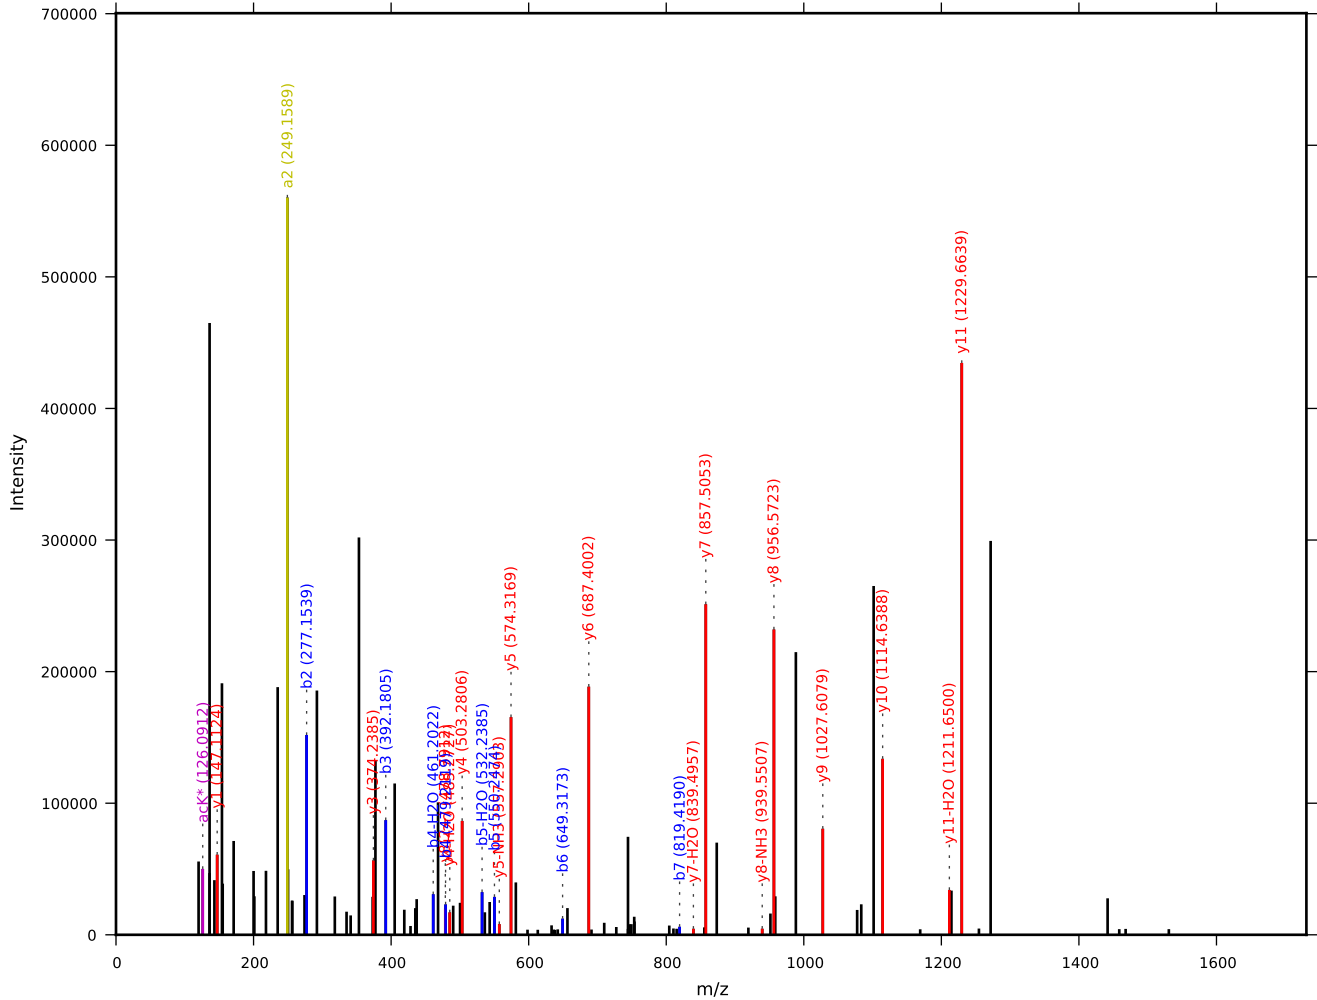

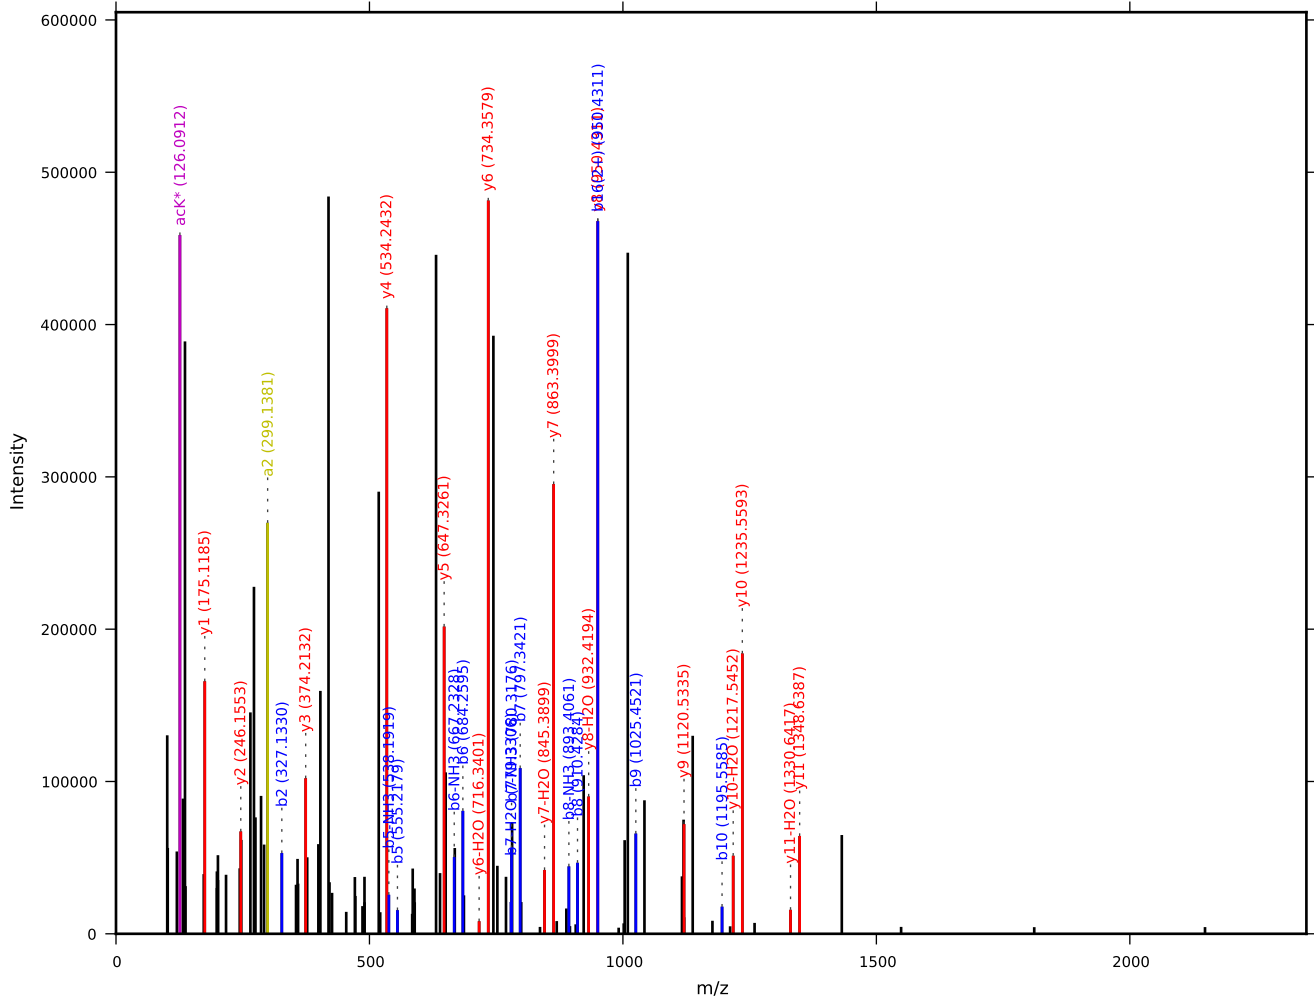

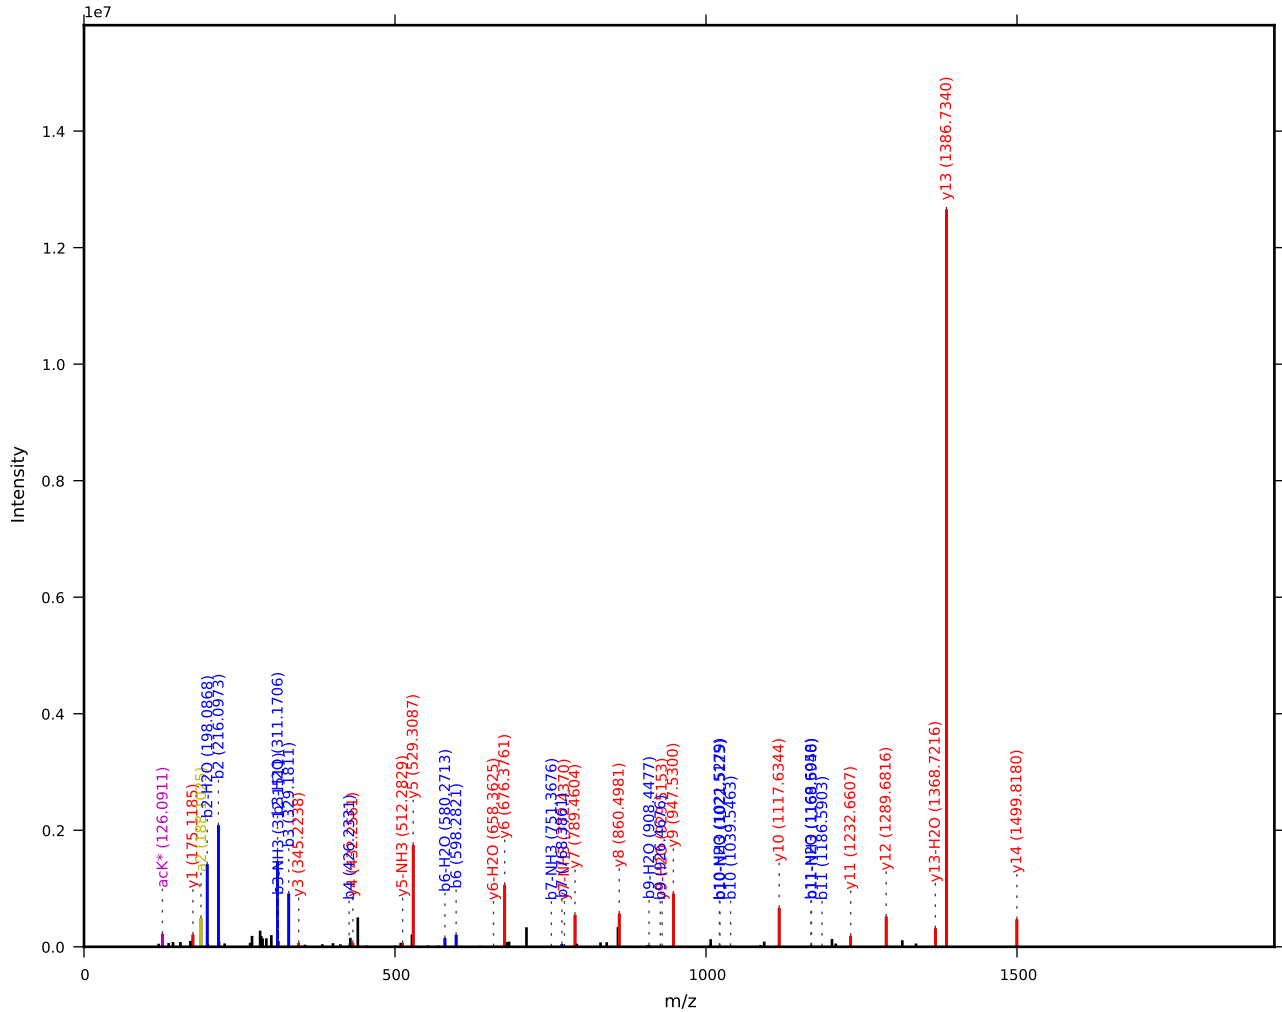

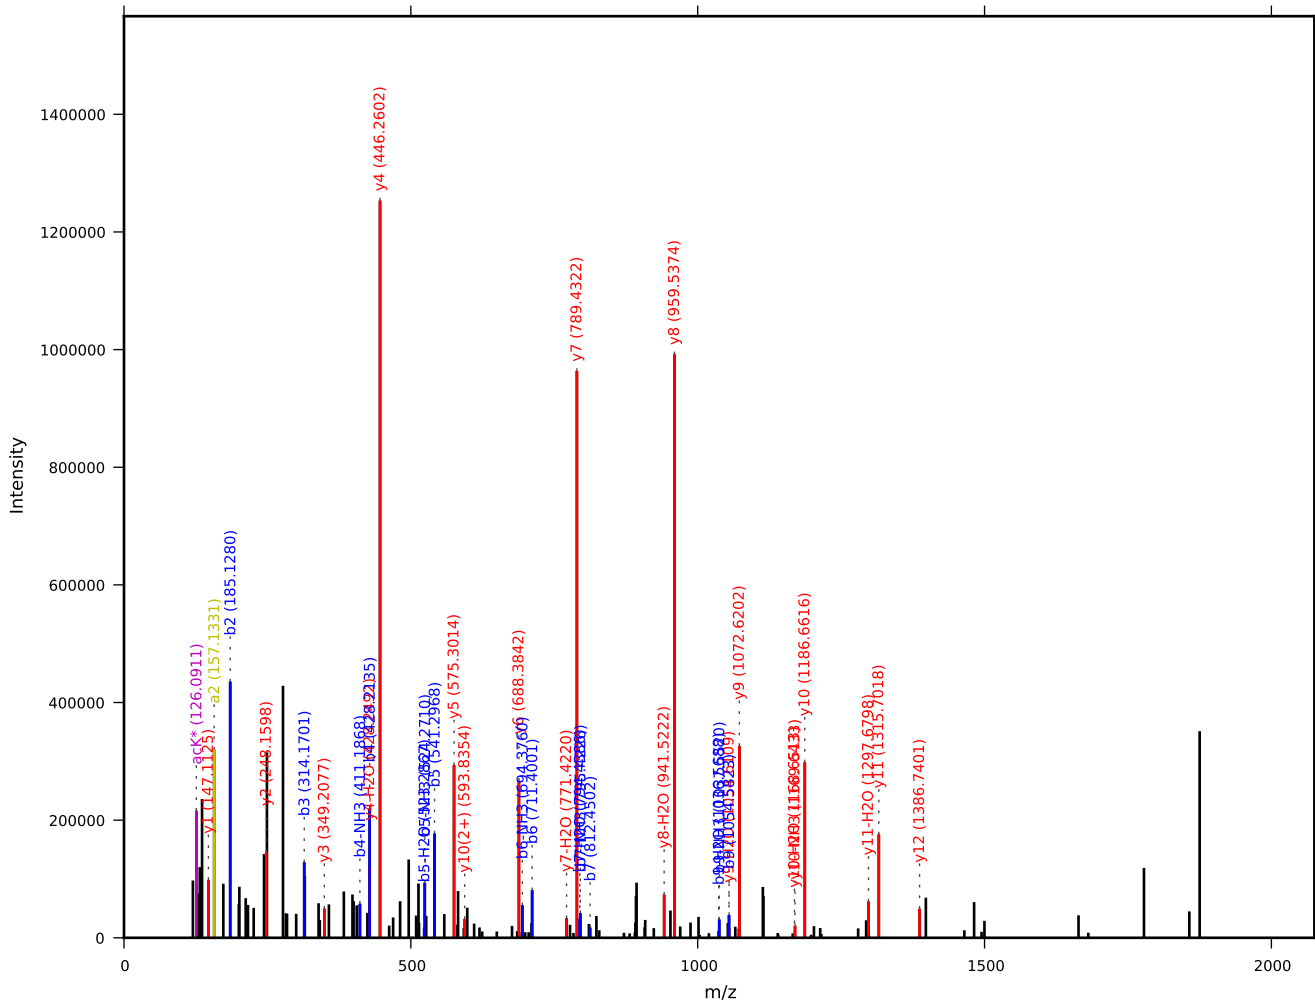

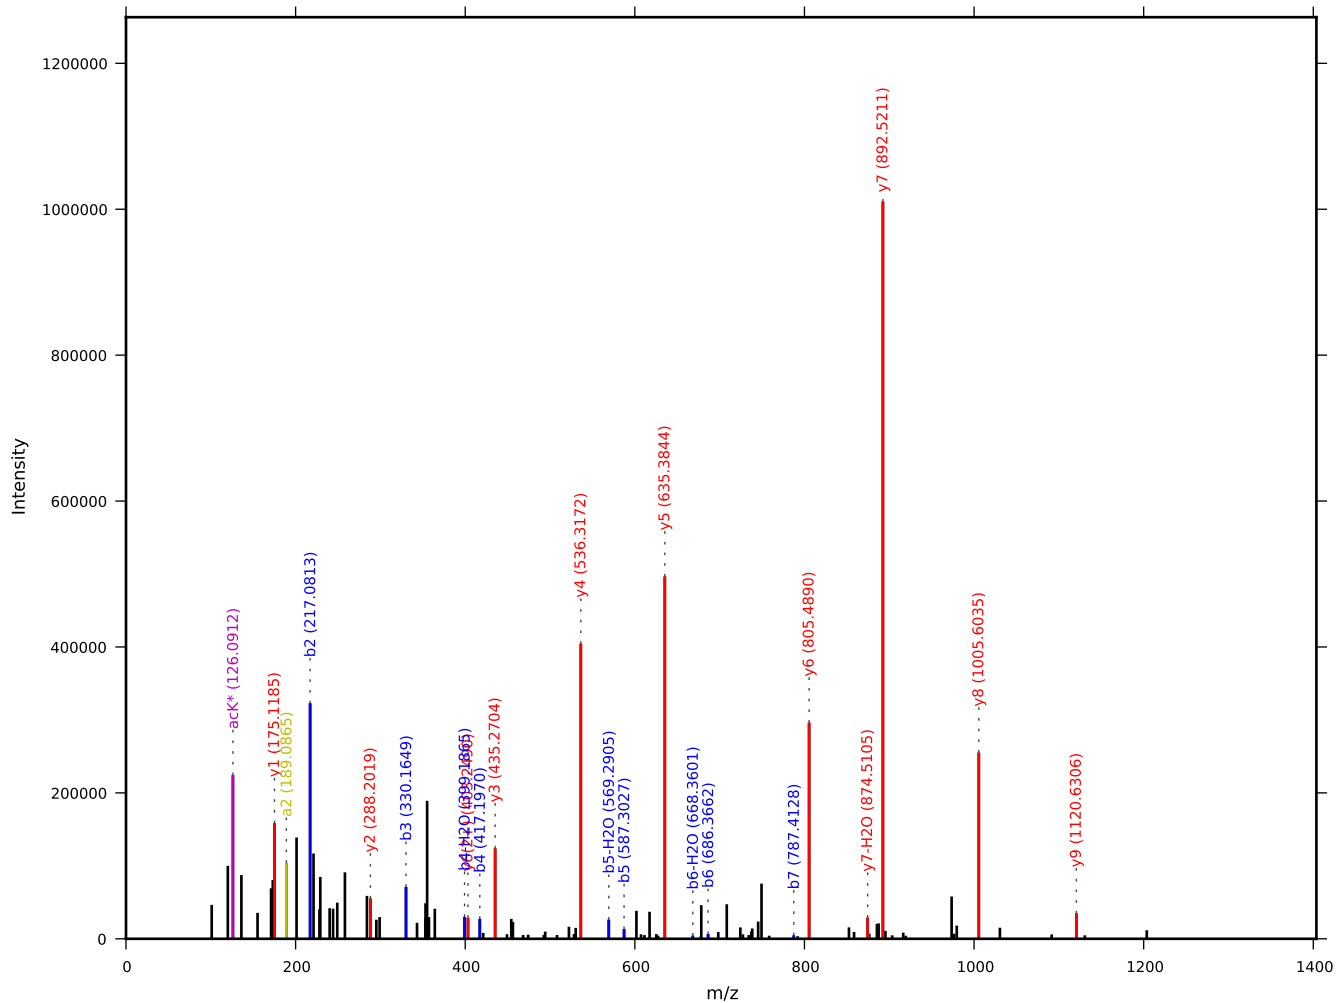

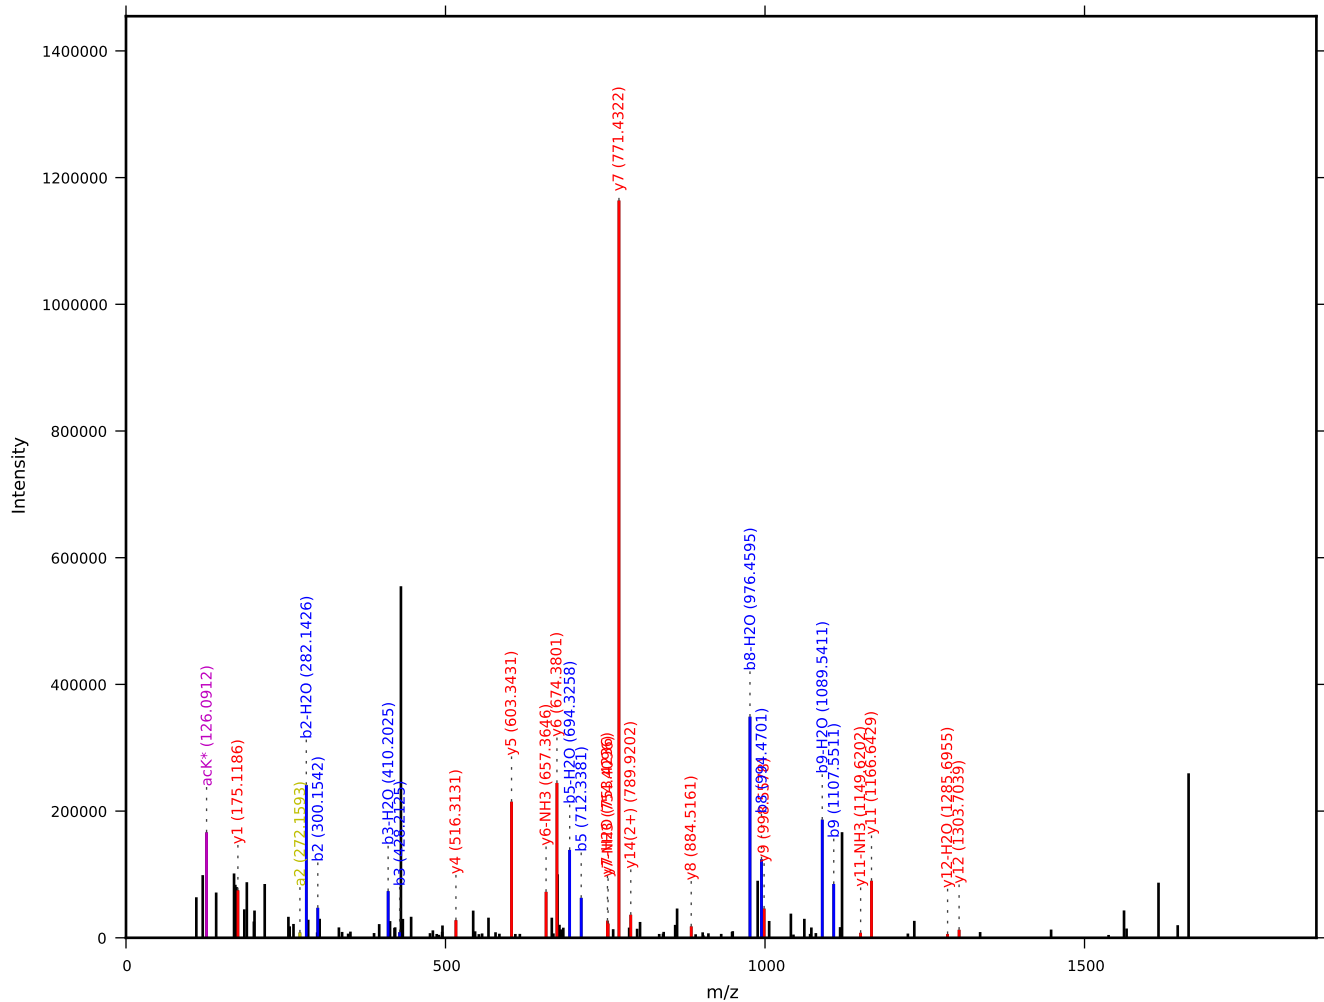



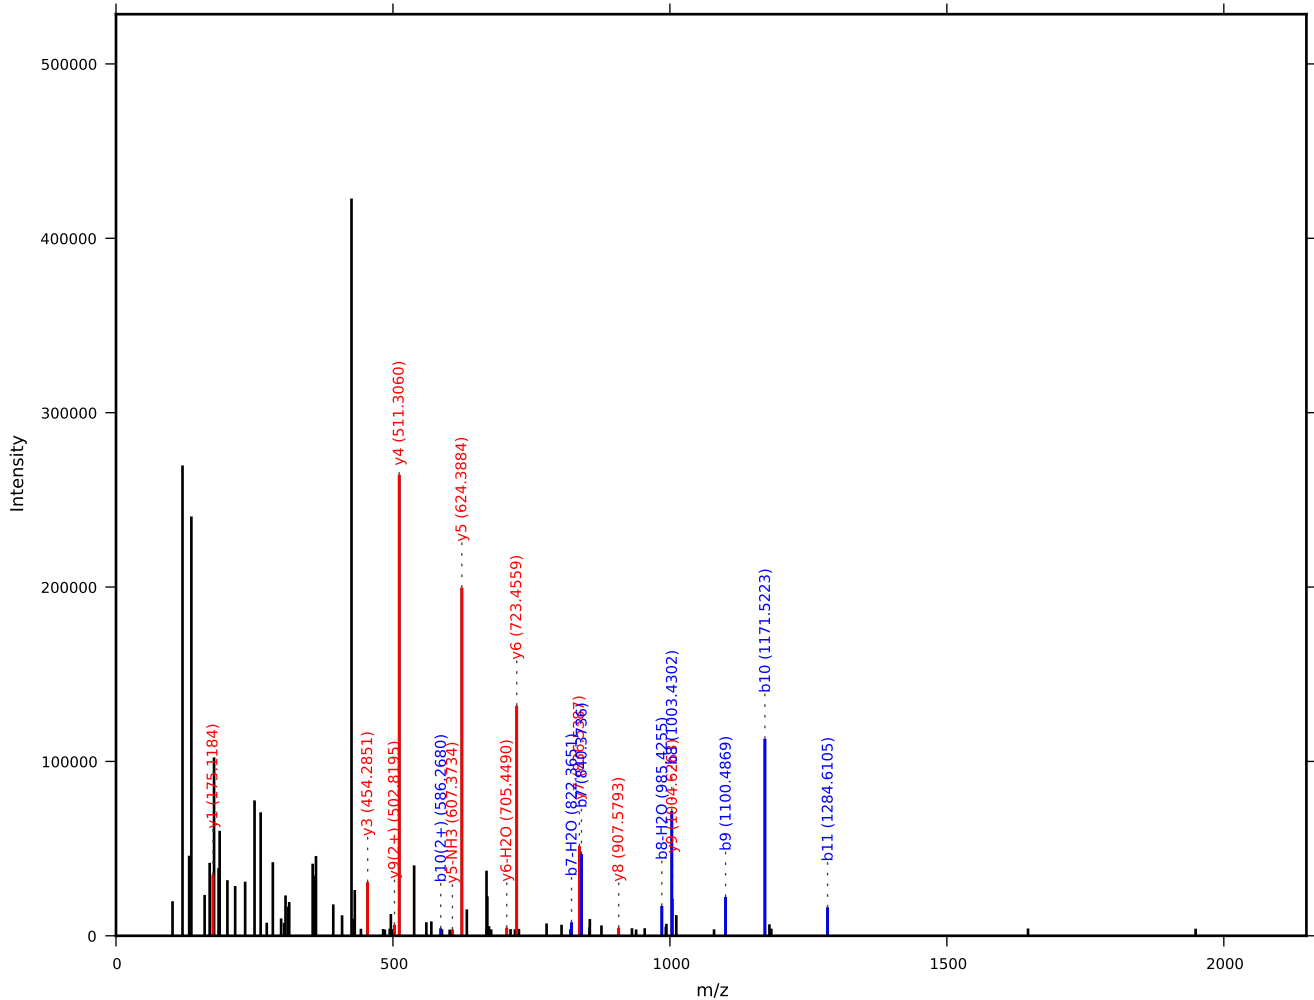

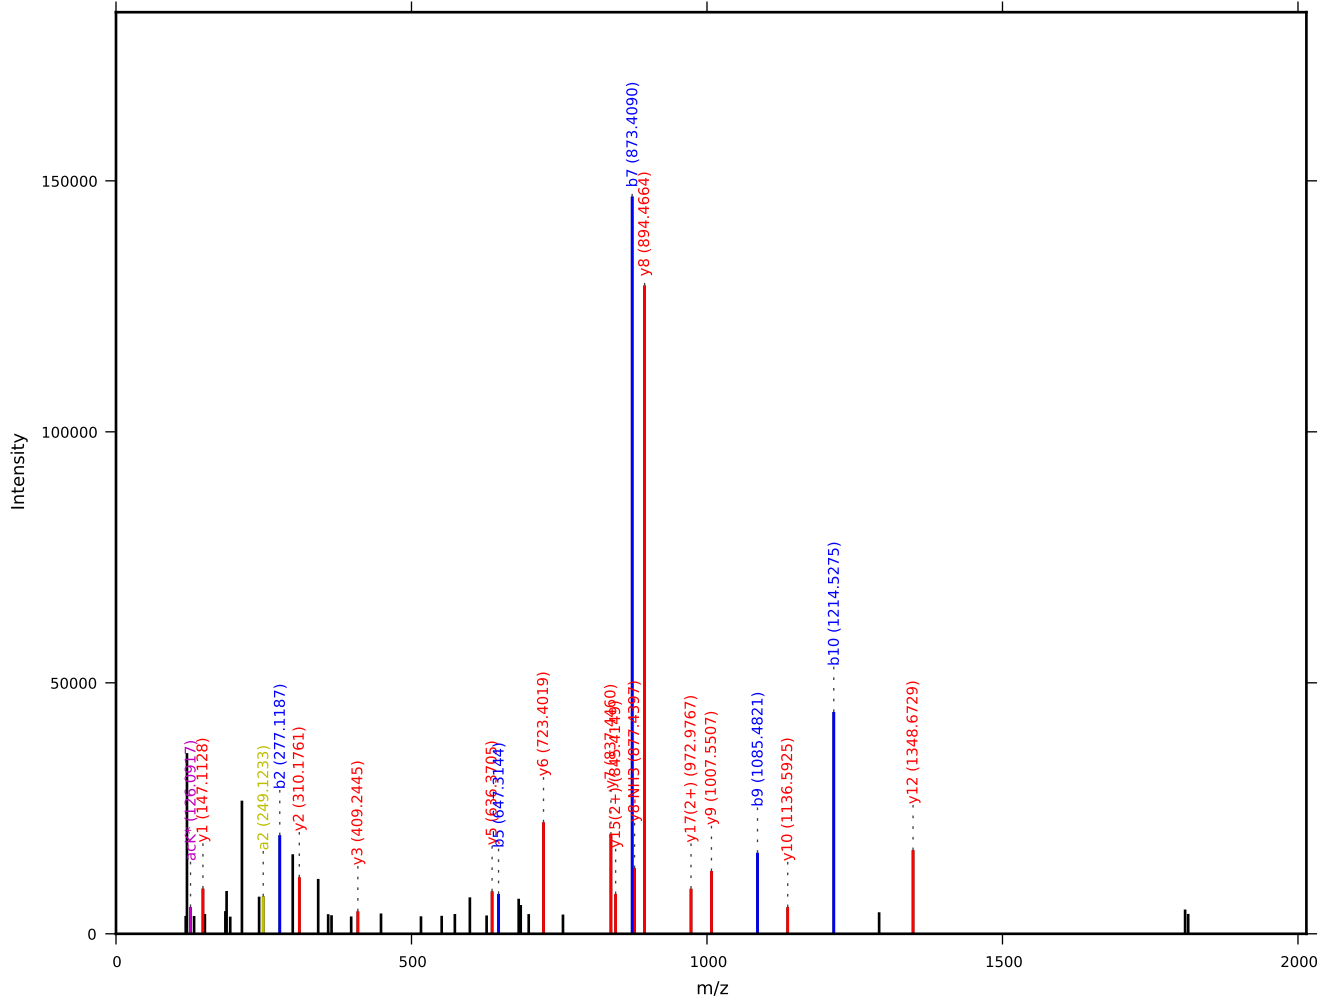

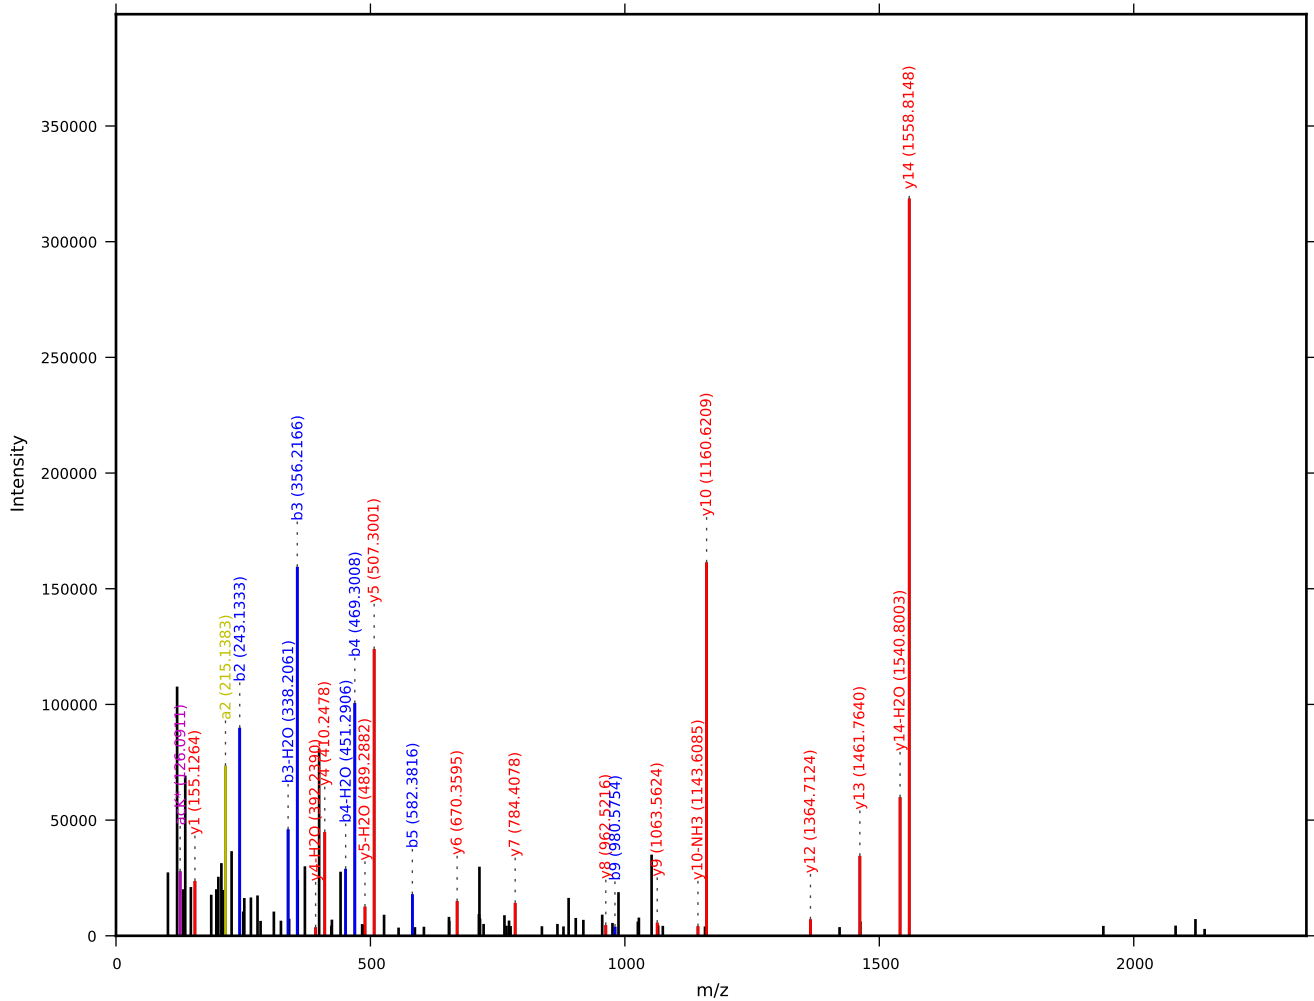

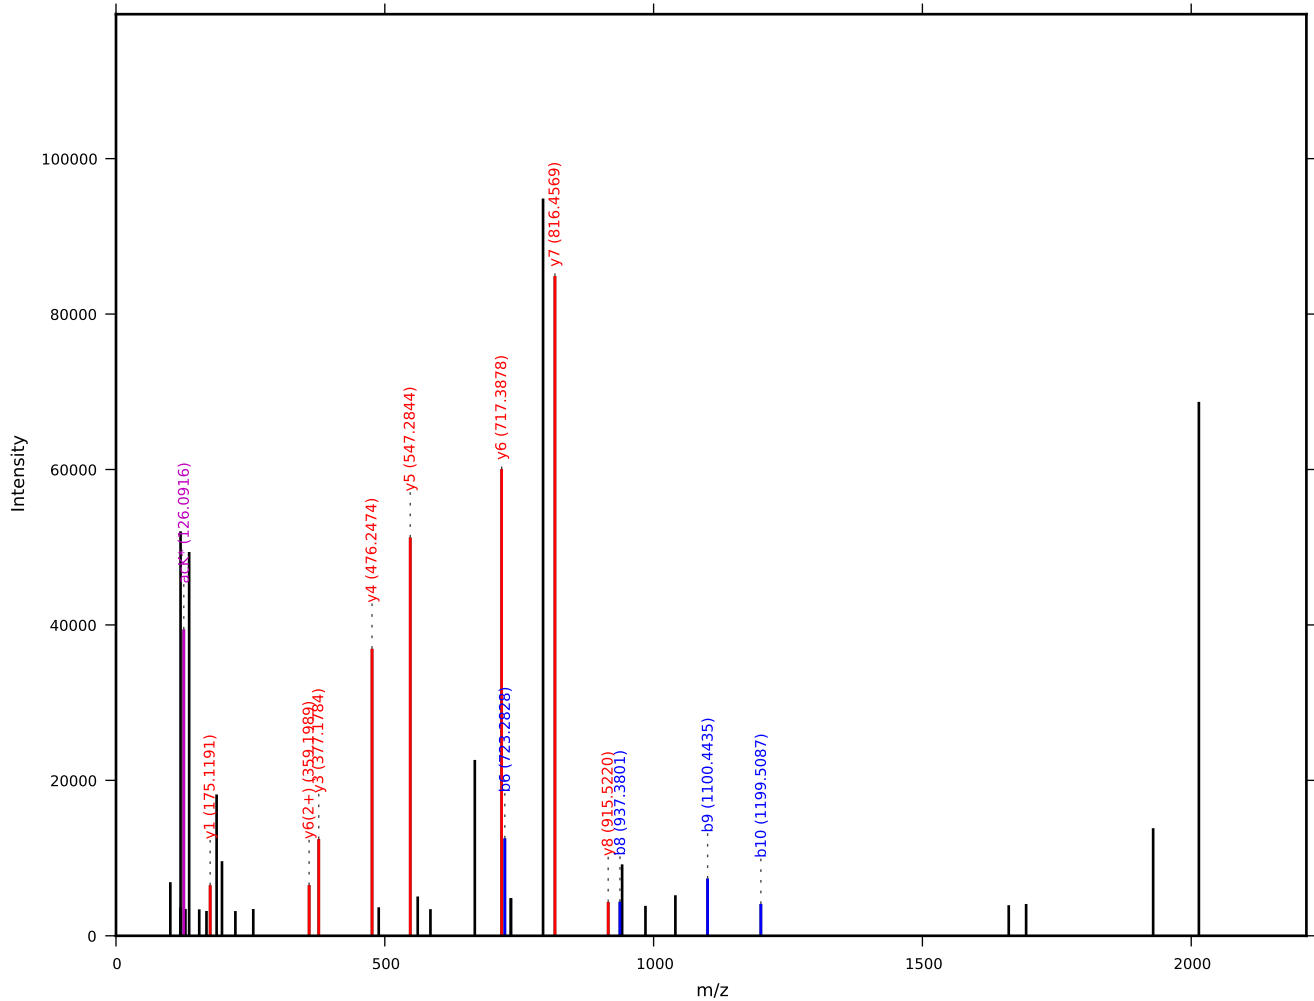

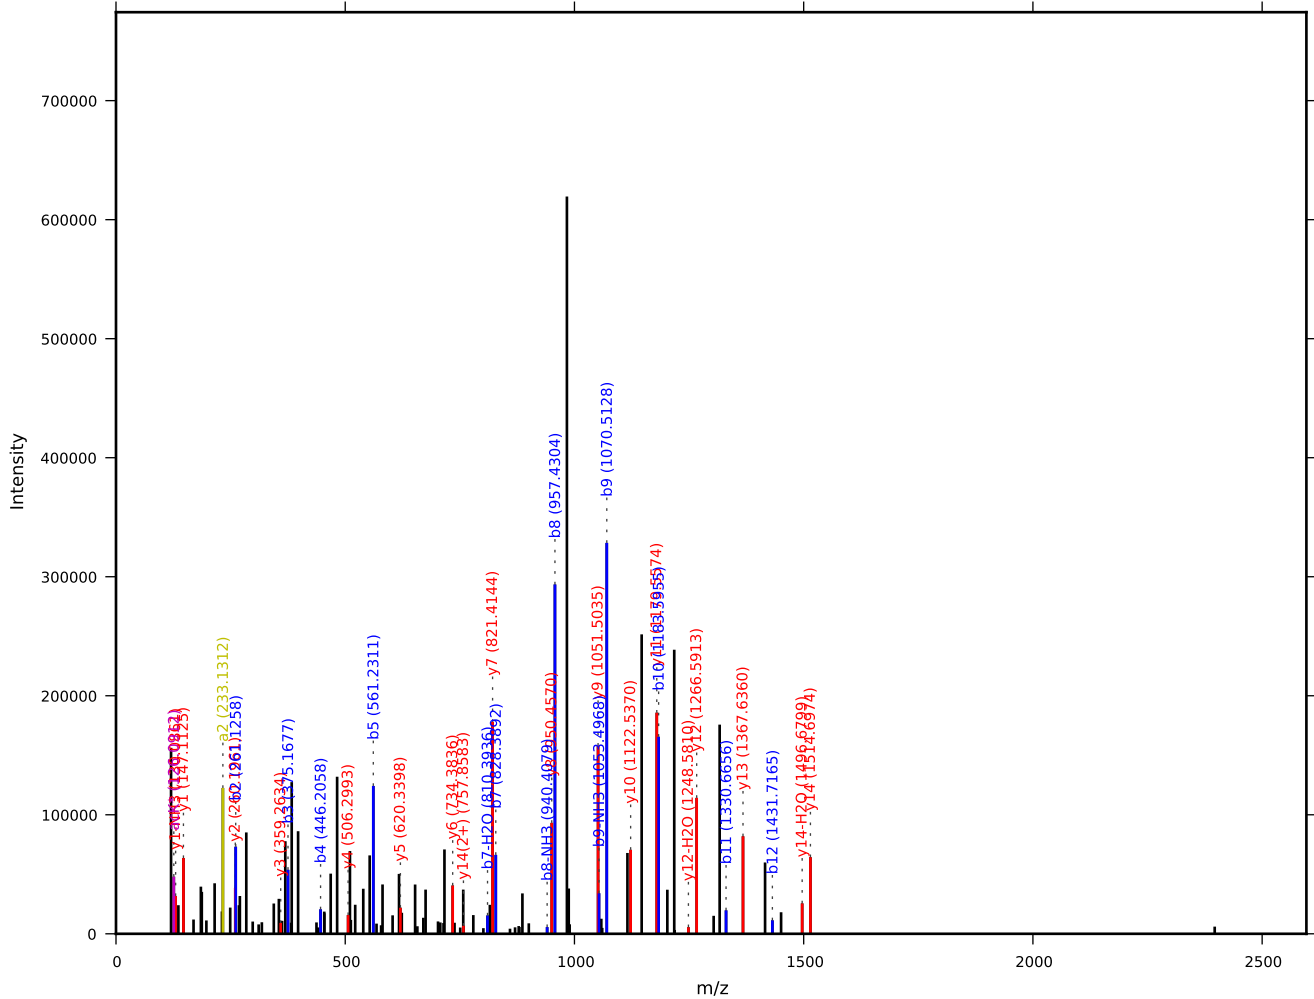

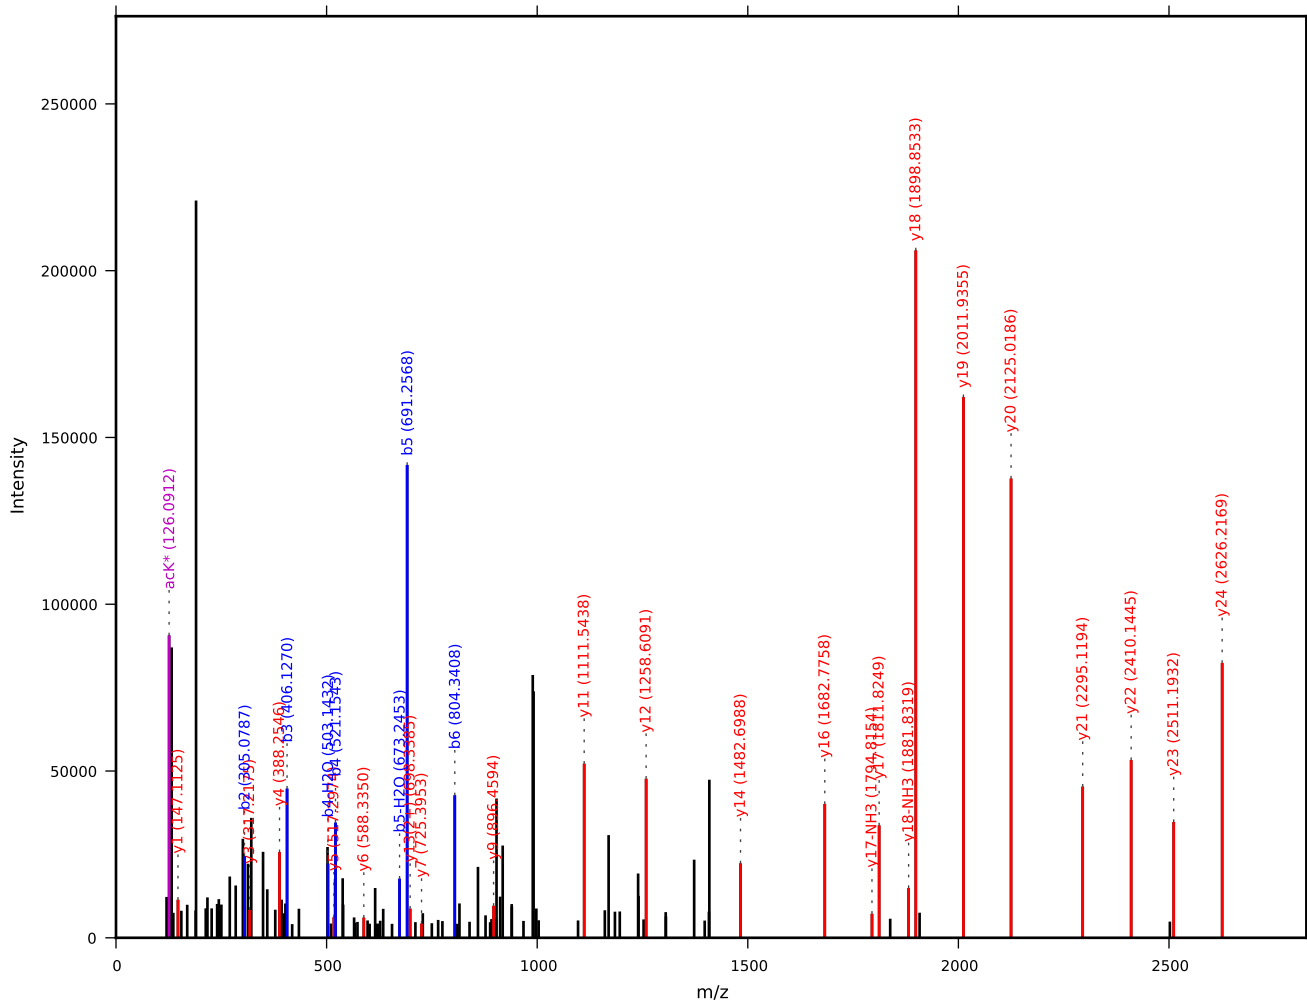

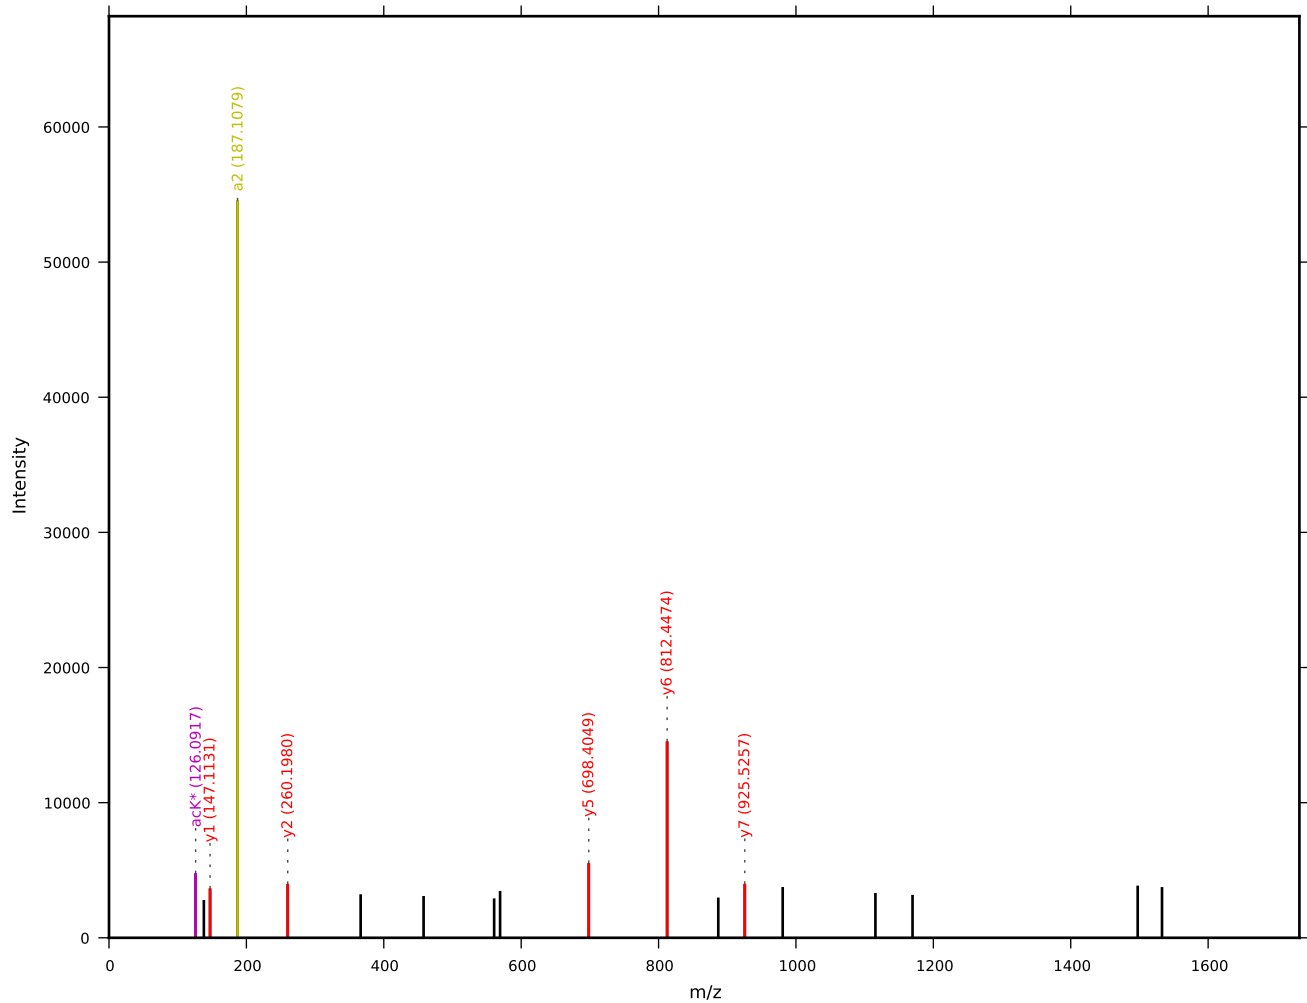

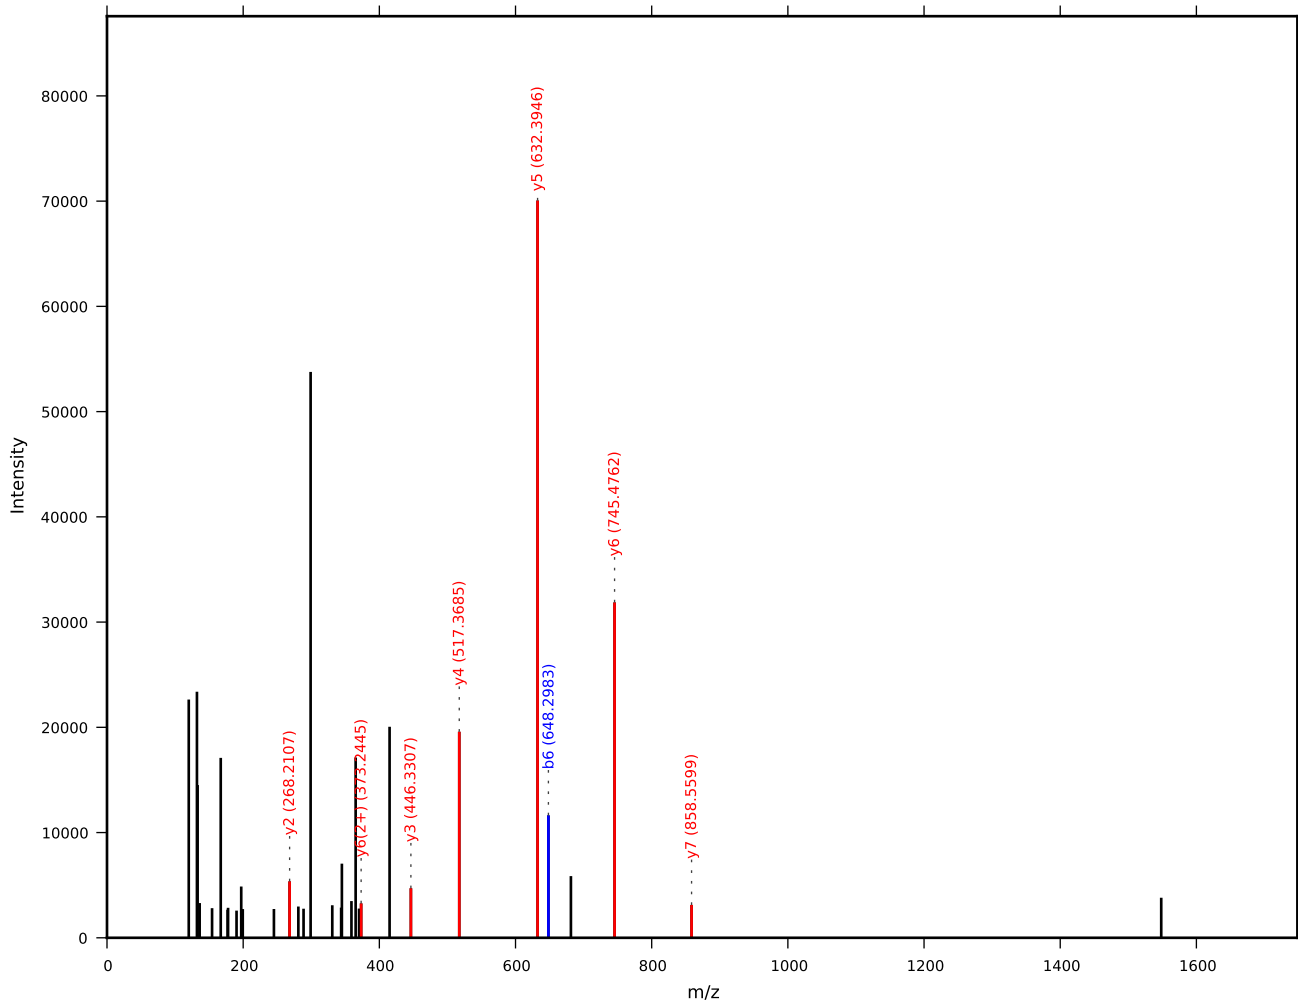



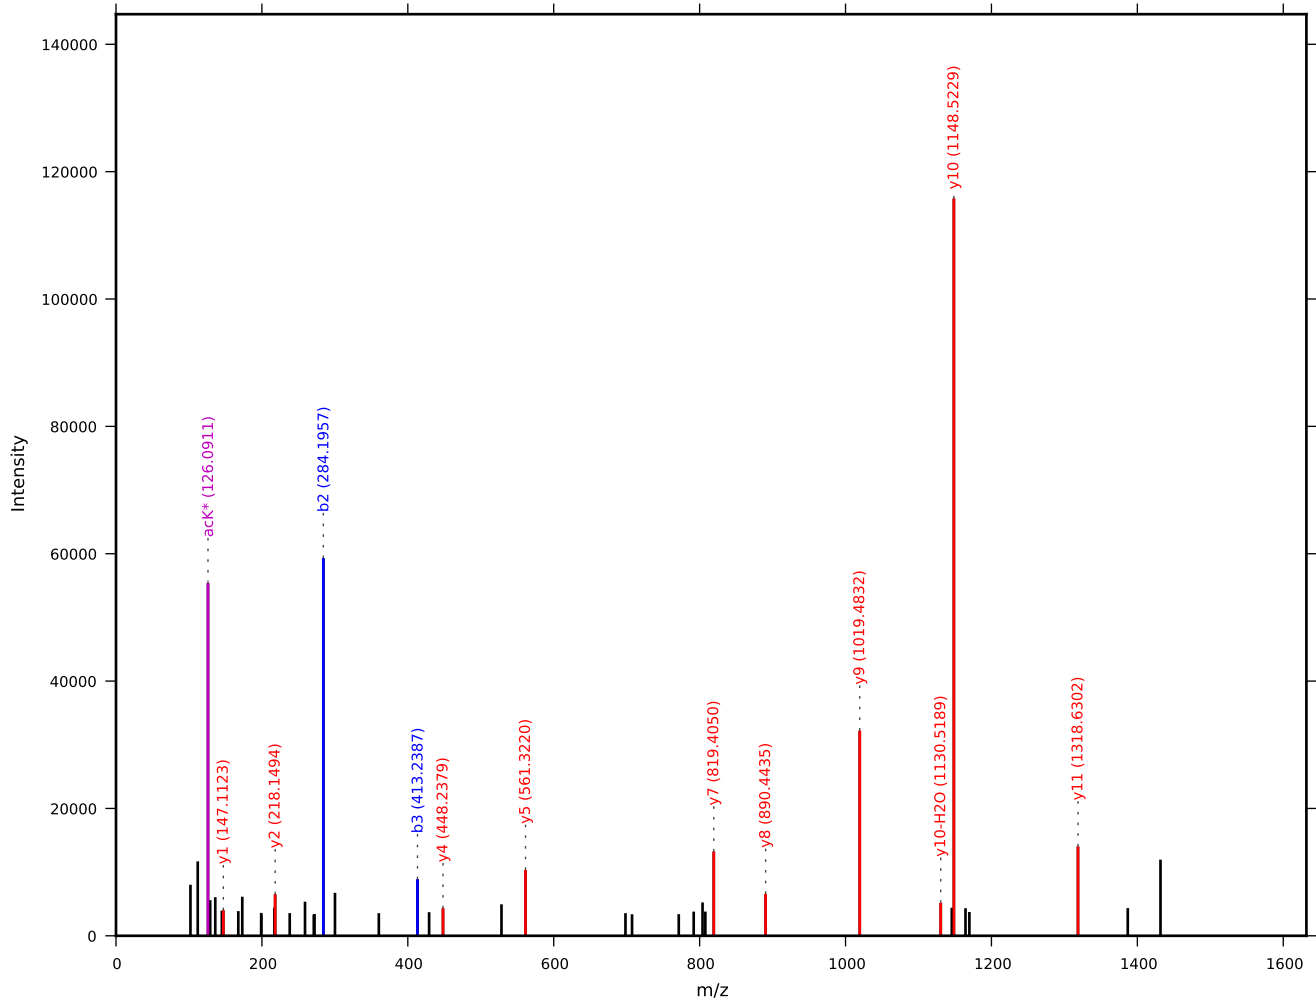

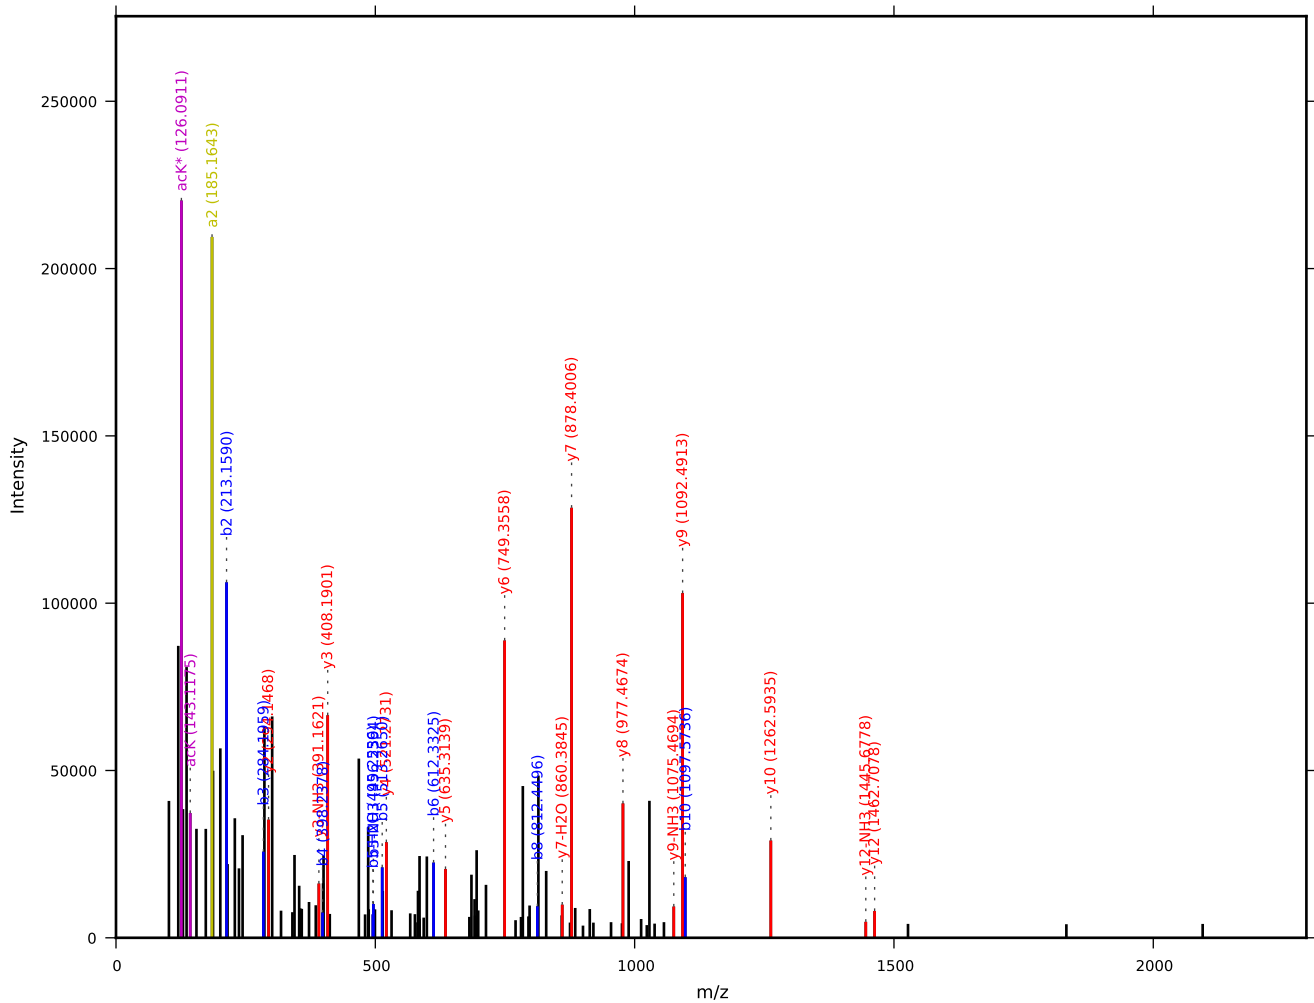

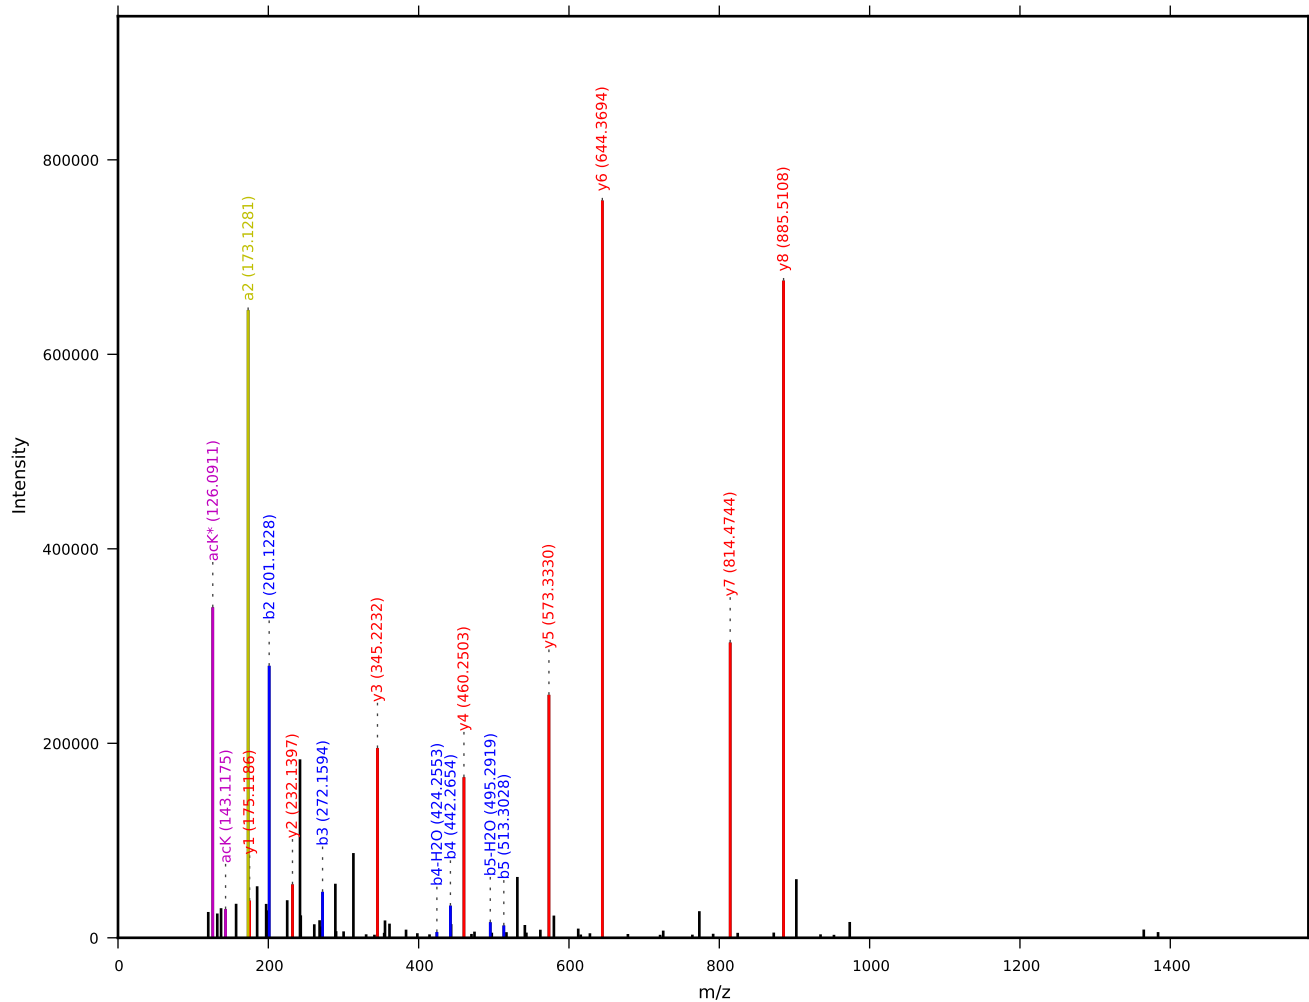

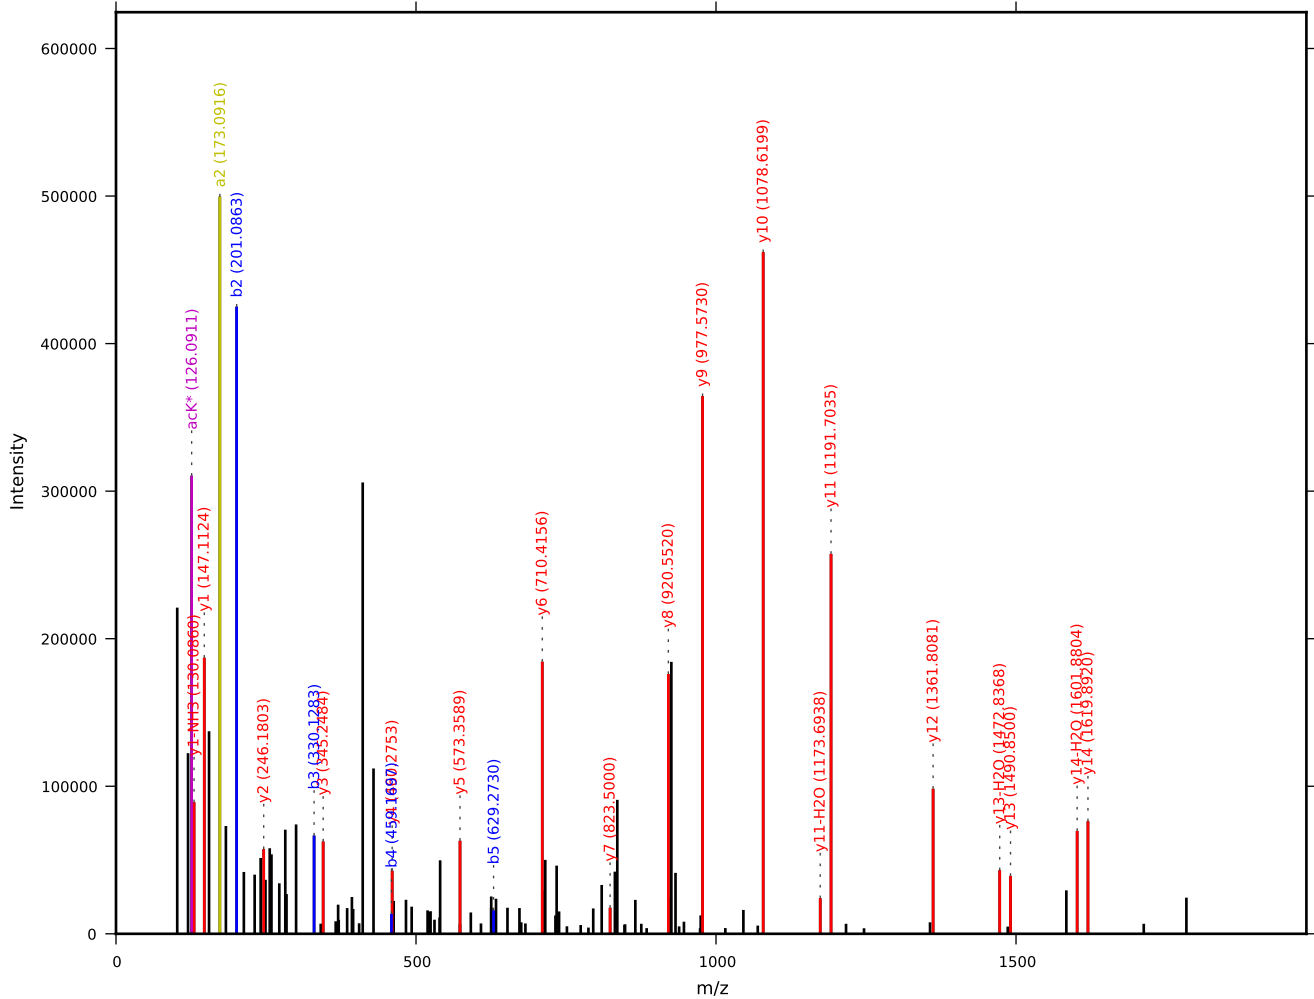

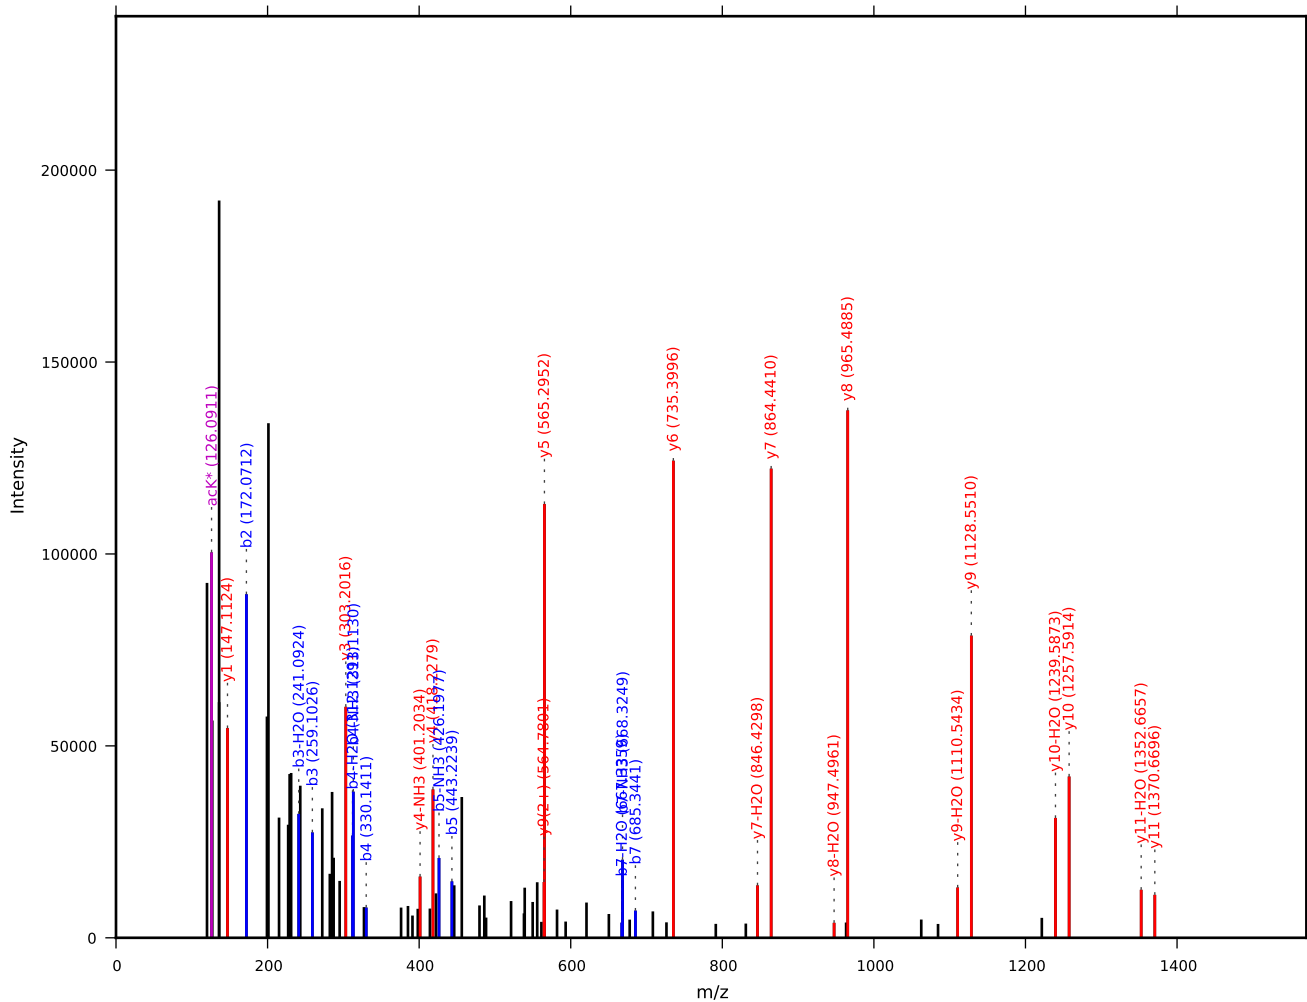

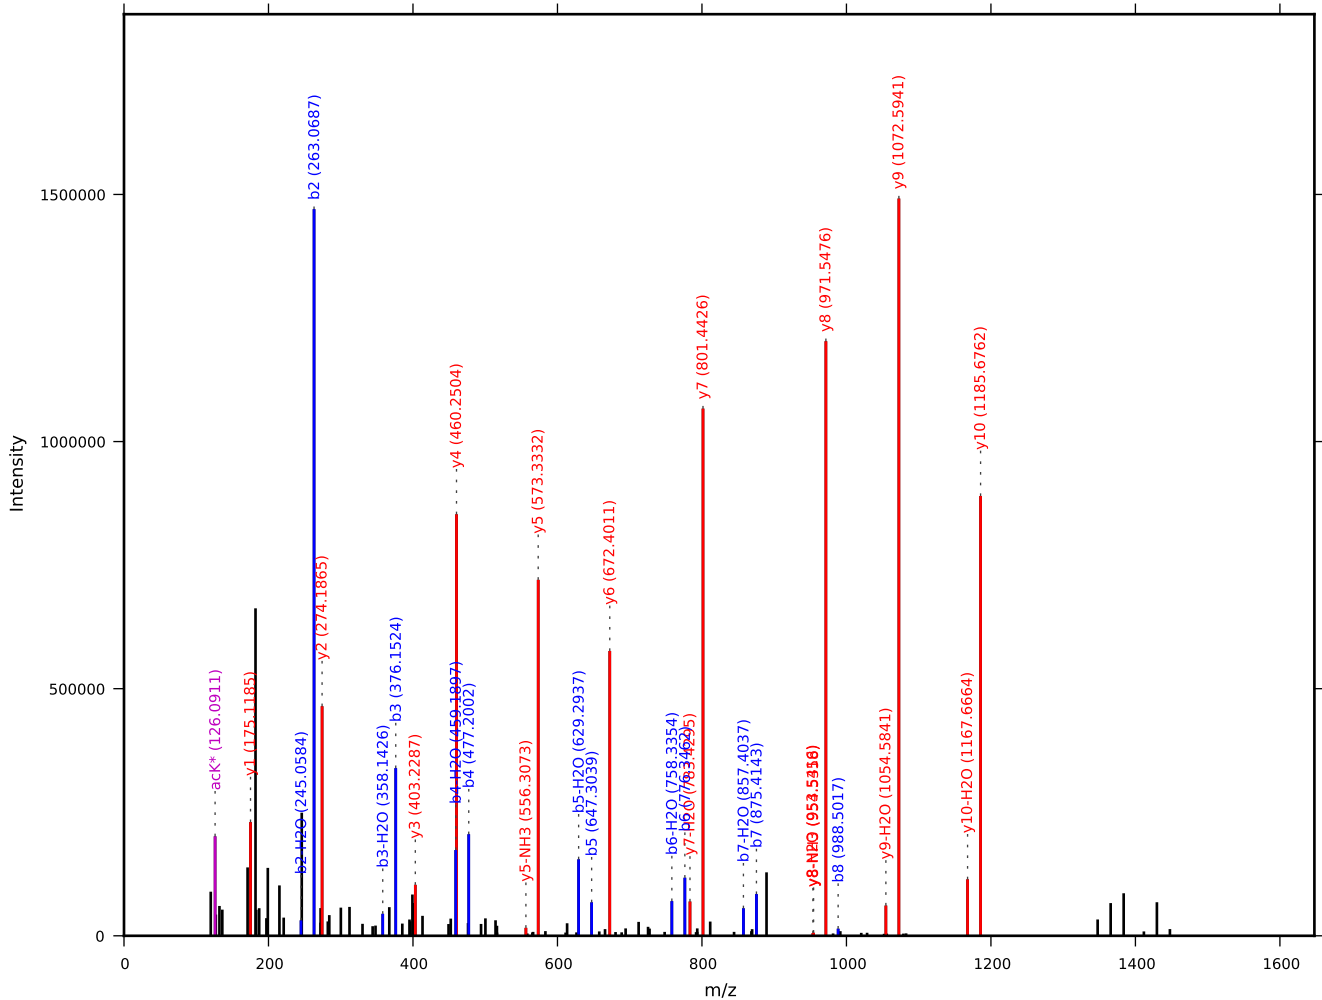

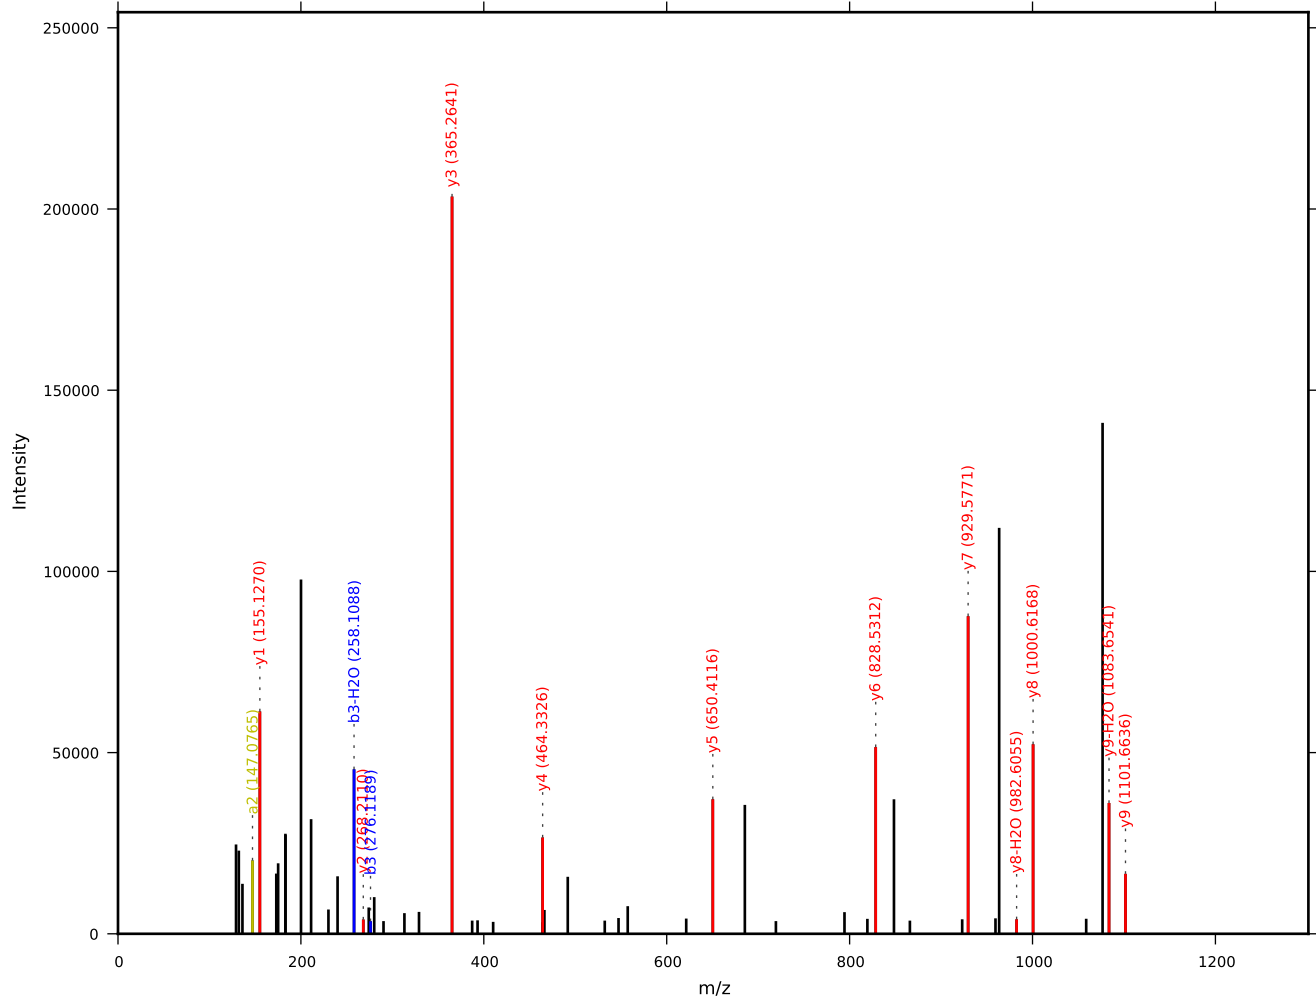

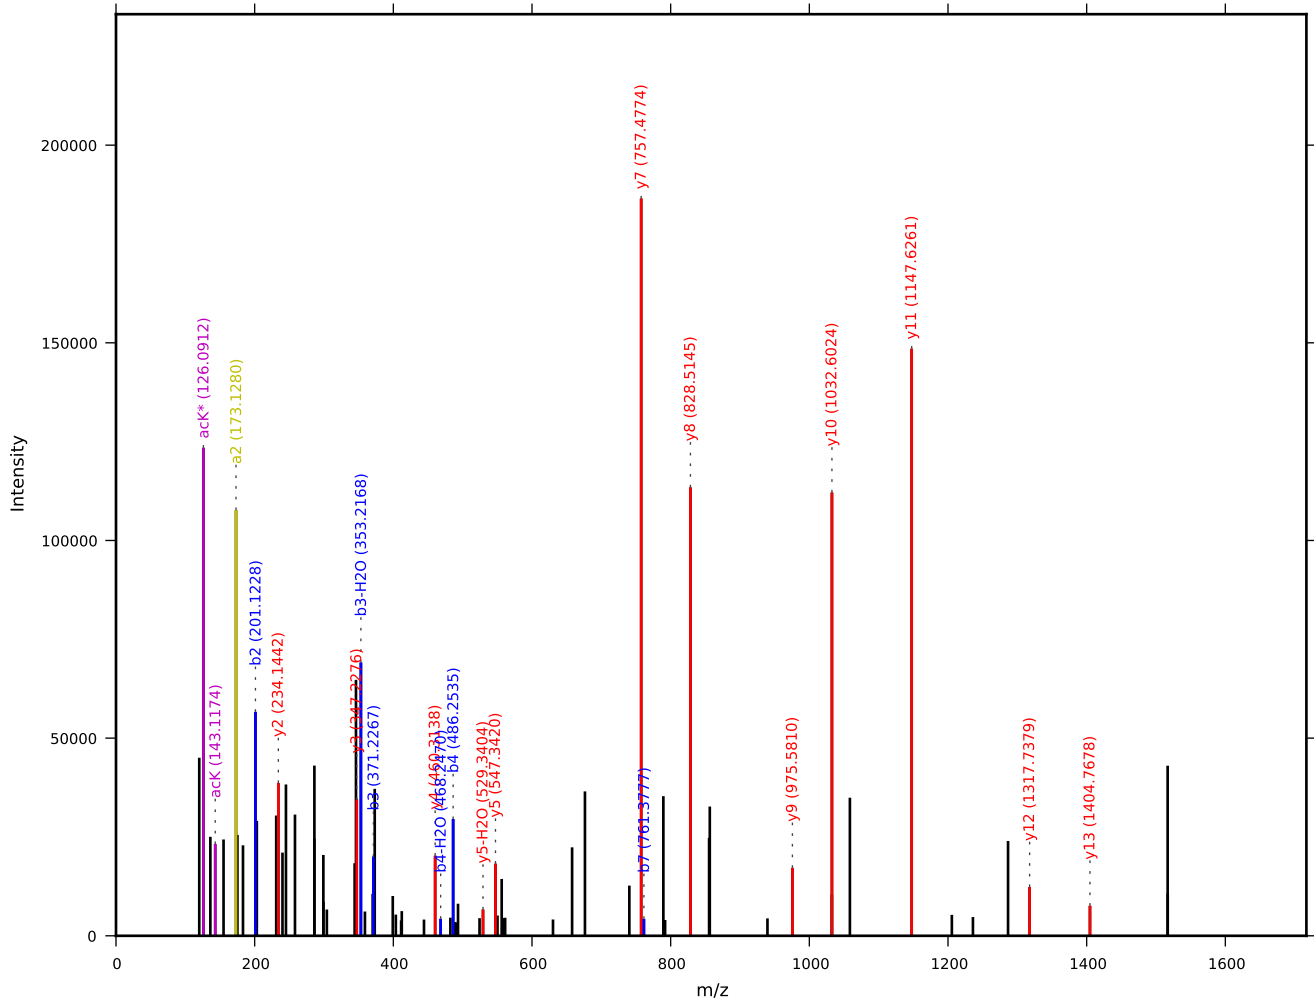



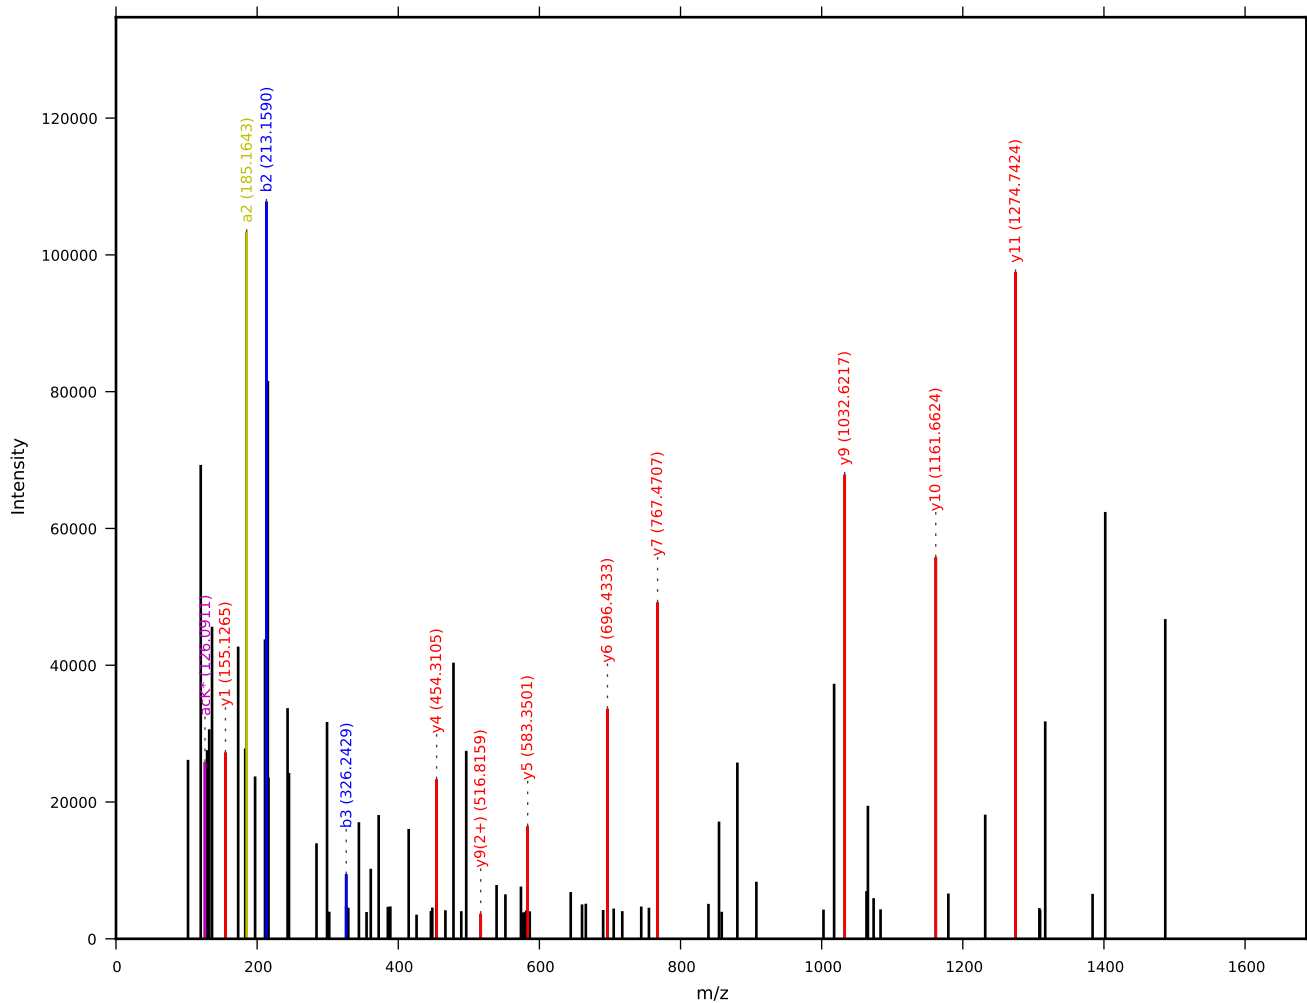

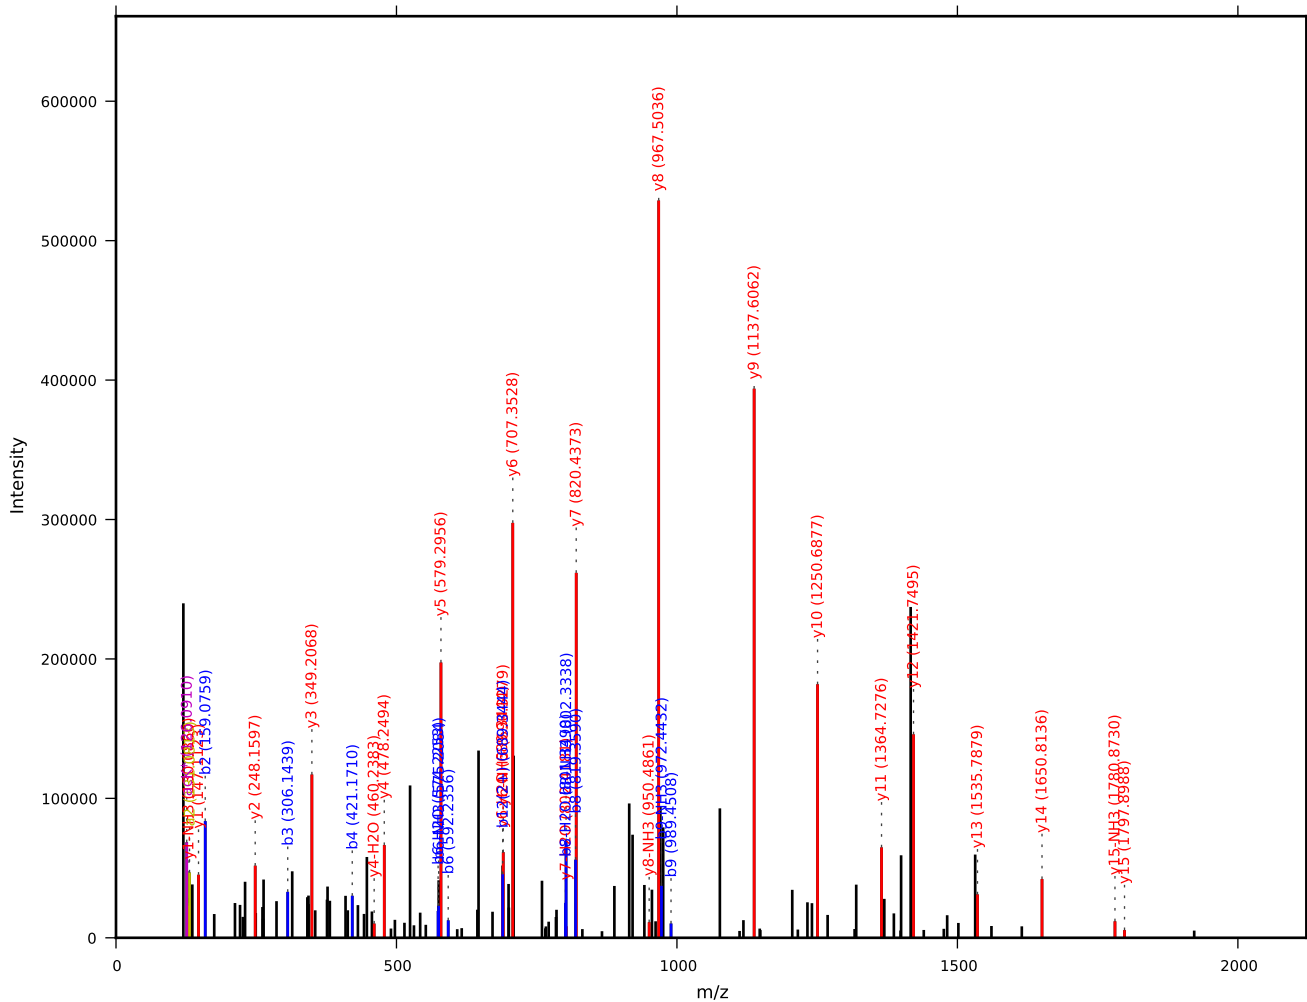

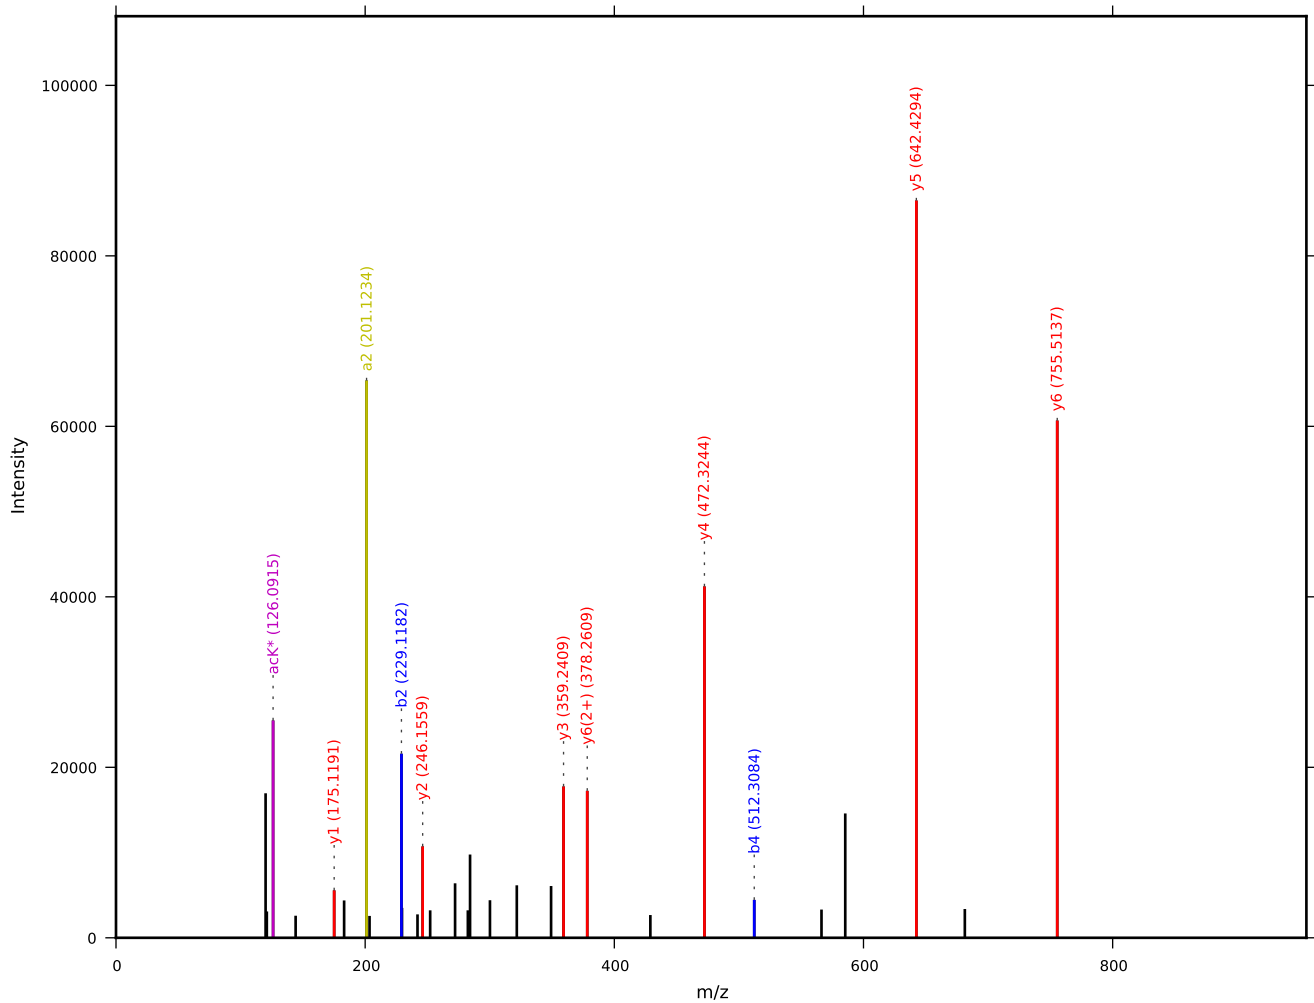

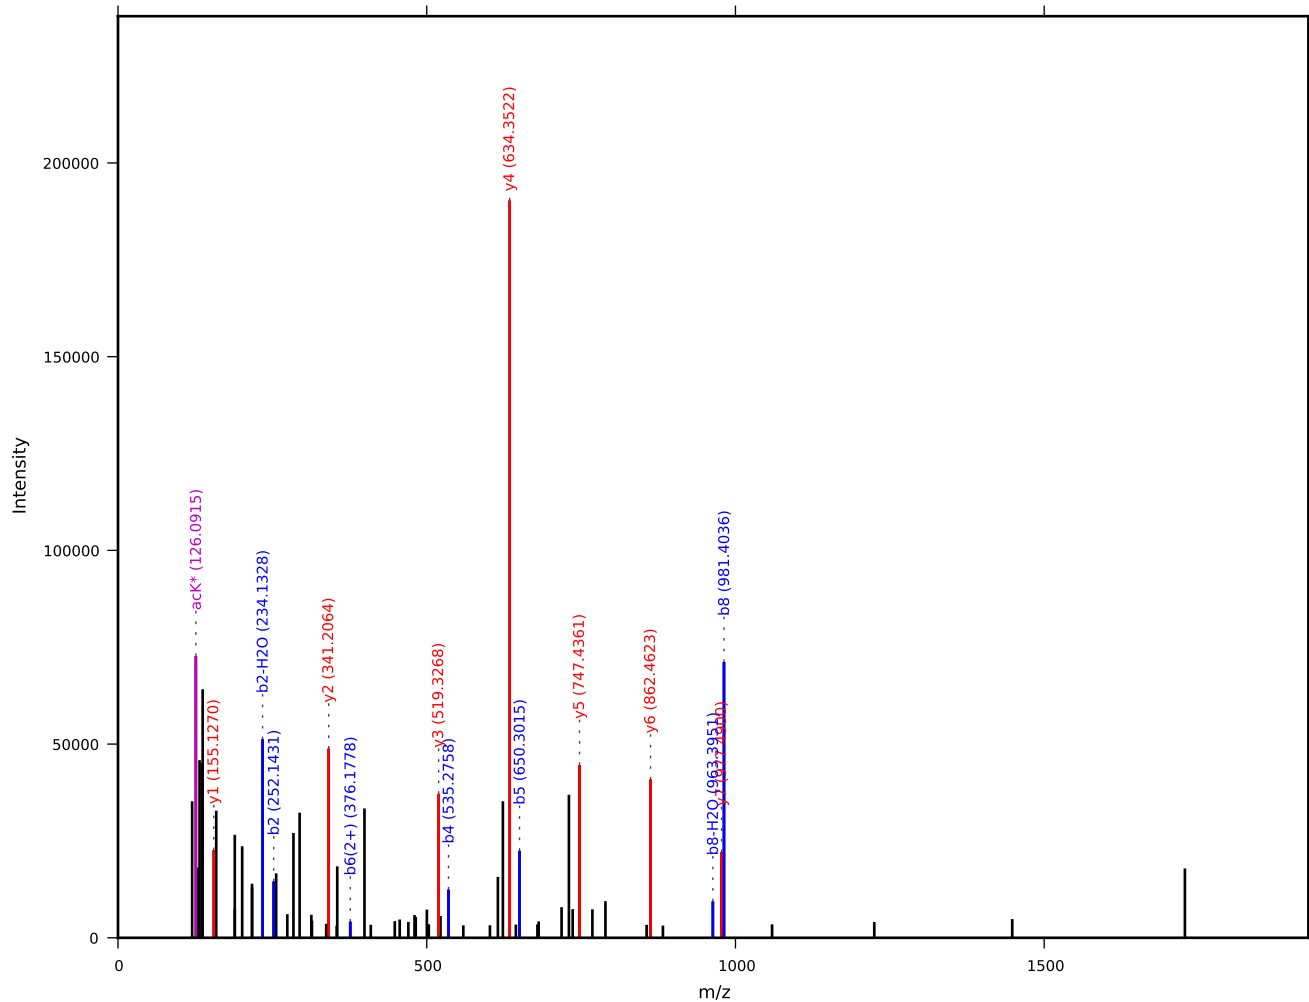

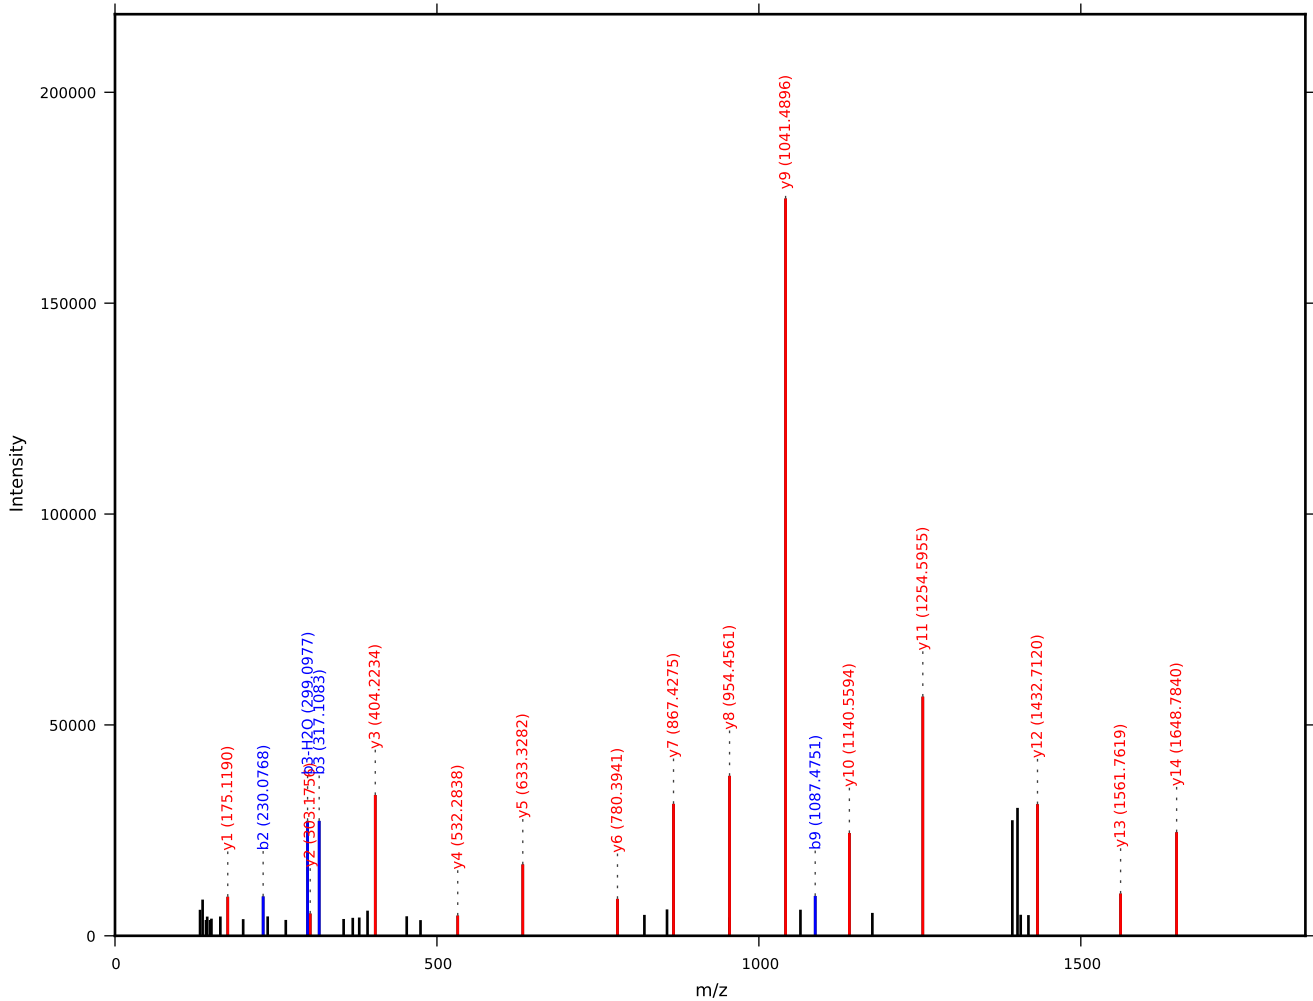

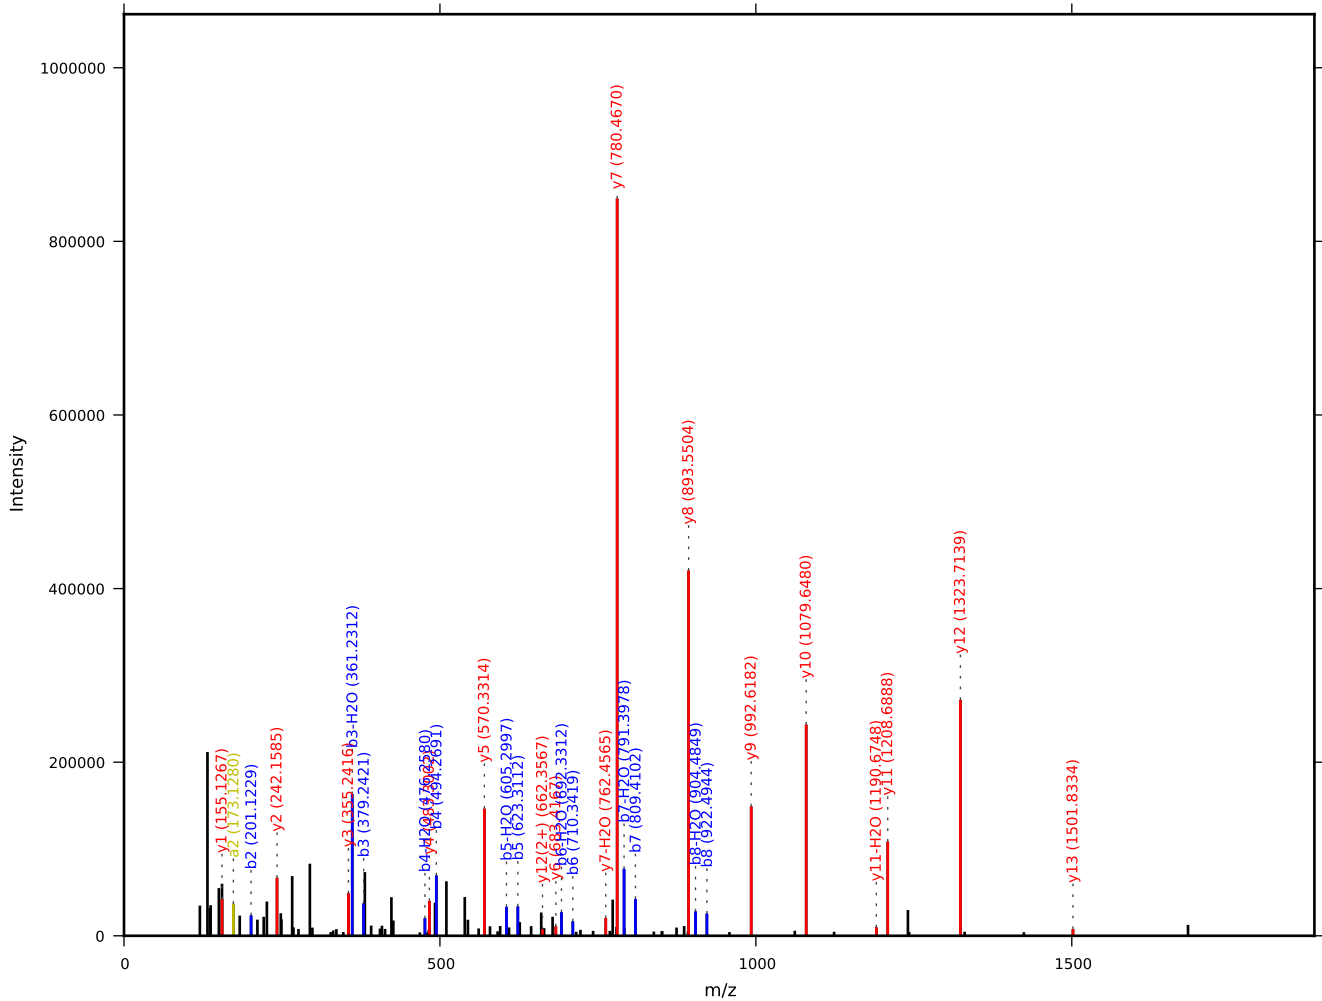

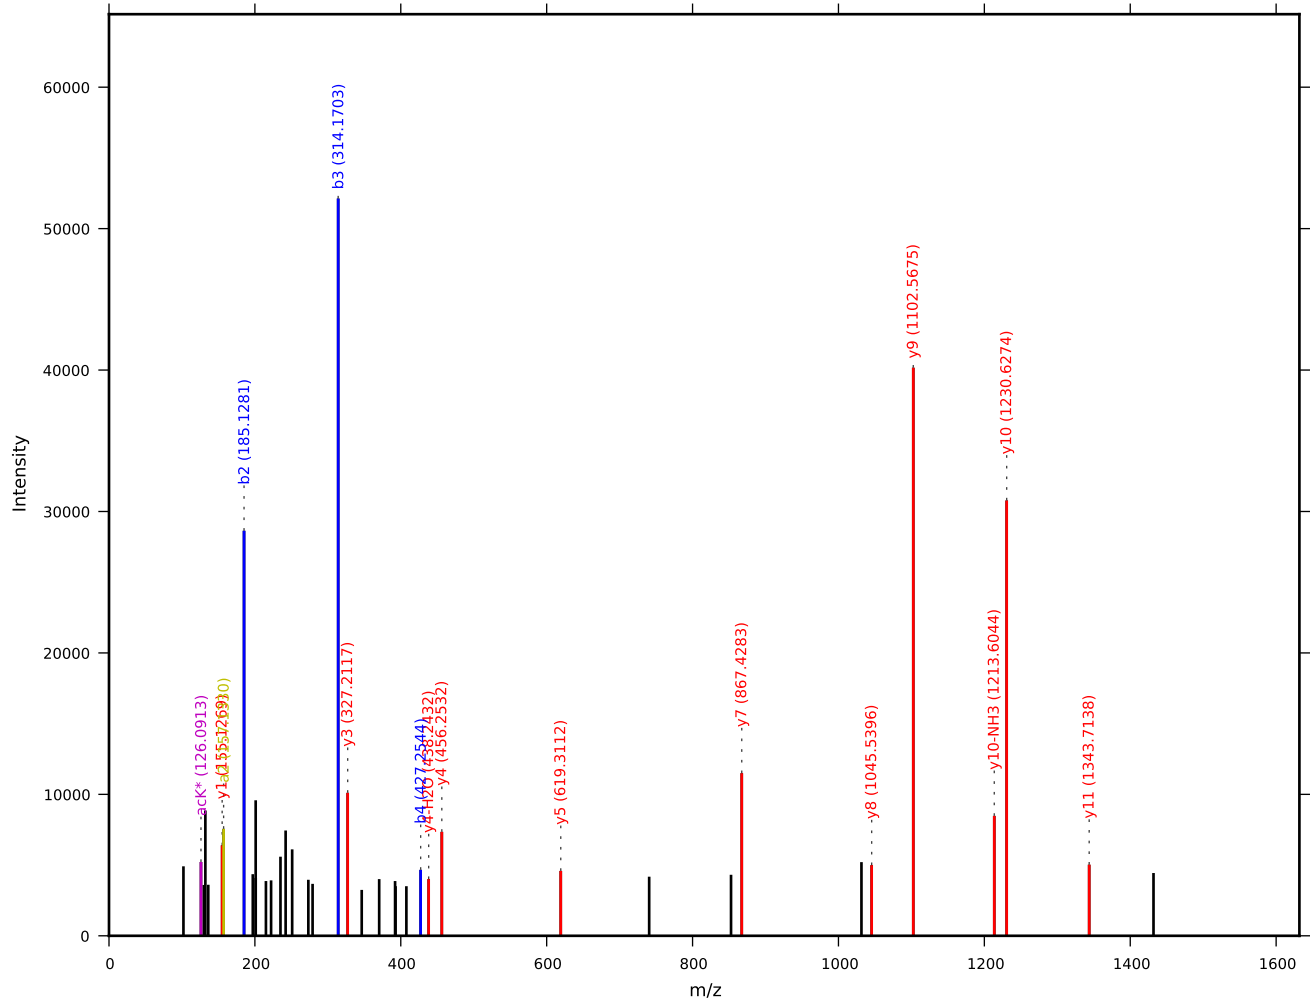

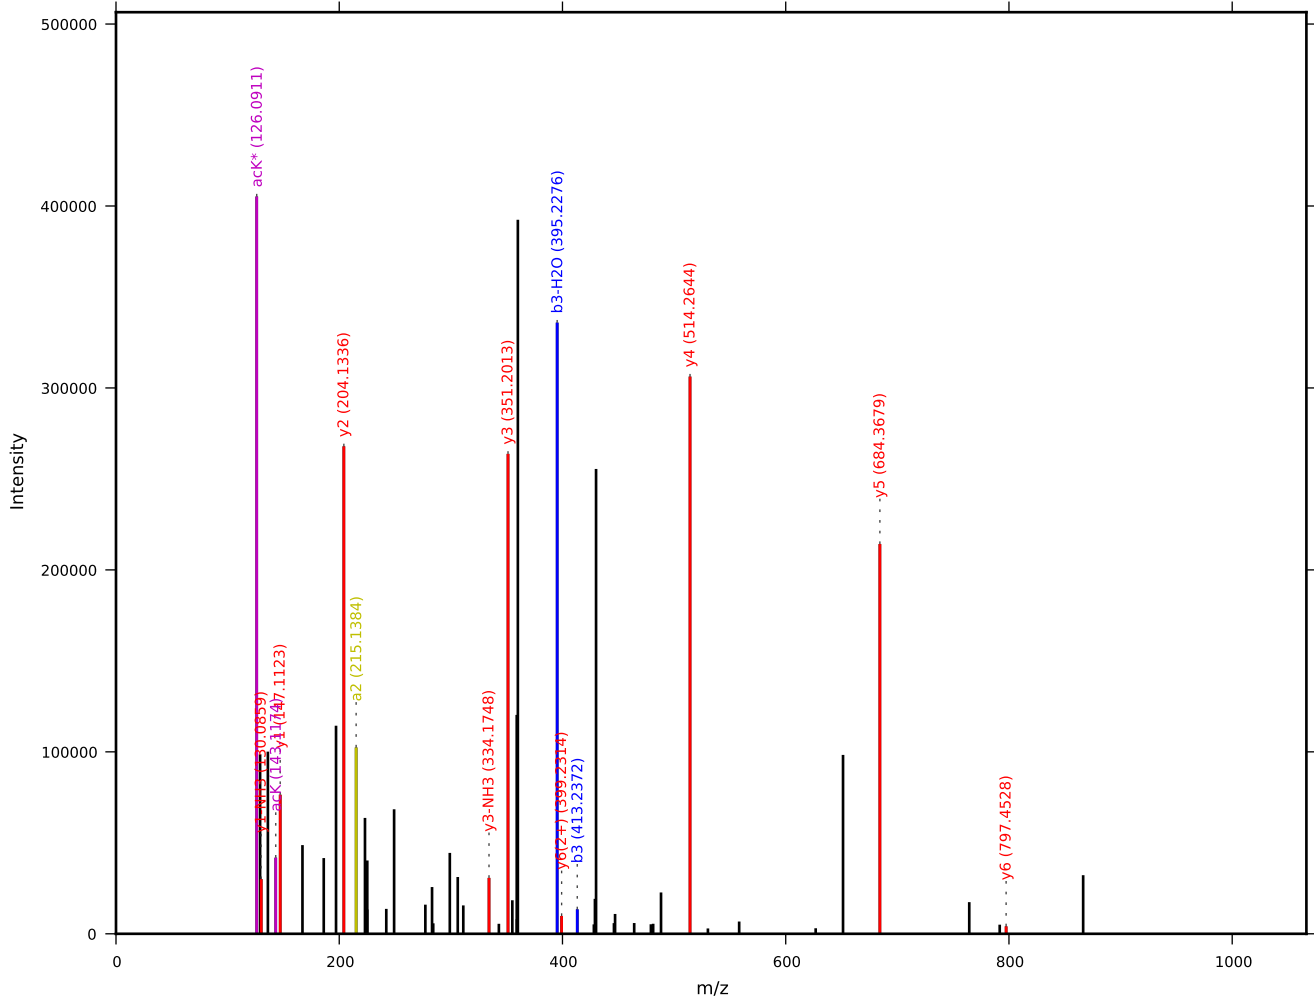



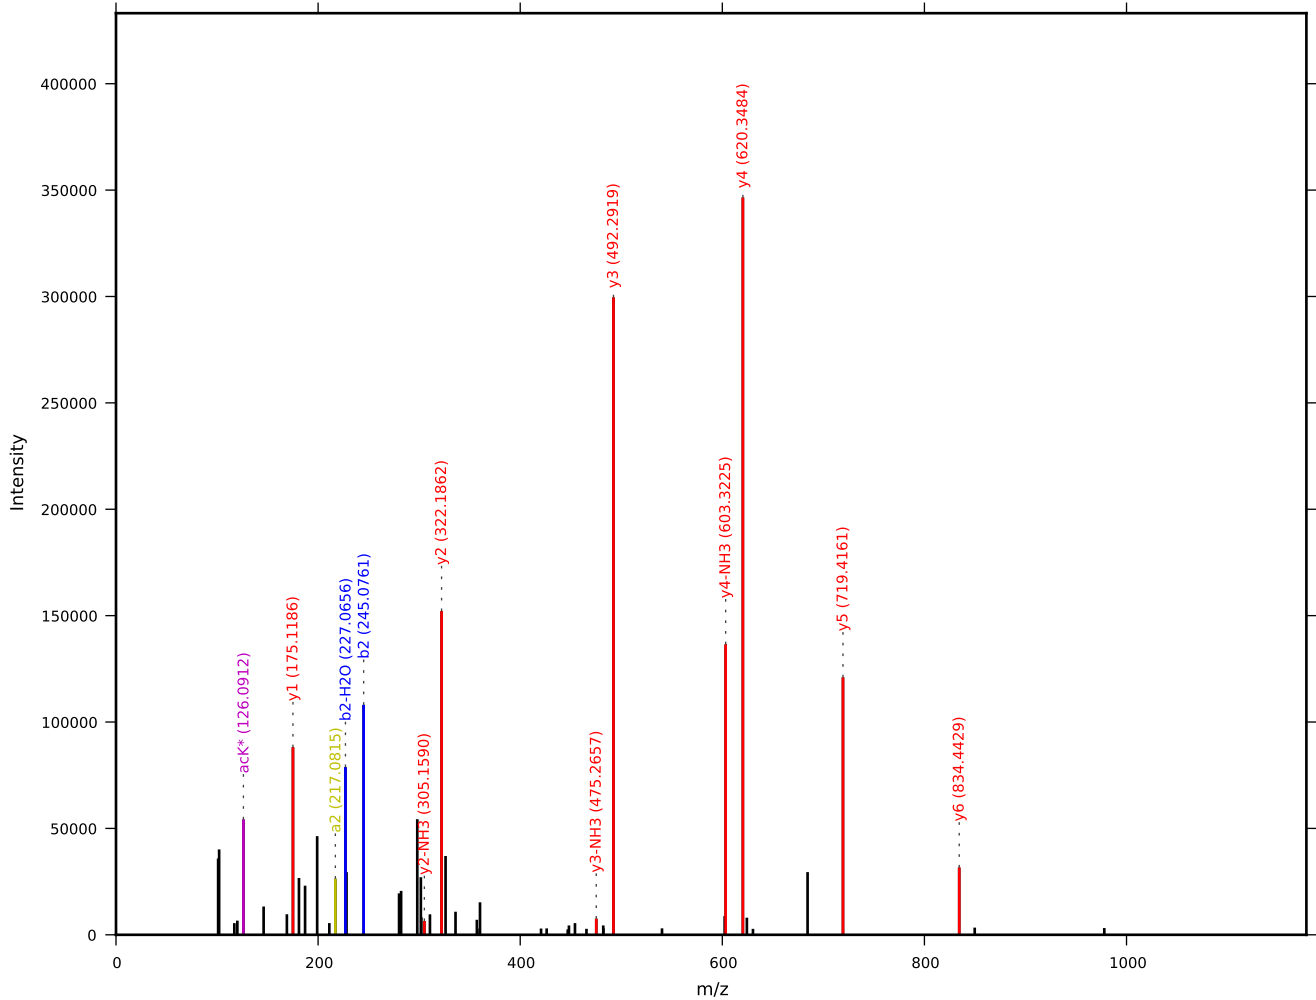

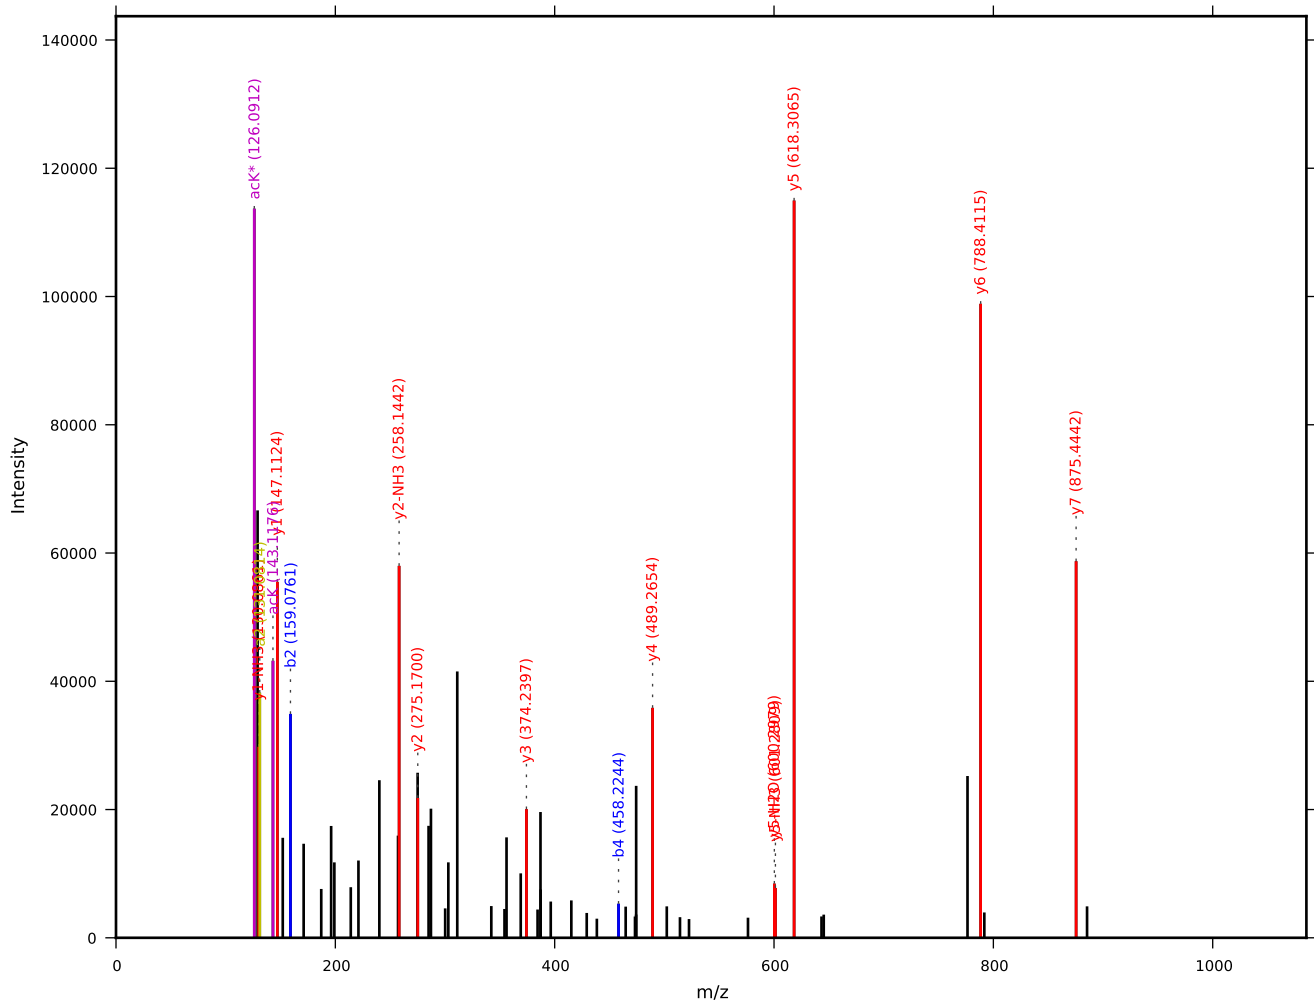

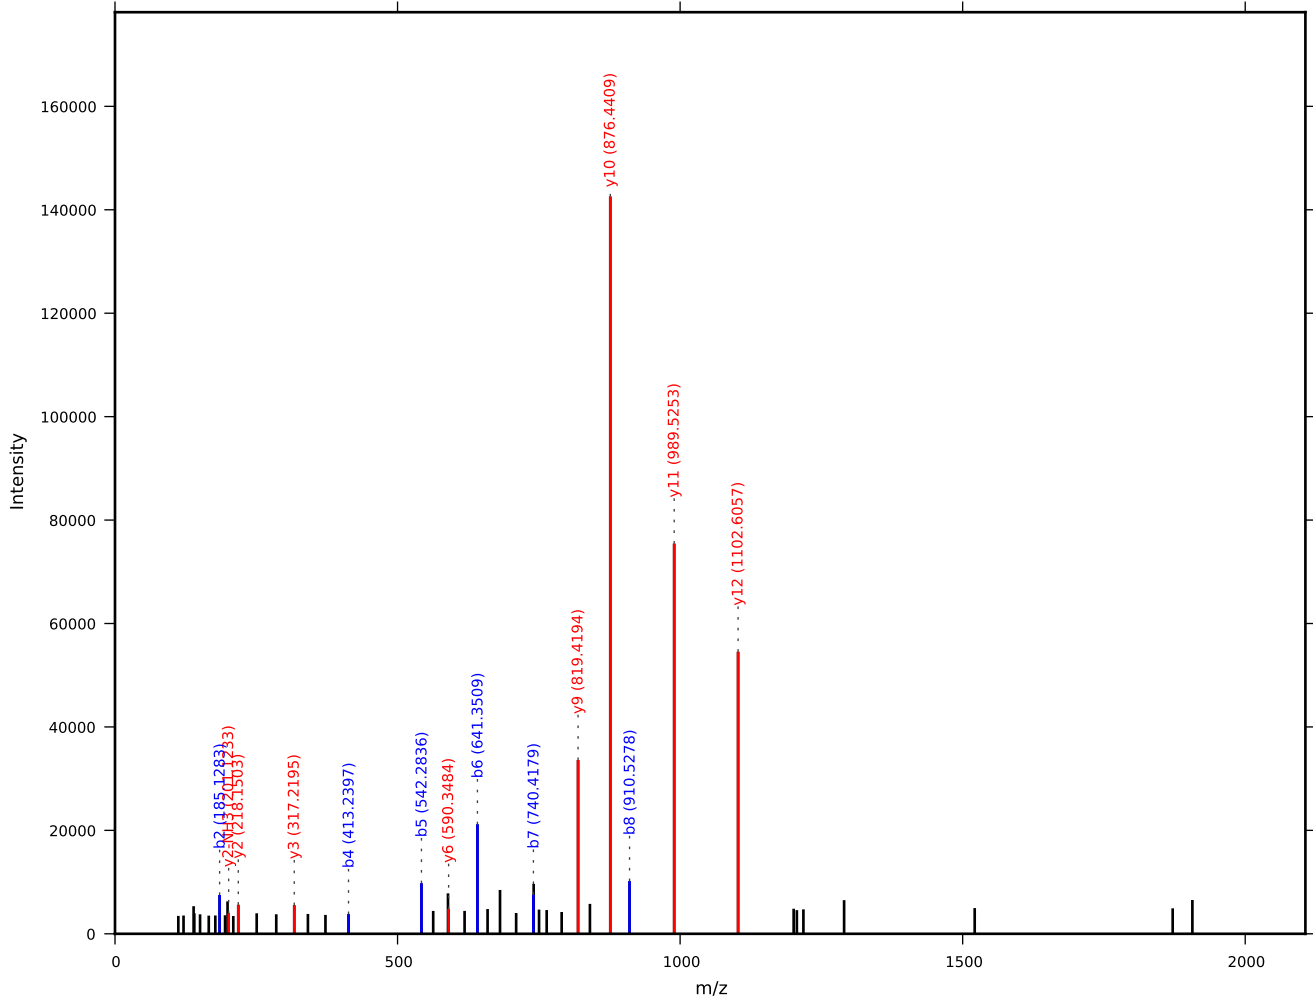

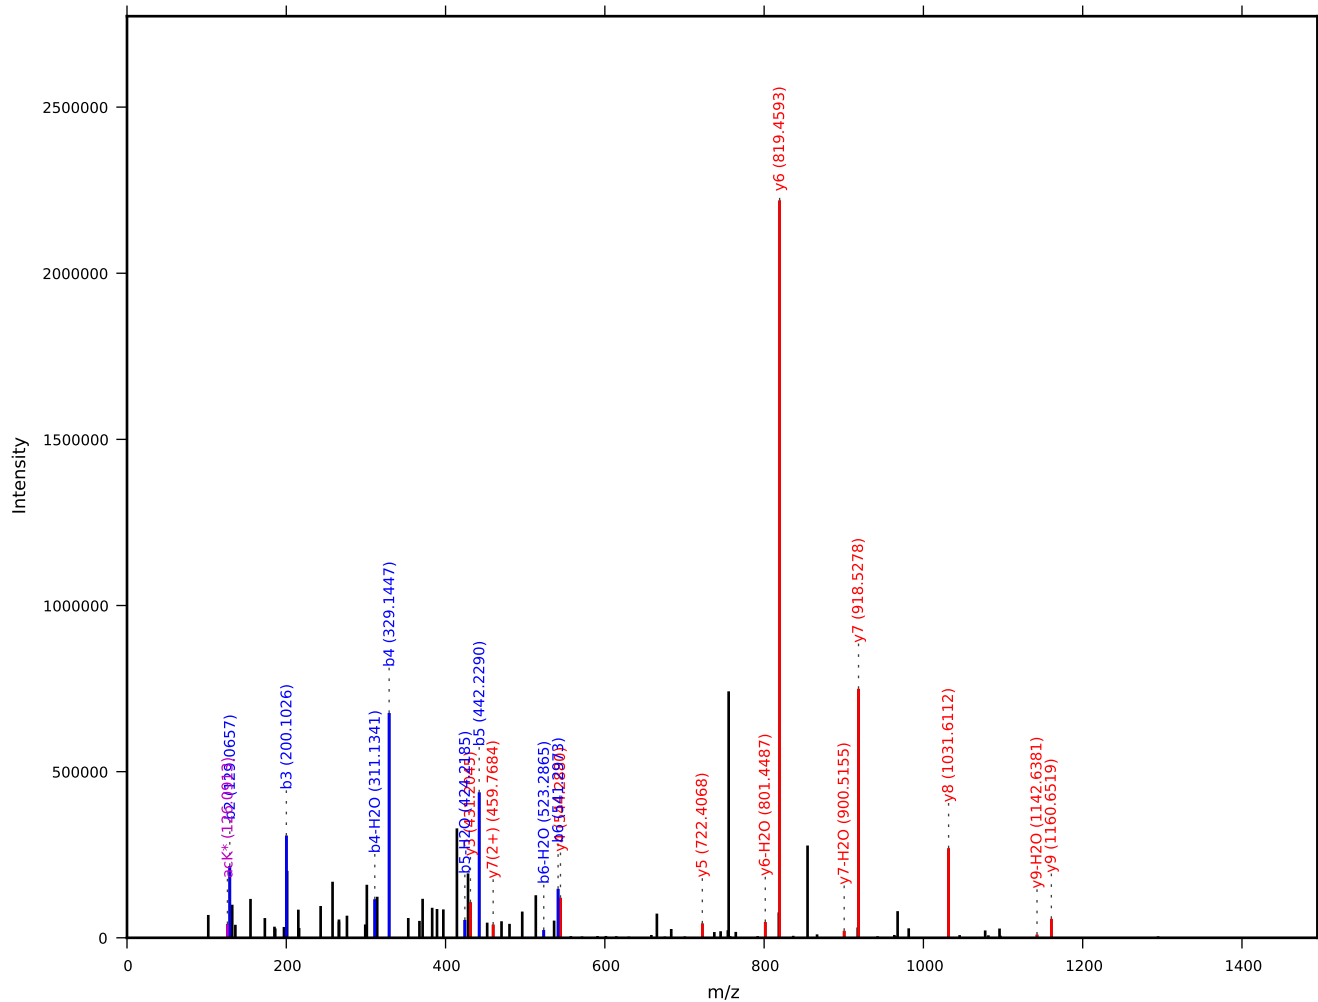

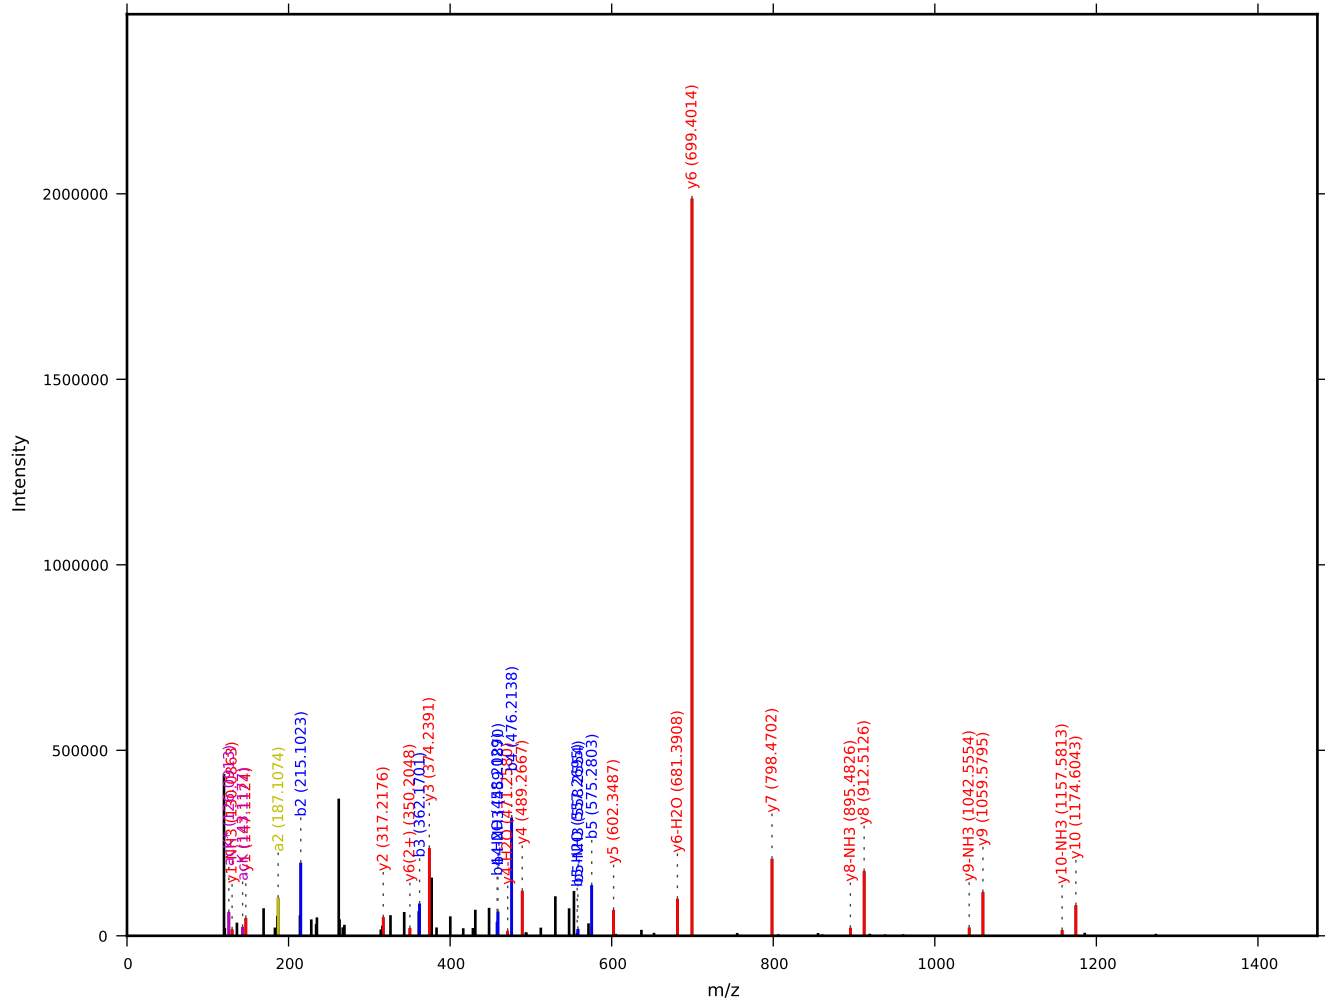

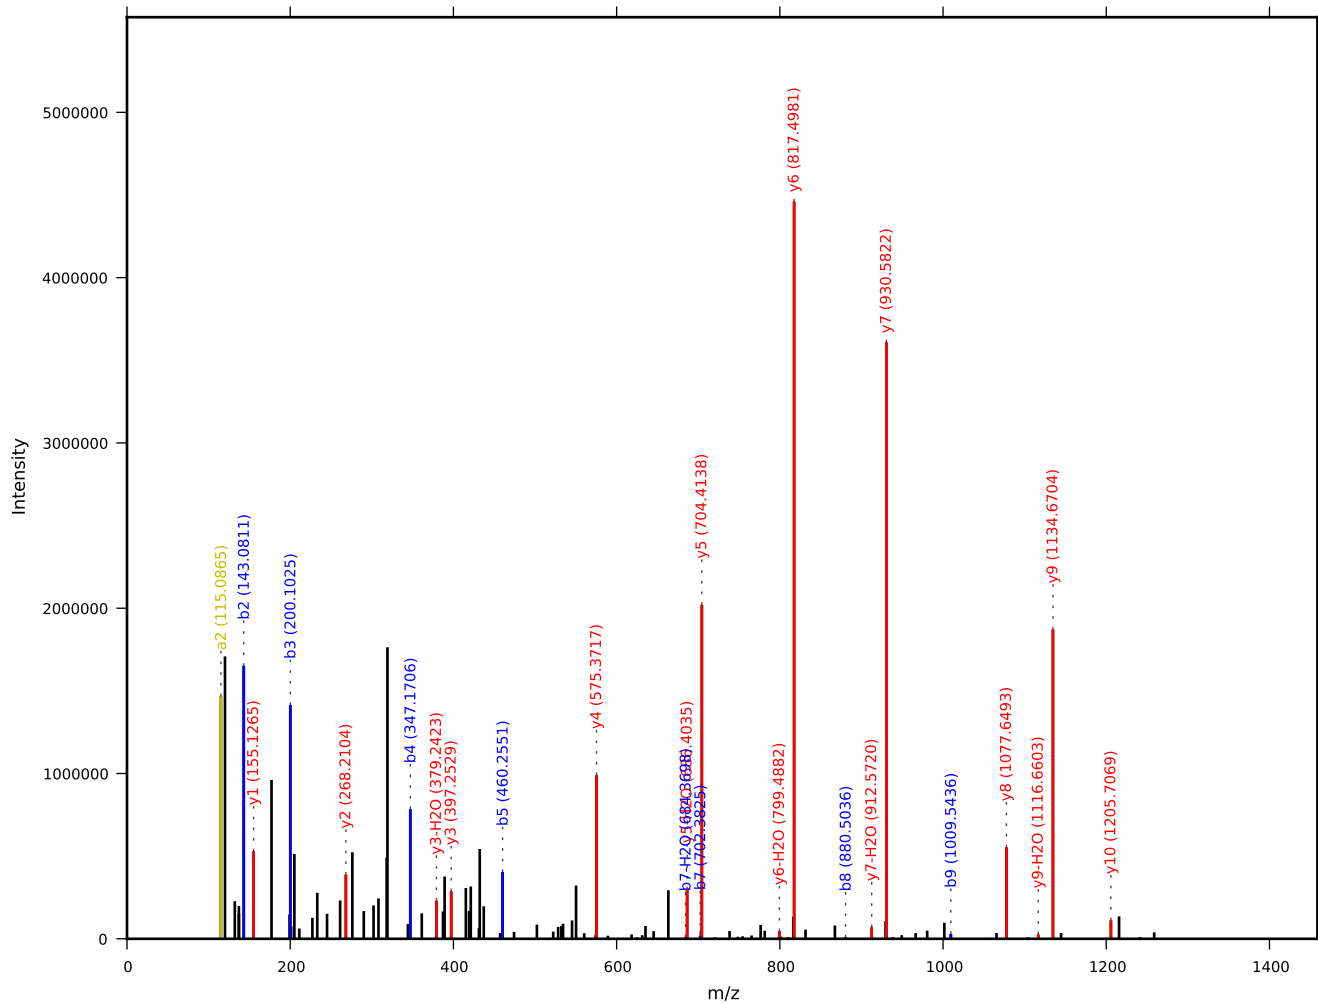

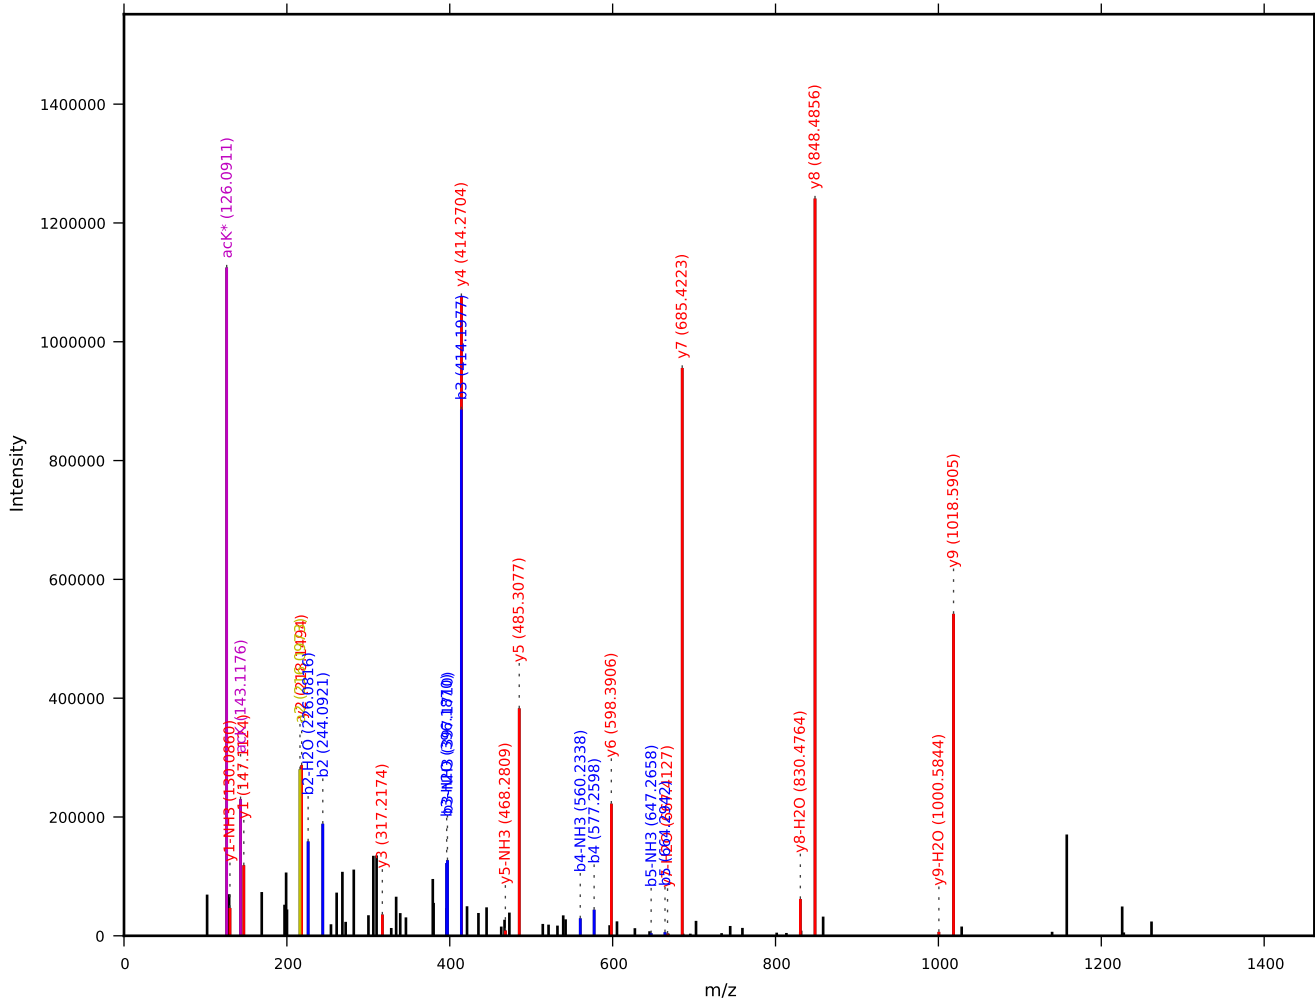

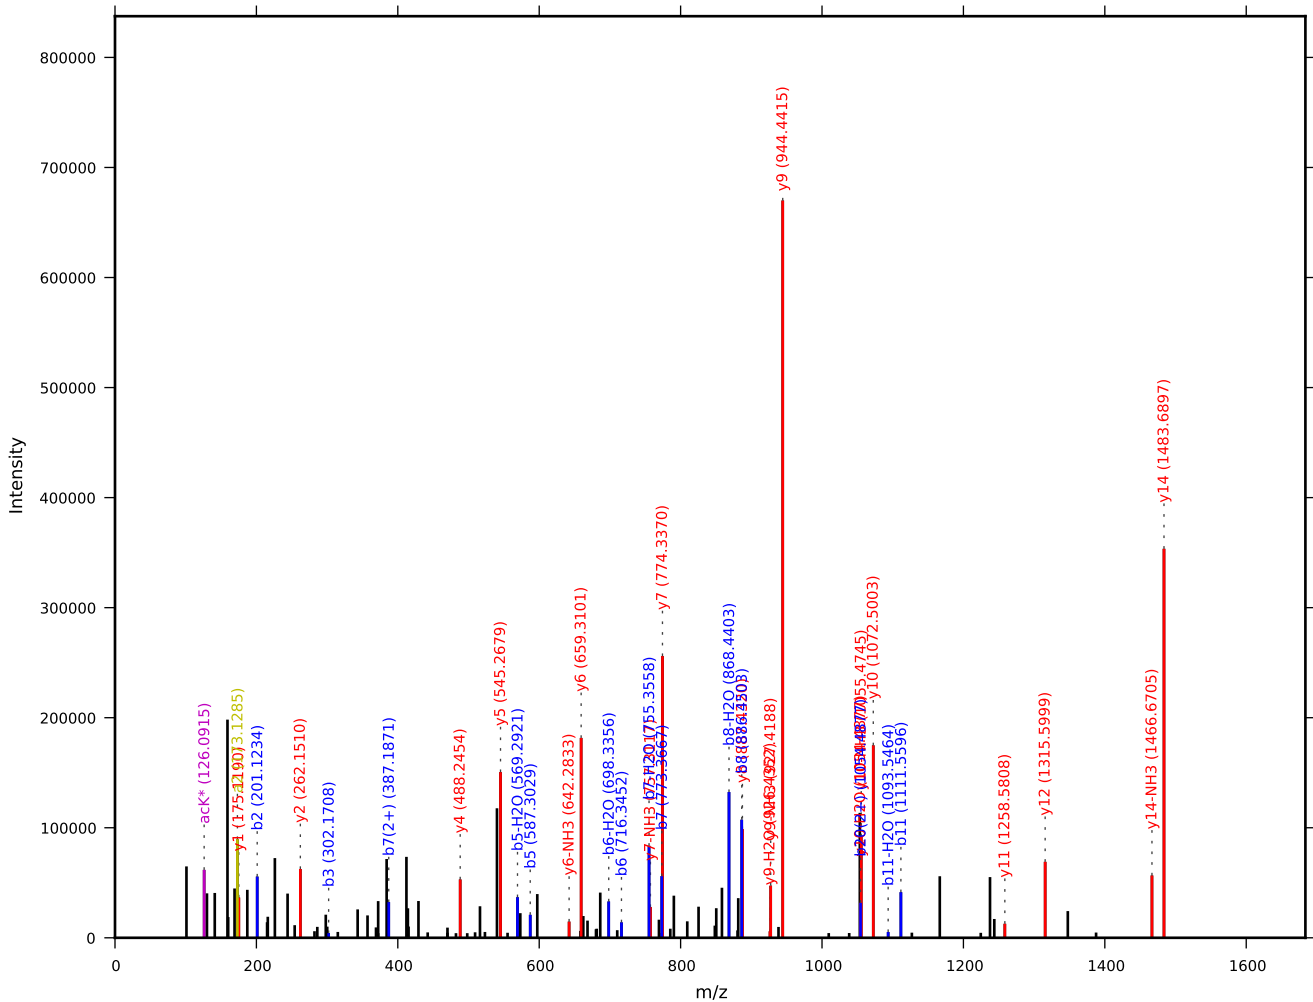



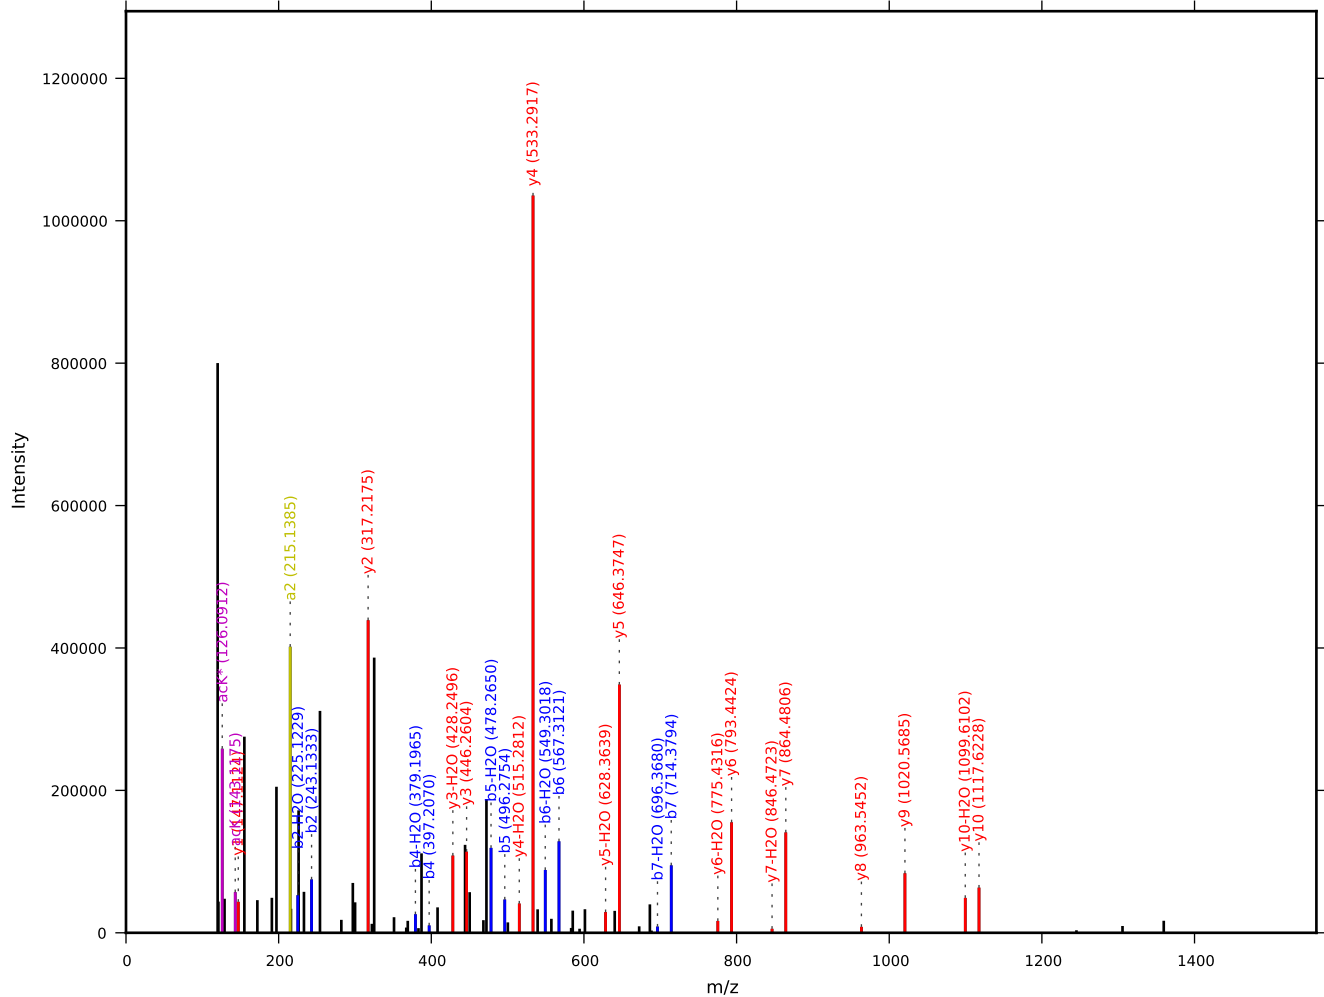

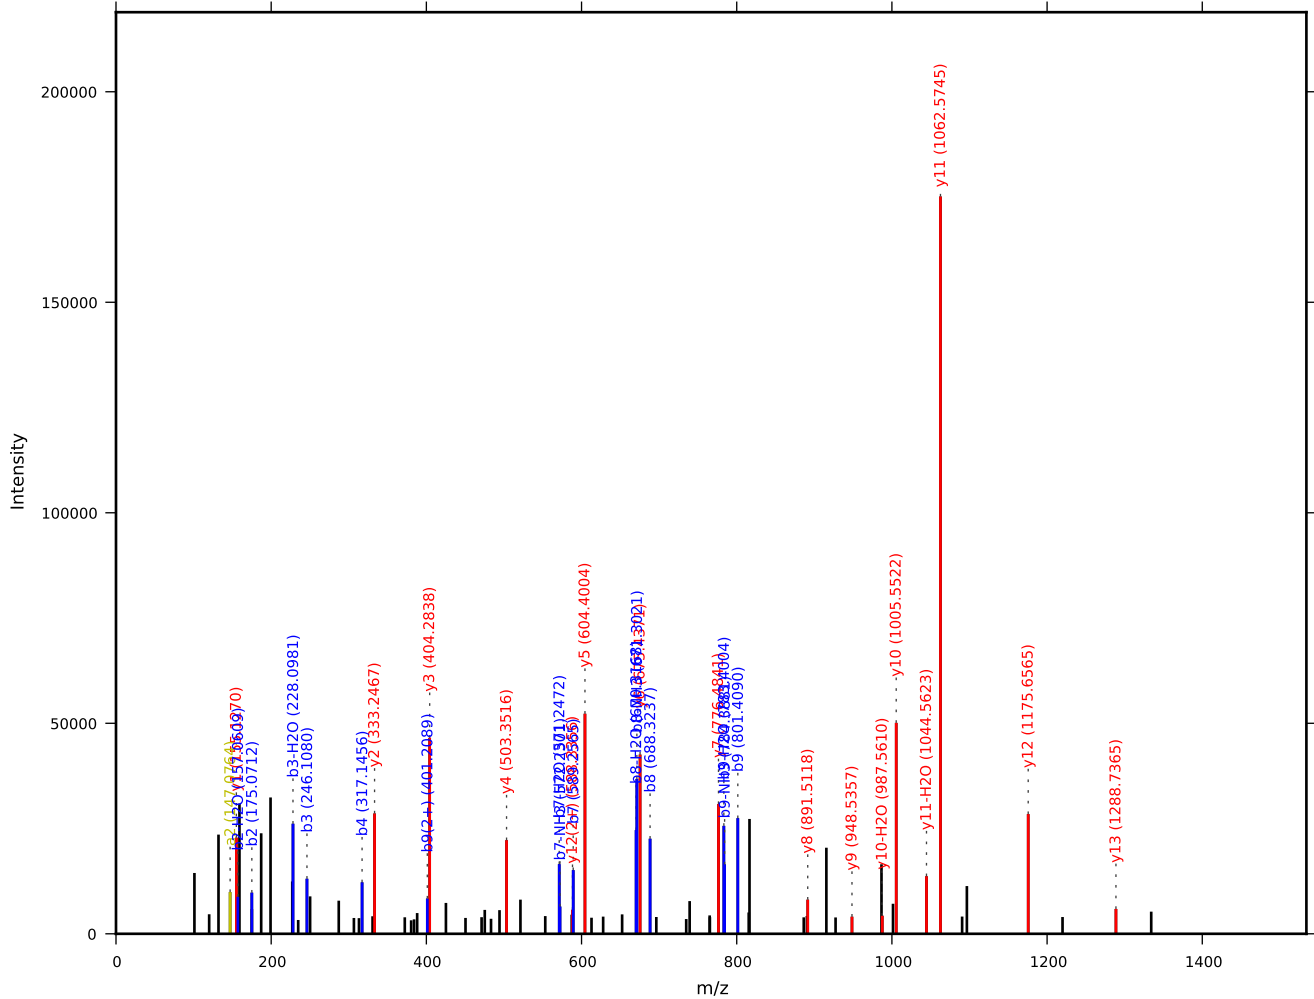

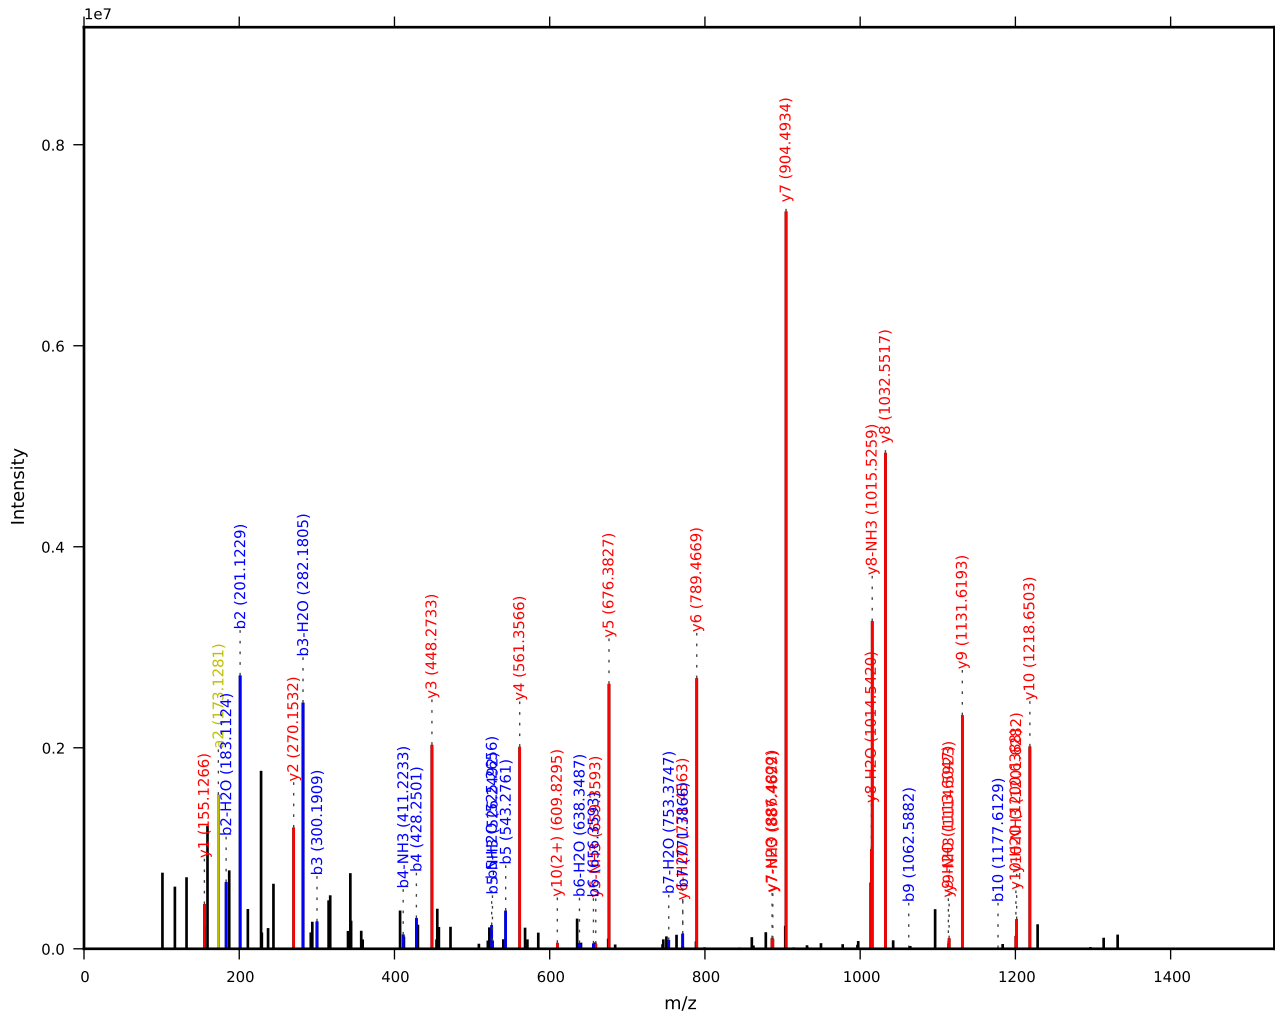

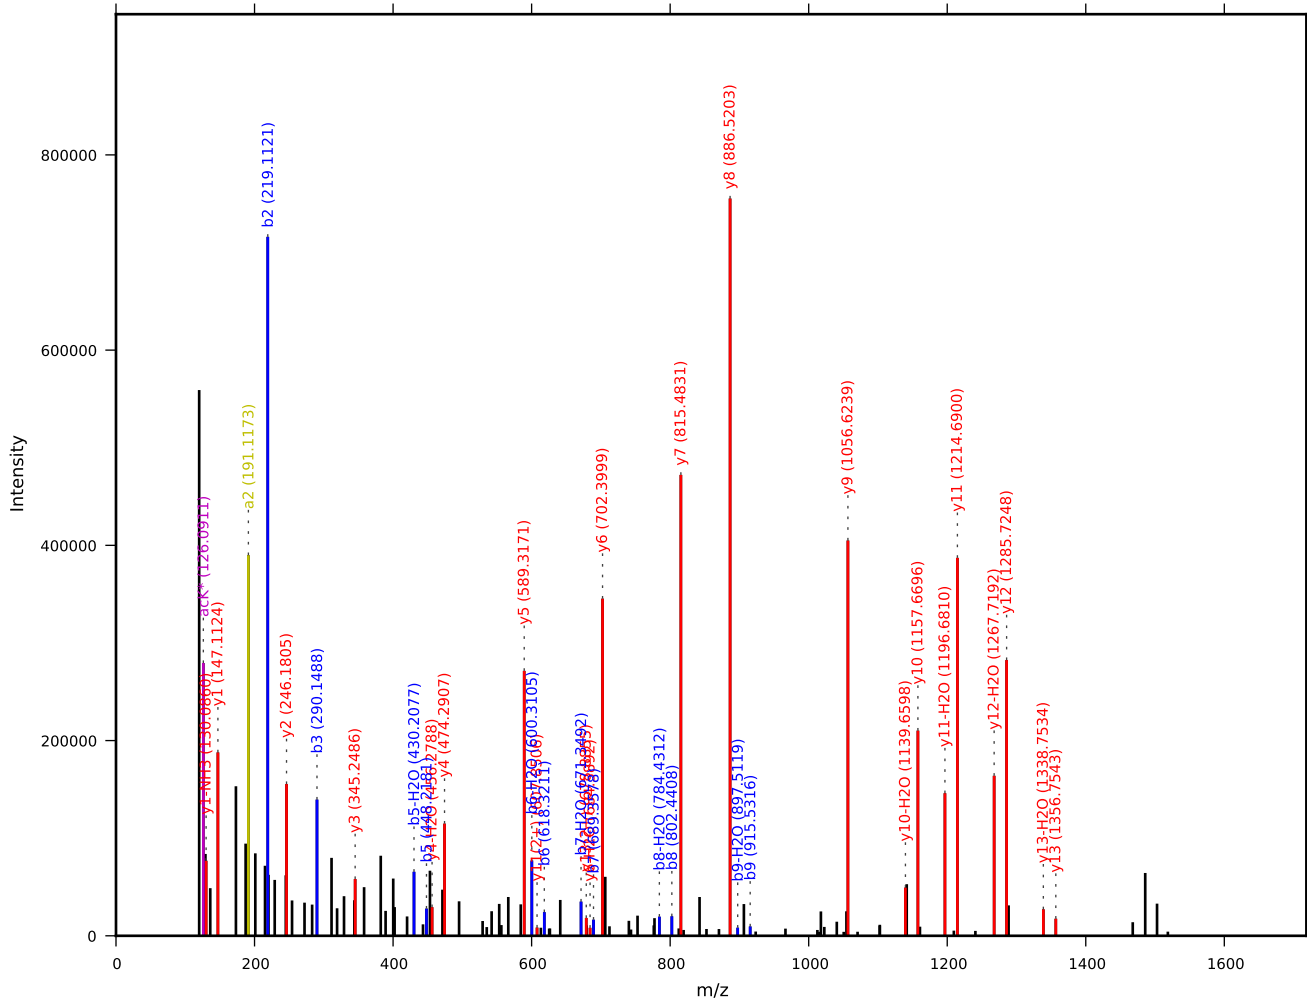

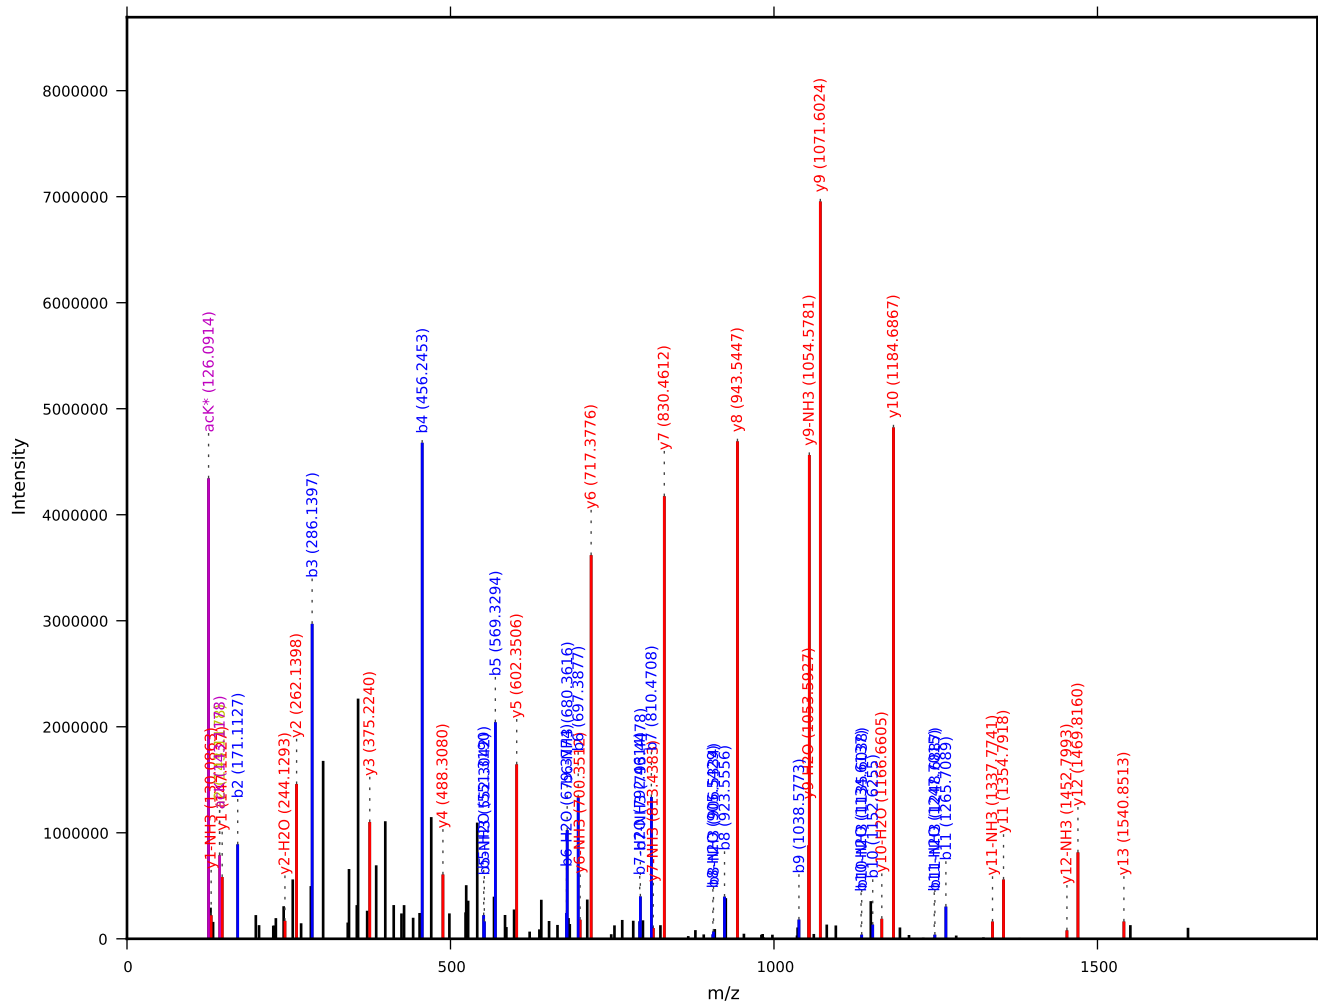

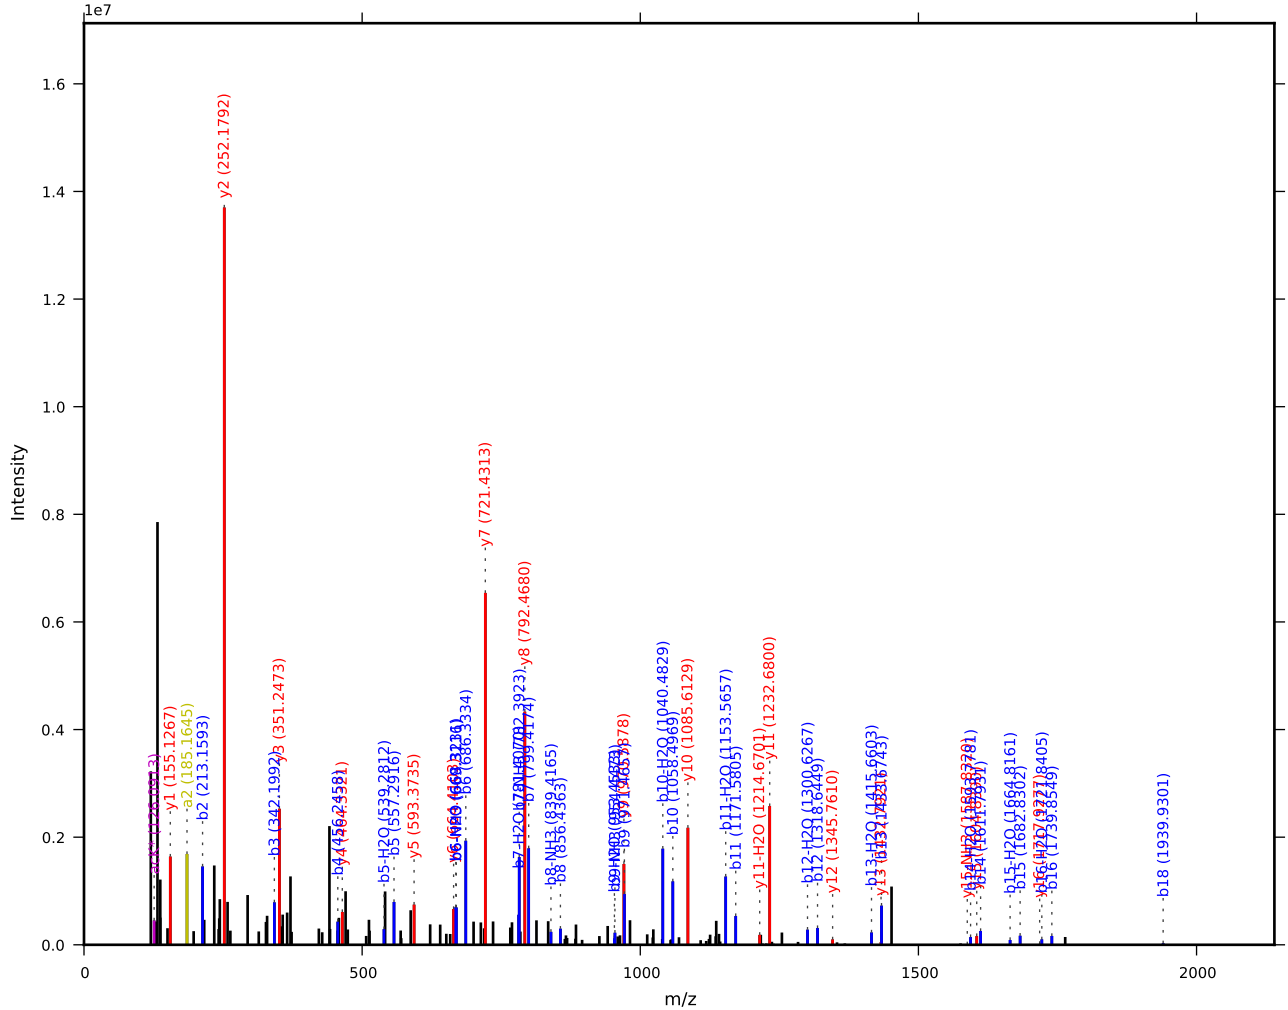

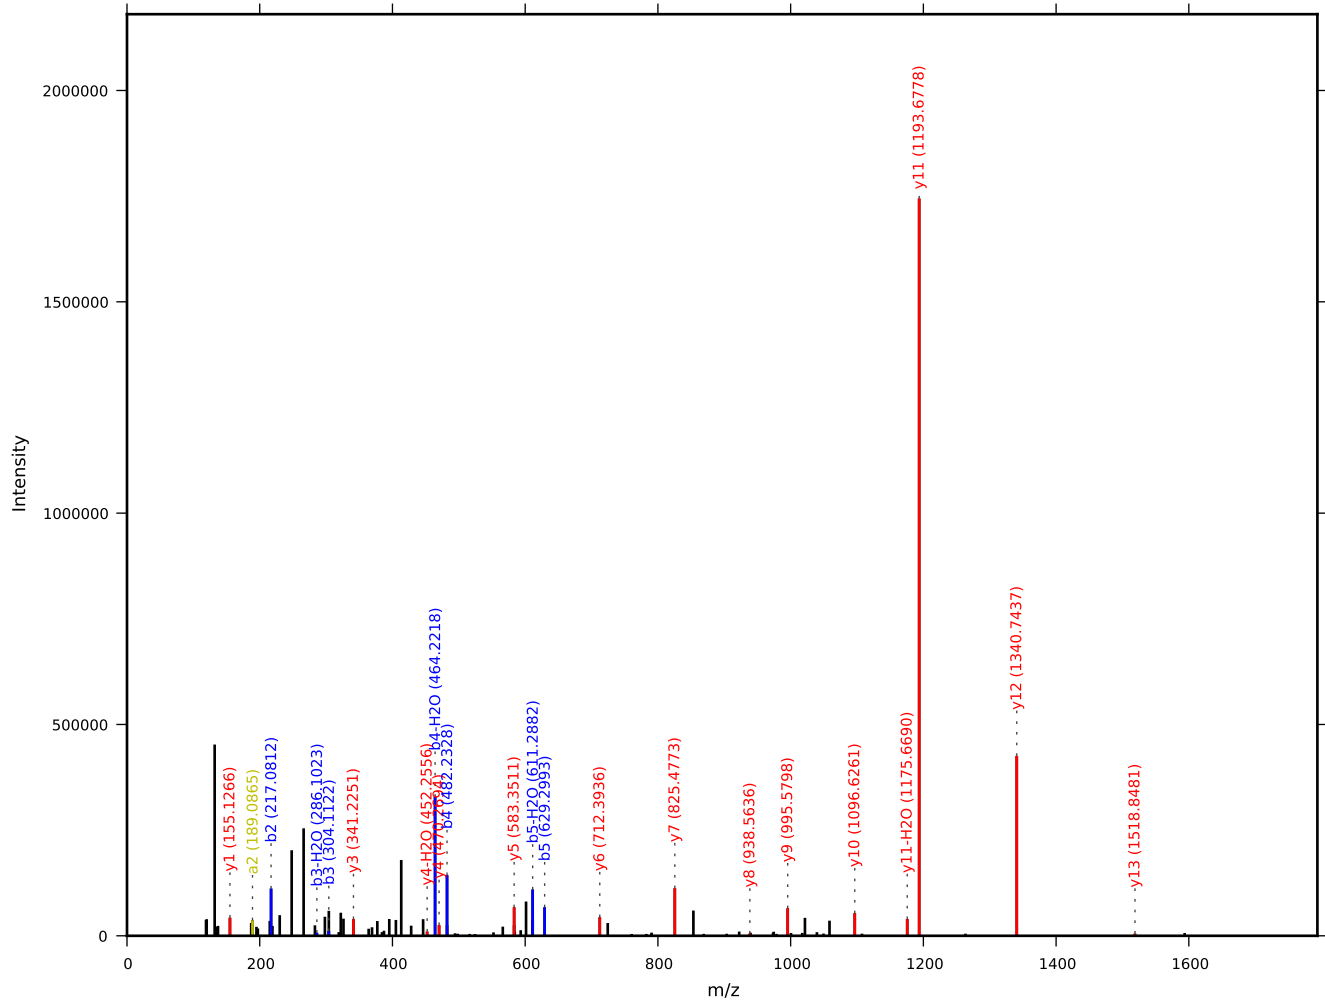

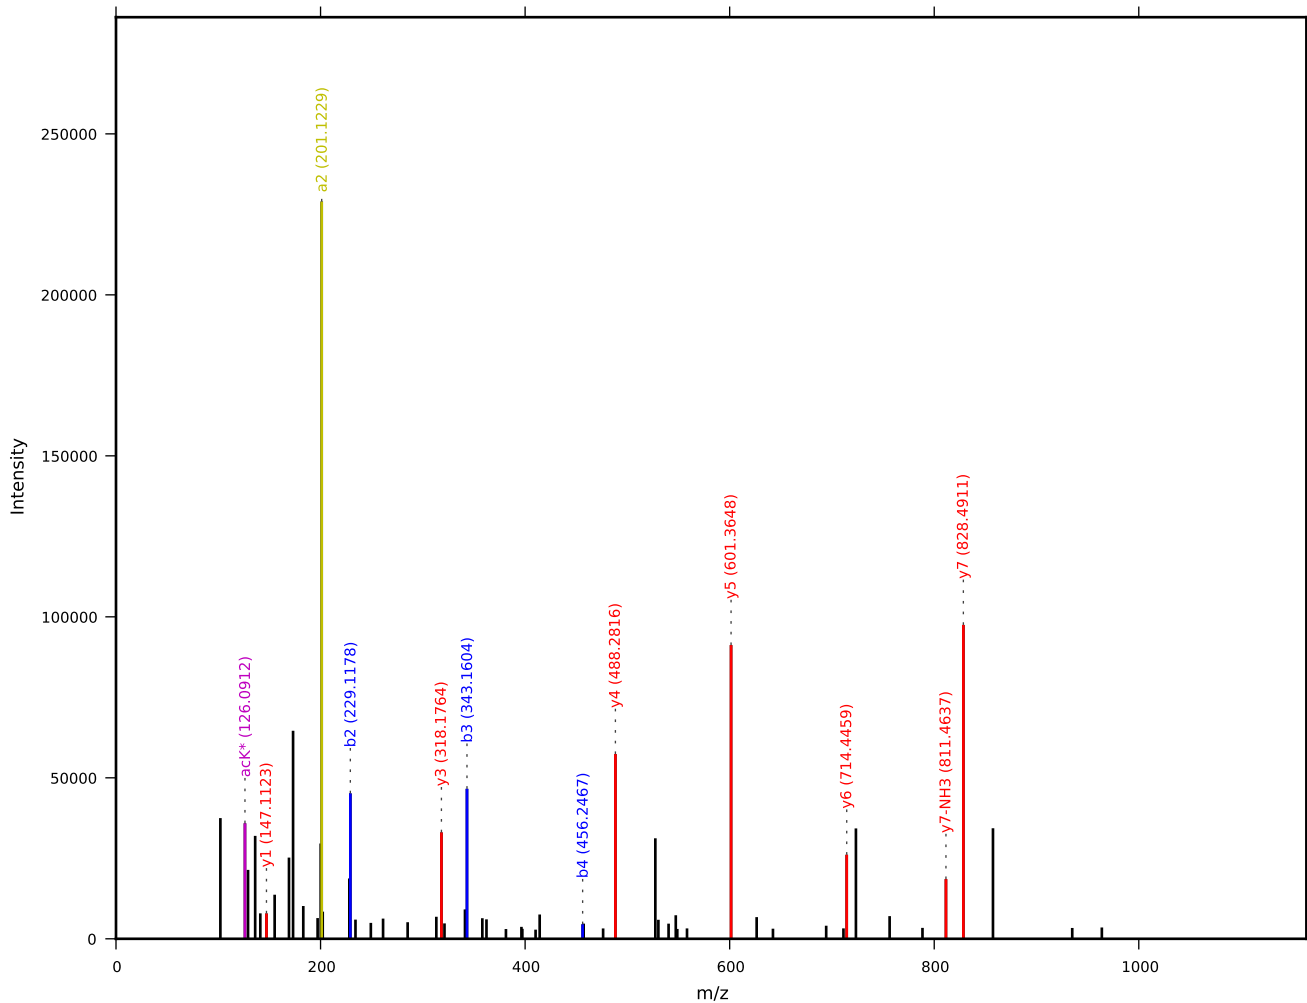



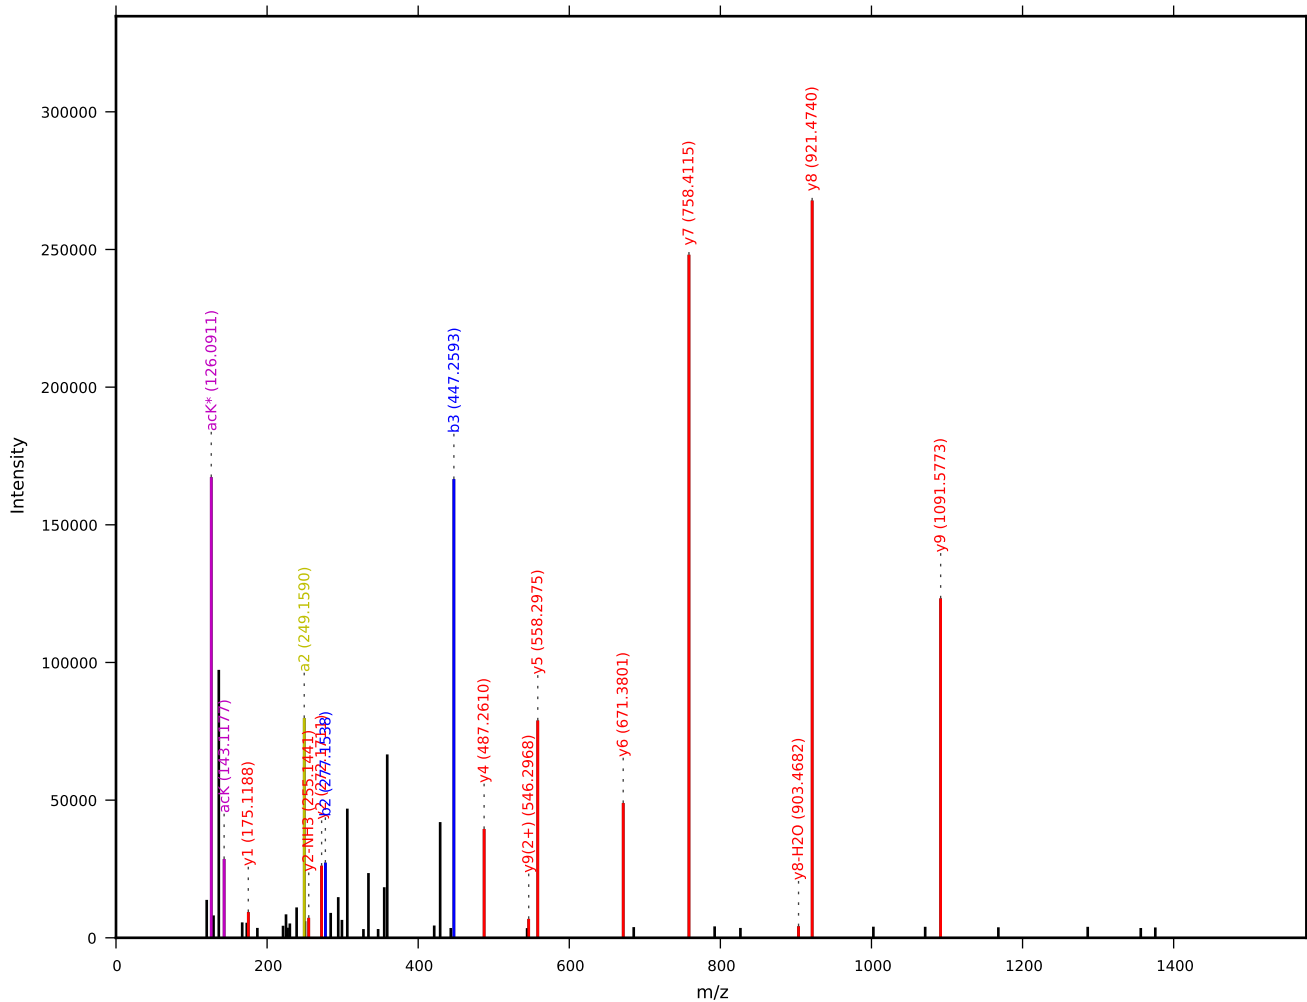

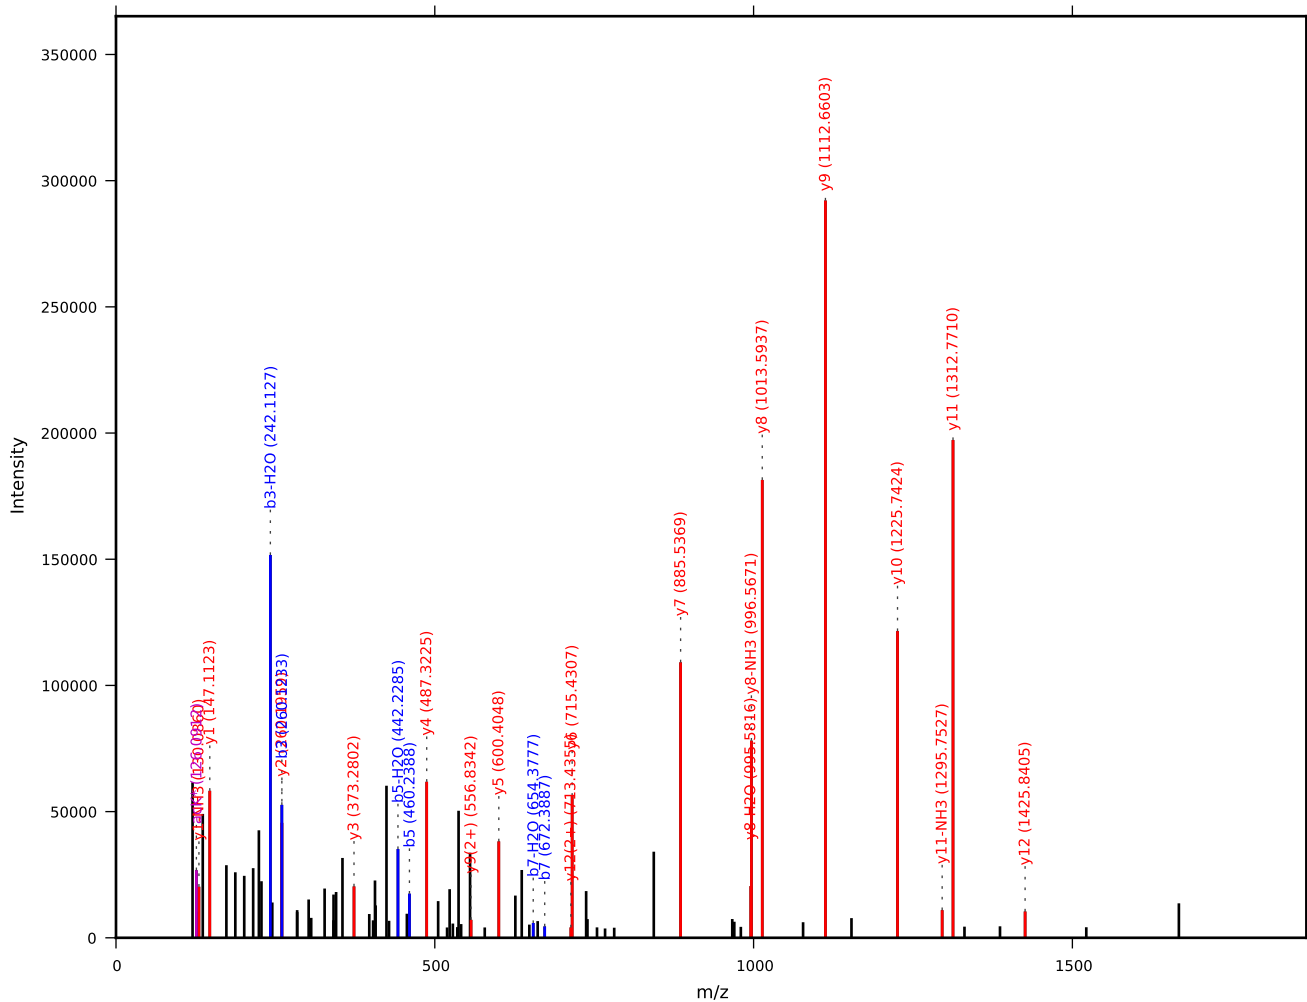

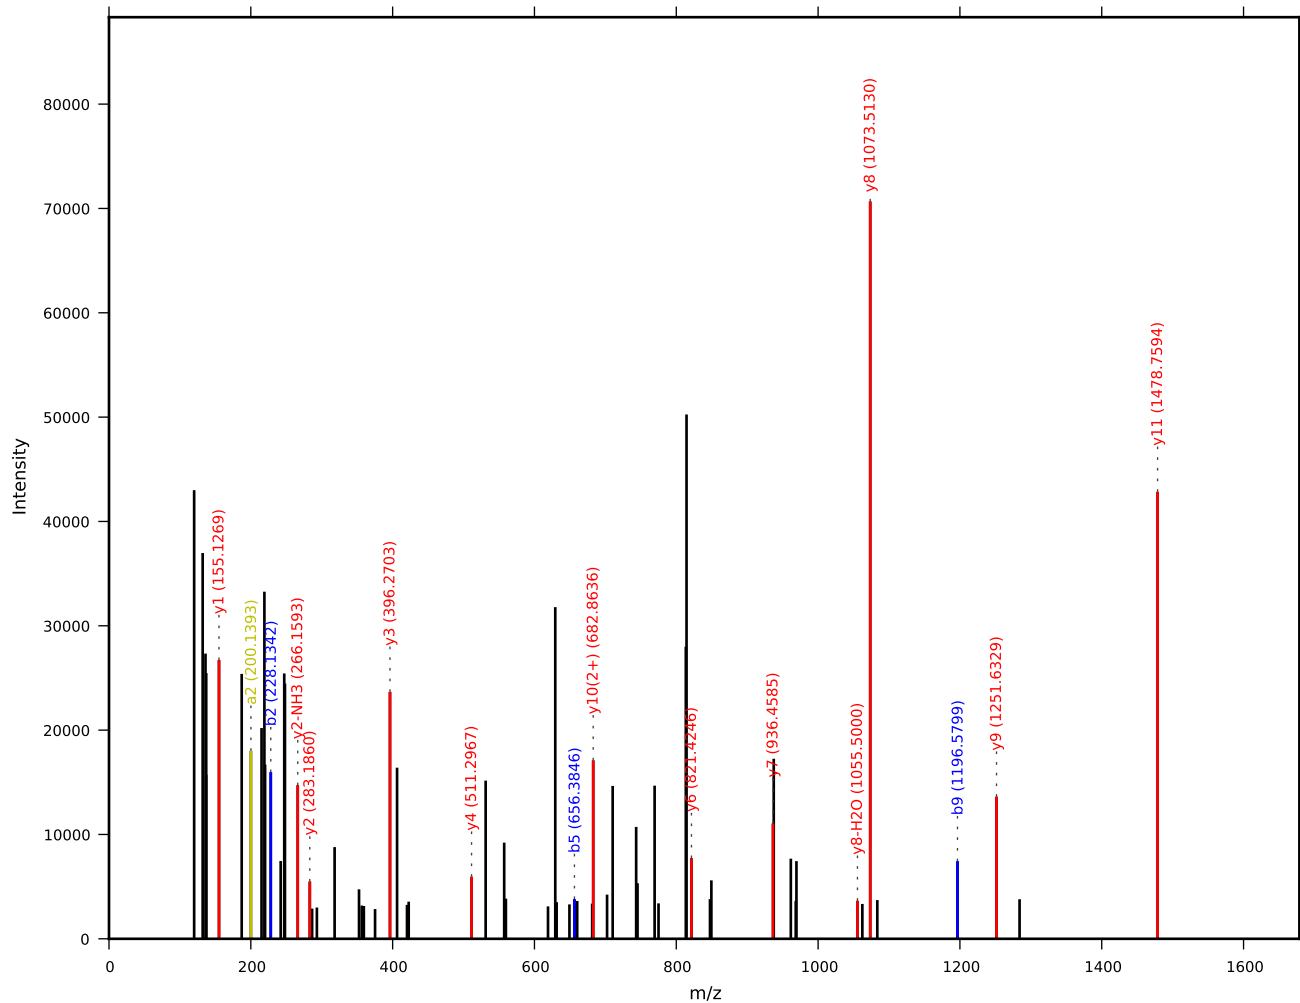

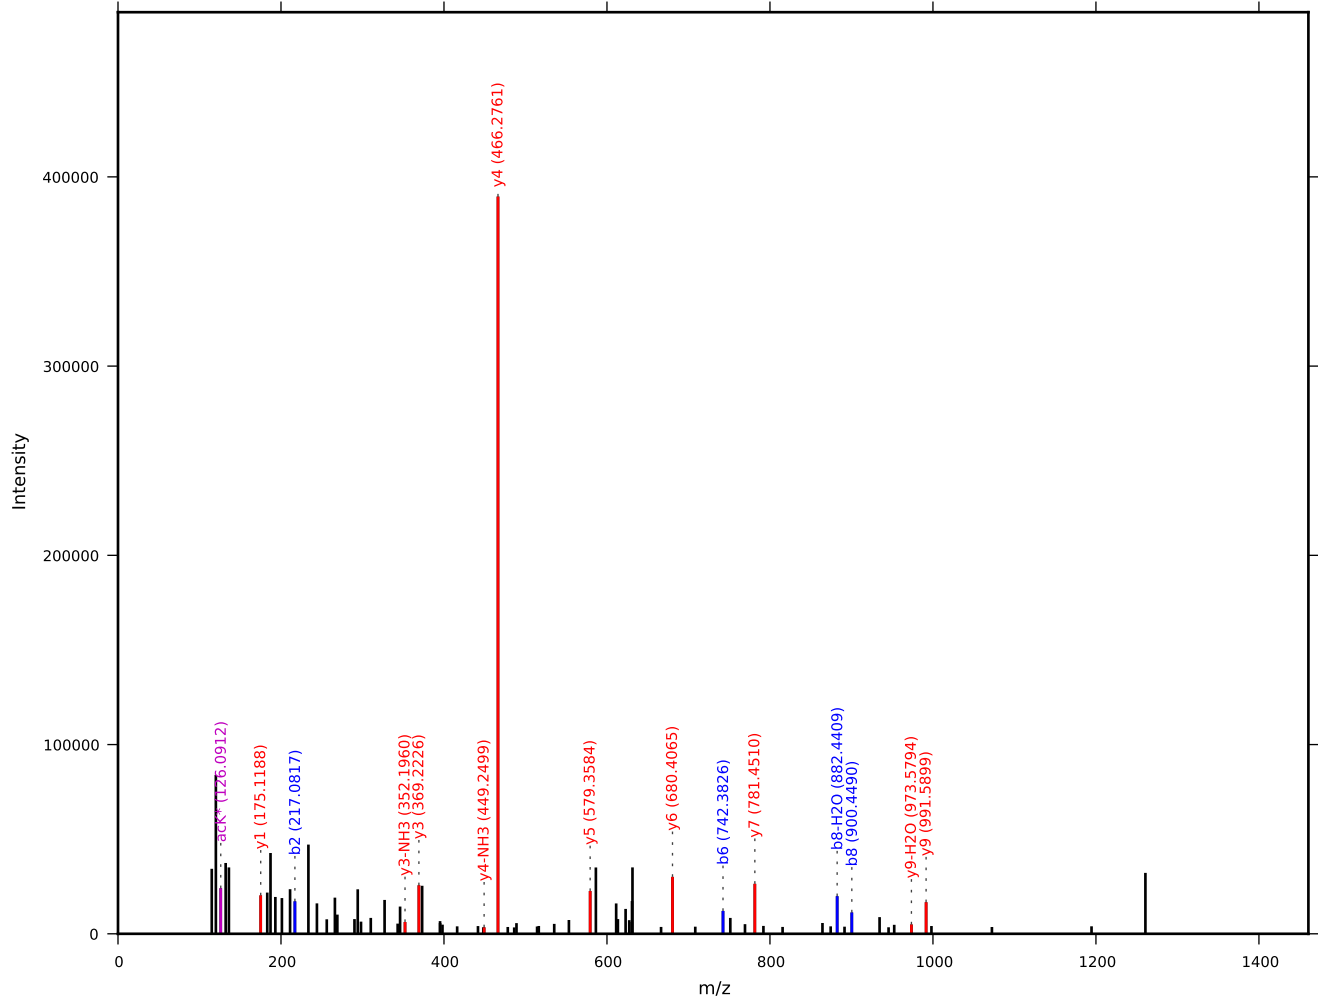

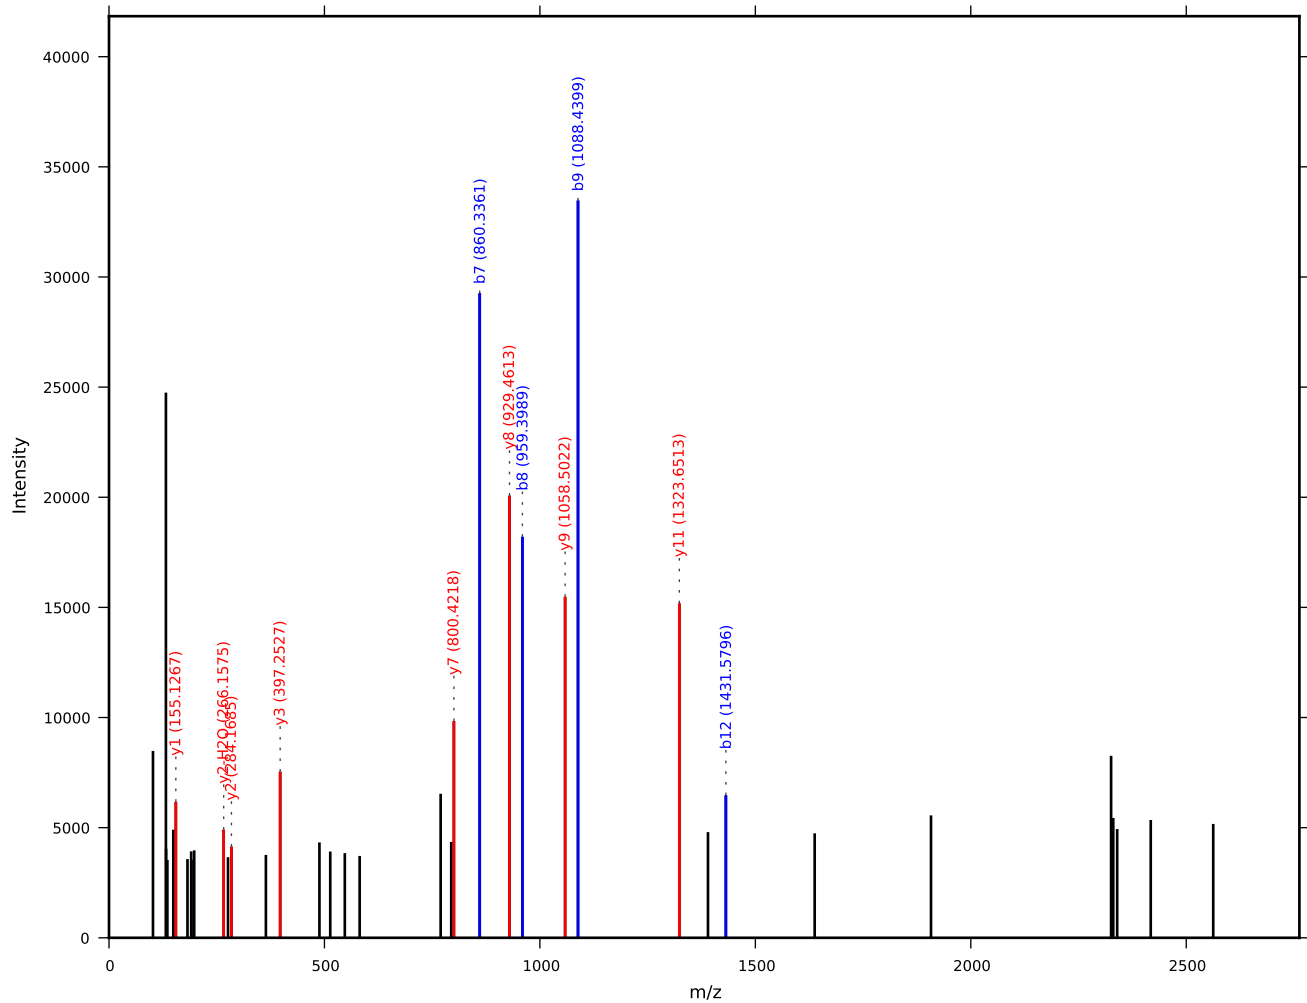

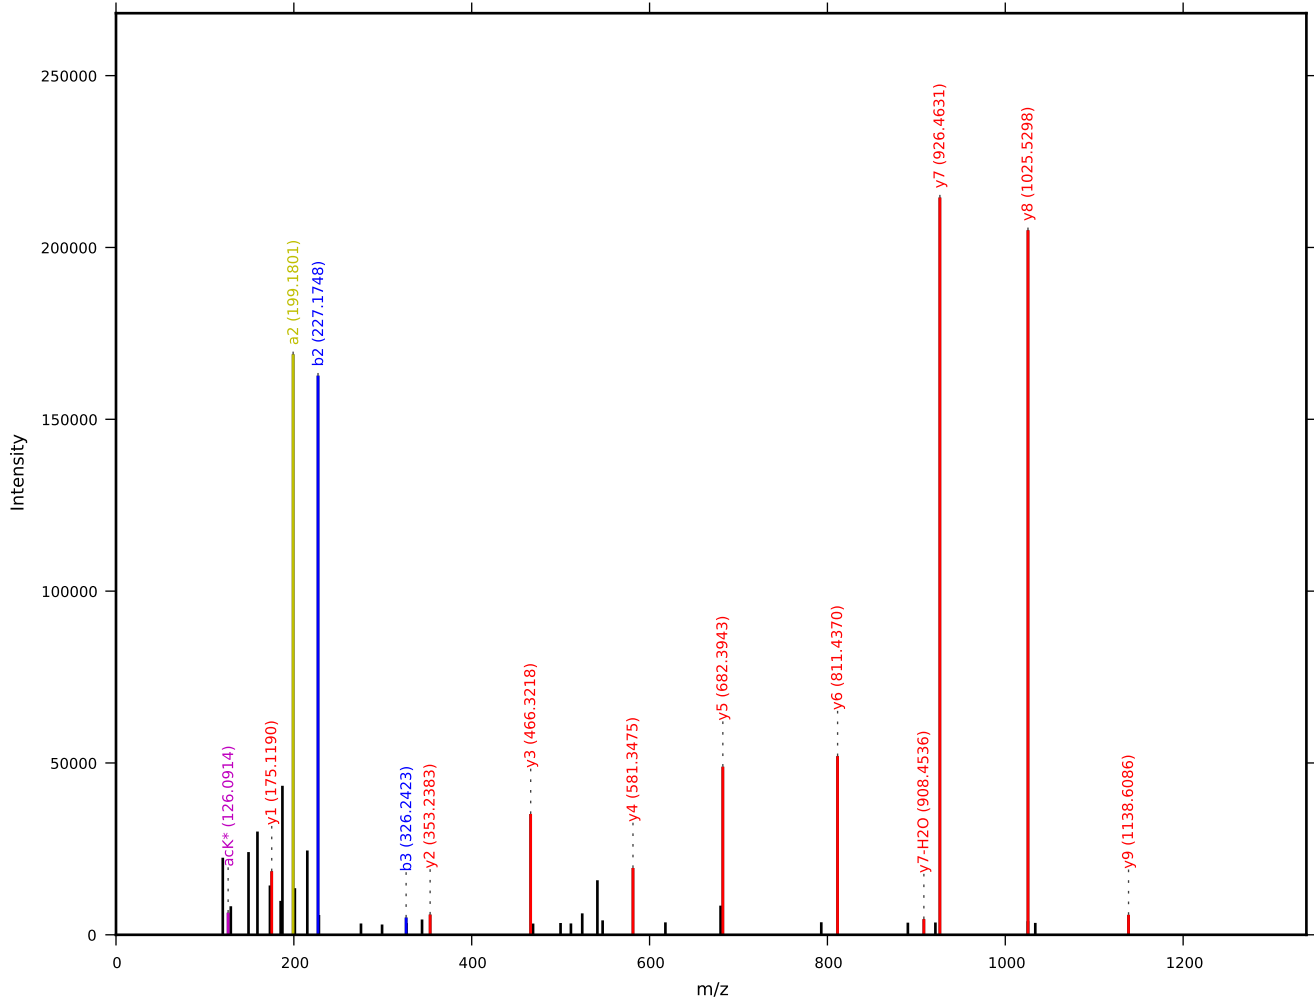

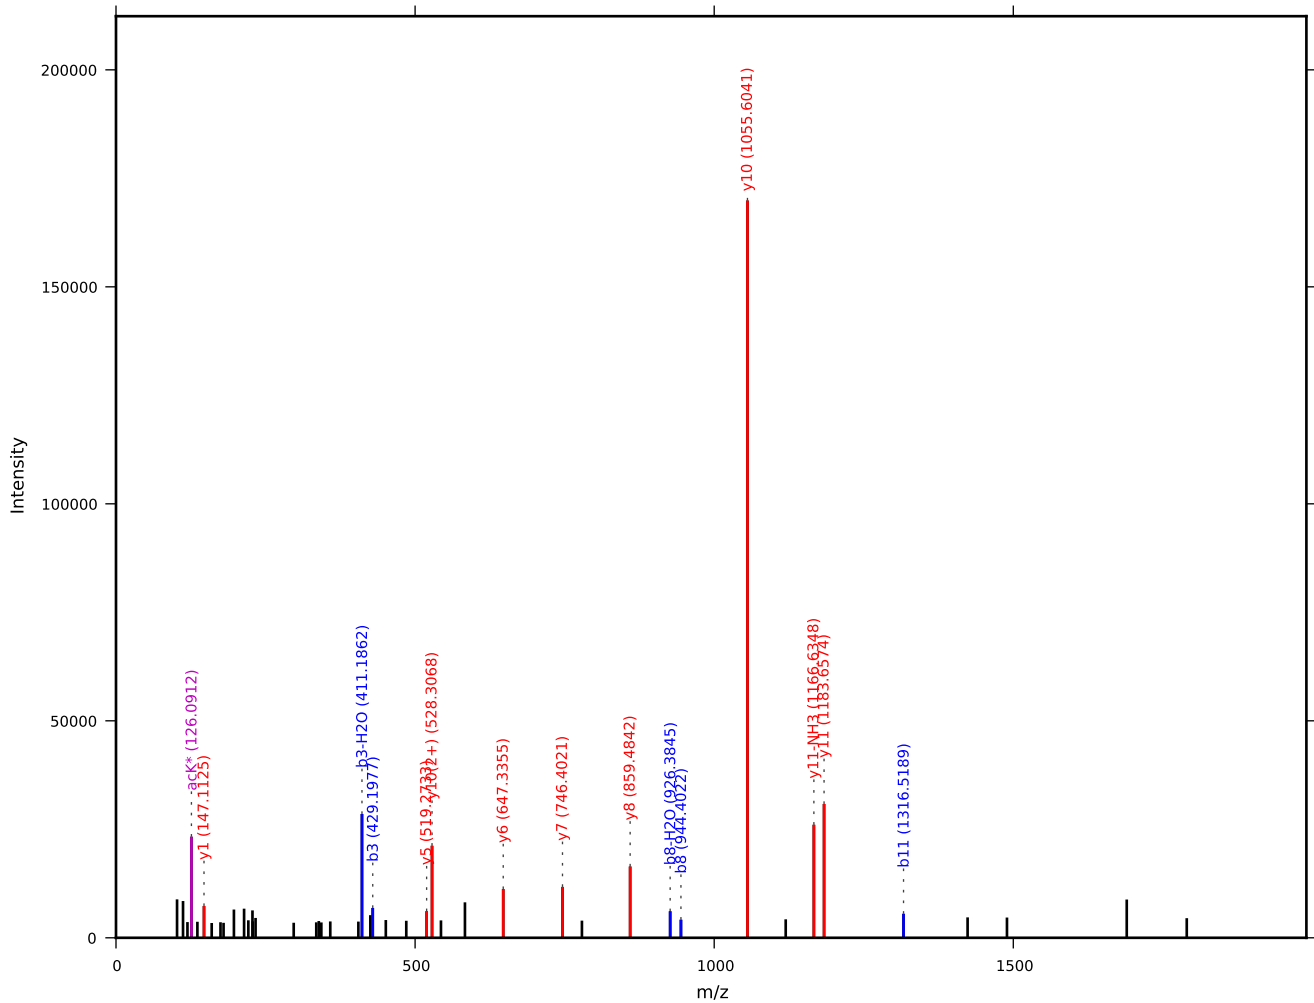

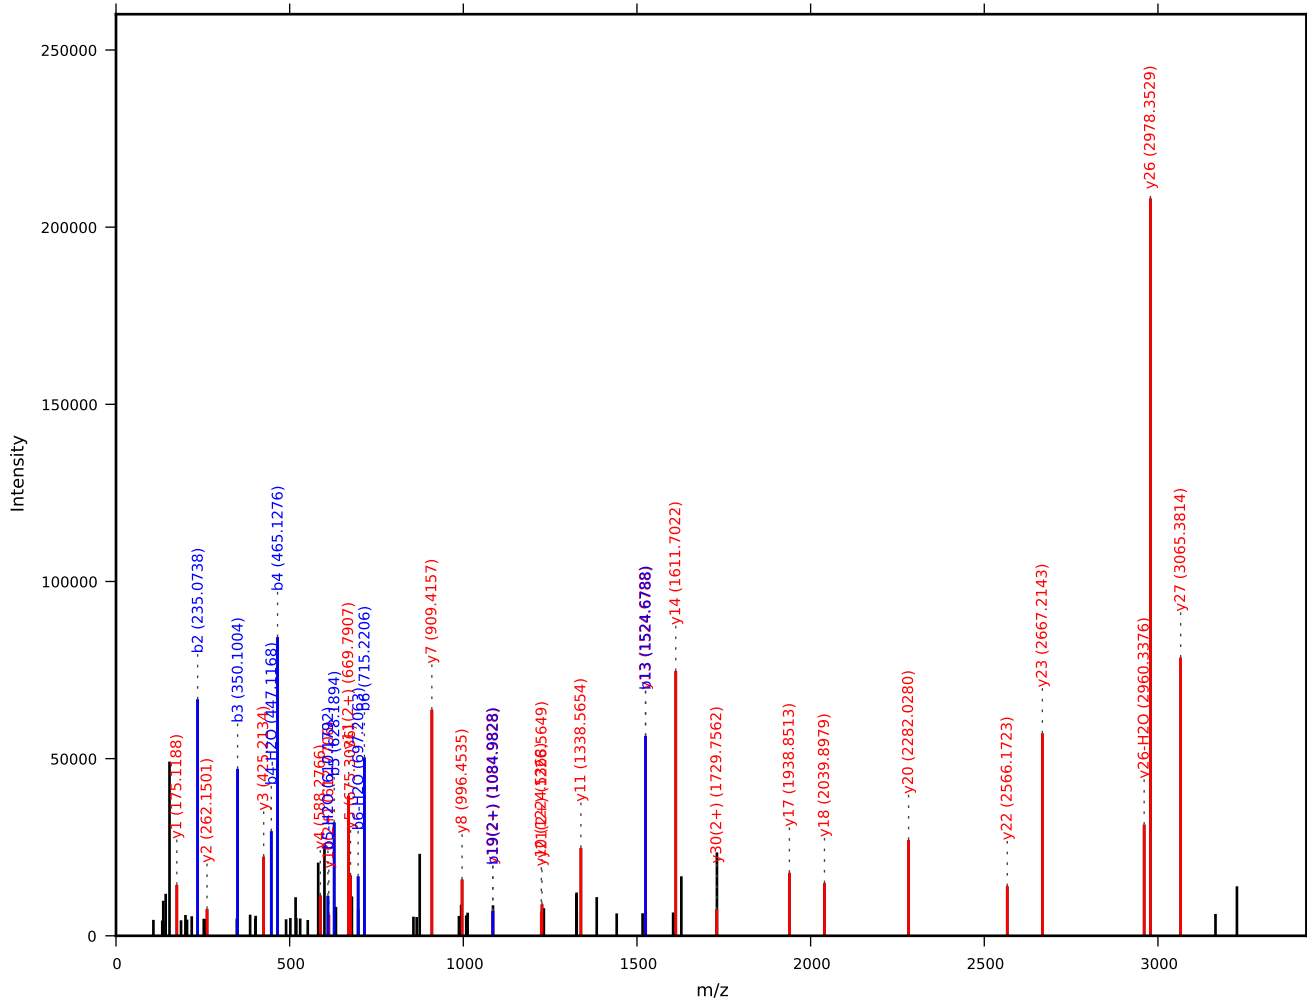



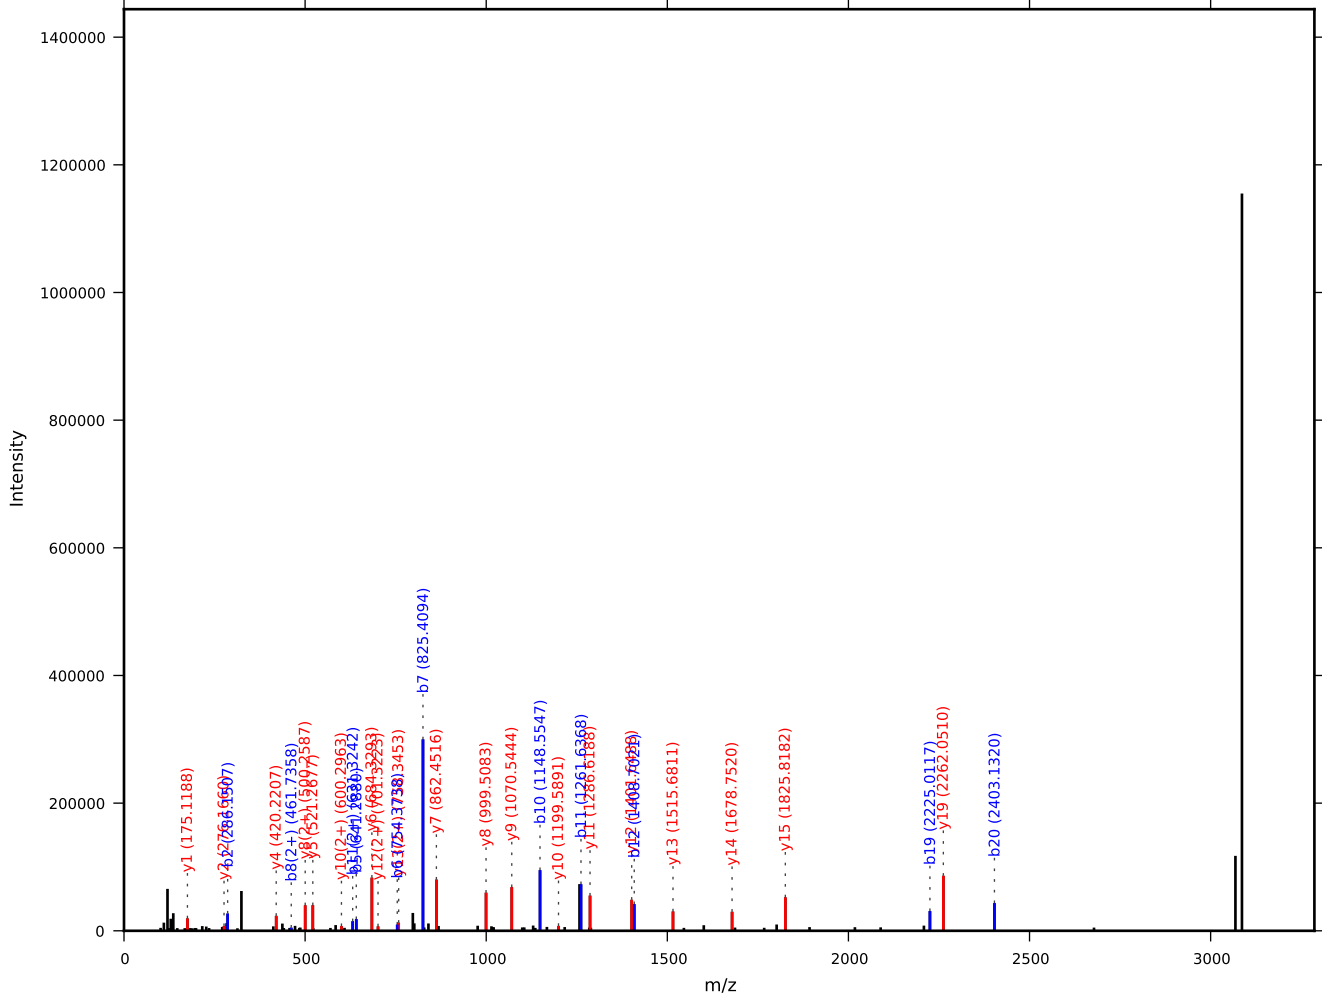

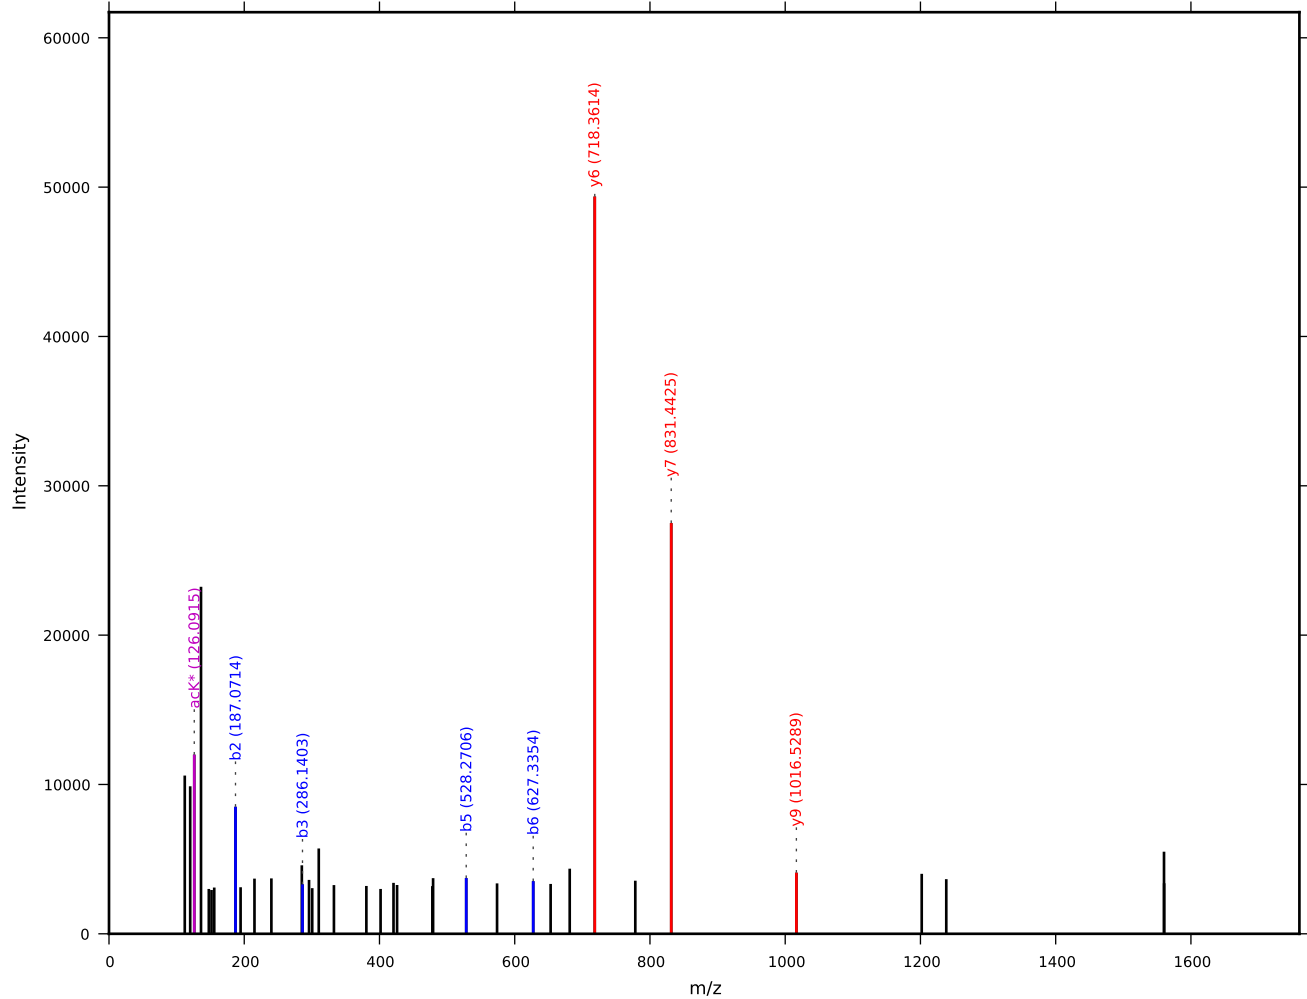

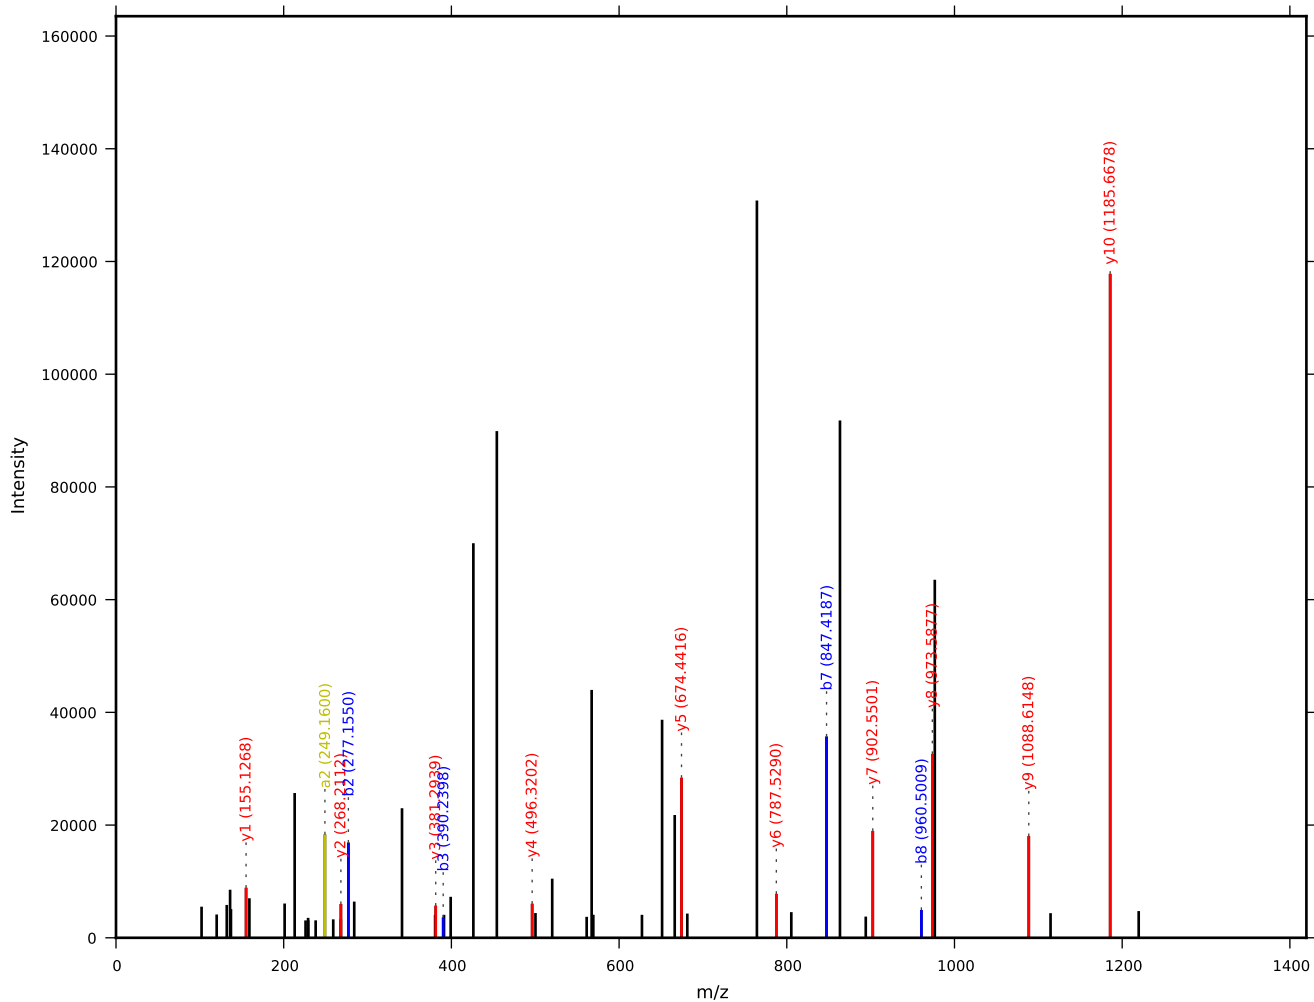

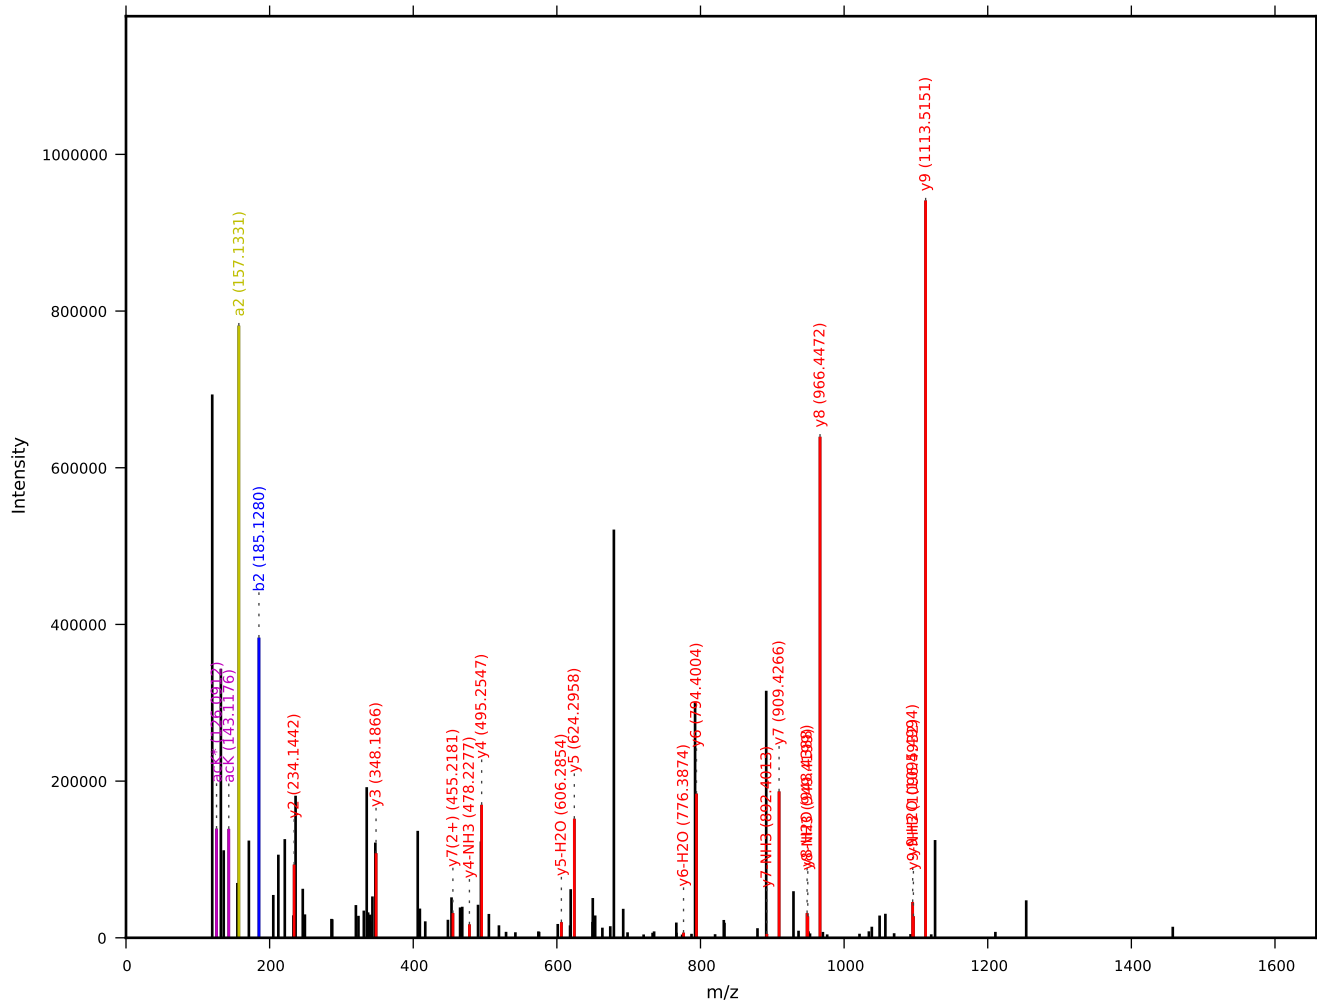

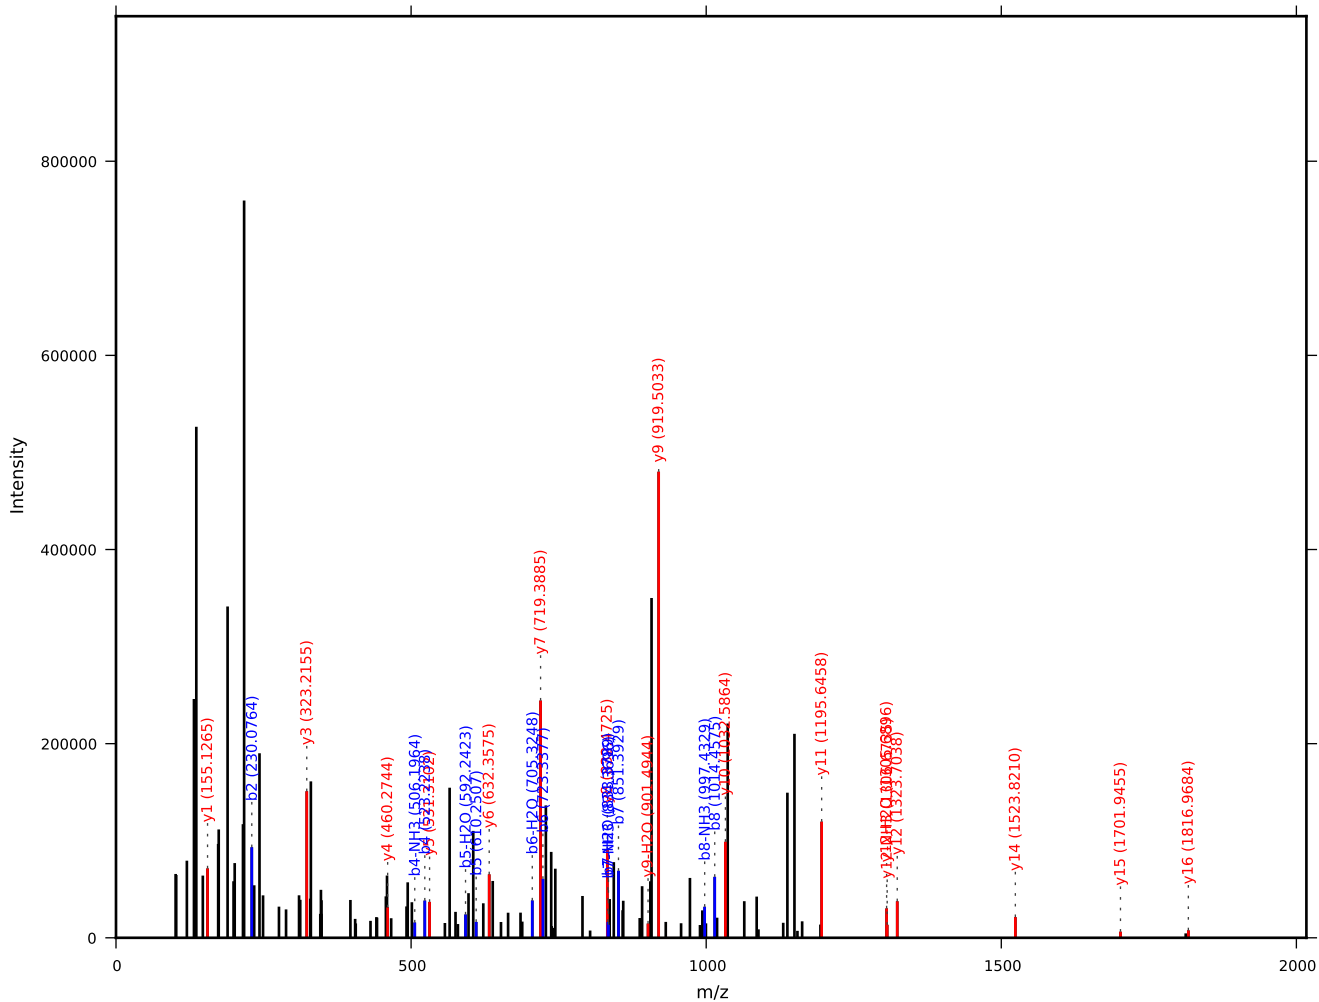

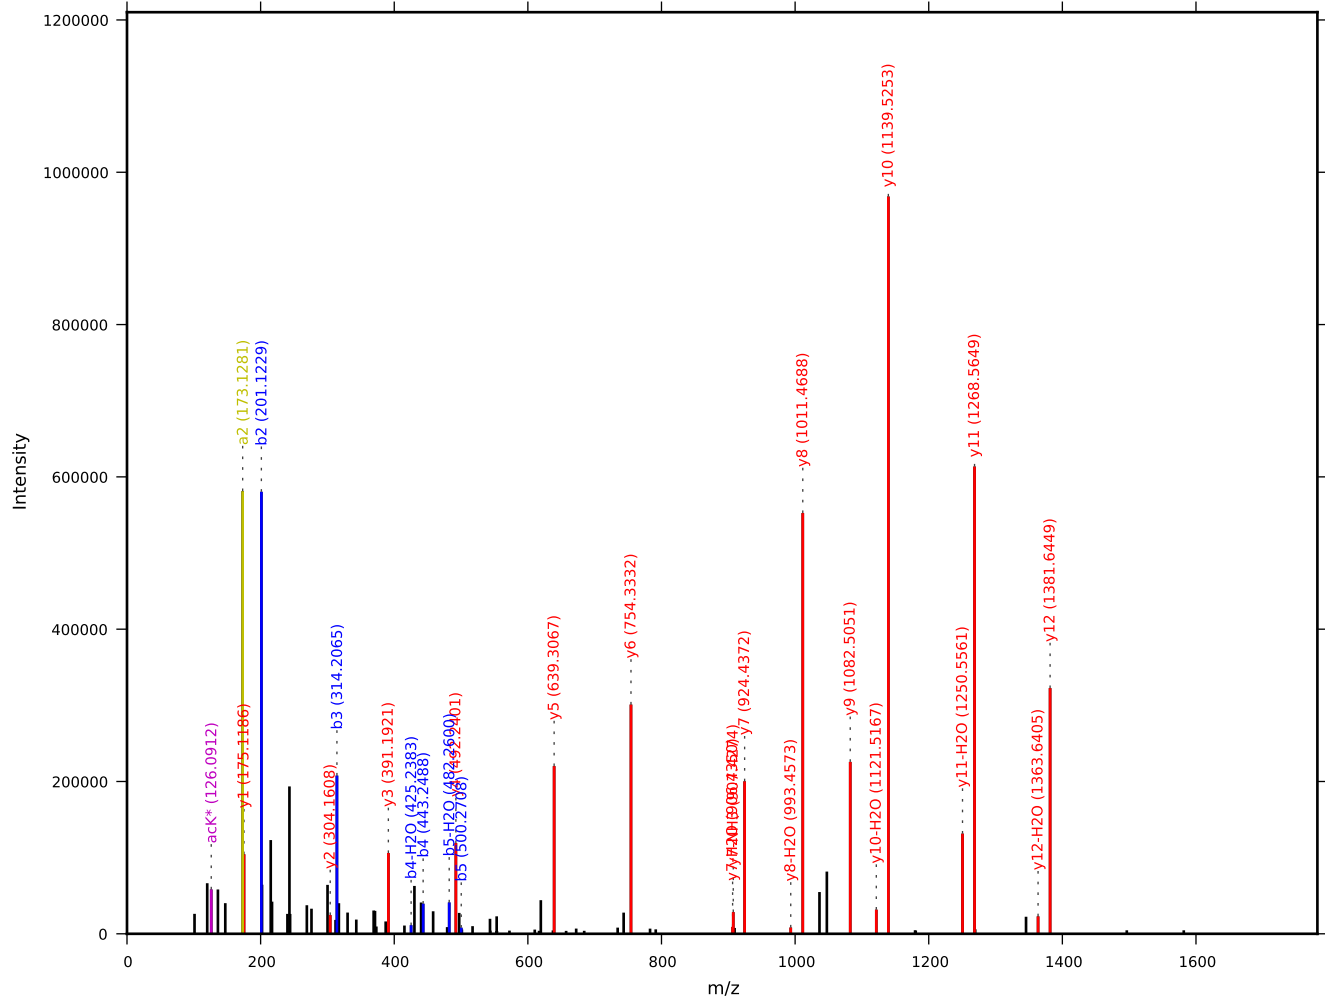

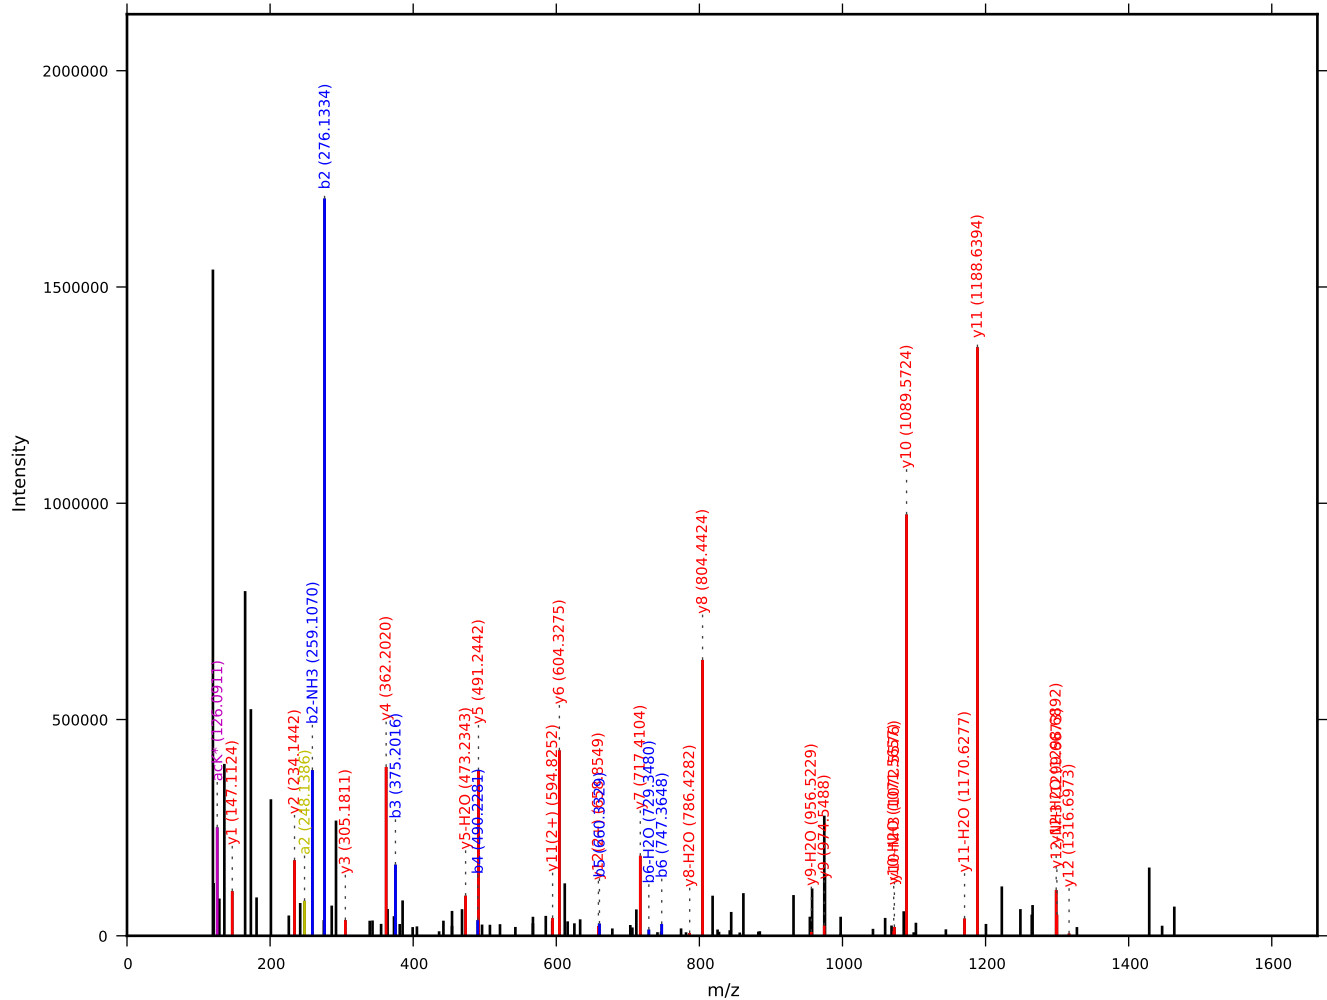

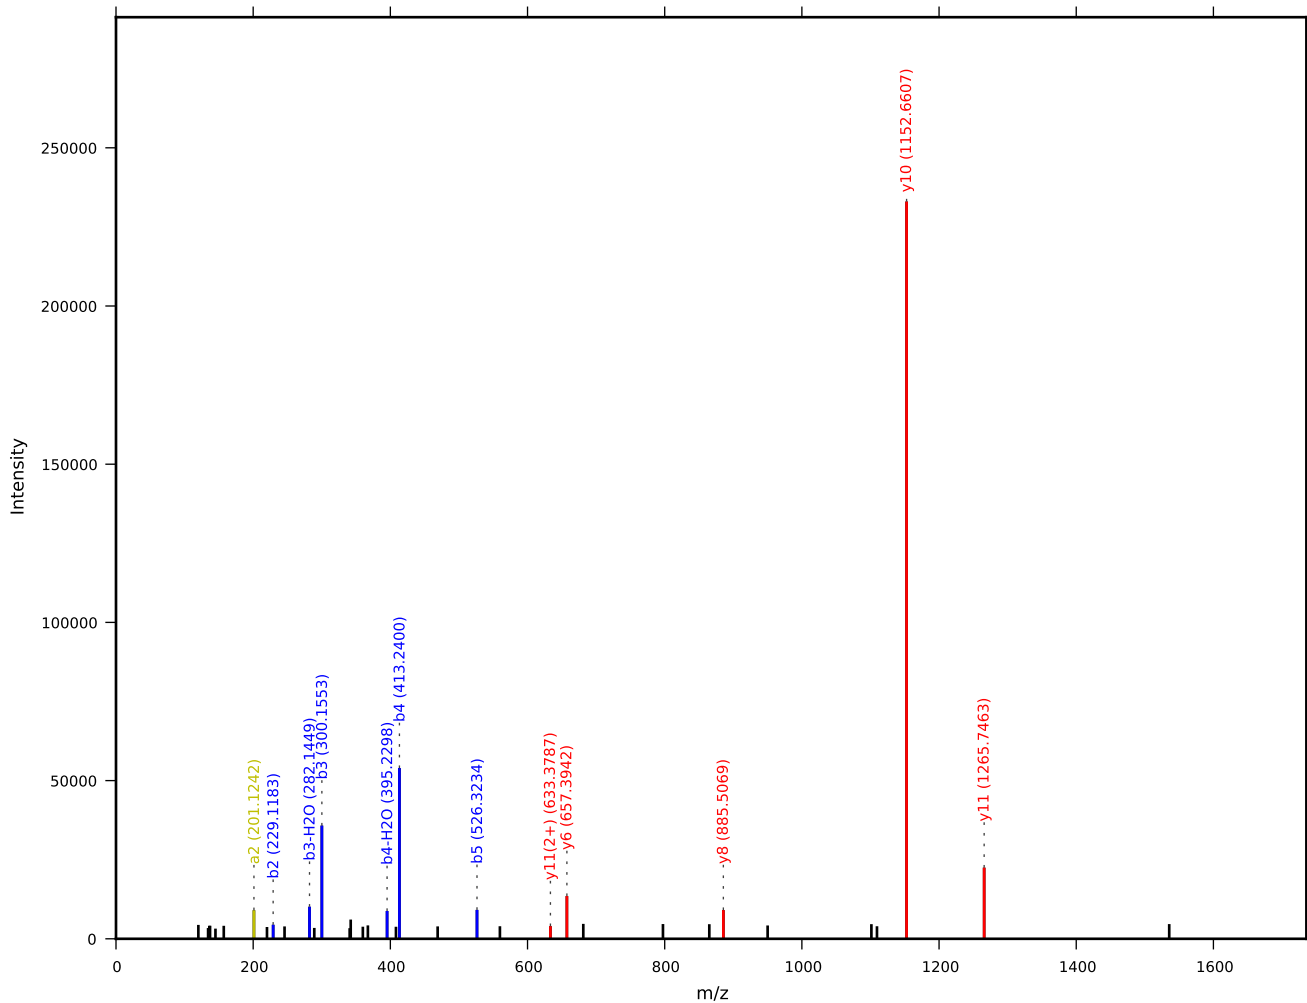



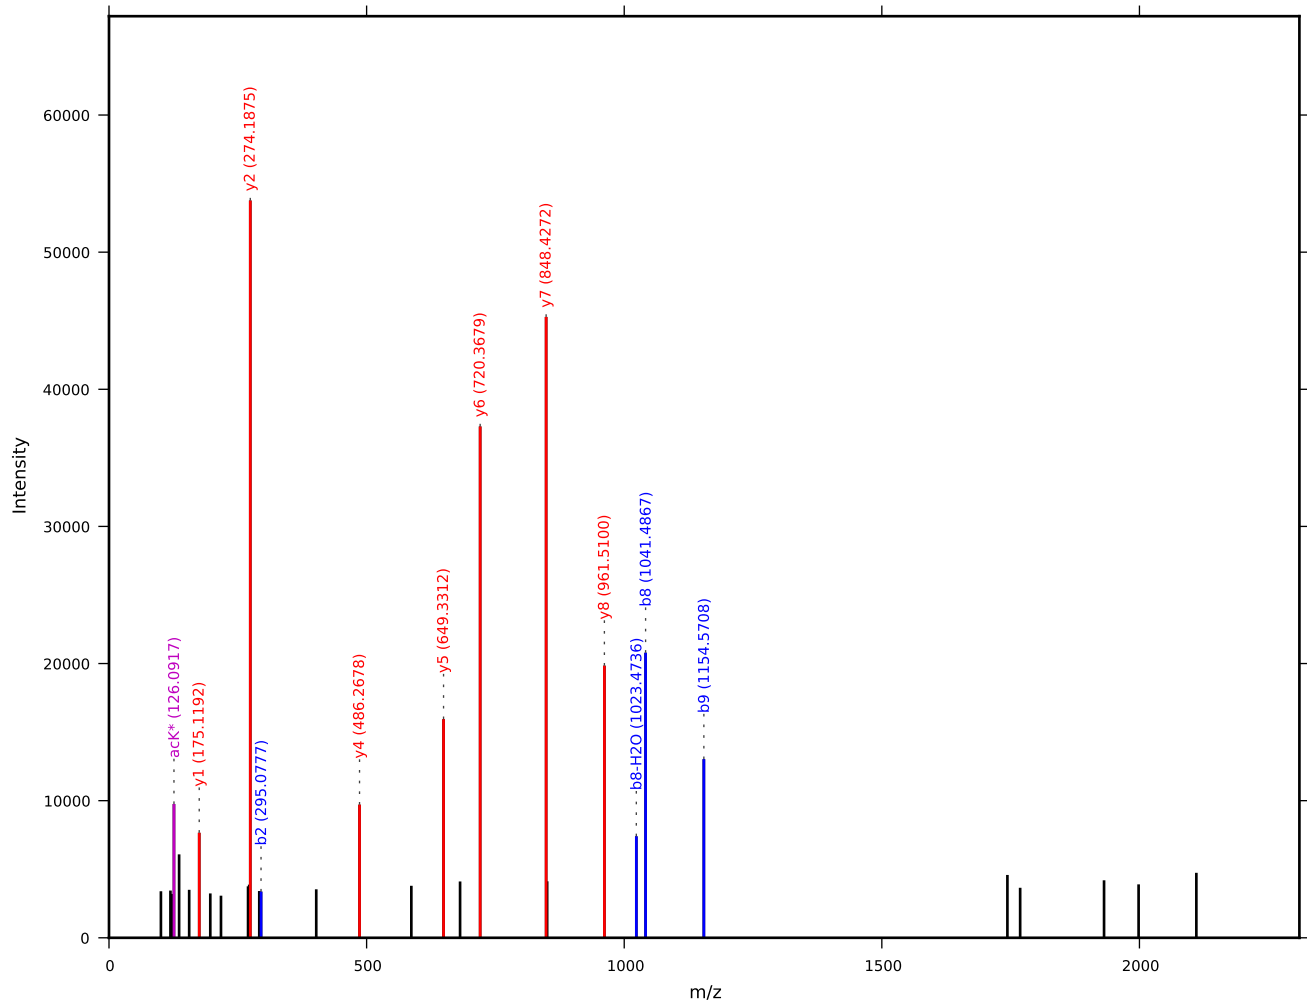

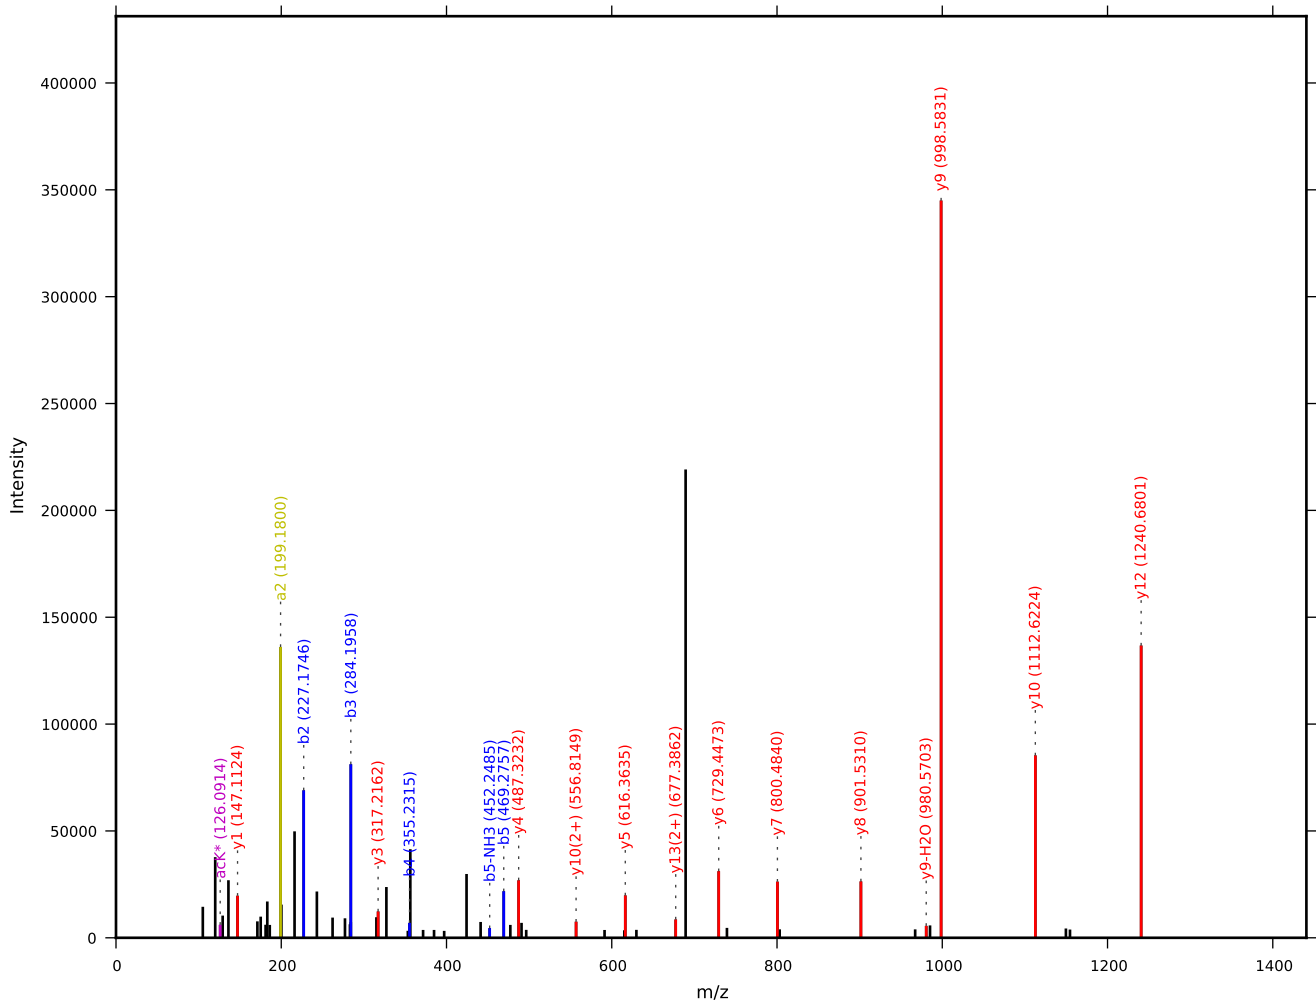

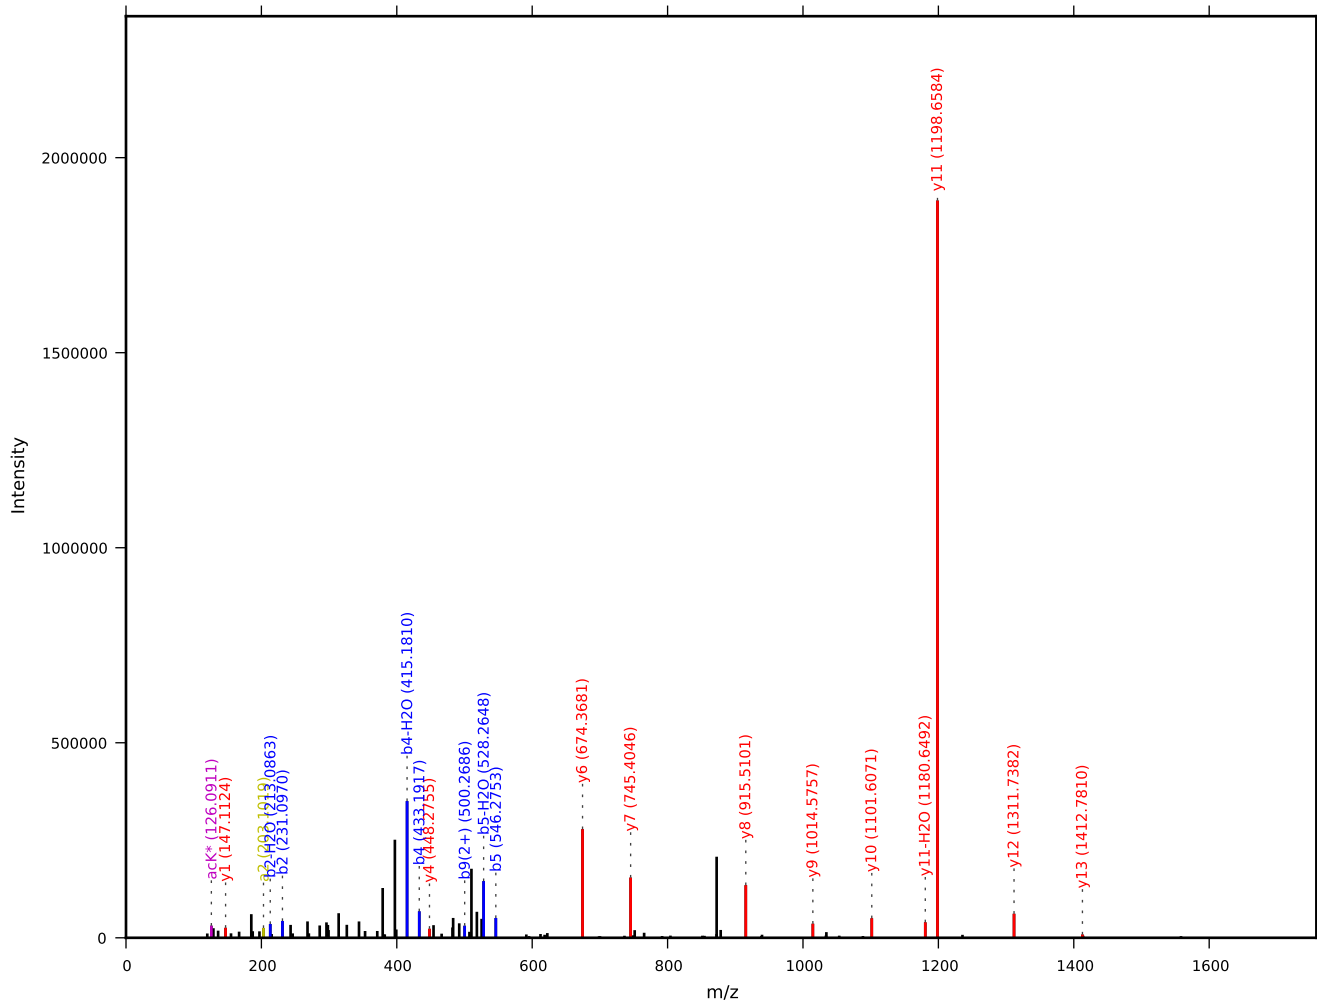

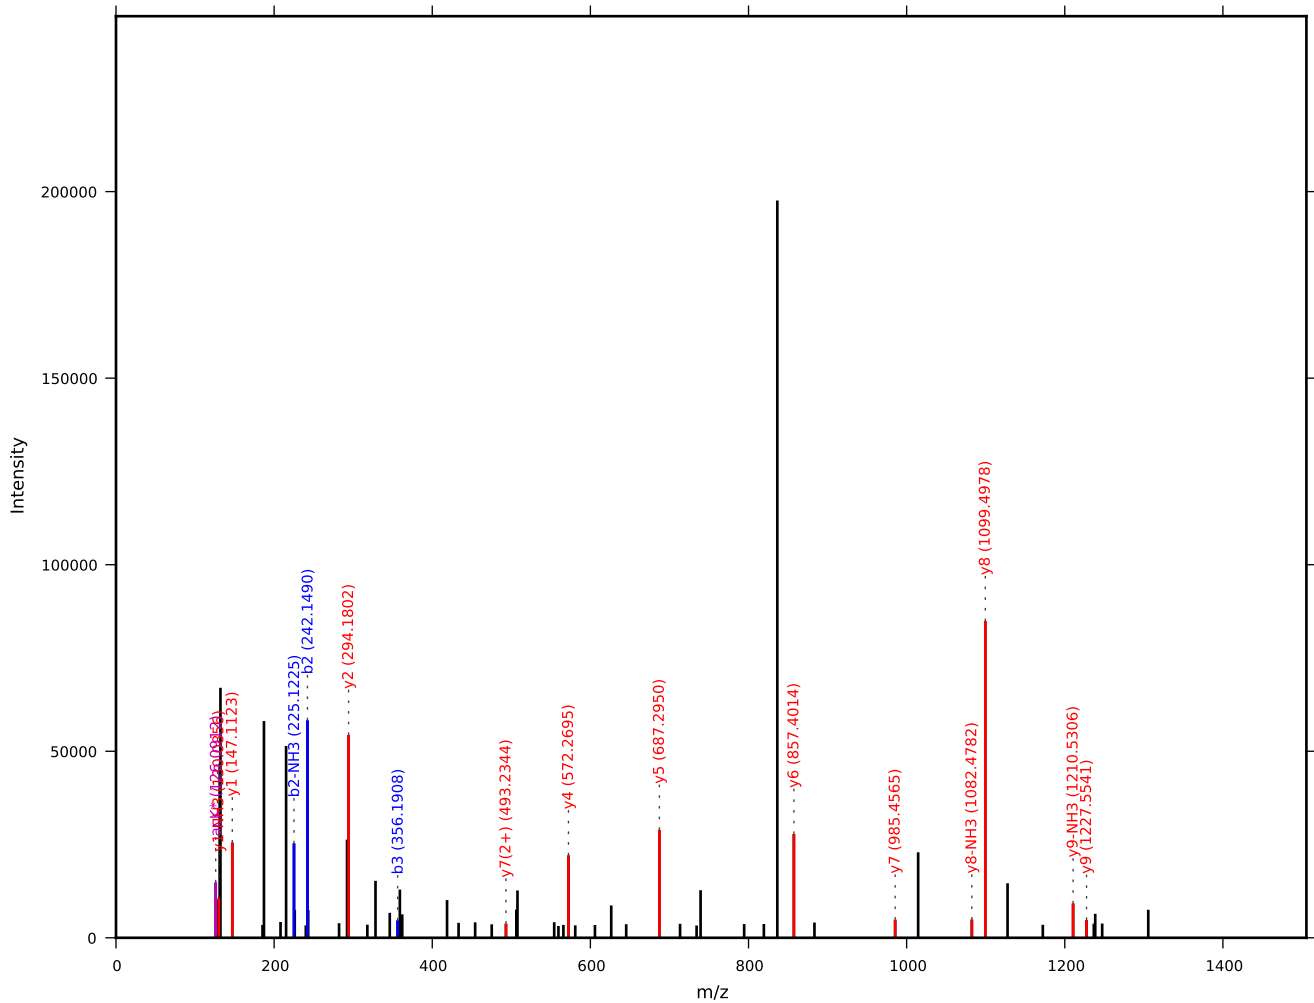

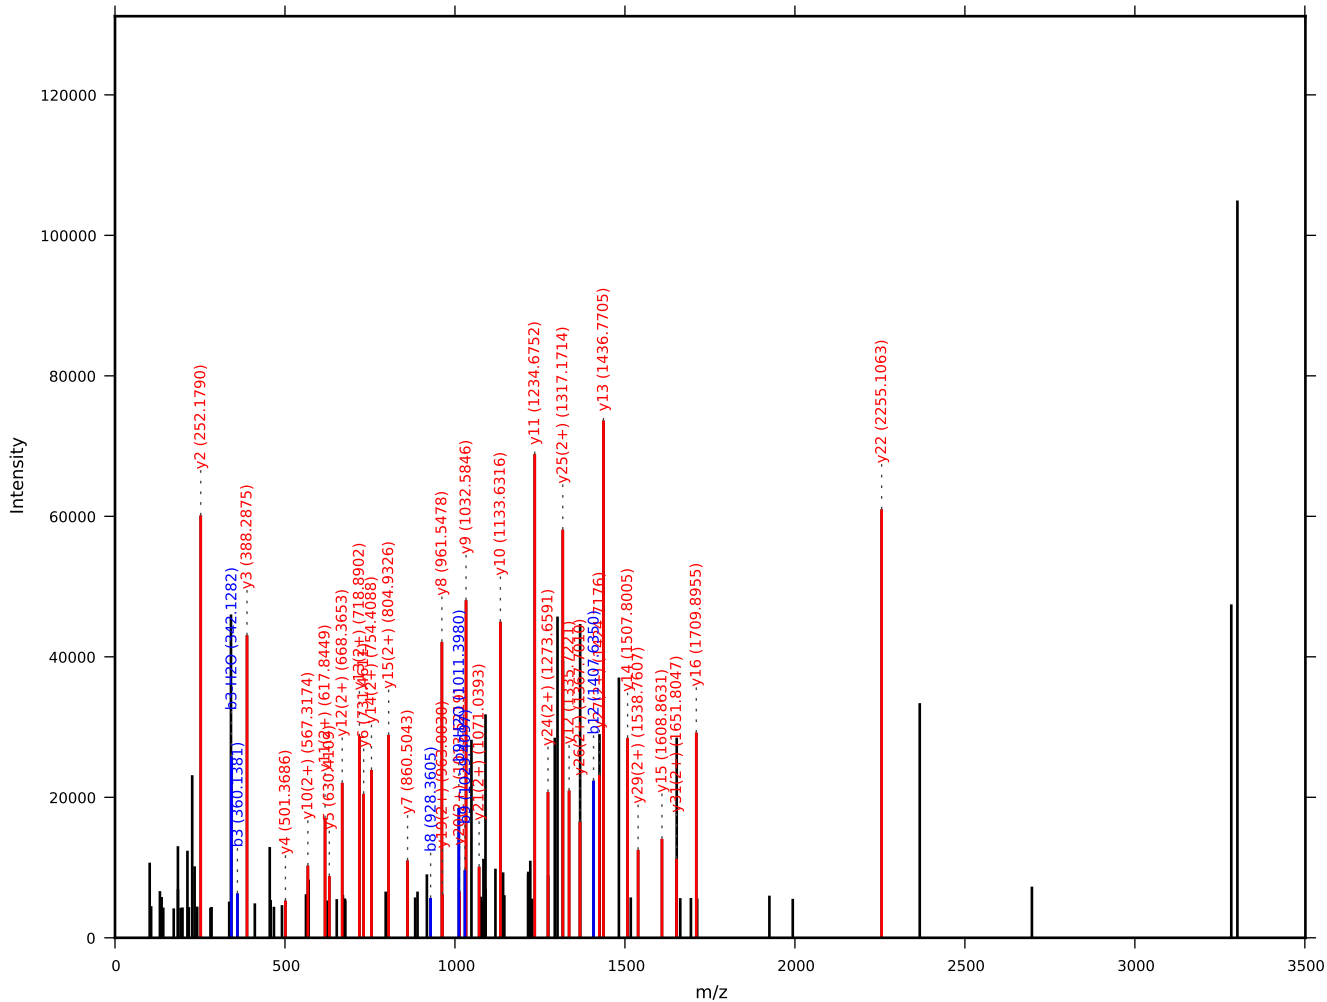

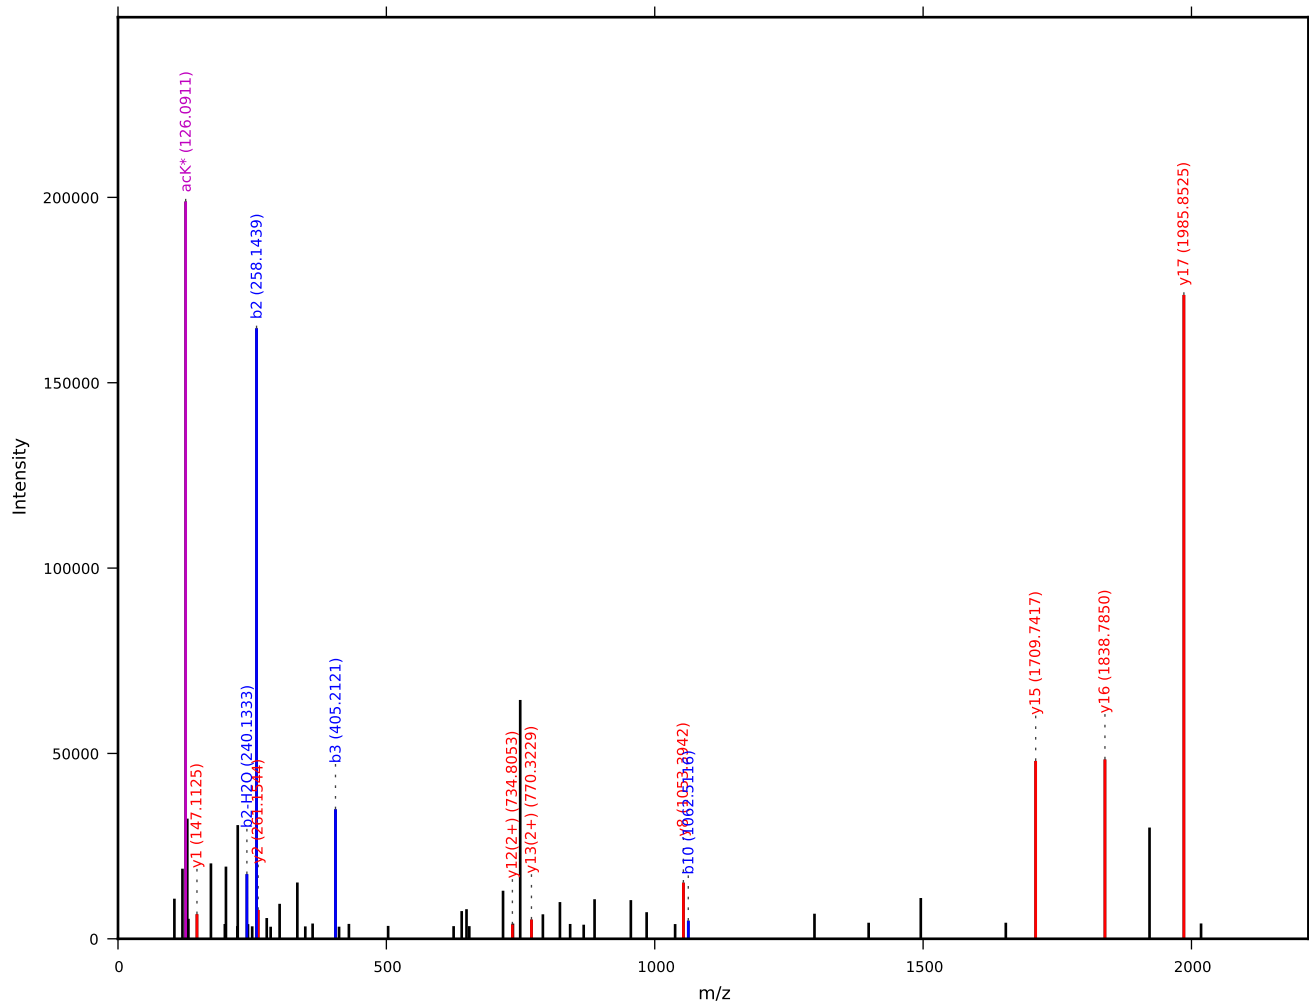

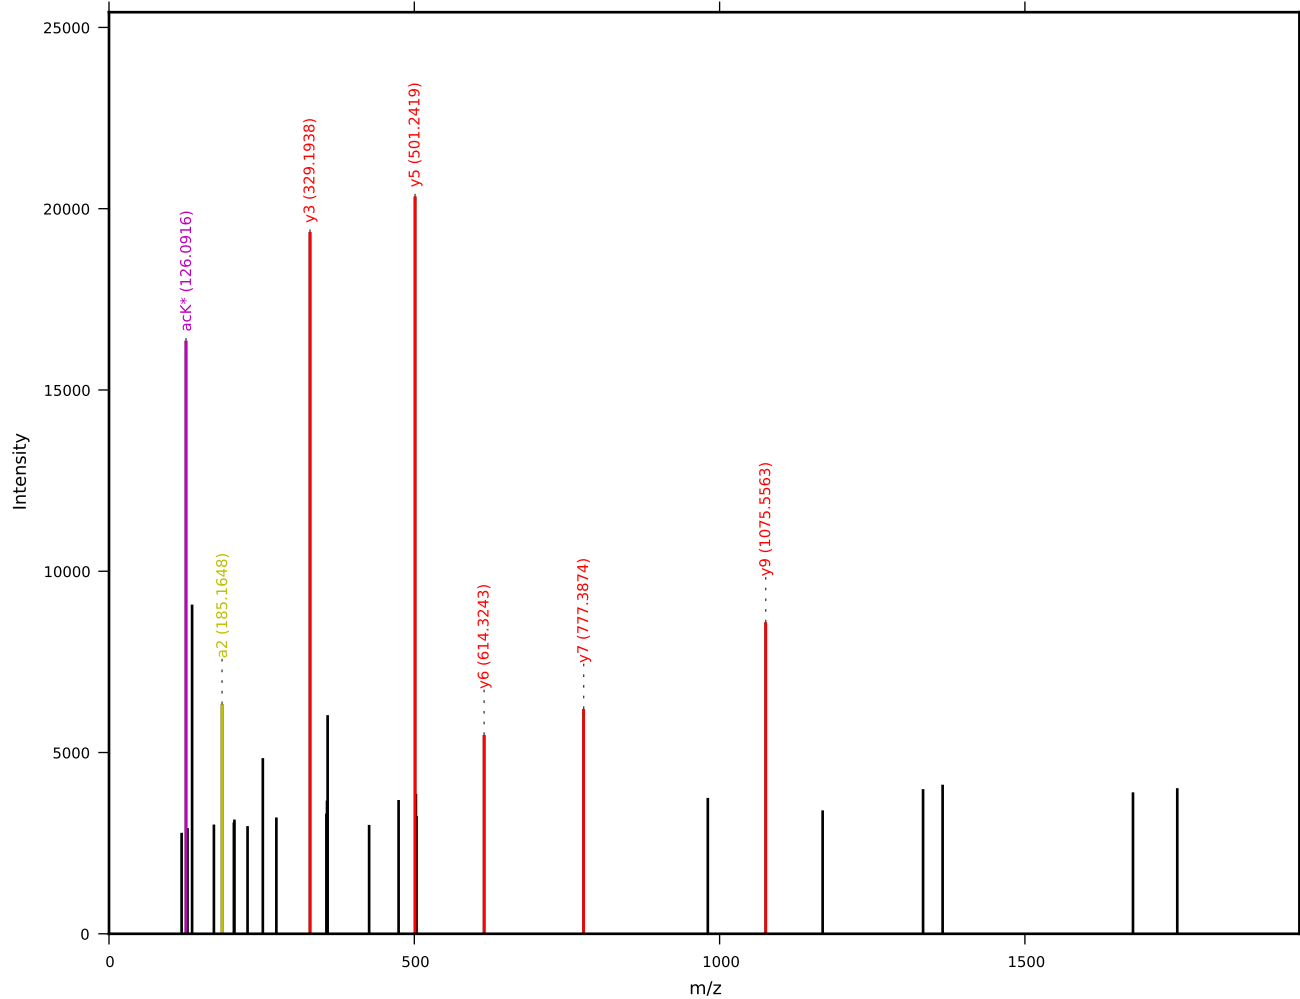

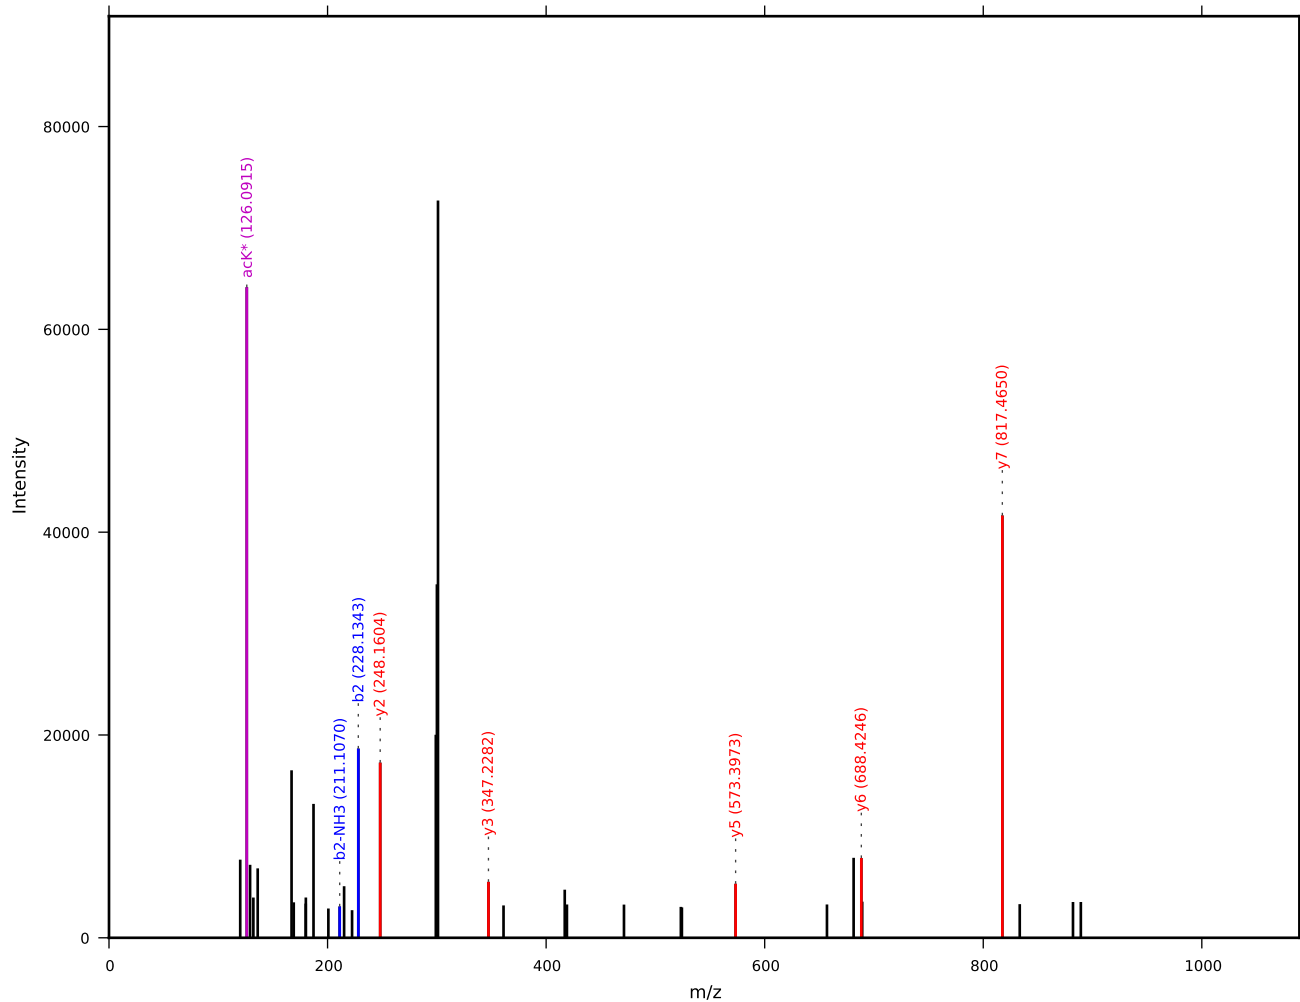



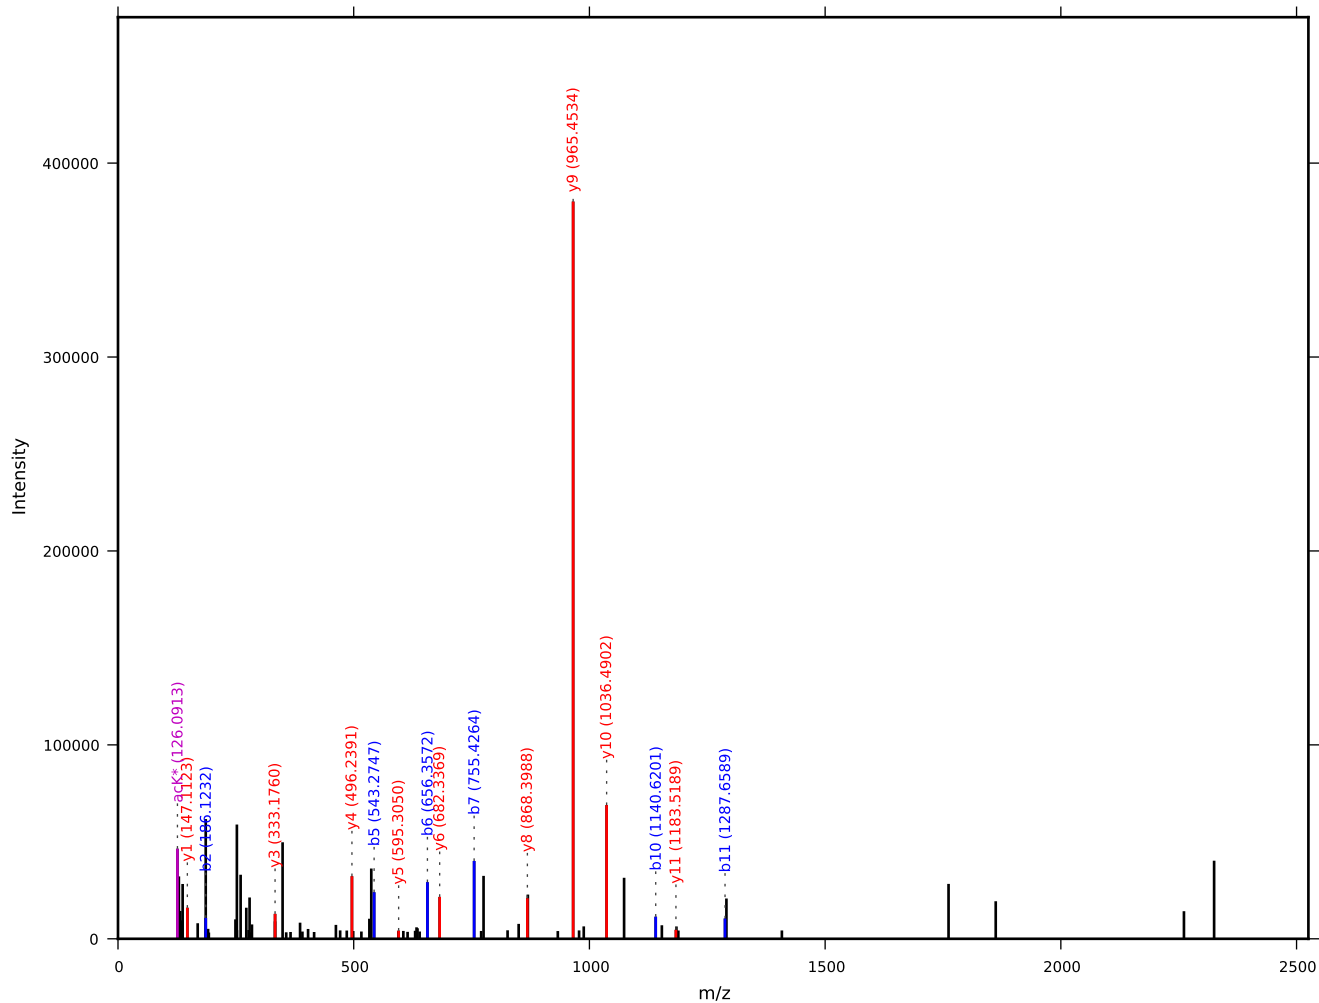

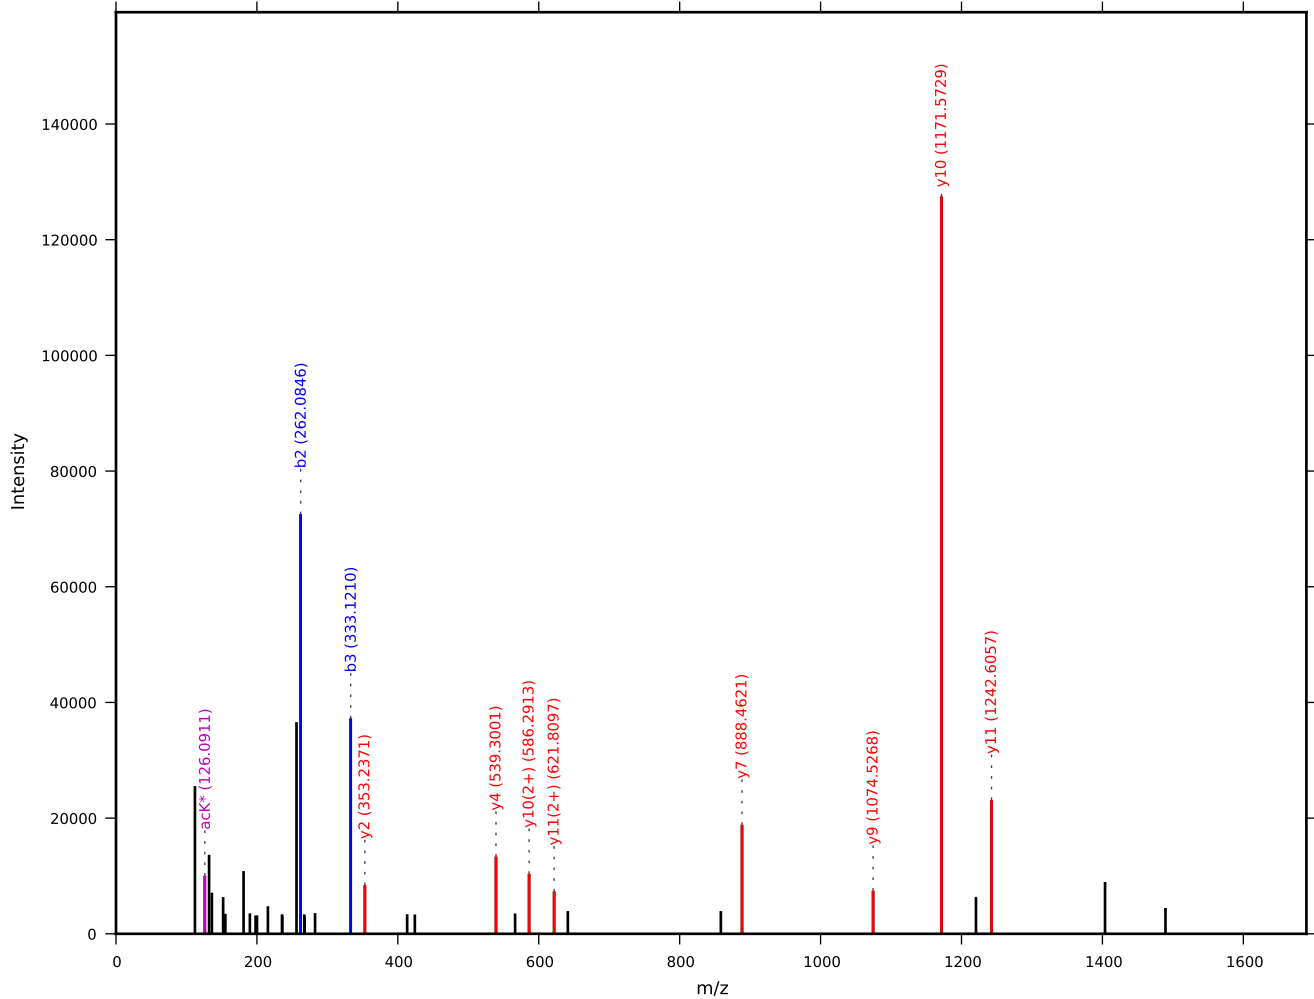

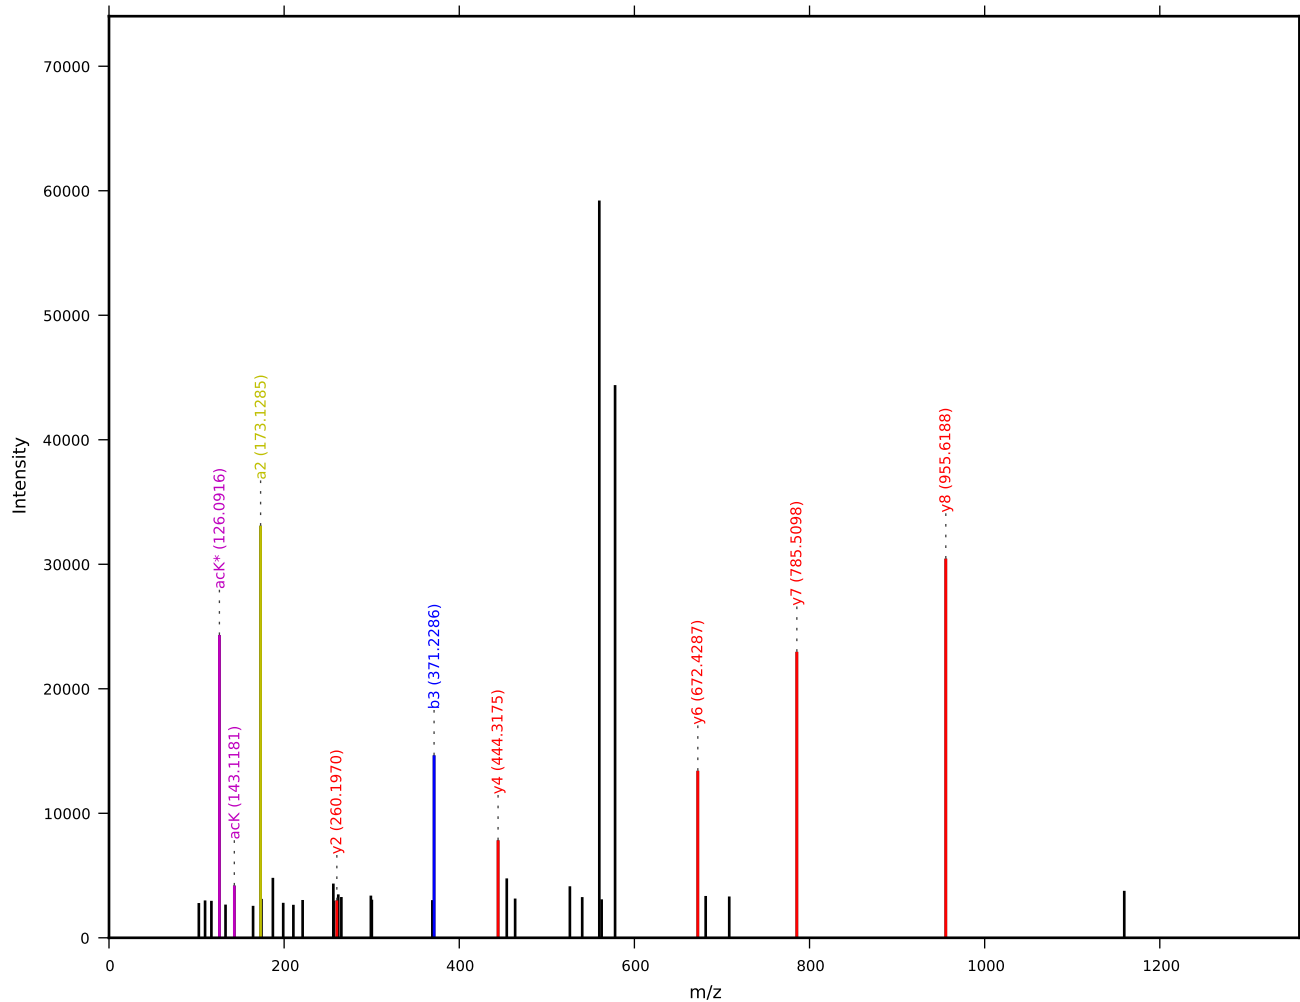

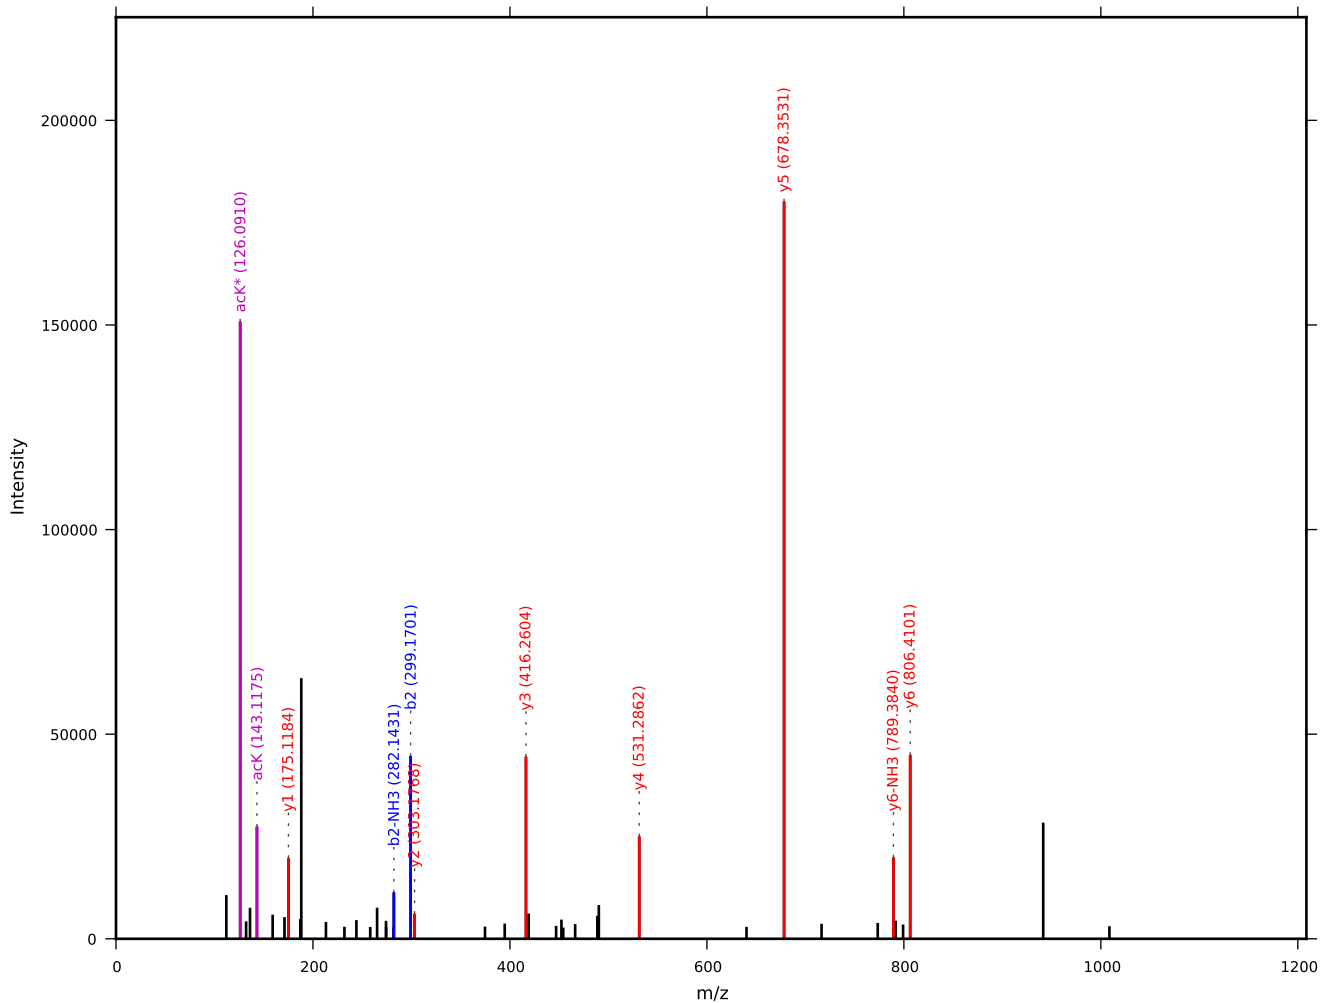

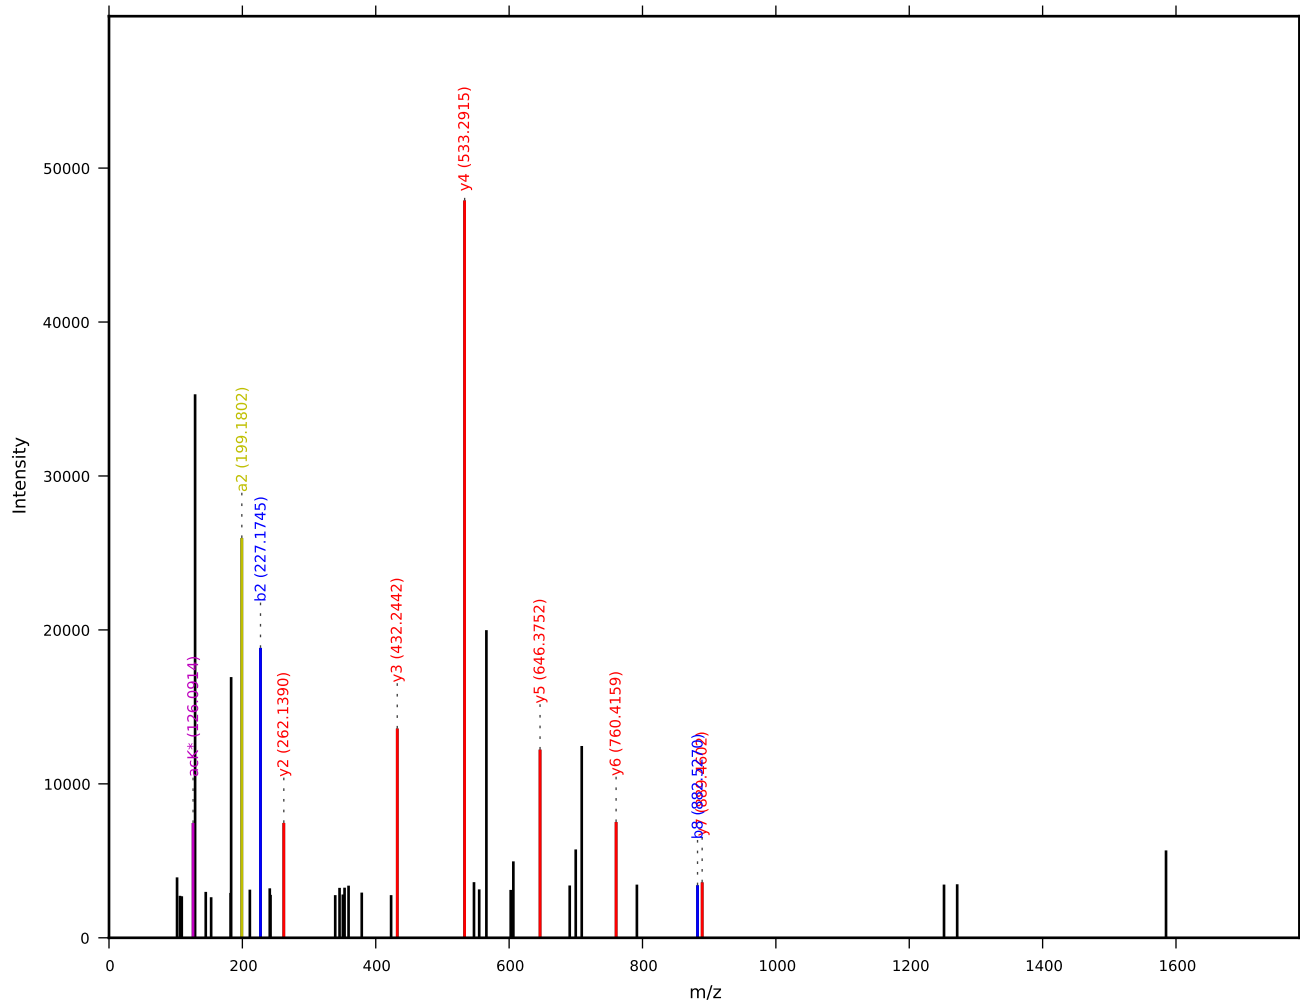

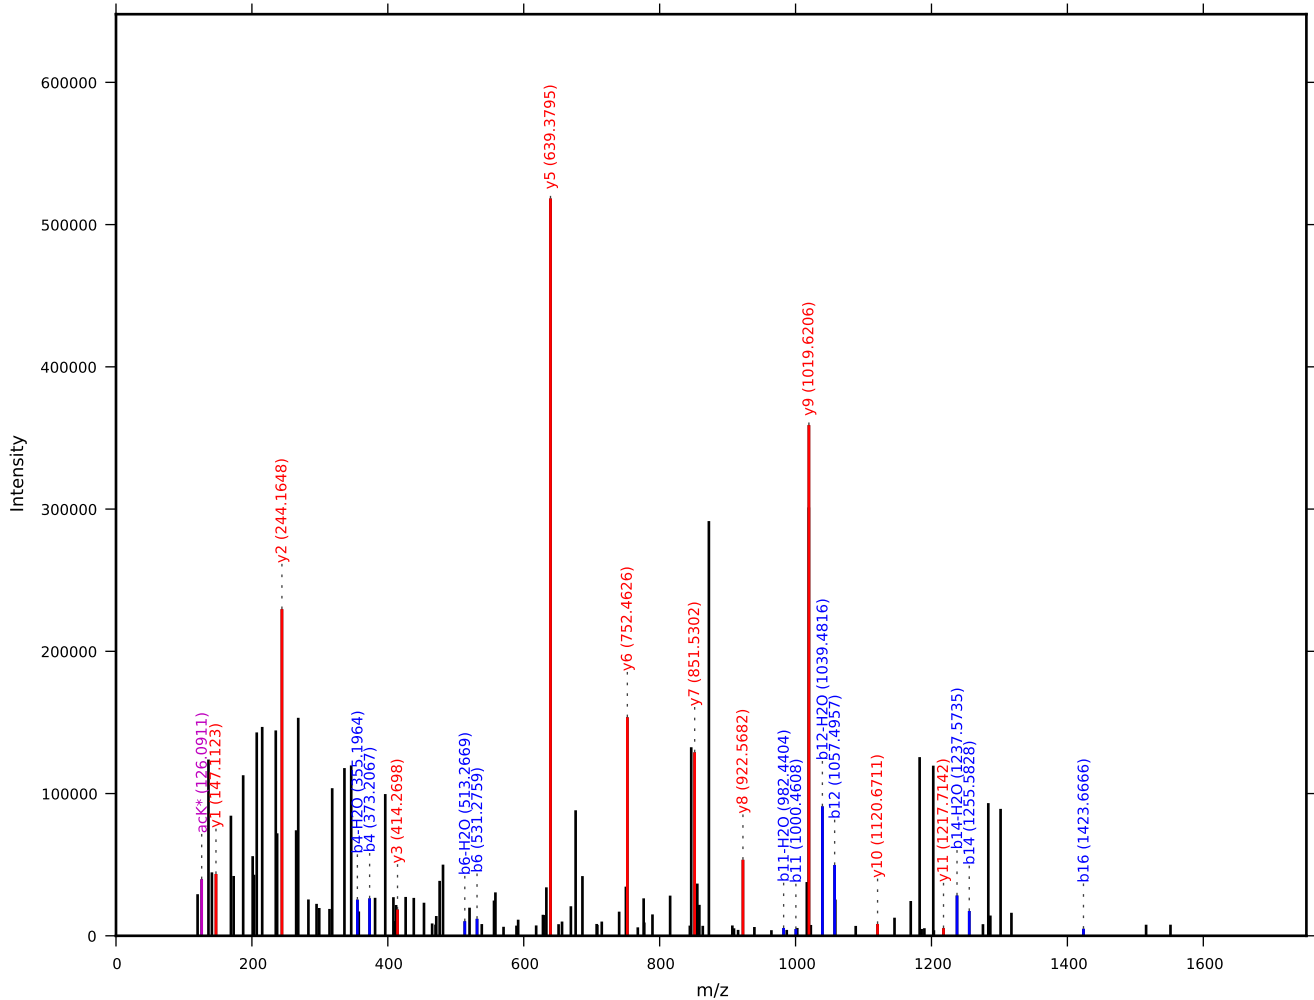

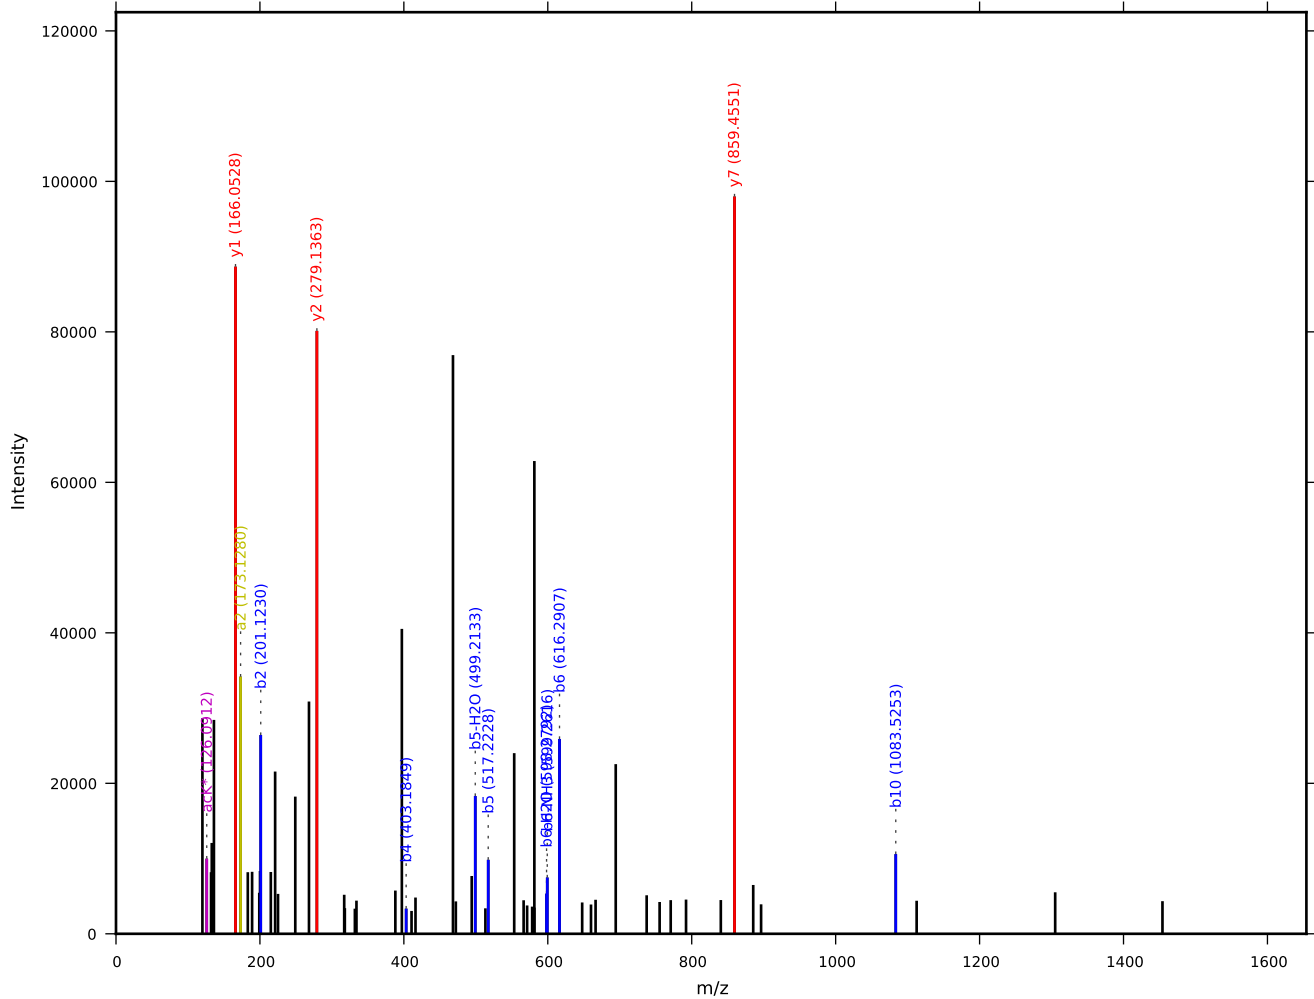

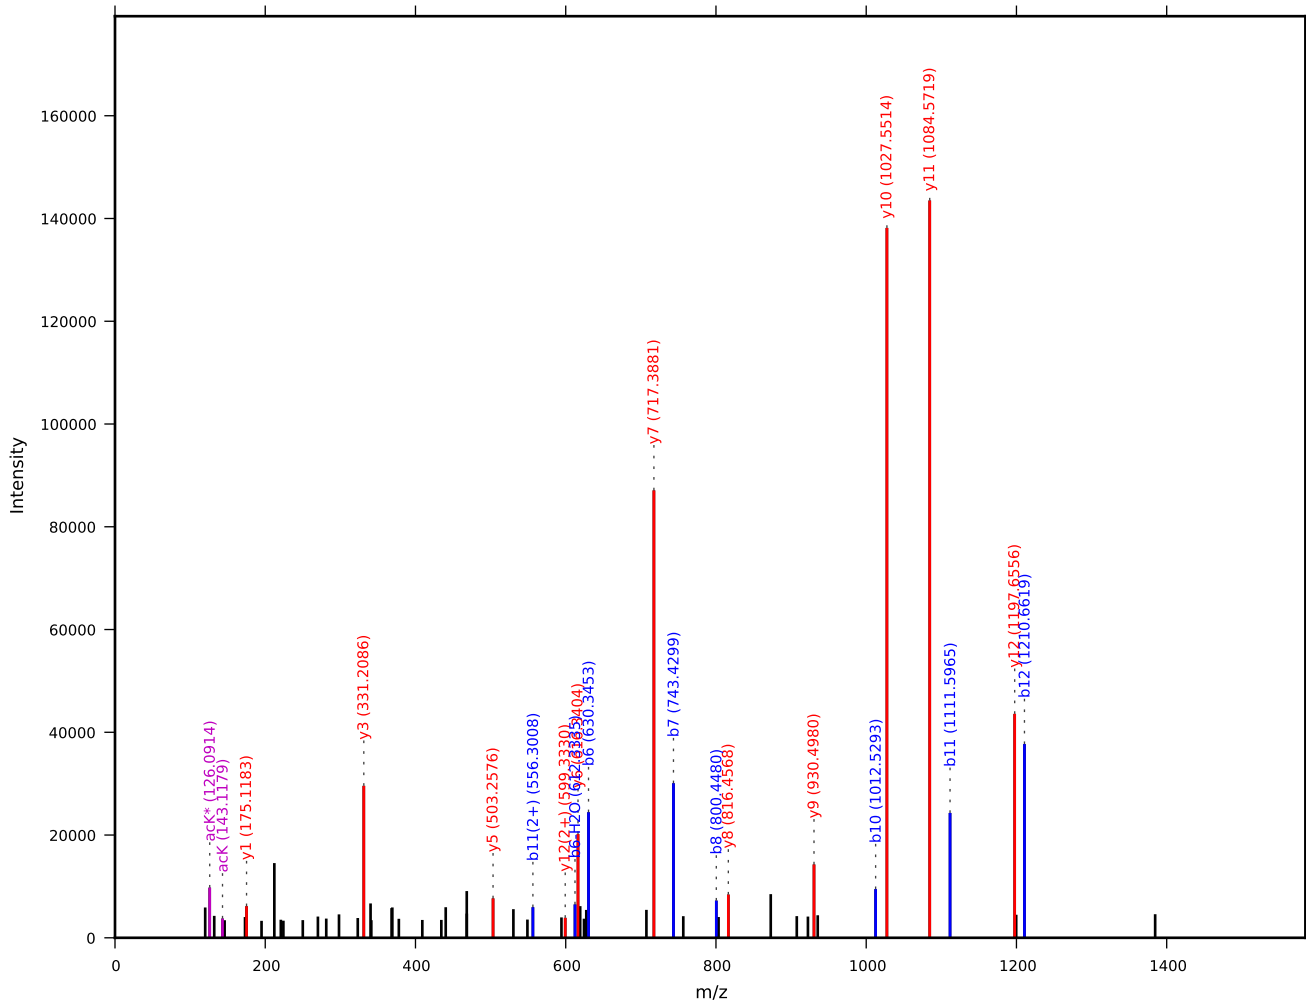



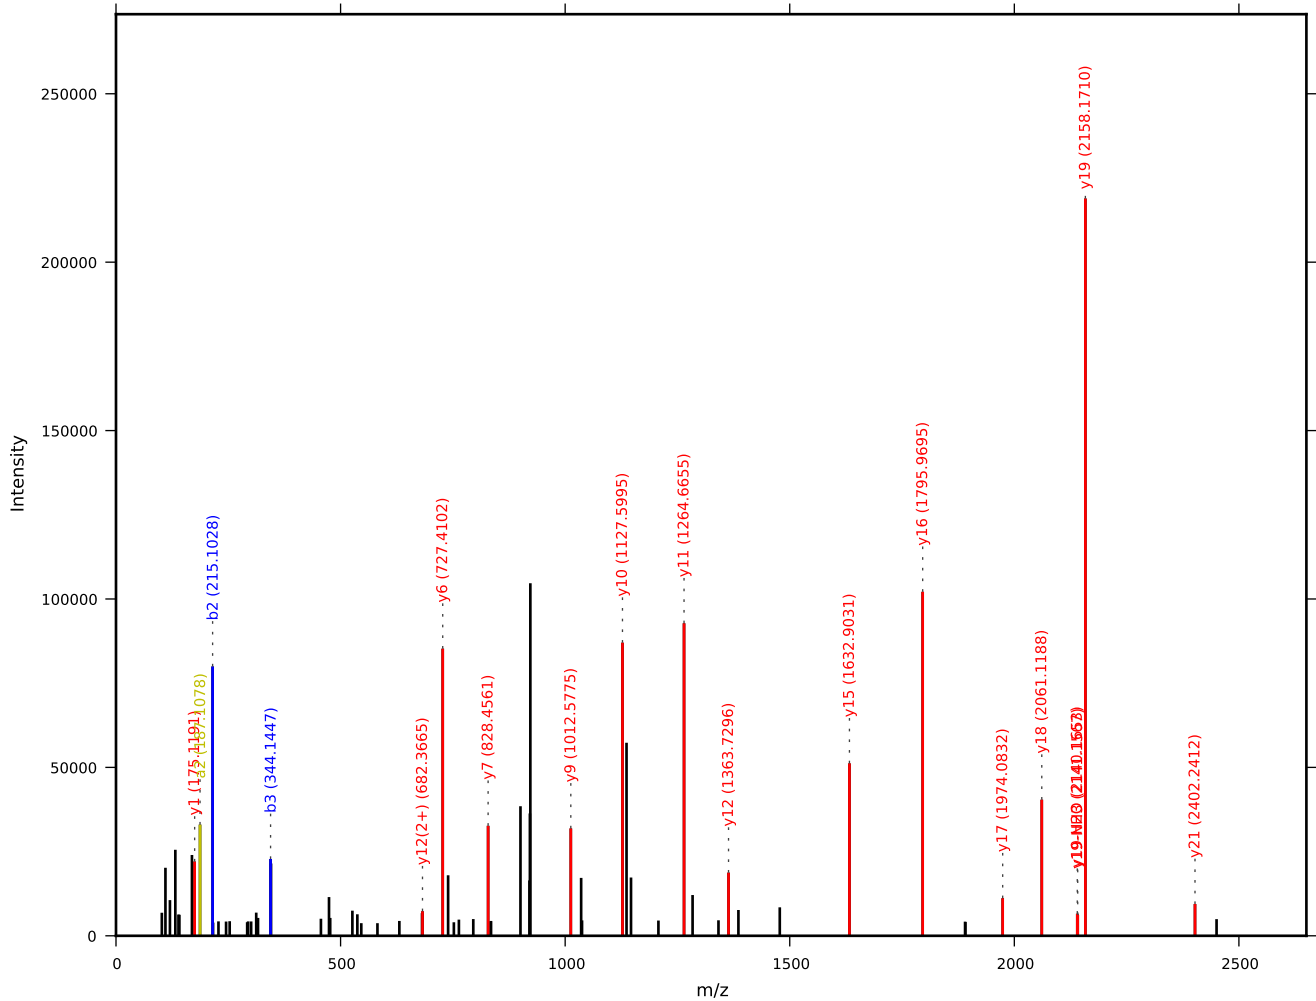

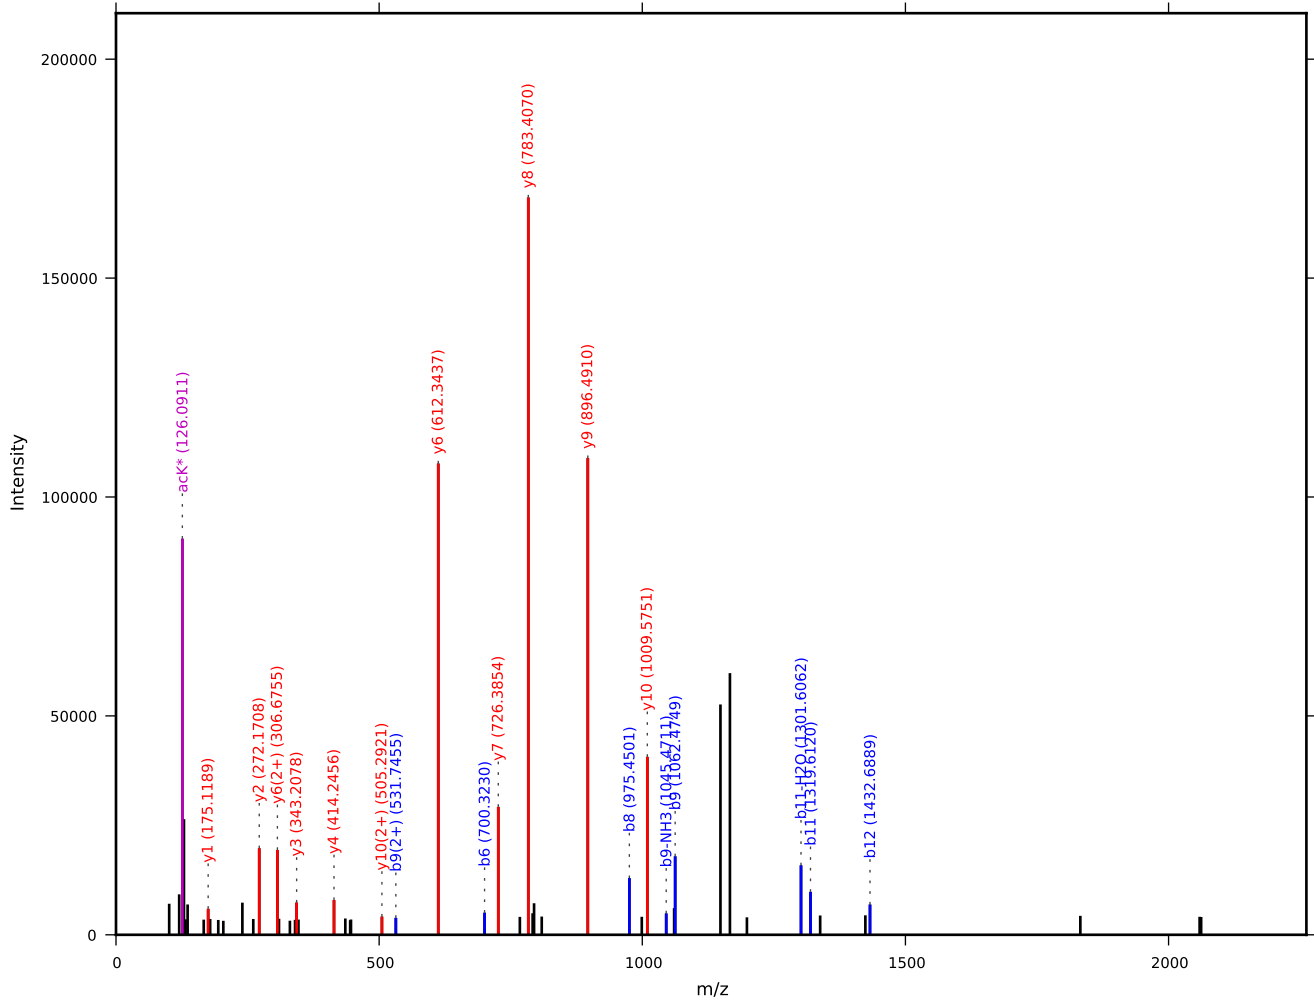

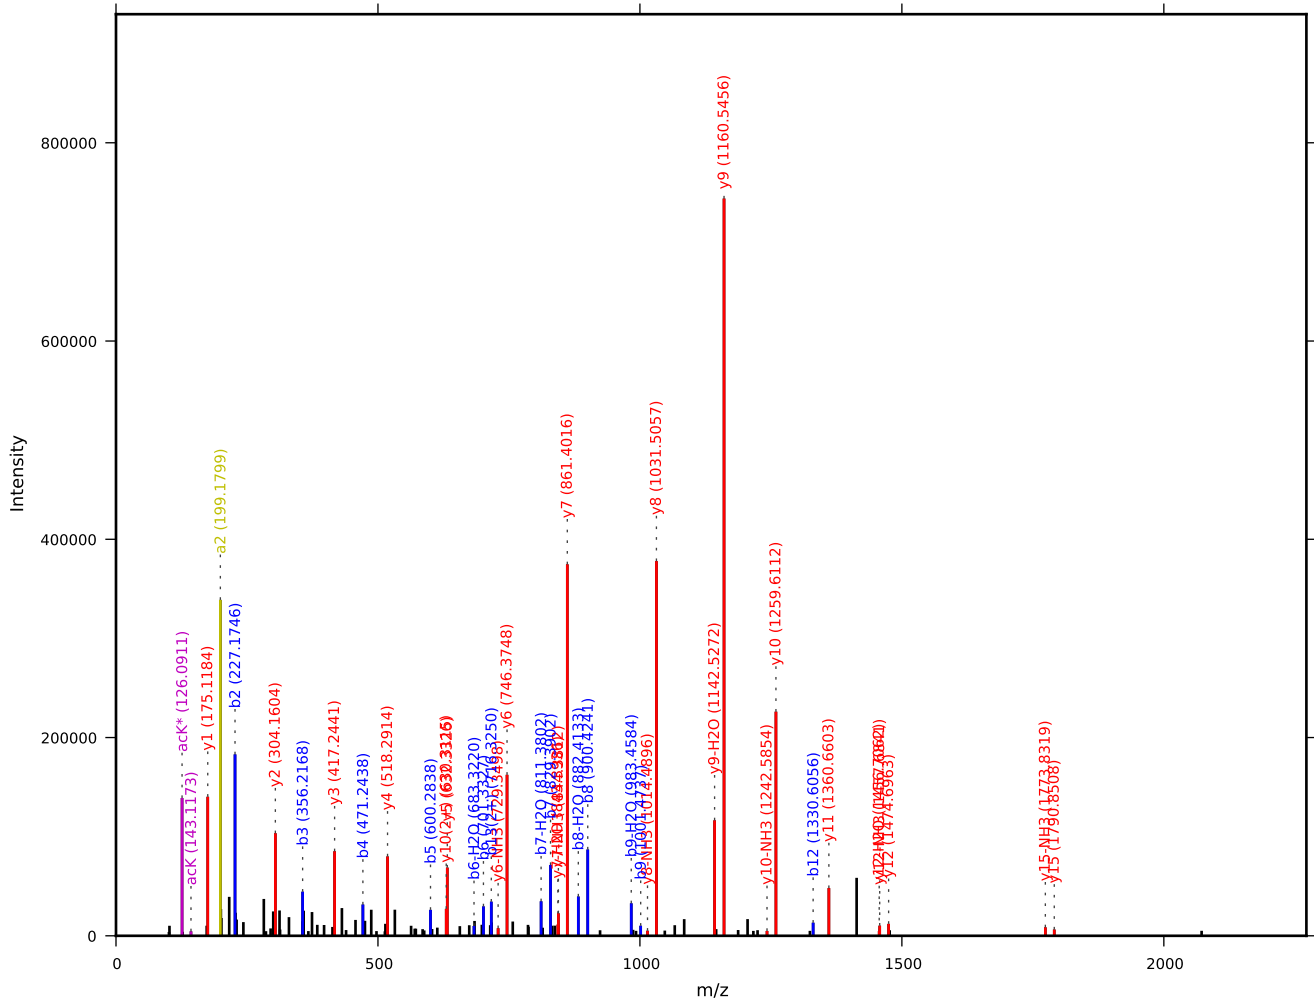

Mass: 1269.6346 Charge: 3 m/z: 424.2188  
Modified Peptide: \_ANDIGFHK(ac)YR\_ Score: 34.532 PEP: 0.0084426

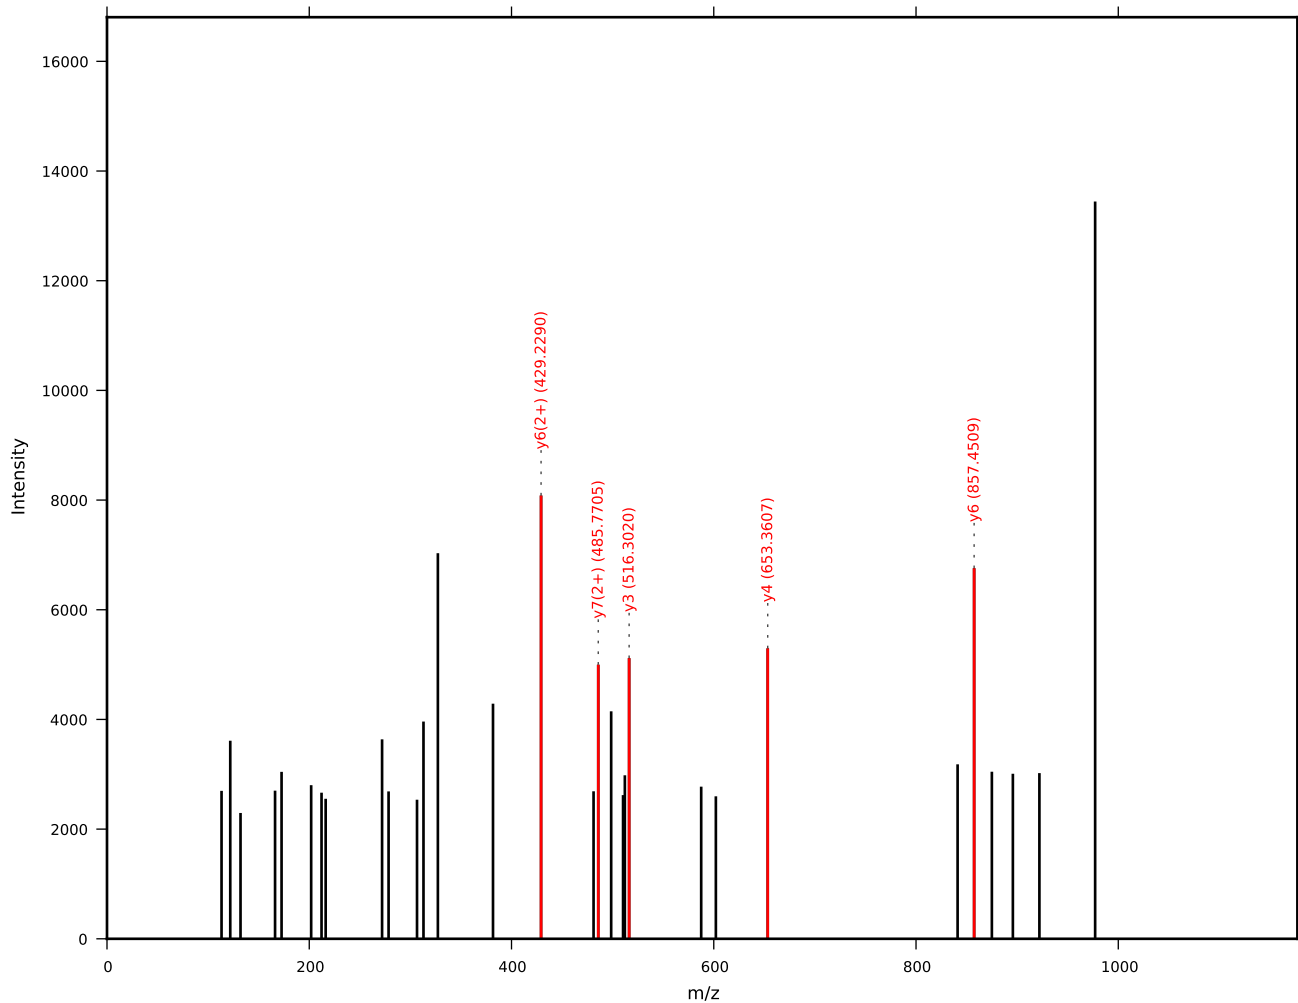

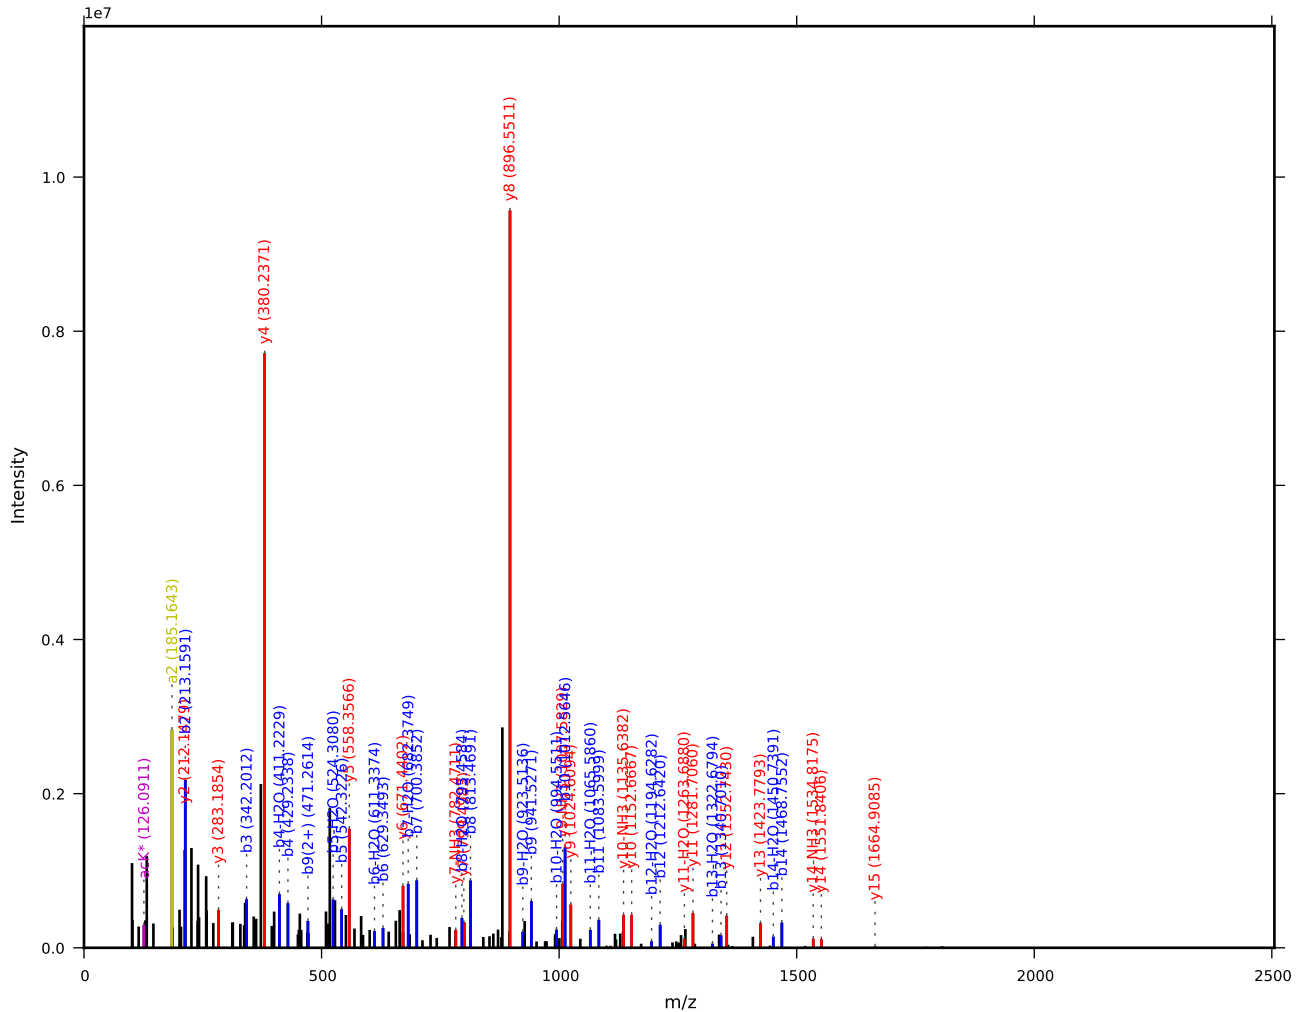

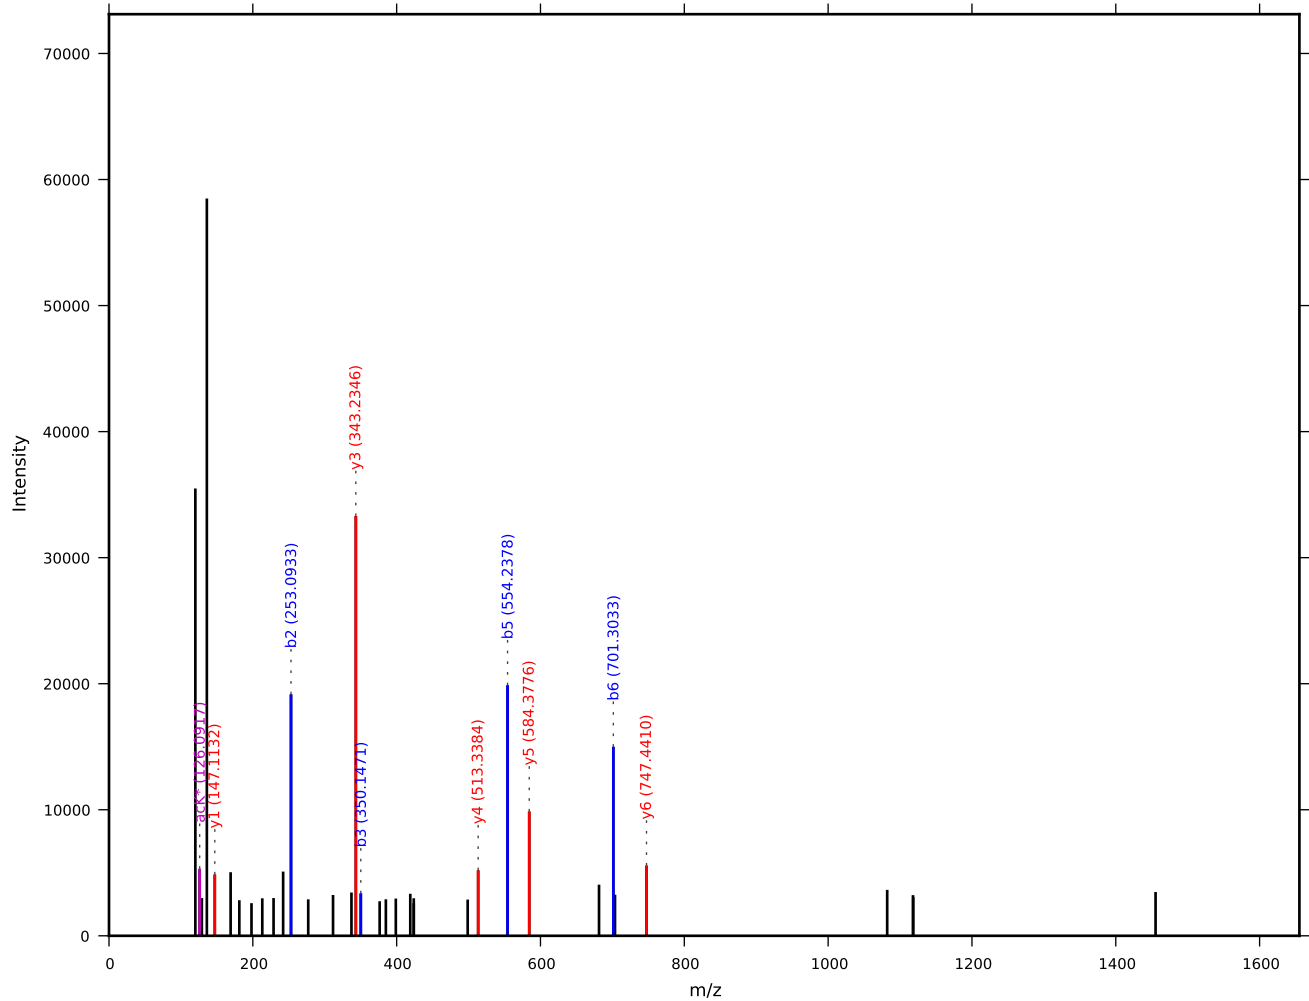

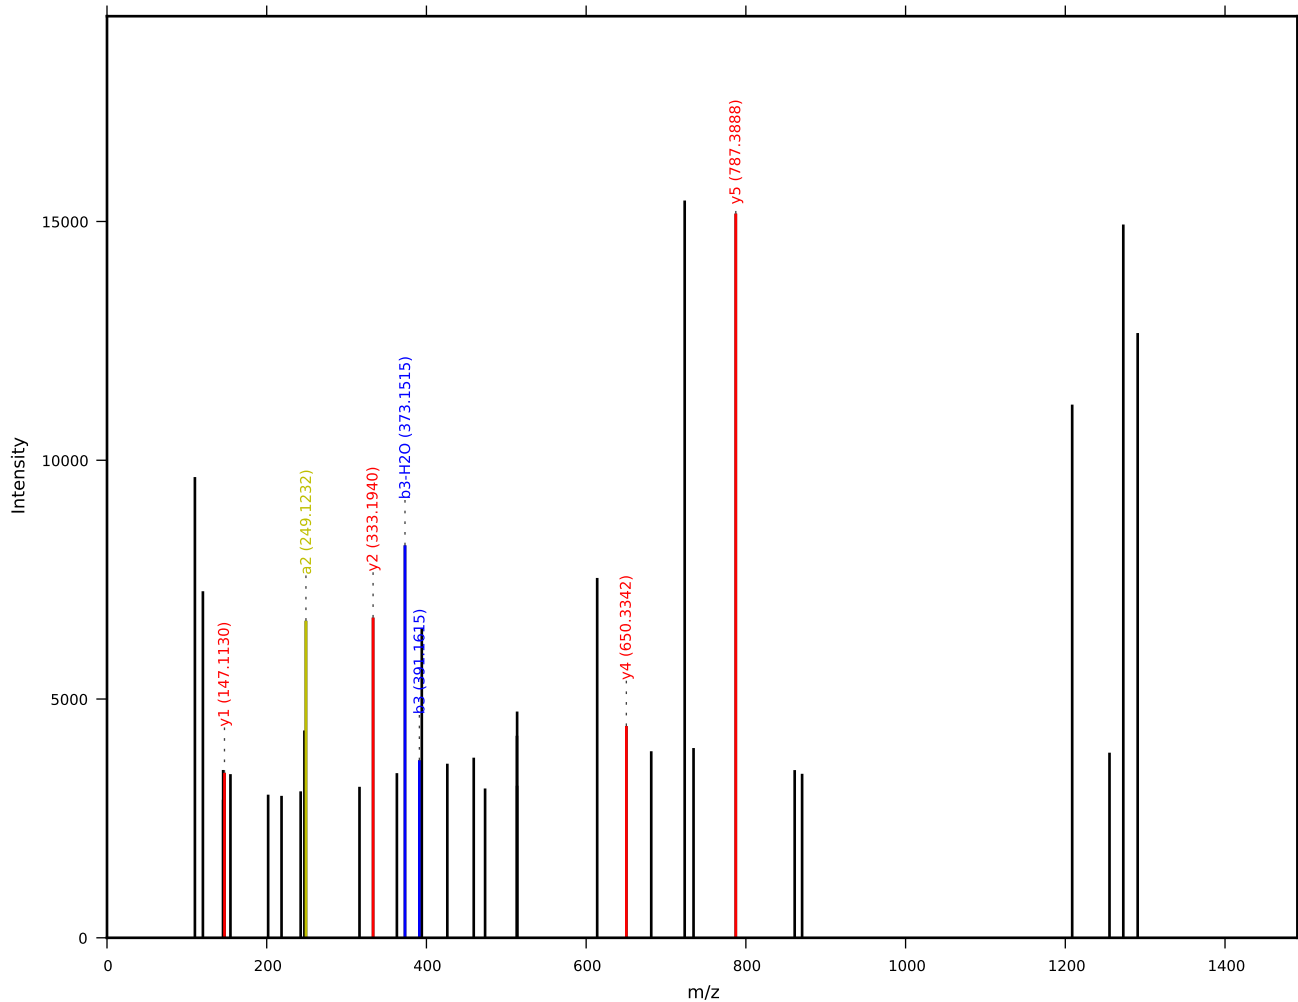

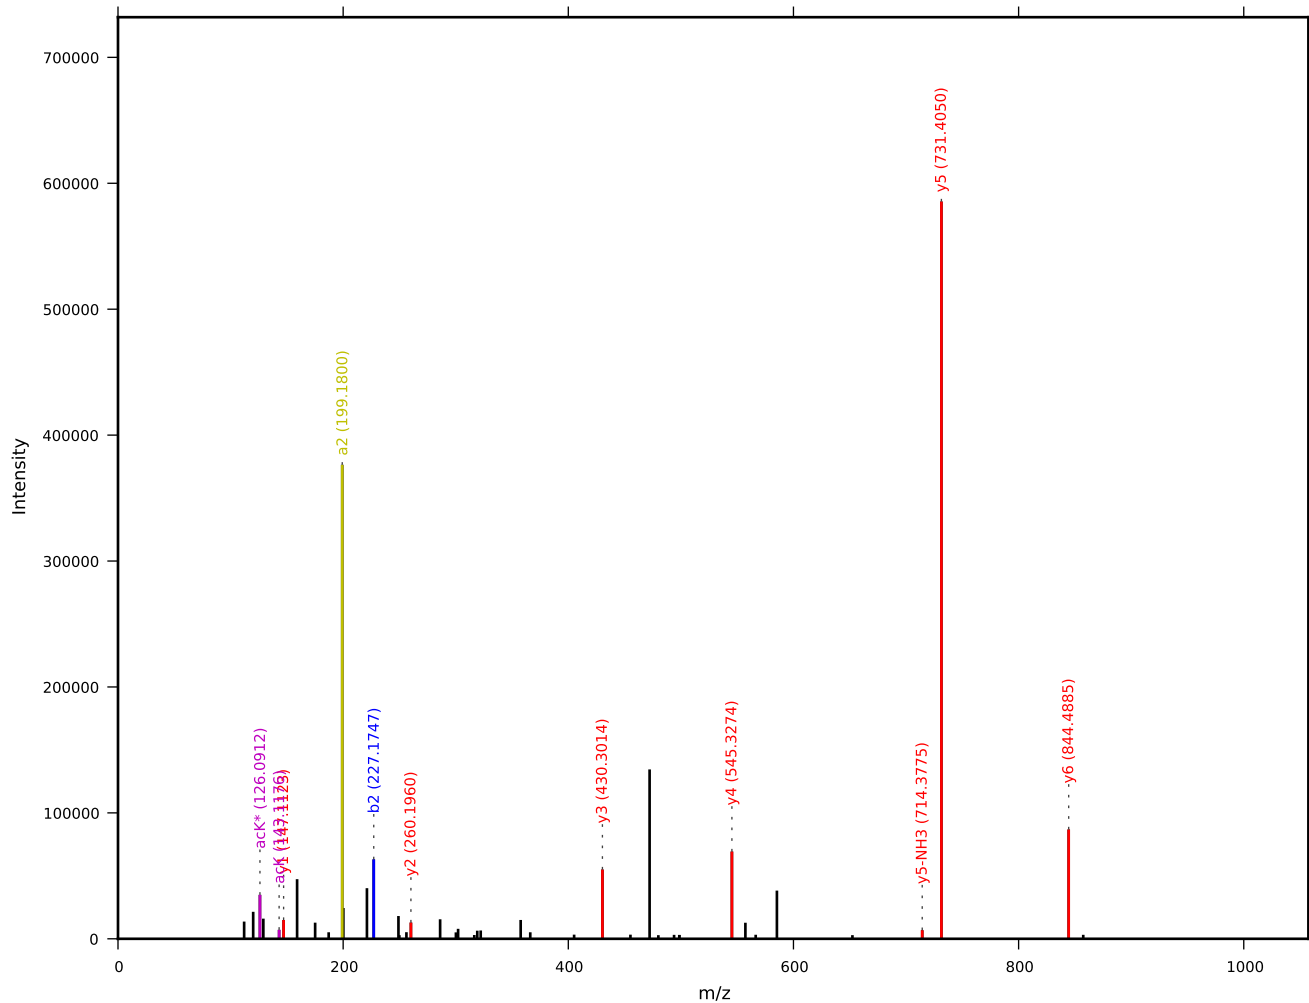



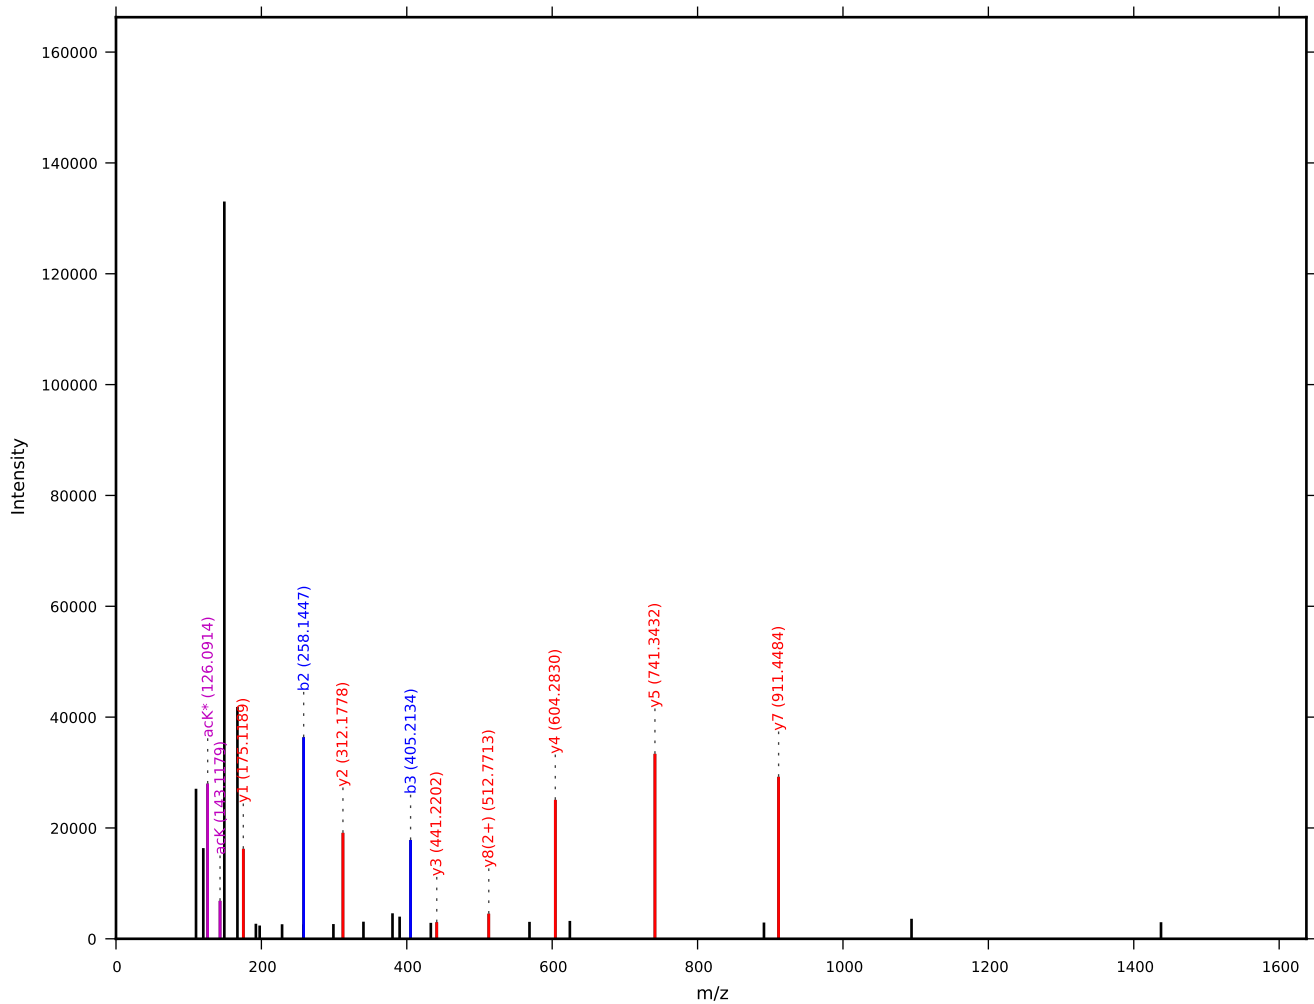

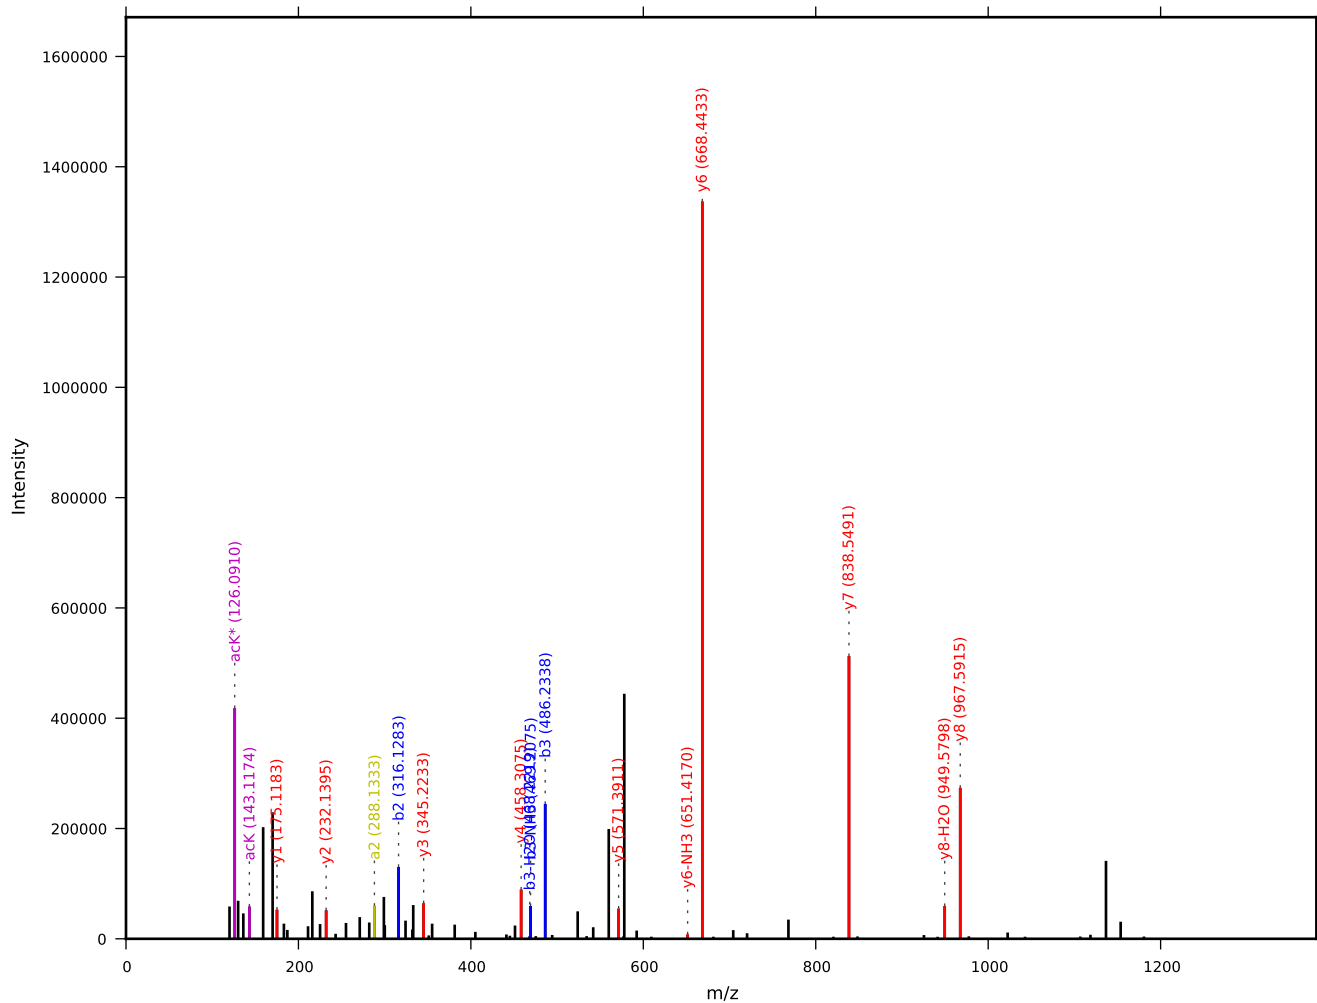

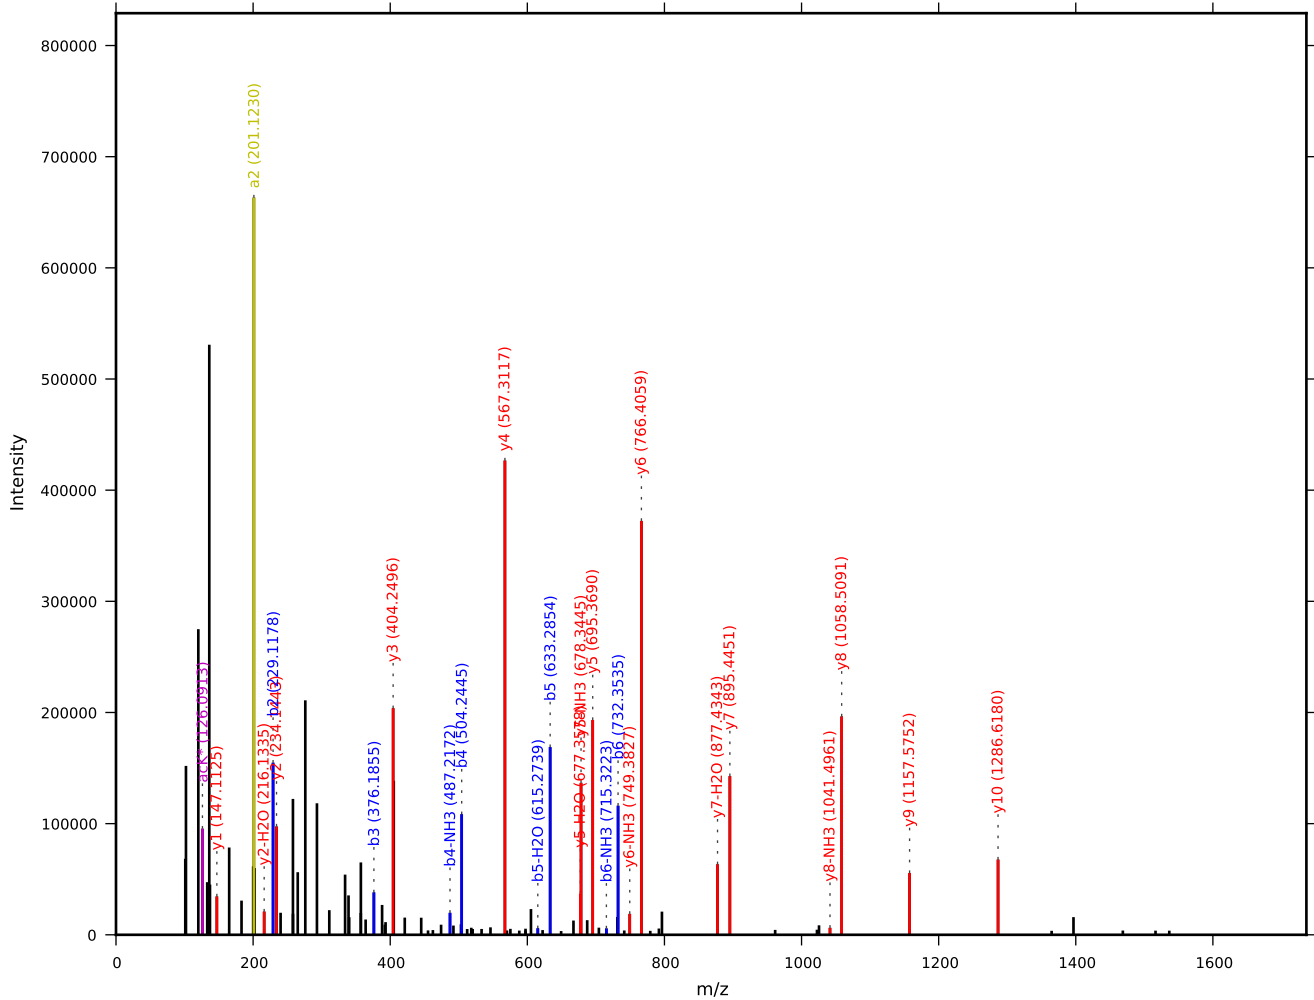

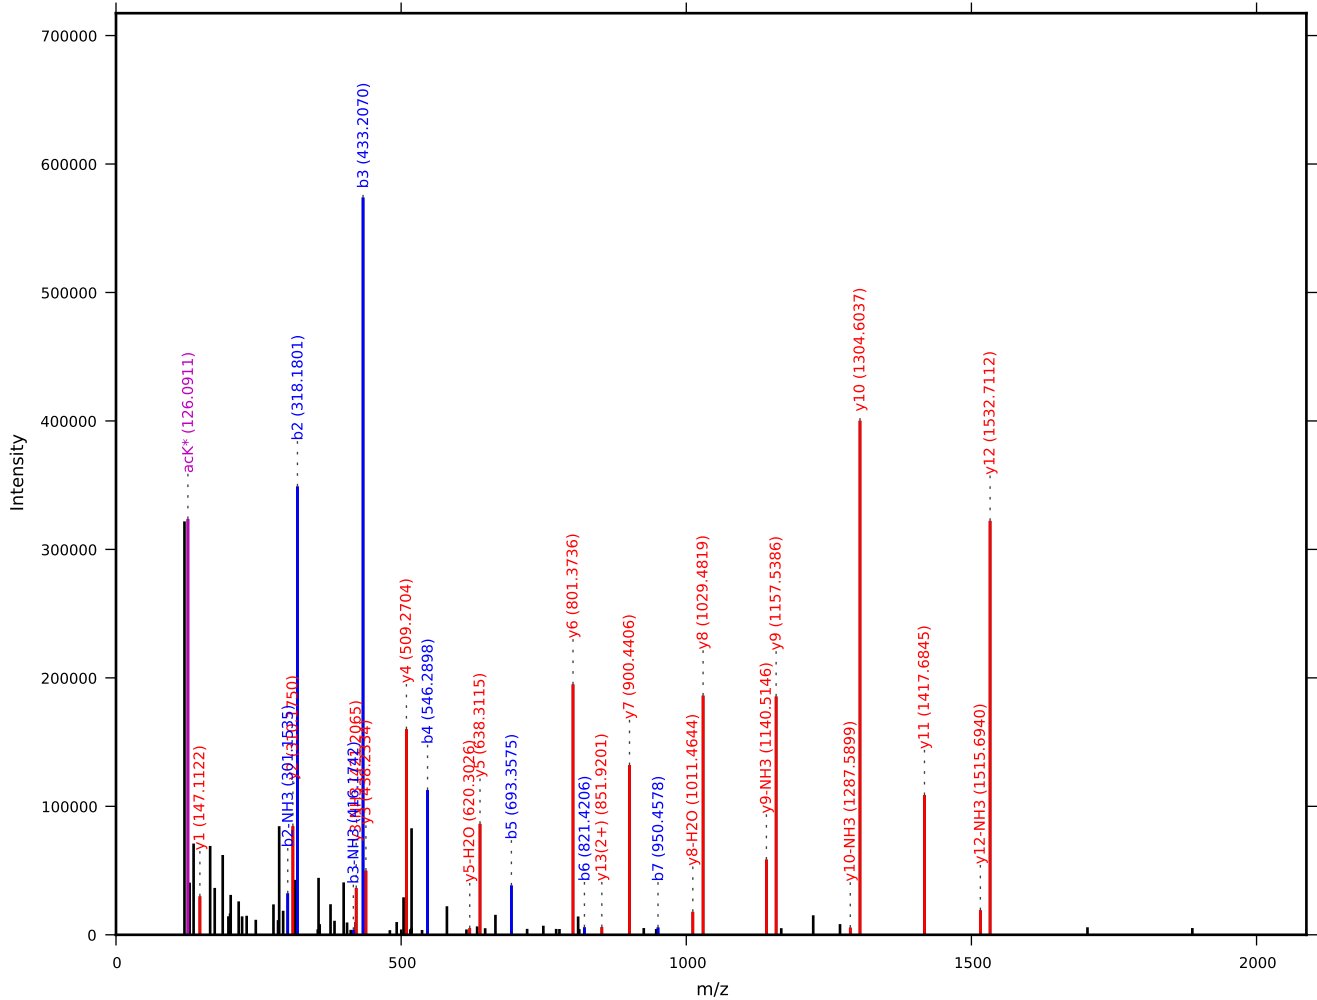

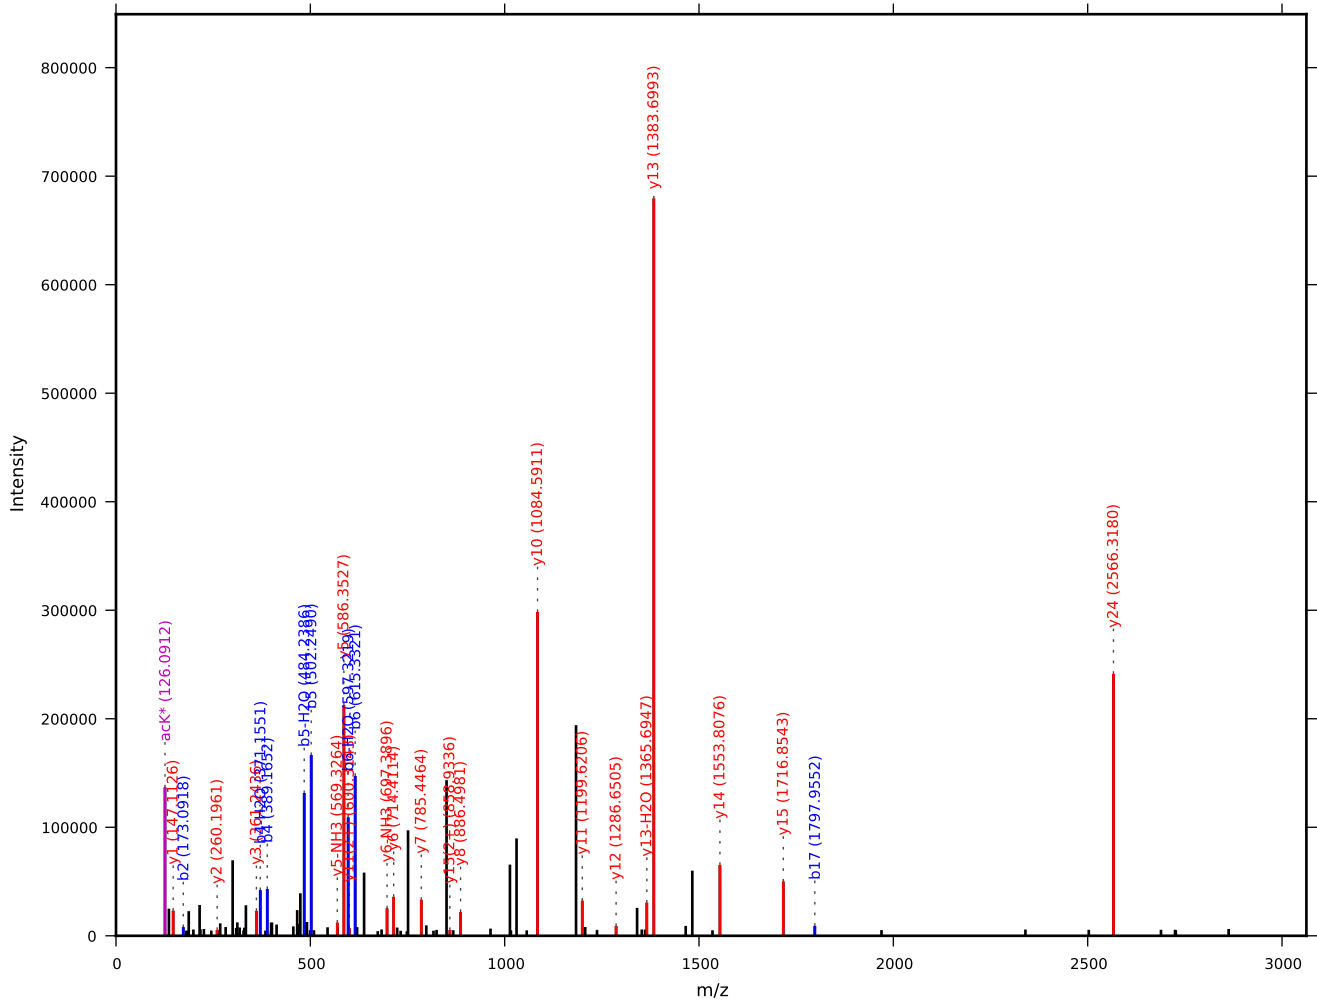

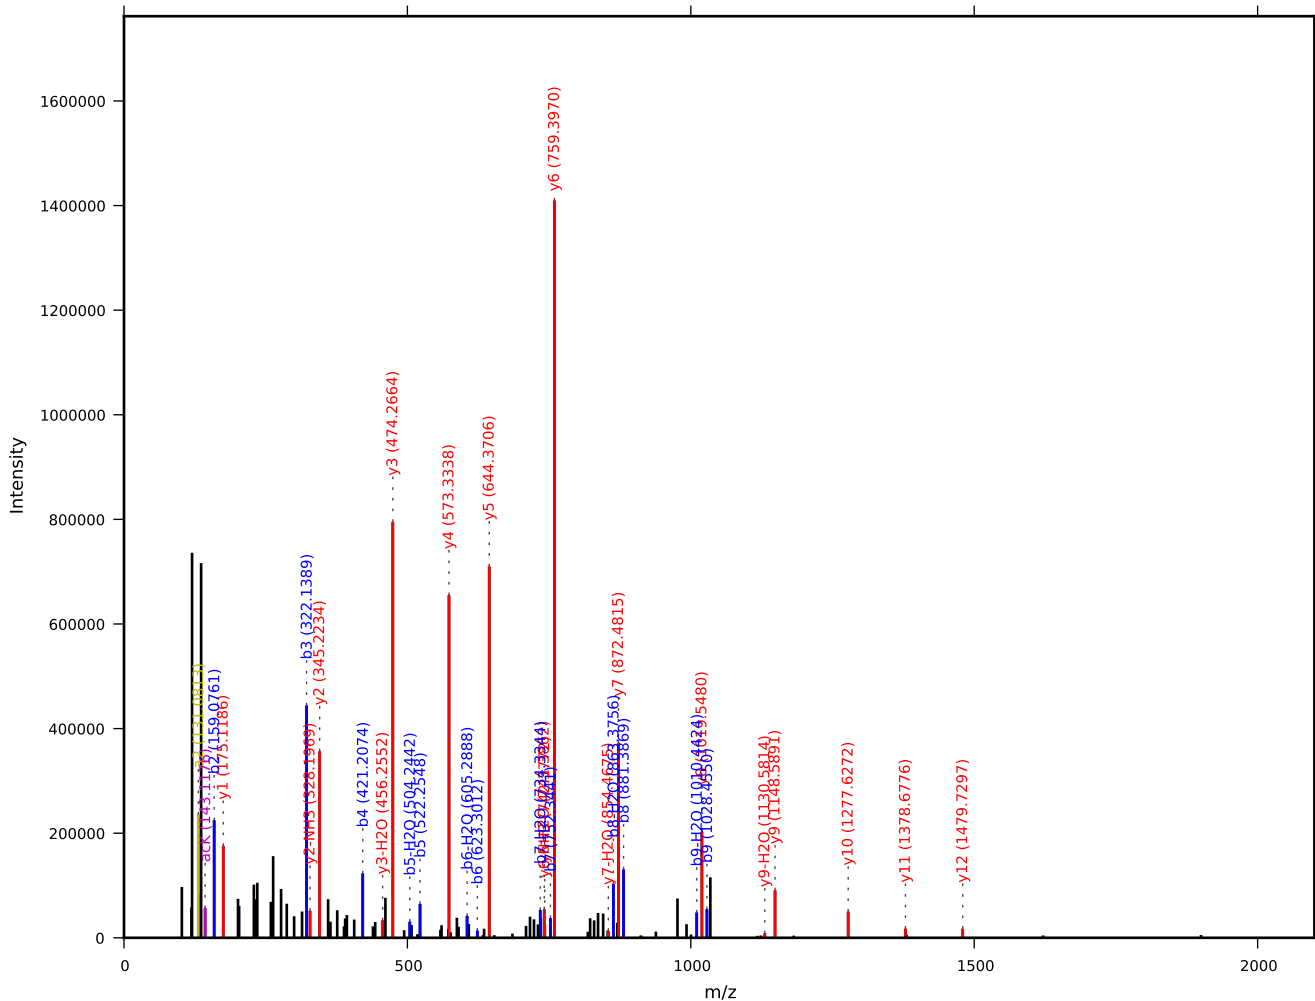

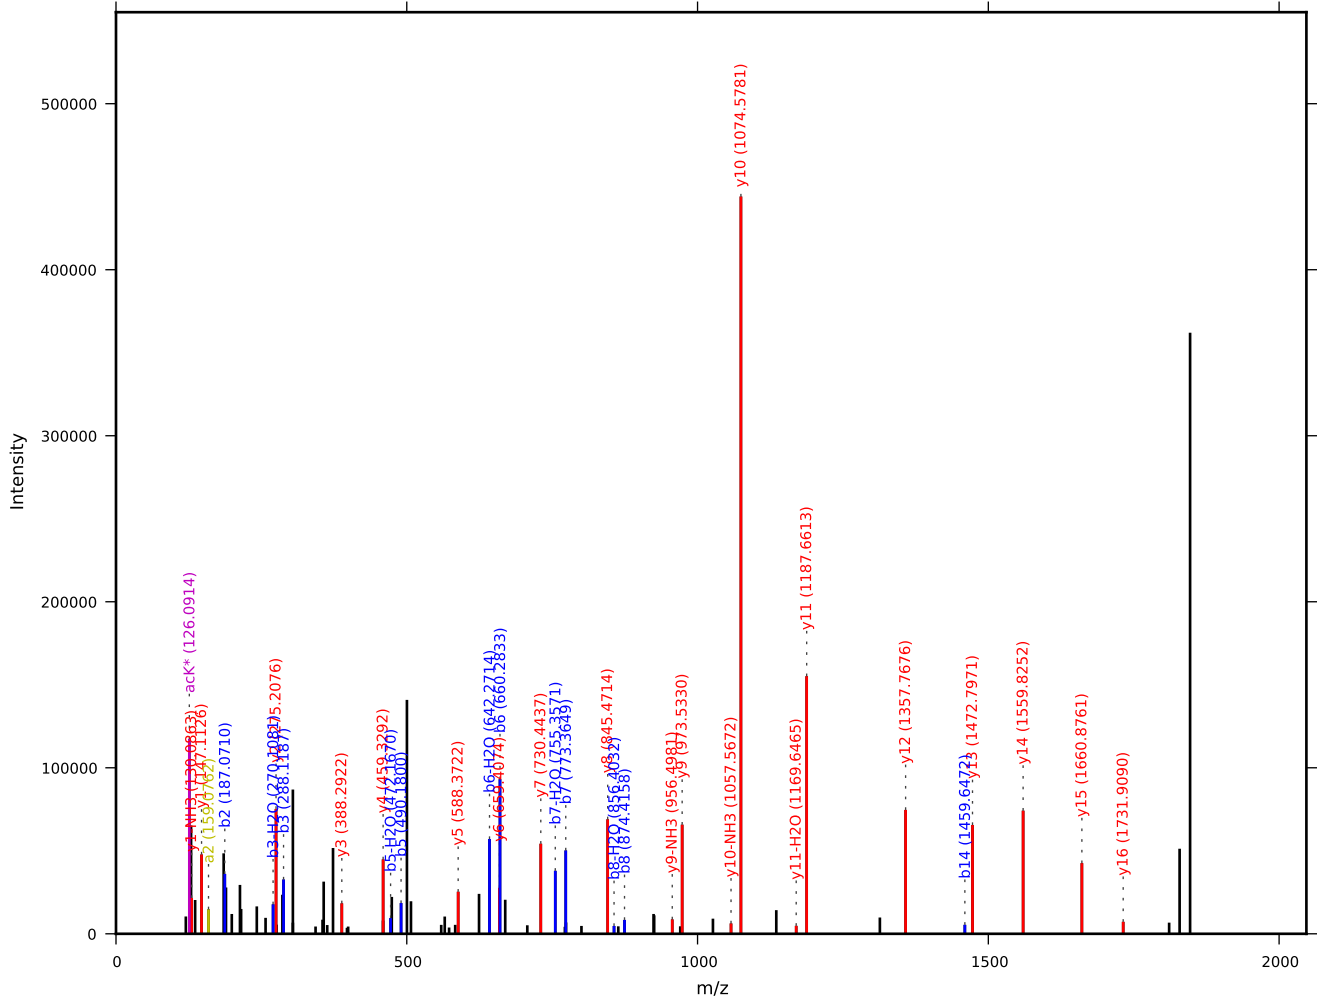

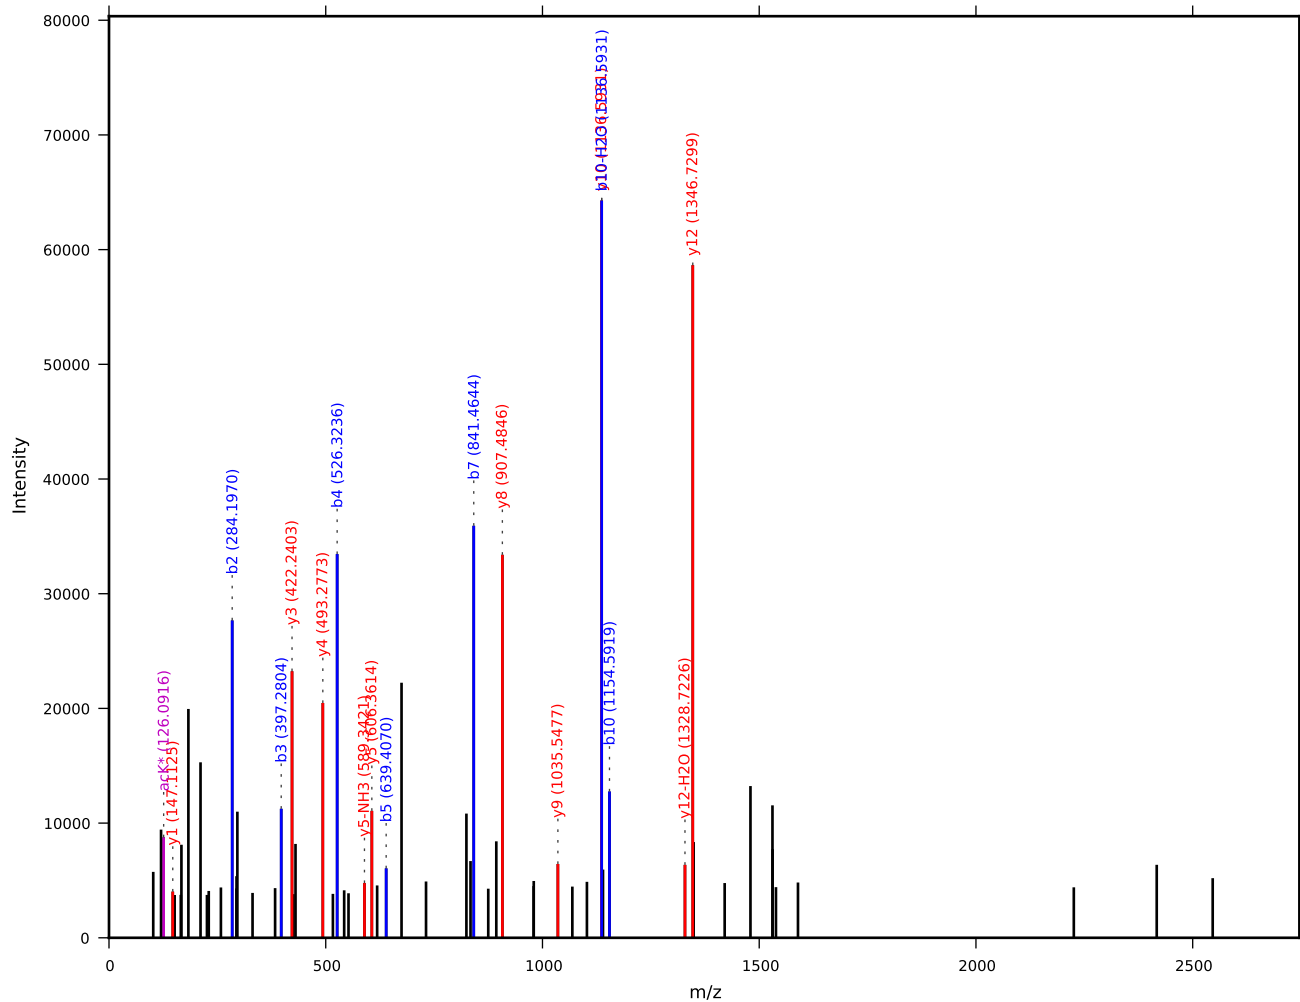



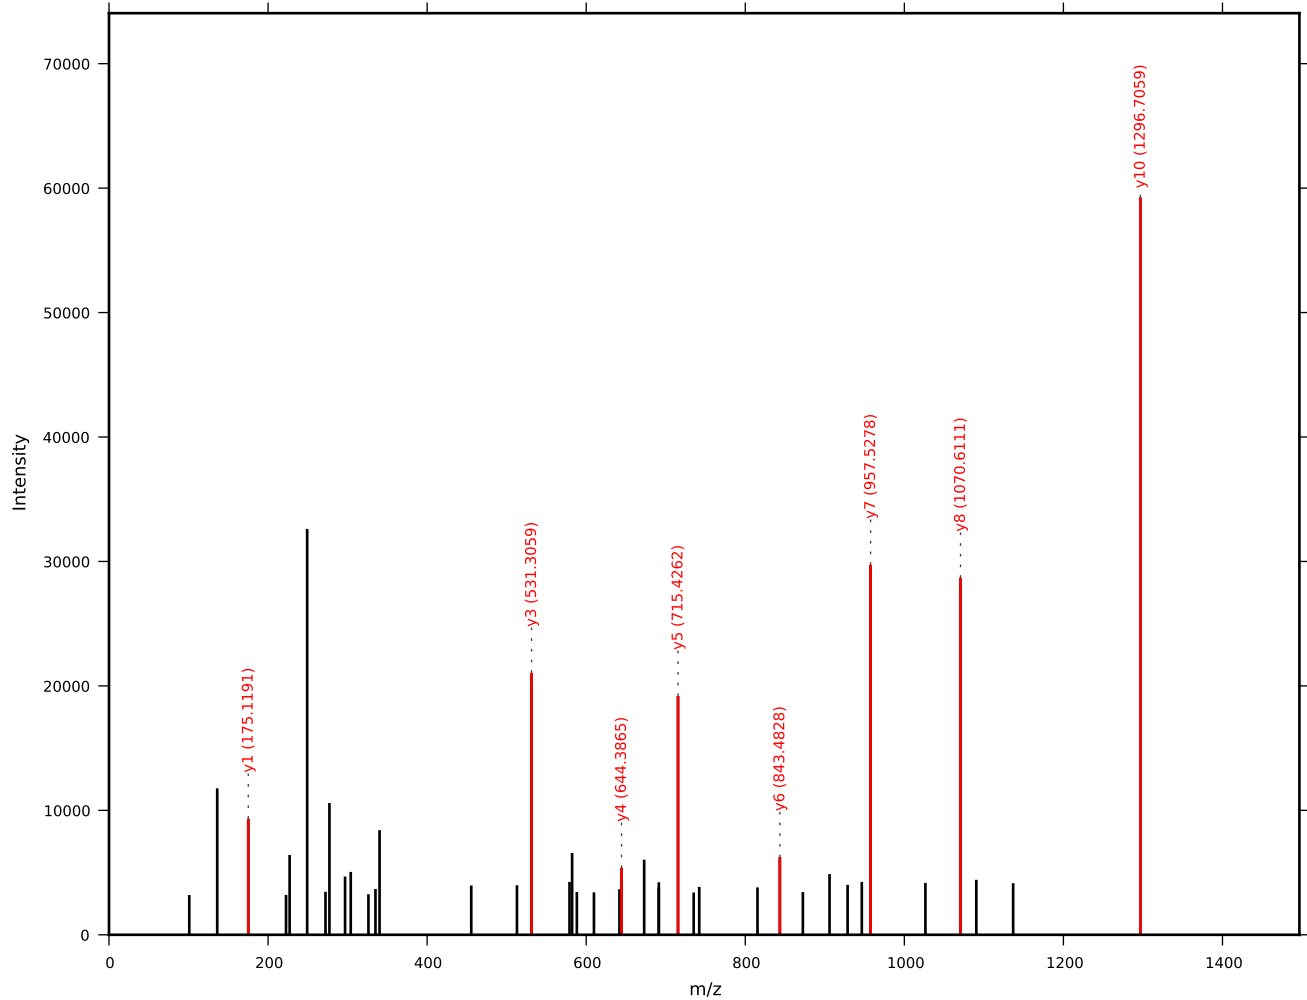

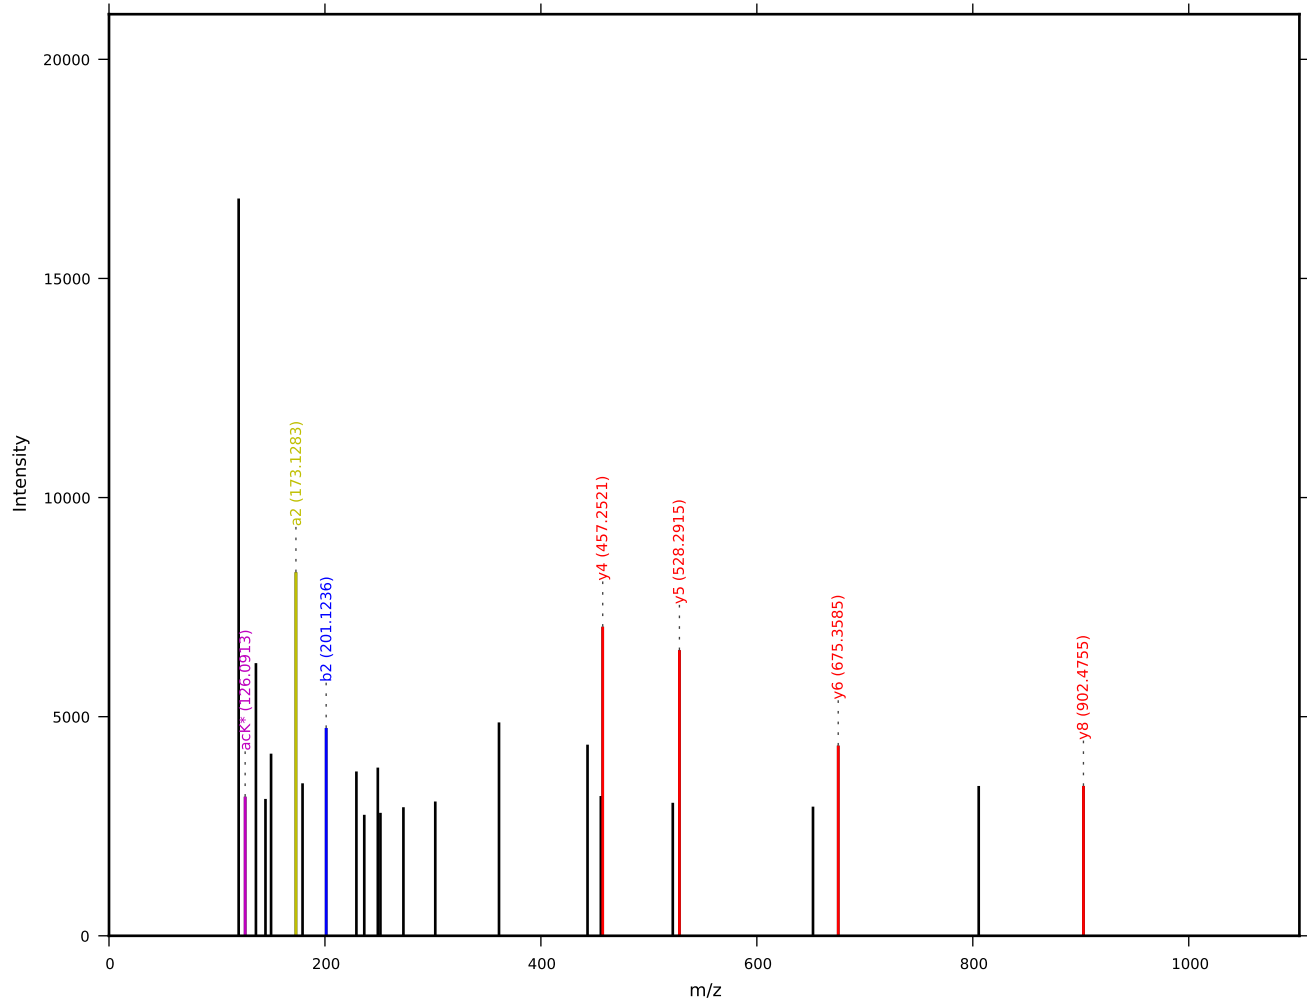

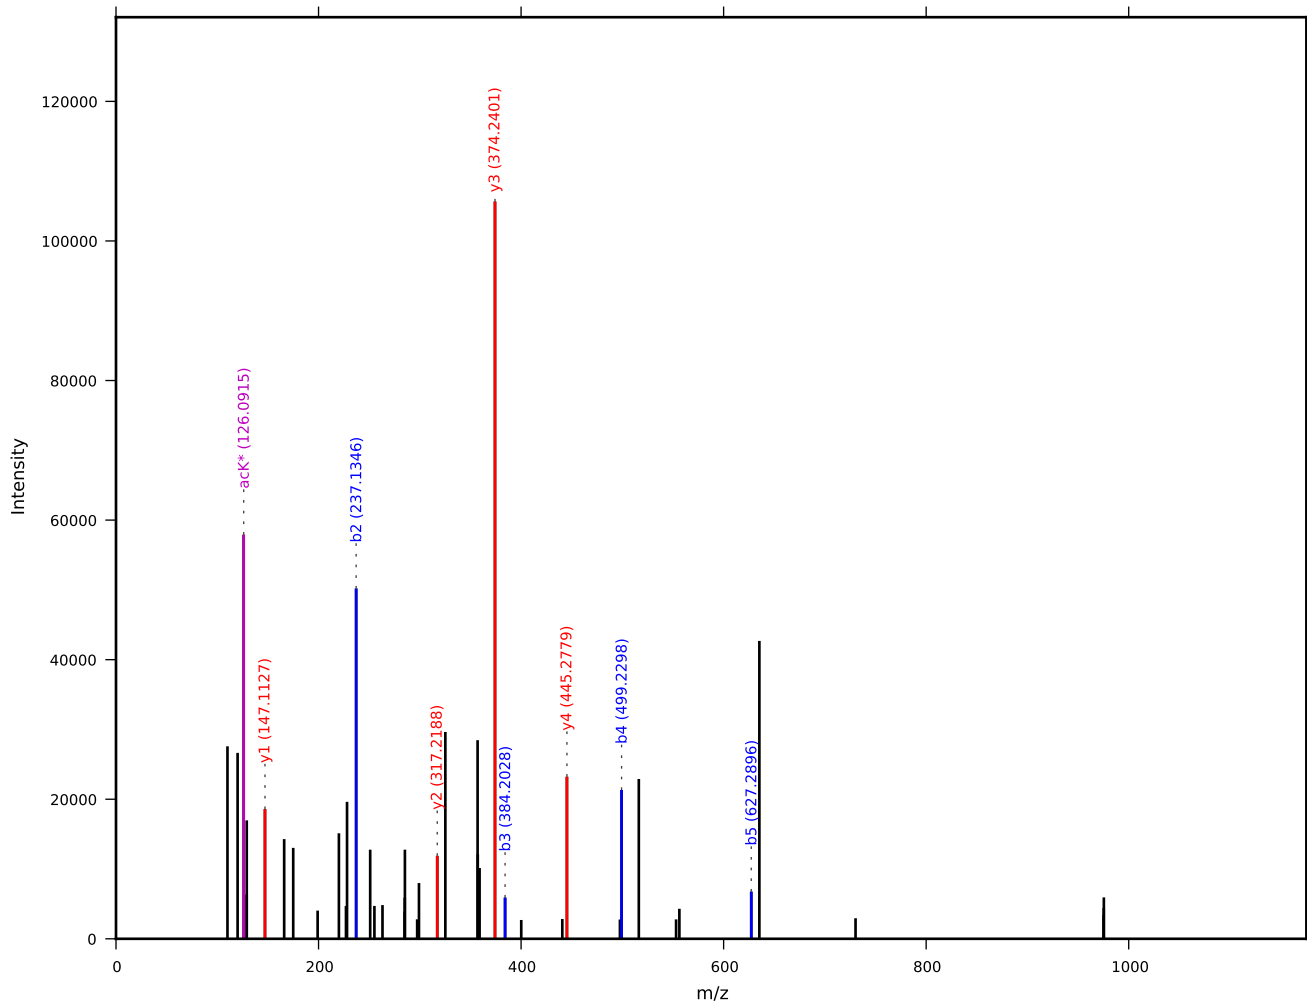

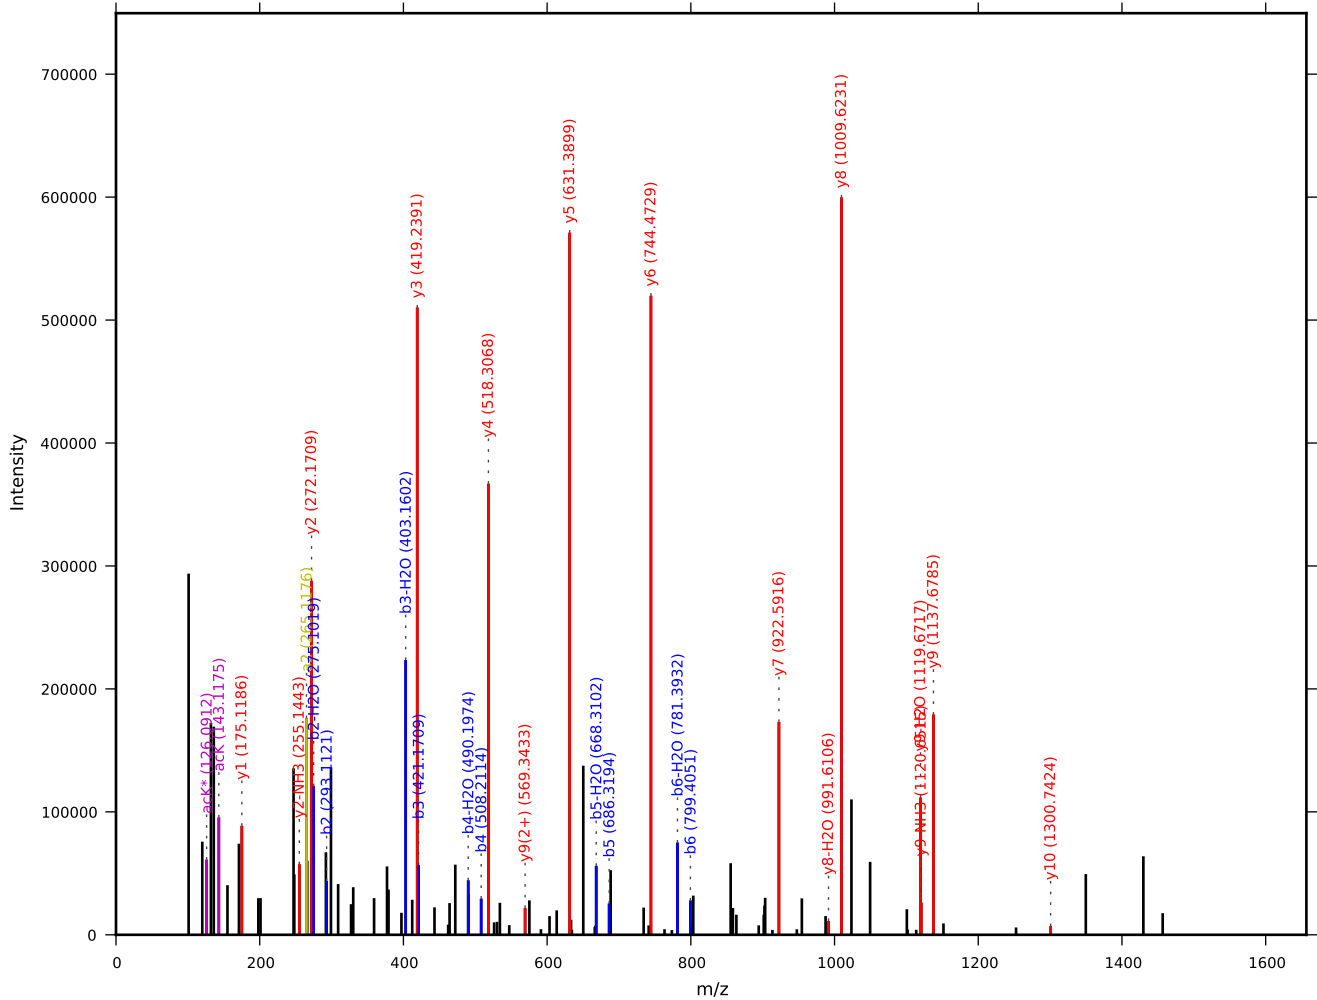

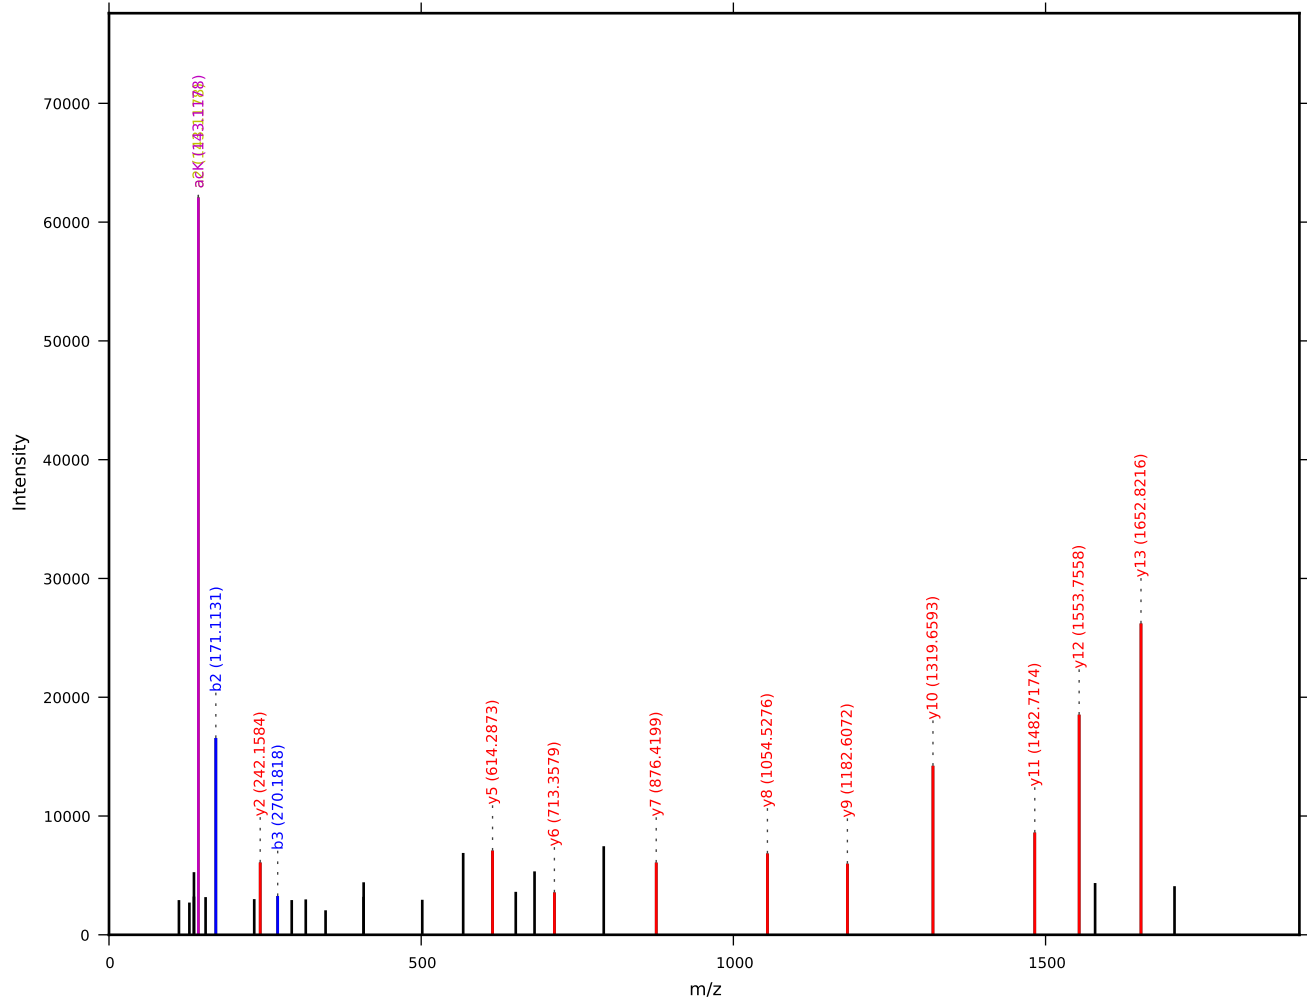

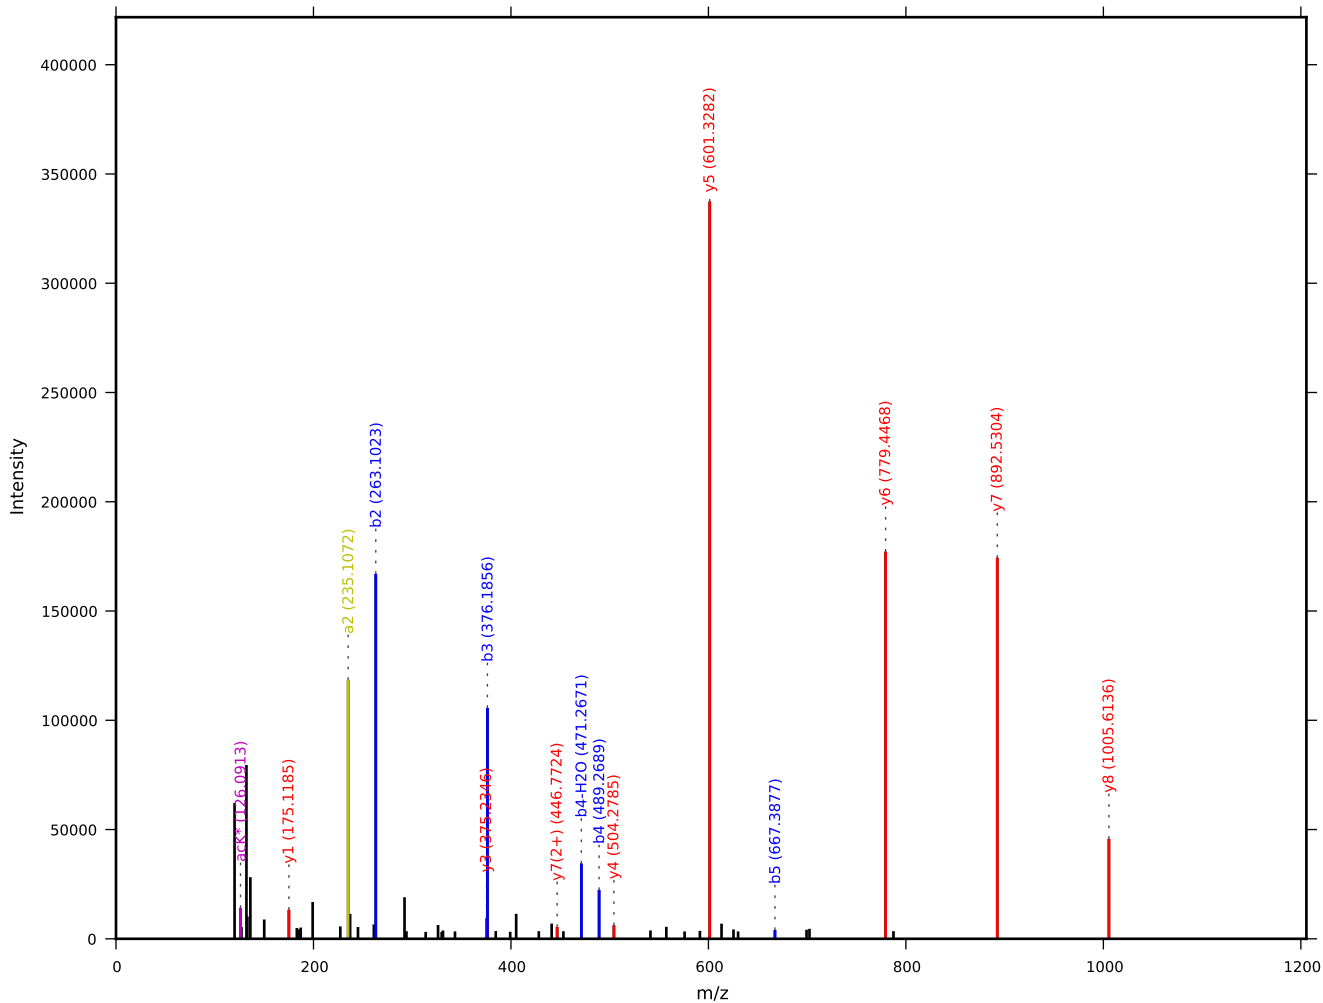

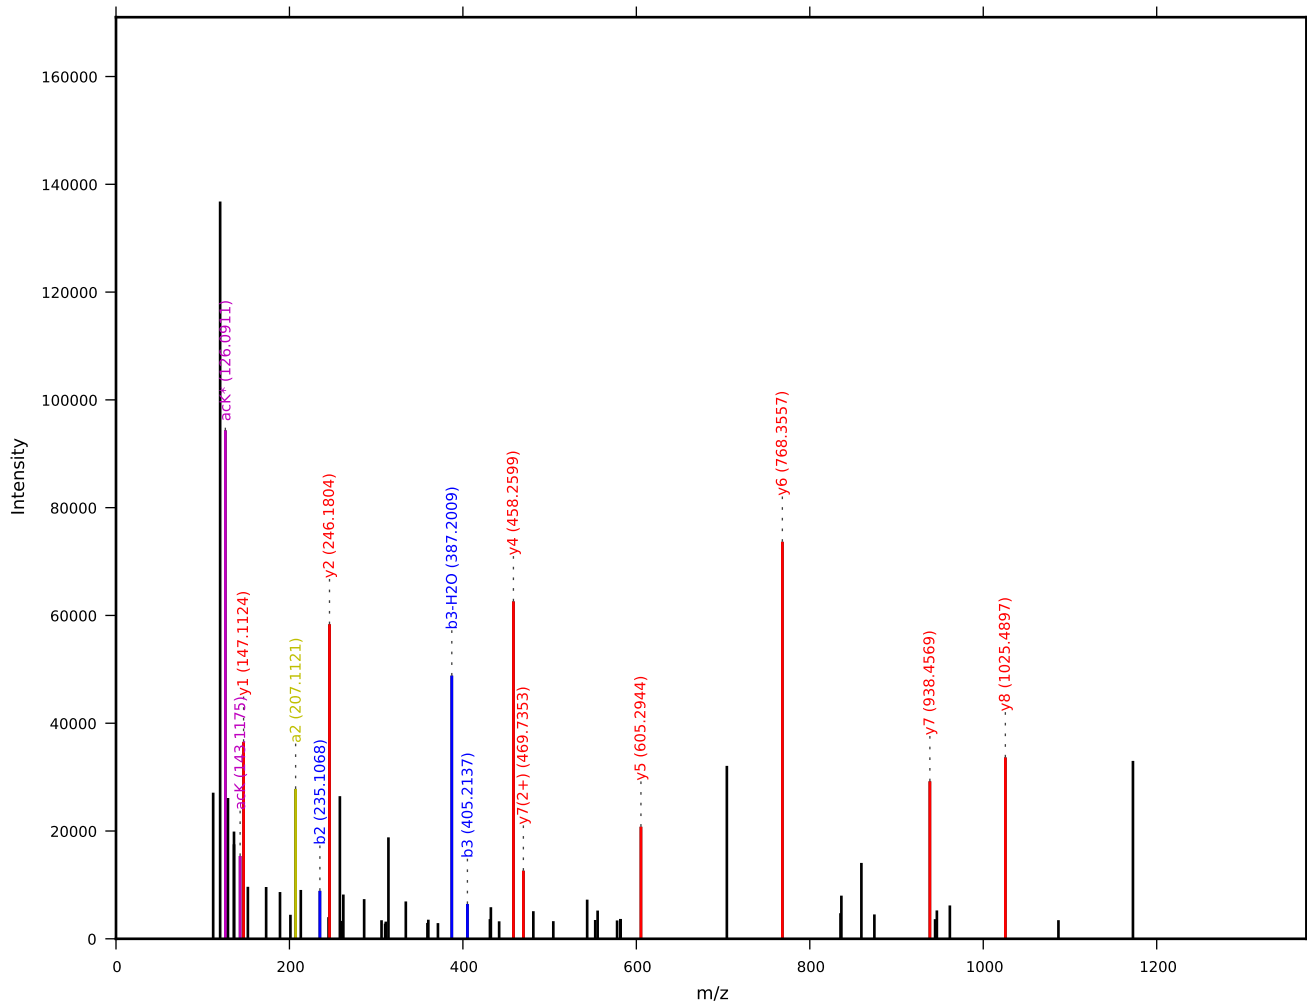

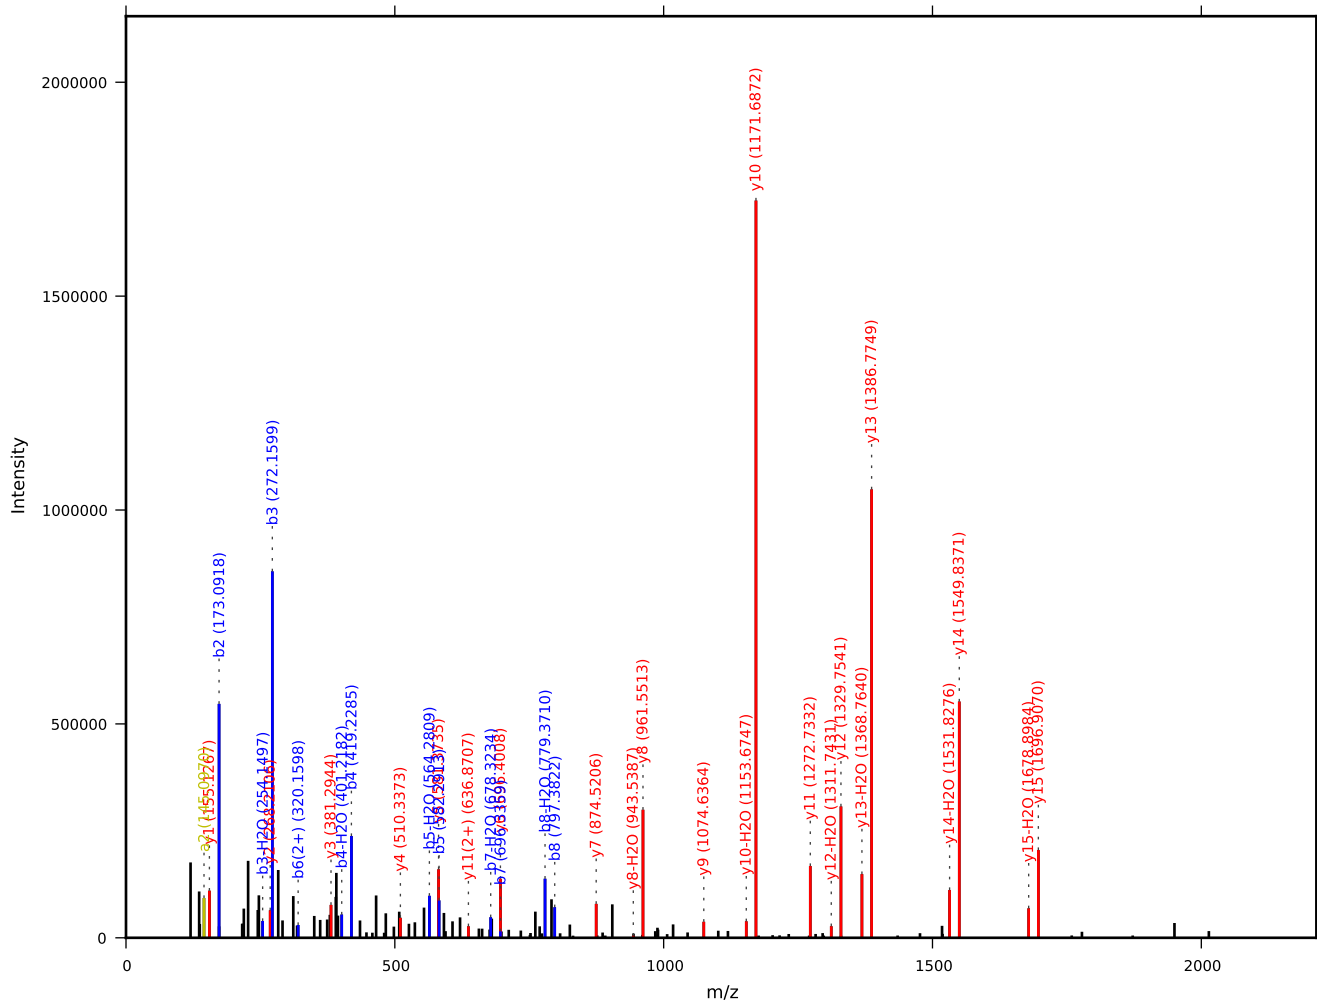



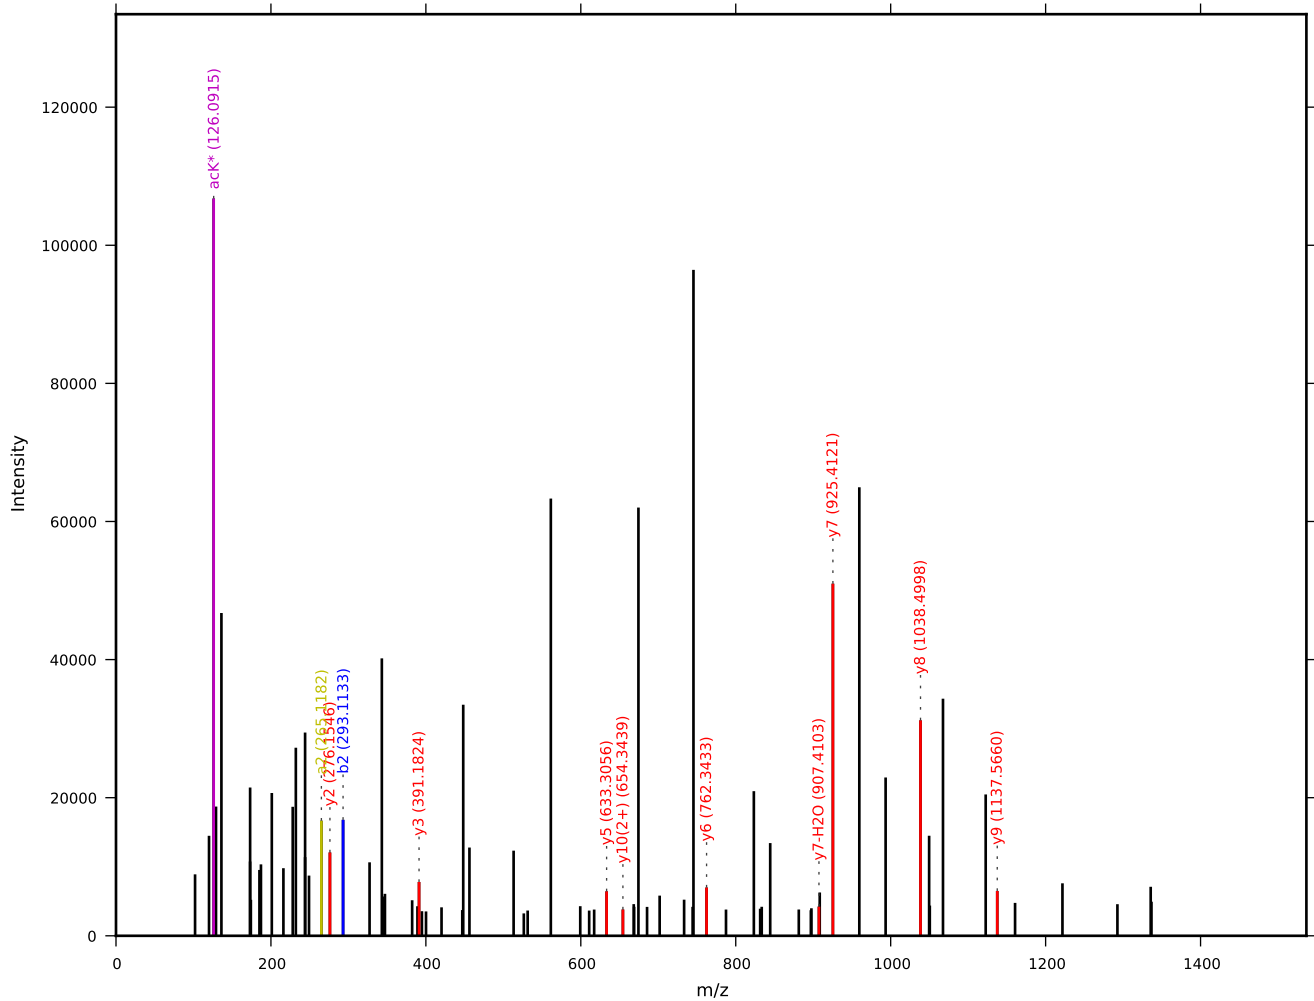

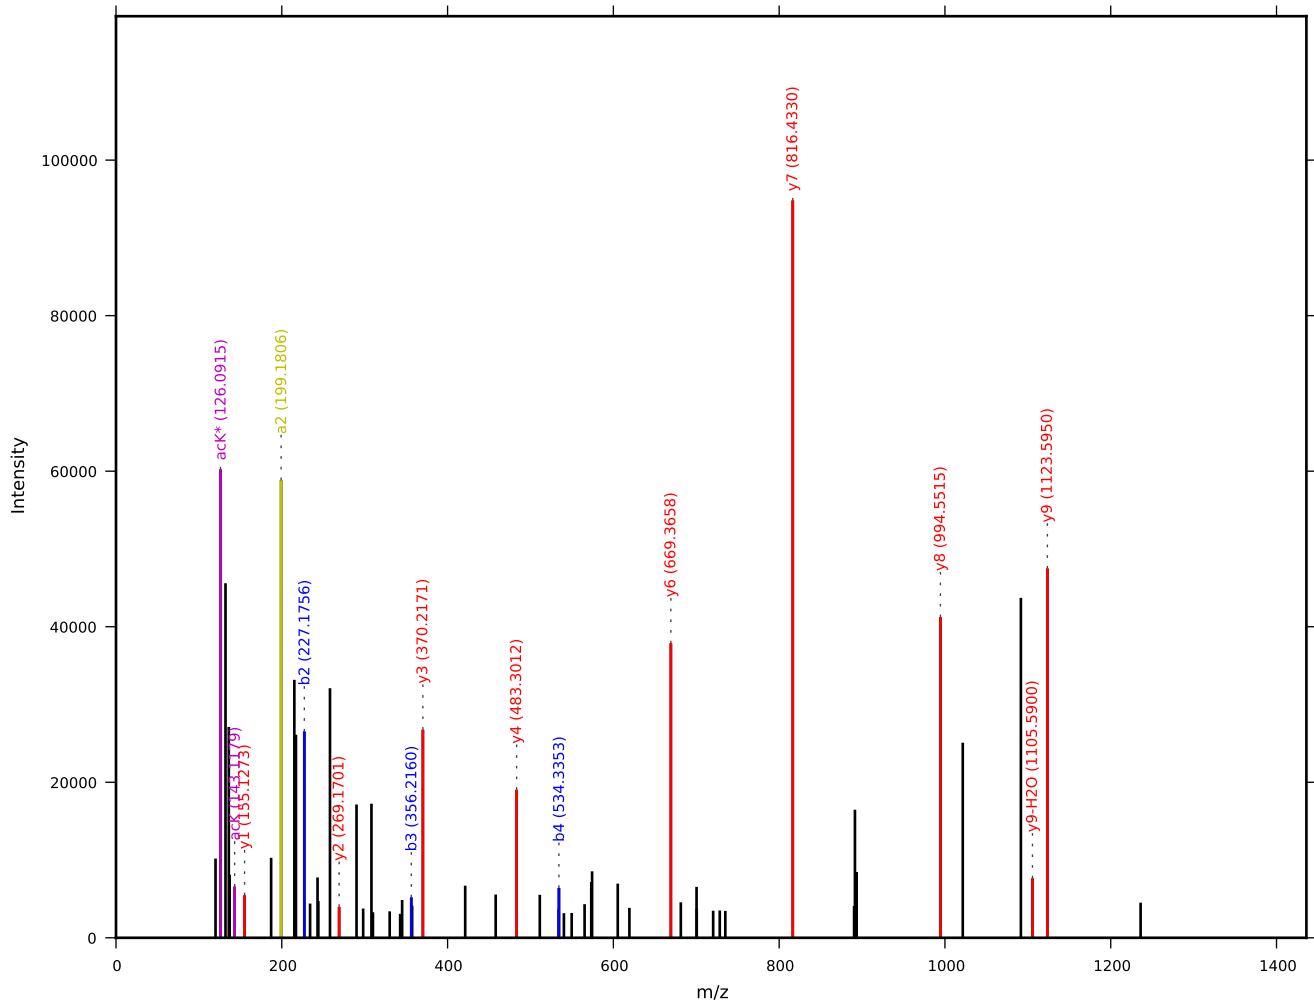

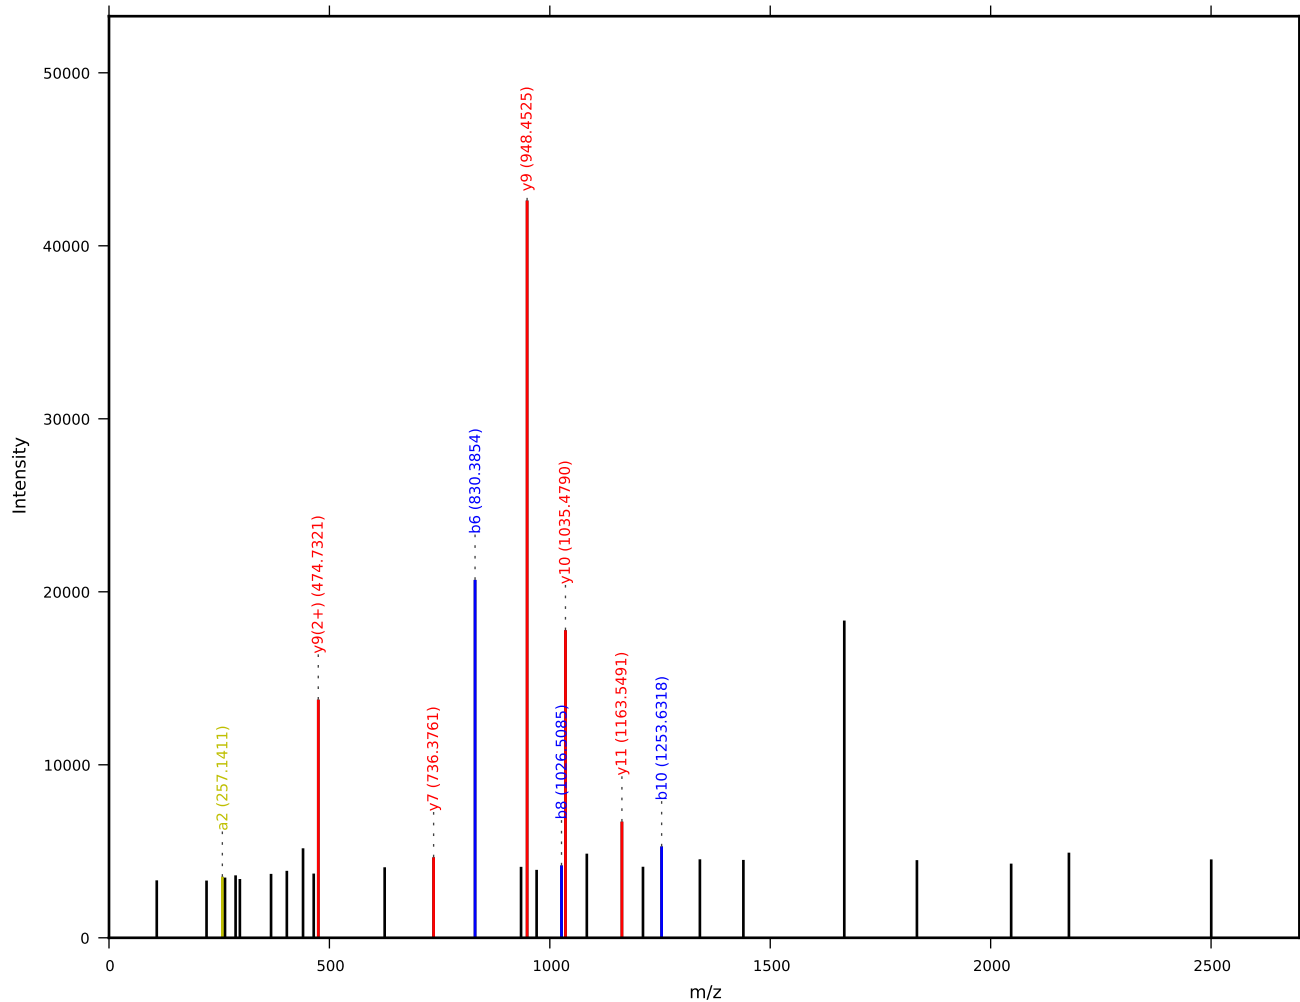

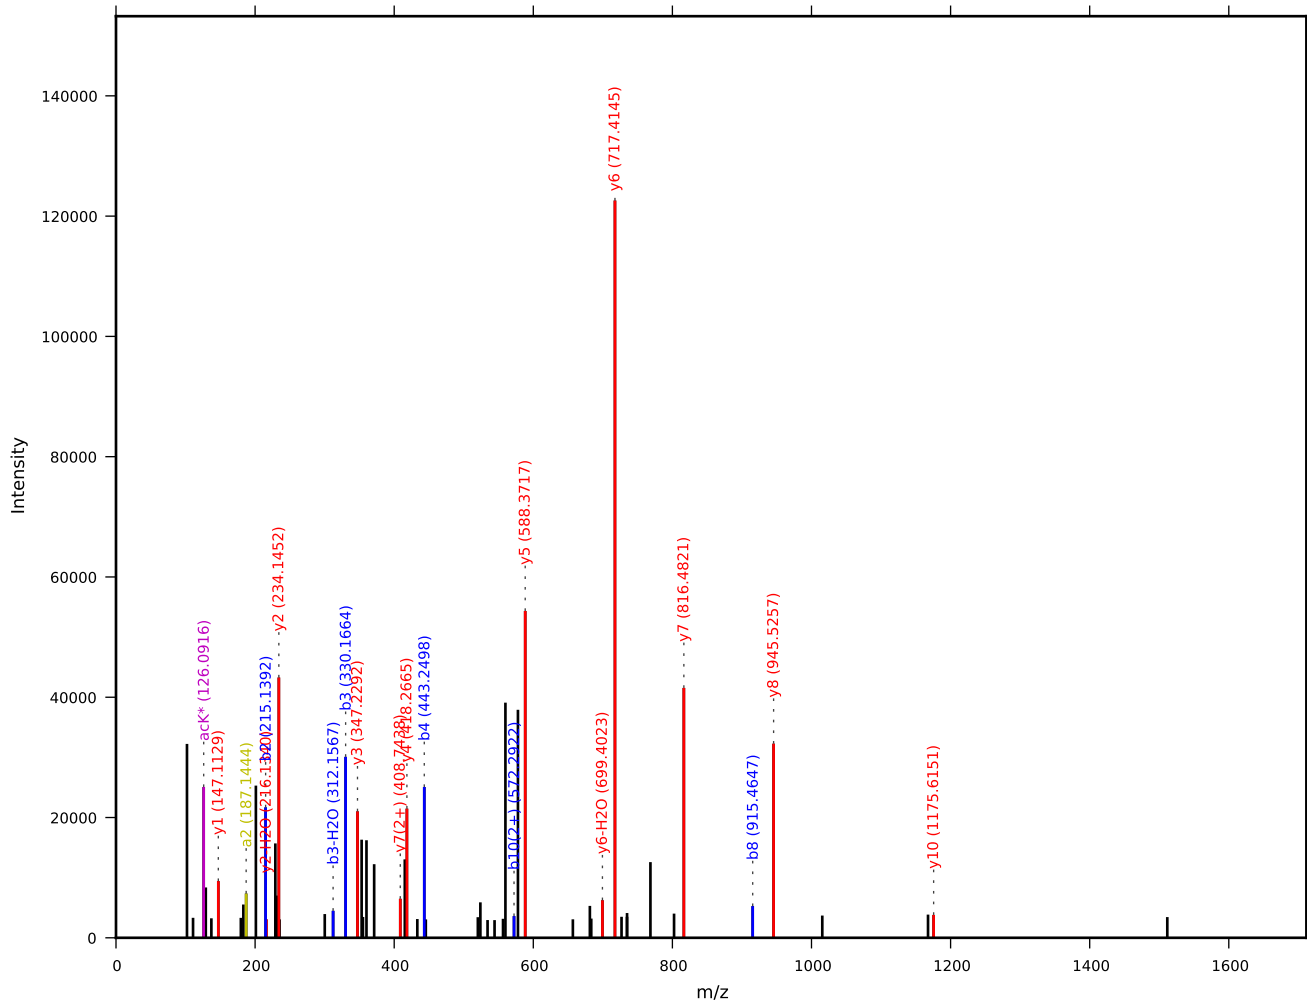

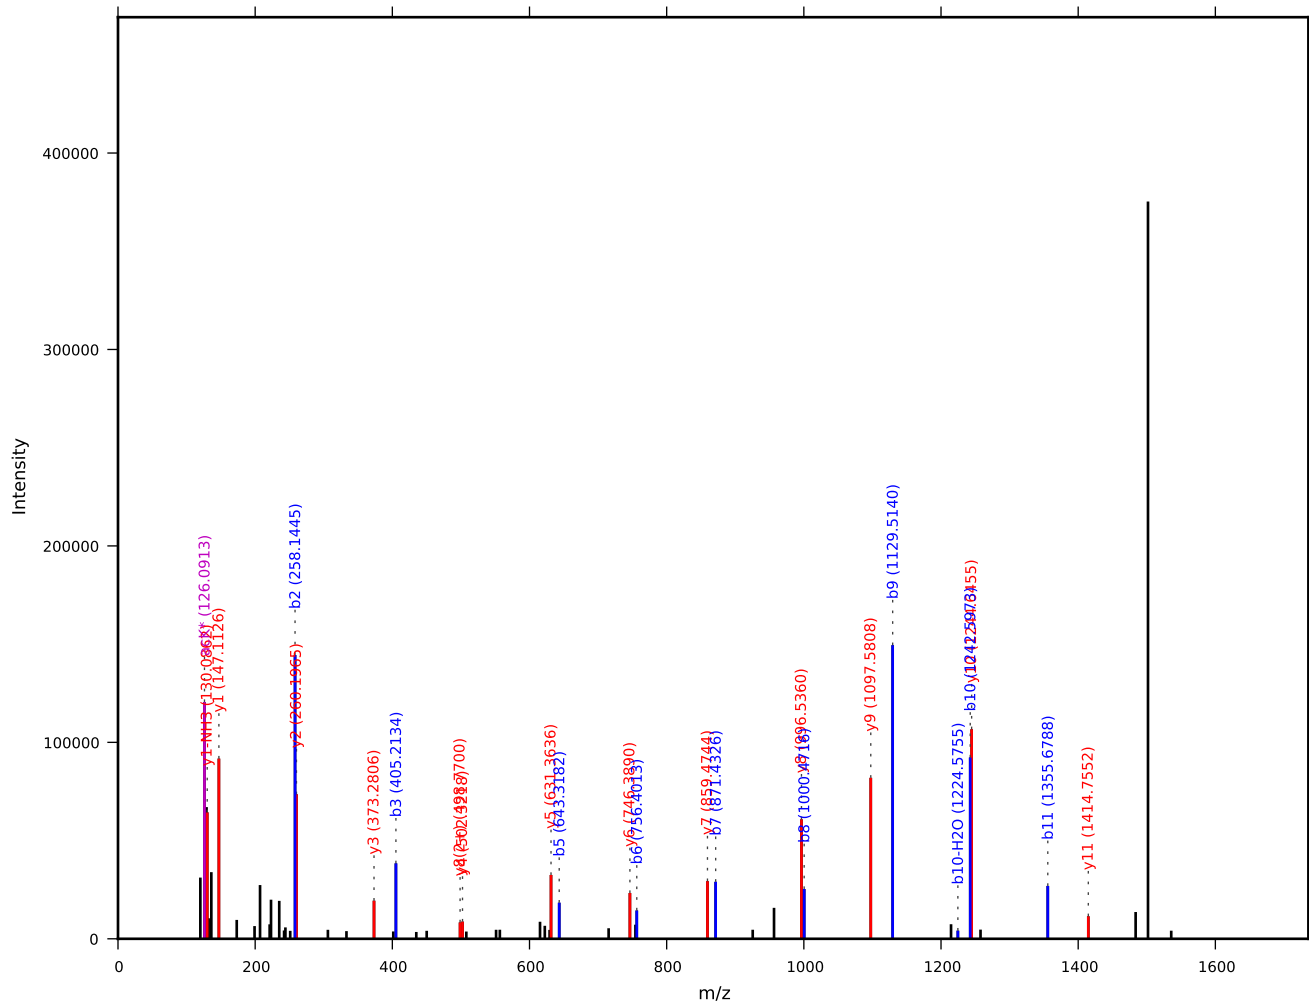

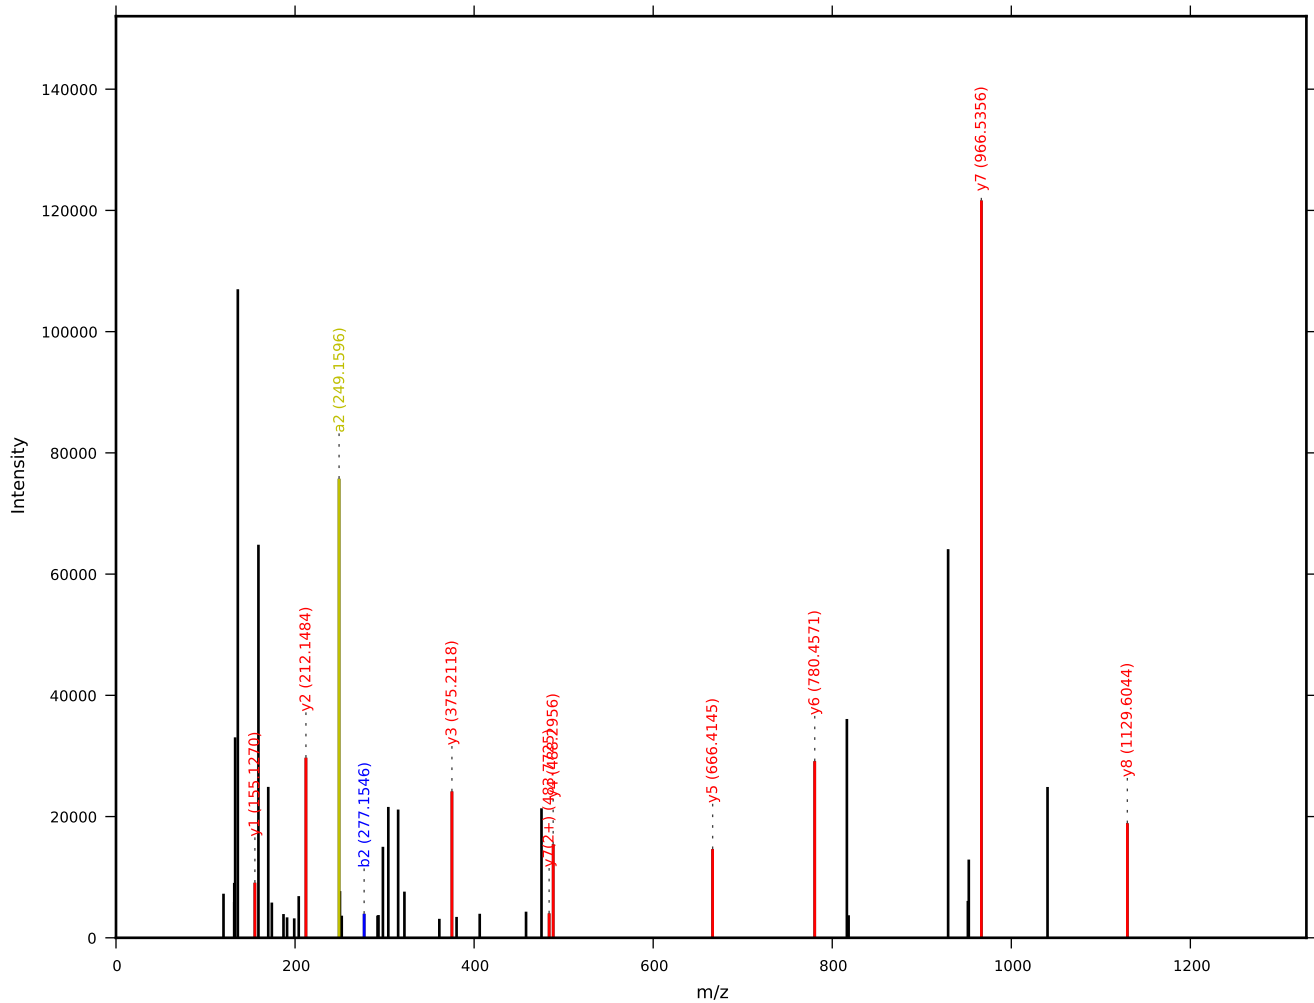

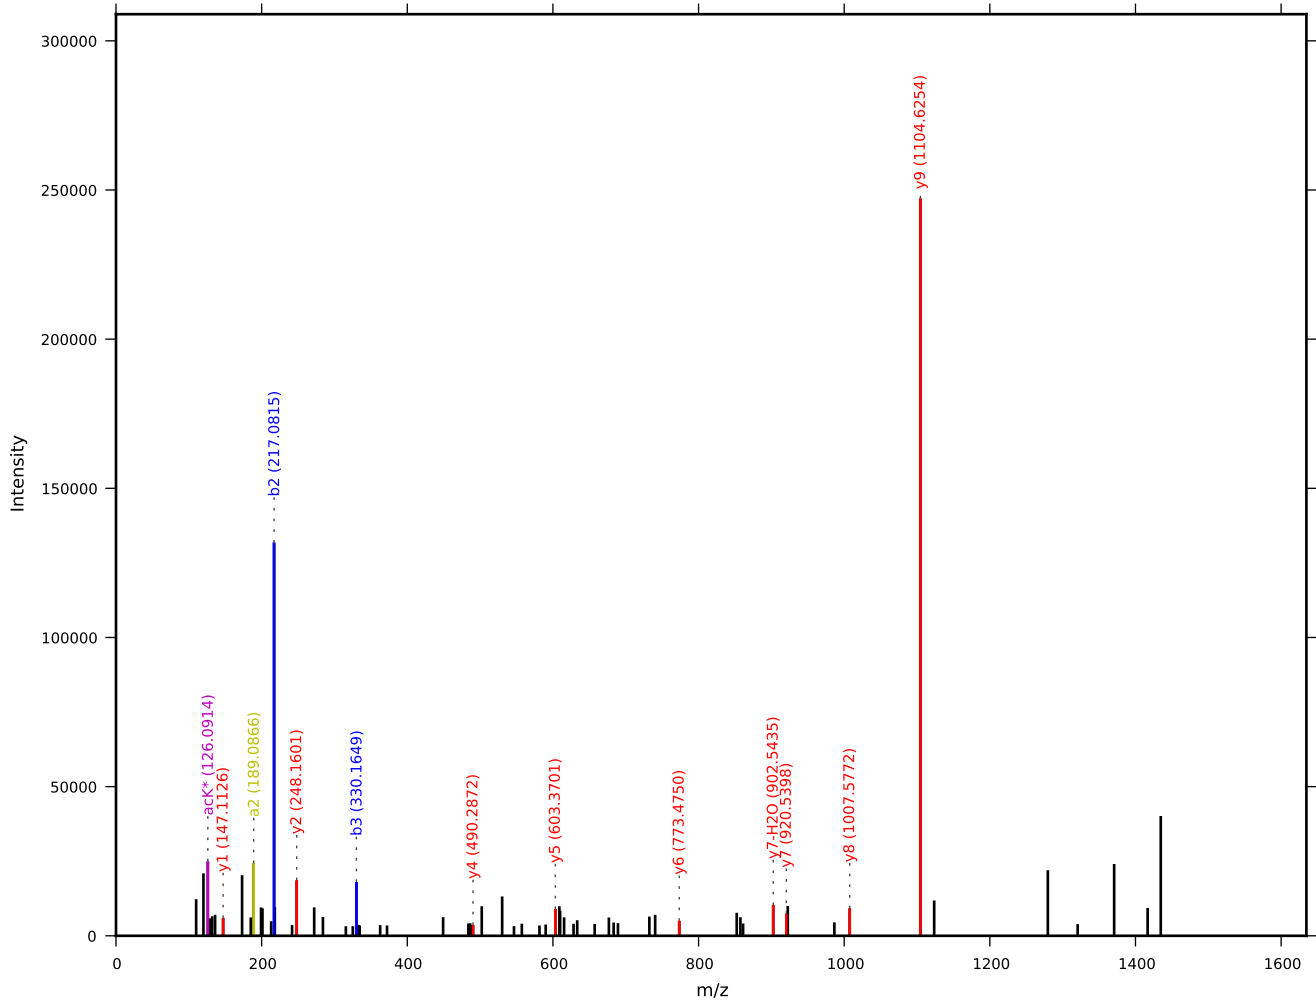

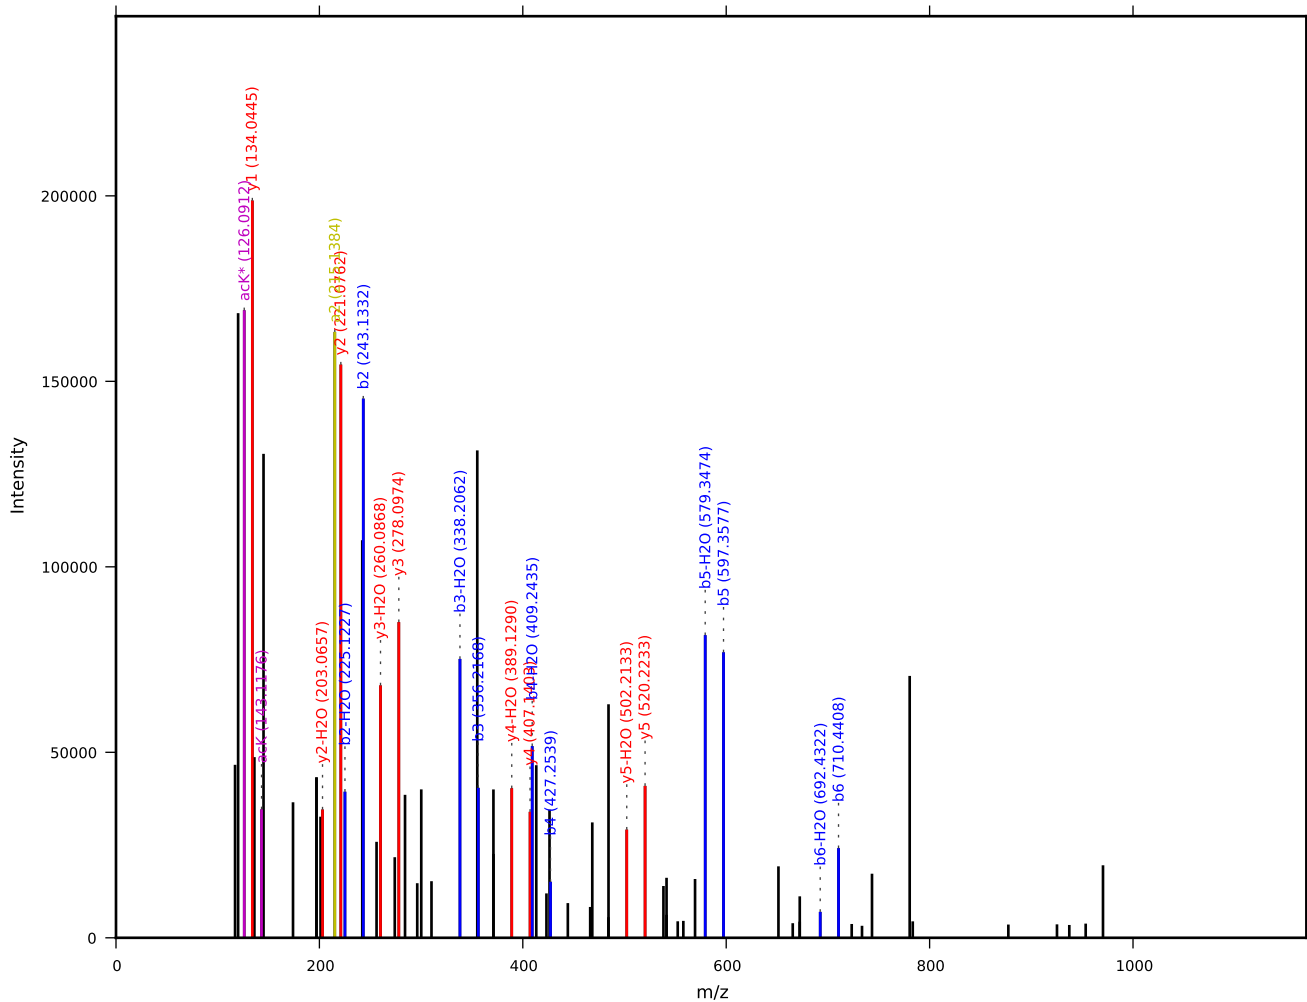



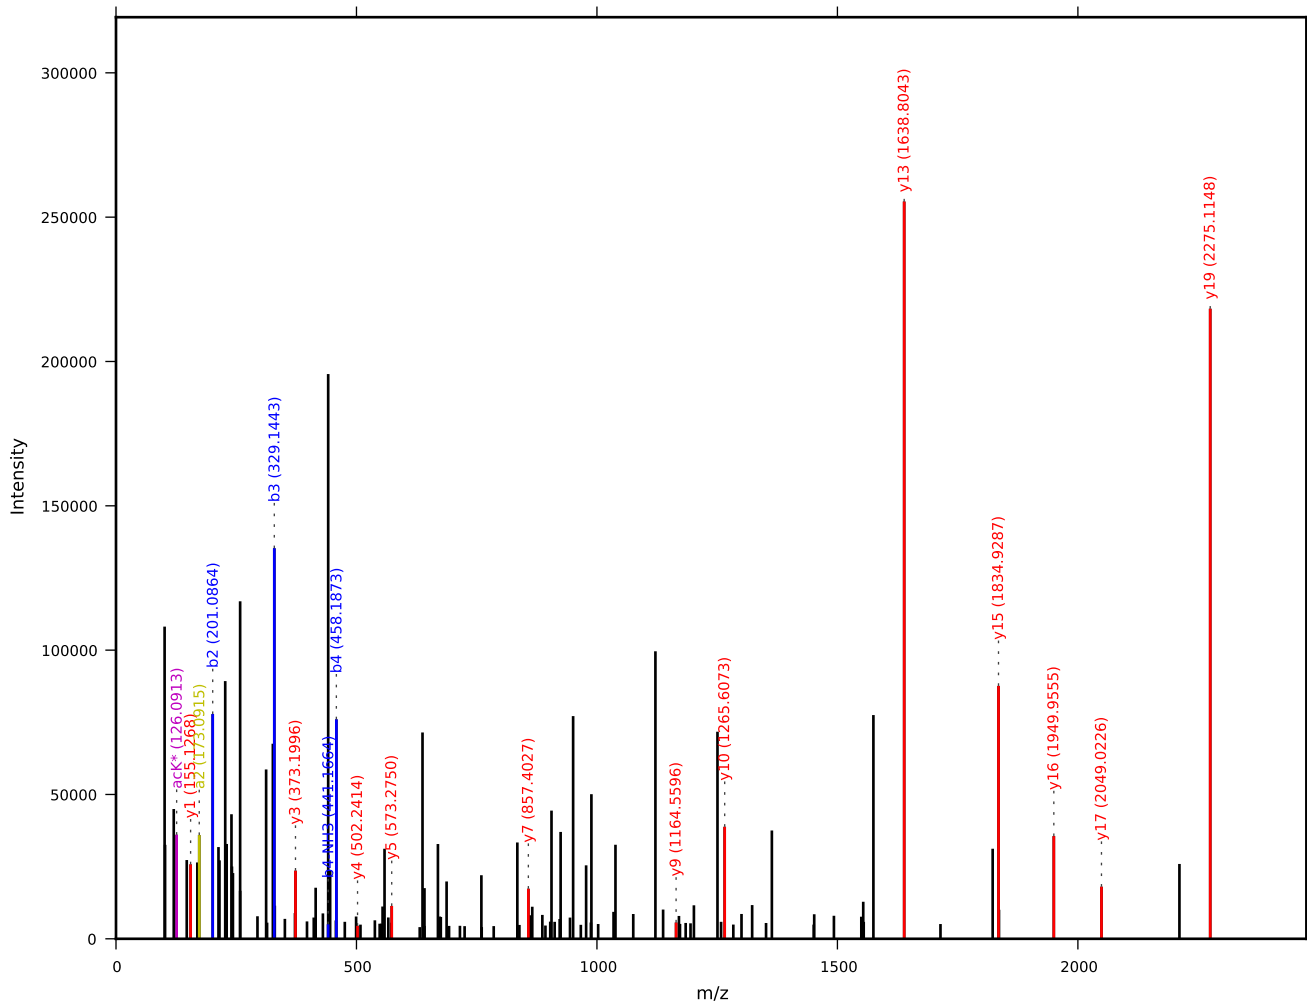

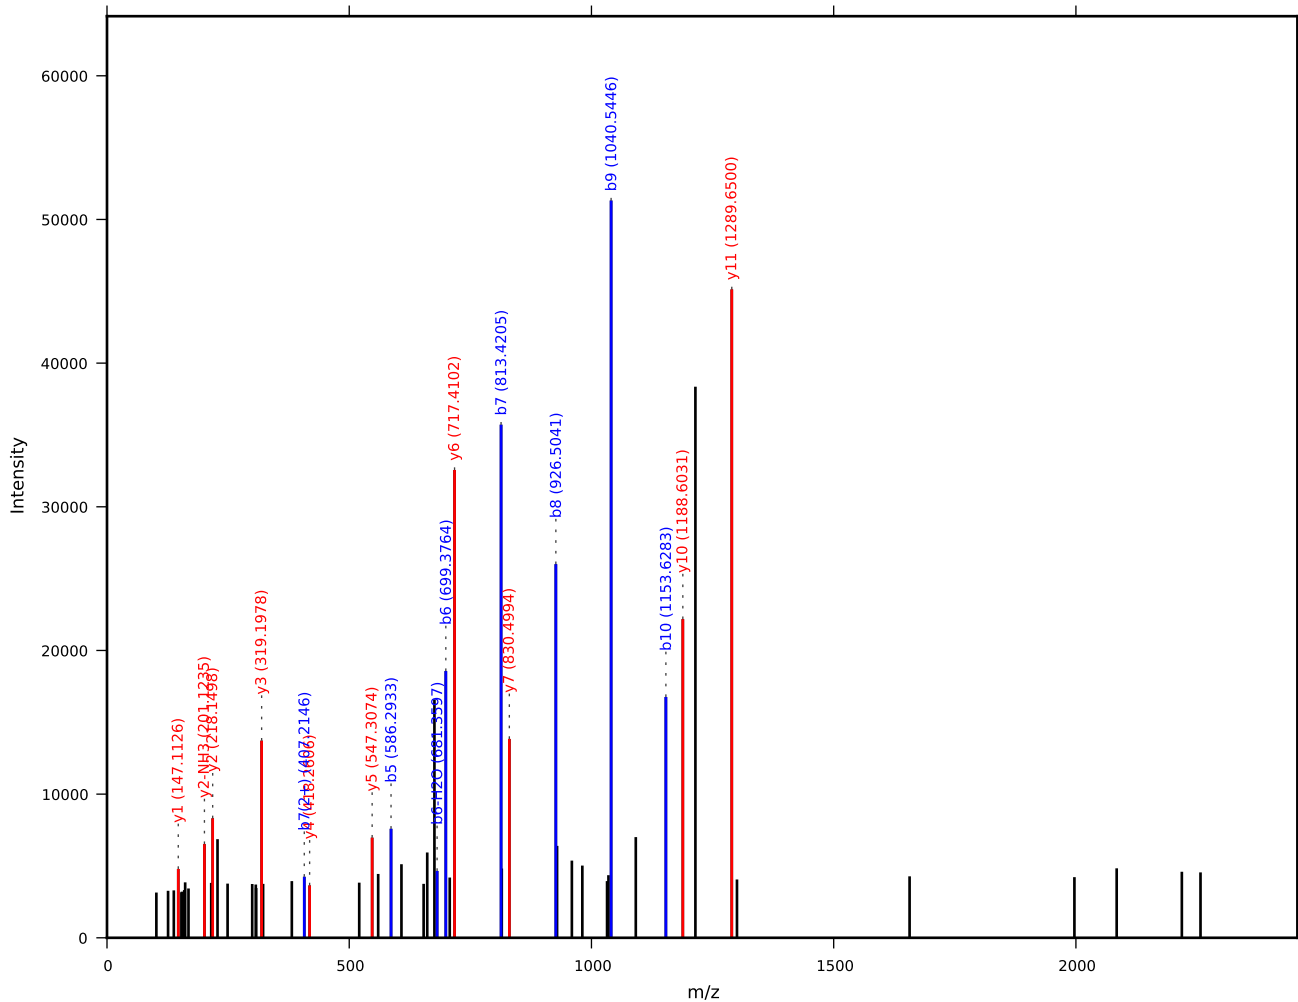

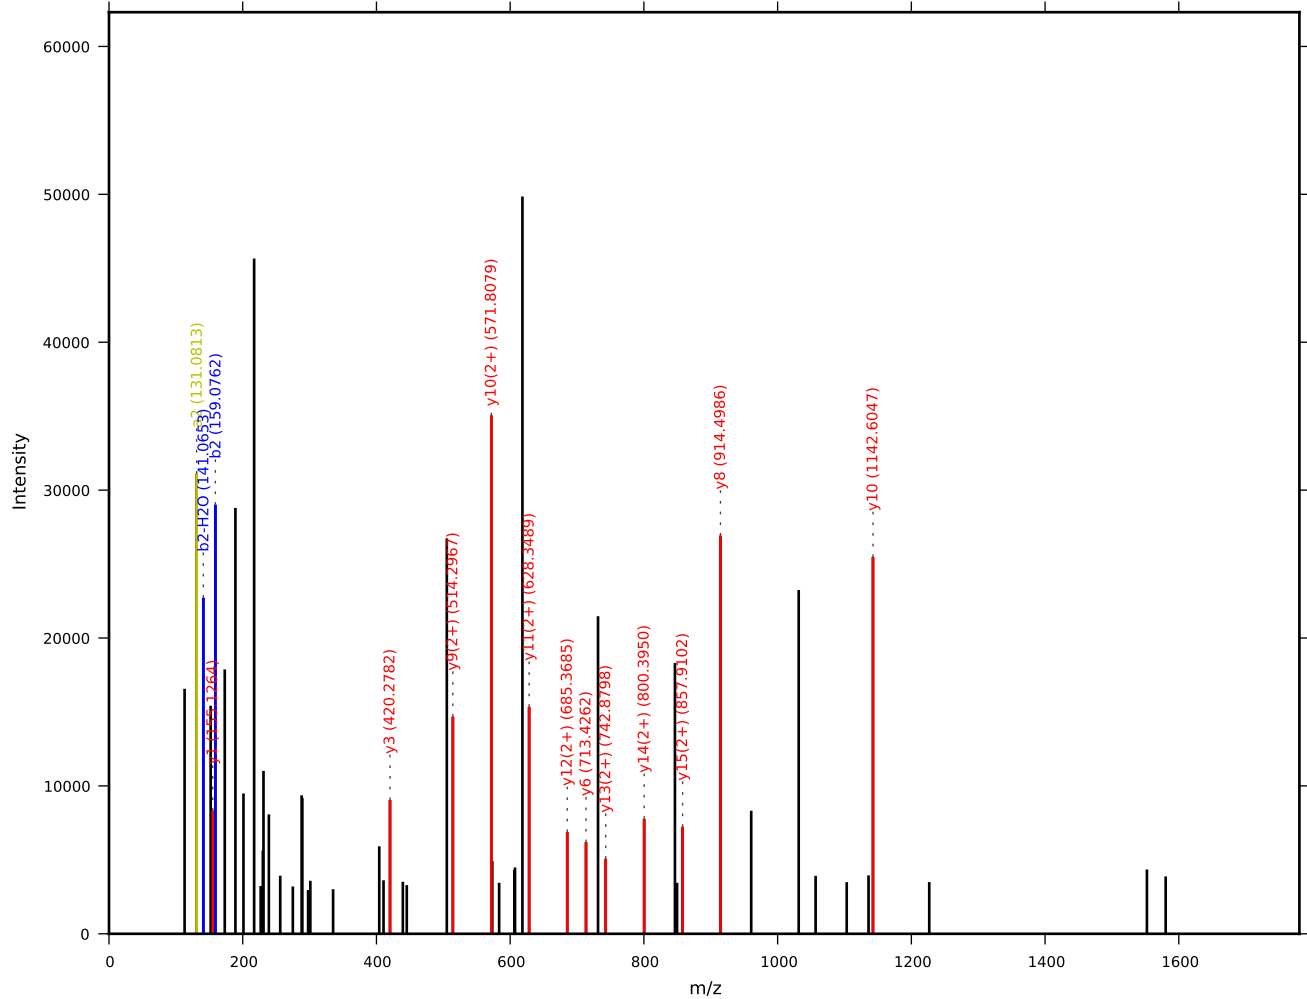

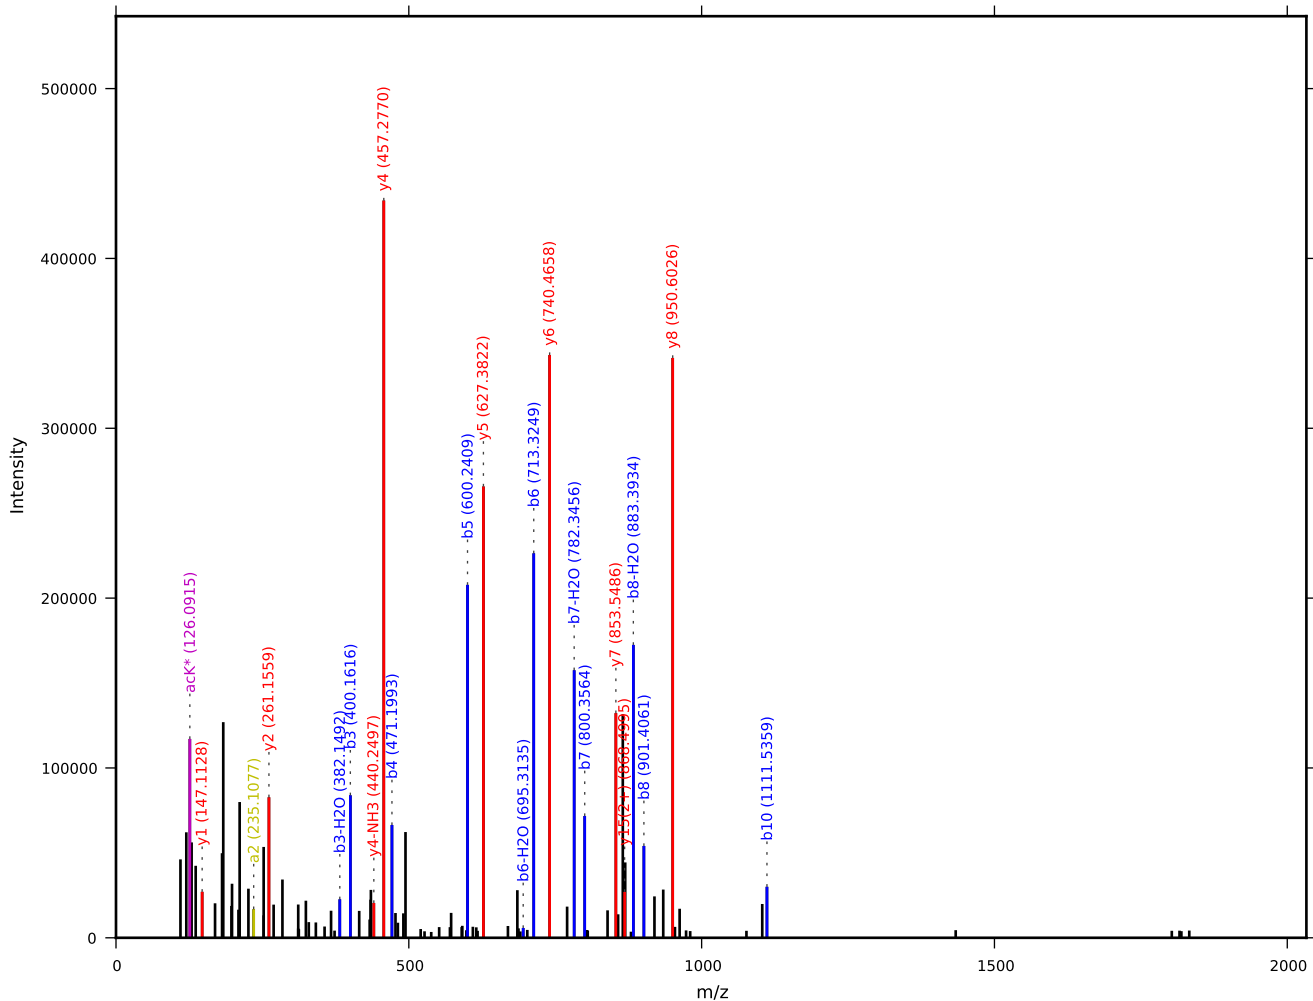

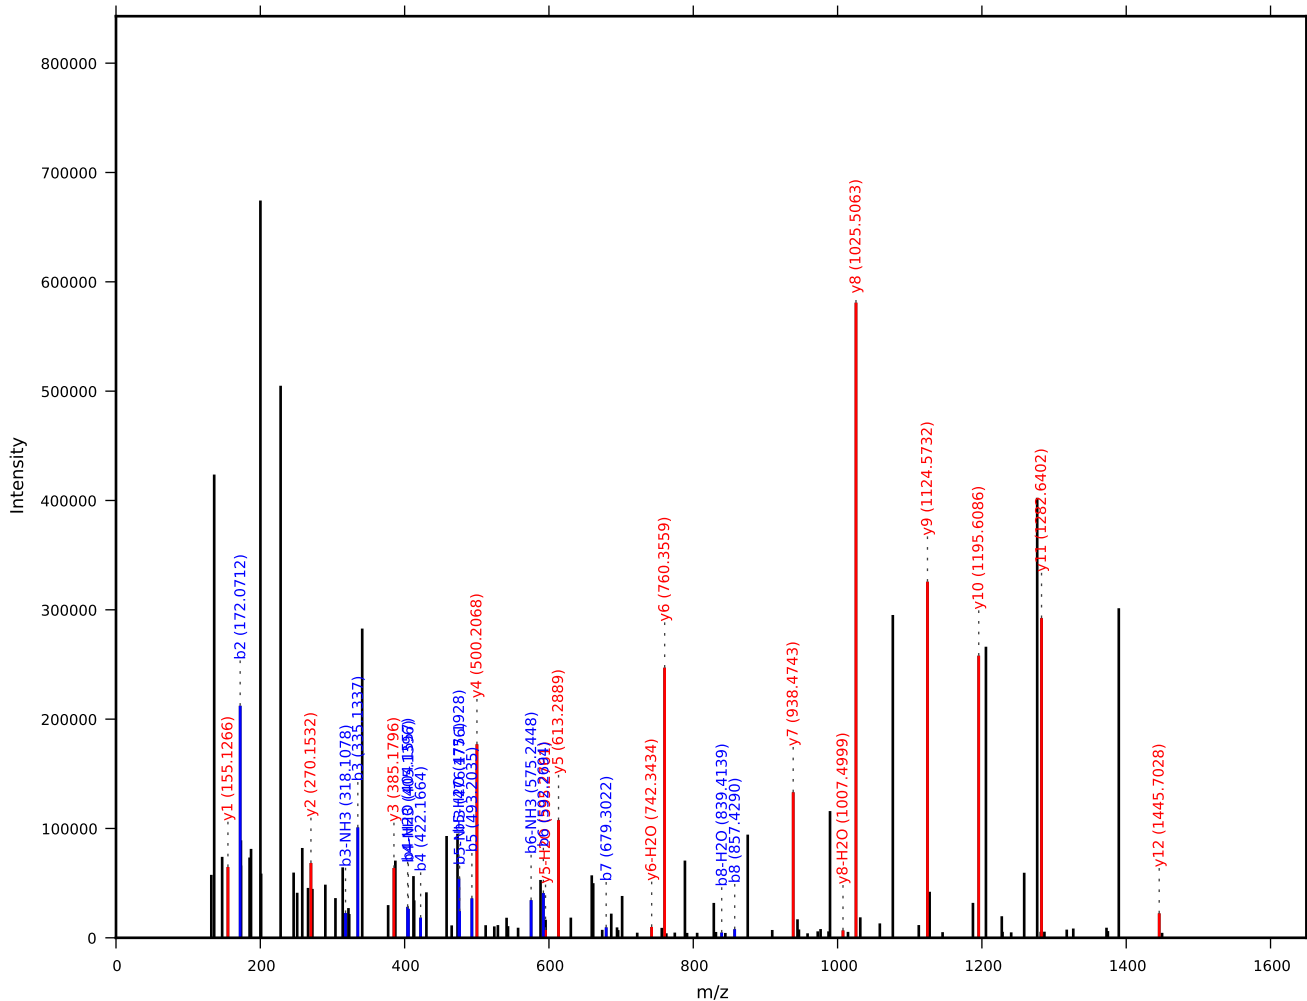

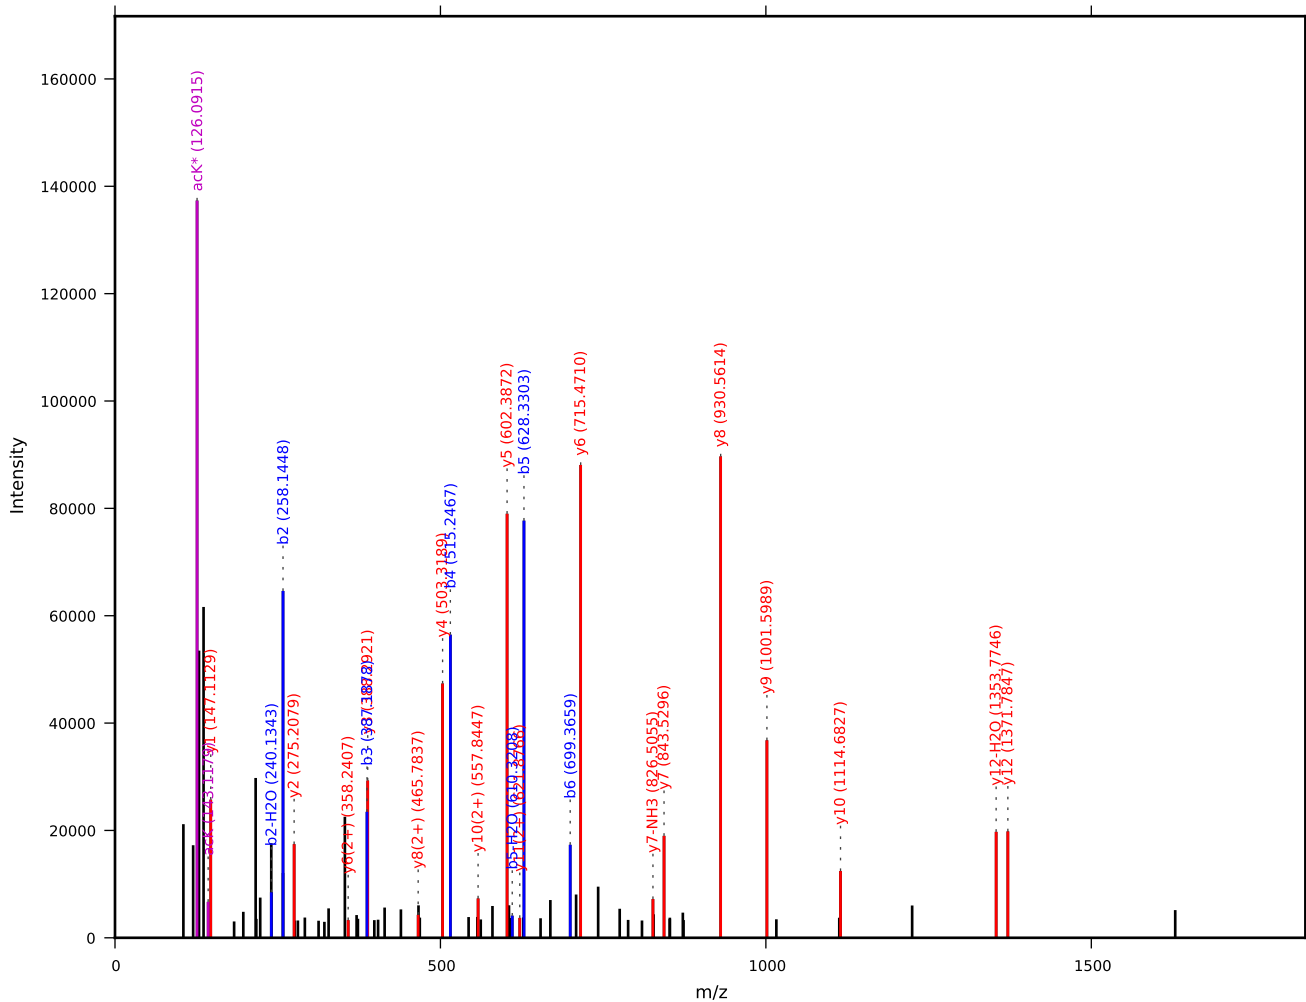

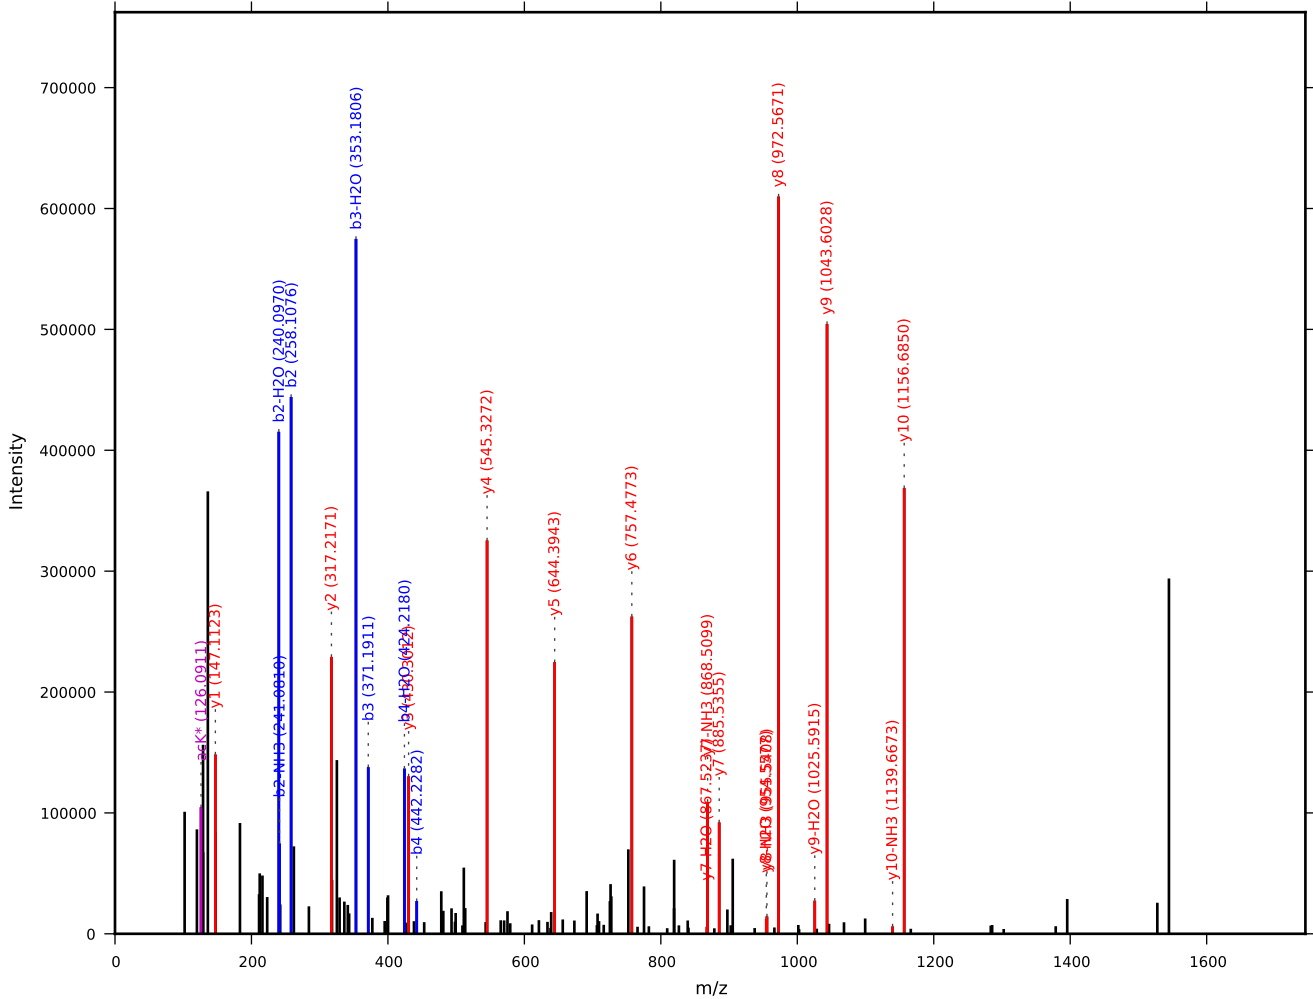

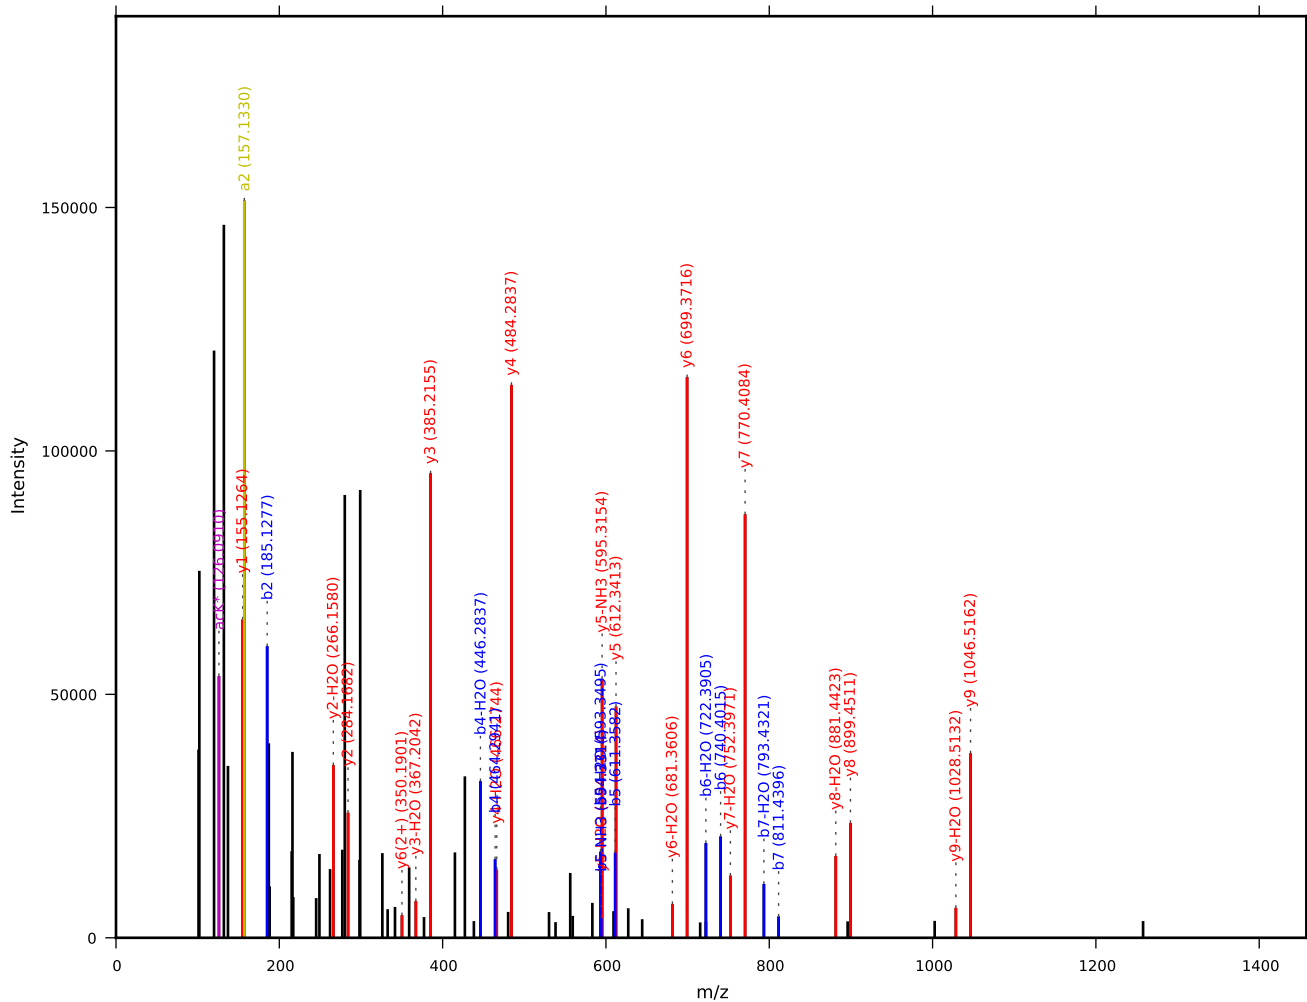



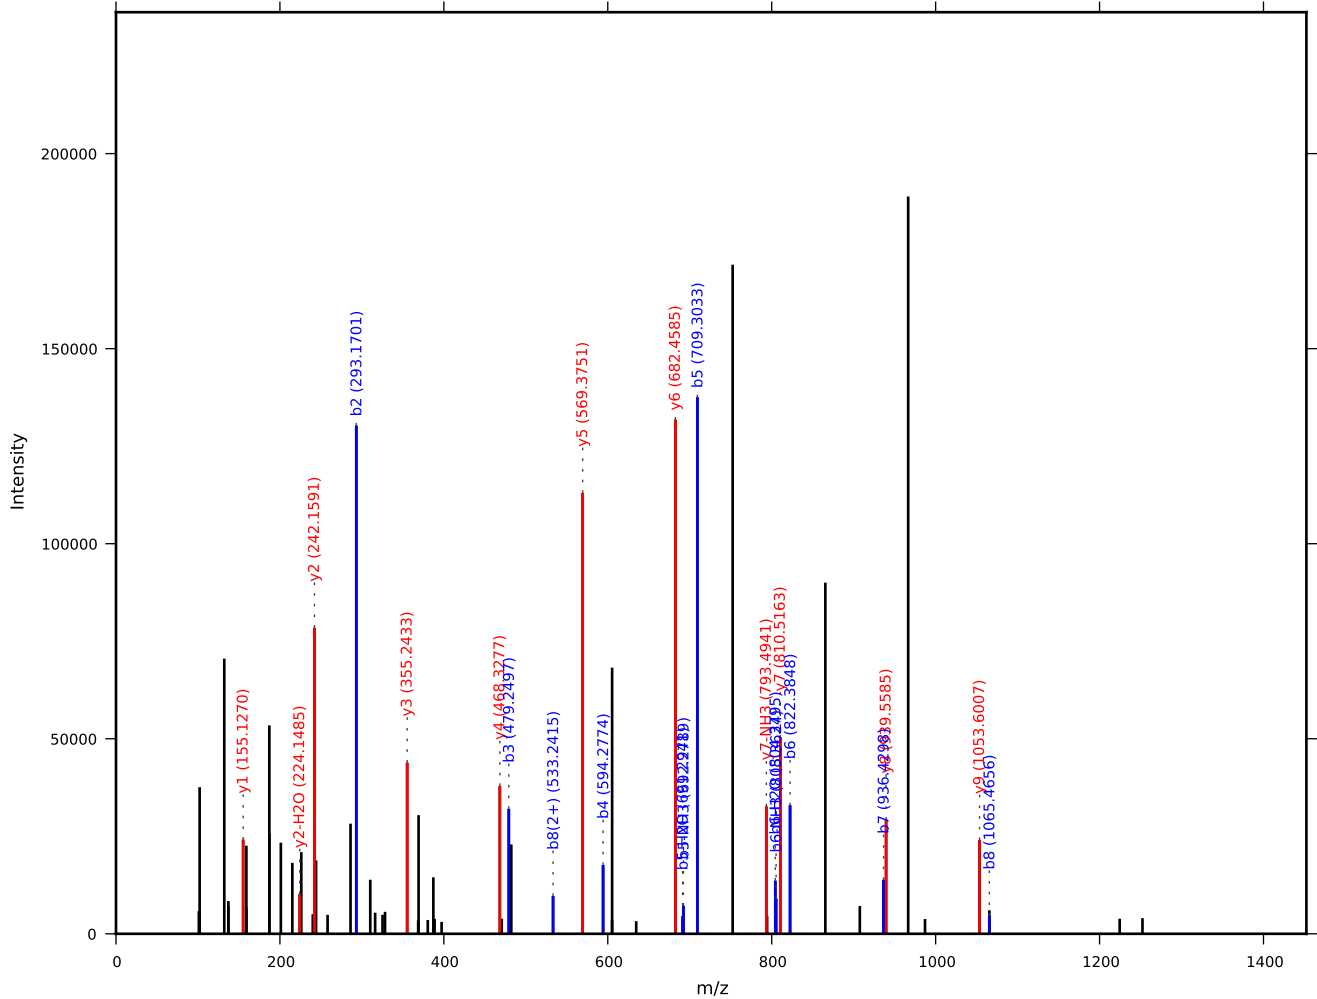

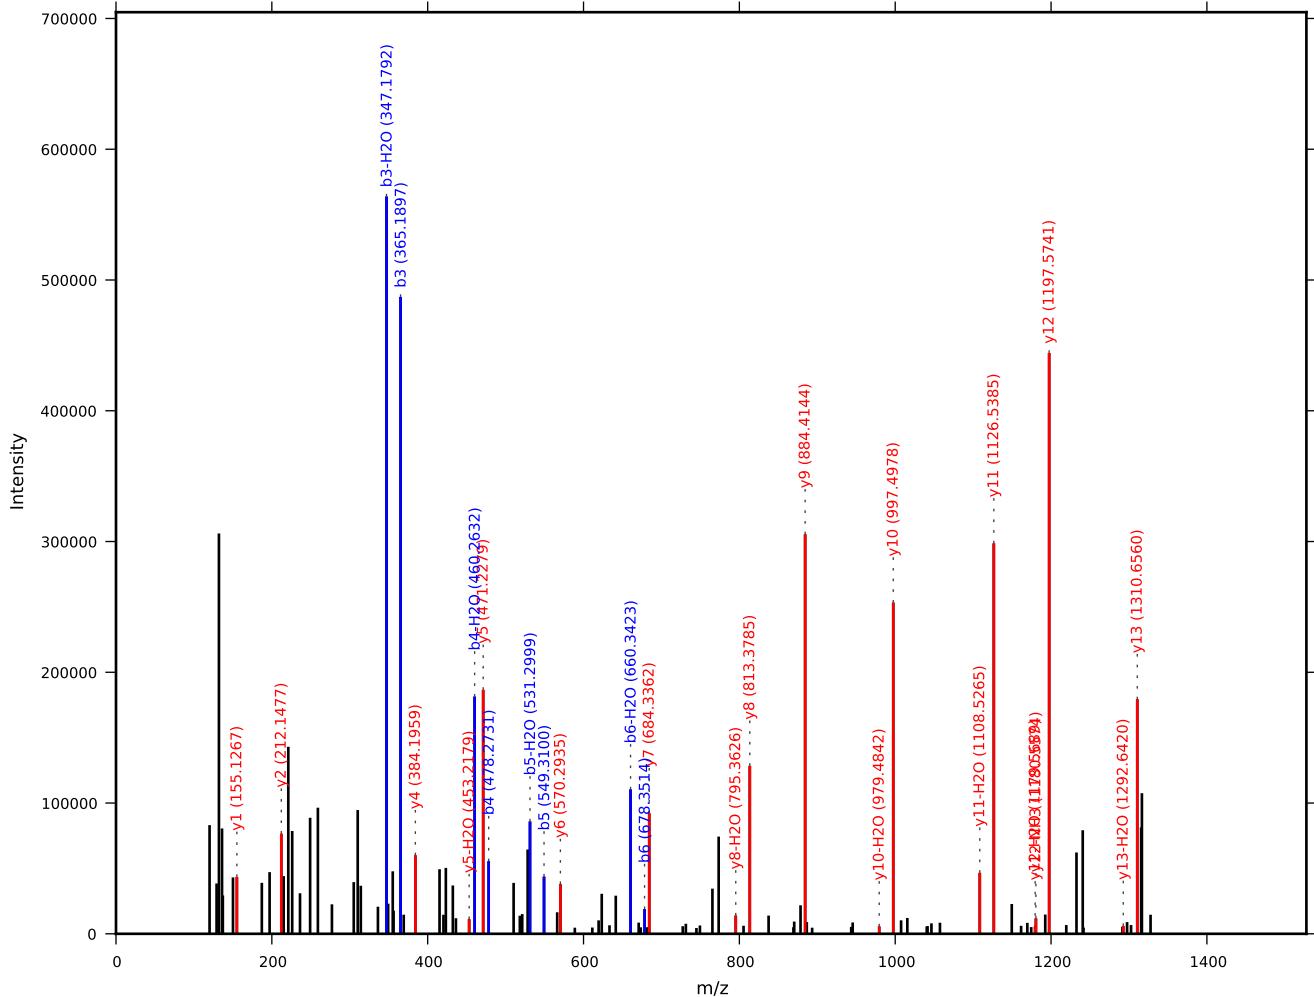

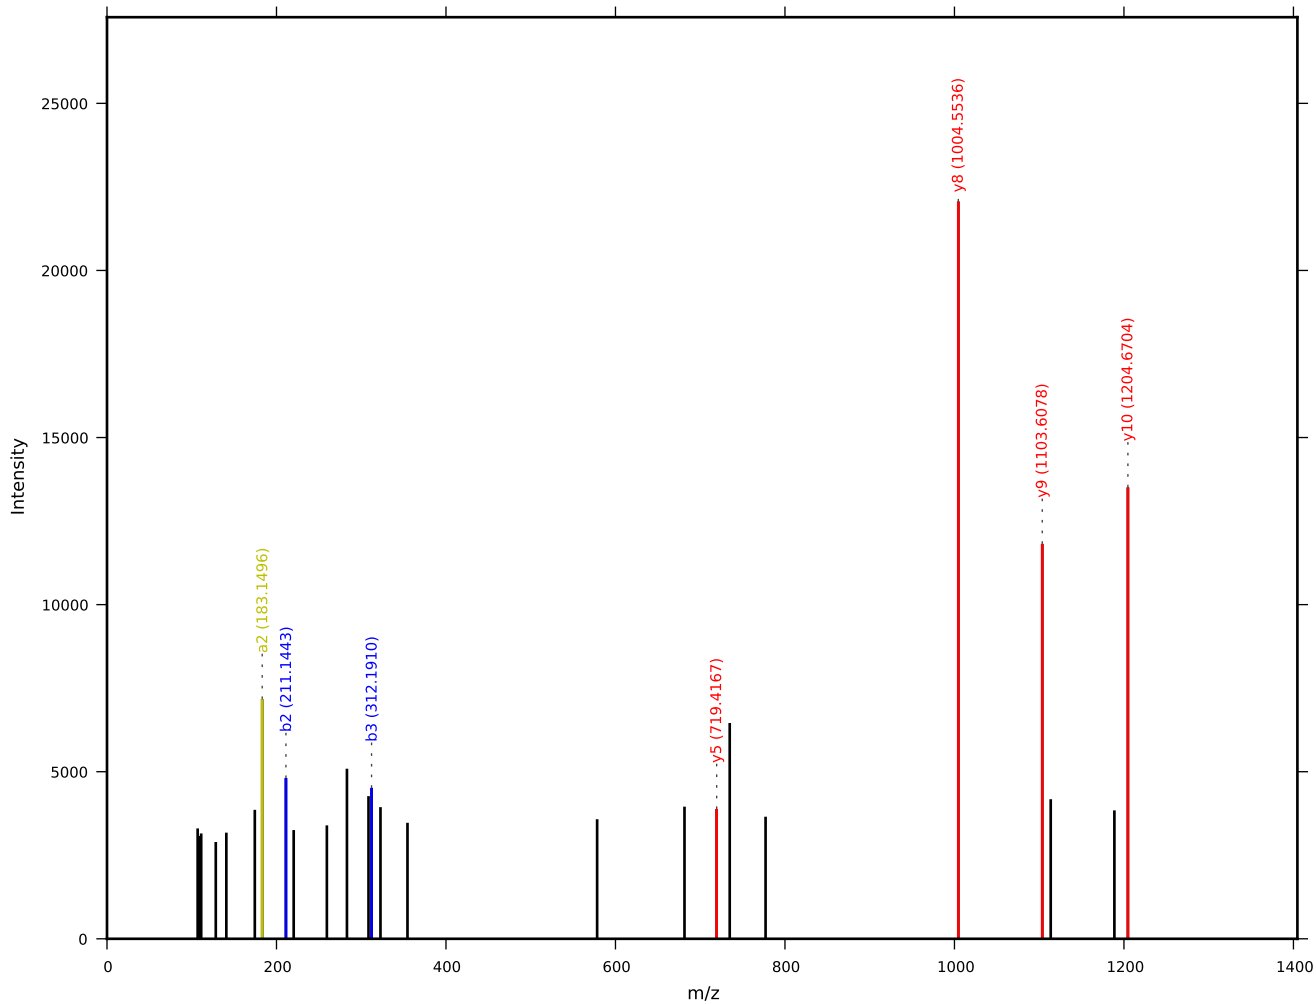

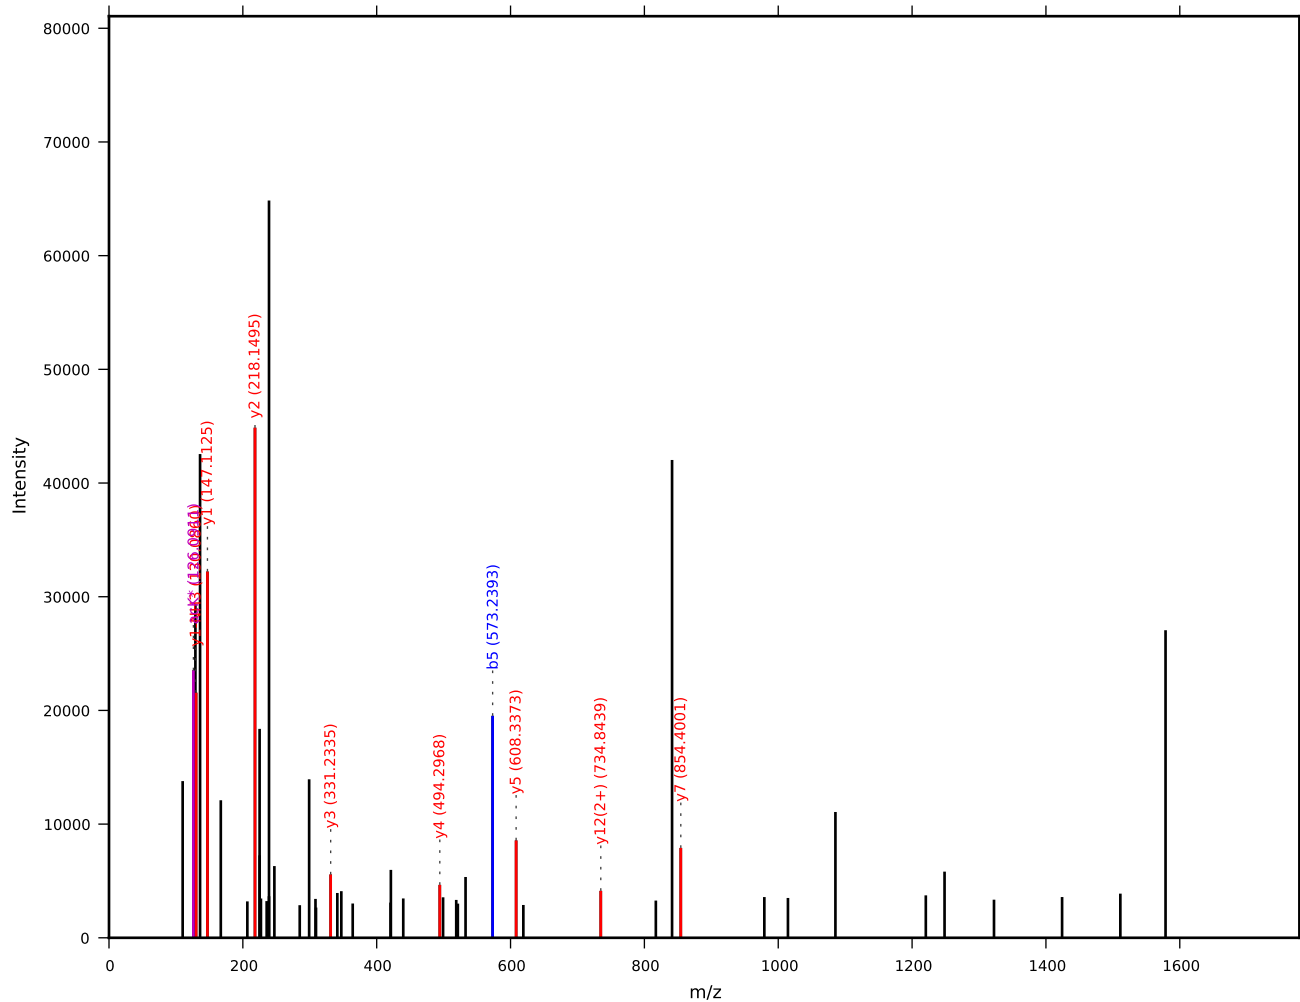

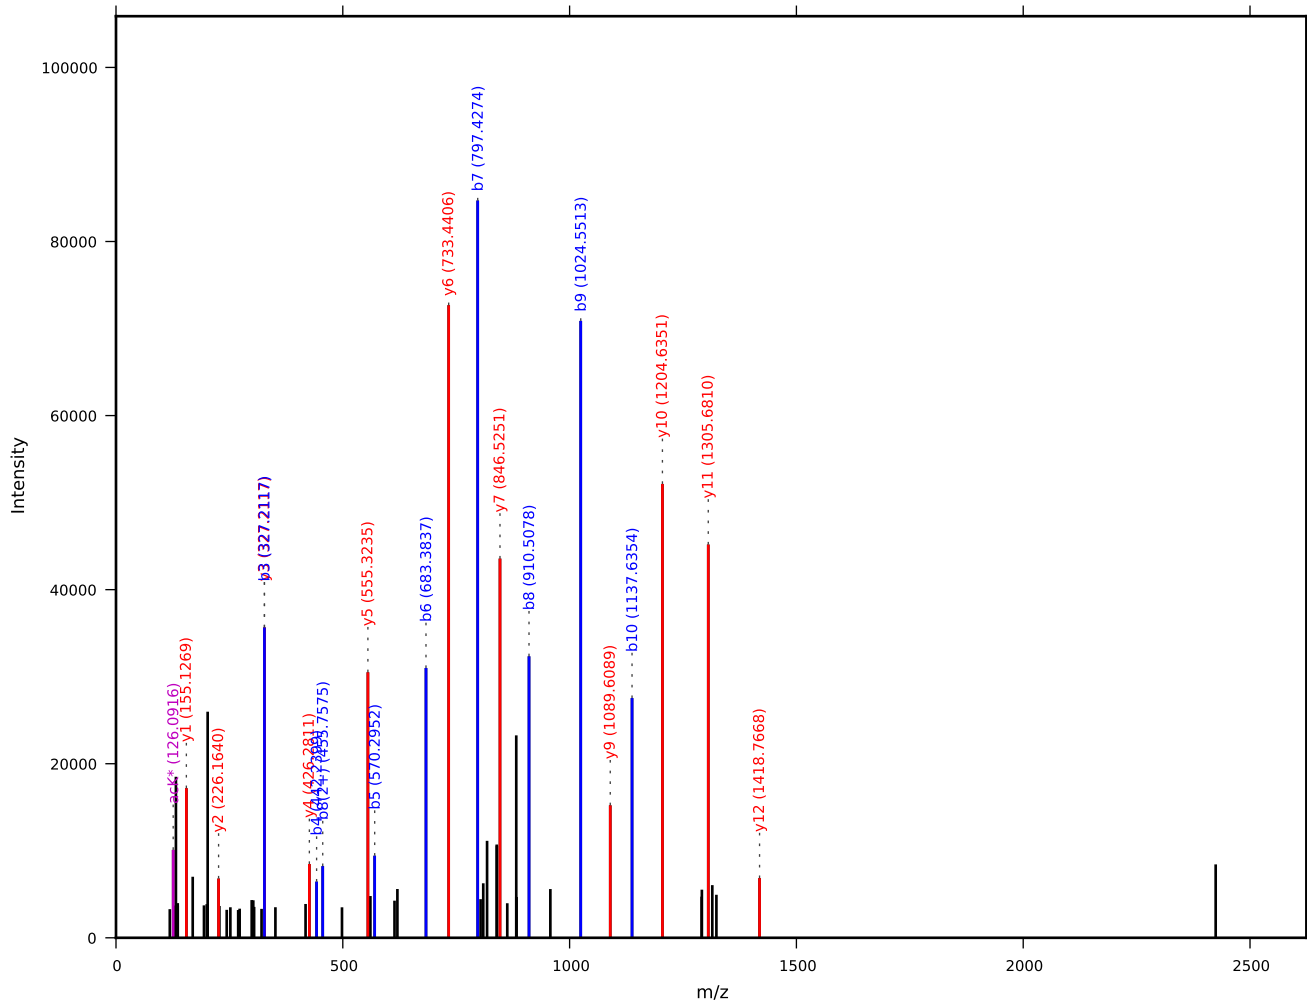

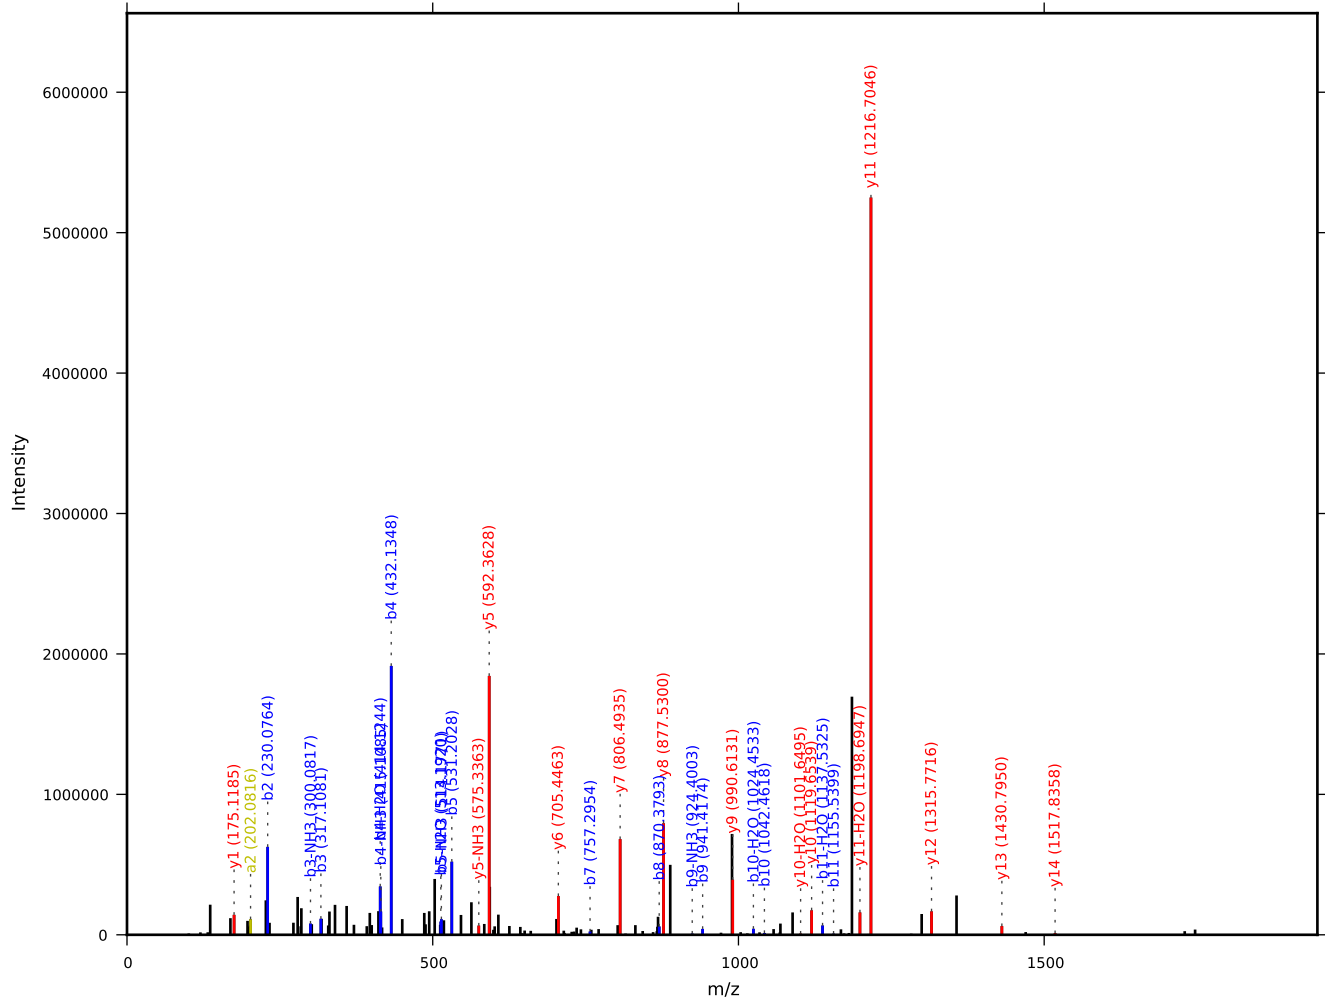

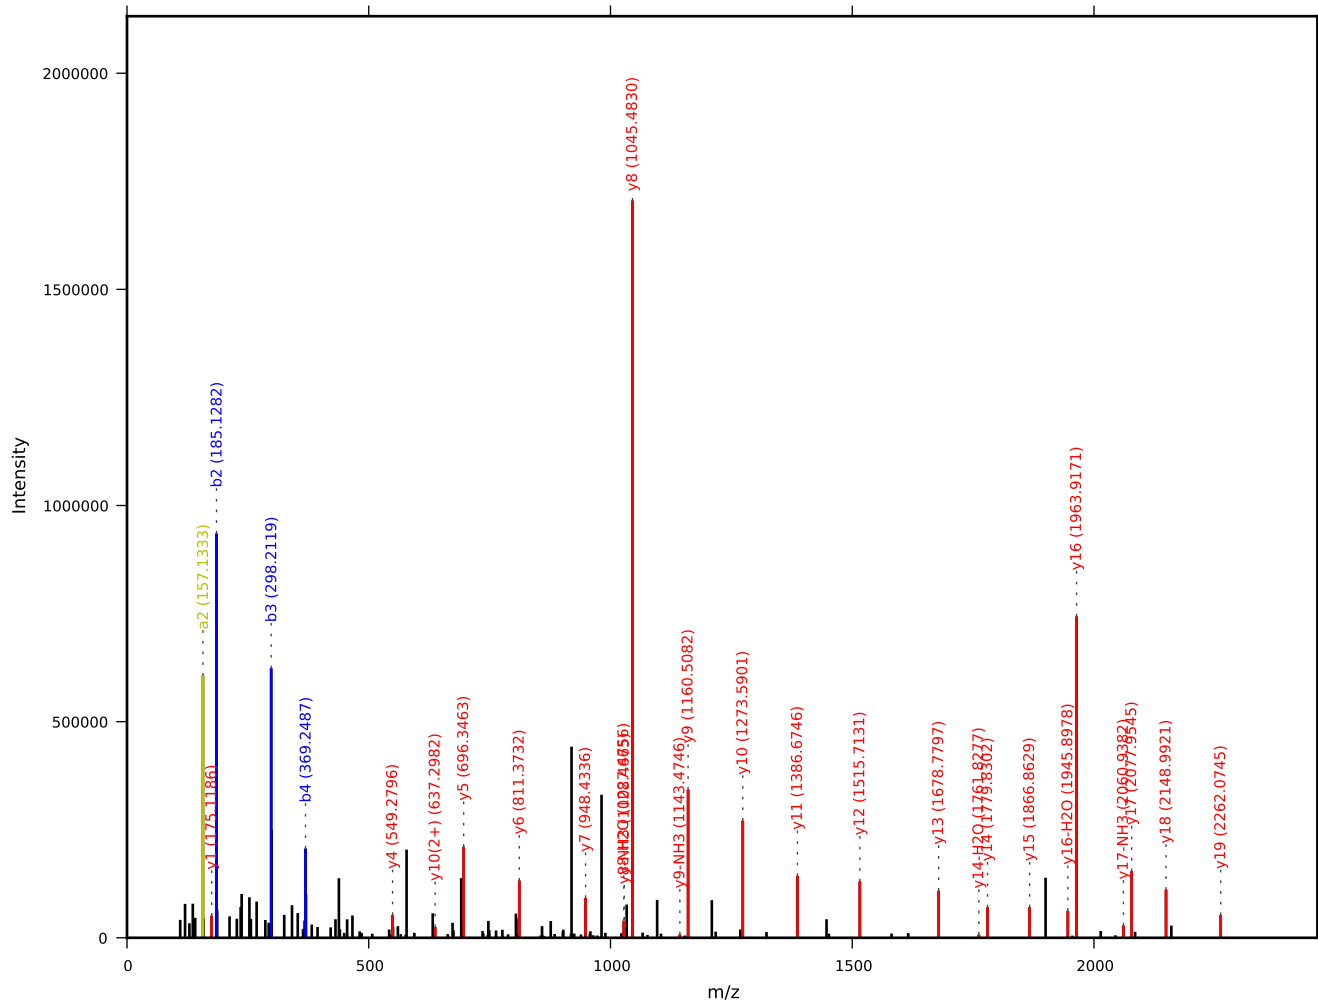

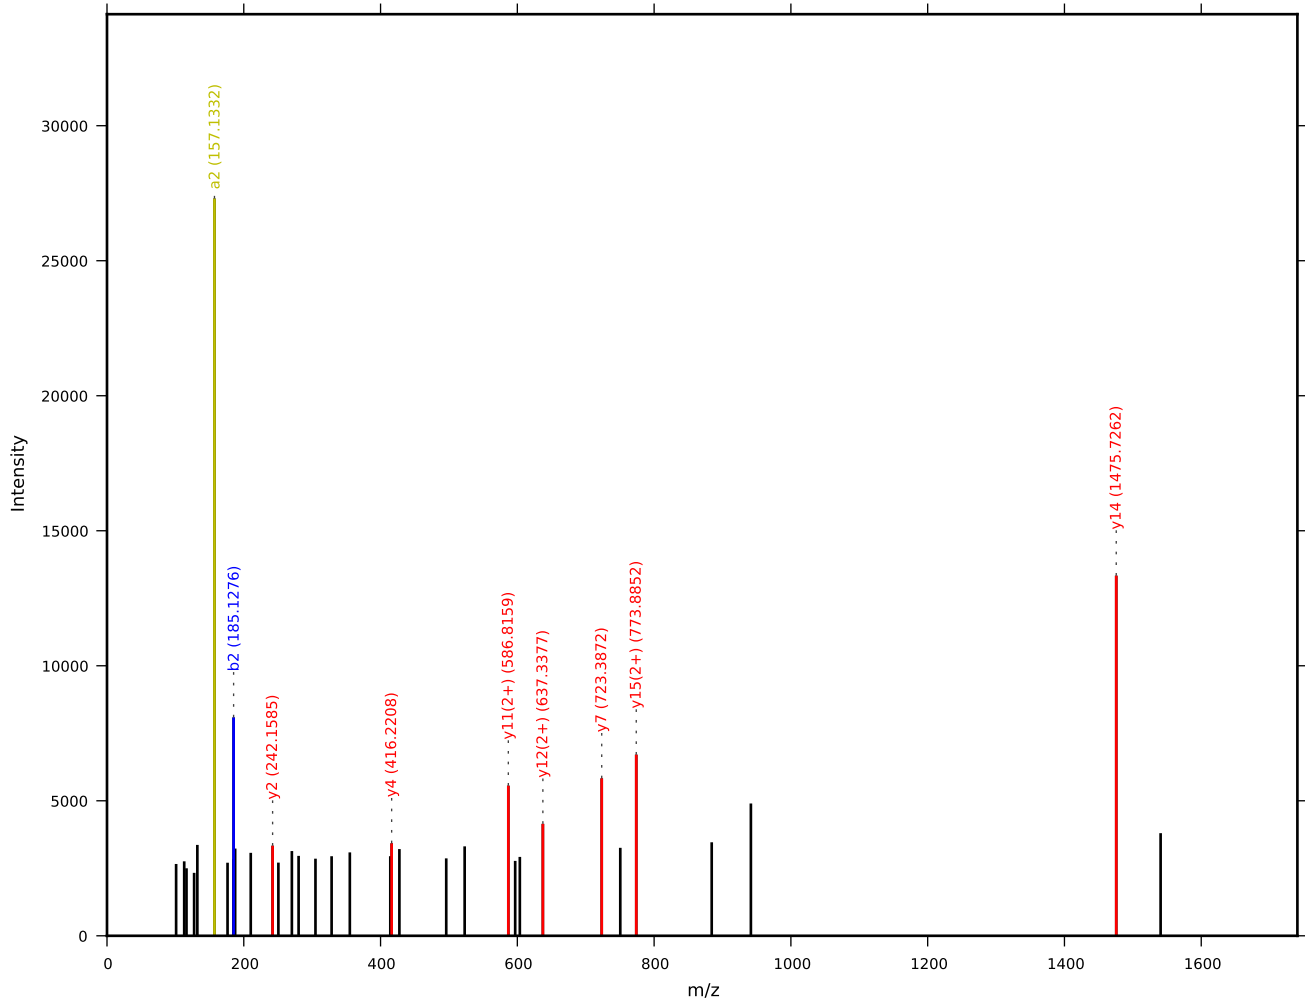



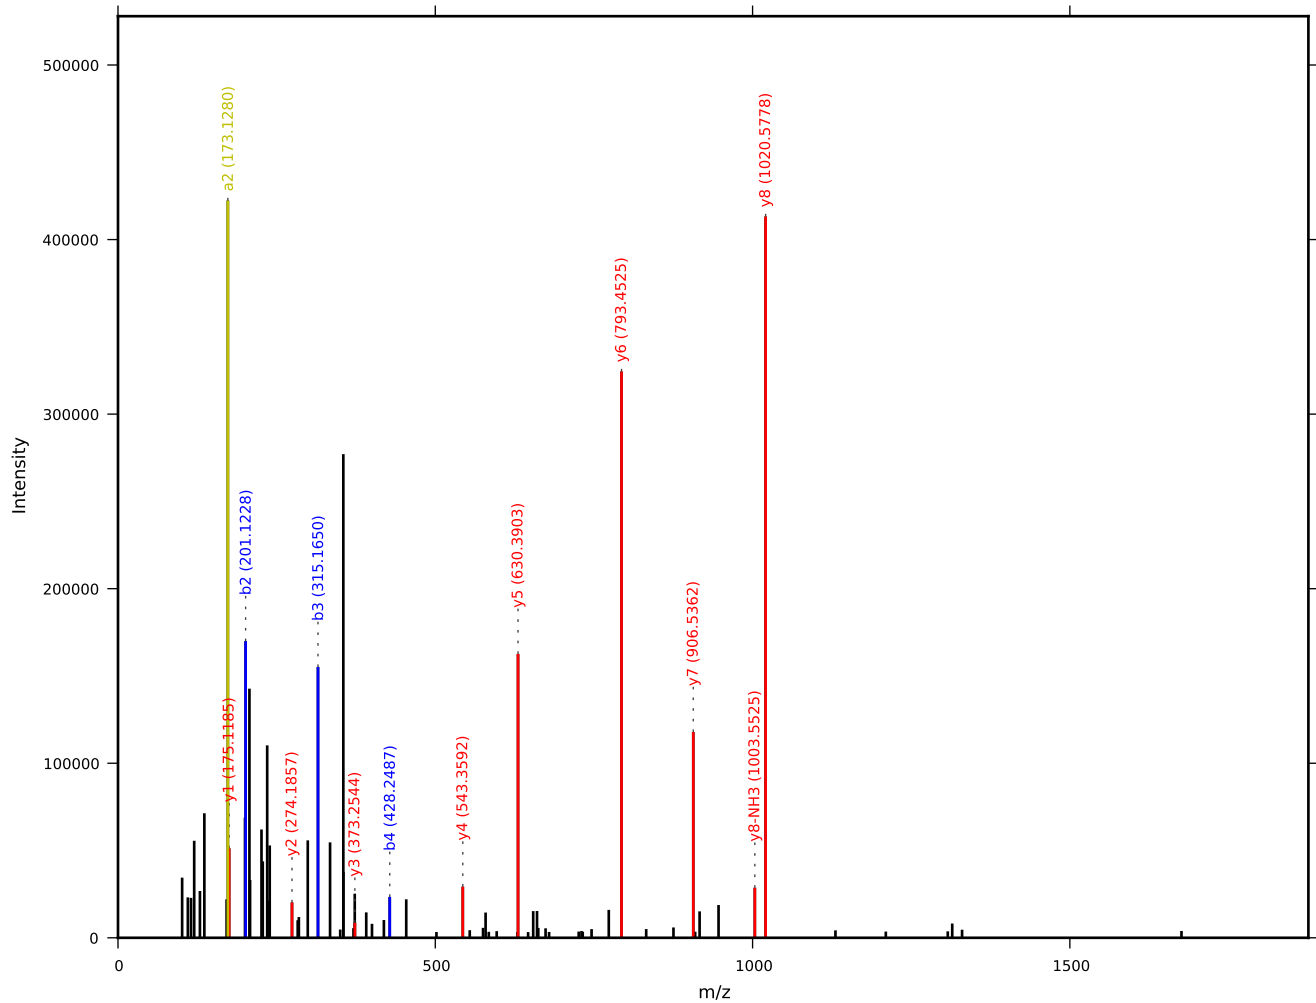

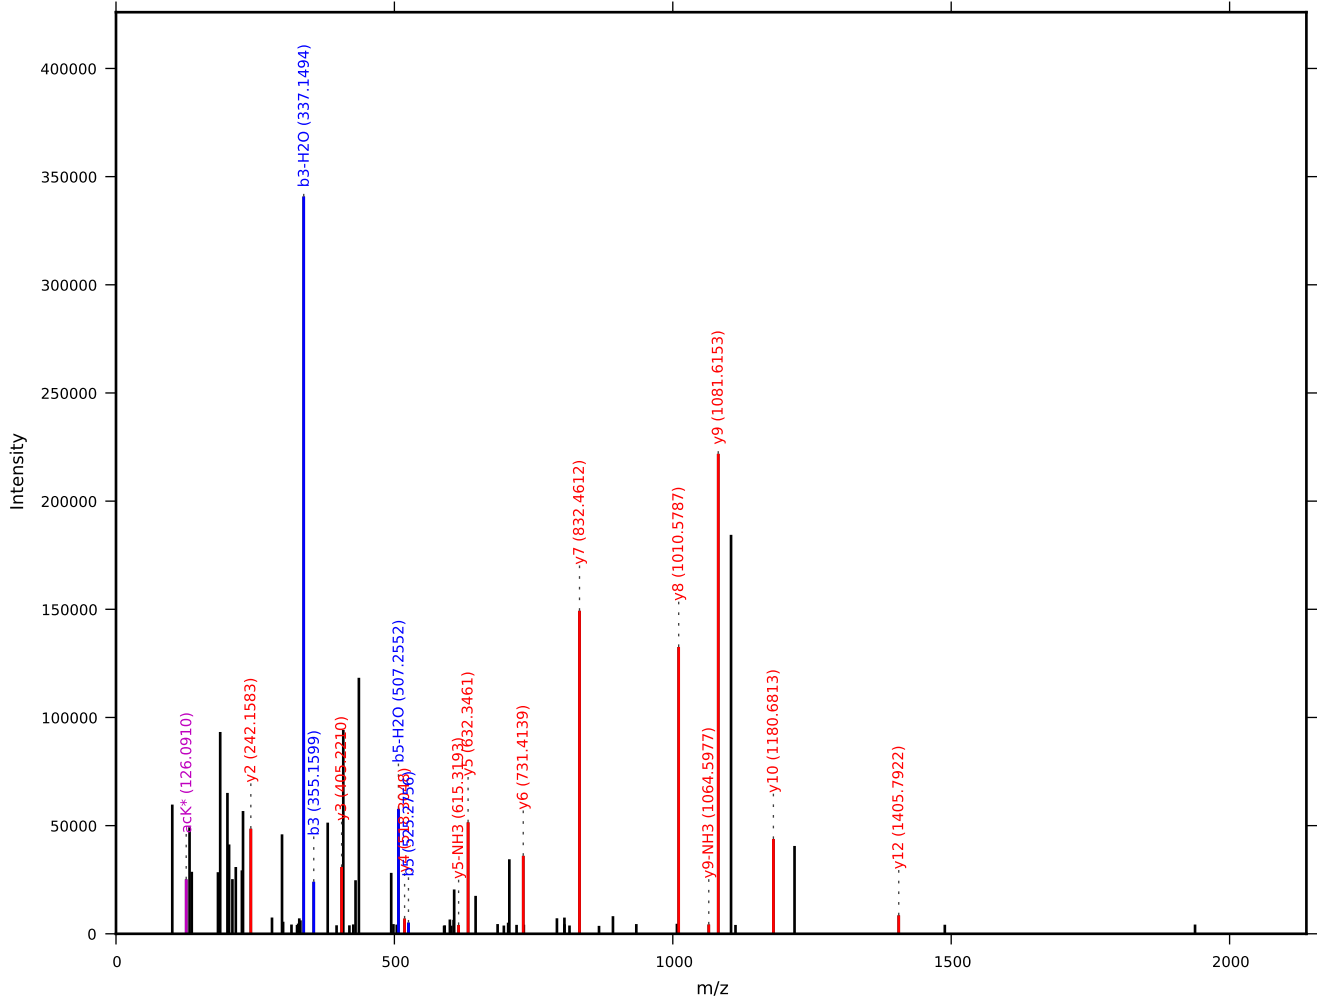

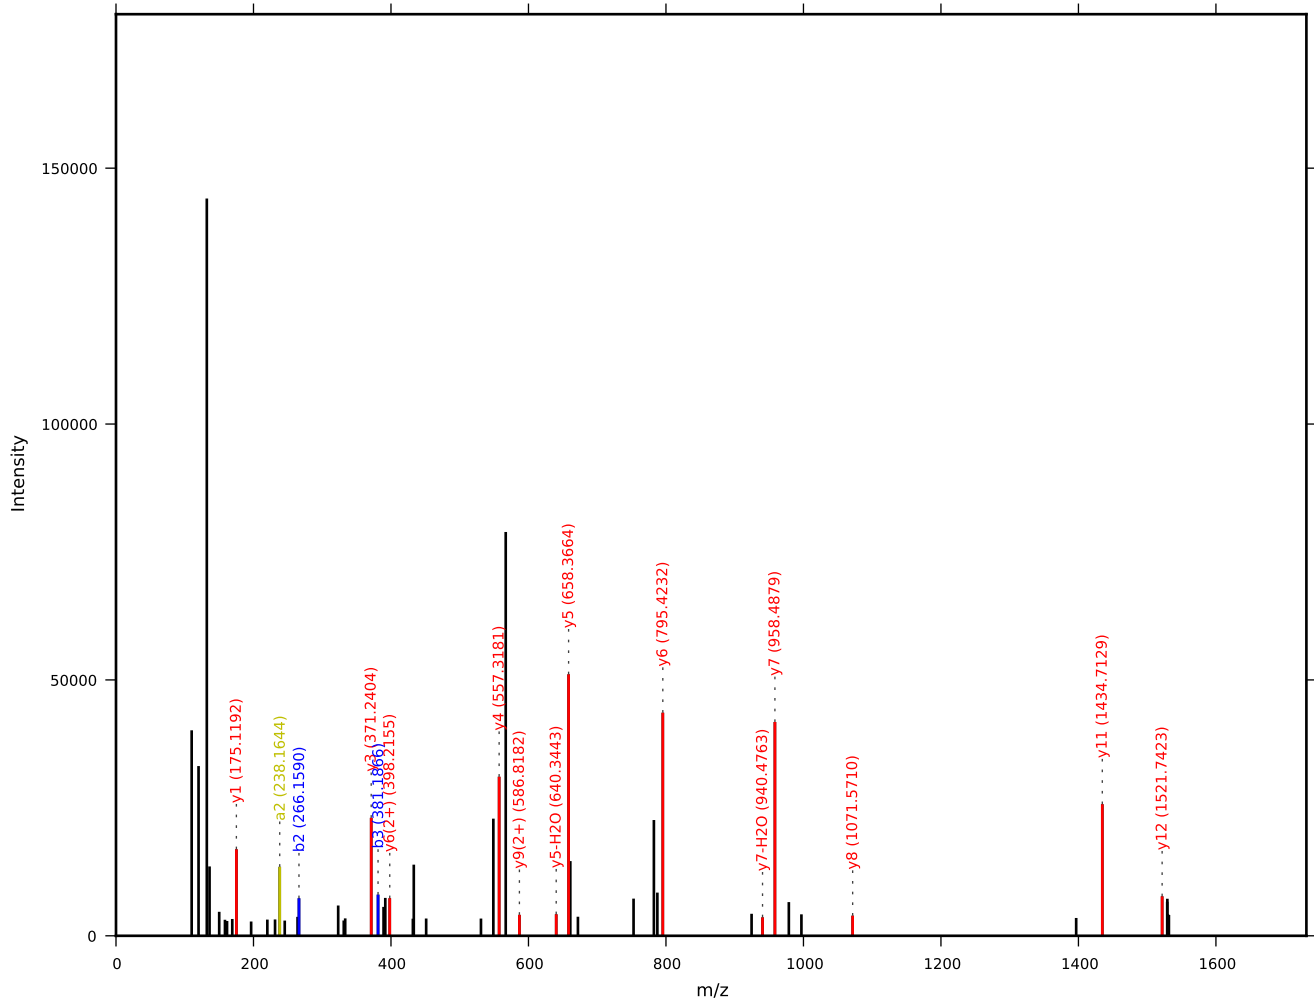

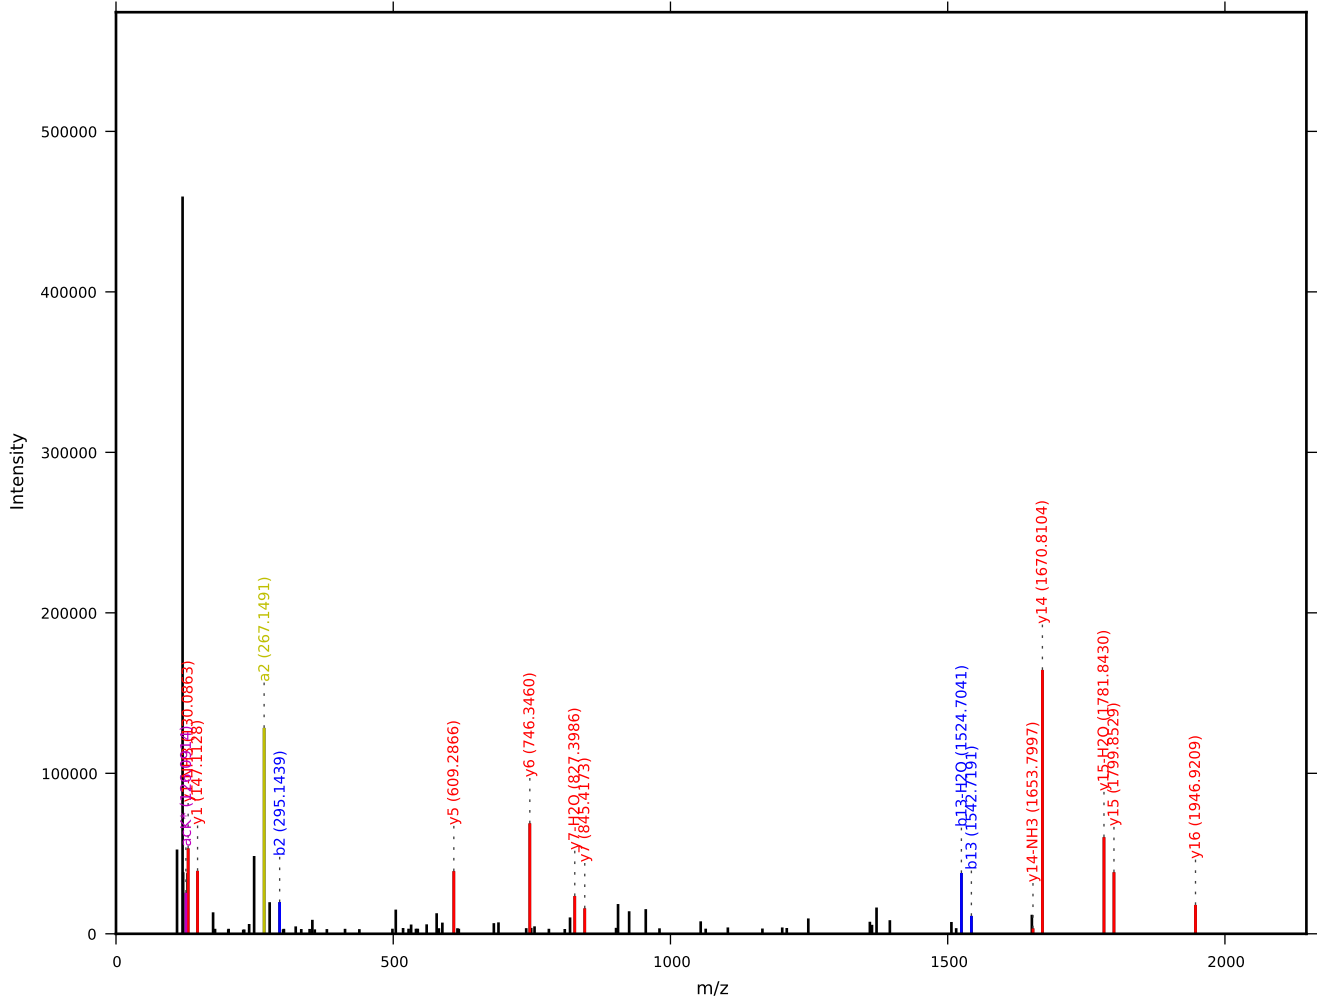

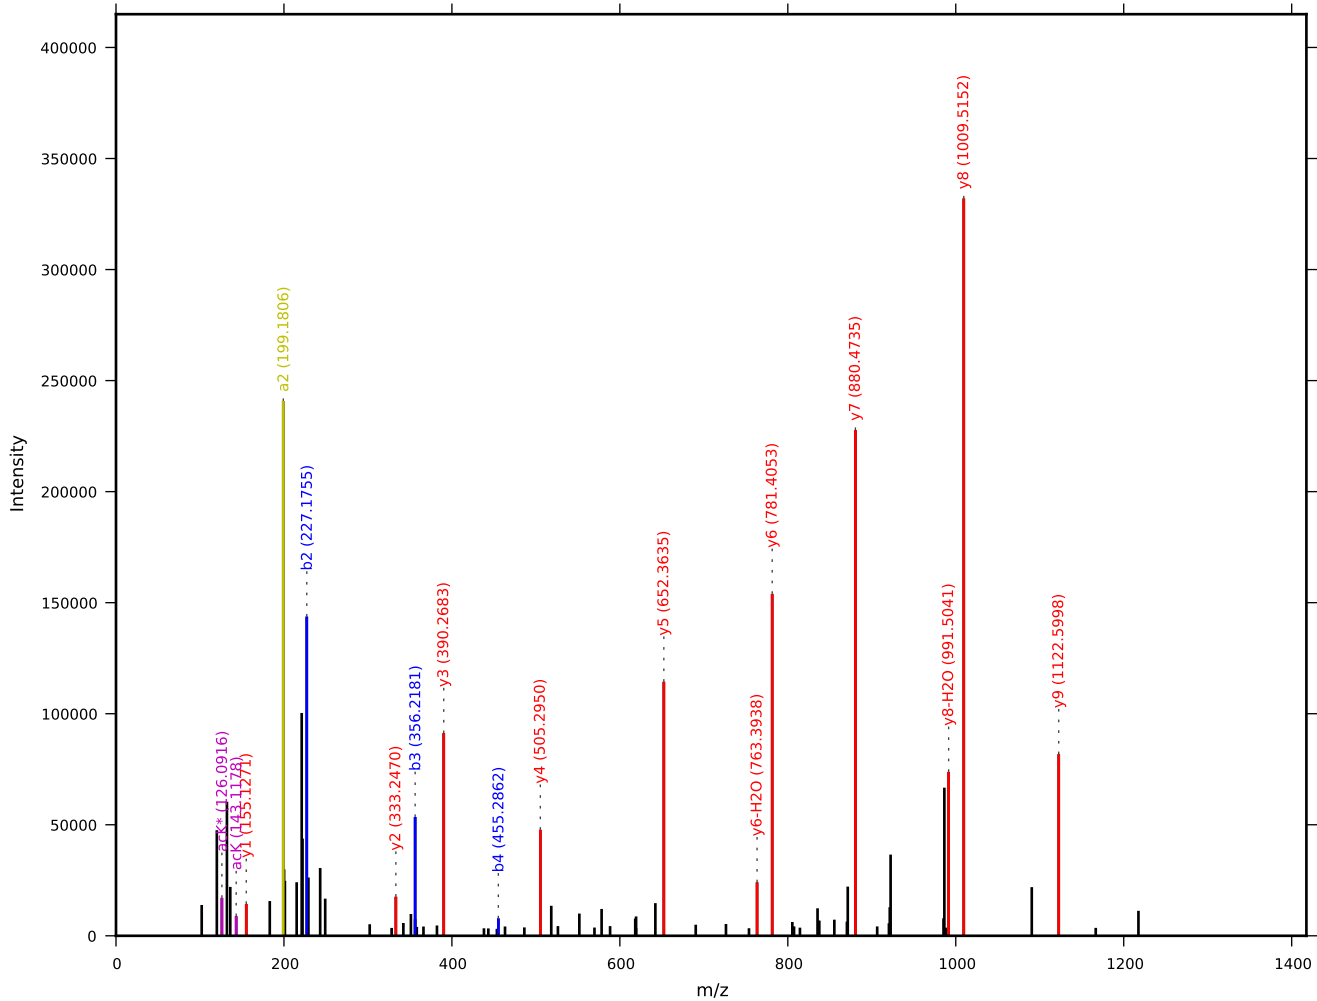

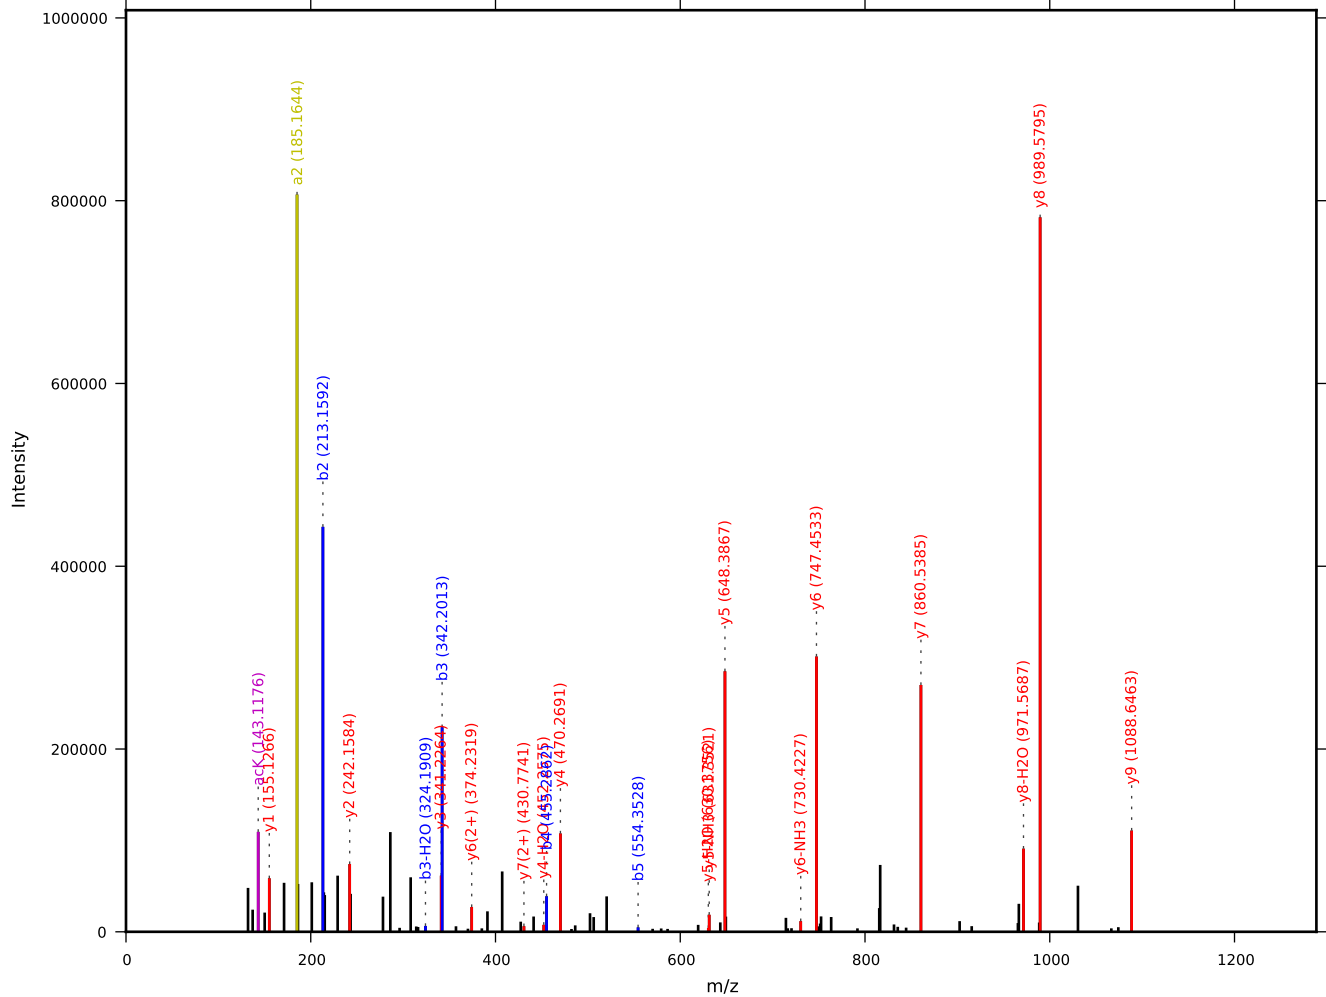

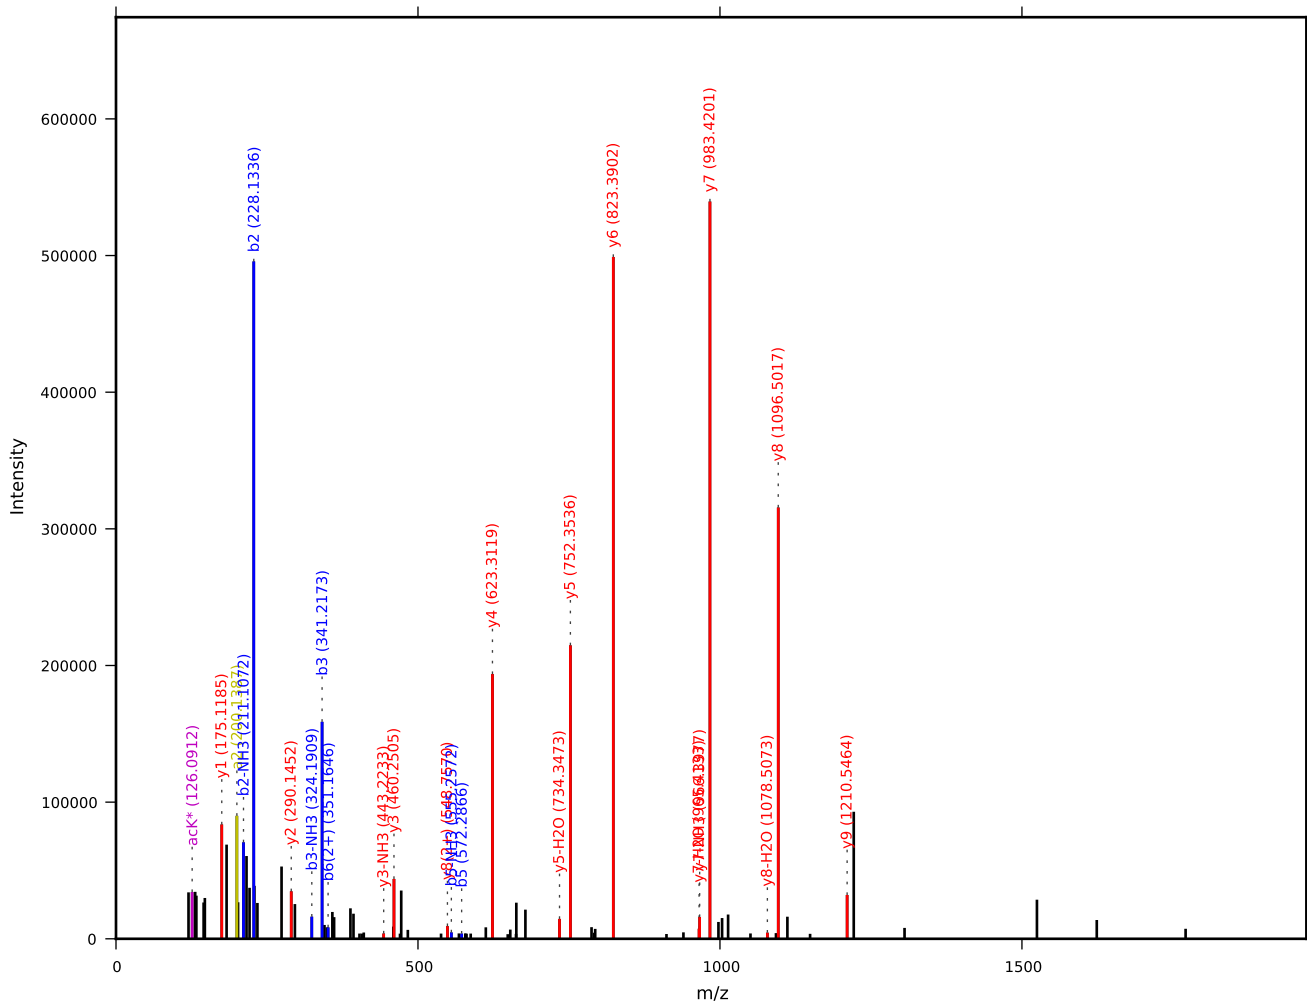

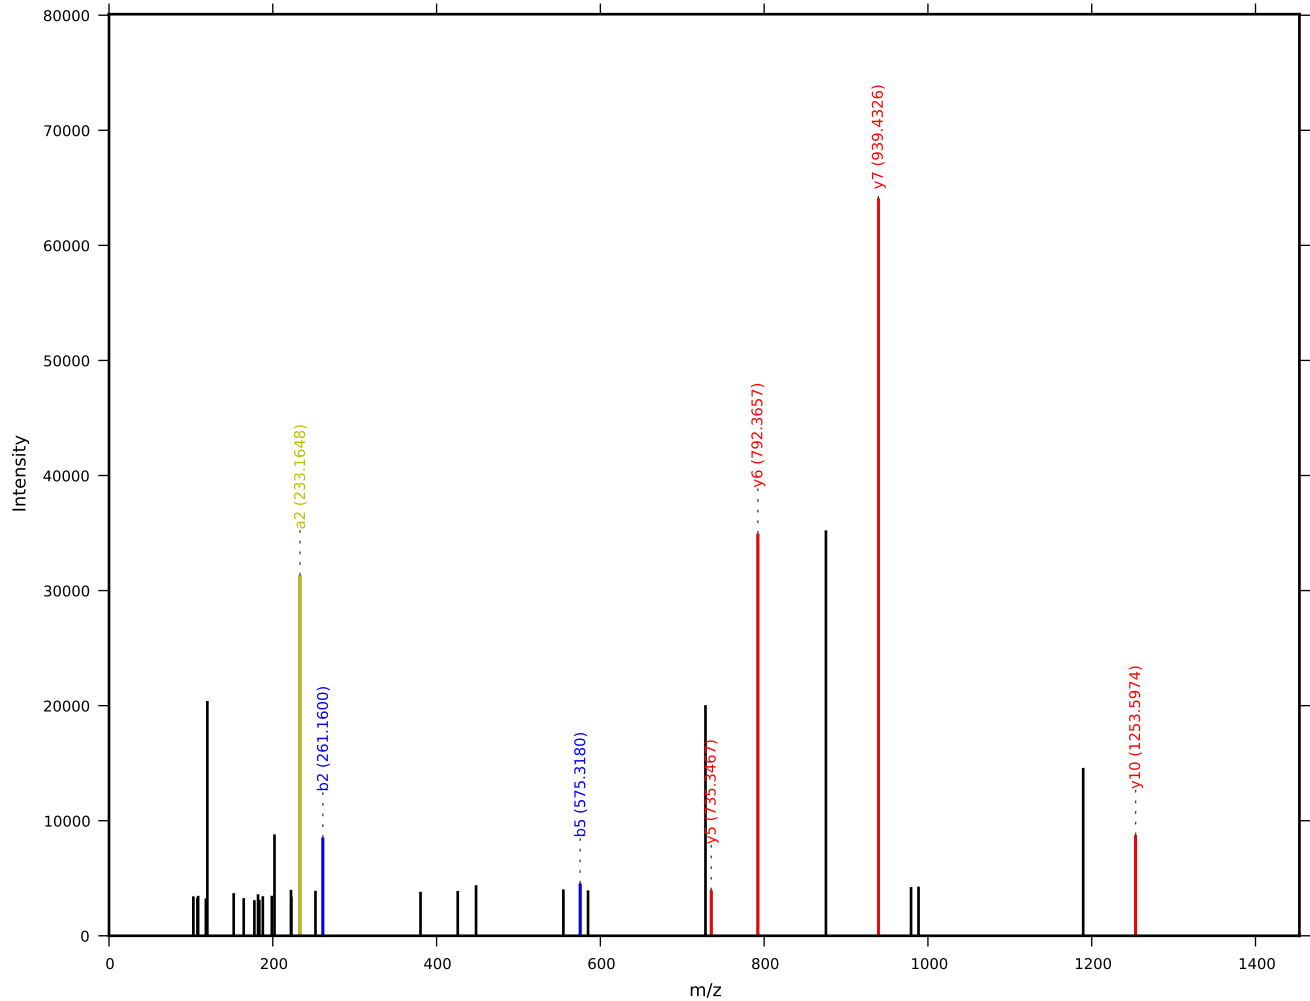



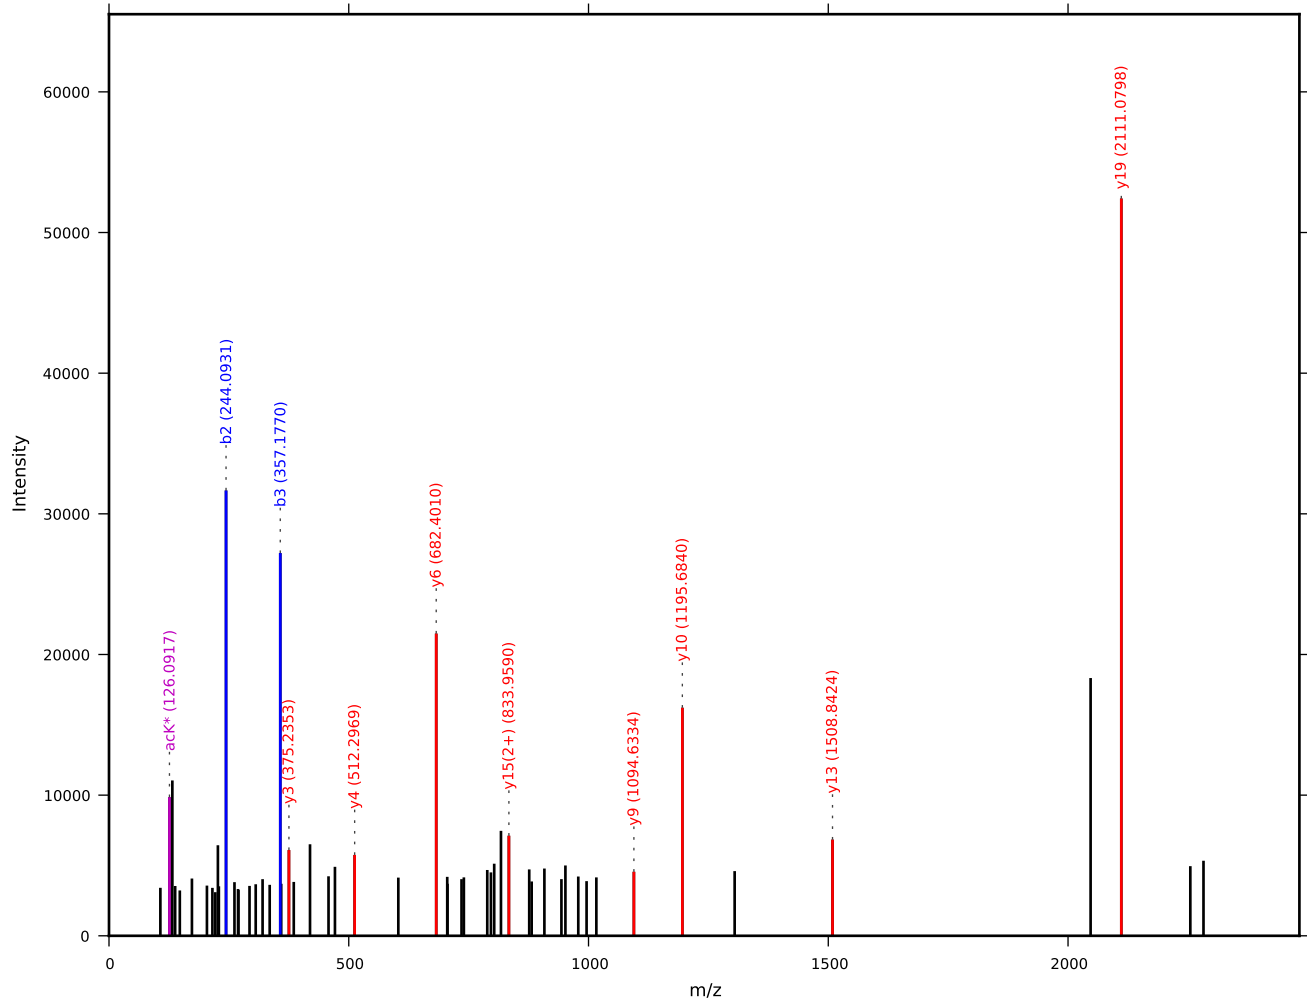

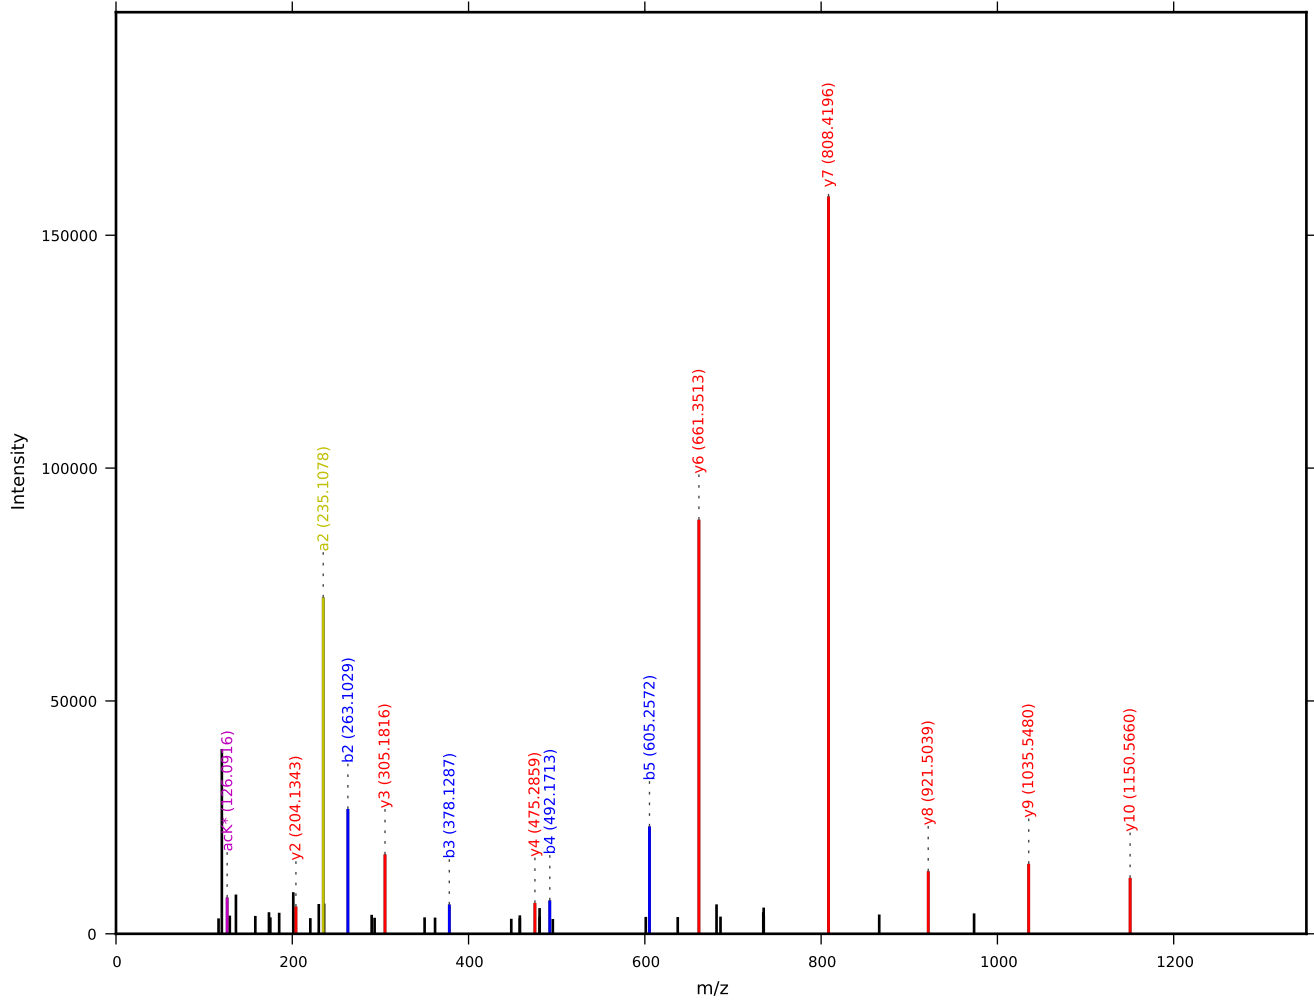

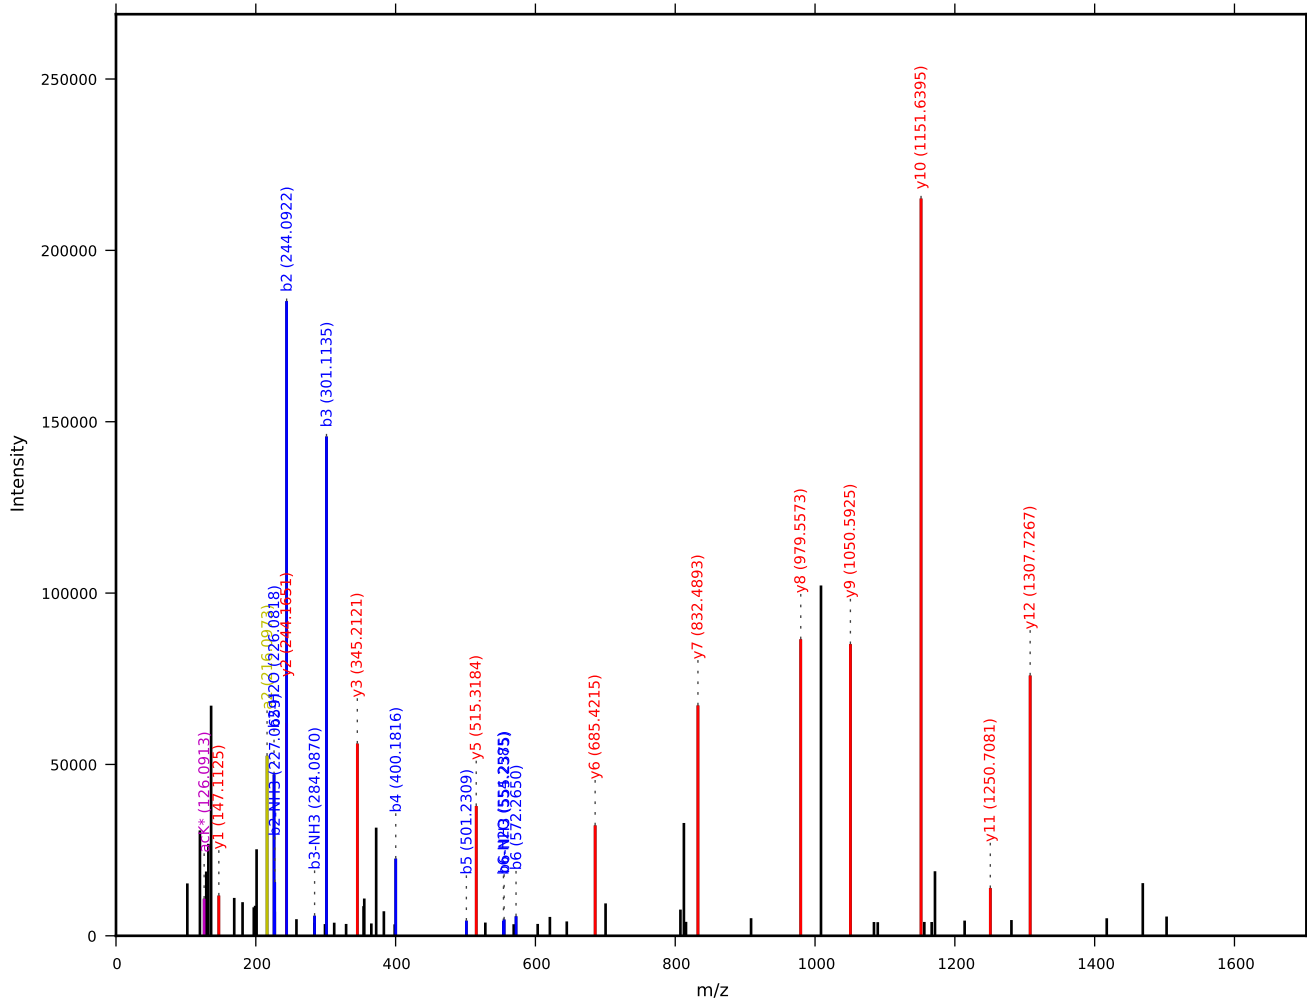

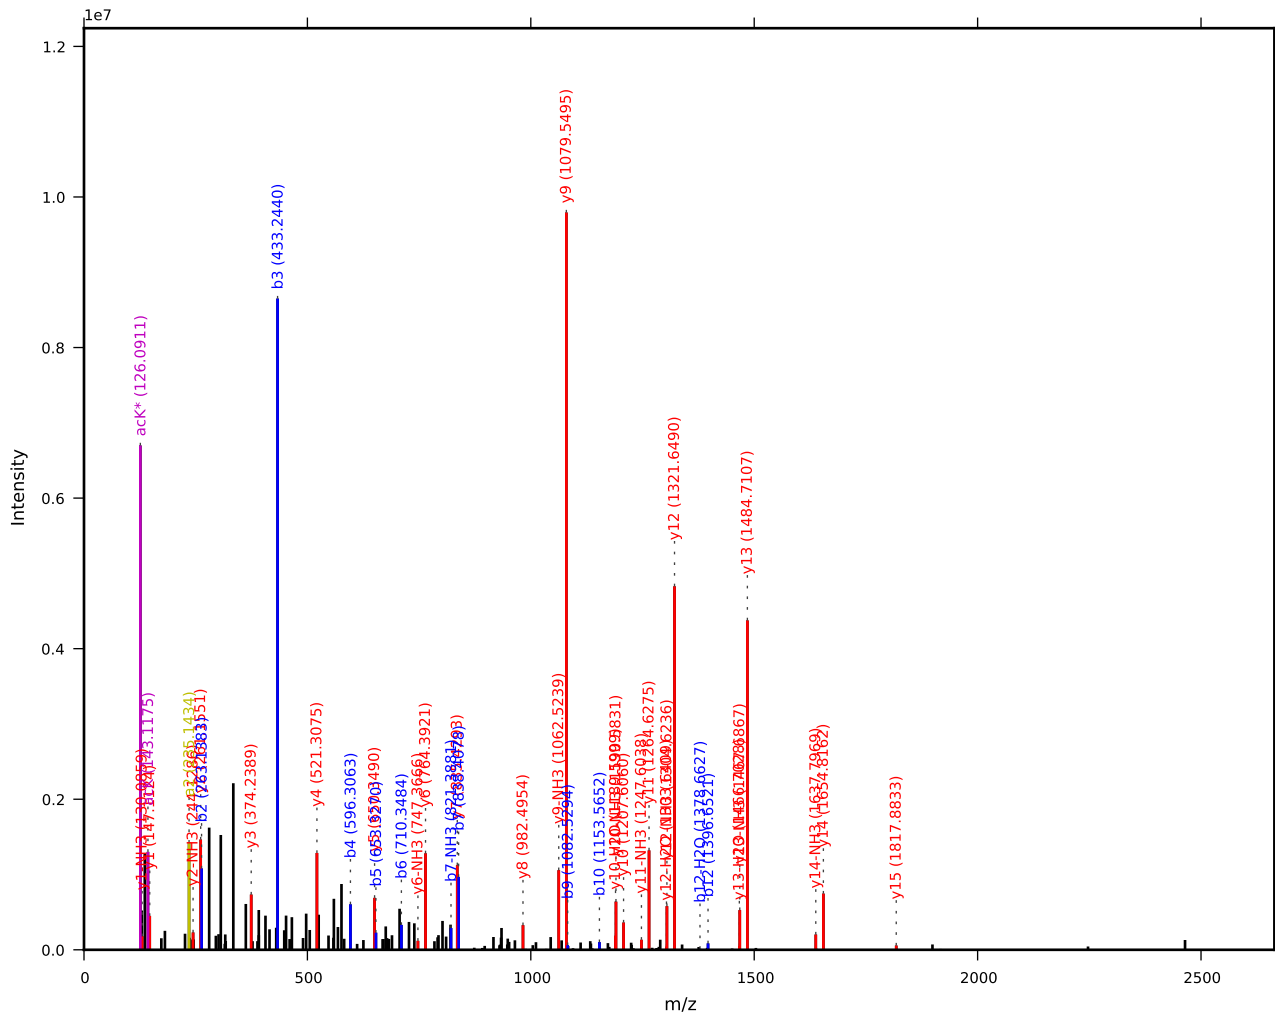

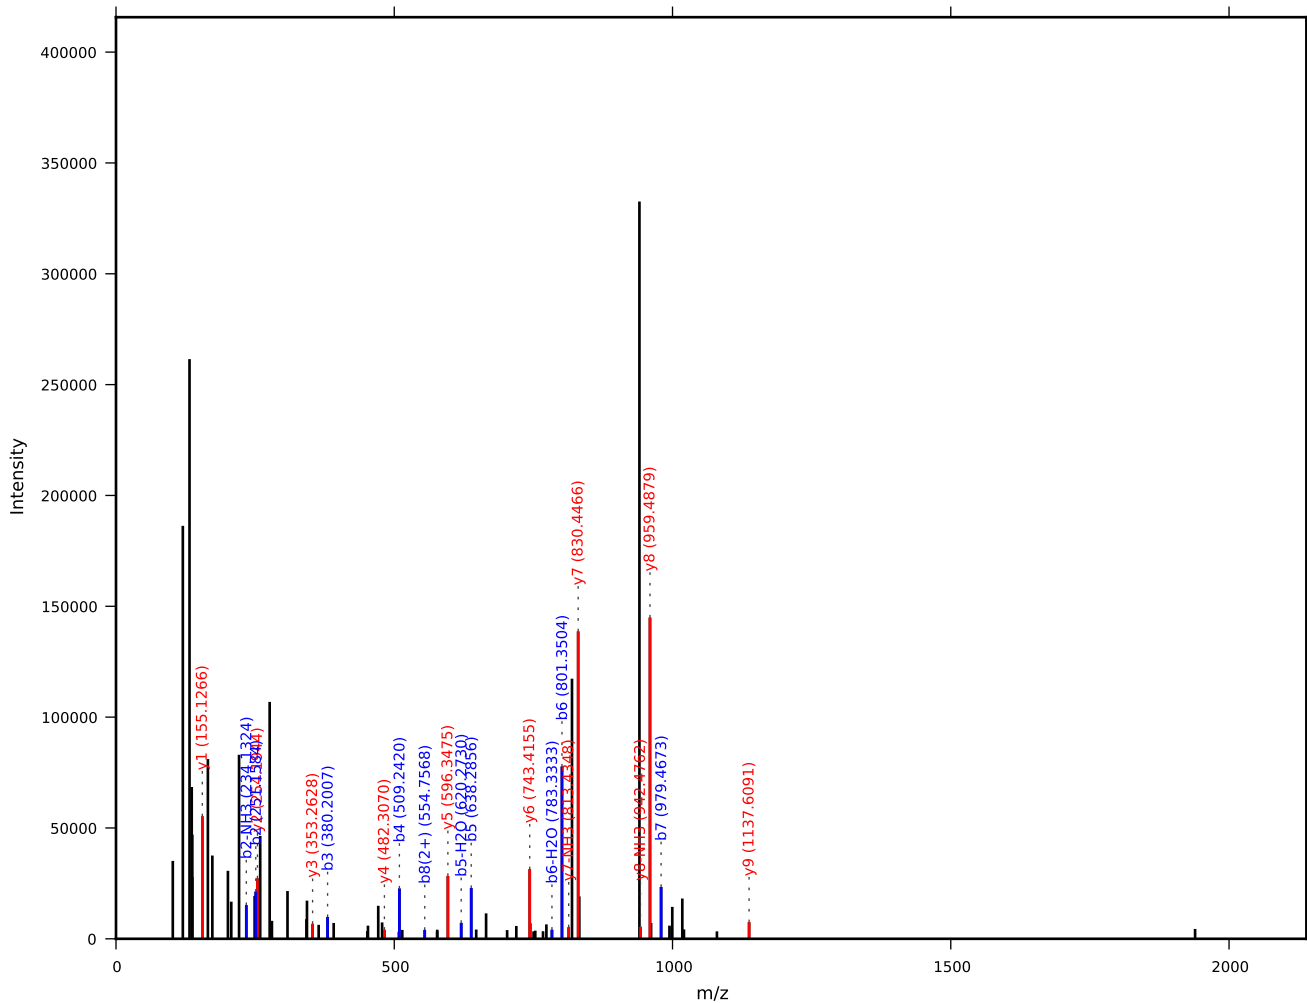

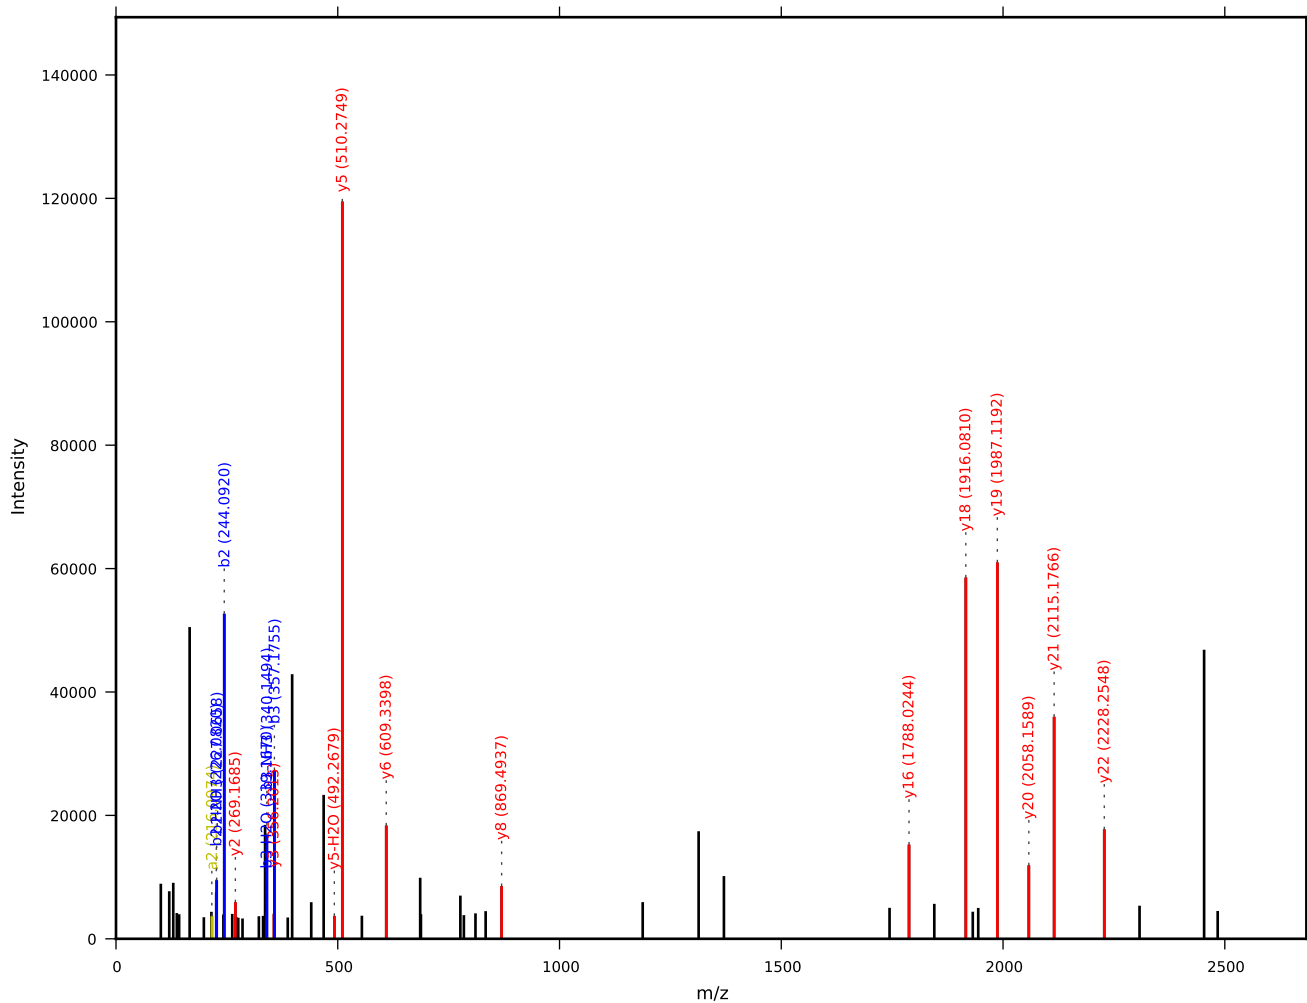

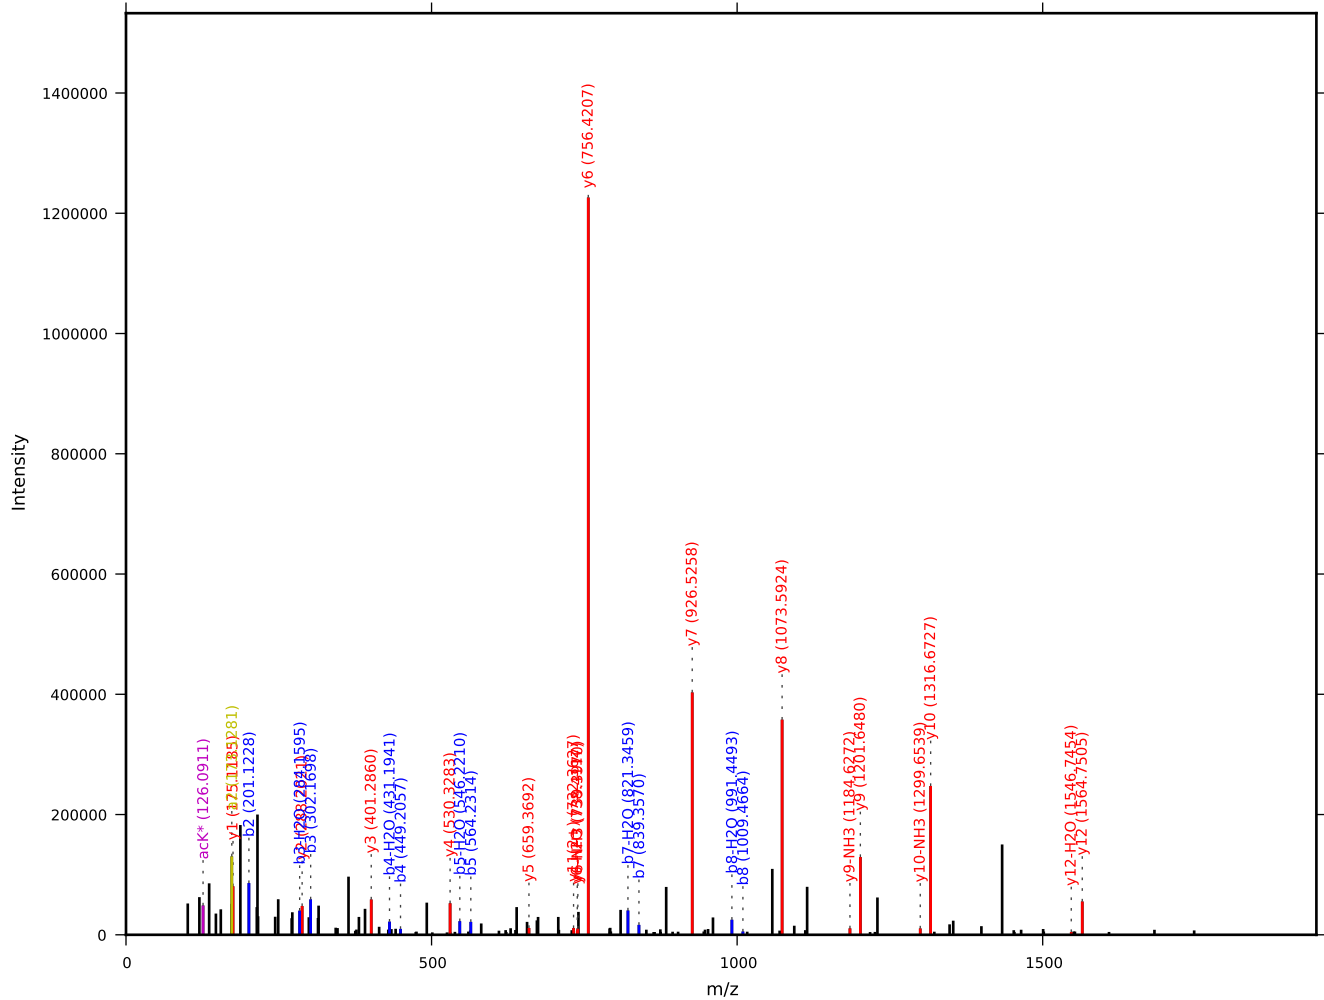

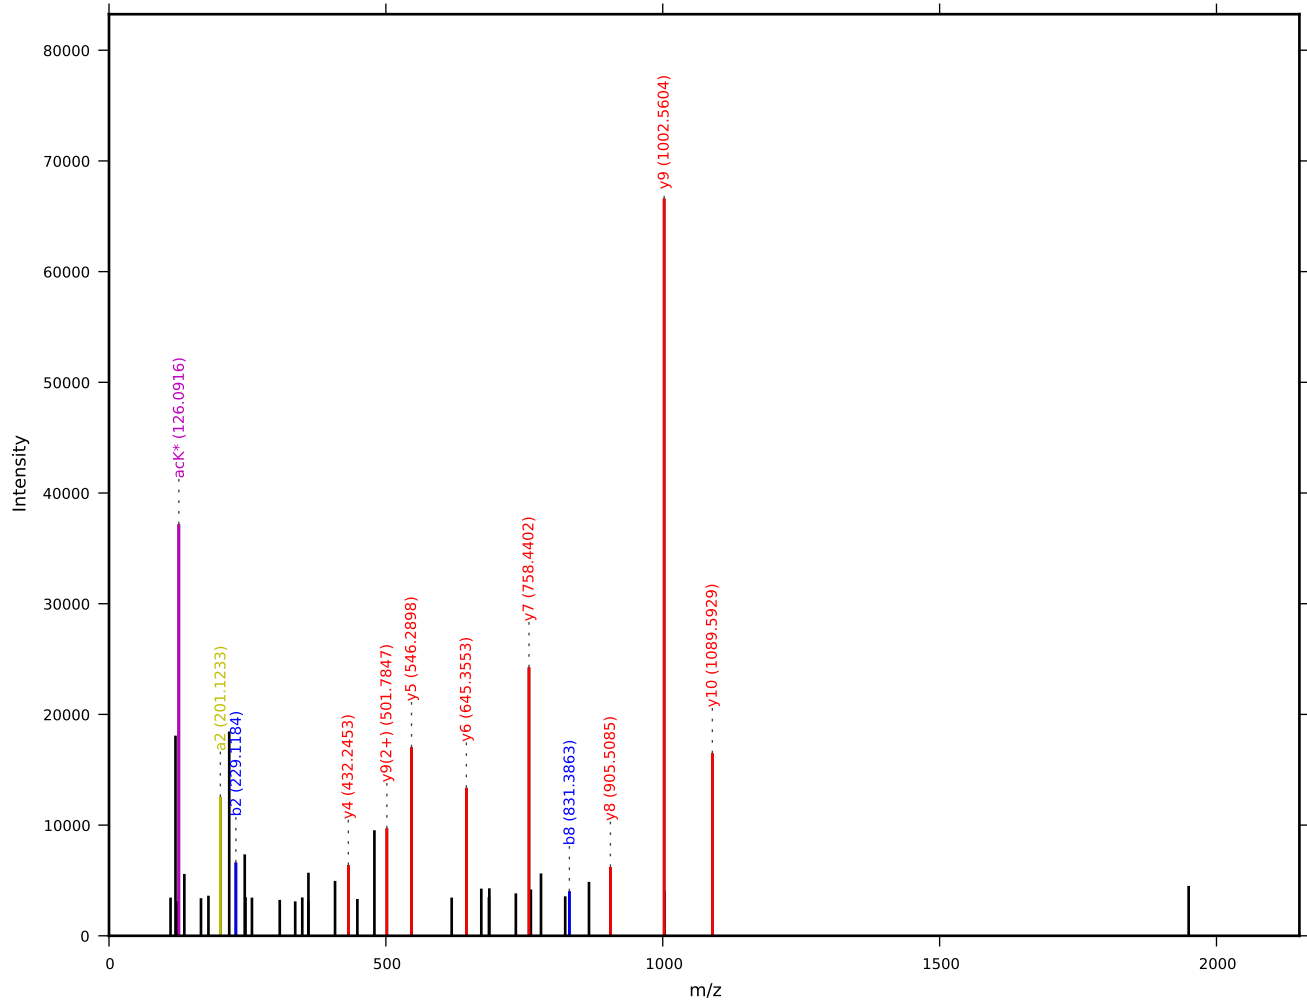



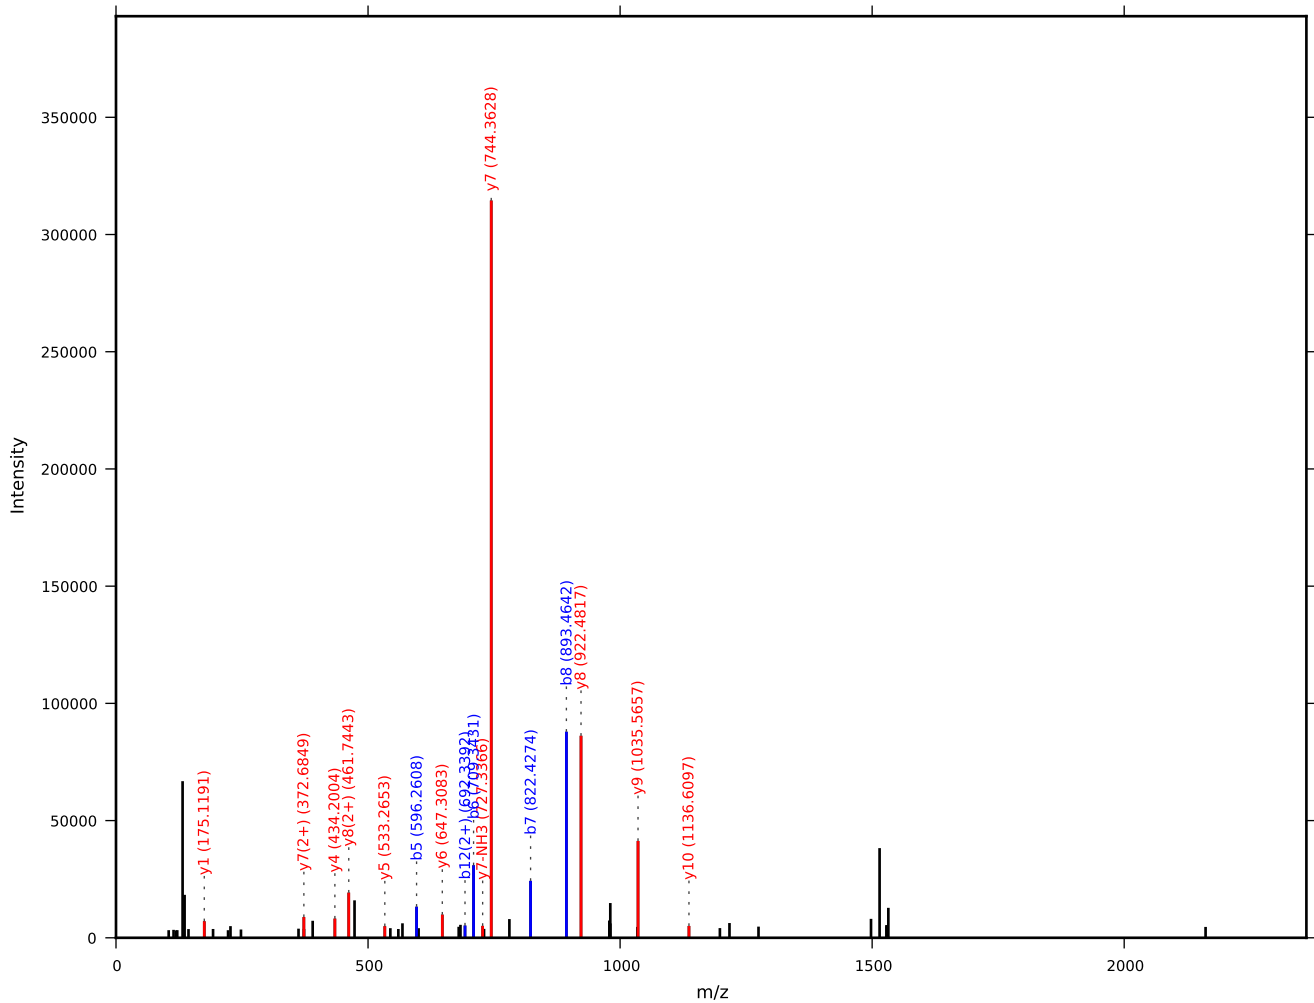

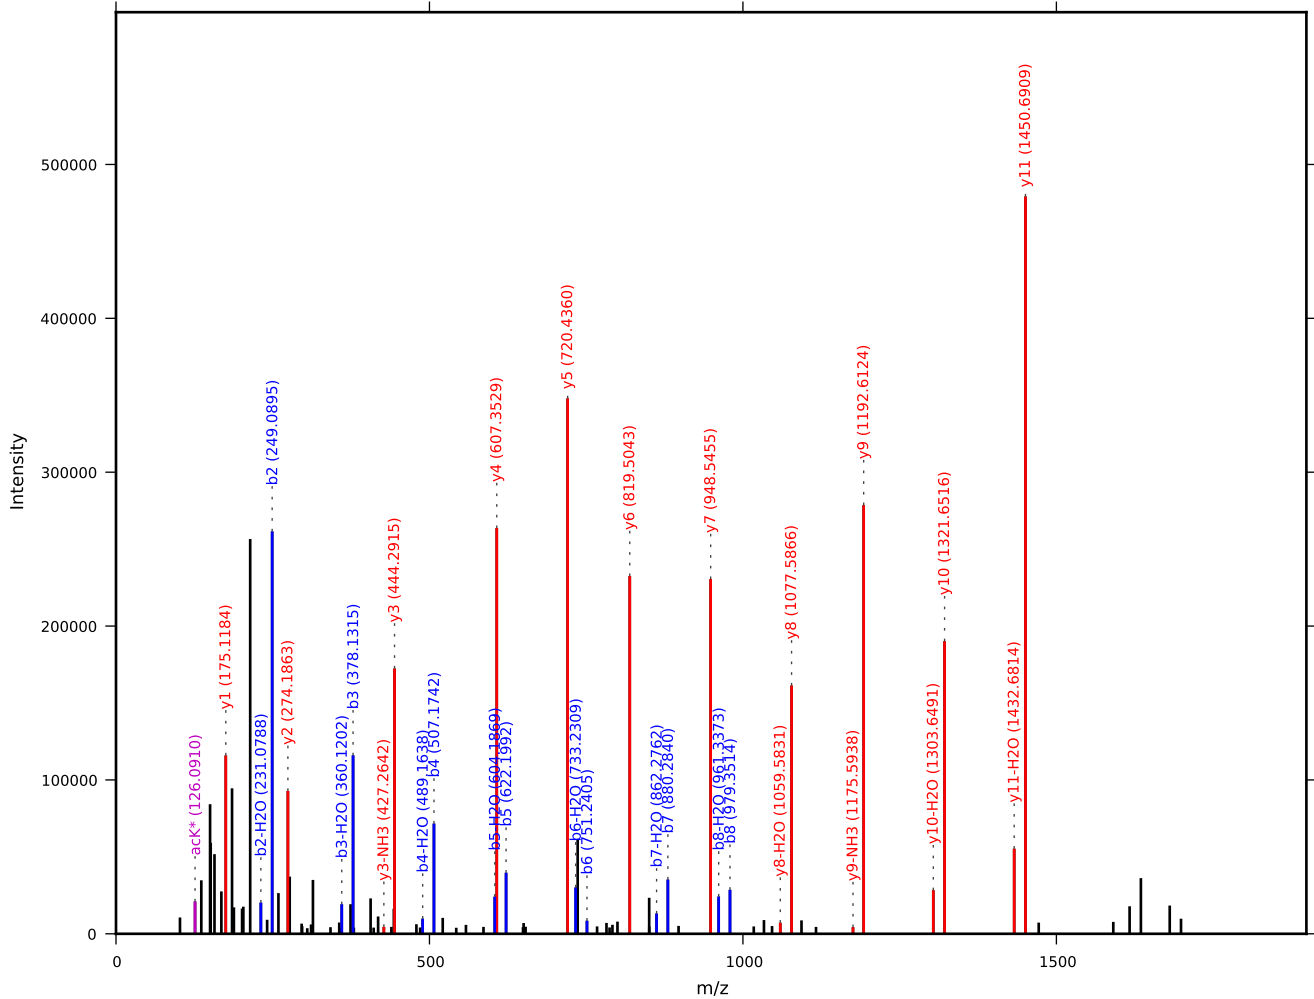

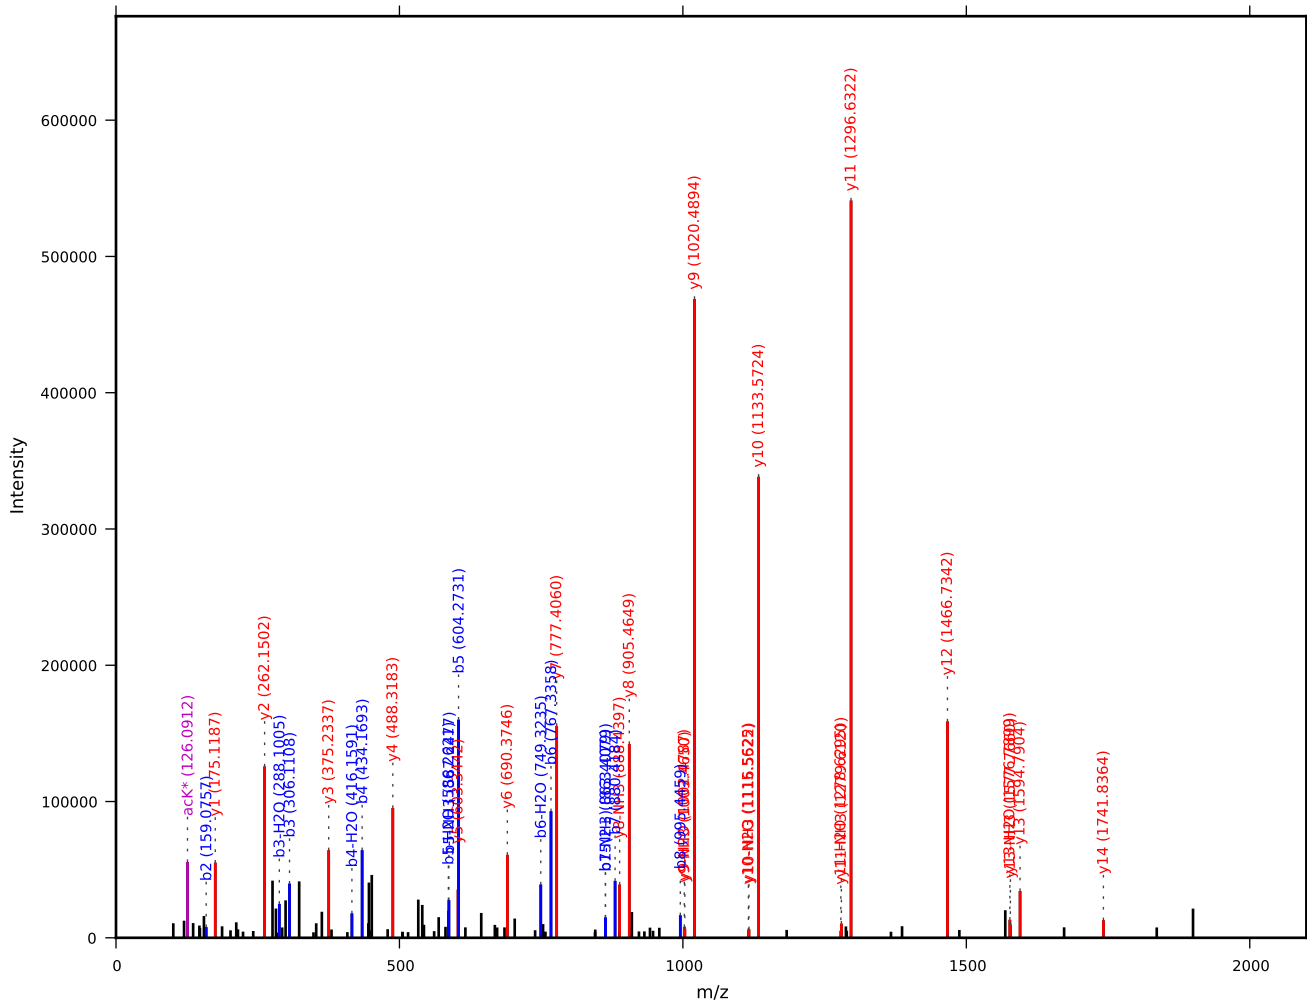

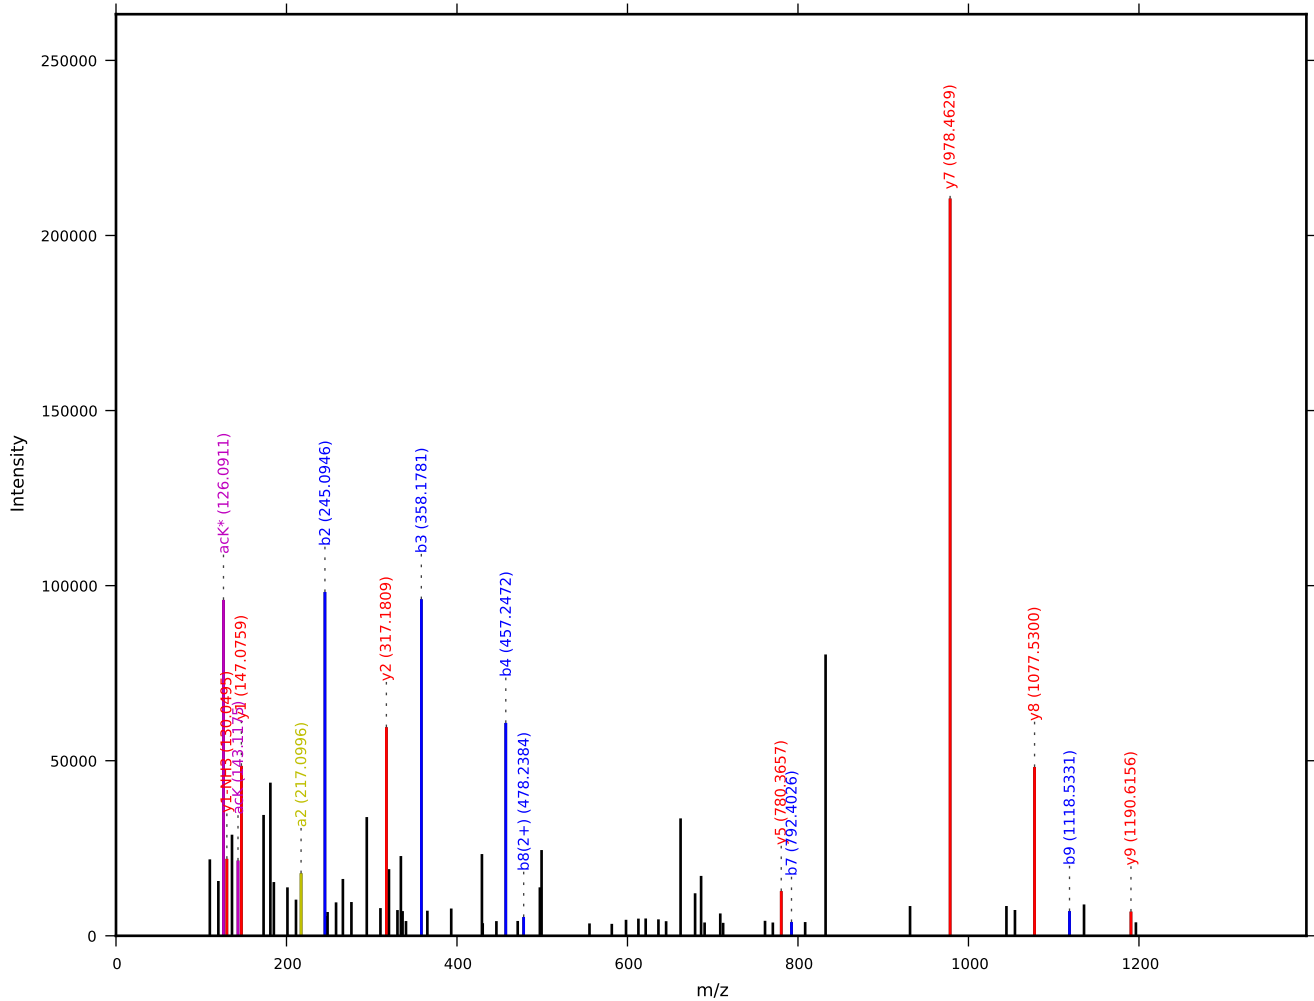

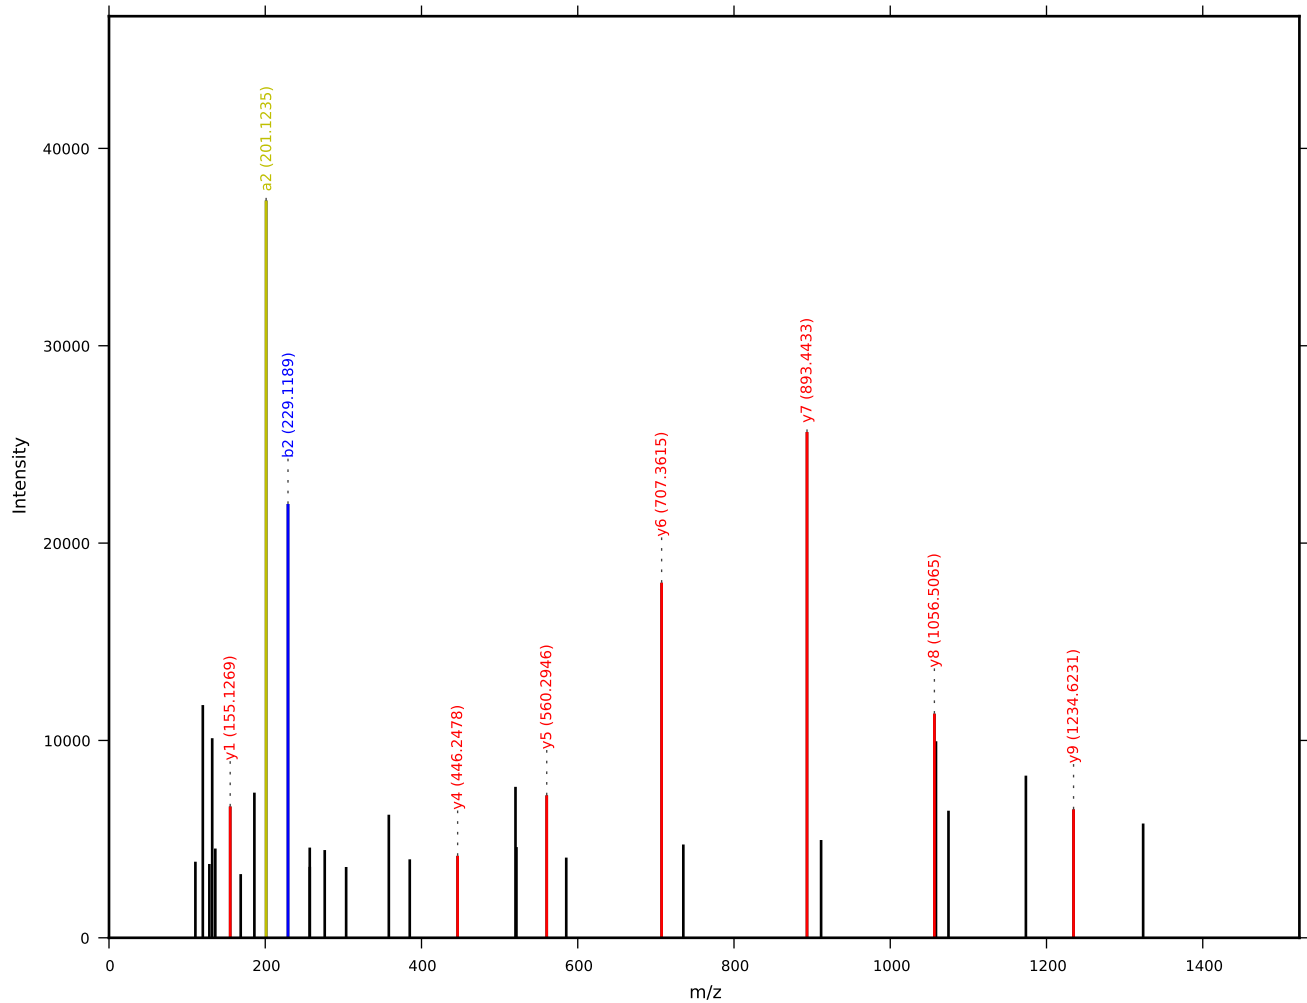

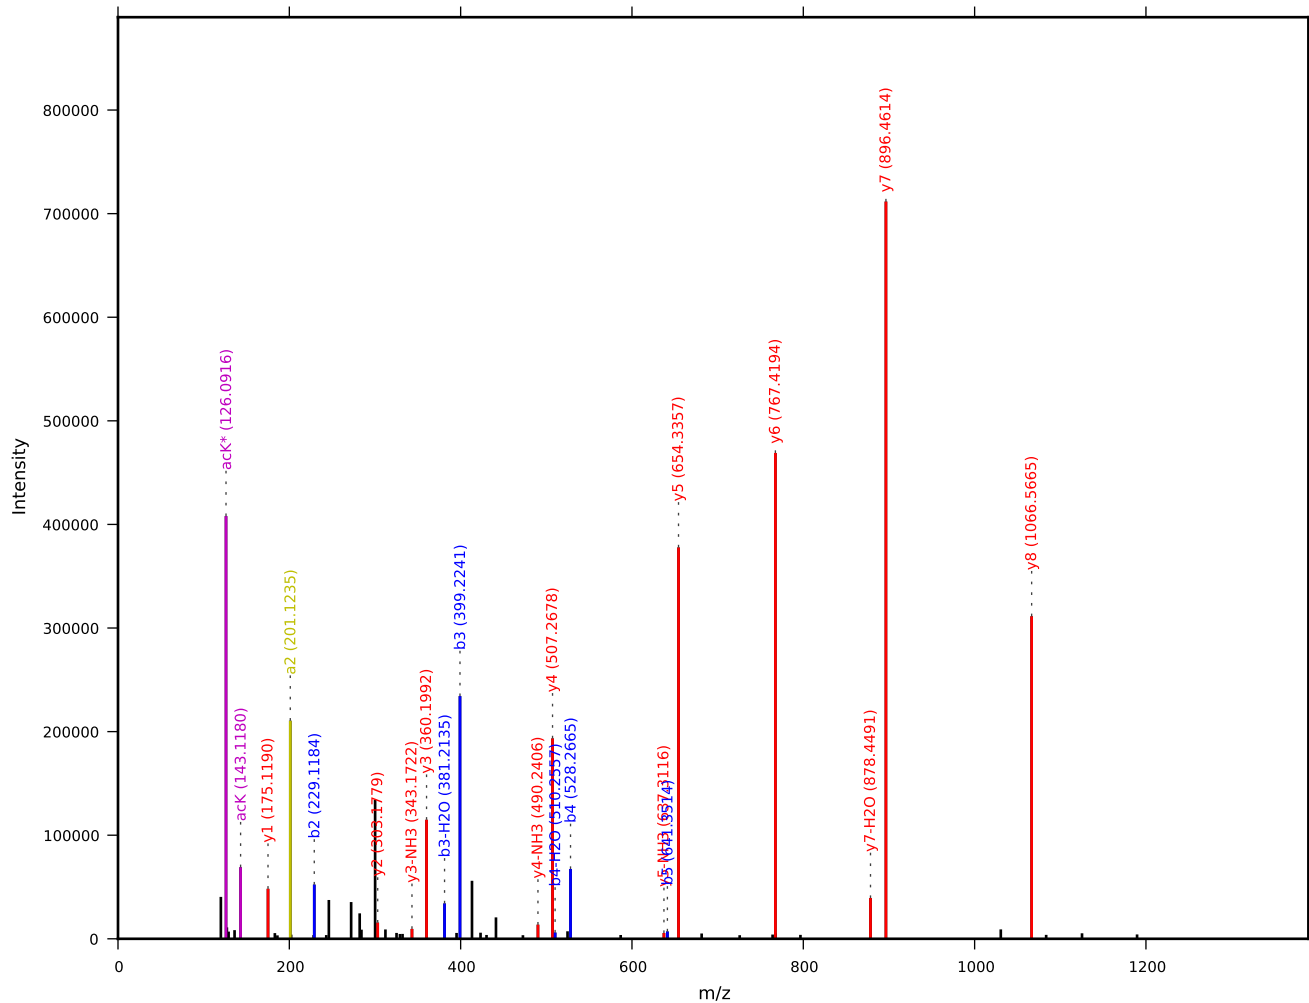

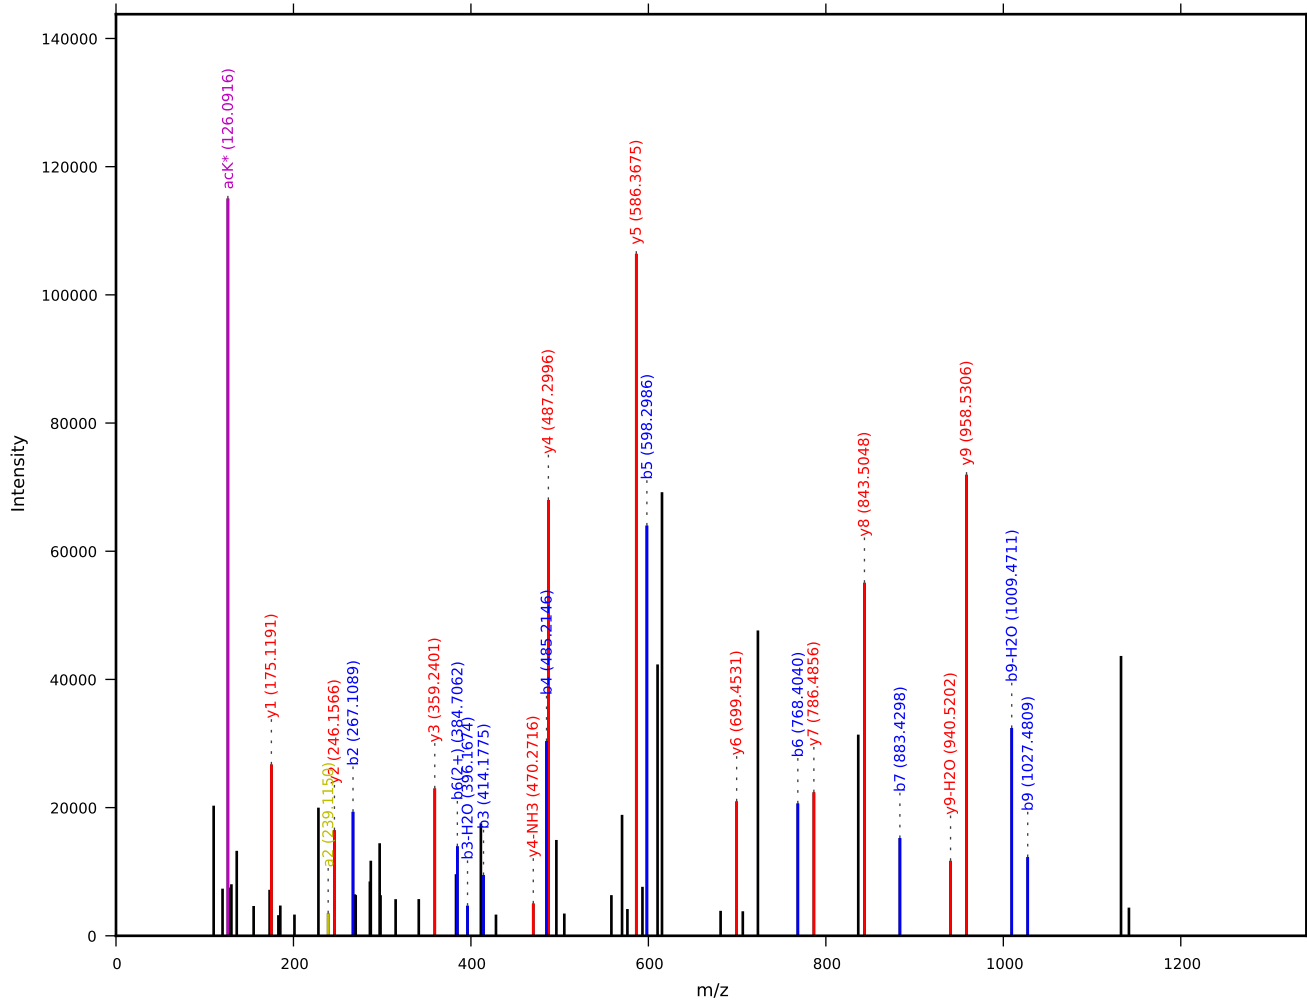

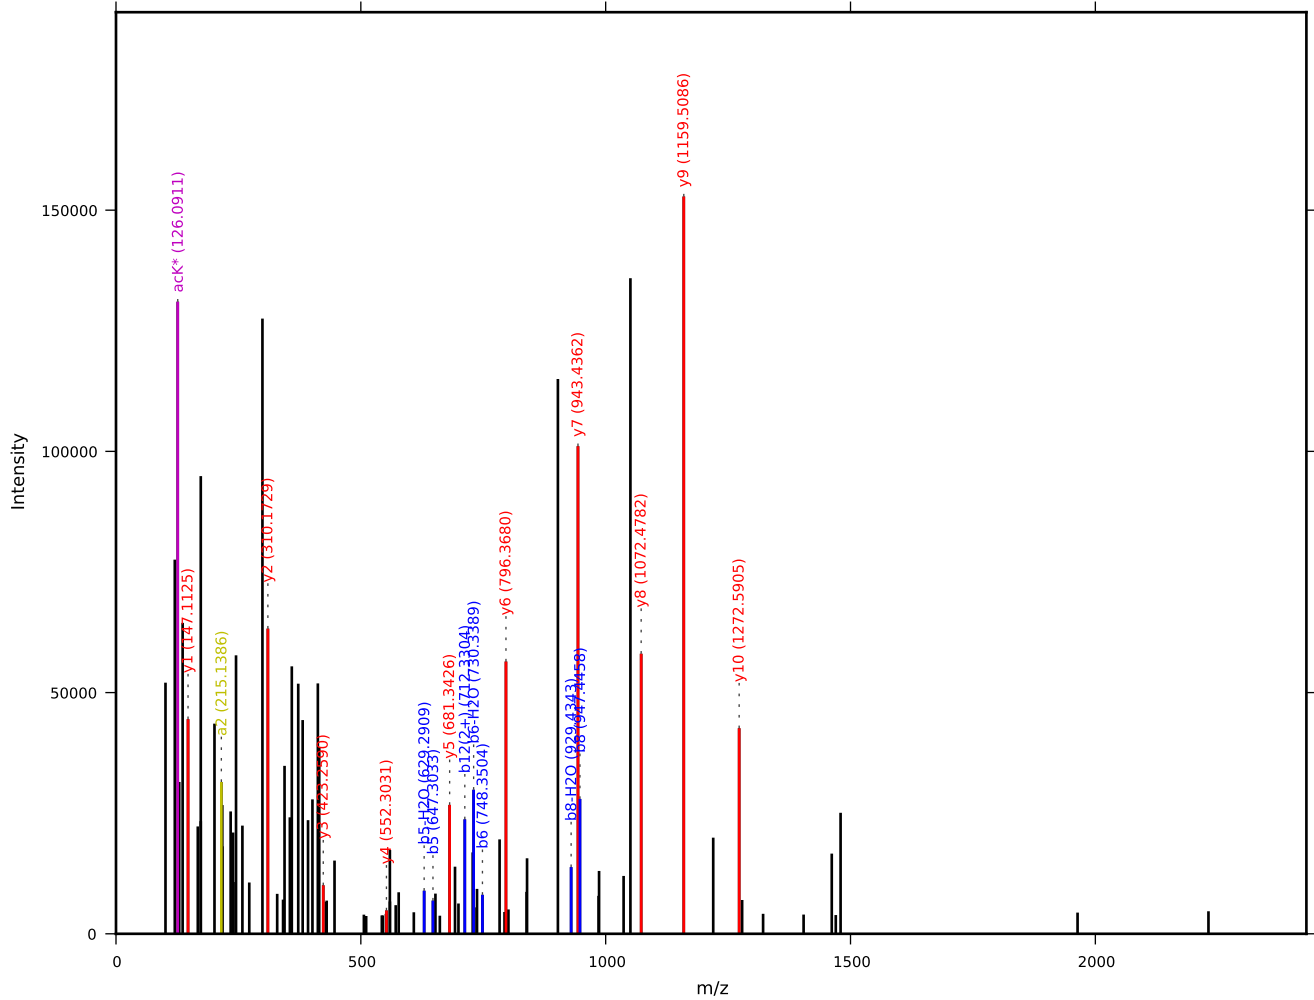



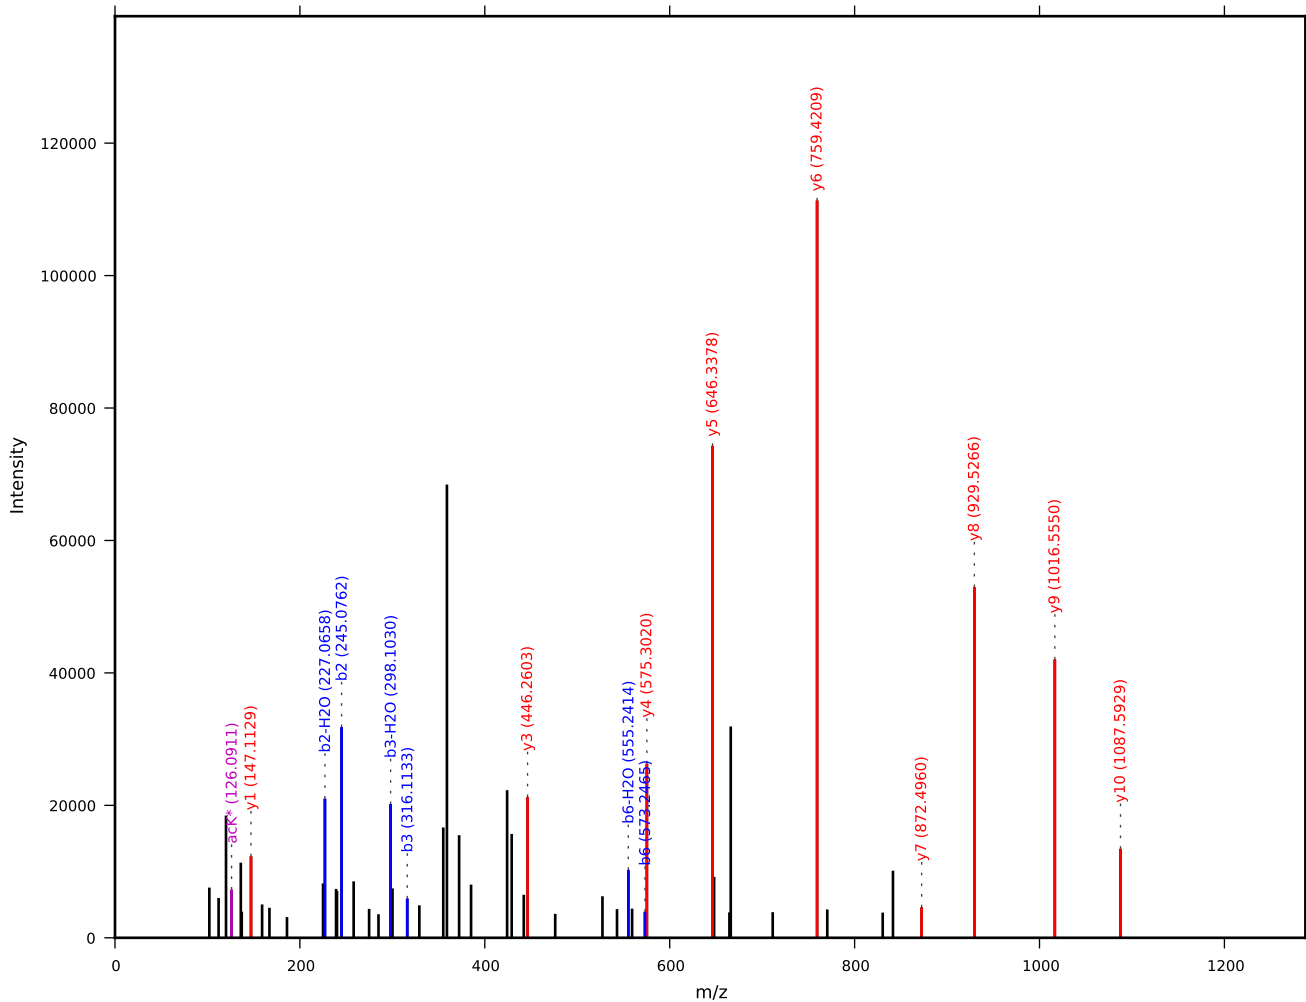

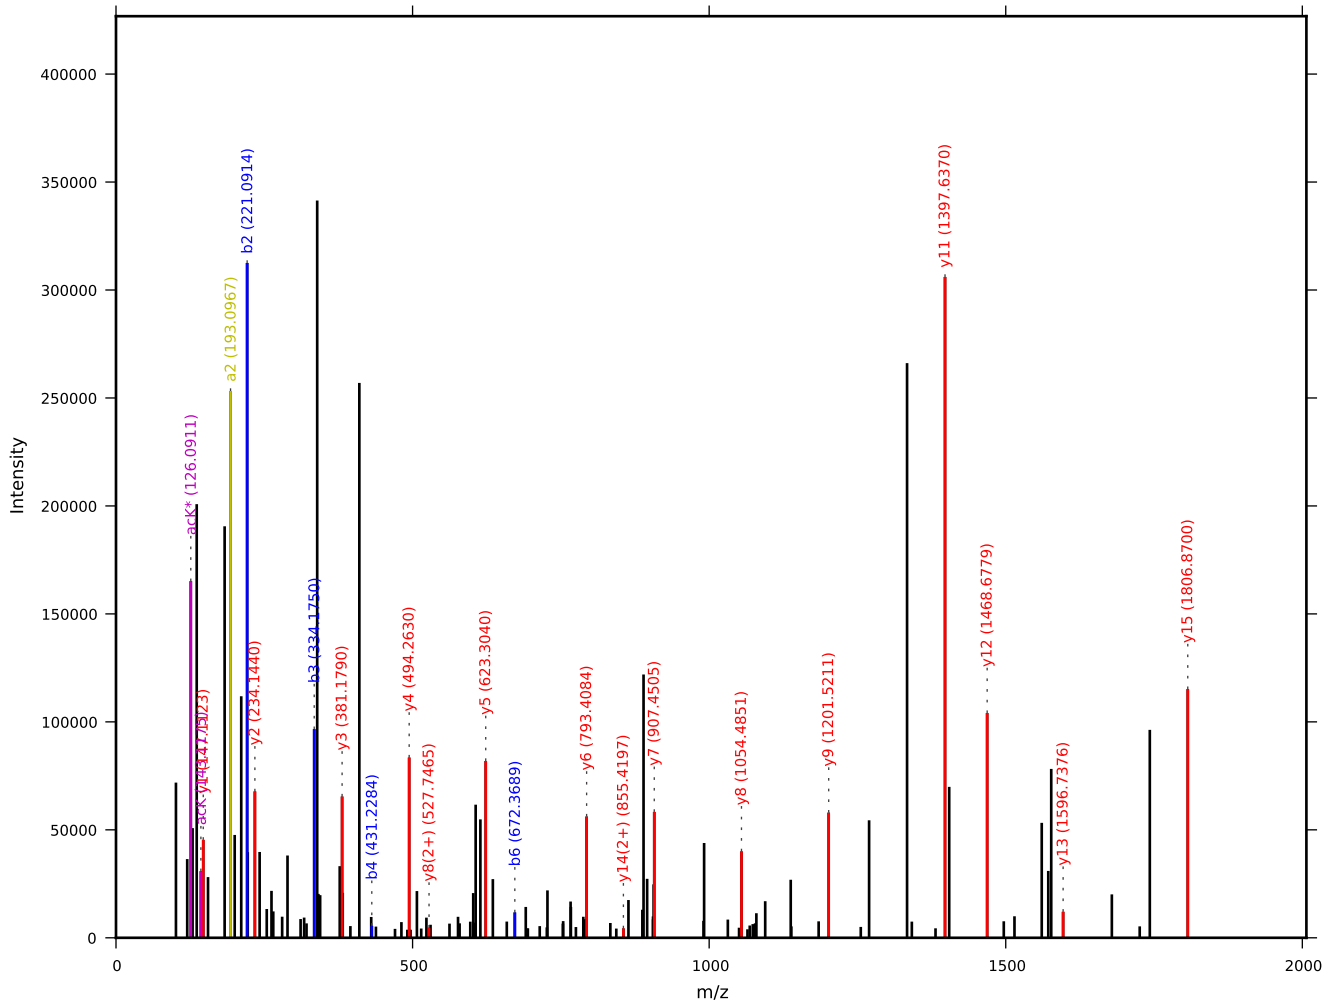

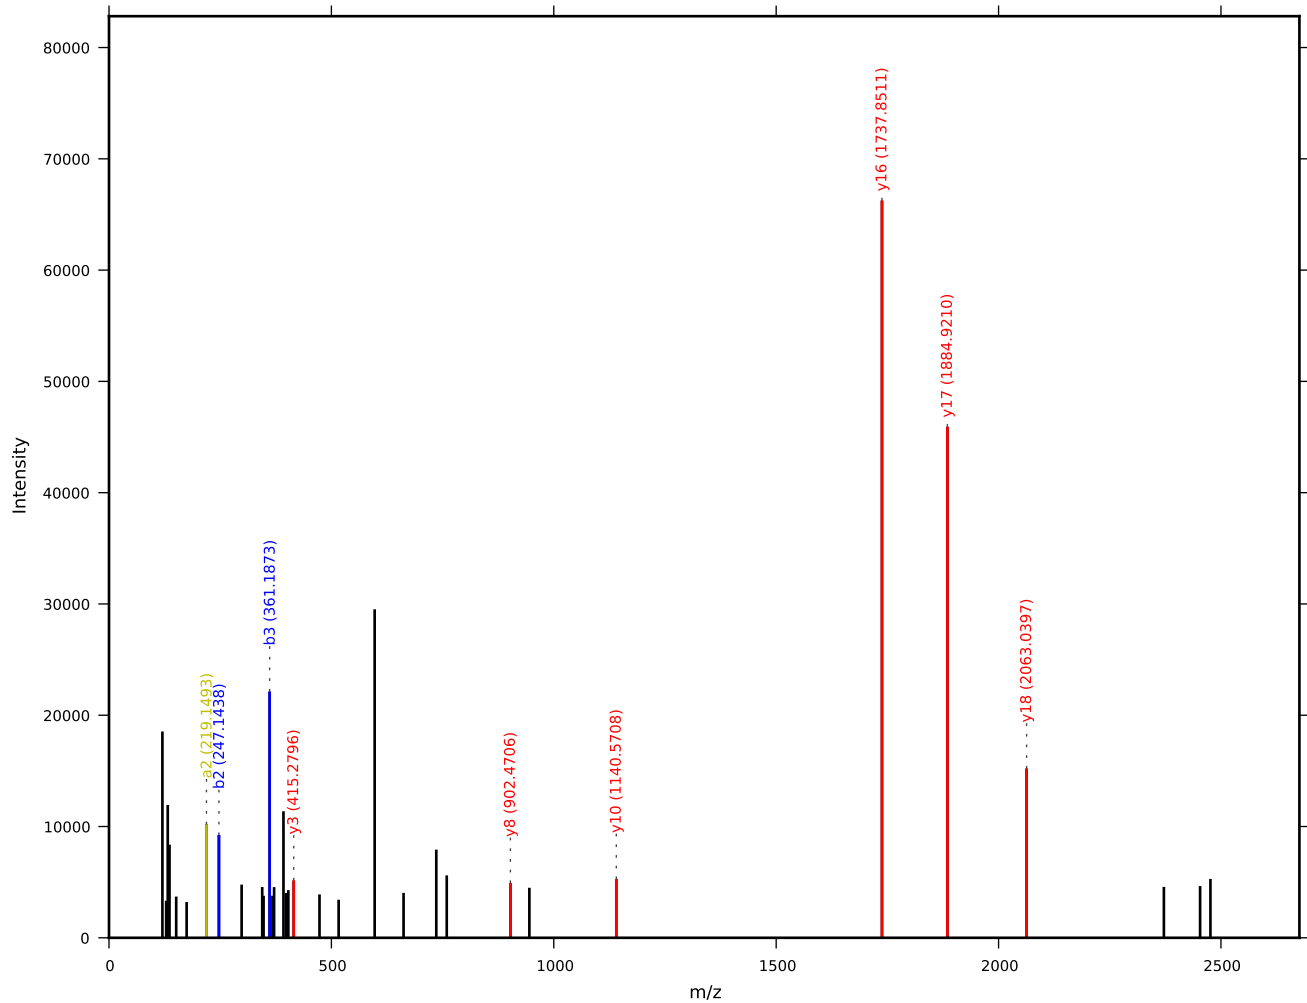

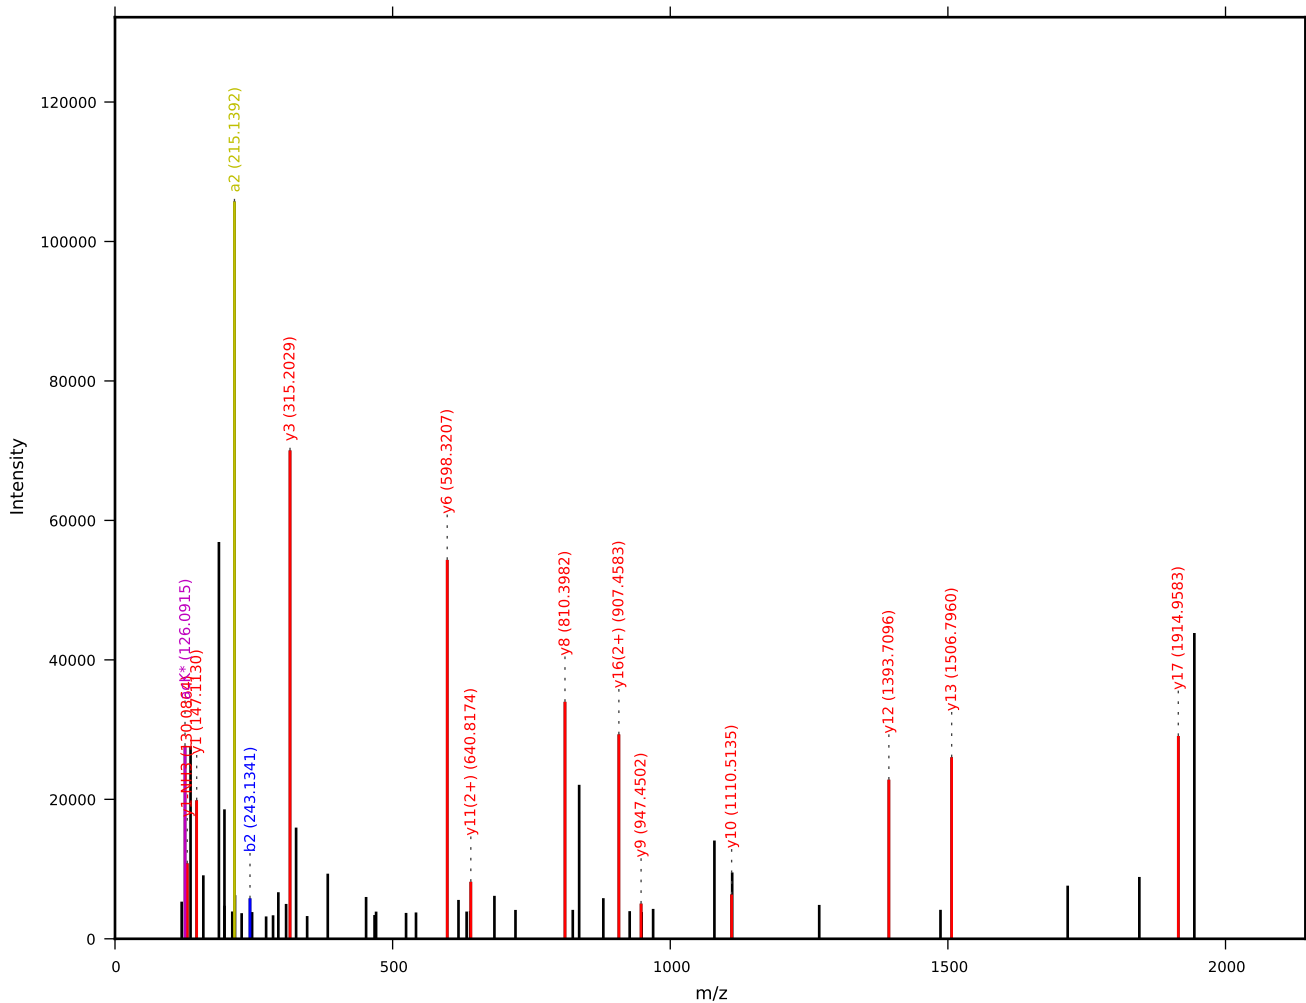

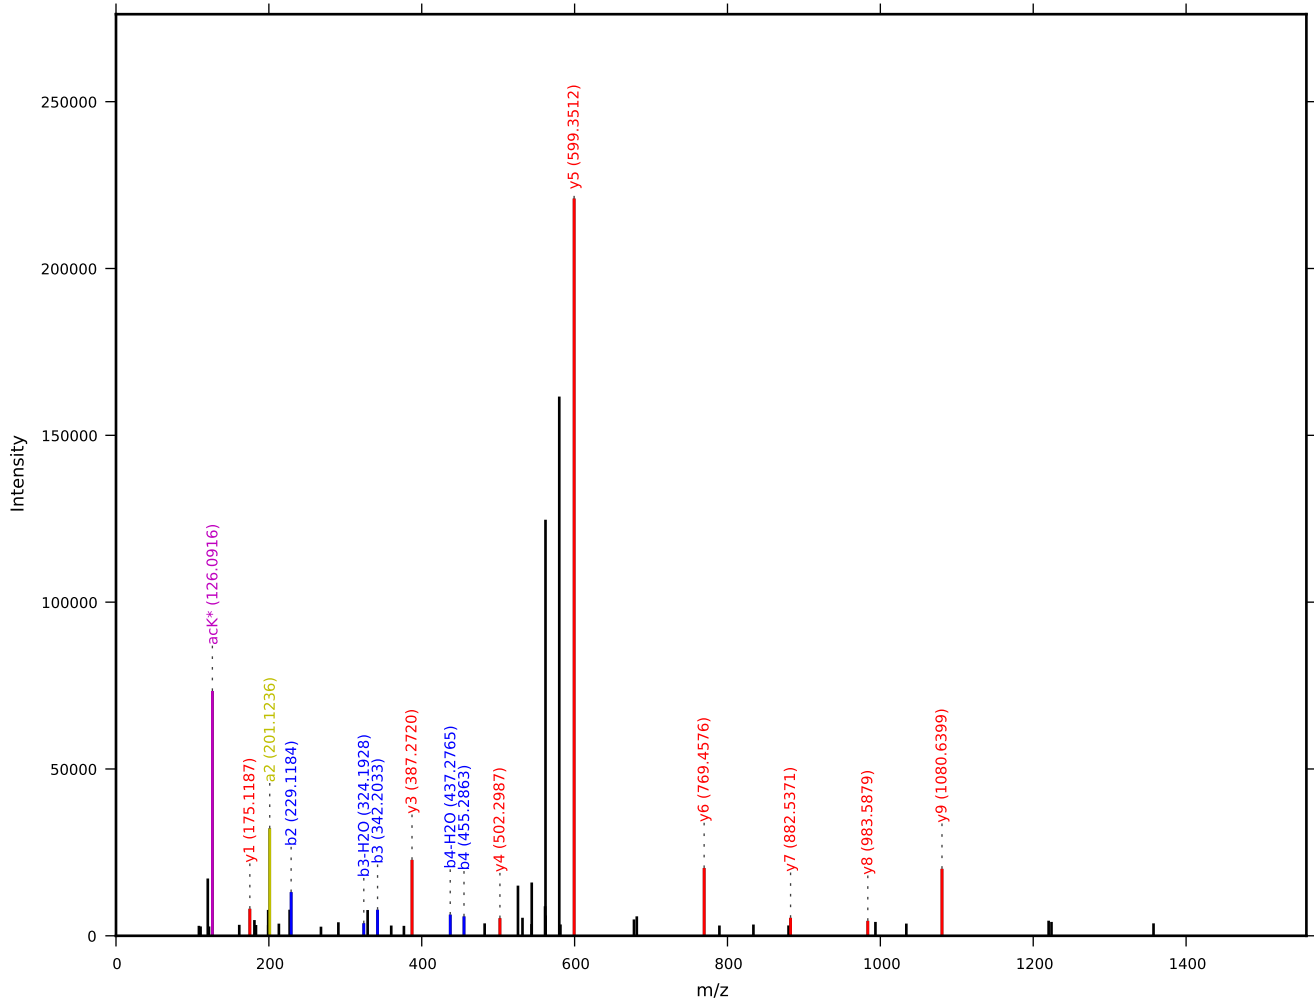

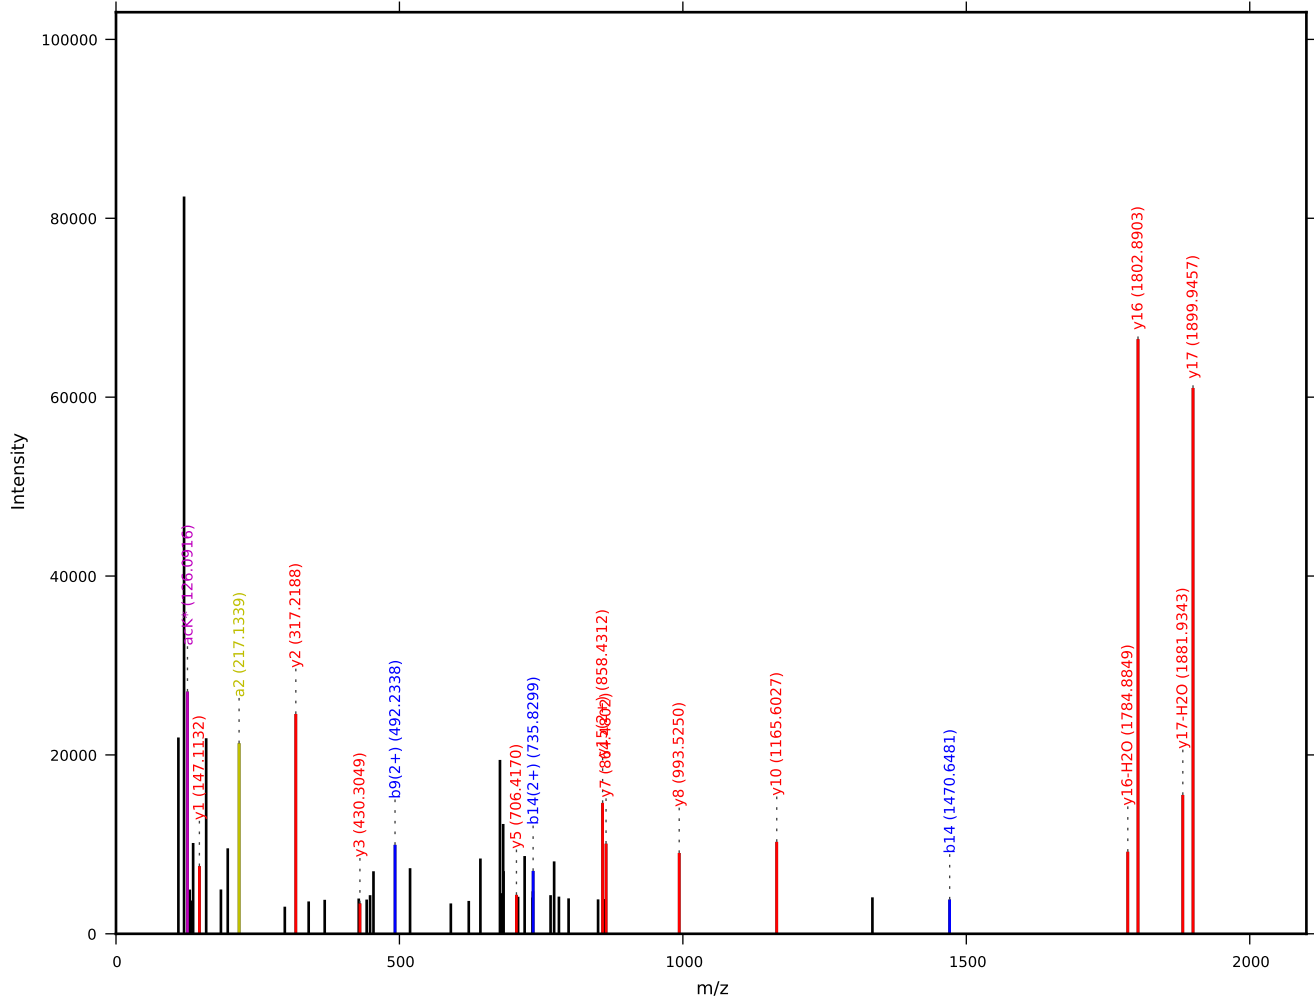

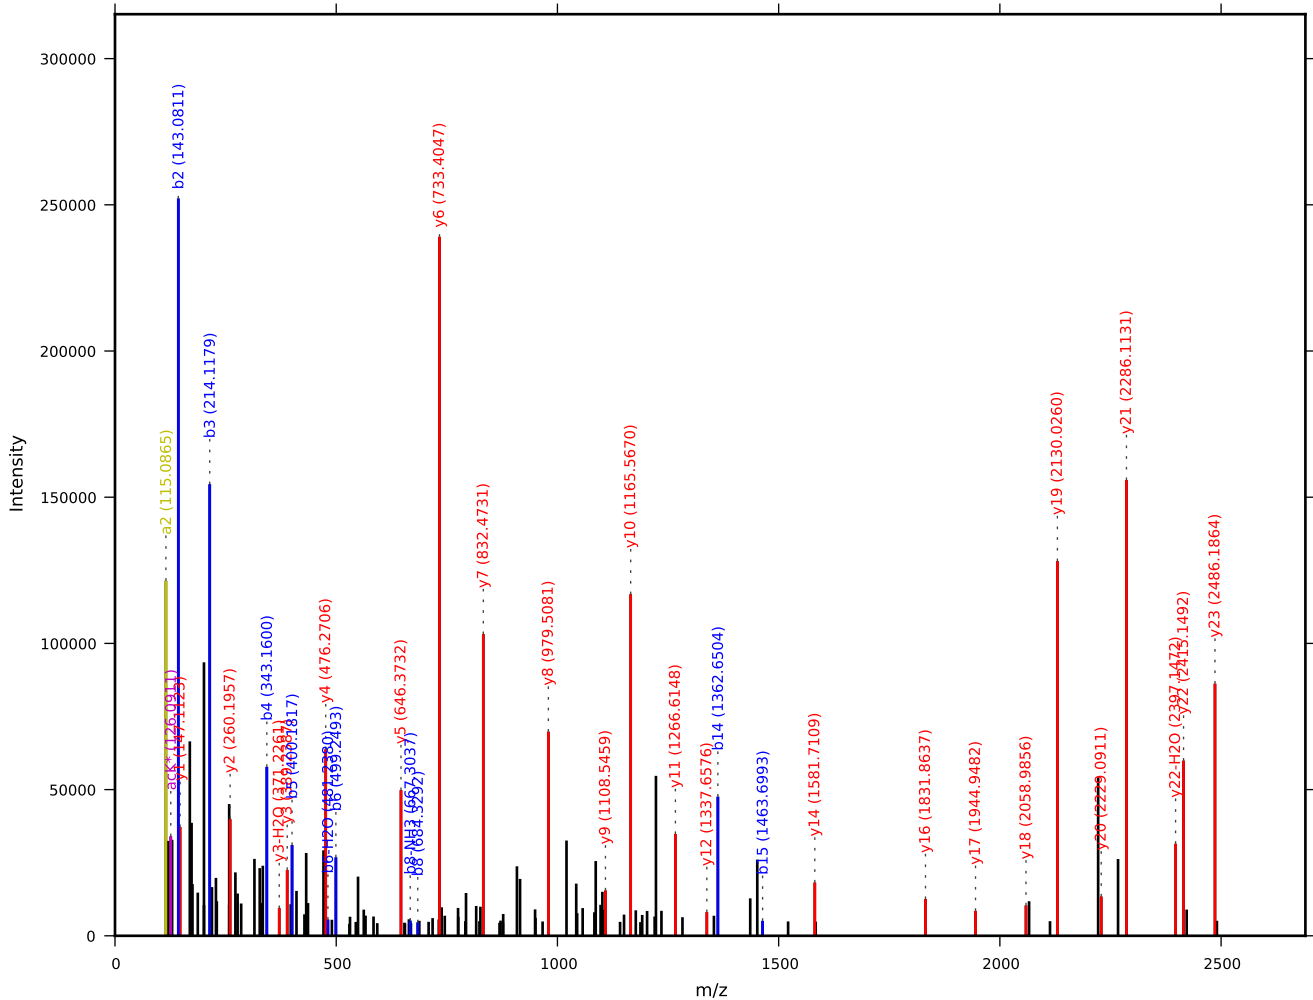

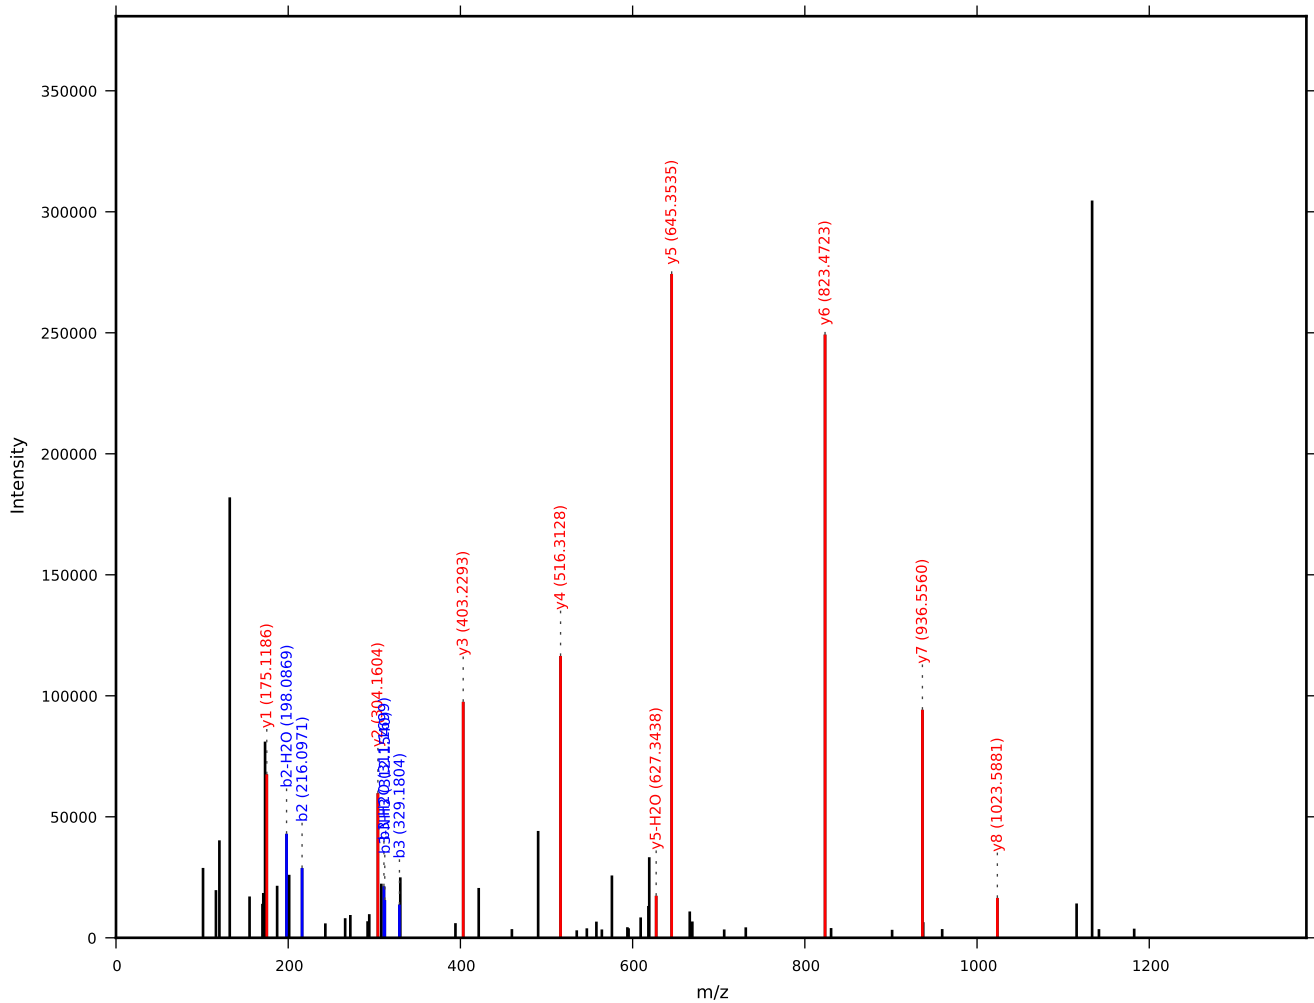



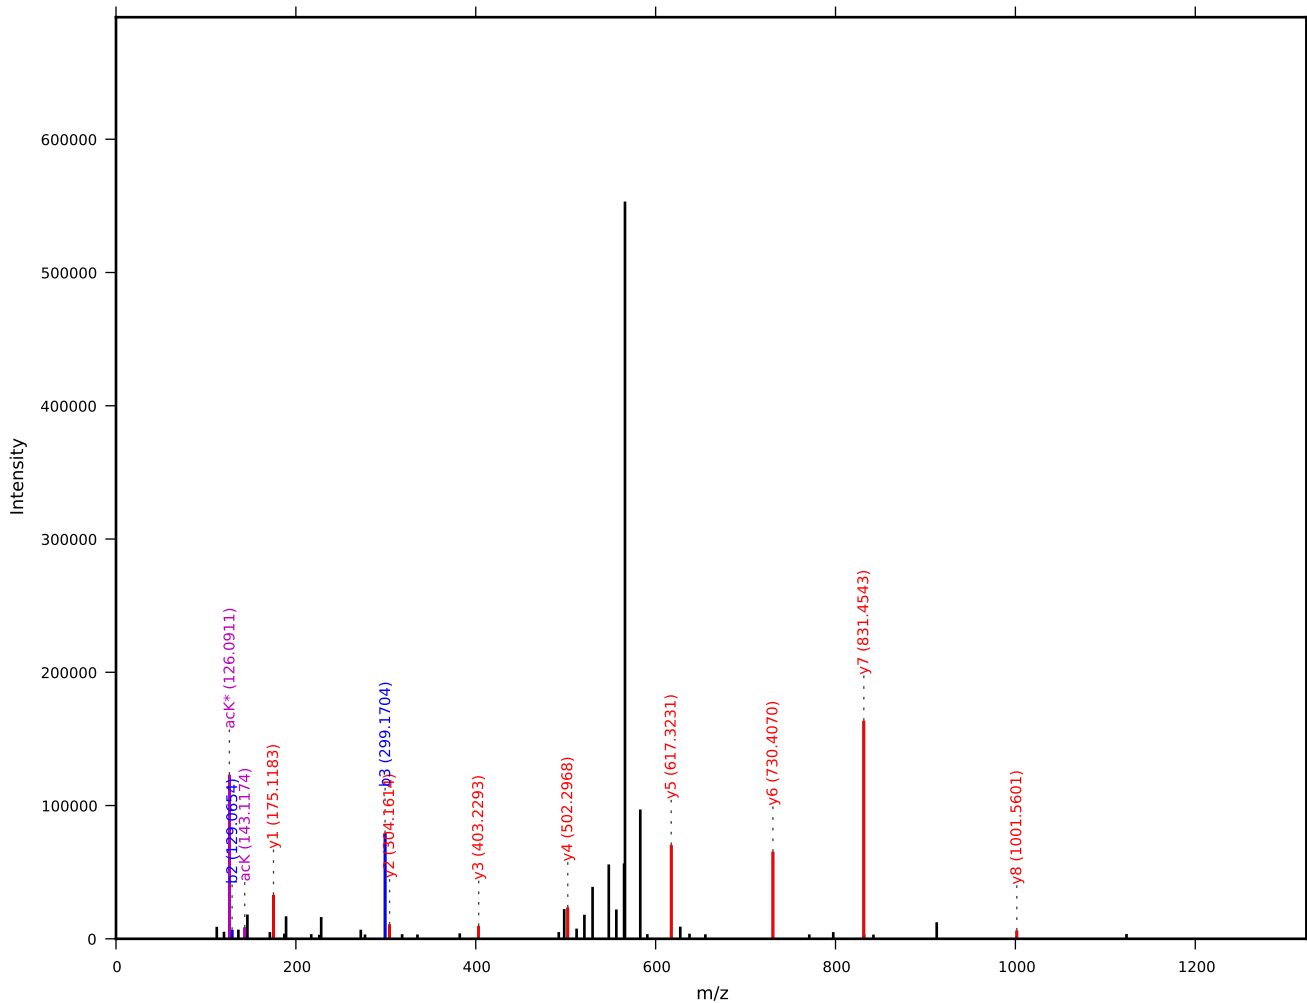

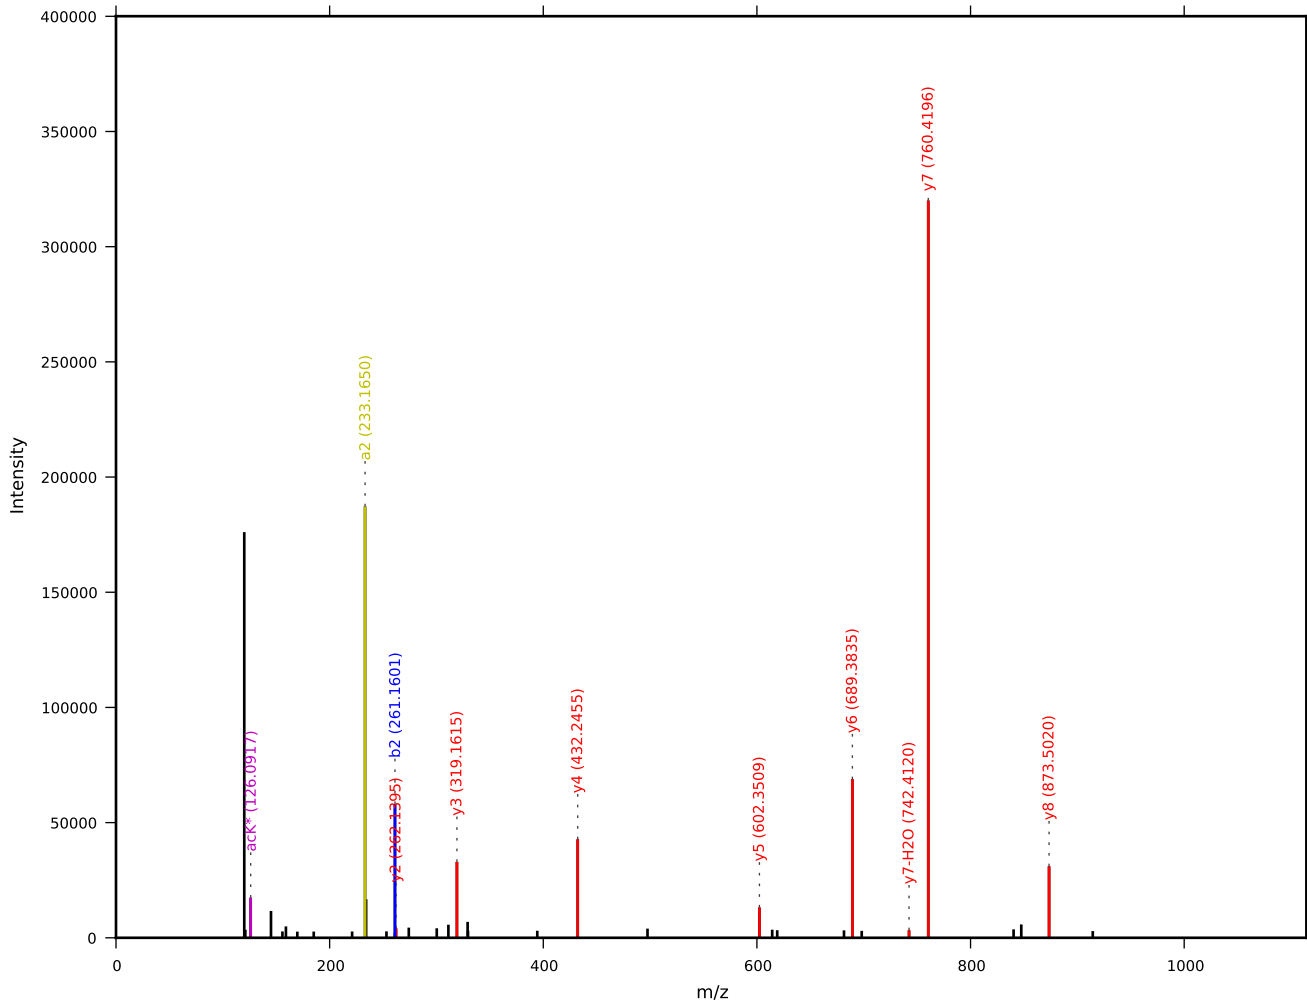

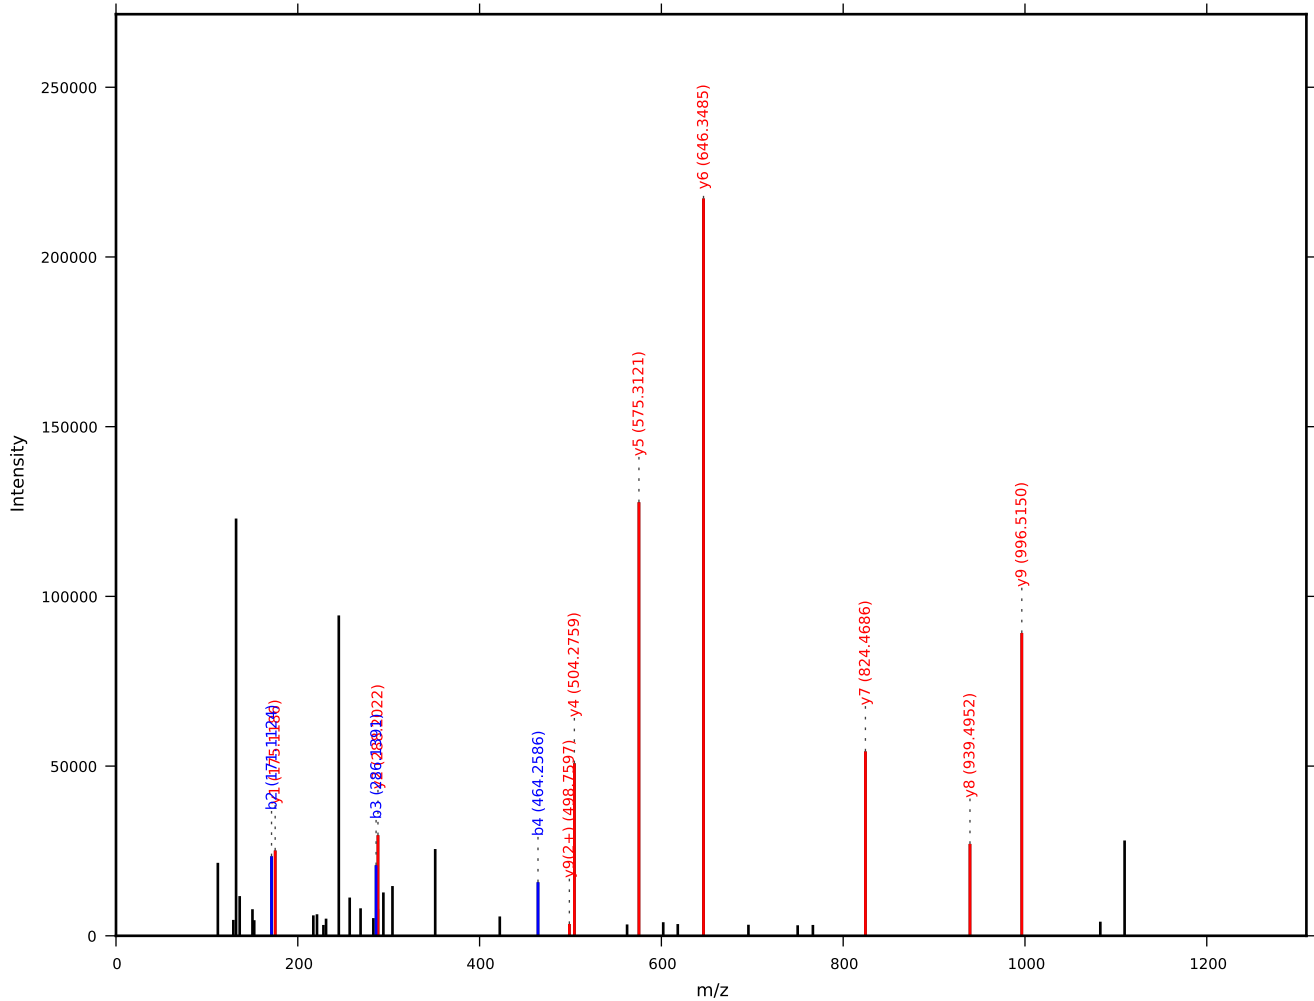

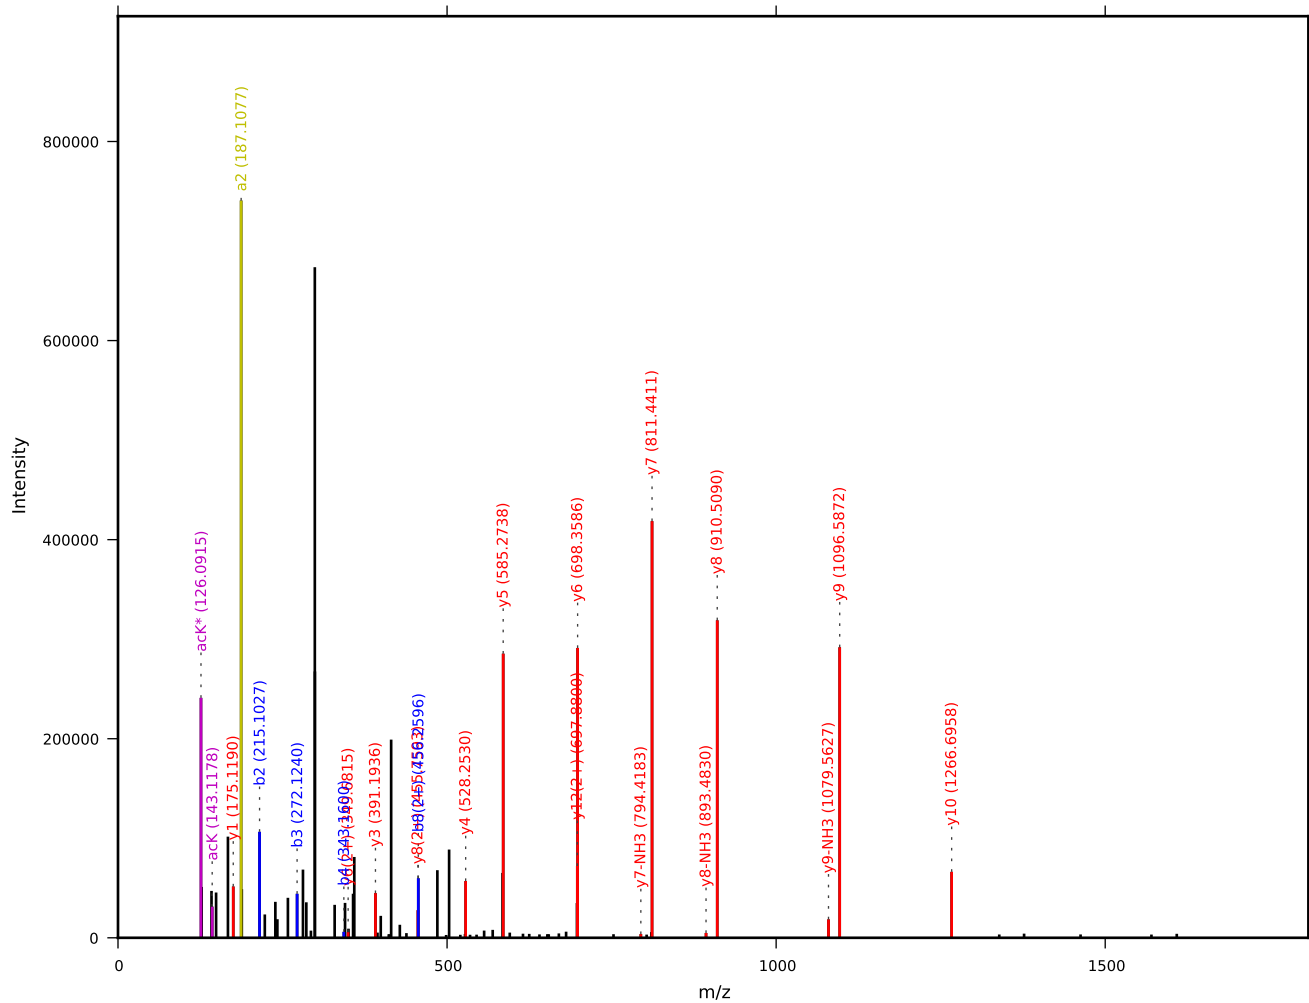

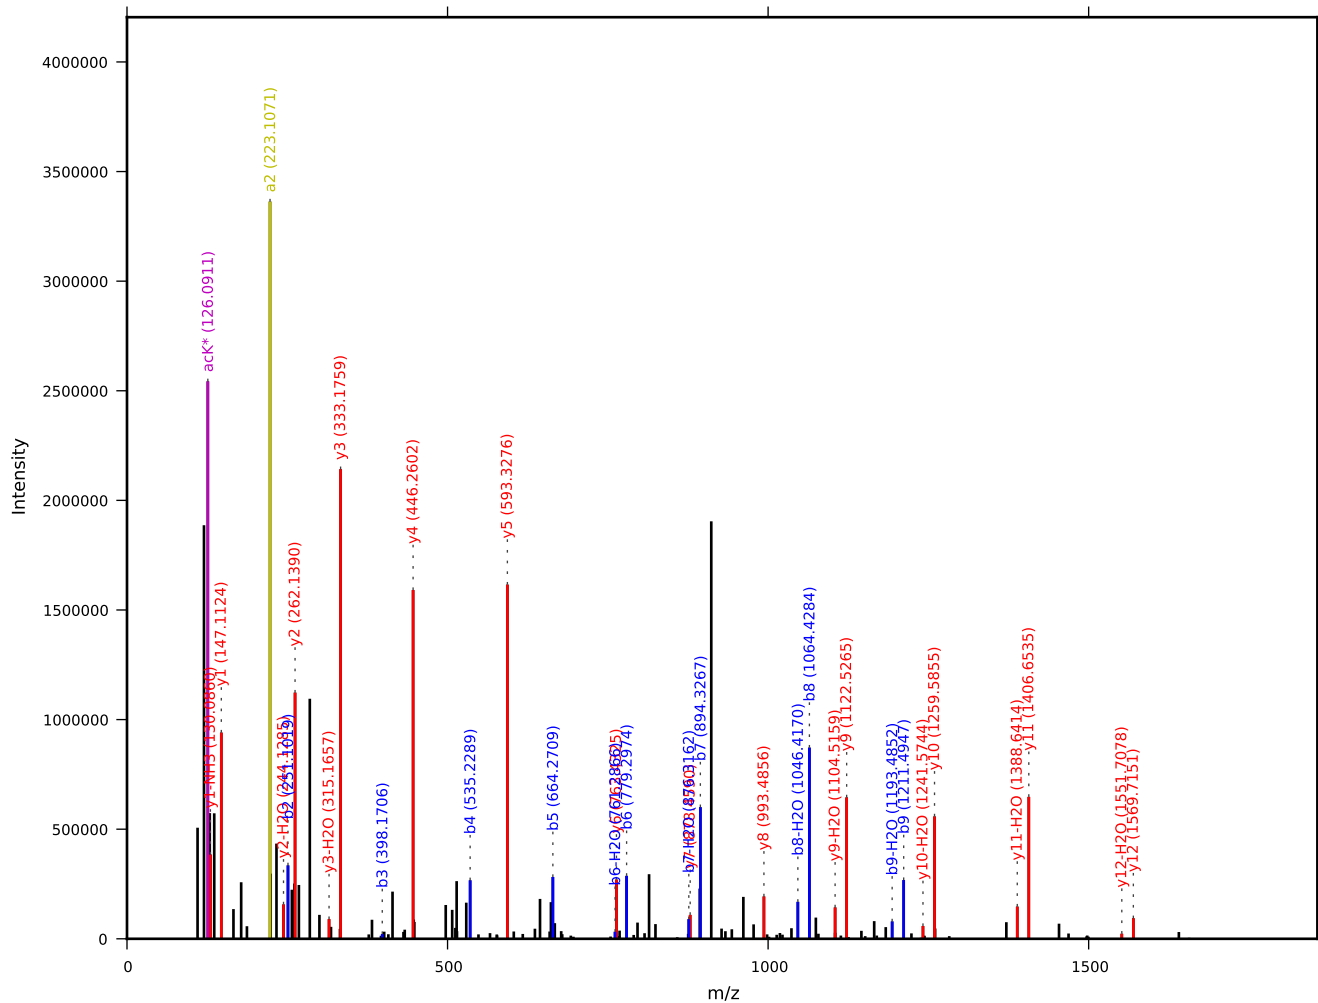

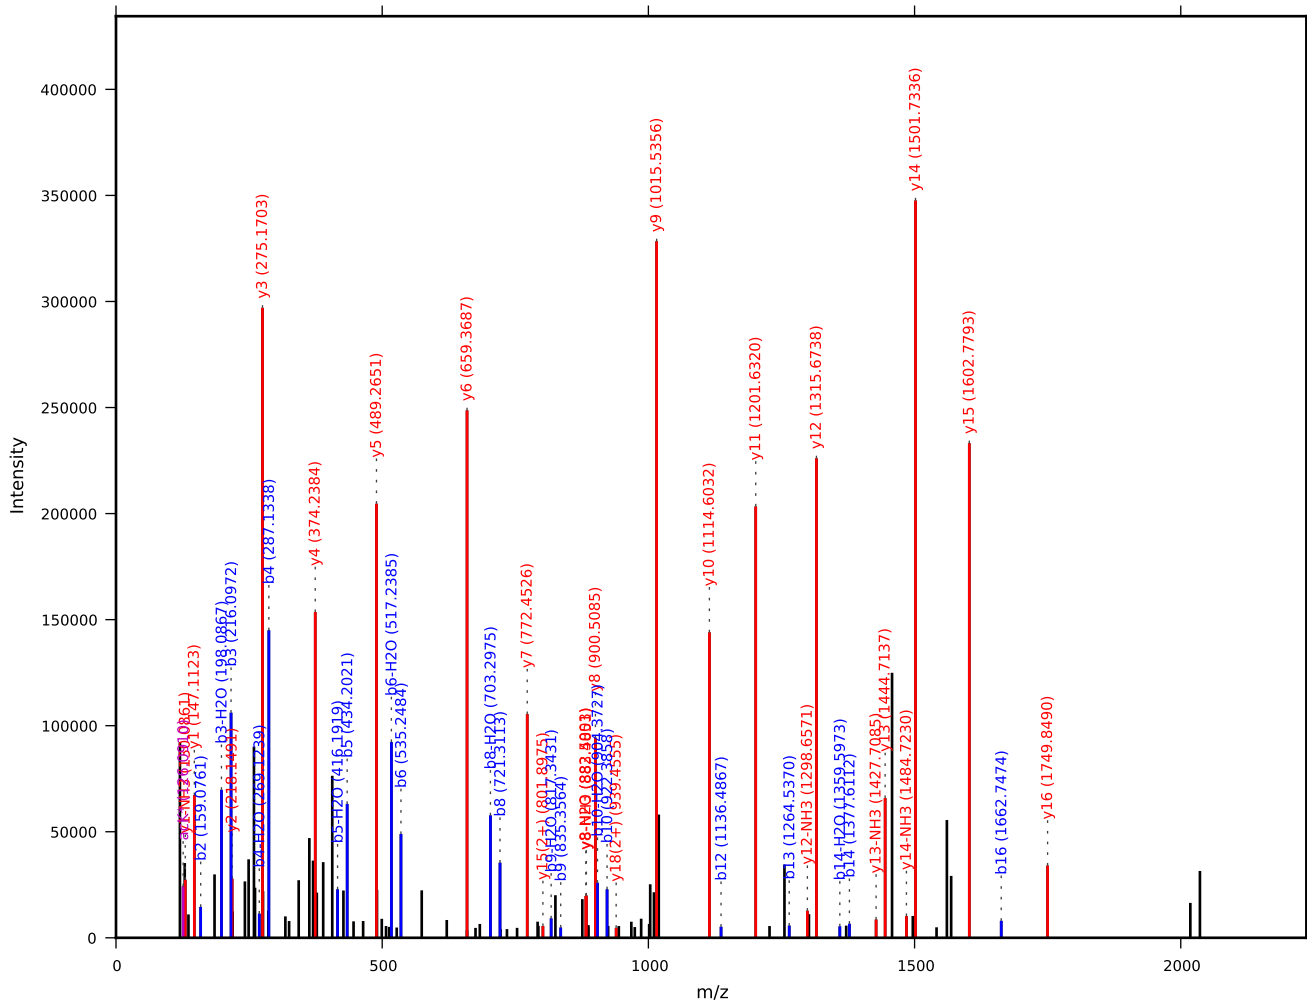

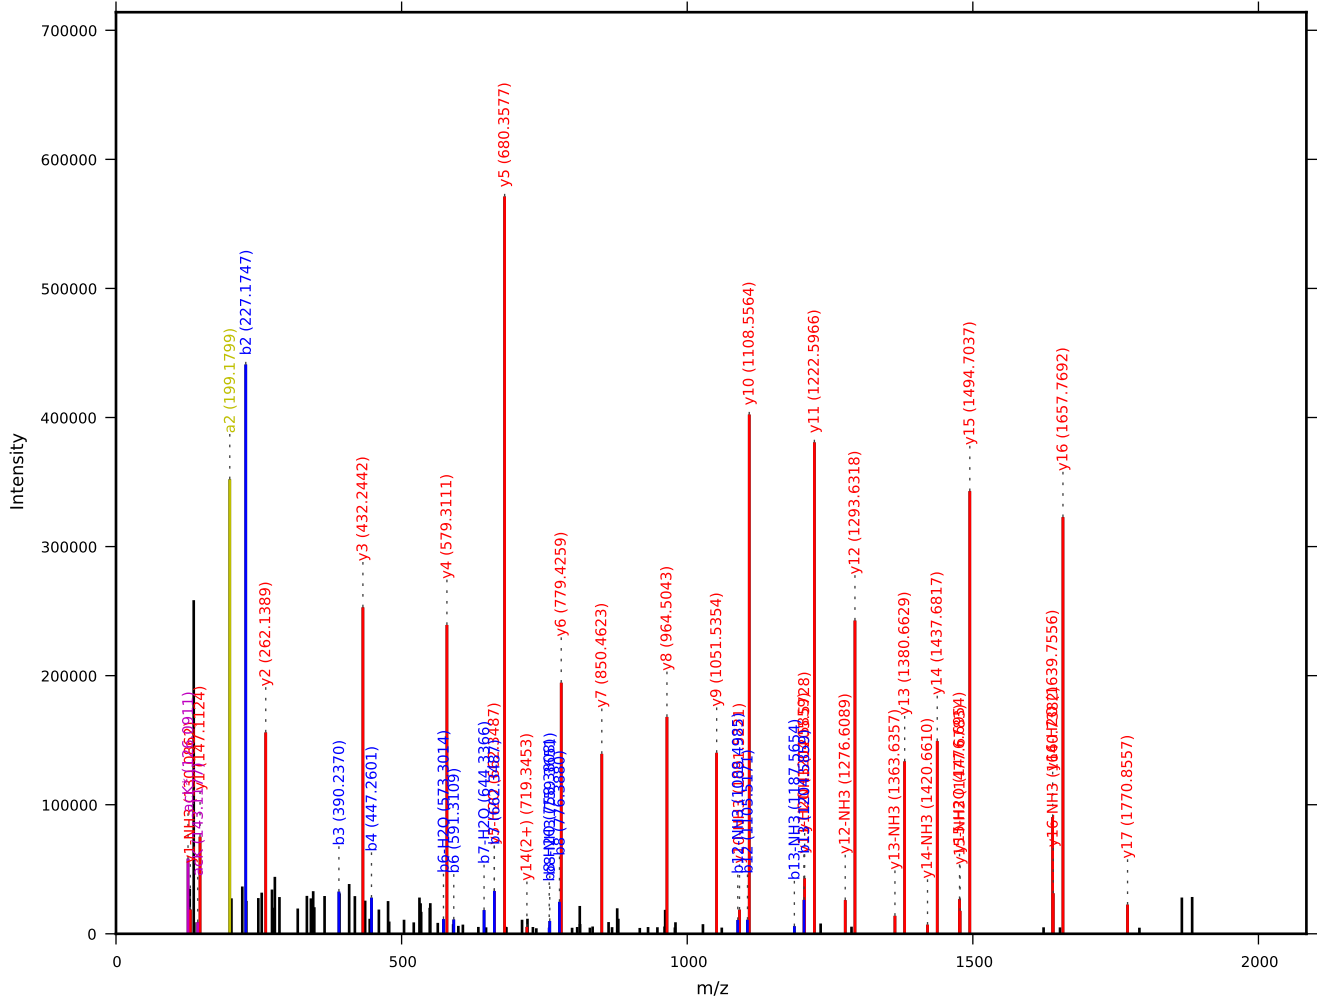

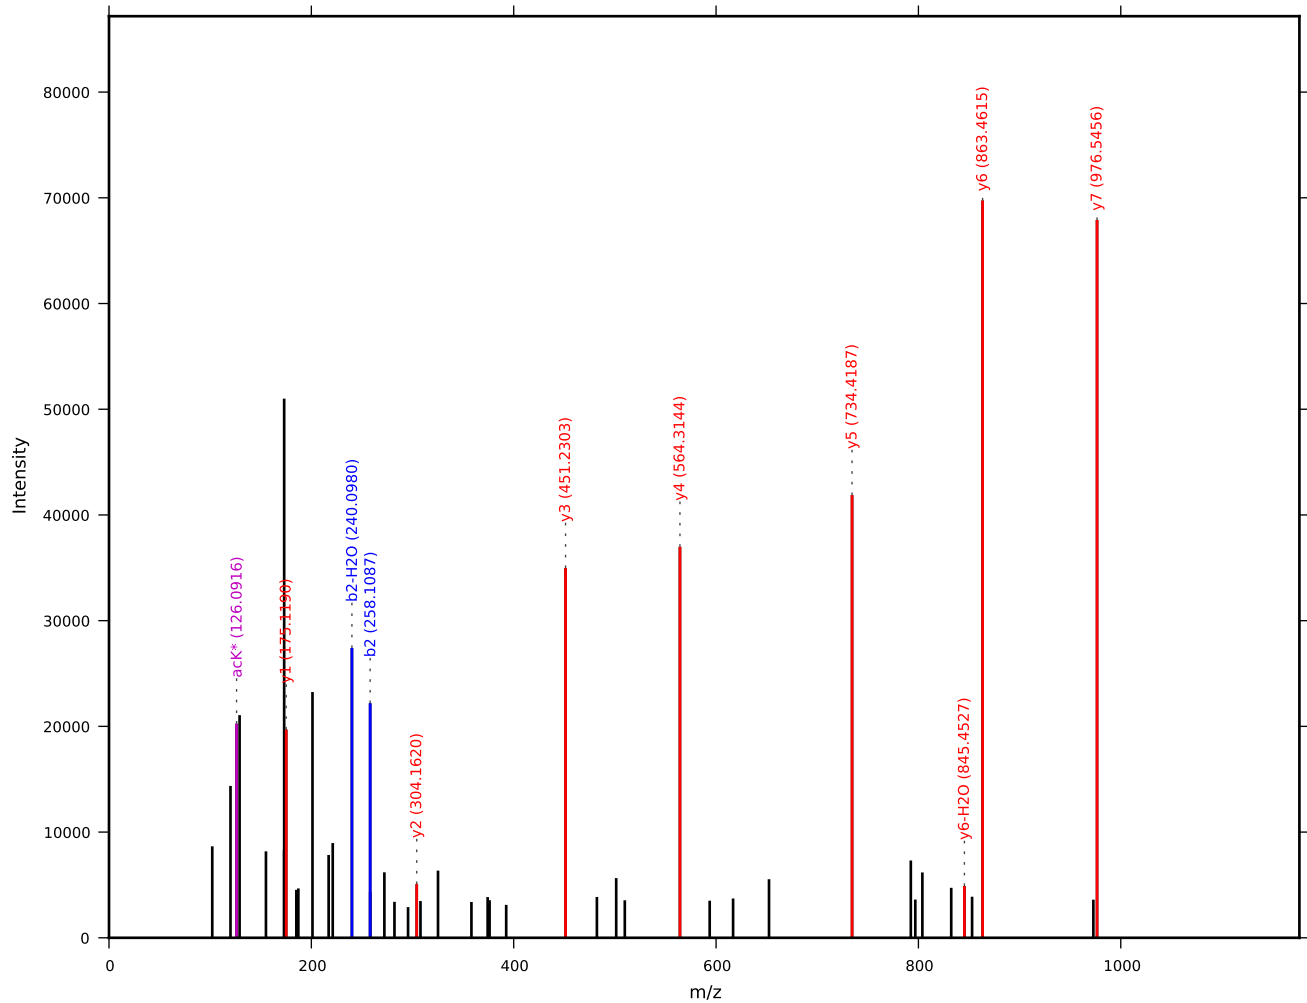



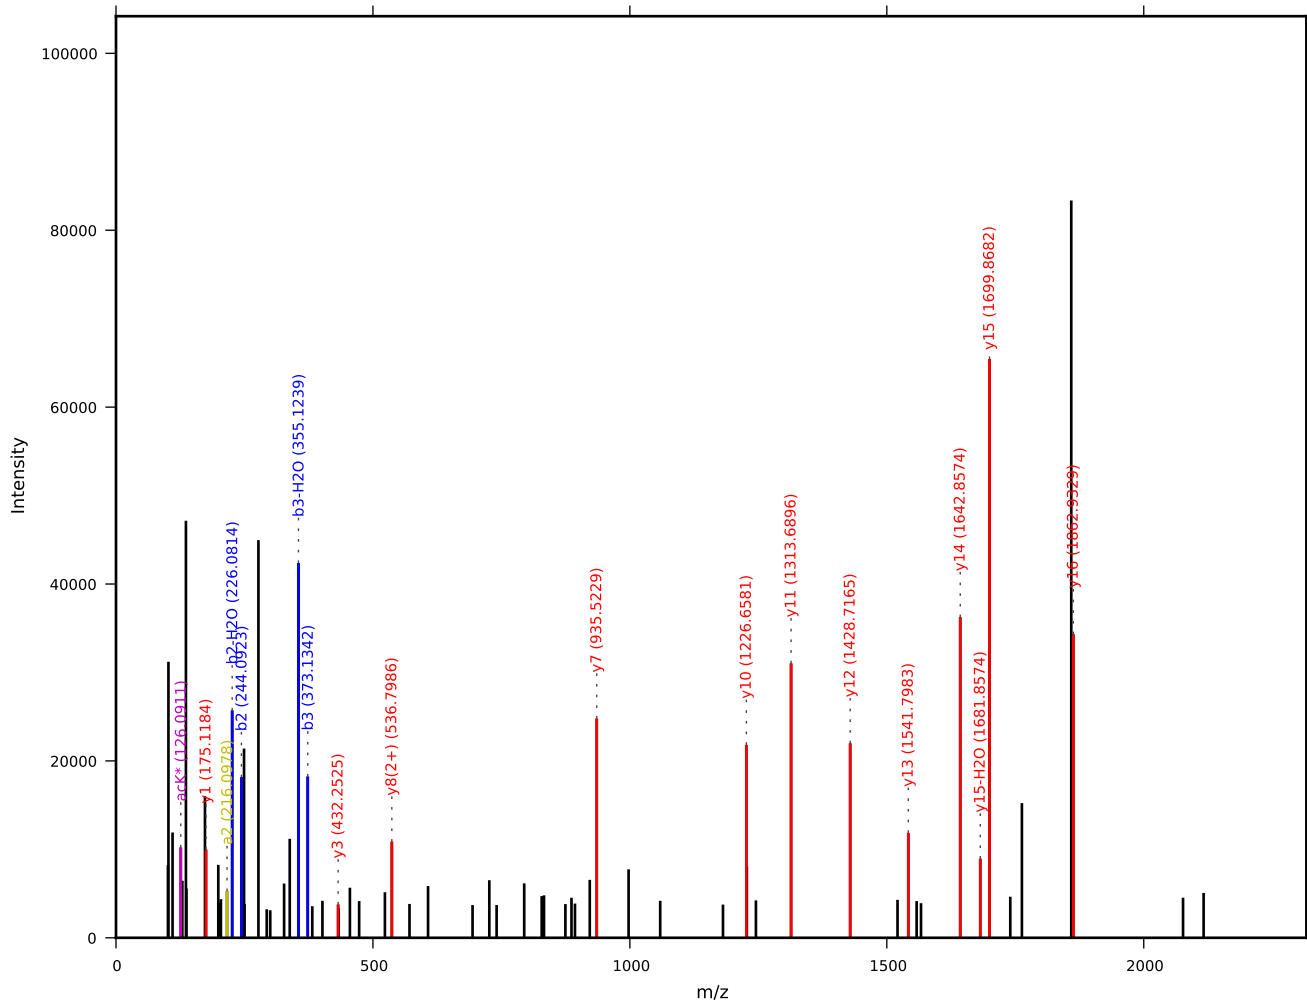

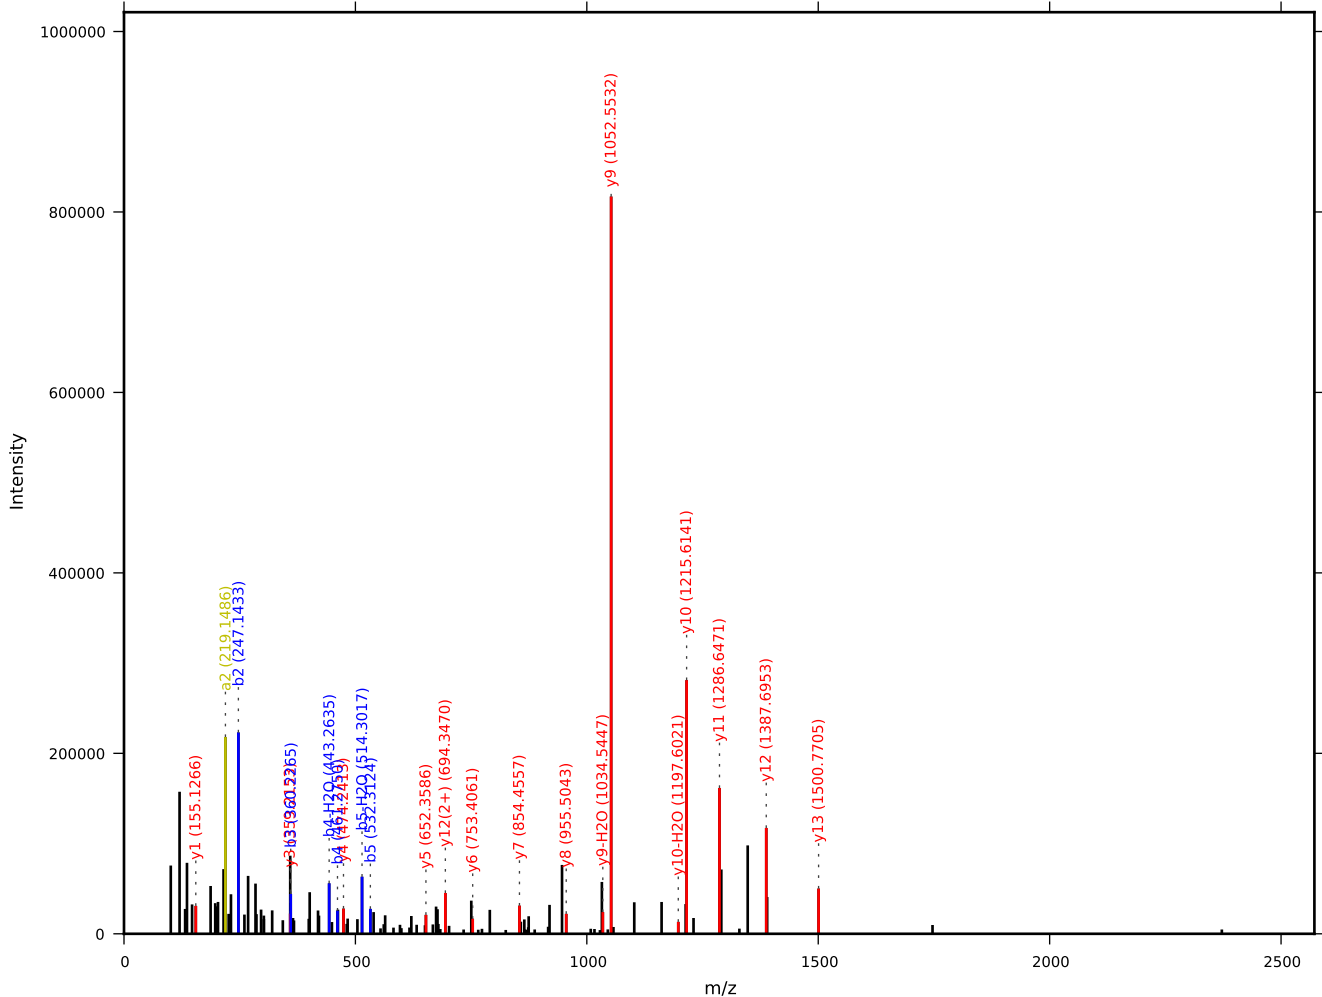

Mass: 1430.87 Charge: 2 m/z: 716.4423  
Modified Peptide: \_K(ac)GLTPSQIGVLLR\_ Score: 55.314 PEP: 0.00092495

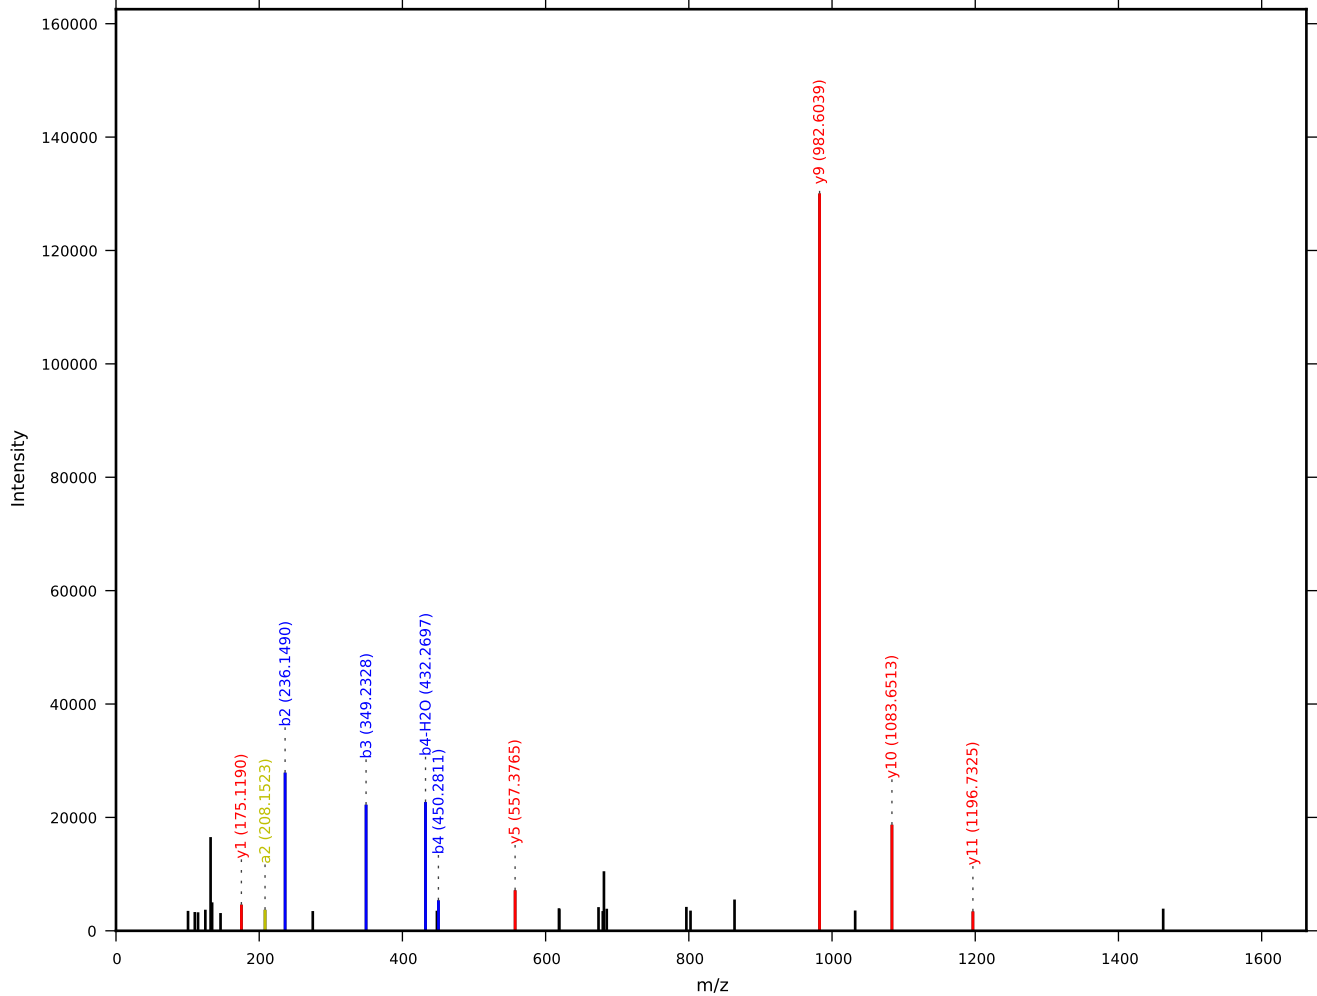

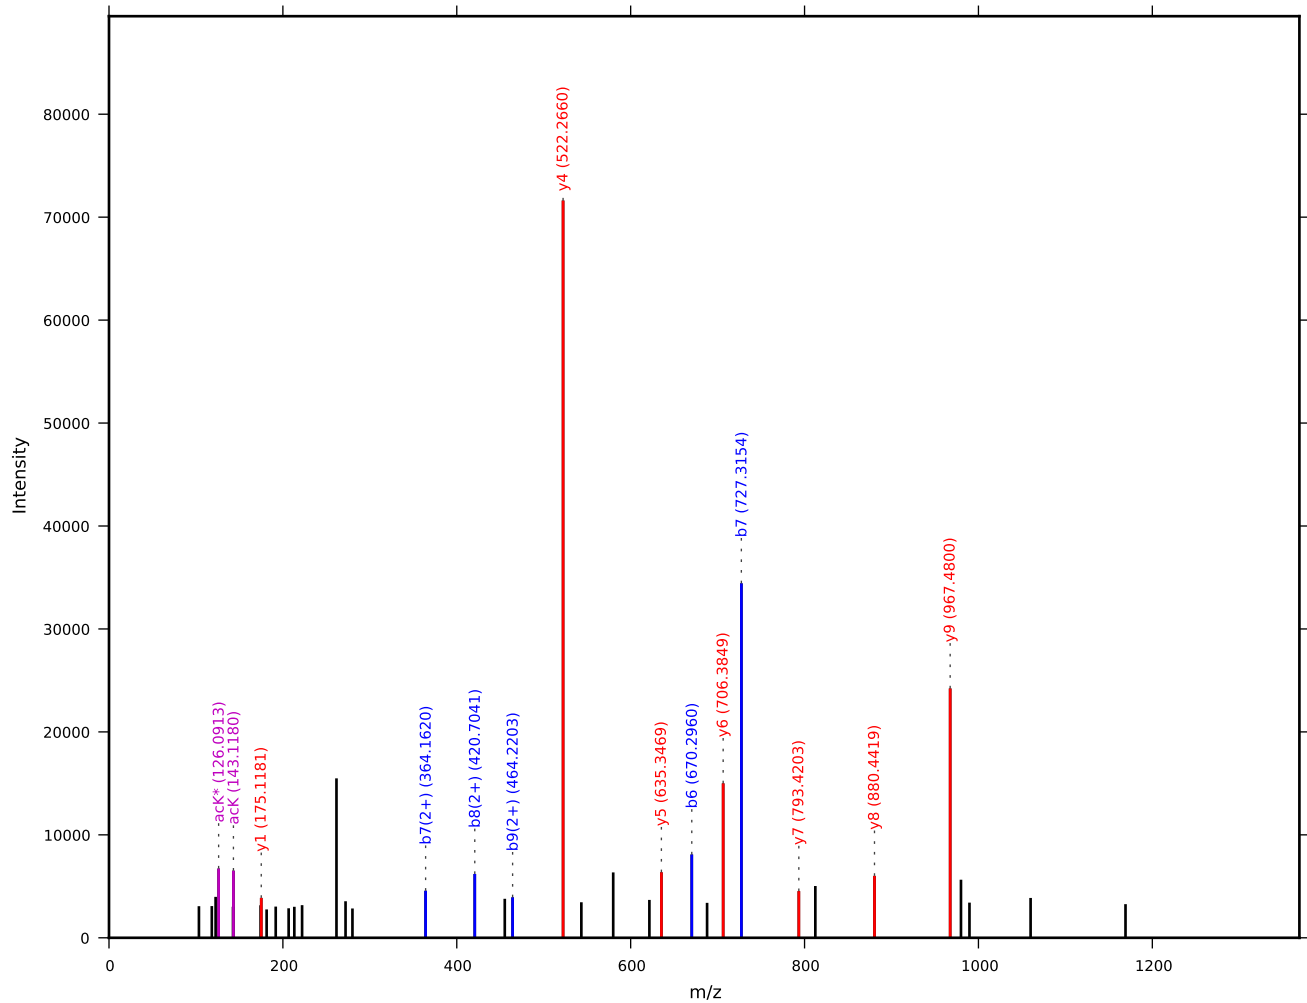

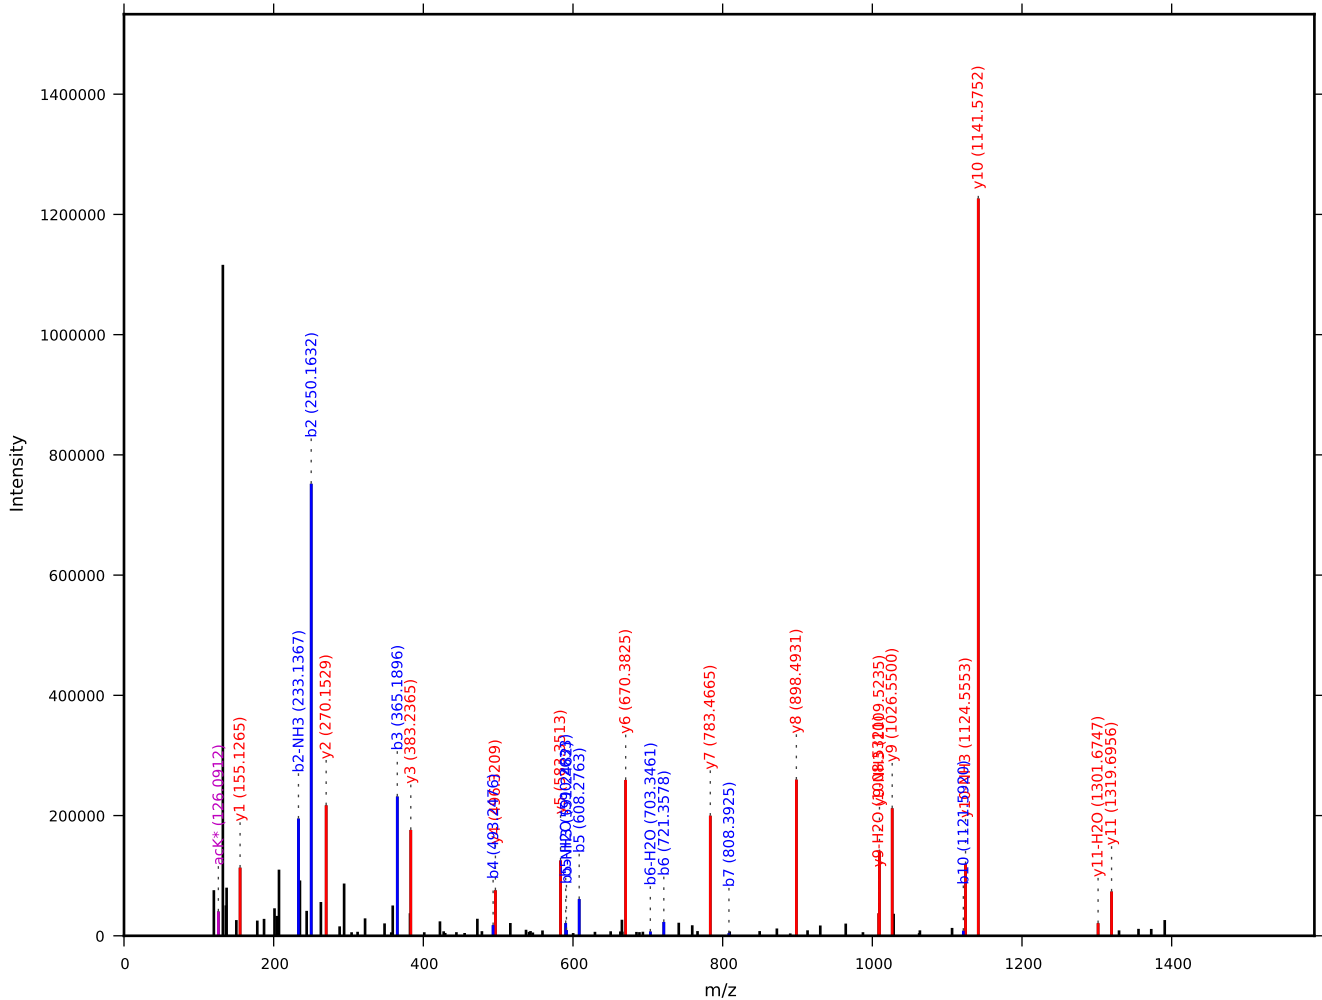

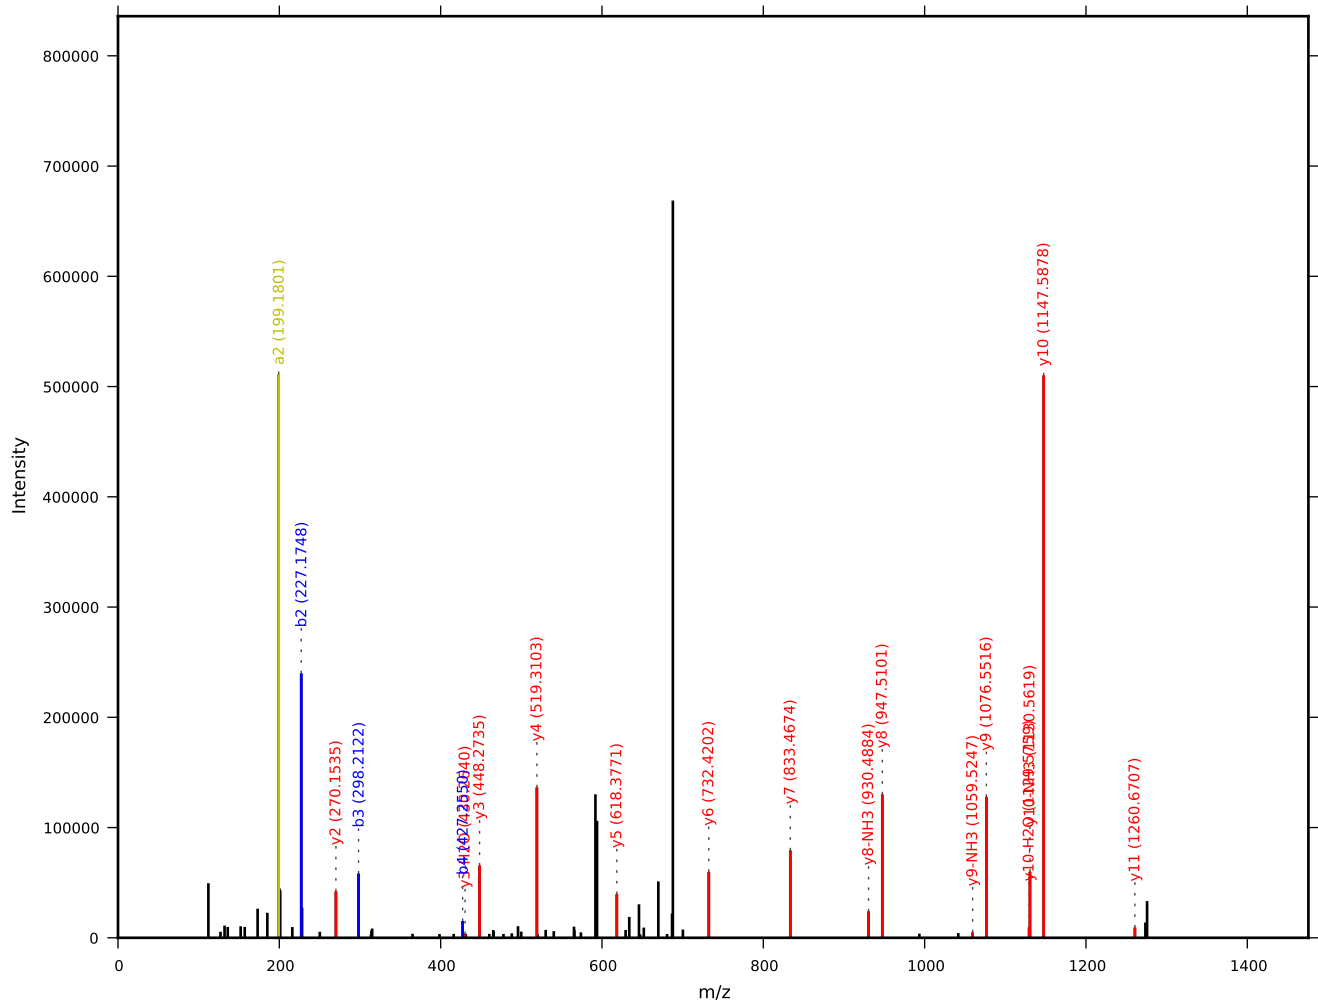

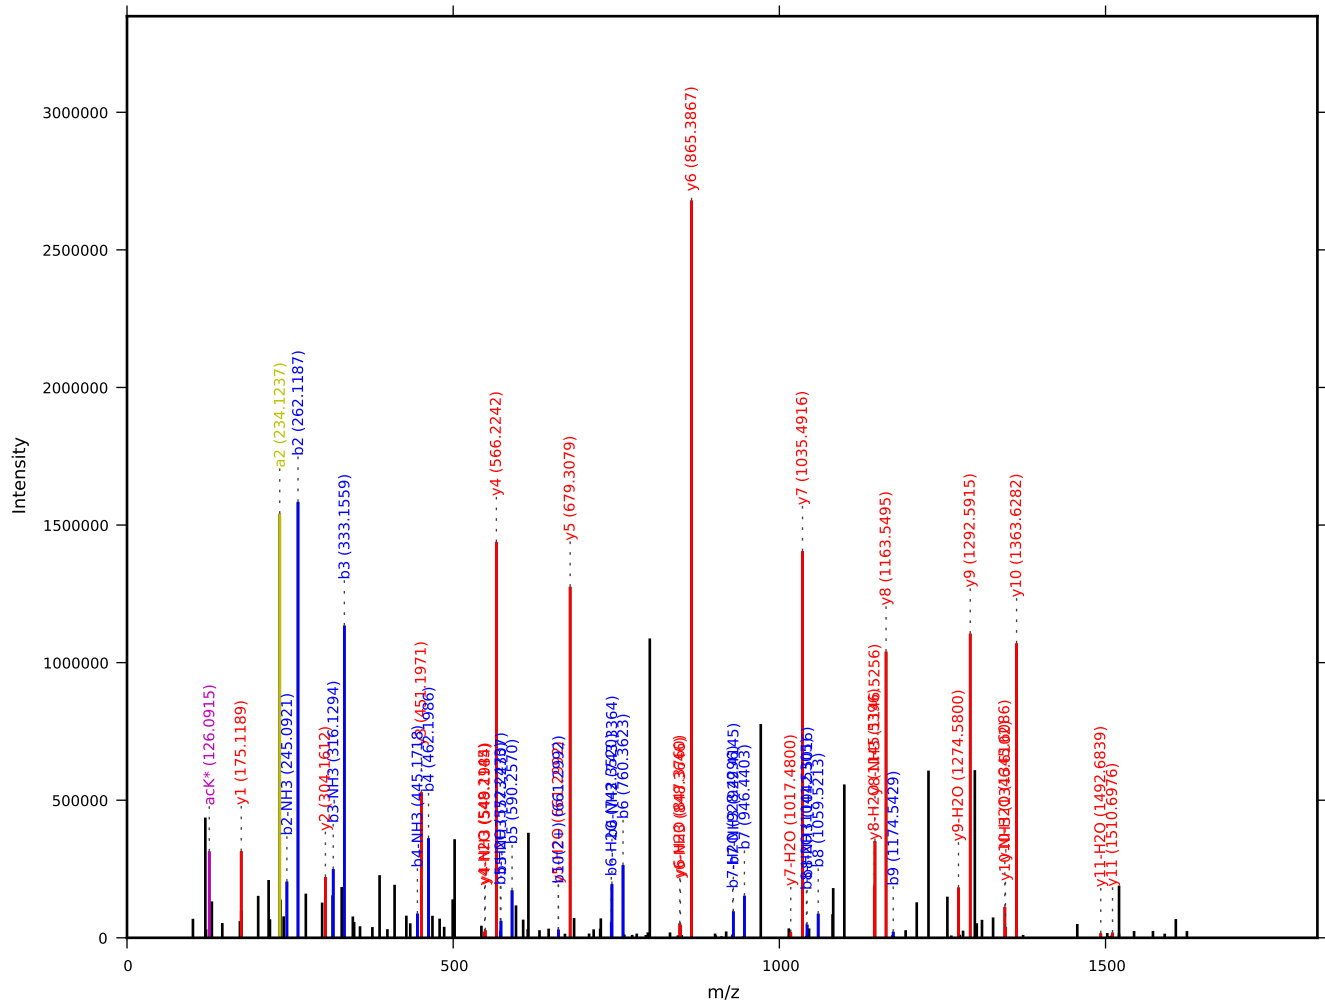

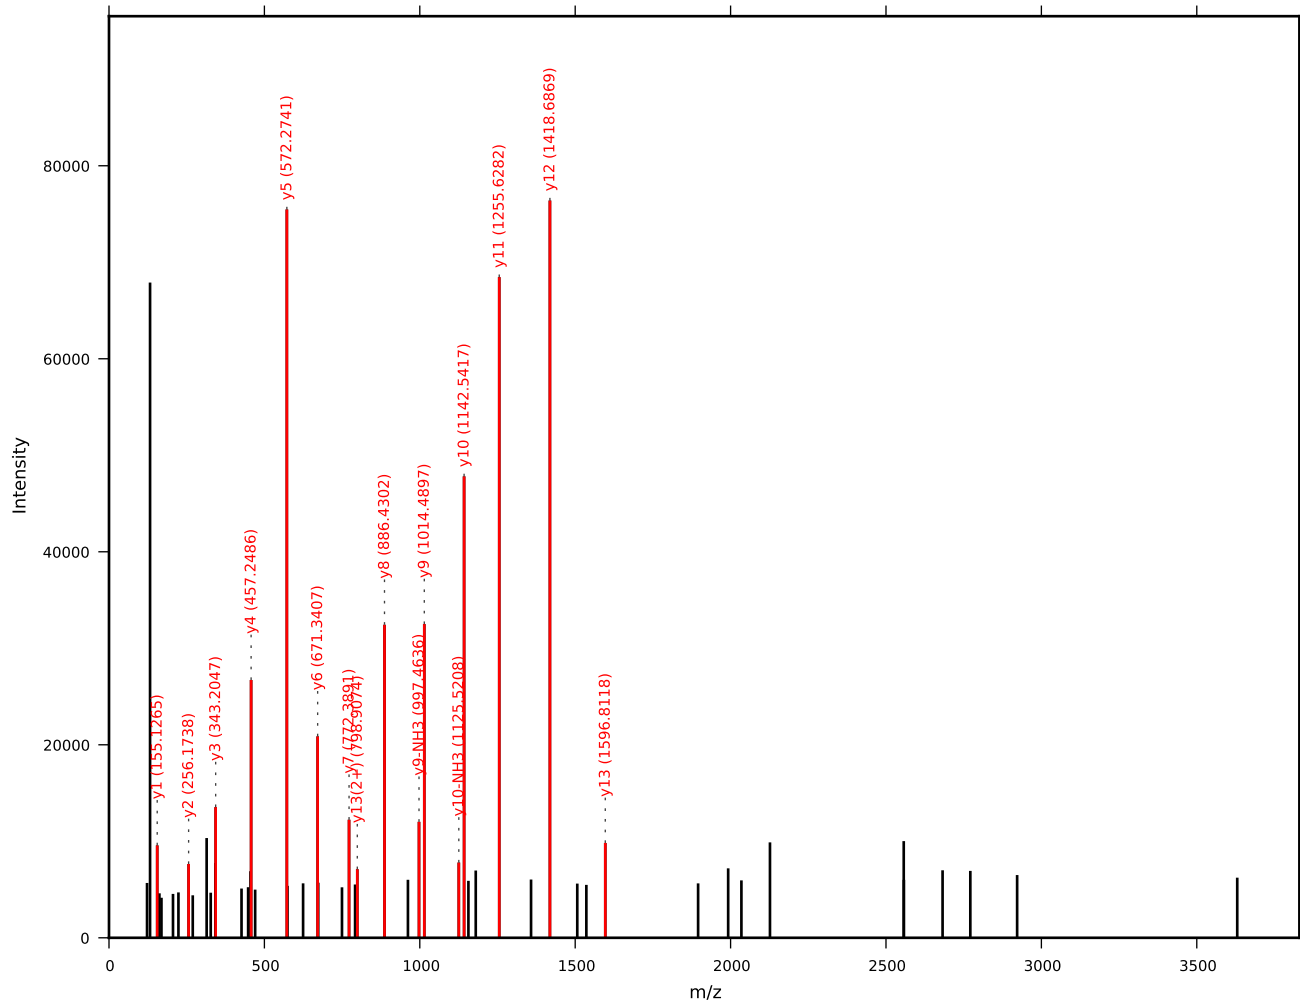



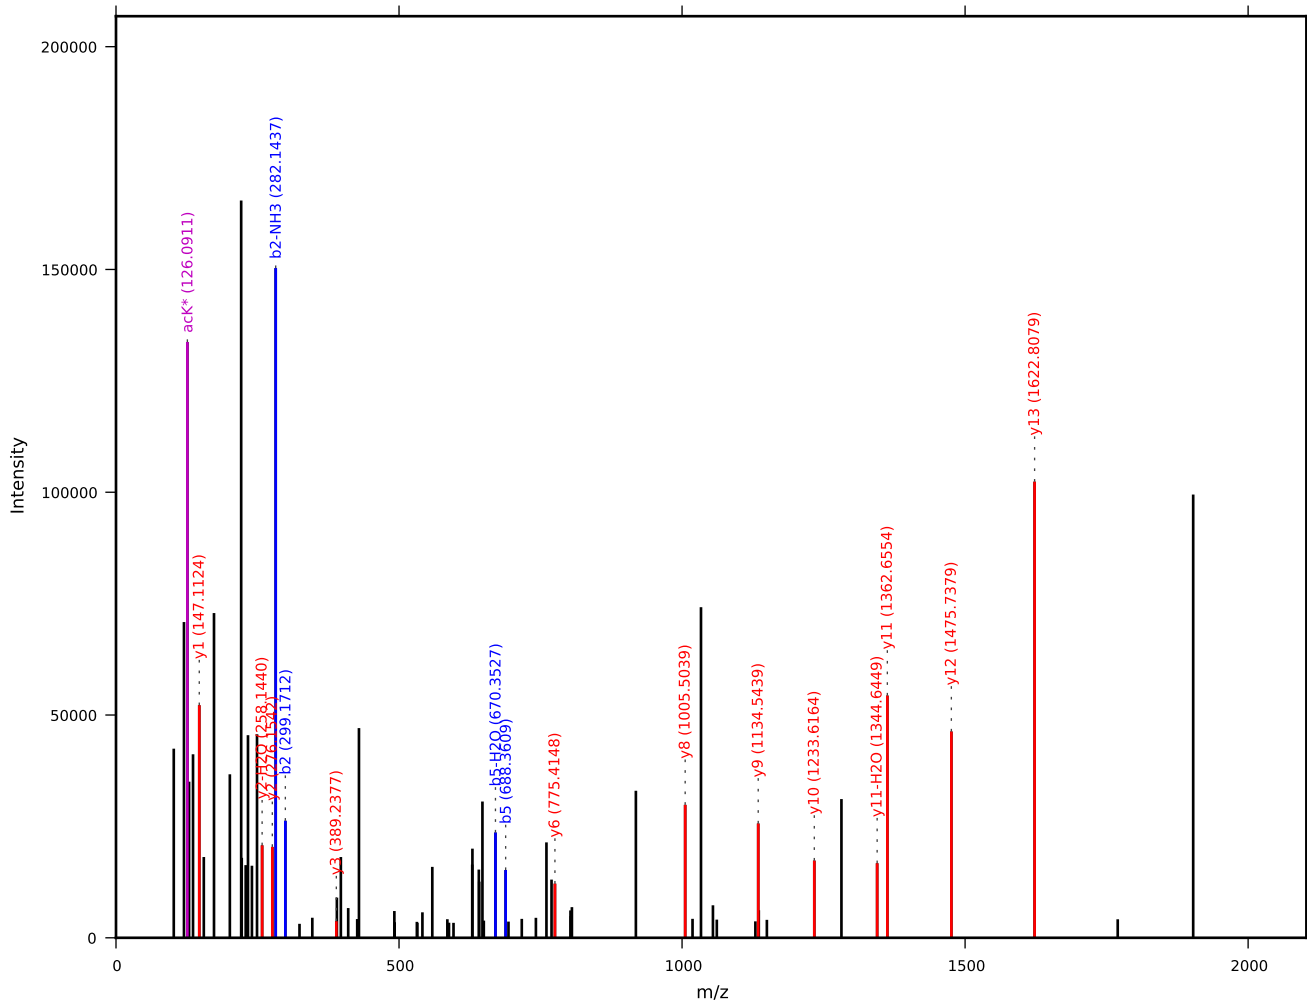

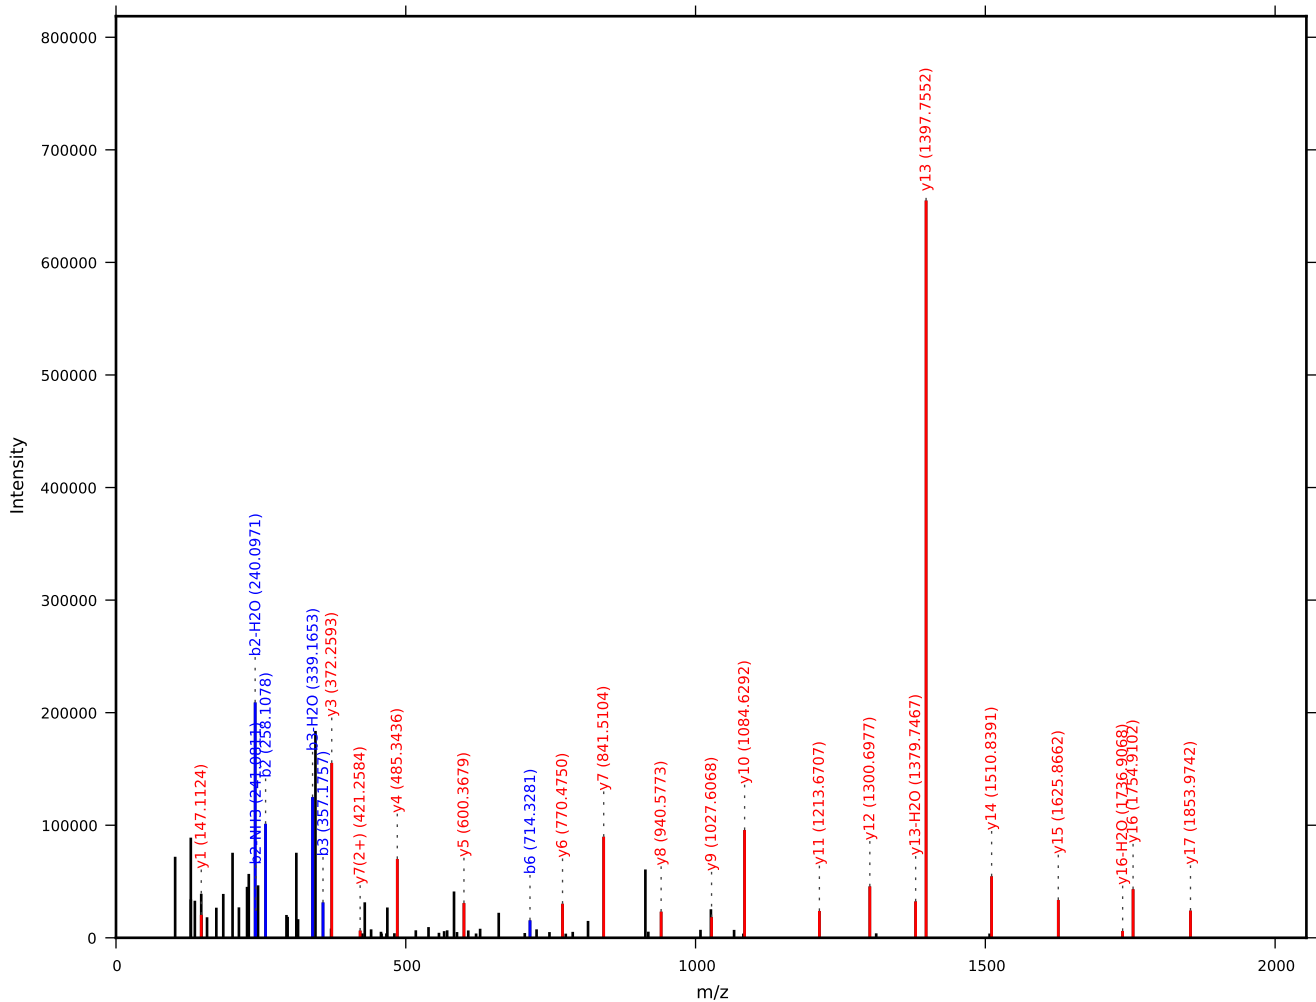

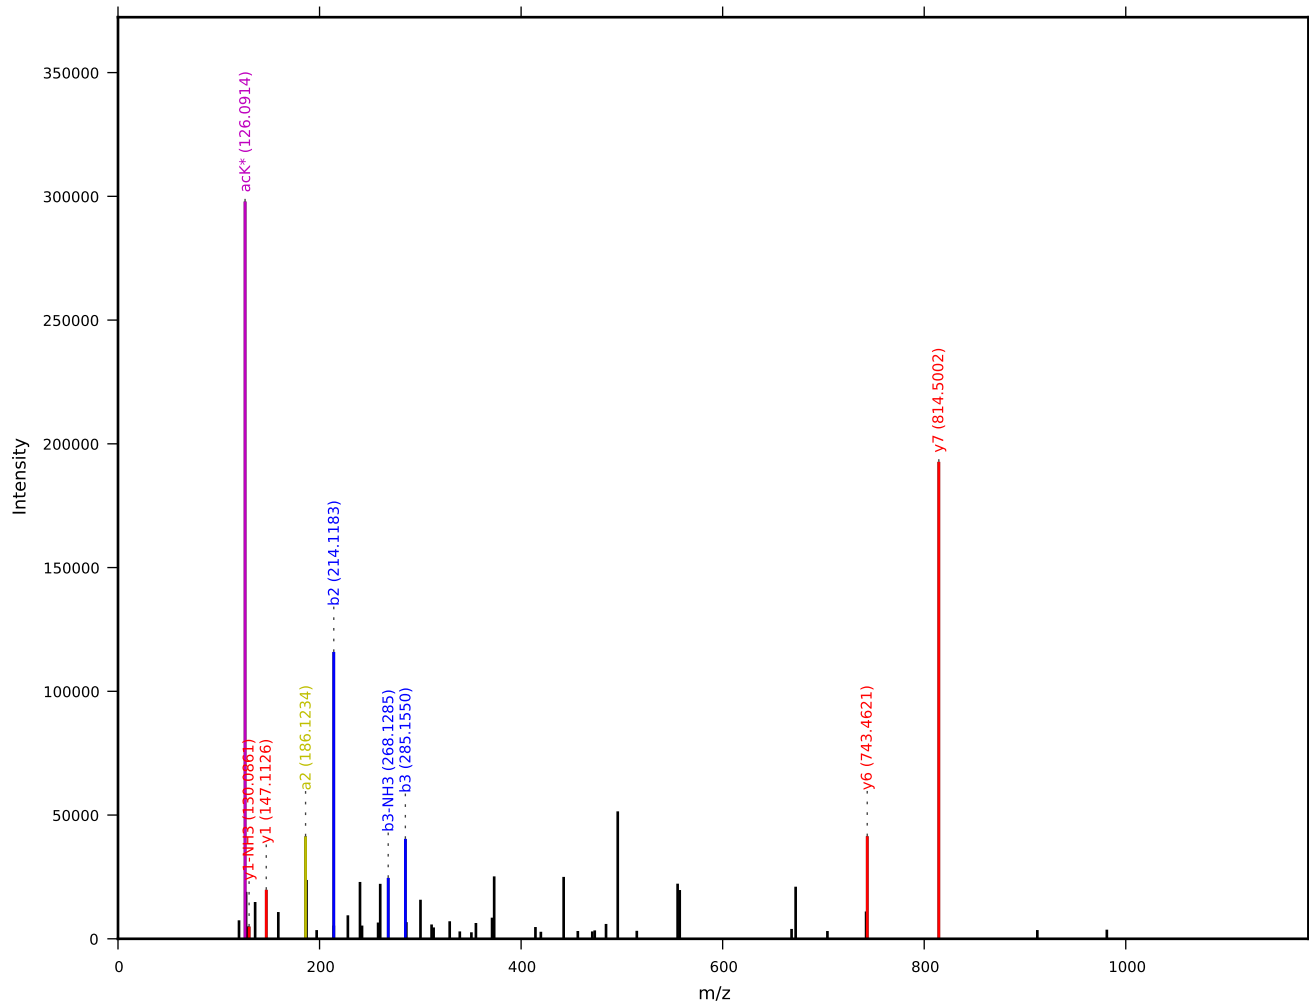

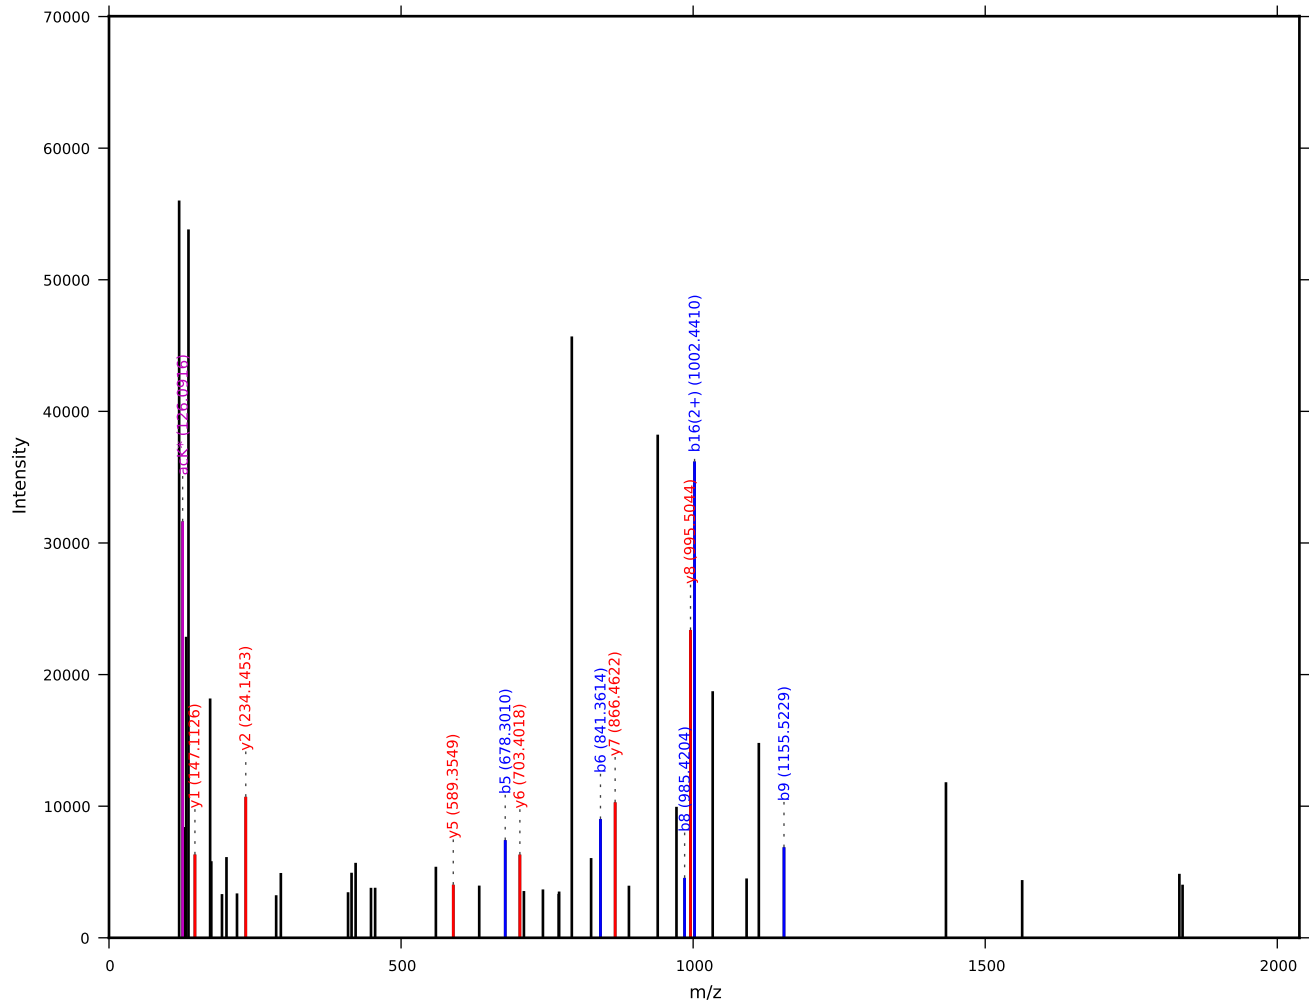

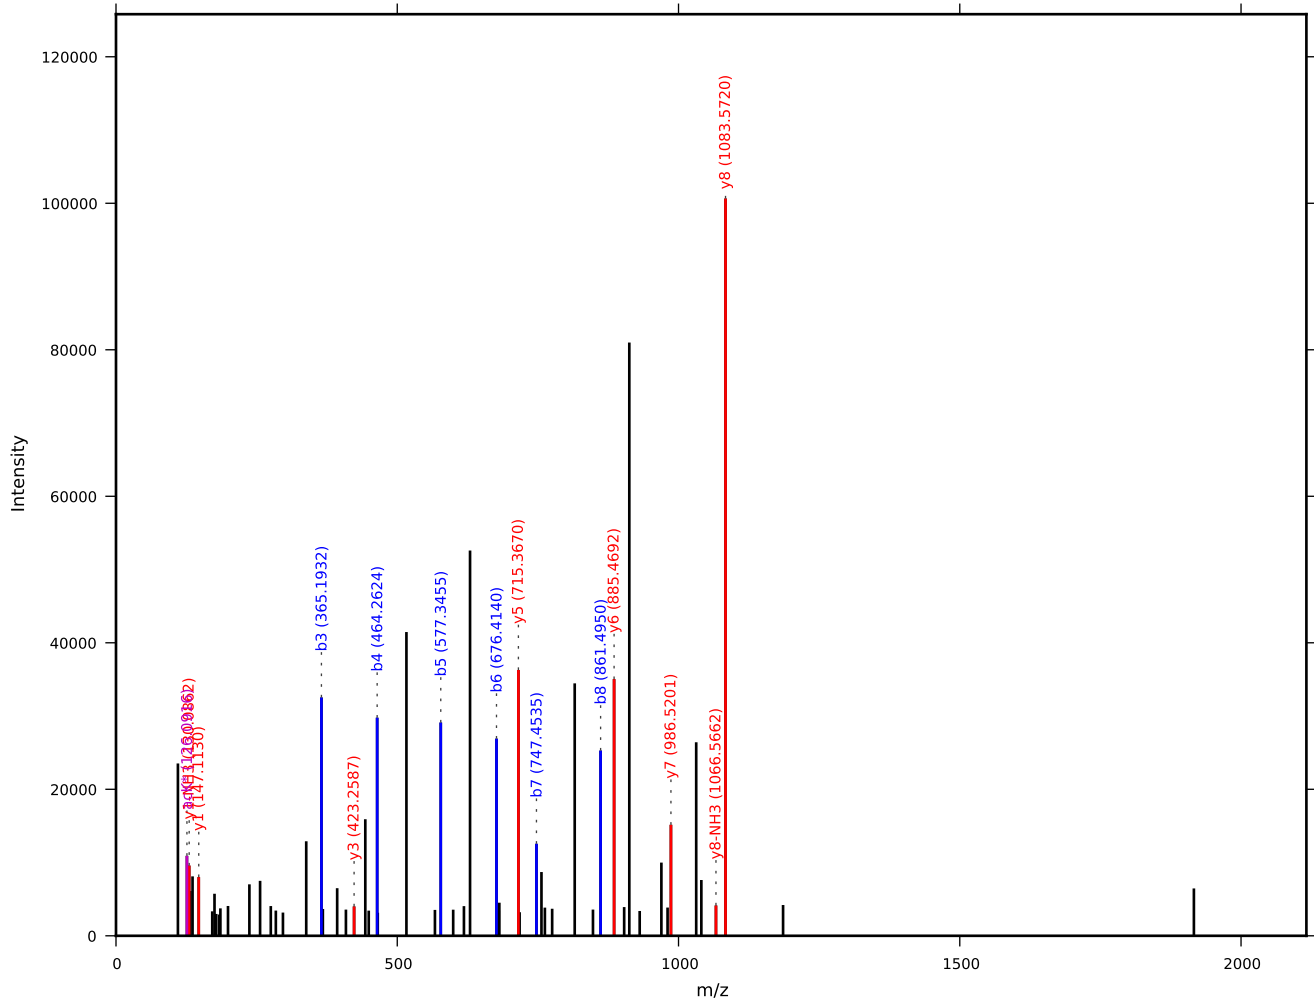

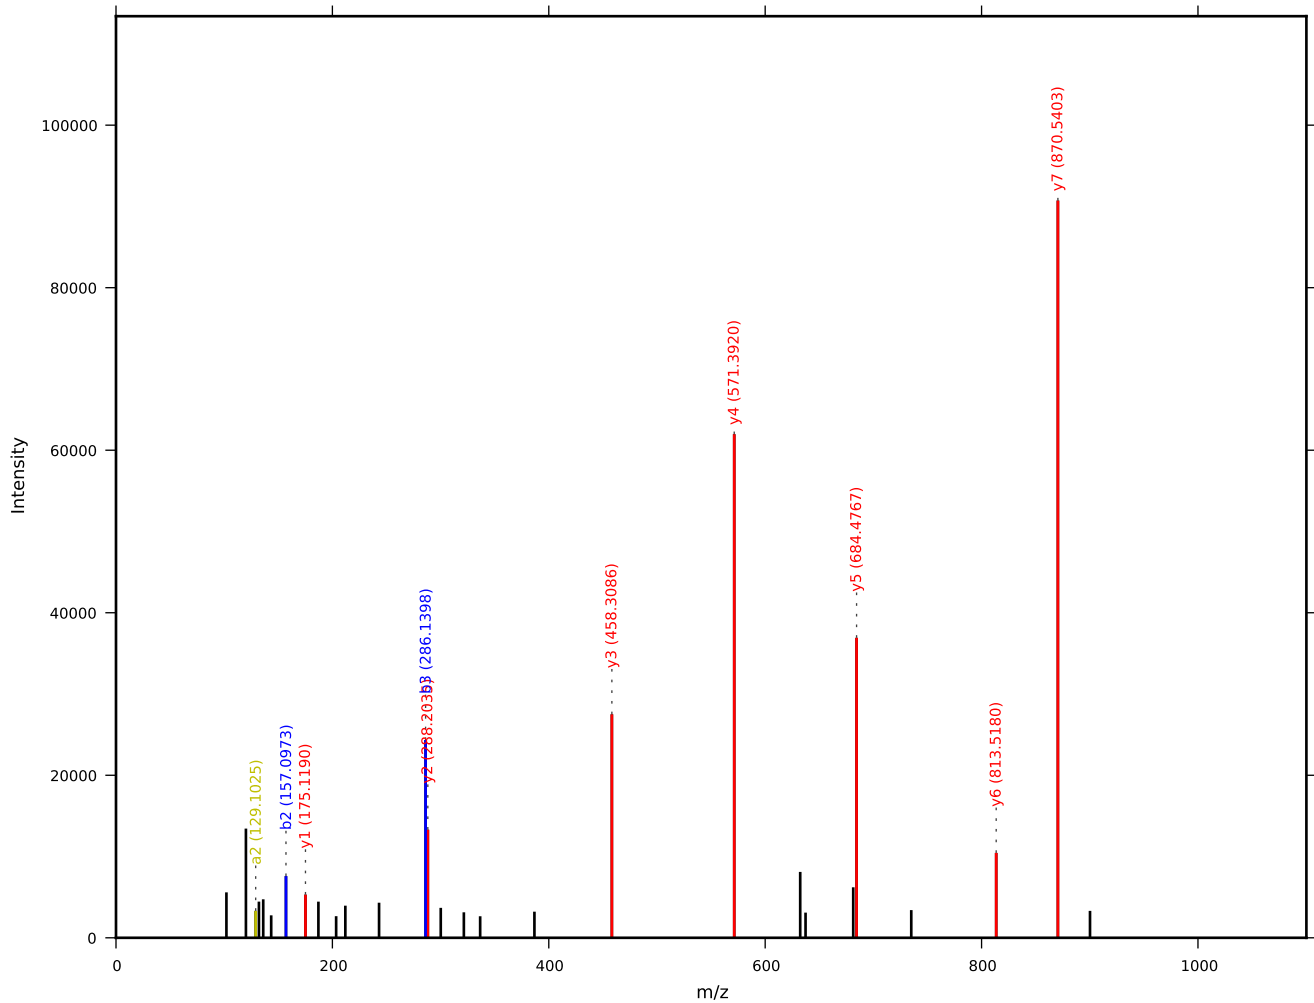

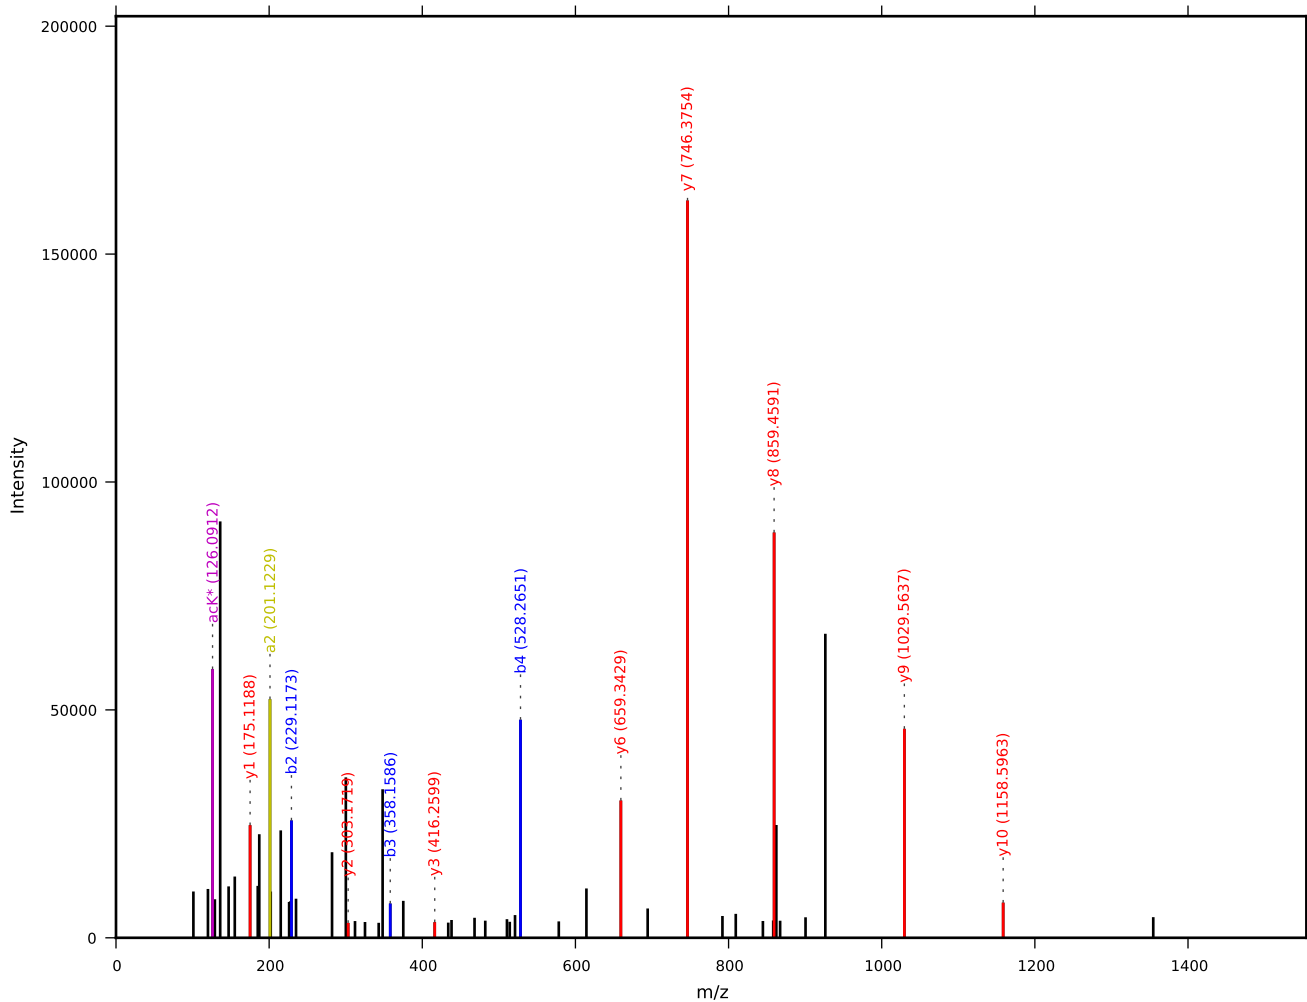

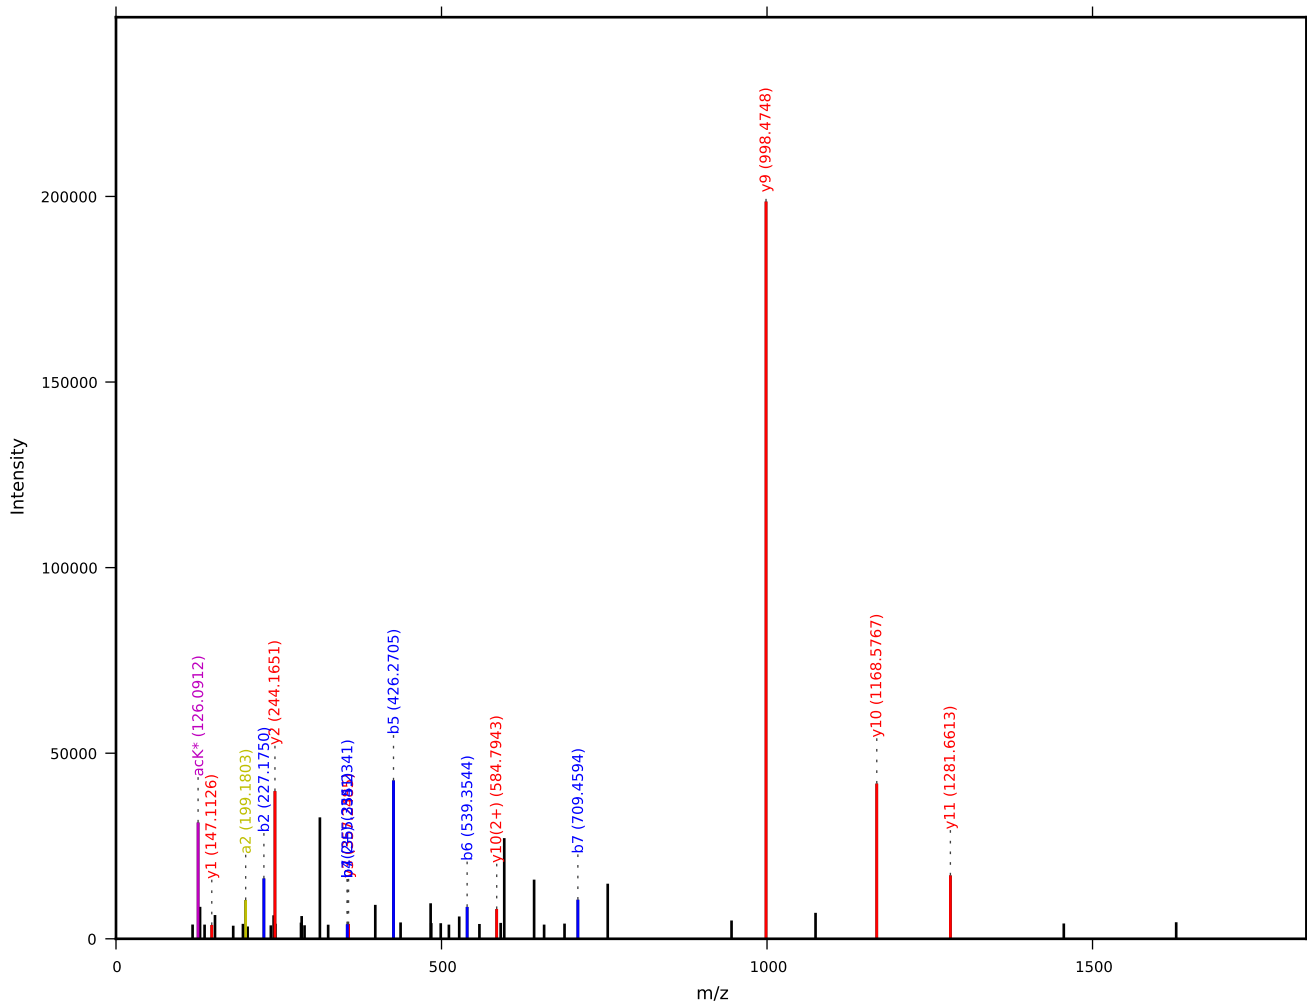



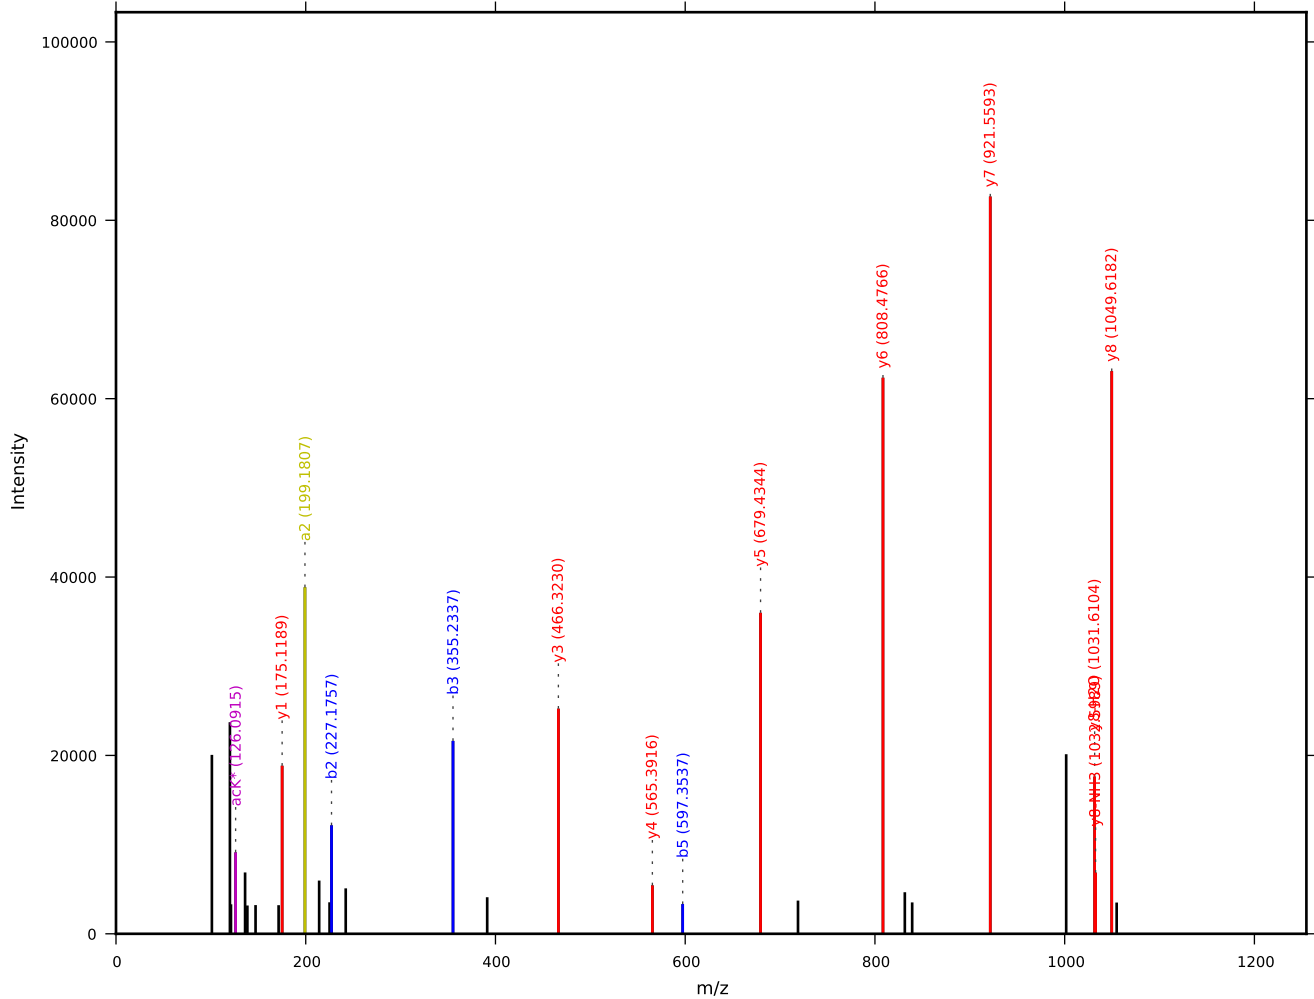

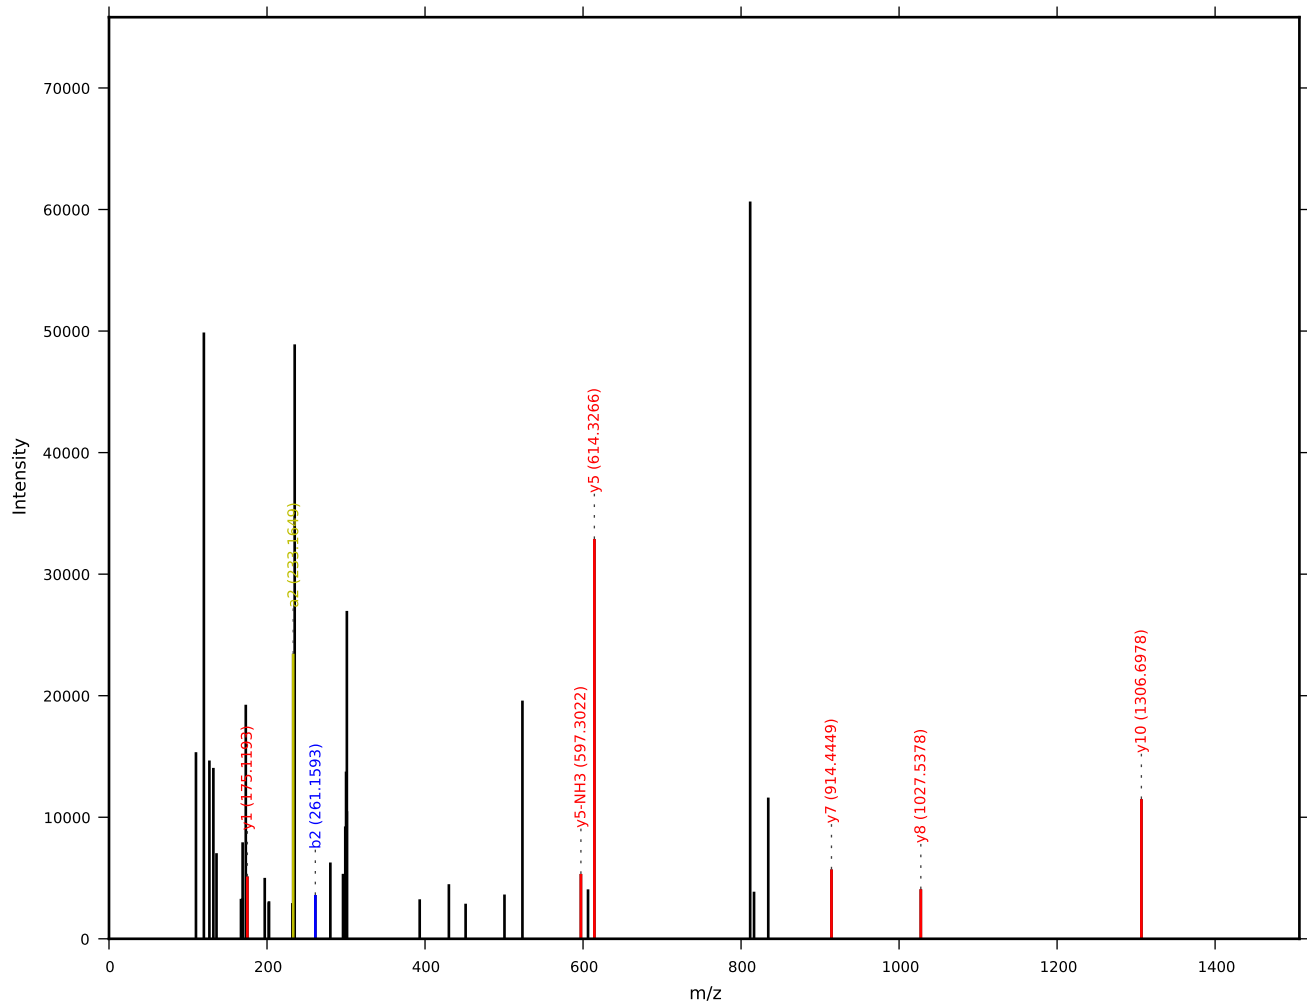

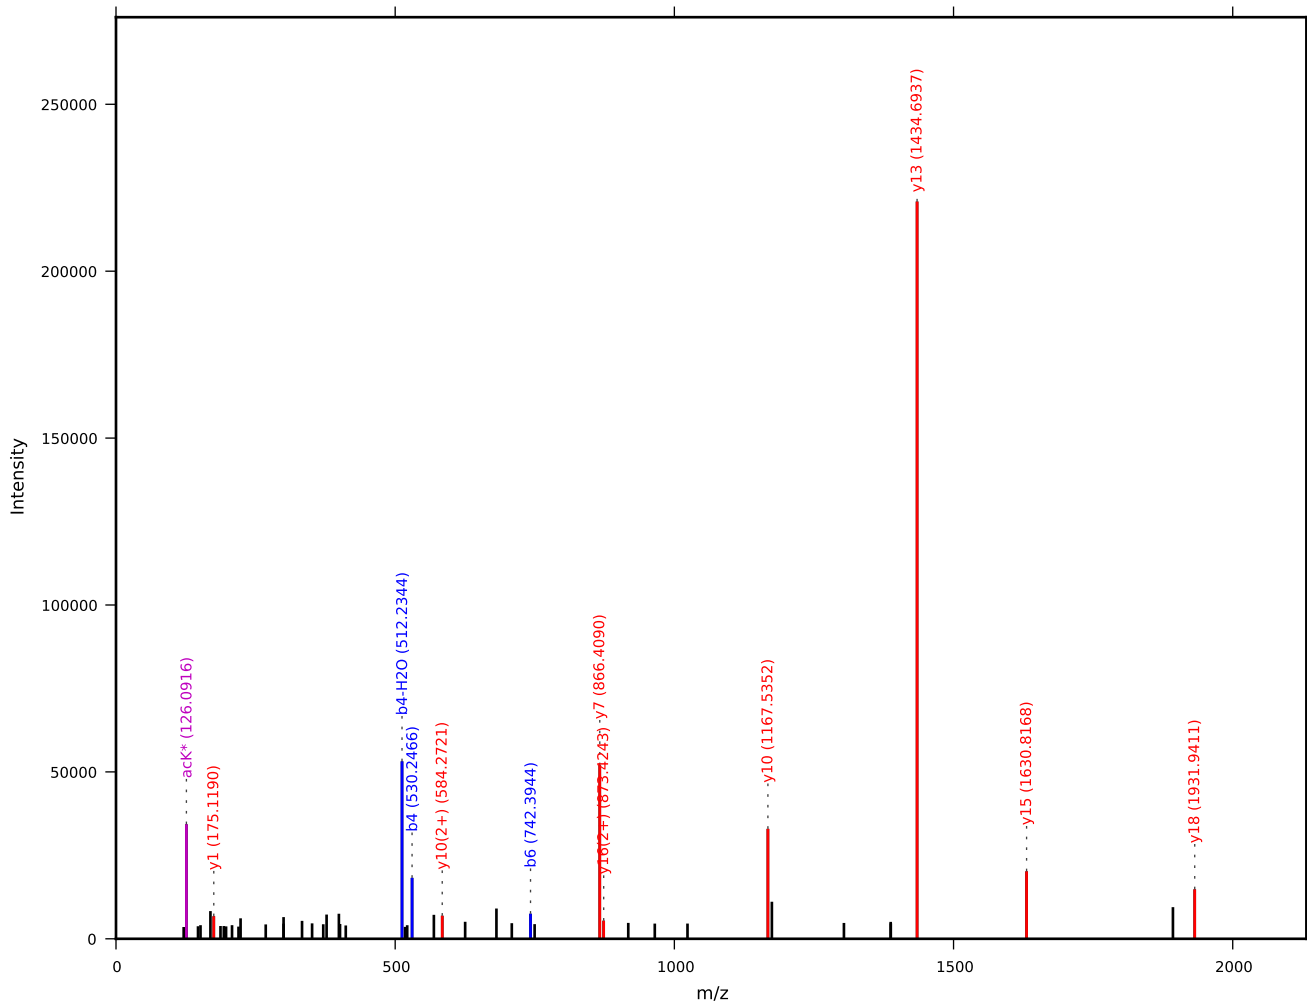

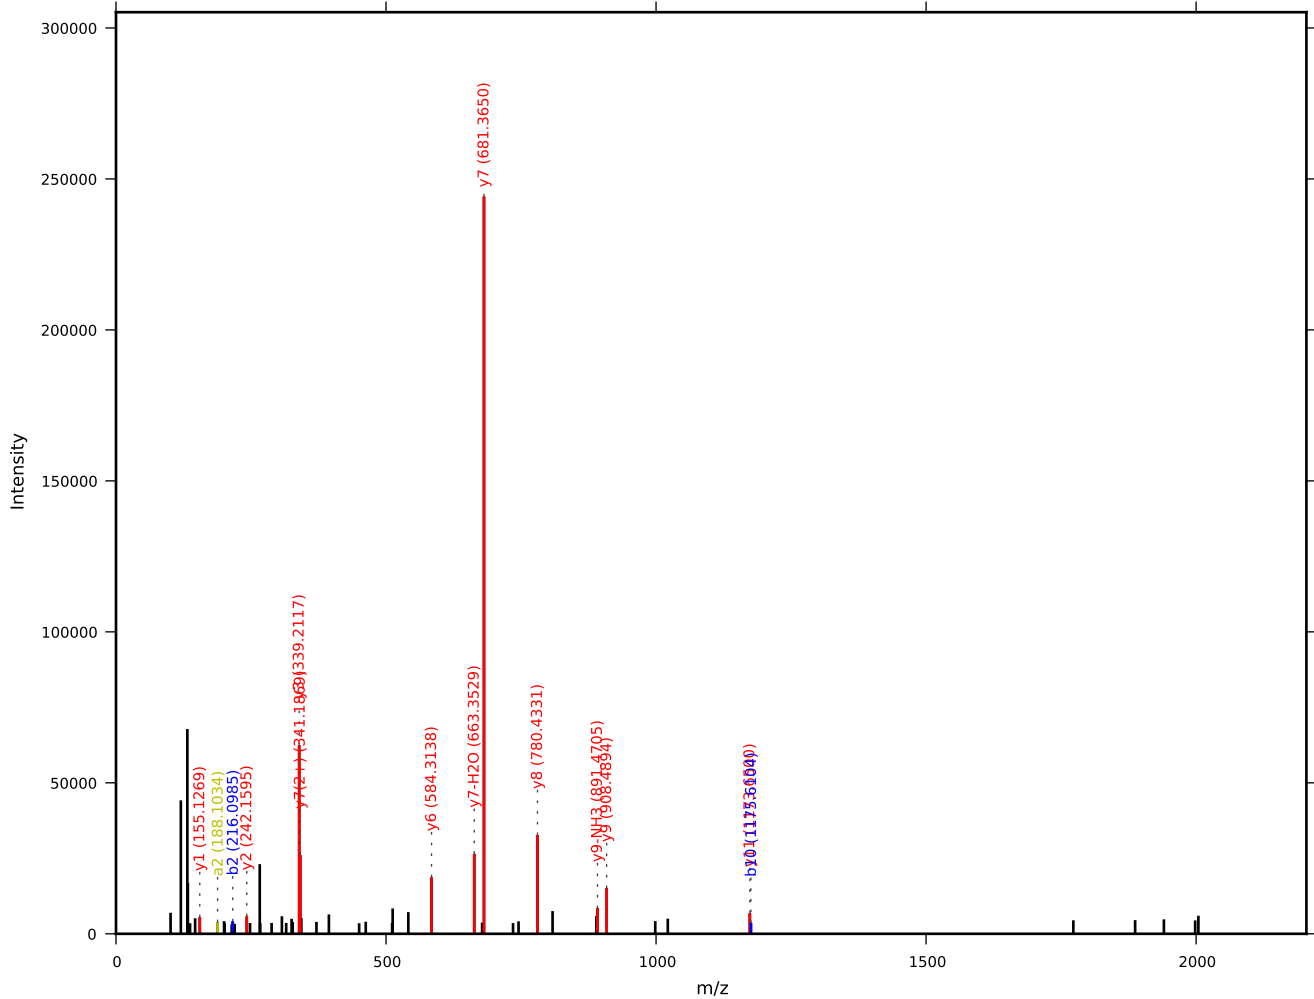

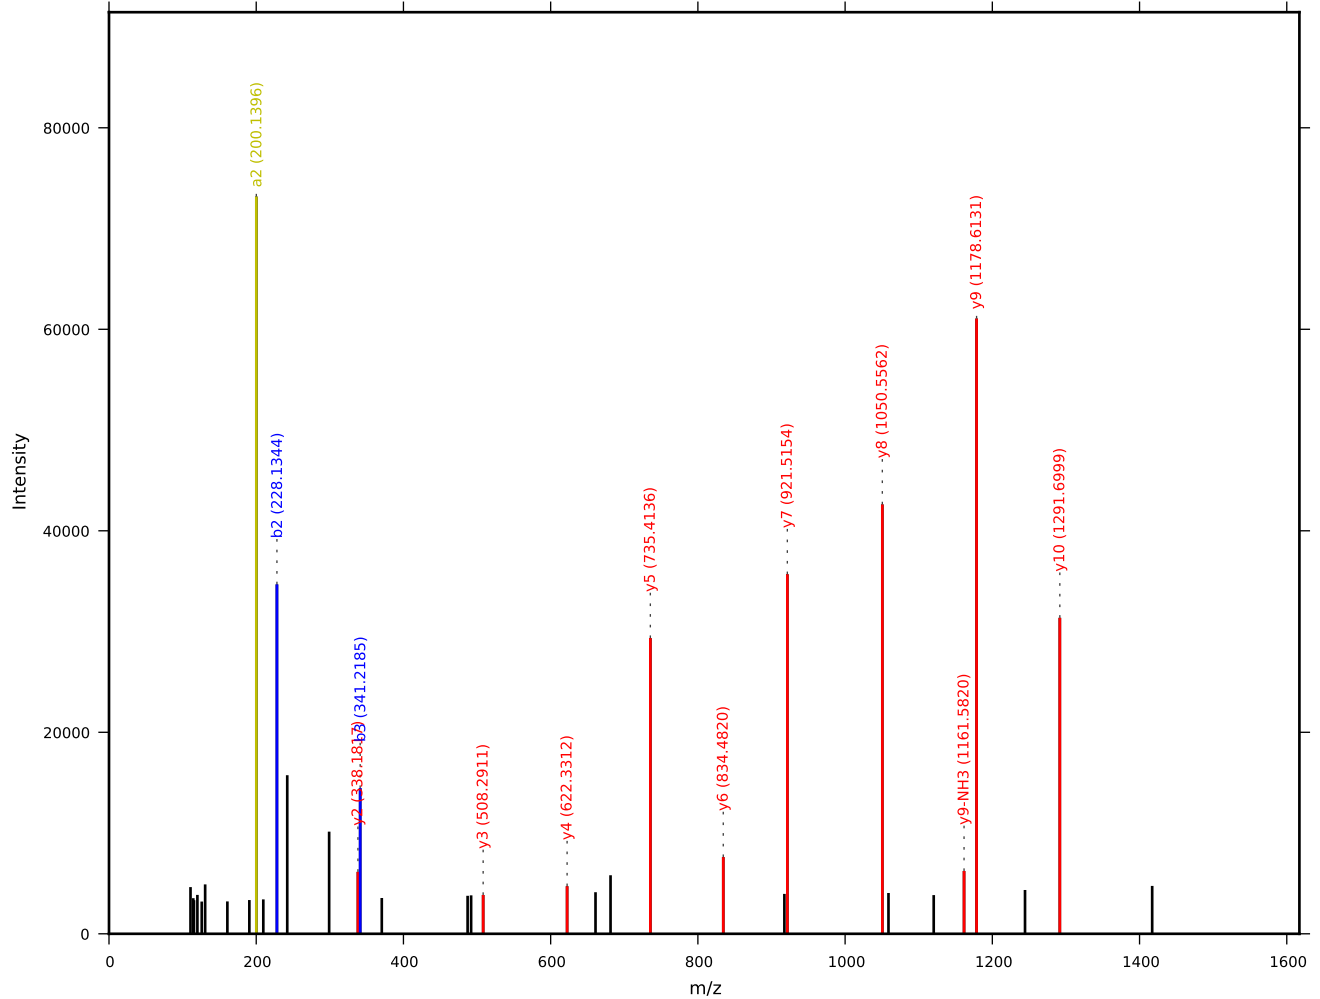

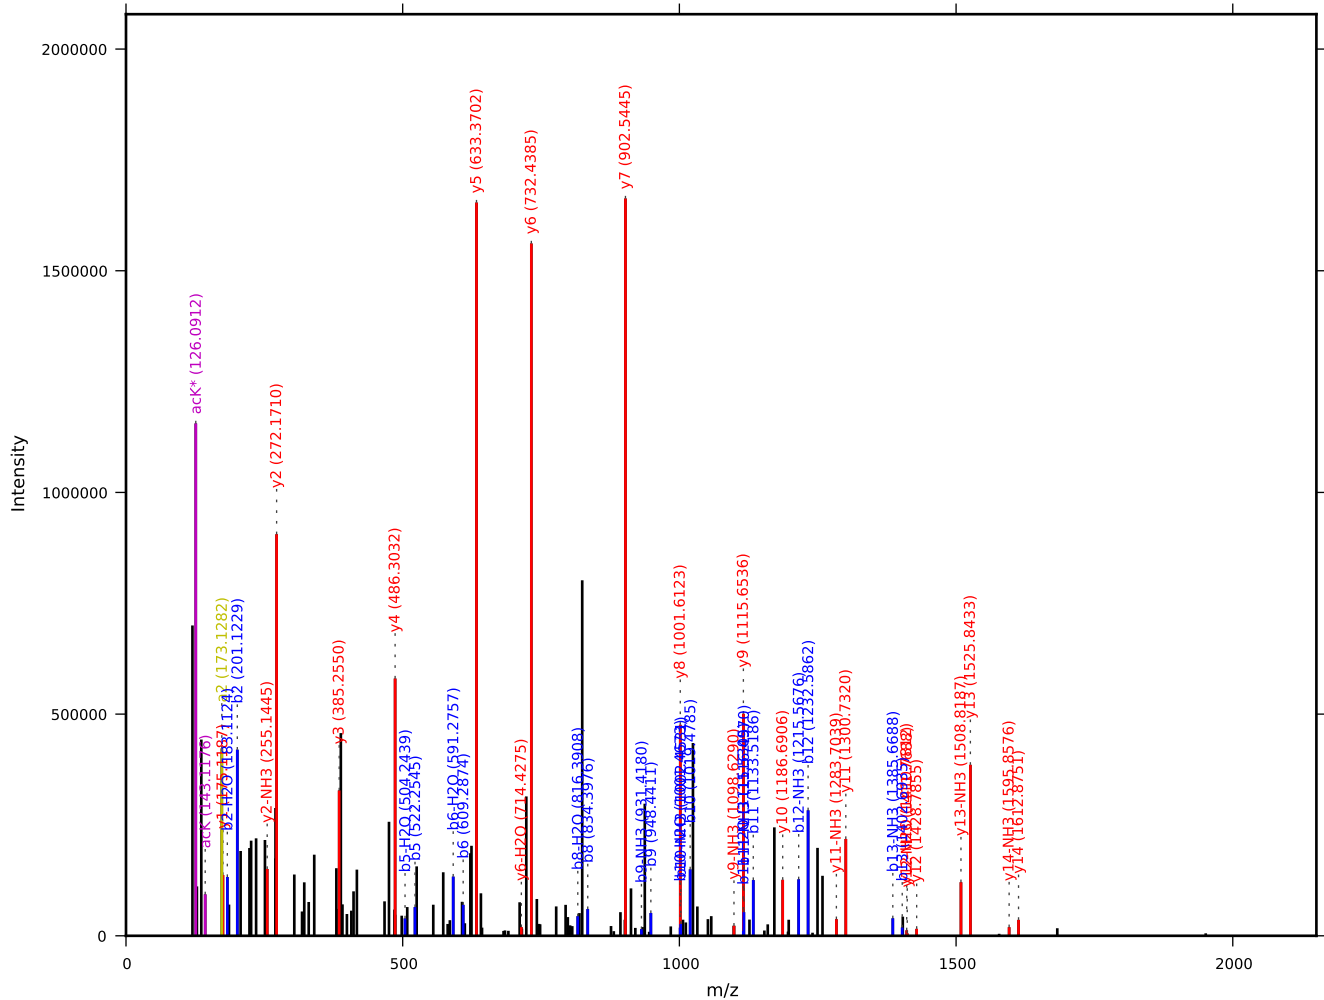

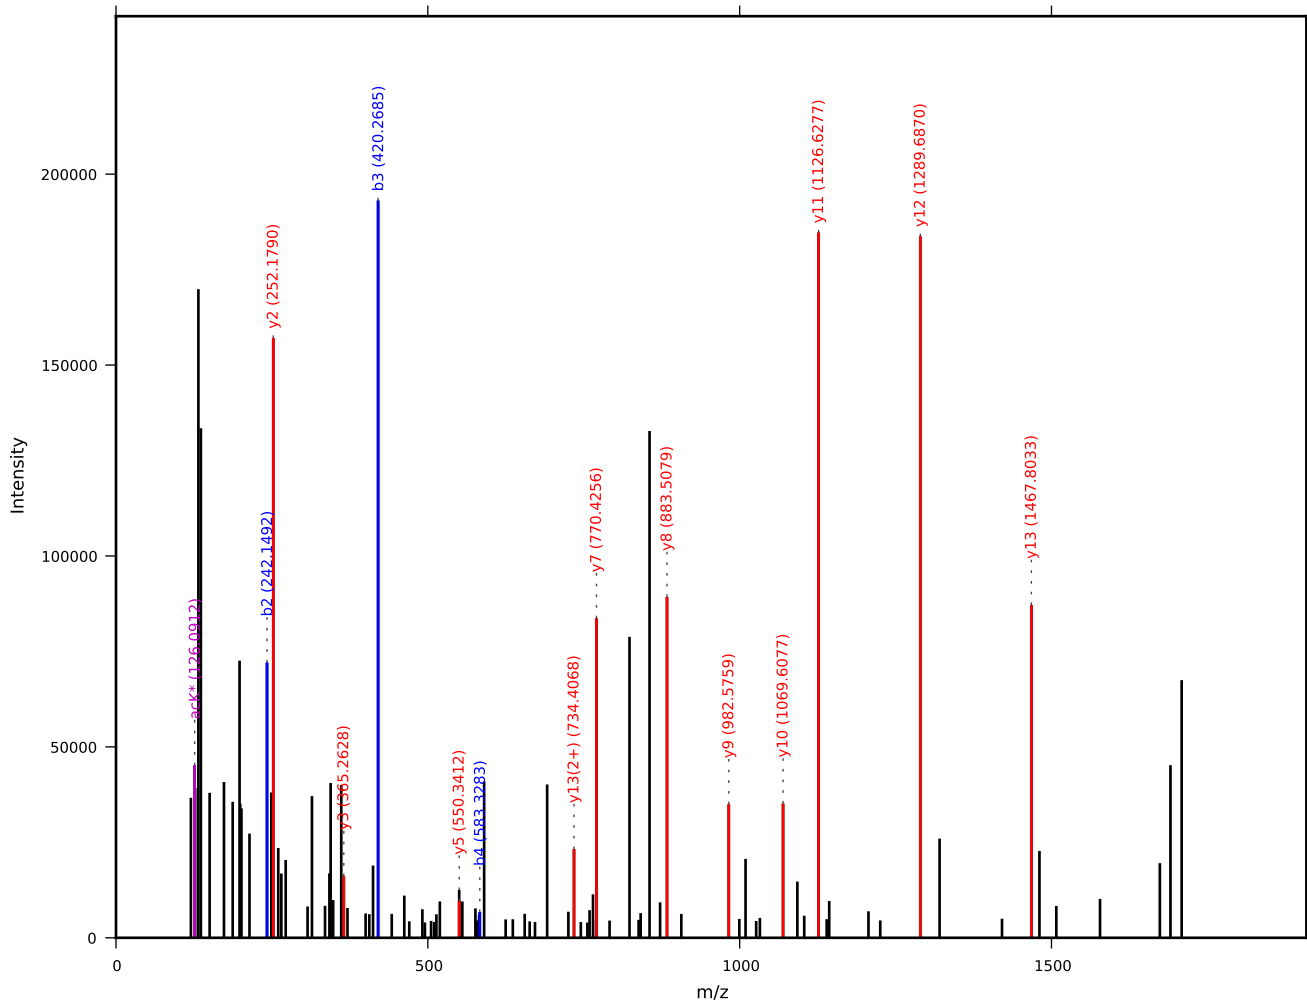

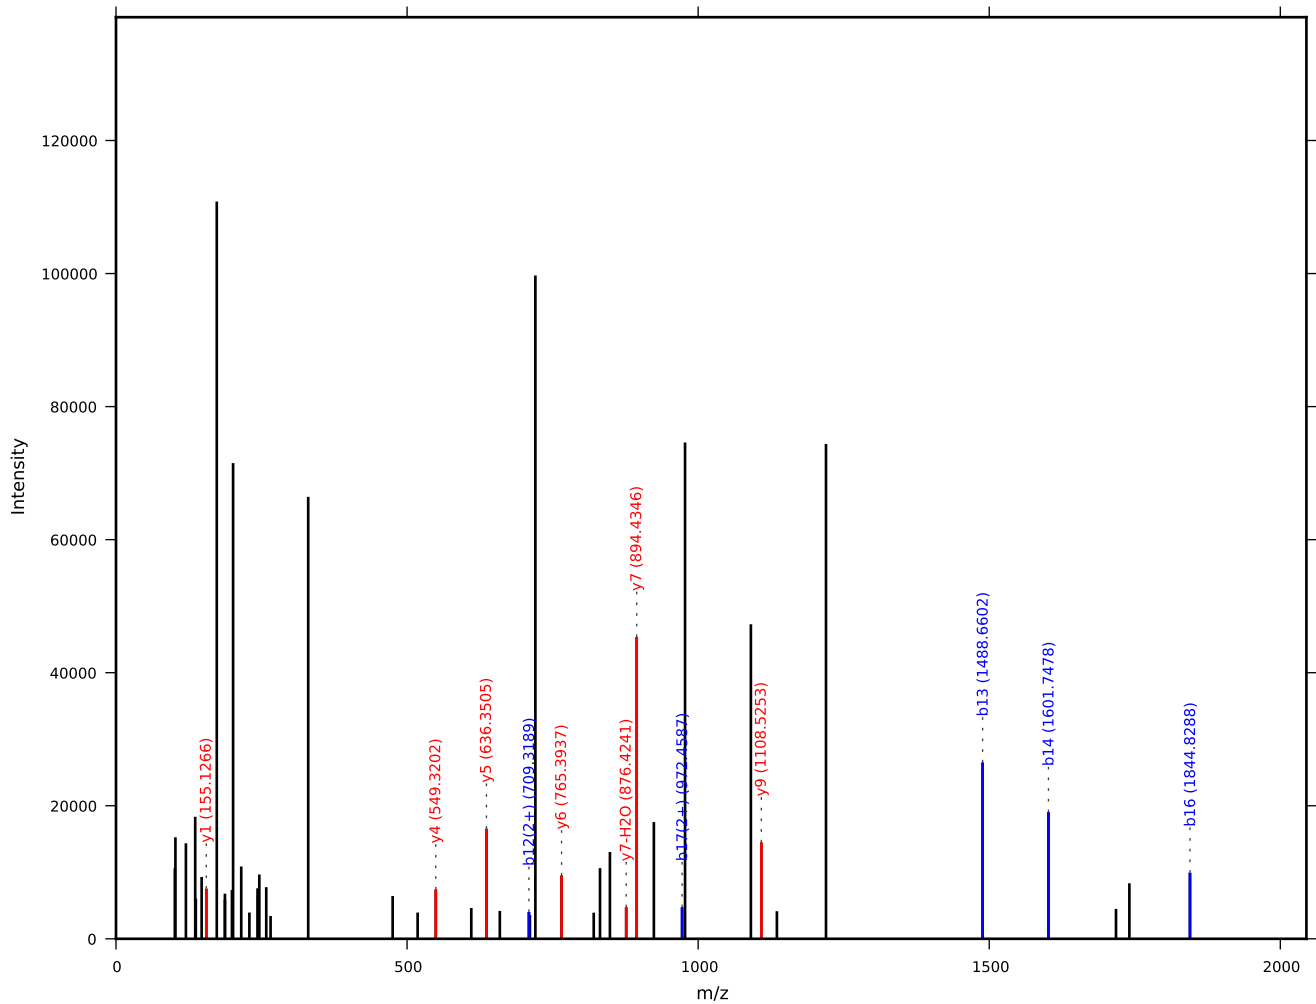



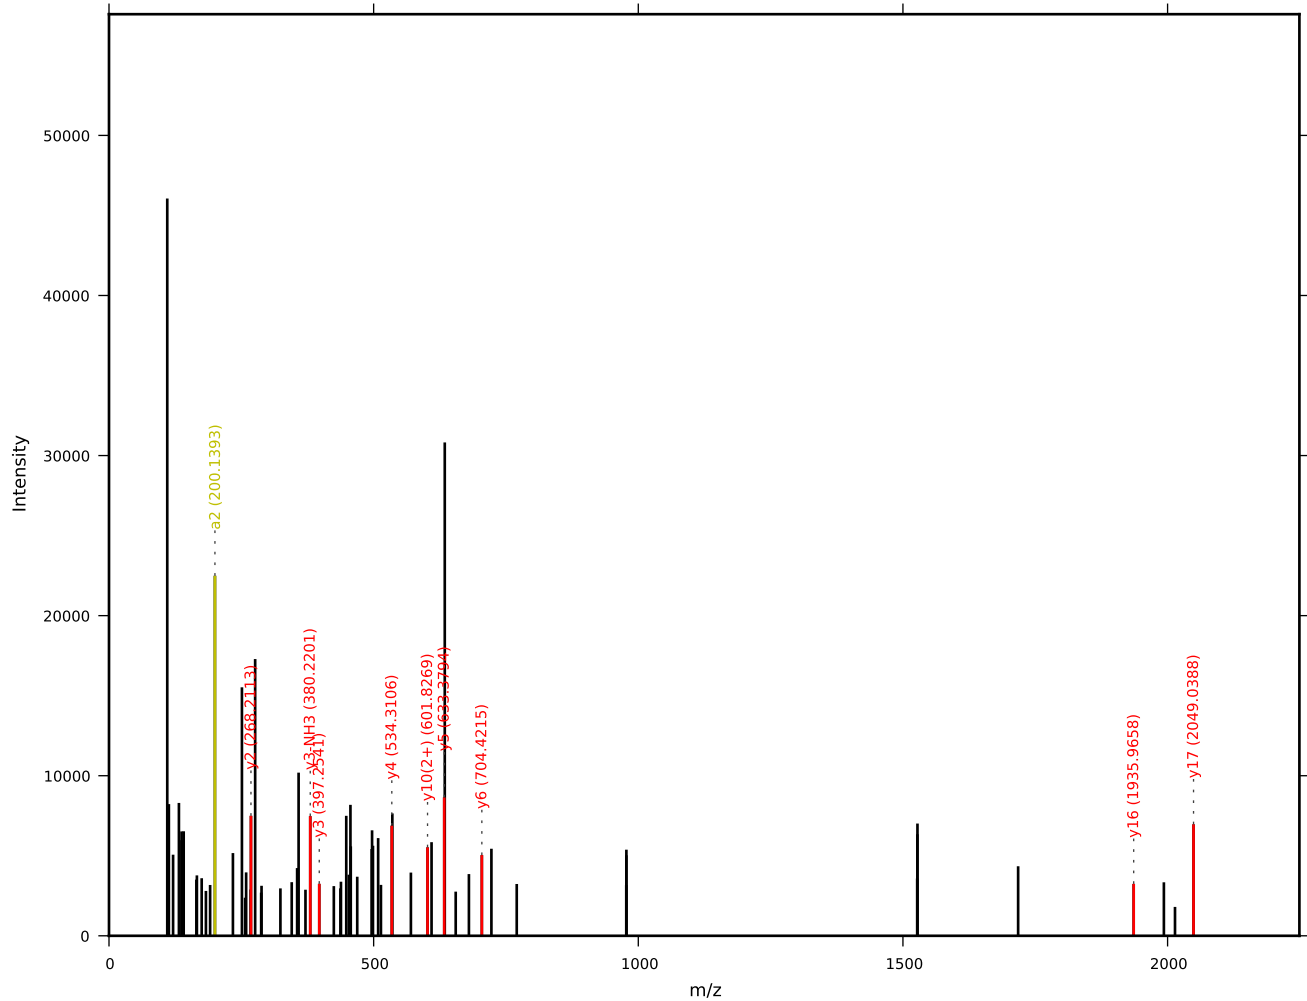

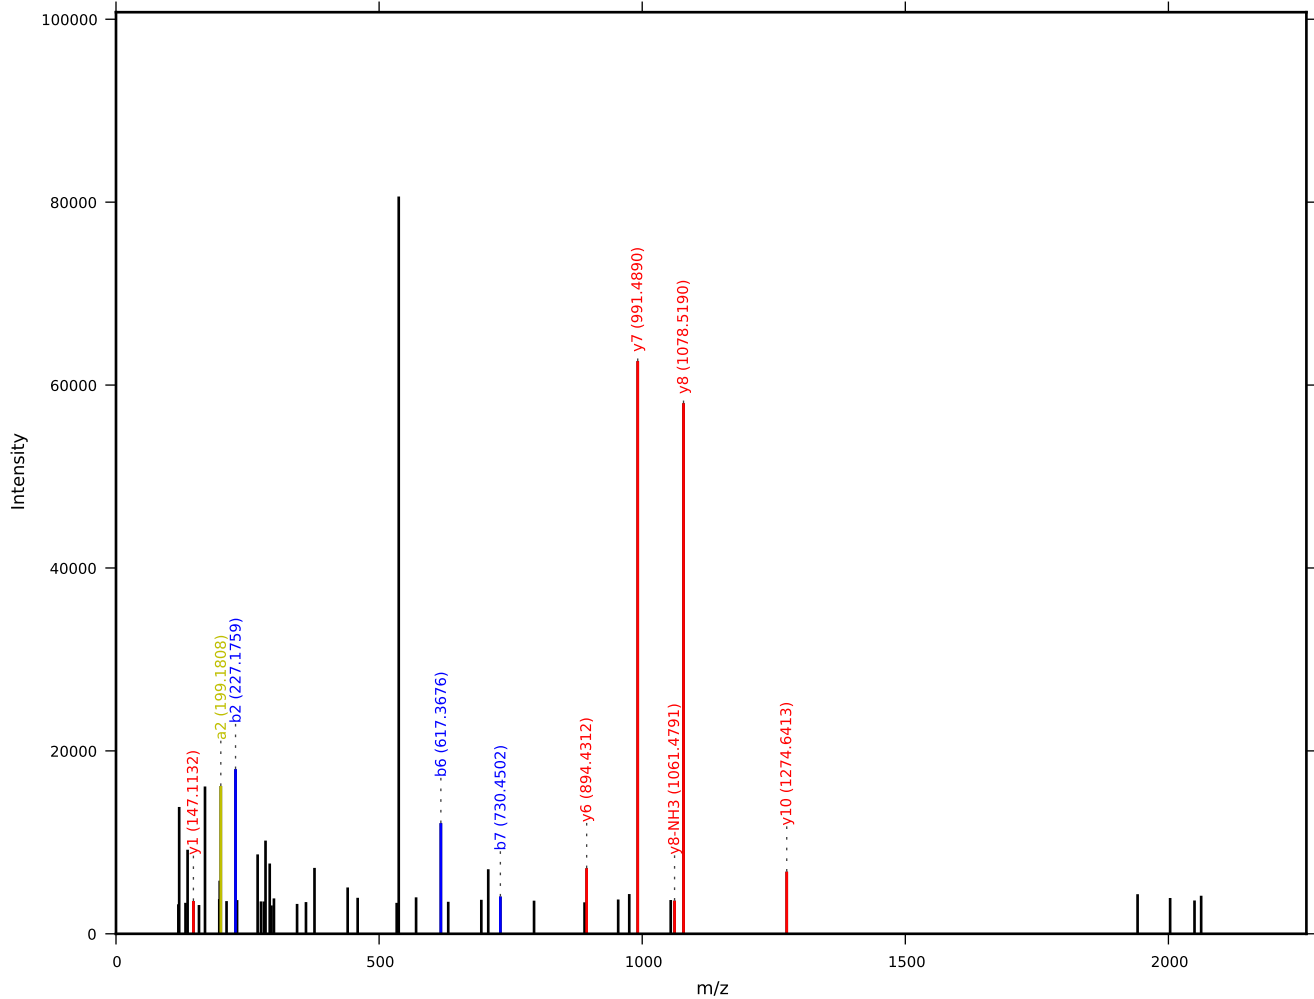

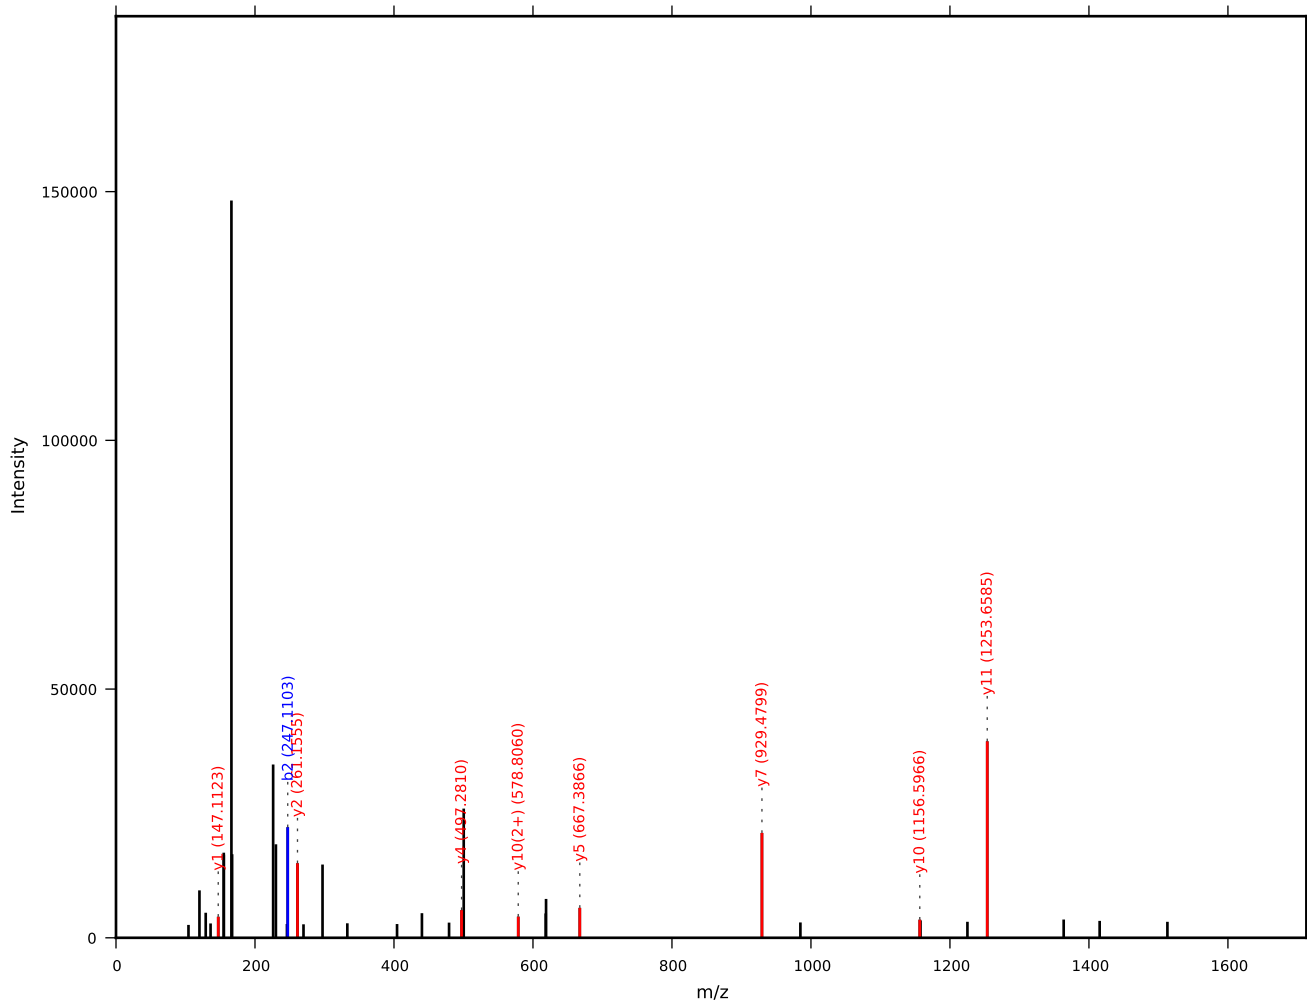

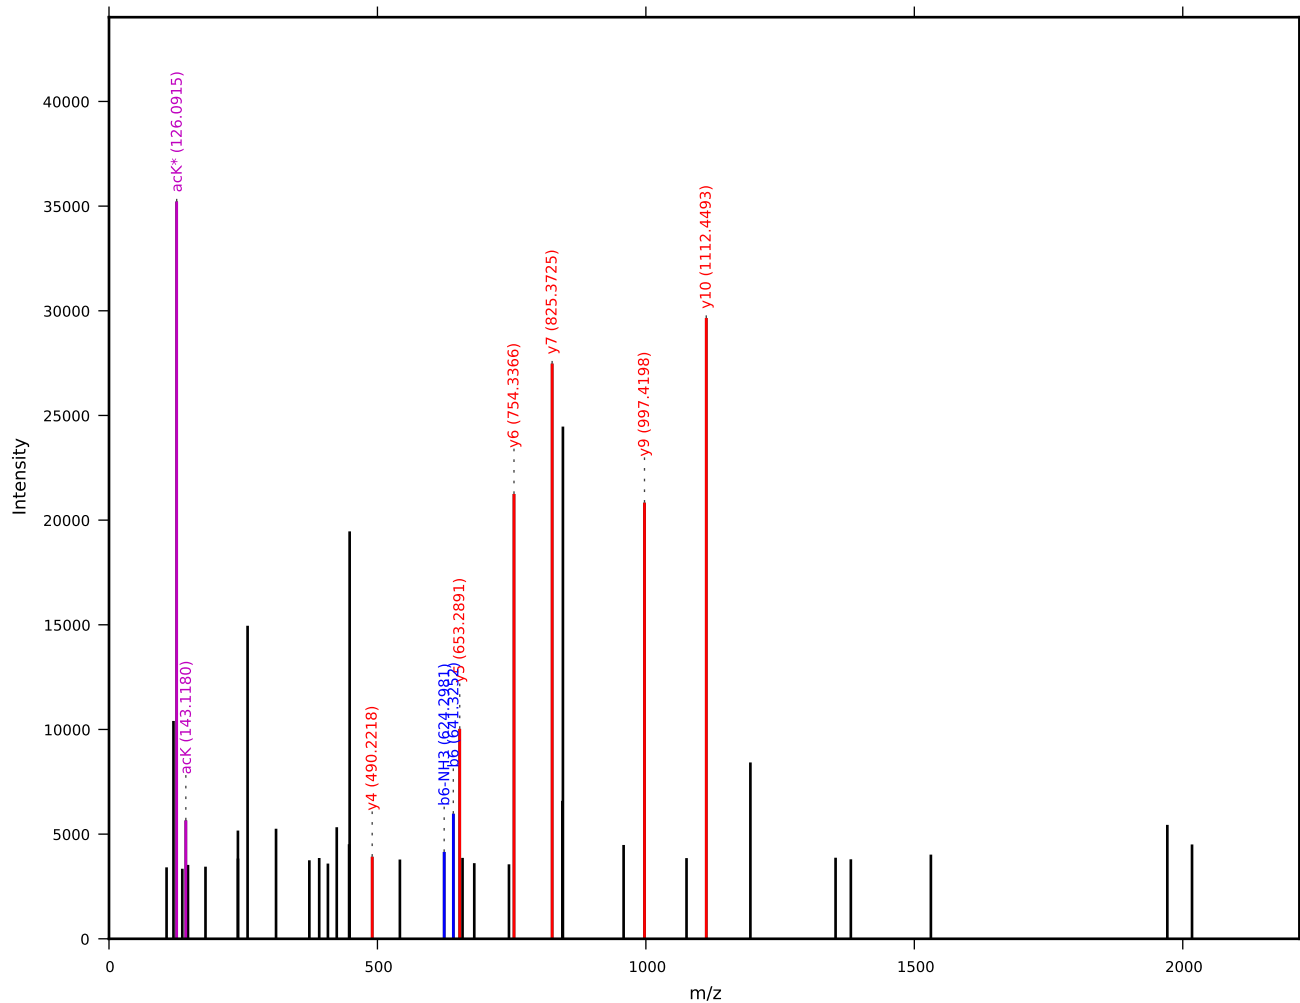

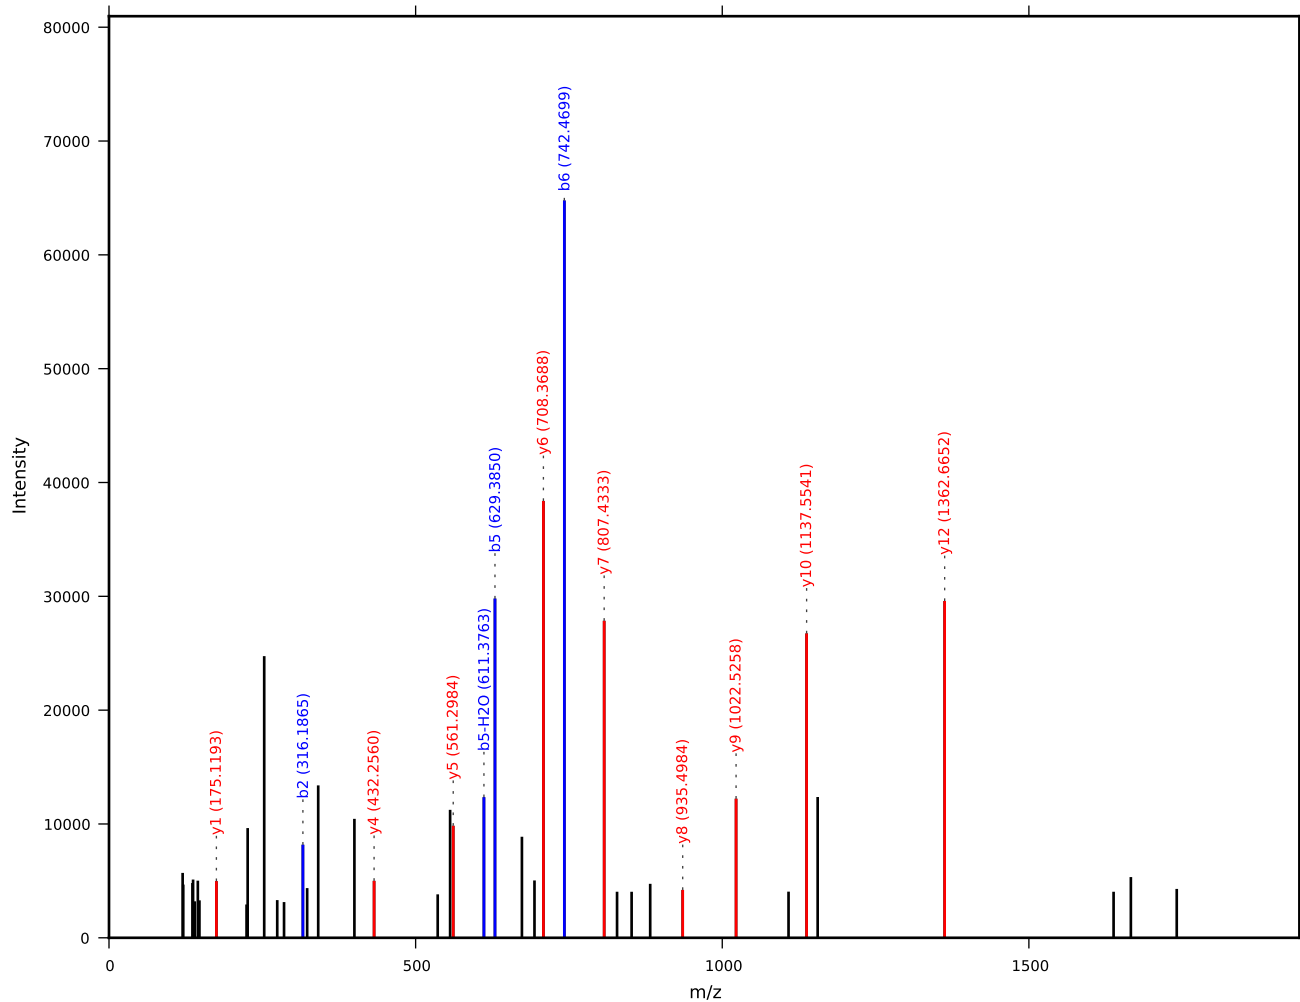

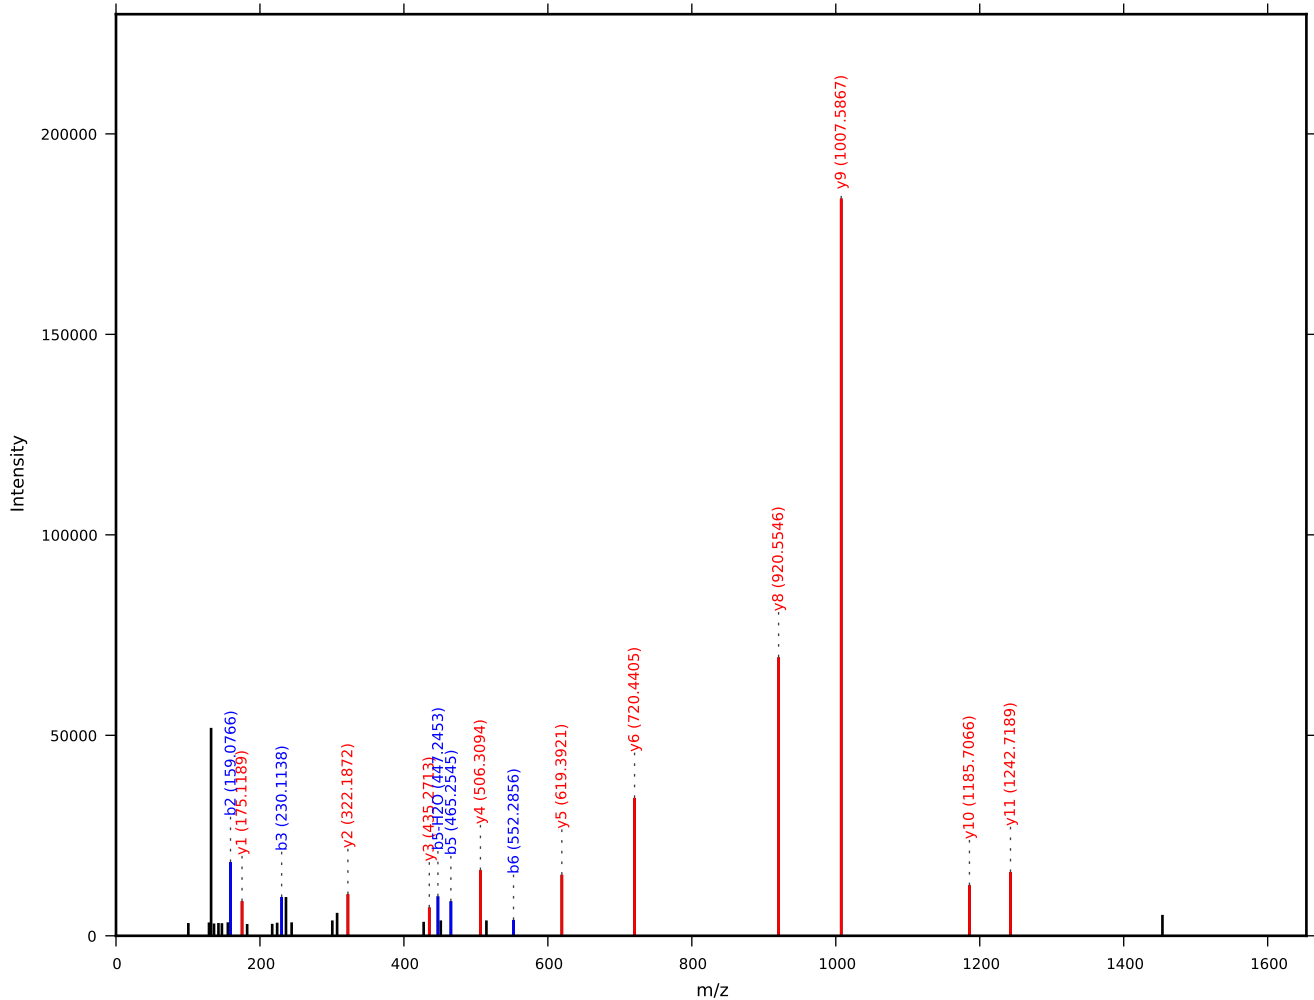

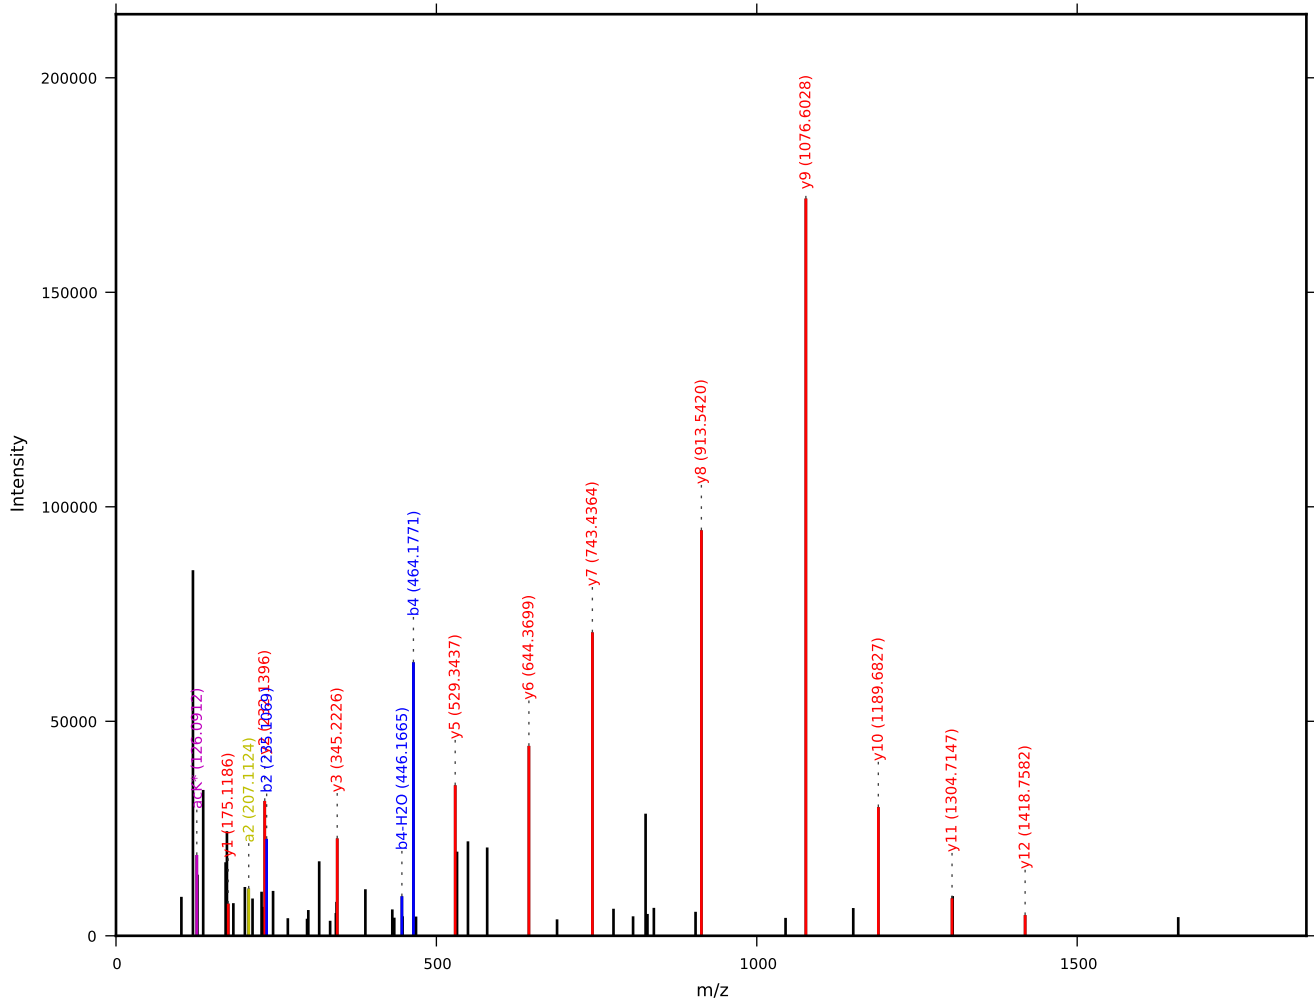

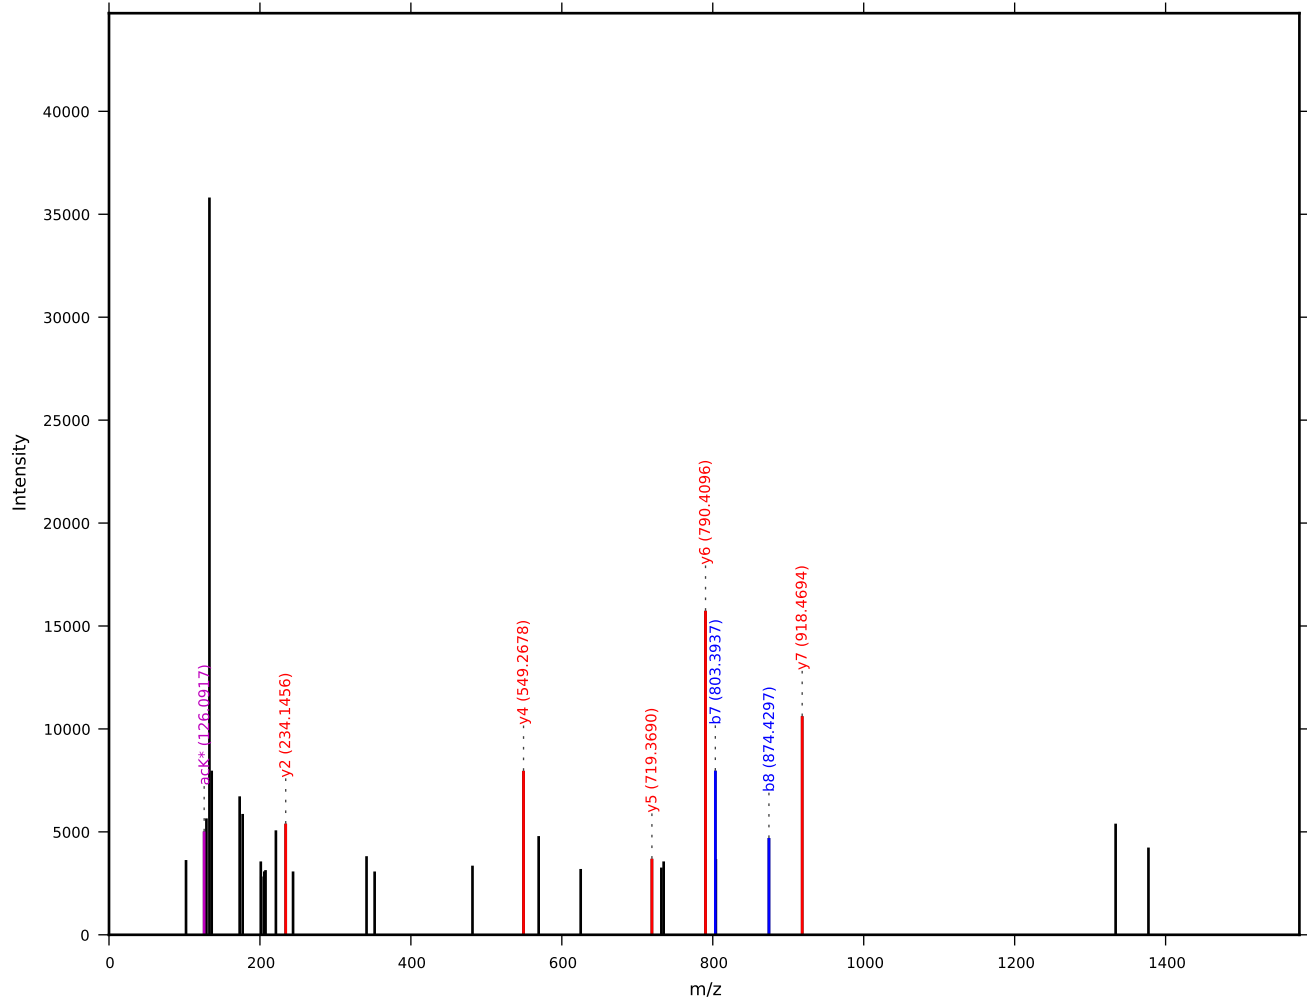



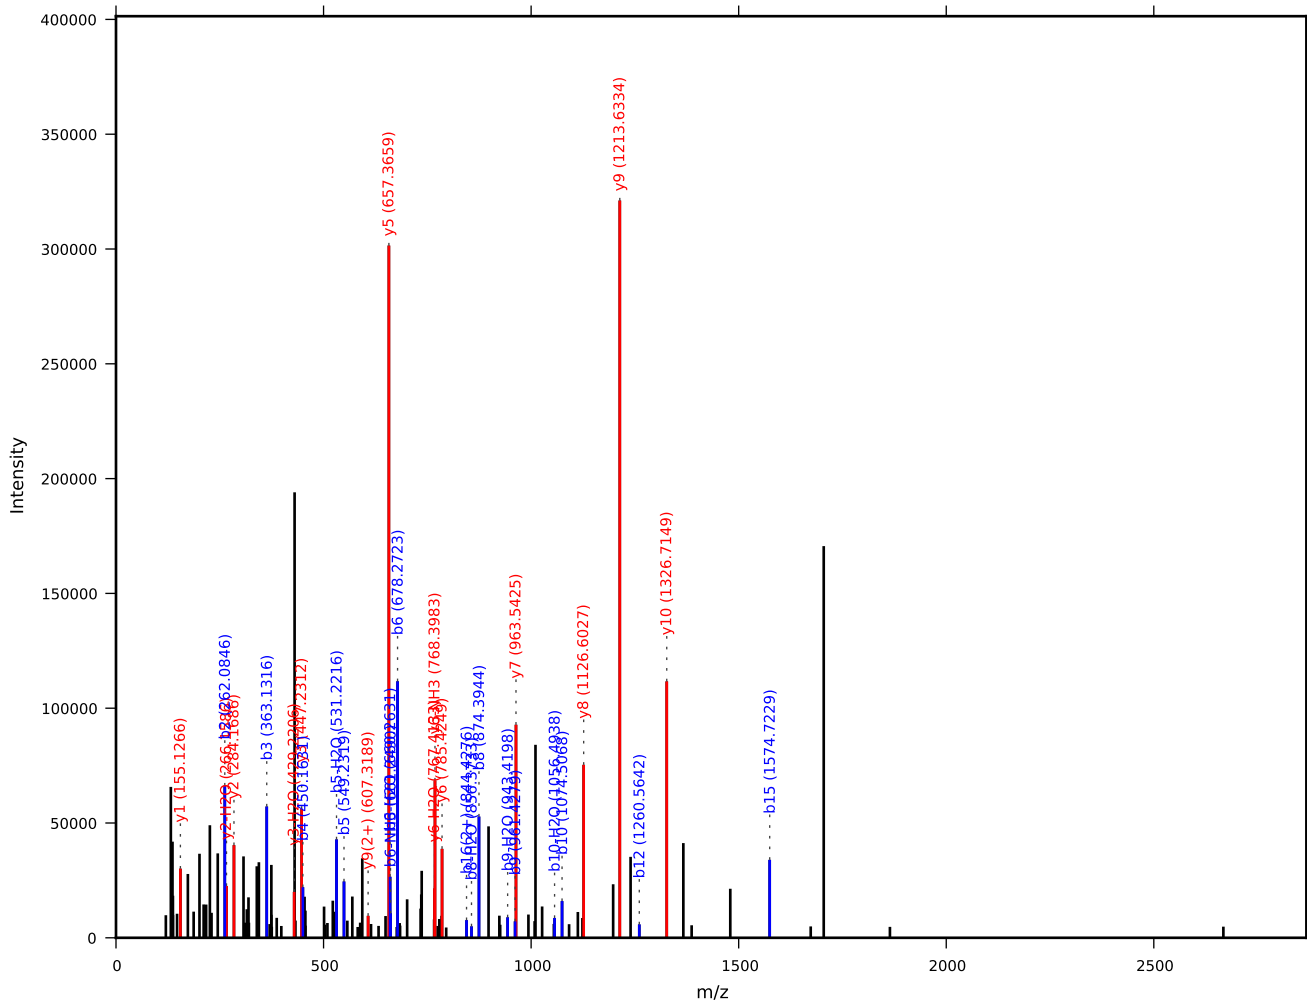

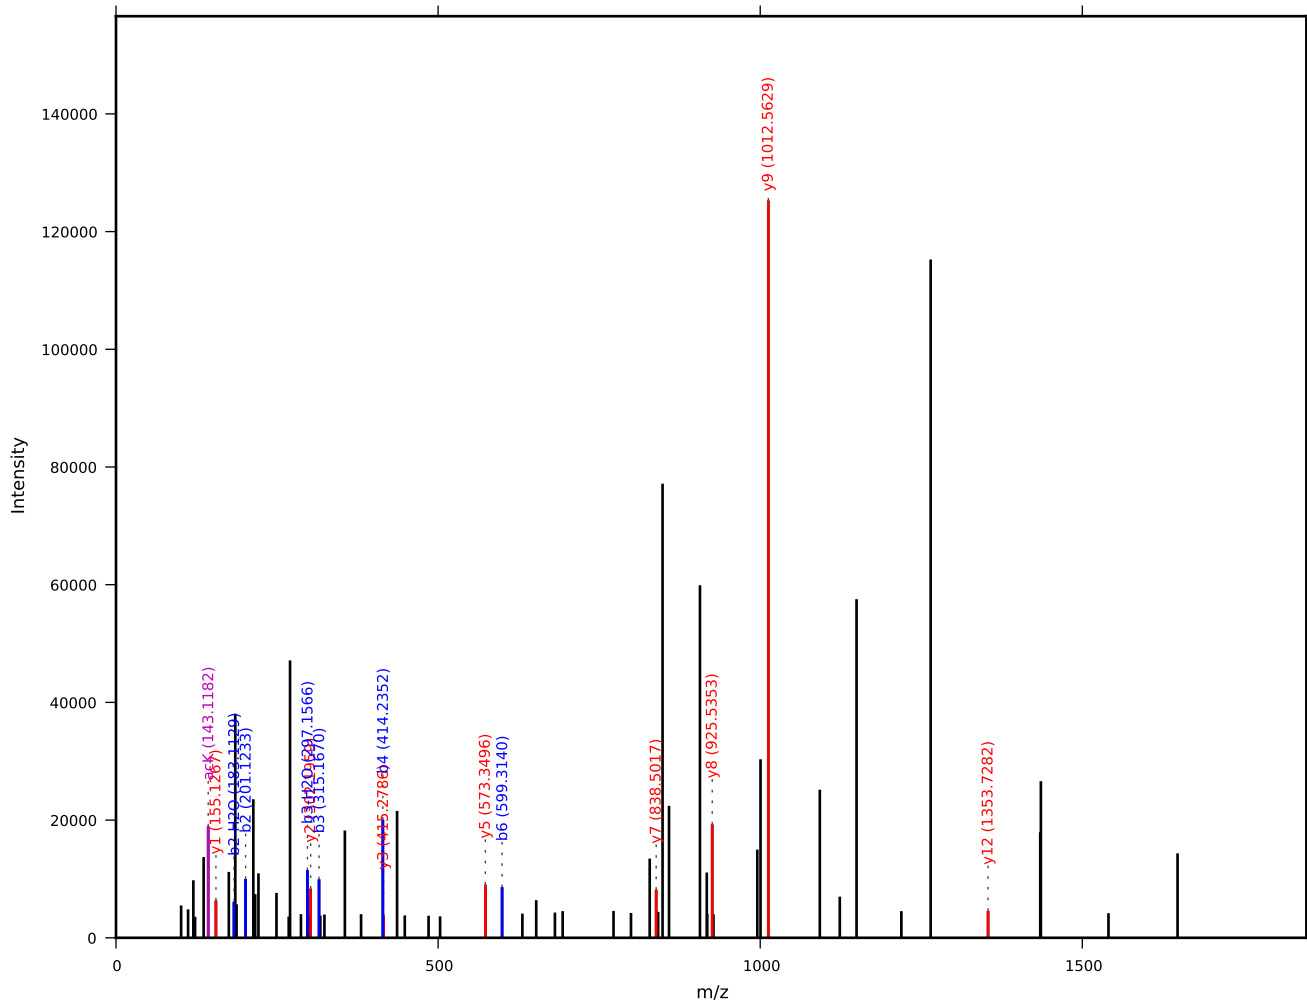

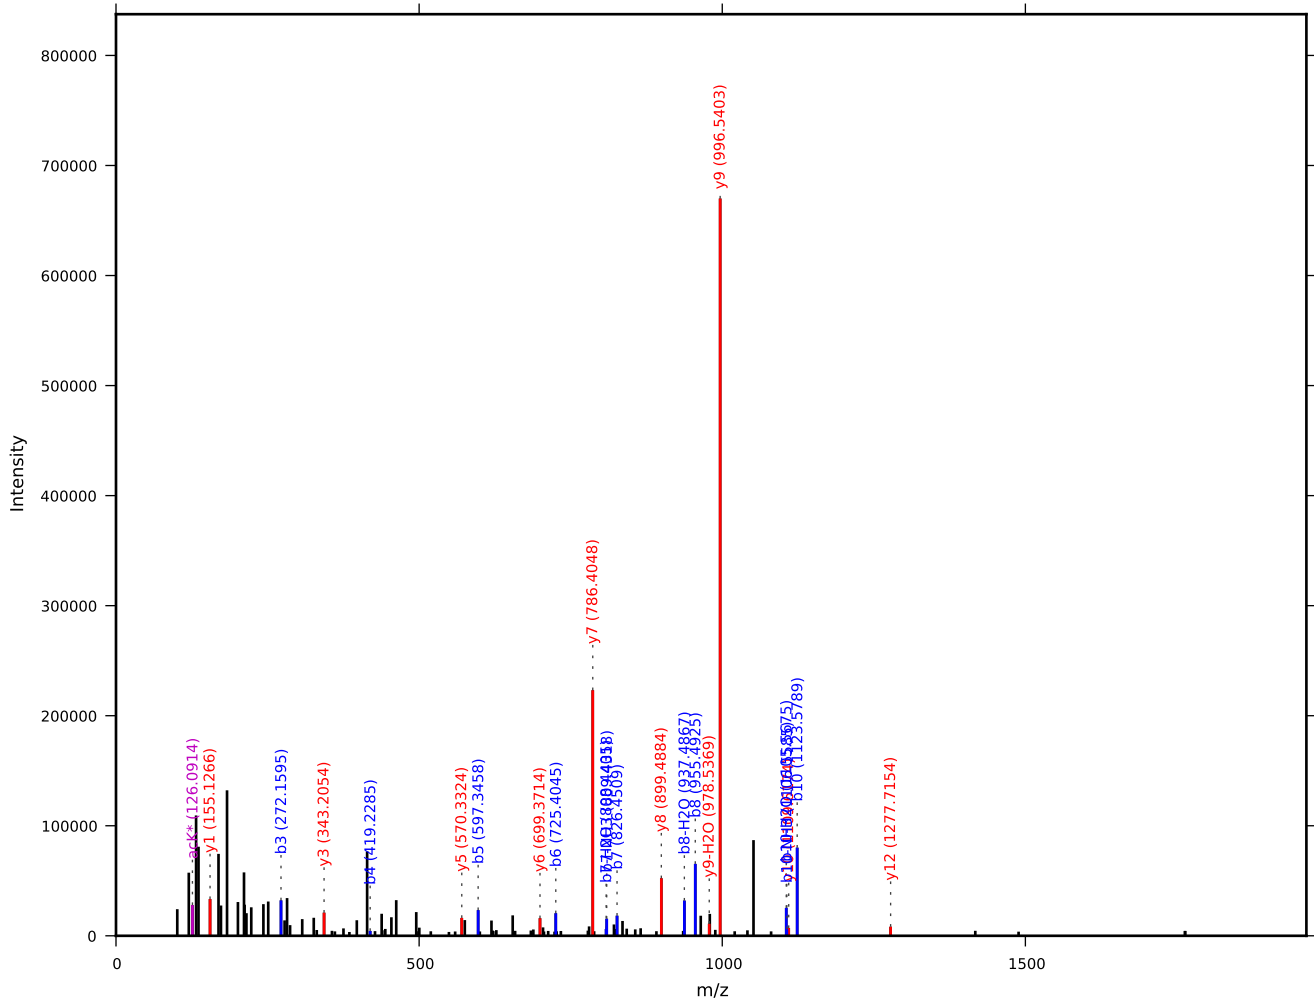

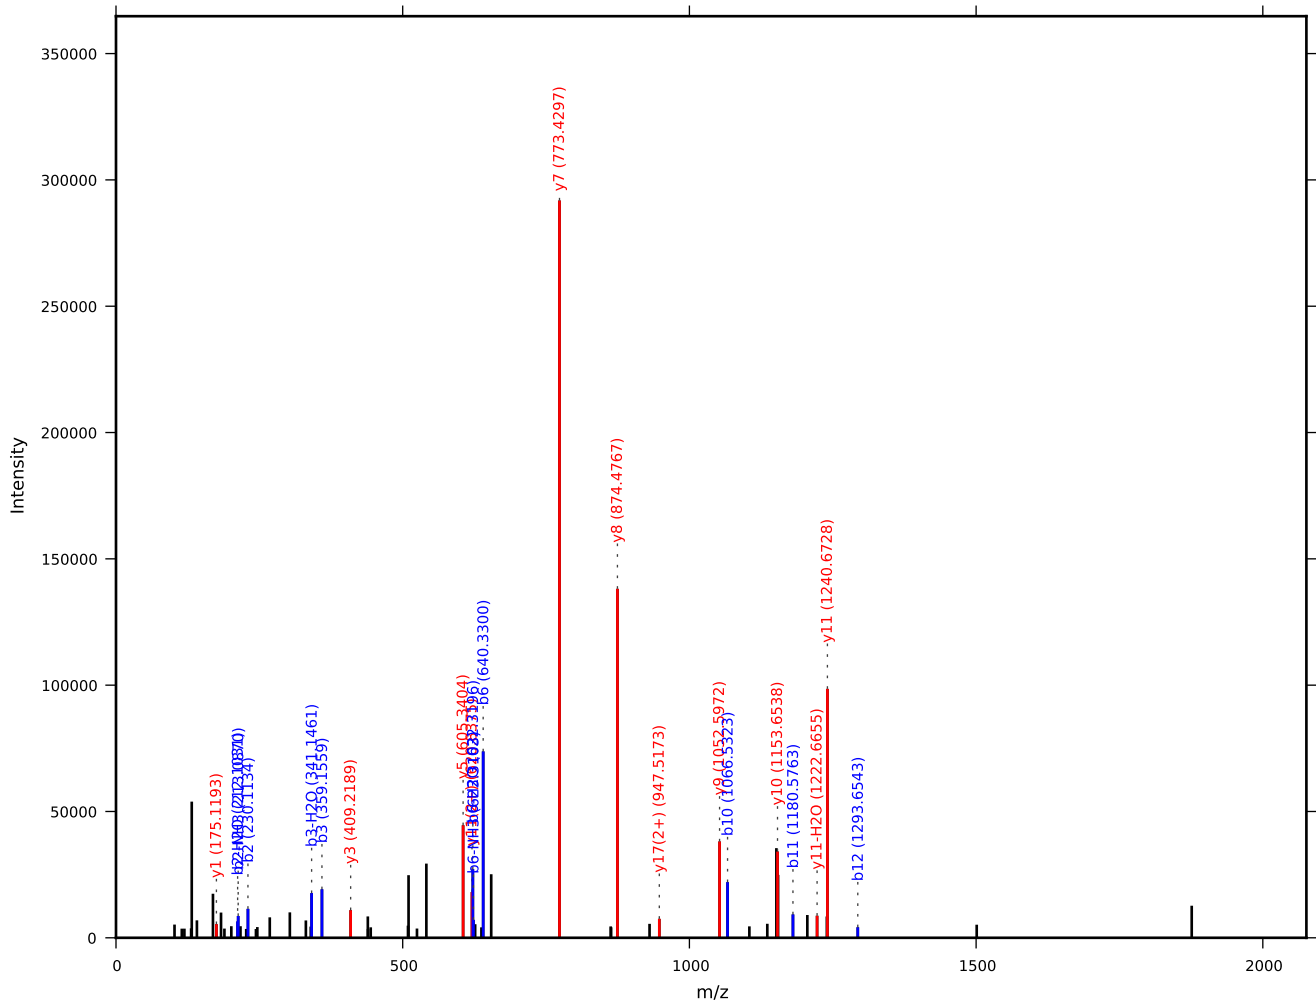

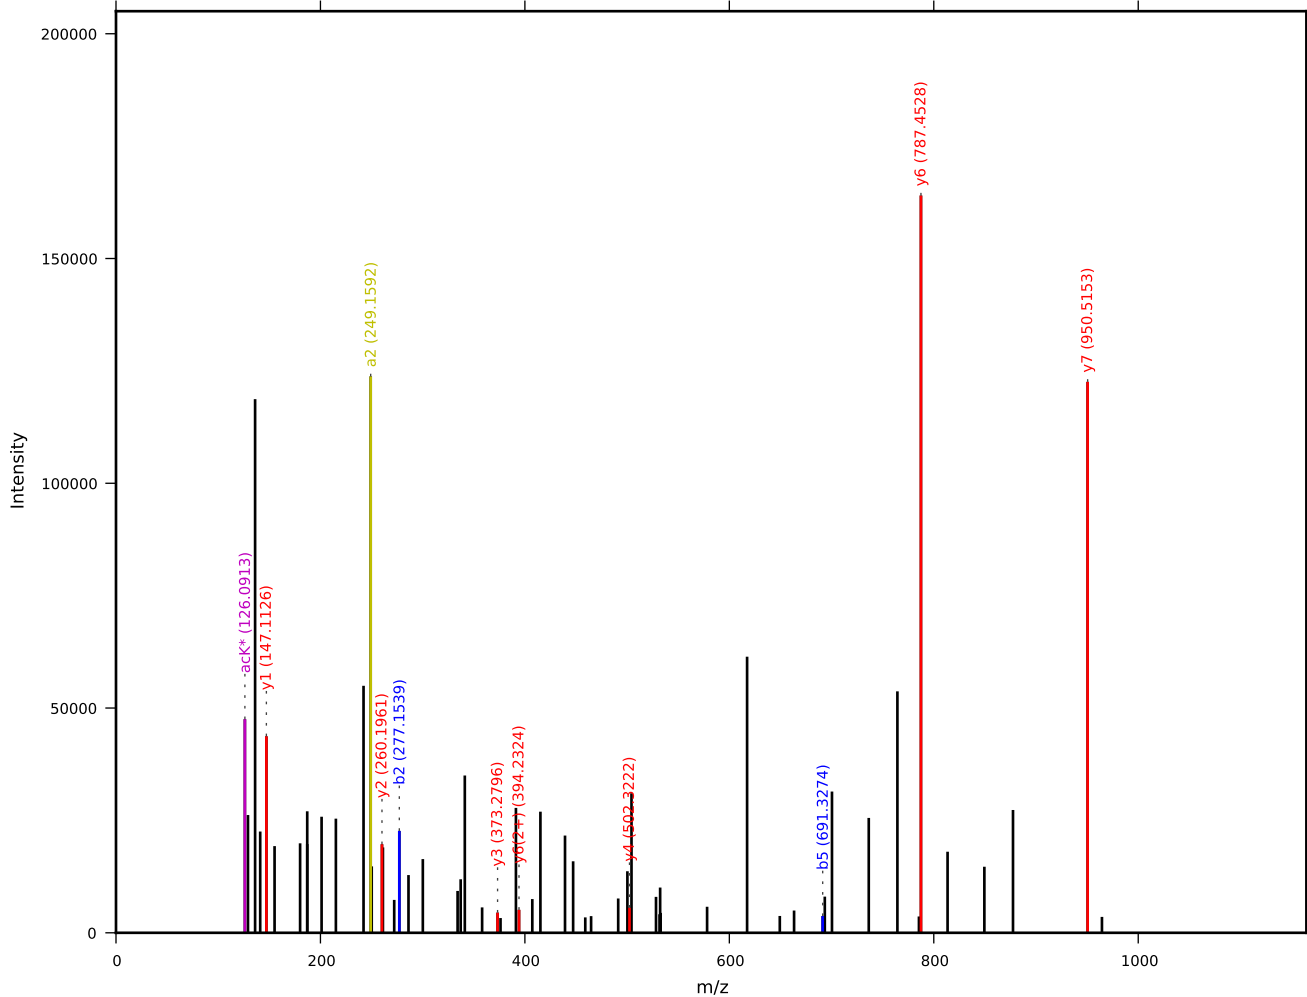

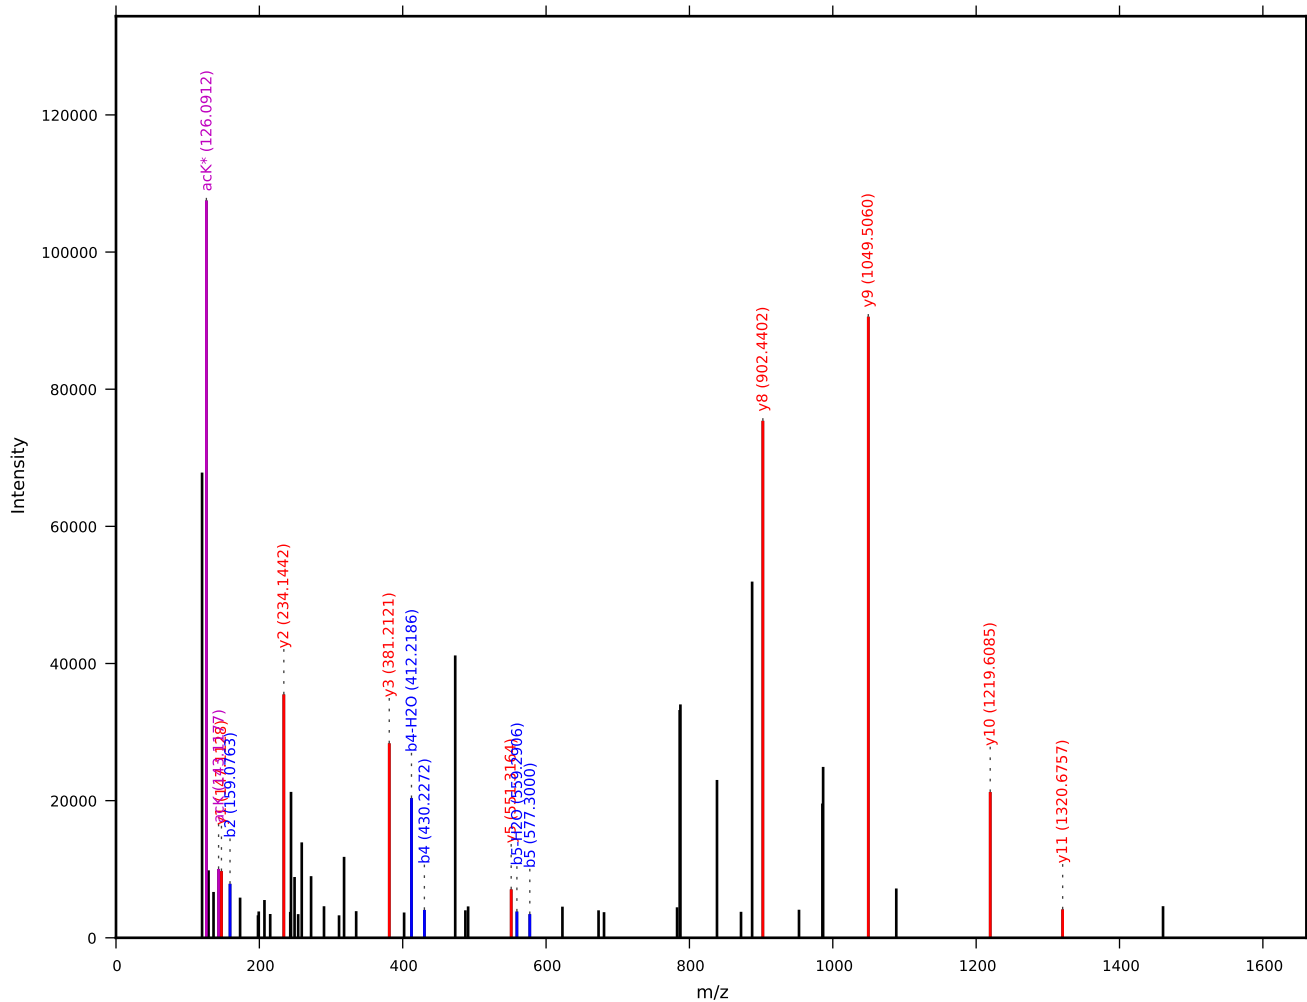

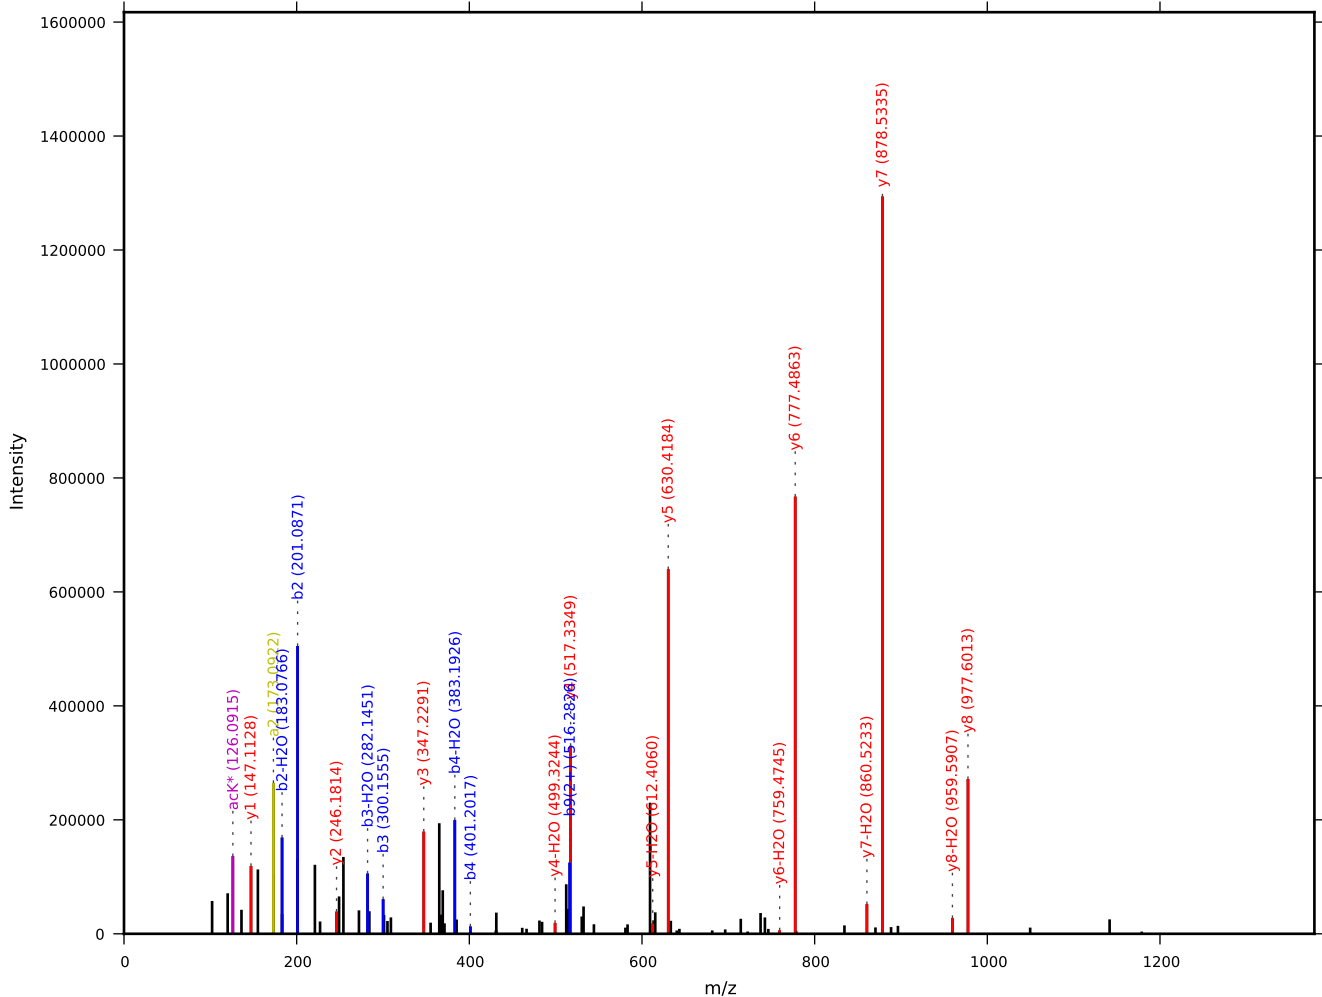

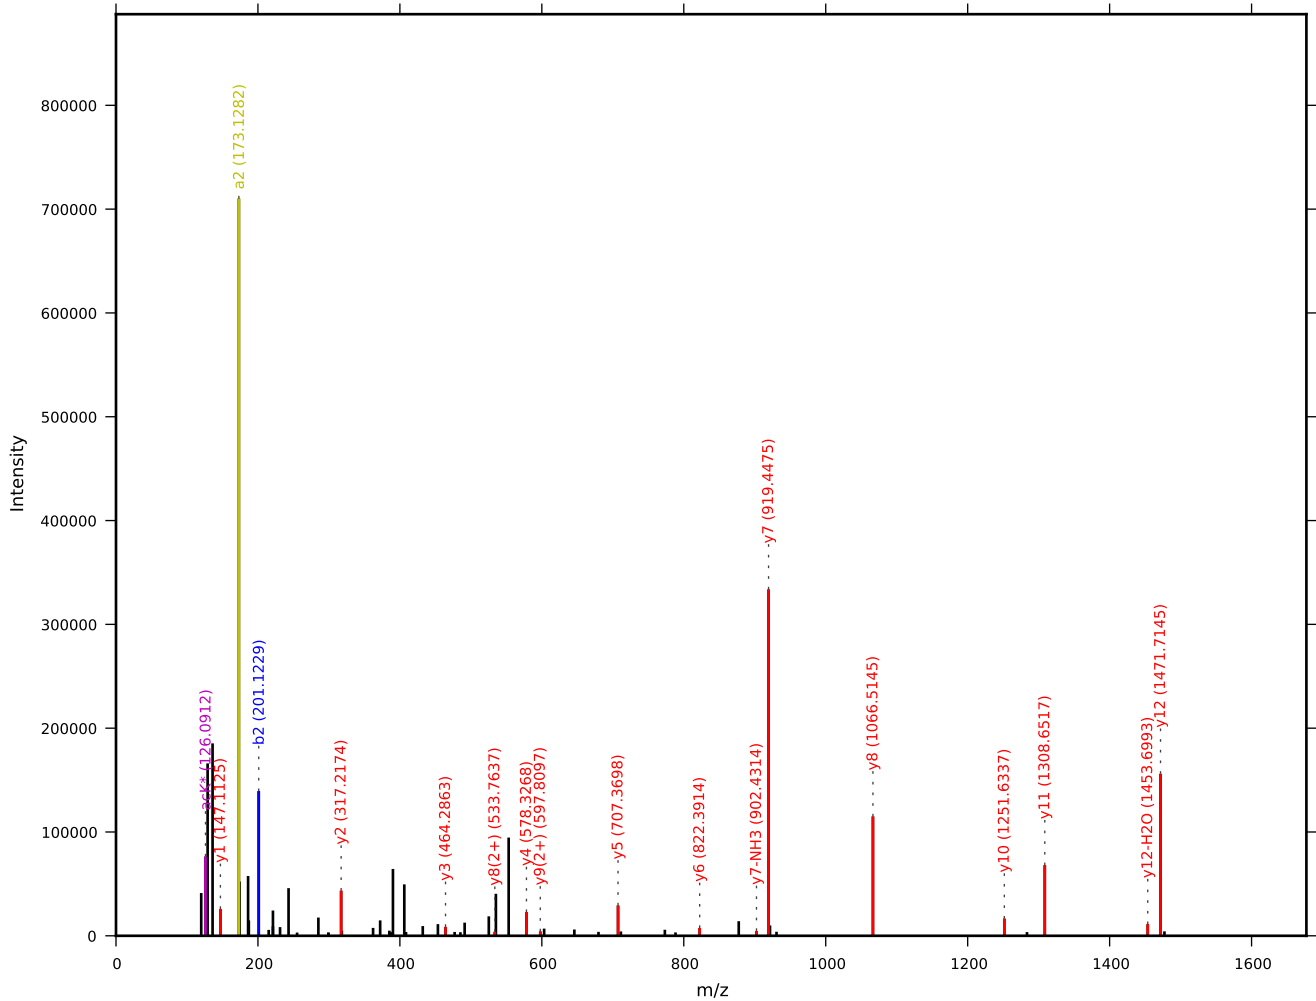



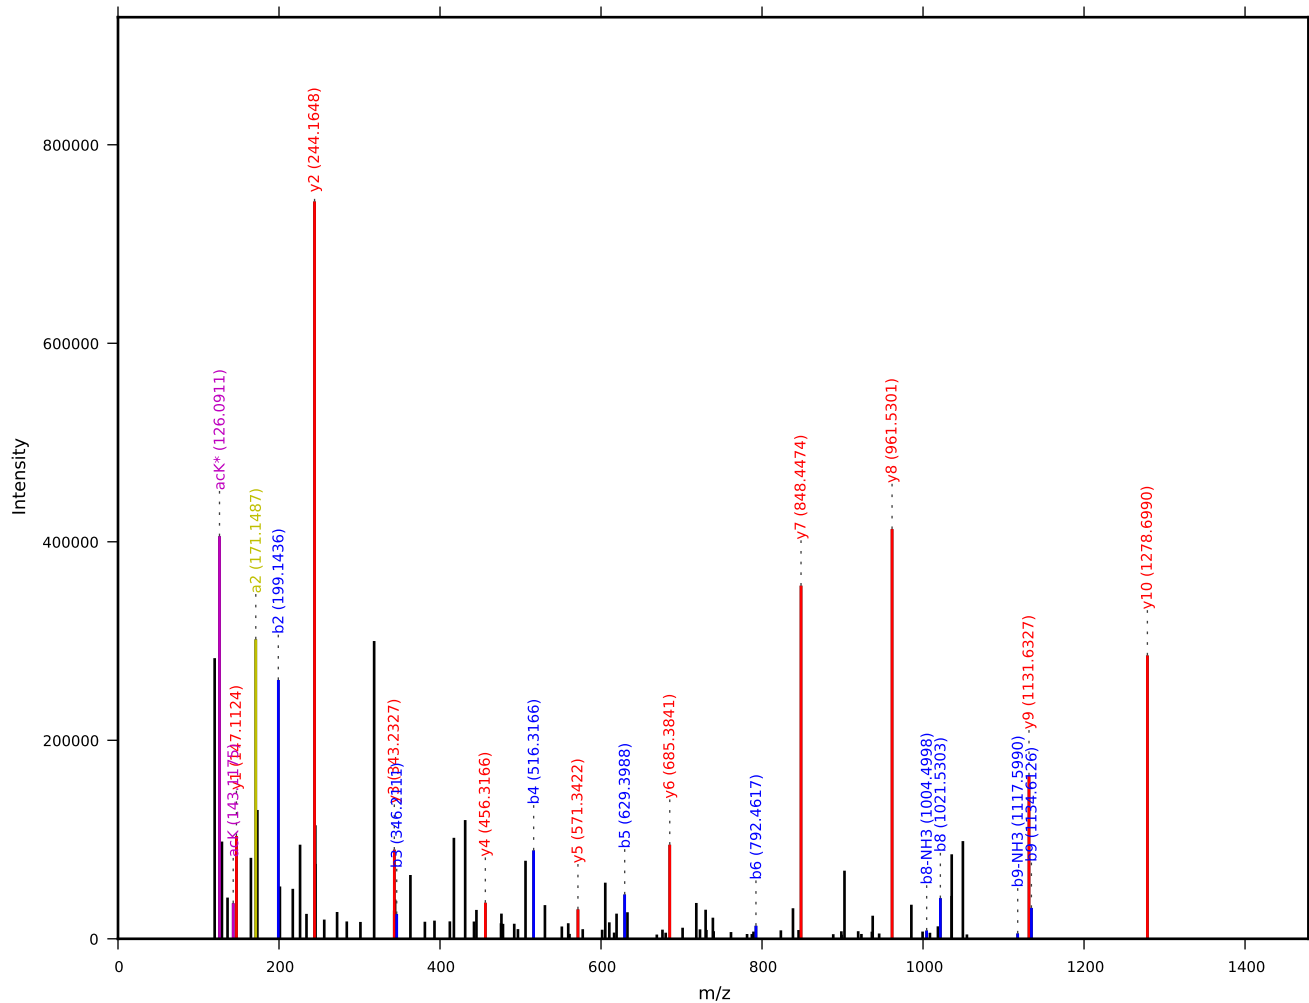

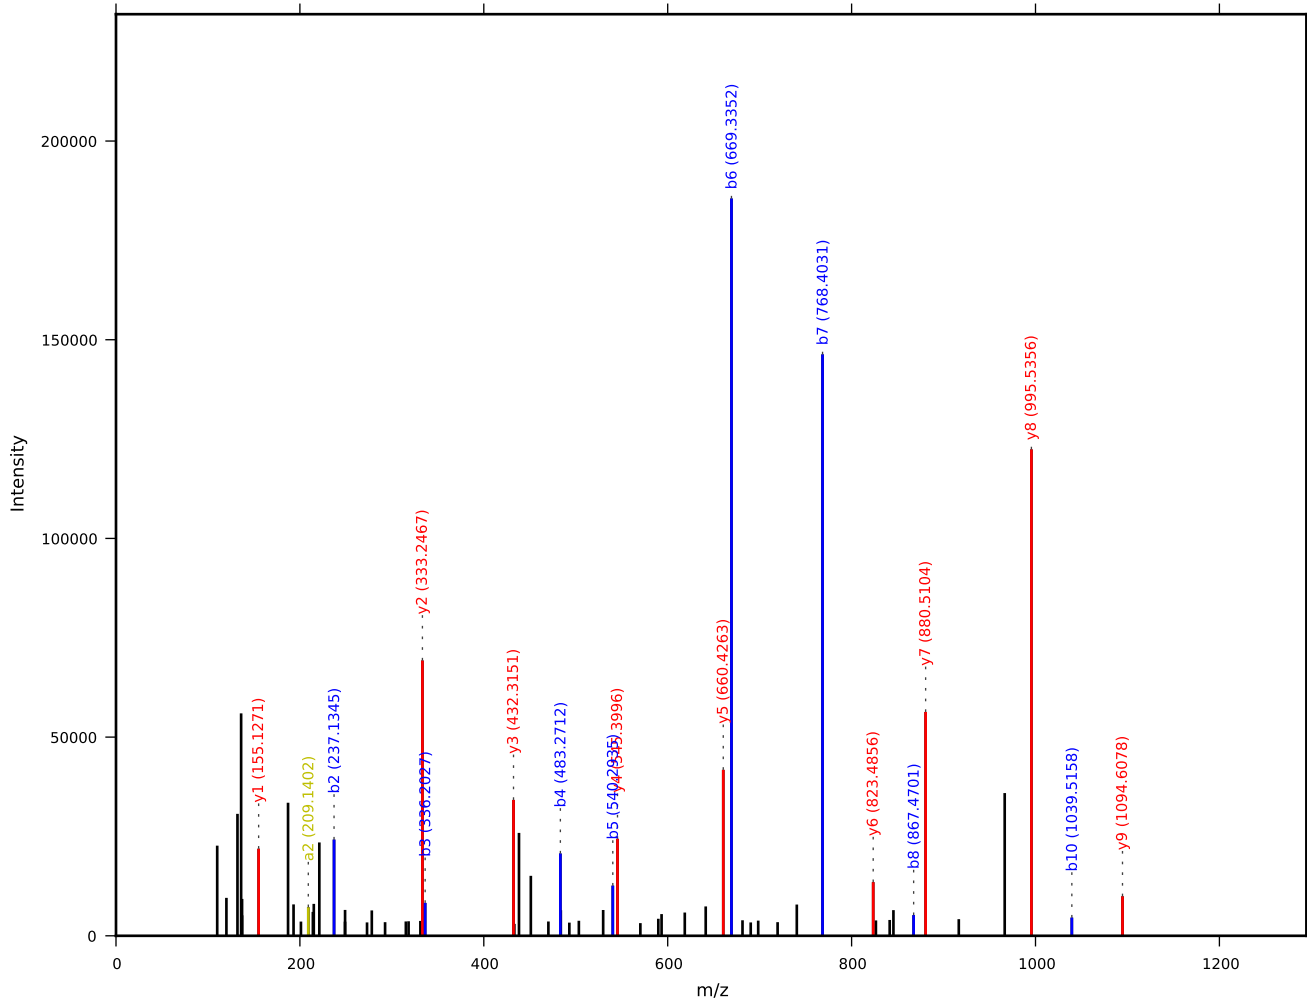

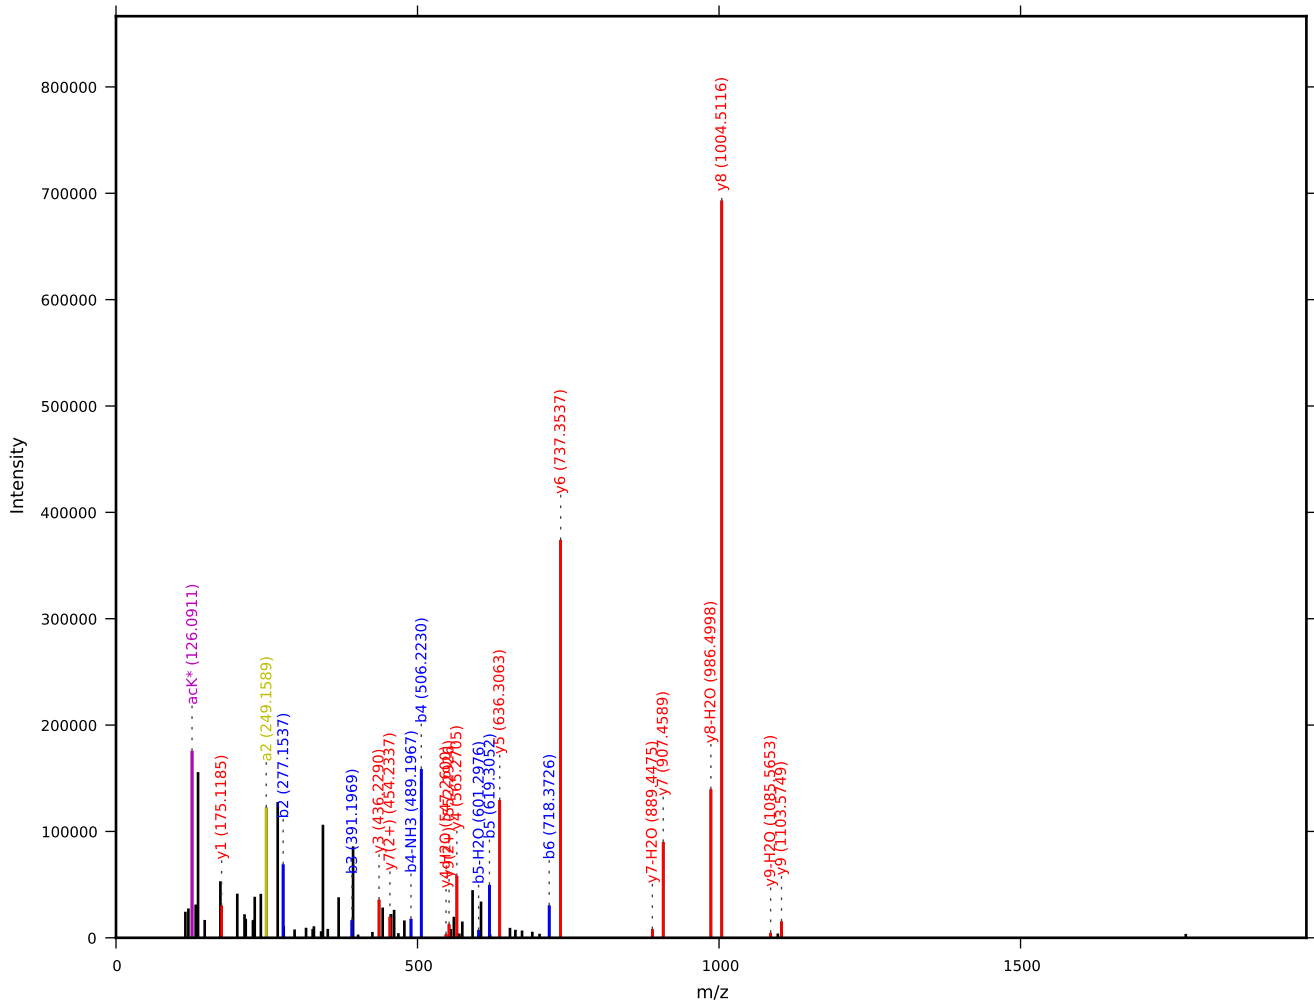

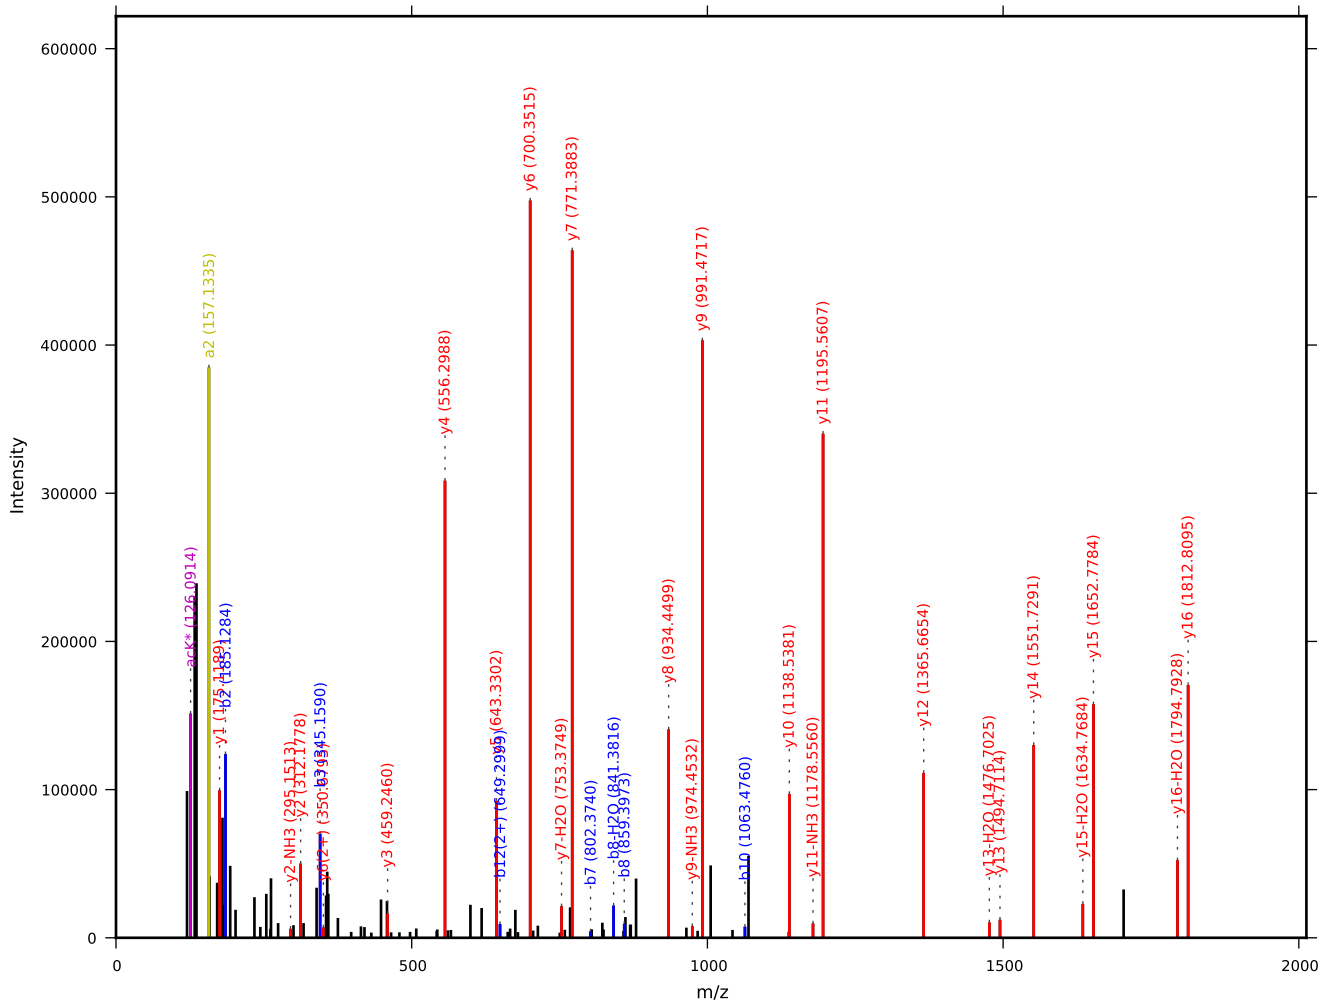

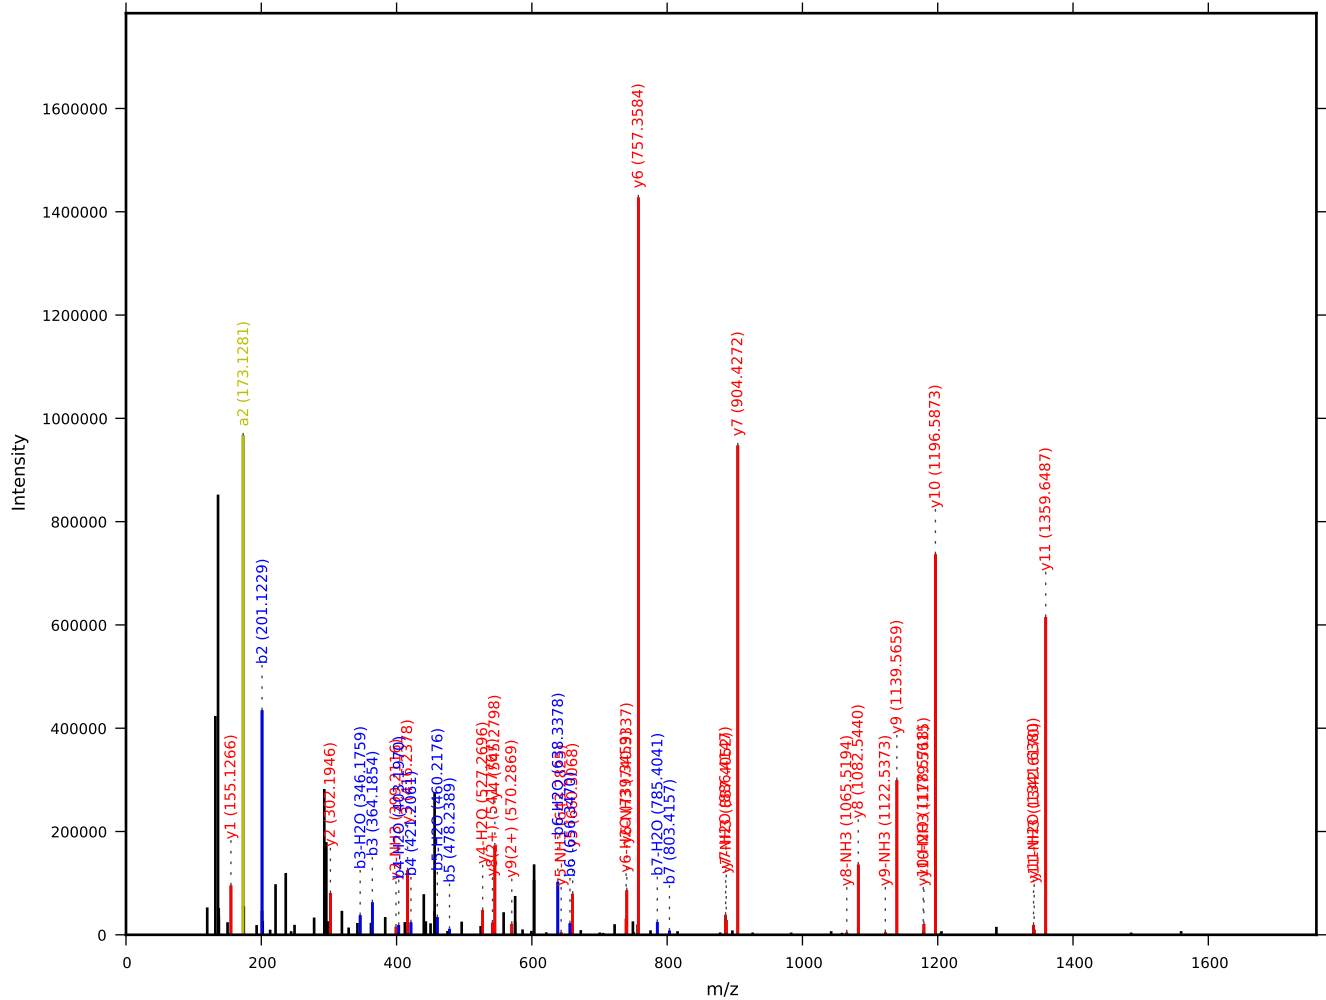

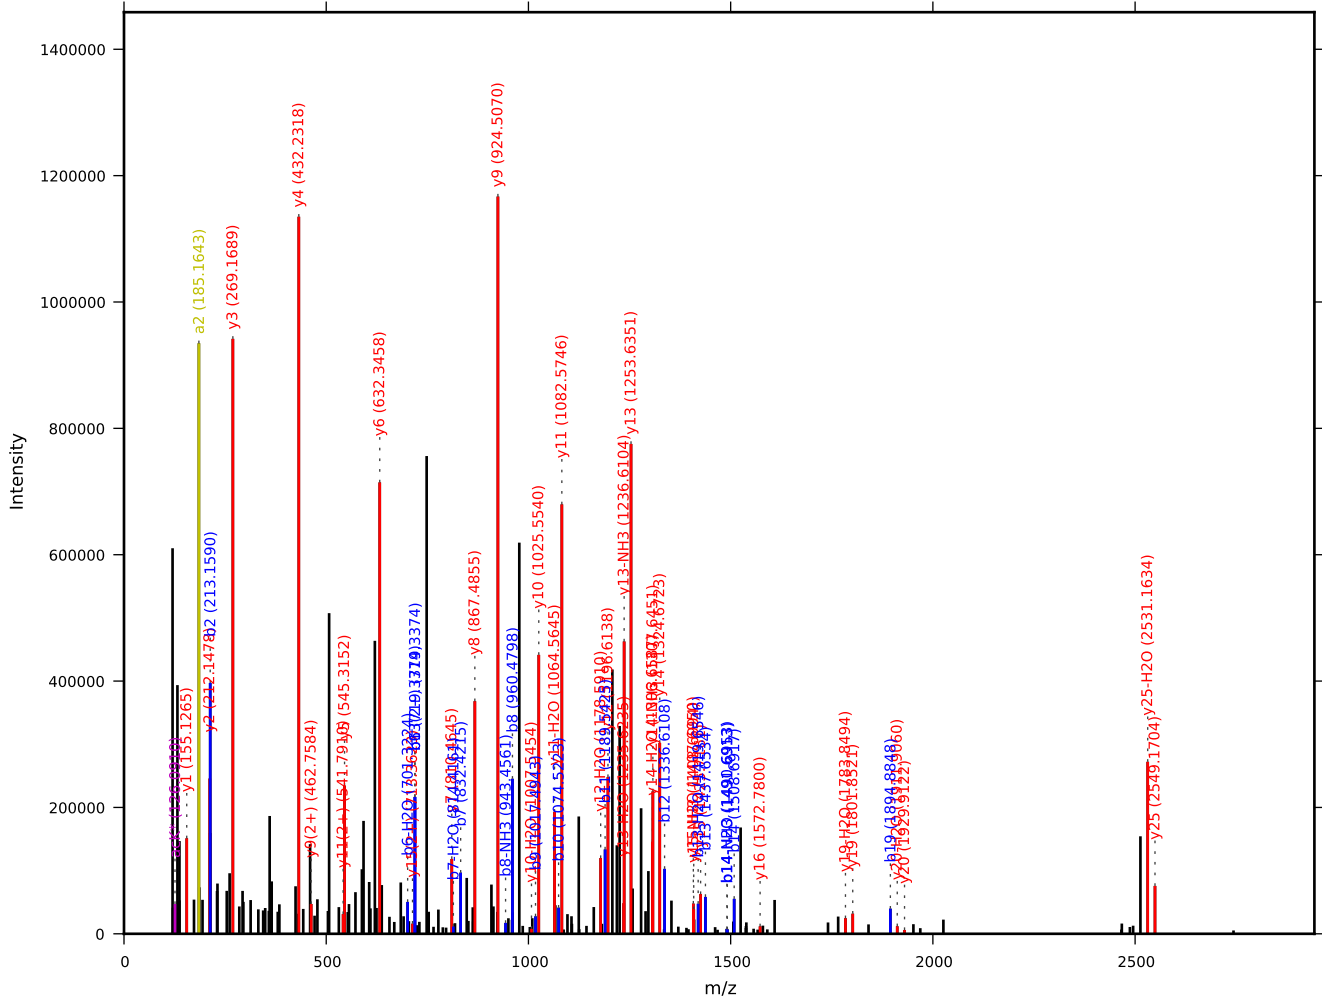

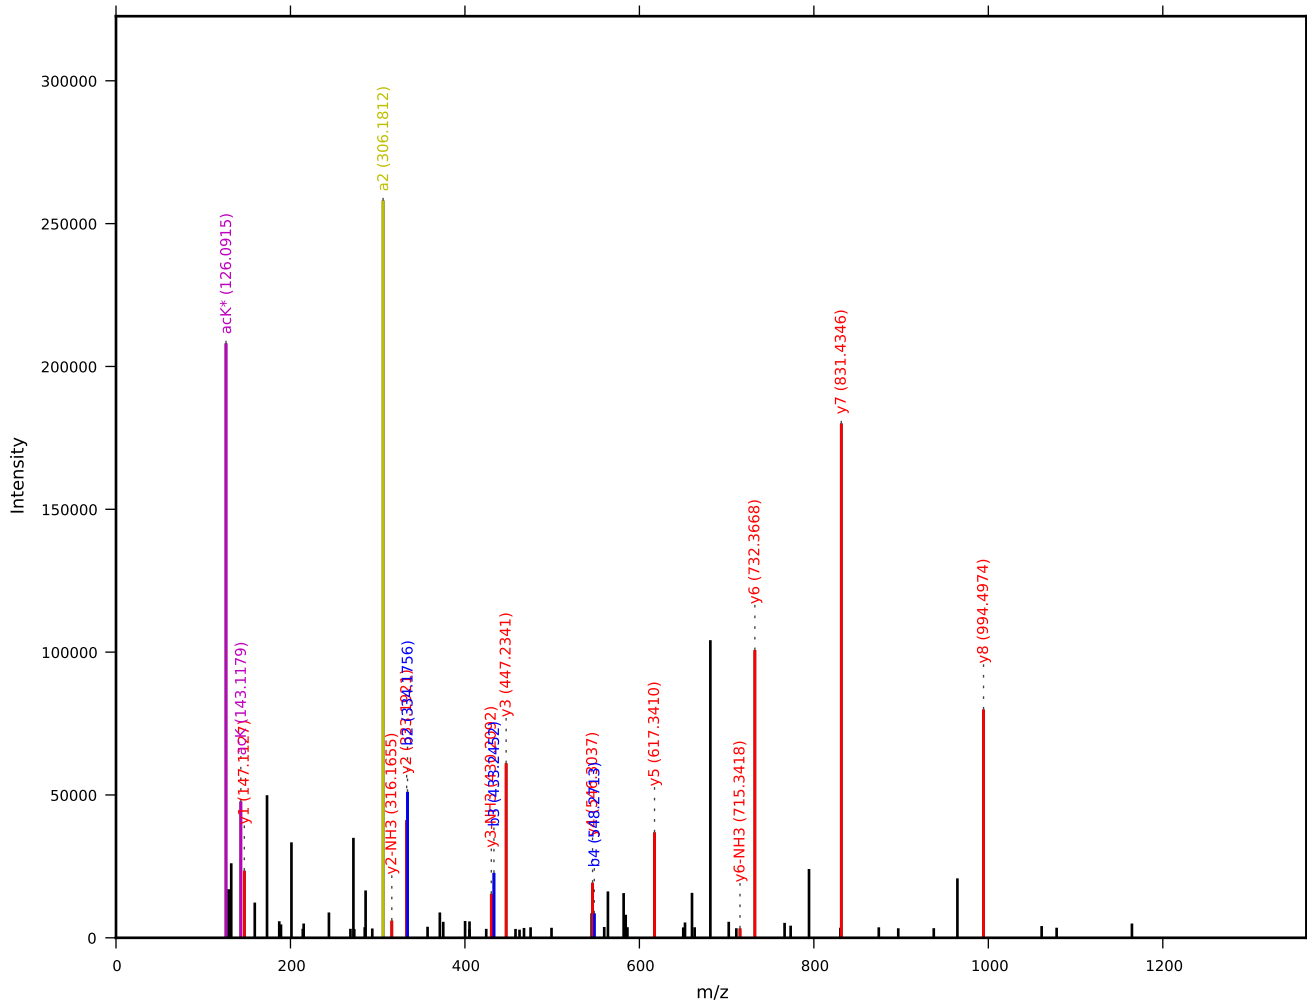

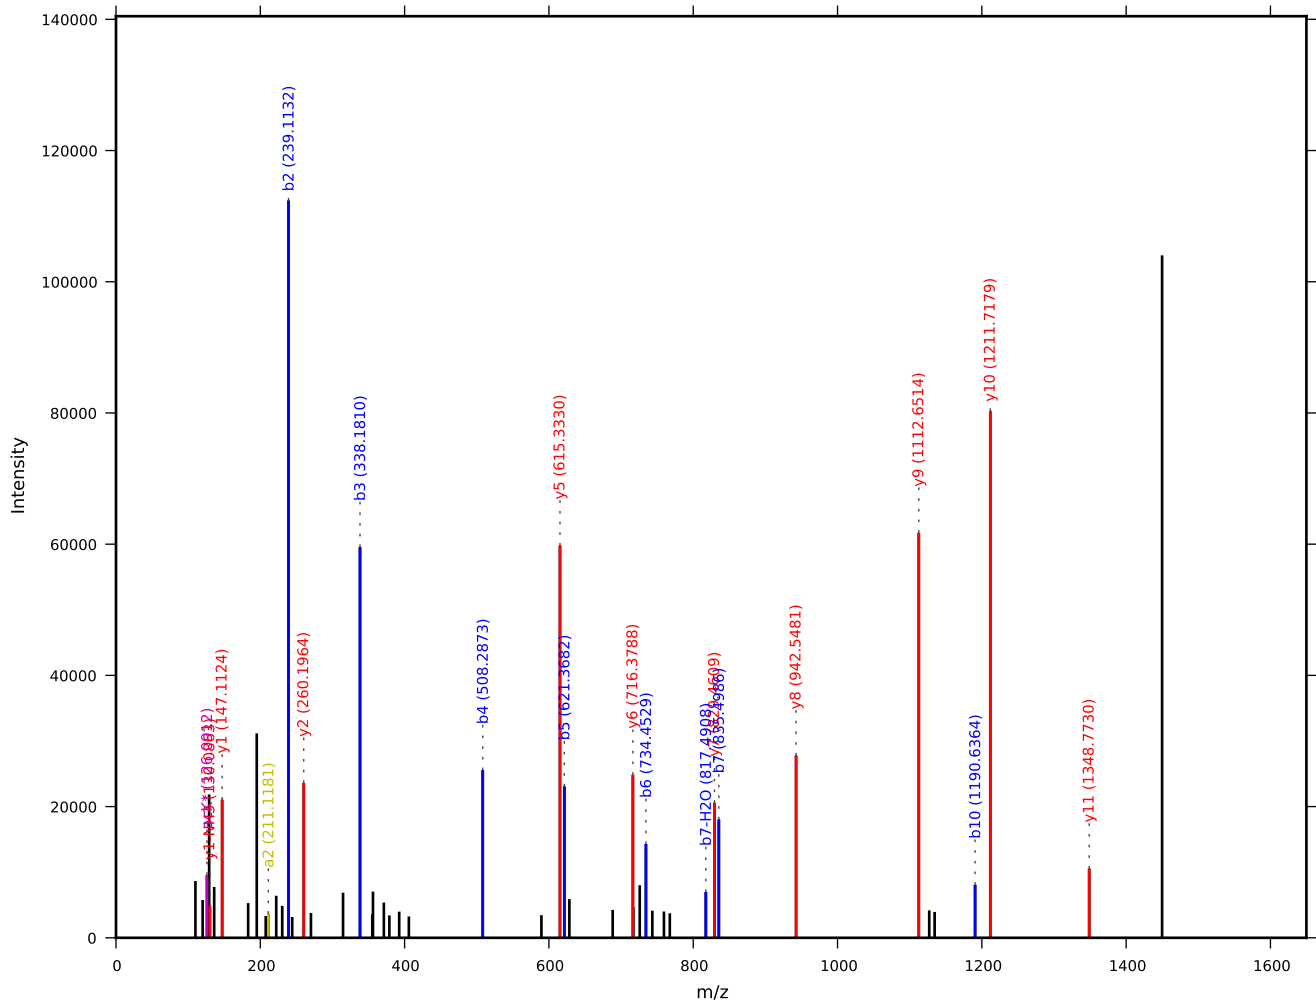



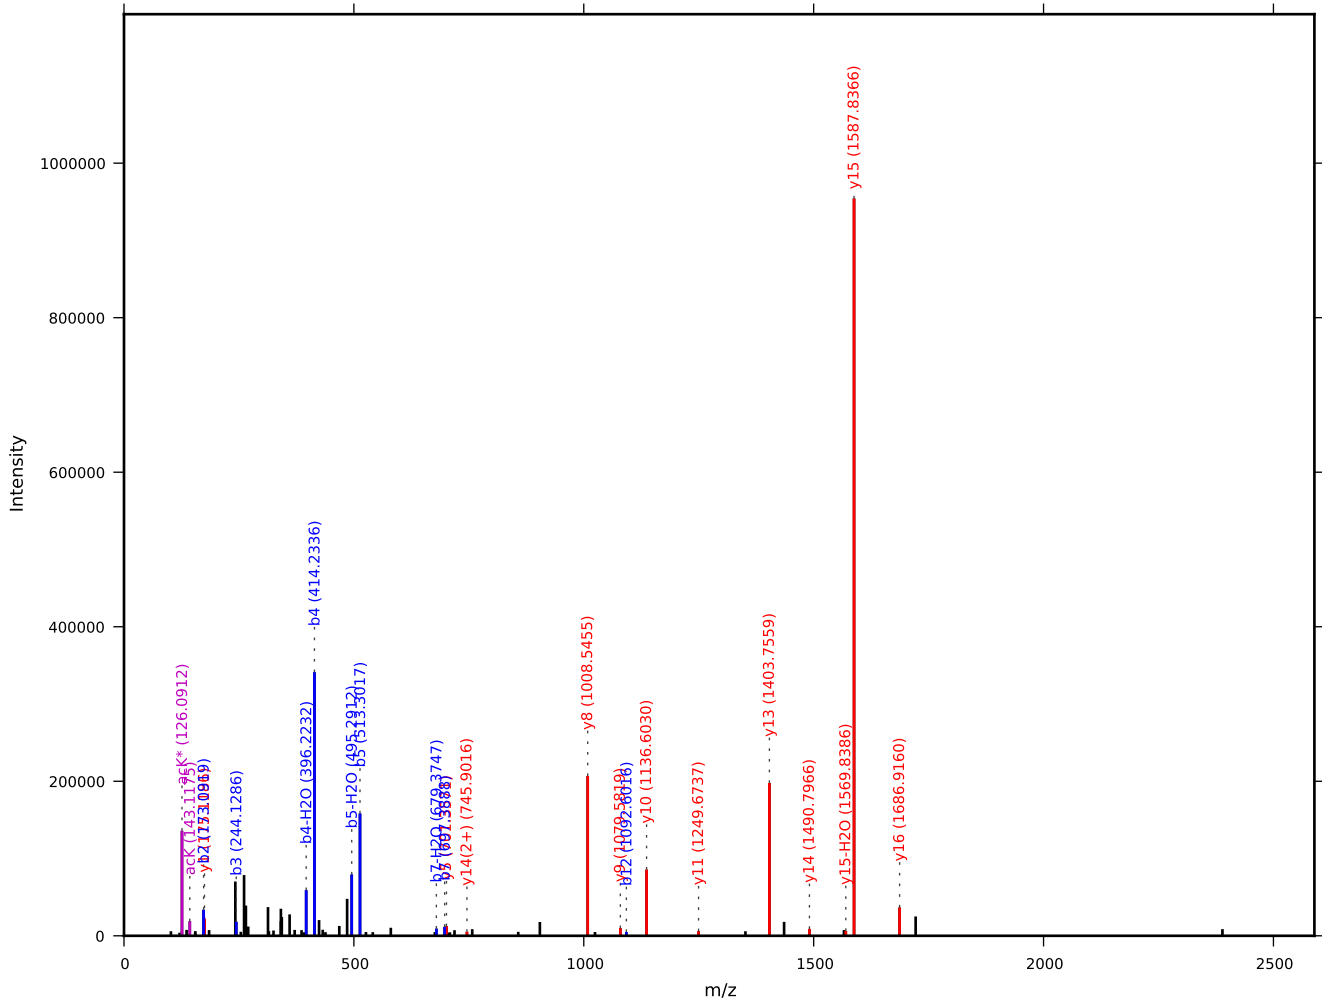

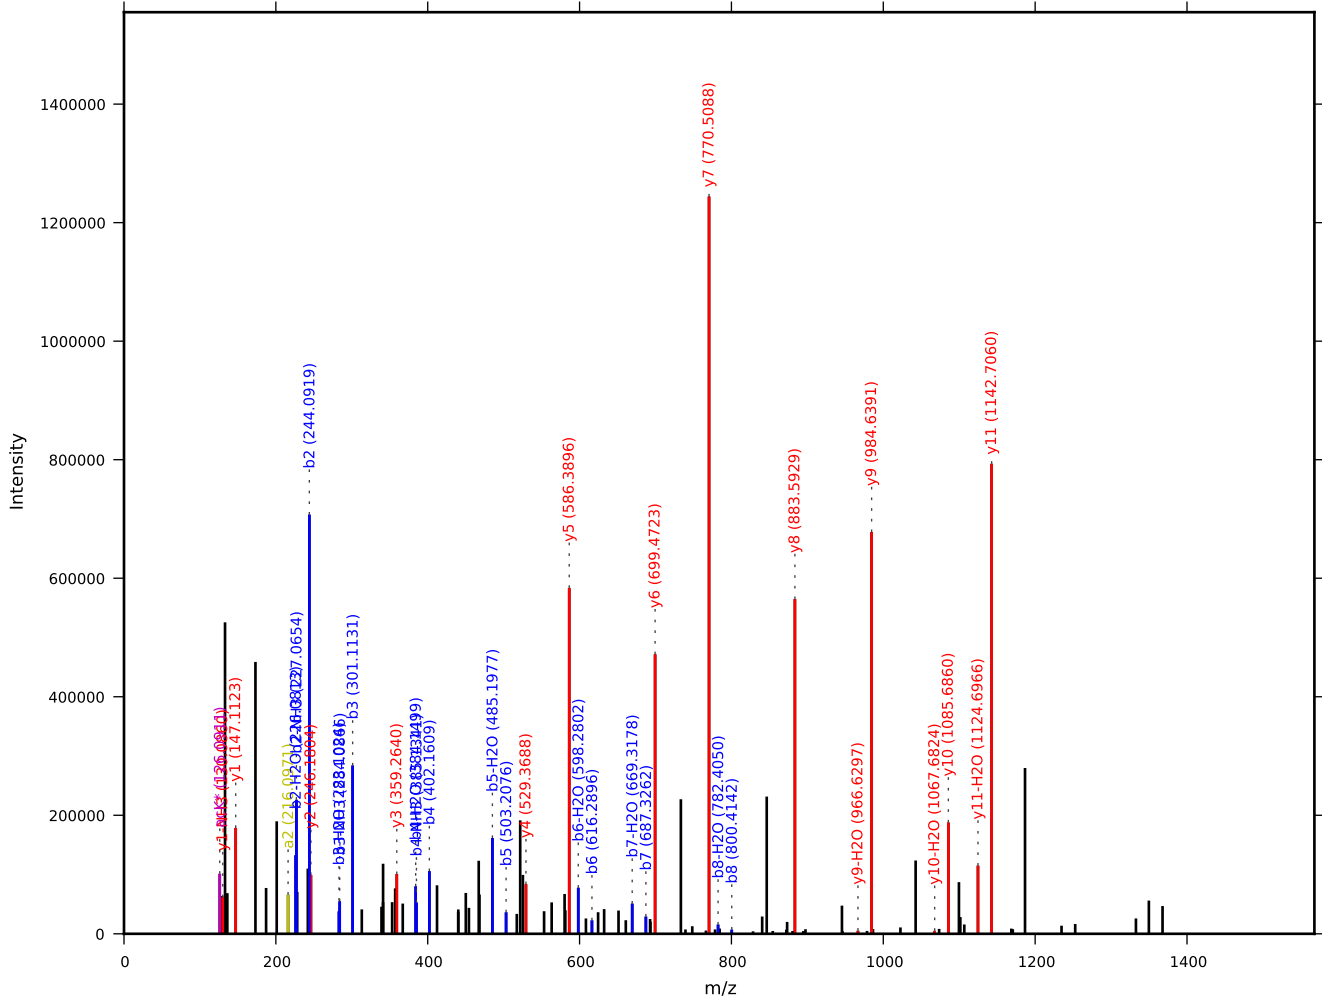

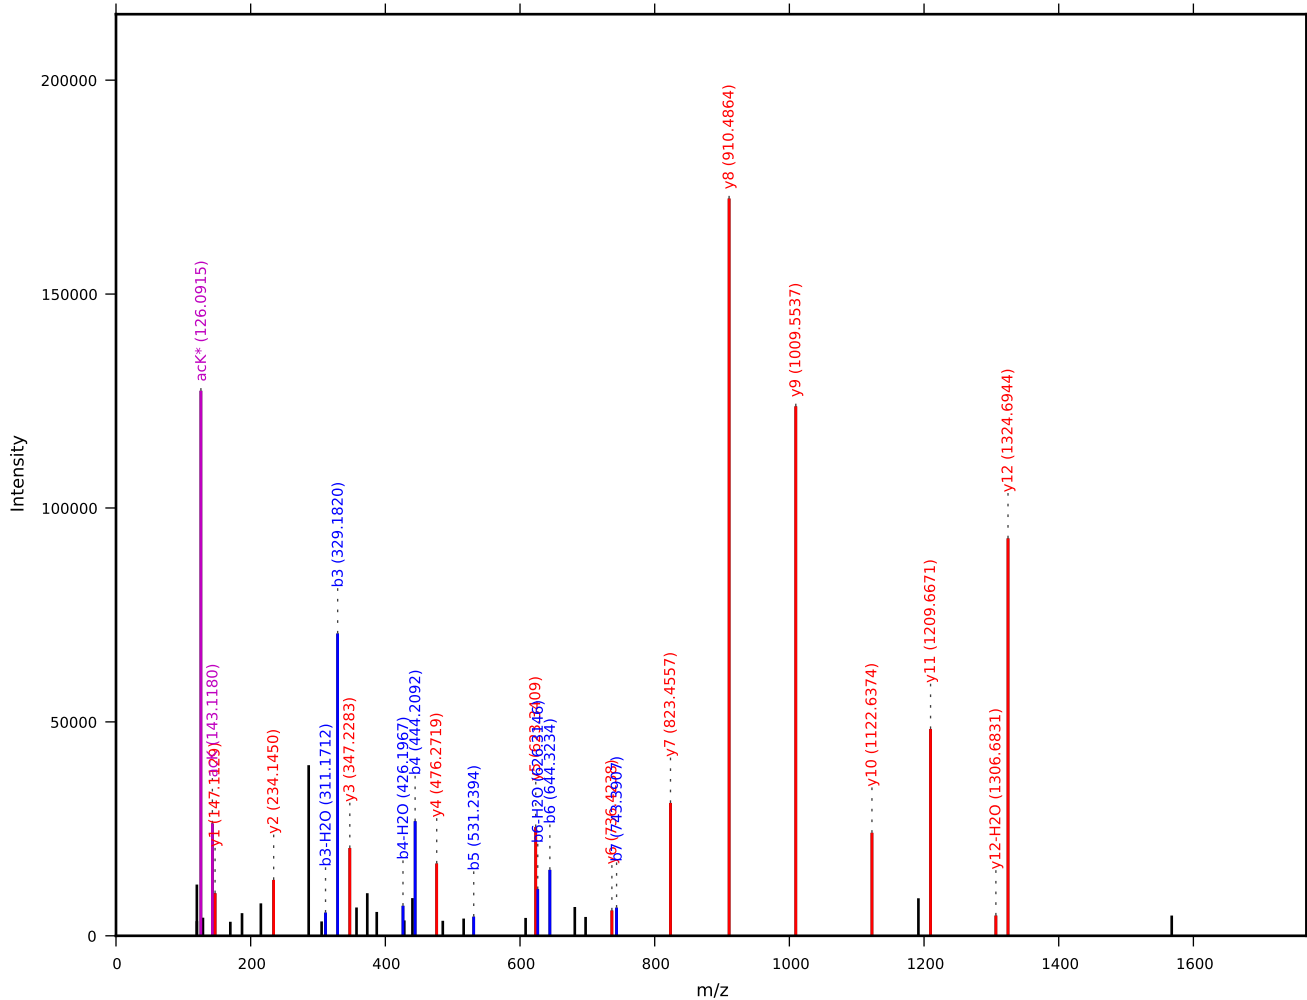

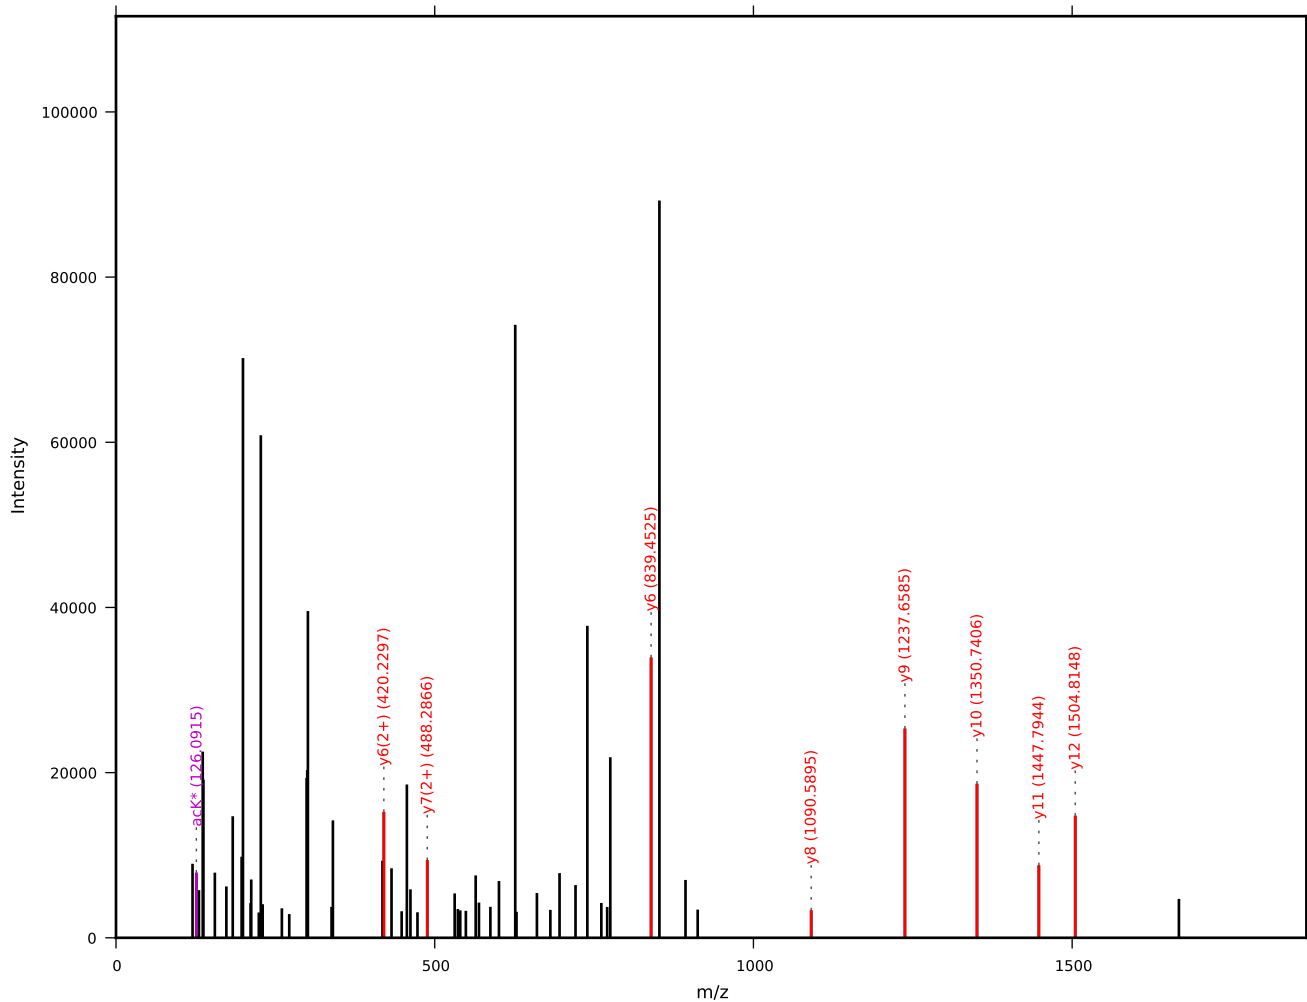

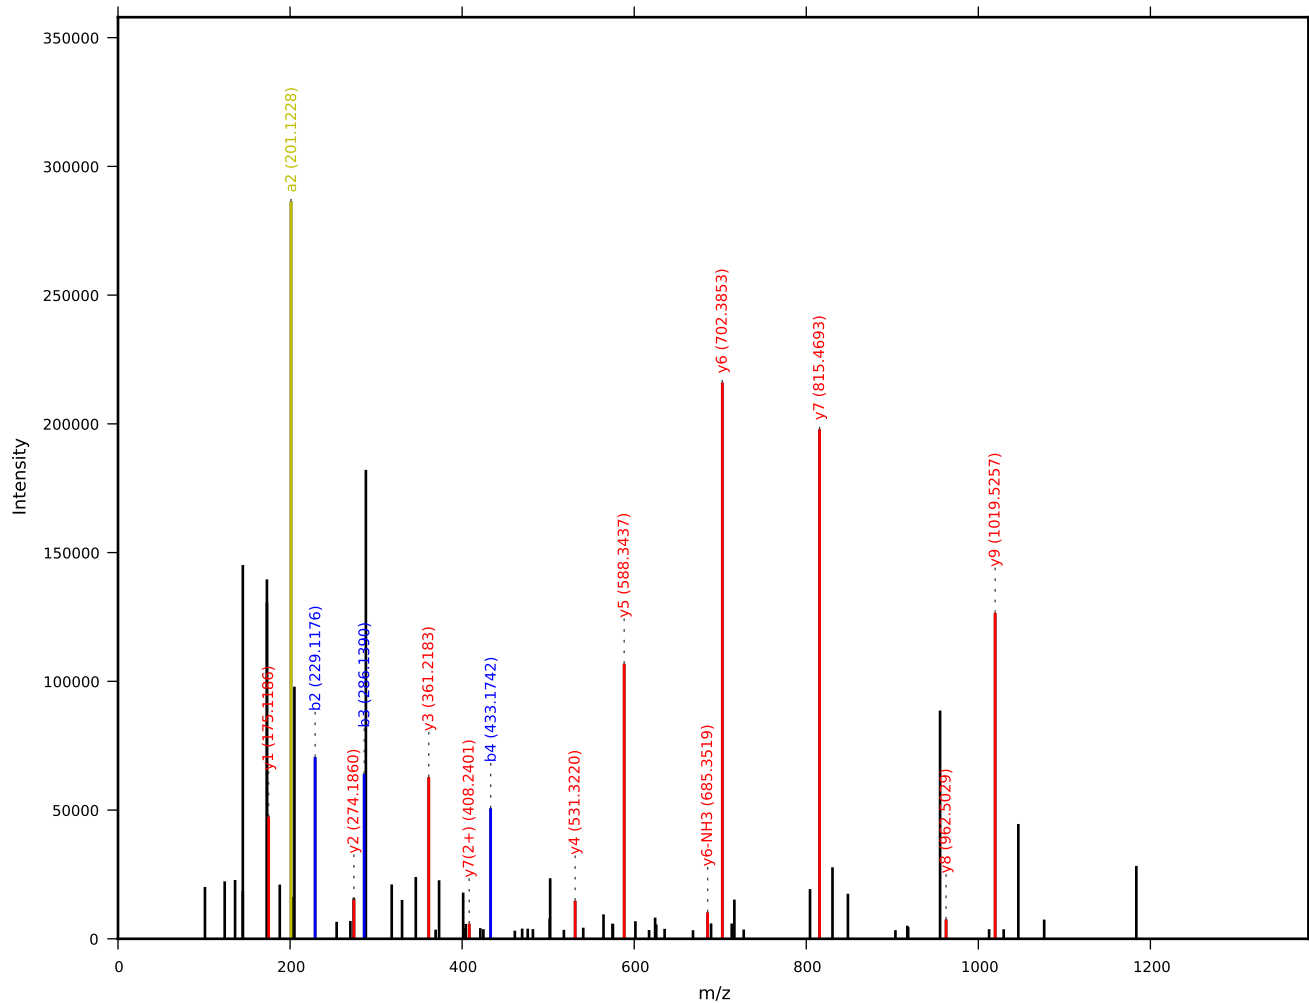

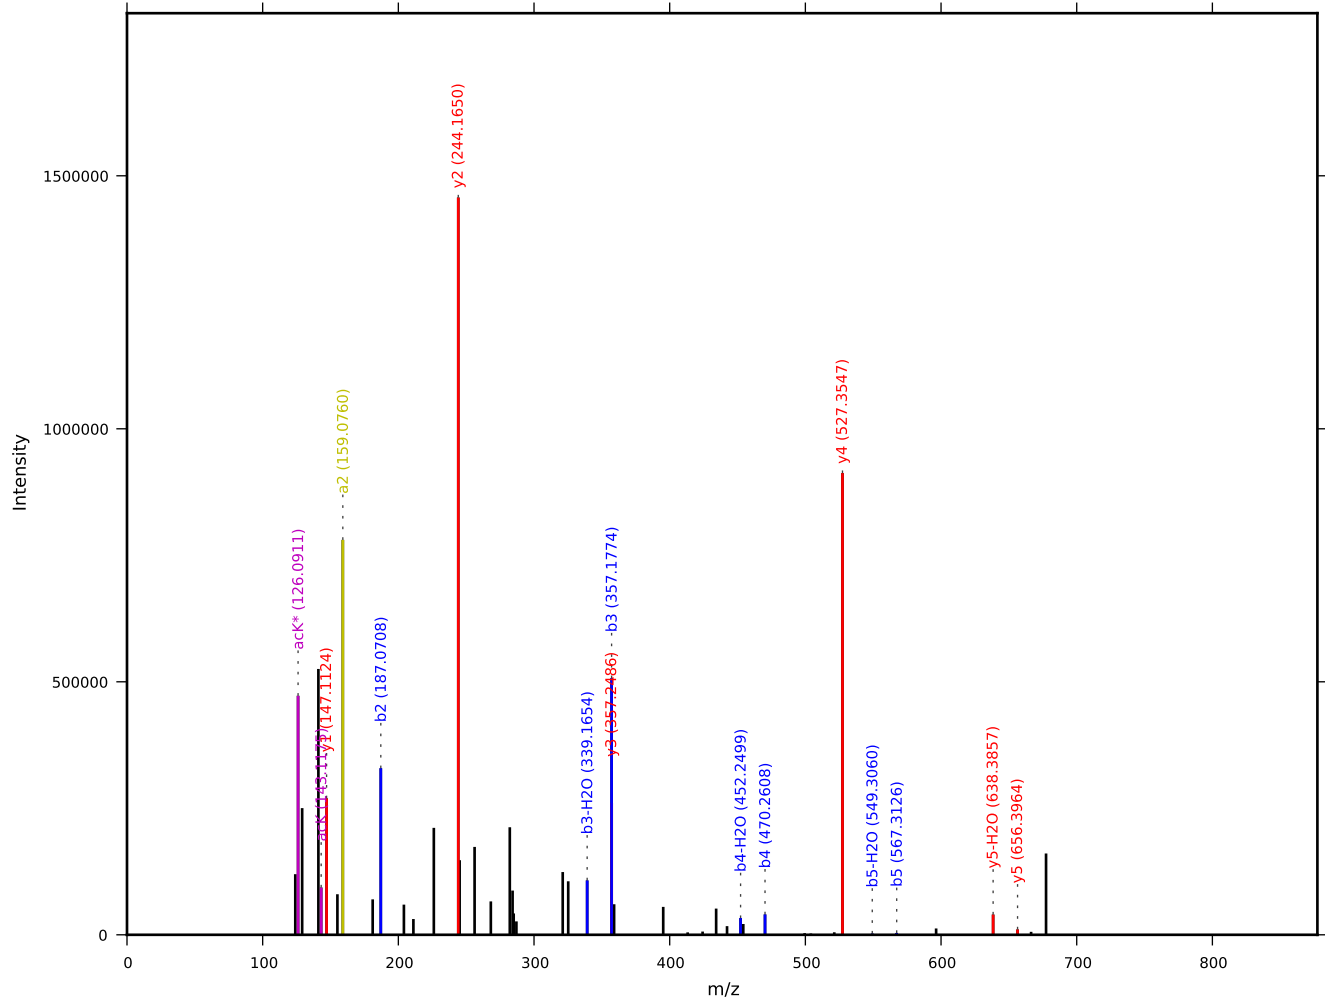

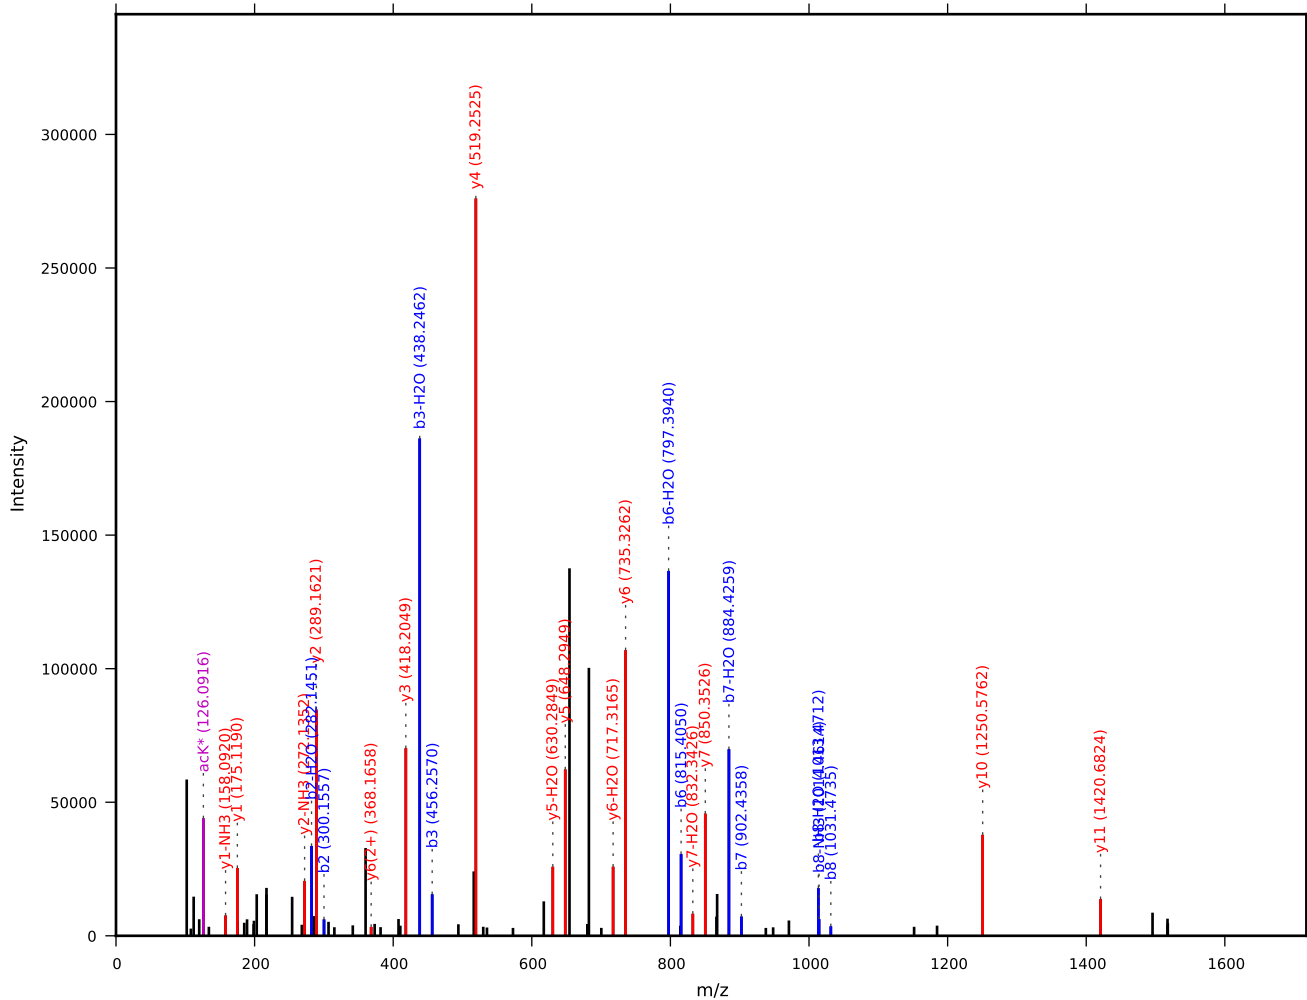

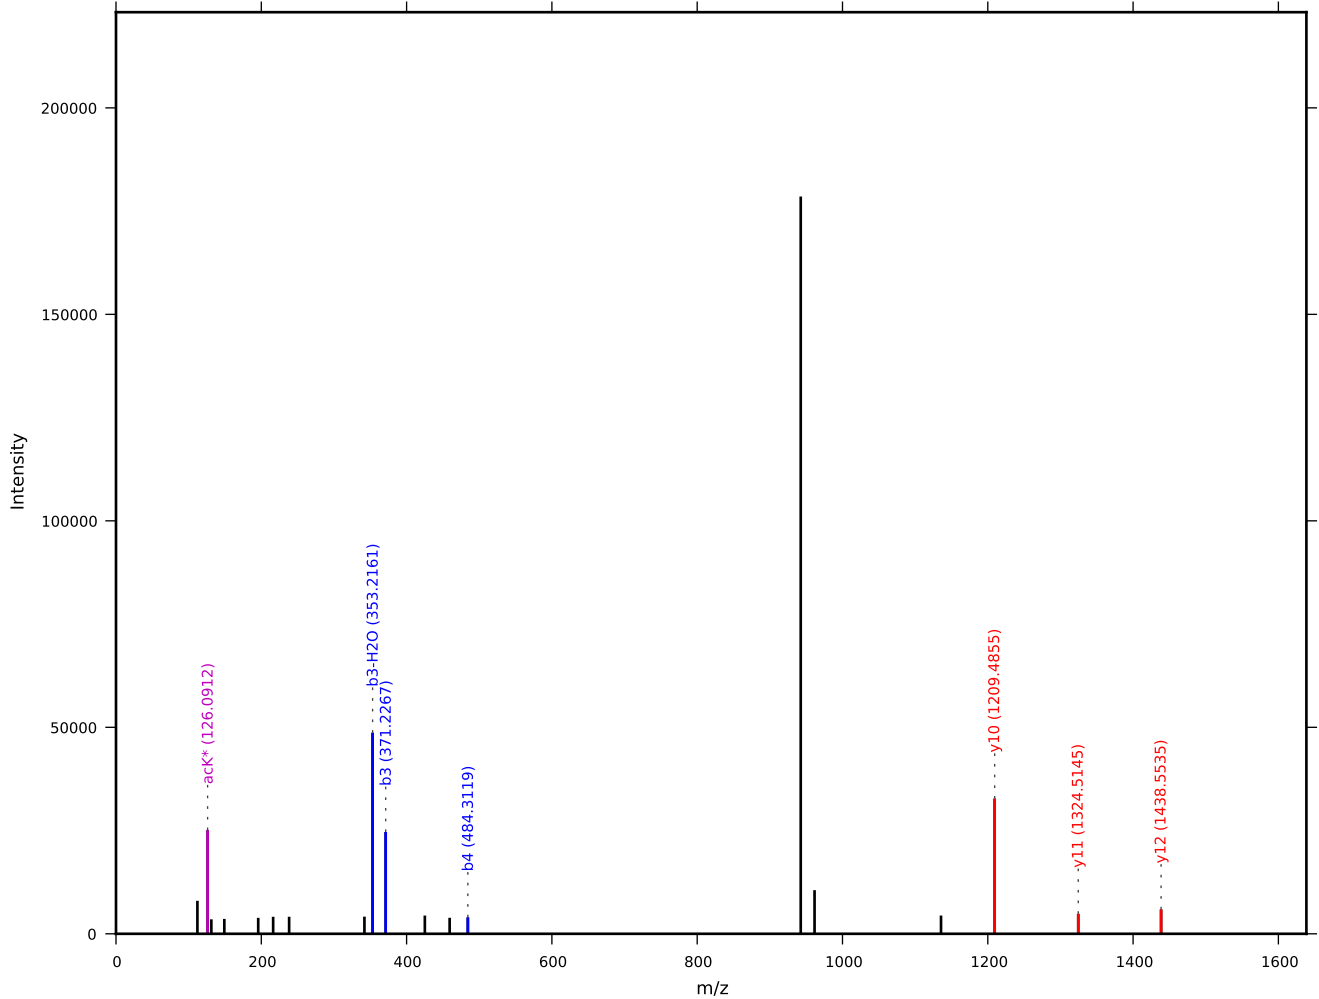



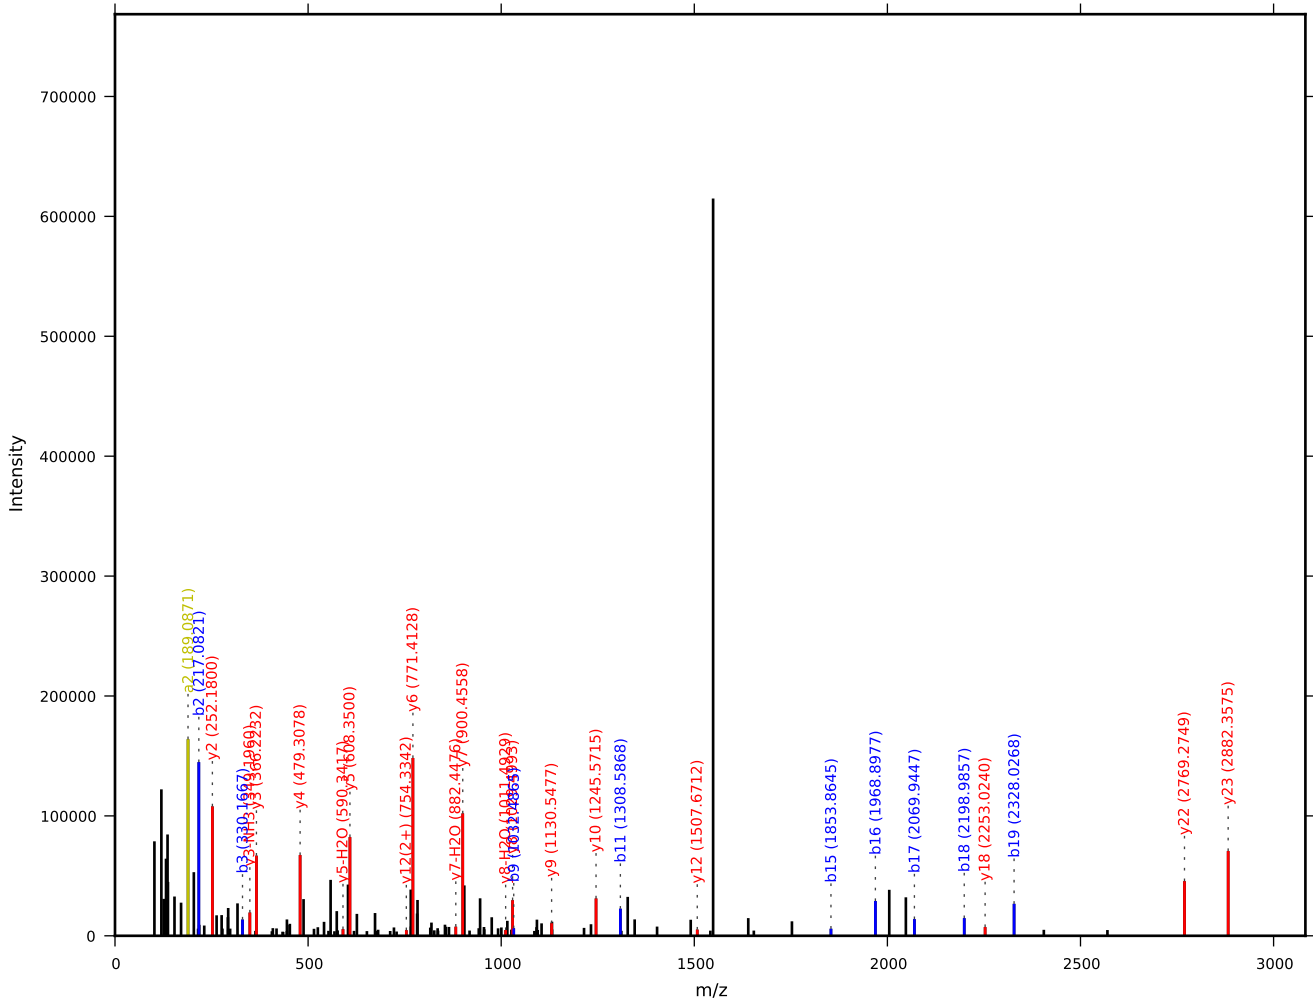

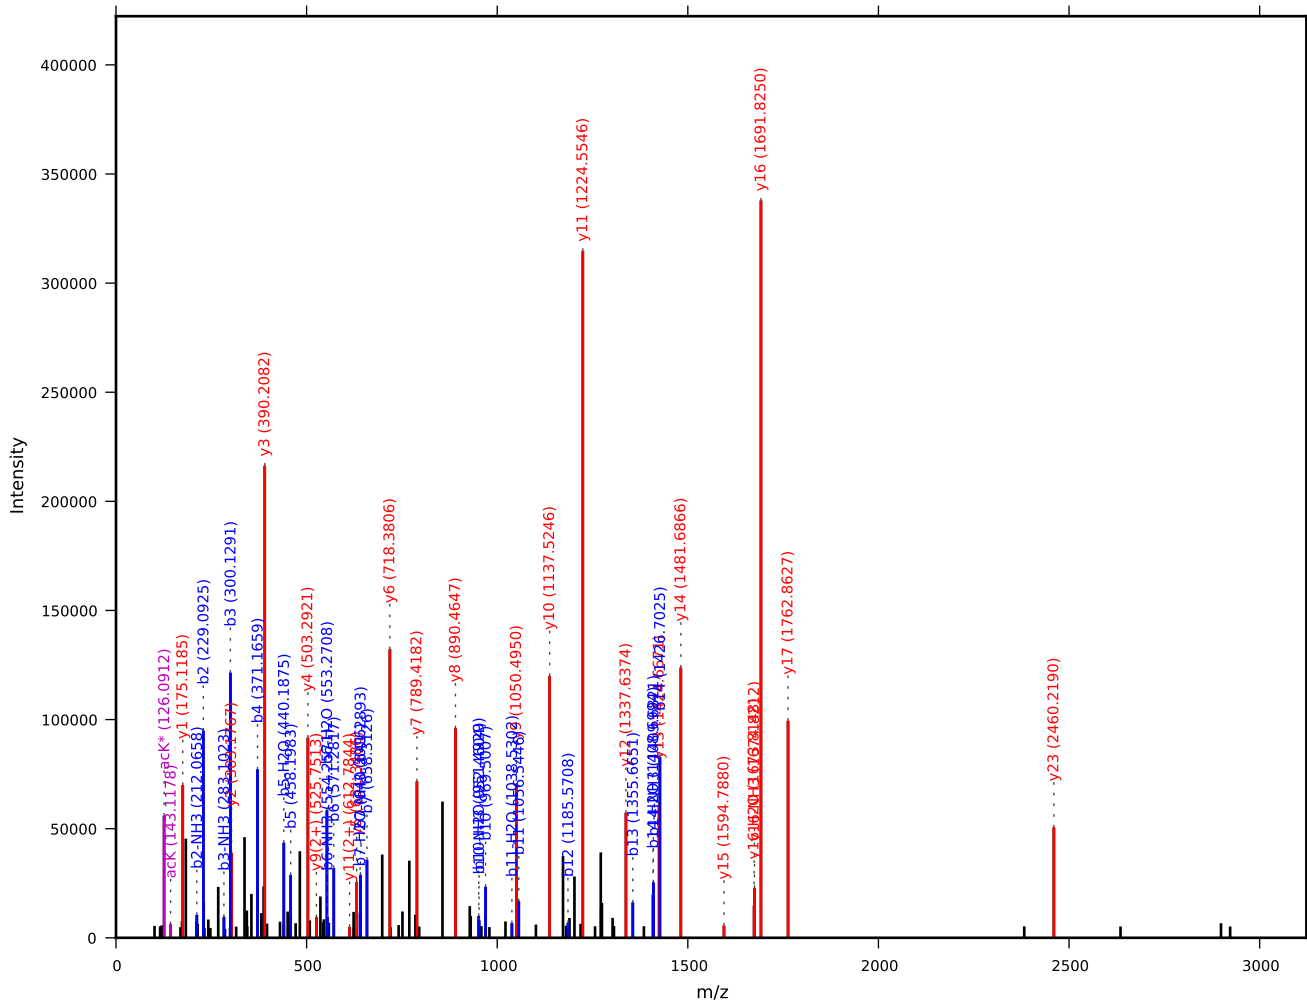

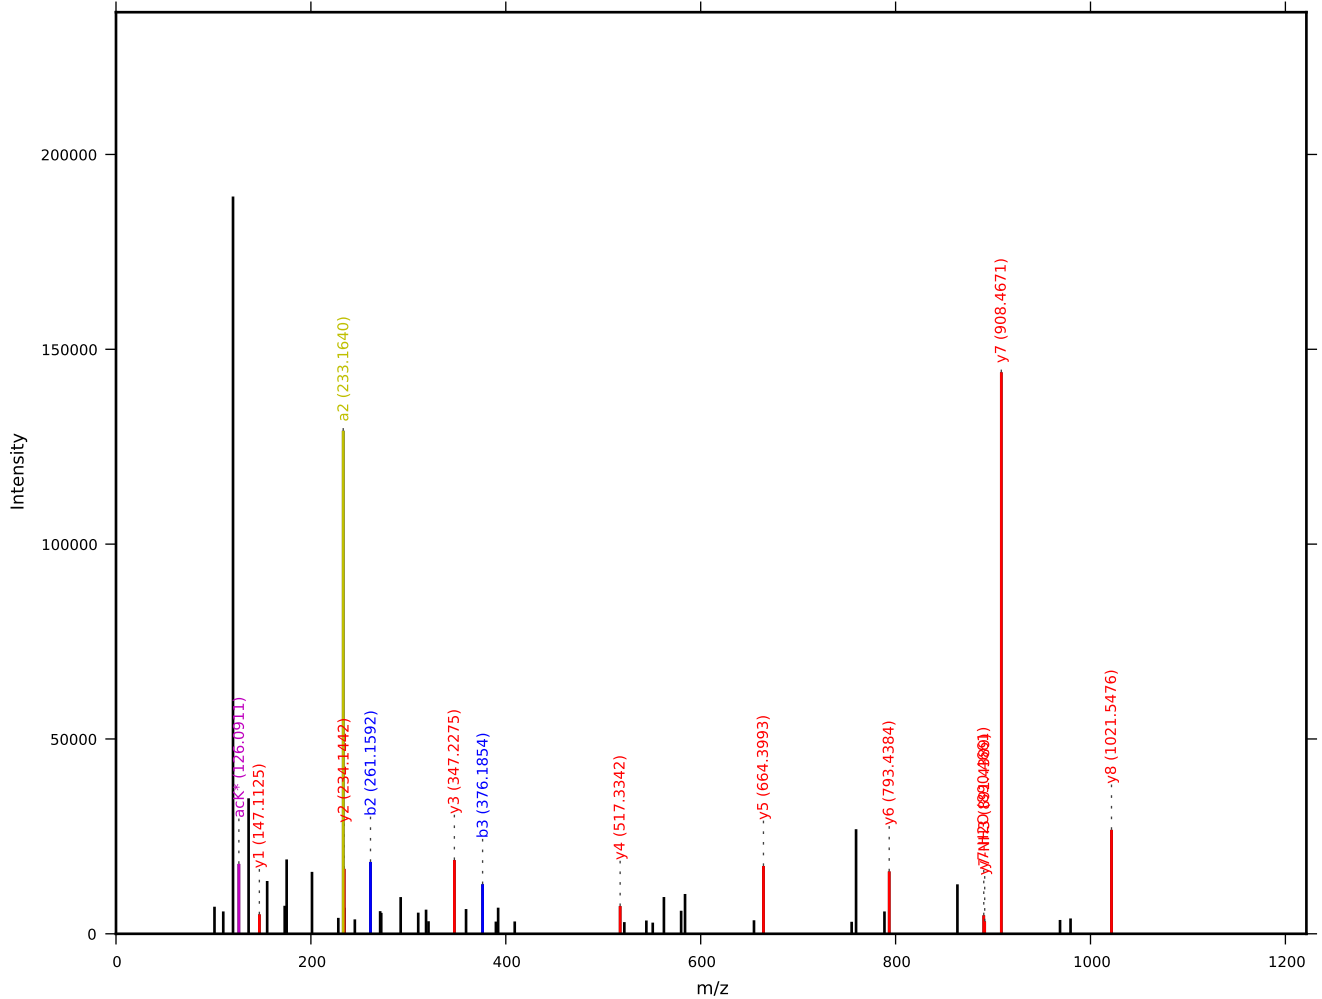

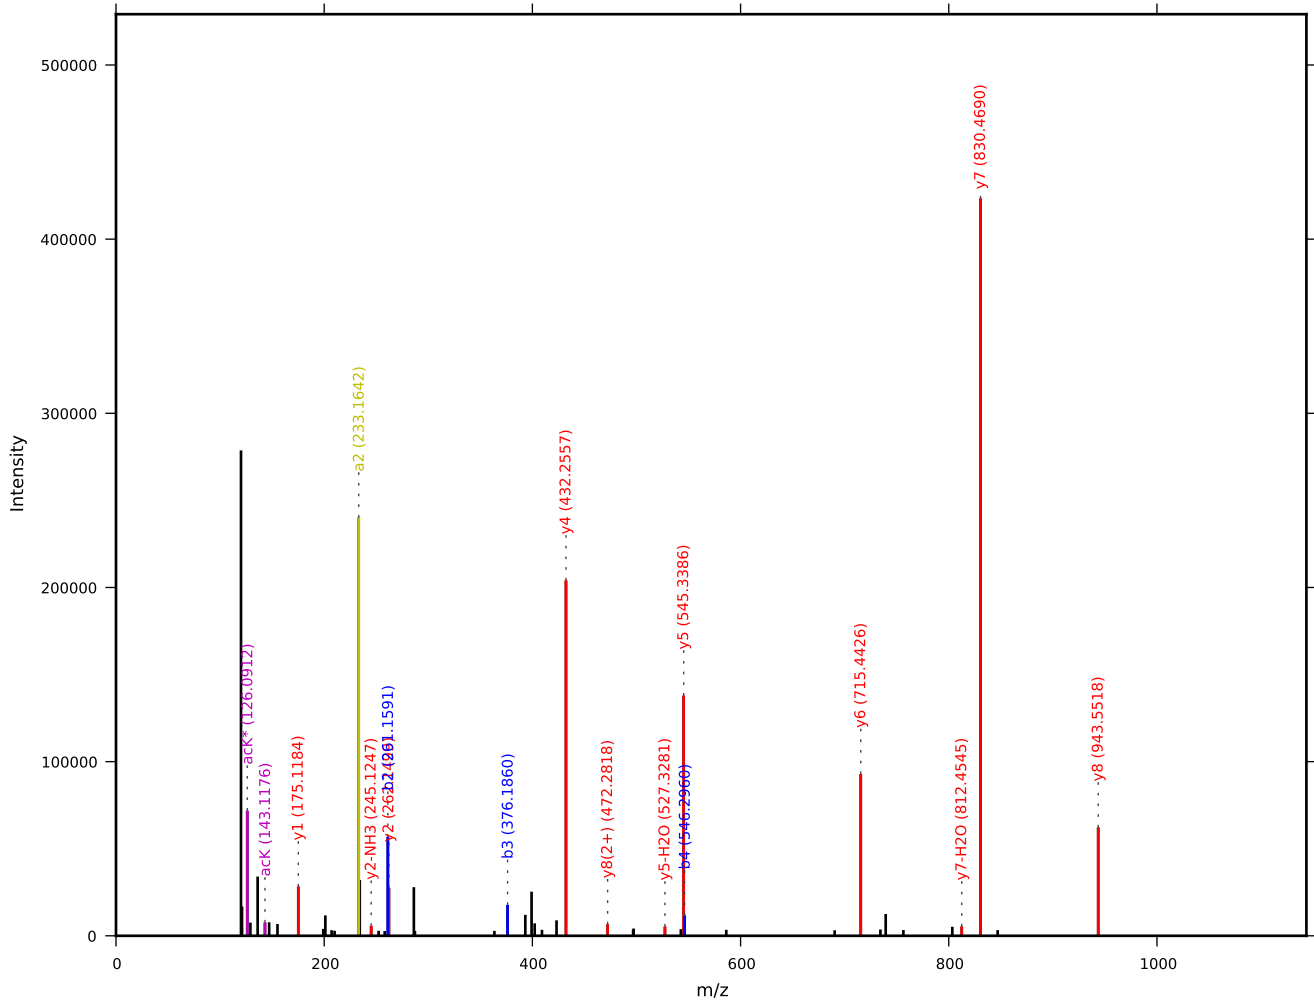

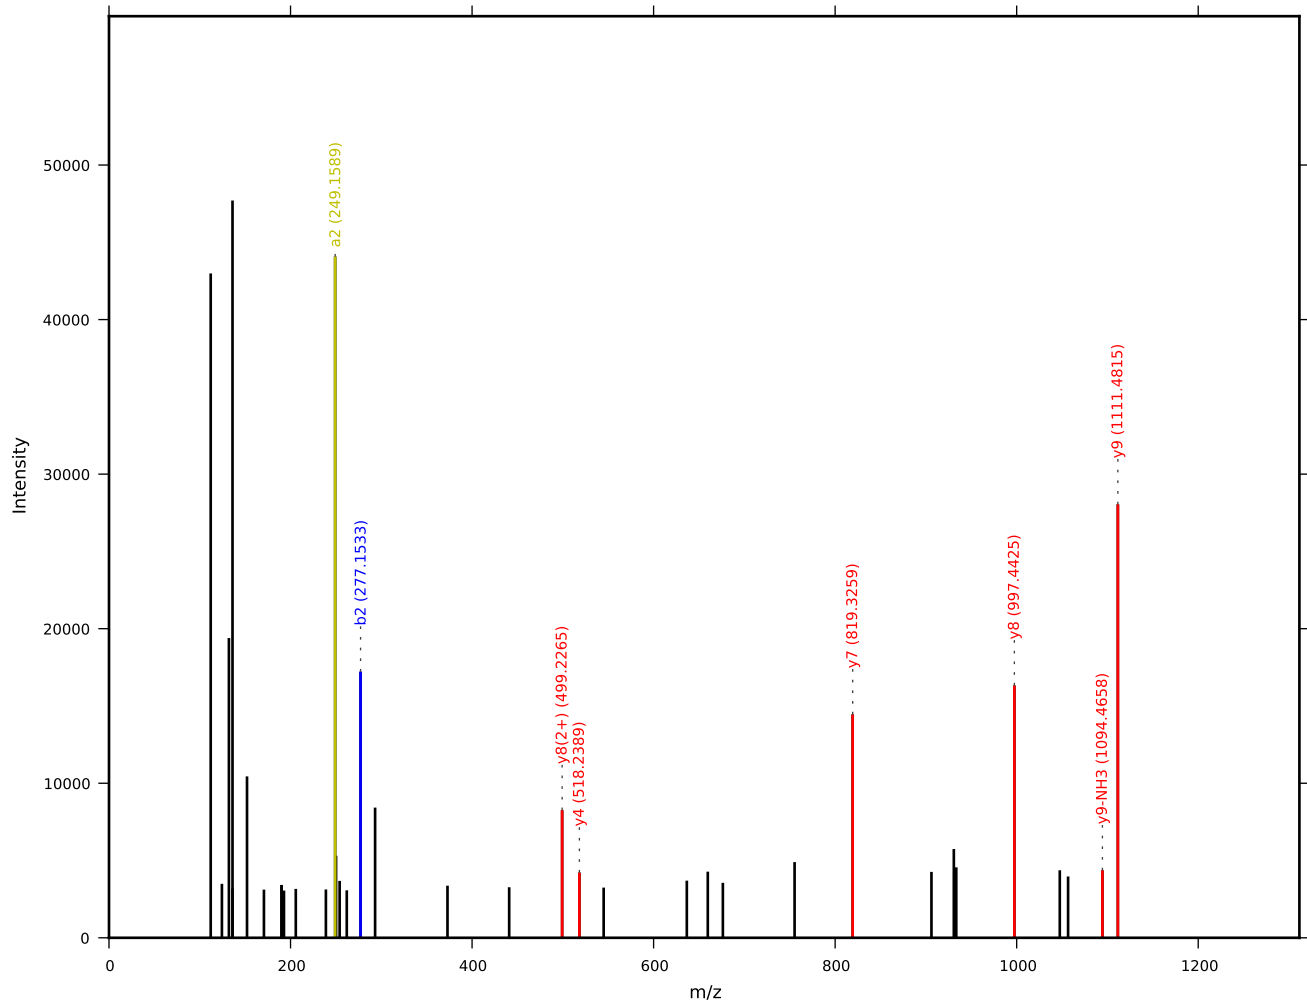

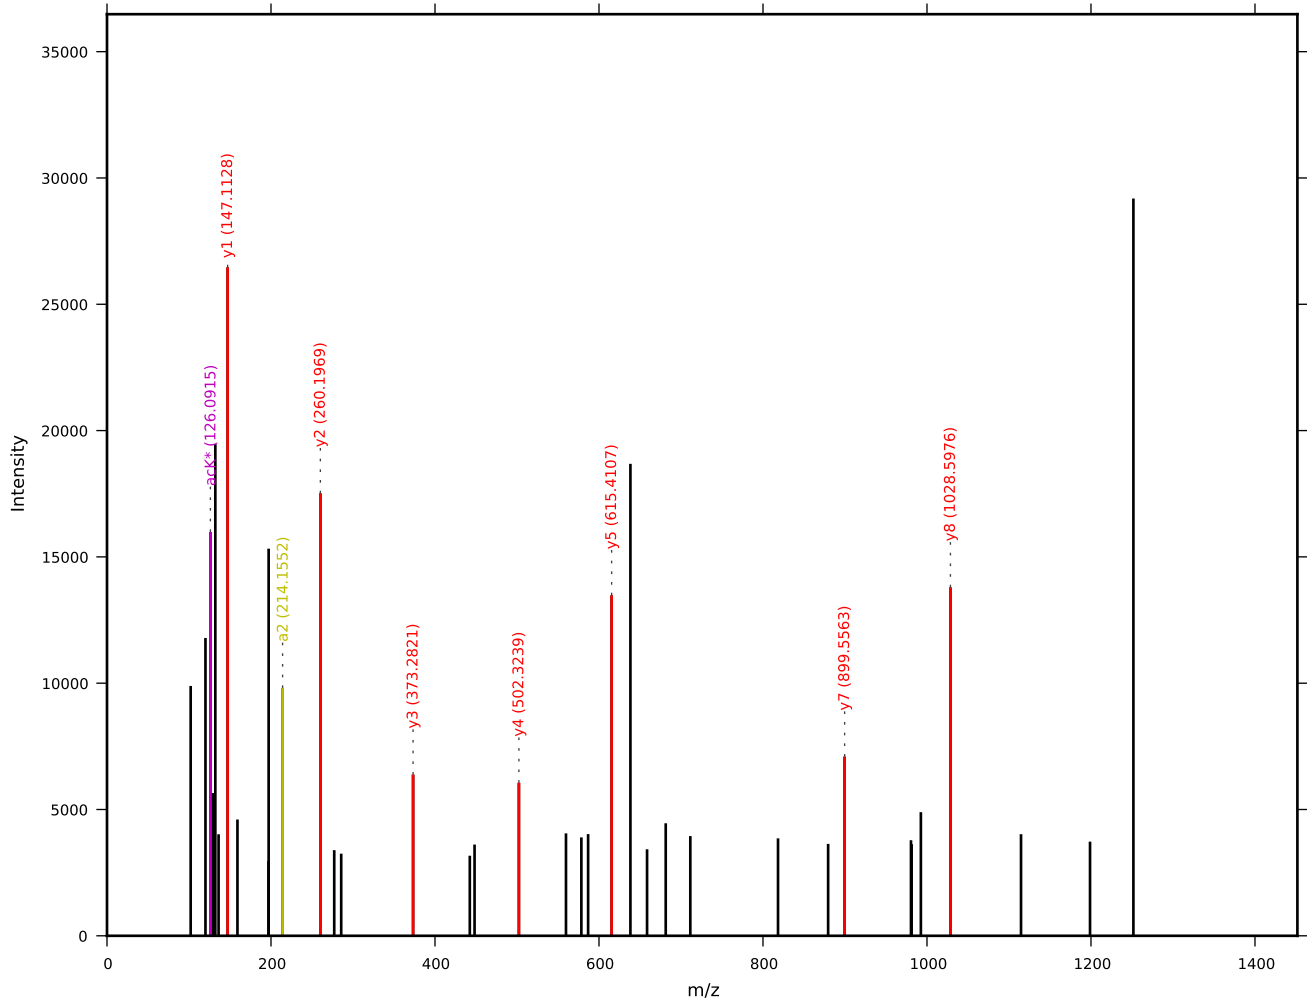

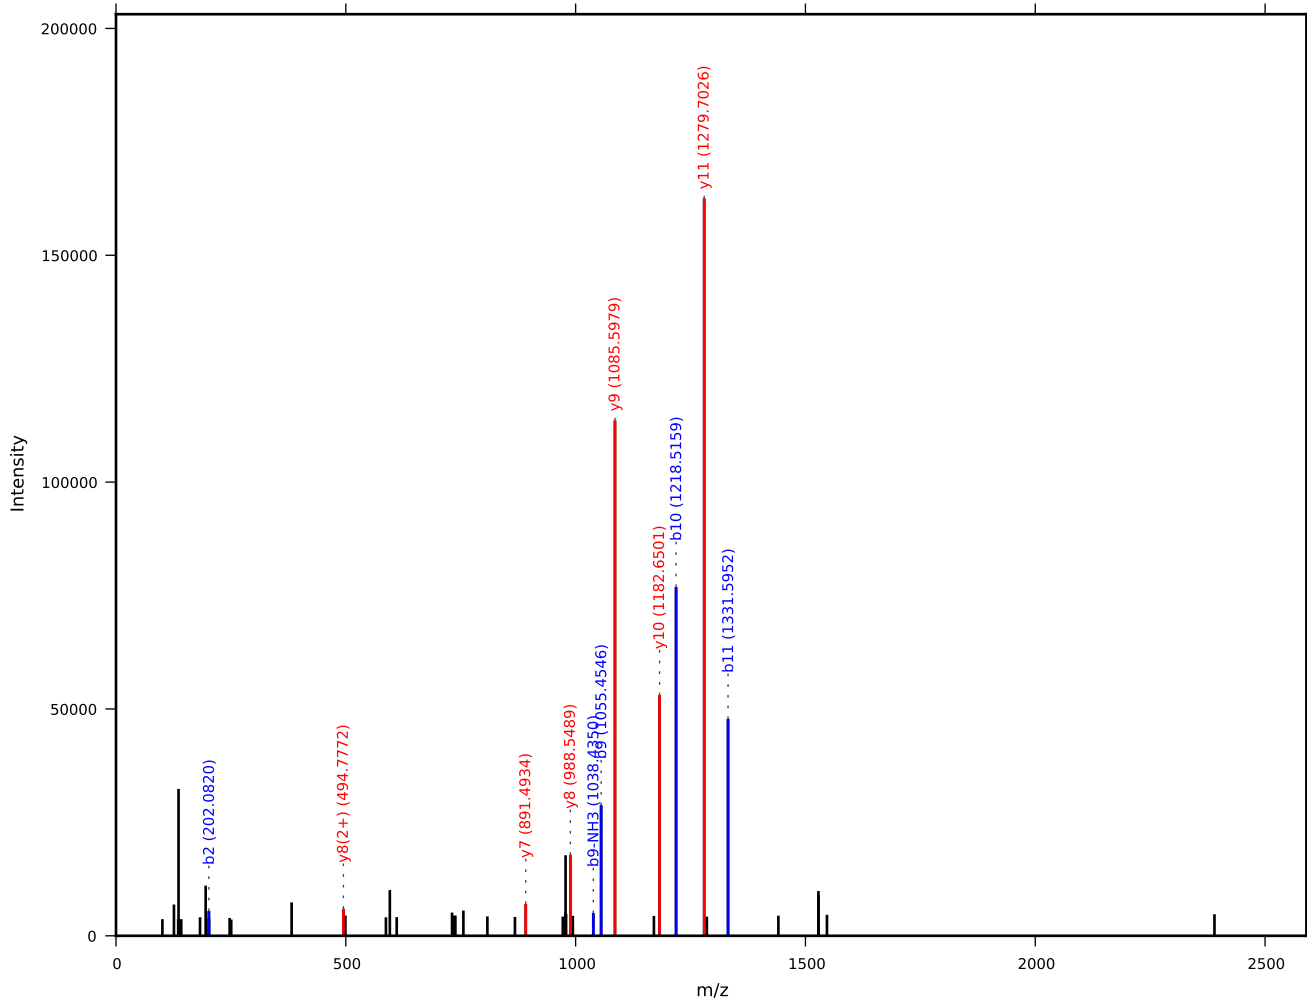

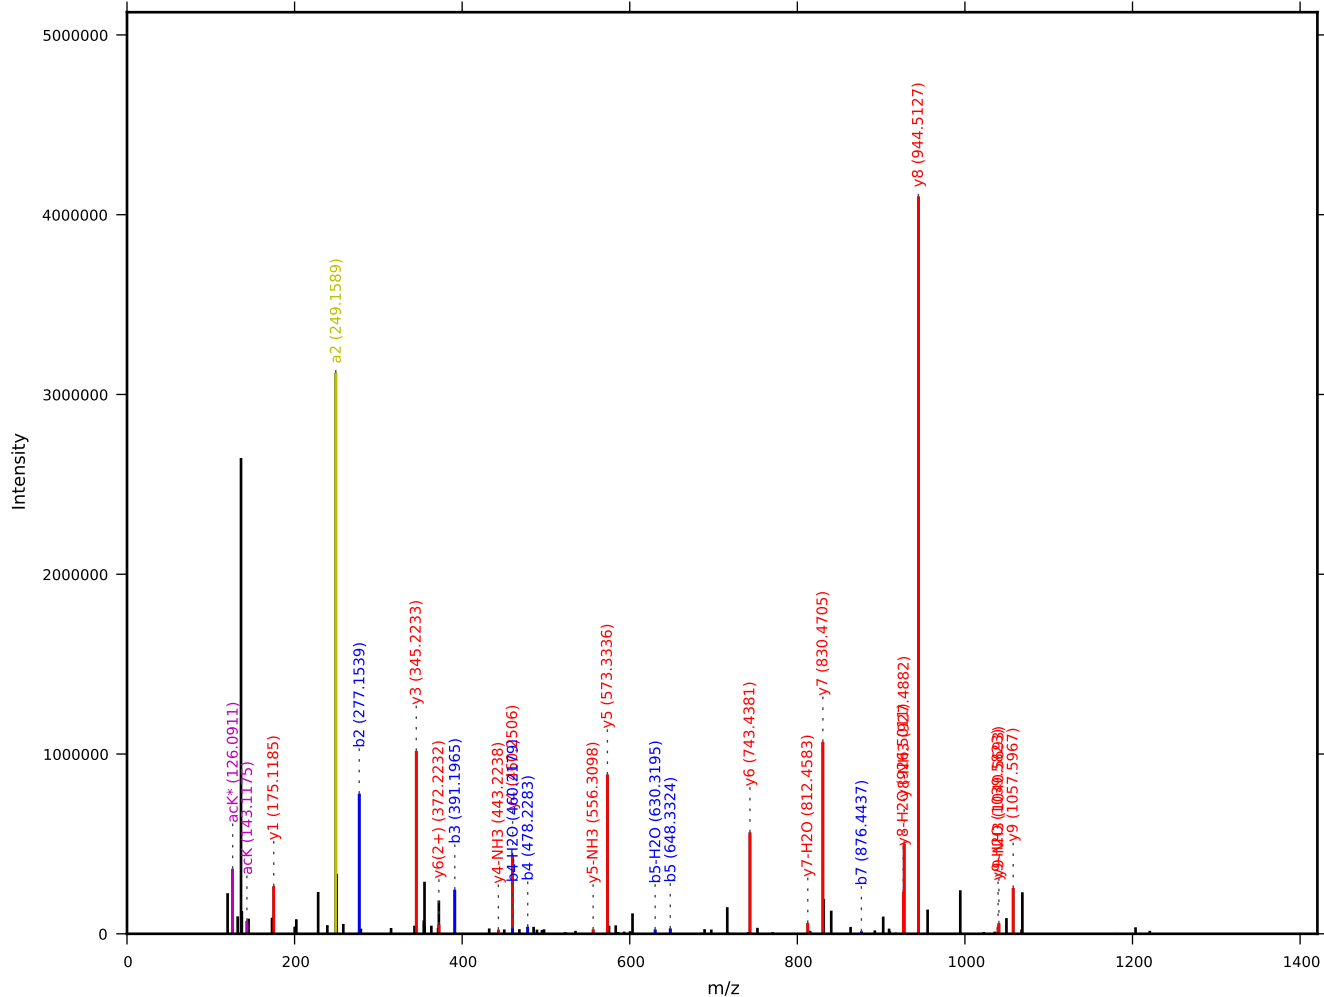



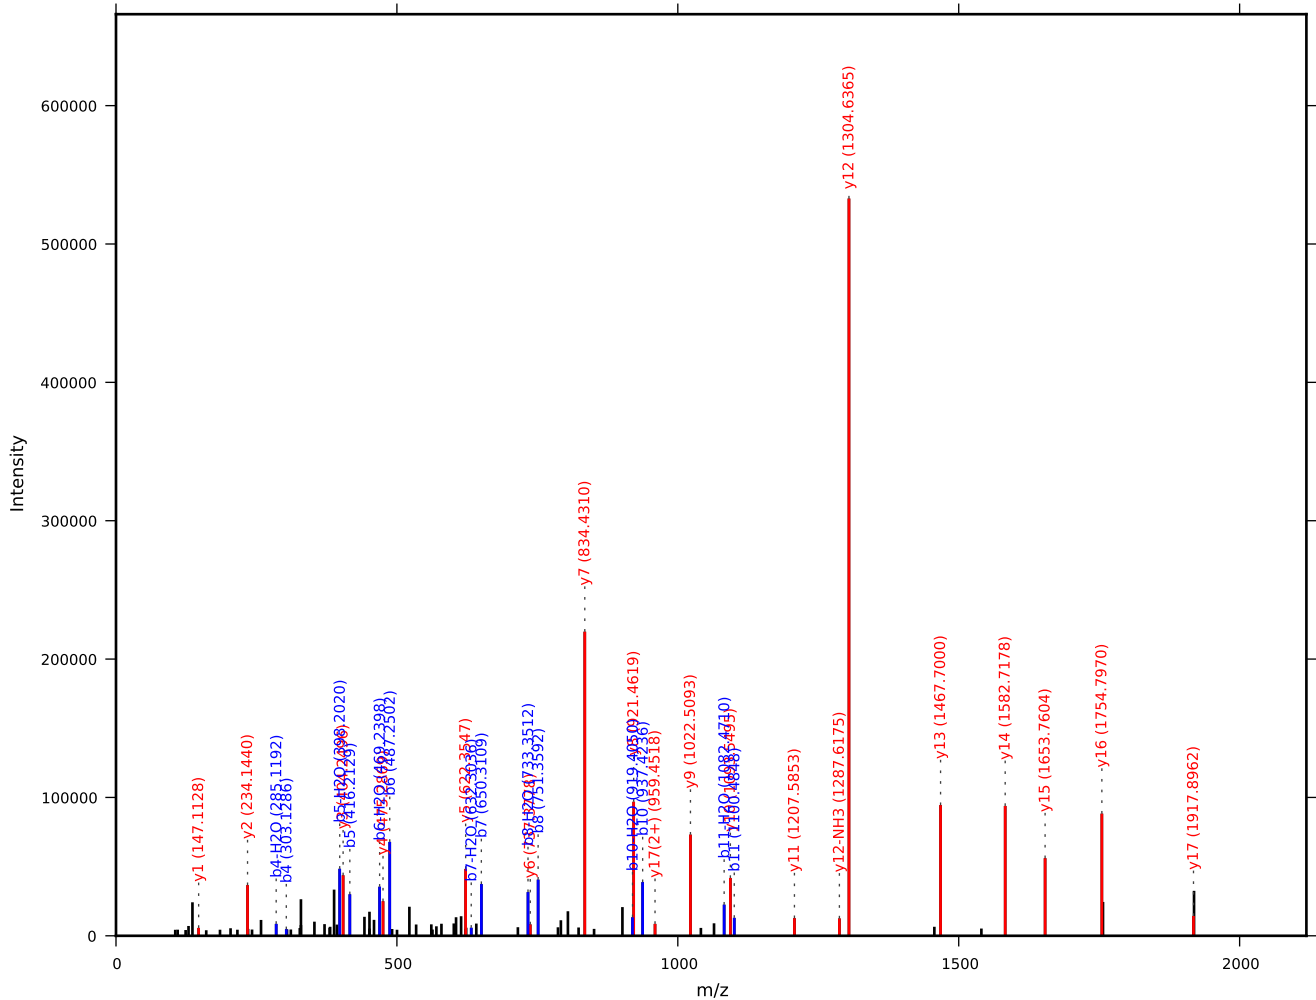

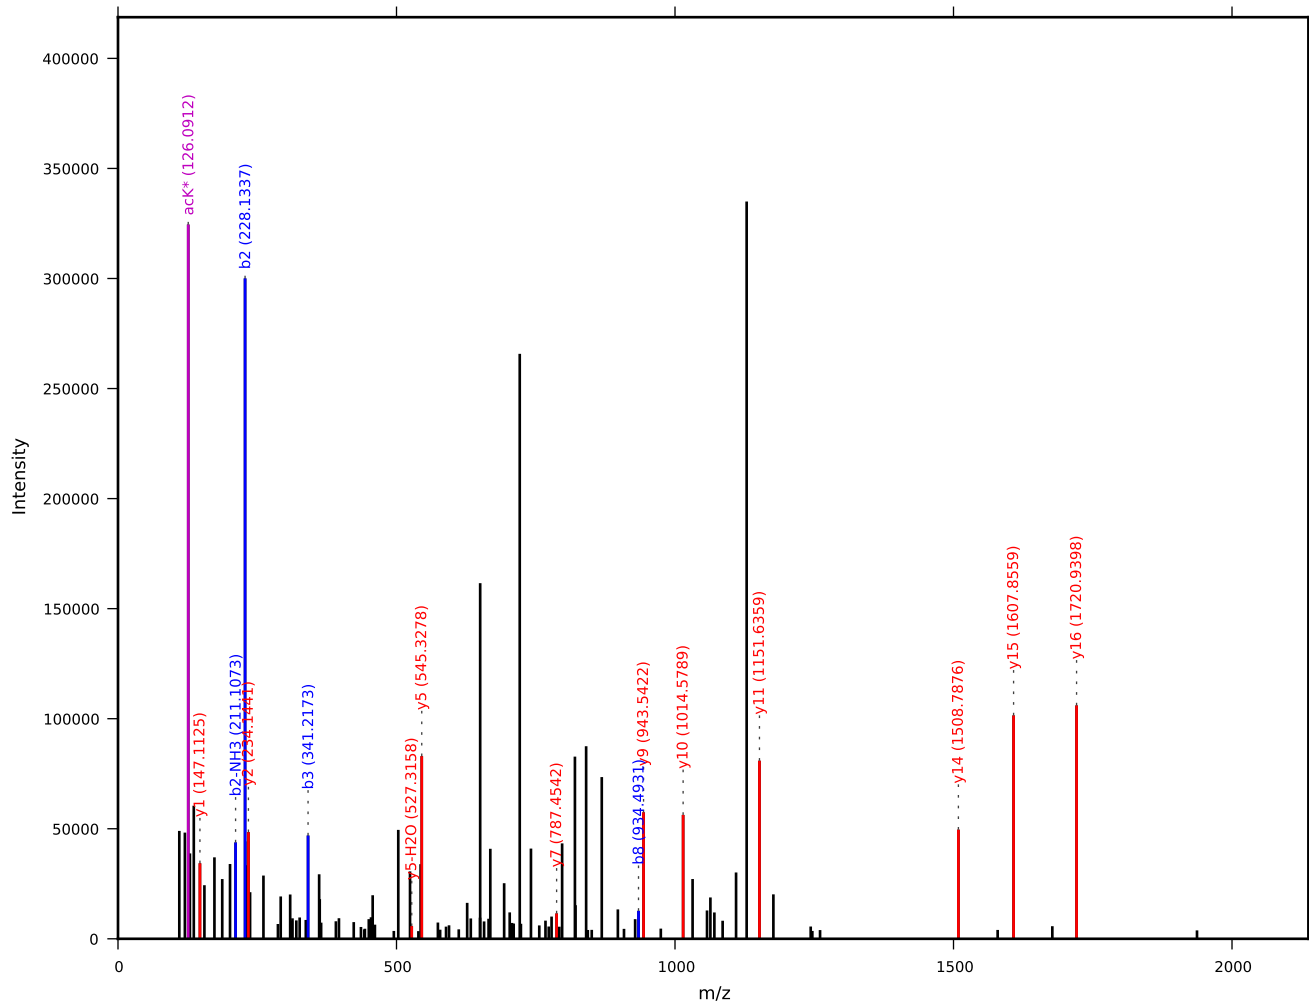

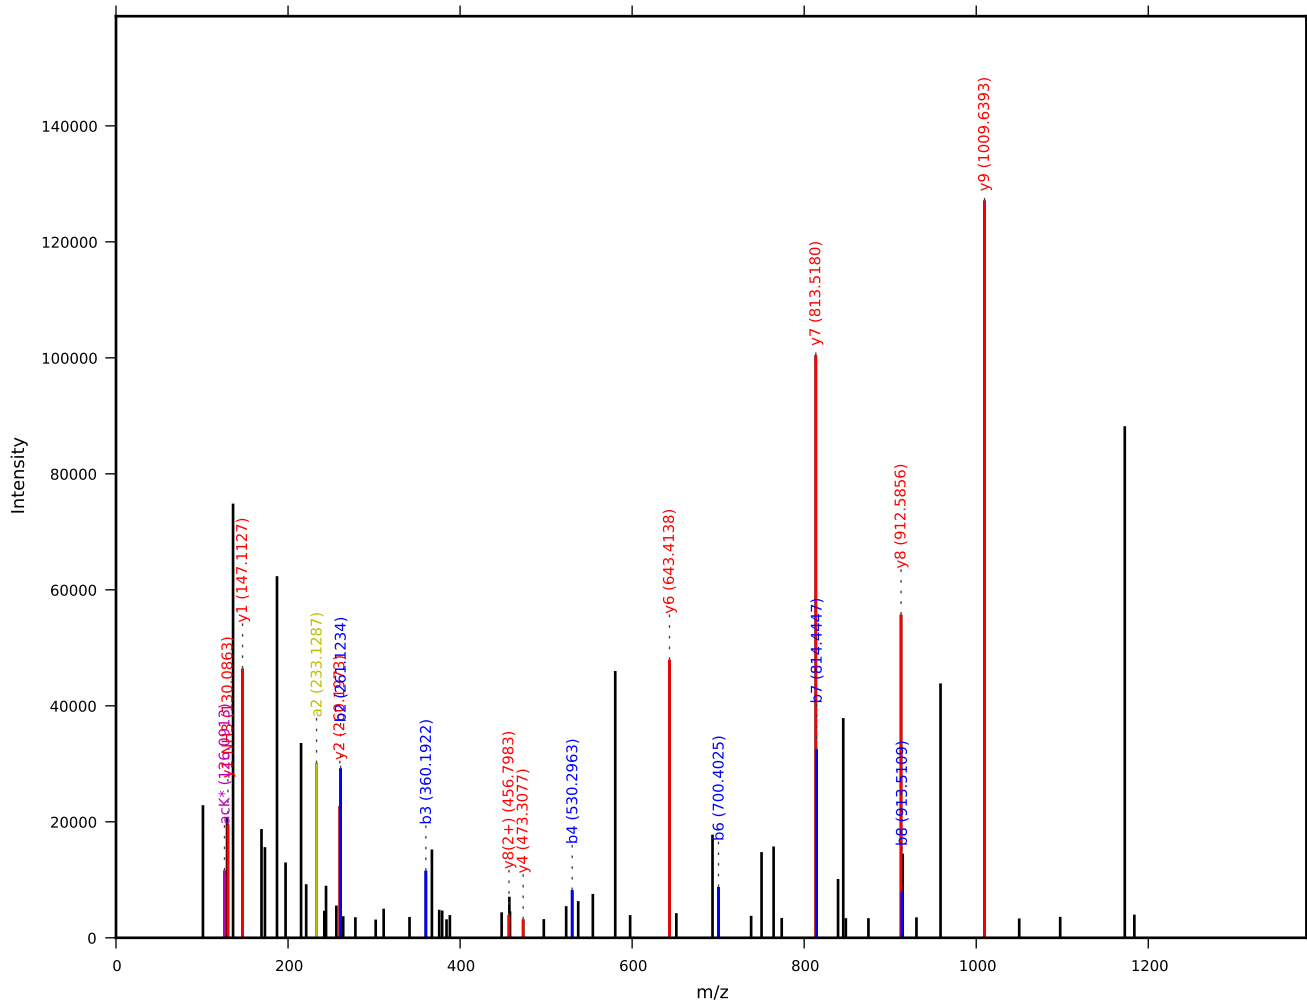

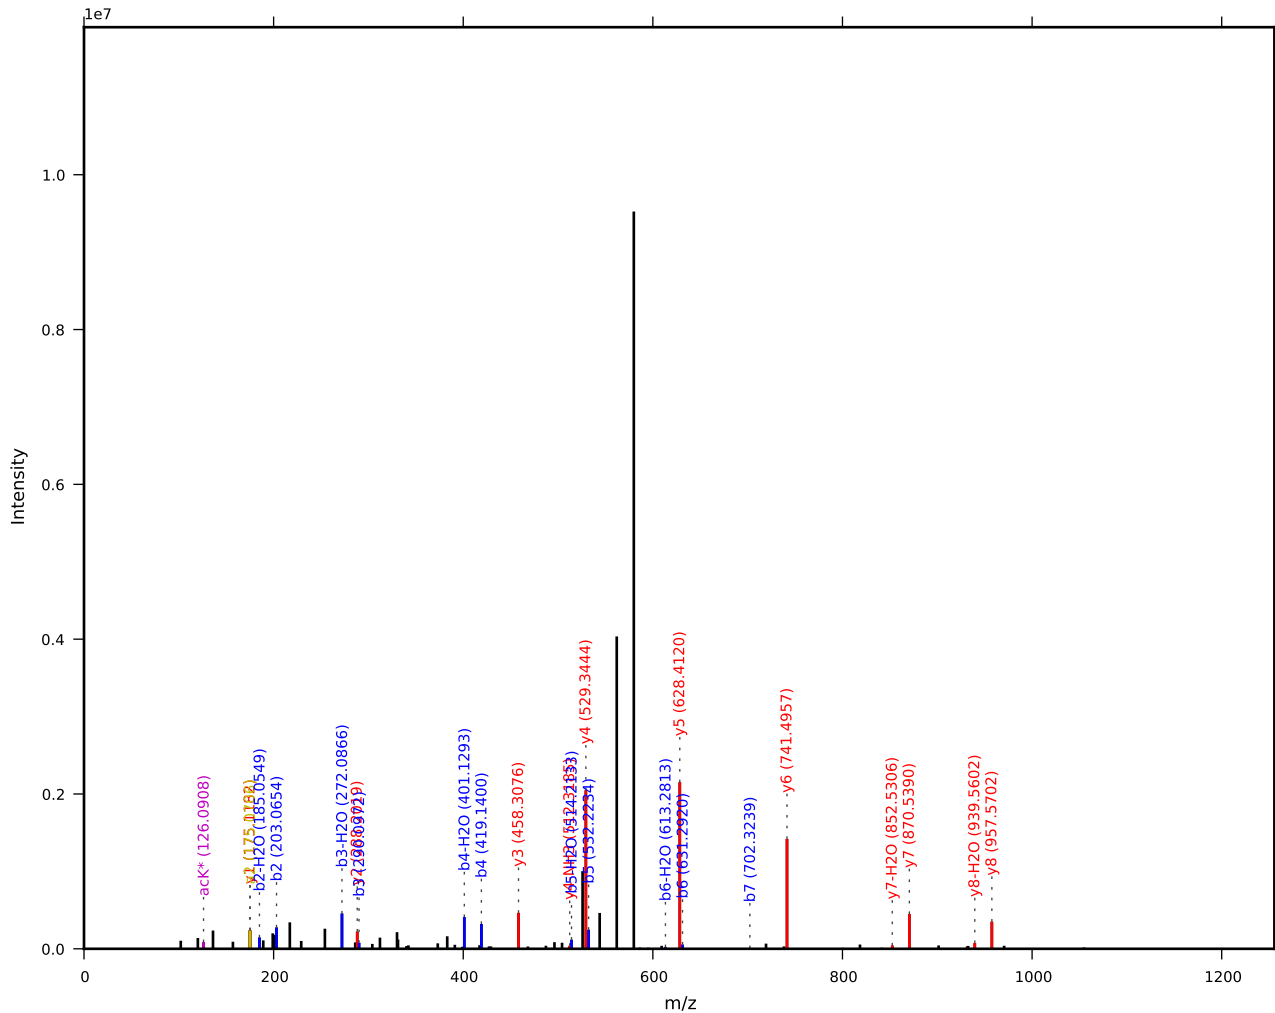

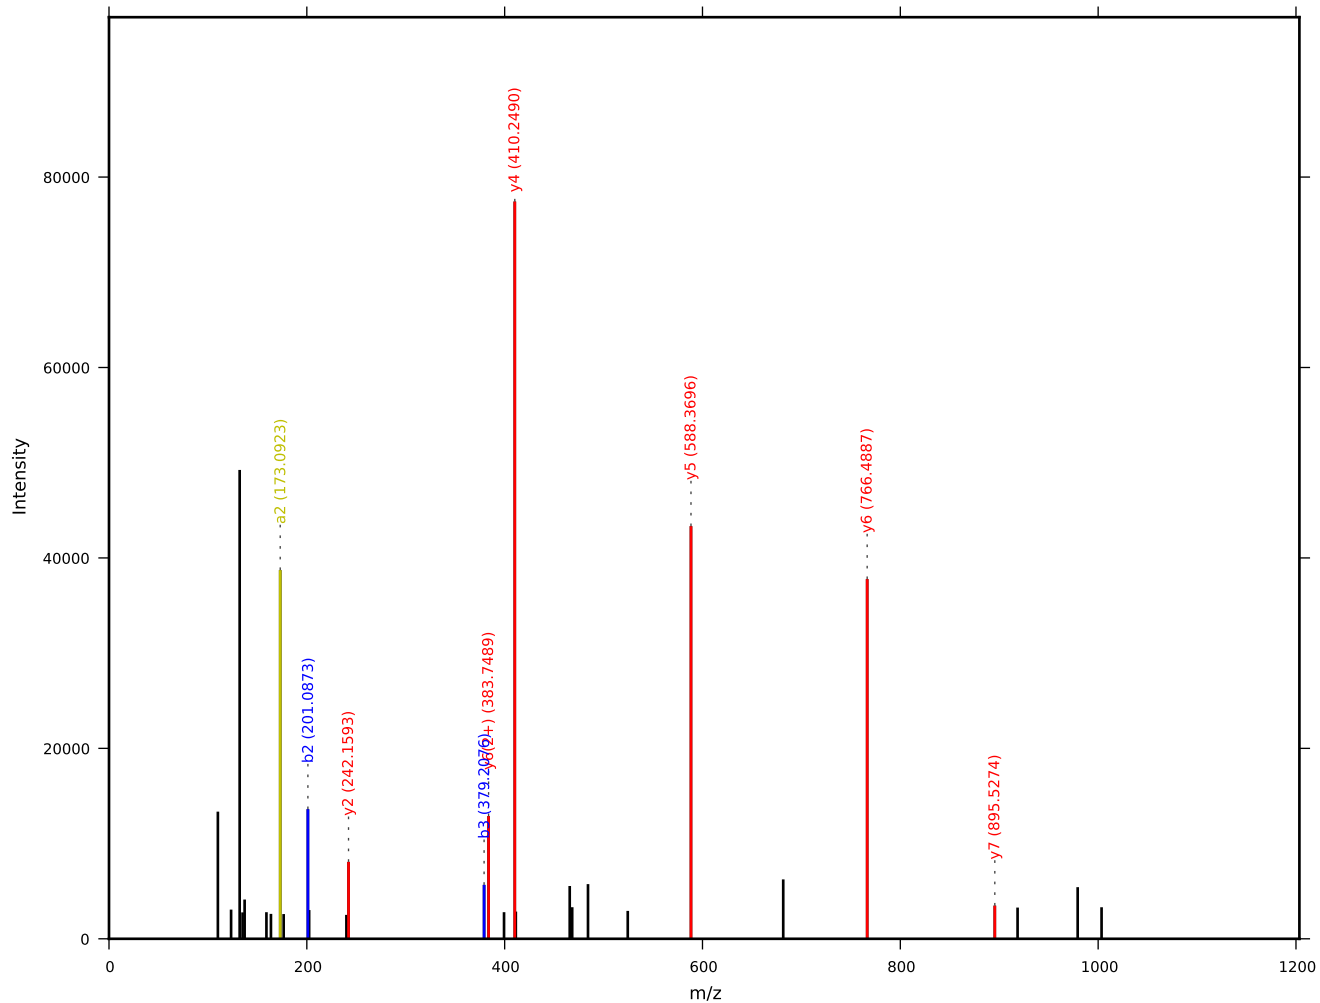

Mass: 910.51859 Charge: 2 m/z: 456.26657  
Modified Peptide: (ac)SAK(ac)AEK(ac)K<sub>2</sub> Score: 76.827 PEP: 0.0032902

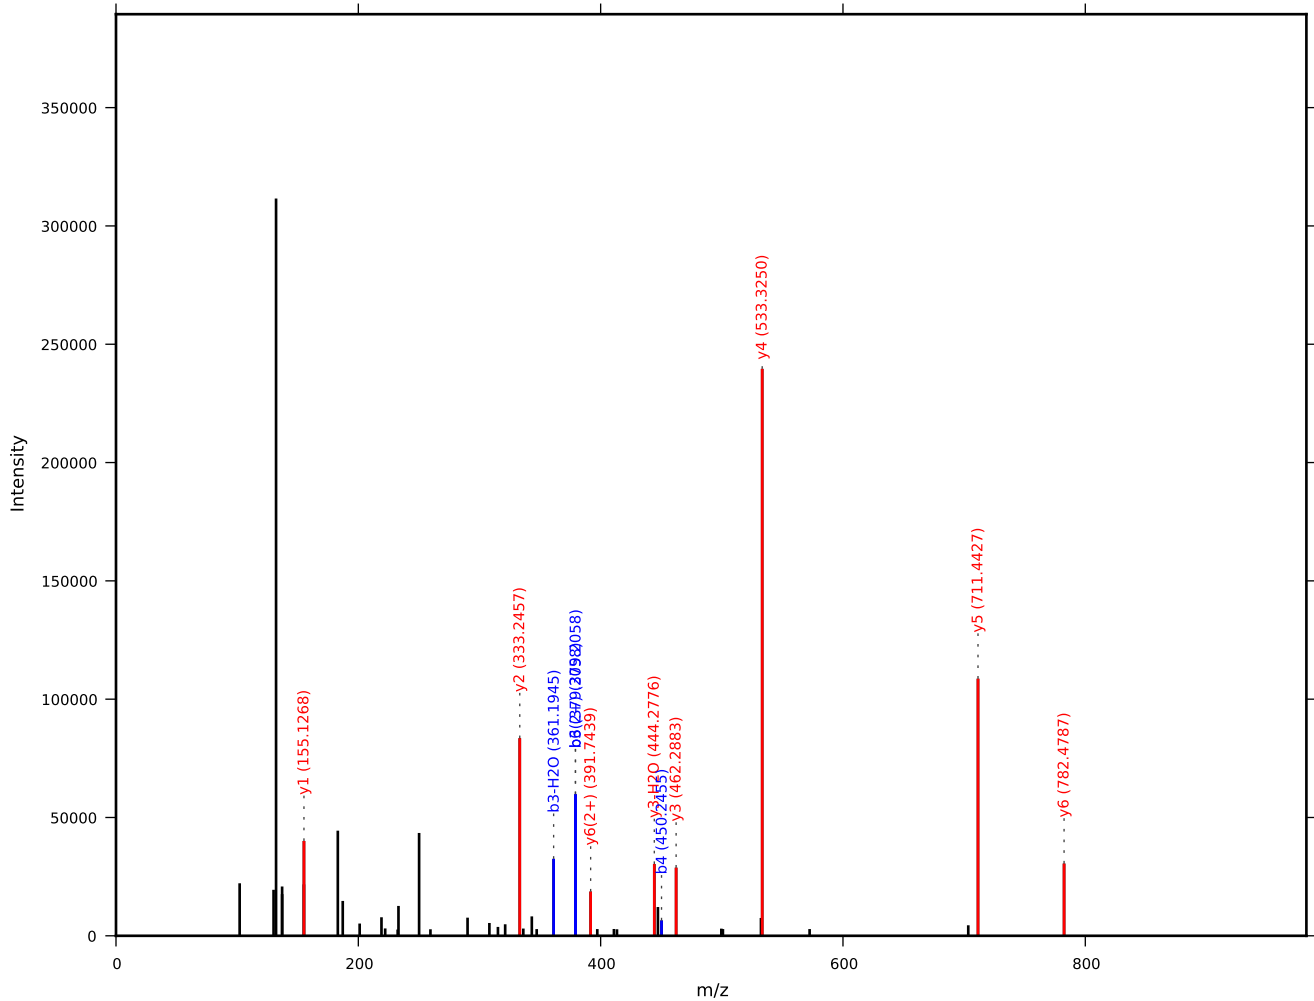

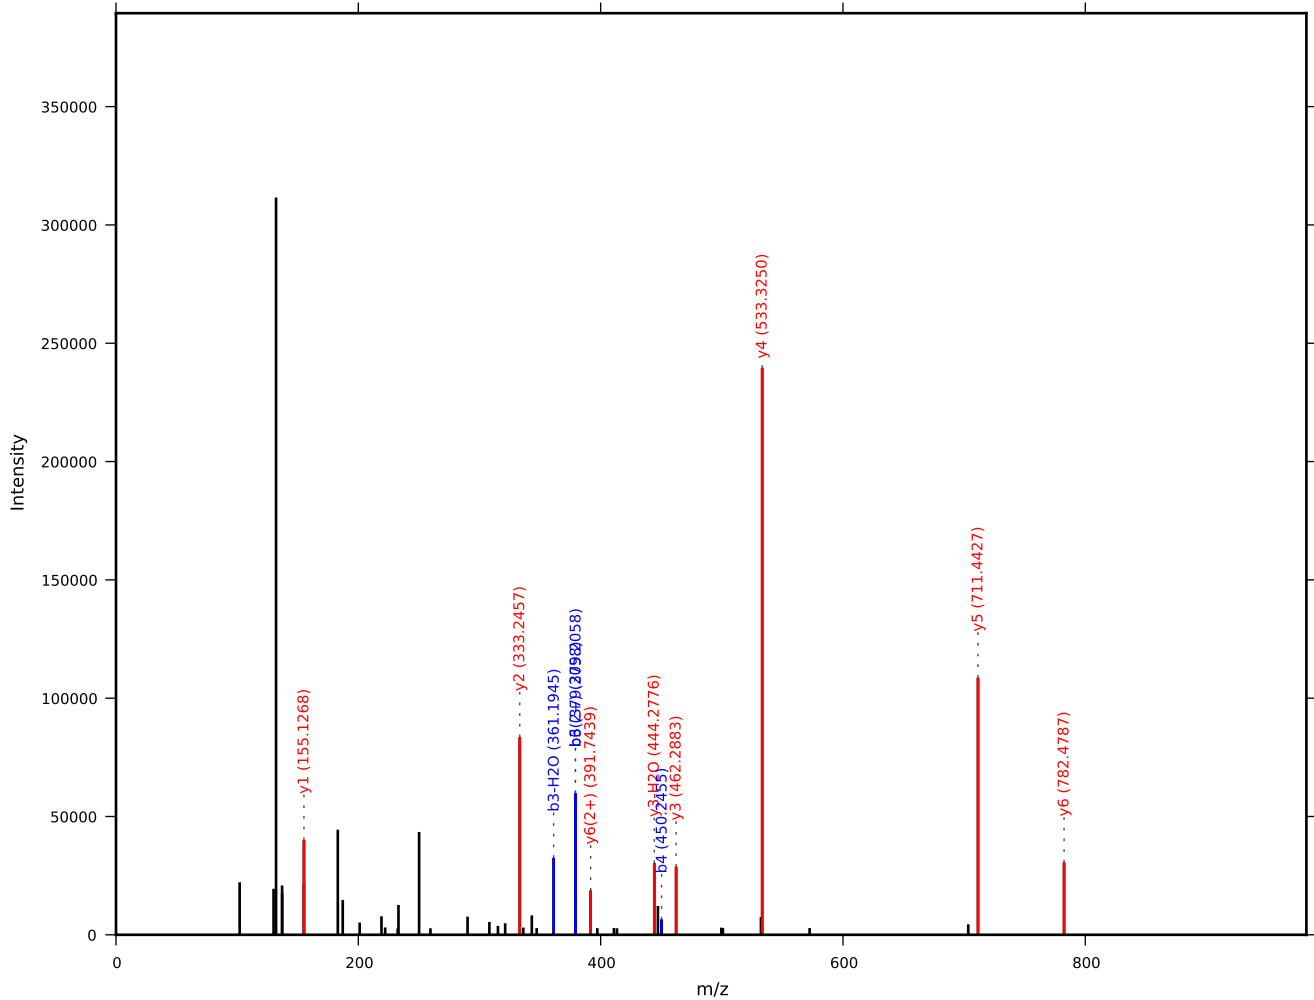

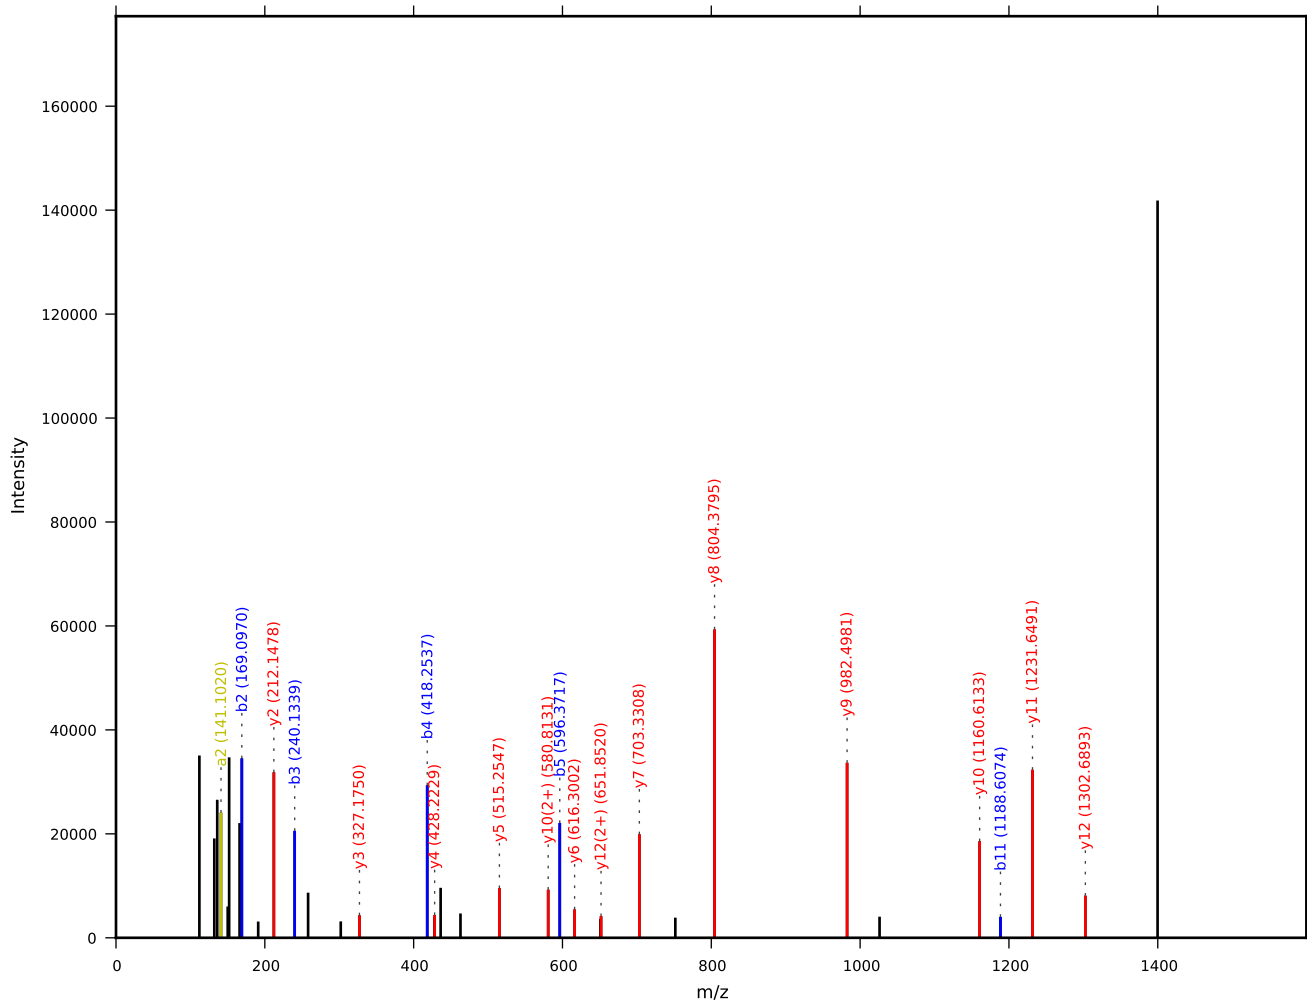





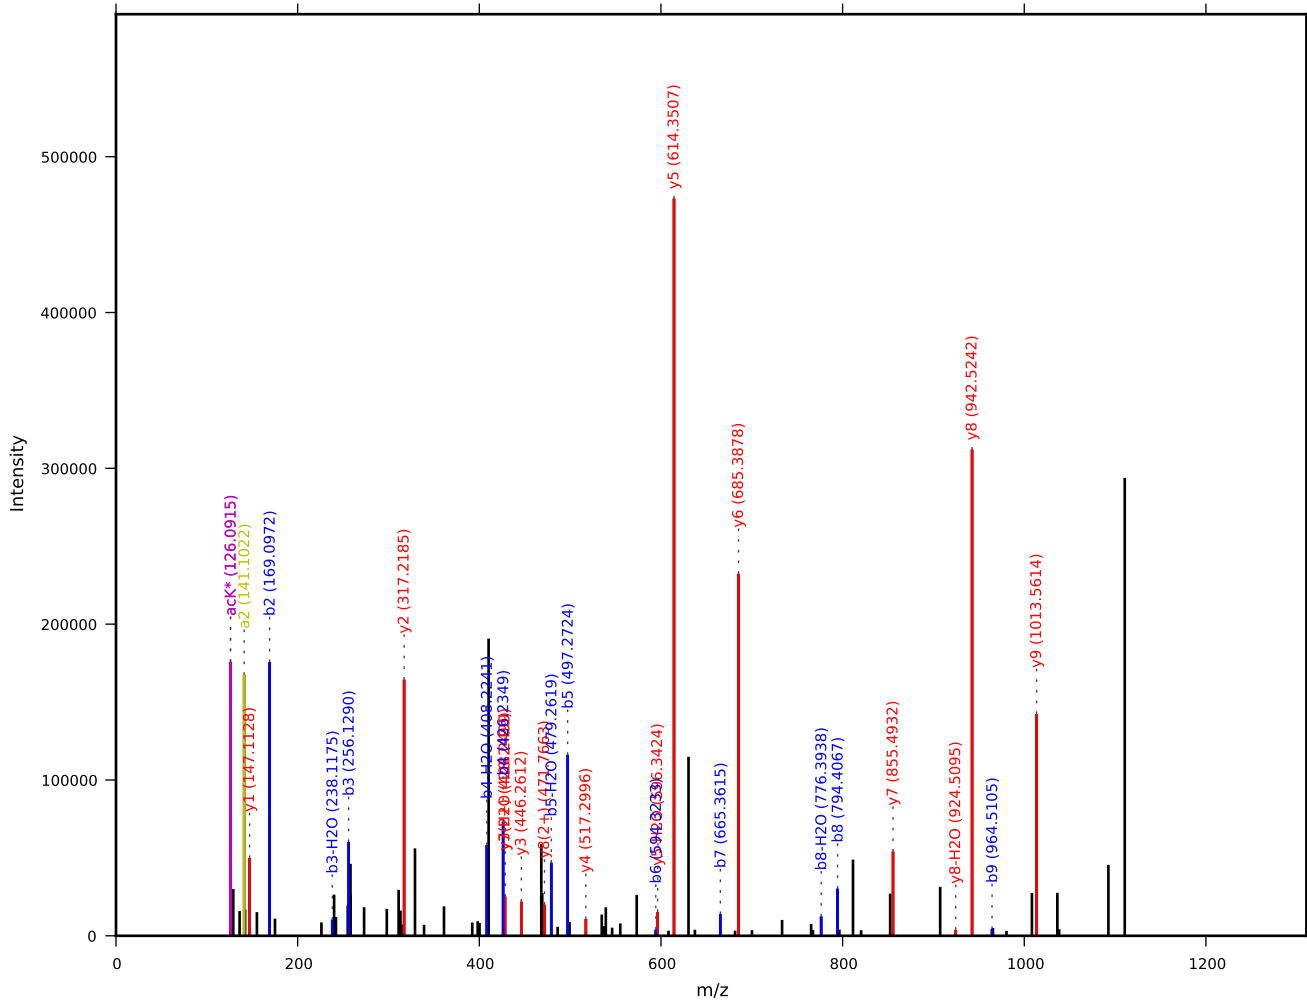

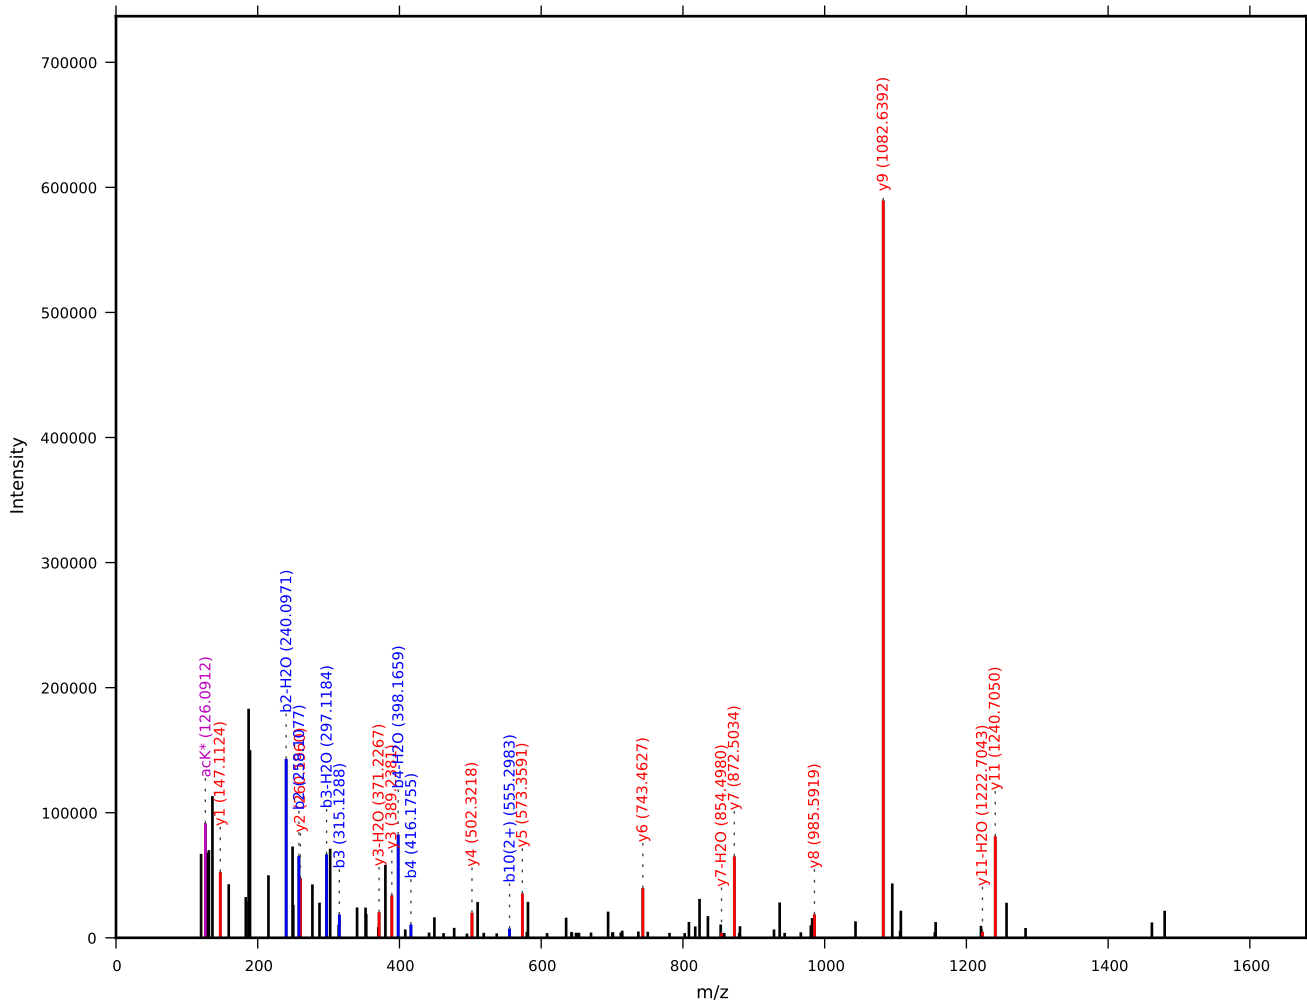

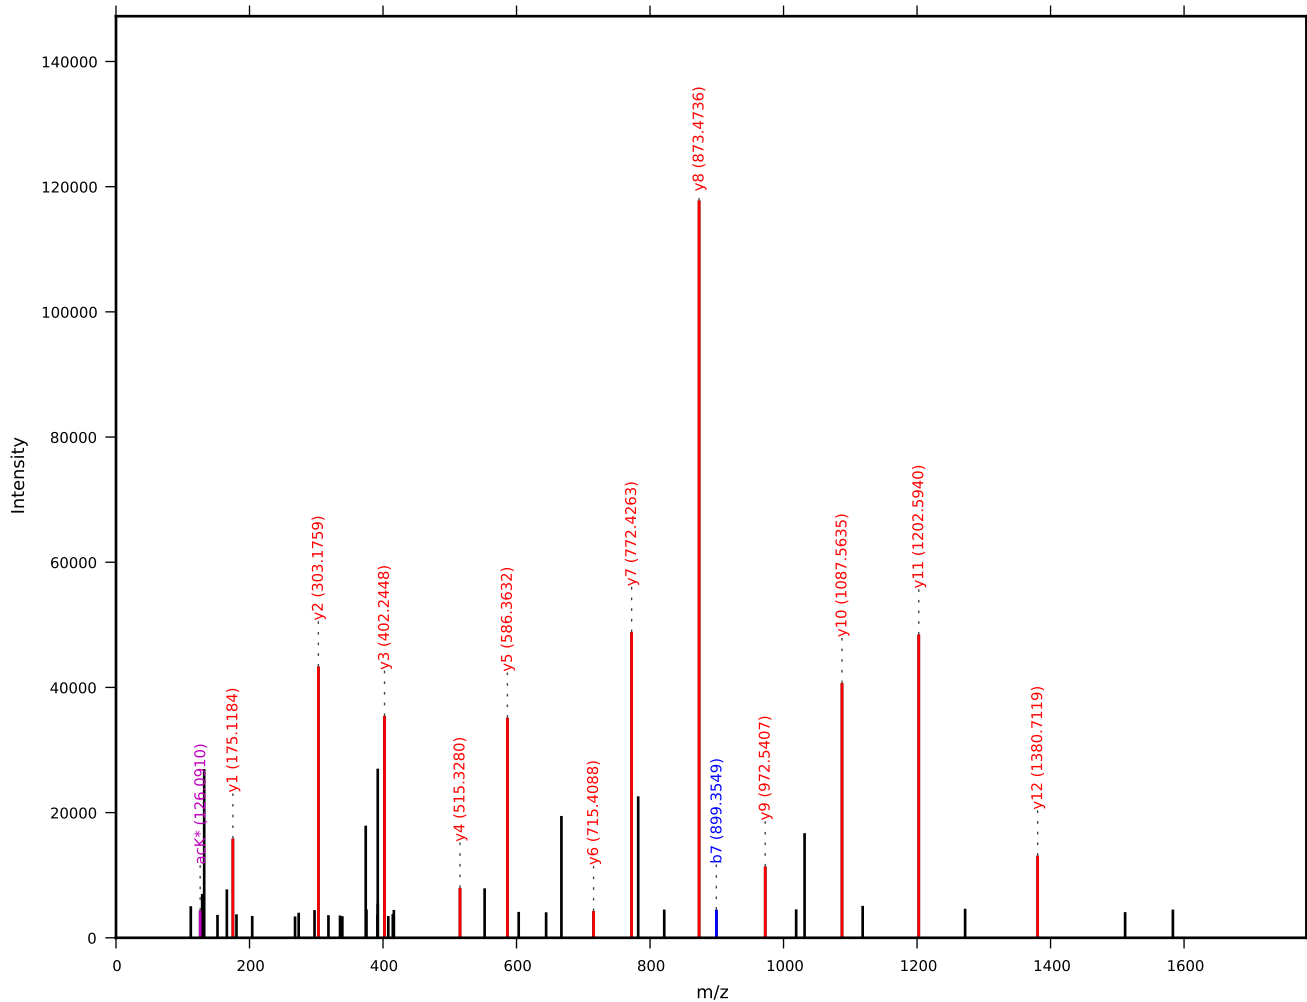

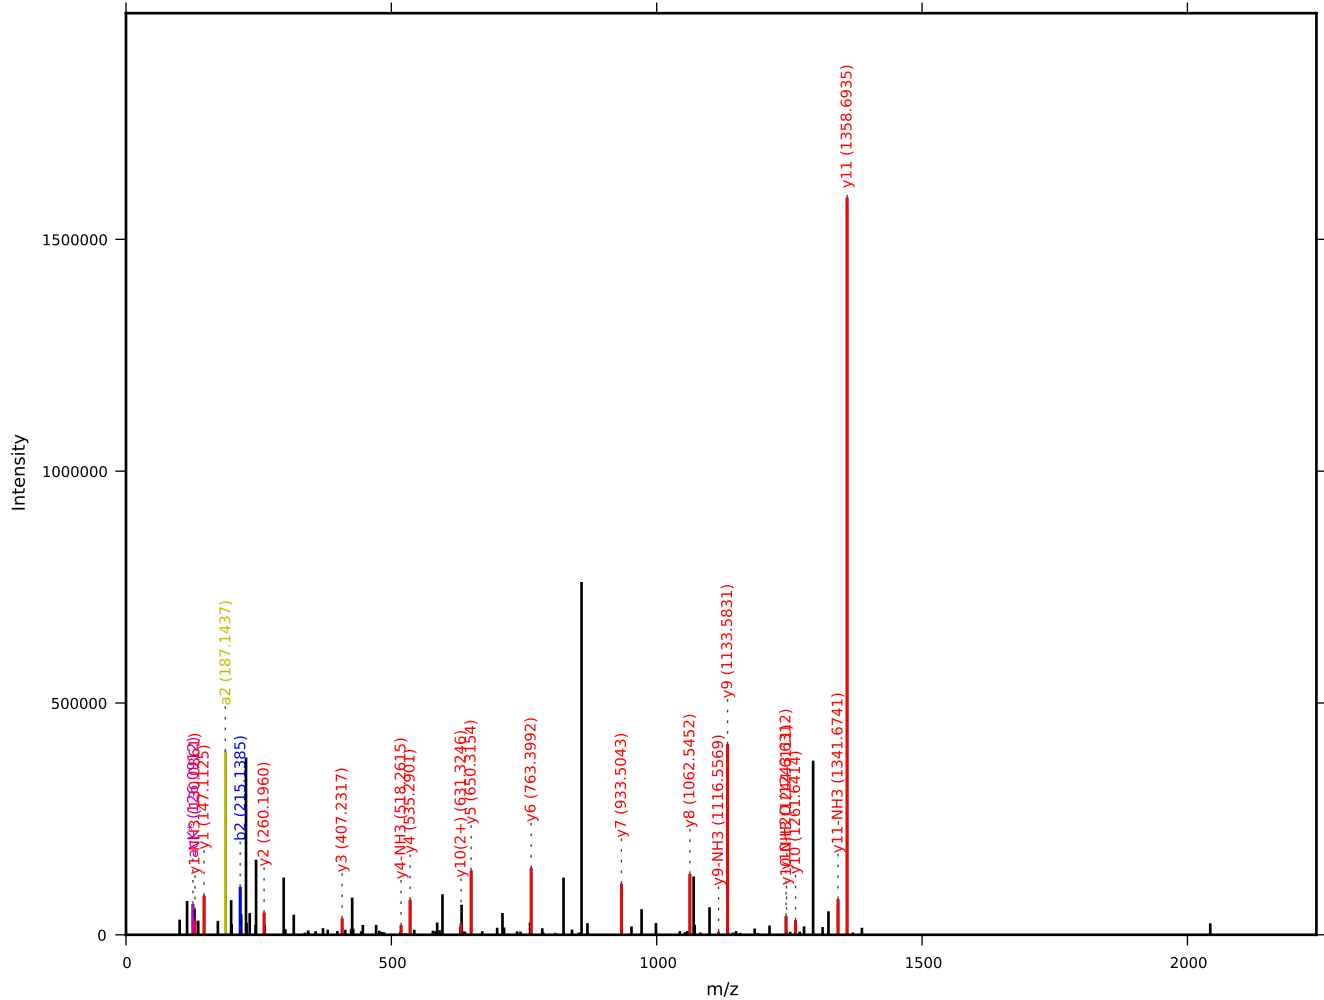

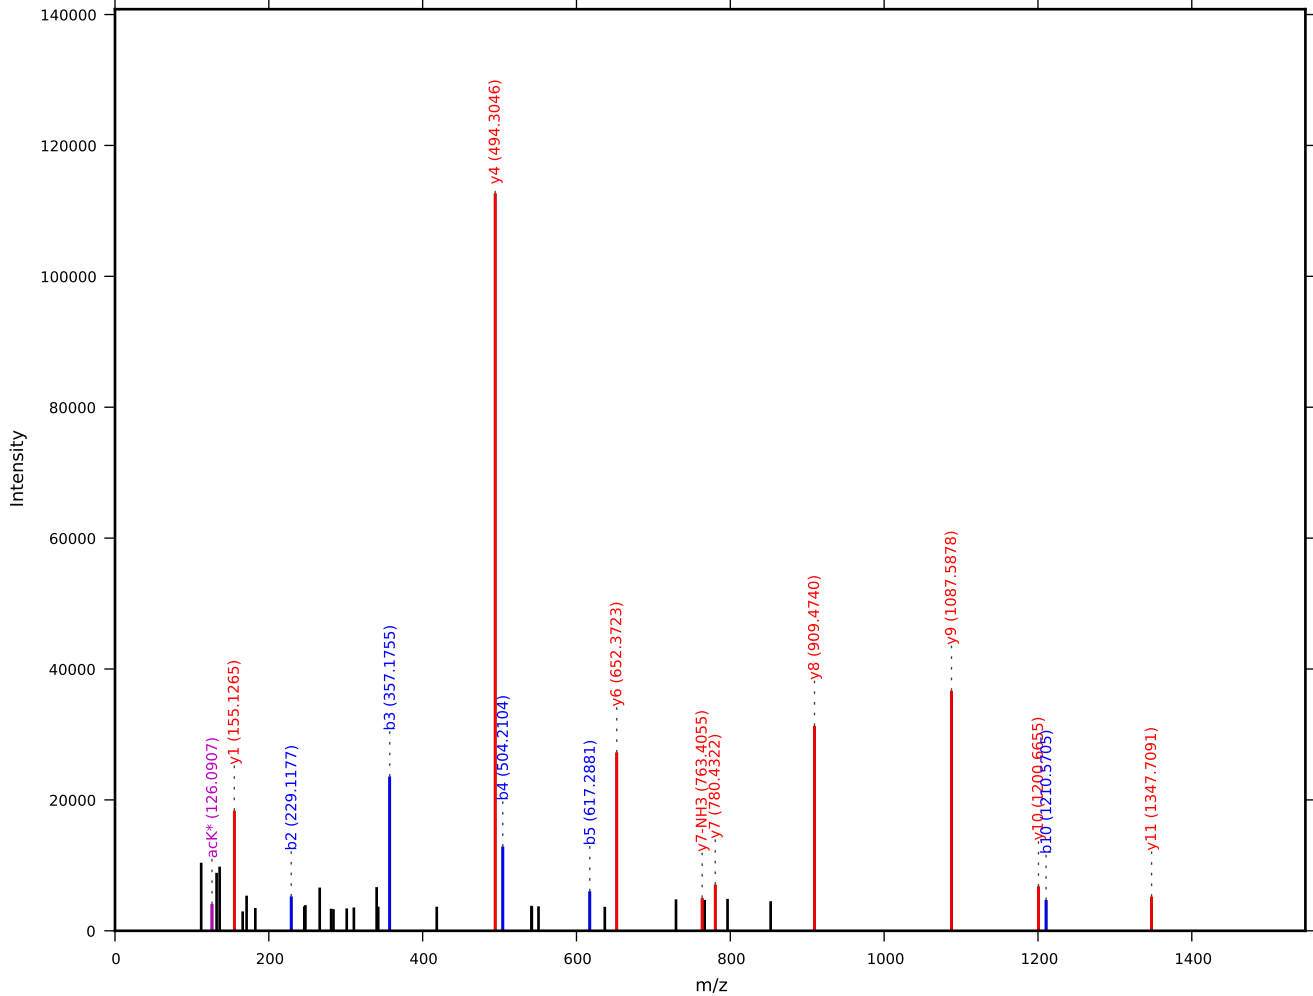

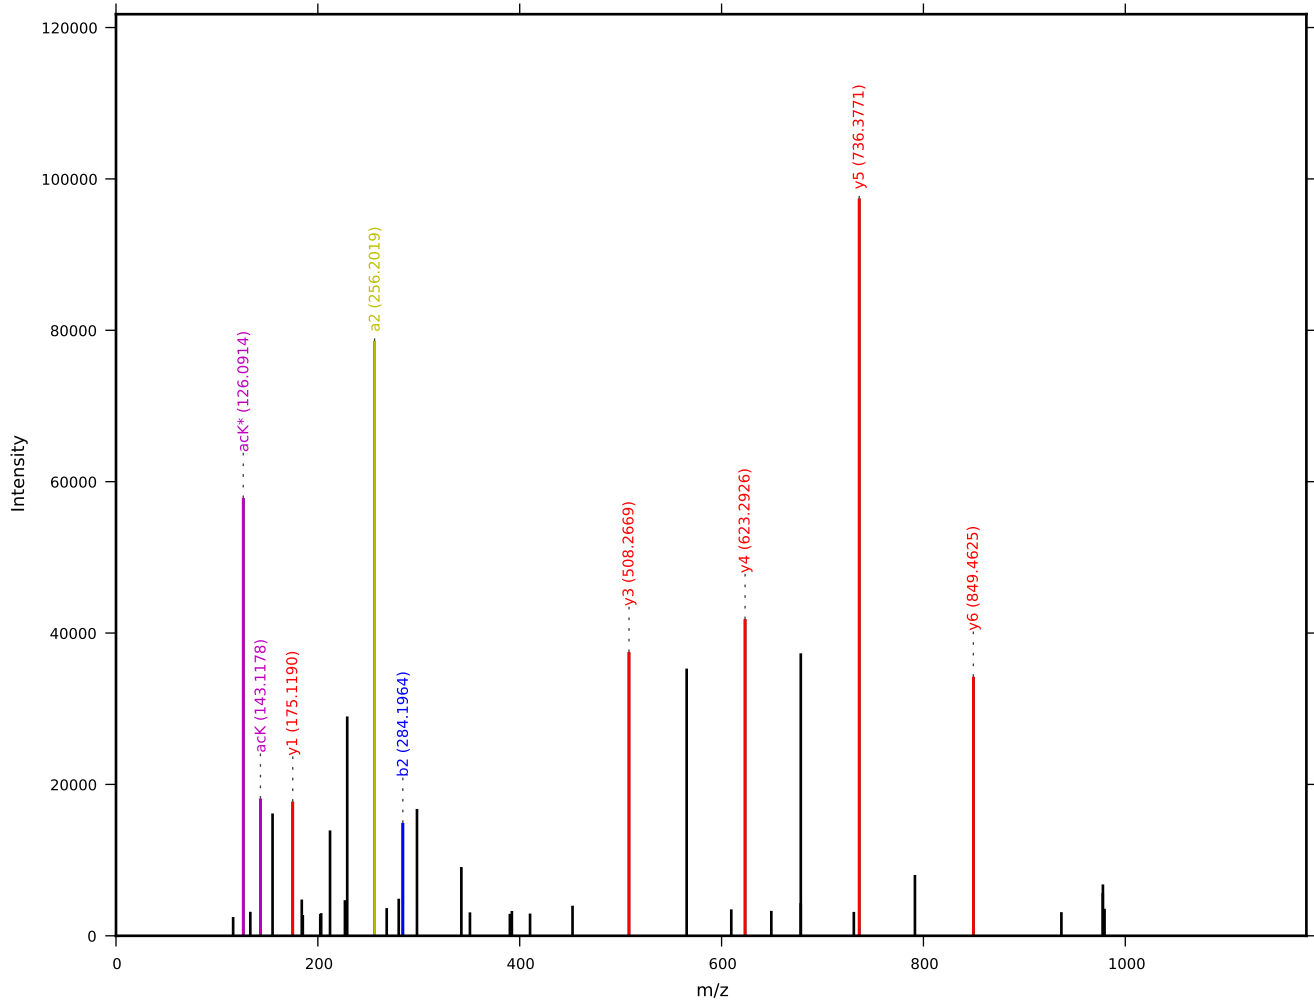

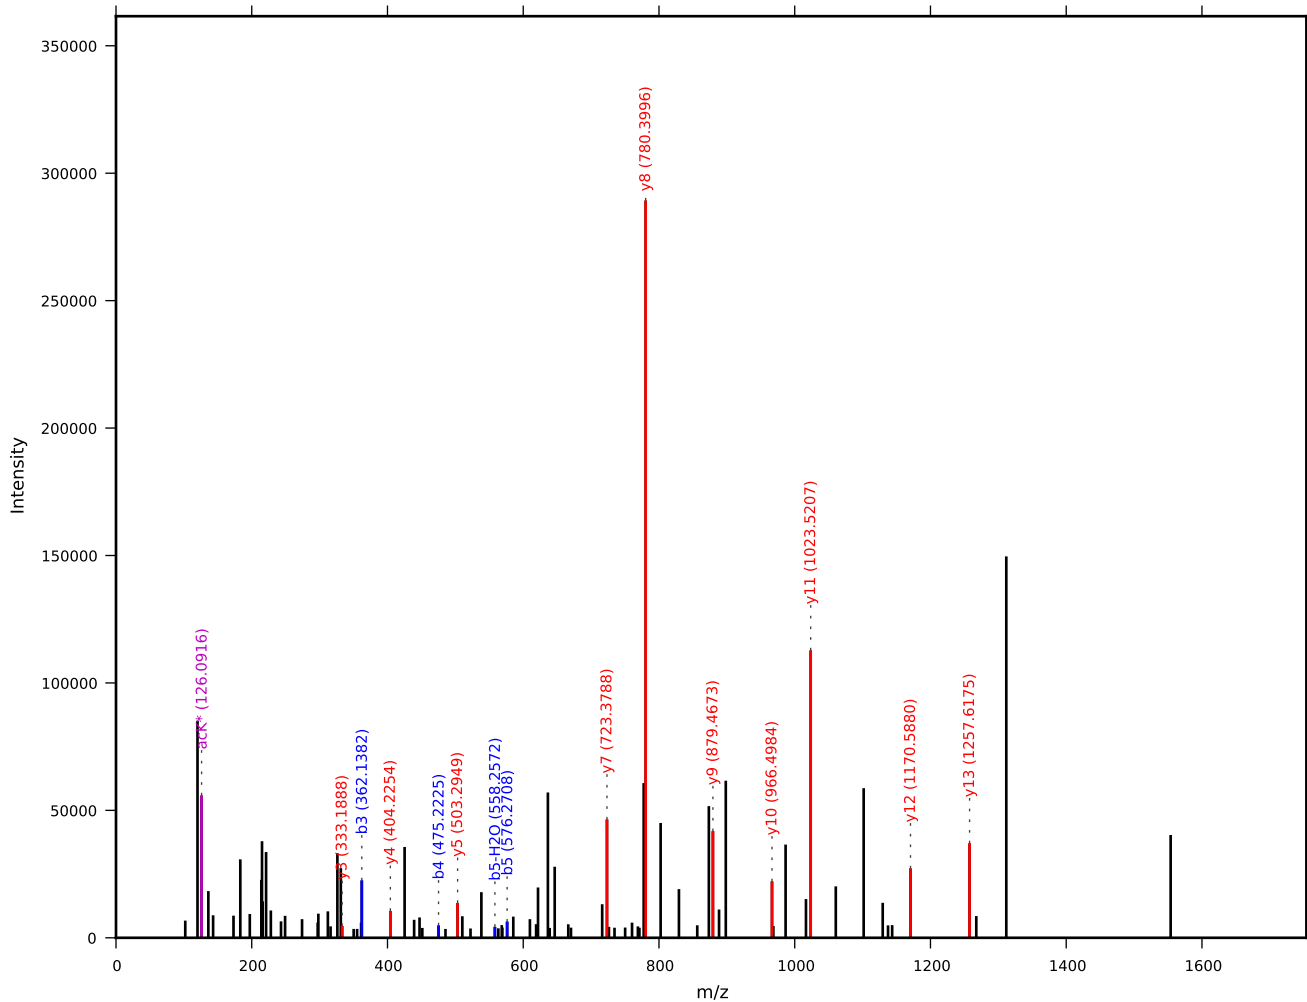



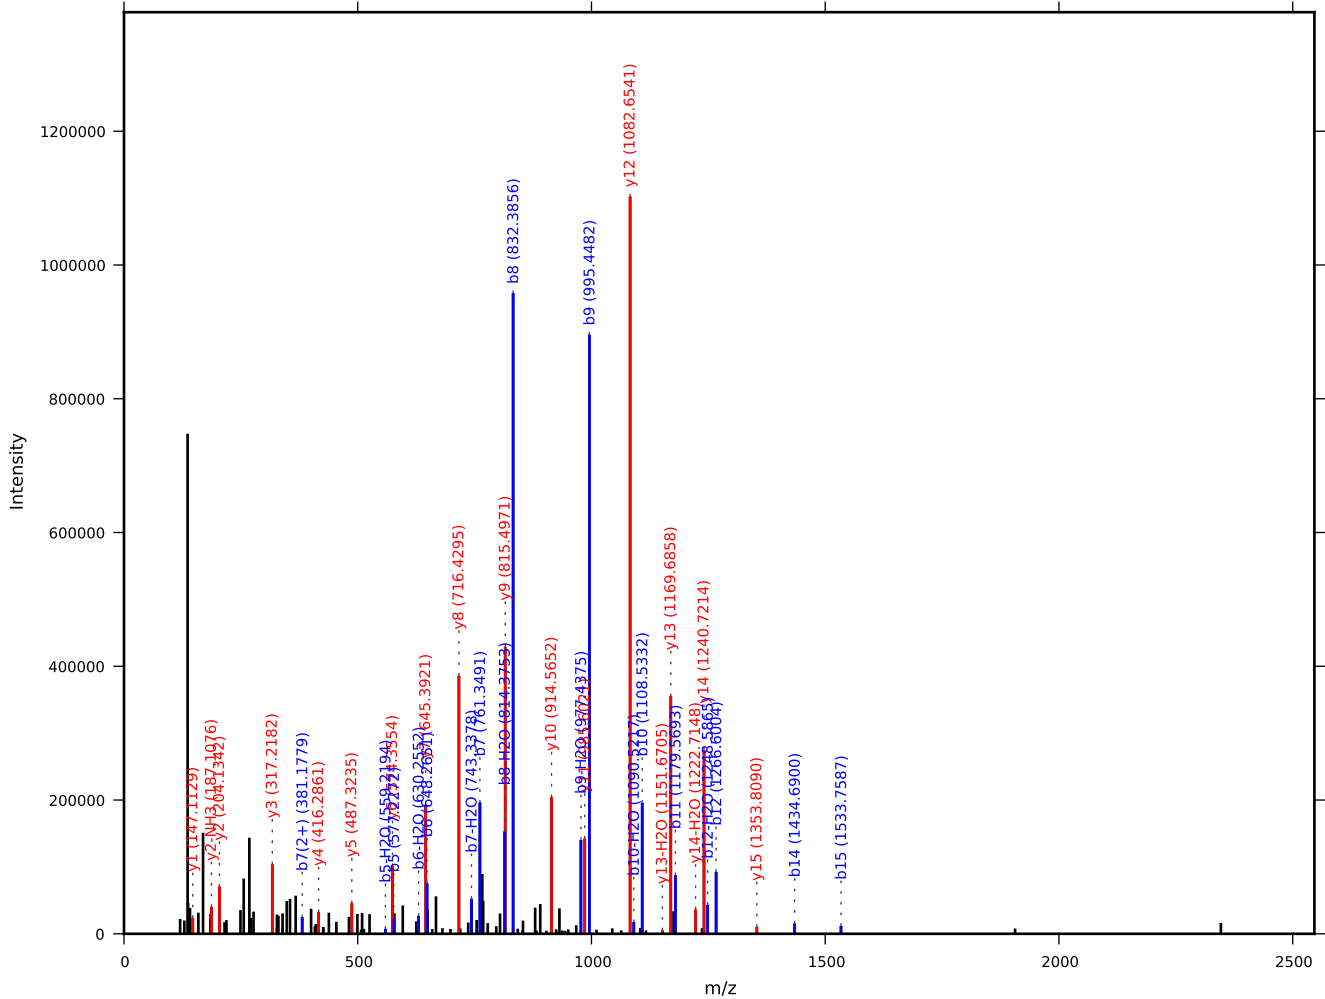

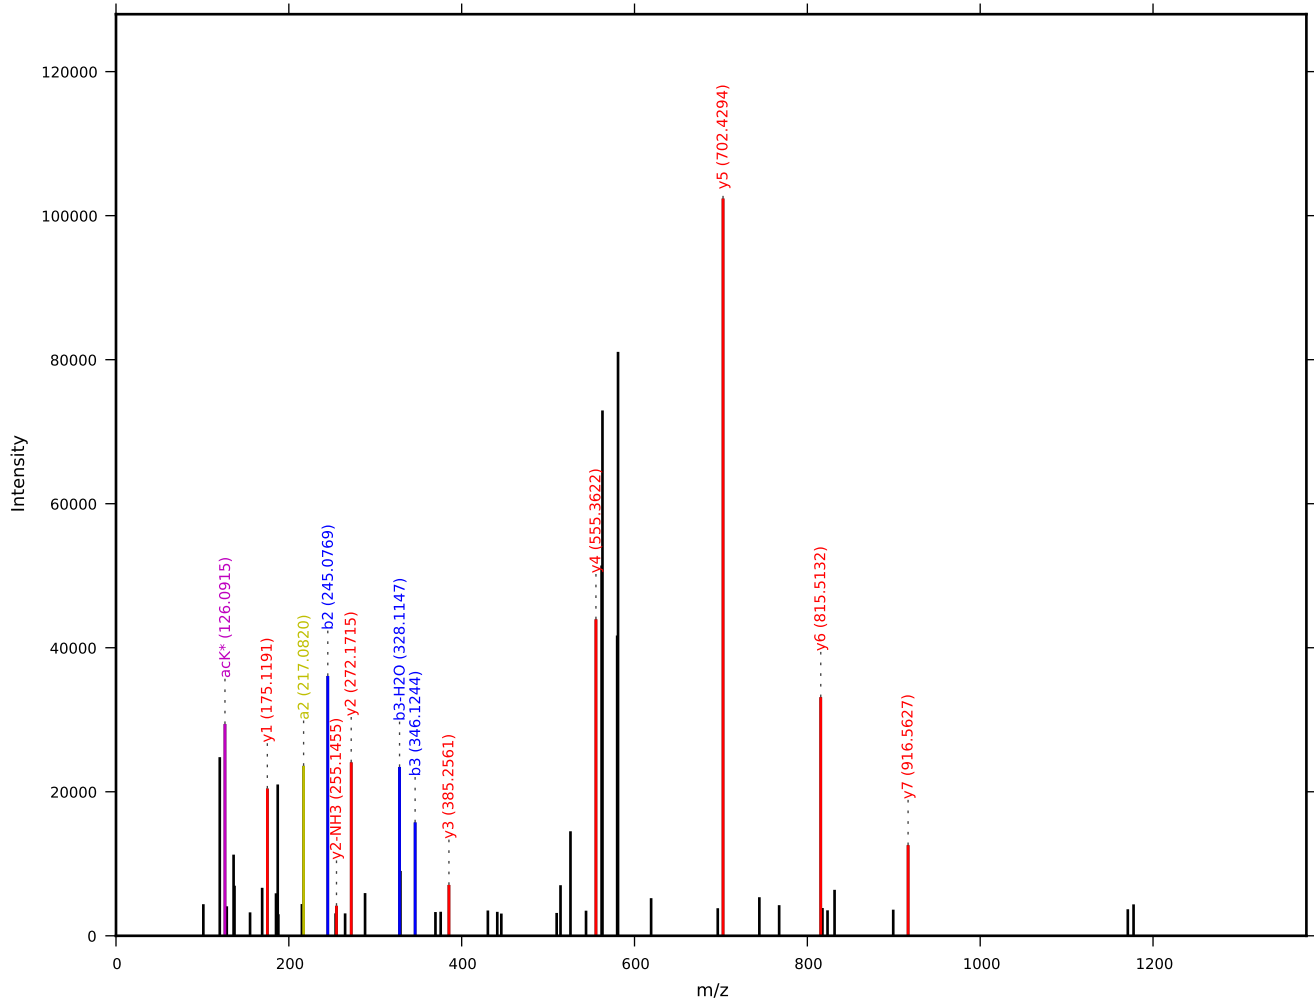

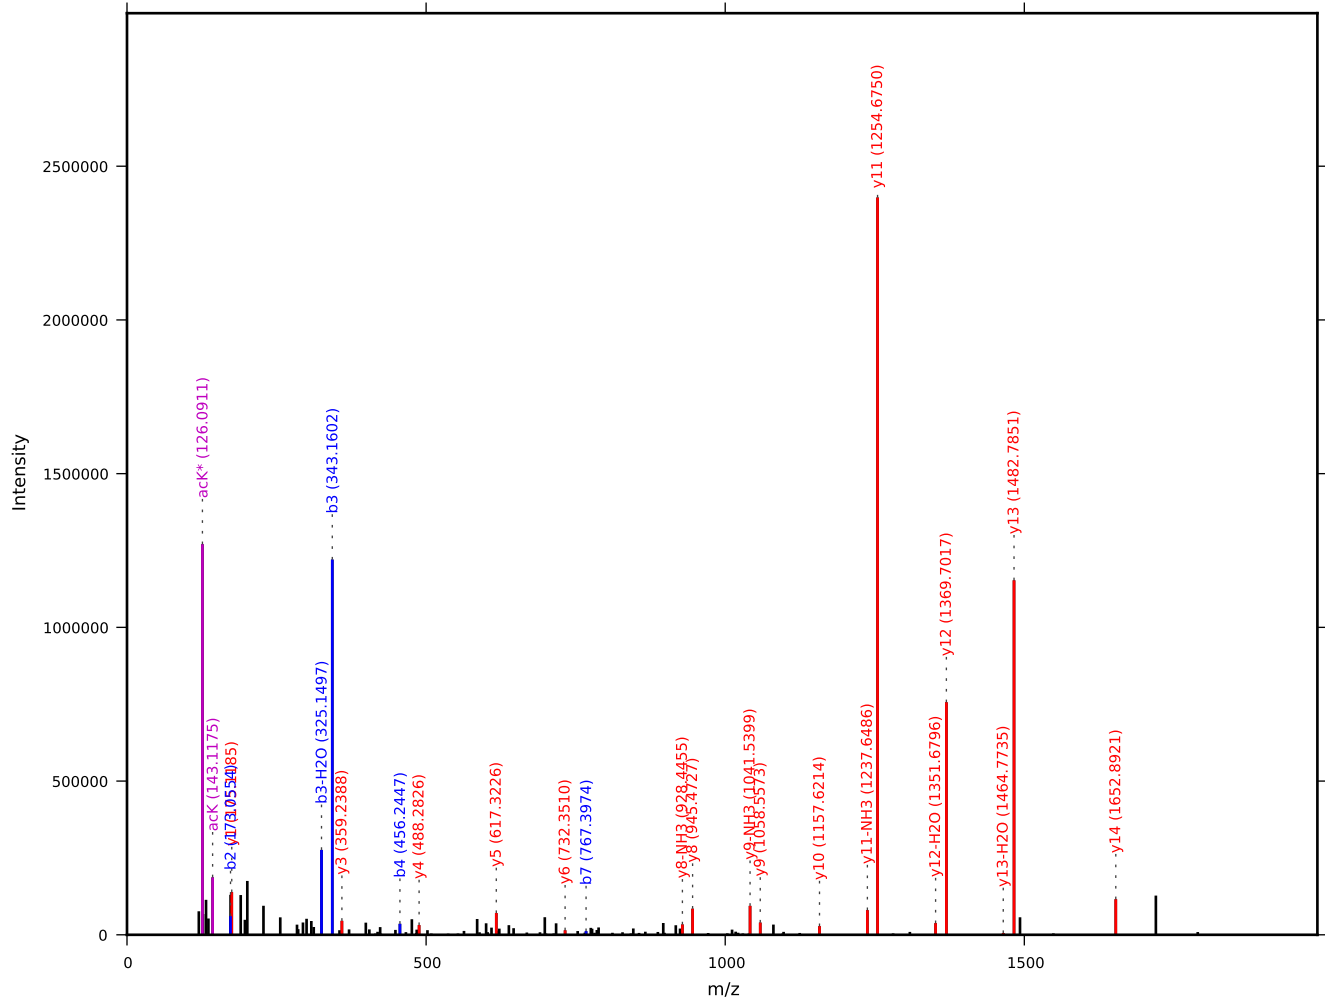

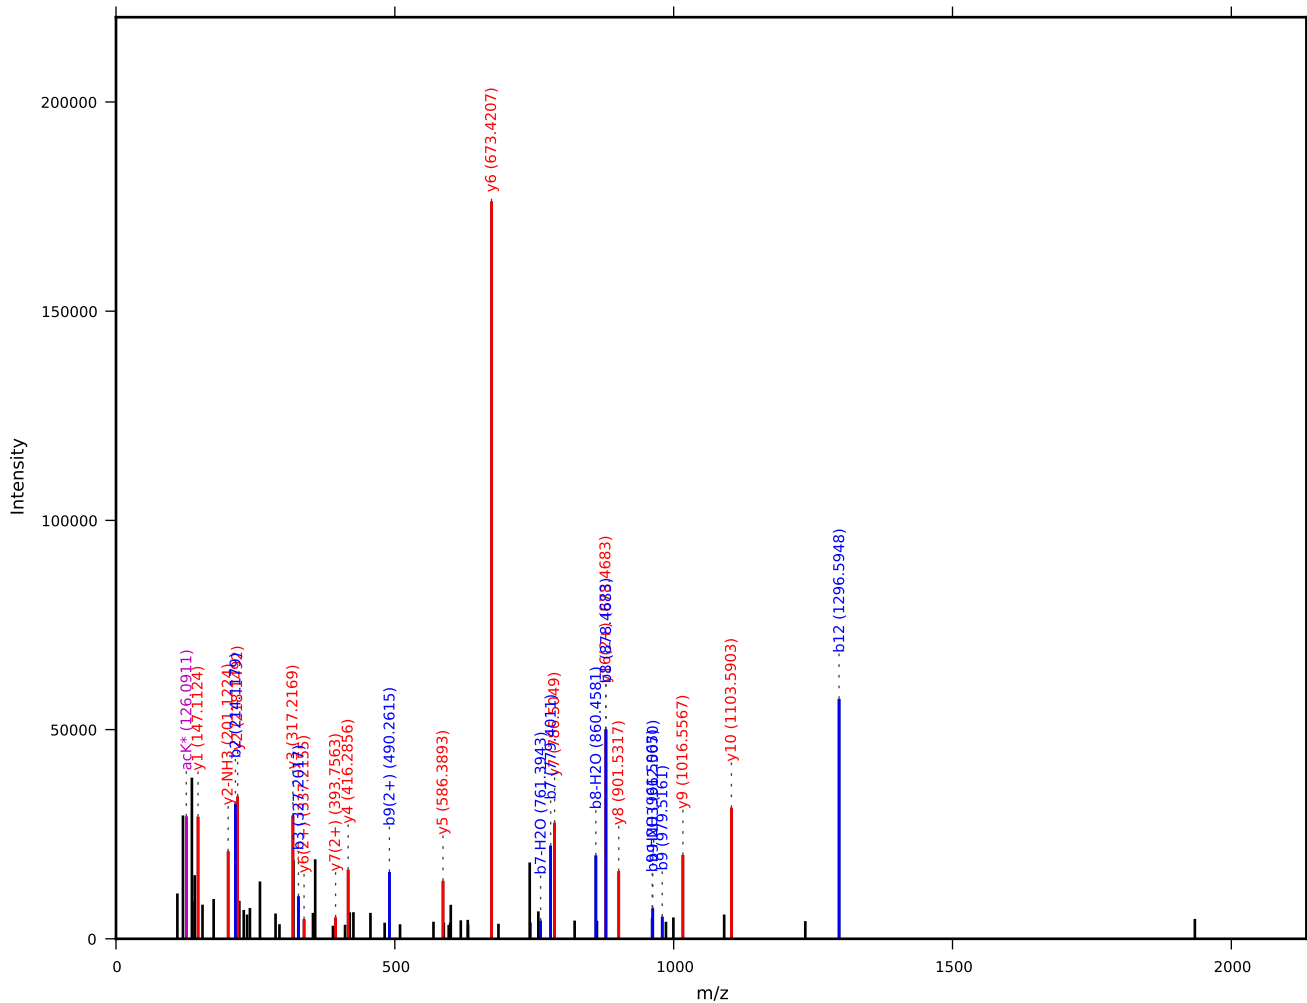

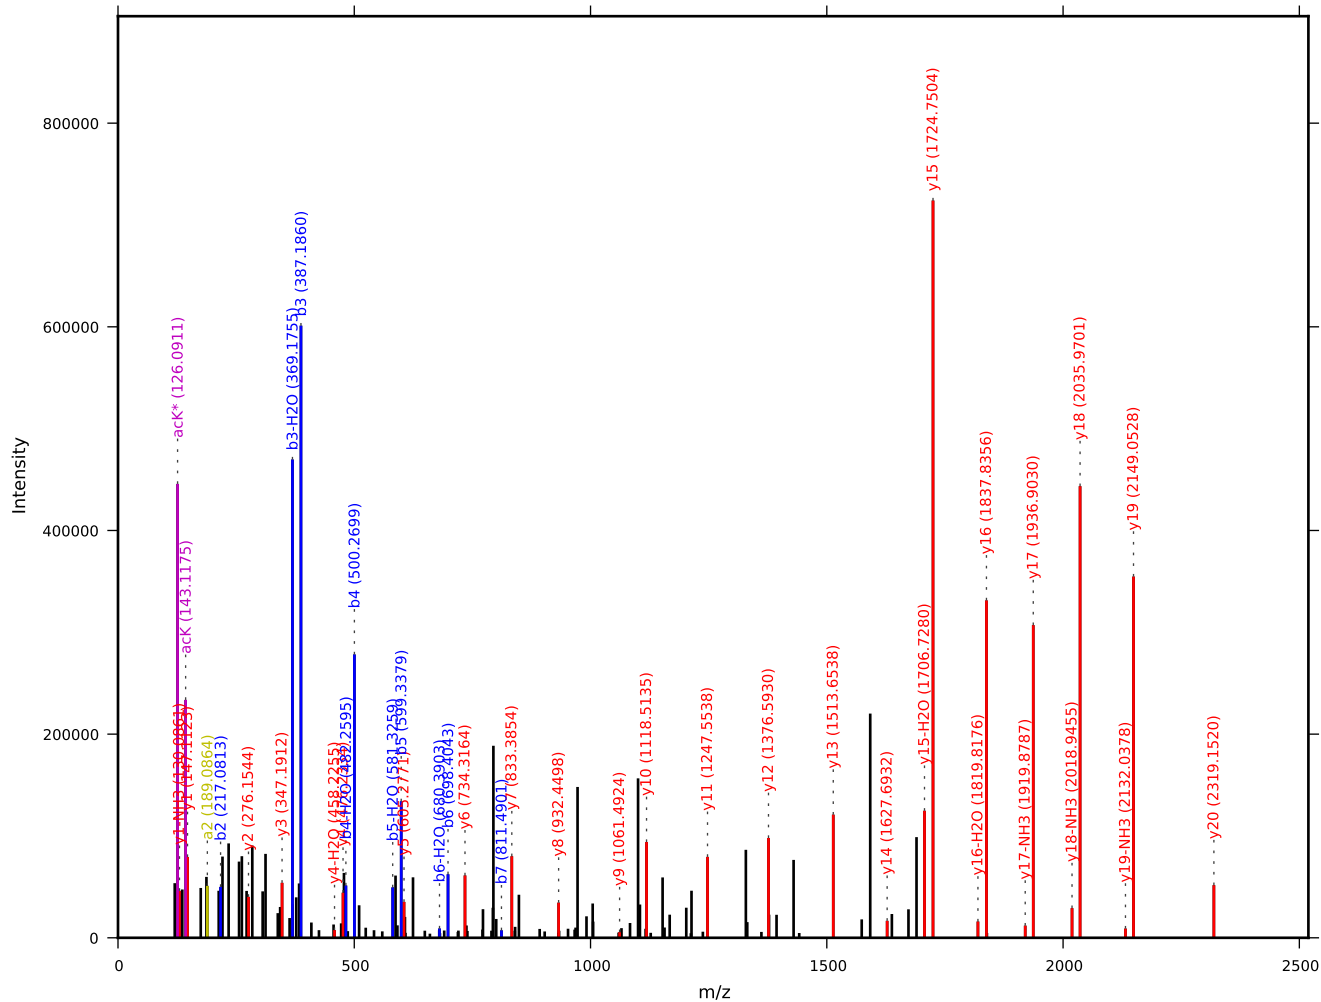

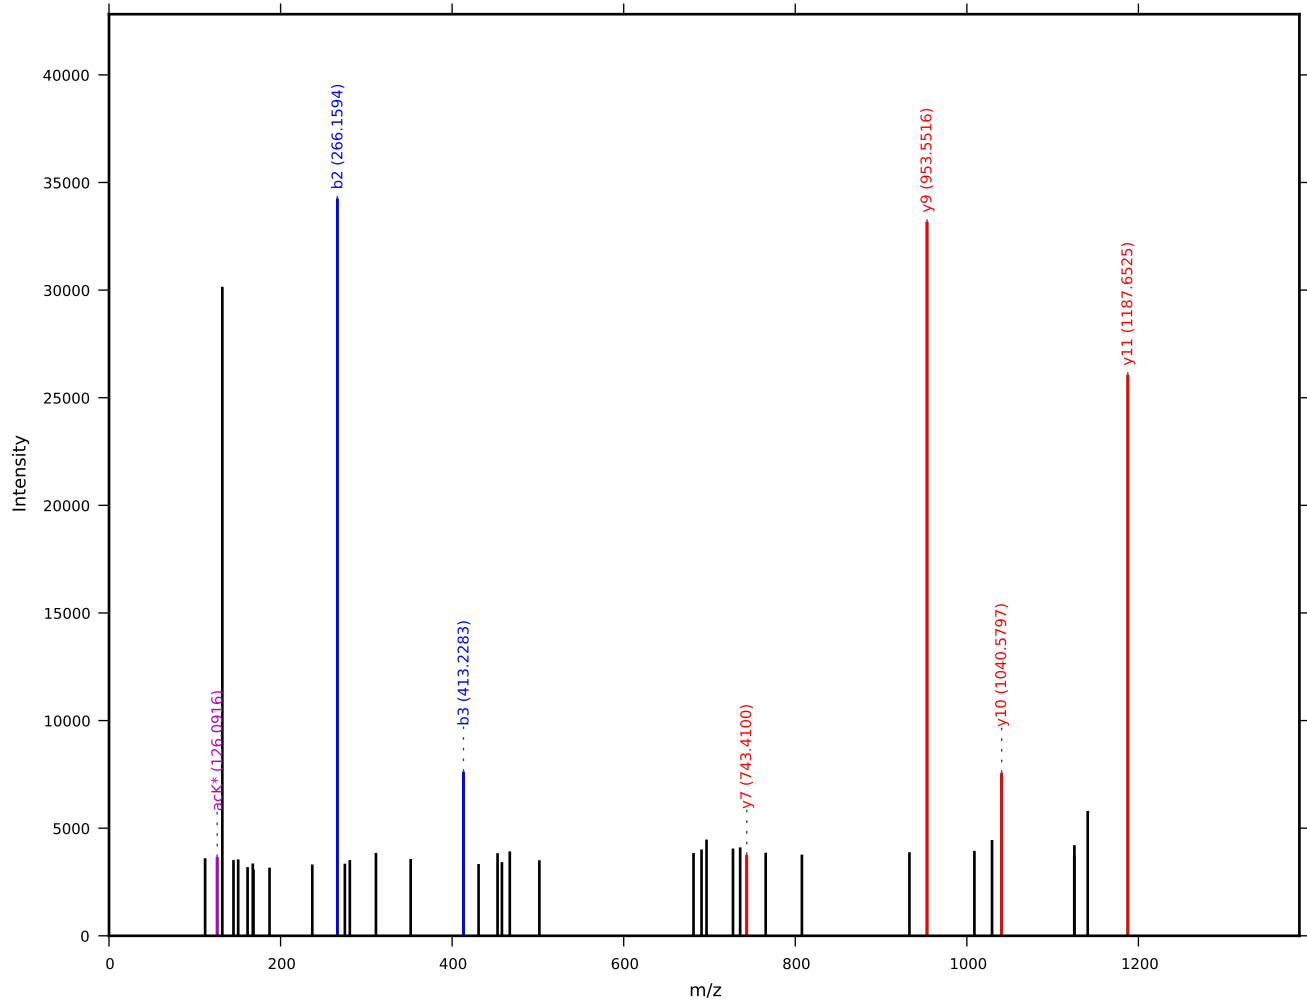

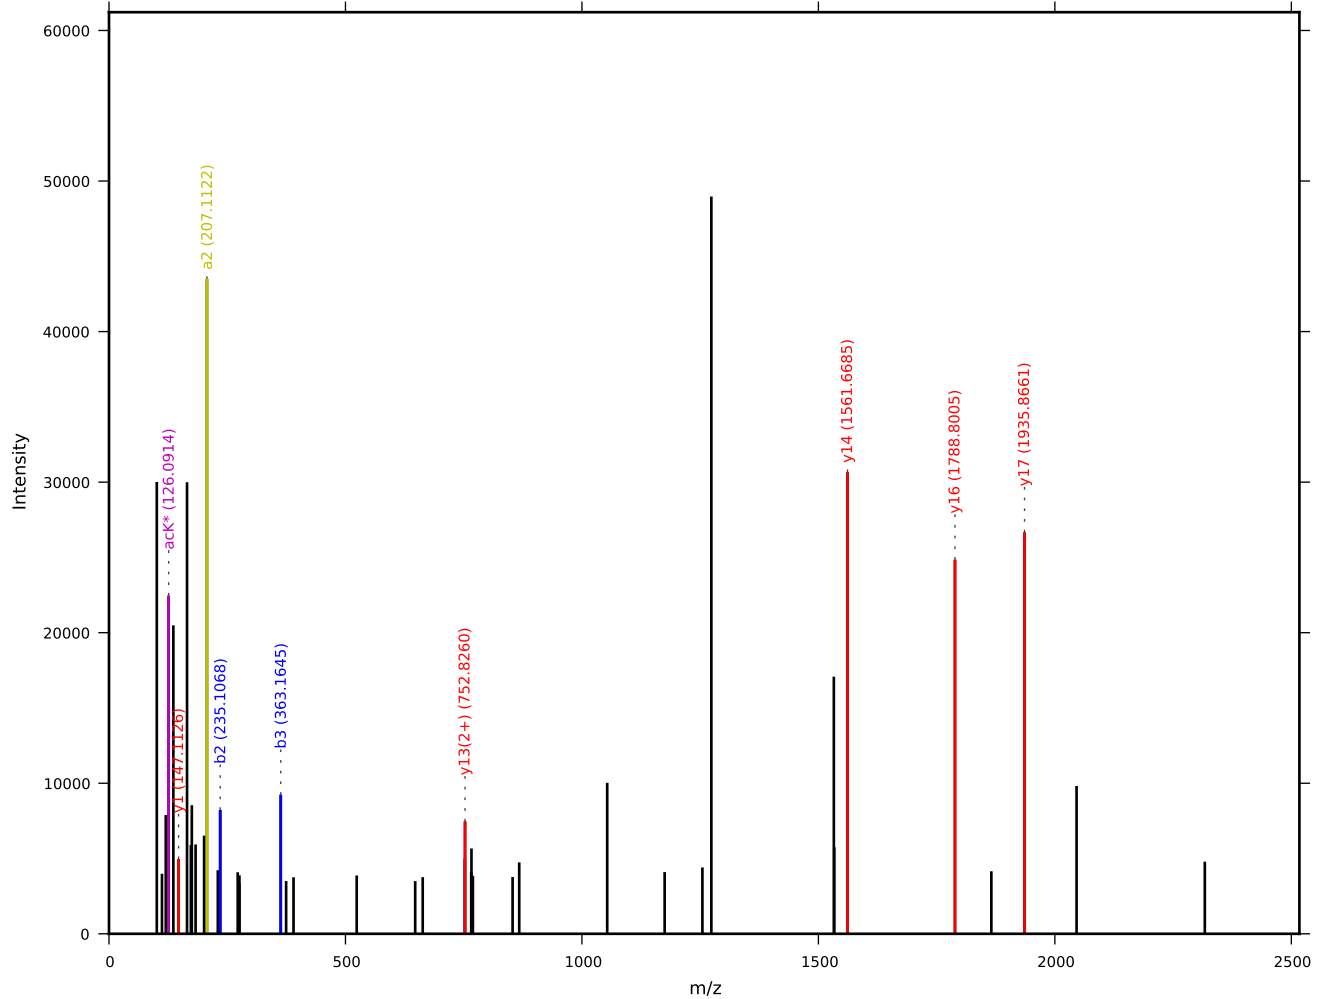

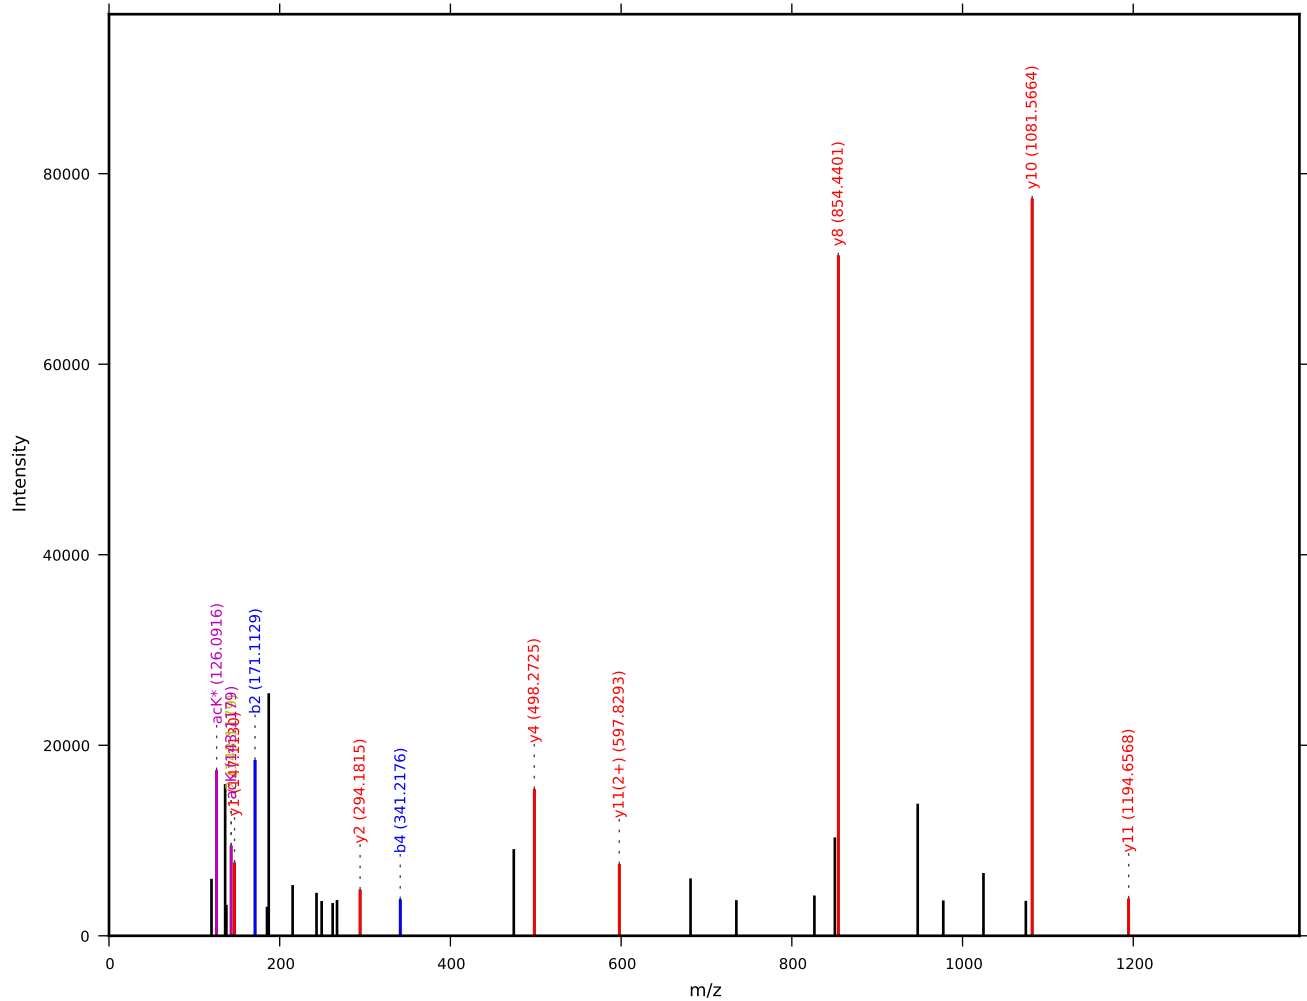



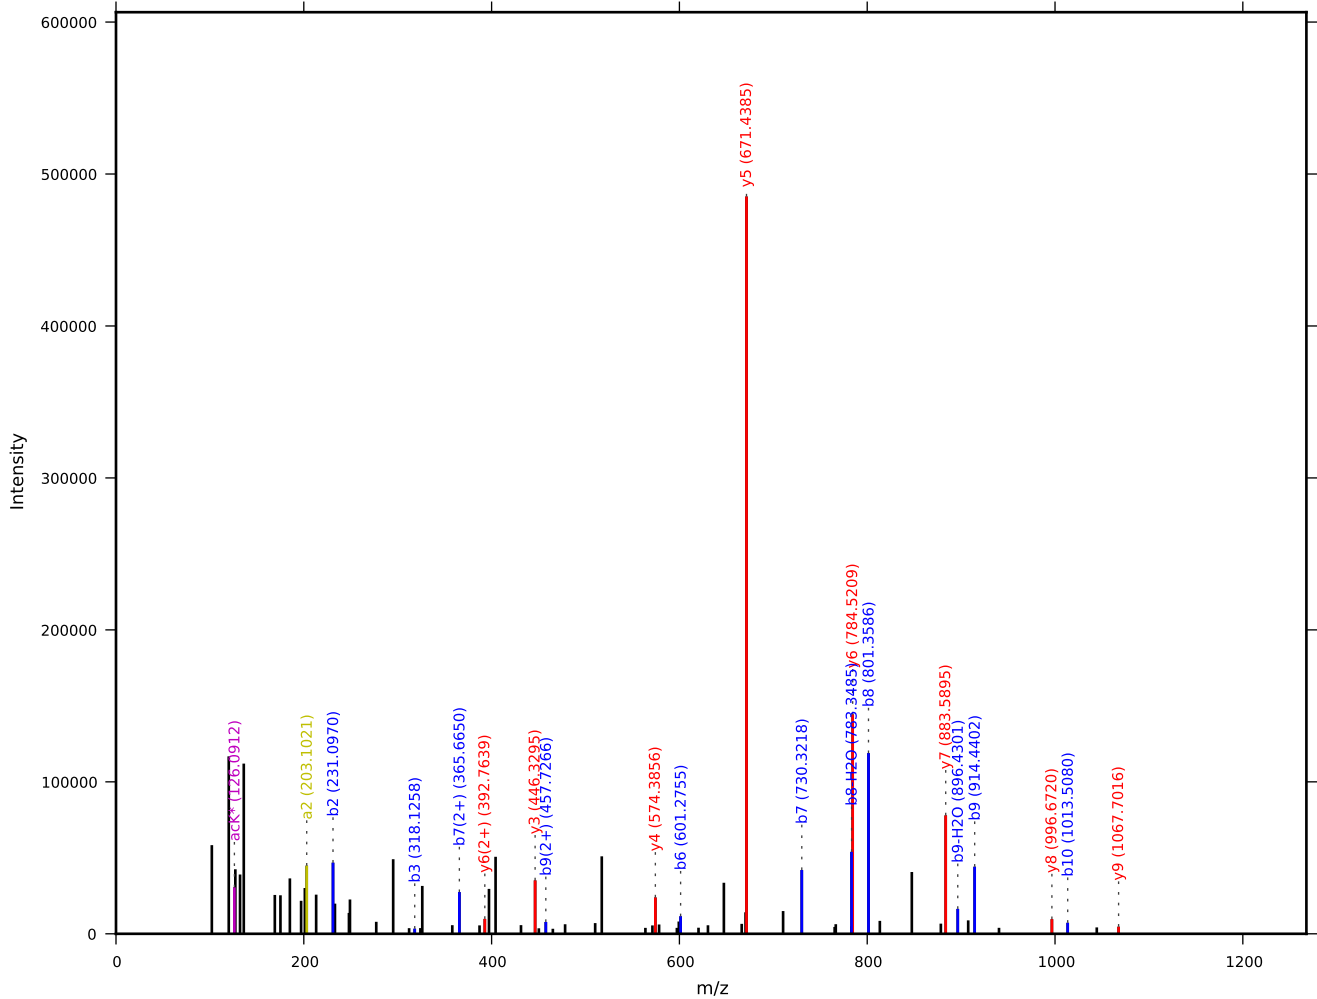

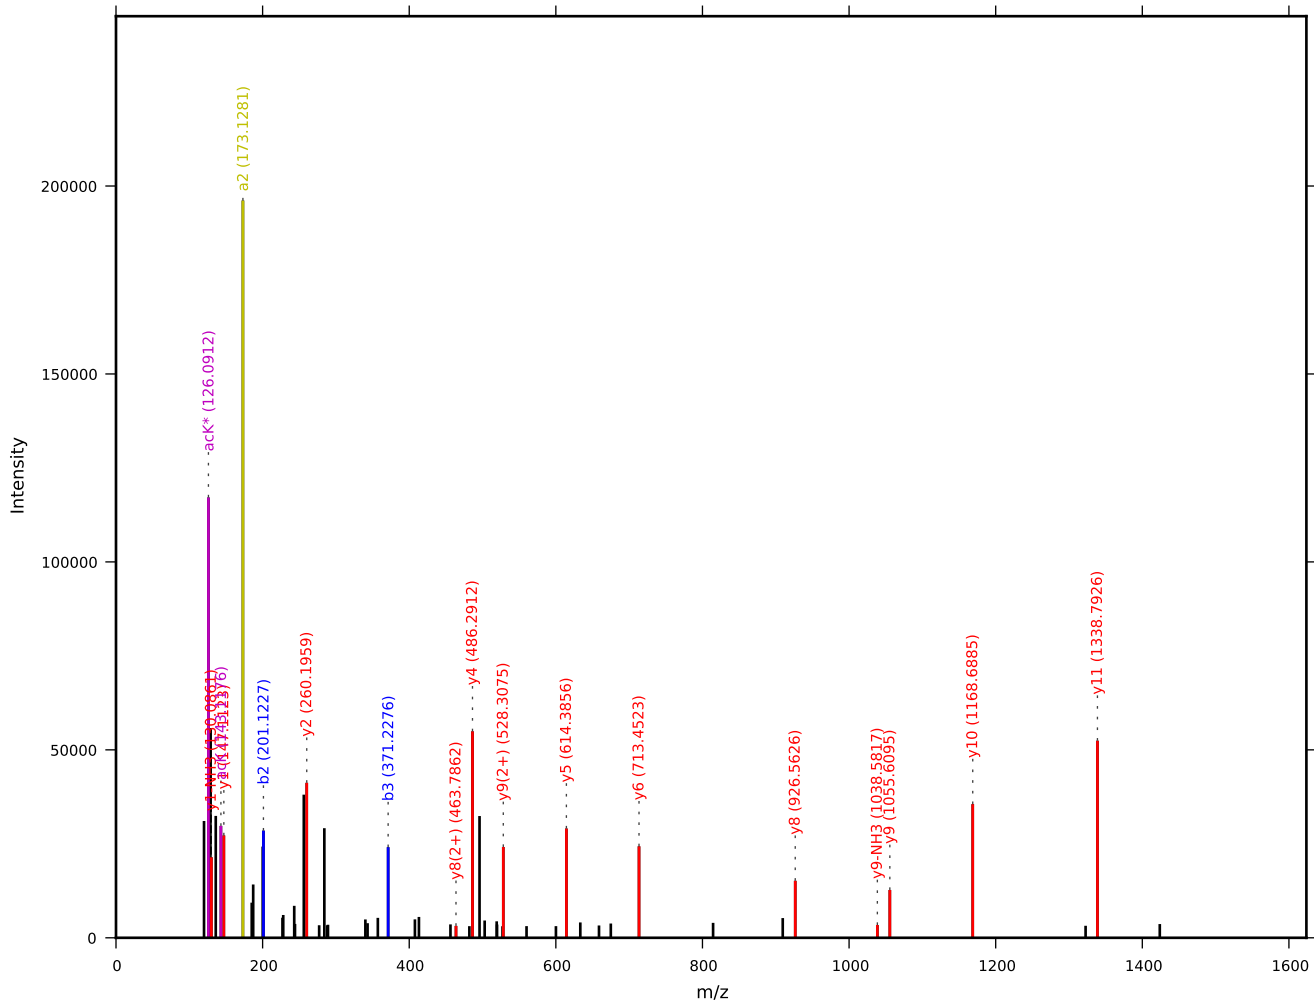

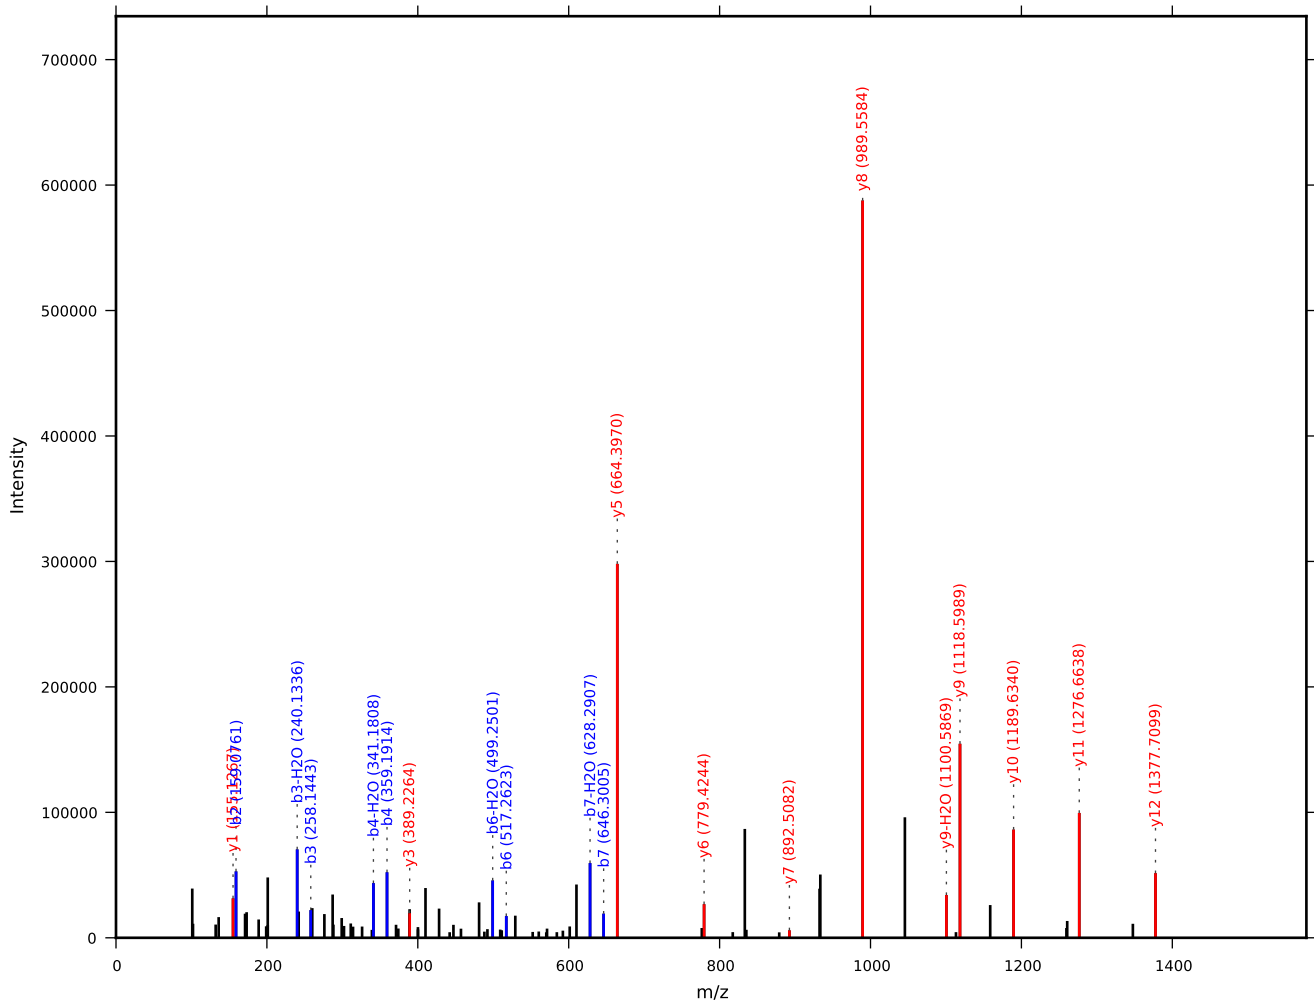

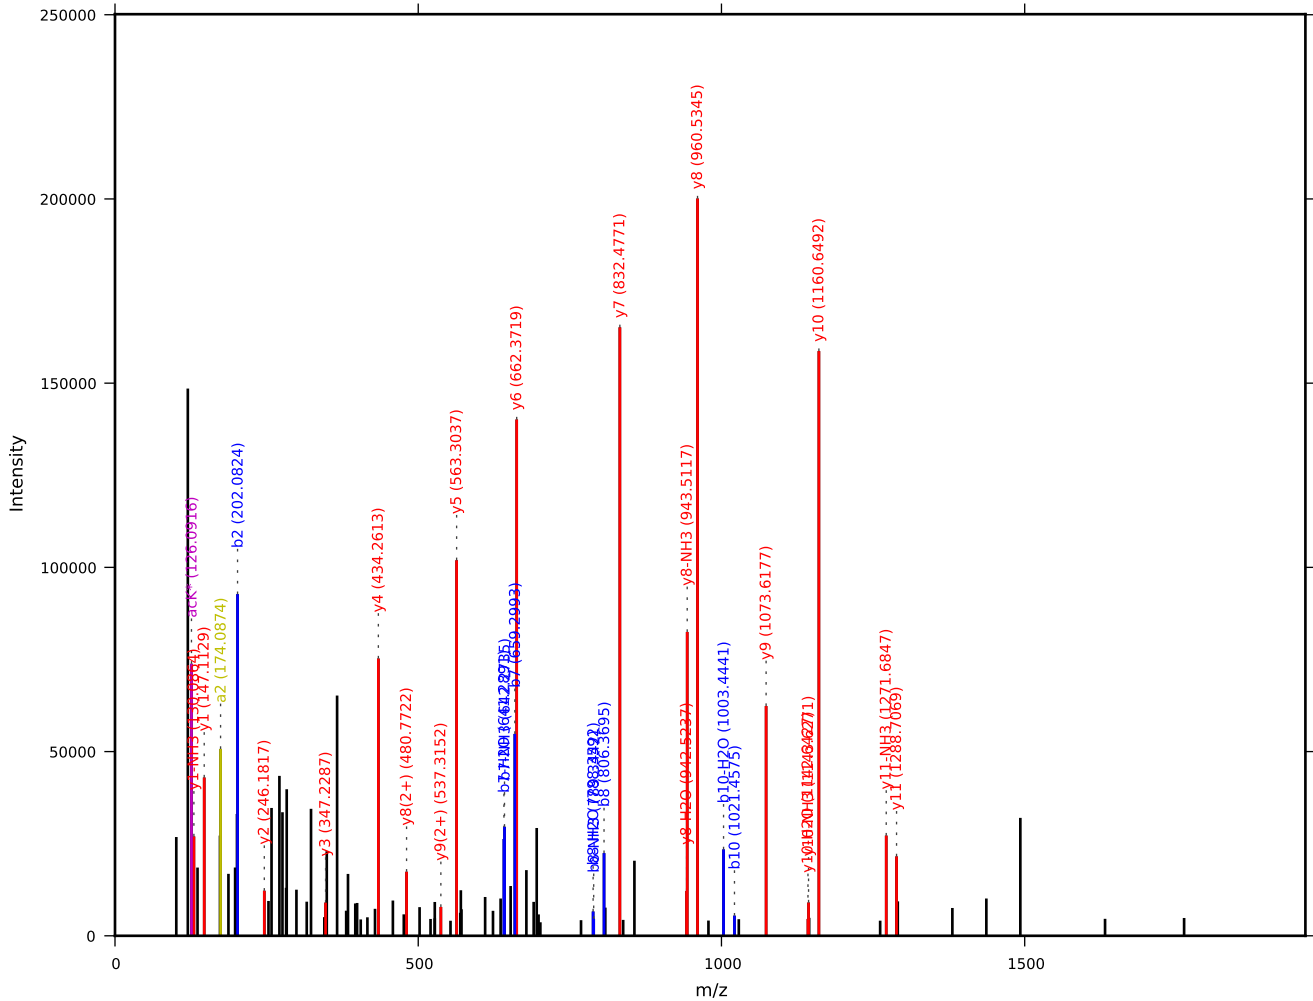

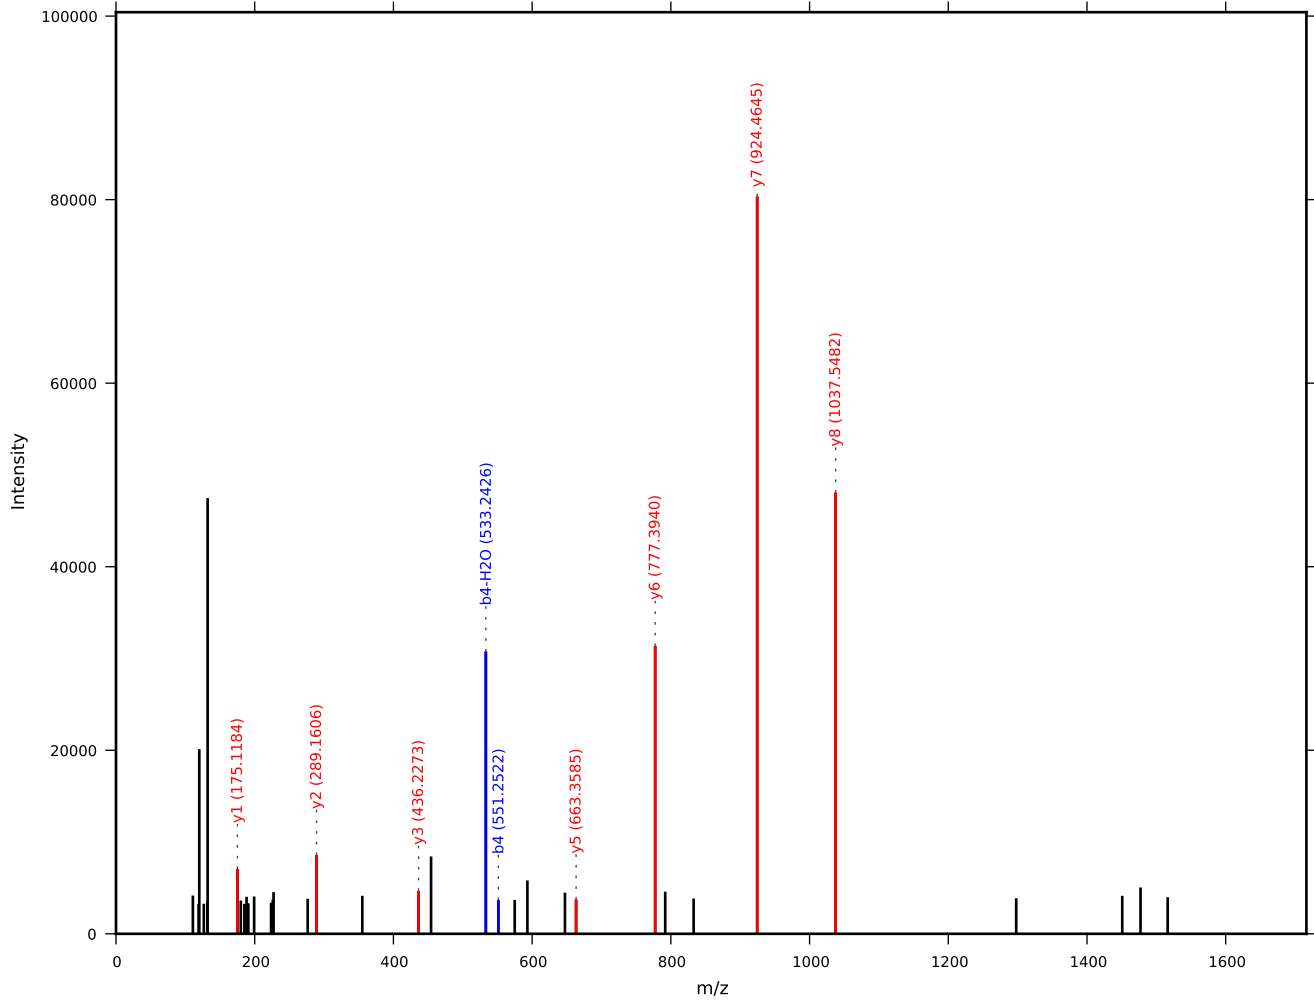

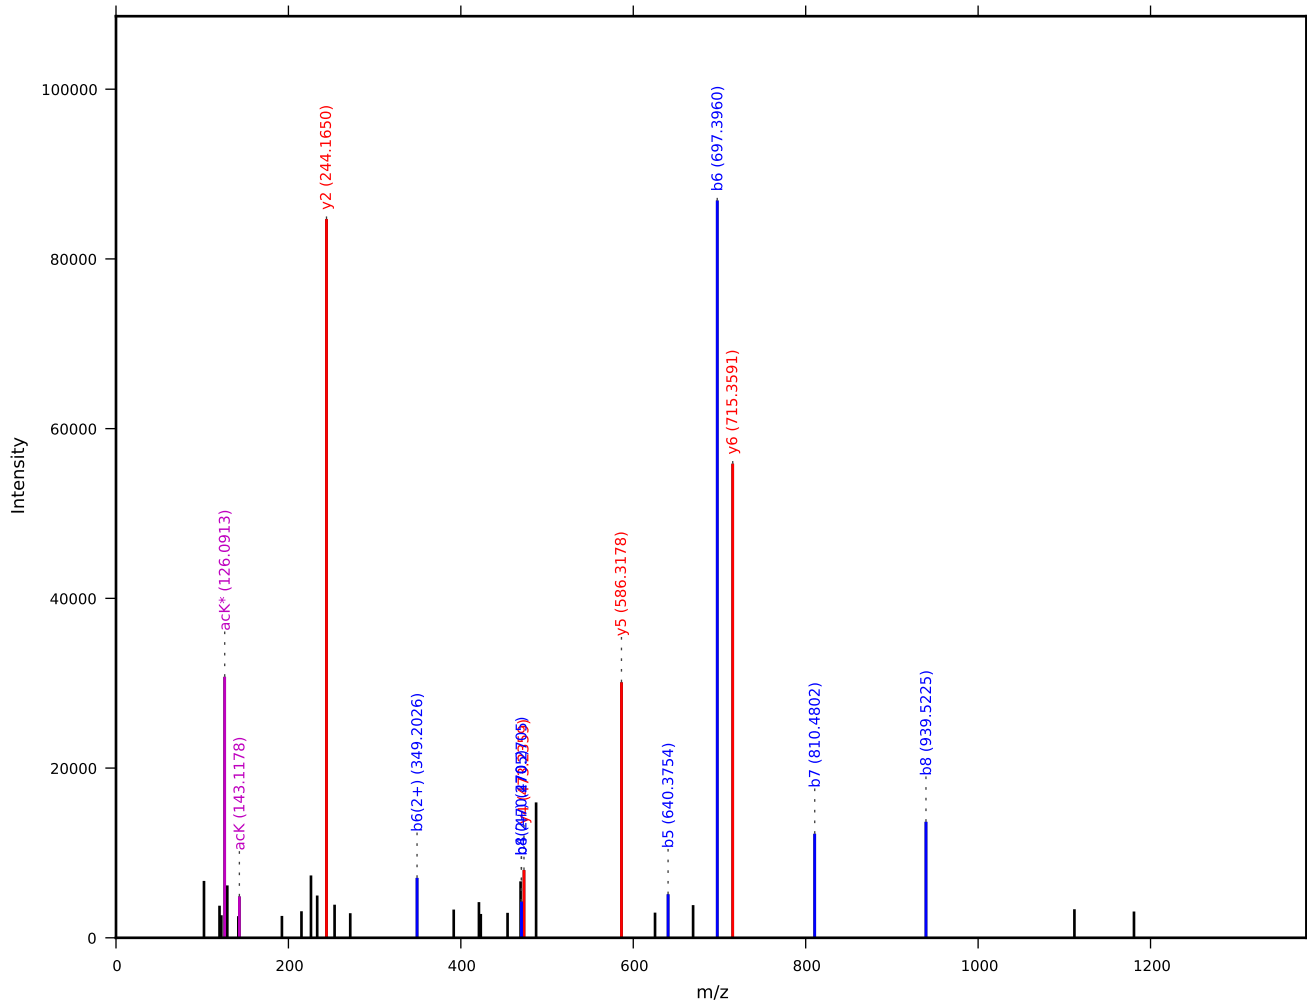

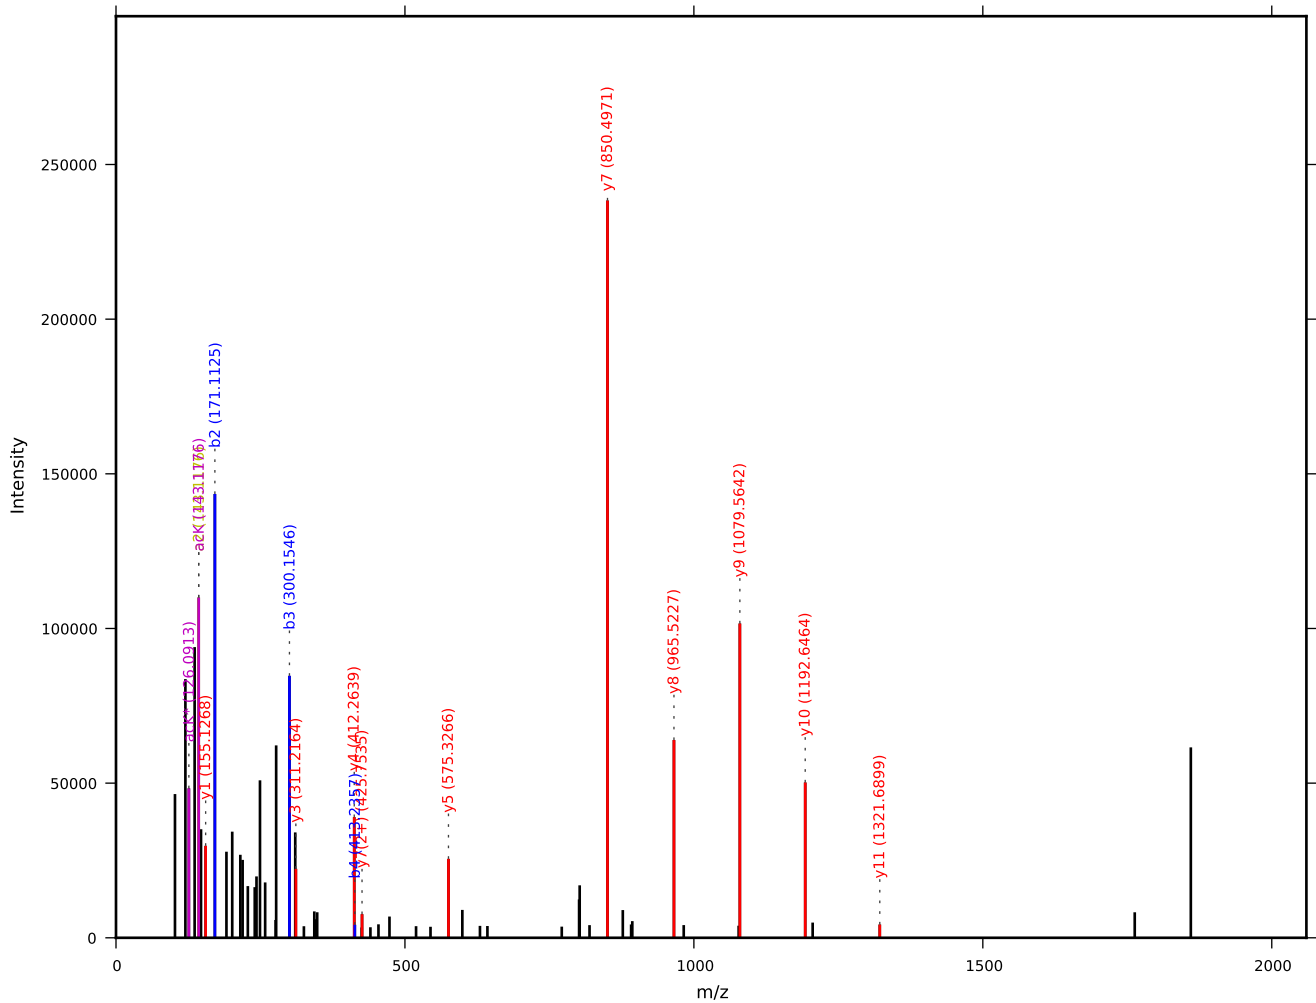

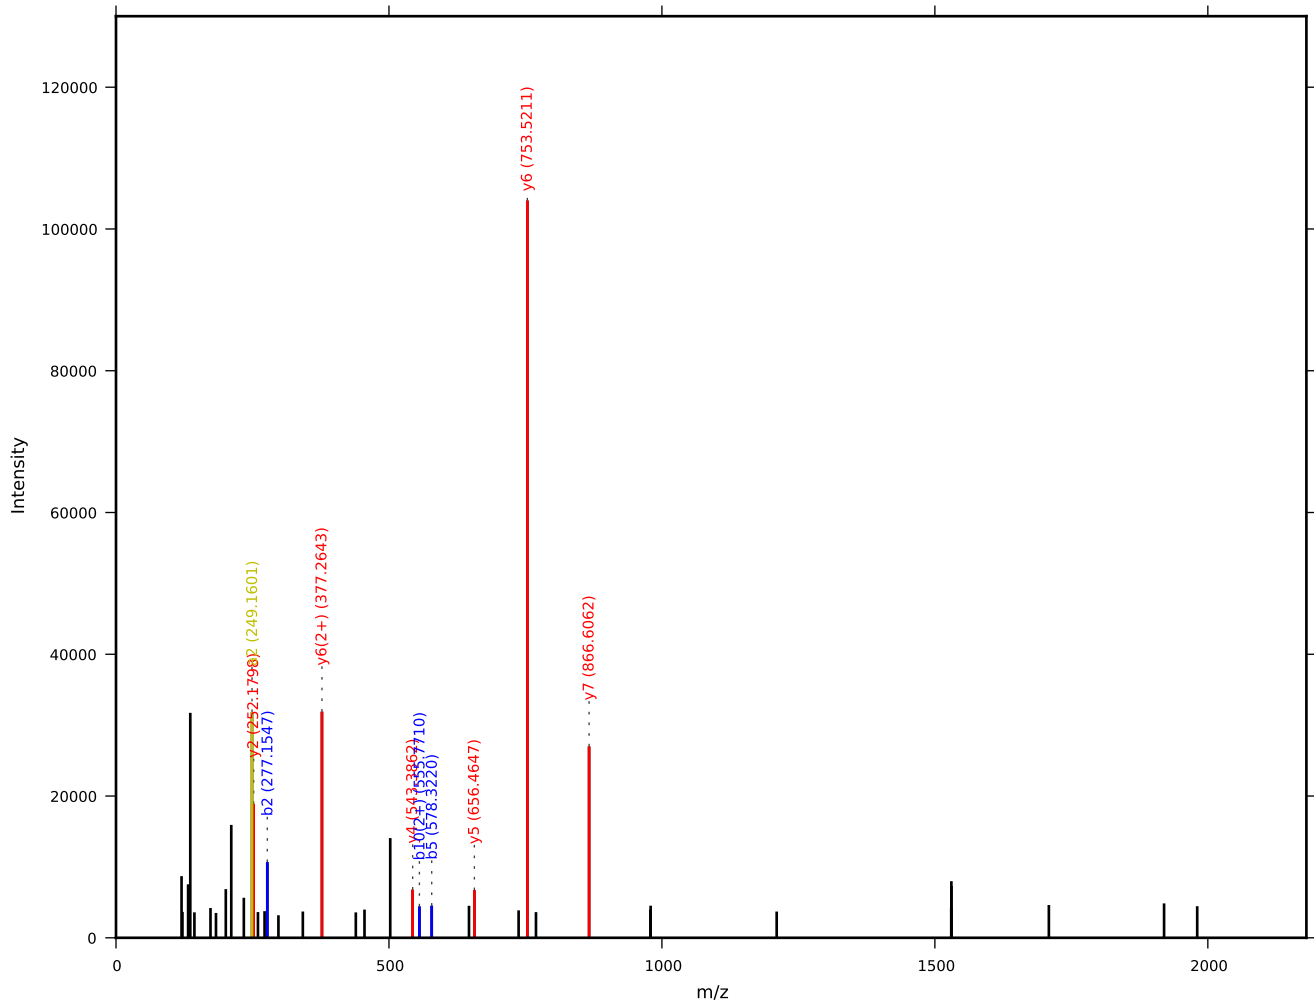



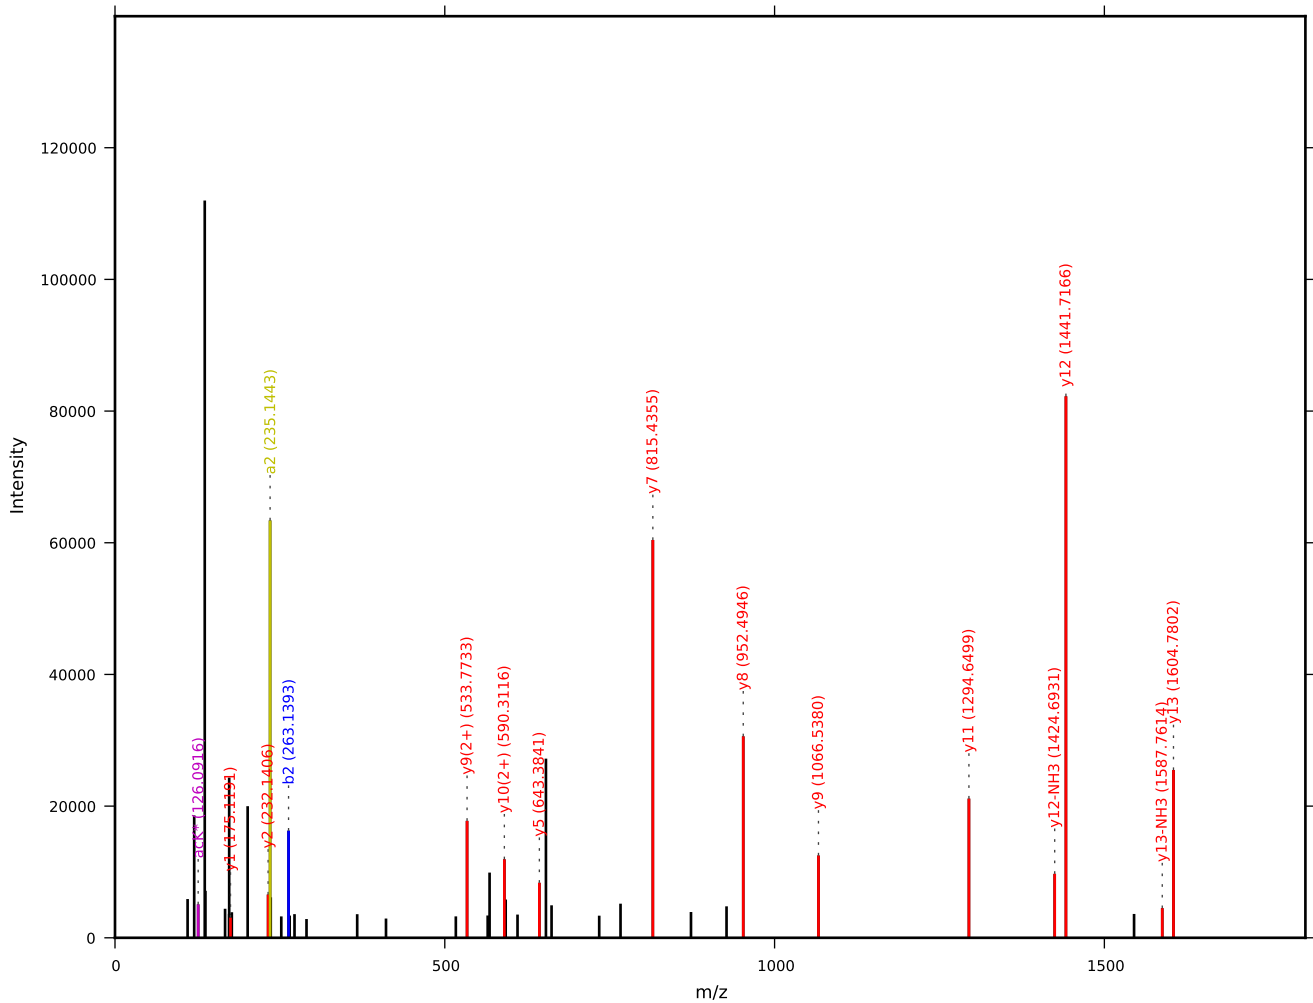

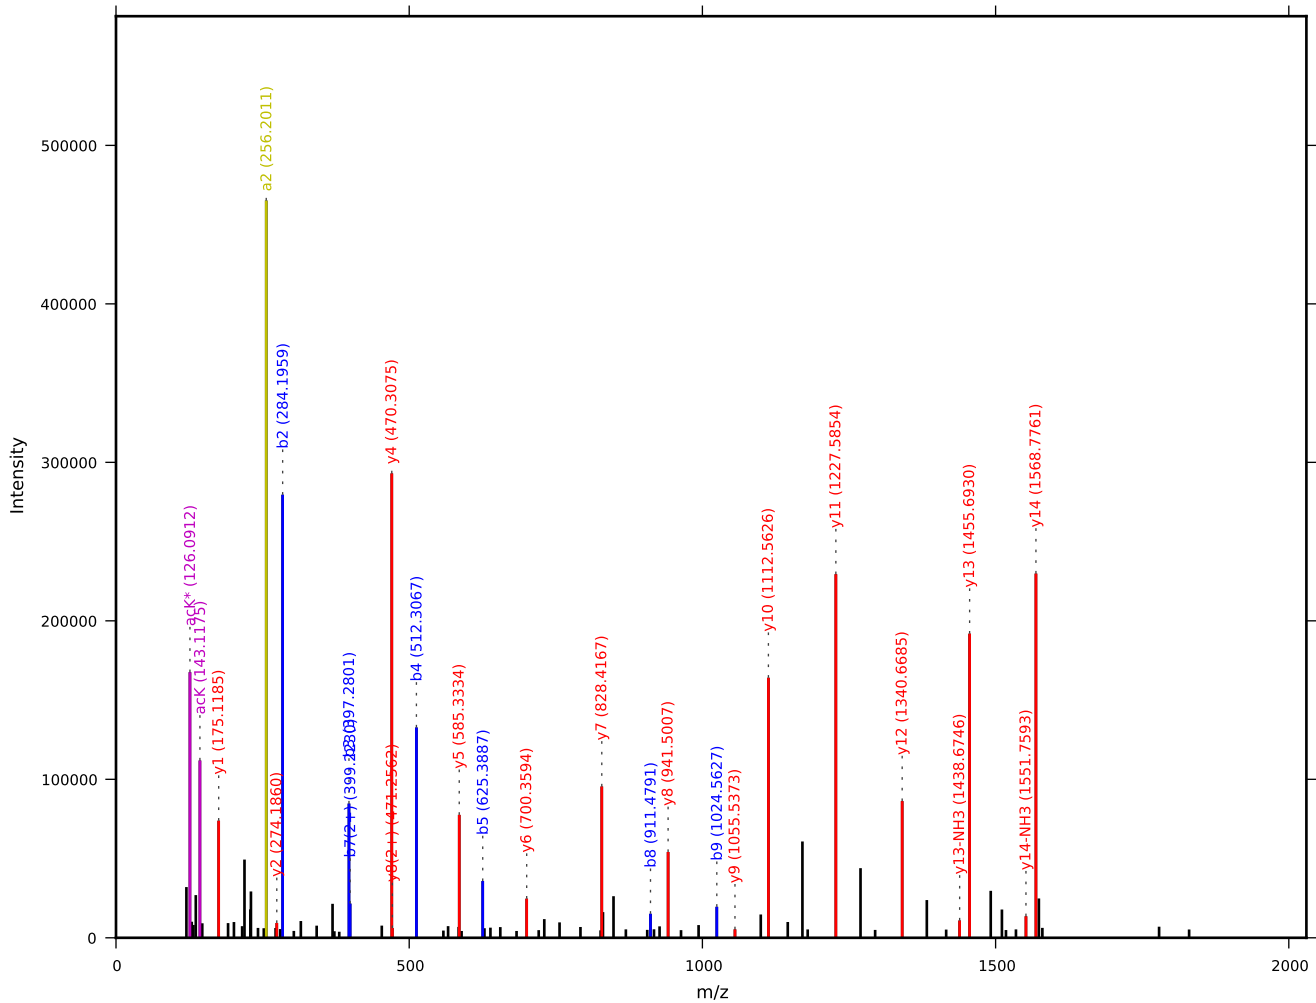

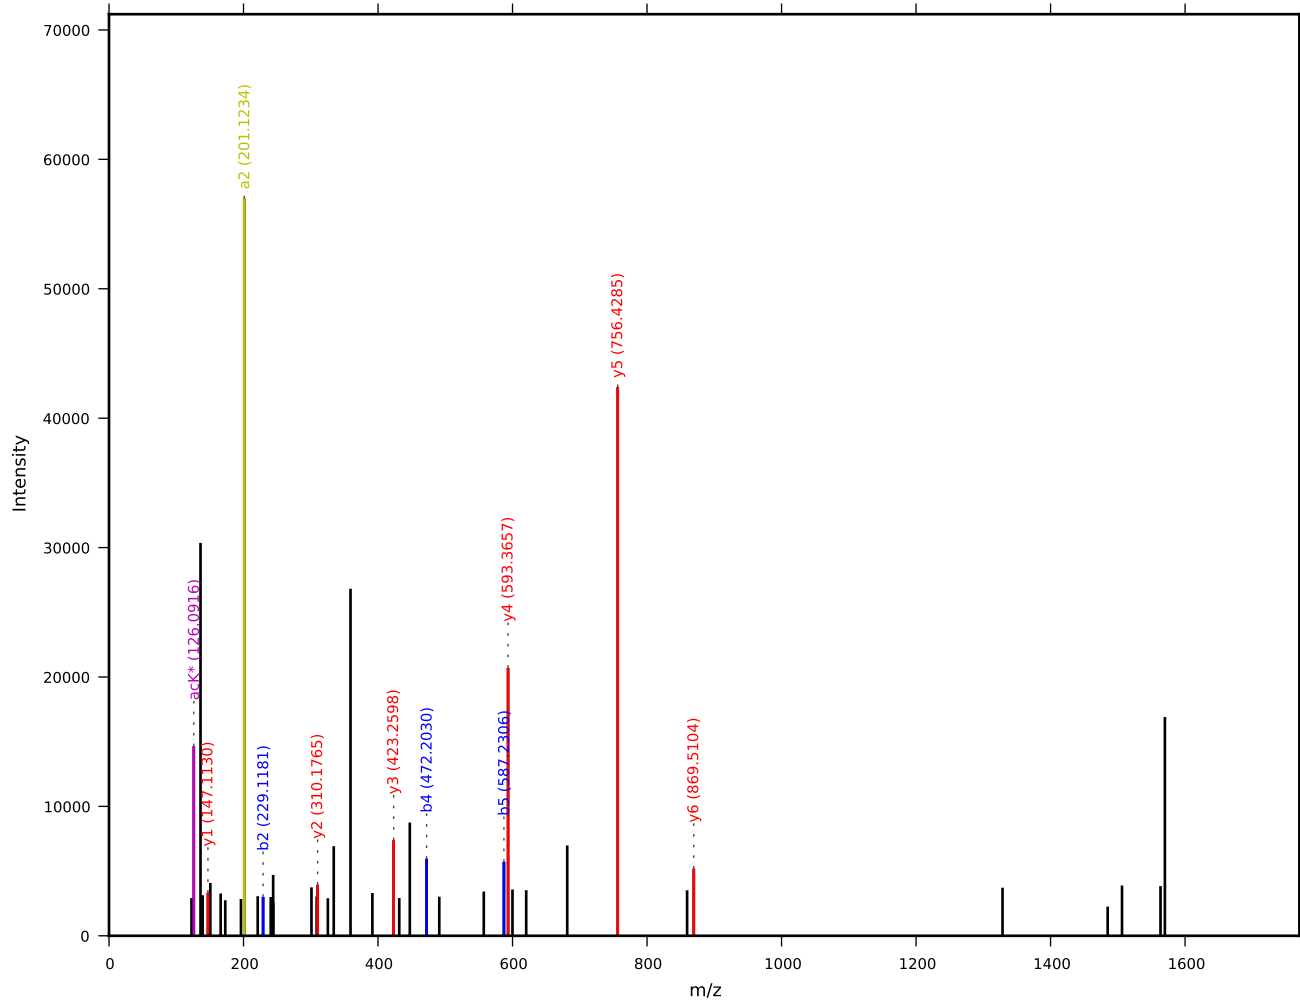

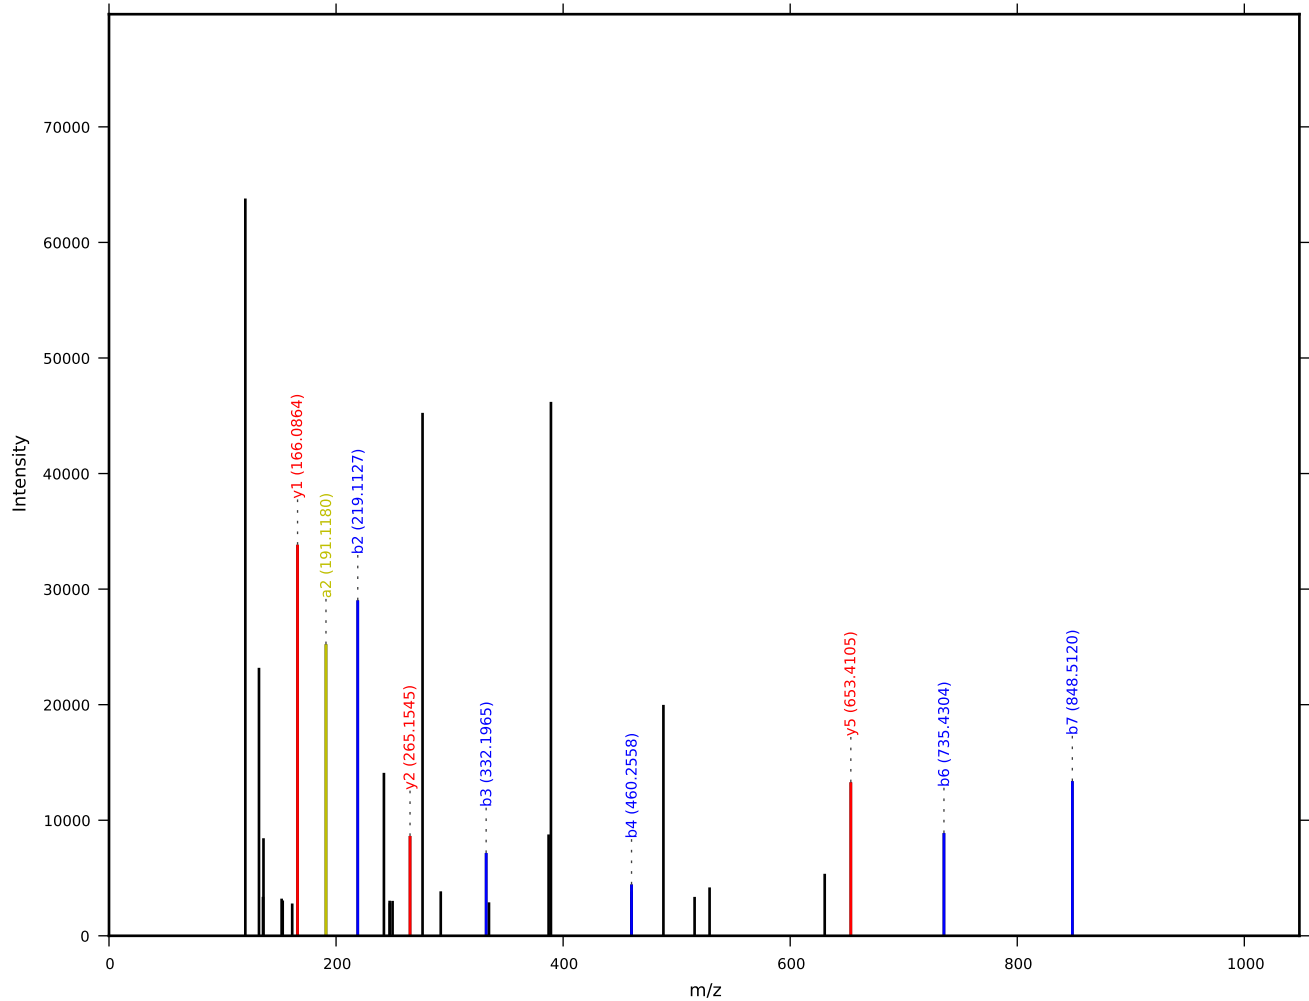

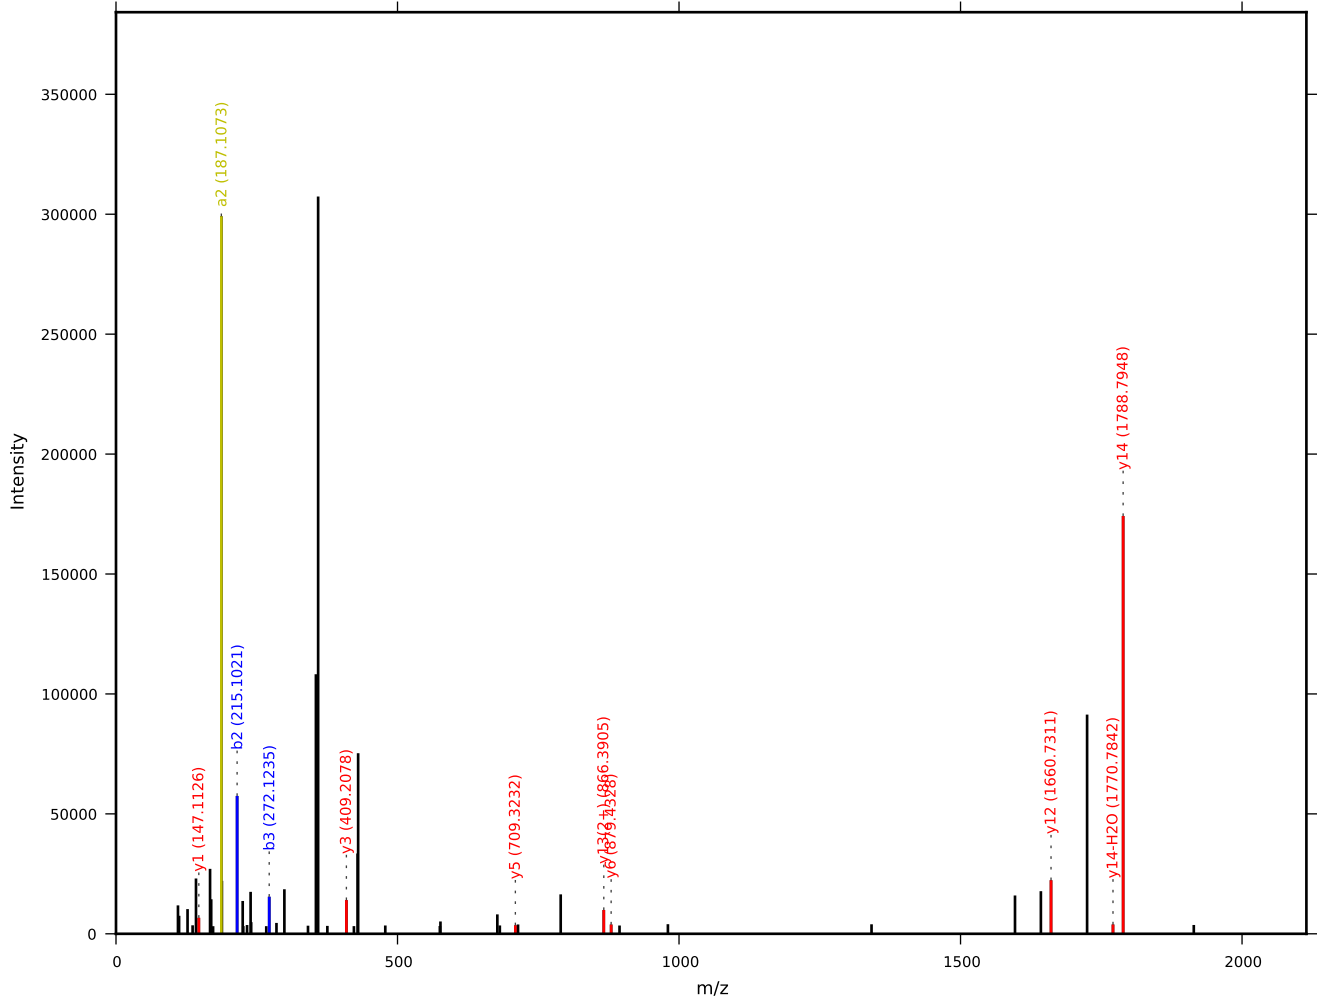

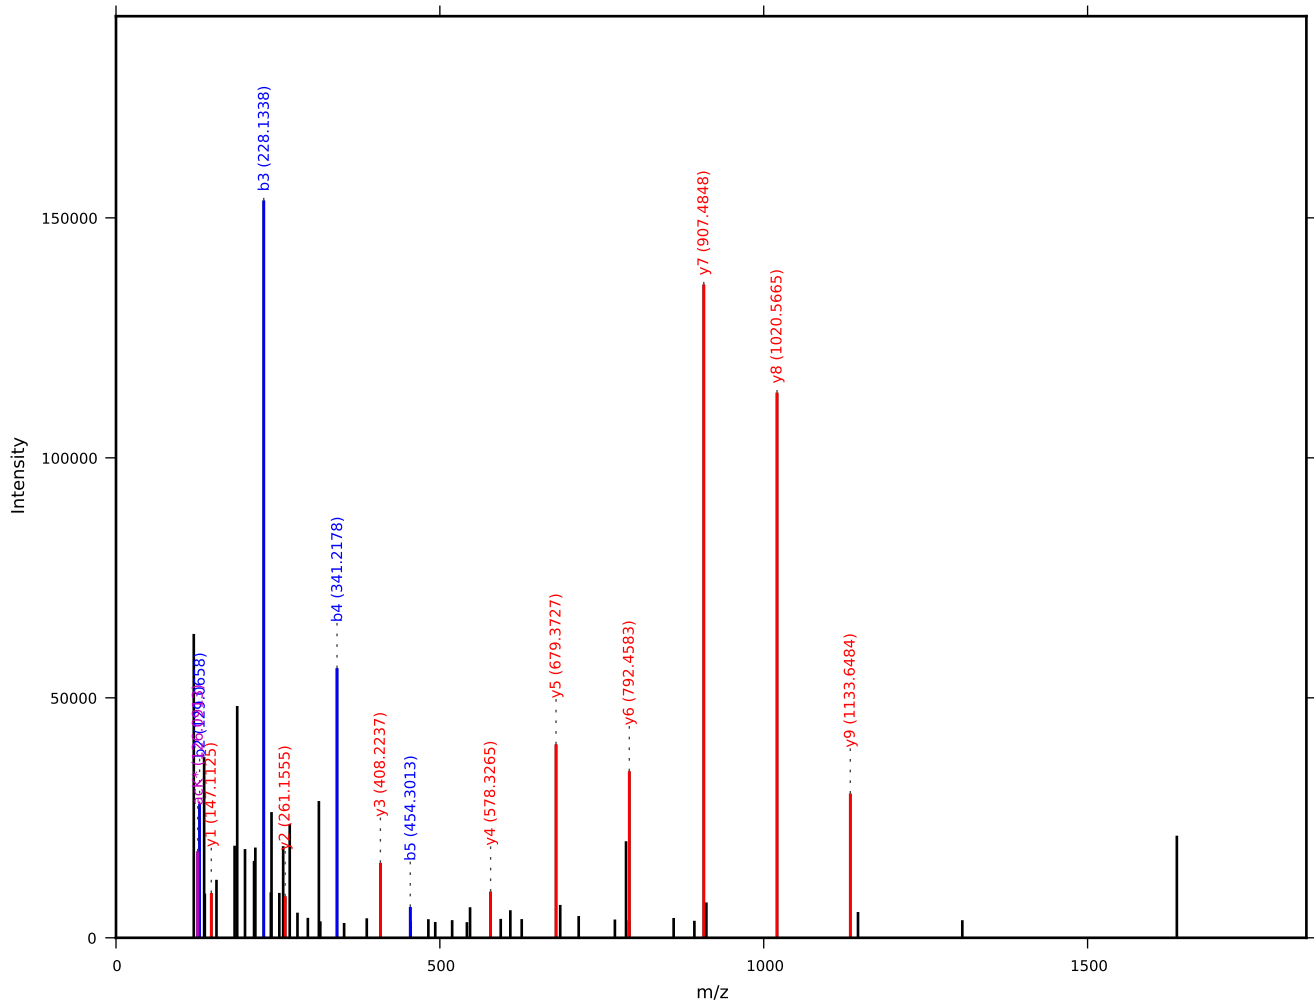

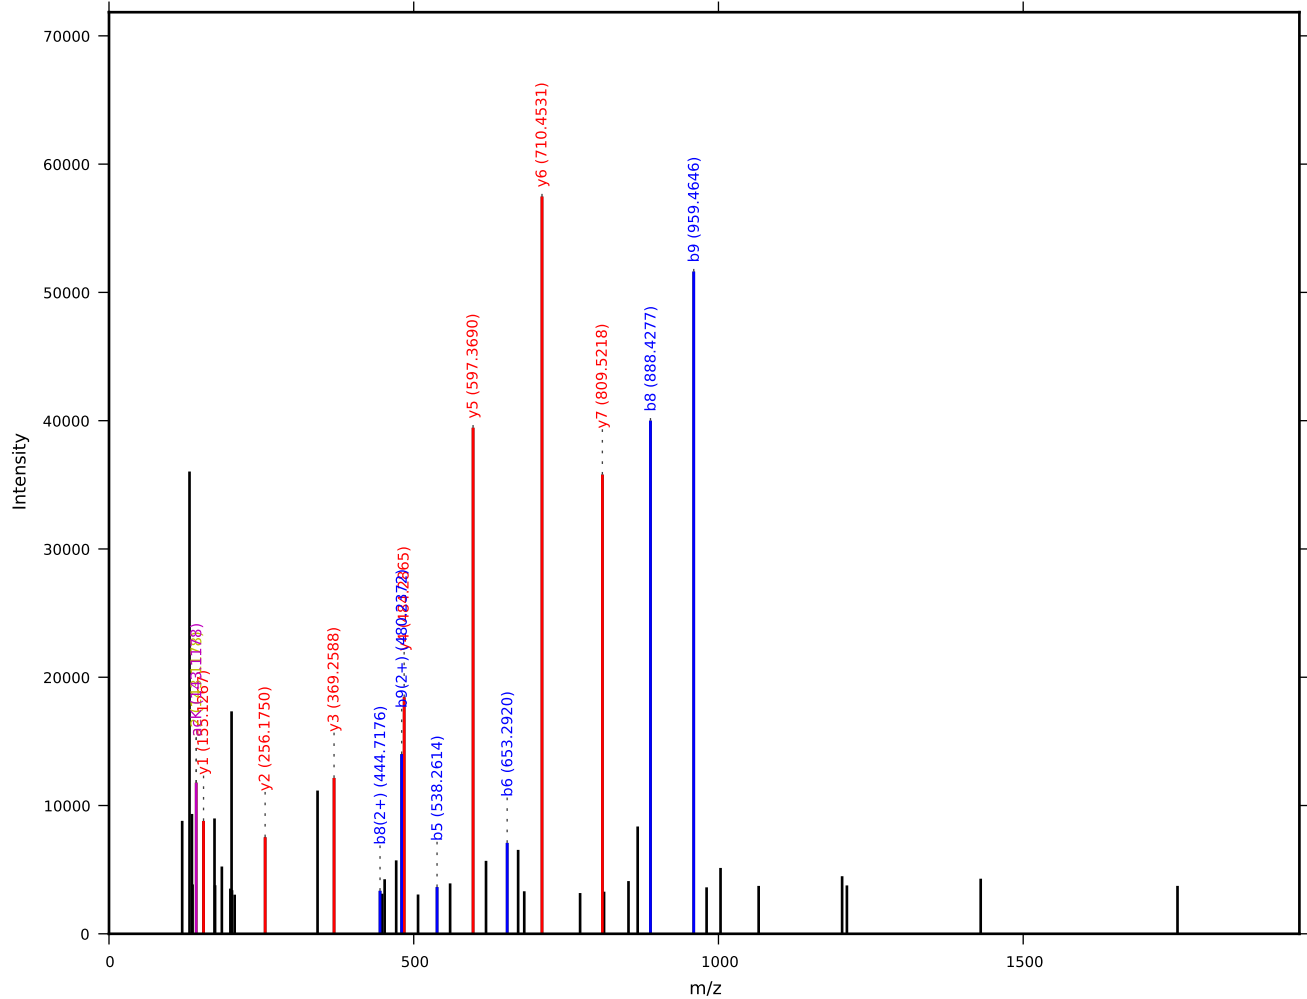

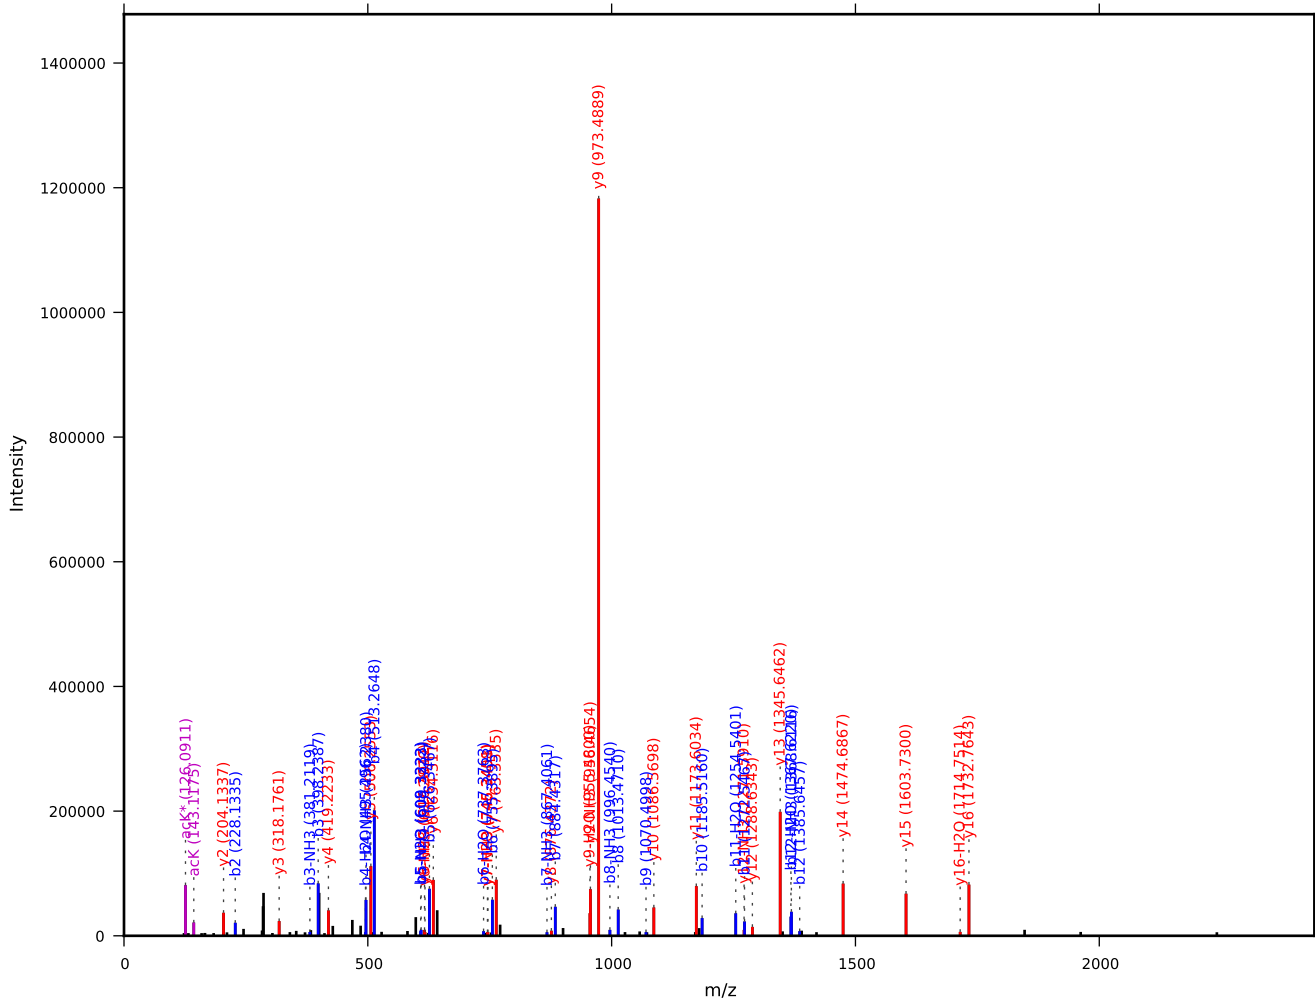



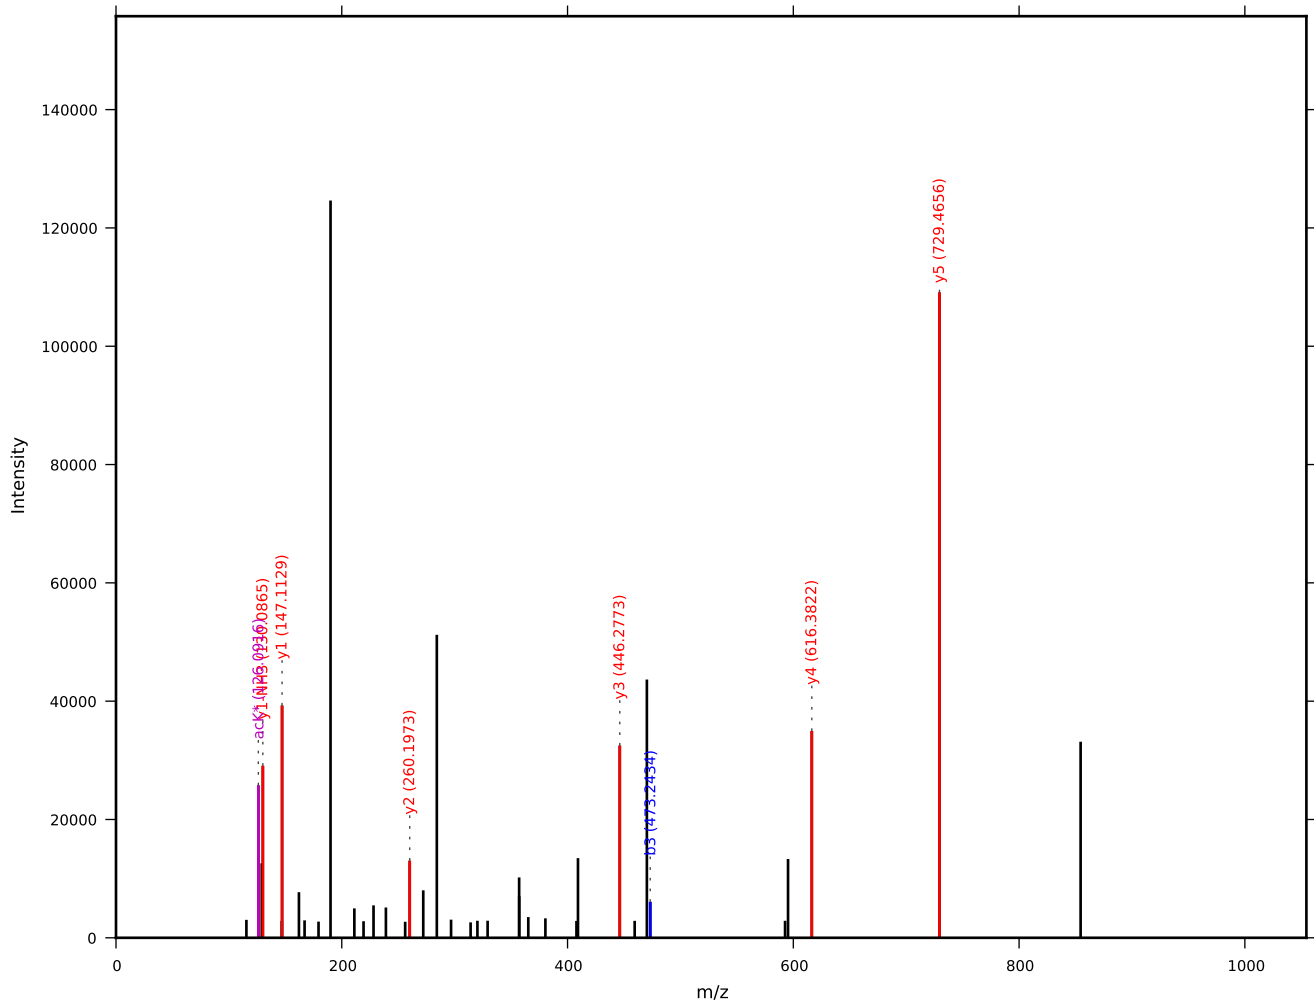

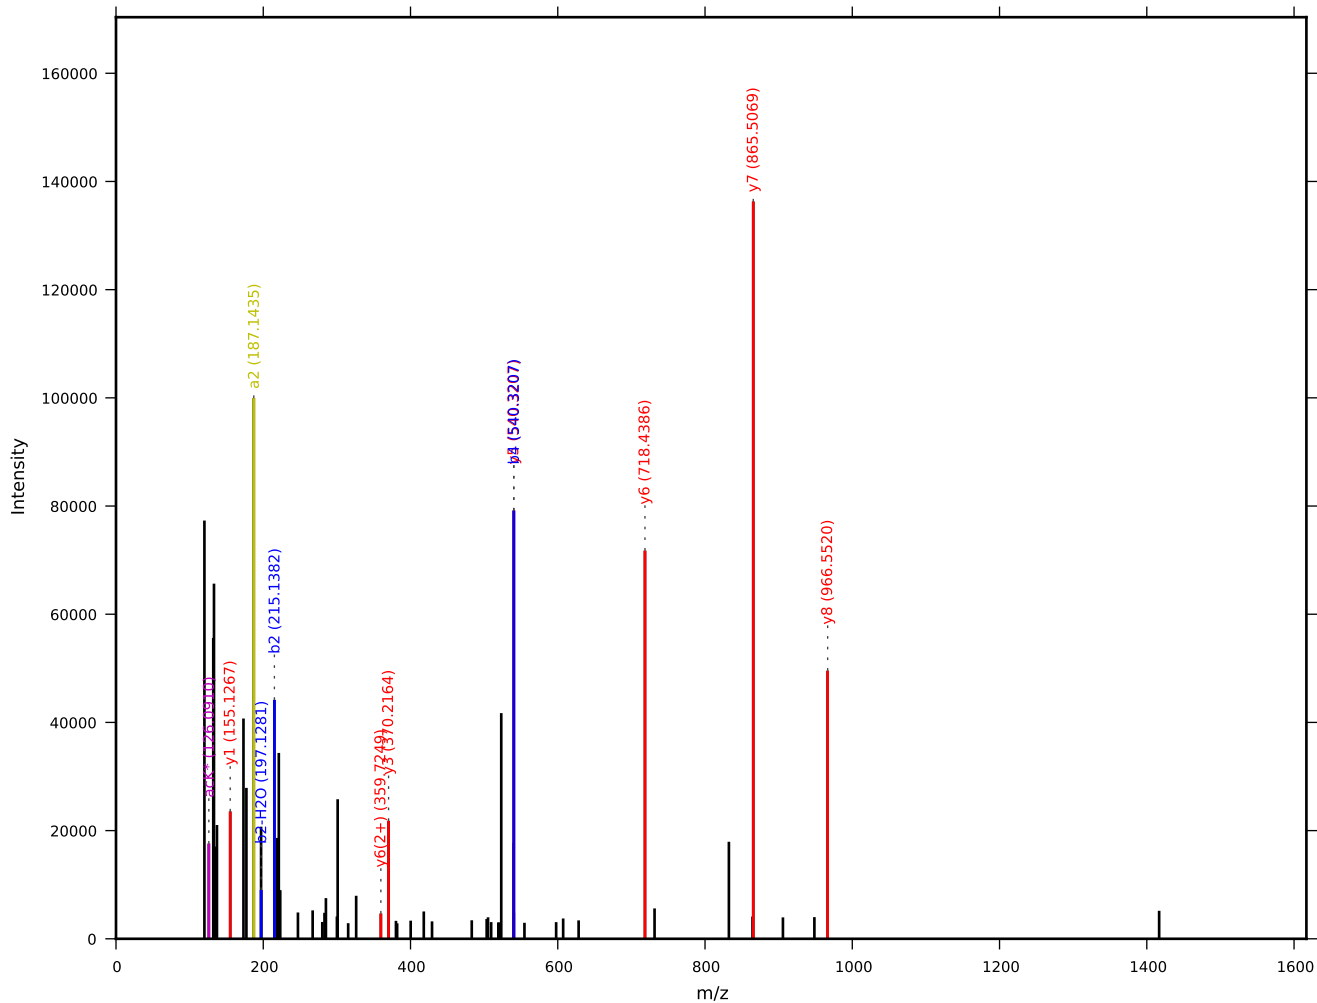

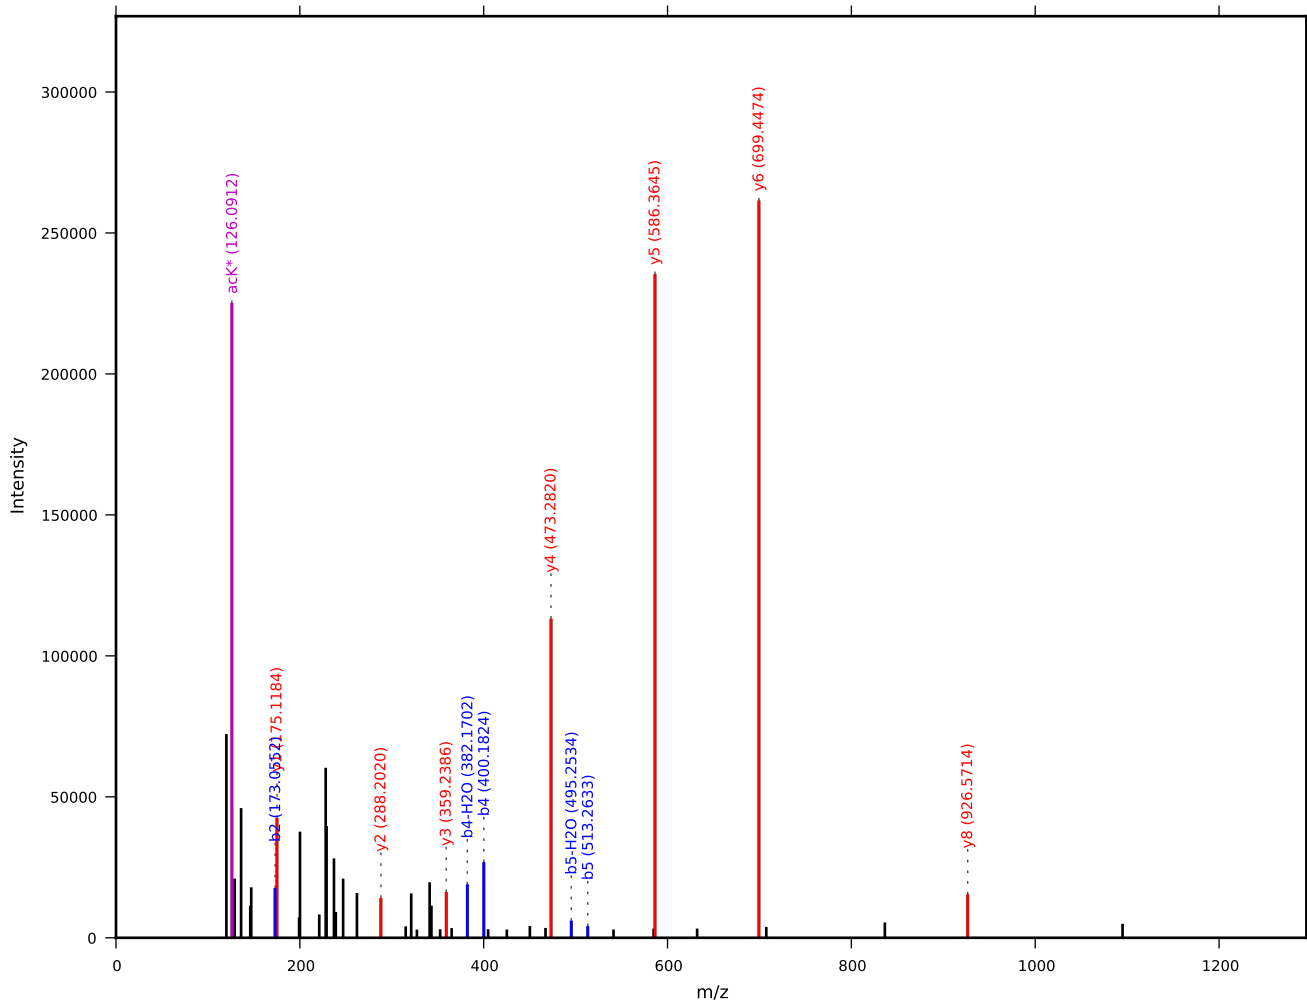

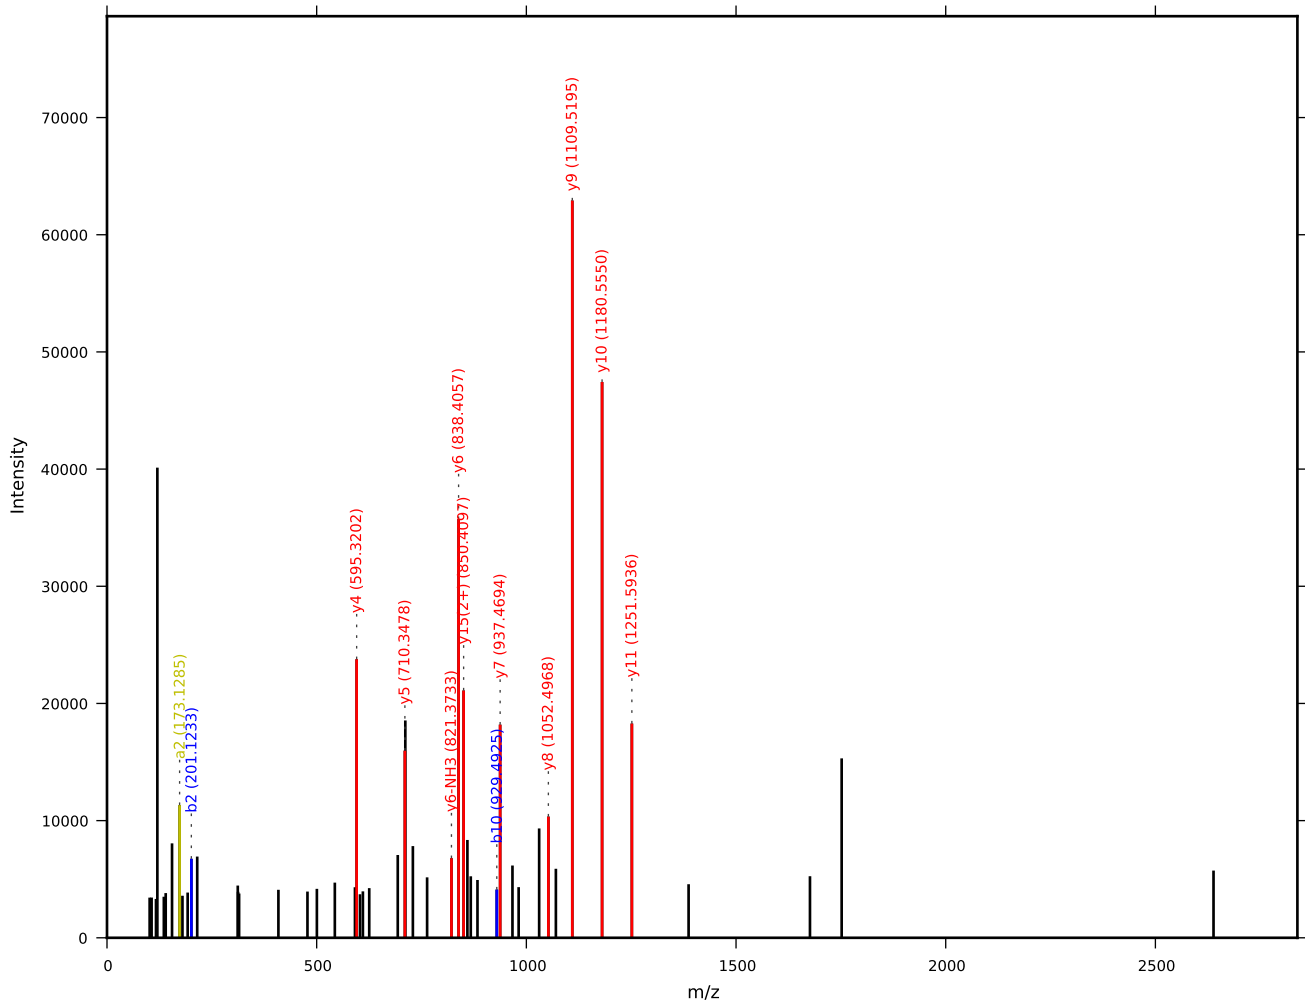

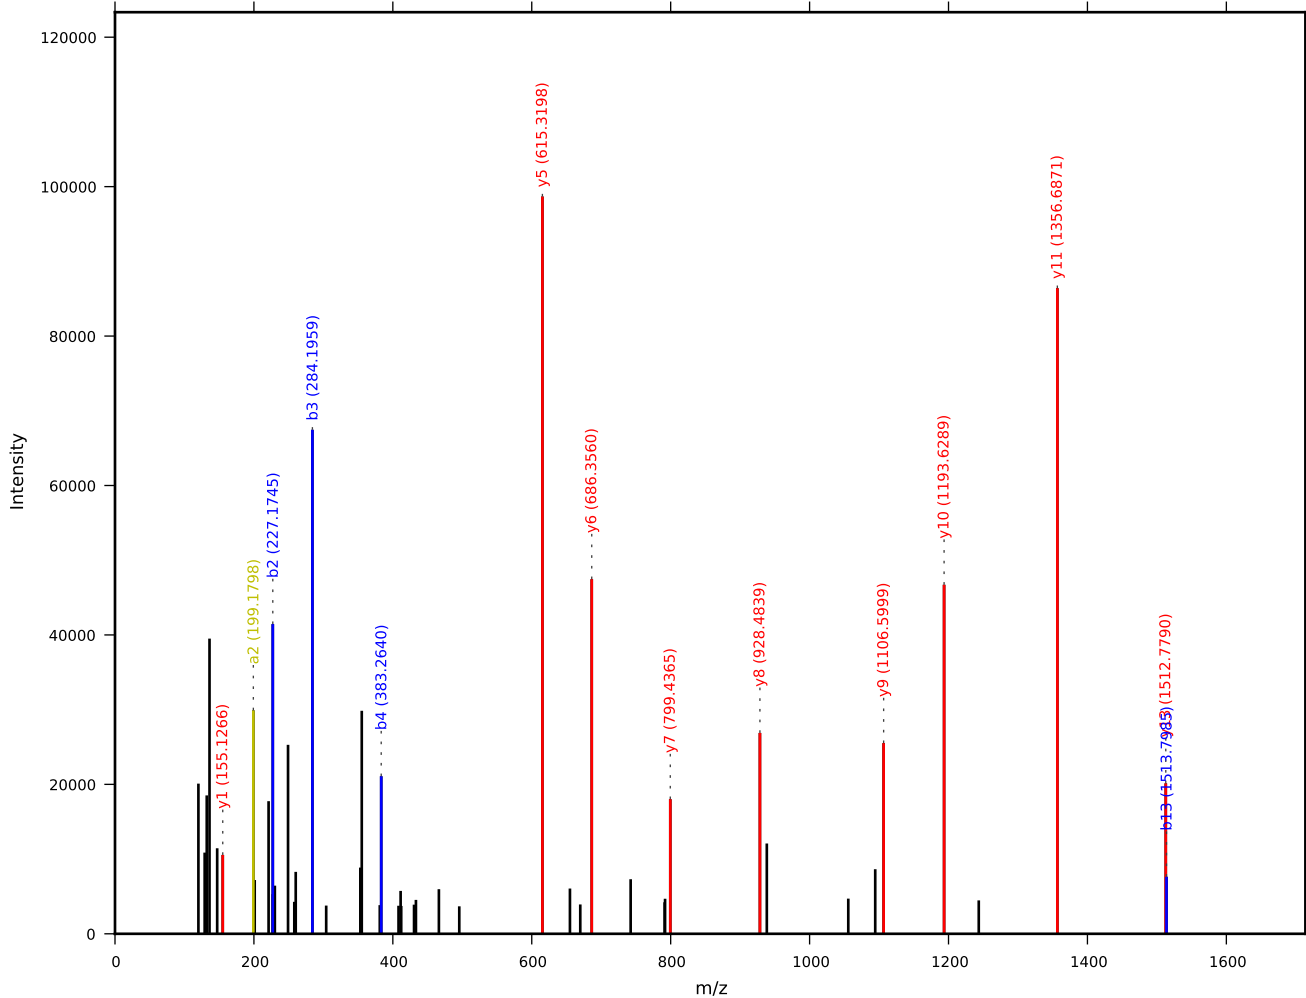

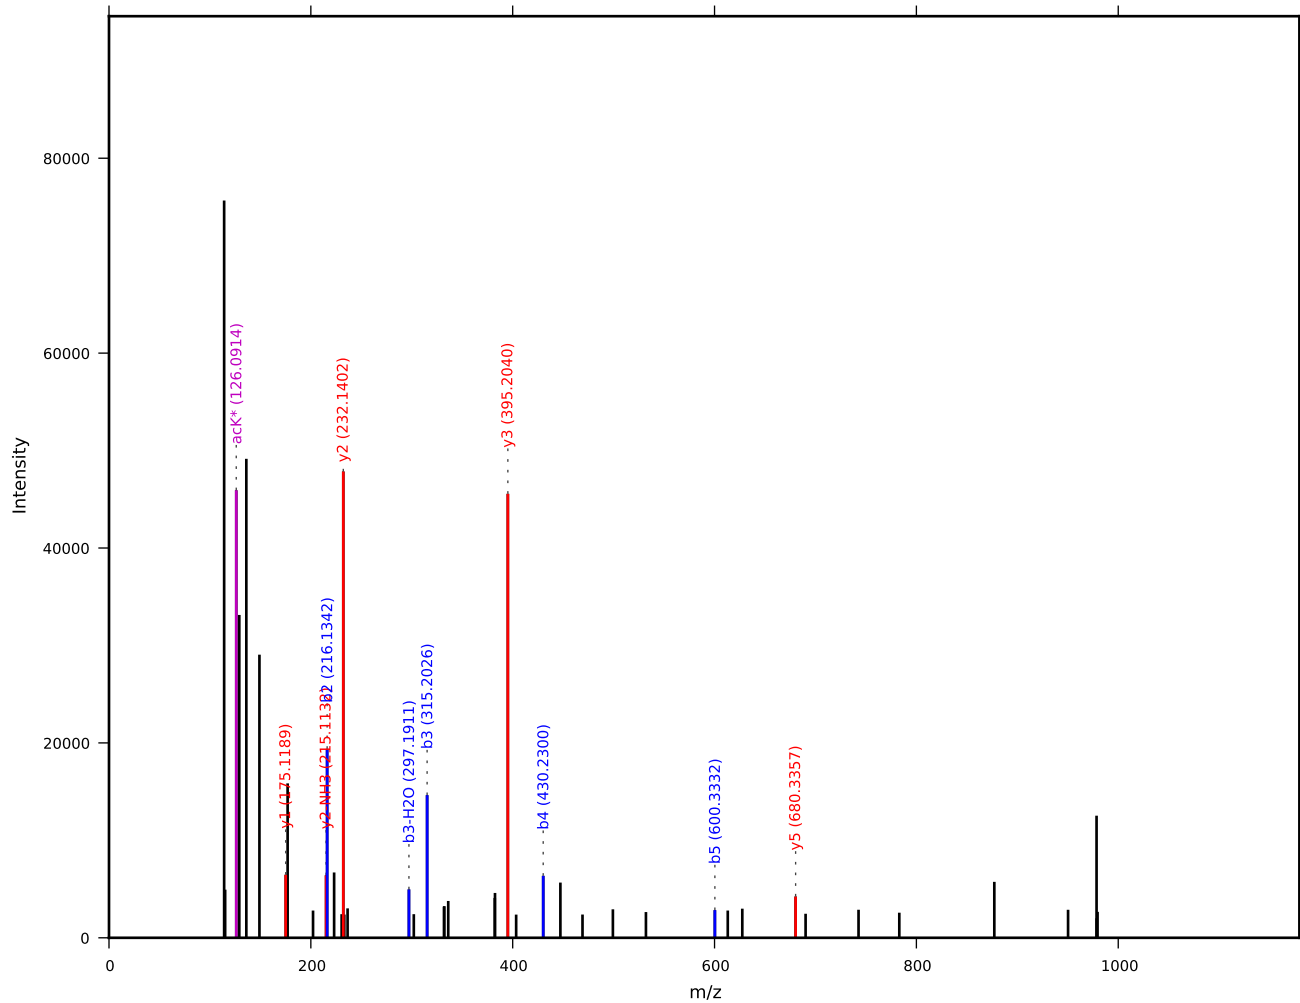

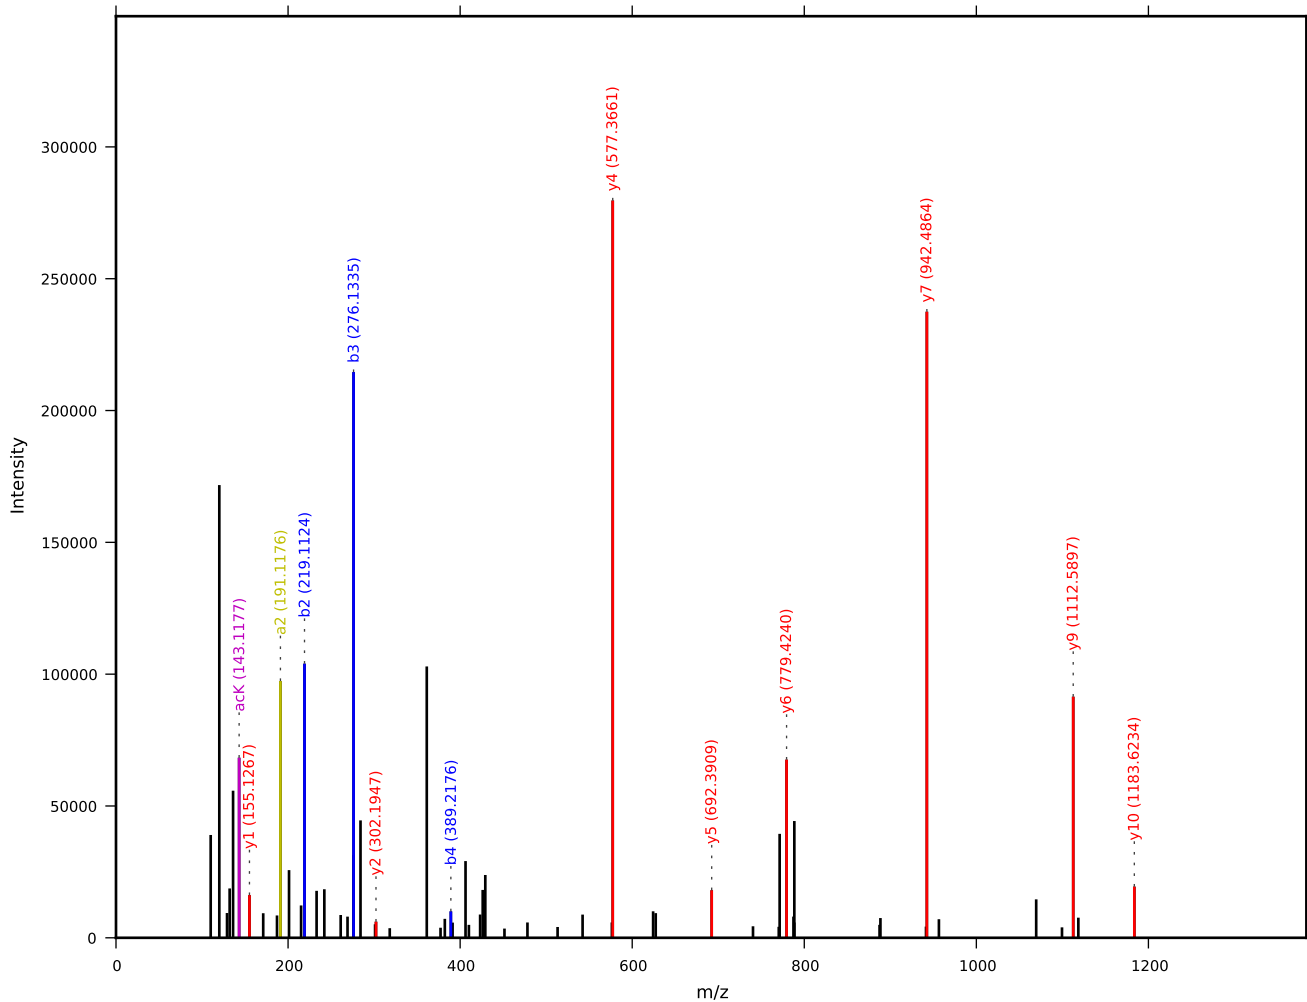

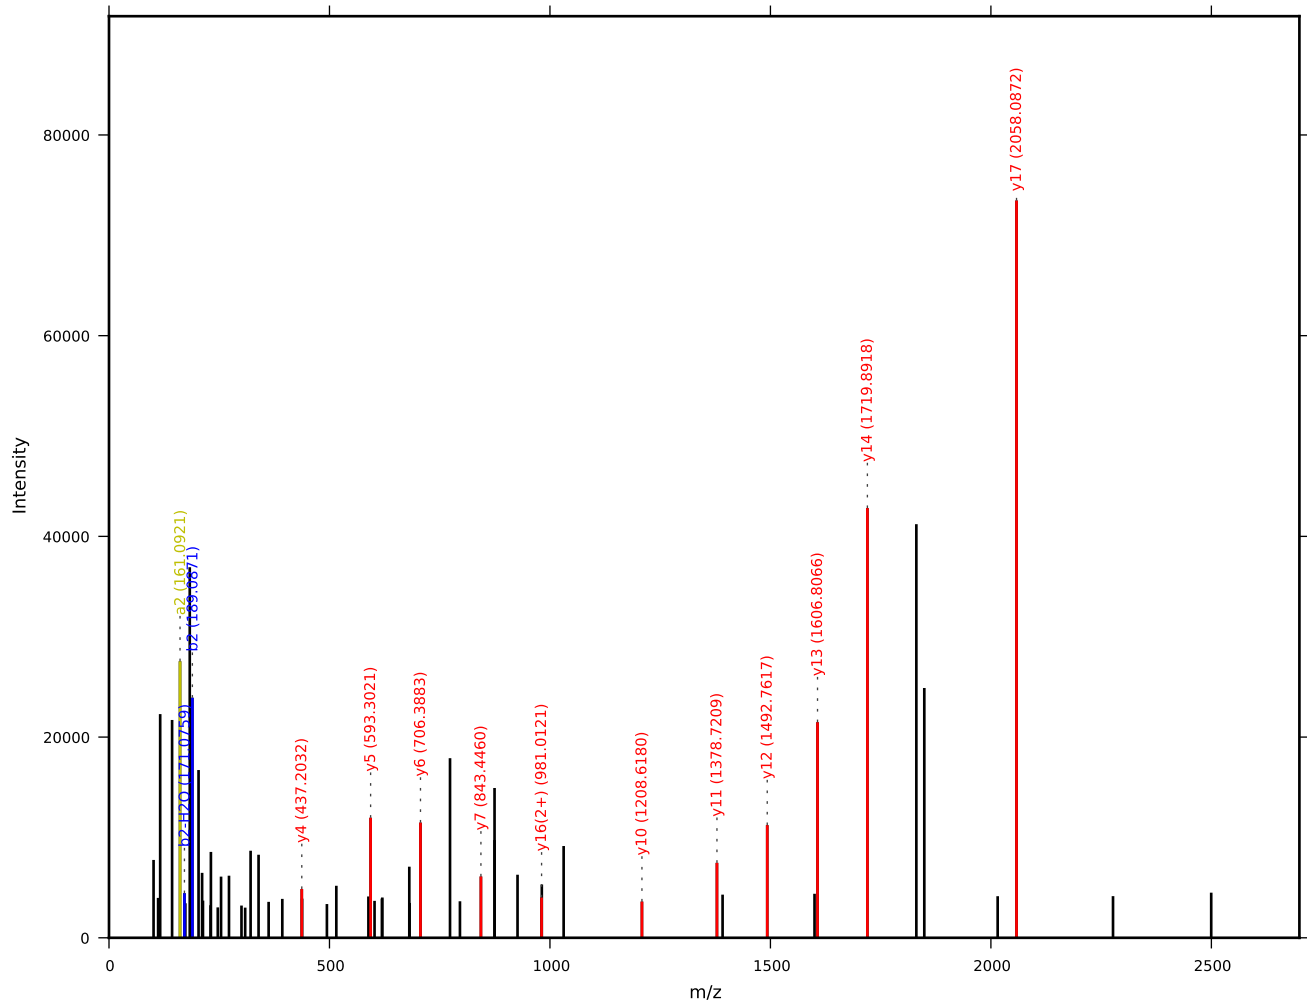



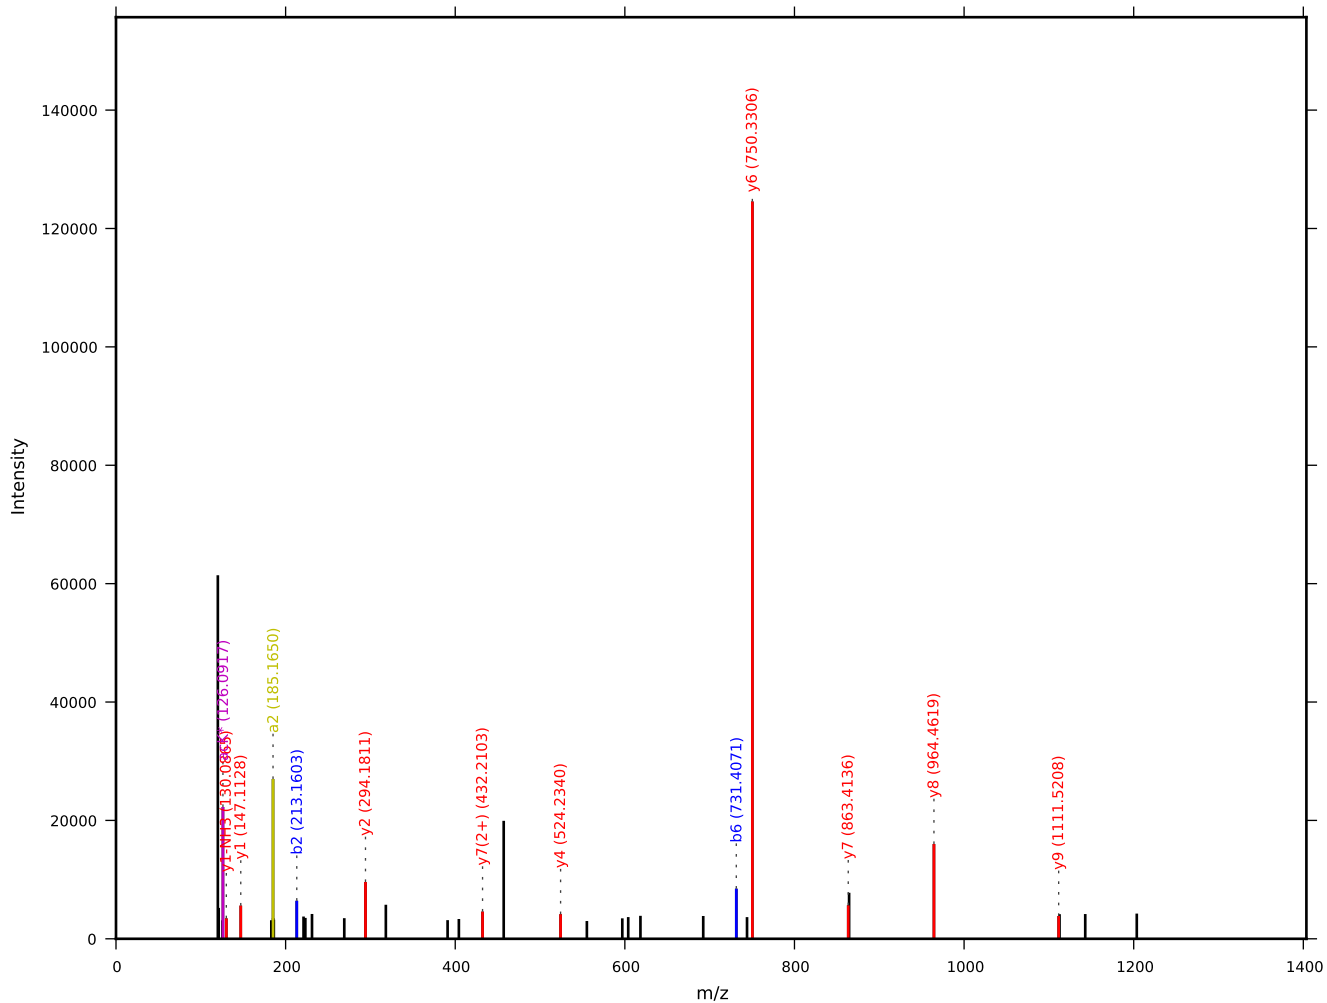

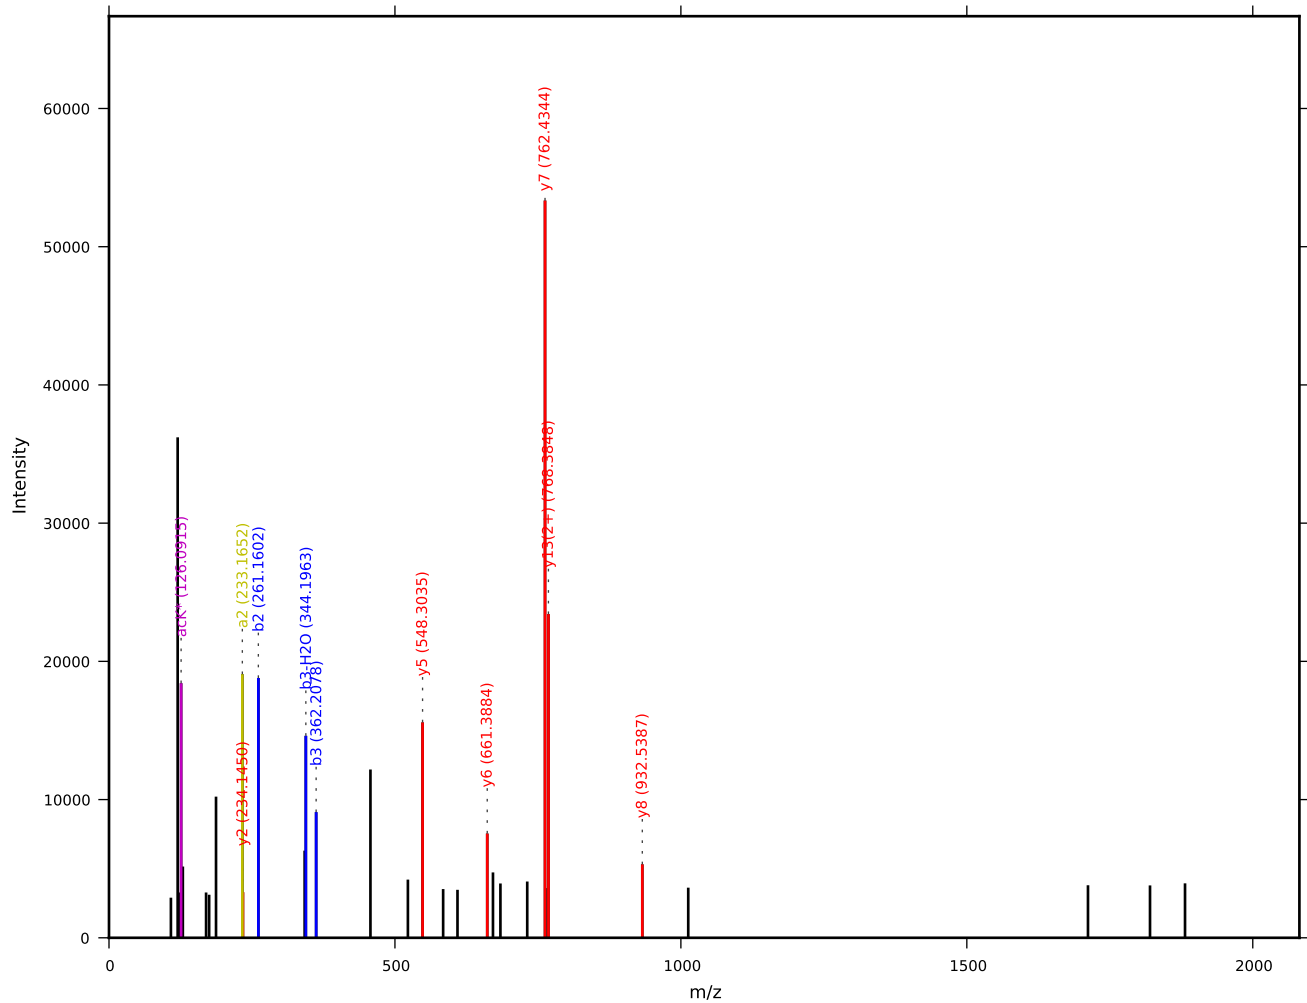

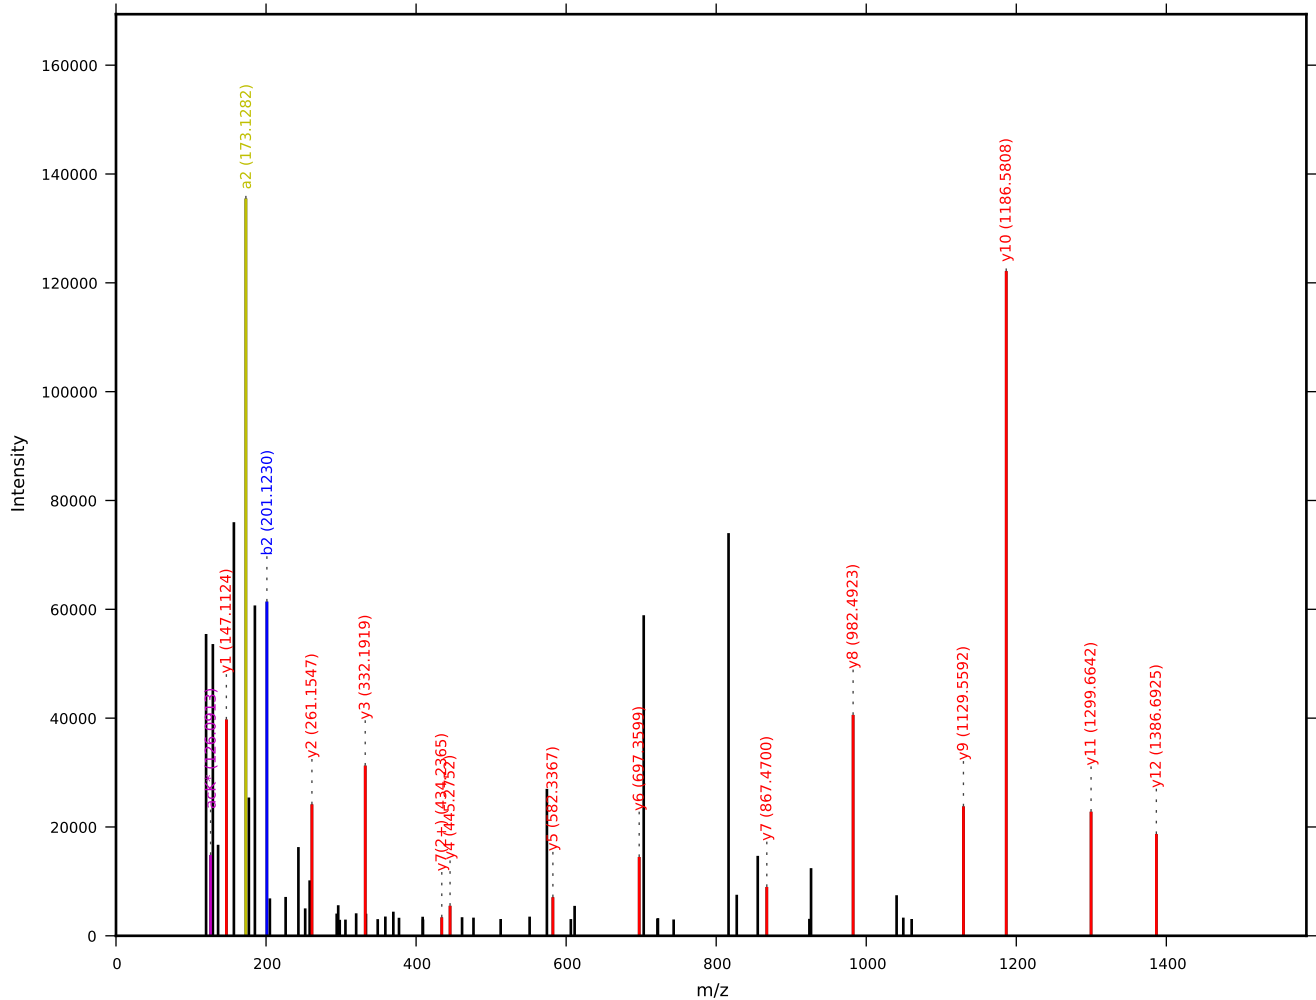

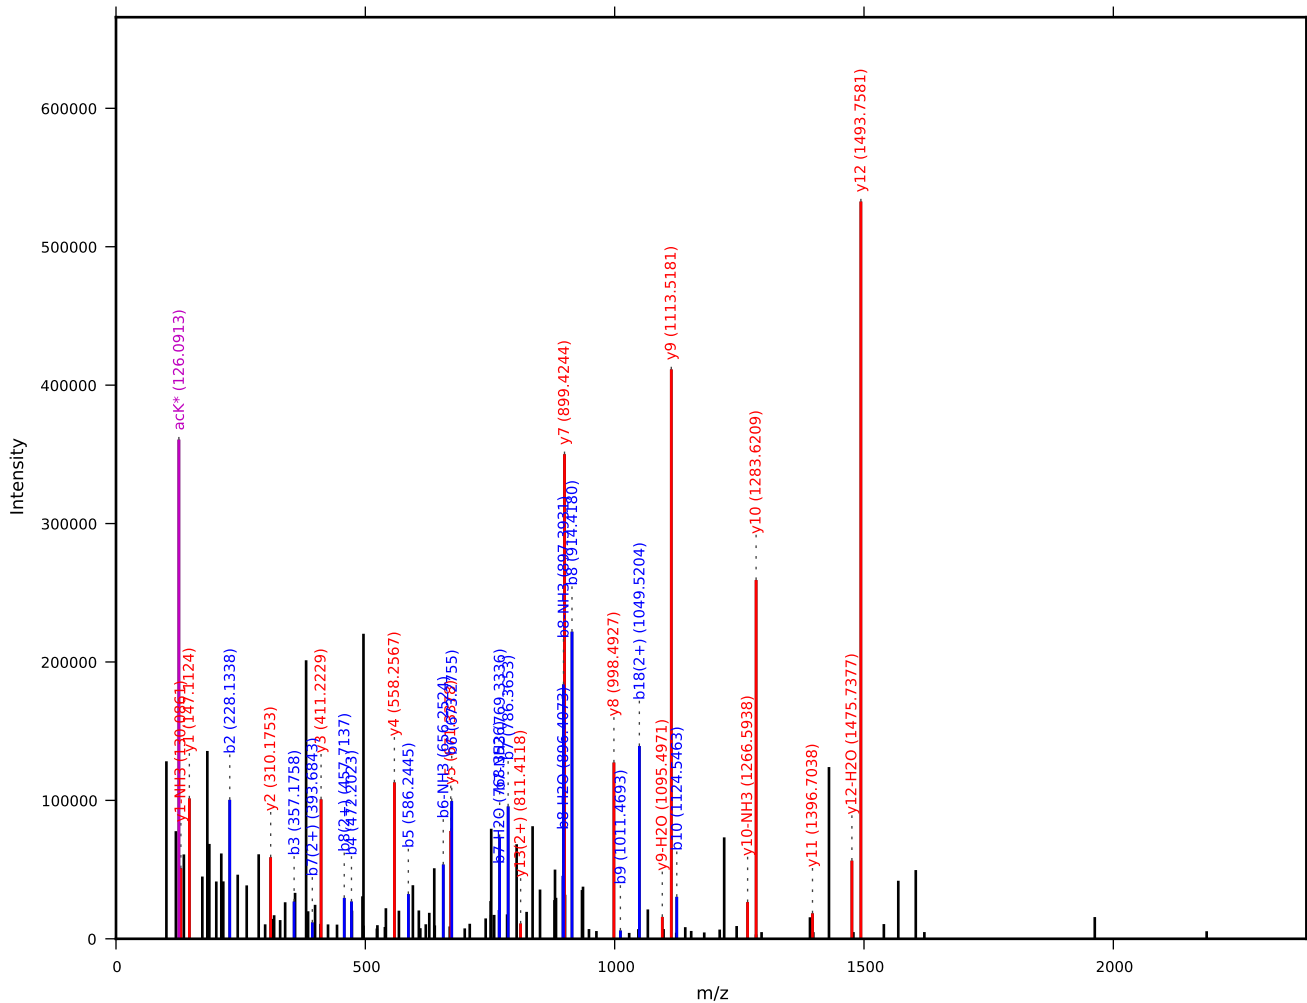

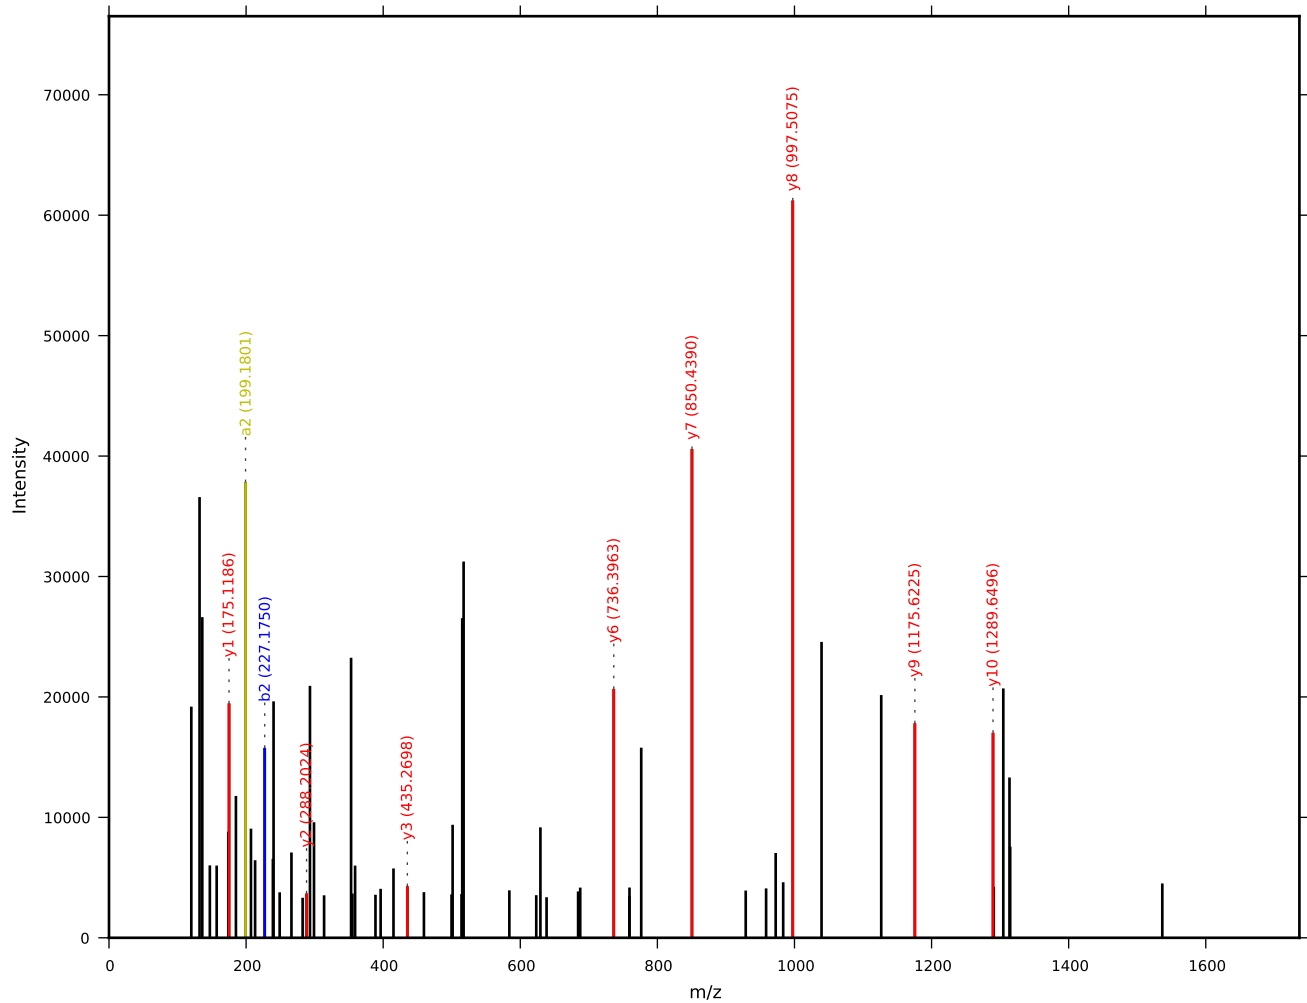

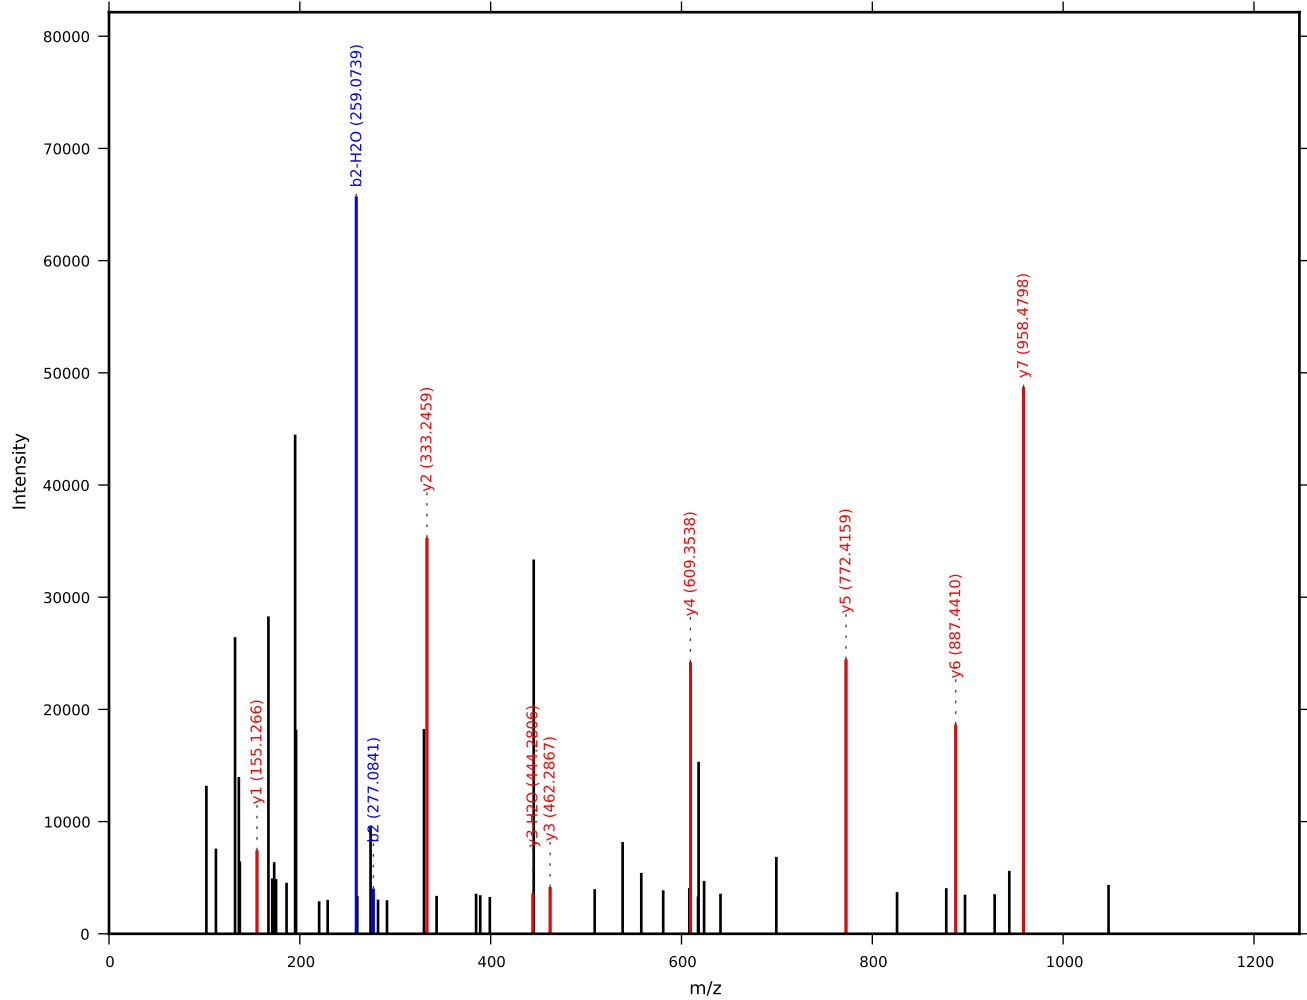

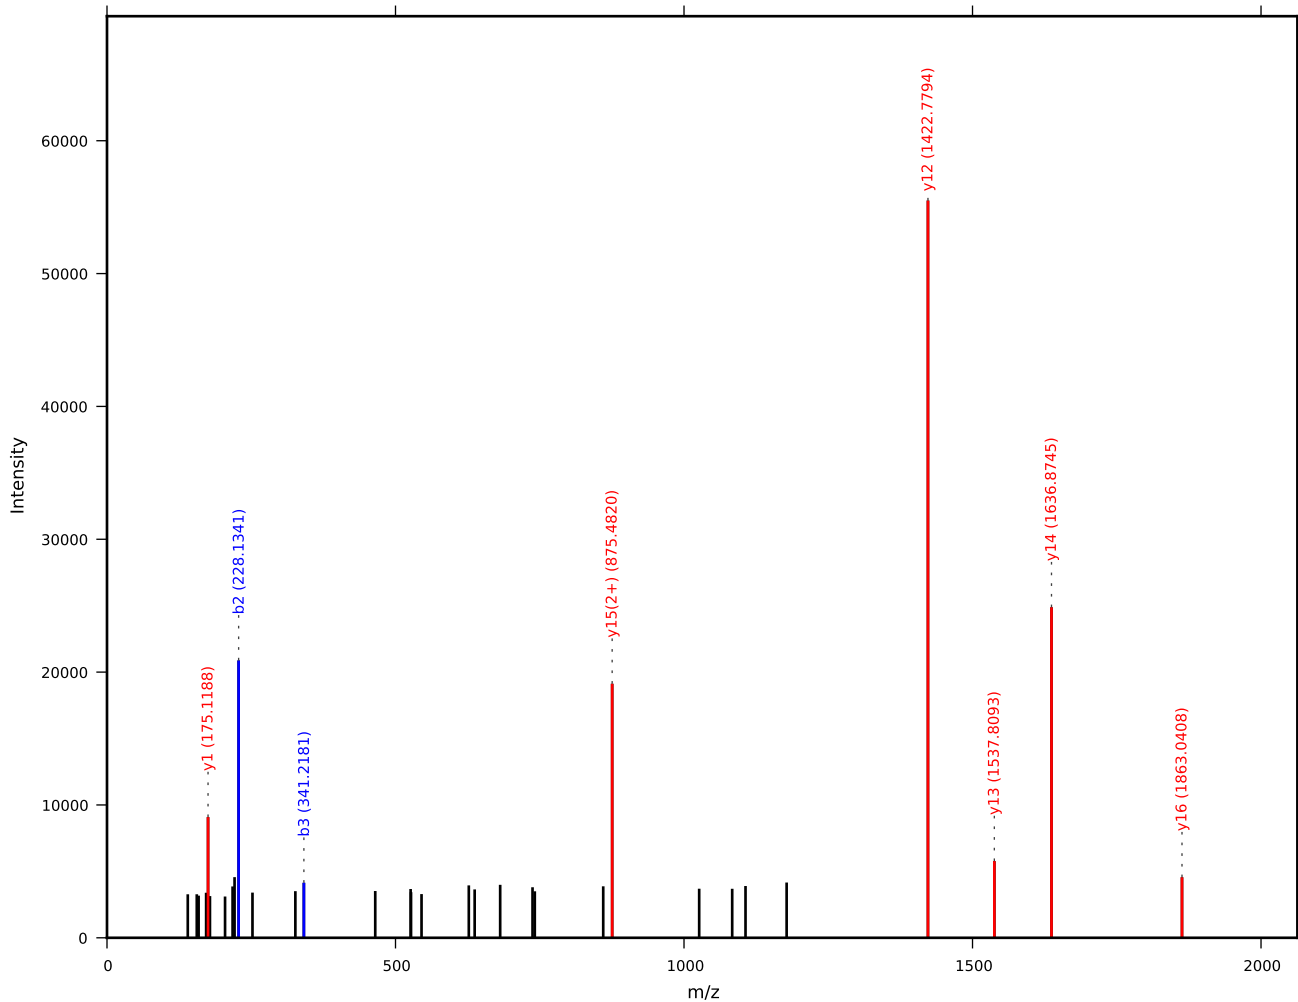

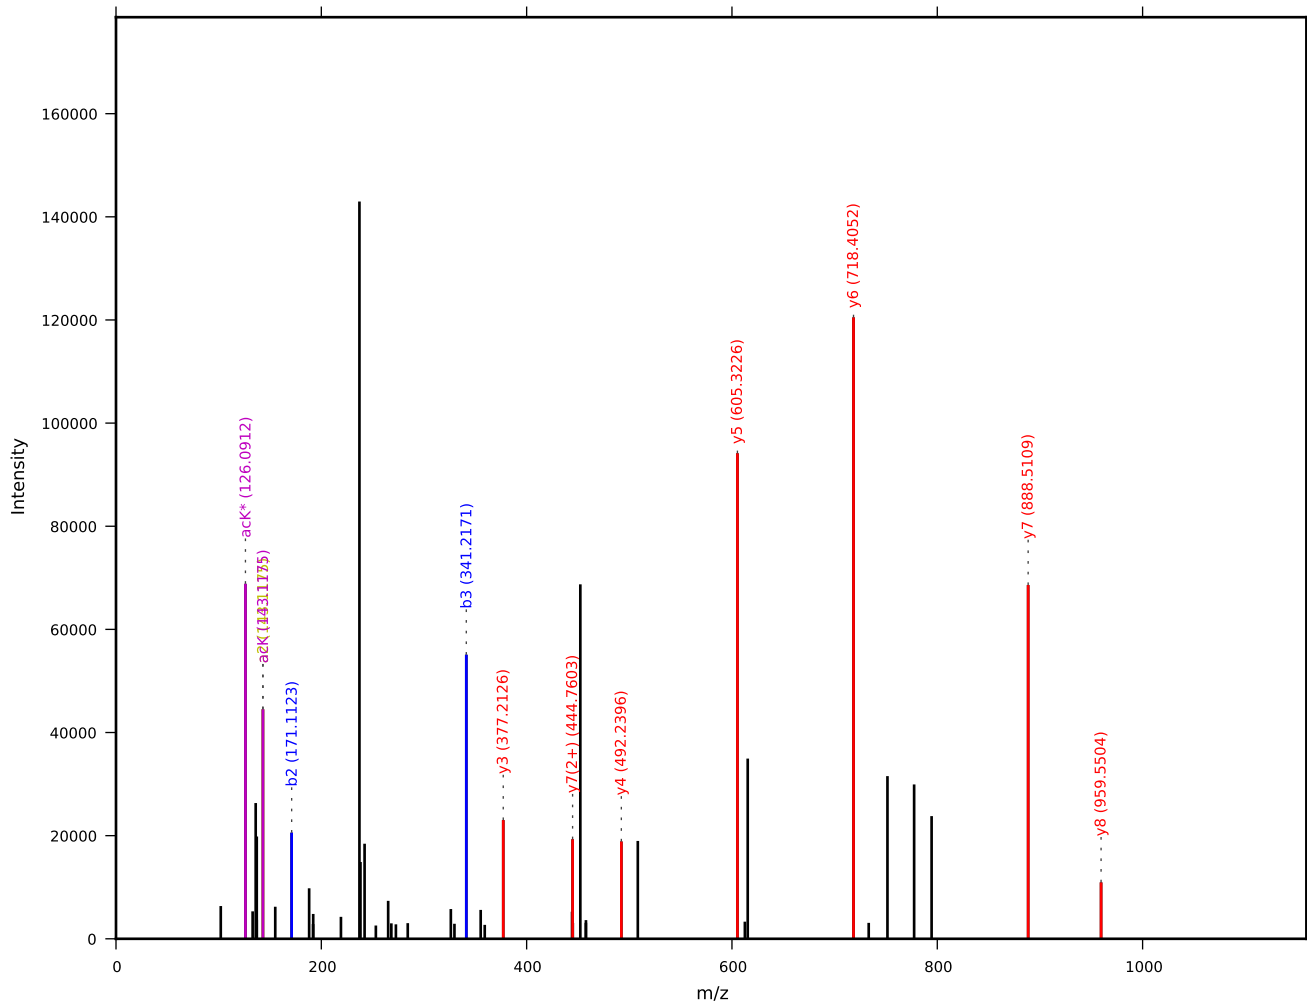



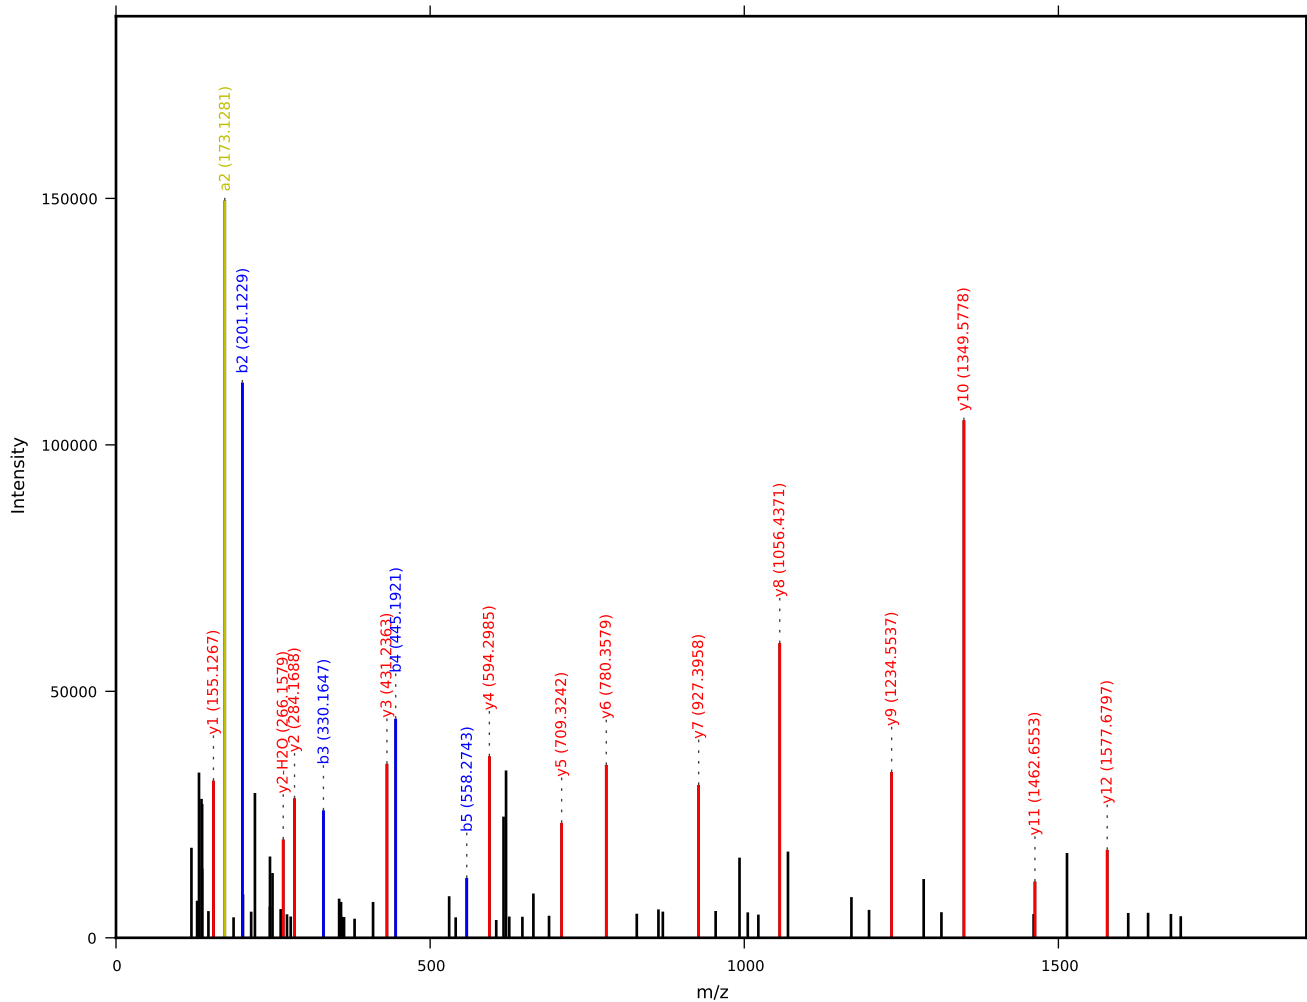

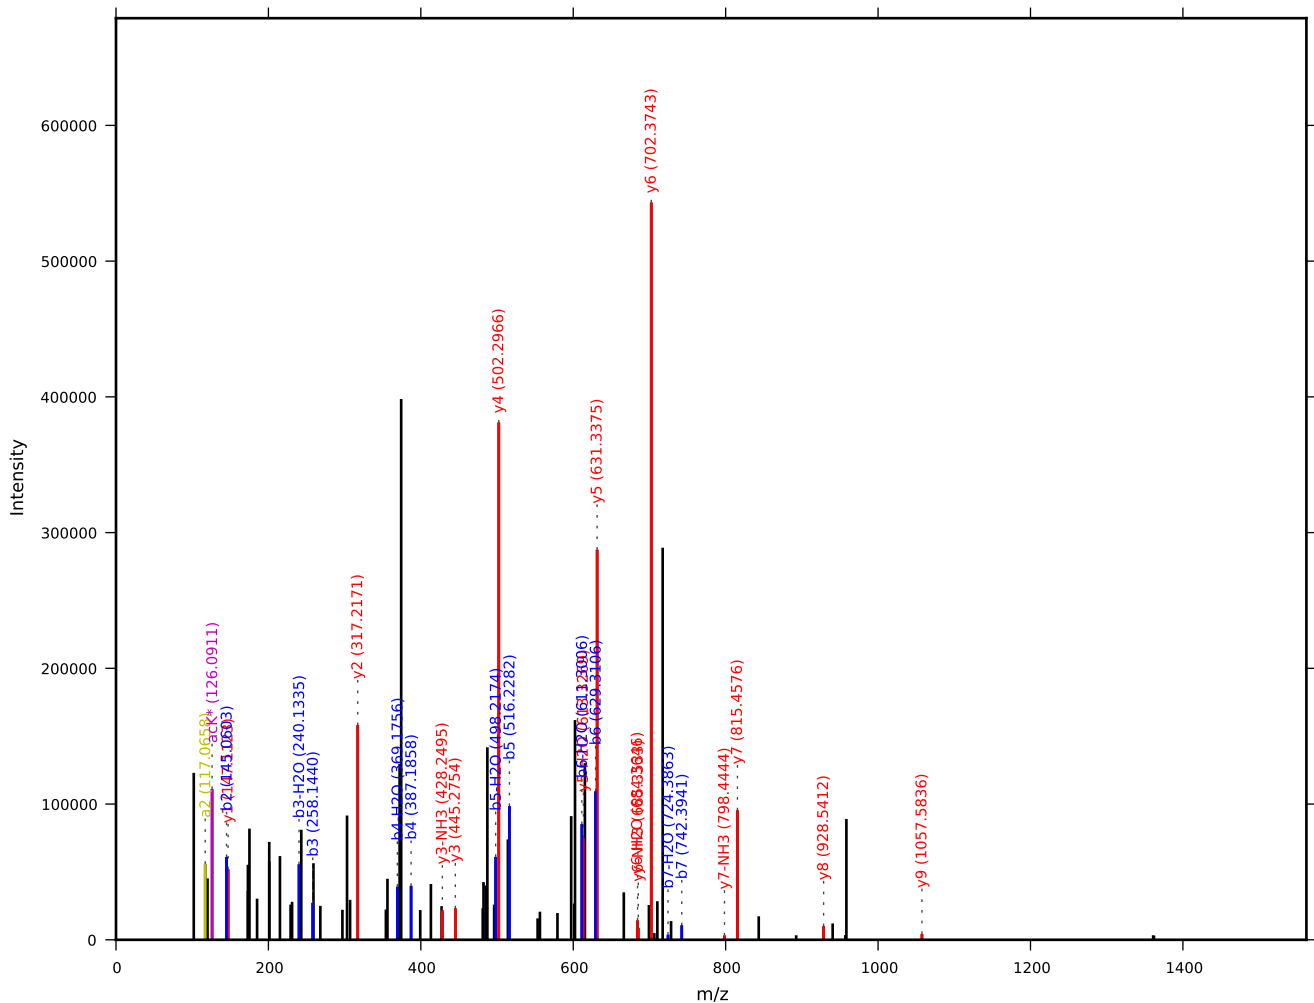

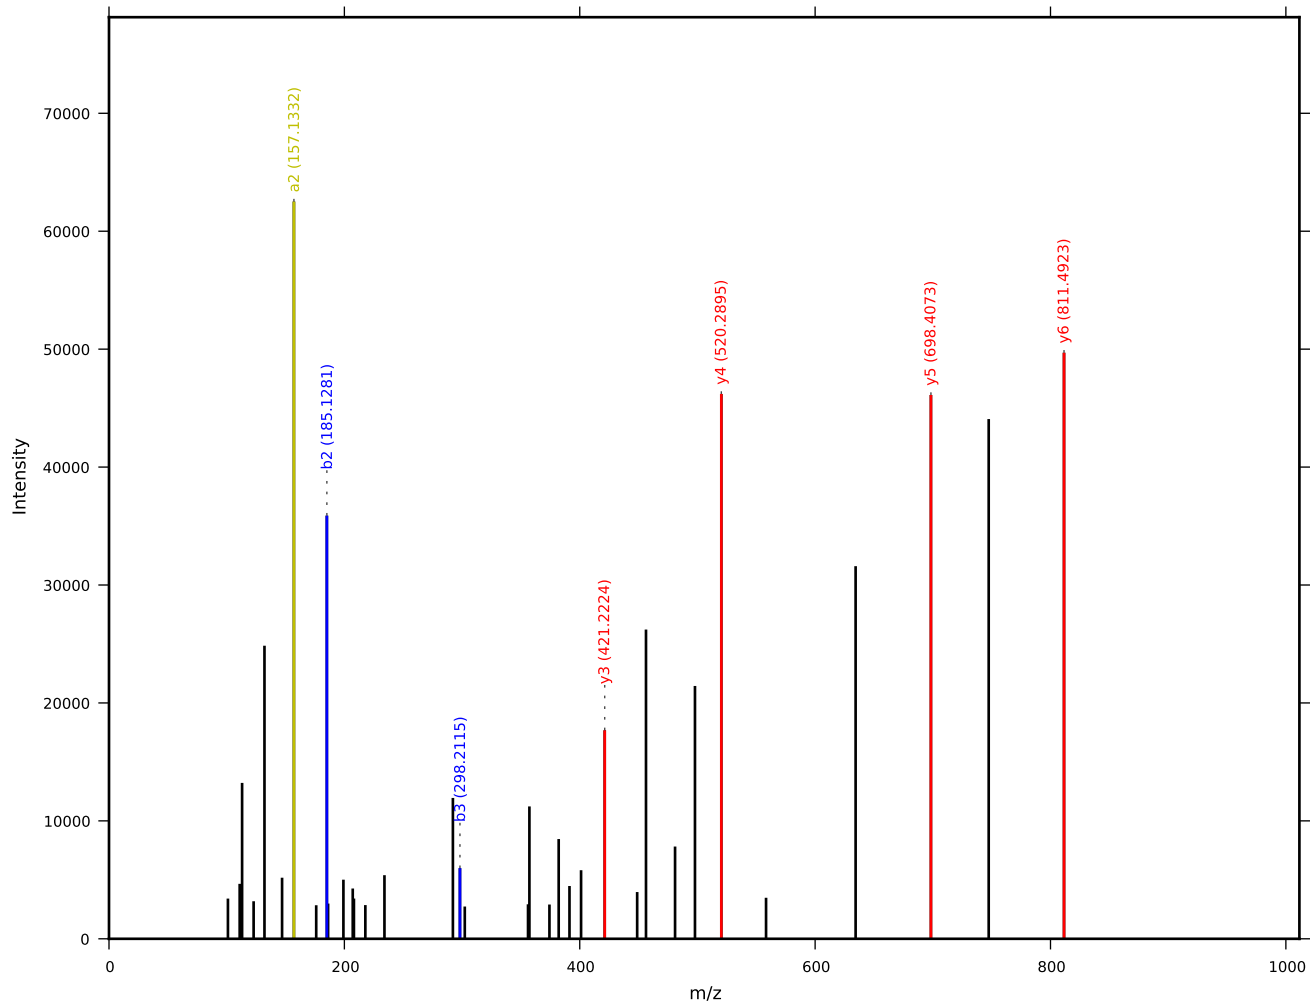

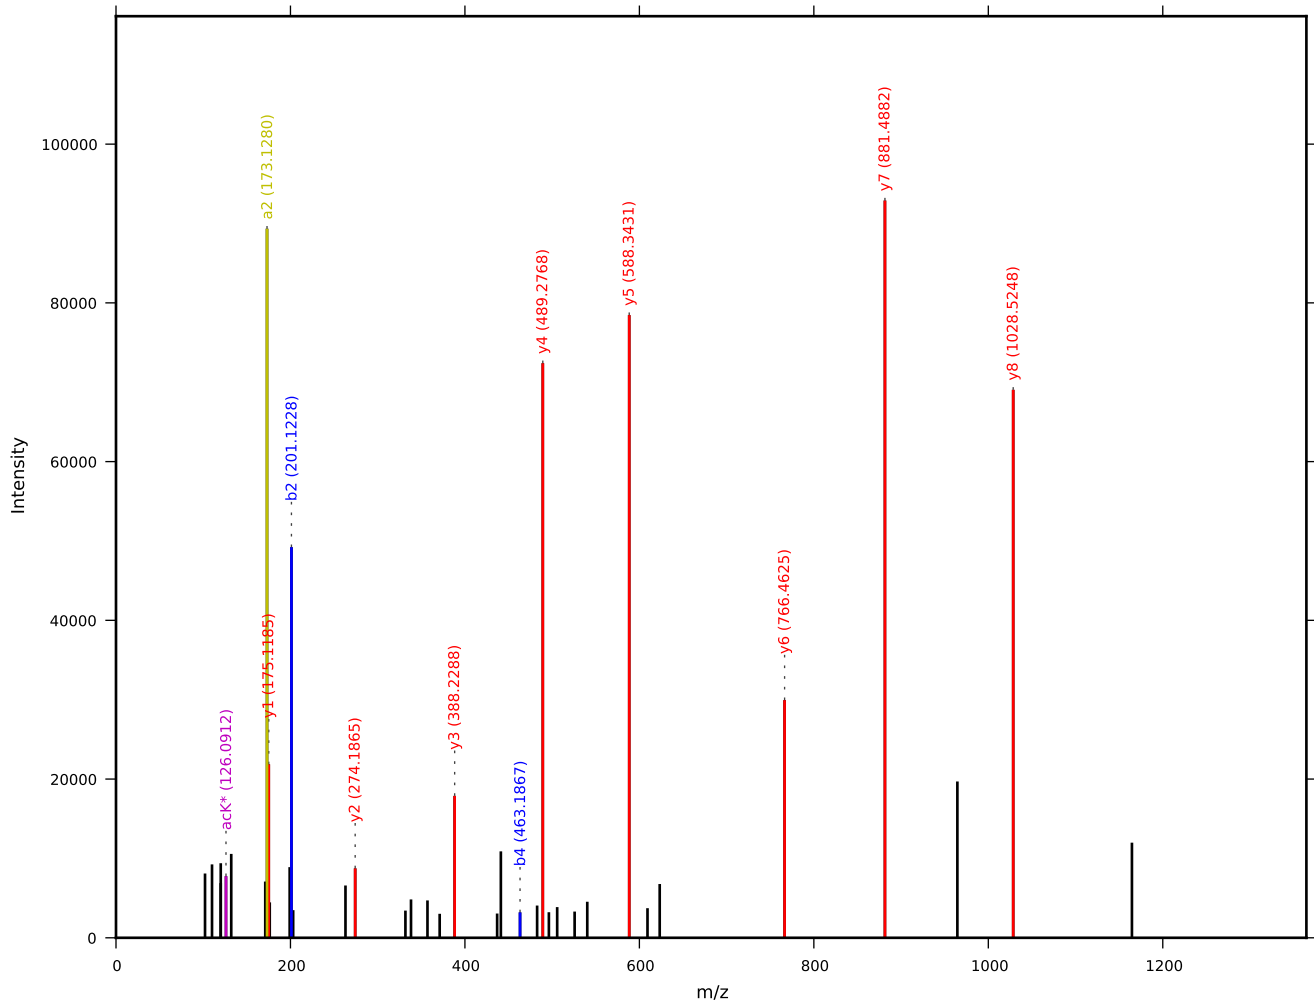

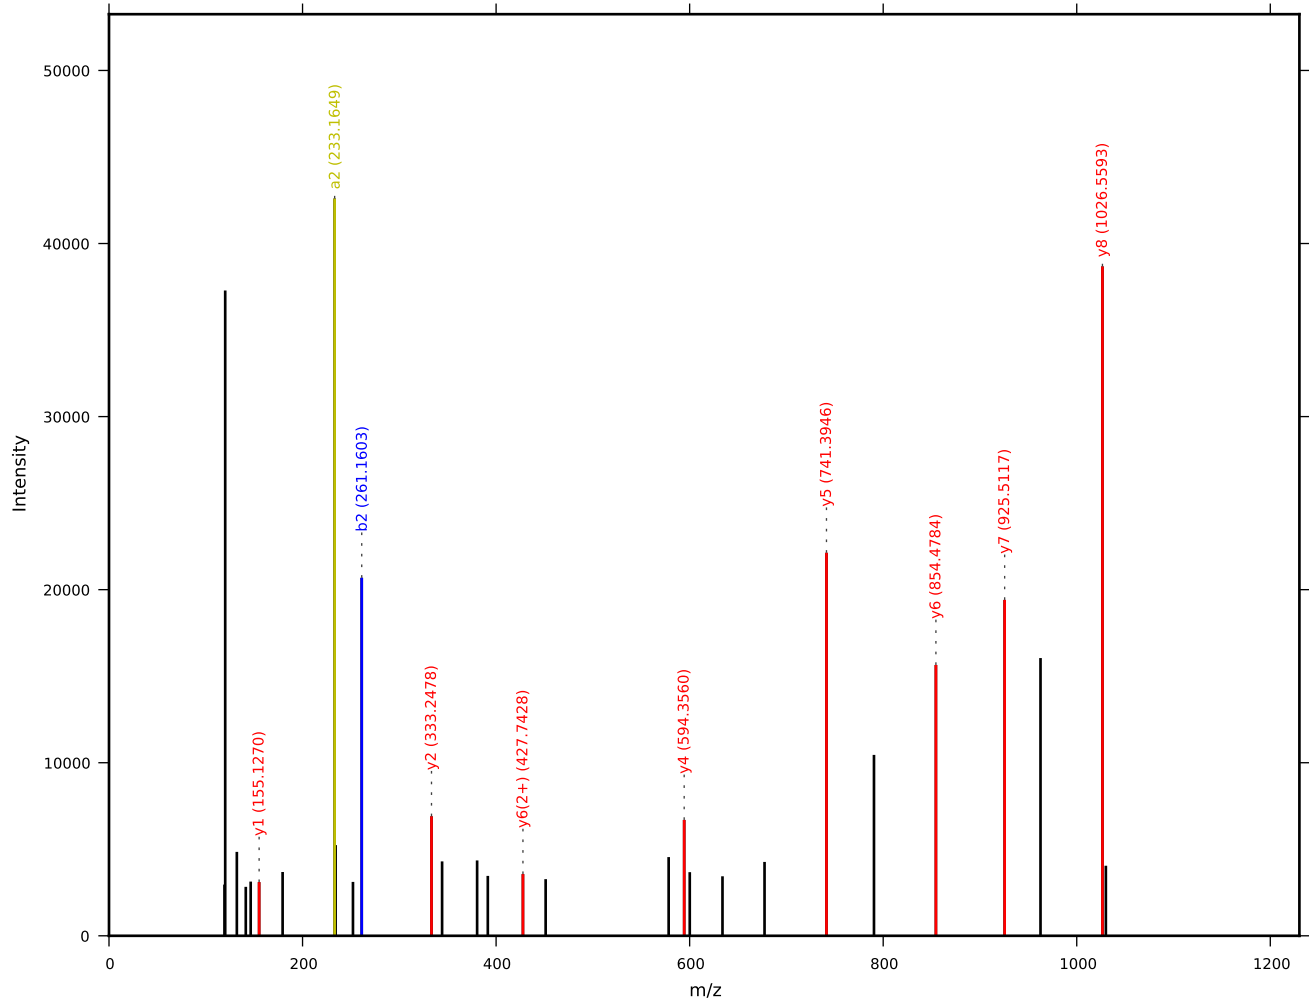

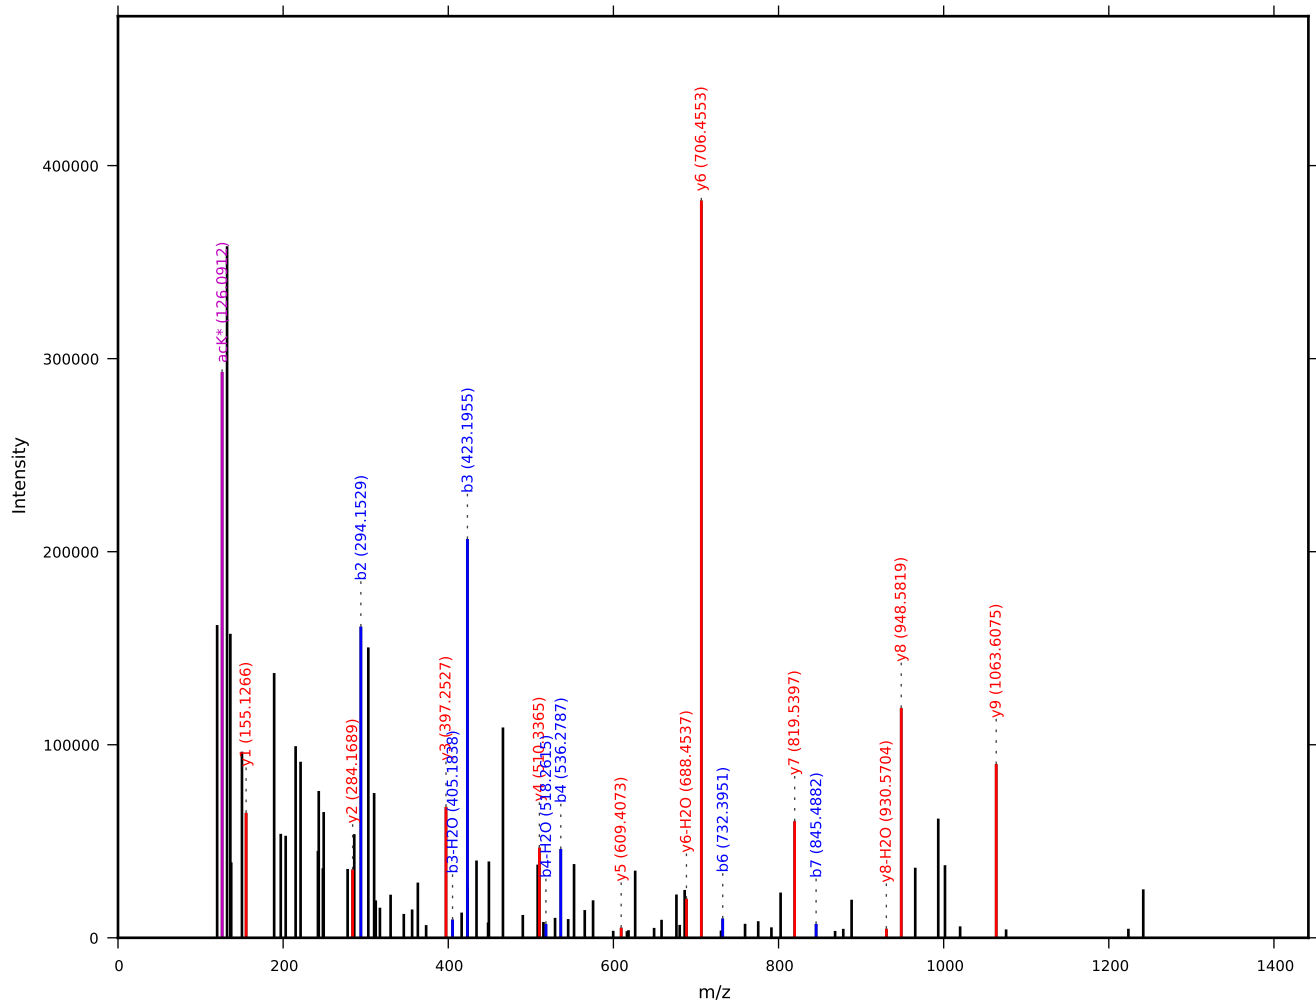

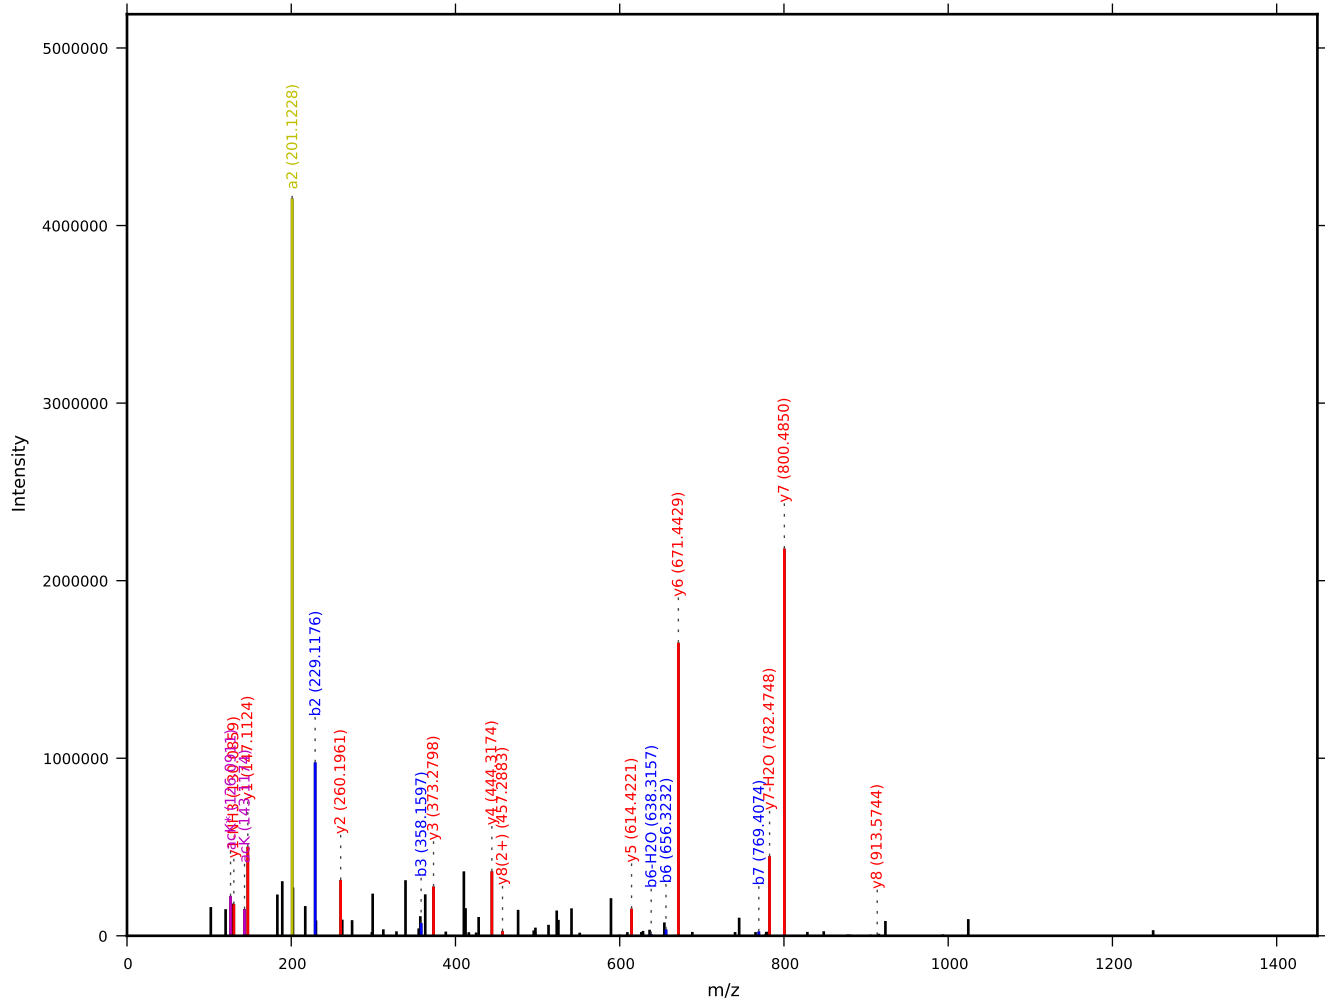

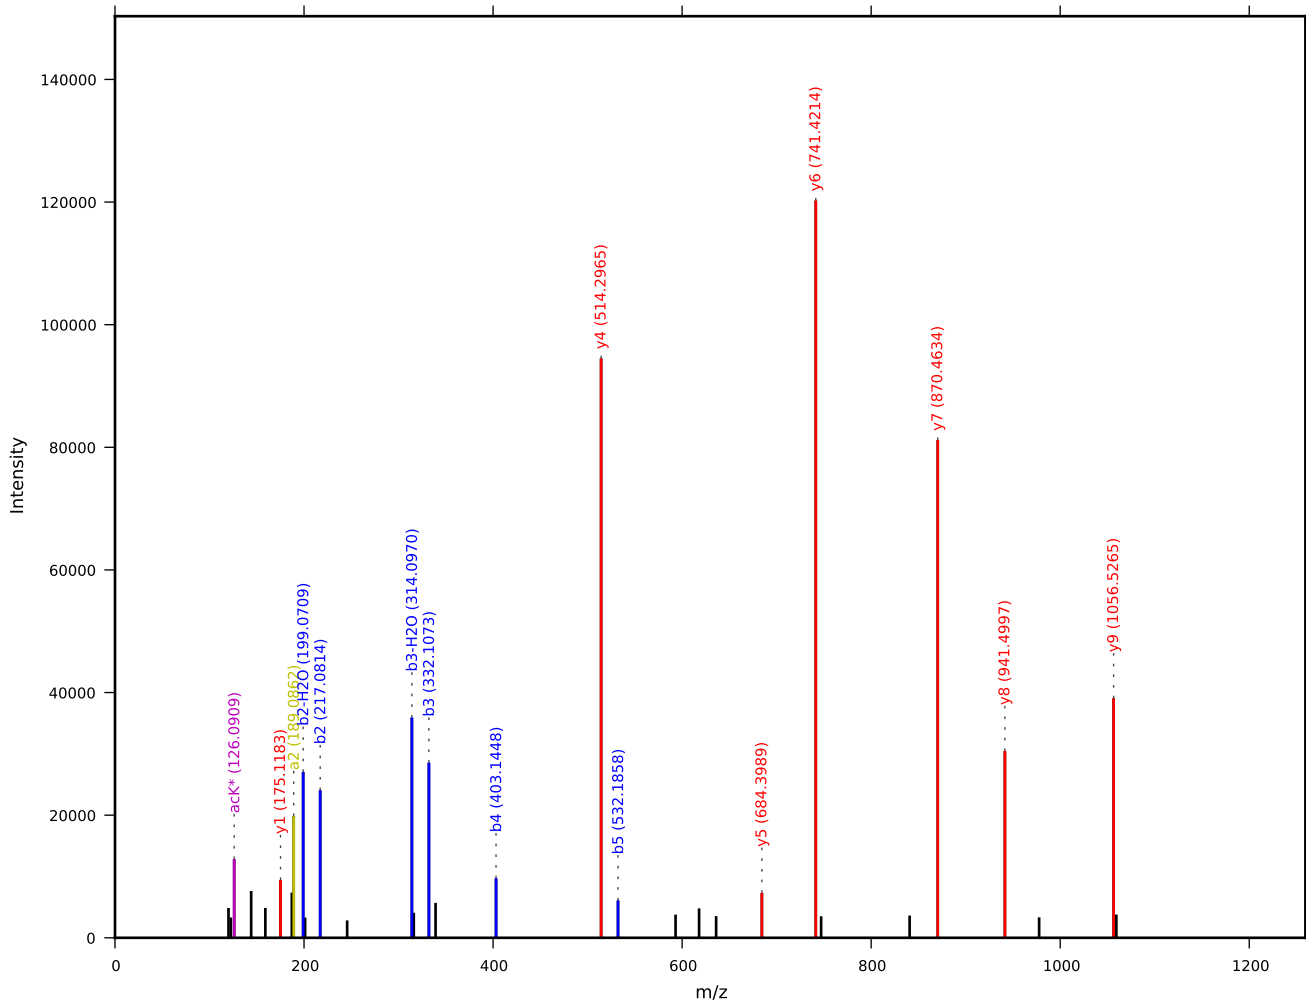



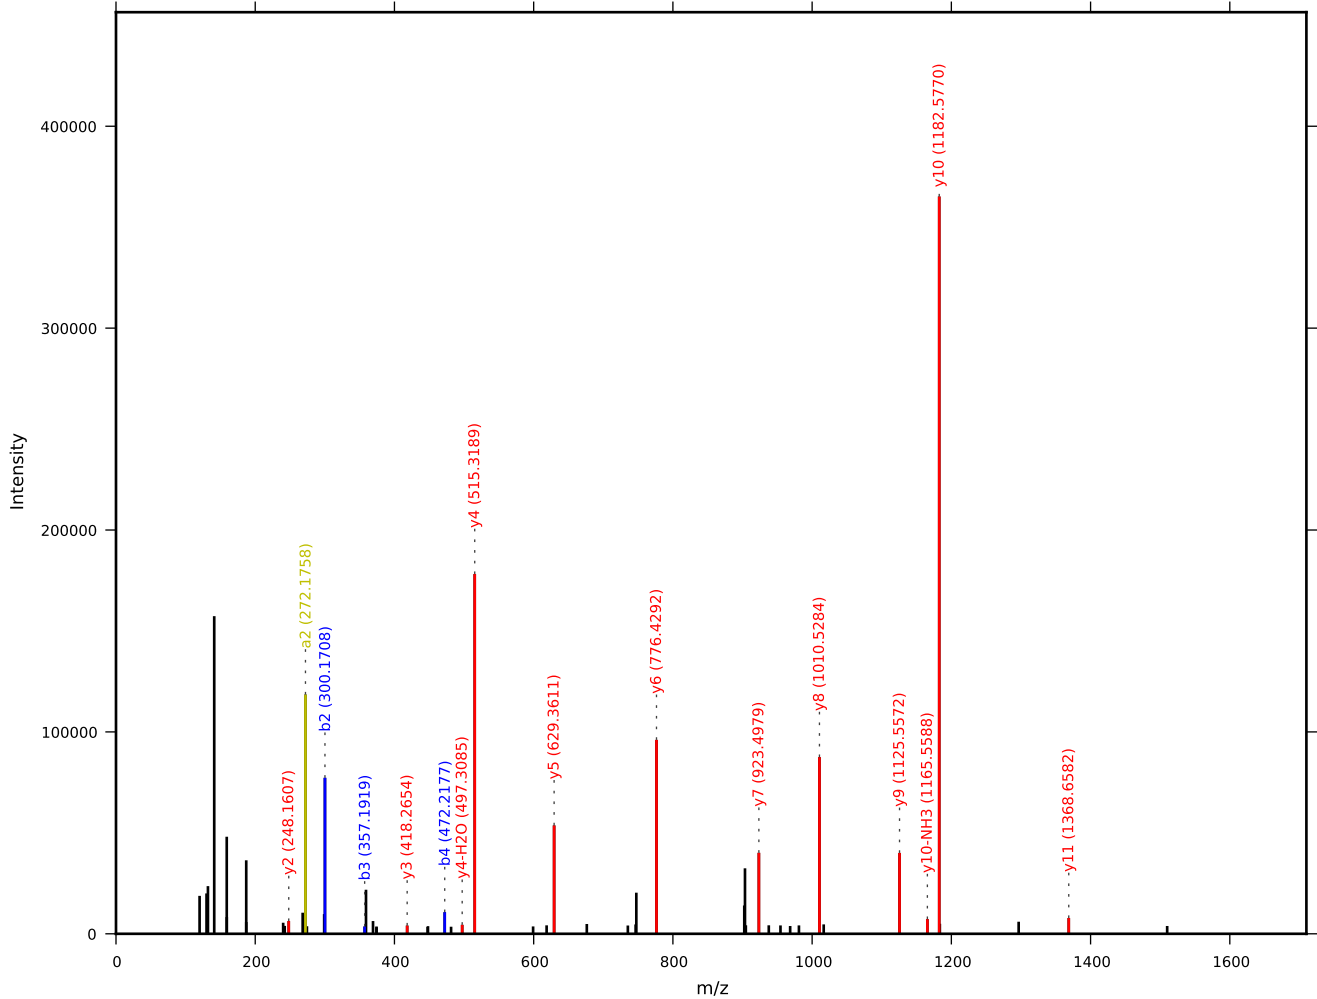

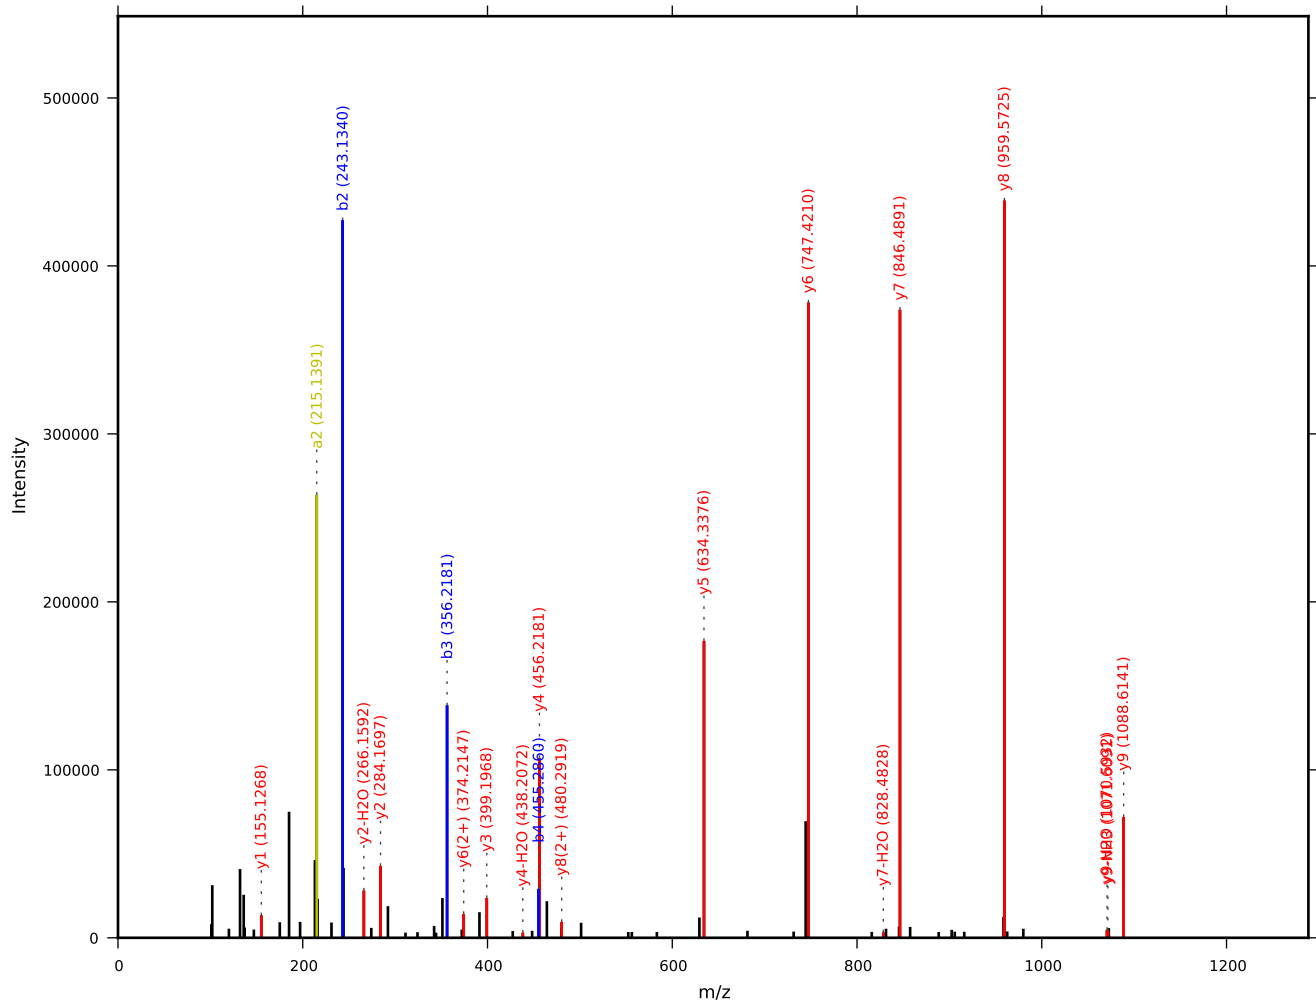

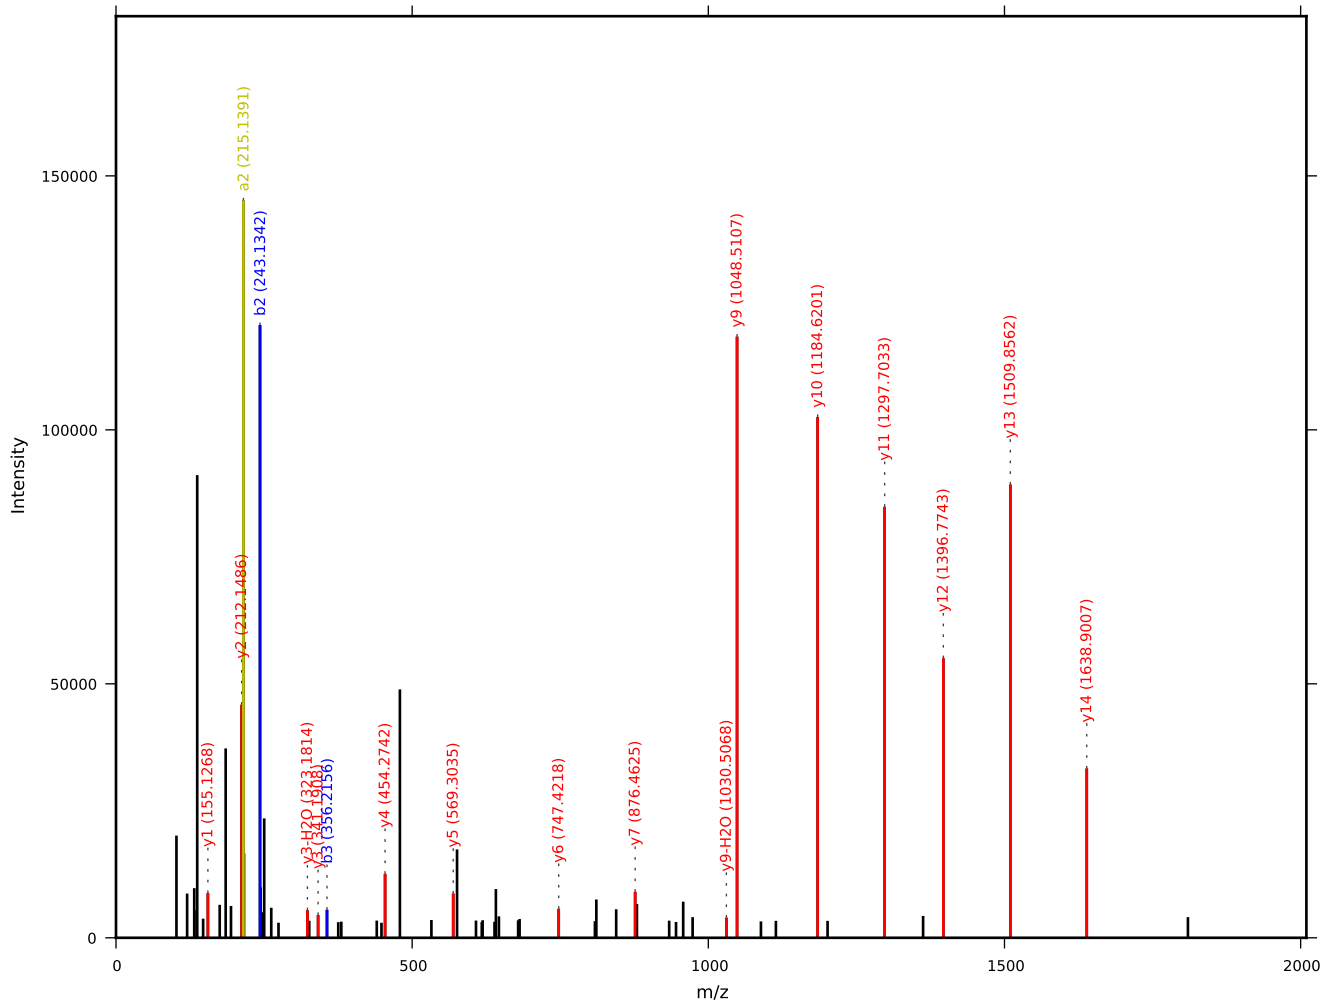

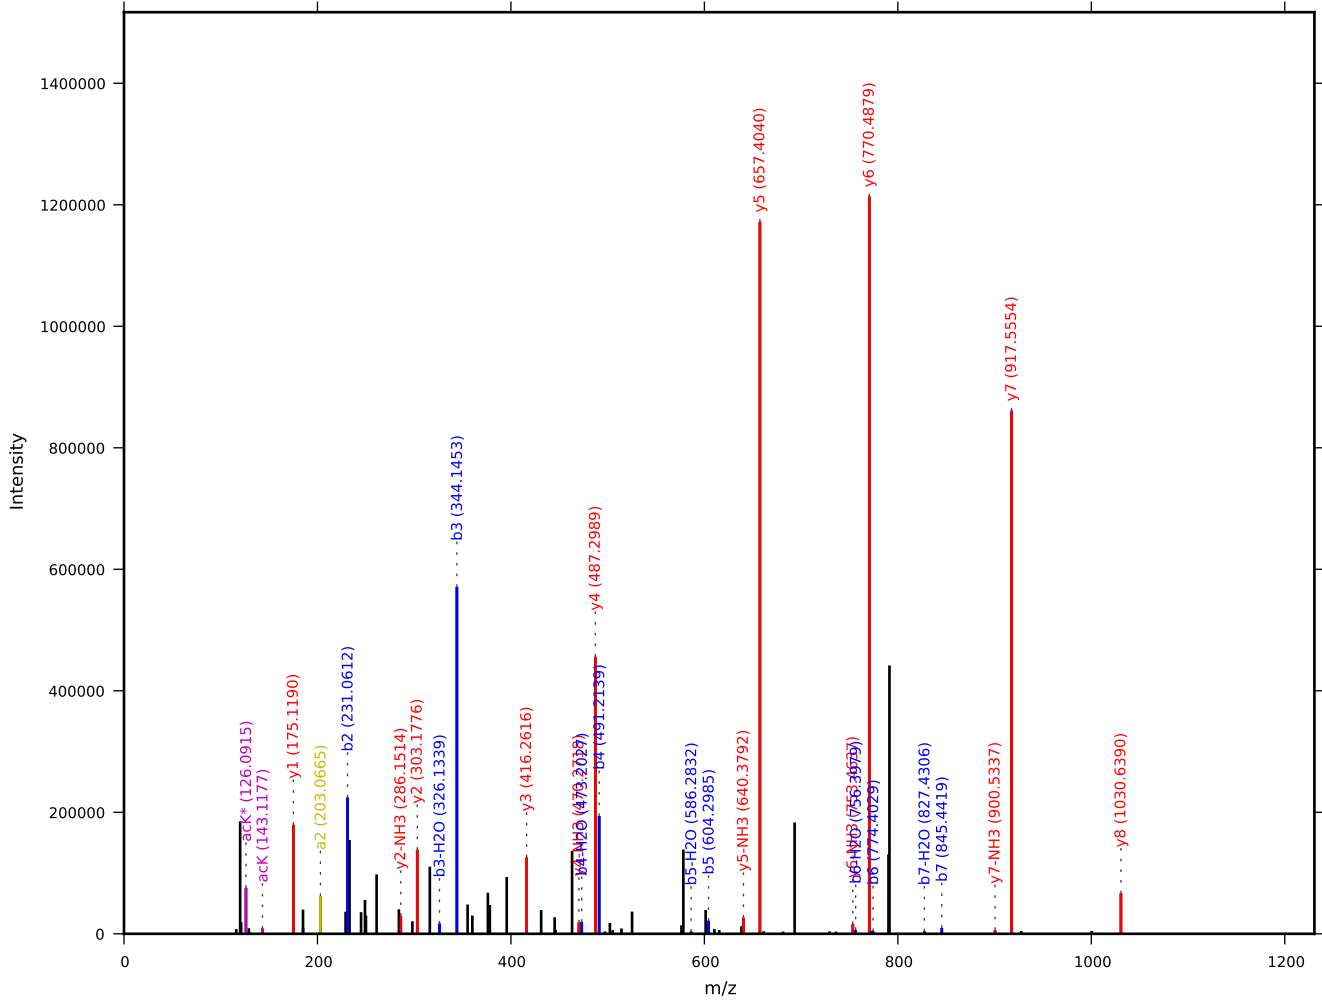

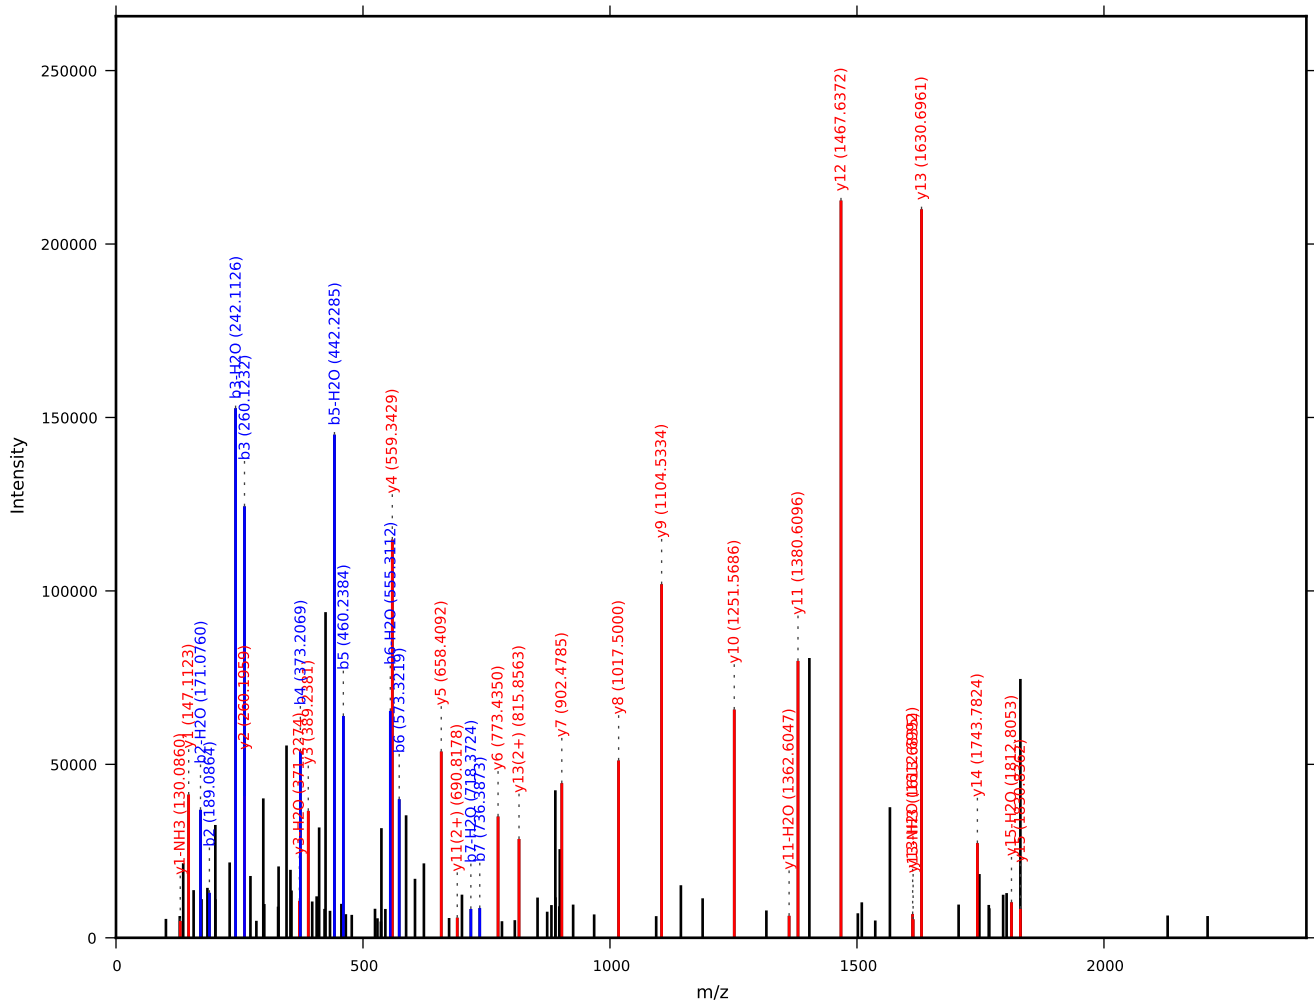

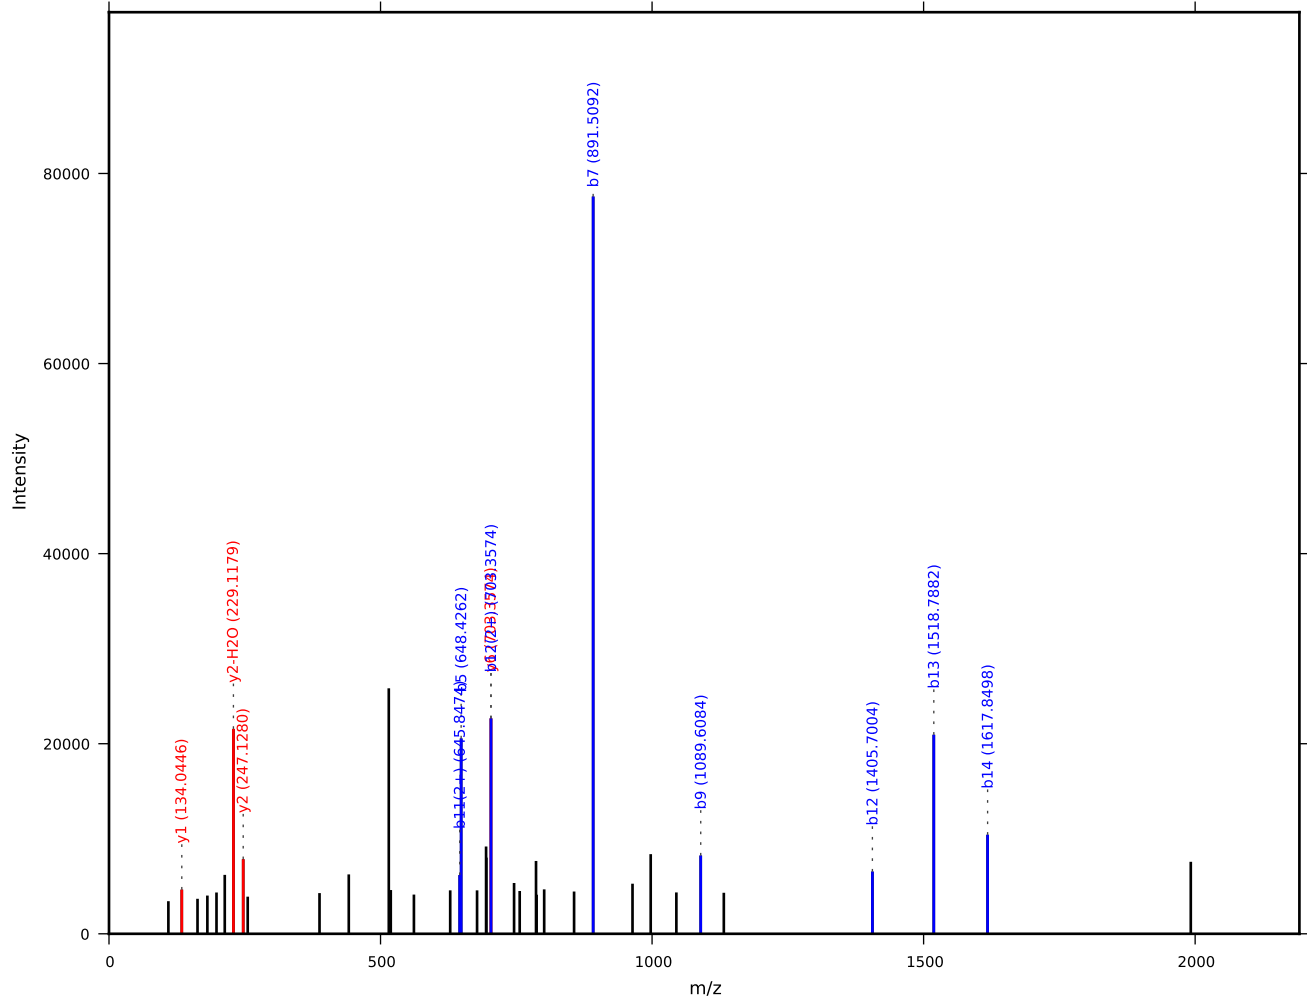

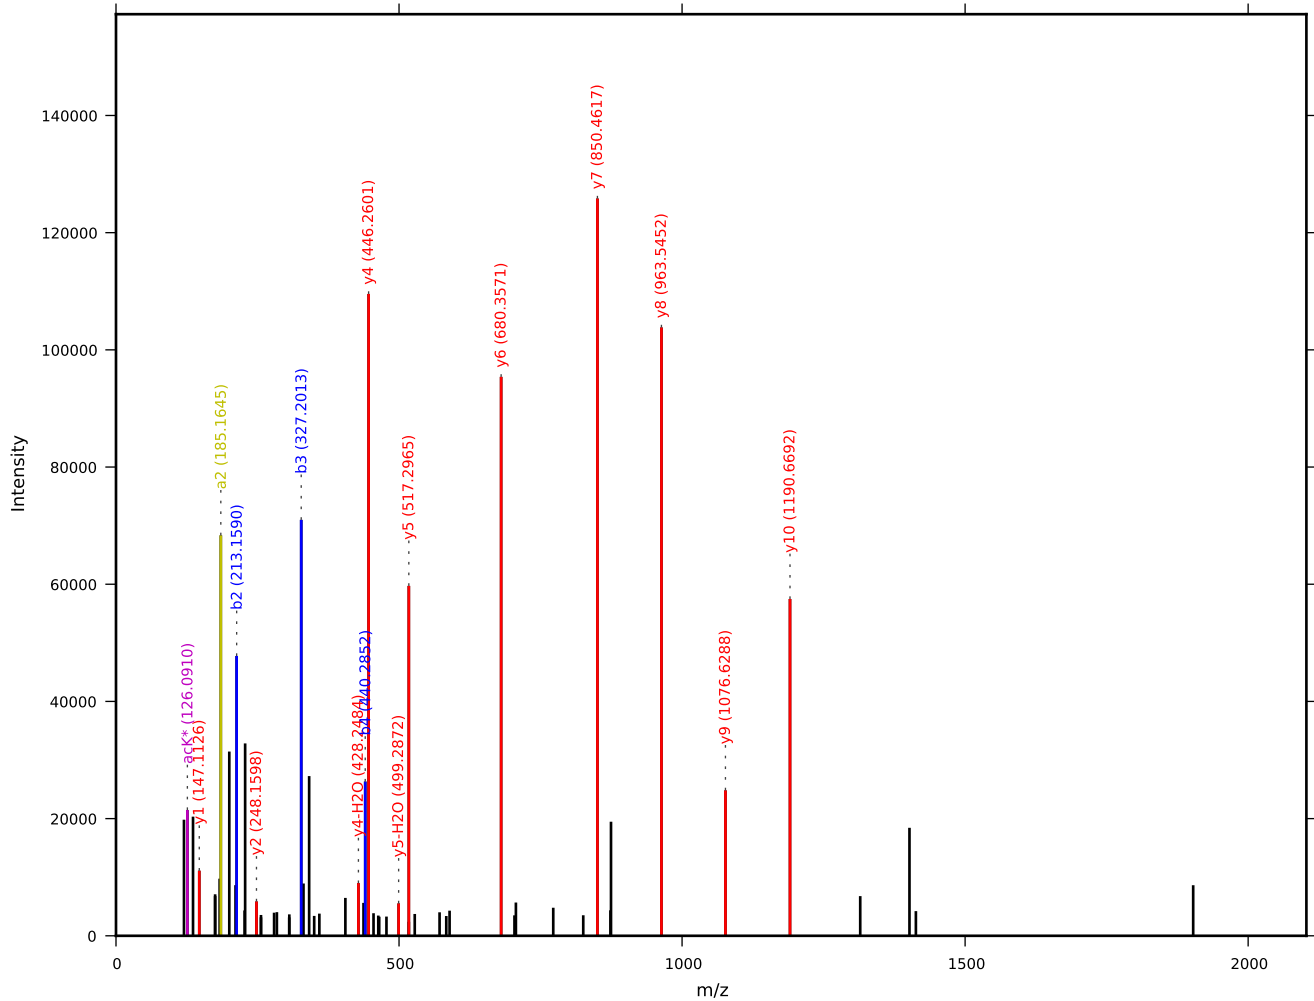

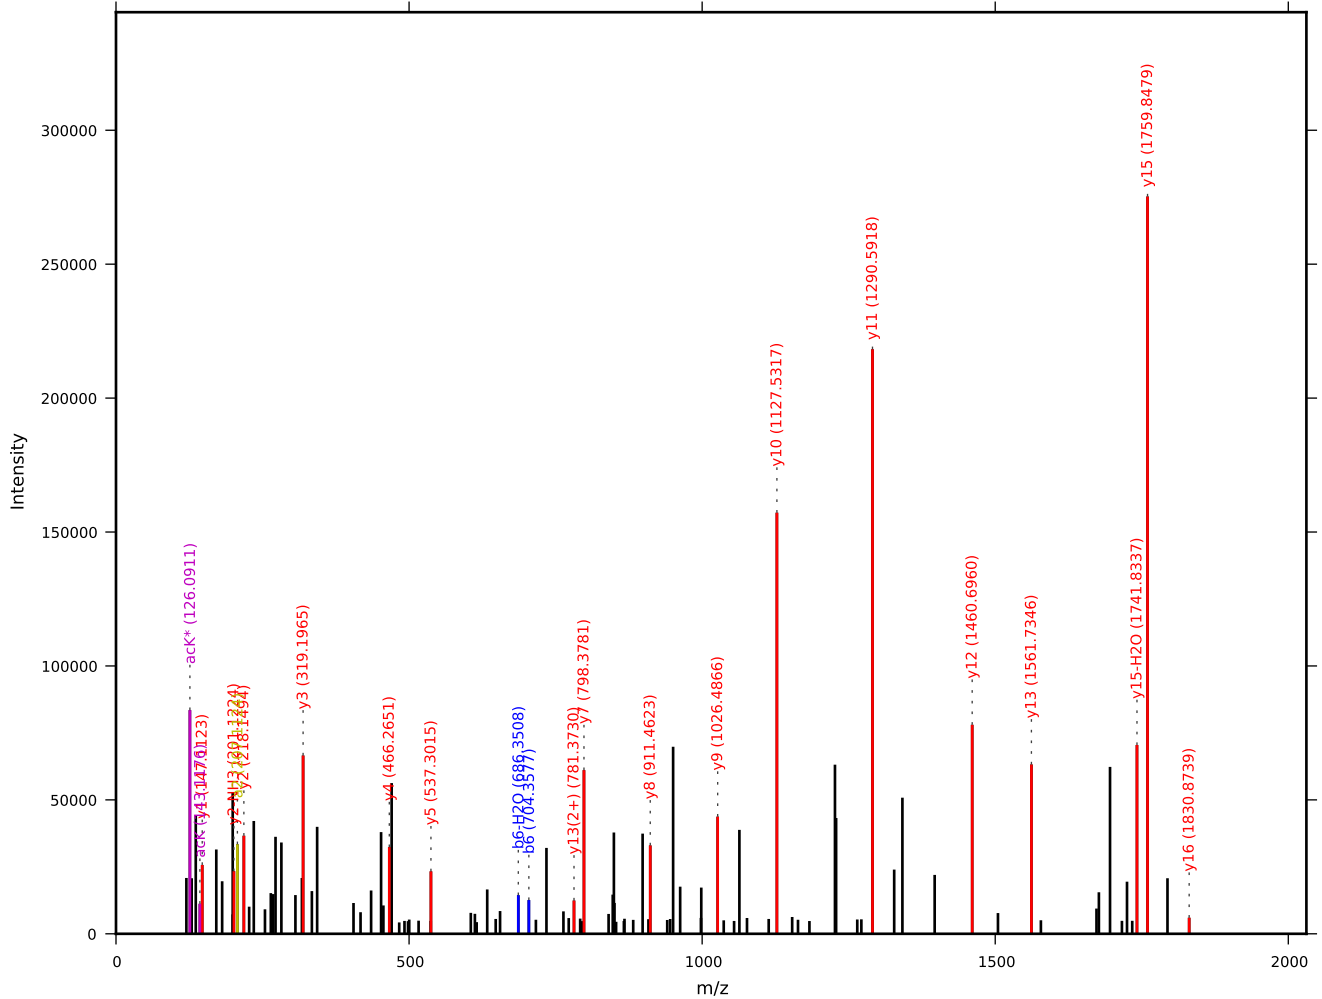



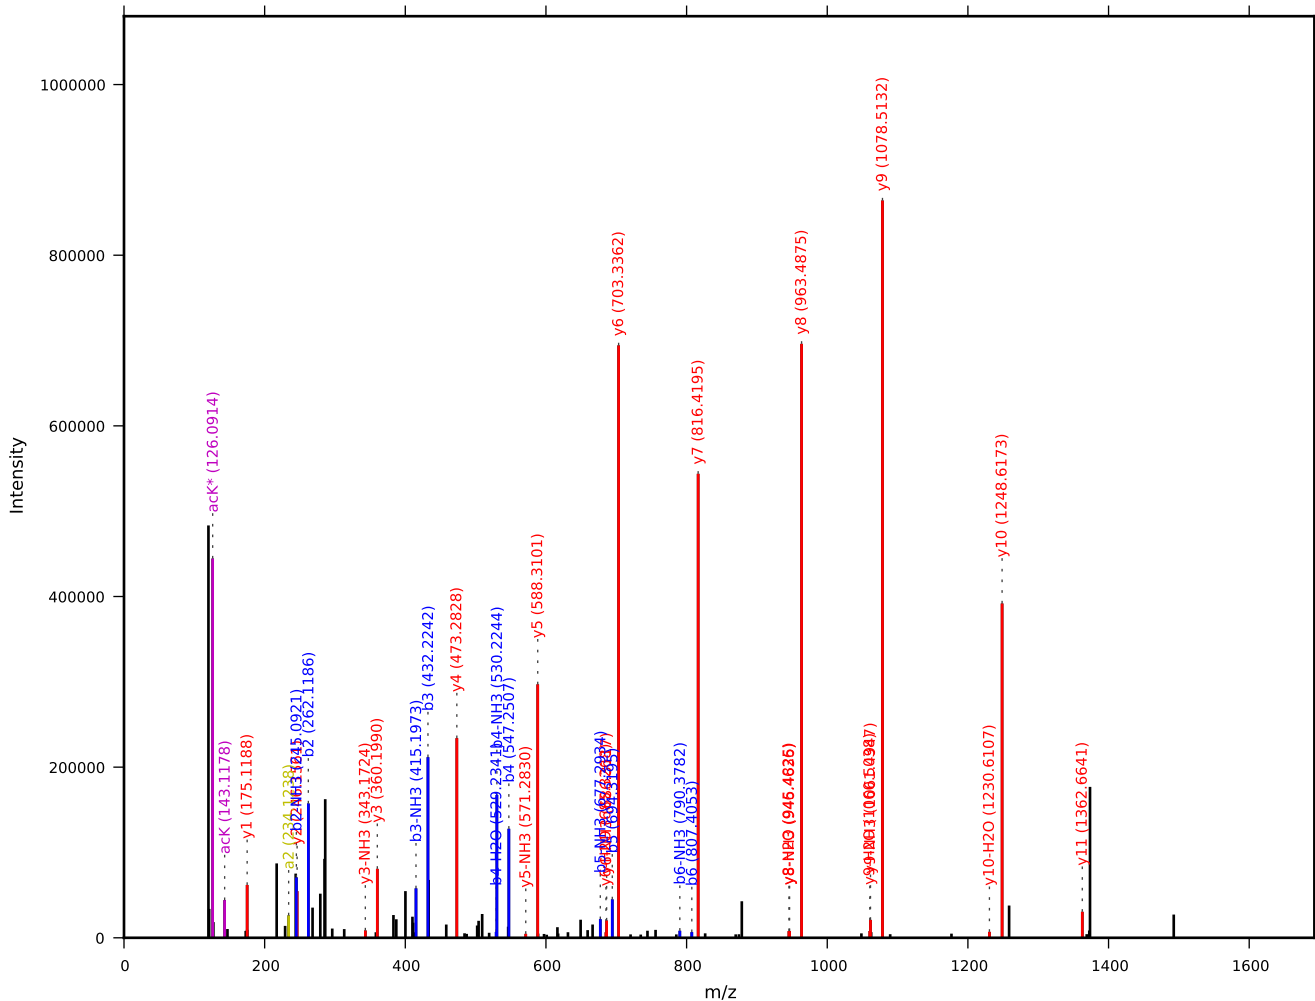

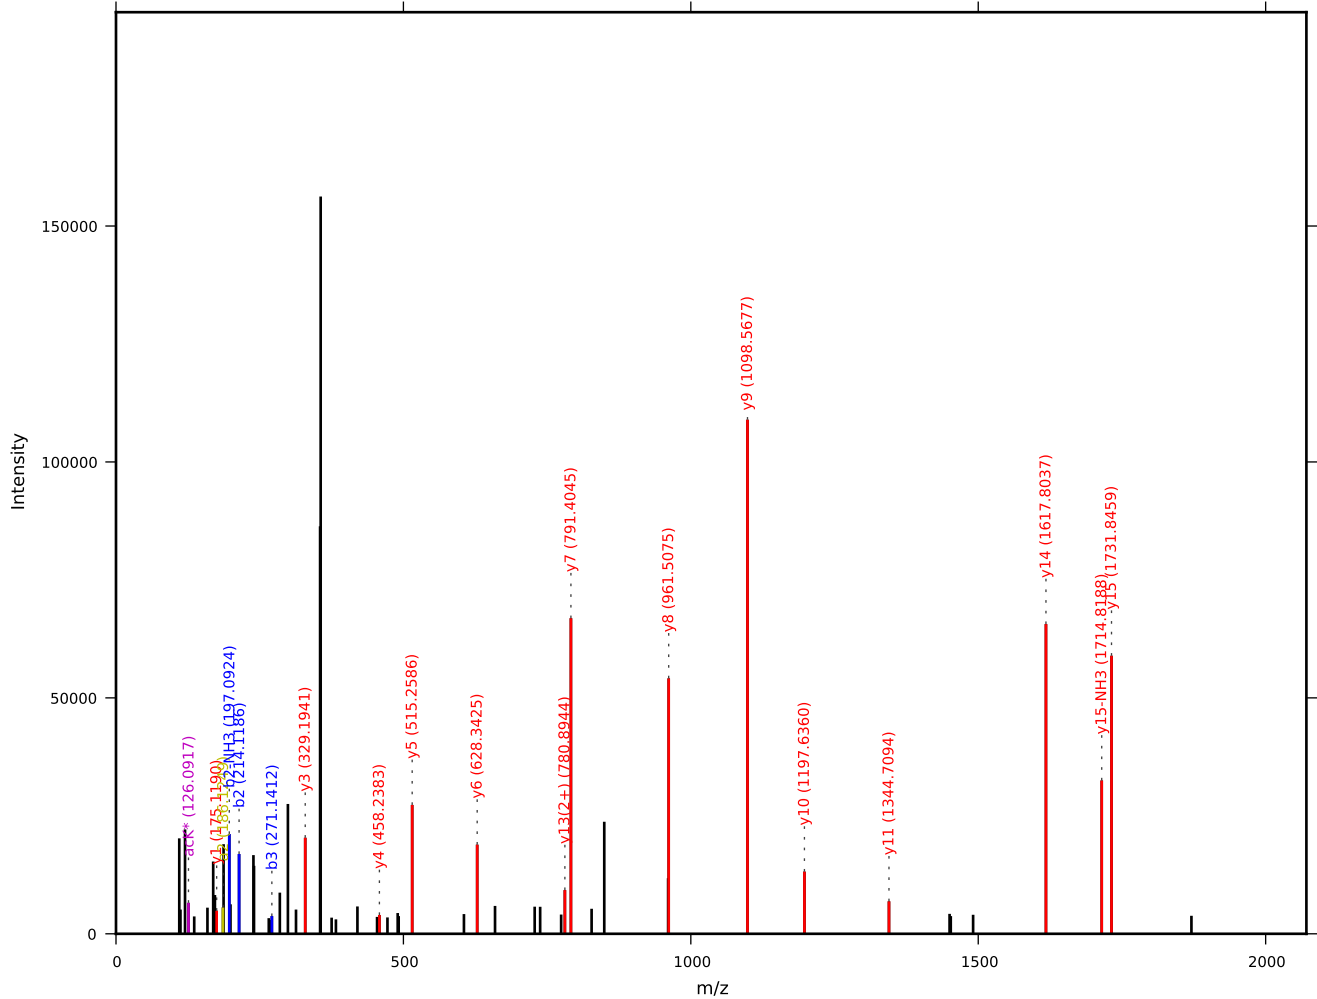

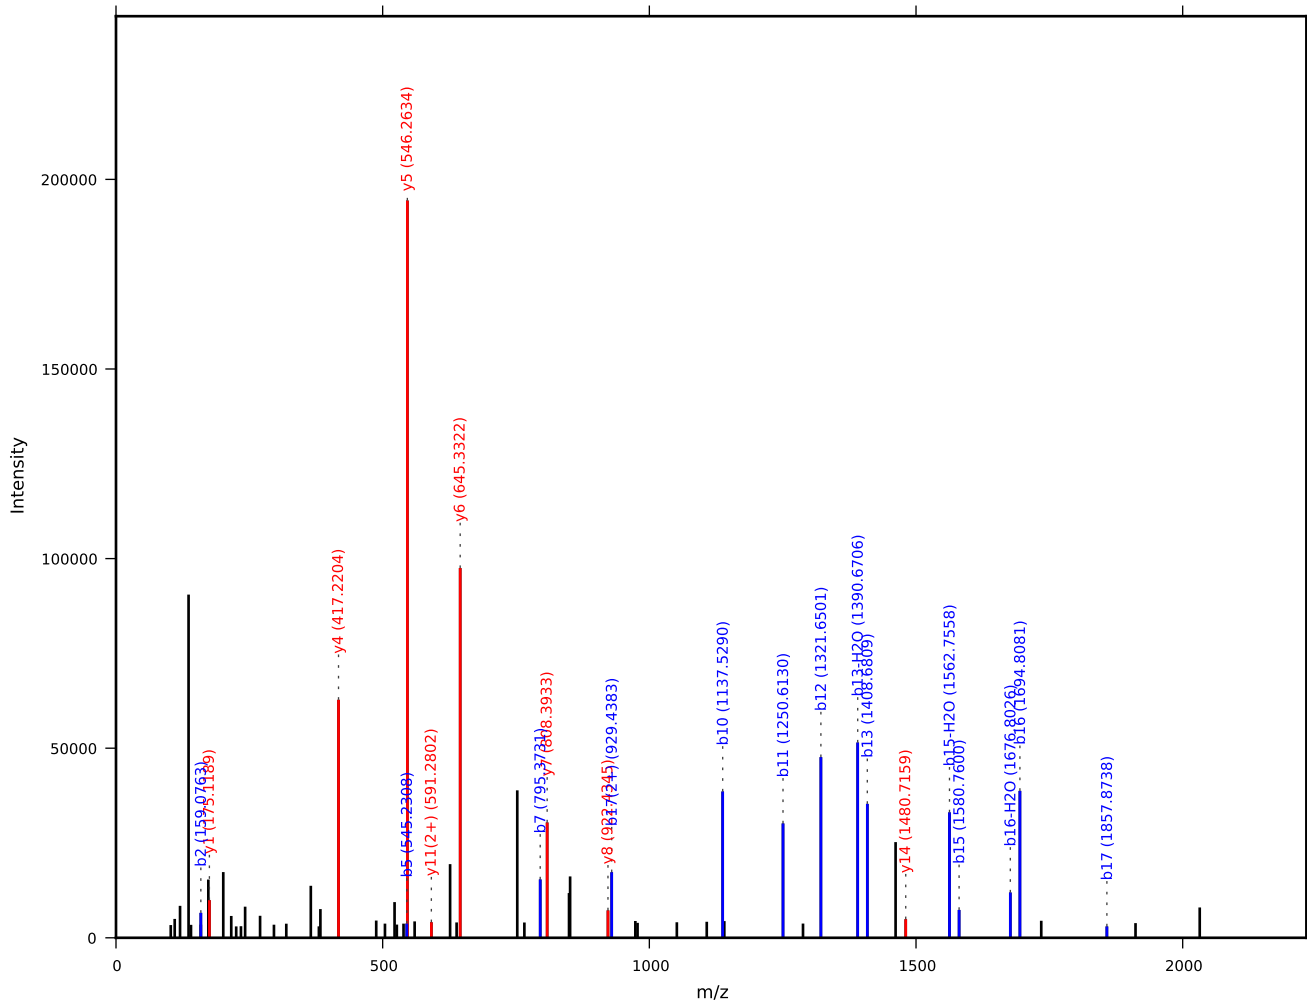

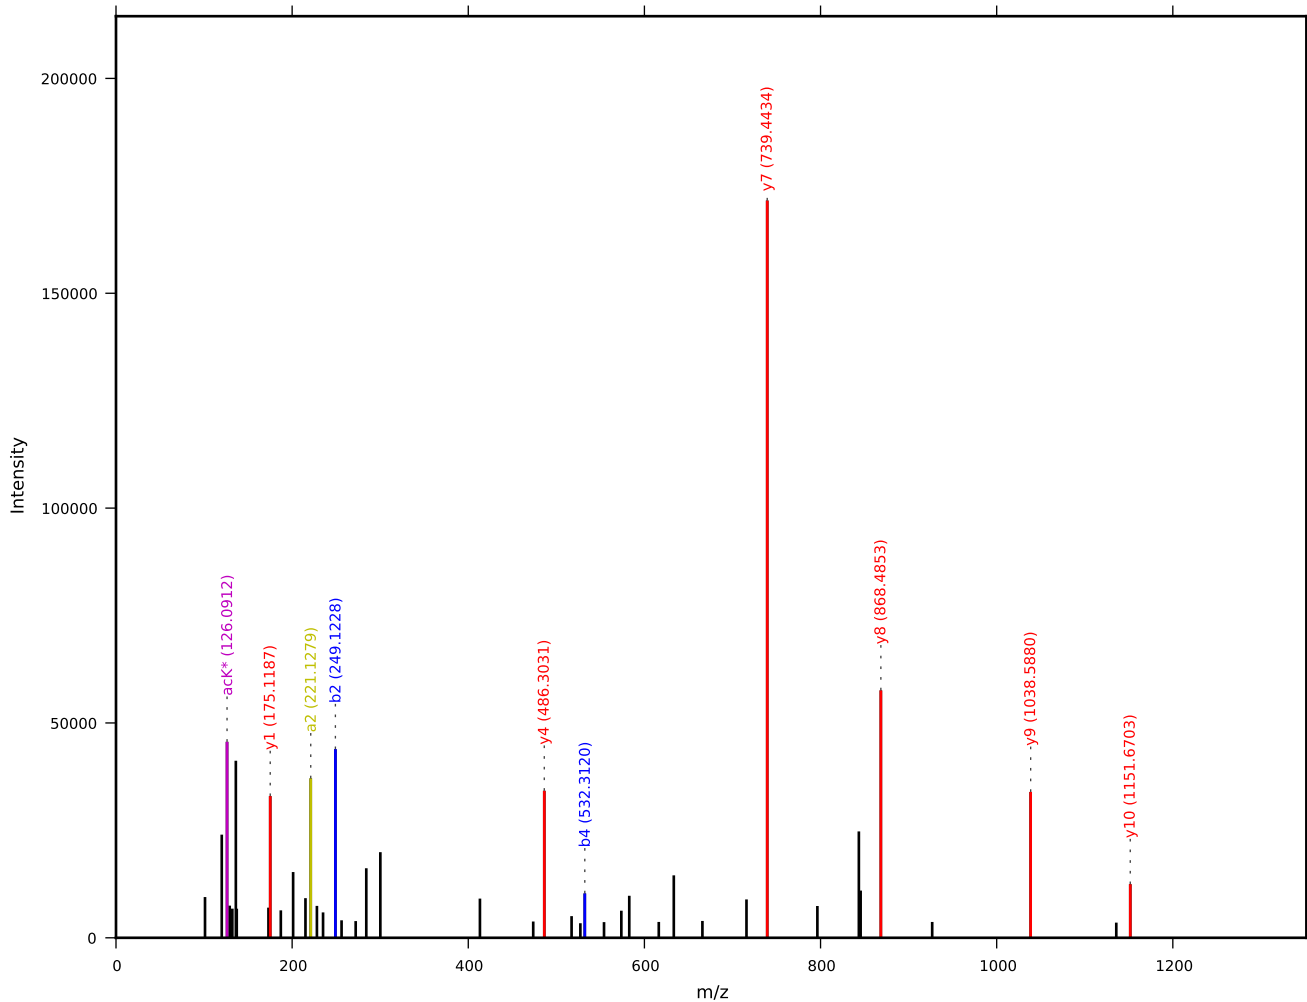

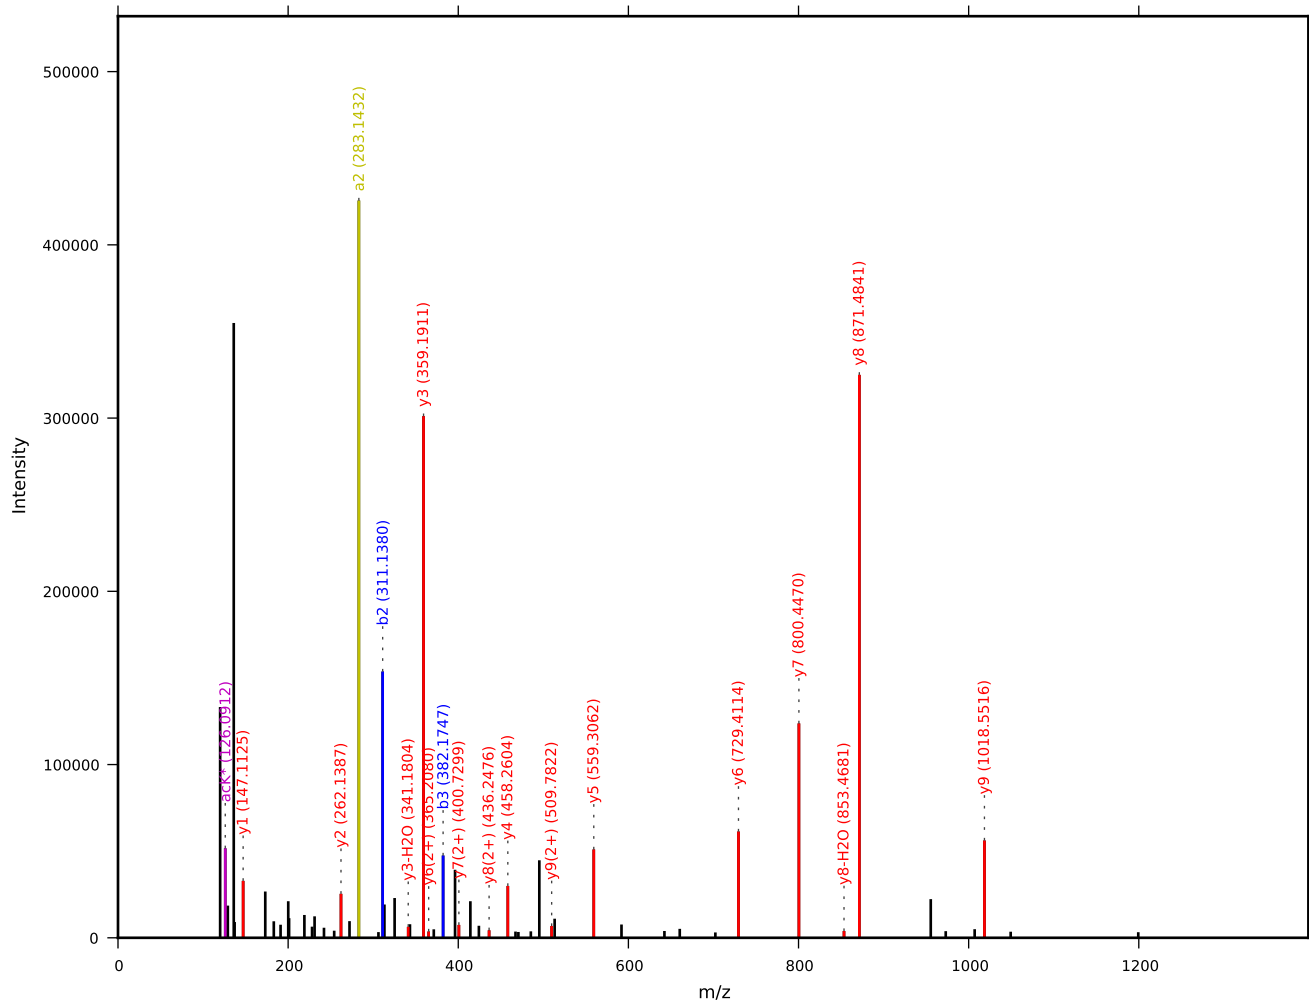

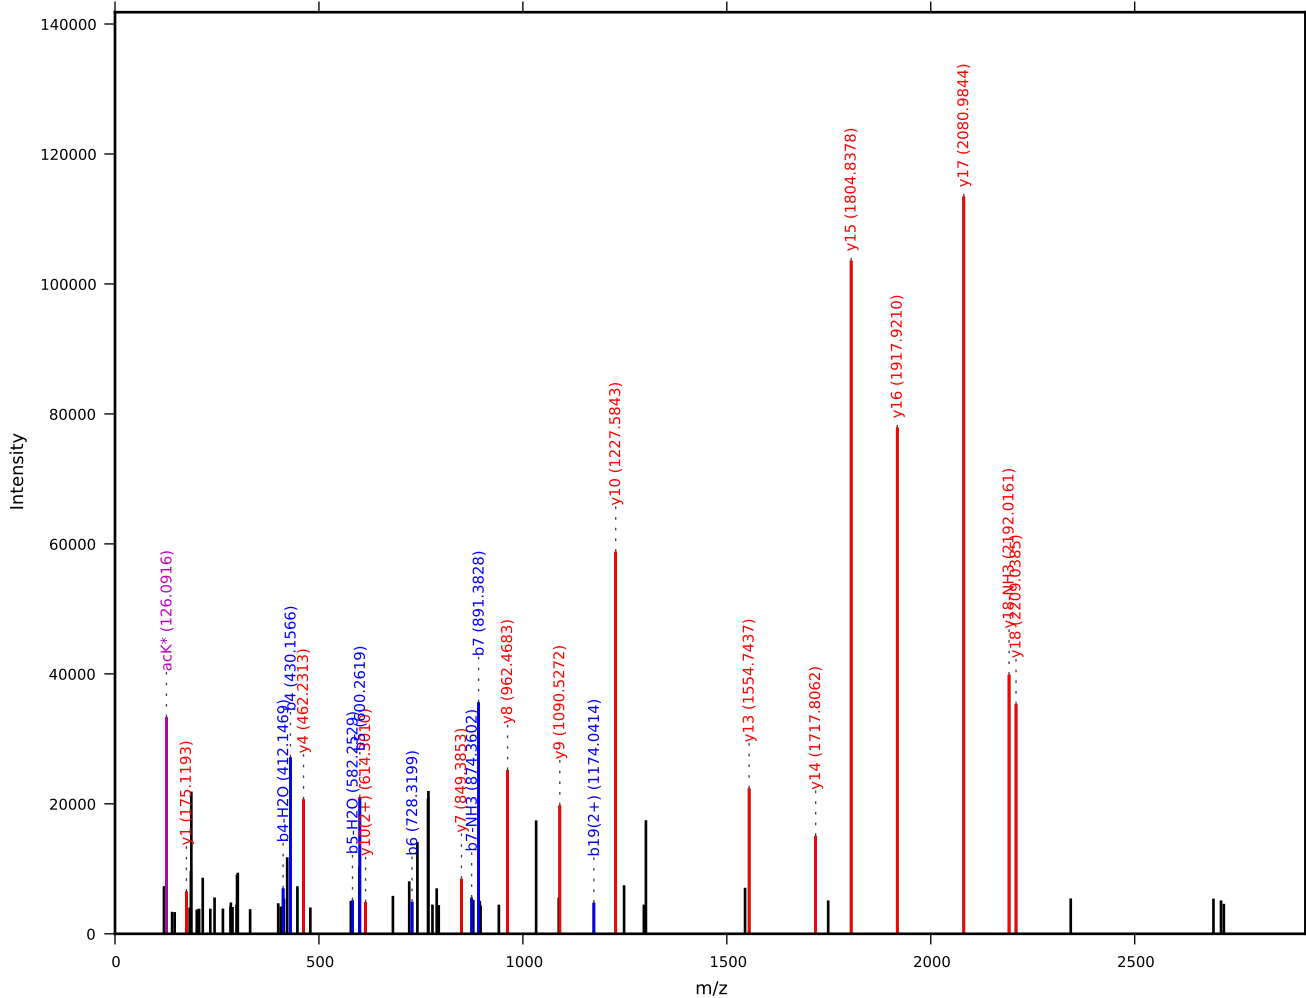

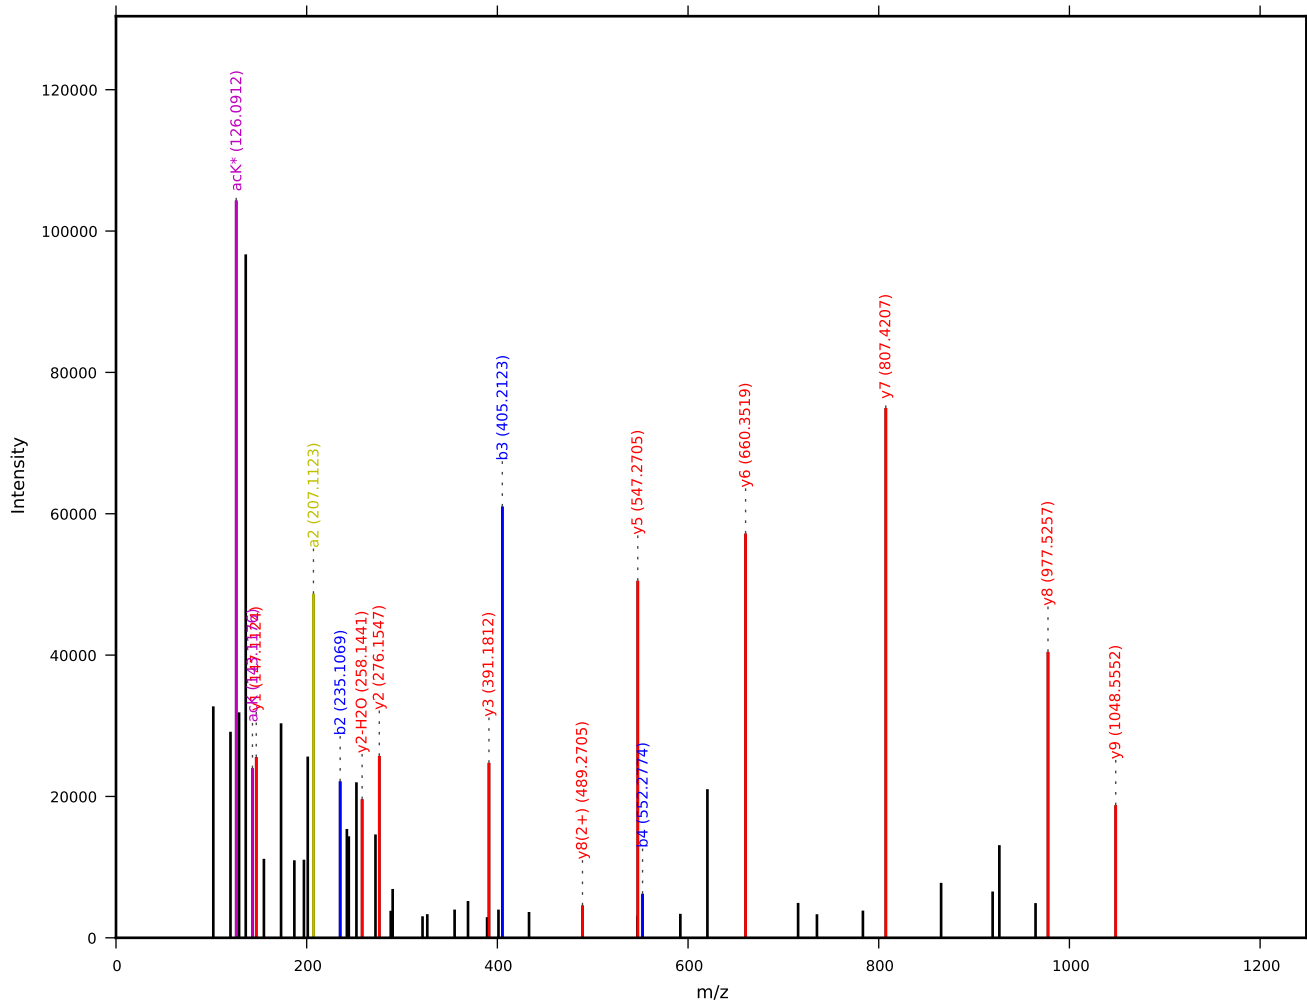

Mass: 1200.6714 Charge: 3 m/z: 401.23108  
Modified Peptide: \_KVGEDIK(ac)ATK\_ Score: 45.915 PEP: 0.0065915

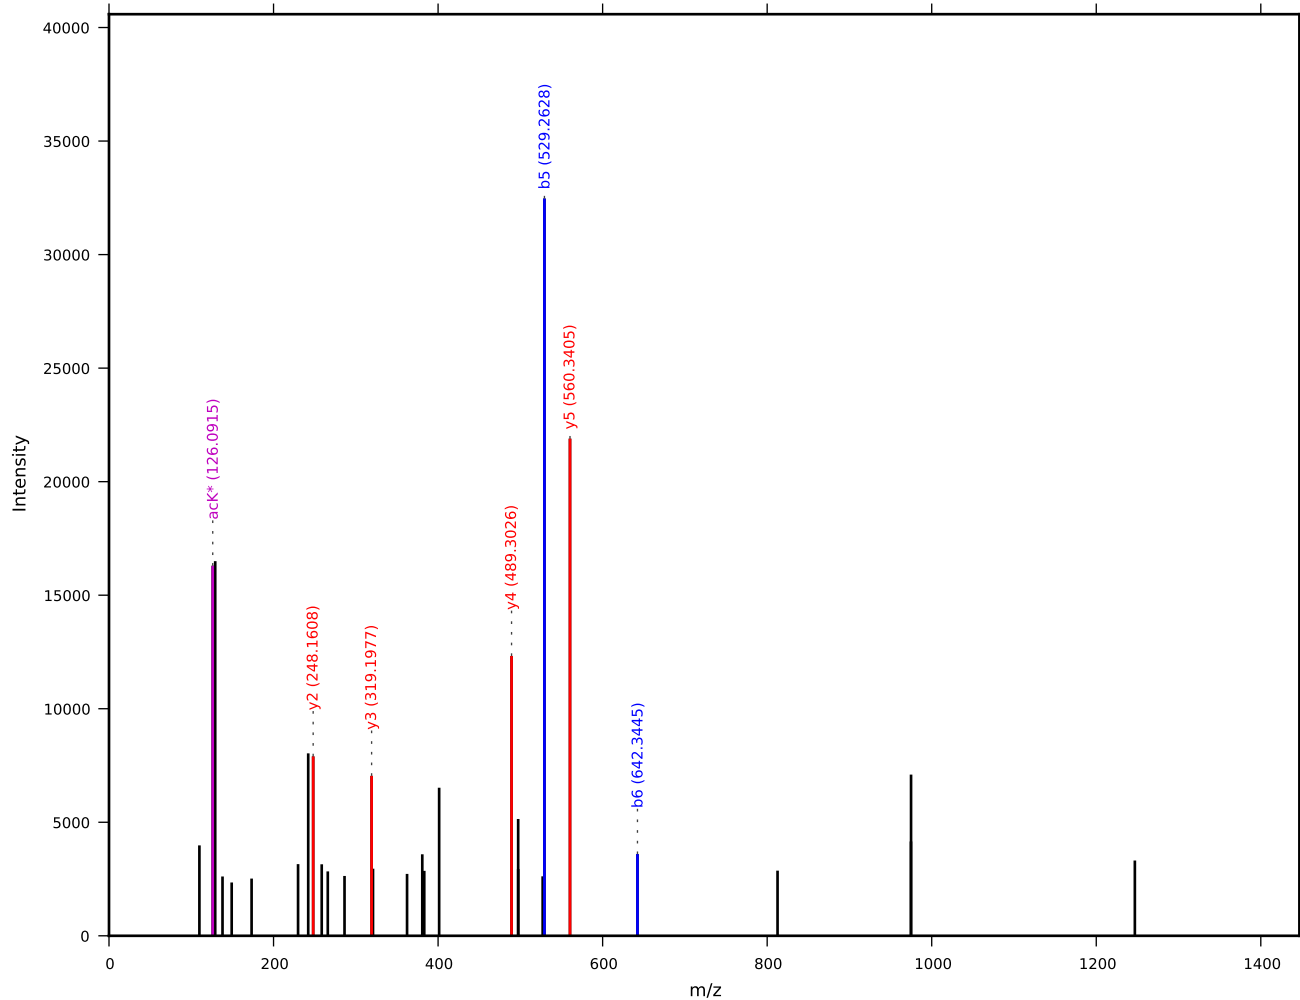



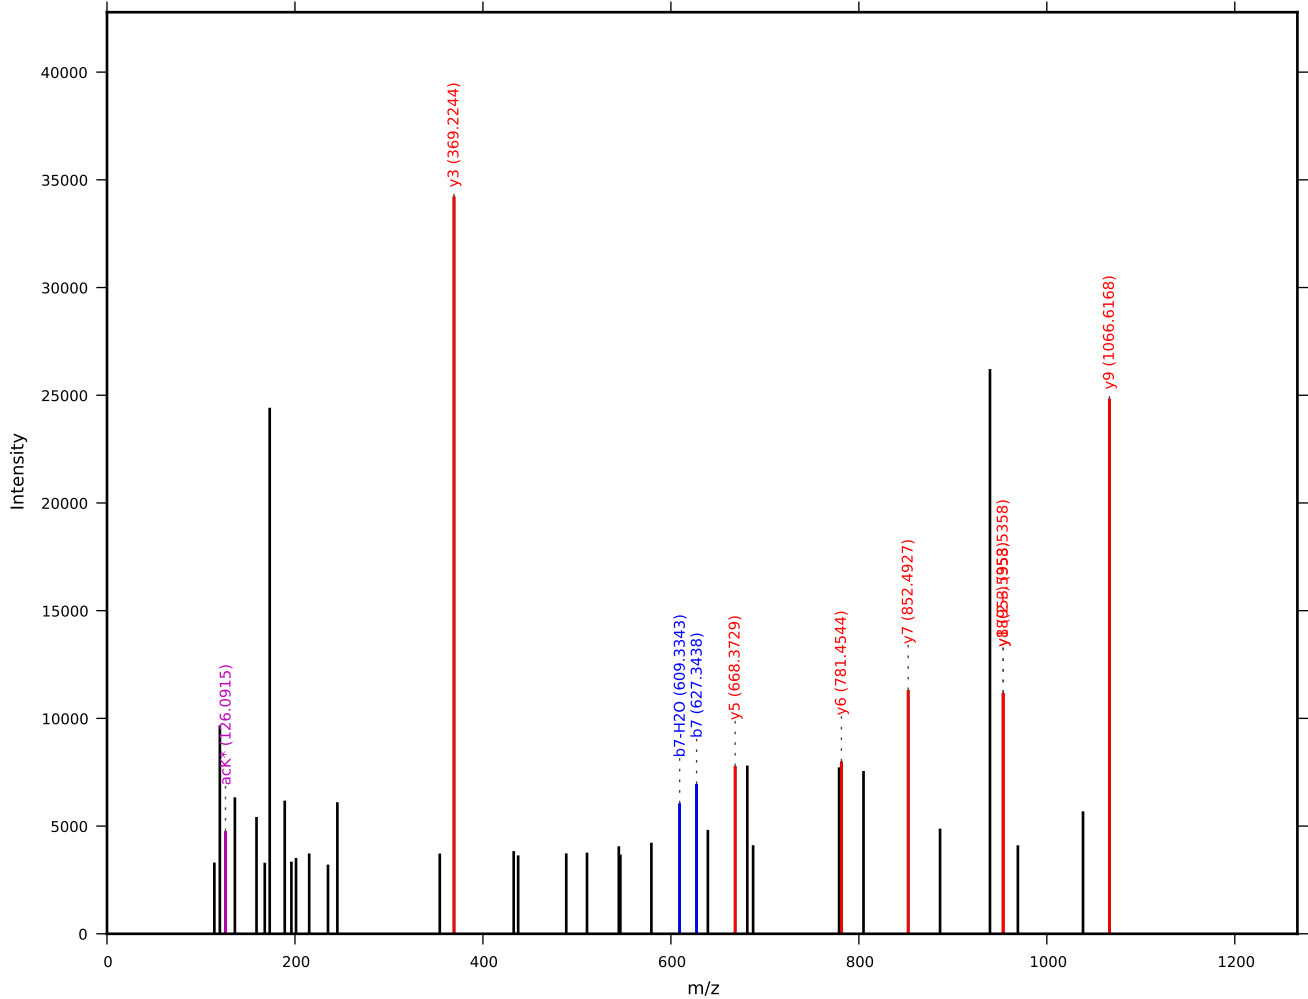

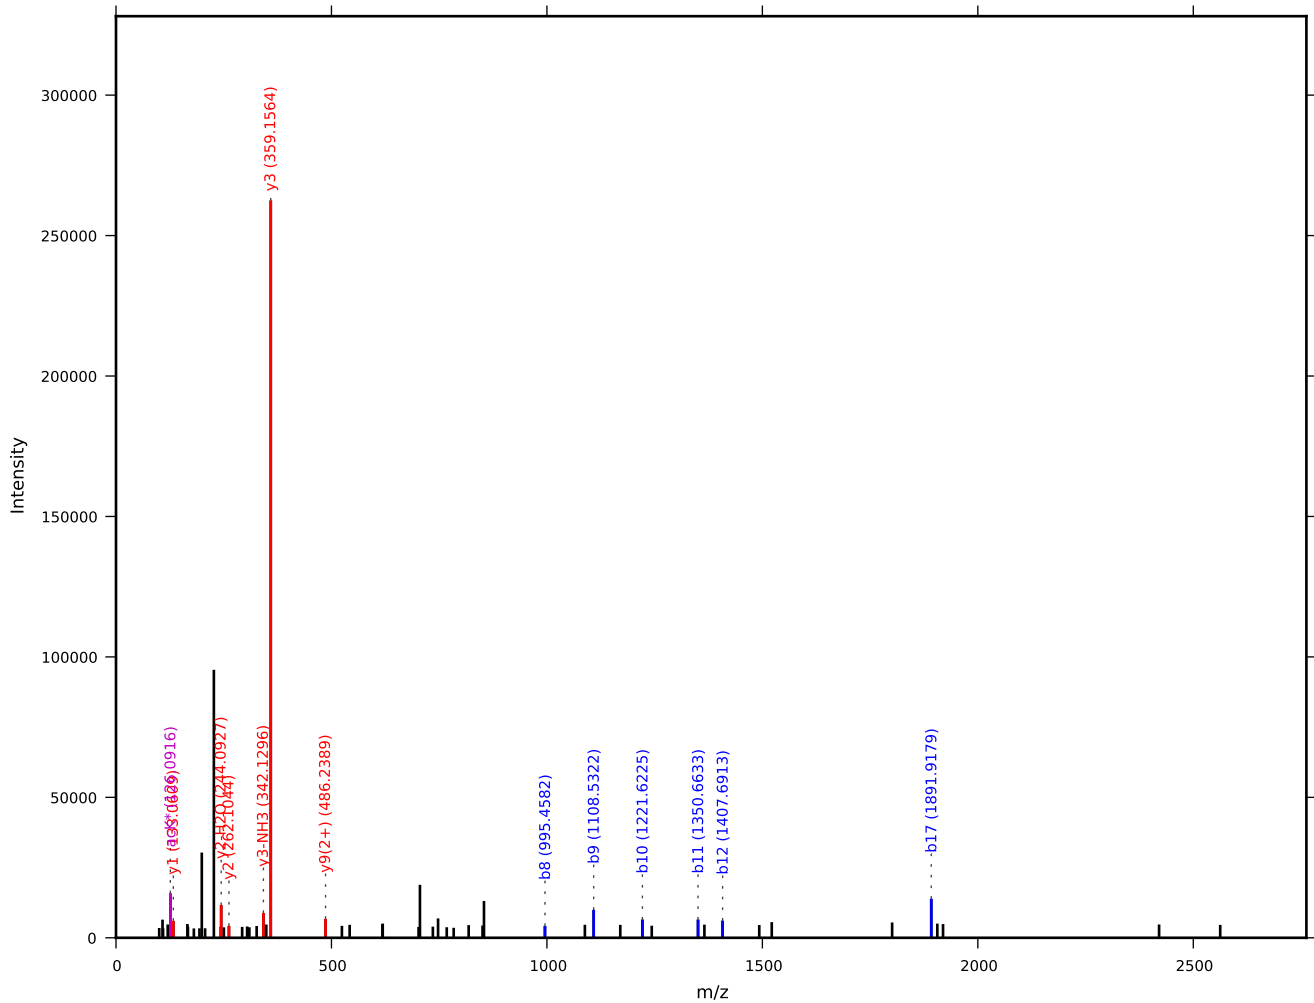

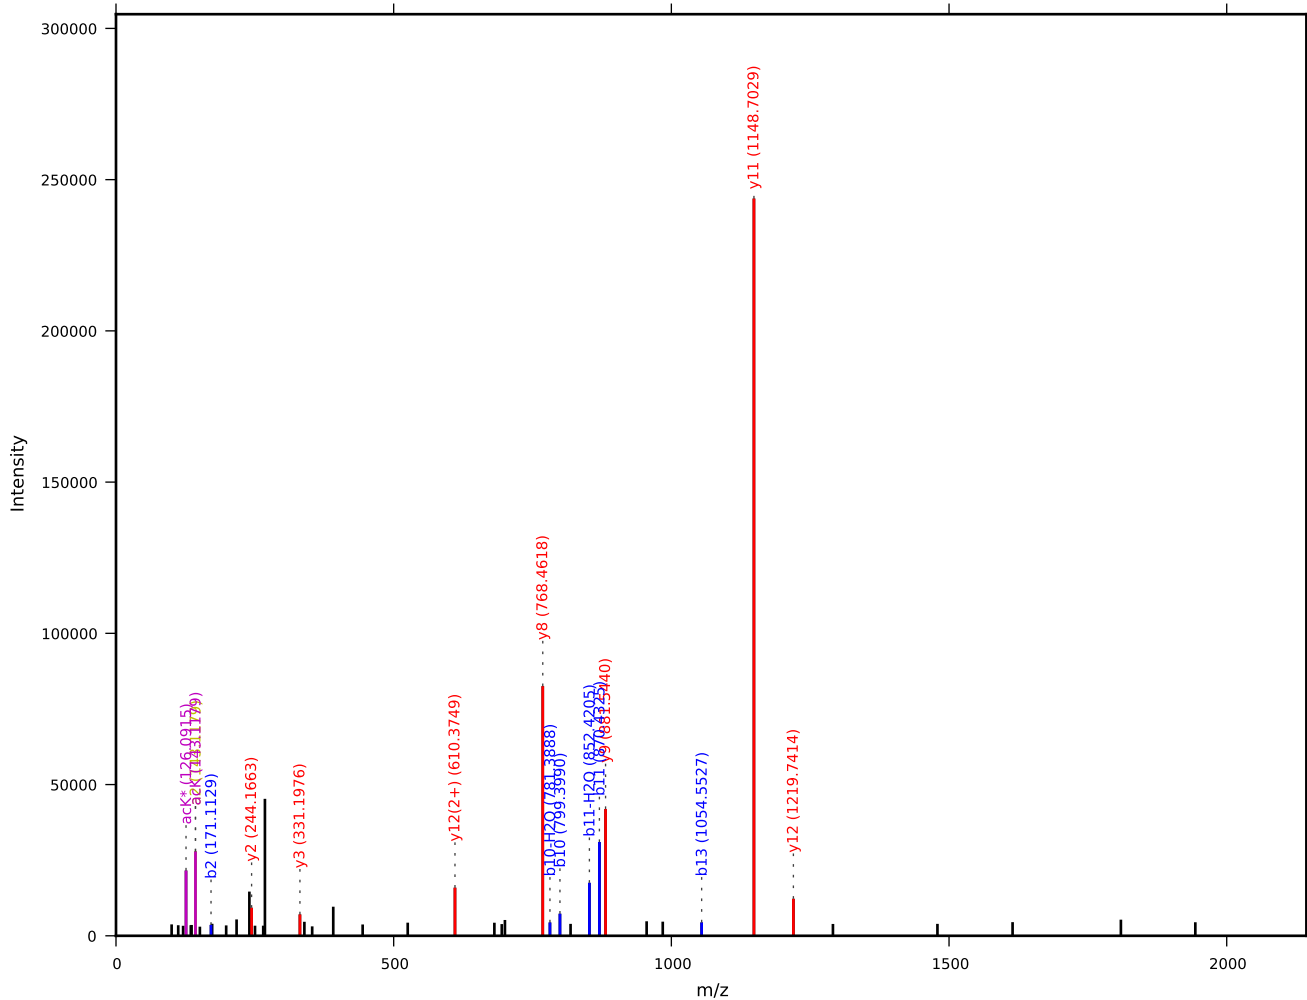

Mass: 1250.6871 Charge: 2 m/z: 626.3508  
Modified Peptide: \_SLLSEITK(ac)YR\_ Score: 42.743 PEP: 0.003322

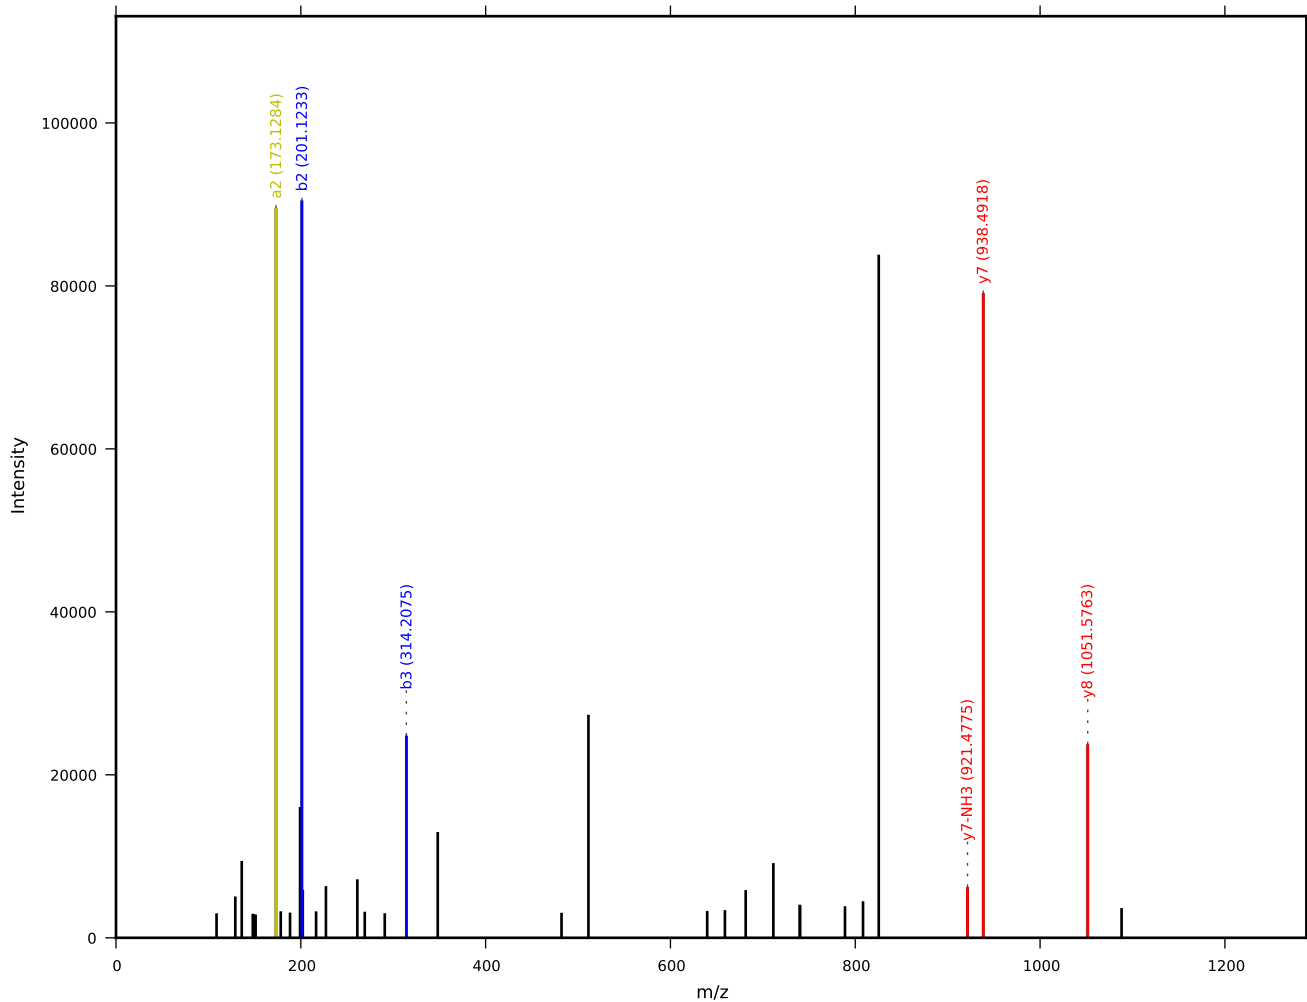

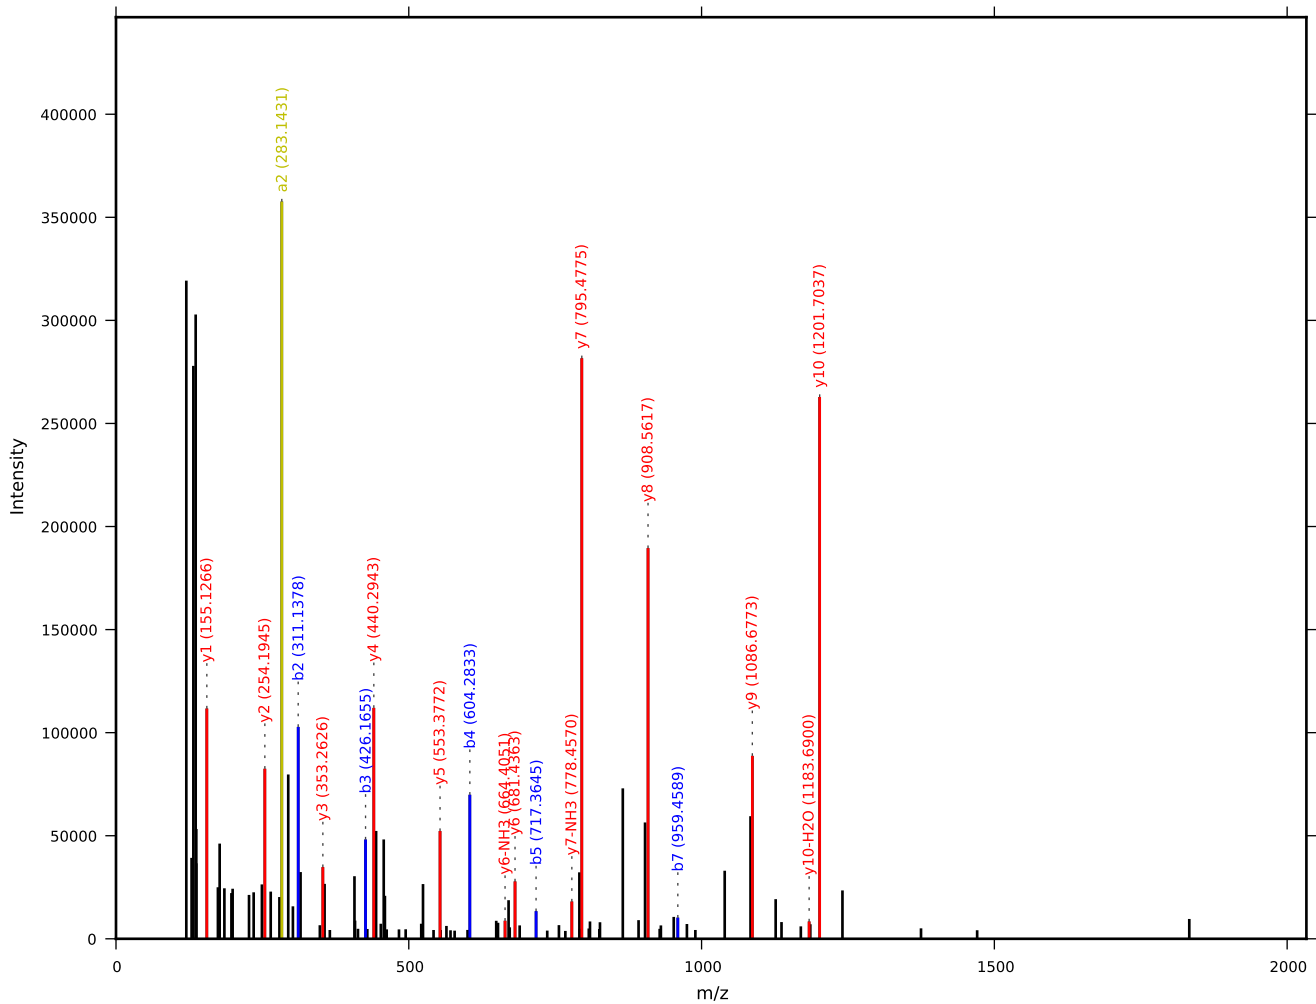

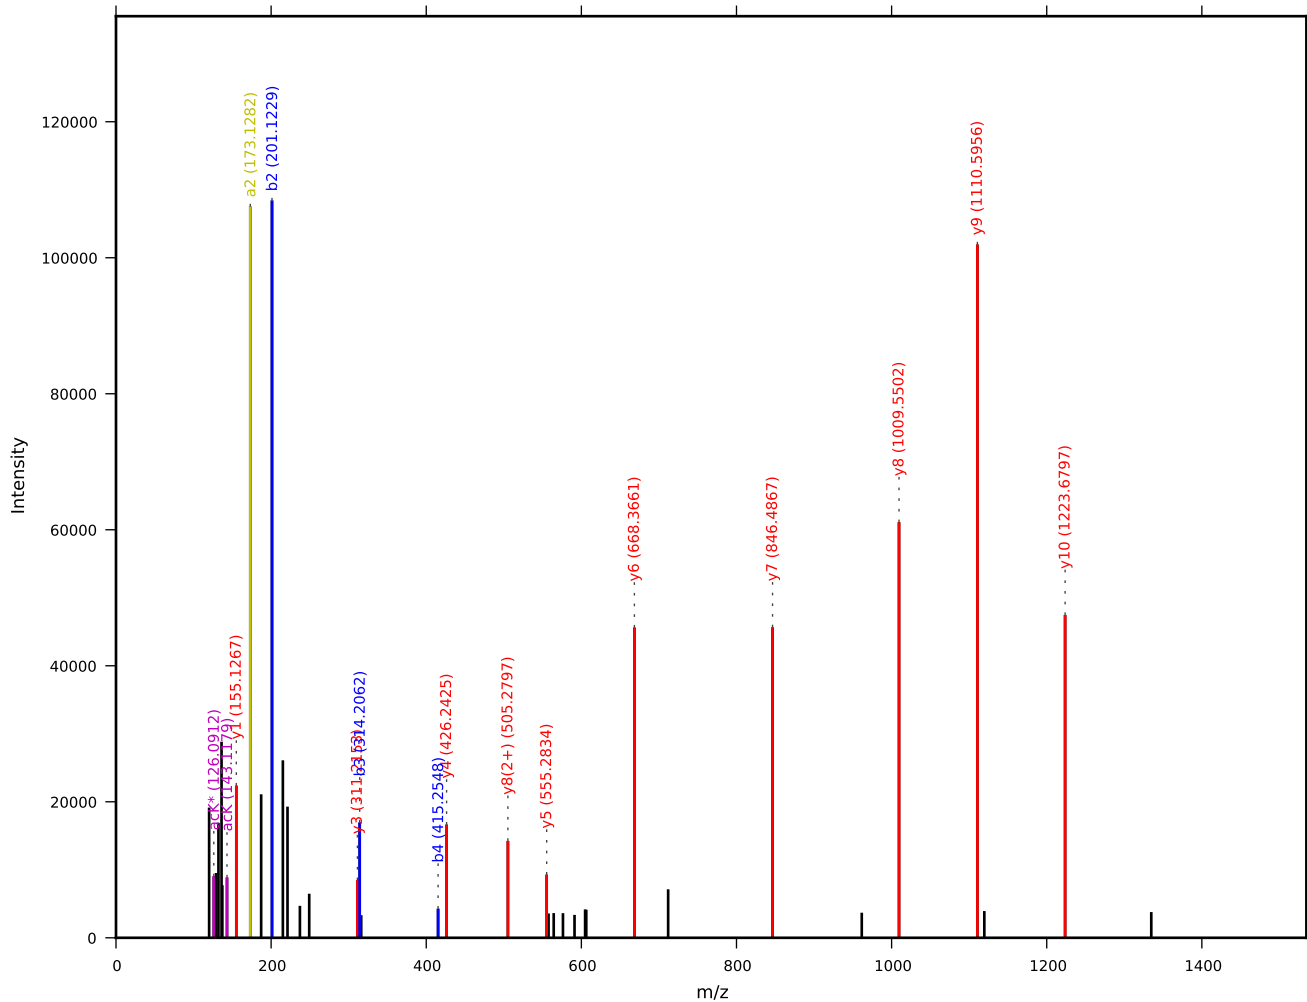

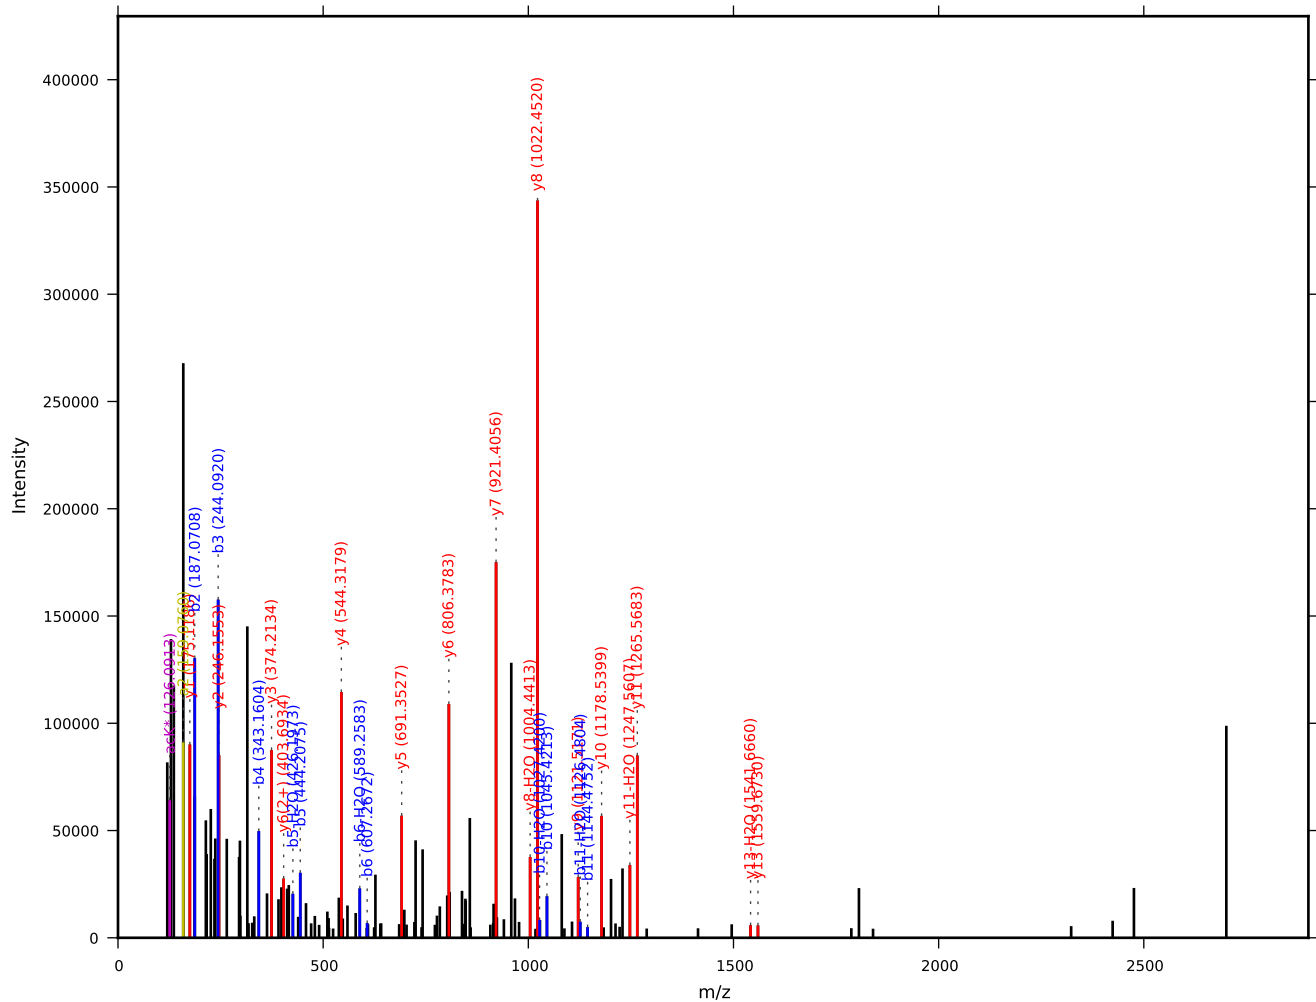

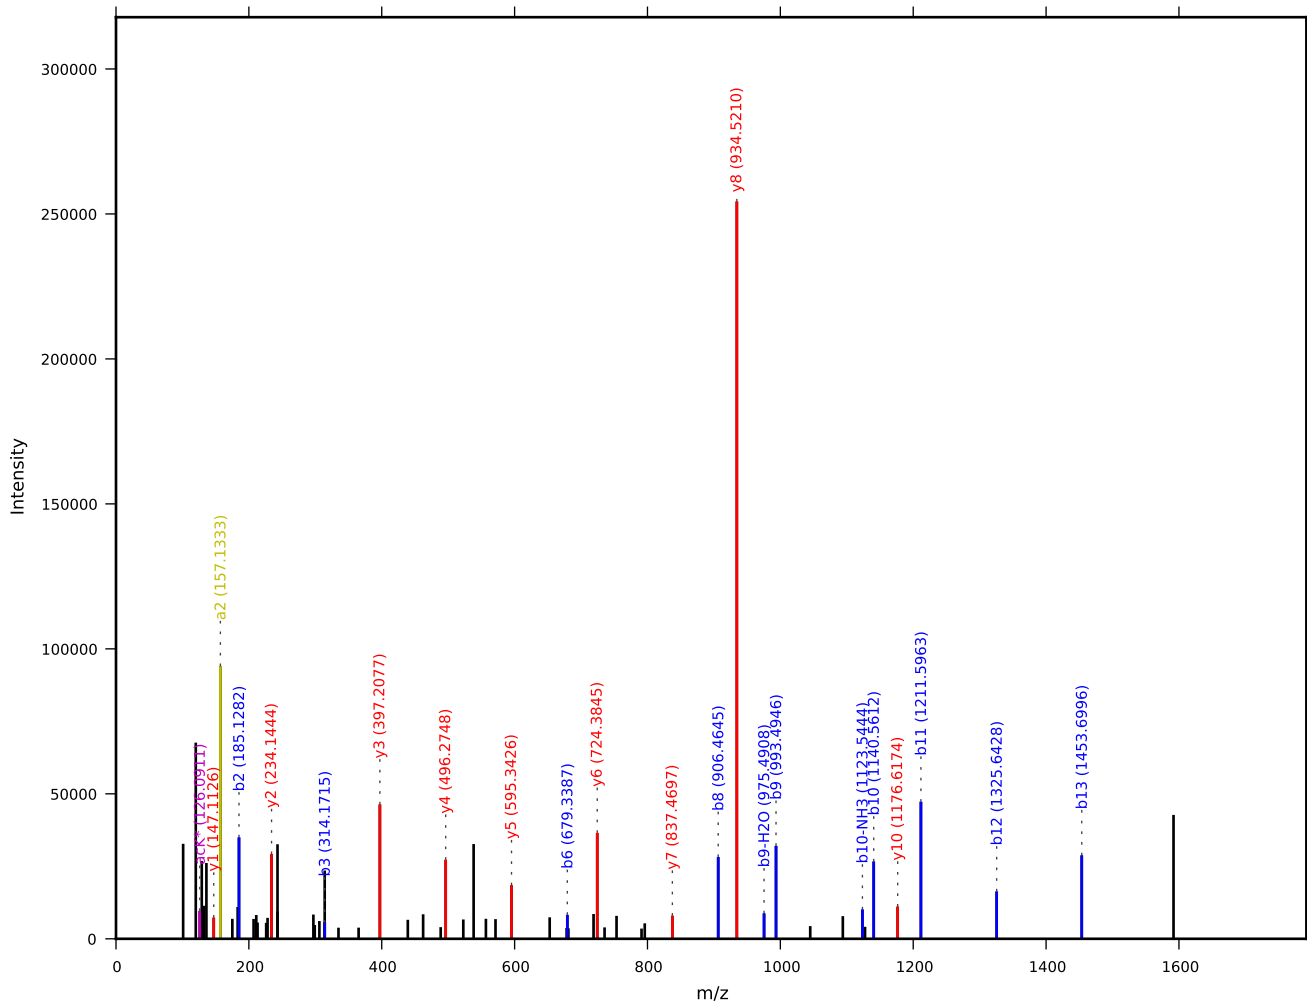



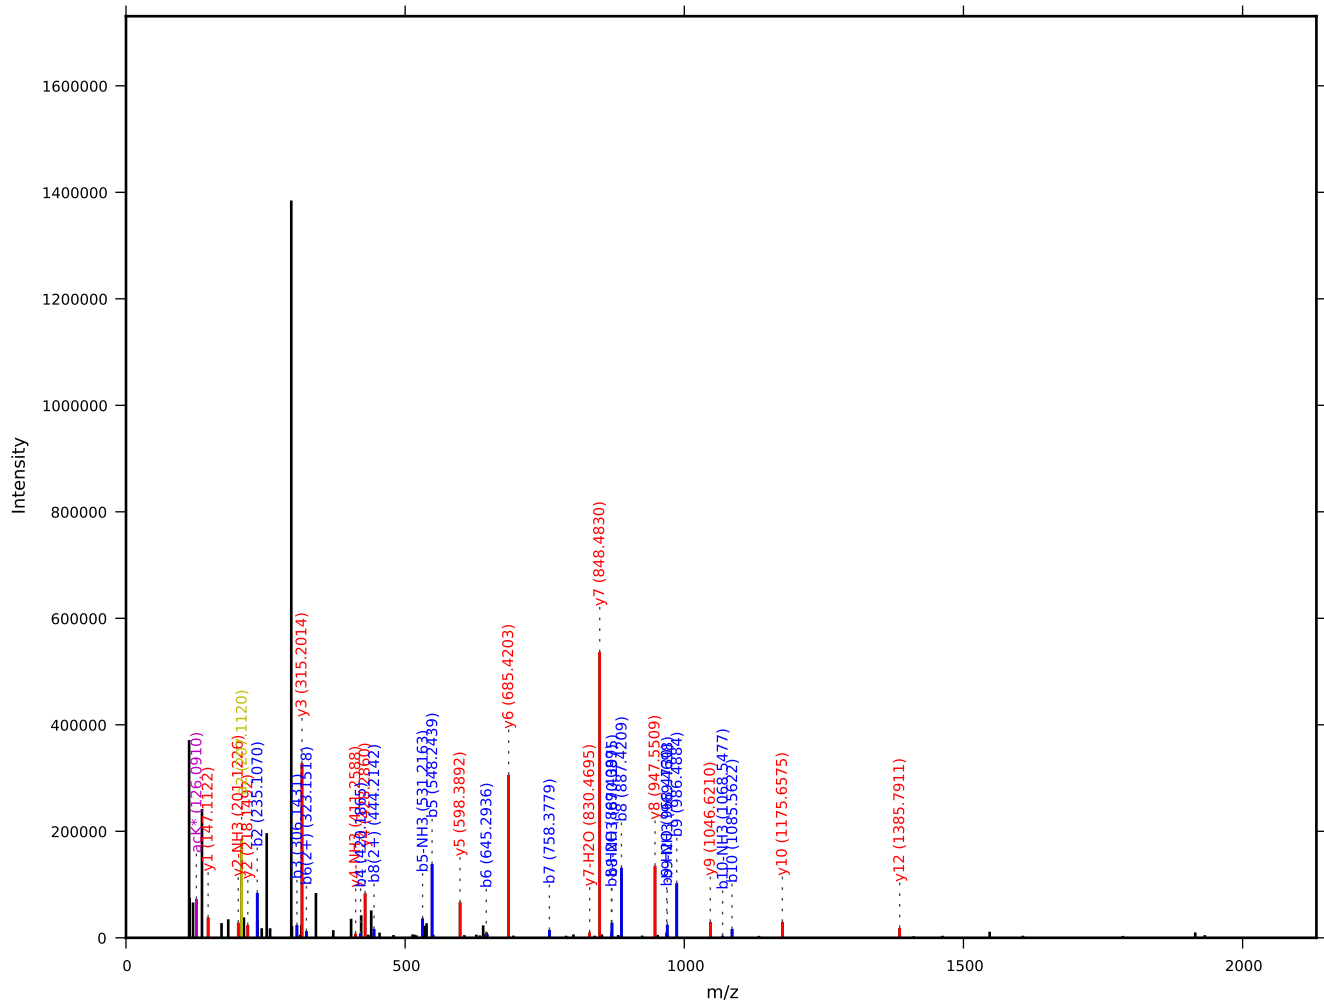

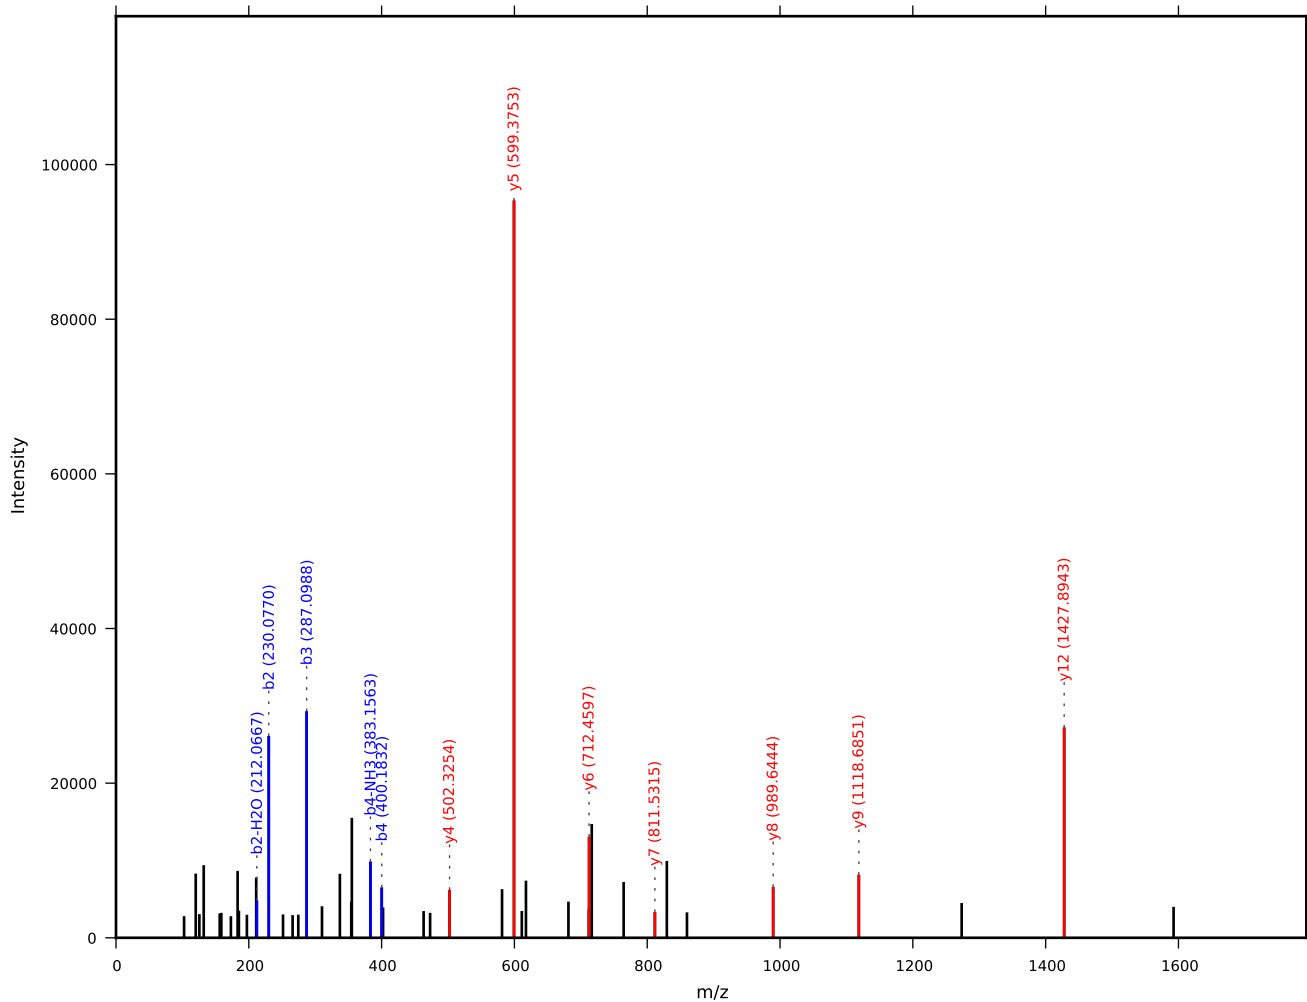

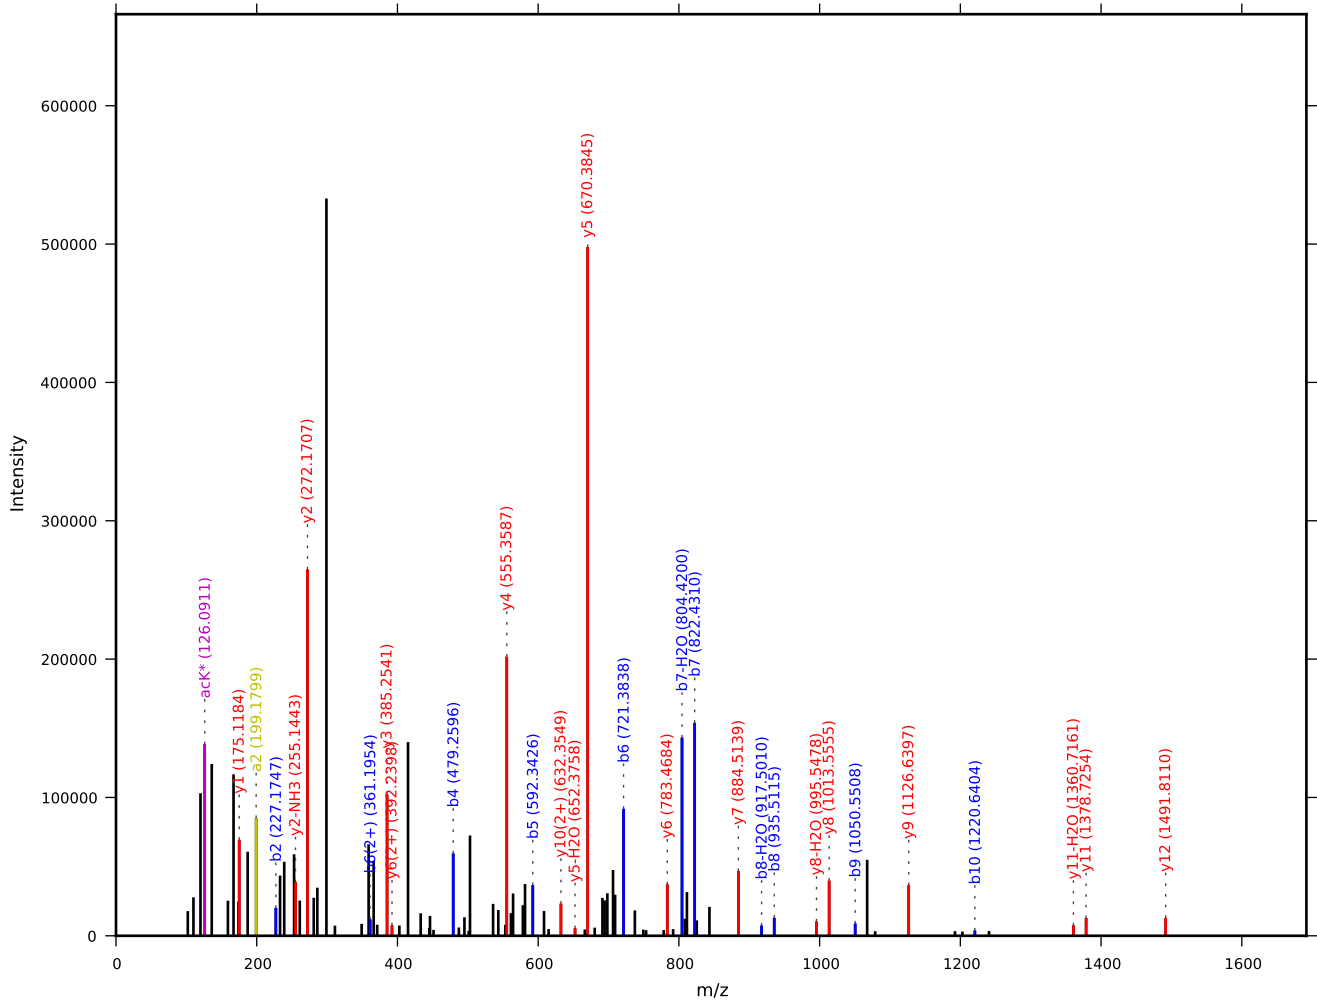

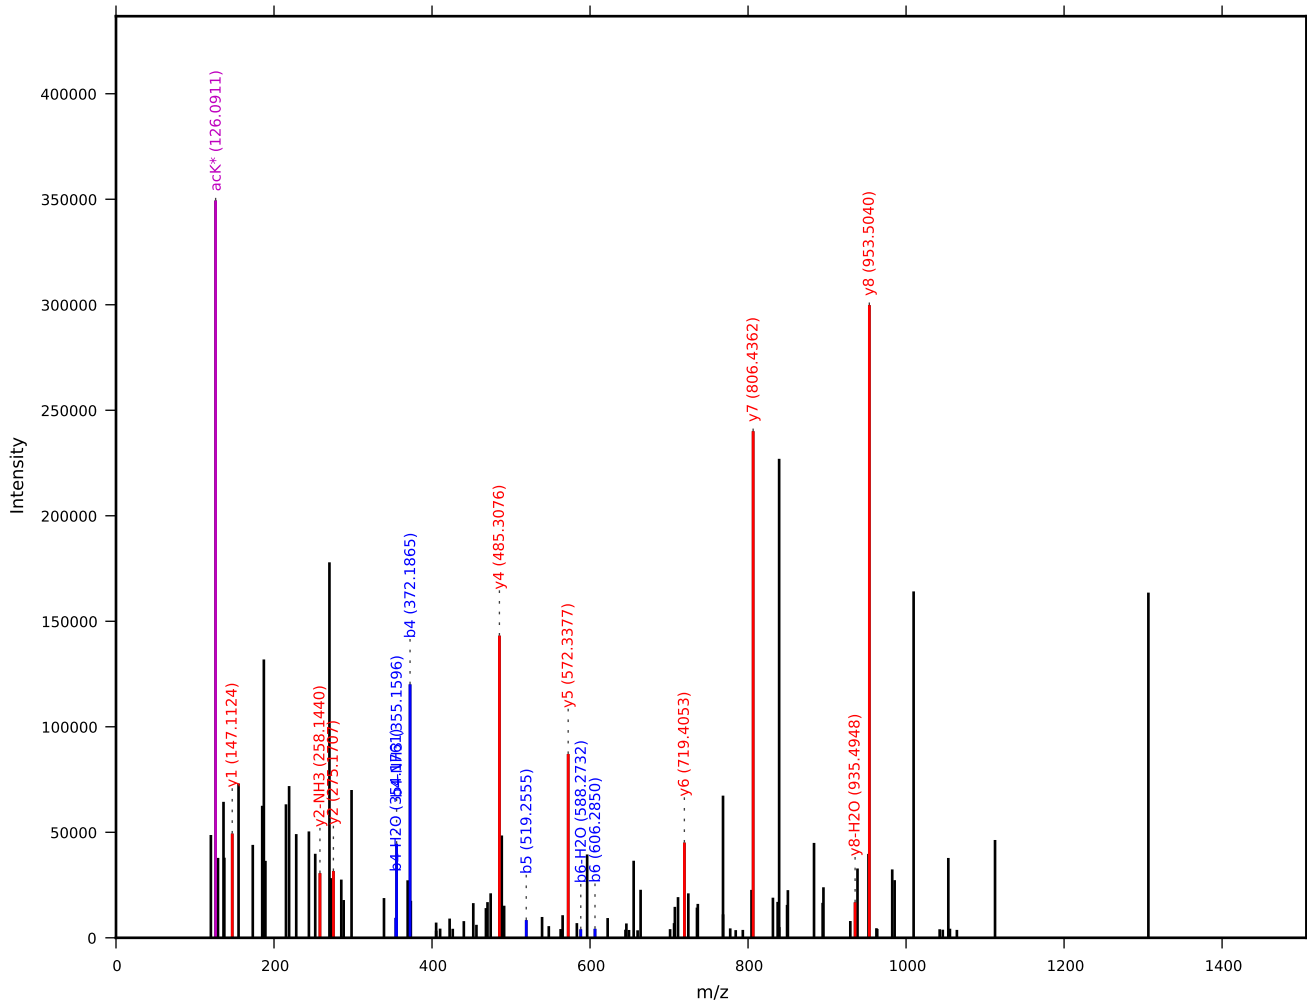

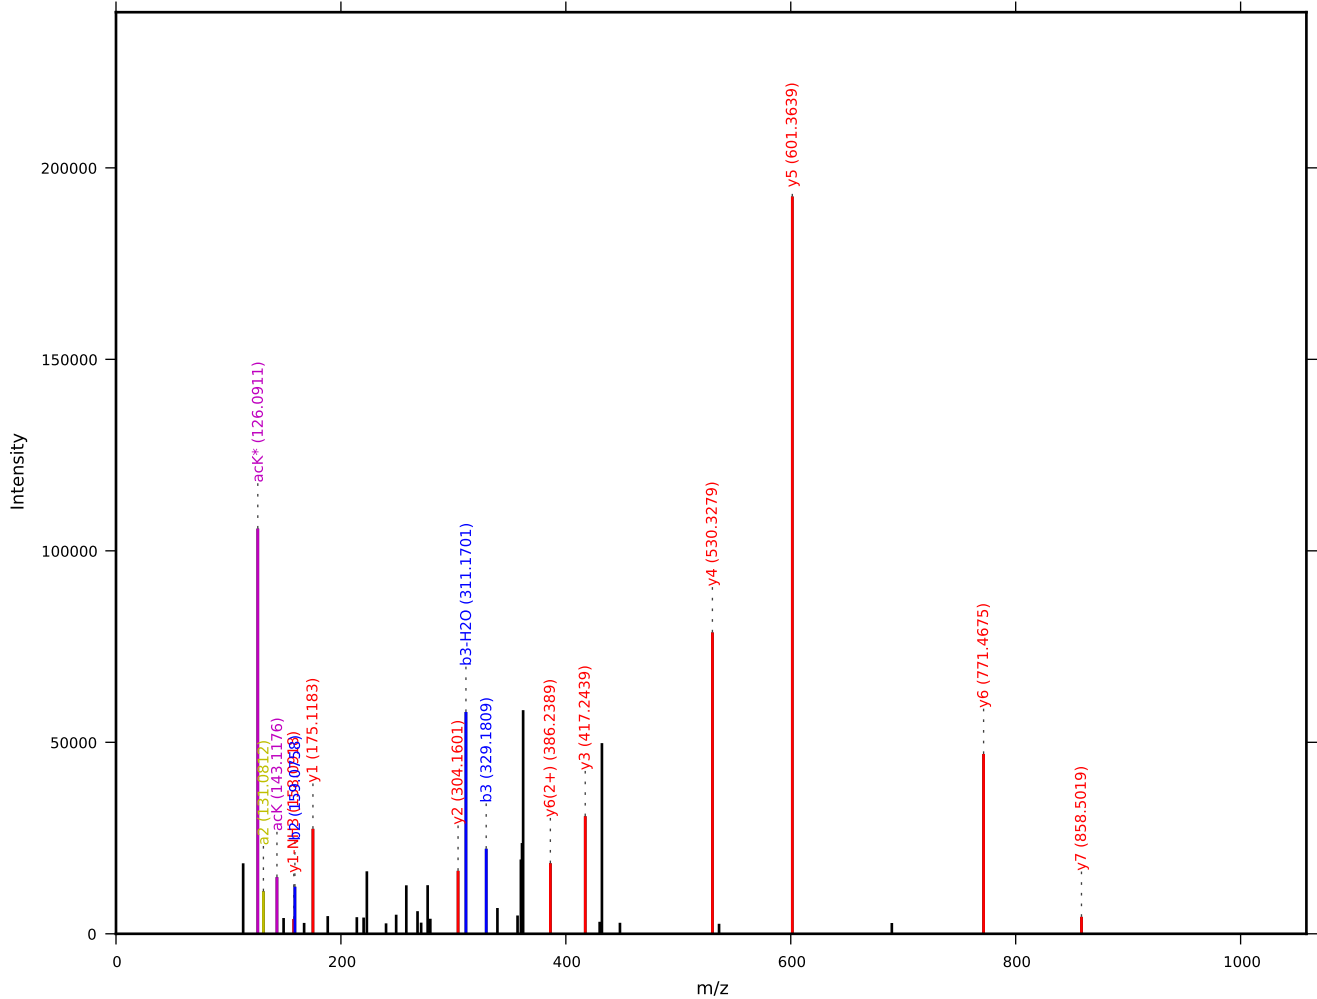

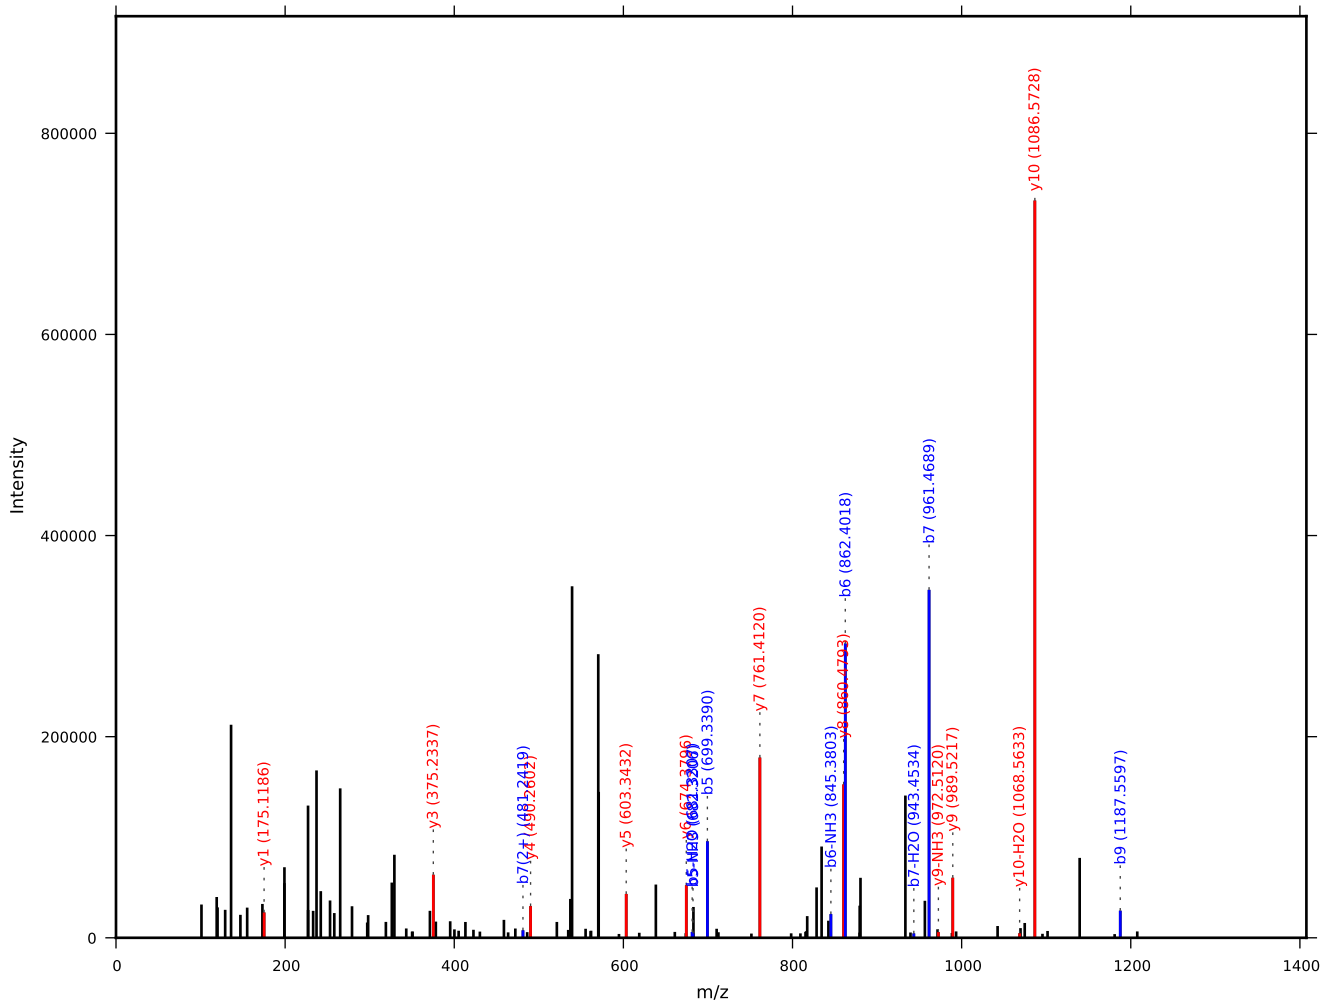

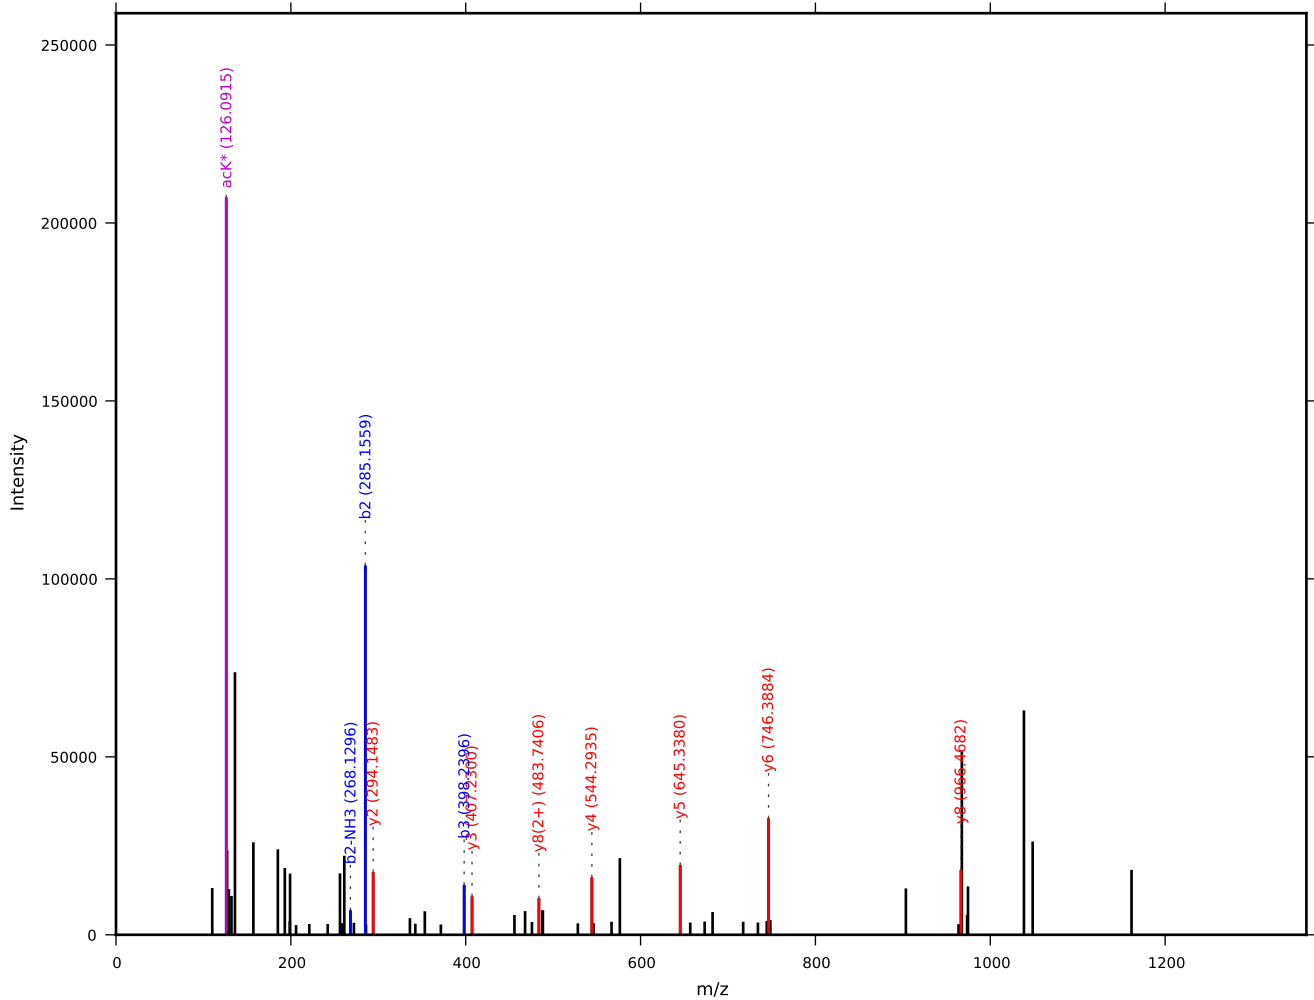

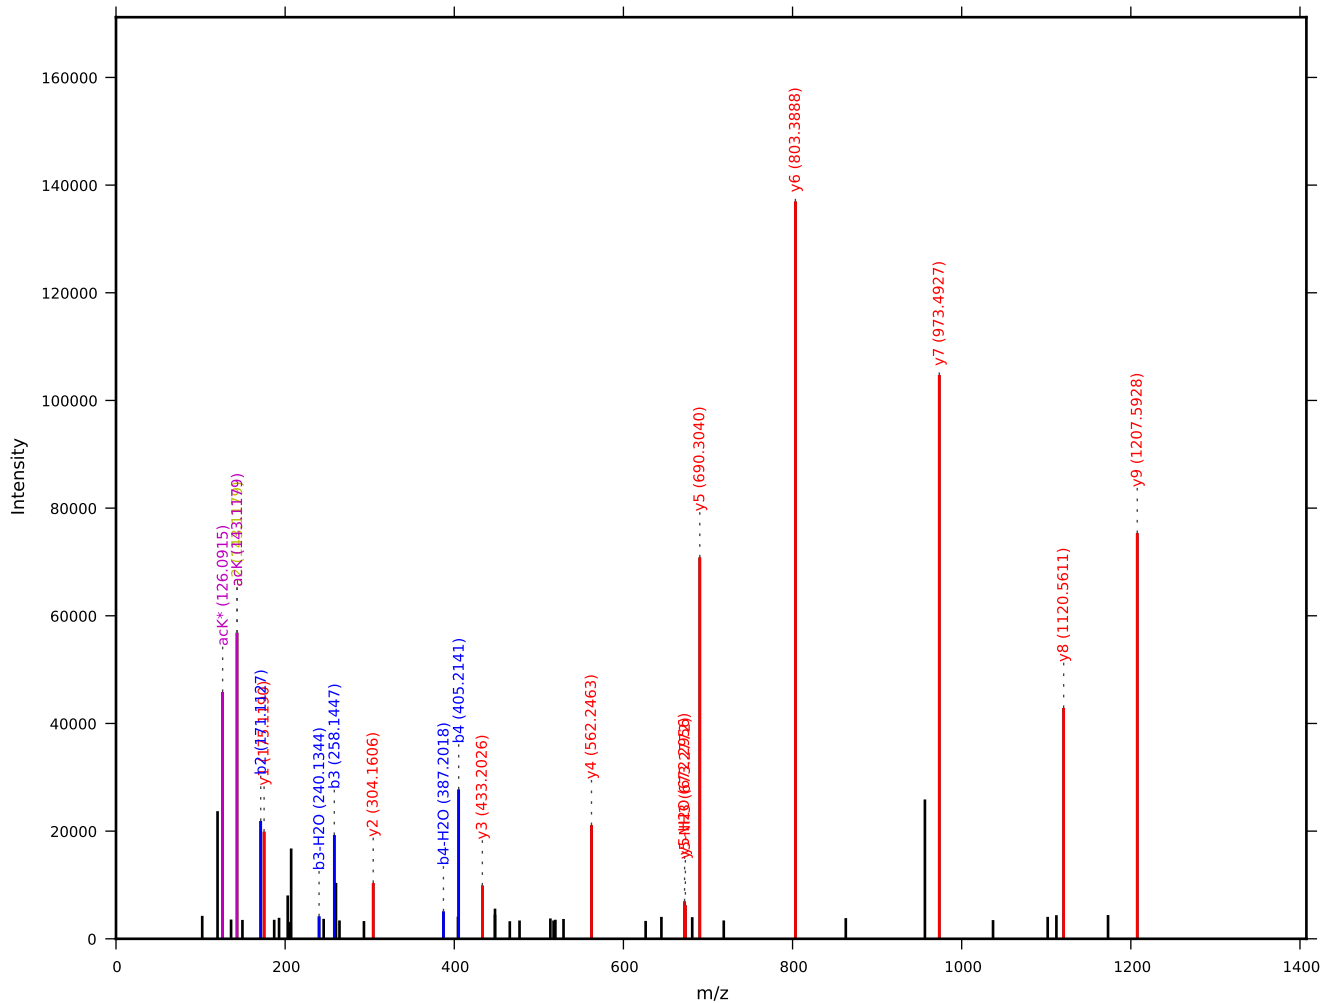



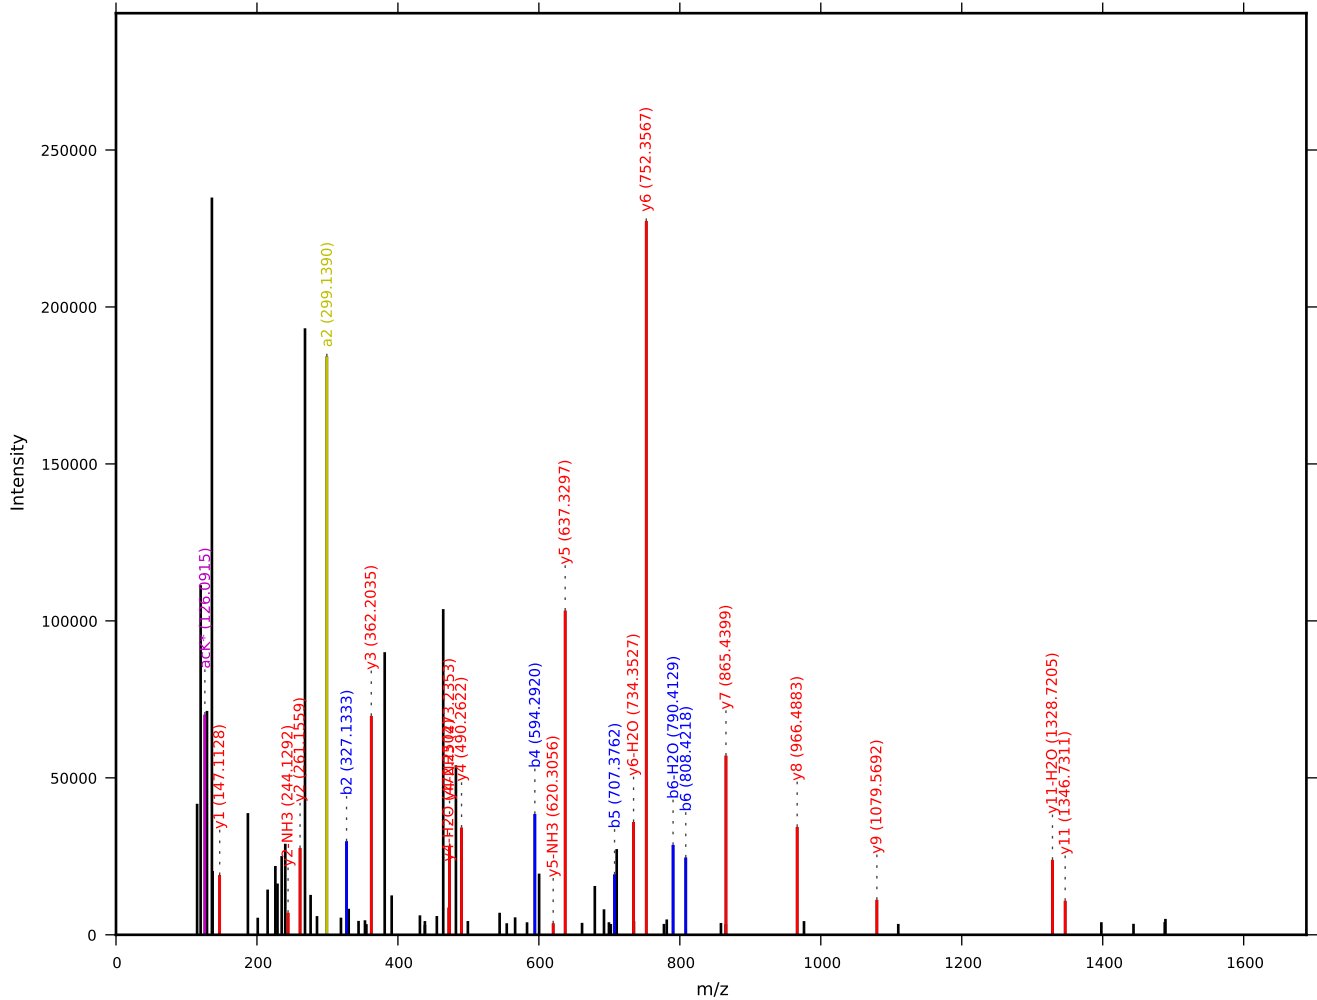

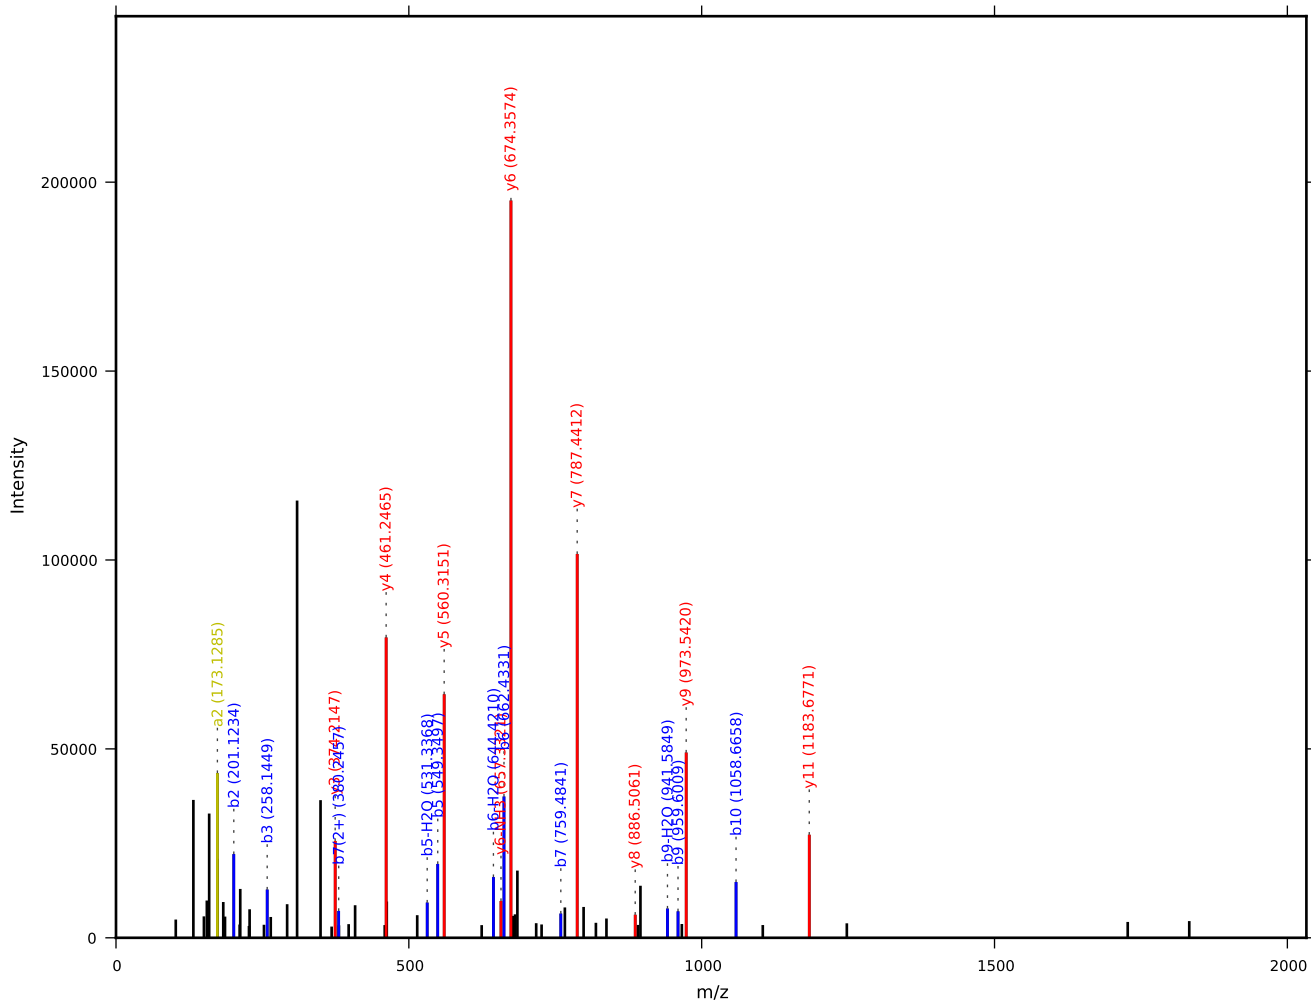

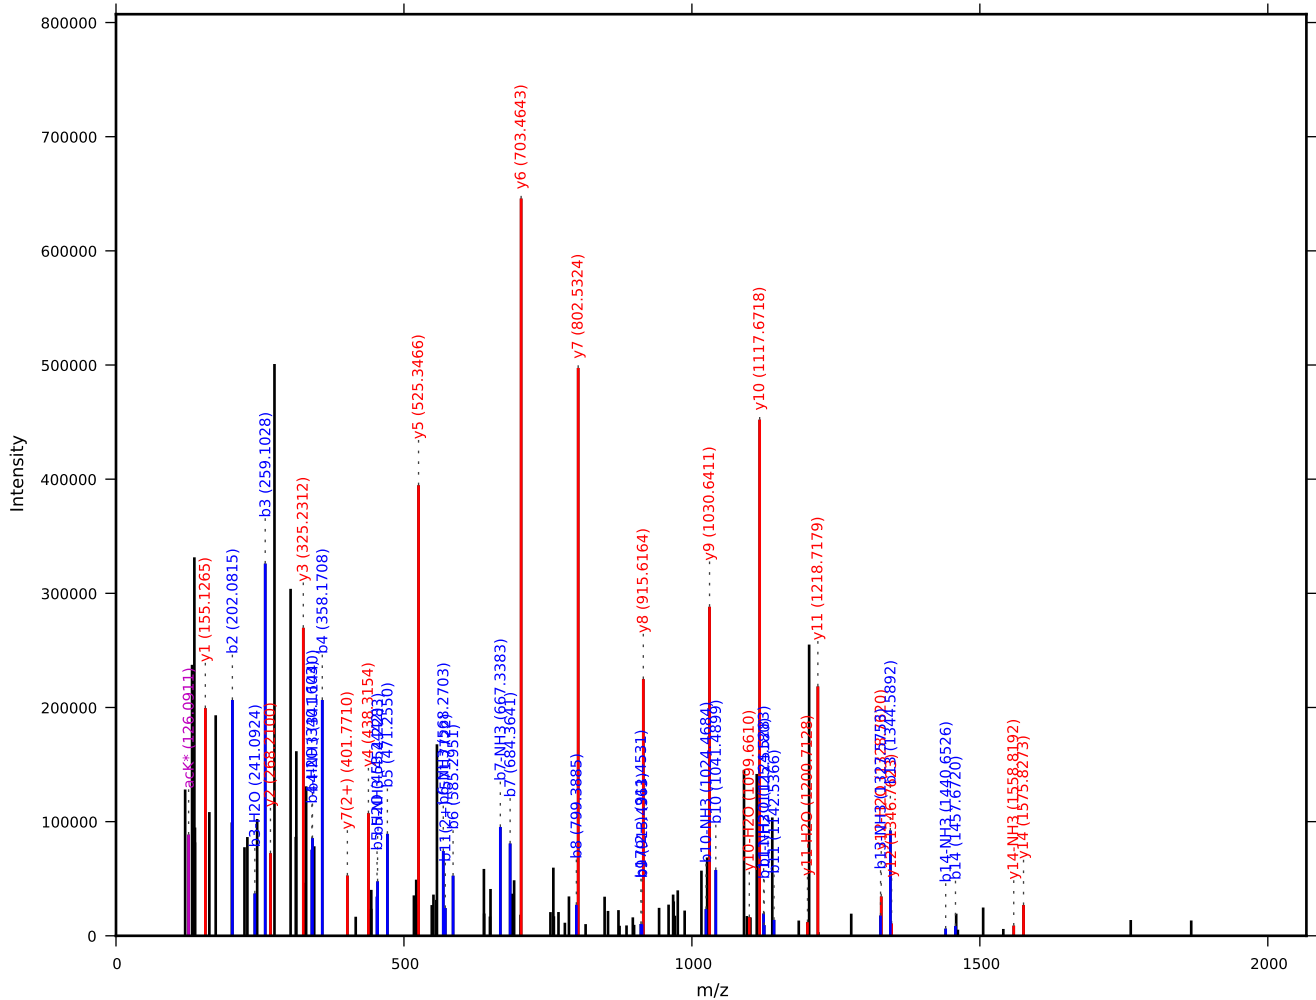

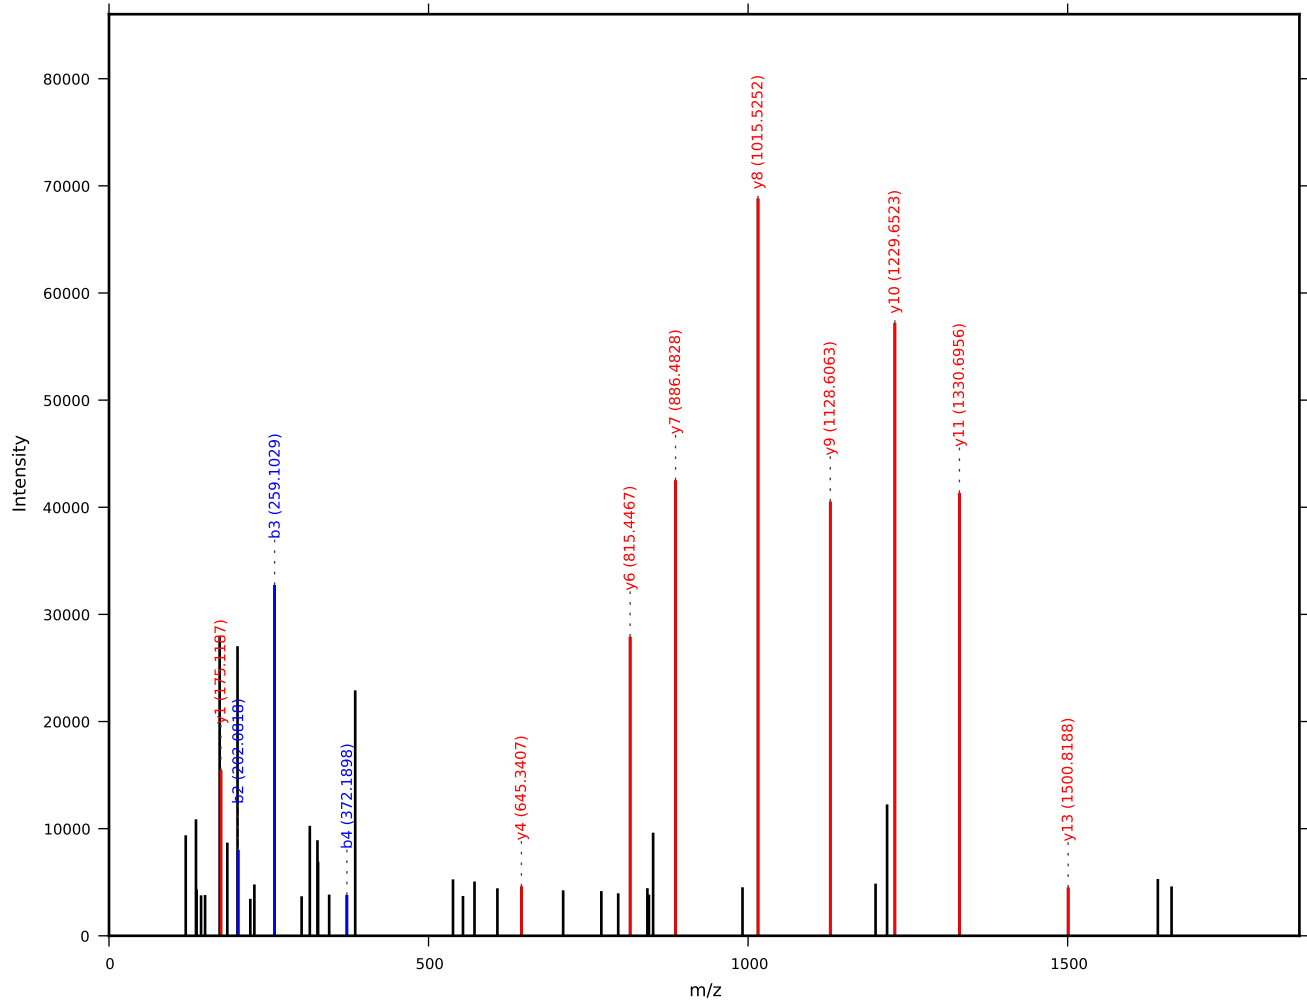

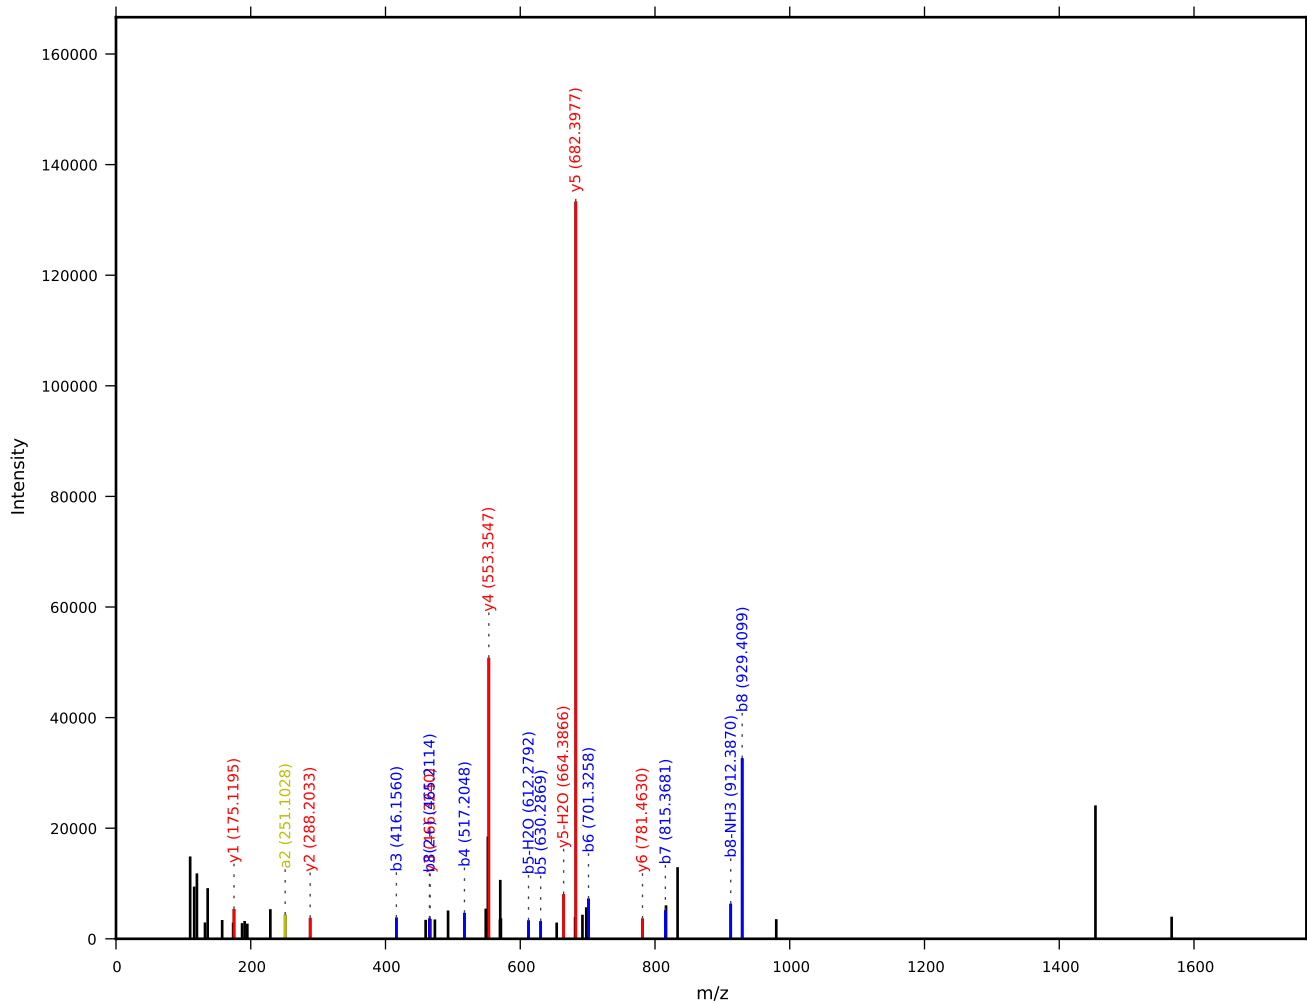

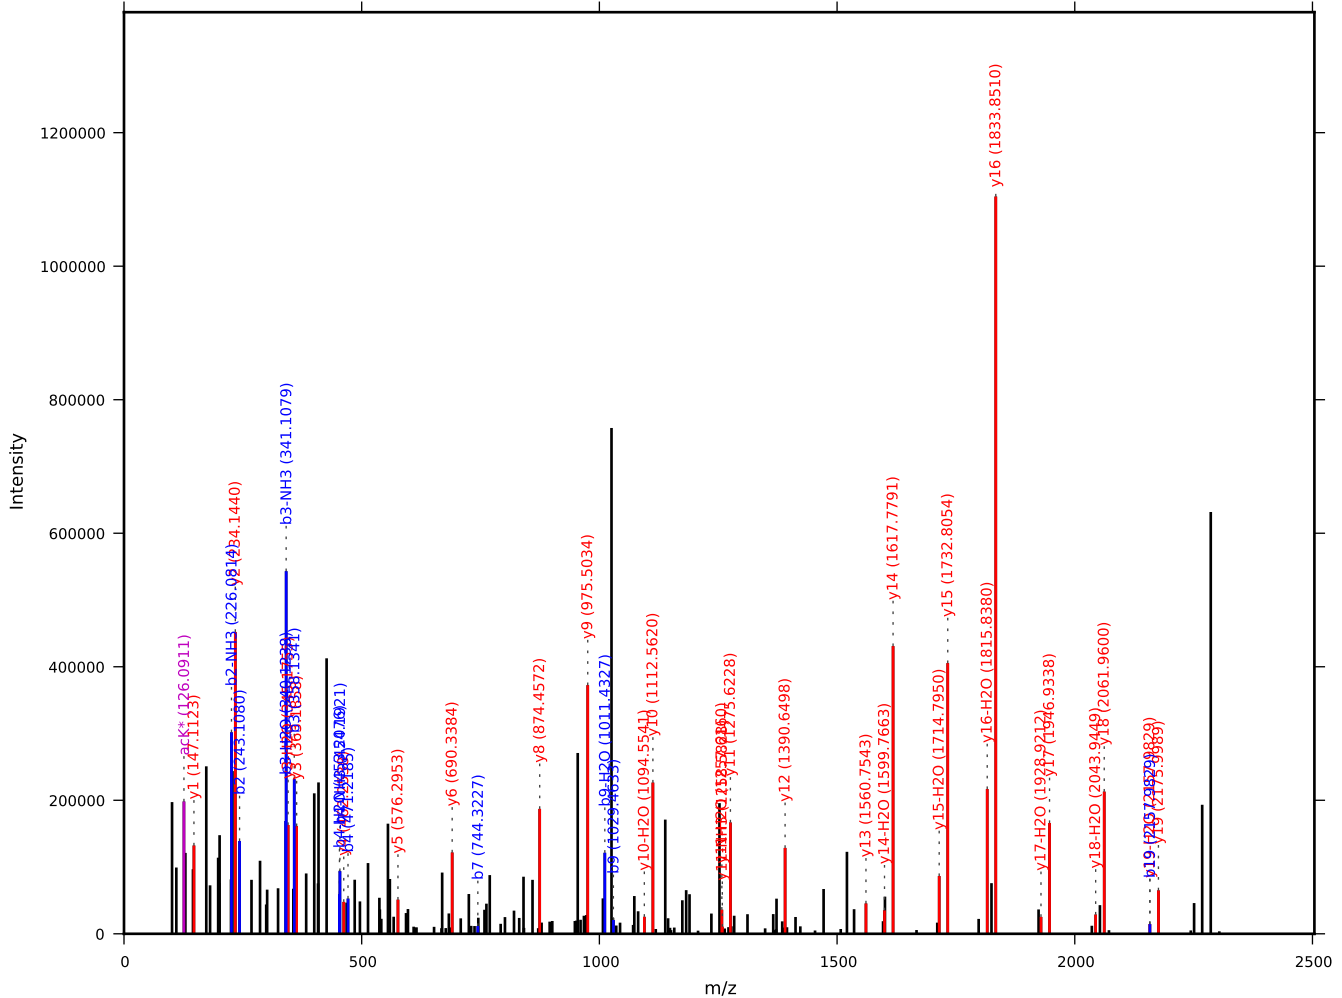

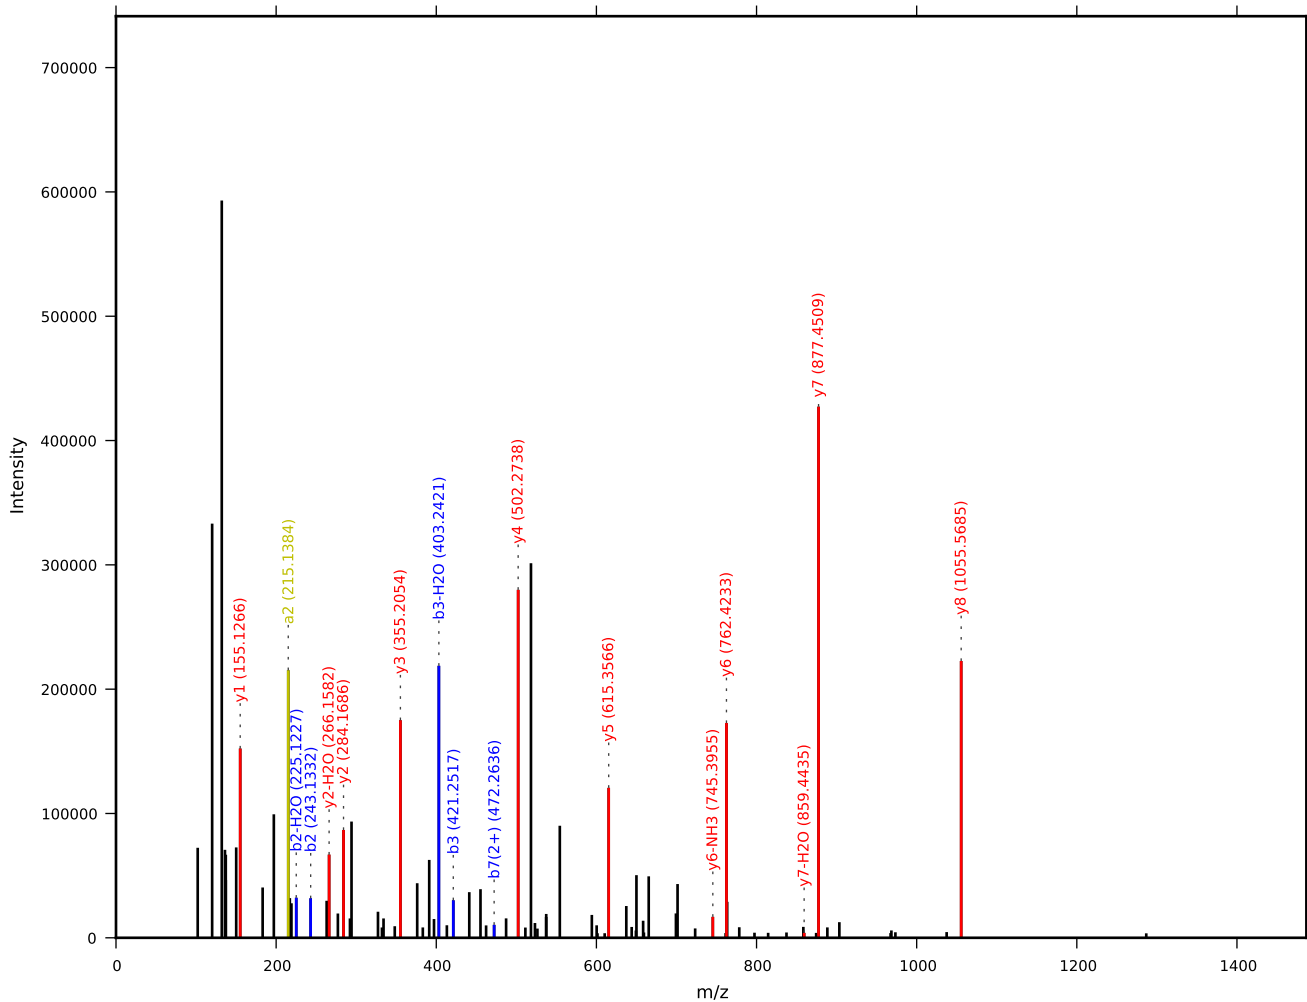

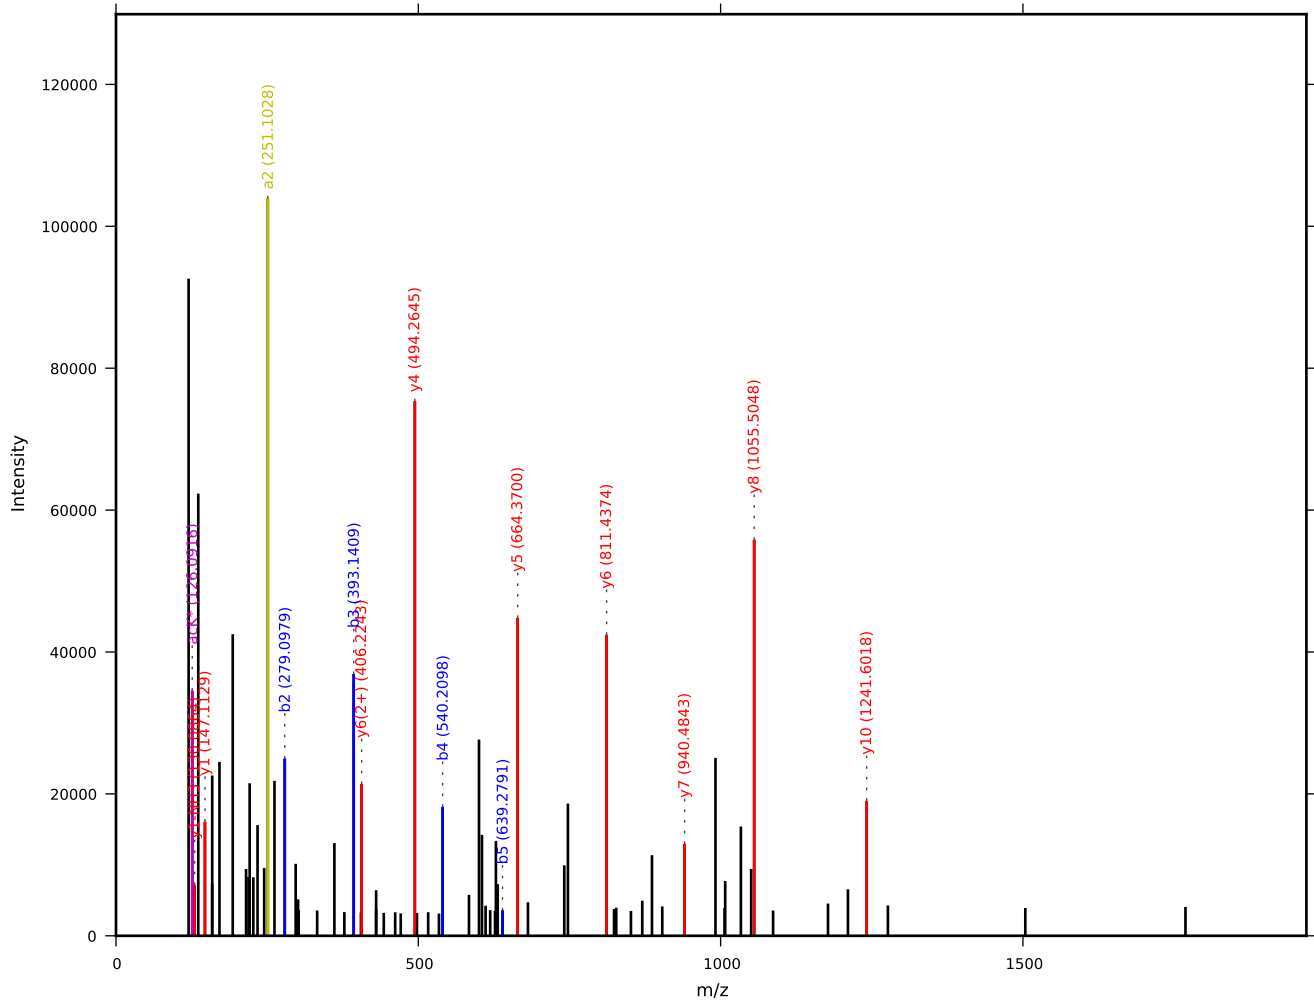



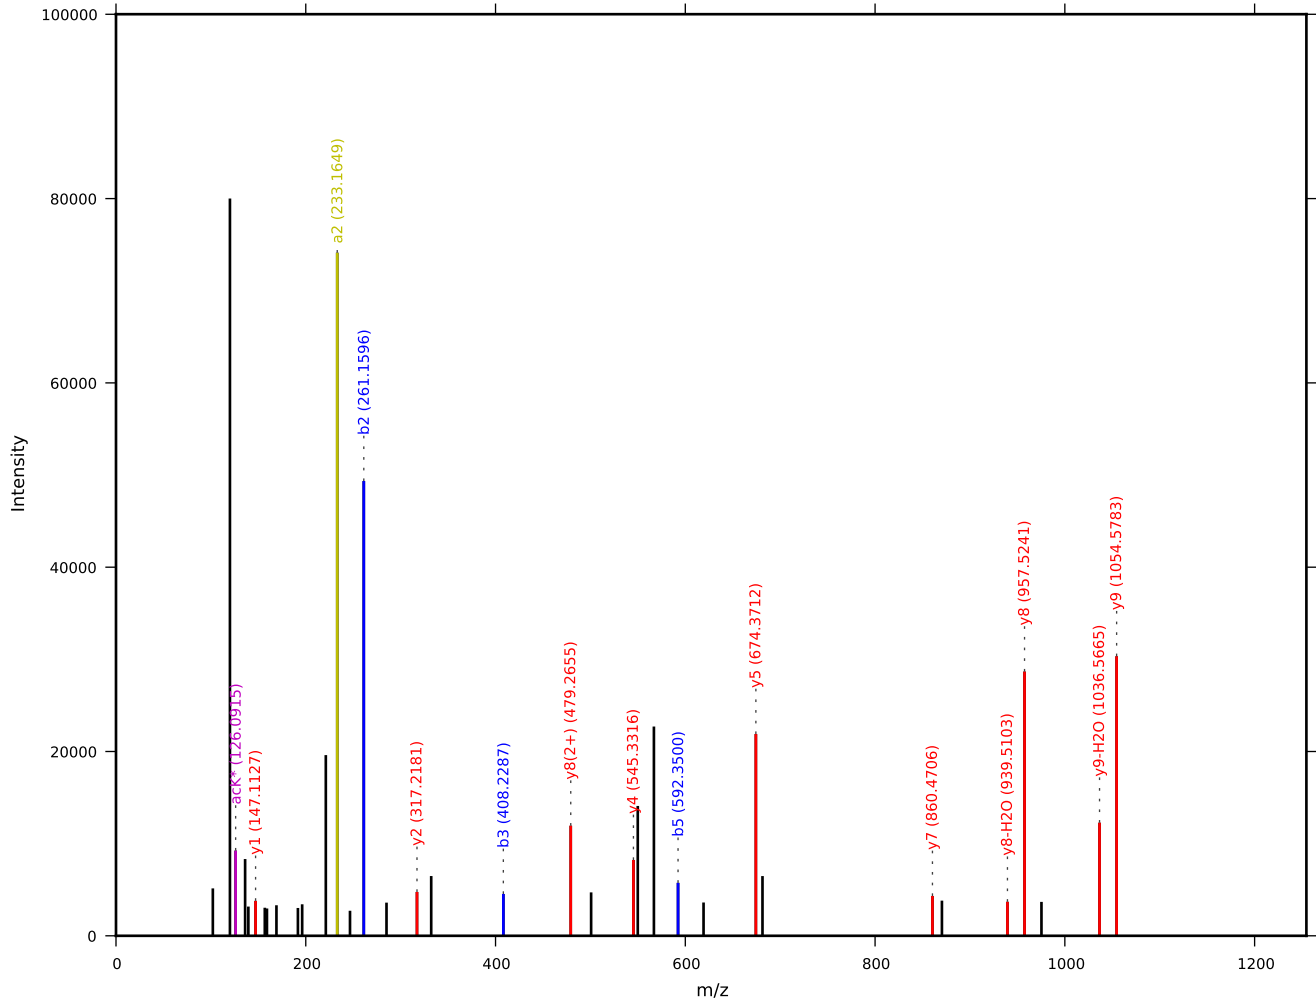

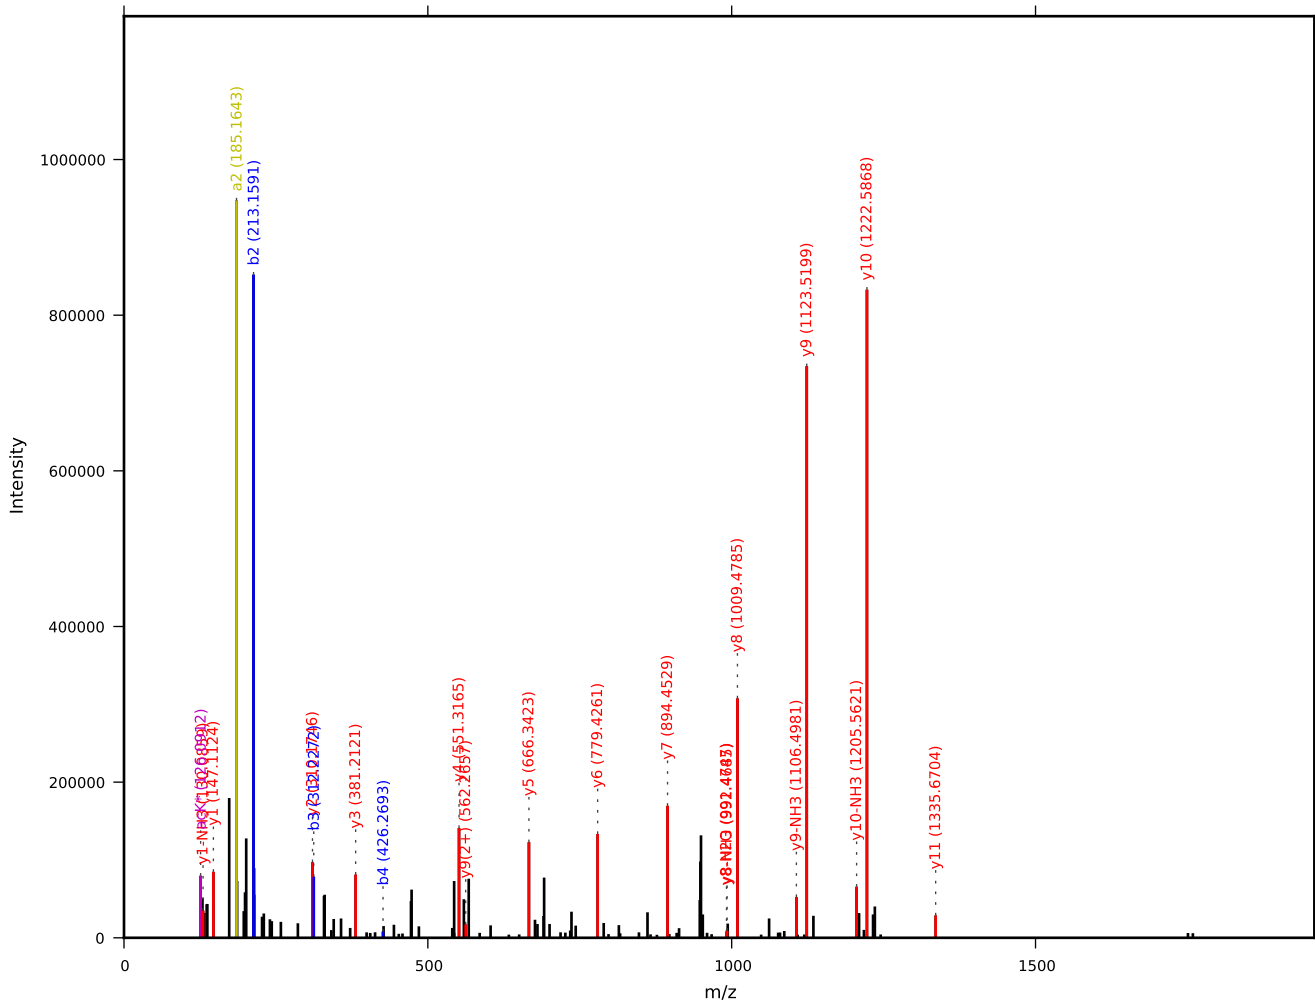

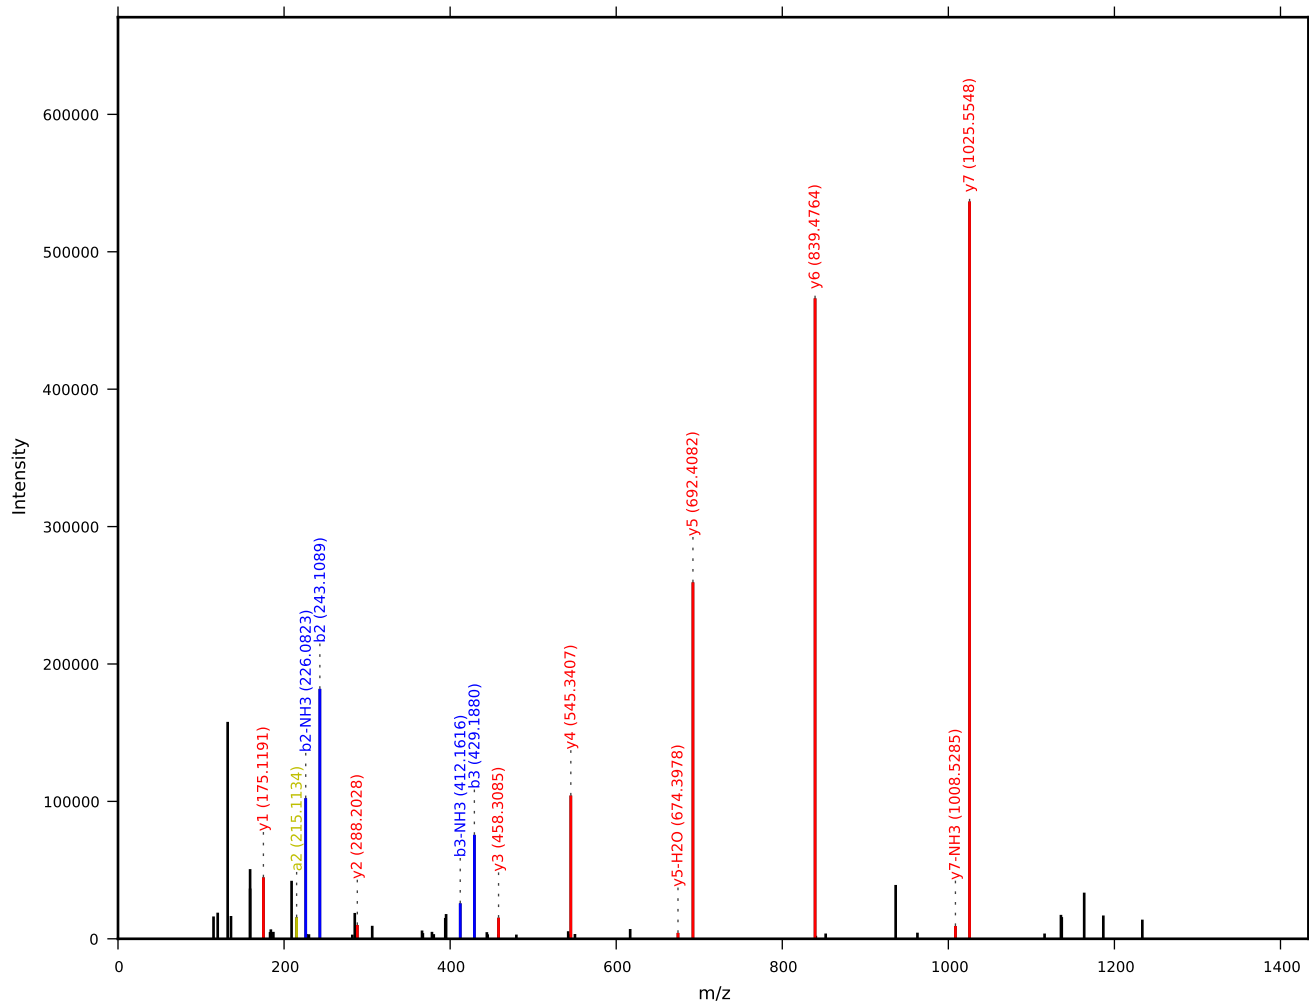

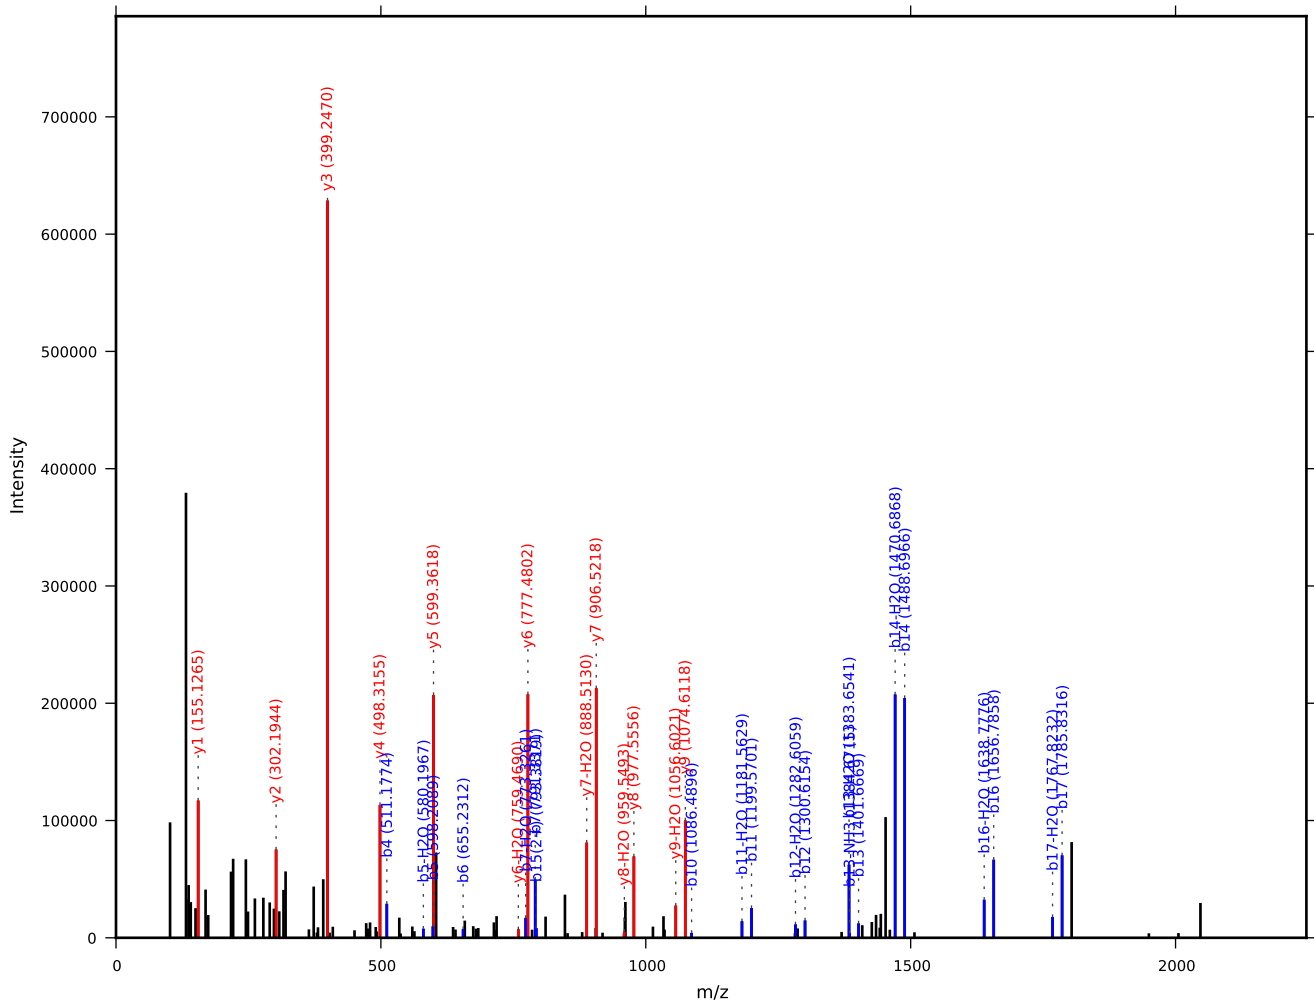

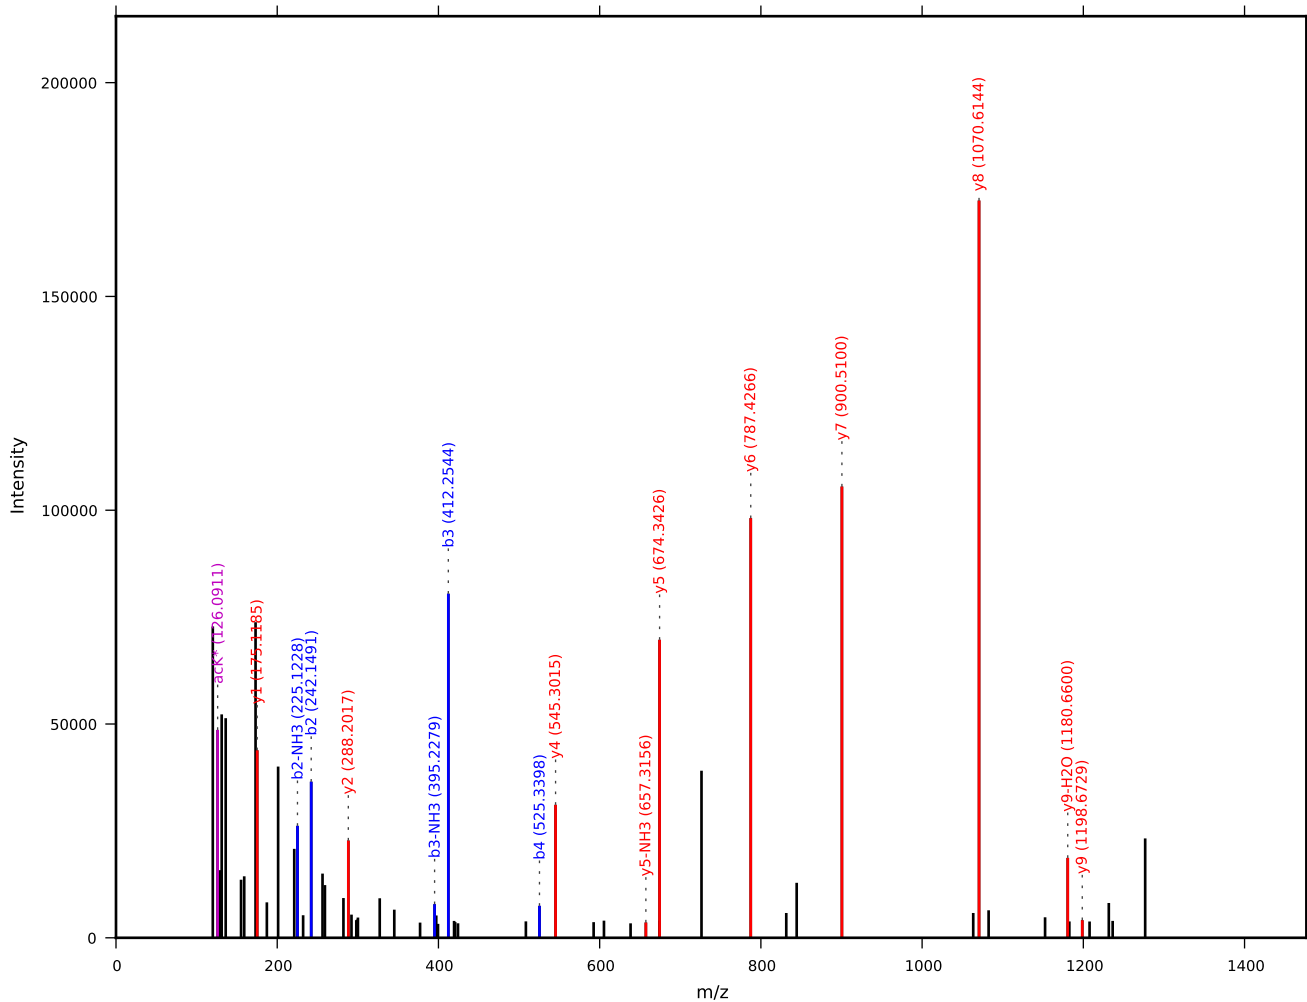

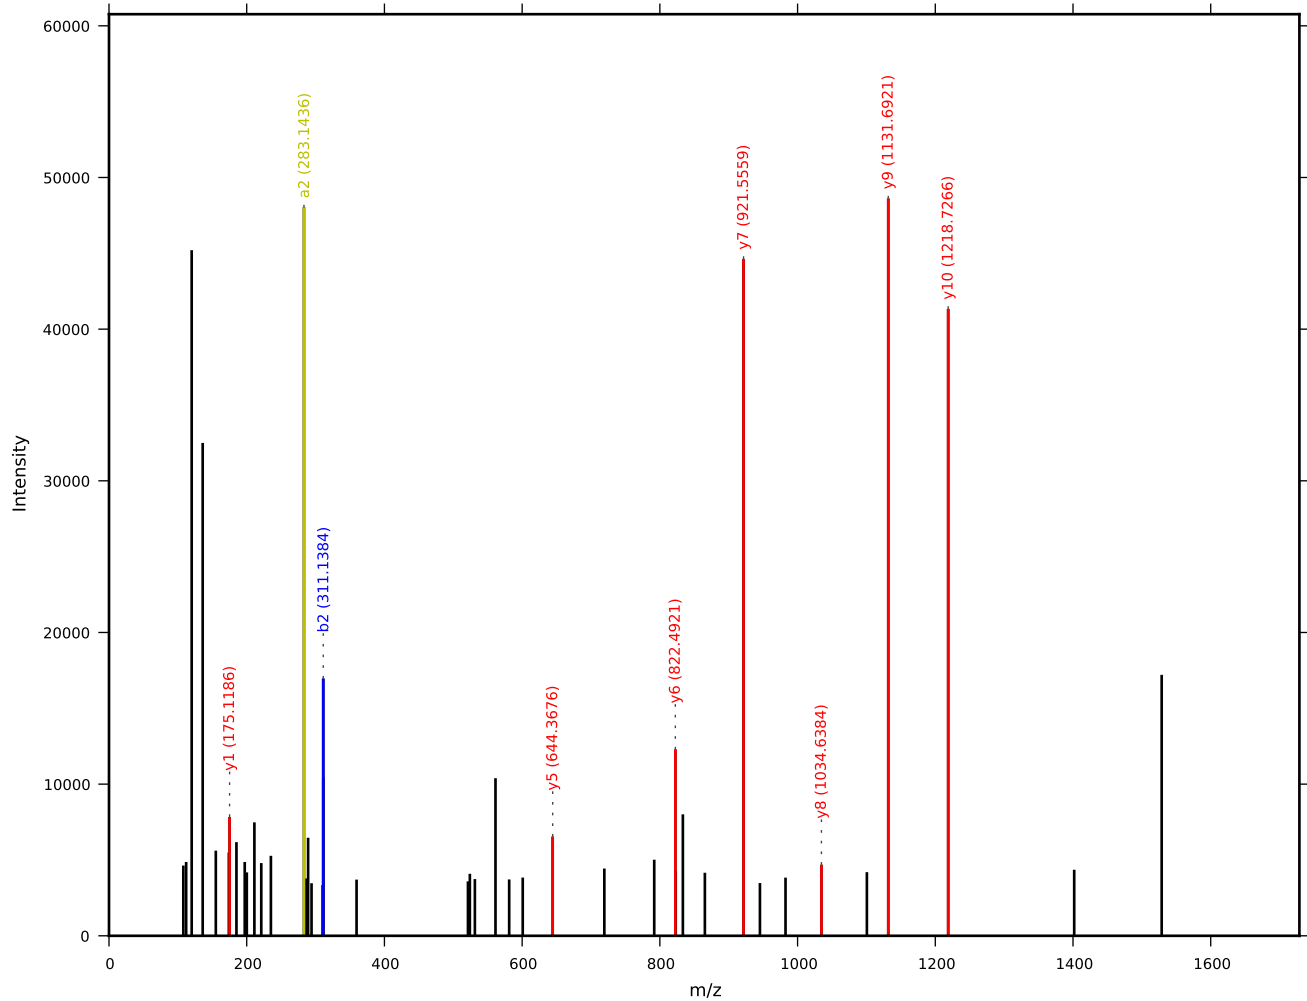

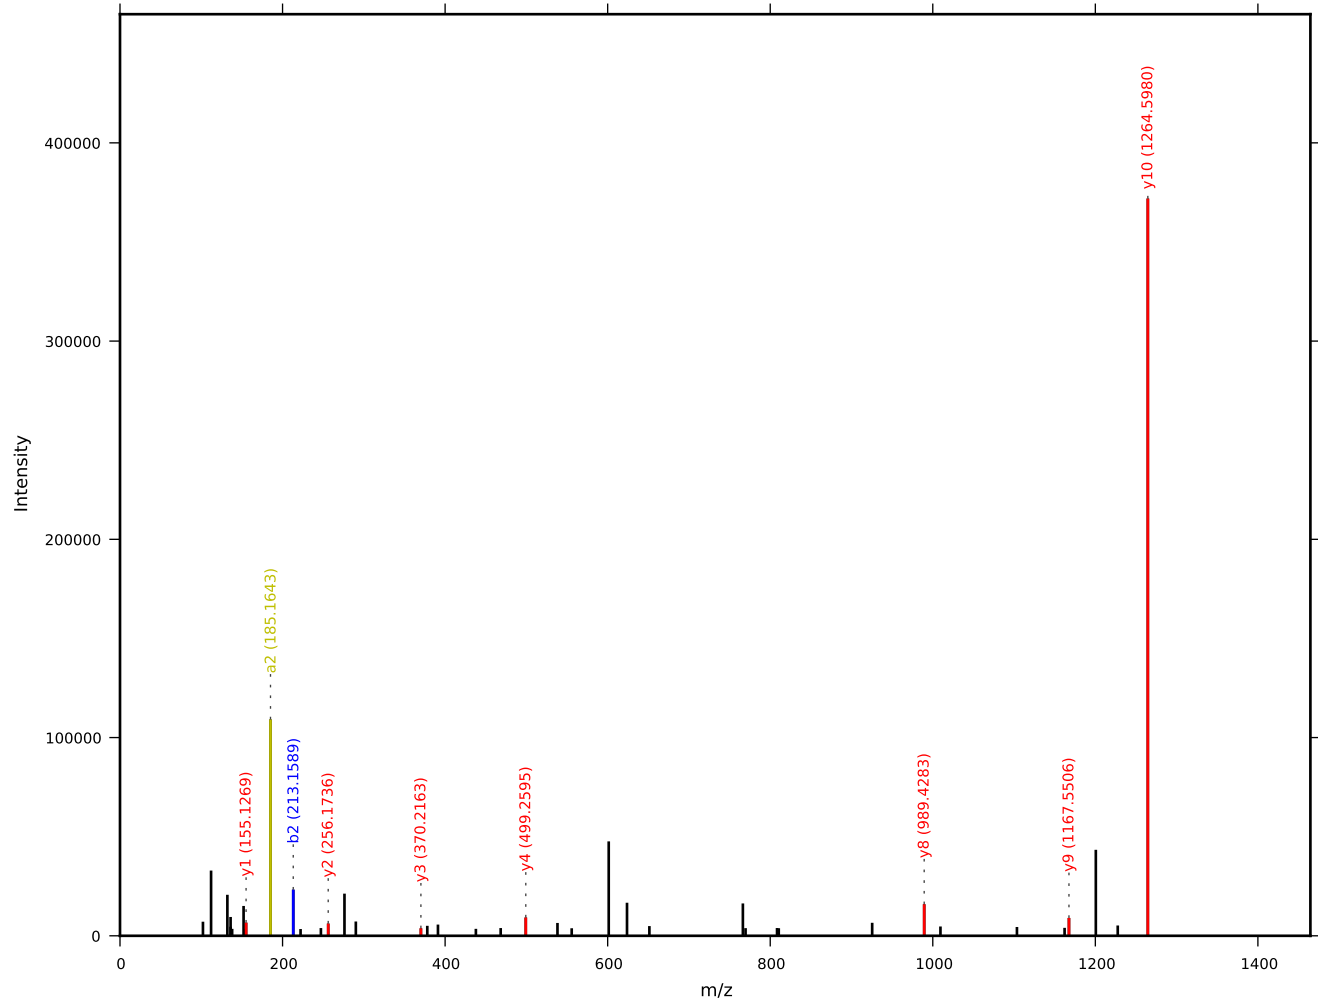

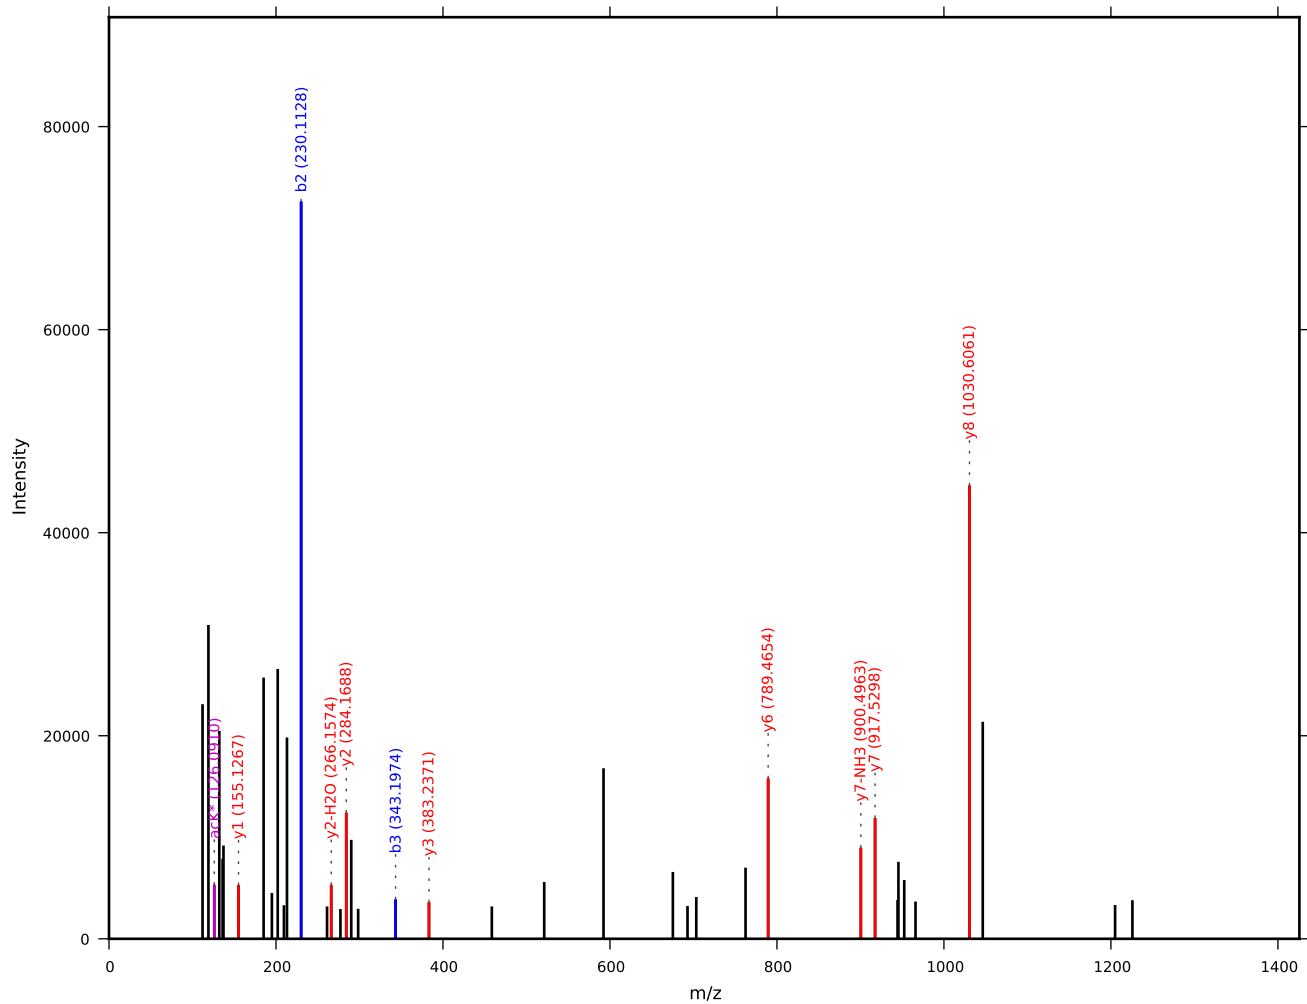



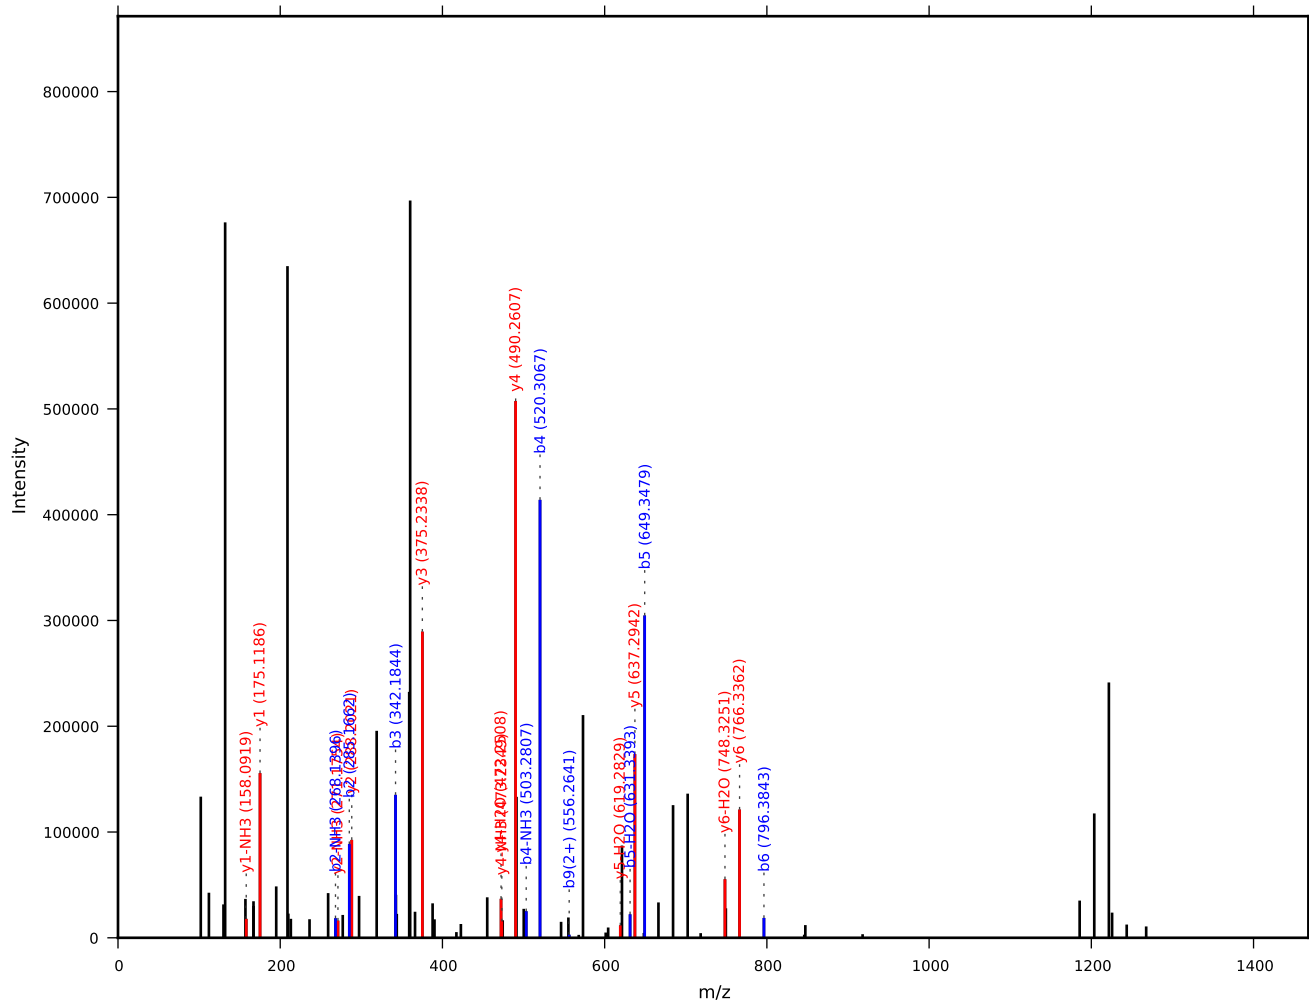

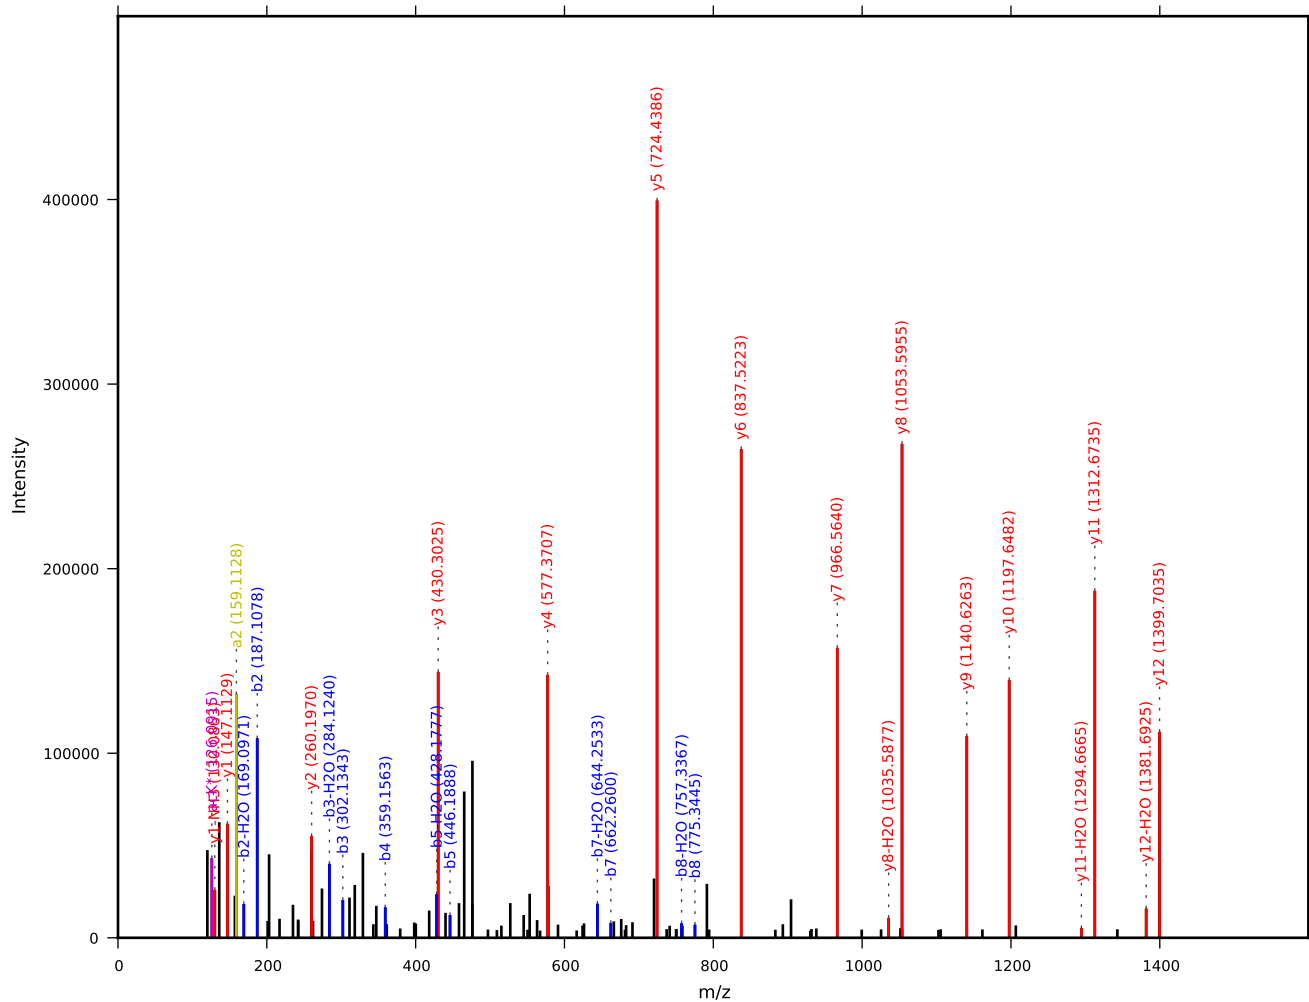

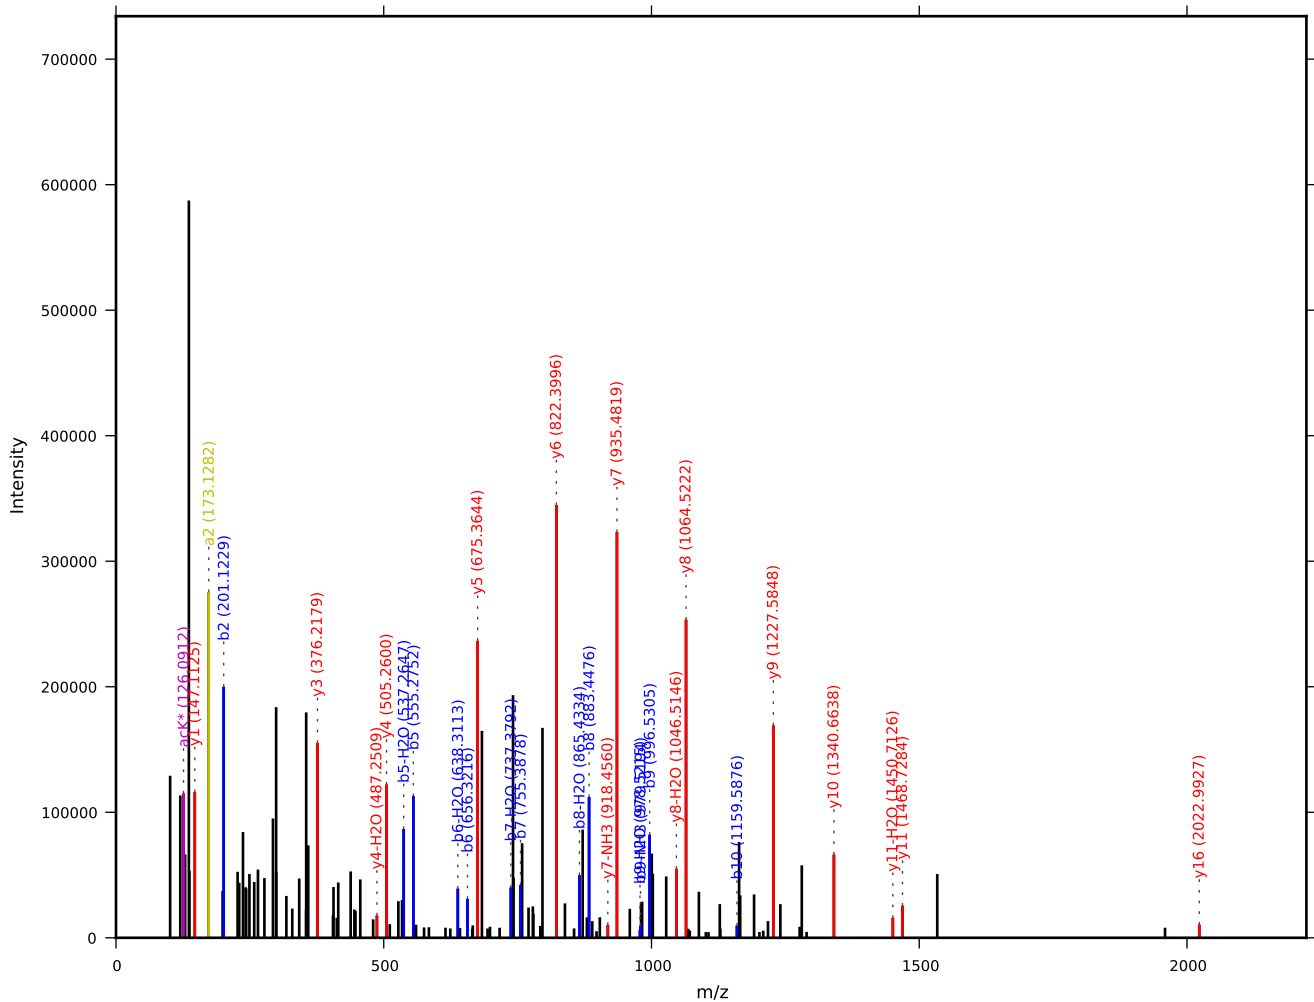

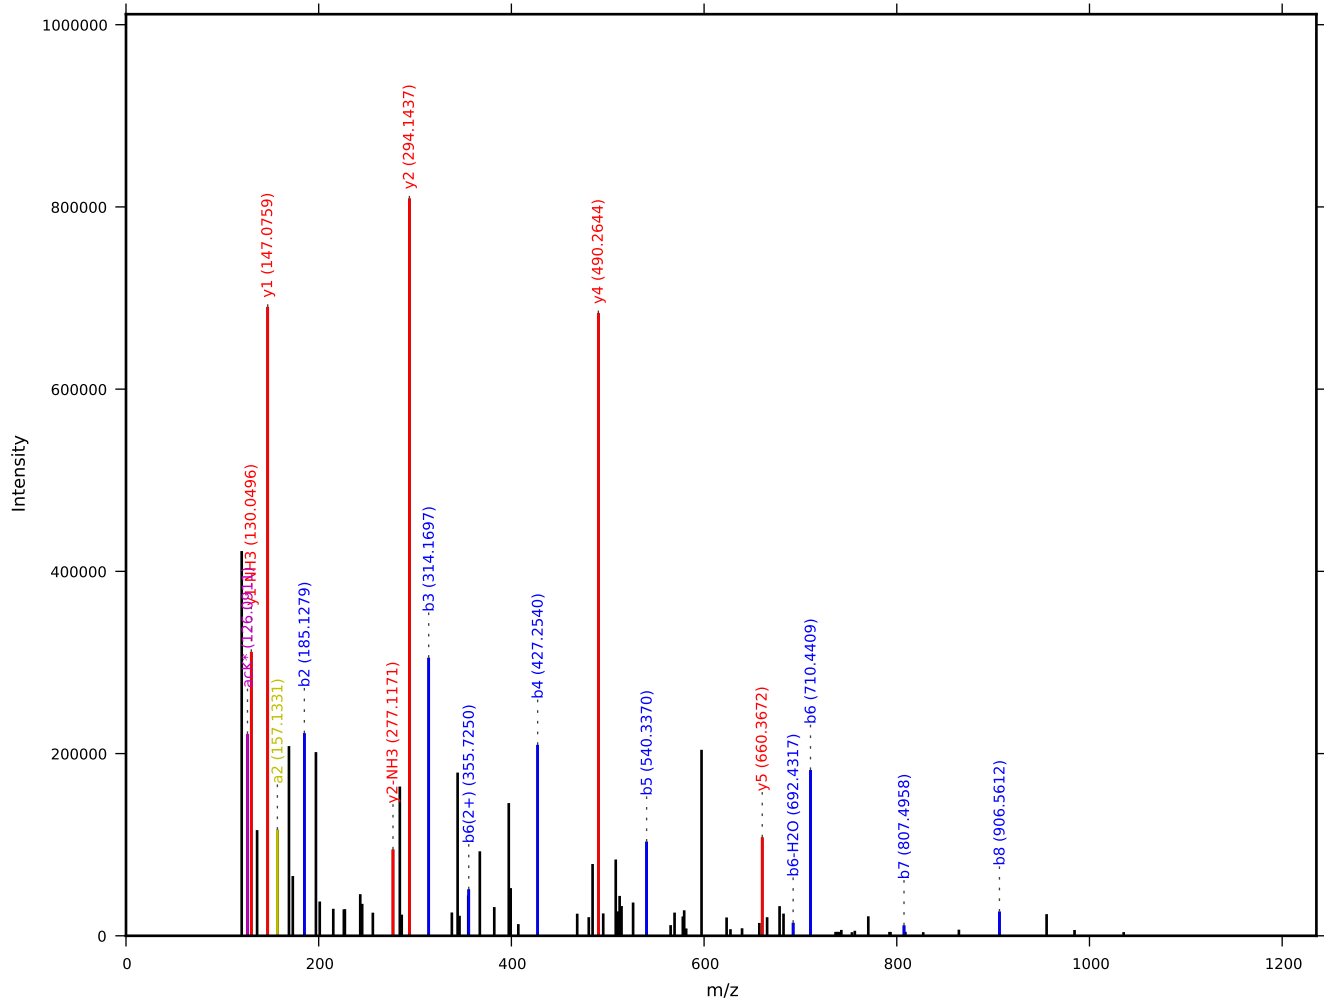

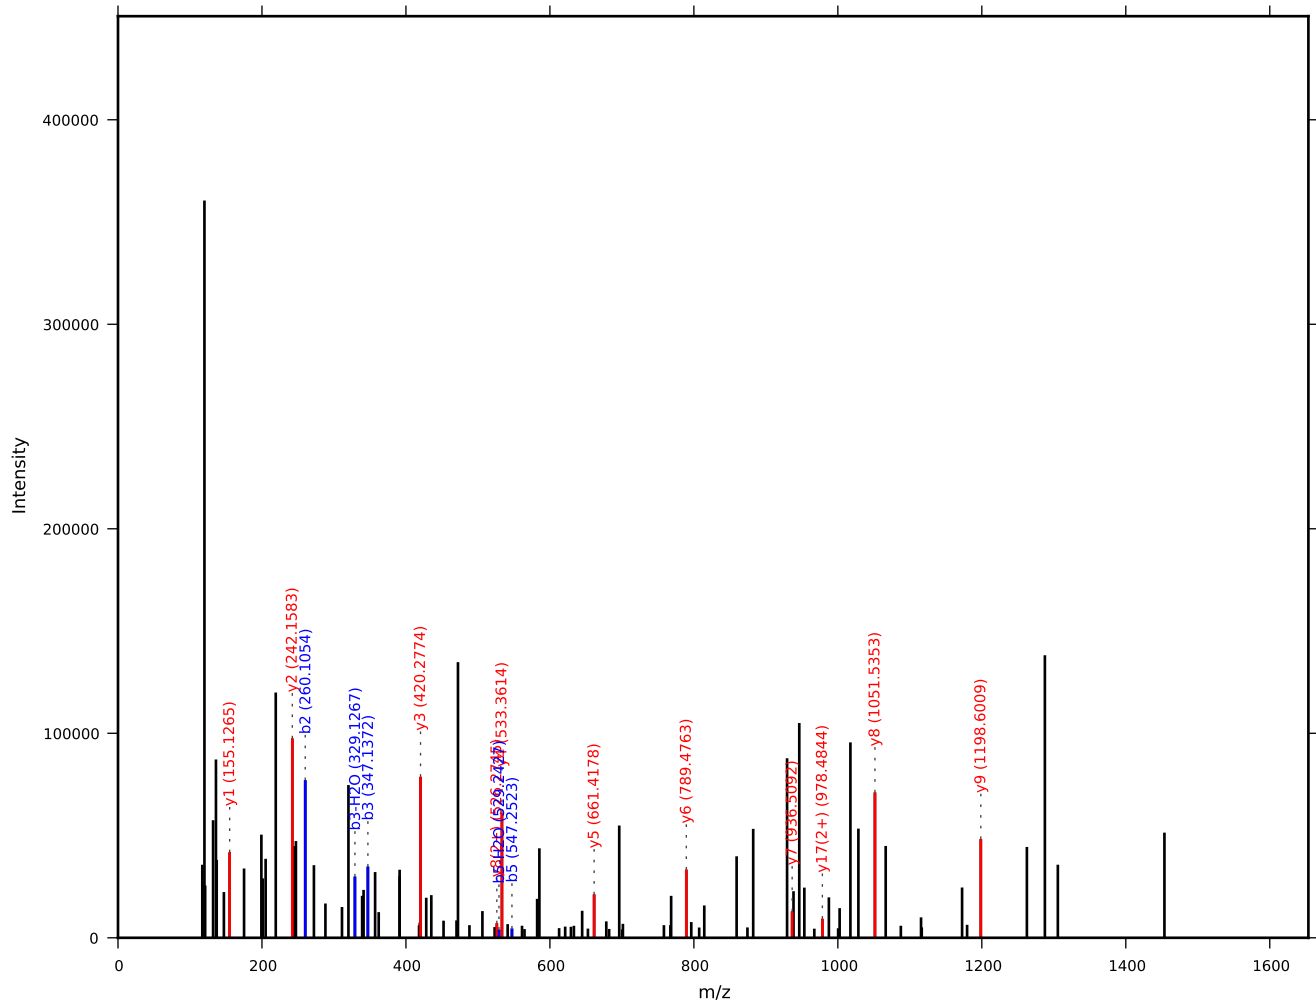

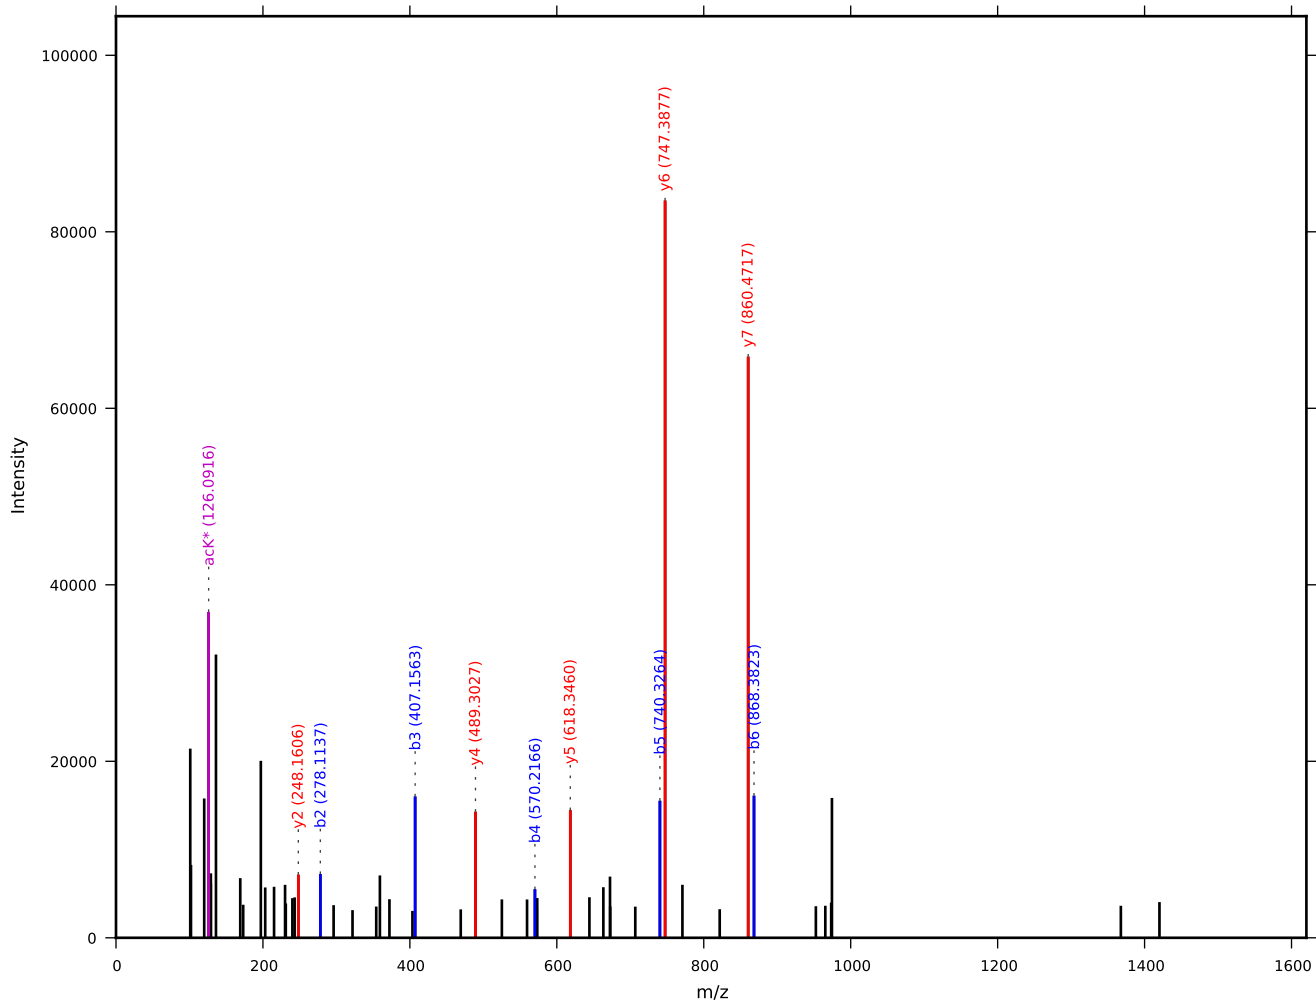

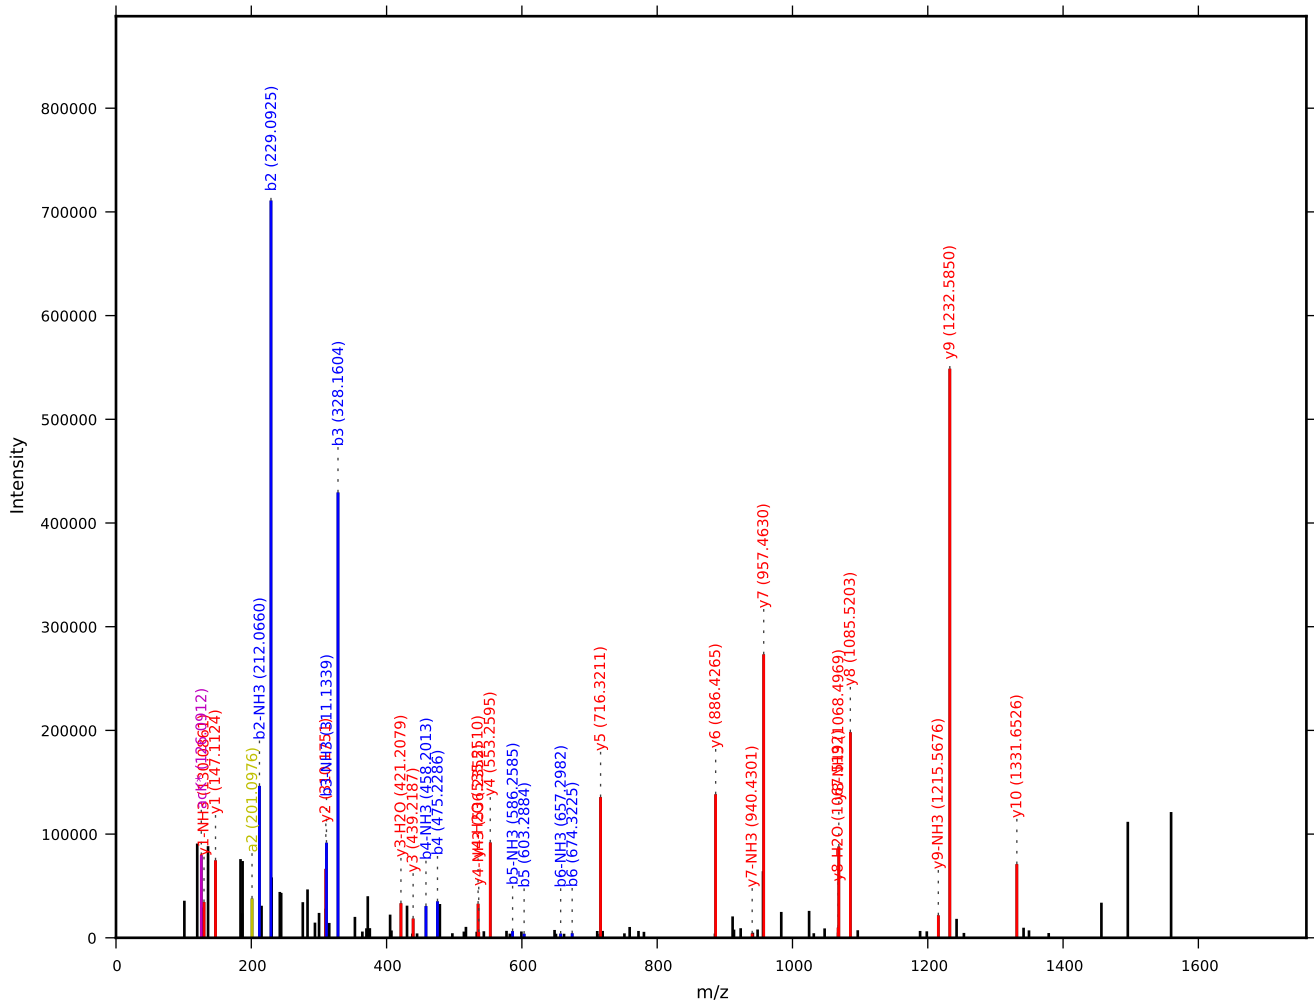

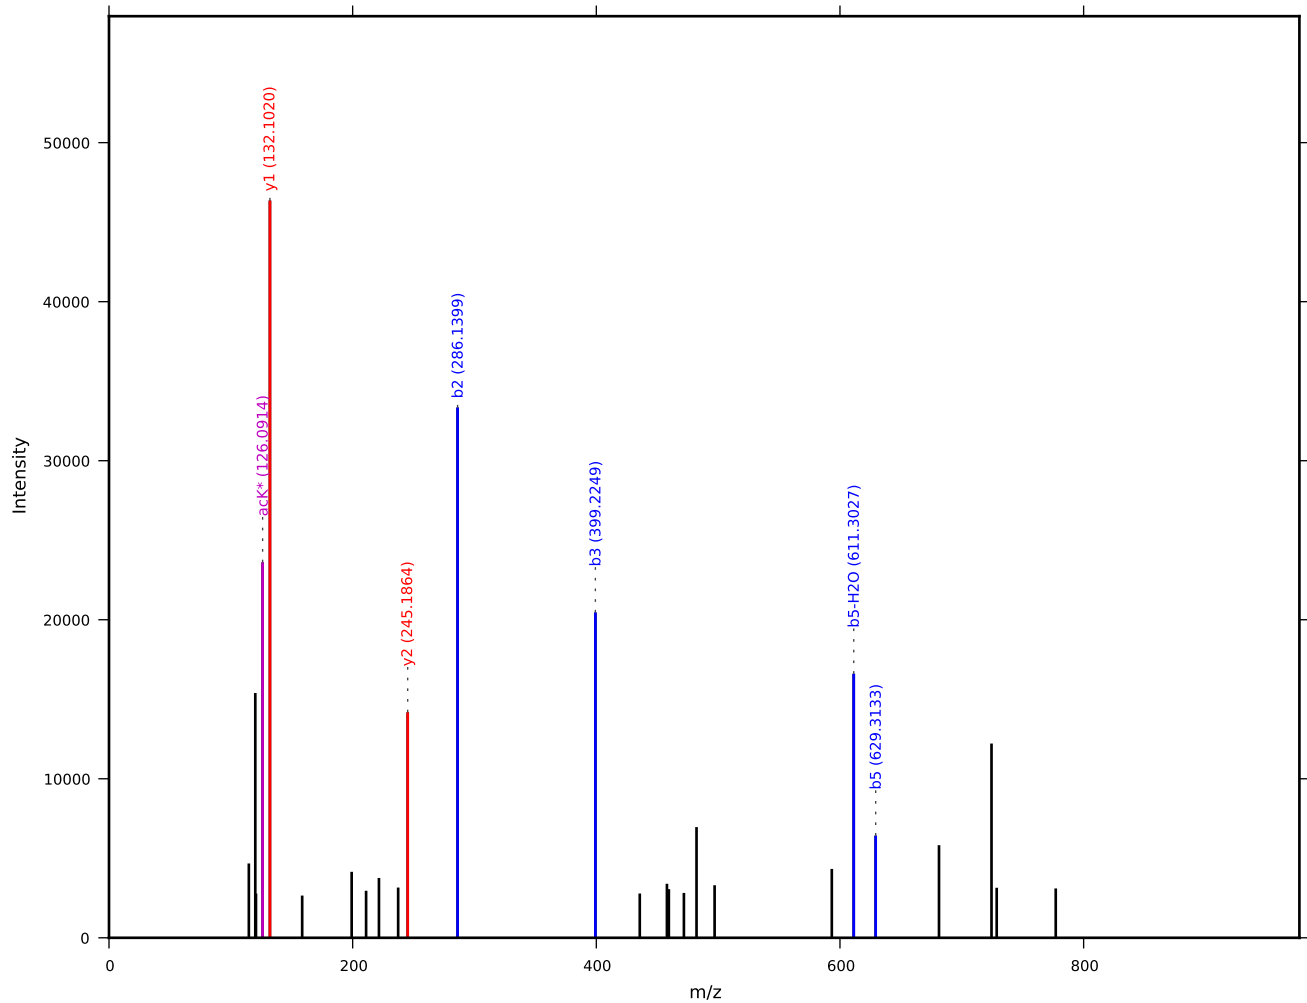



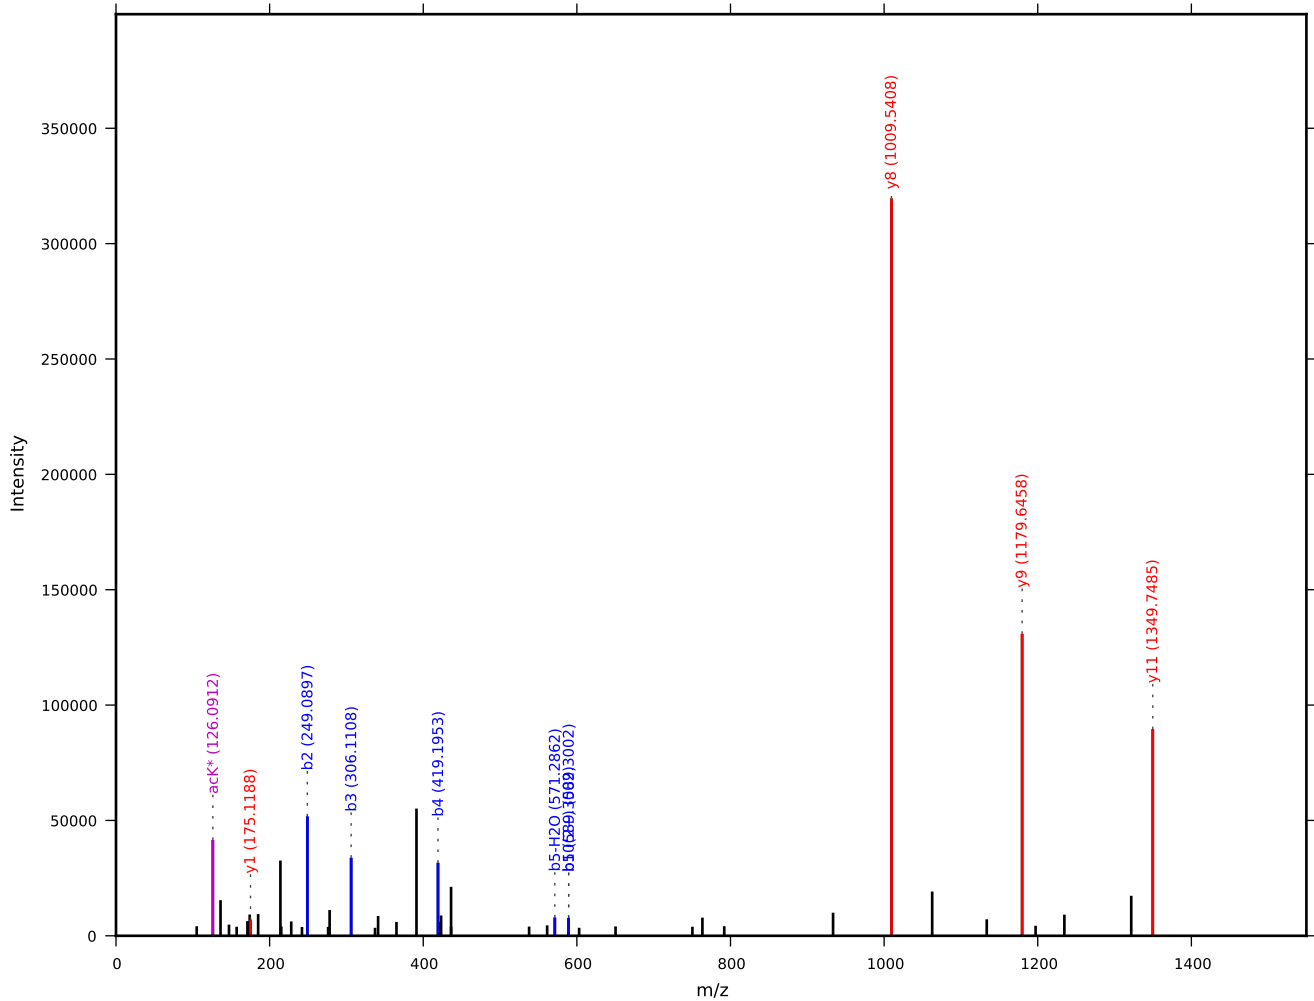

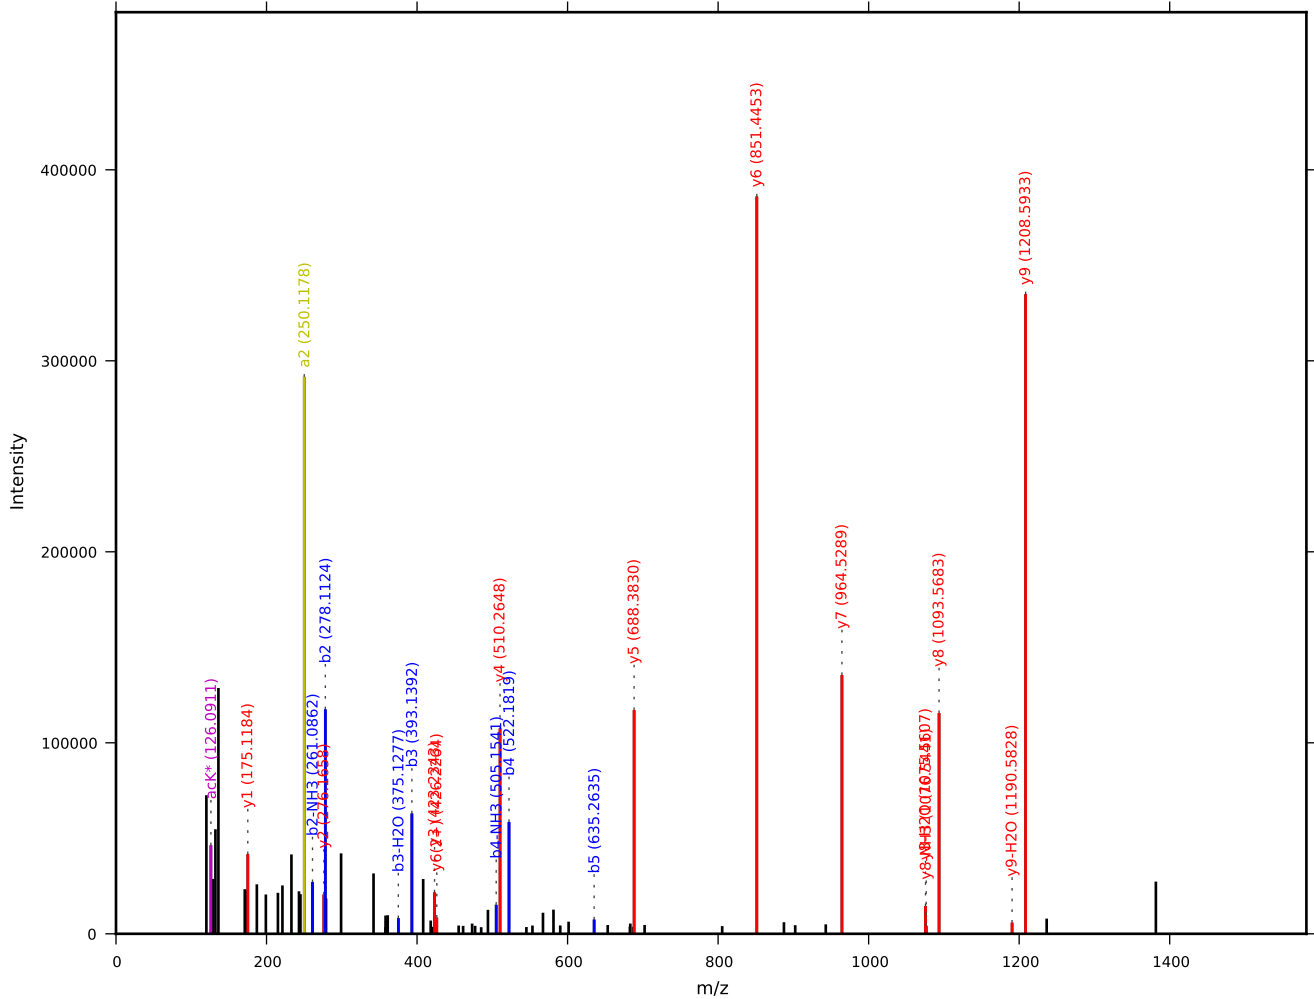

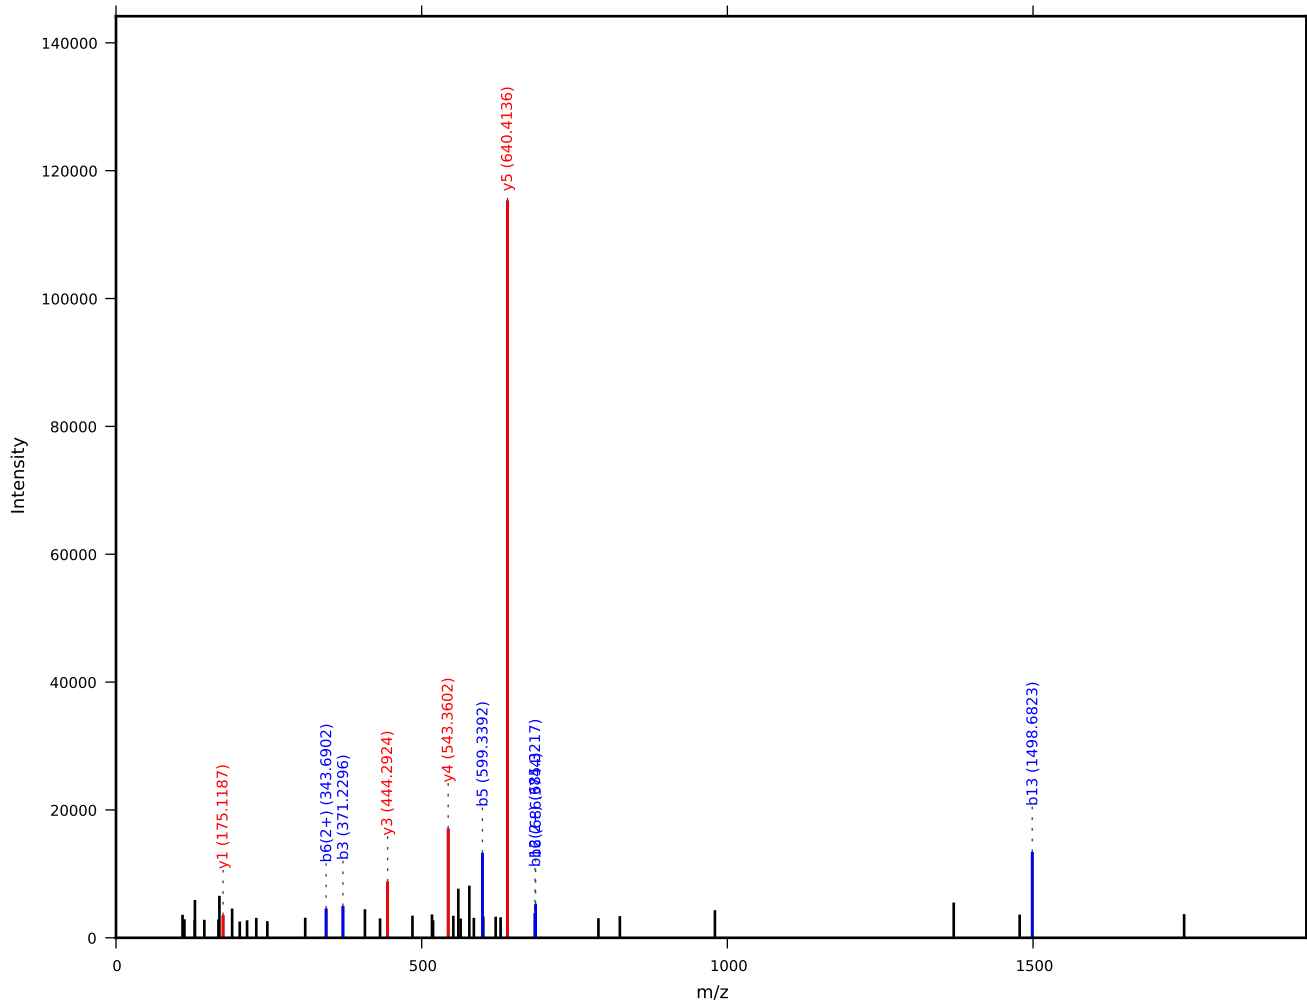

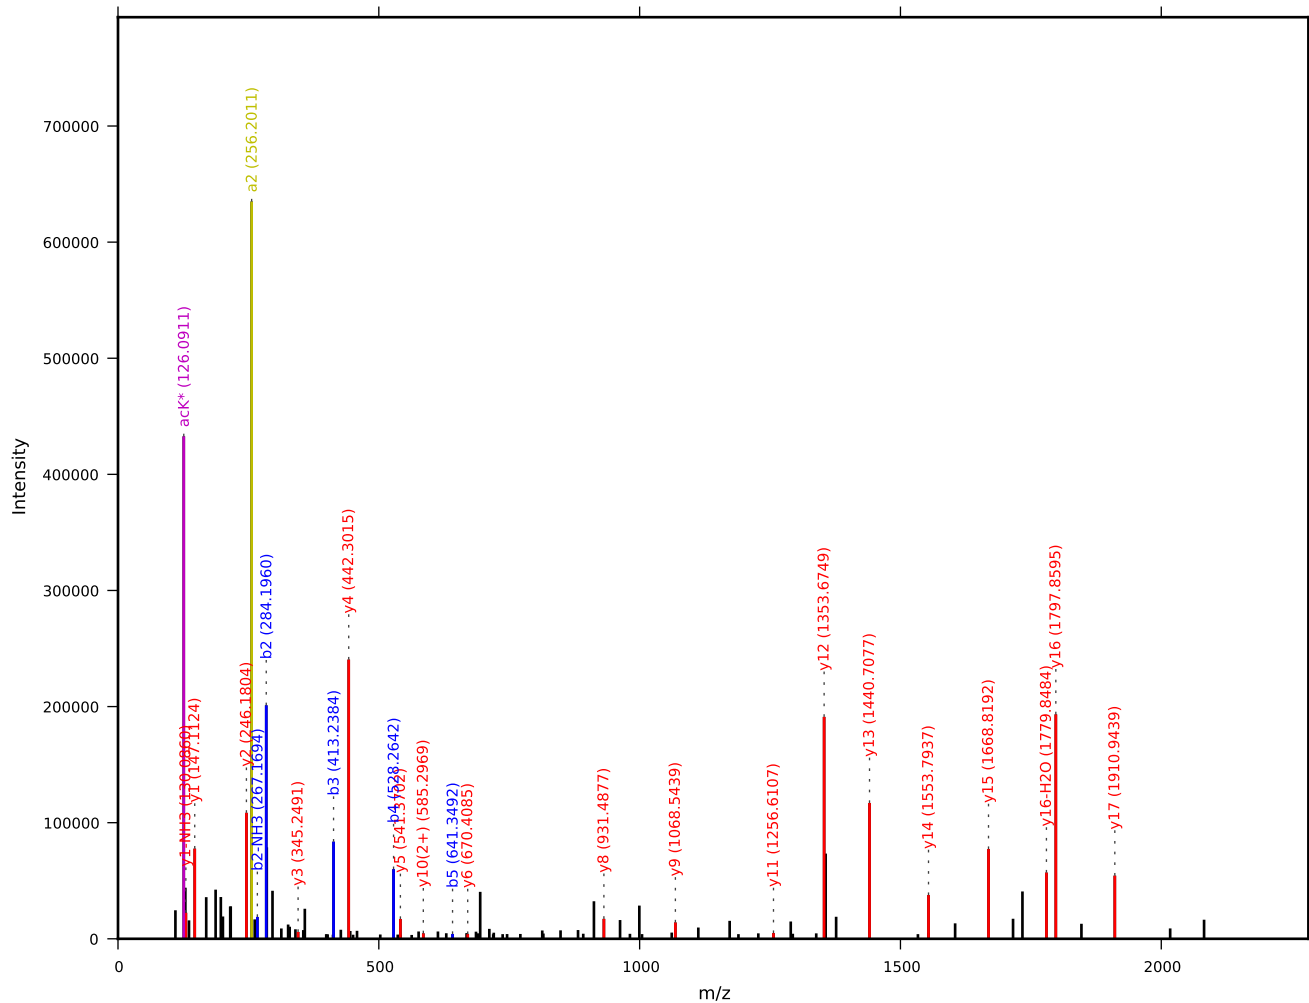

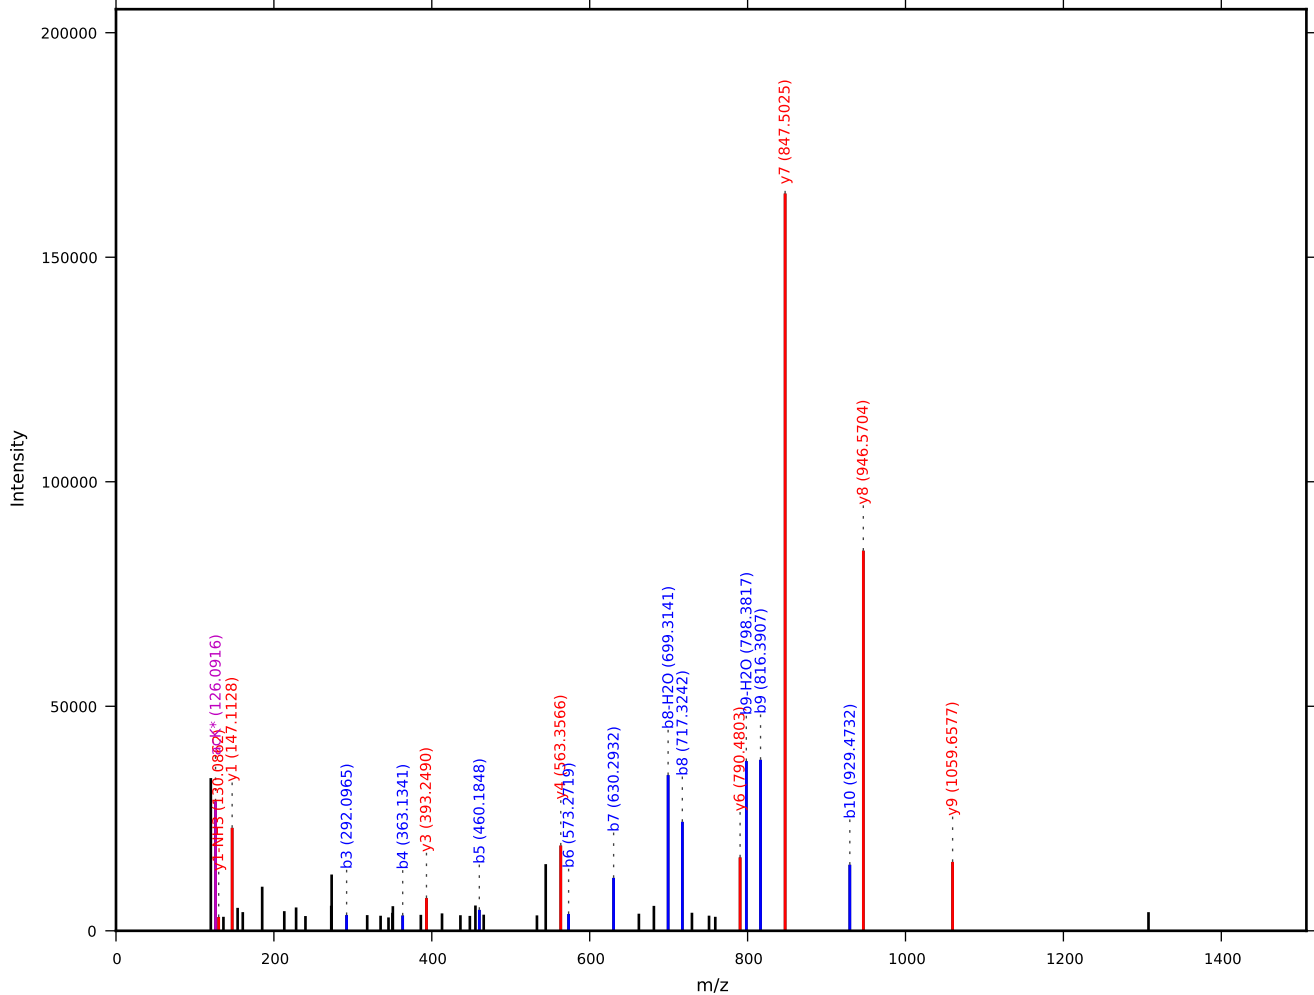

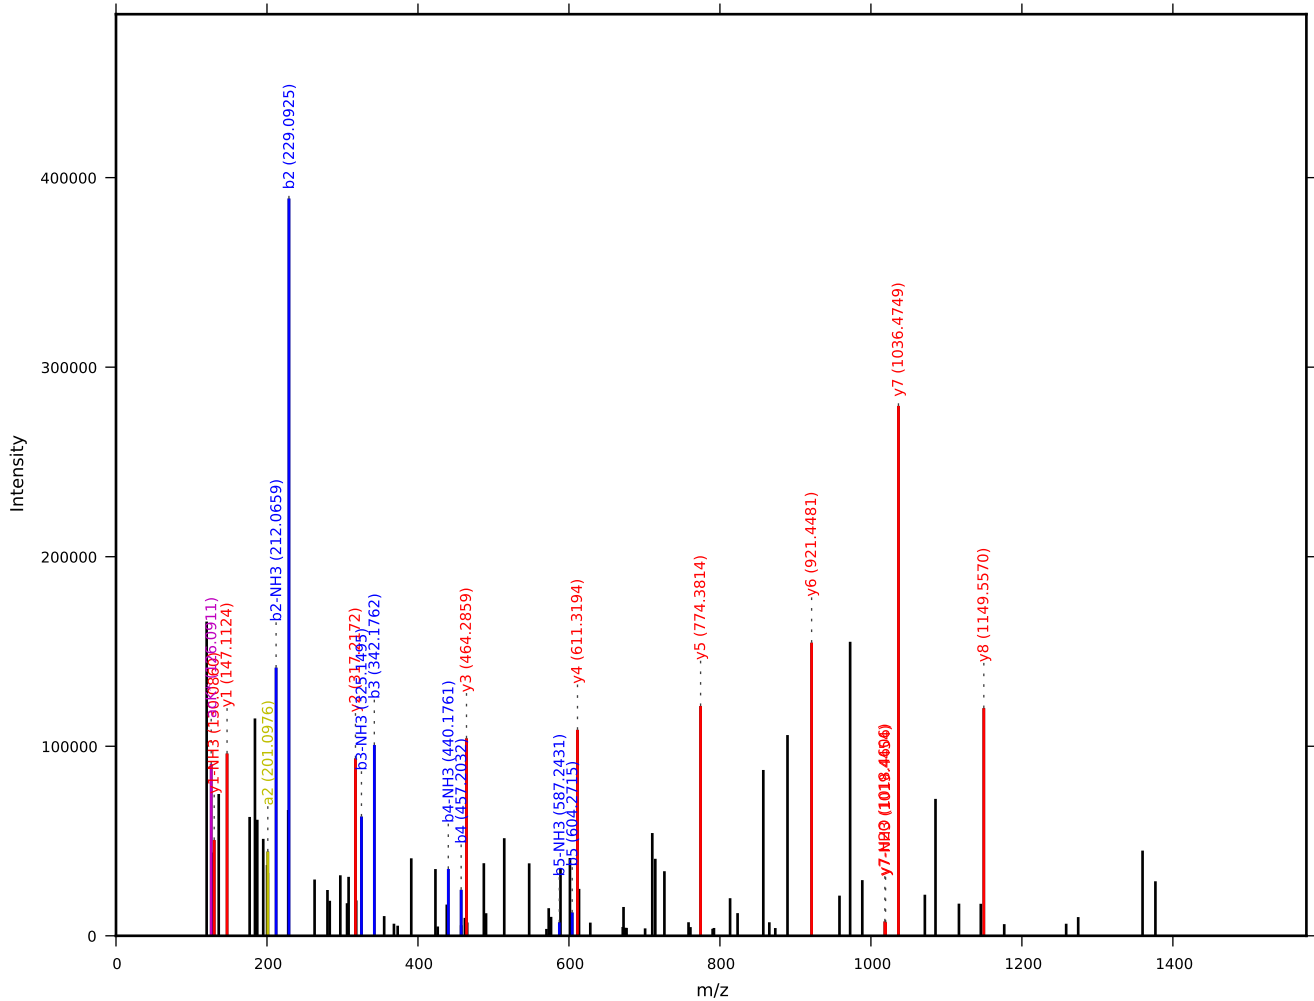

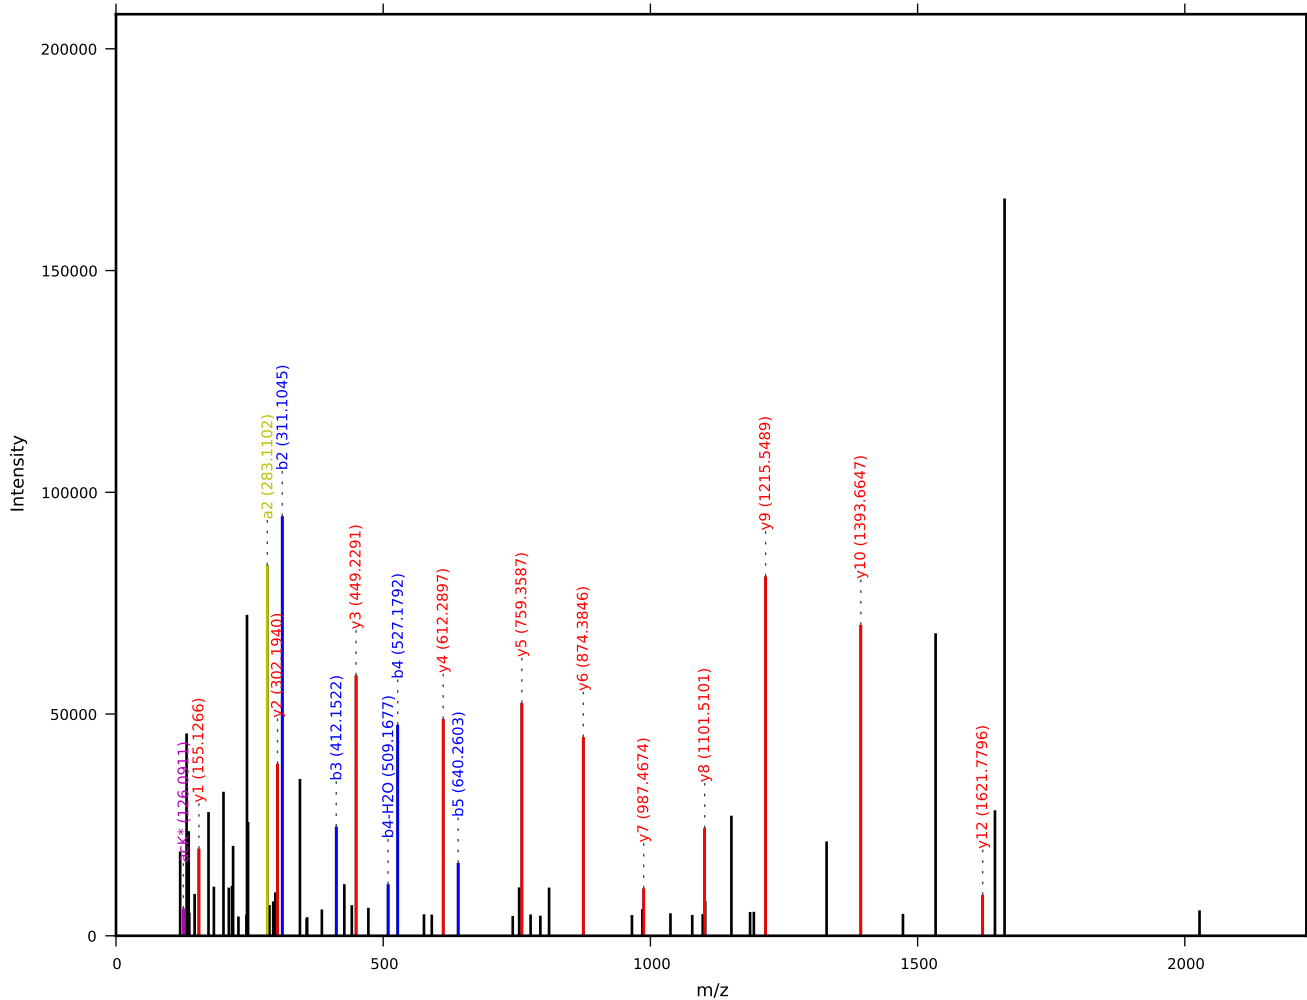

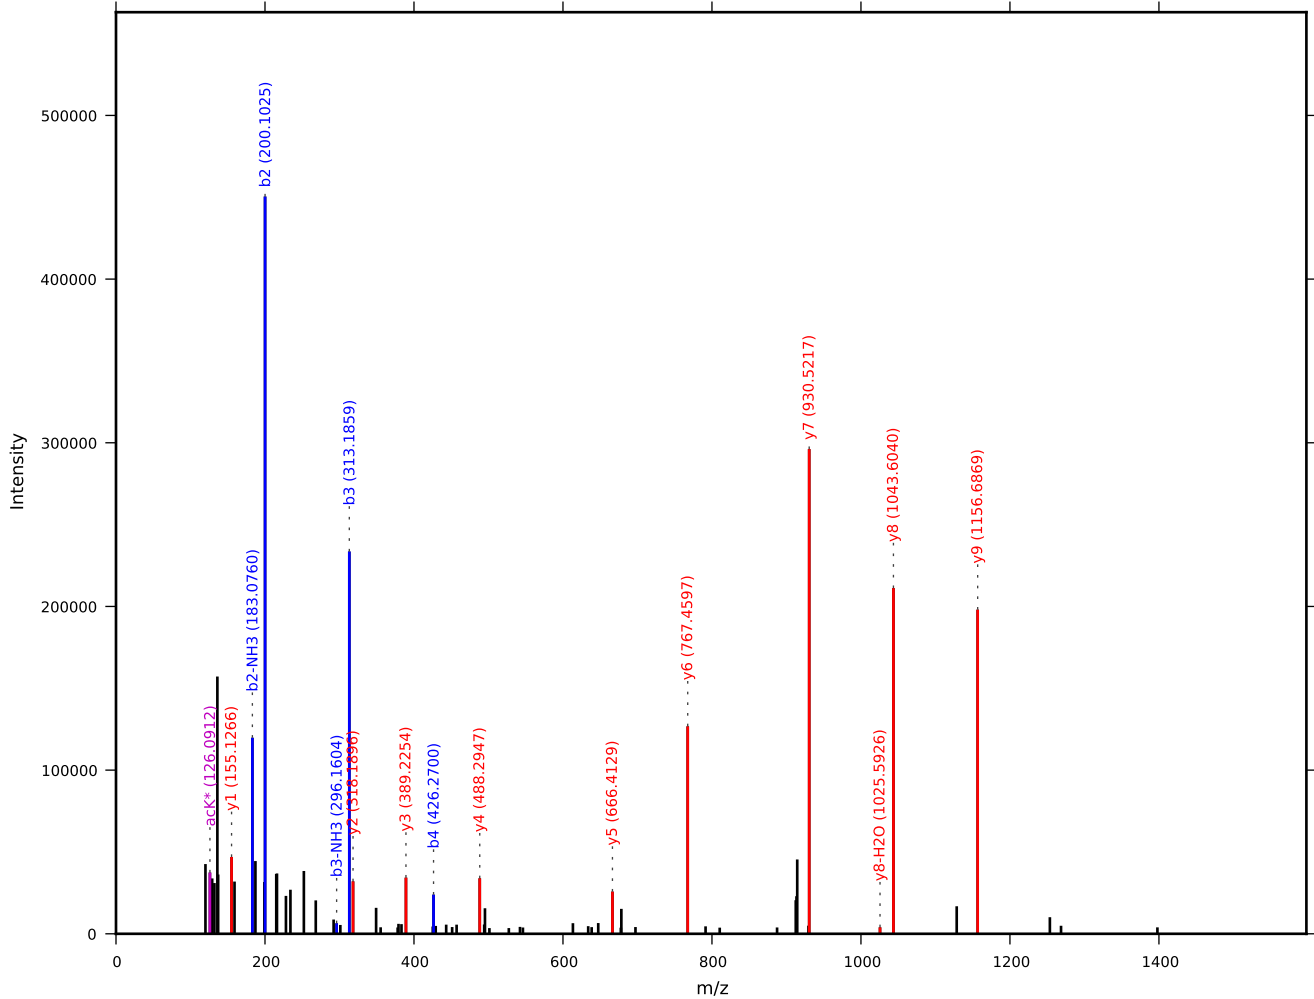



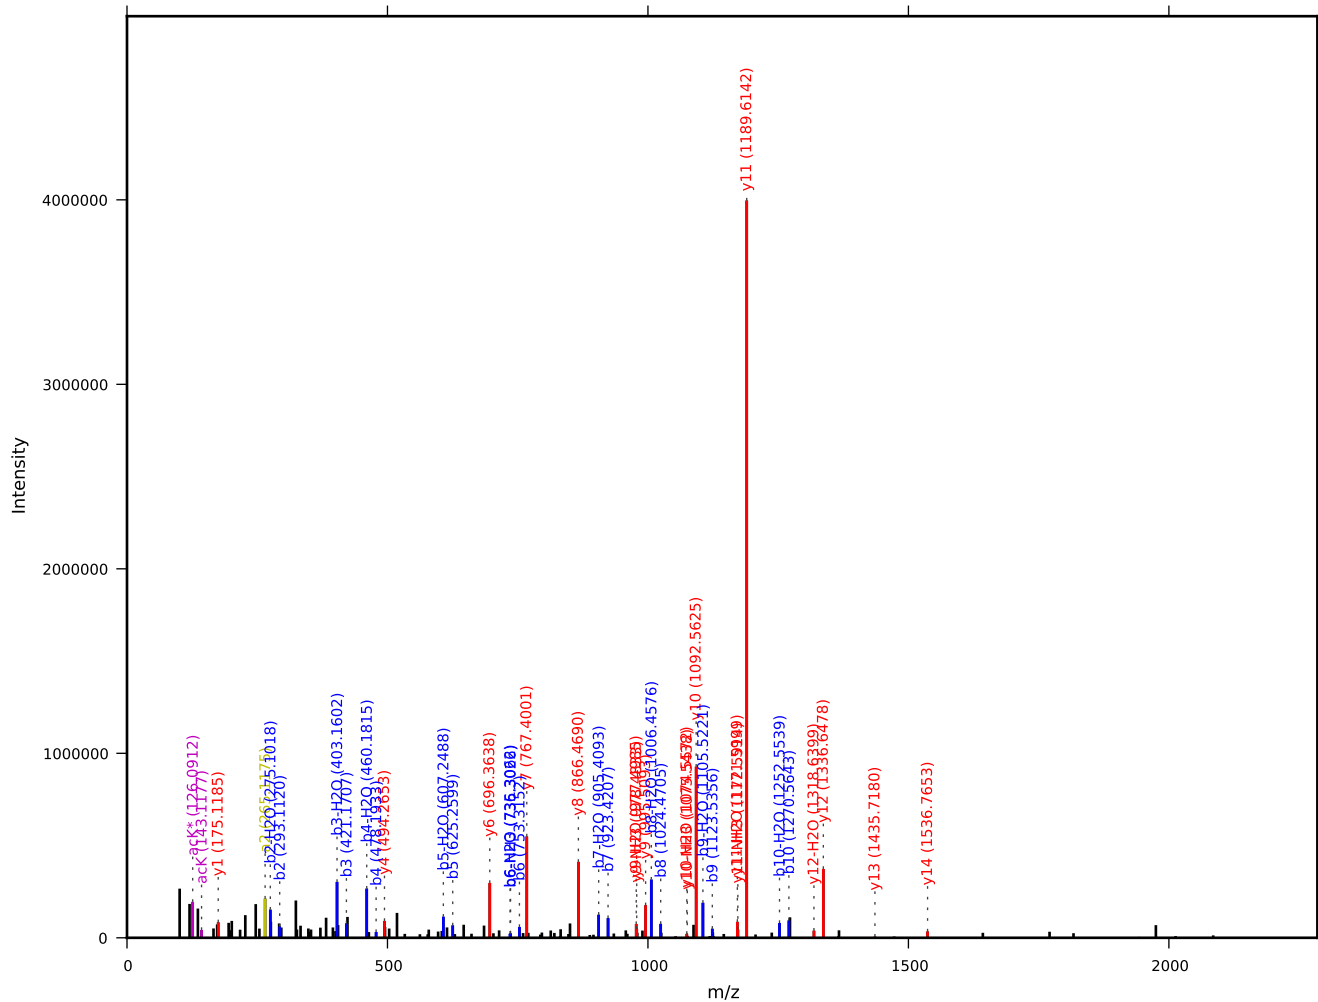

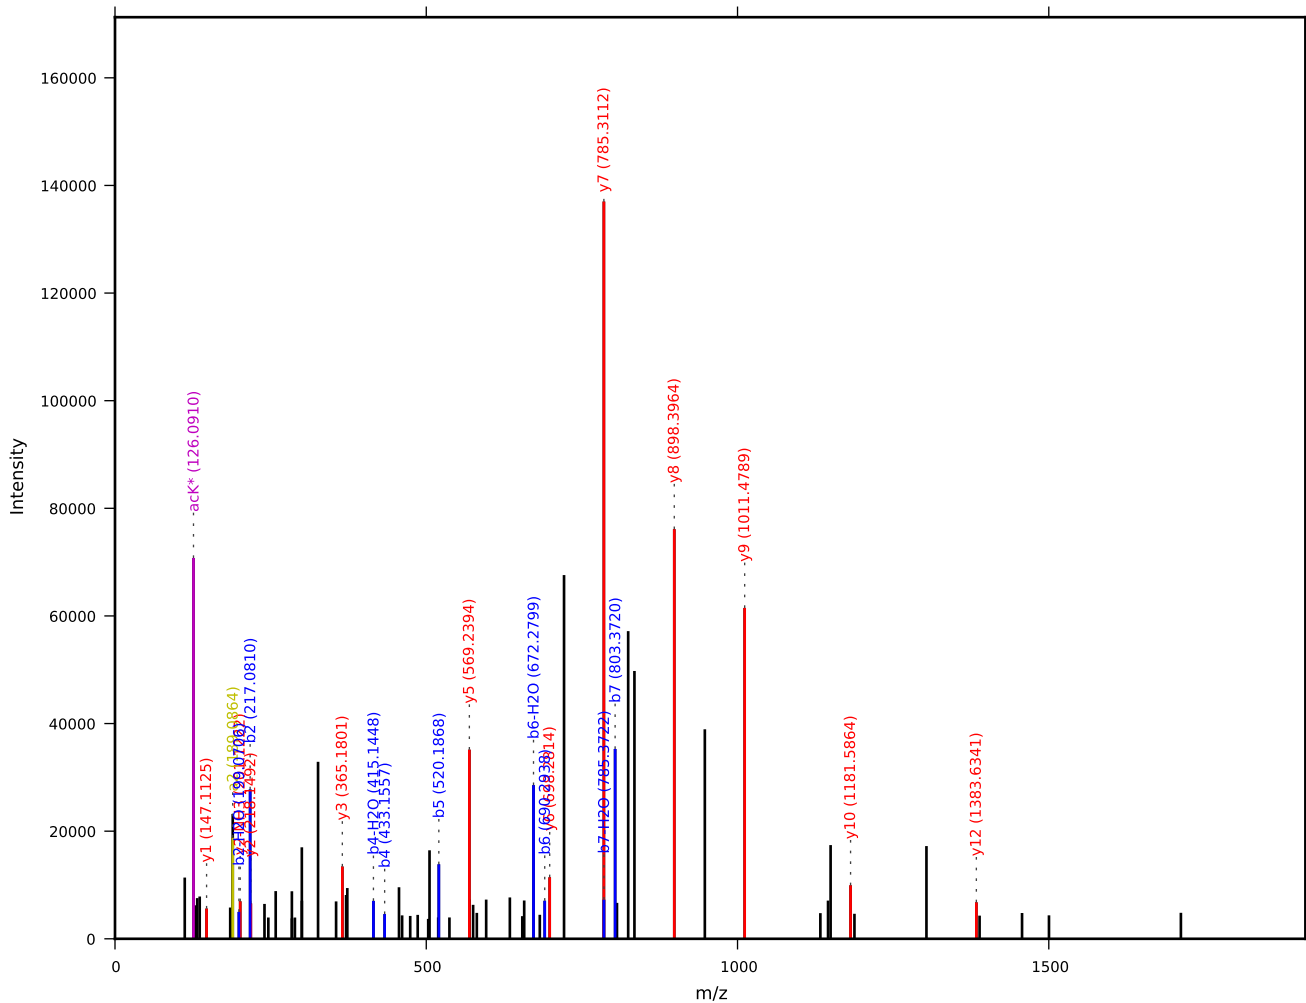

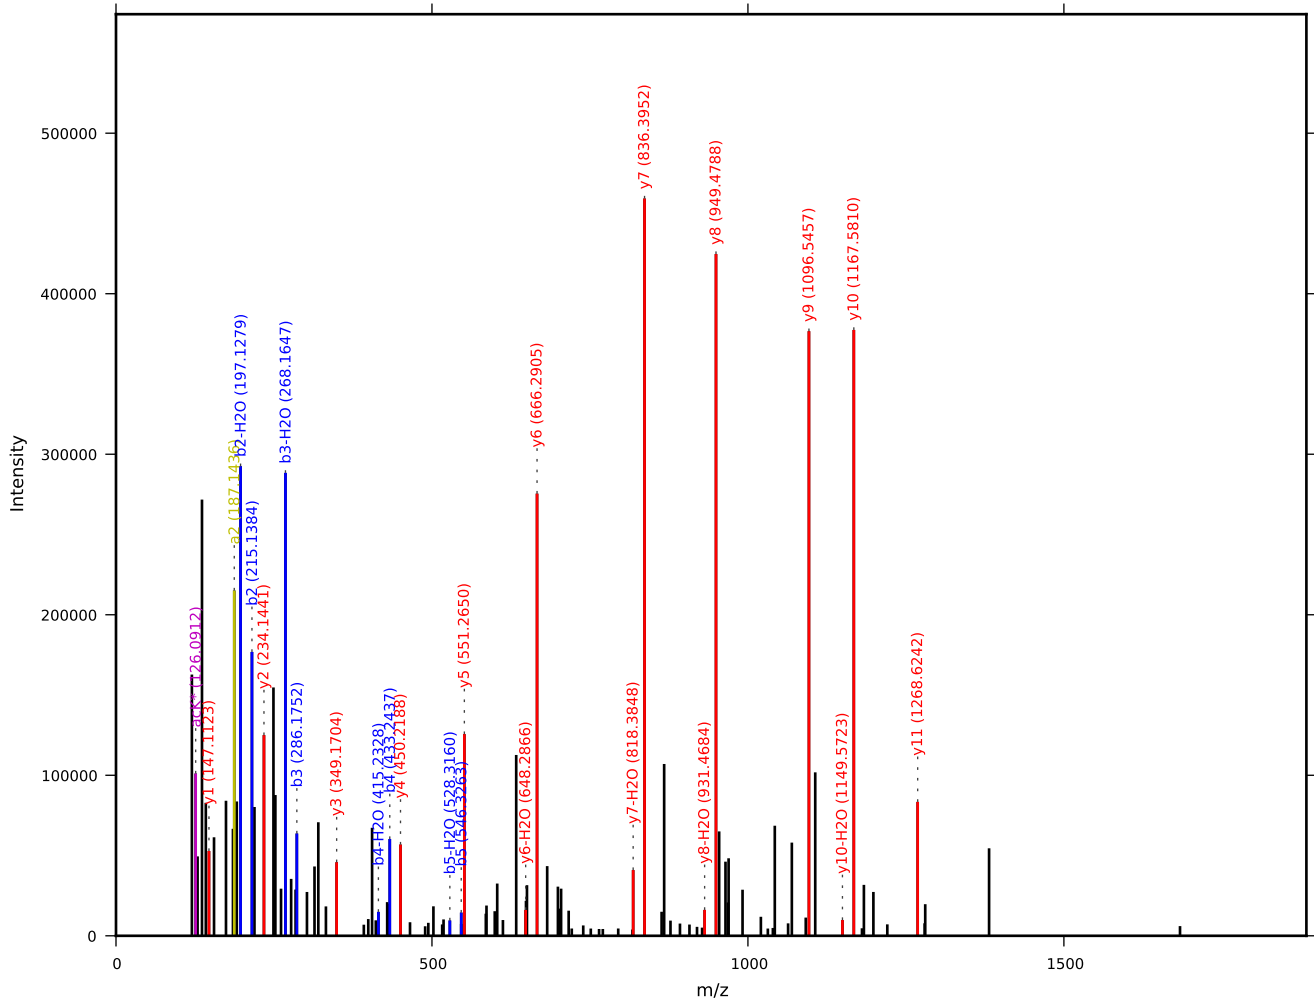

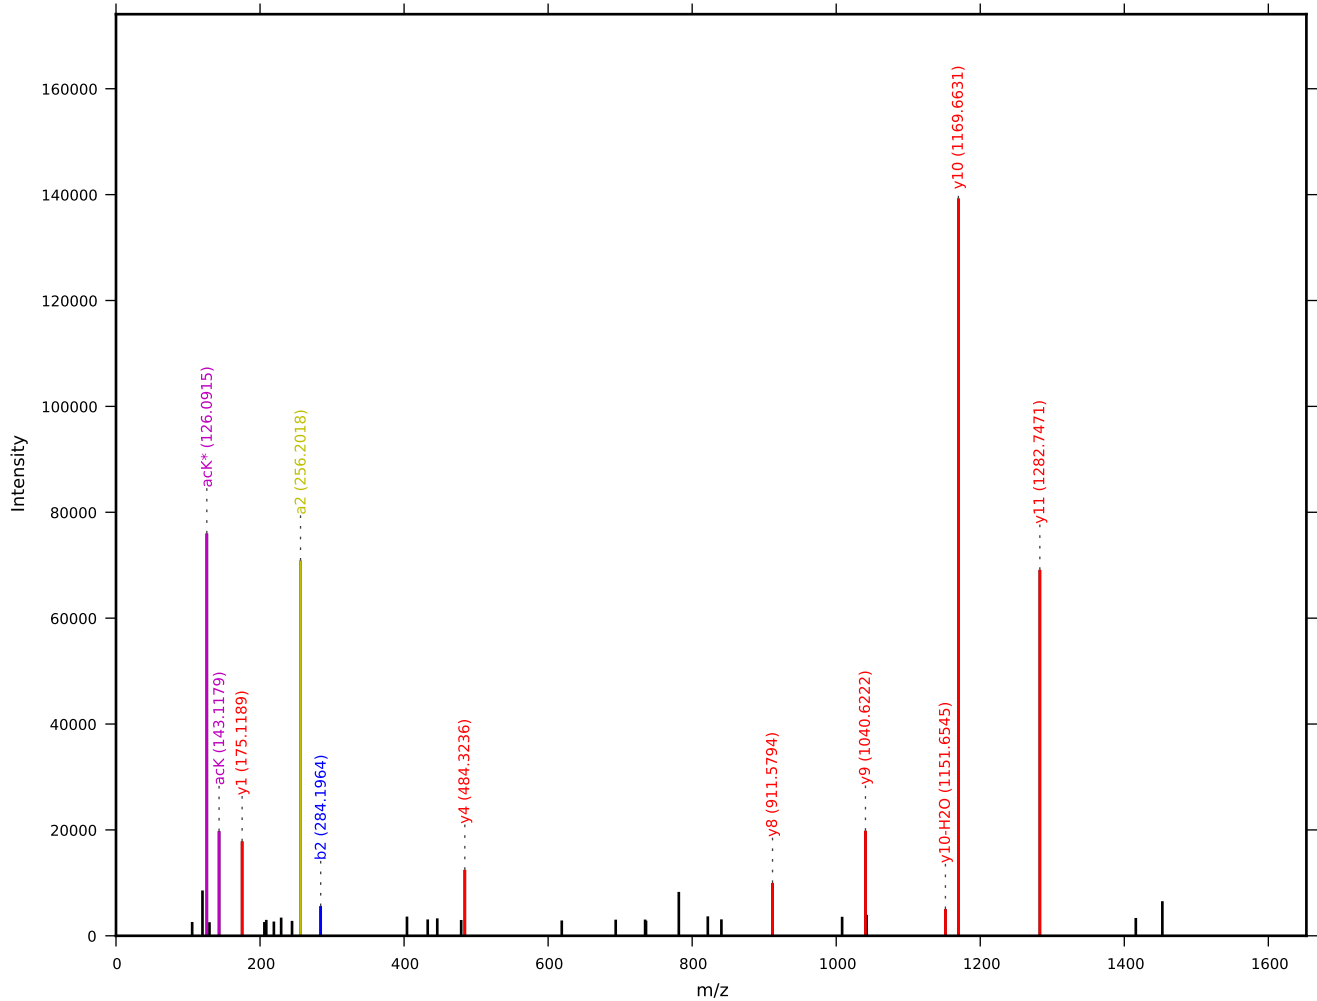

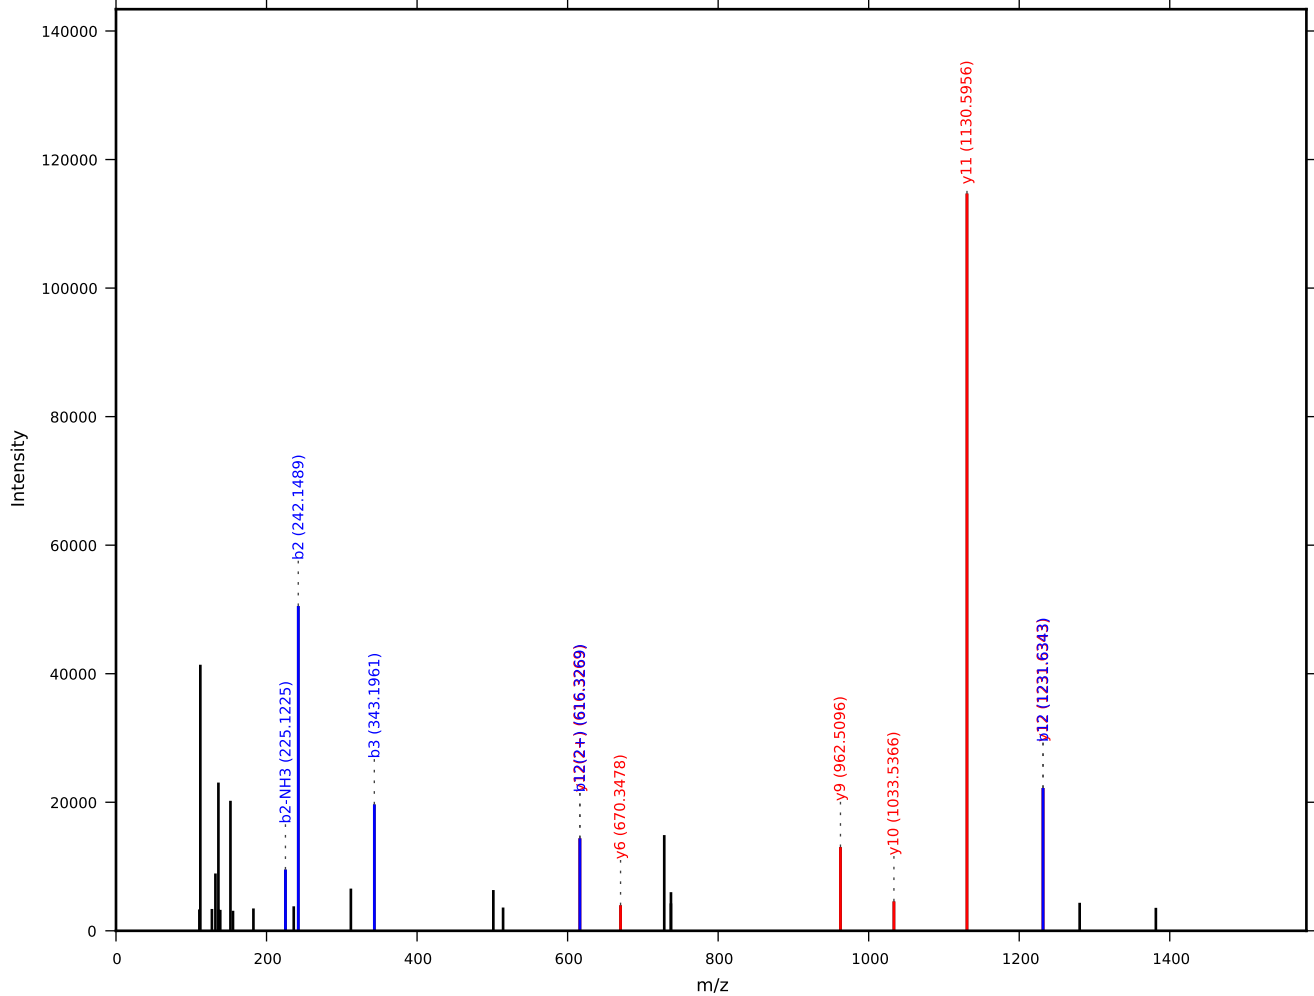

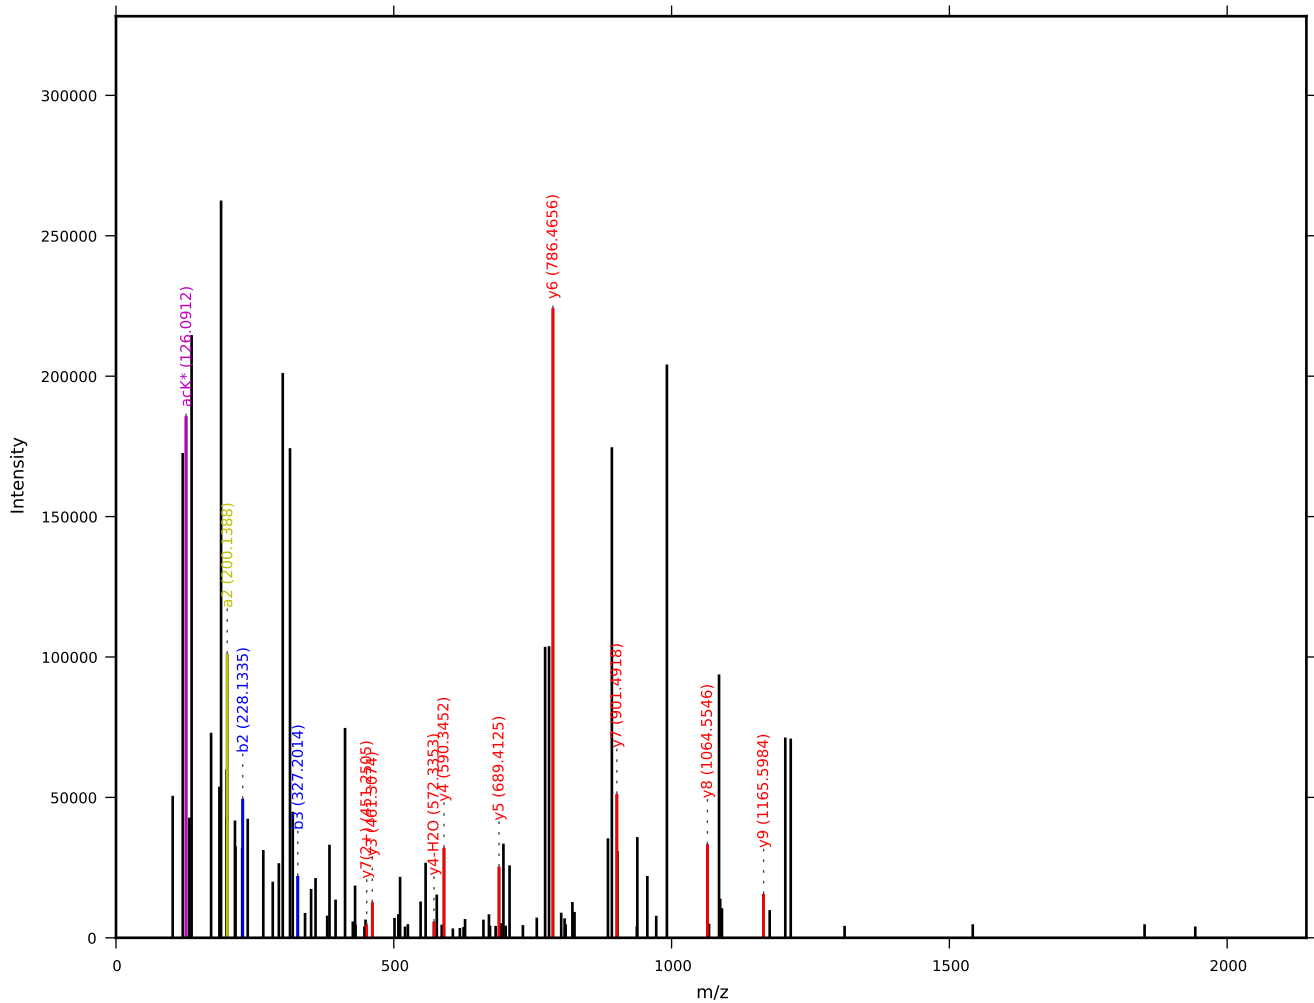

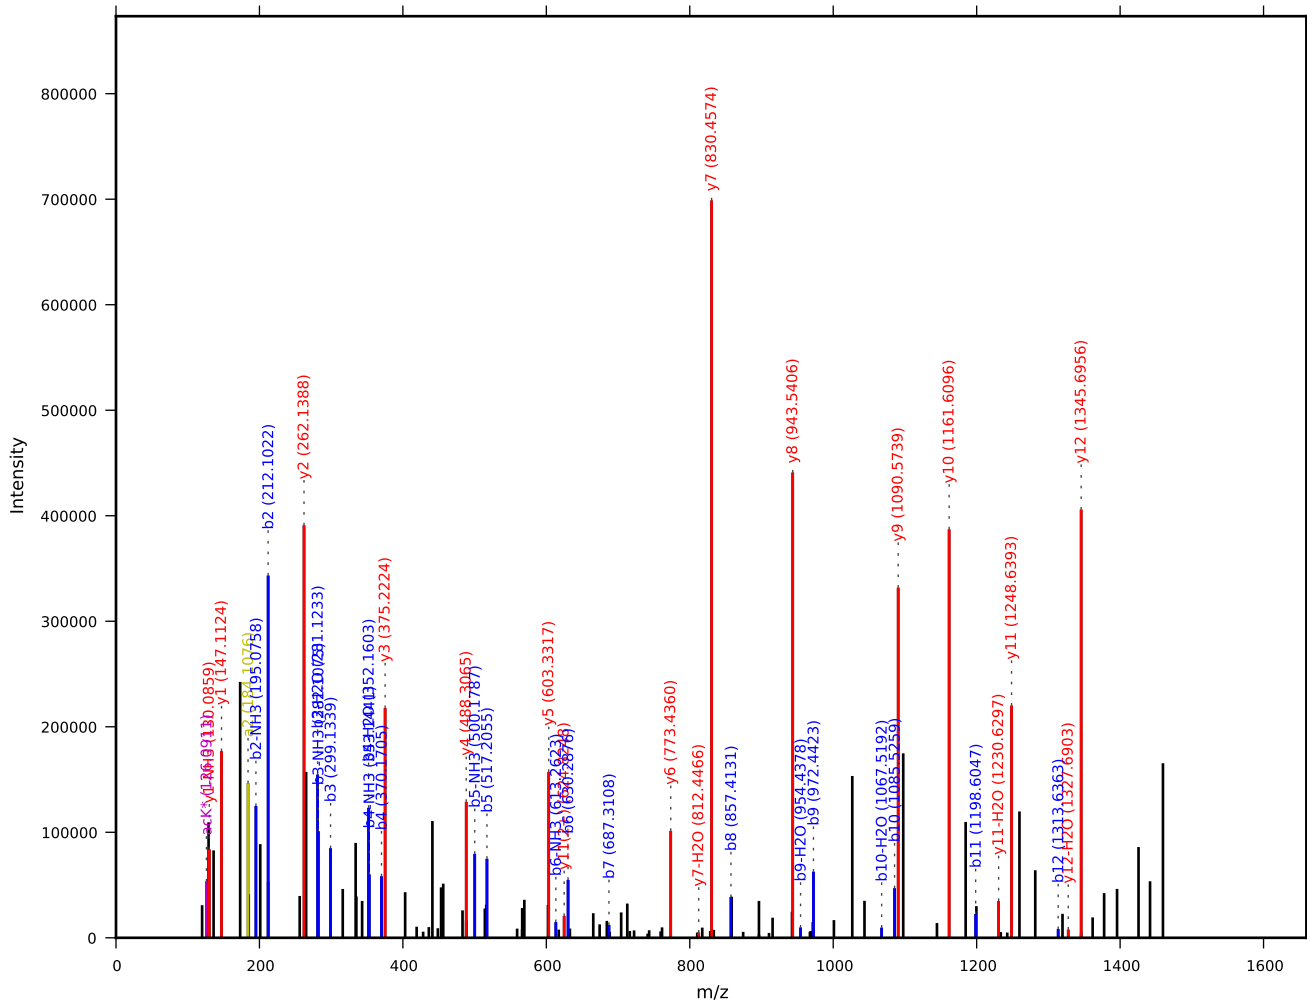

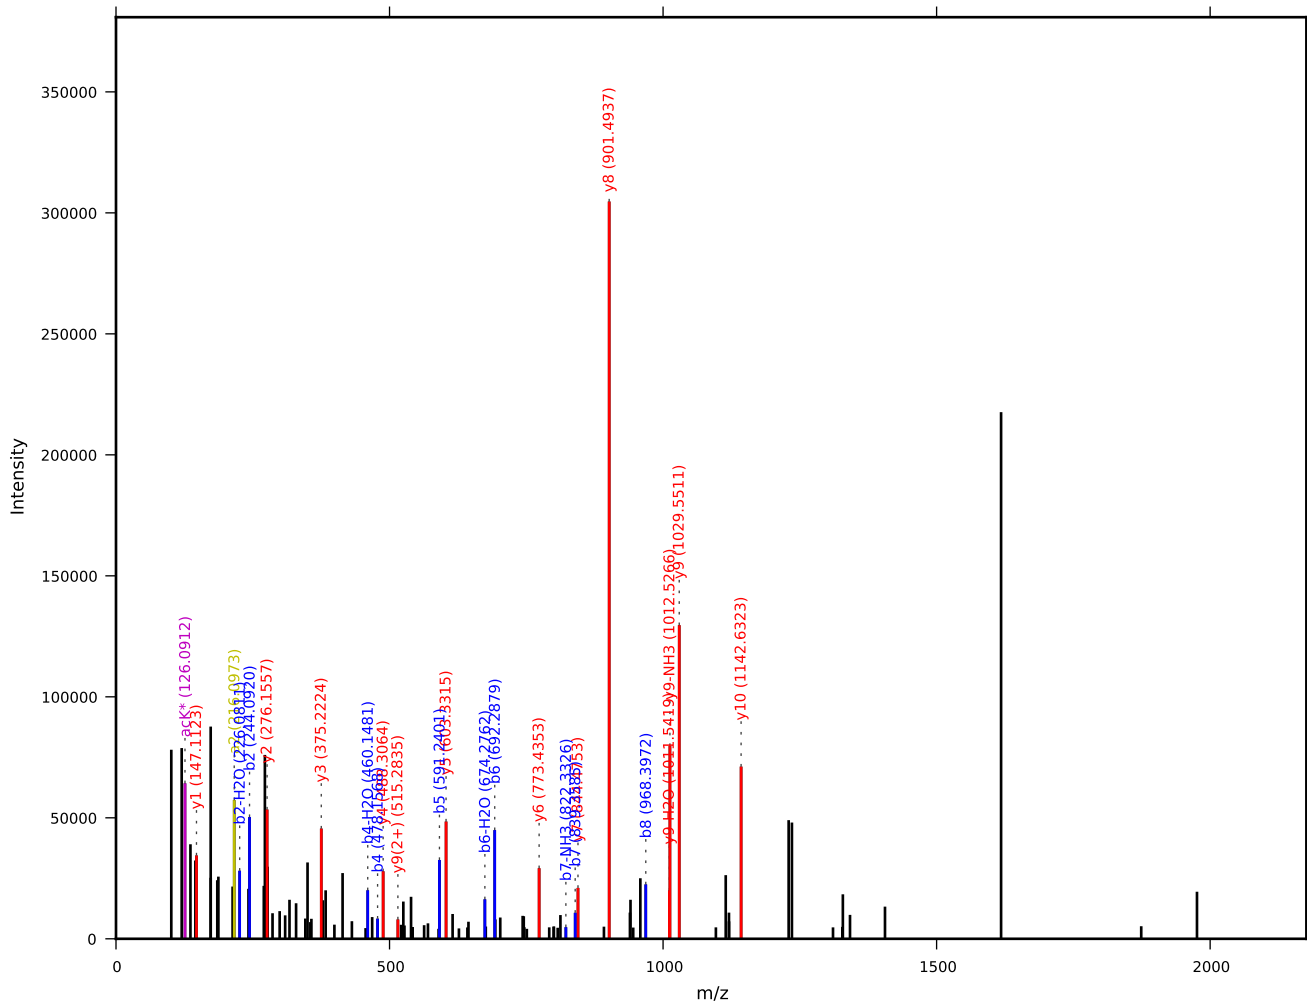



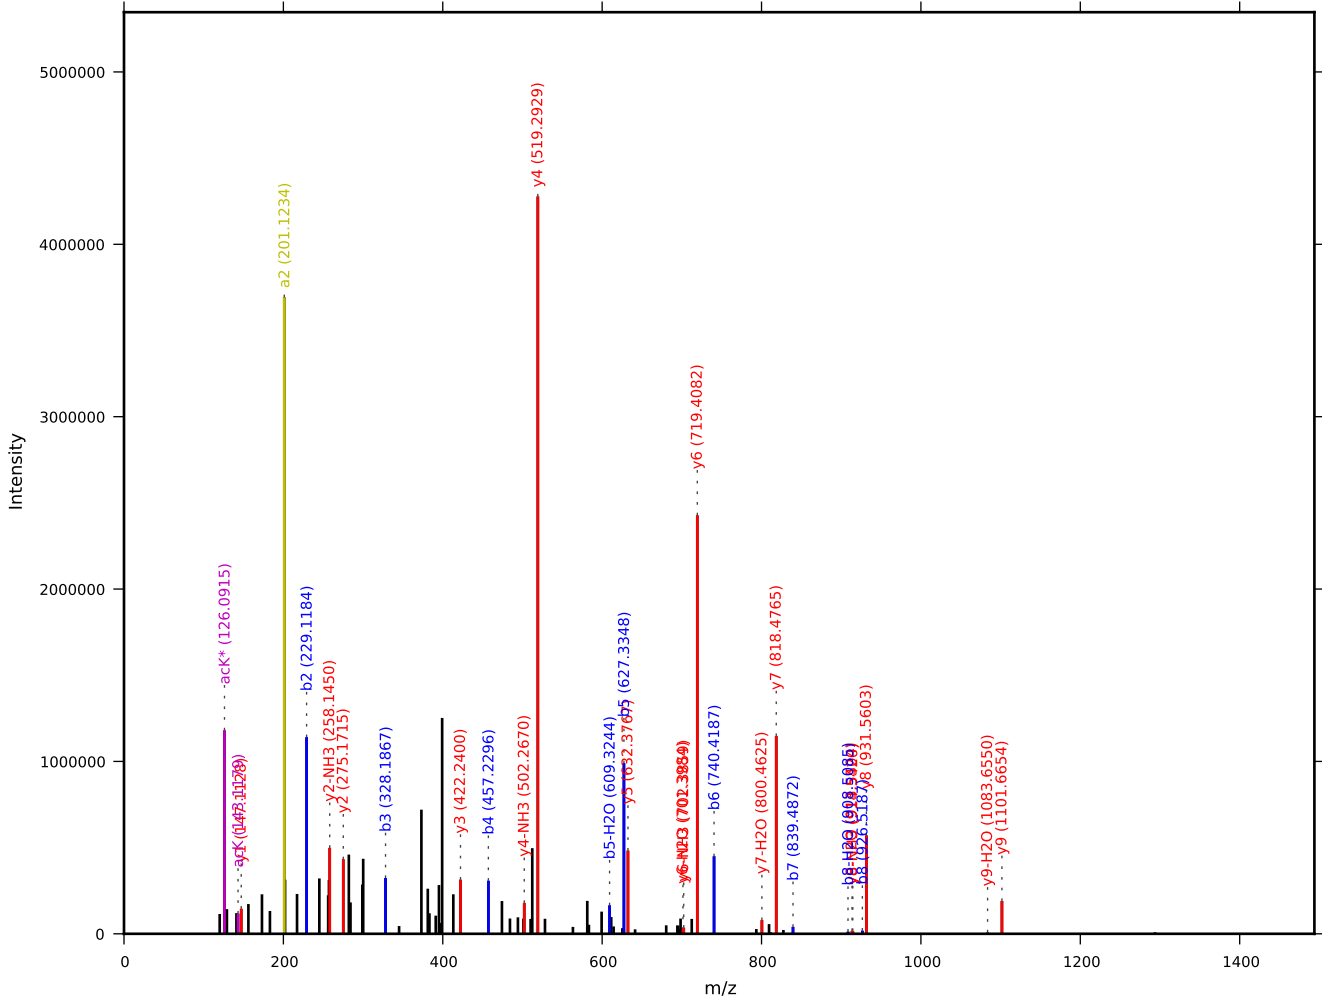

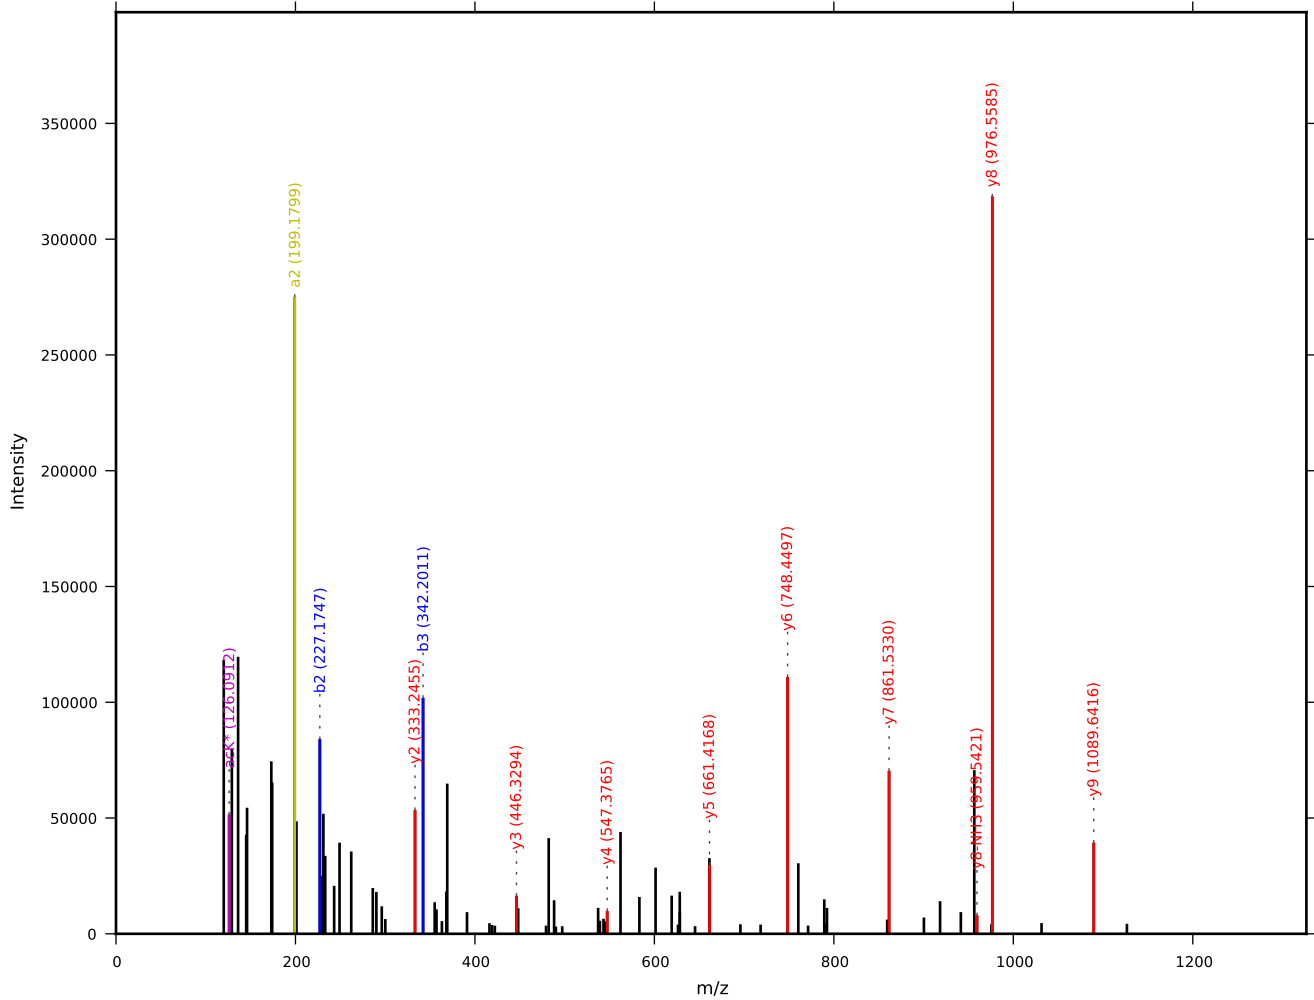

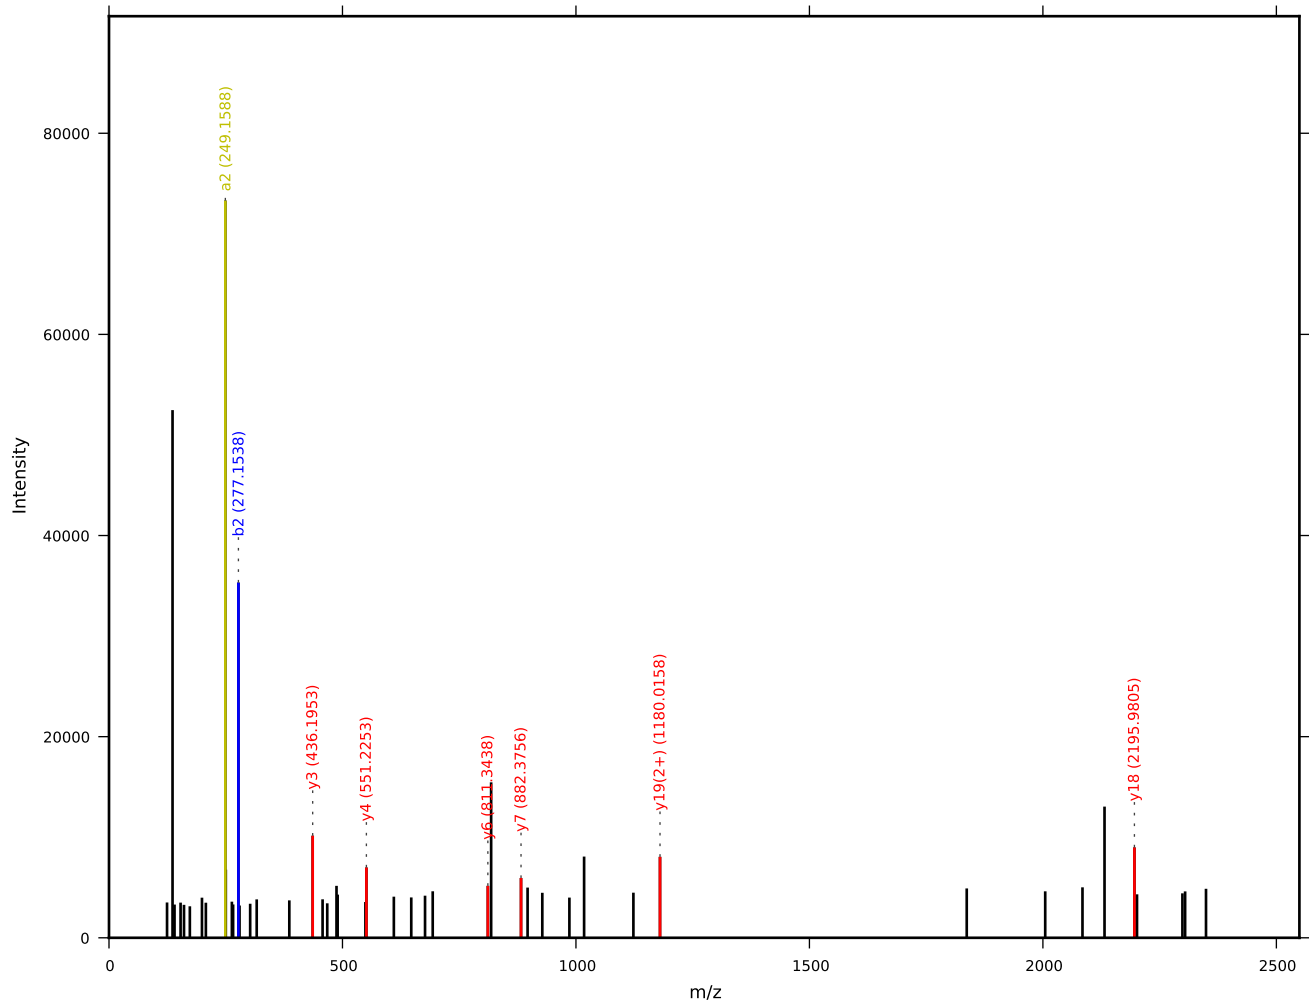

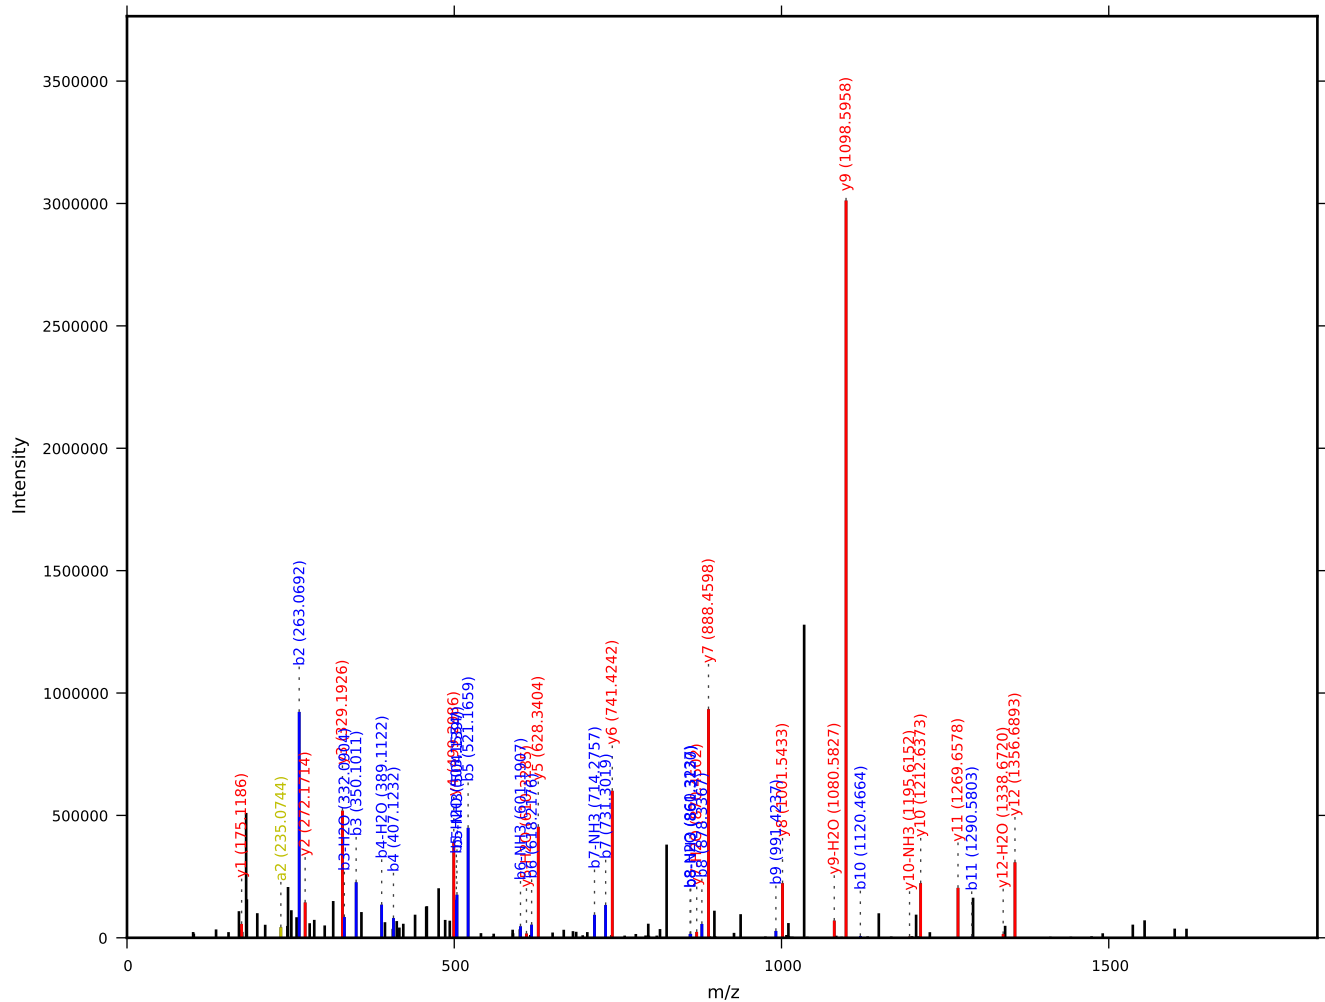

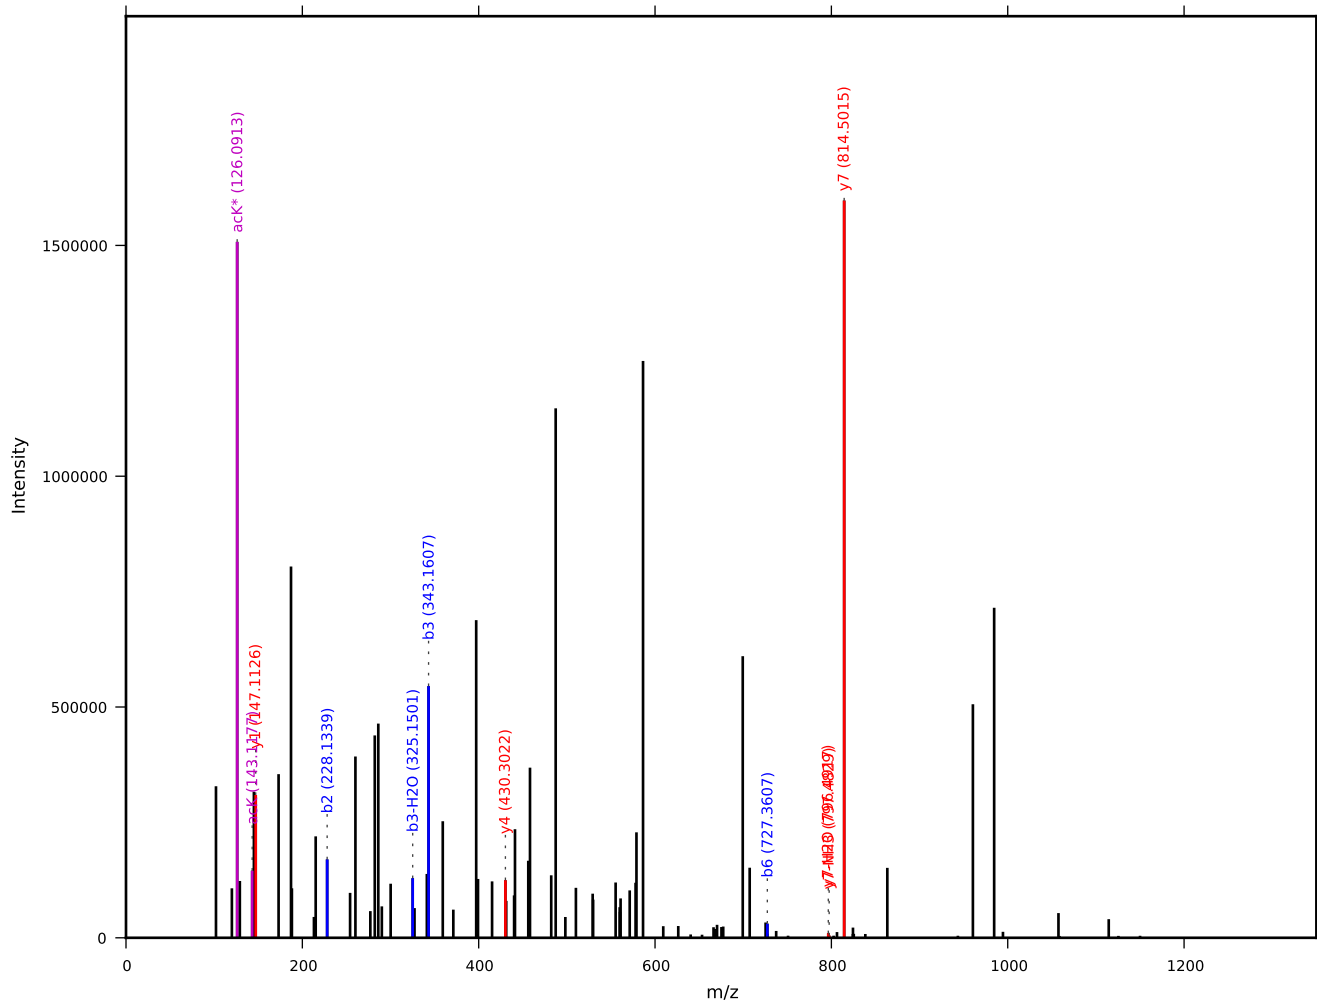

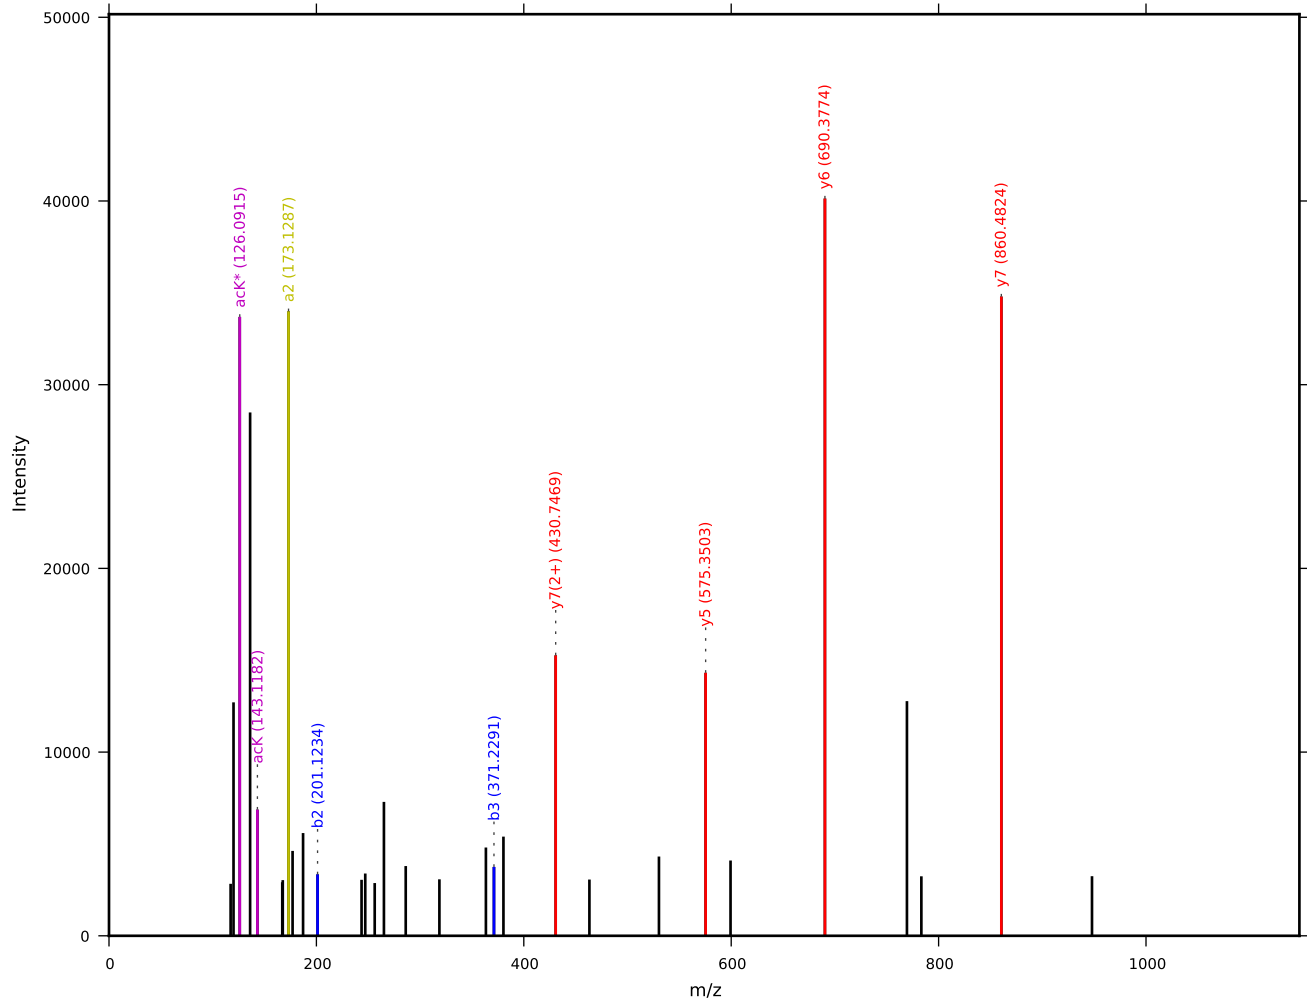

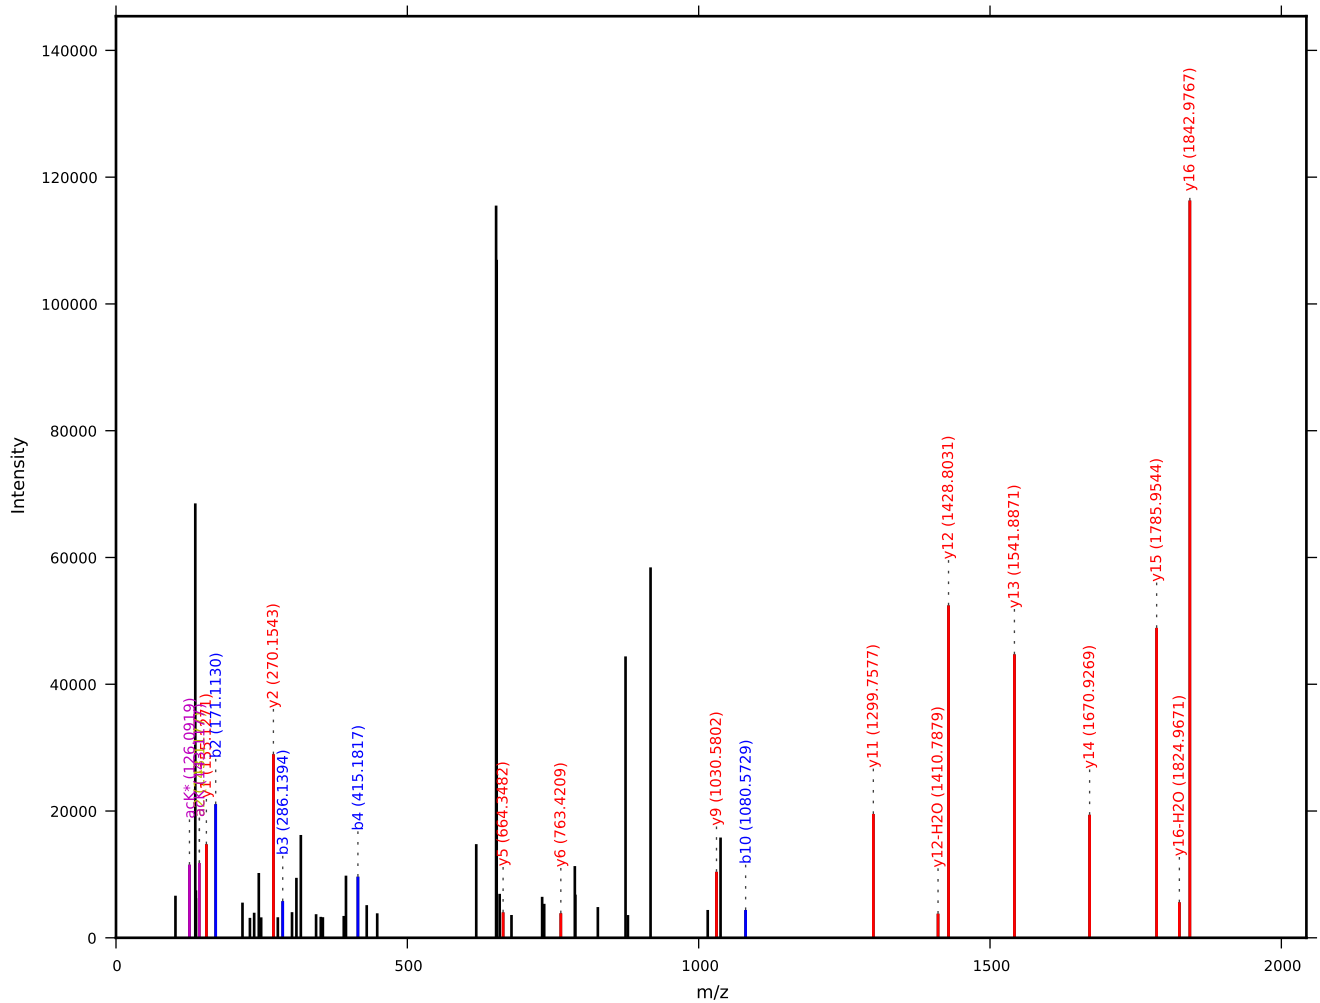

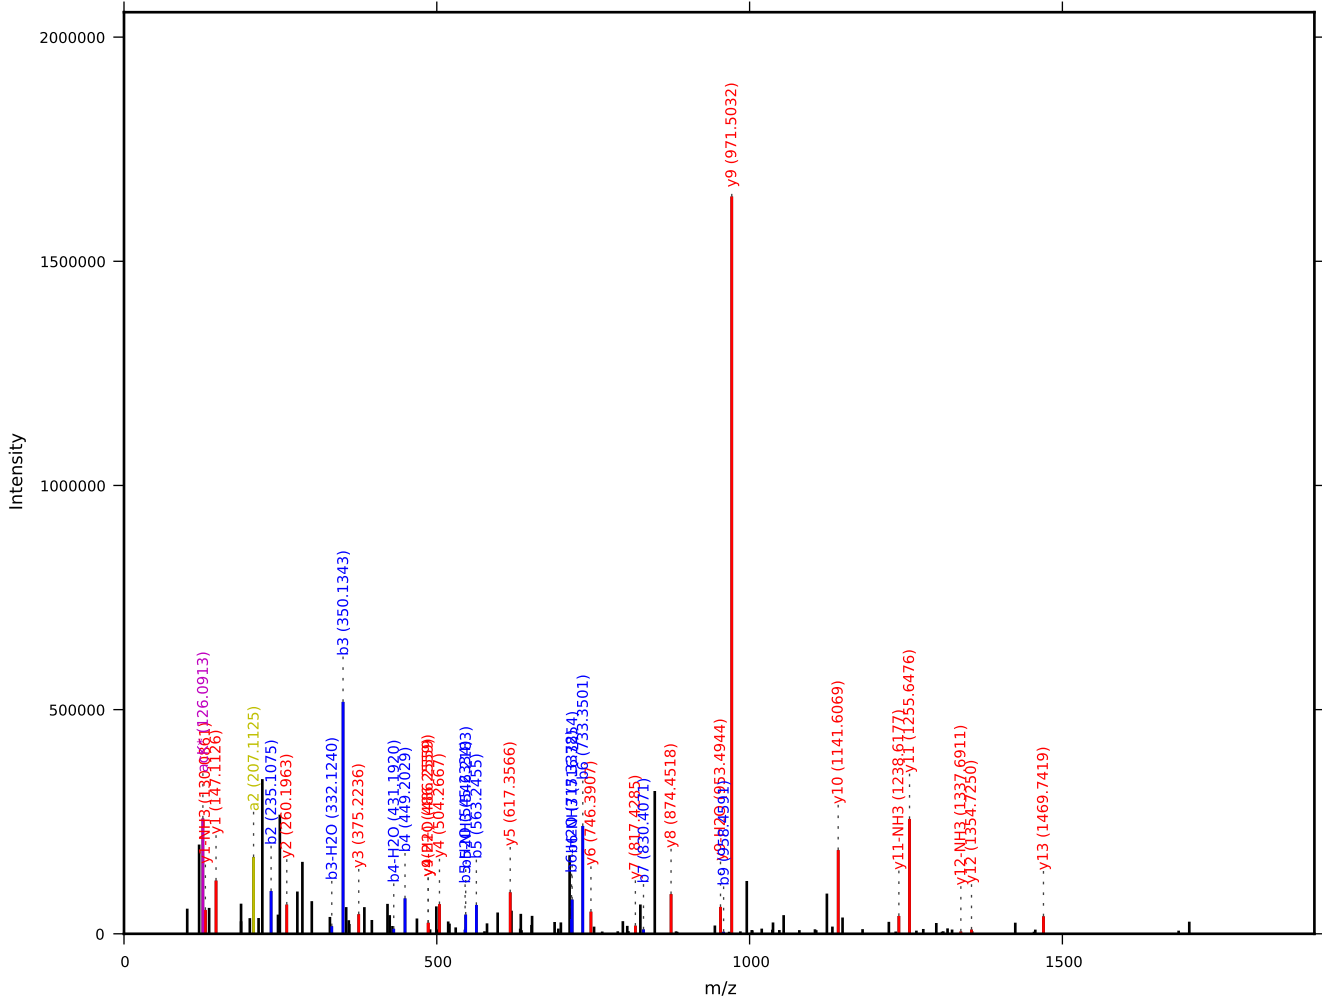



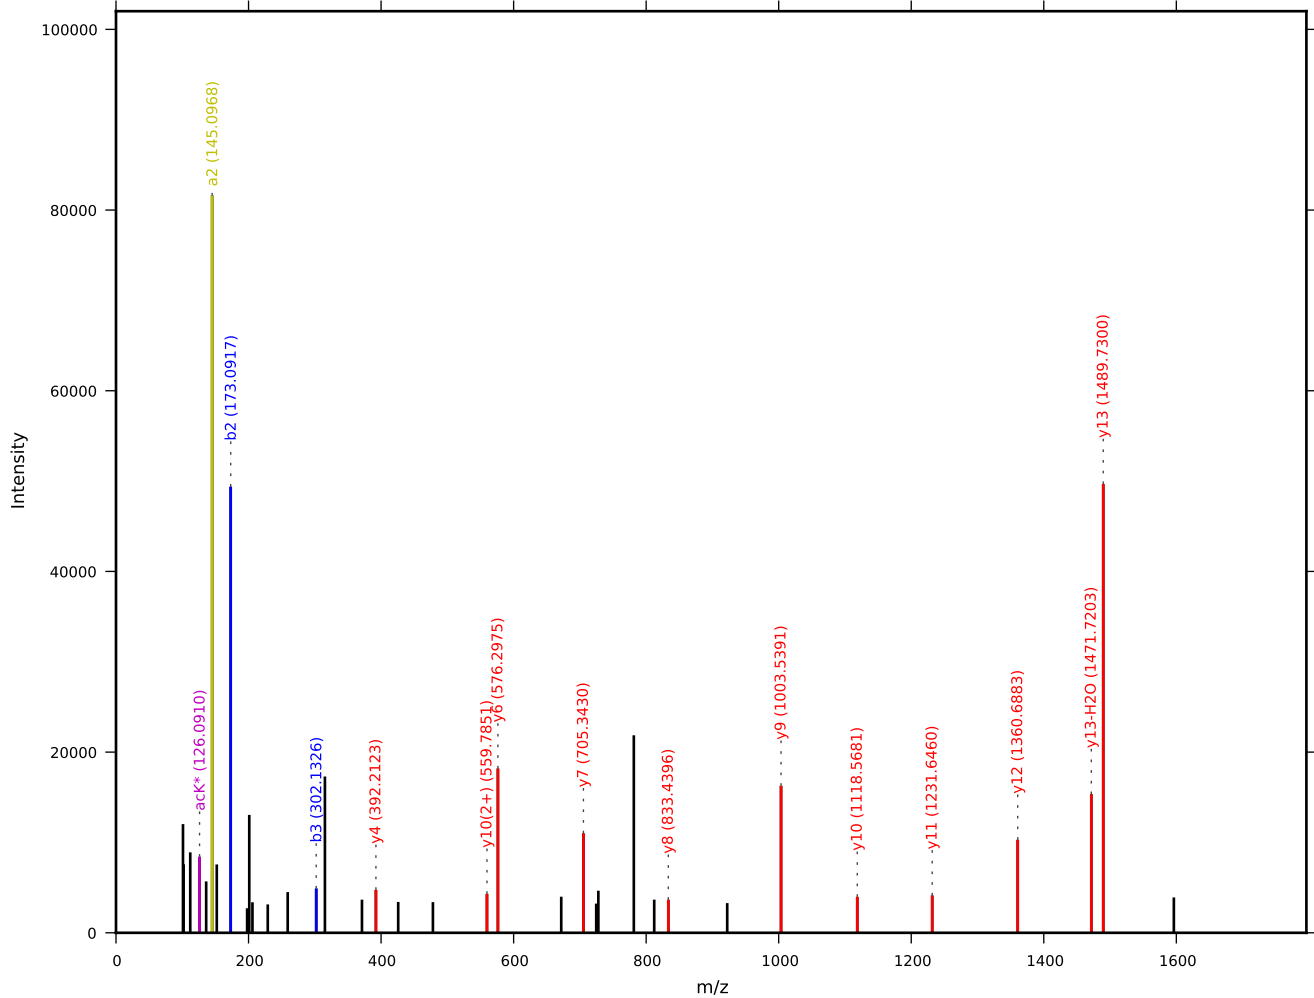

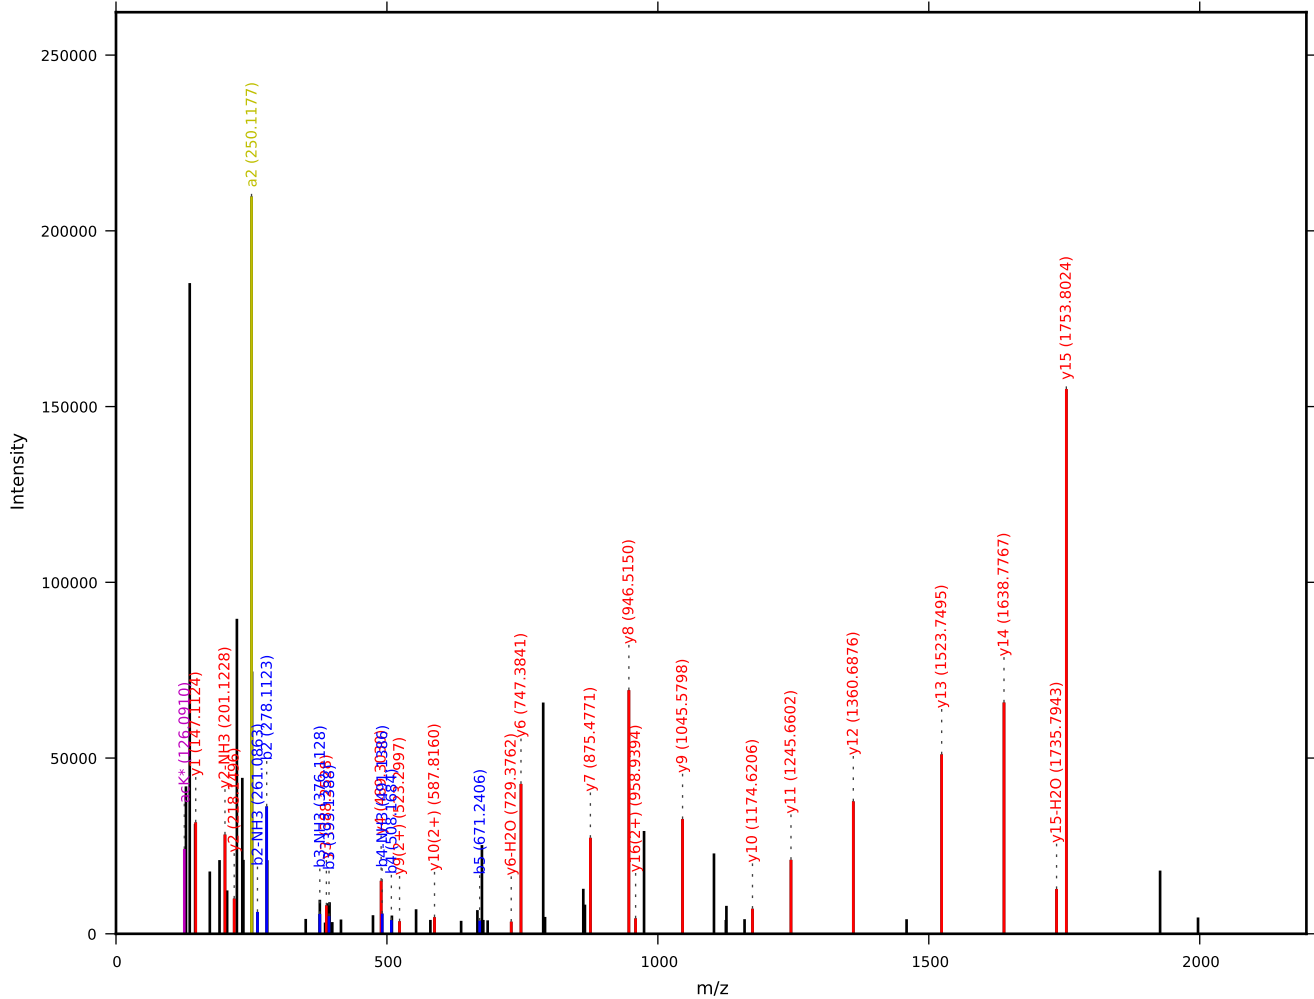

Mass: 1846.808 Charge: 2 m/z: 924.41126  
Modified Peptide: \_NYDDYDAEVAK(ac)EETK\_ Score: 261.74 PEP: 3.4006E-150

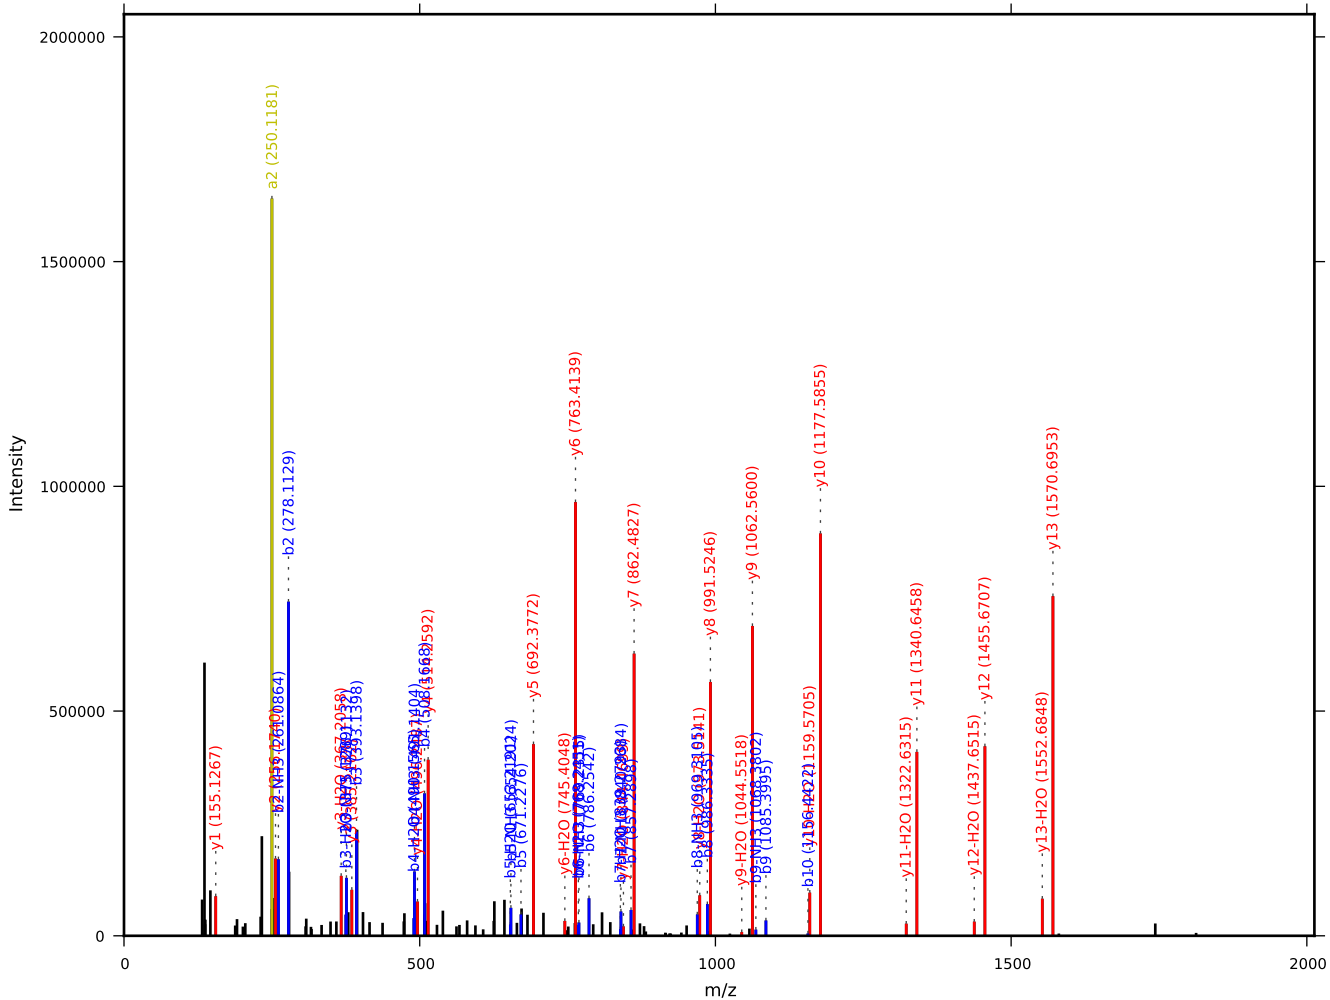

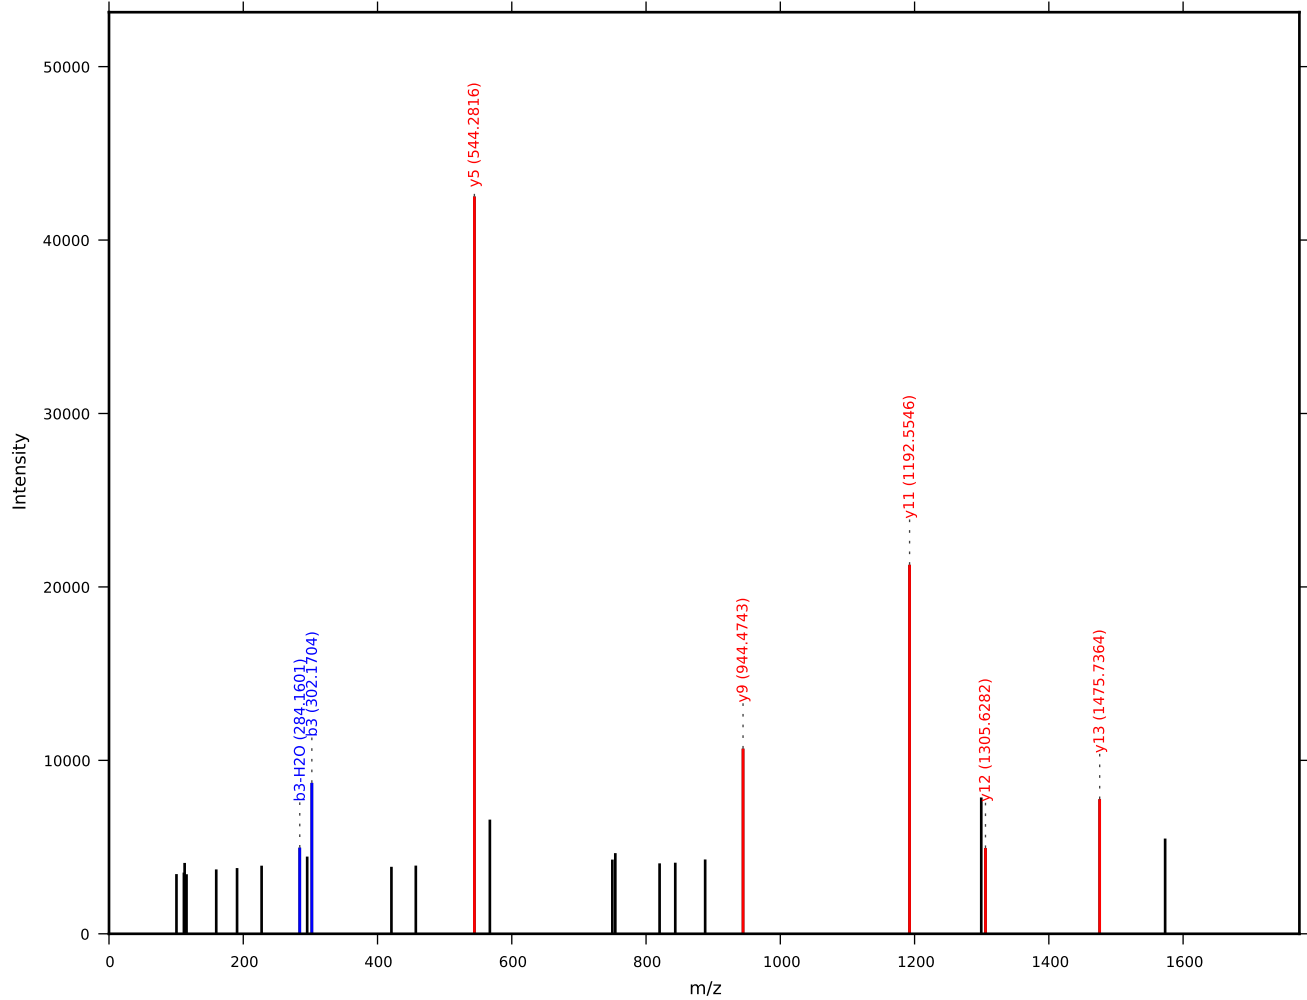

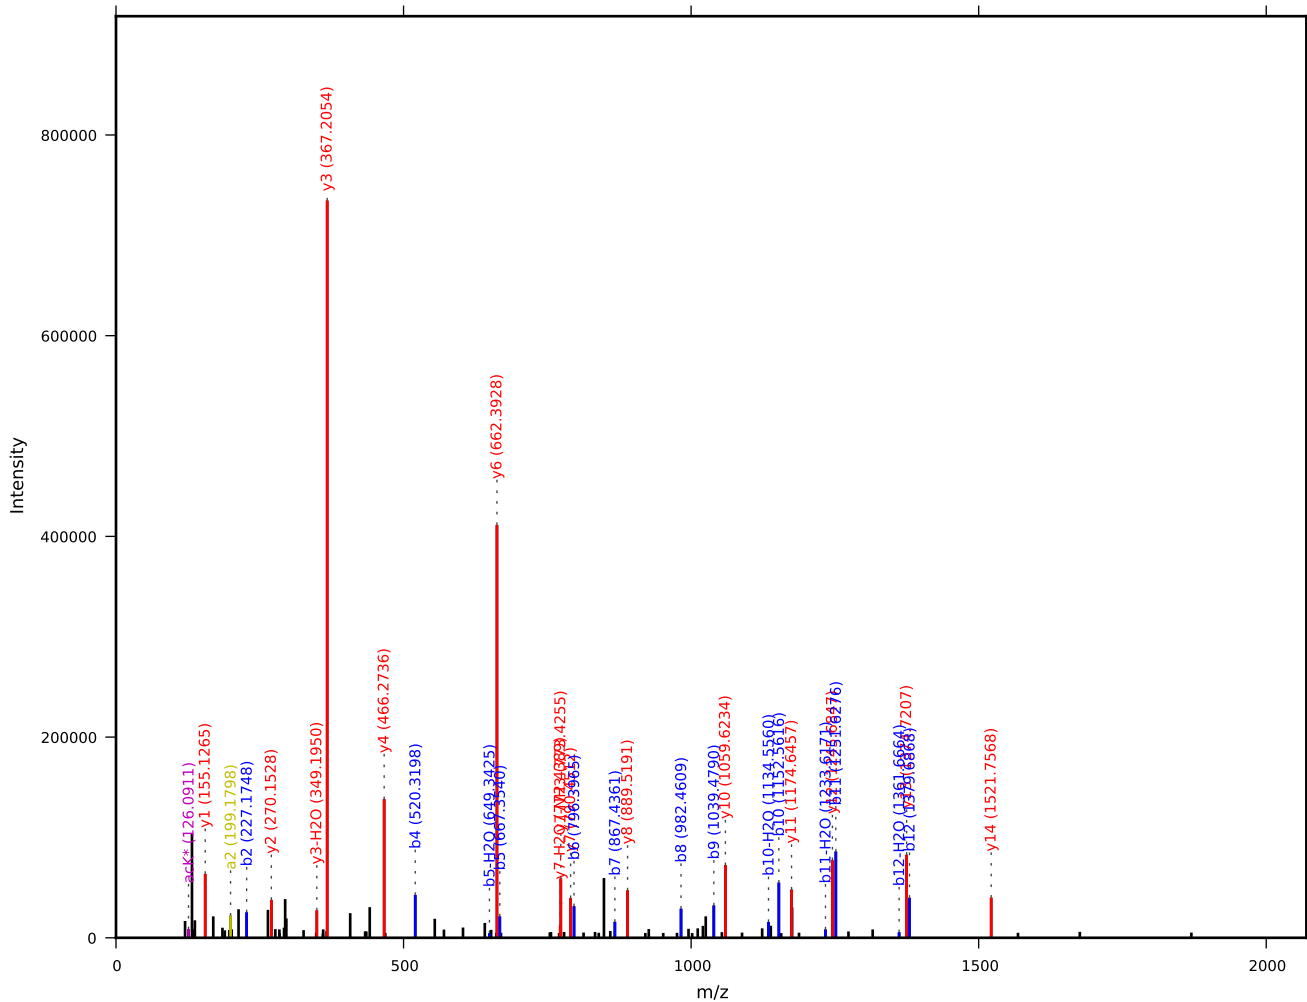

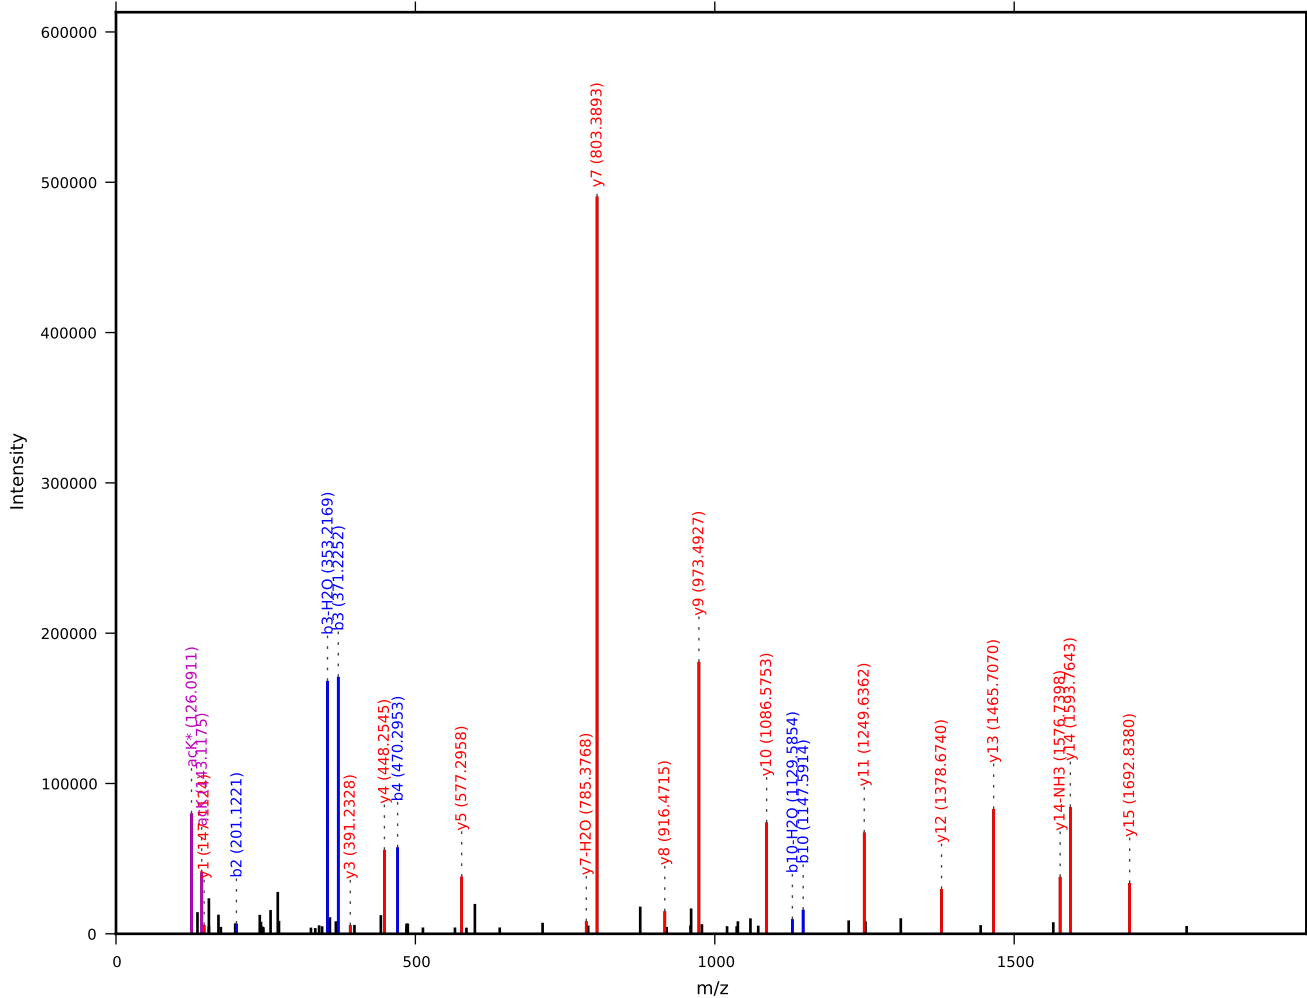

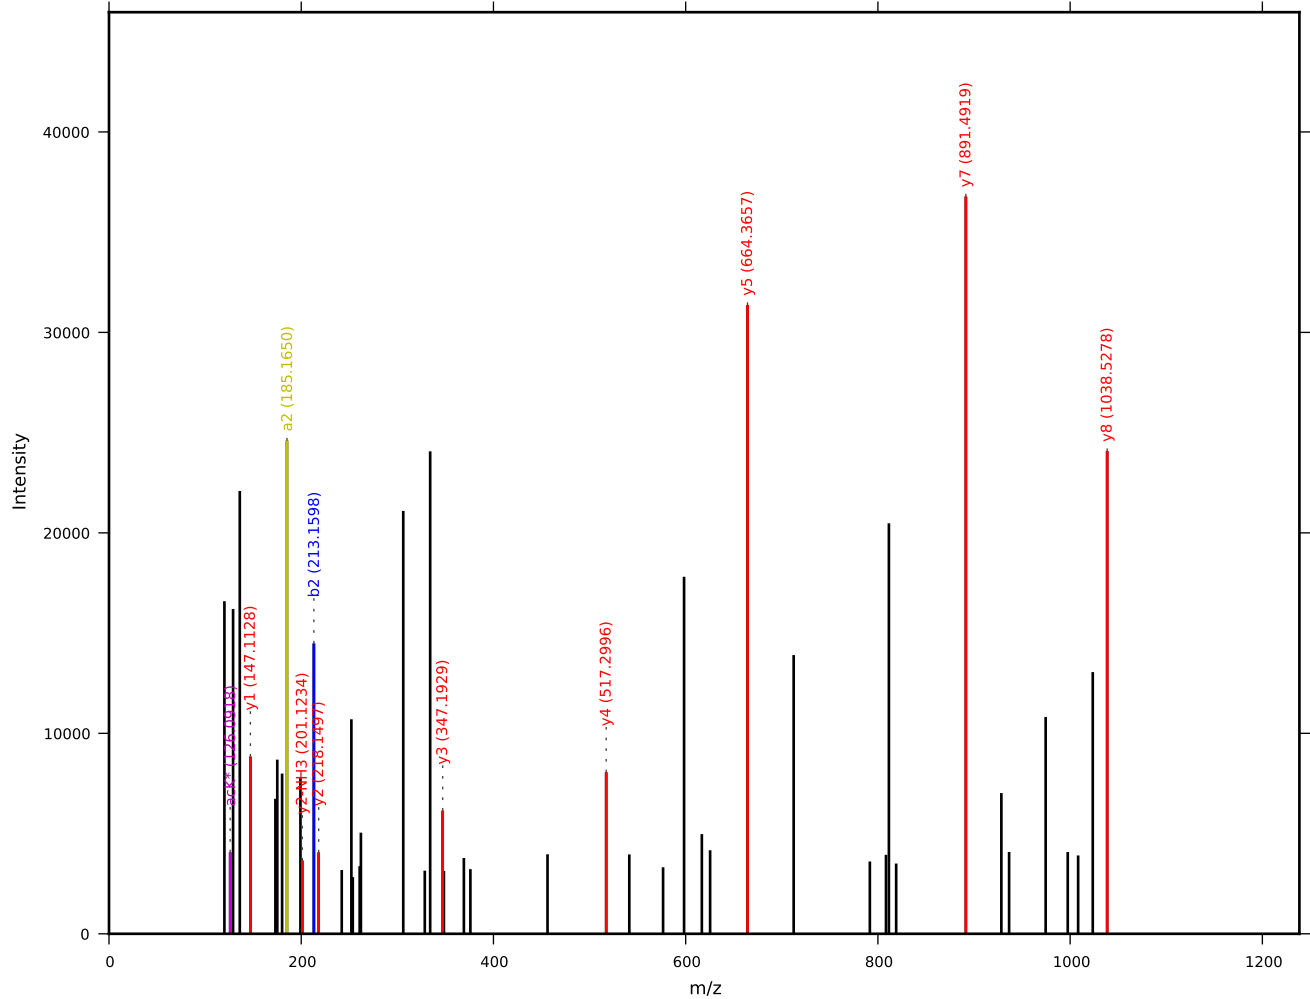

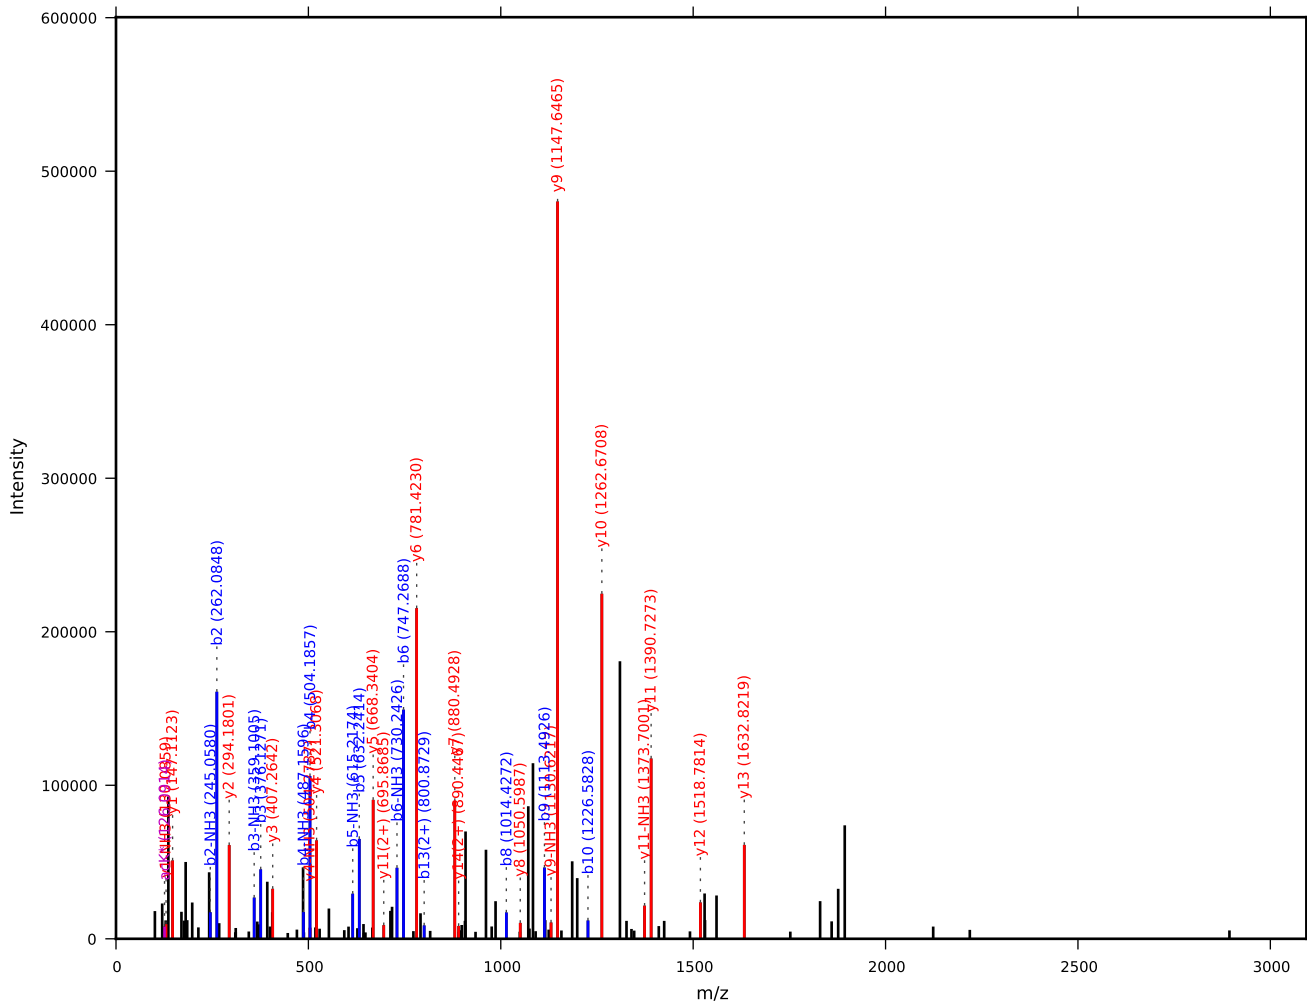



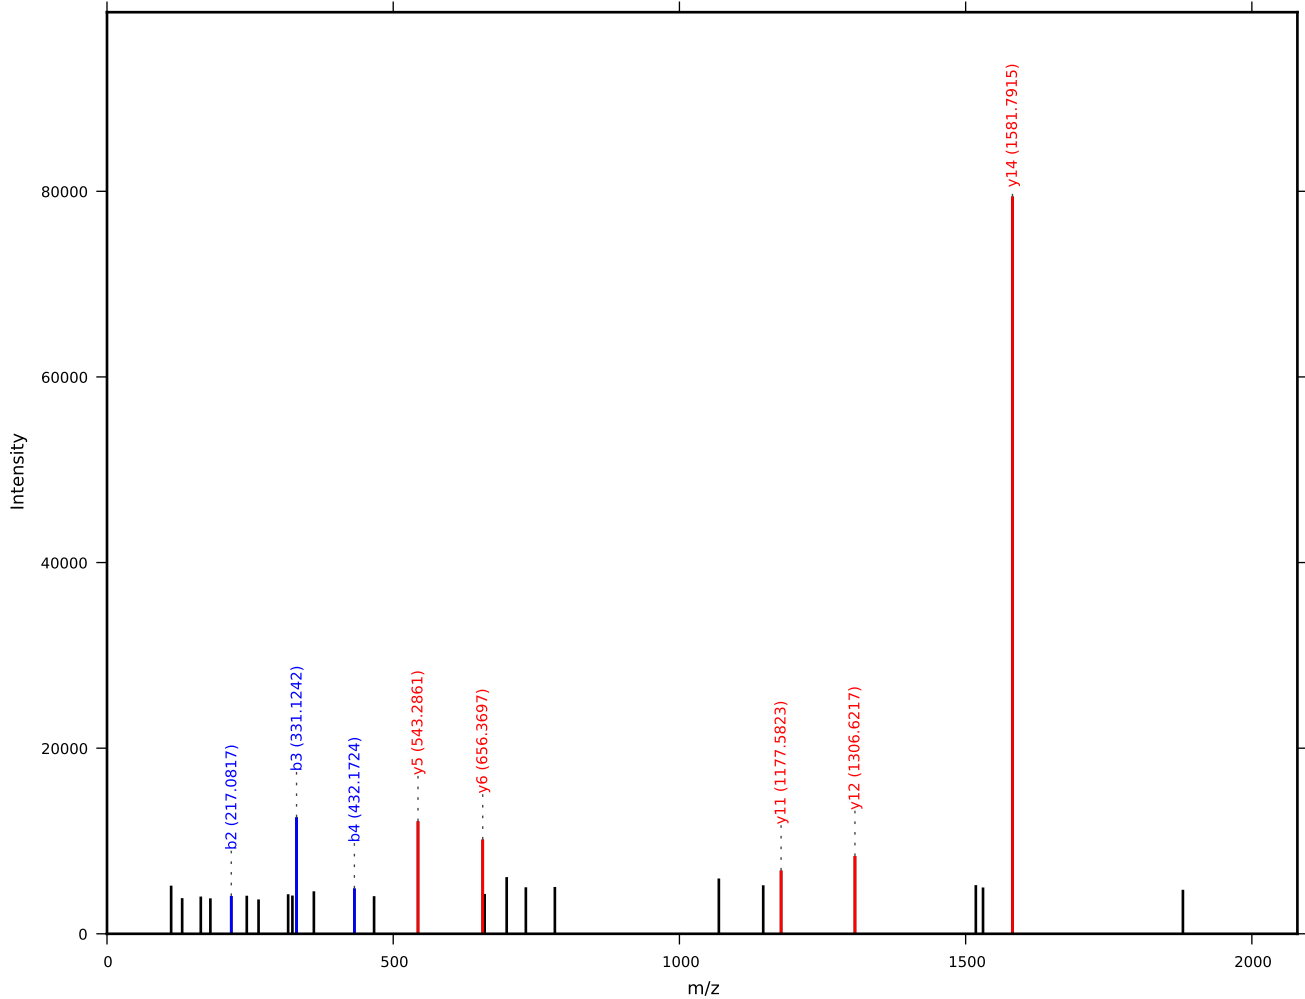

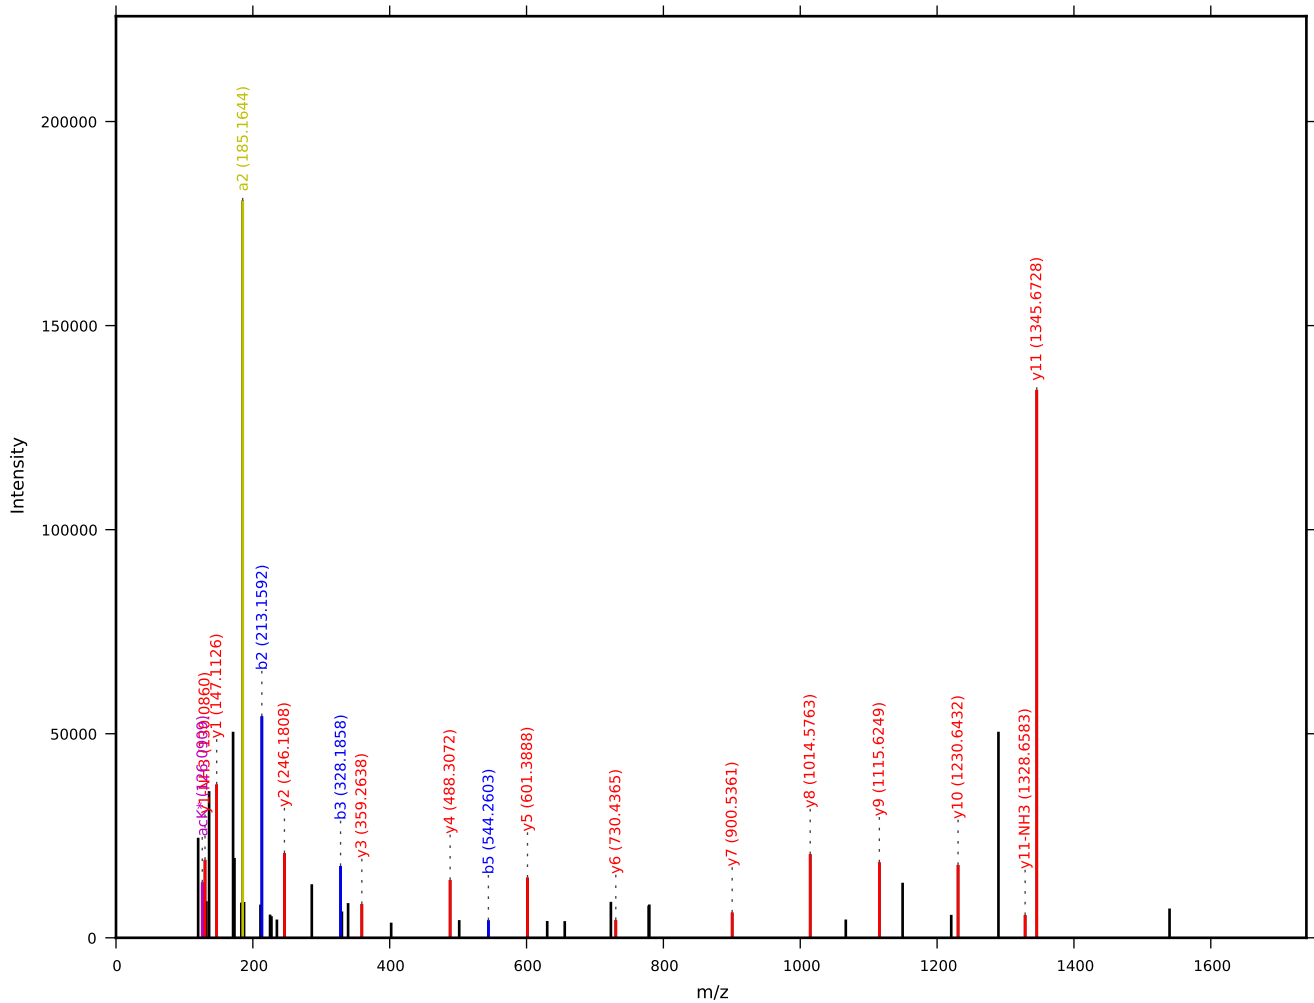

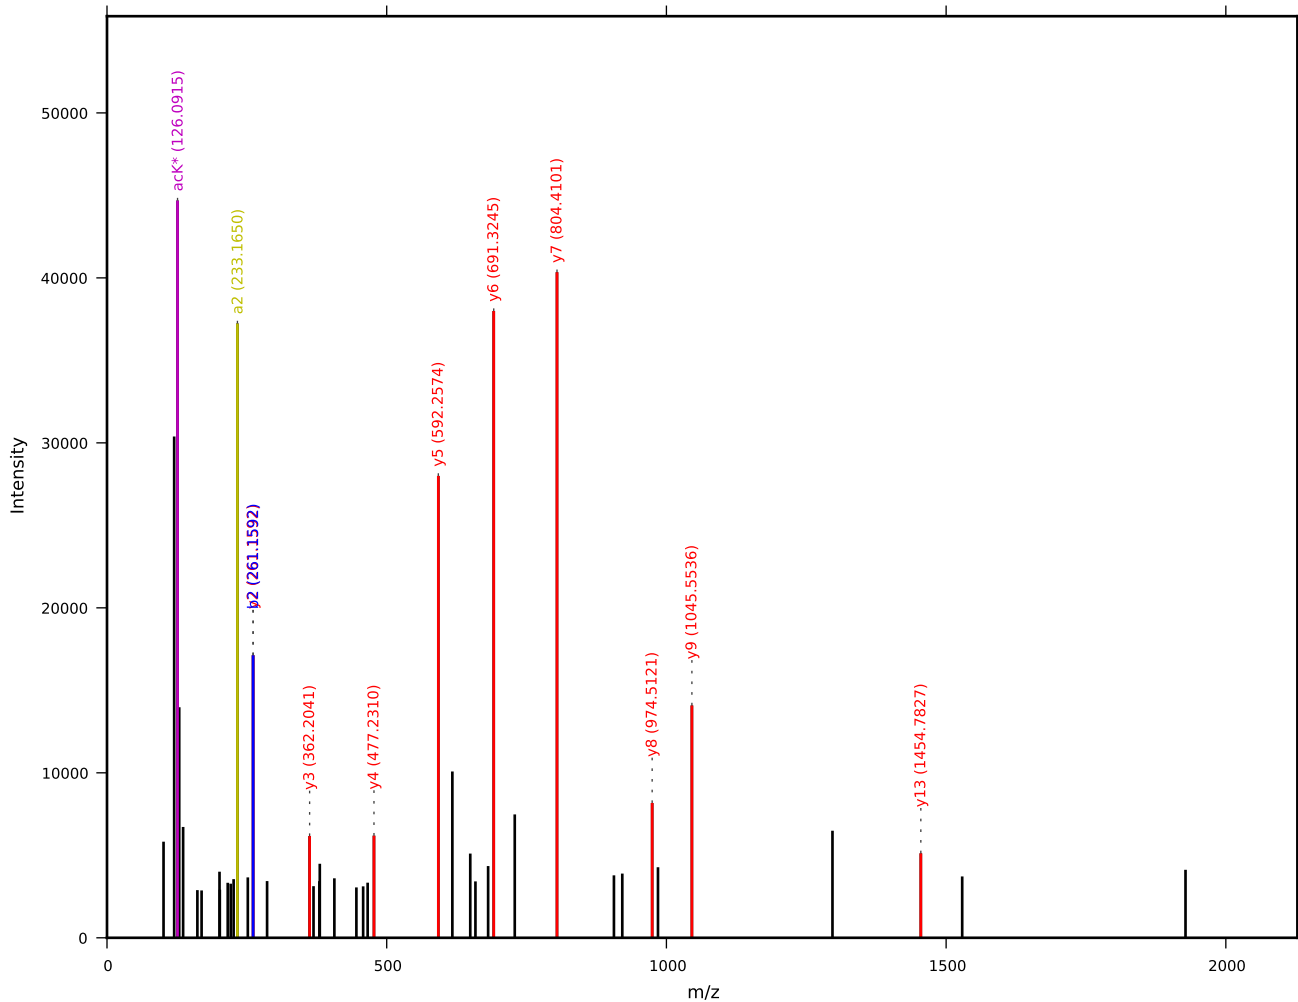

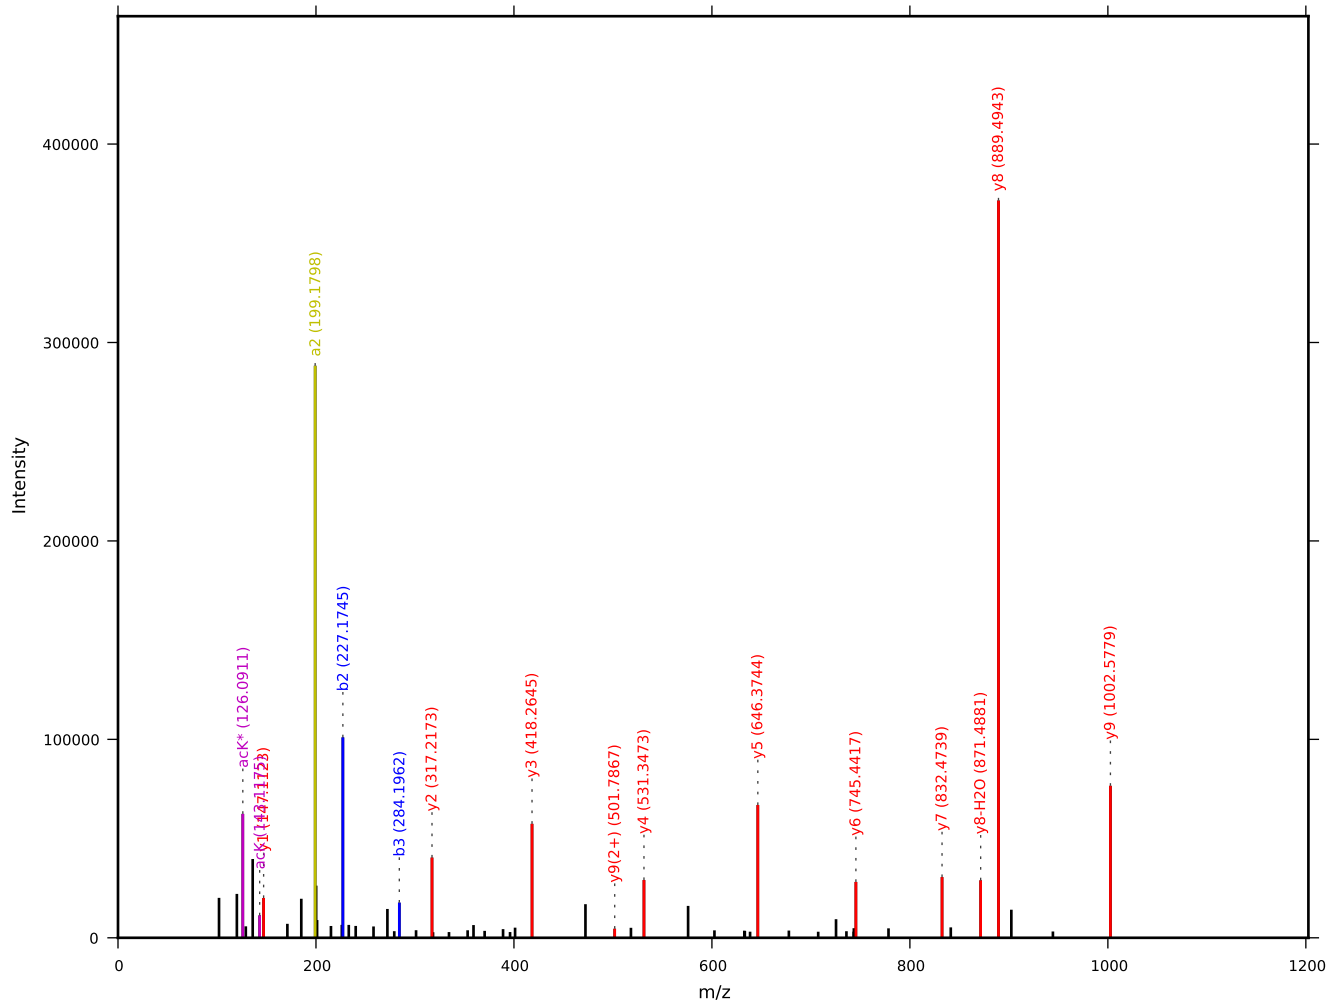

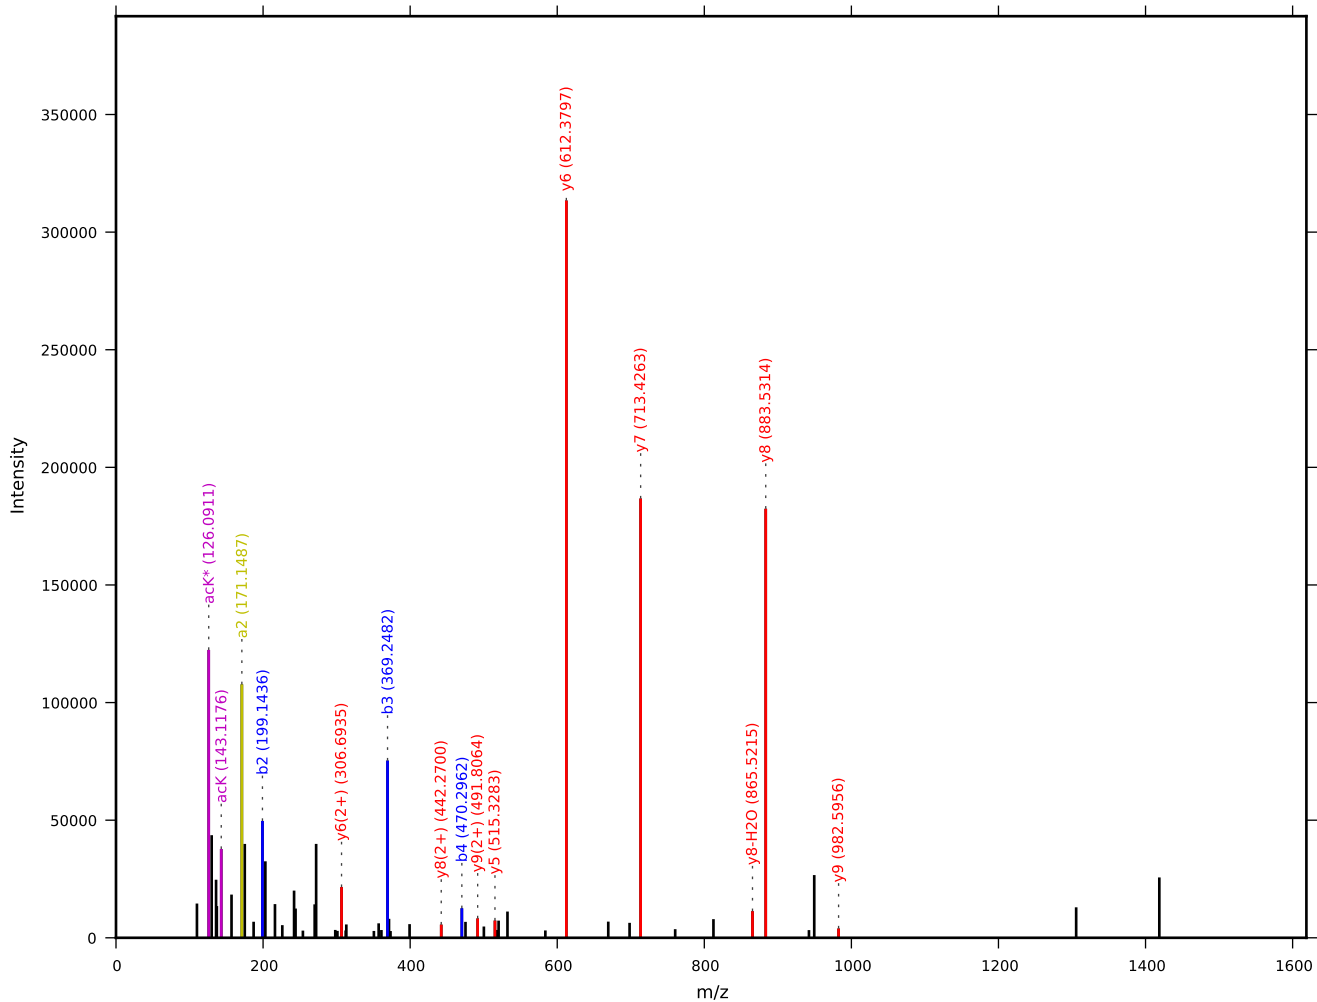

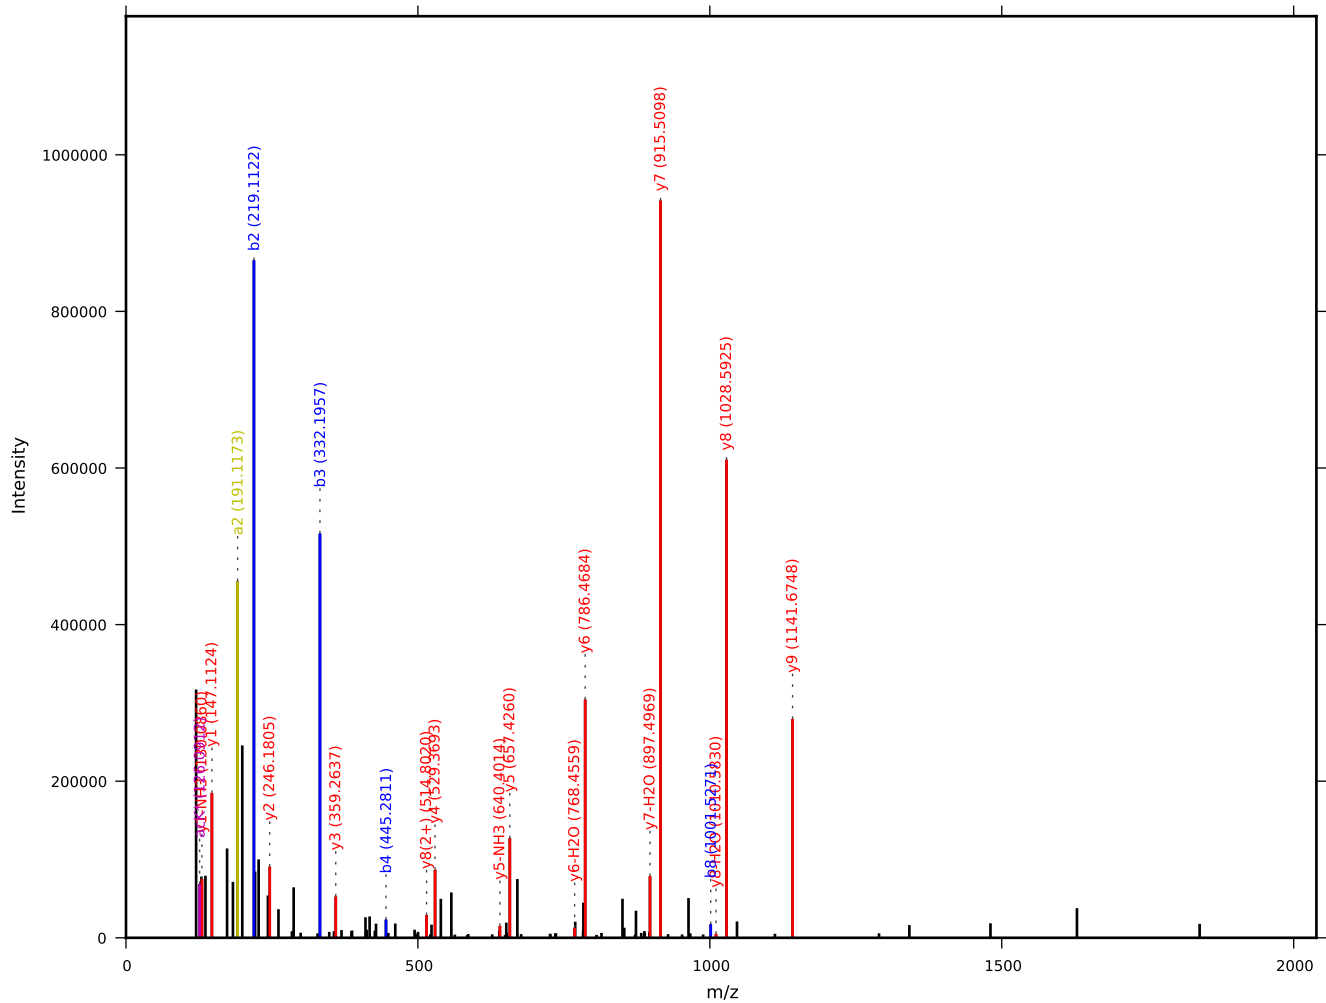

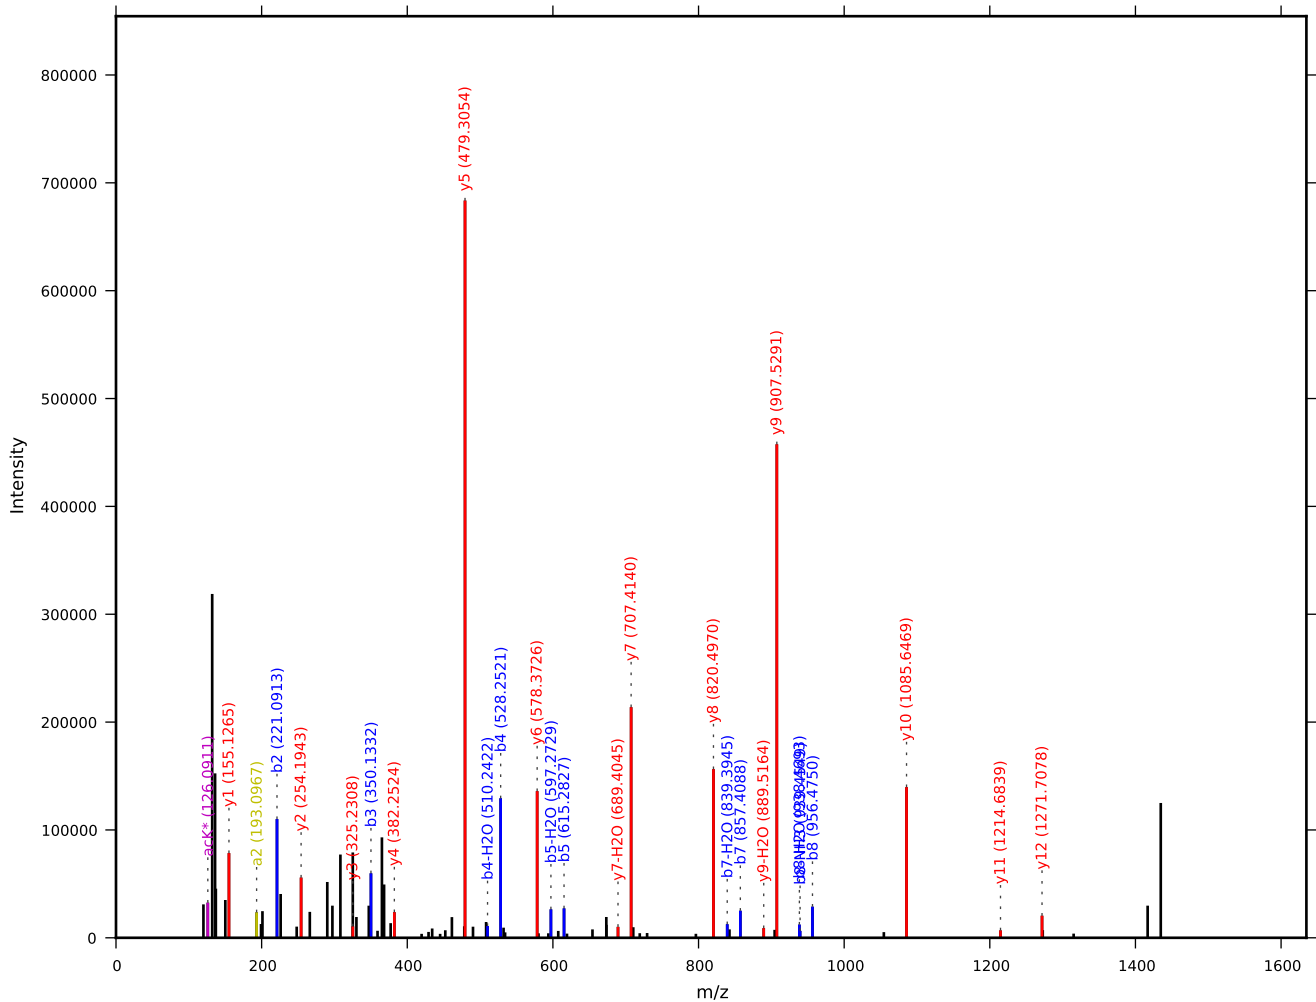

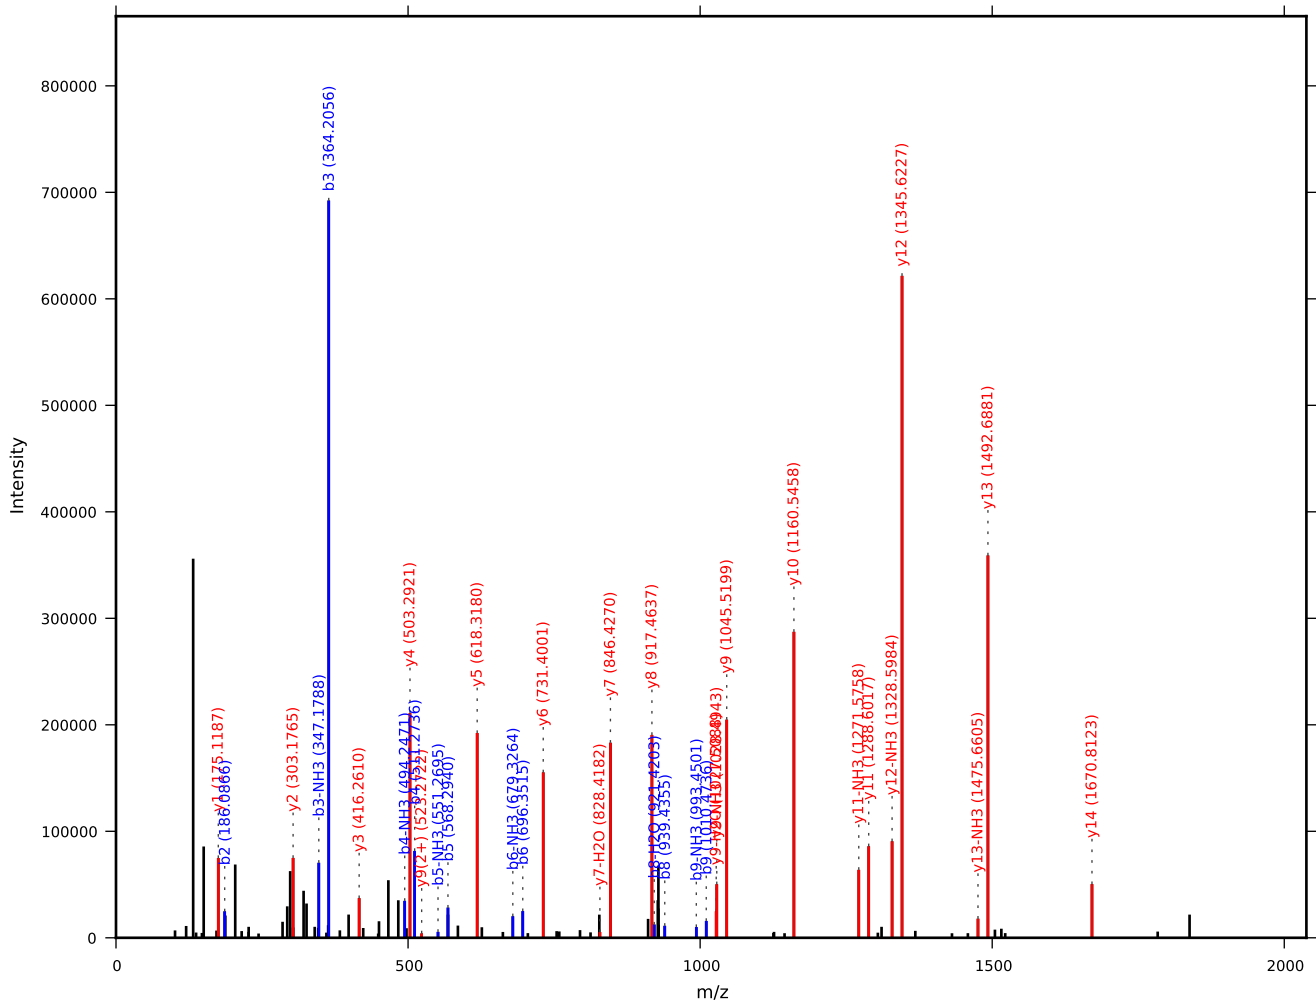



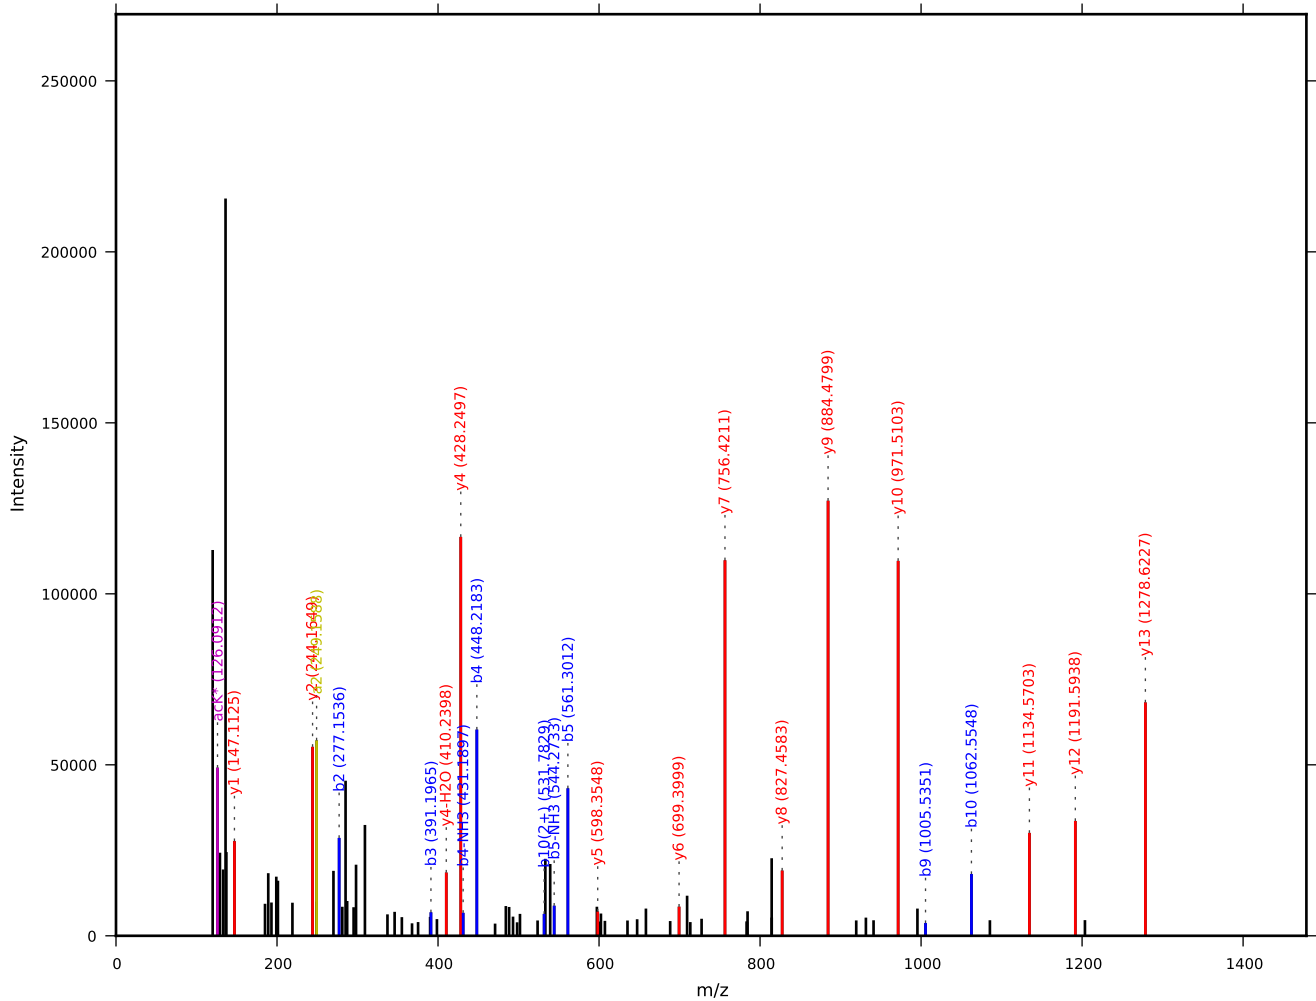

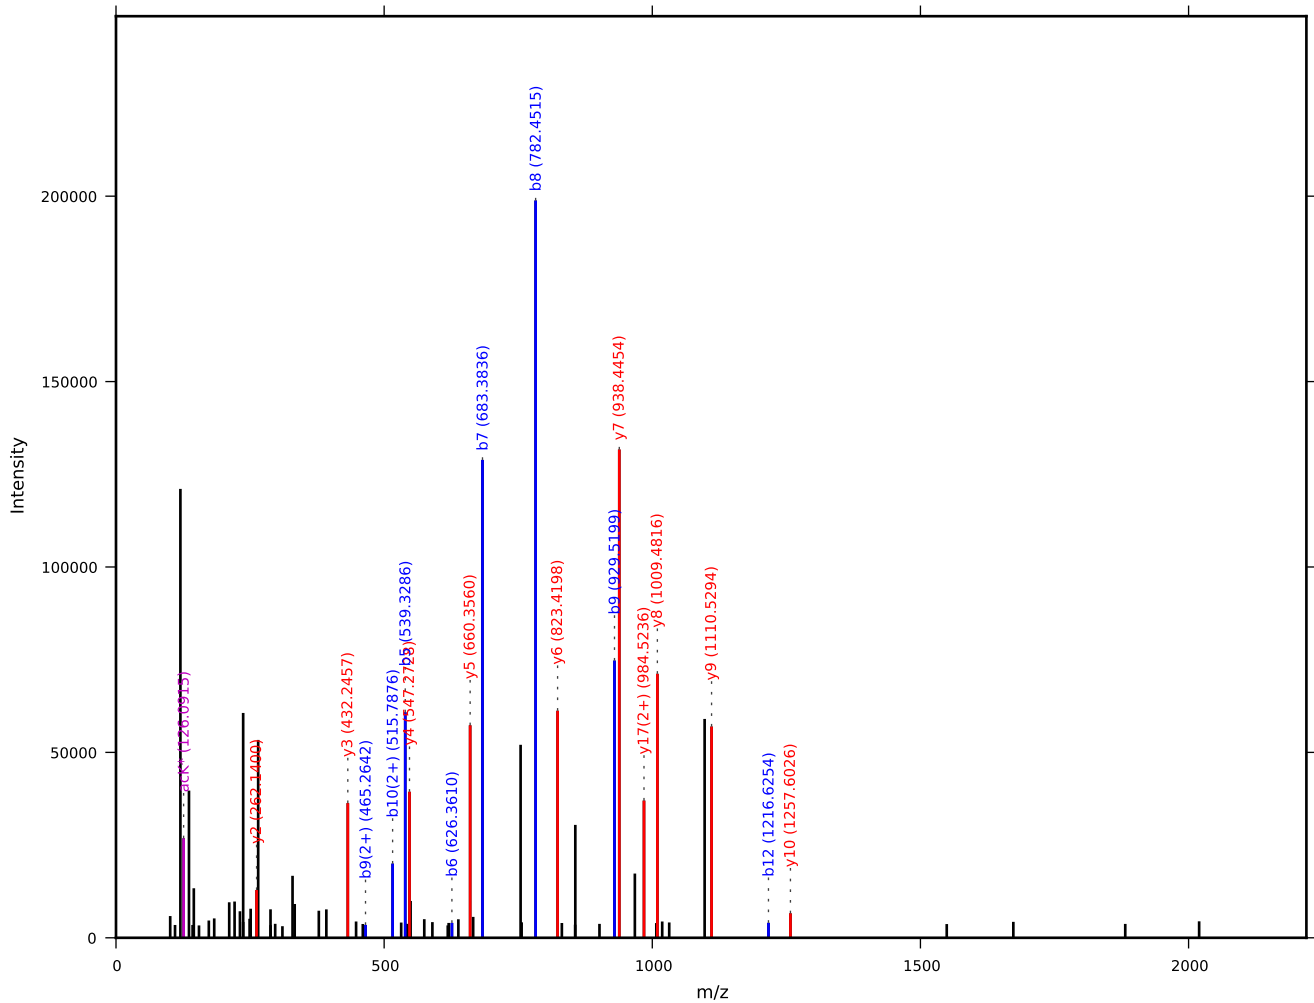

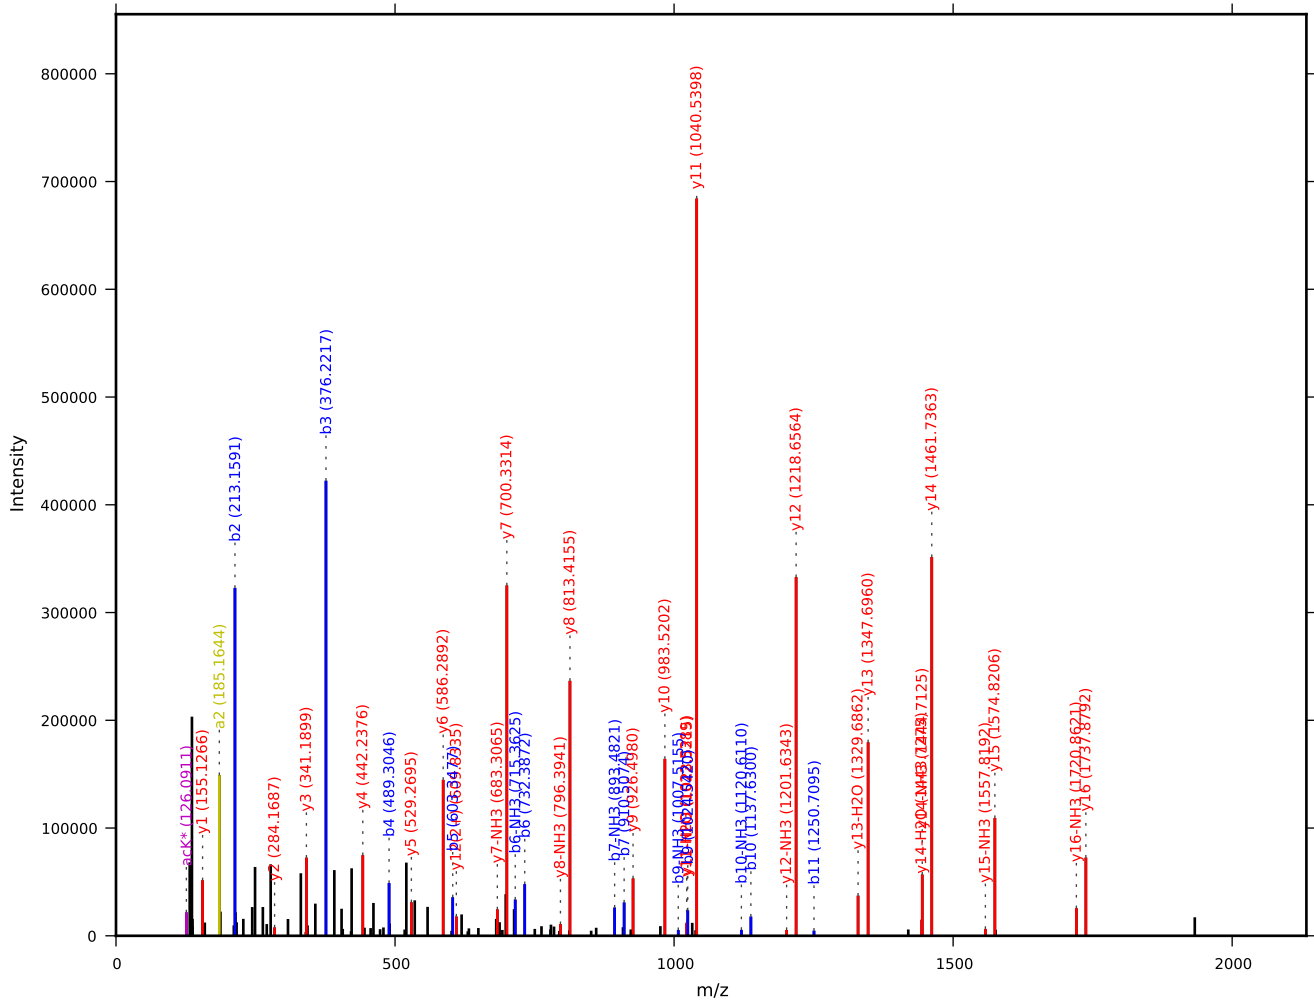

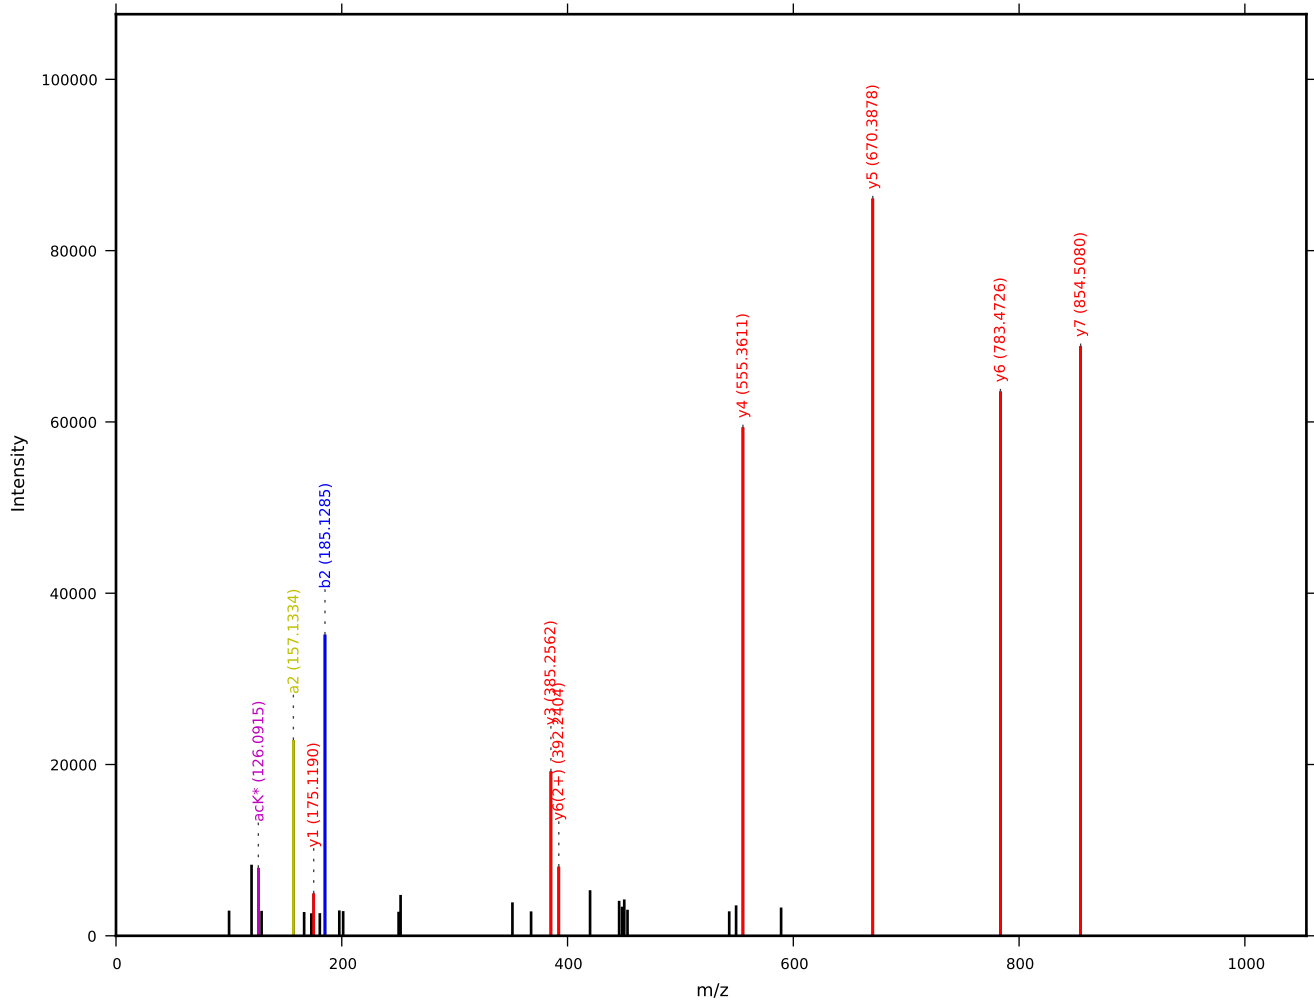

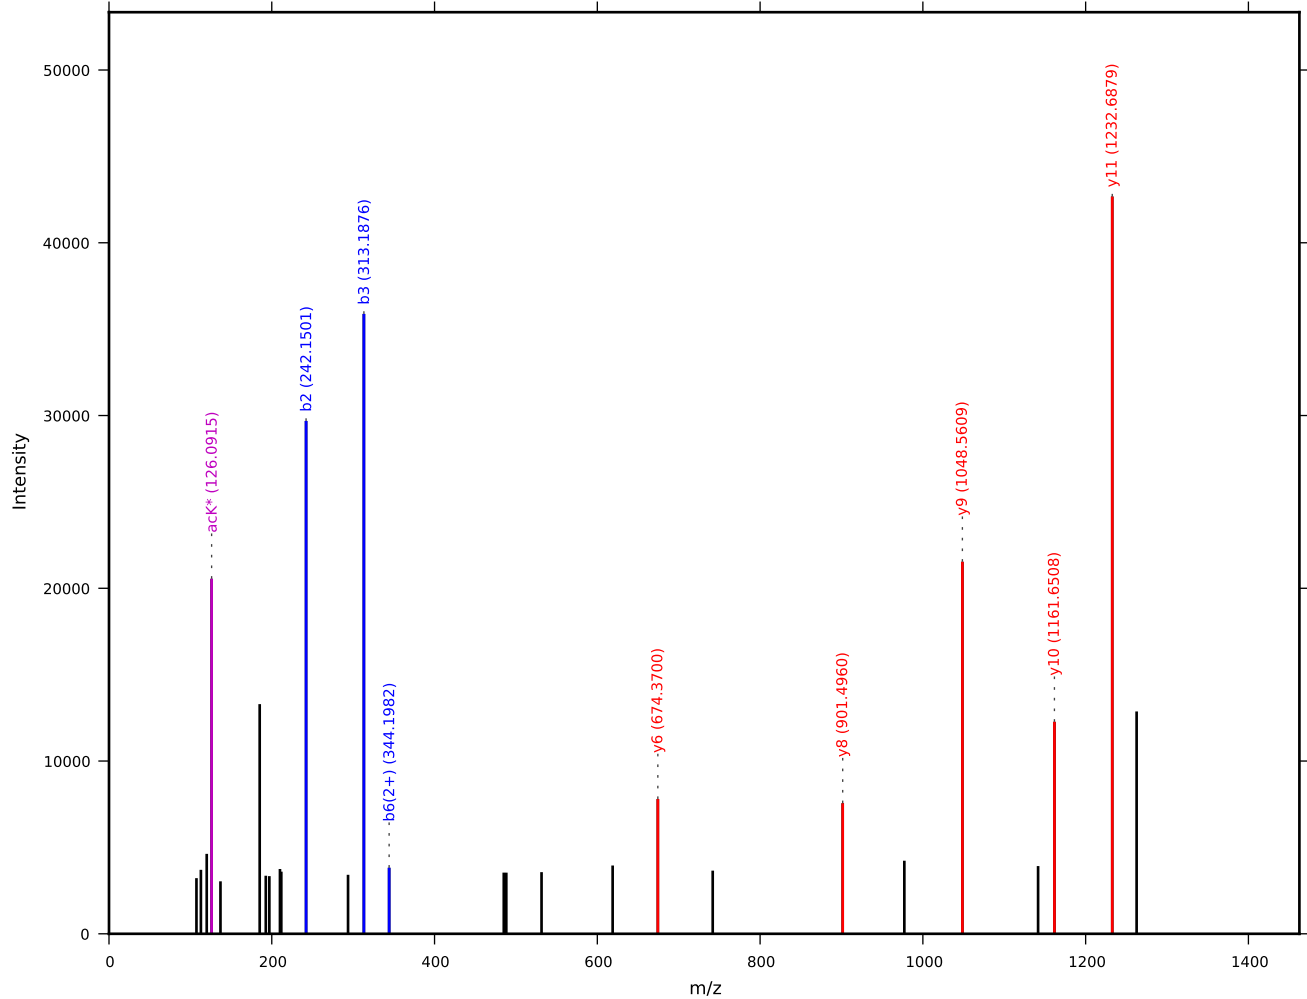

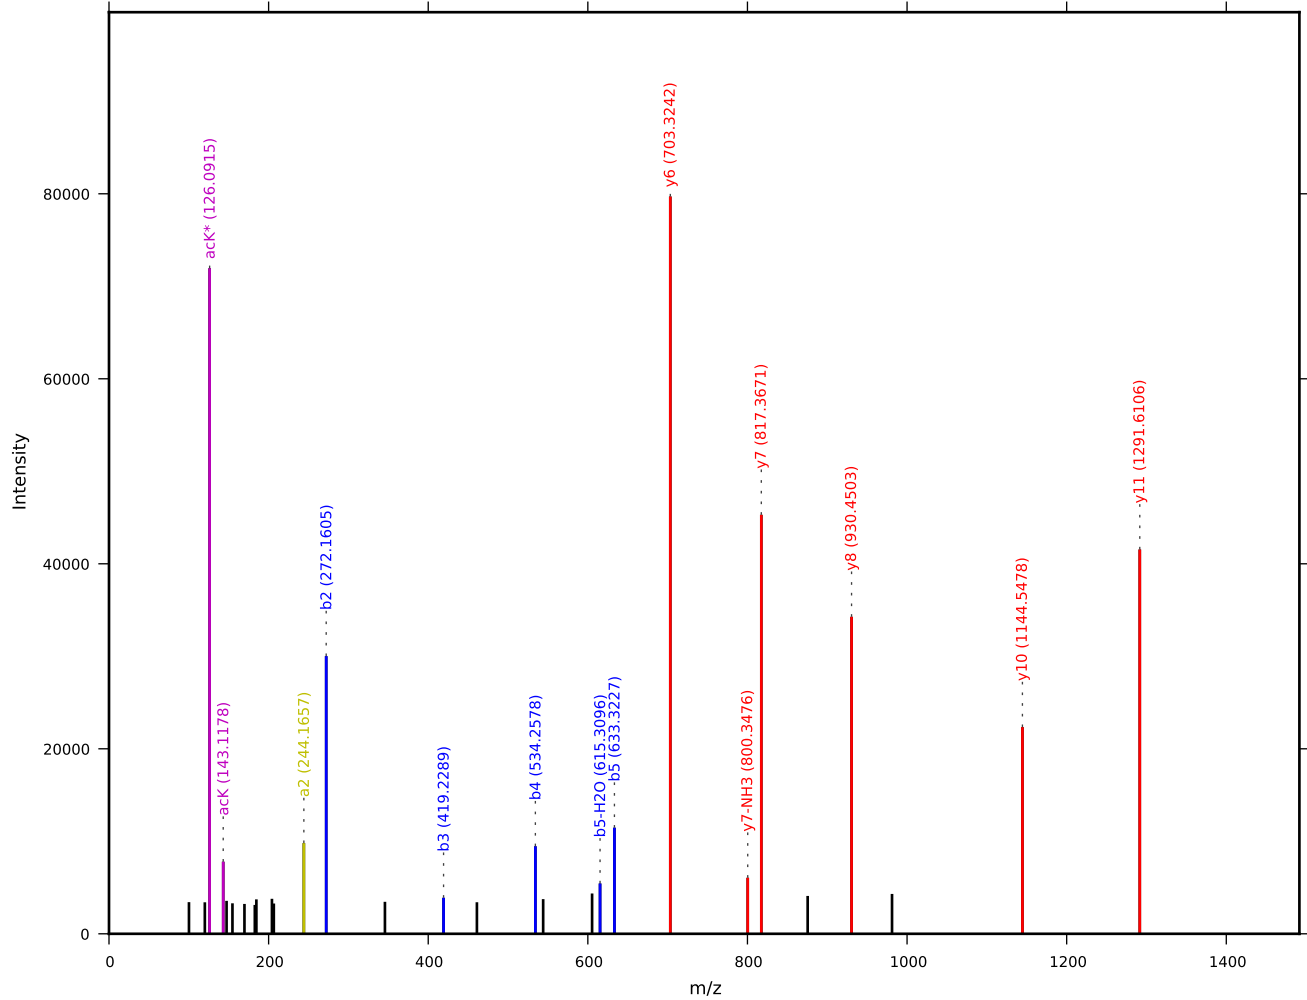

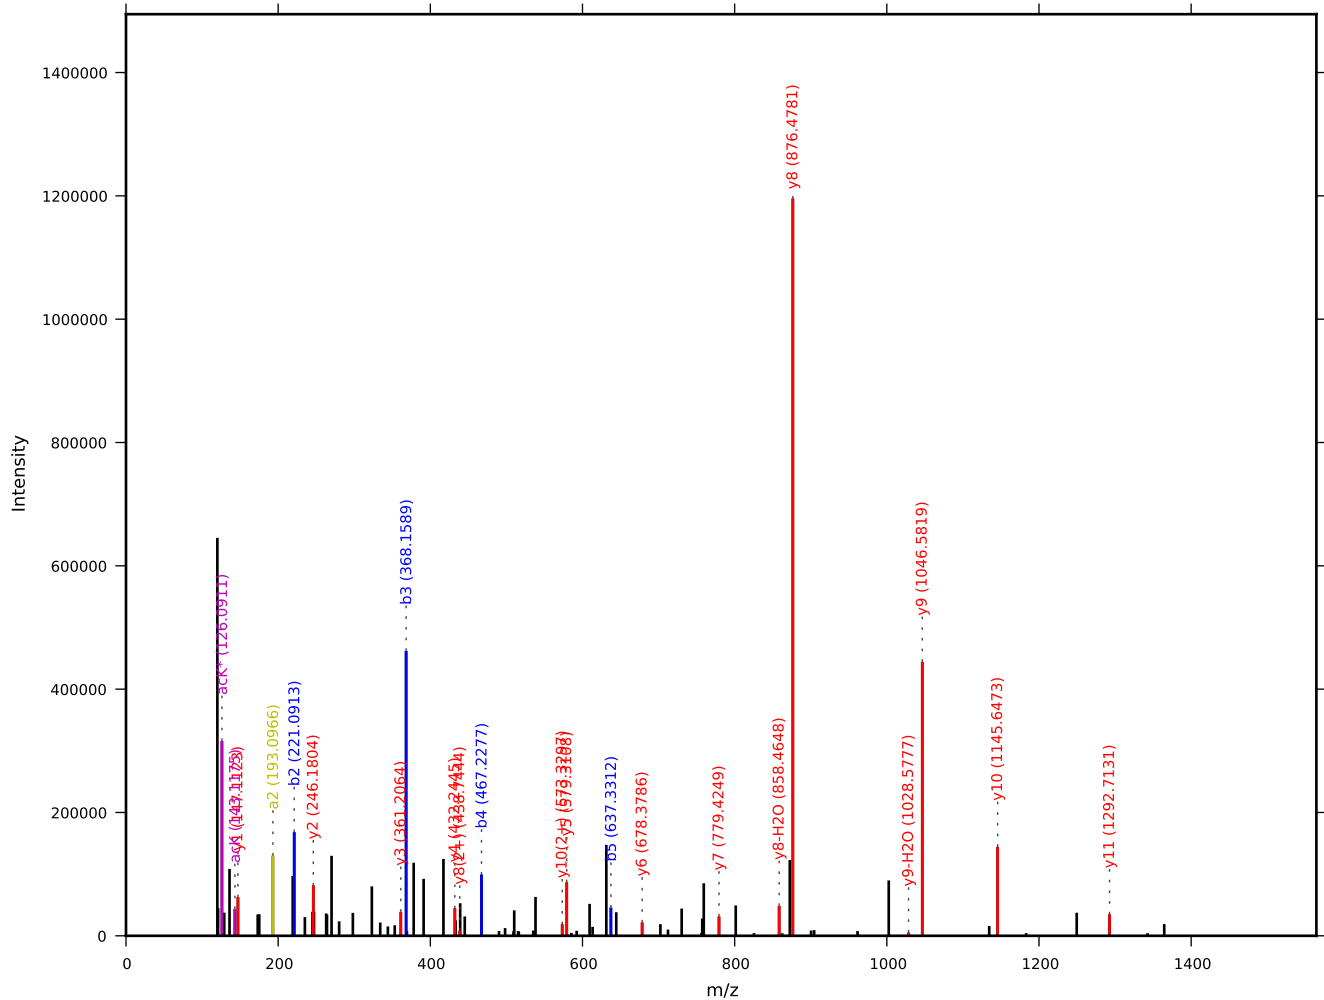

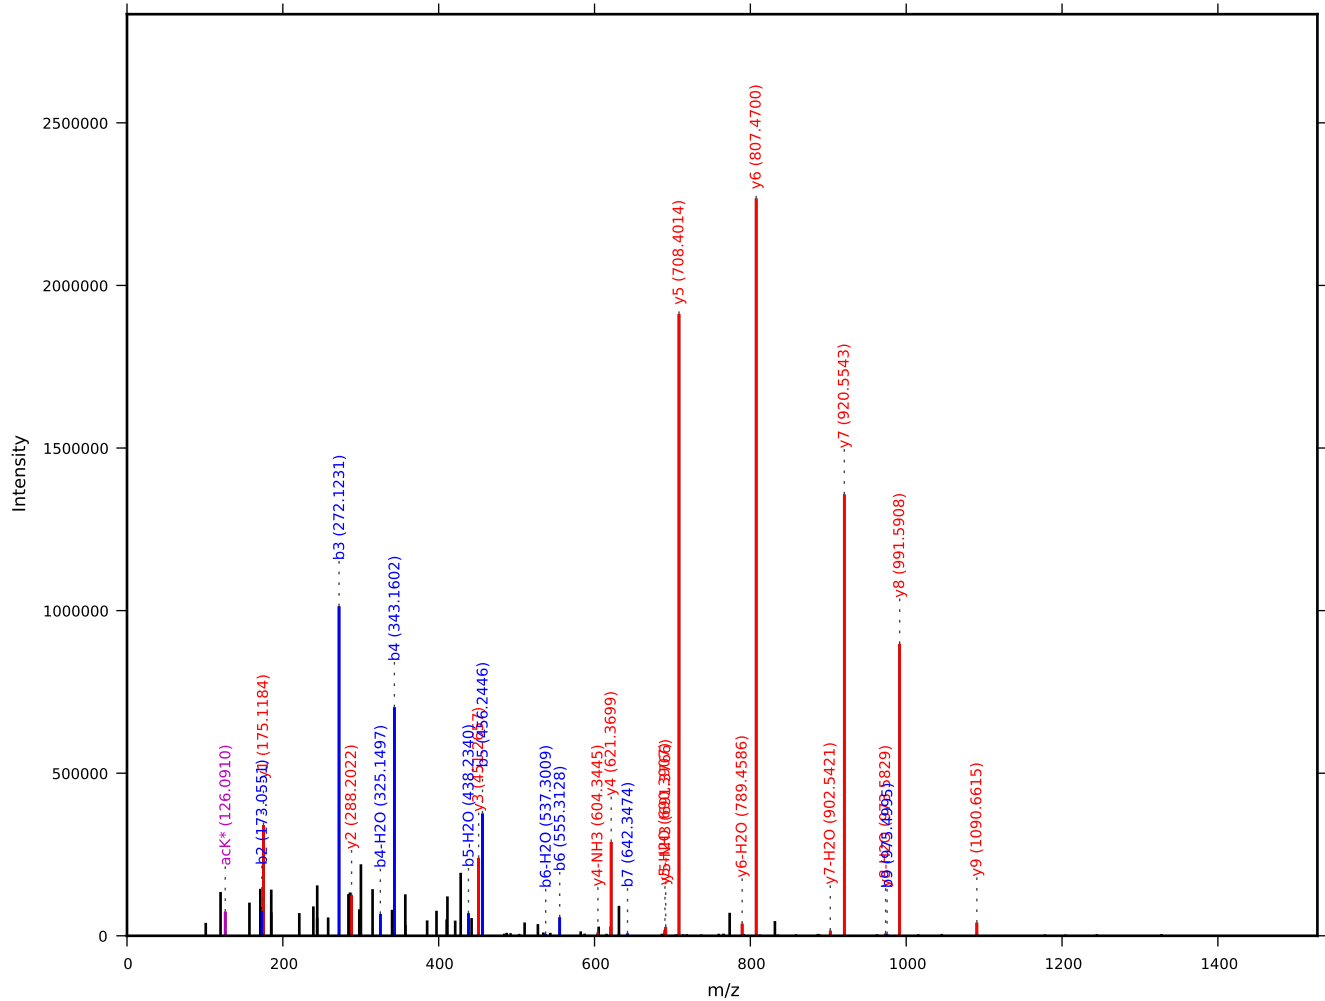



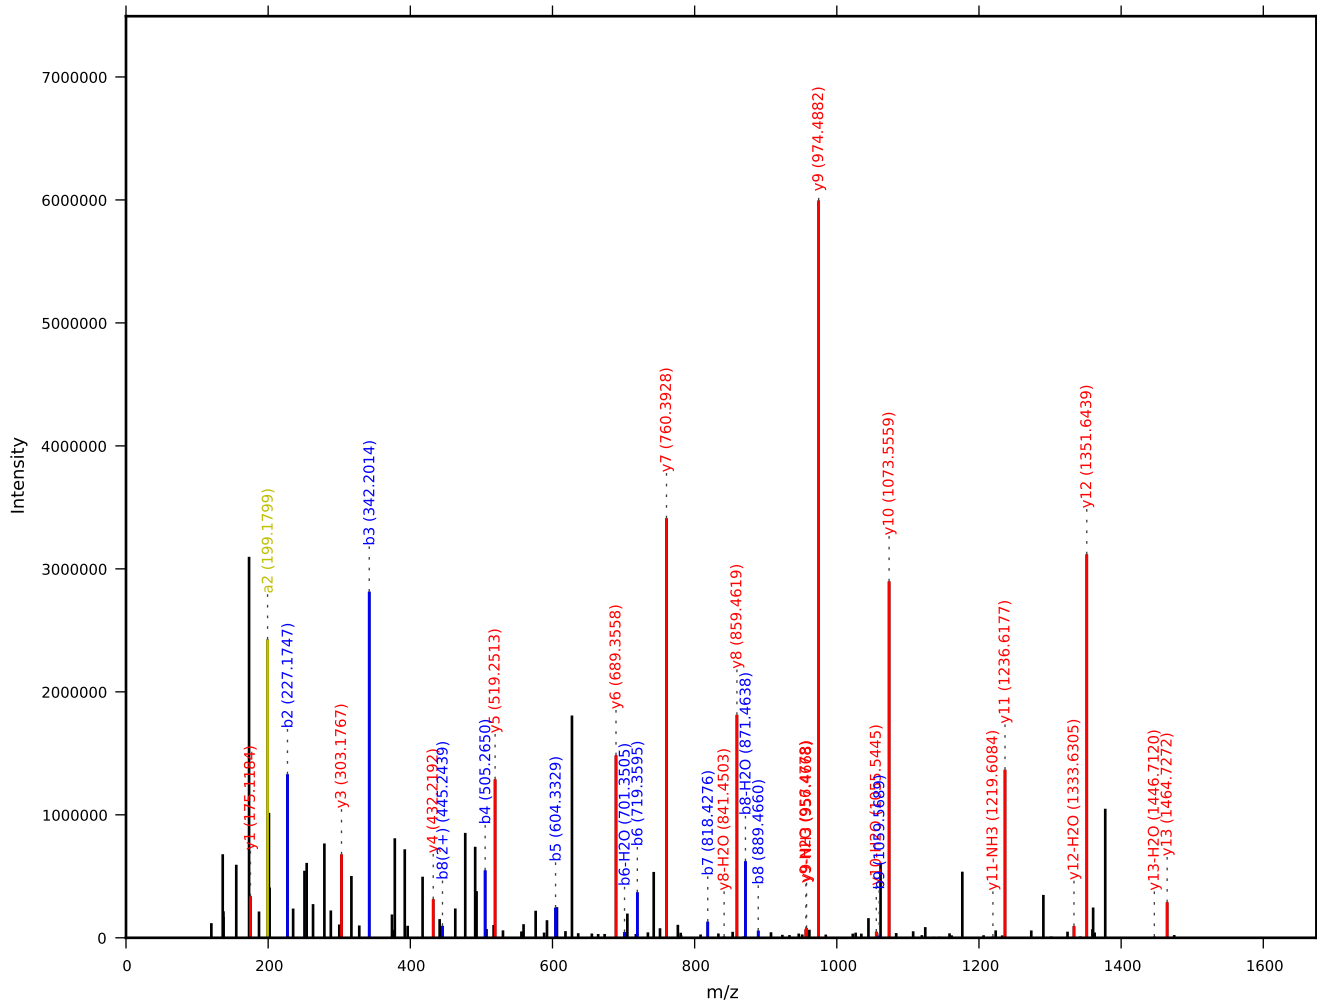

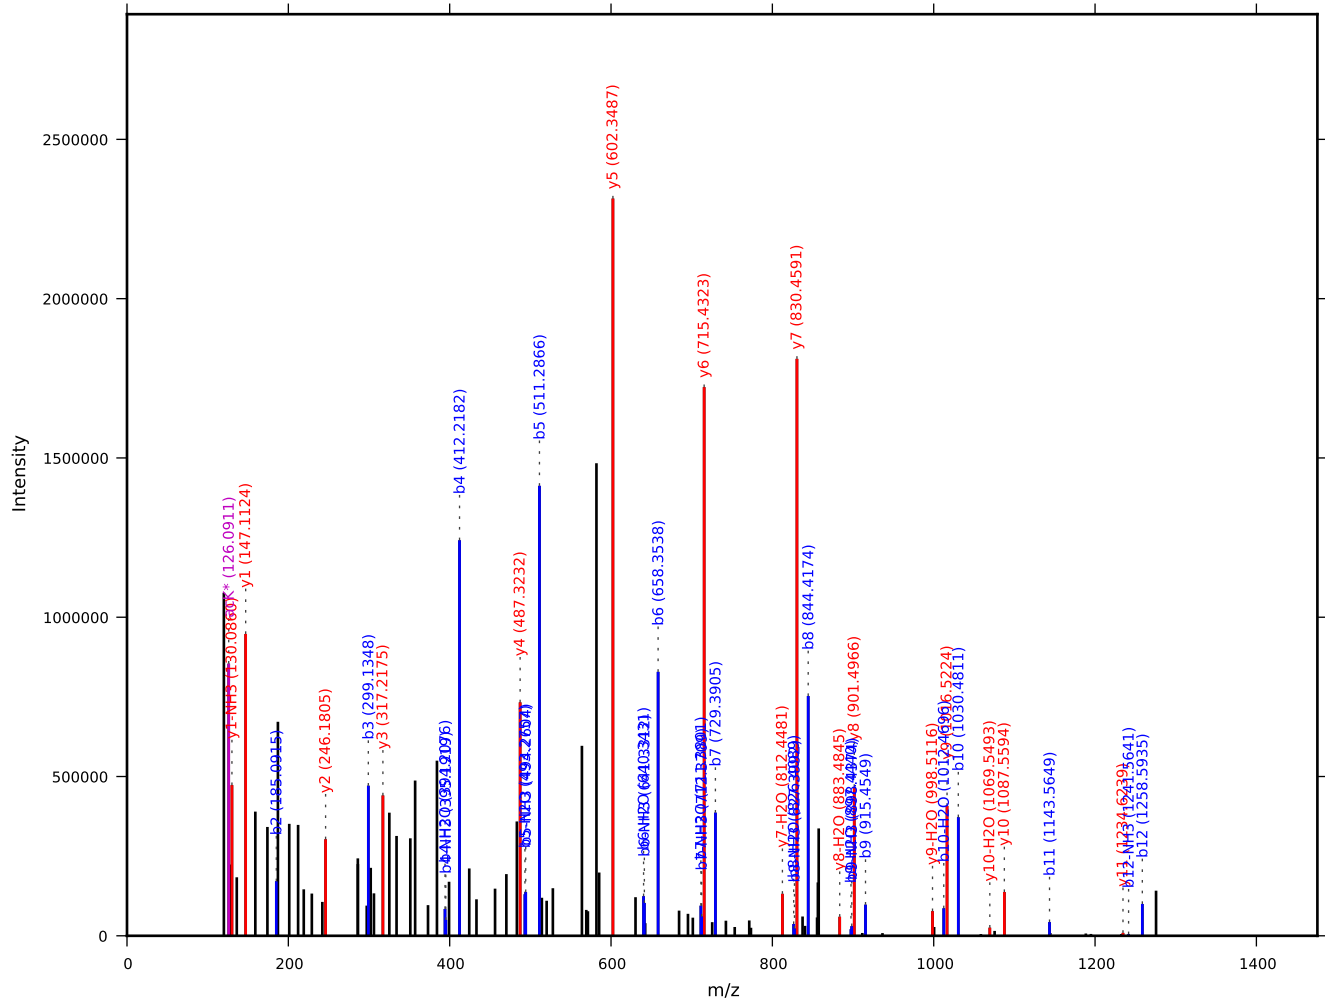

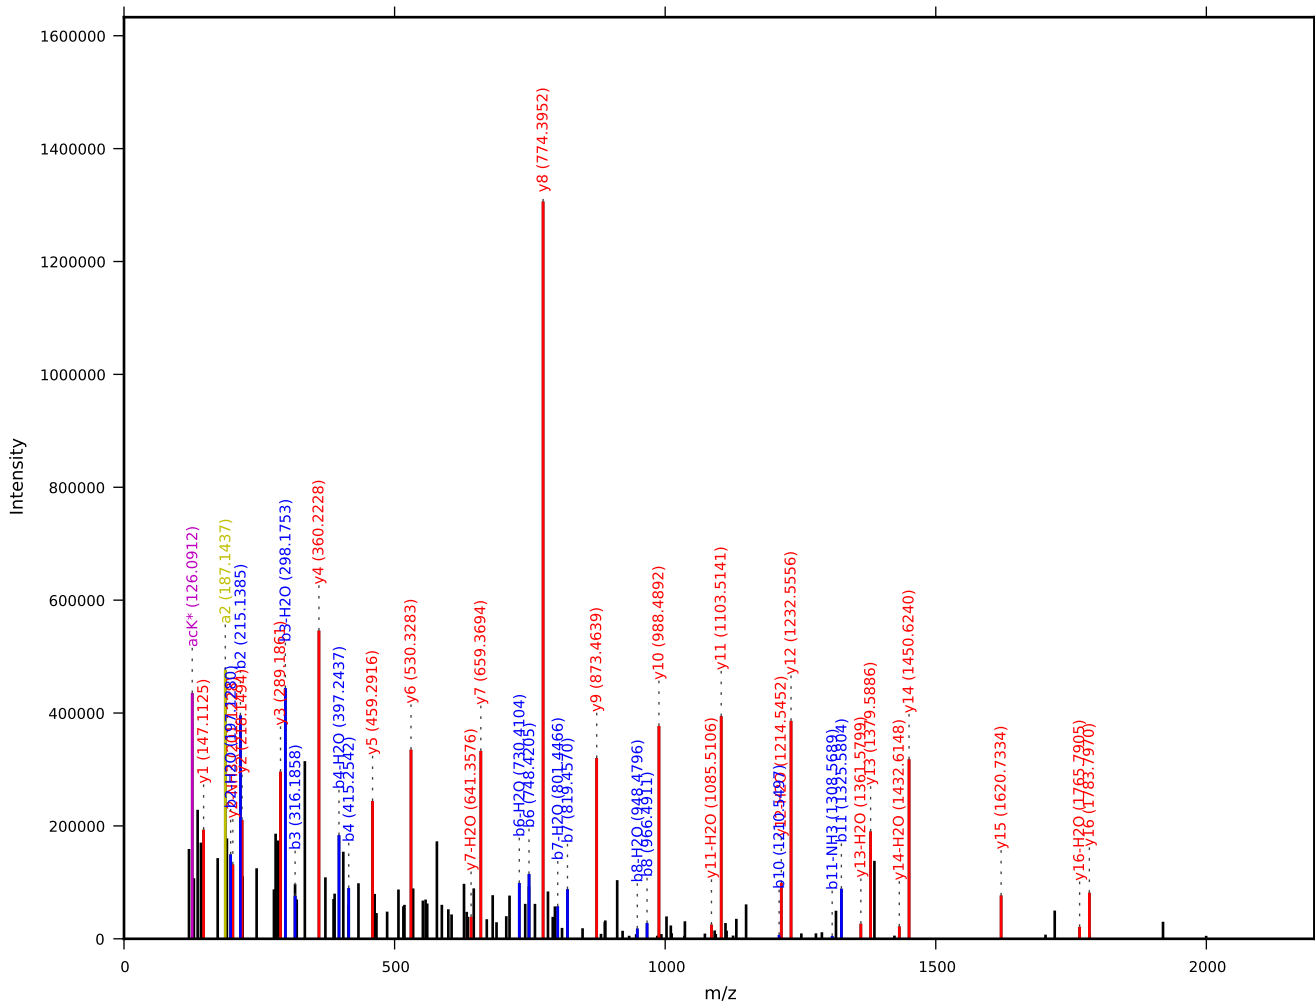

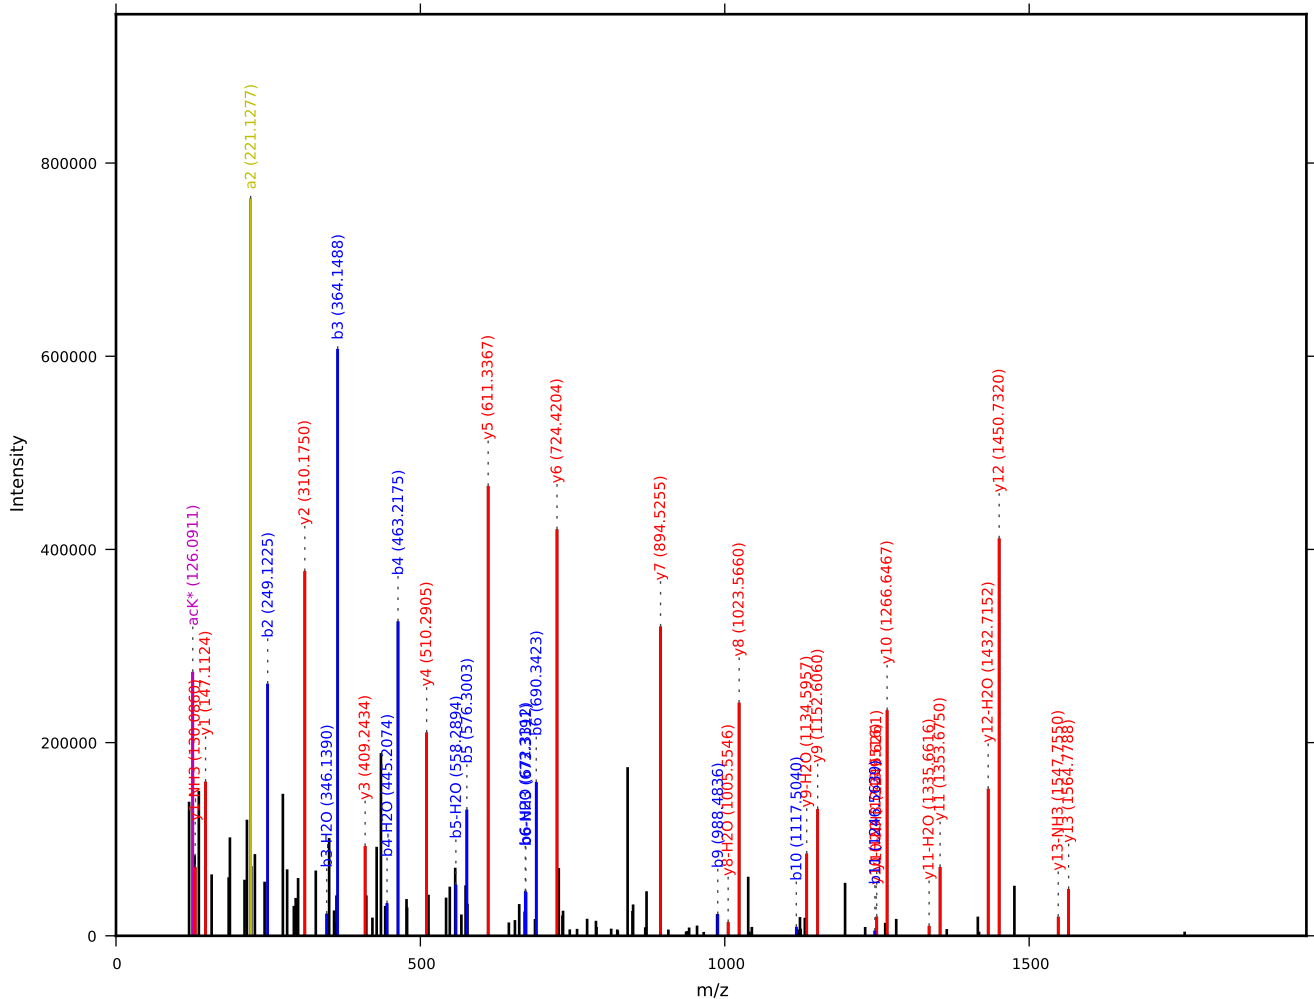

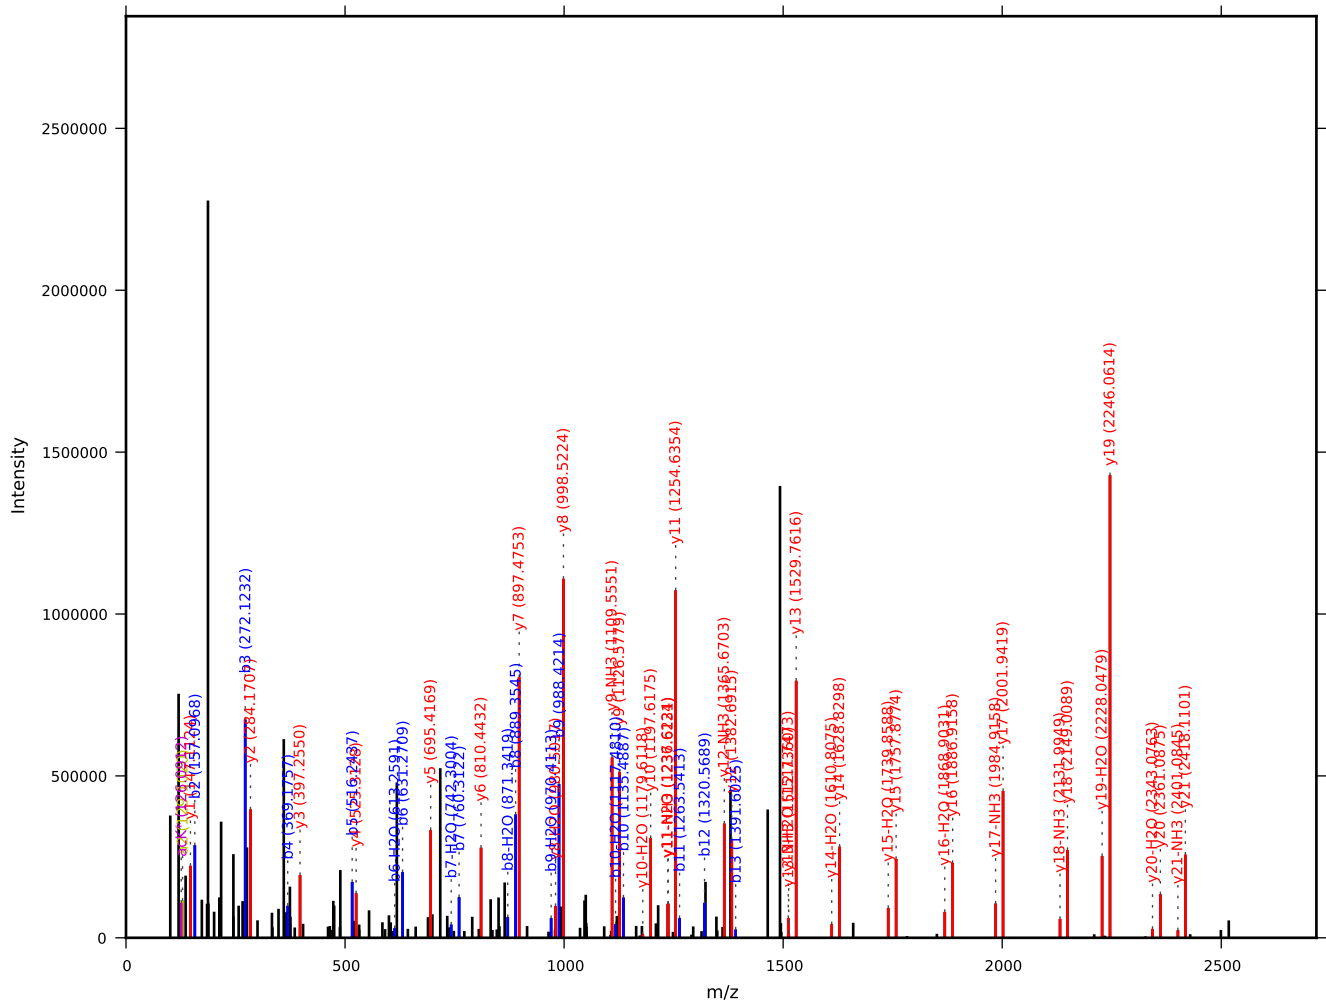

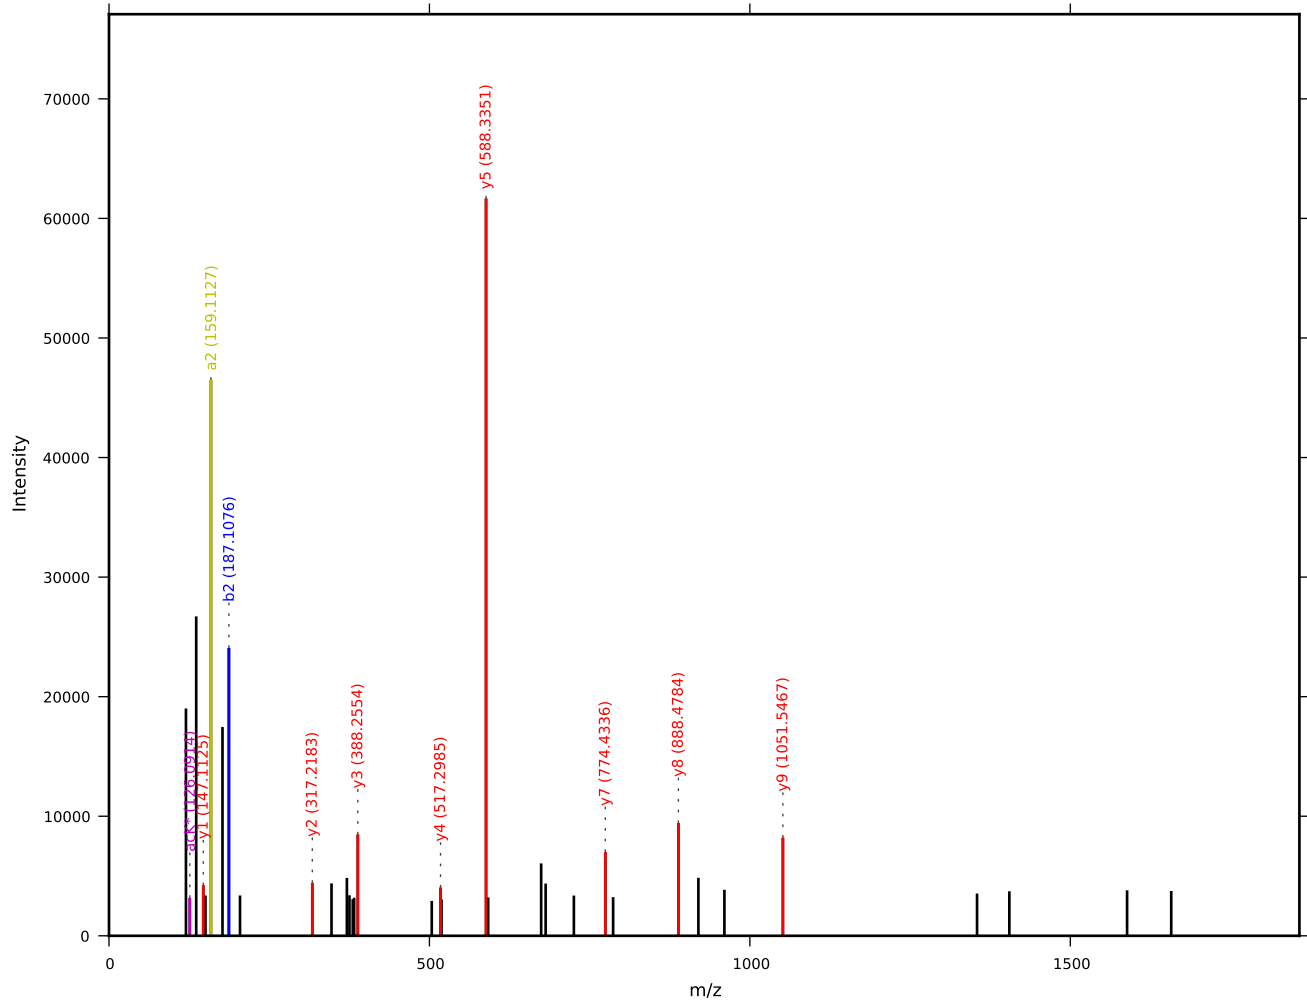

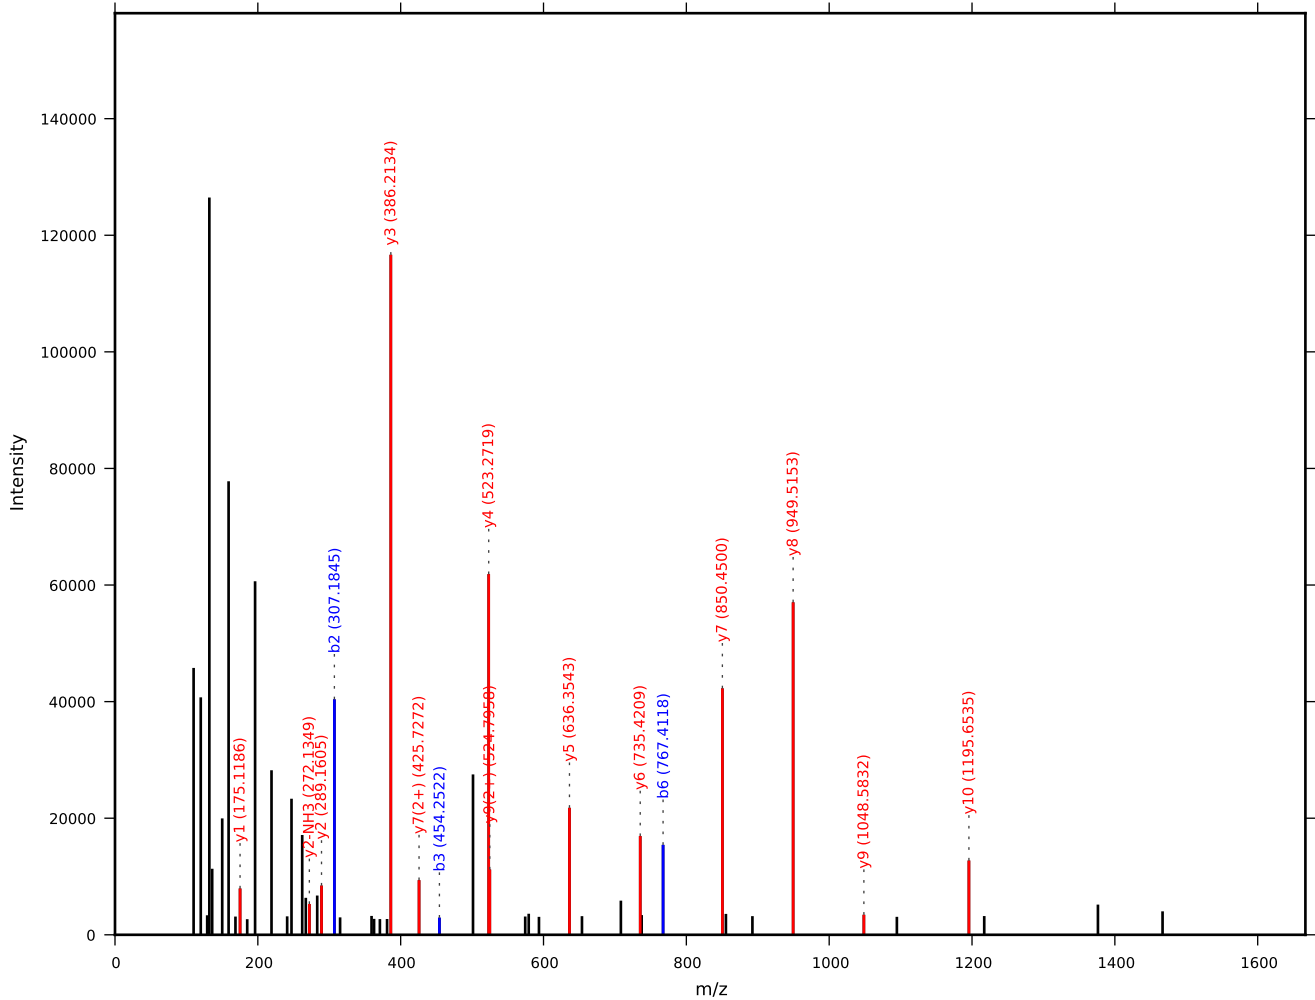

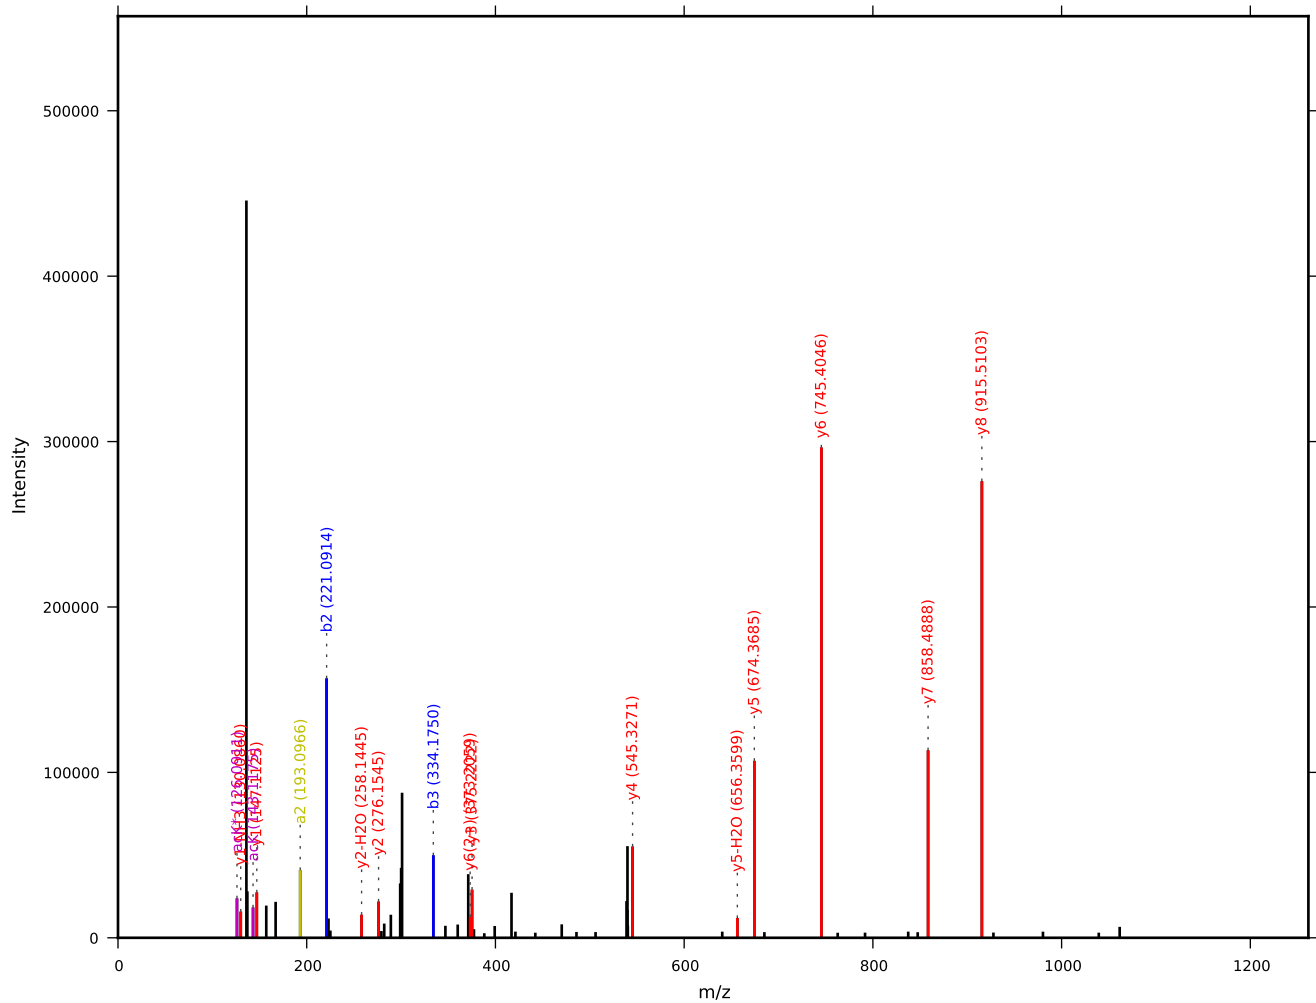



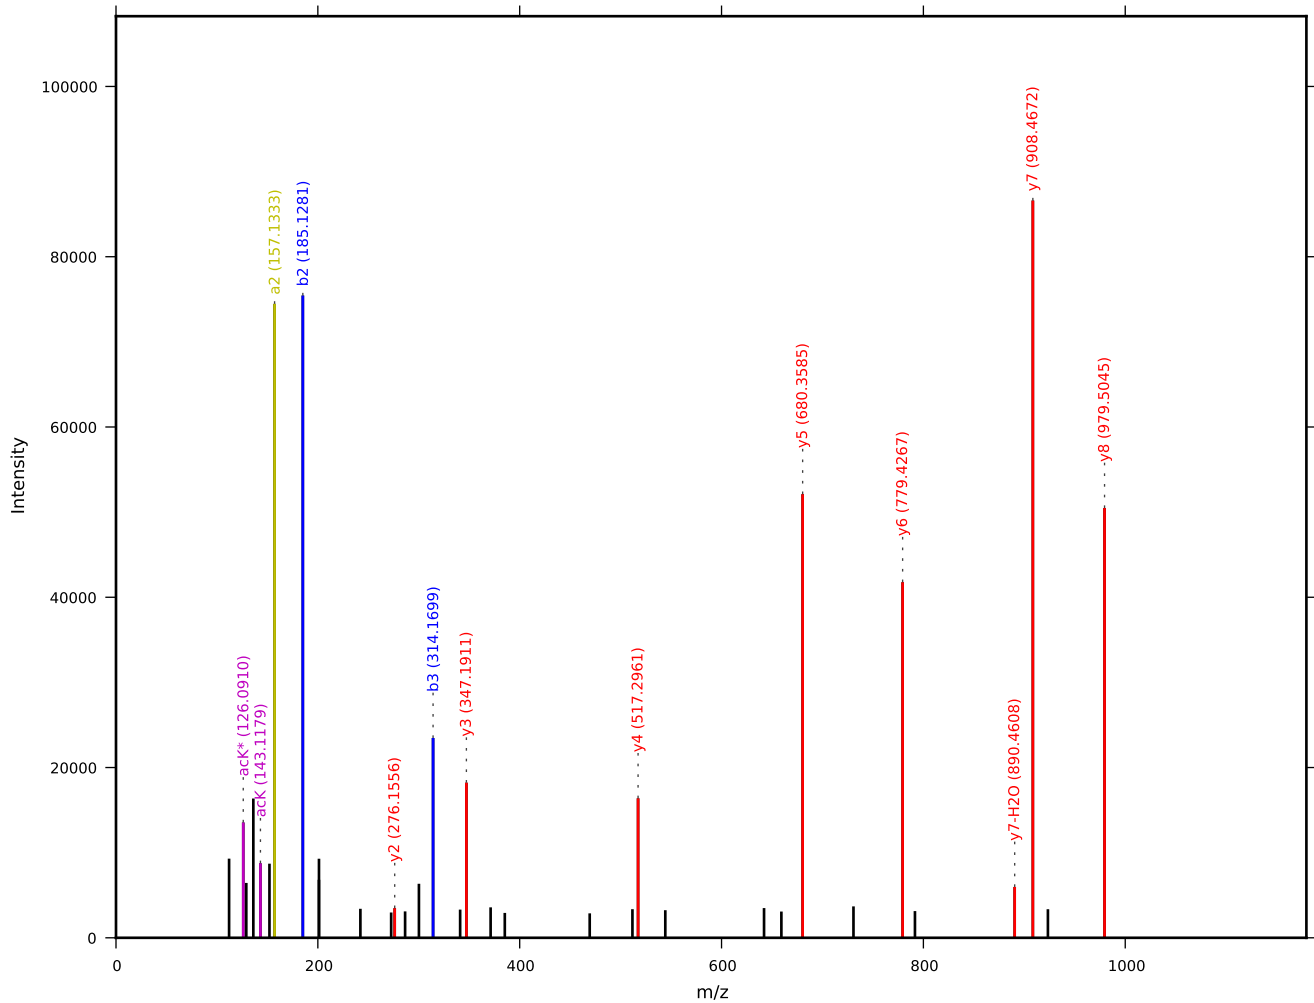

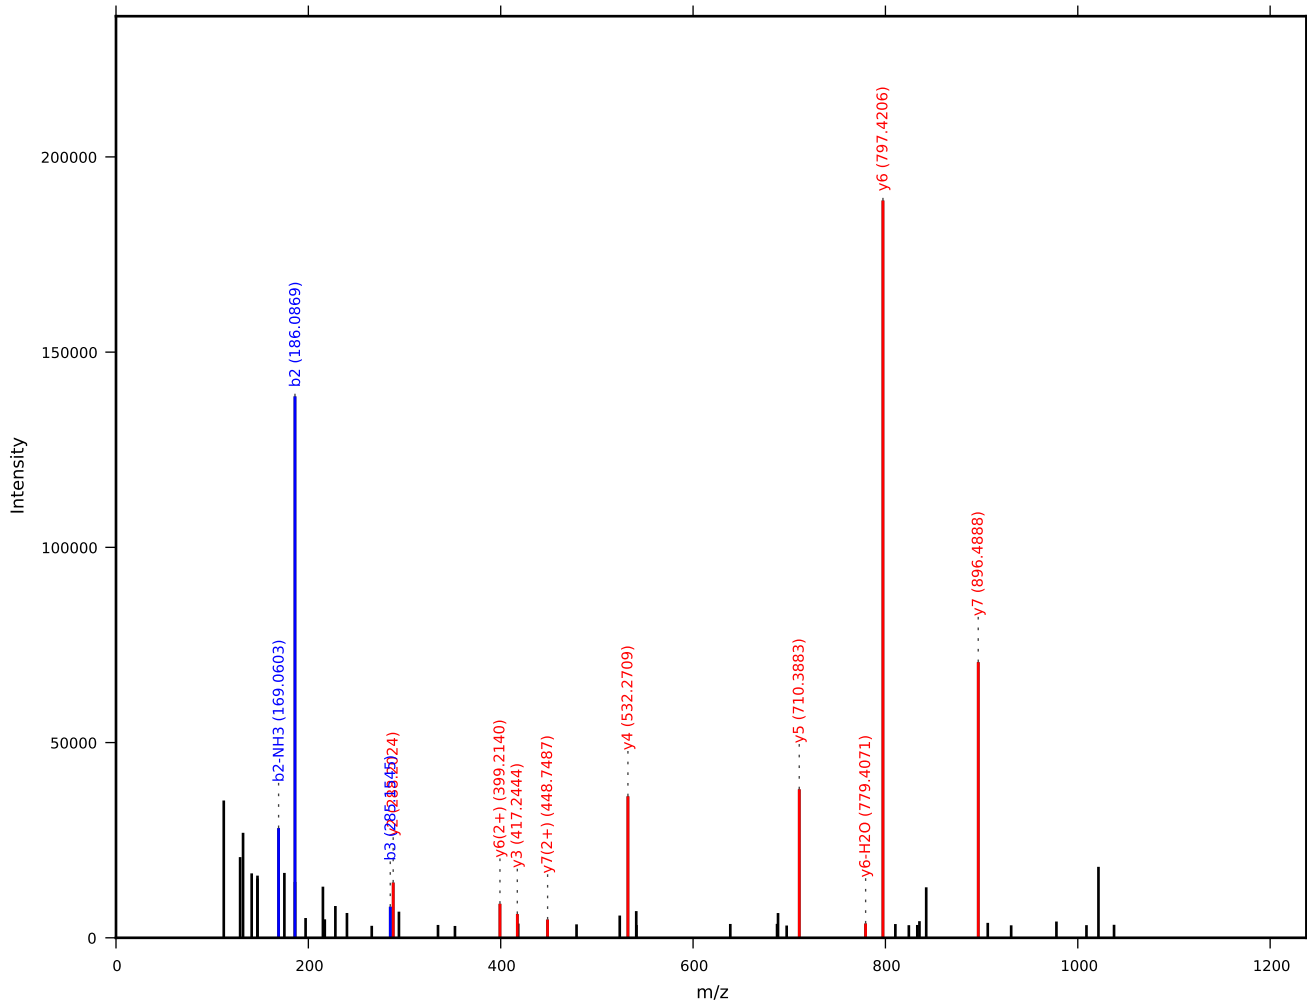

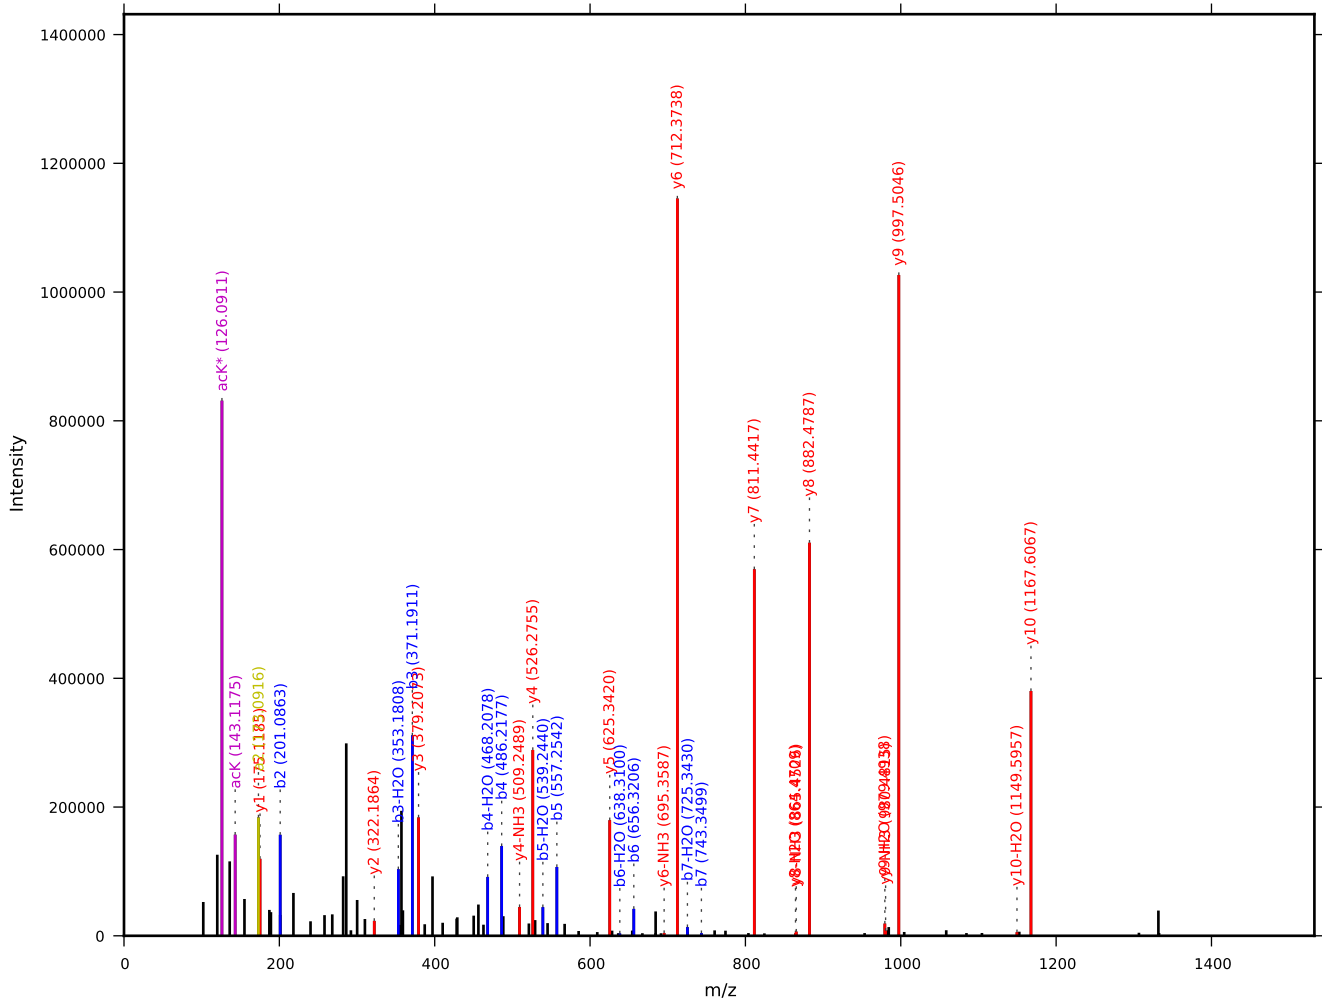

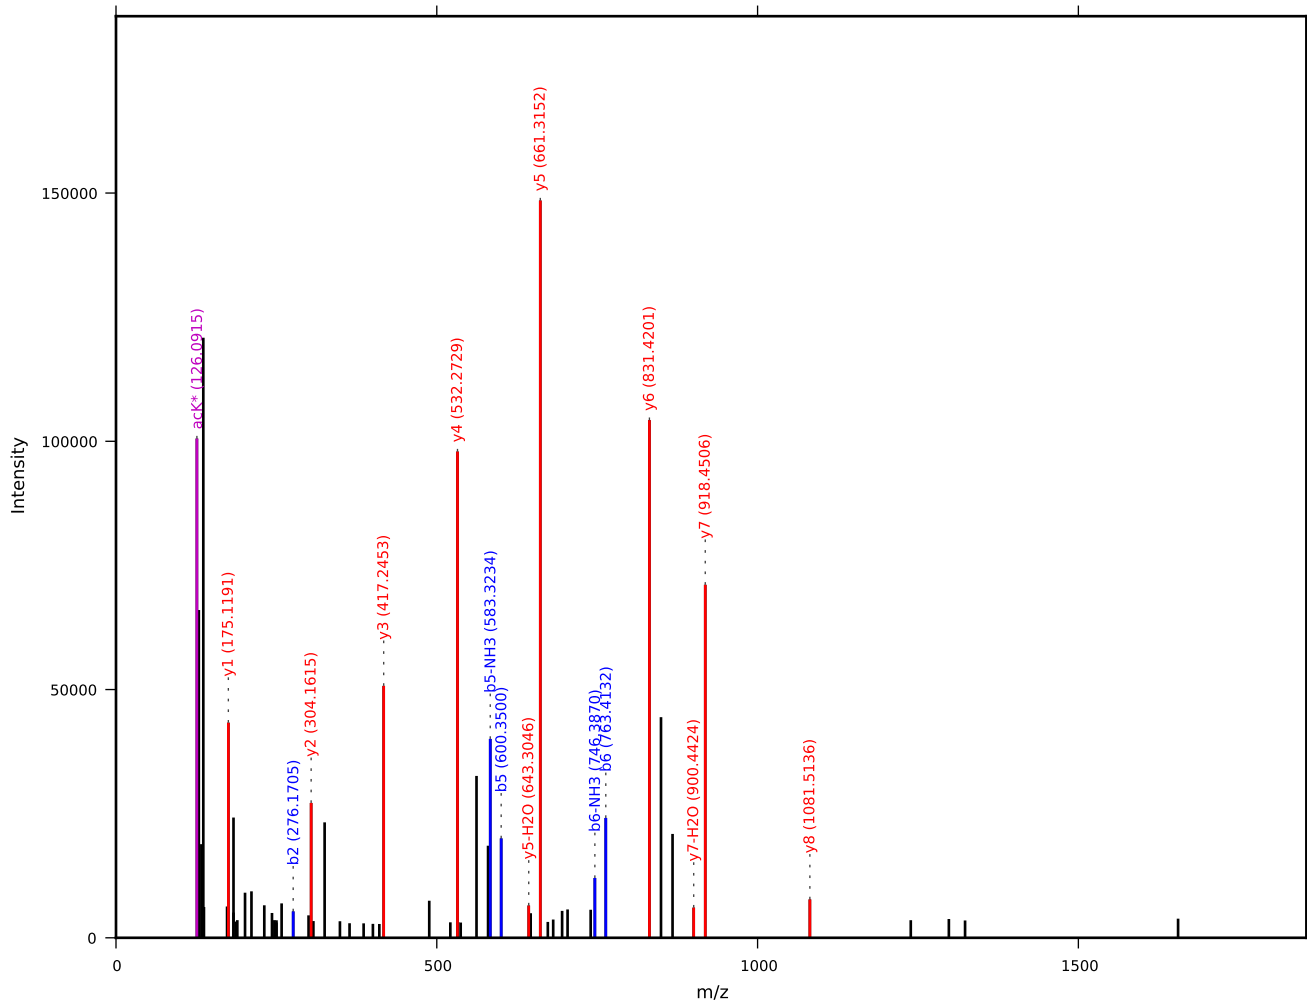

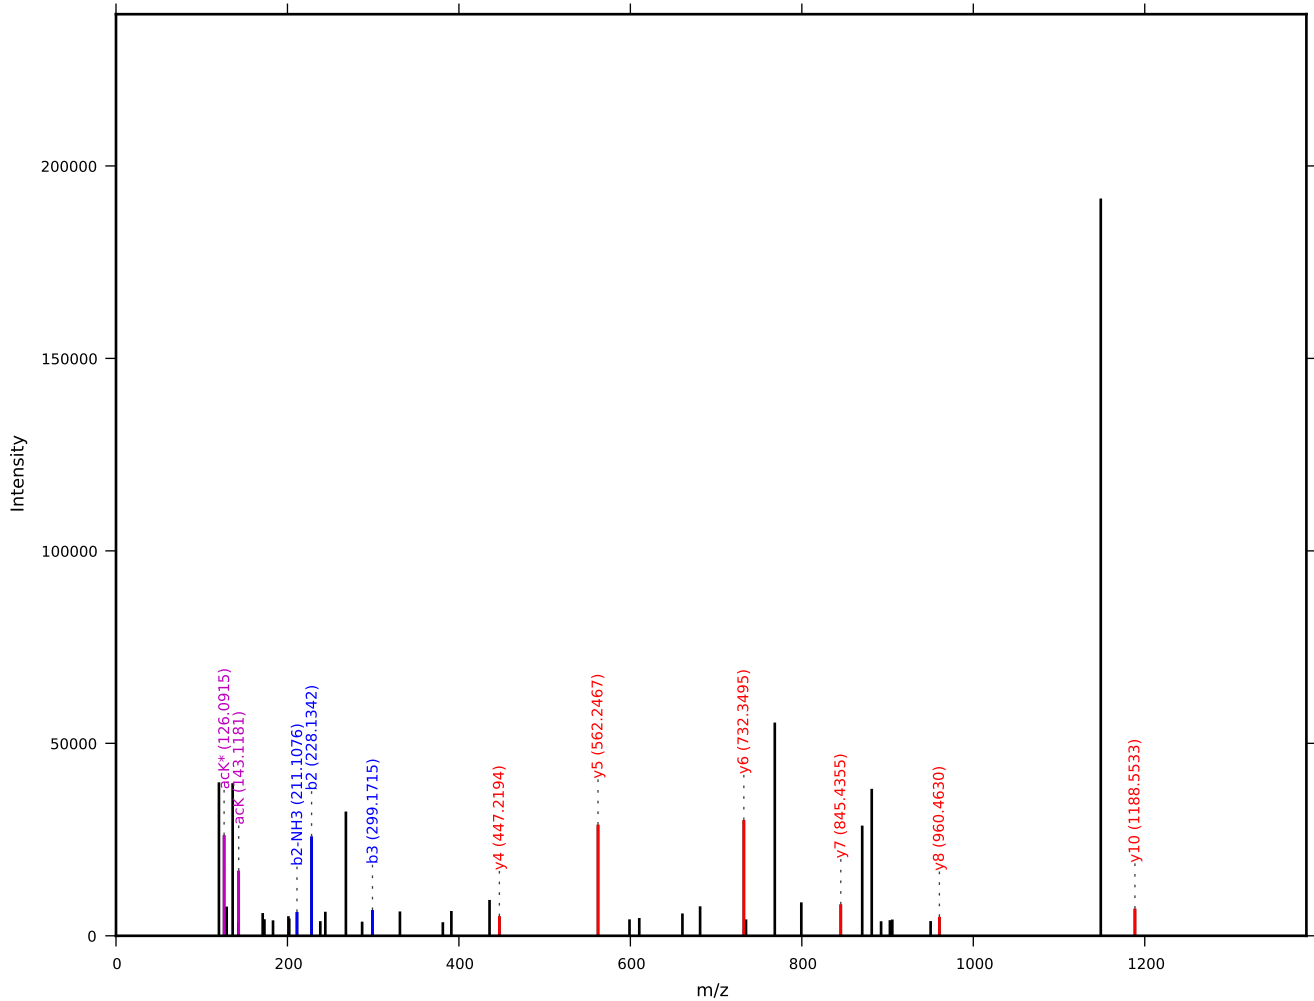

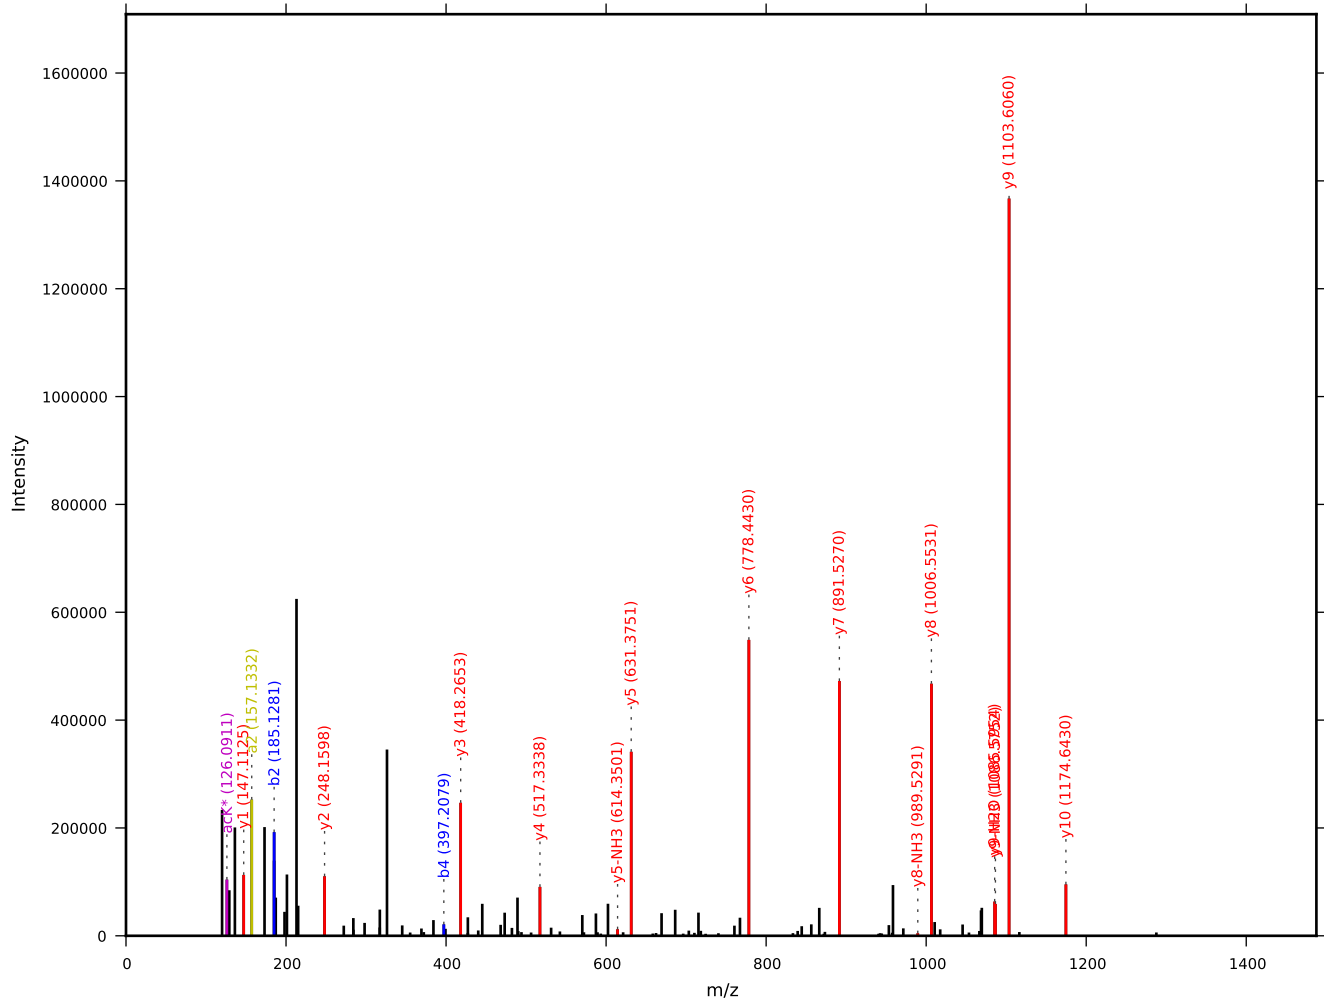

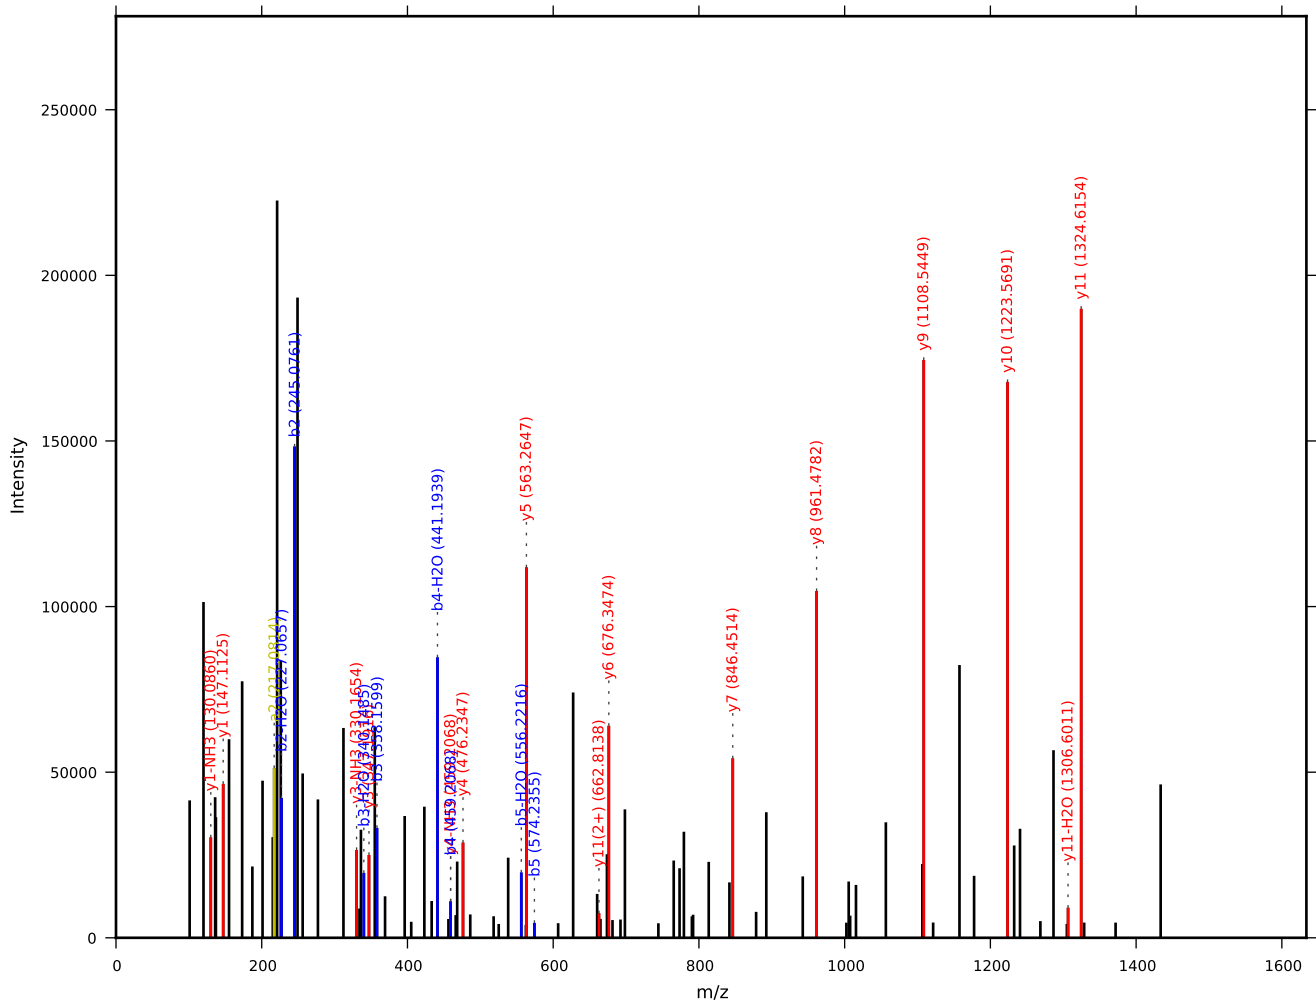

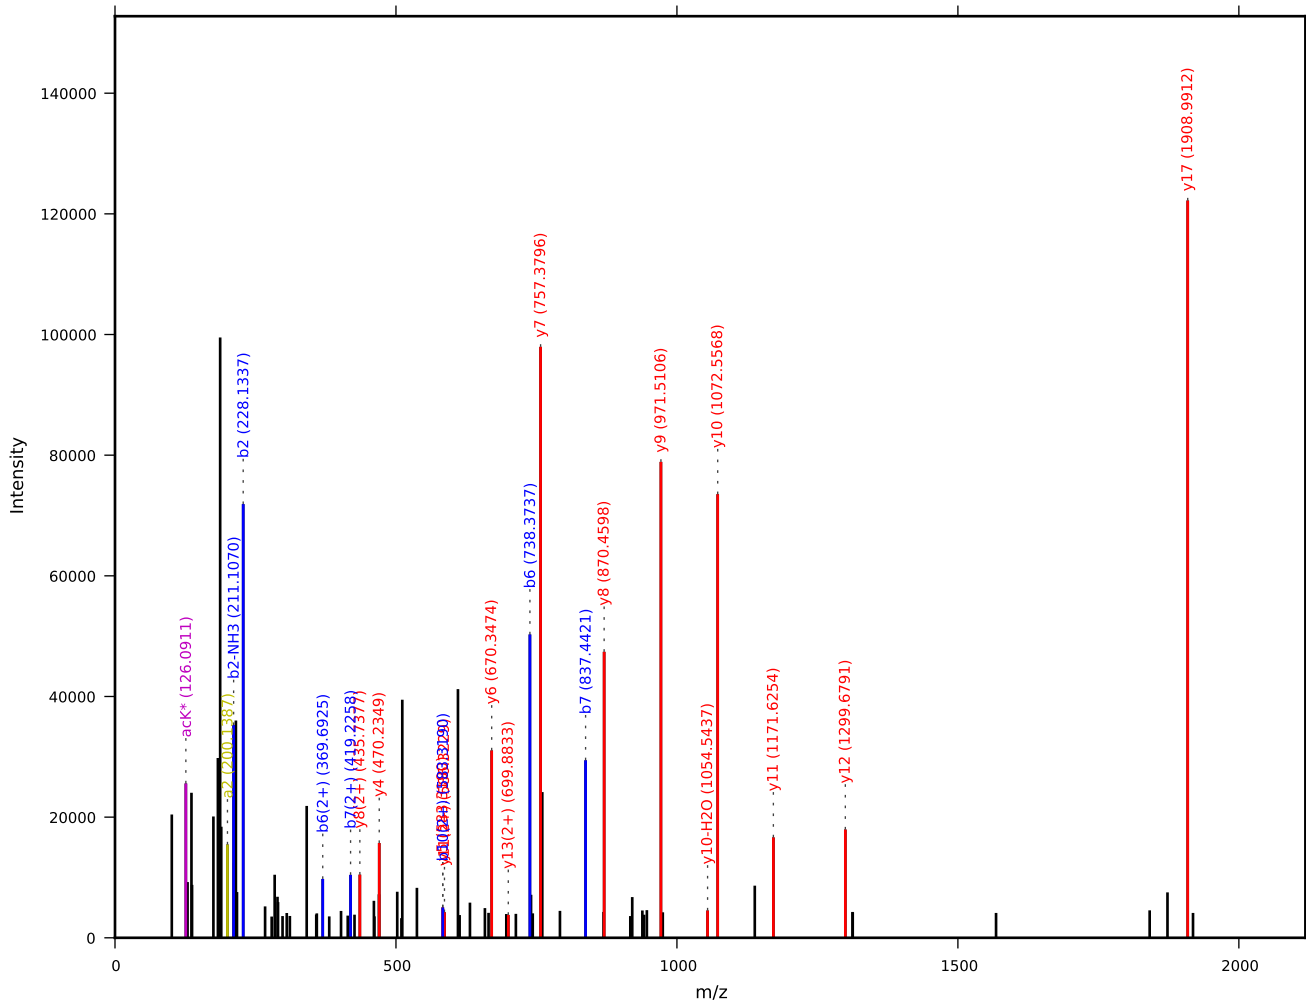



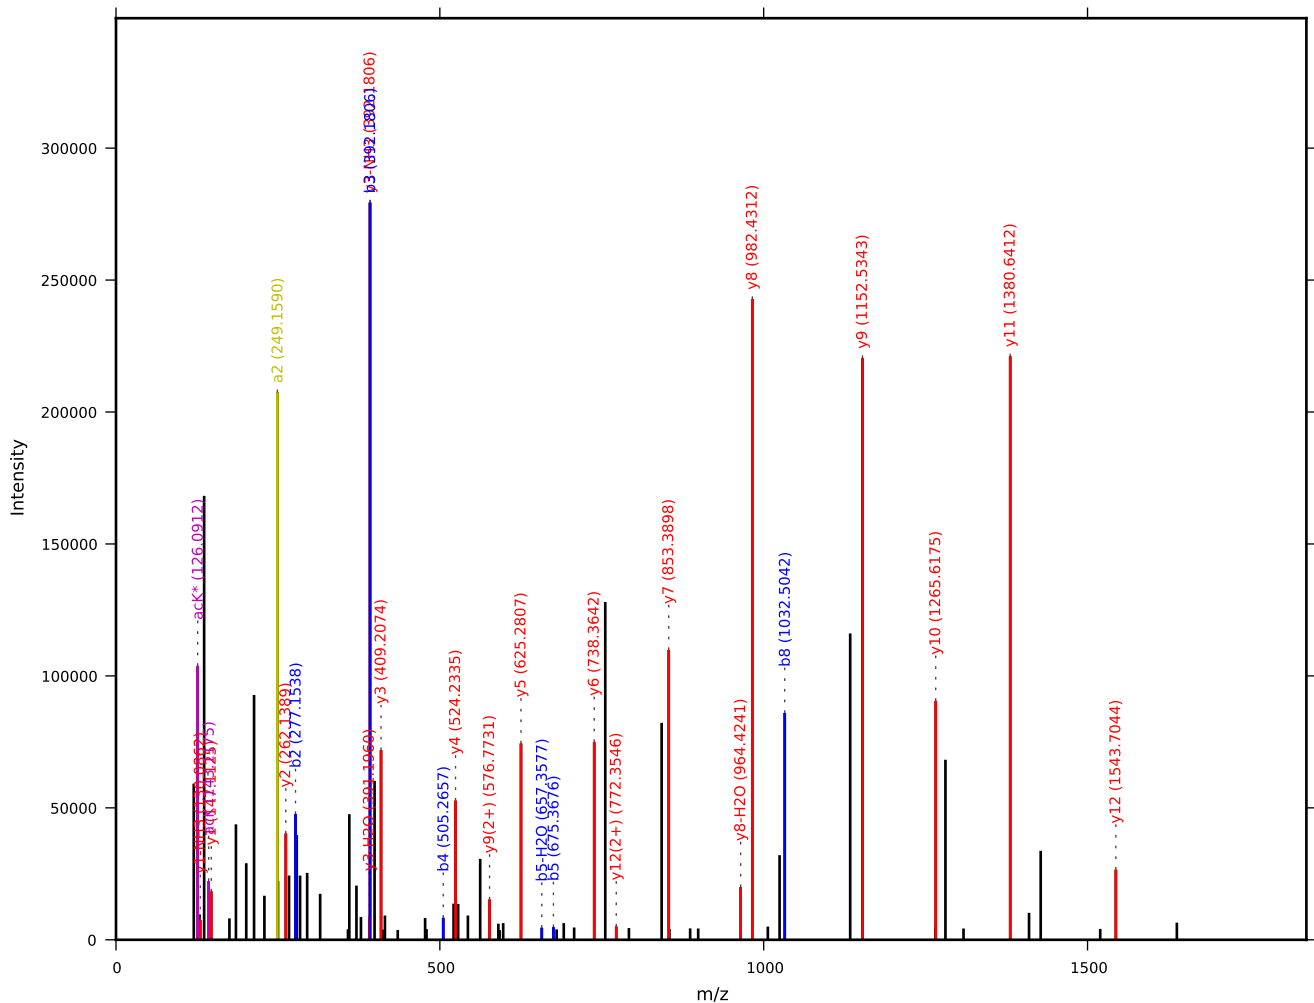

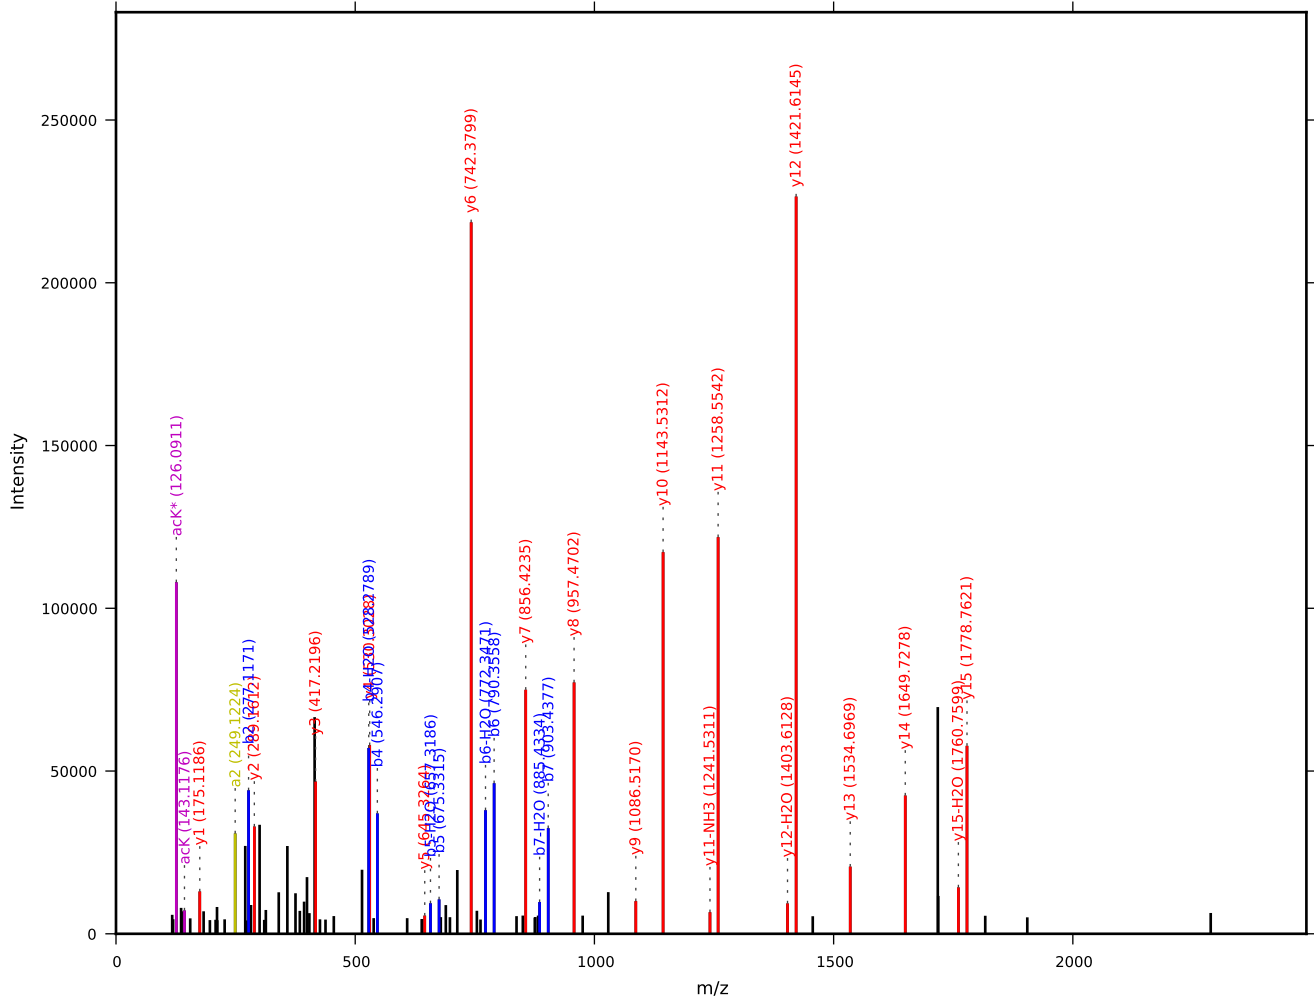

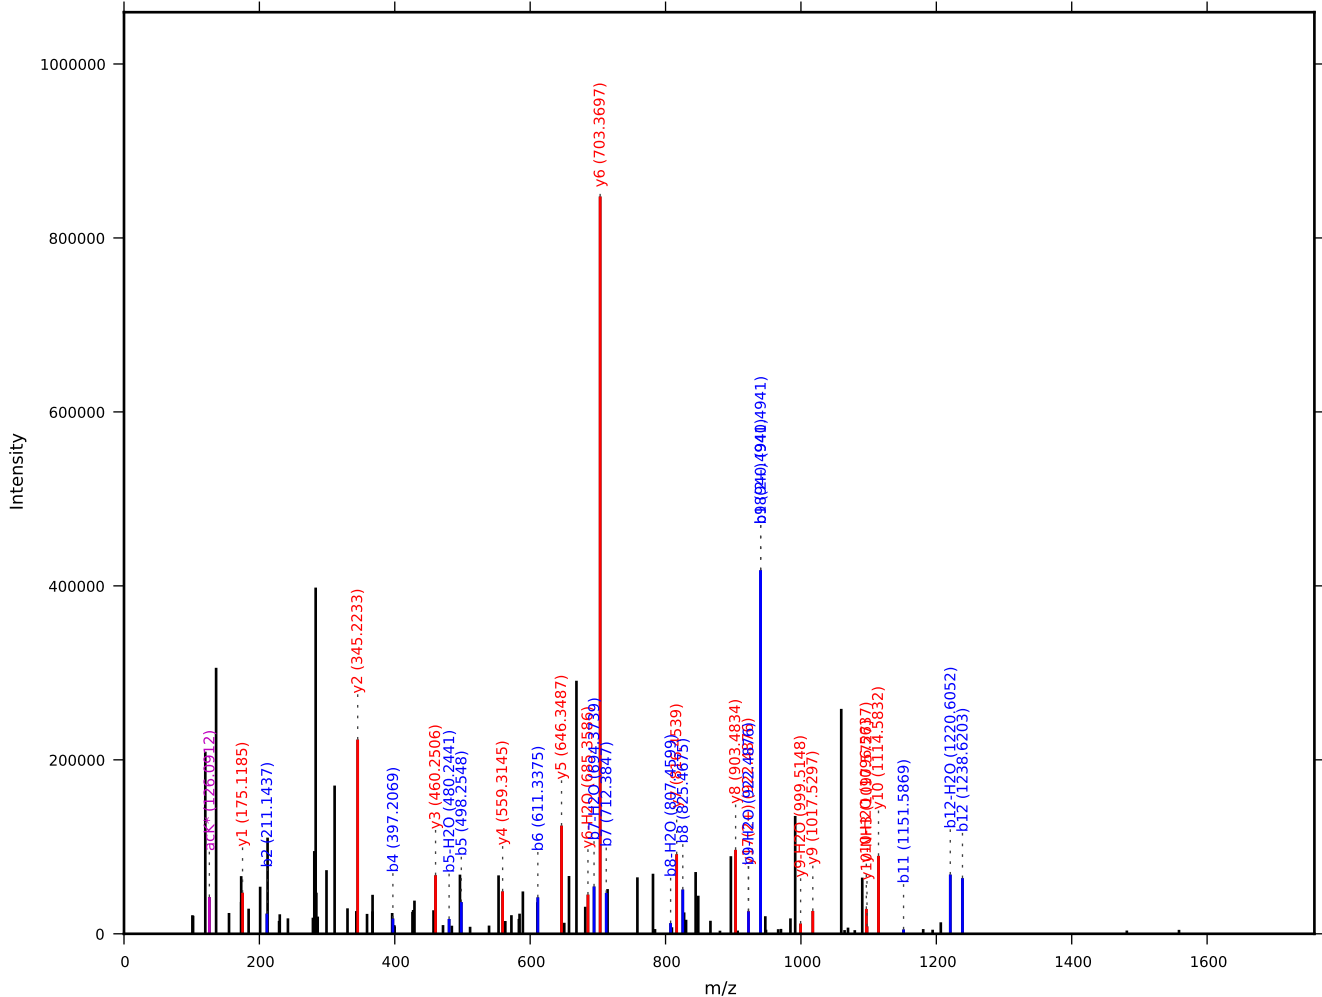

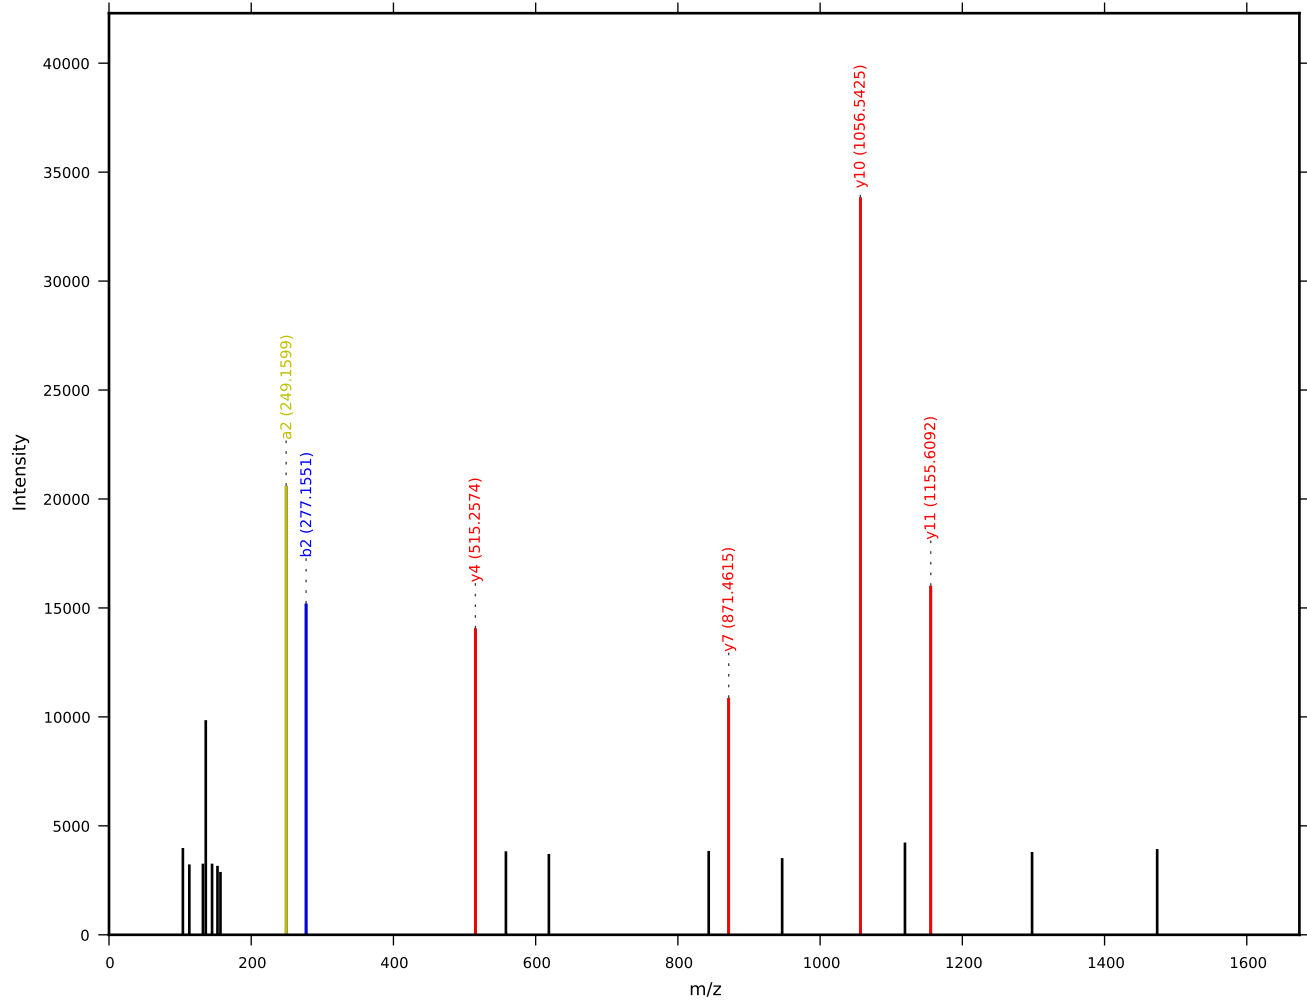

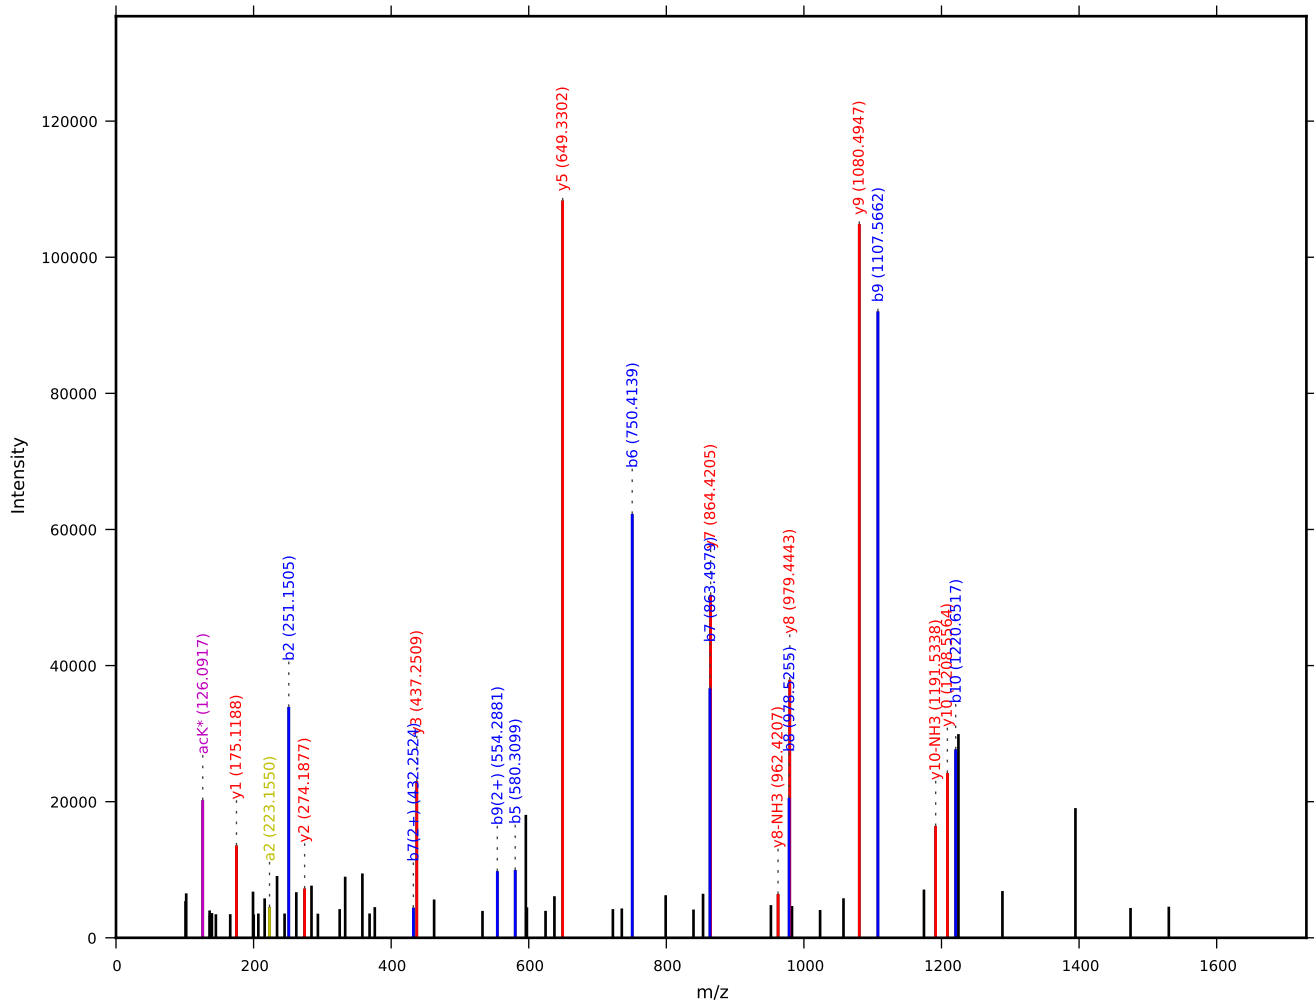

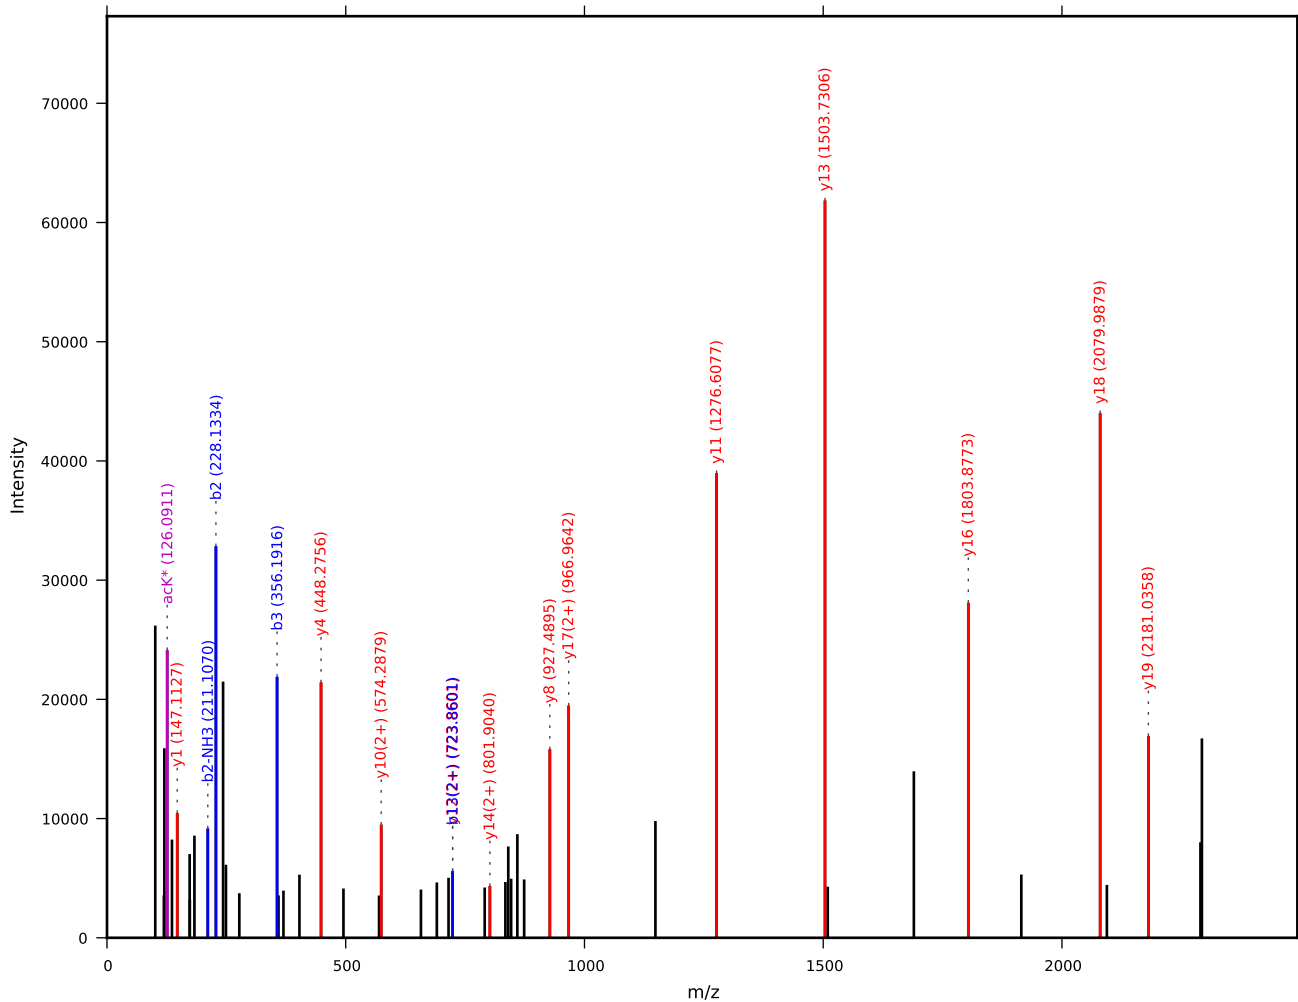

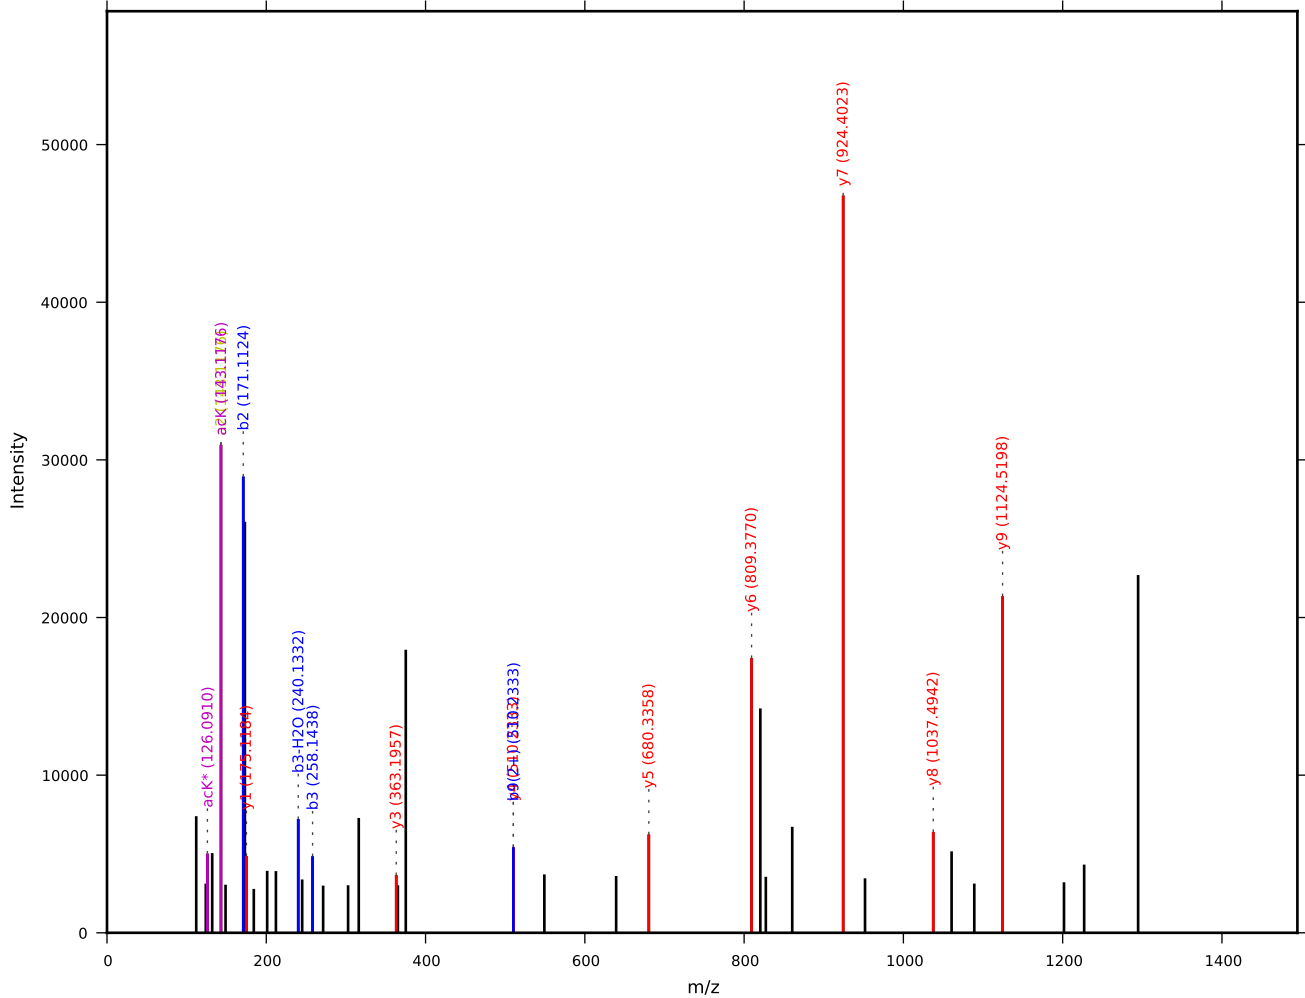

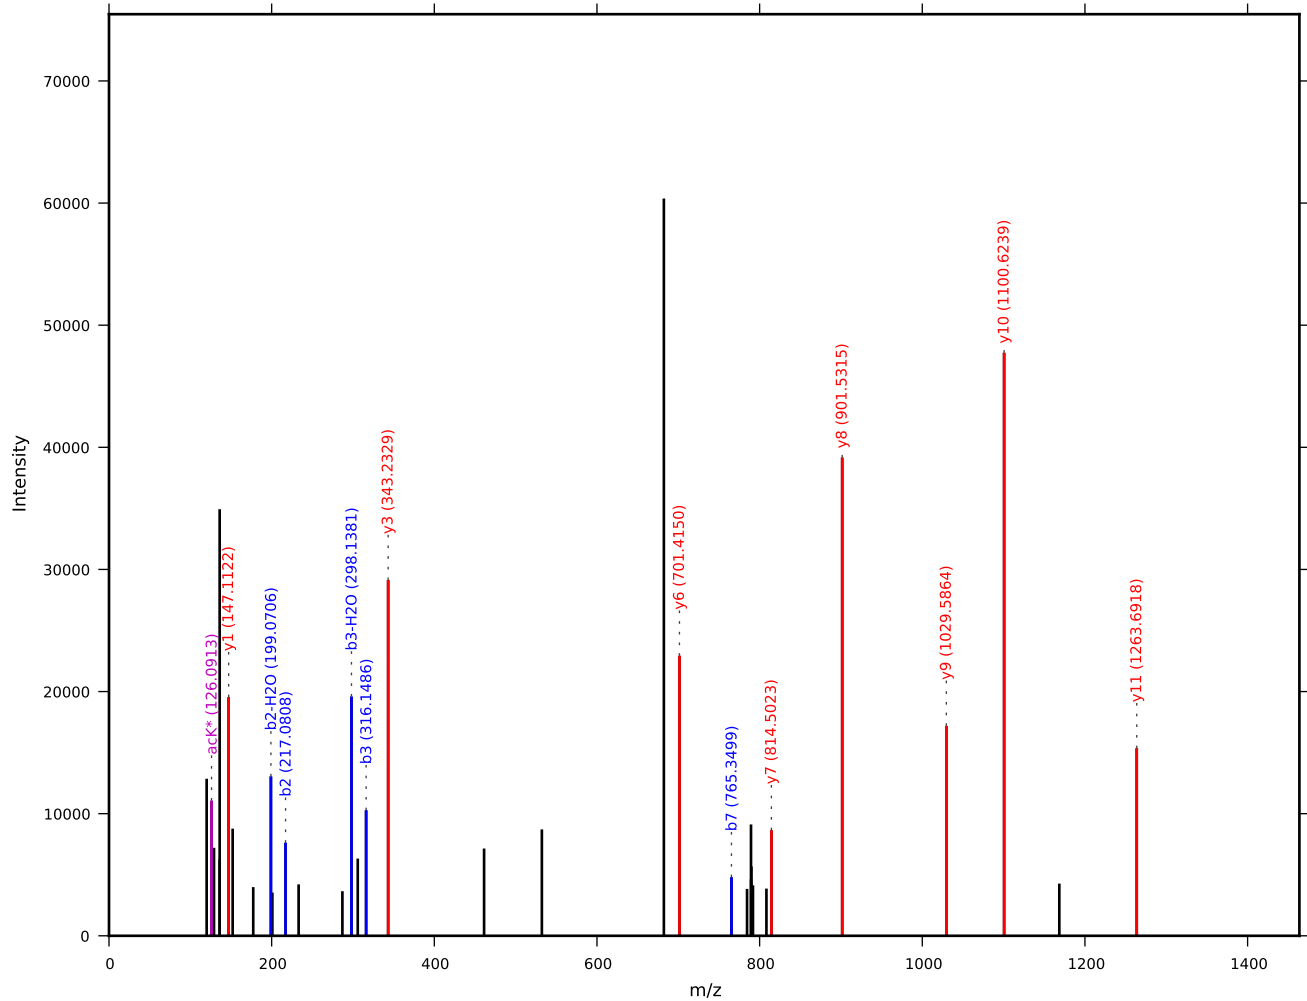



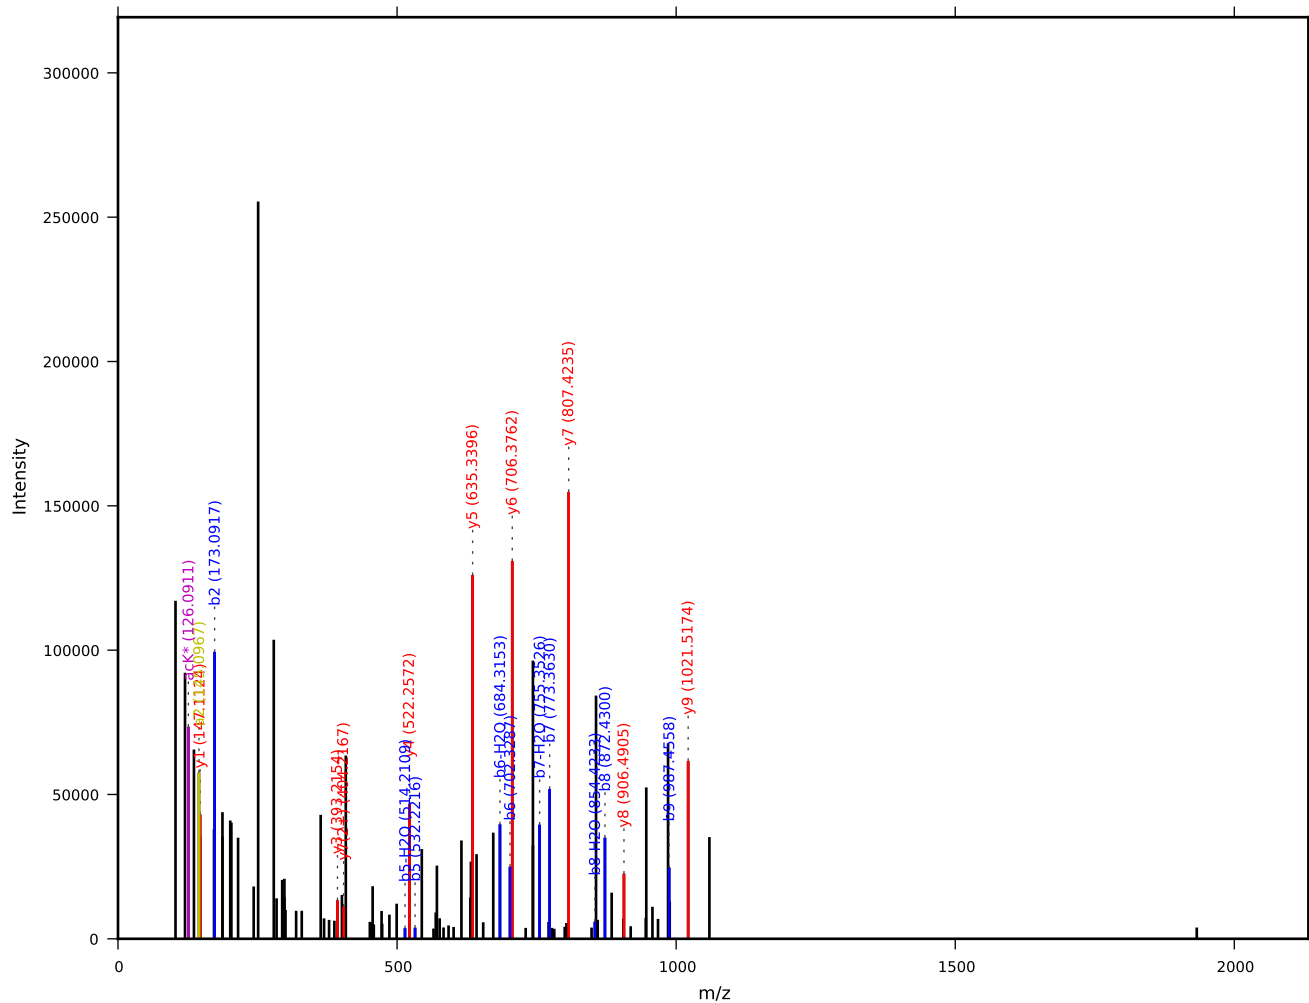

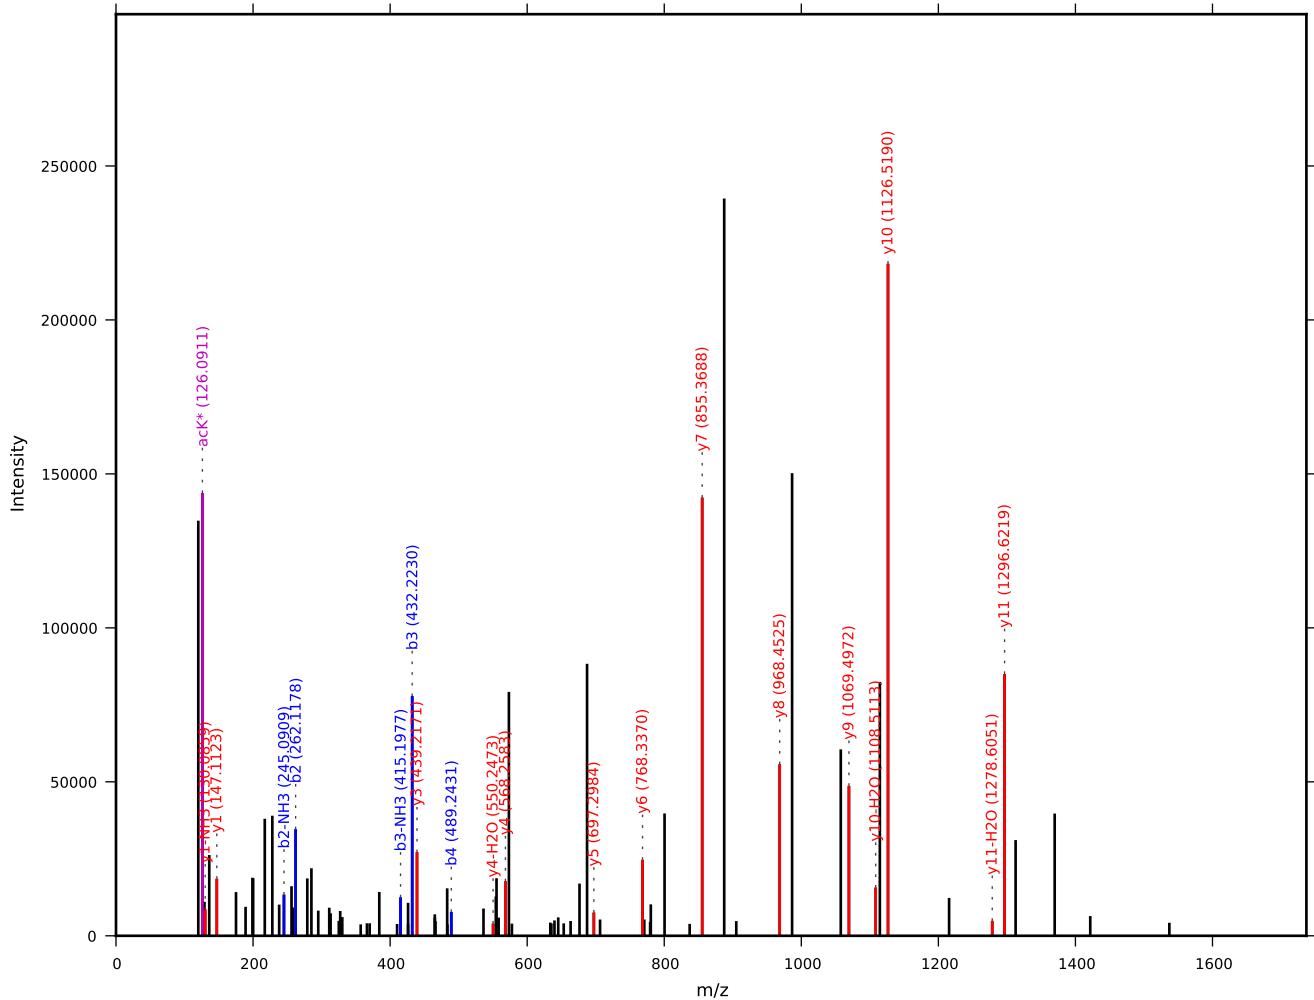

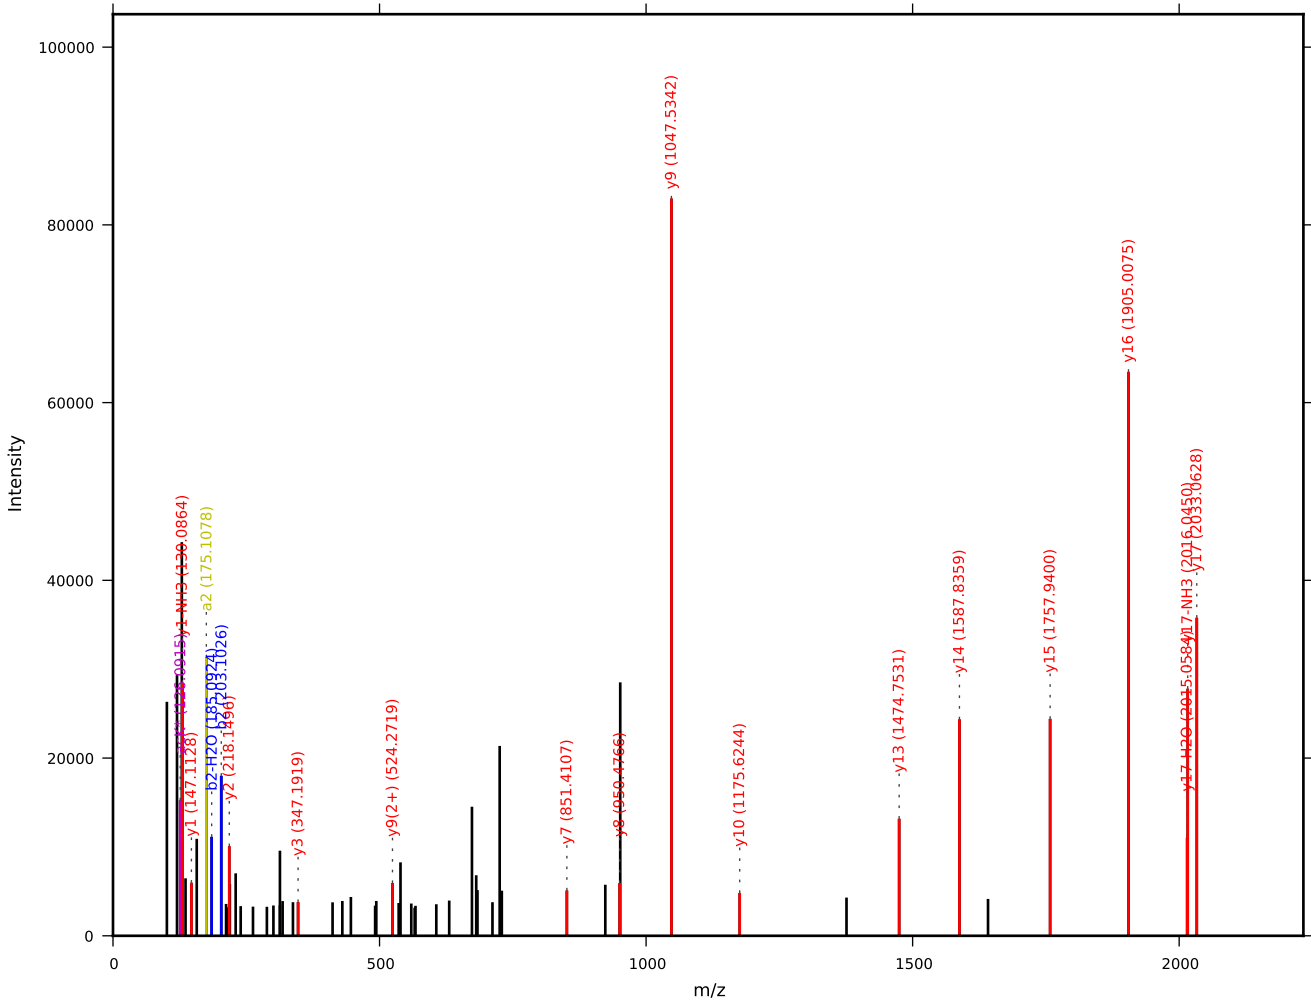

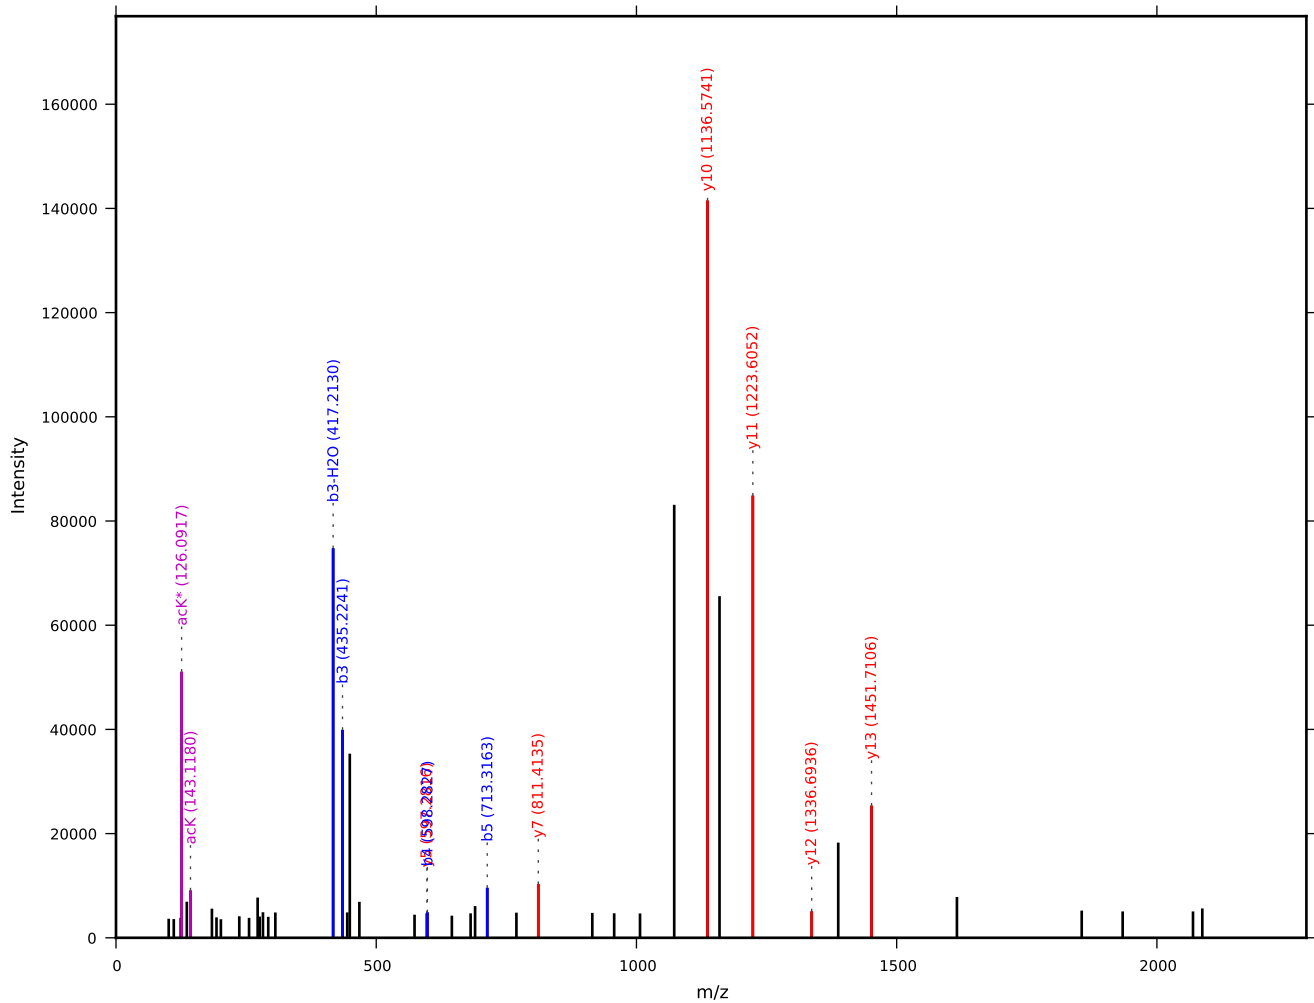

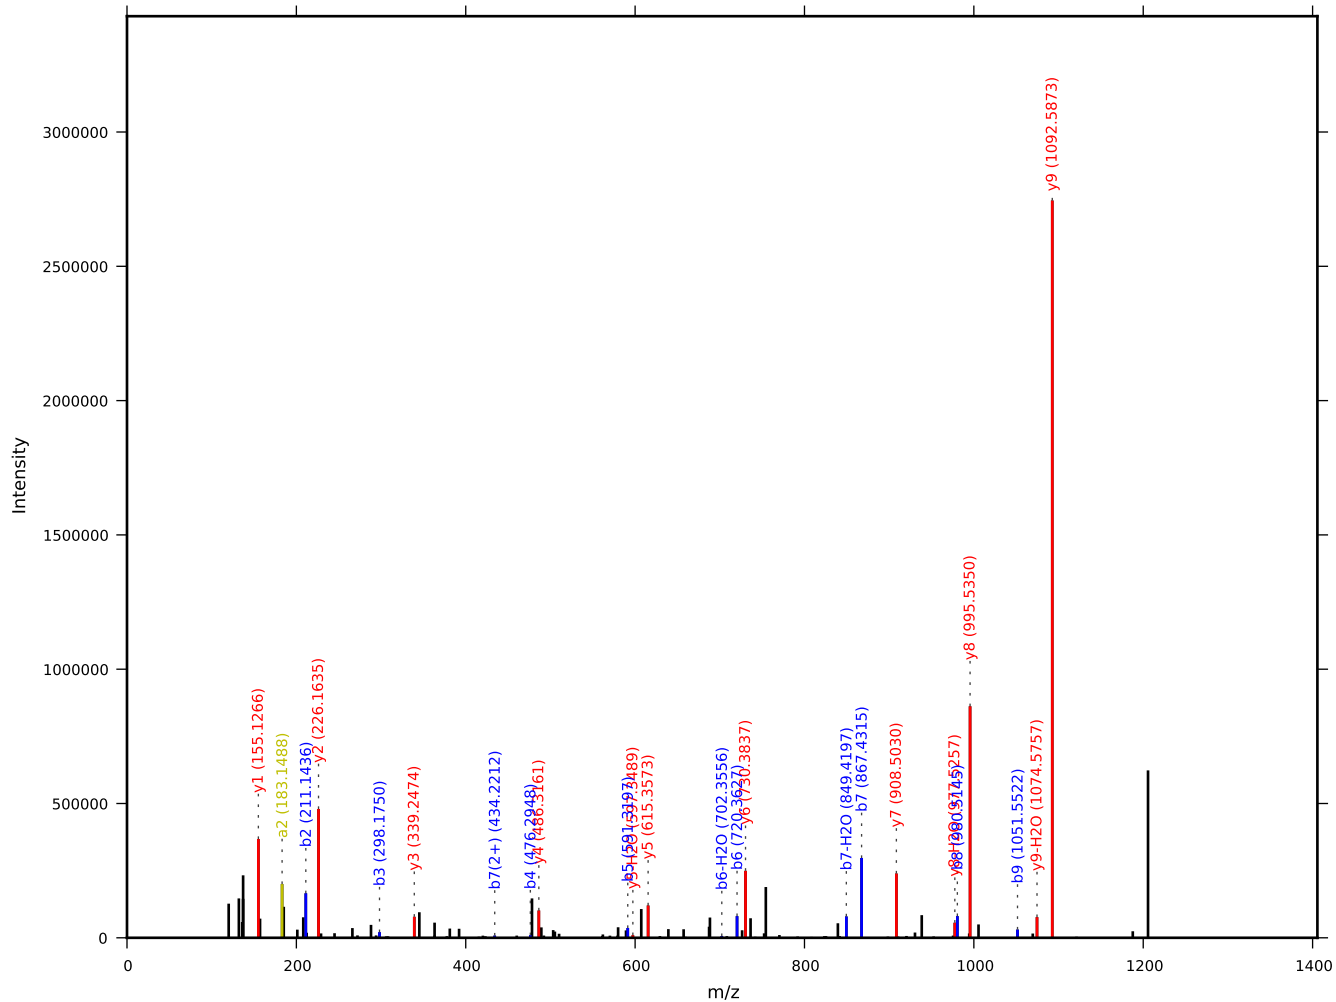

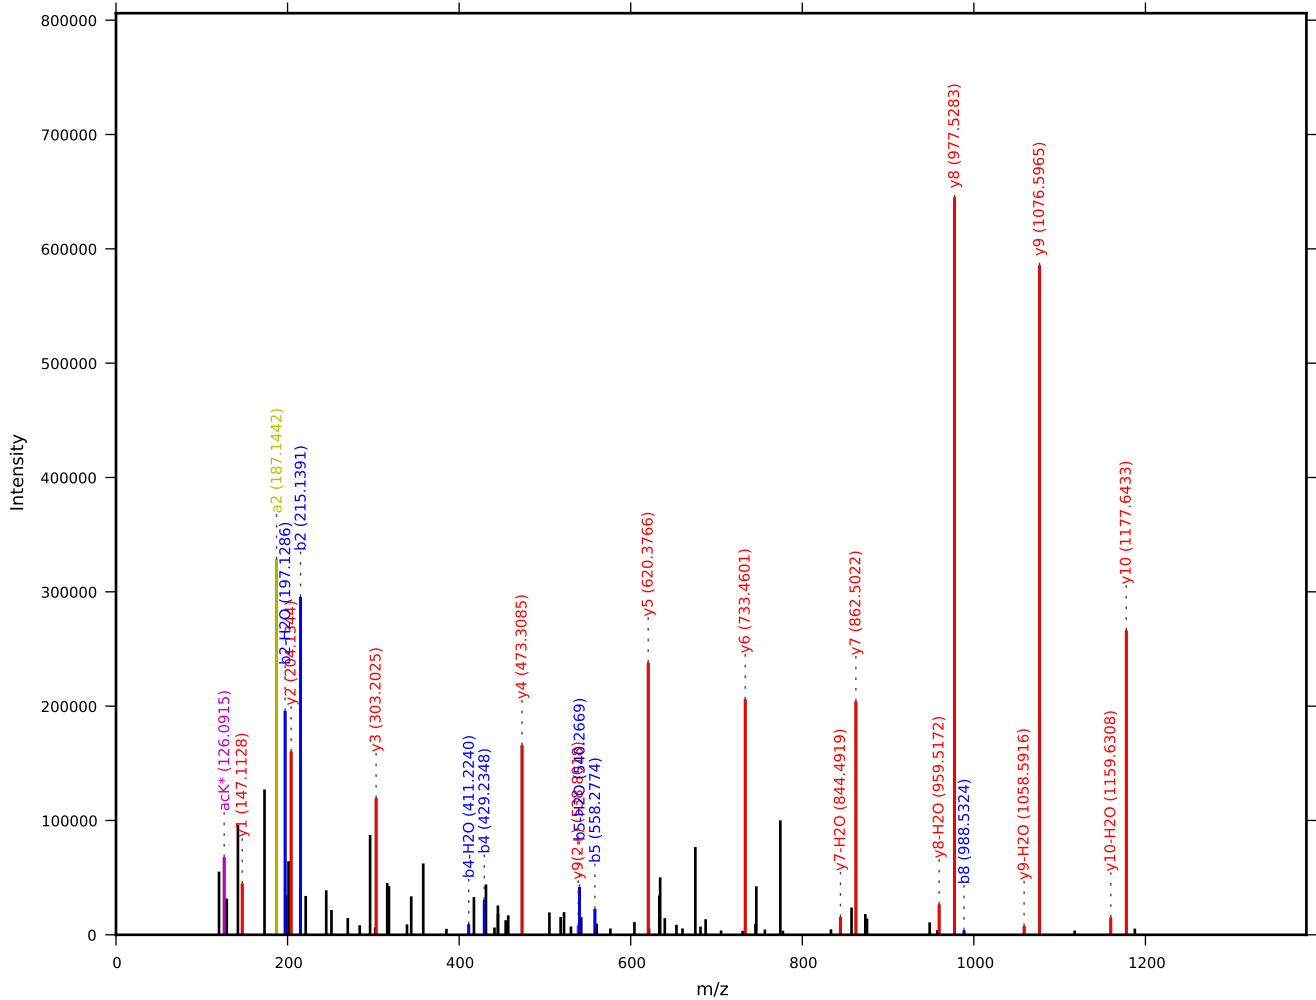

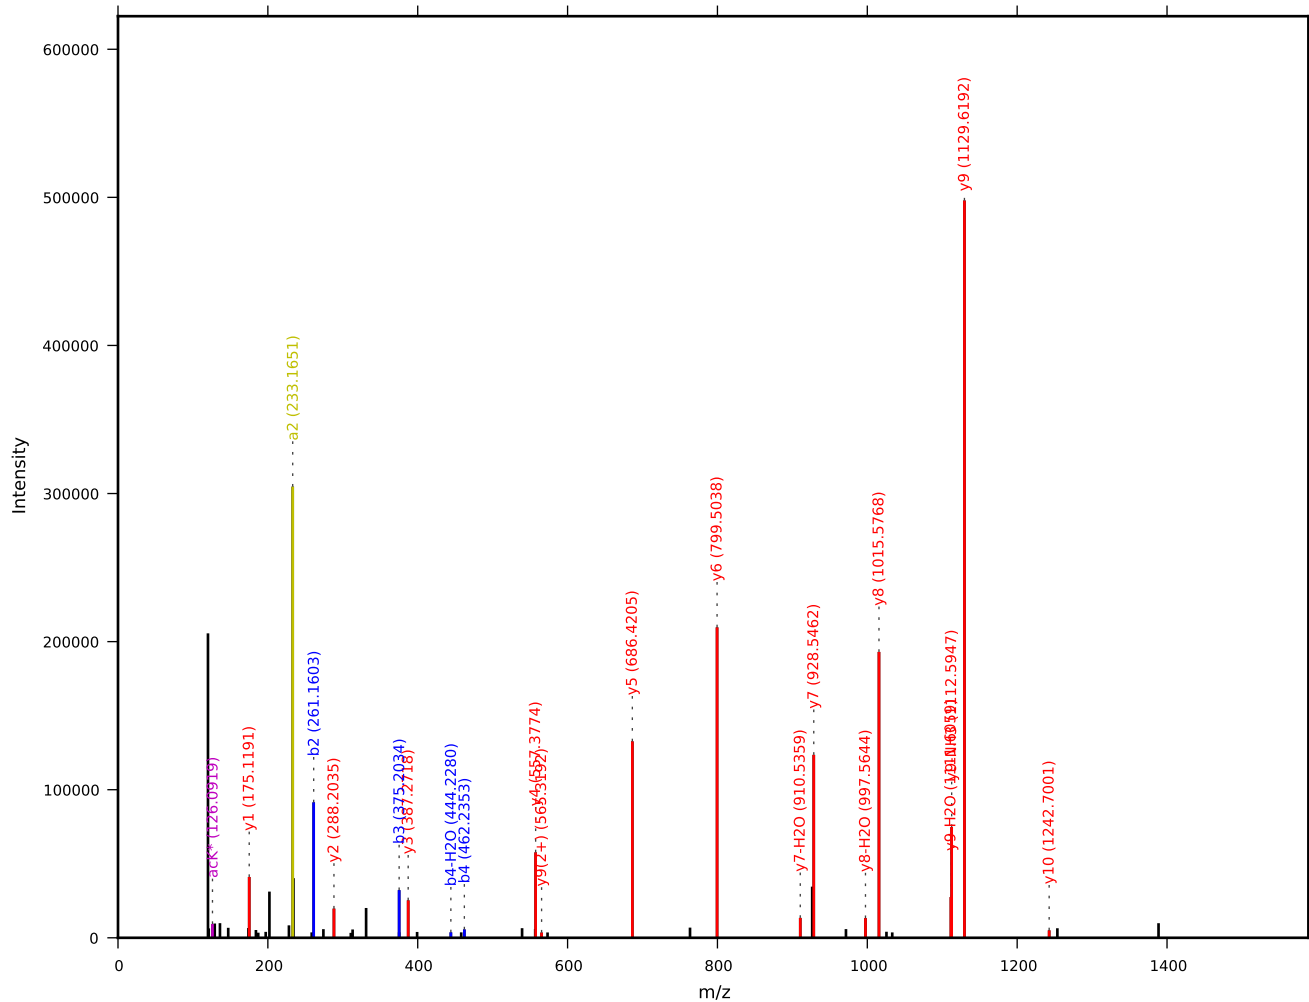

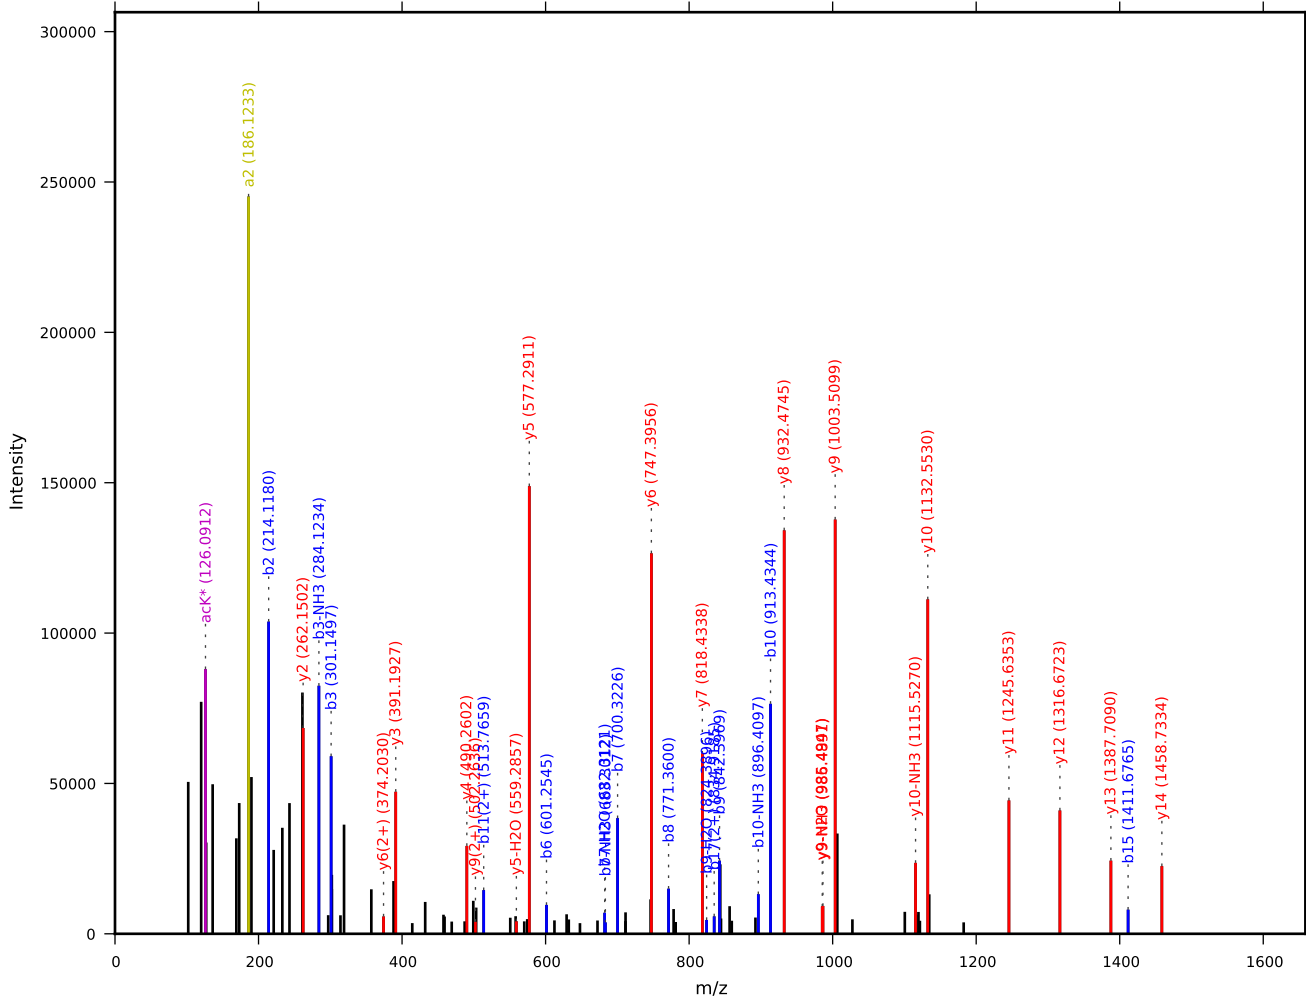



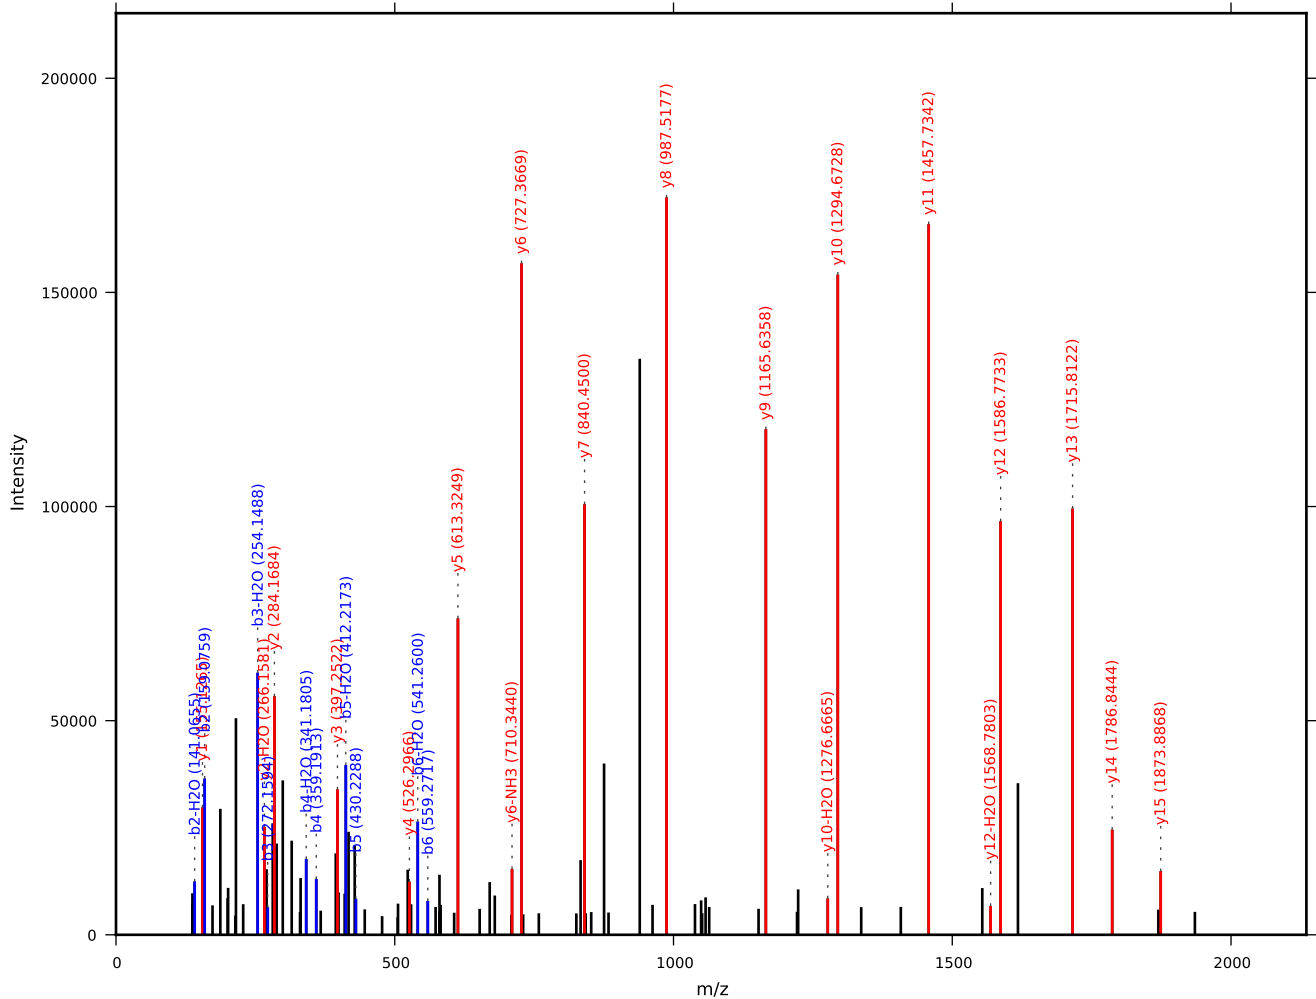

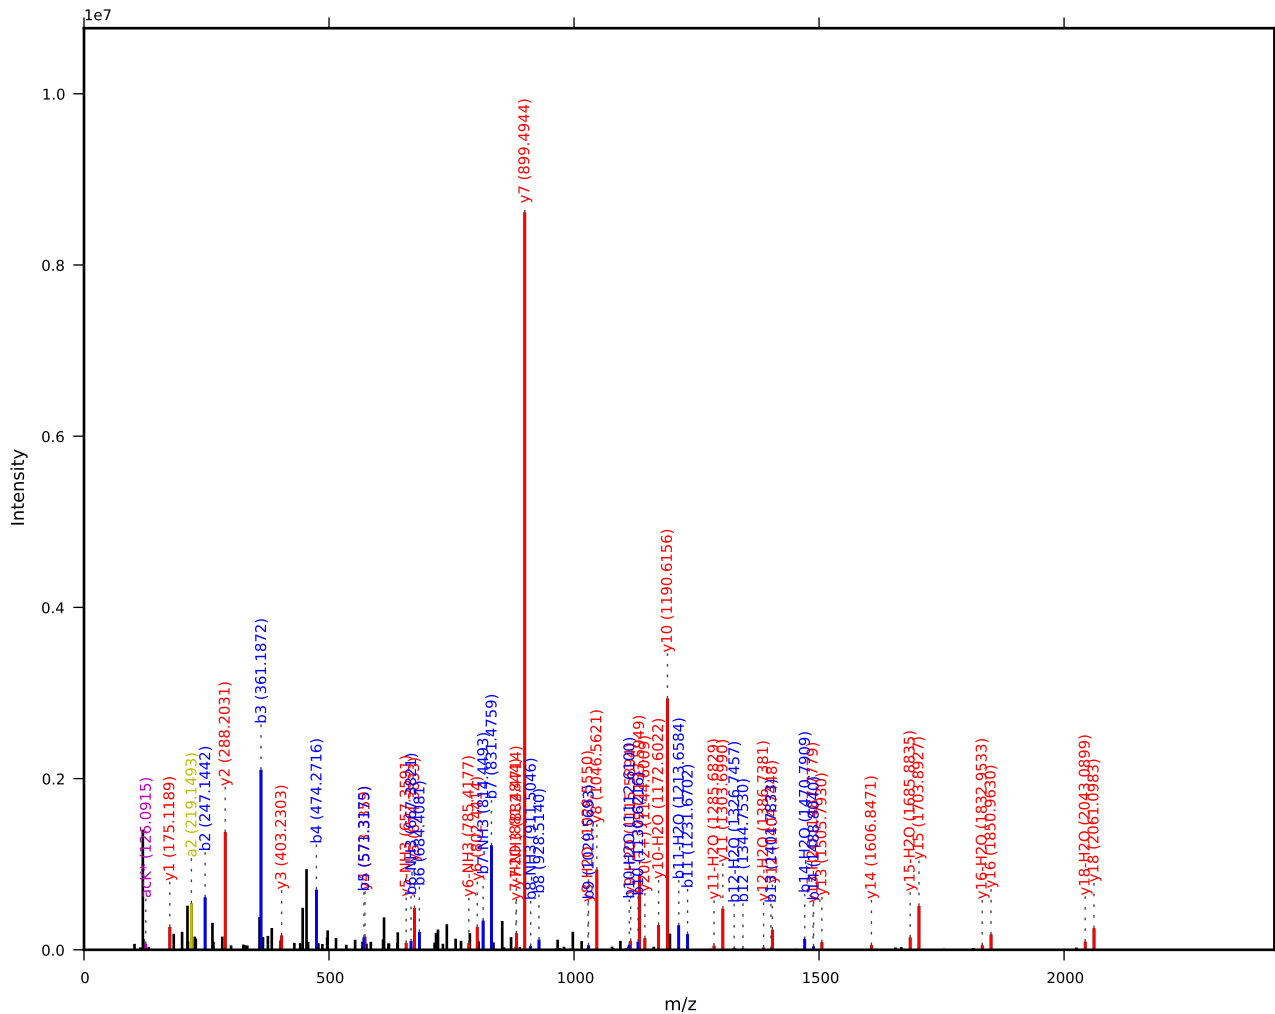

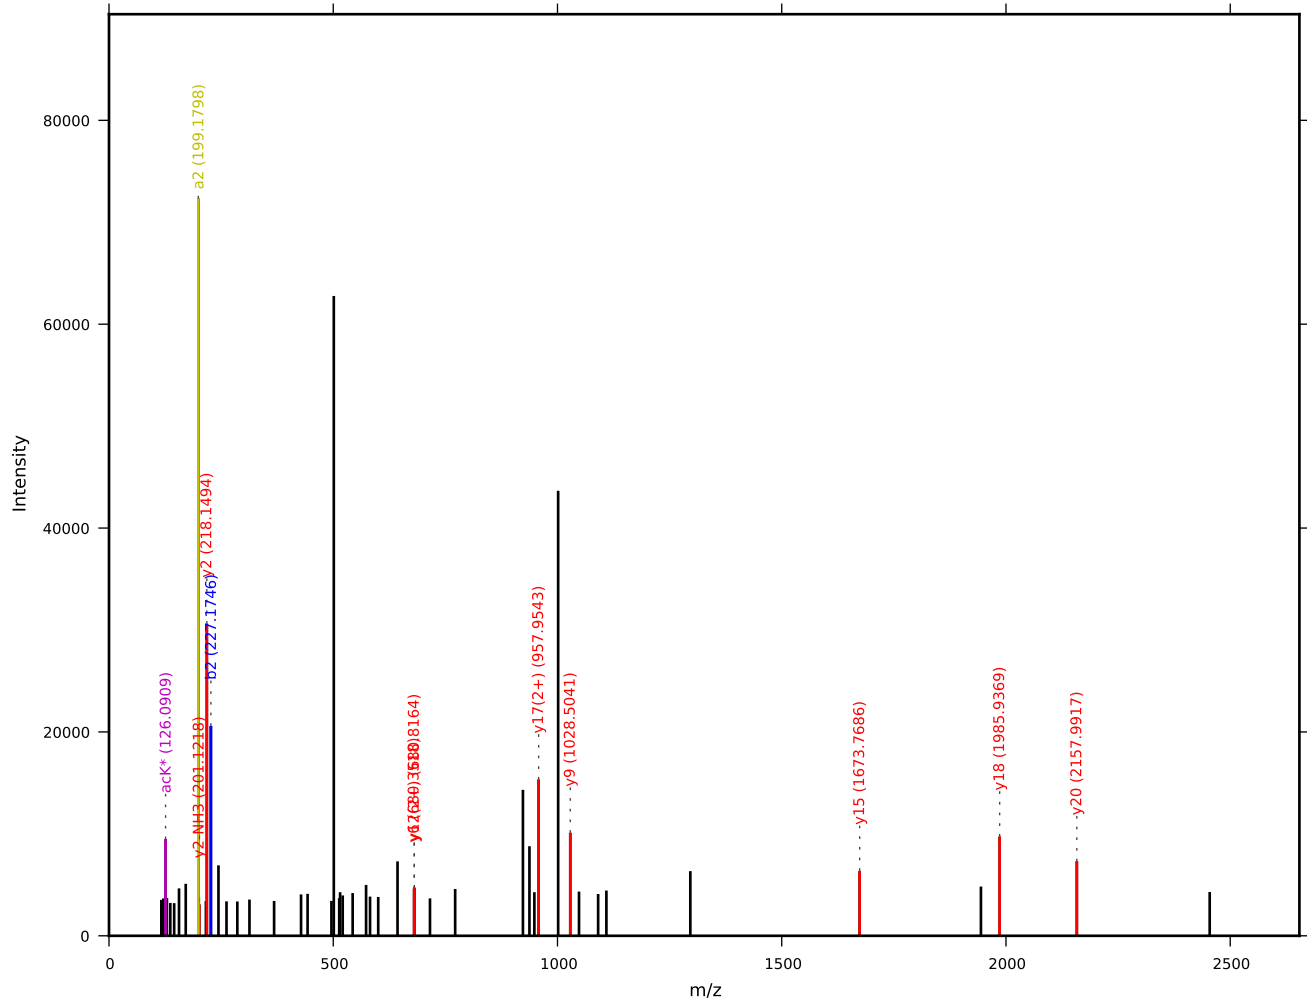

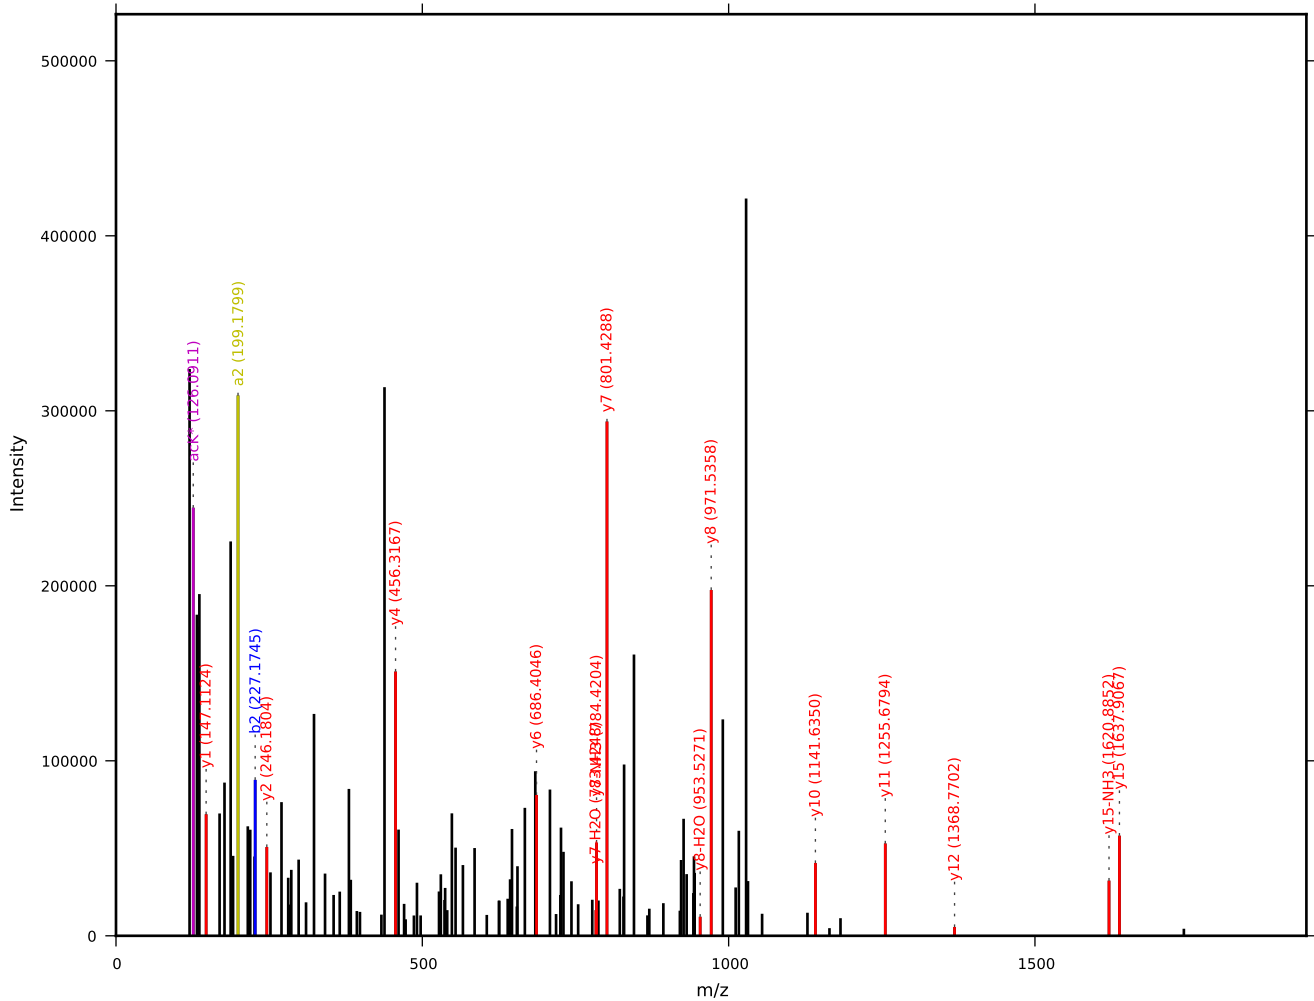

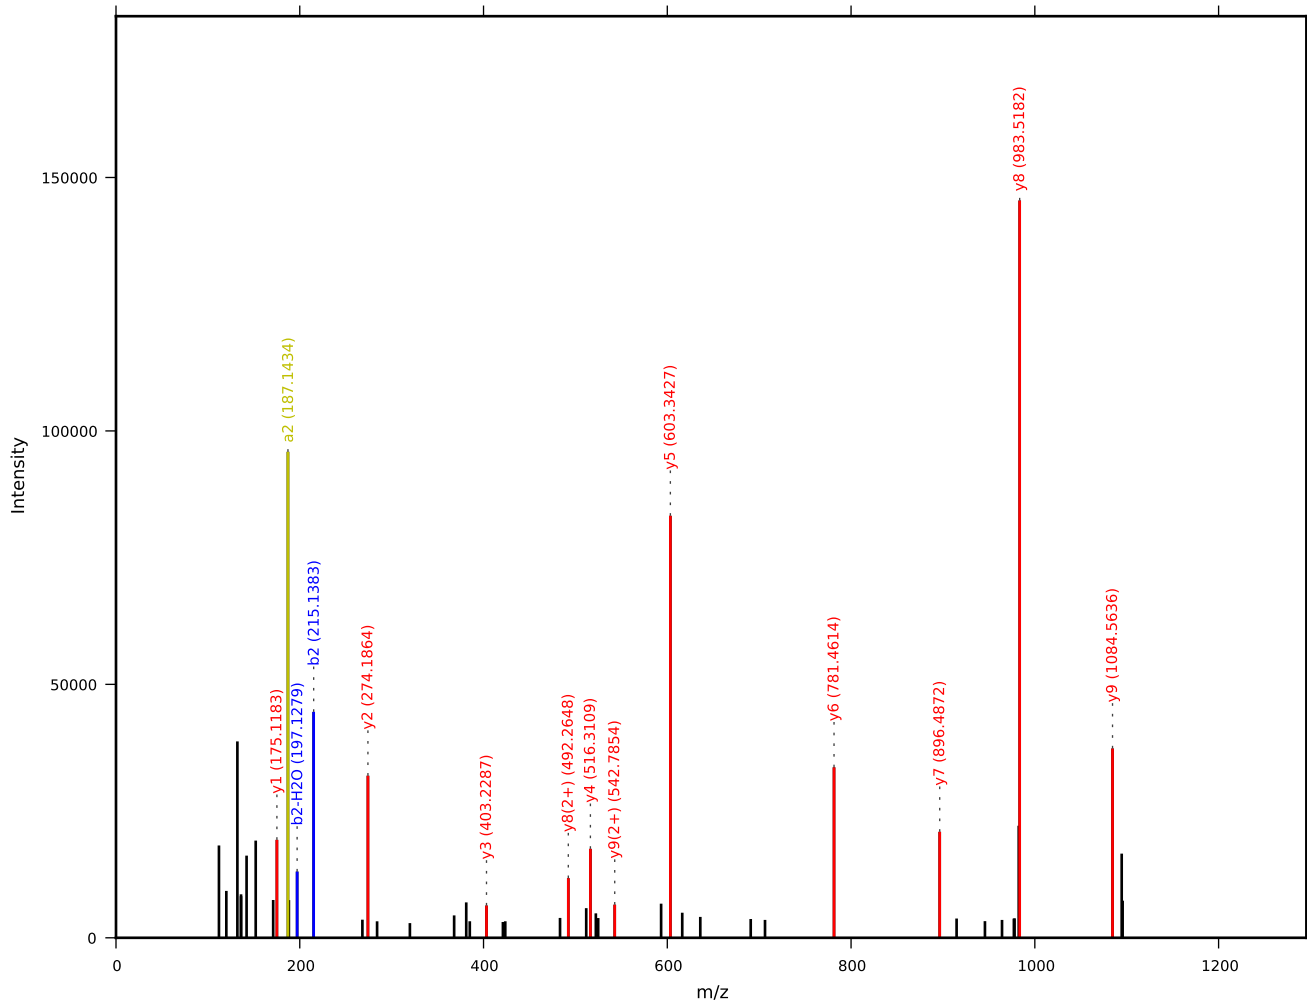

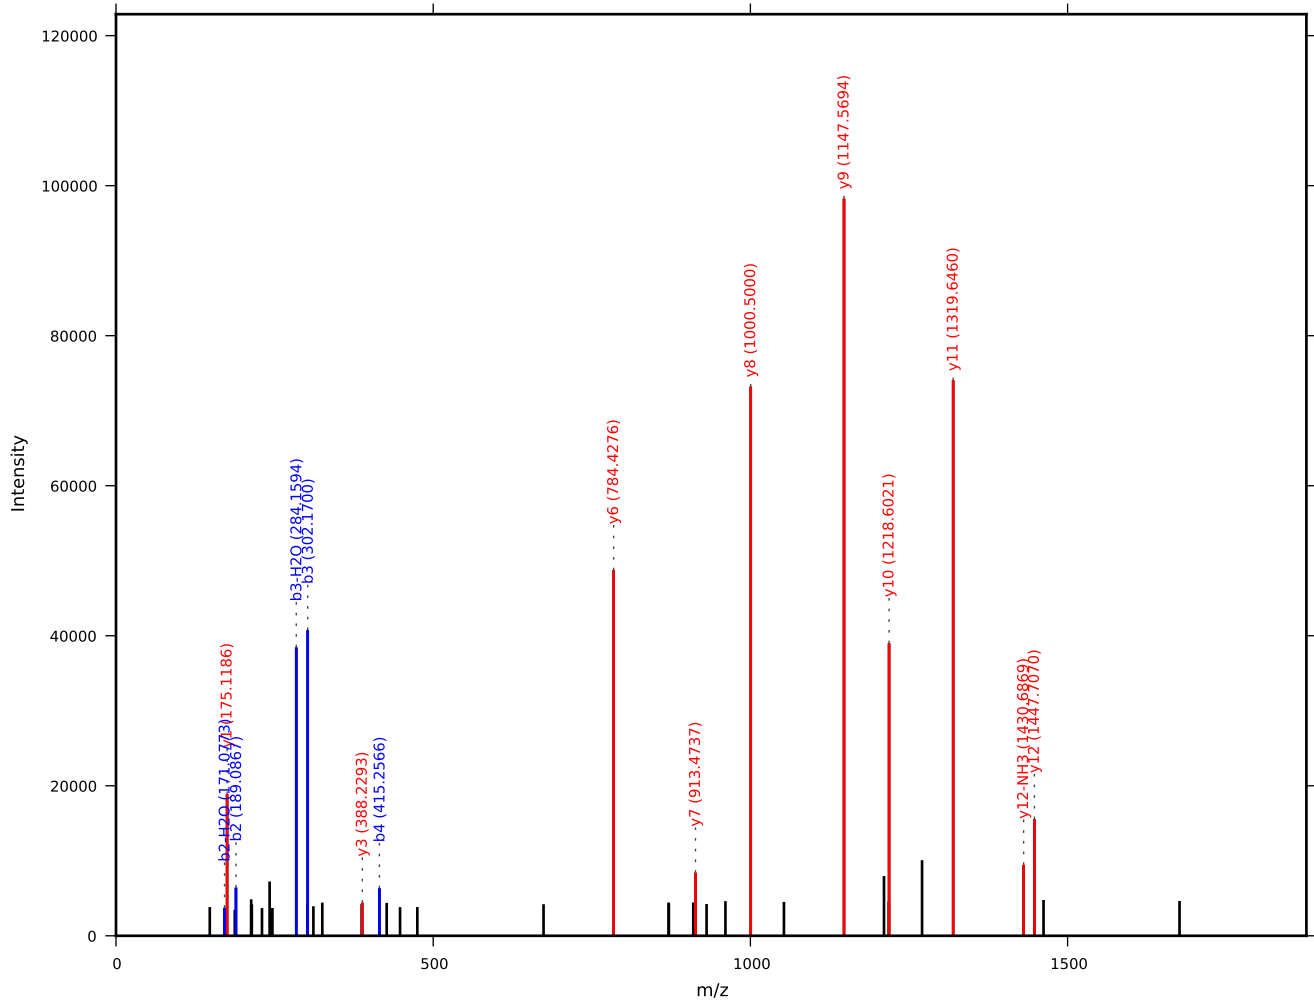

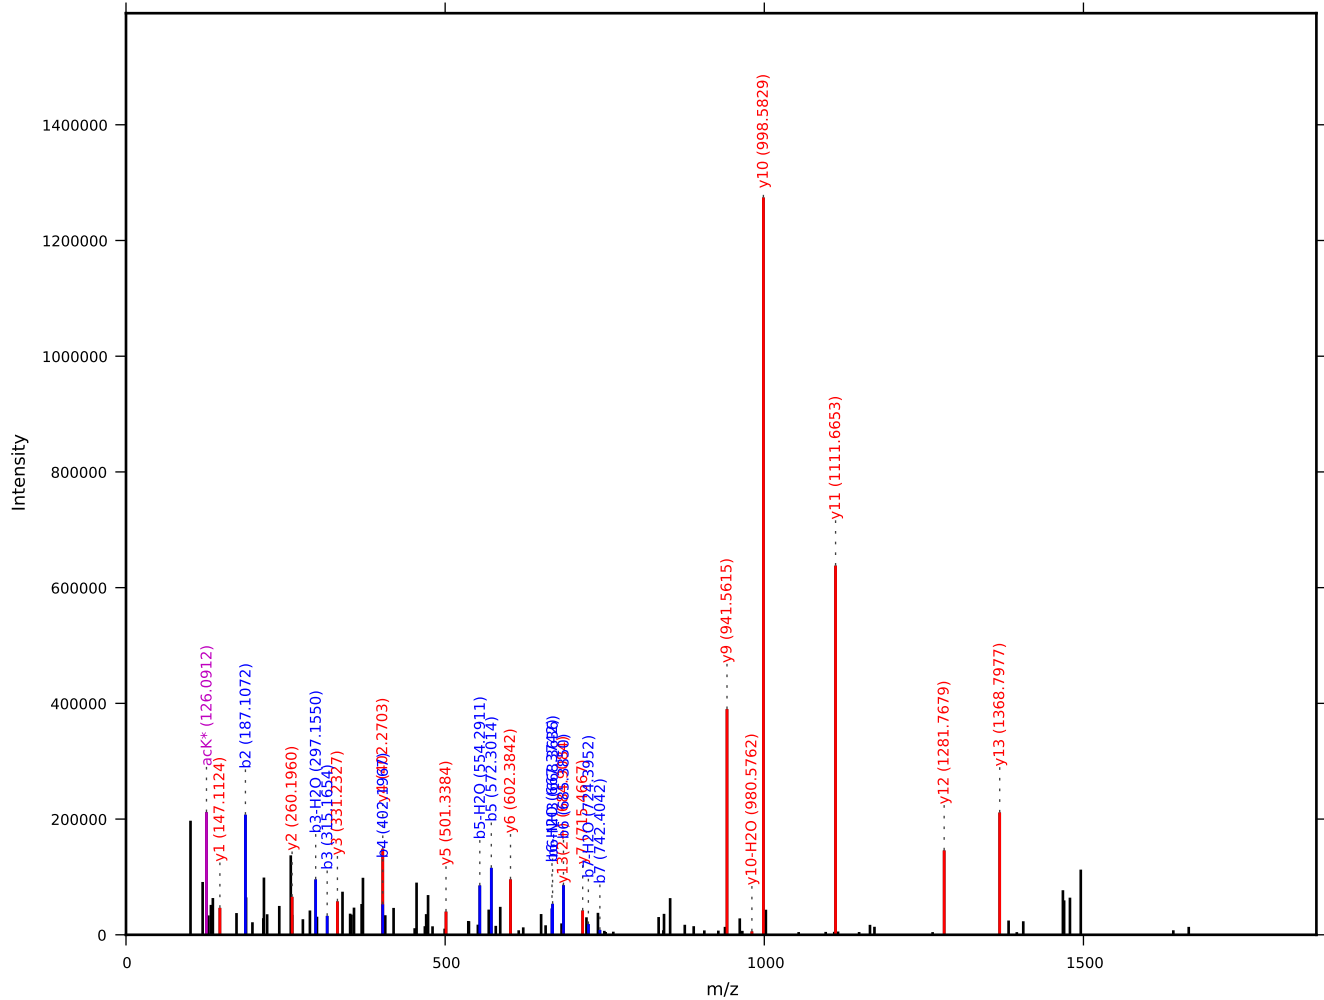

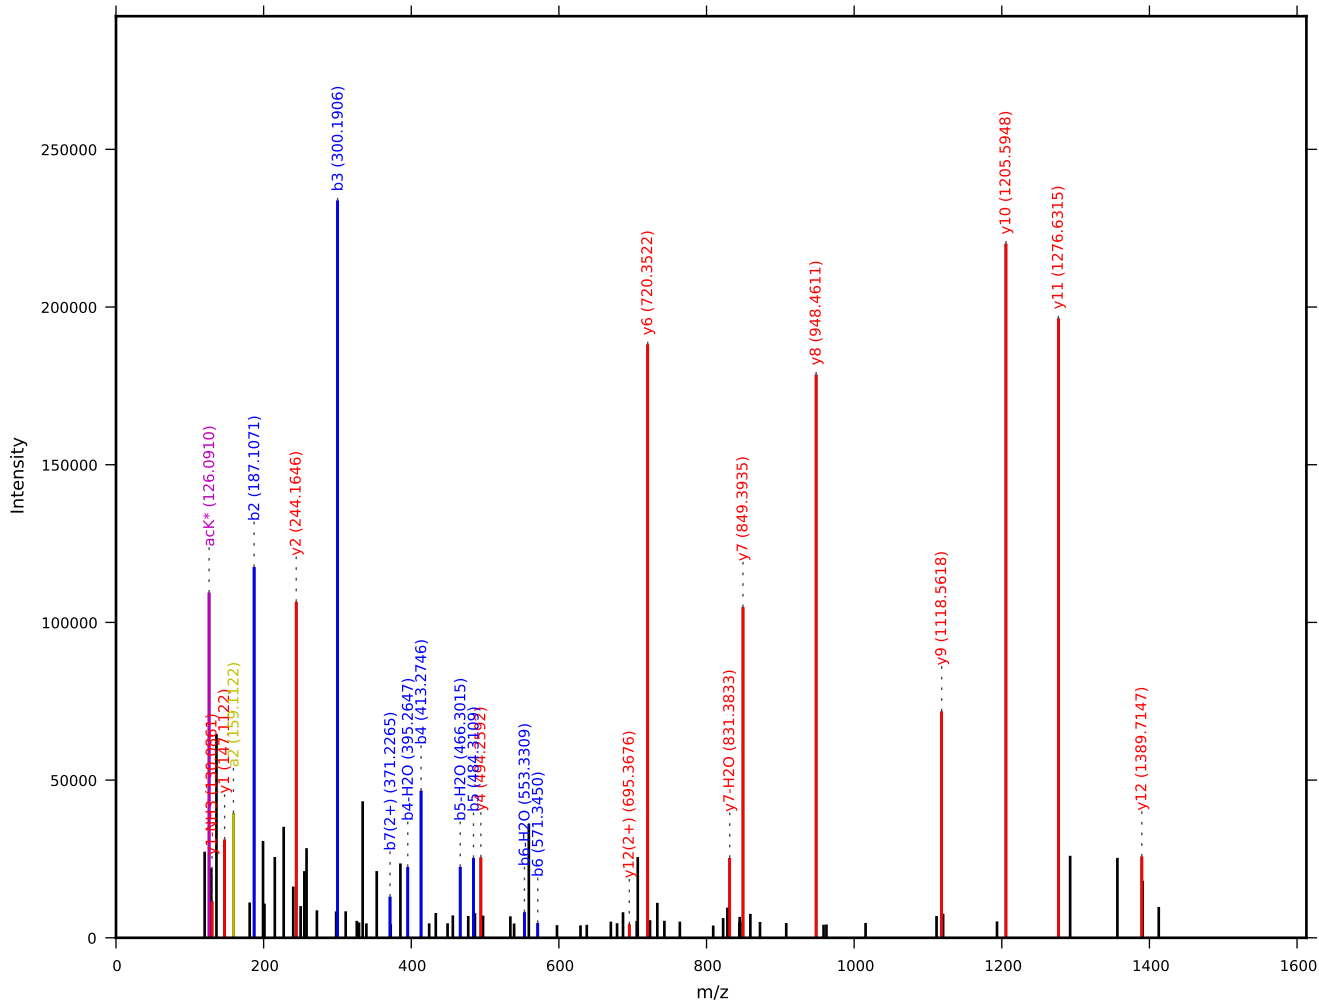



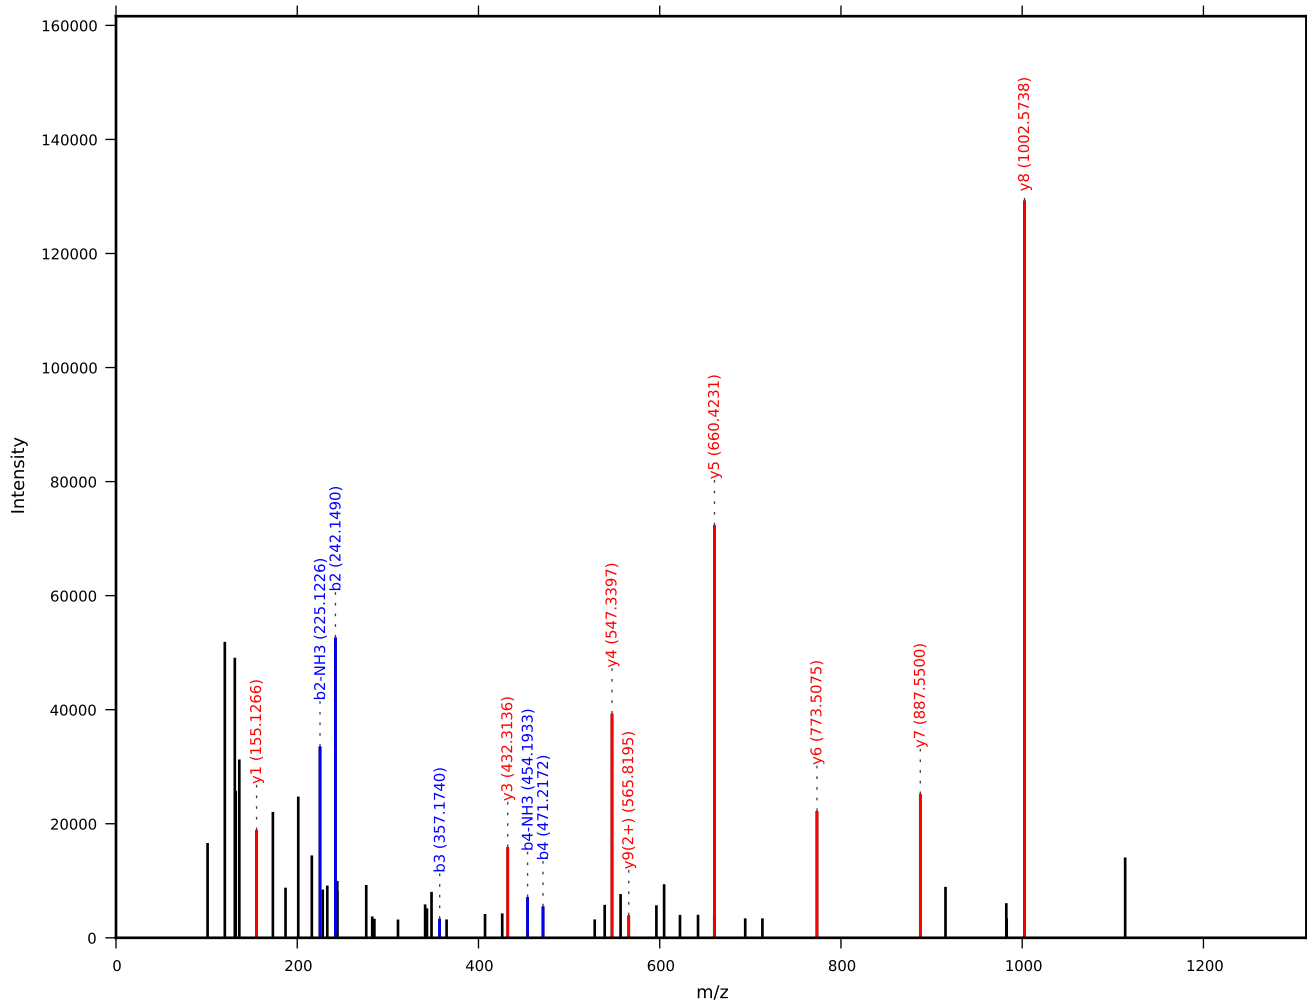

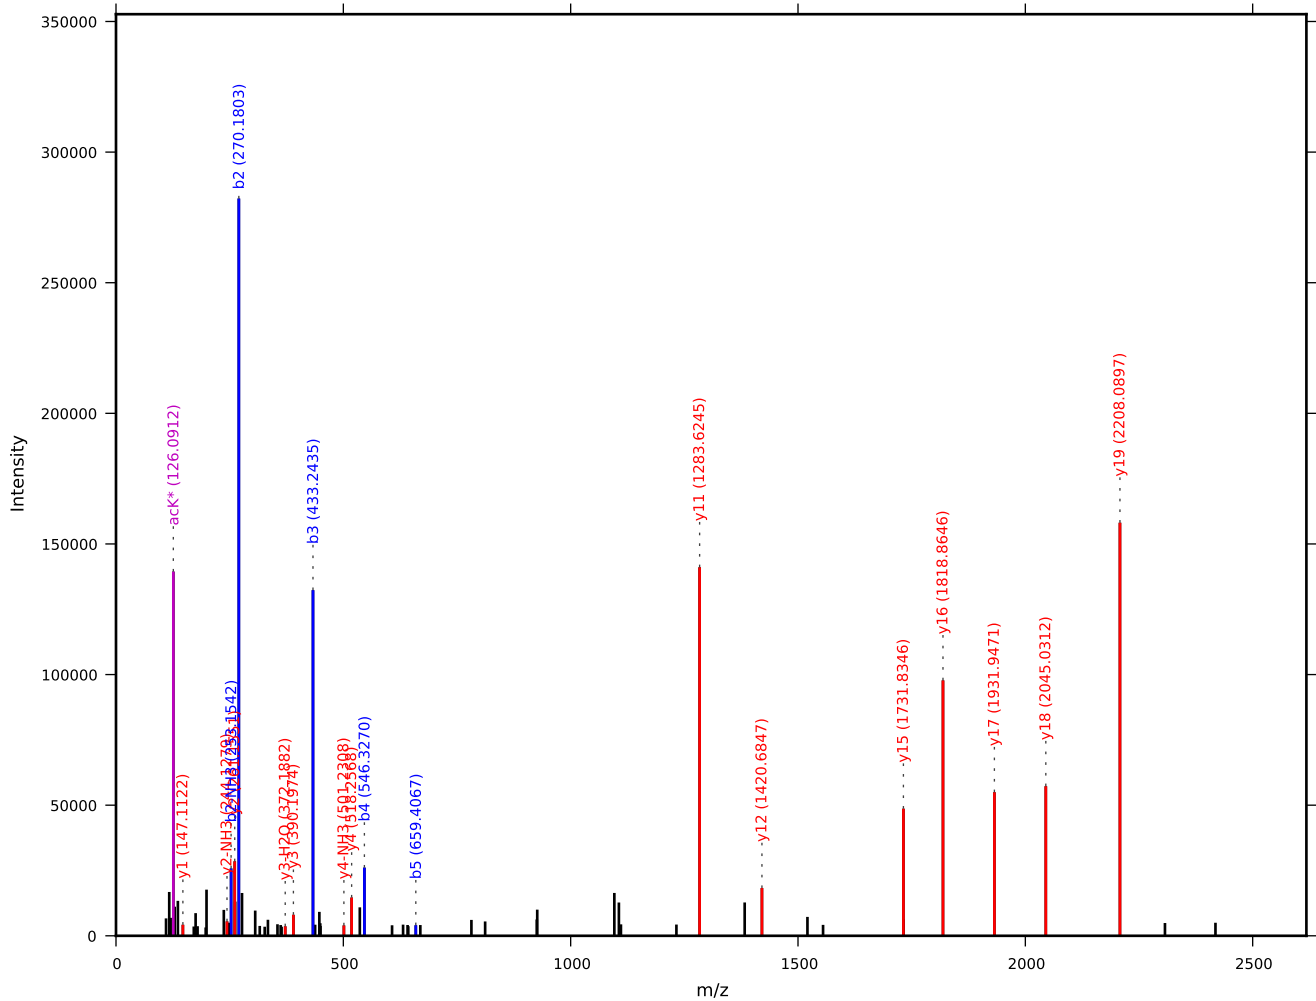

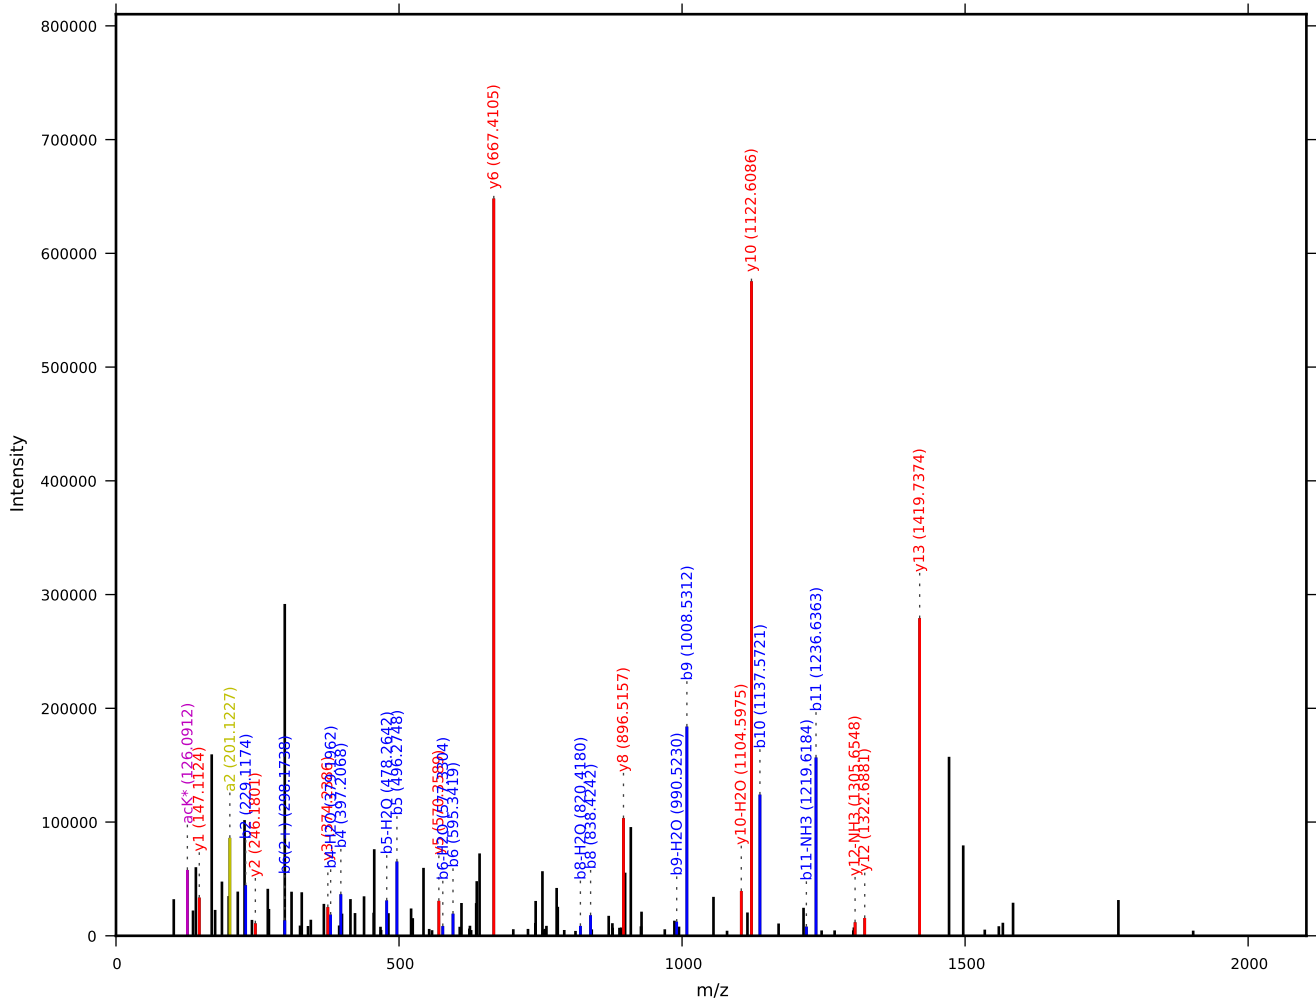

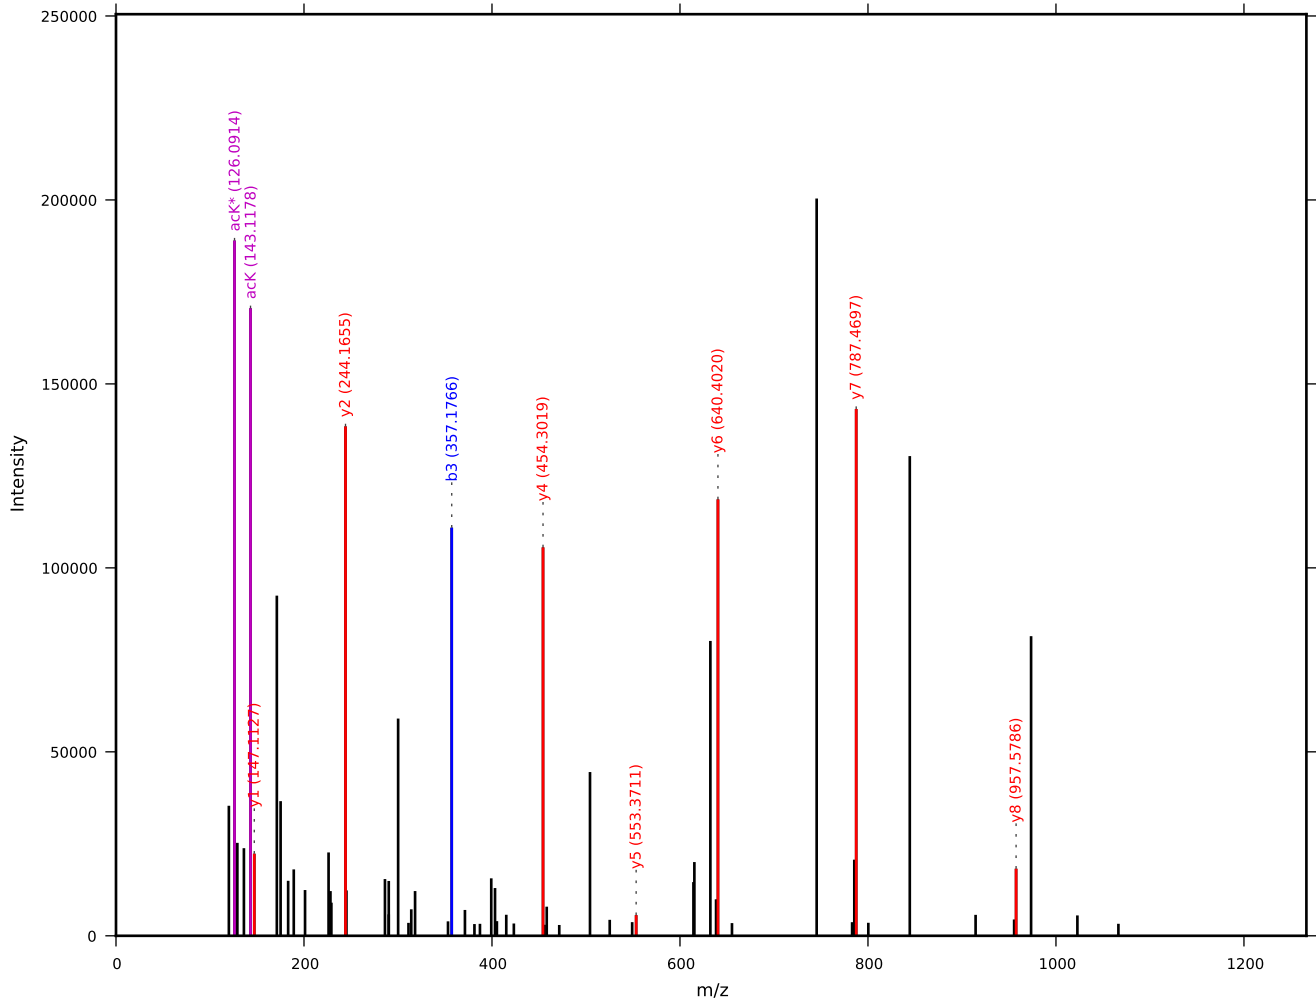

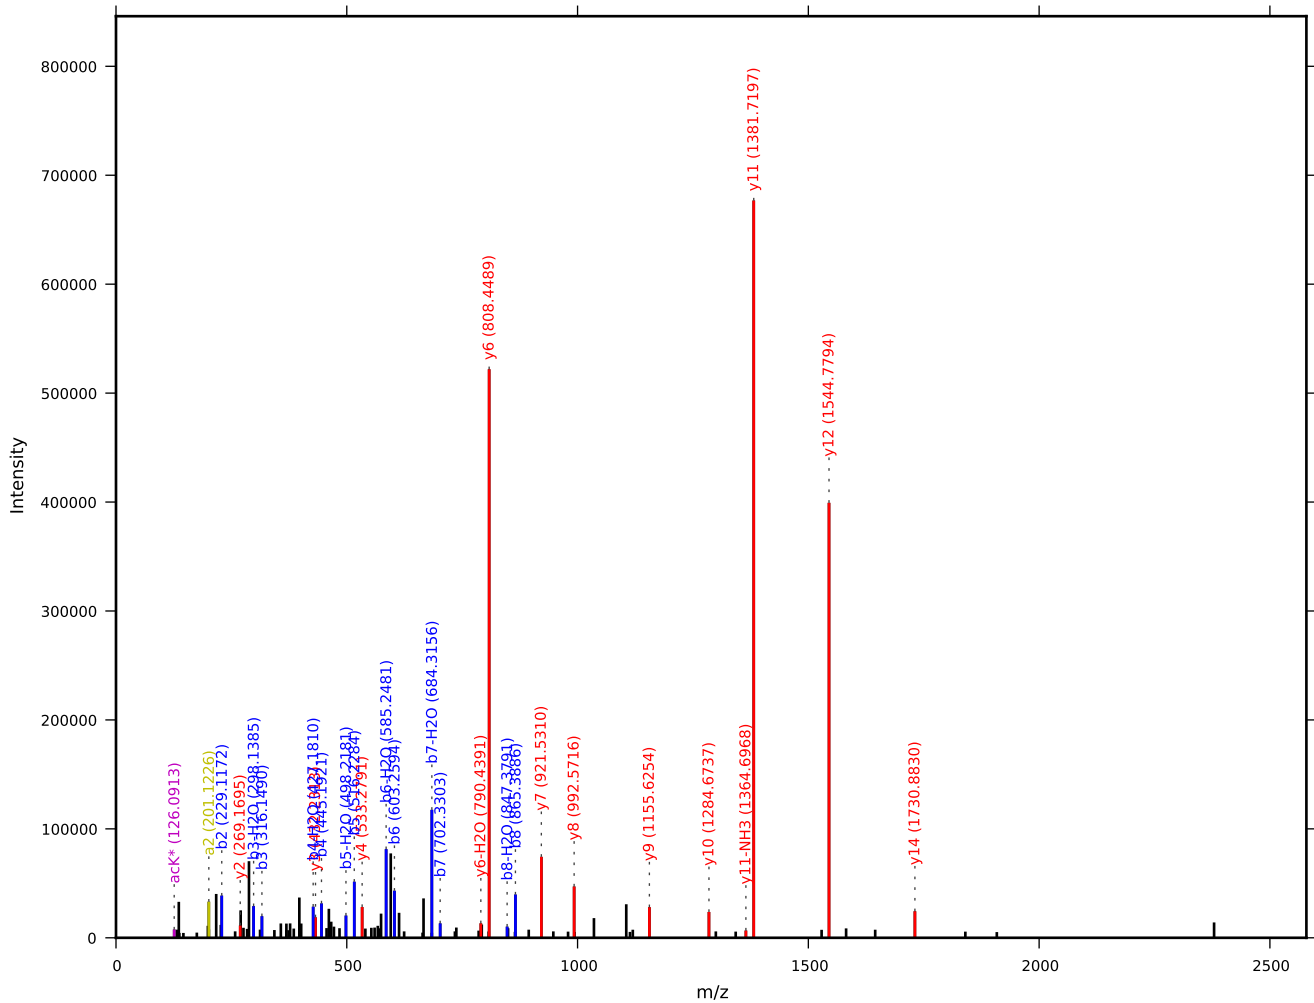

Mass: 1005.5648 Charge: 2 m/z: 503.78965  
Modified Peptide: \_YNIK(ac)LWK\_ Score: 53.17 PEP: 0.0087024

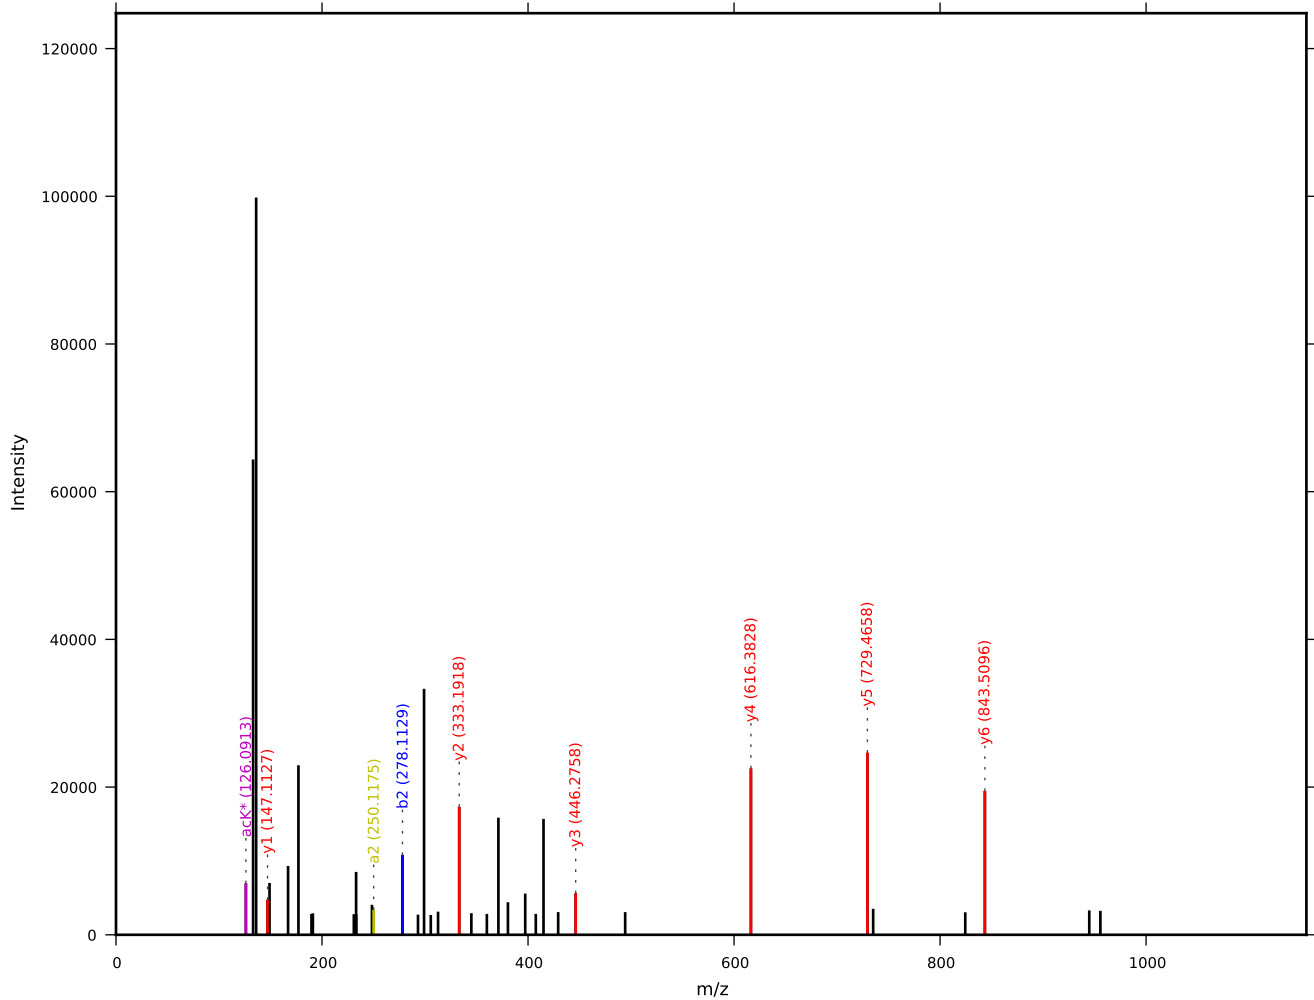

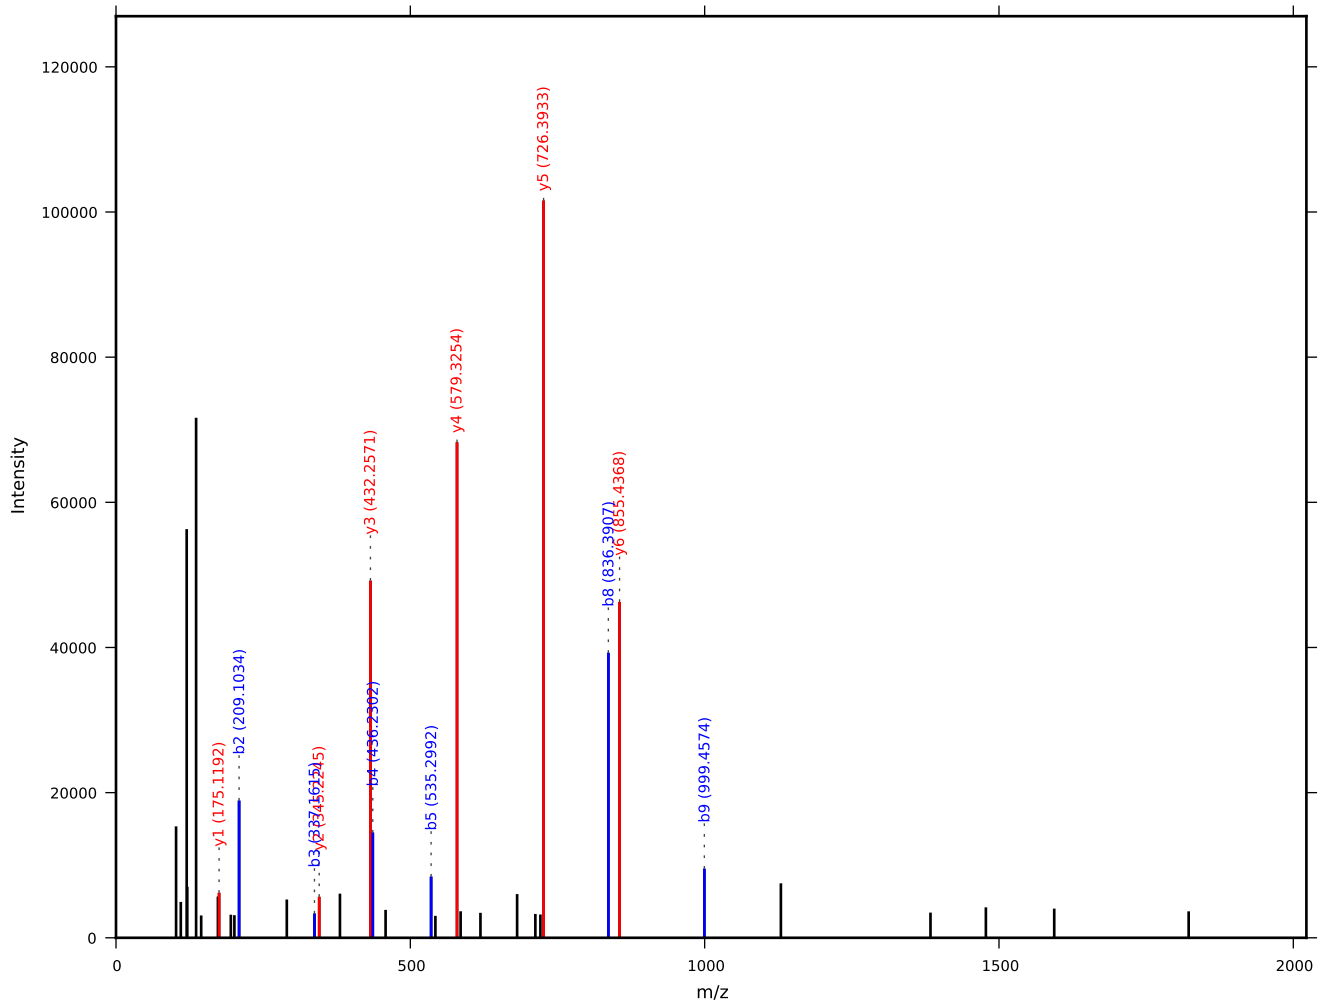

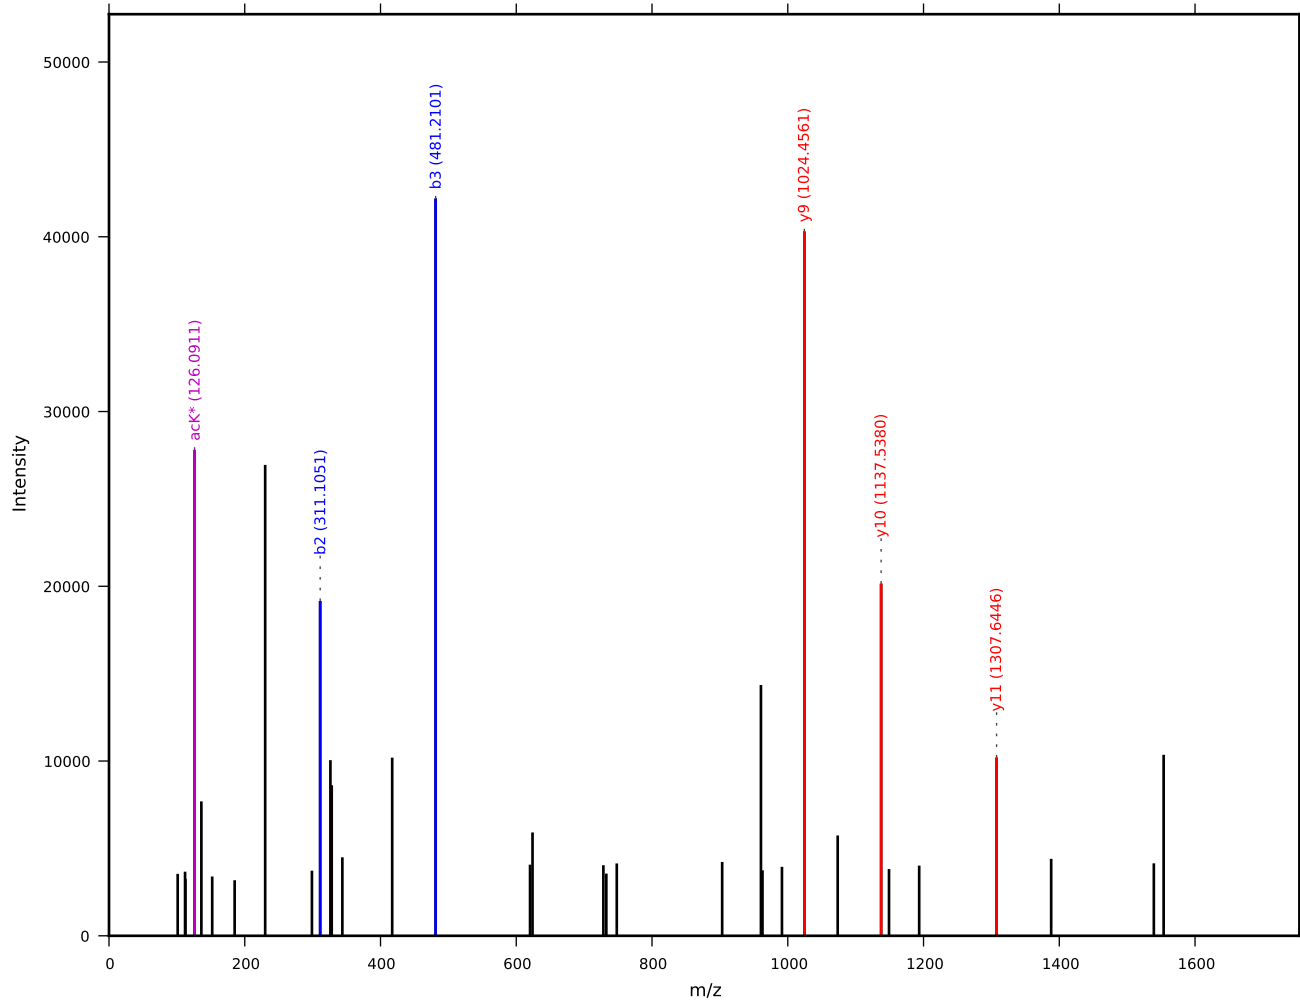



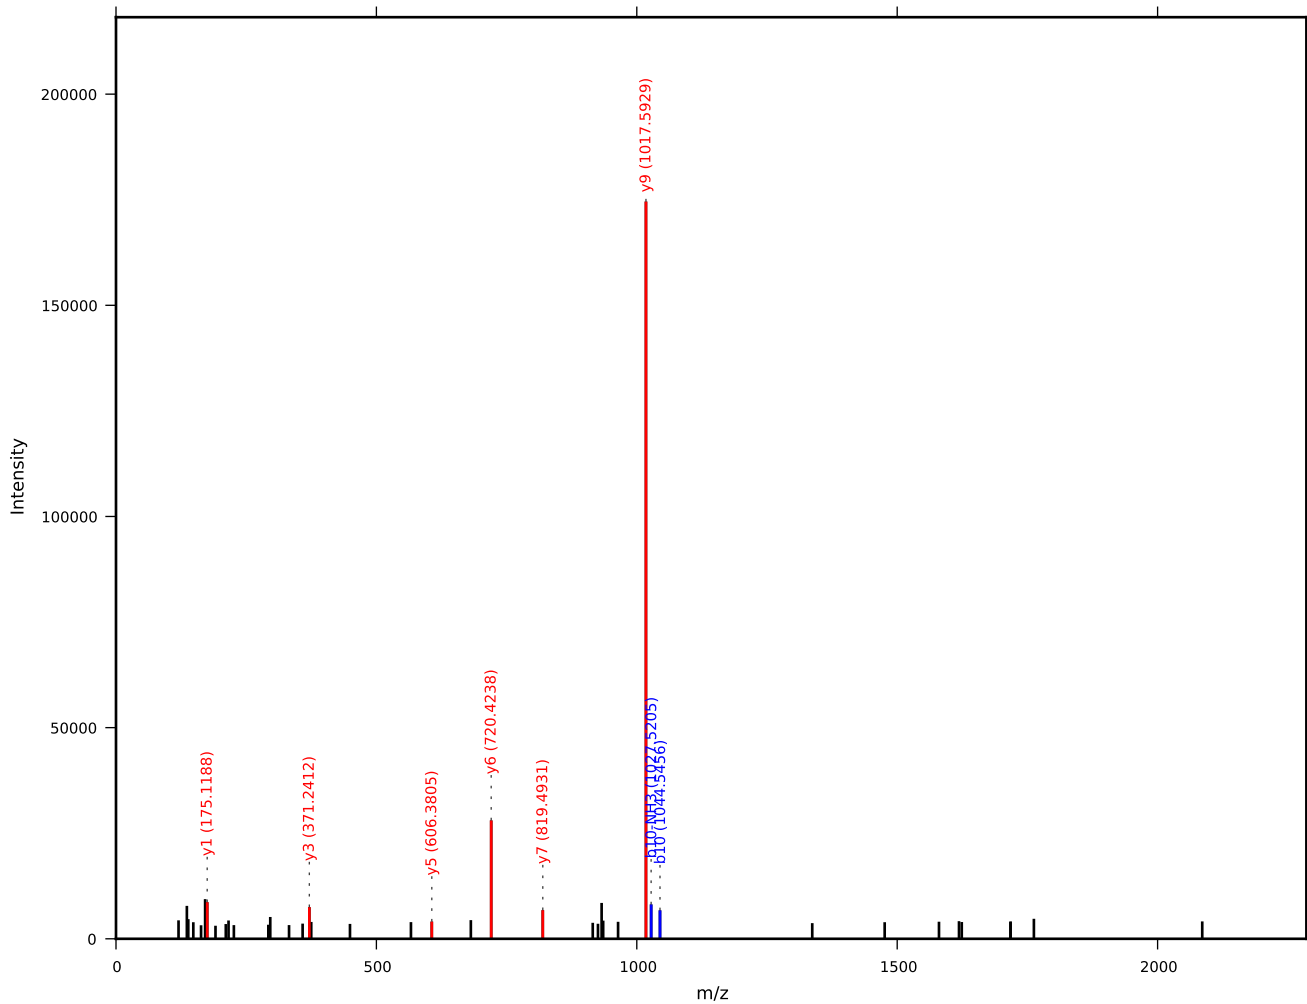

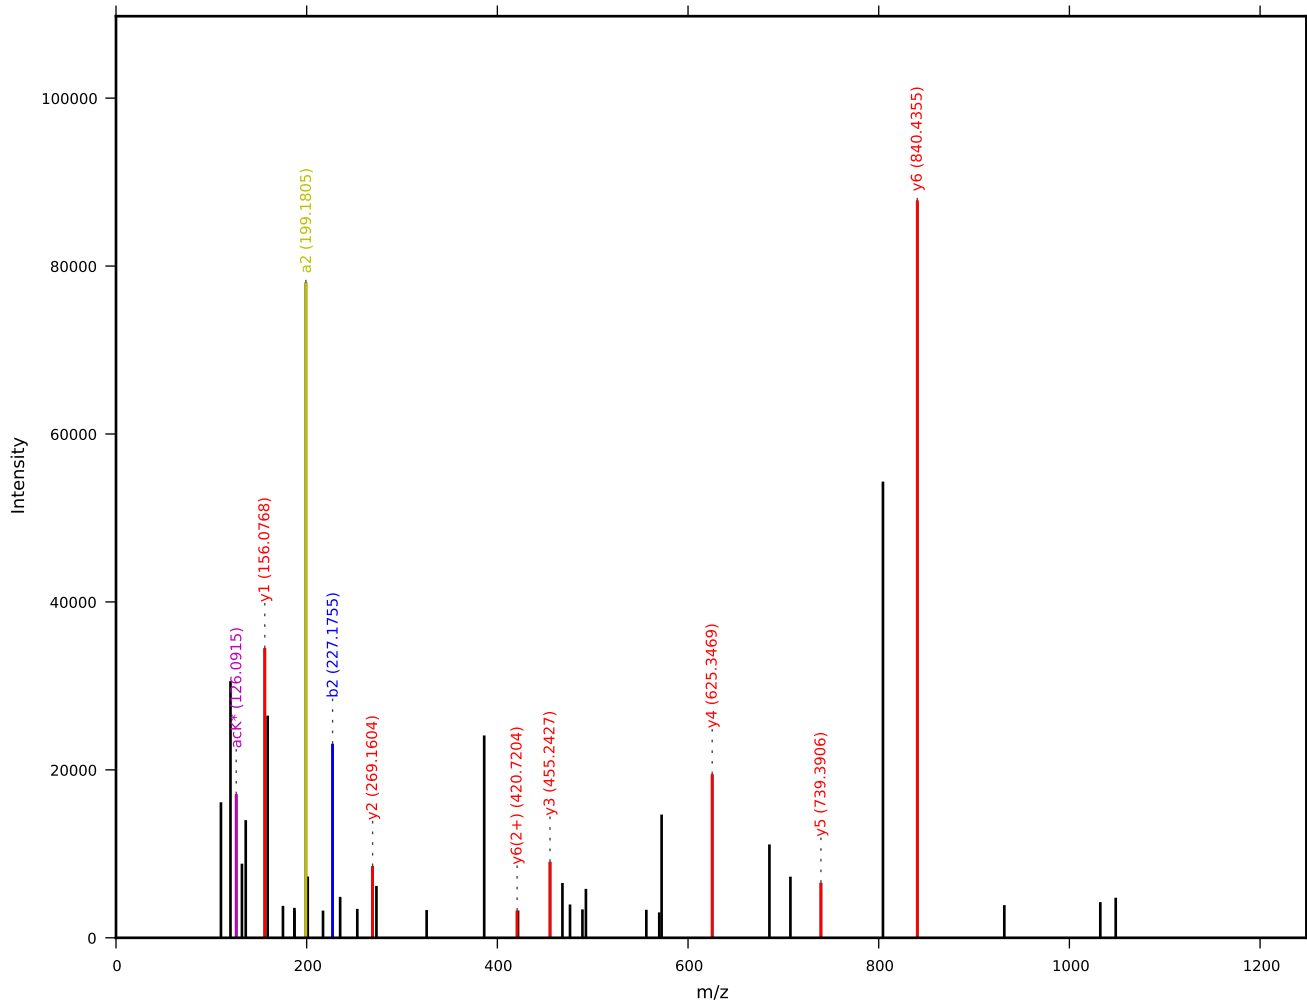

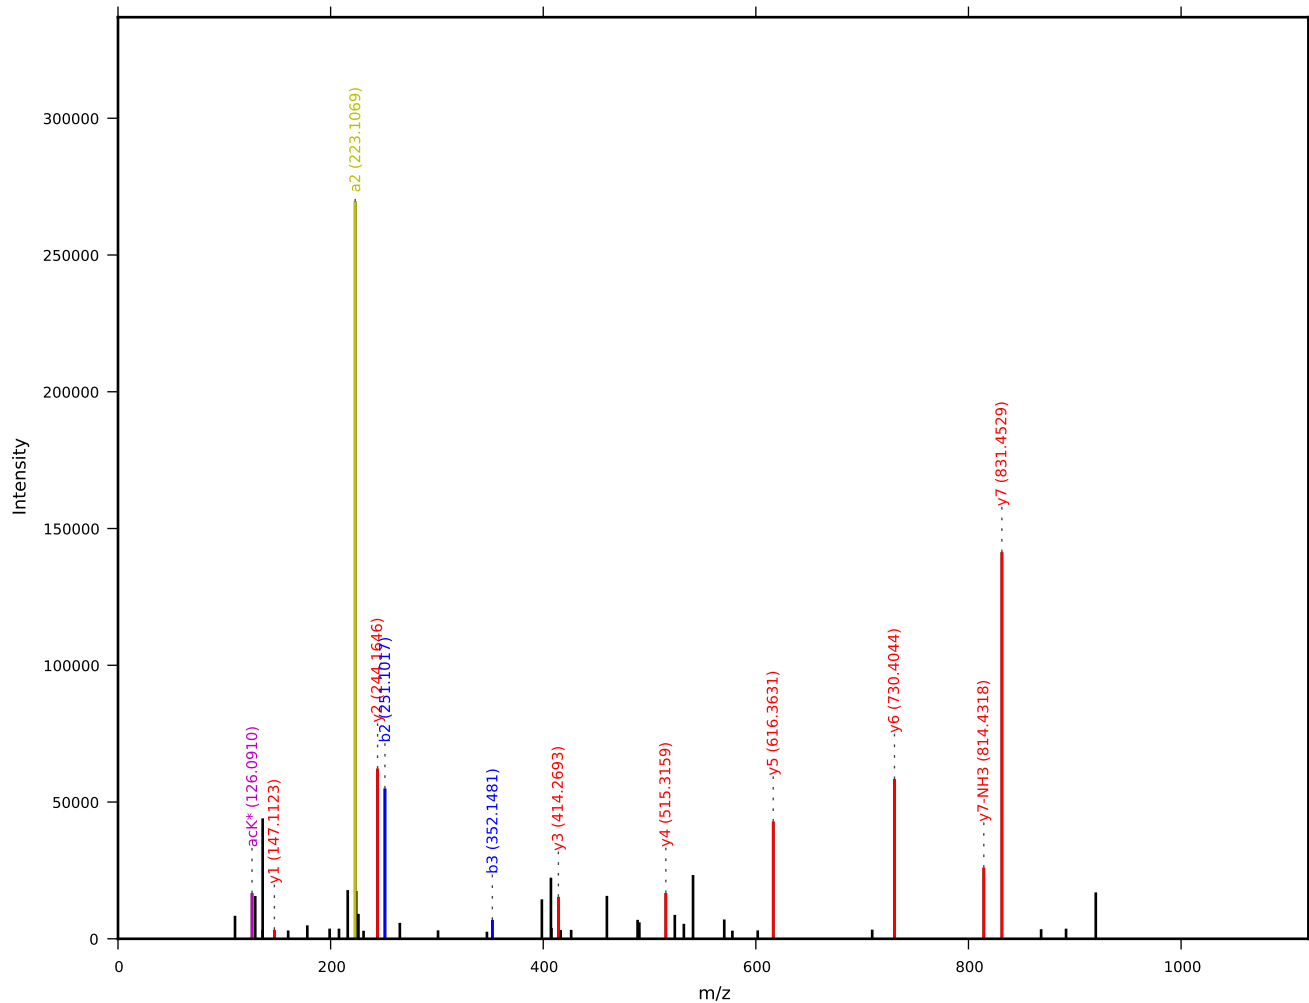

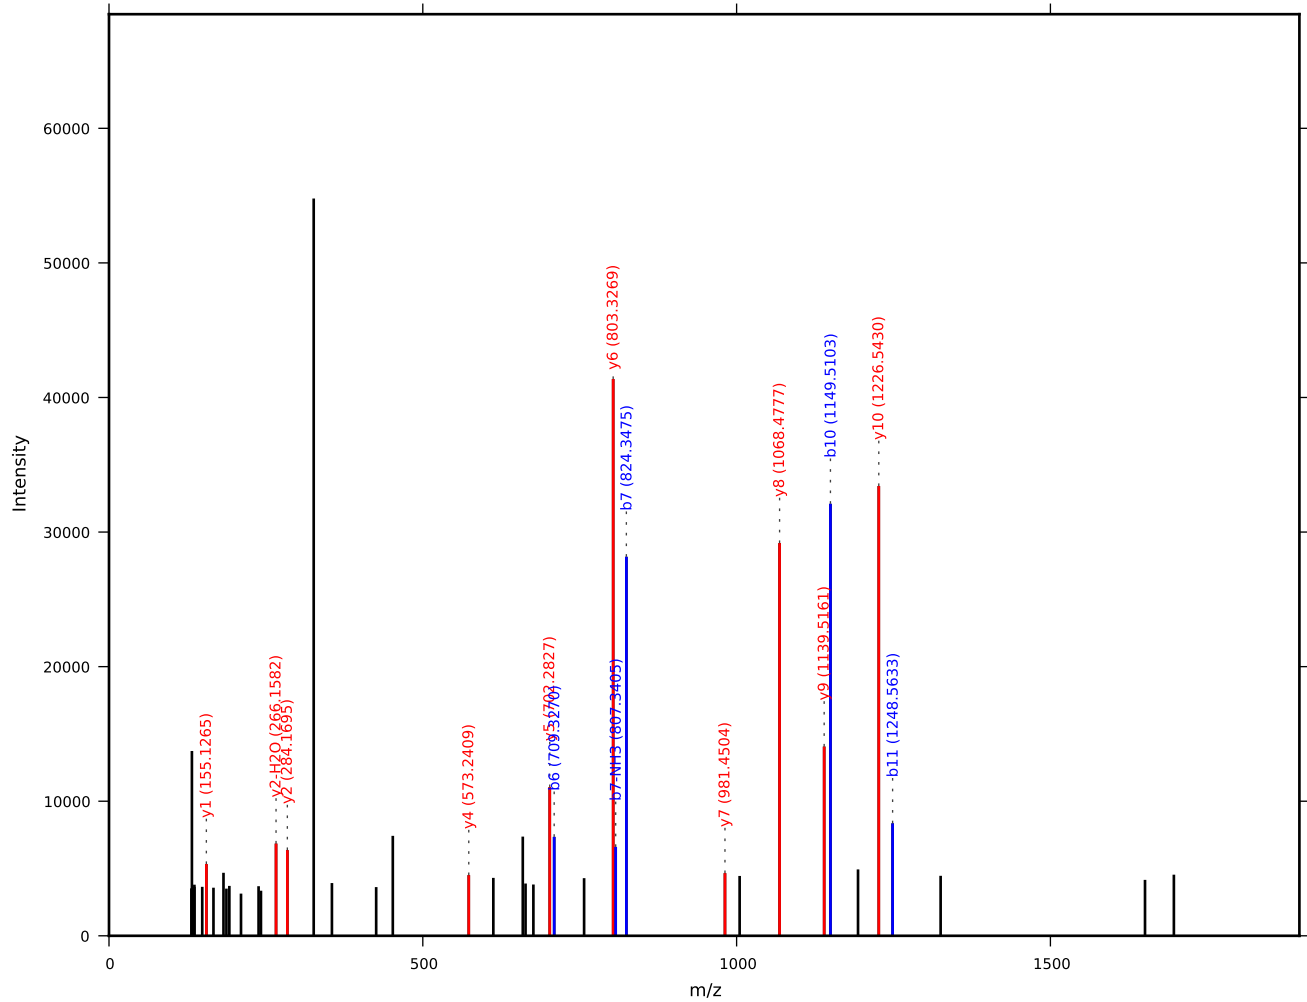

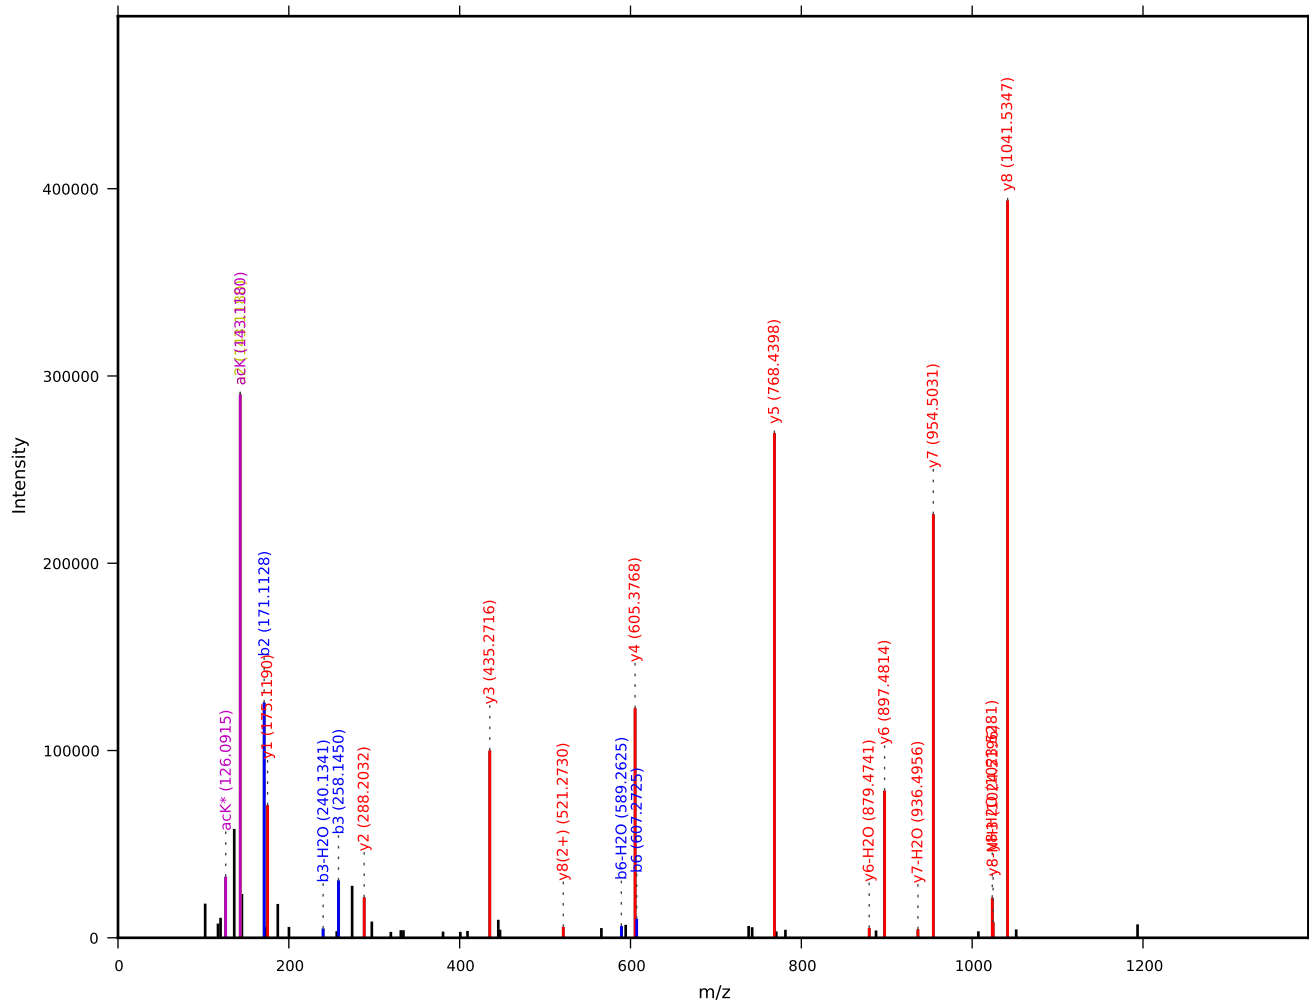

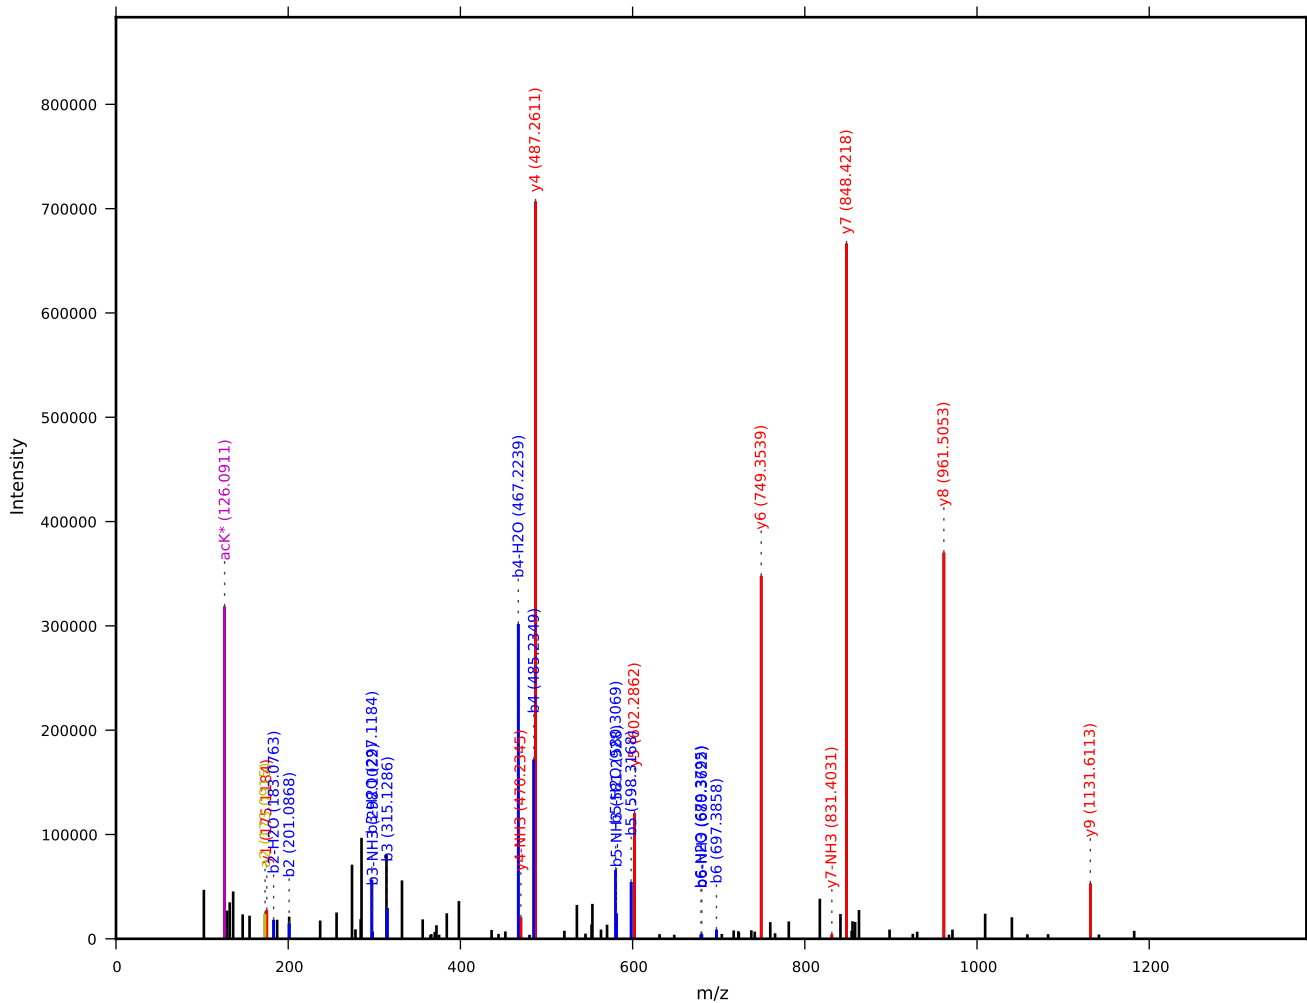

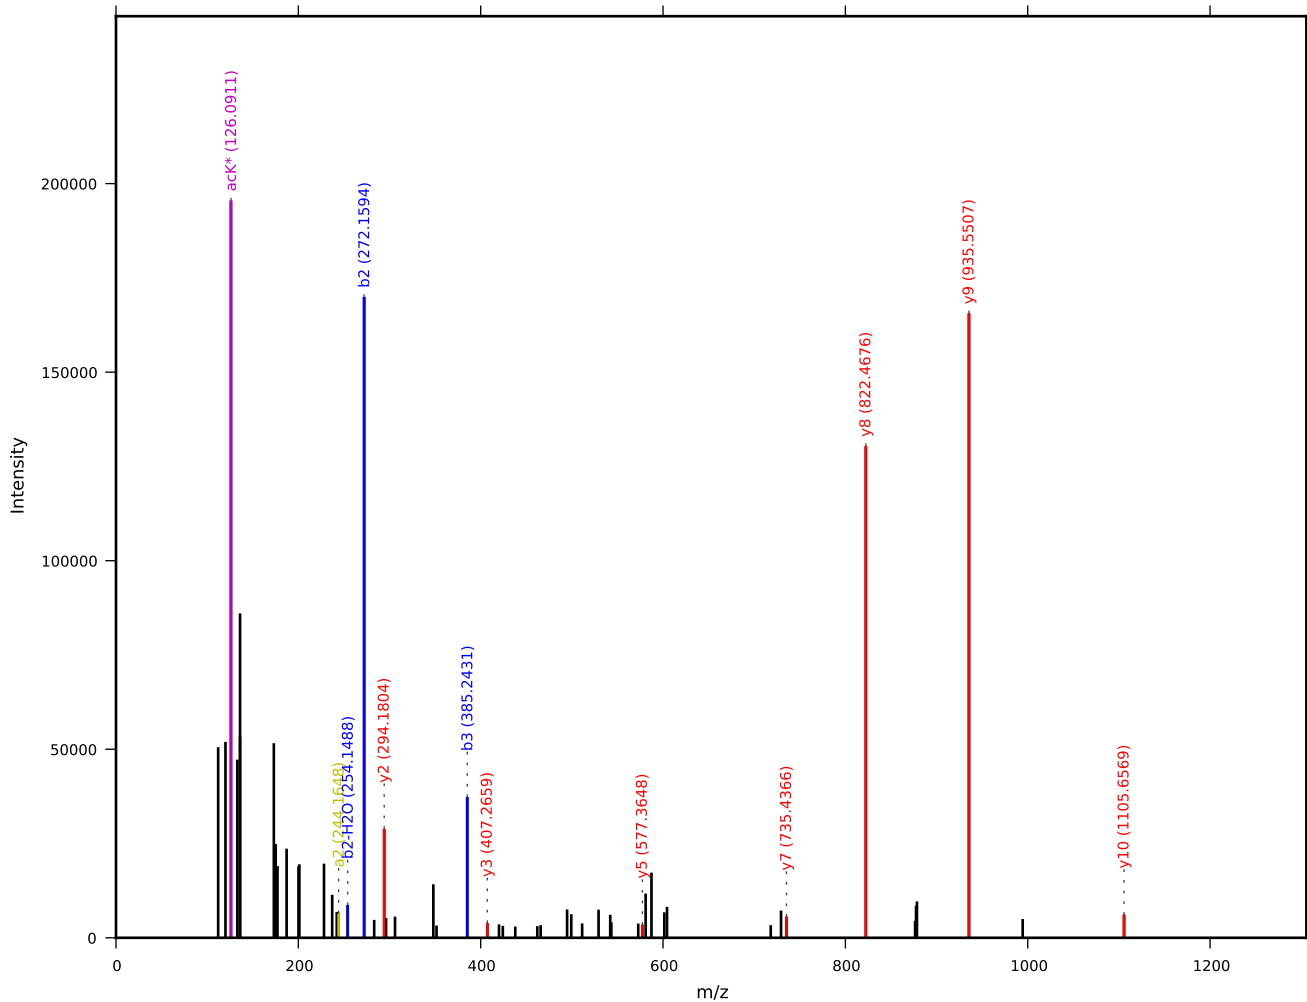

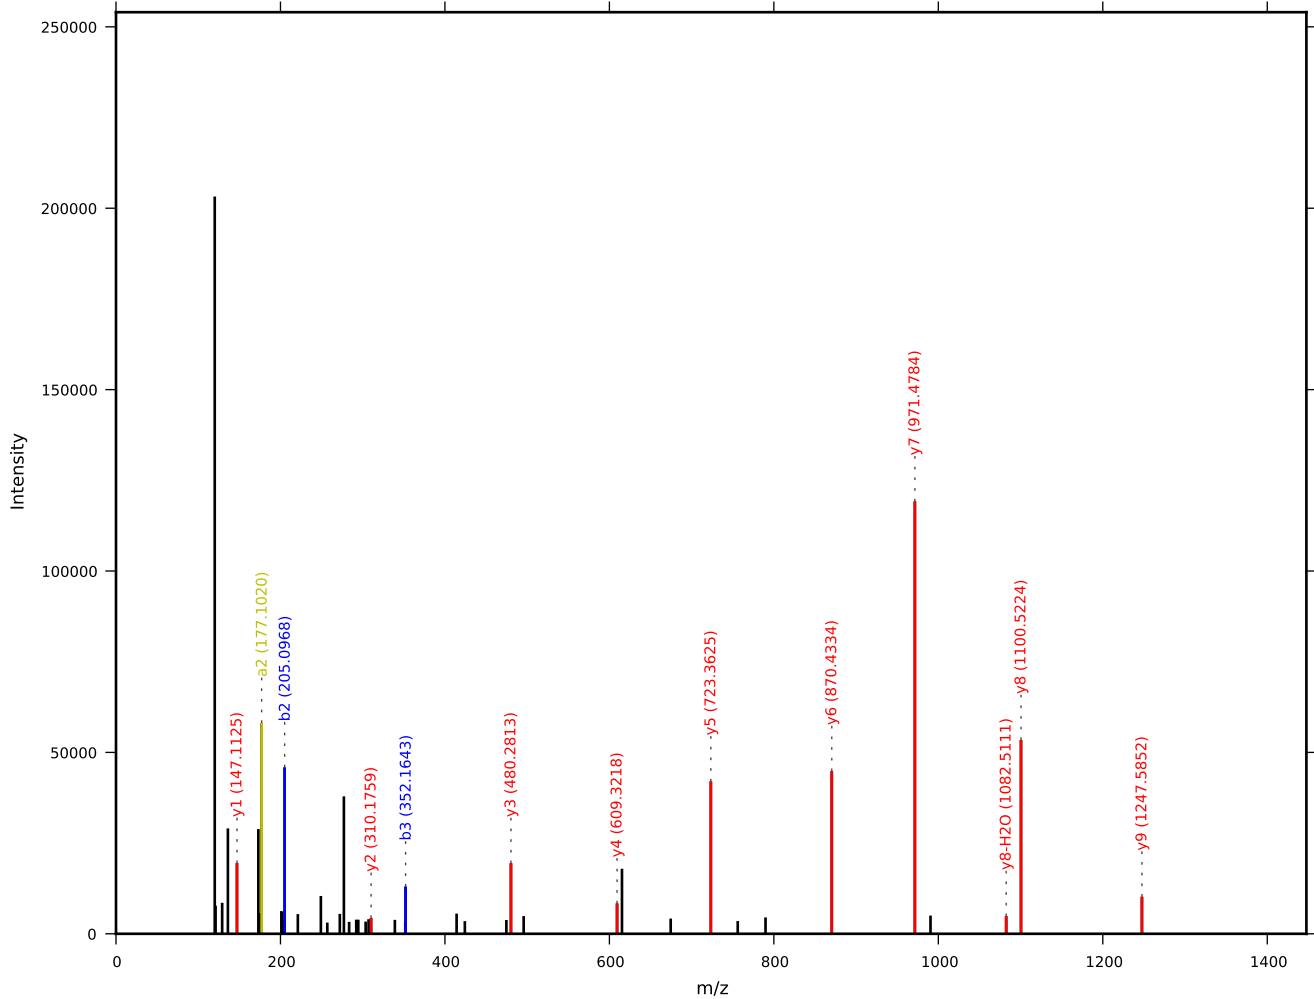



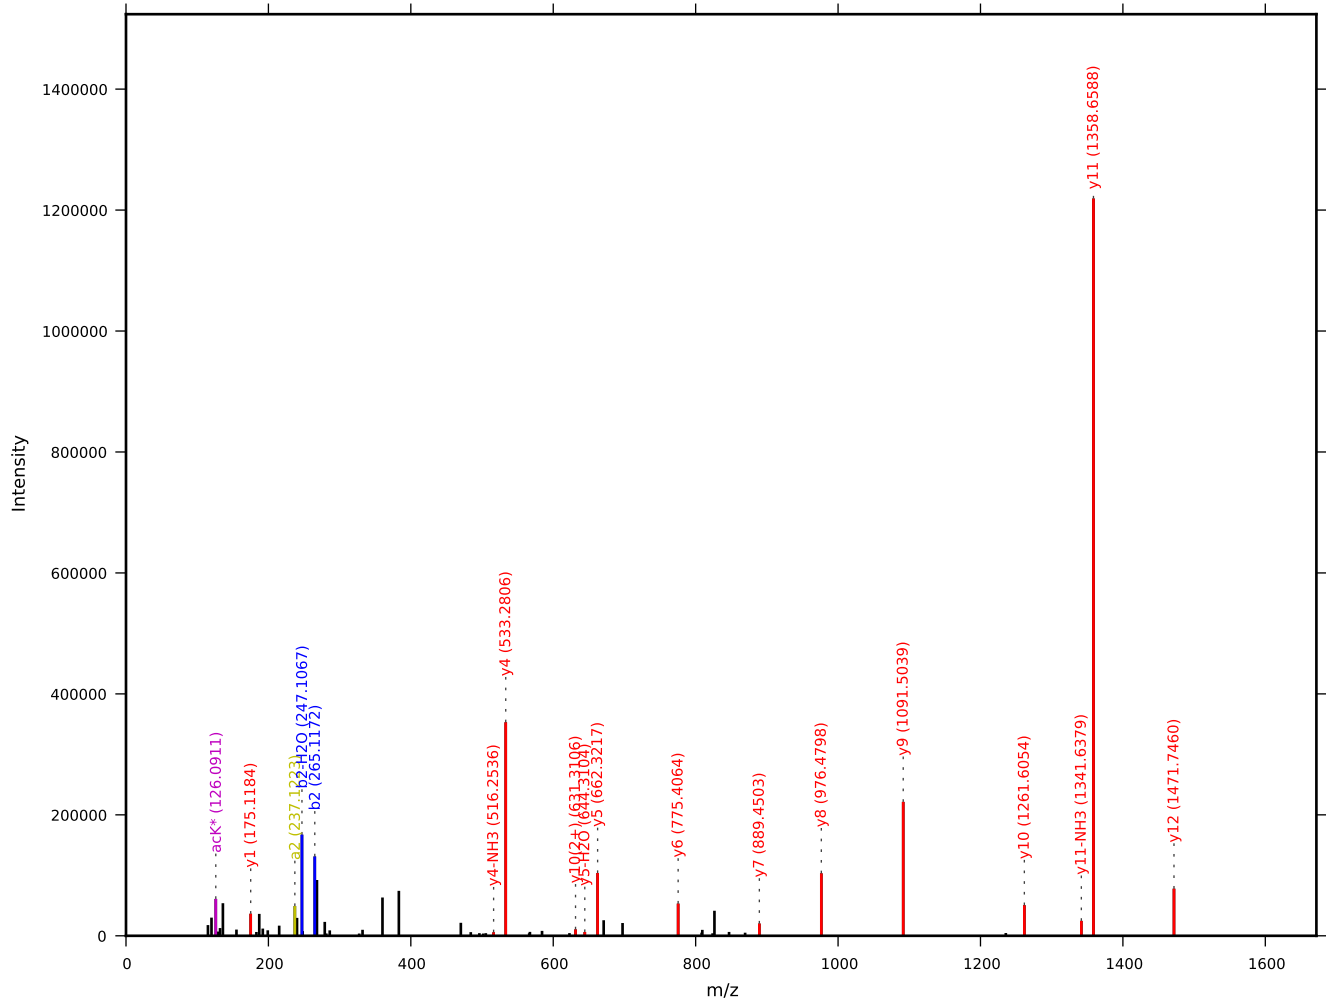

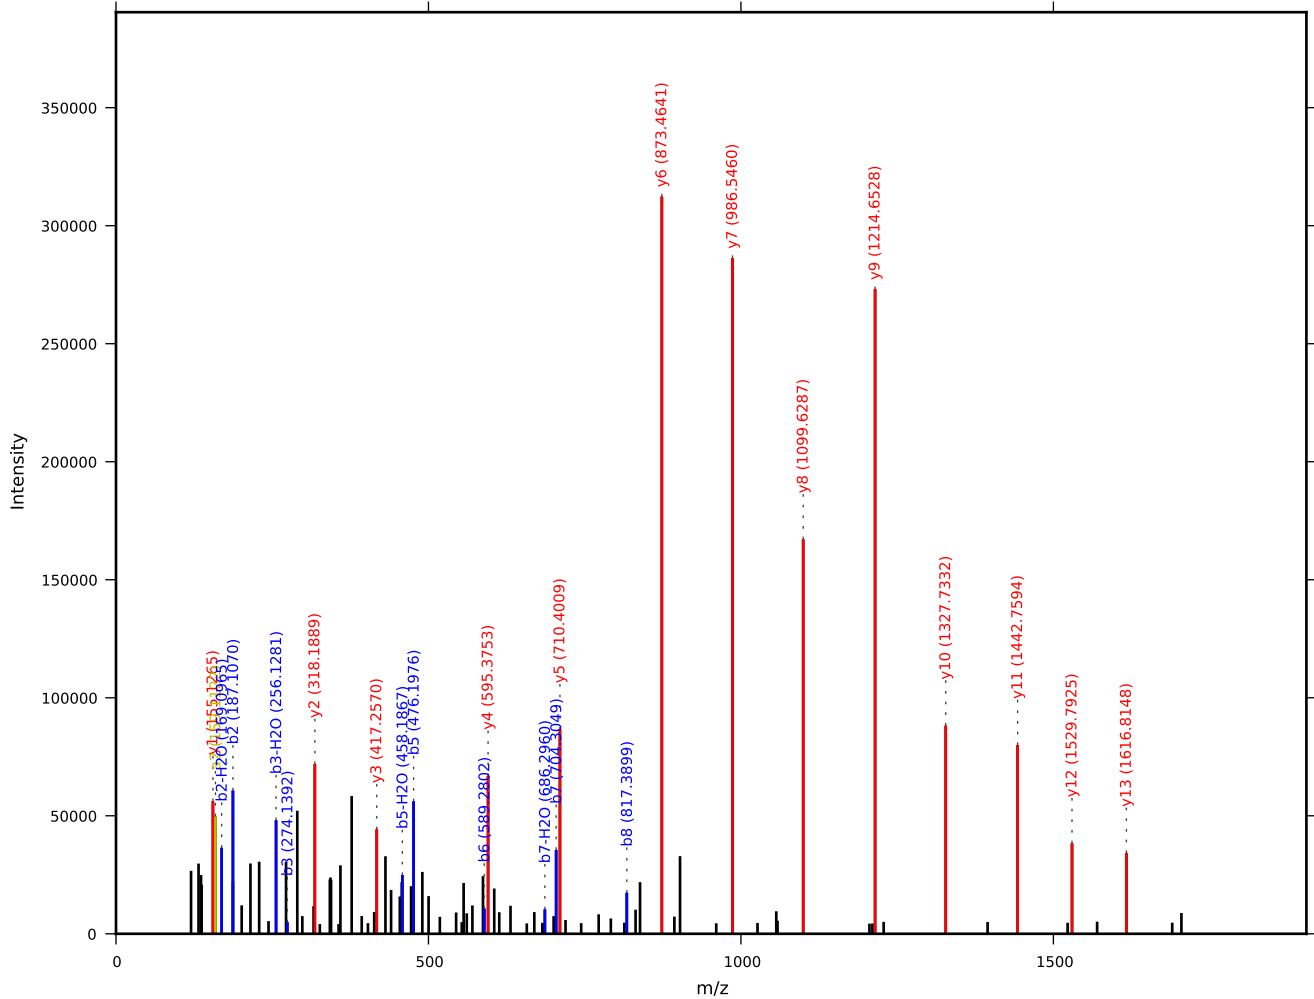

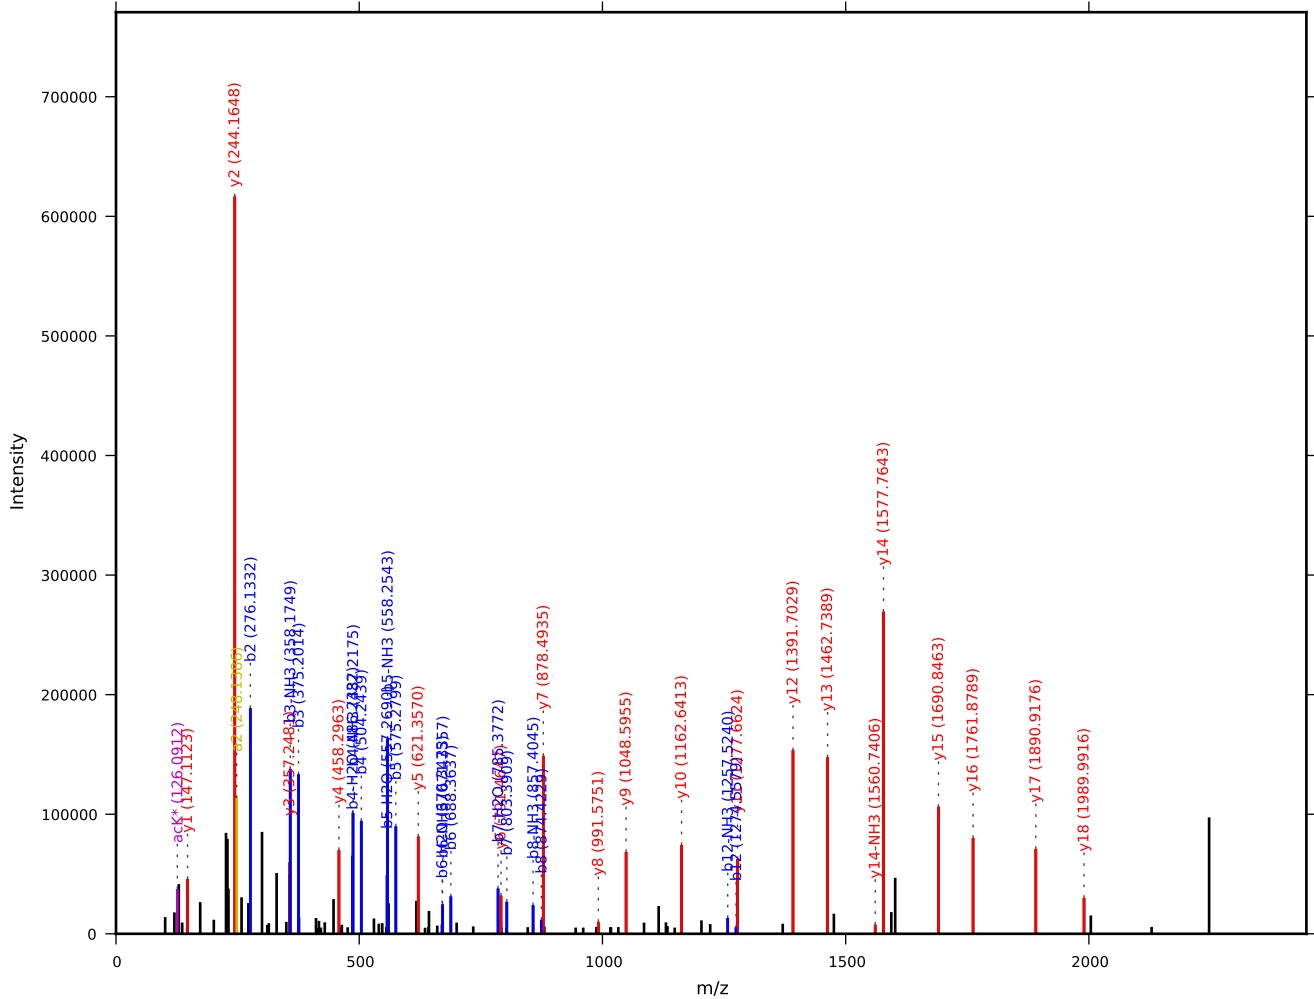

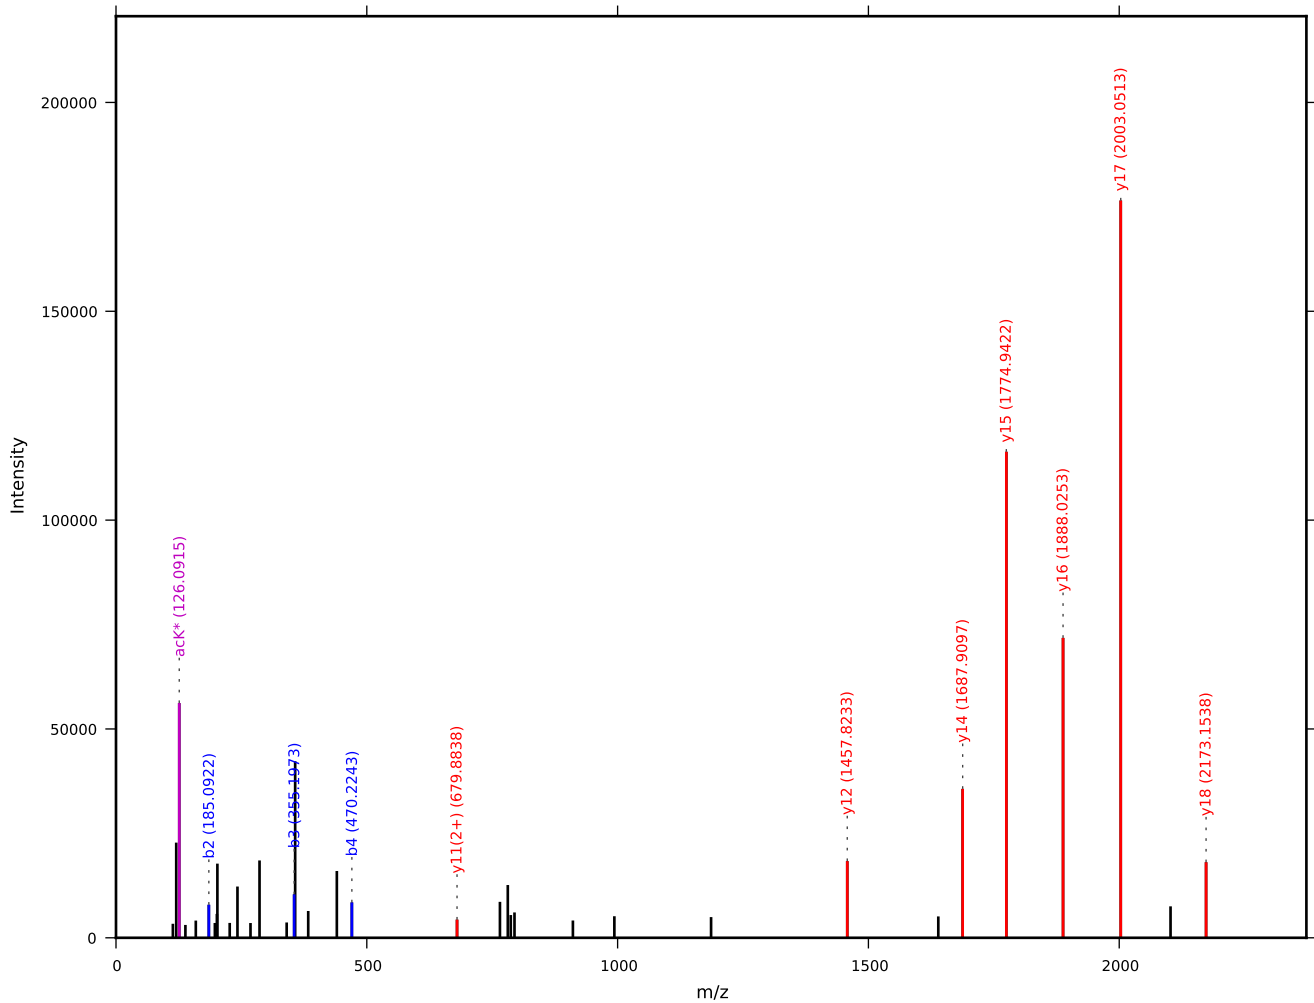

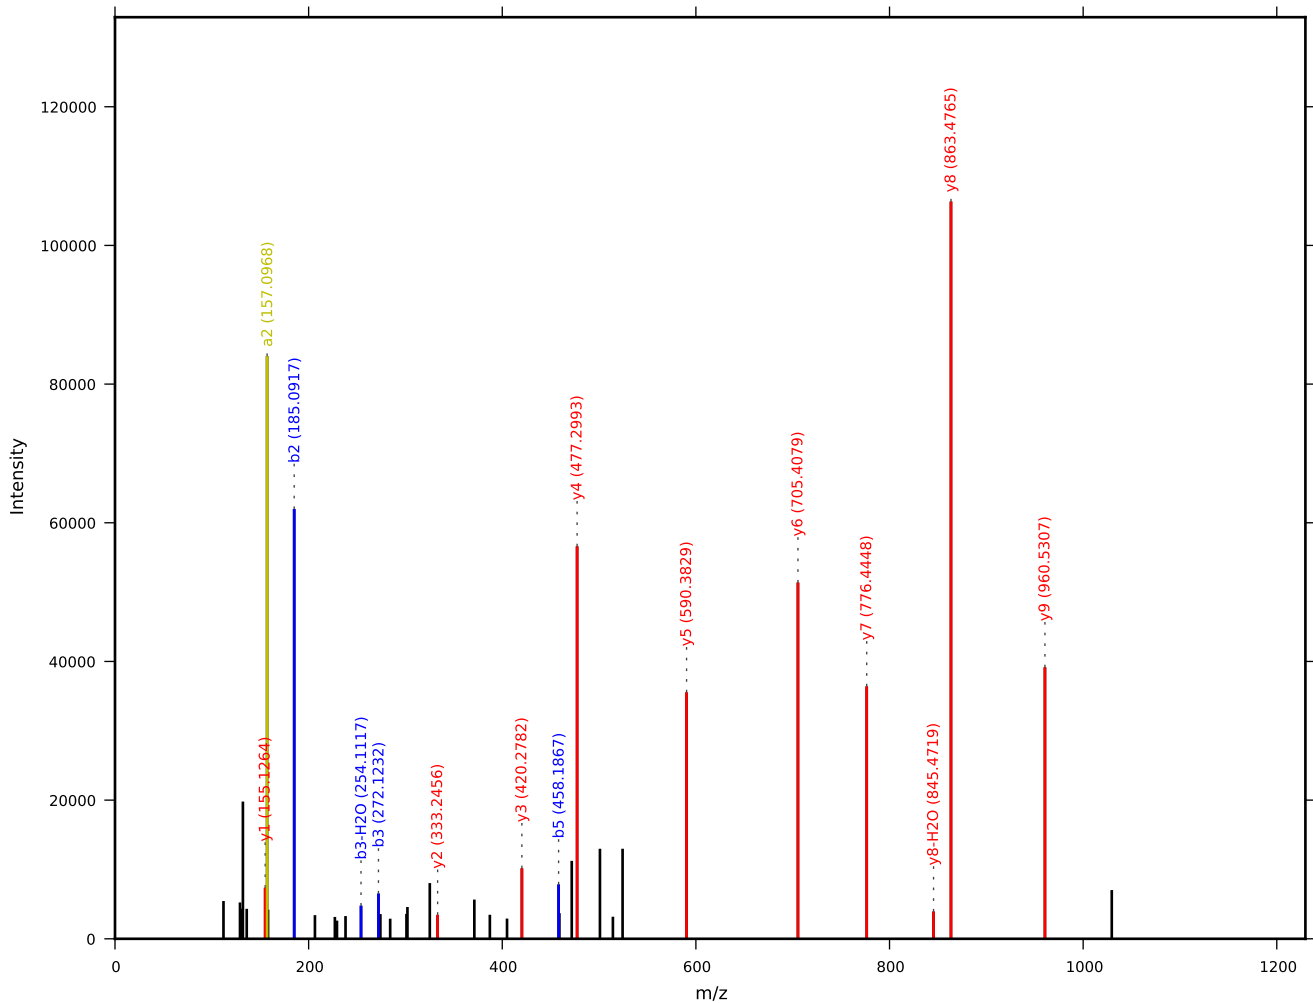

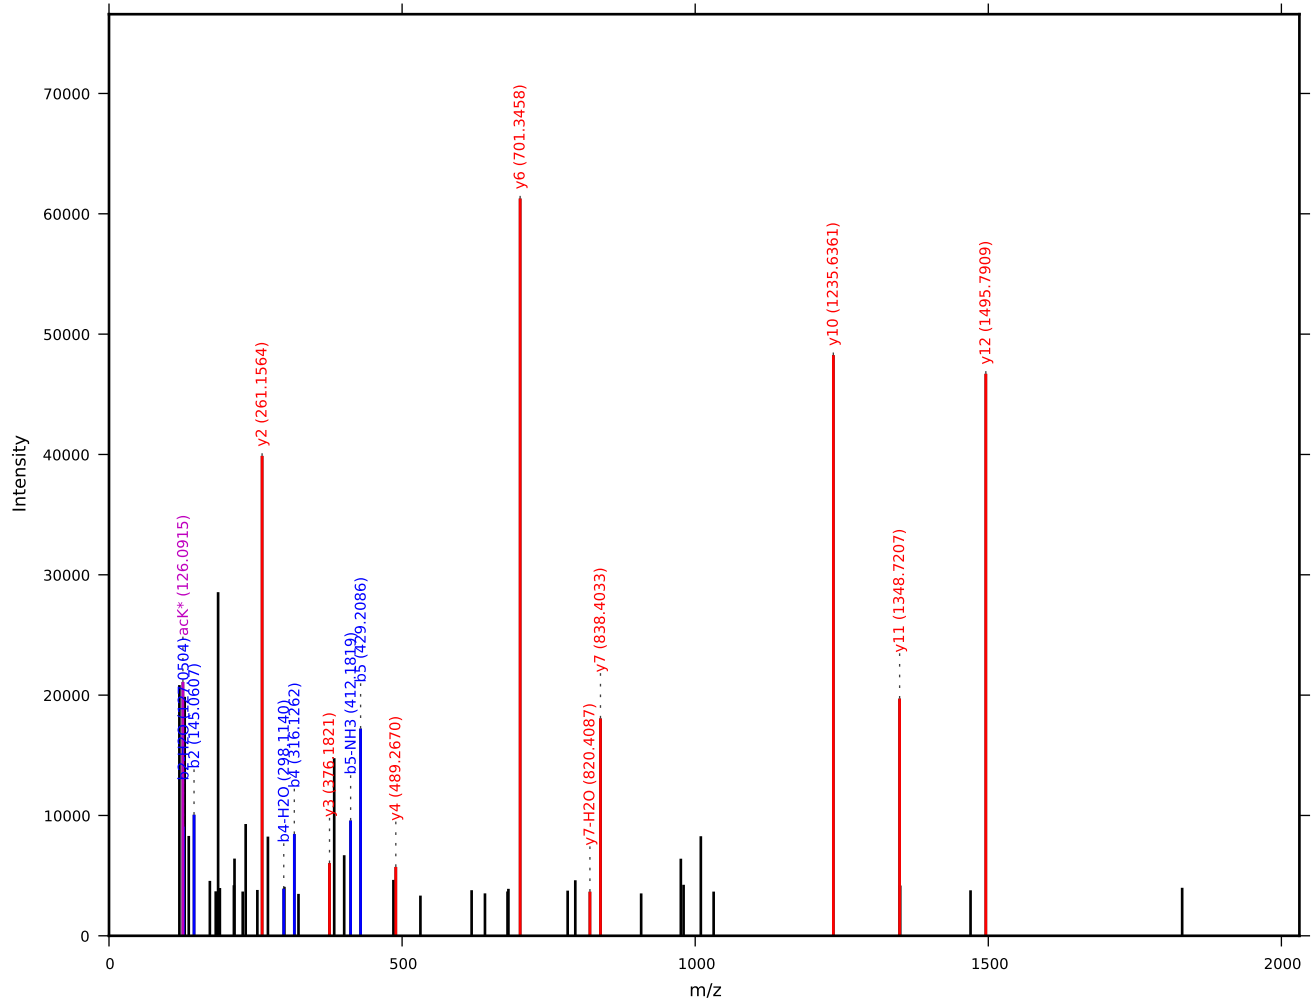

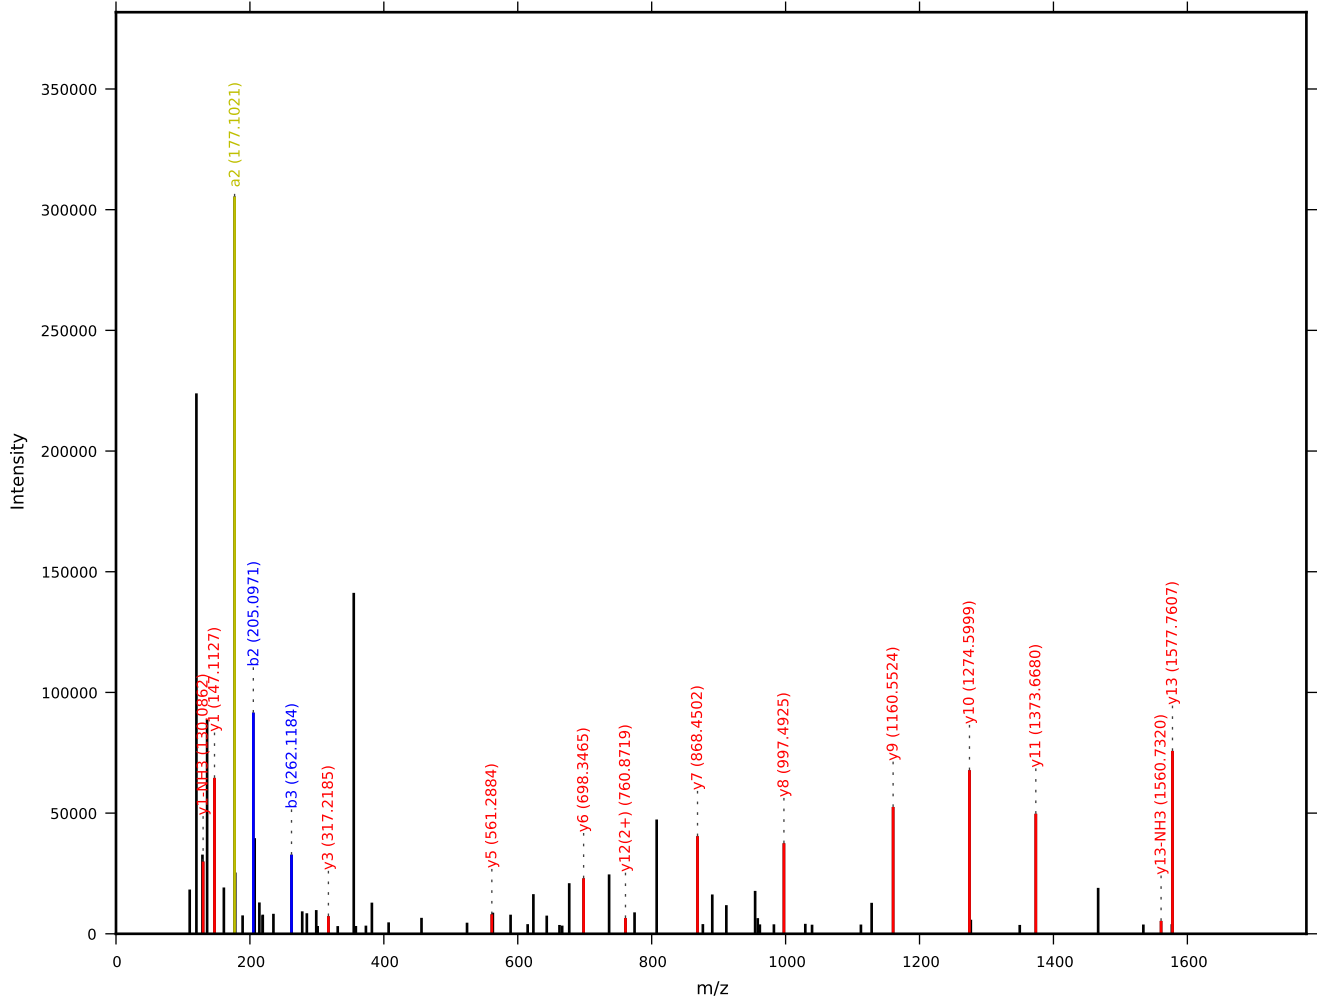

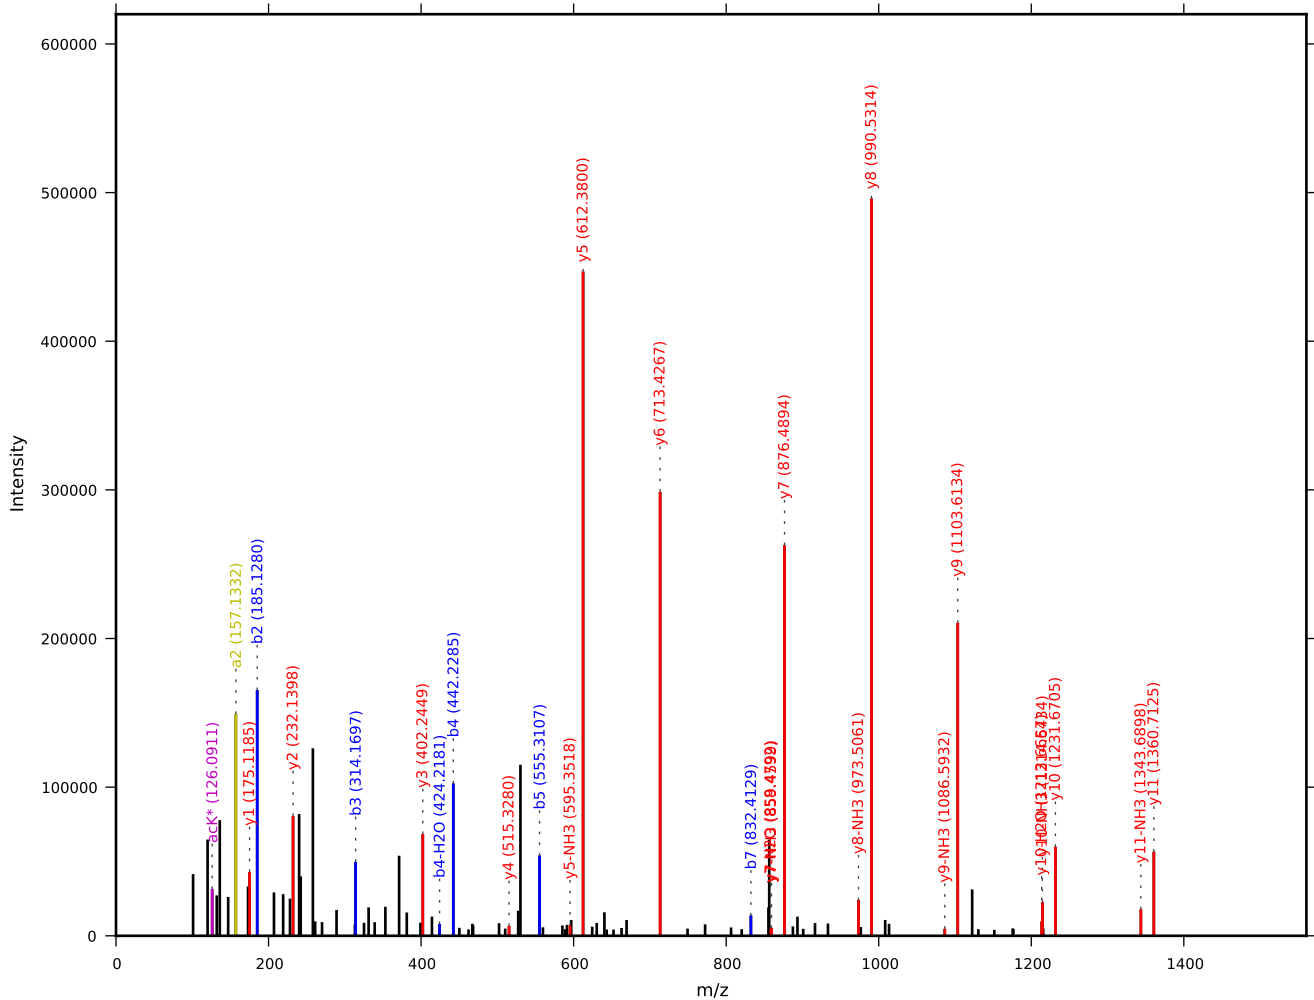



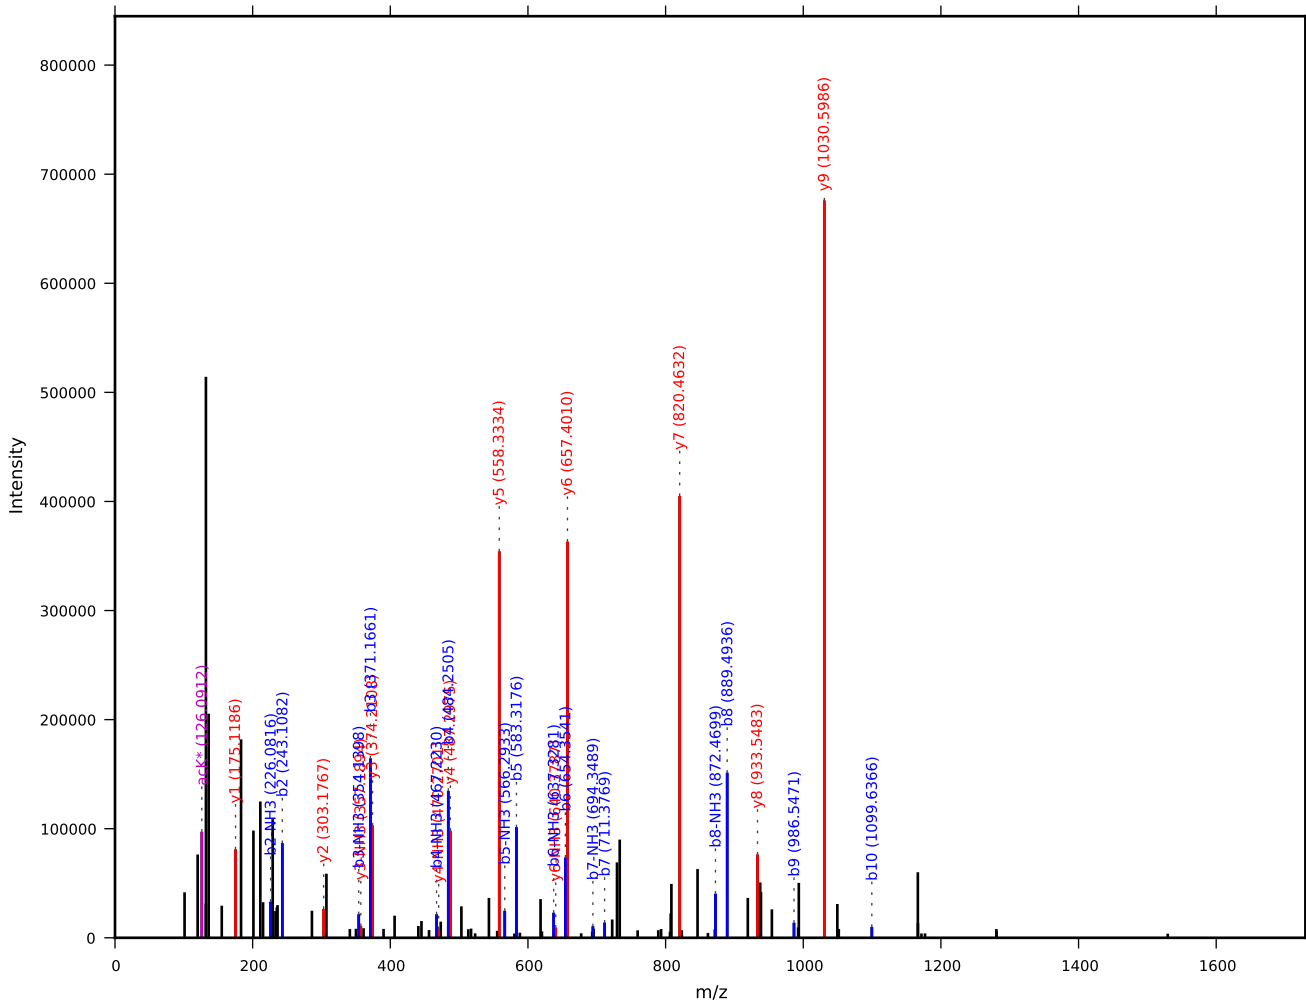

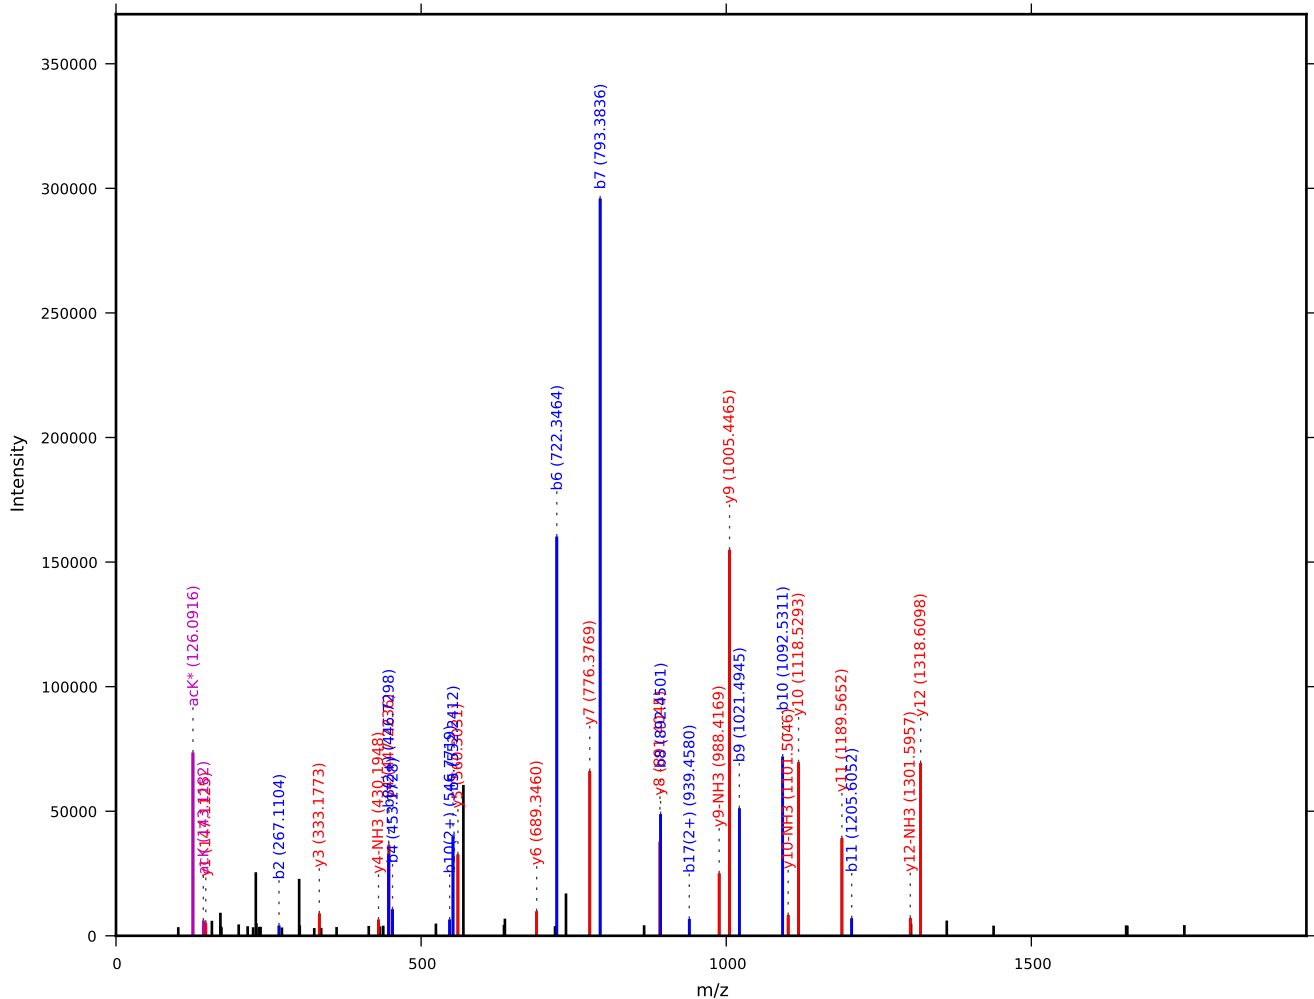

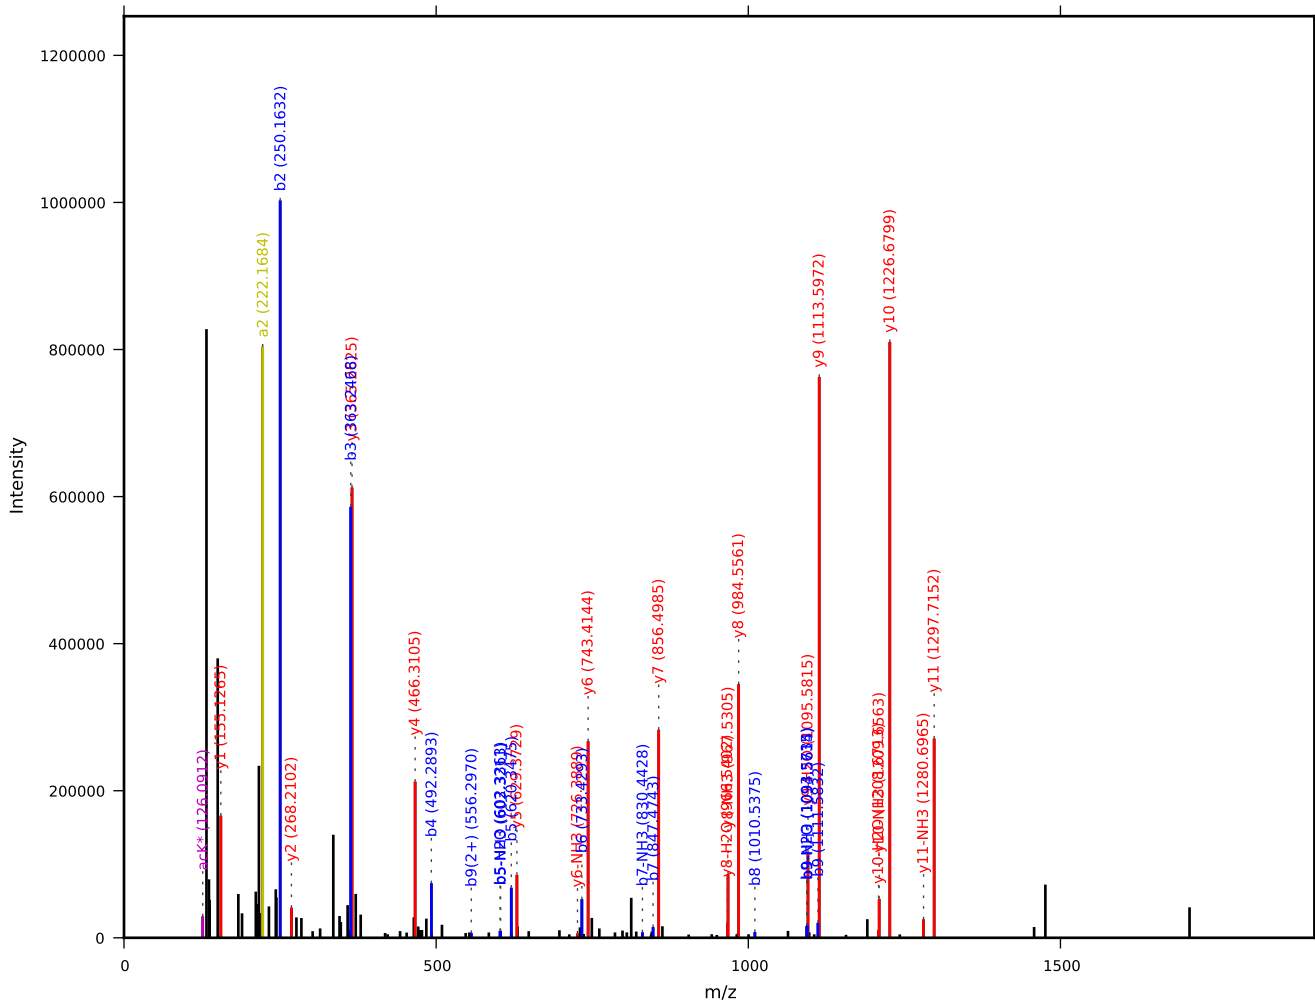

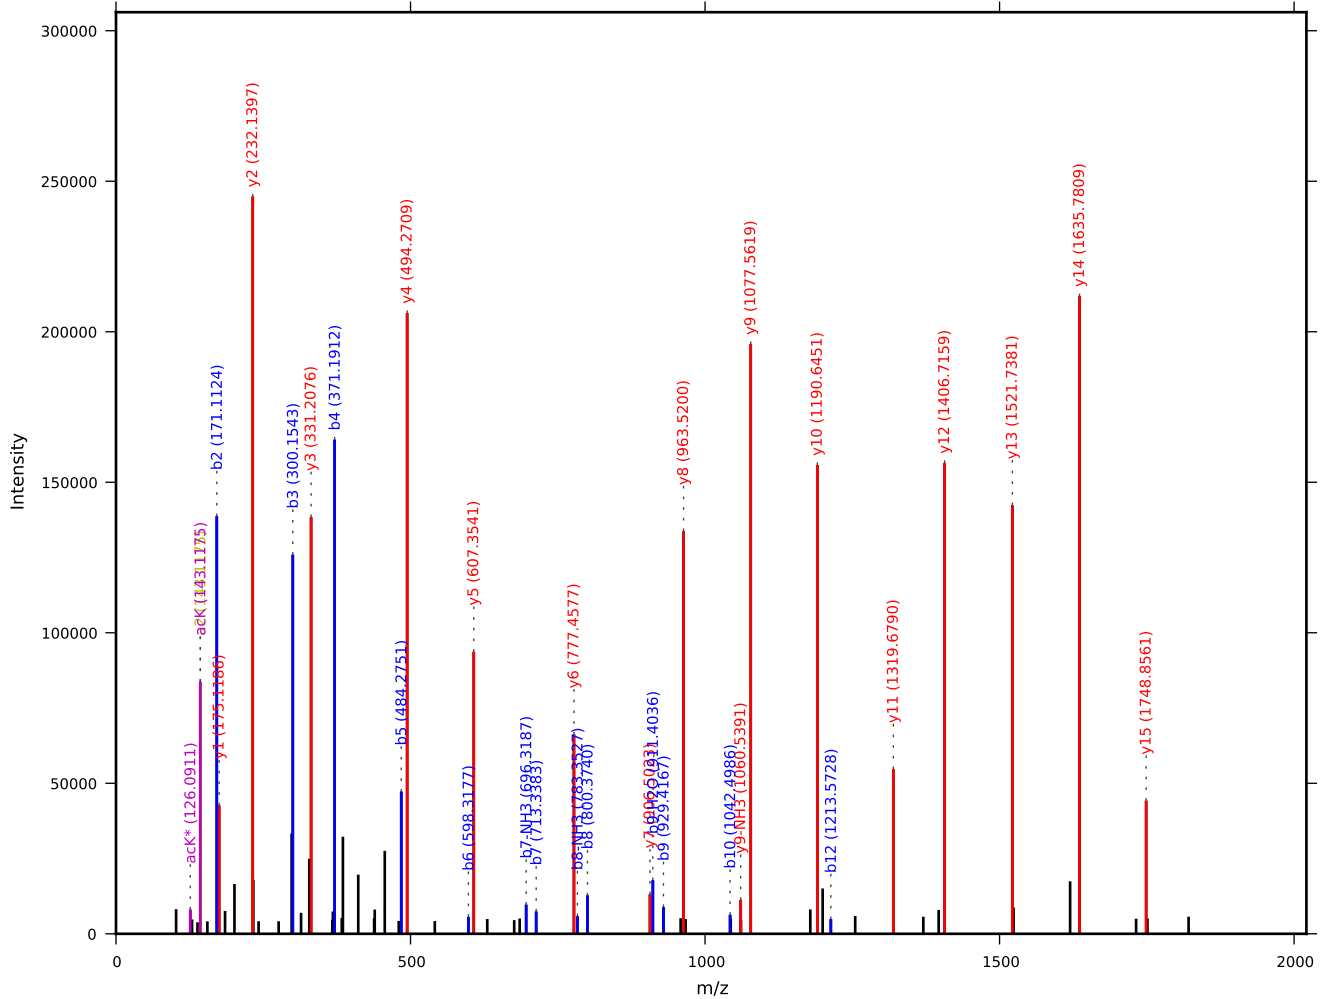

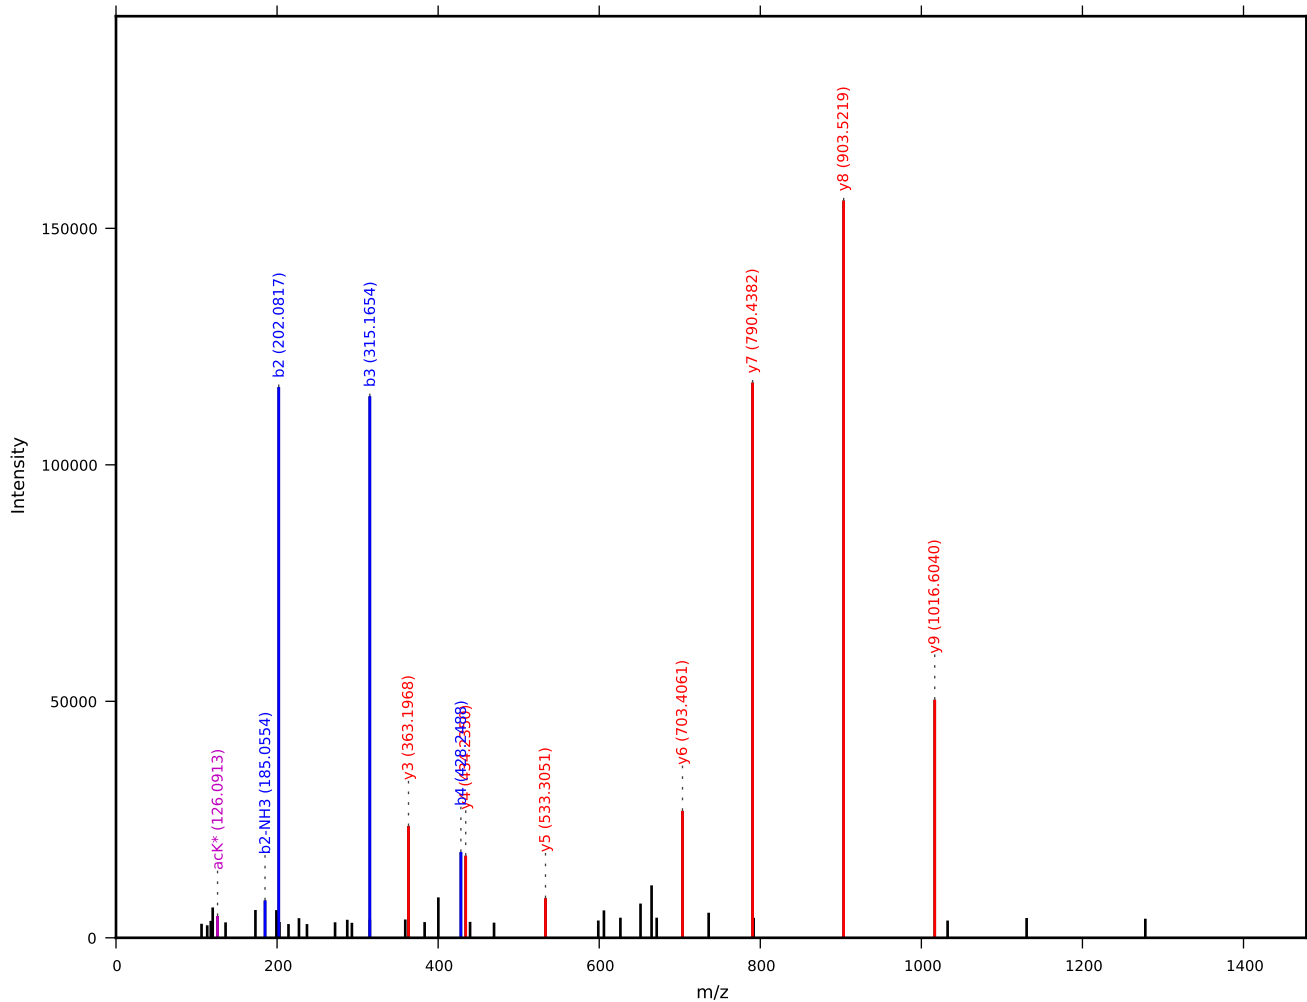

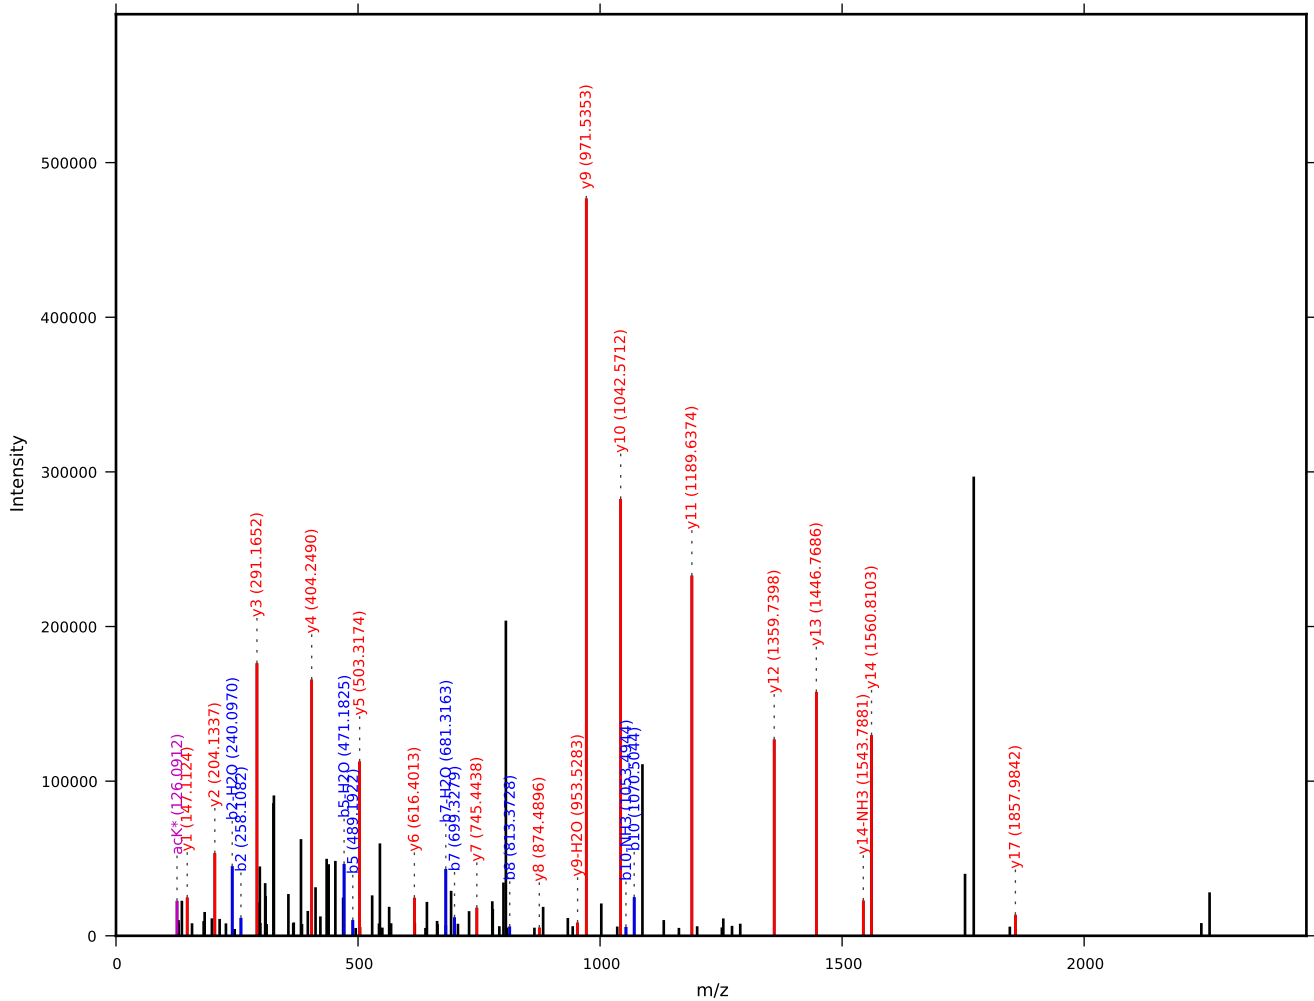

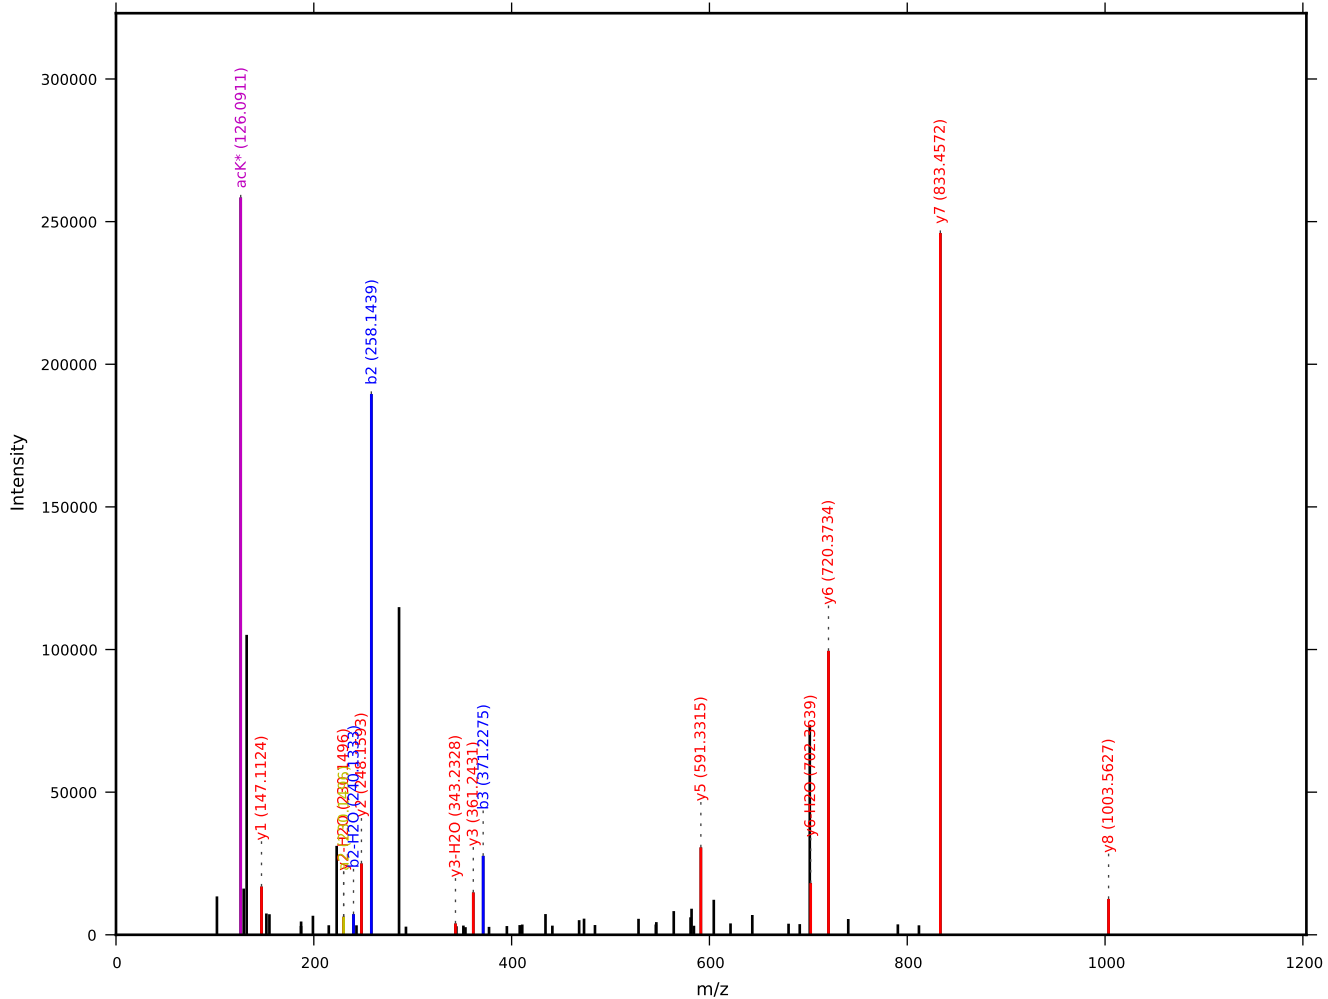

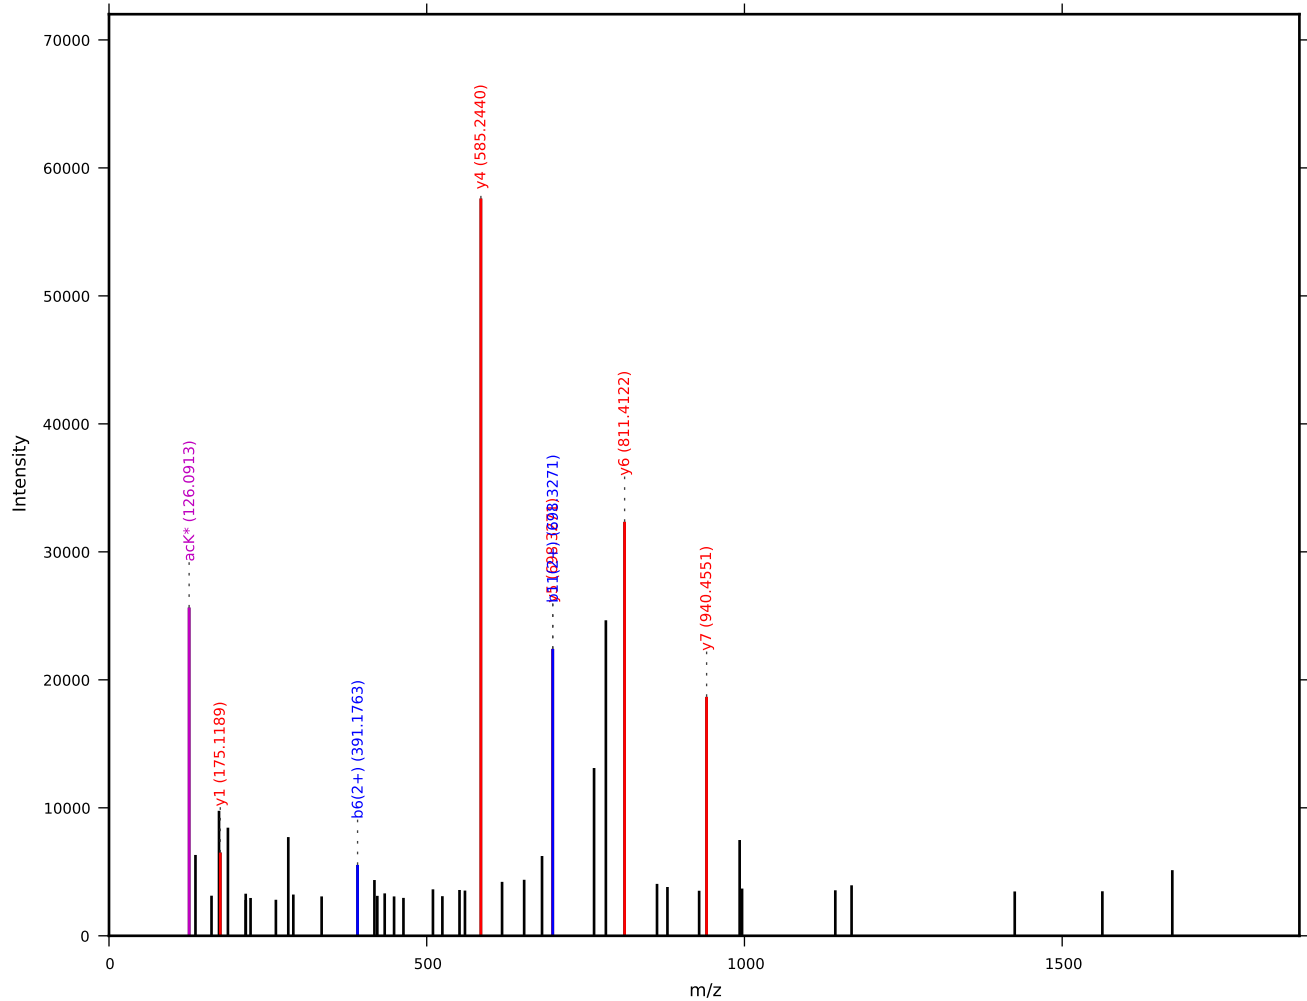



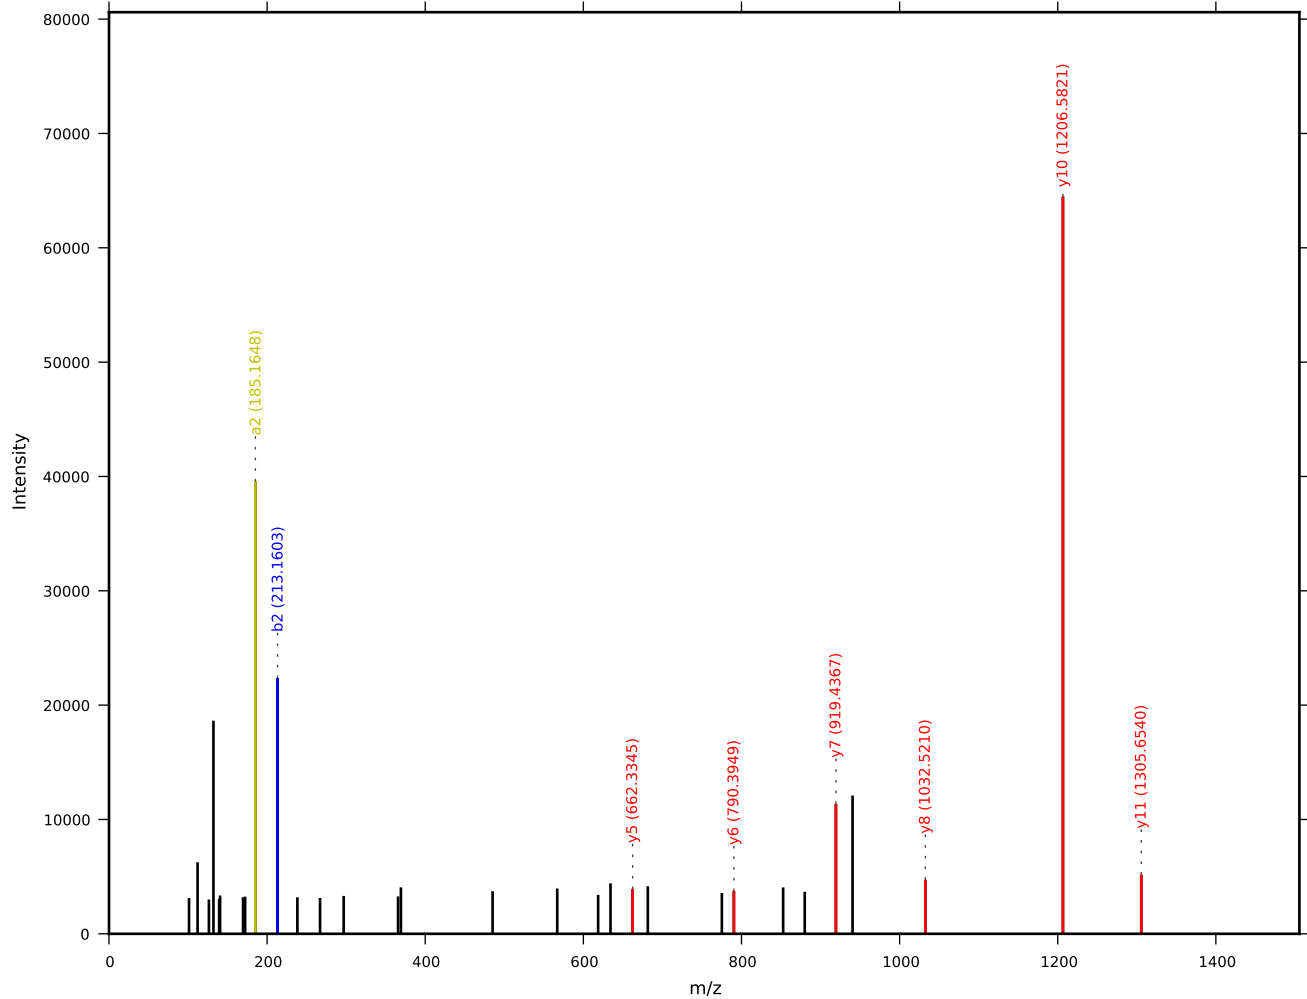

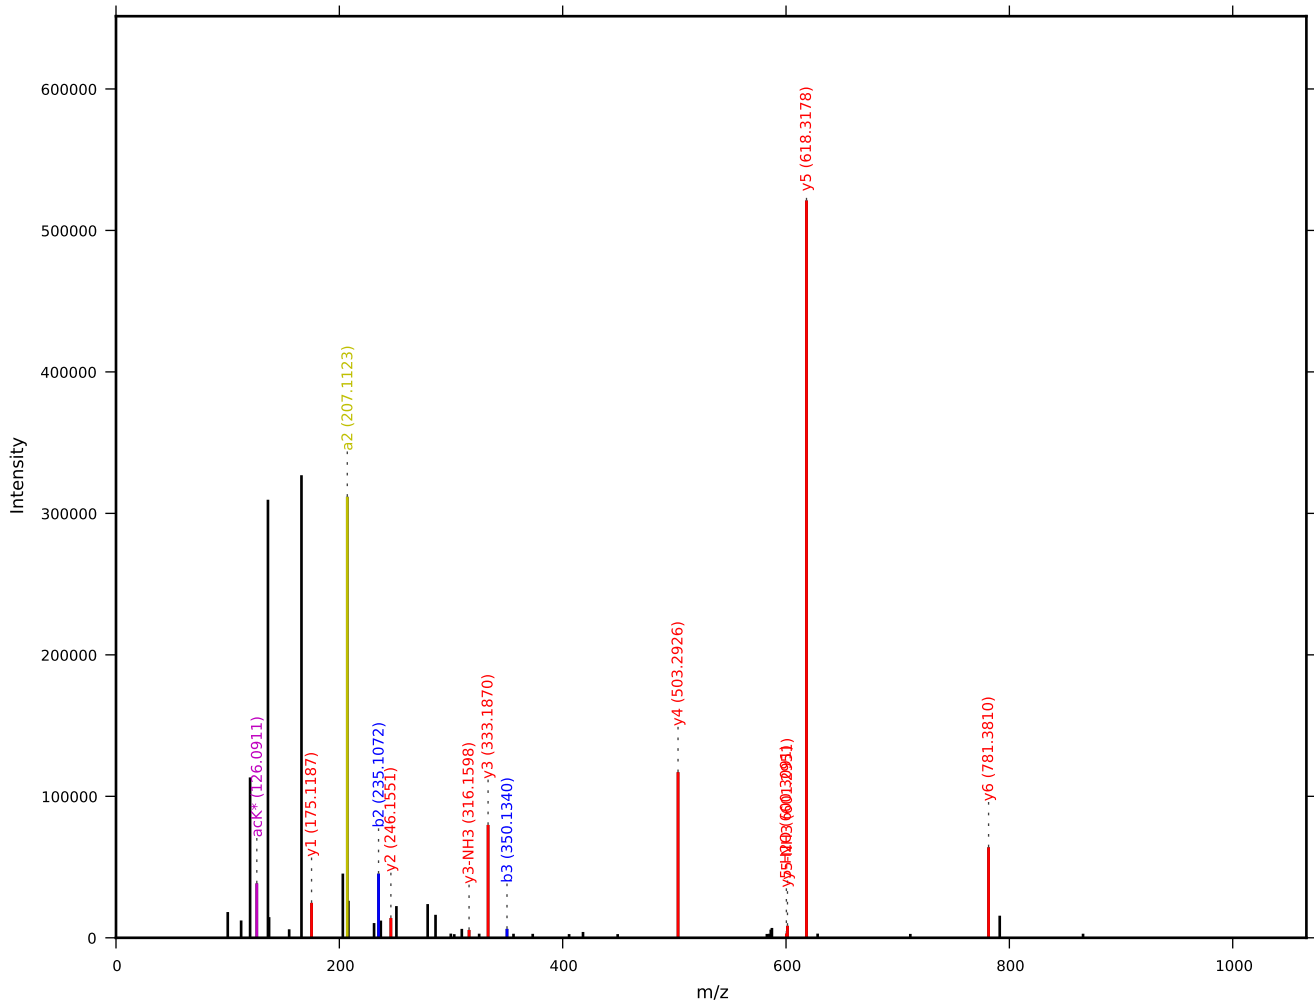

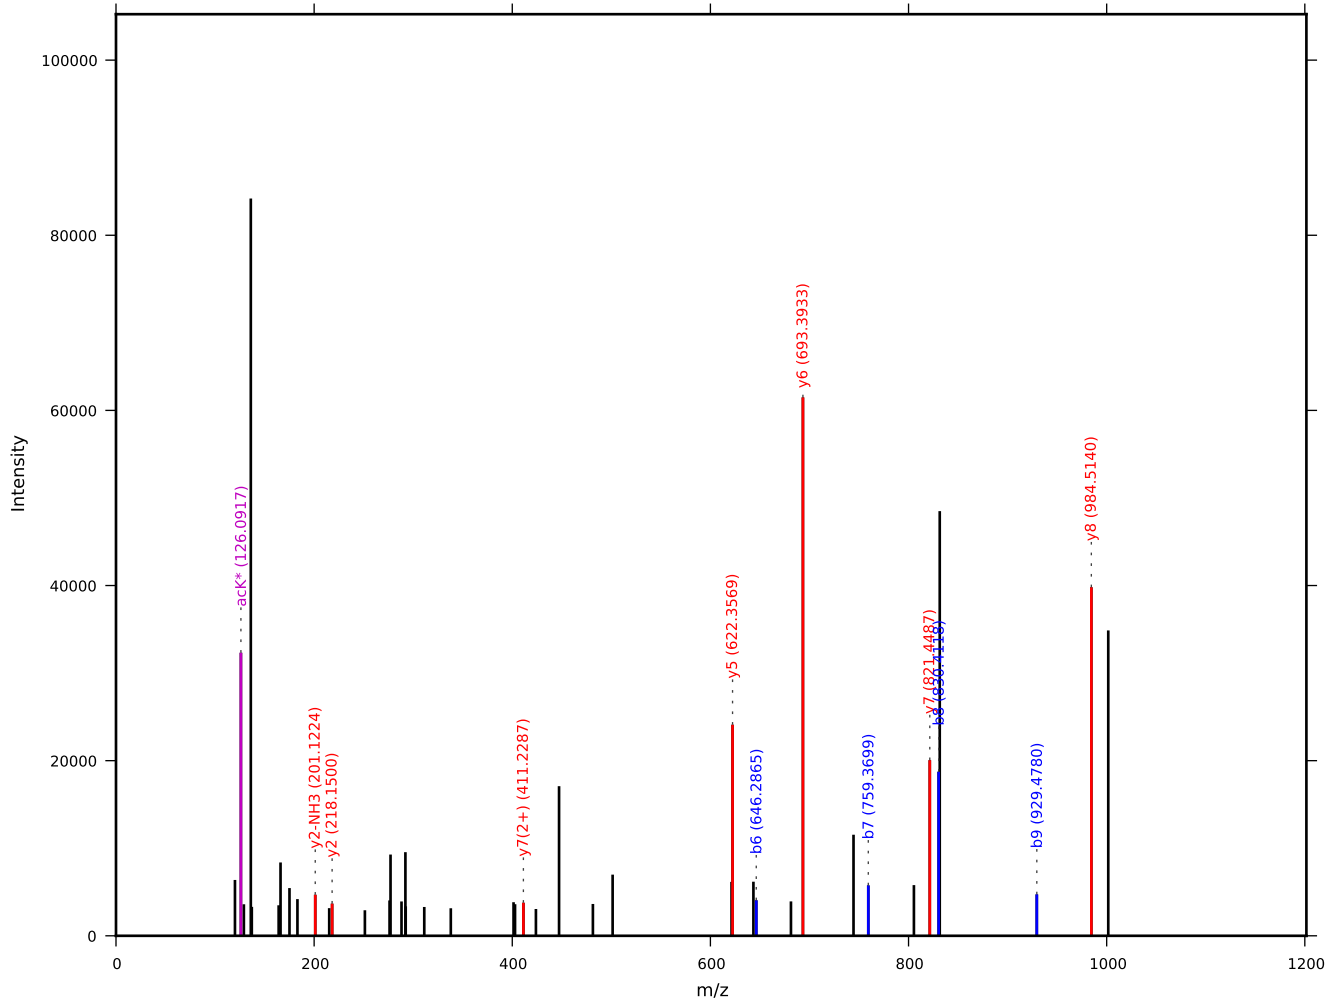

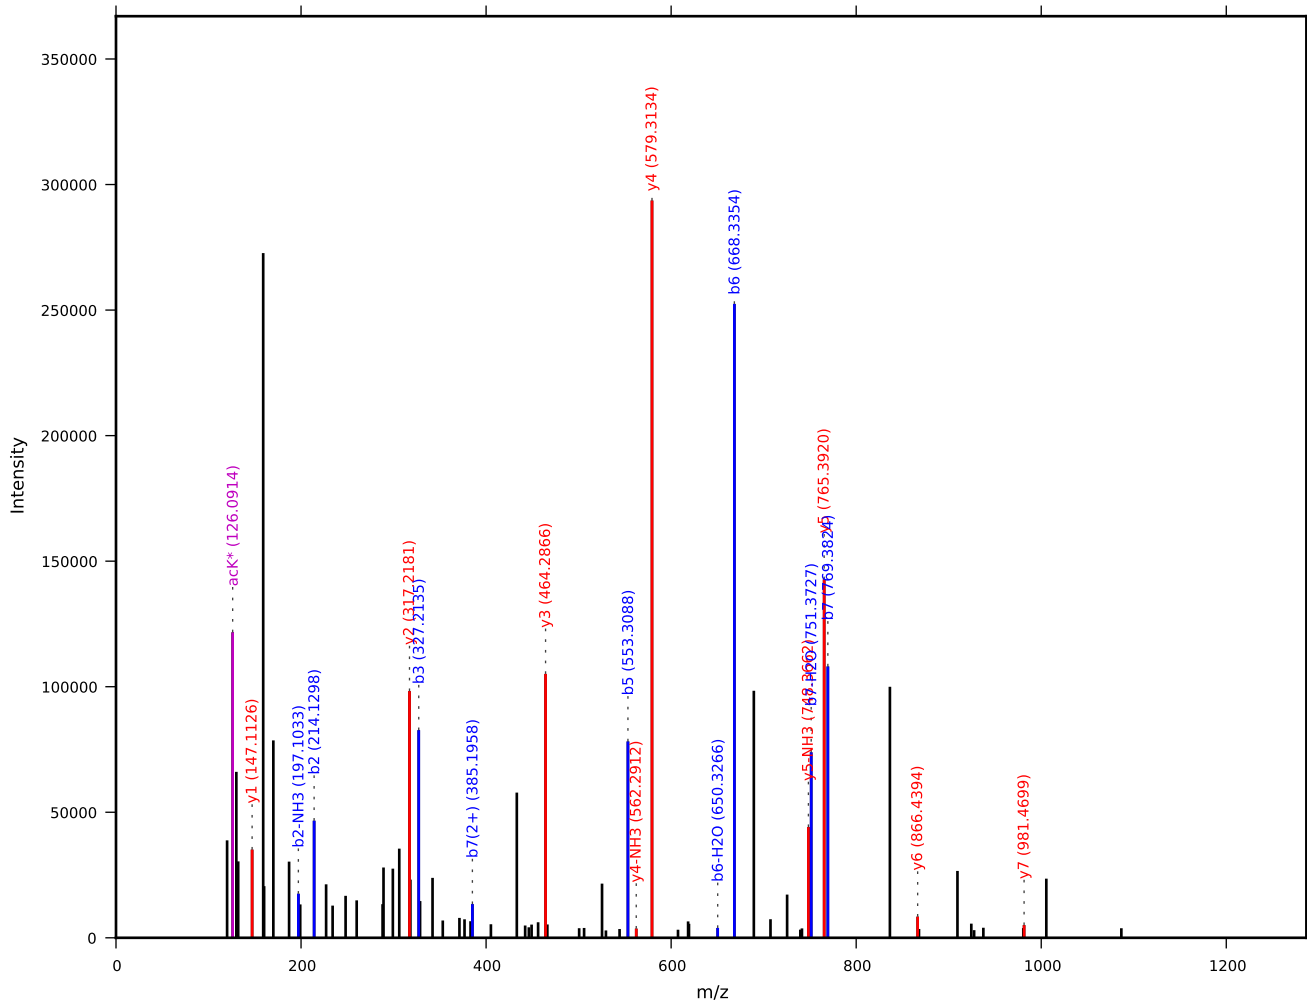

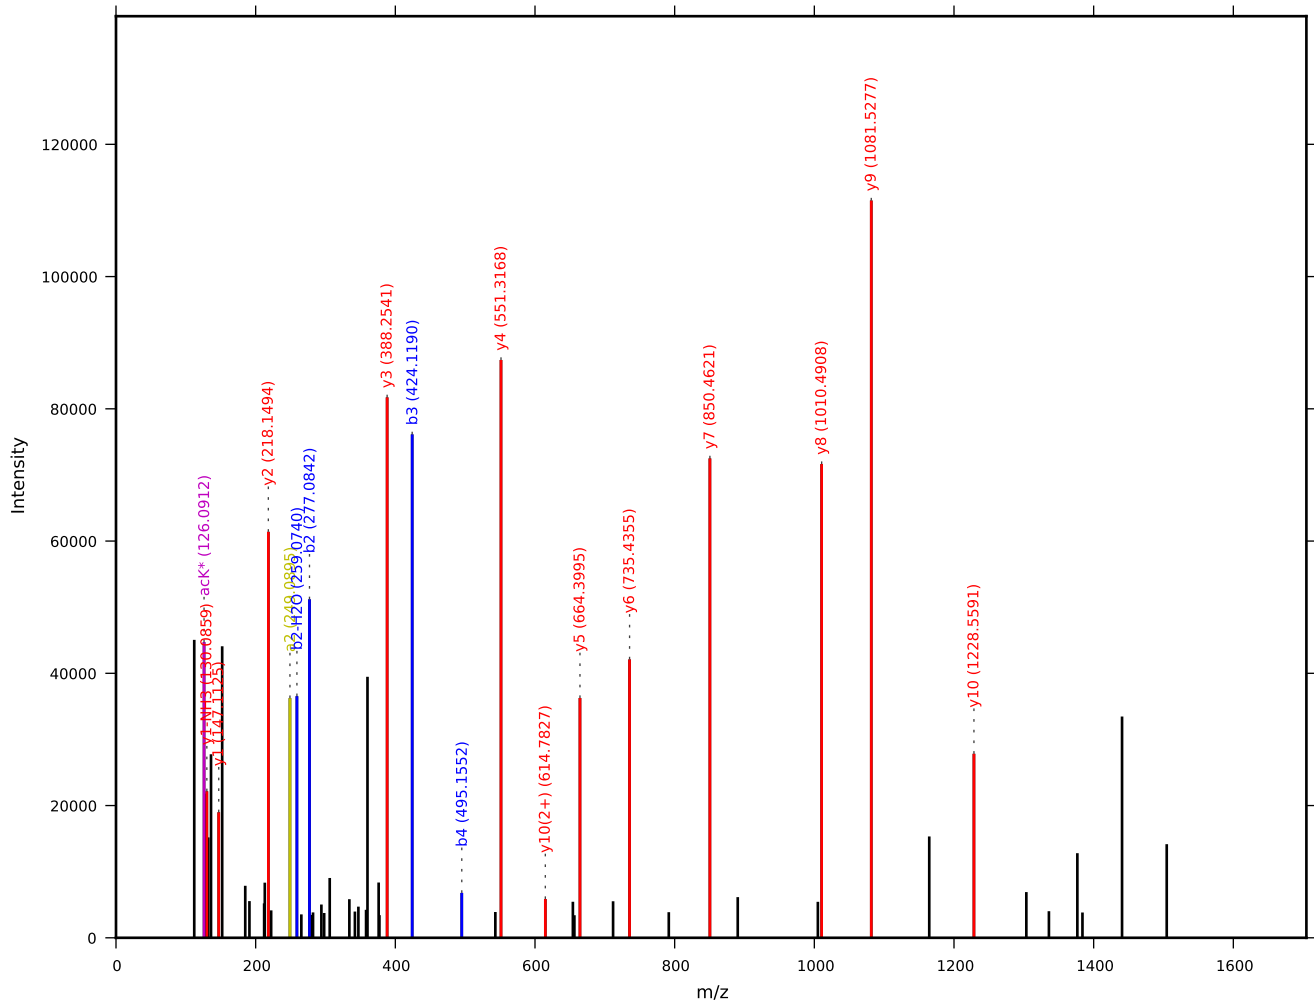

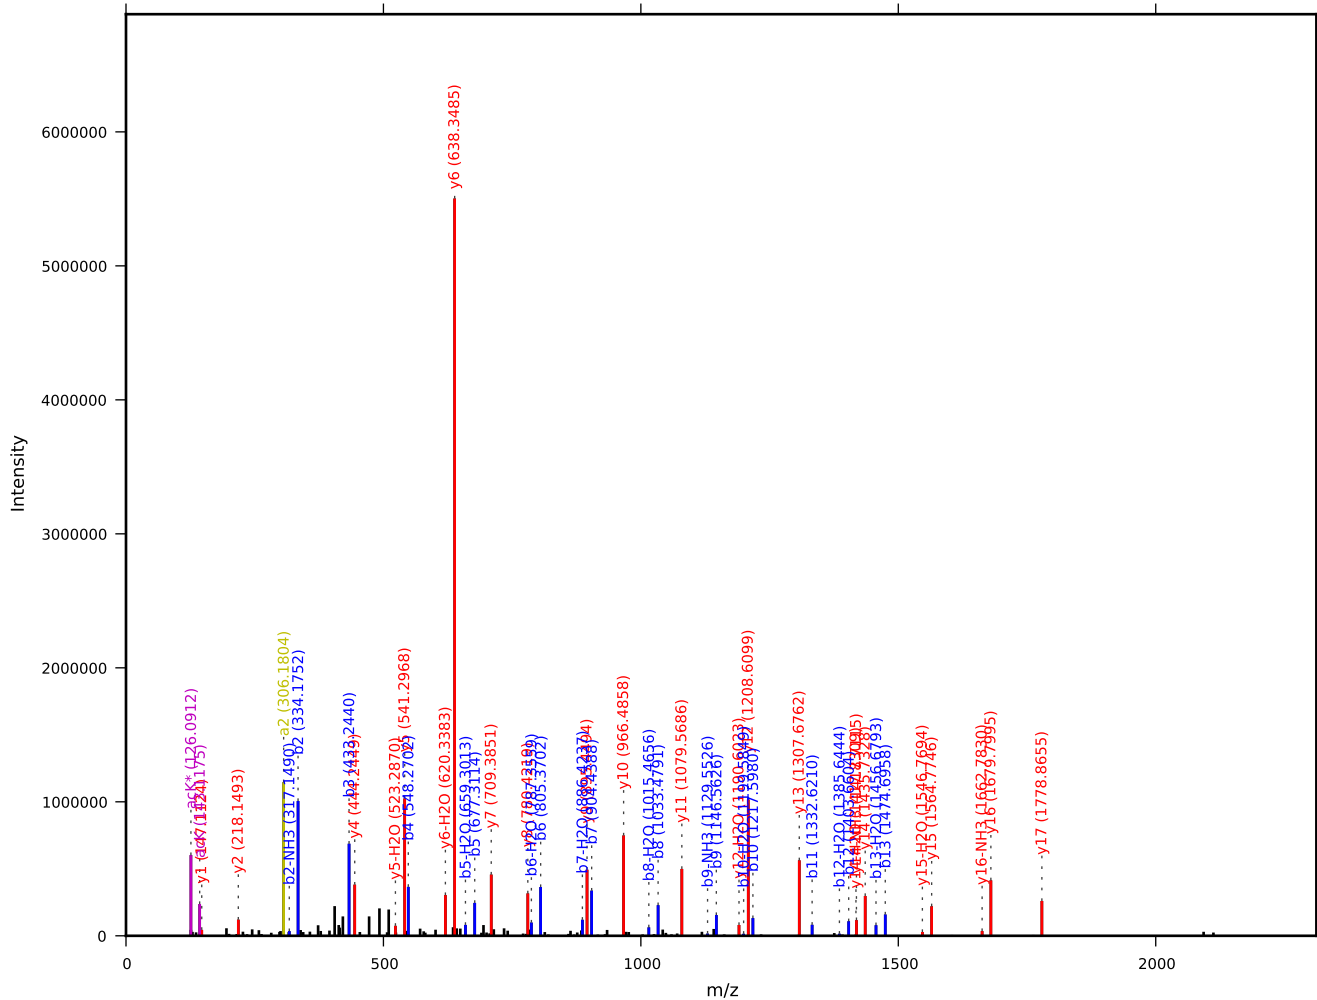

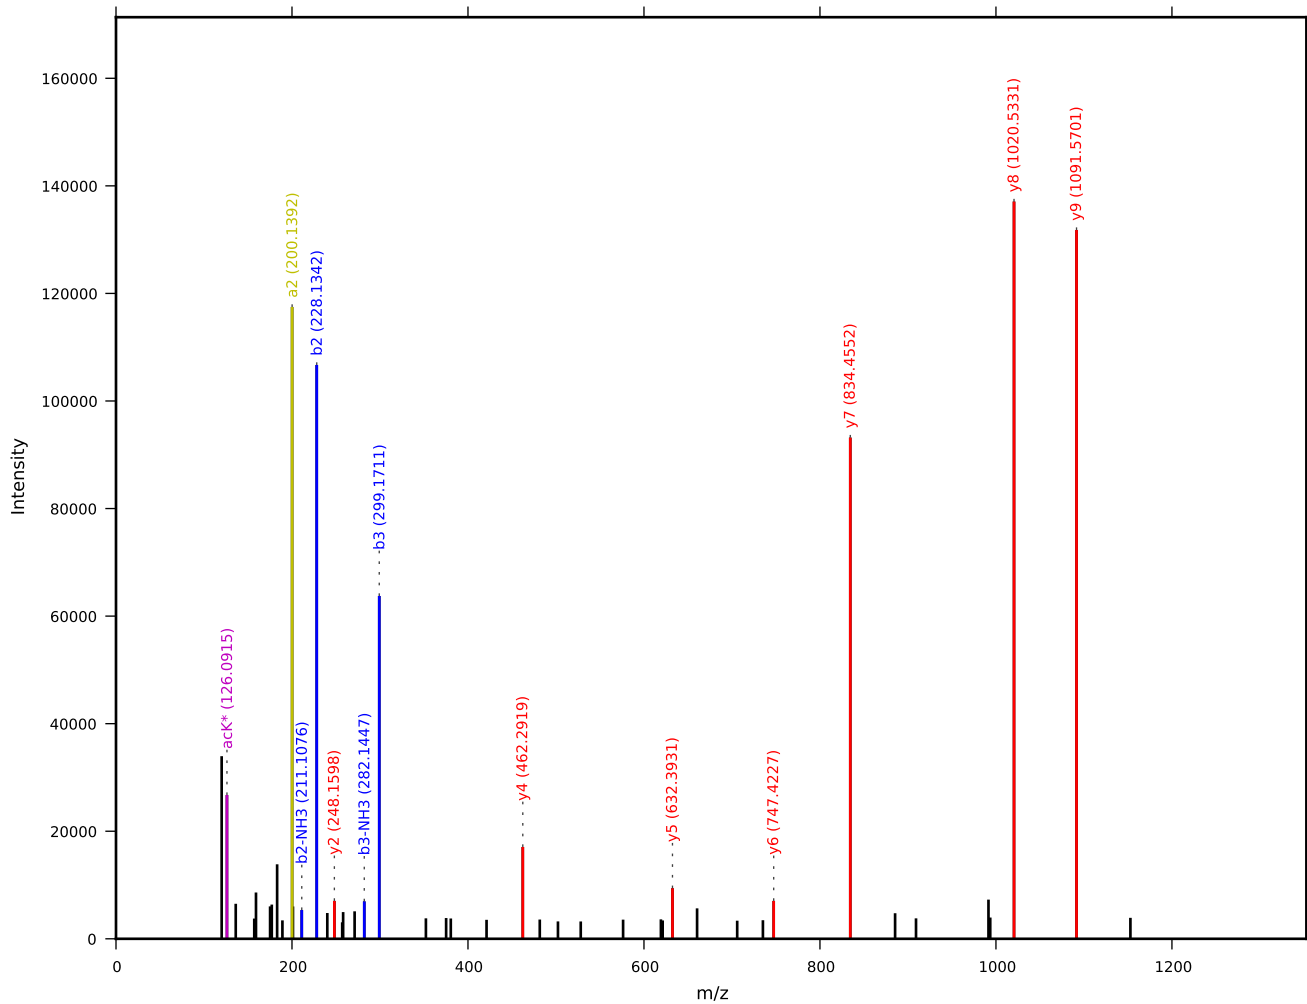

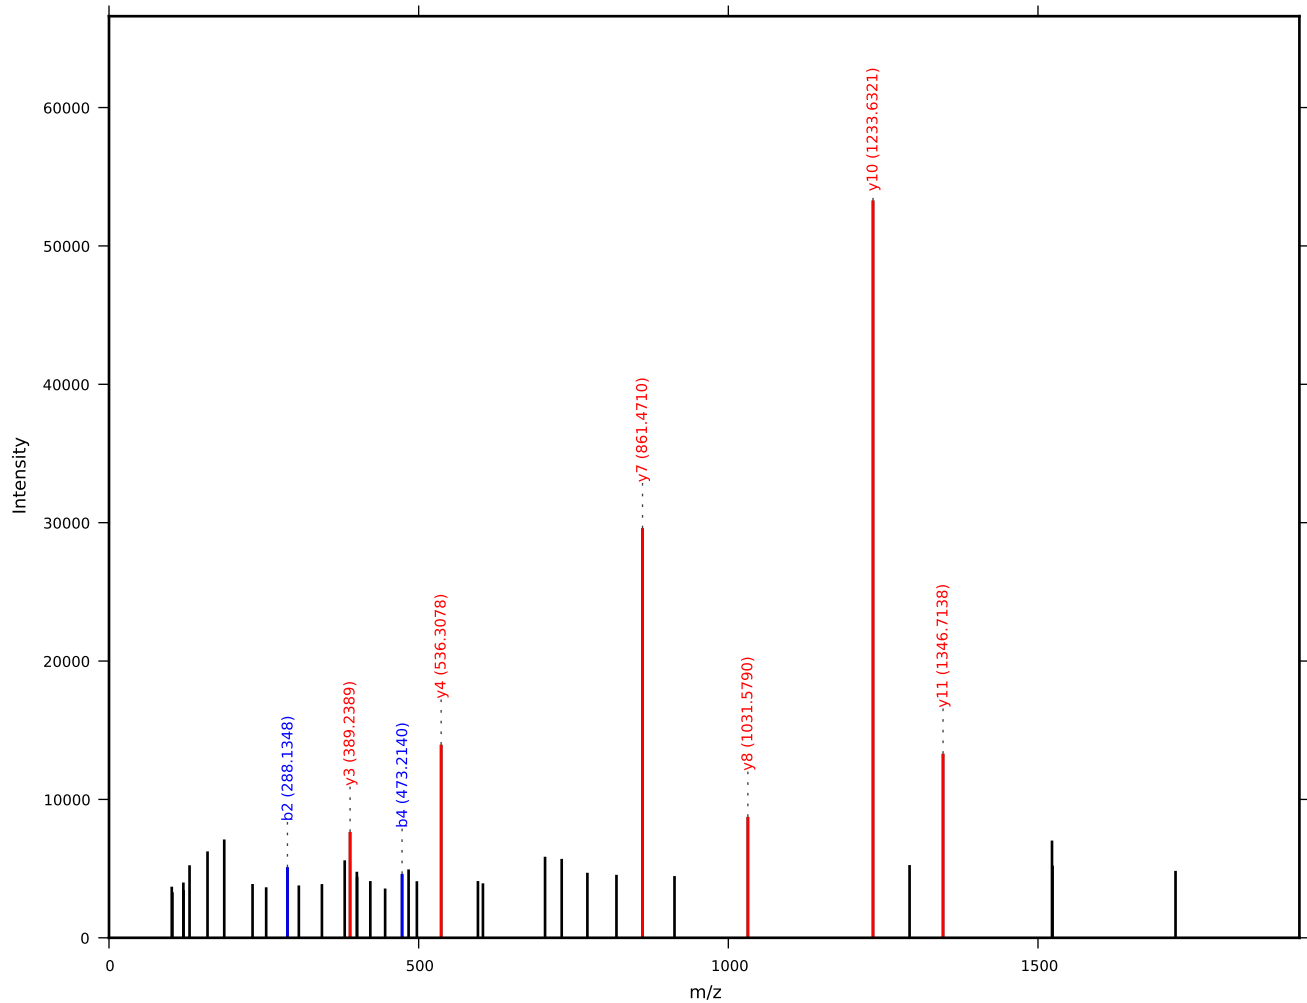



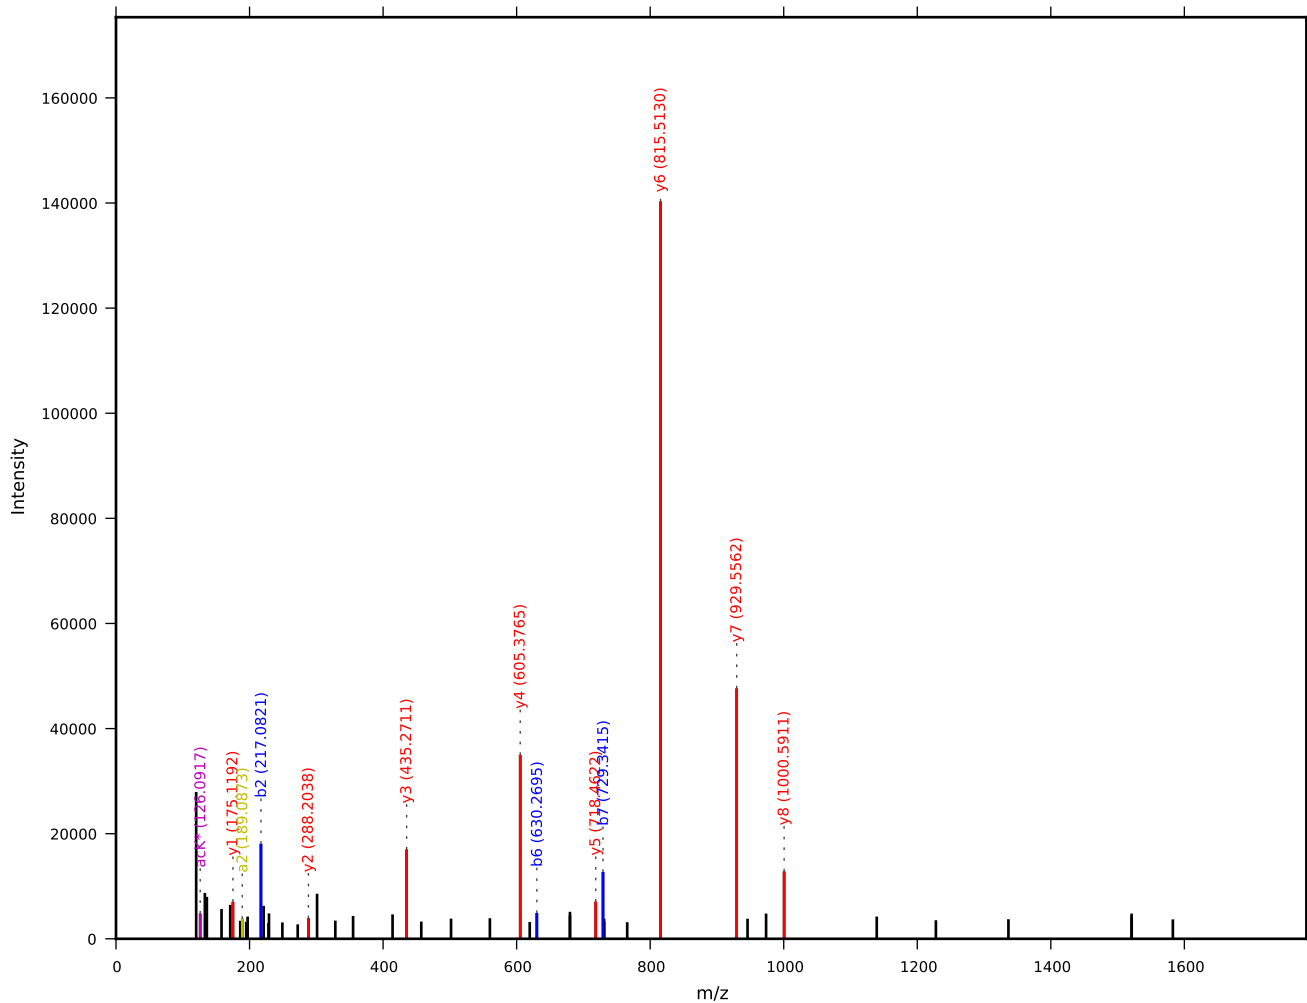

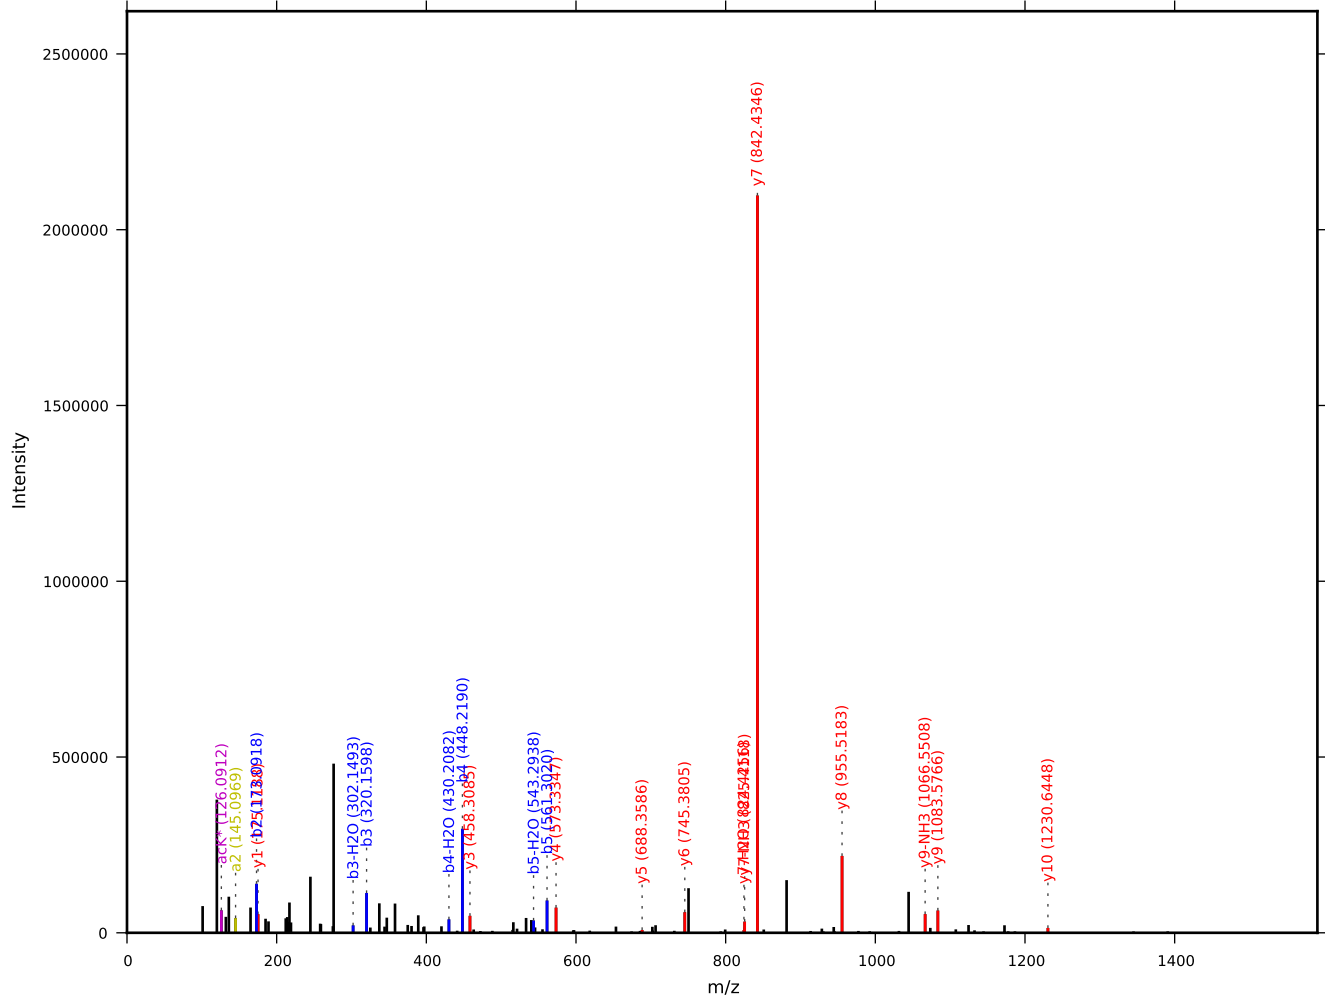

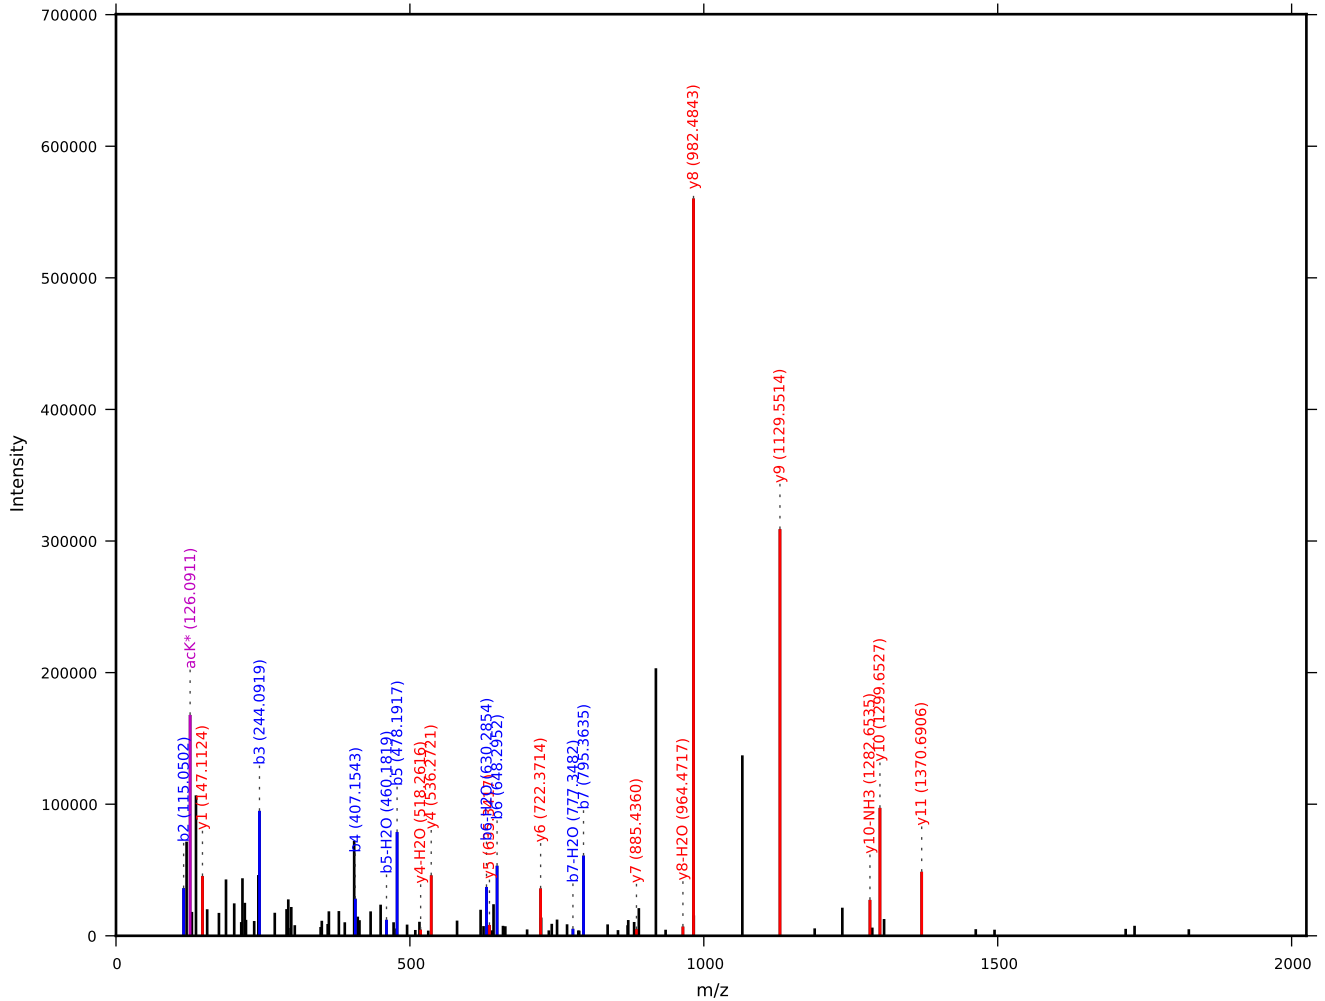

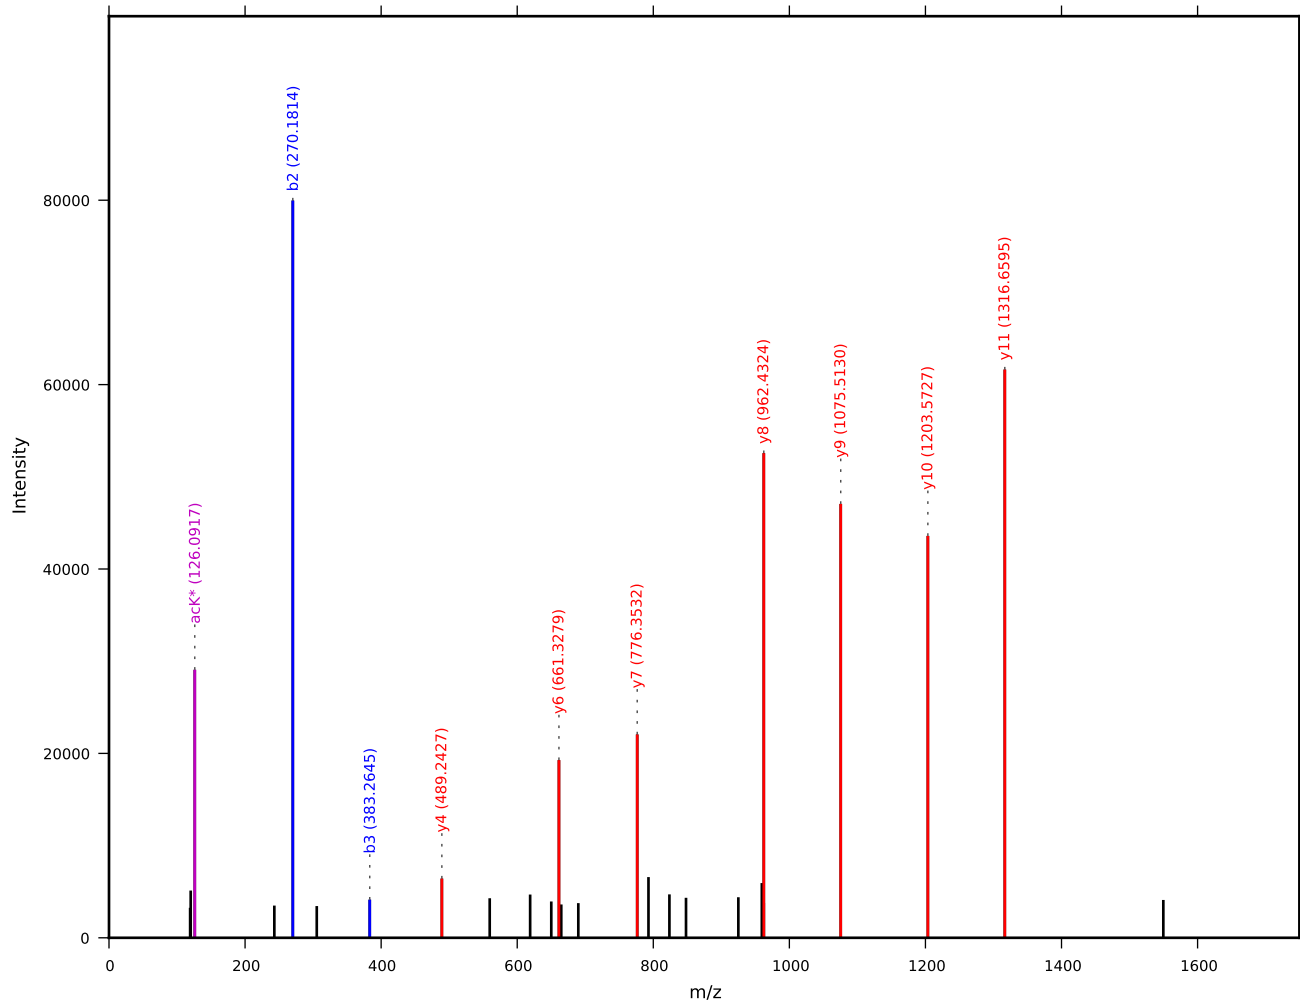

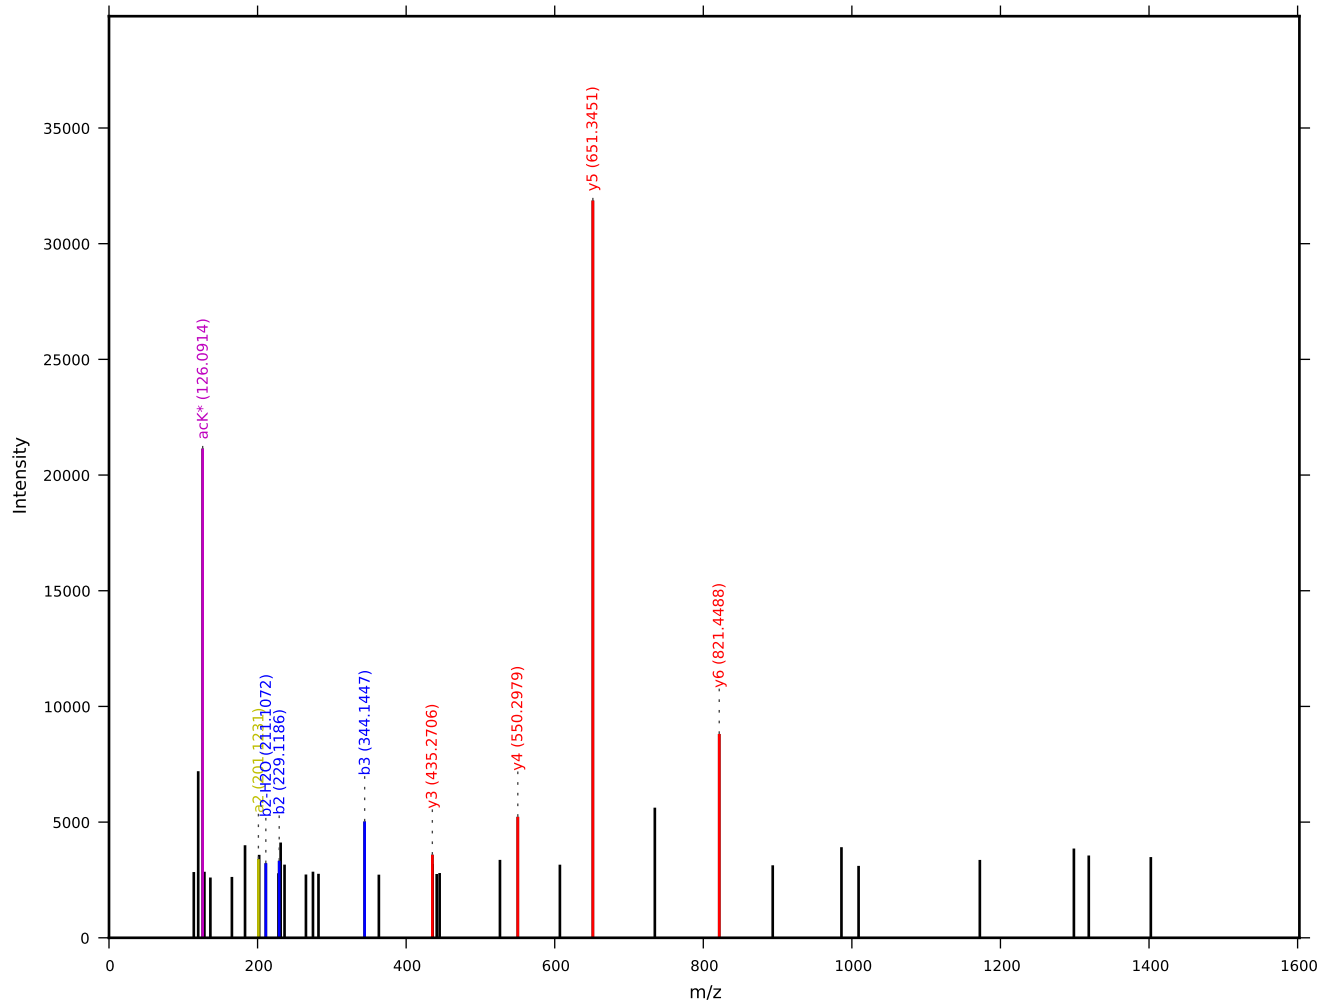

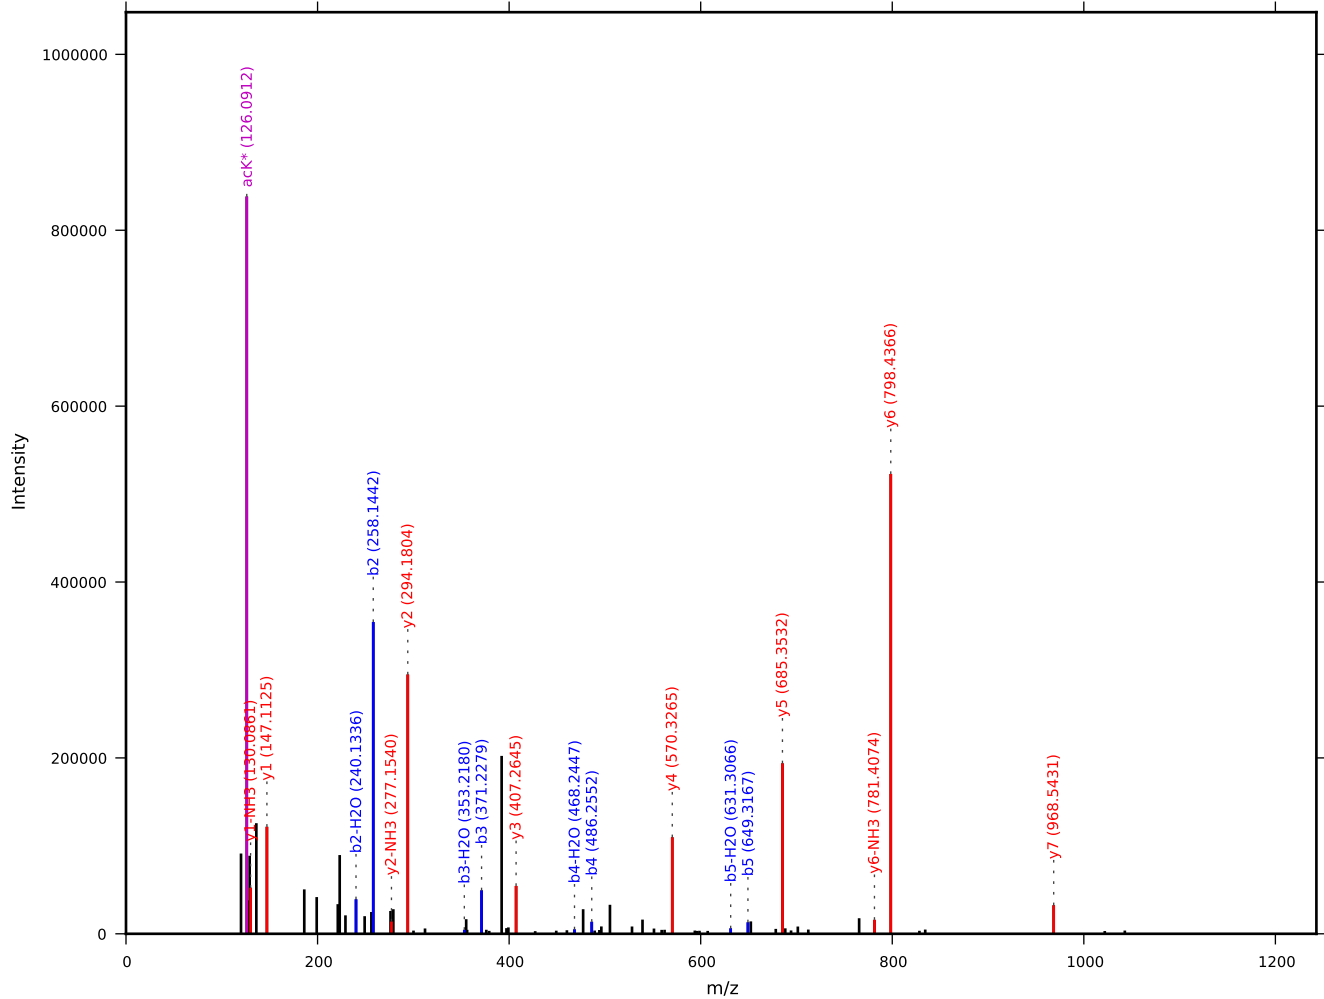

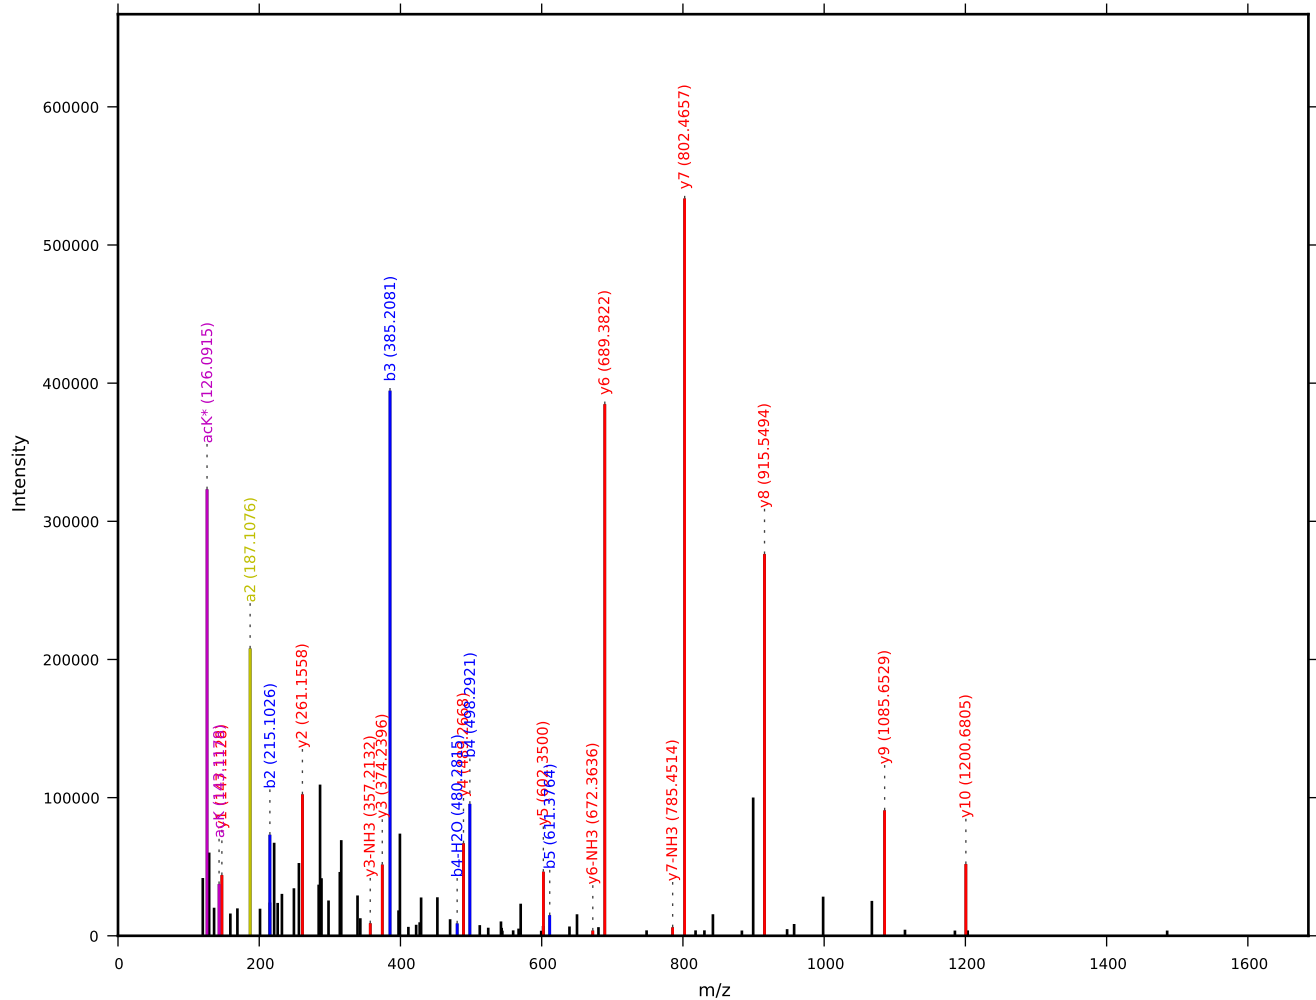

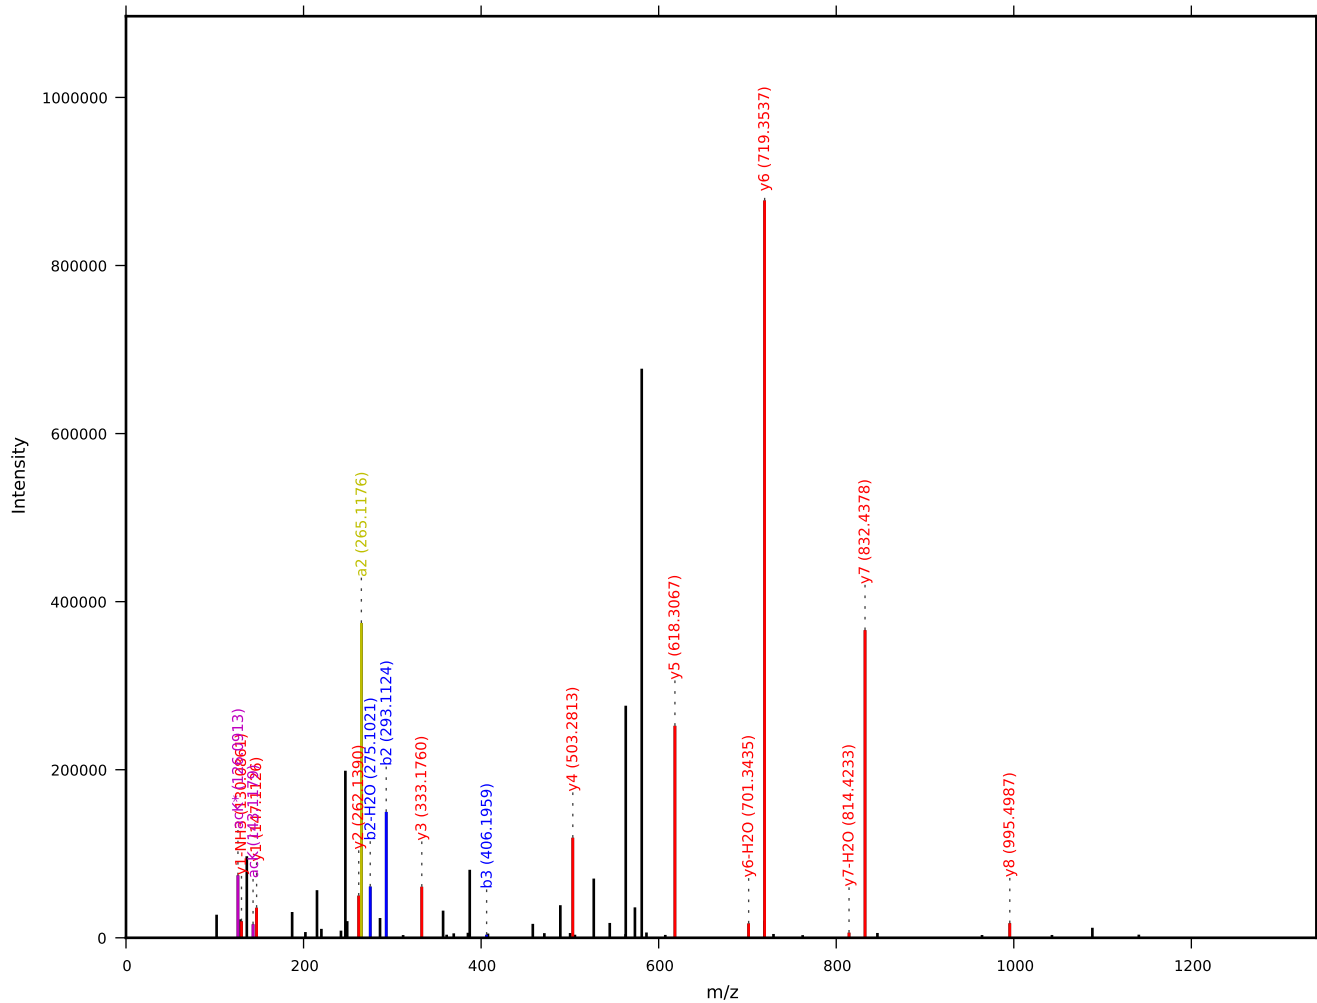



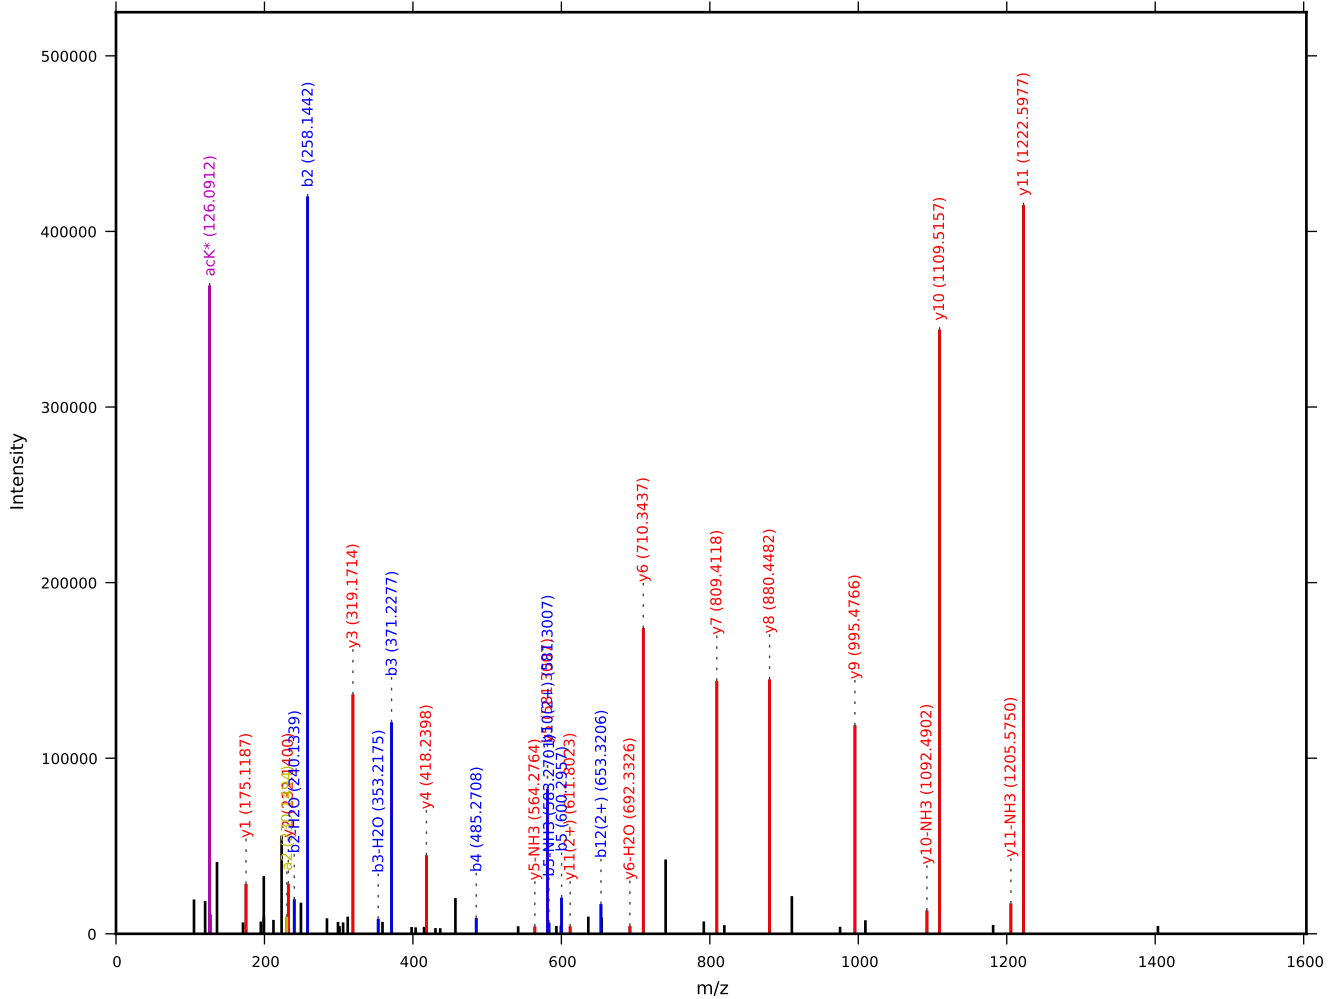

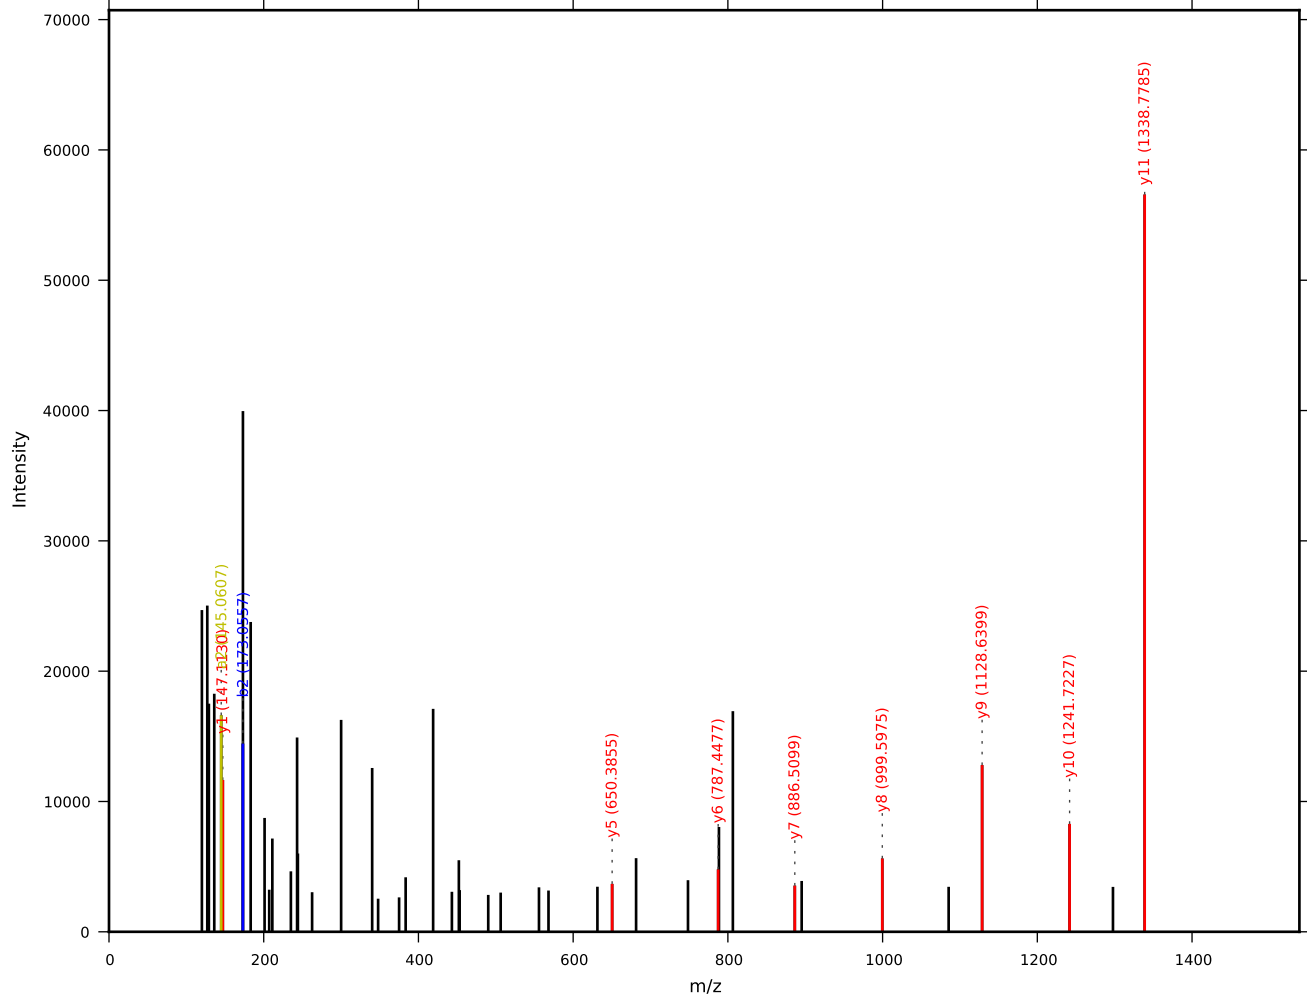

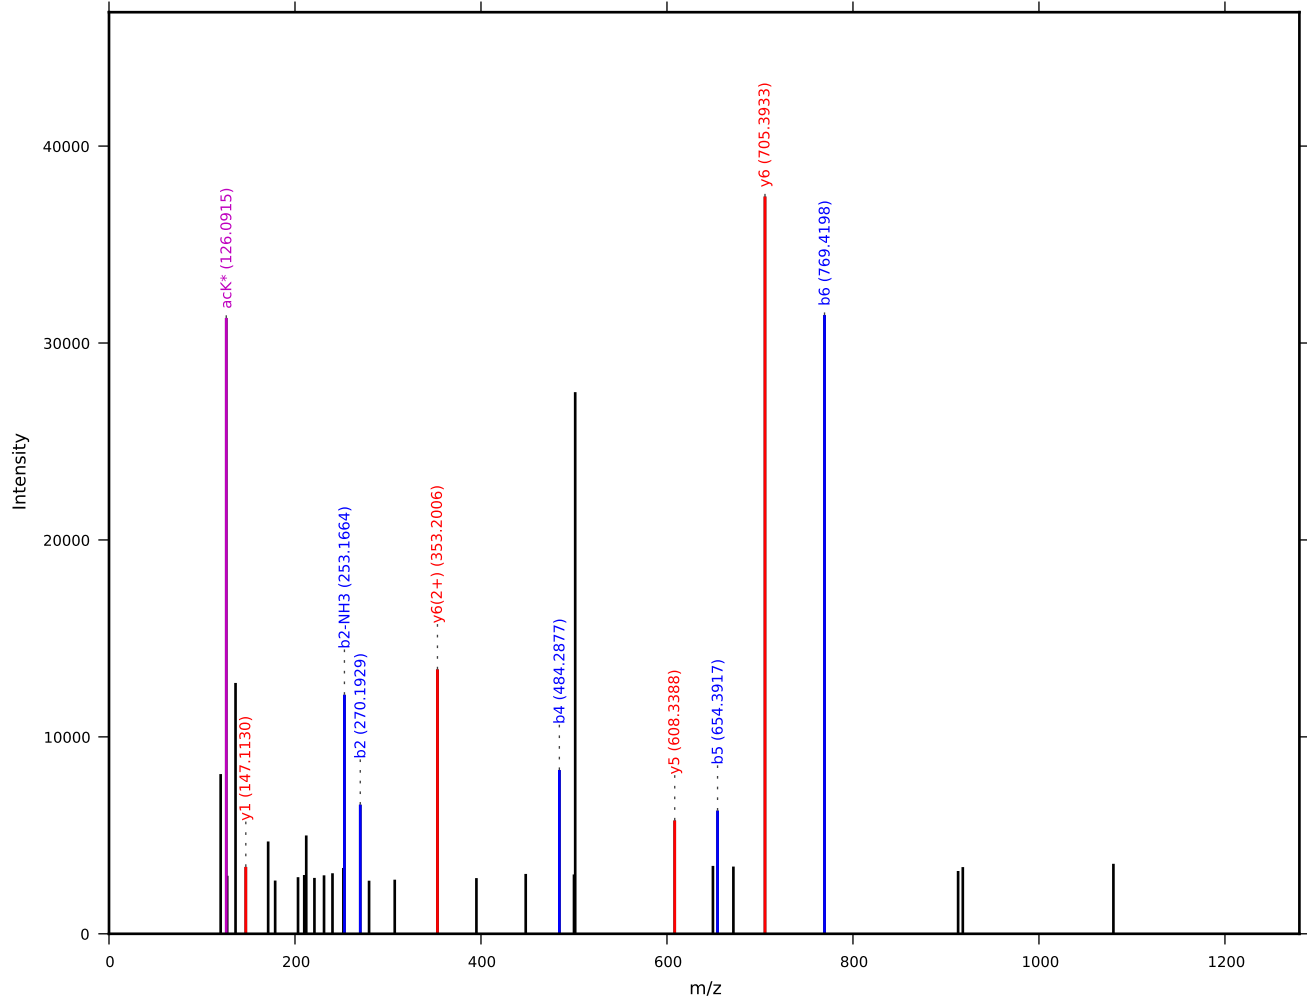

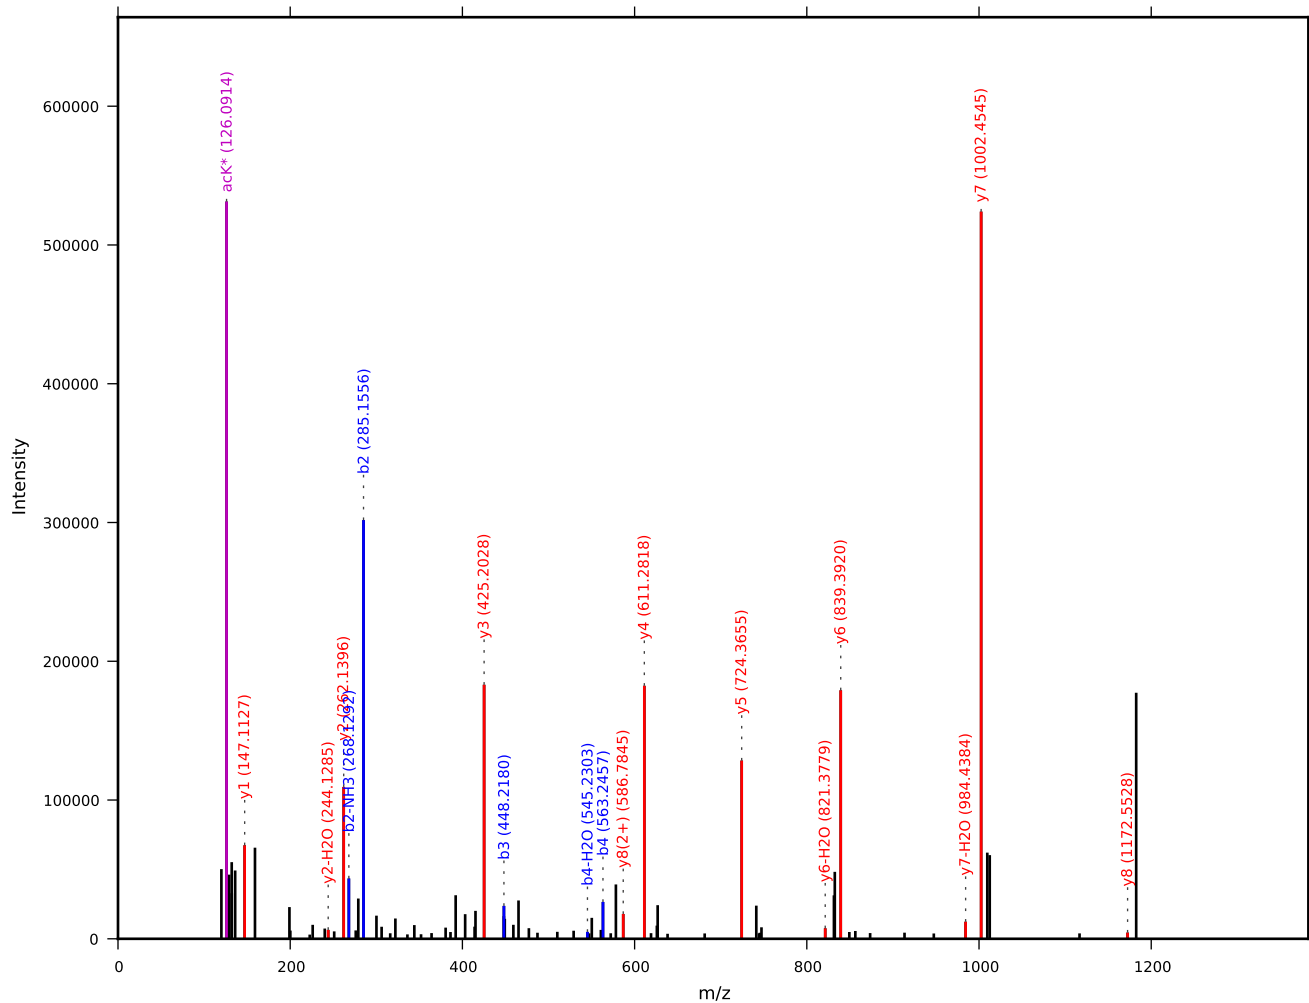

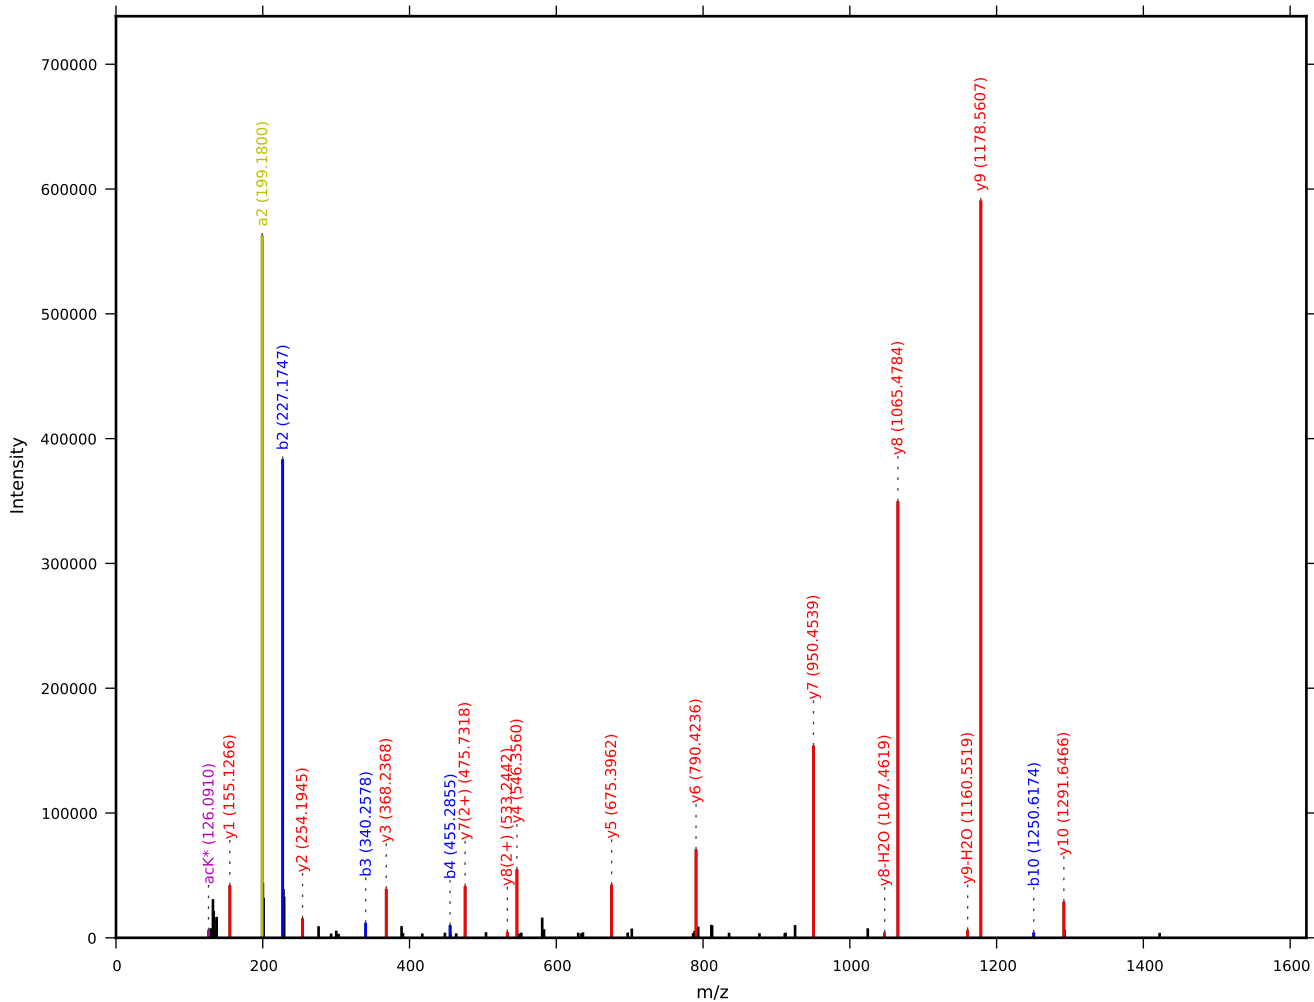

Mass: 876.5069 Charge: 2 m/z: 439.26073  
Modified Peptide: \_ATQK(ac)FLK\_ Score: 91.041 PEP: 0.0034324

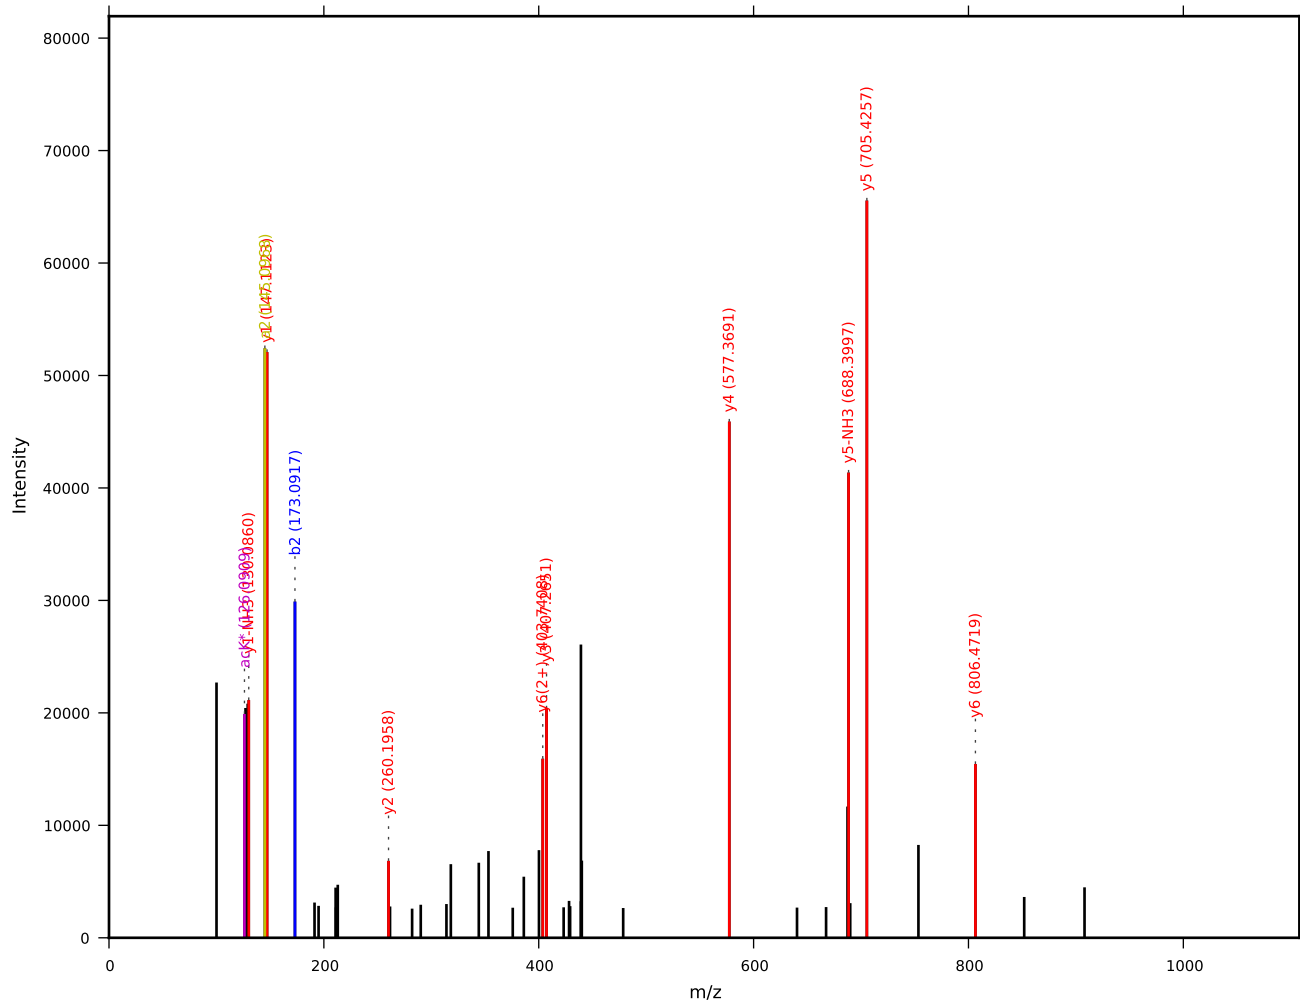

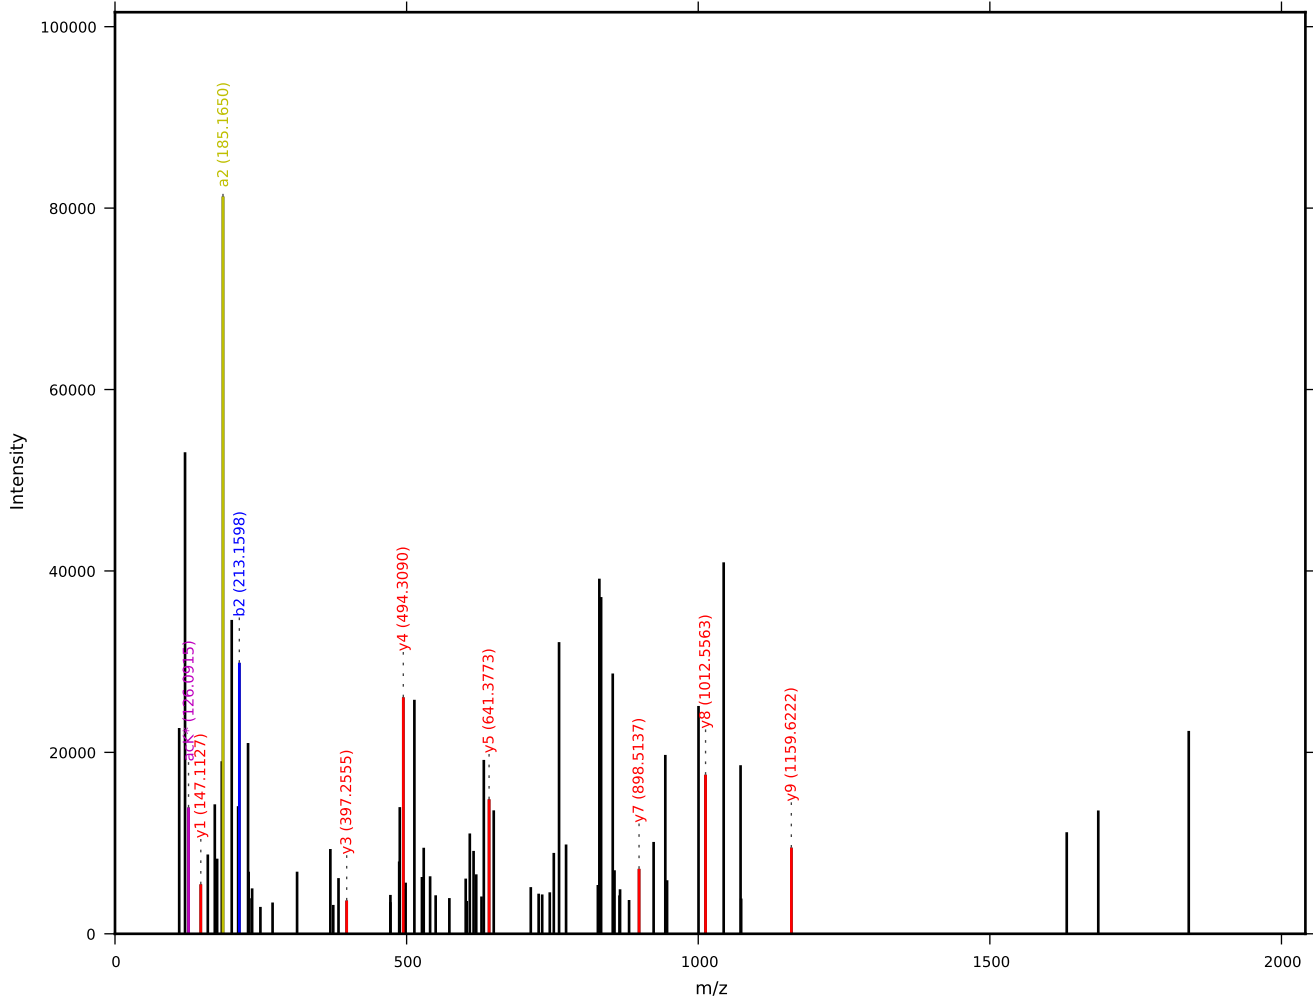

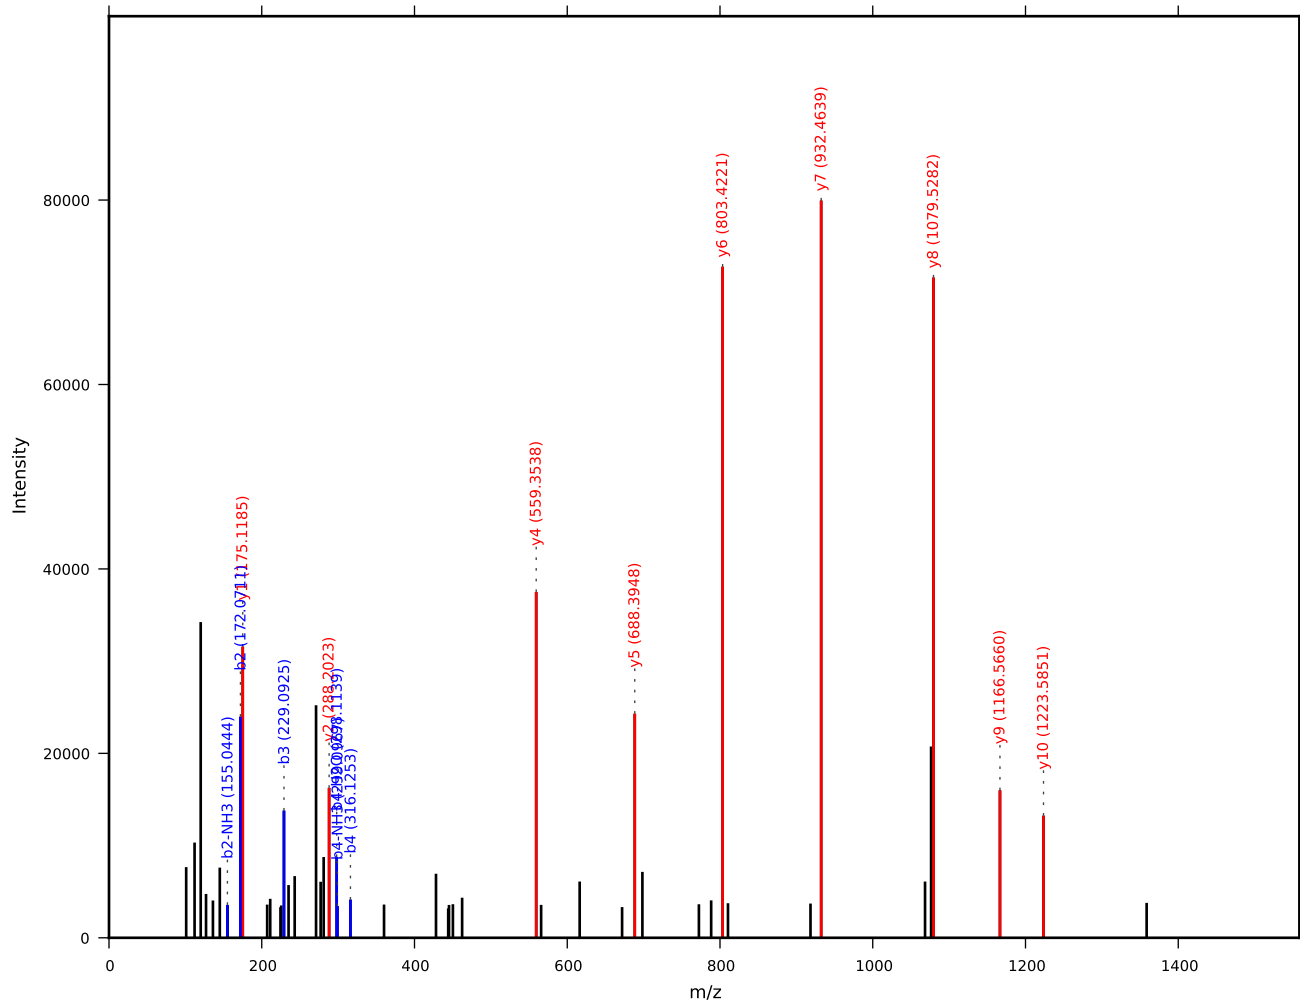



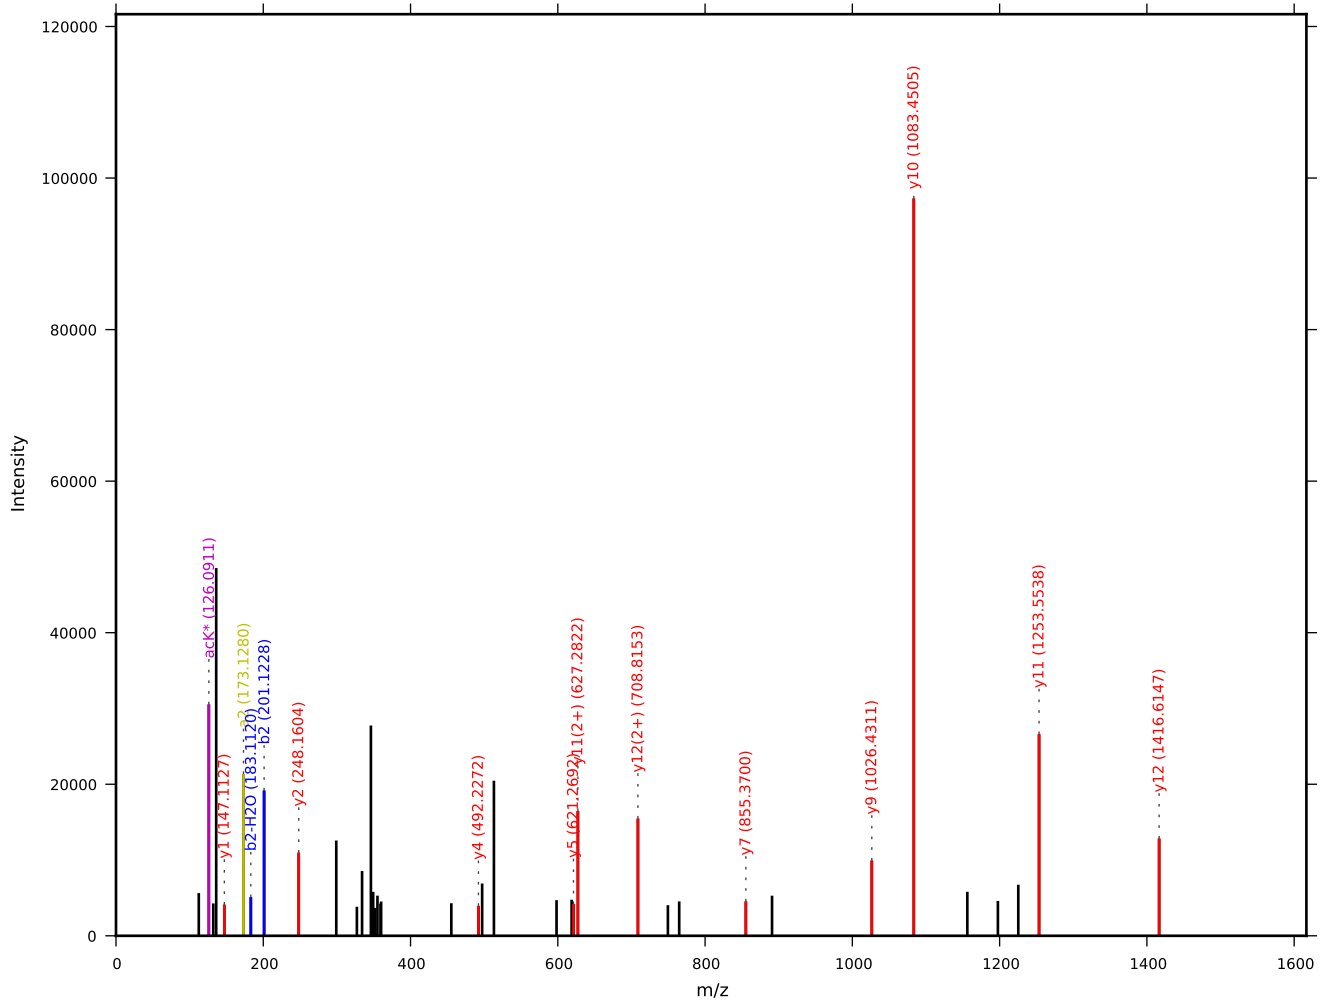

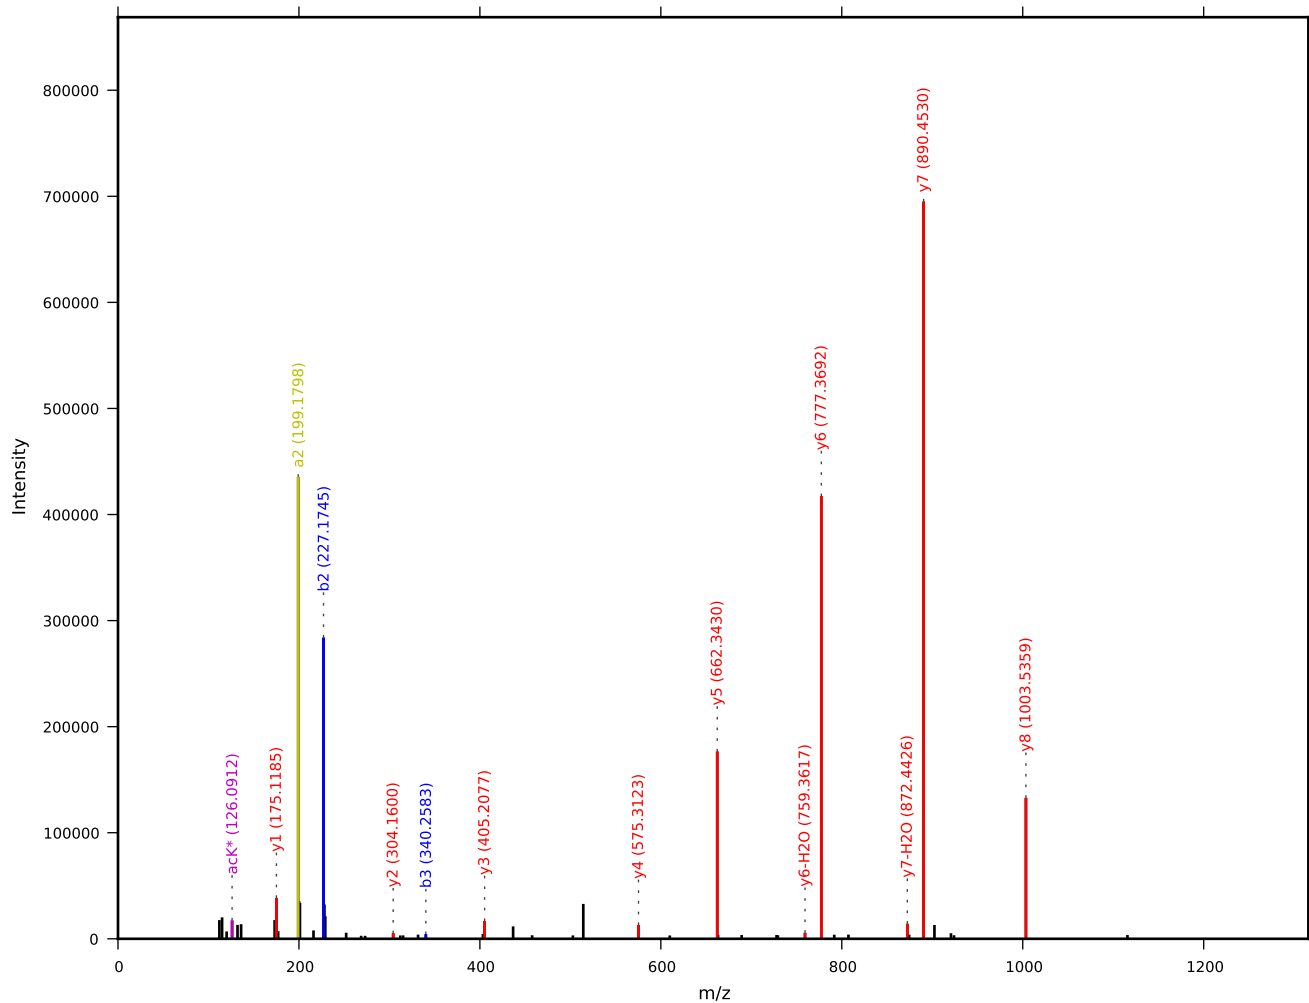

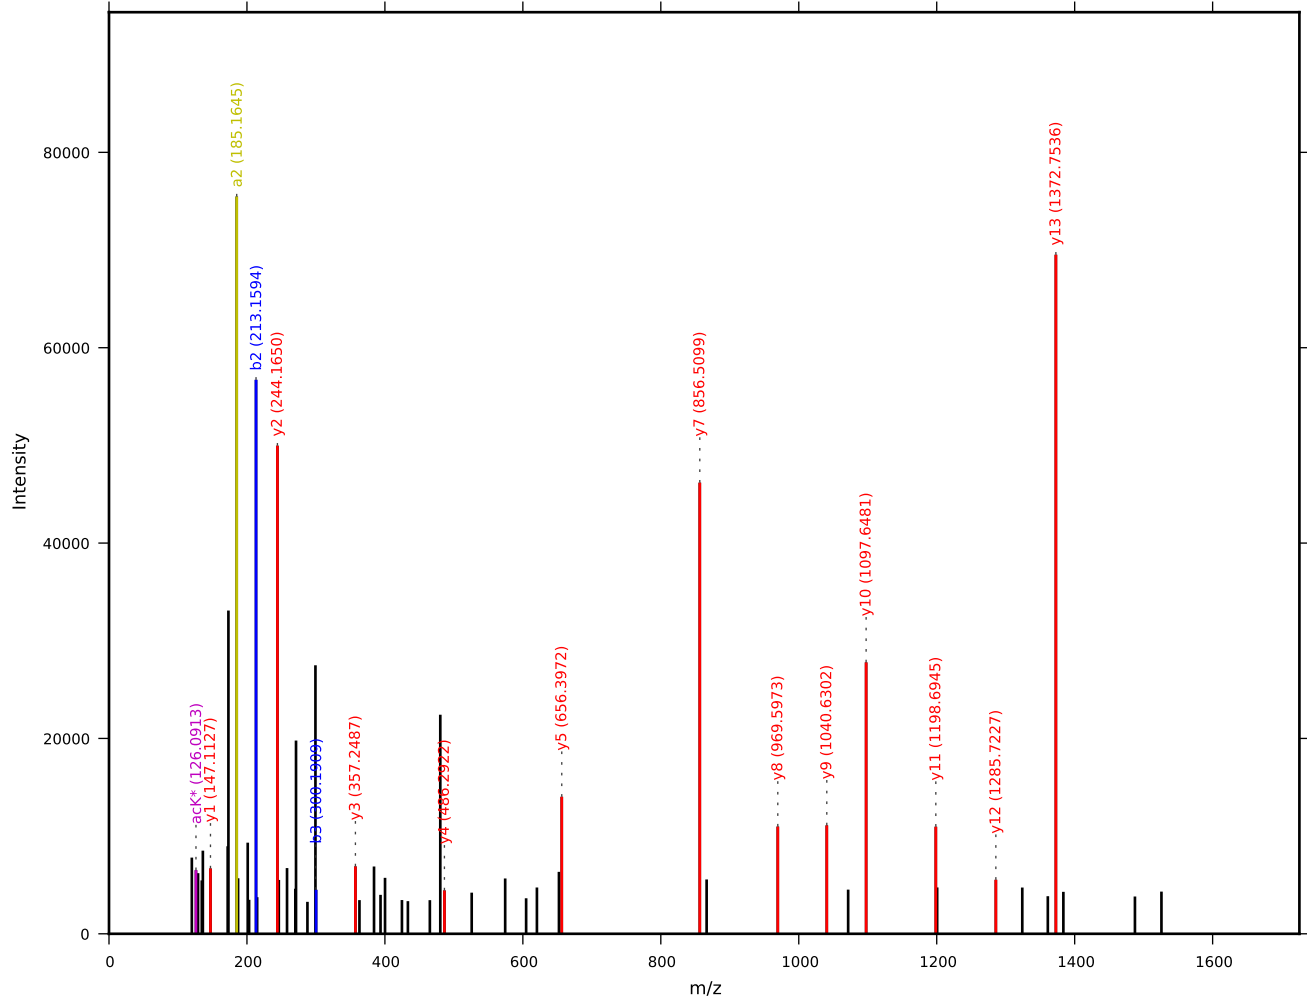

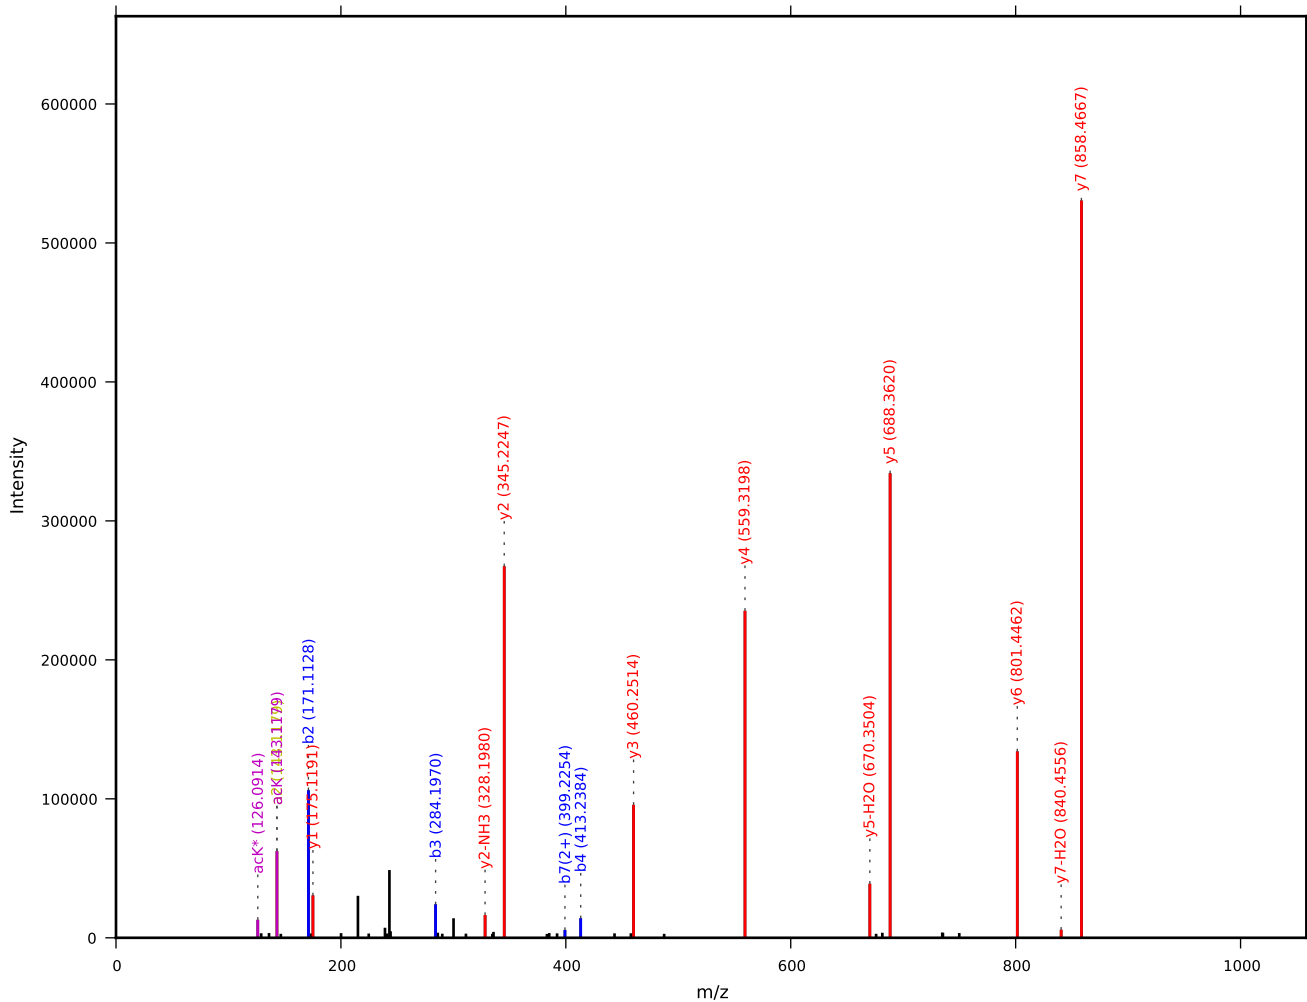

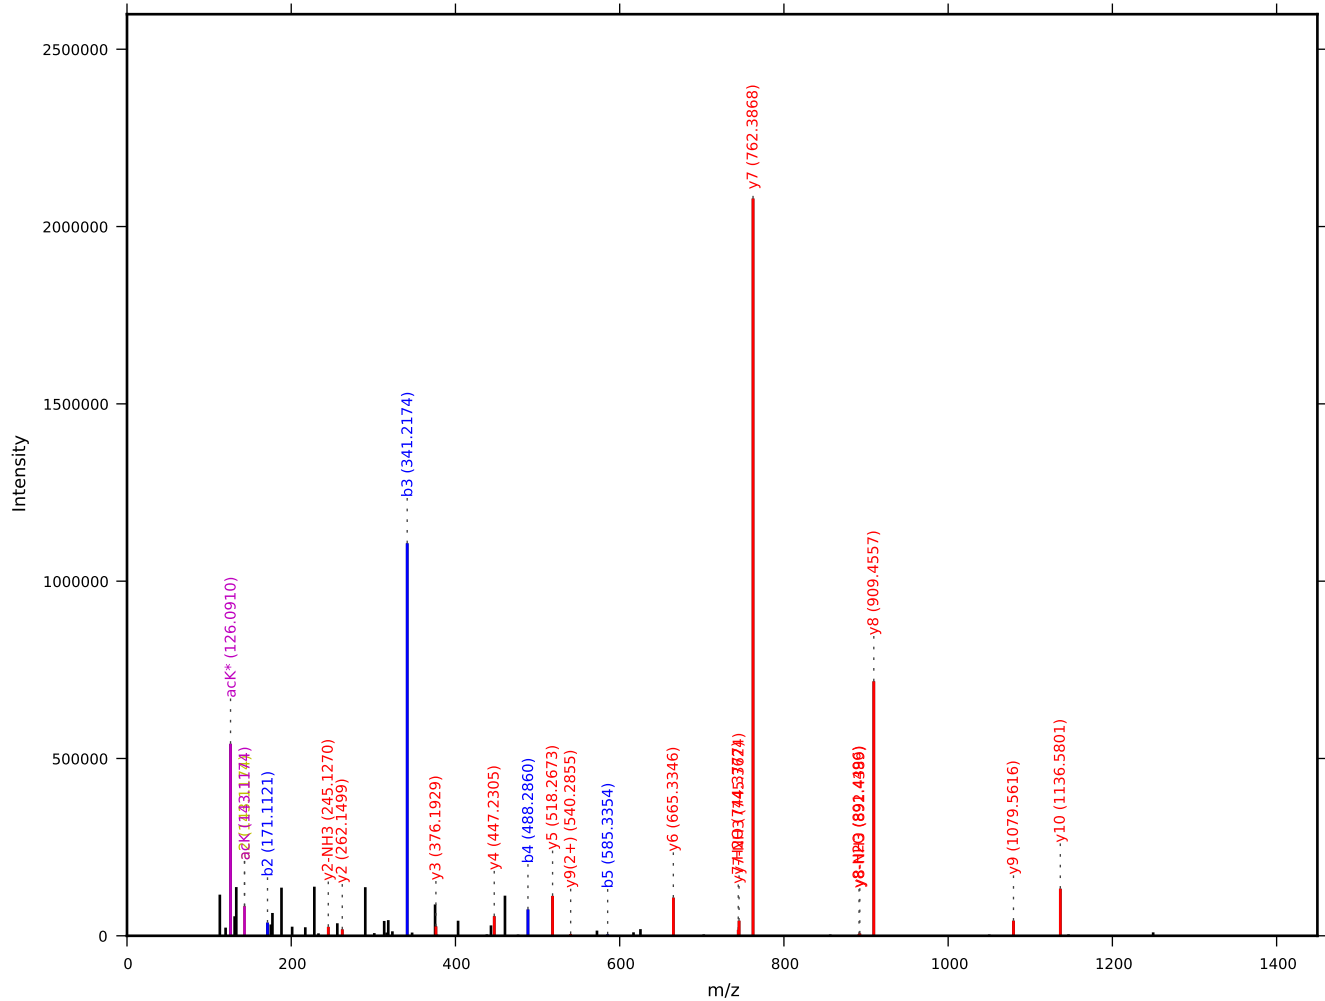

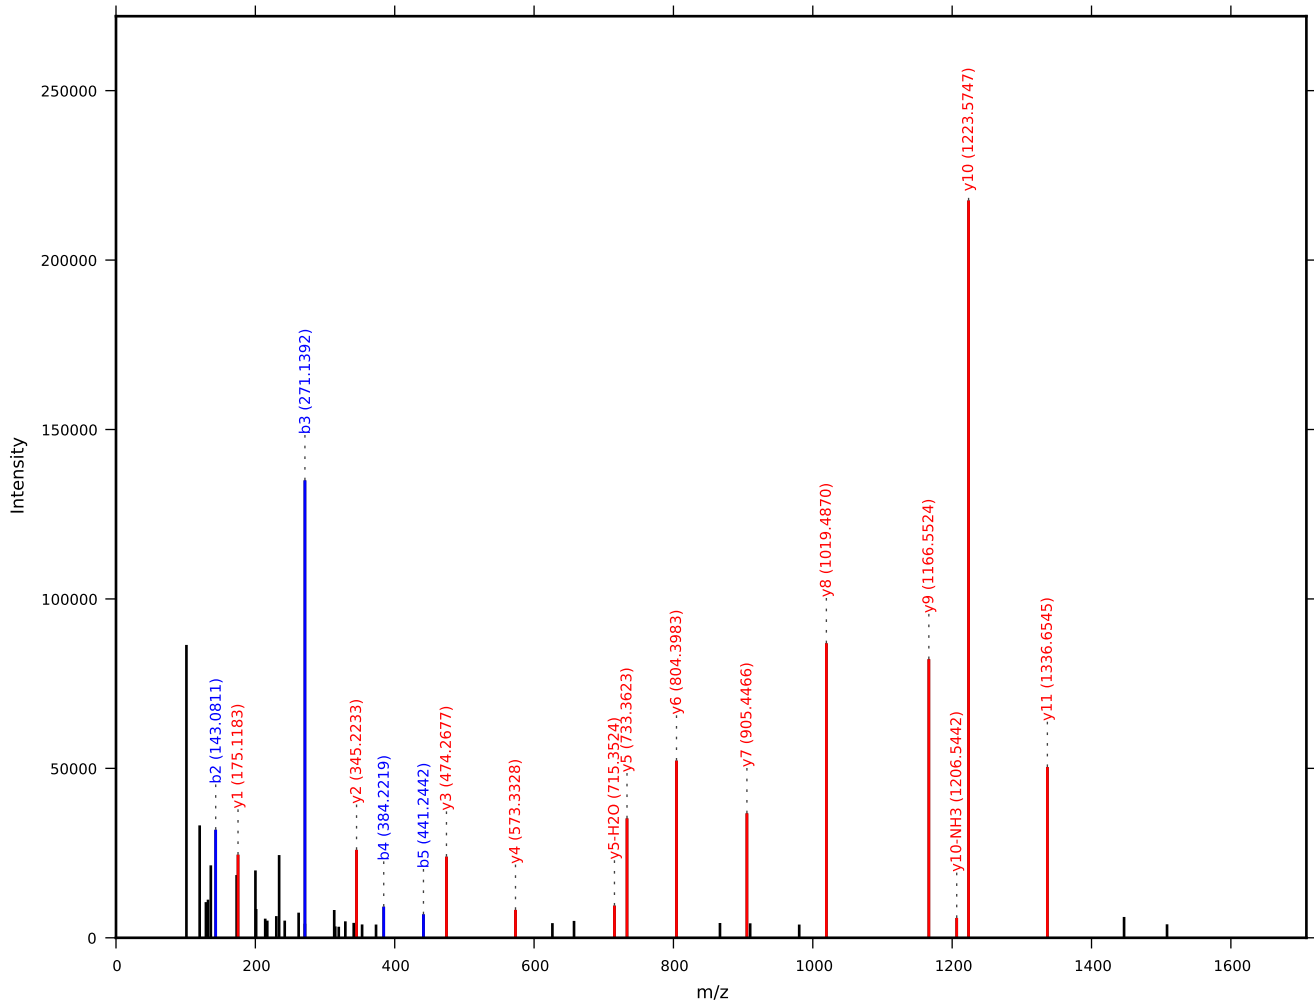

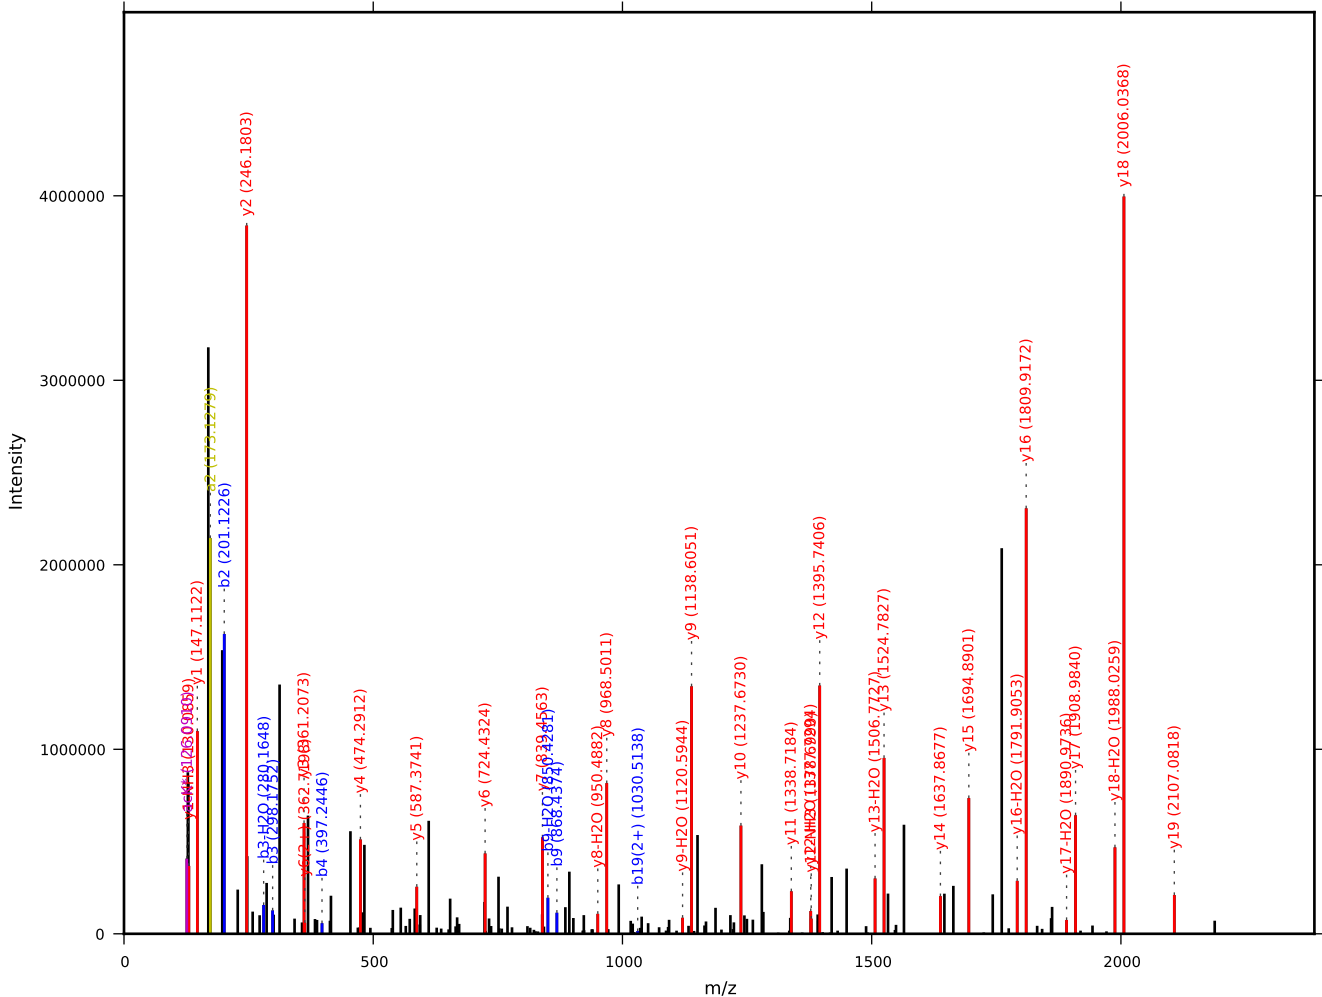

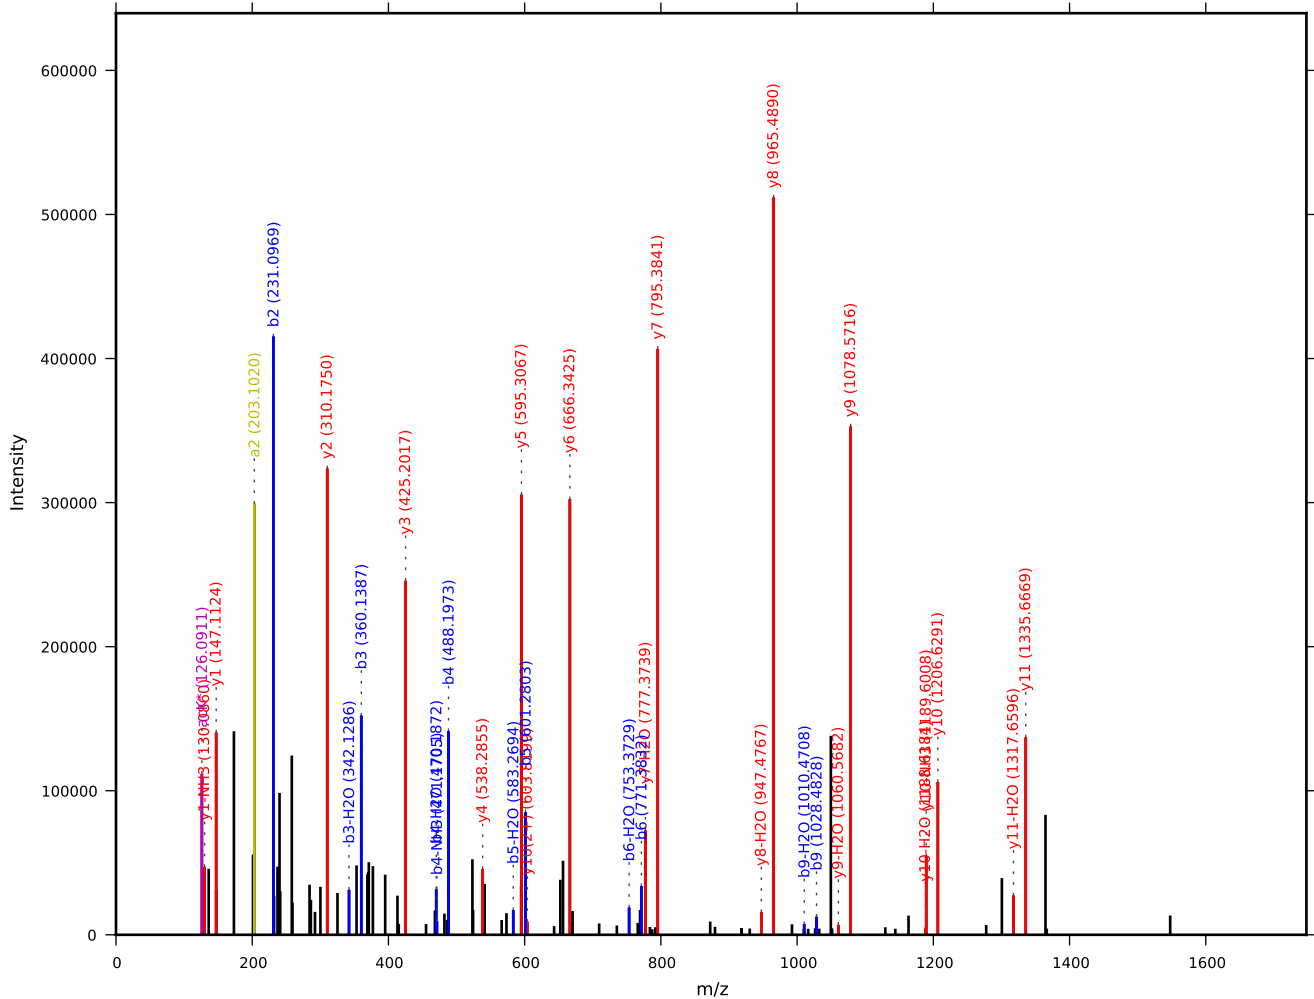



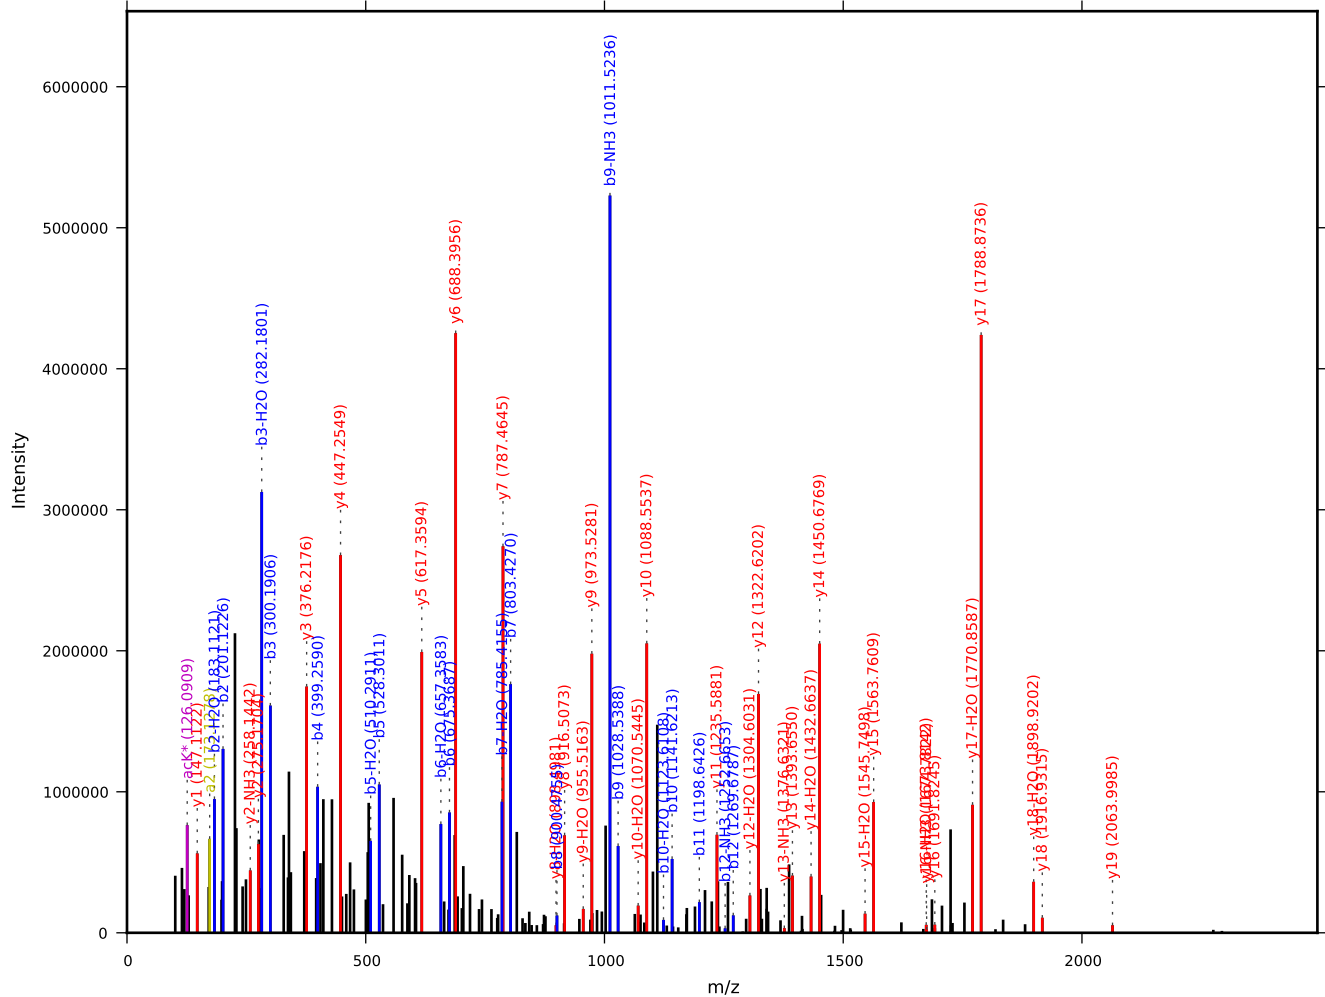

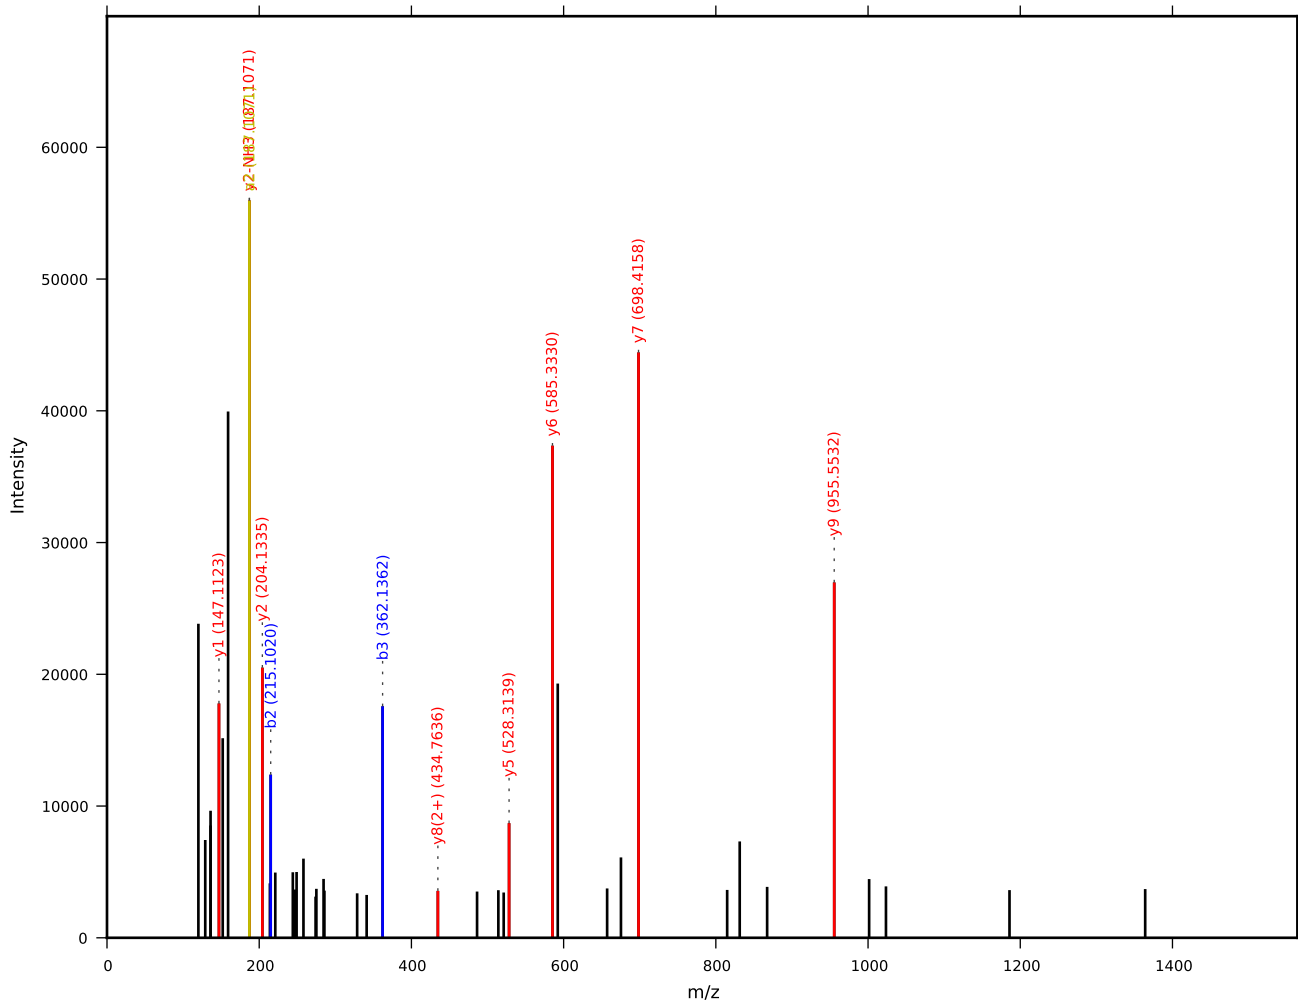

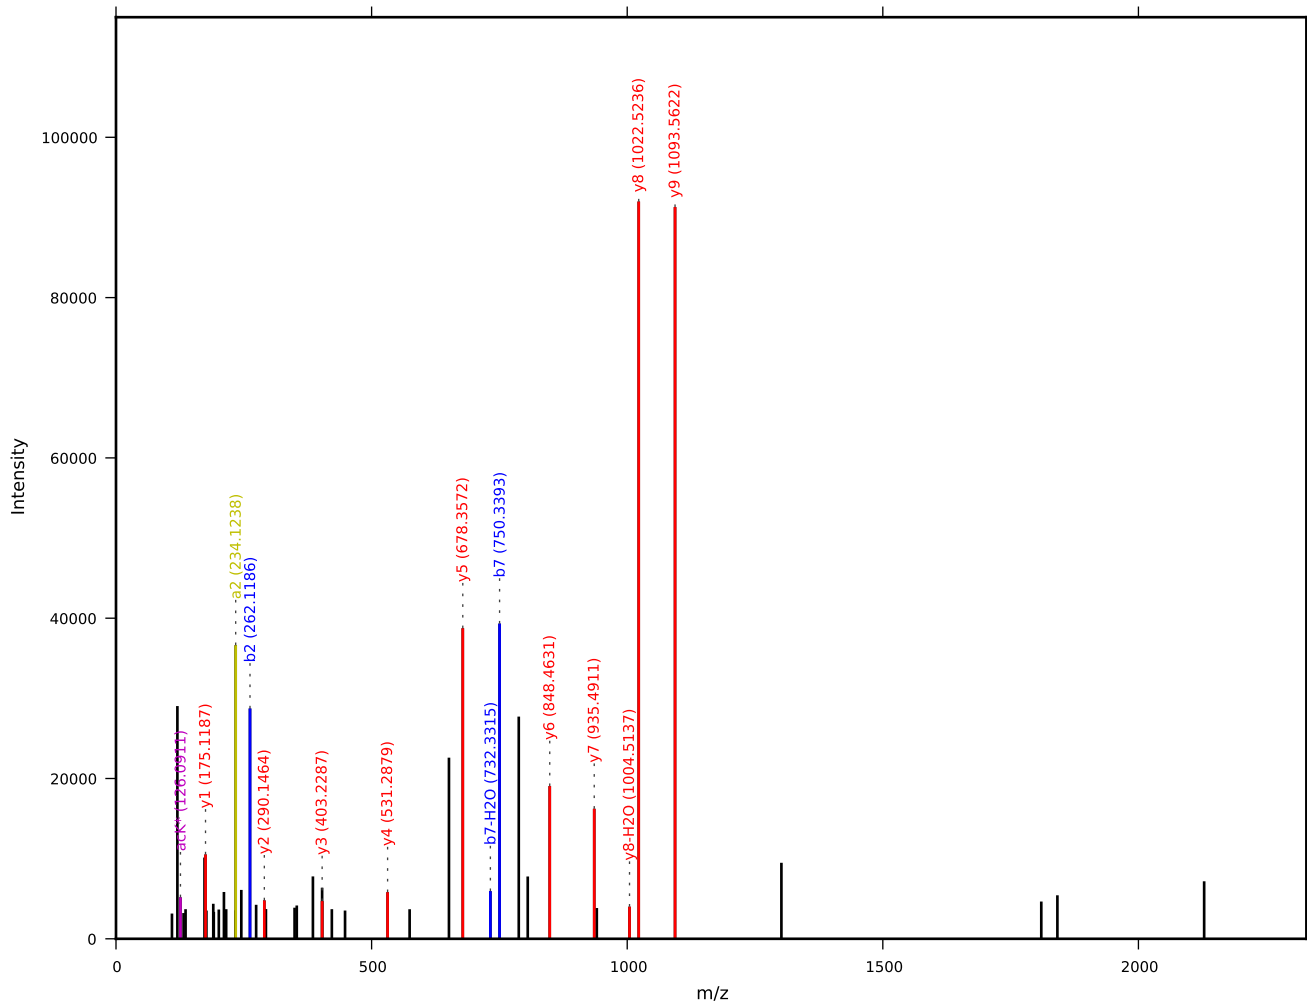

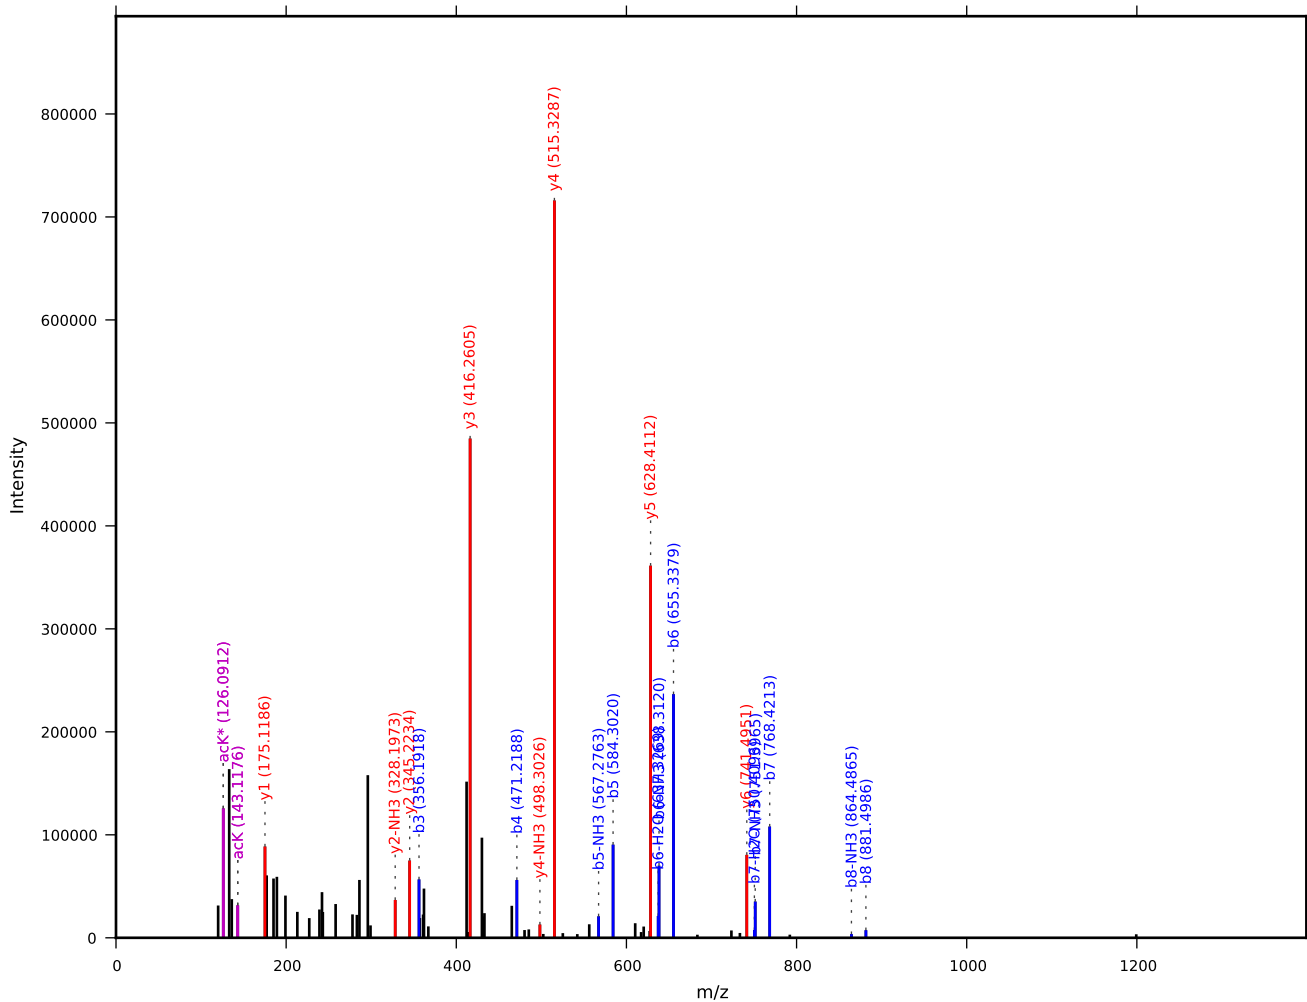

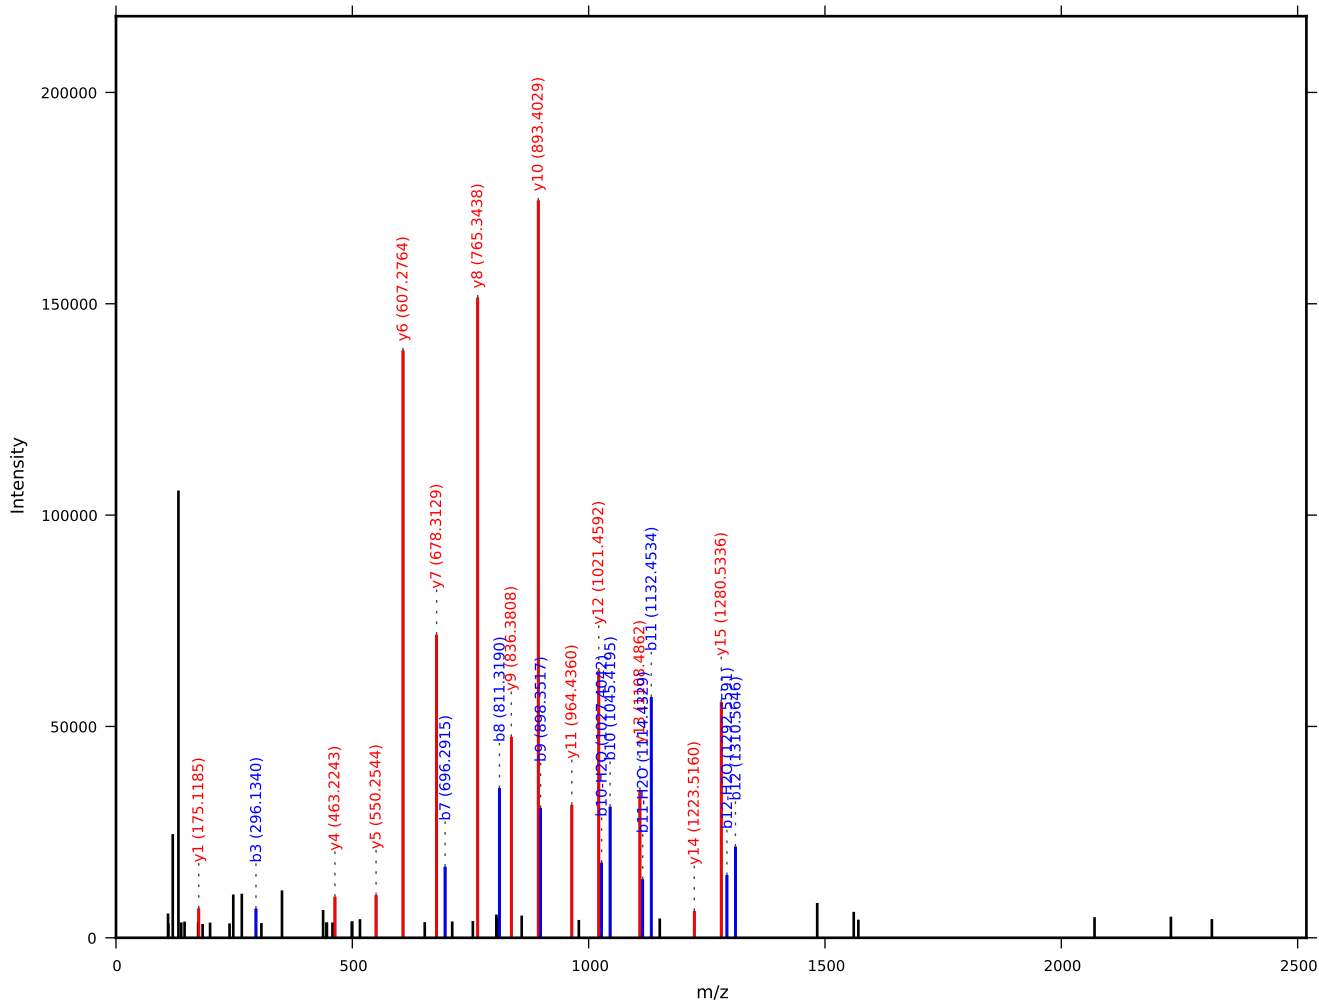

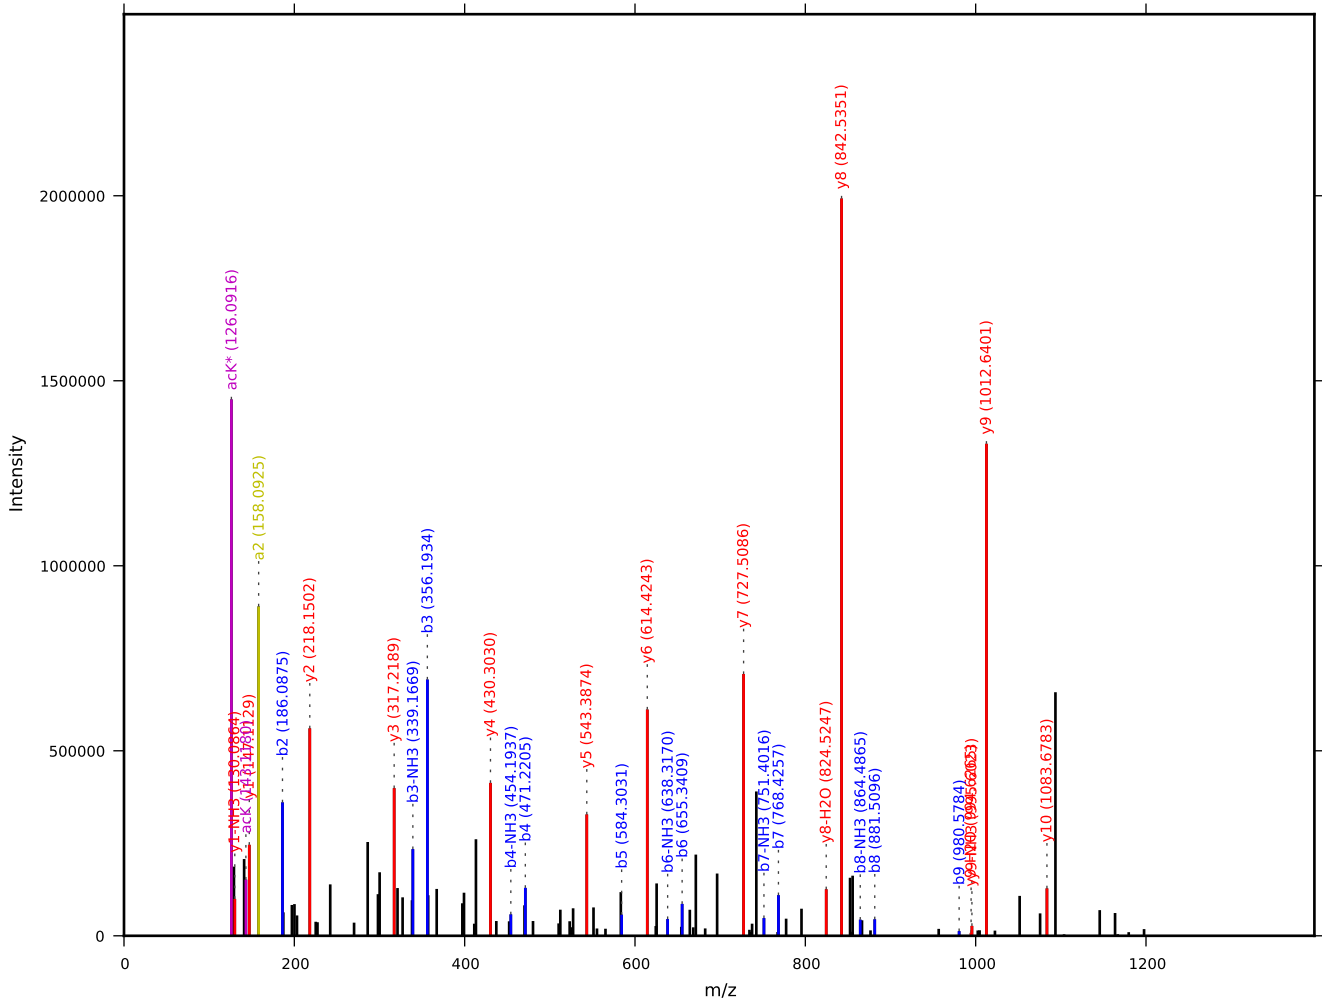

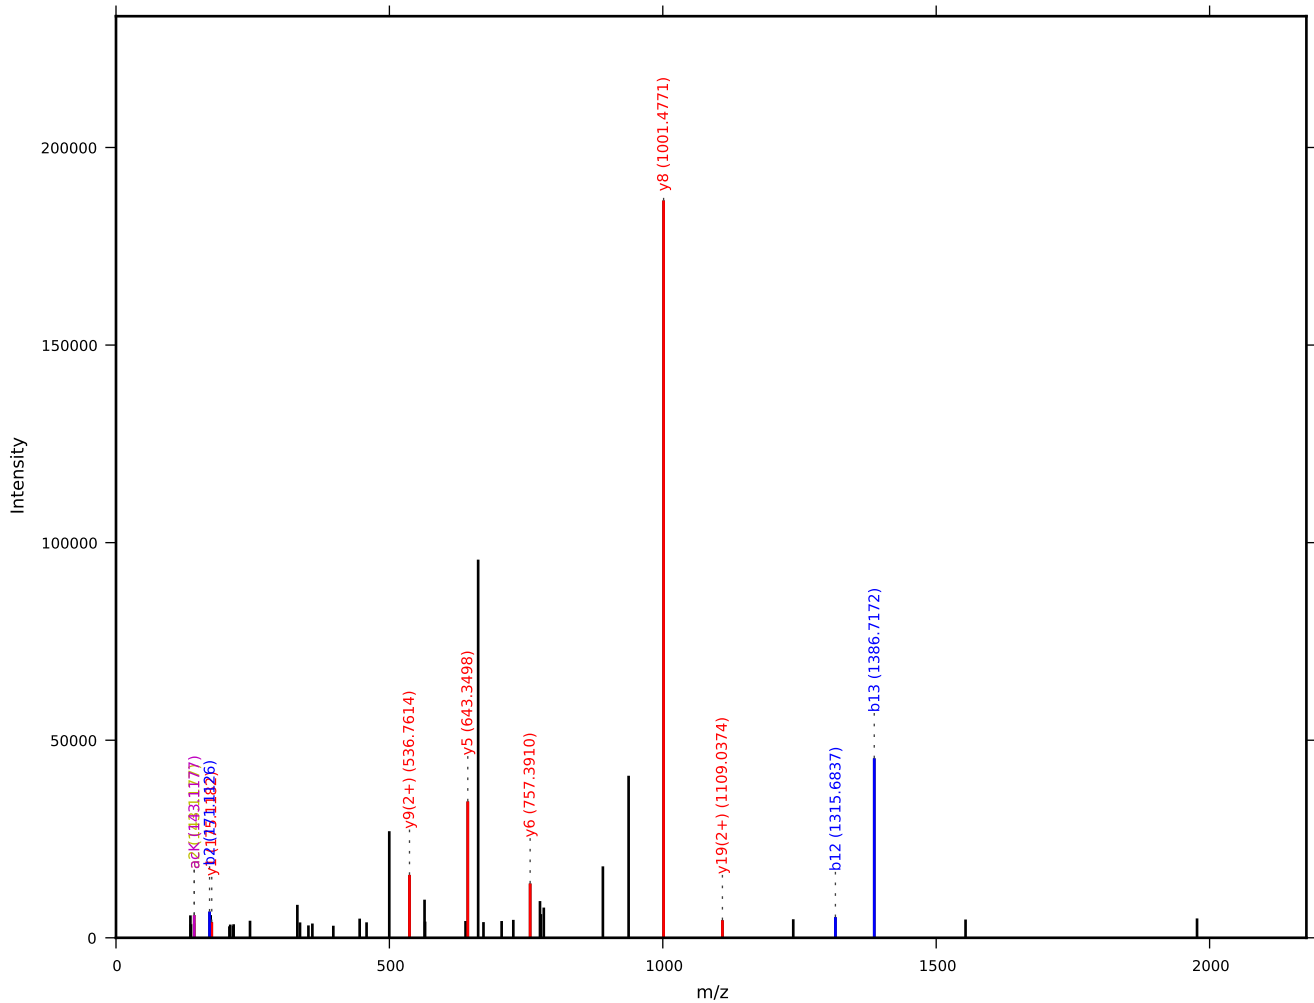

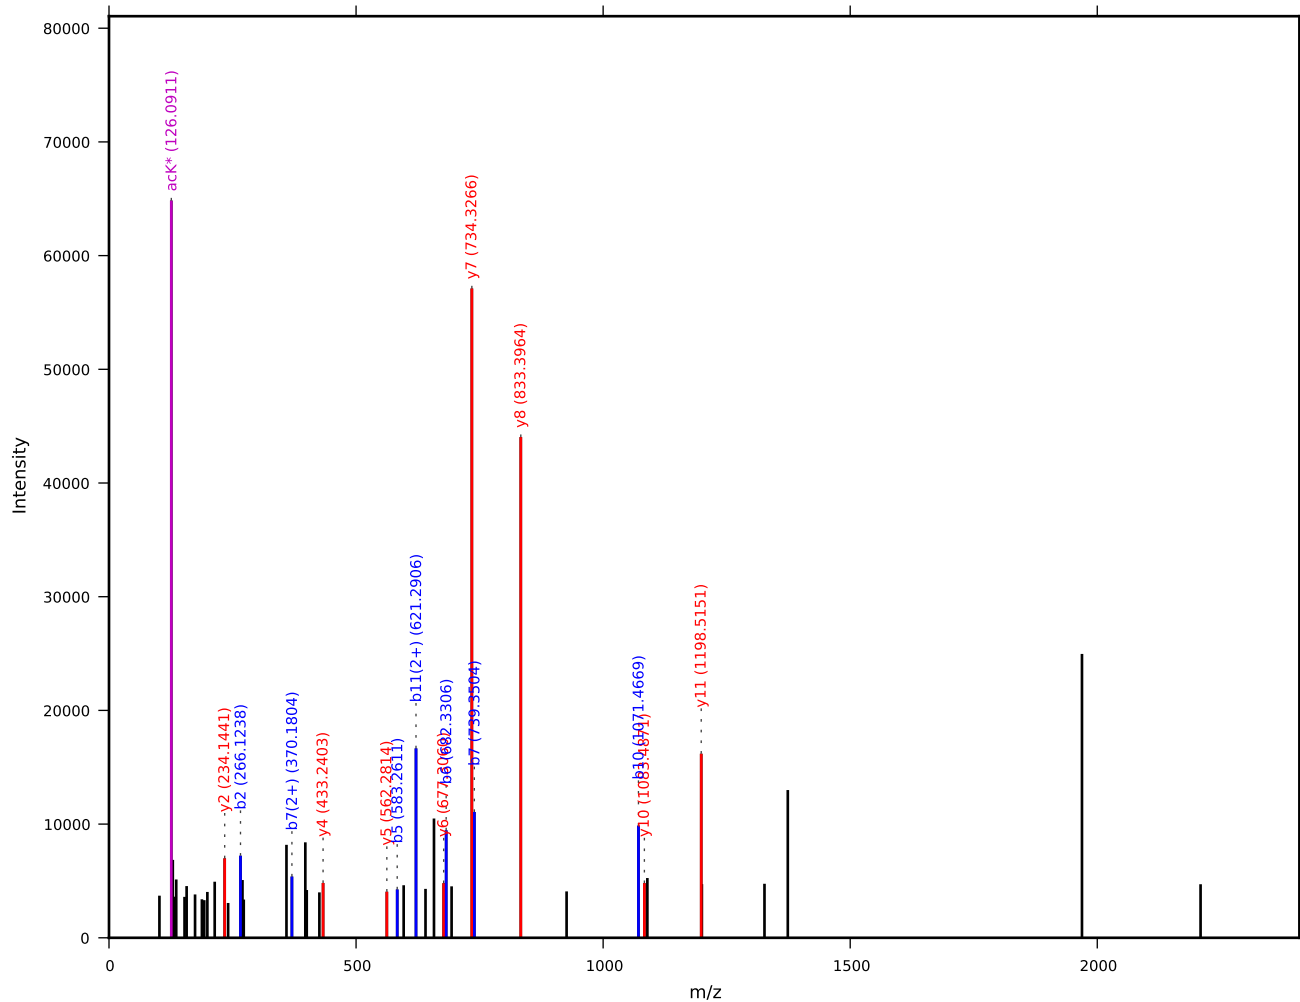



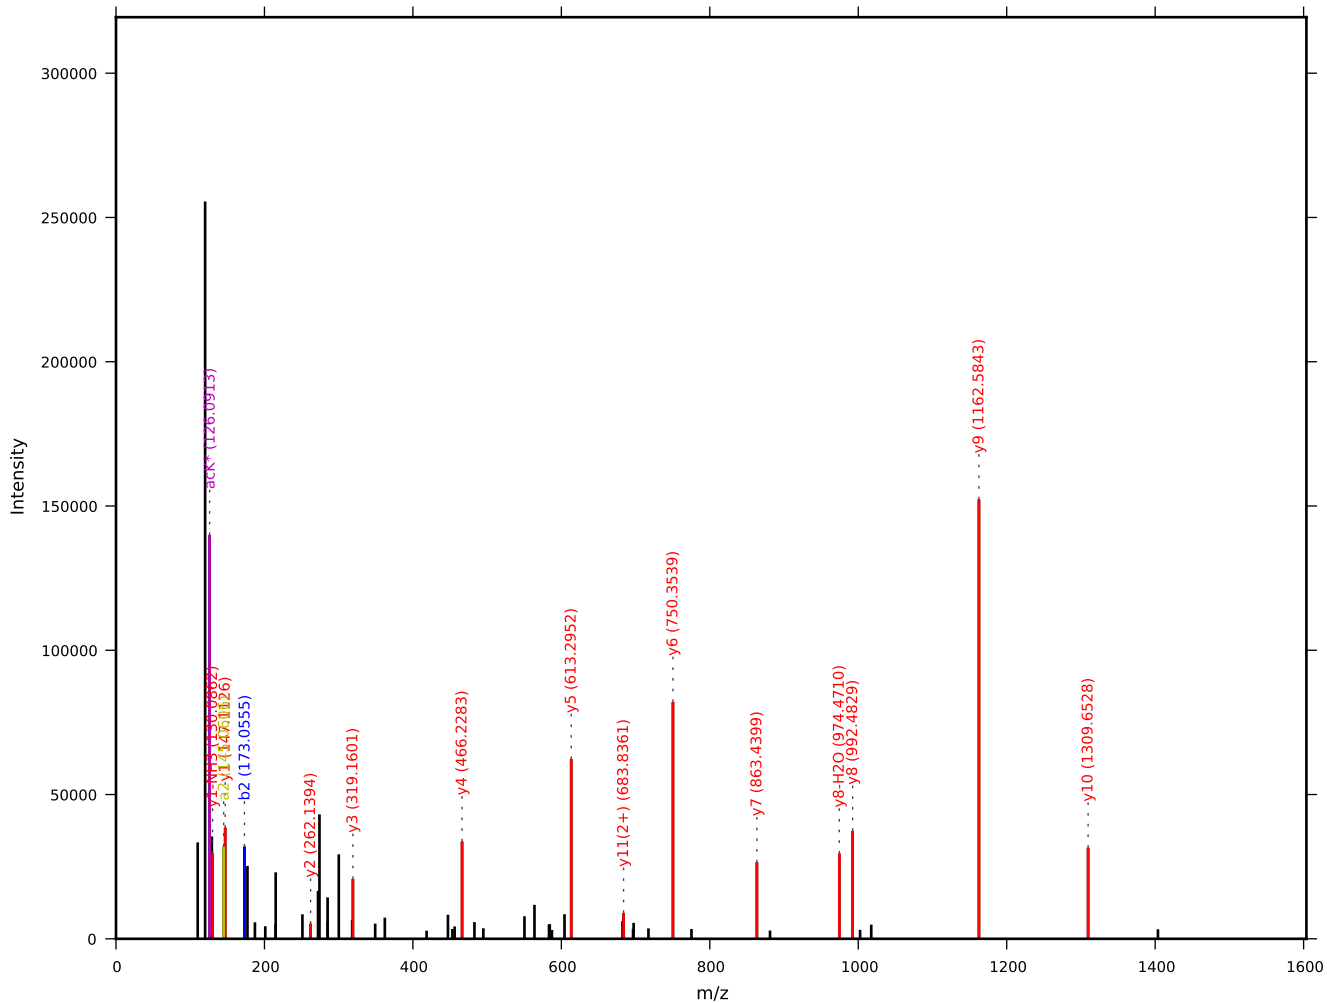

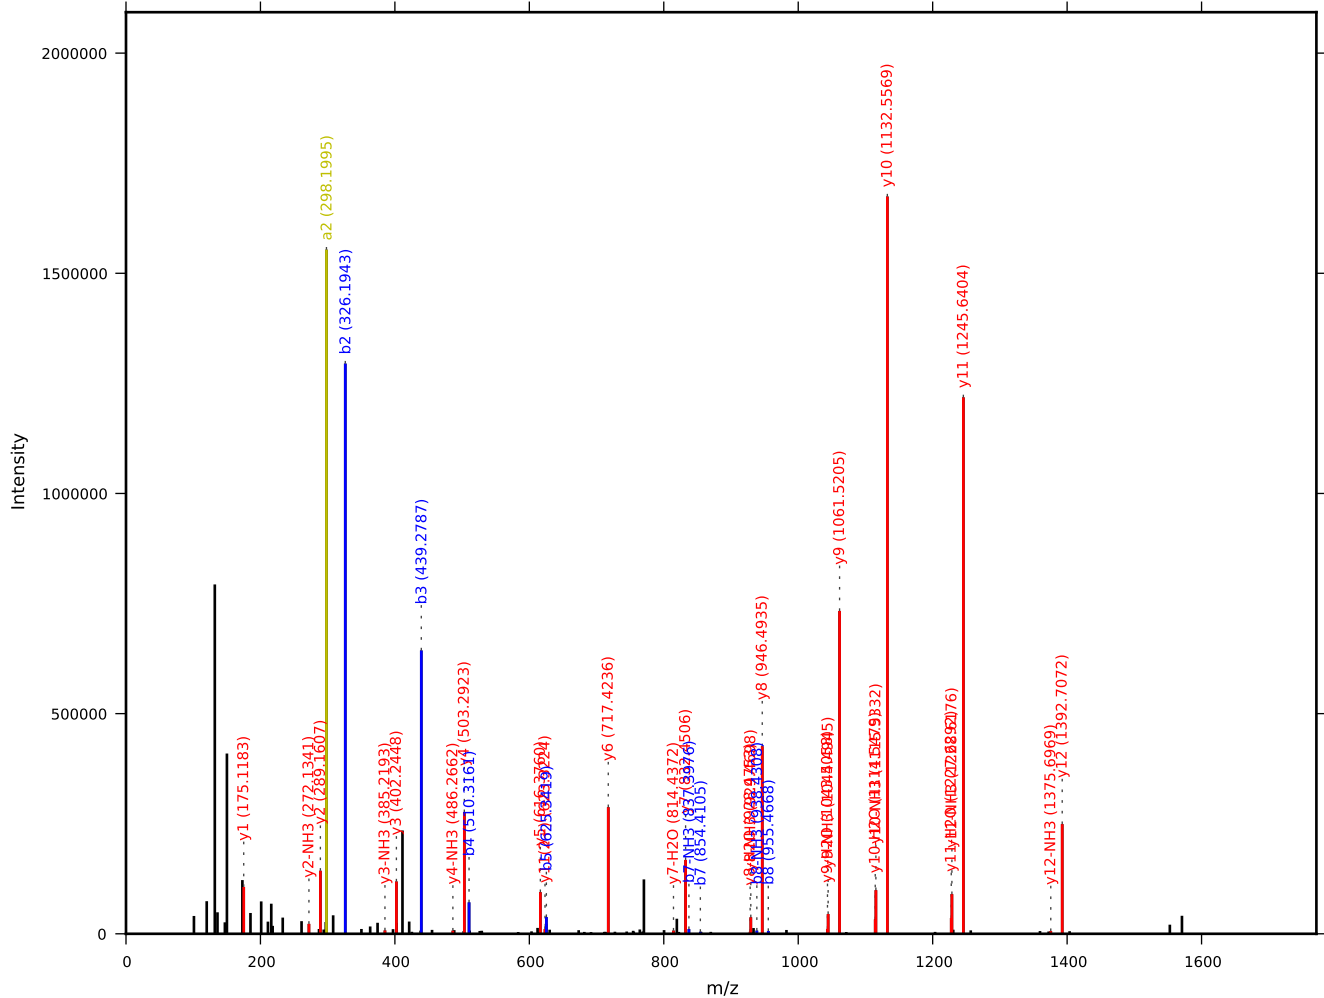

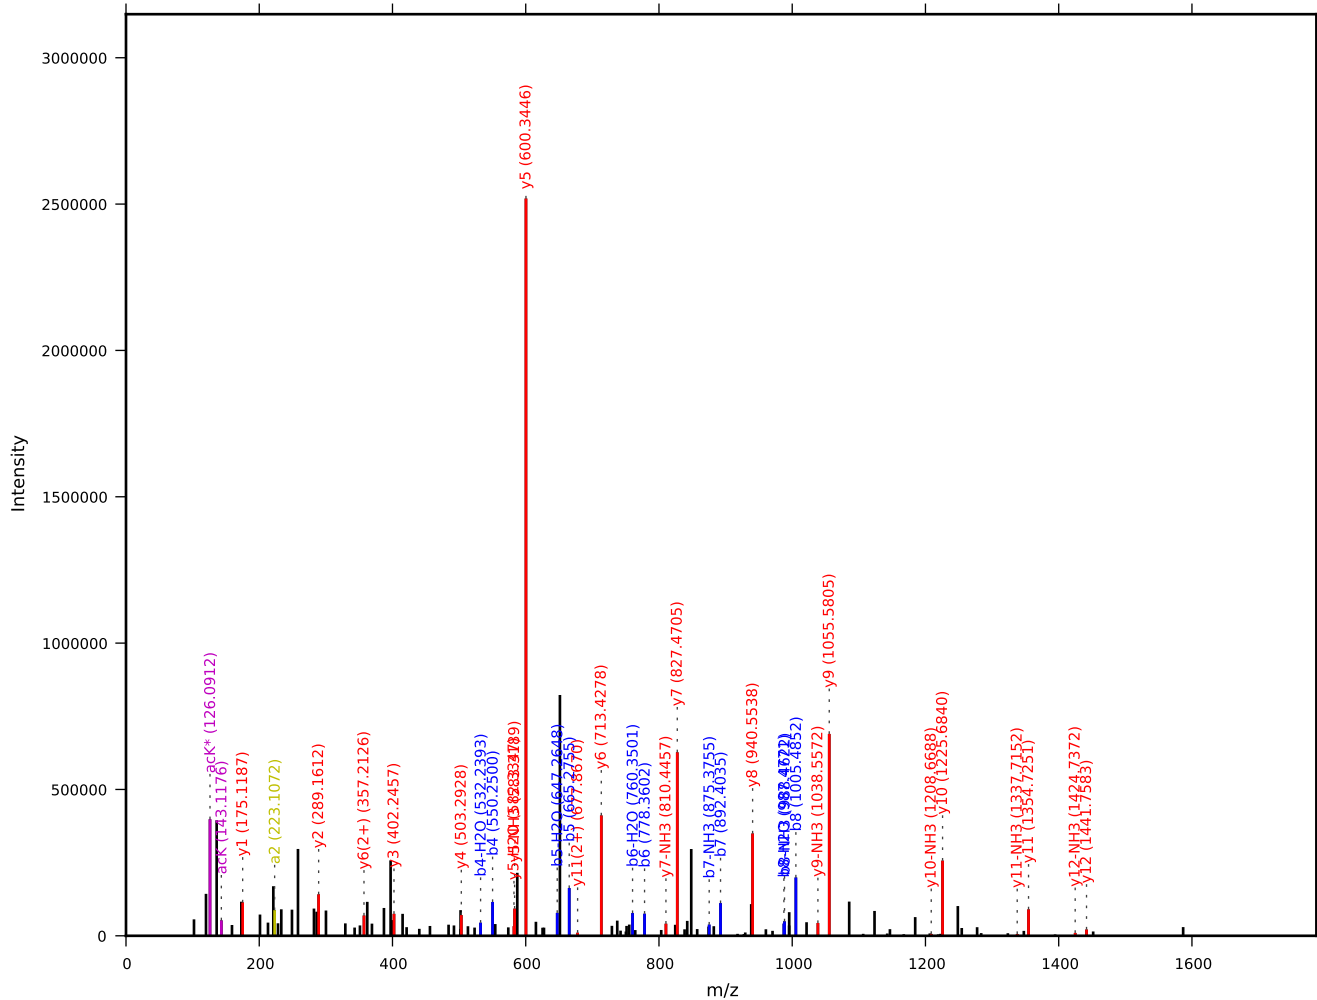

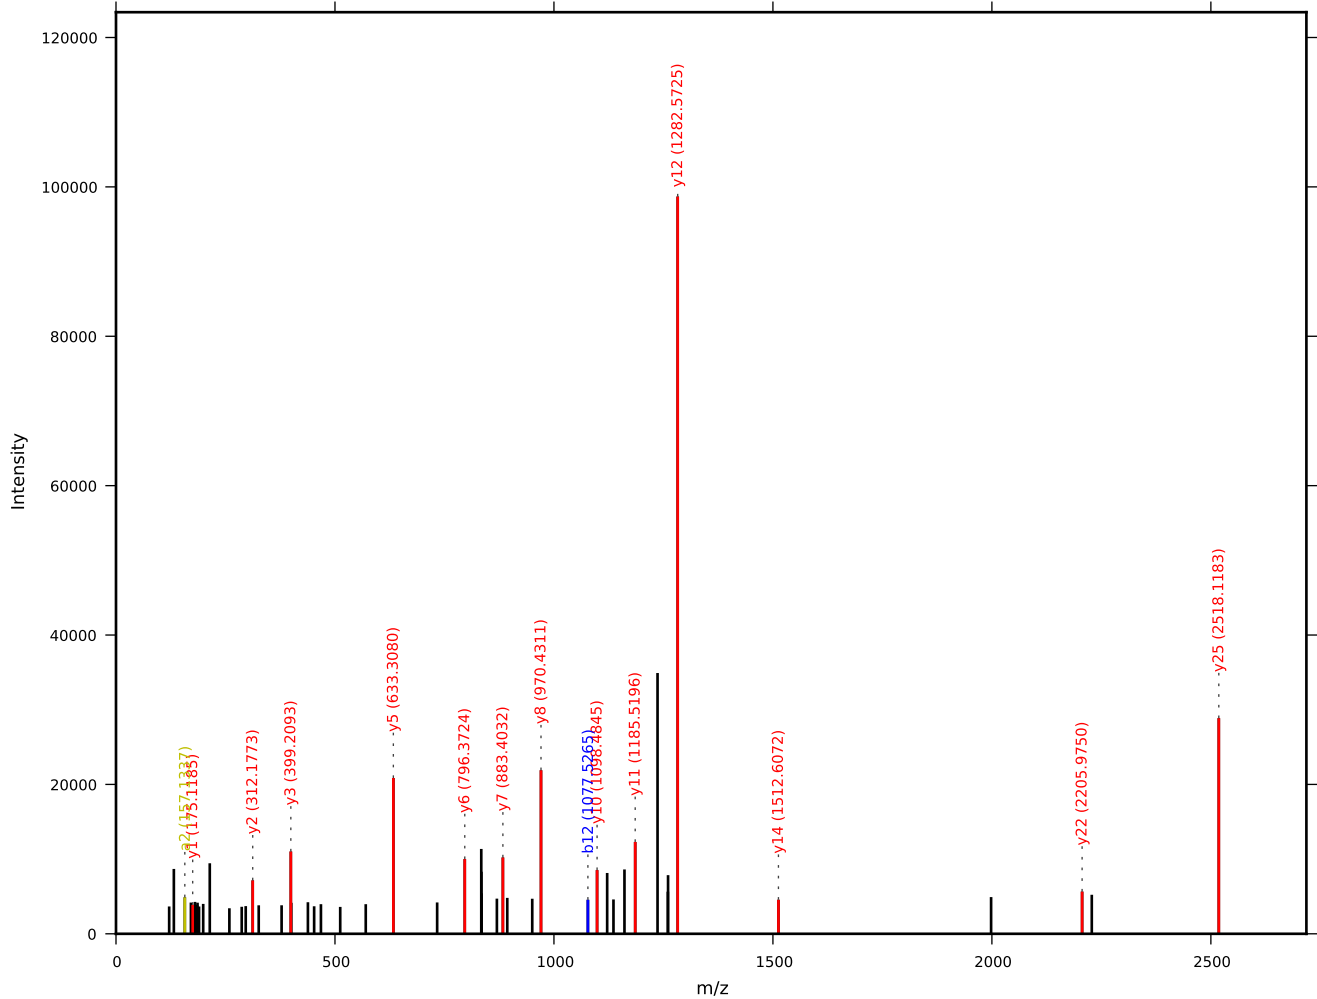

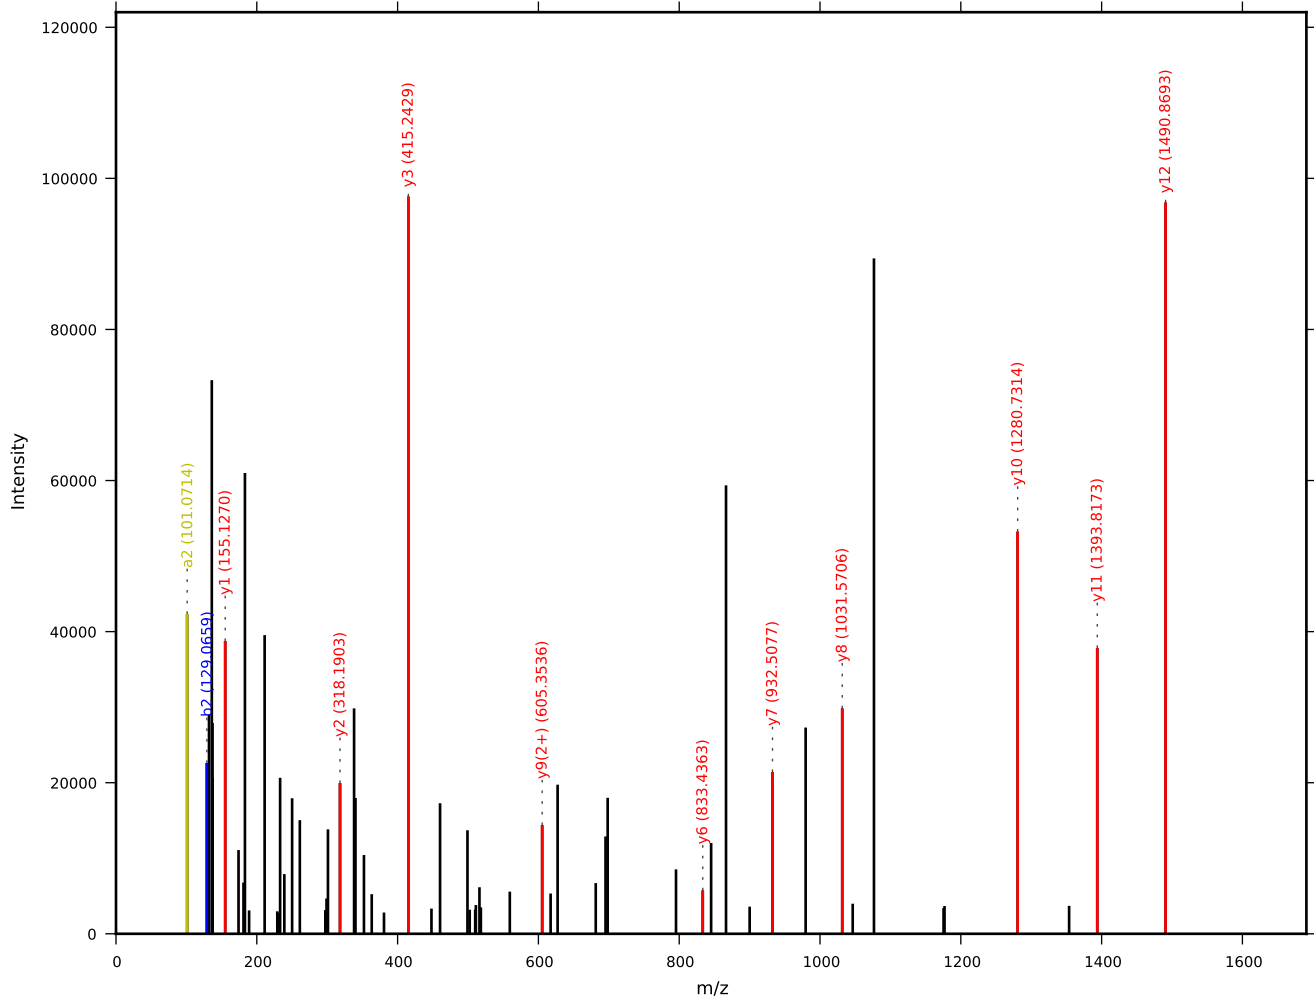

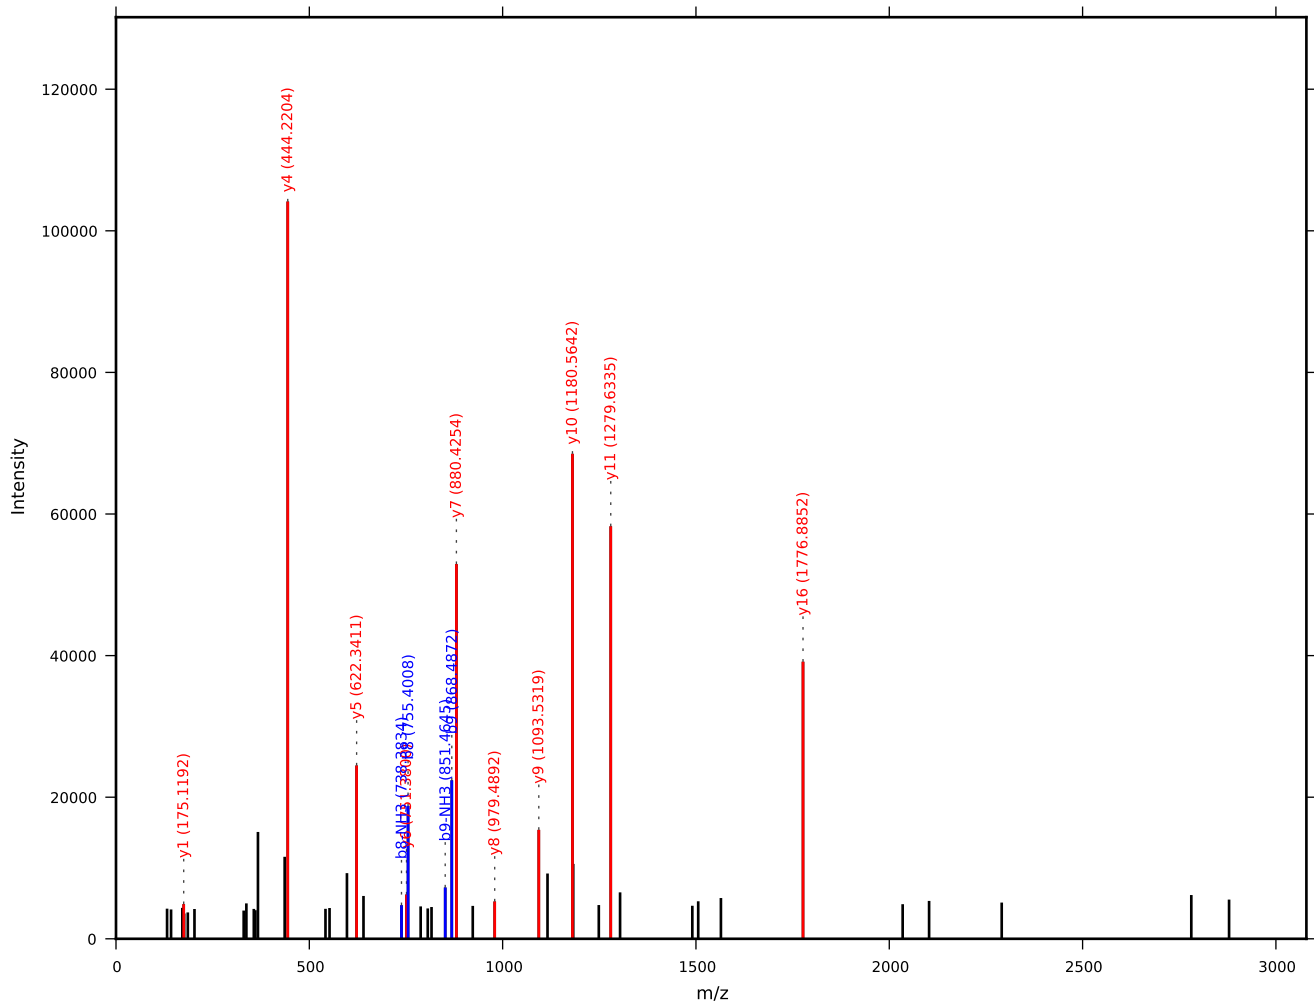

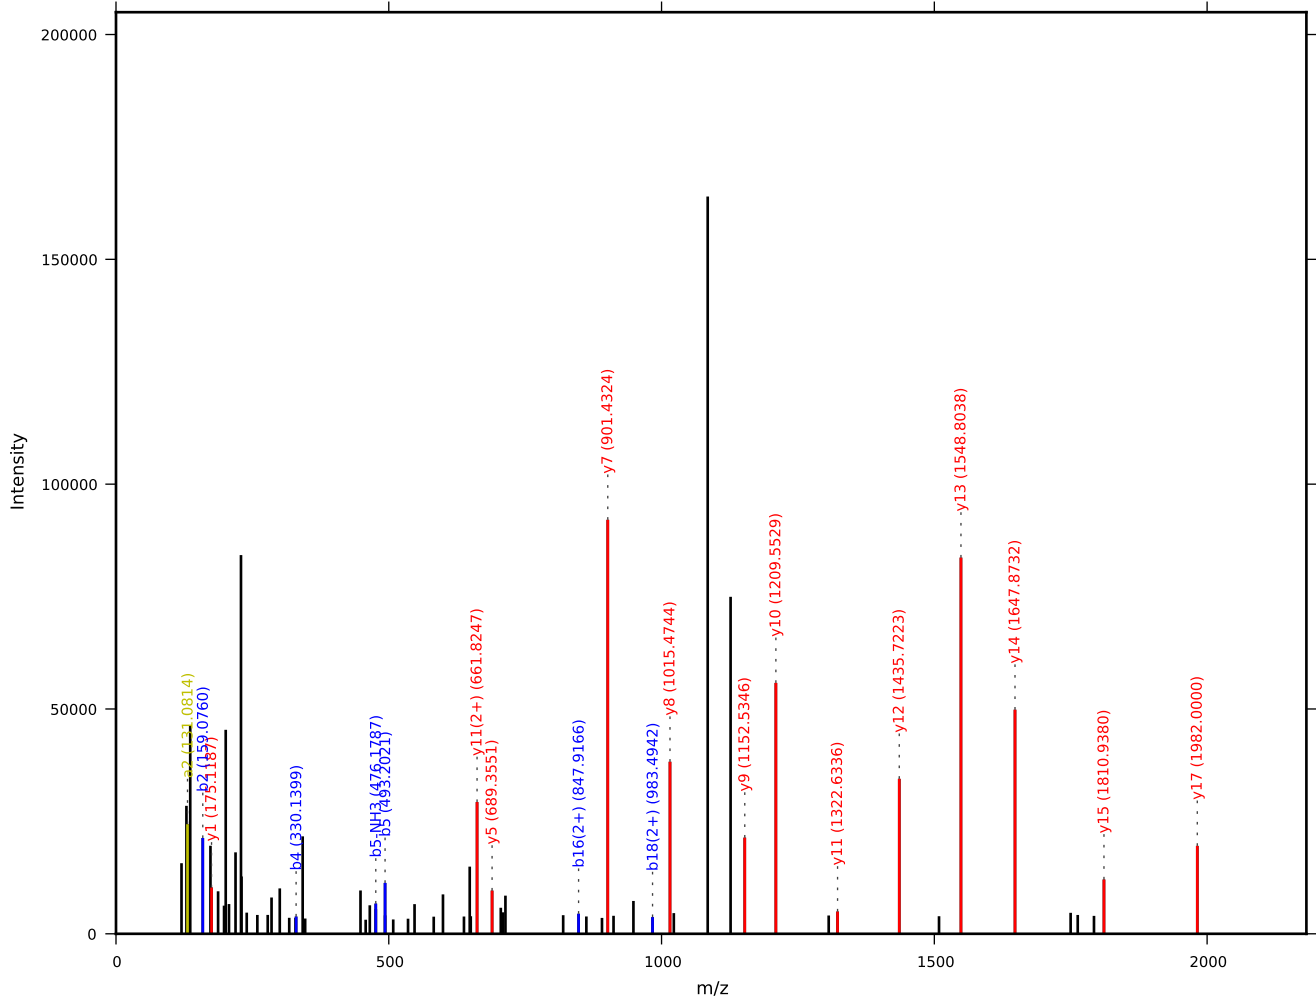

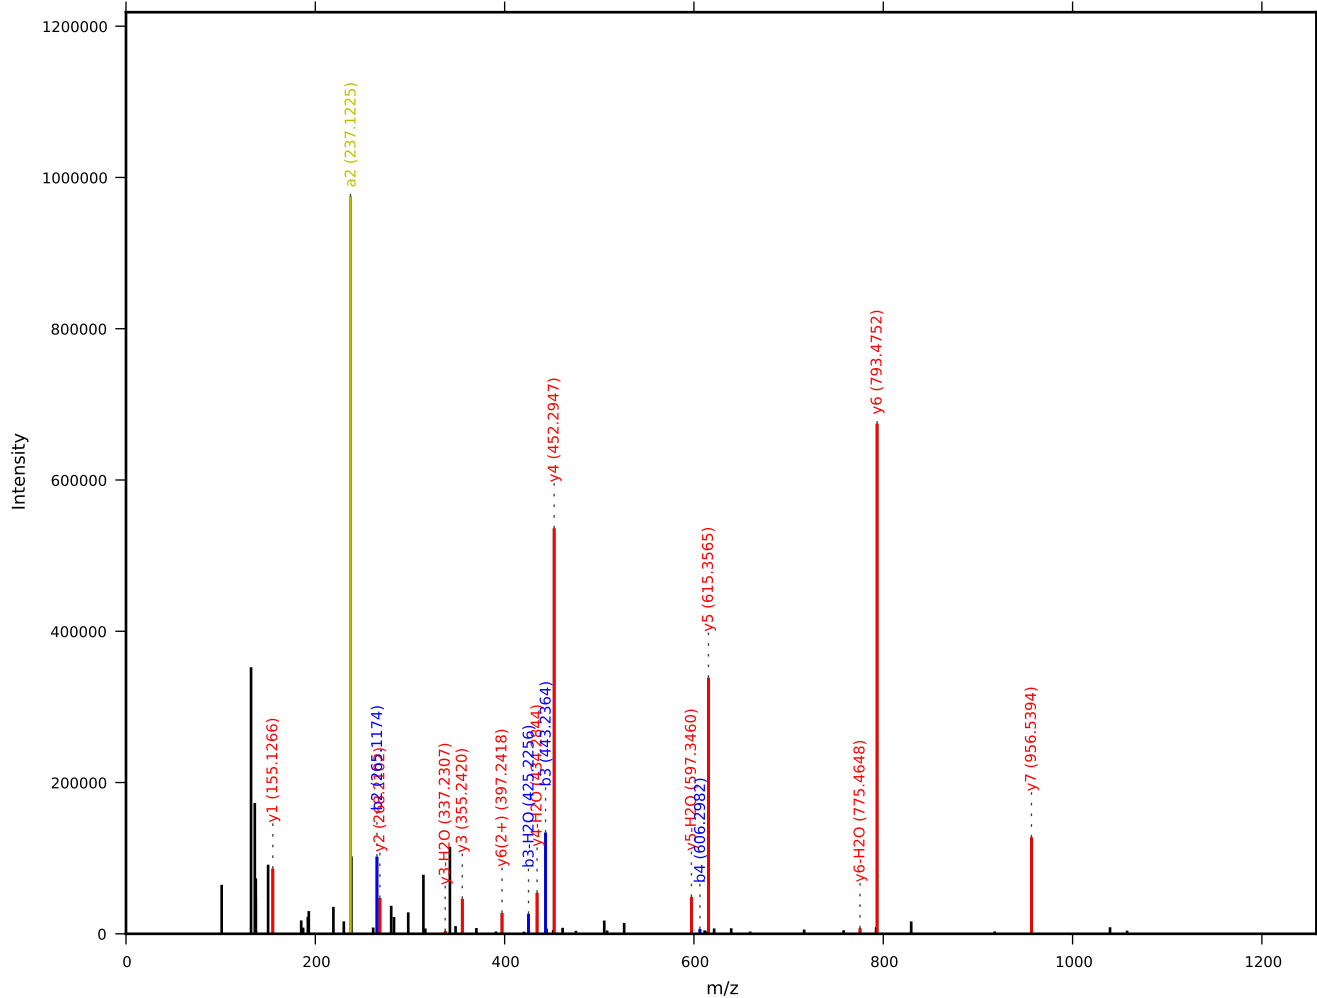



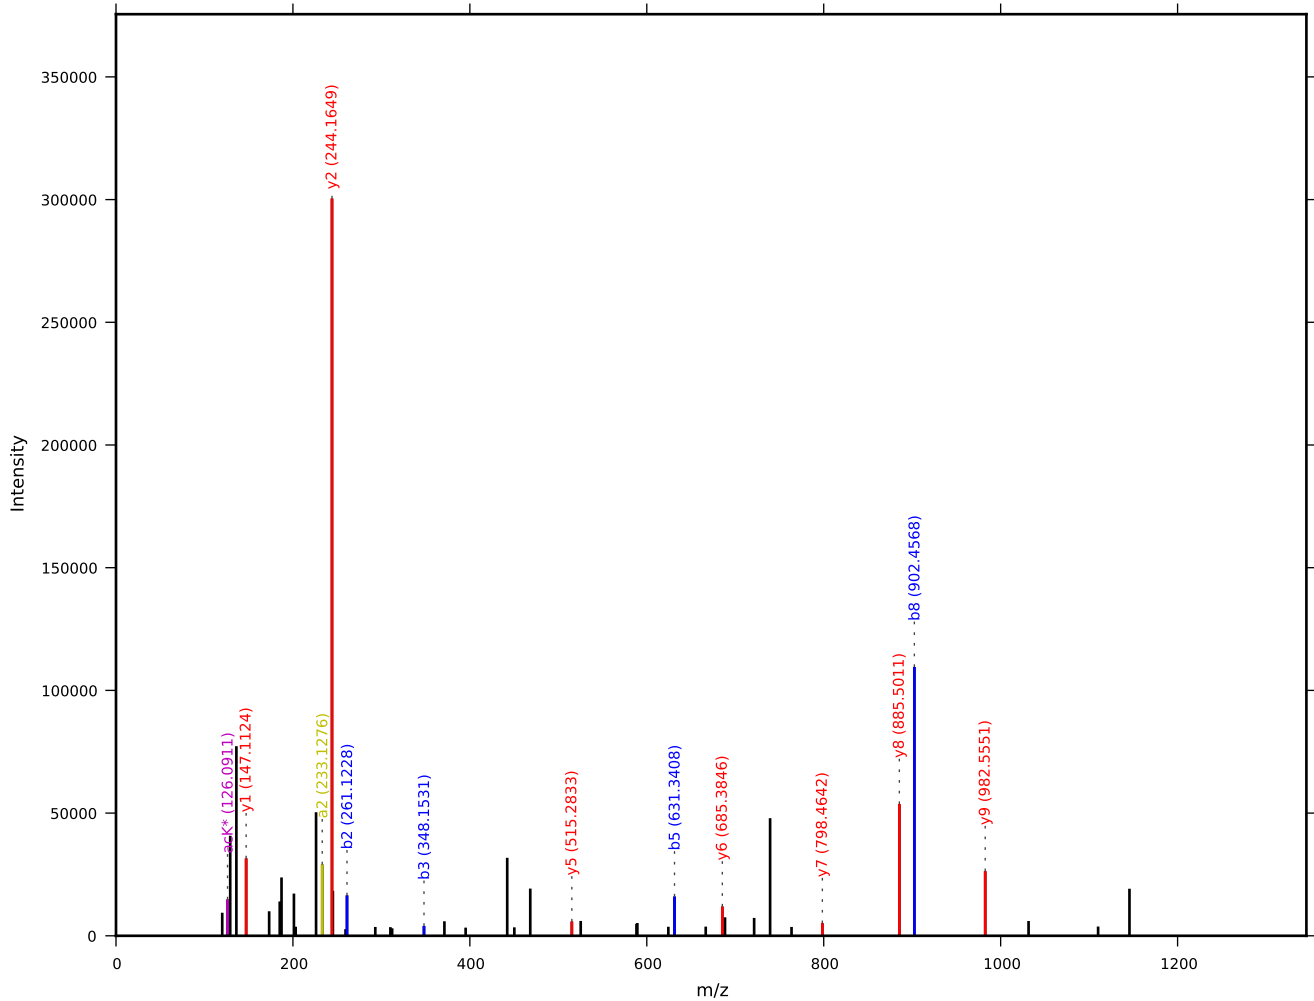

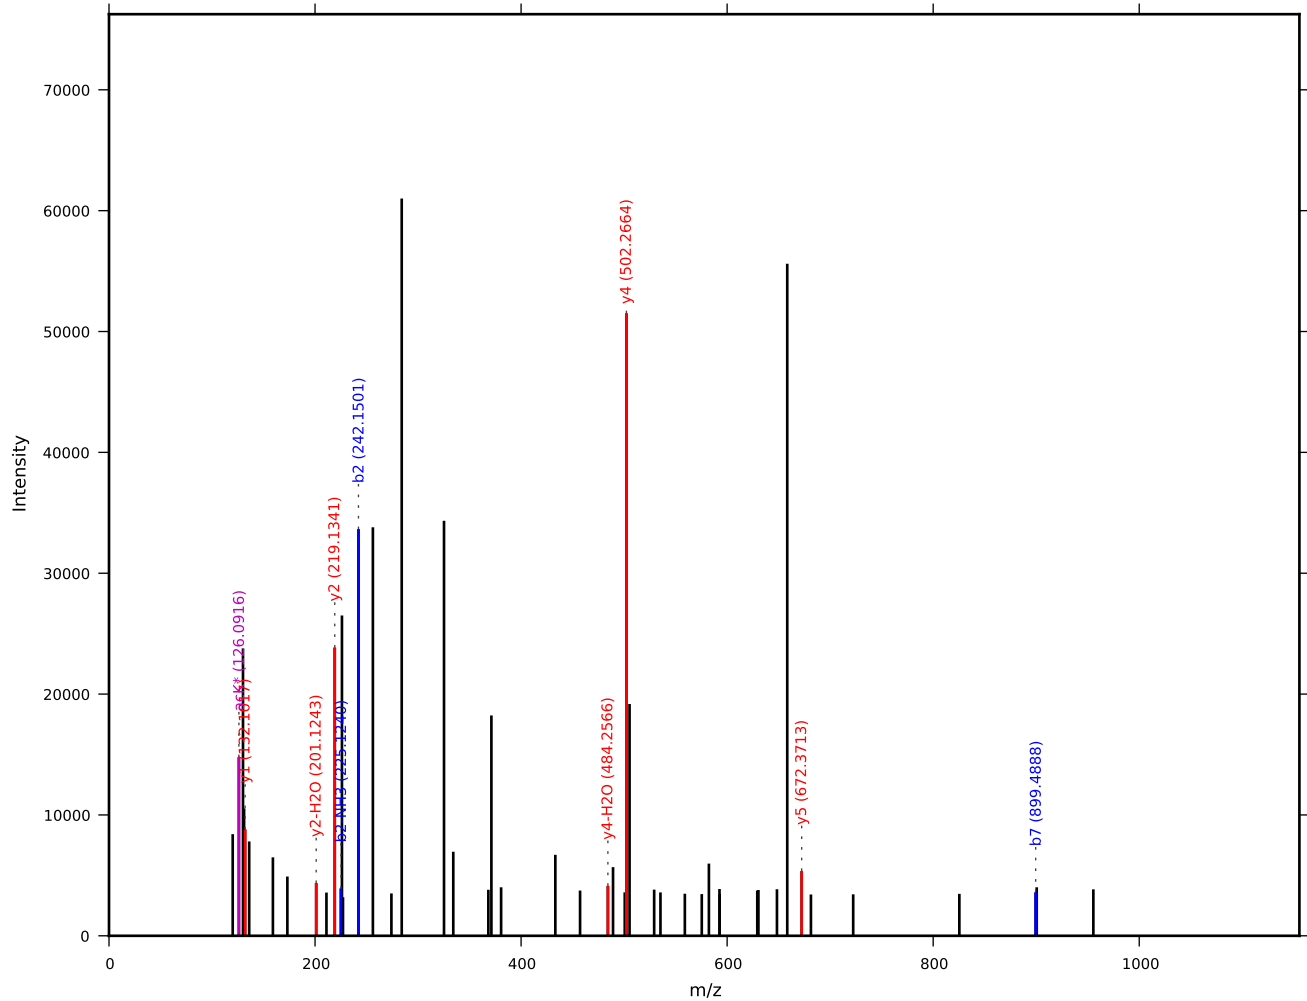

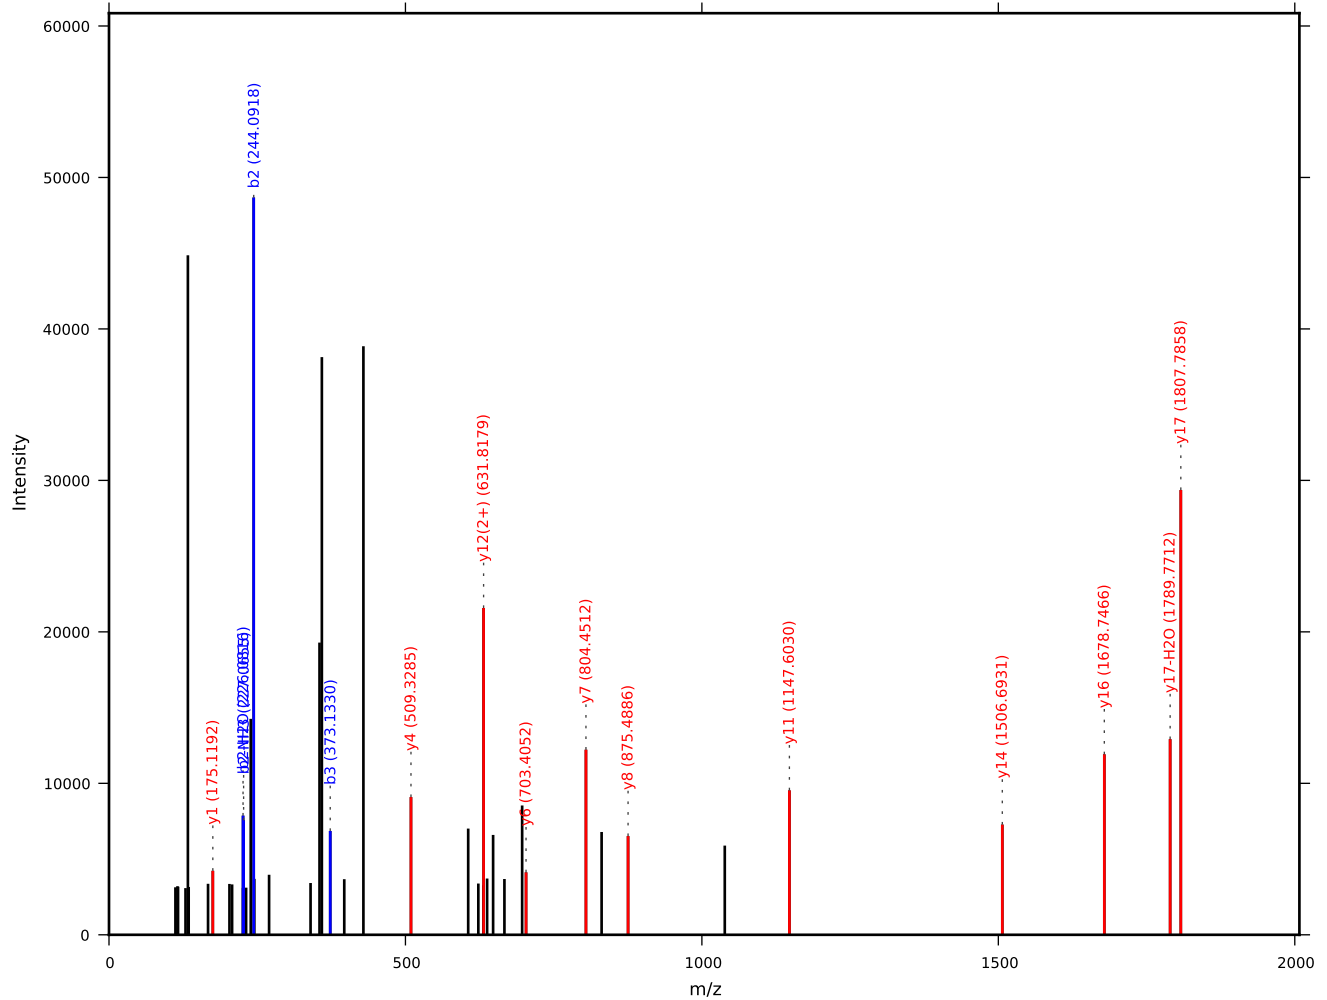

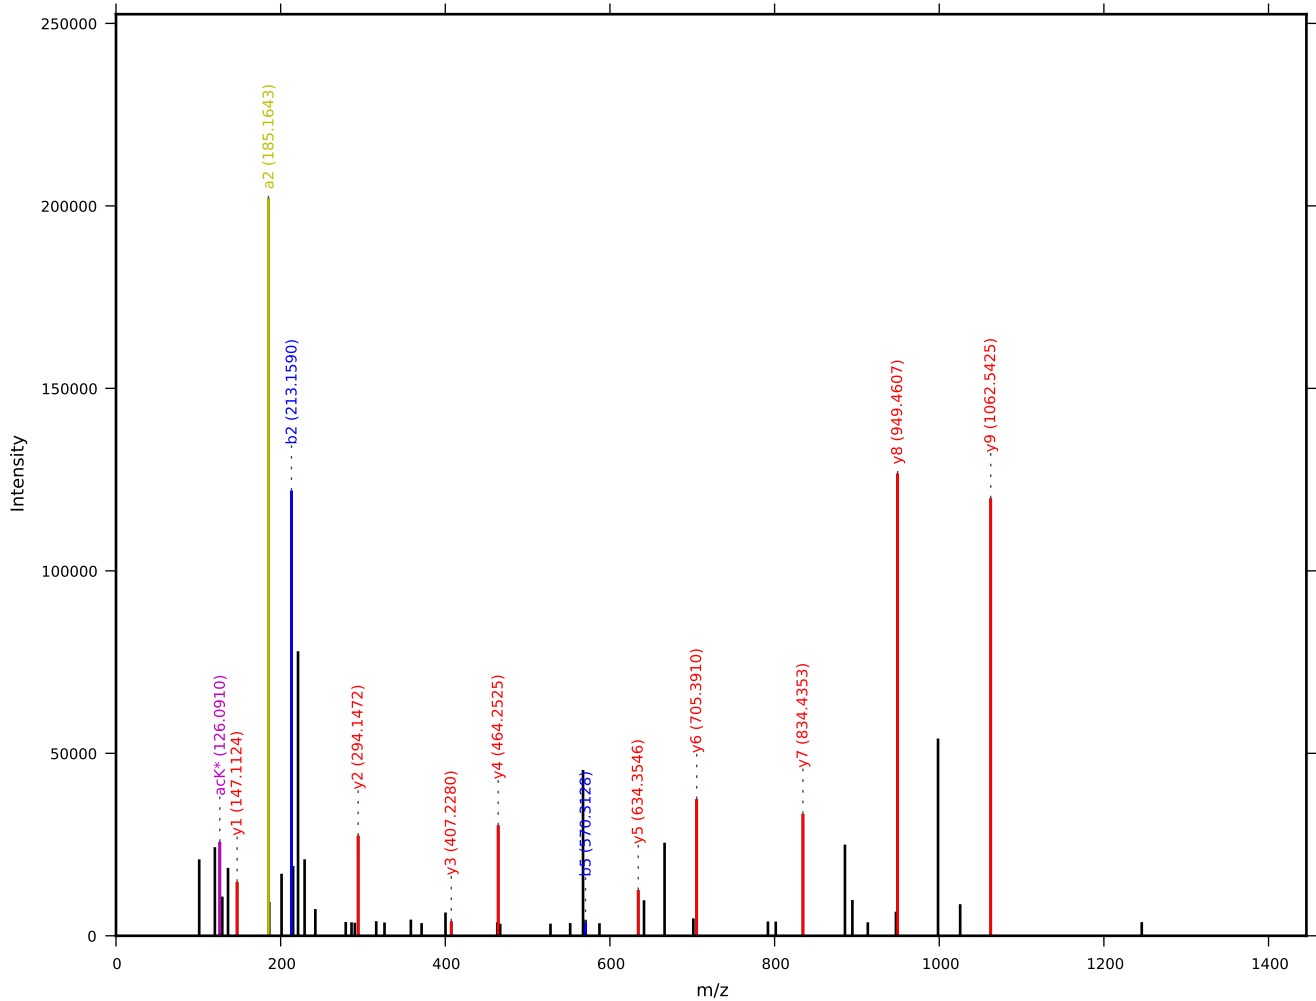

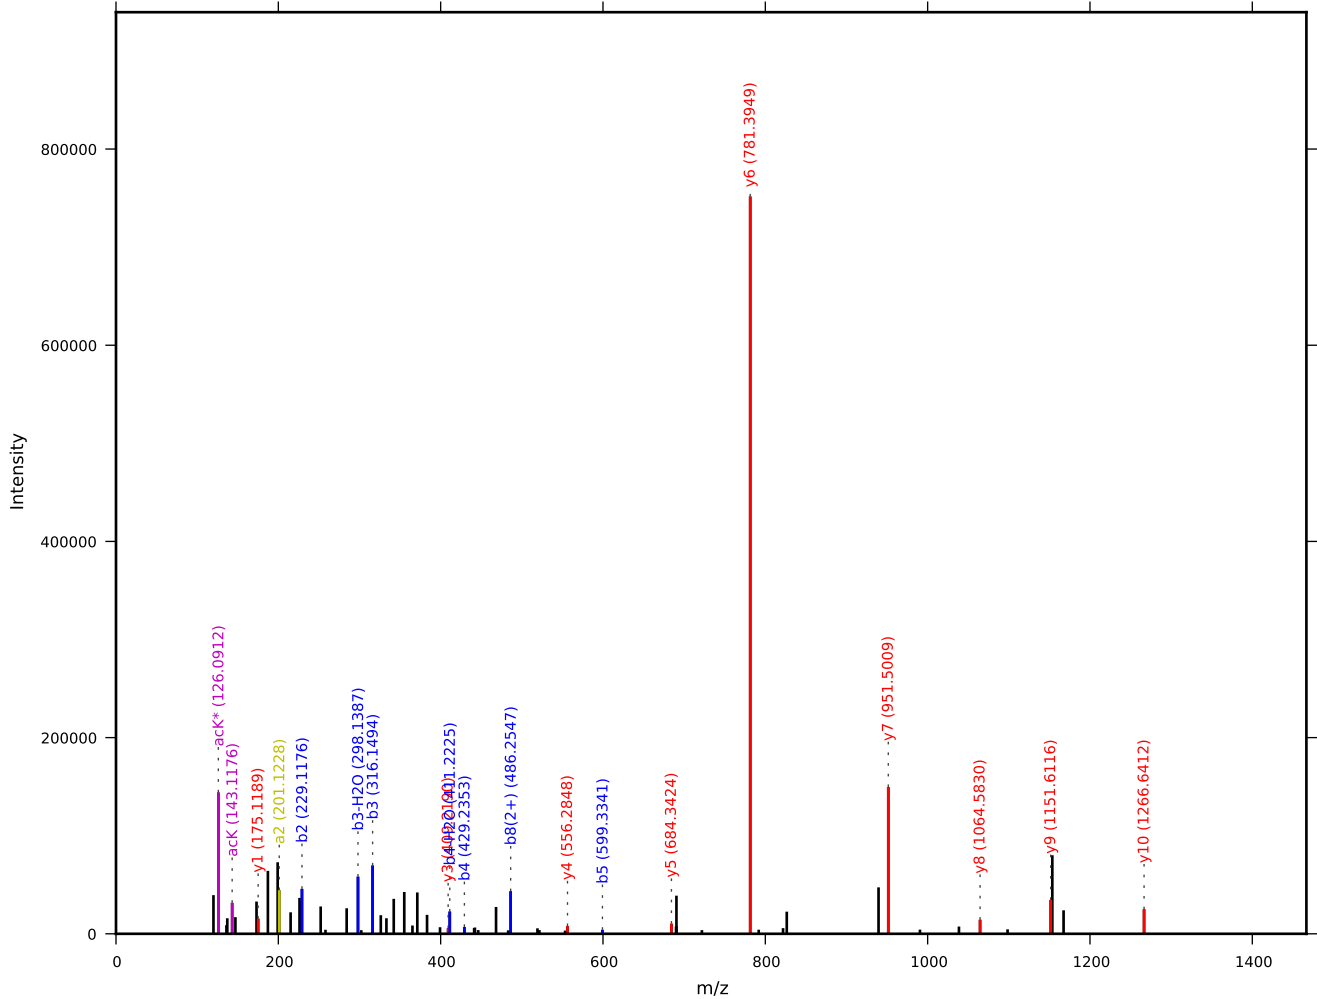

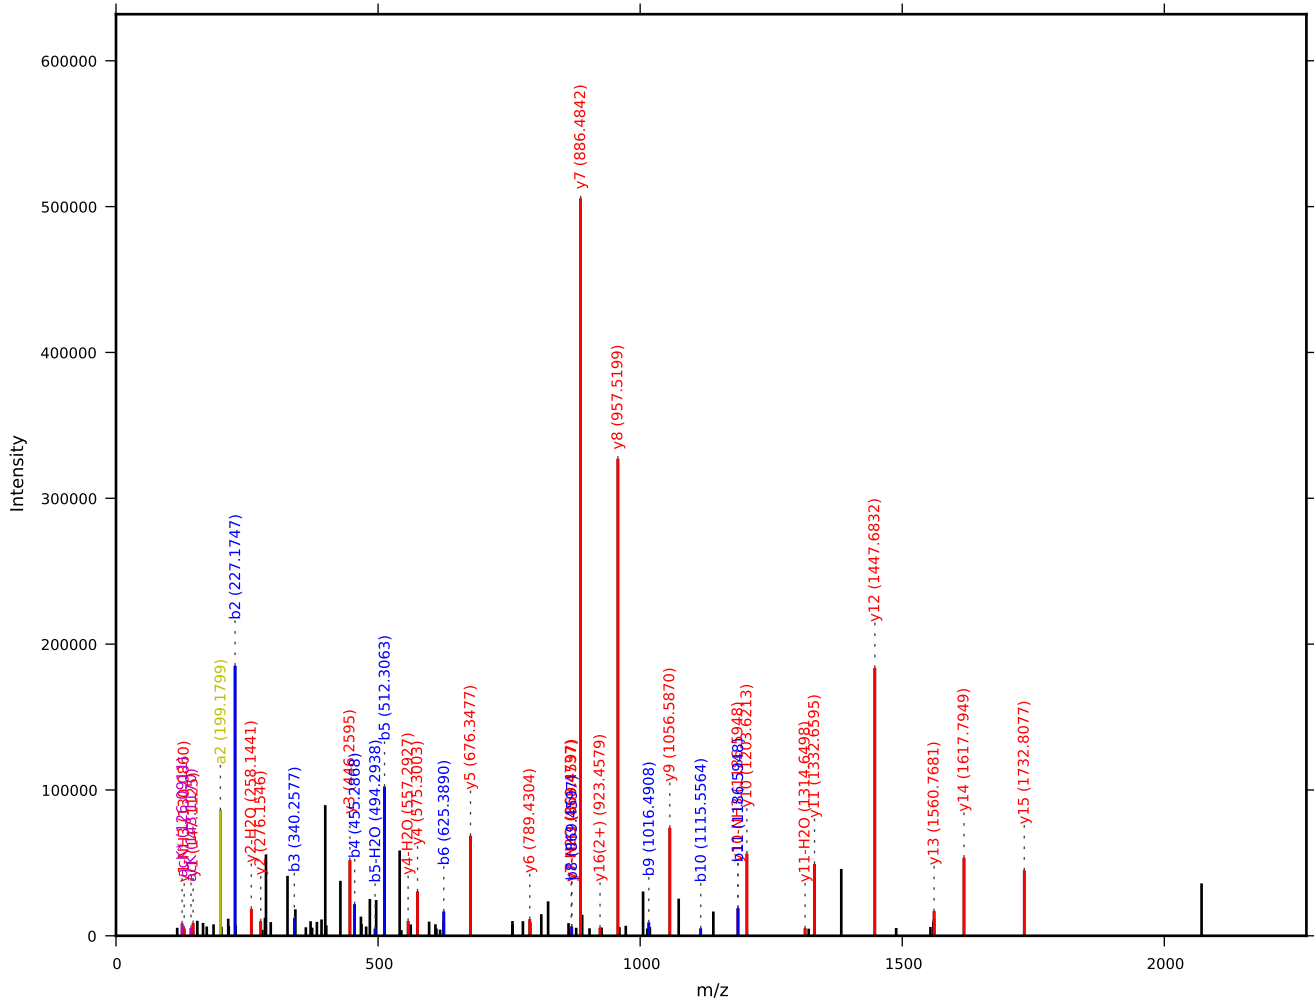

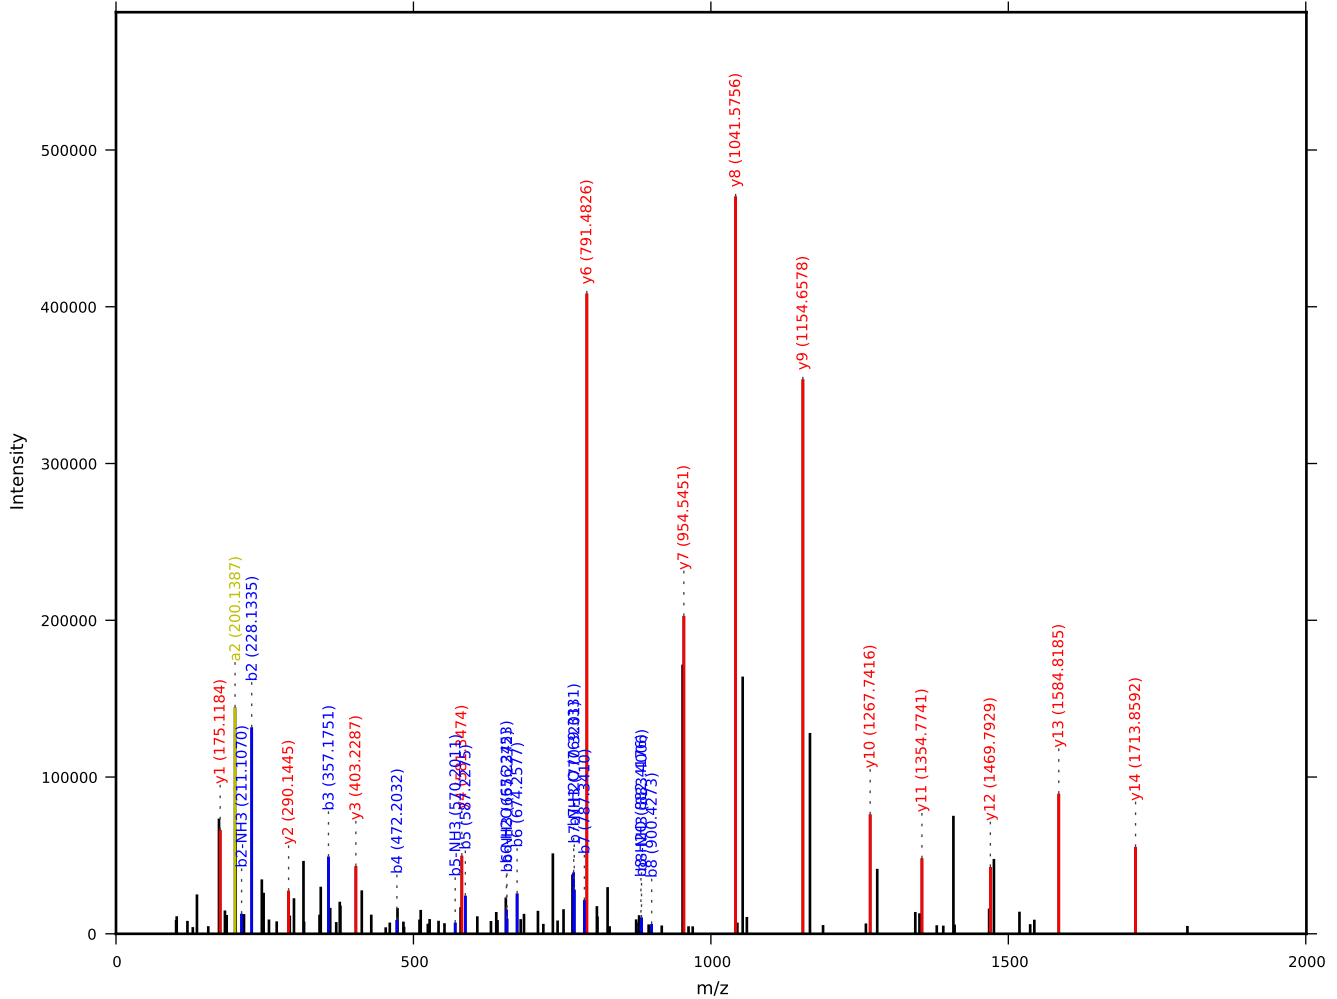

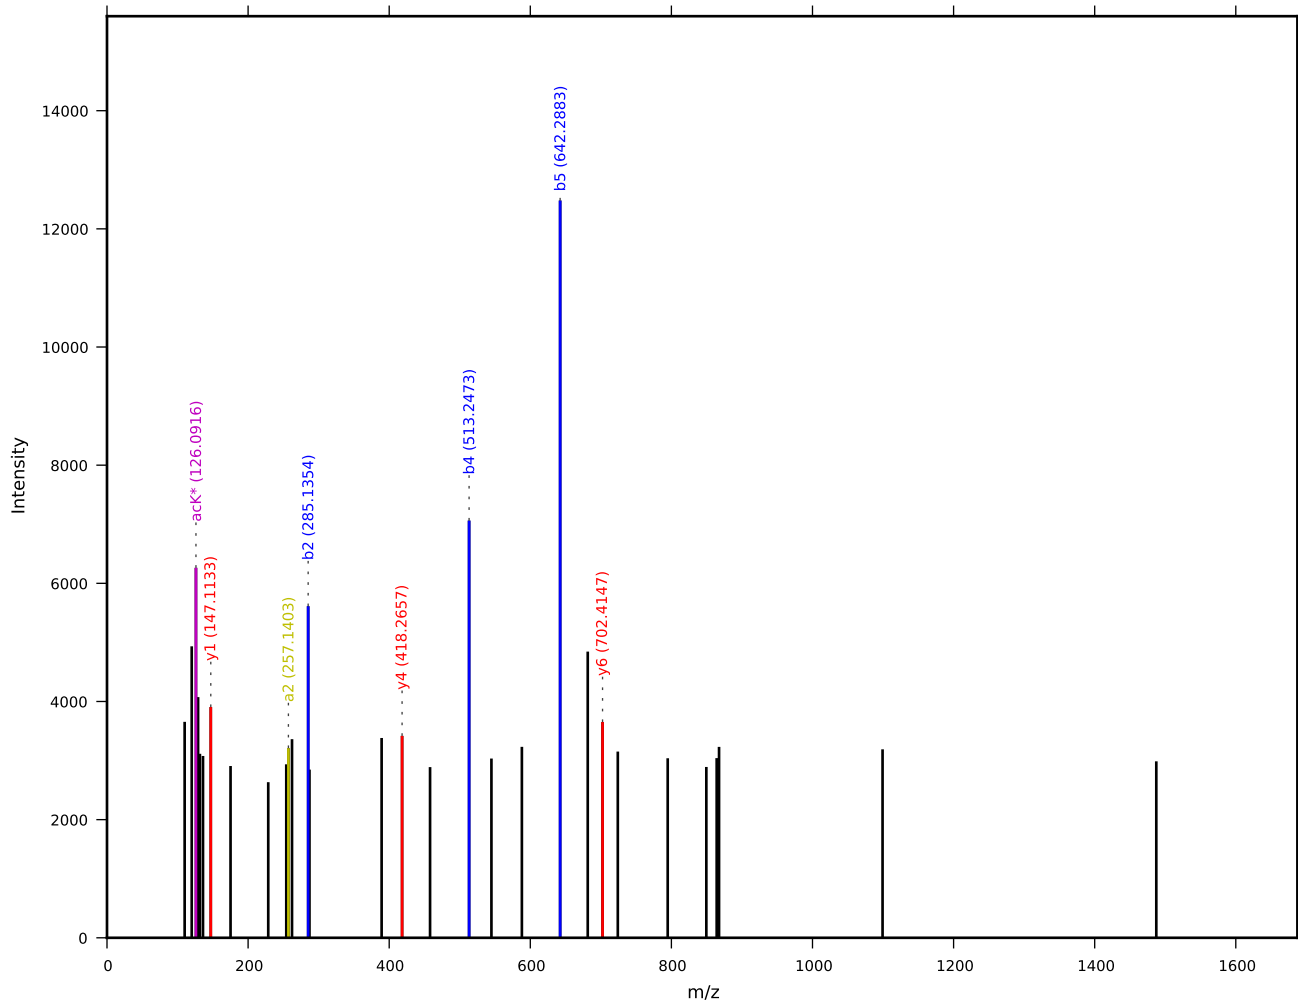



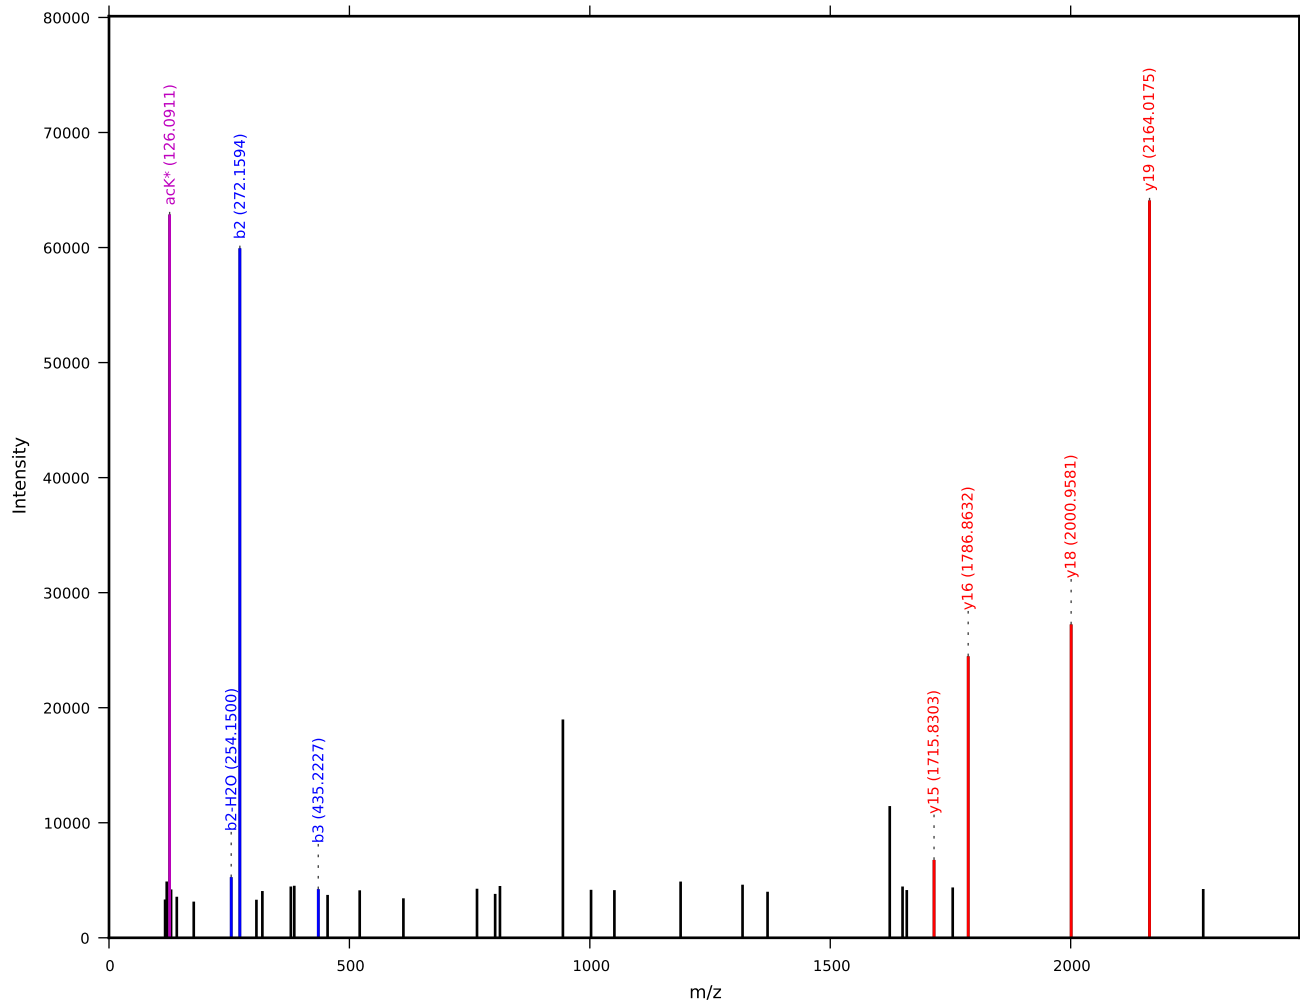

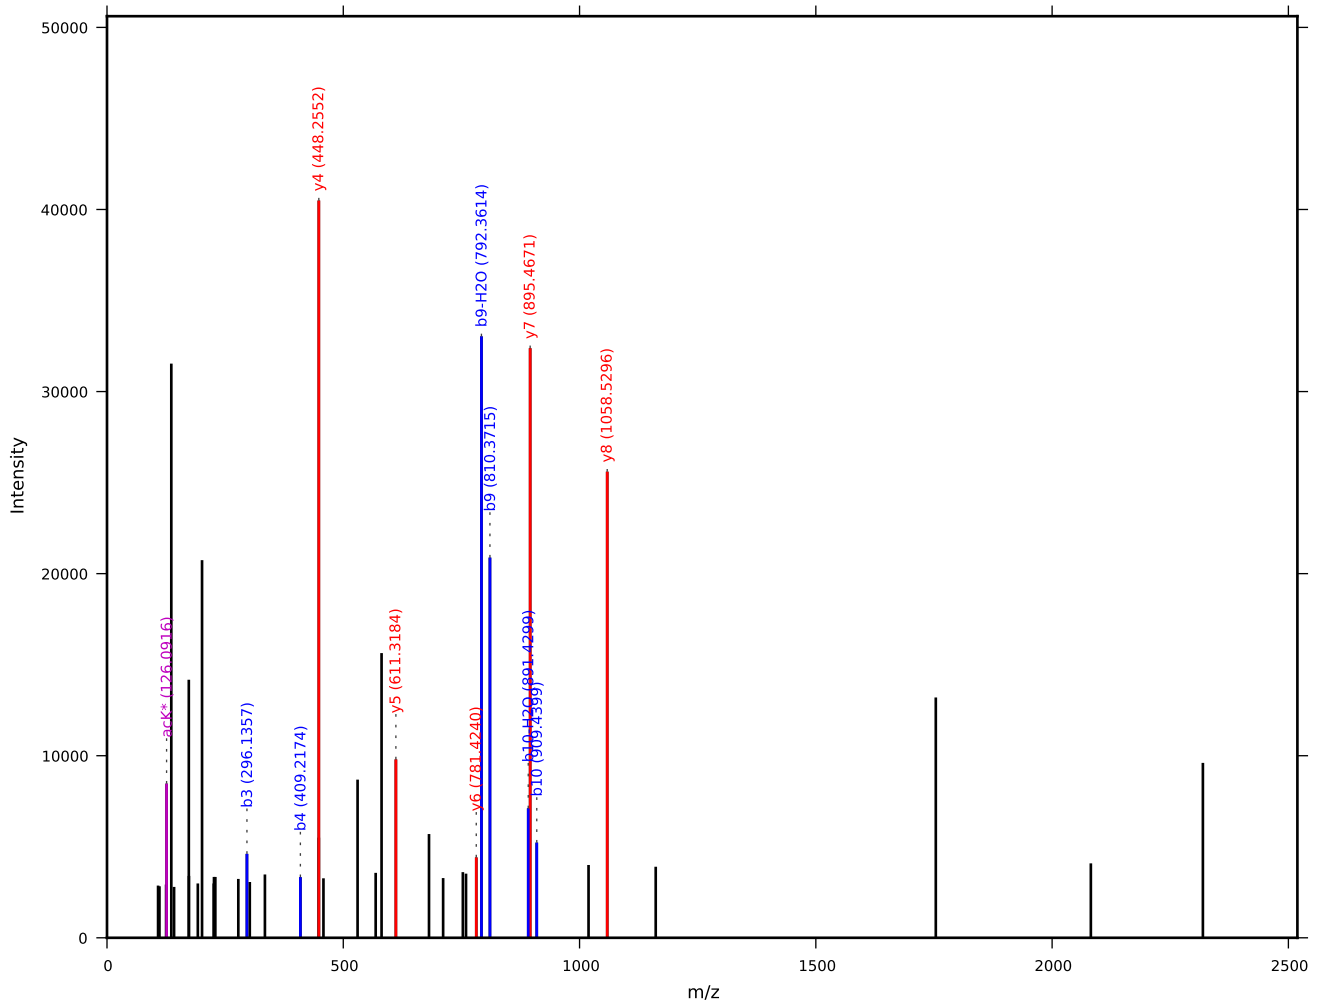

Mass: 879.47018 Charge: 2 m/z: 440.74237  
Modified Peptide: \_DALTK(ac)YK\_ Score: 53.17 PEP: 0.0087024

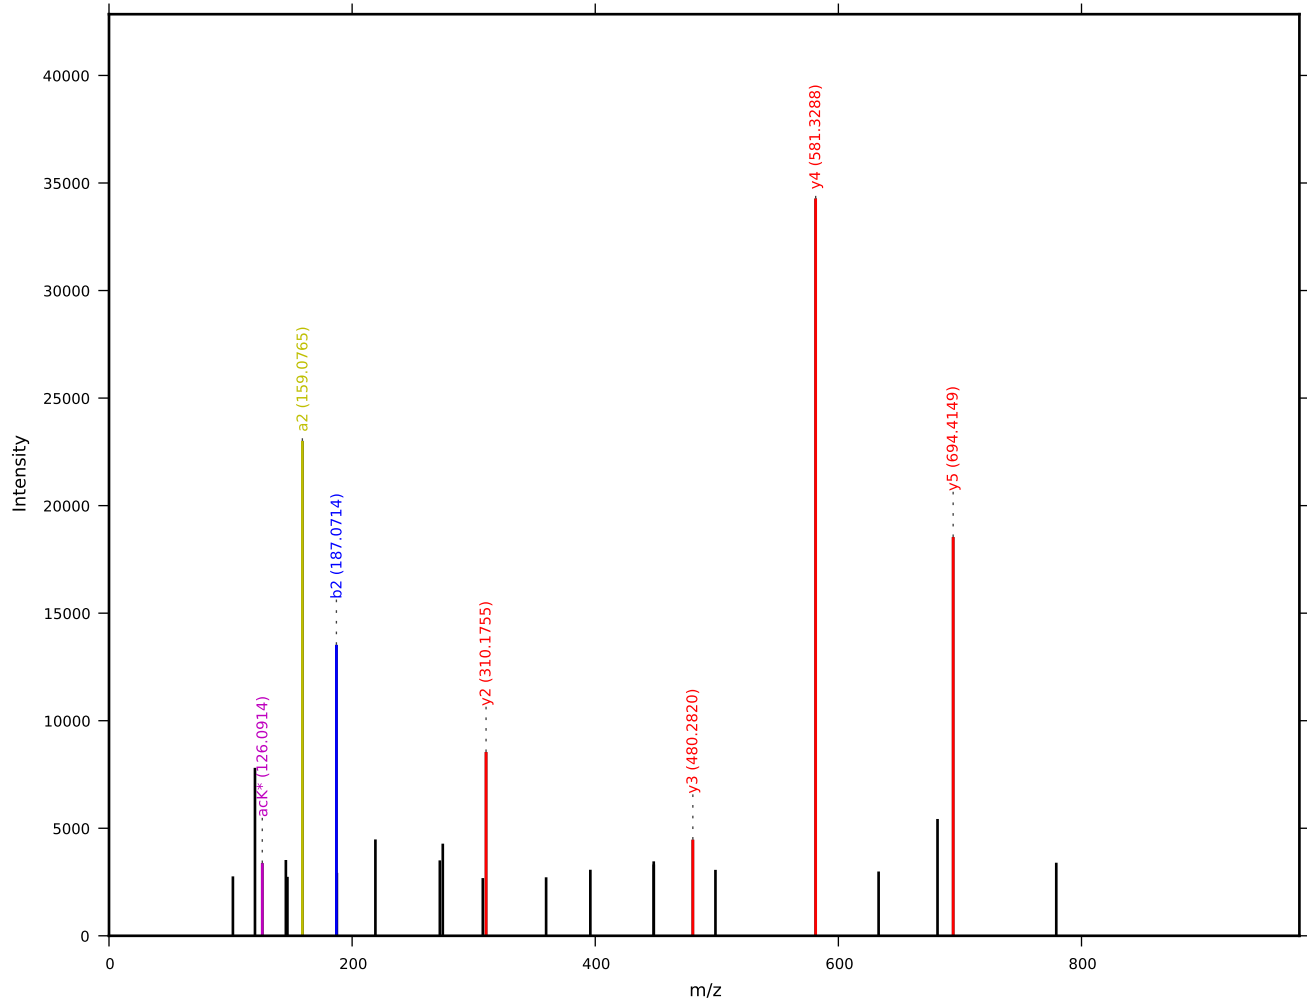

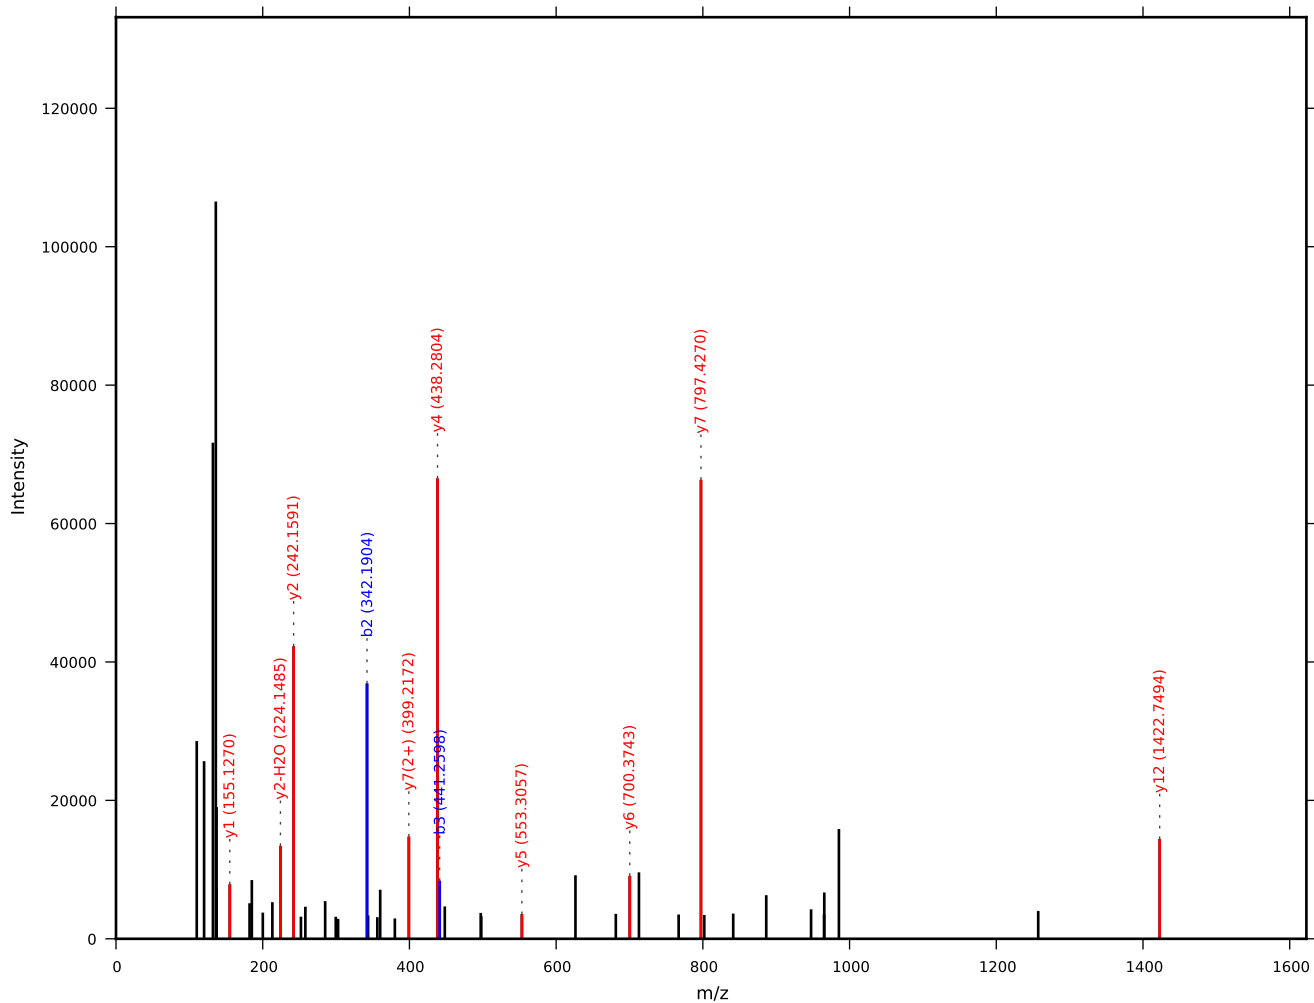

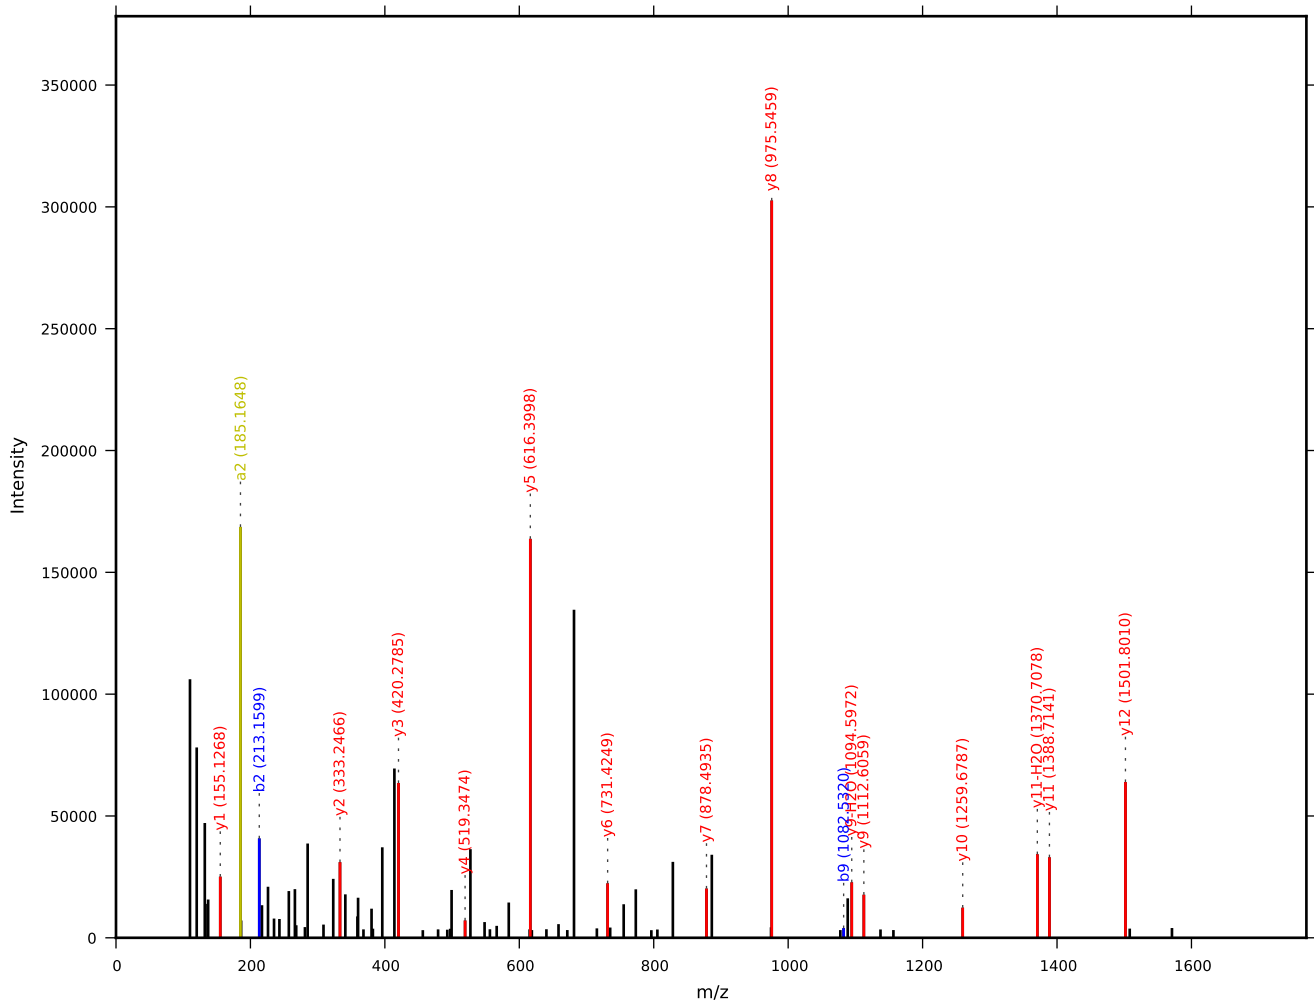

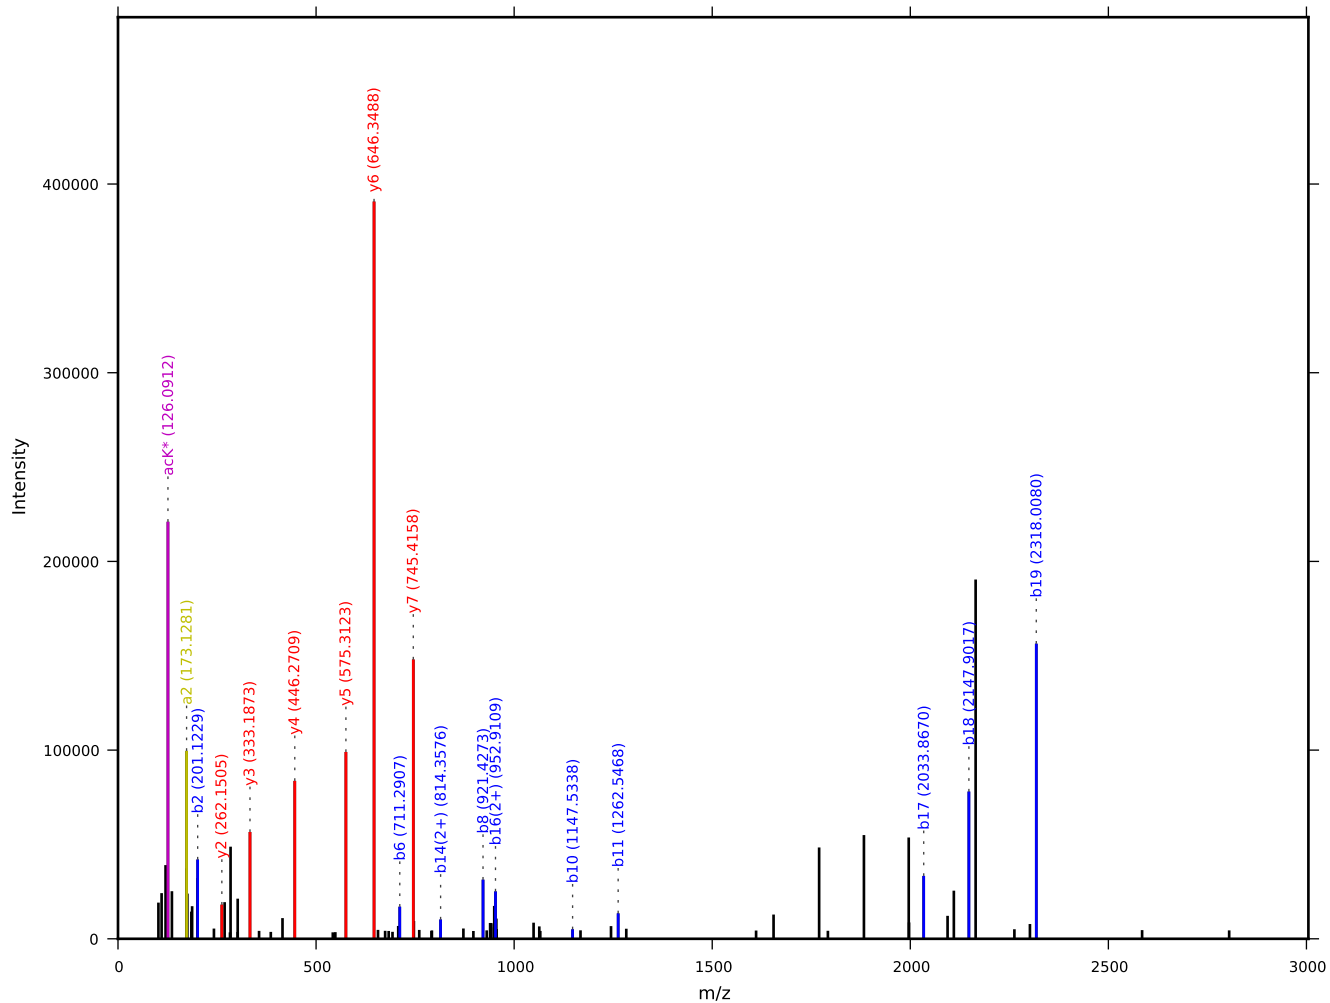

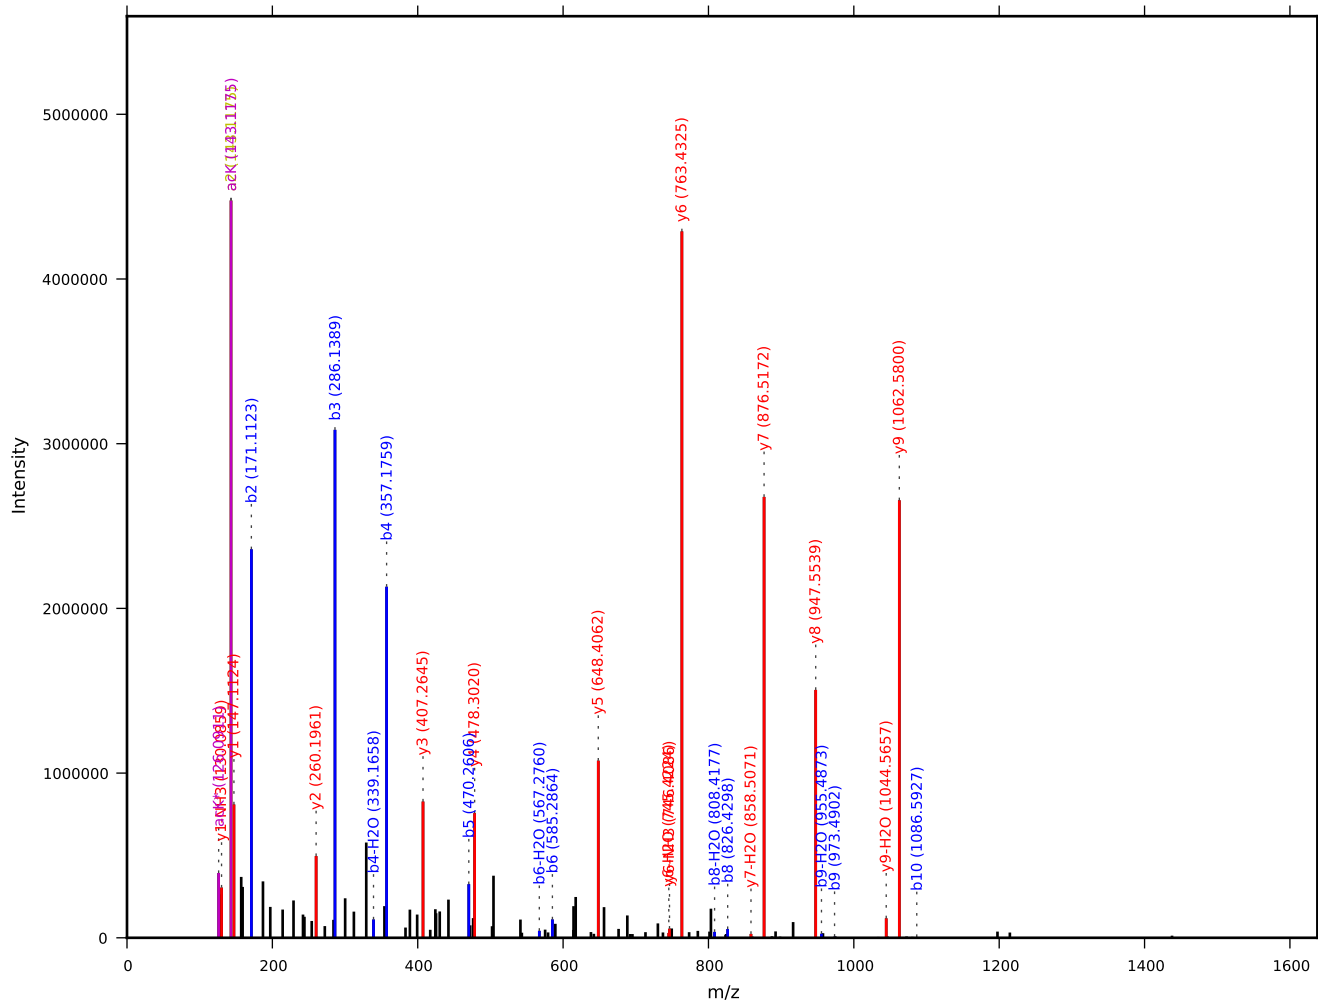

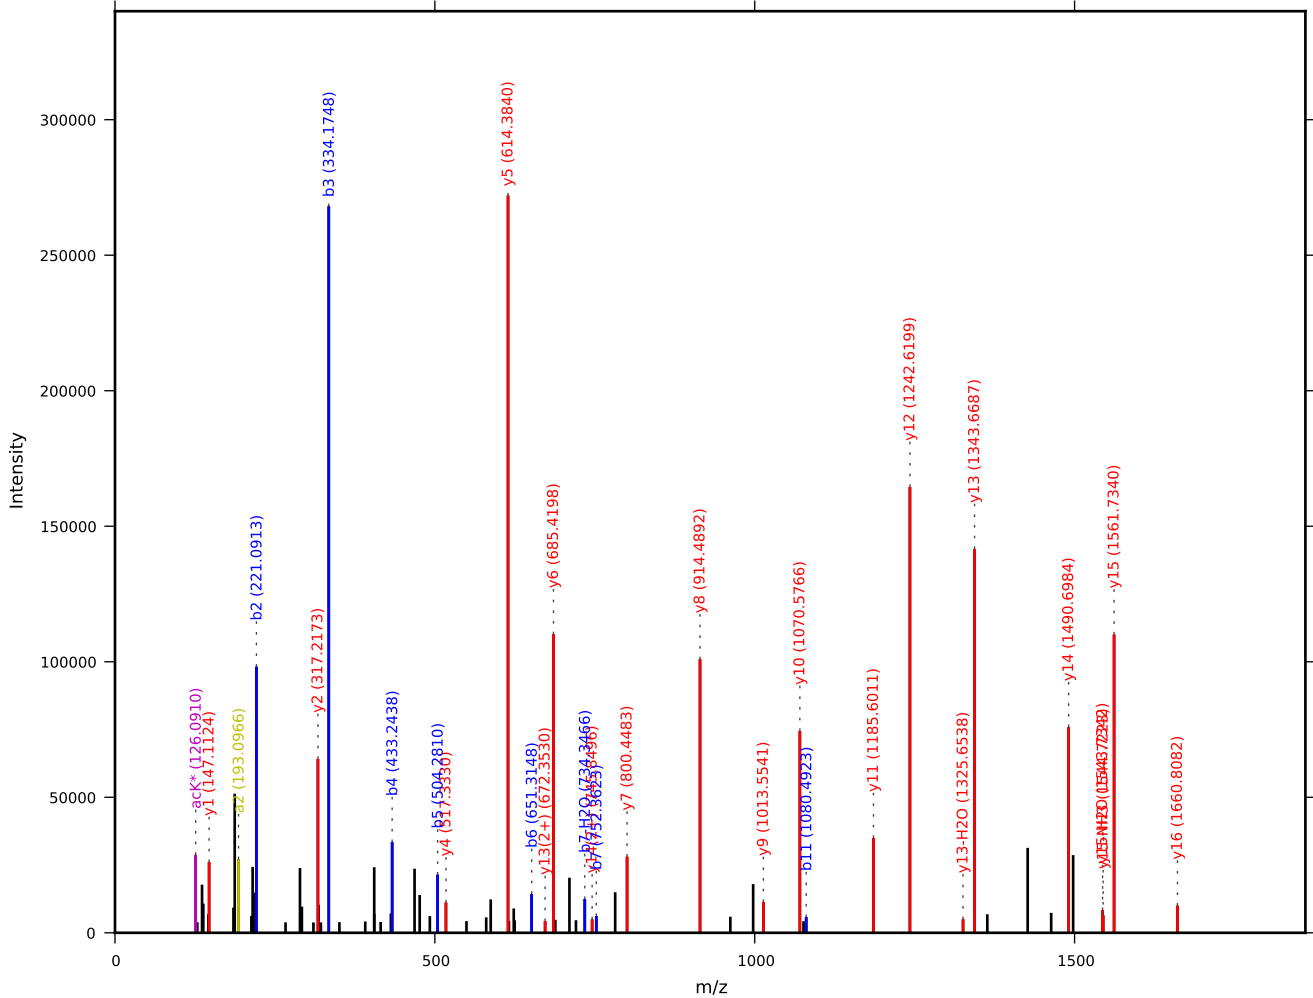



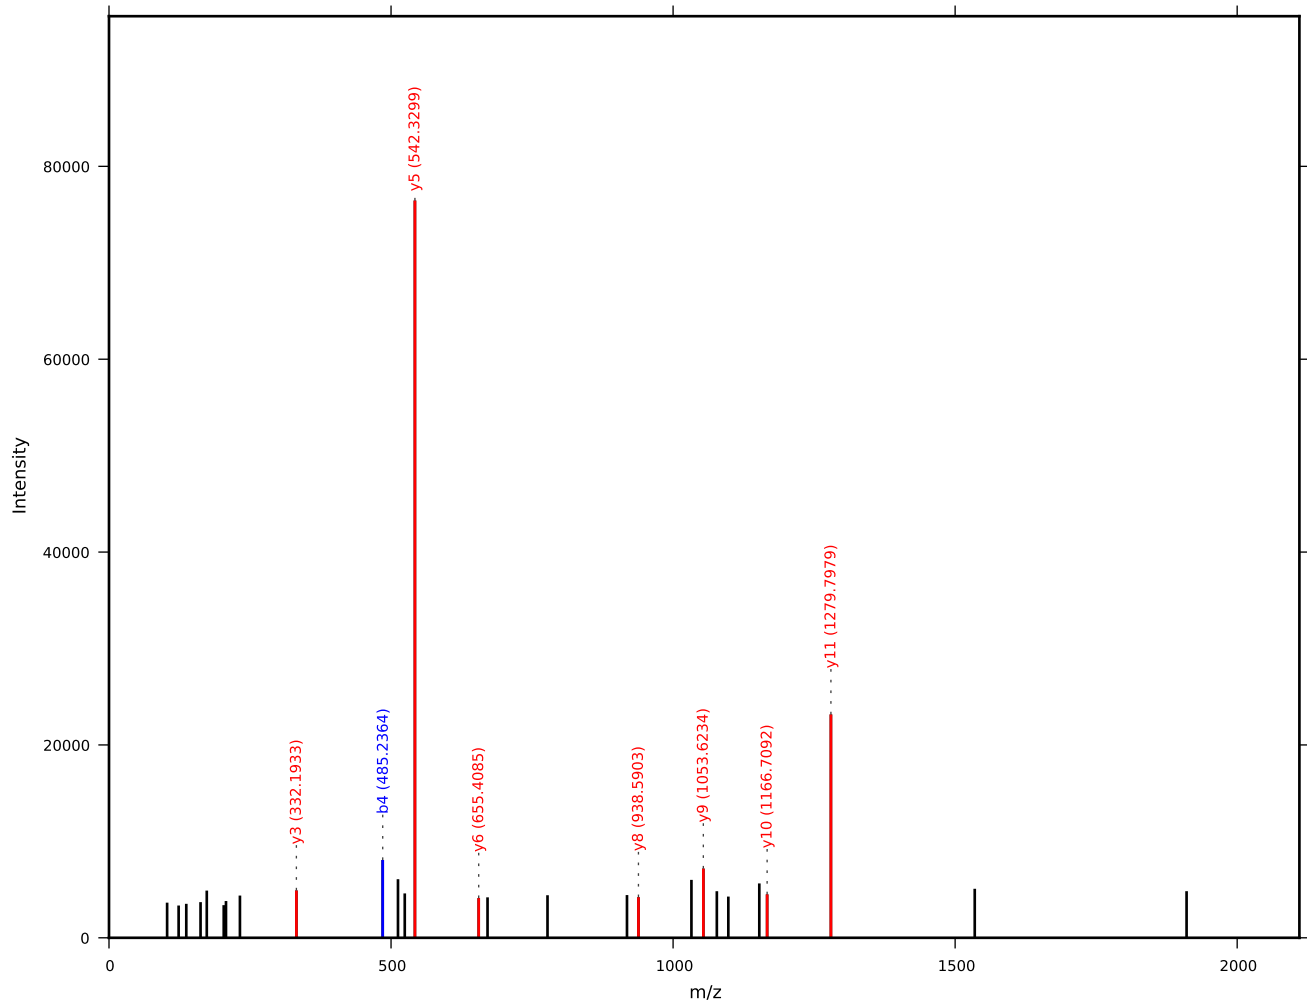

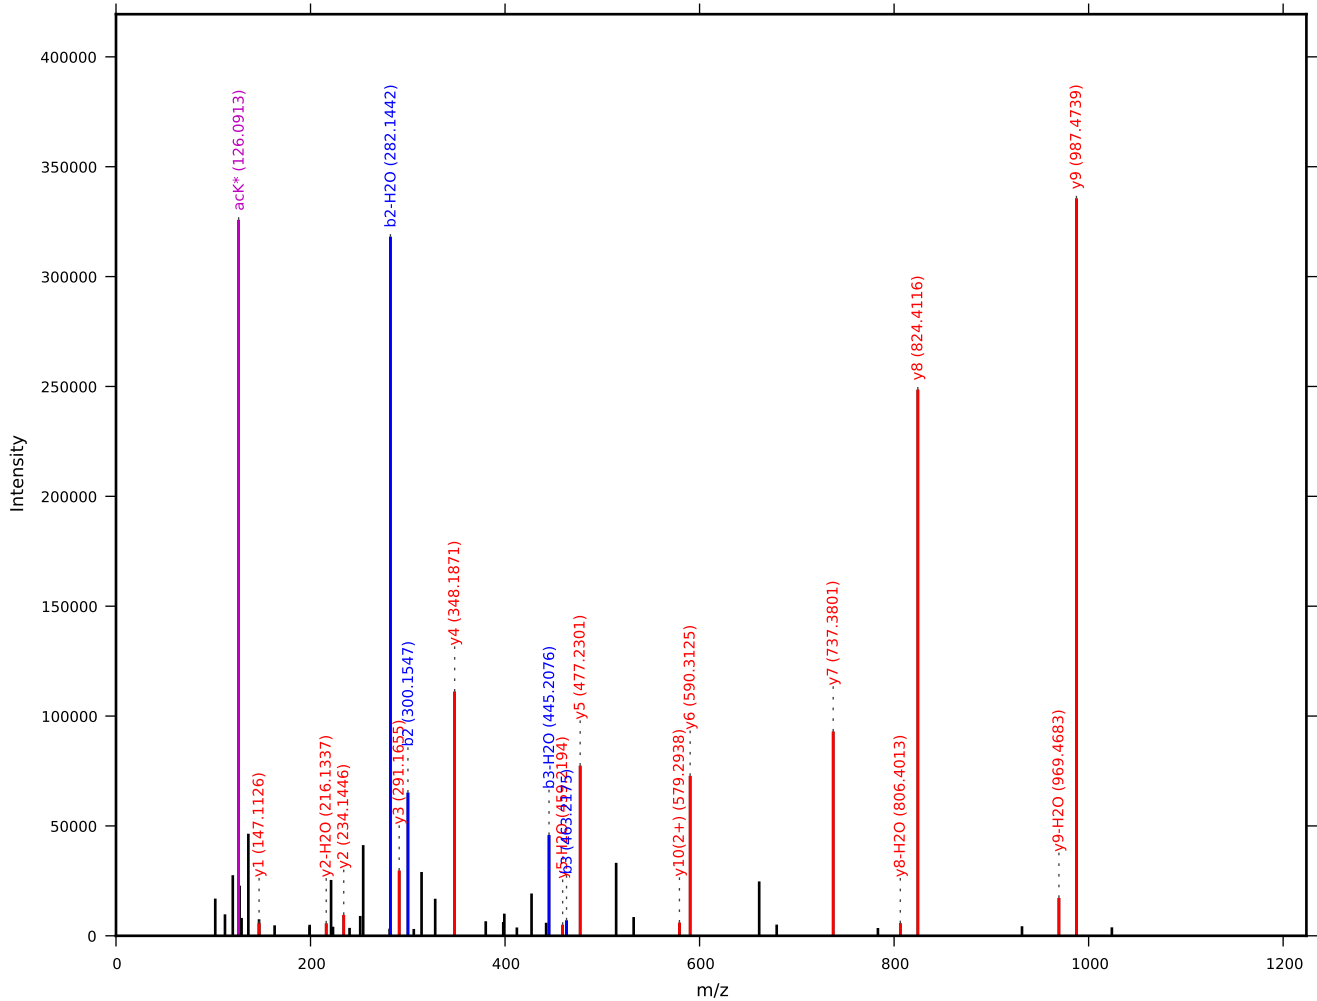

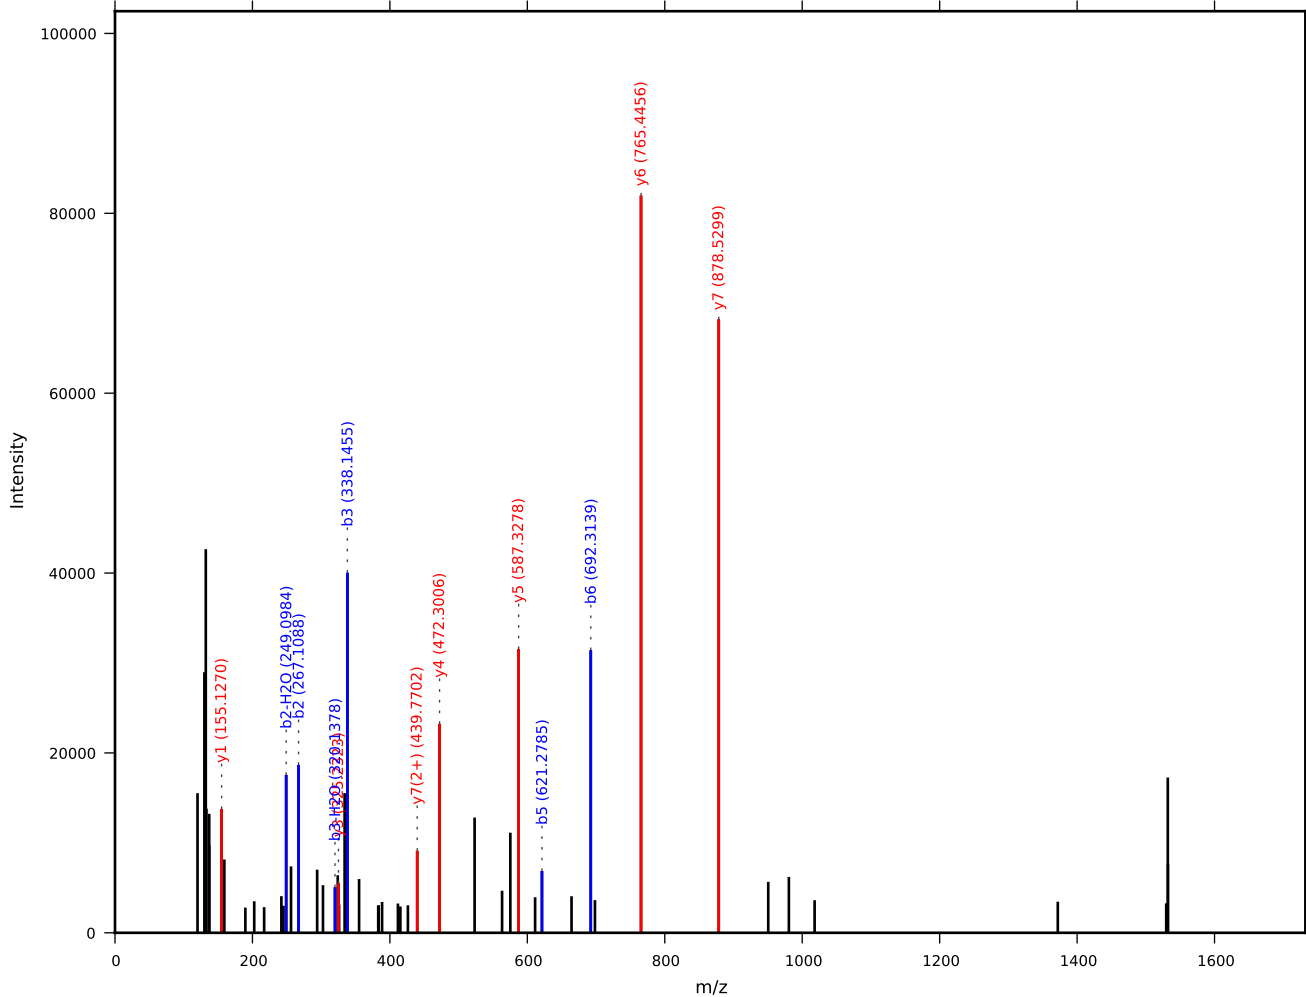

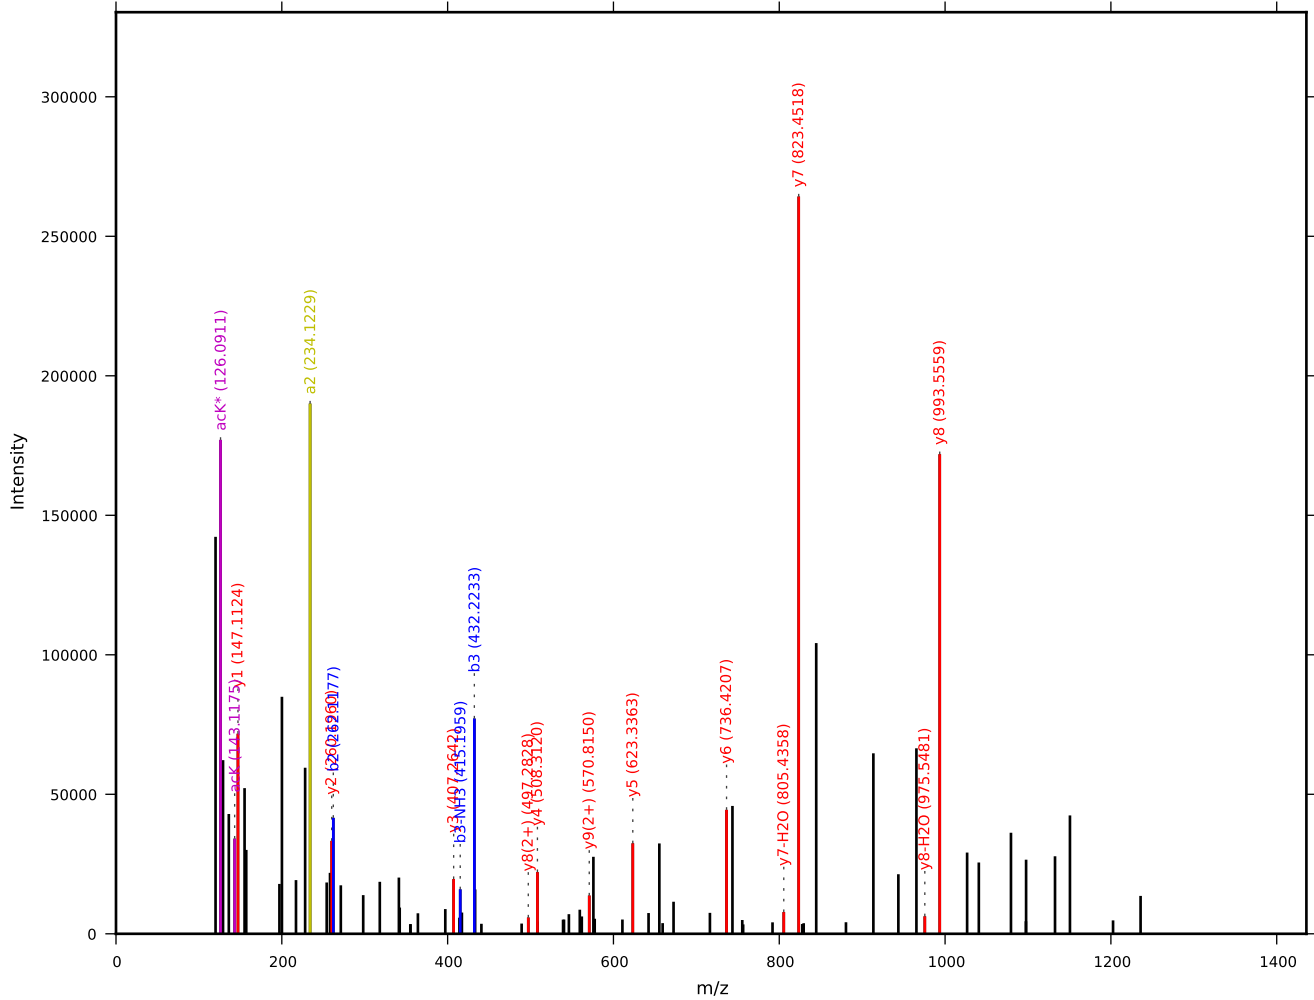

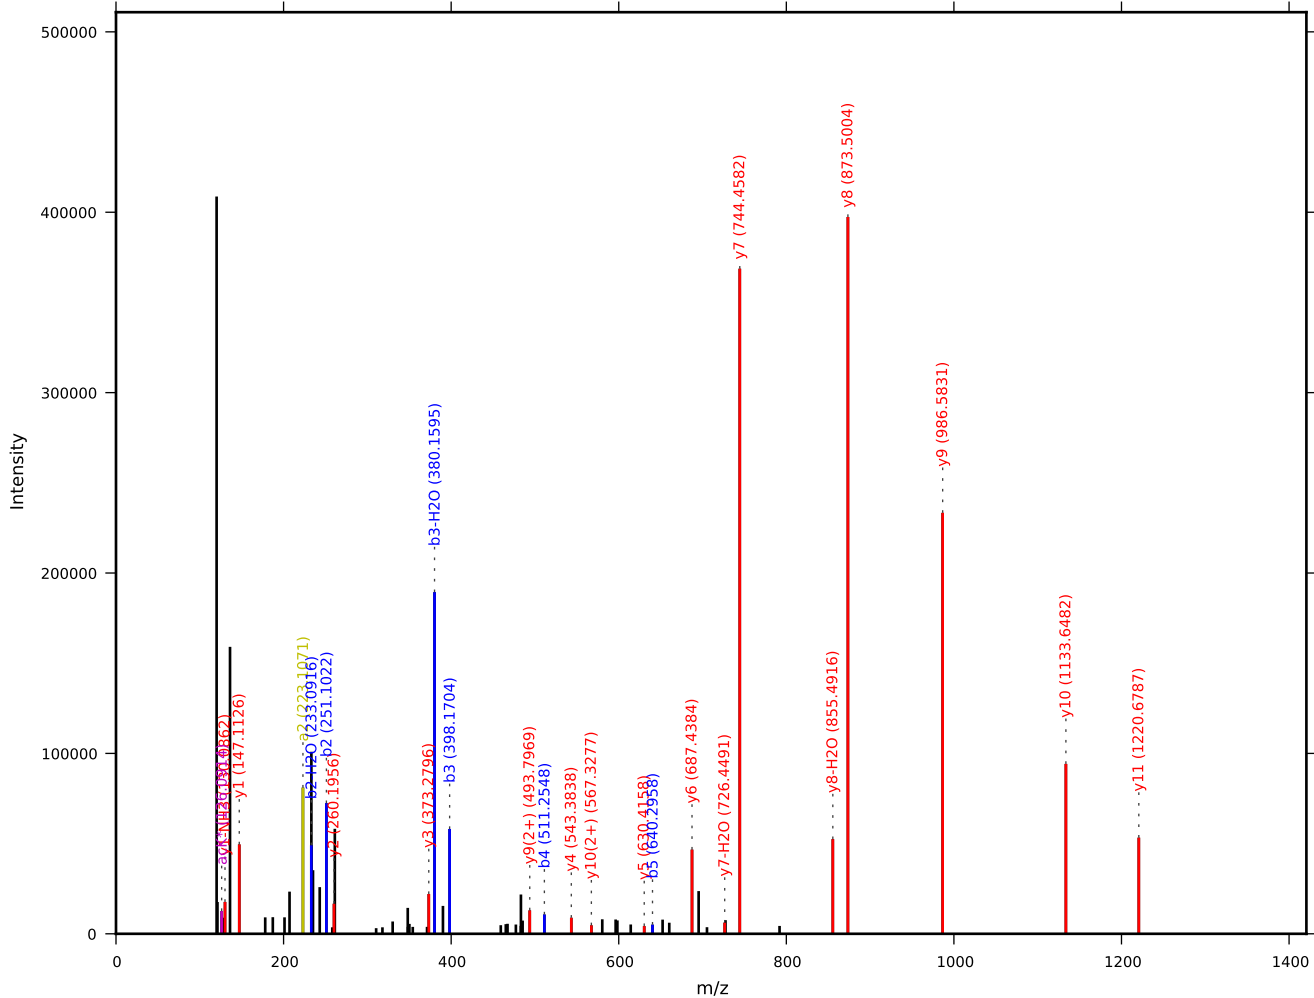

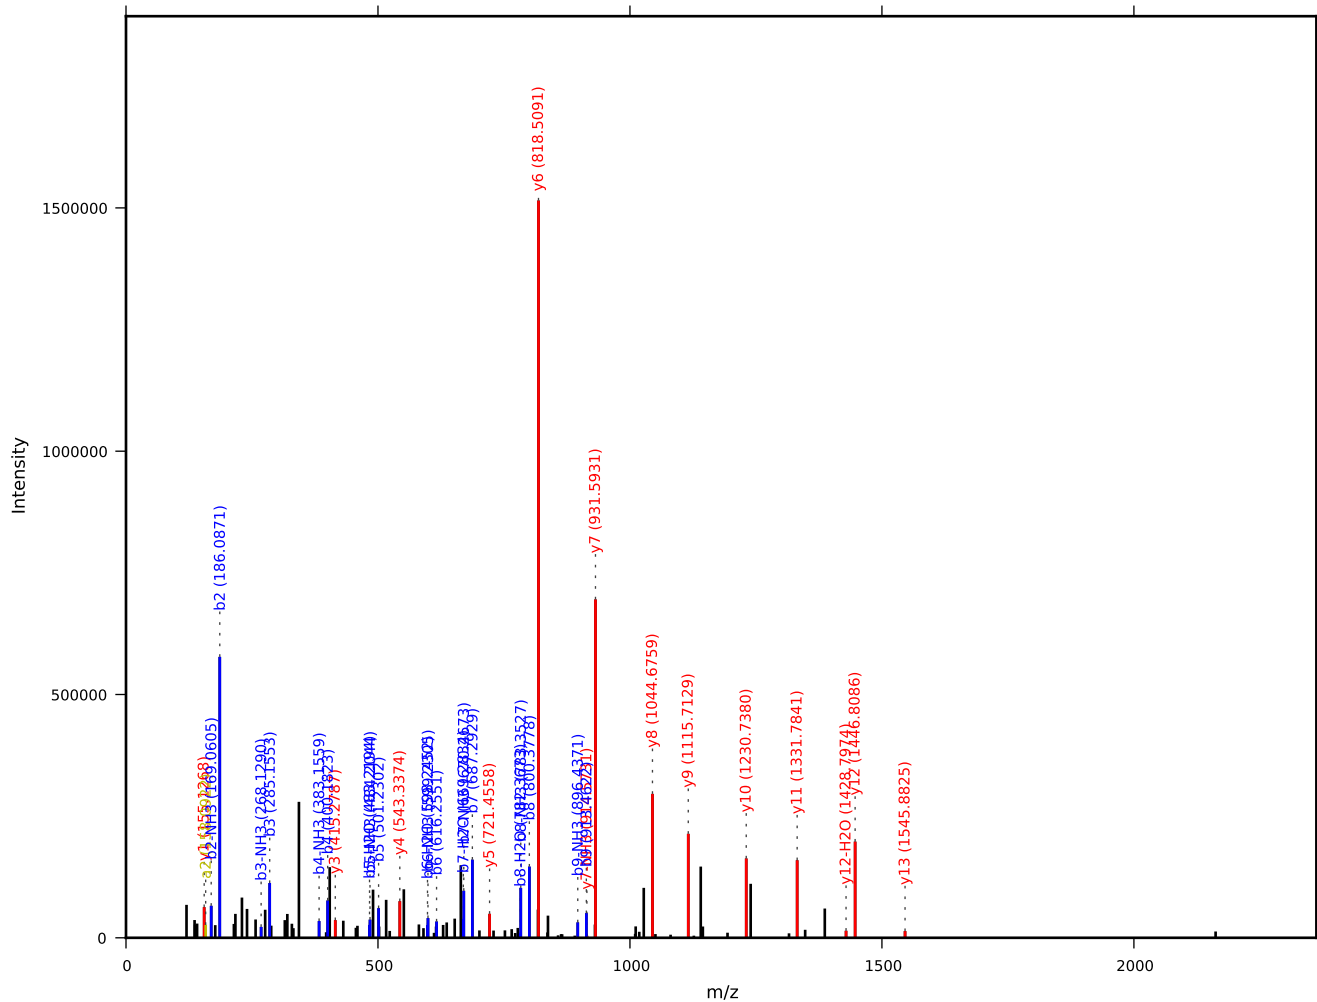

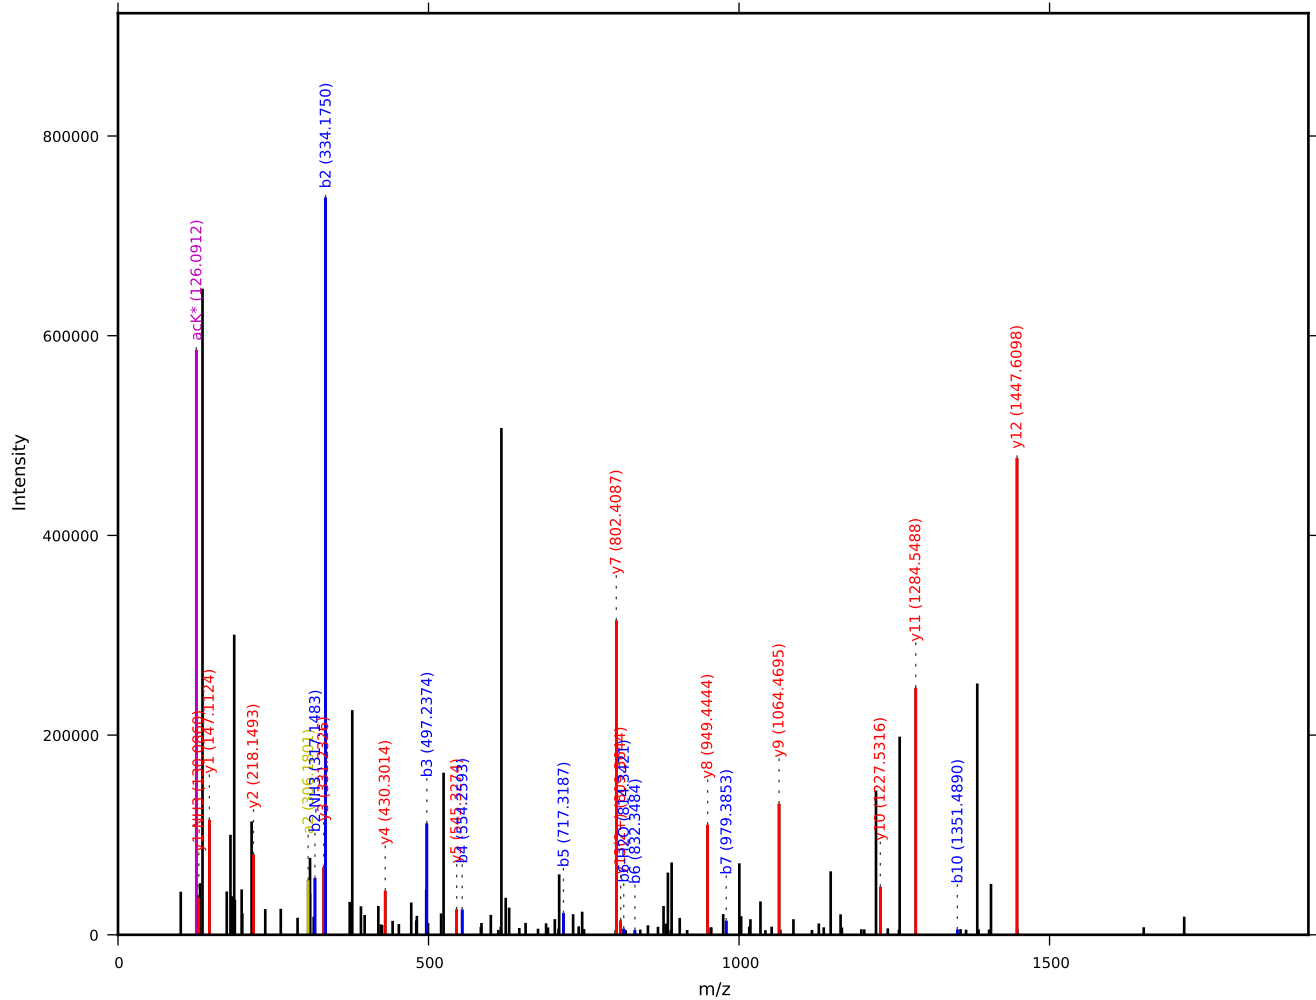

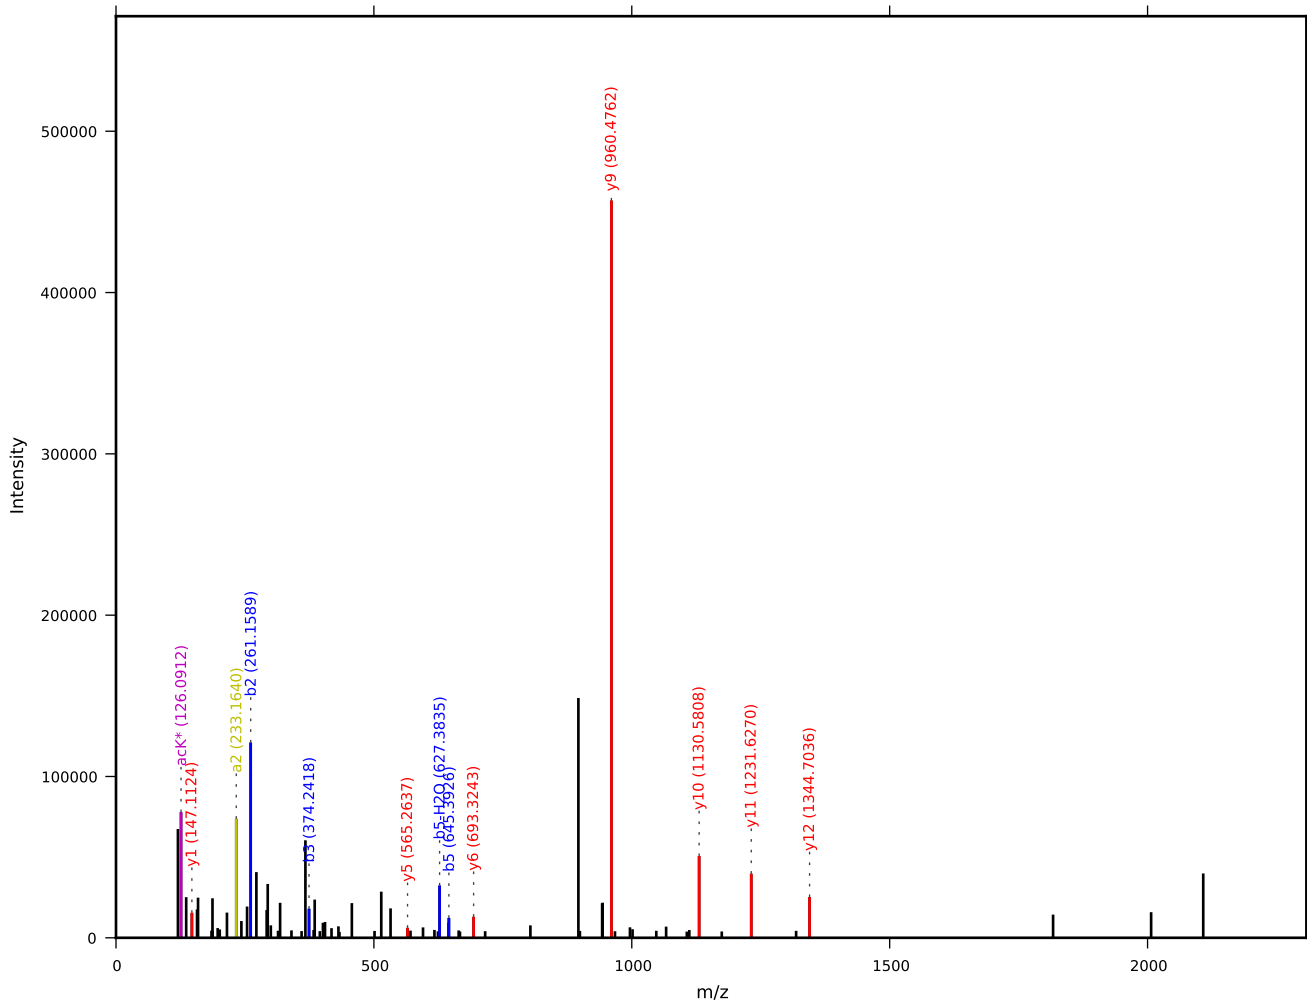



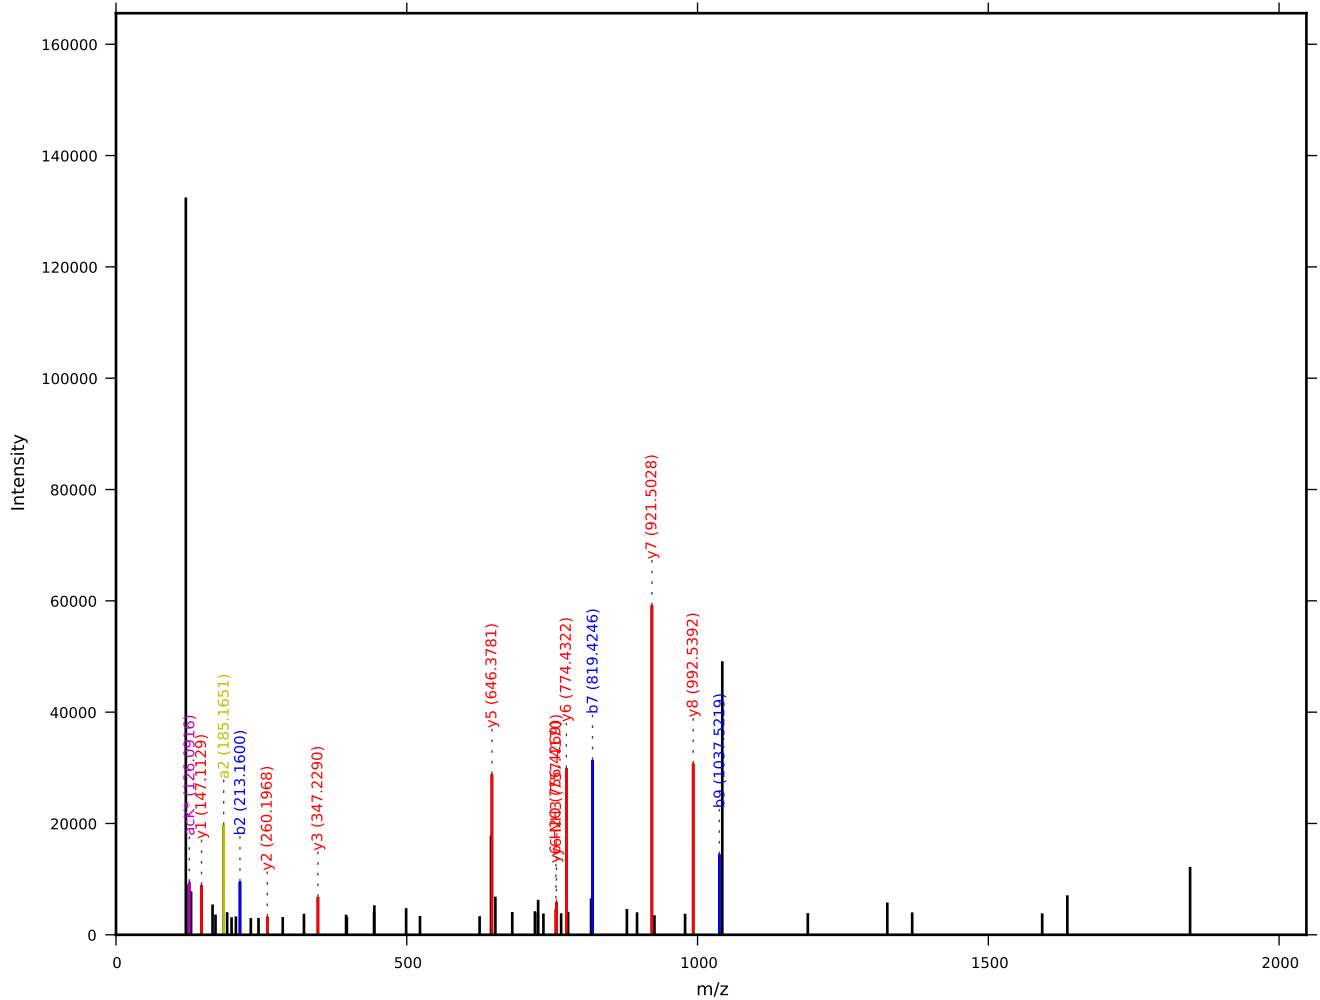

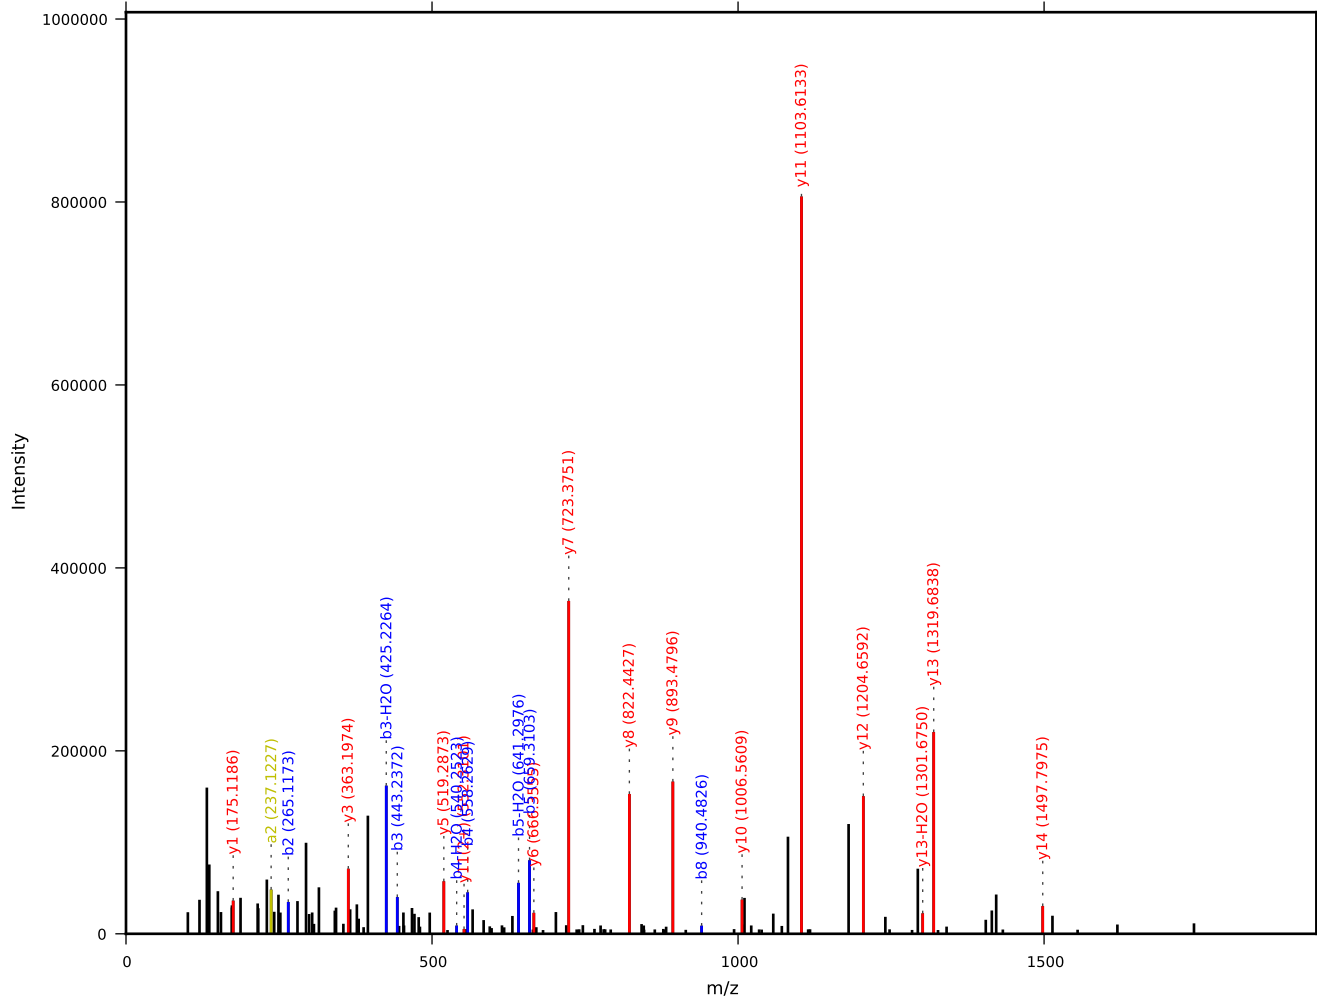

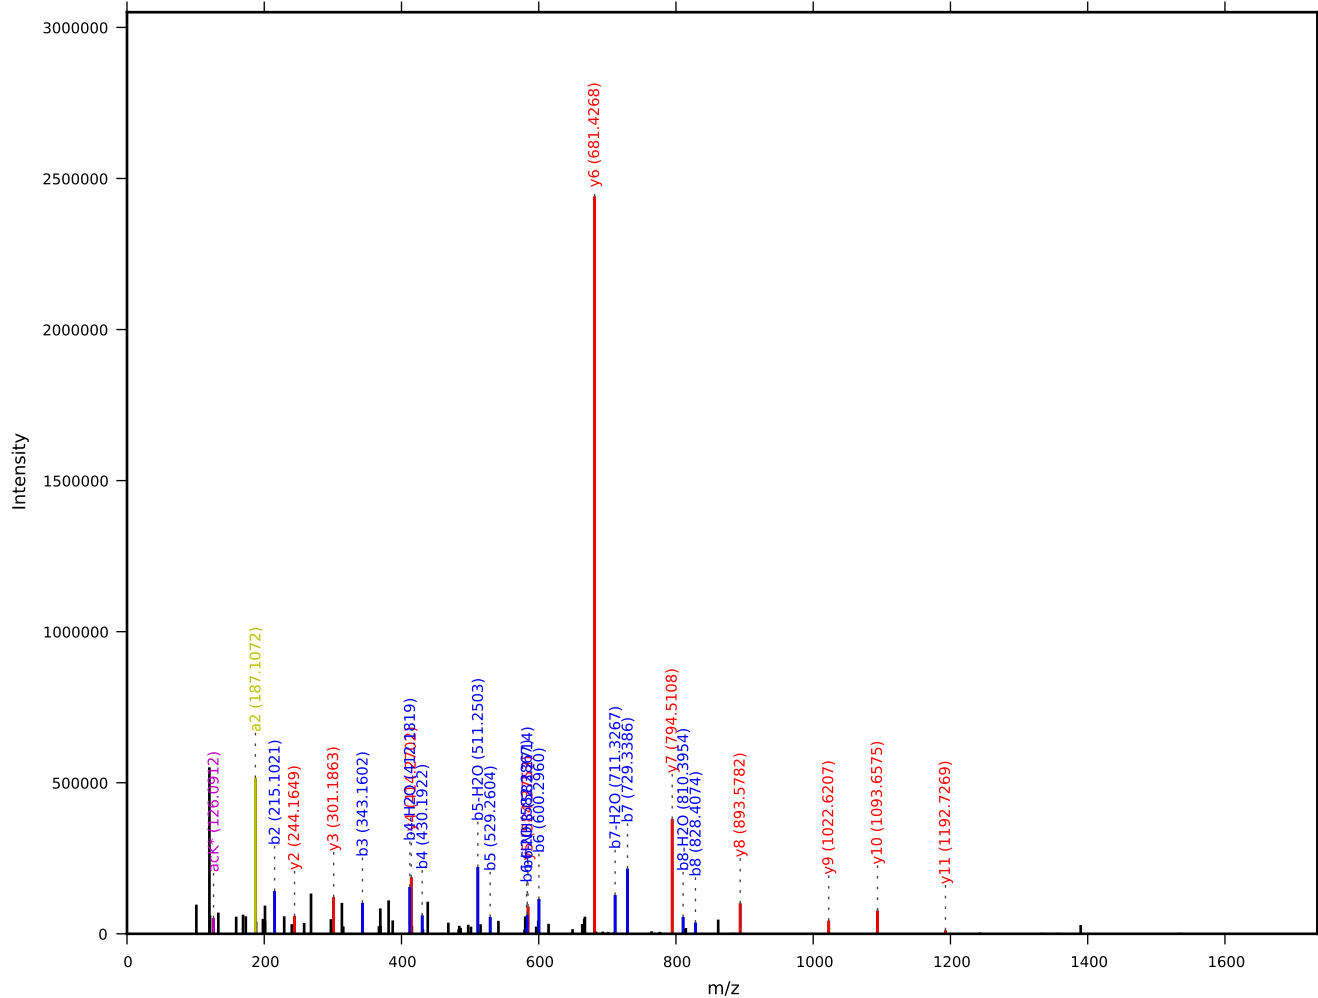

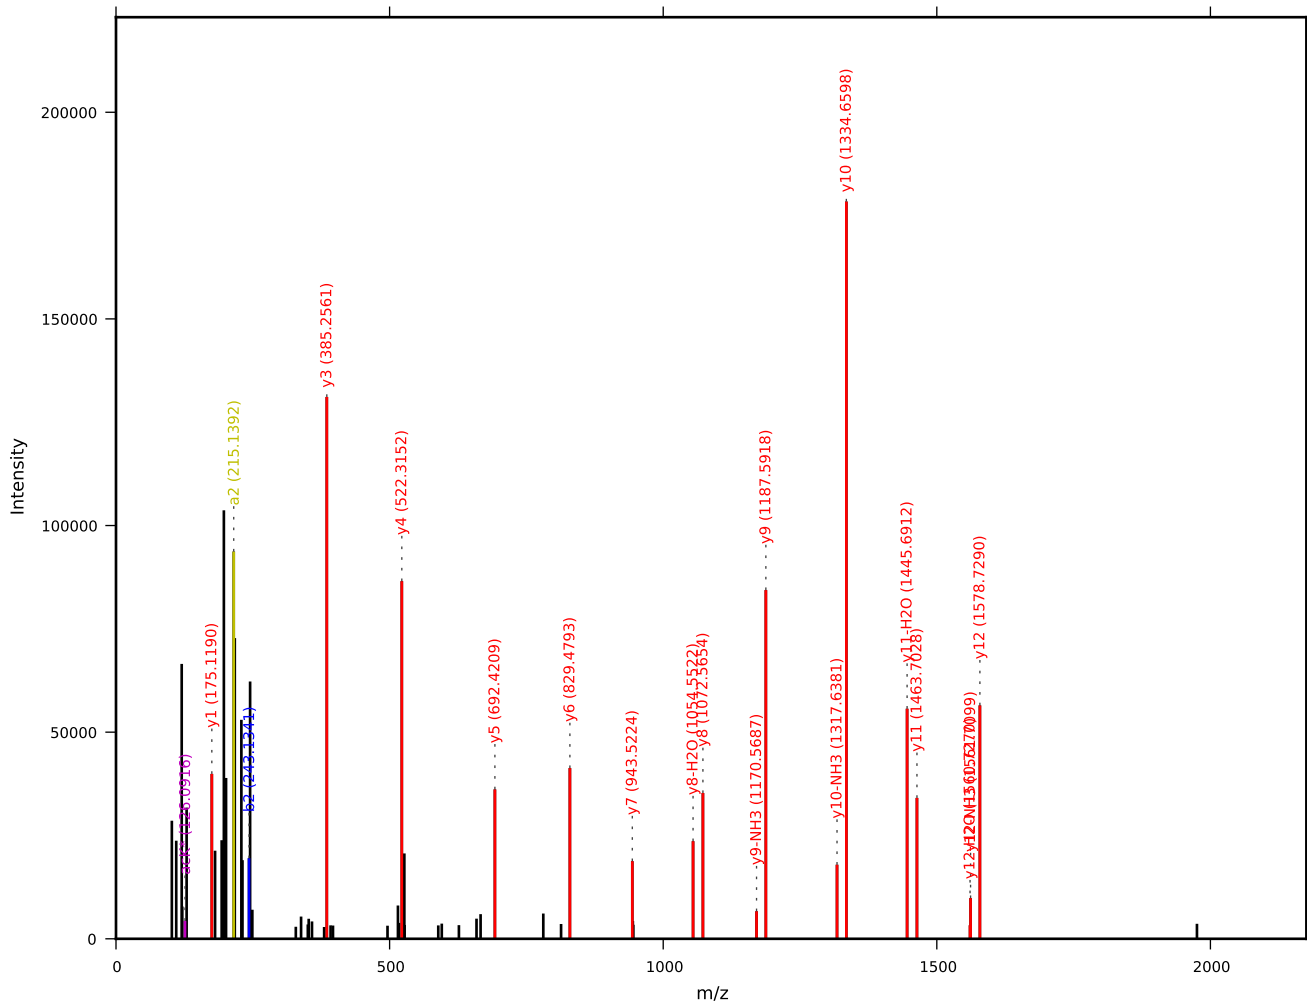

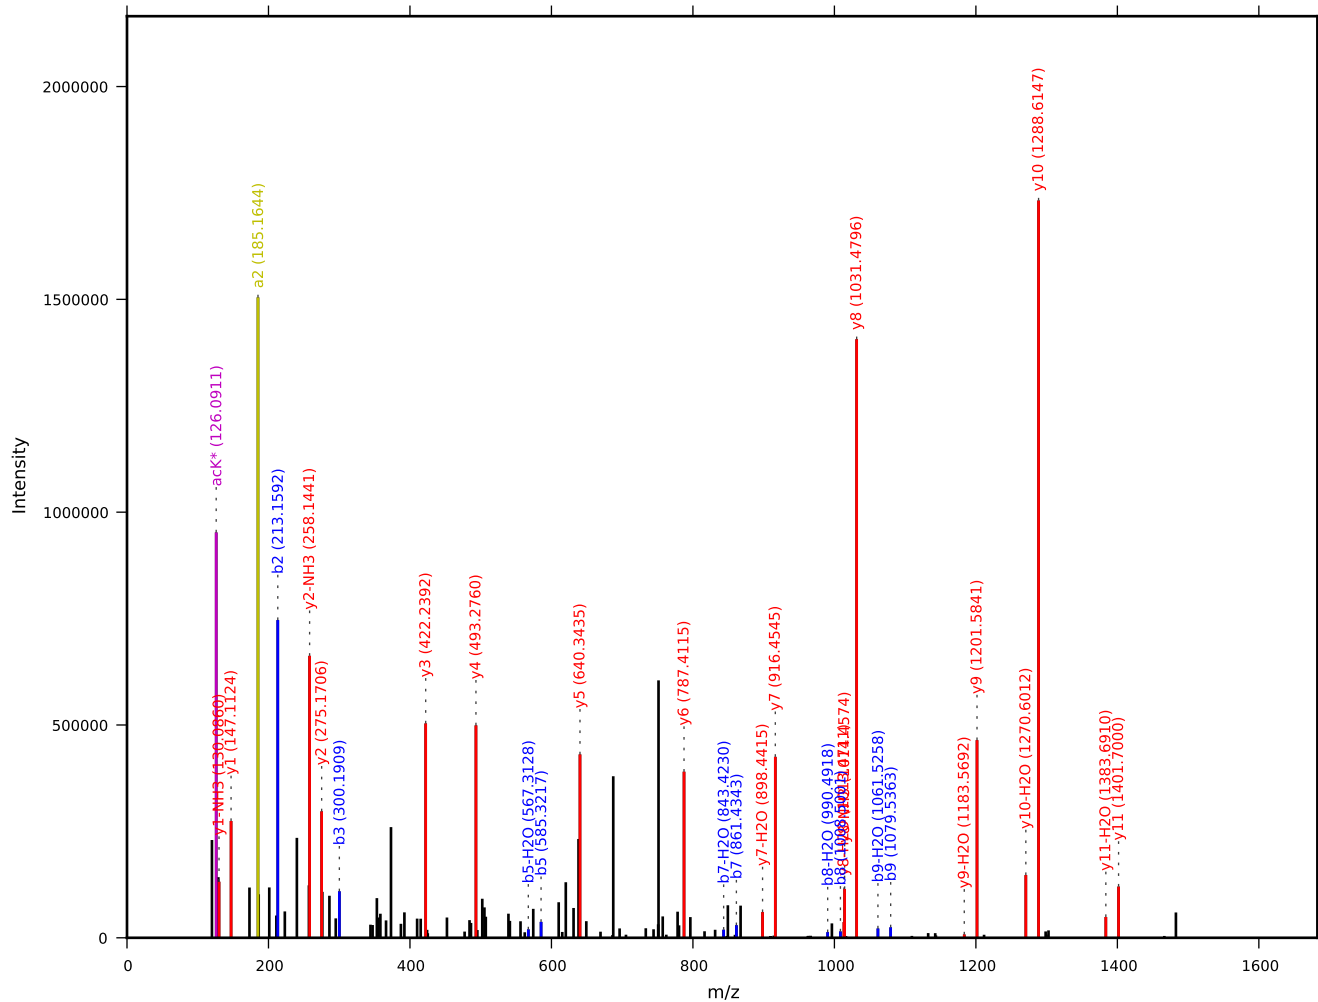

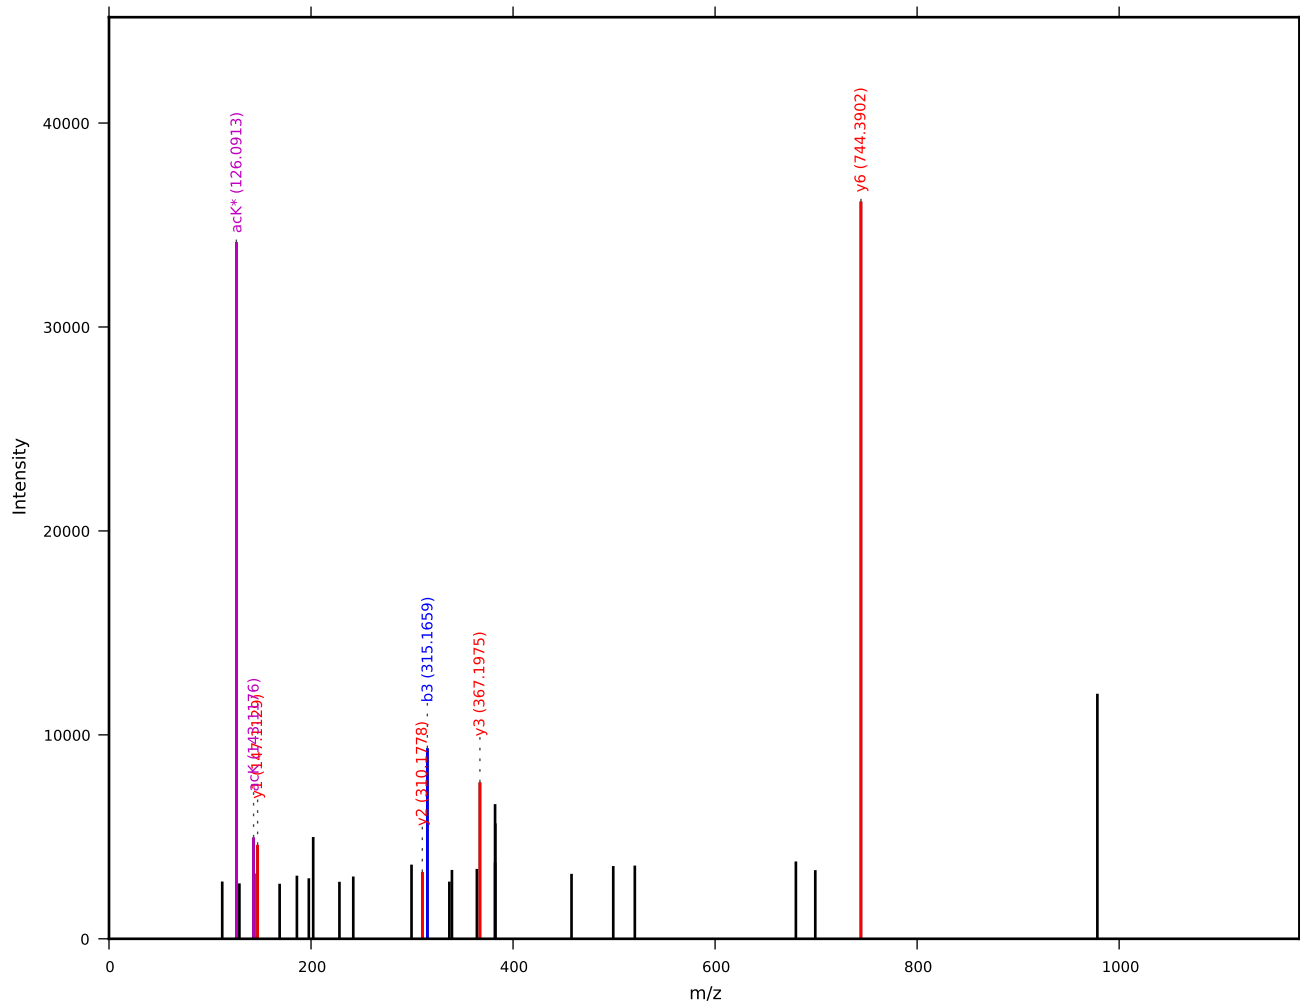

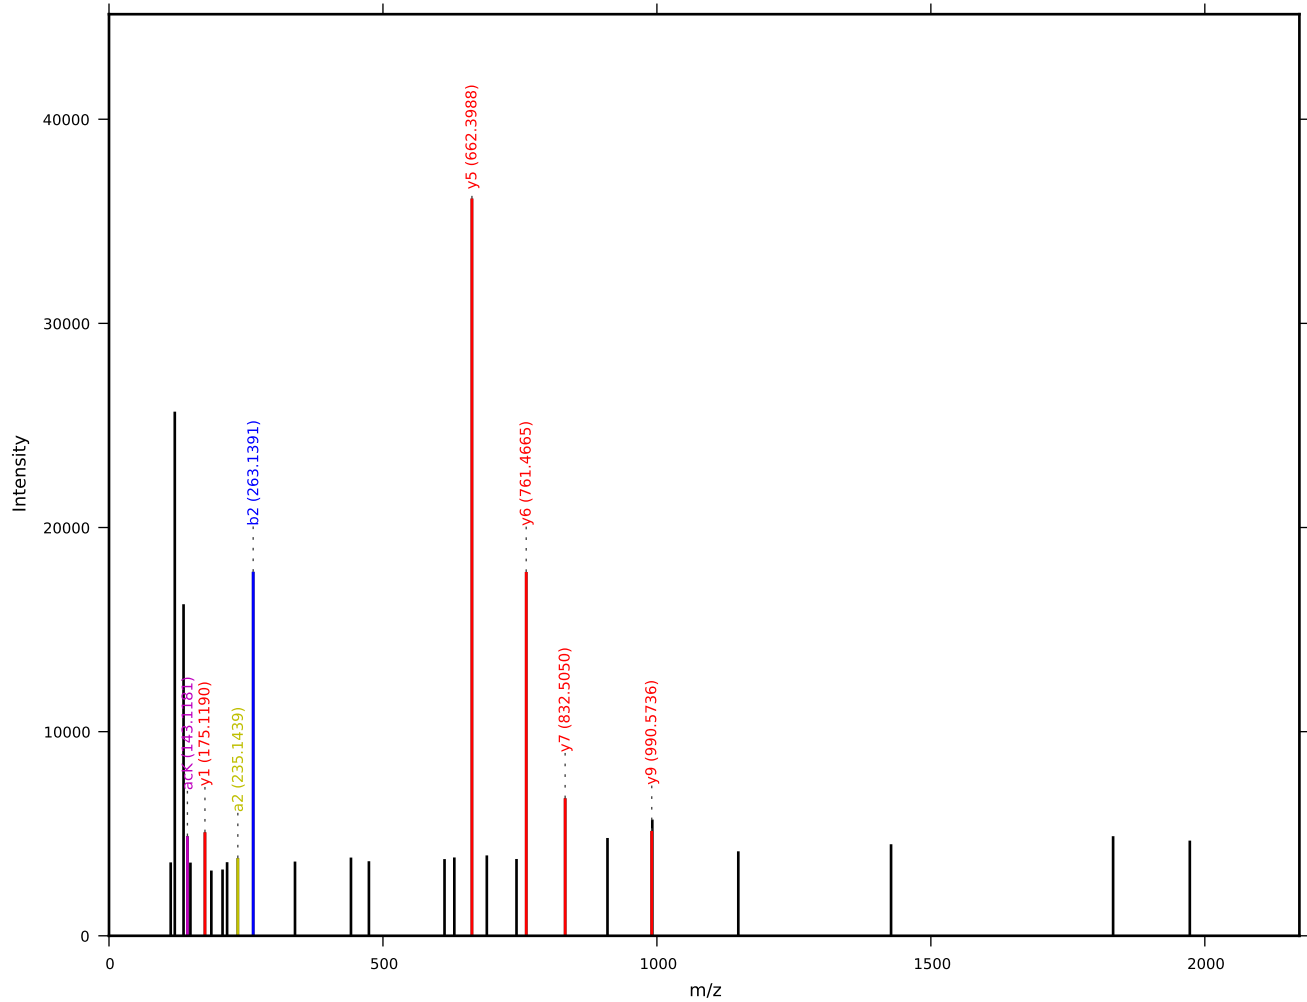

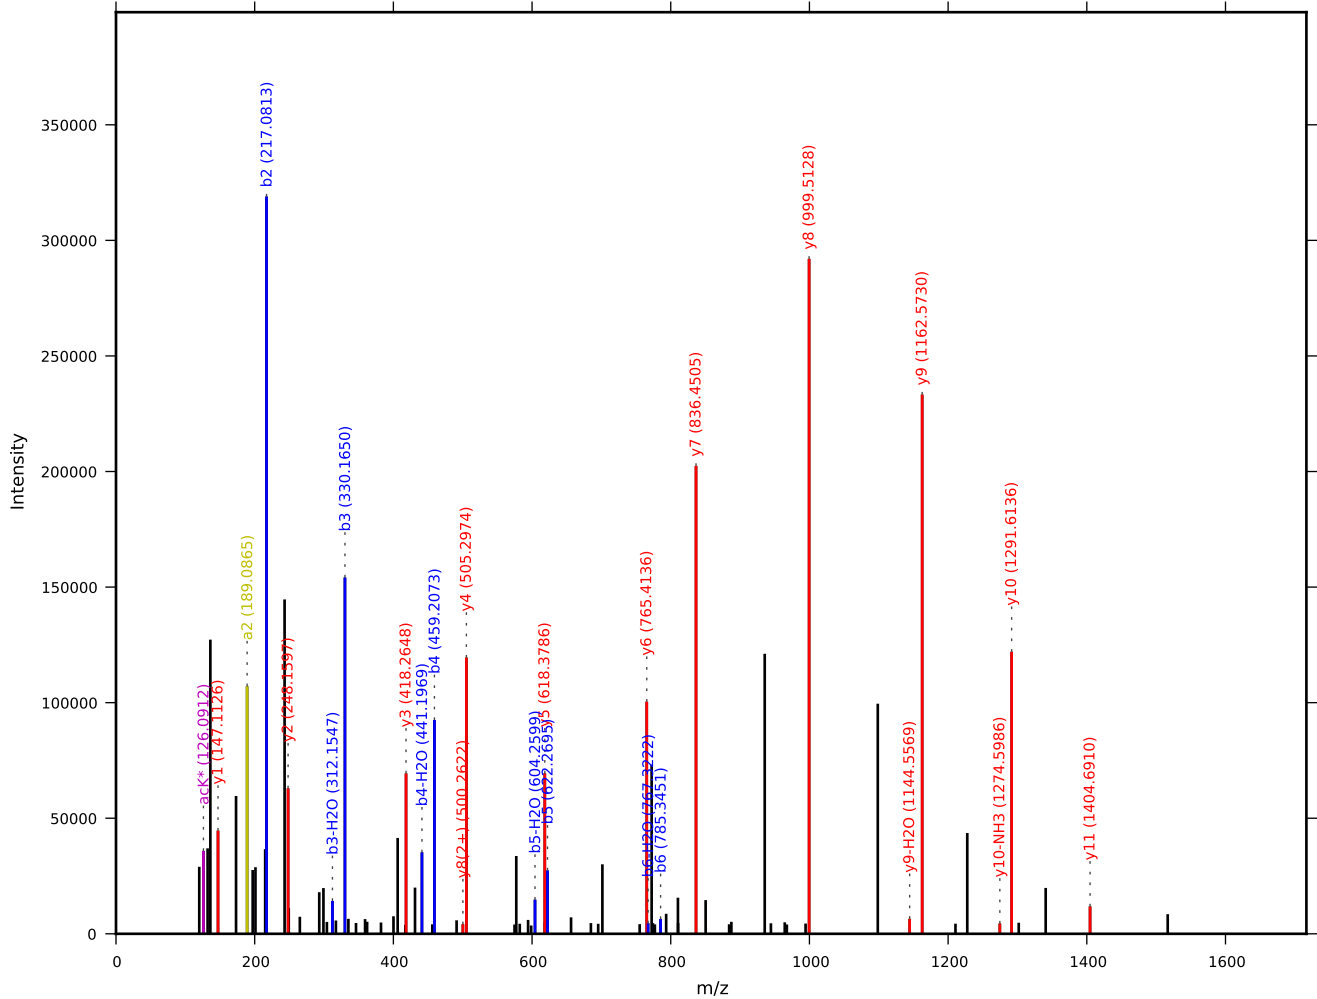



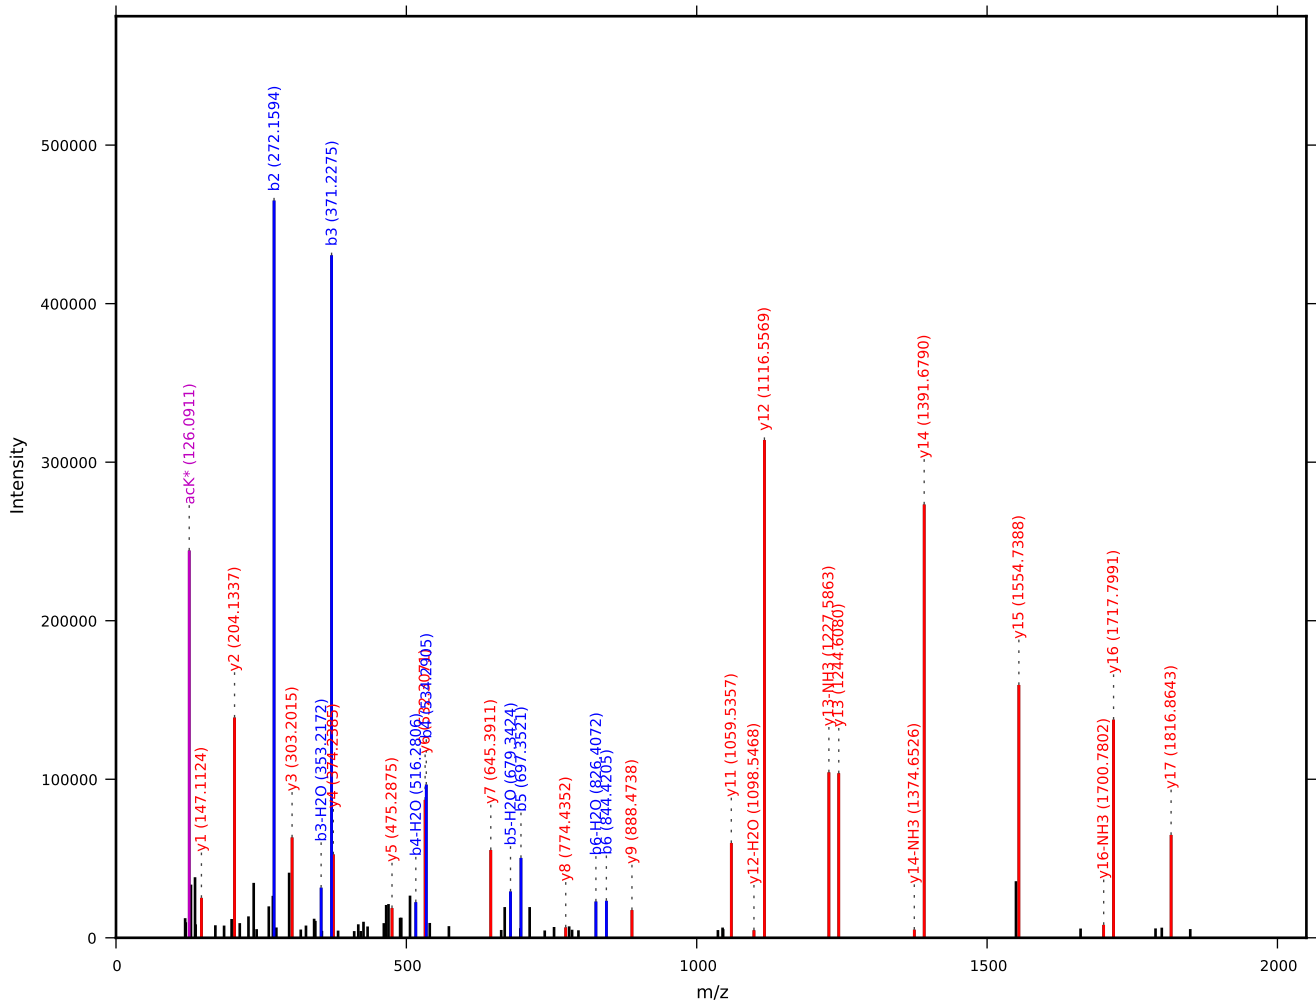

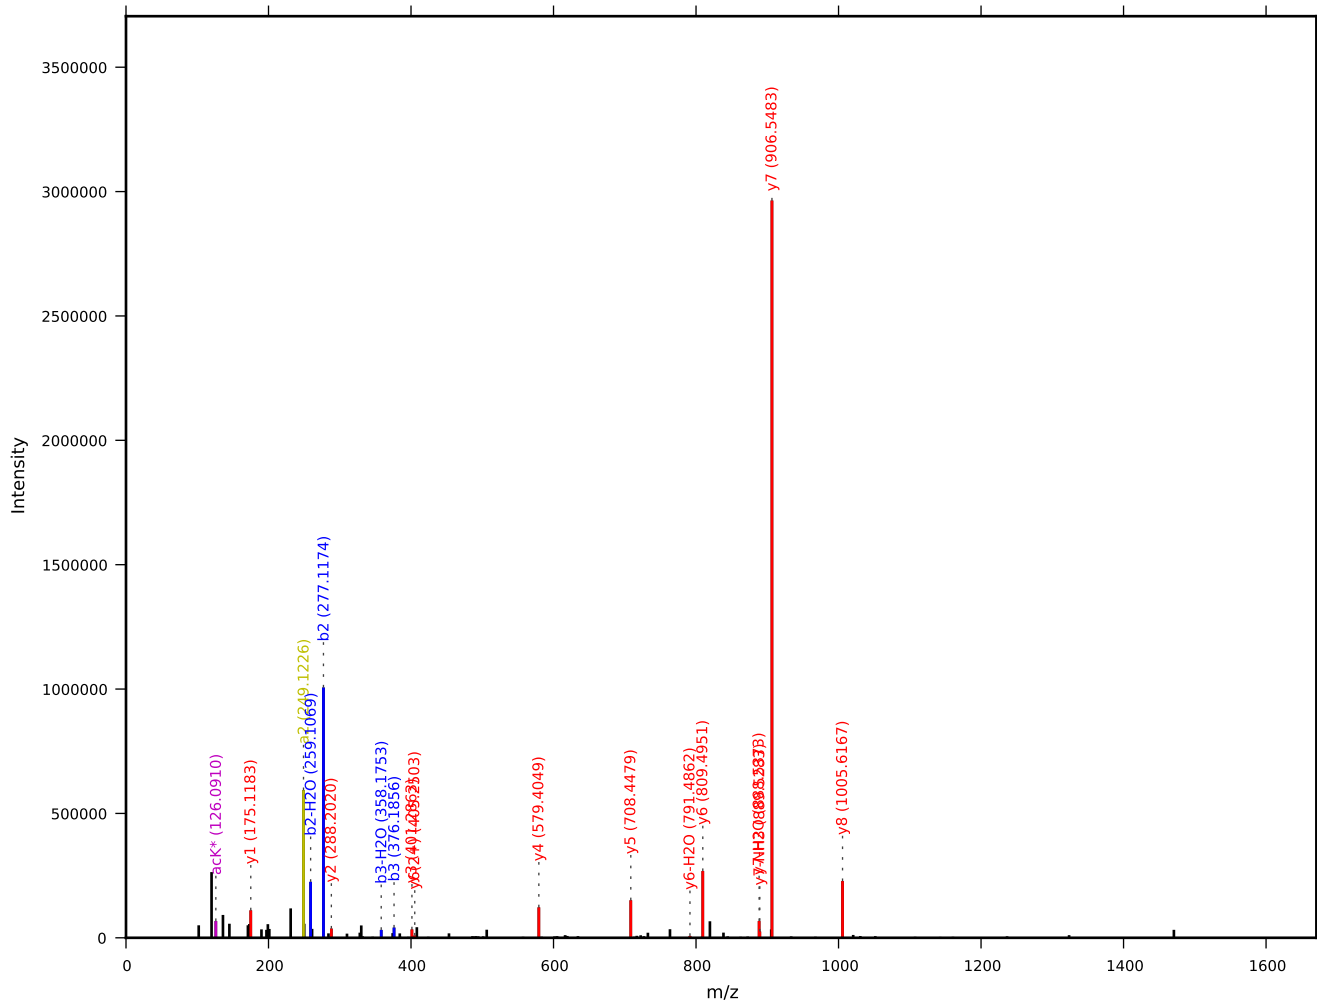

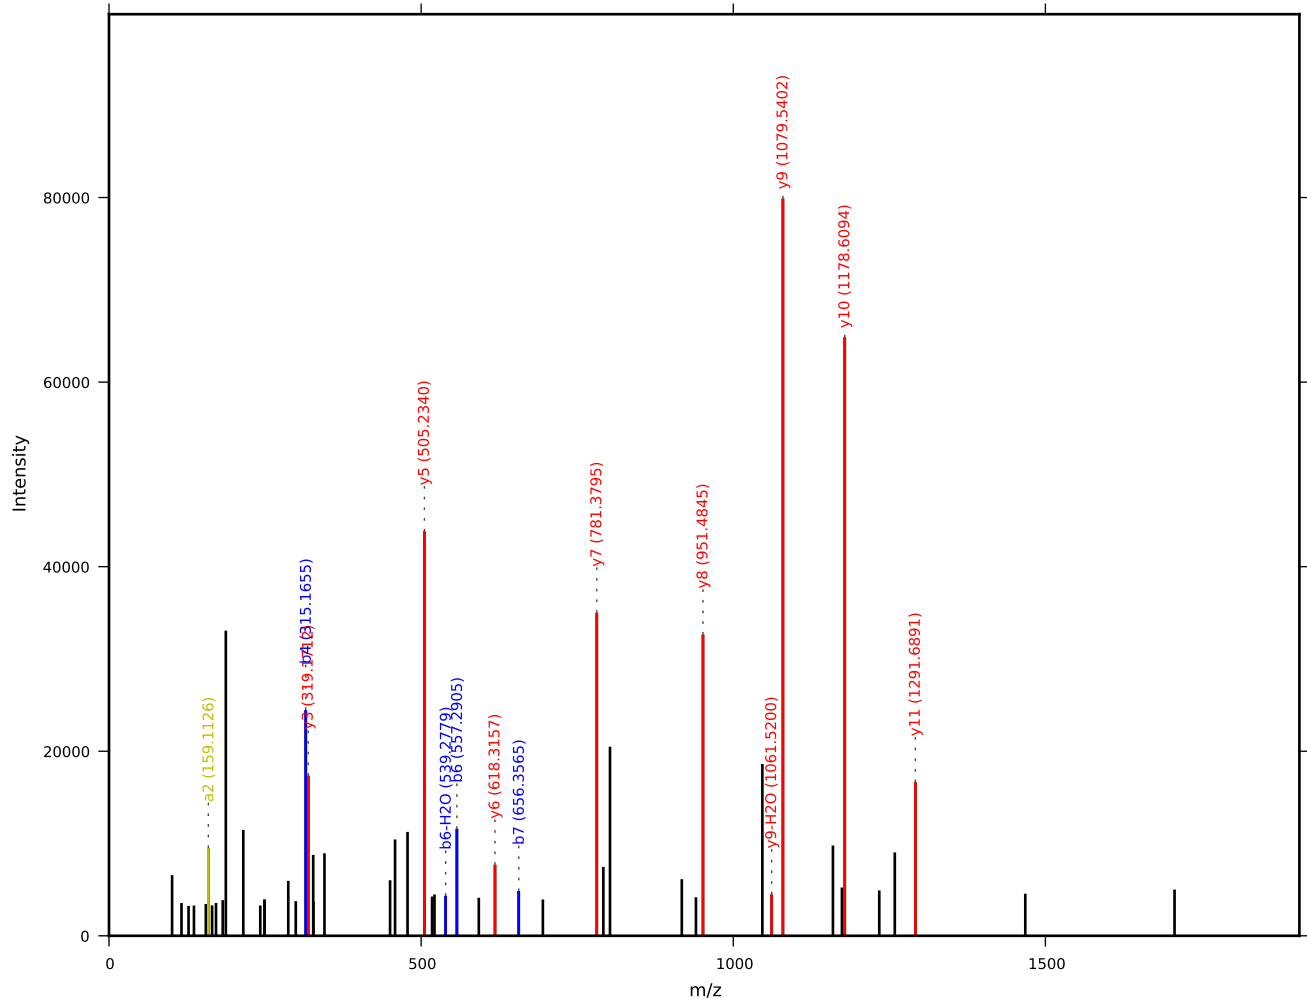

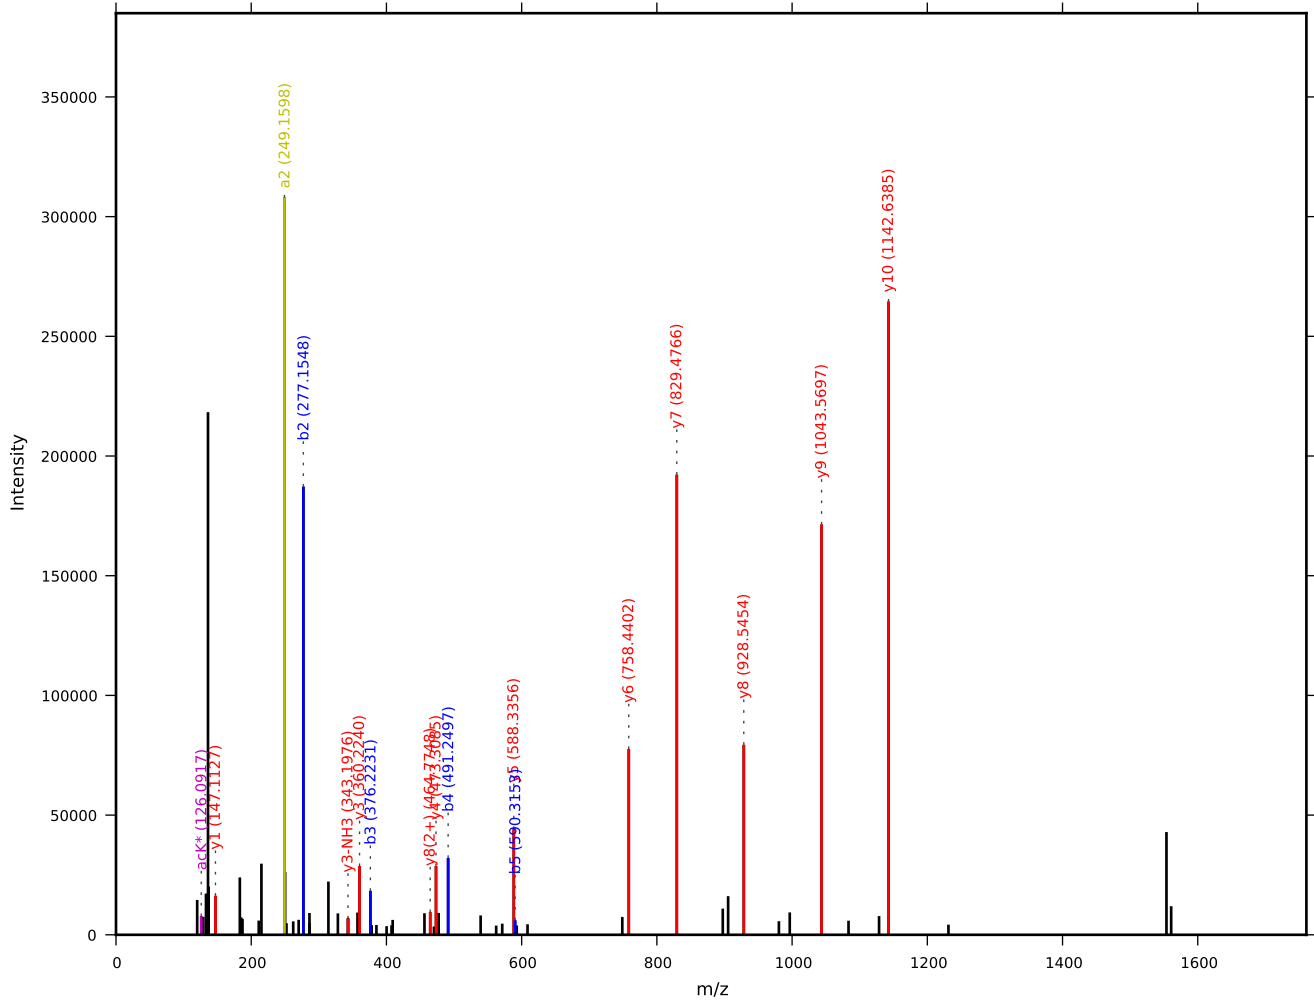

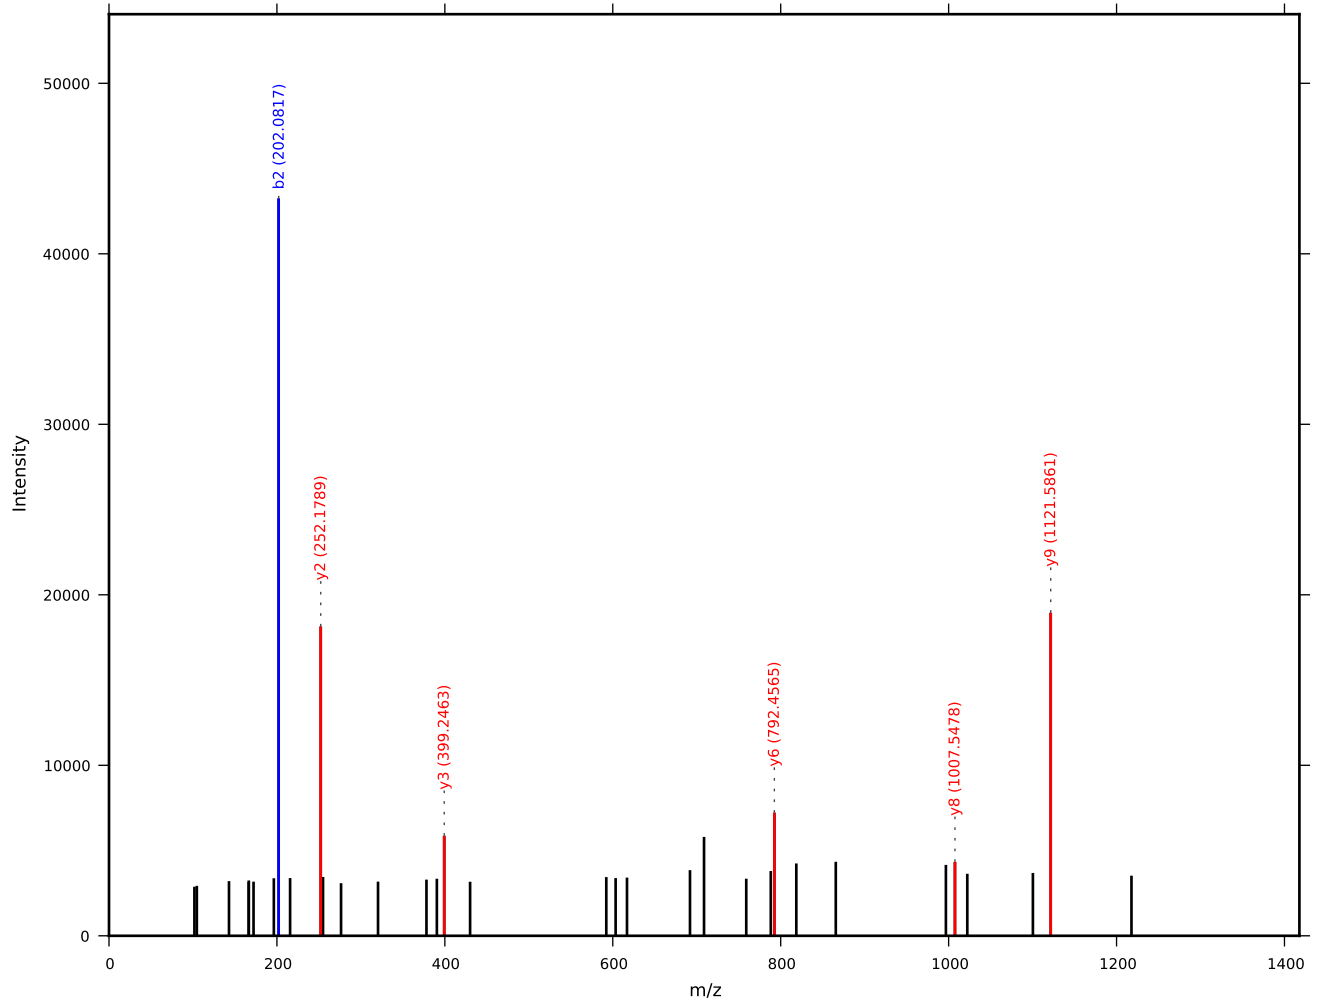

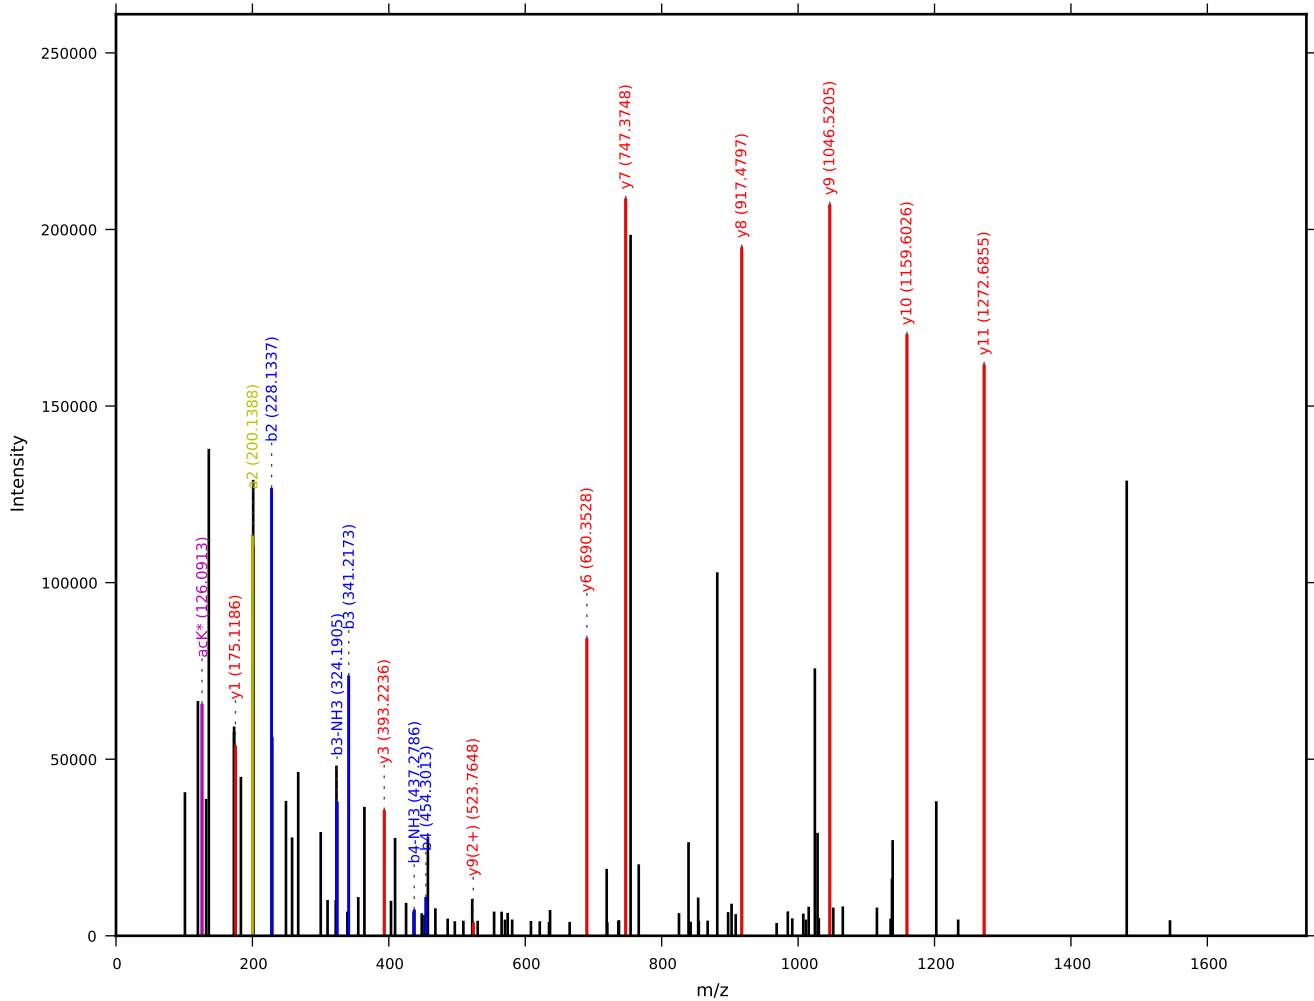

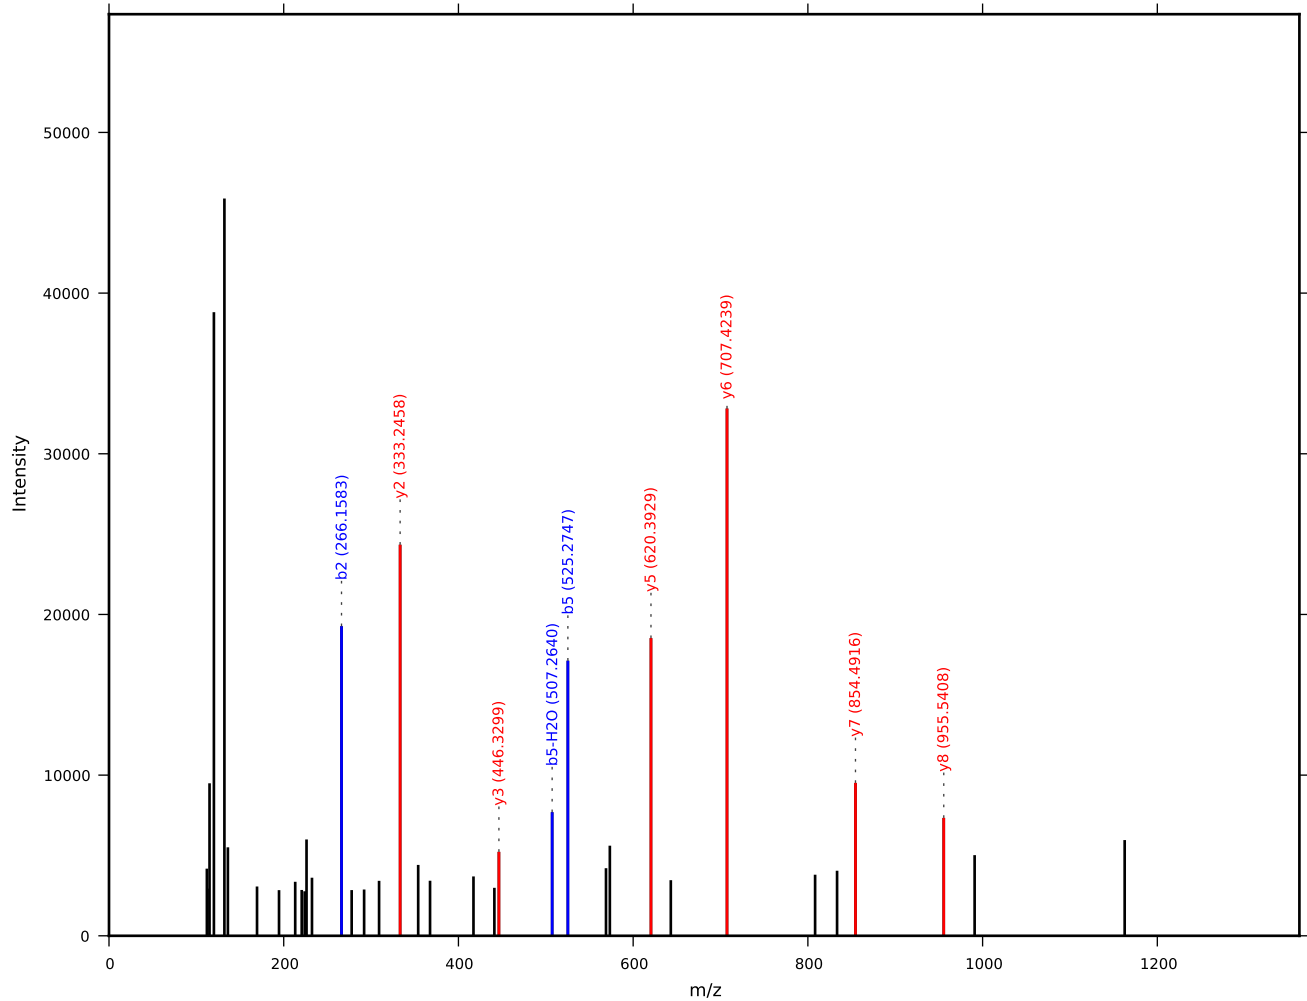

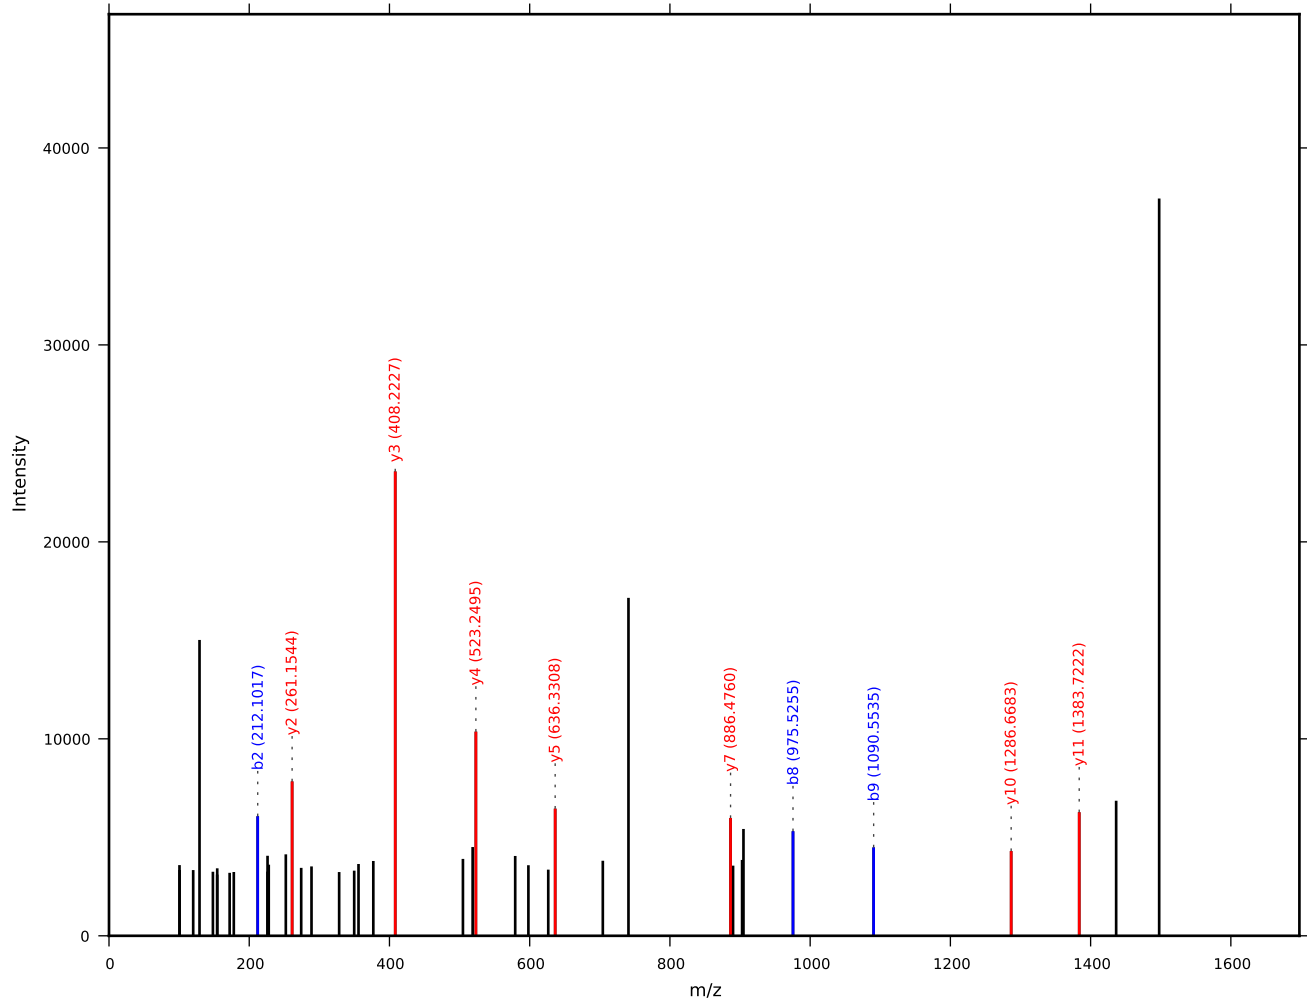



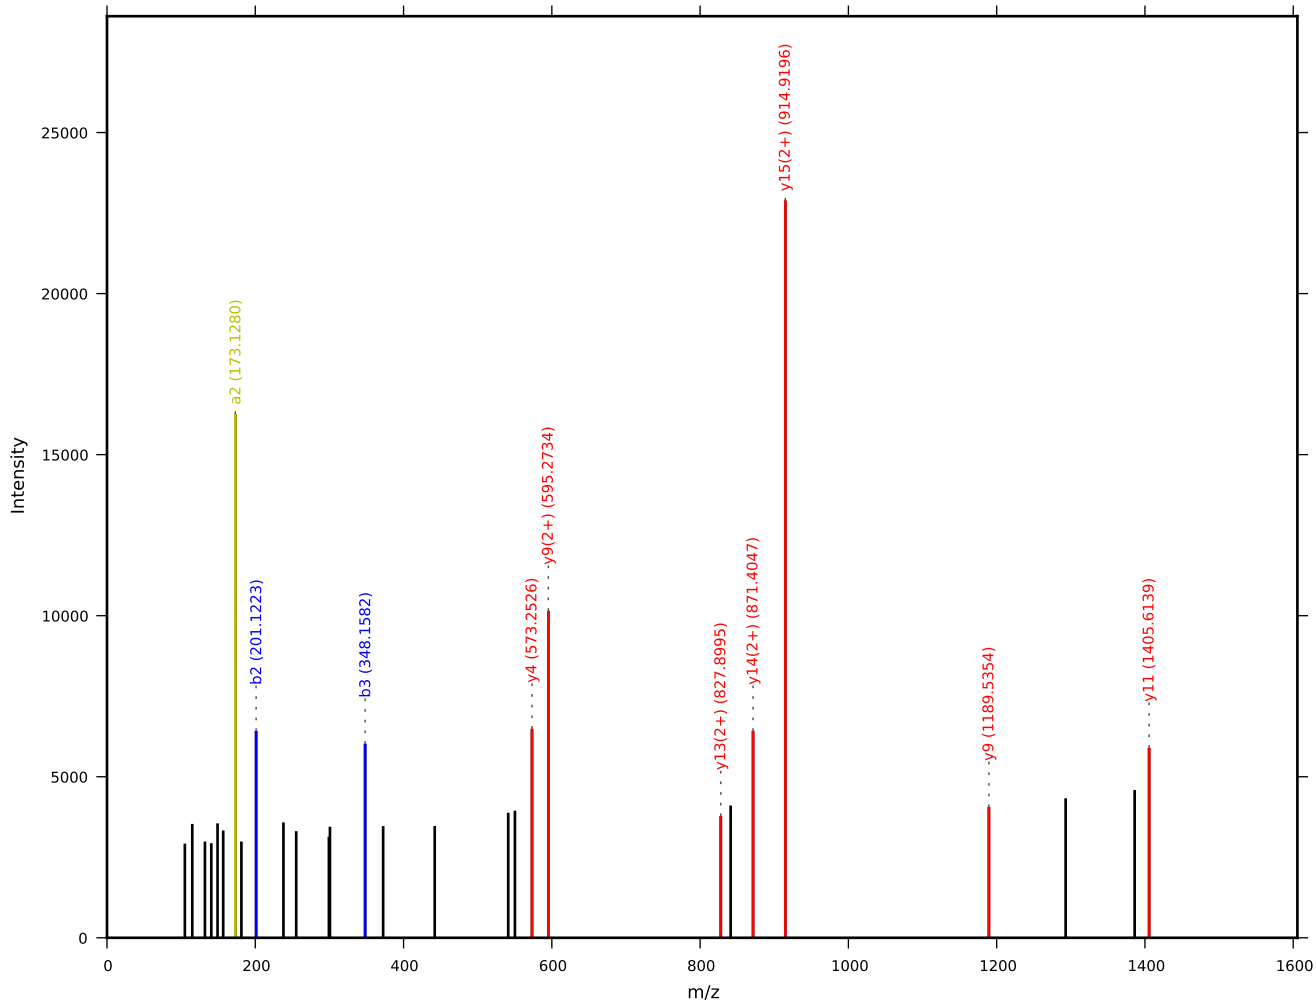

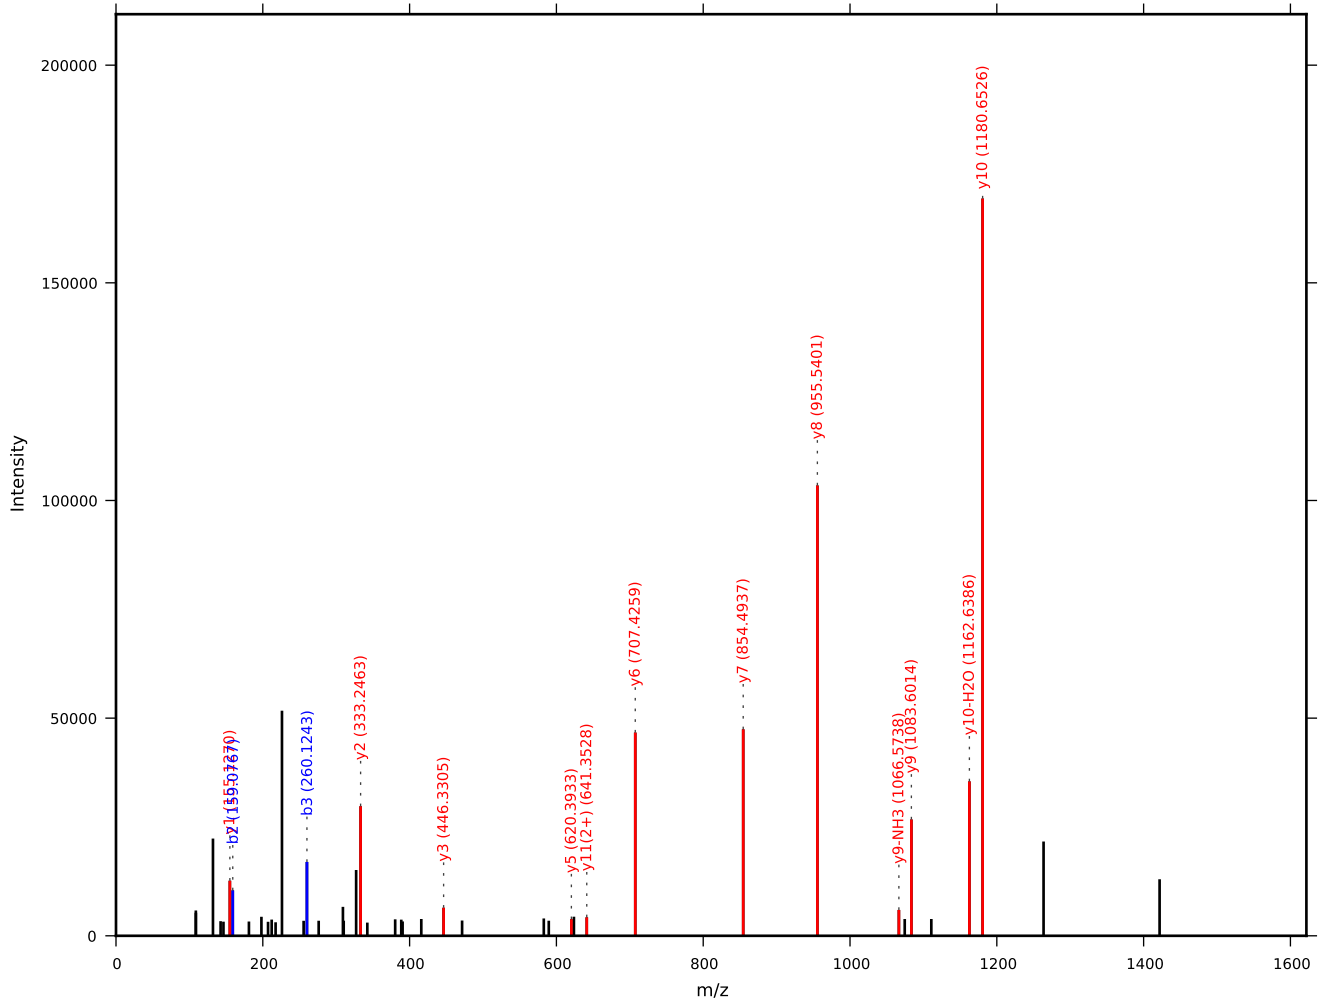

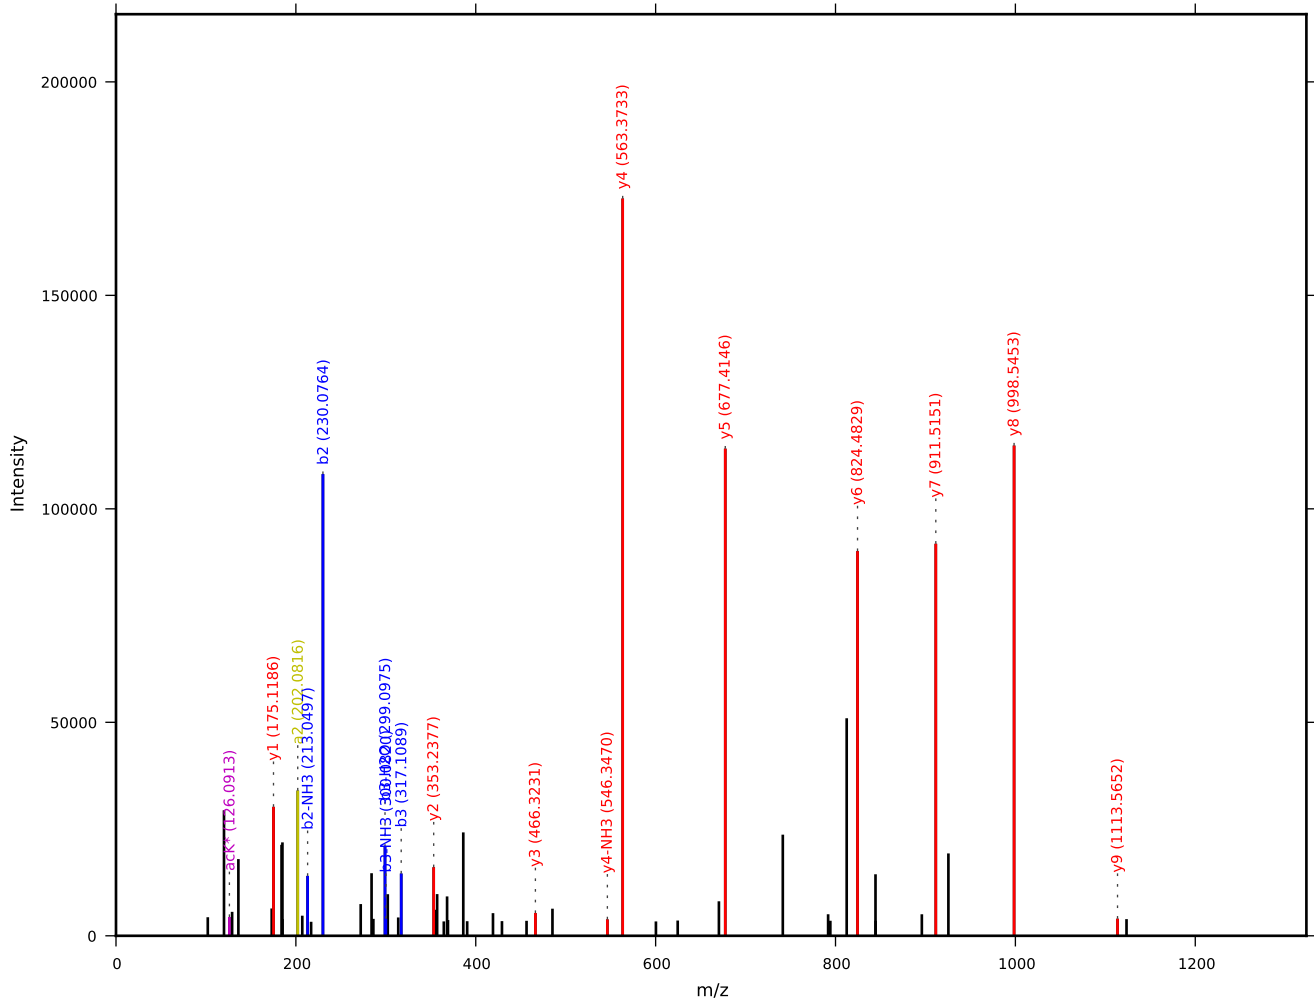

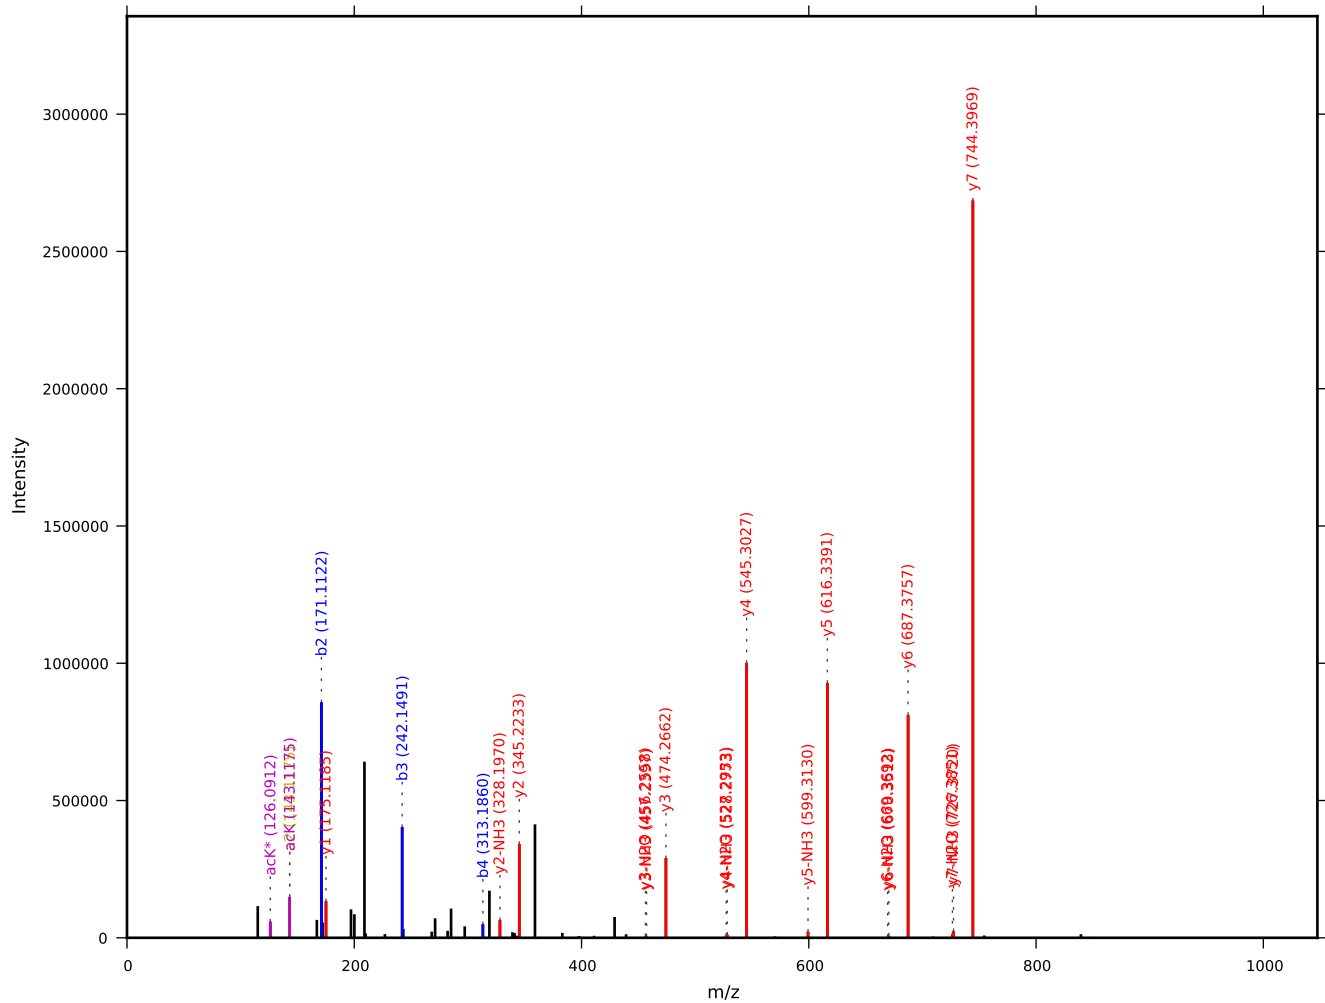

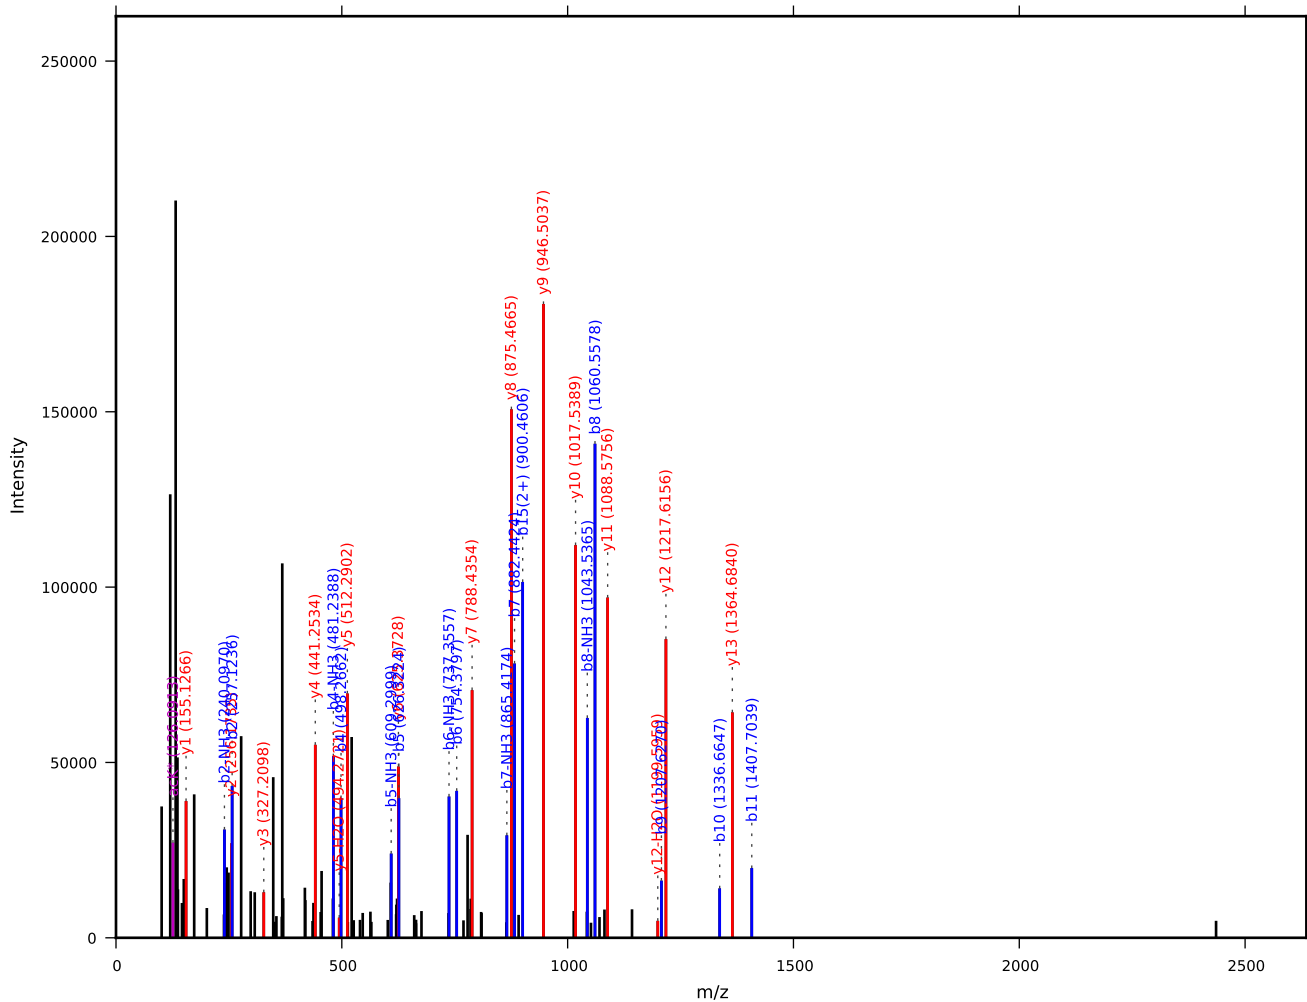

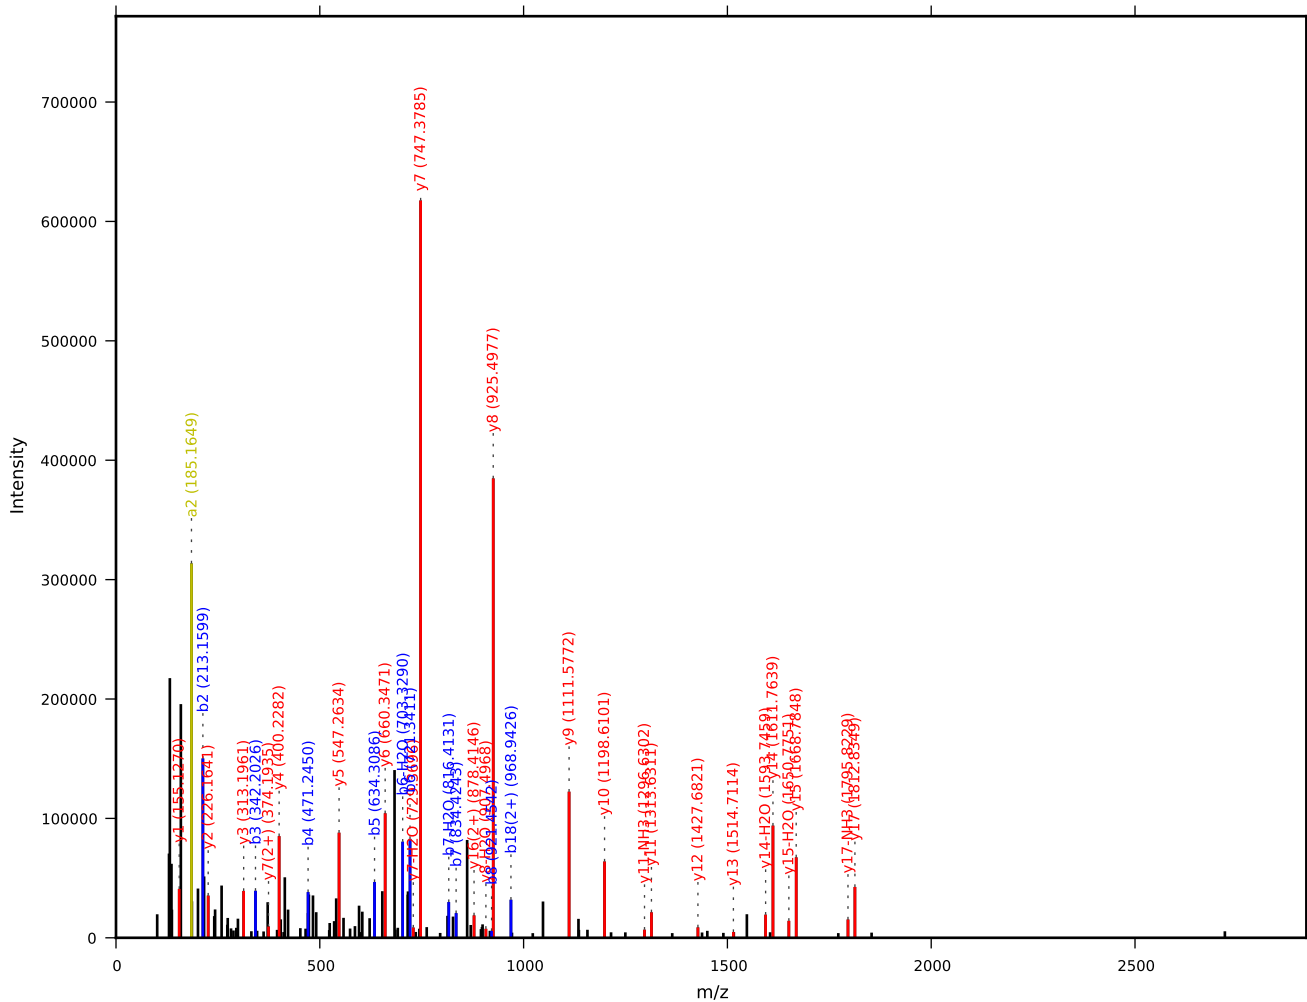

Mass: 2121.9967 Charge: 3 m/z: 708.33951  
Modified Peptide: \_DHIFK(ac)QTNEDASLYSQGK\_ Score: 46.621 PEP: 0.00011976

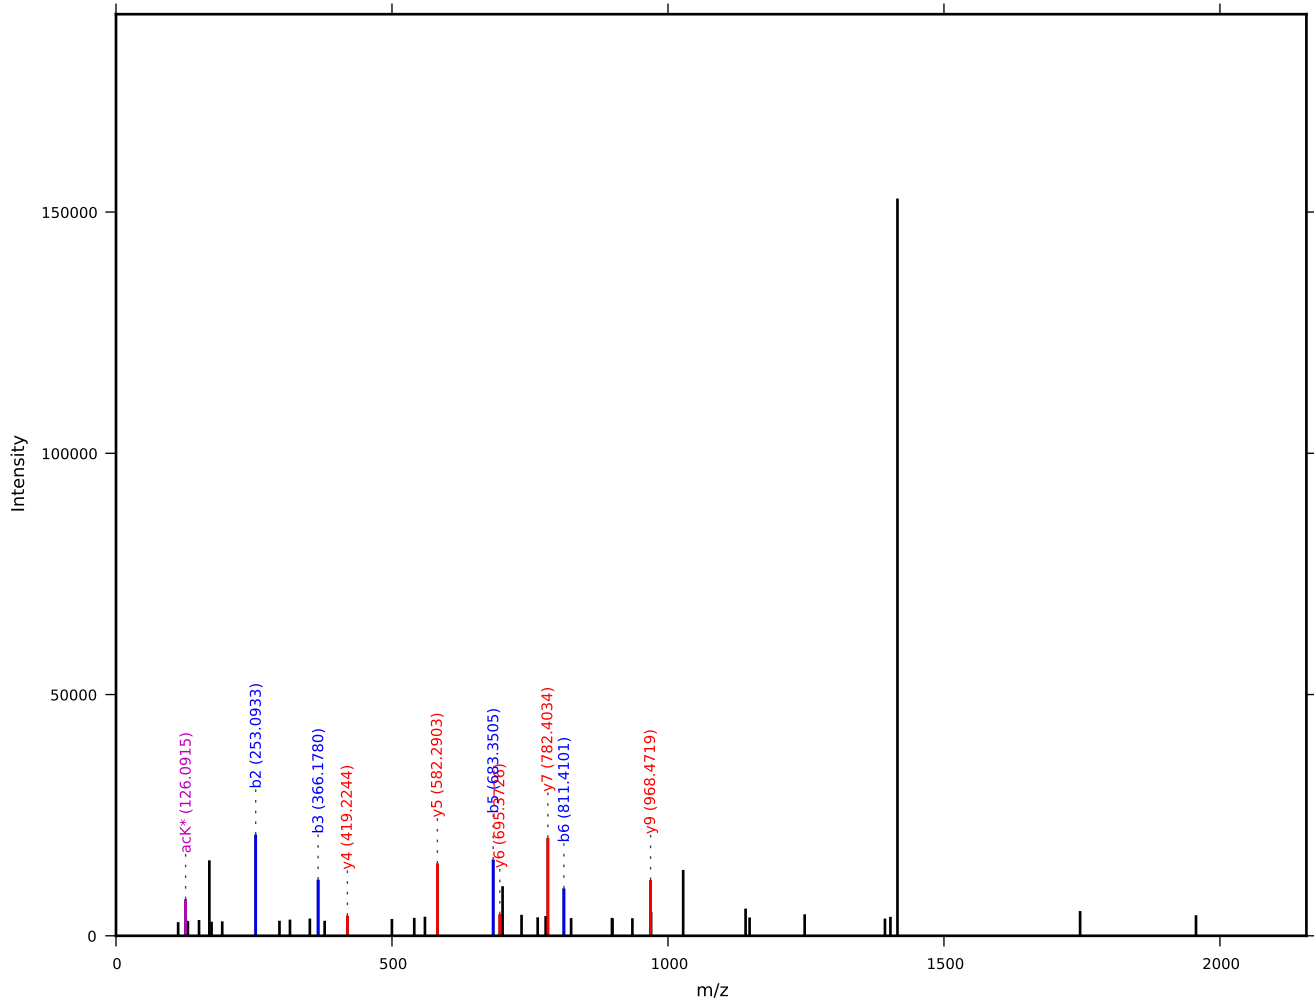

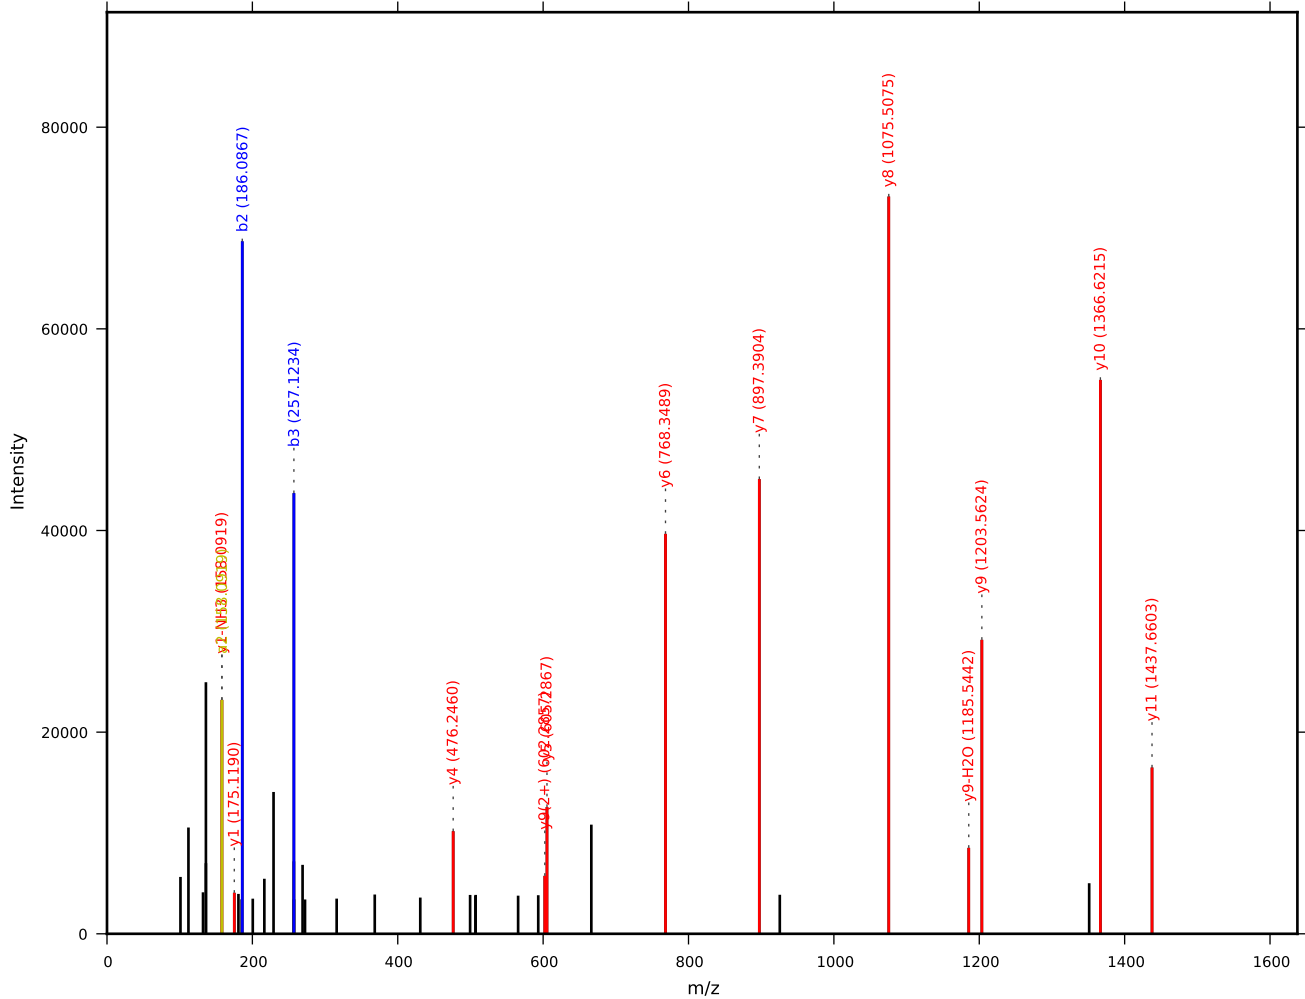



Mass: 913.6183 Charge: 2 m/z: 457.81643  
Modified Peptide: \_LLELLK(ac)K\_ Score: 79.469 PEP: 0.0091124

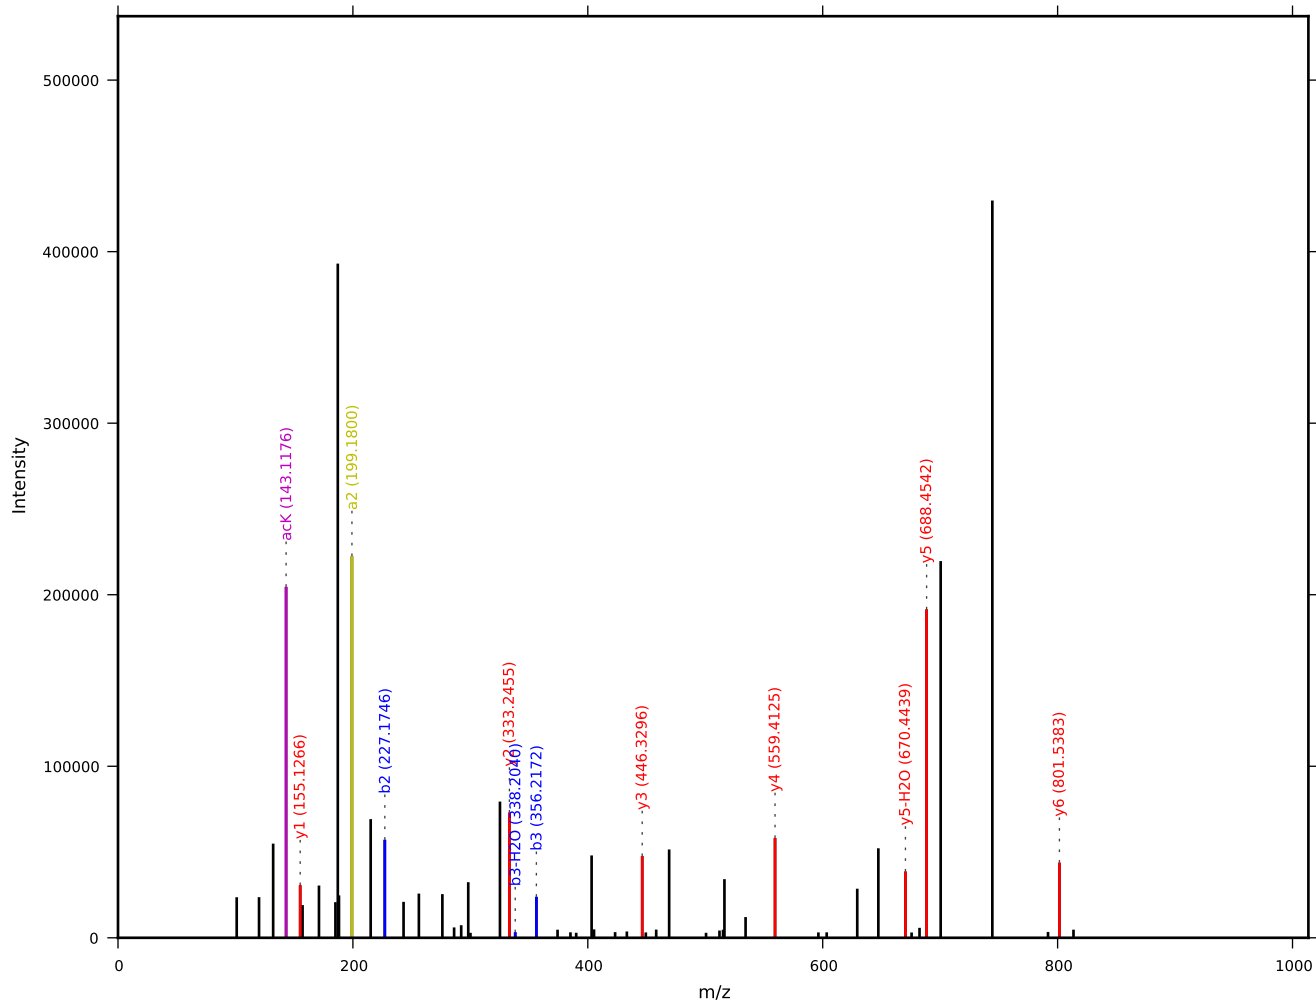

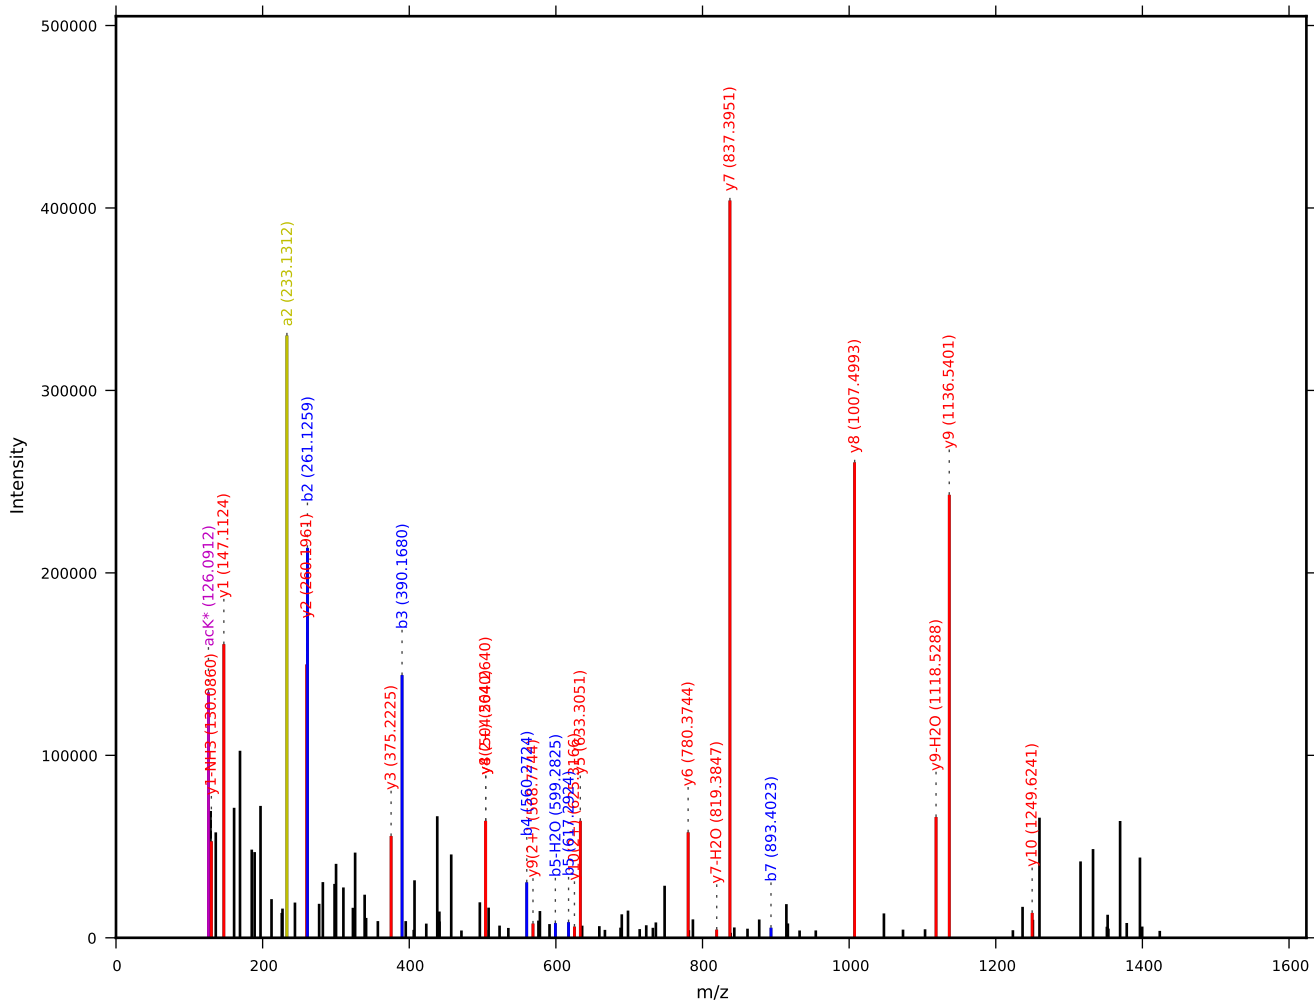

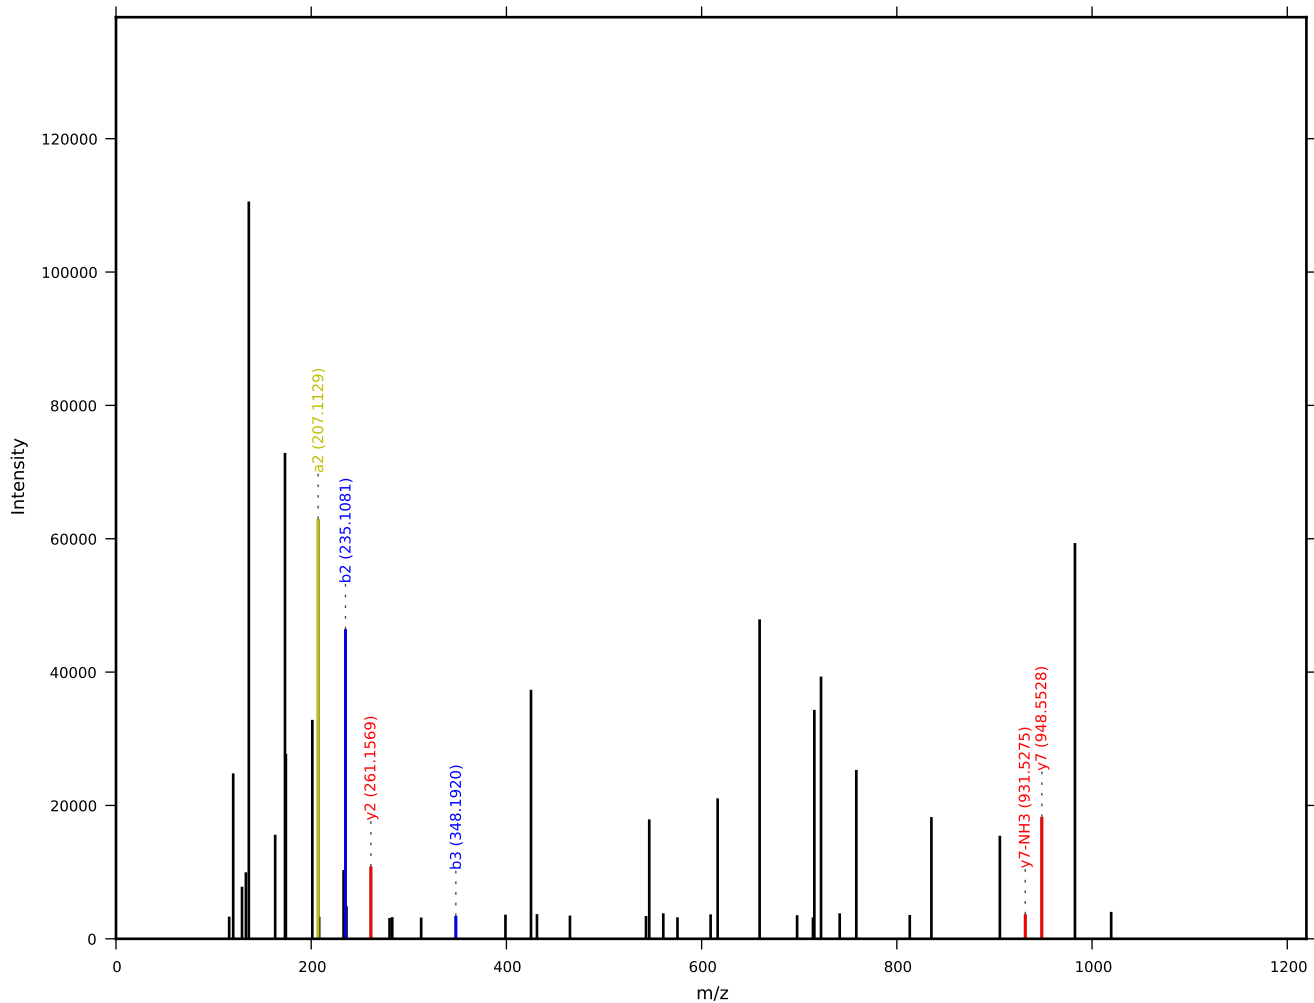

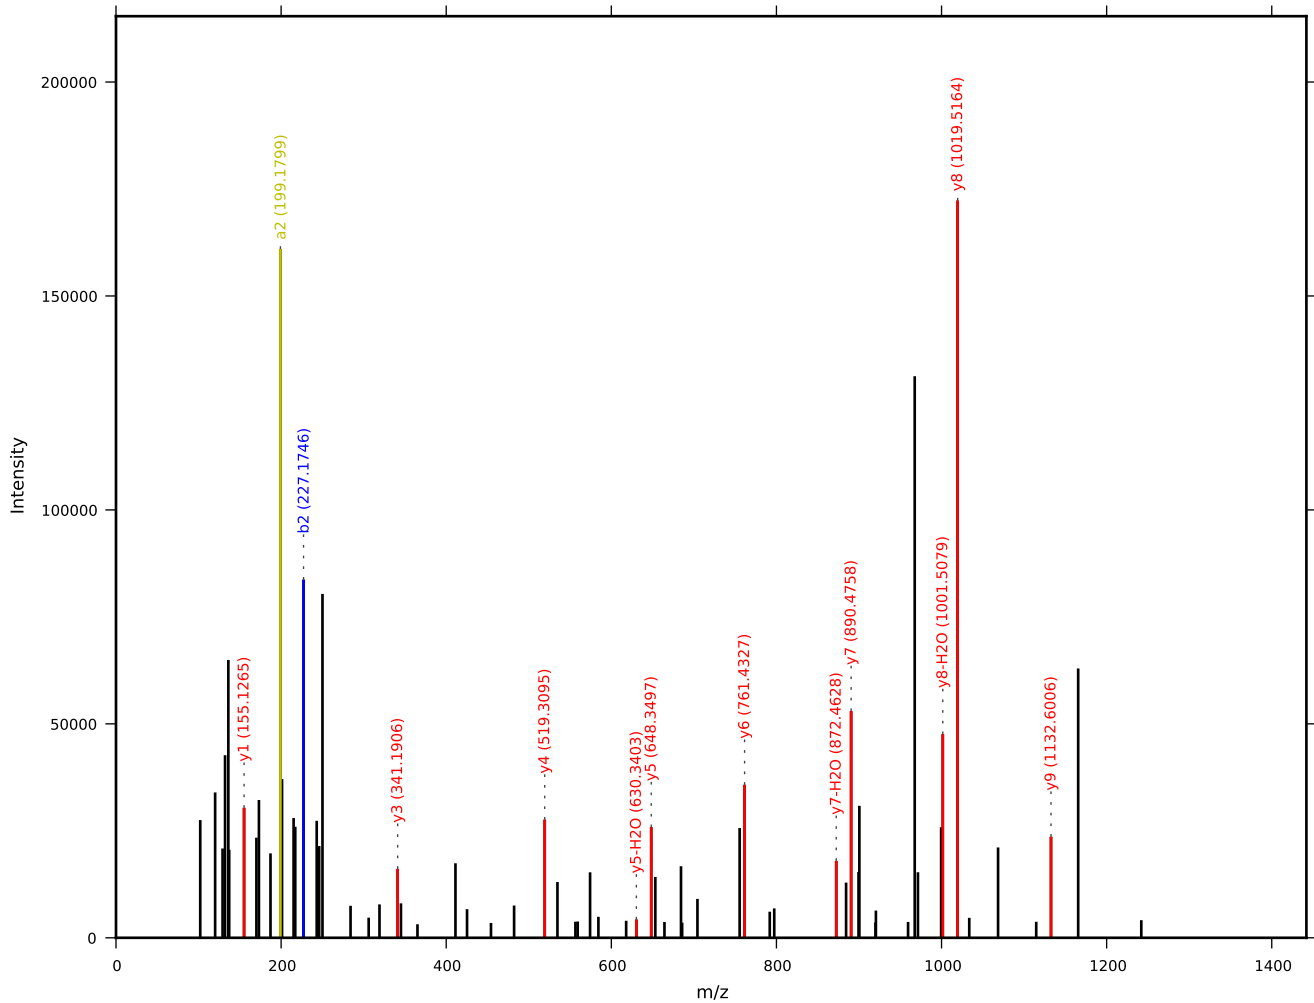

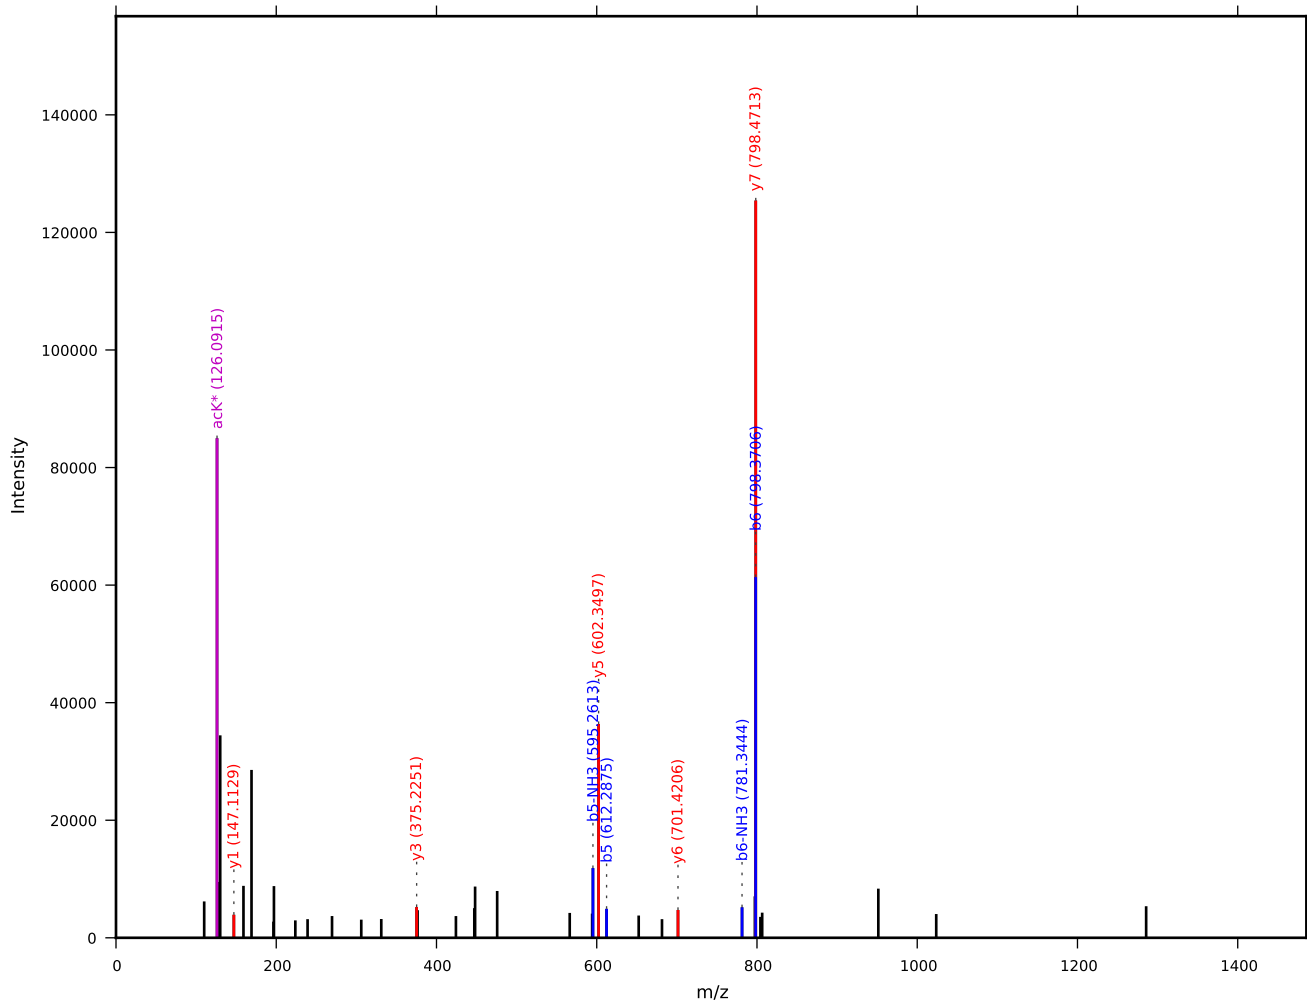

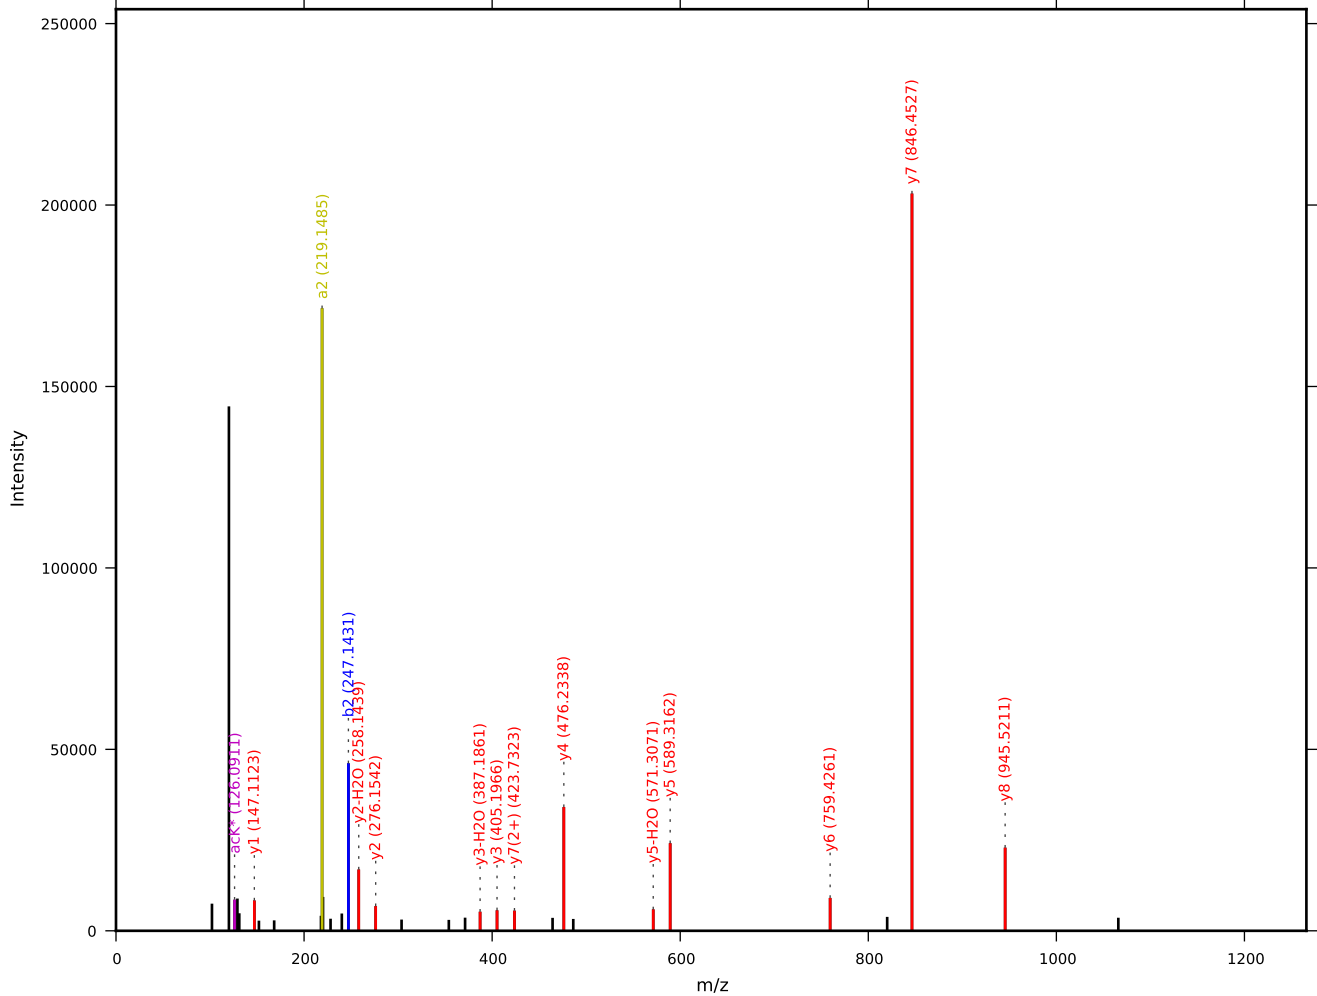

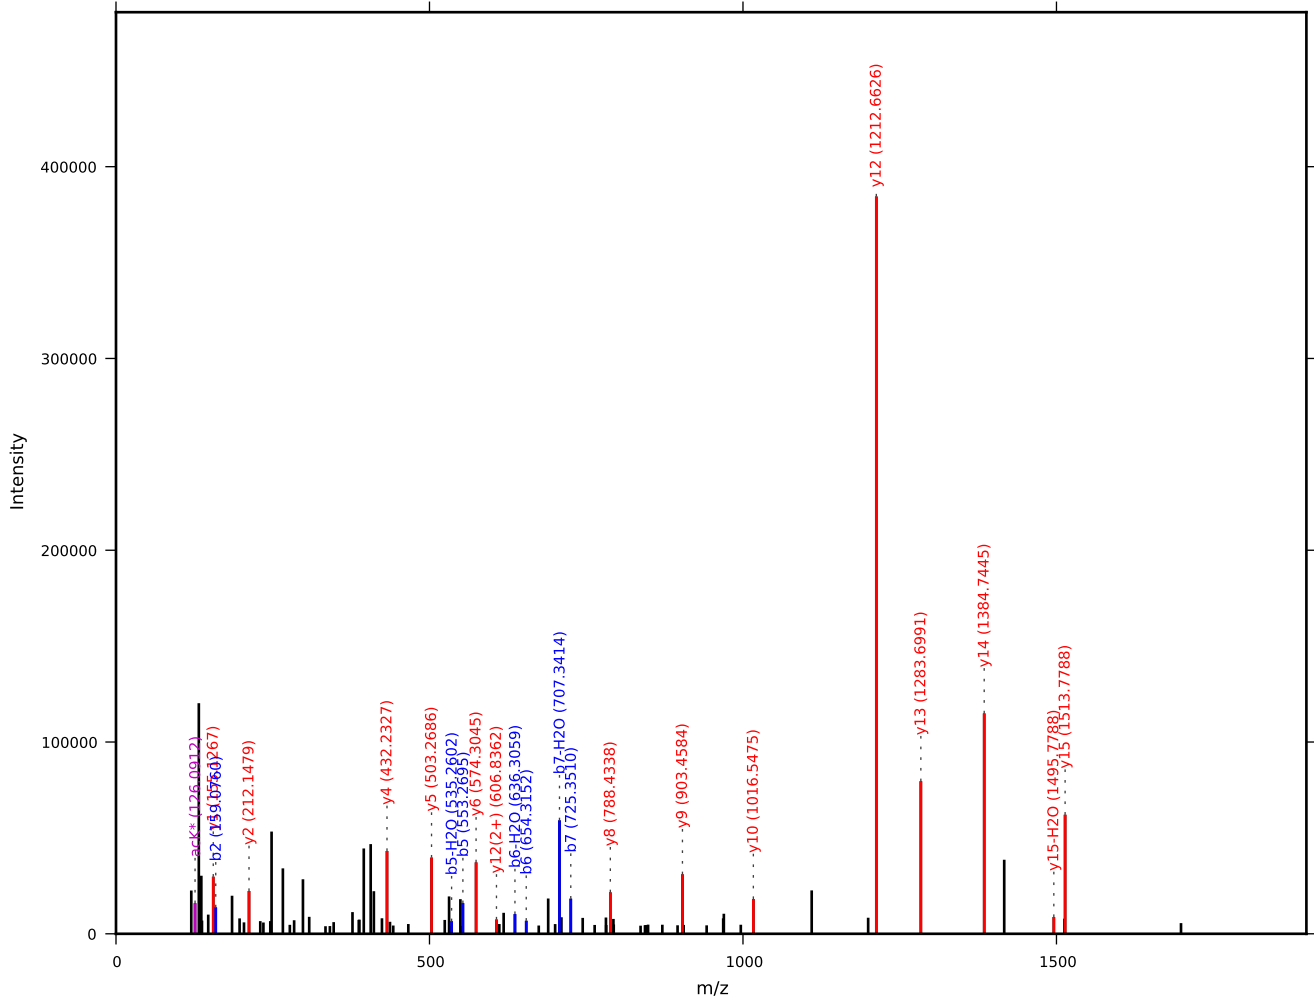

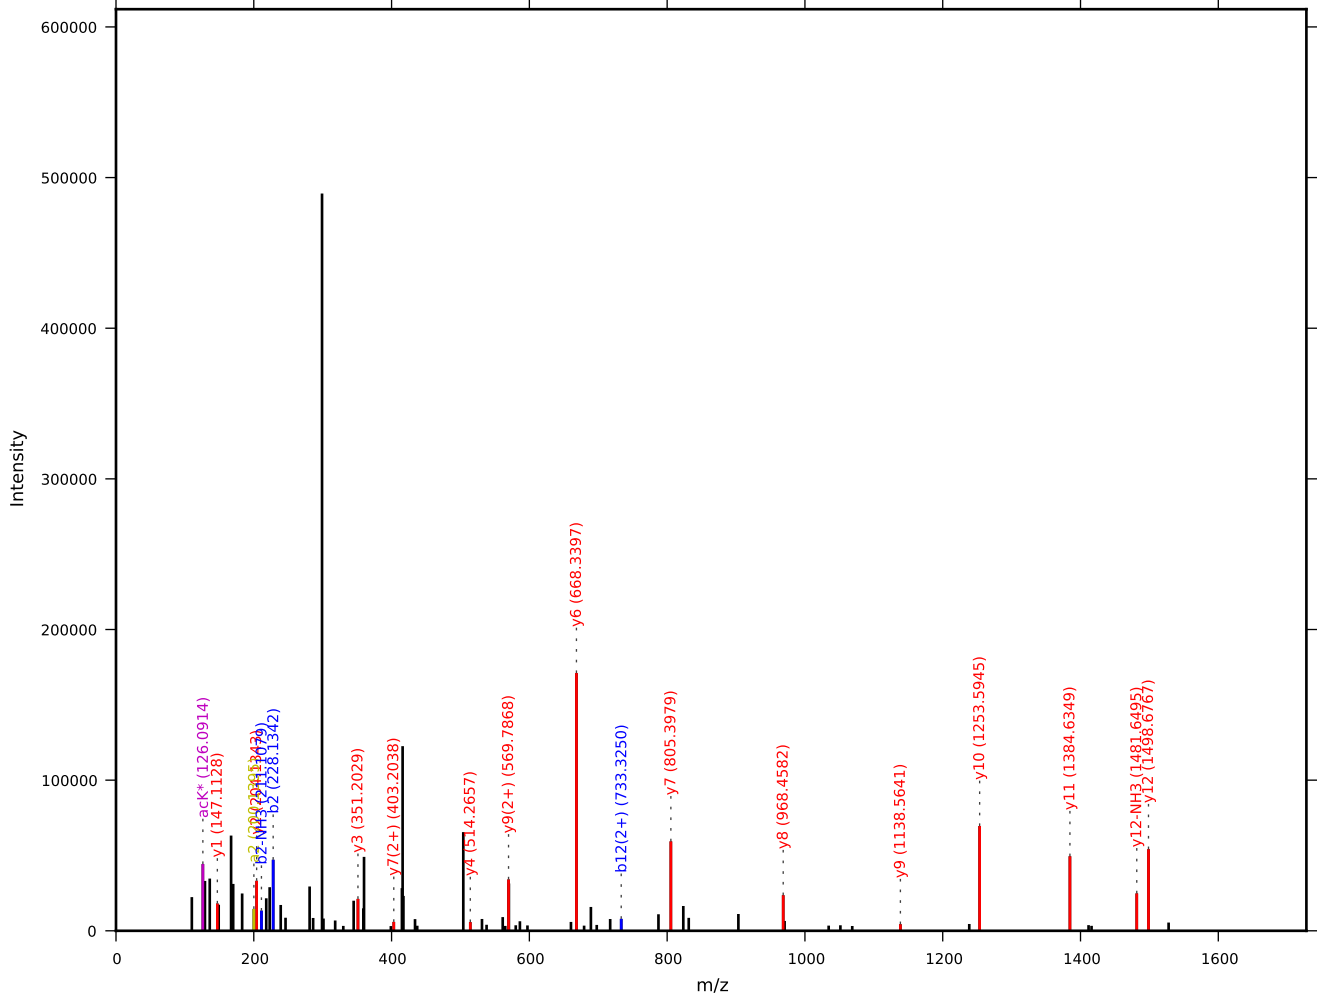



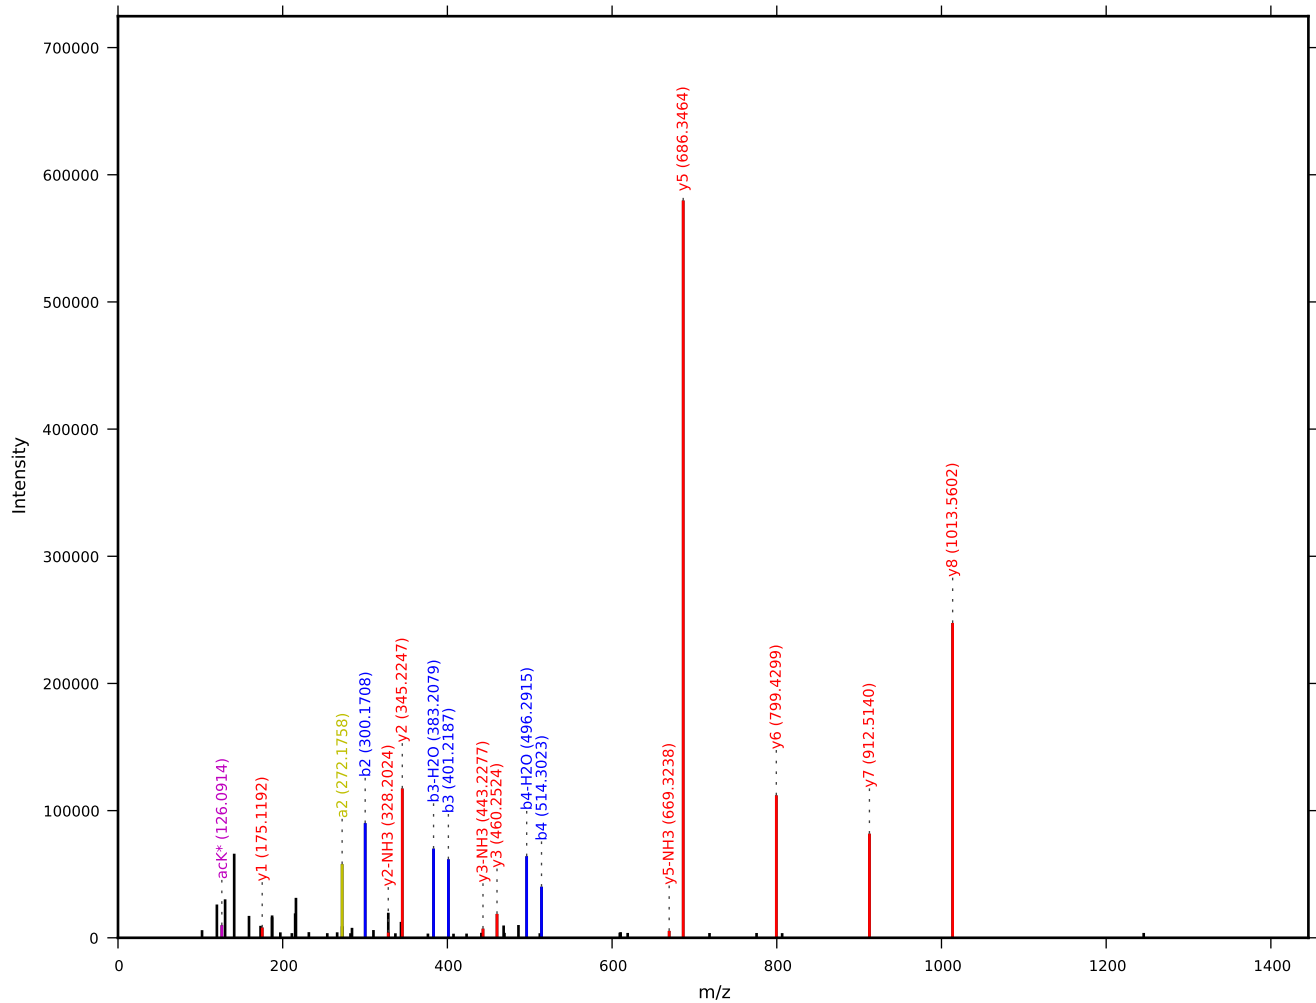

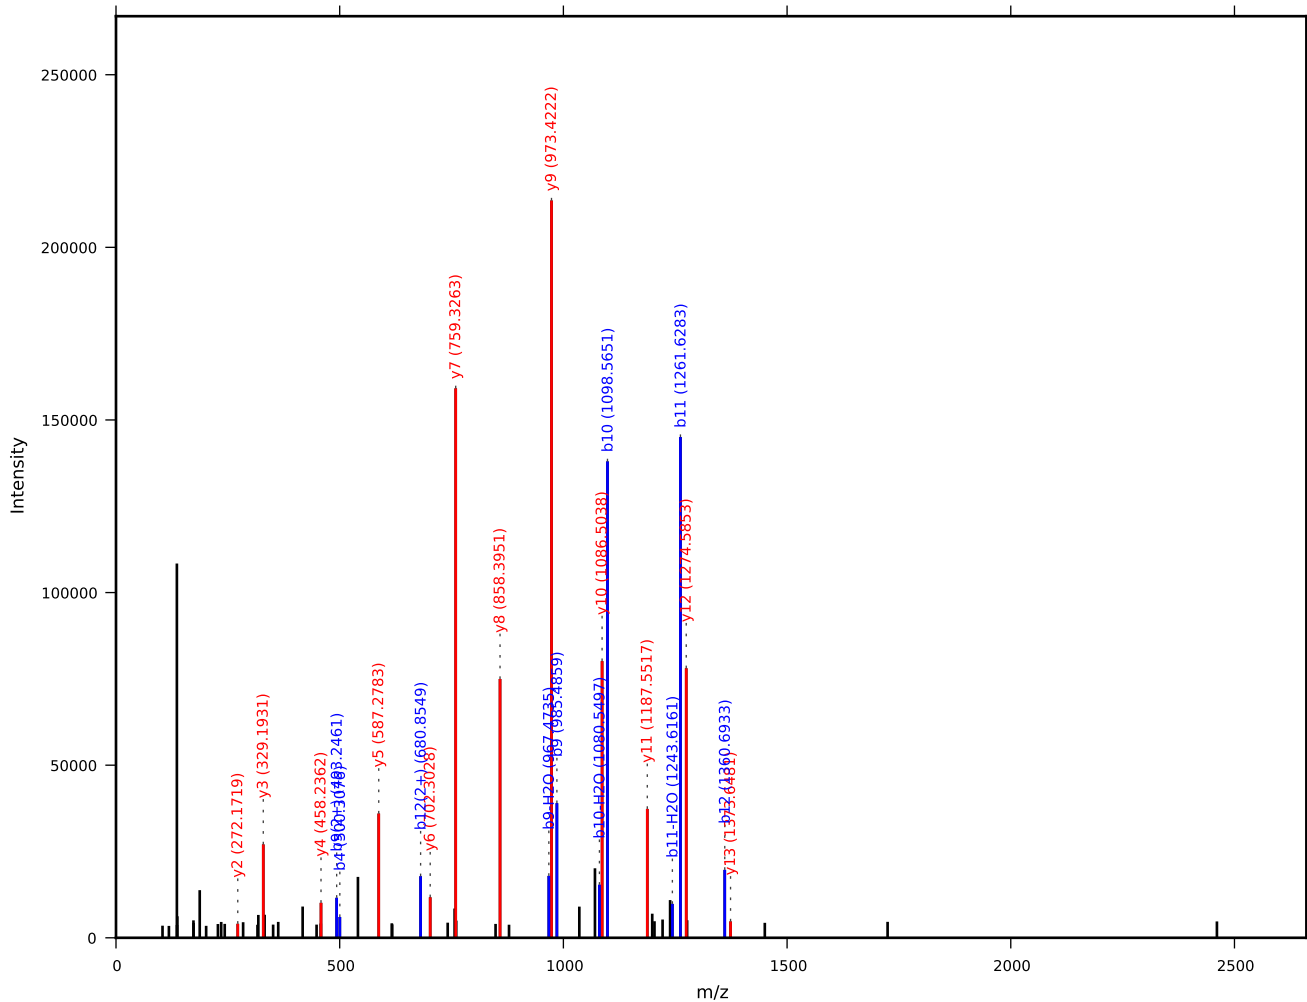

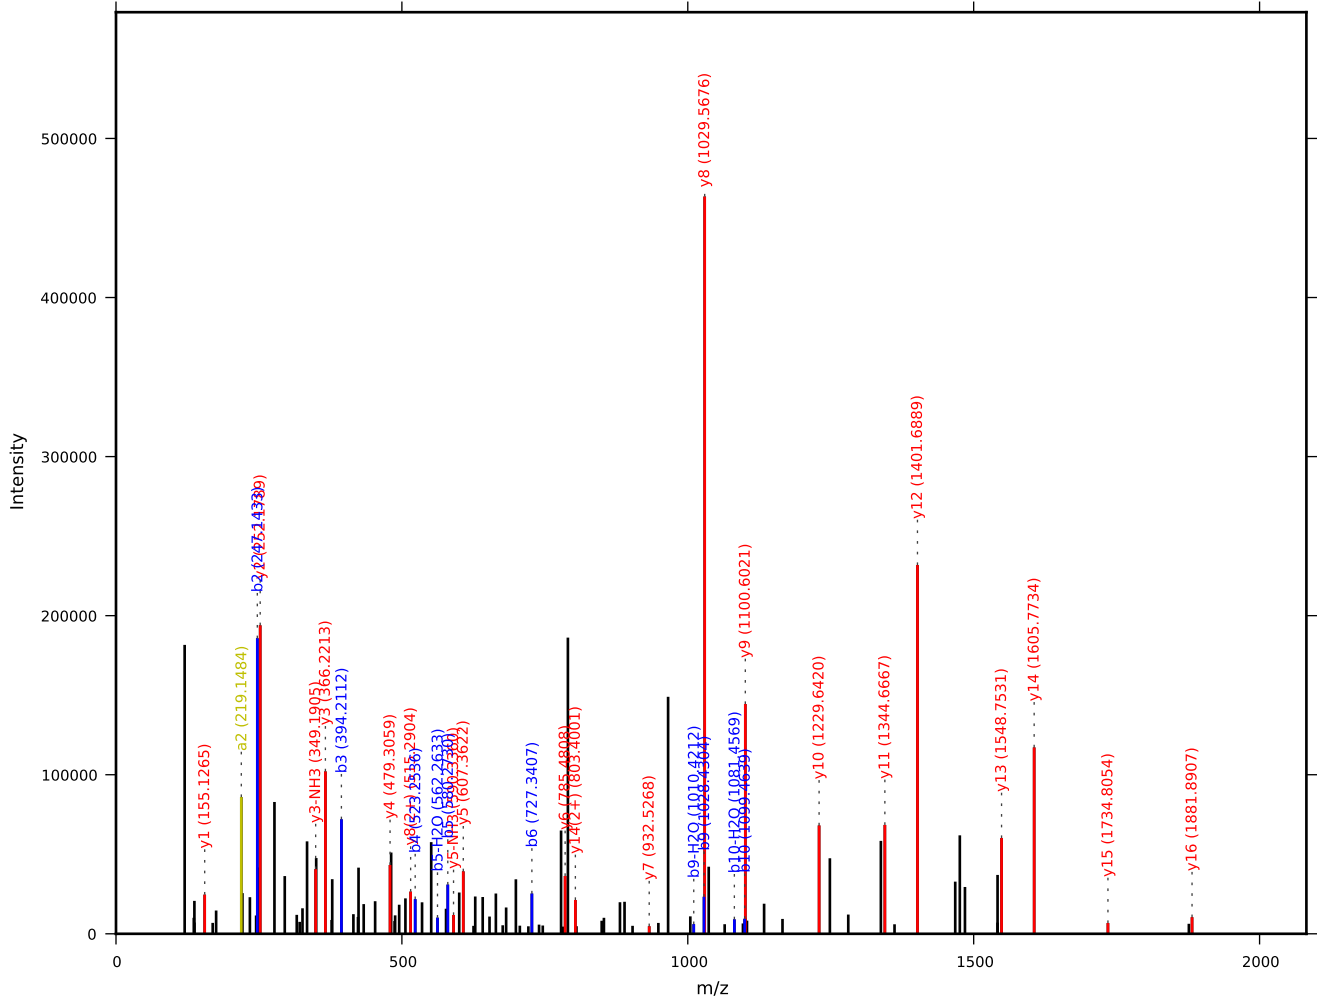

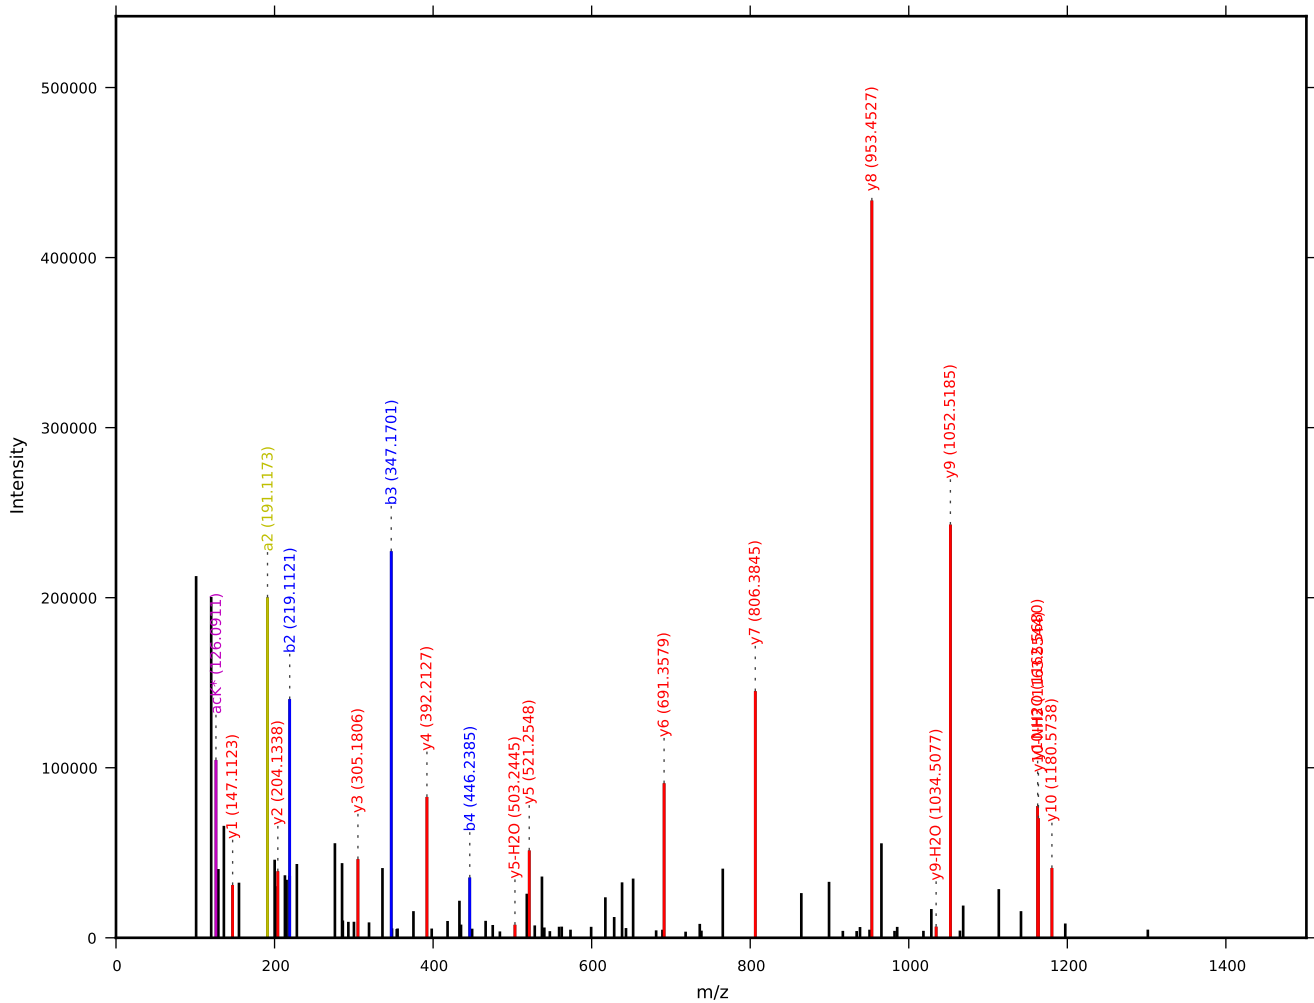

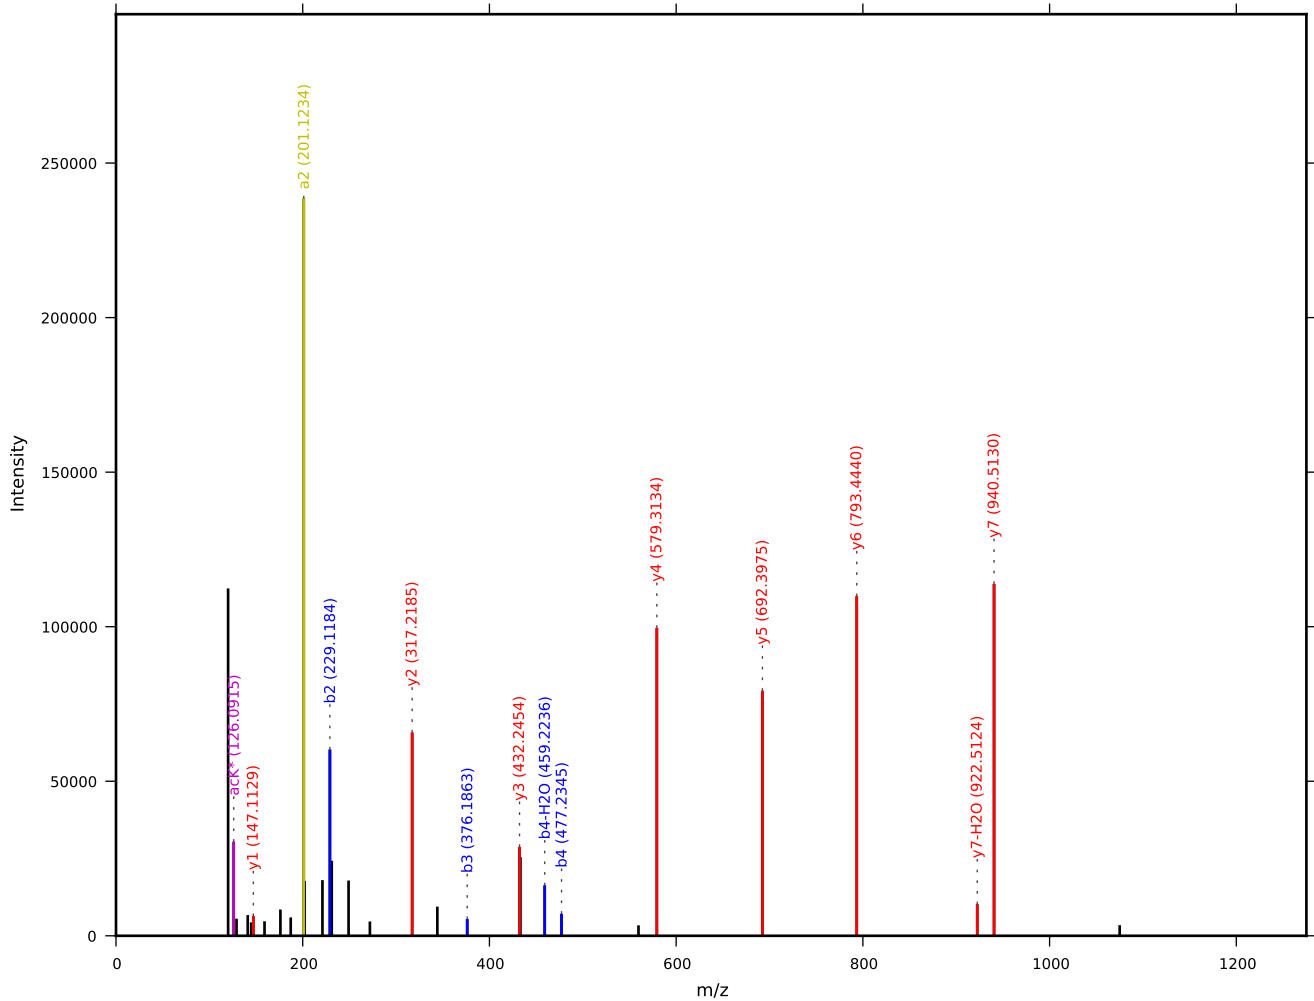

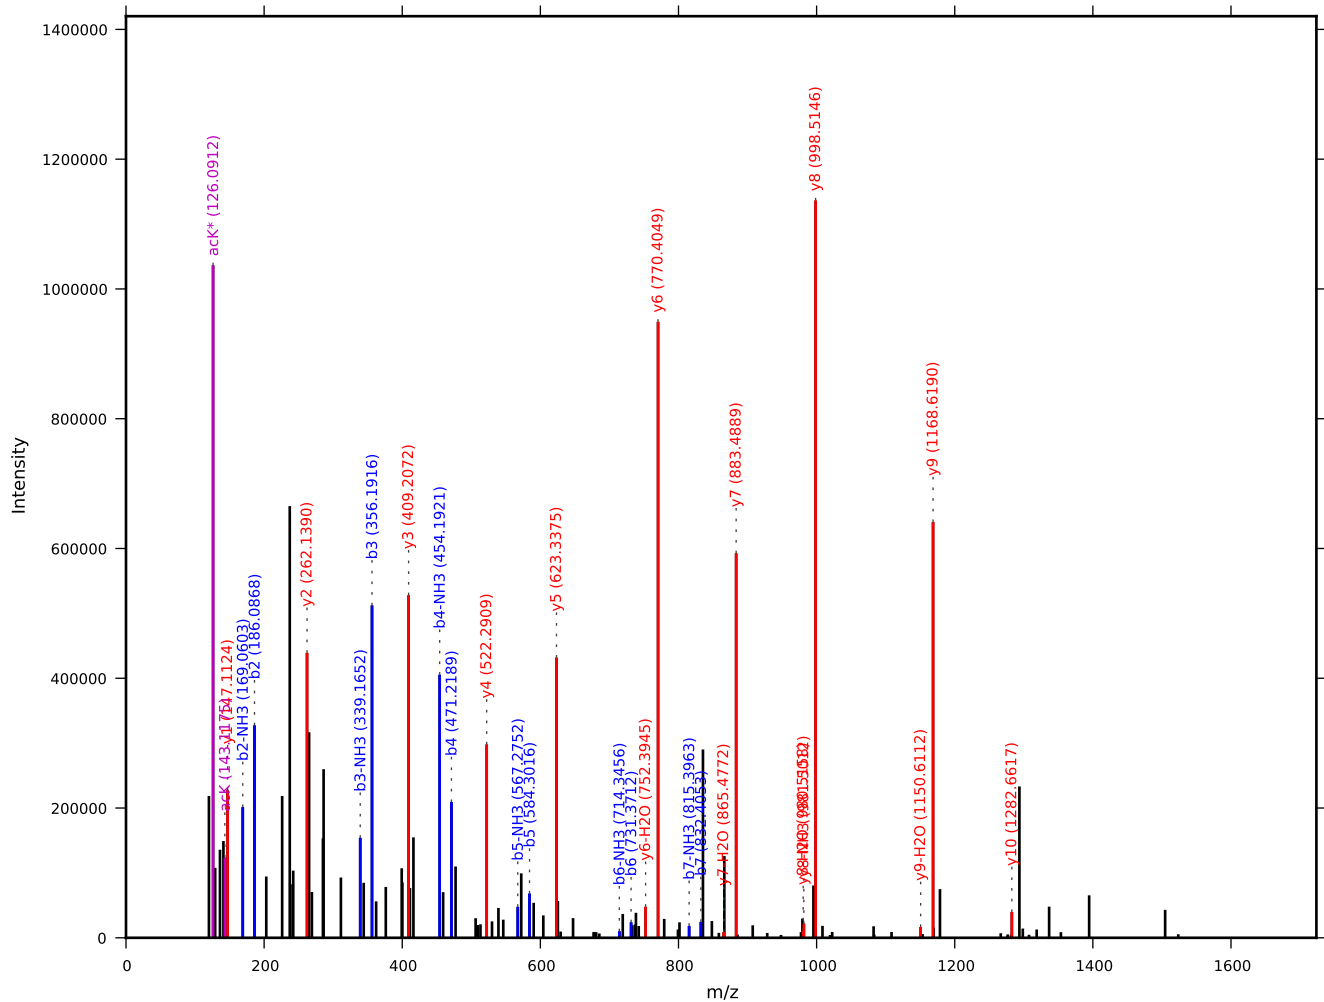

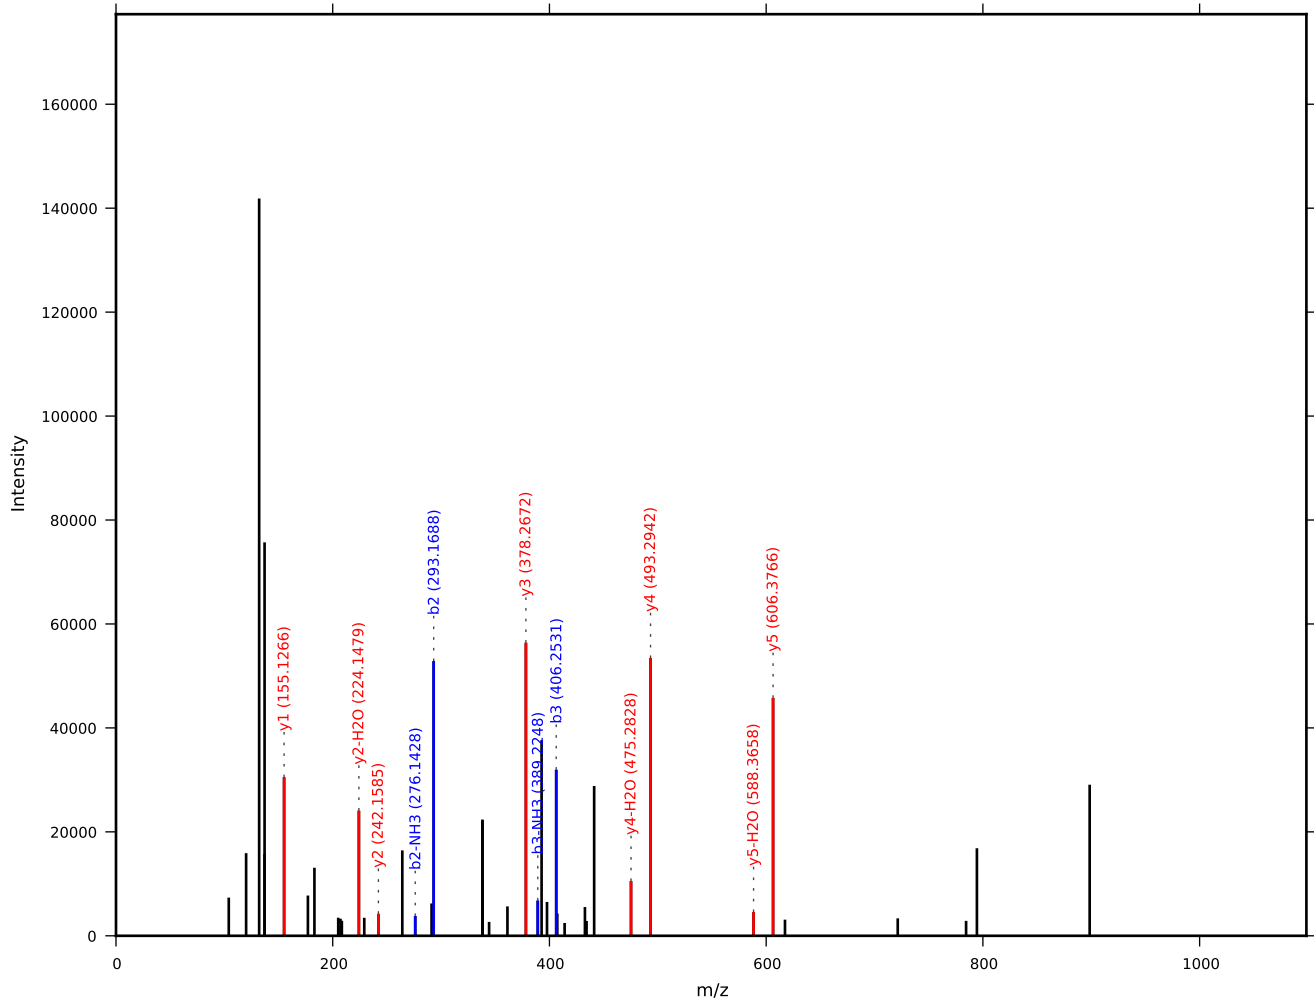

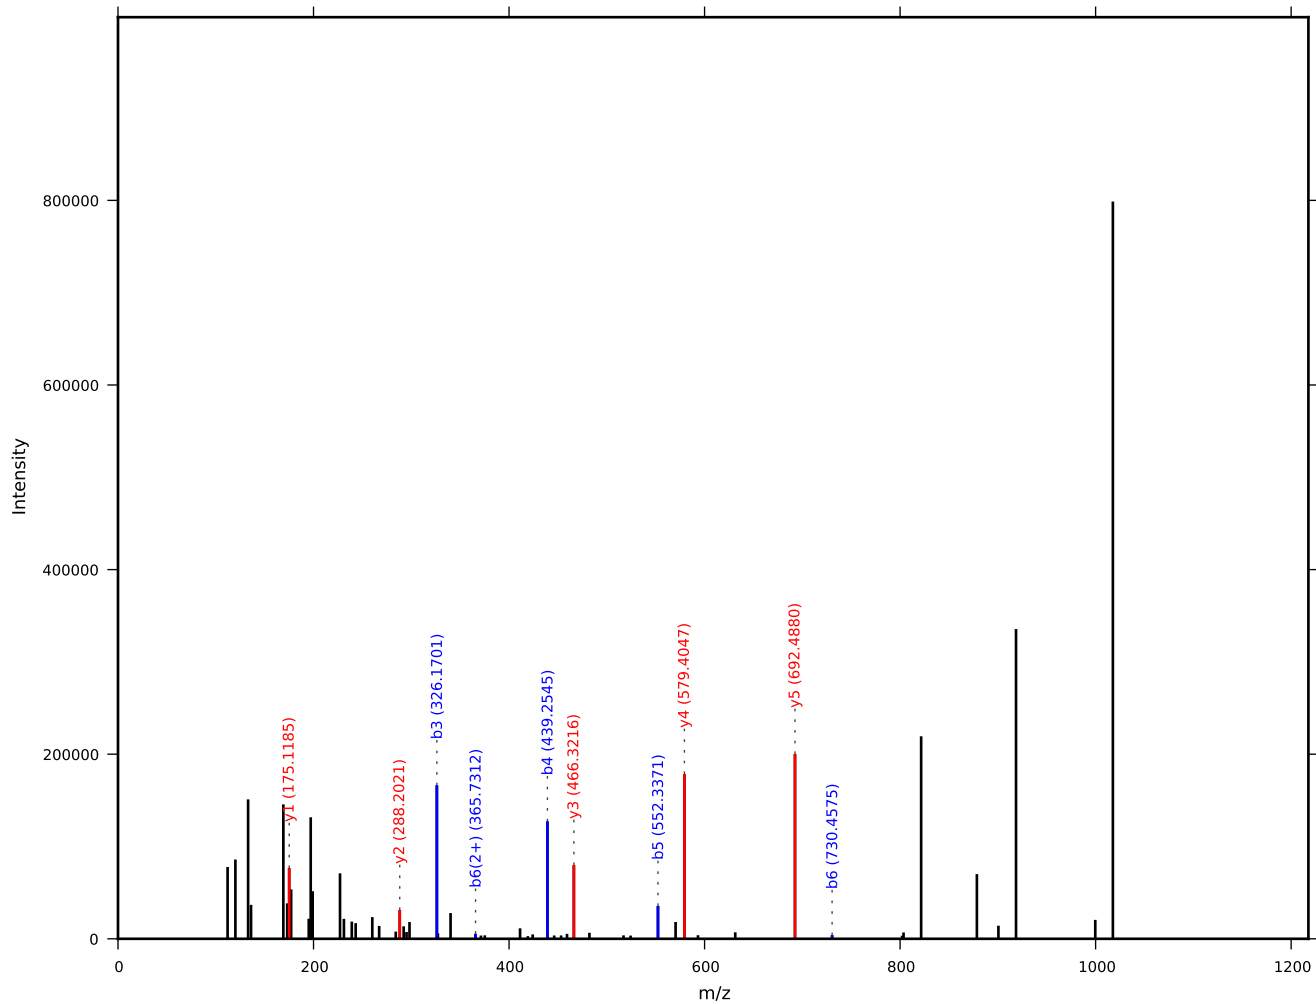



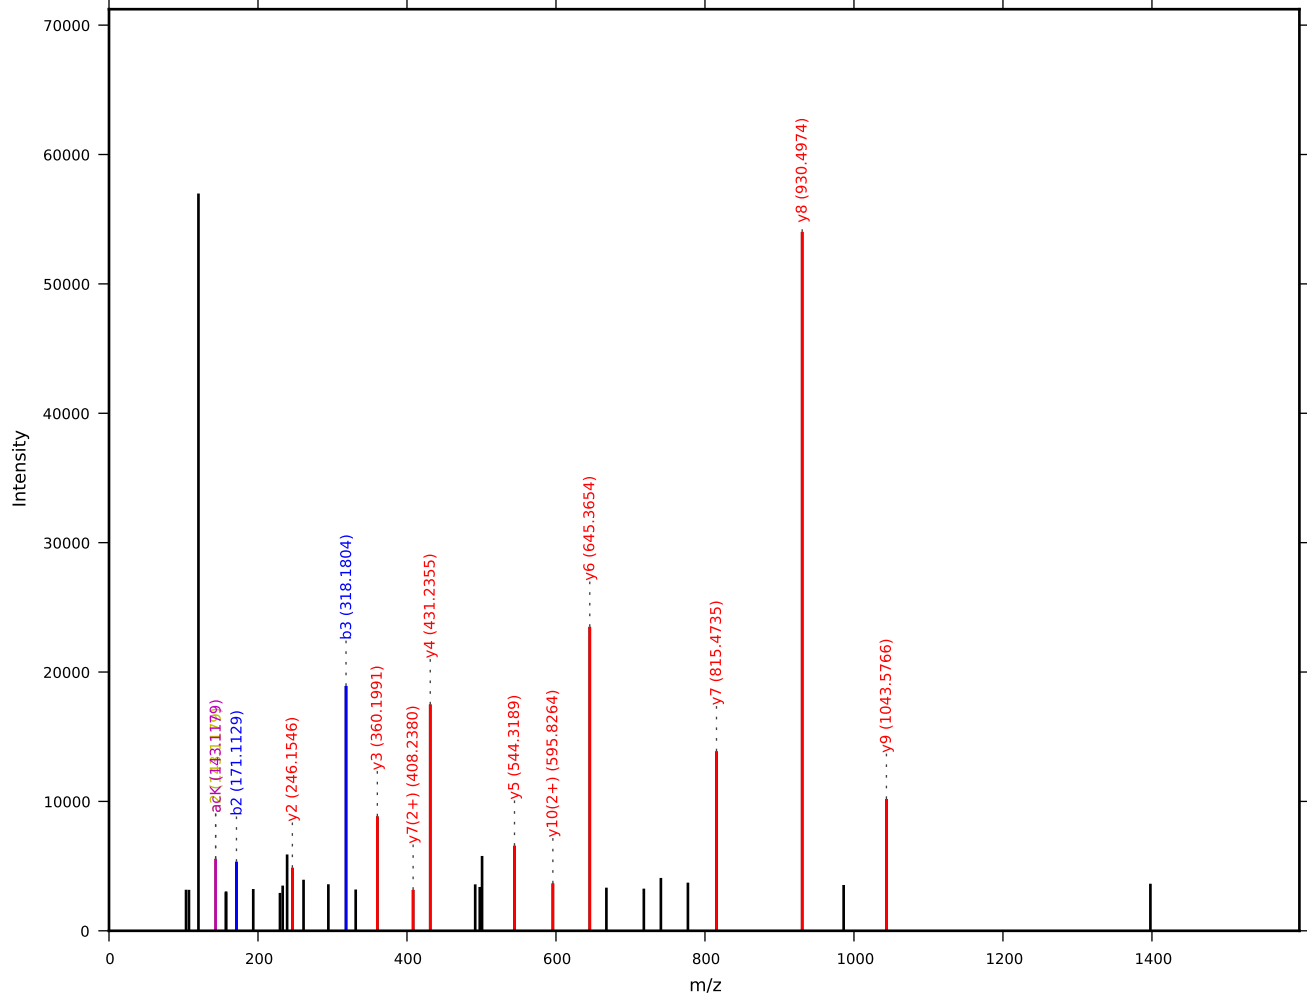

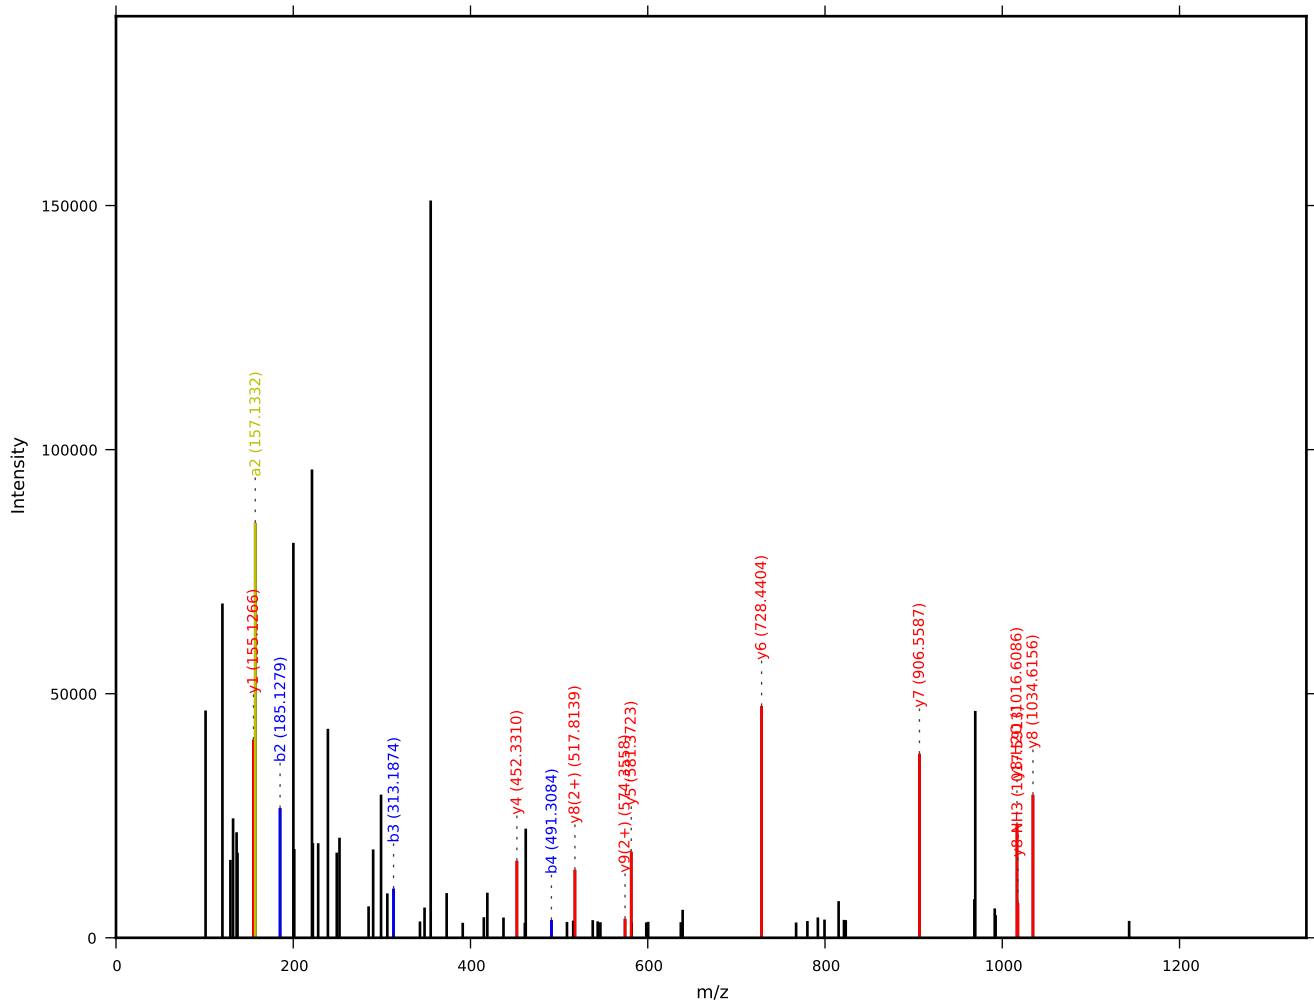

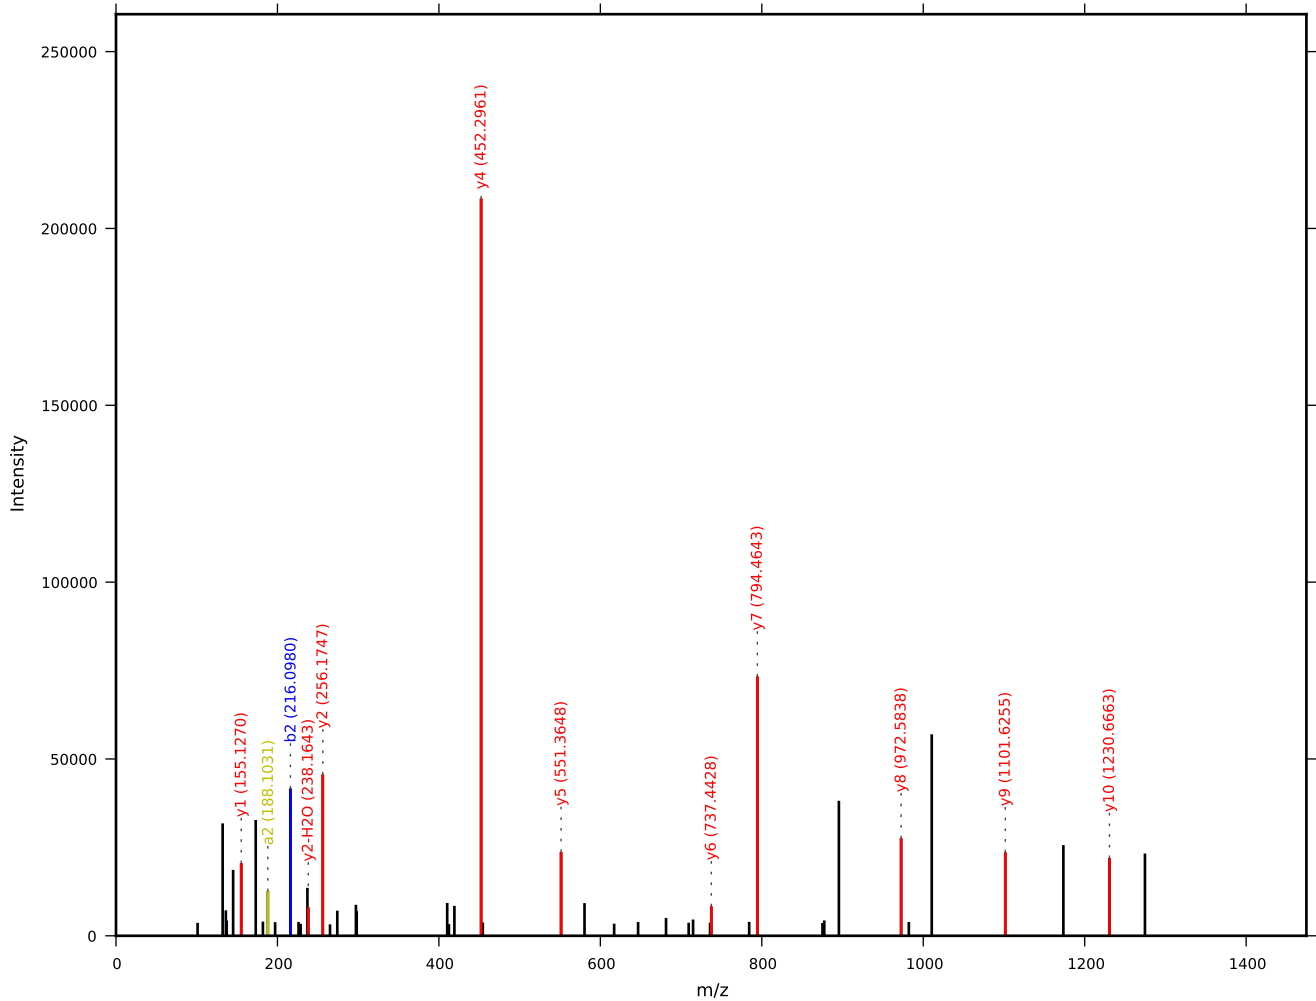

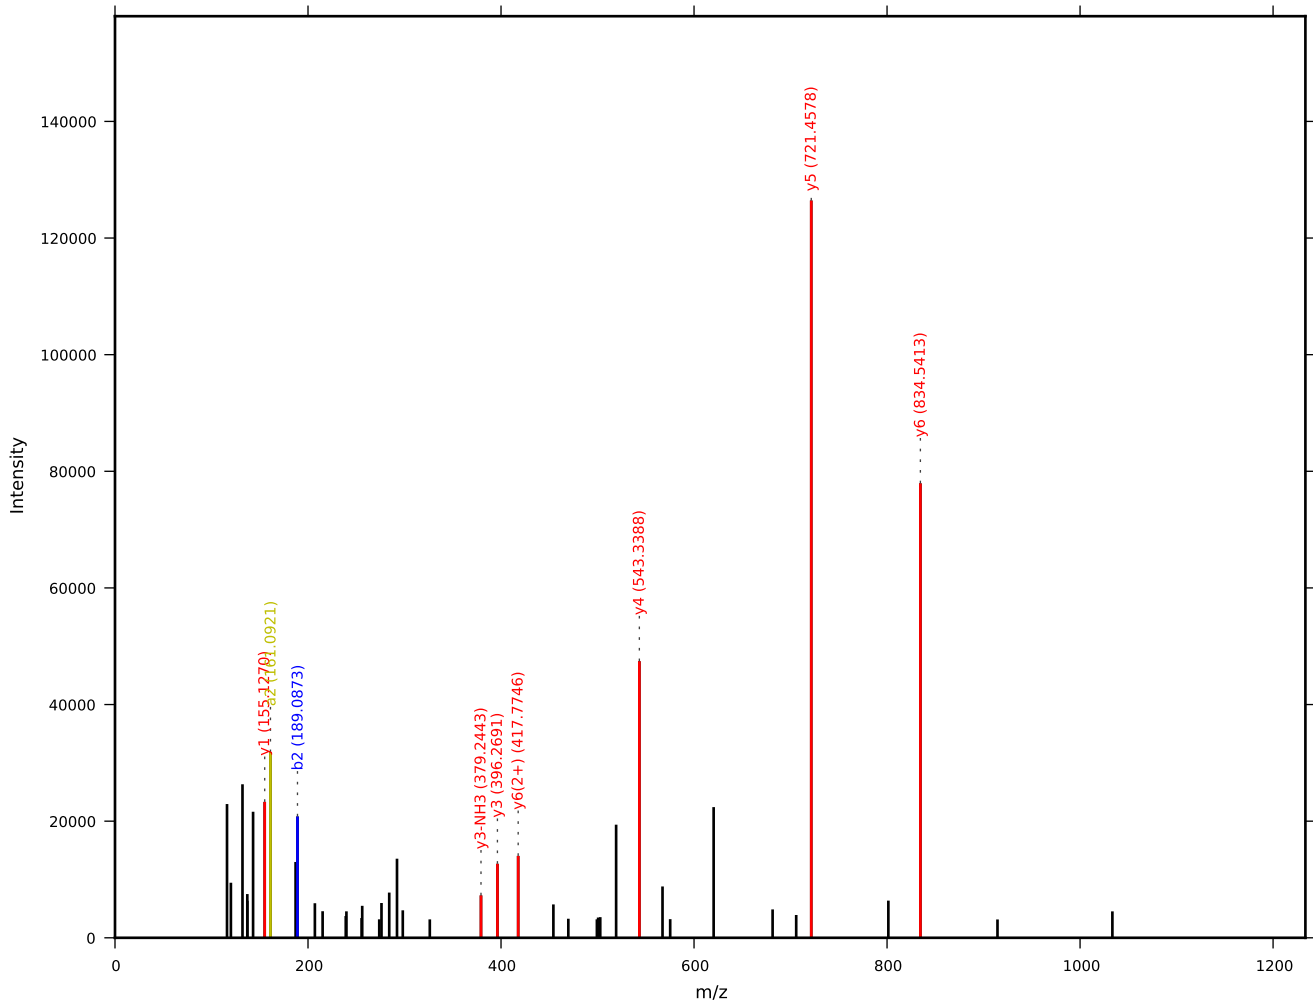

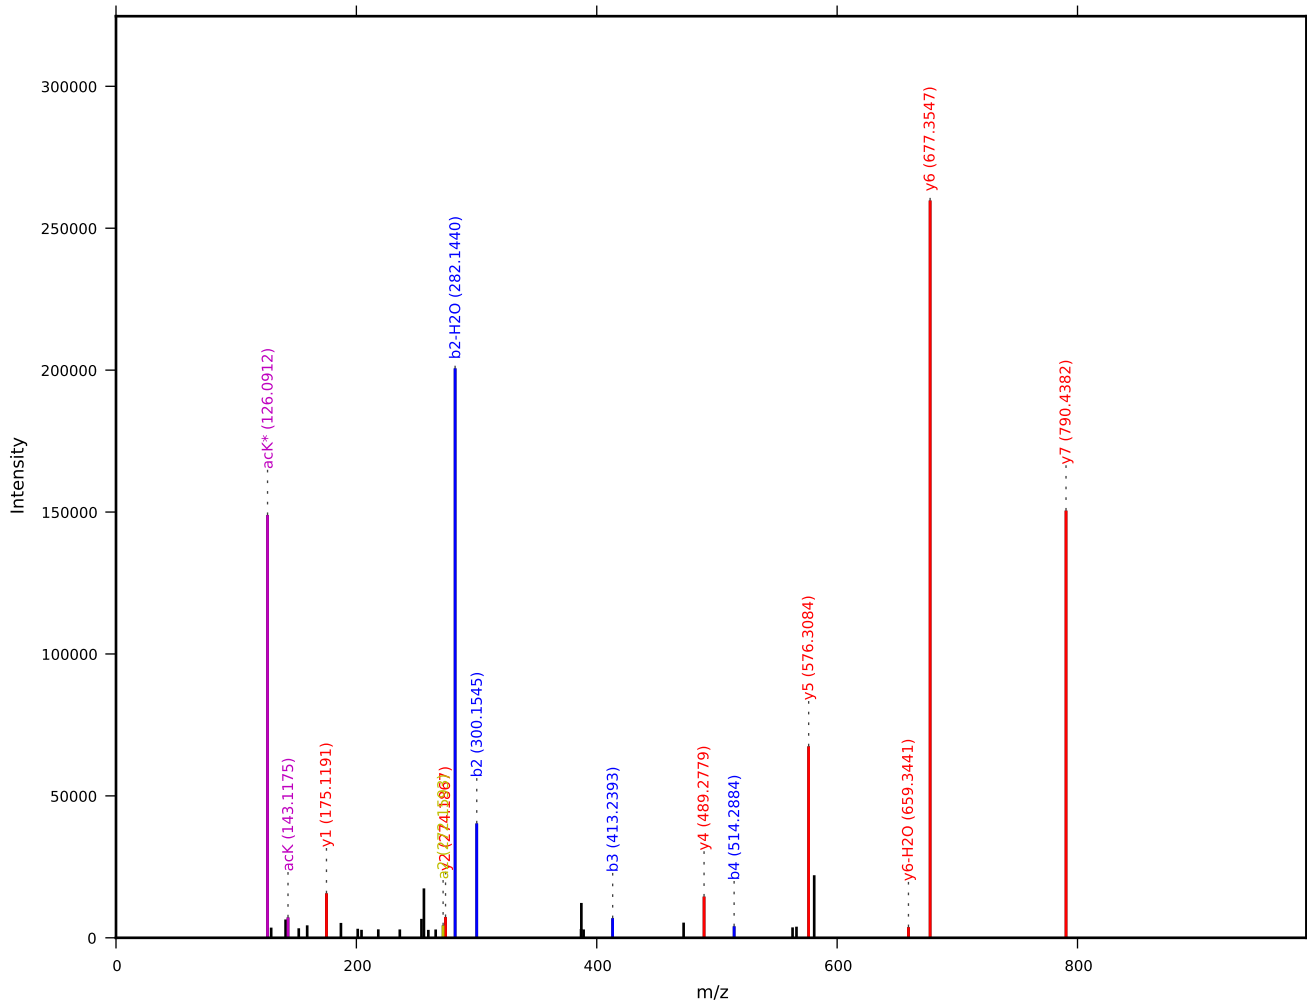

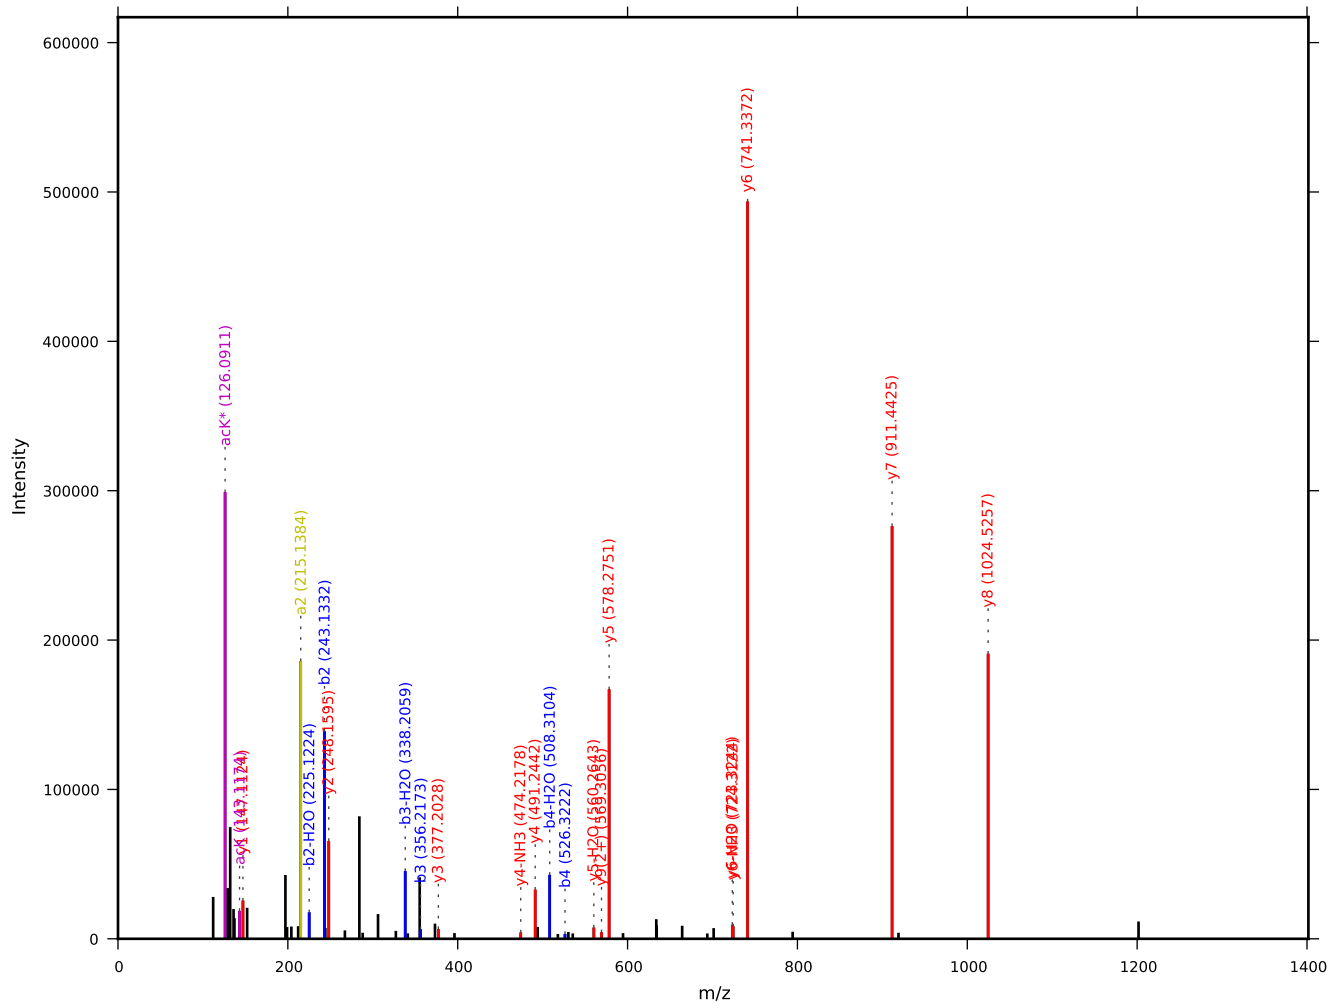

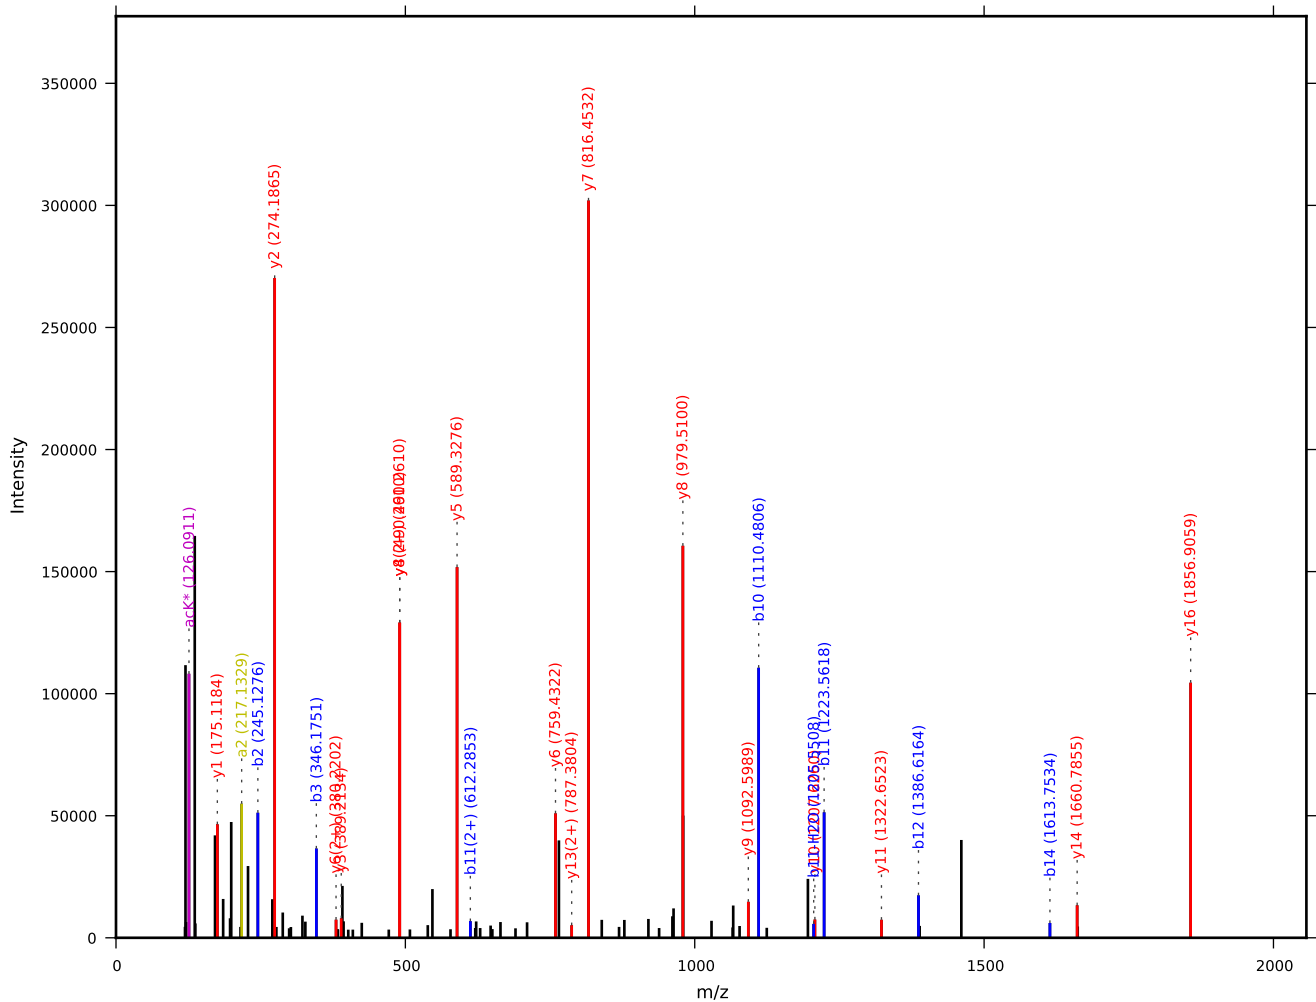

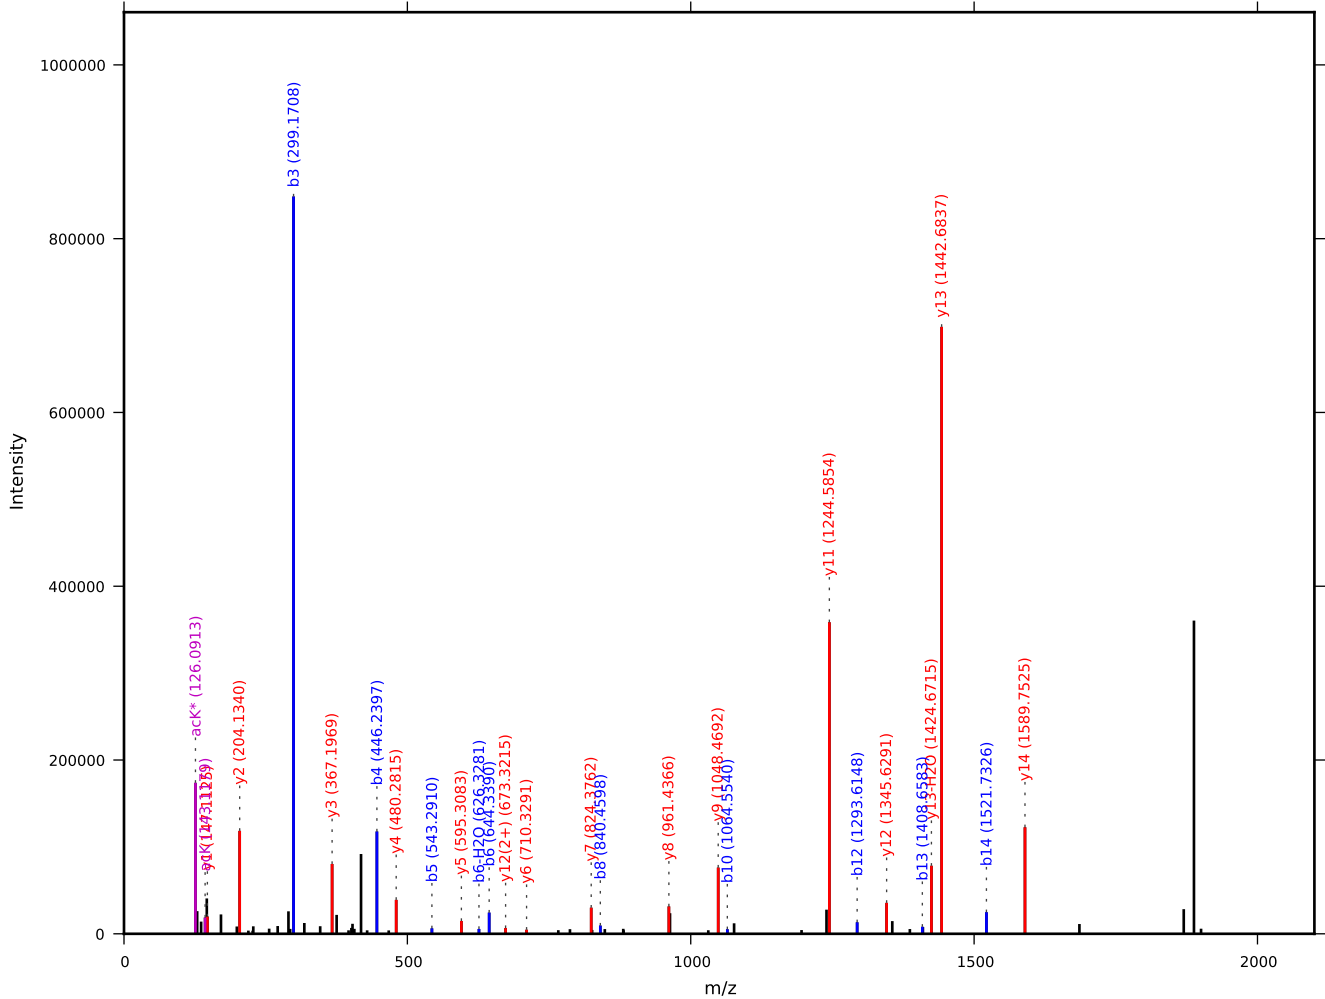



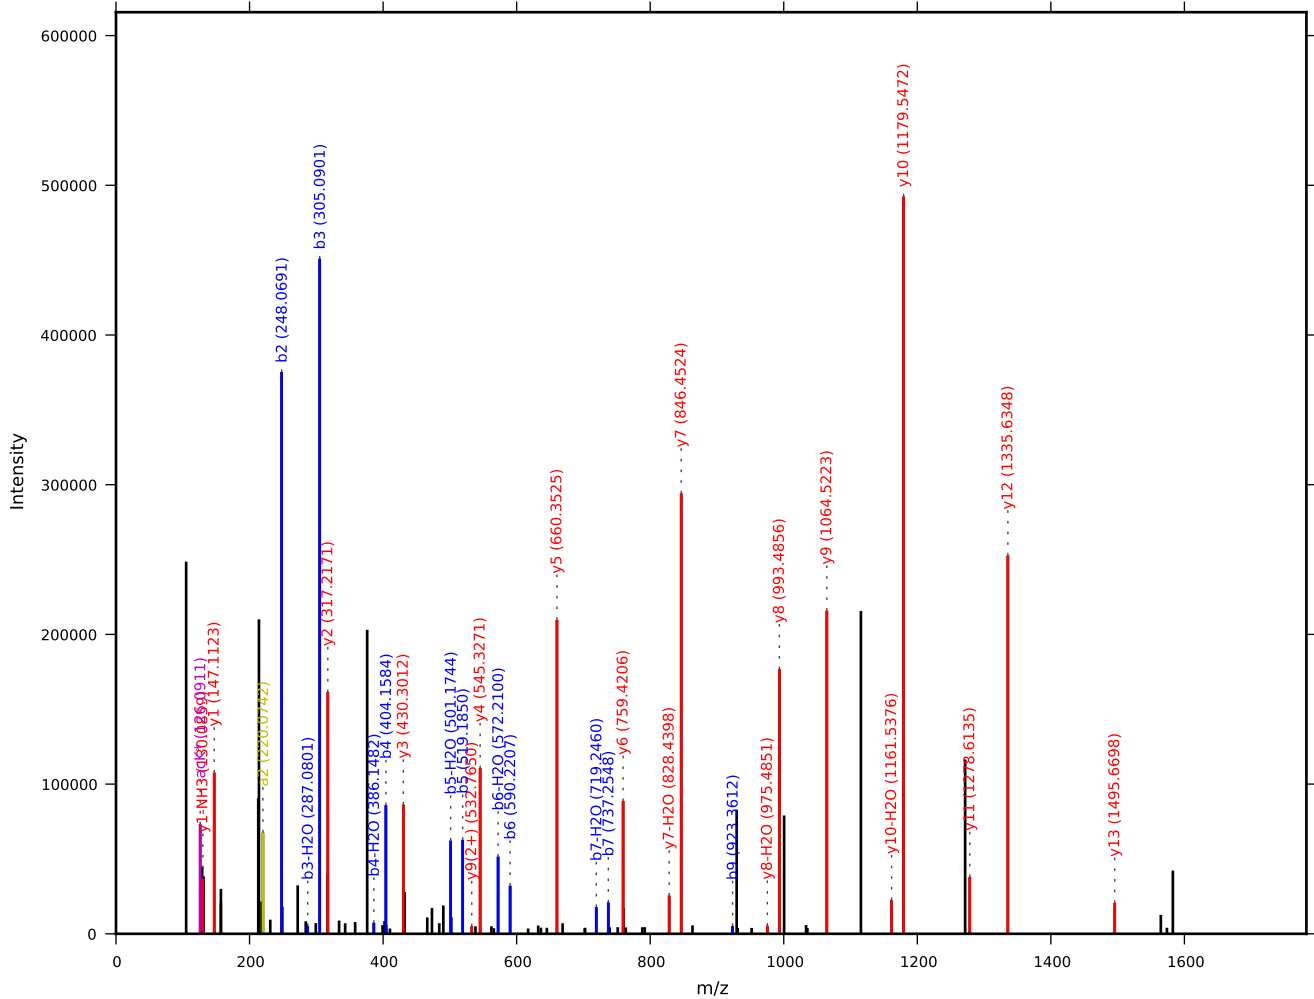

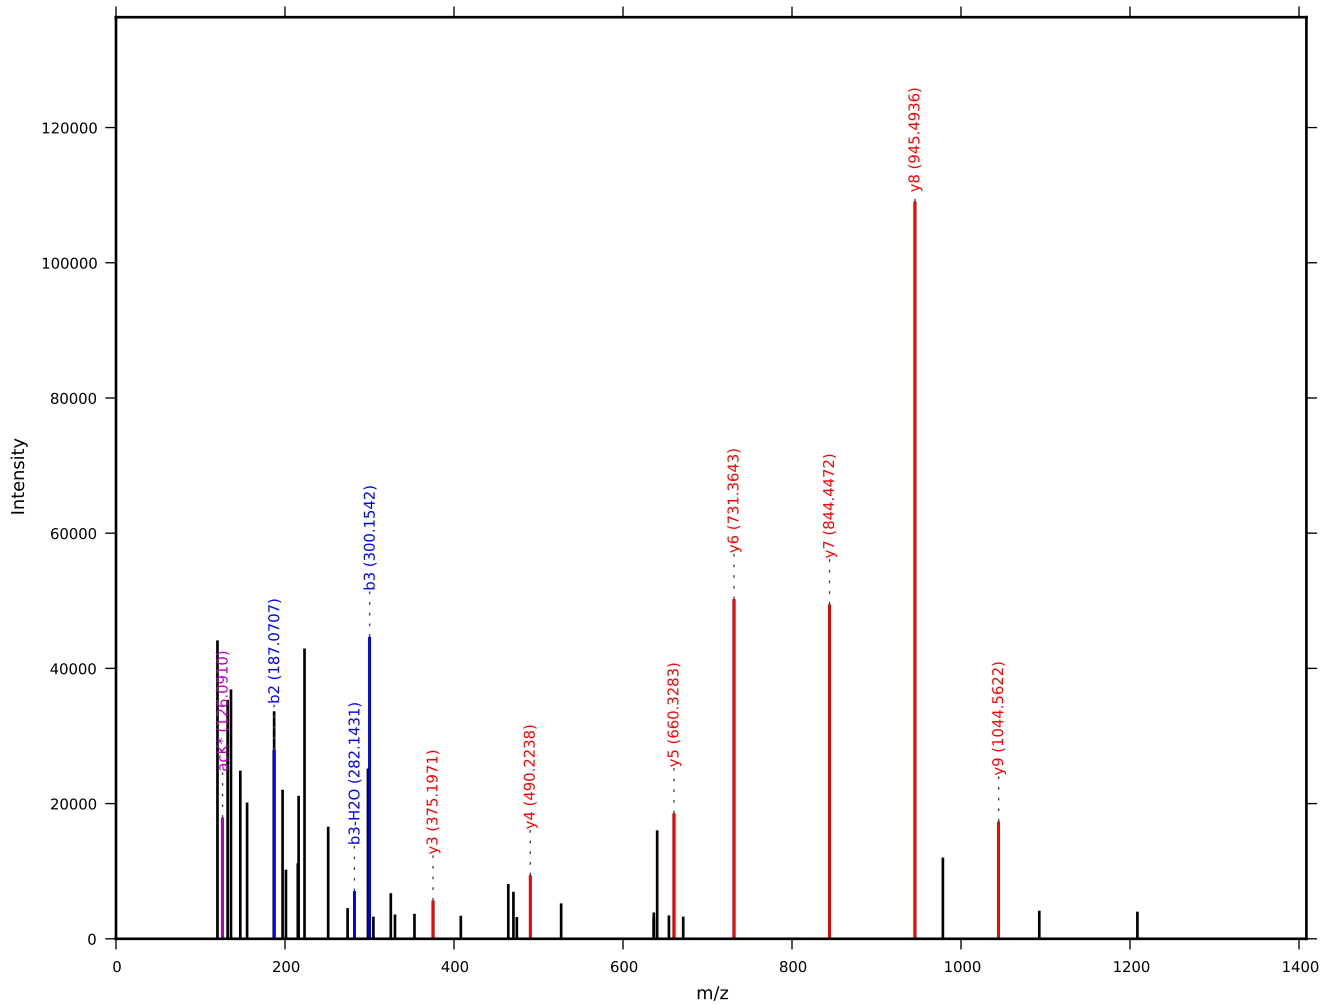

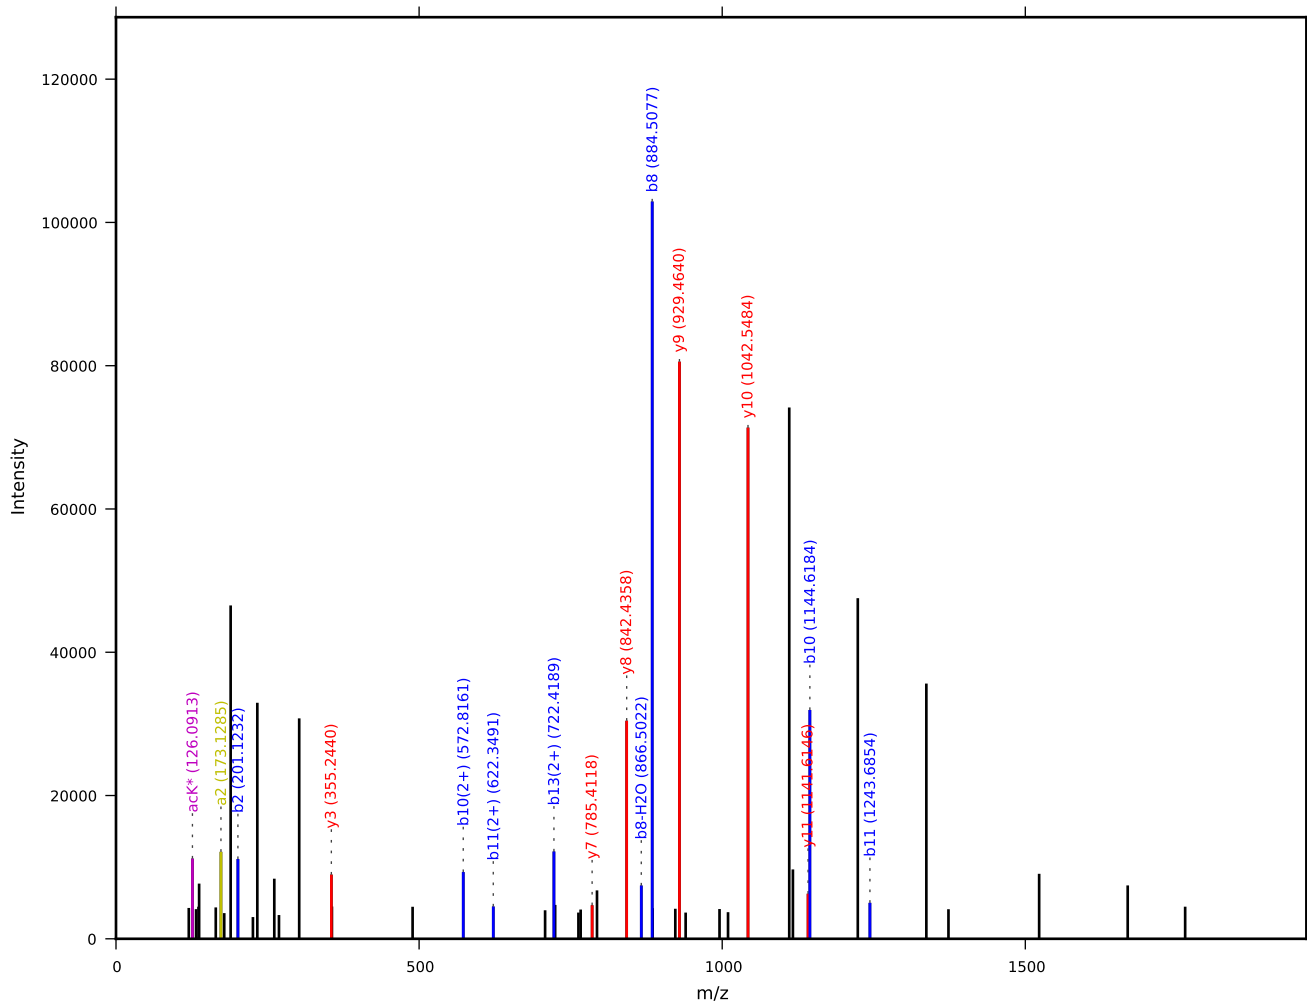

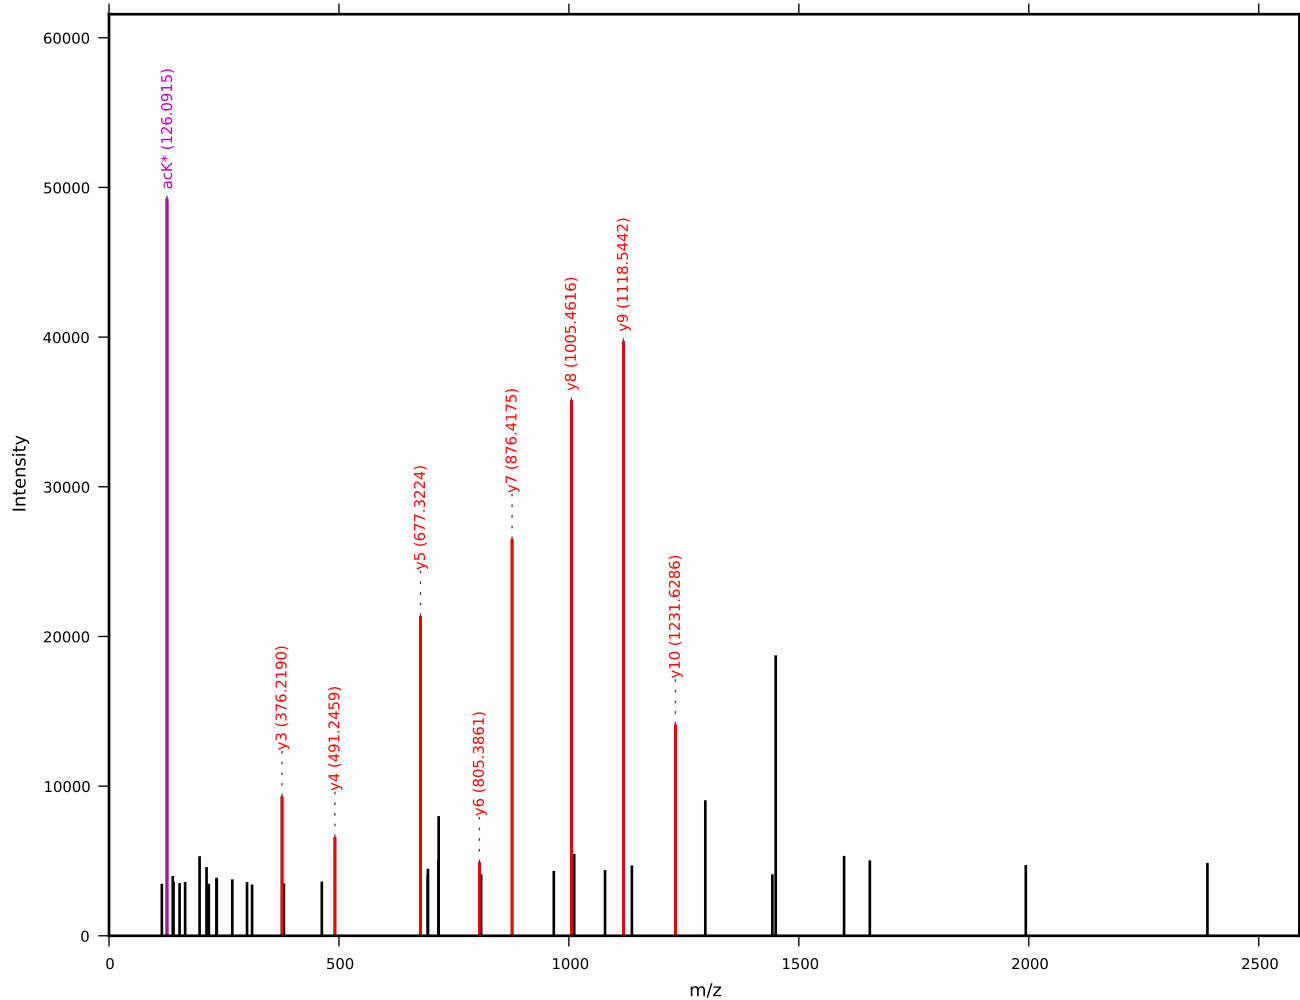

Mass: 1372.7685 Charge: 3 m/z: 458.59679  
Modified Peptide: \_NLK(ac)HIDVTFTK\_ Score: 38.402 PEP: 0.0046773

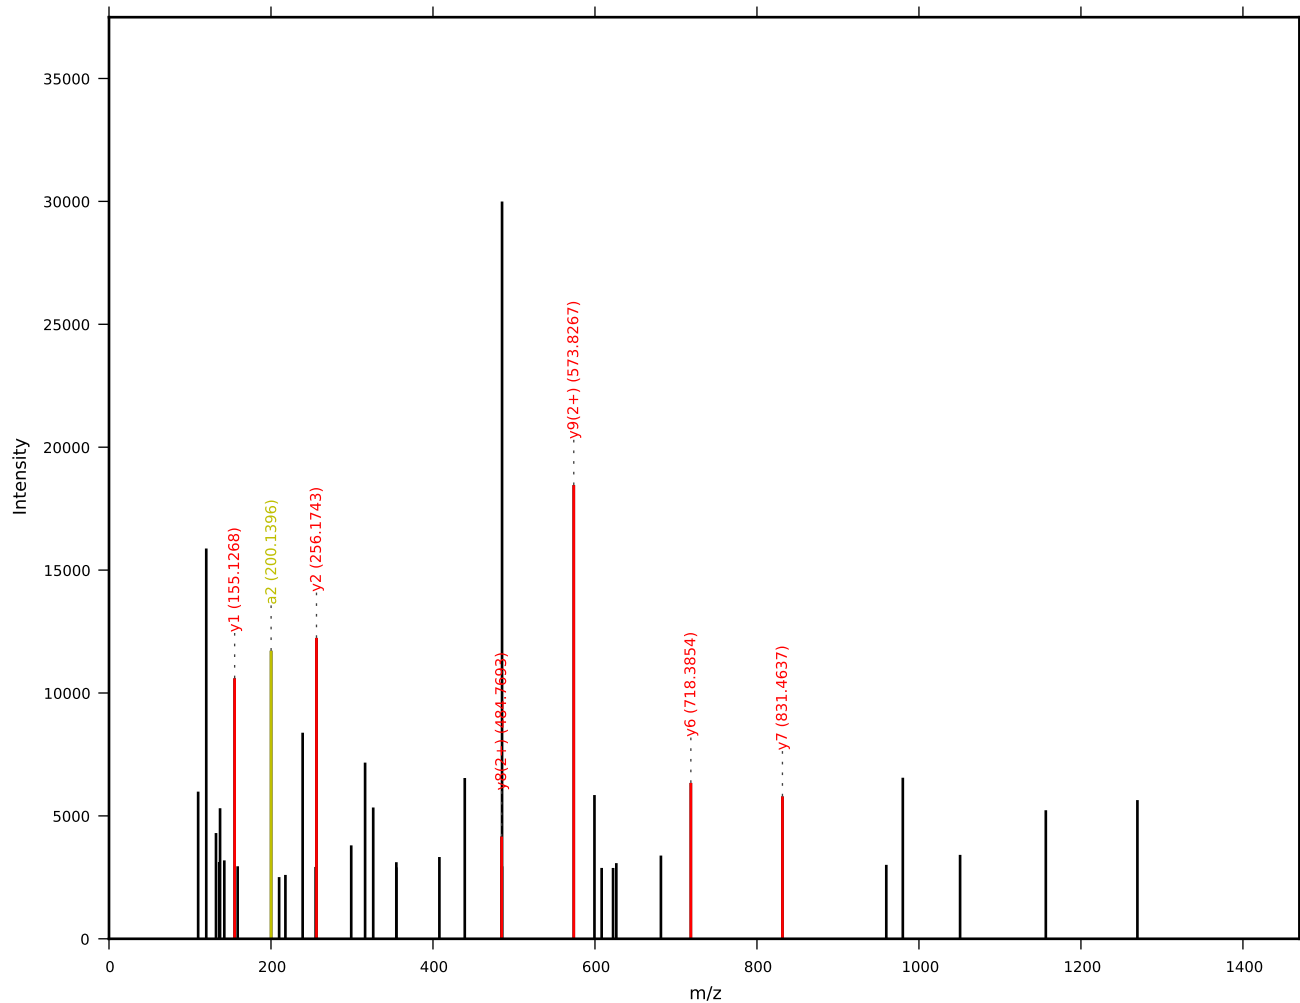

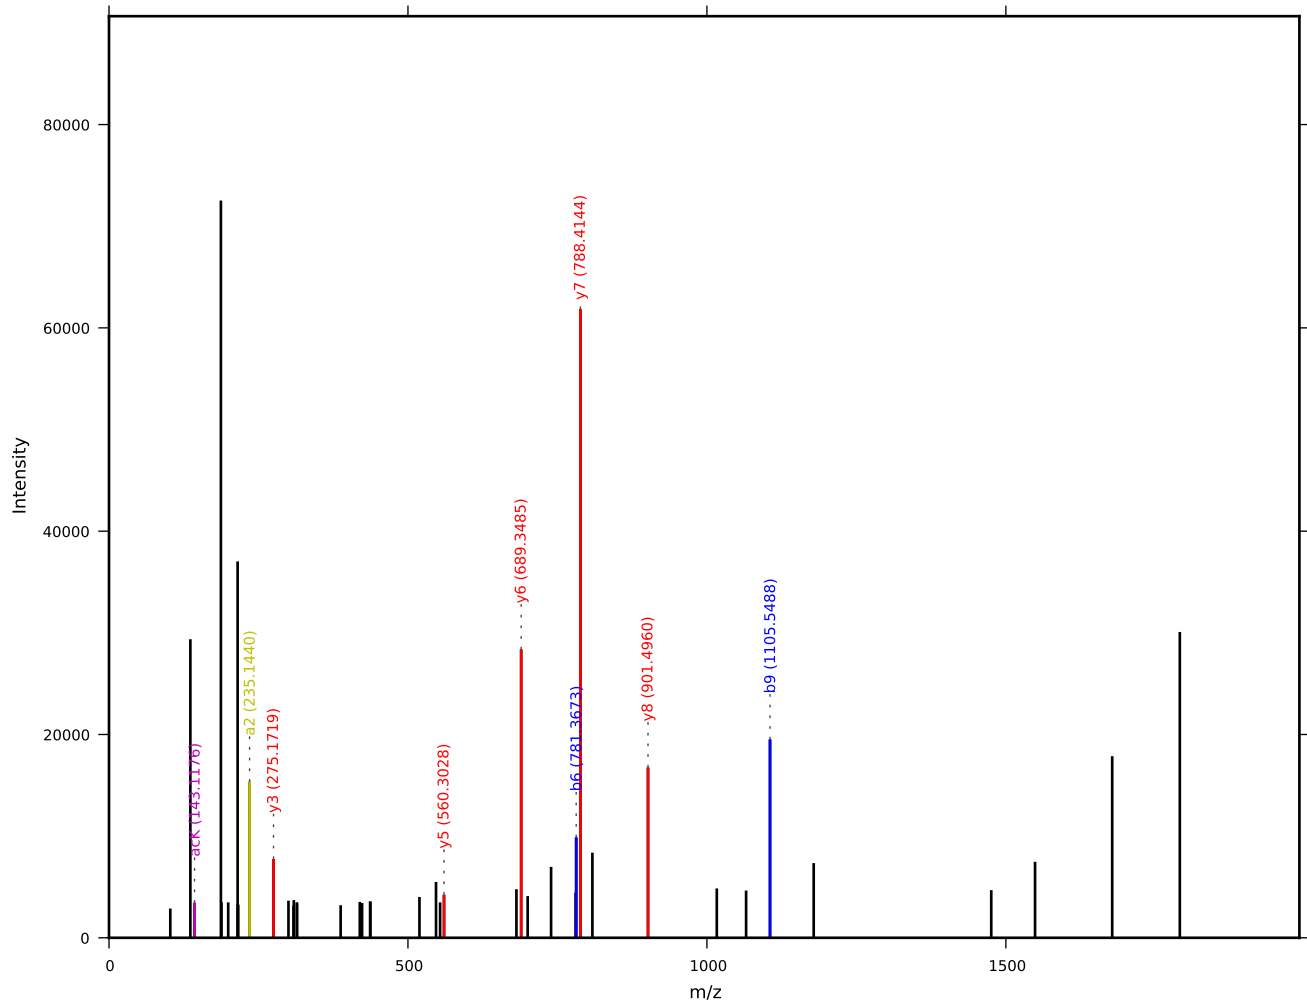

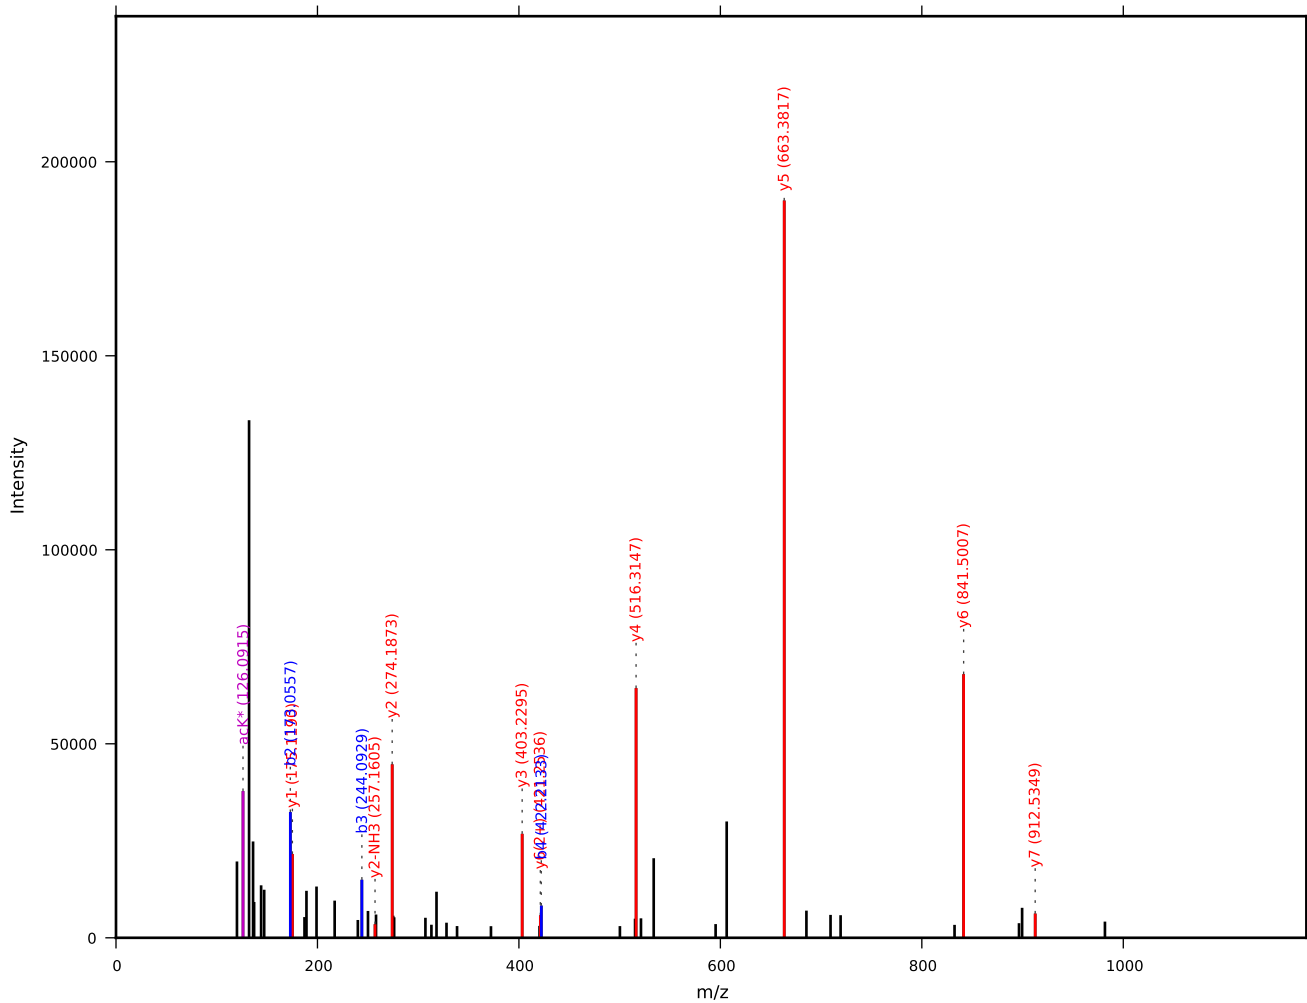

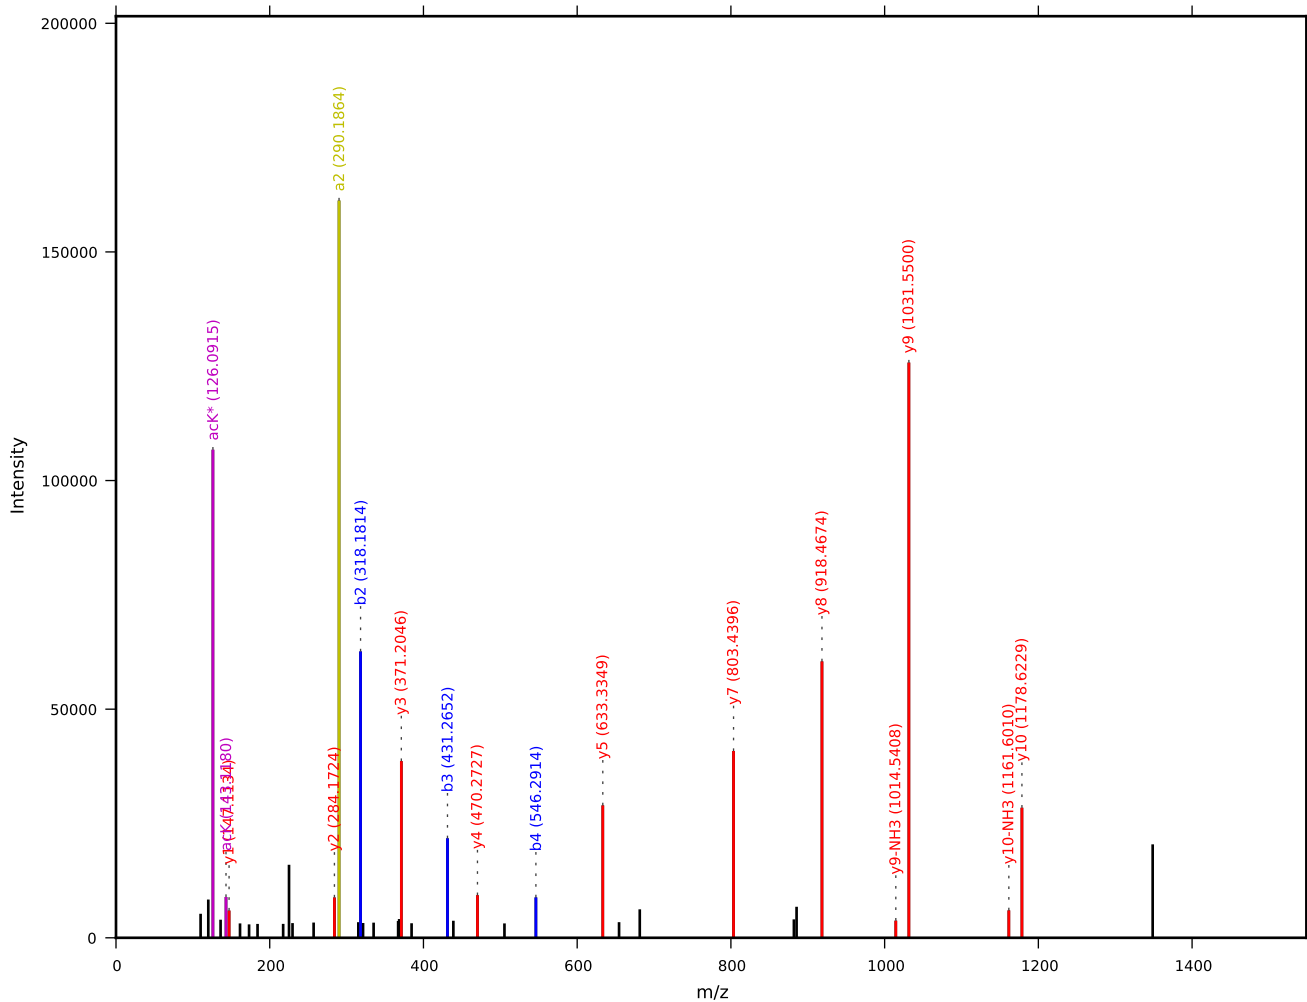



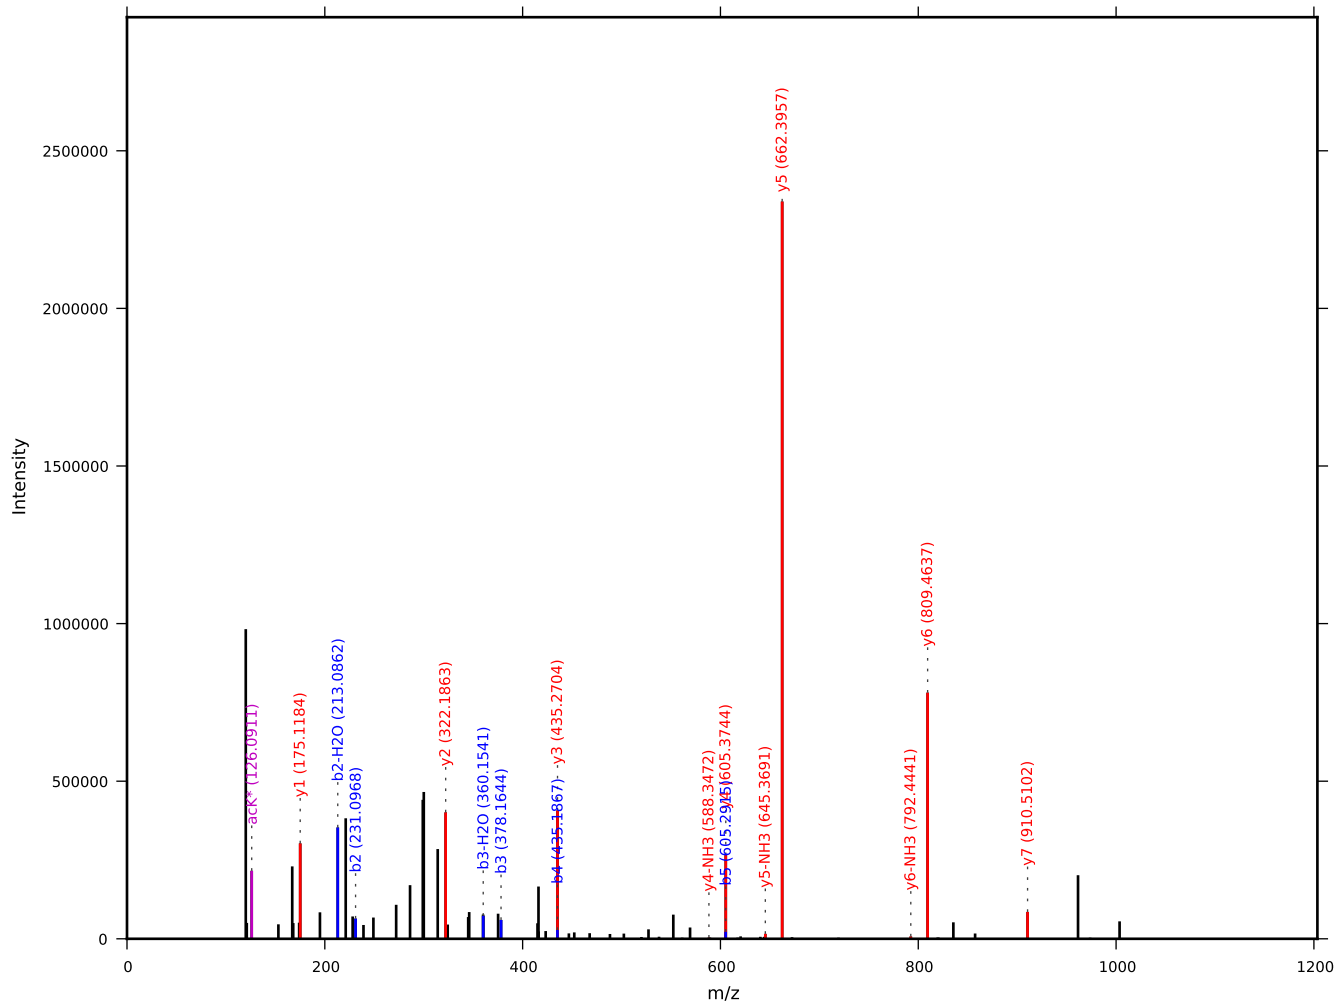

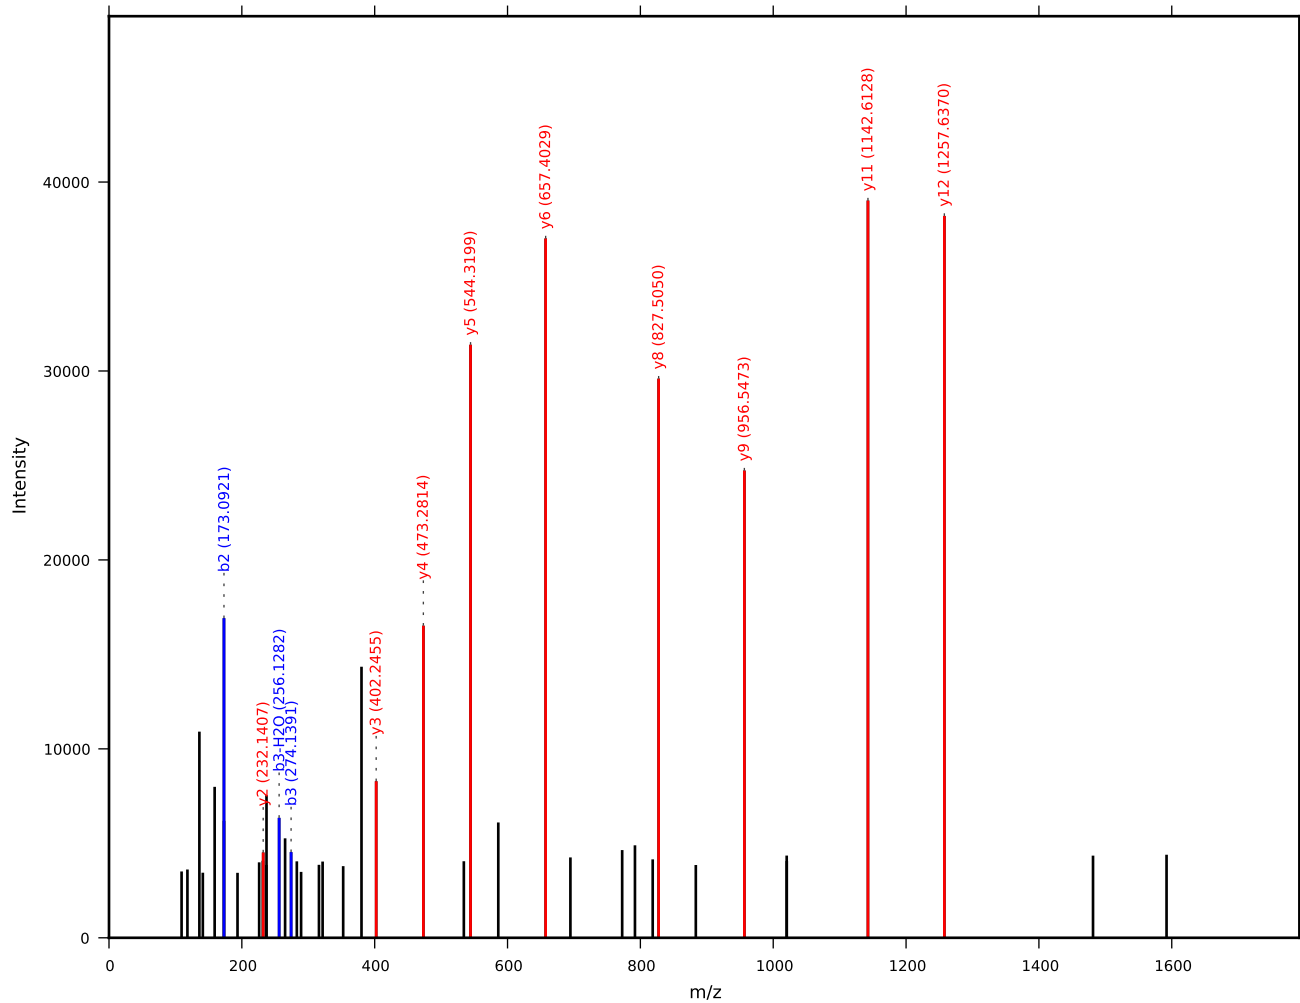

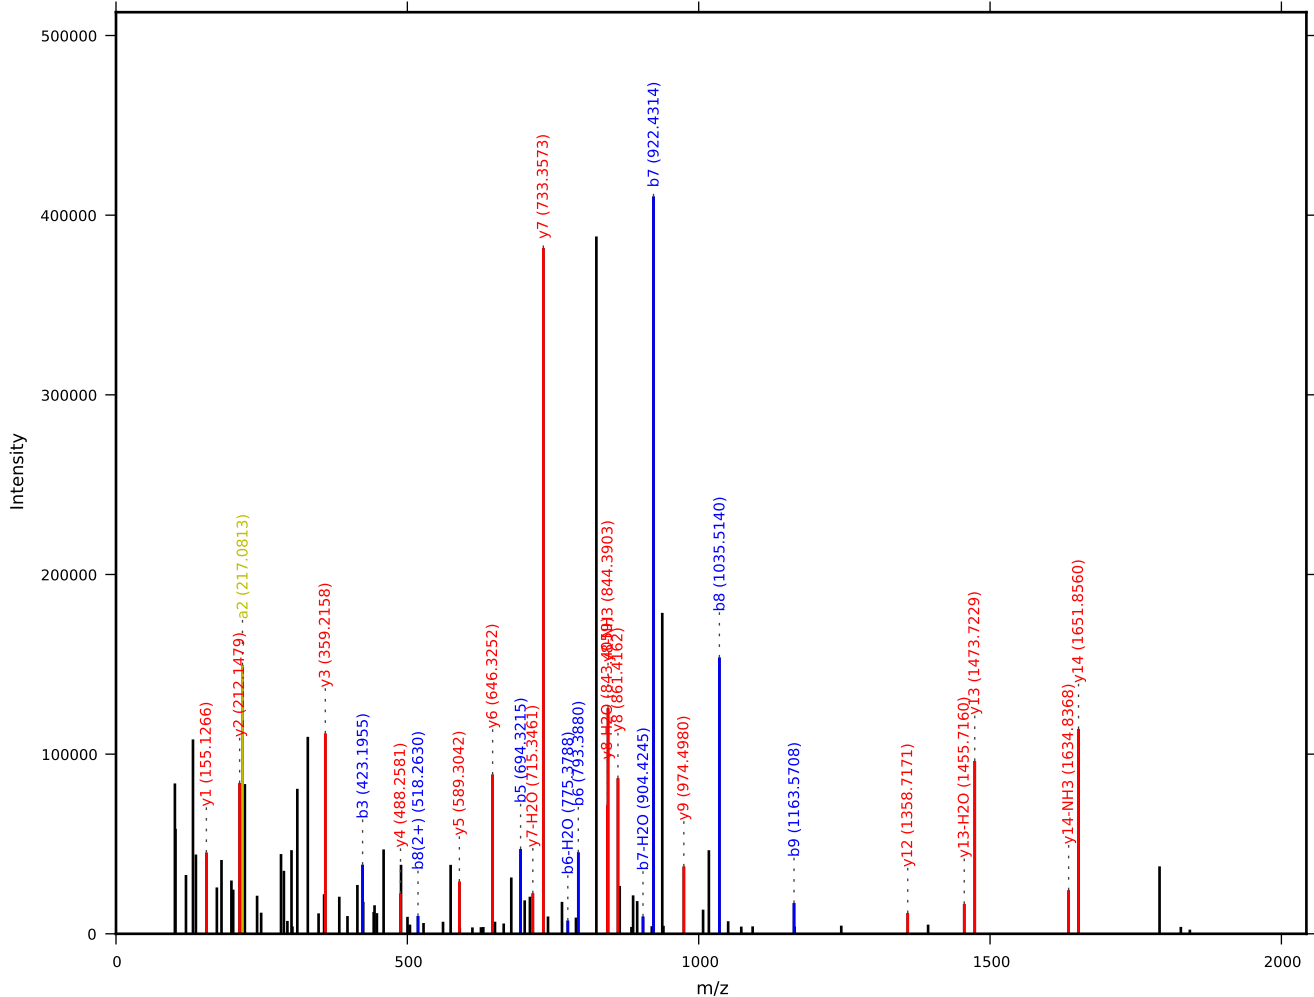

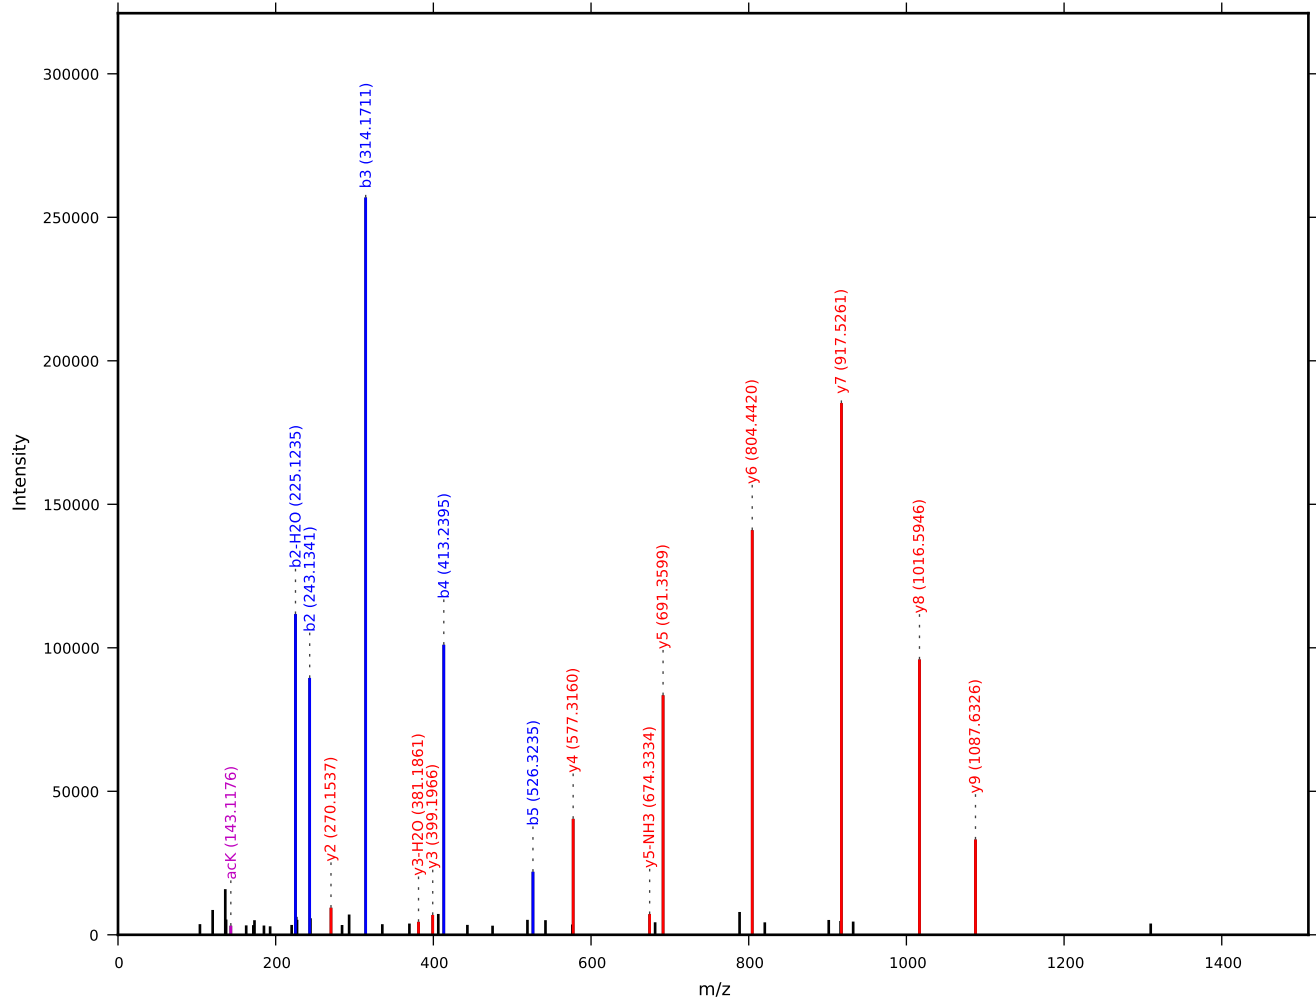

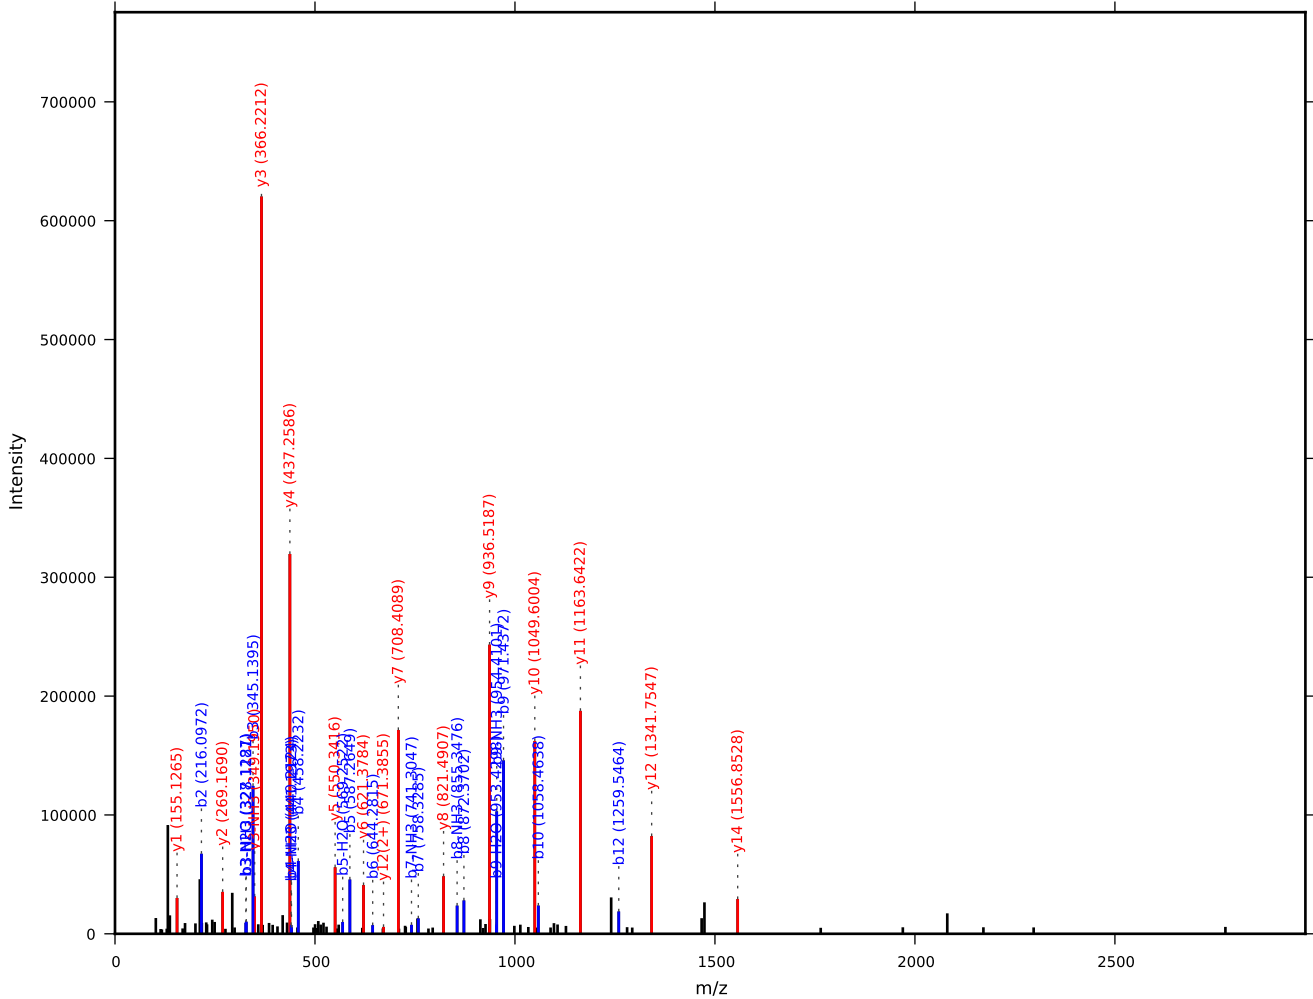

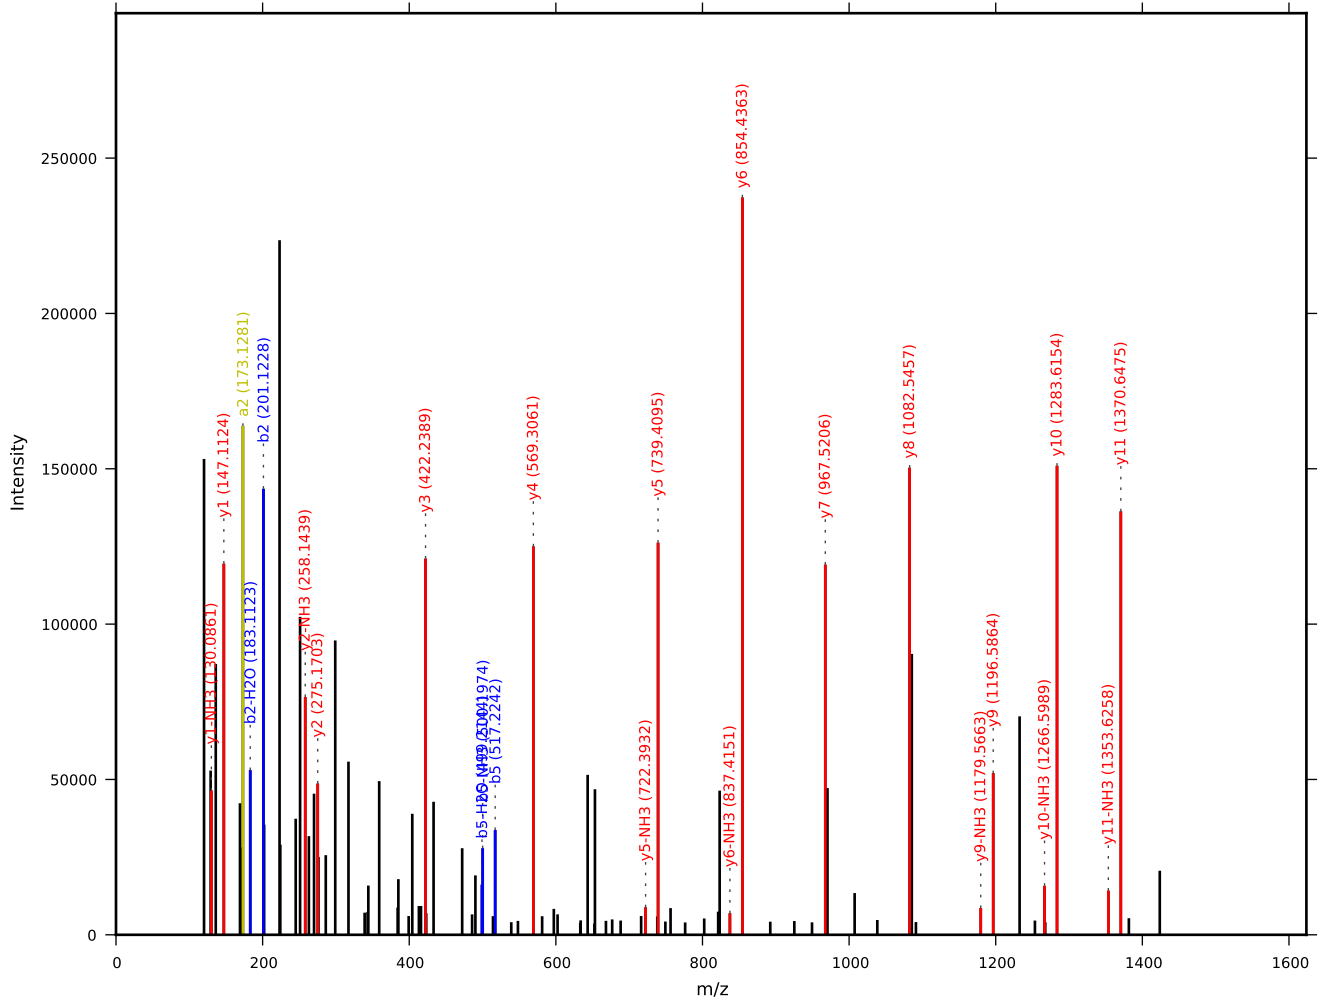

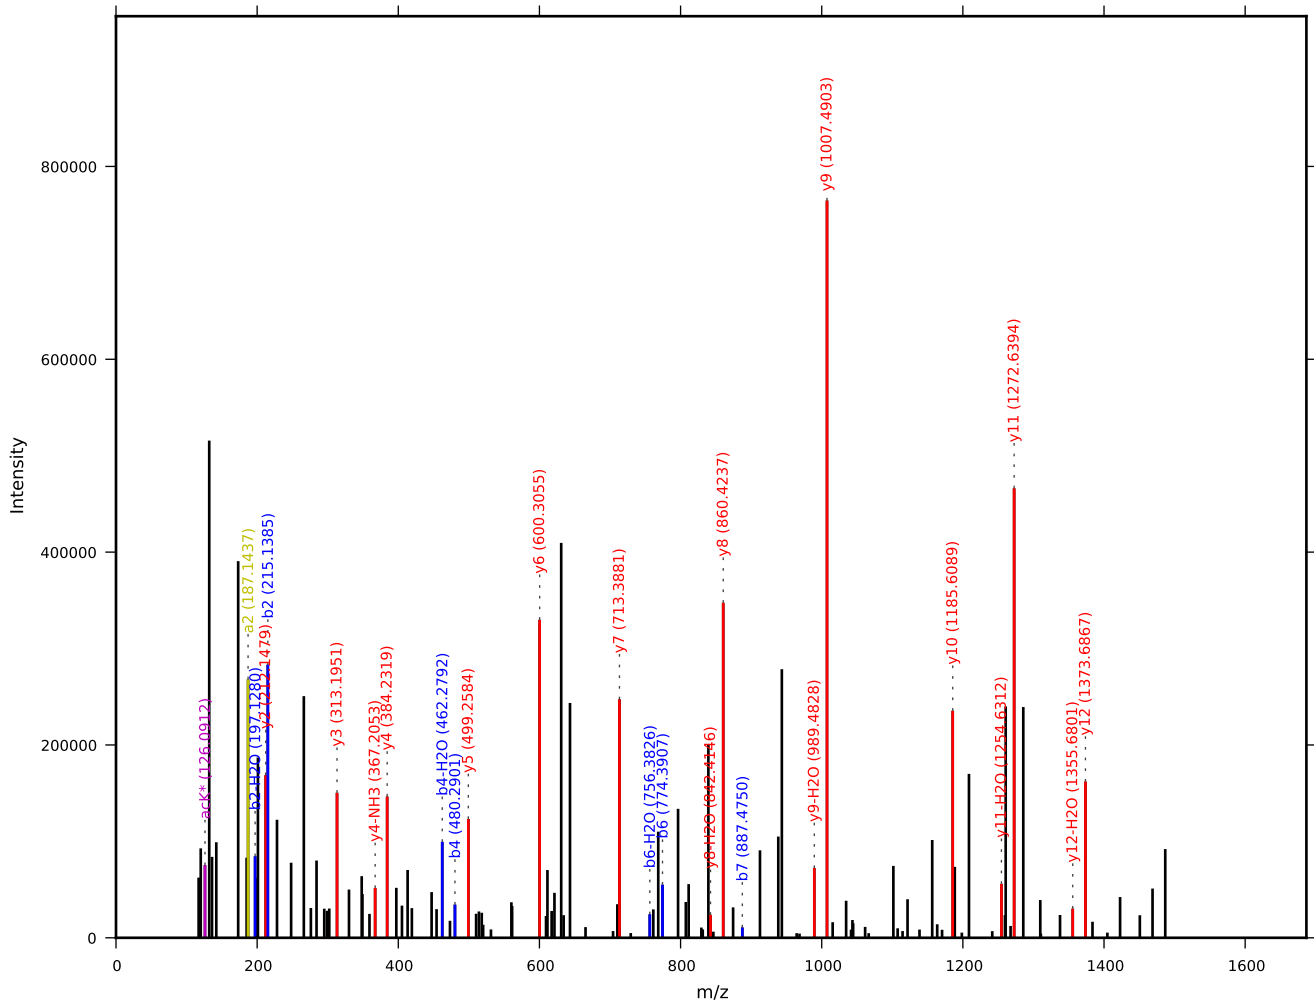

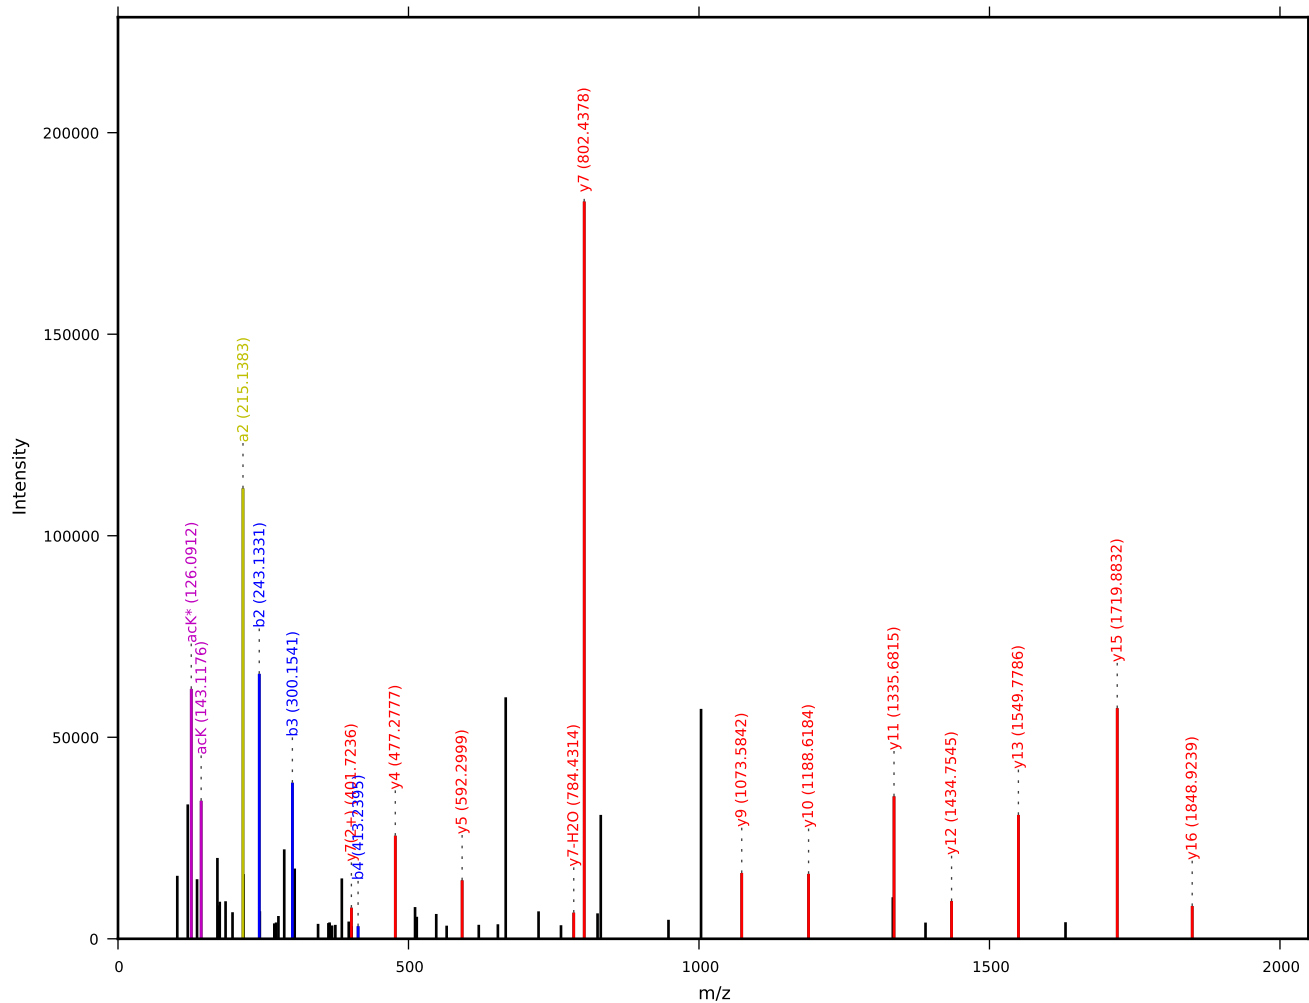



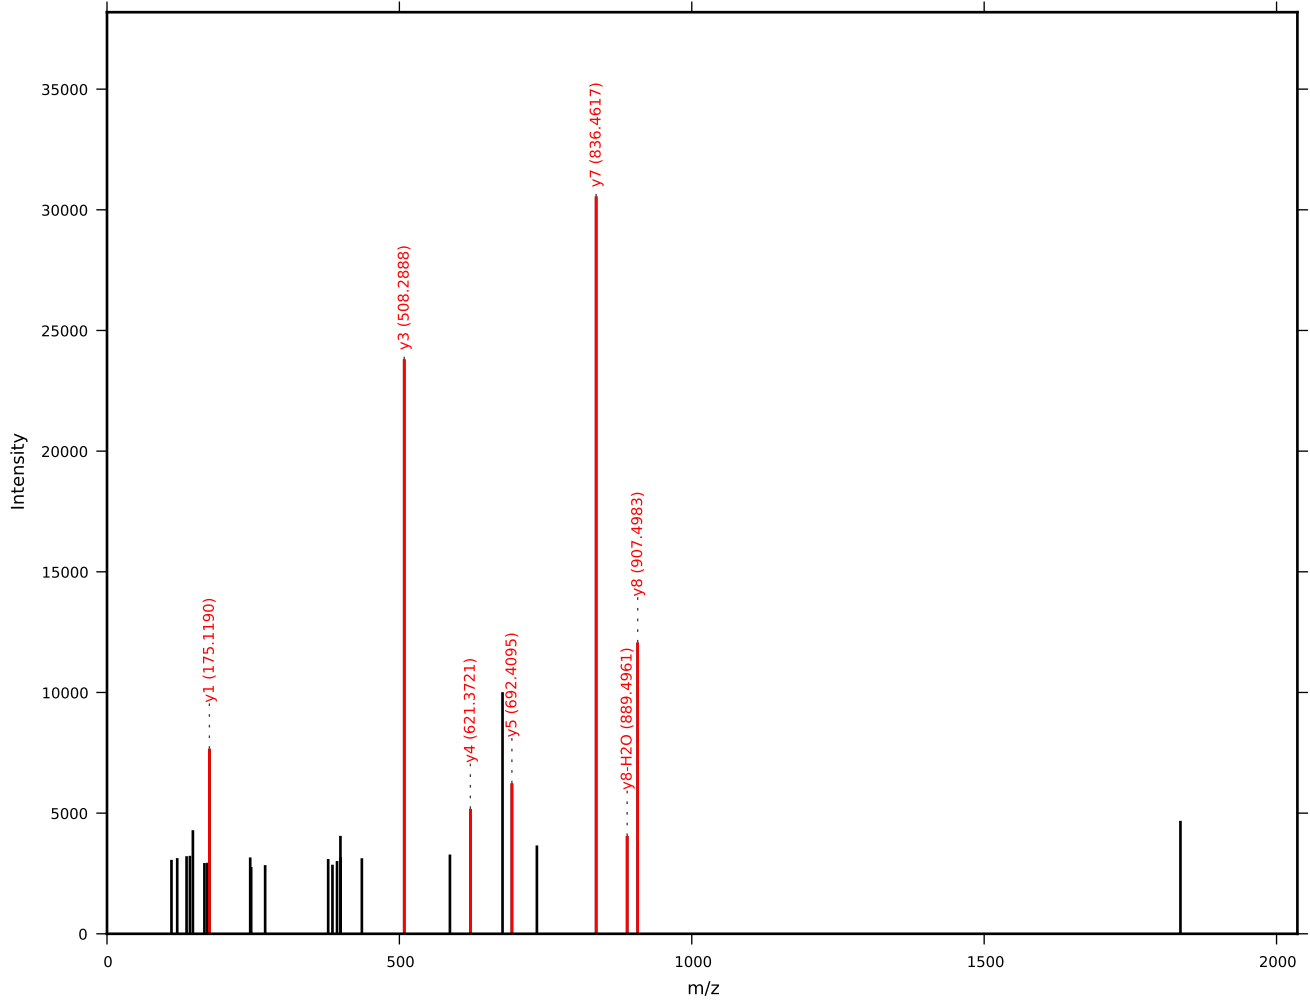

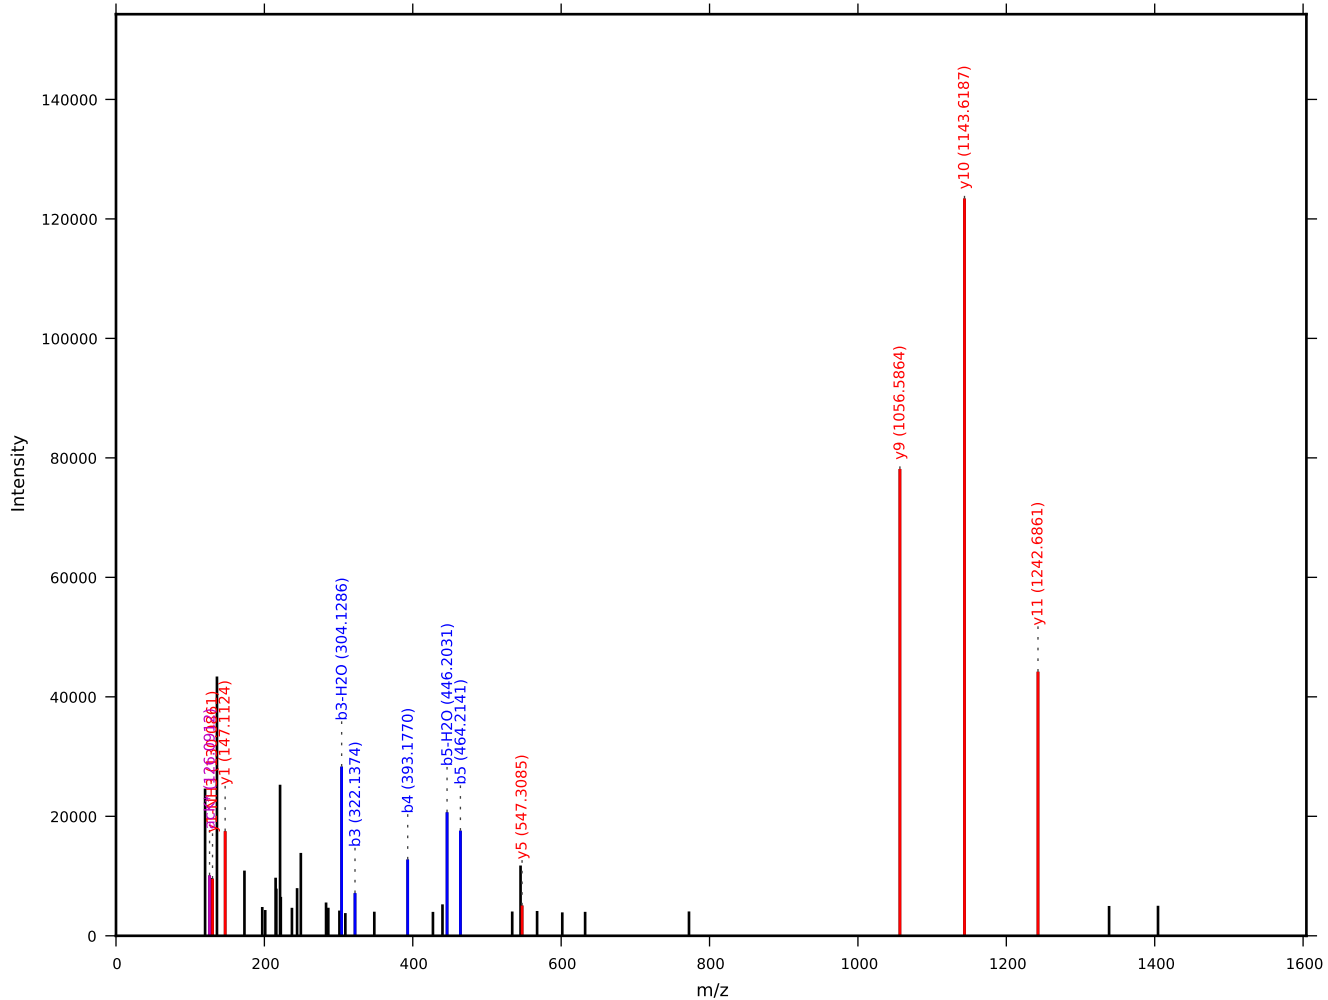

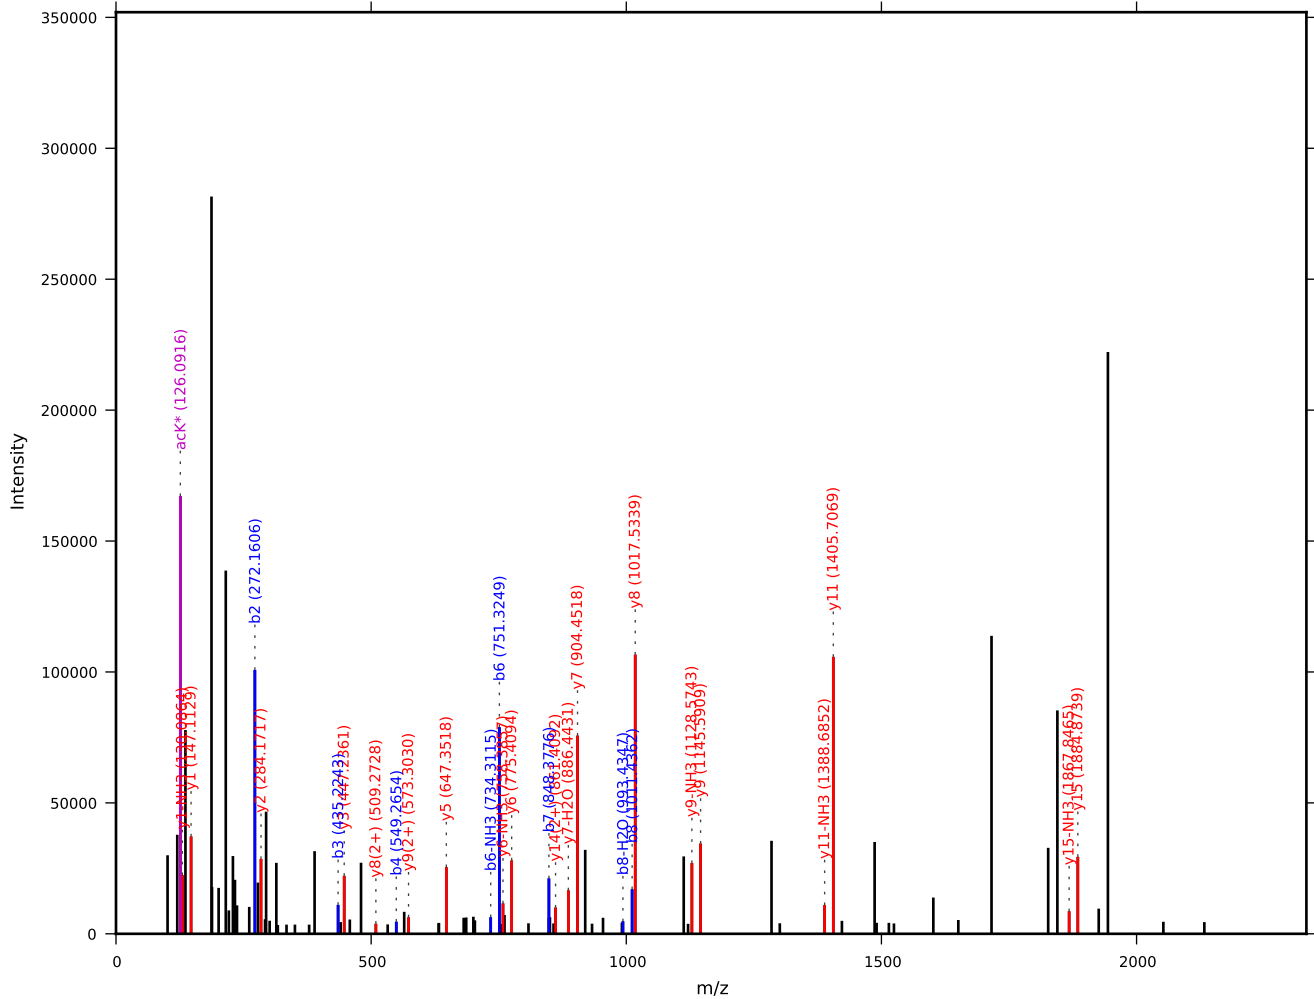

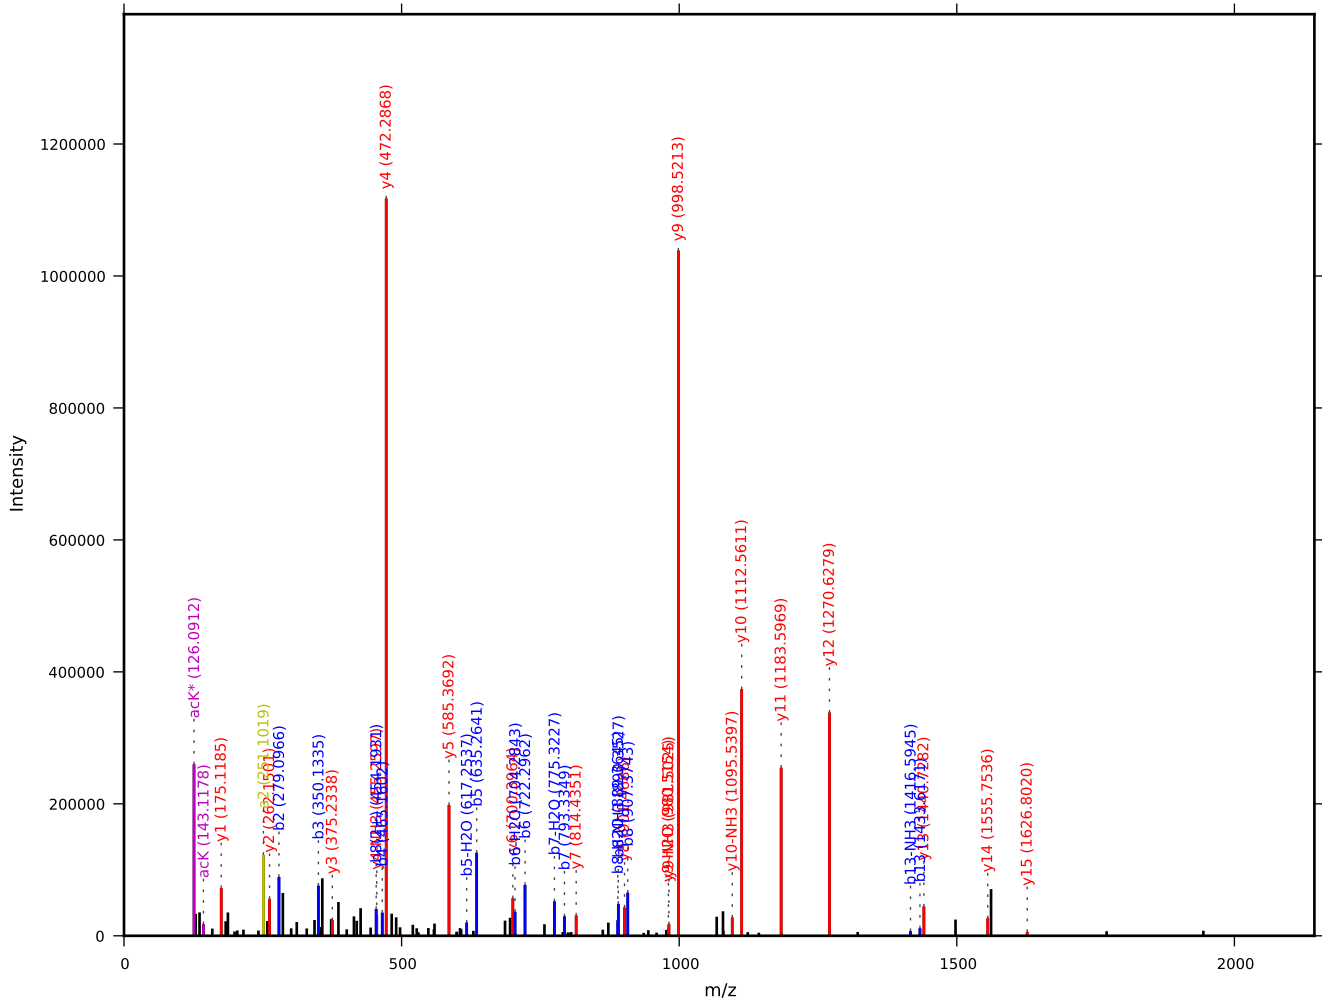

Mass: 1148.6565 Charge: 2 m/z: 575.33552  
Modified Peptide: \_QLFEK(ac)WLK\_ Score: 59.8 PEP: 0.0021734

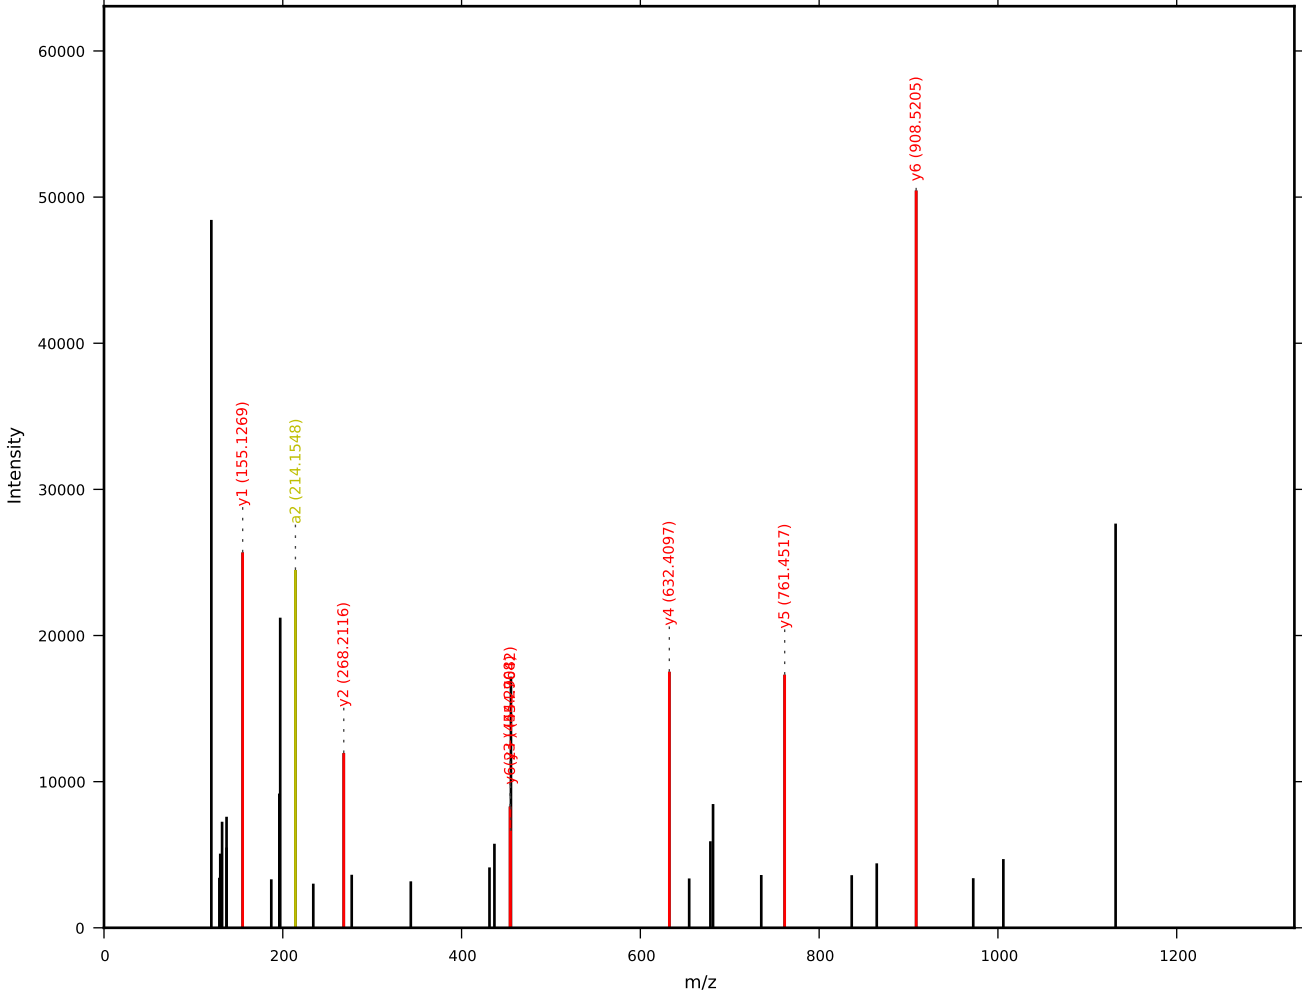

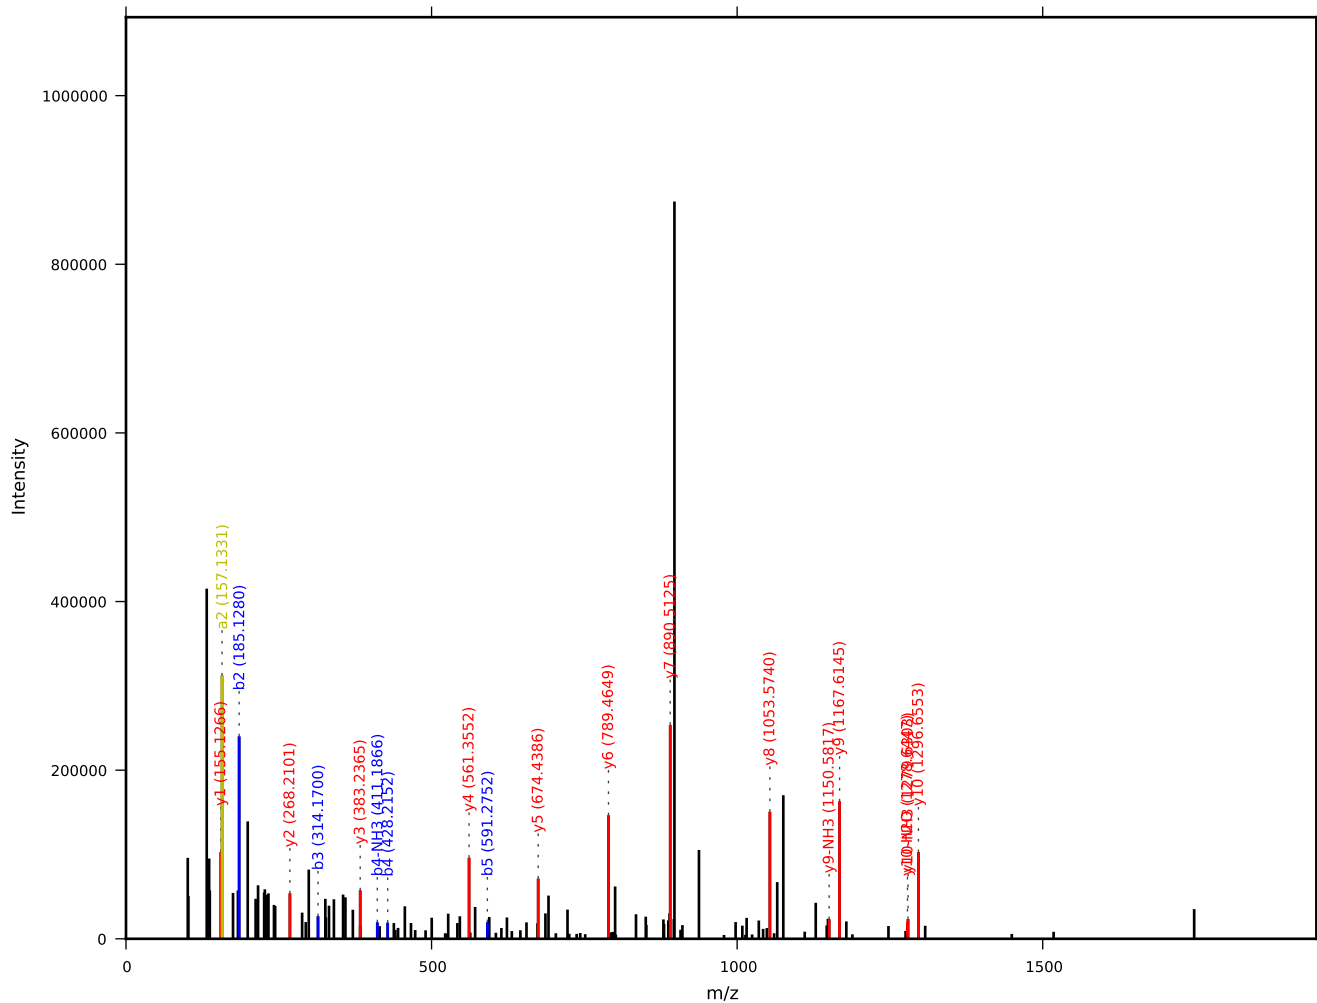

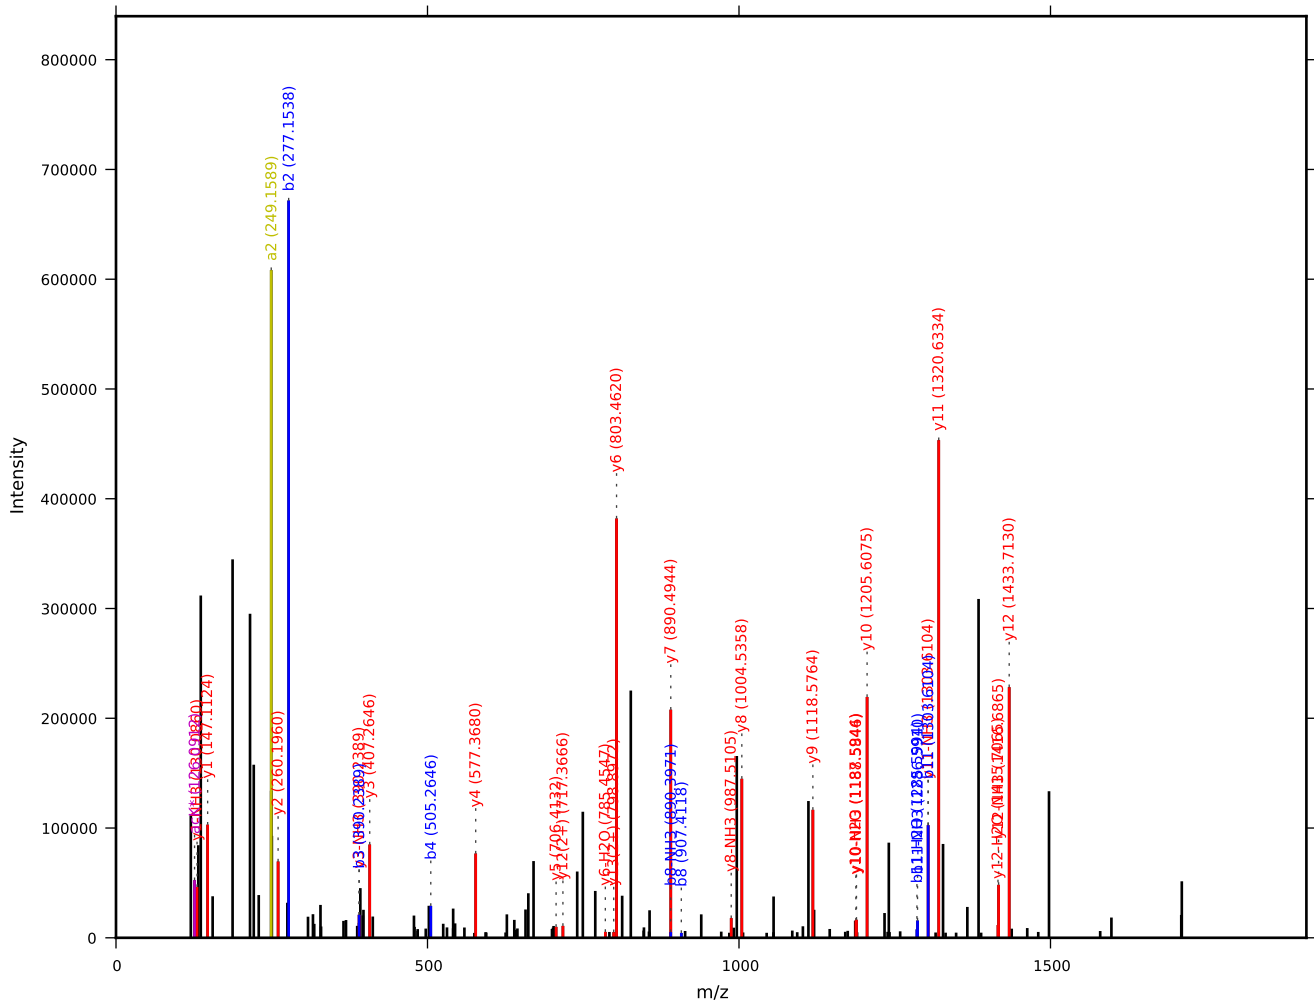

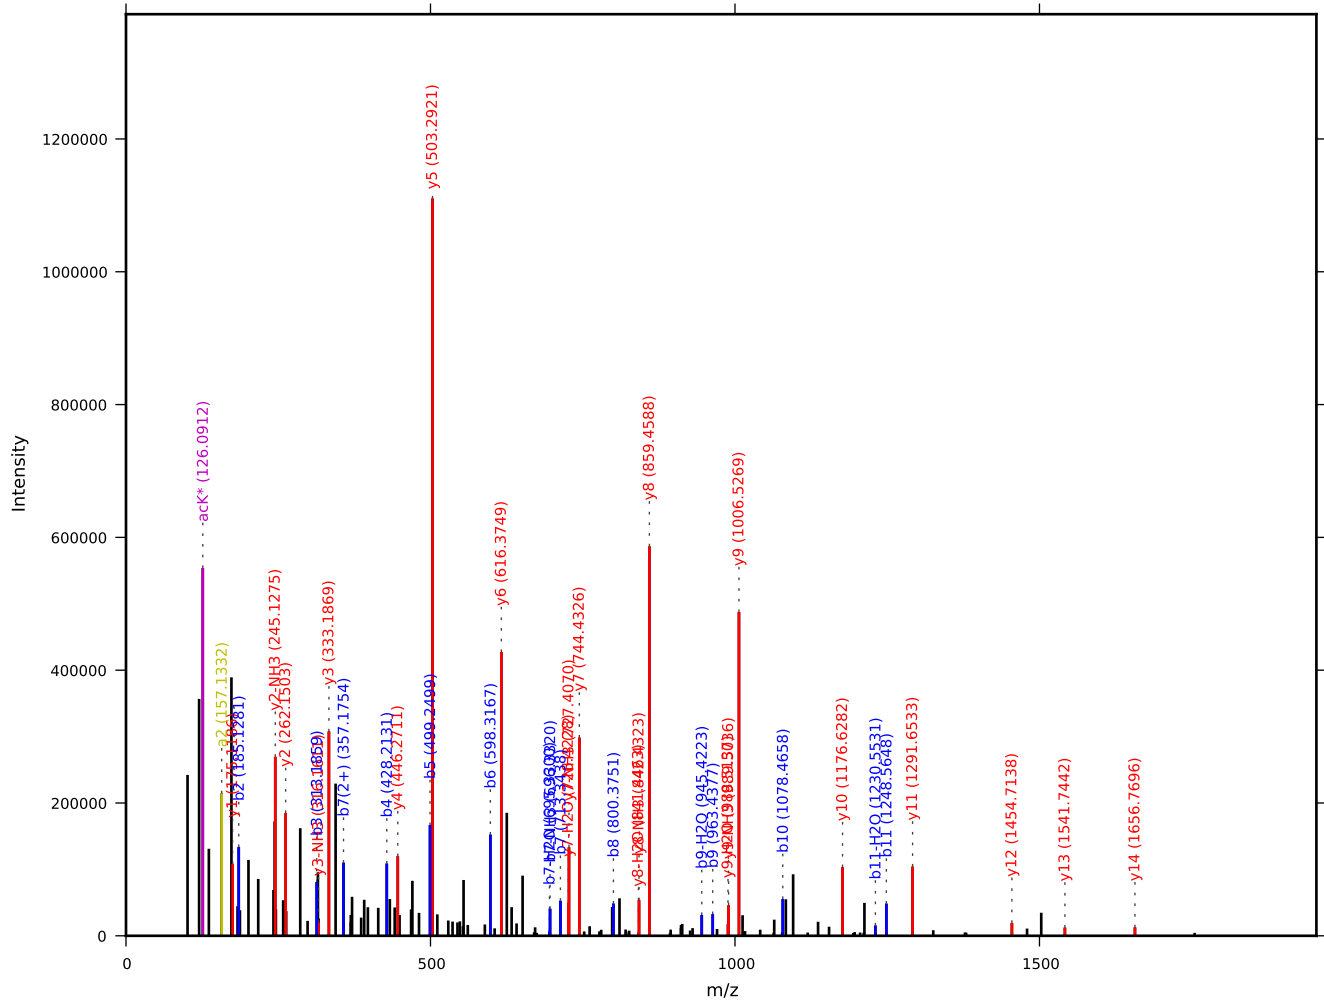



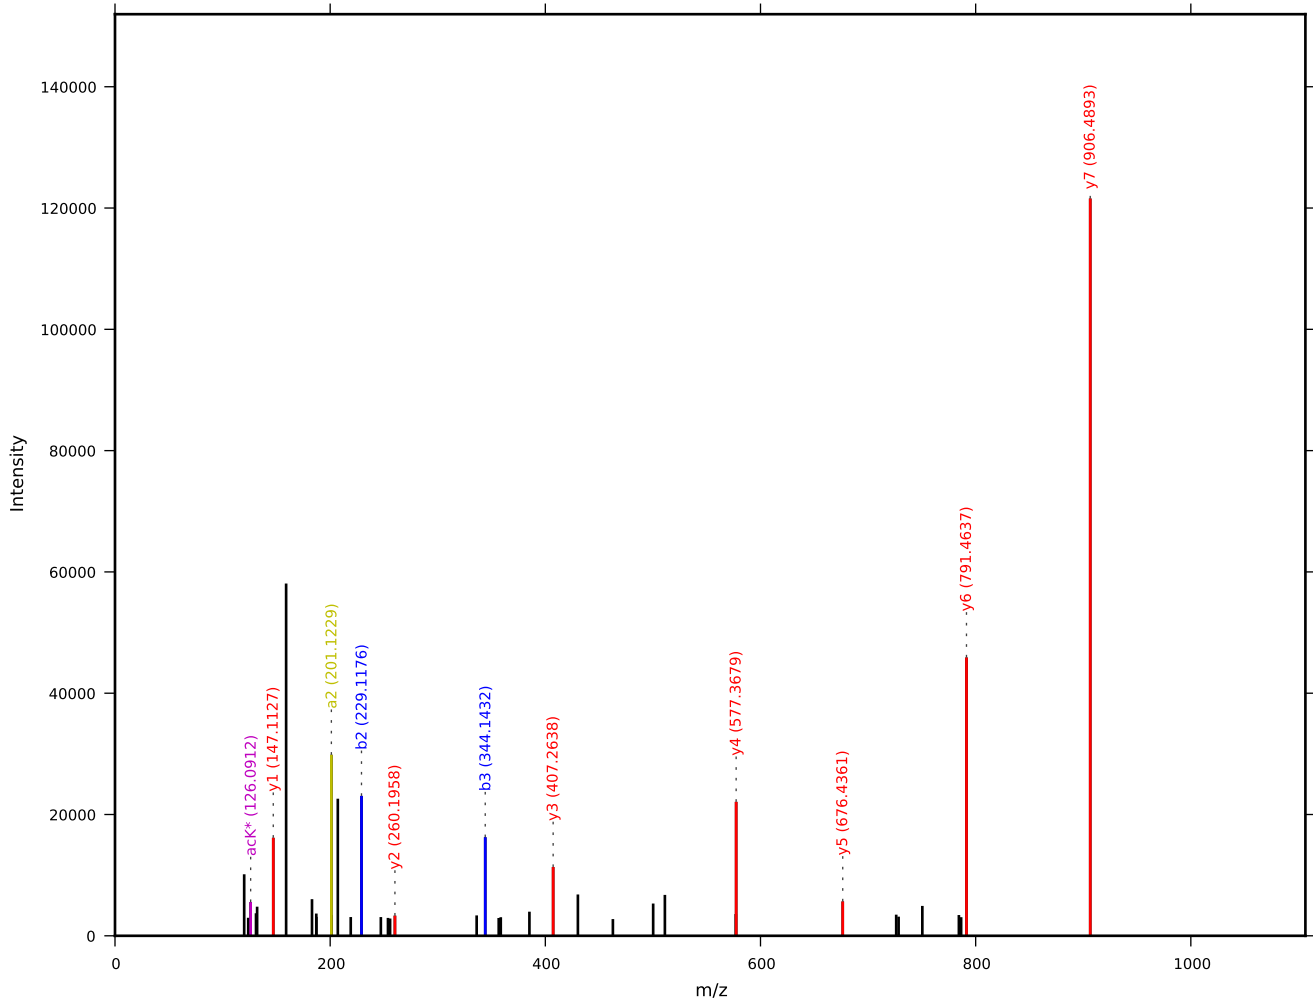

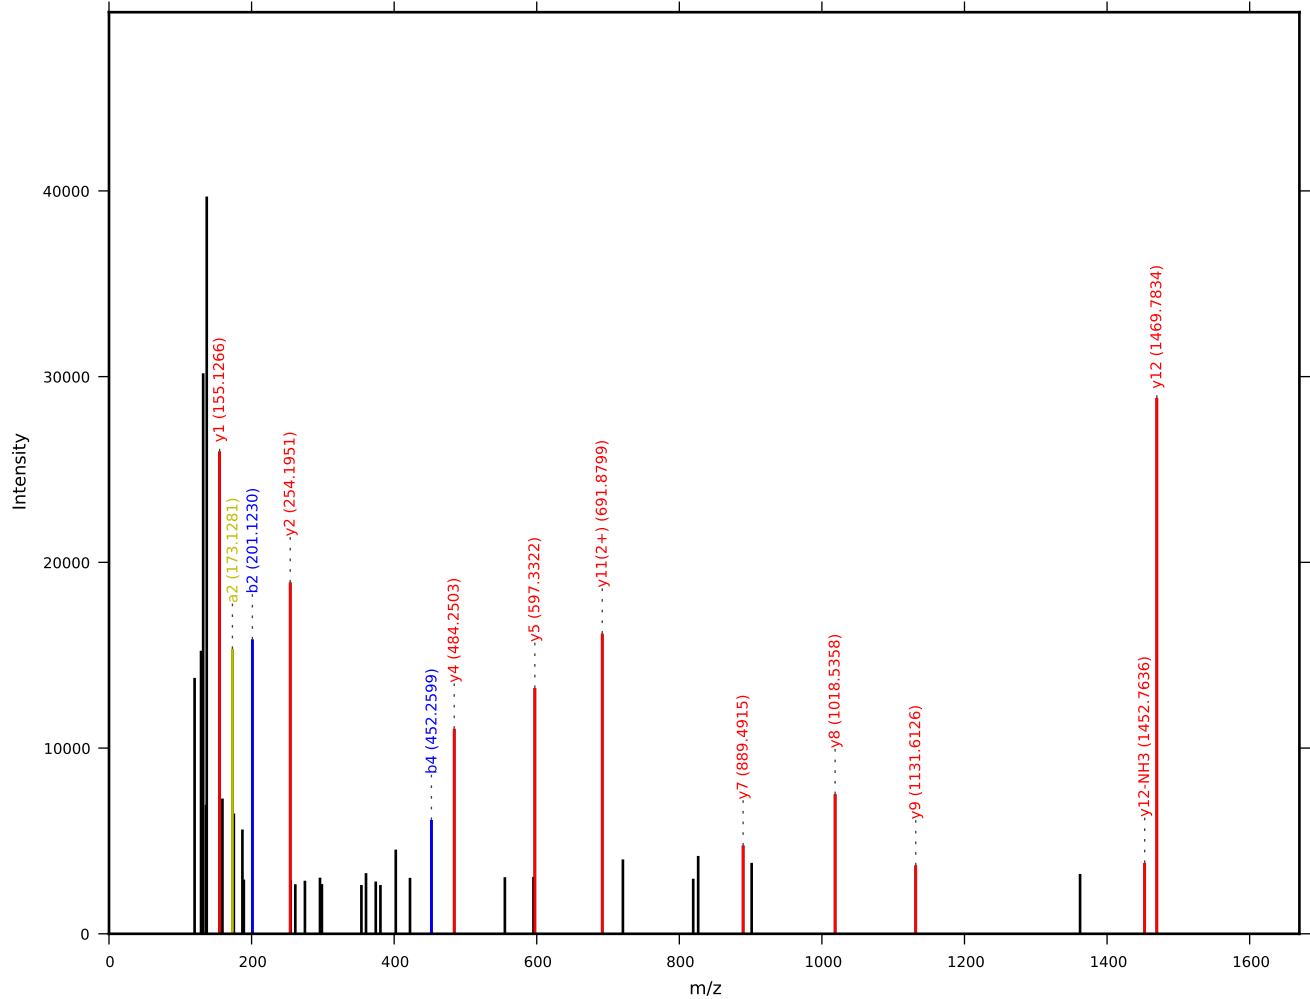

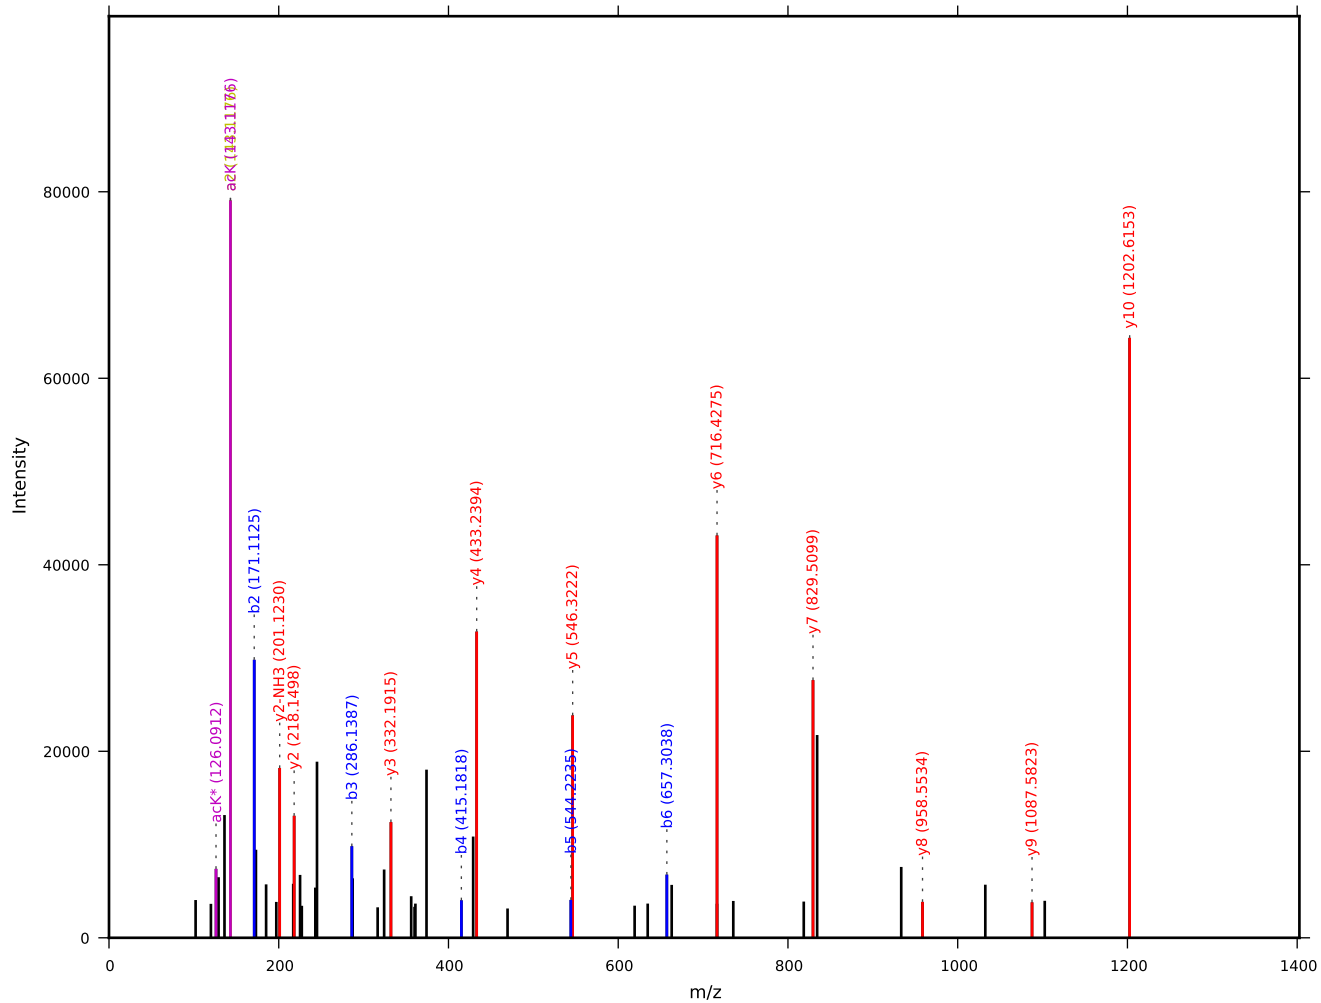

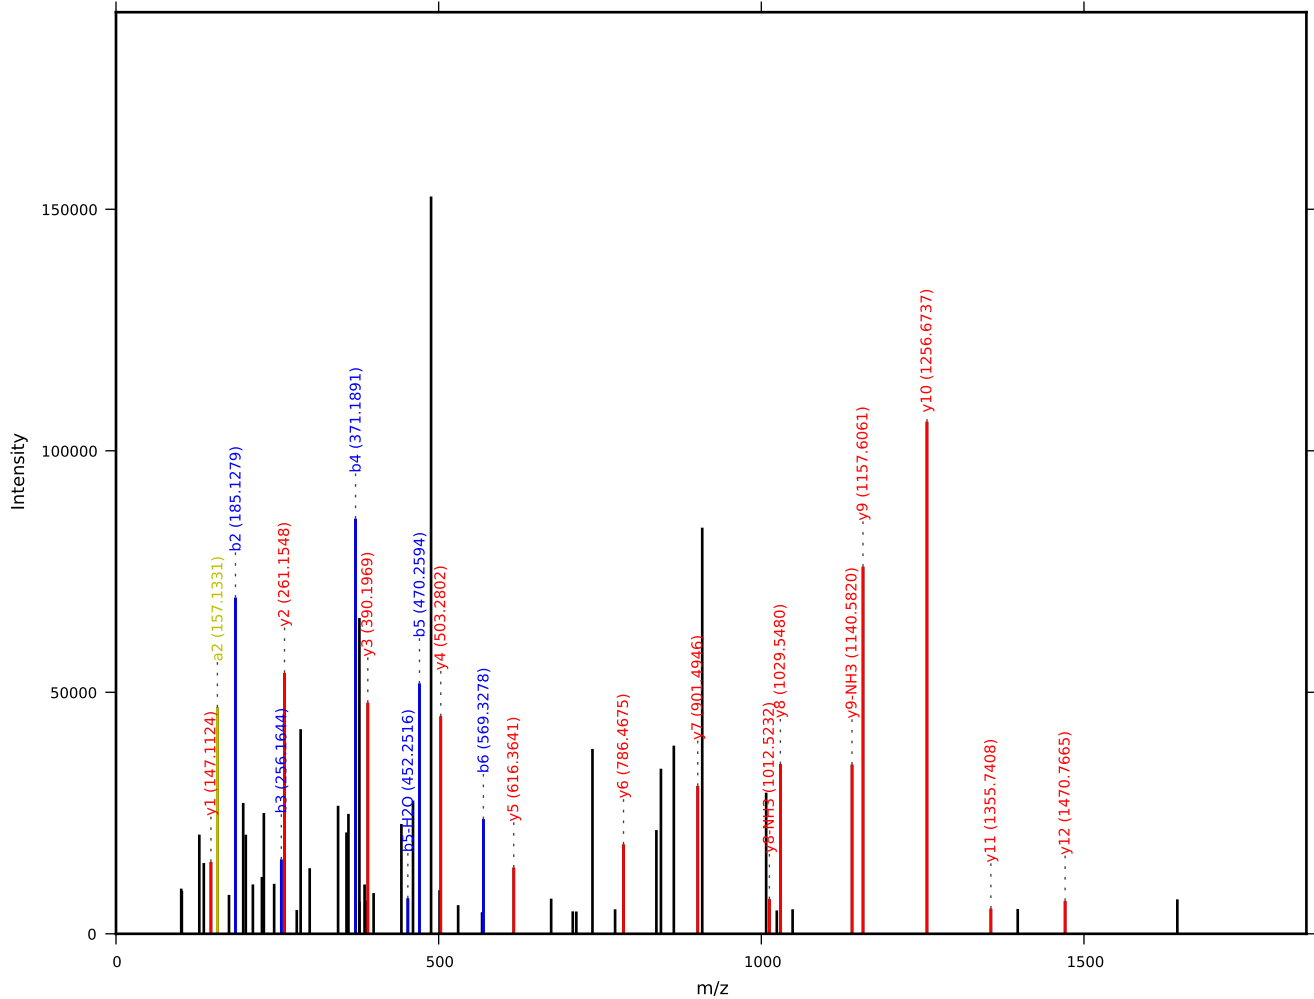

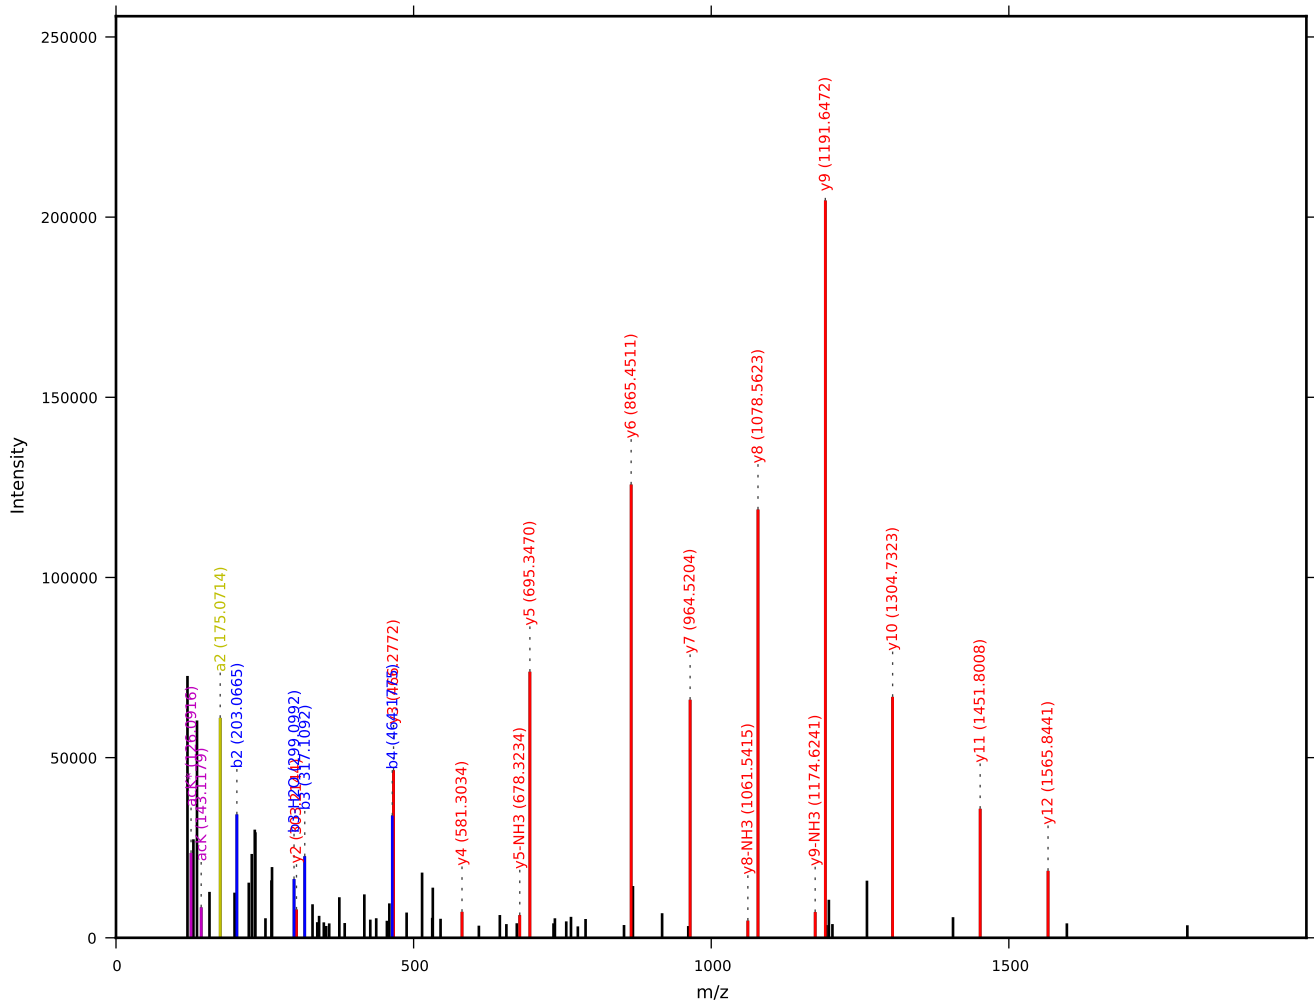

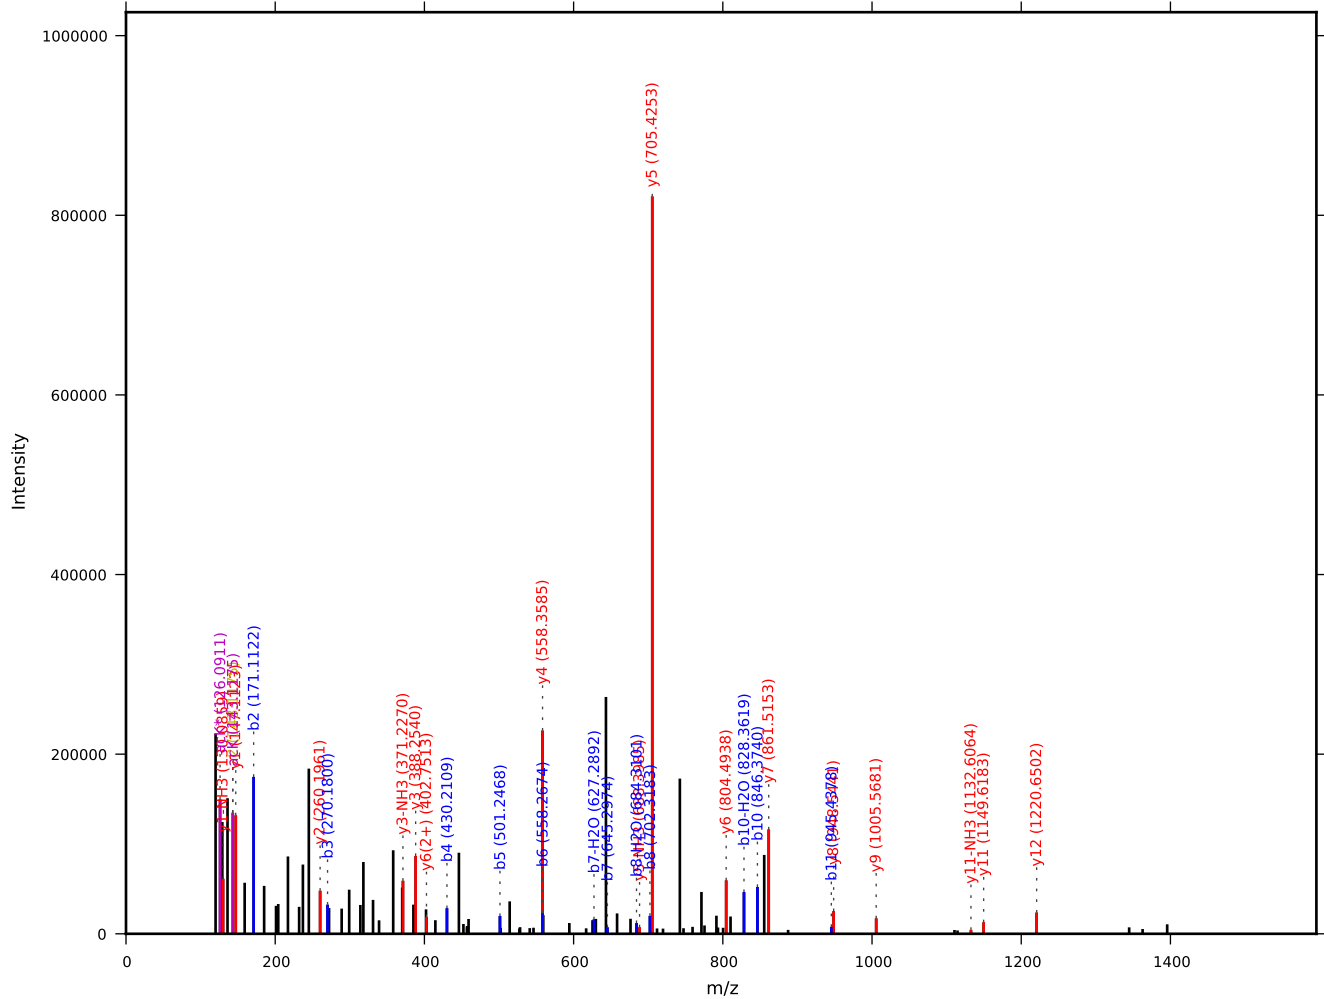

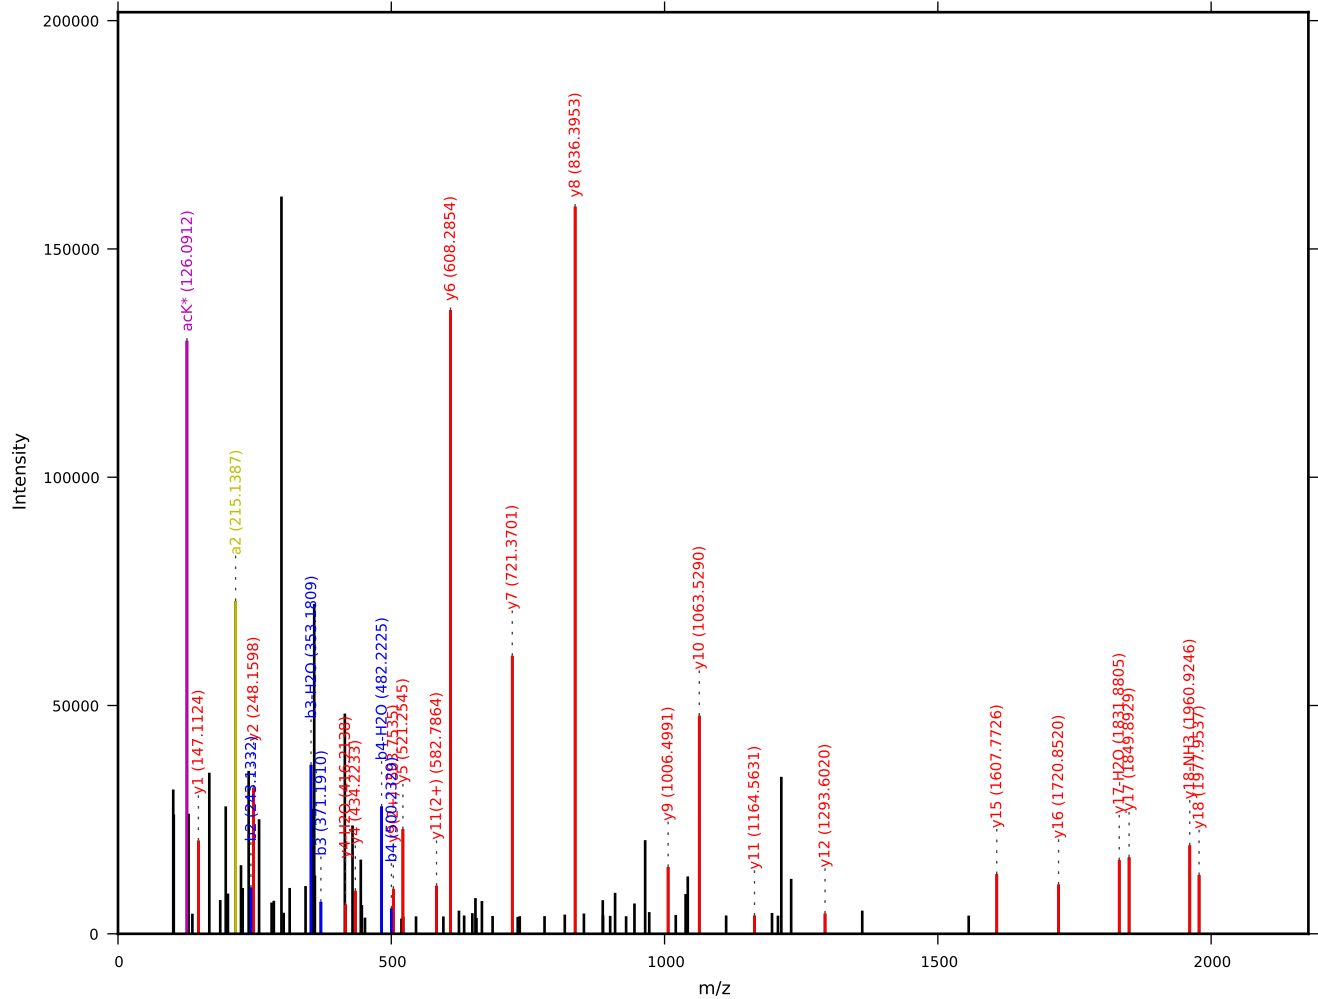

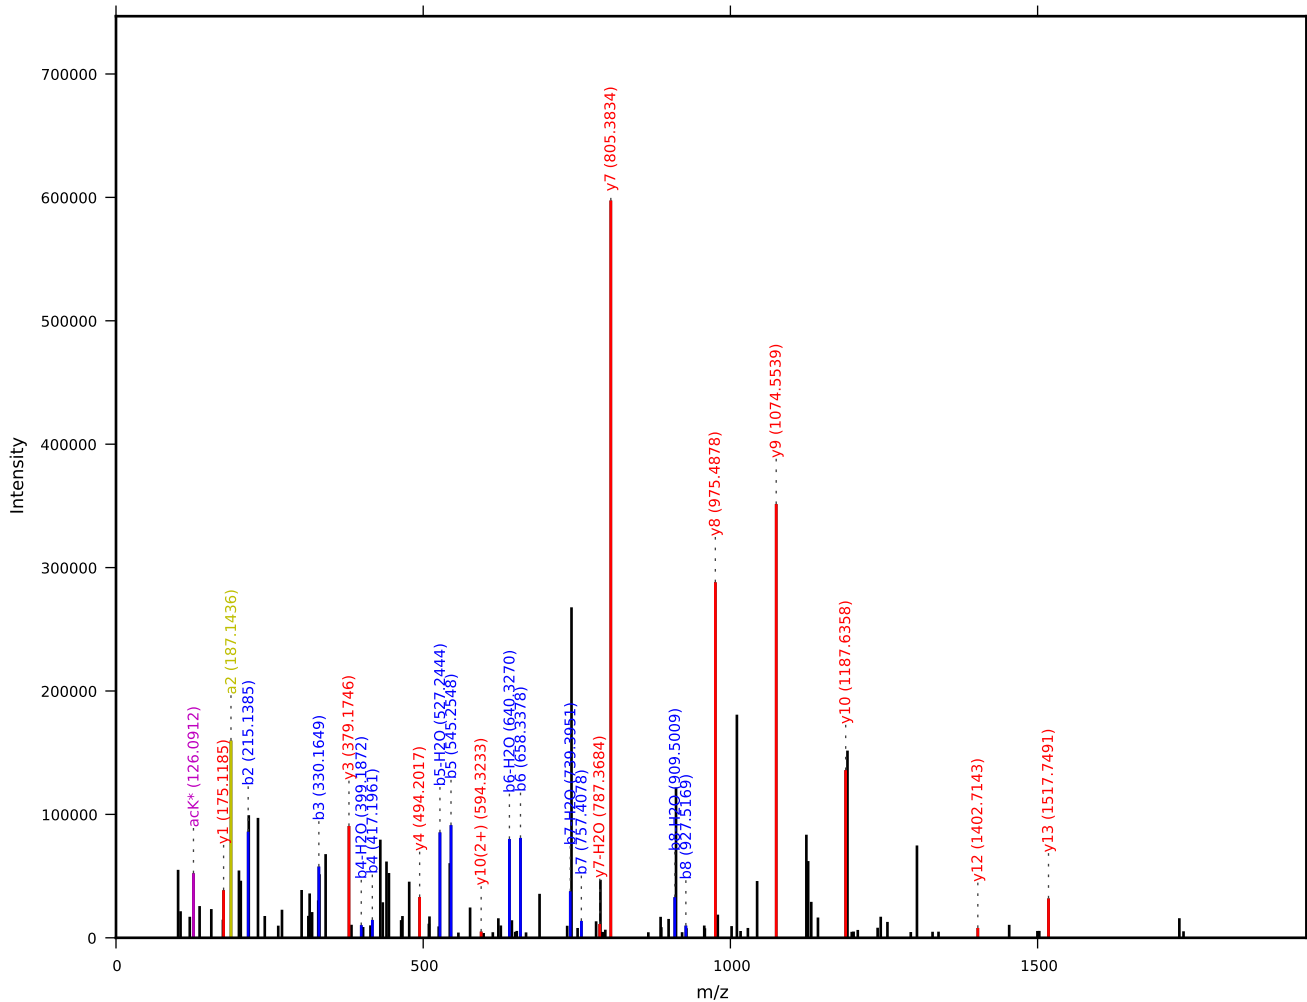



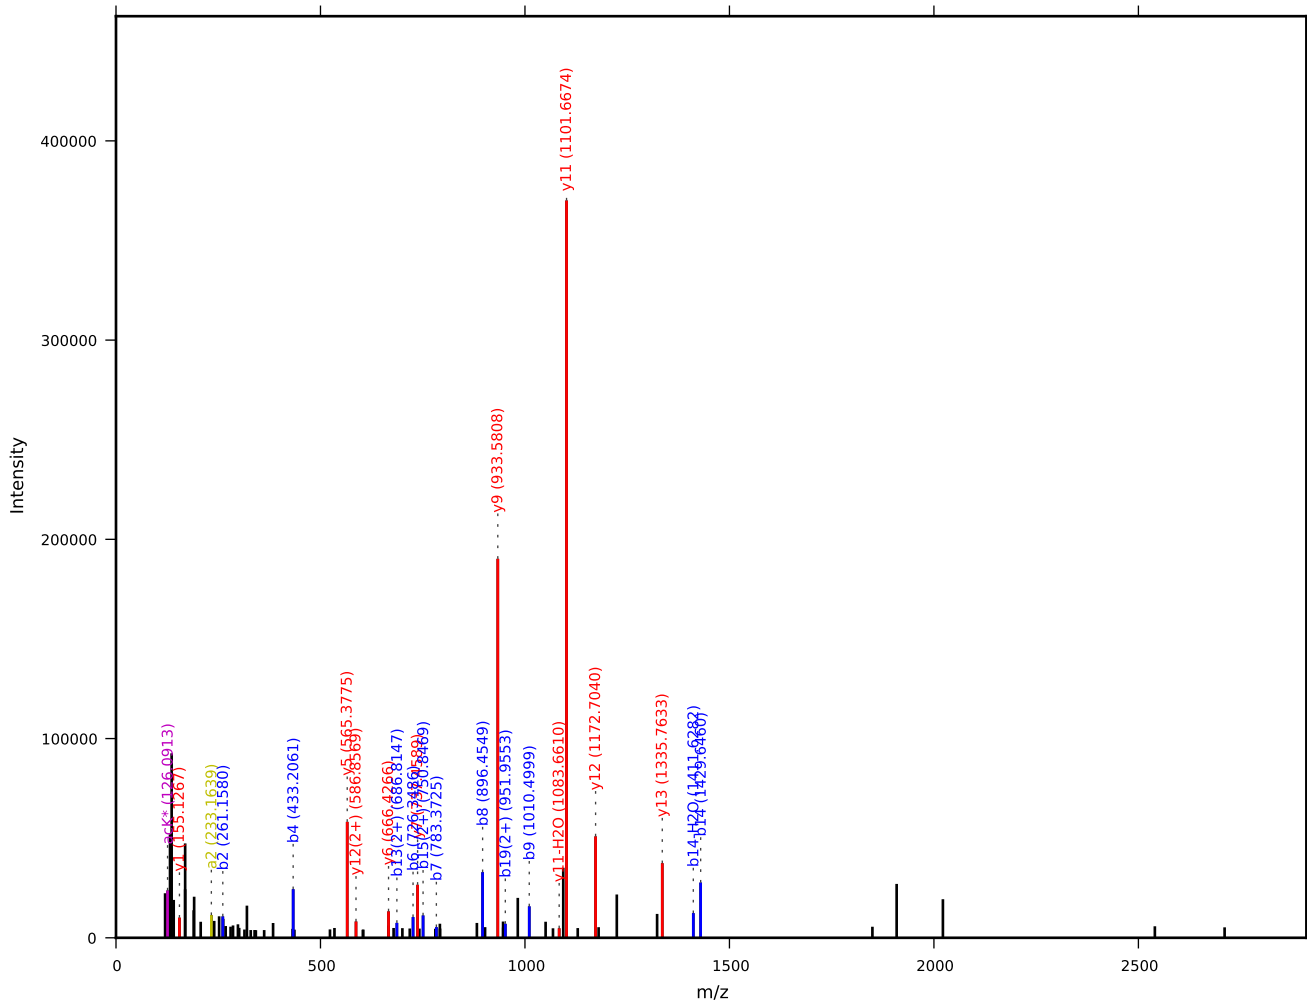

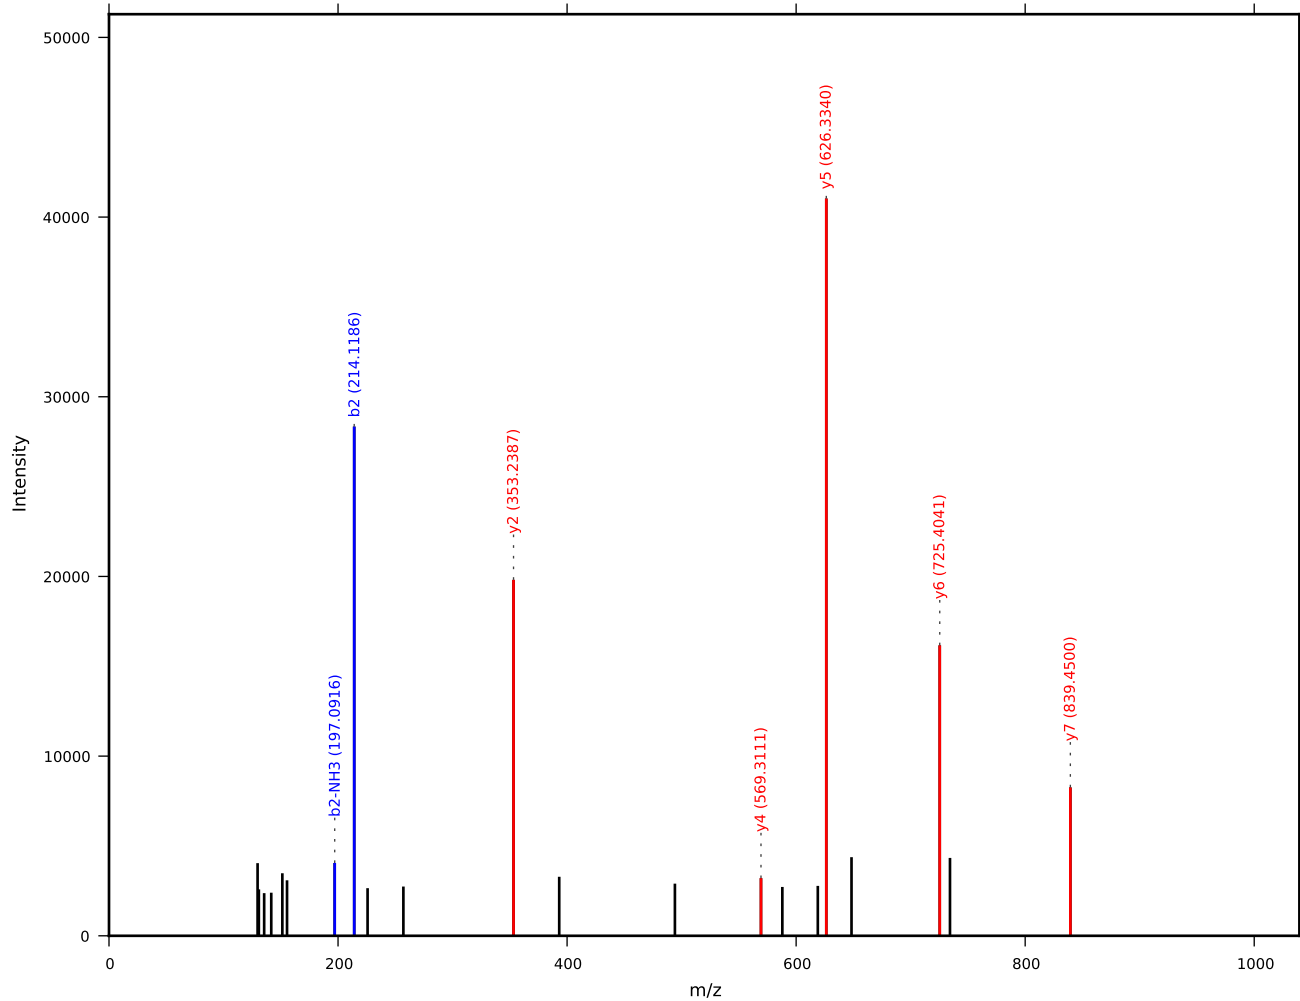

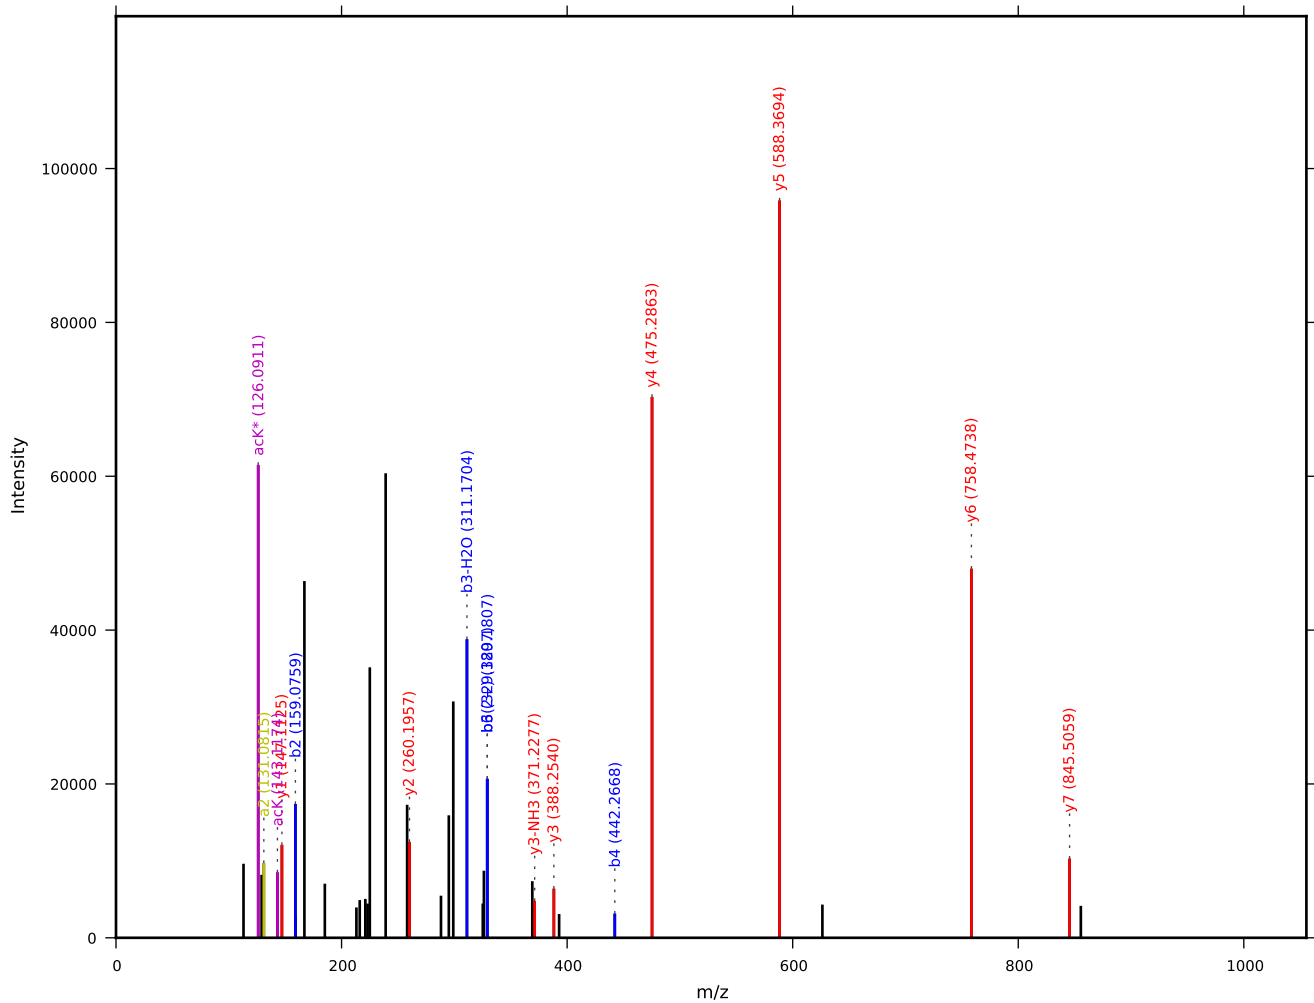

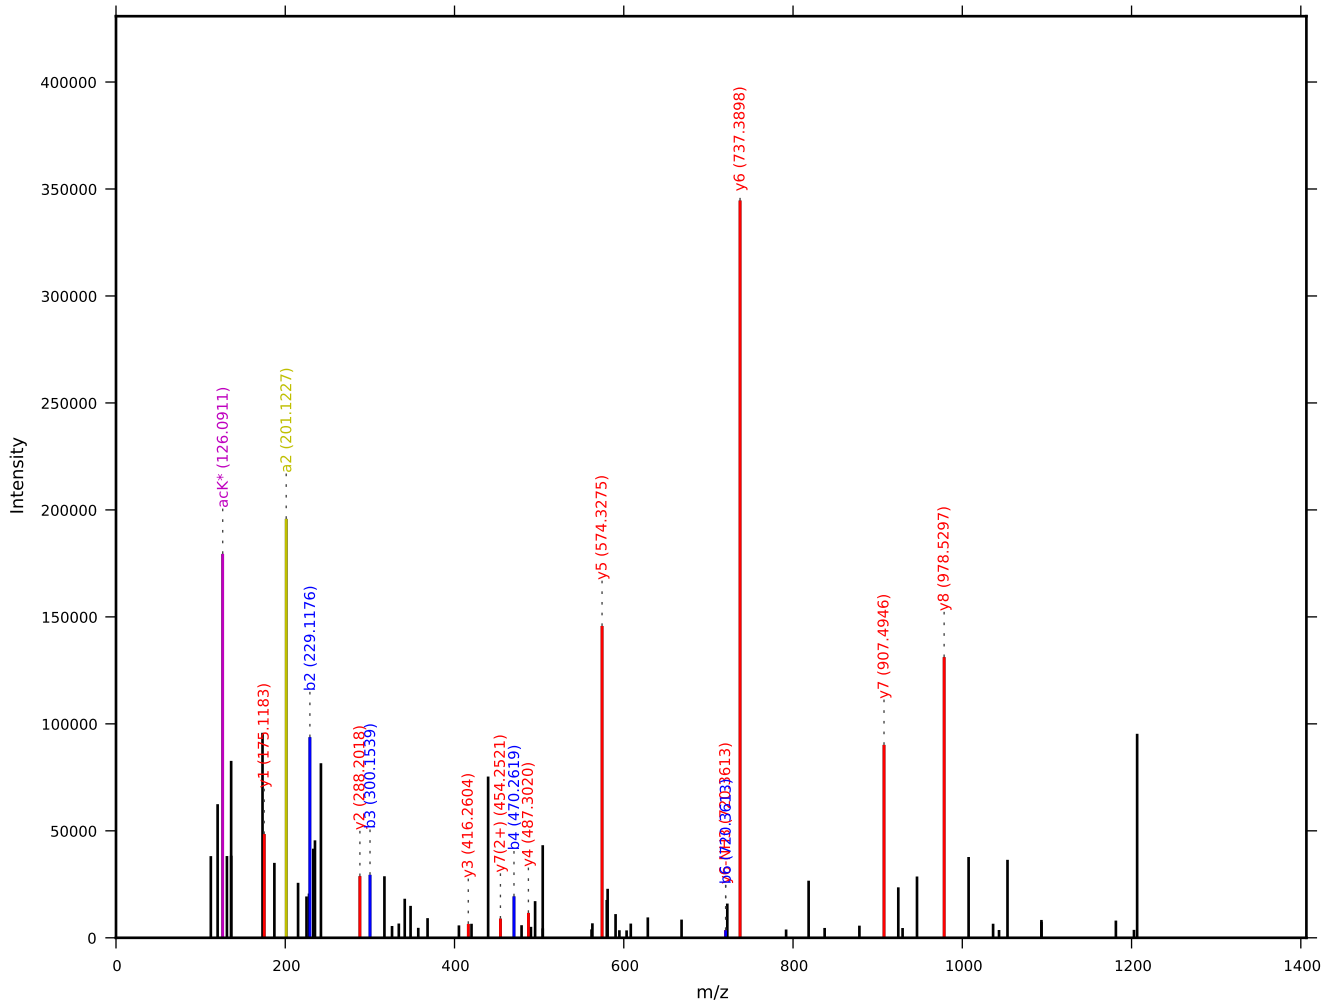

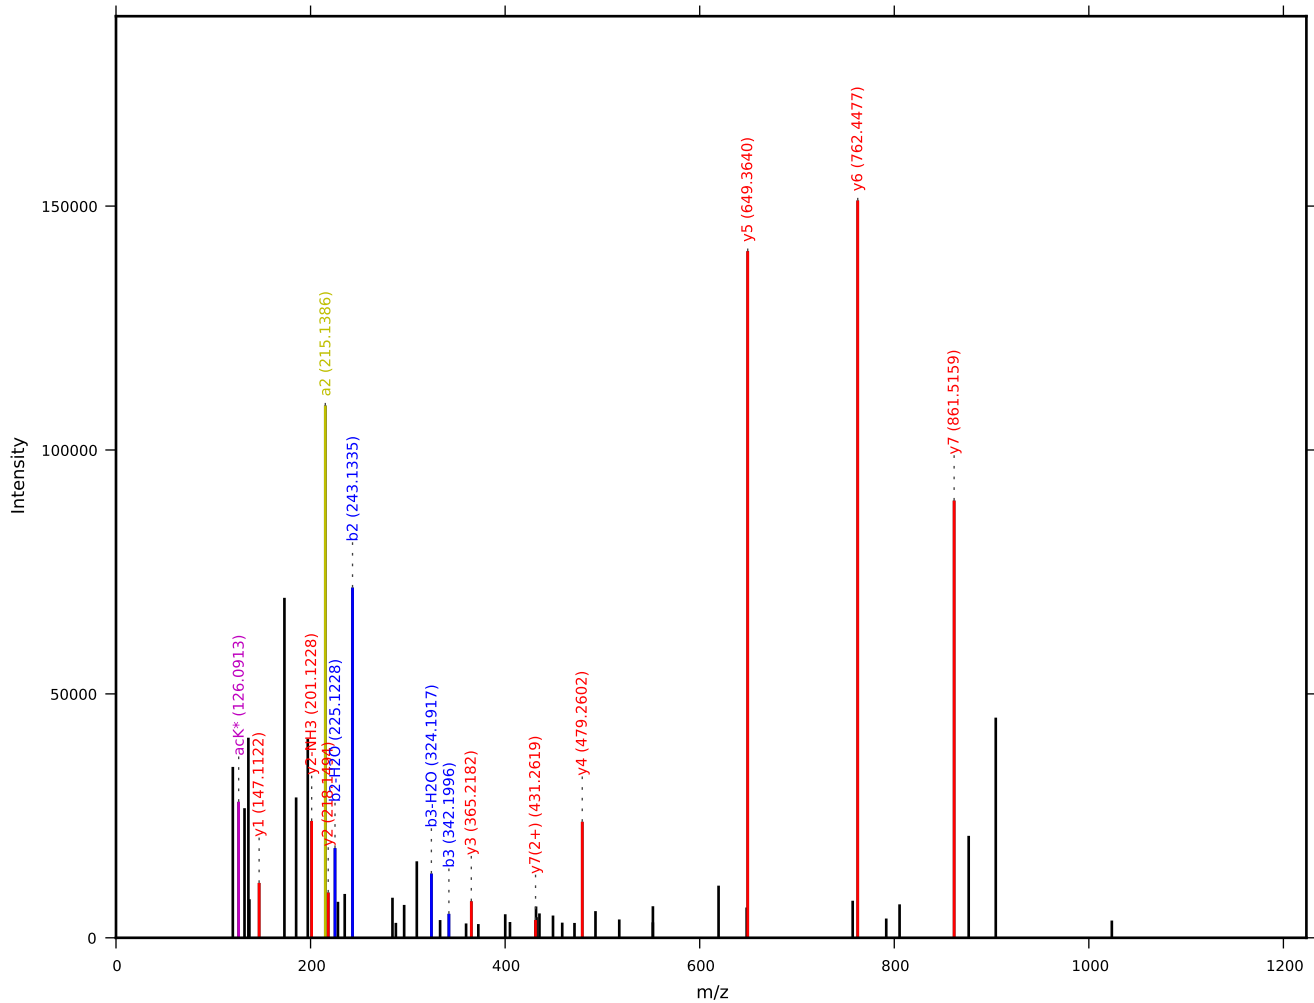

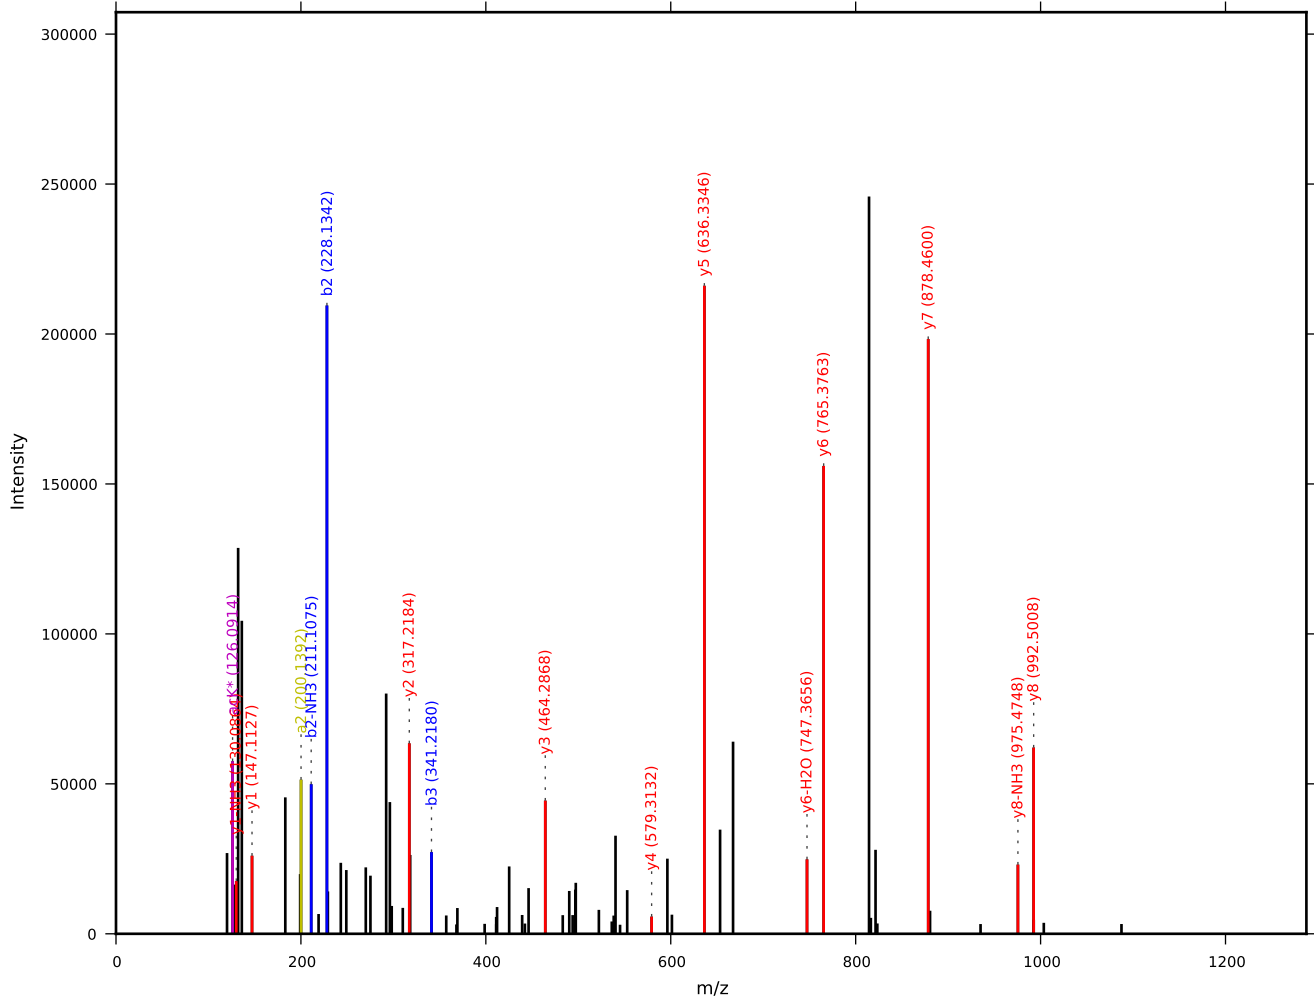

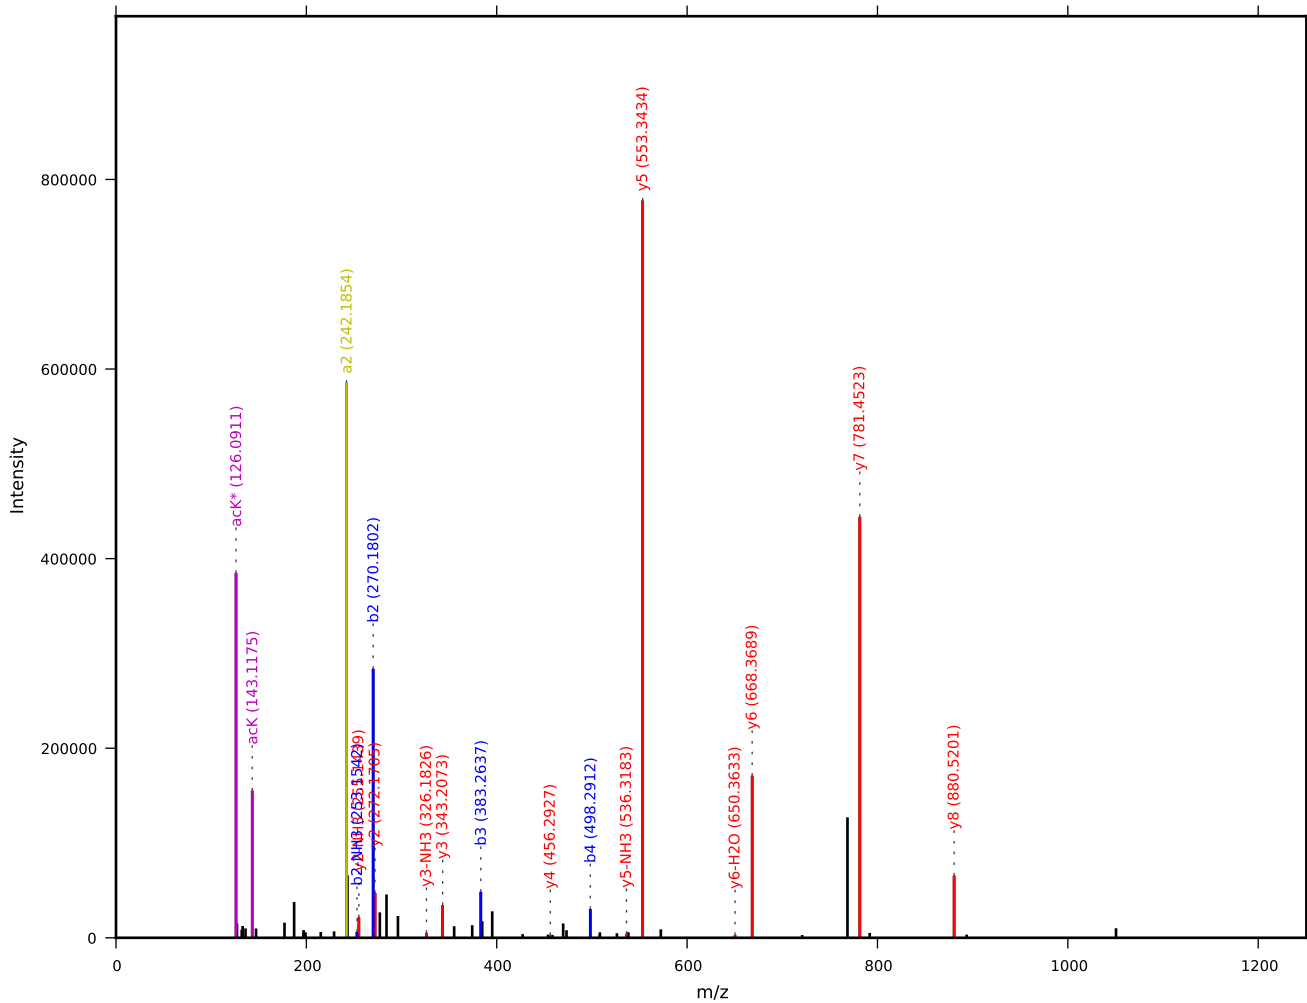

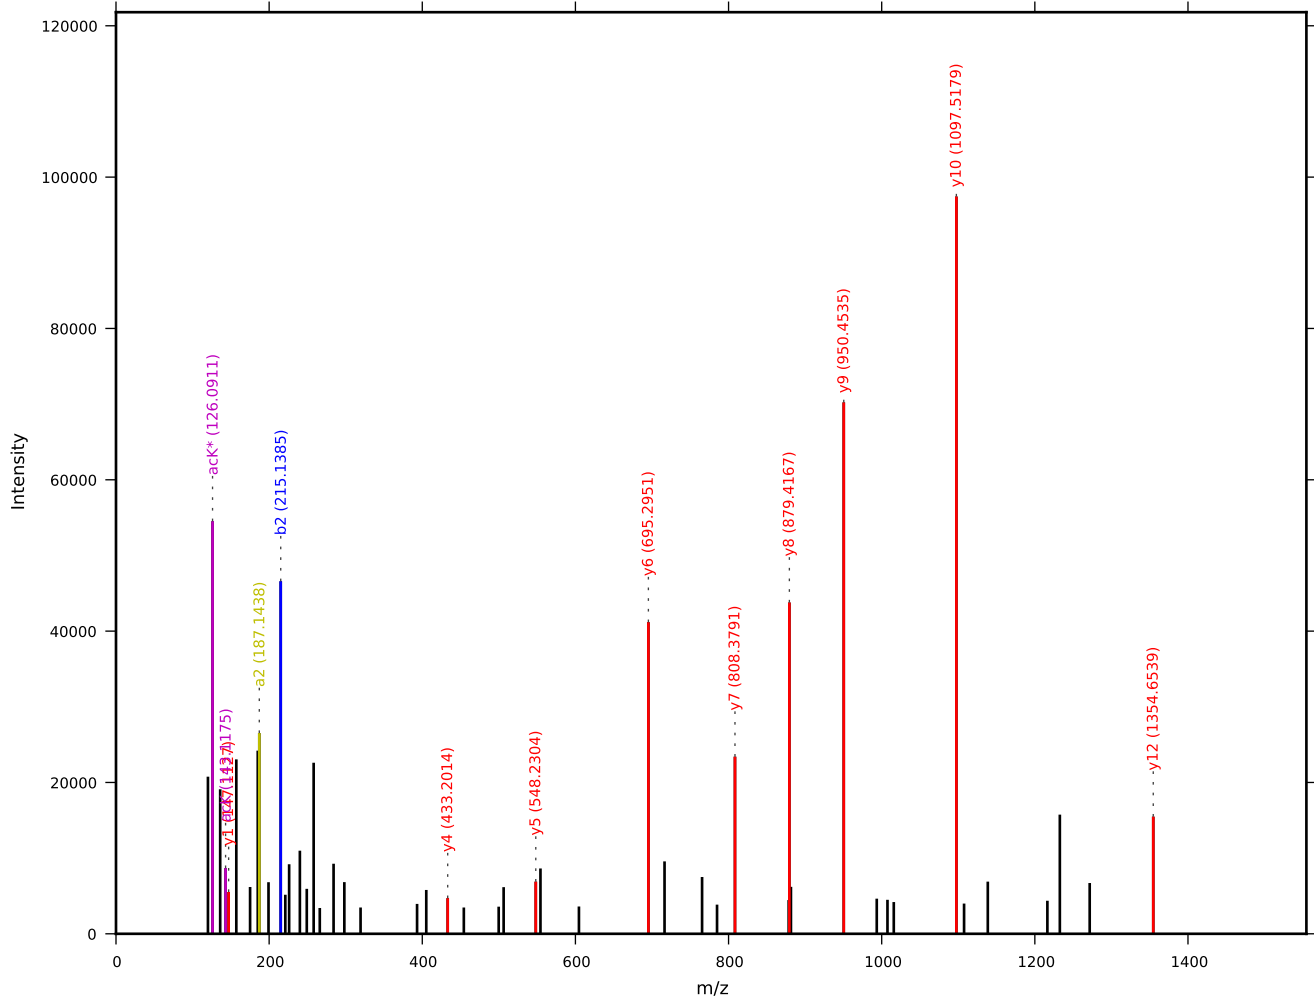



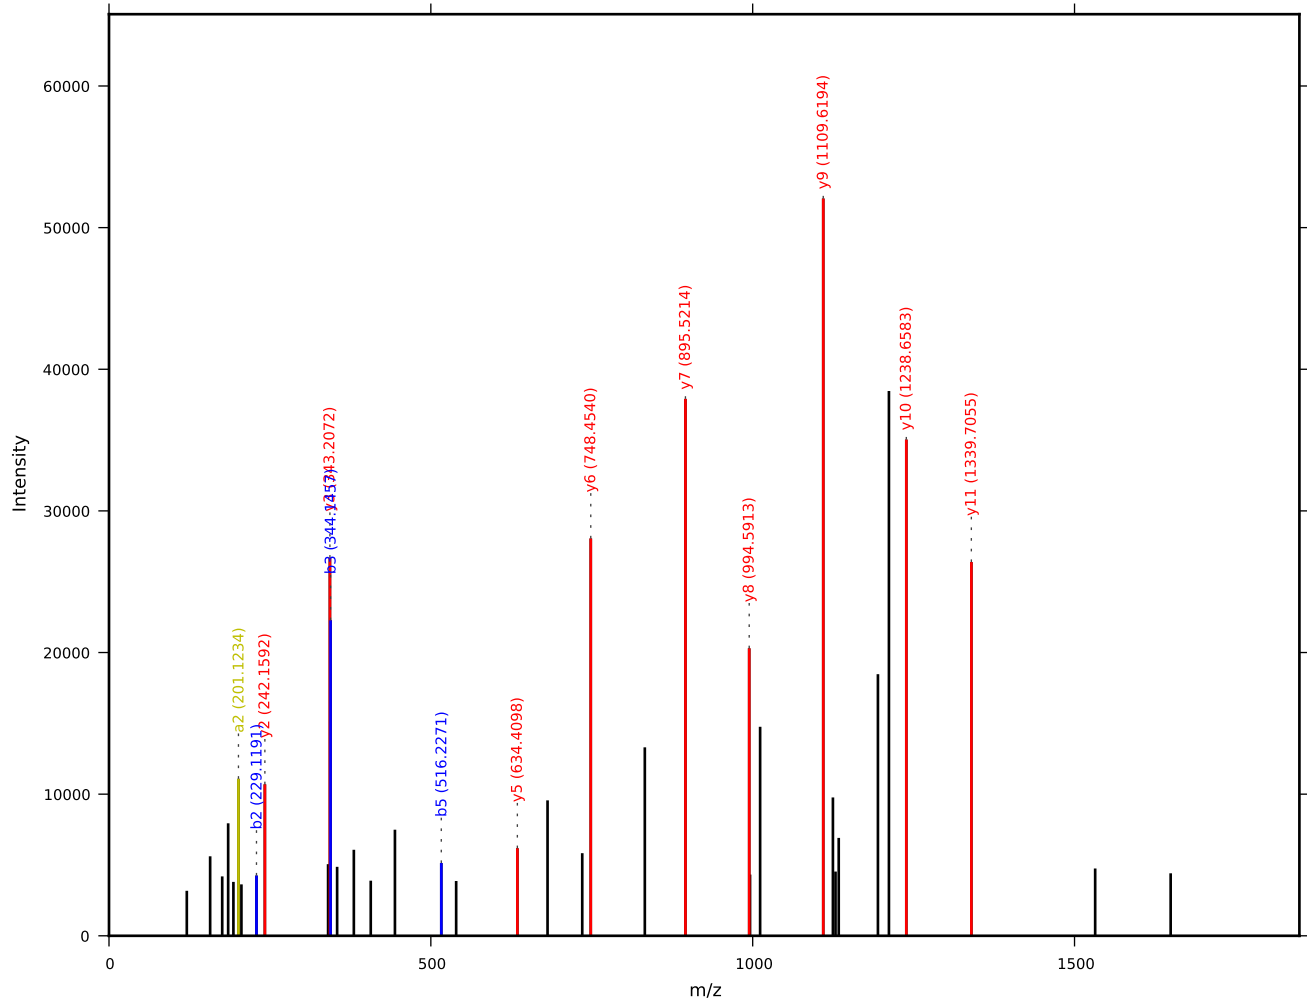

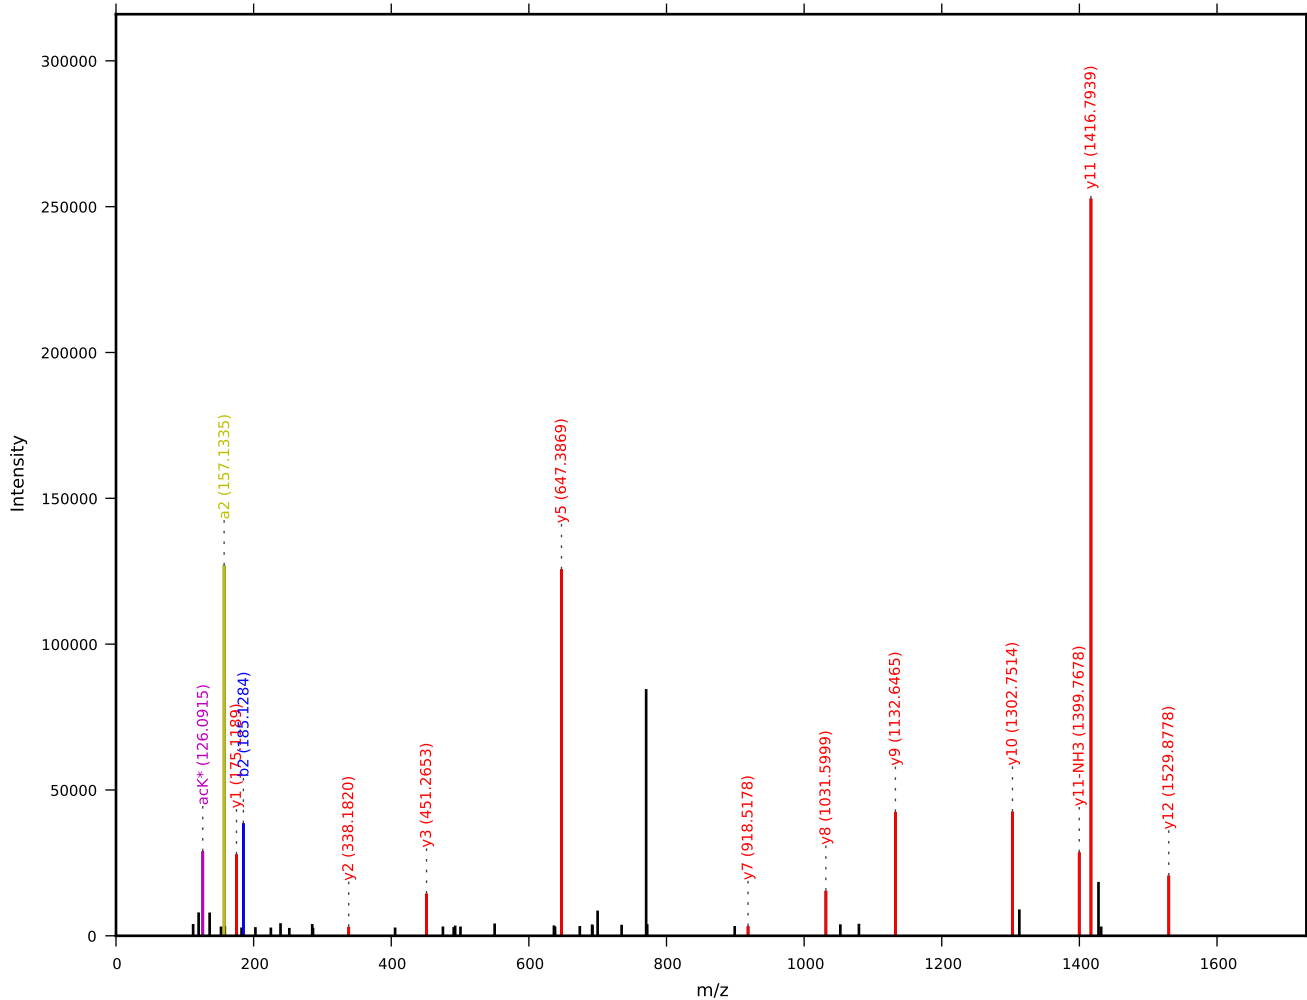

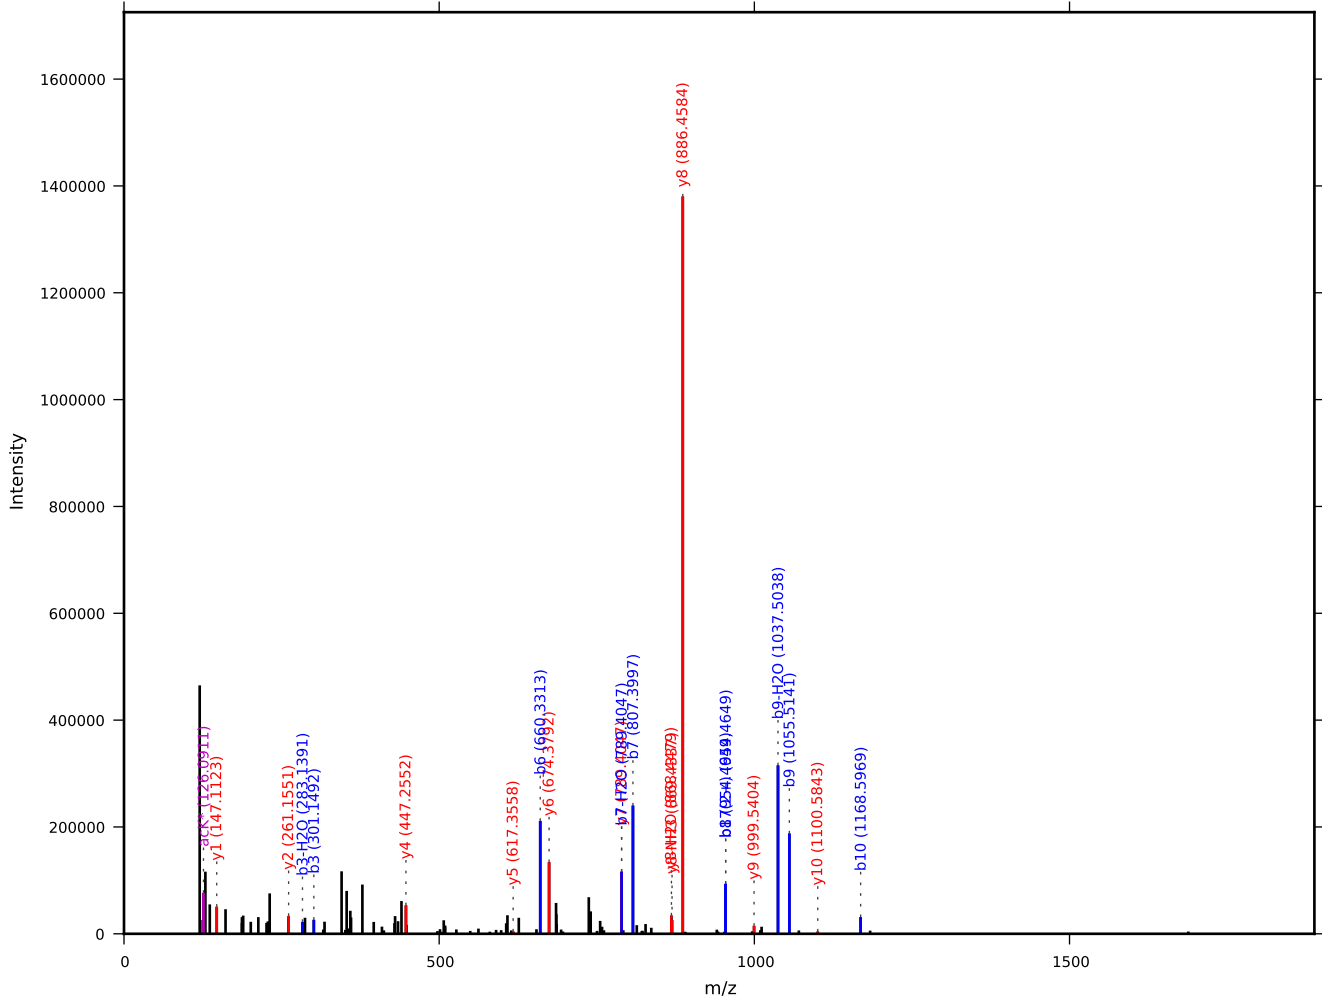

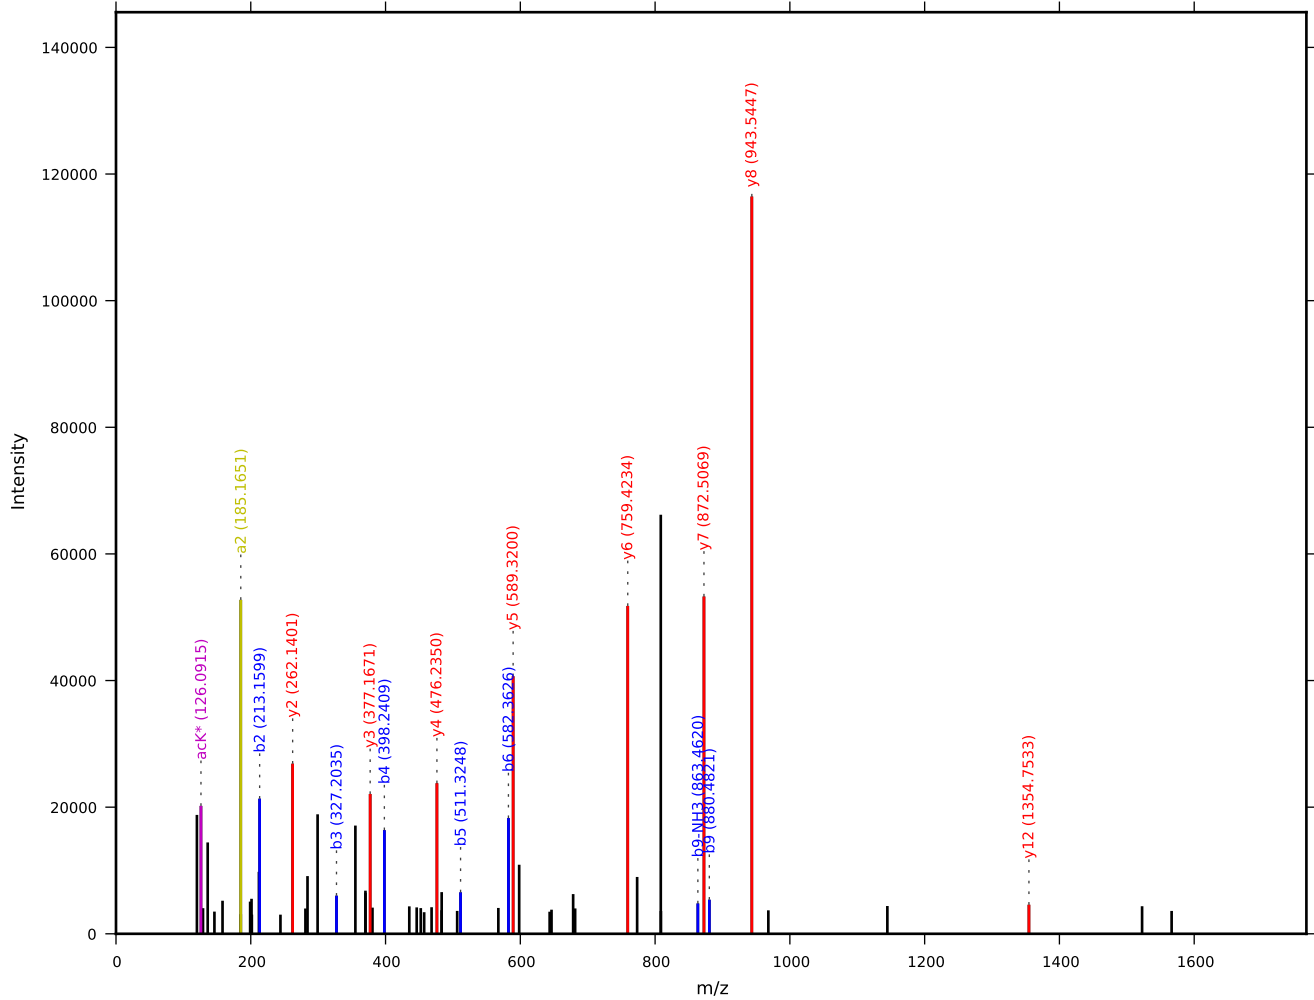

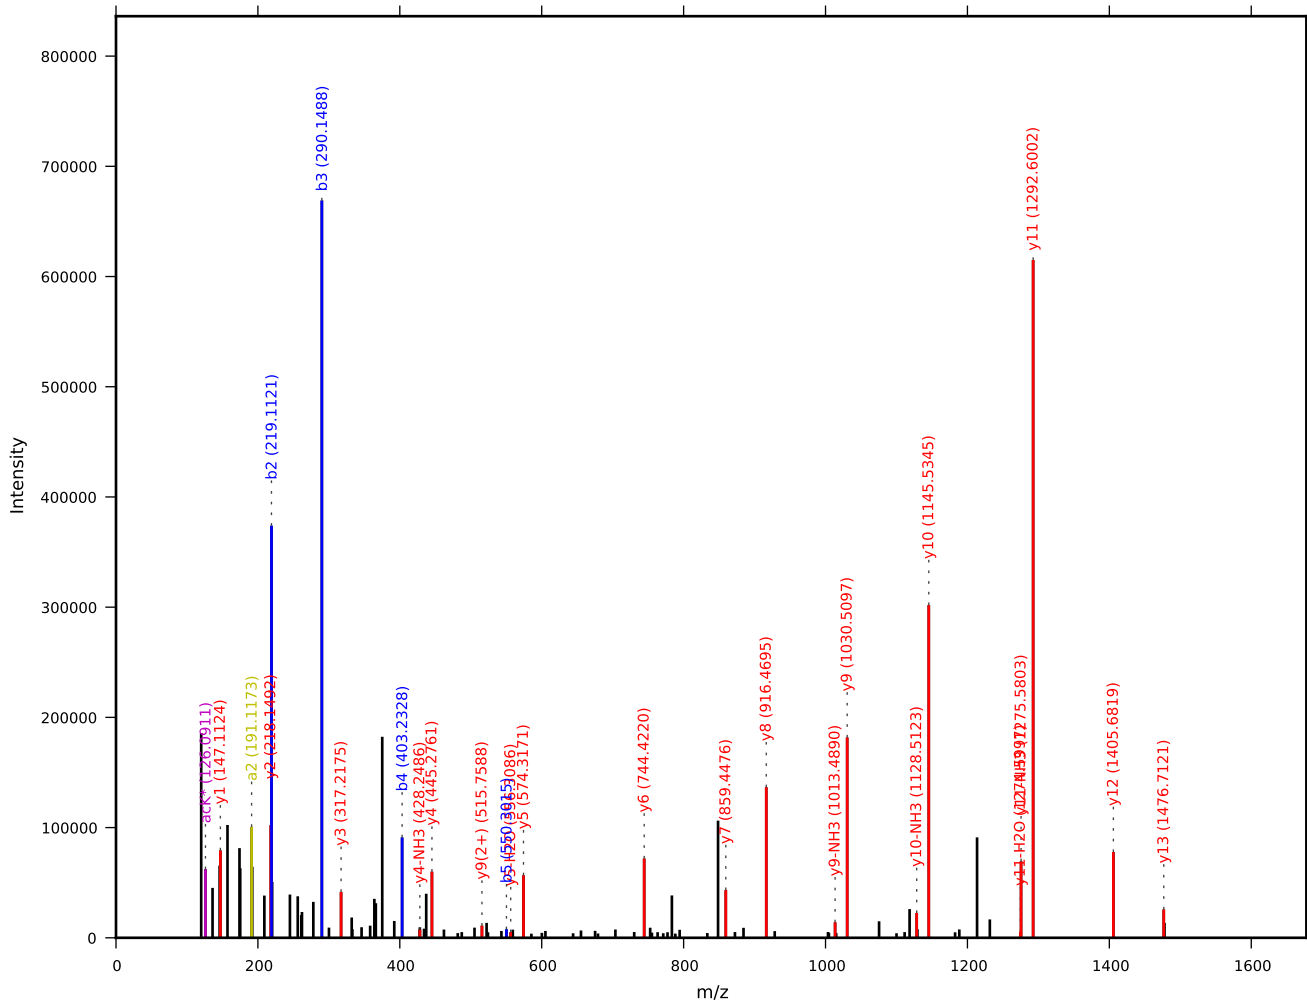

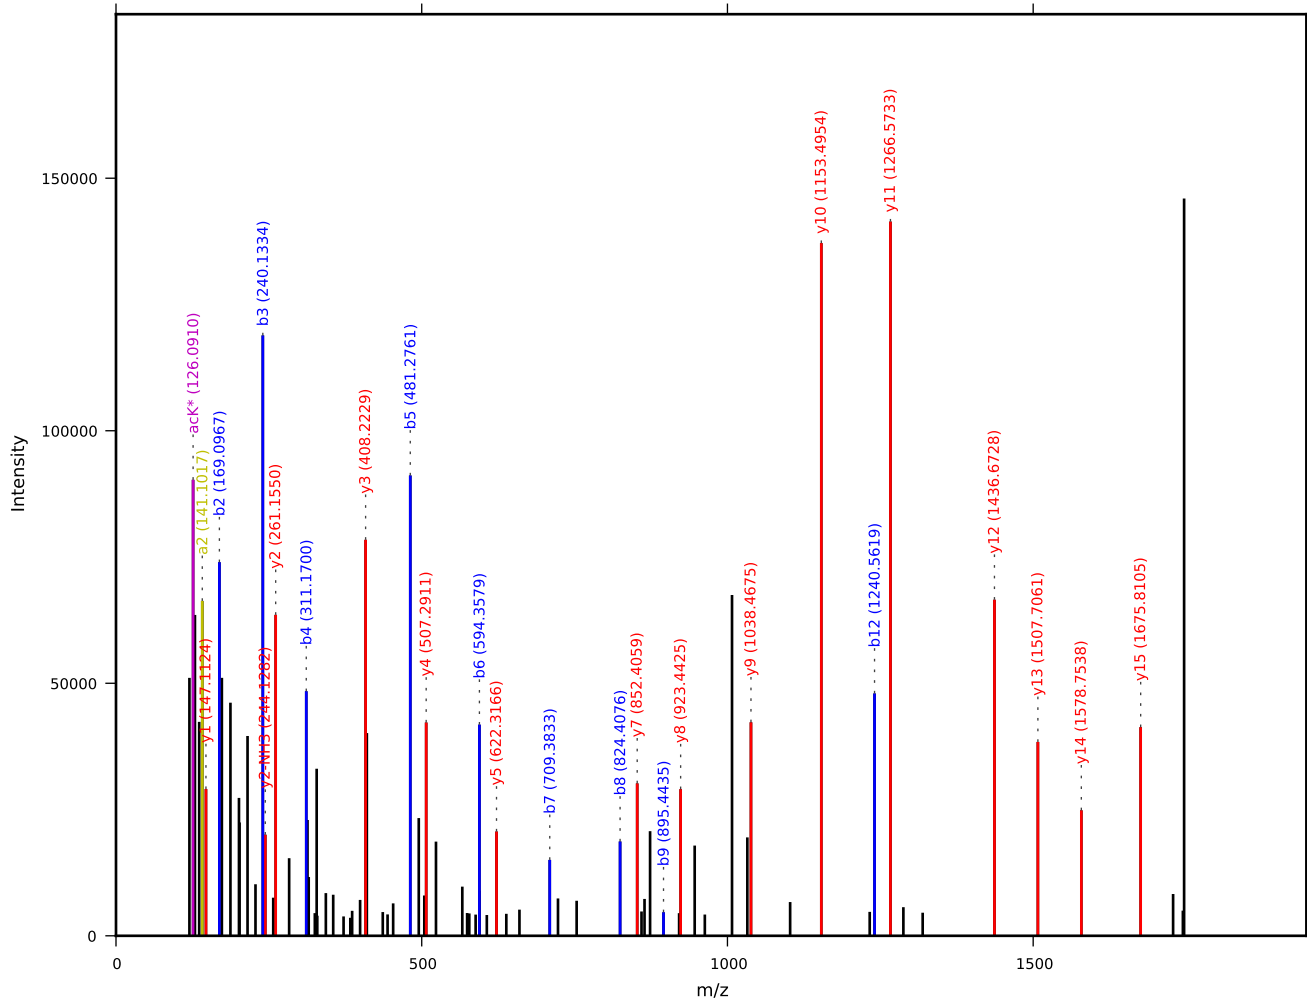

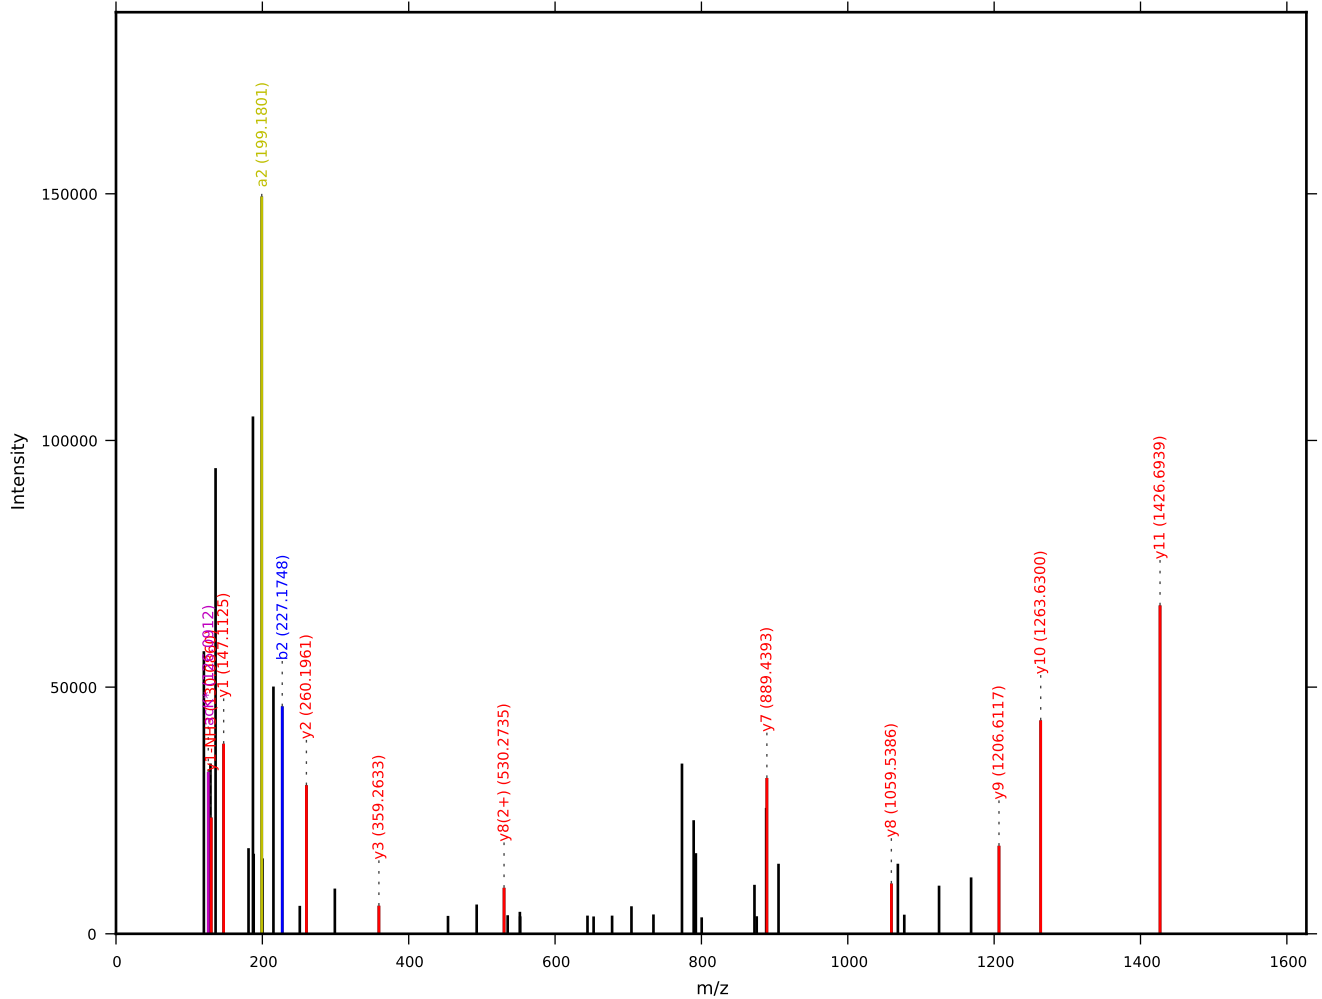

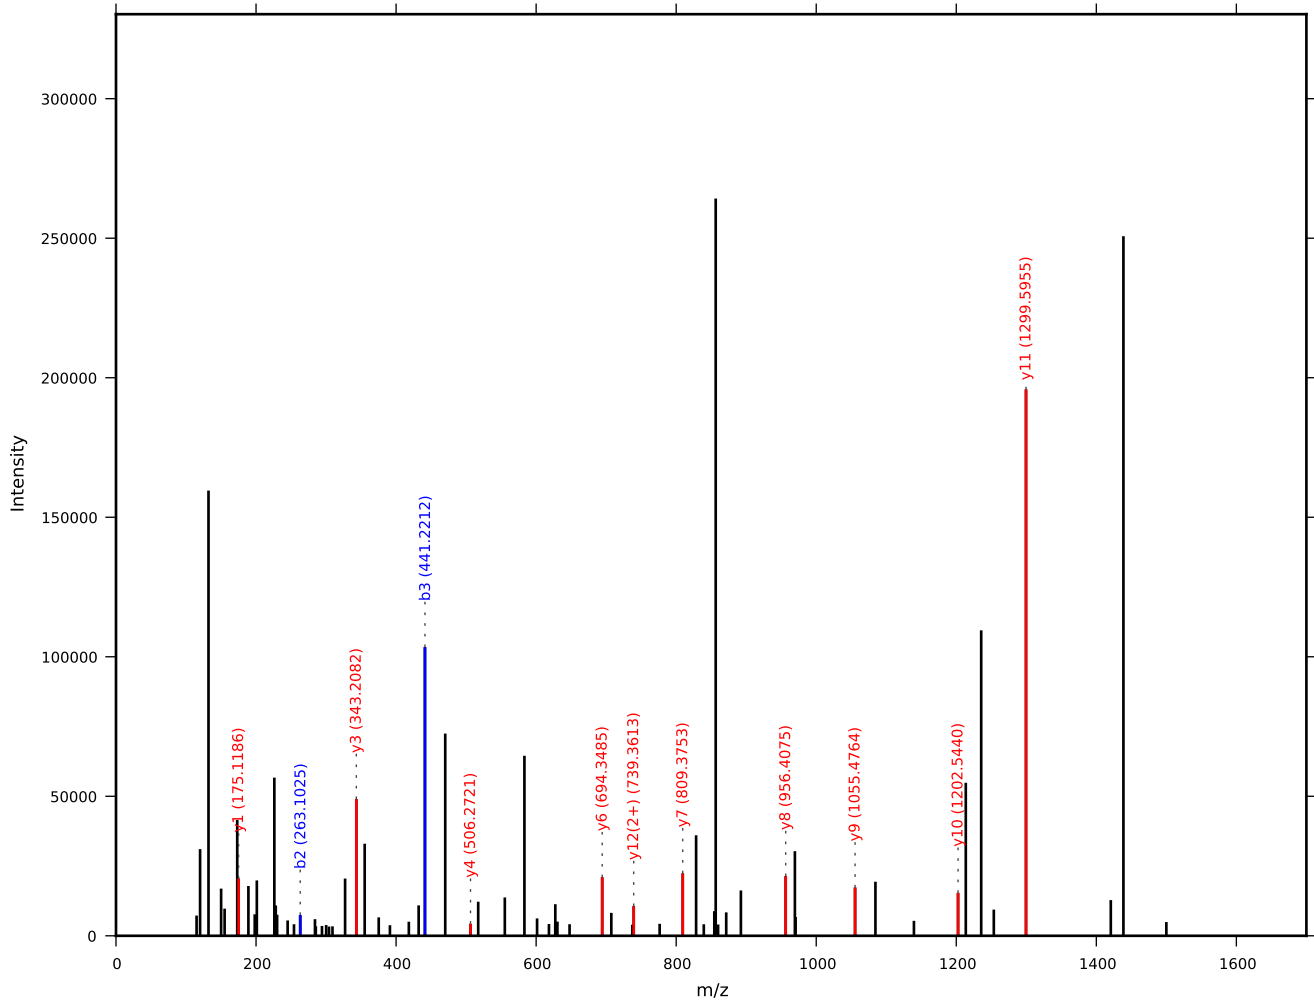



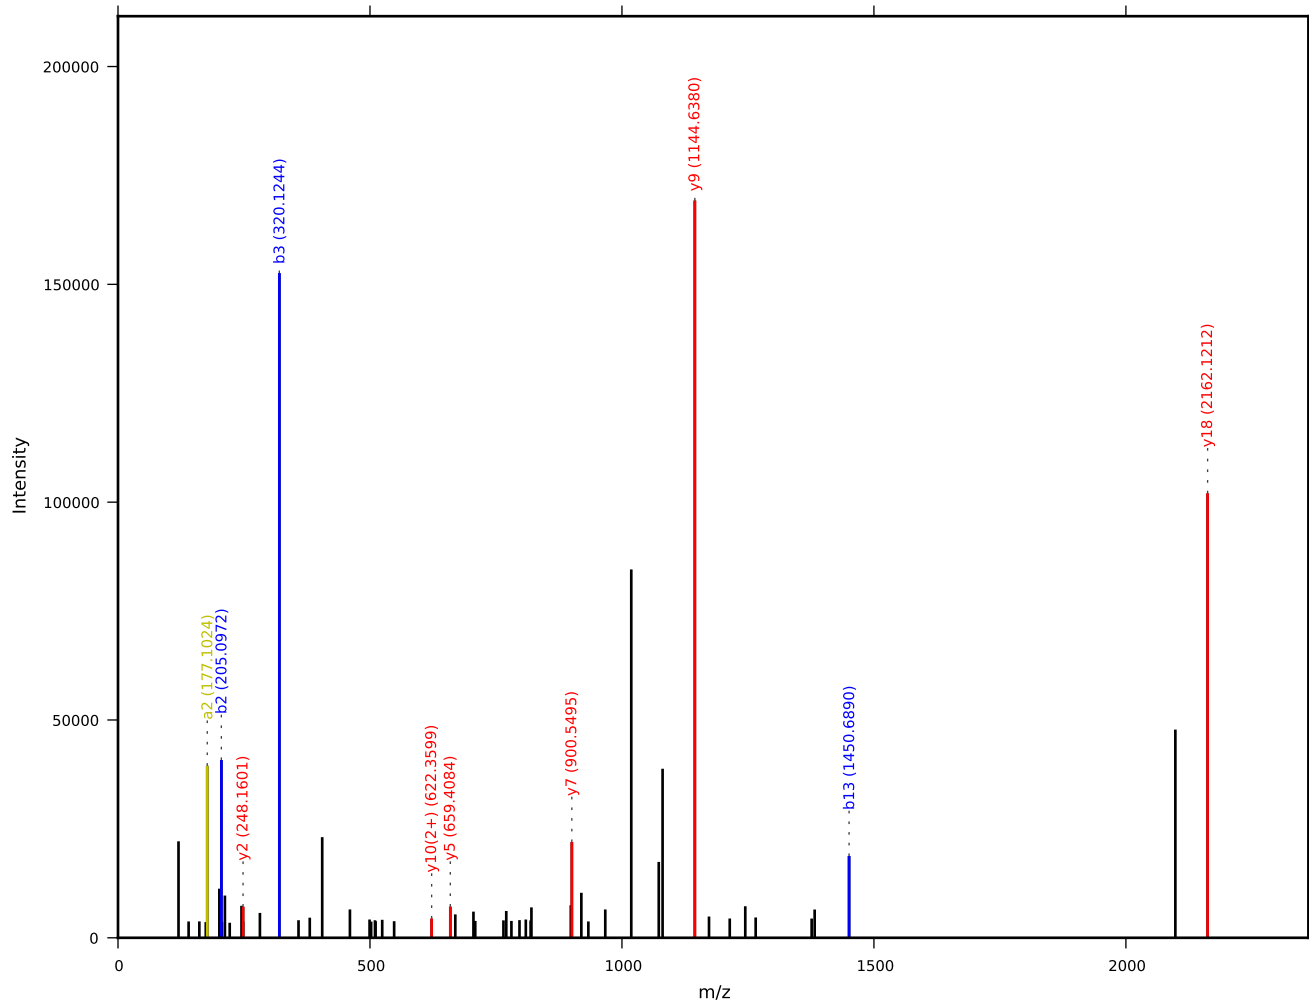

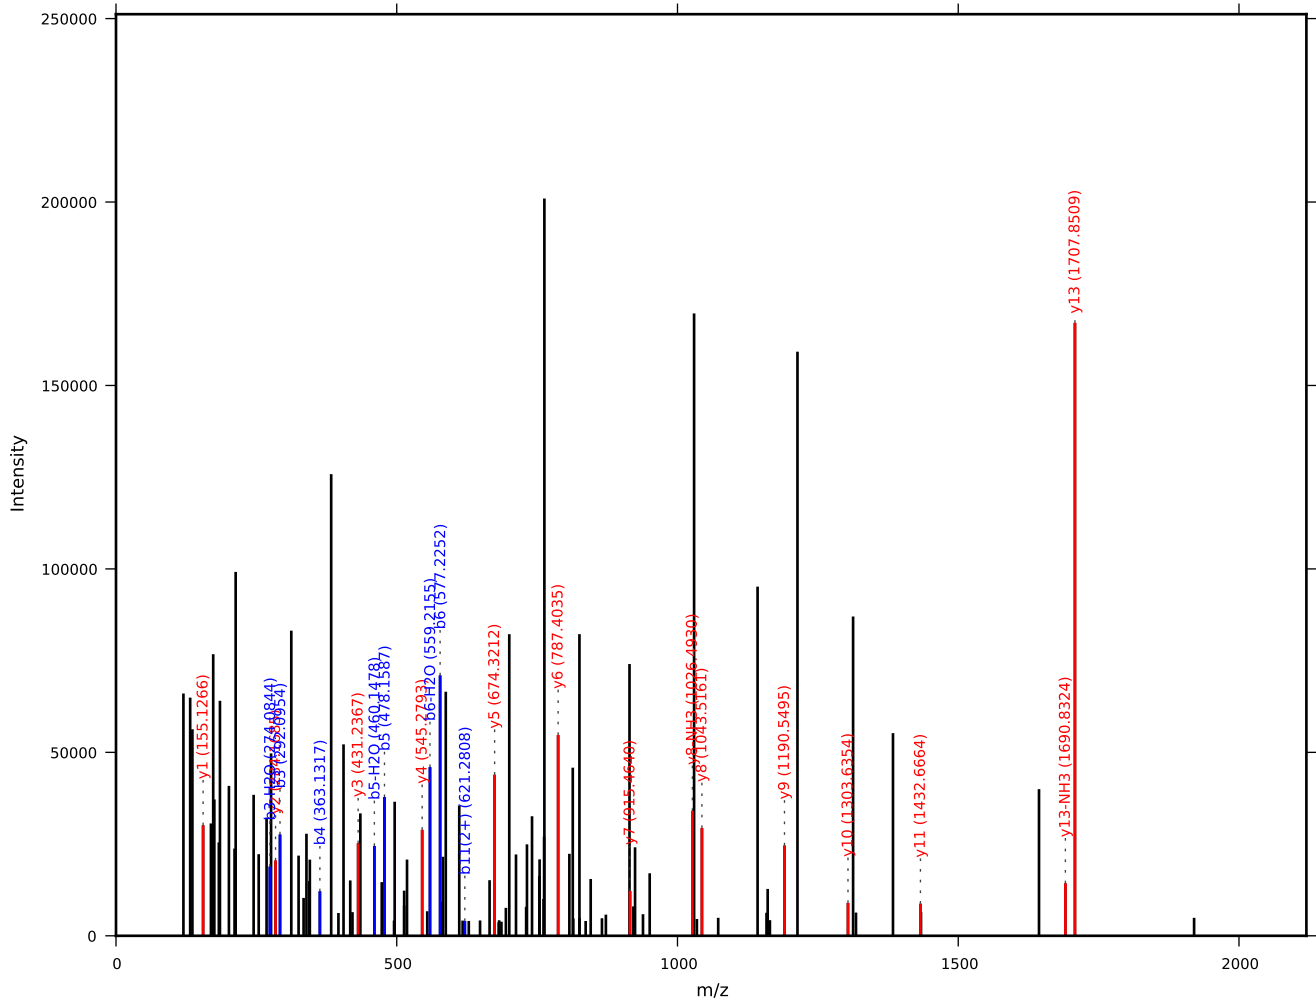

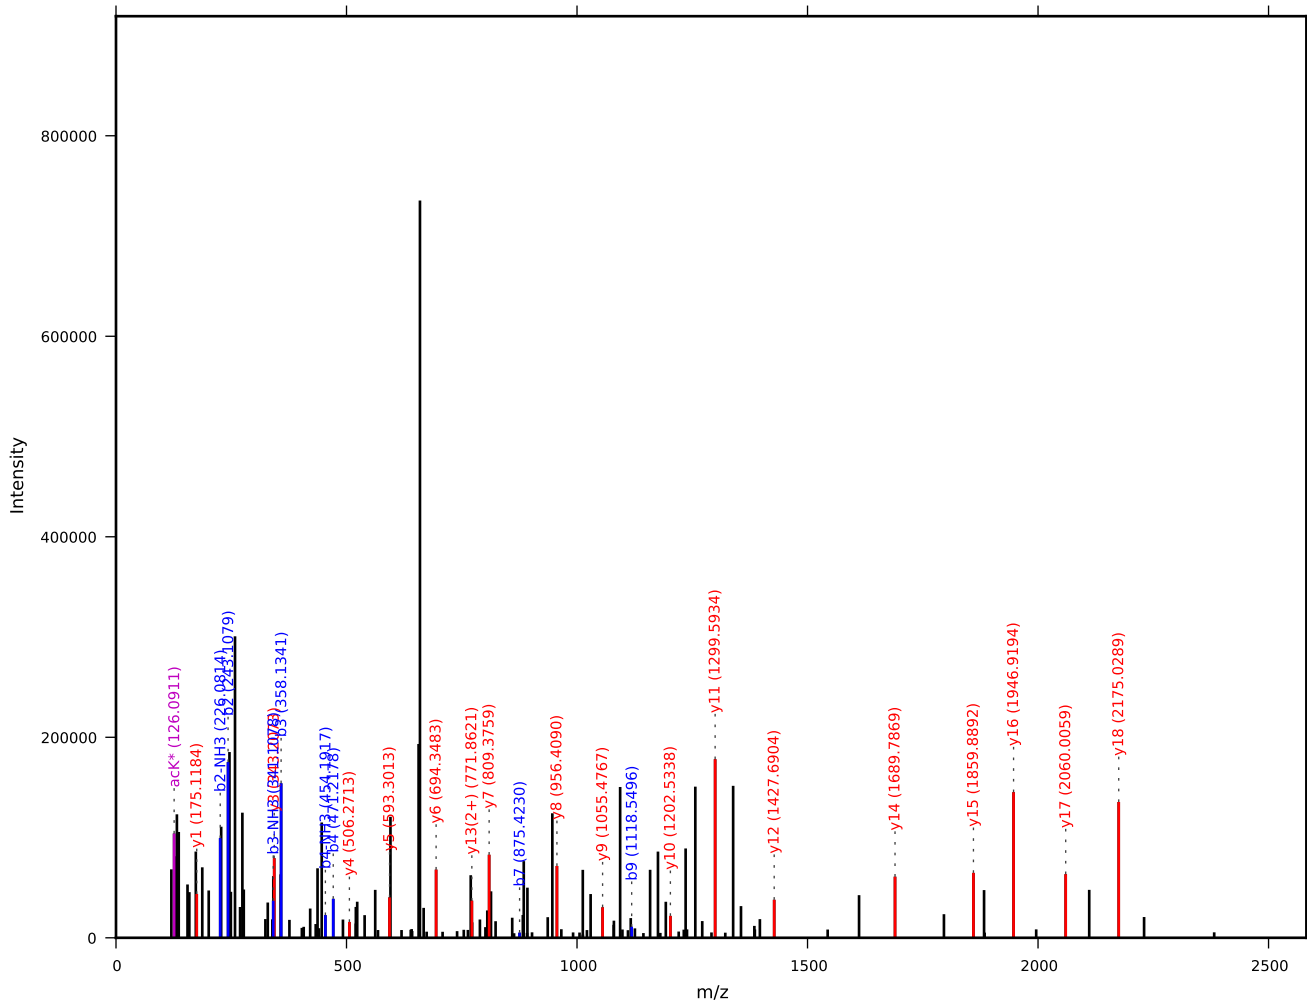

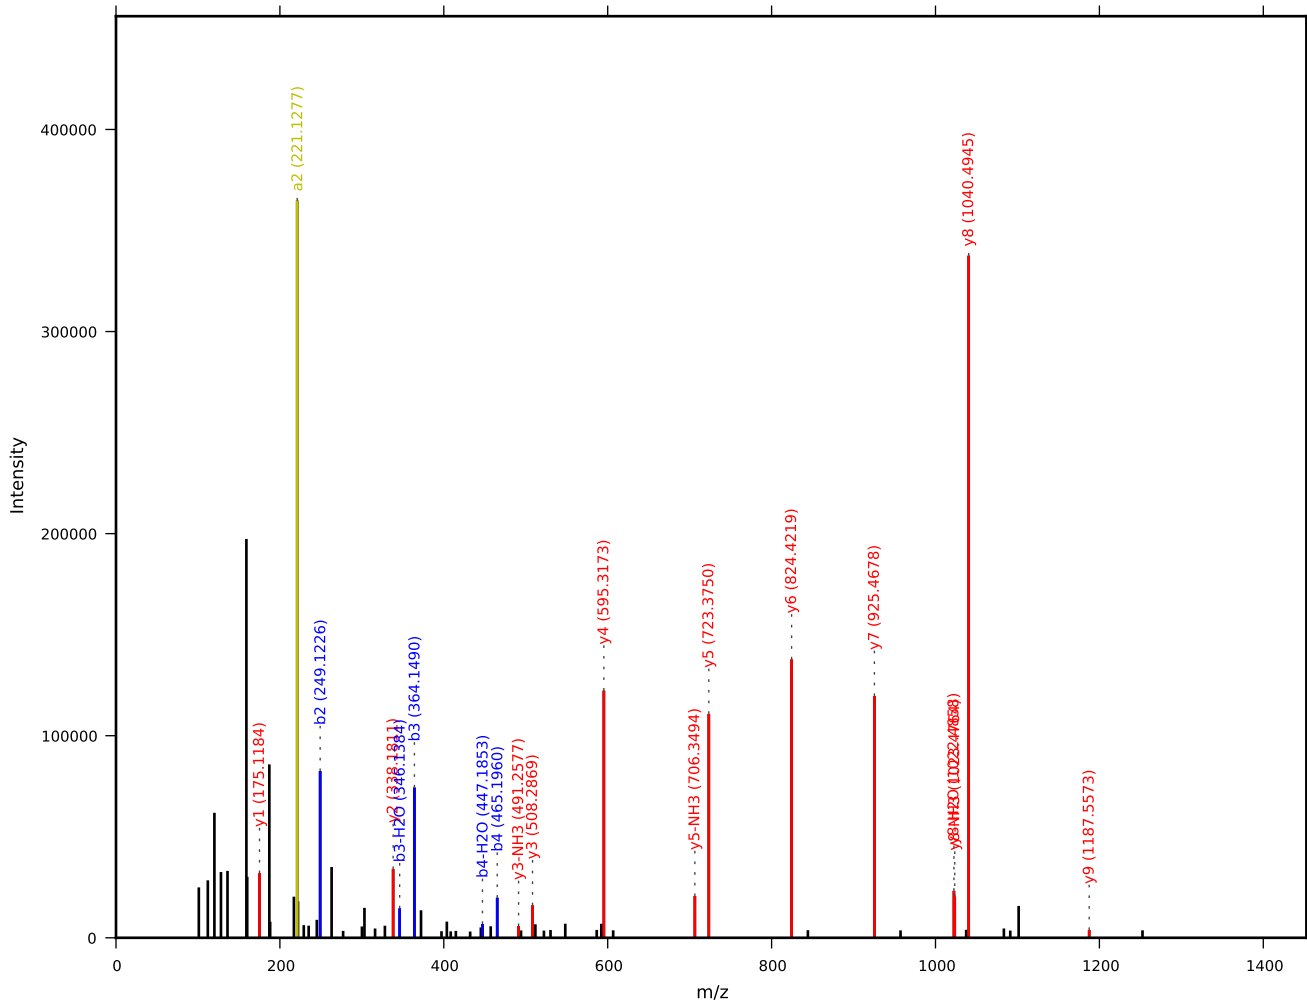

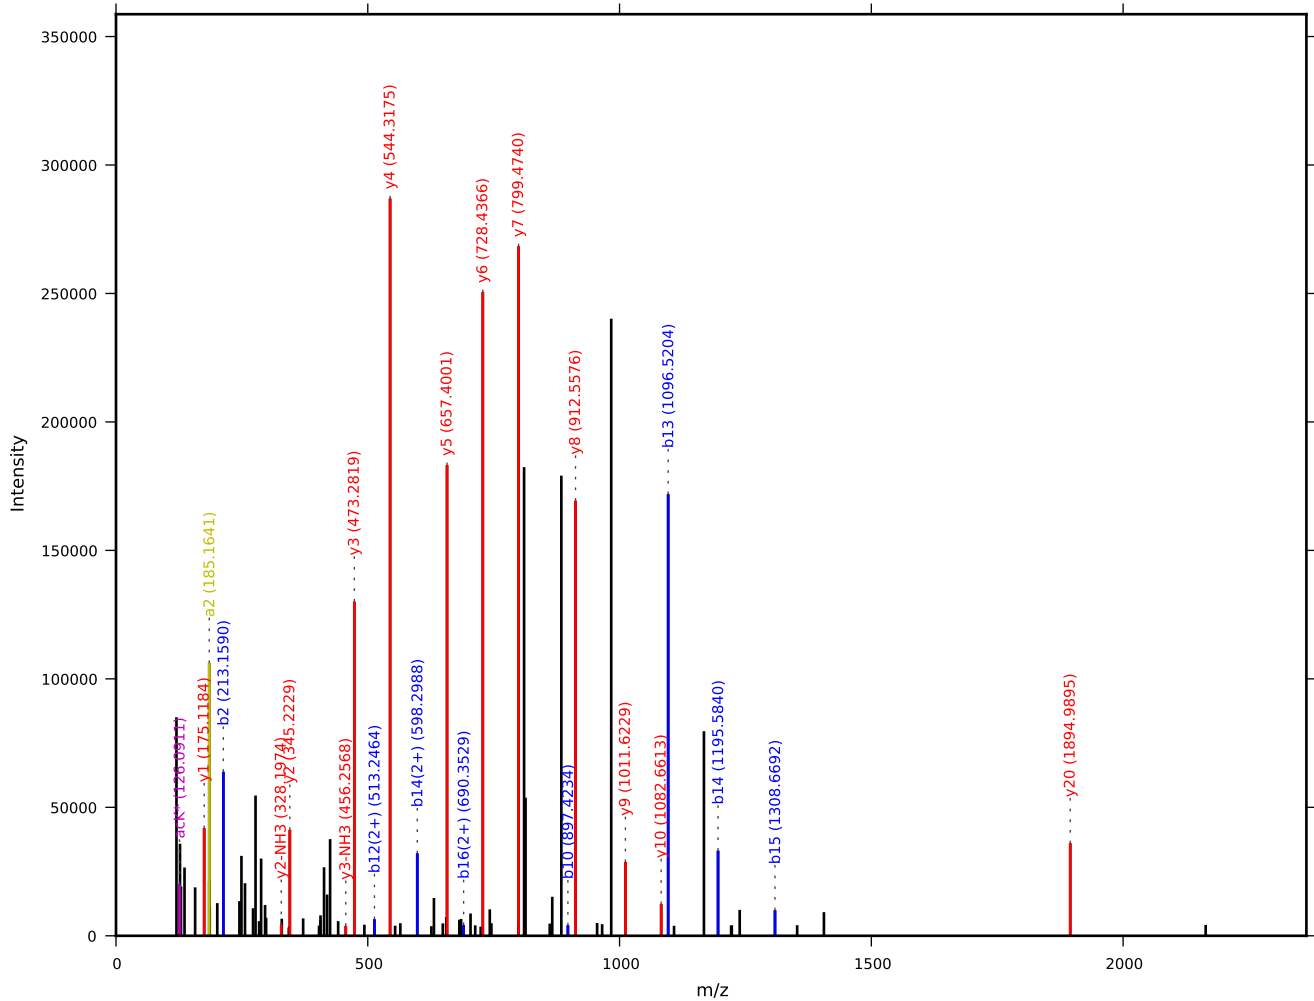

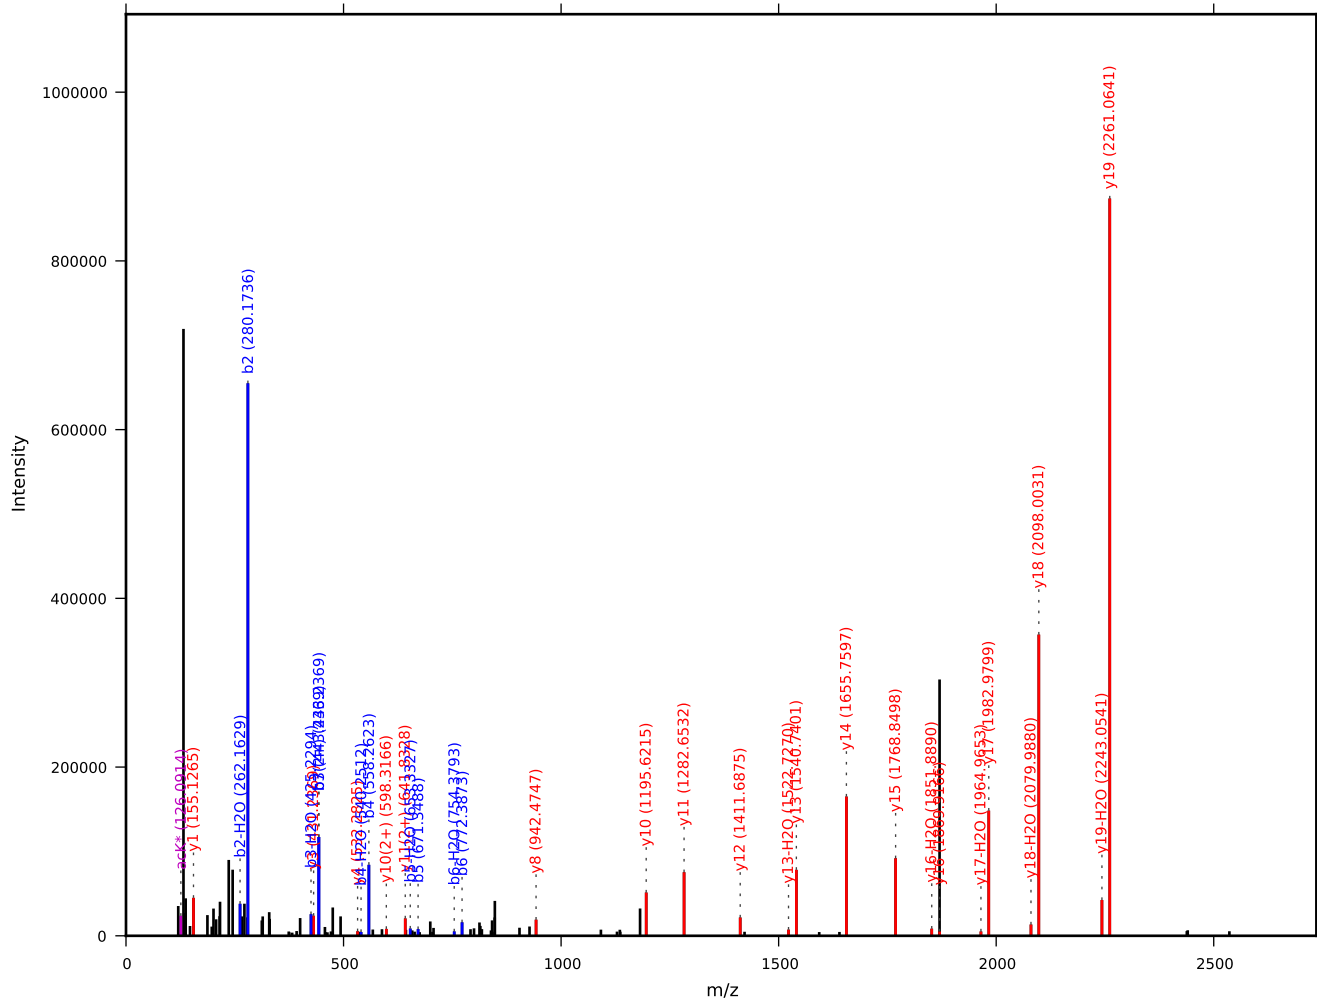

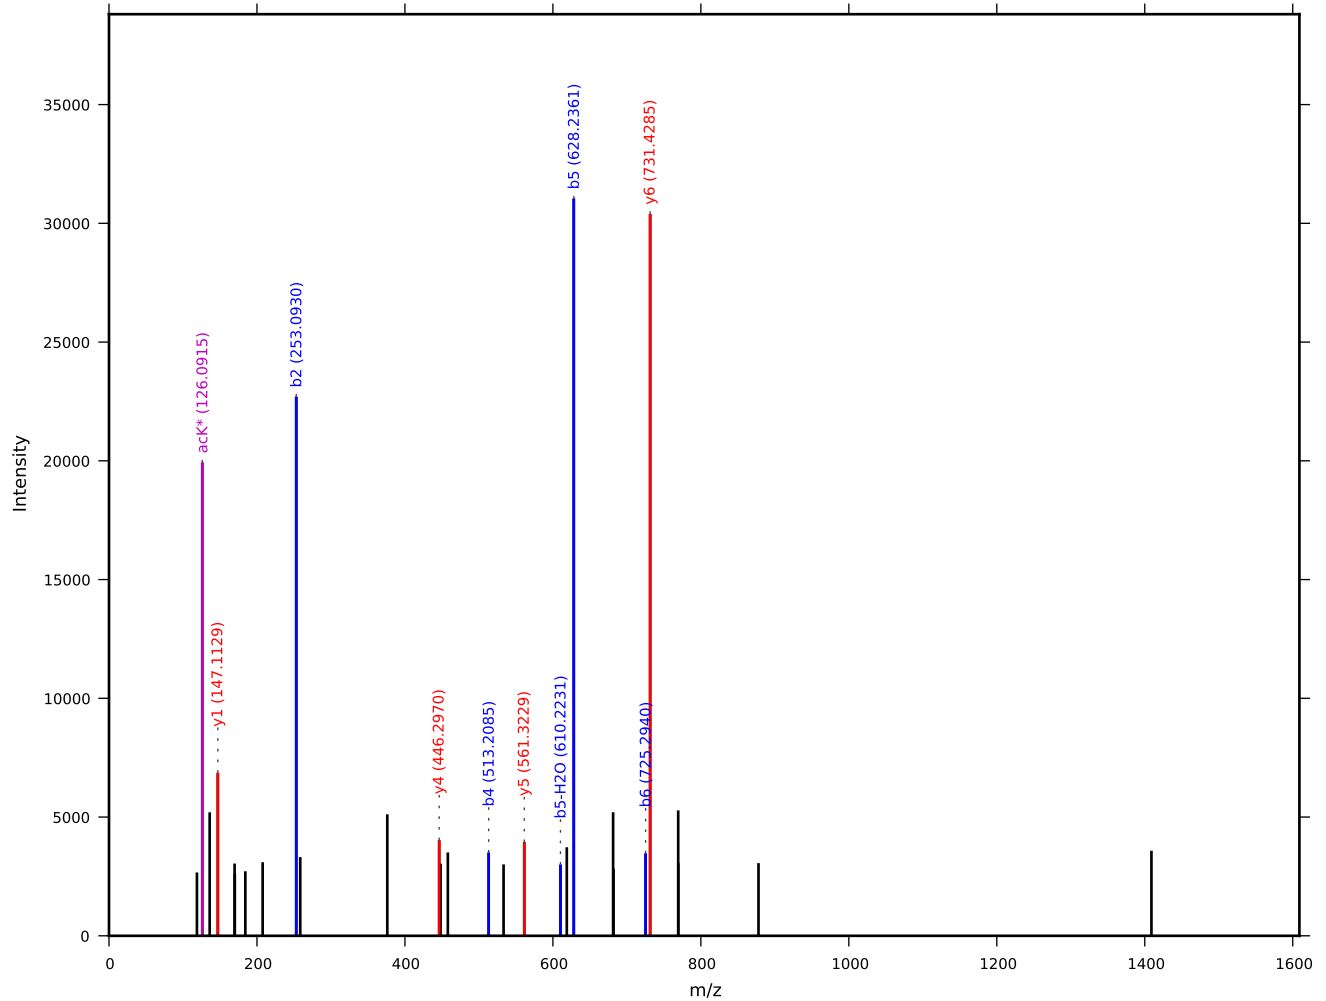

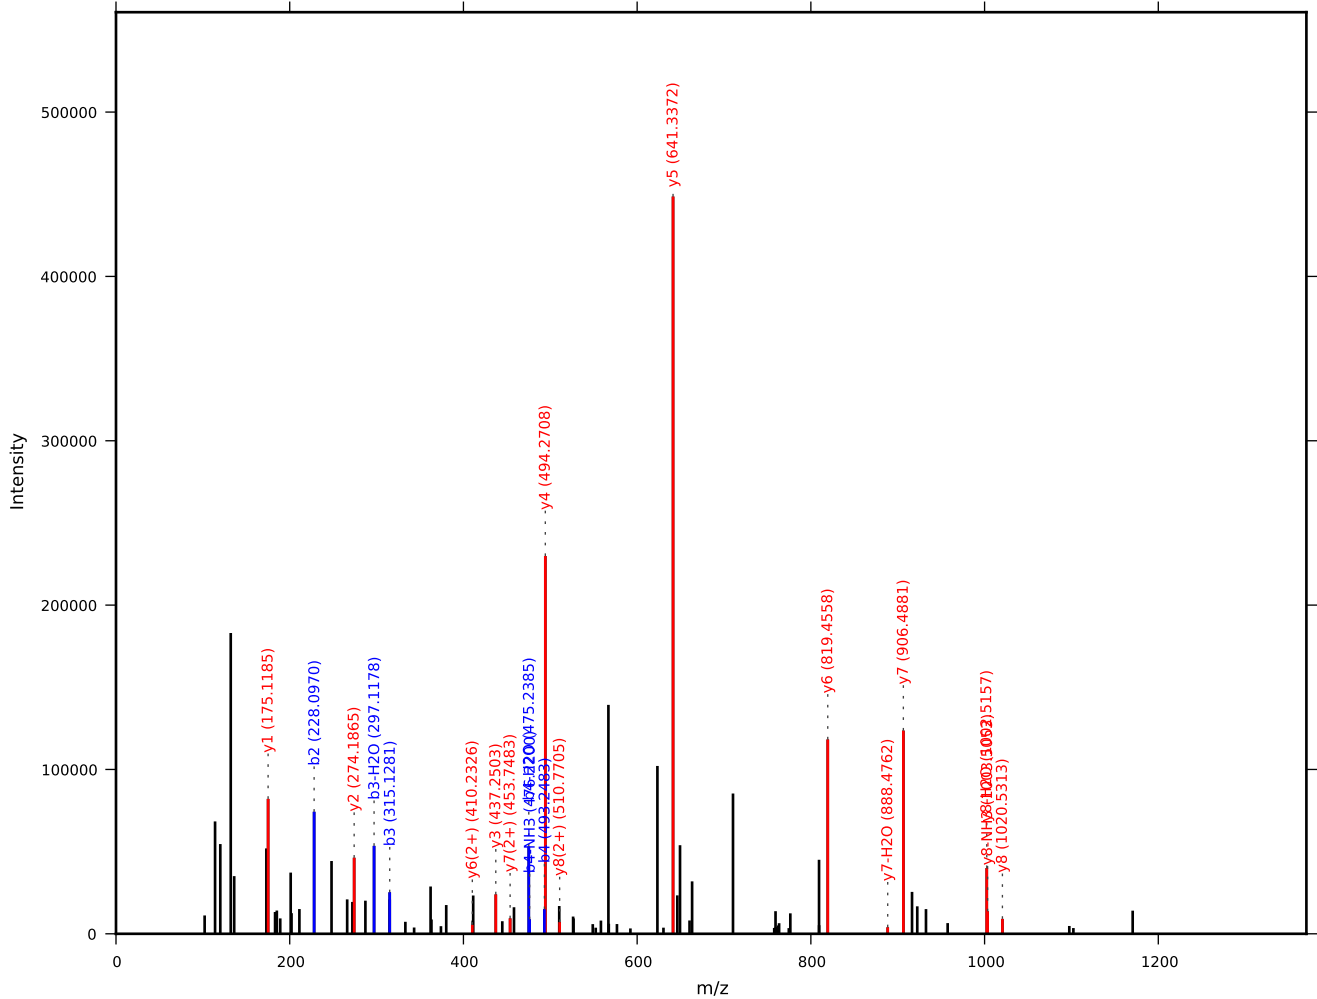



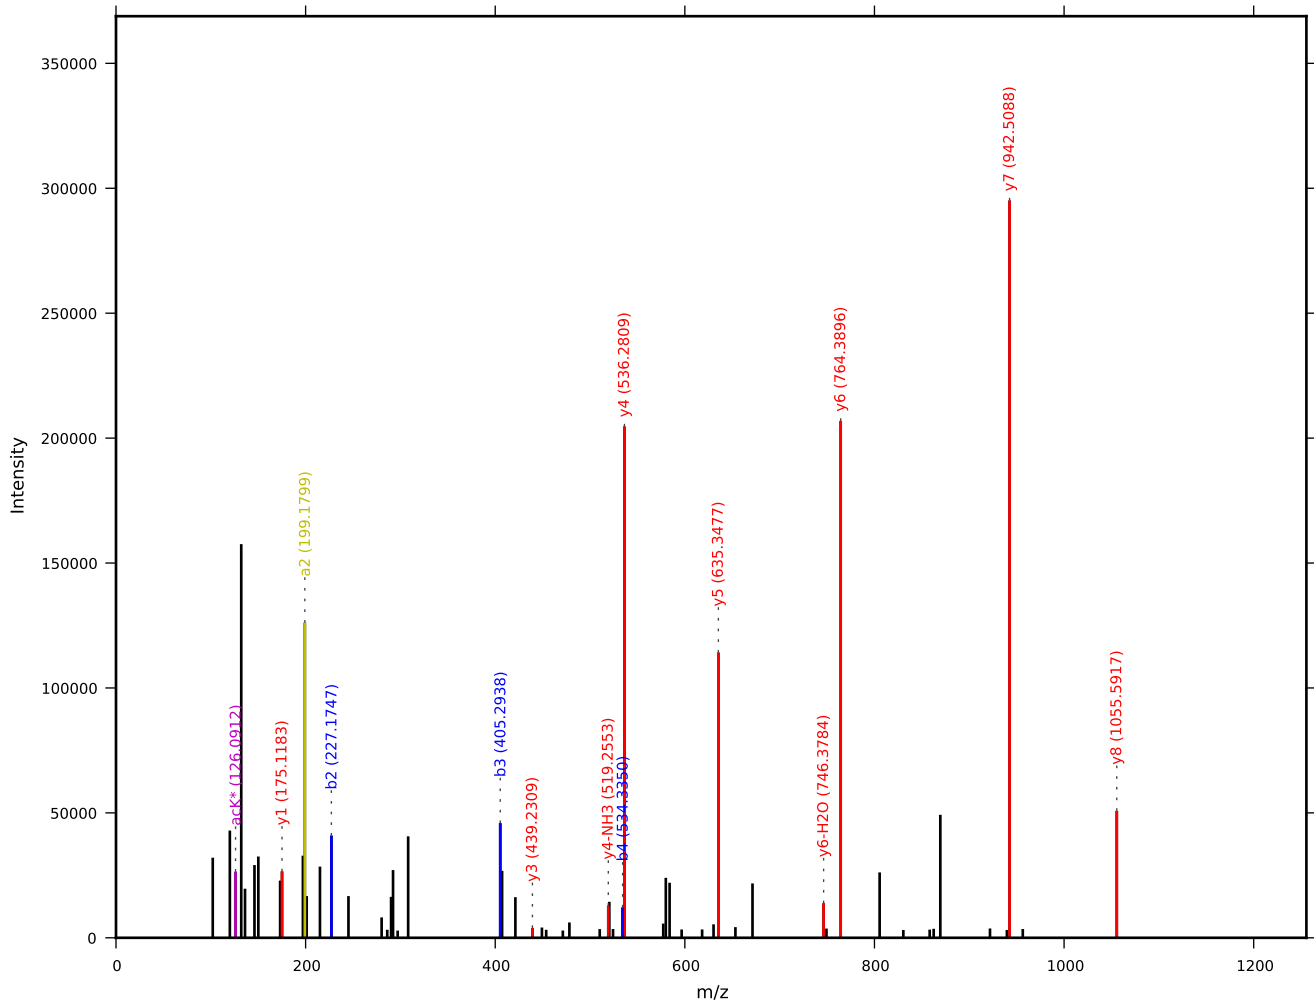

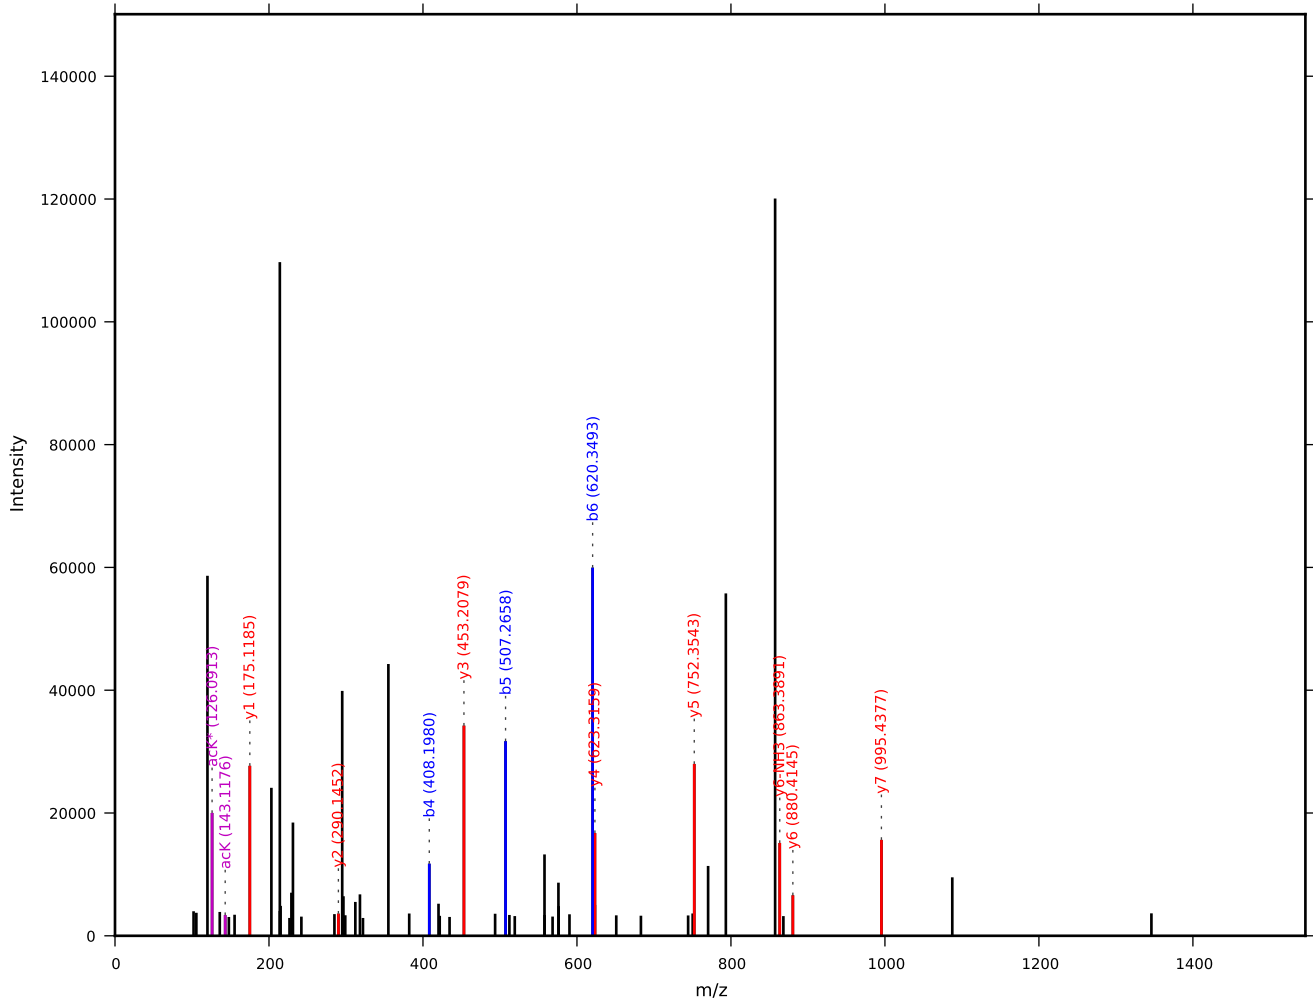

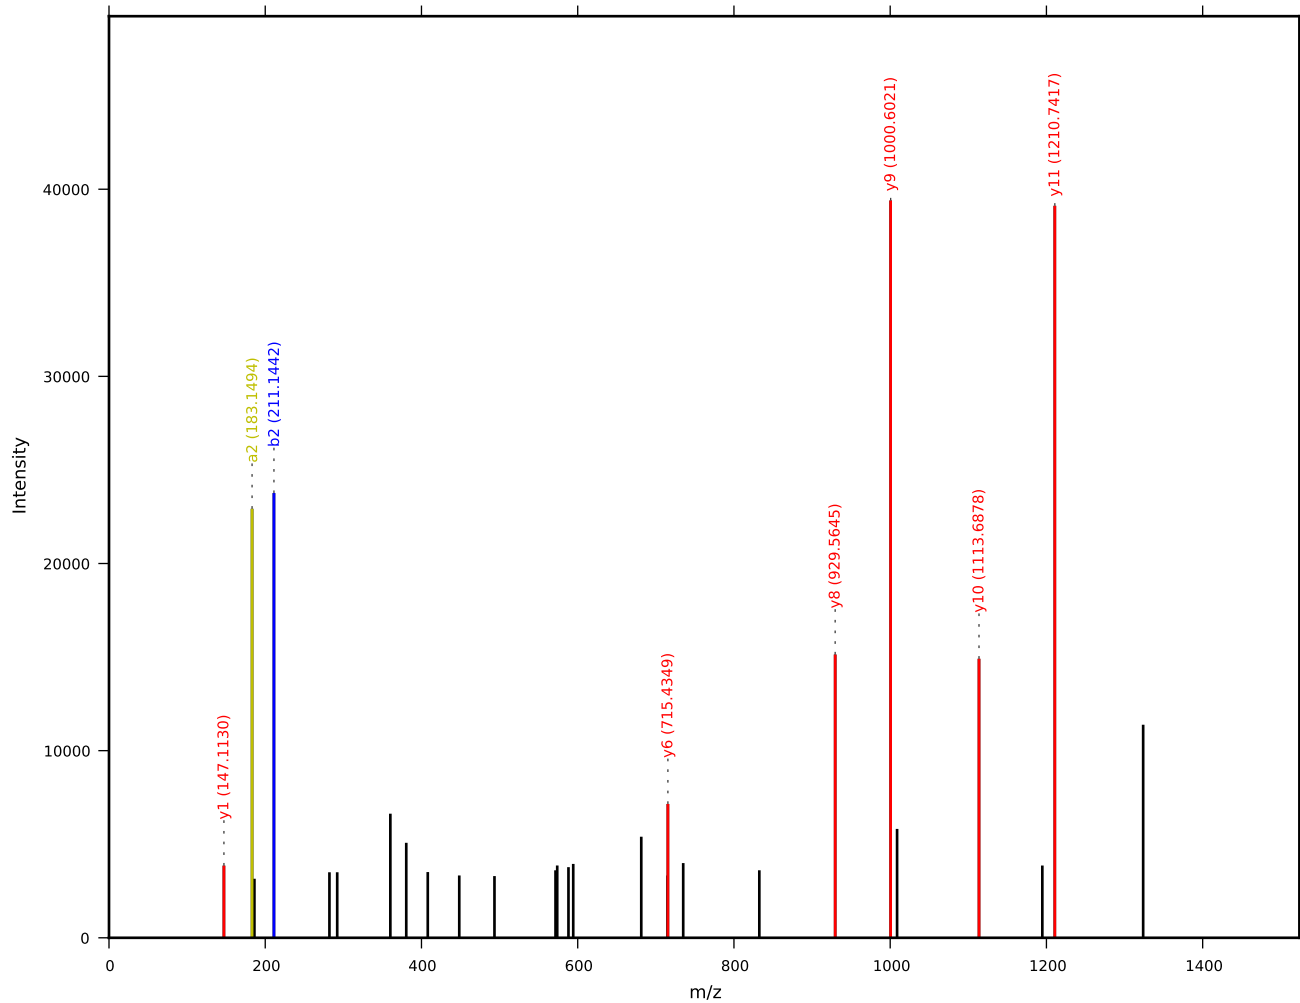

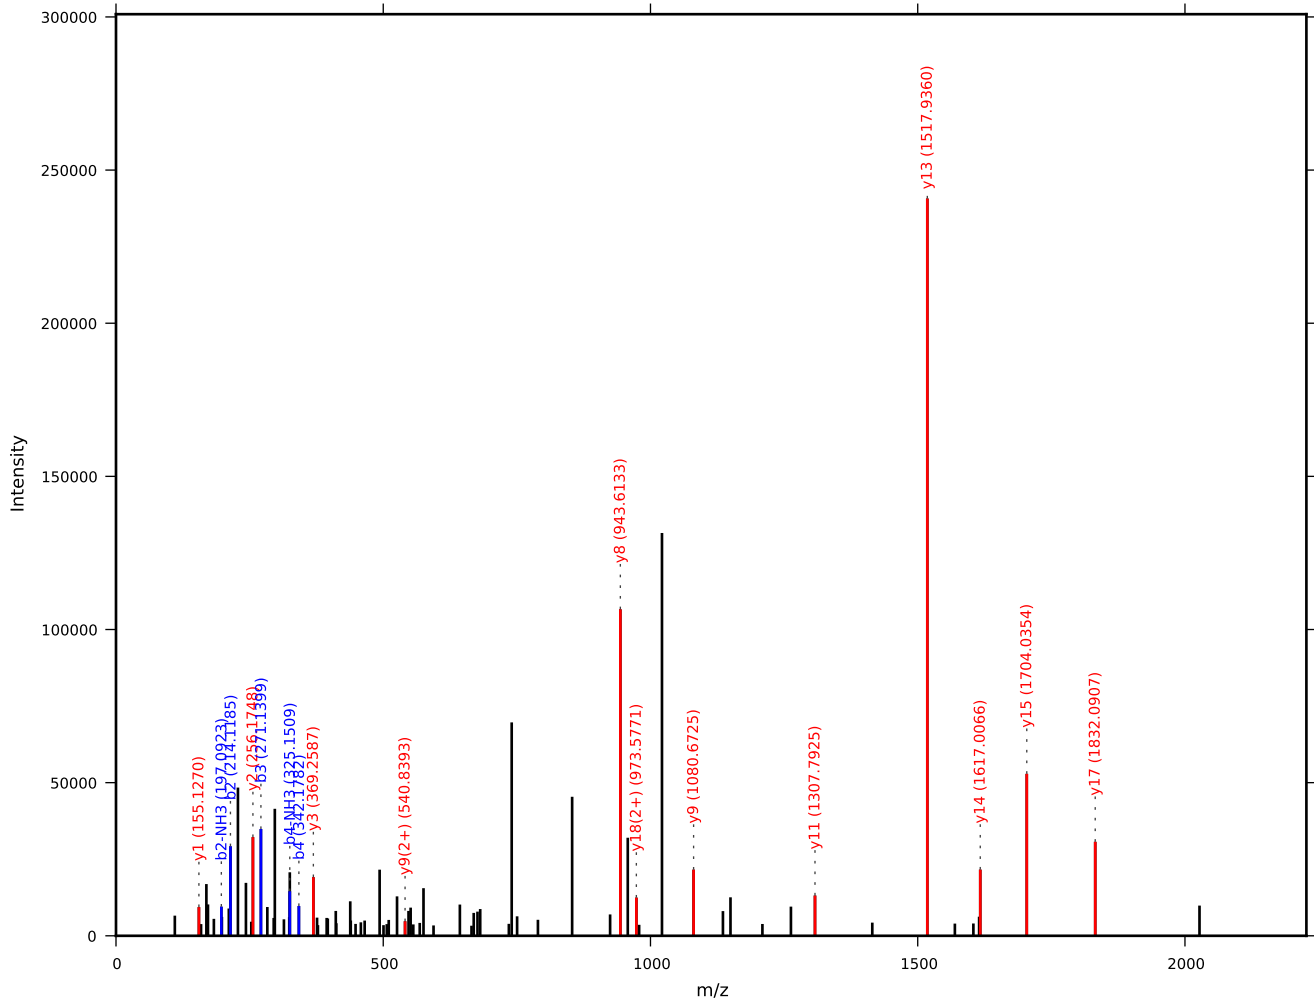

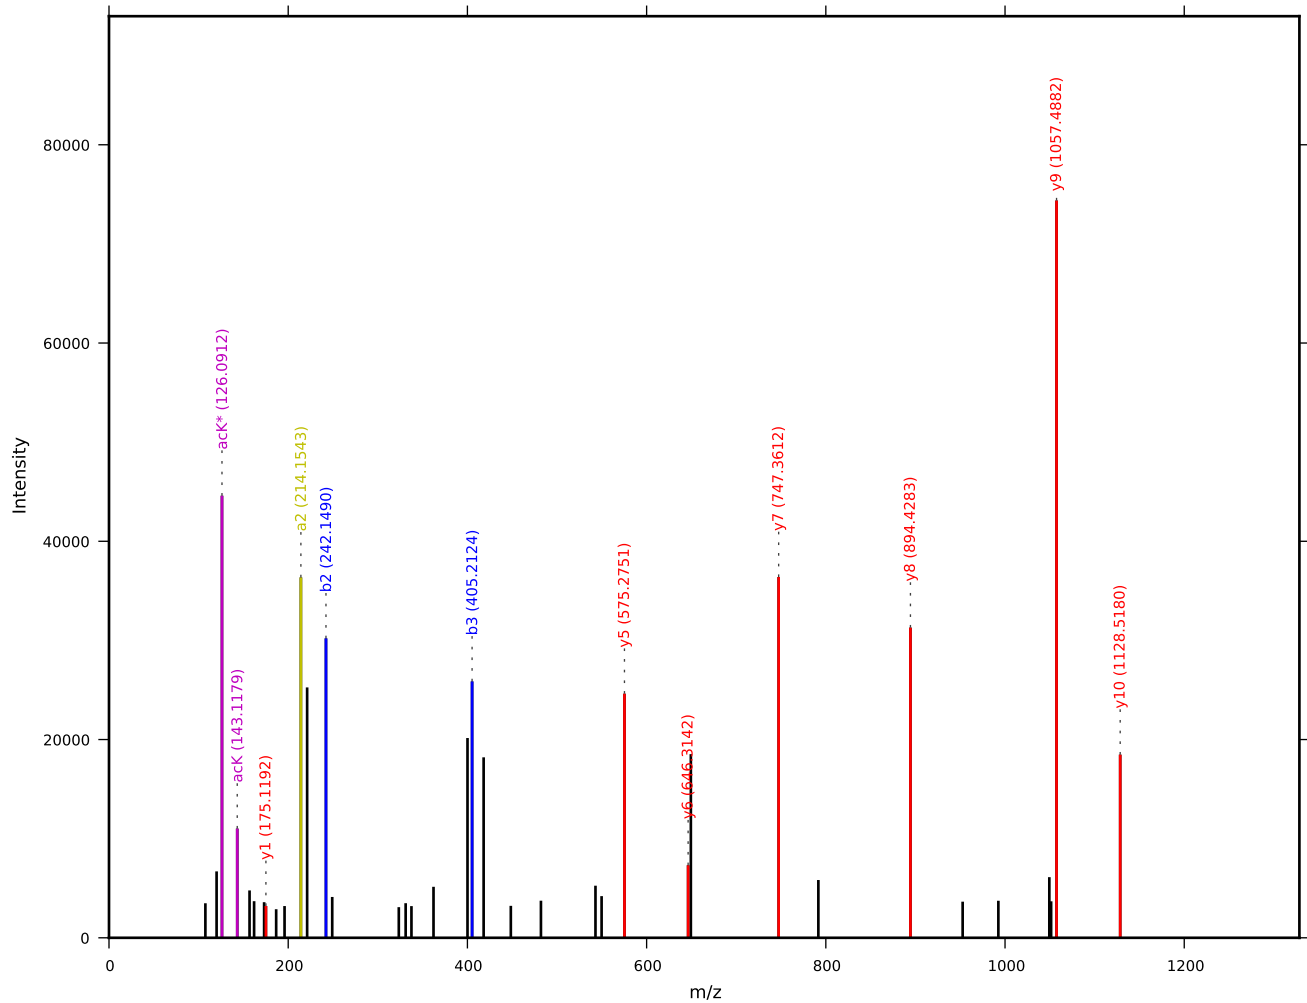

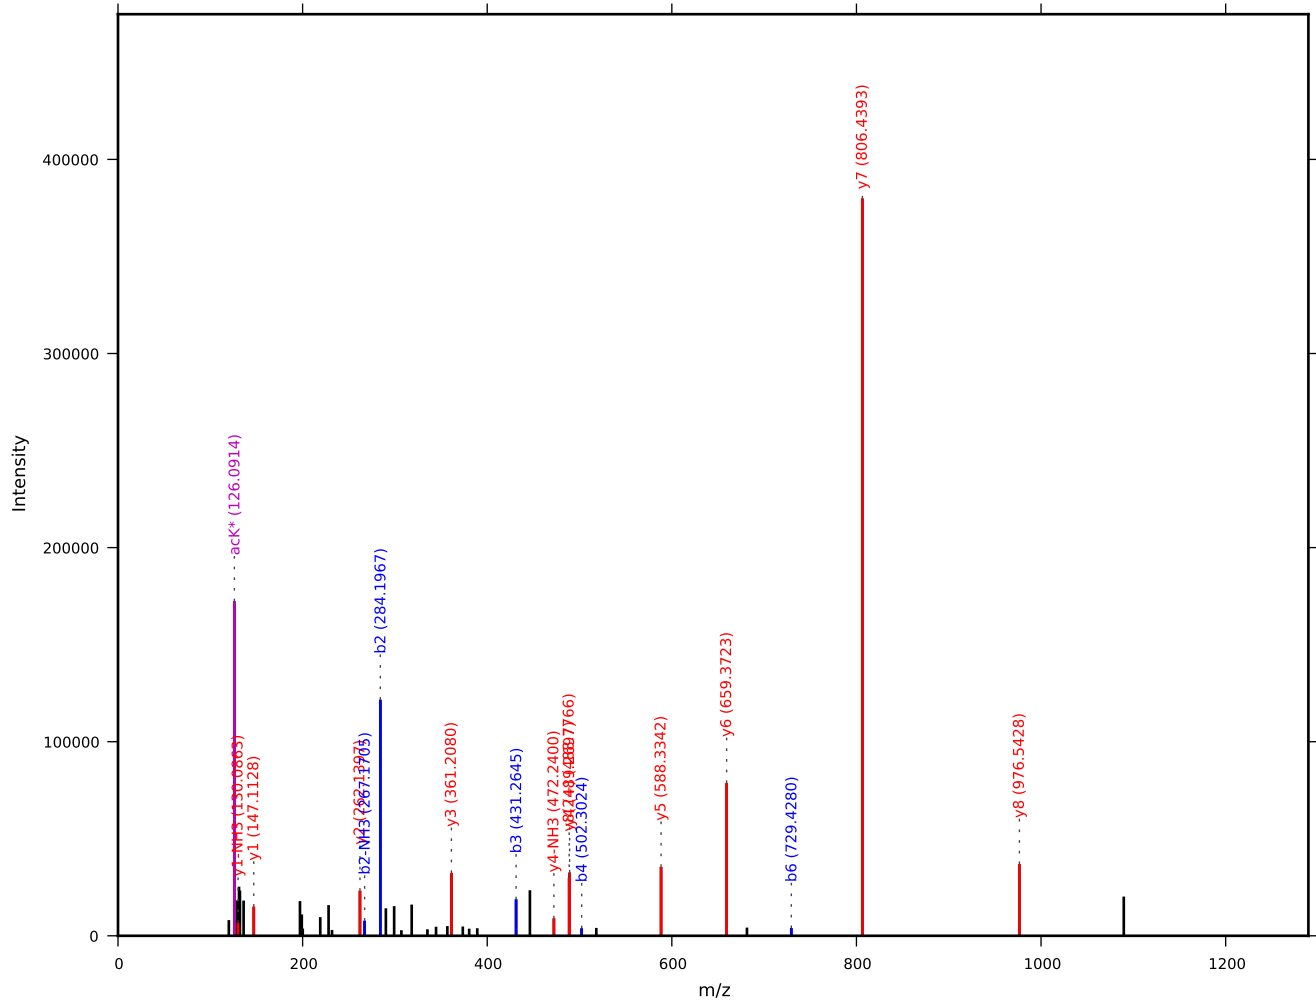

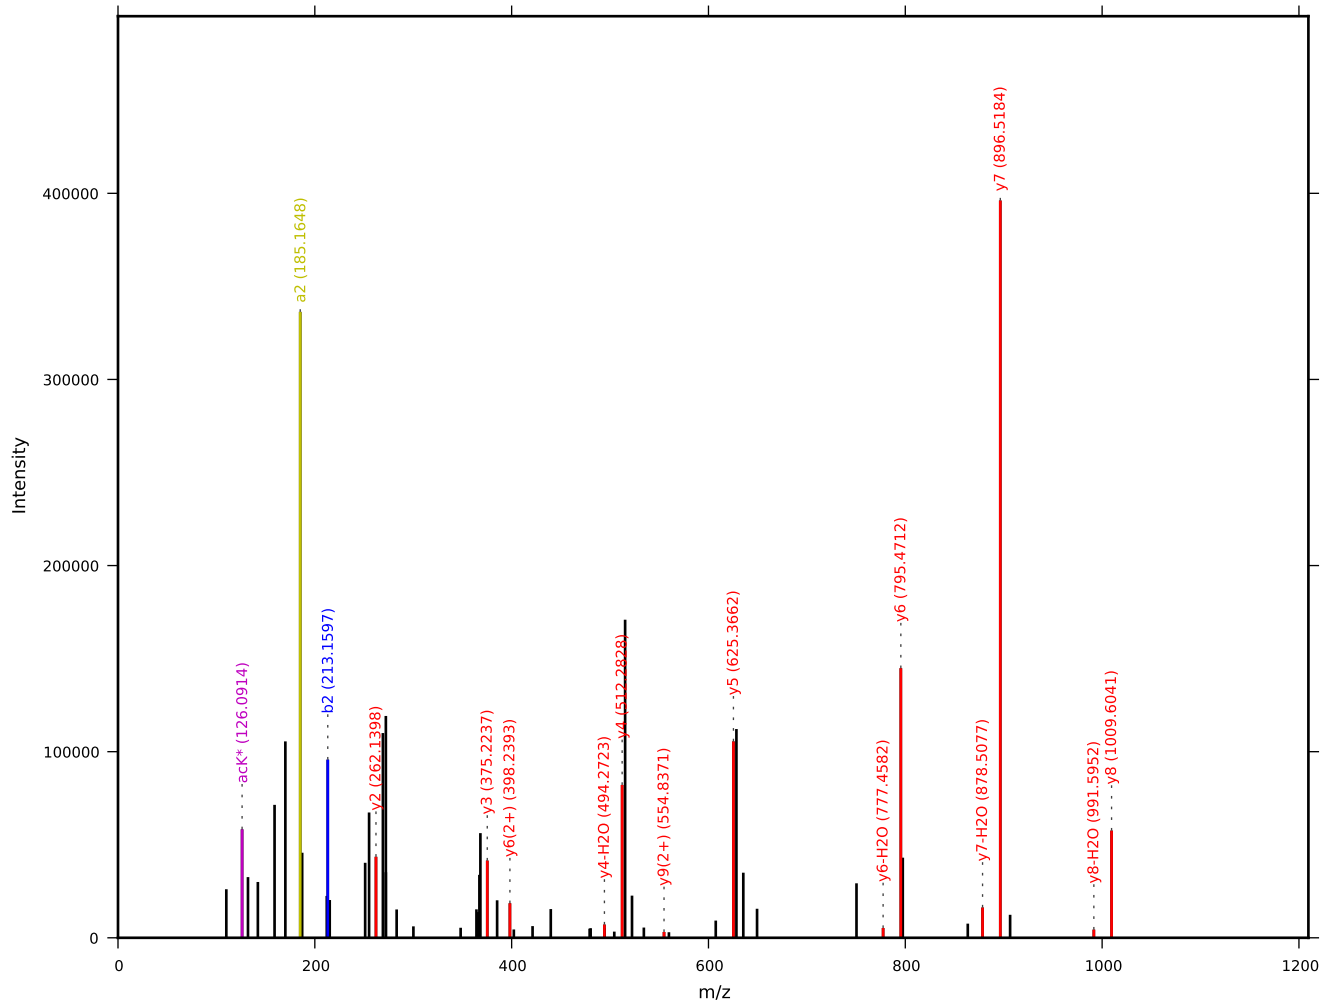

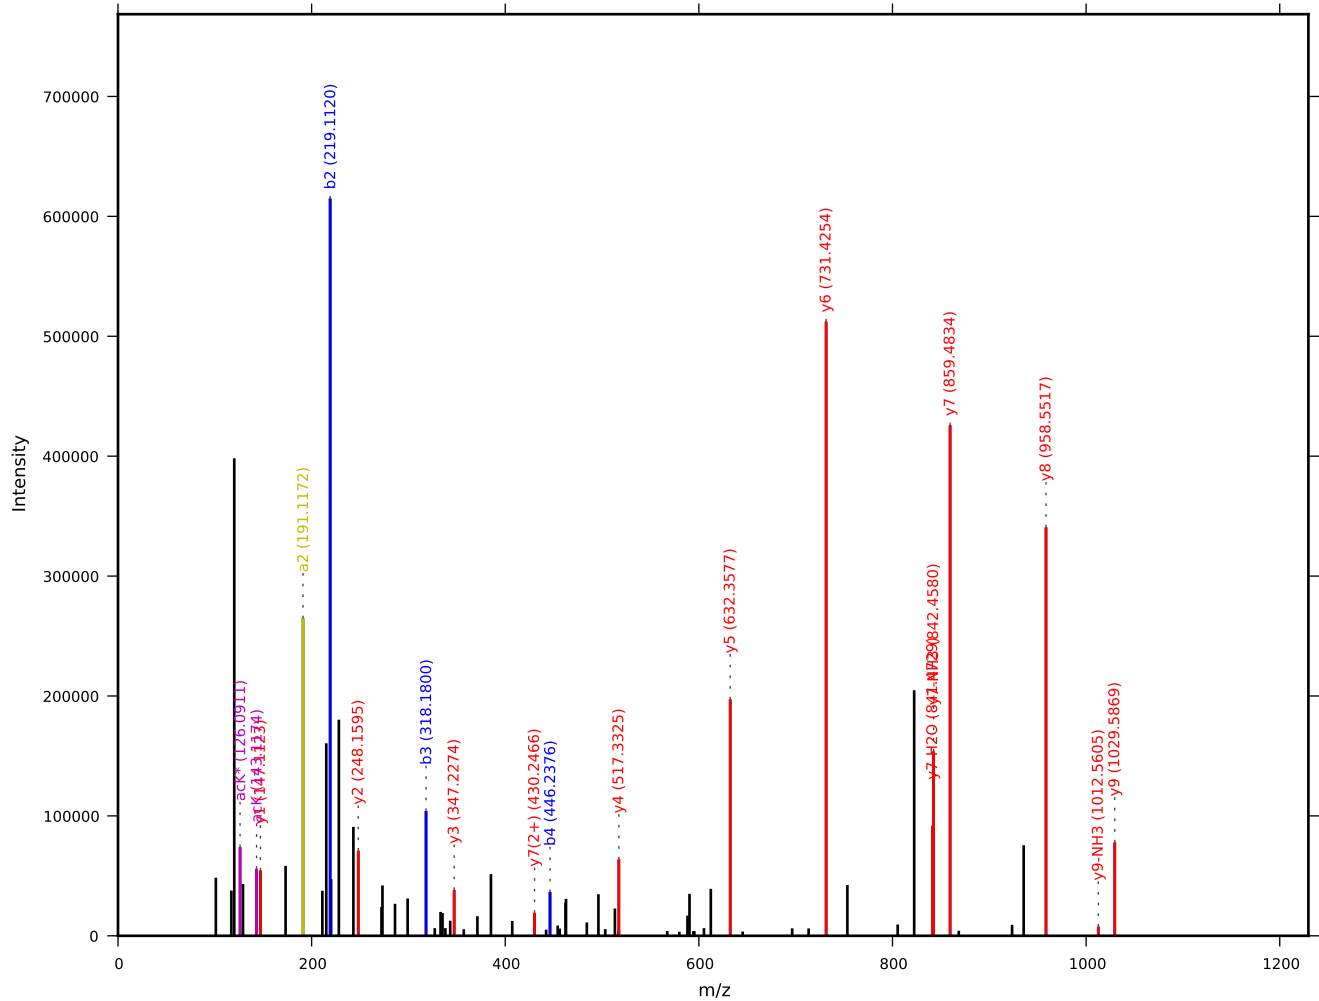



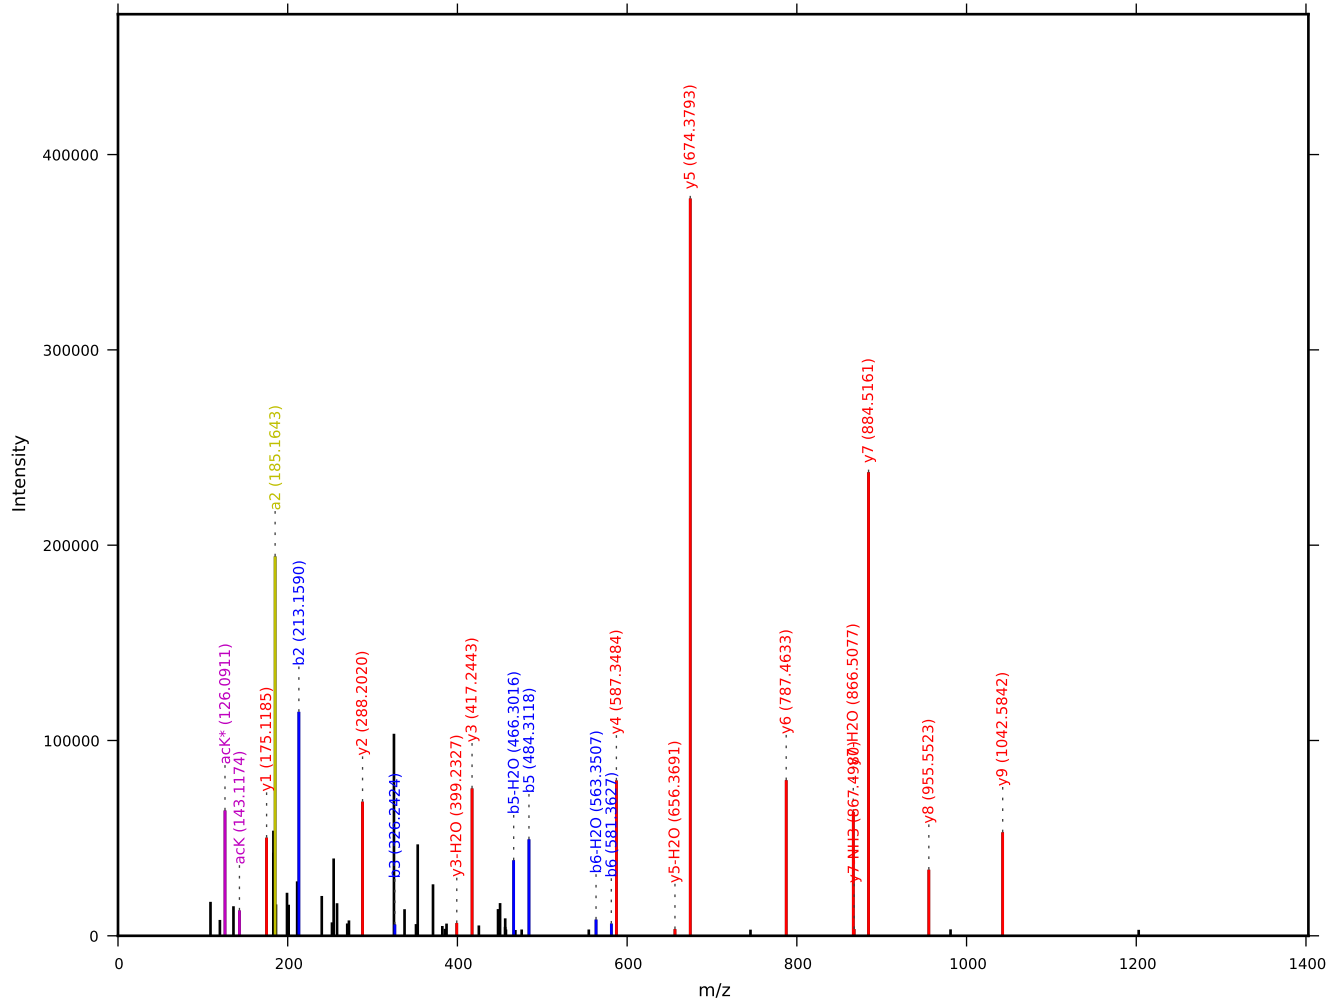

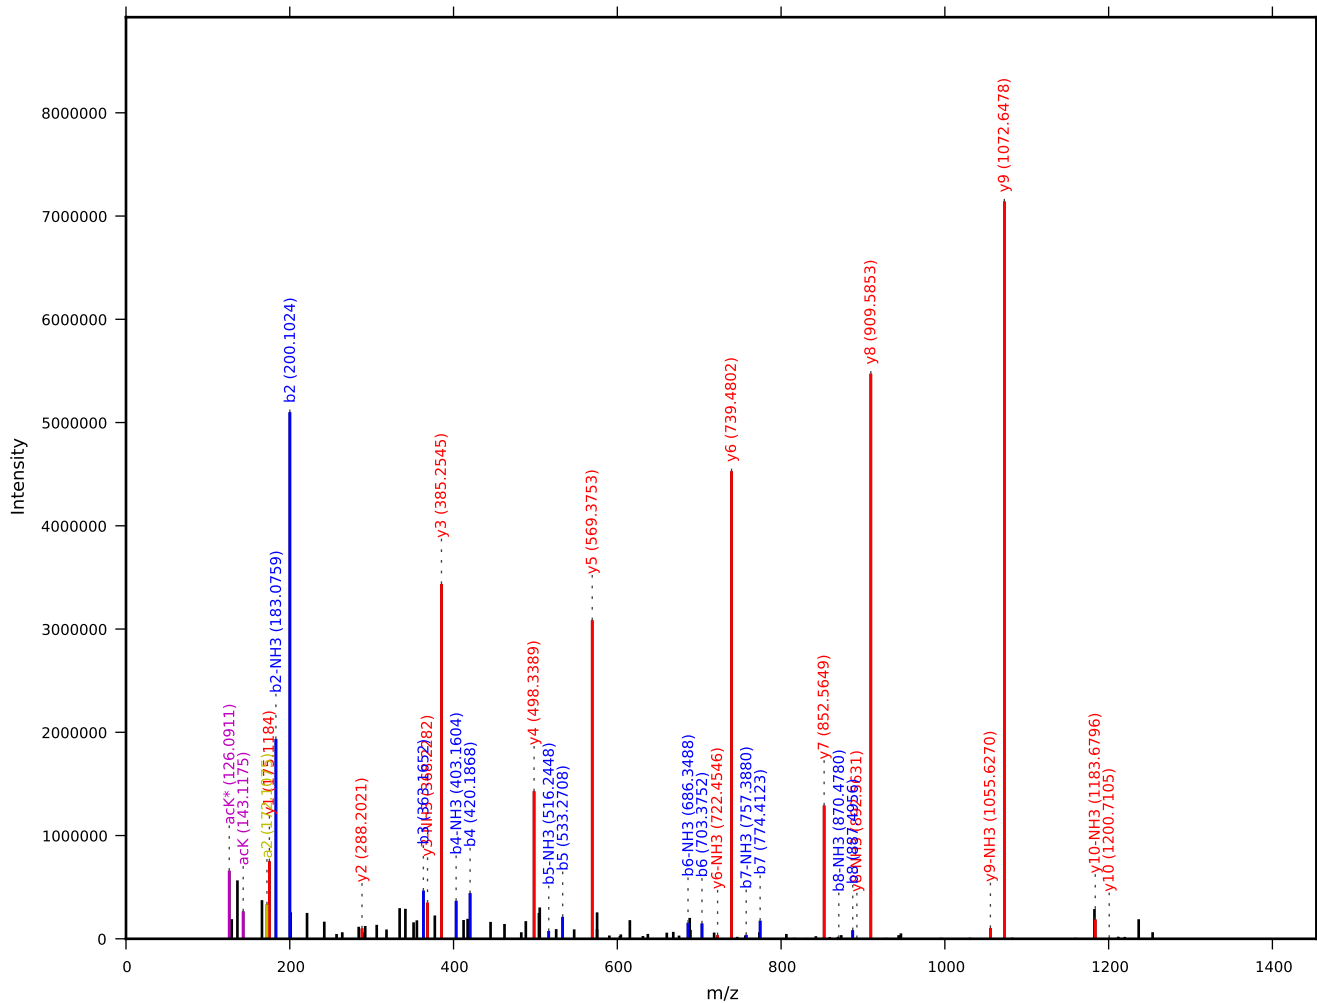

Mass: 1375.6918 Charge: 3 m/z: 459.57122  
Modified Peptide: \_EKPGIFNMK(ac)DR\_ Score: 44.543 PEP: 0.0096446

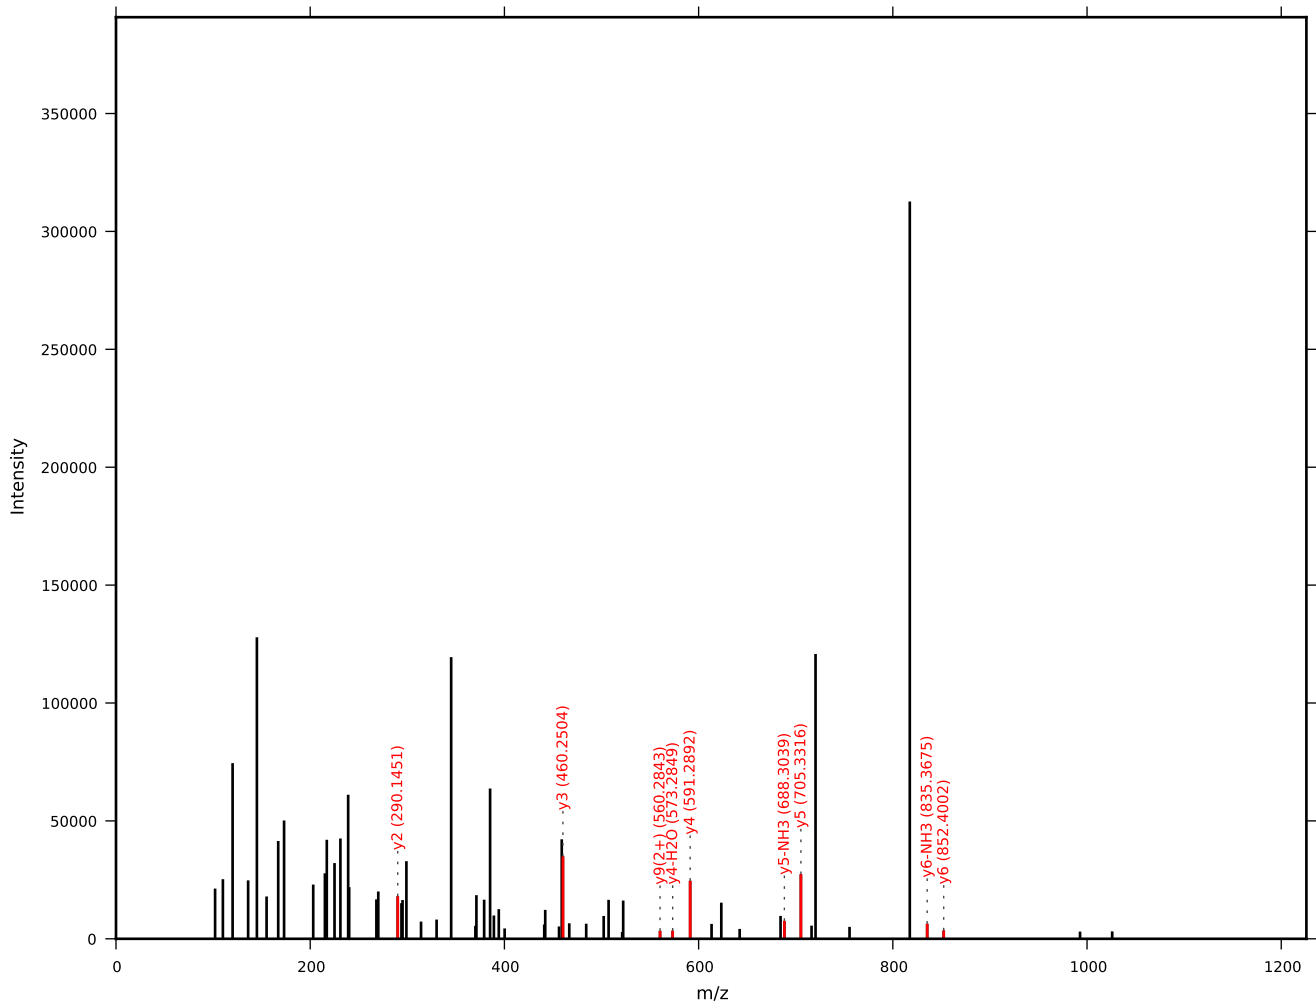

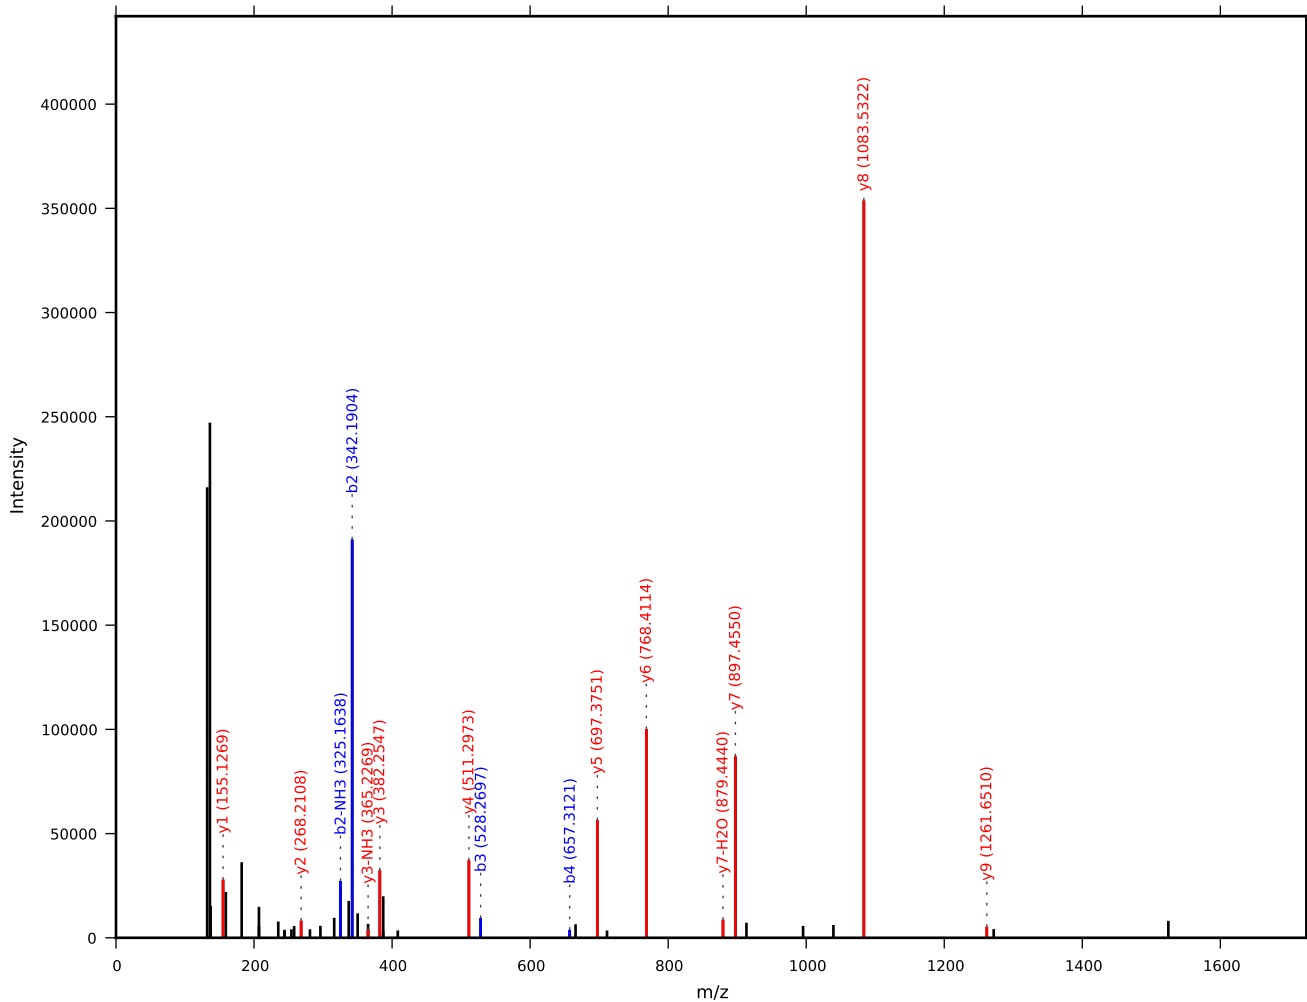

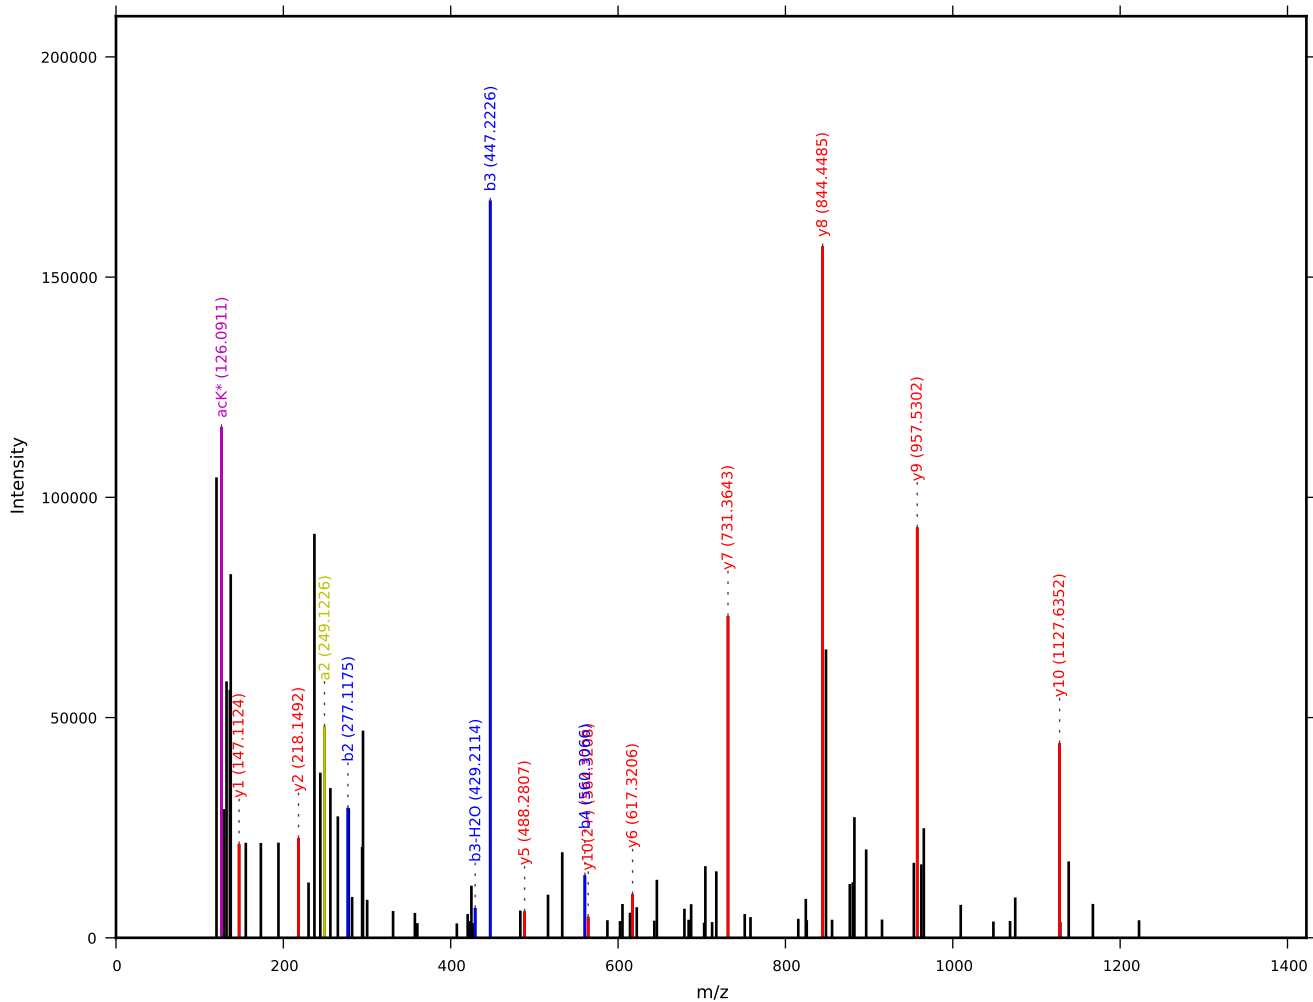

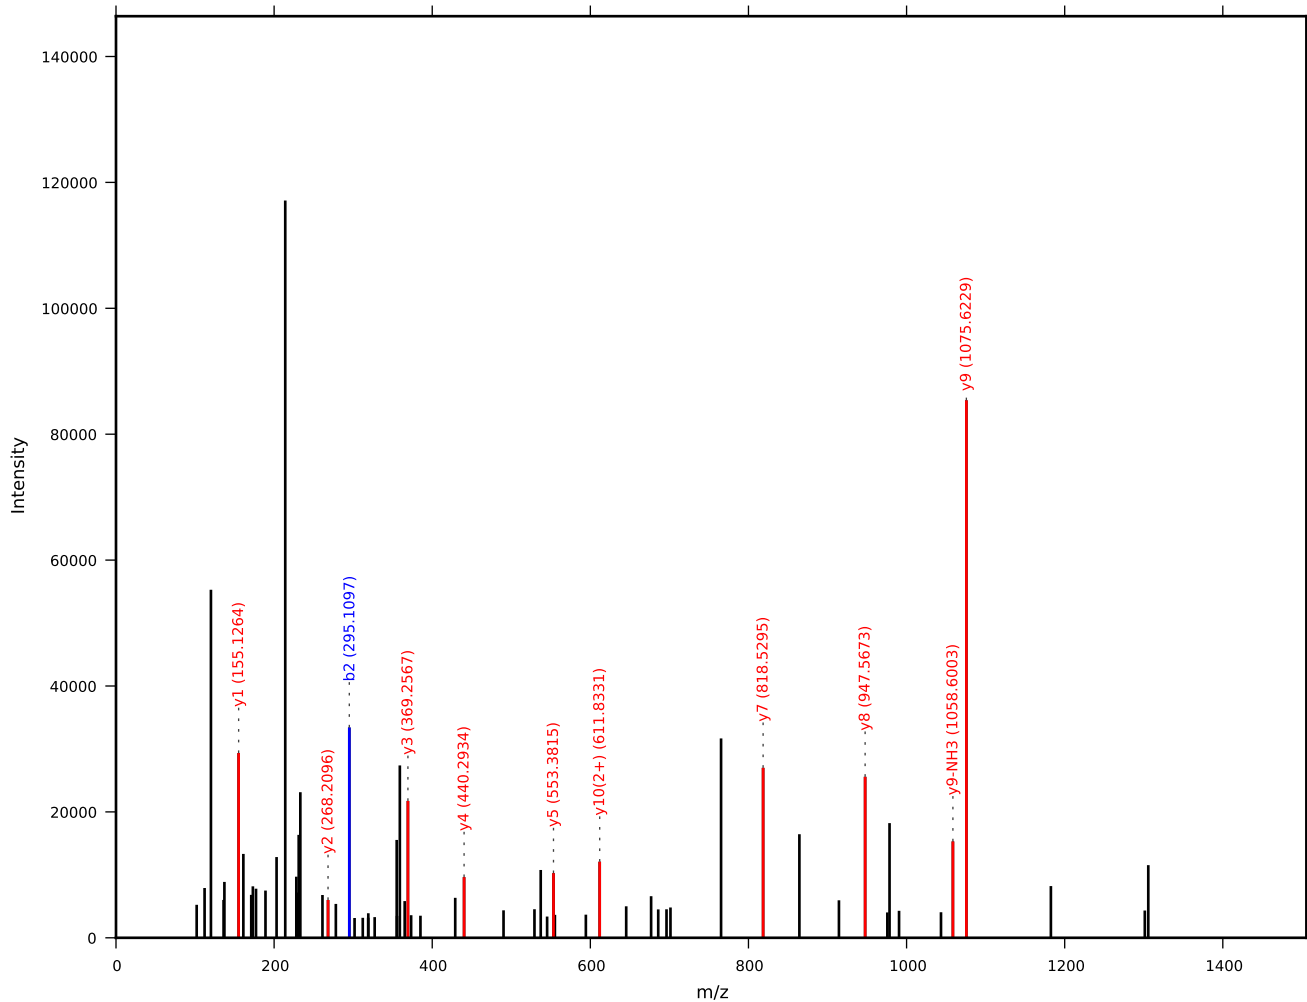

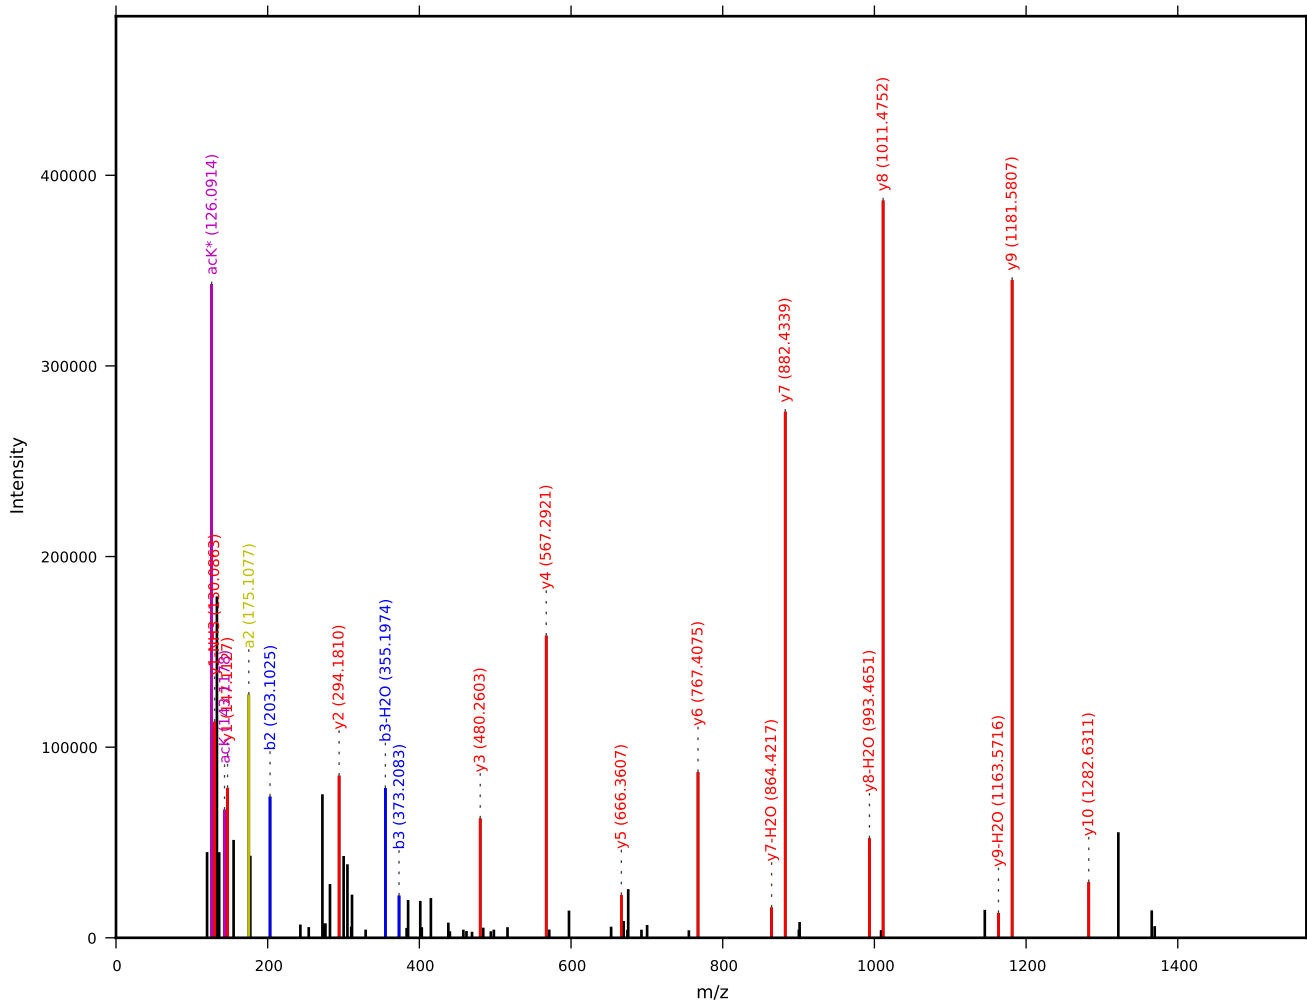

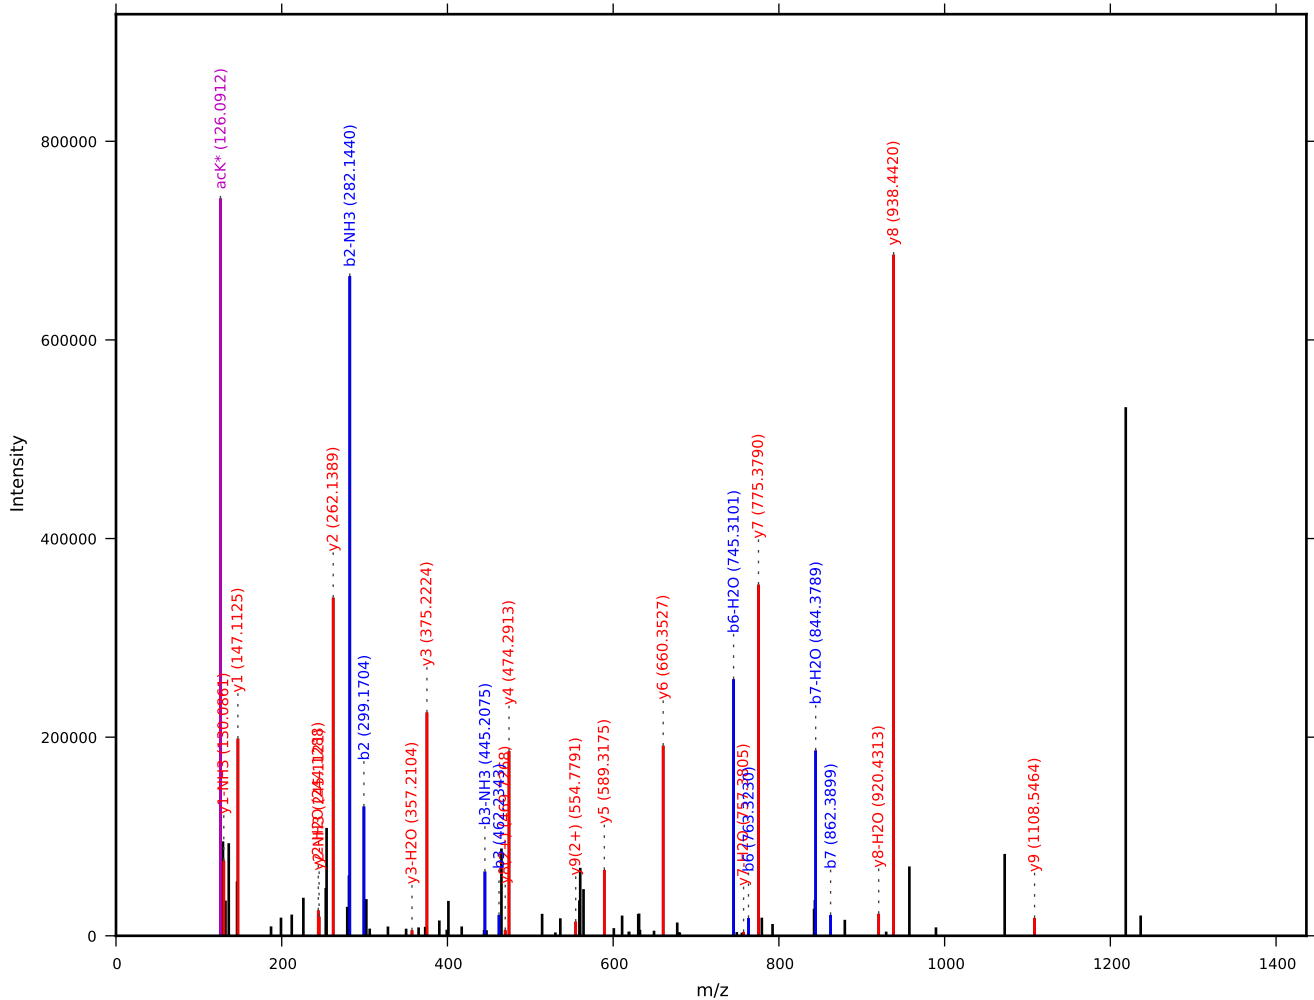



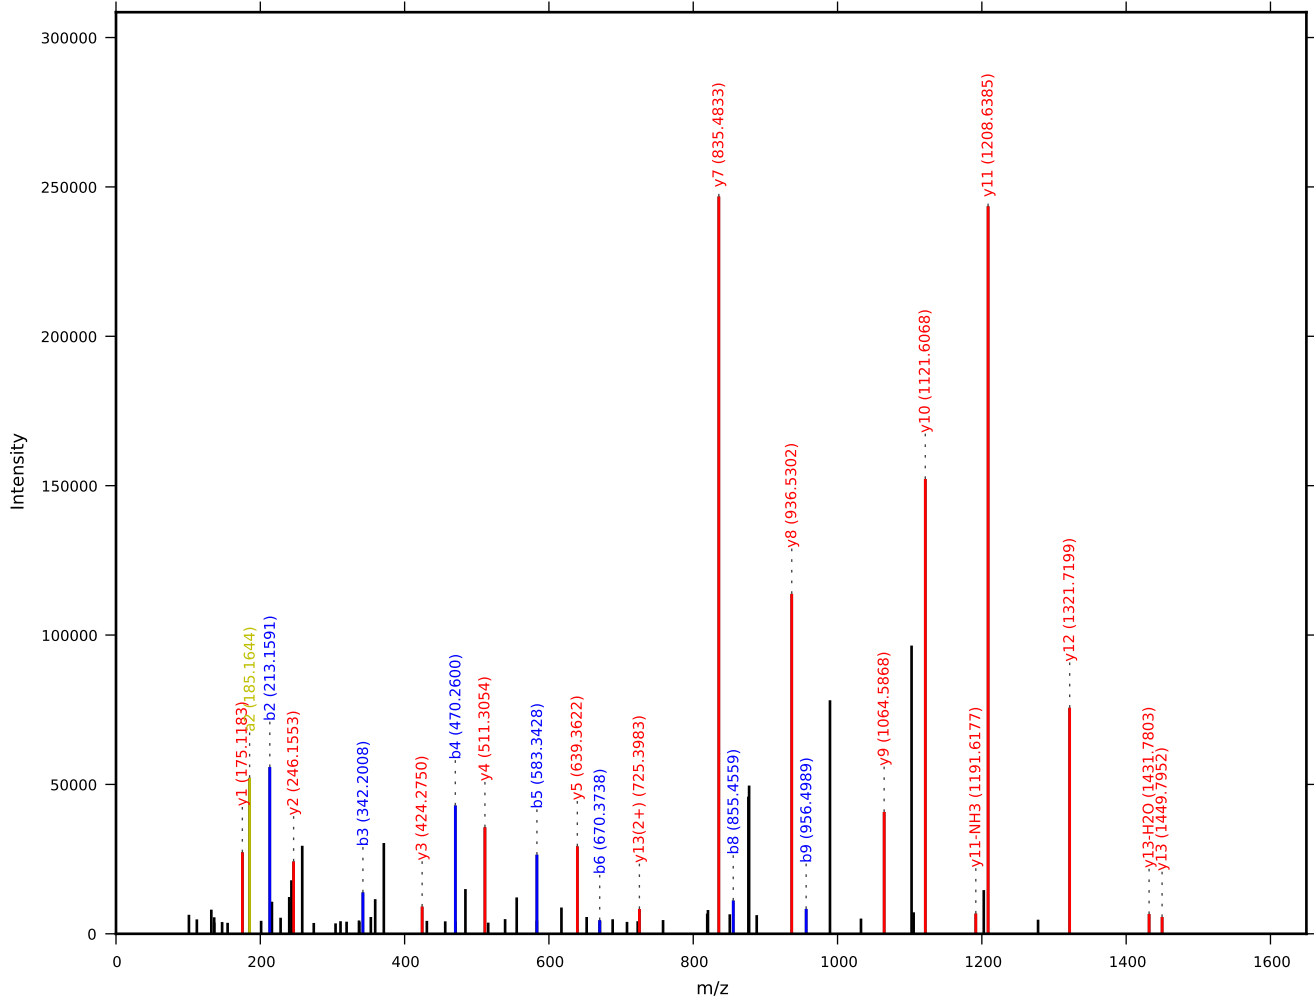

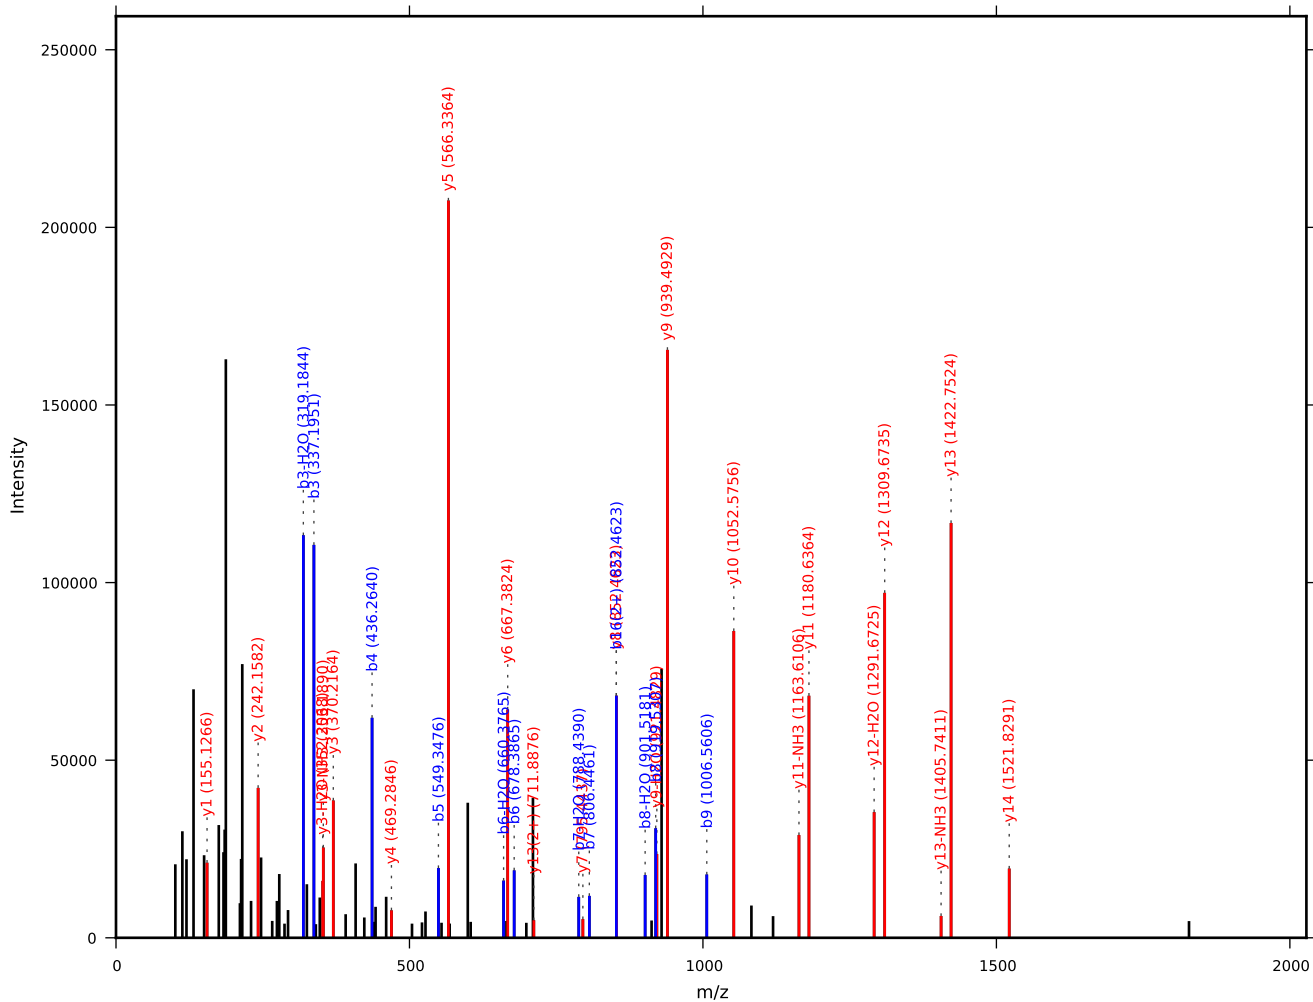

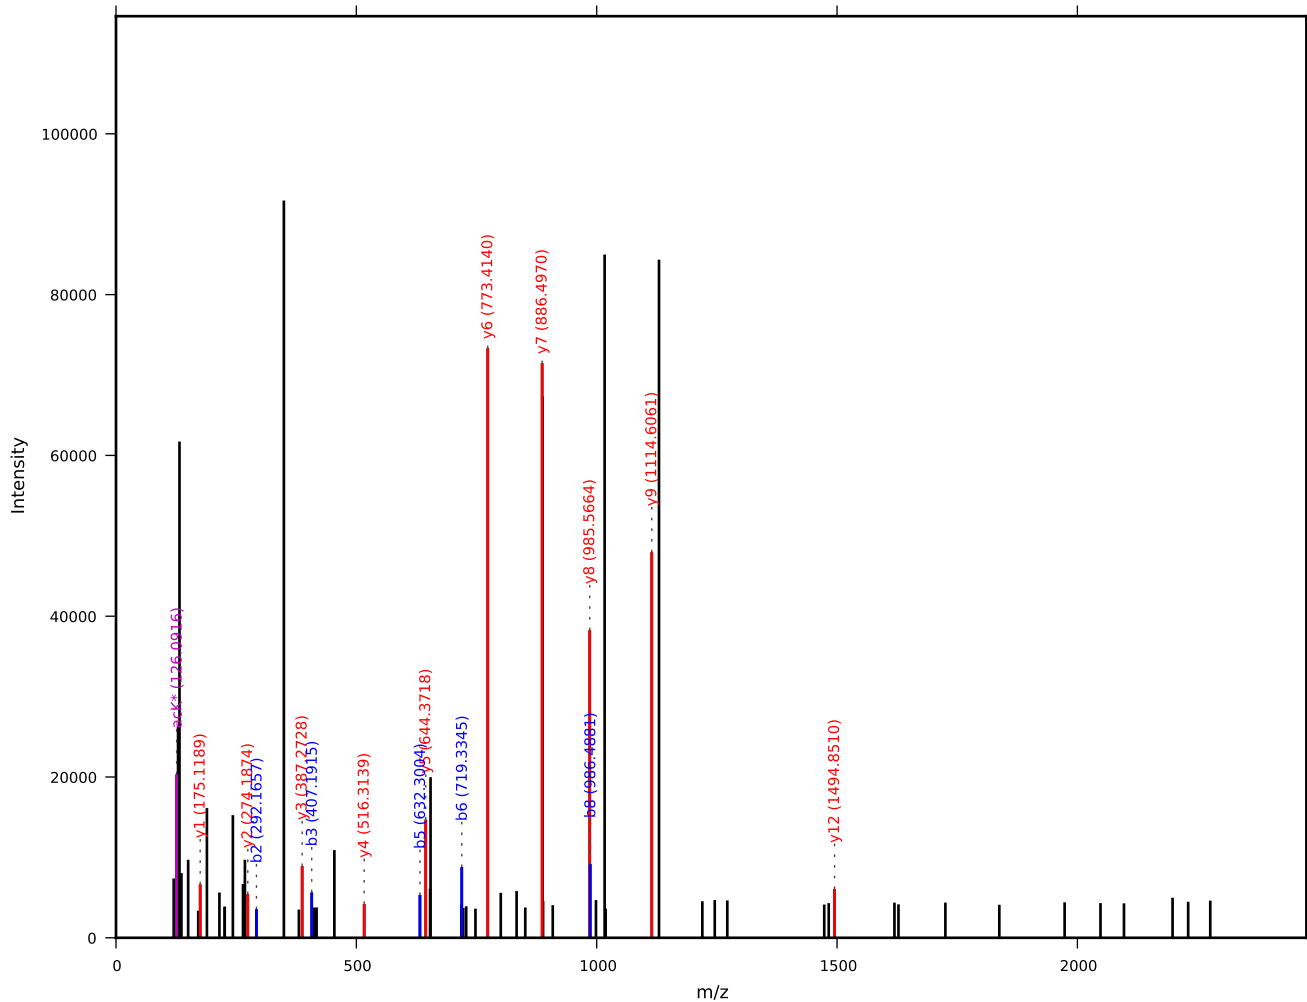

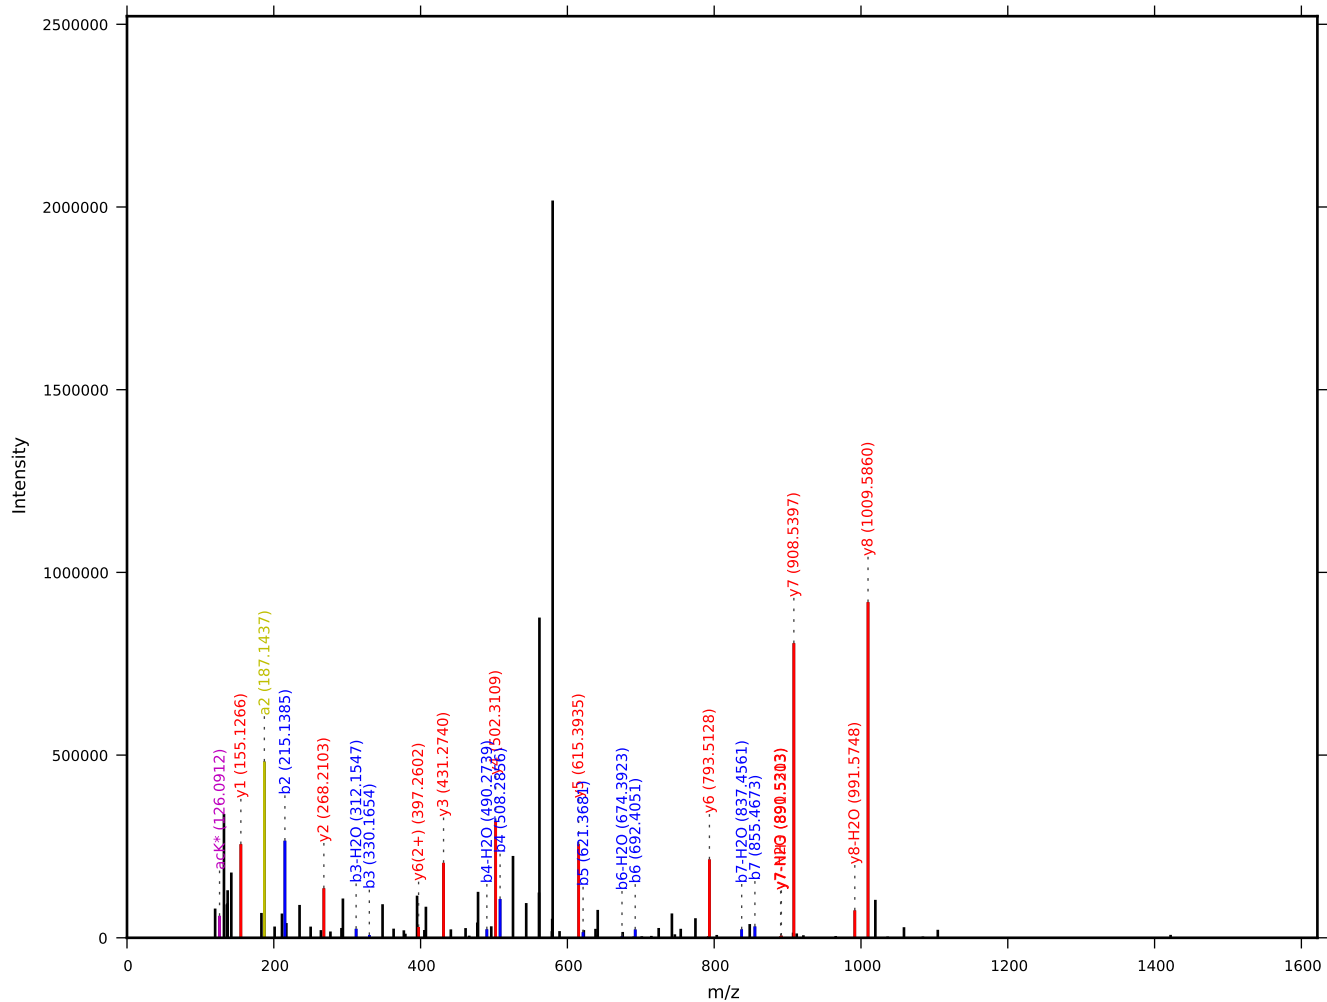

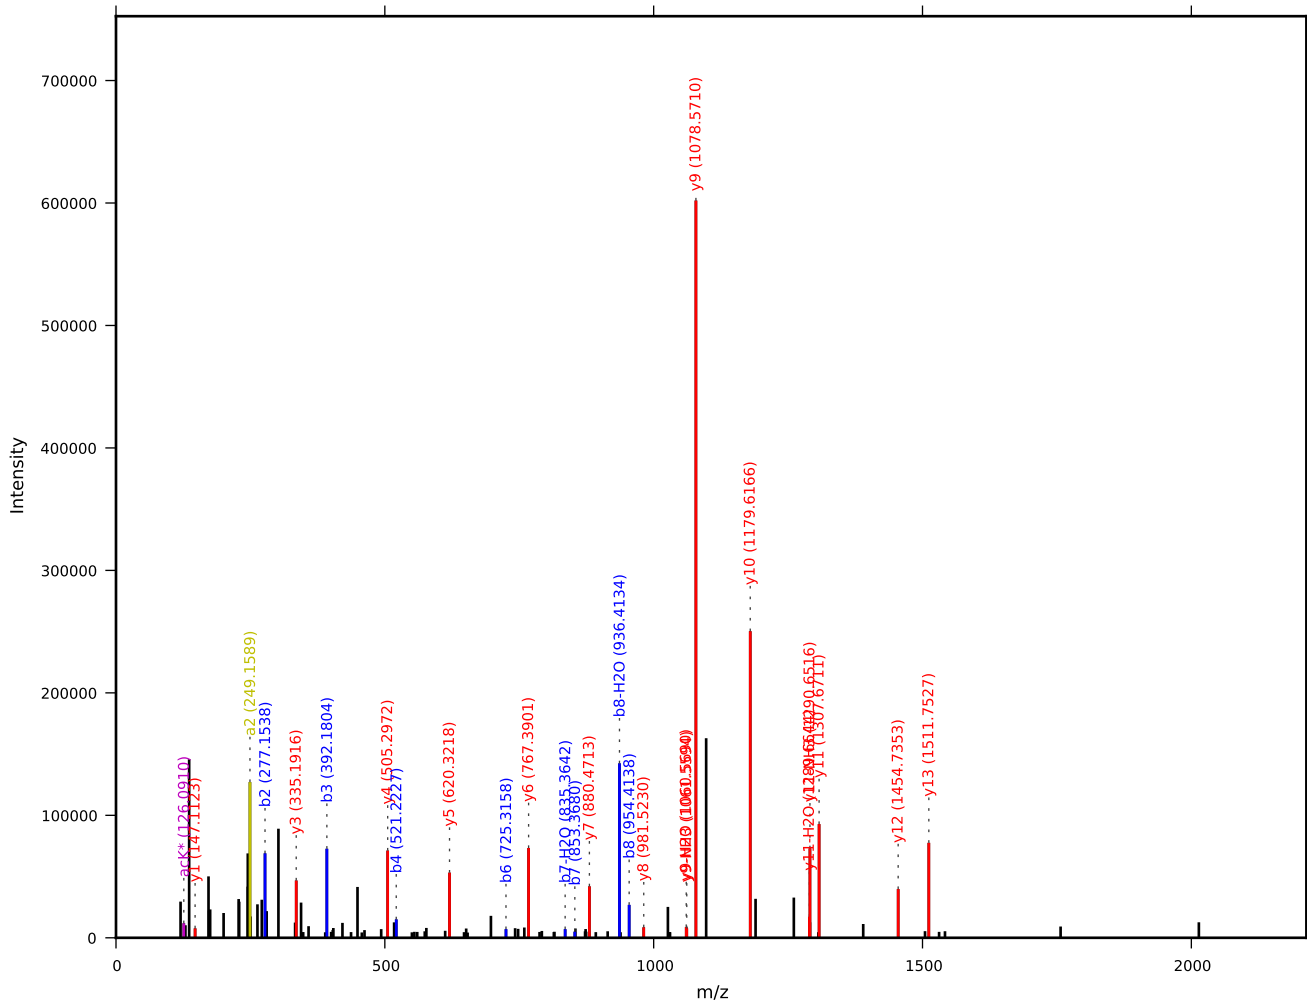

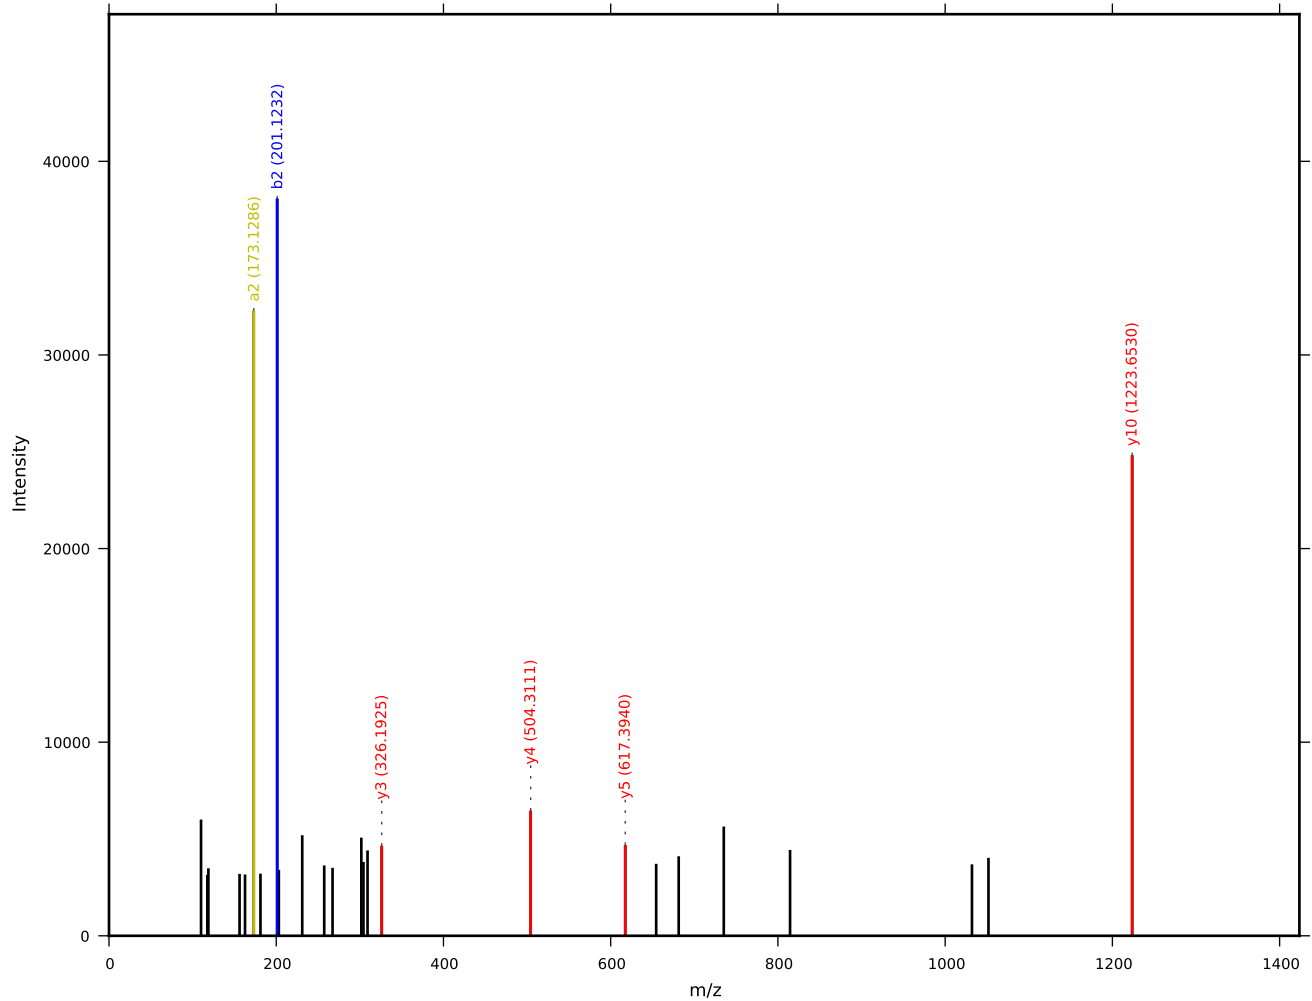

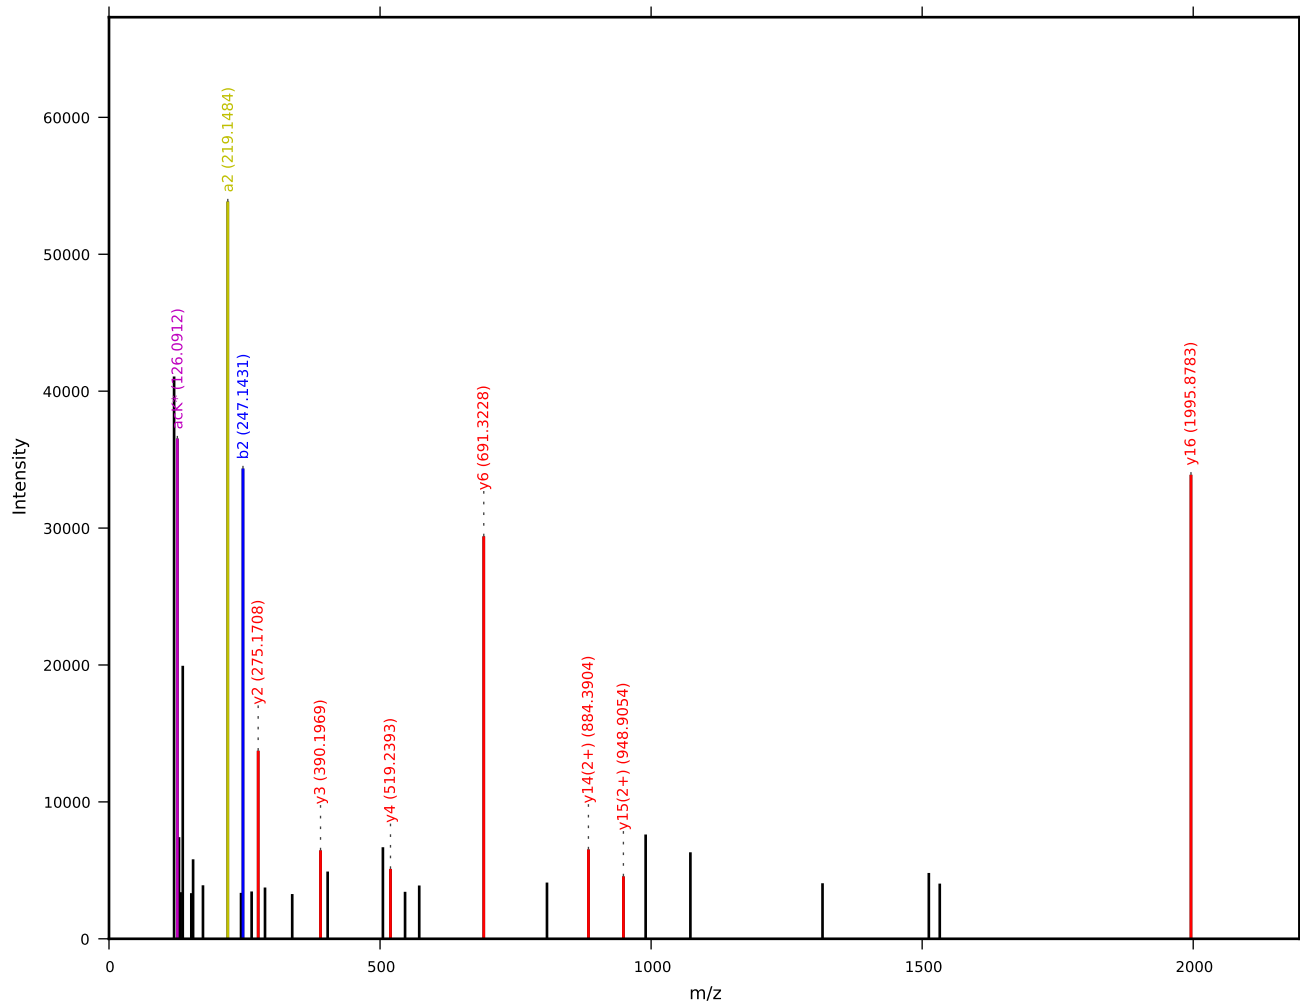

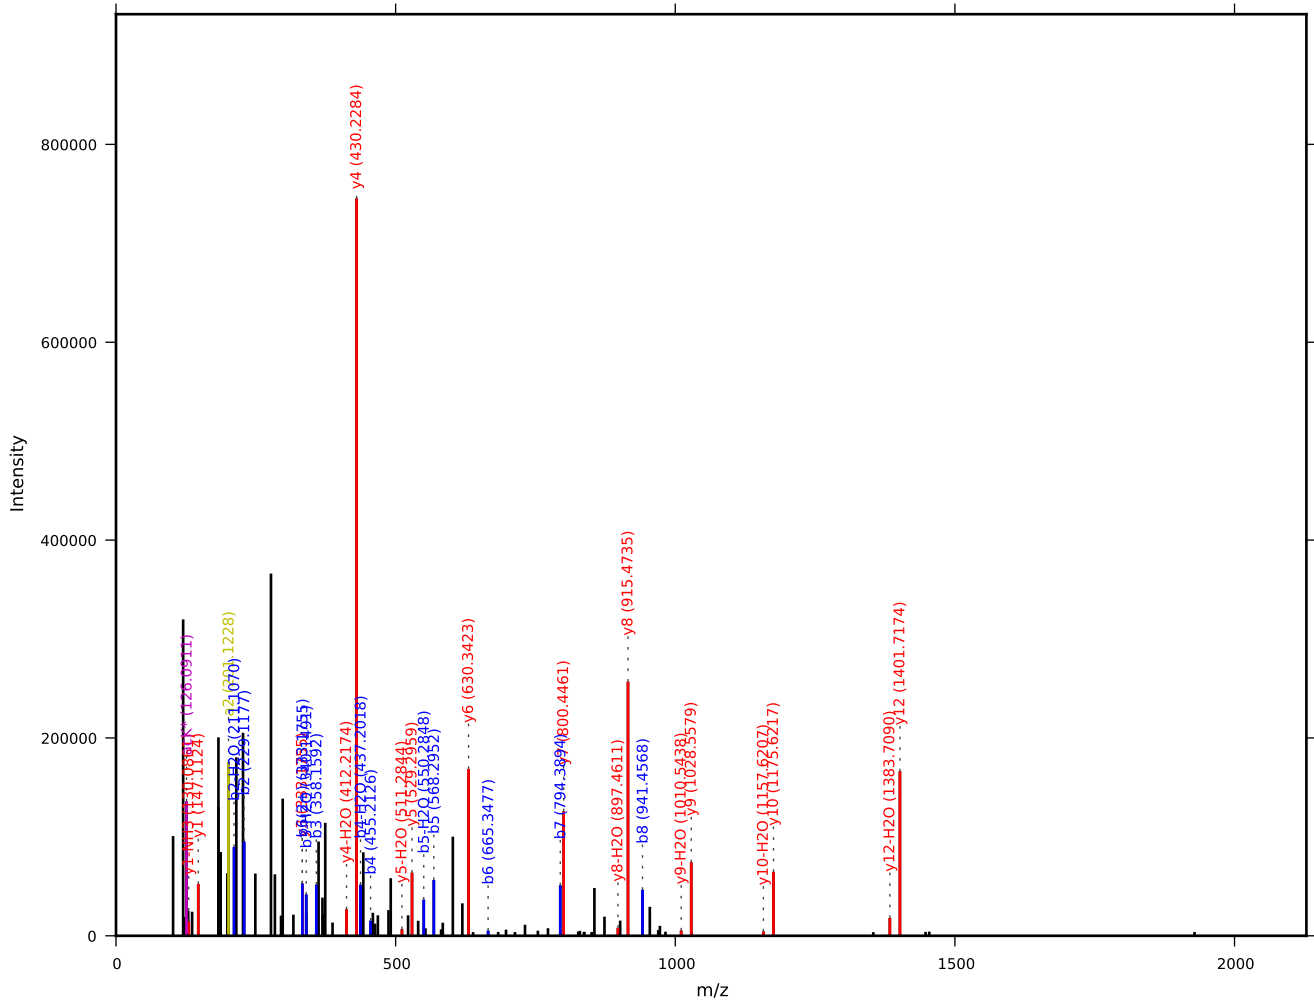



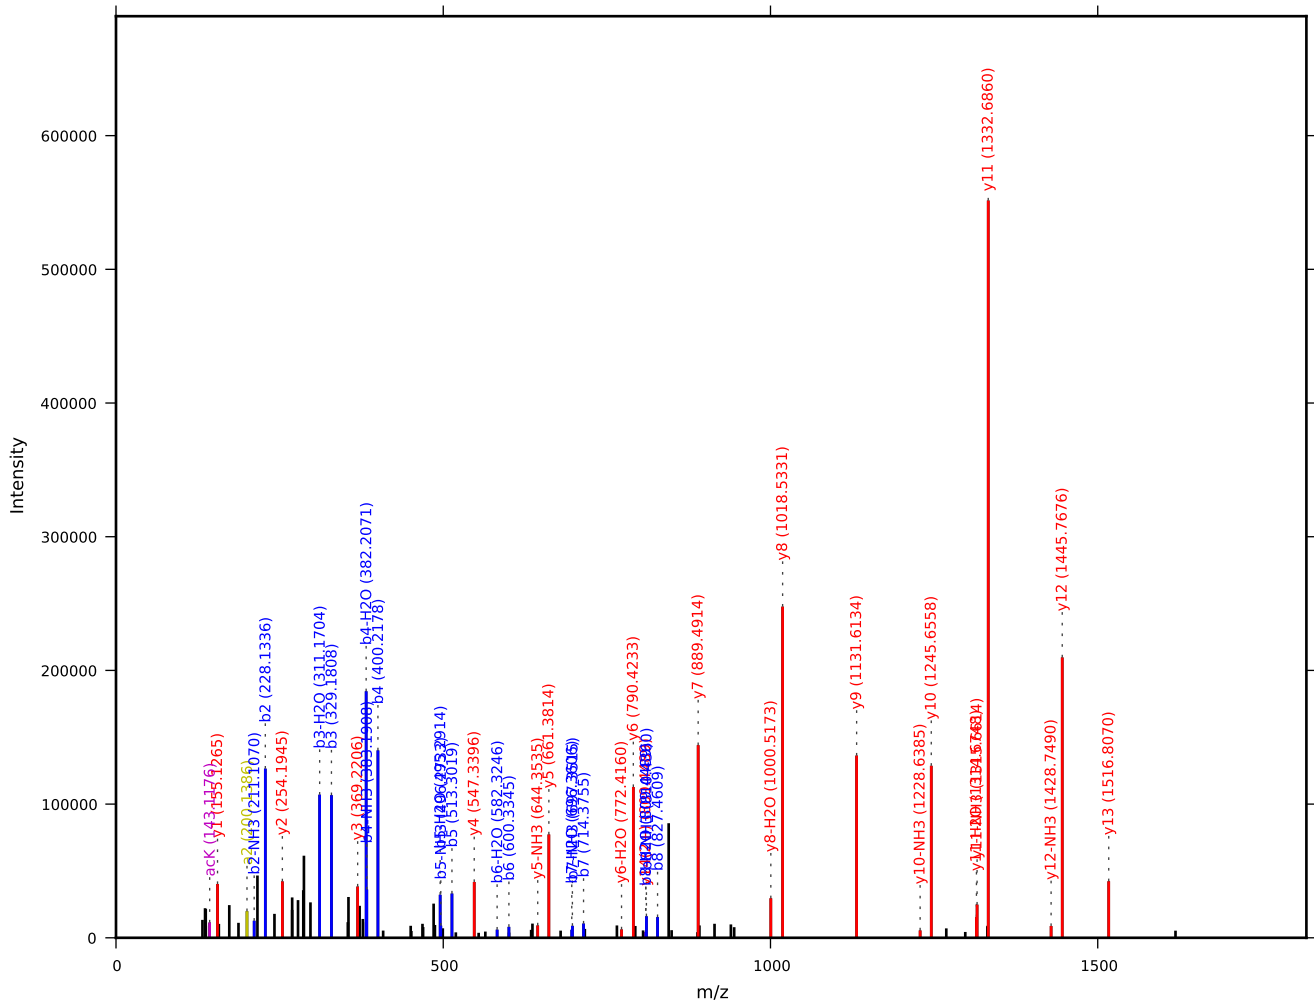

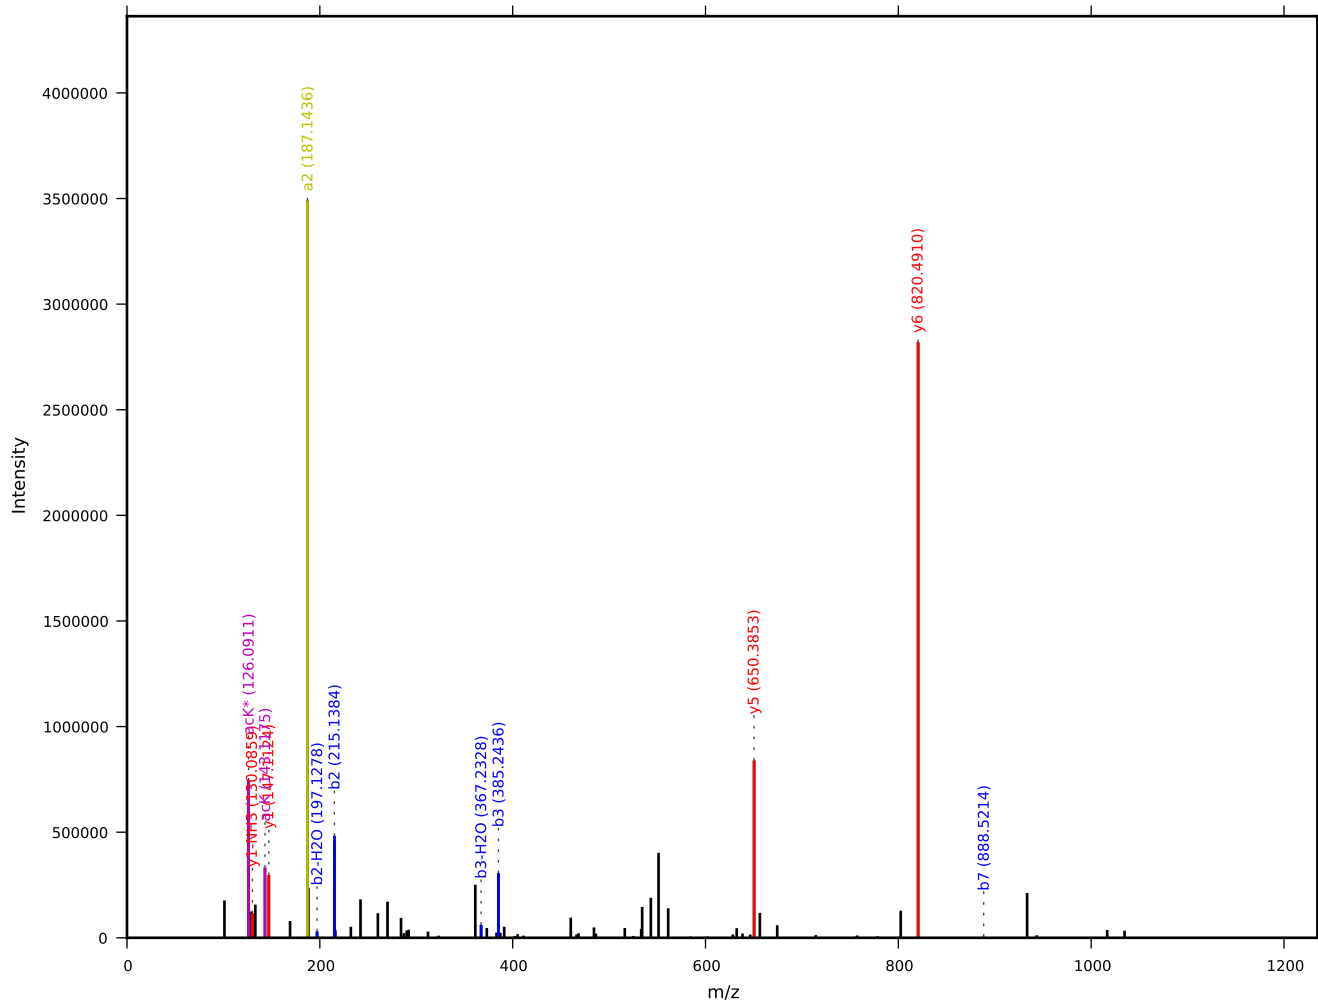

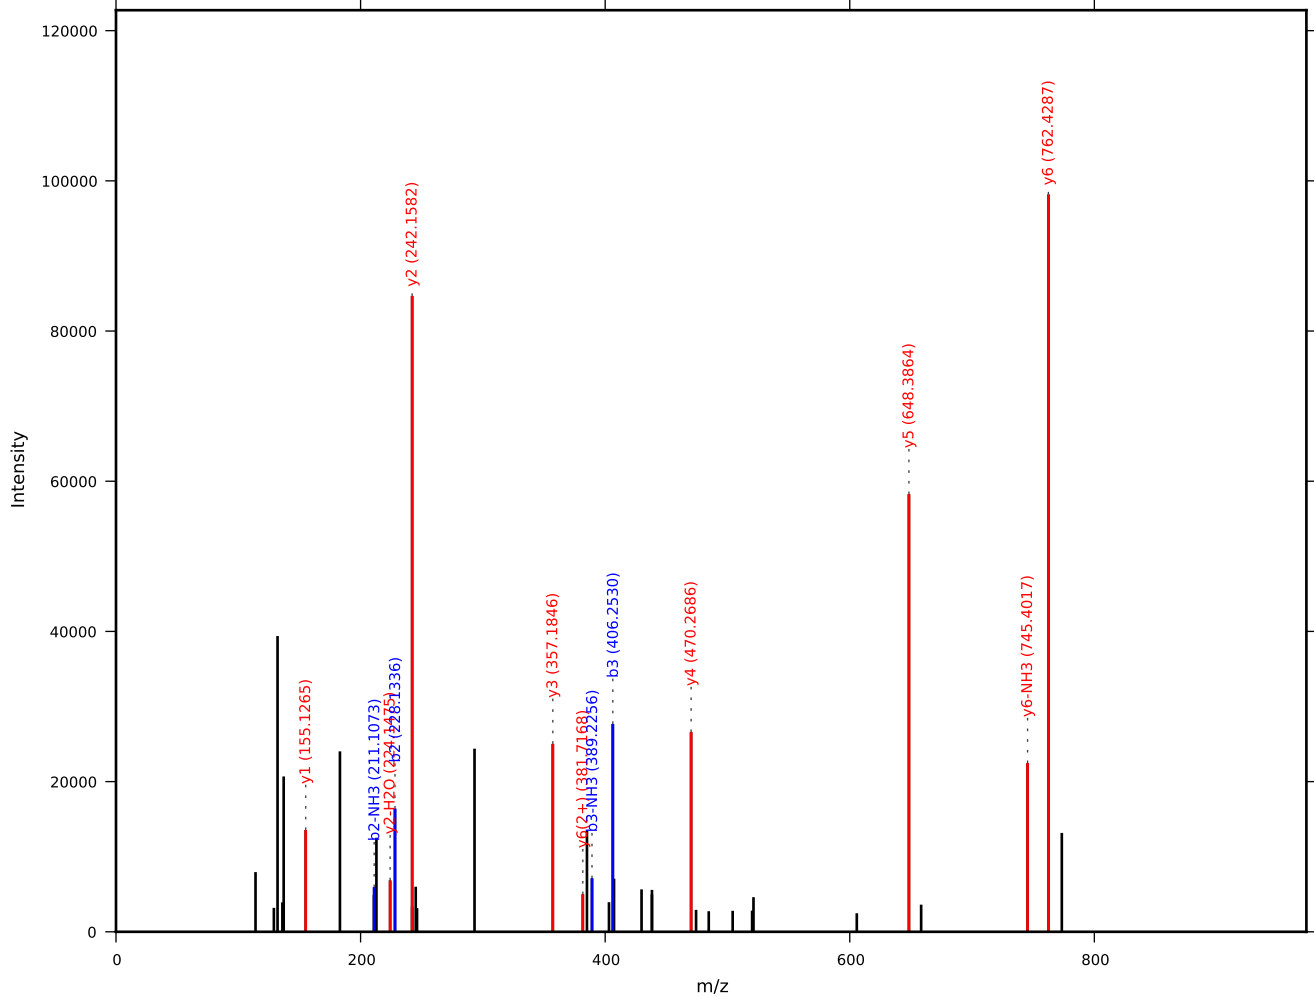

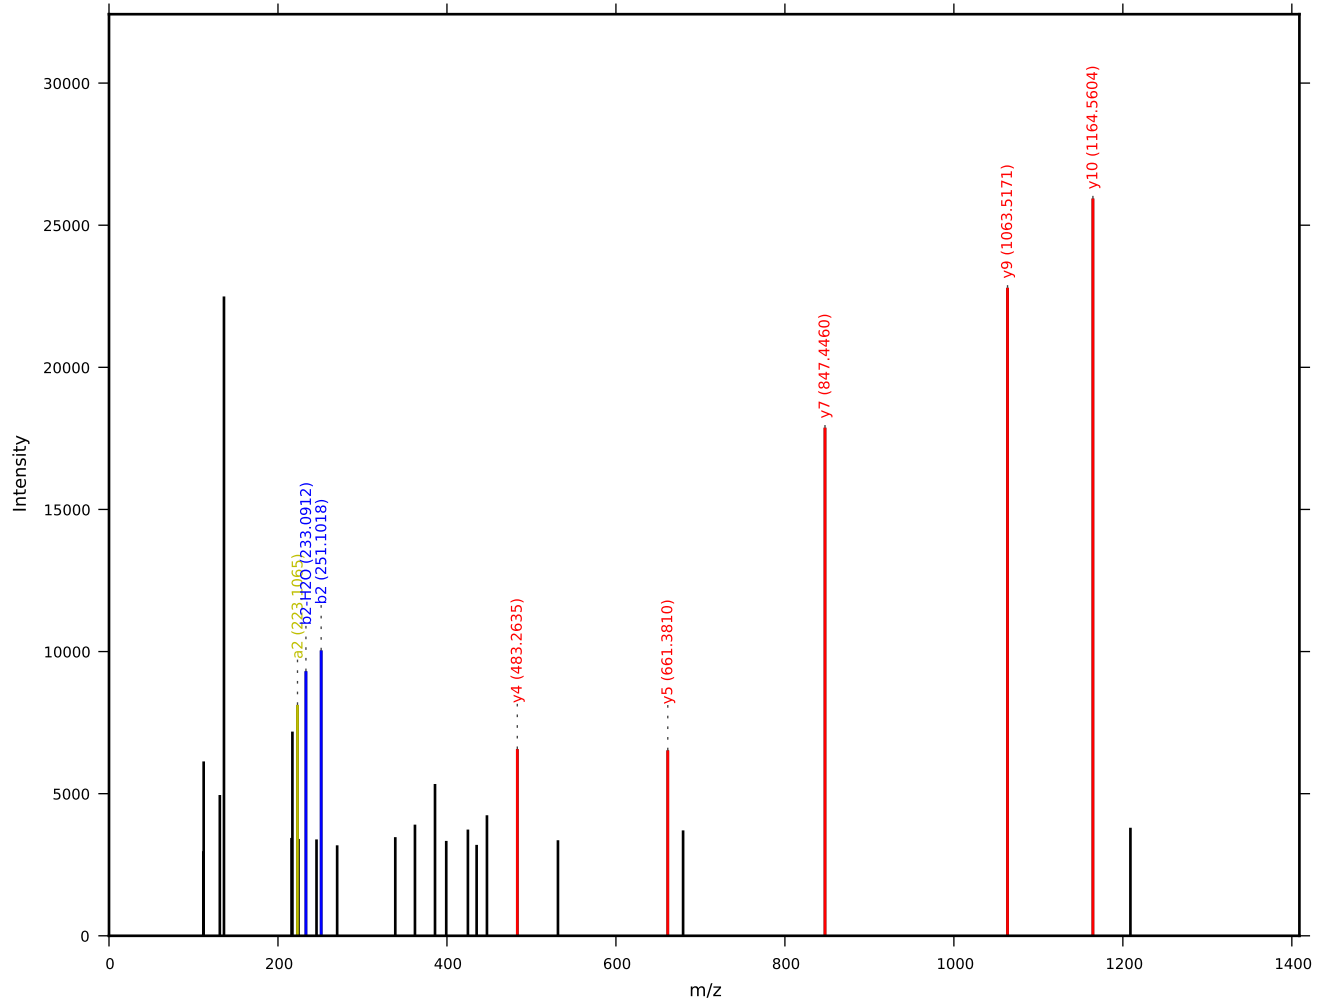

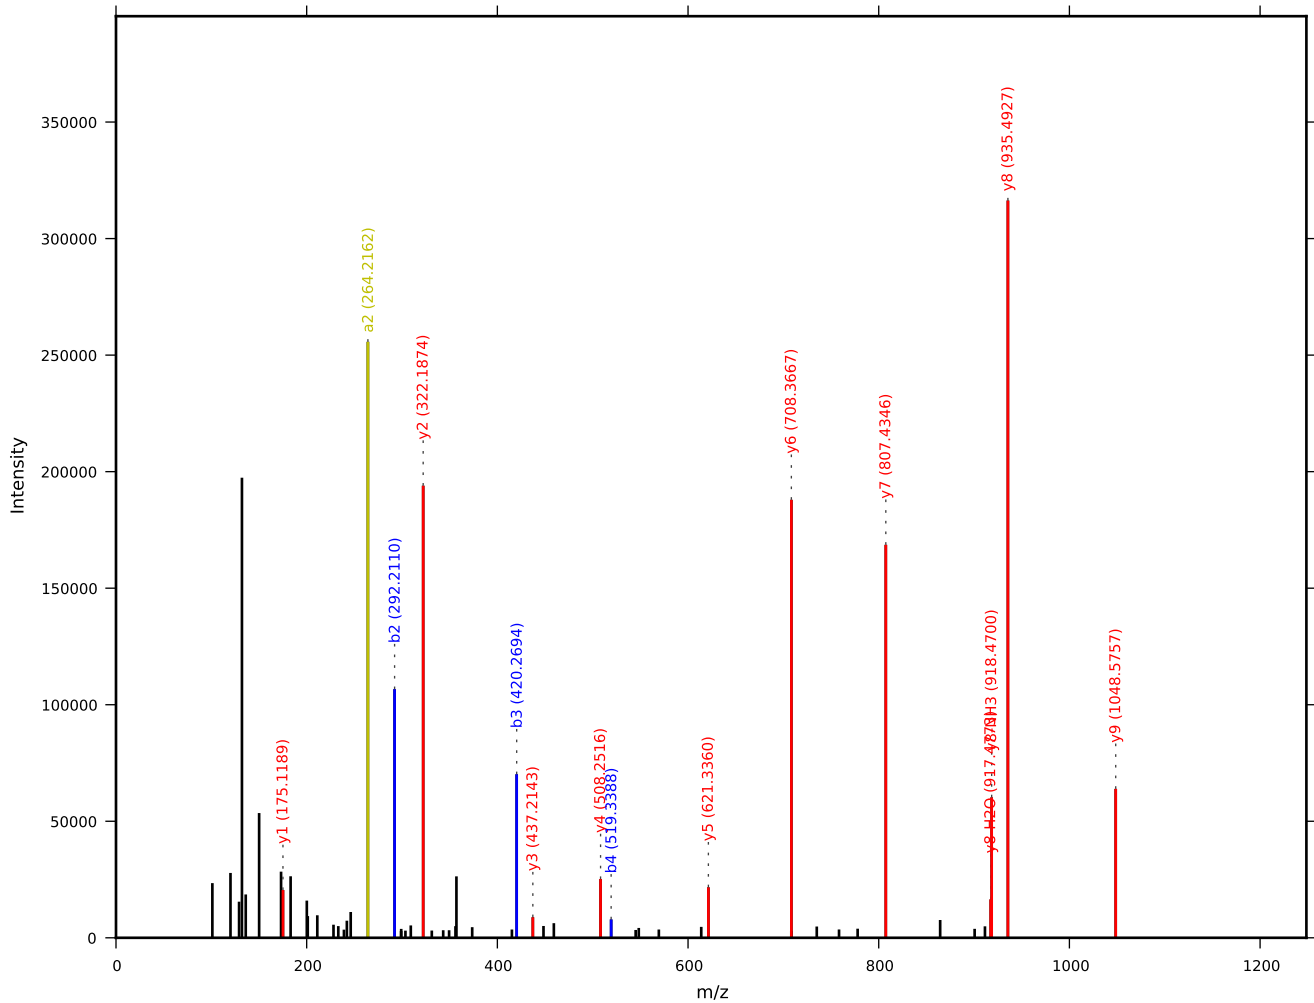

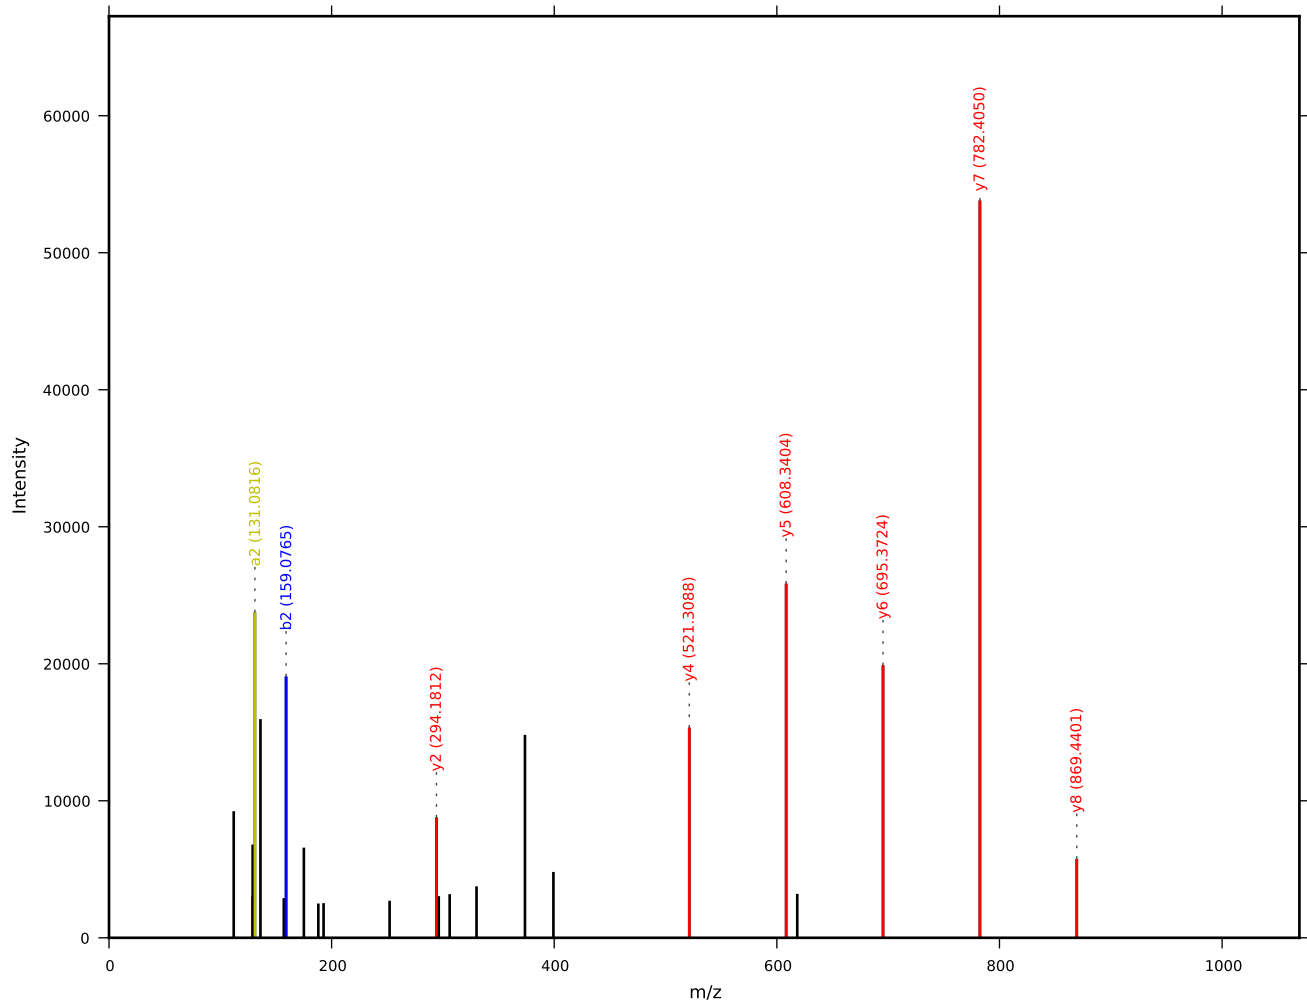

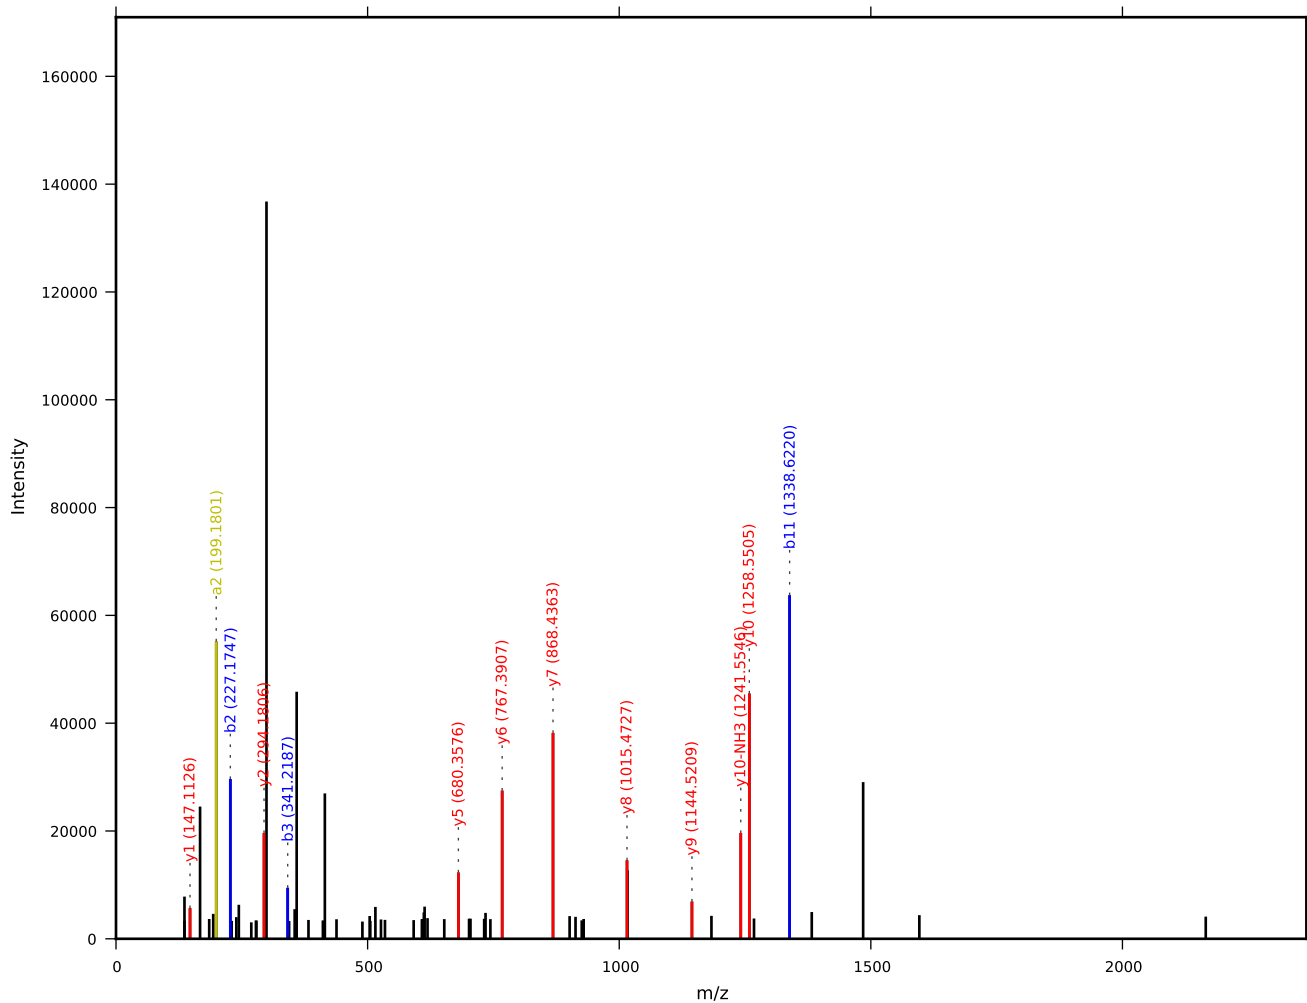

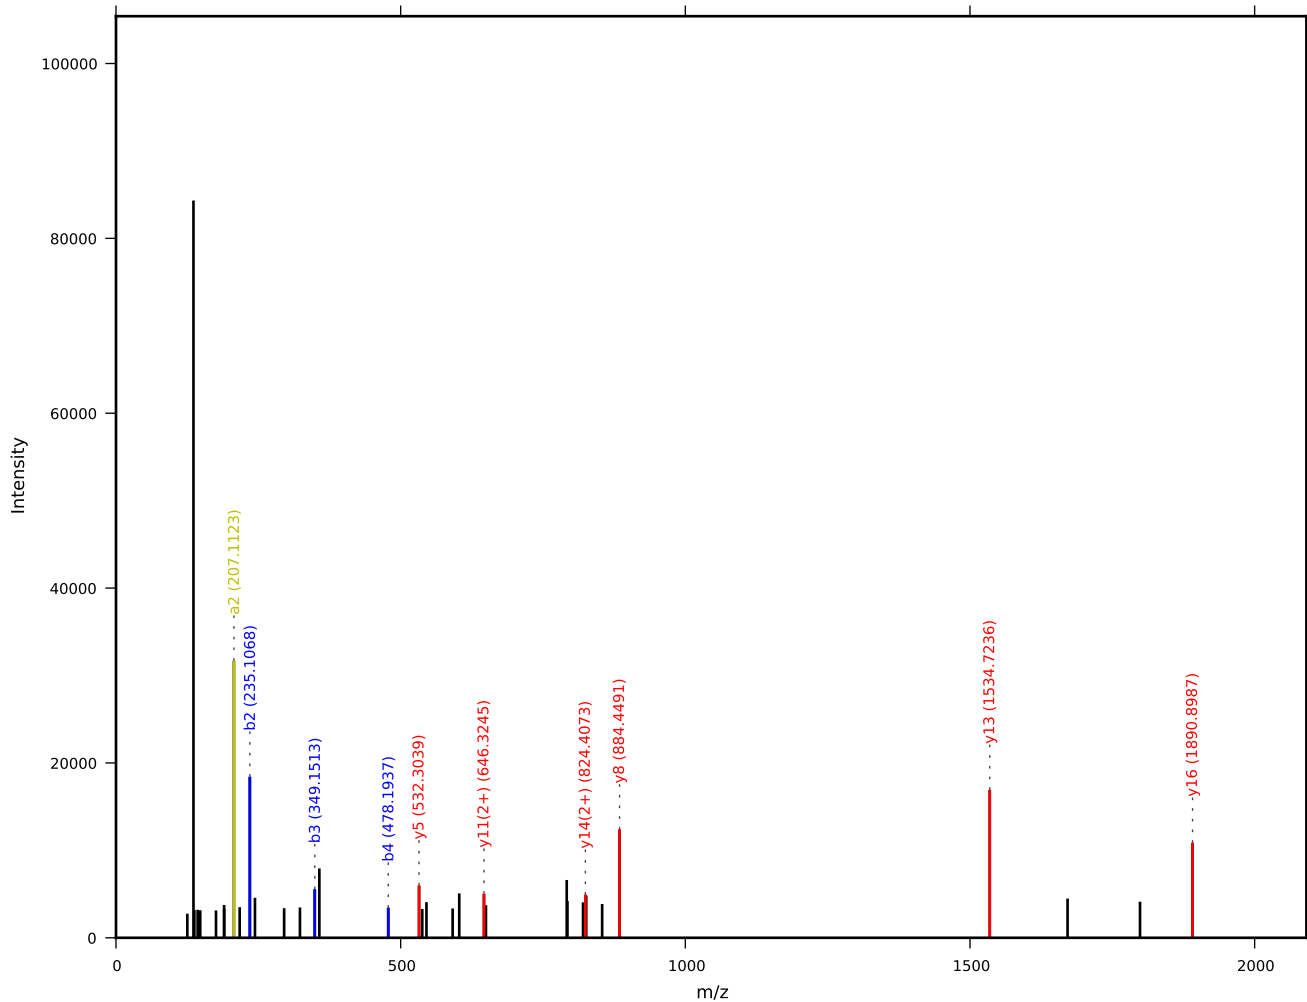



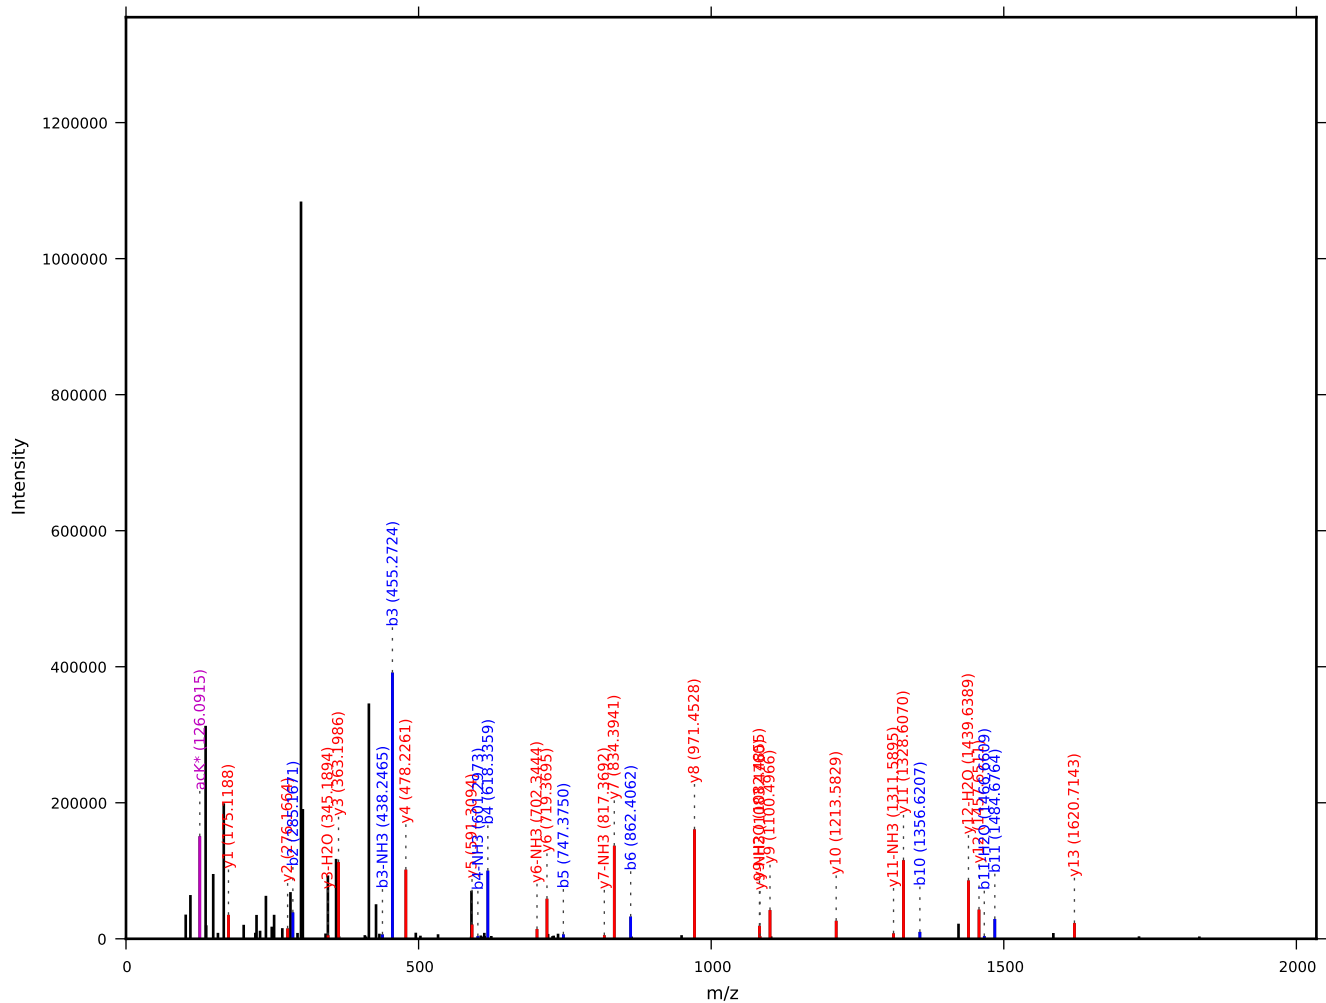

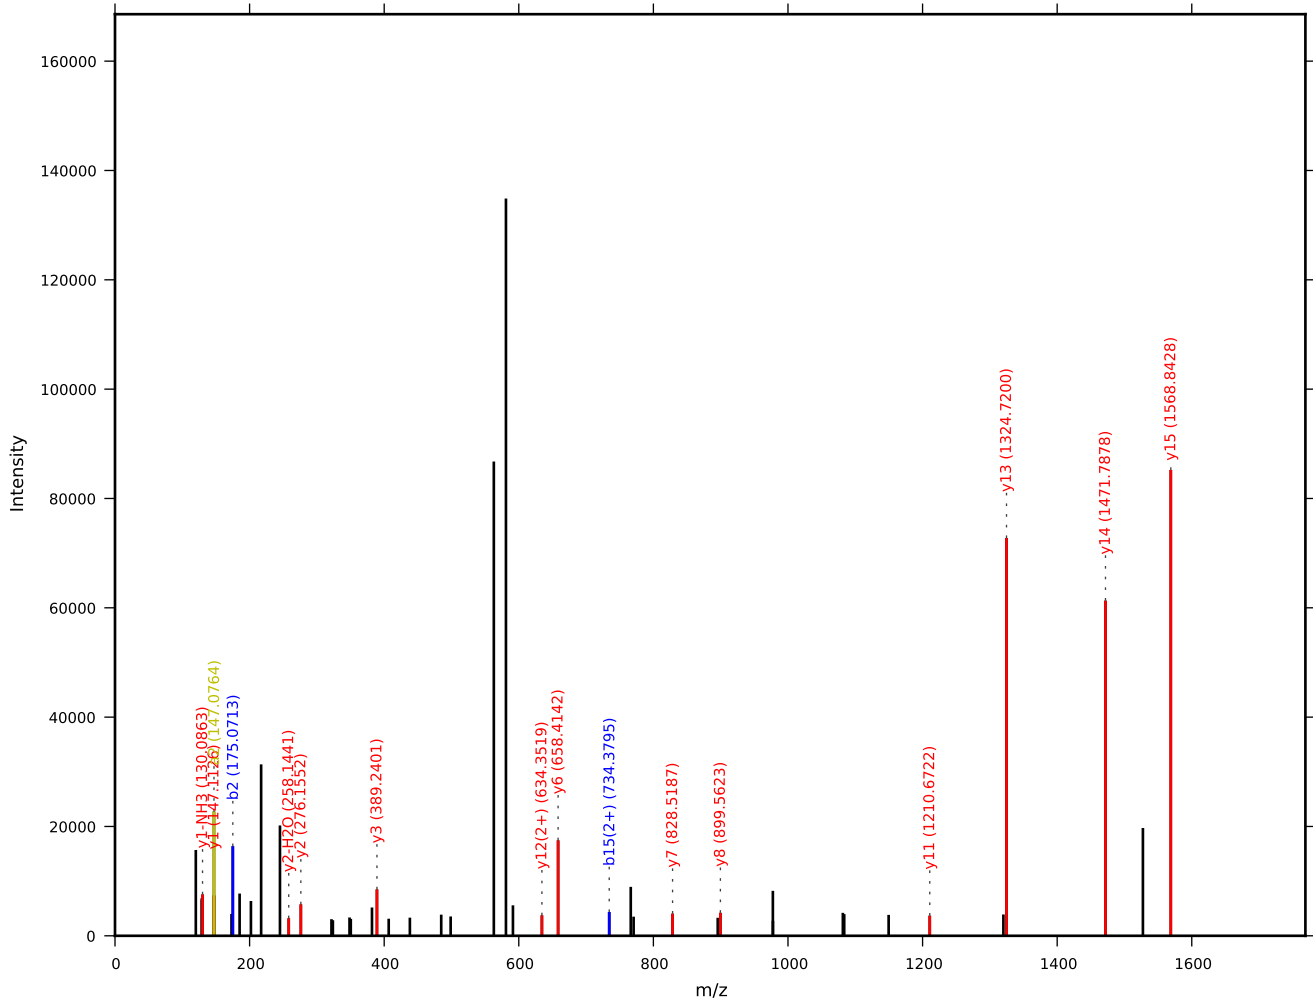

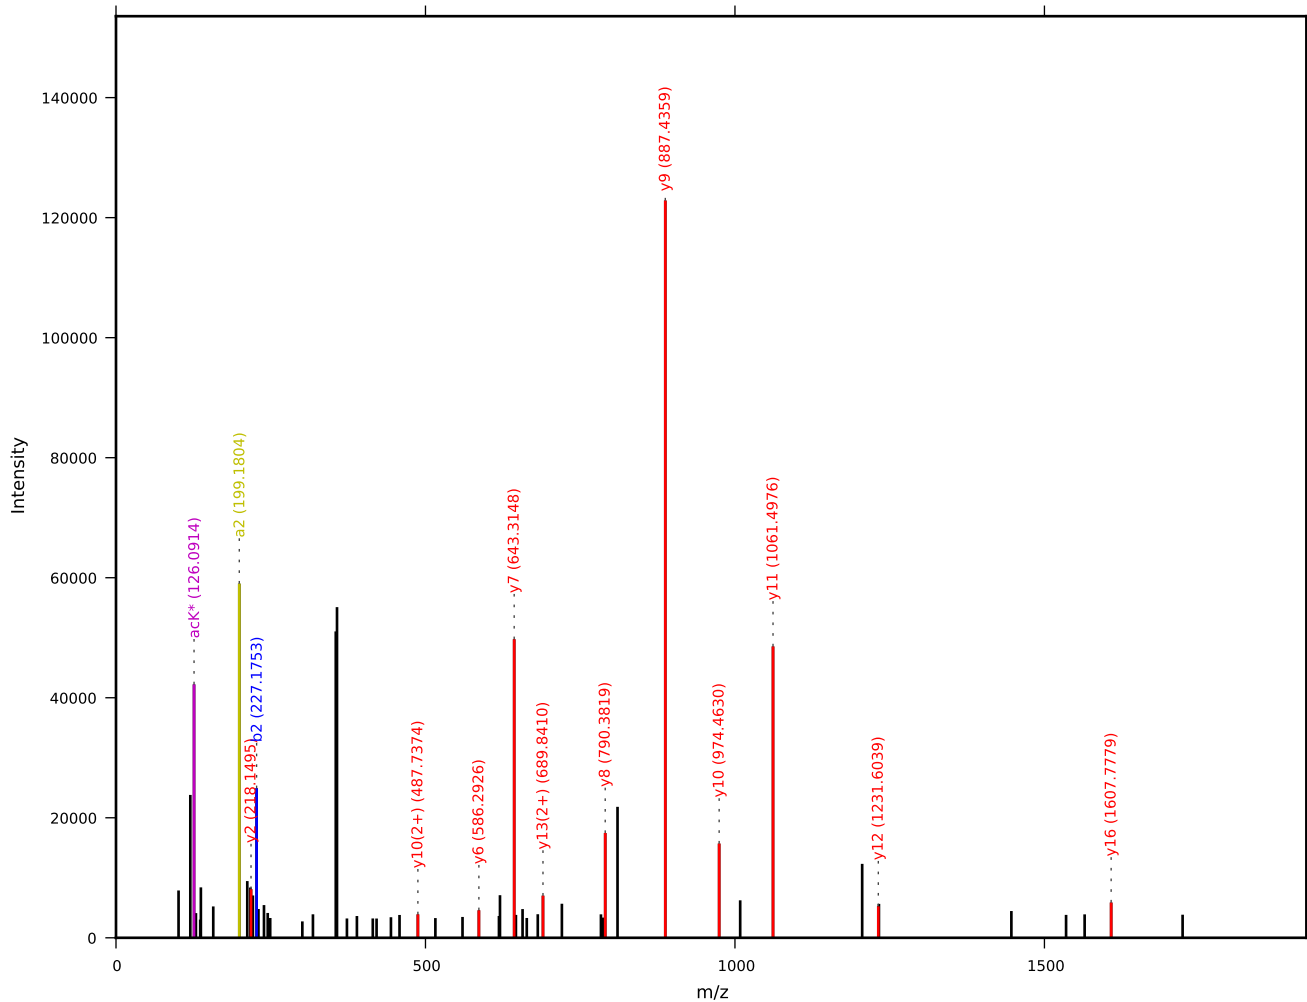

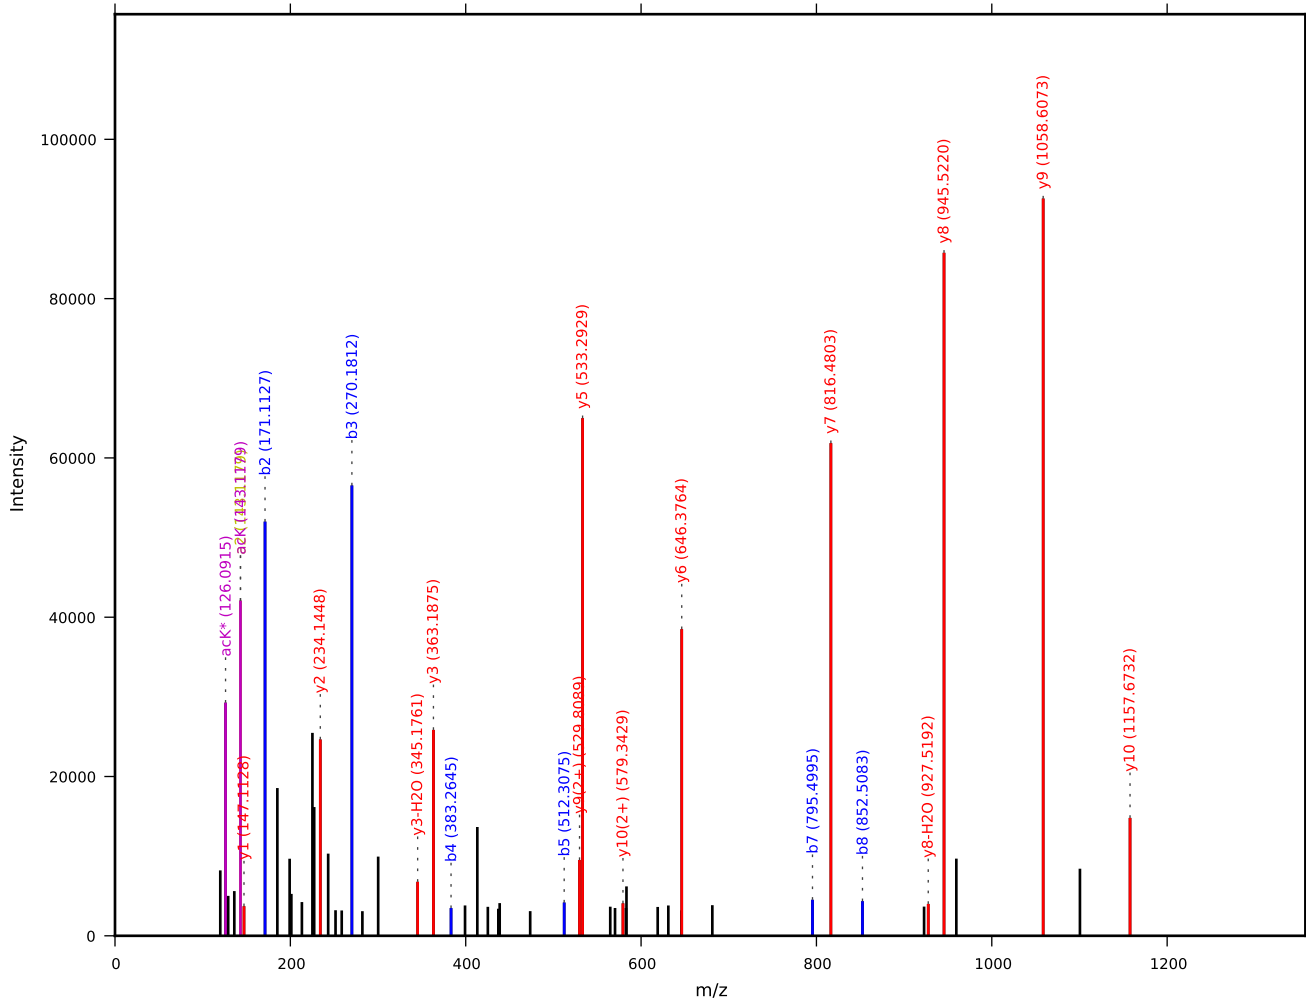

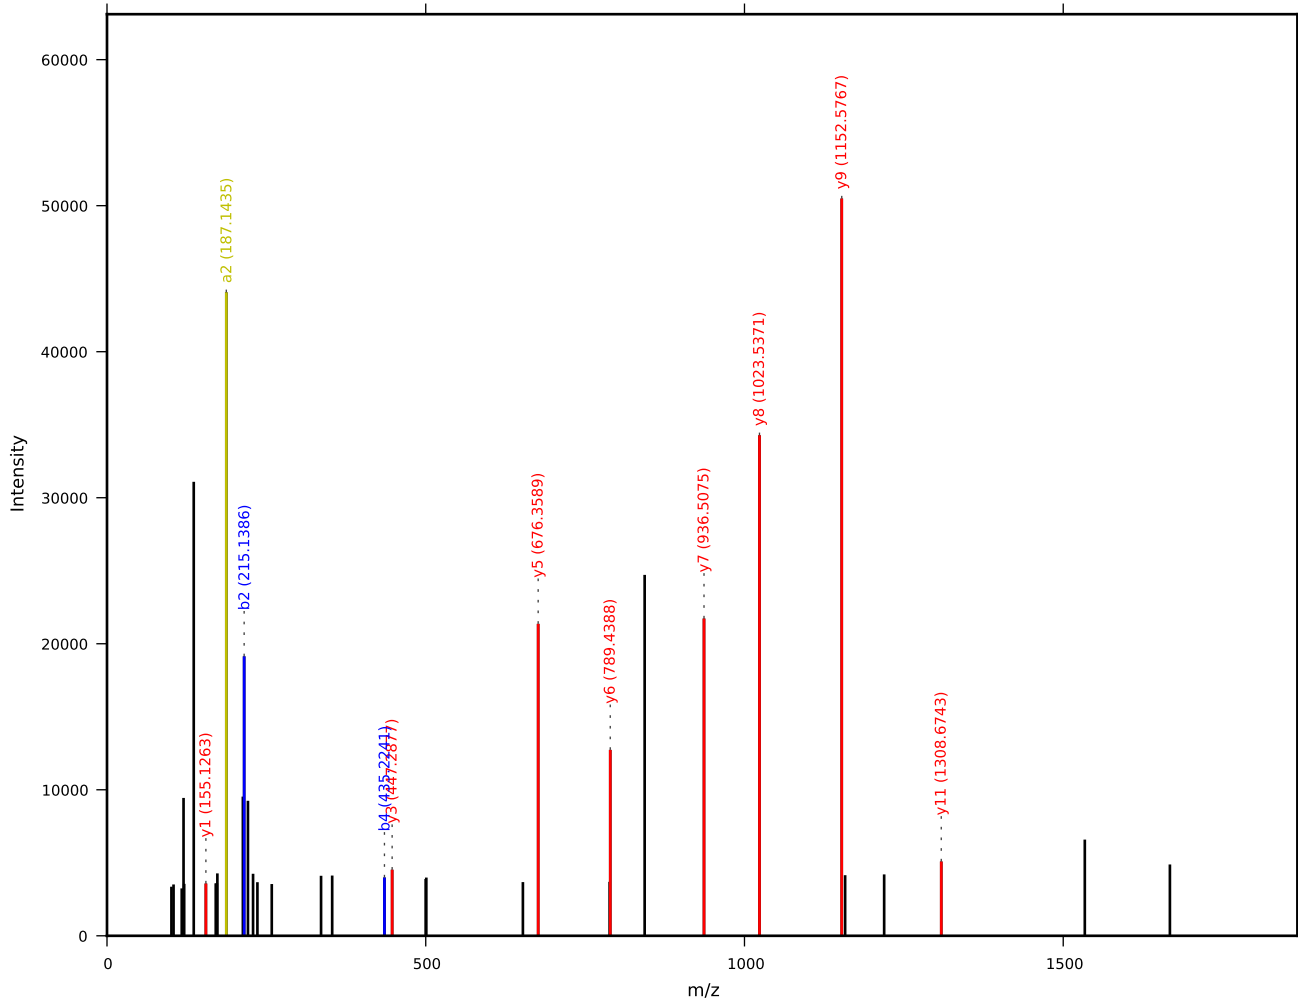

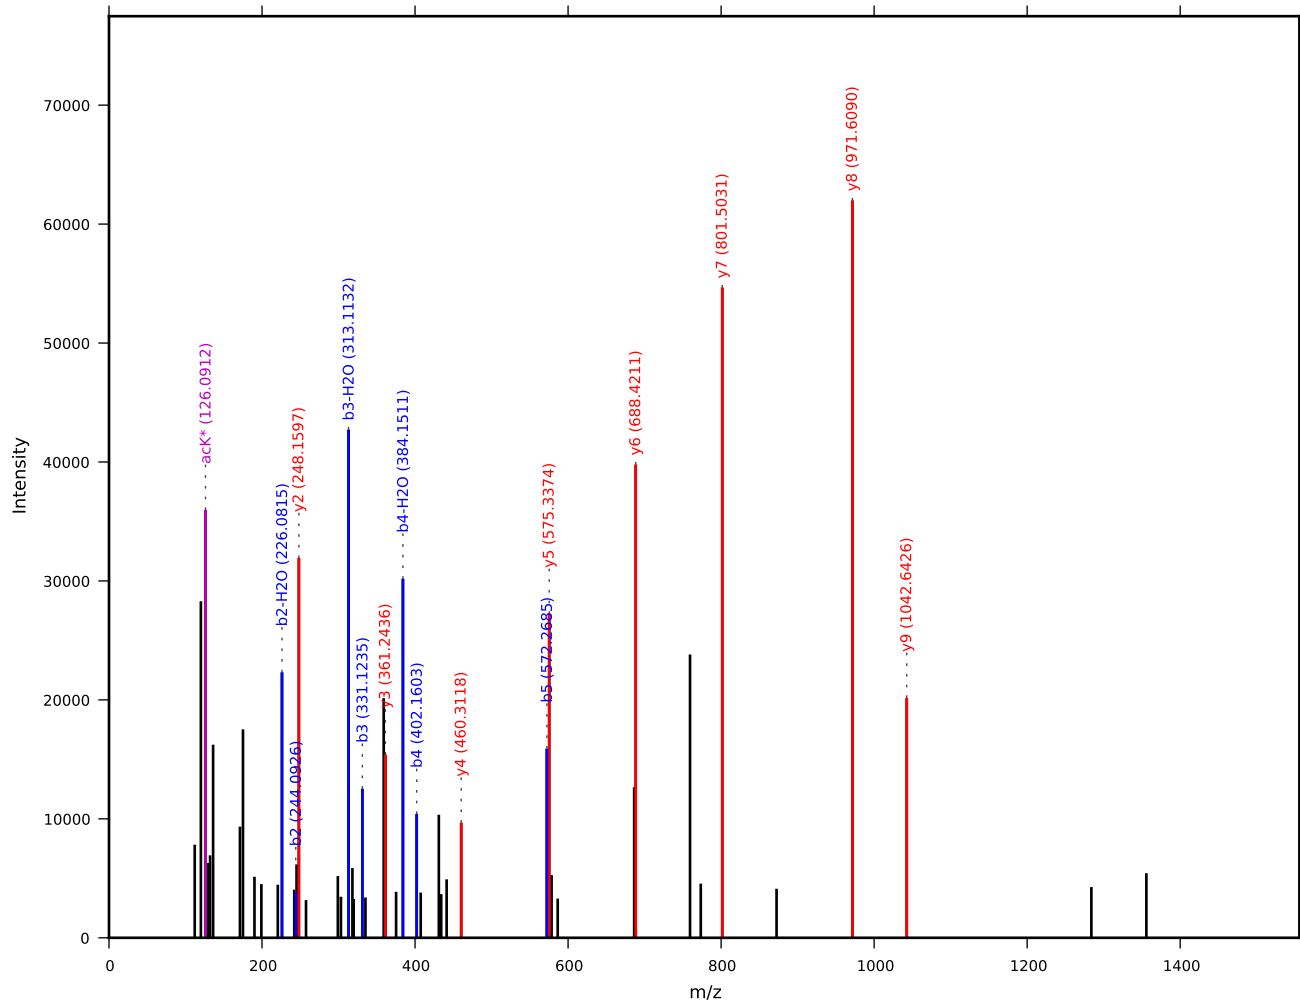

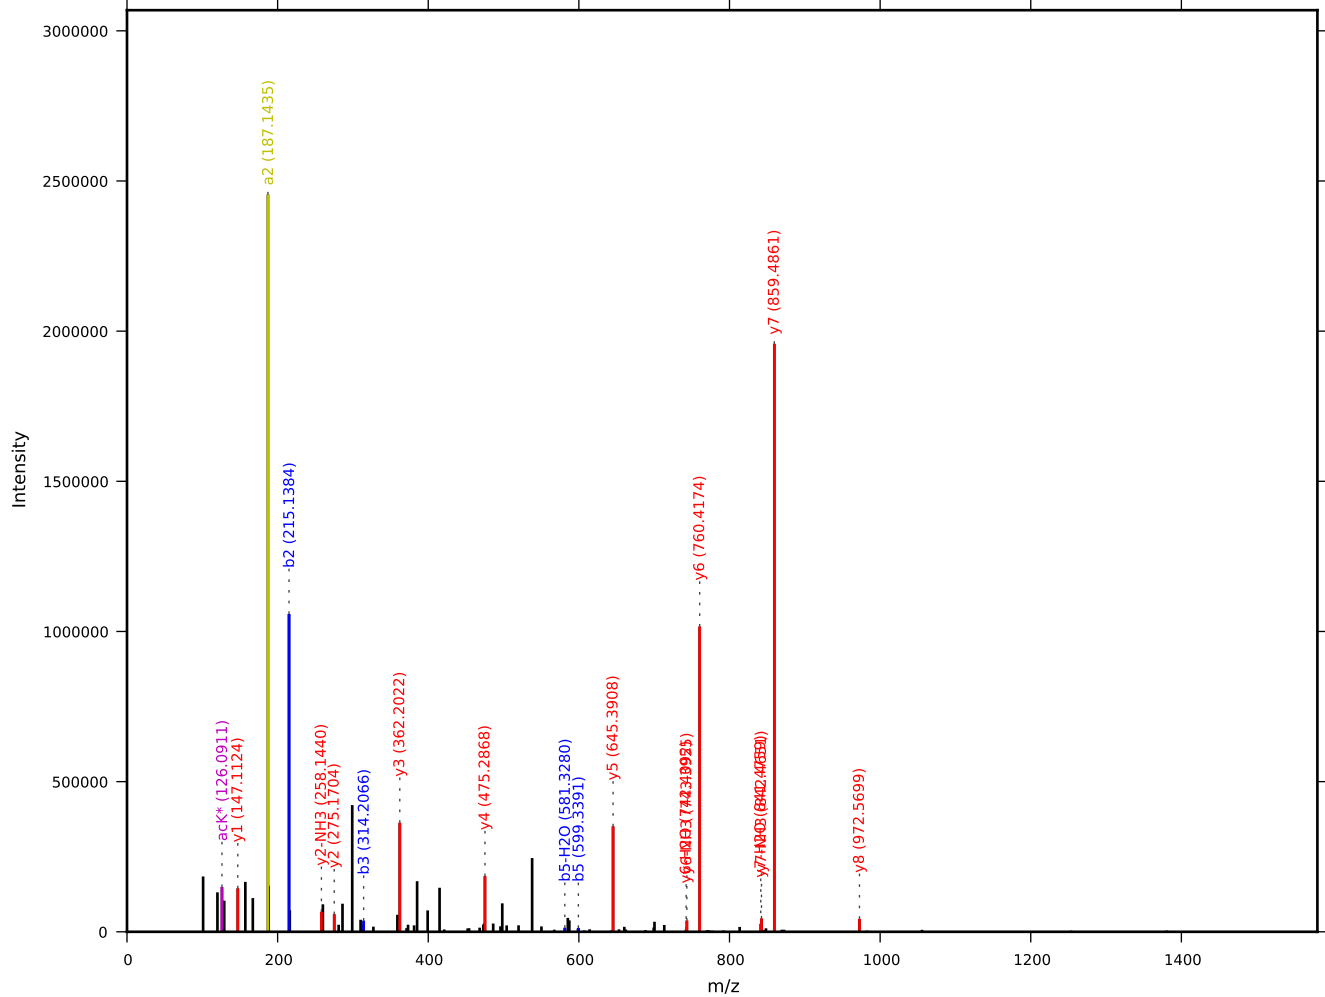

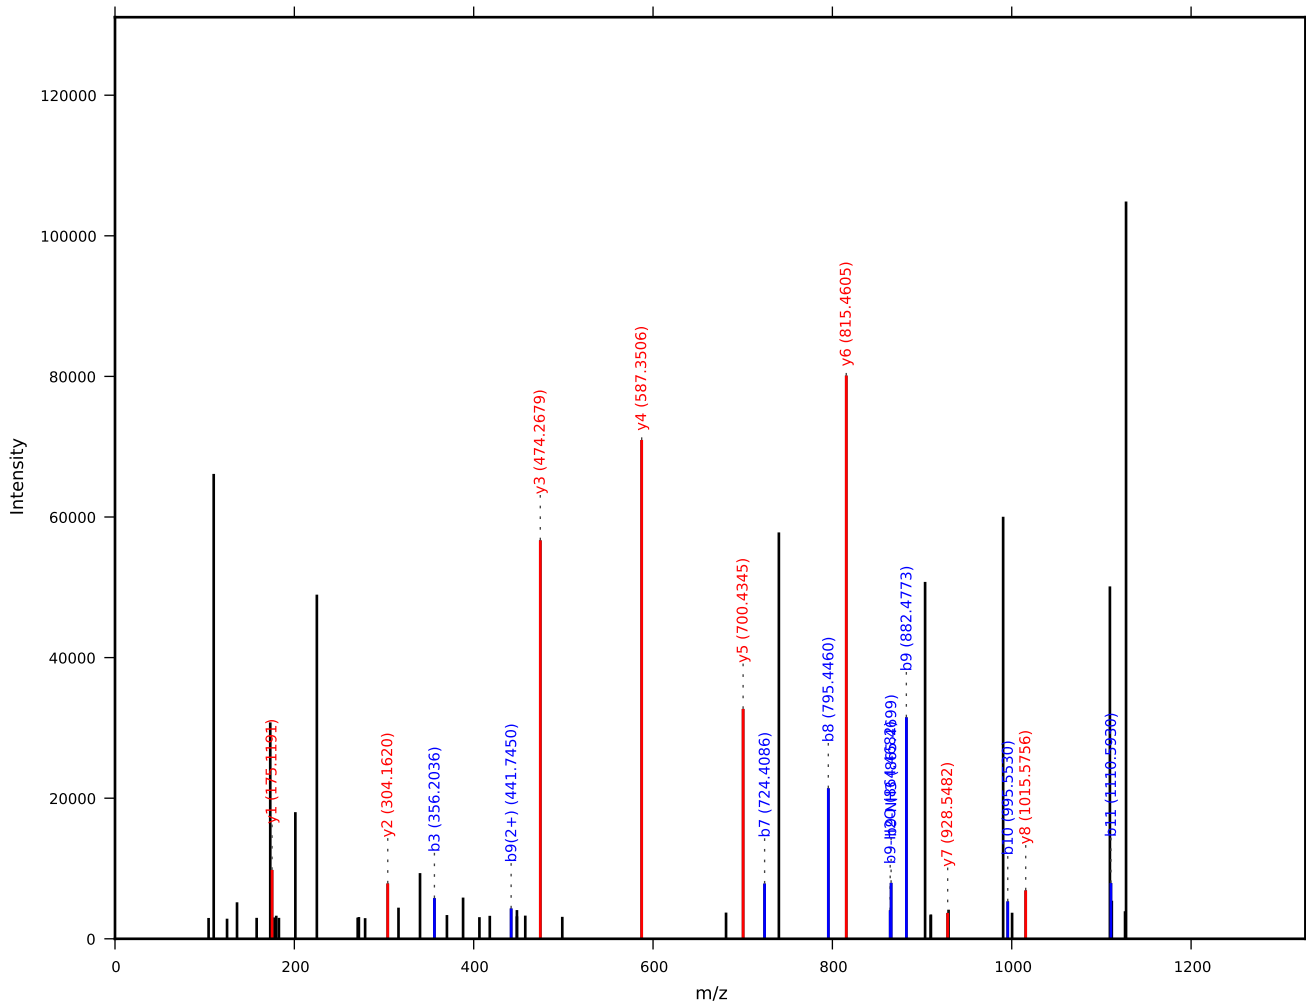



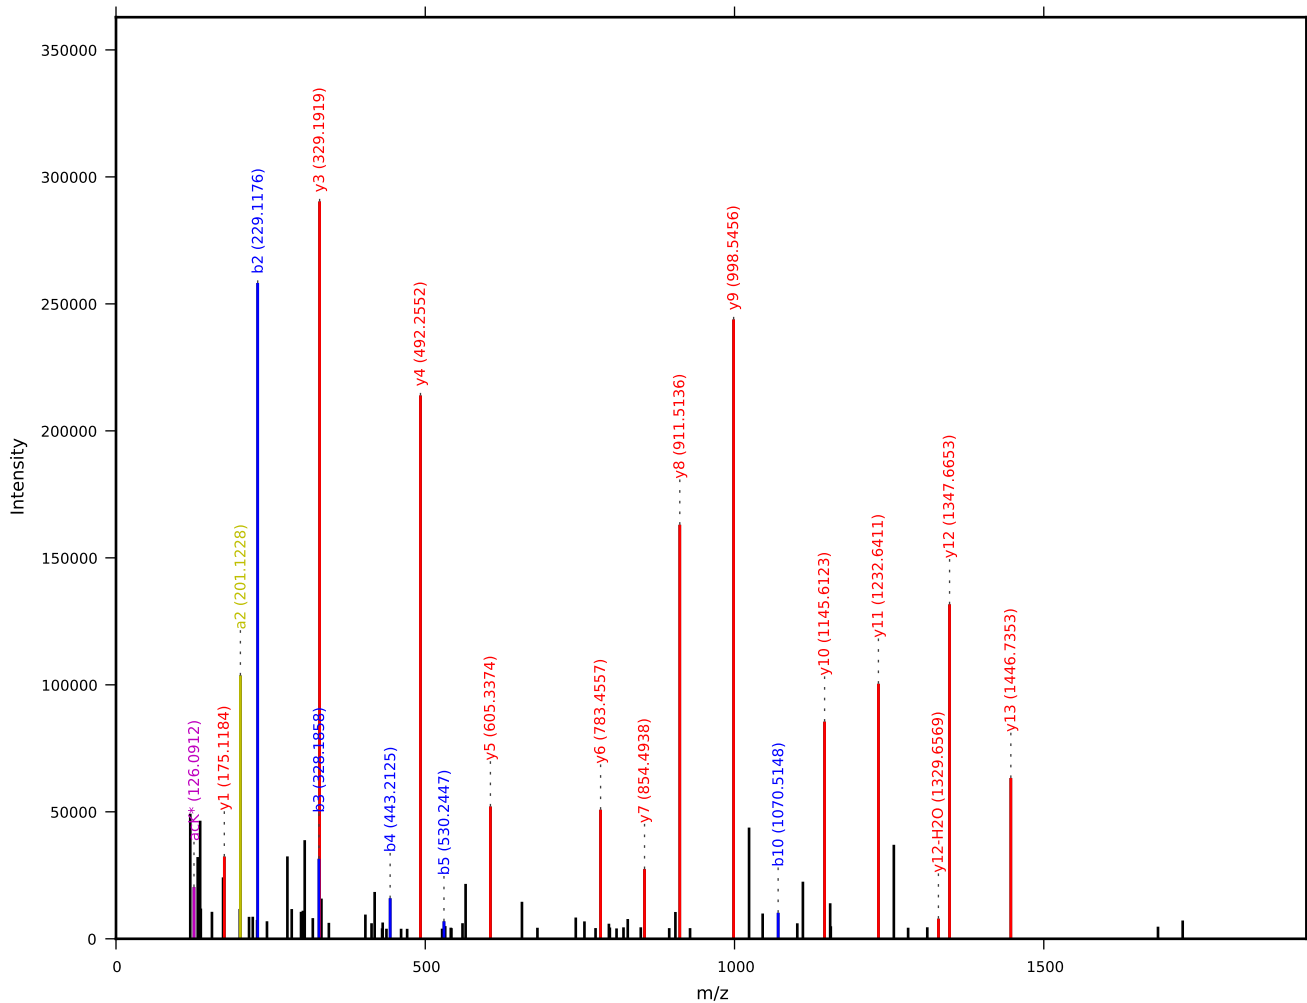

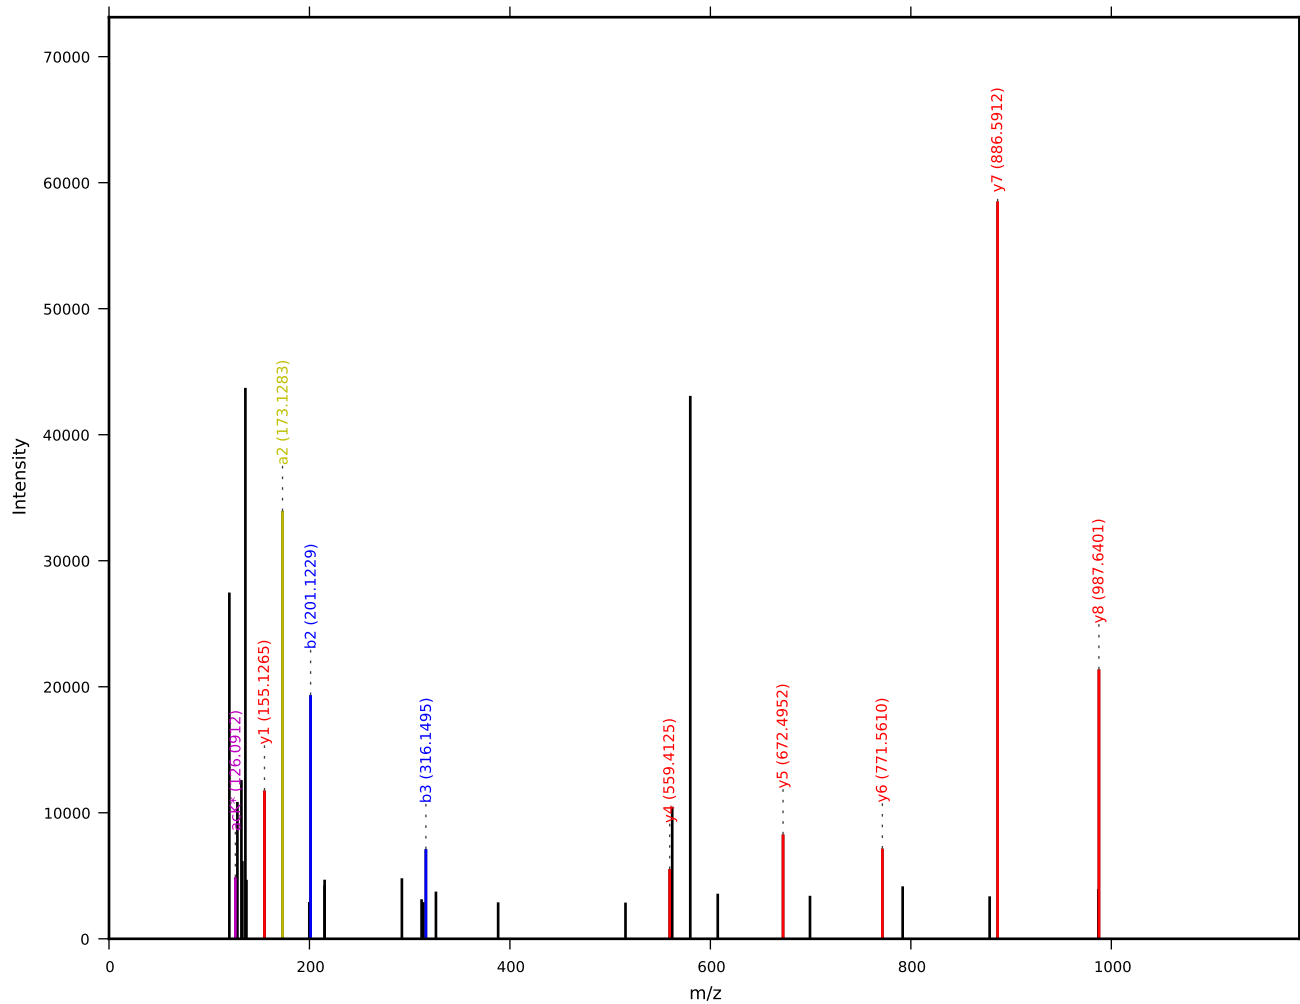

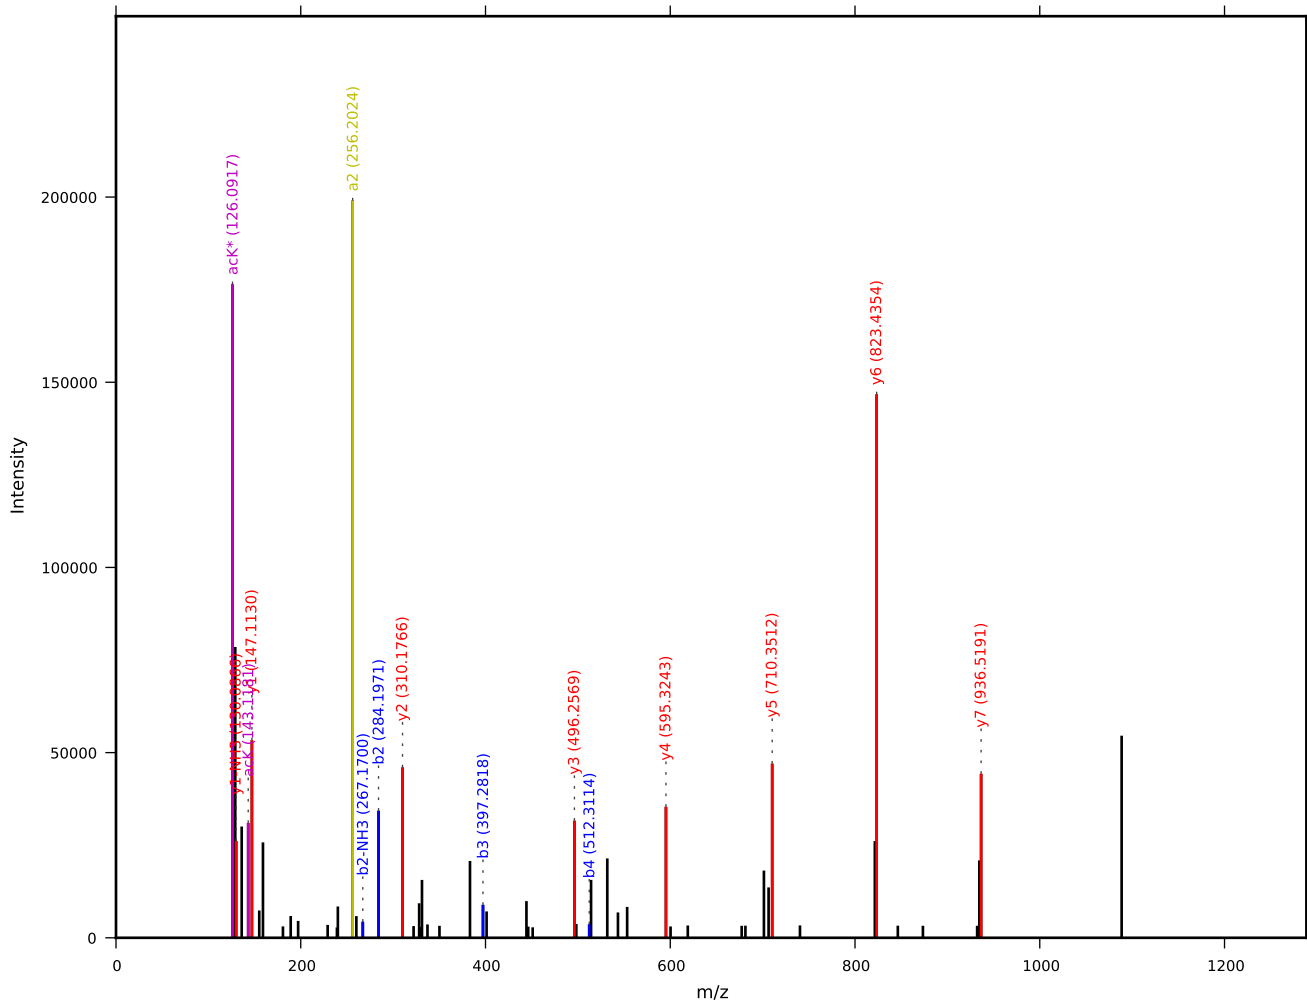

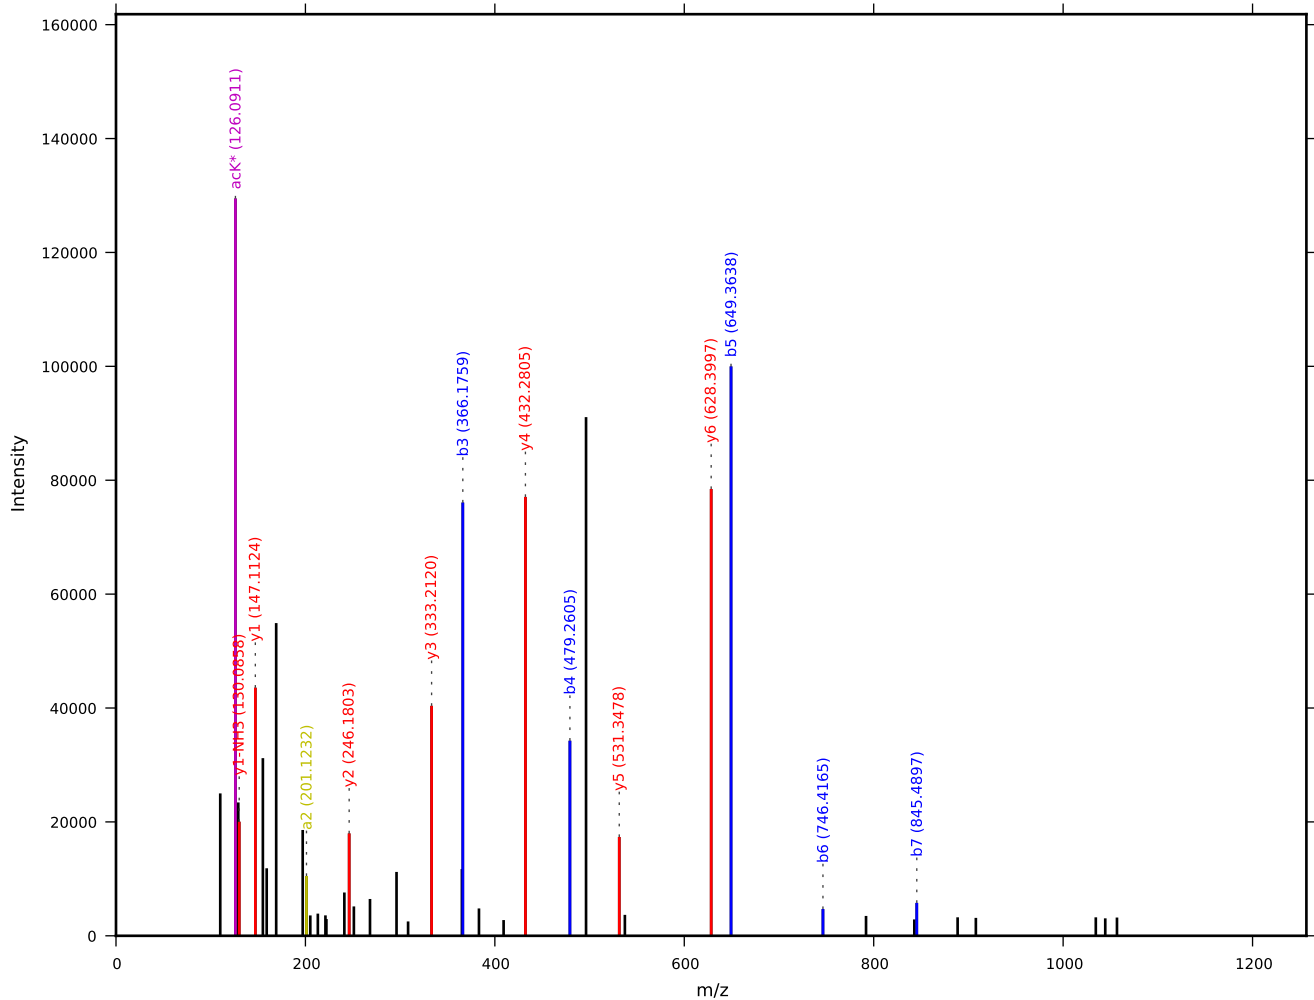

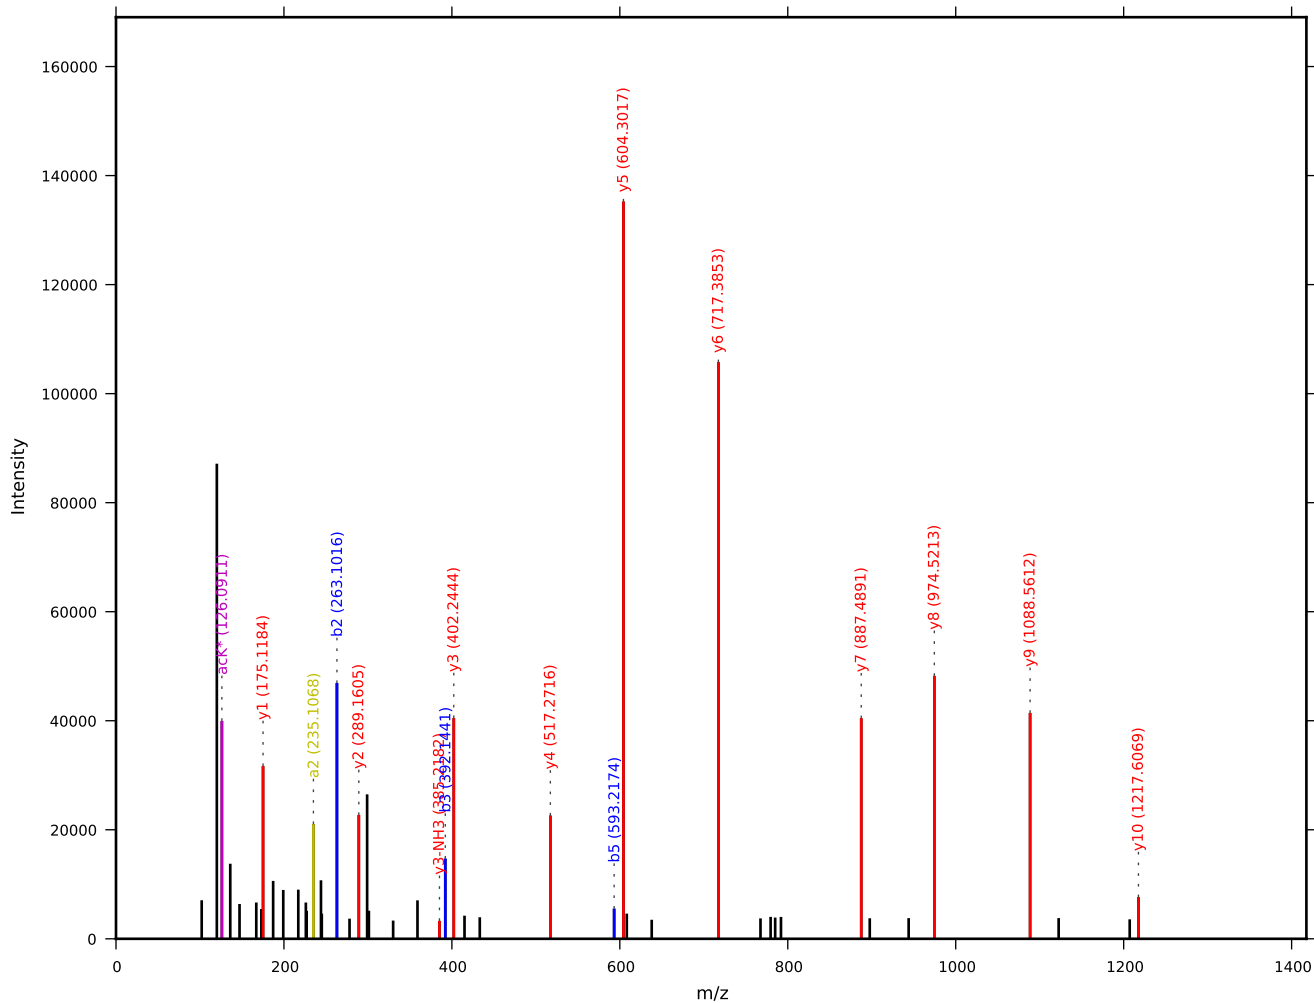

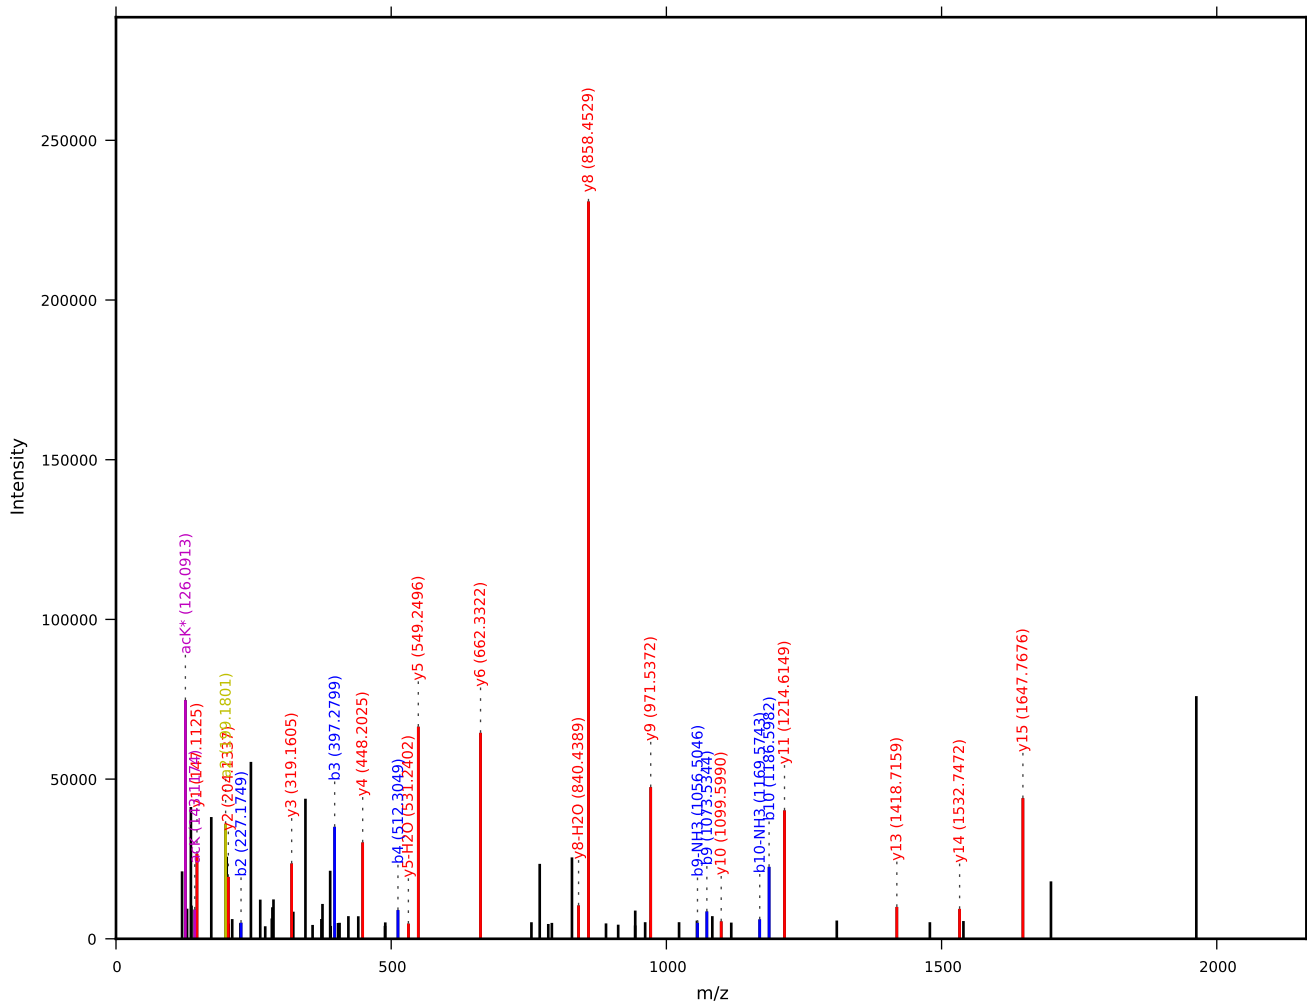

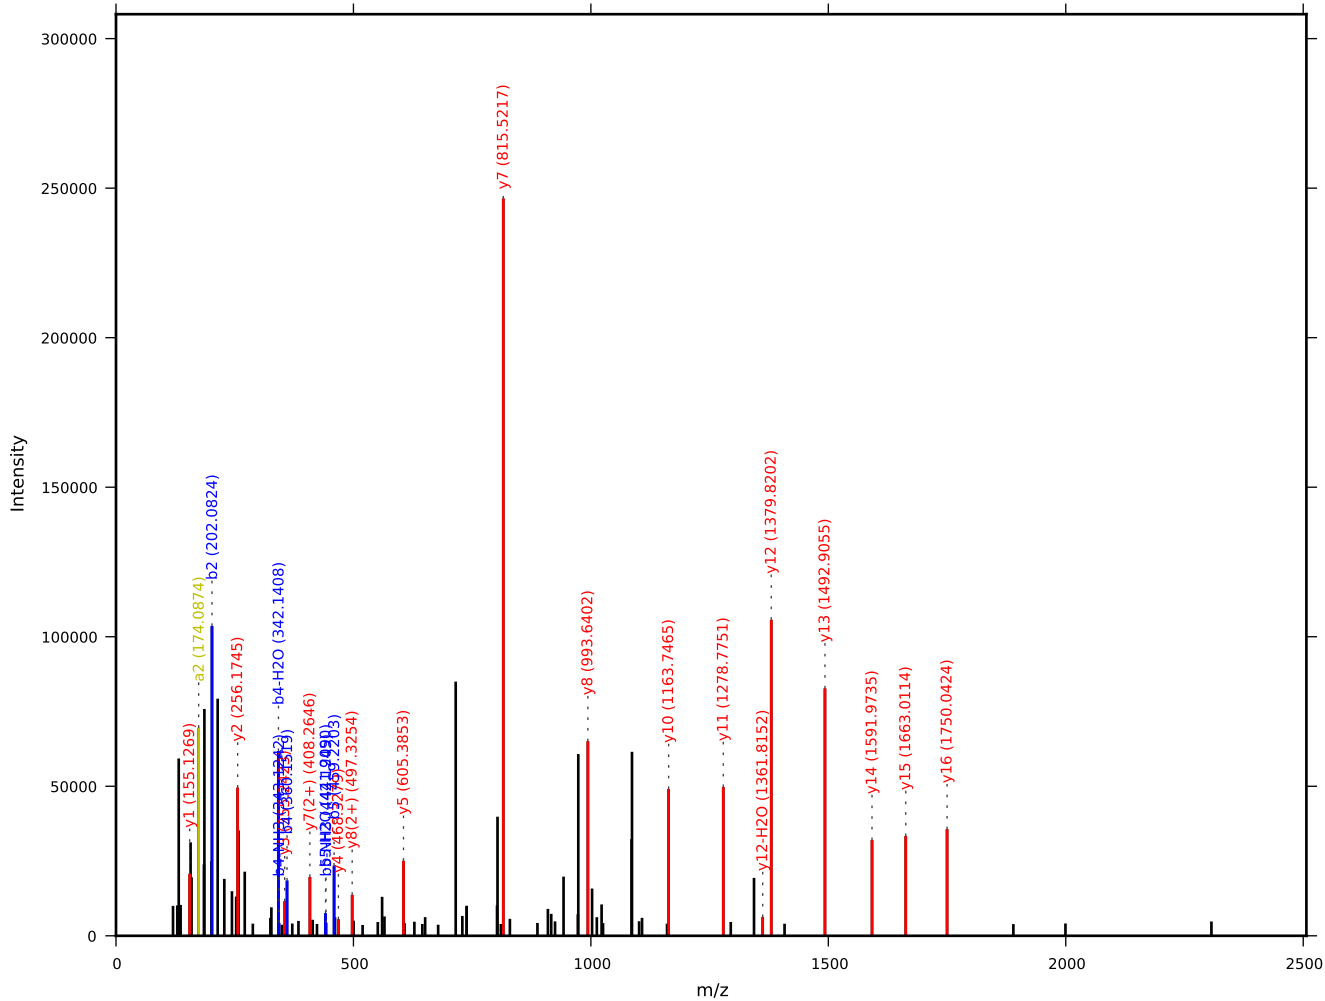

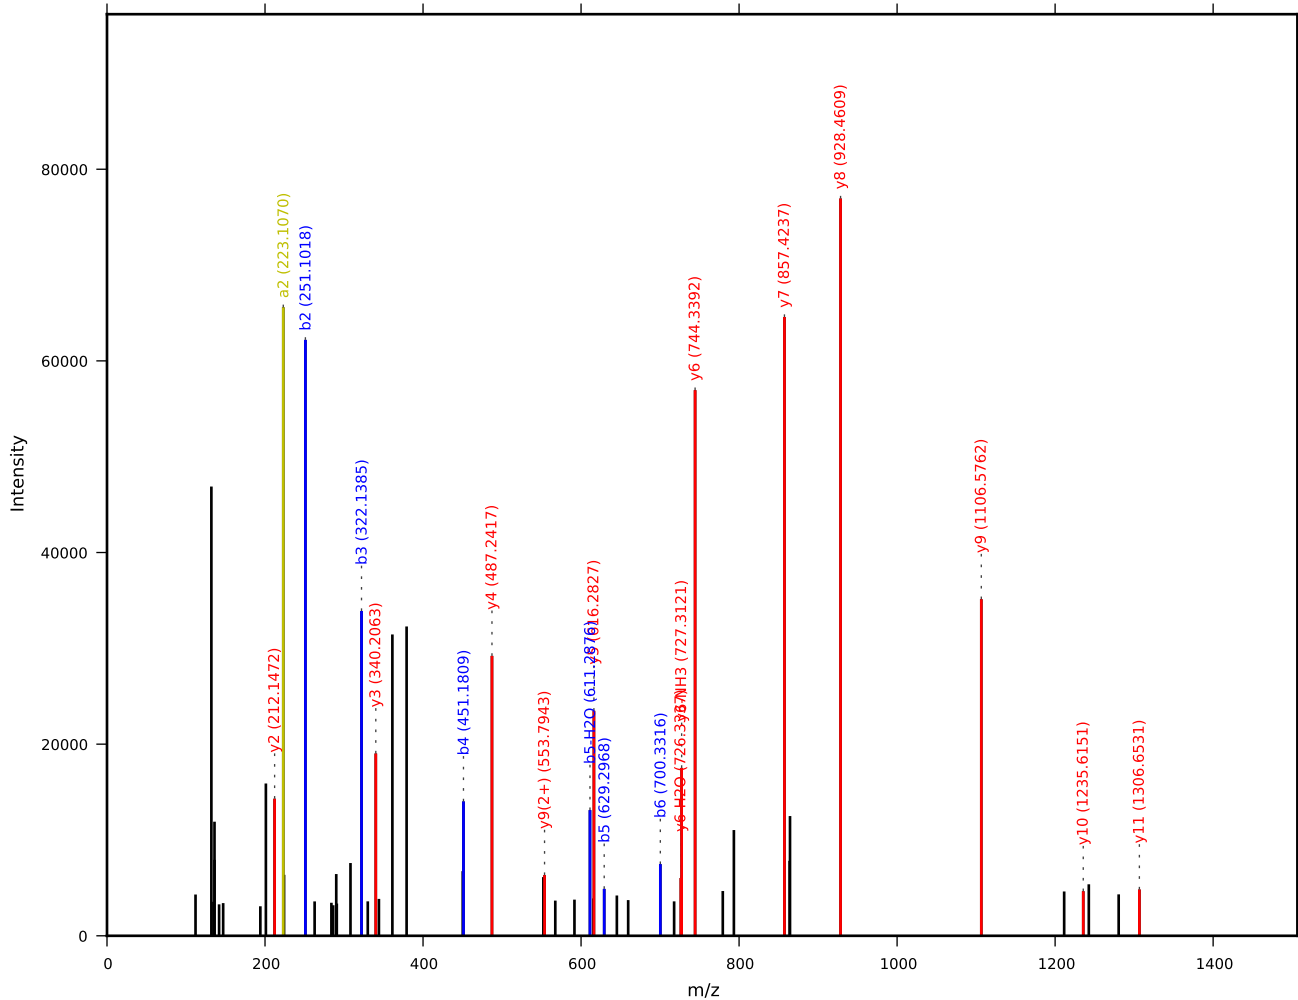



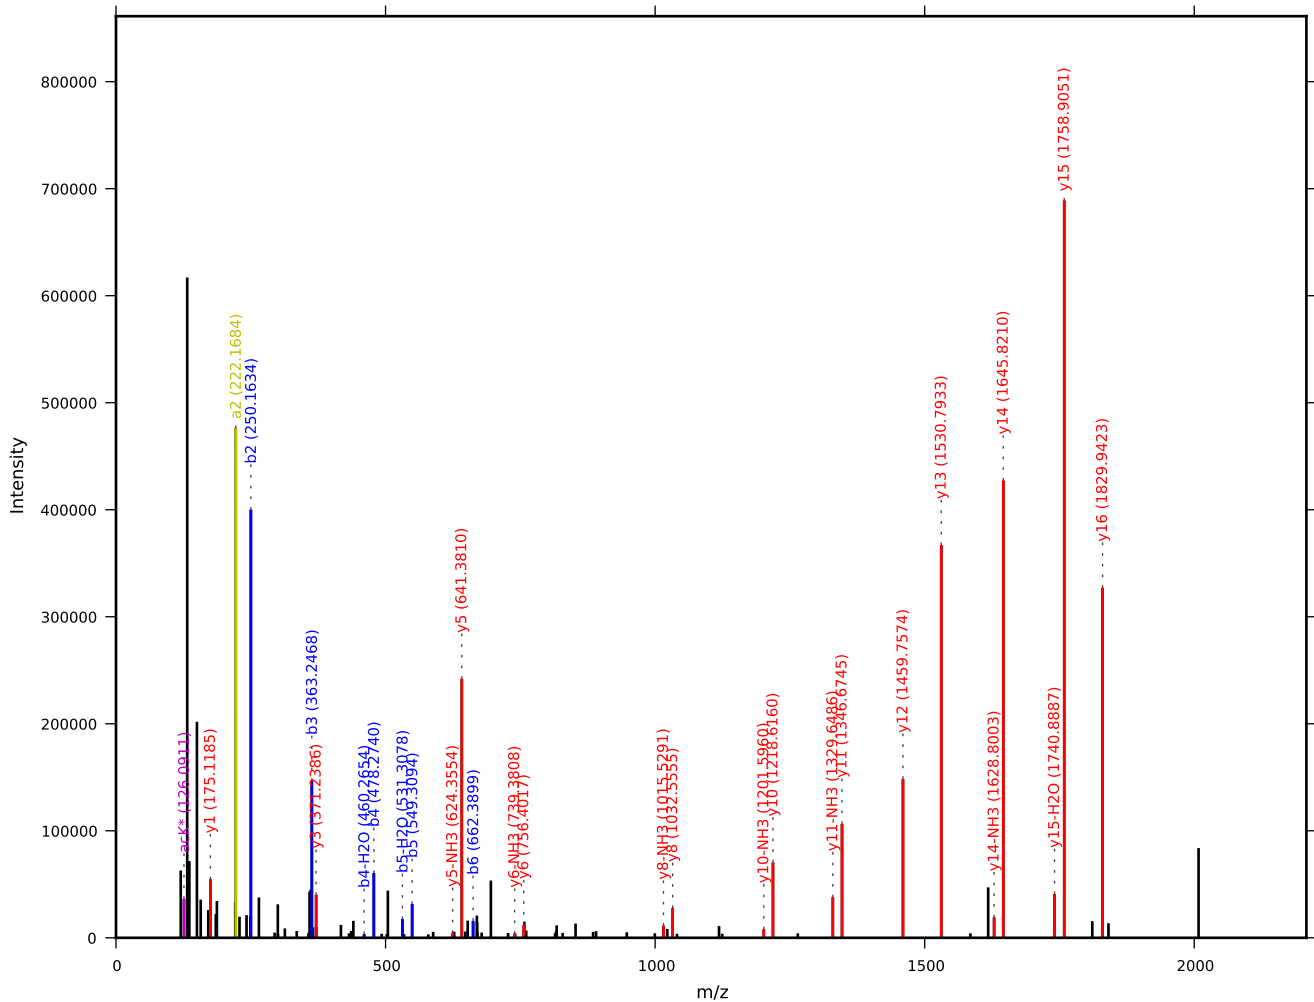

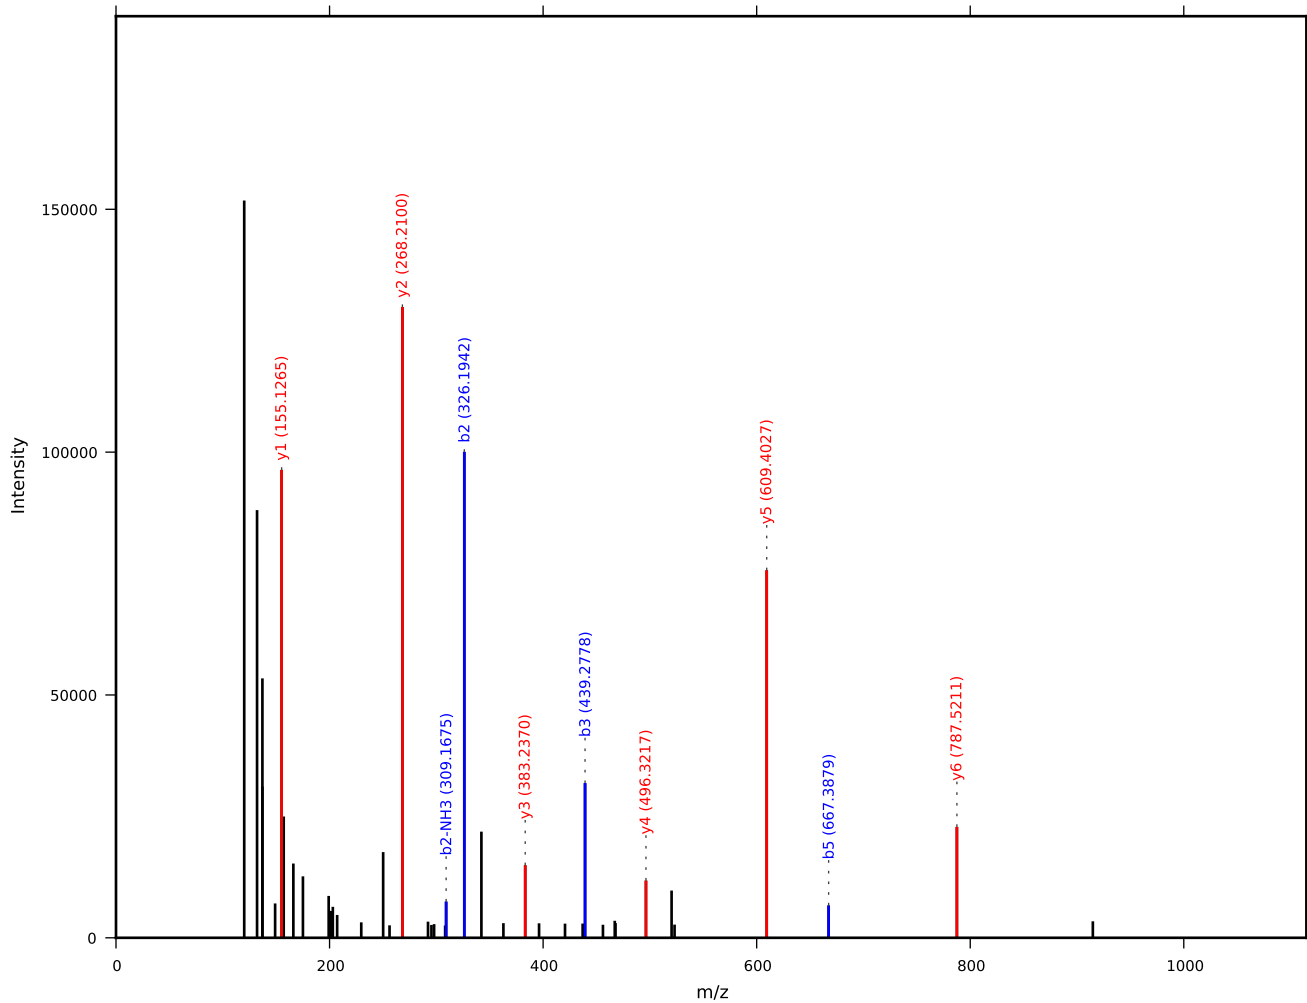

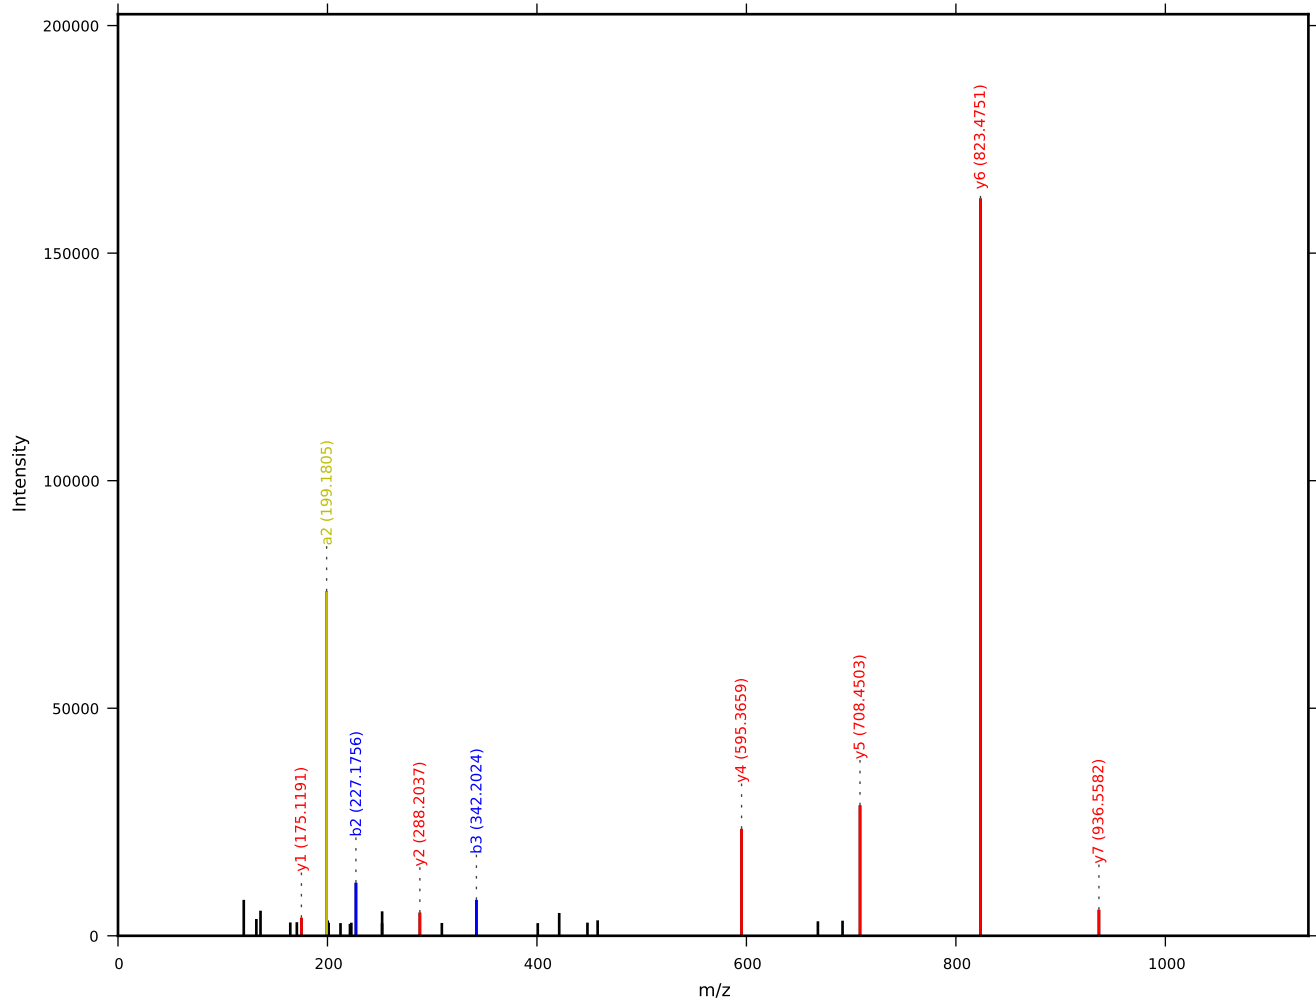

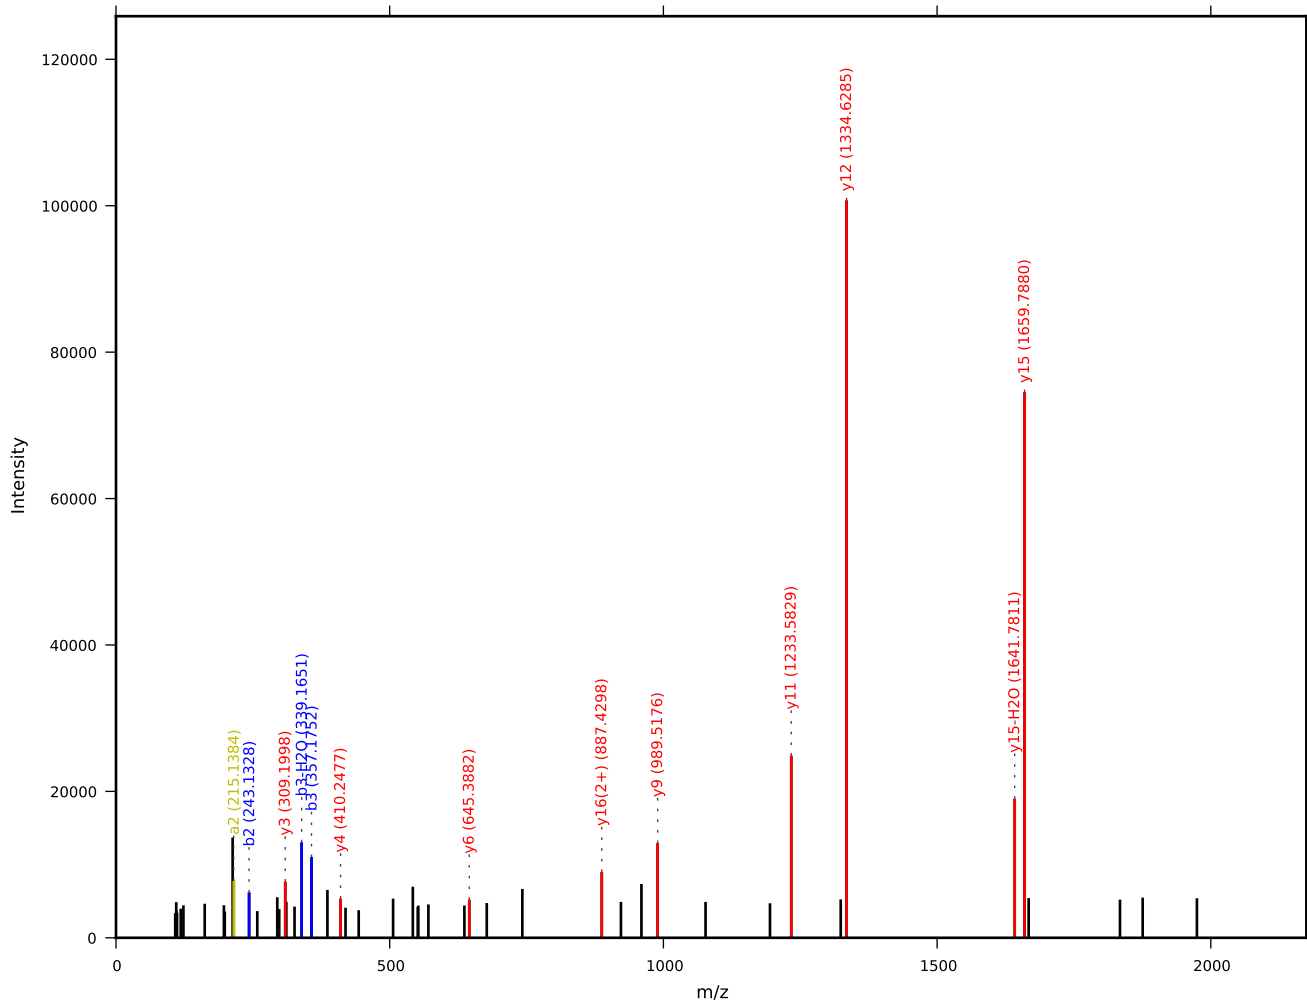

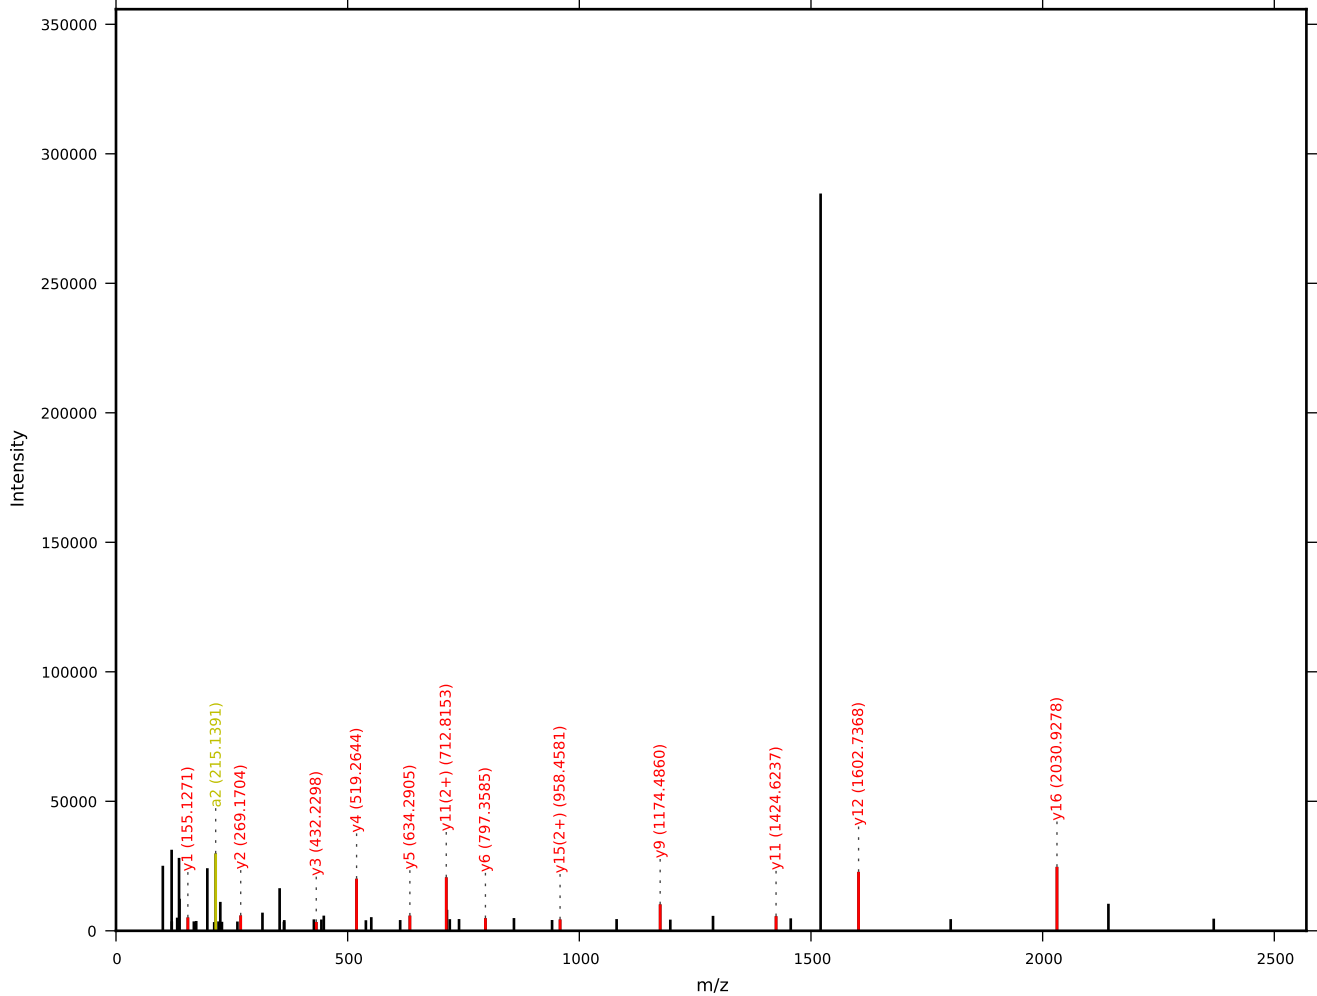

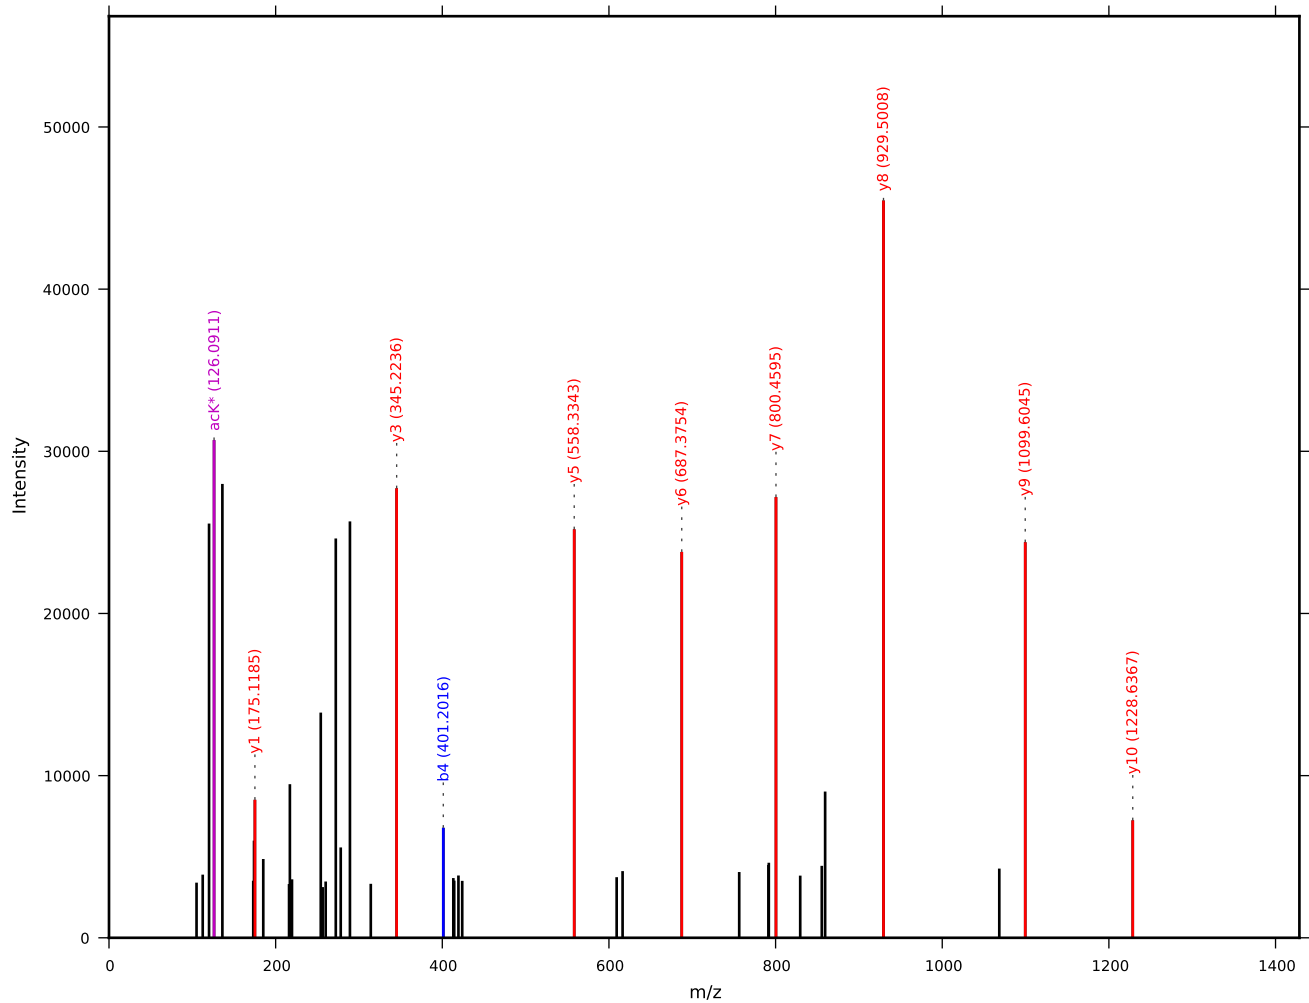

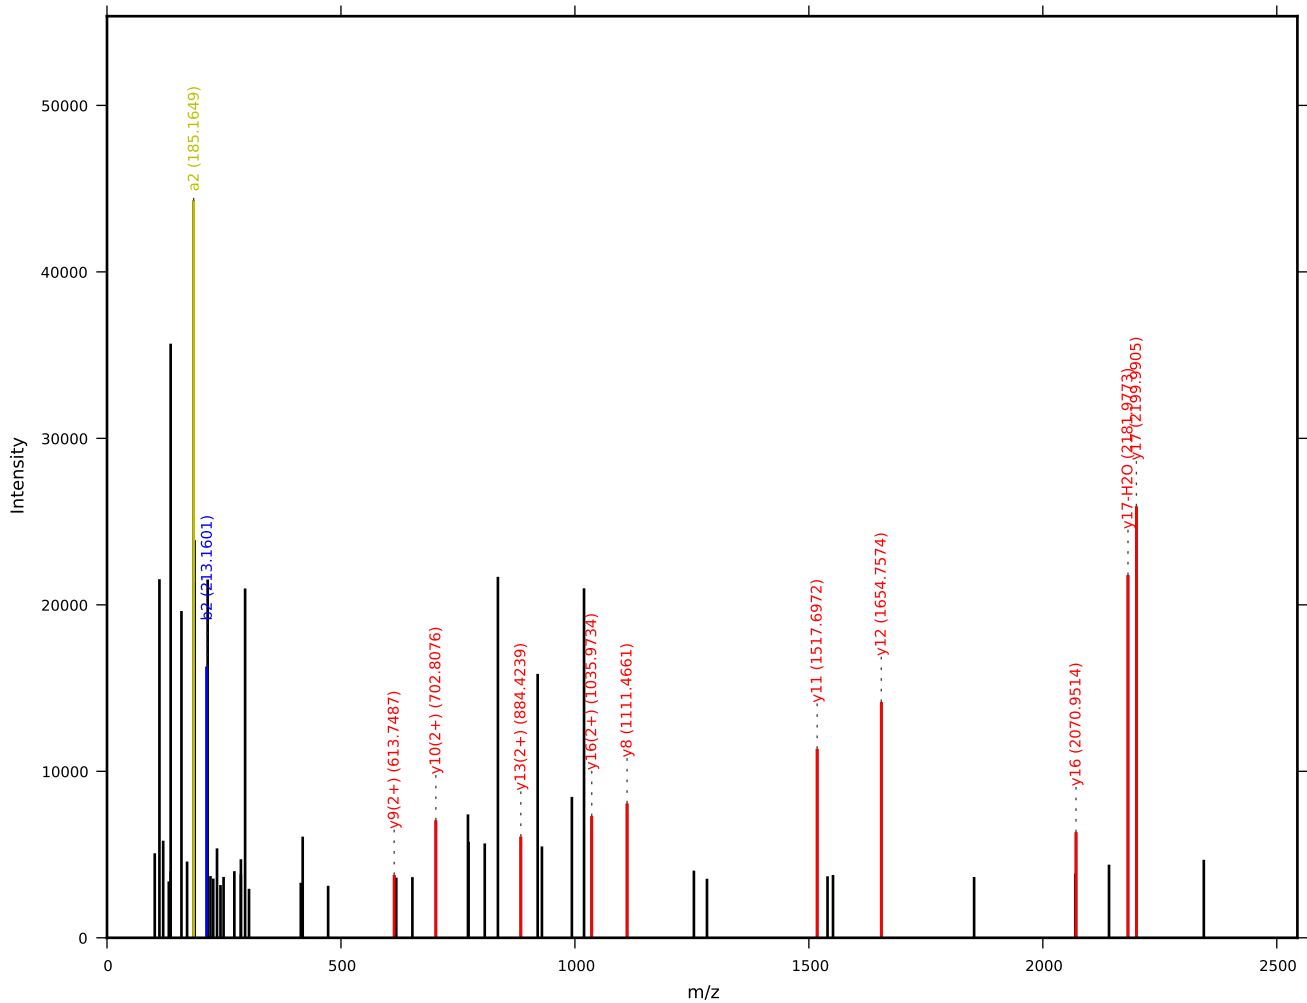

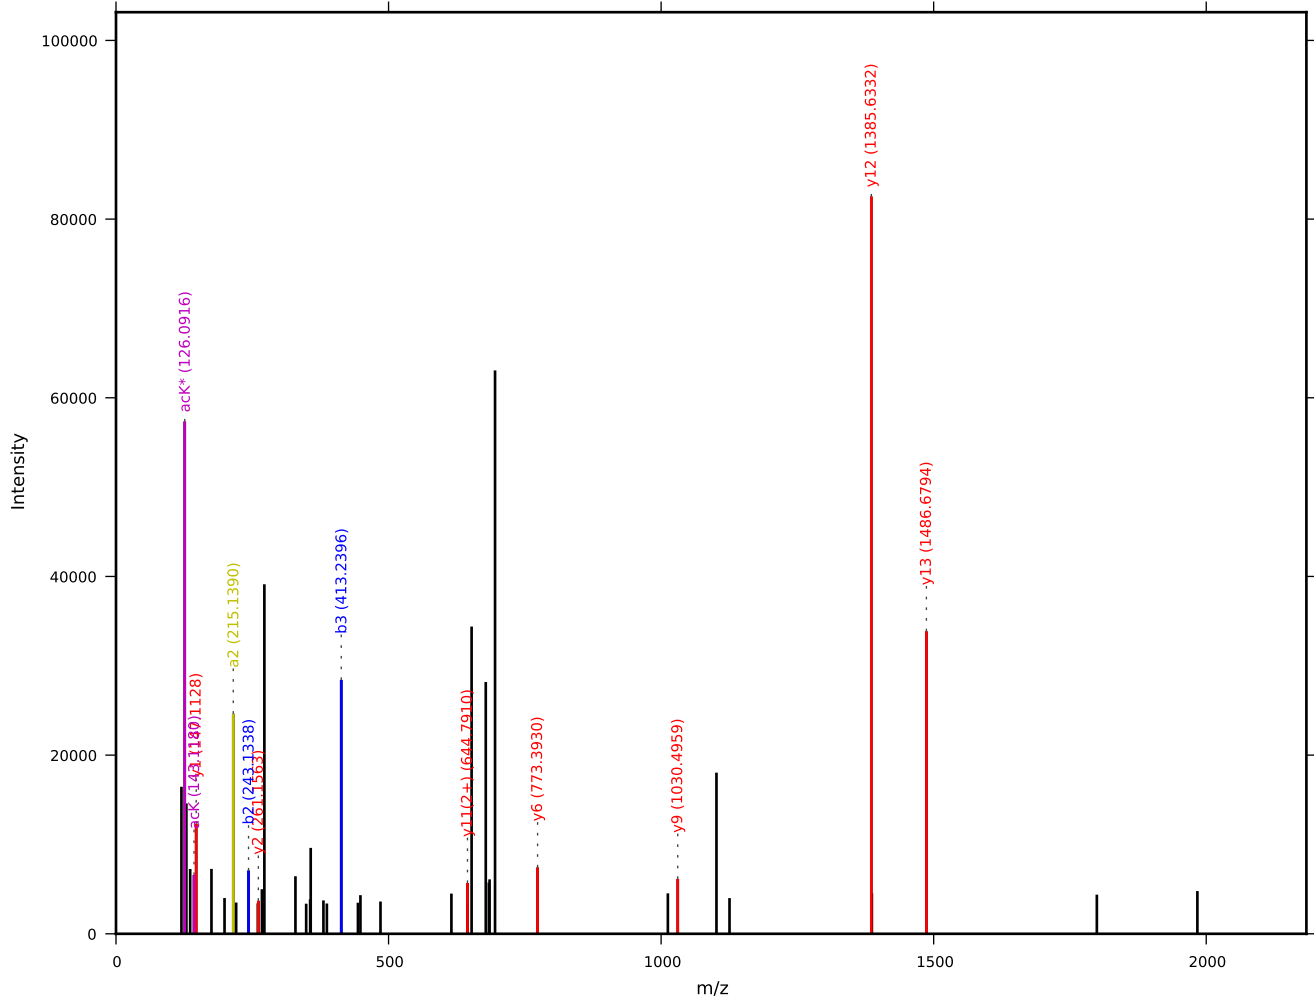



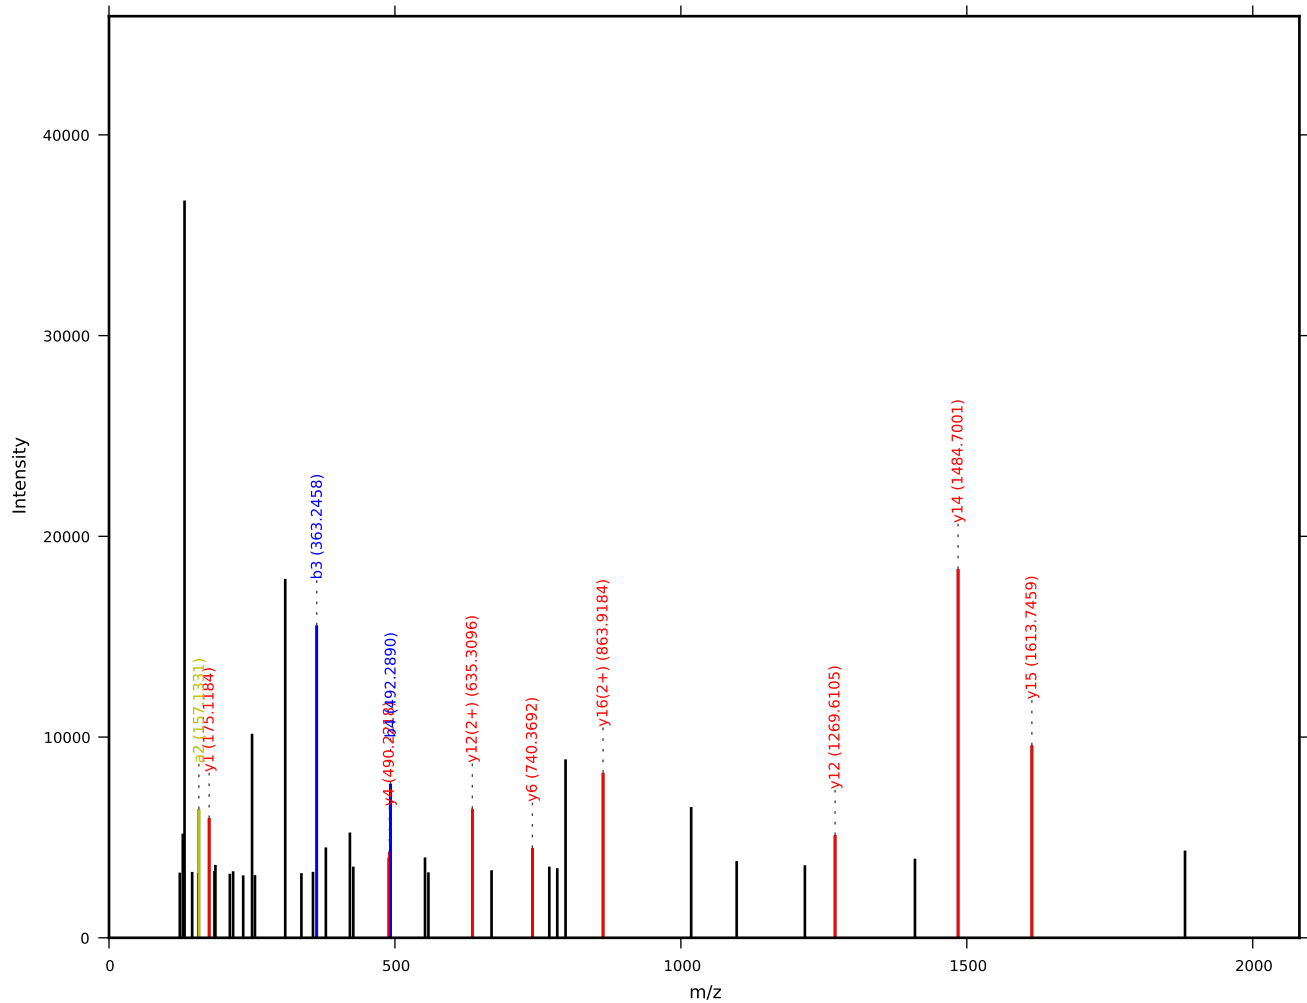

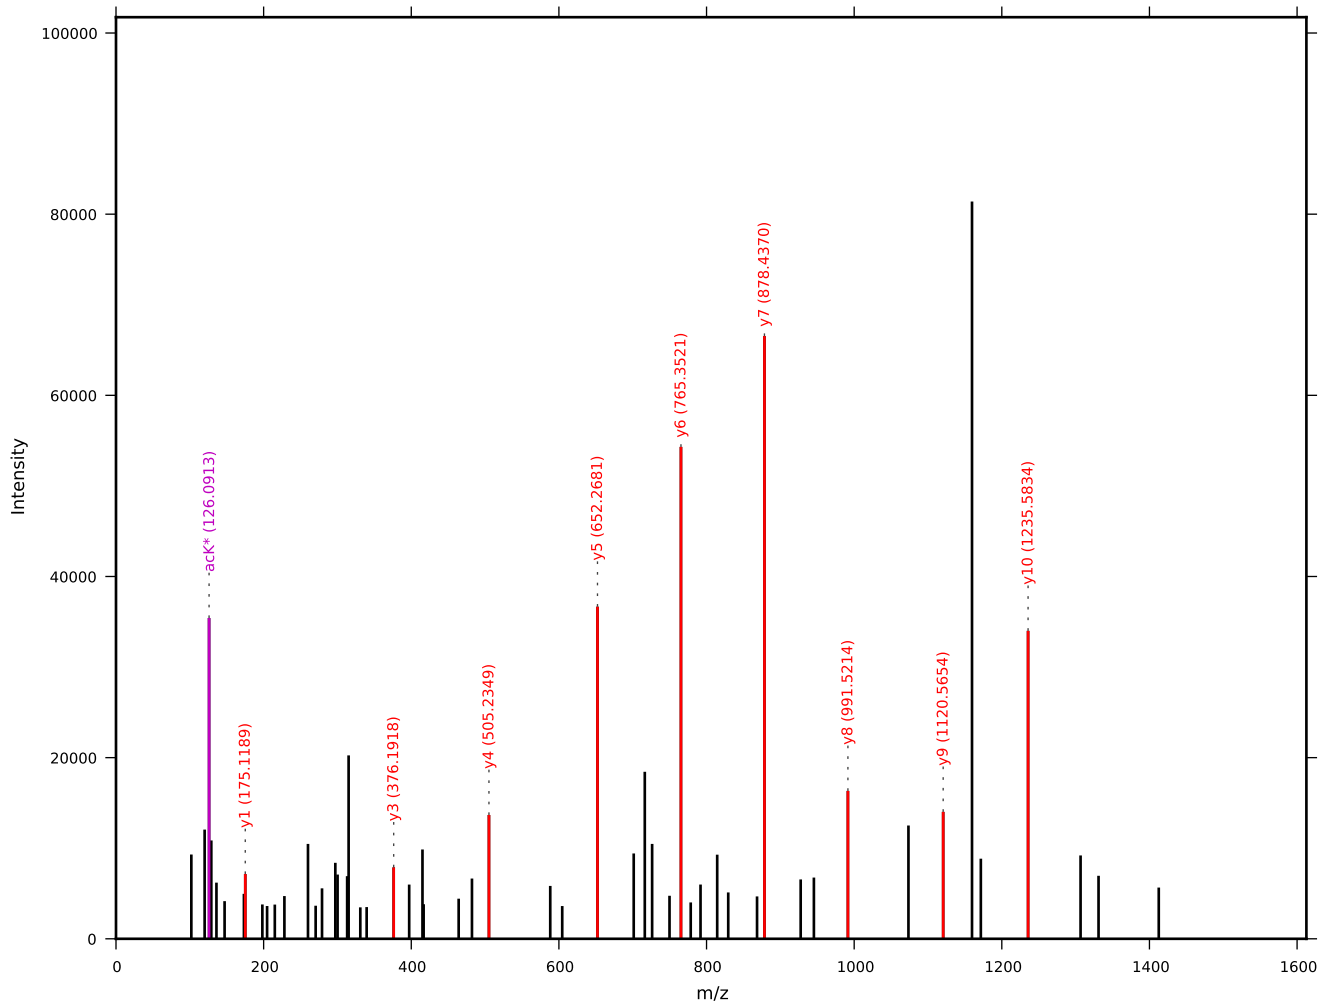

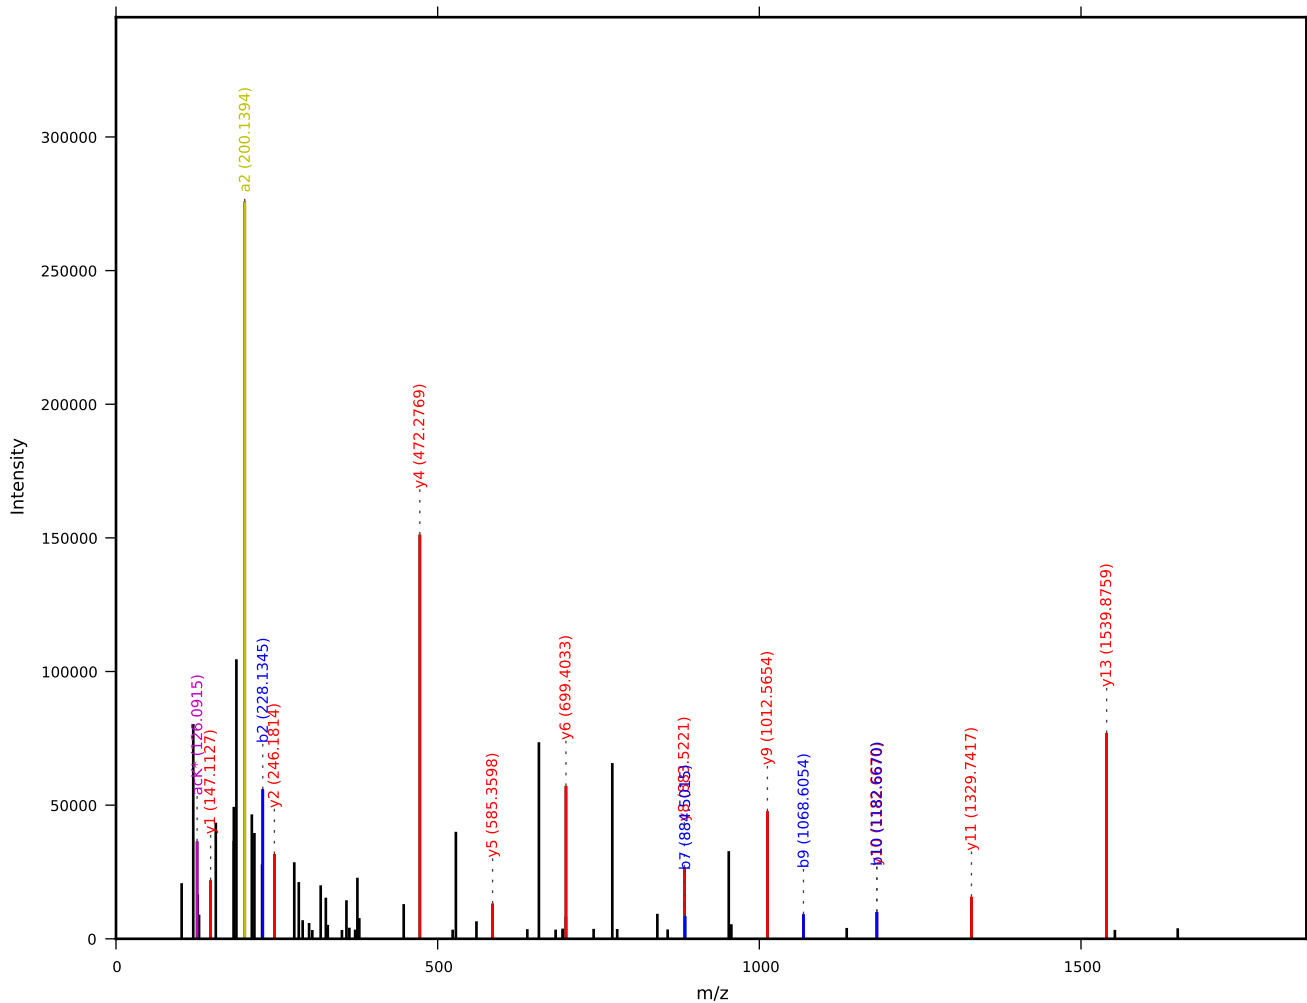

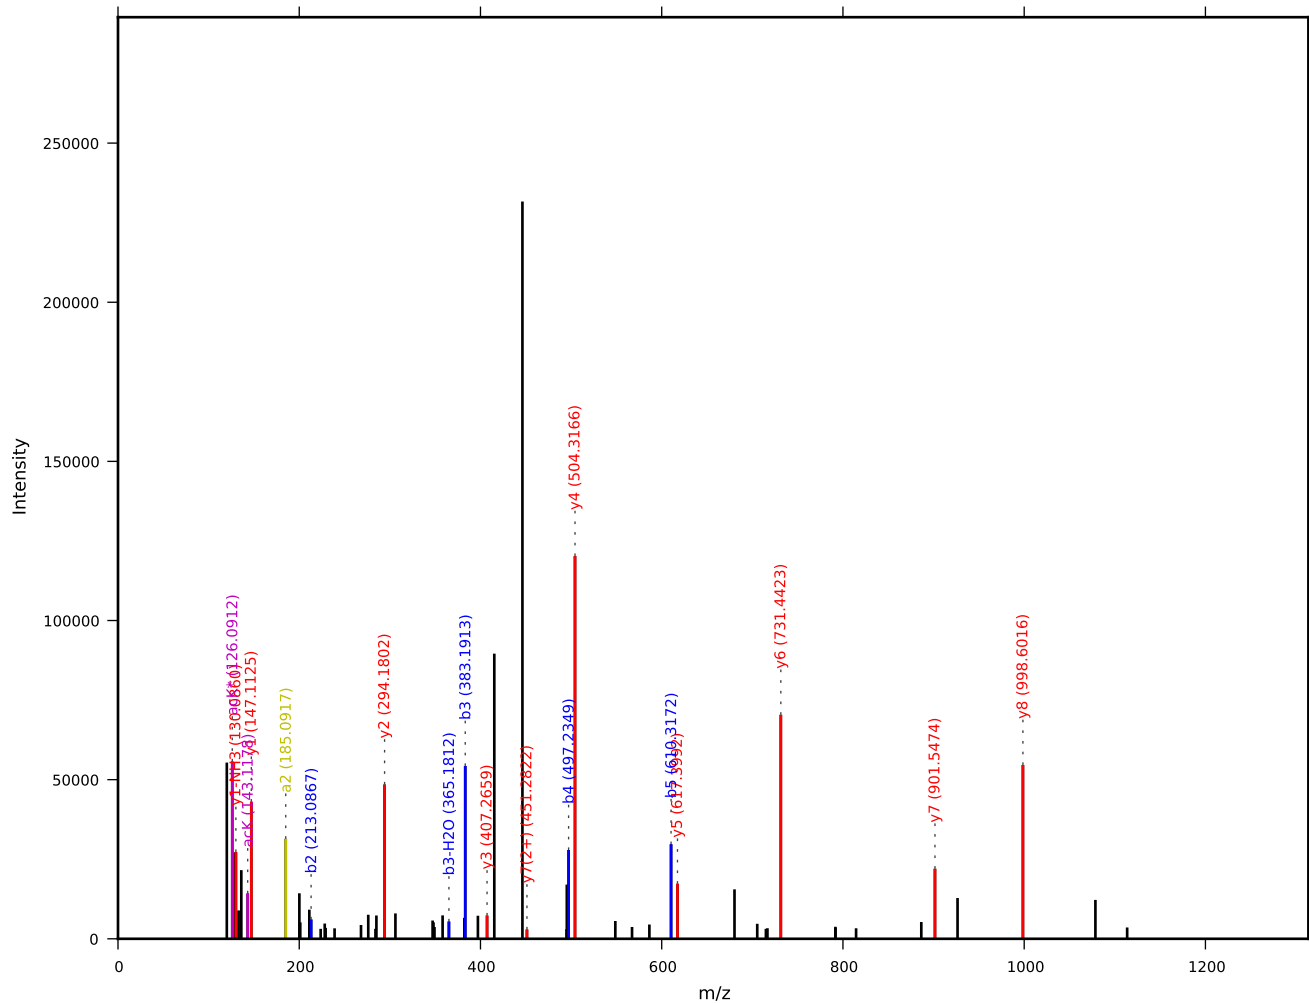

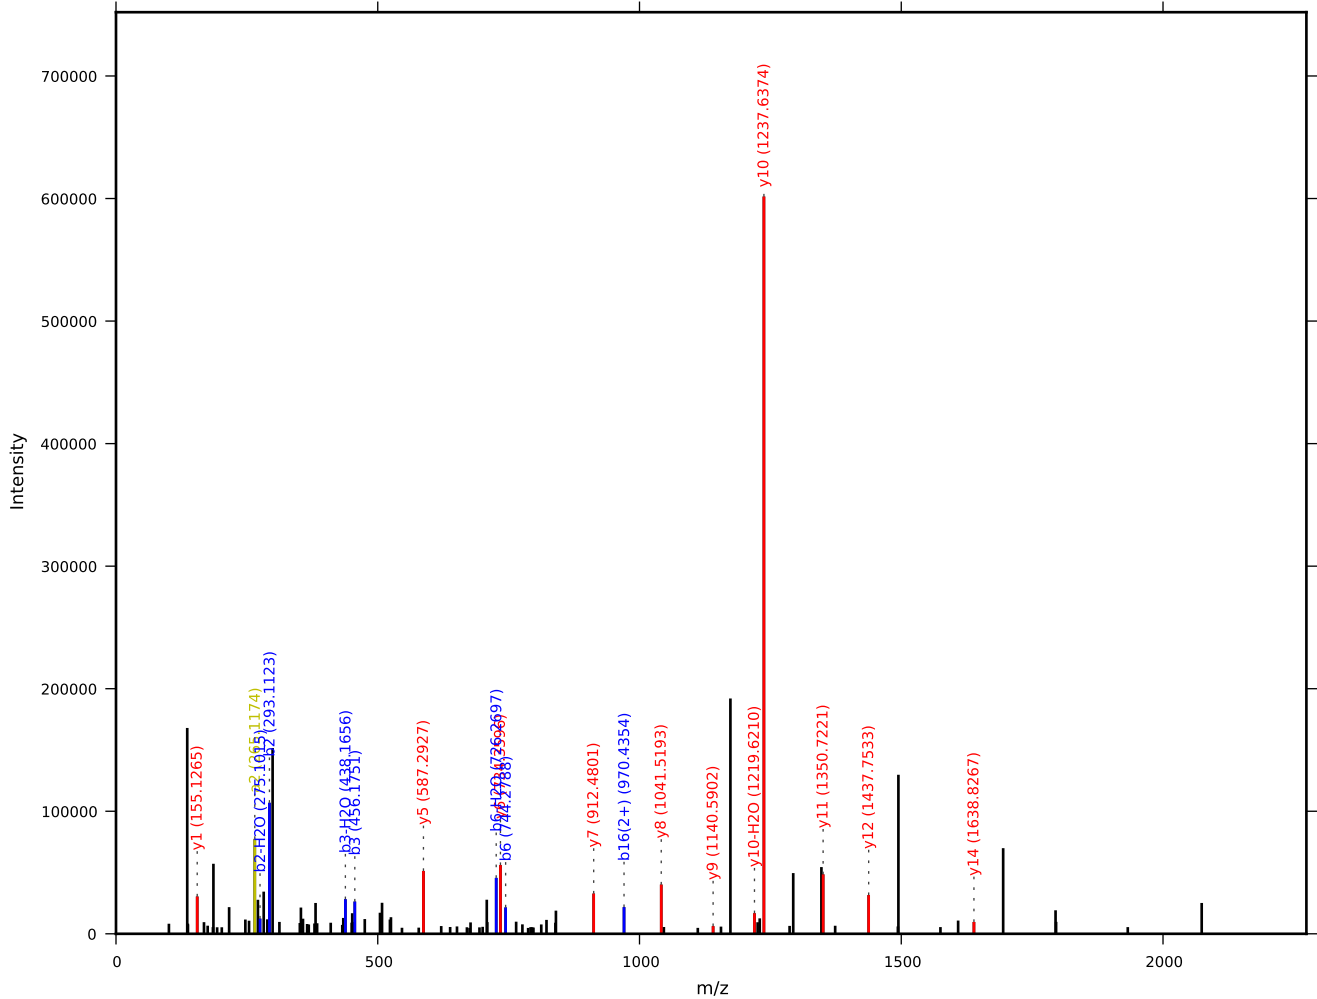

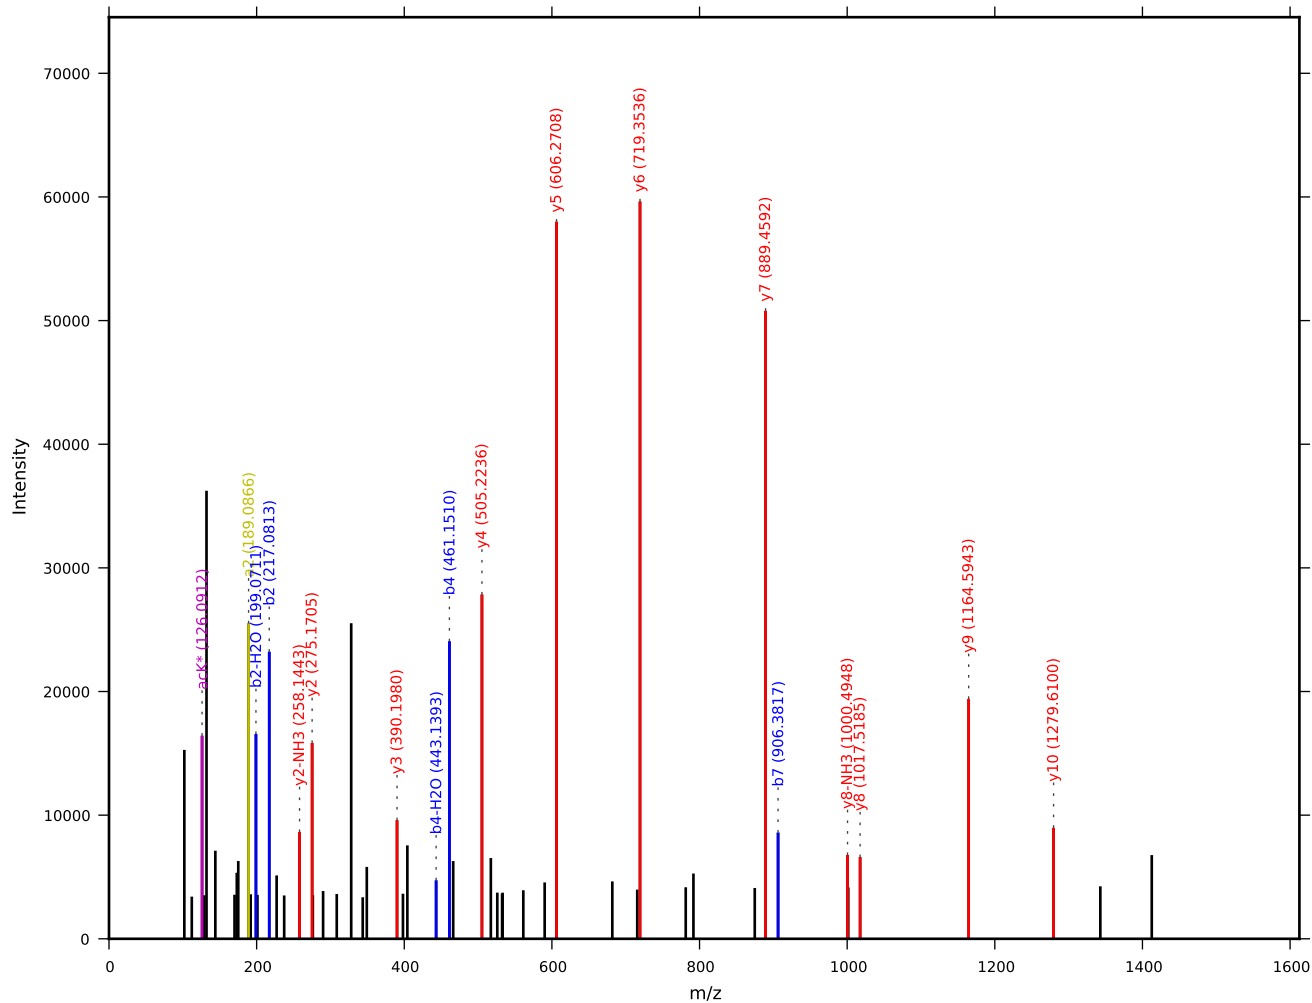

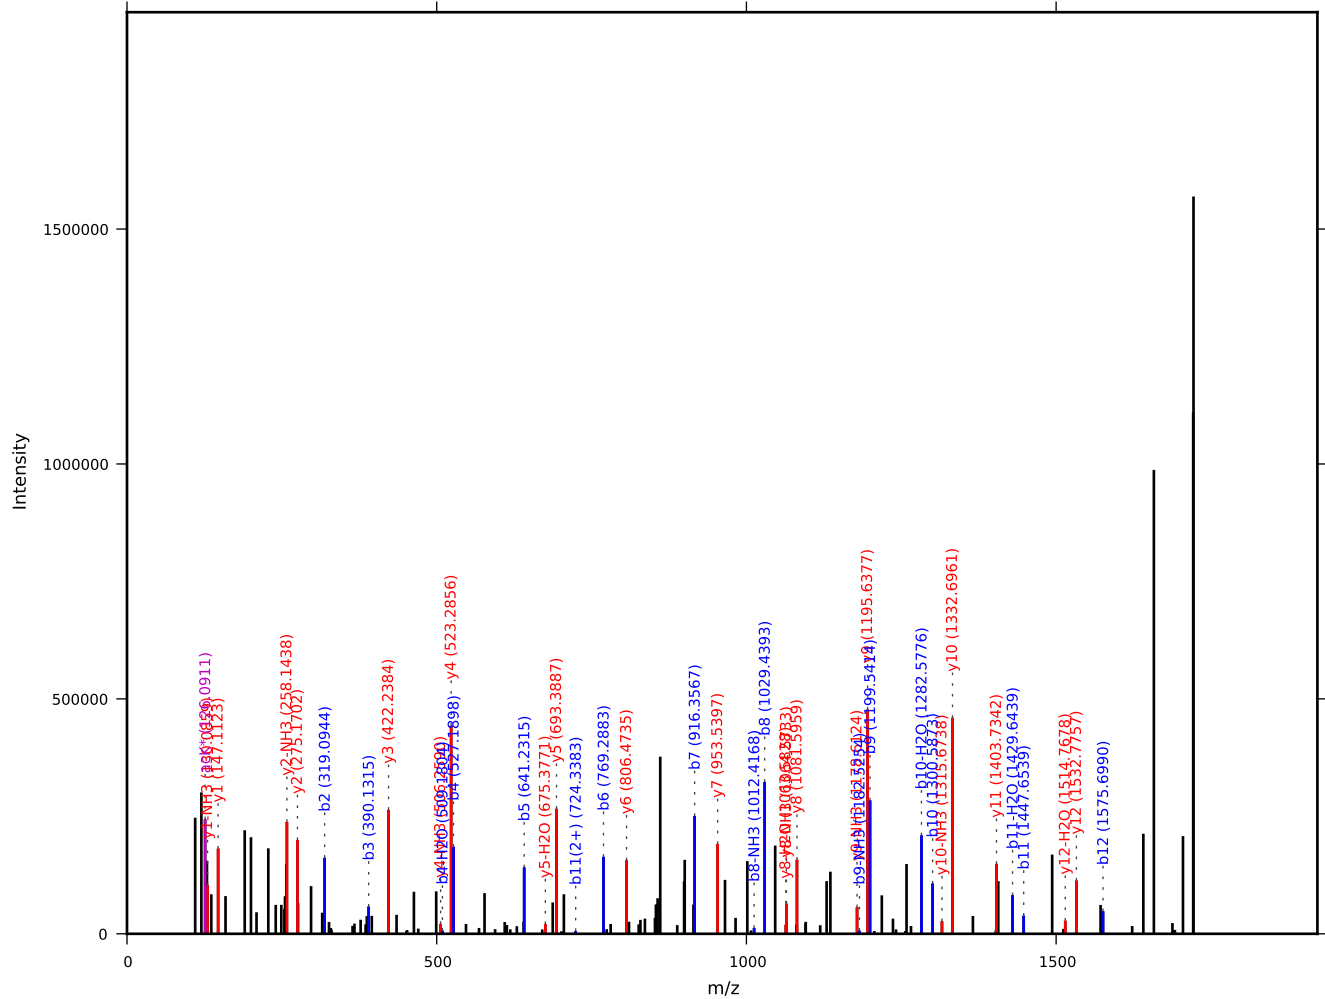

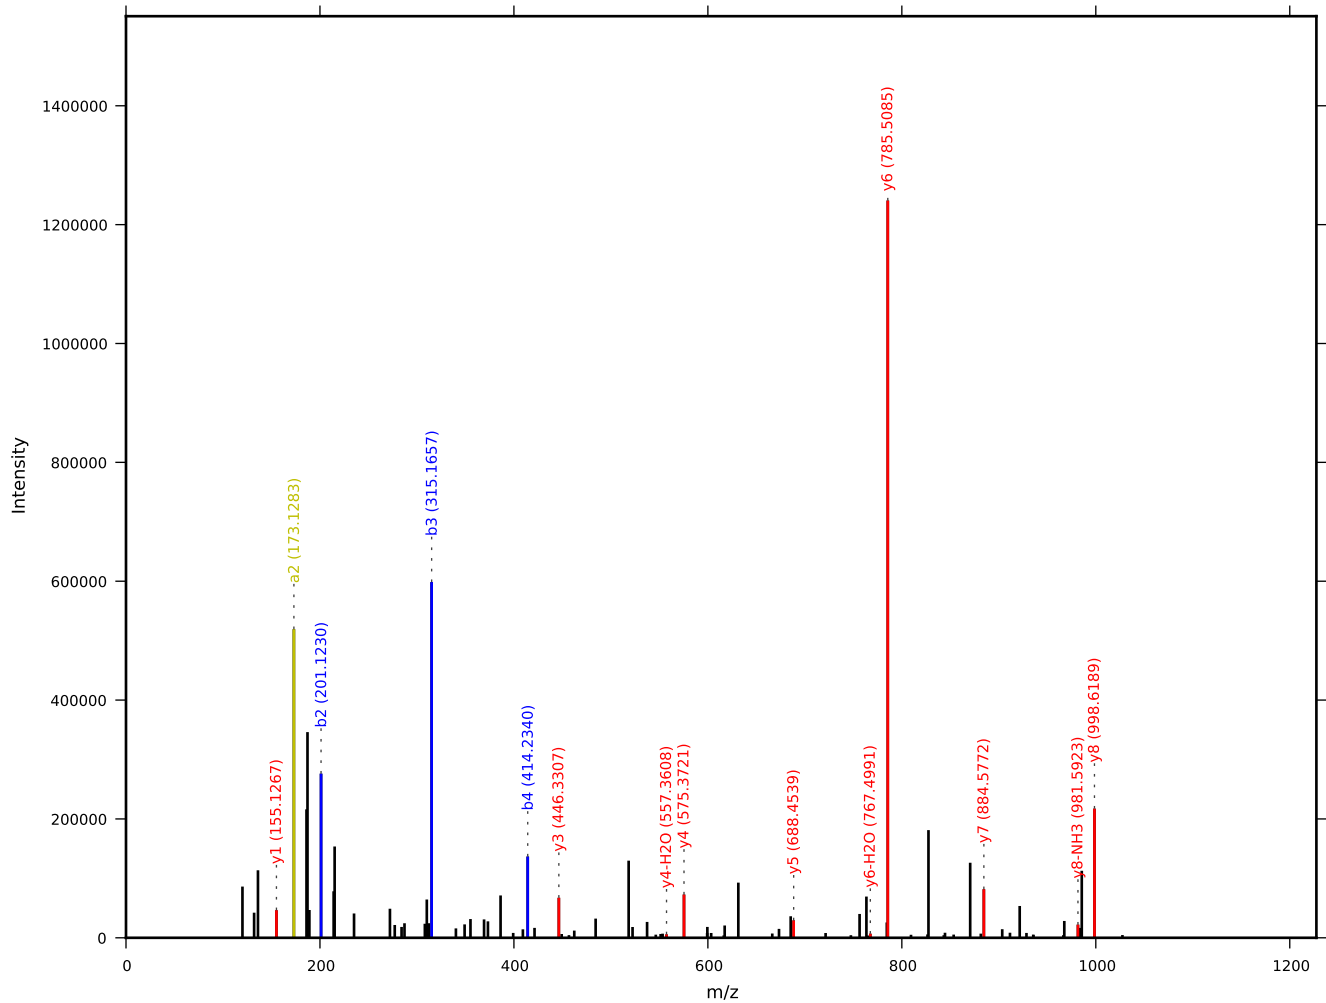



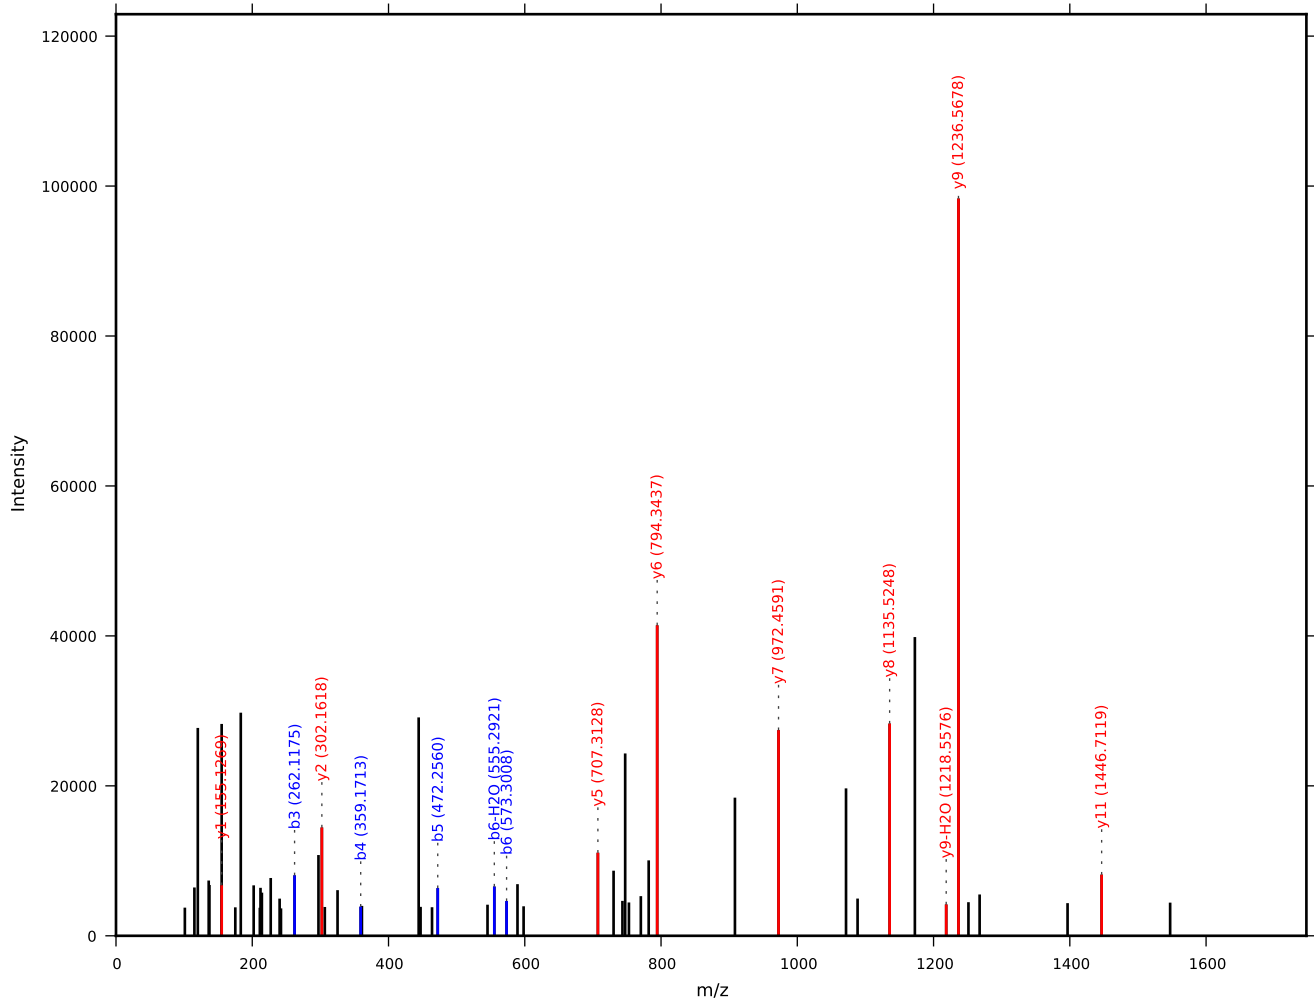

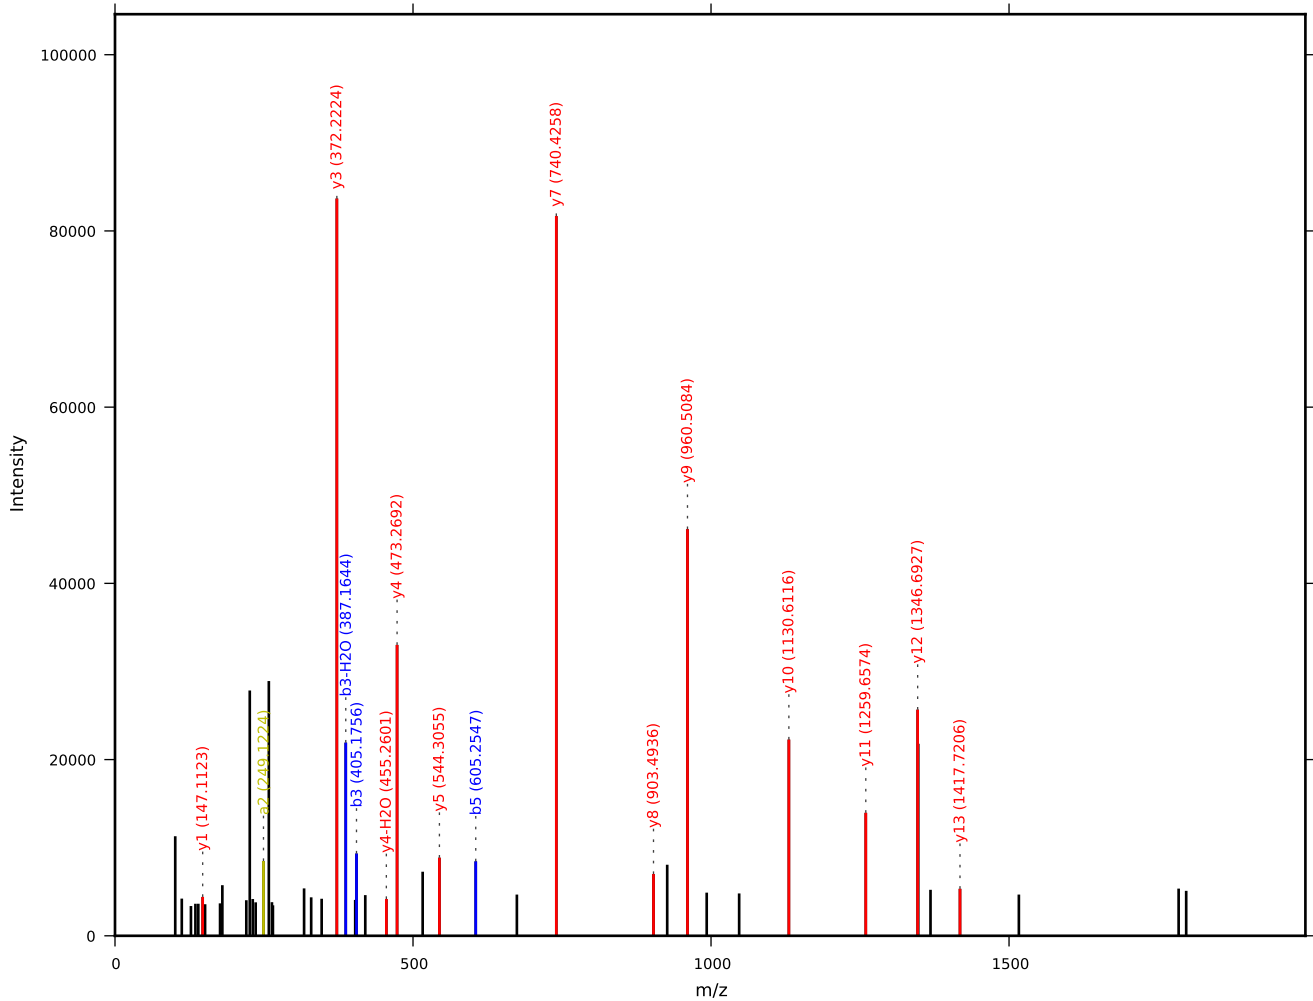

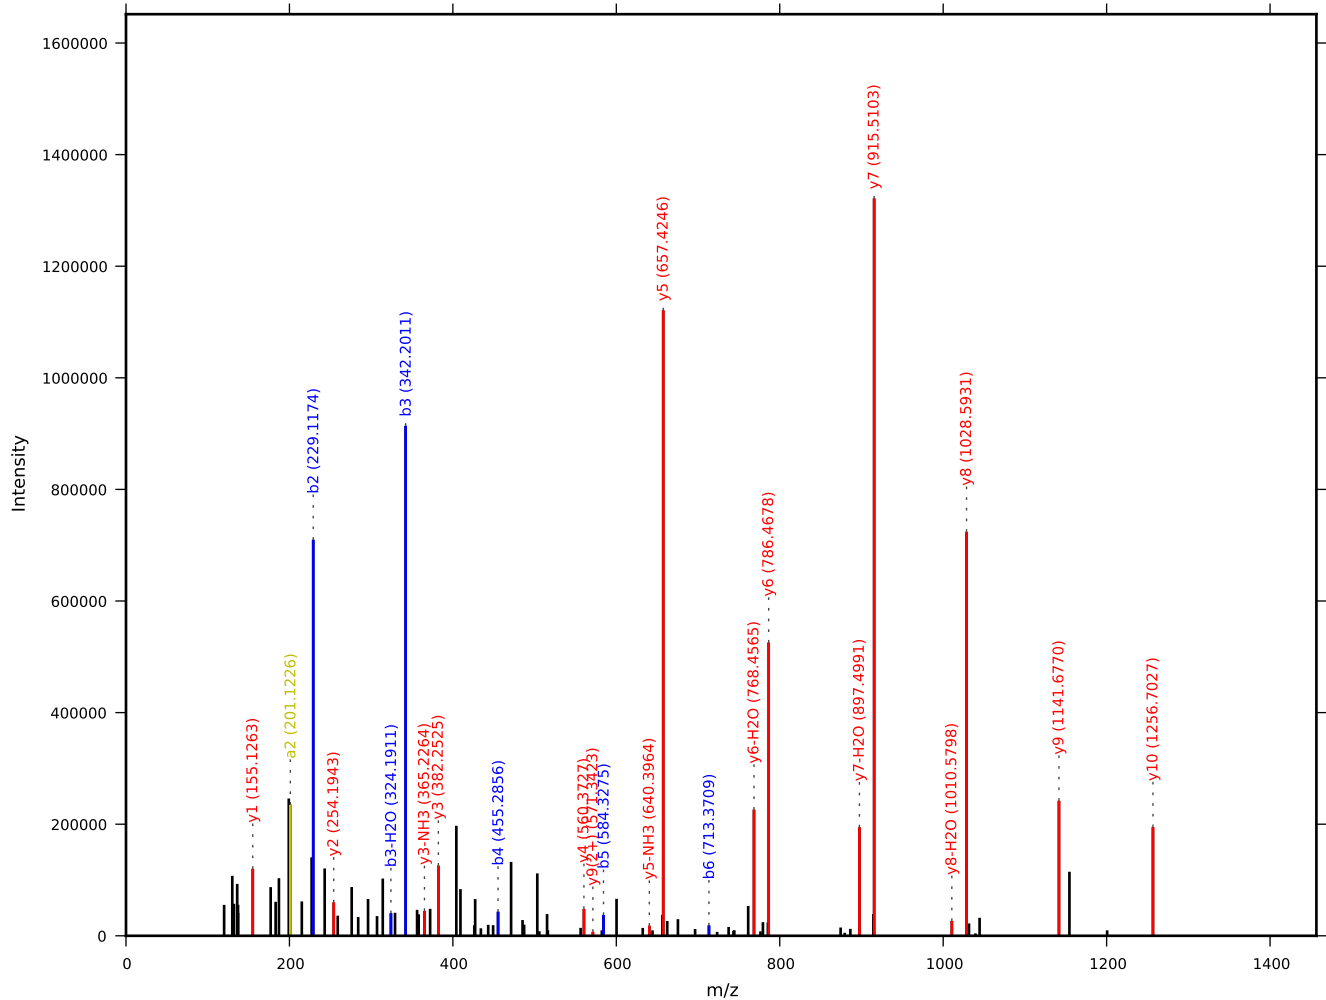

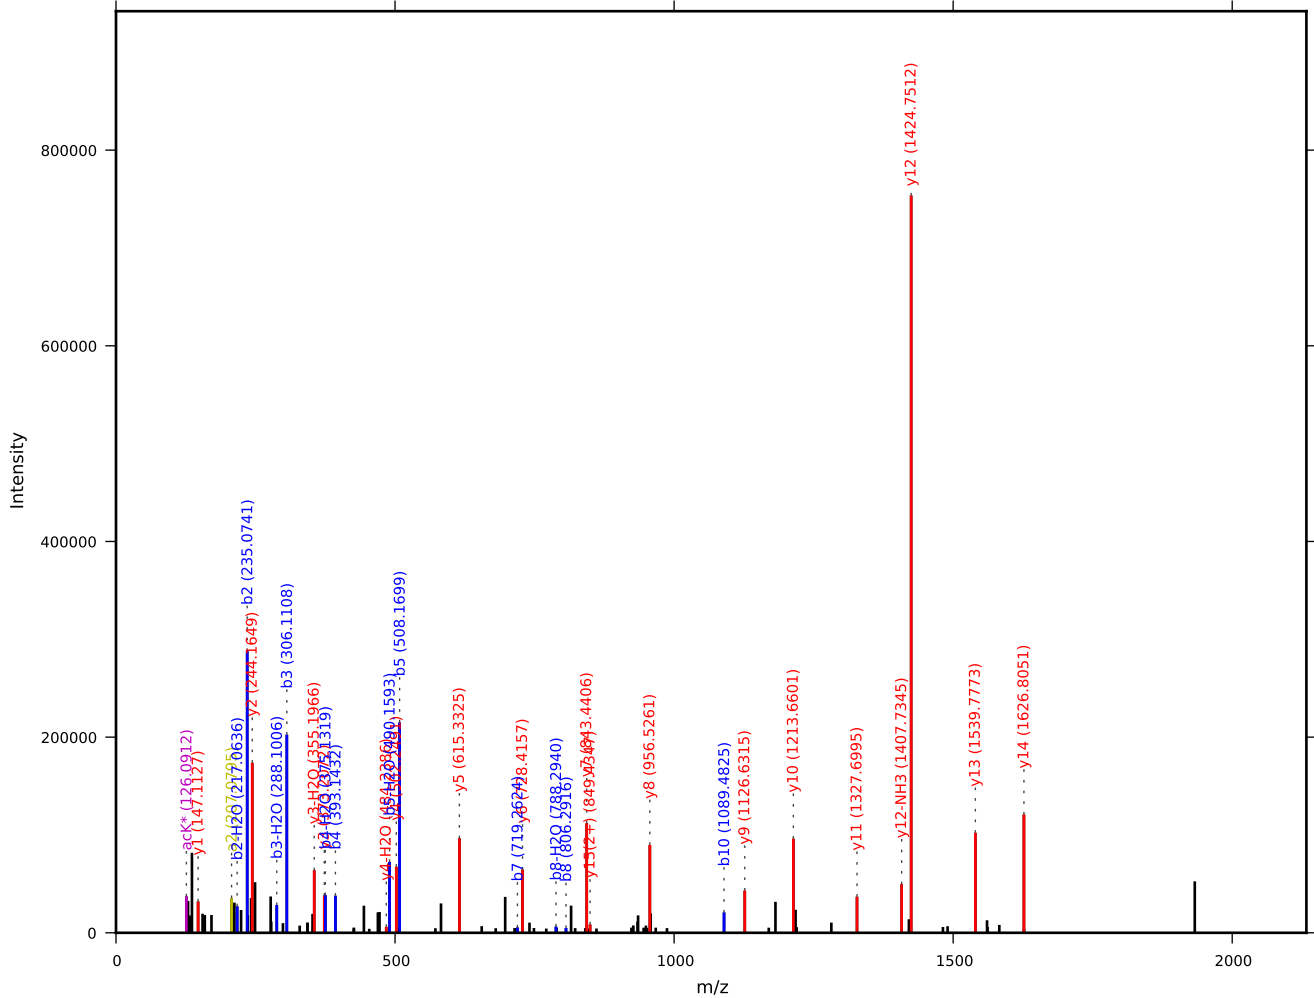

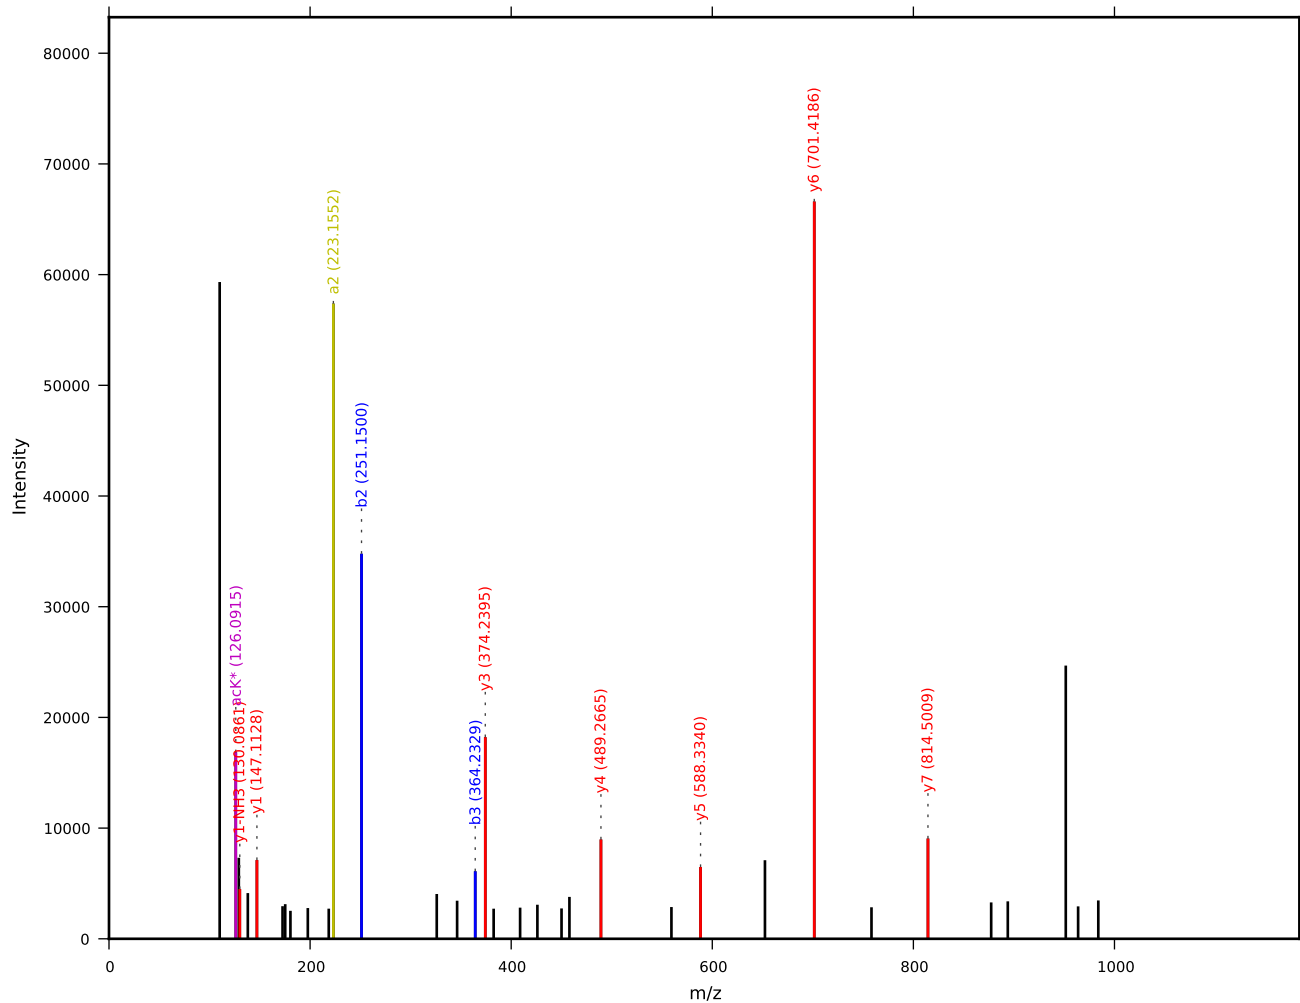

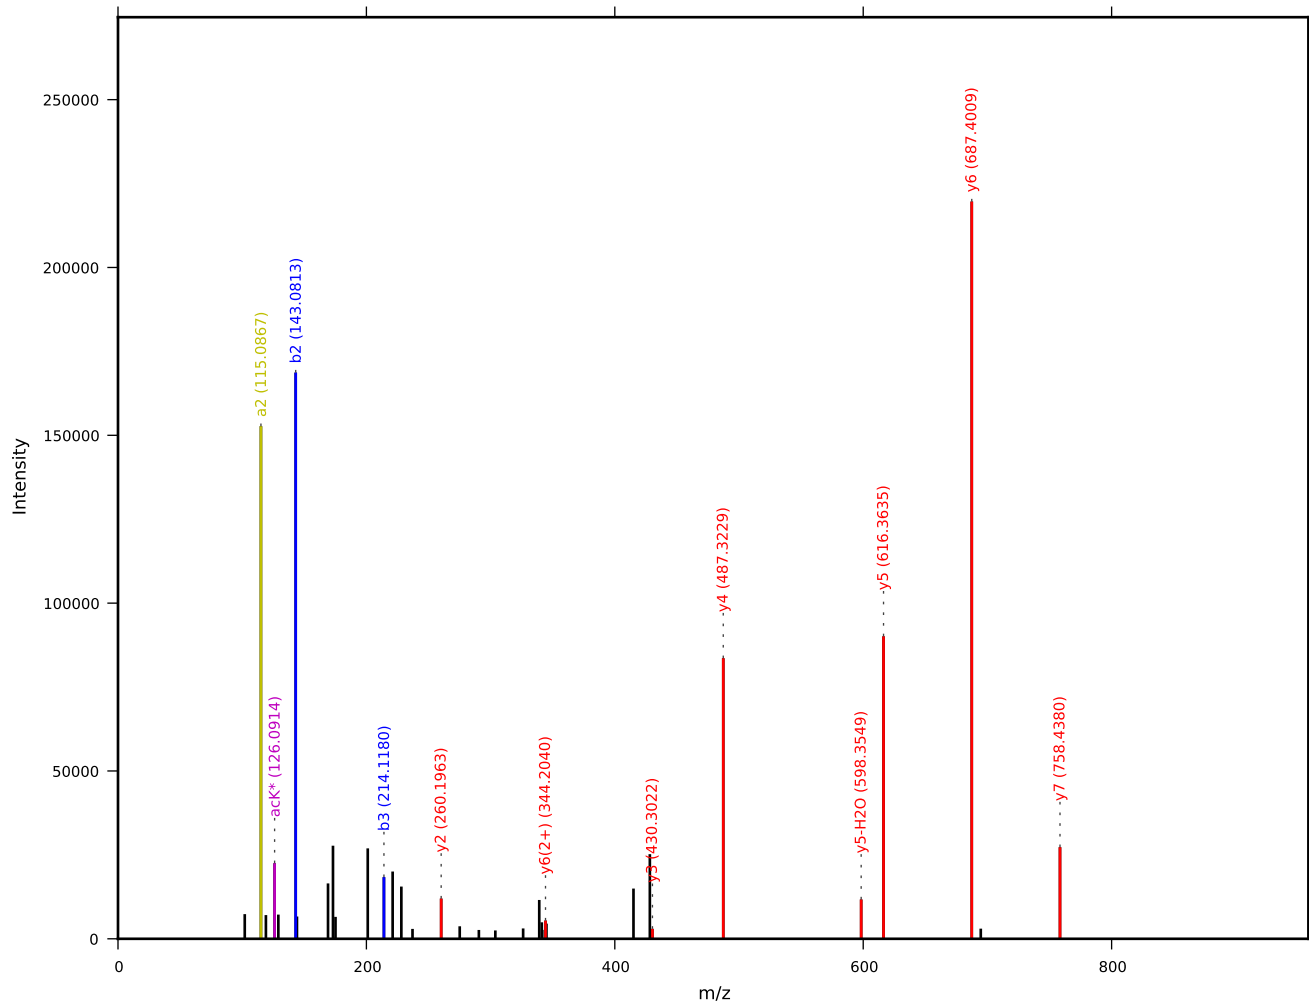

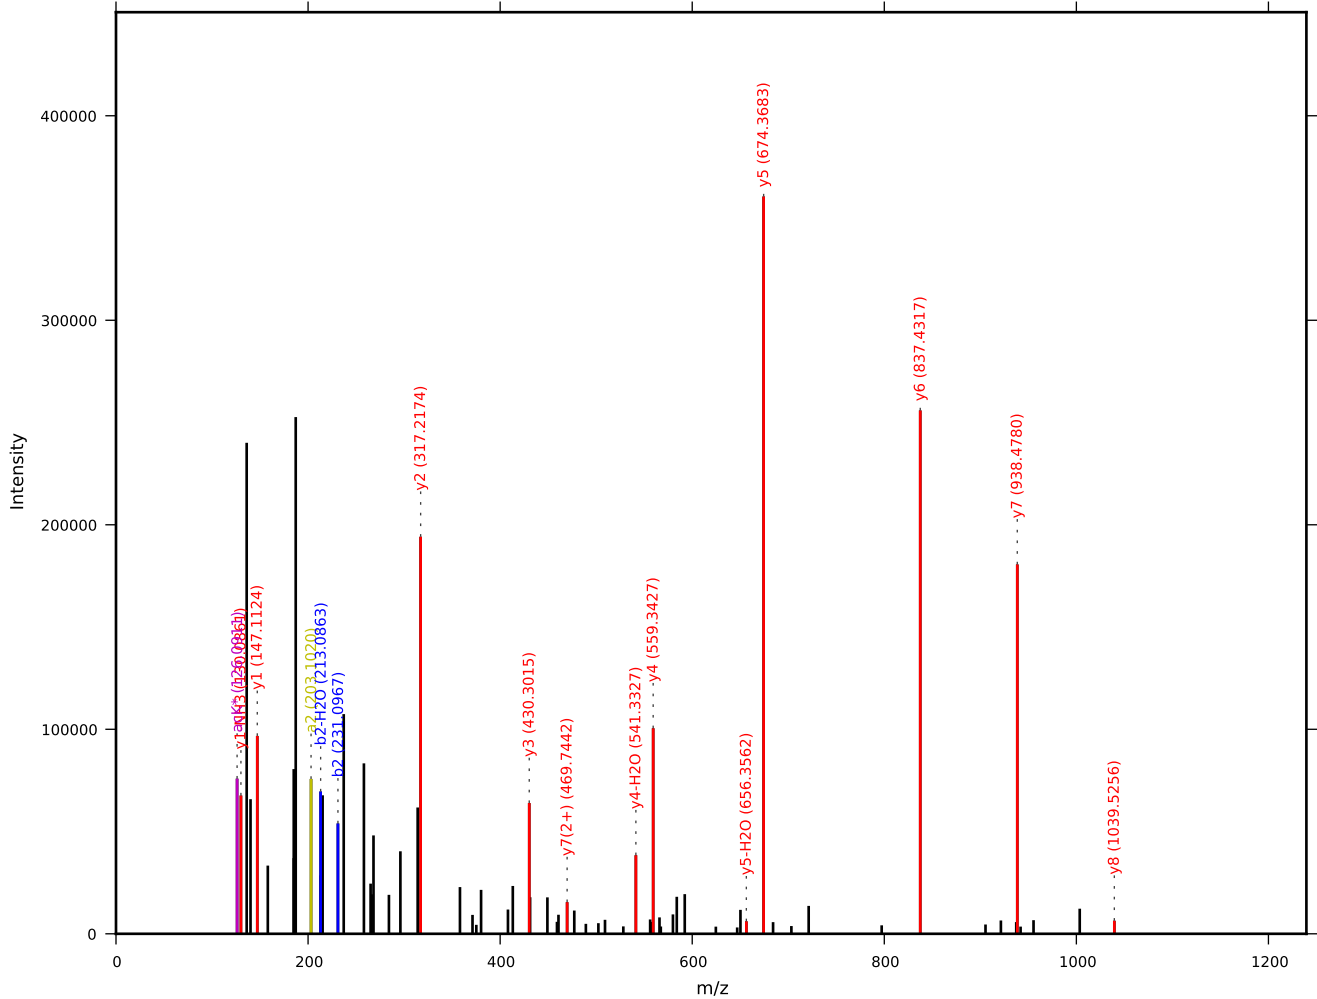

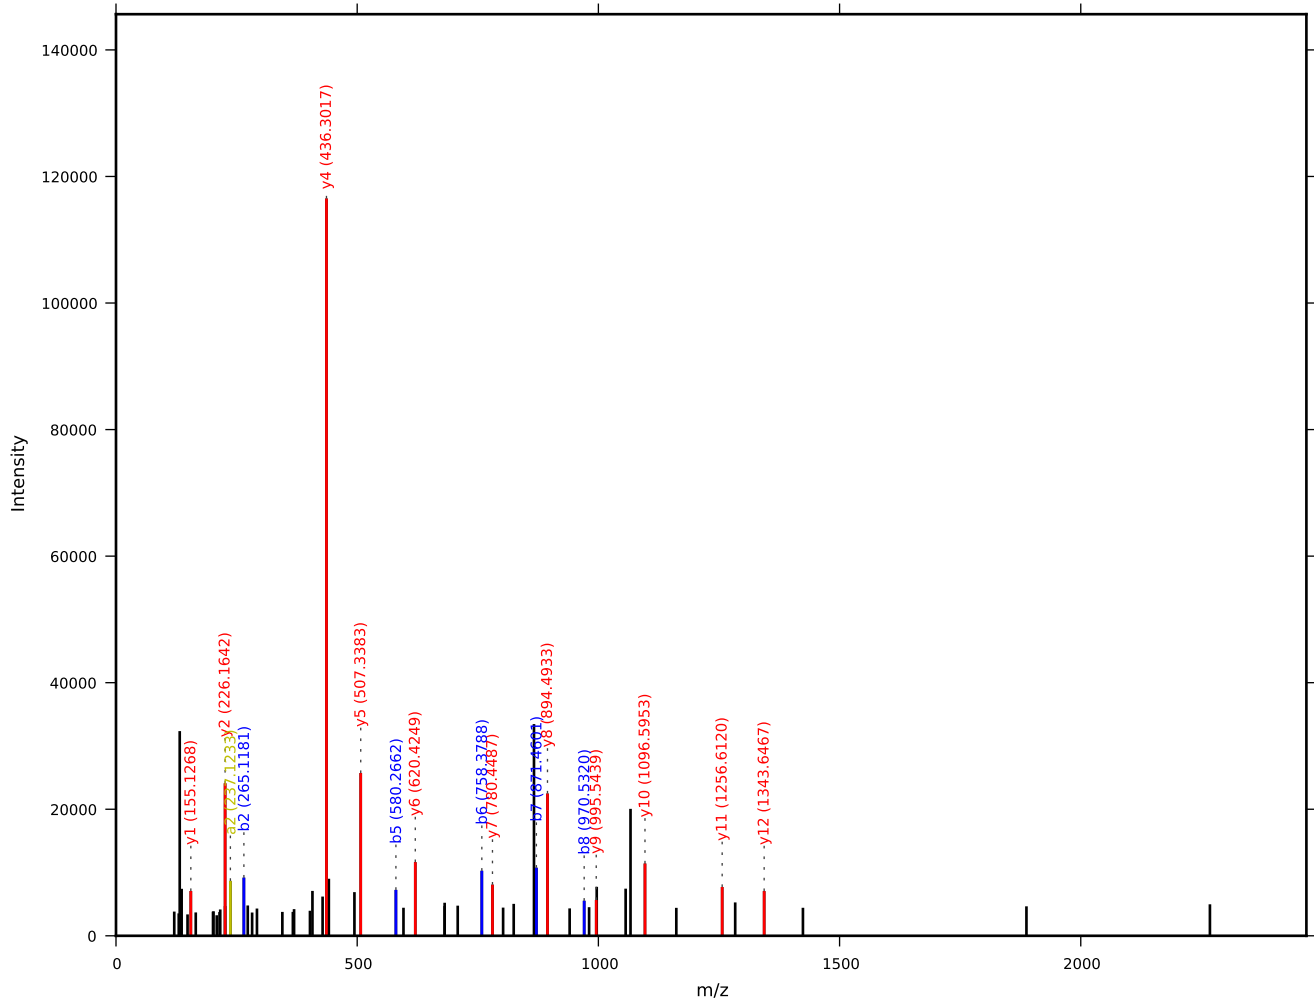



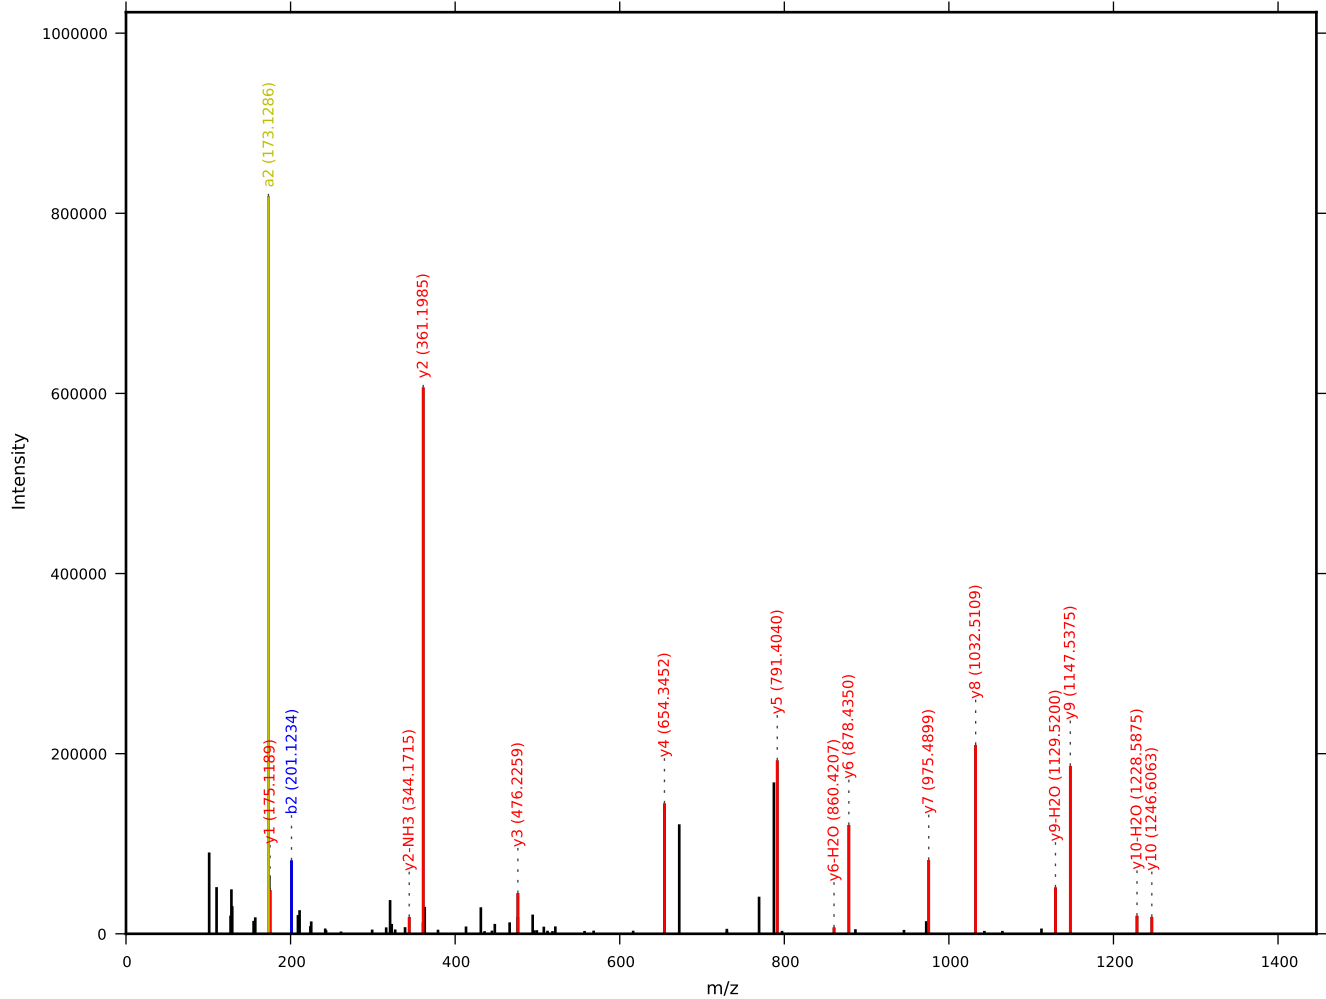

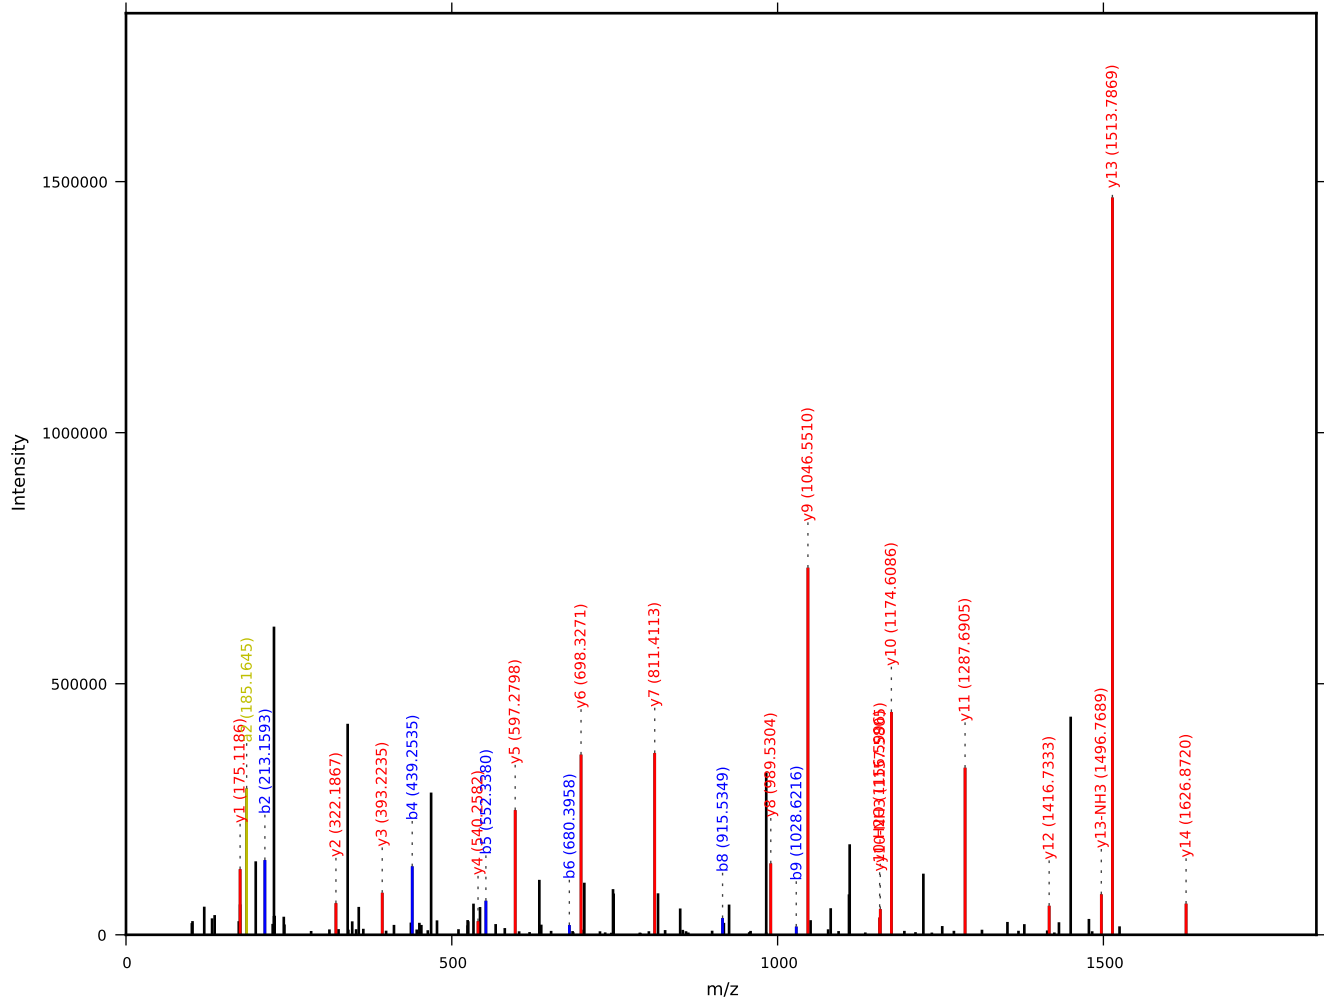

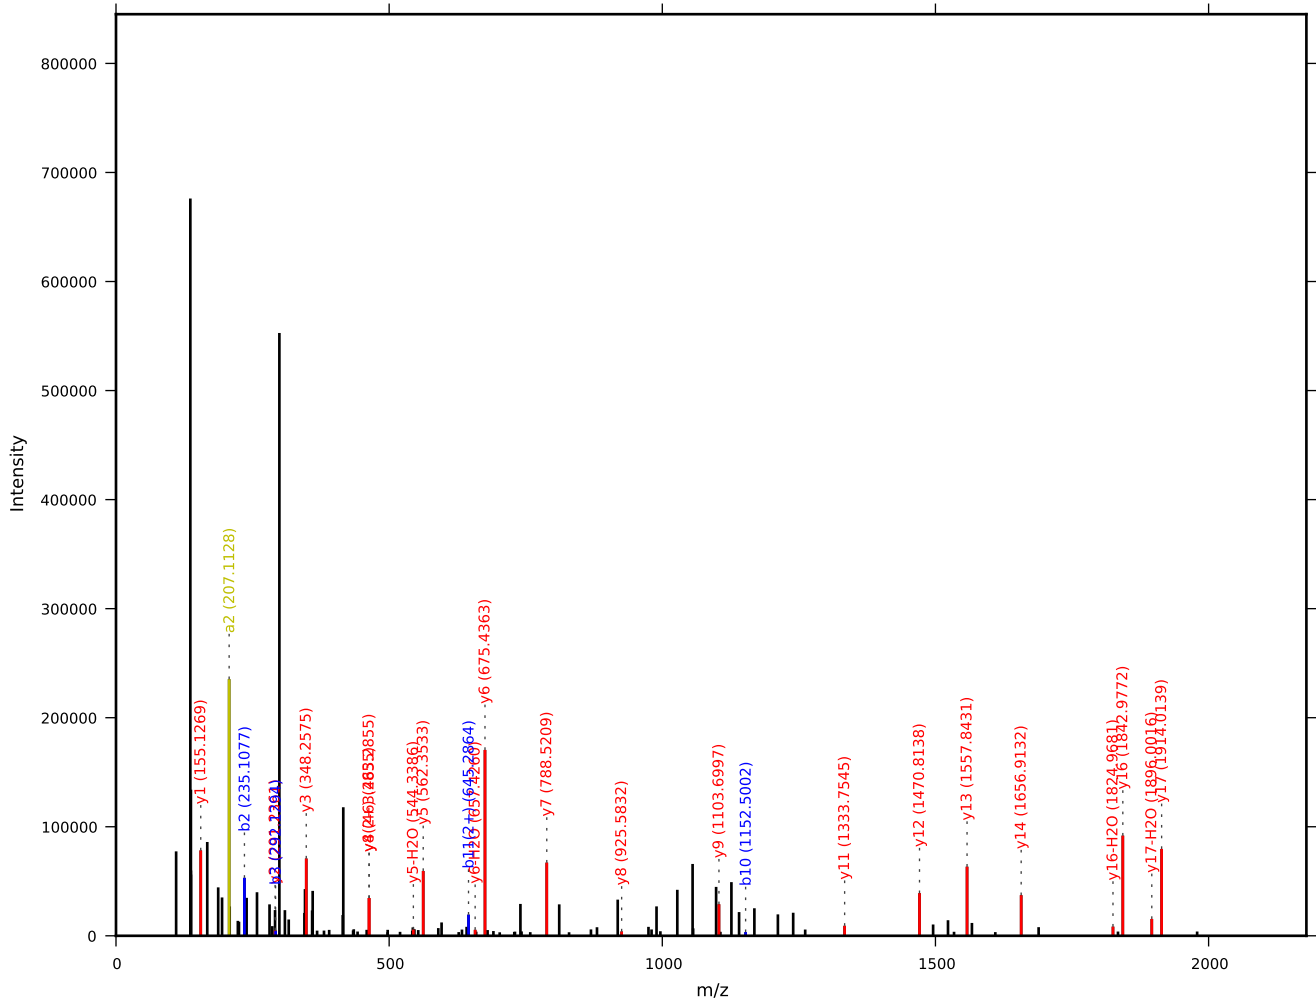

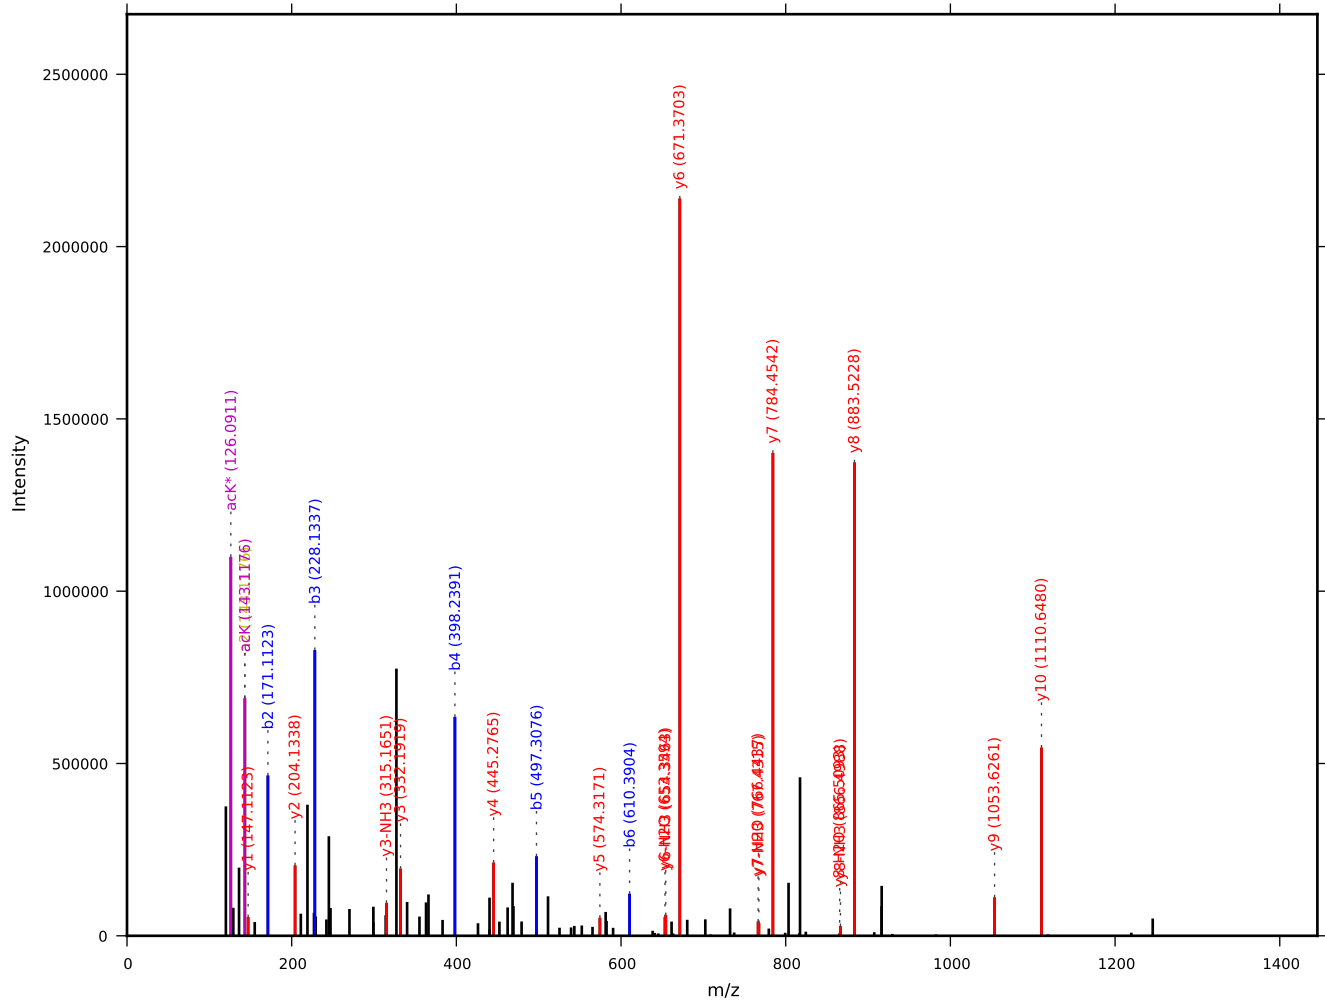

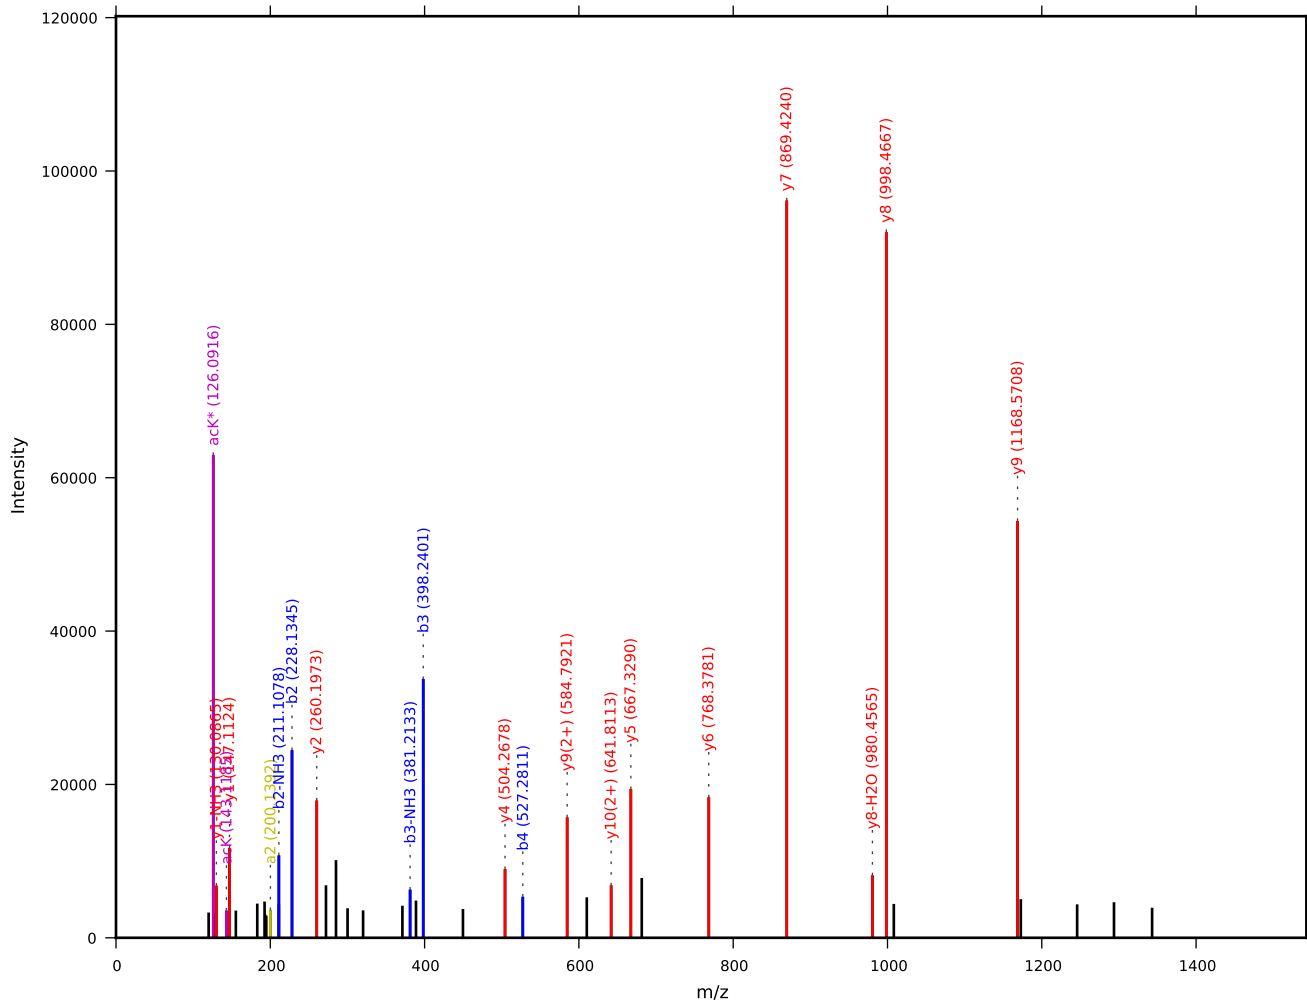

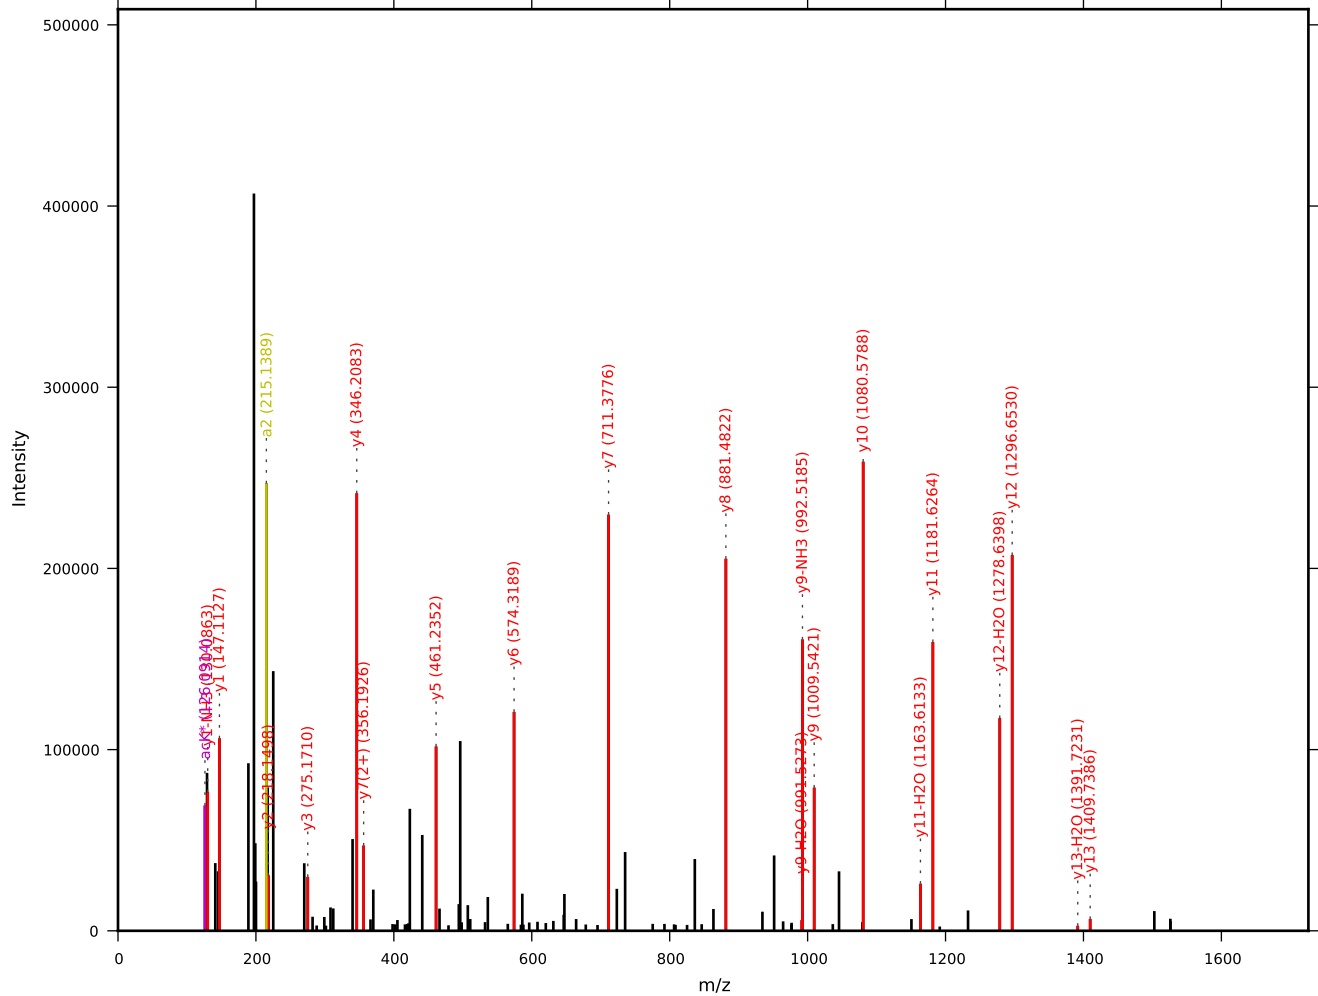

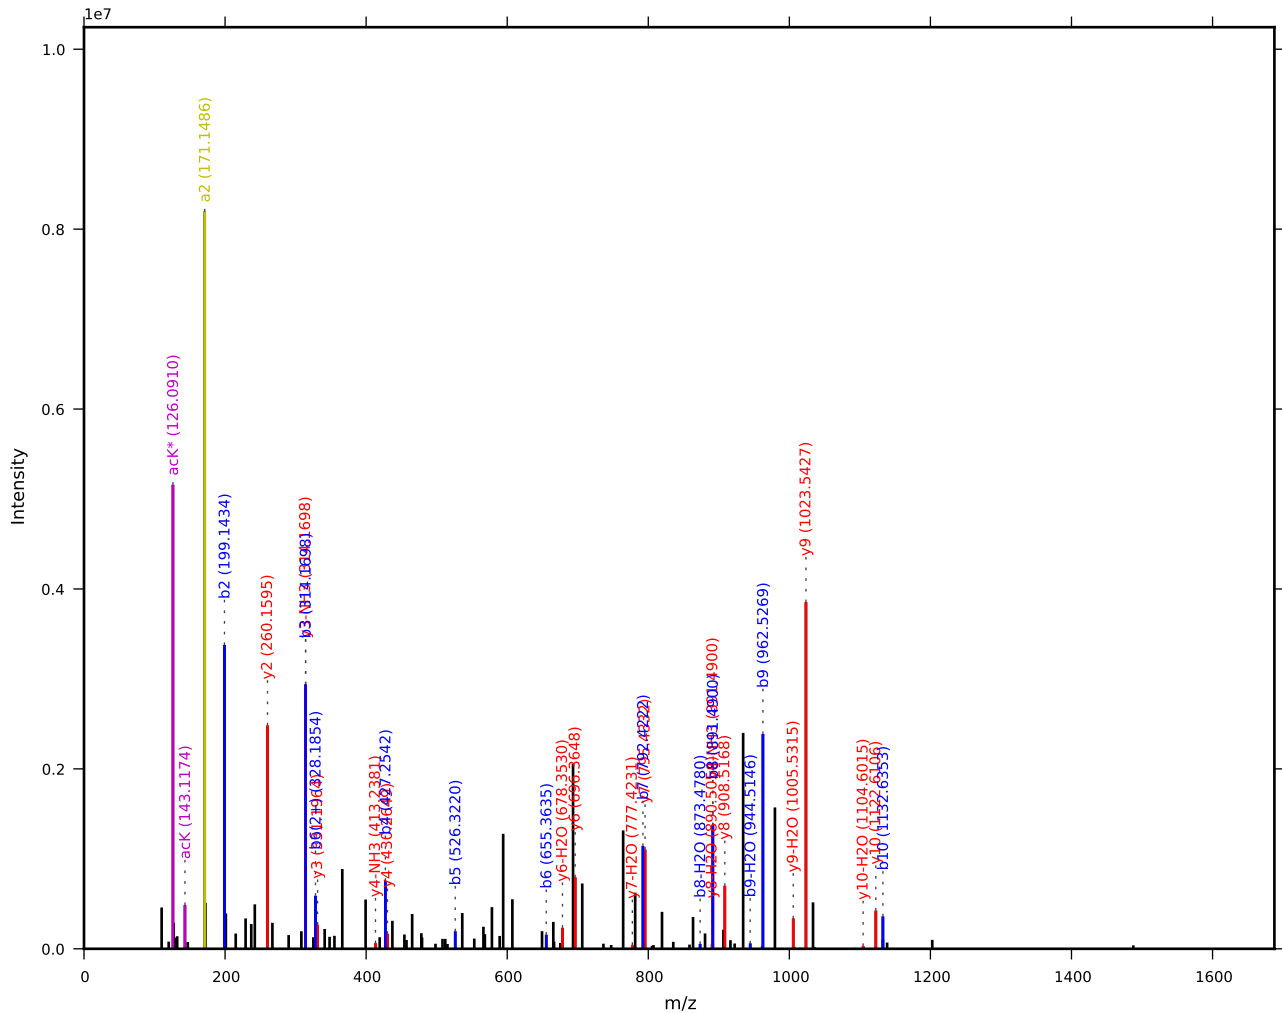

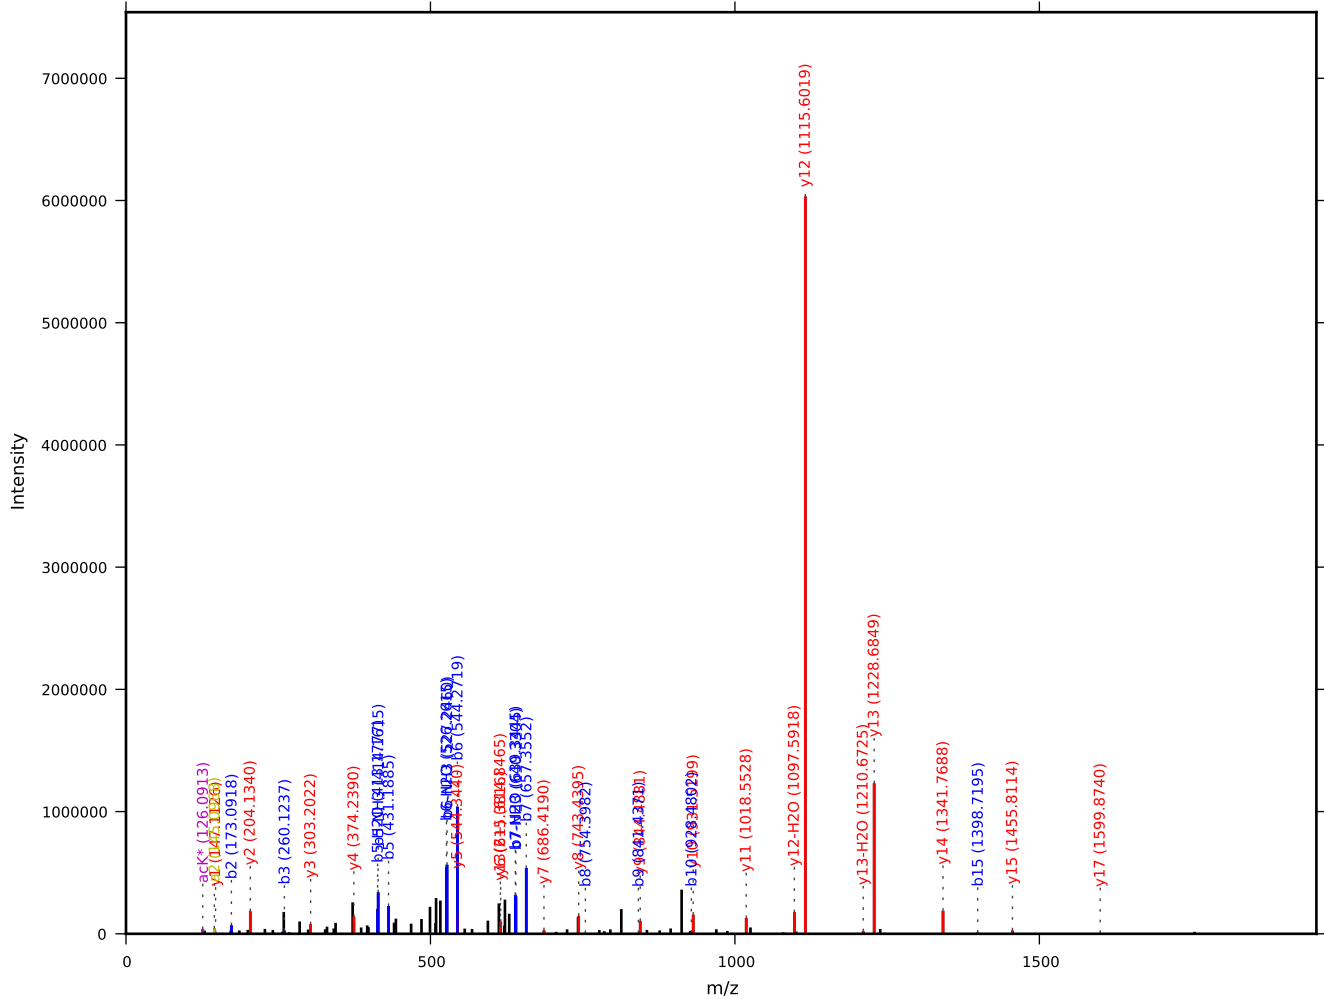



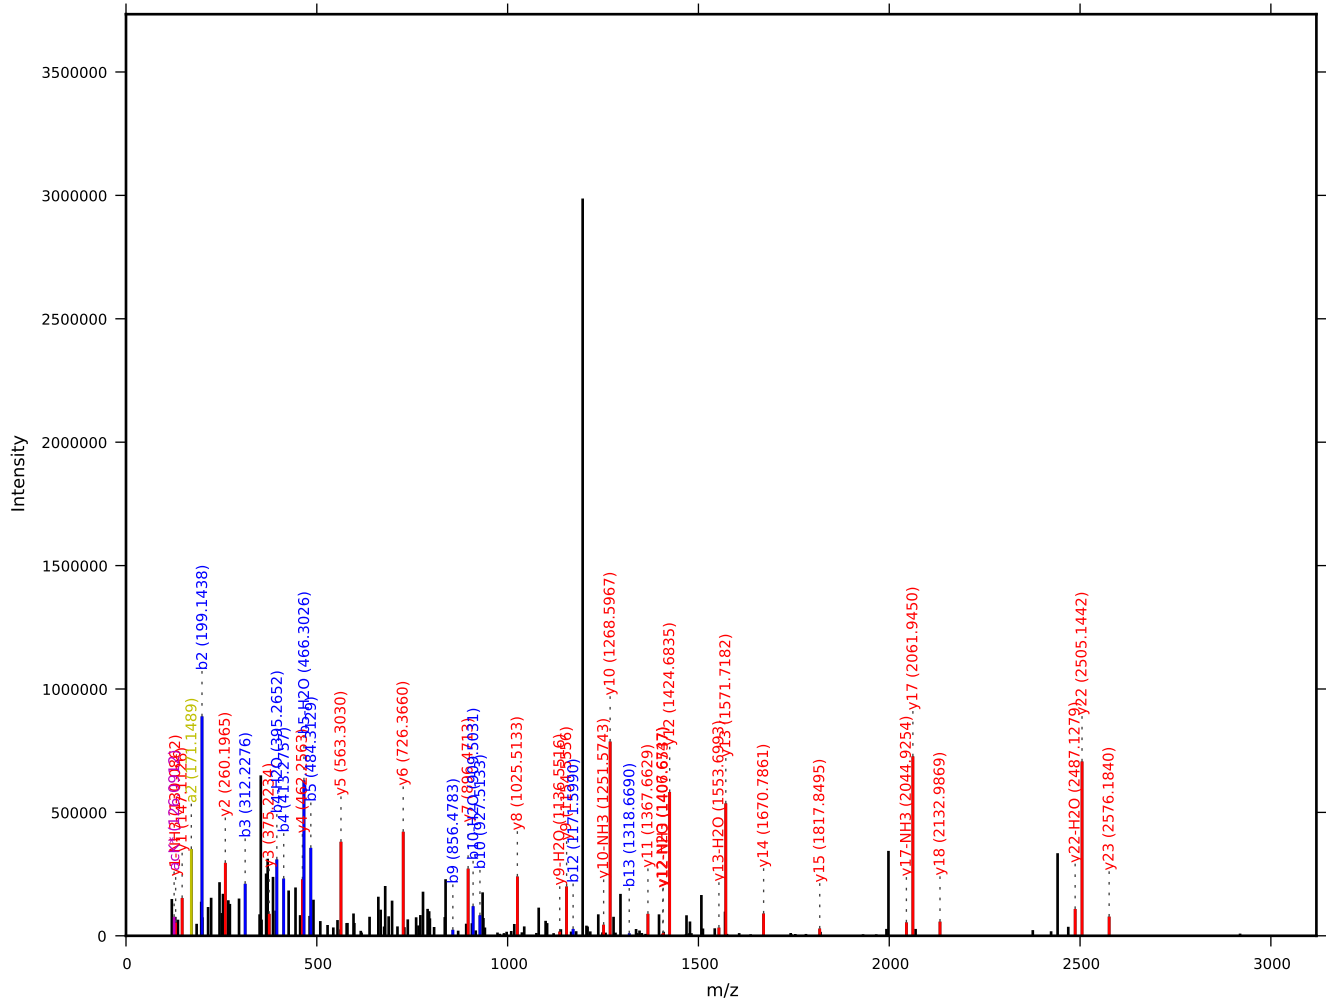

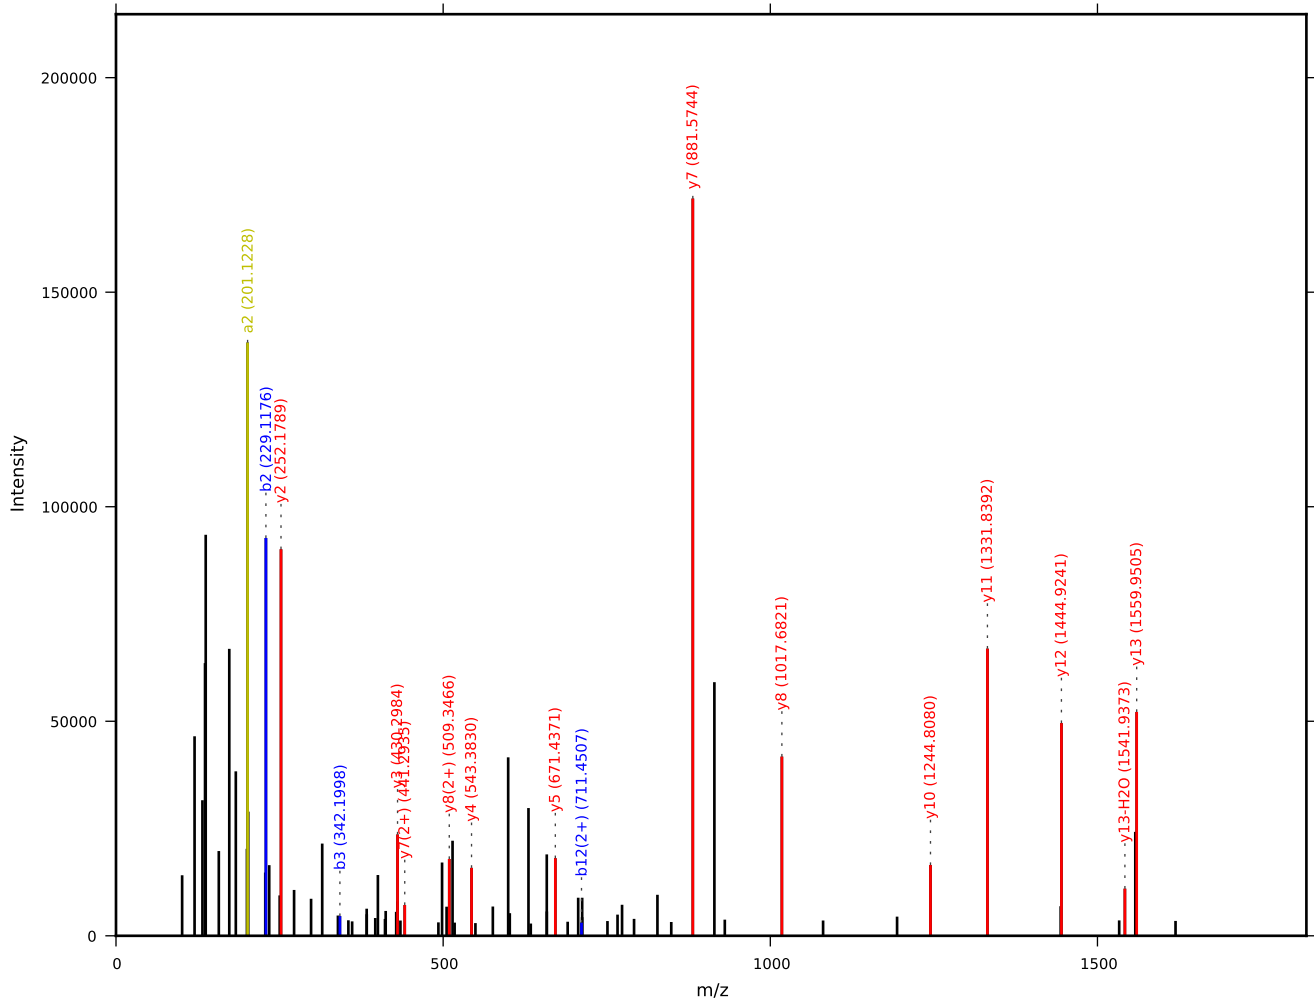

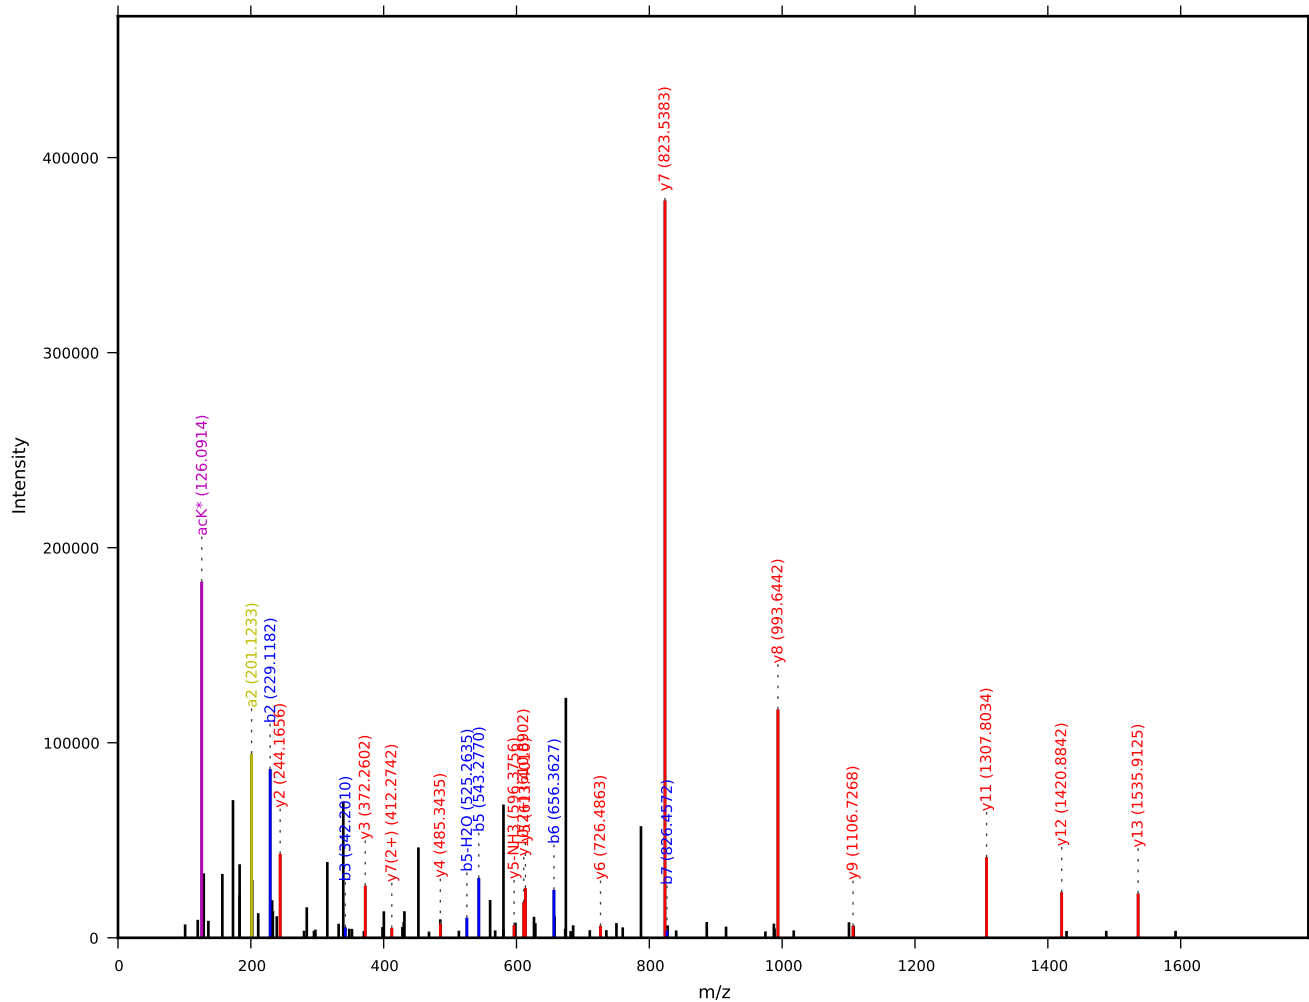

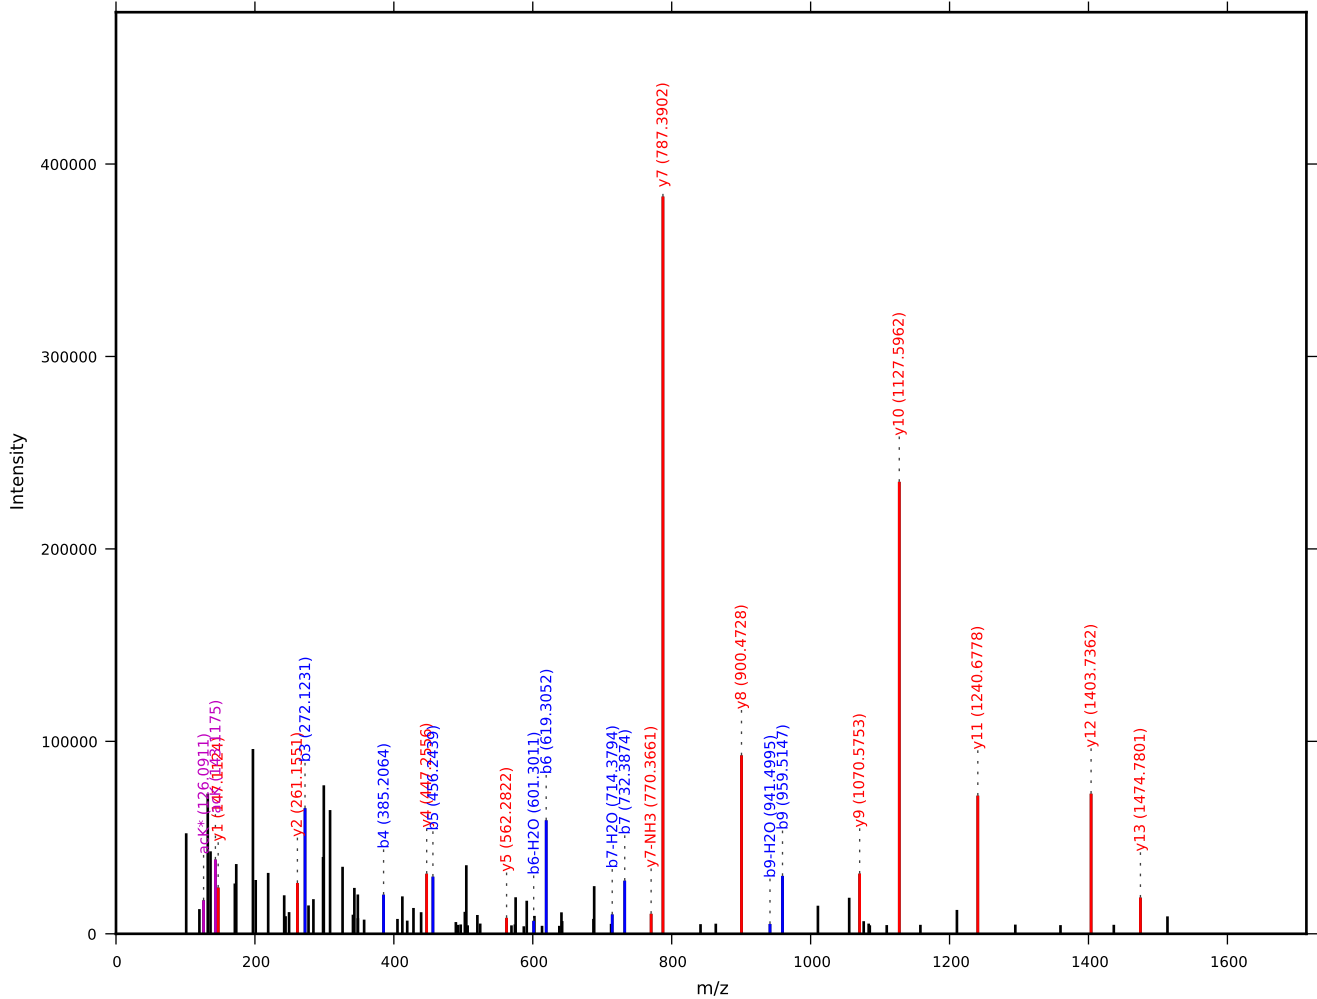

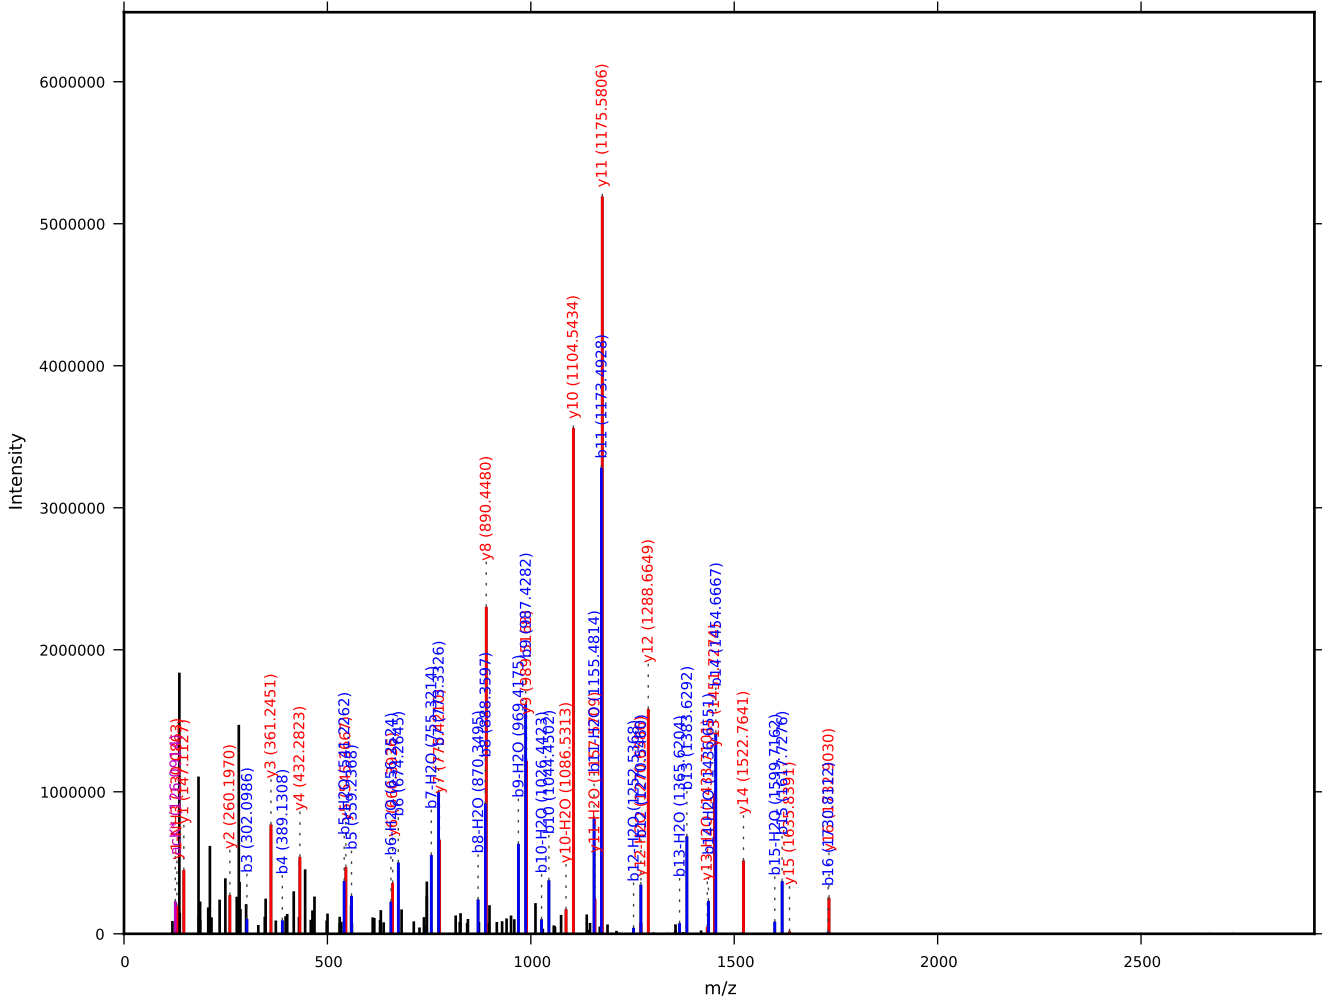

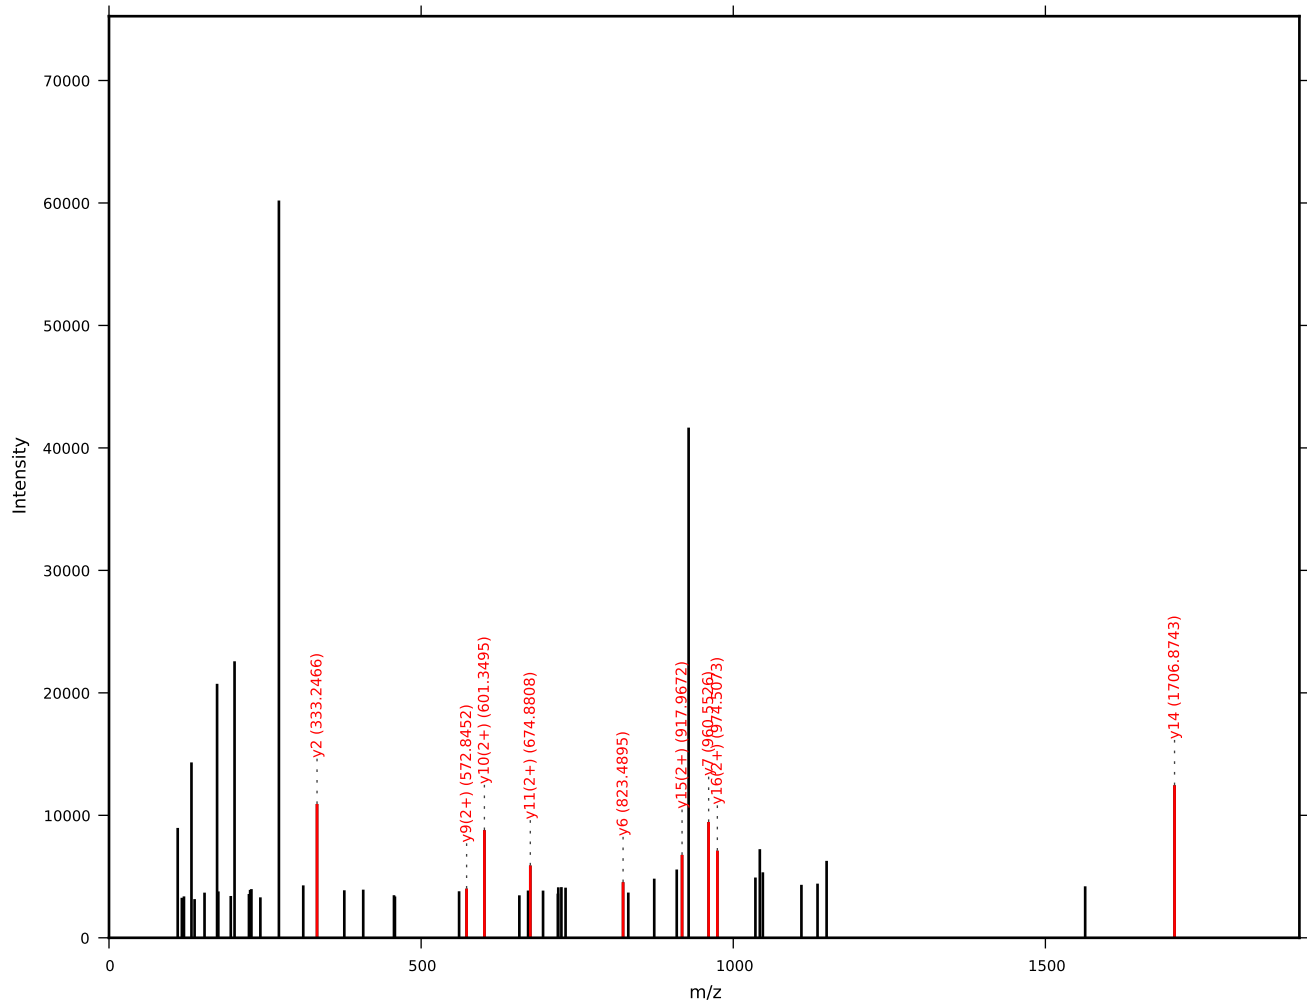

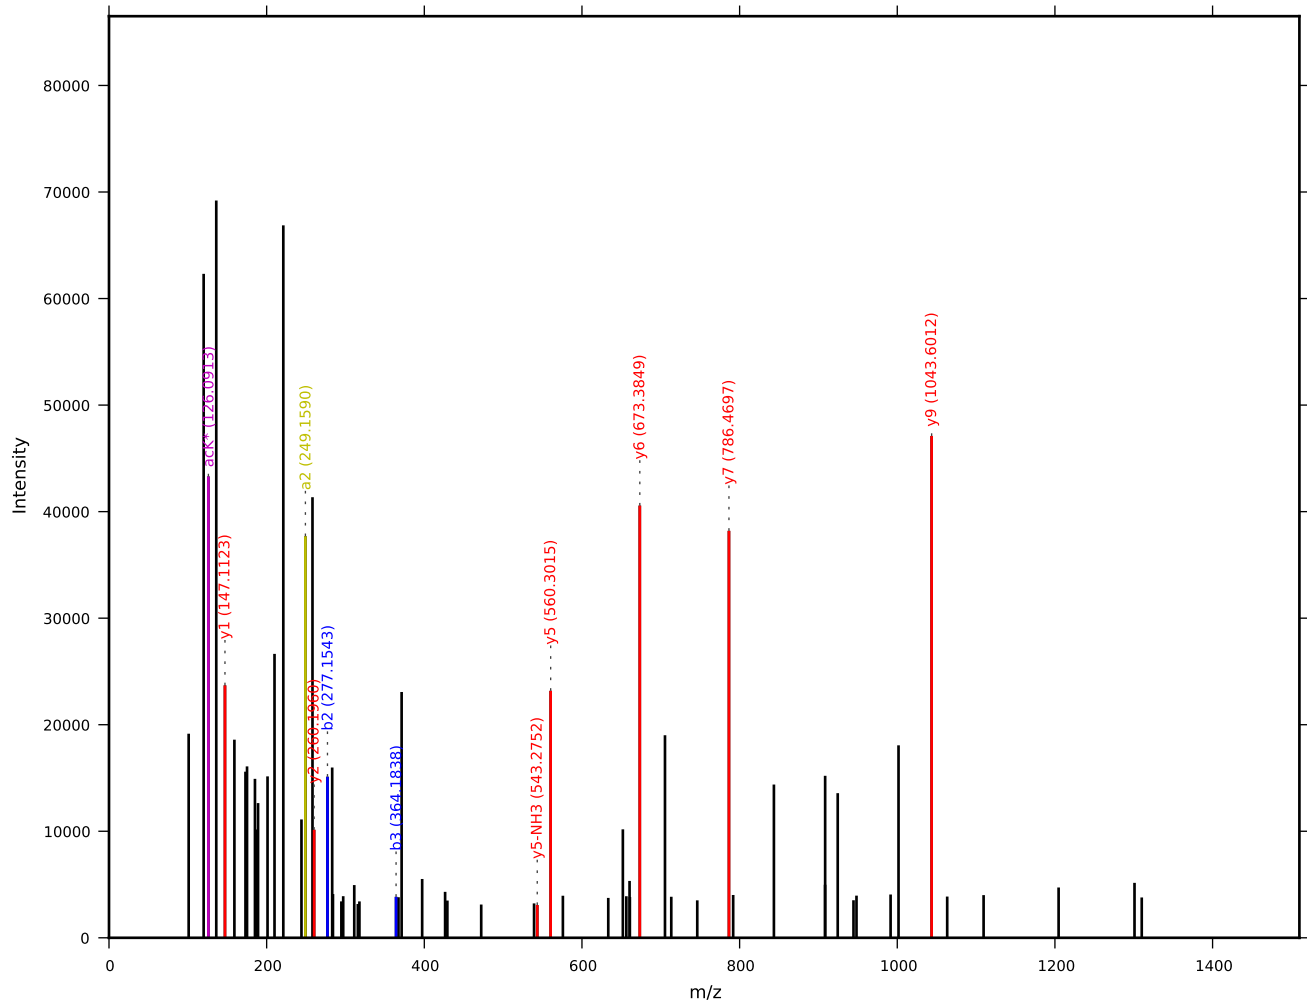

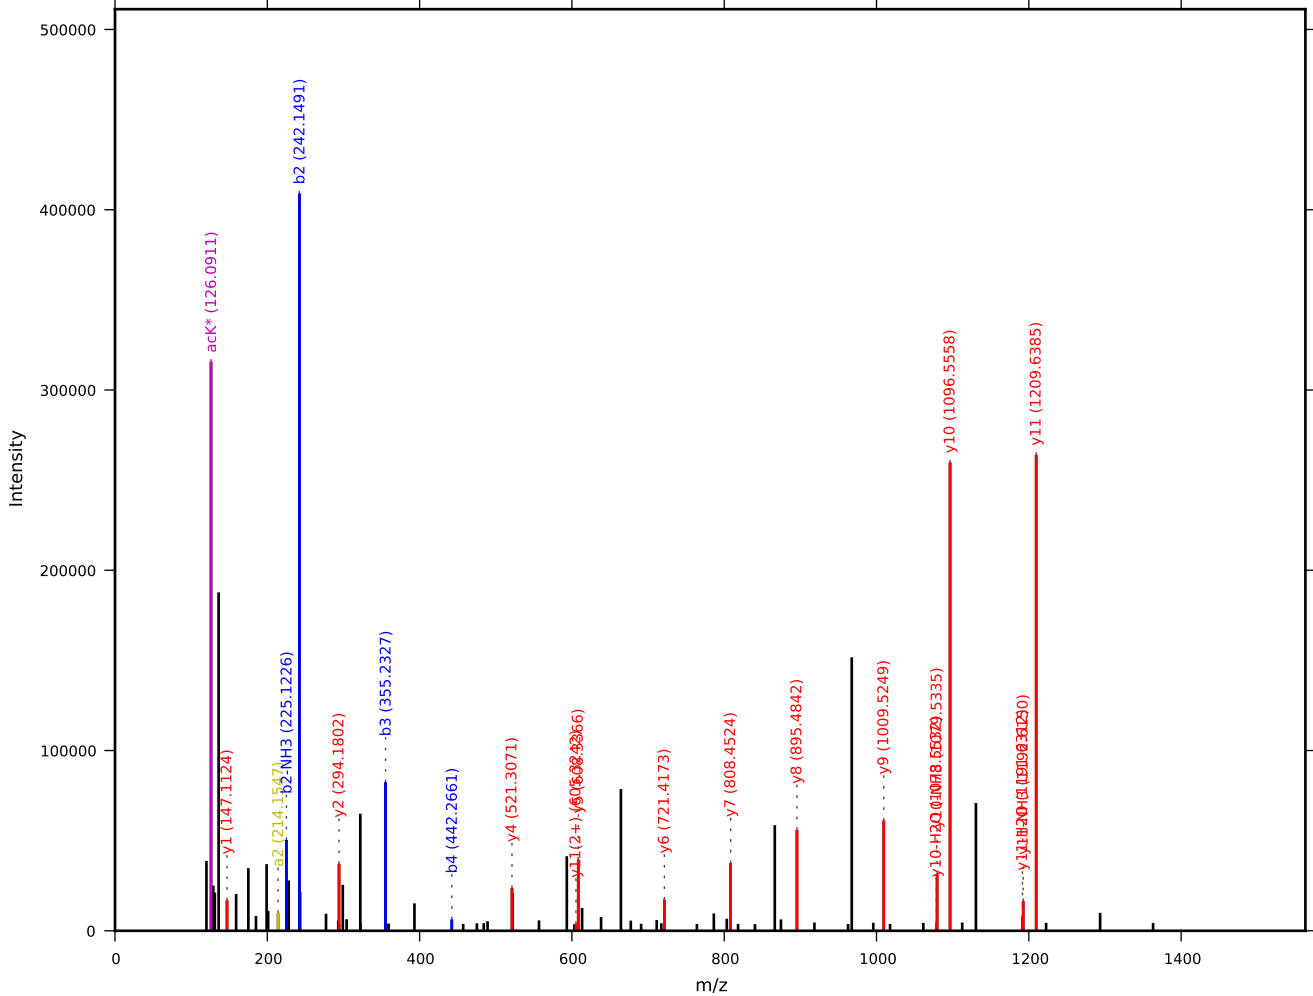



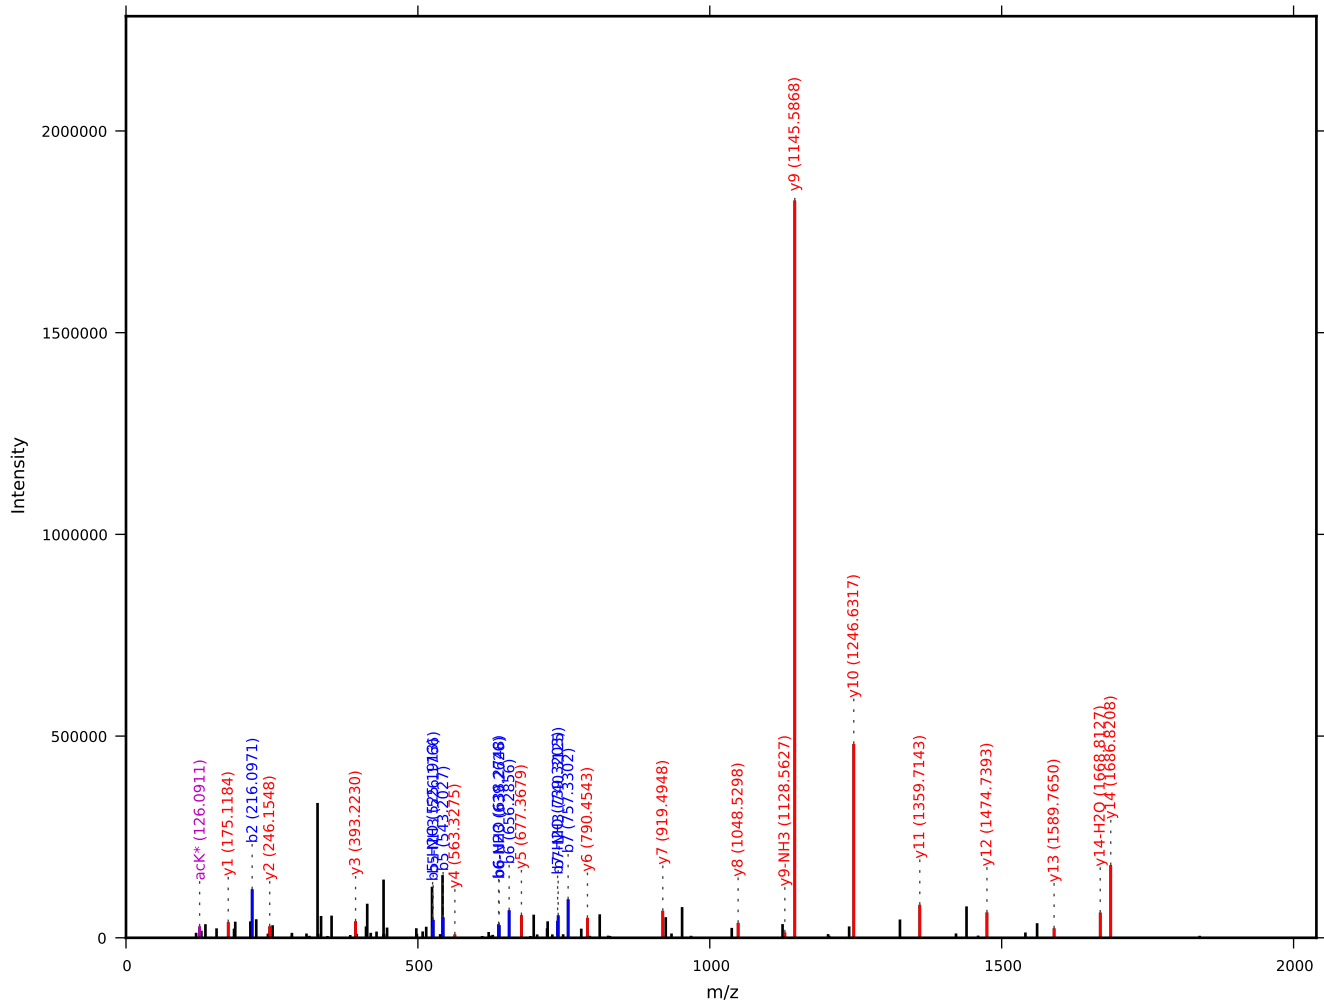

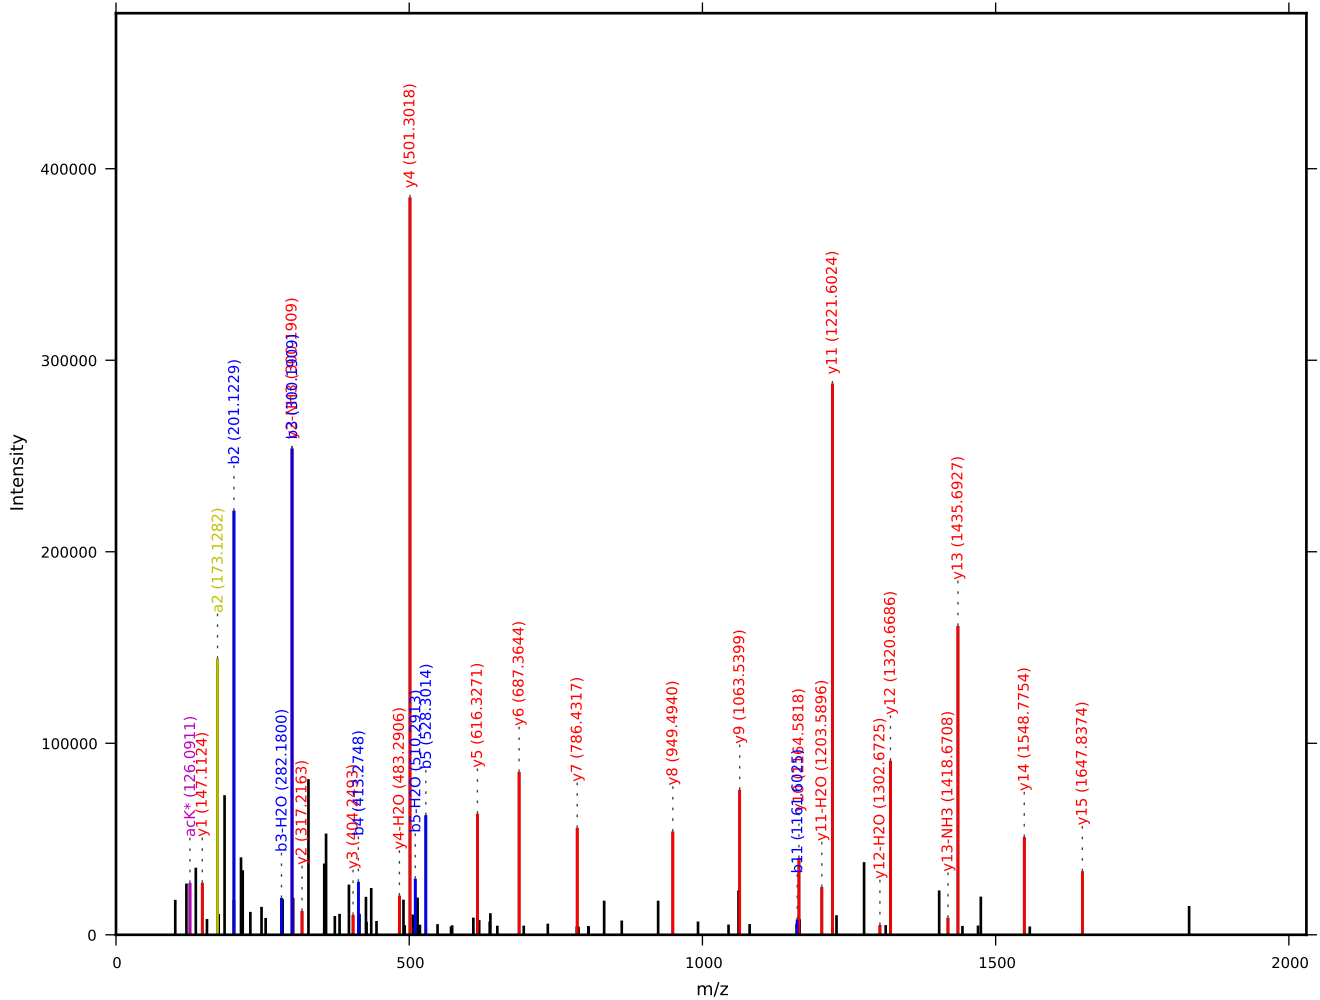

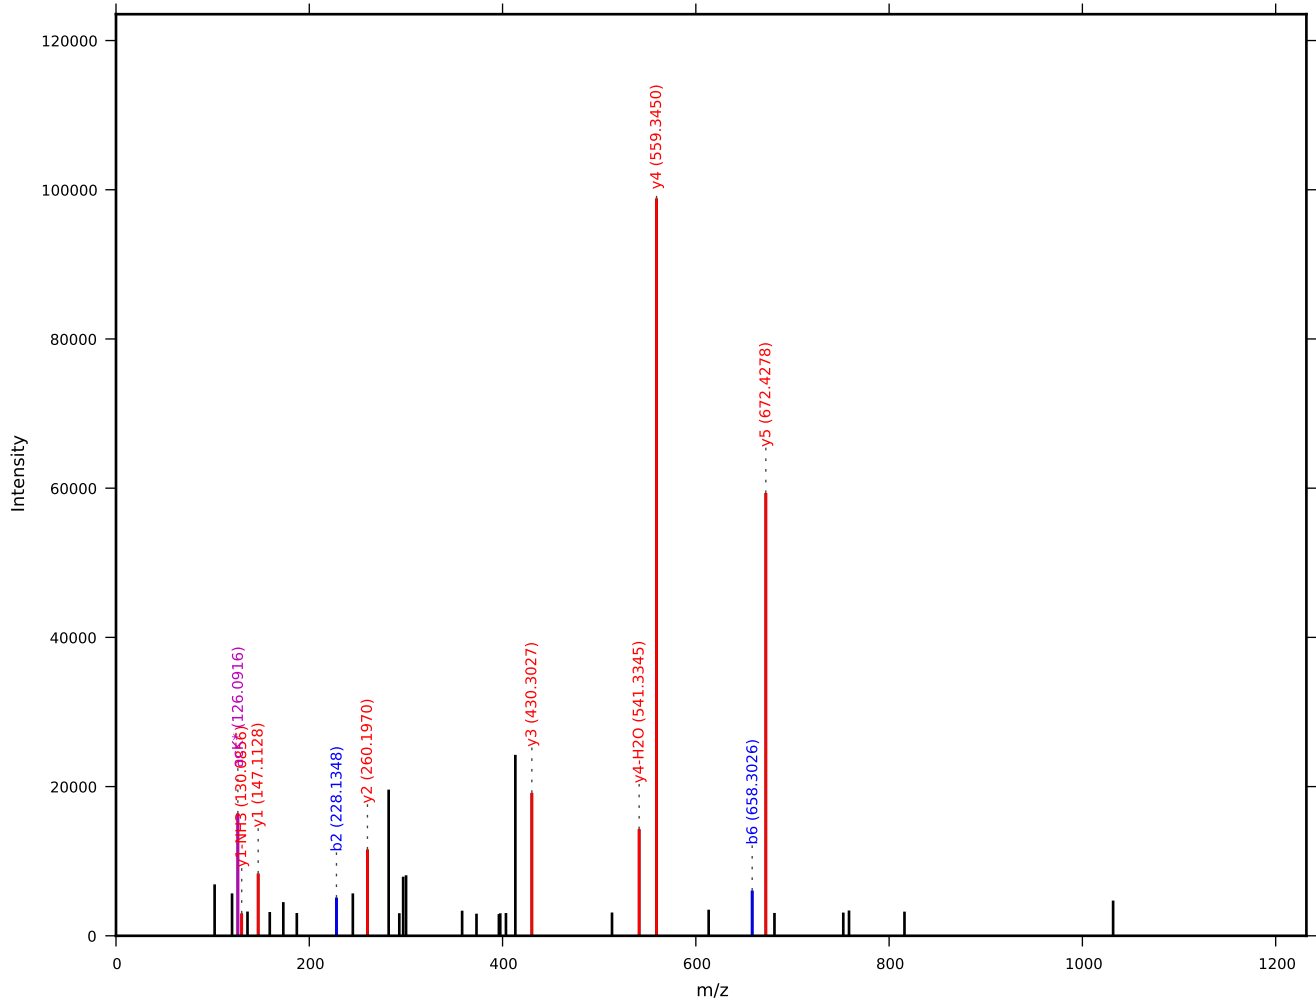

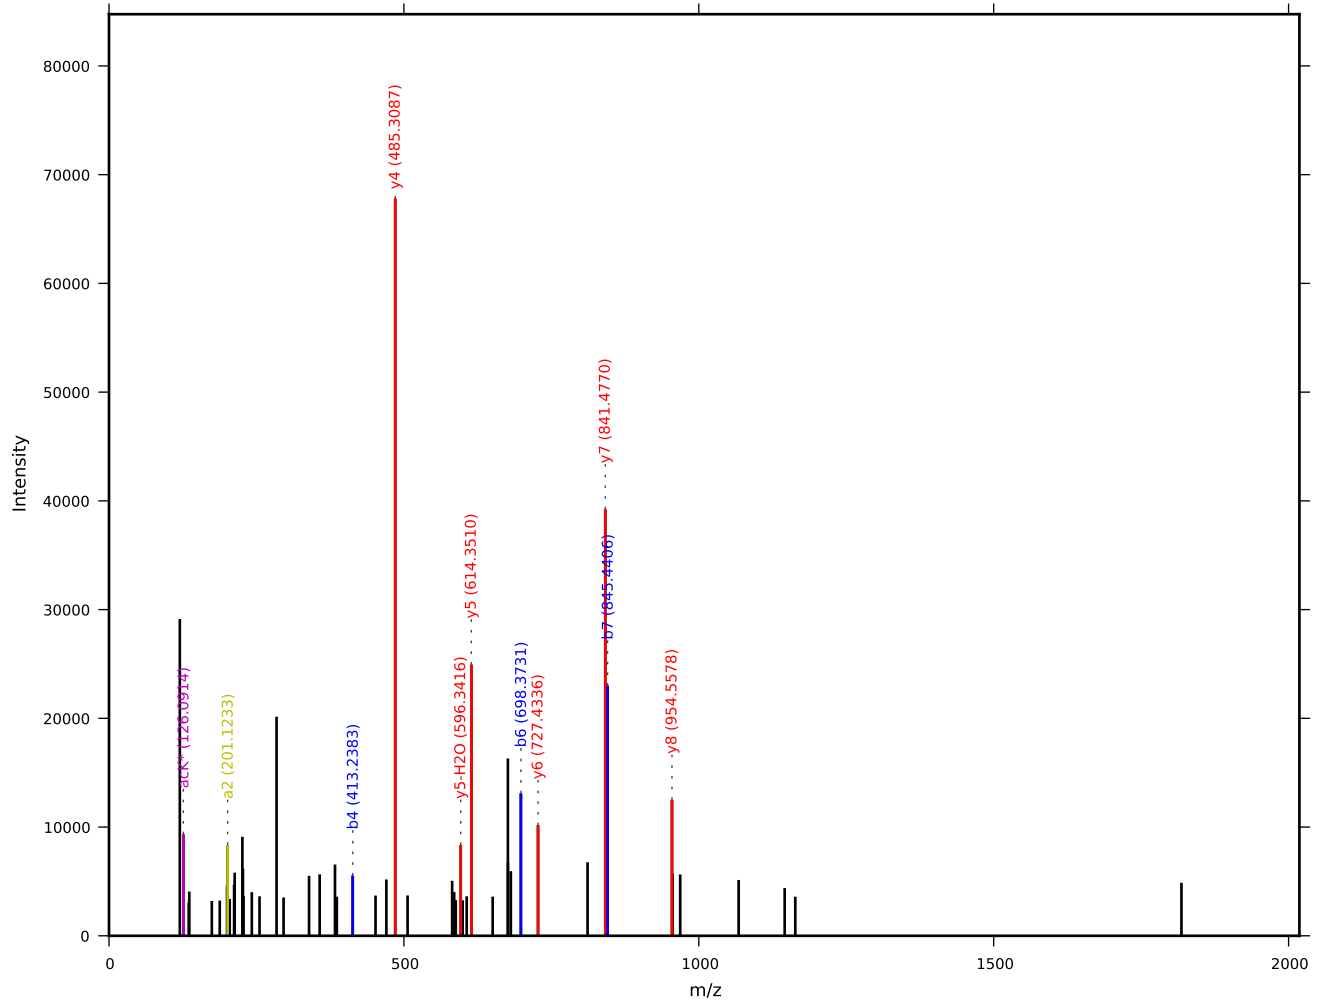

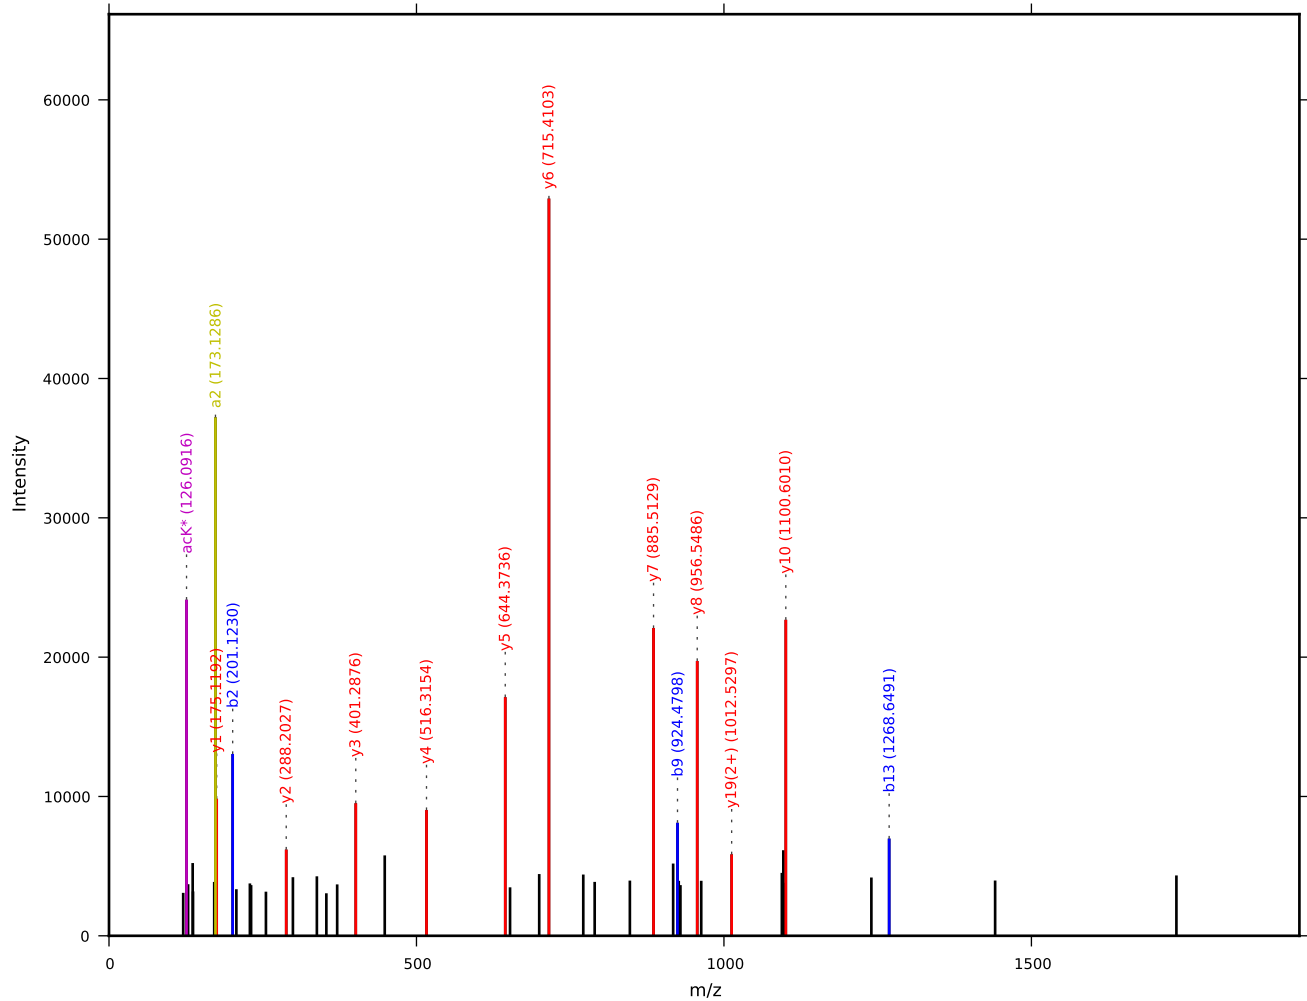

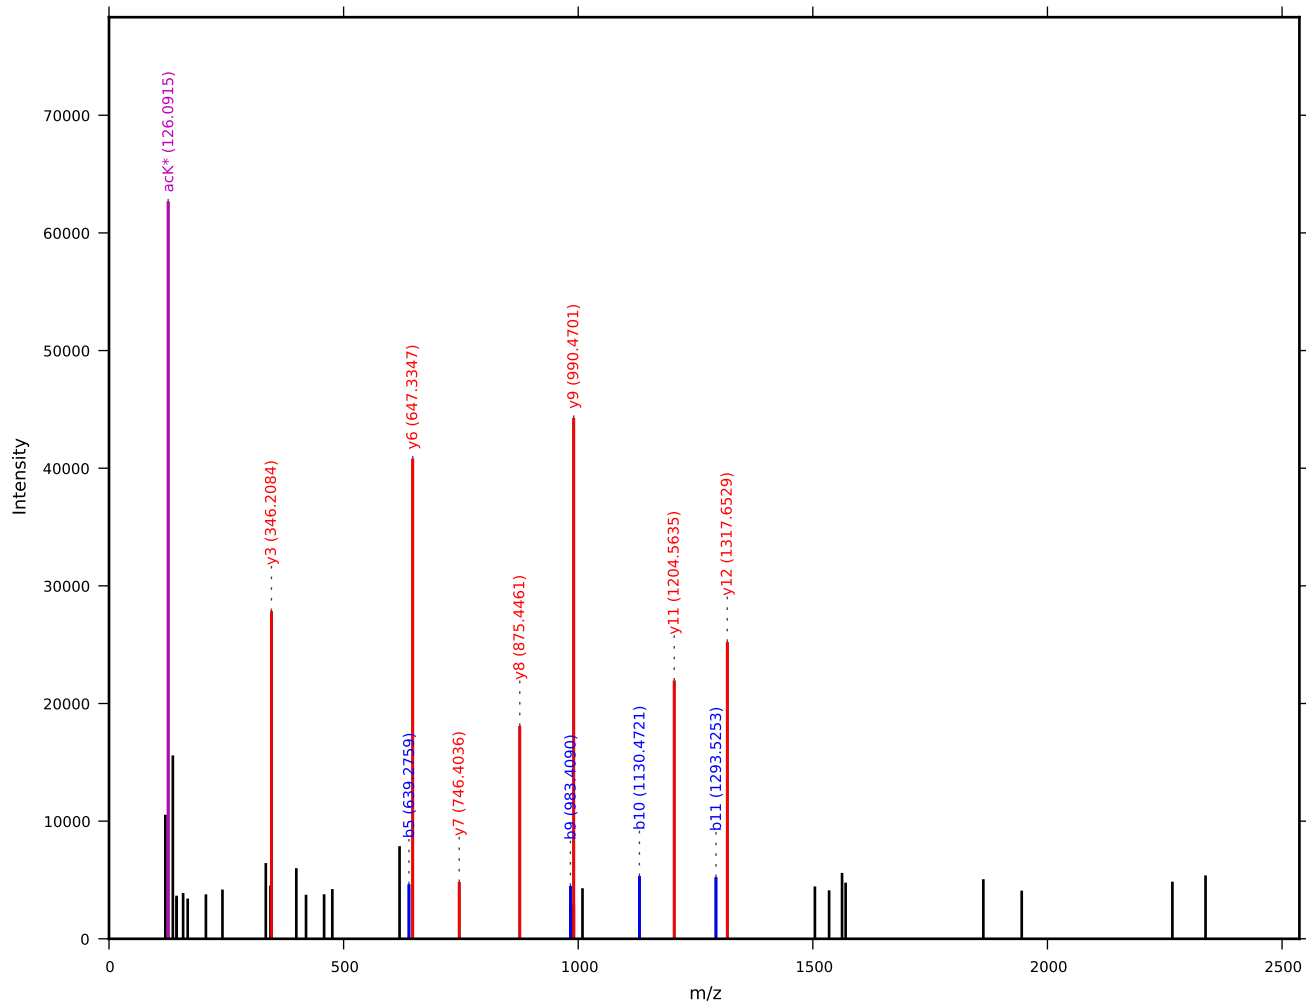

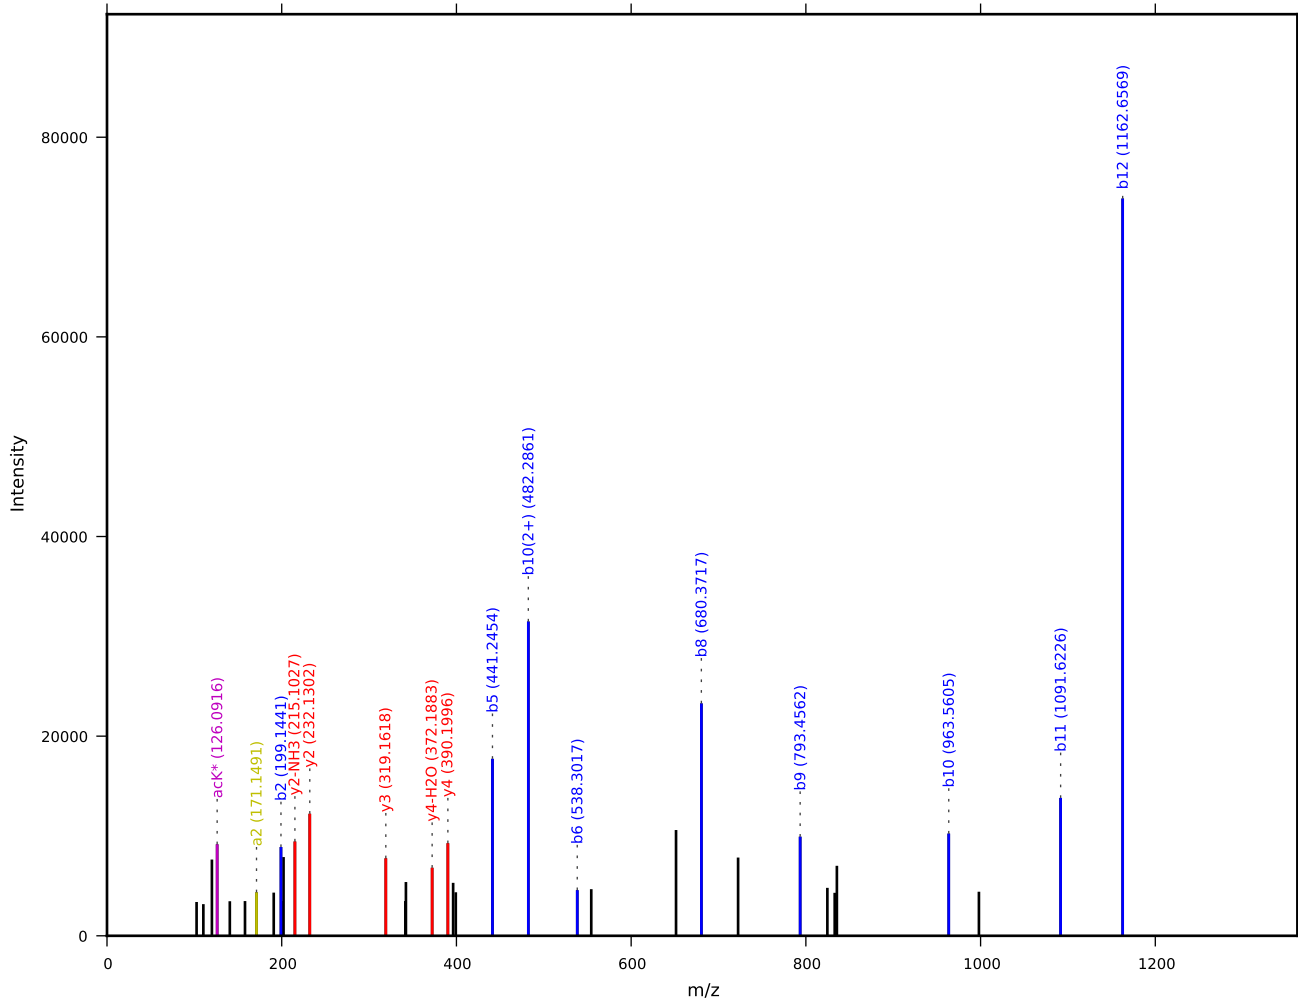

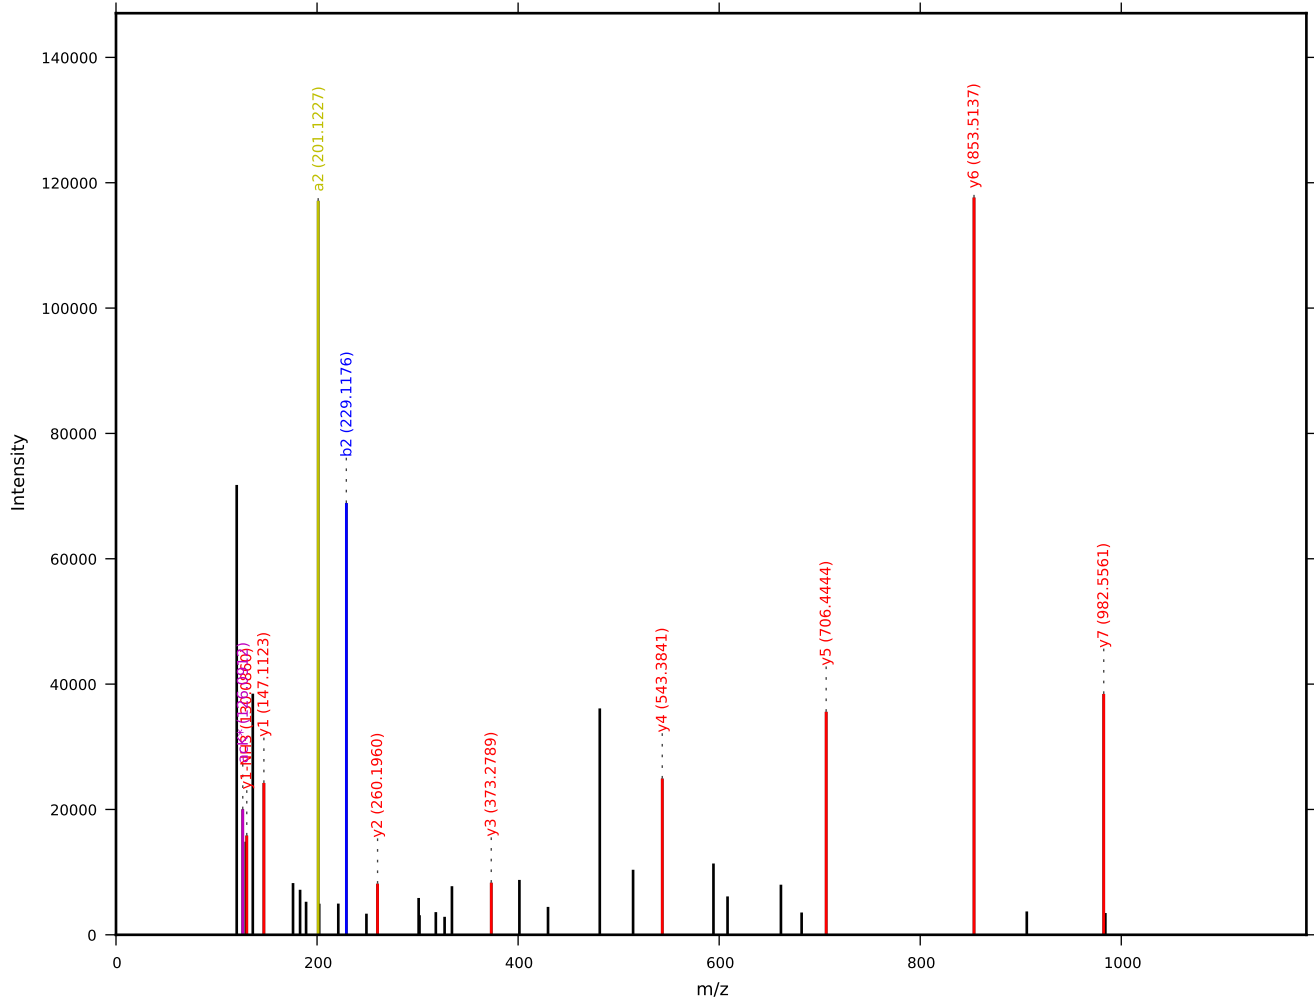



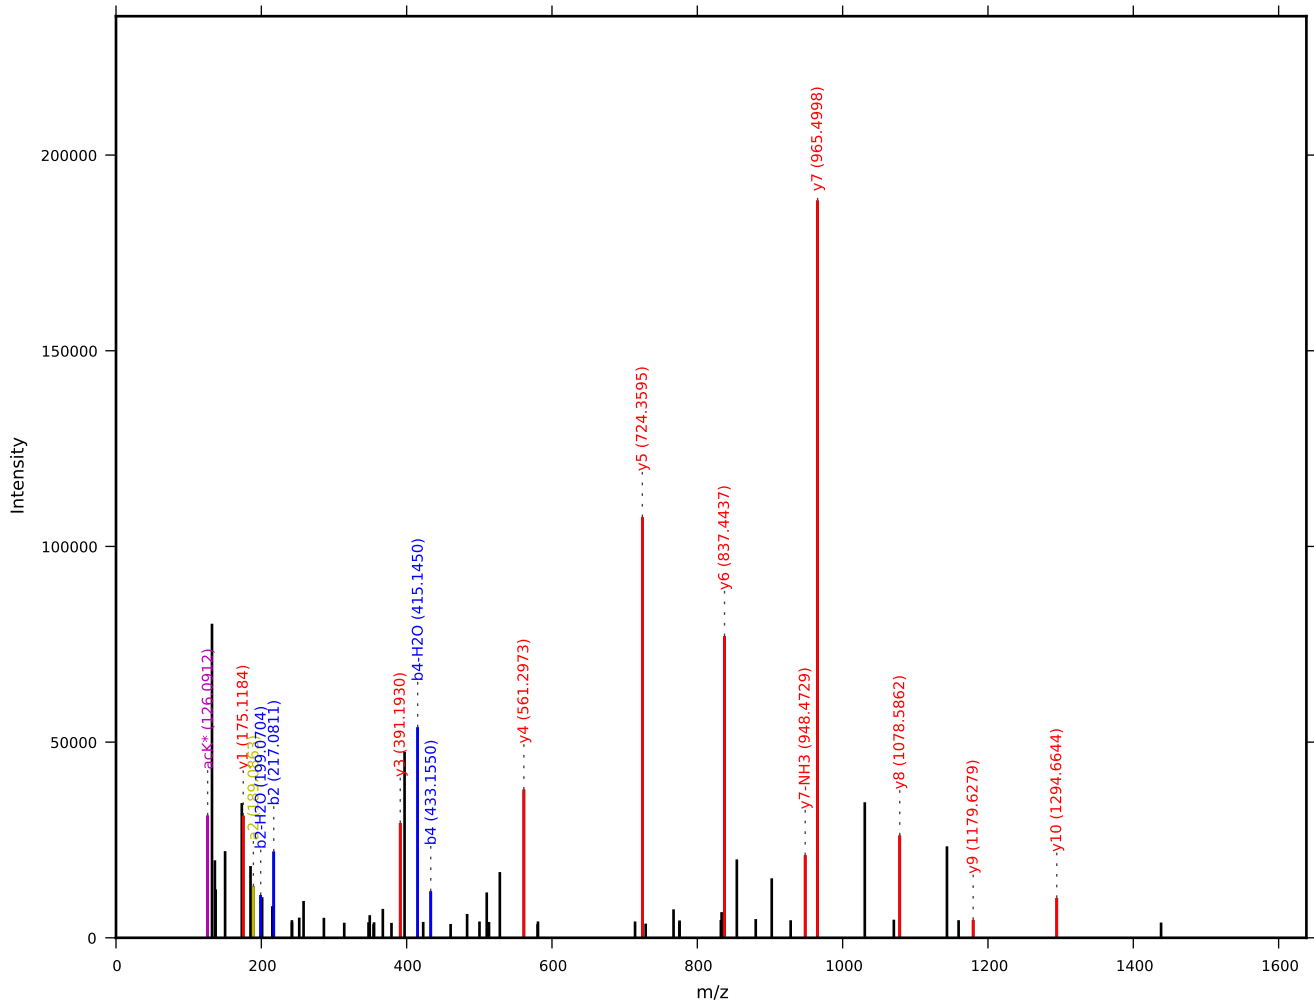

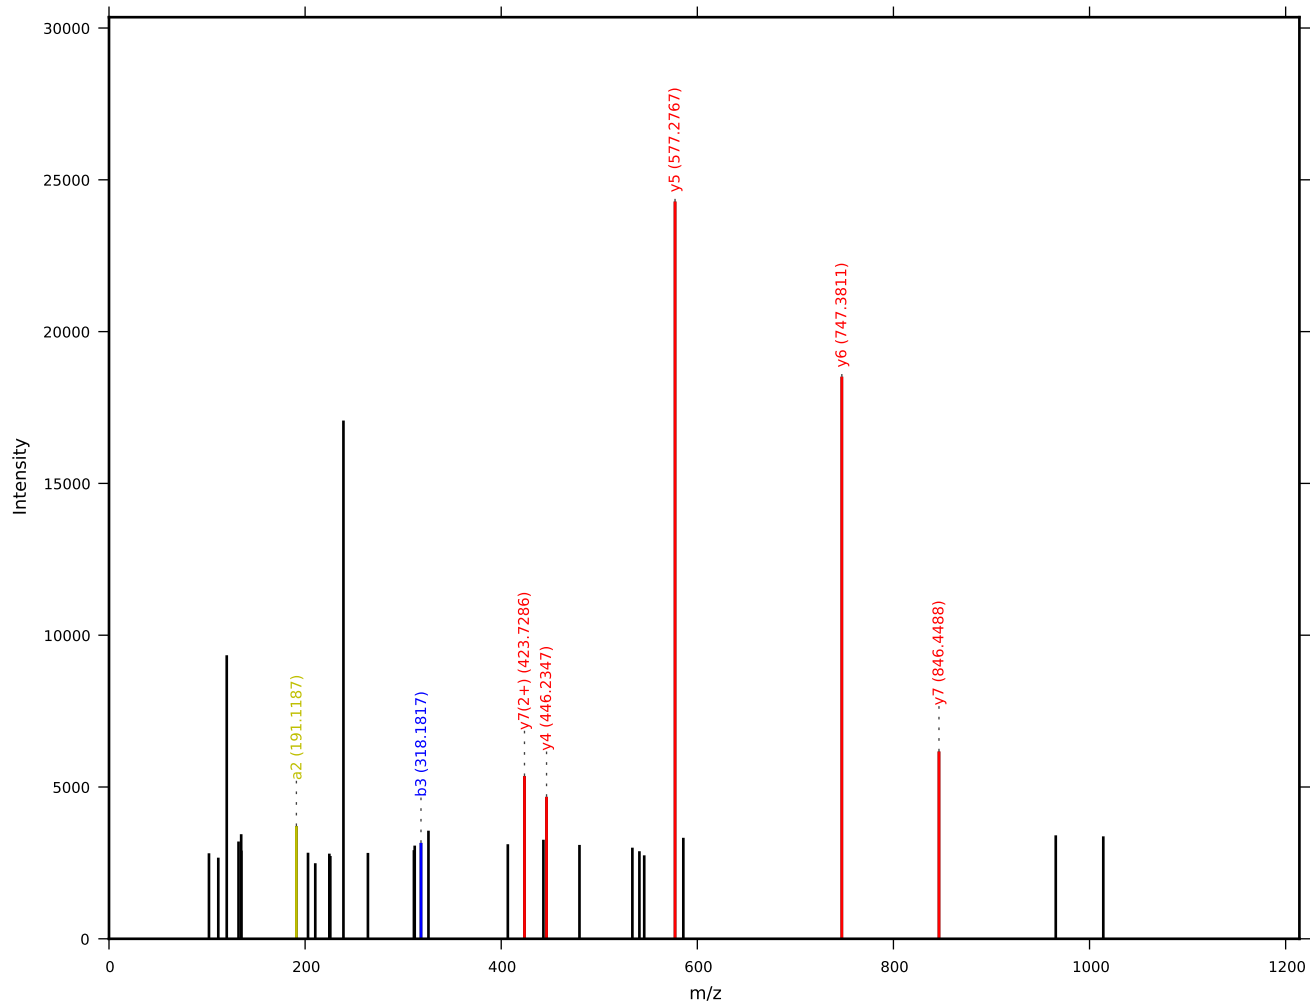

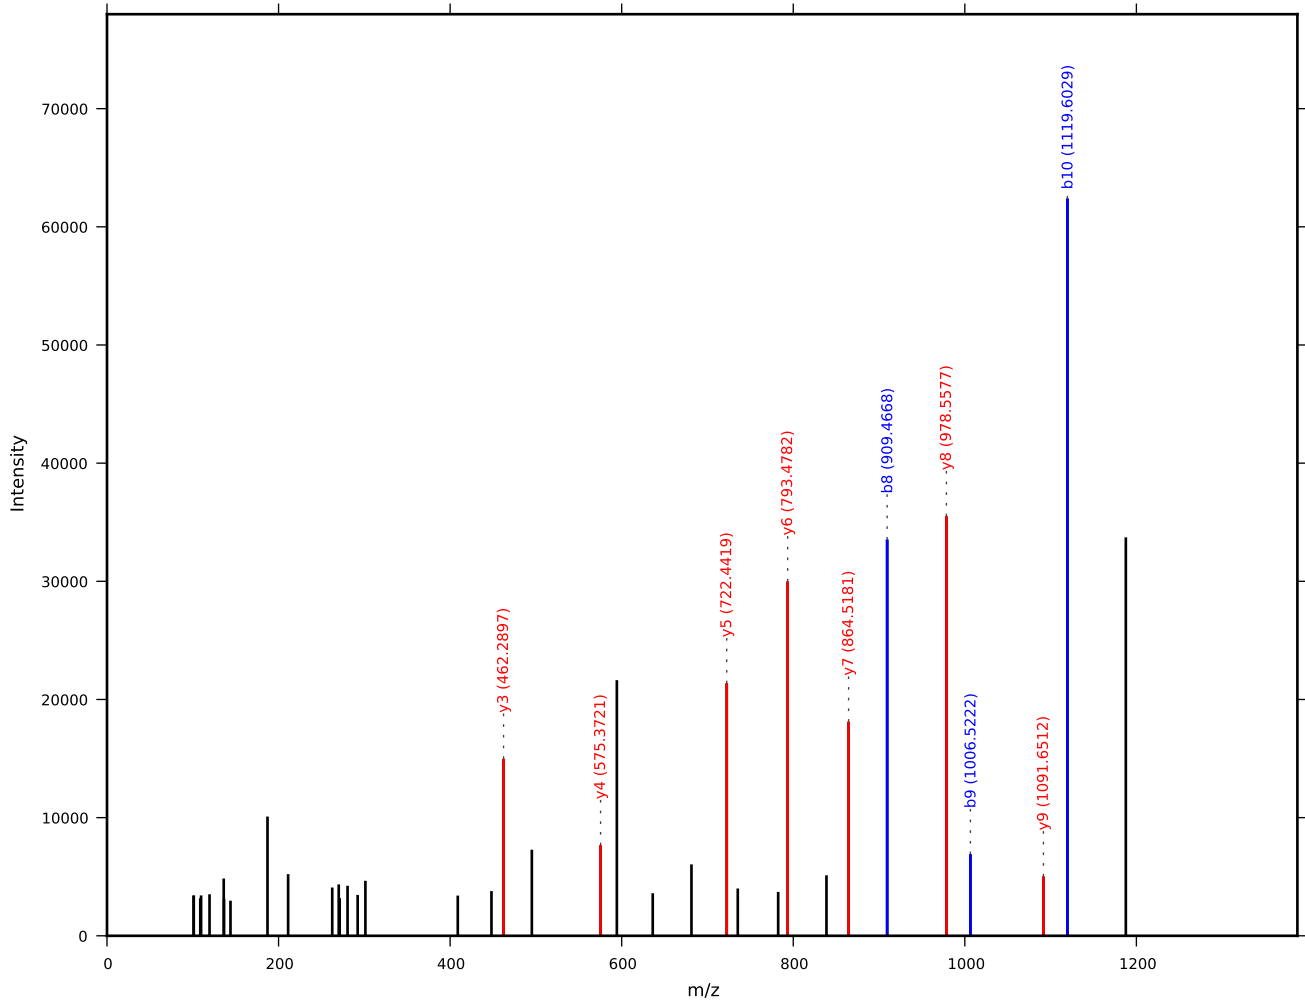

Mass: 1268.6624 Charge: 2 m/z: 635.33845  
Modified Peptide: \_FTK(ac)EEVAPYK\_ Score: 32.606 PEP: 0.0096438

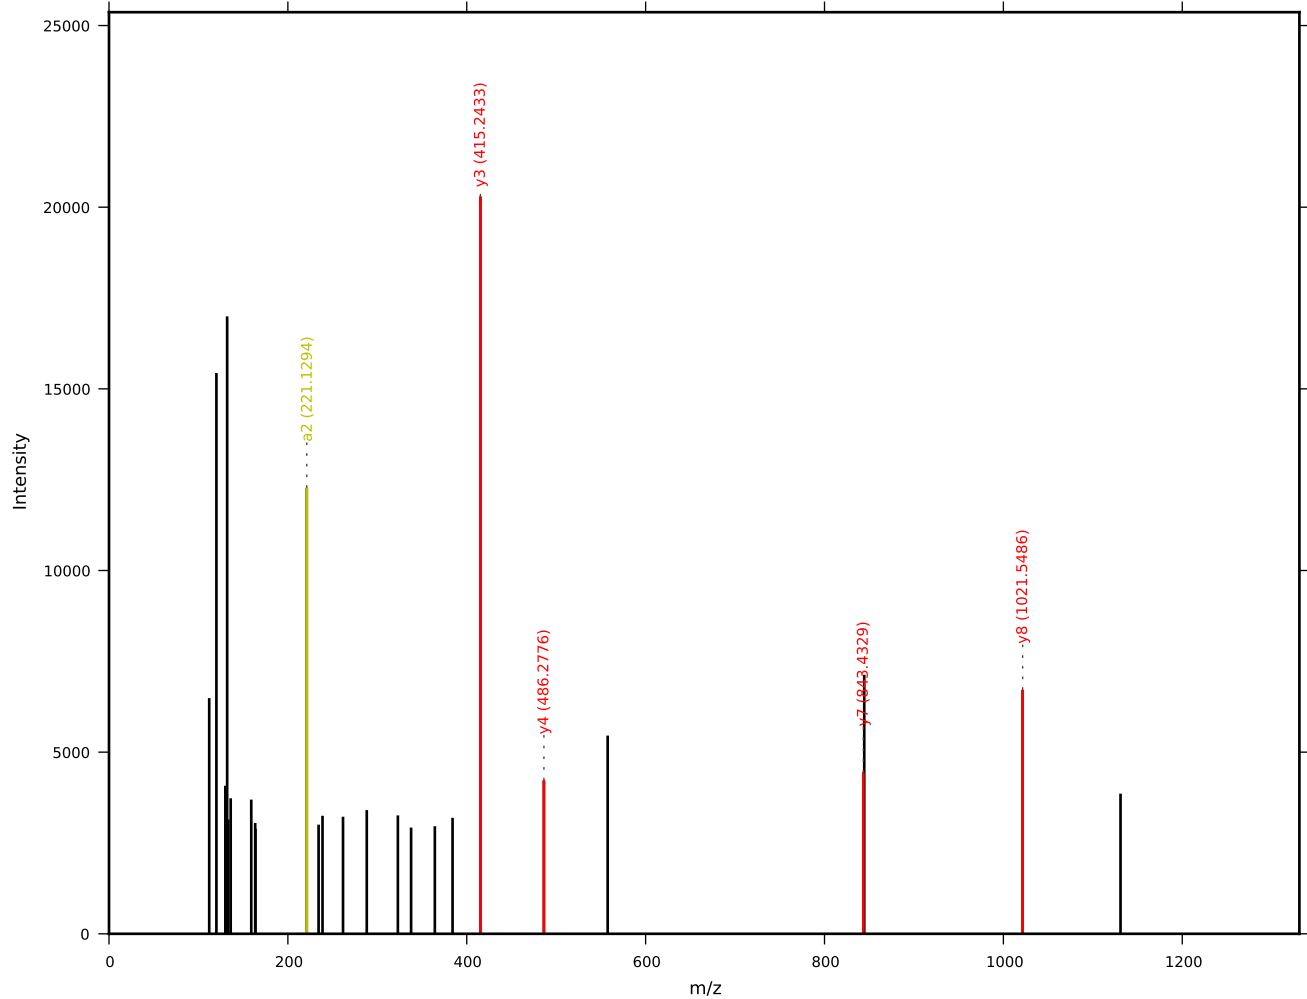

Mass: 917.5557 Charge: 2 m/z: 459.78513  
Modified Peptide: \_IVEK(ac)FPK\_ Score: 64.836 PEP: 0.0052851

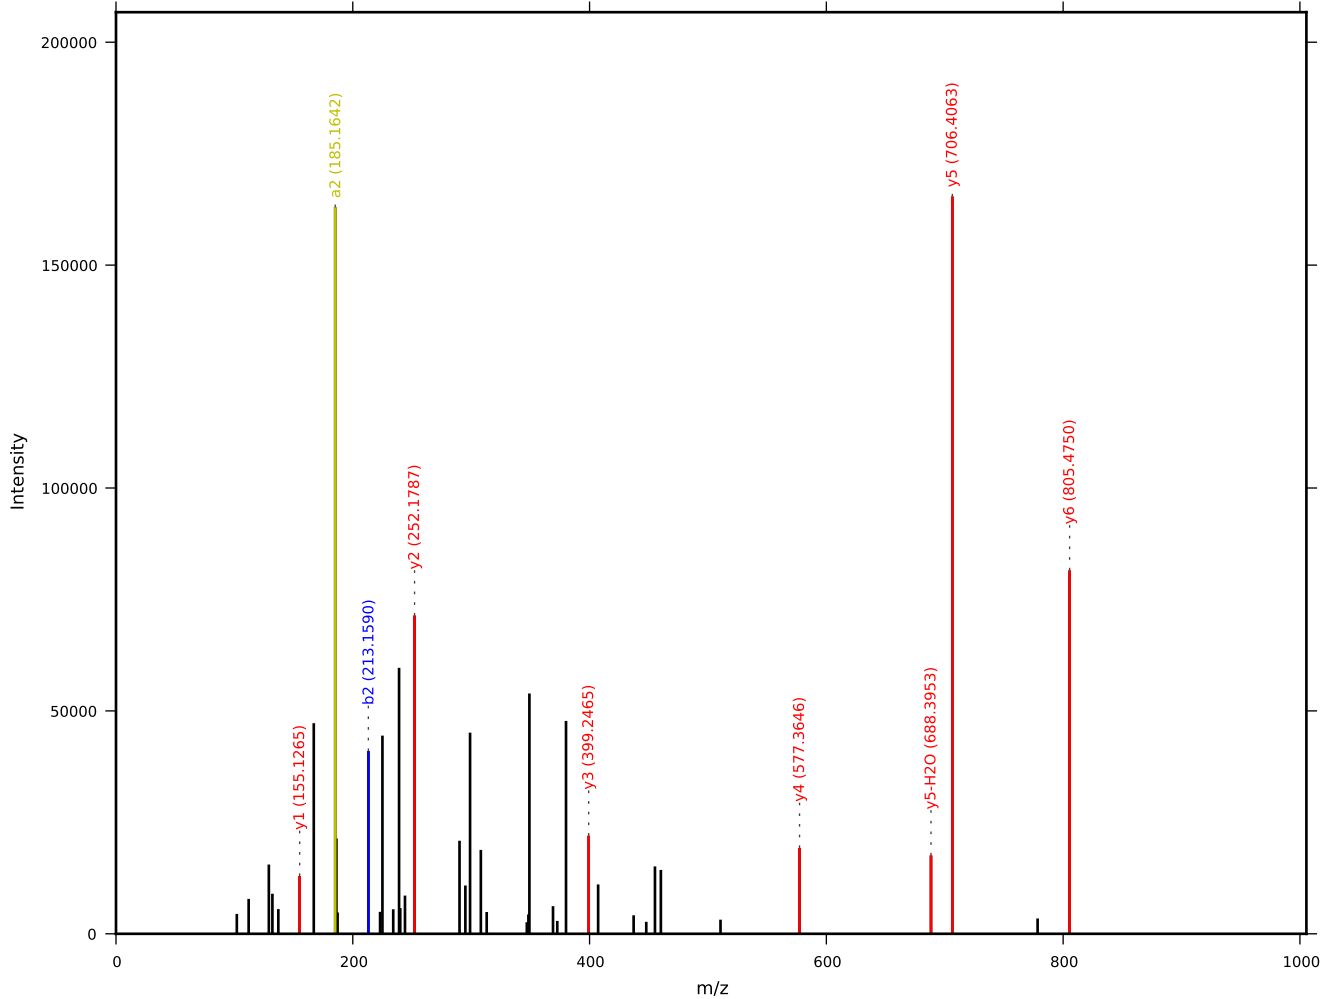

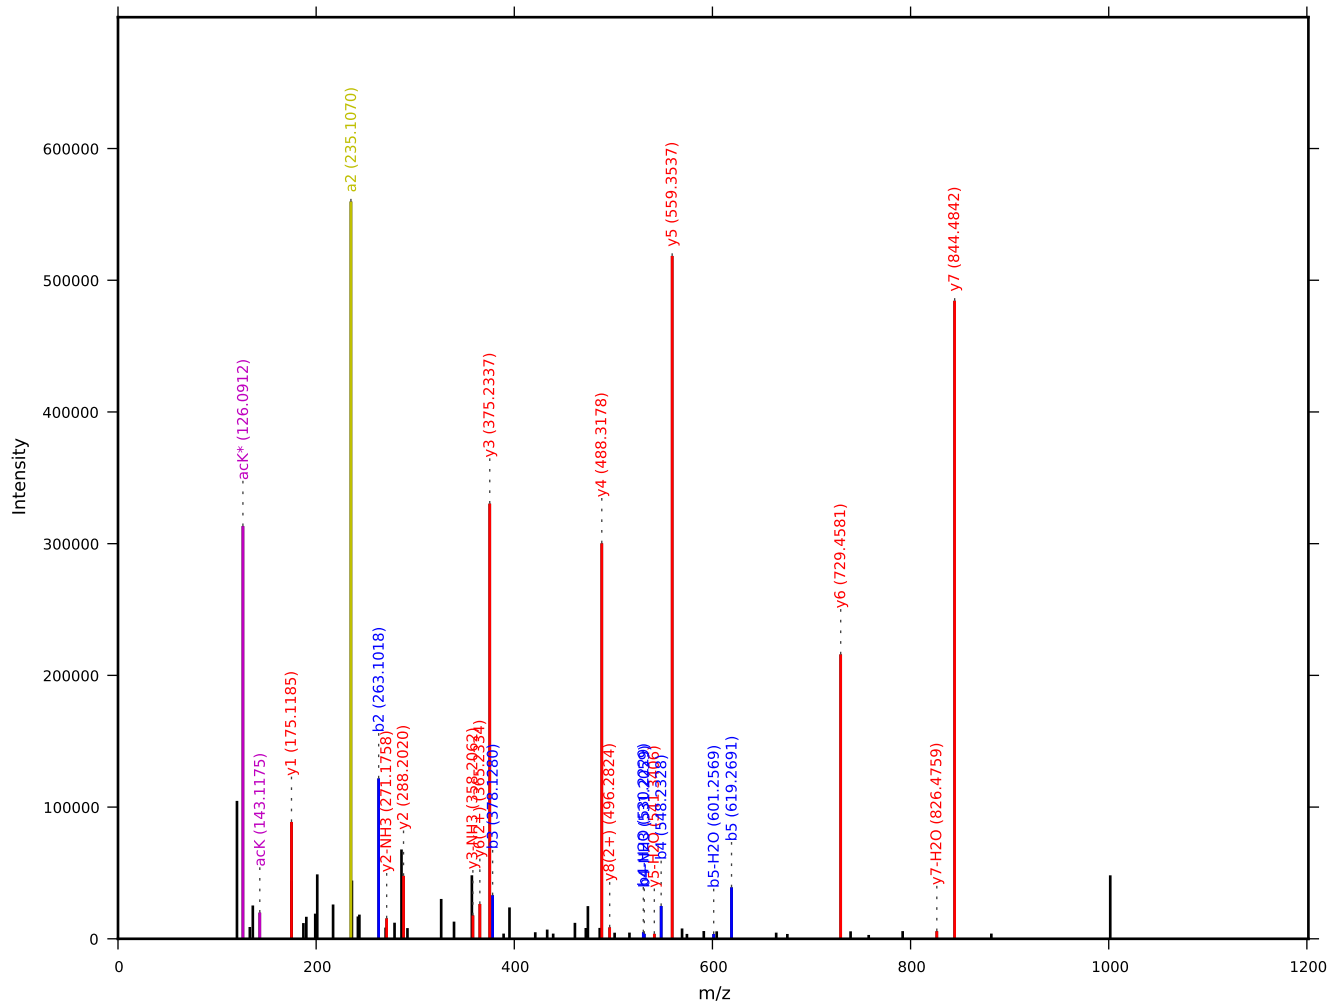

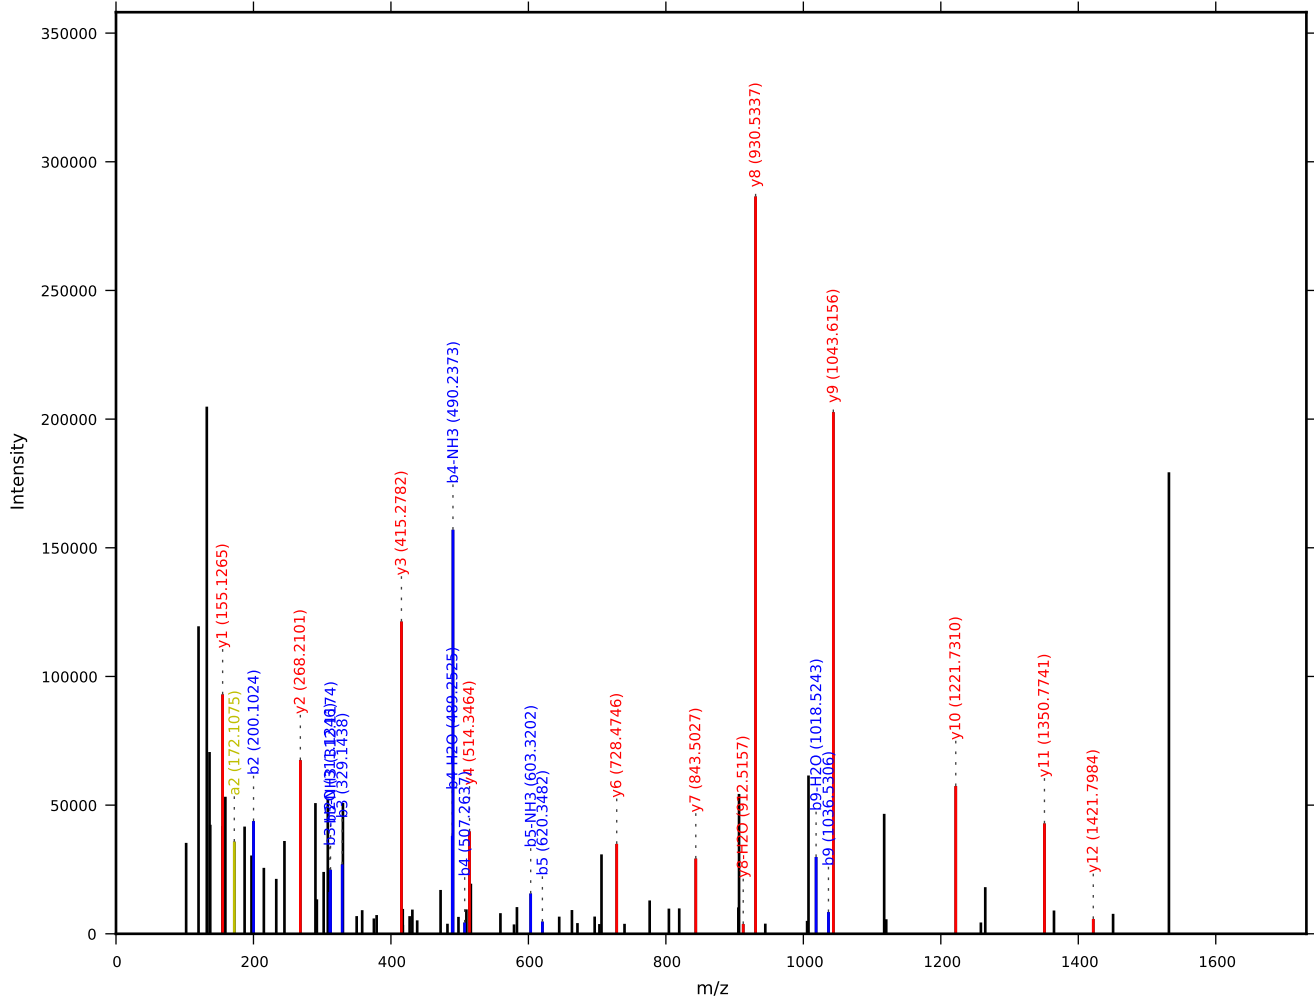

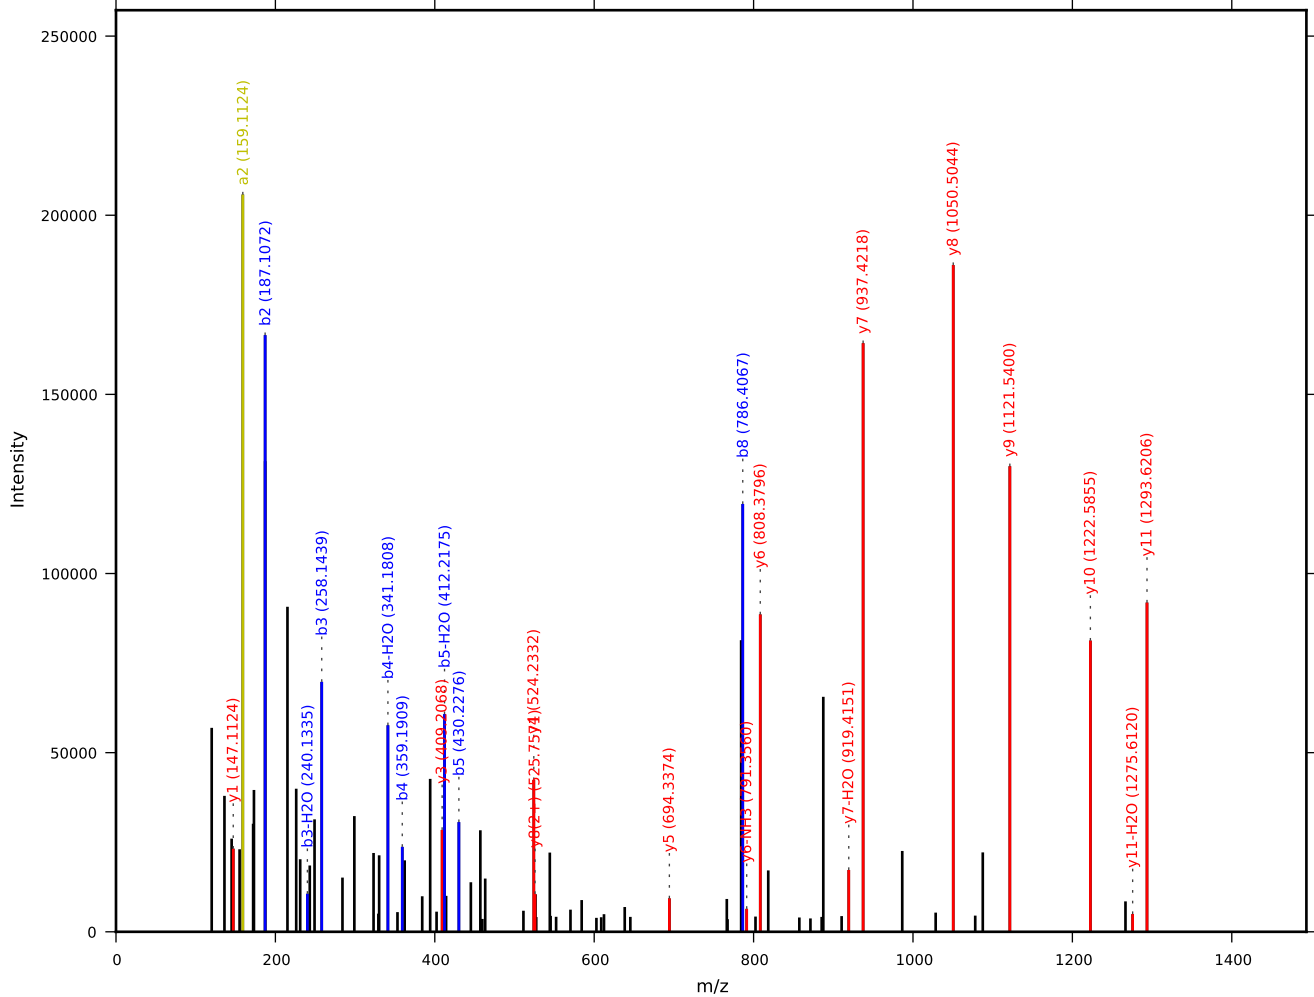



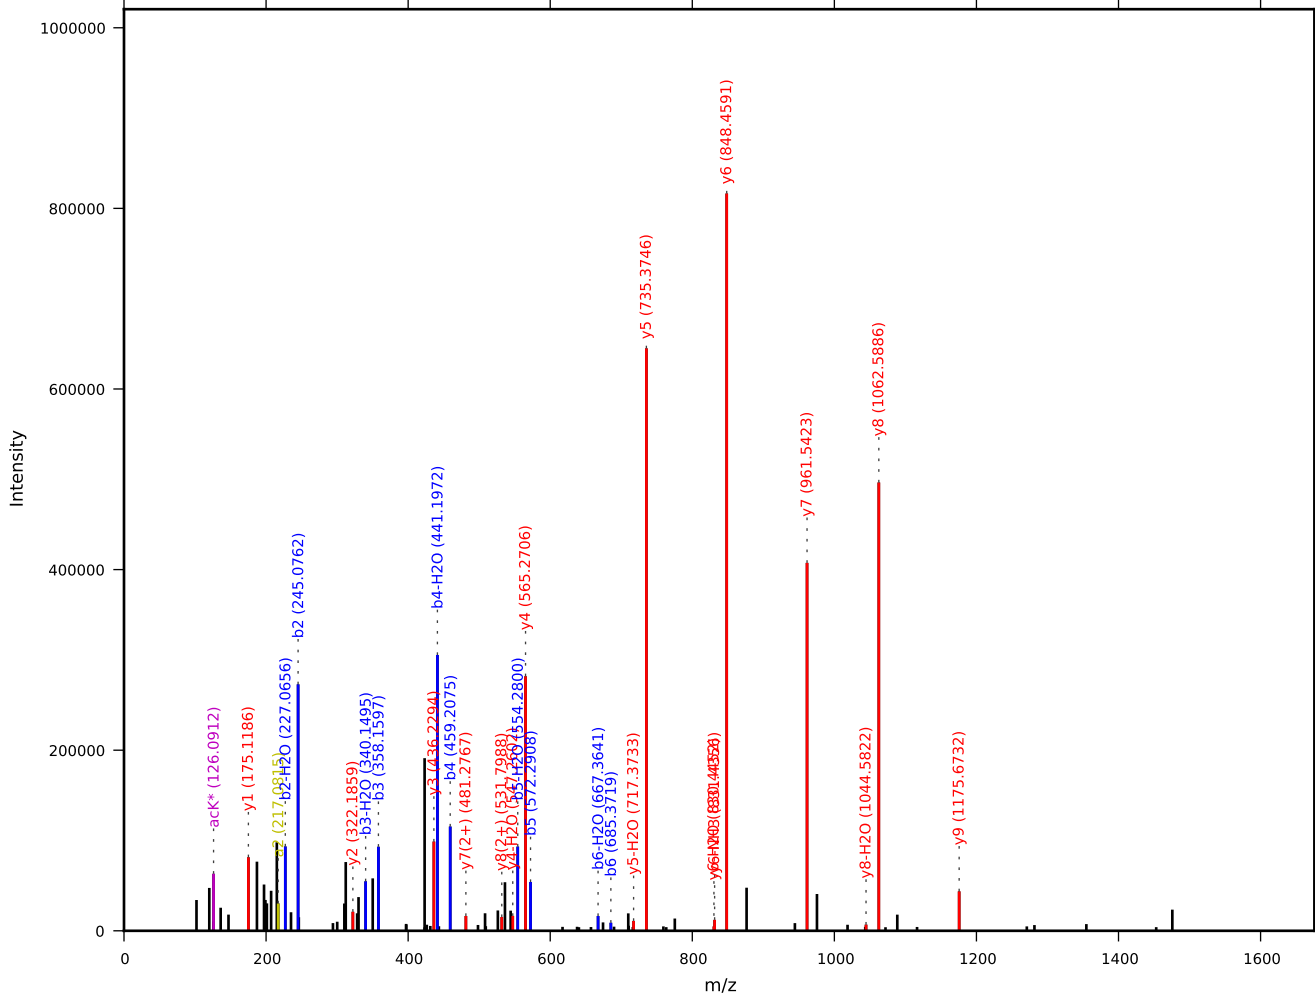

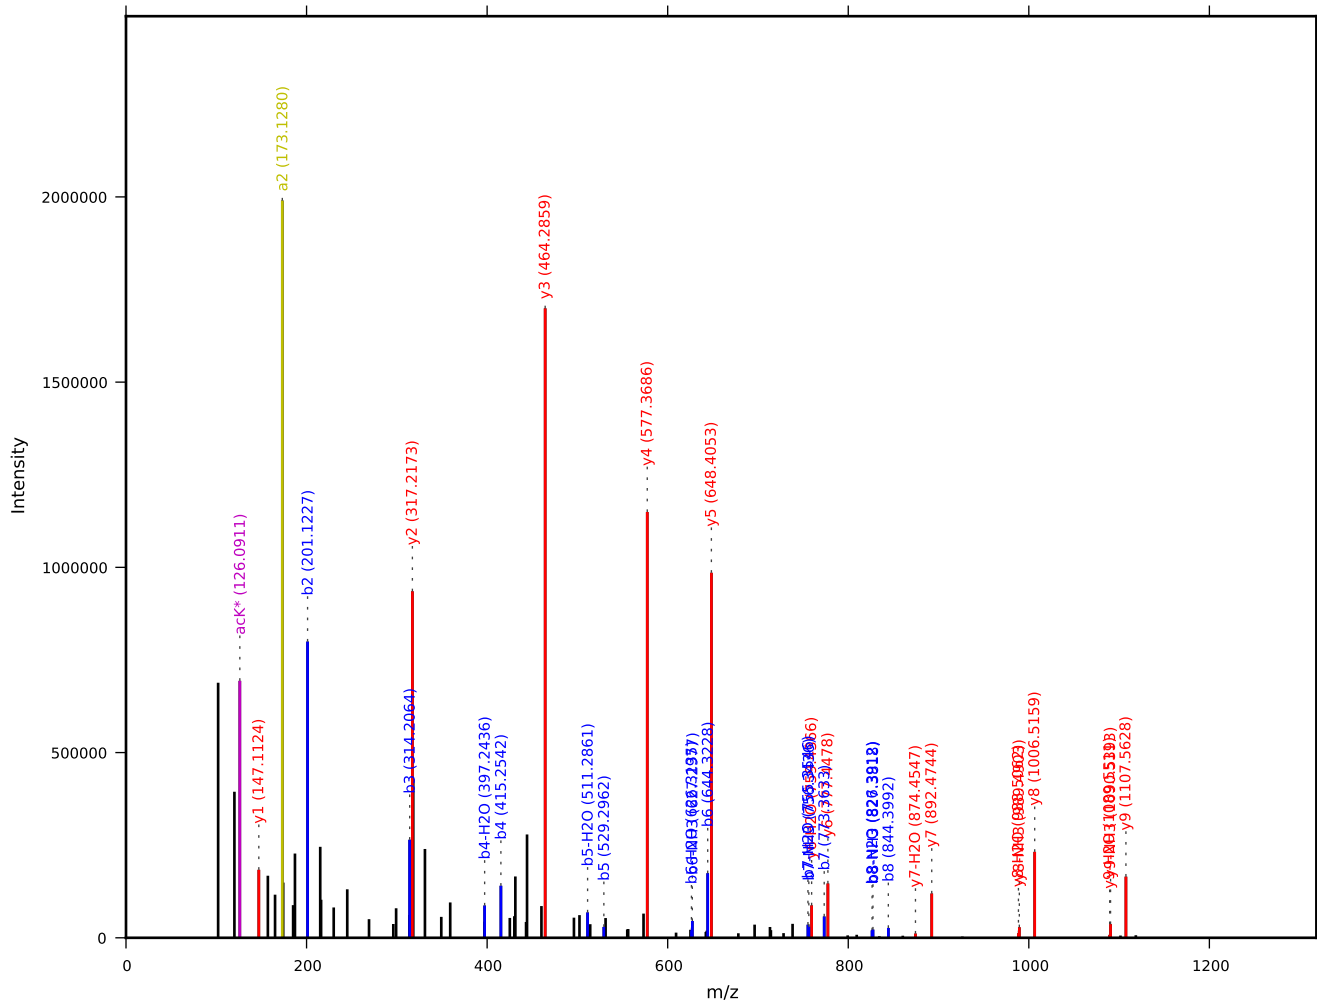

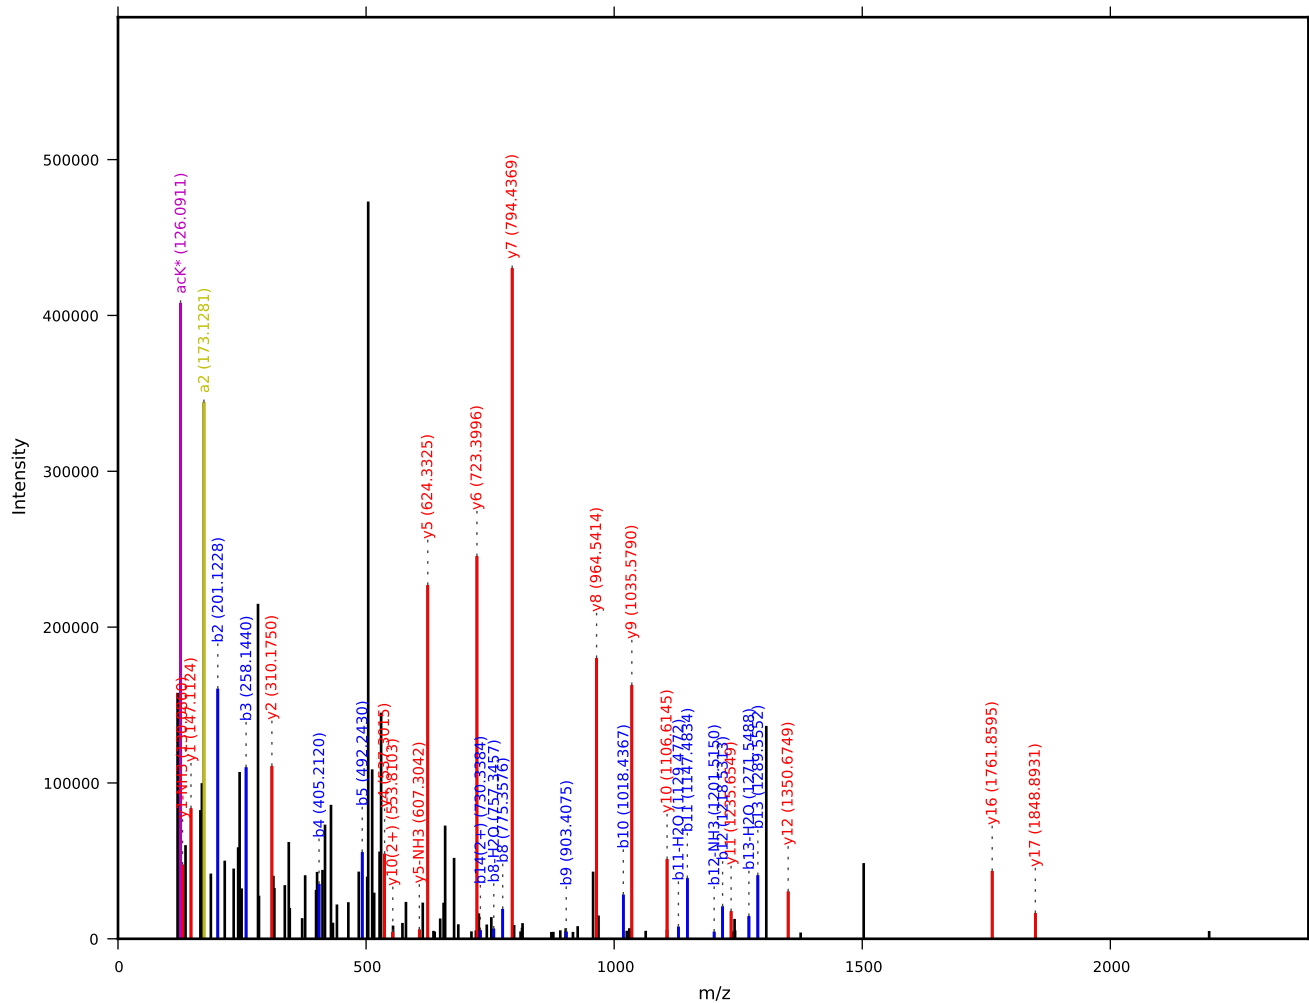

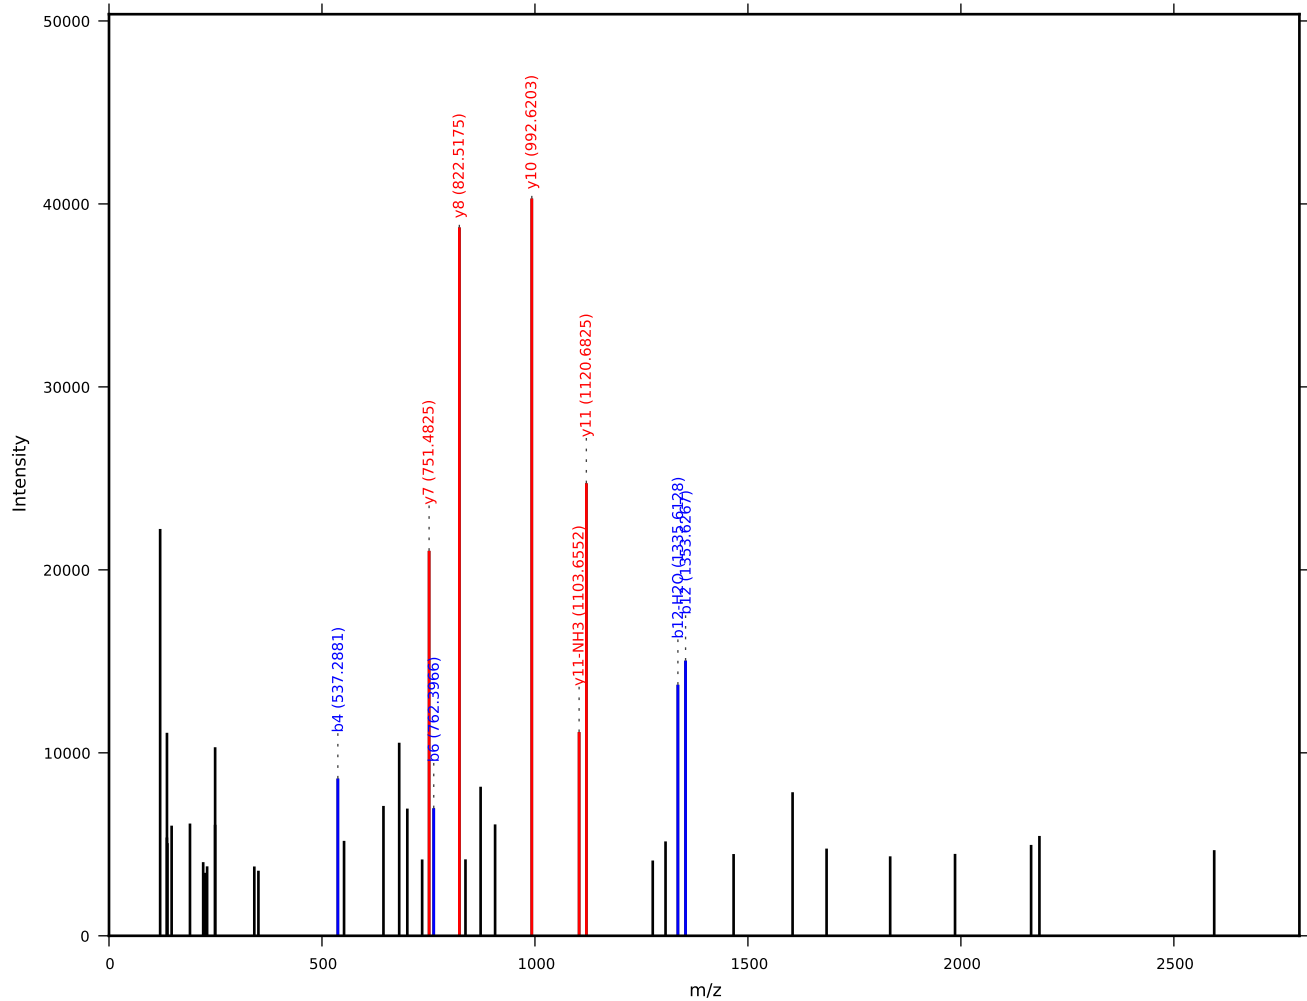

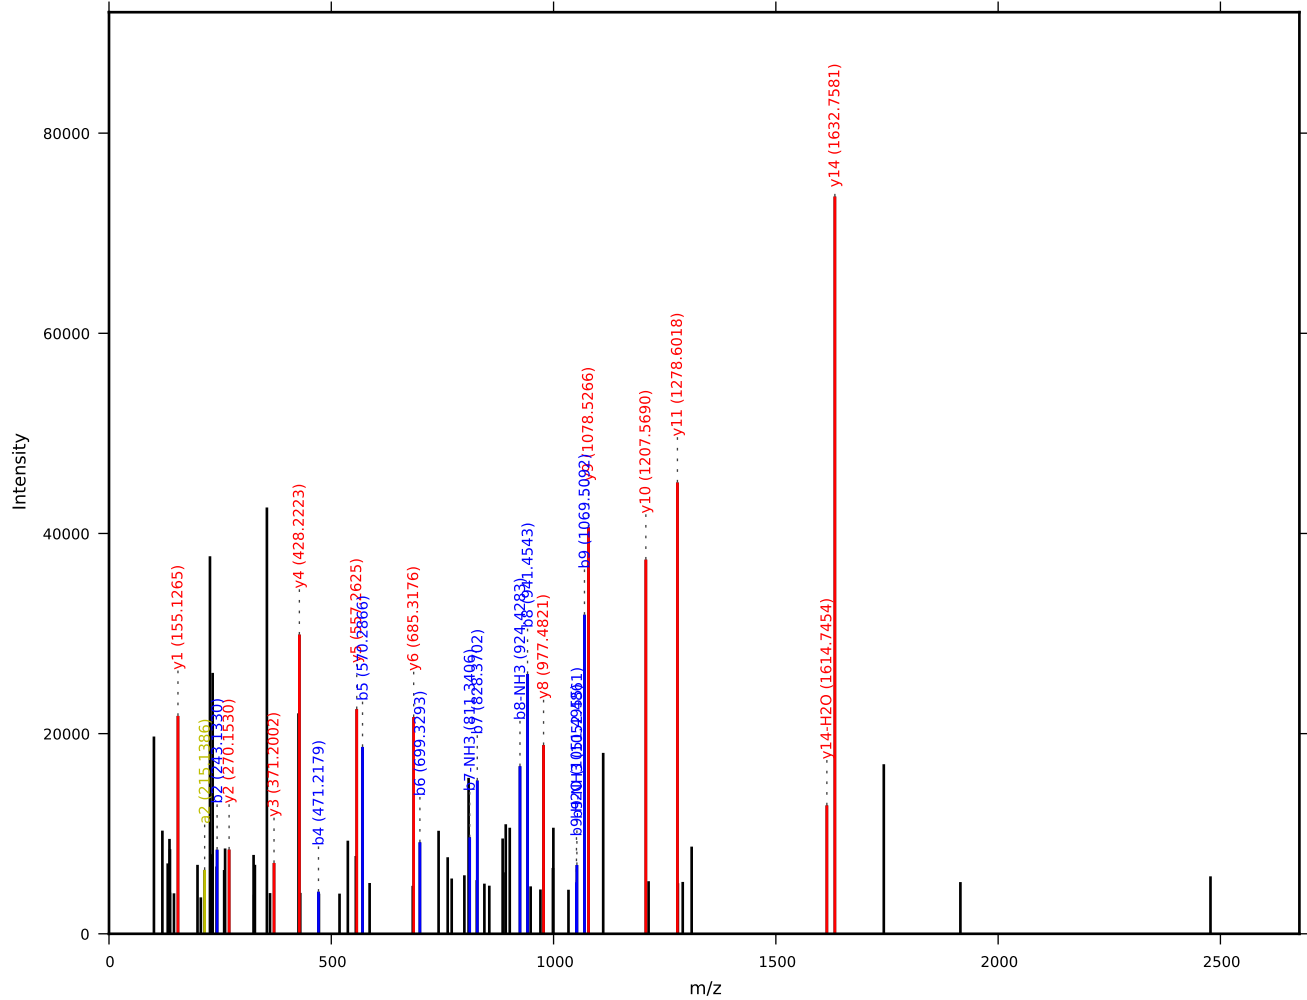

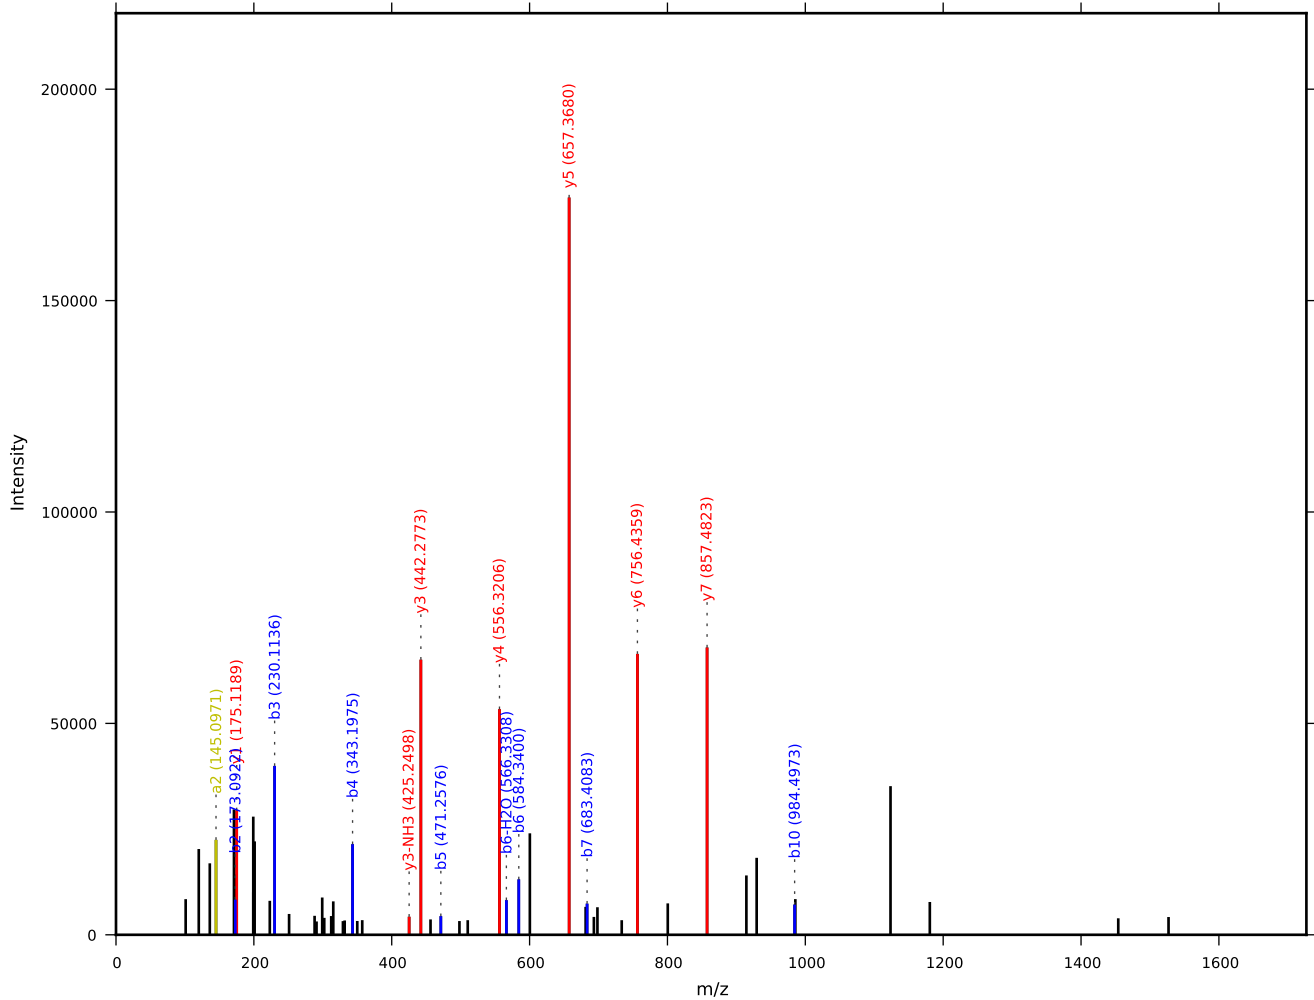

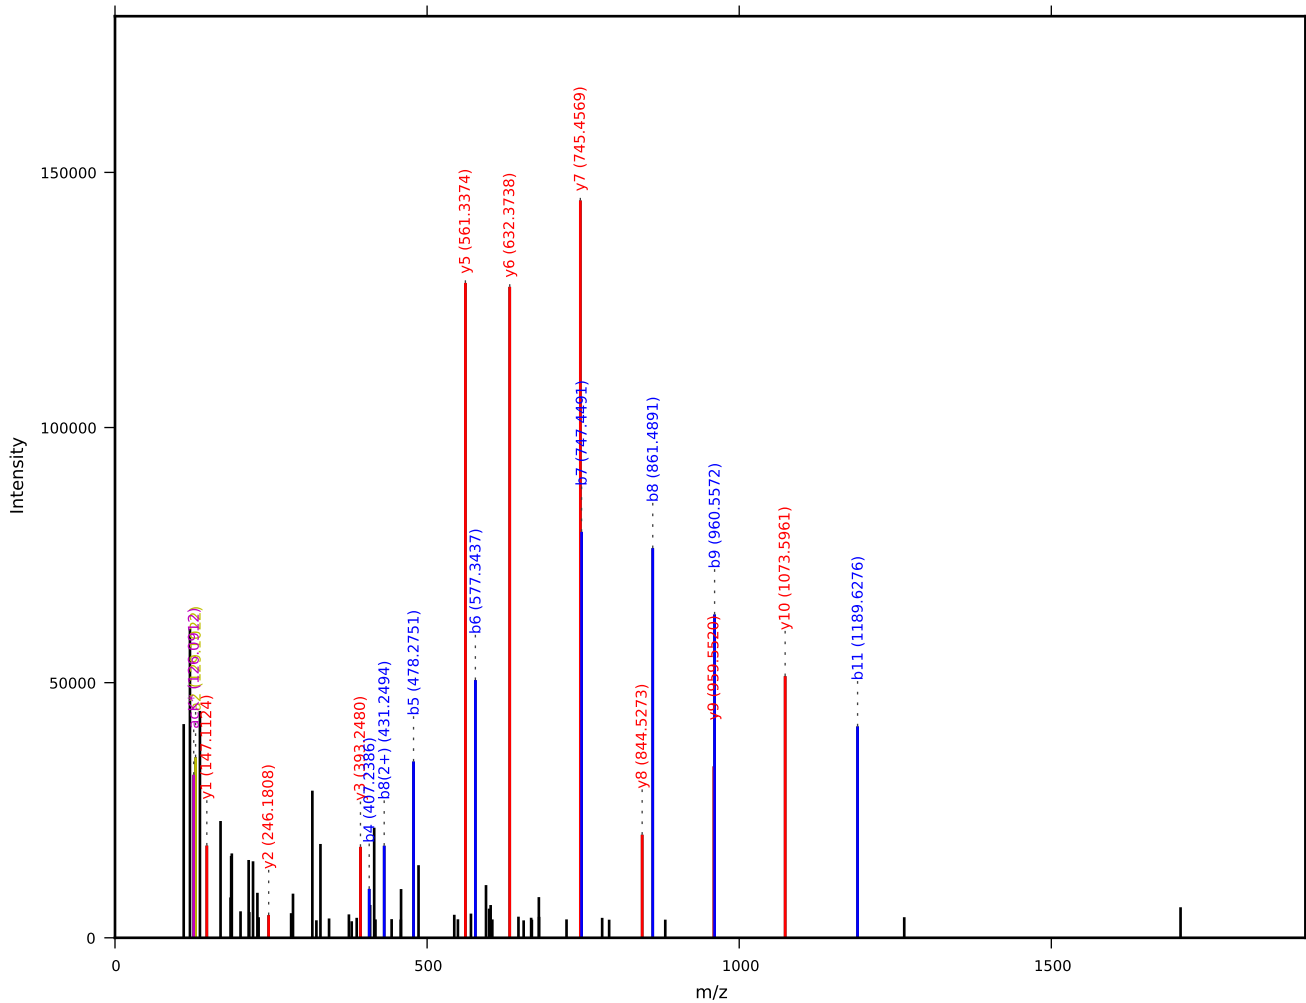

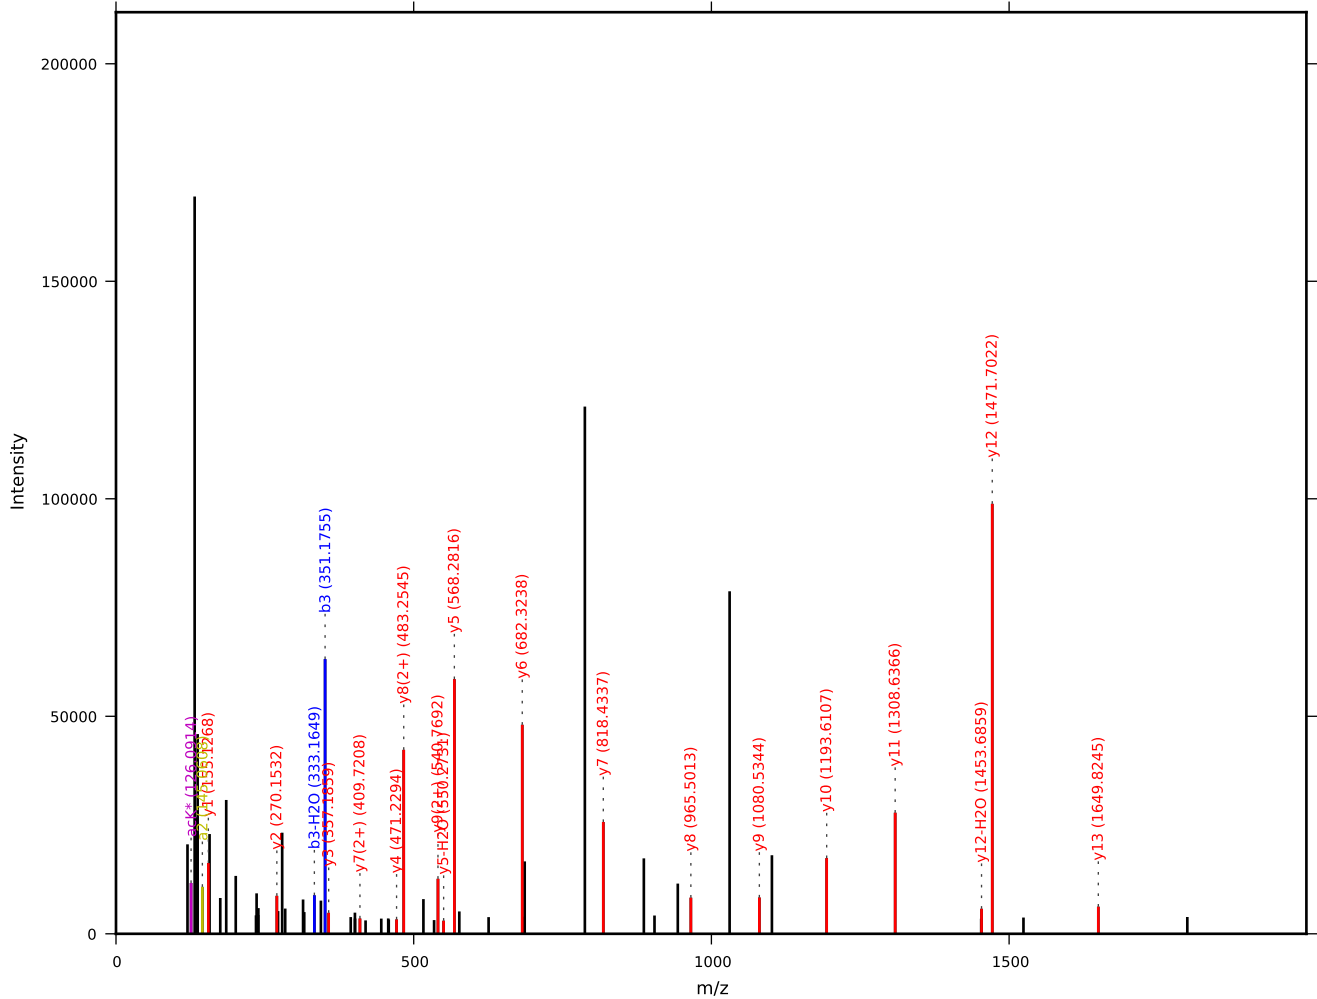



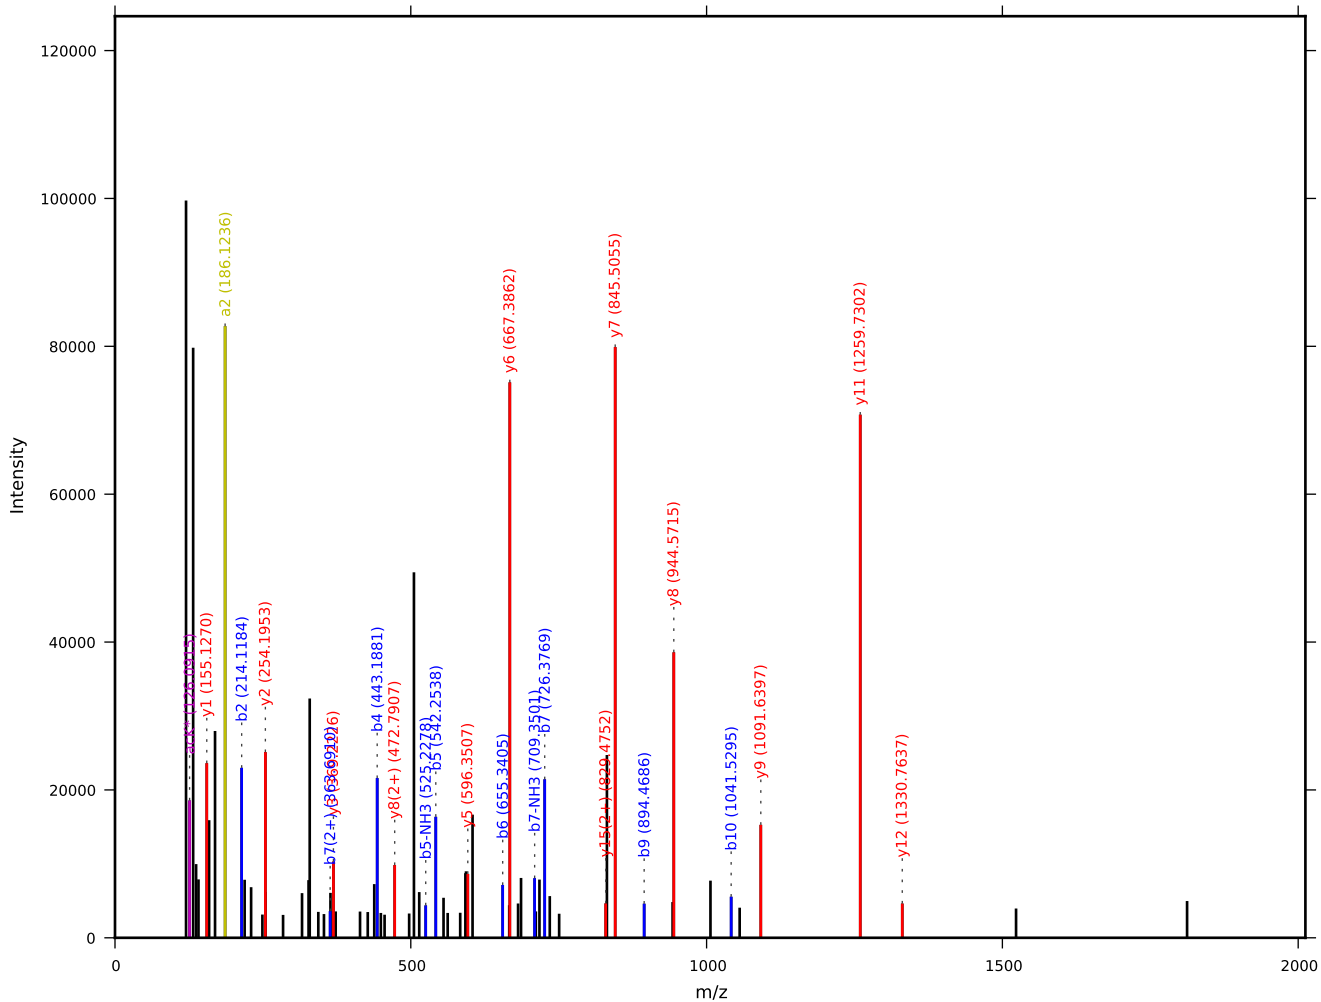

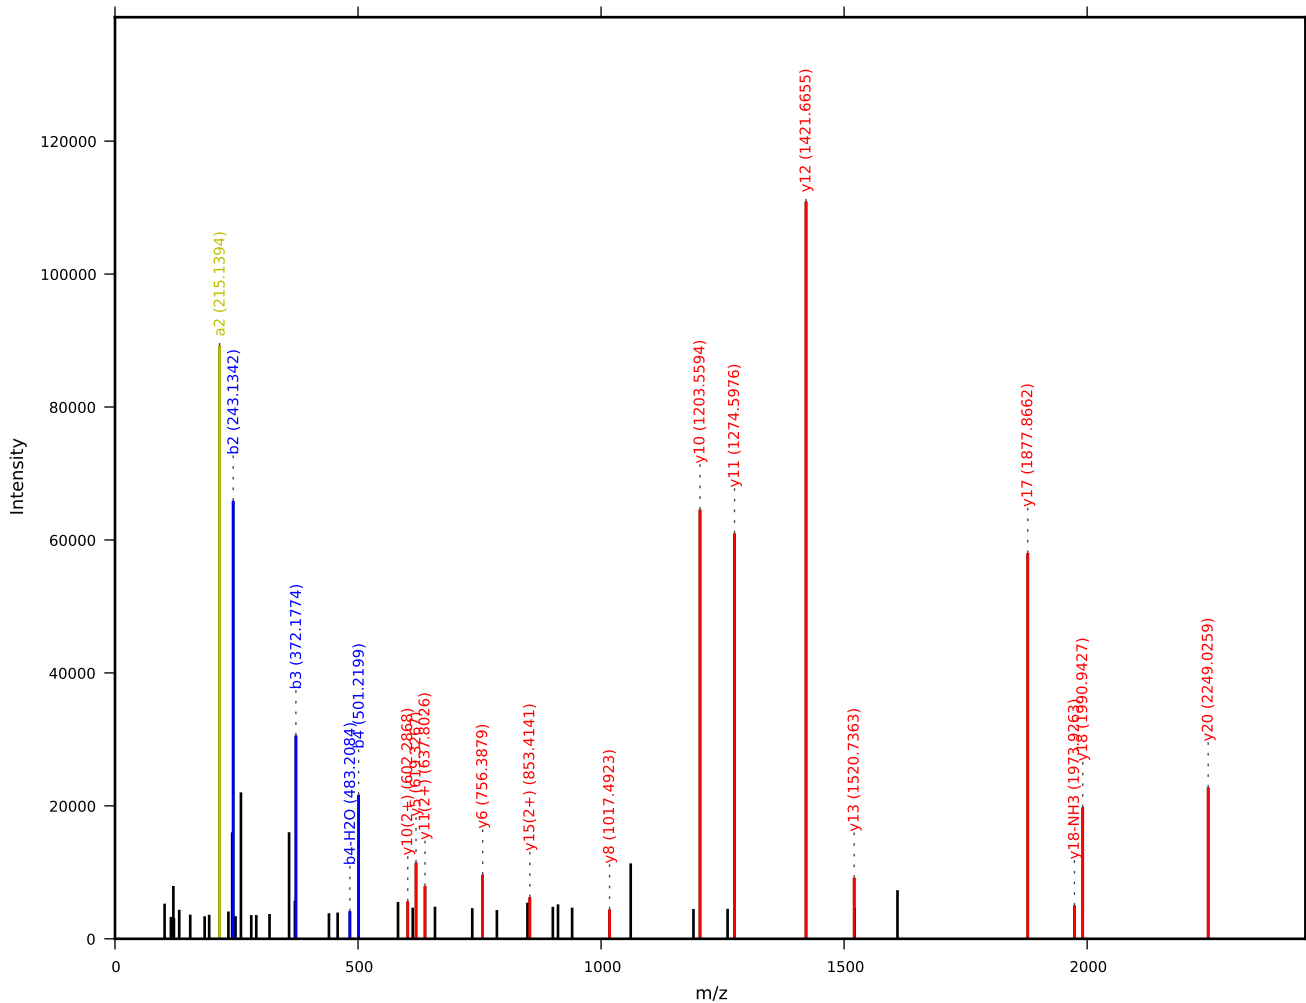

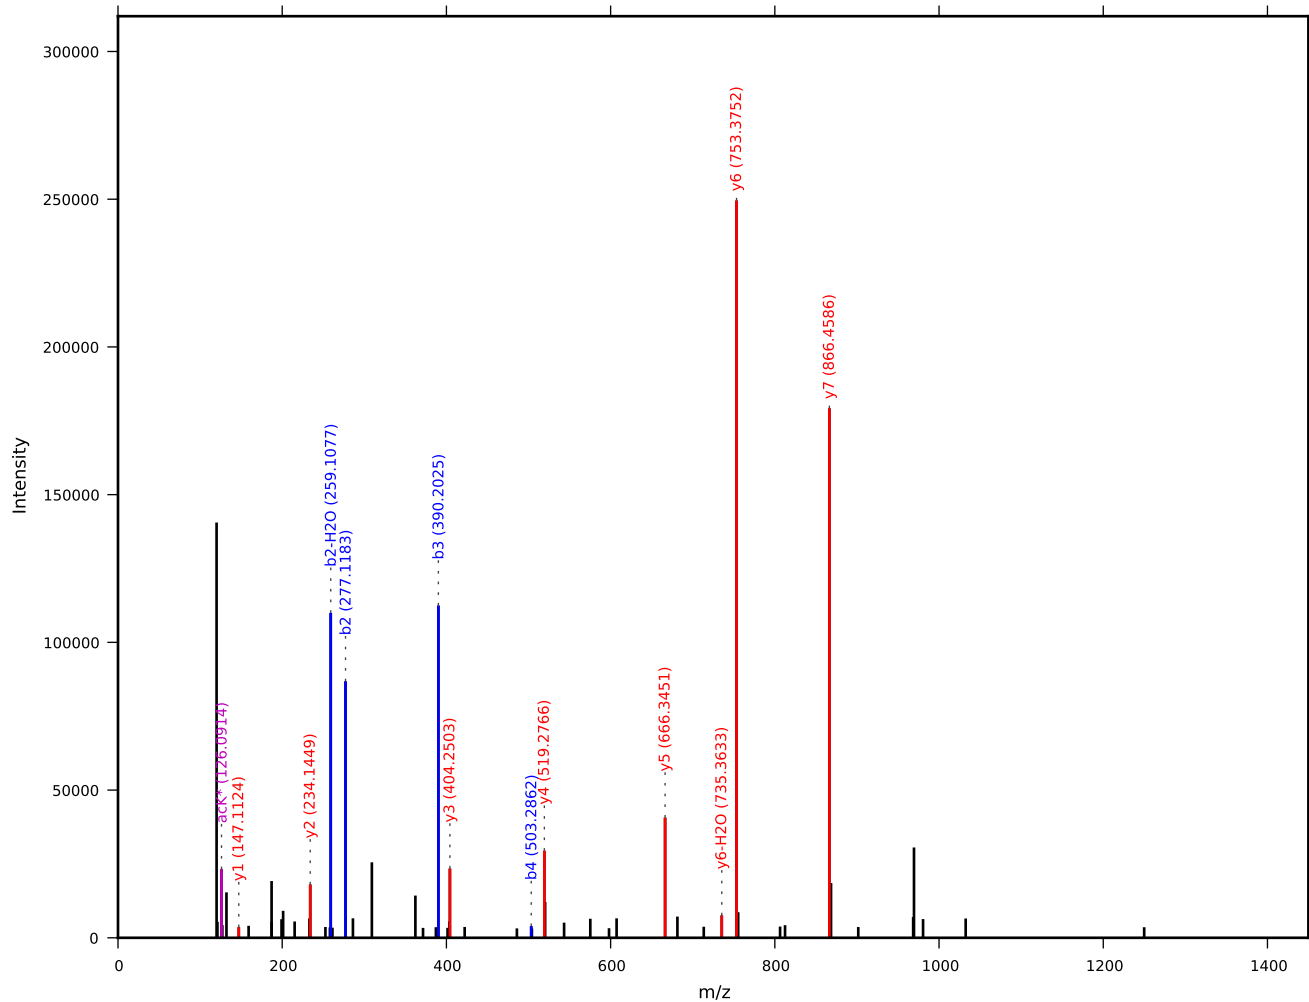

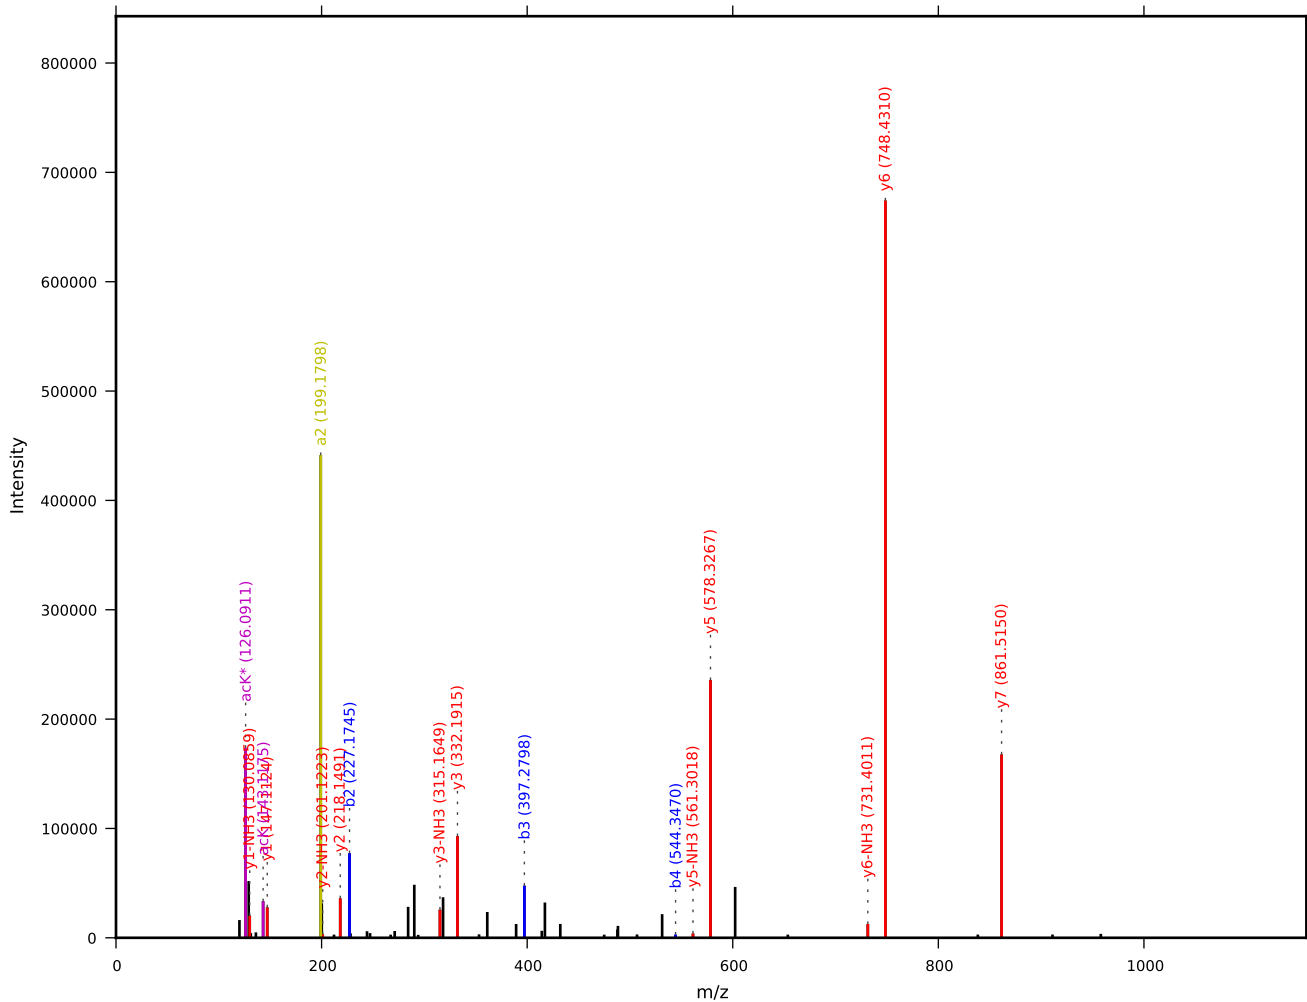

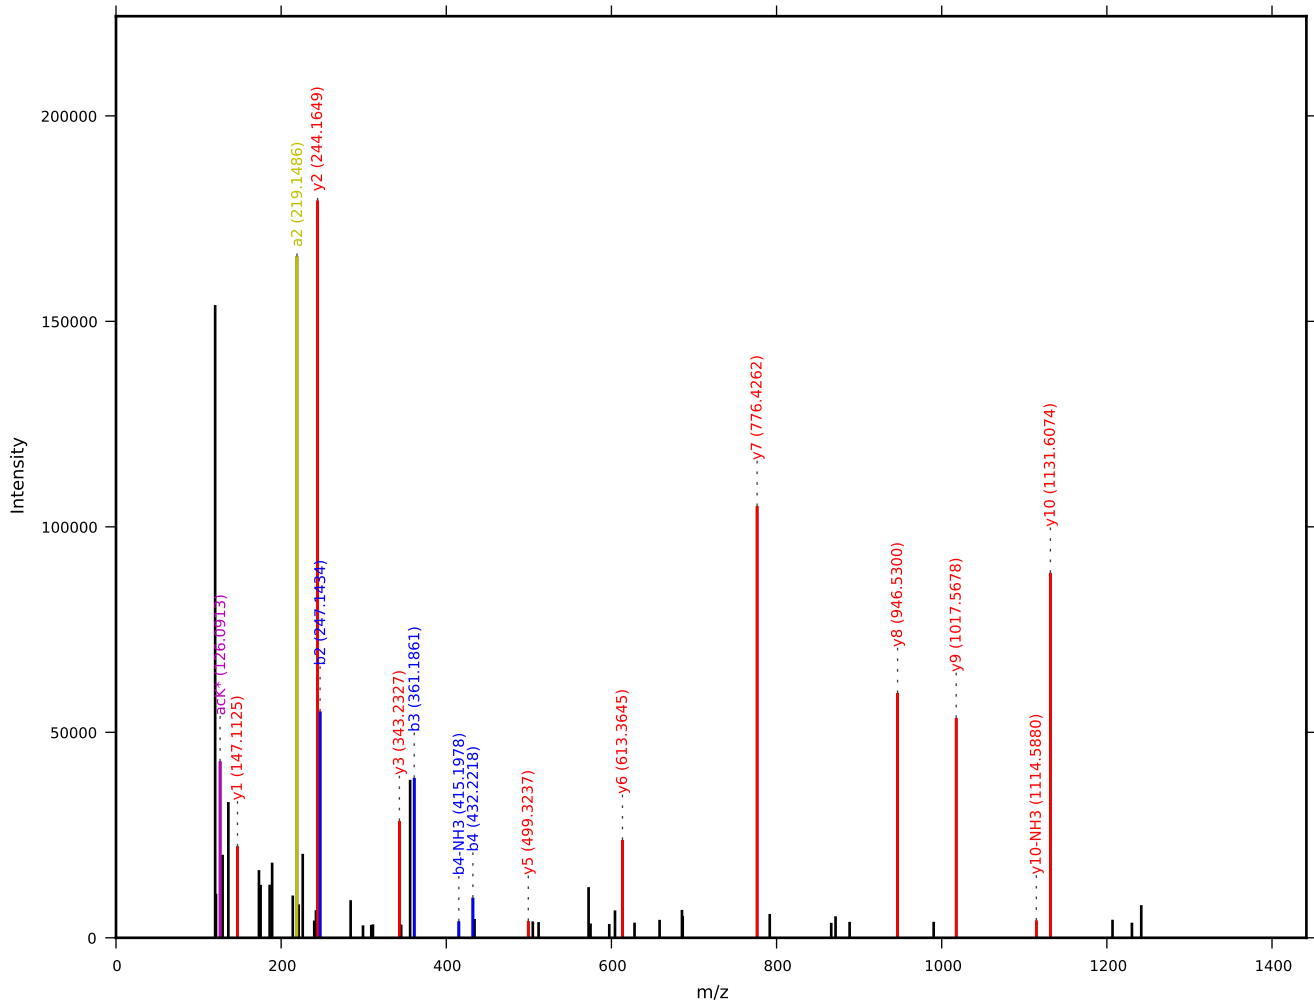

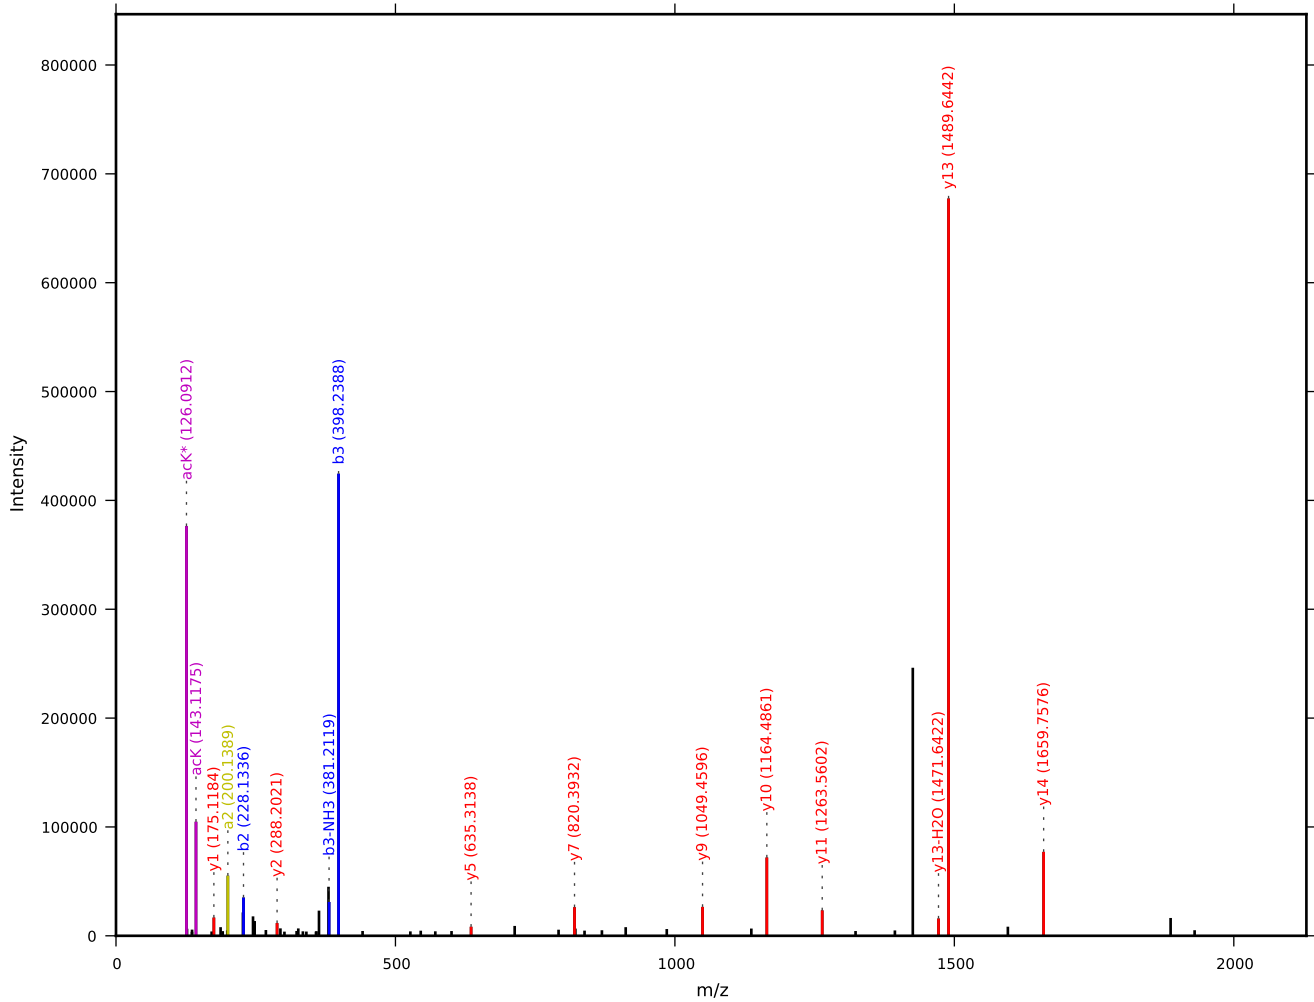

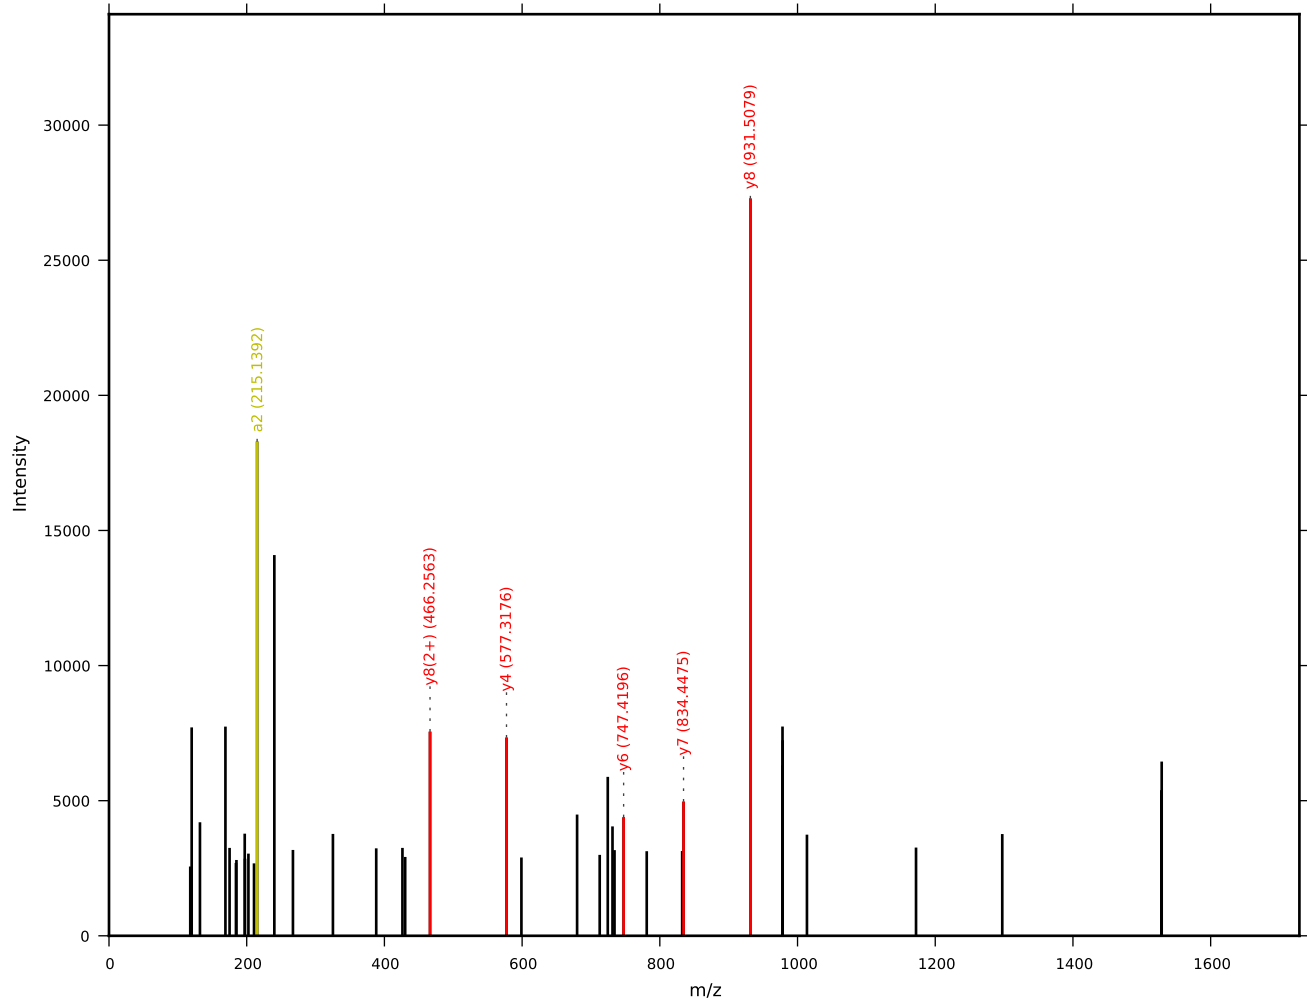

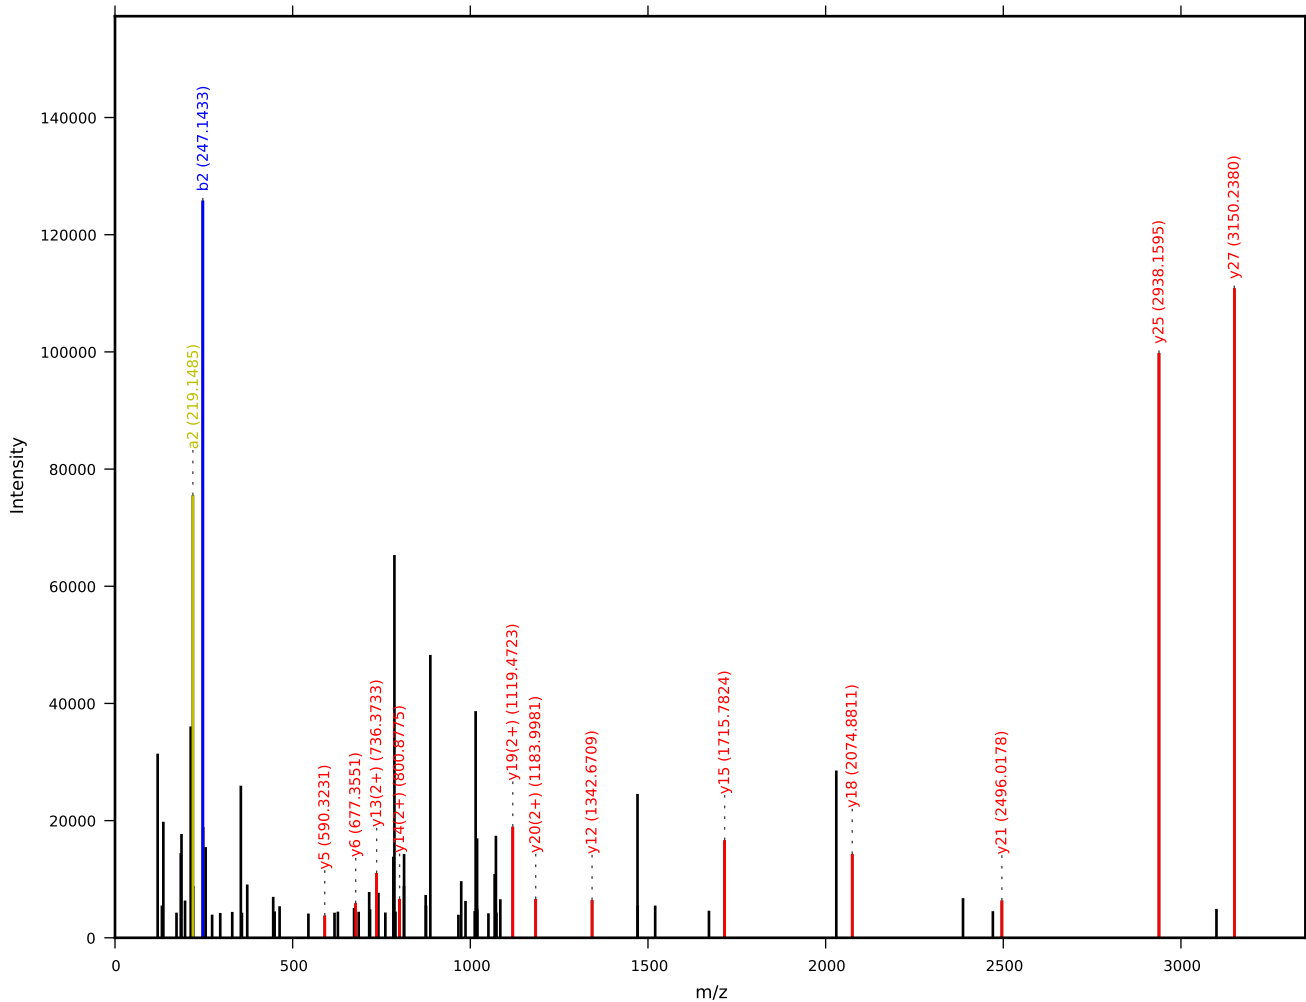



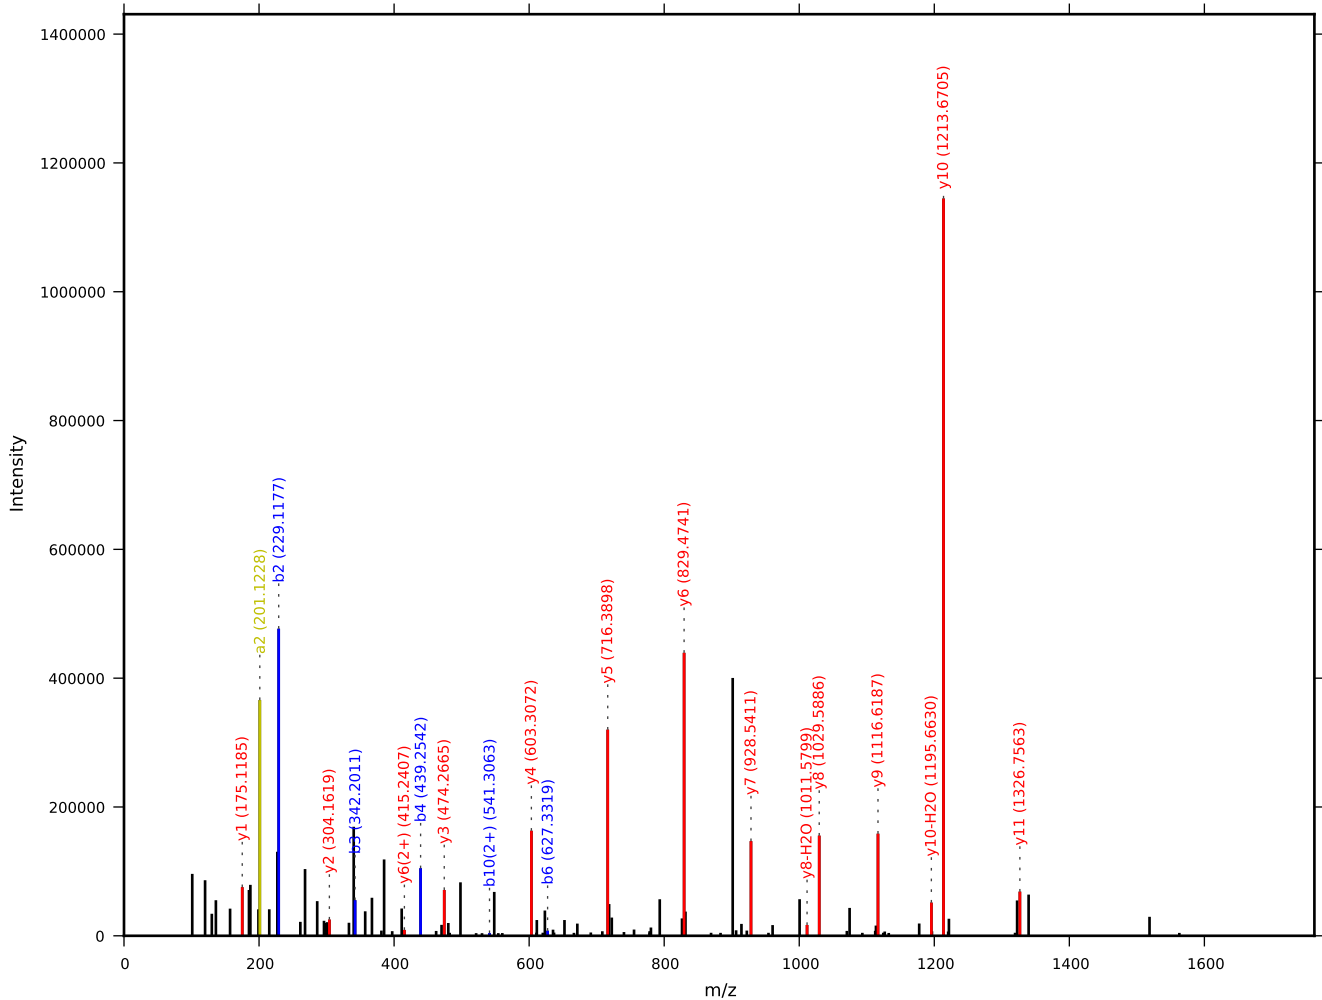

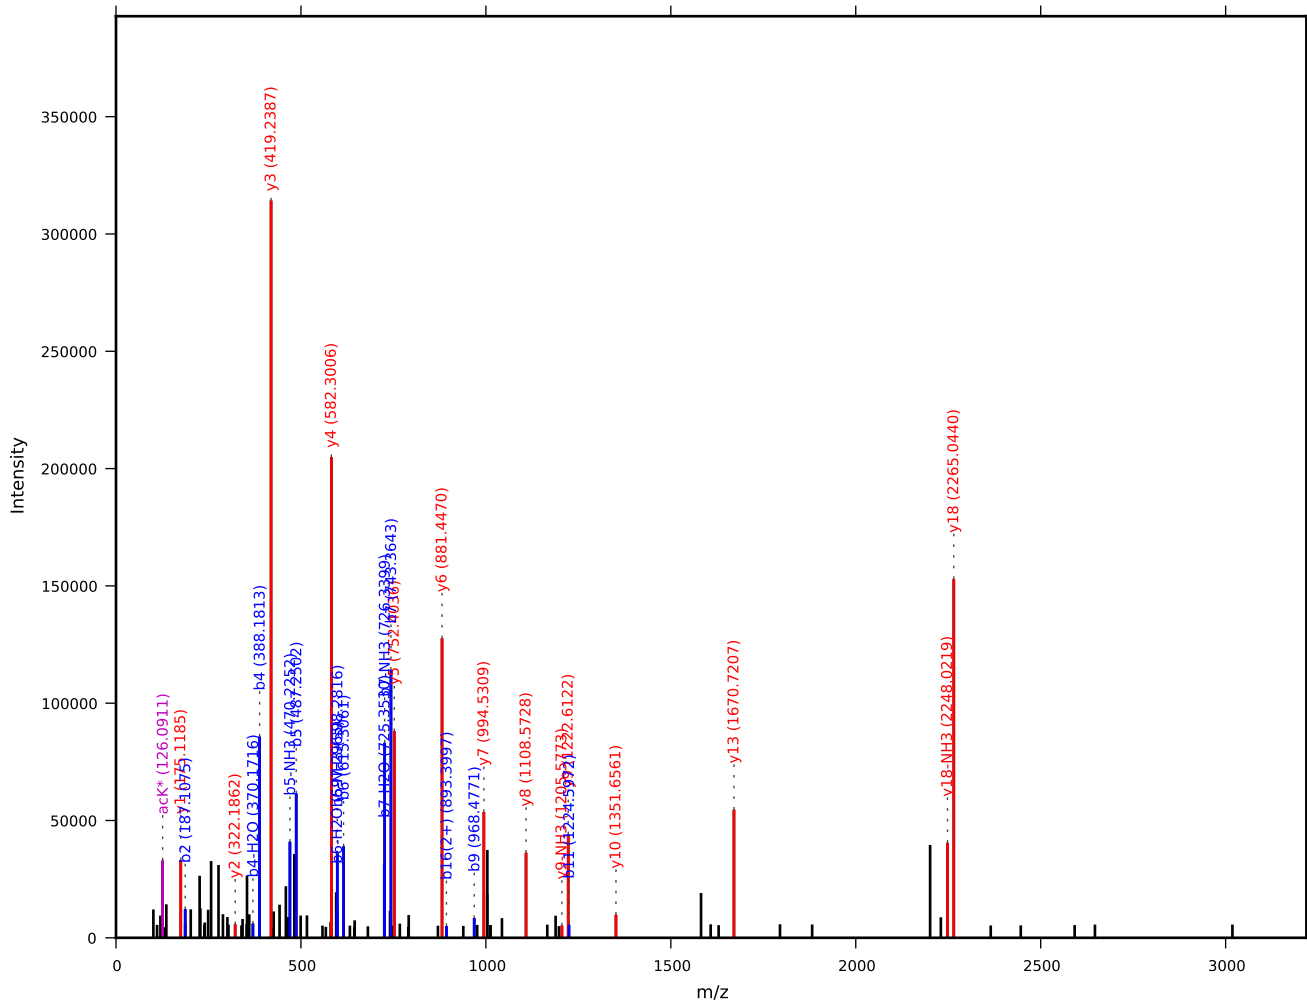

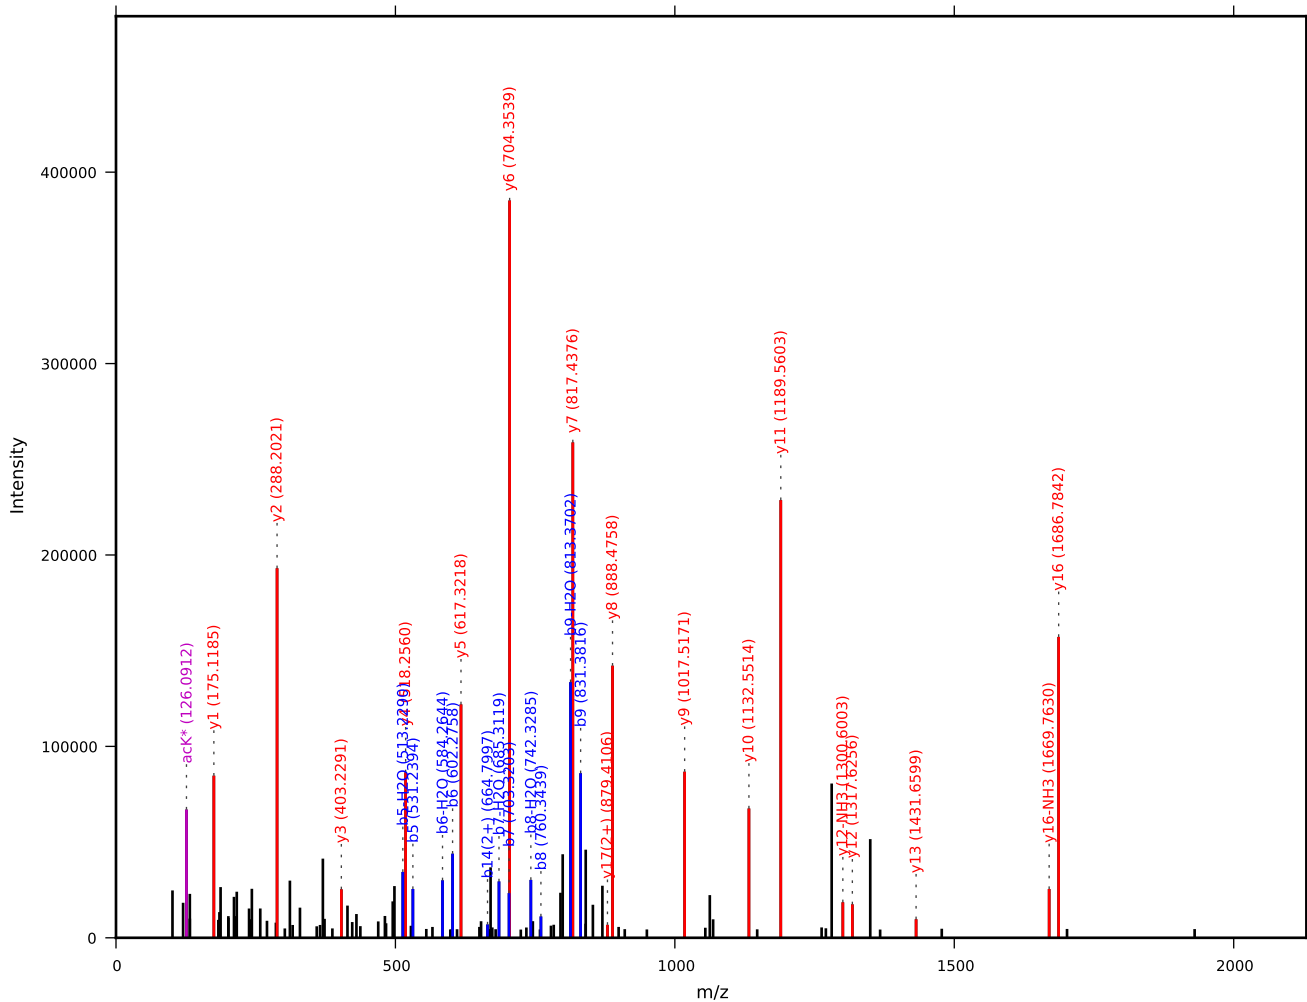

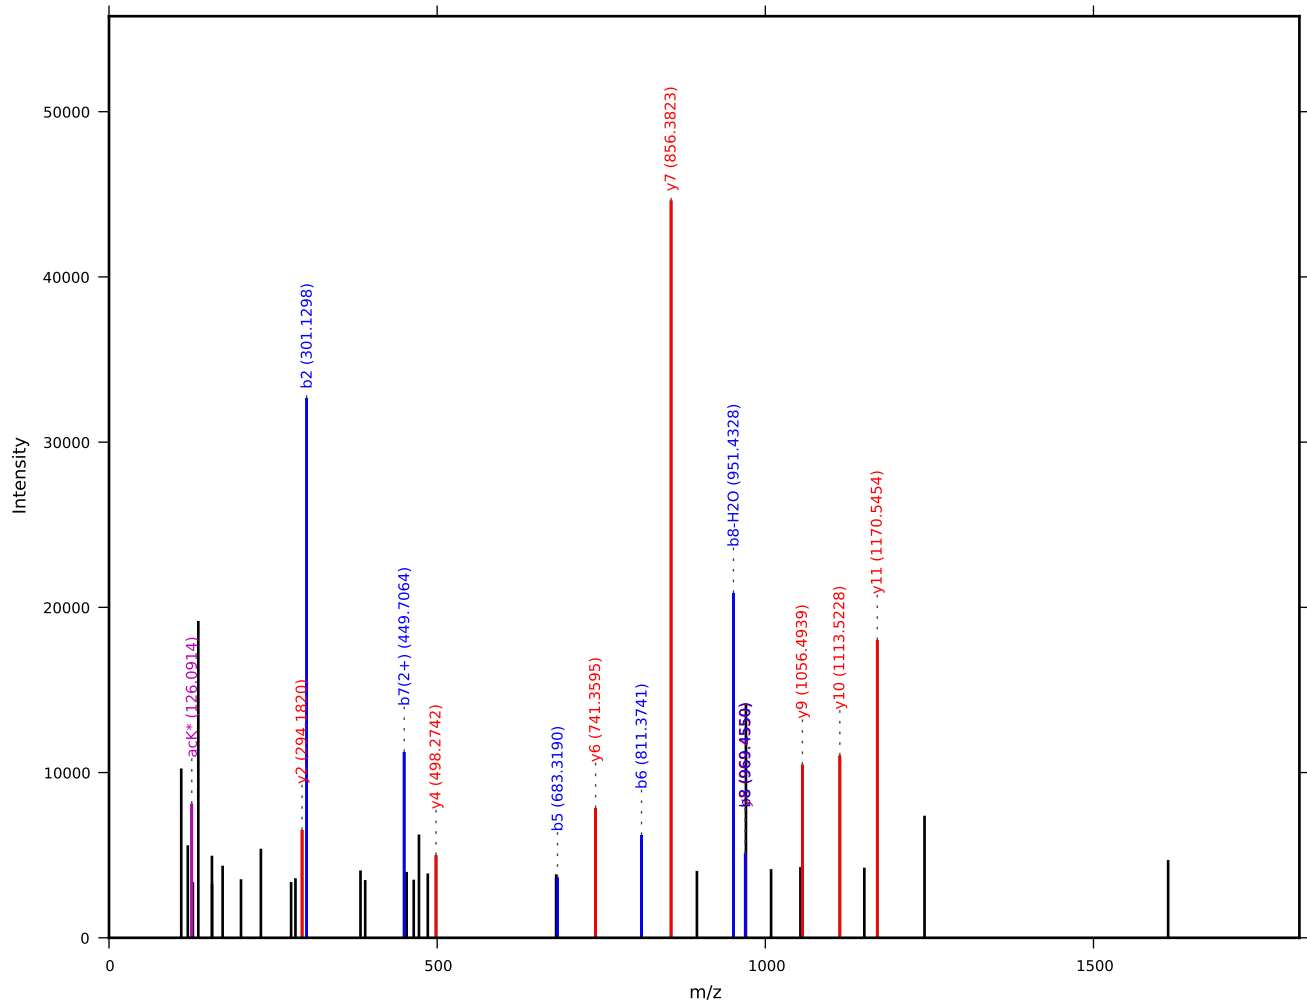

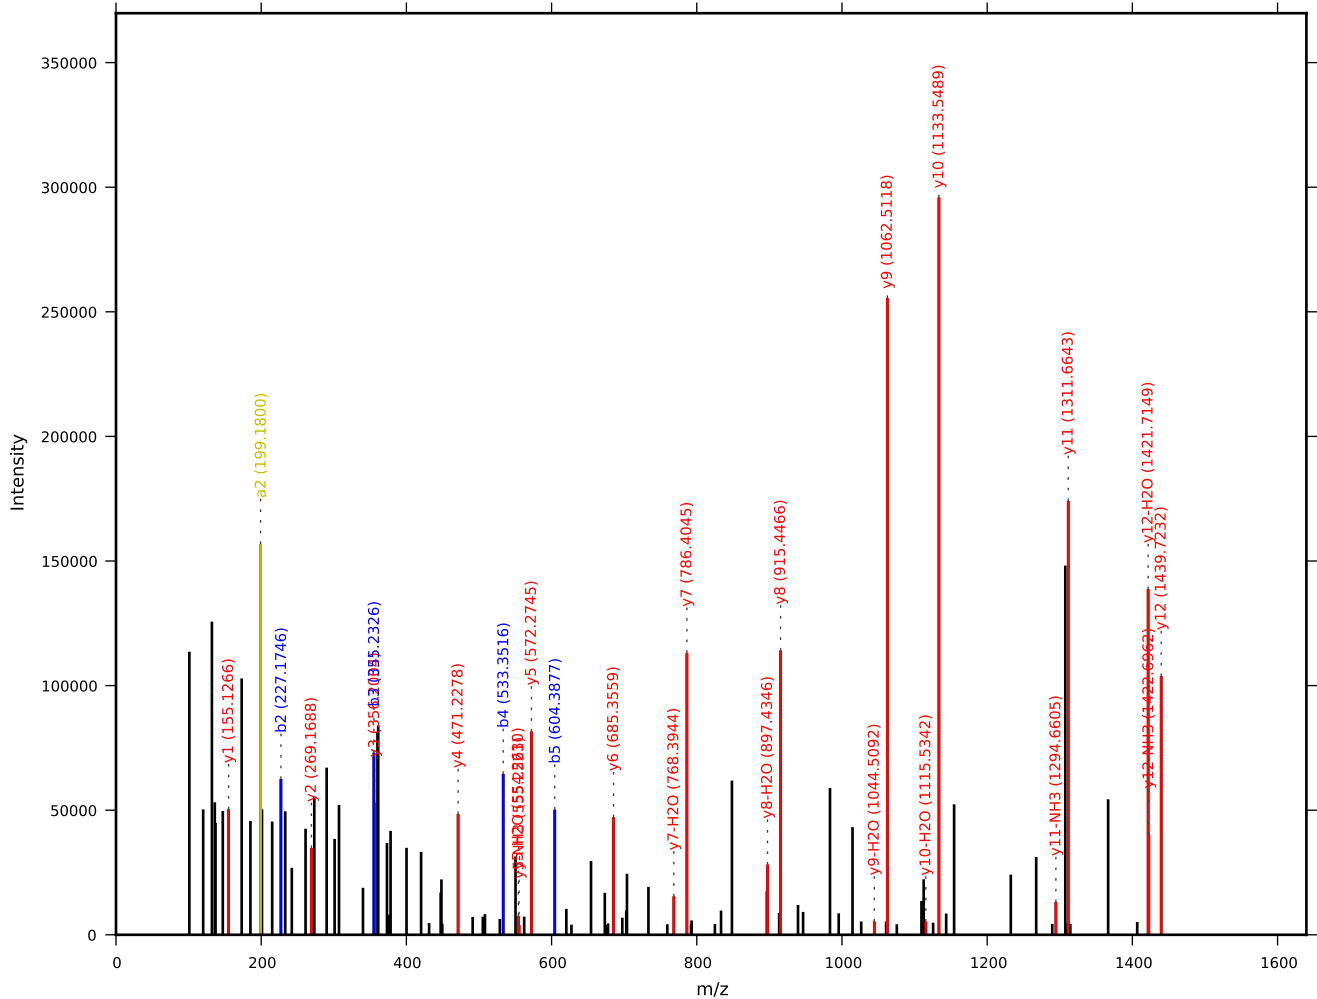

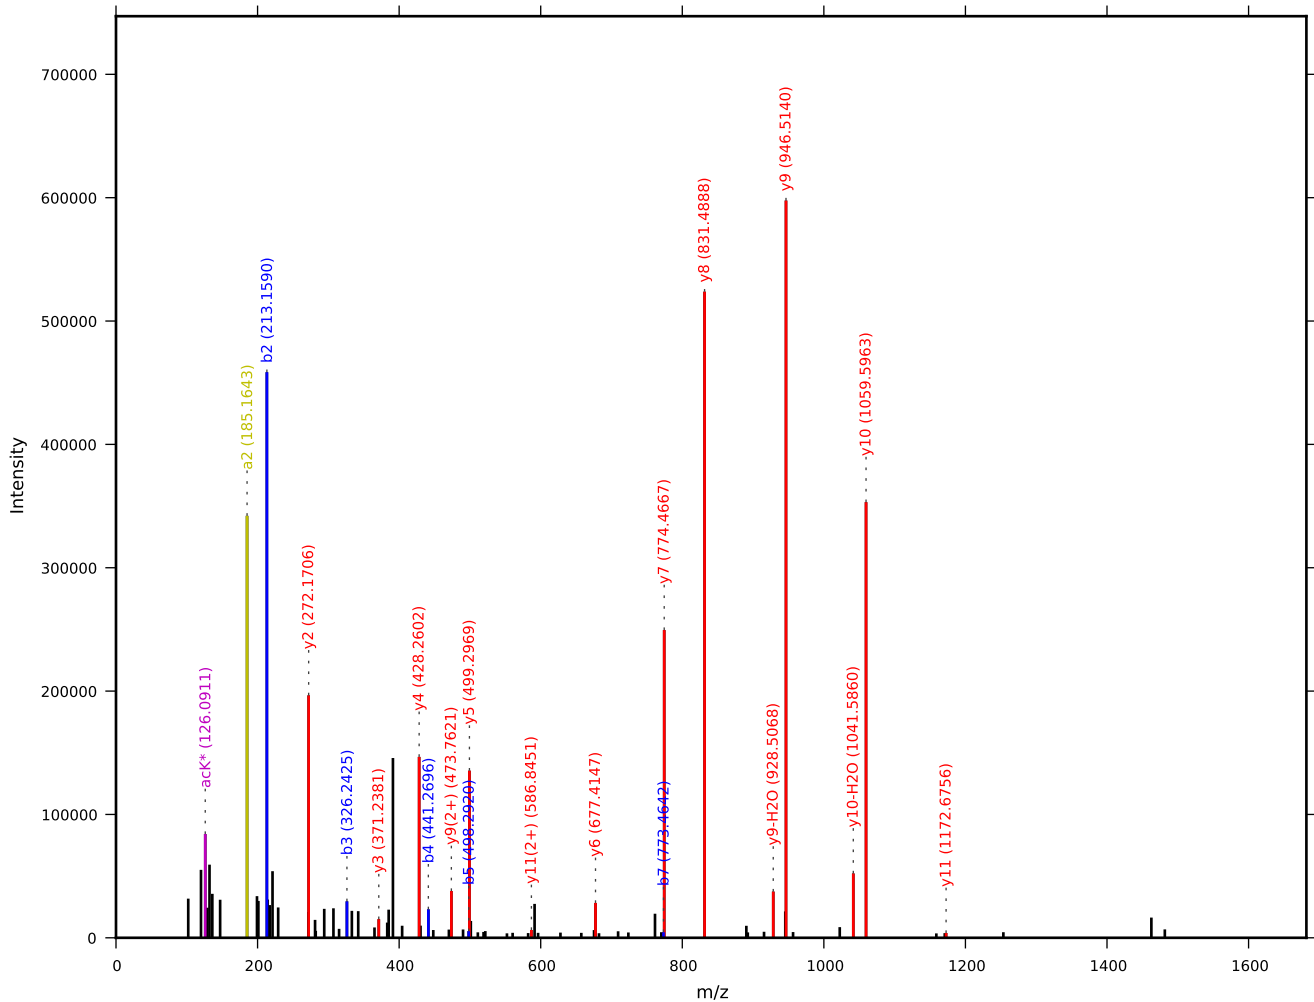

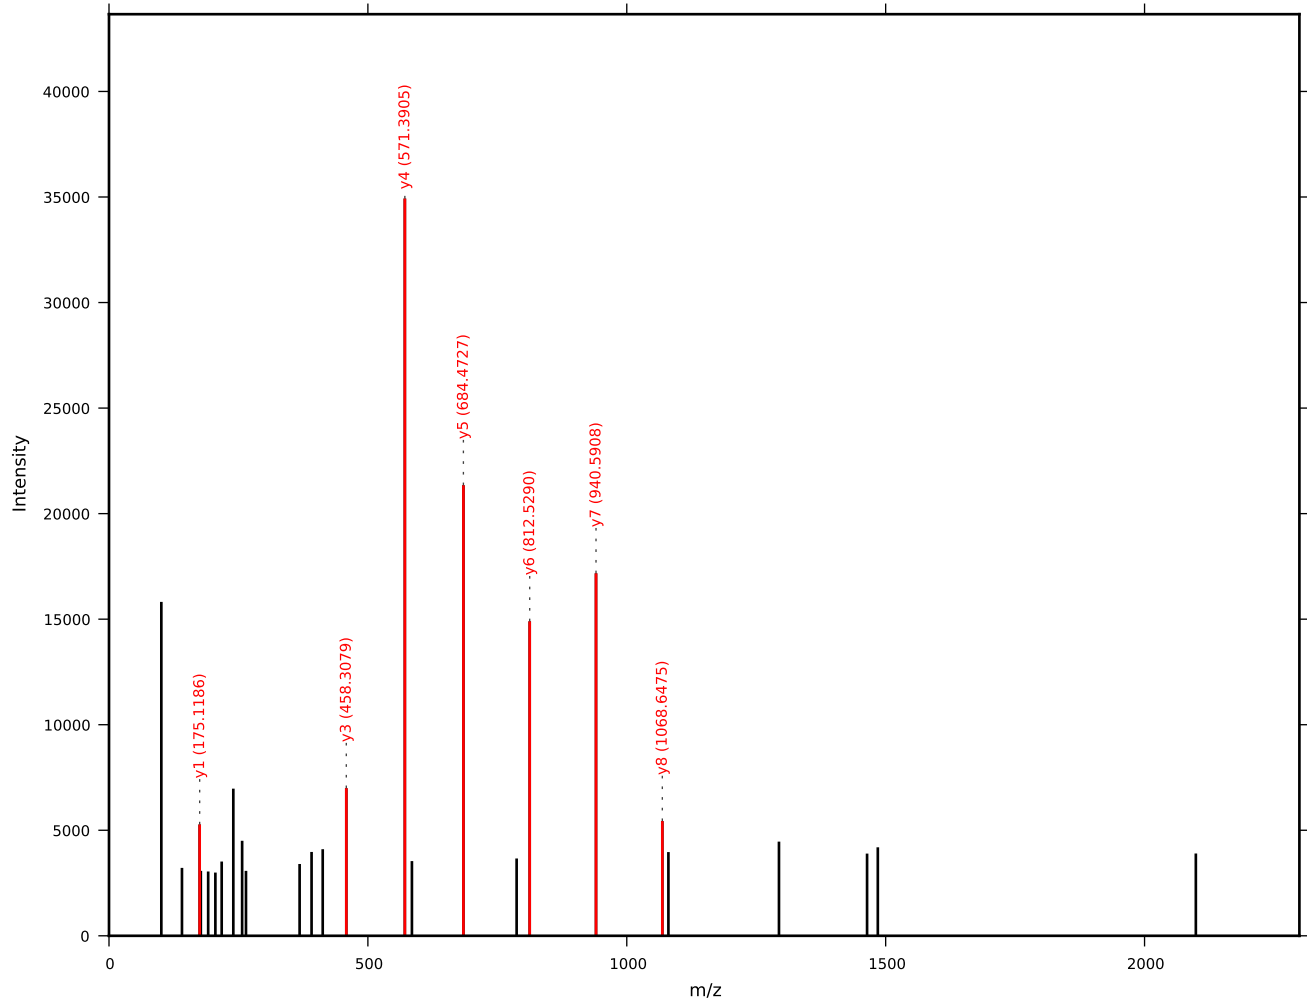

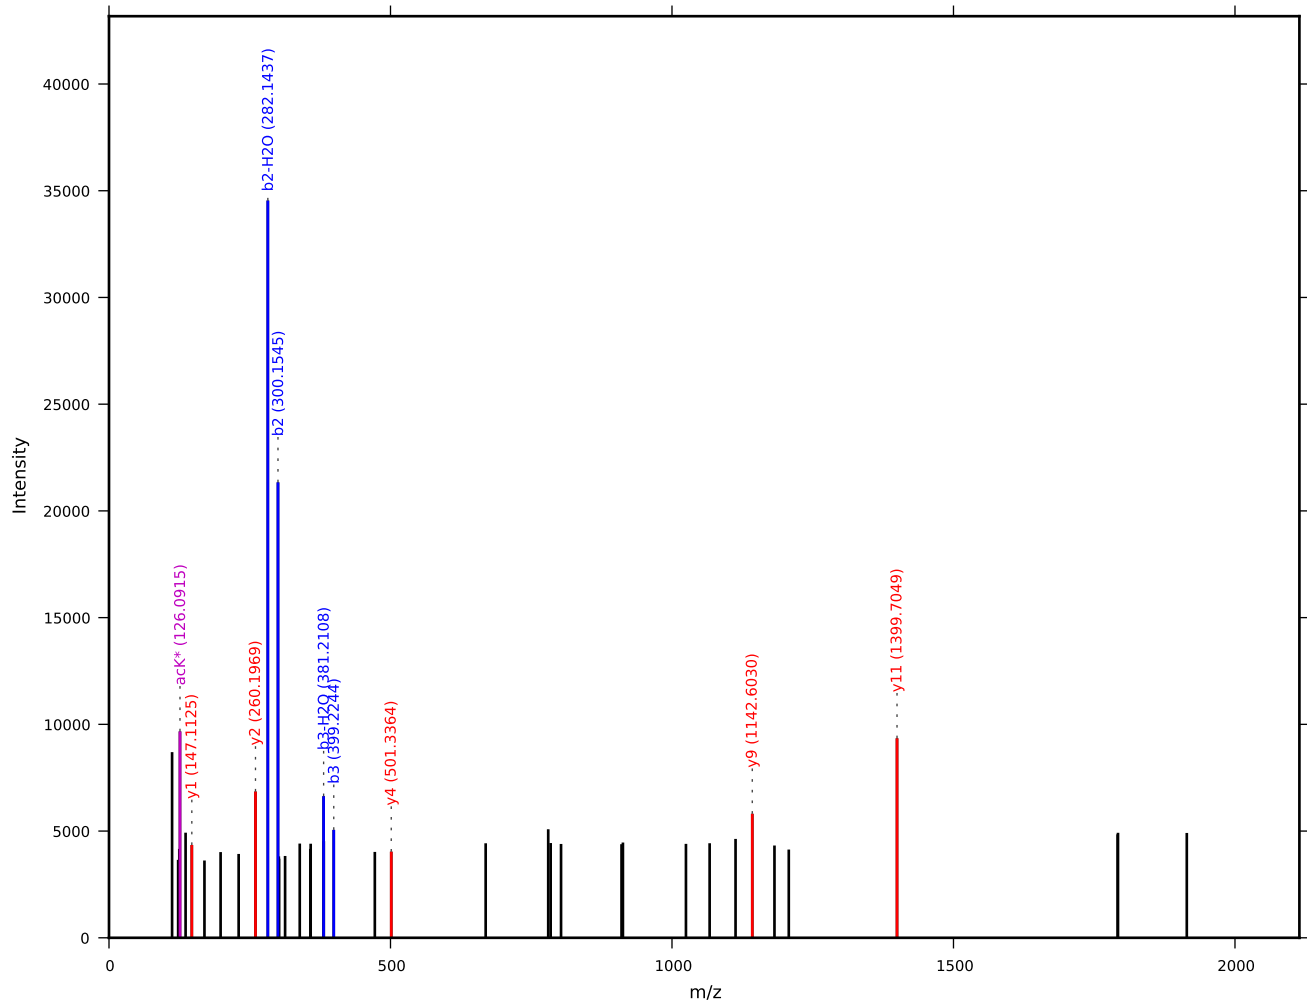



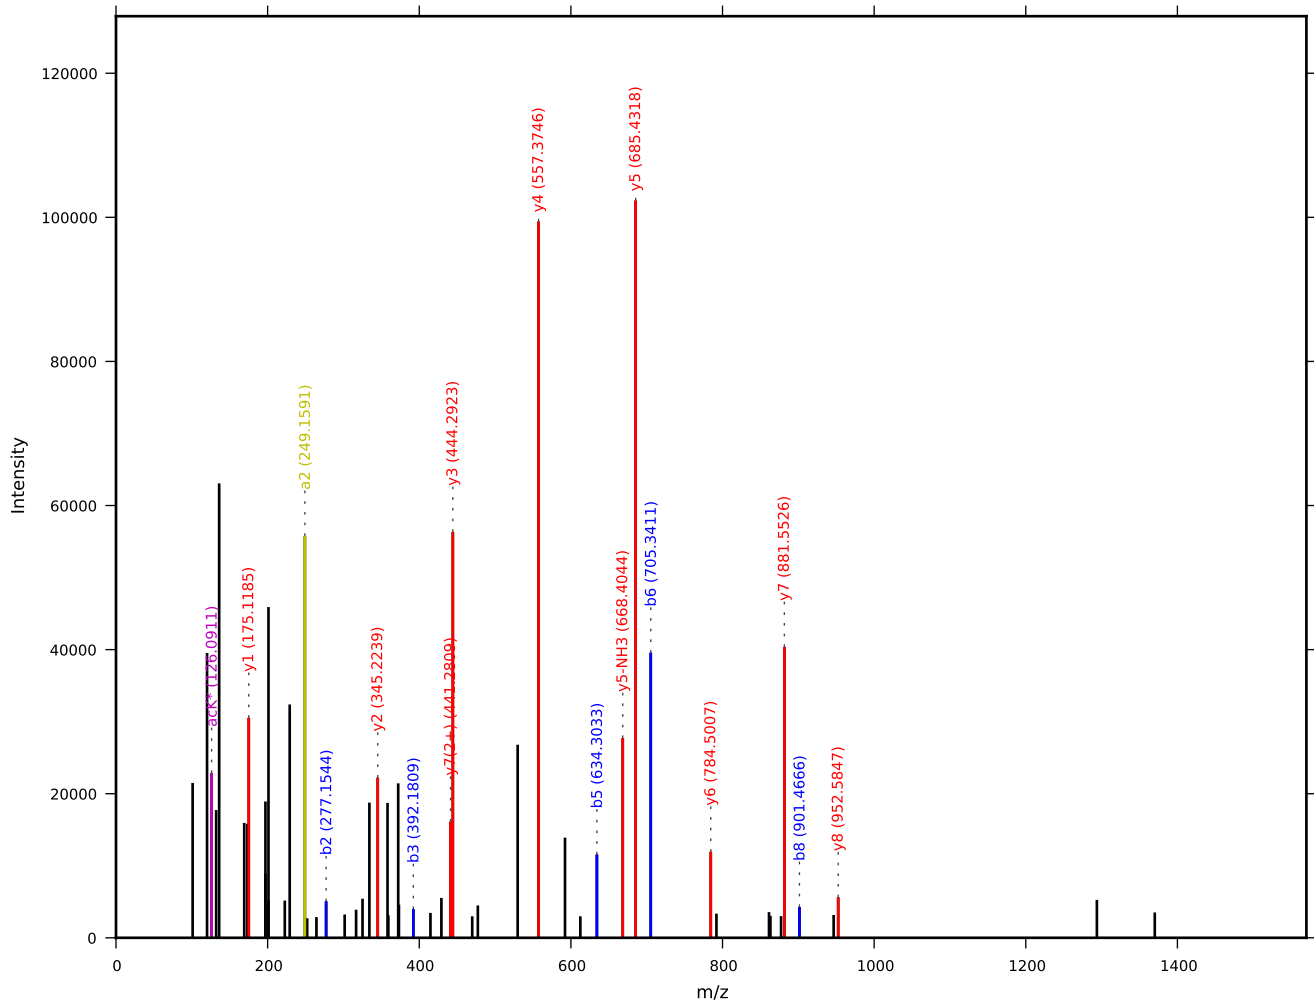

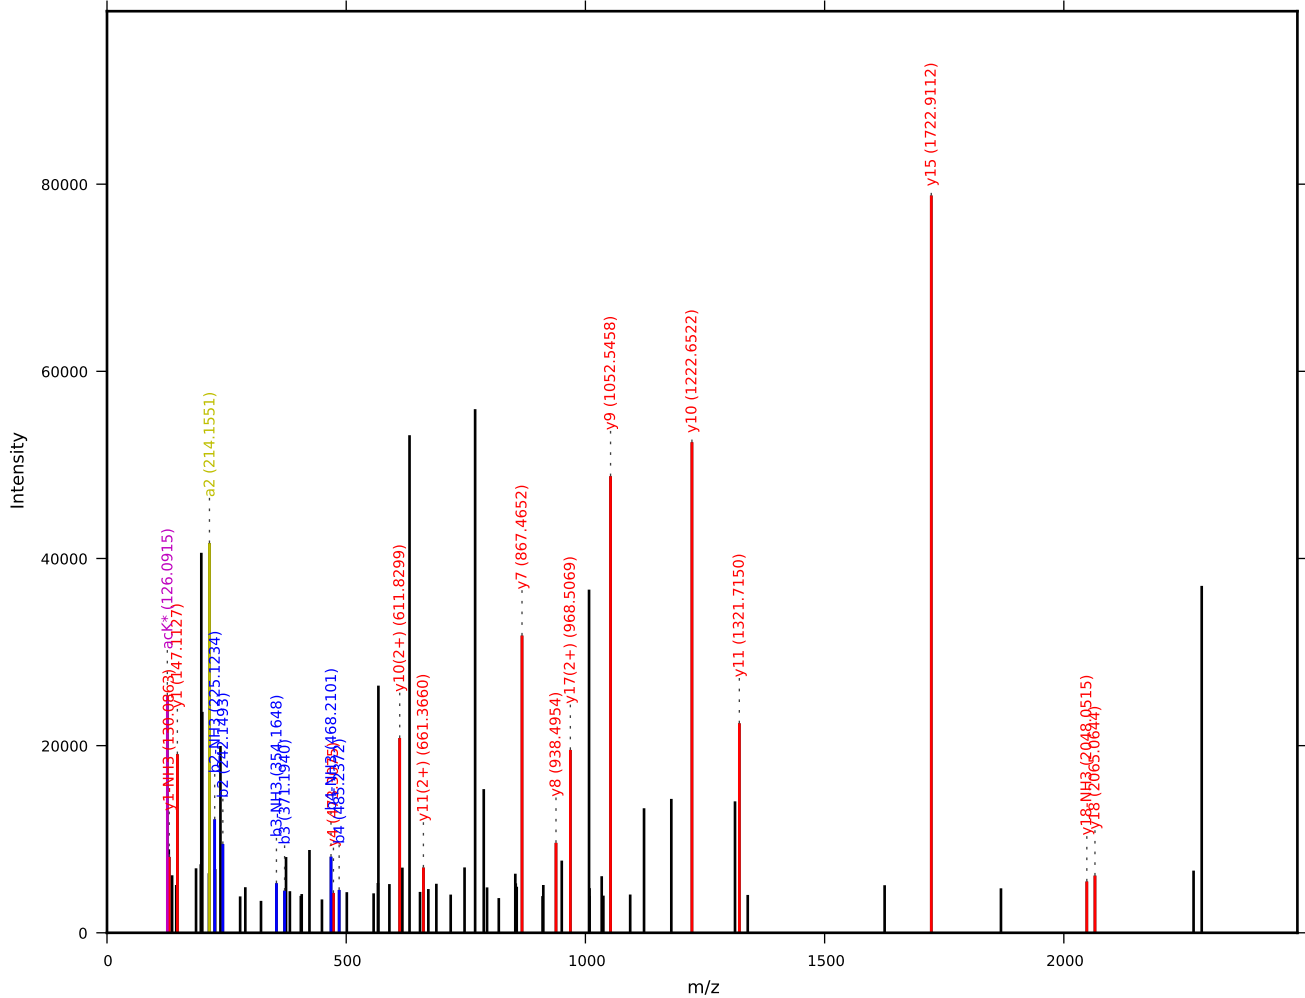

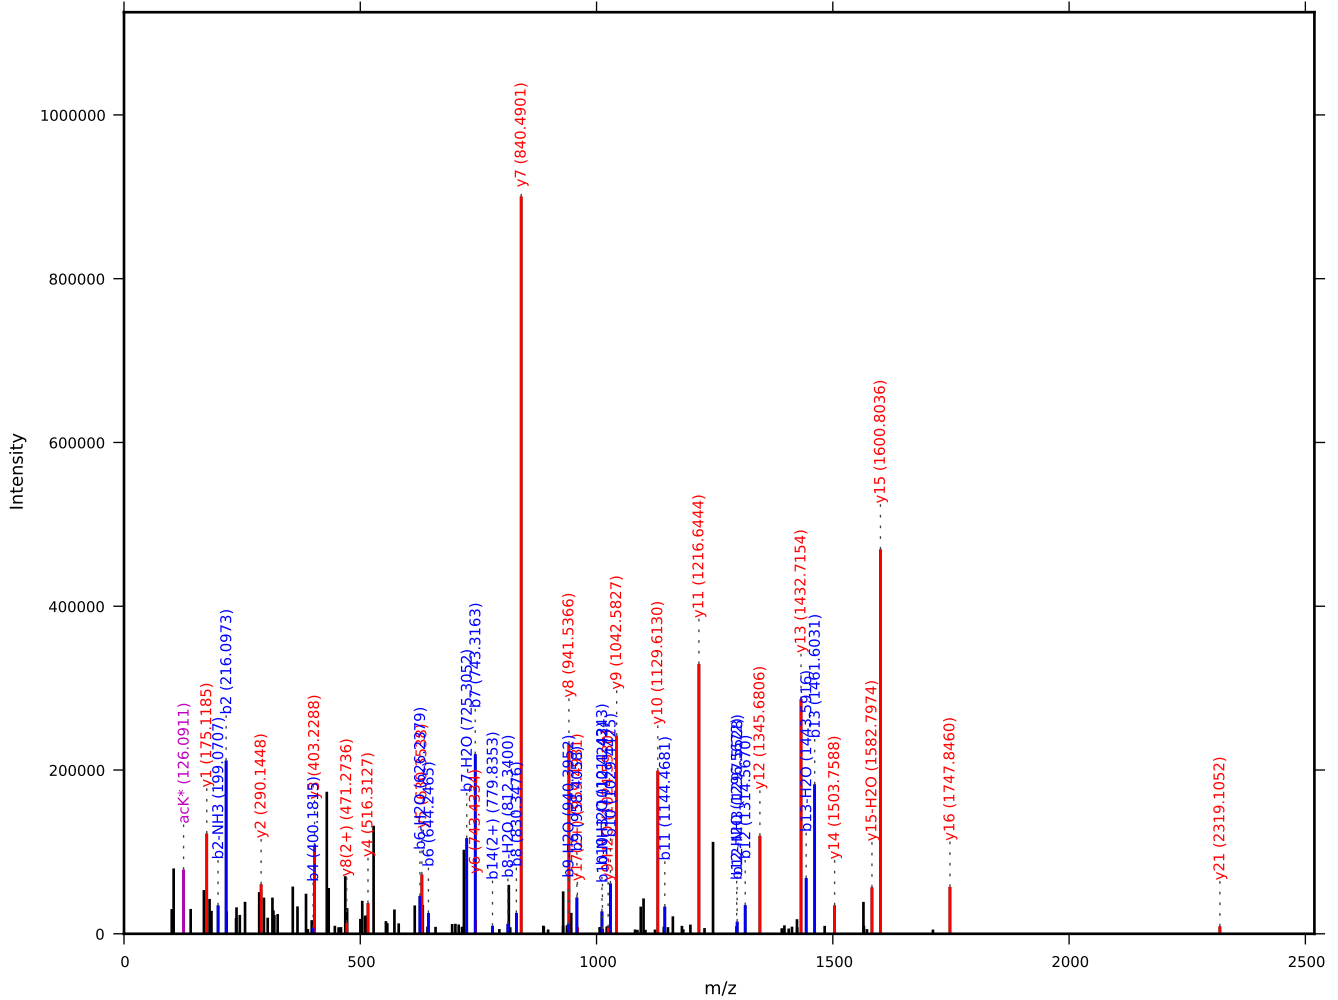

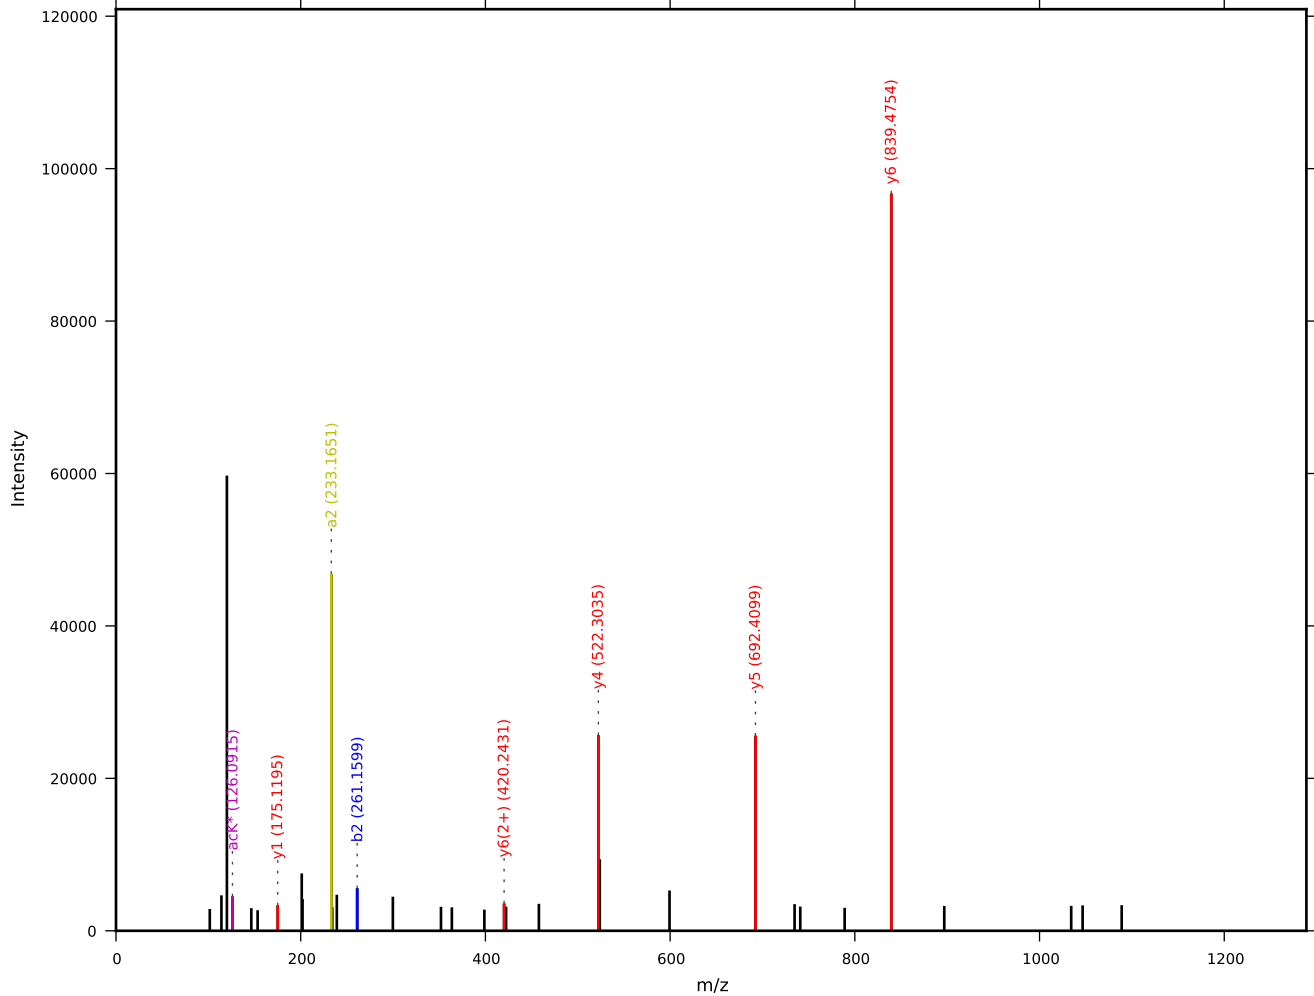

Mass: 1346.6841 Charge: 3 m/z: 449.90199  
Modified Peptide: \_FLEEK(ac)FPHDK\_ Score: 46.352 PEP: 0.0012264

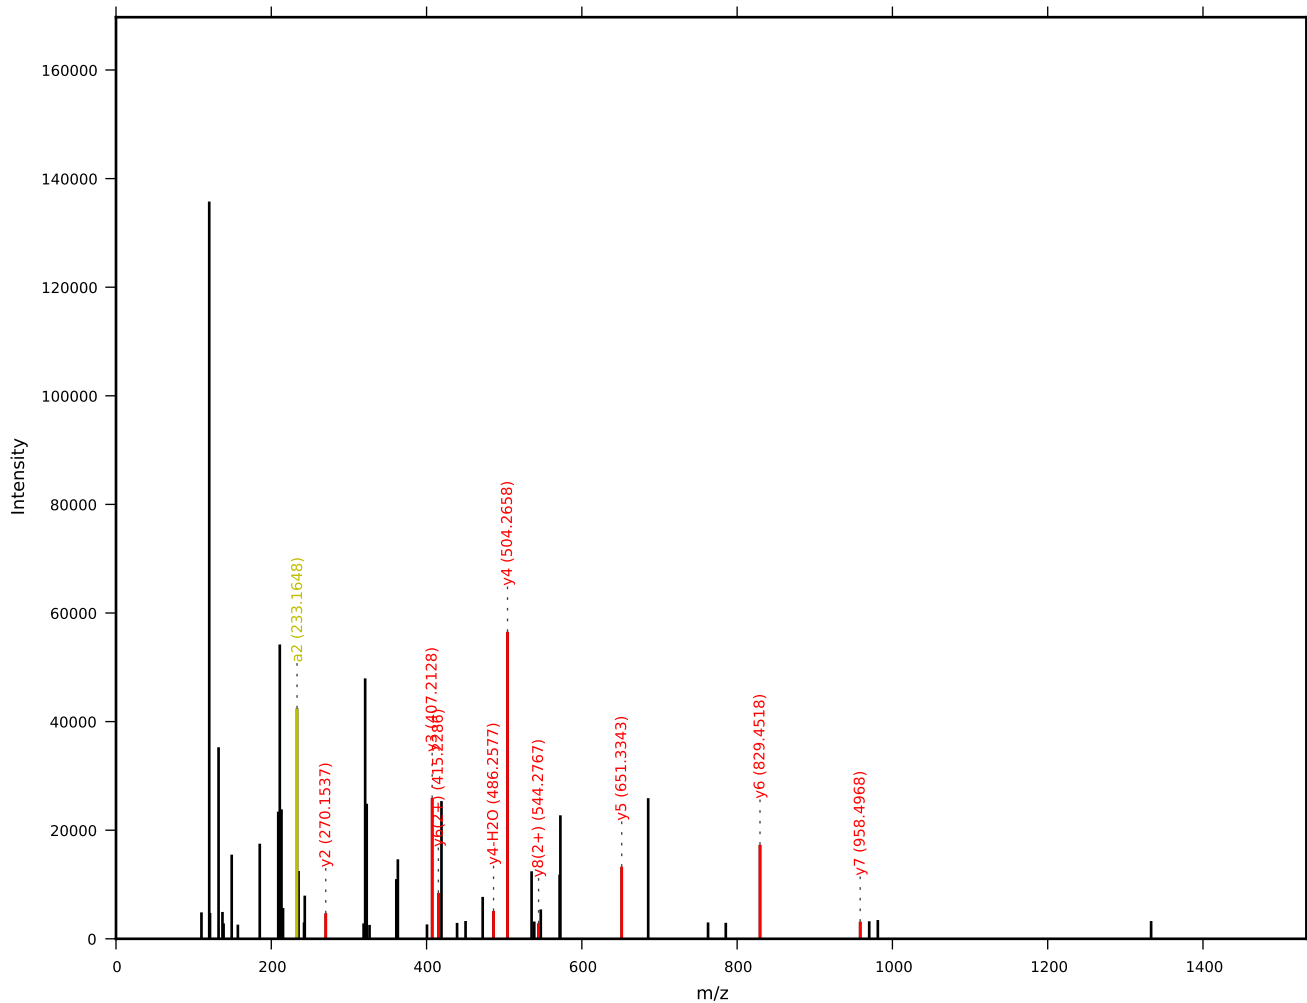

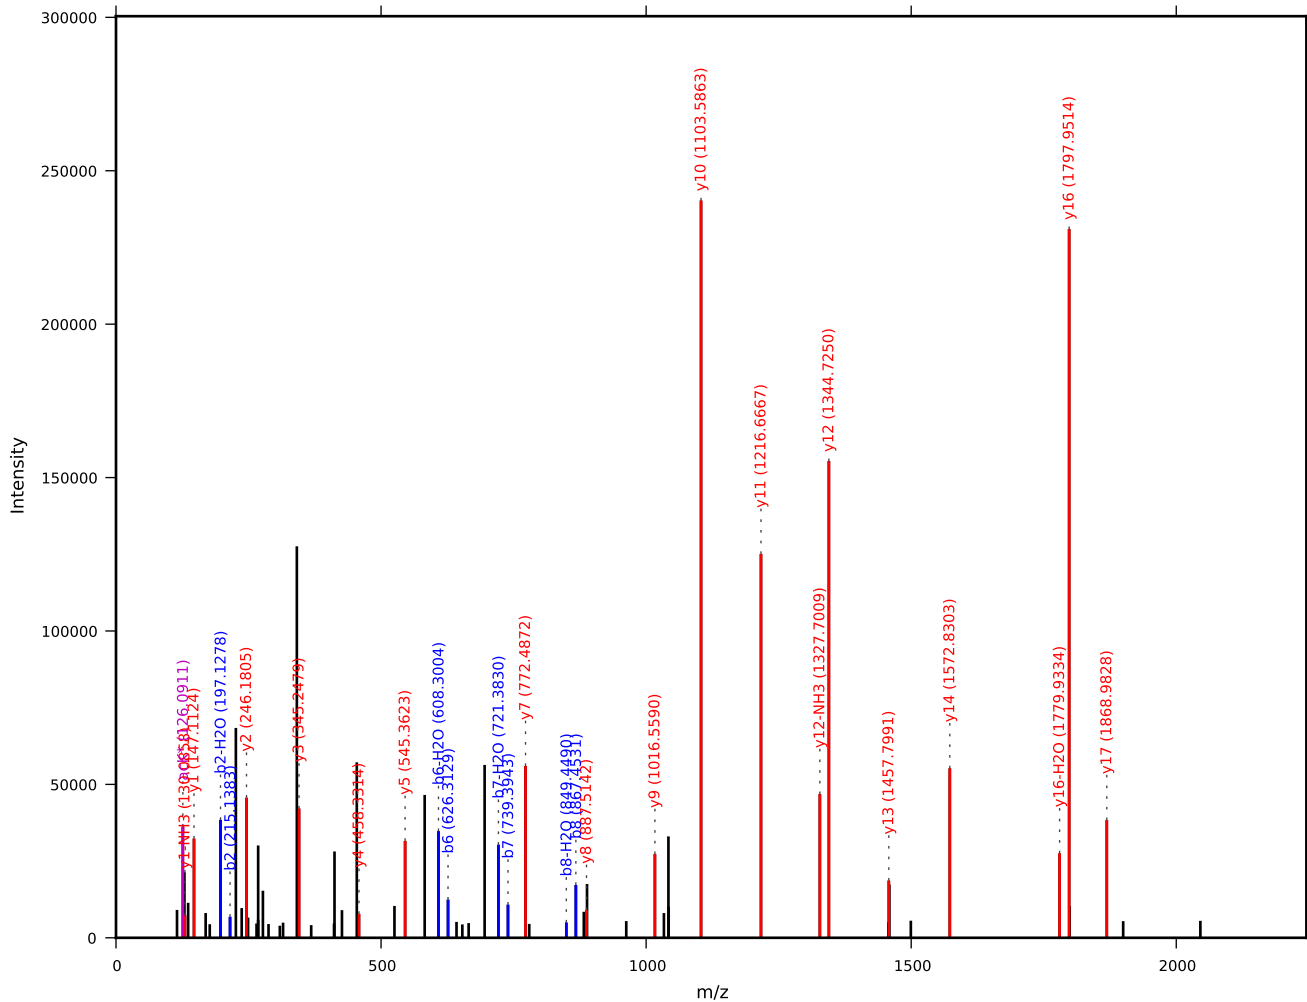

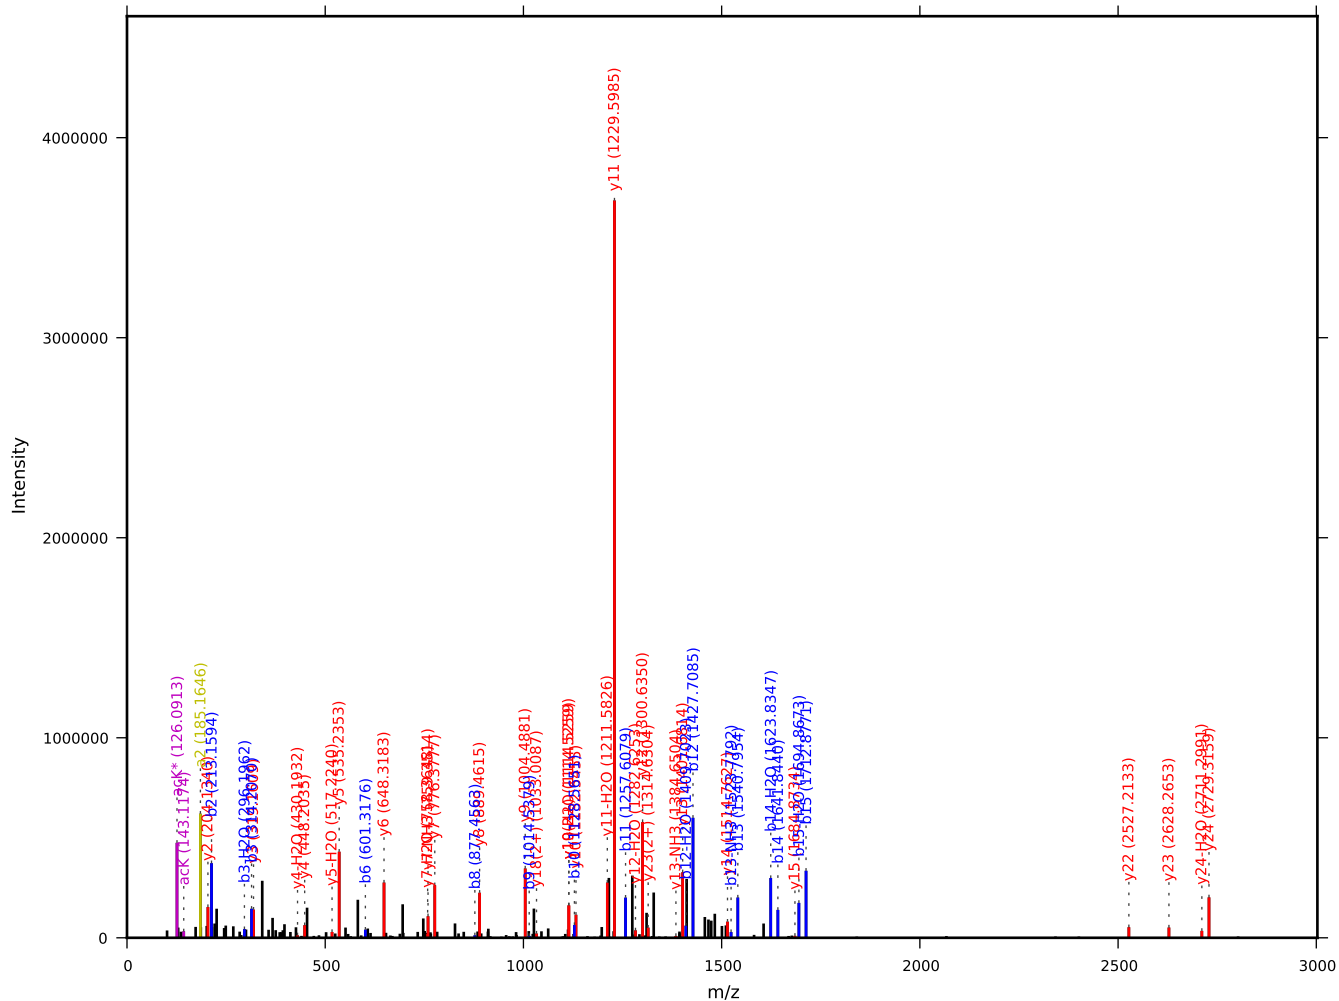

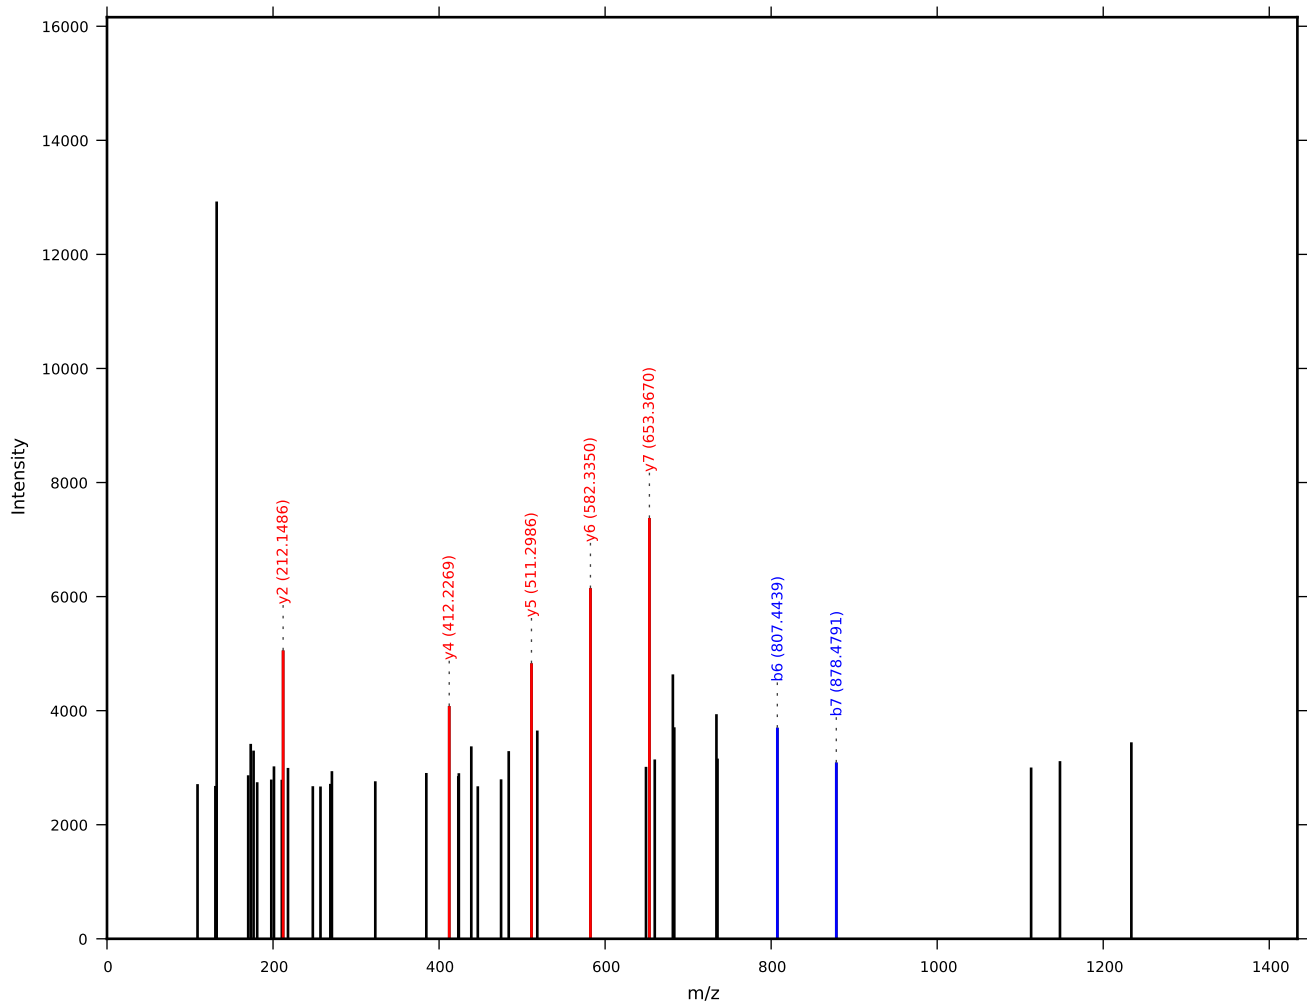



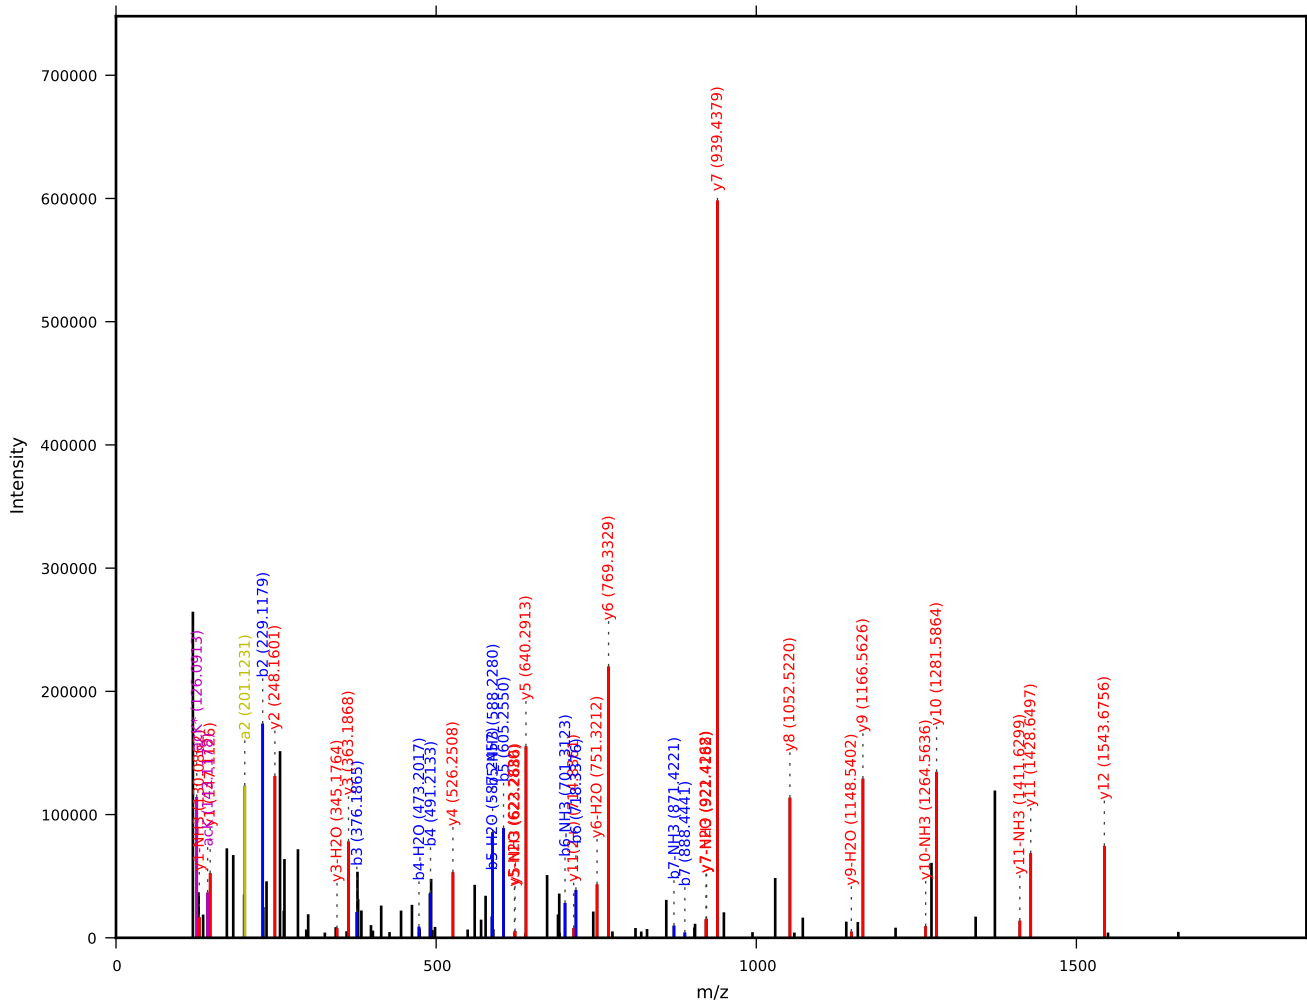

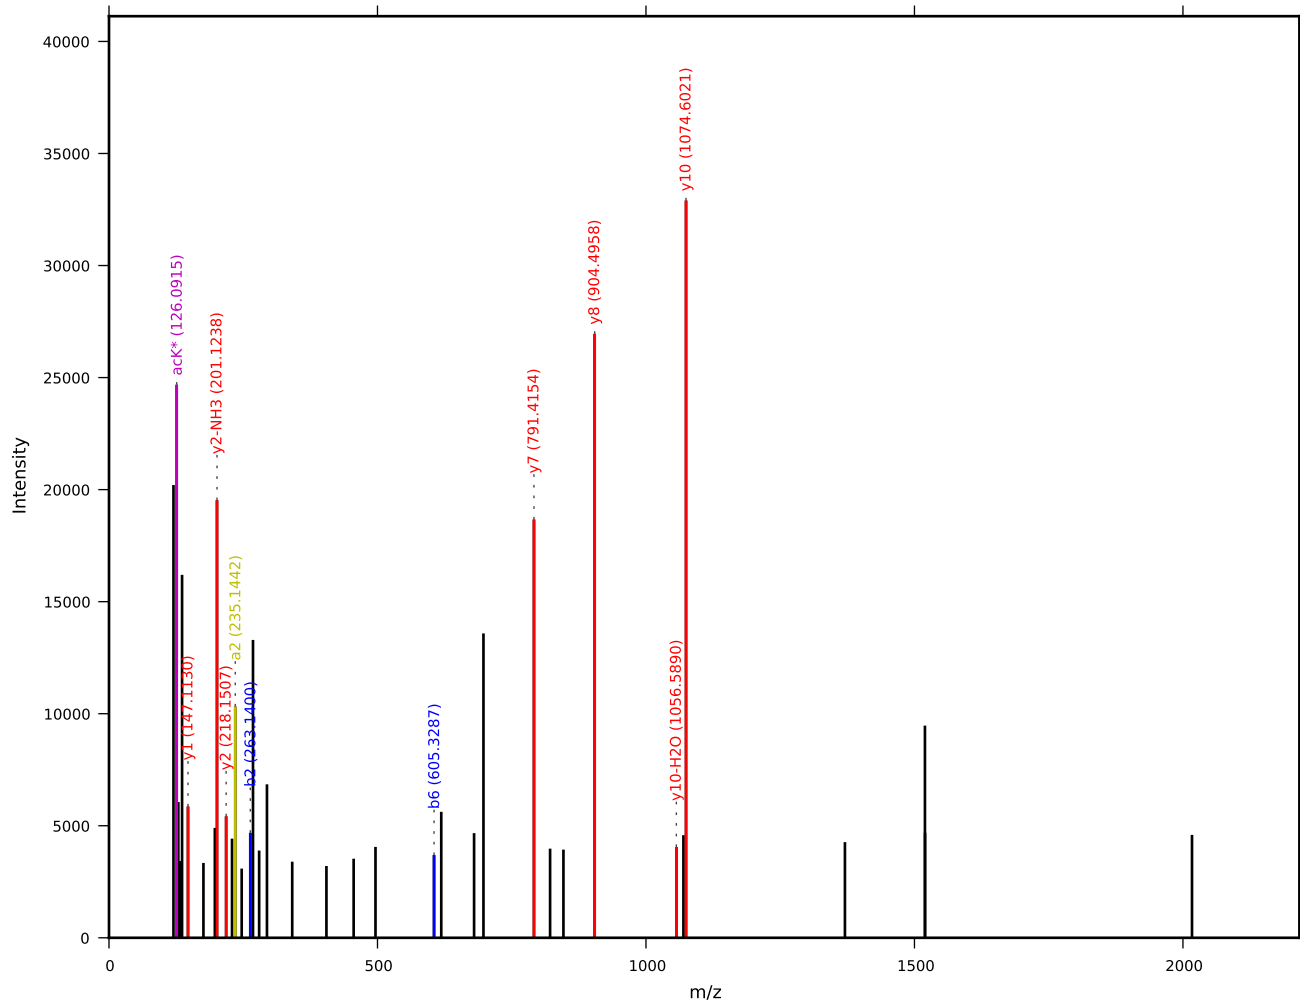

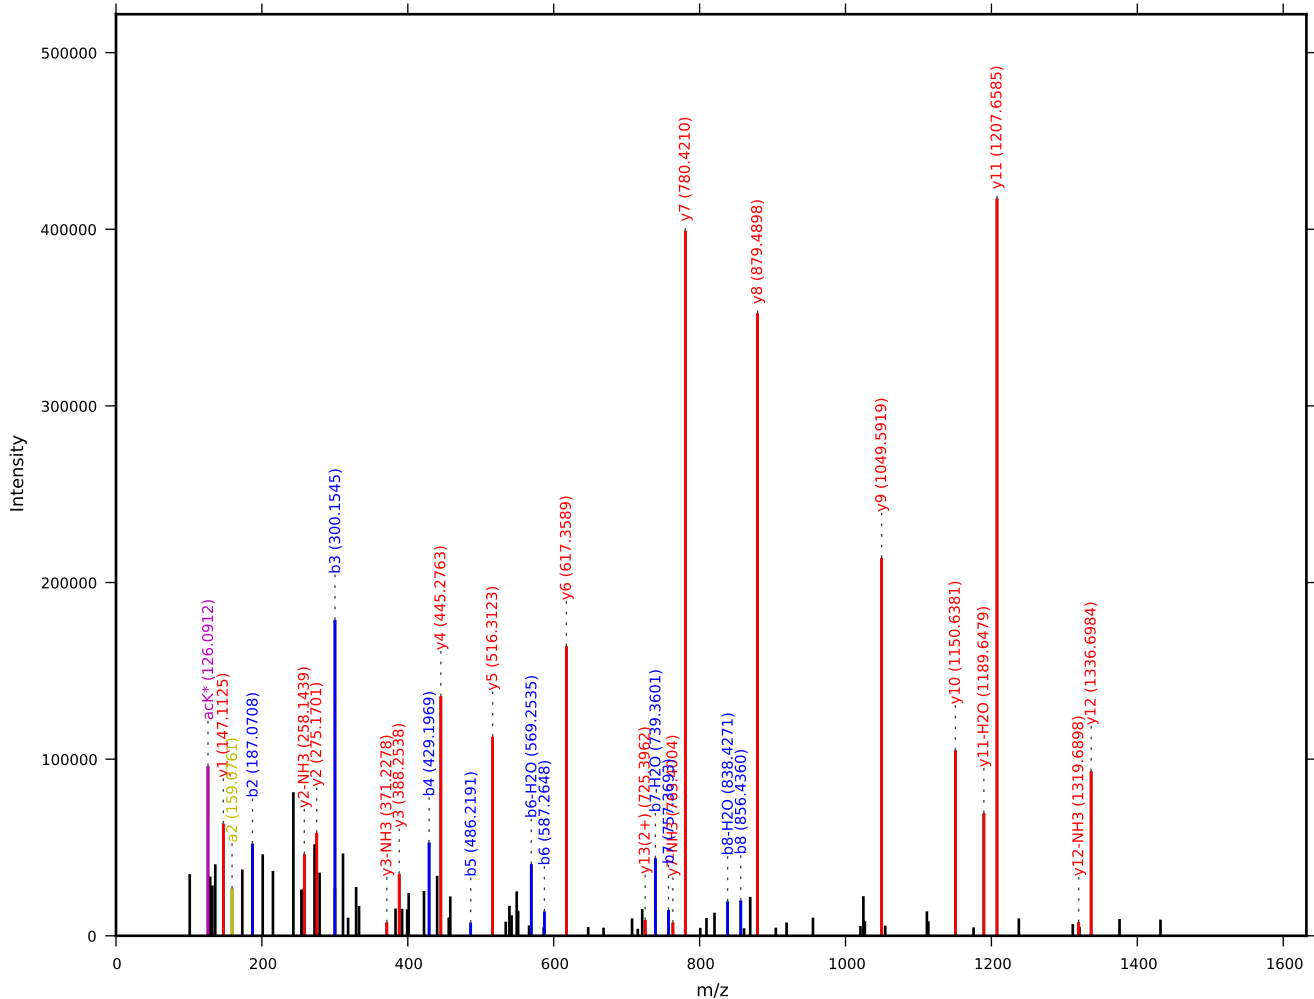

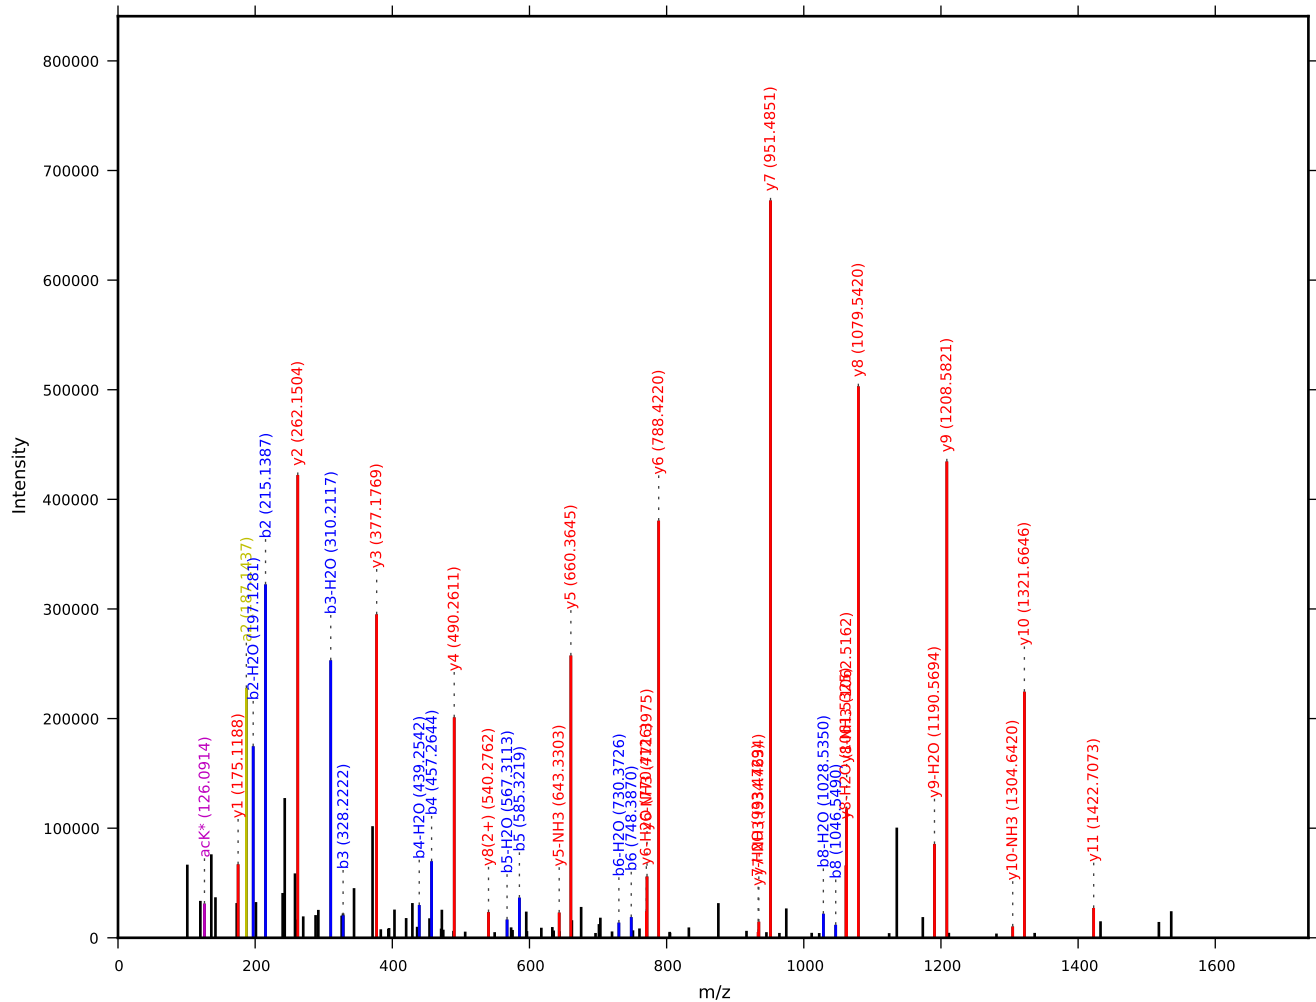

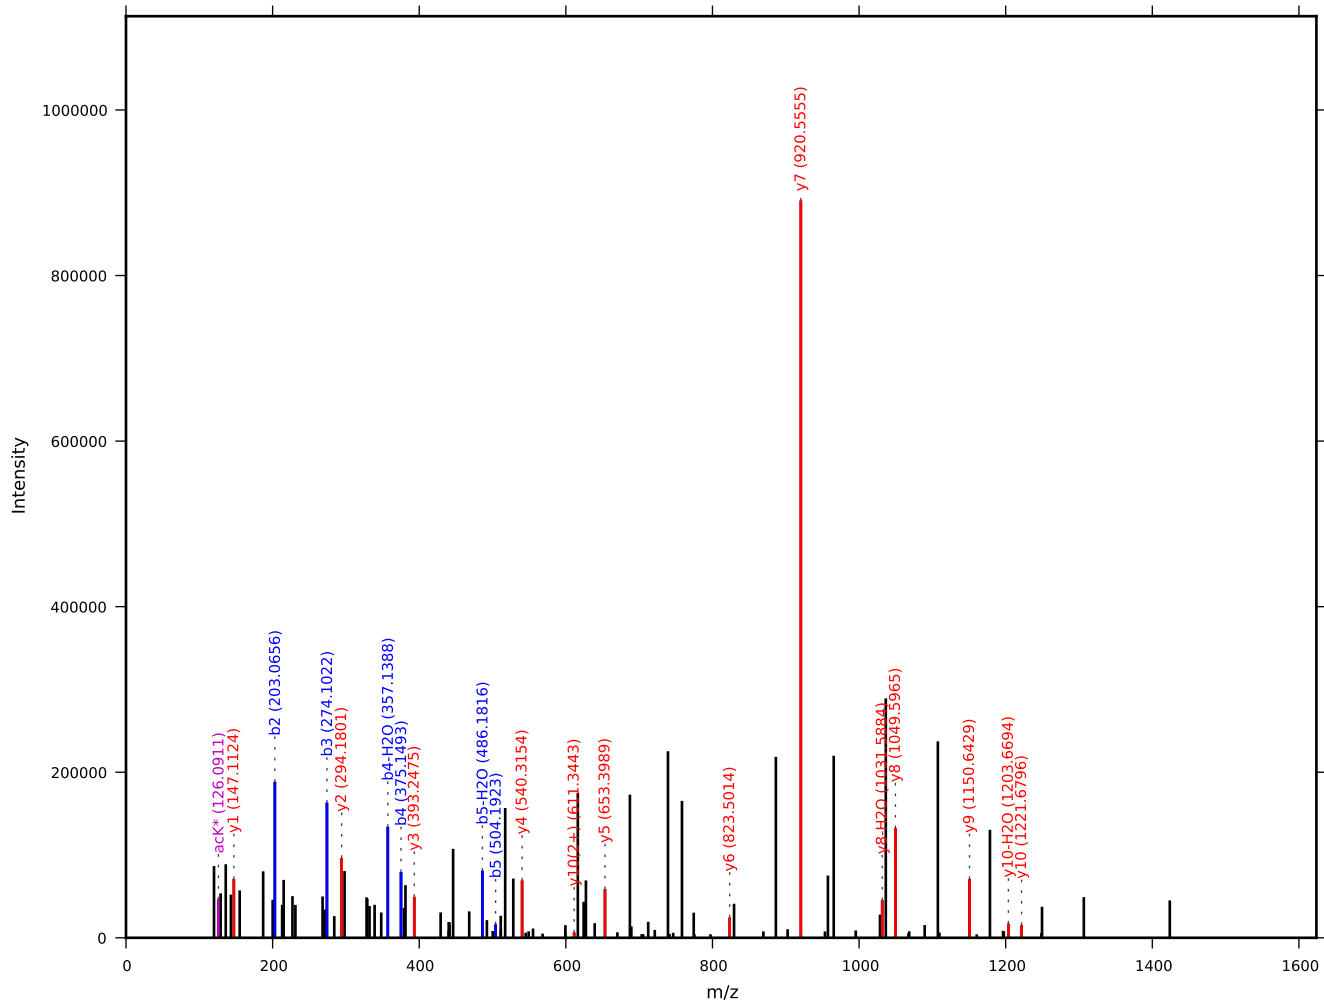

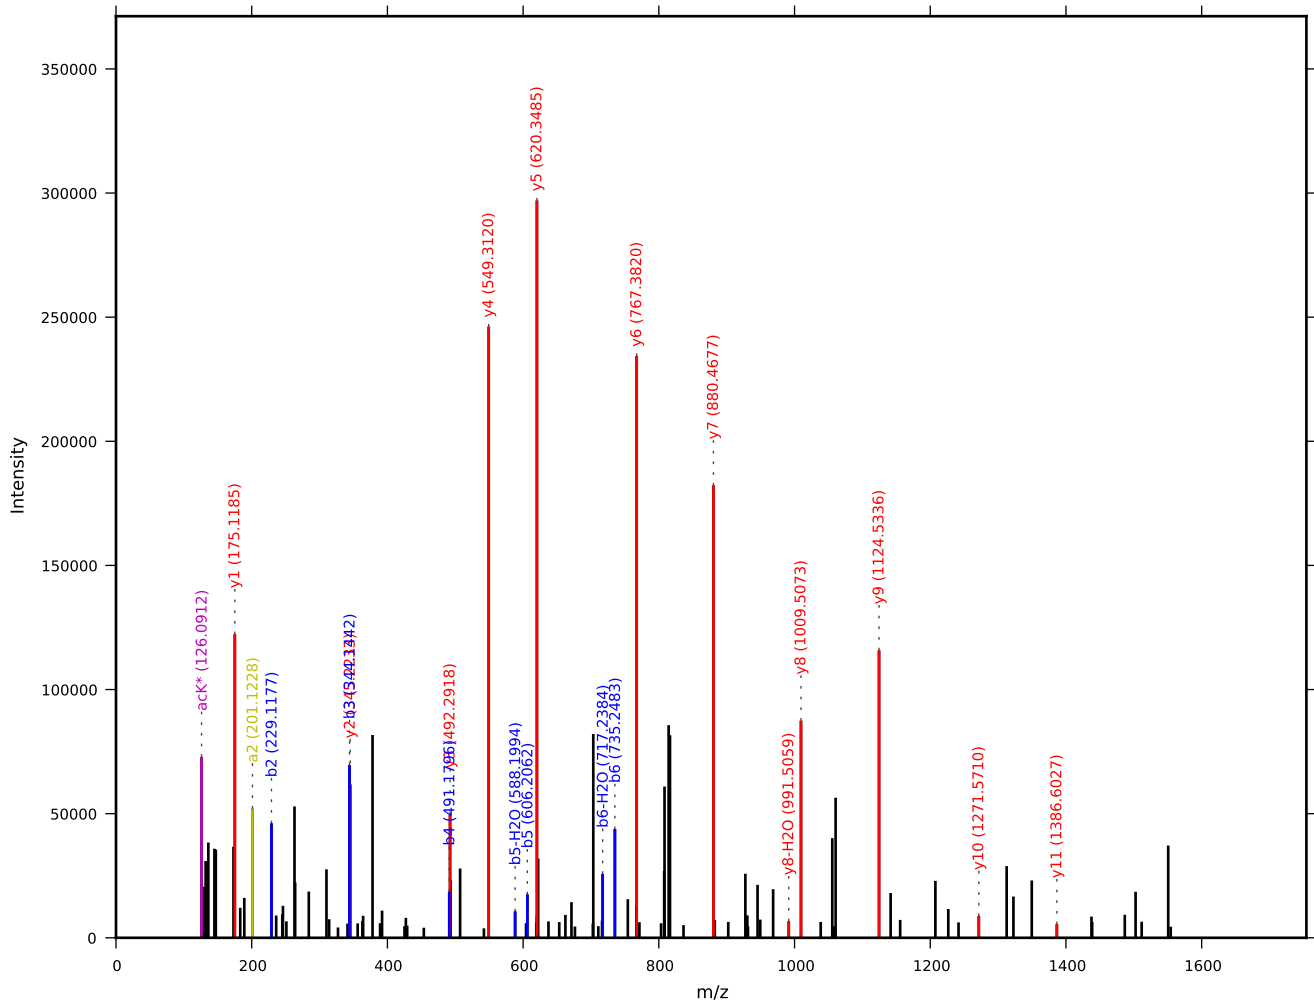

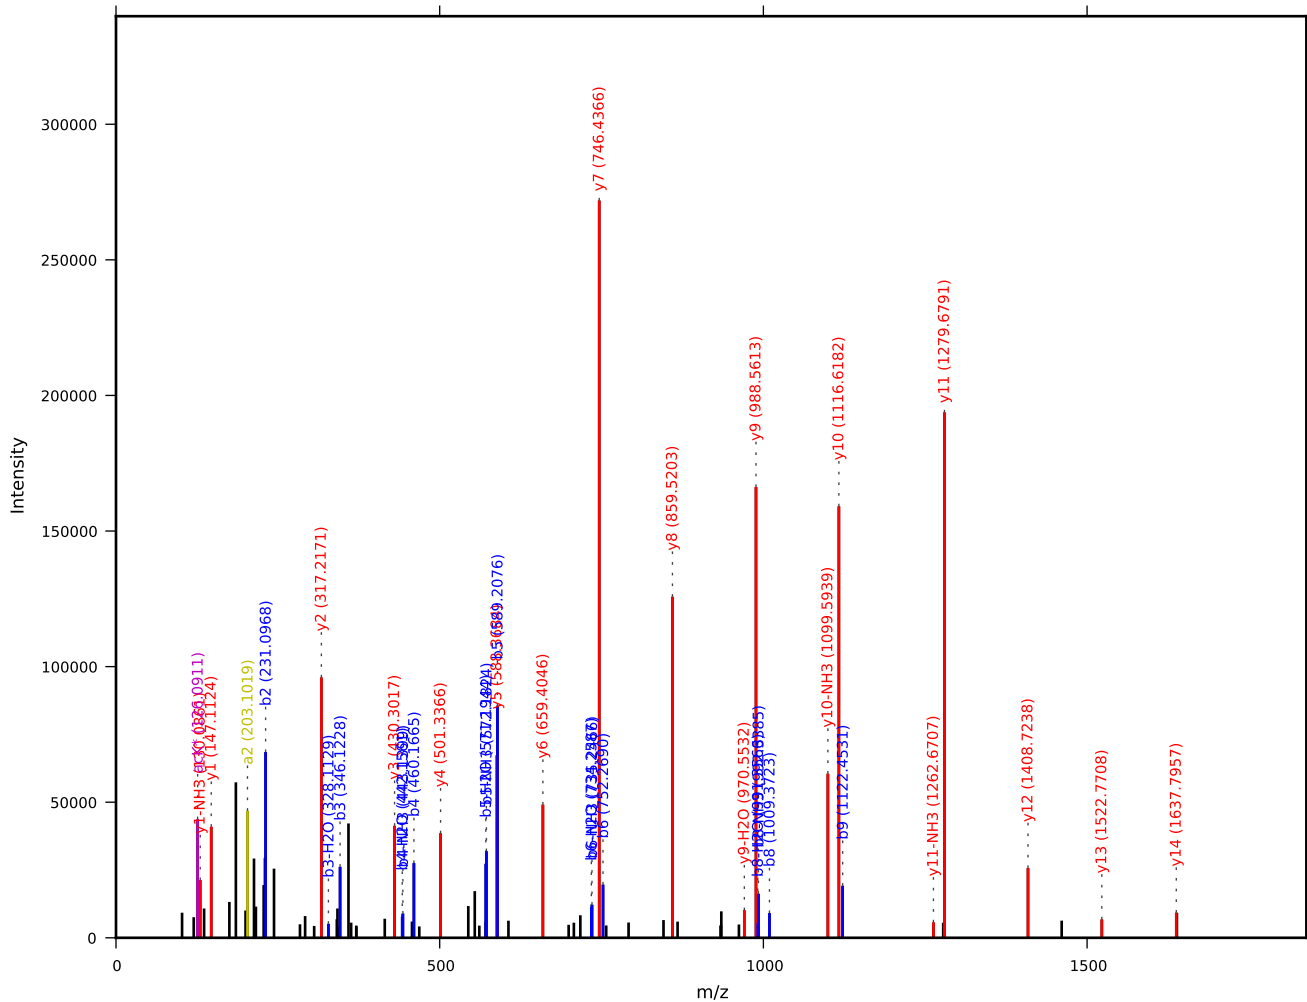

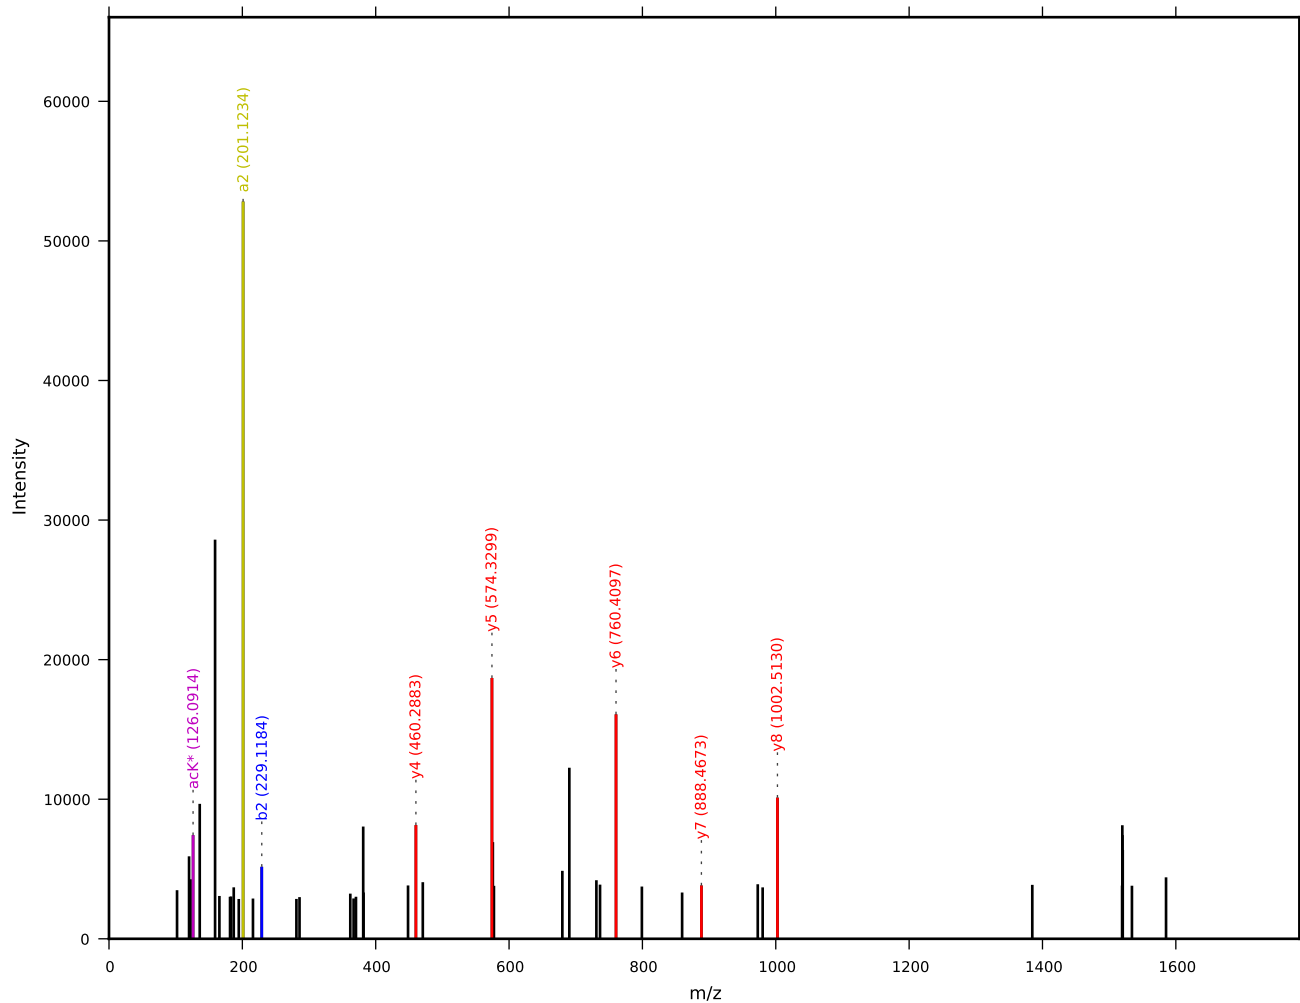



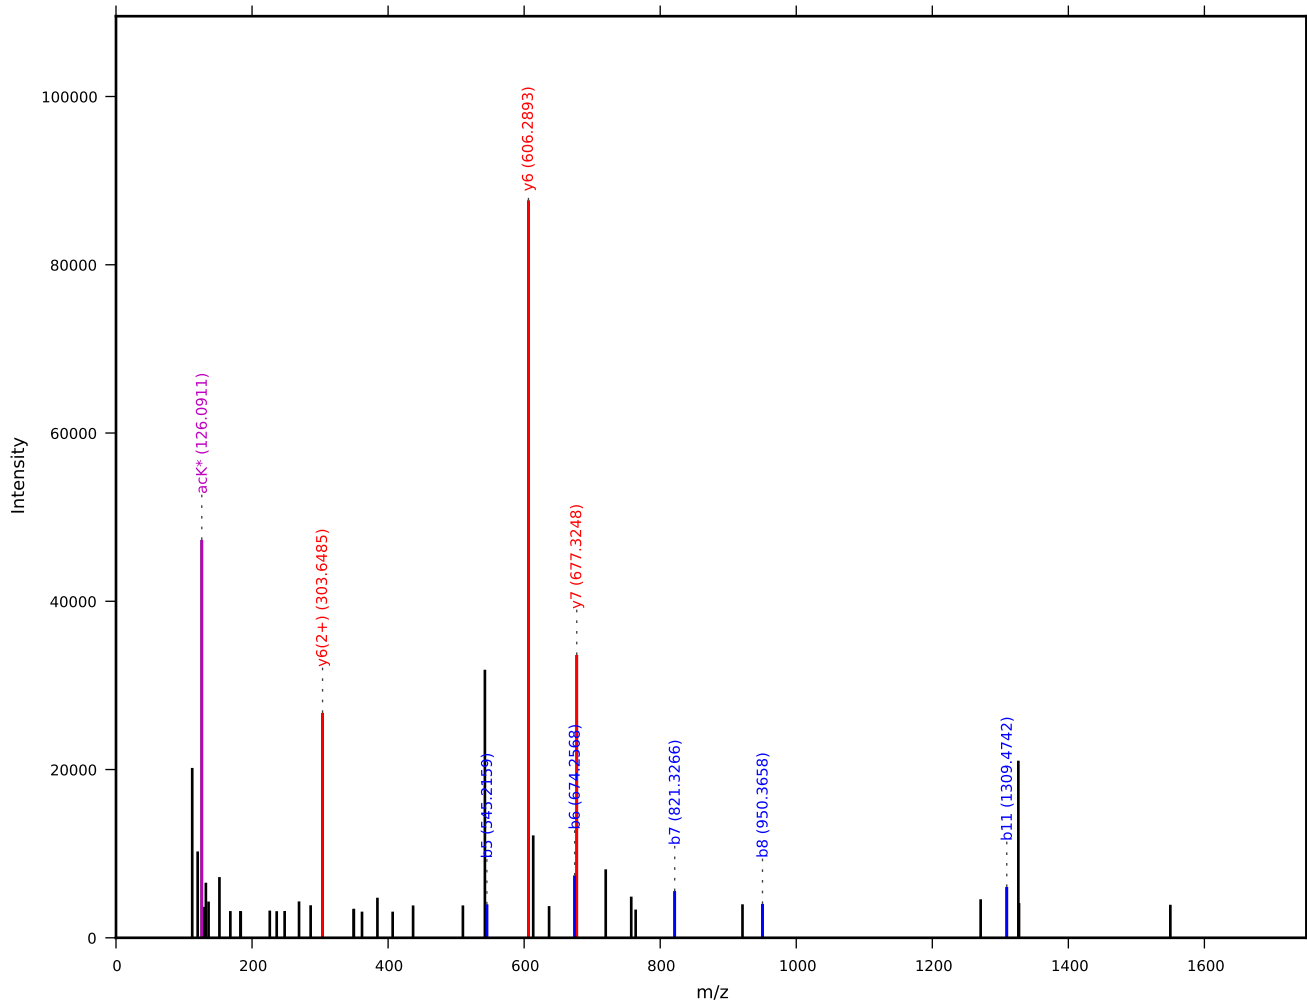

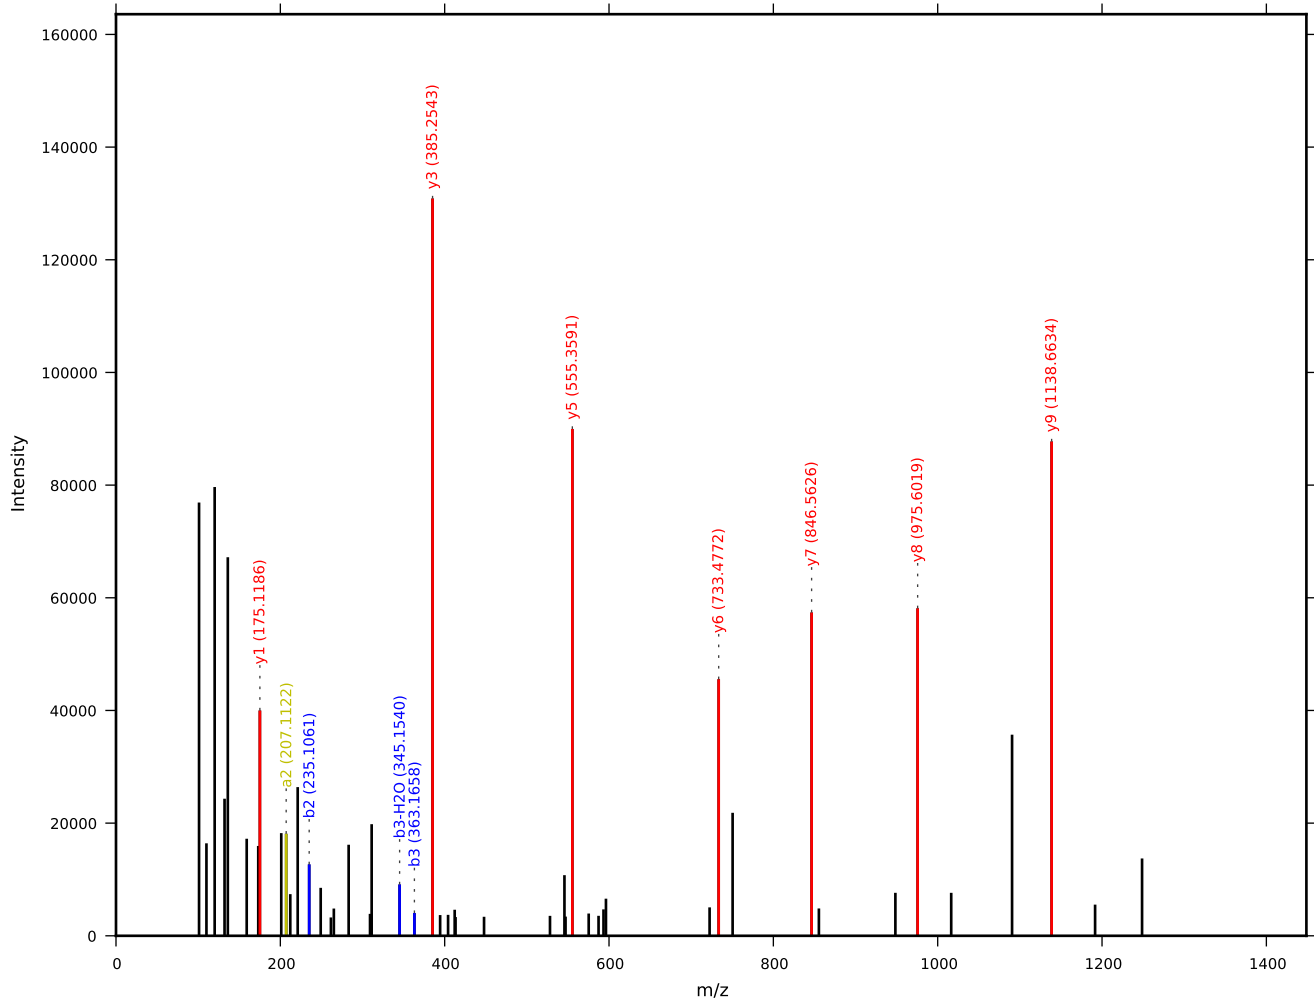

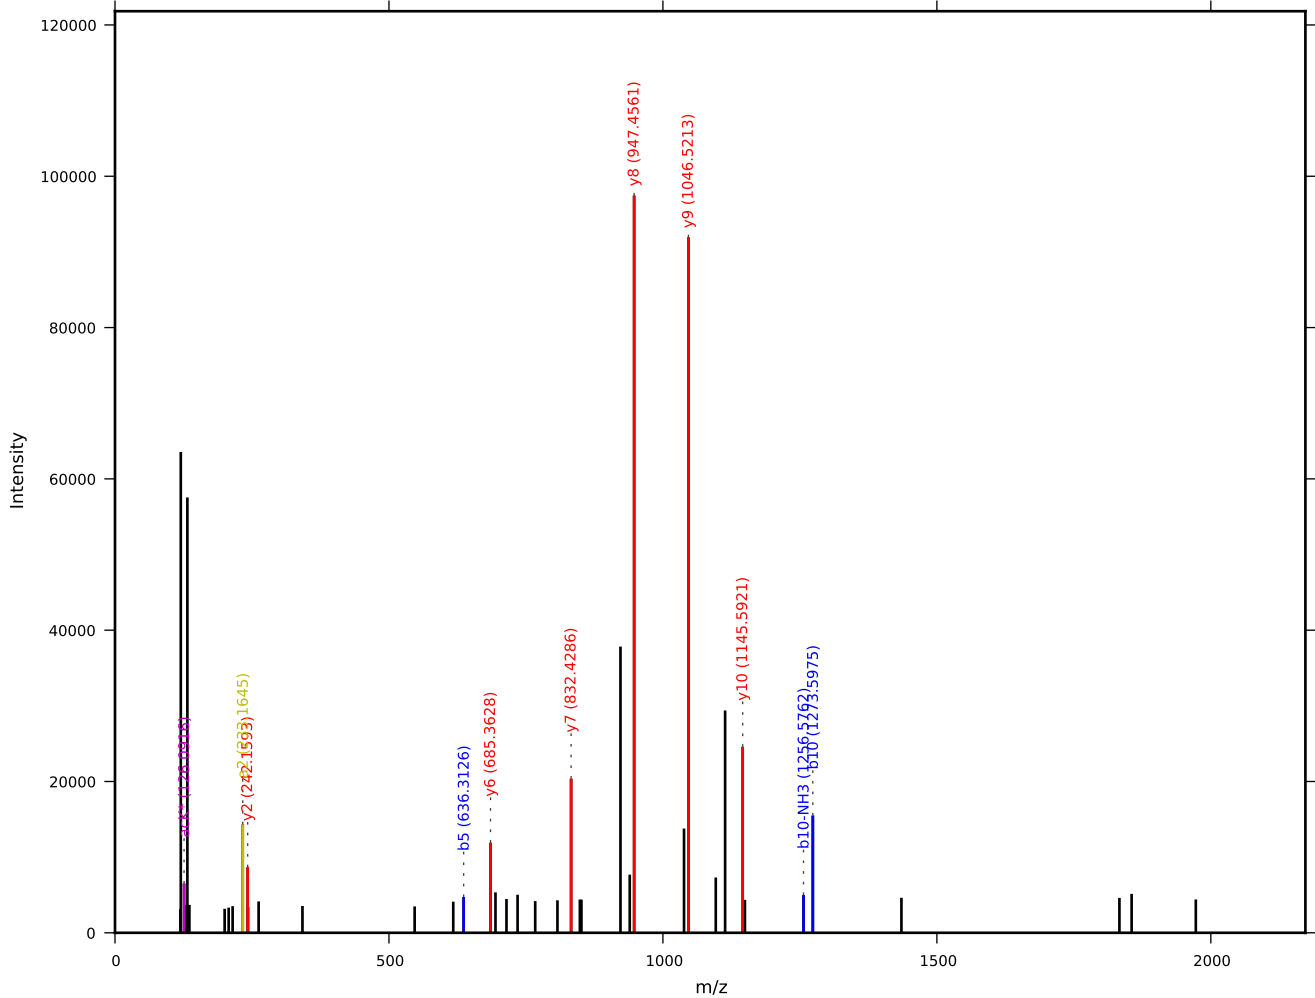

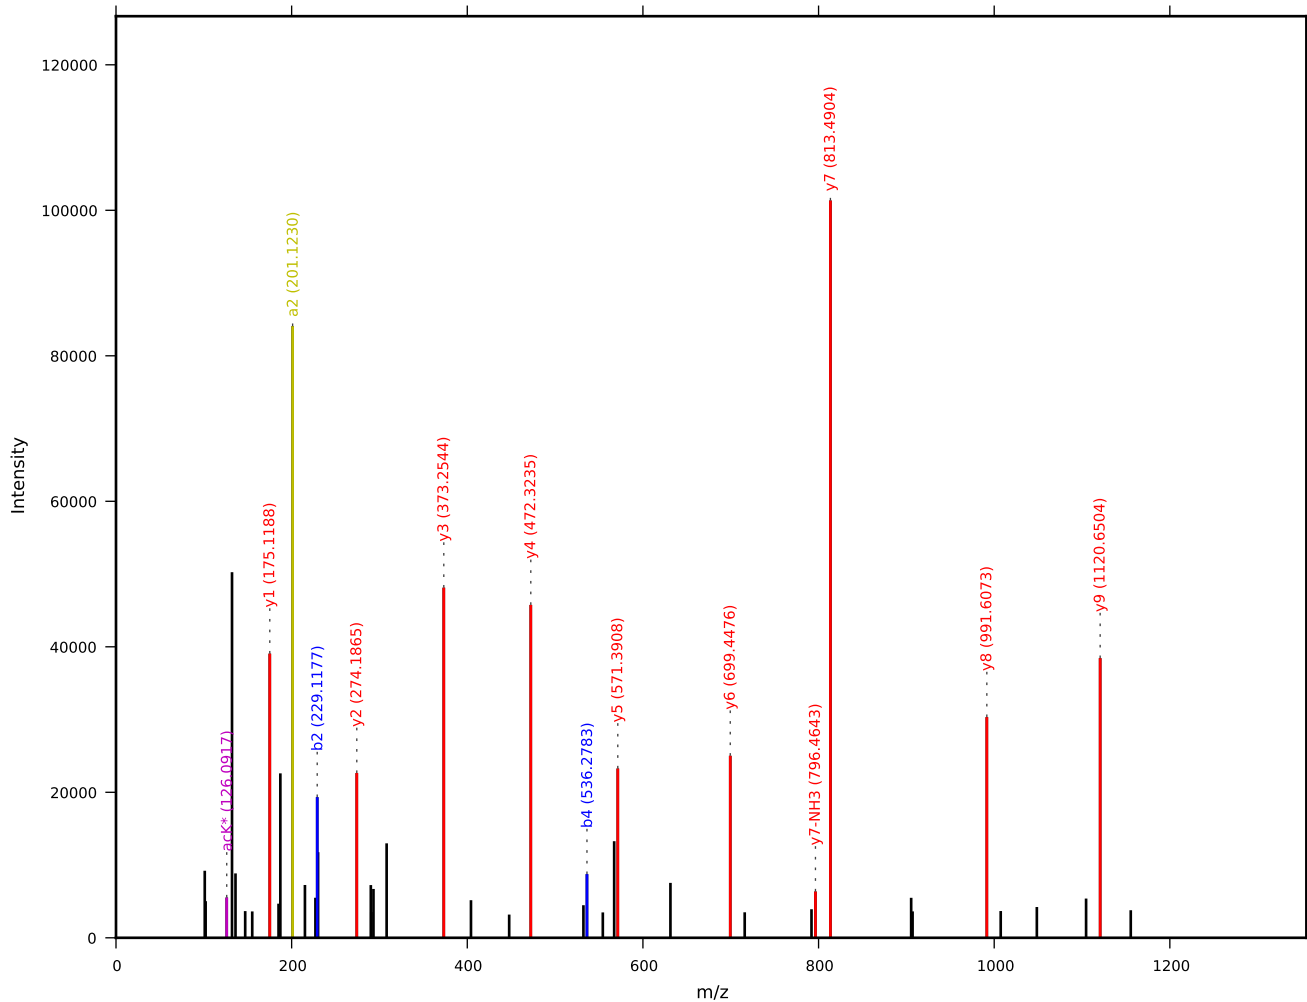

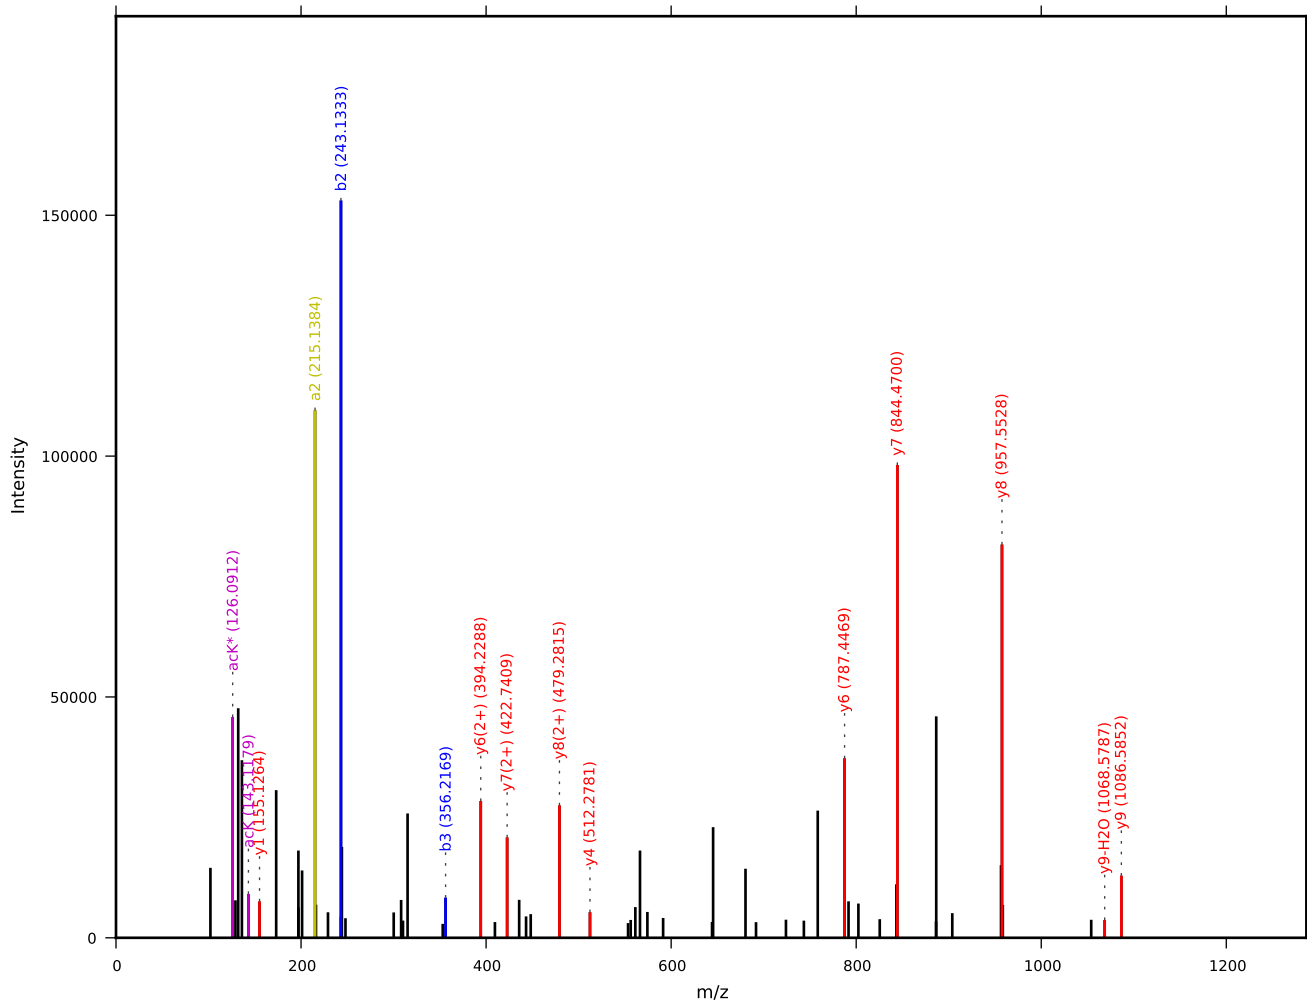

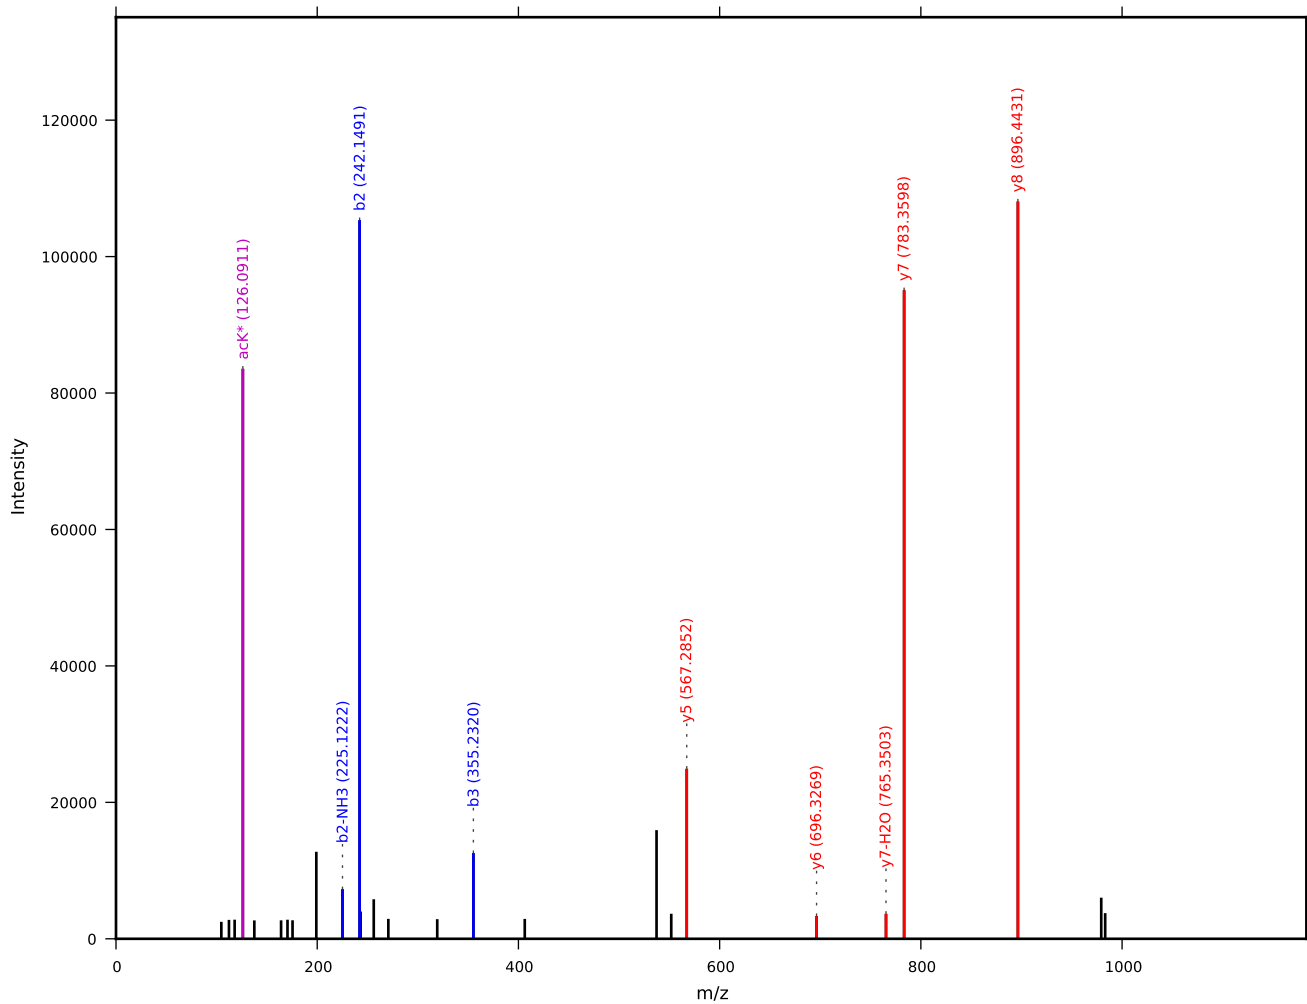

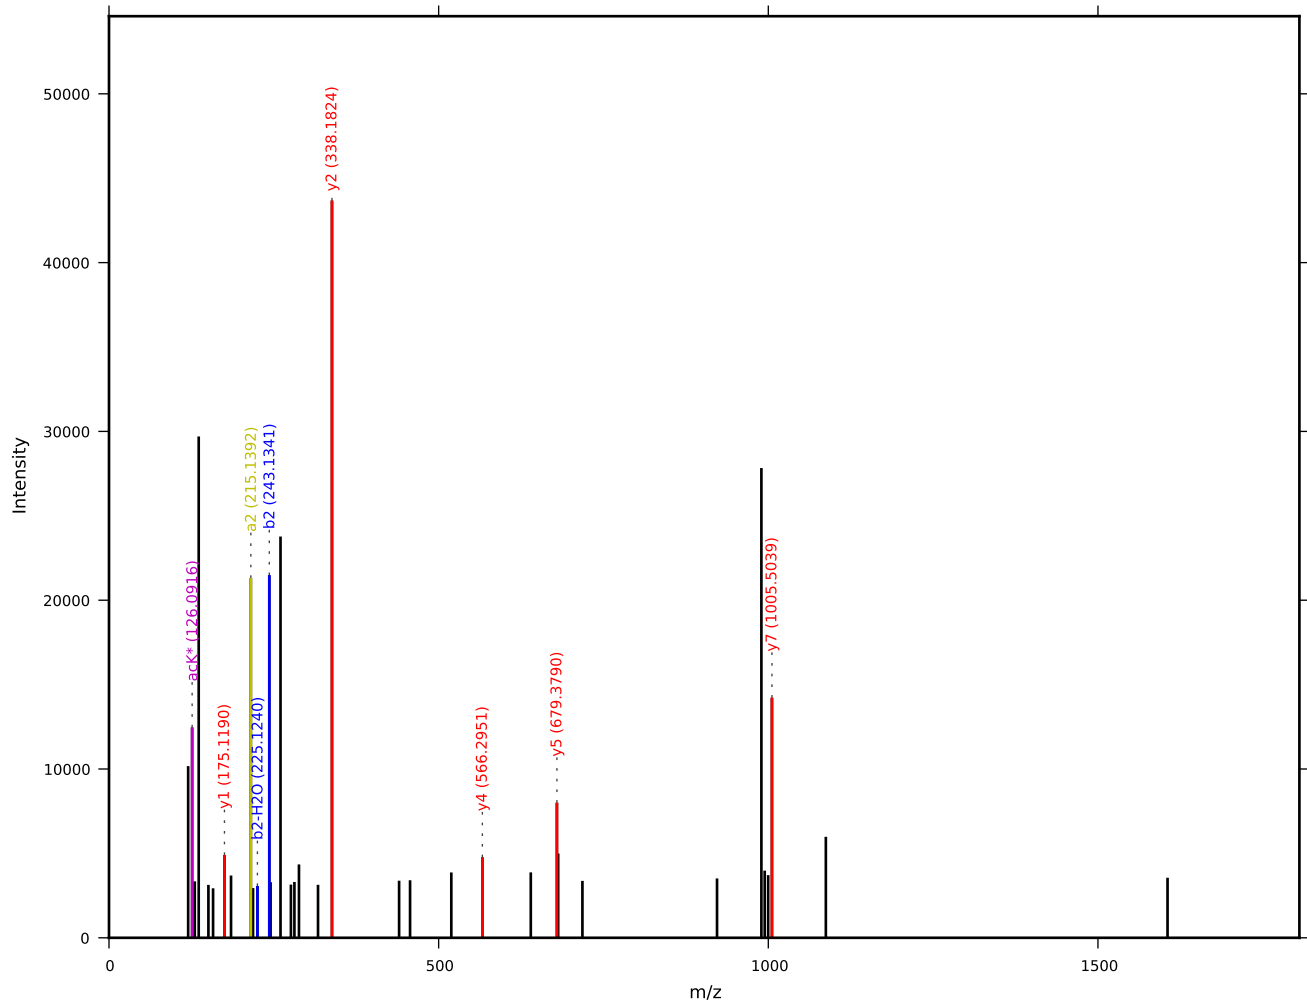

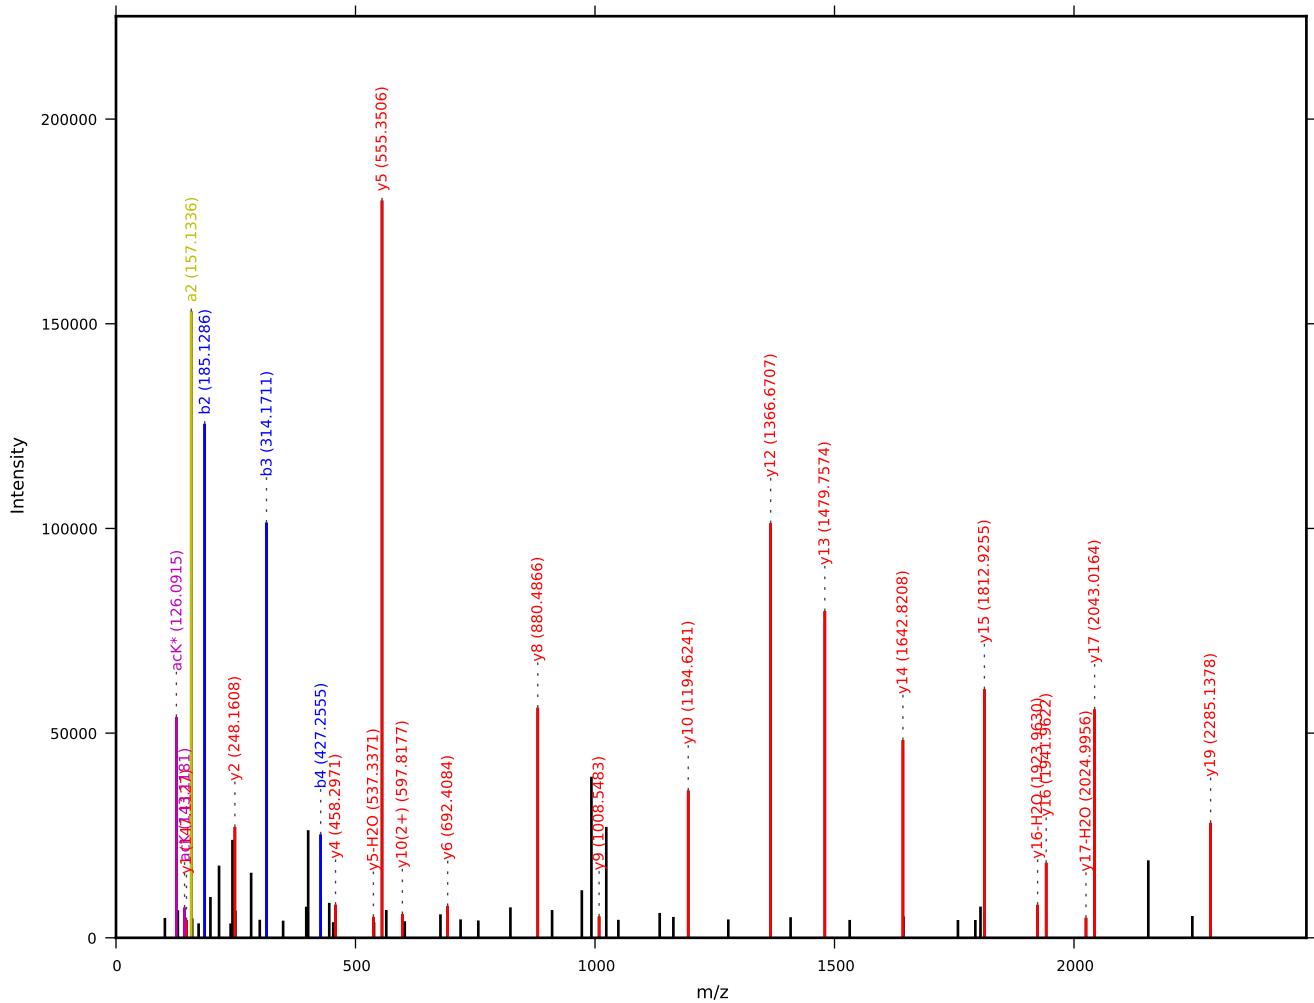



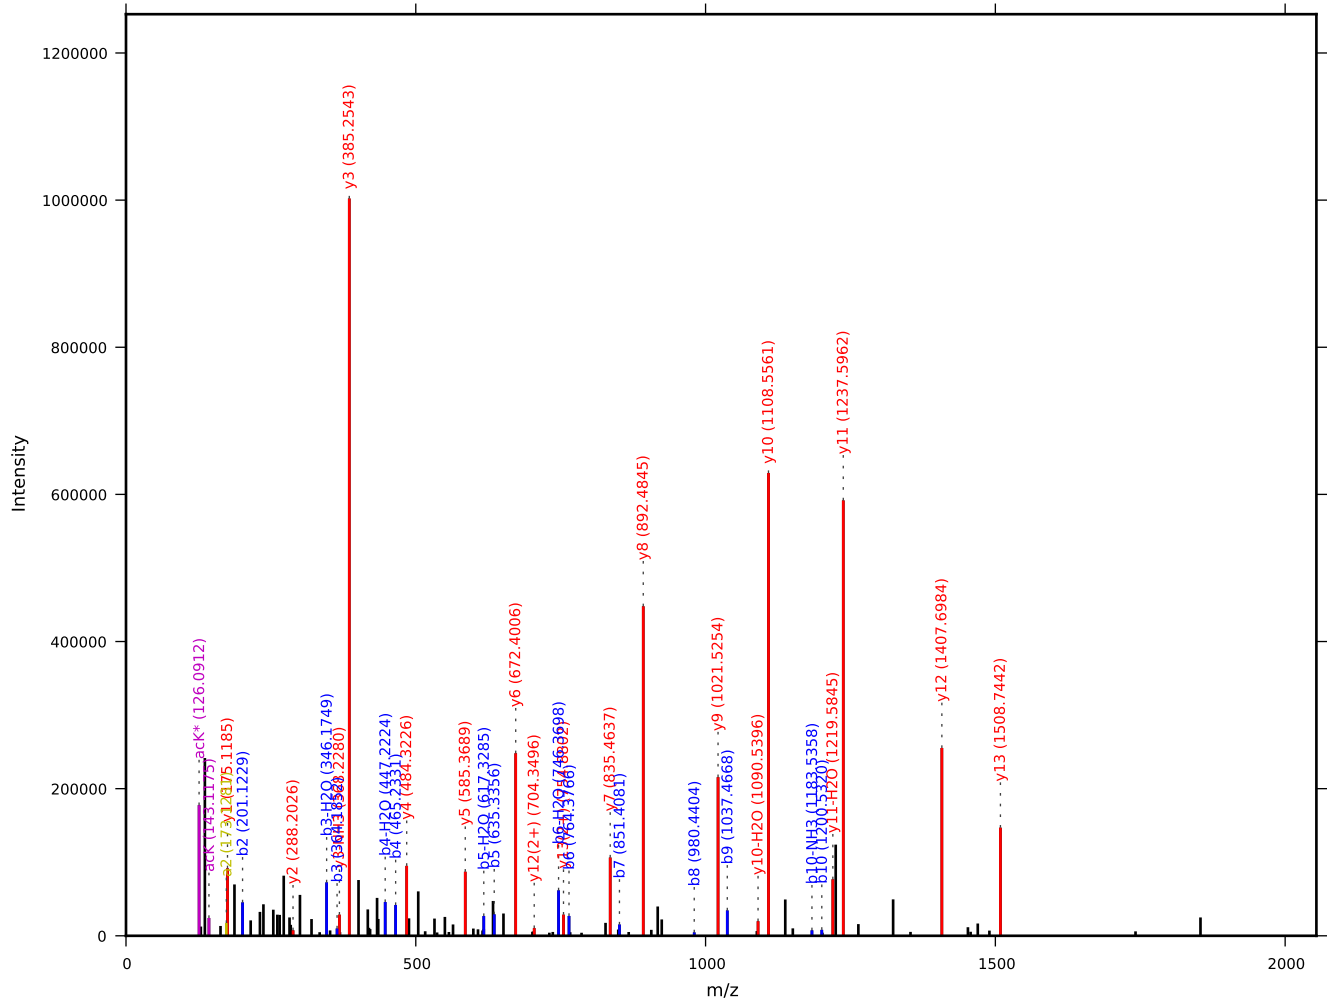

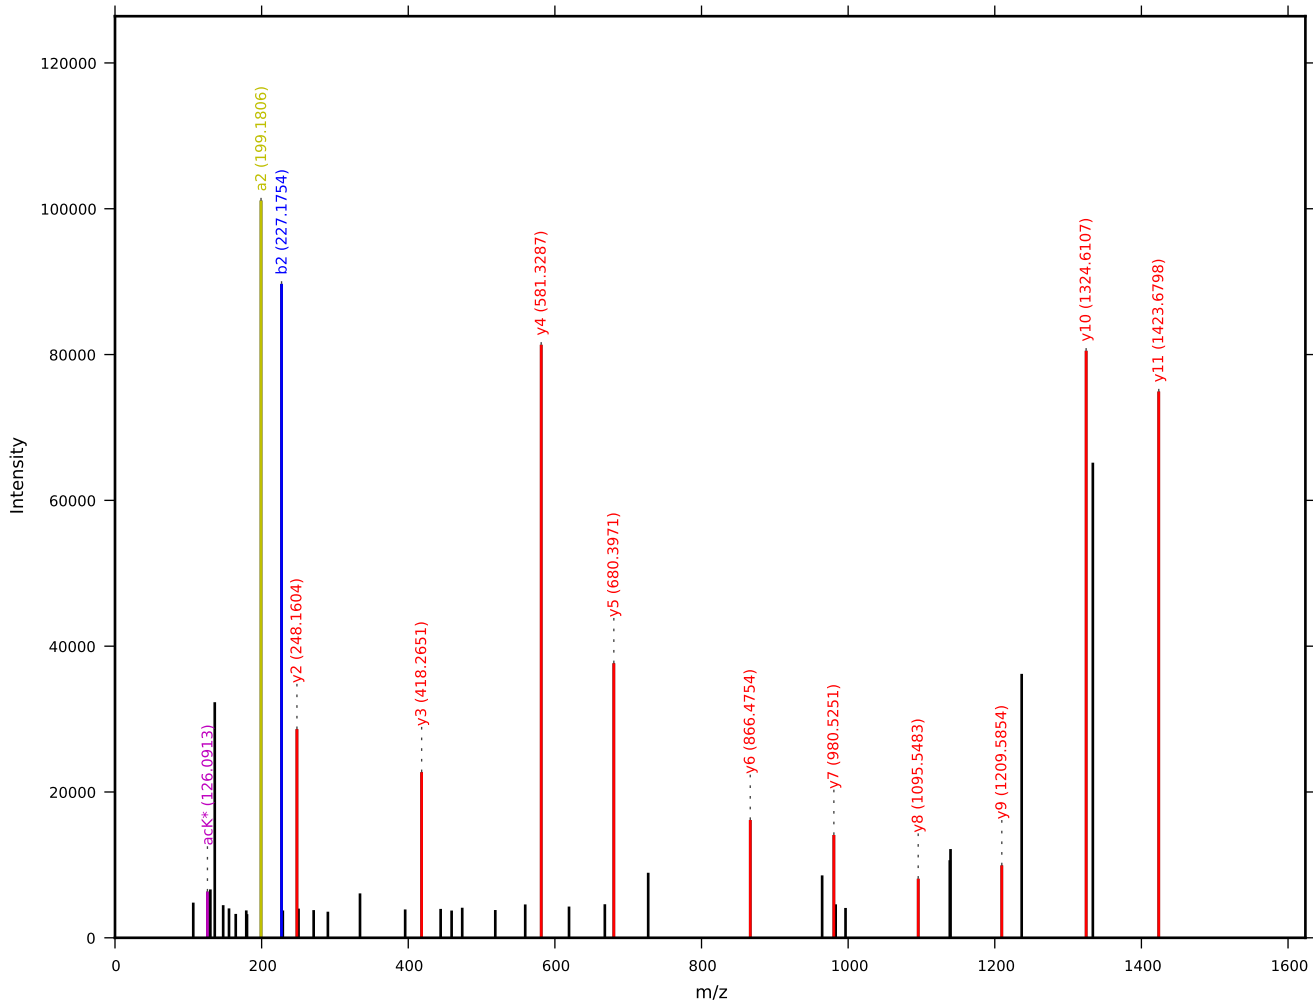

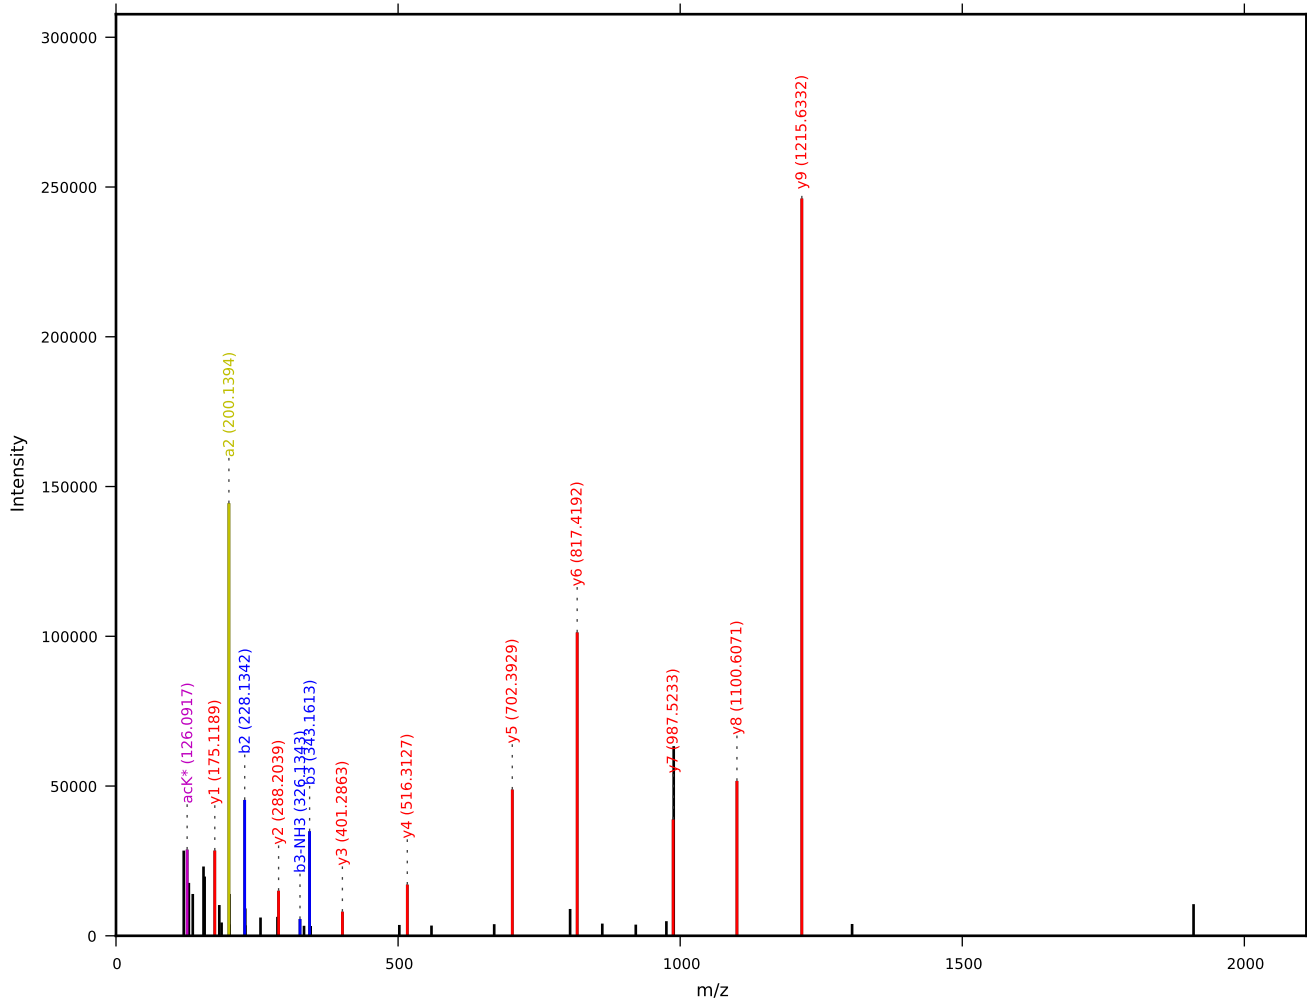

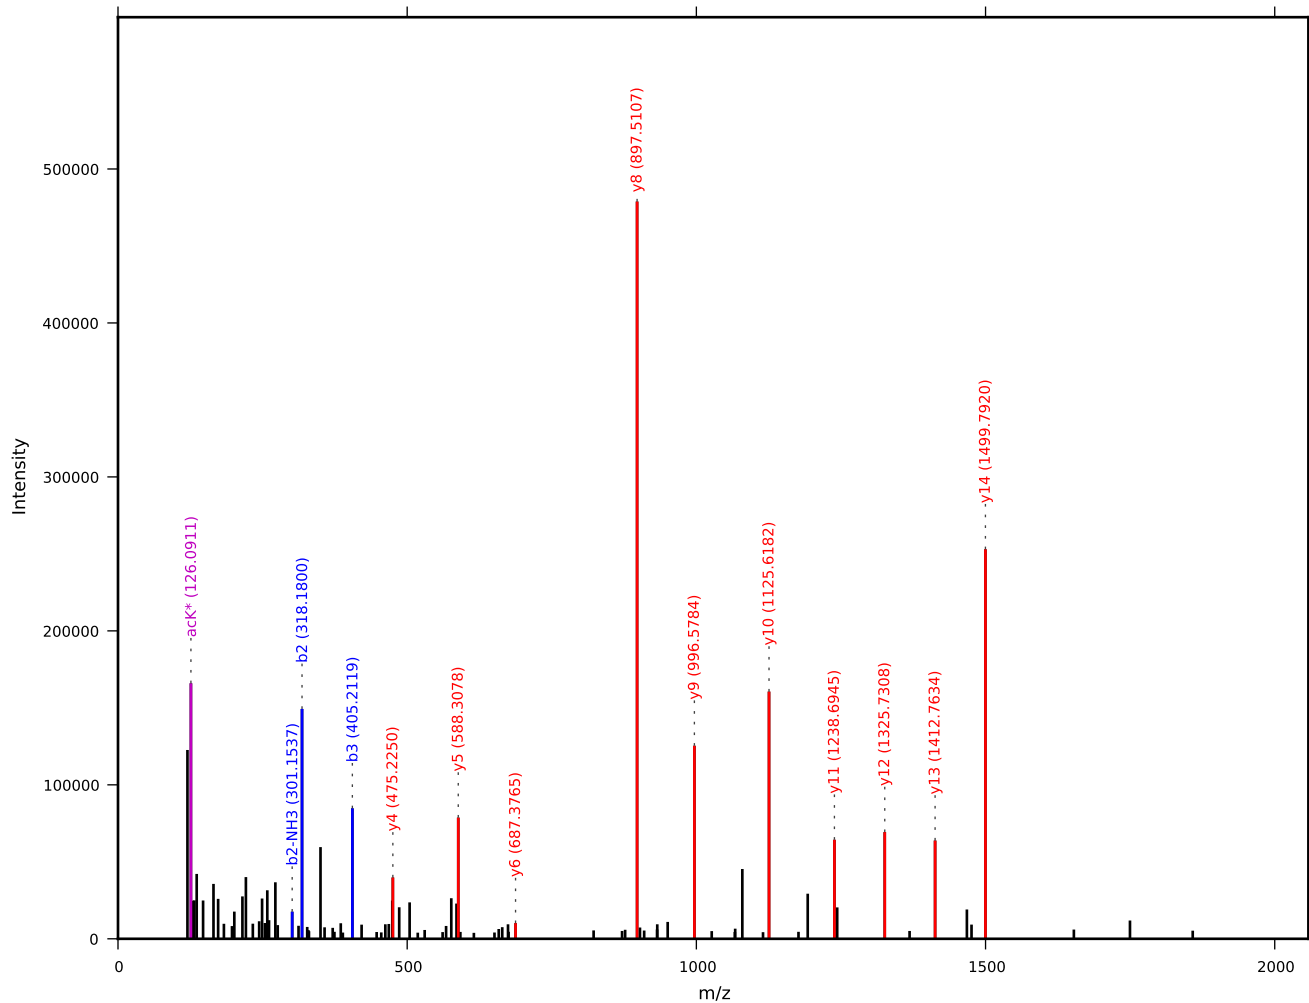

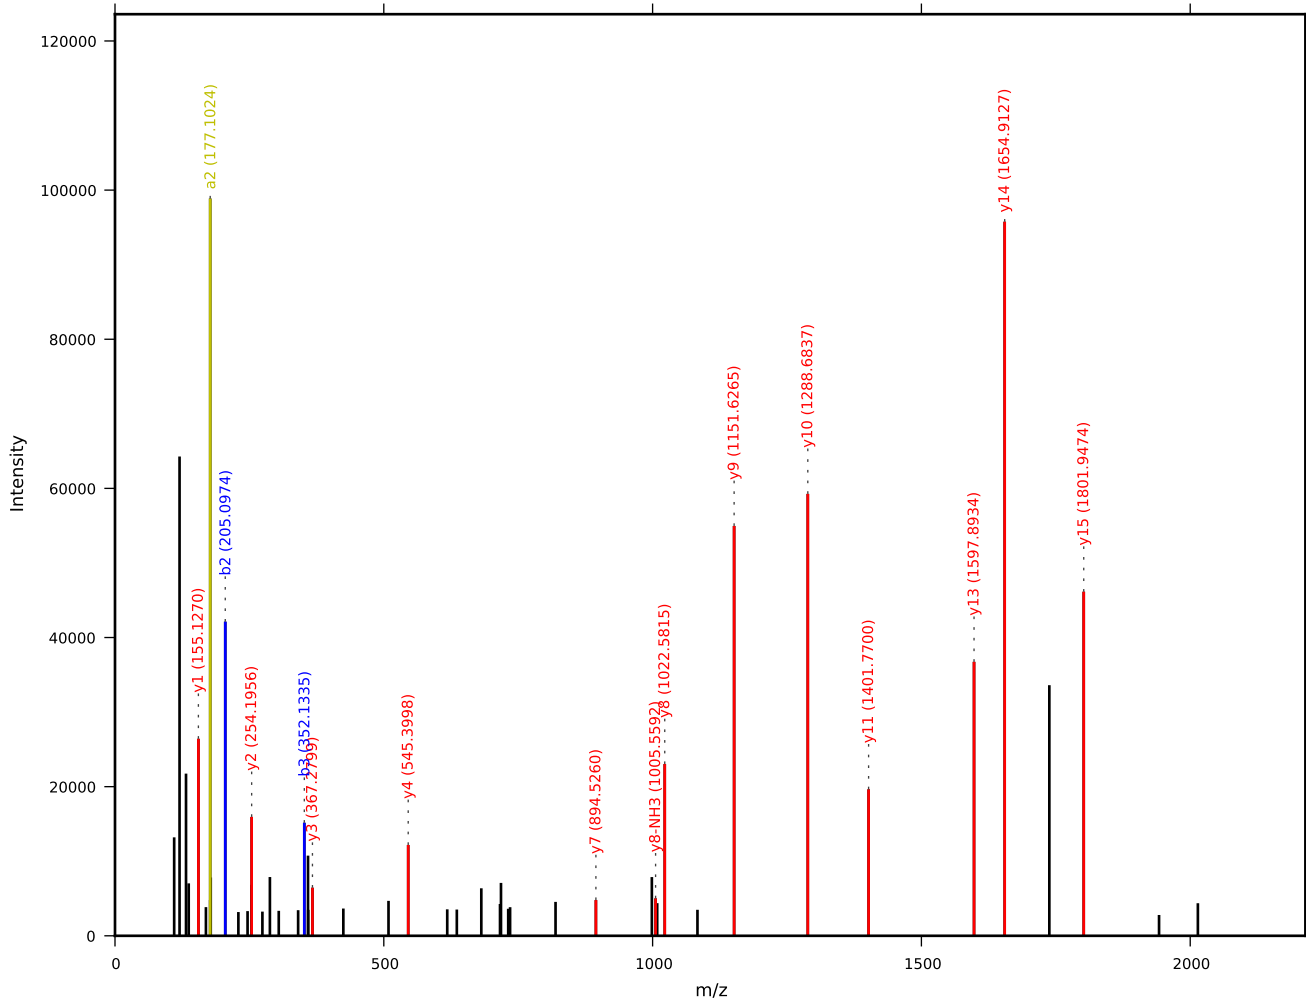

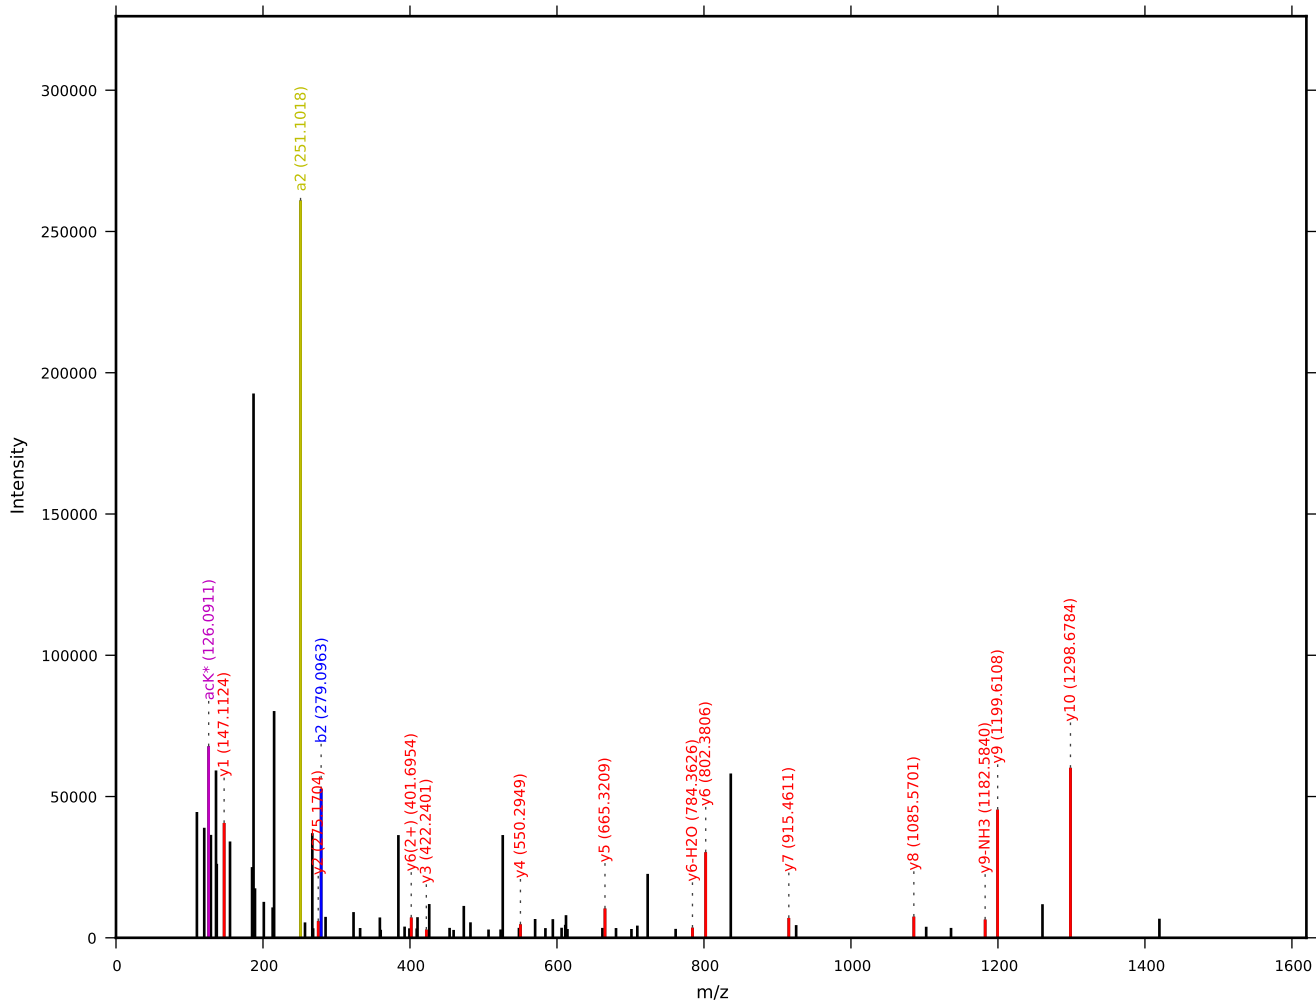

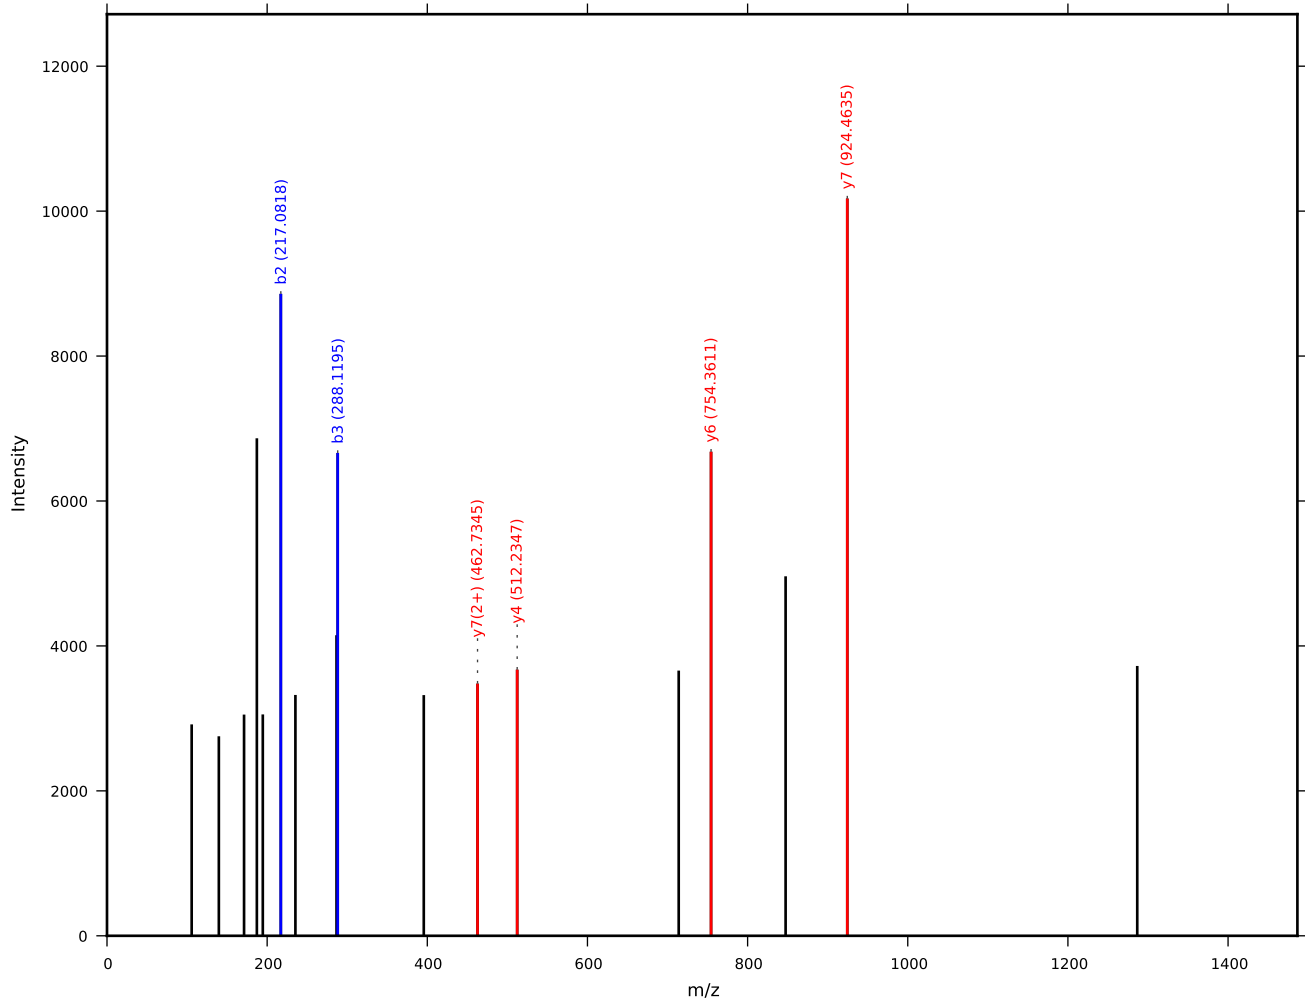

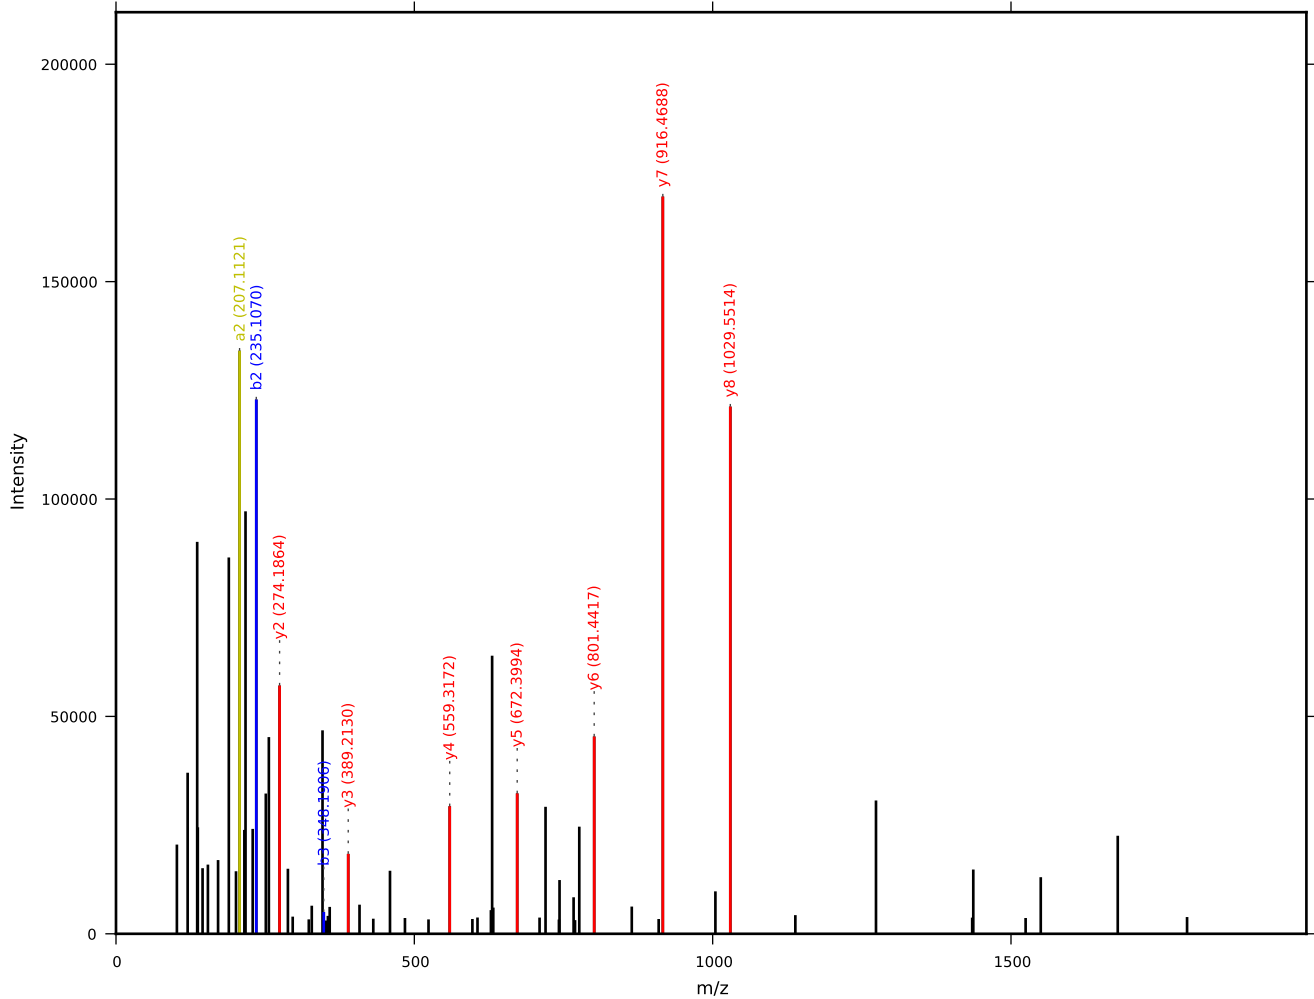



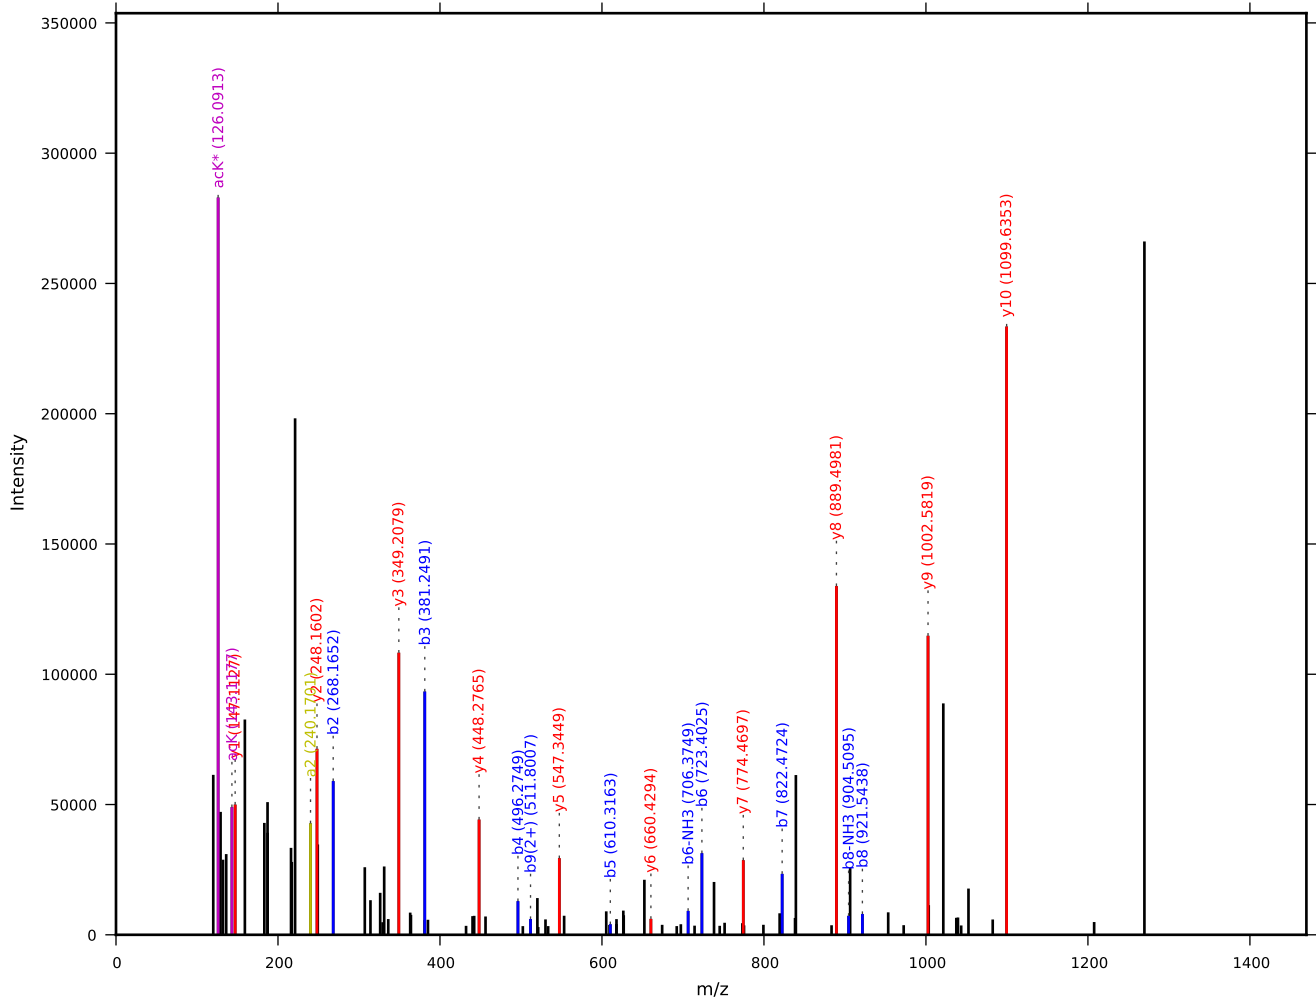

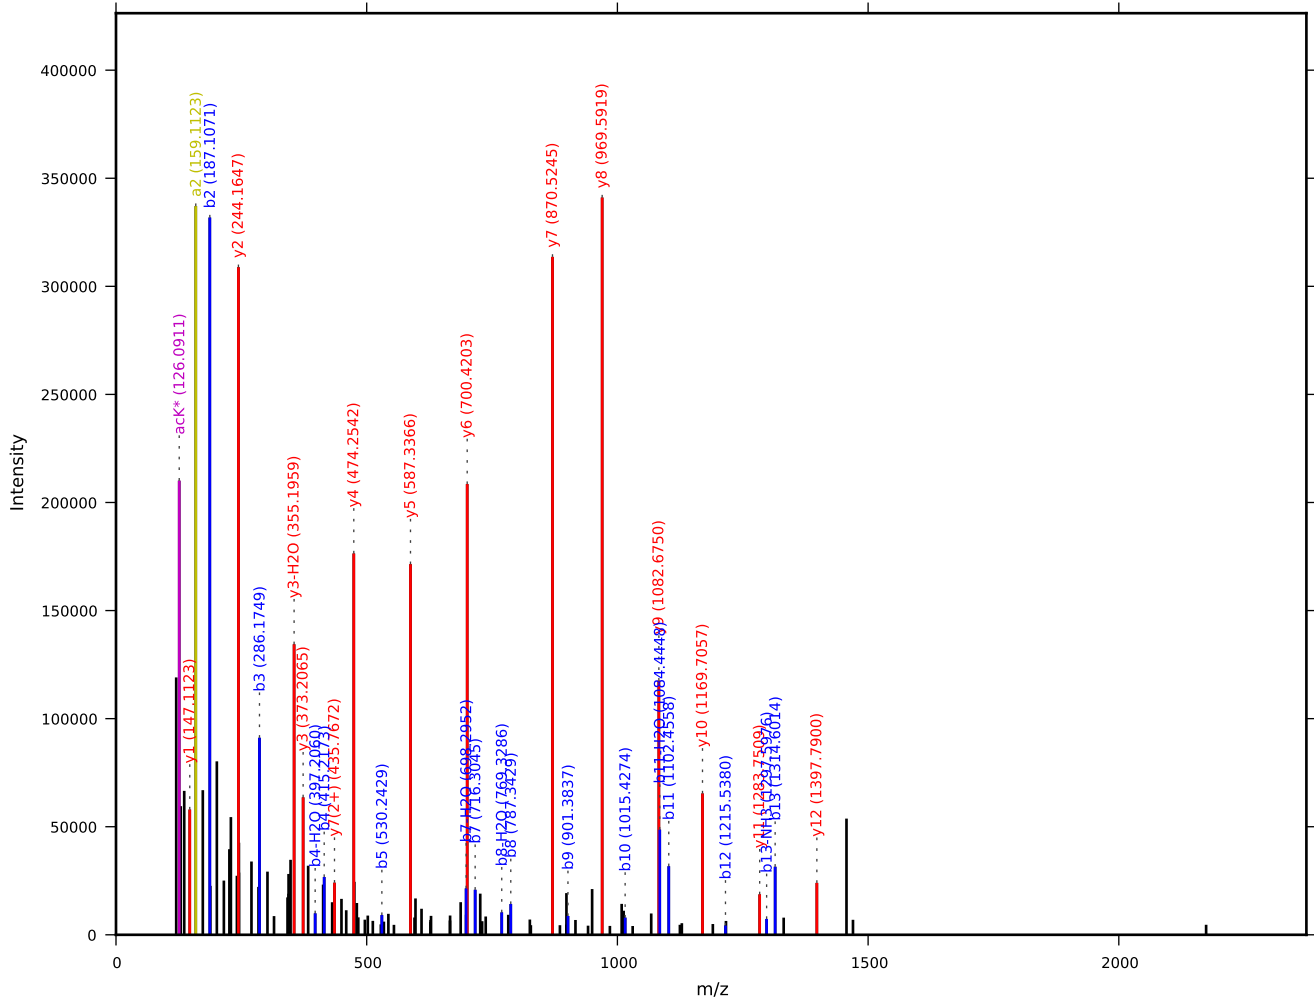

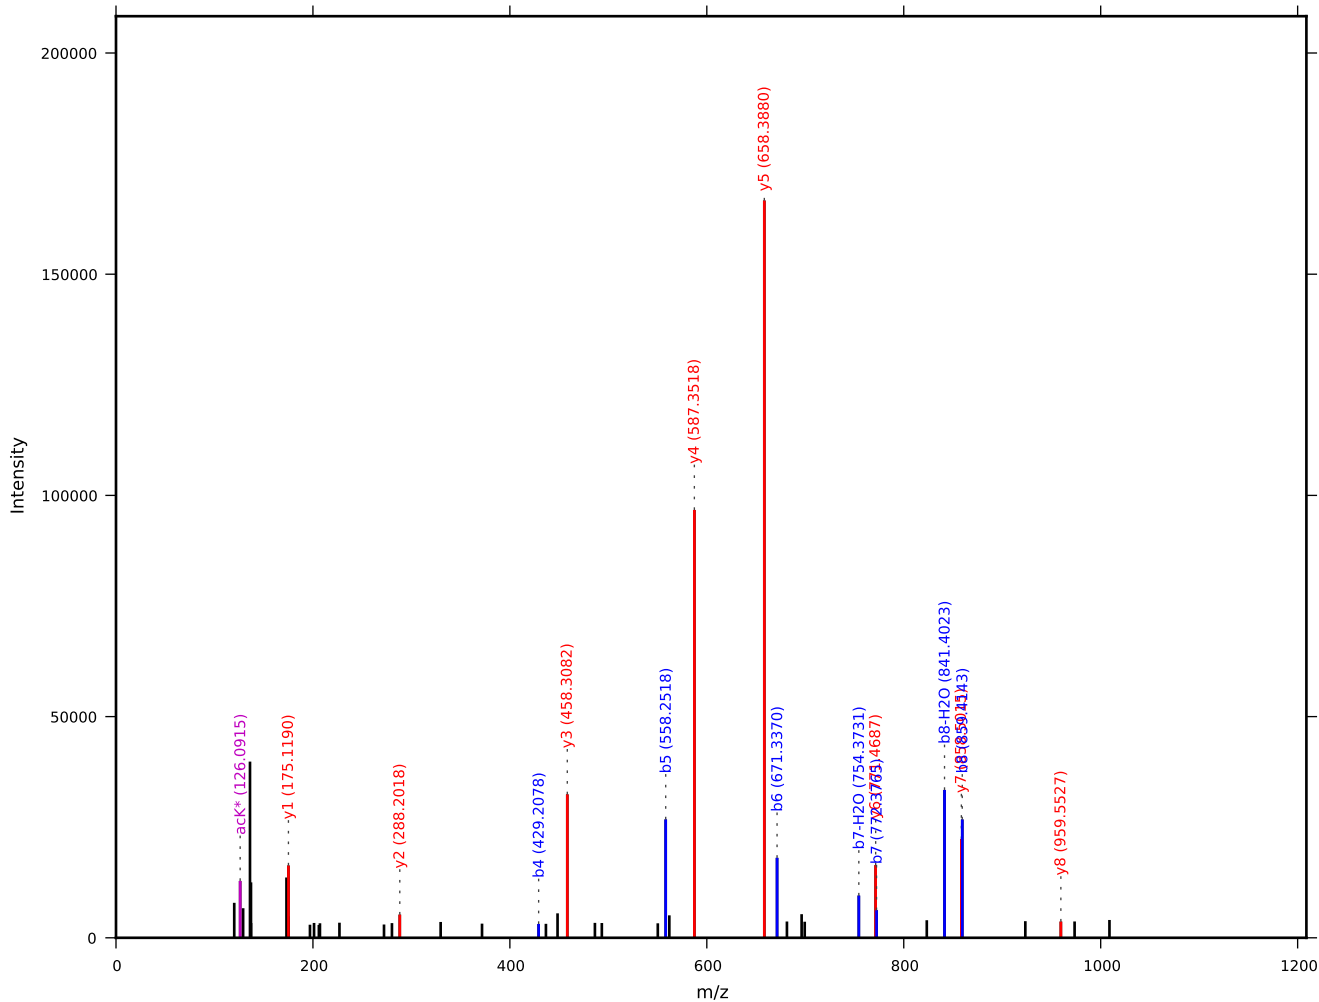

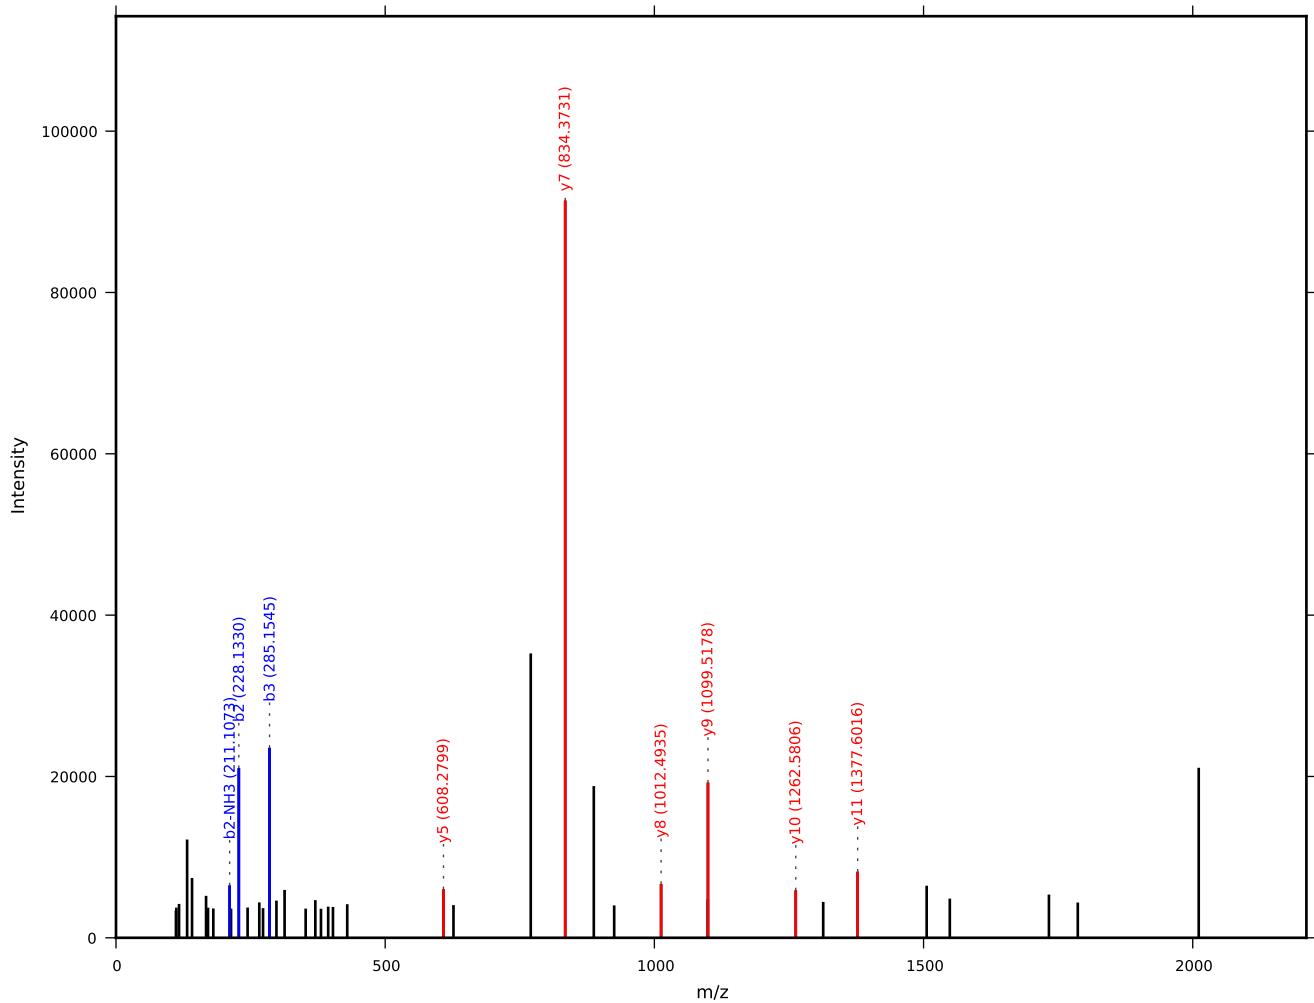

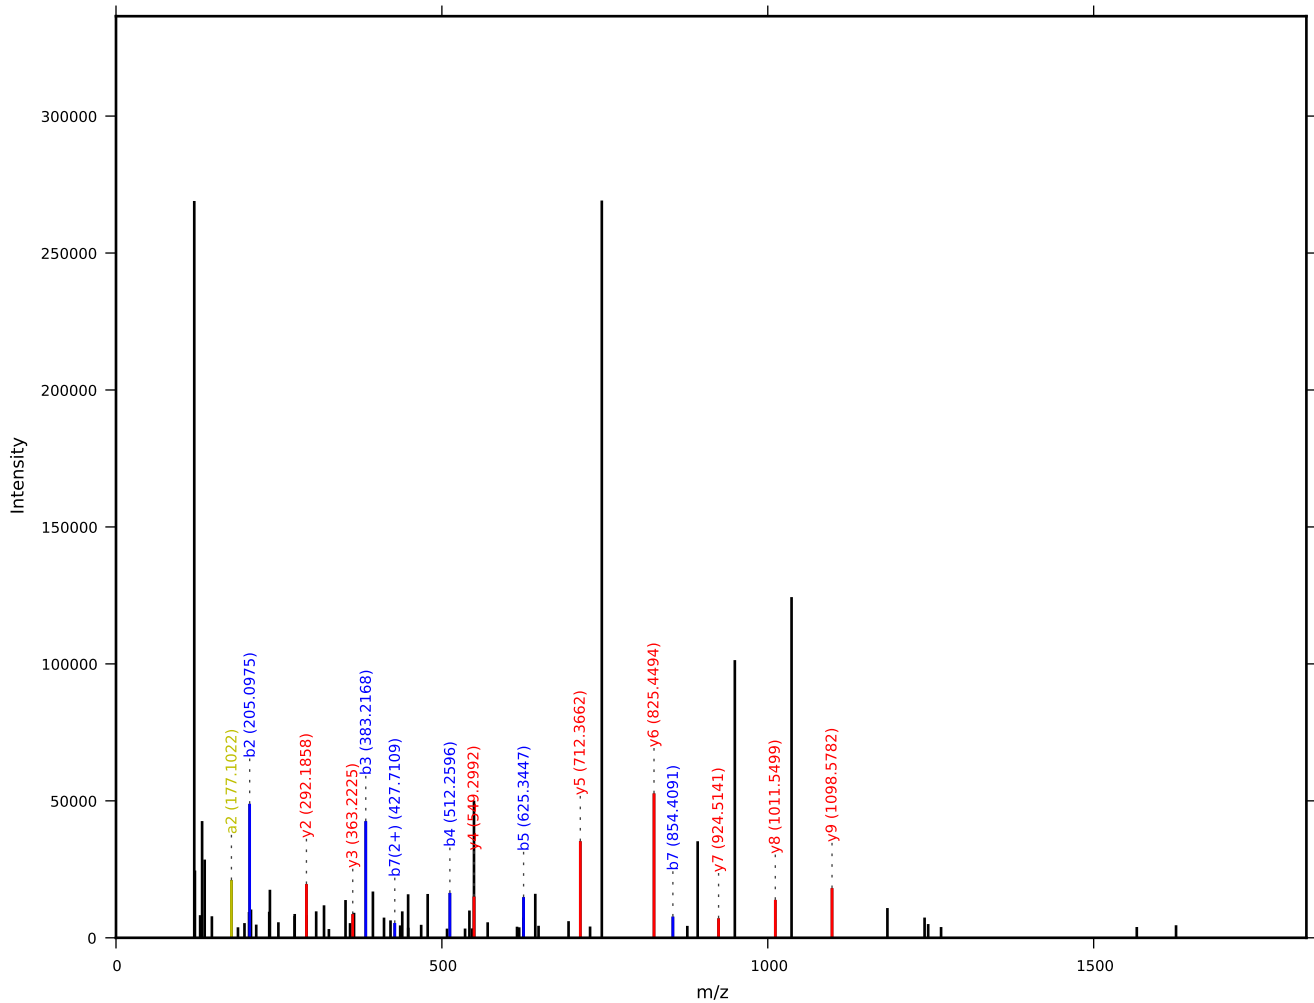

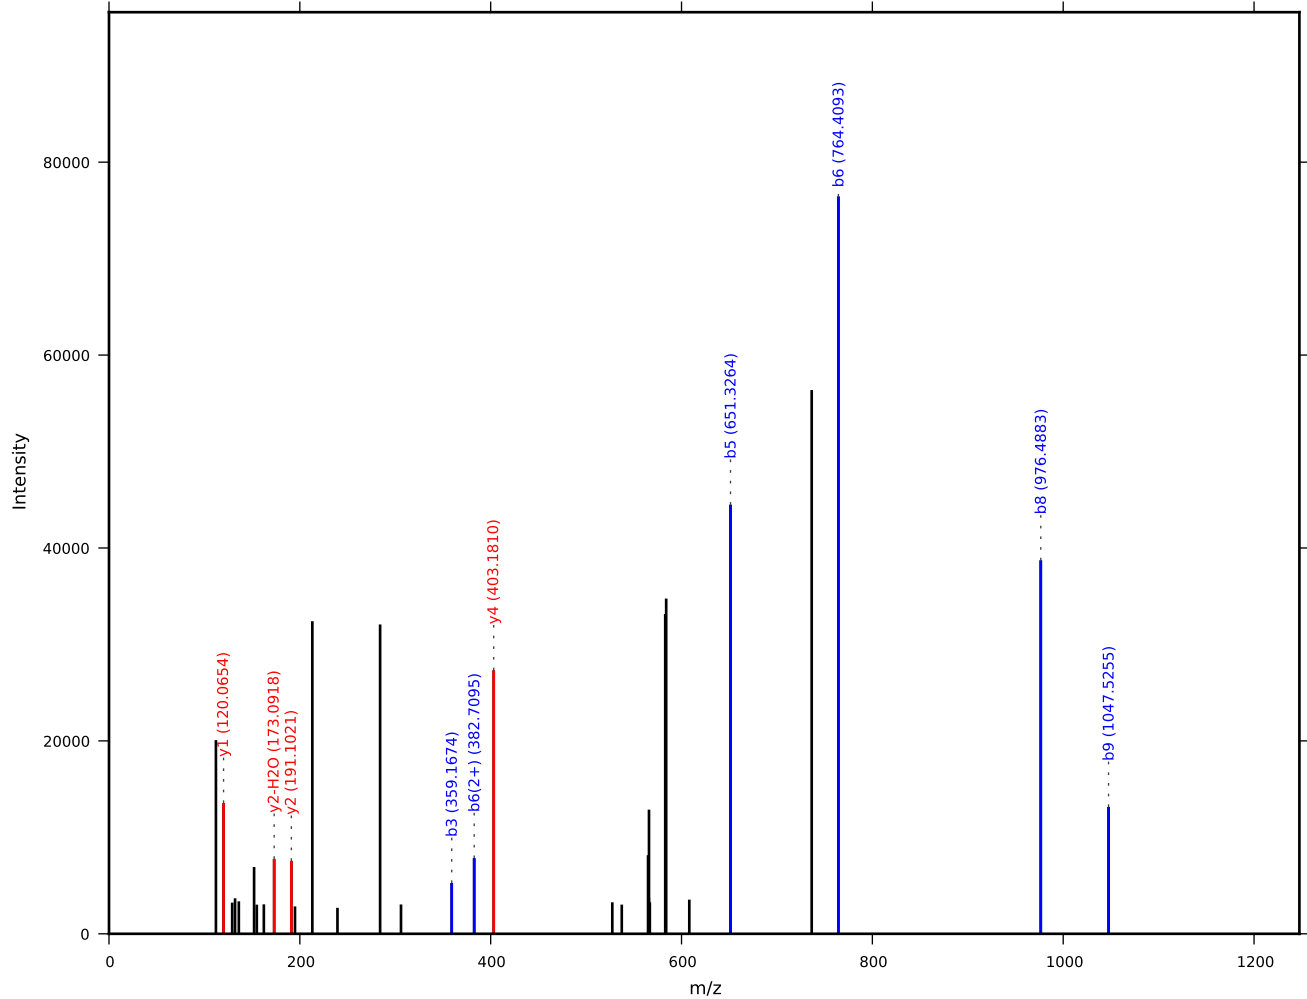

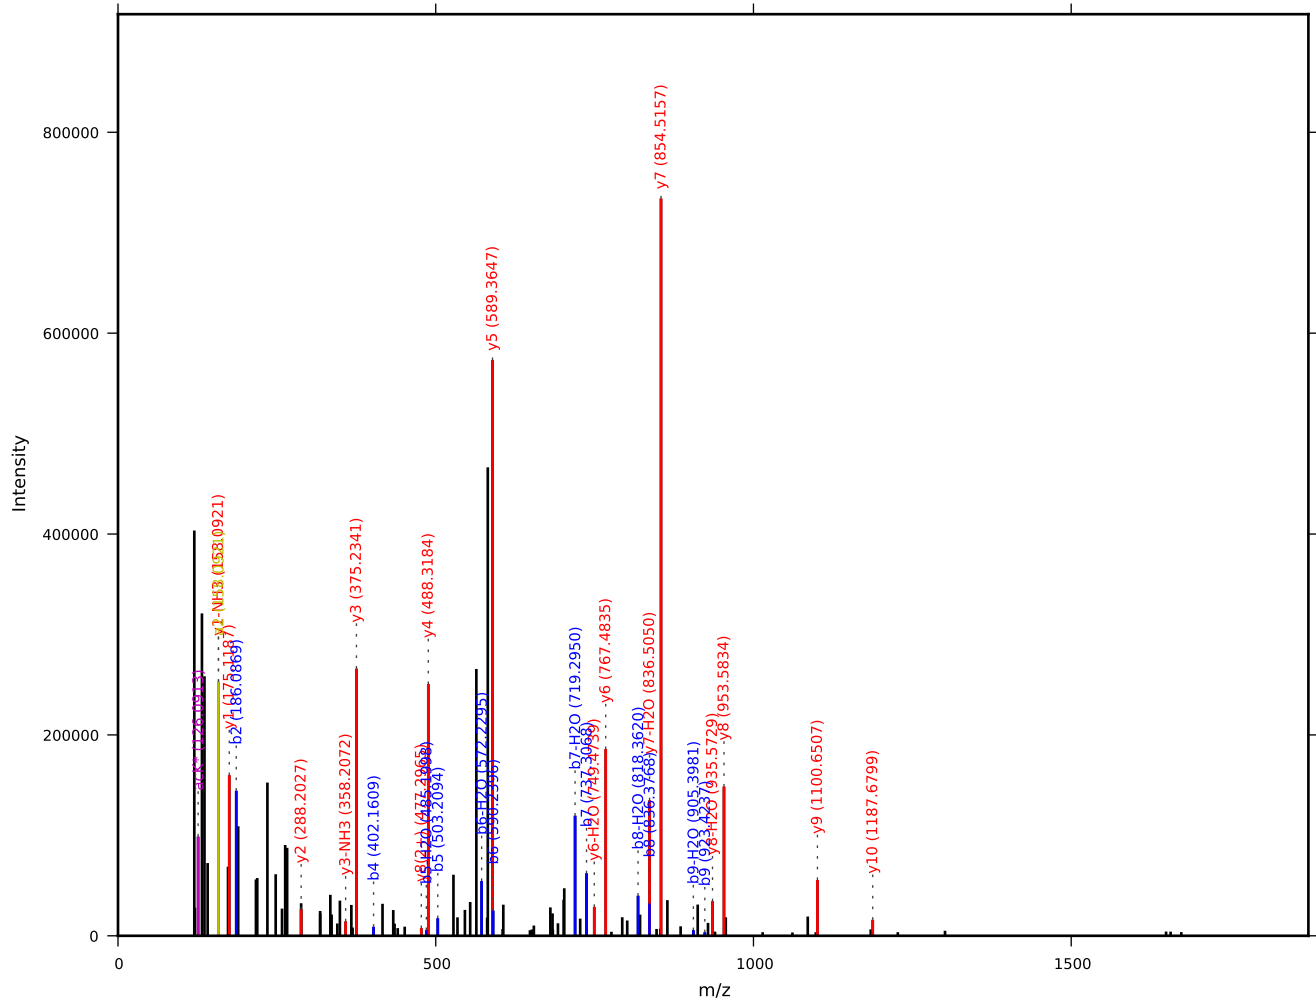

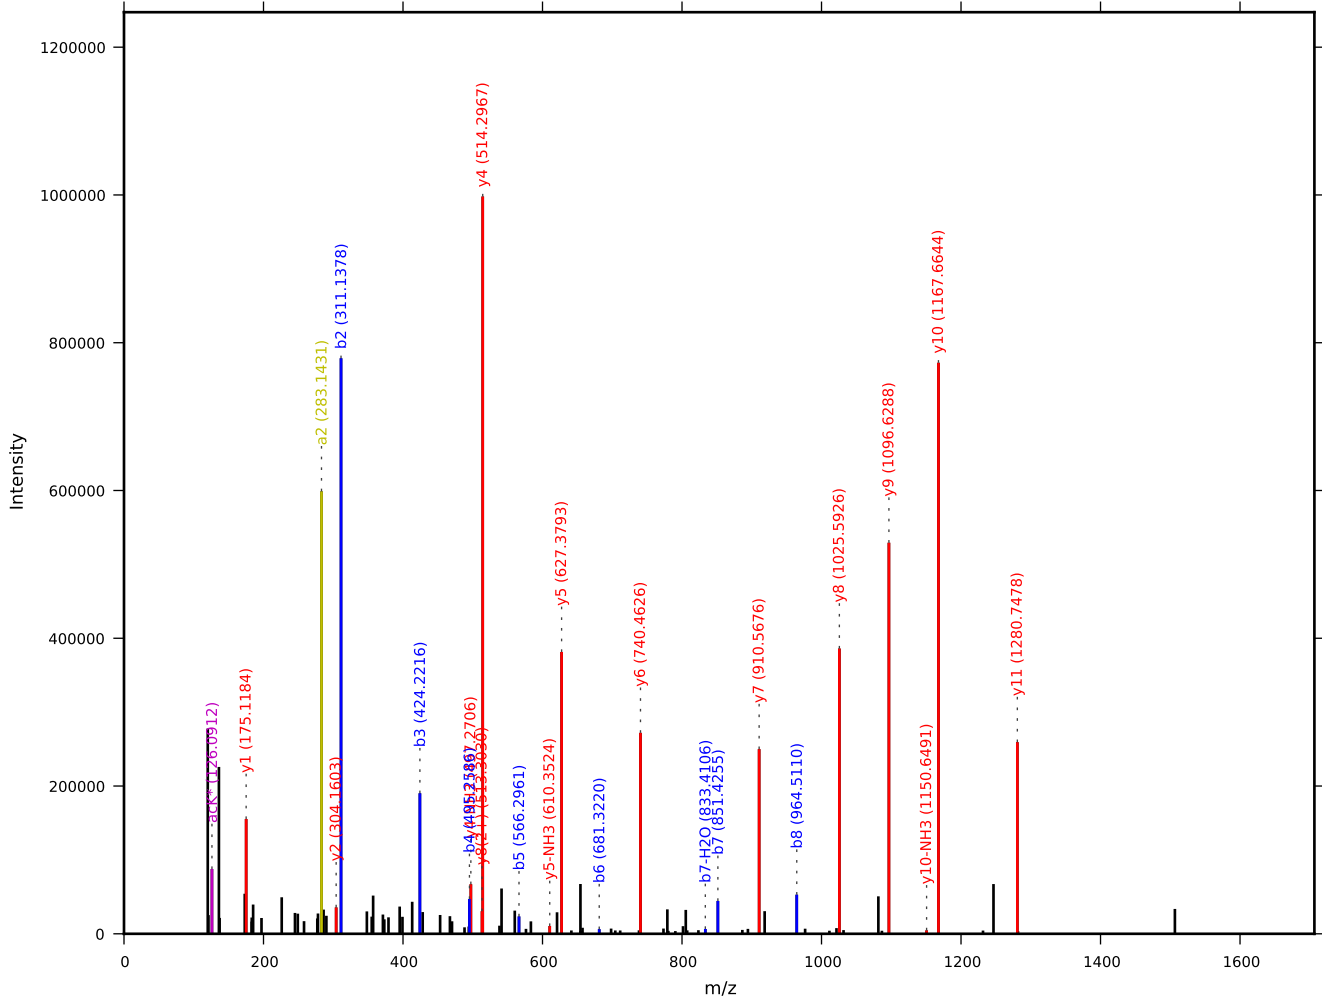



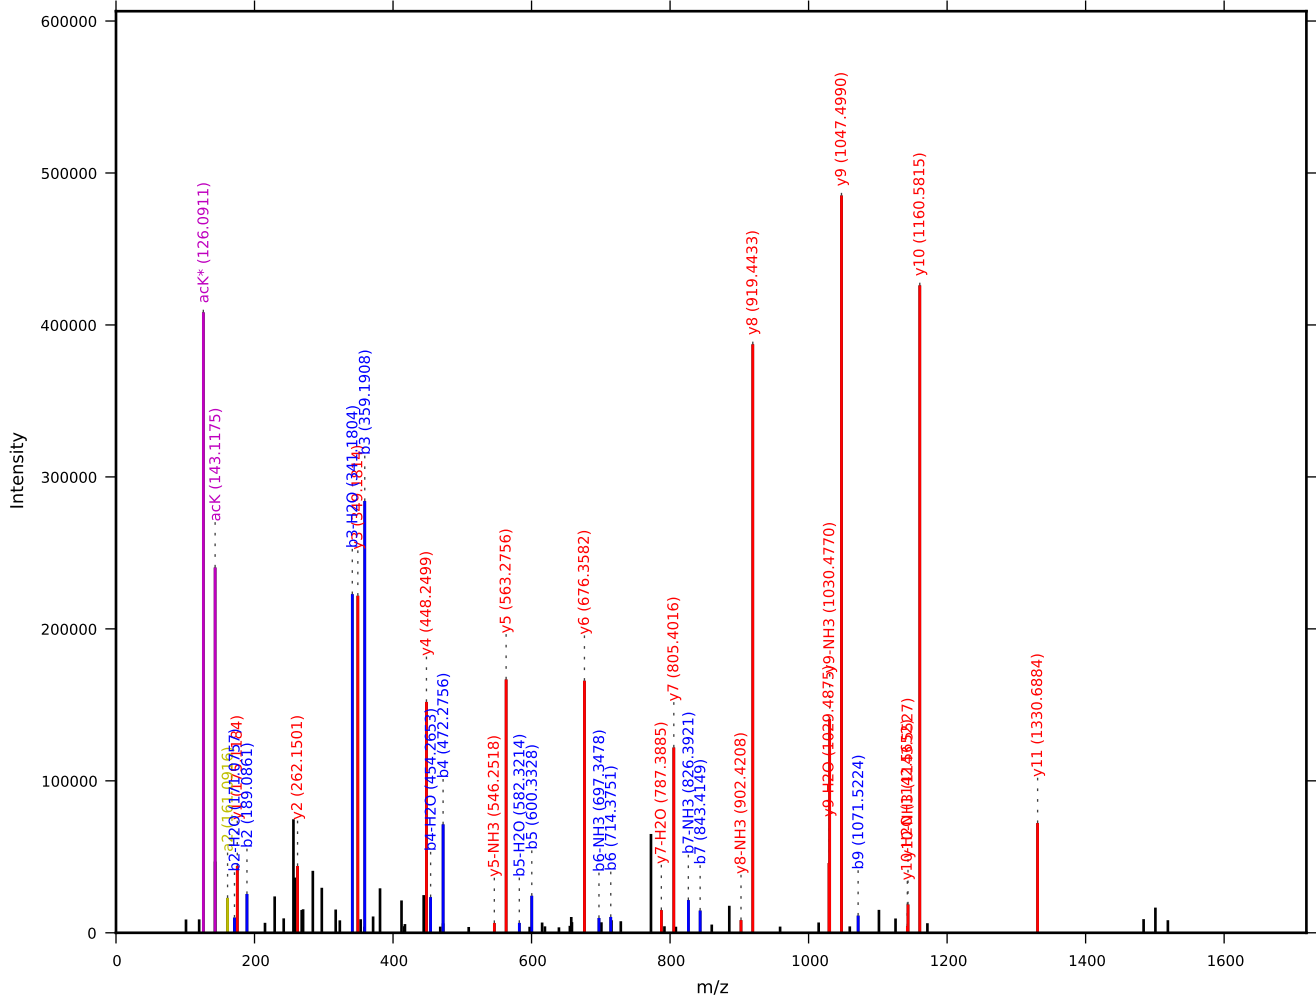

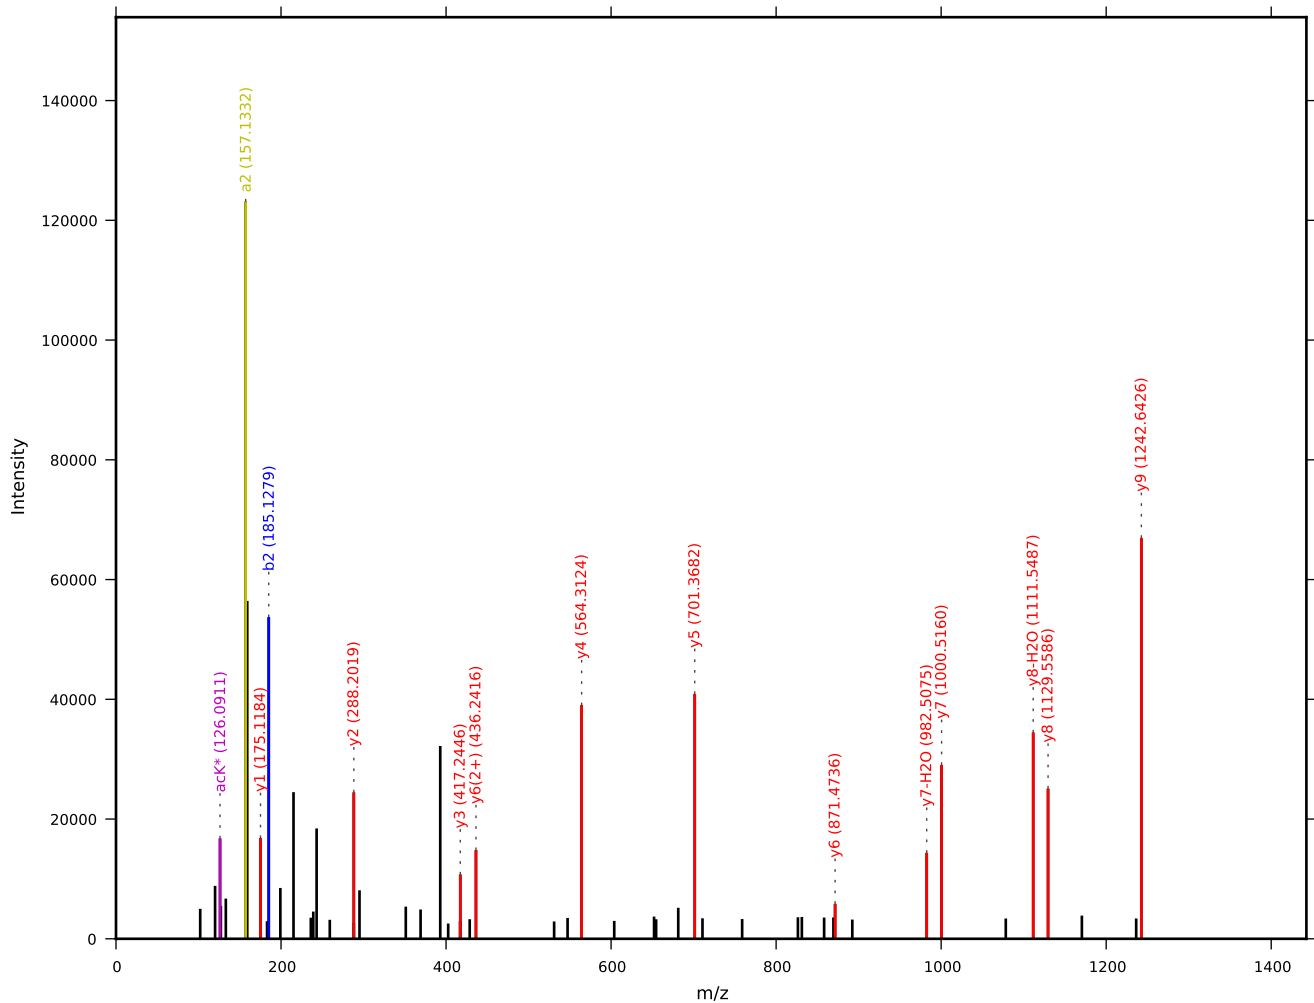

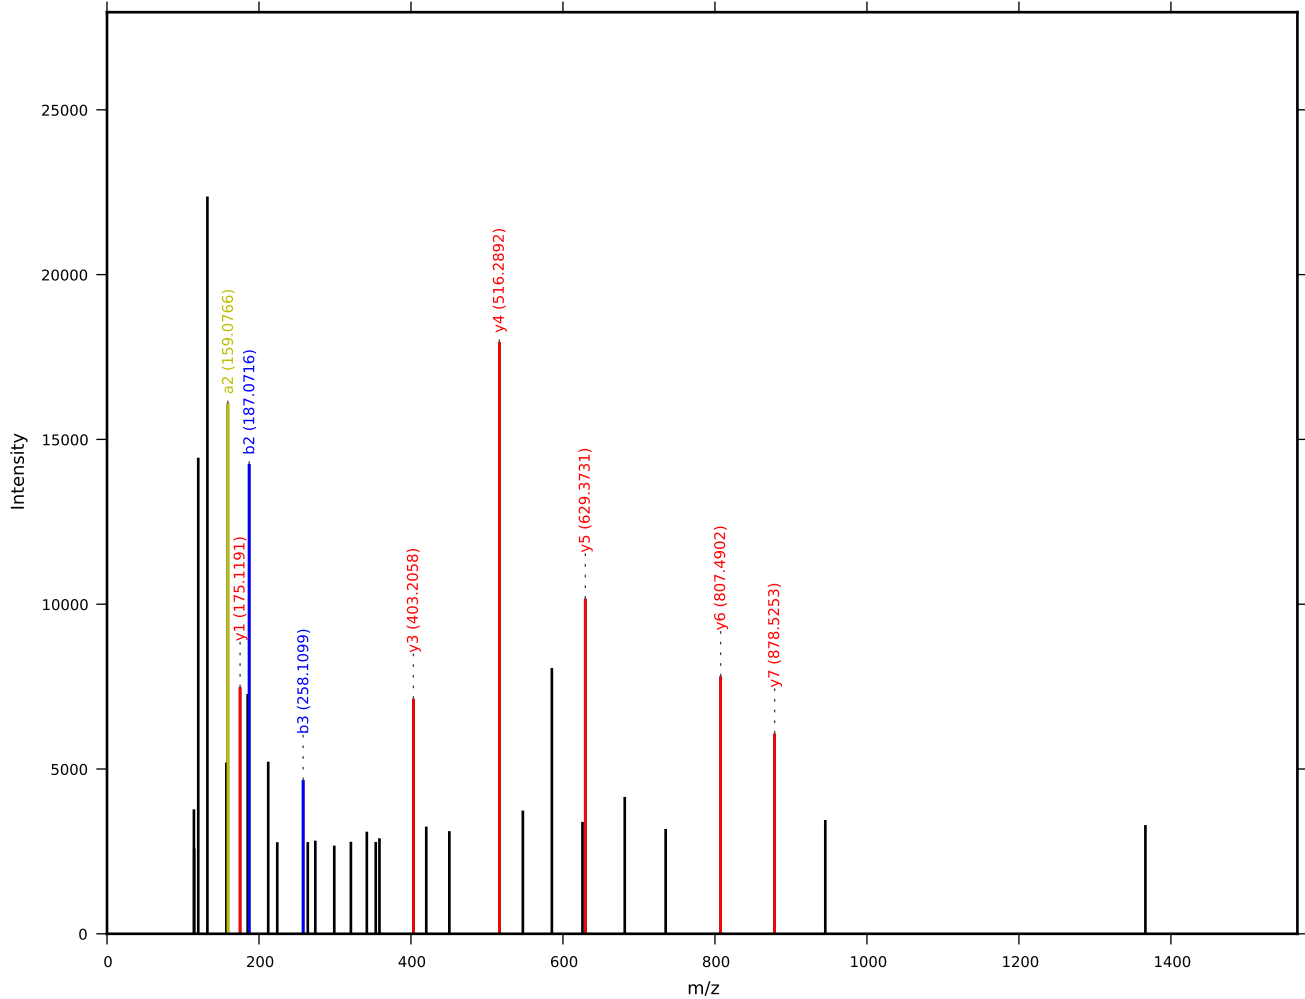

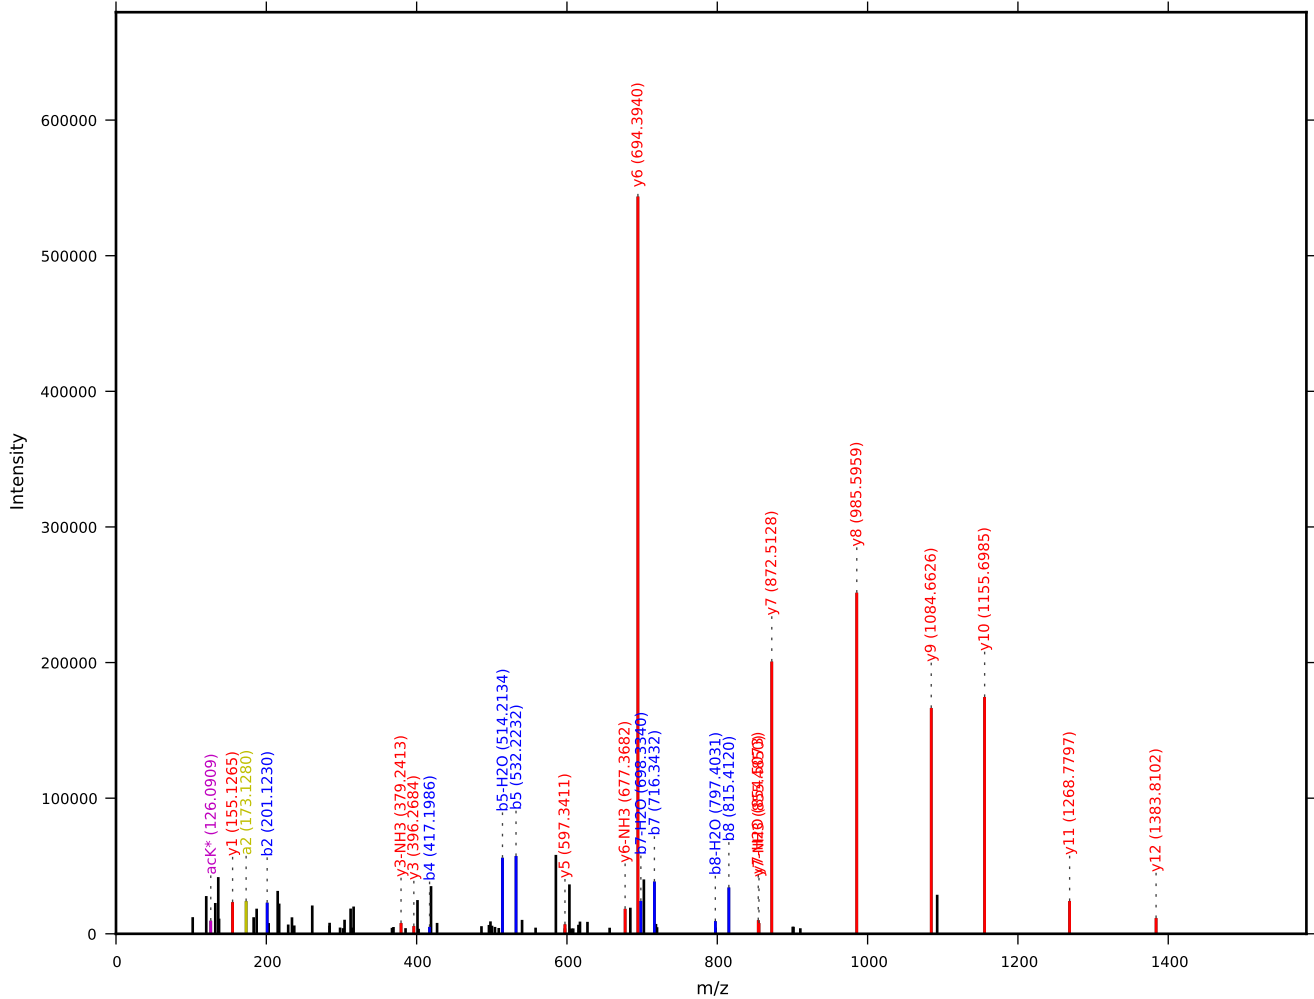

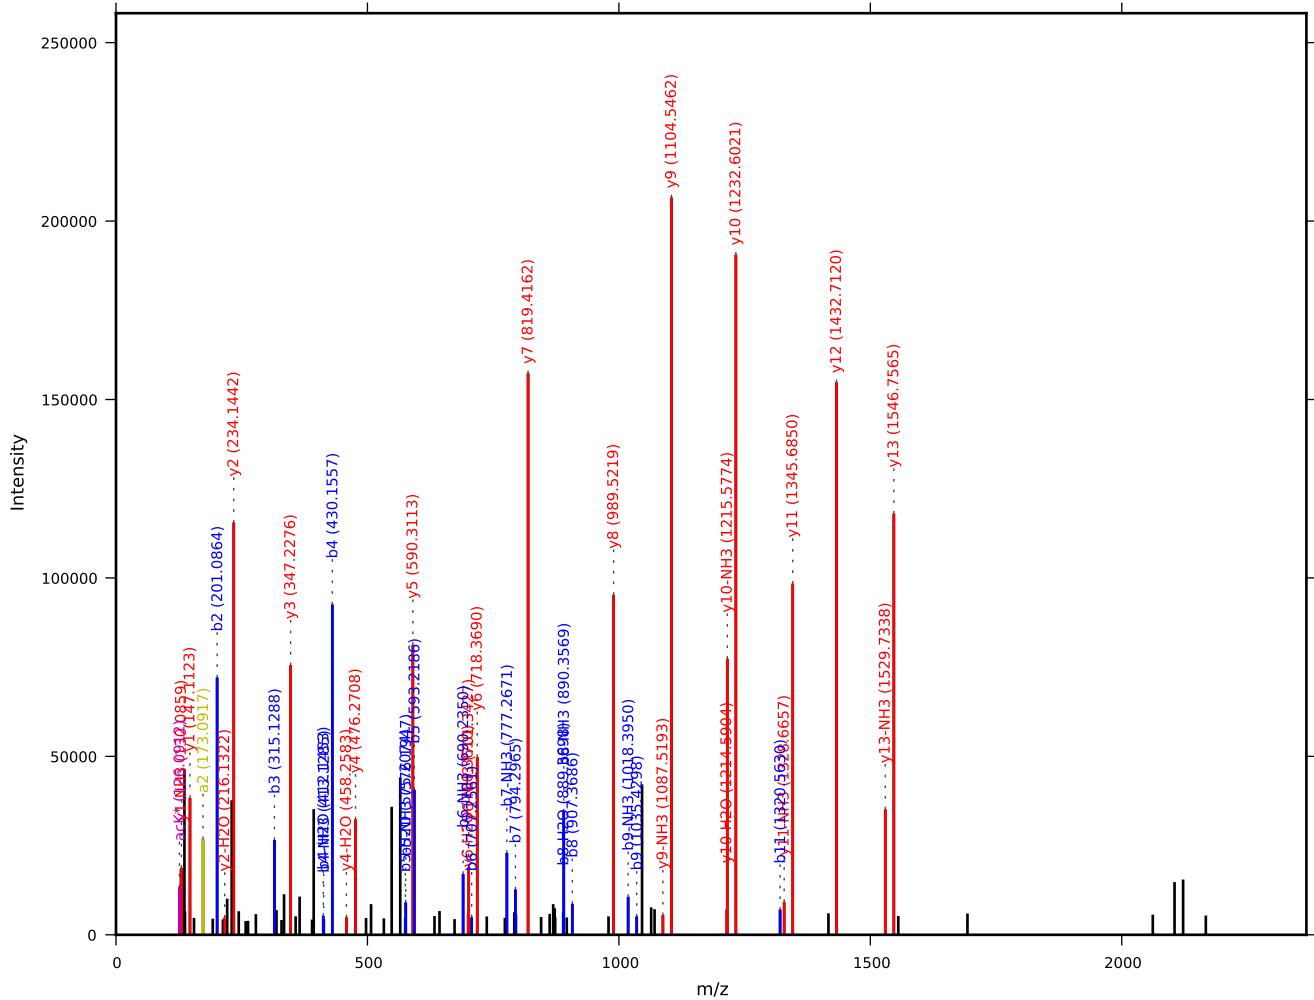

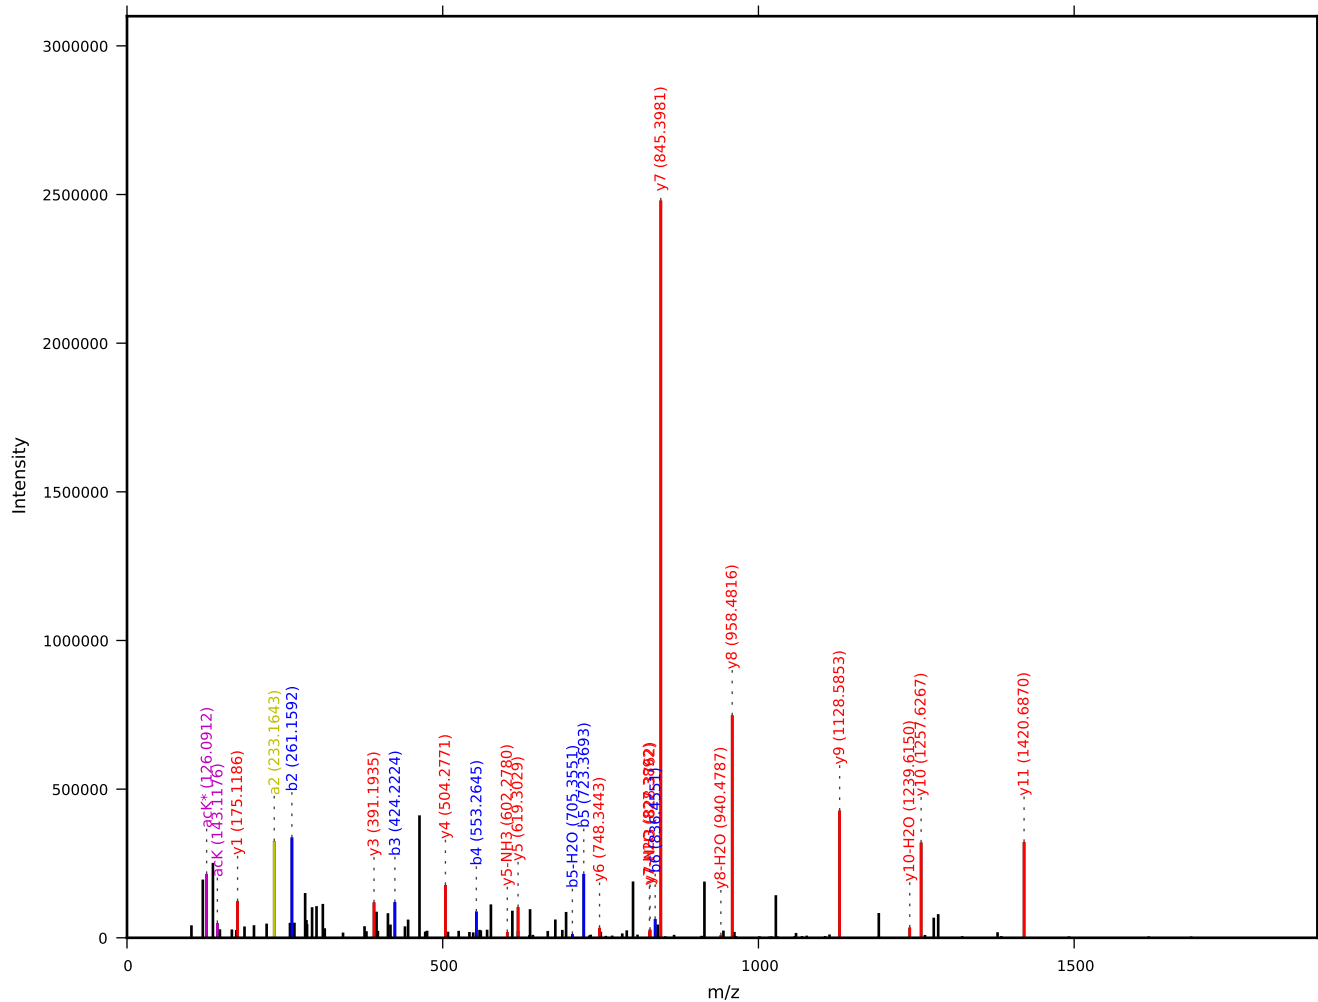

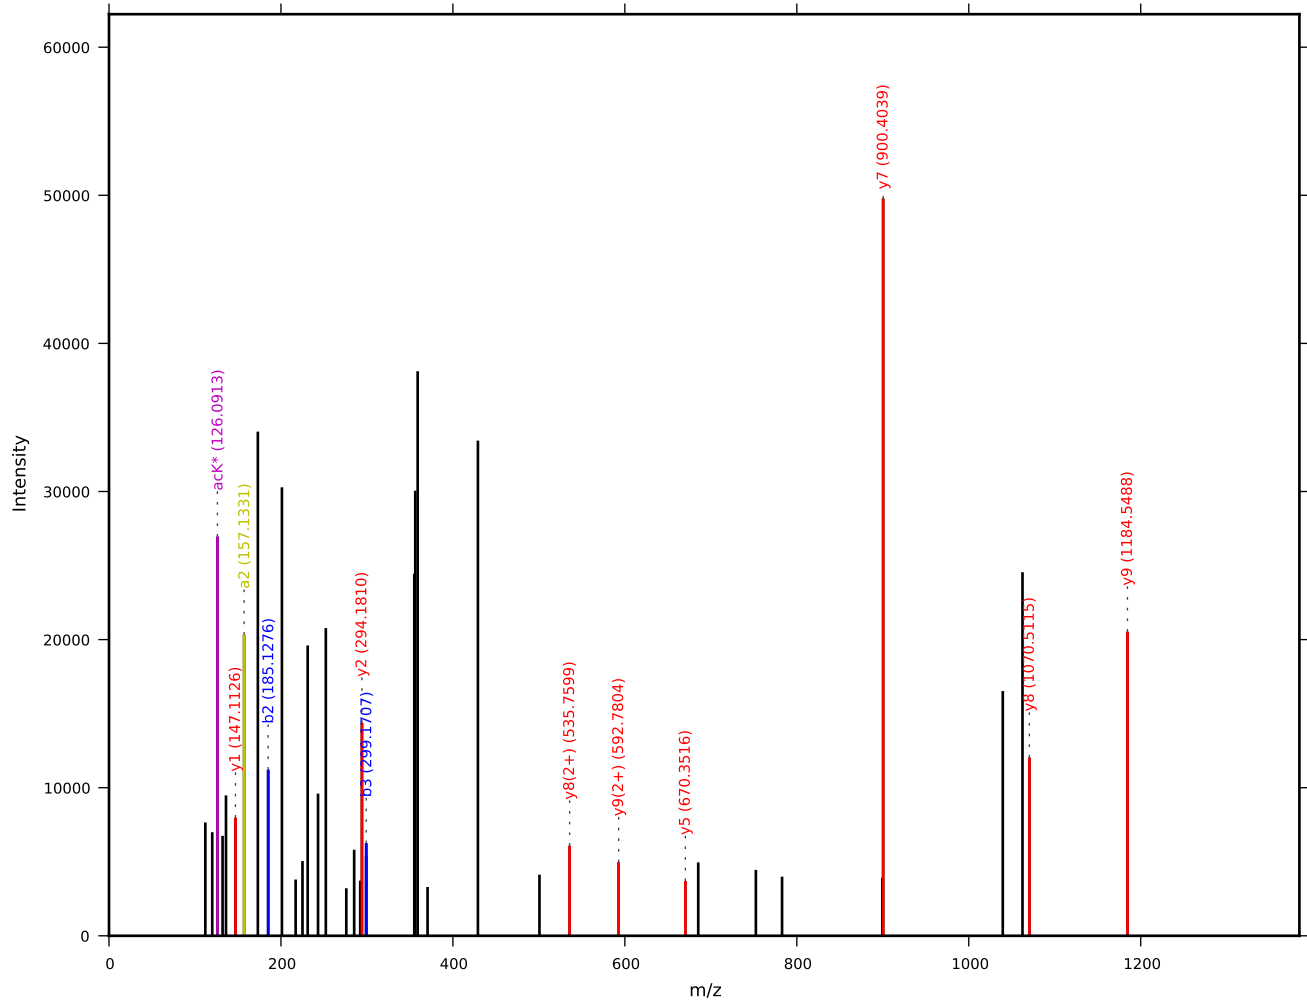

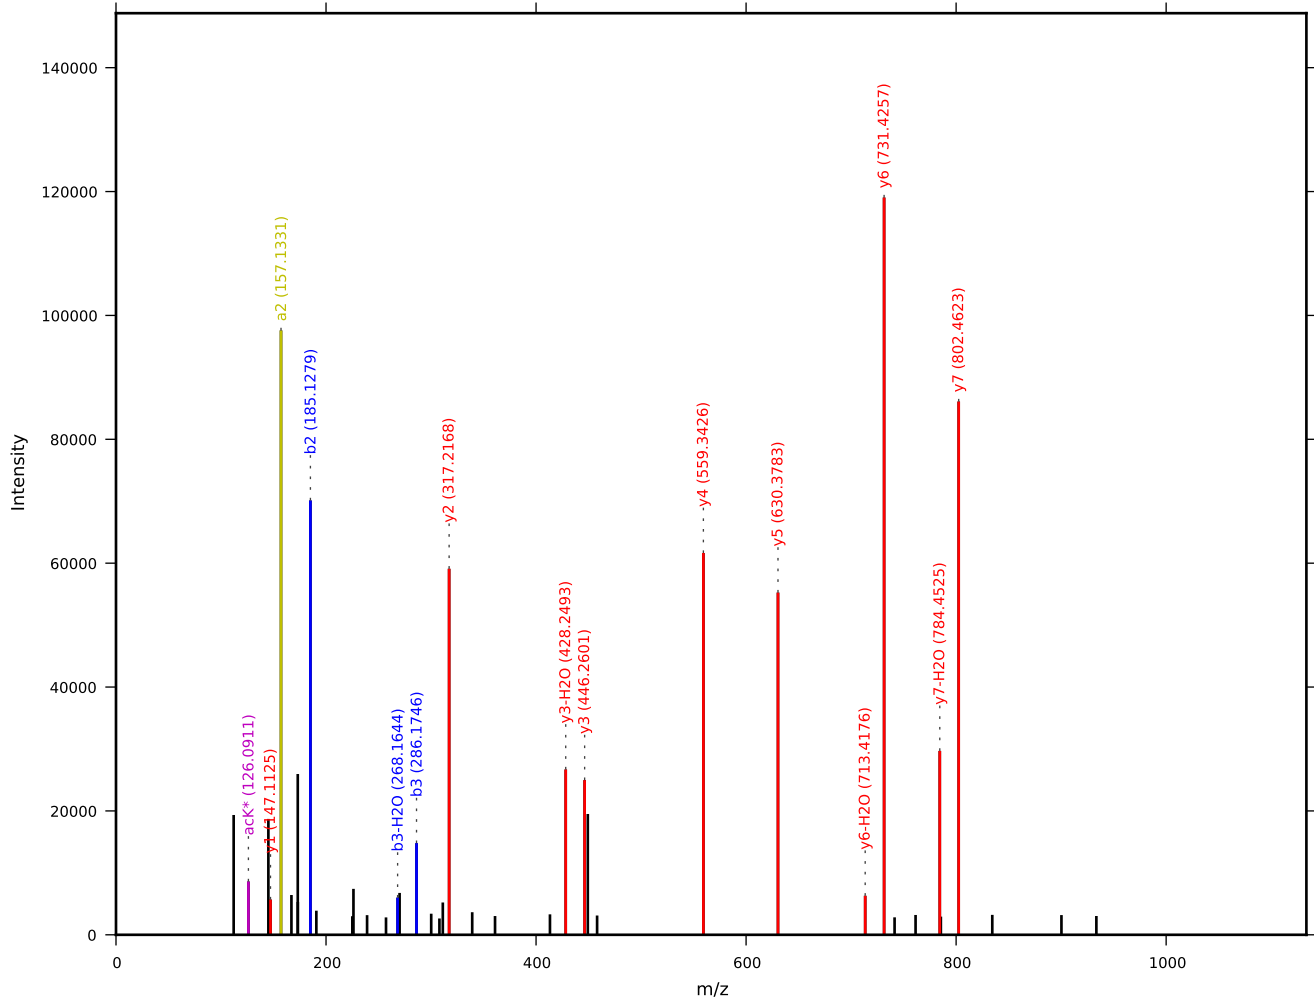



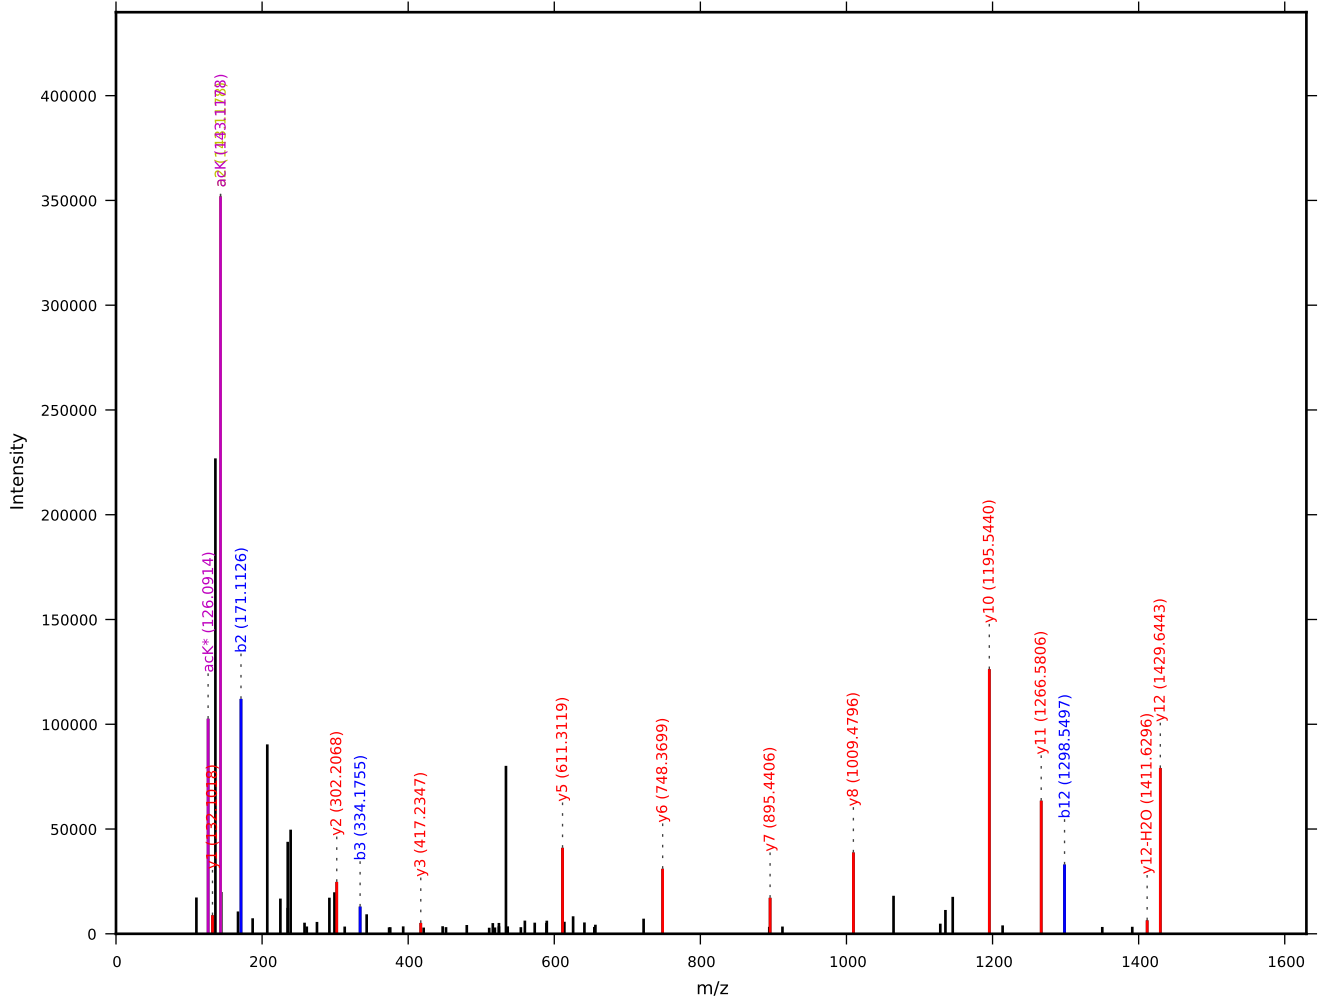

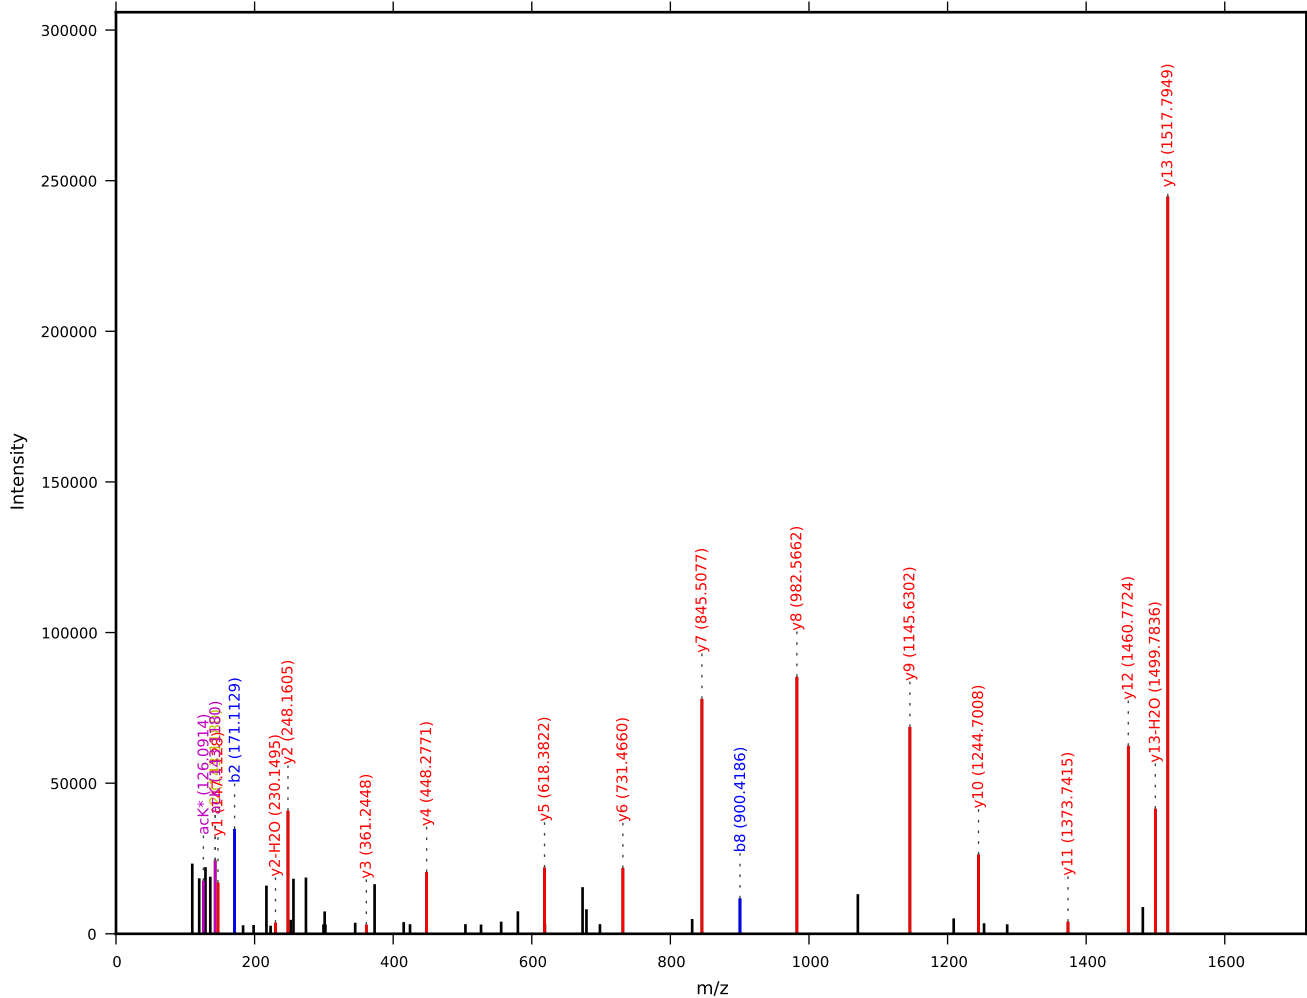

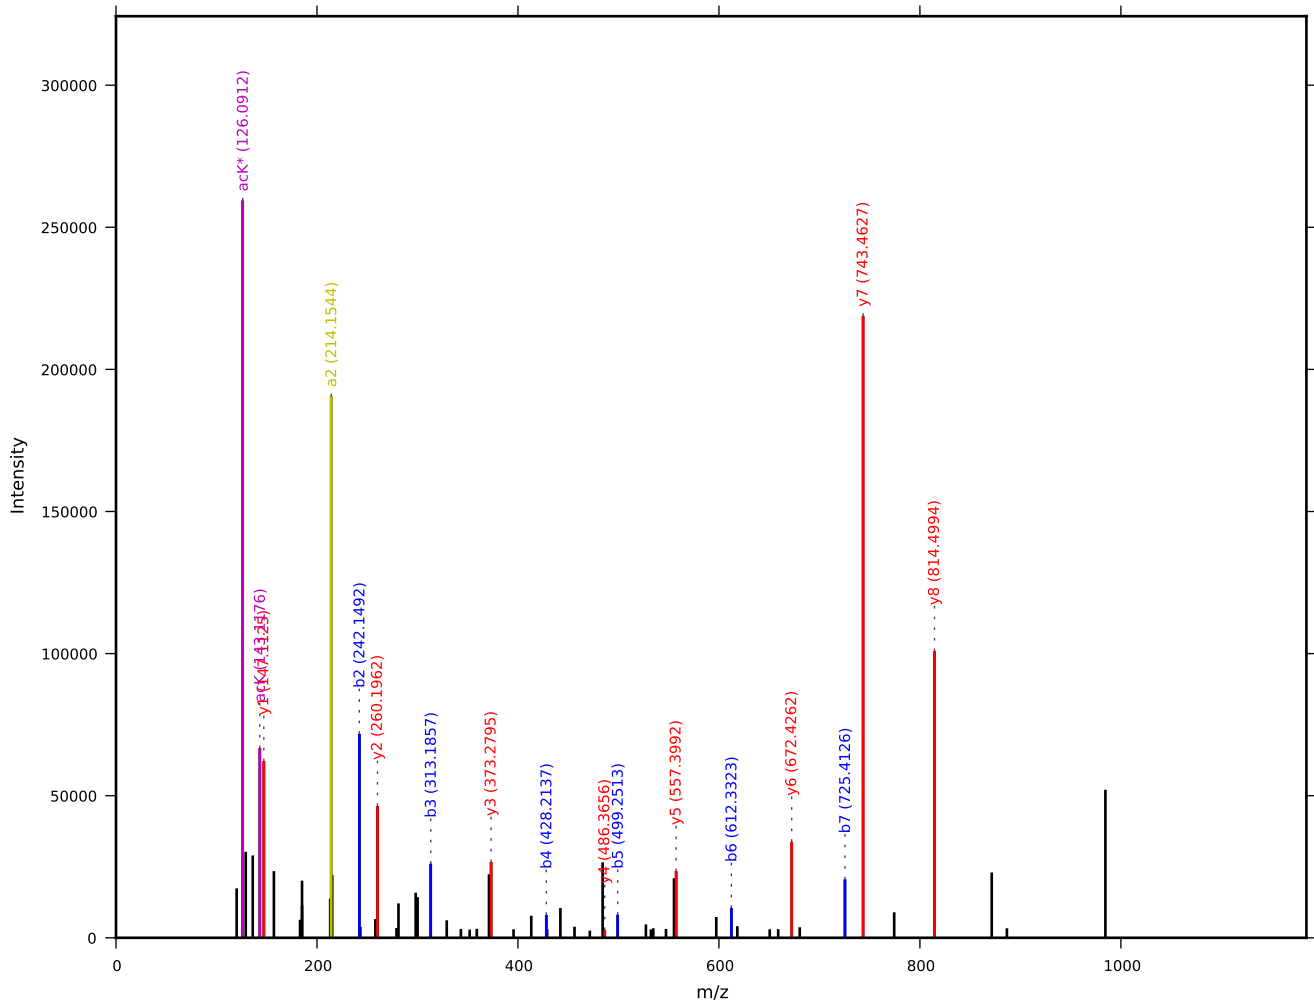

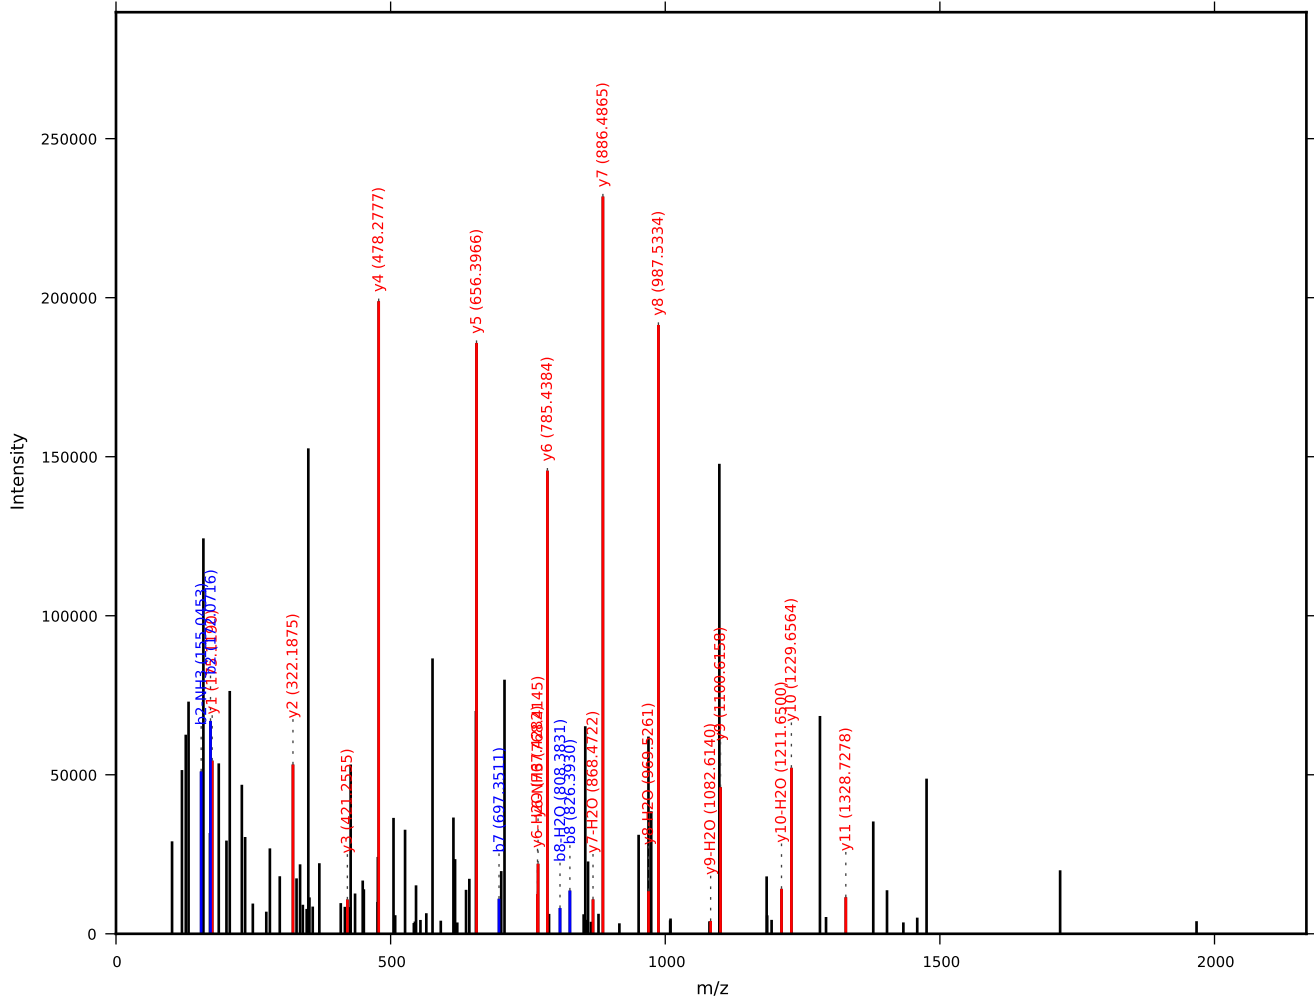

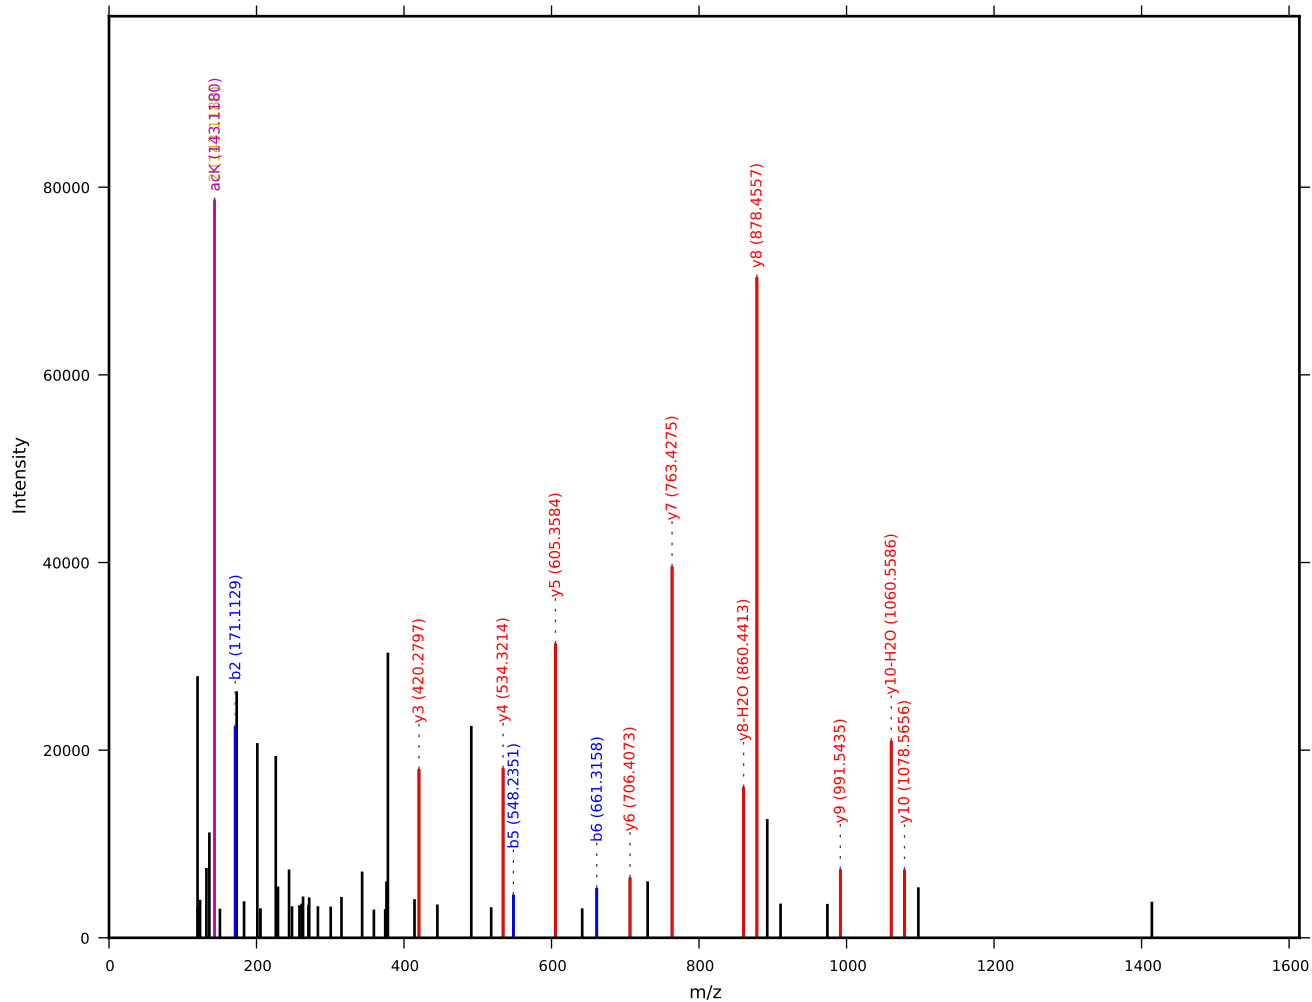

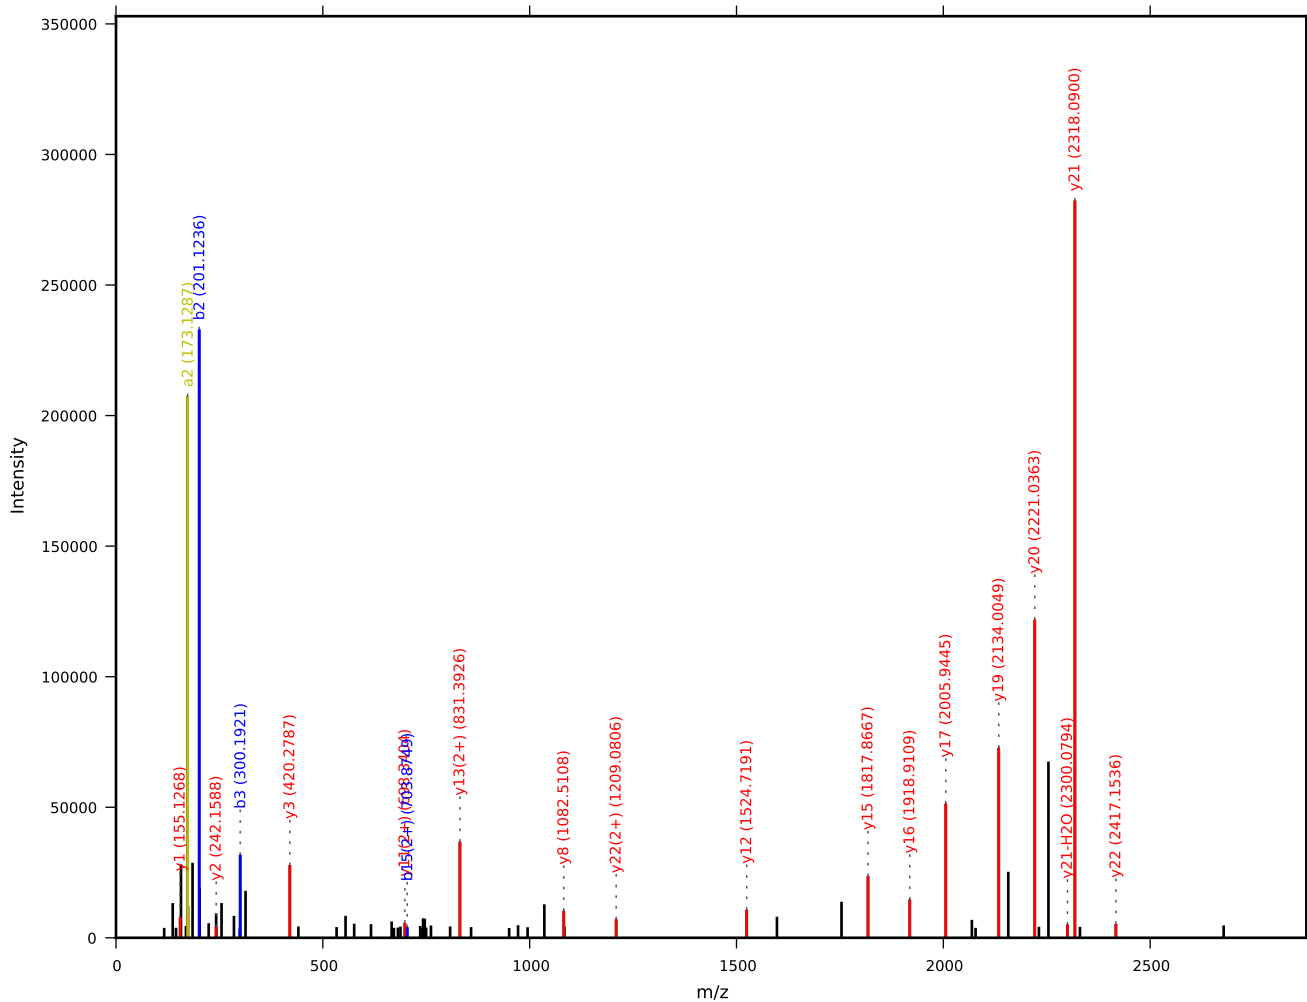

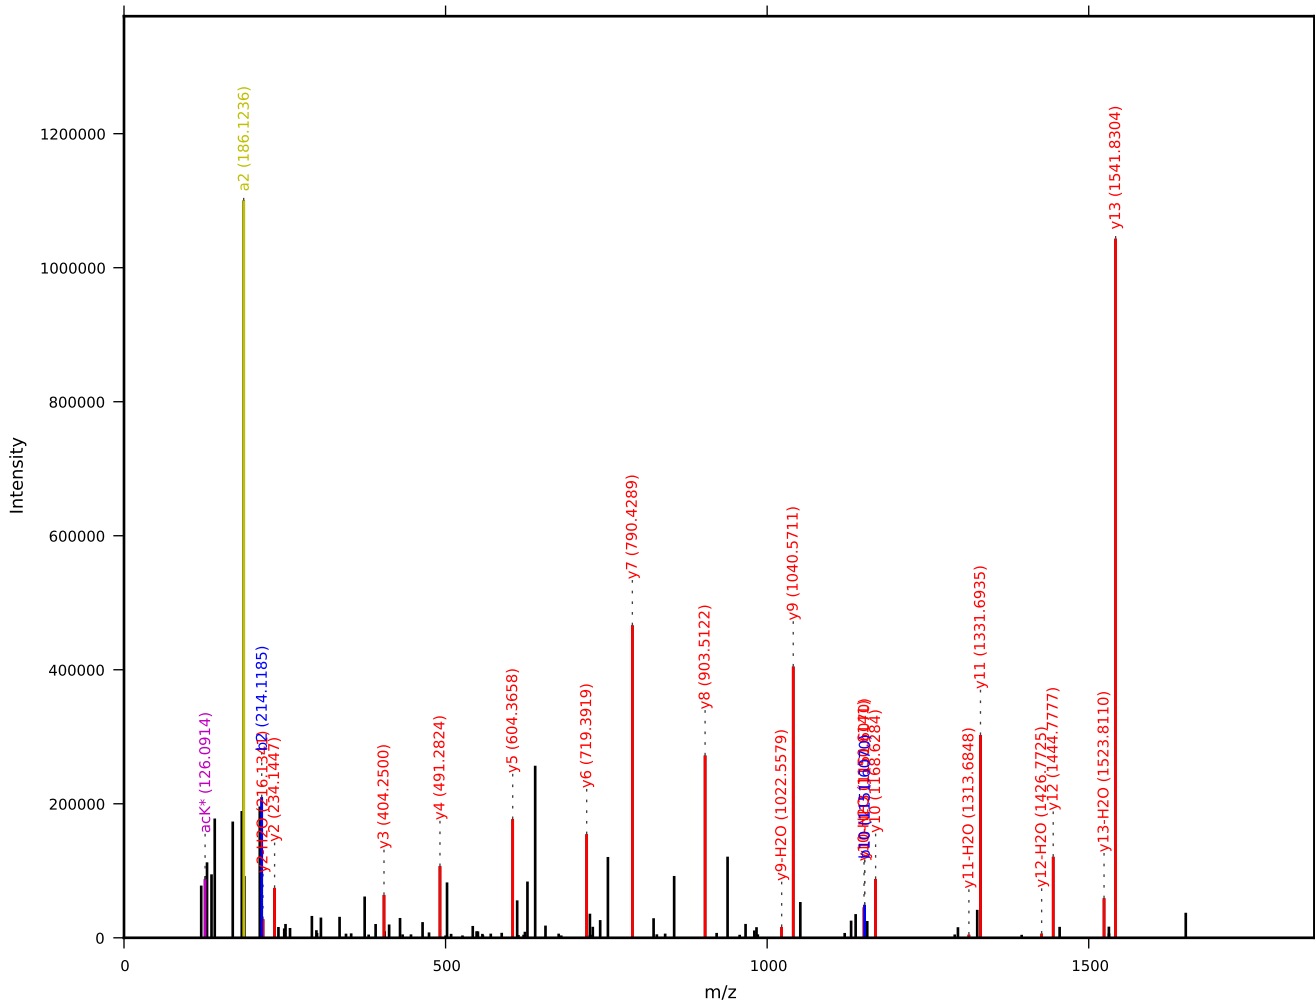

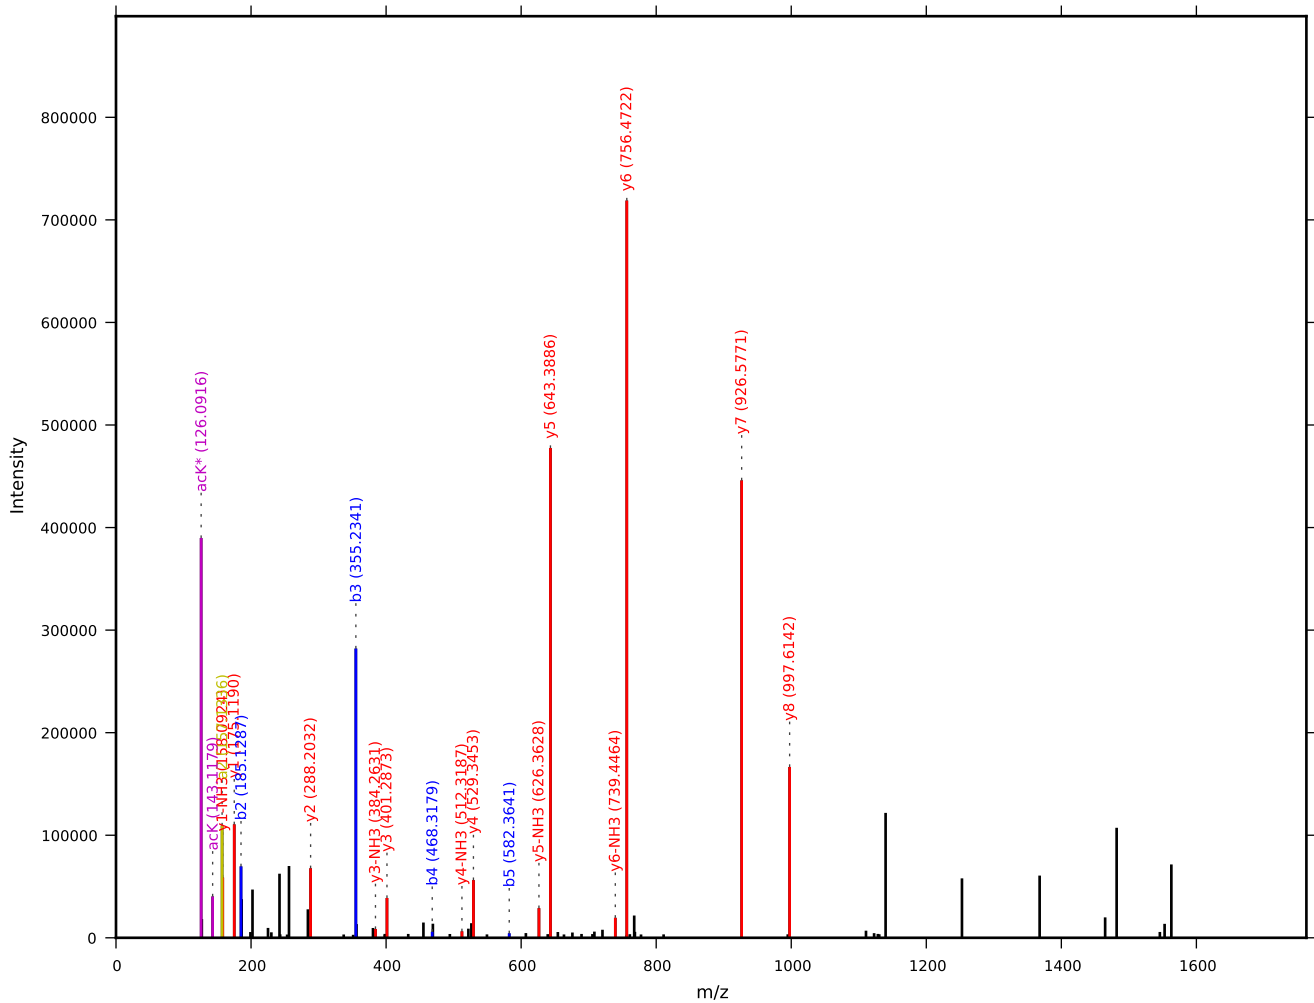



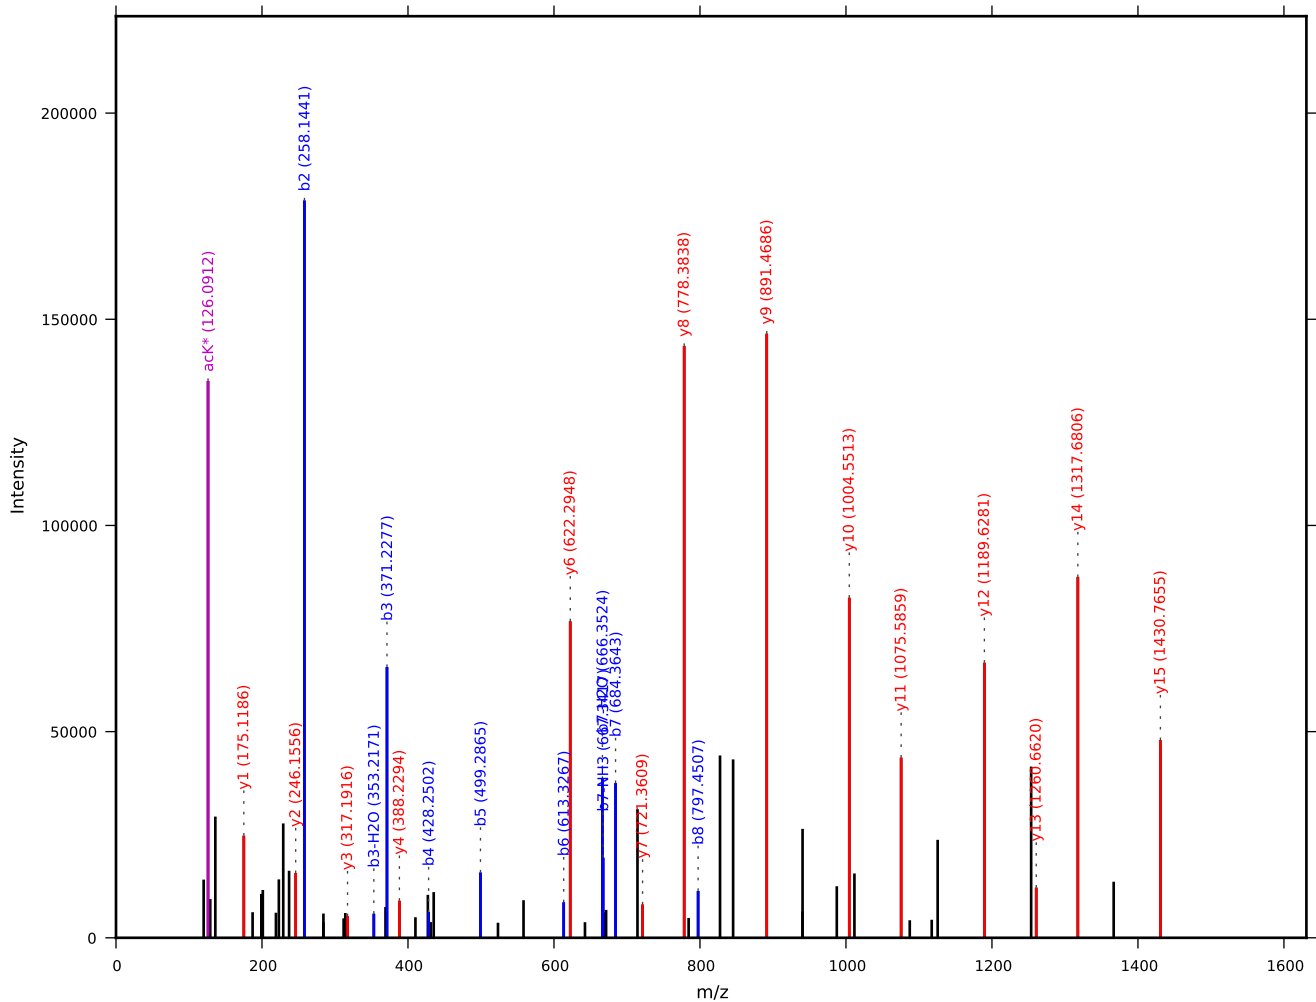

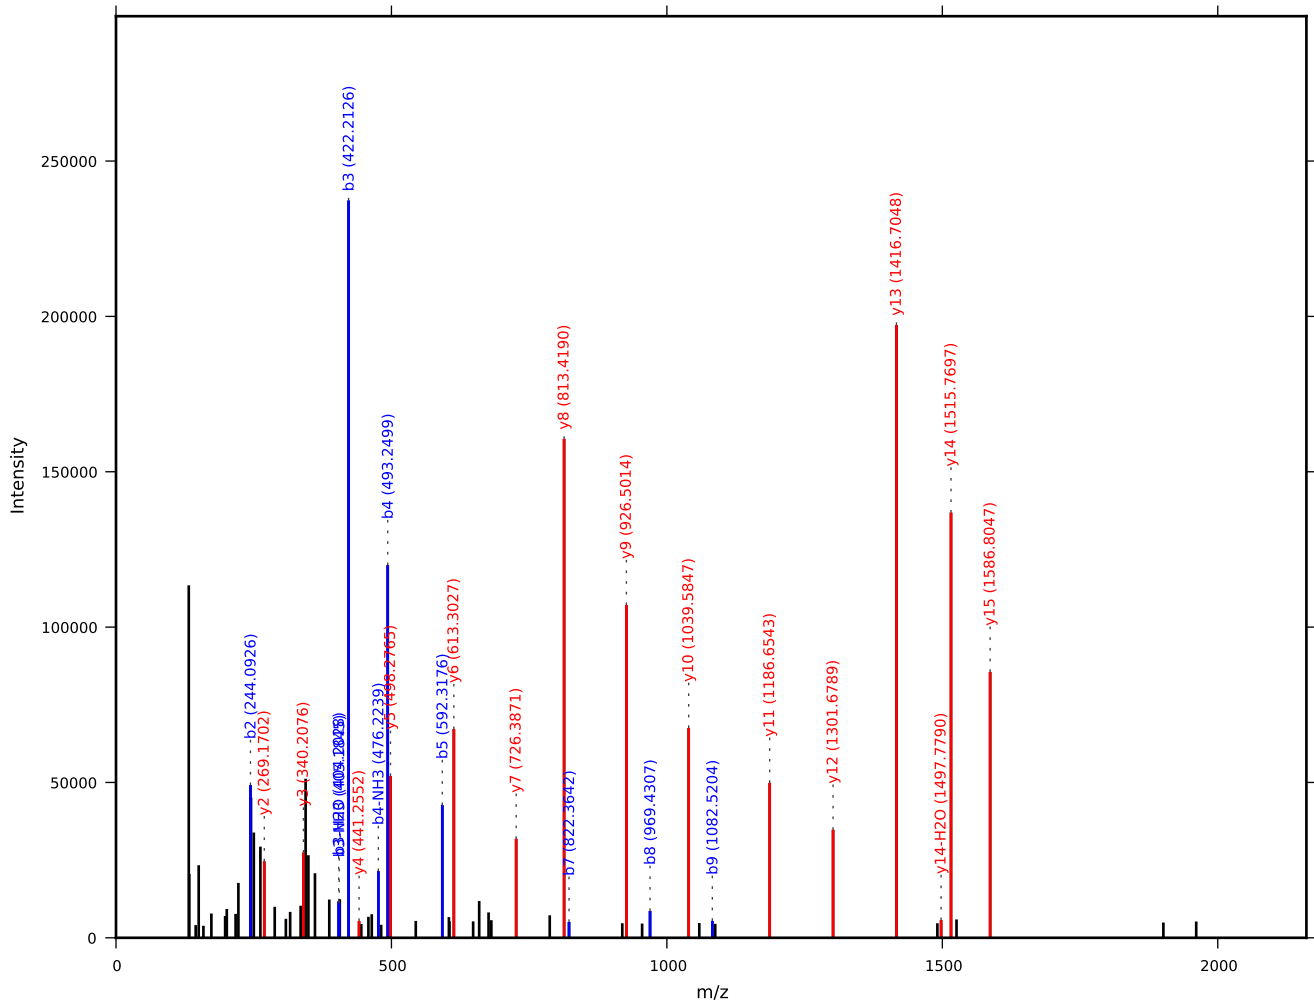

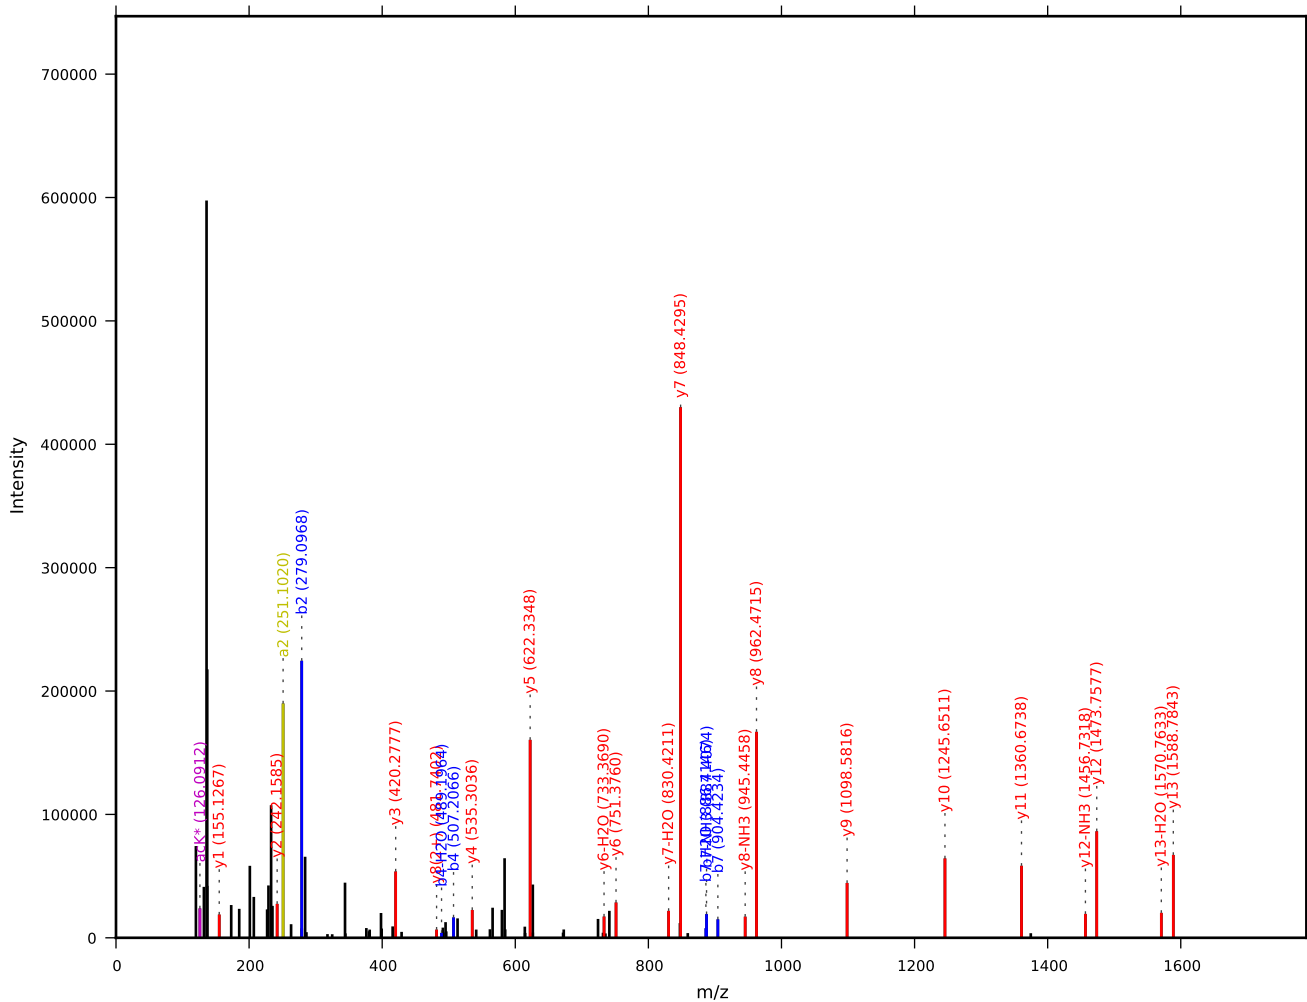

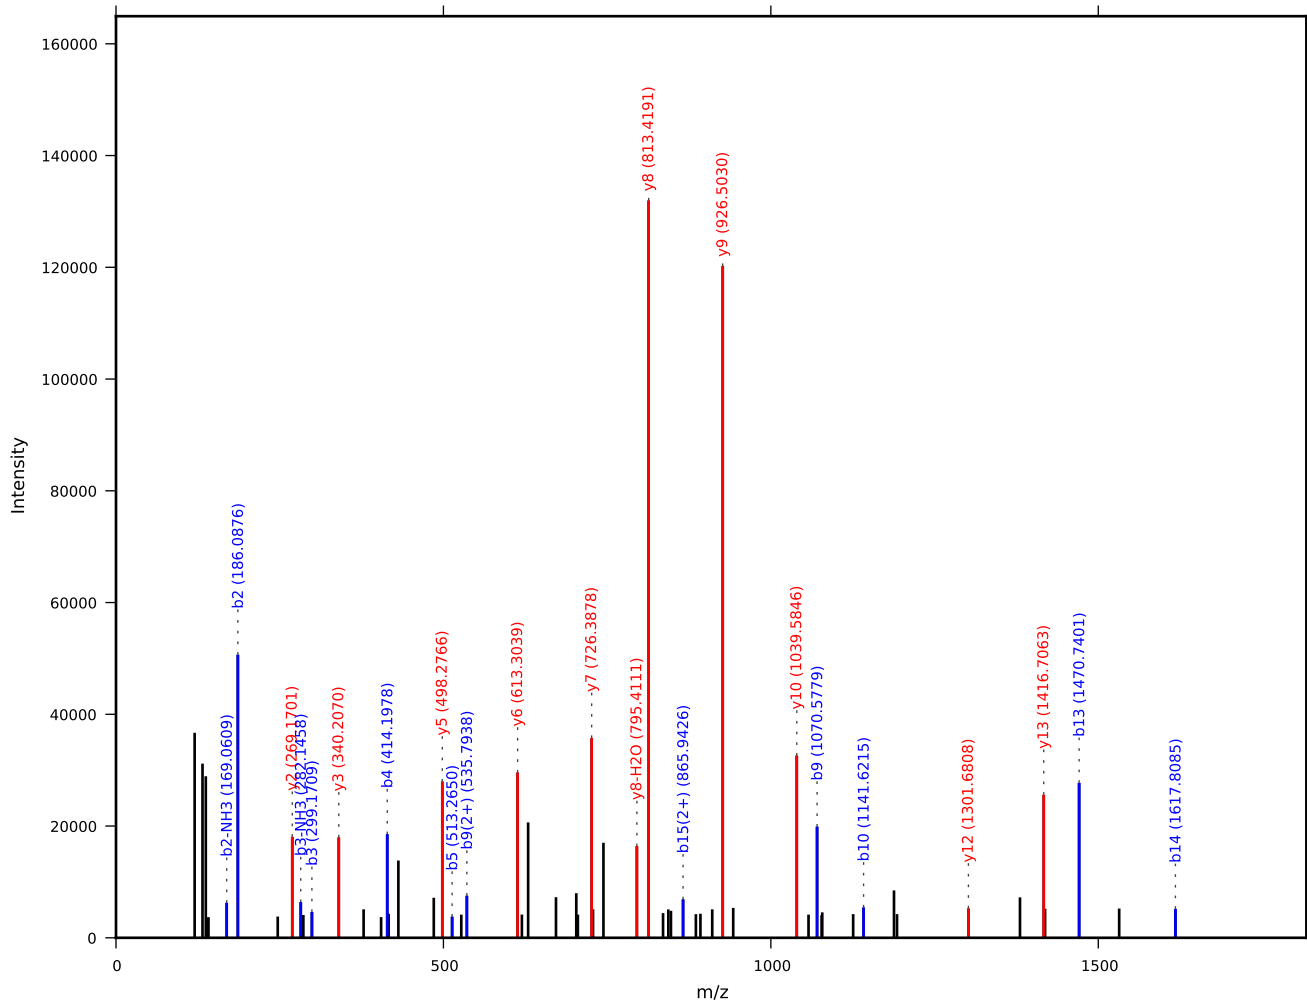

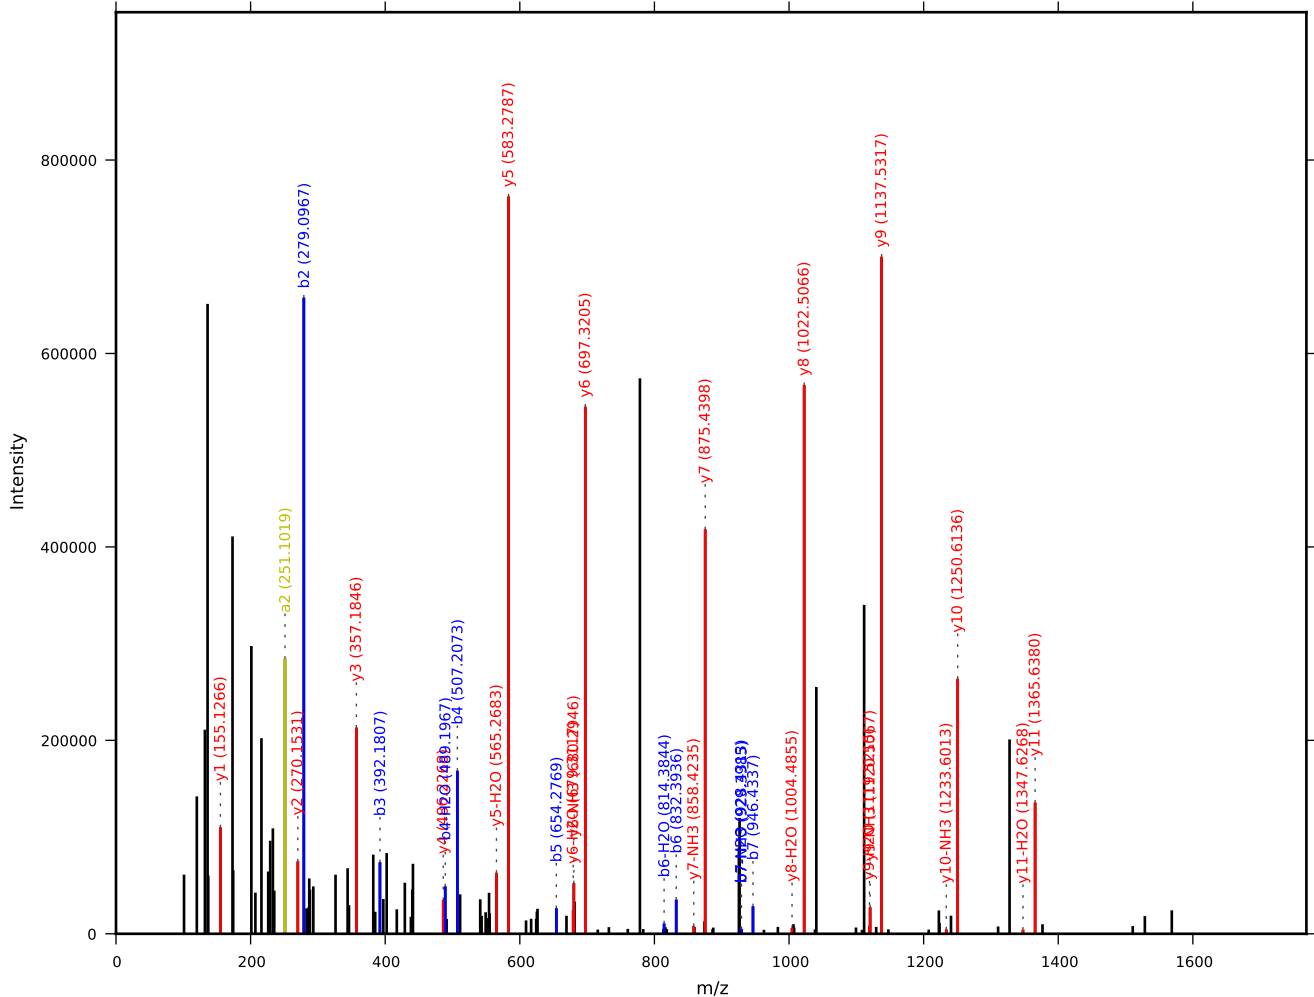

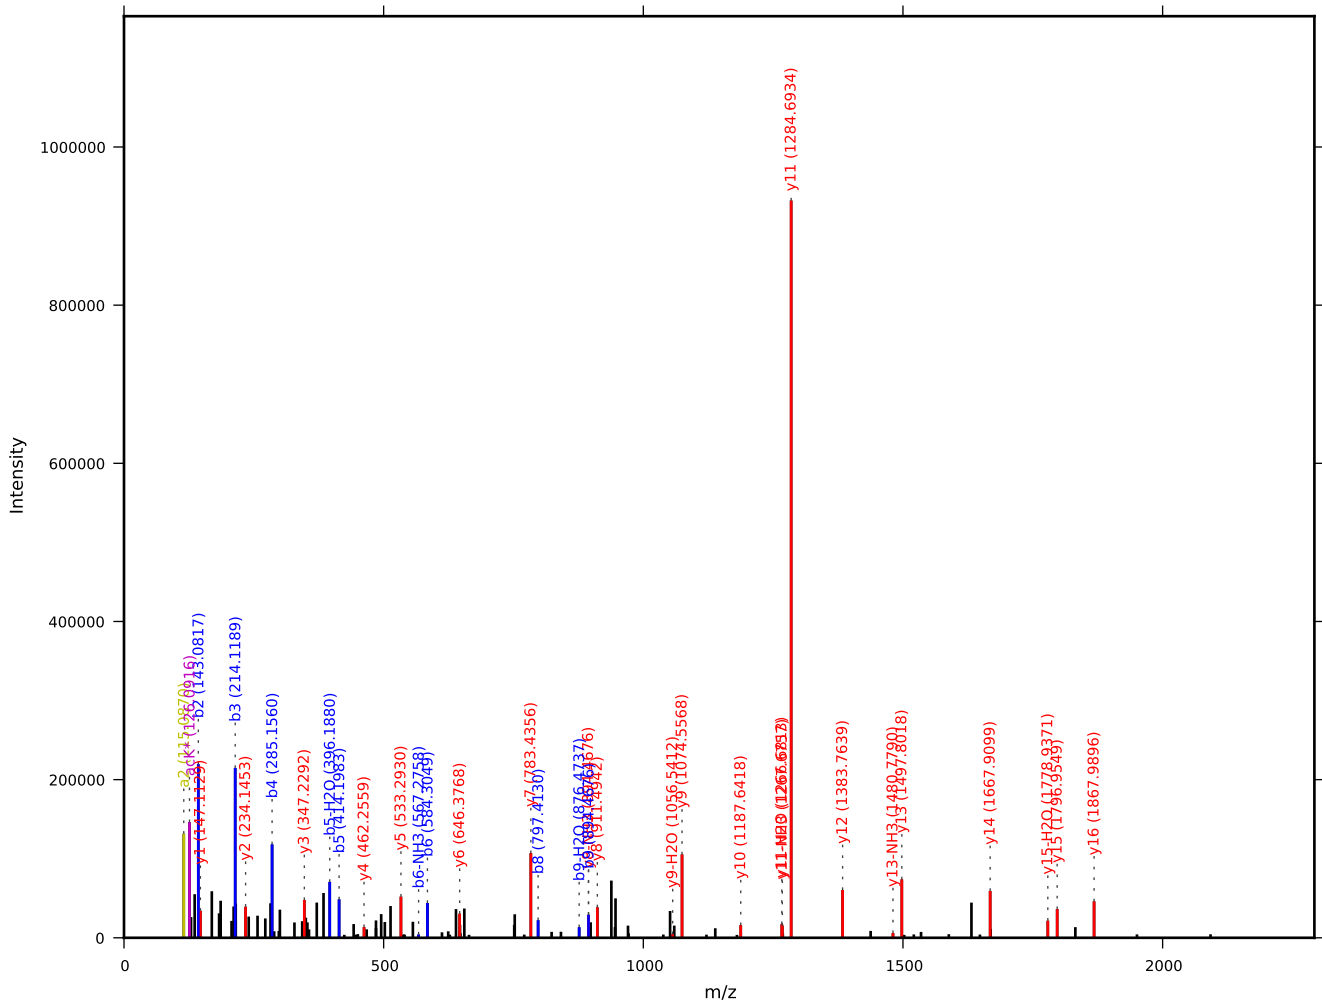

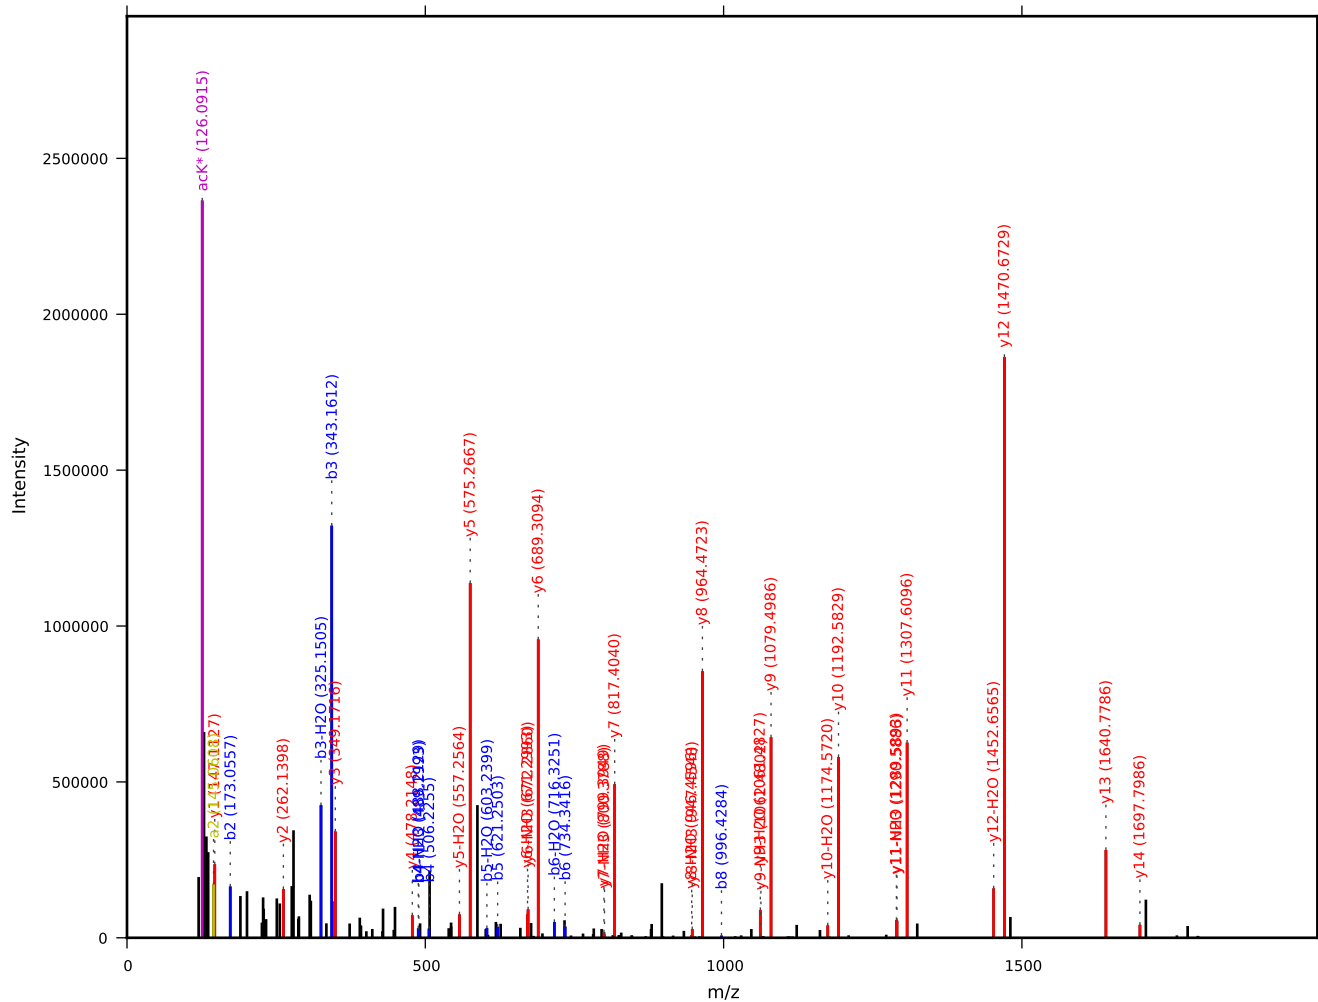

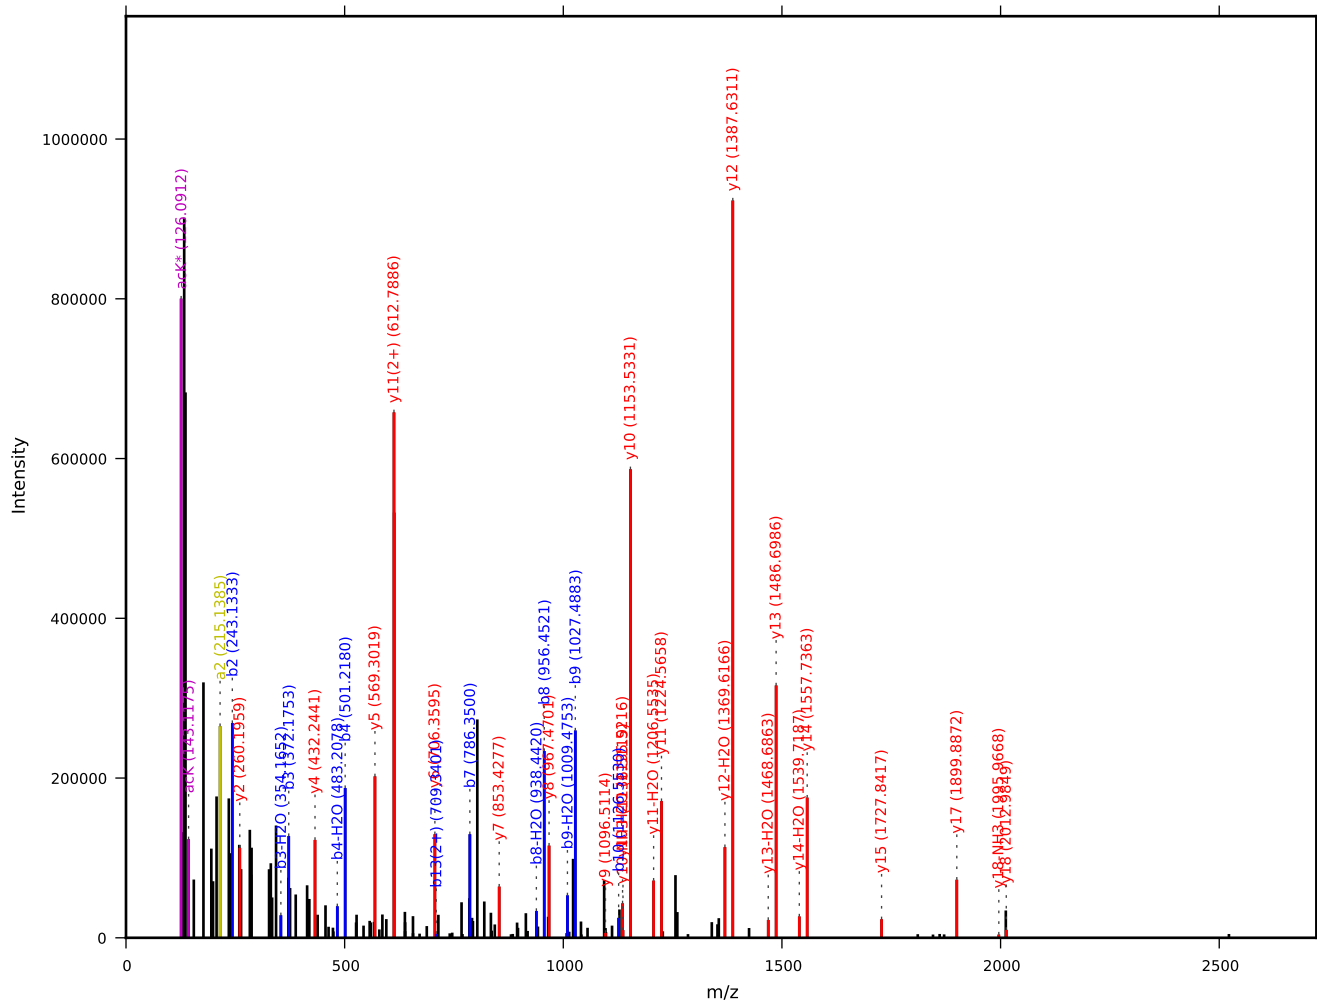



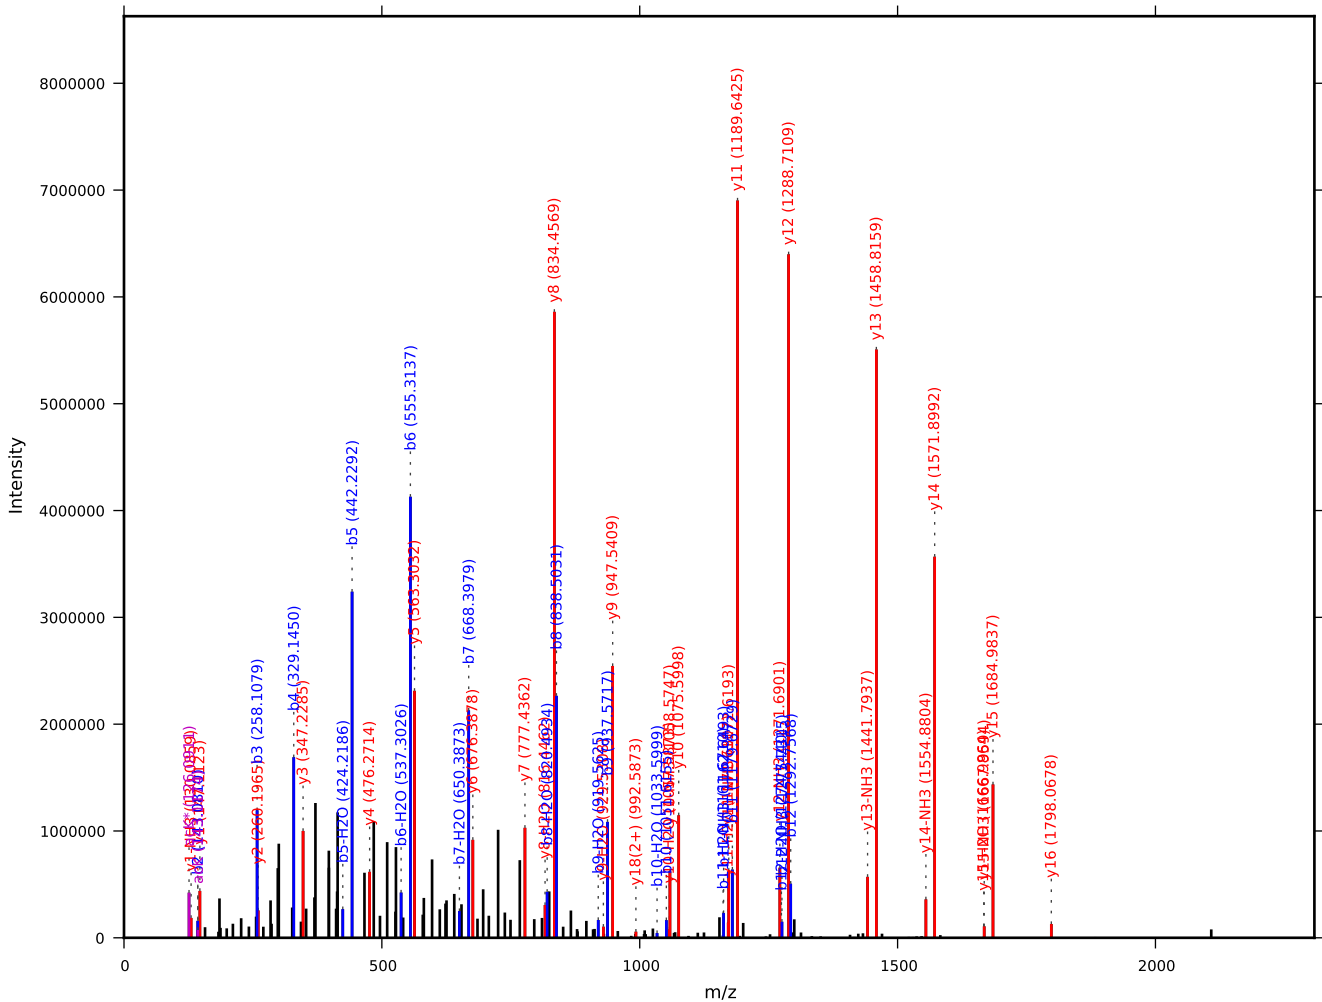

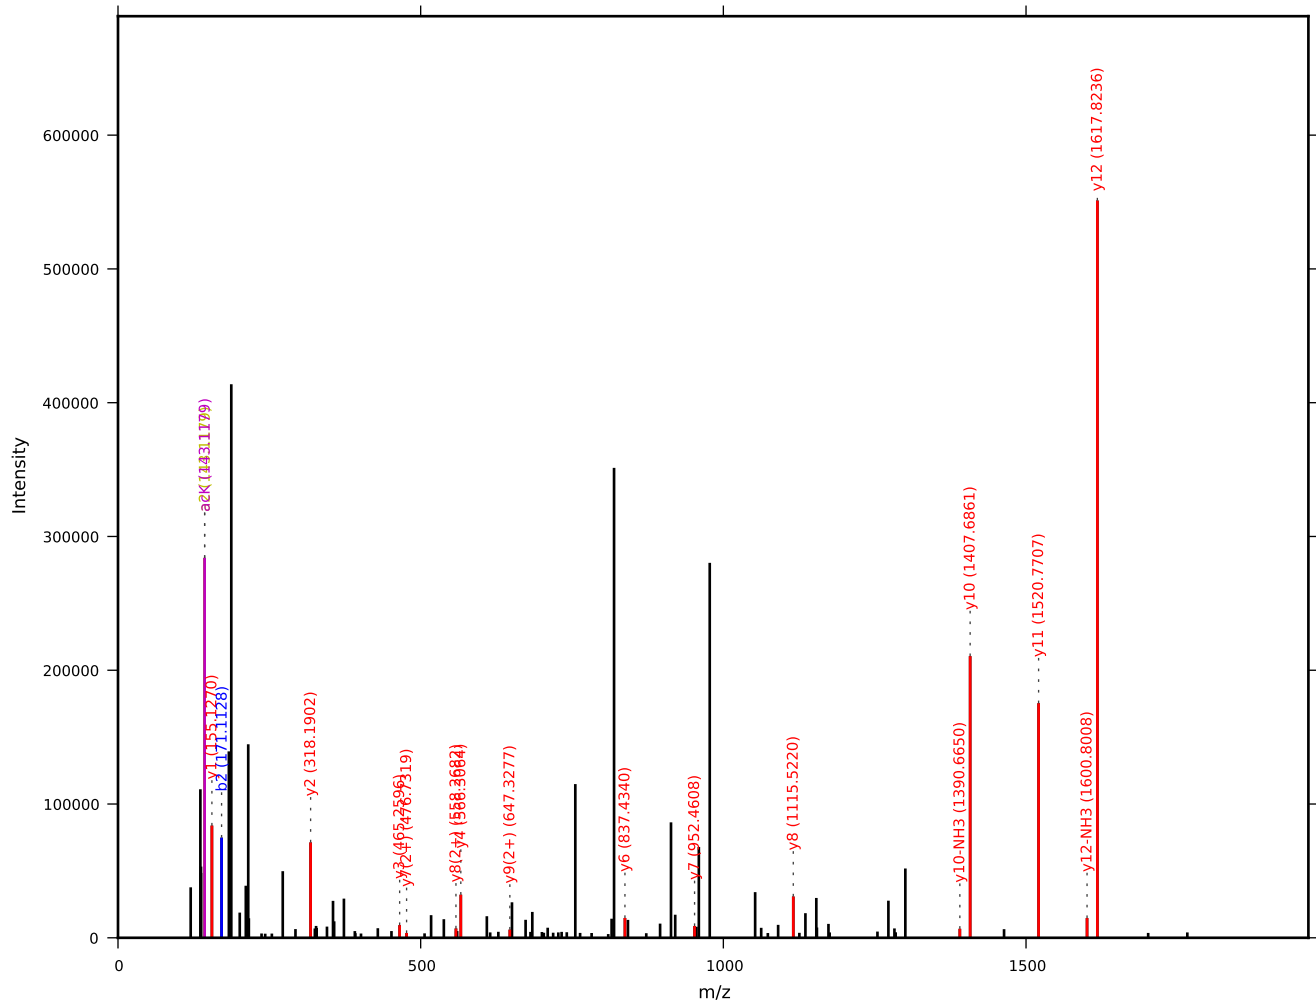

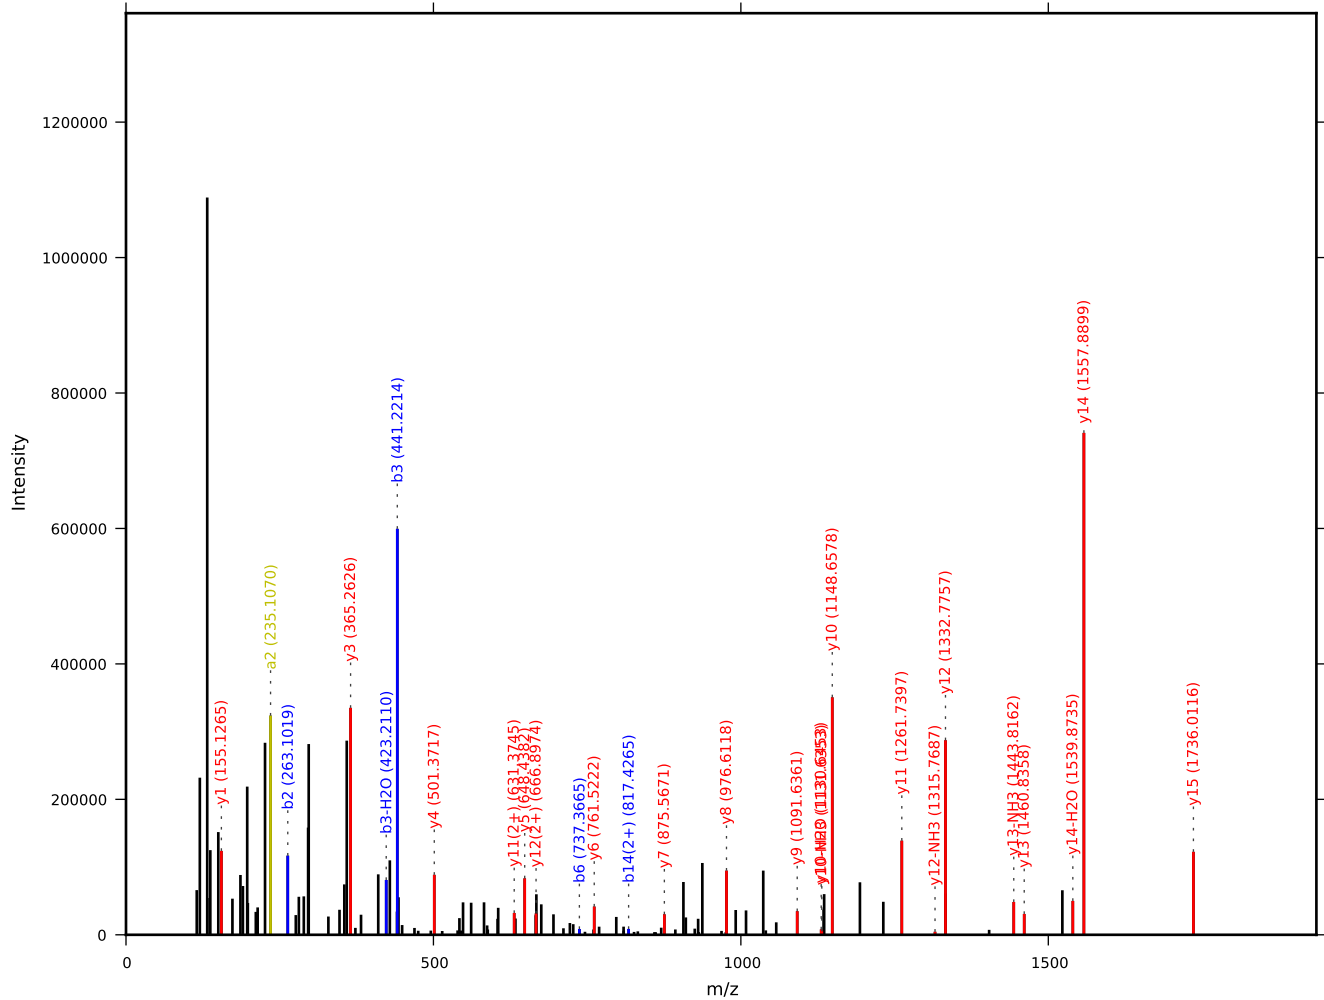

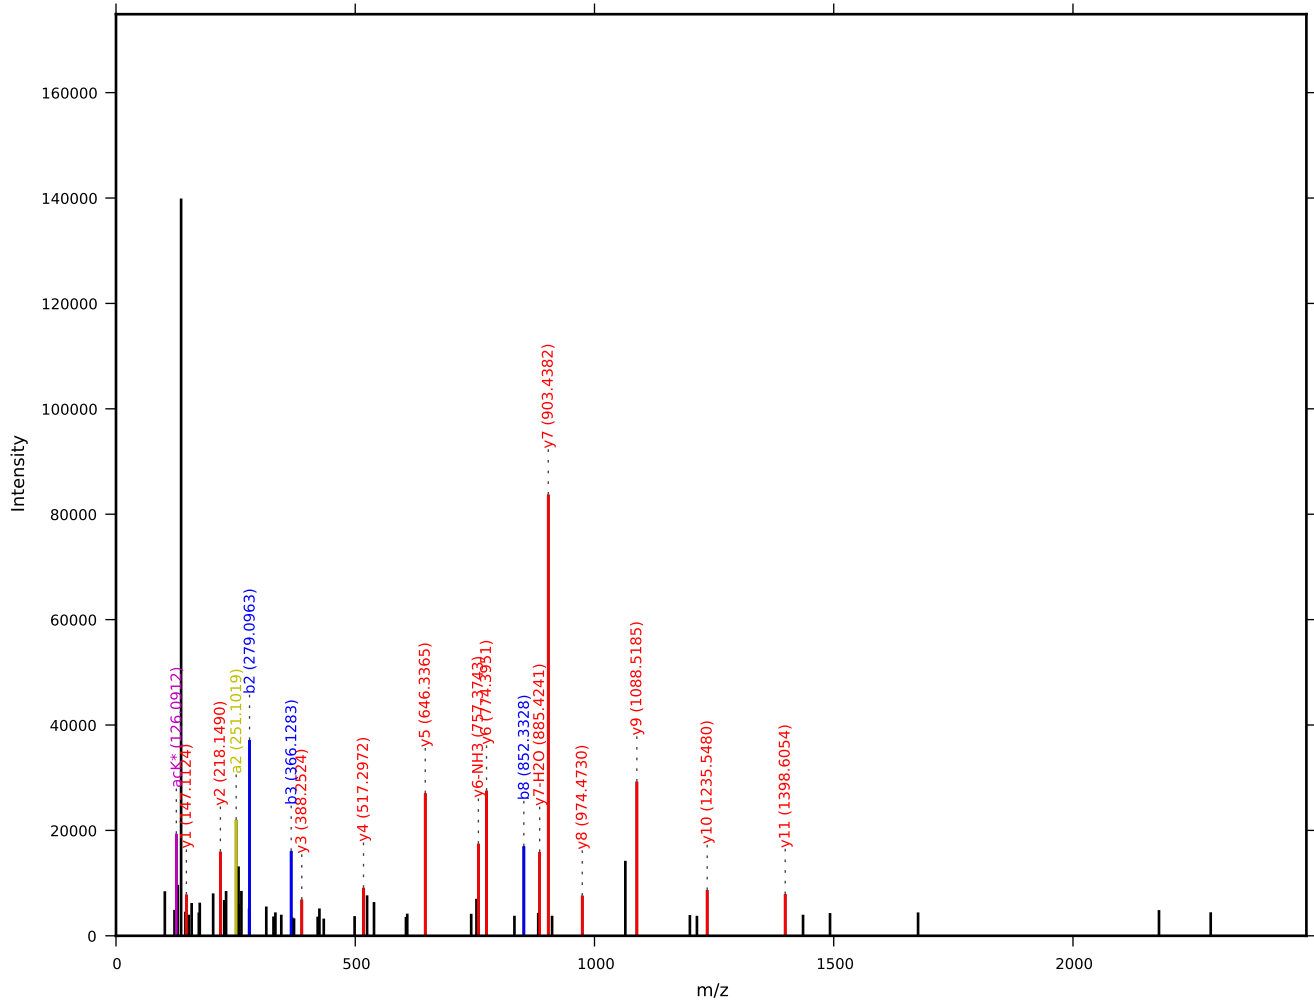

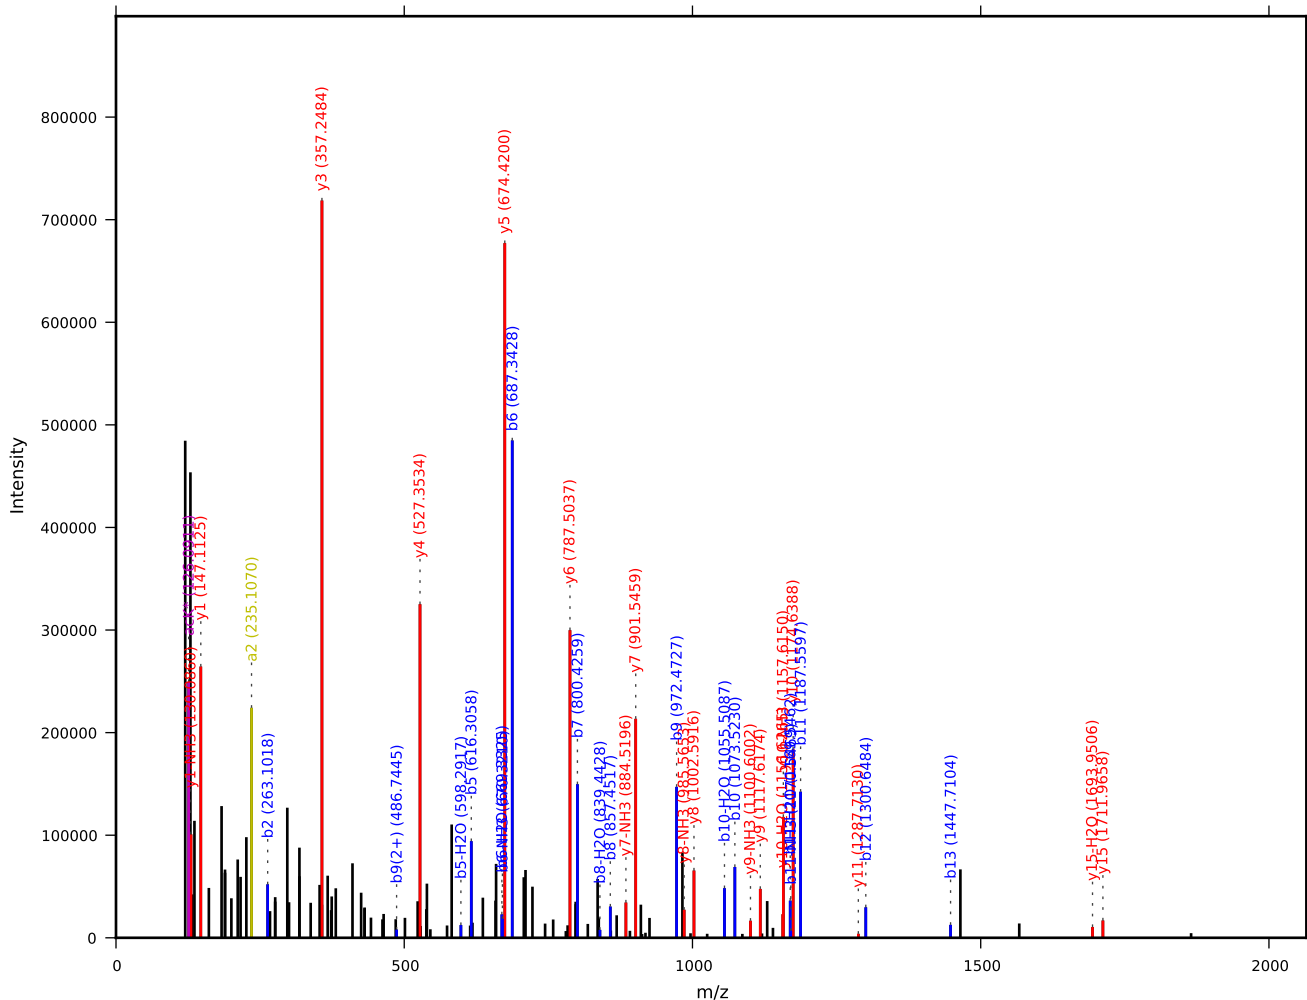

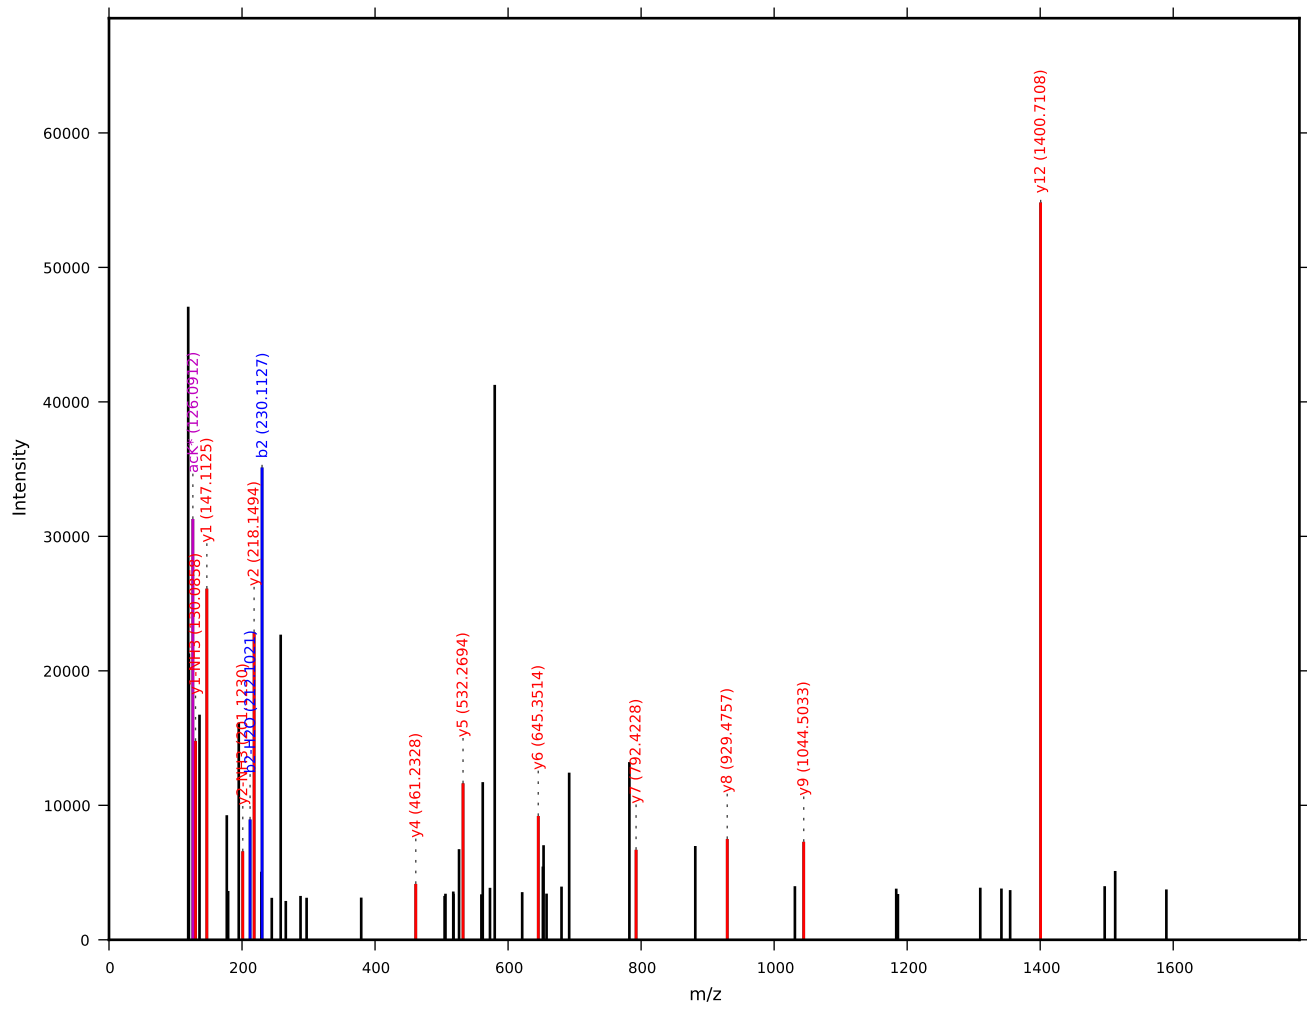

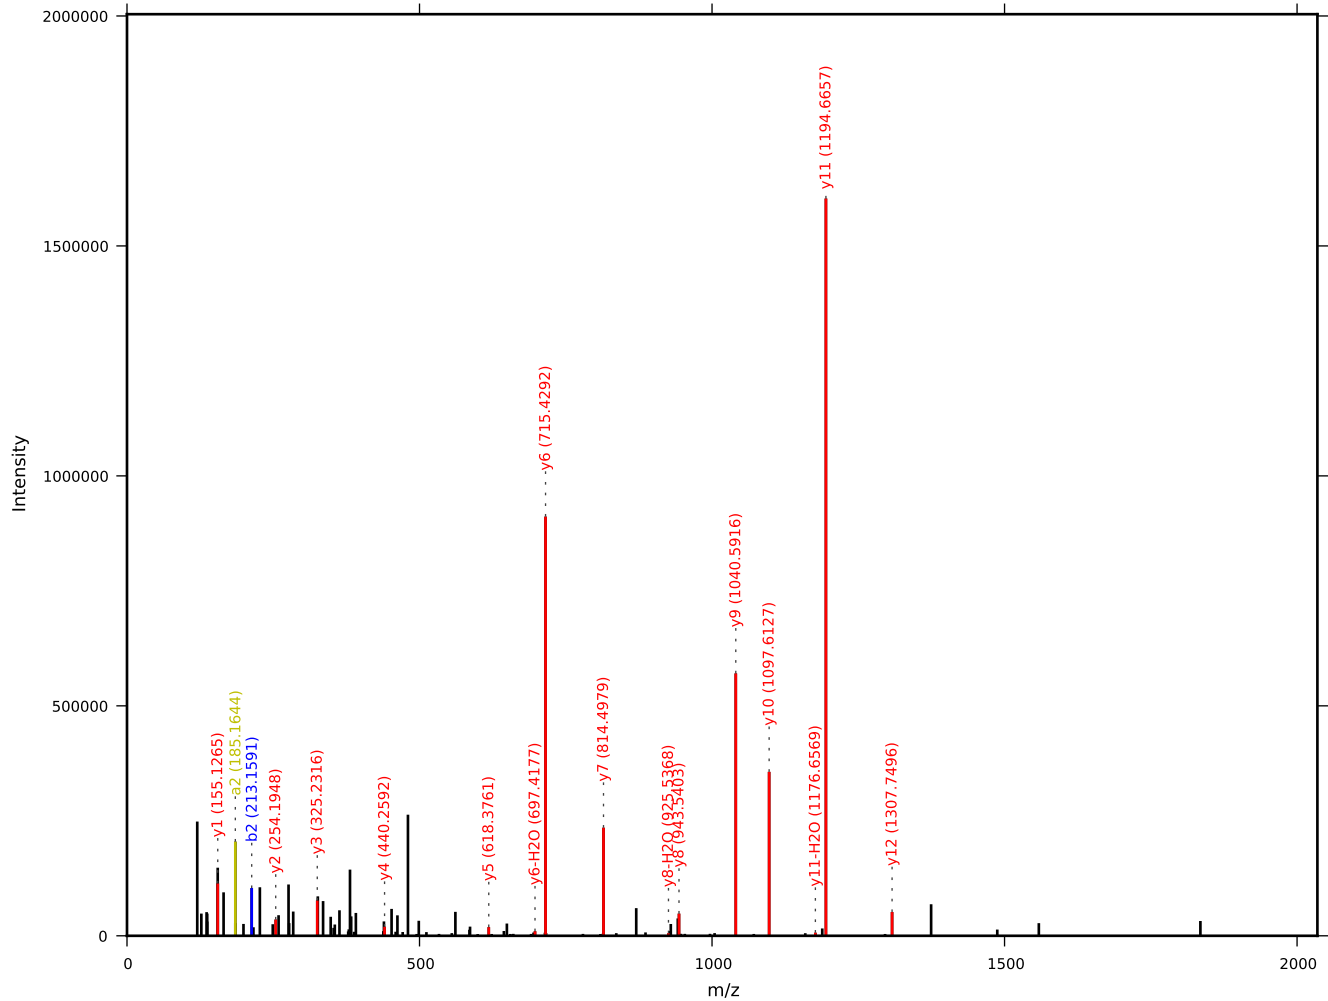

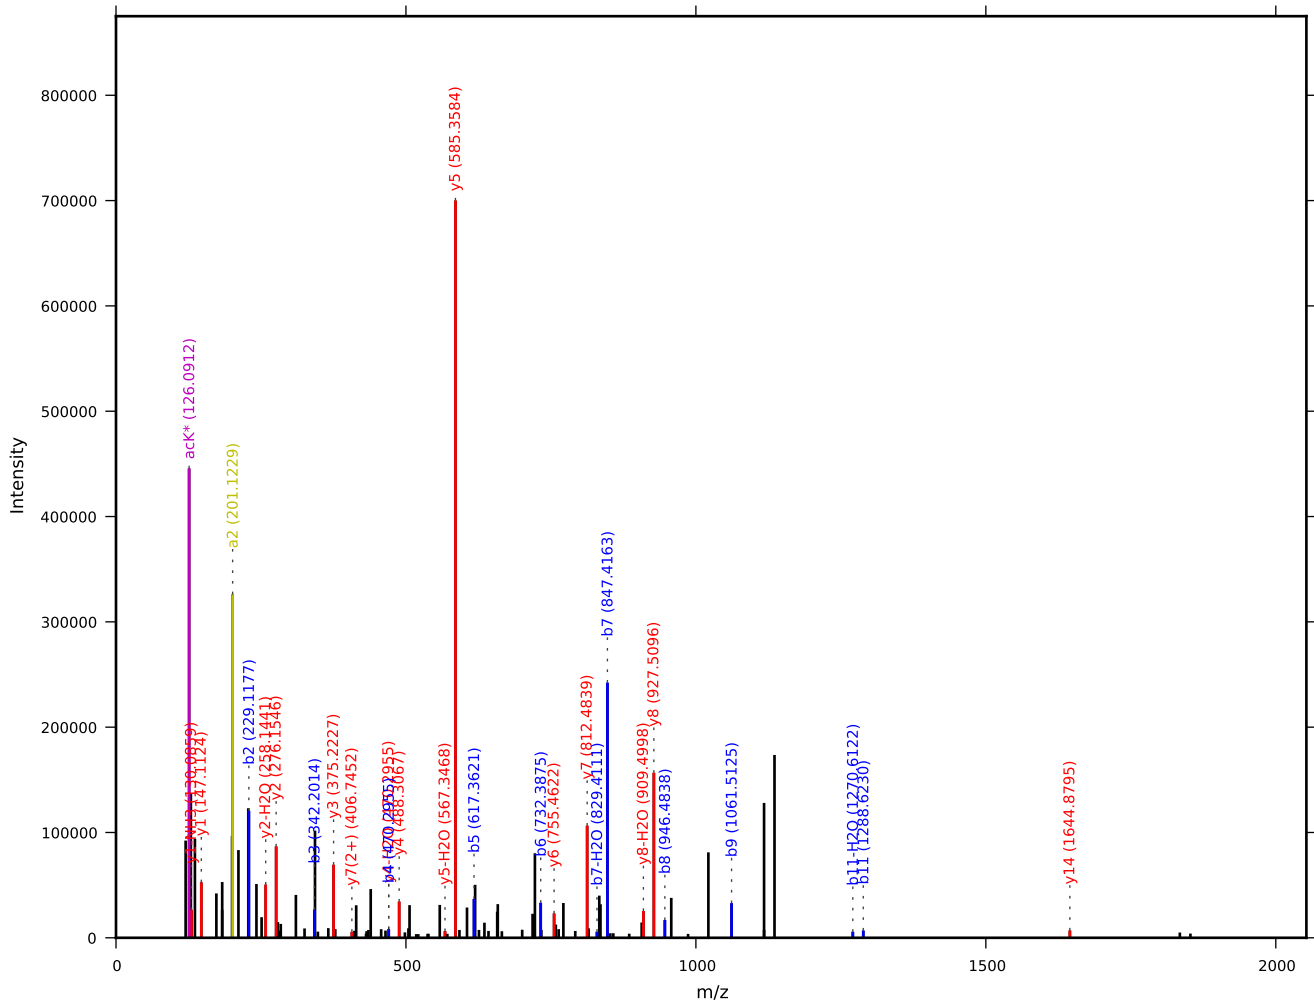



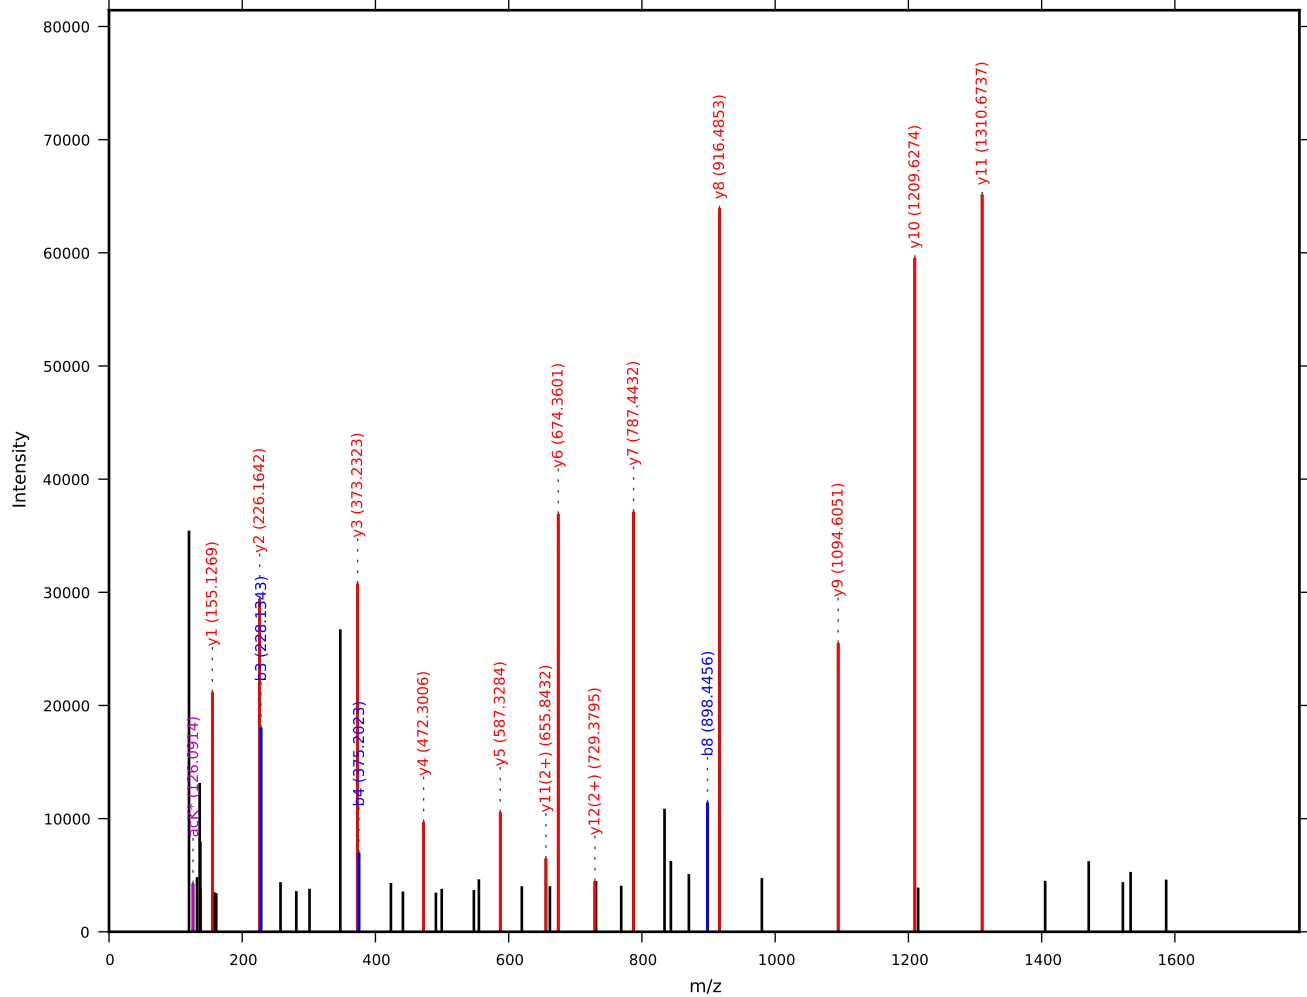

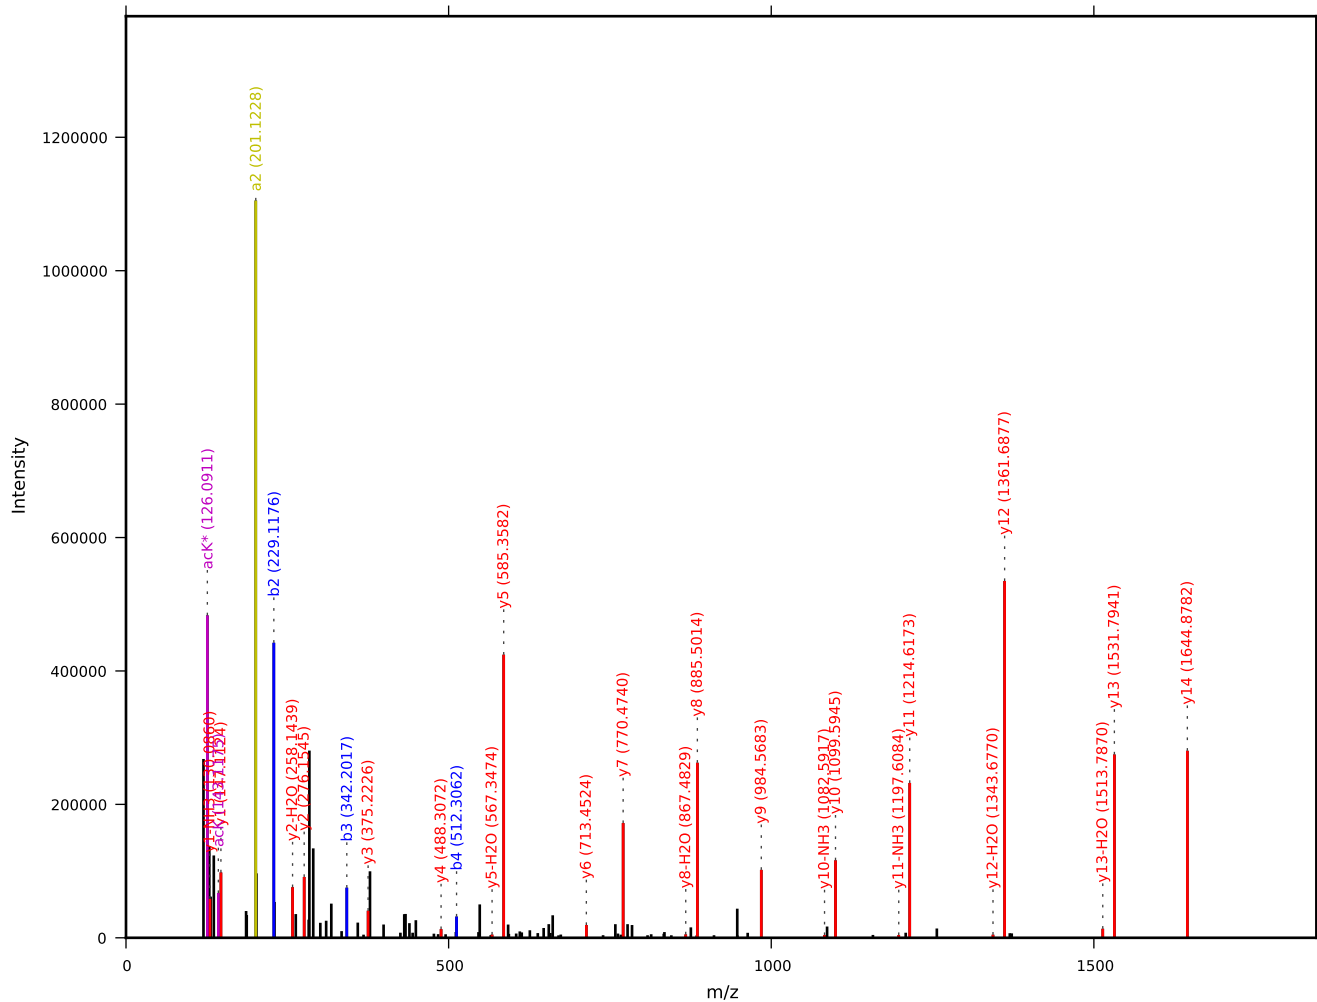

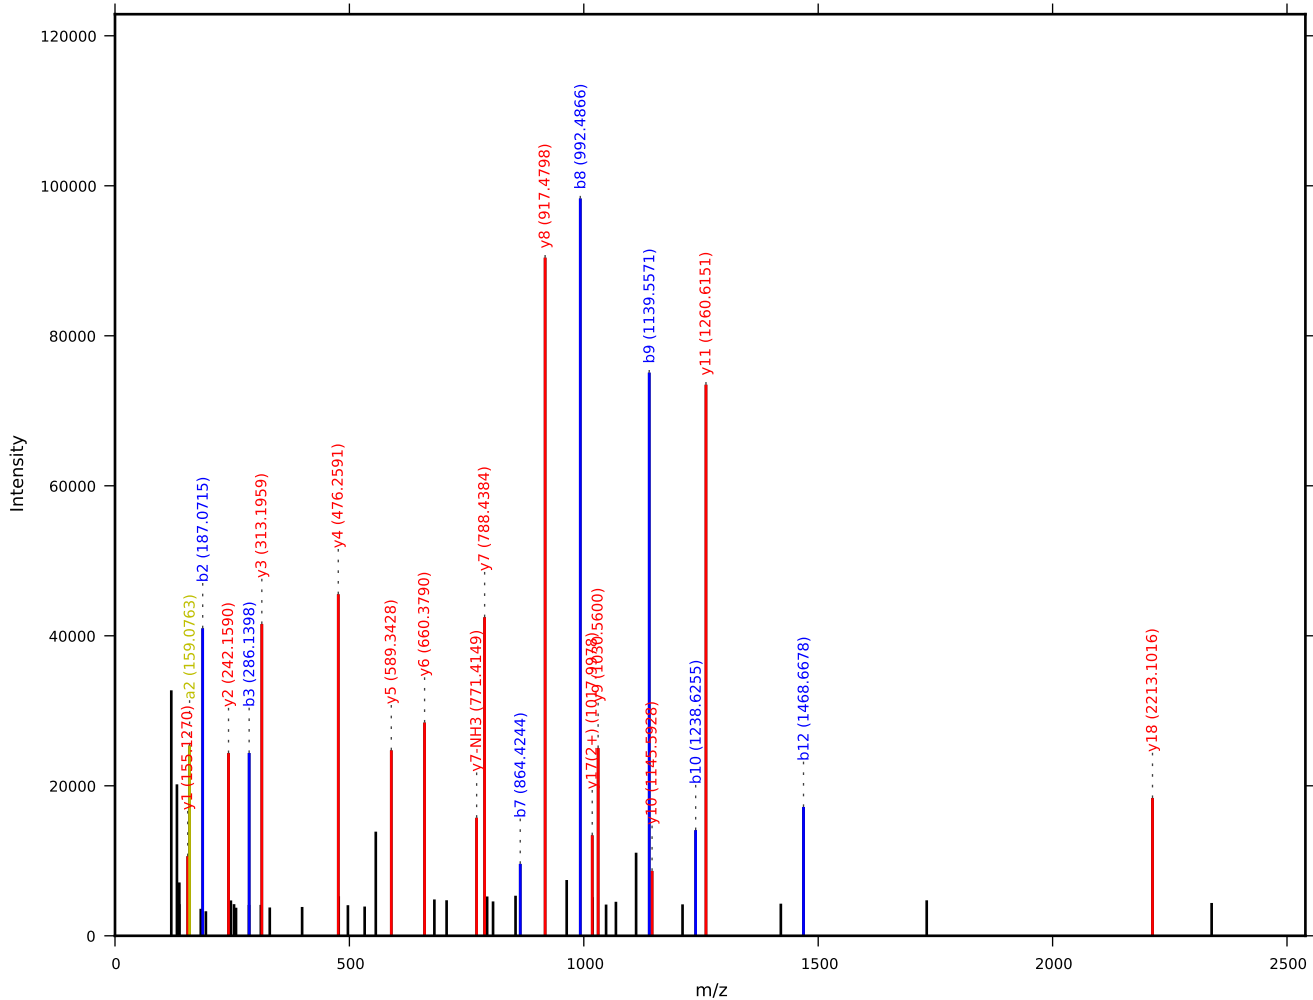

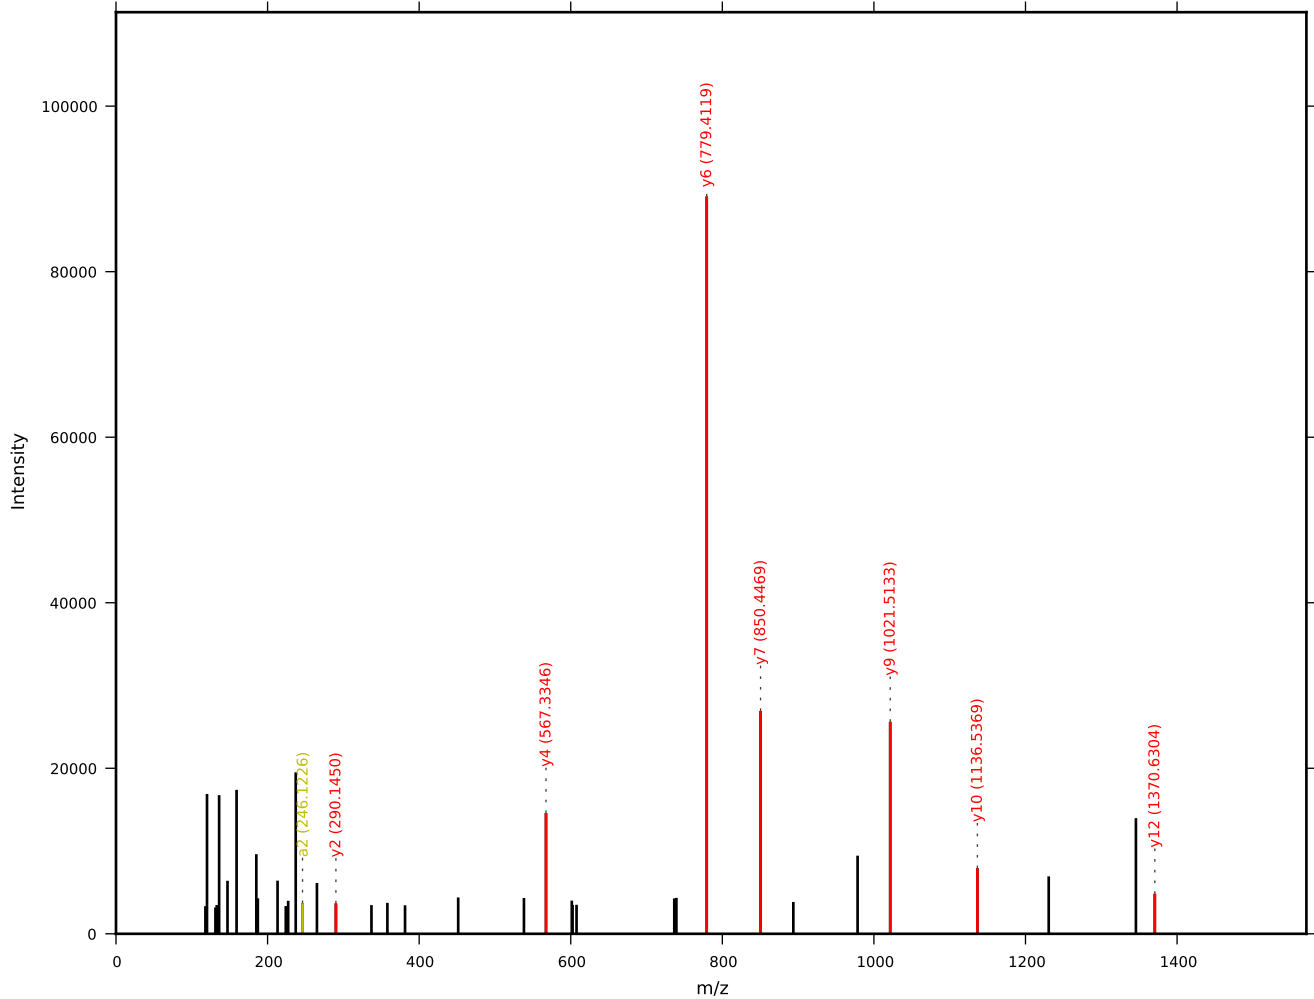

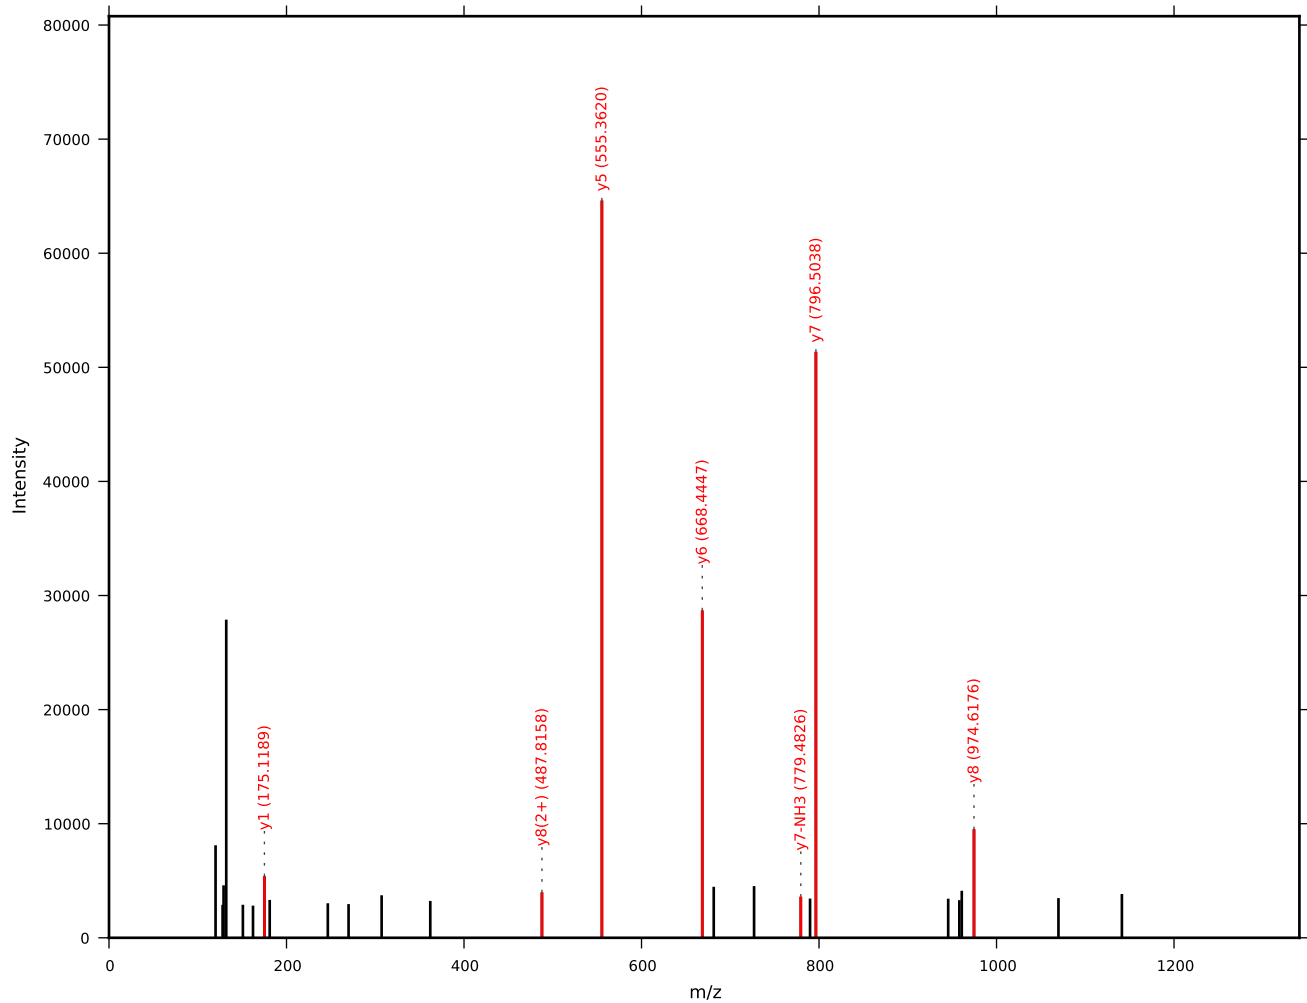

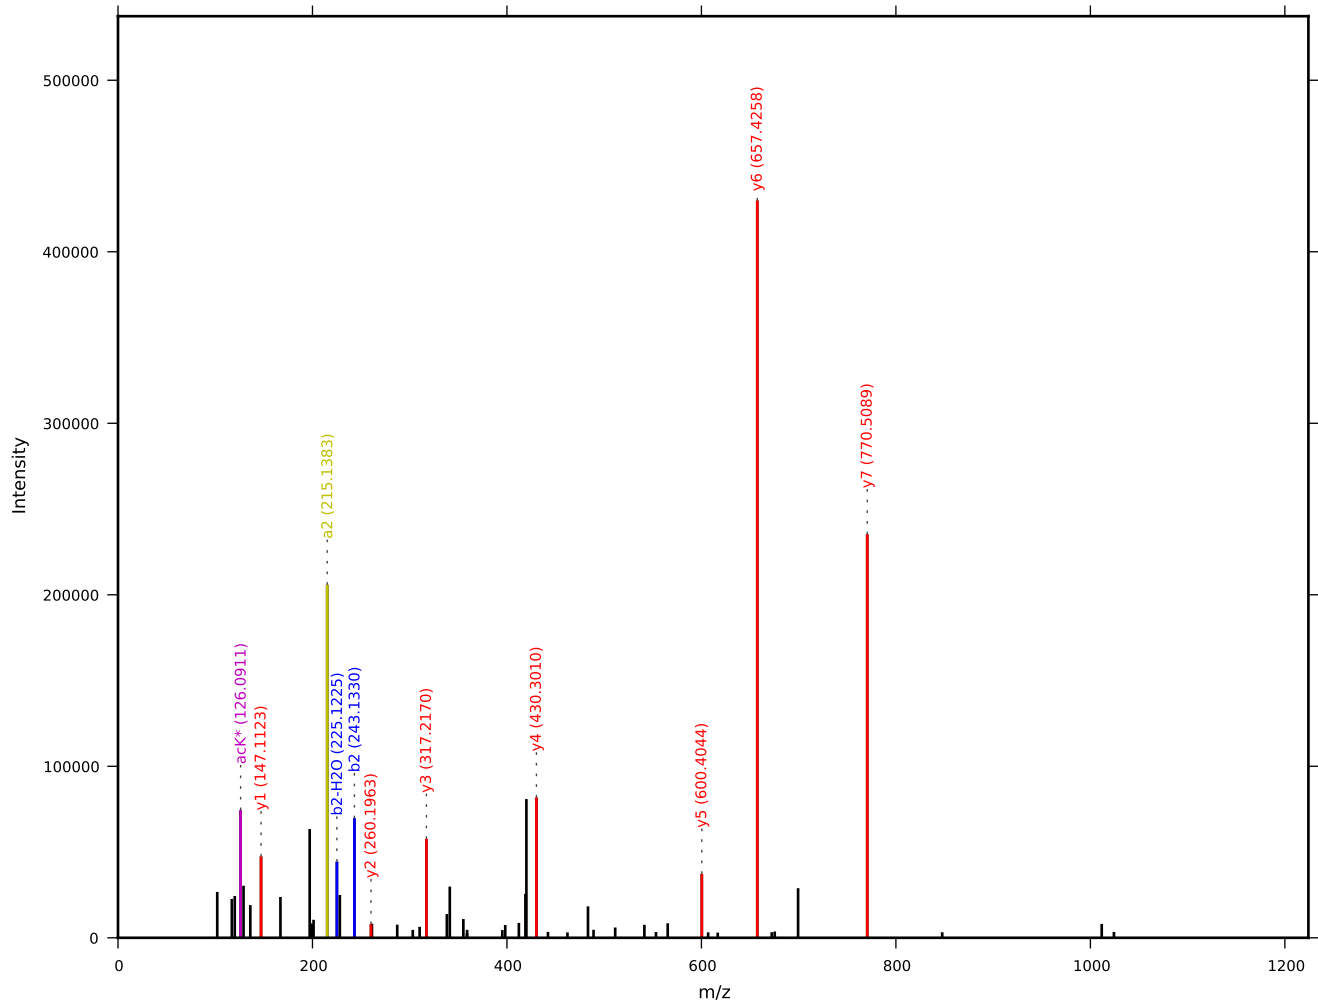

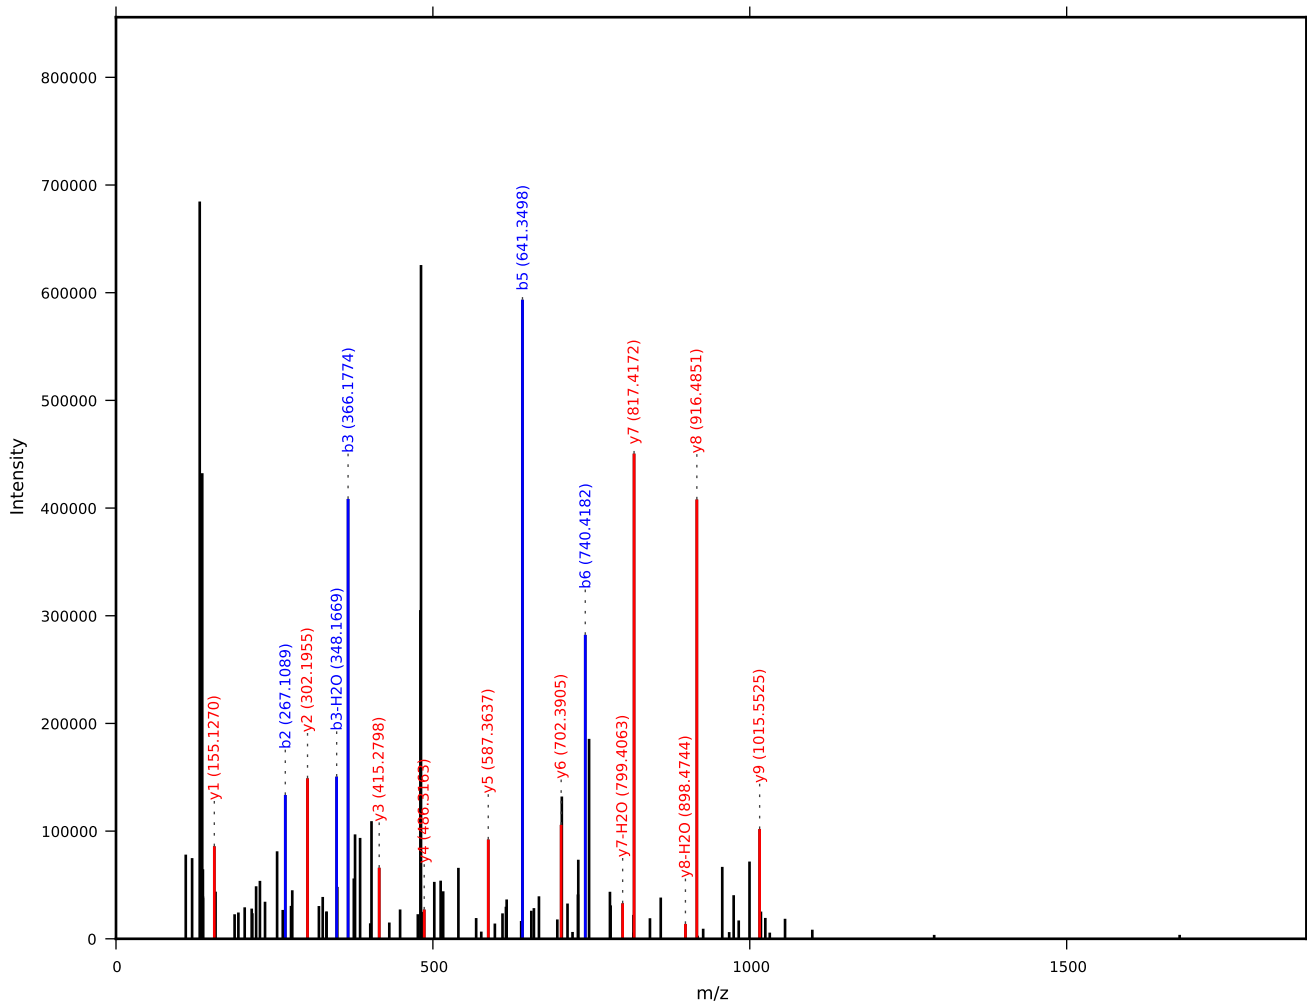

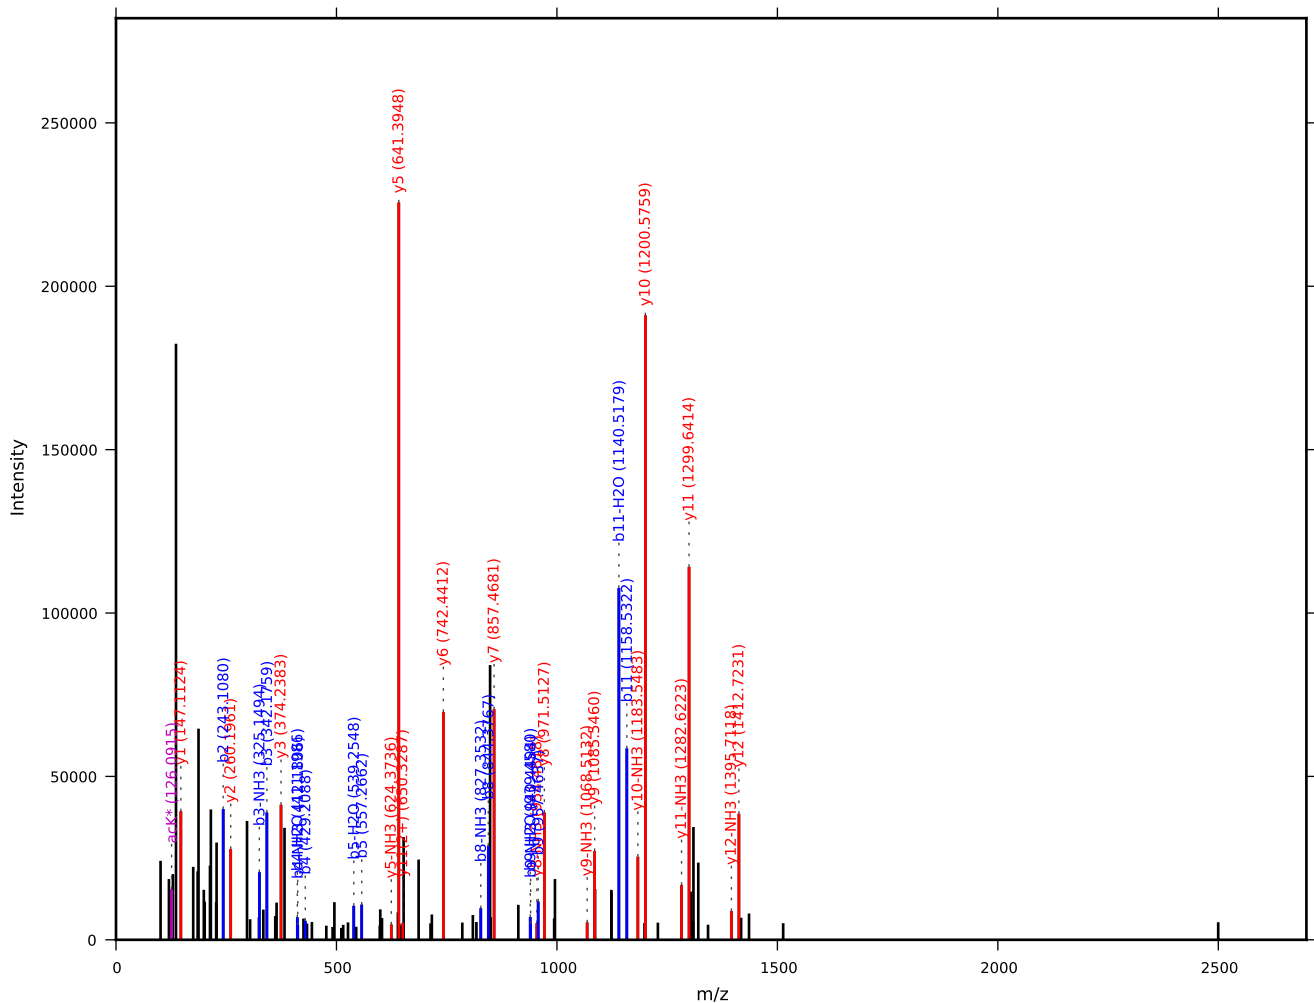



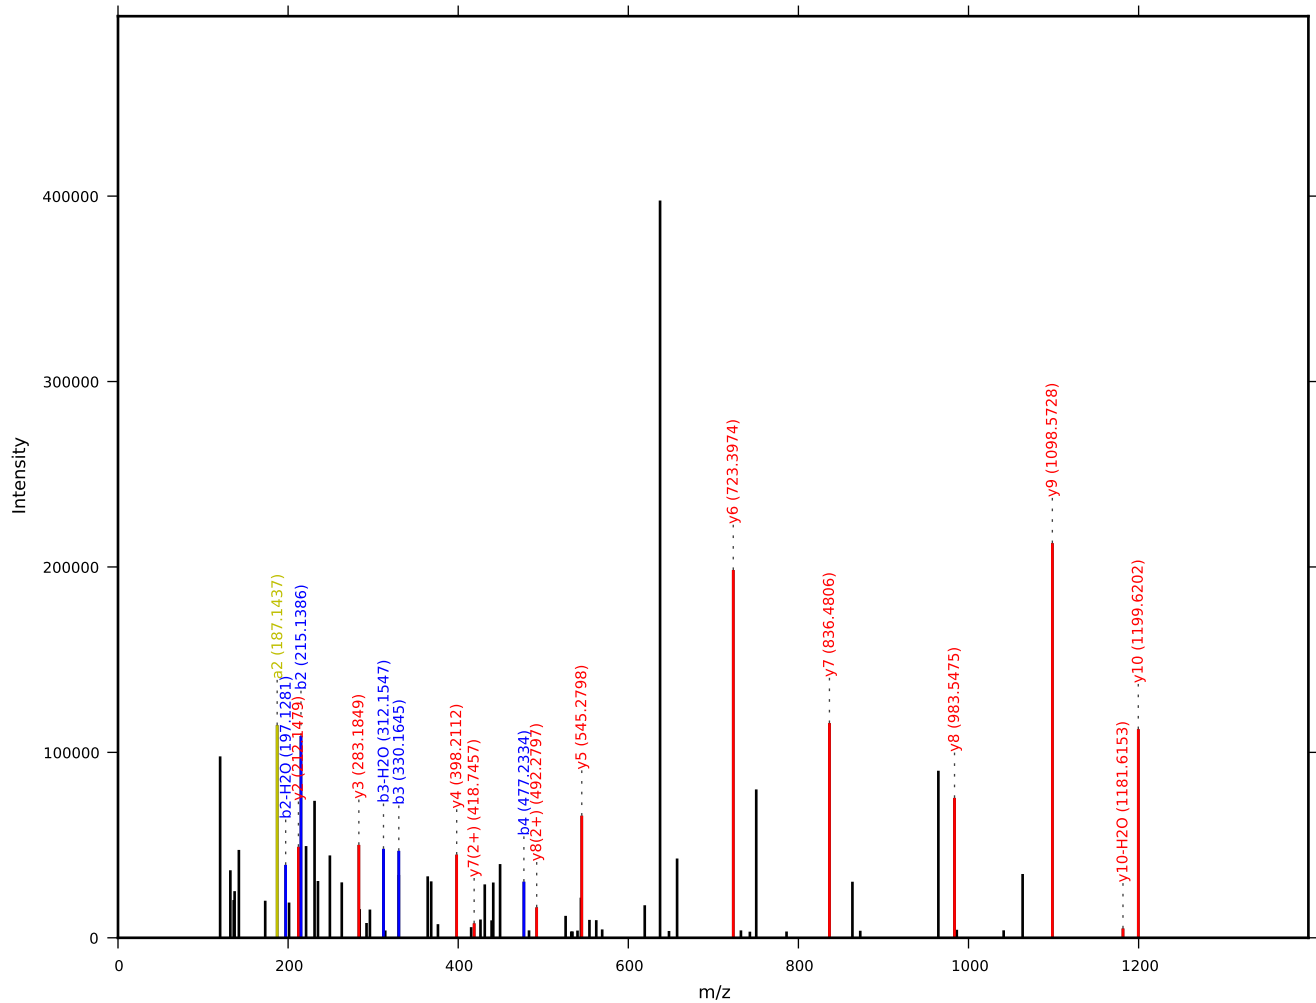

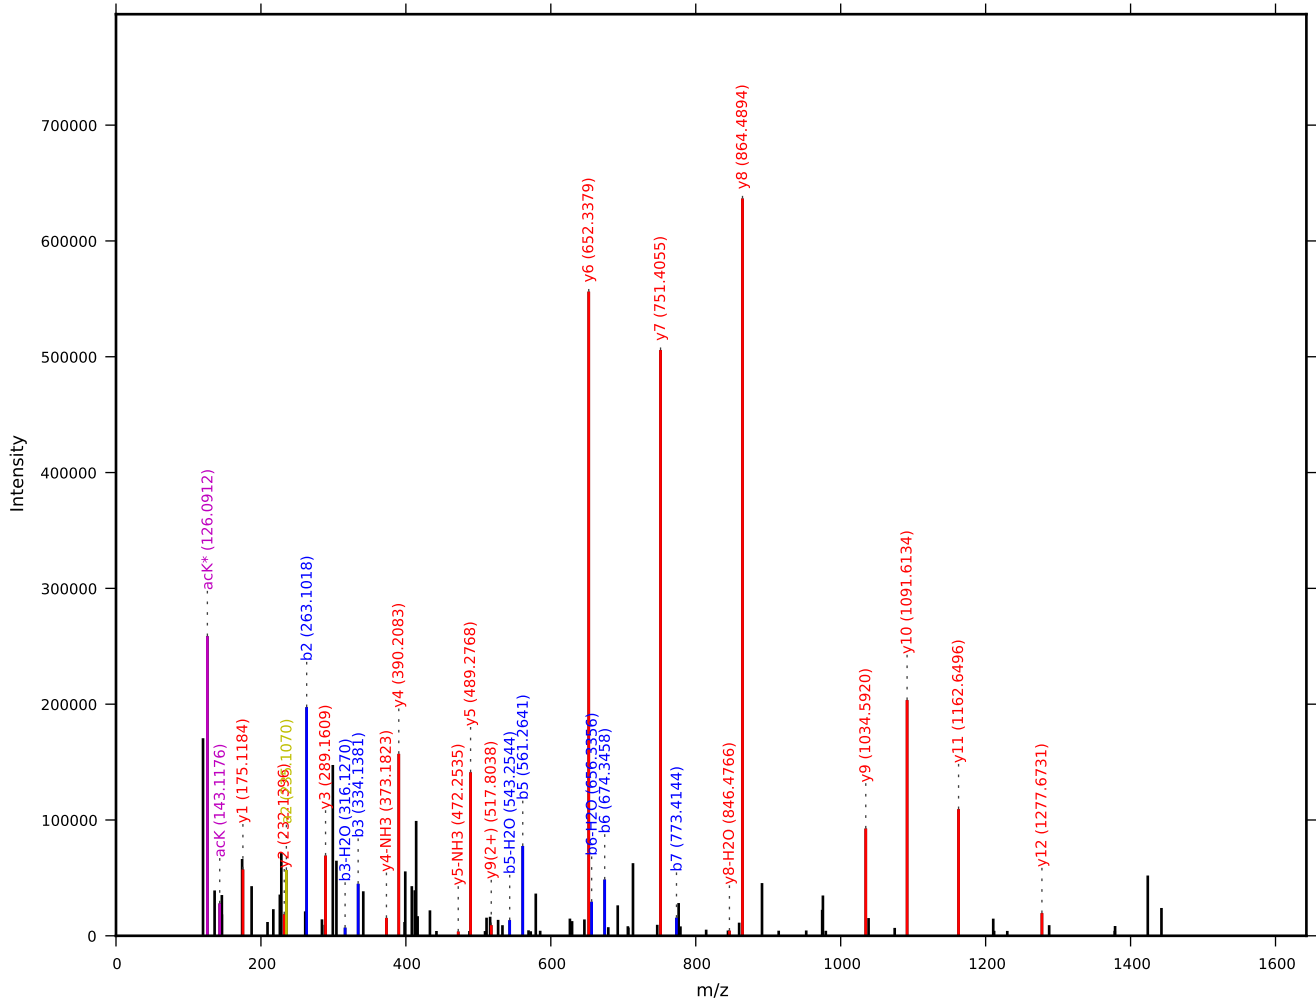

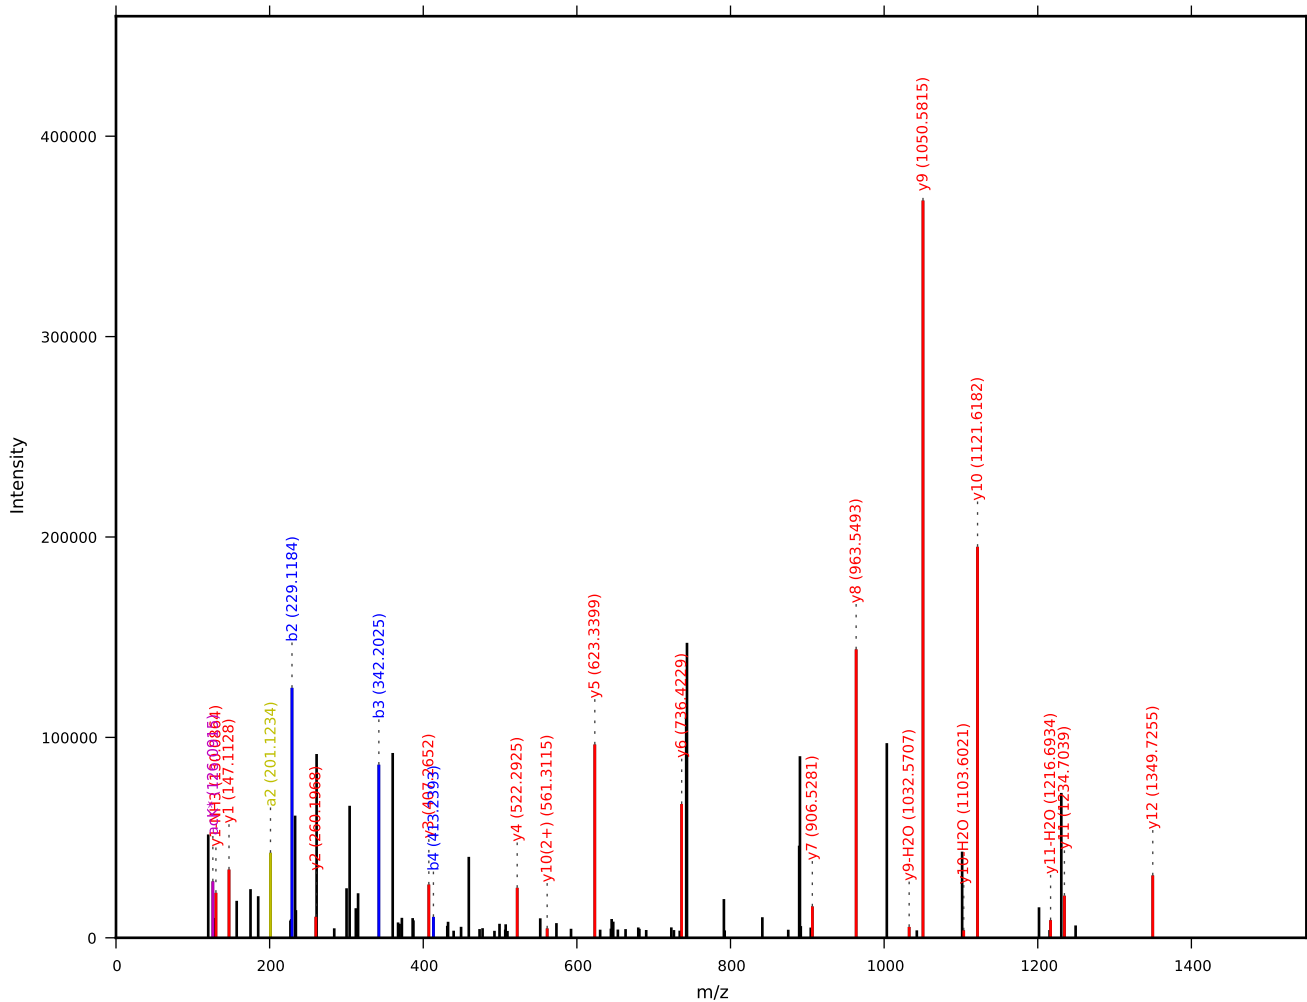

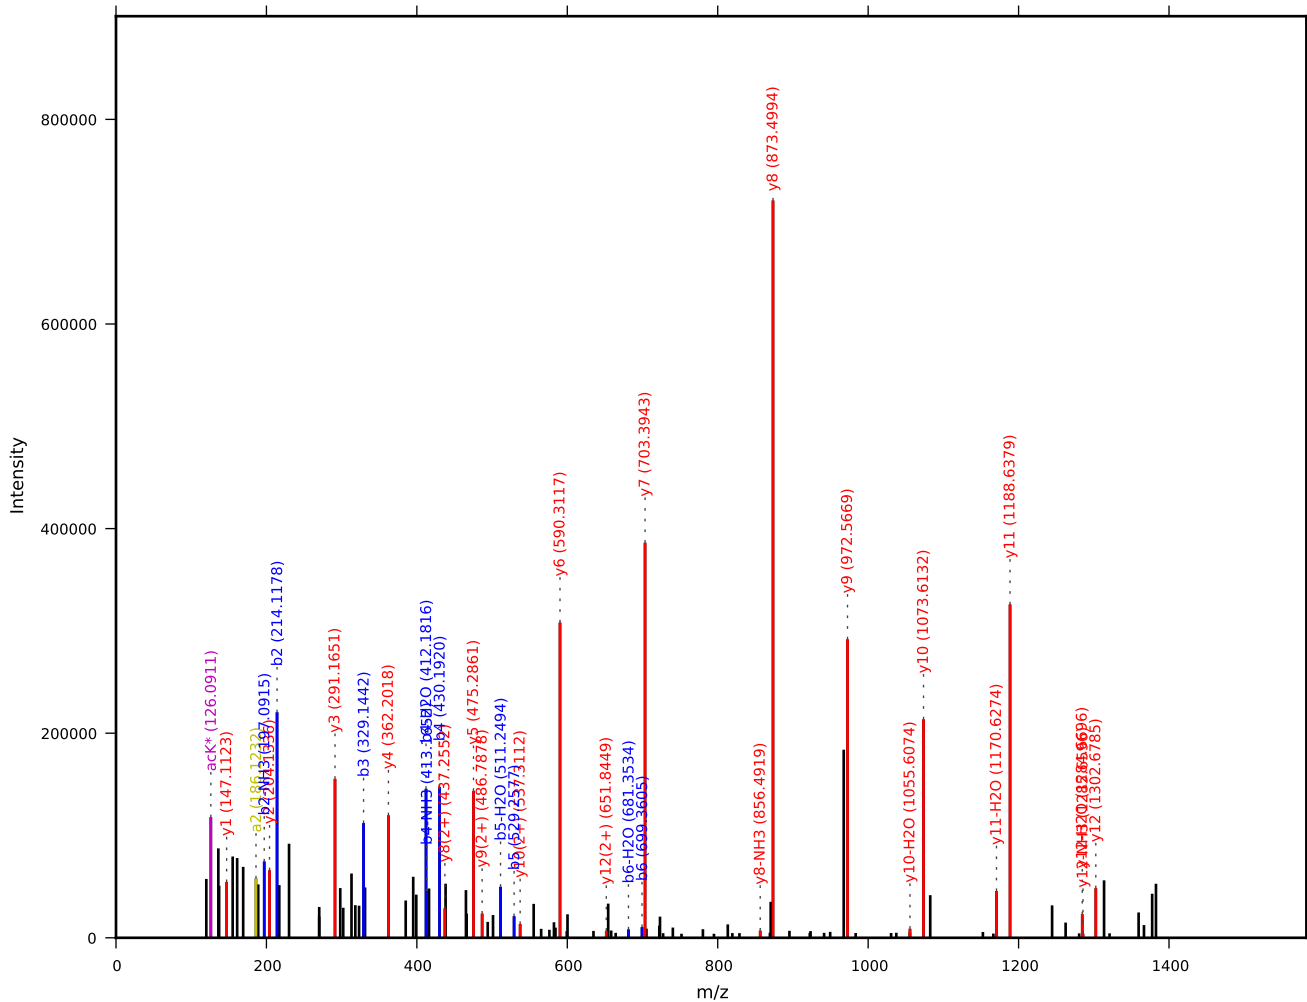

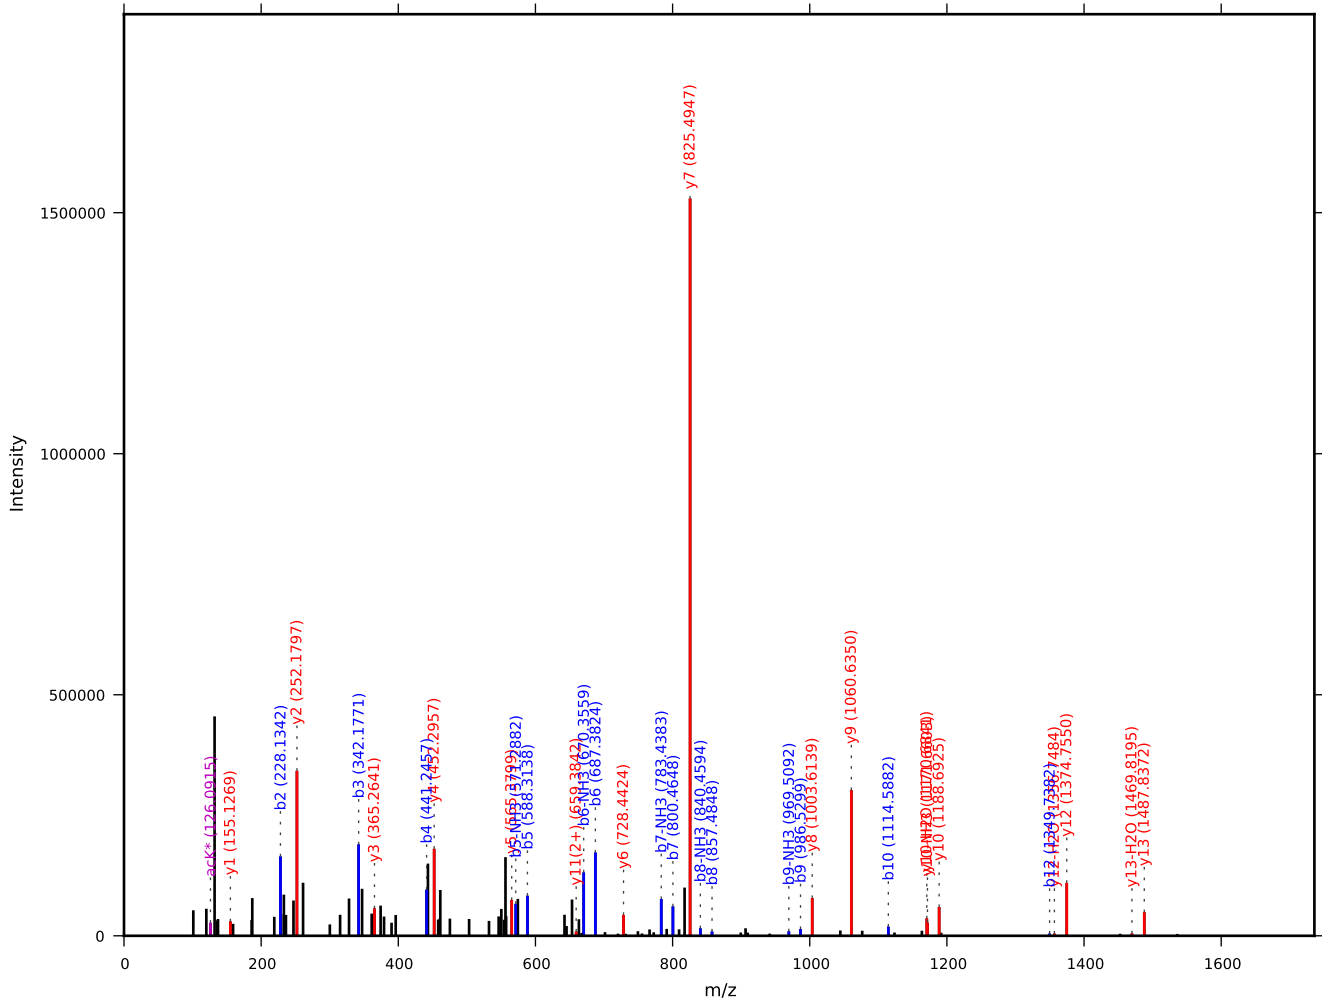

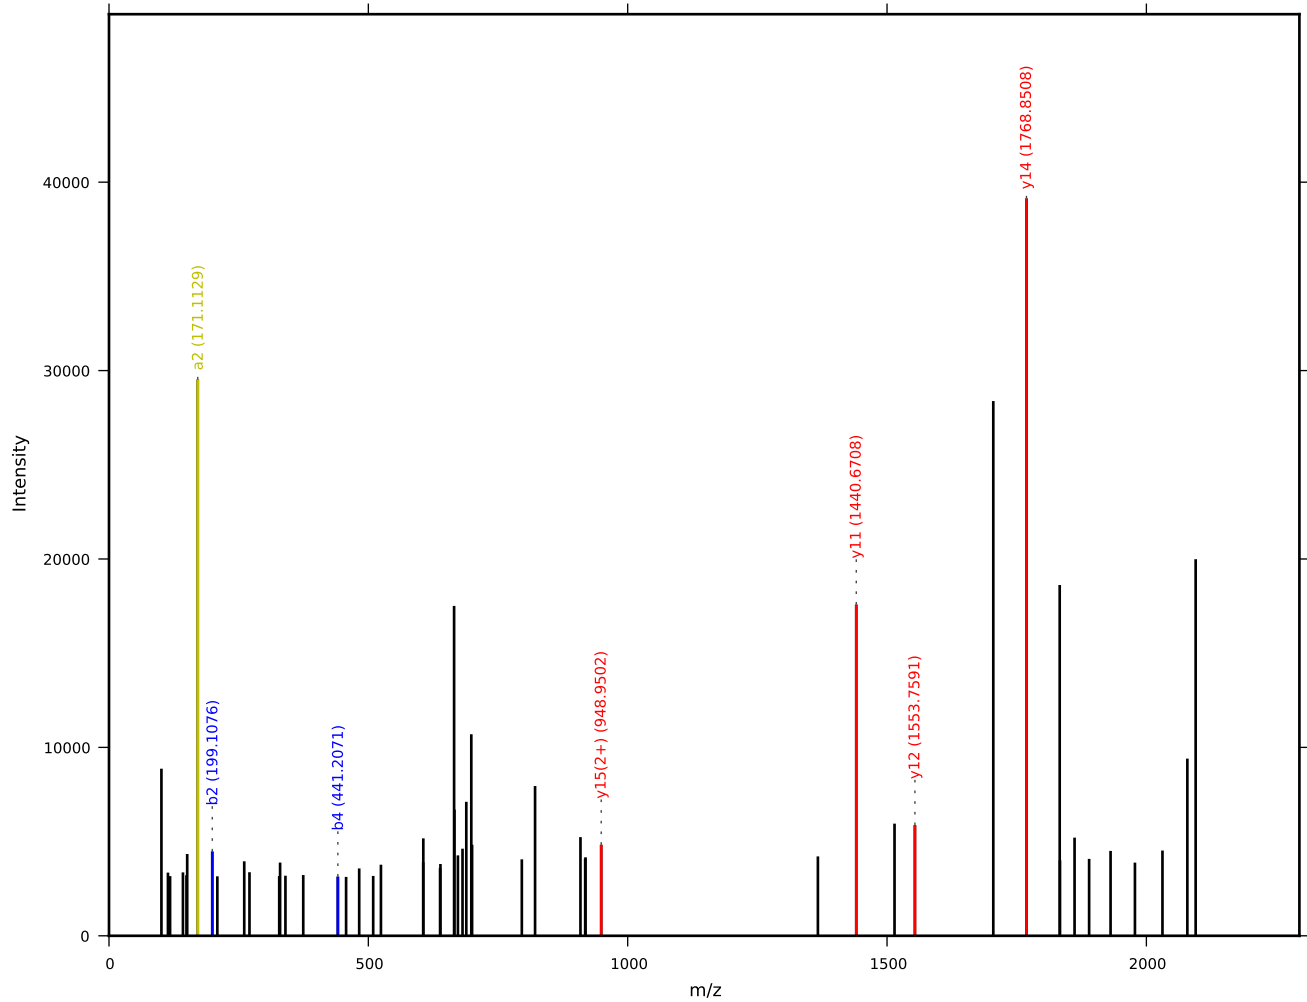

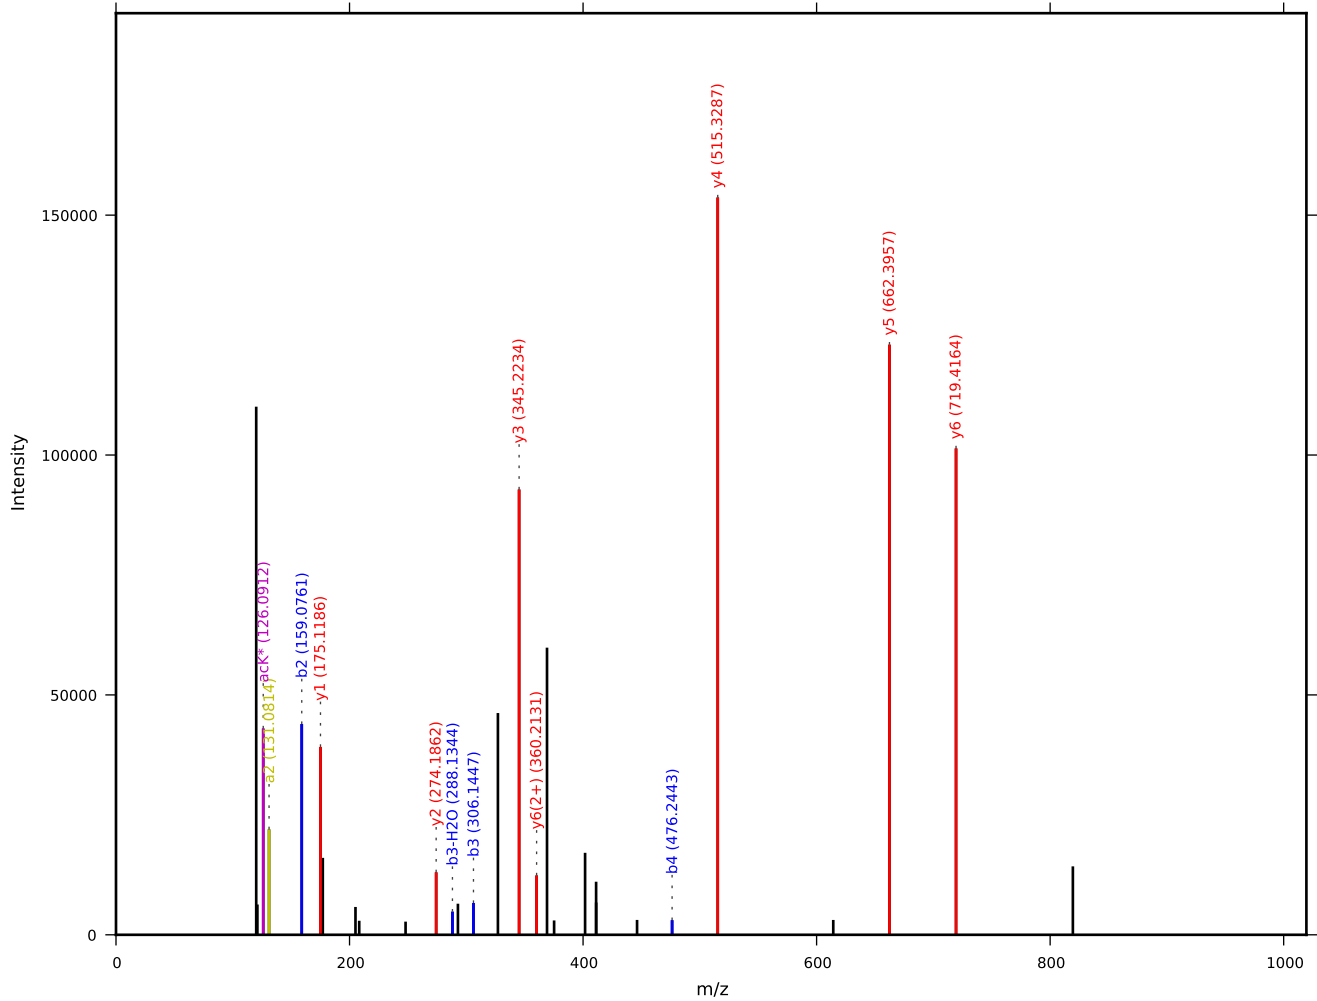

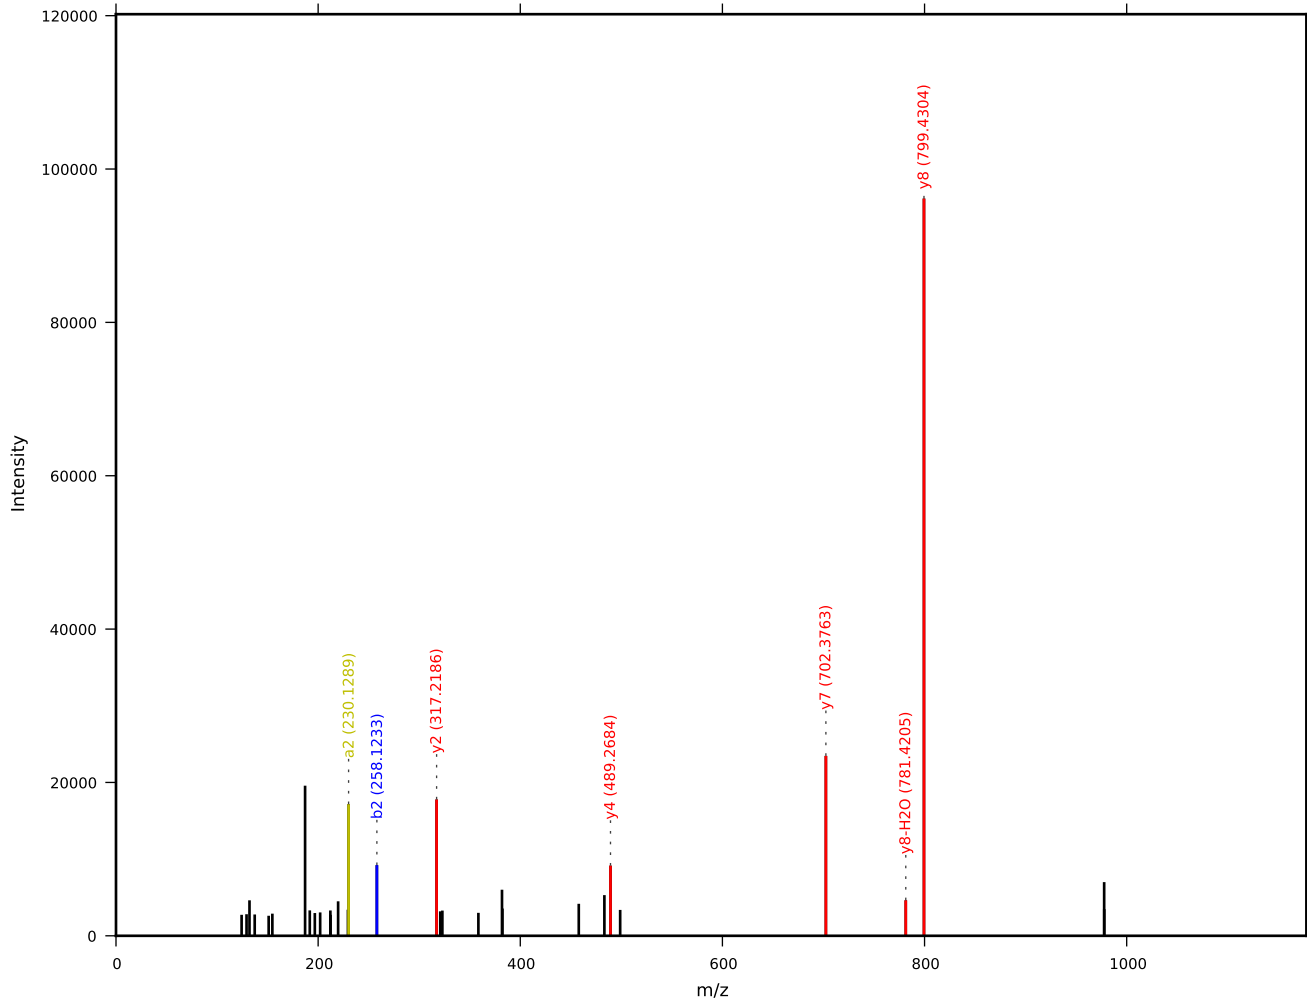



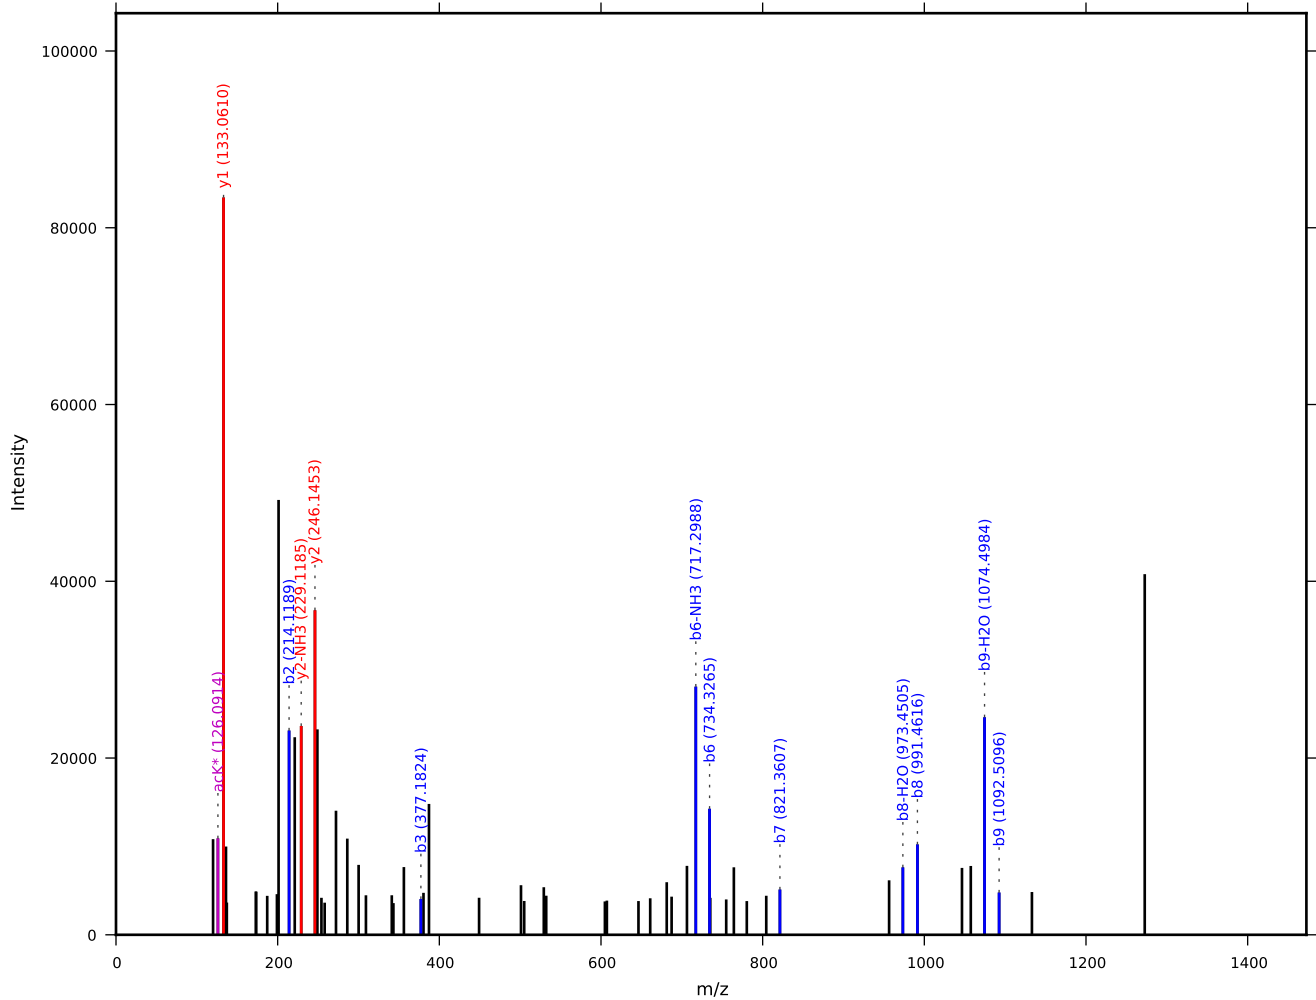

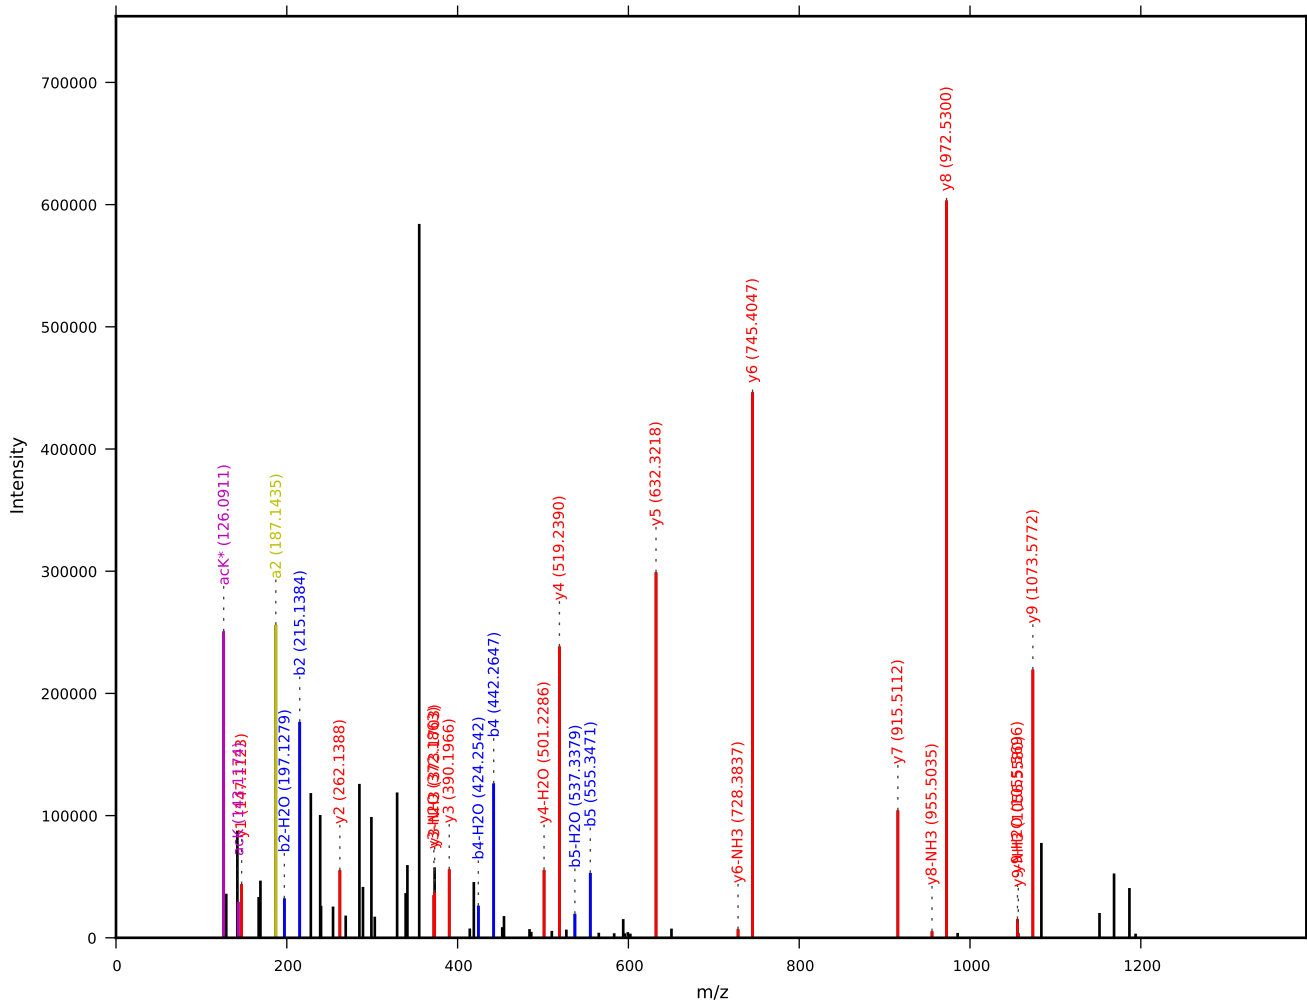

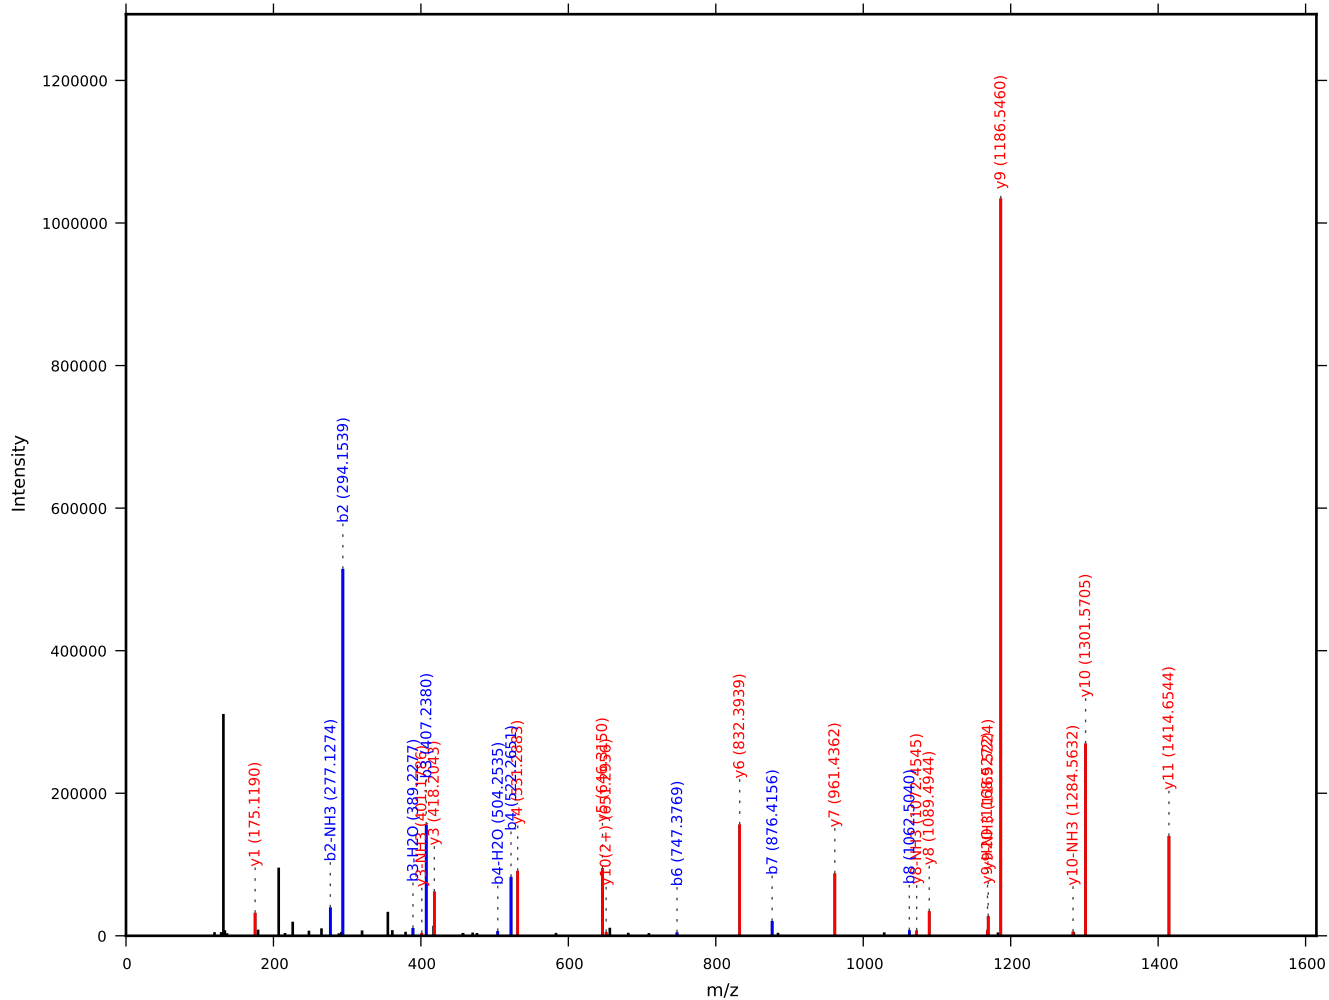

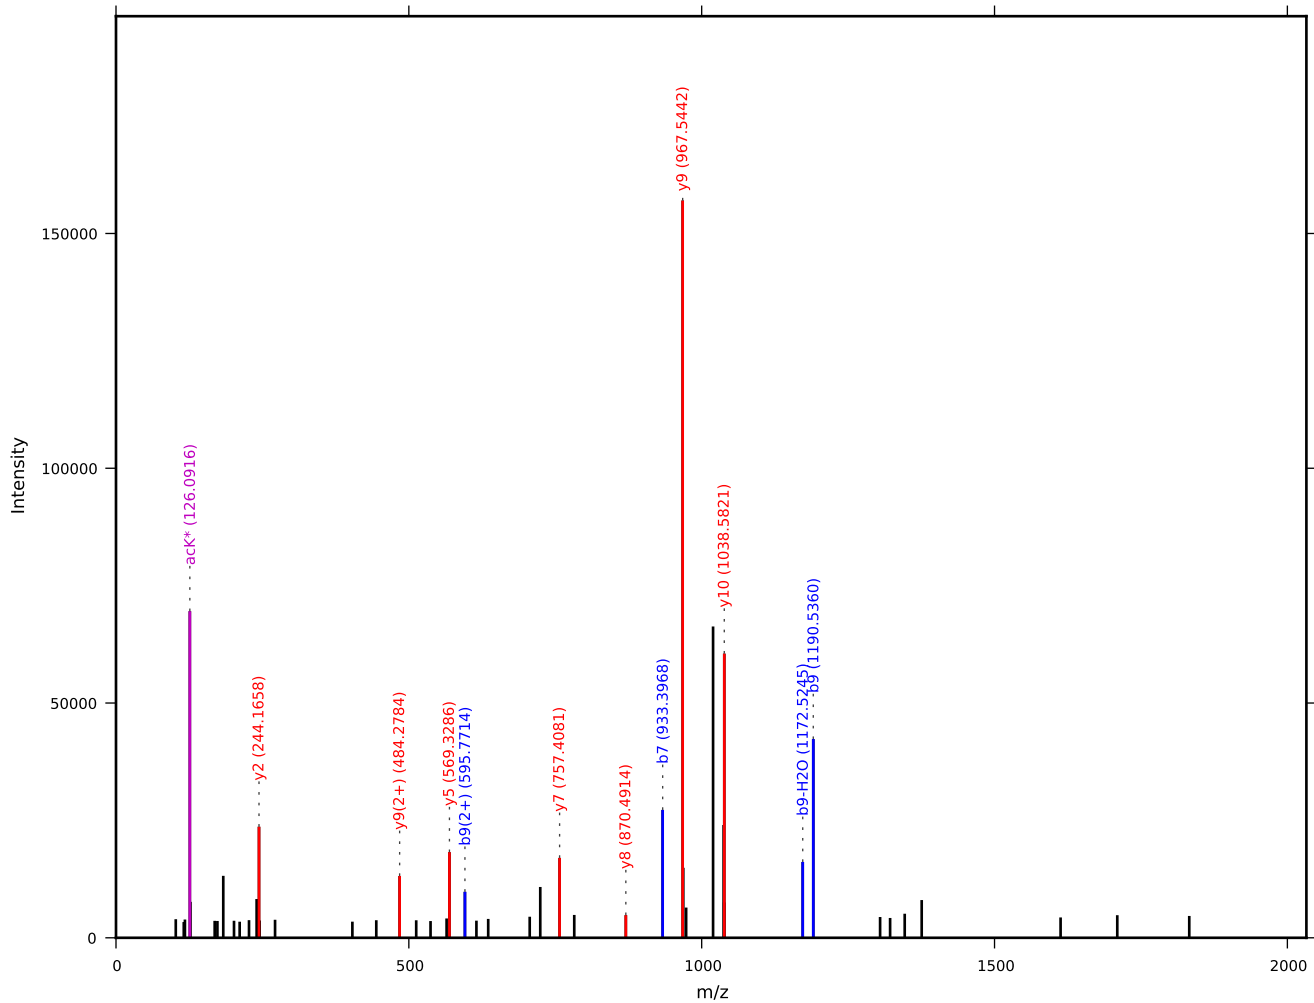

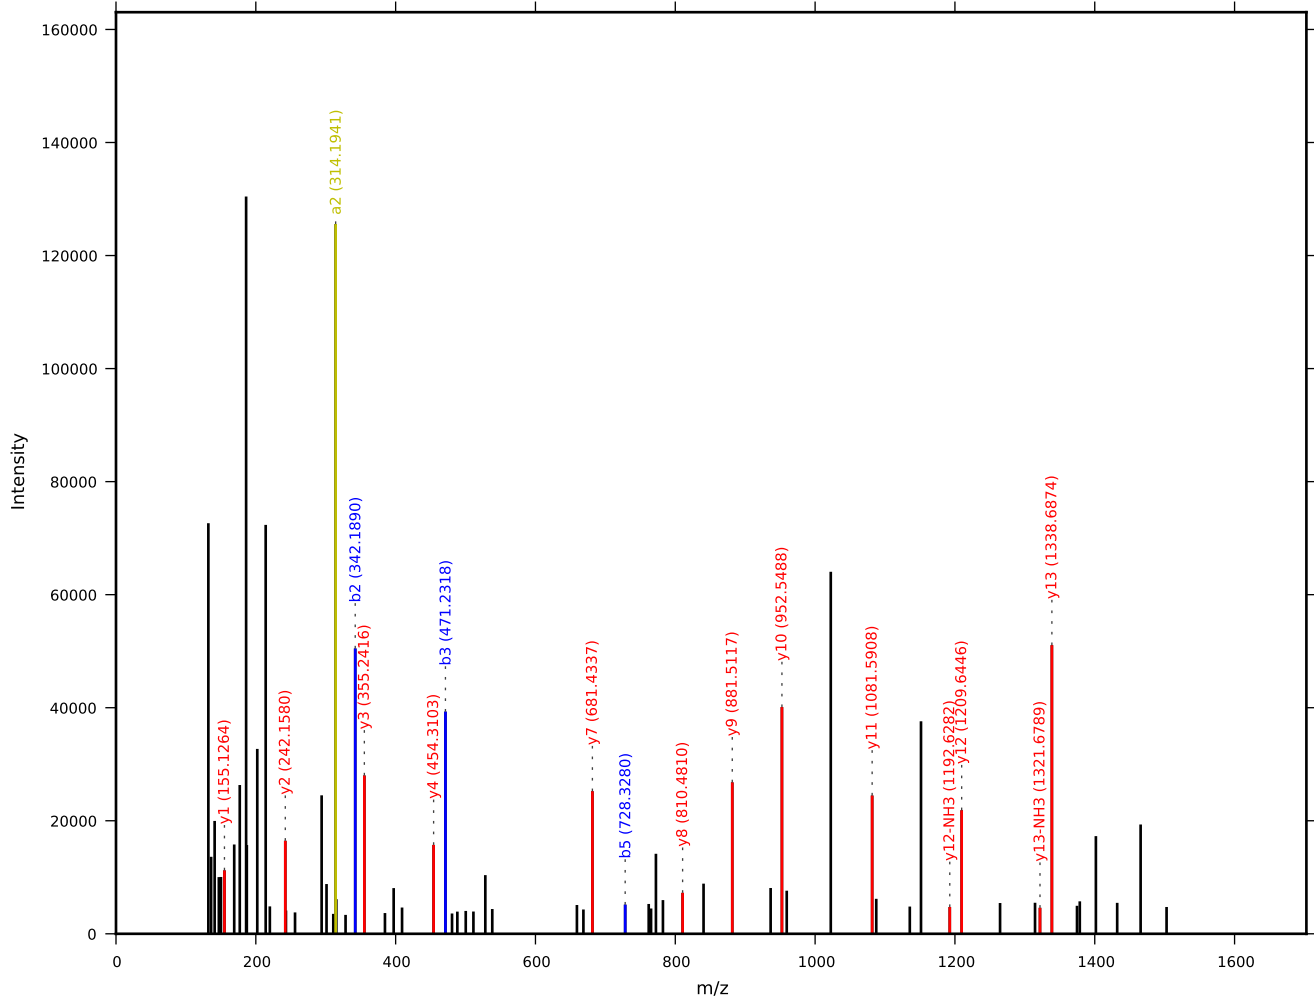

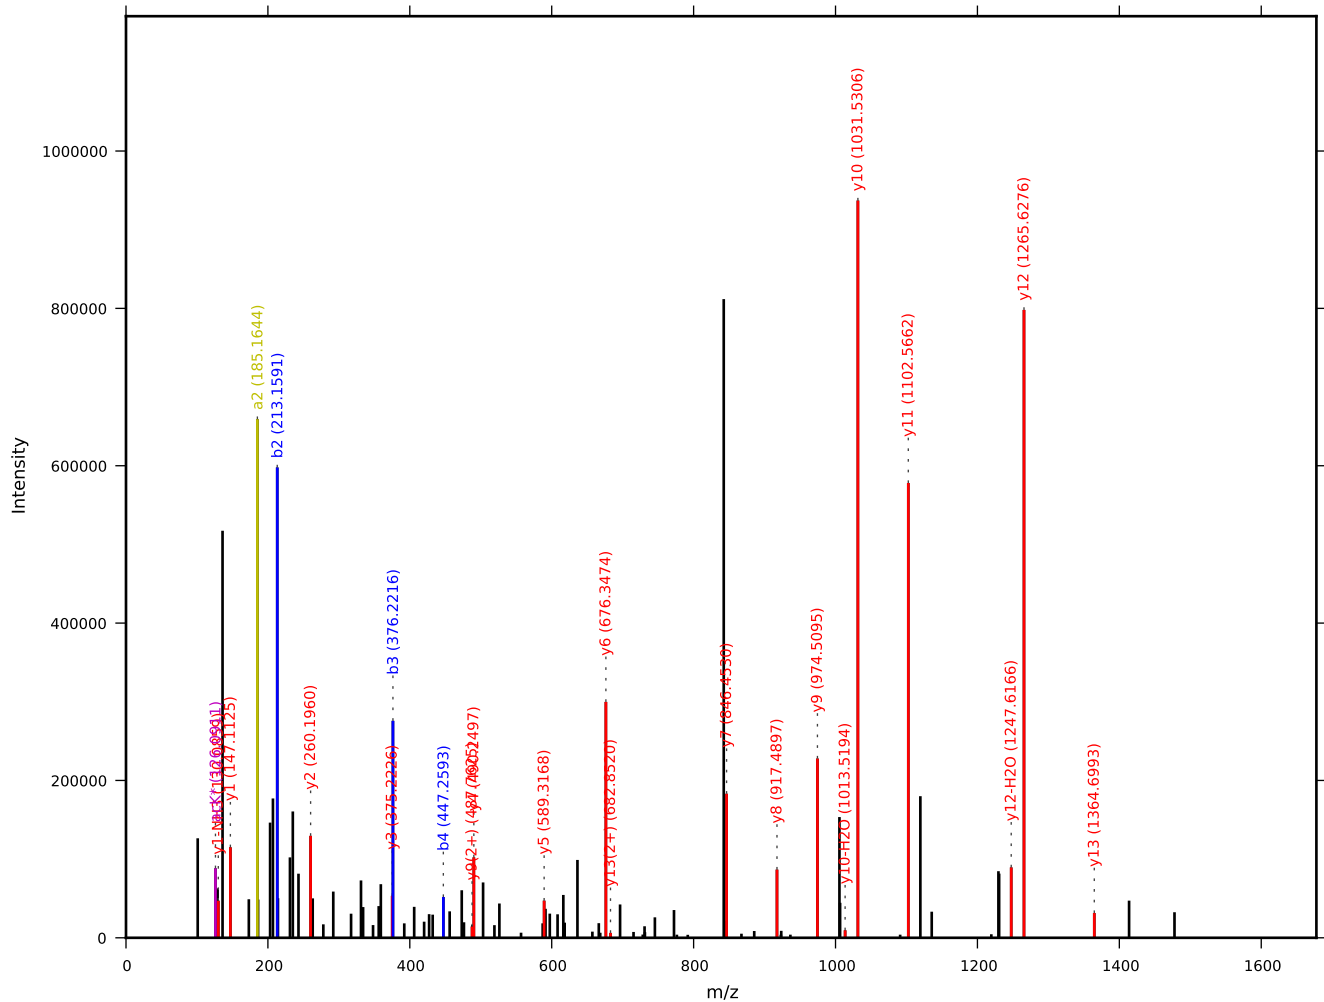

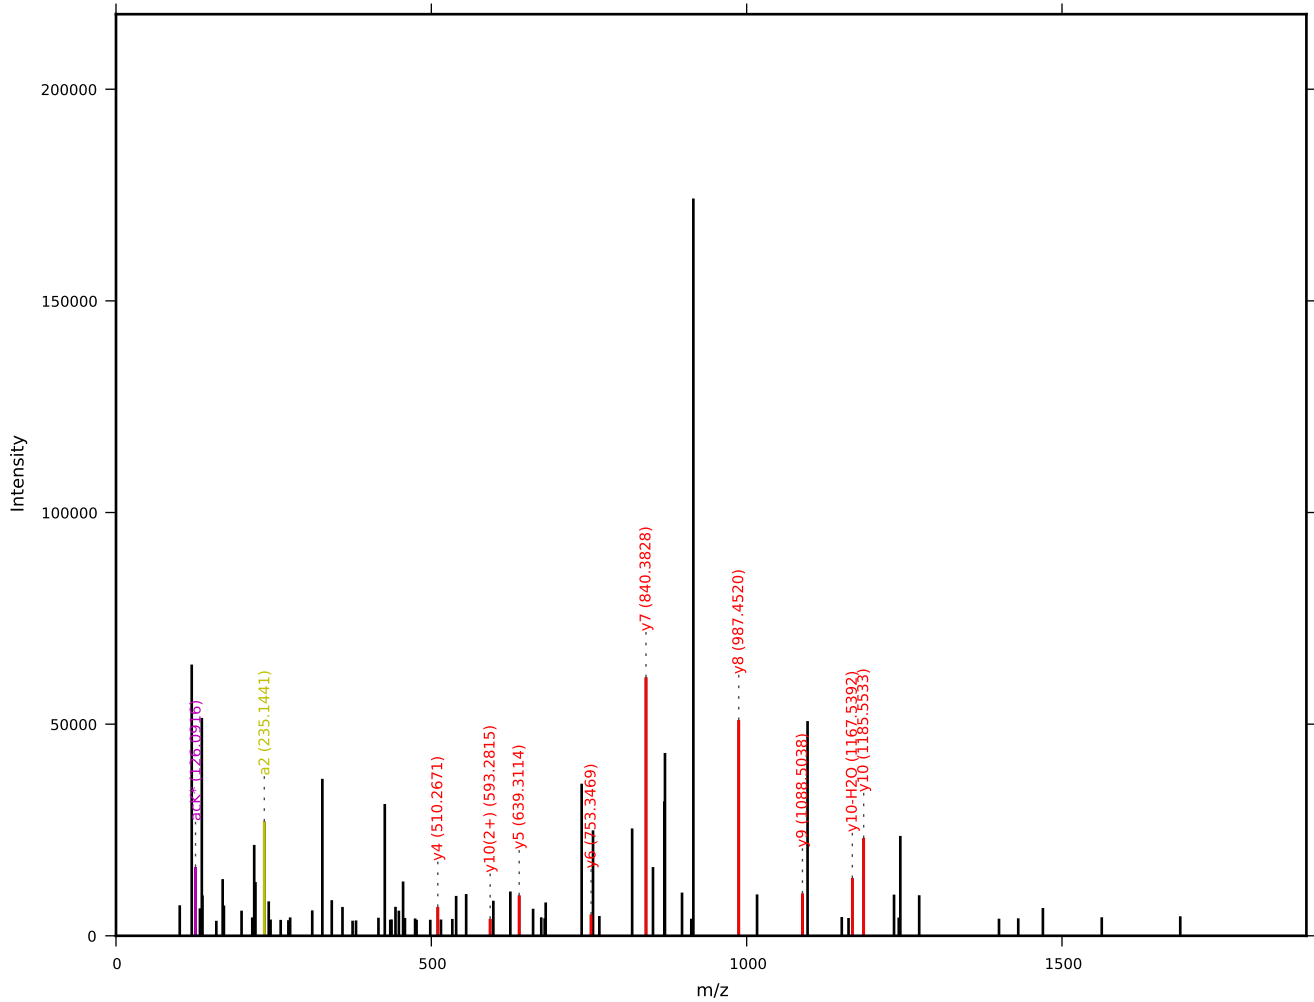

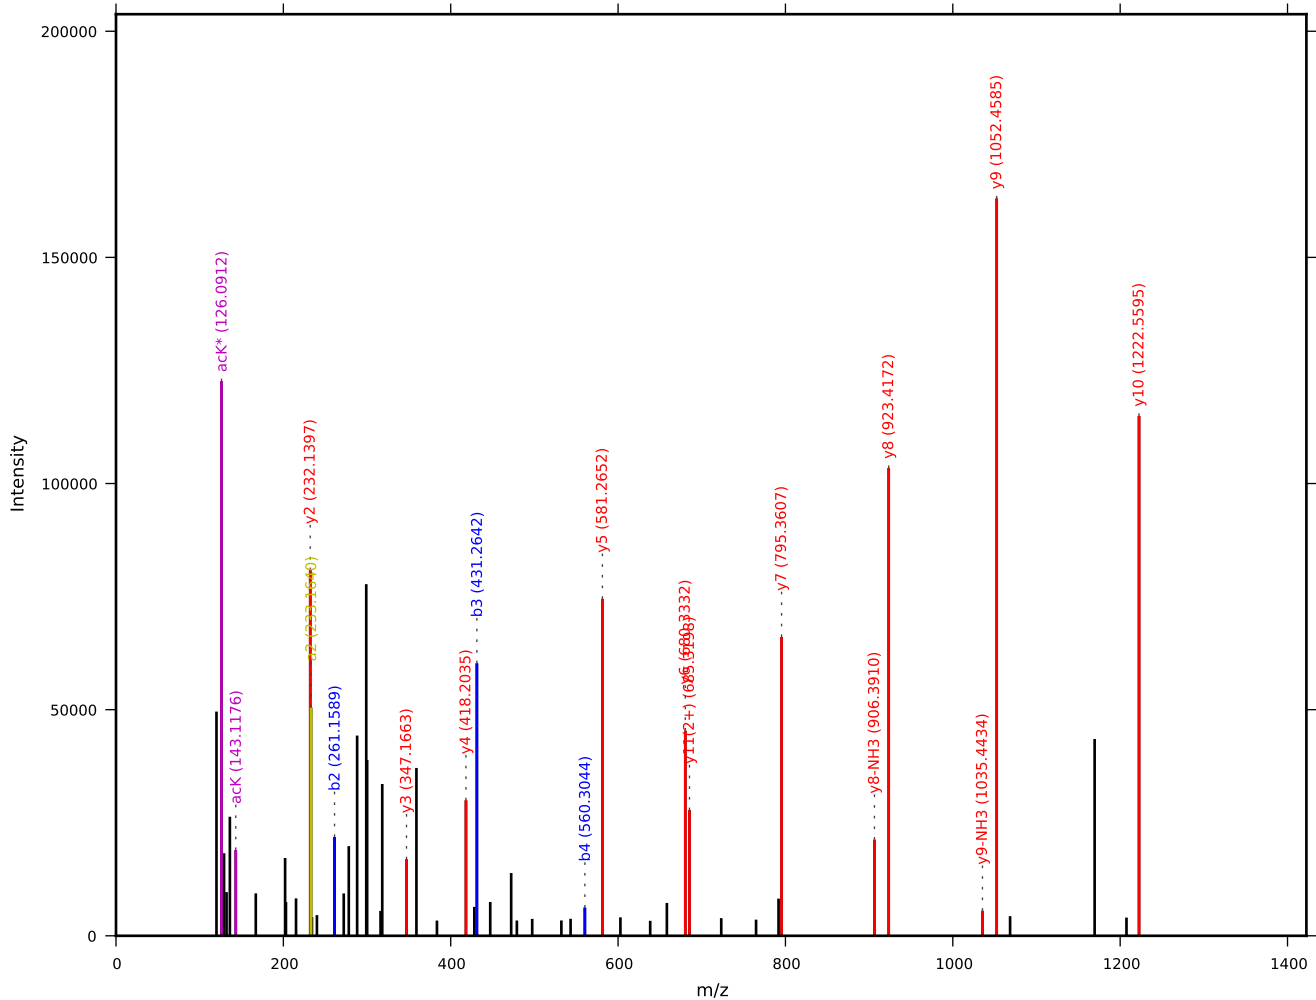



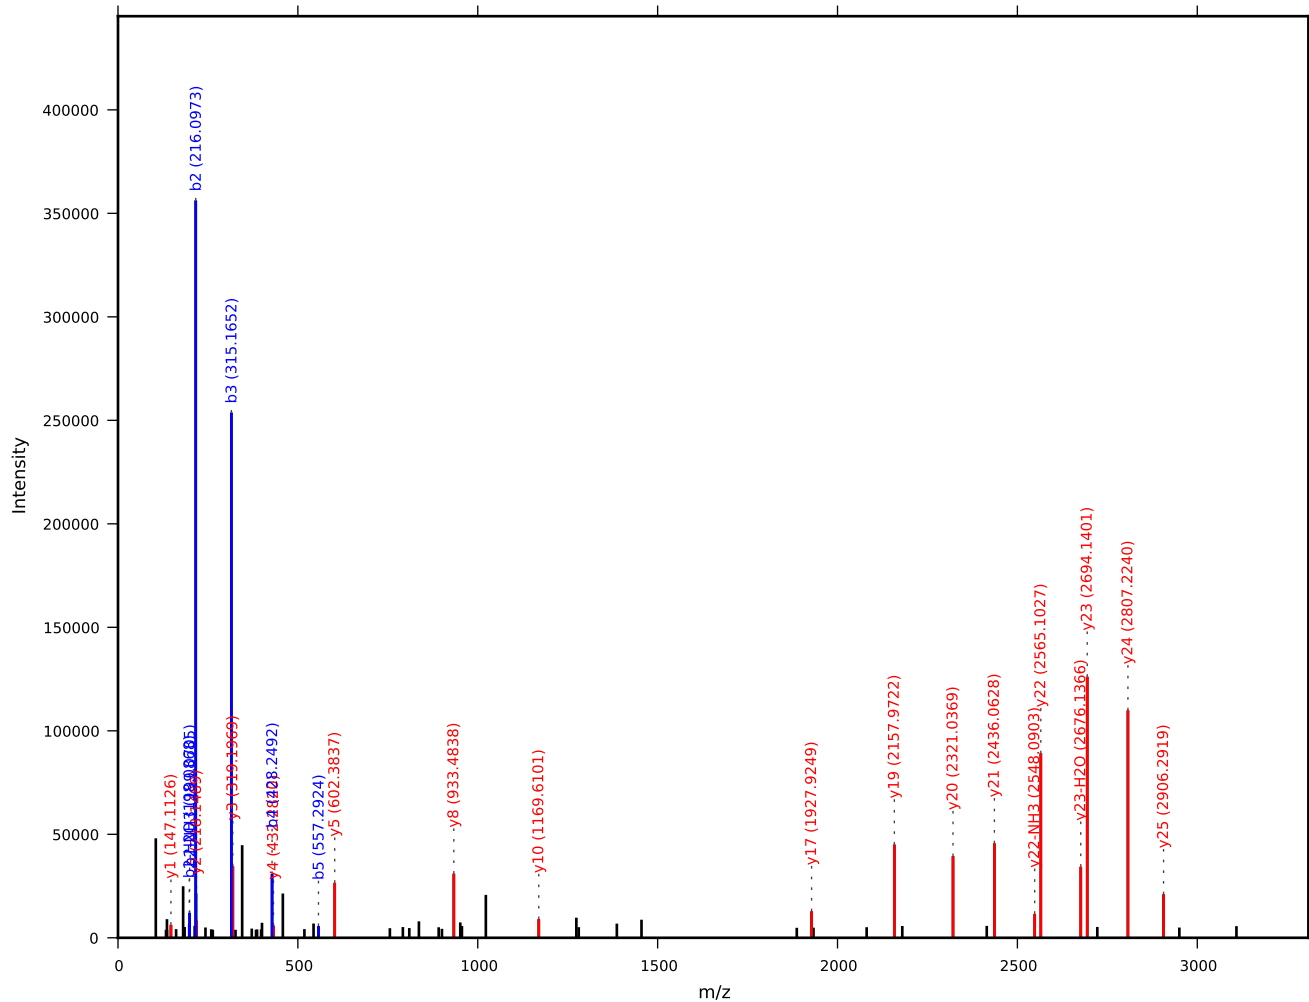

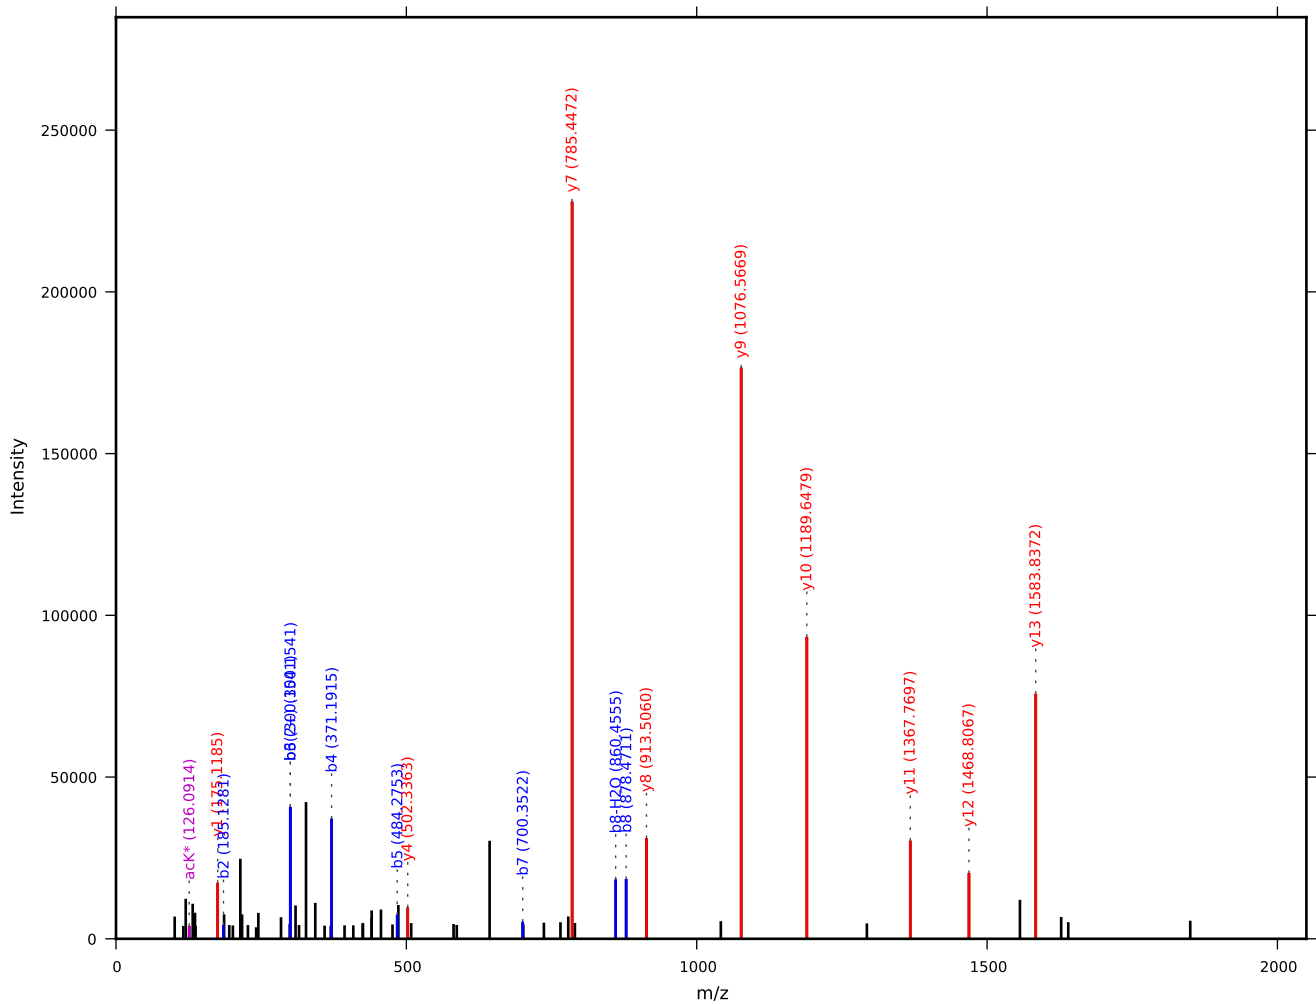

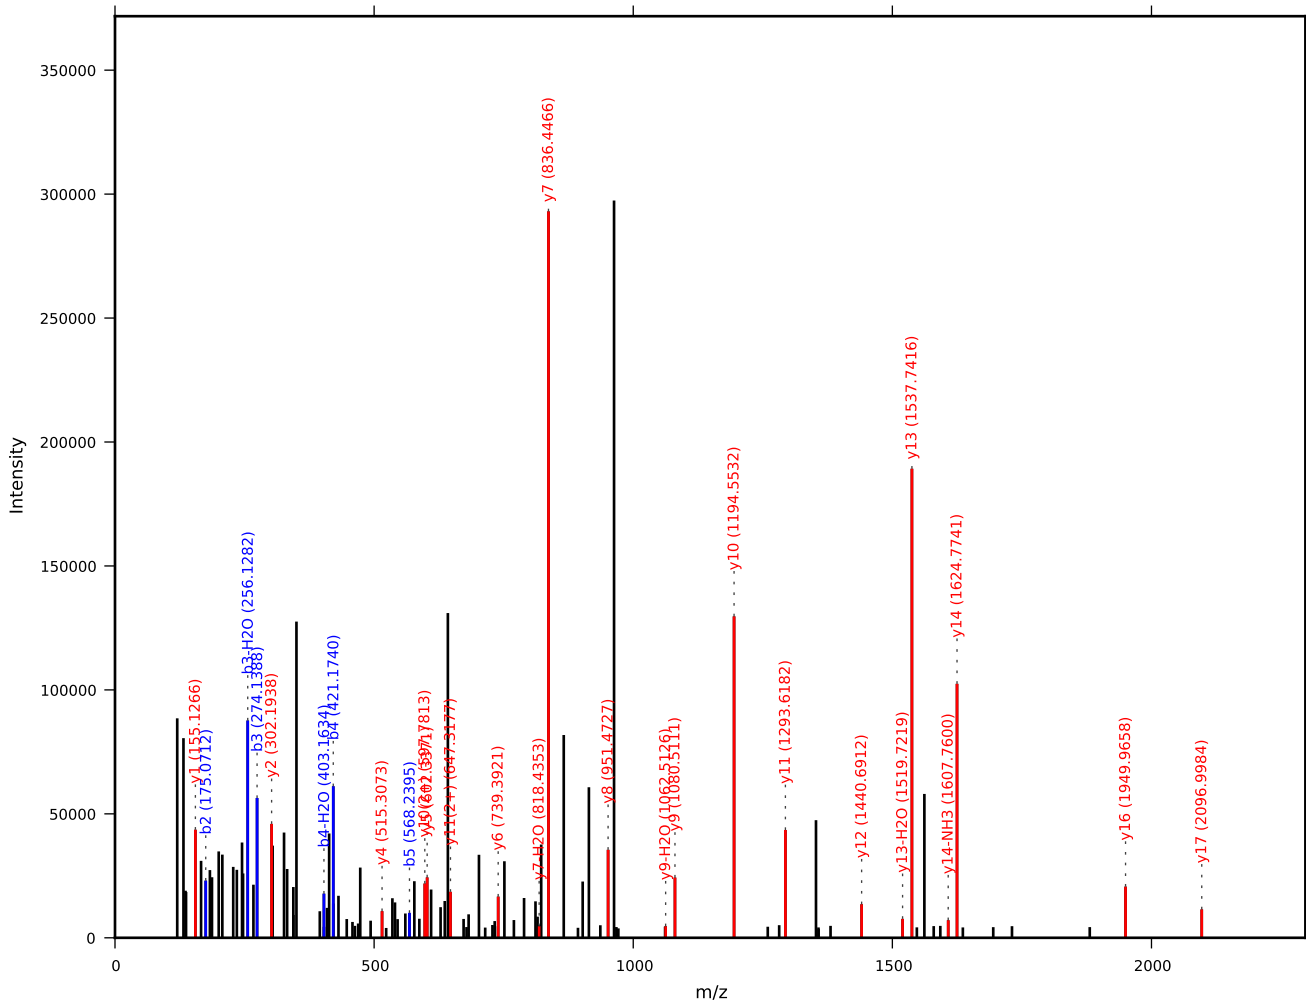

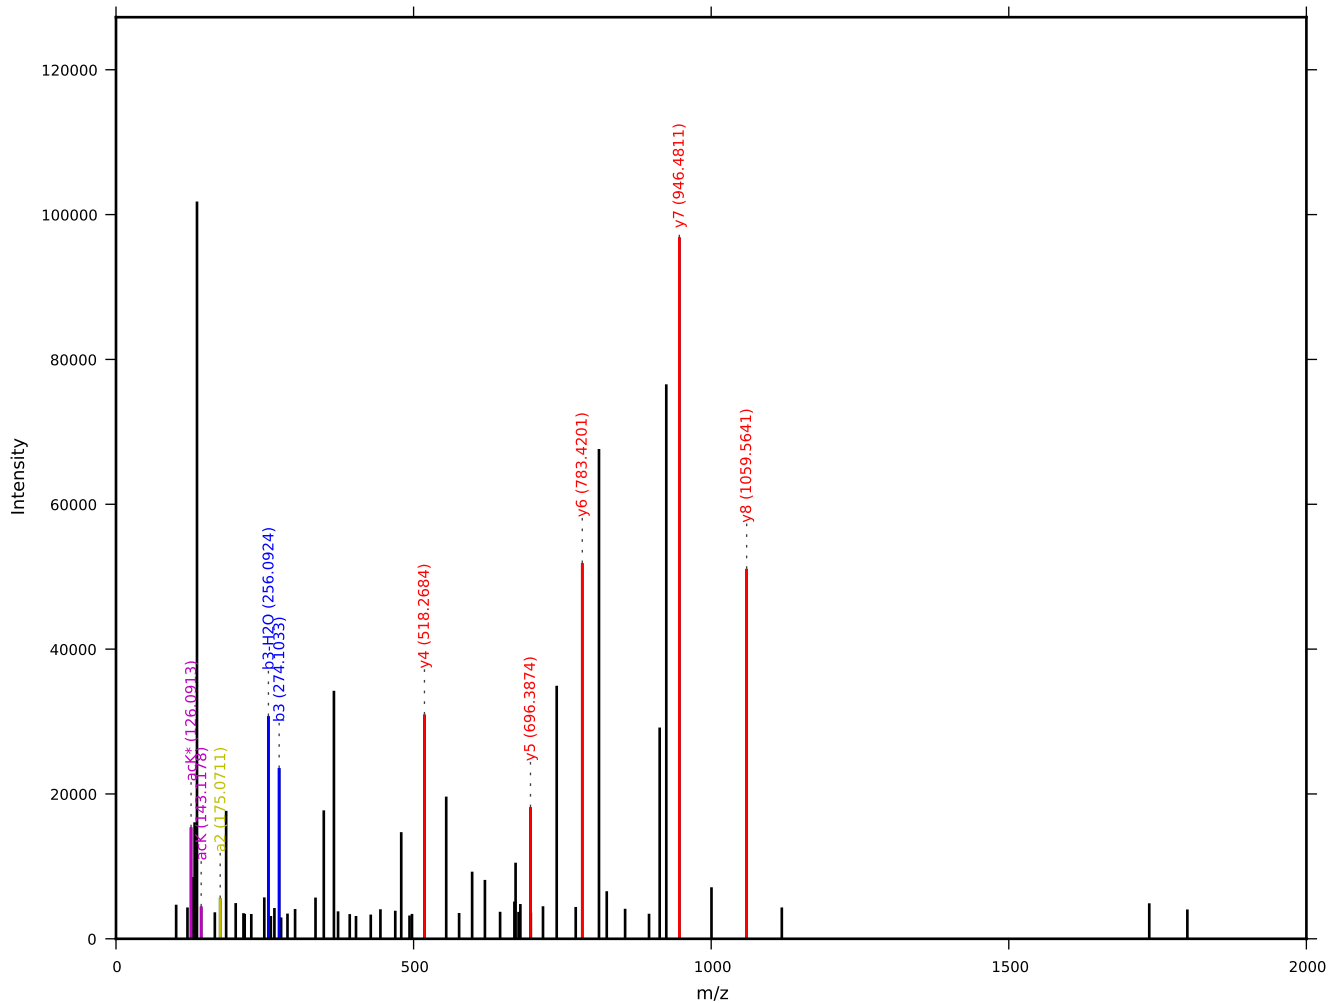

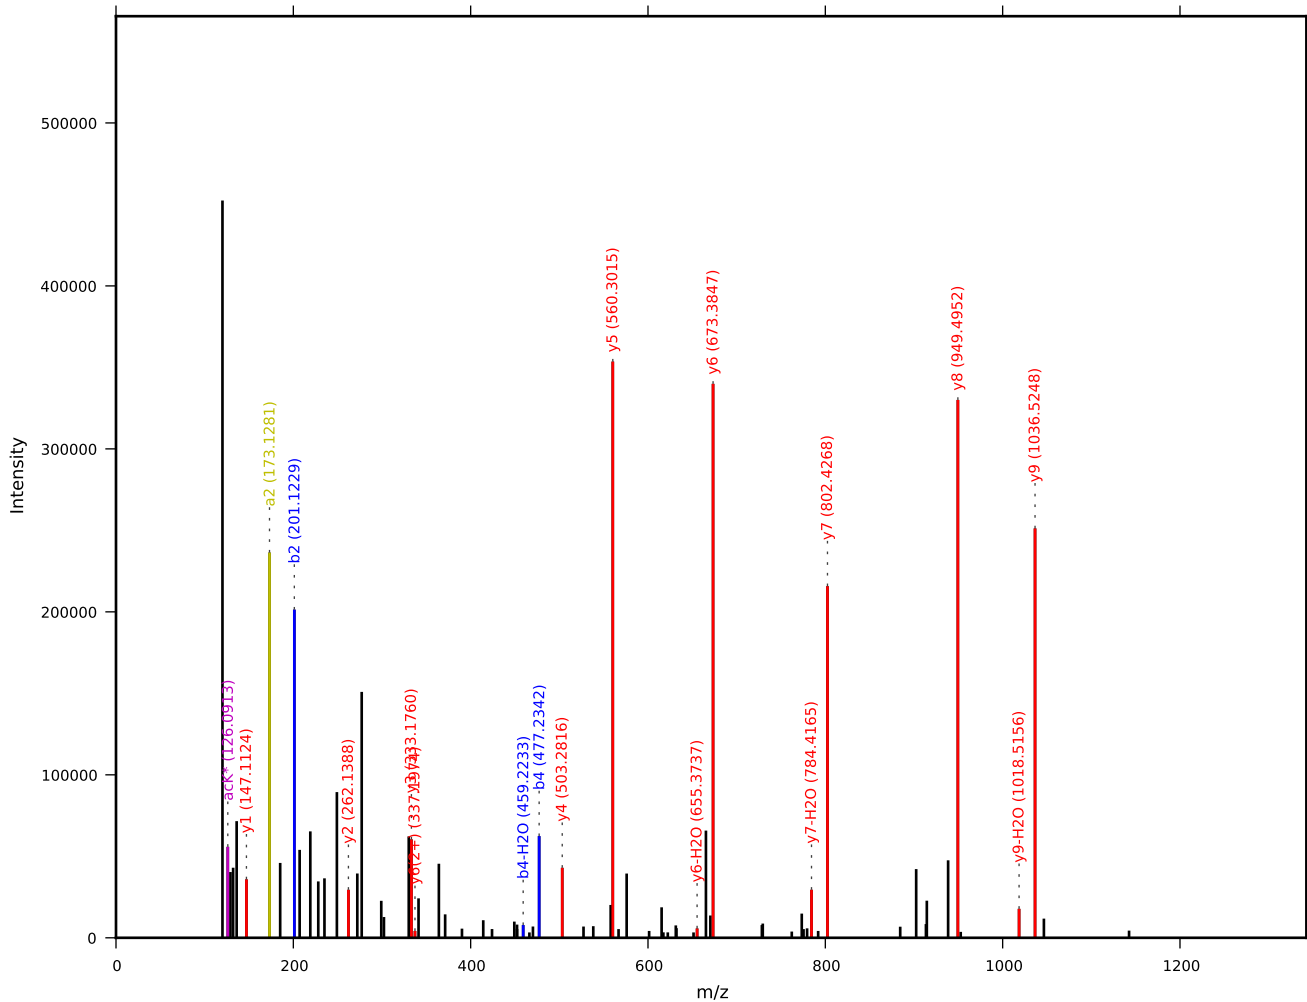

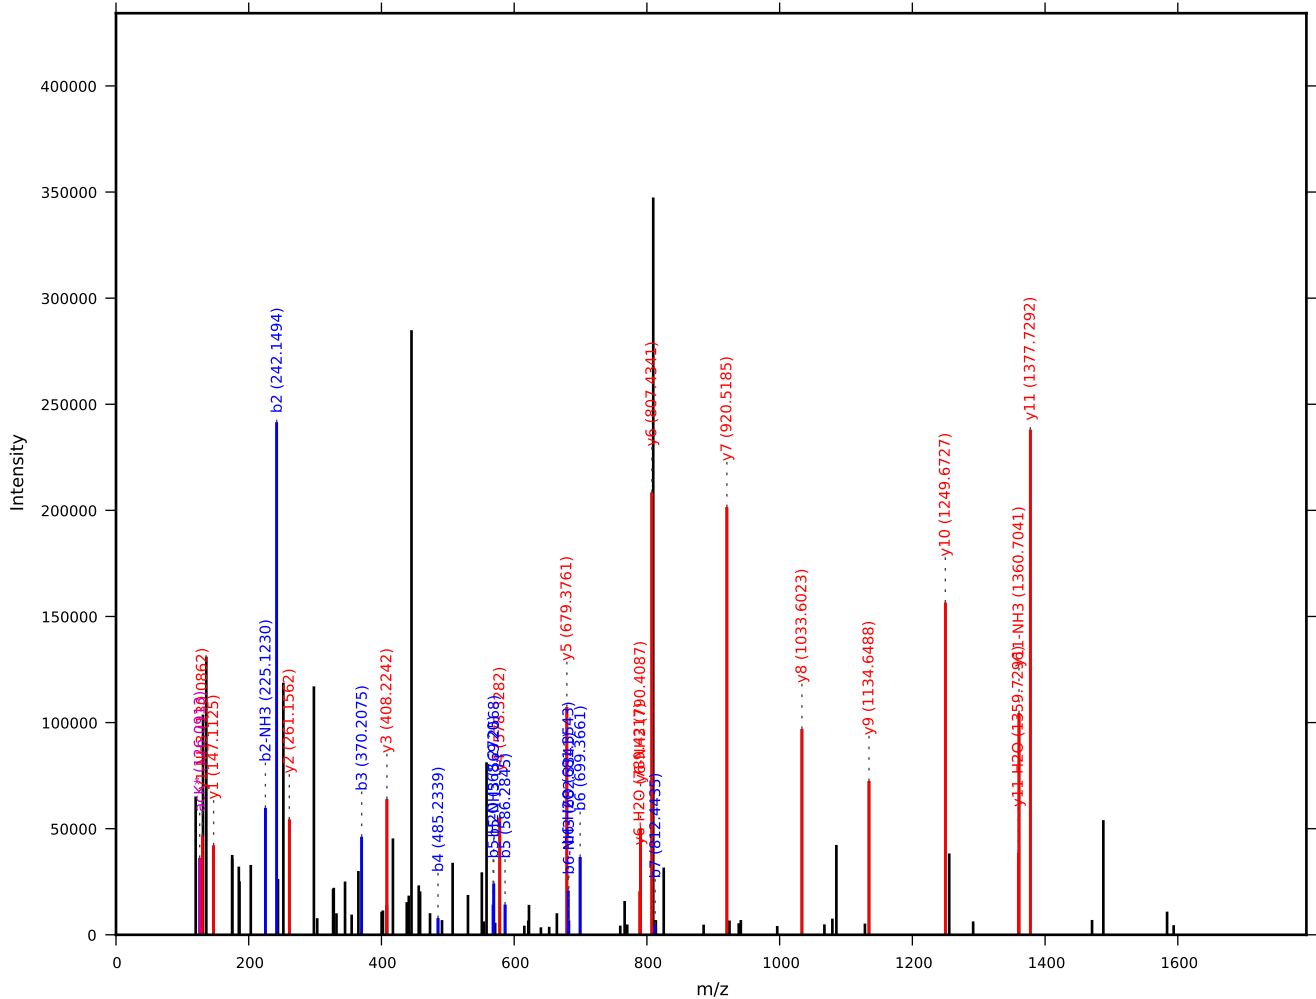

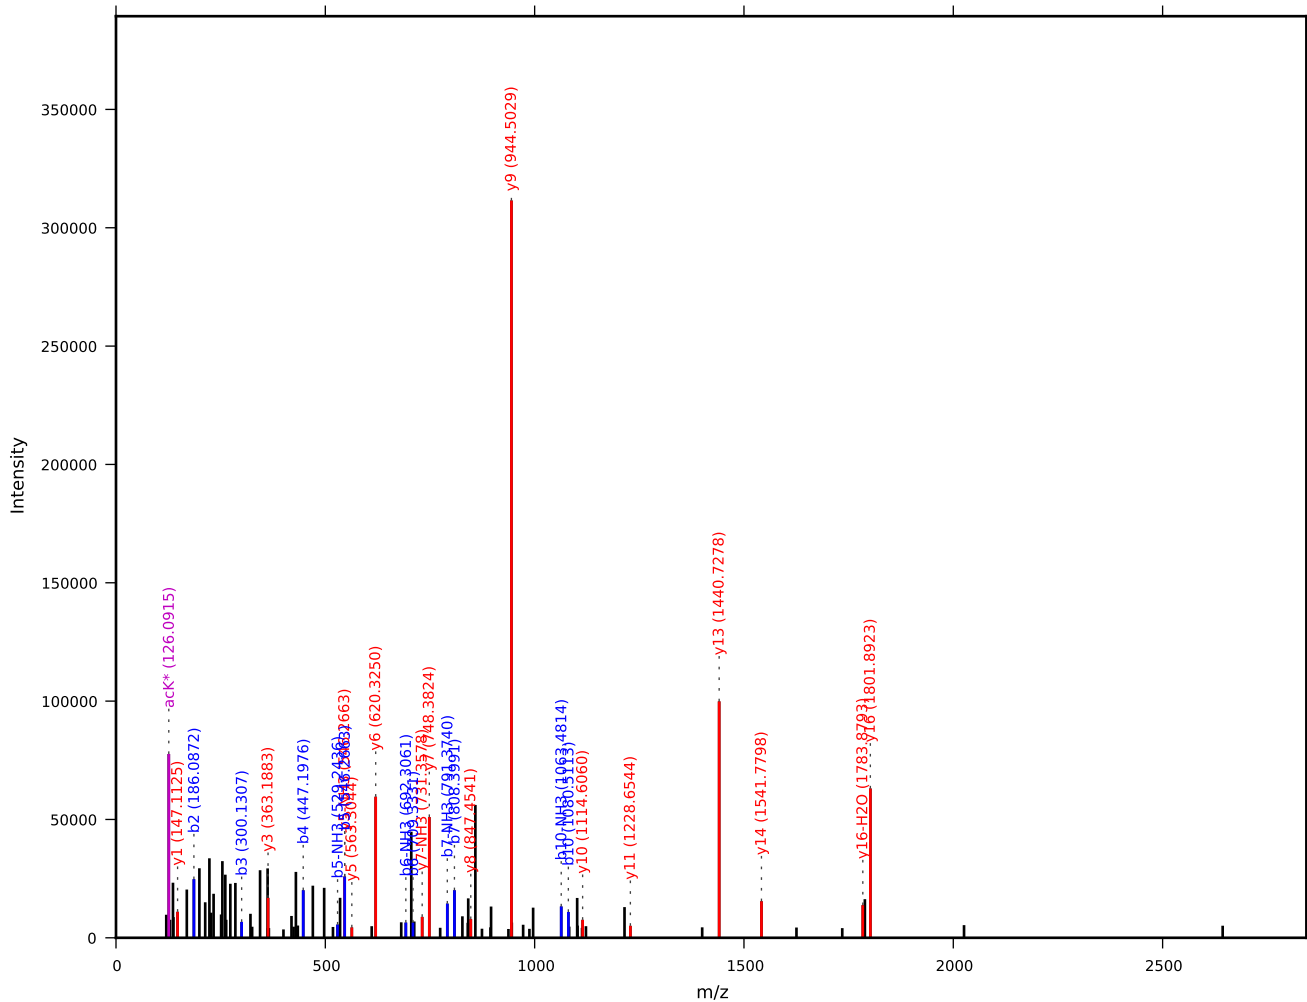

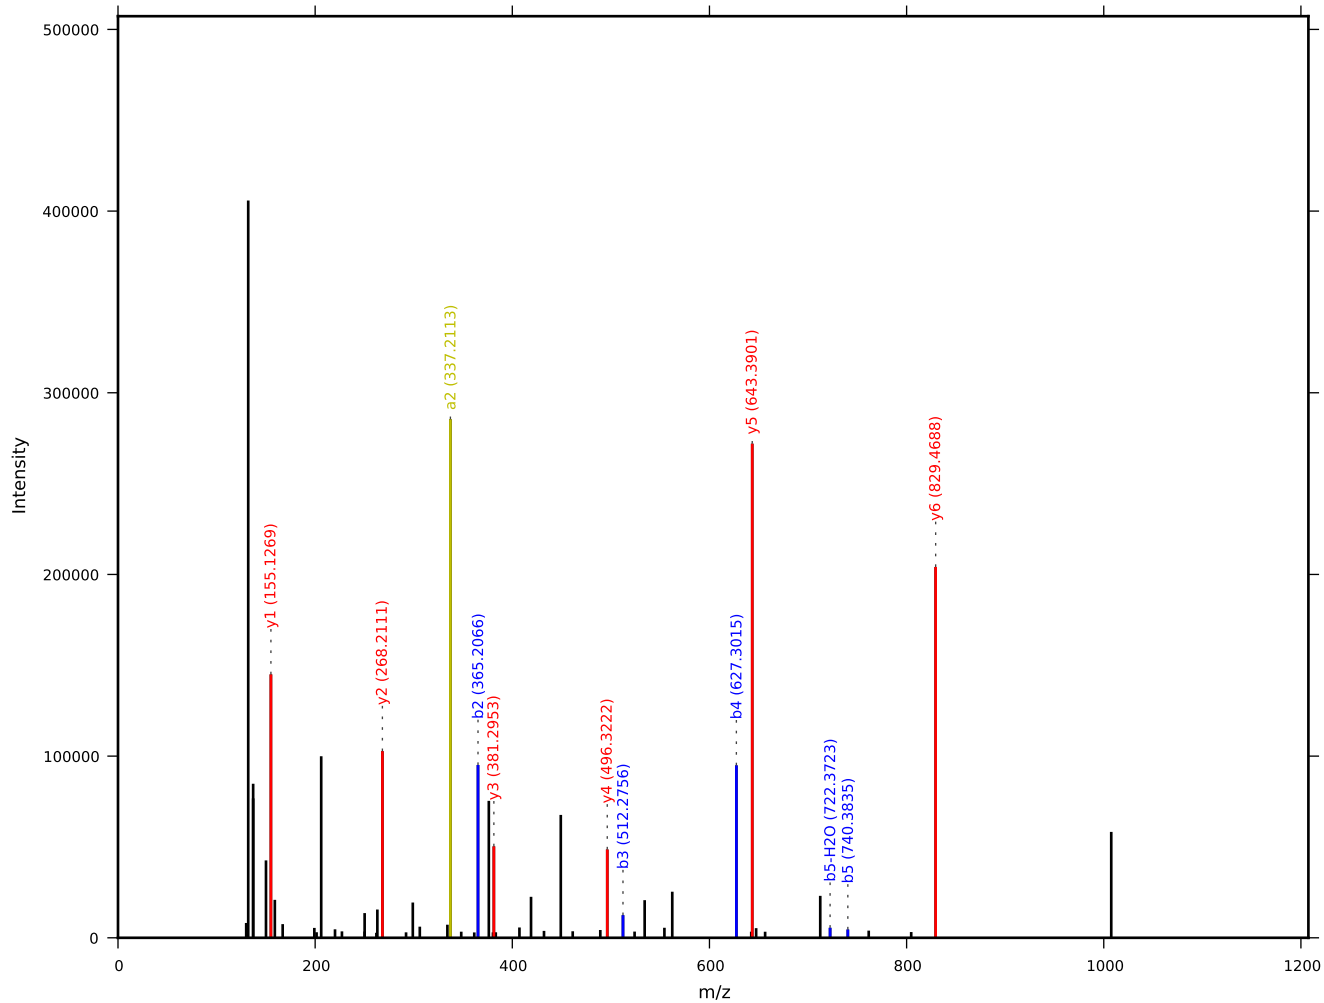



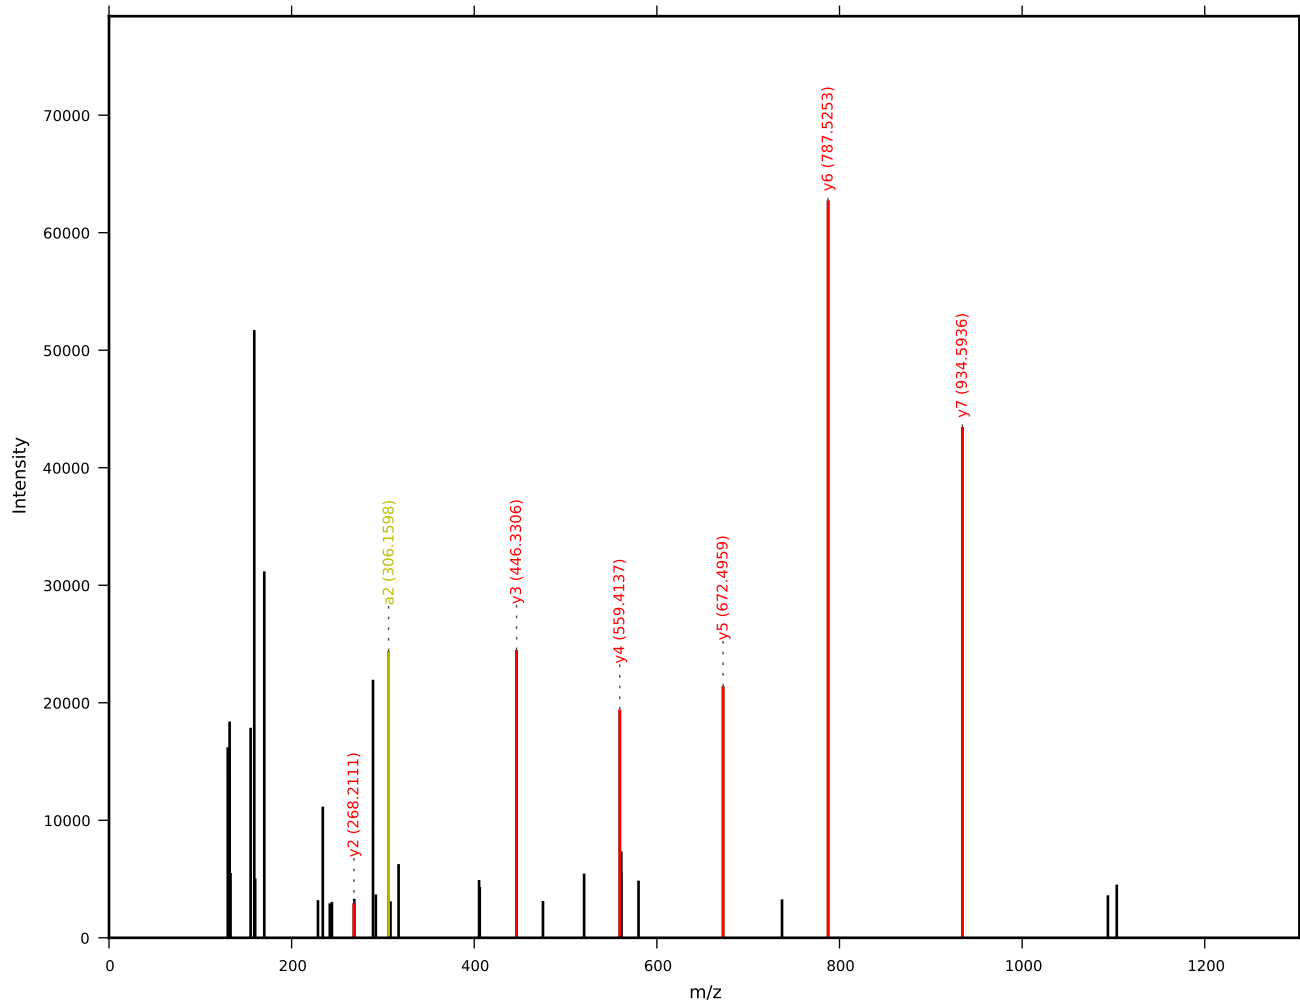

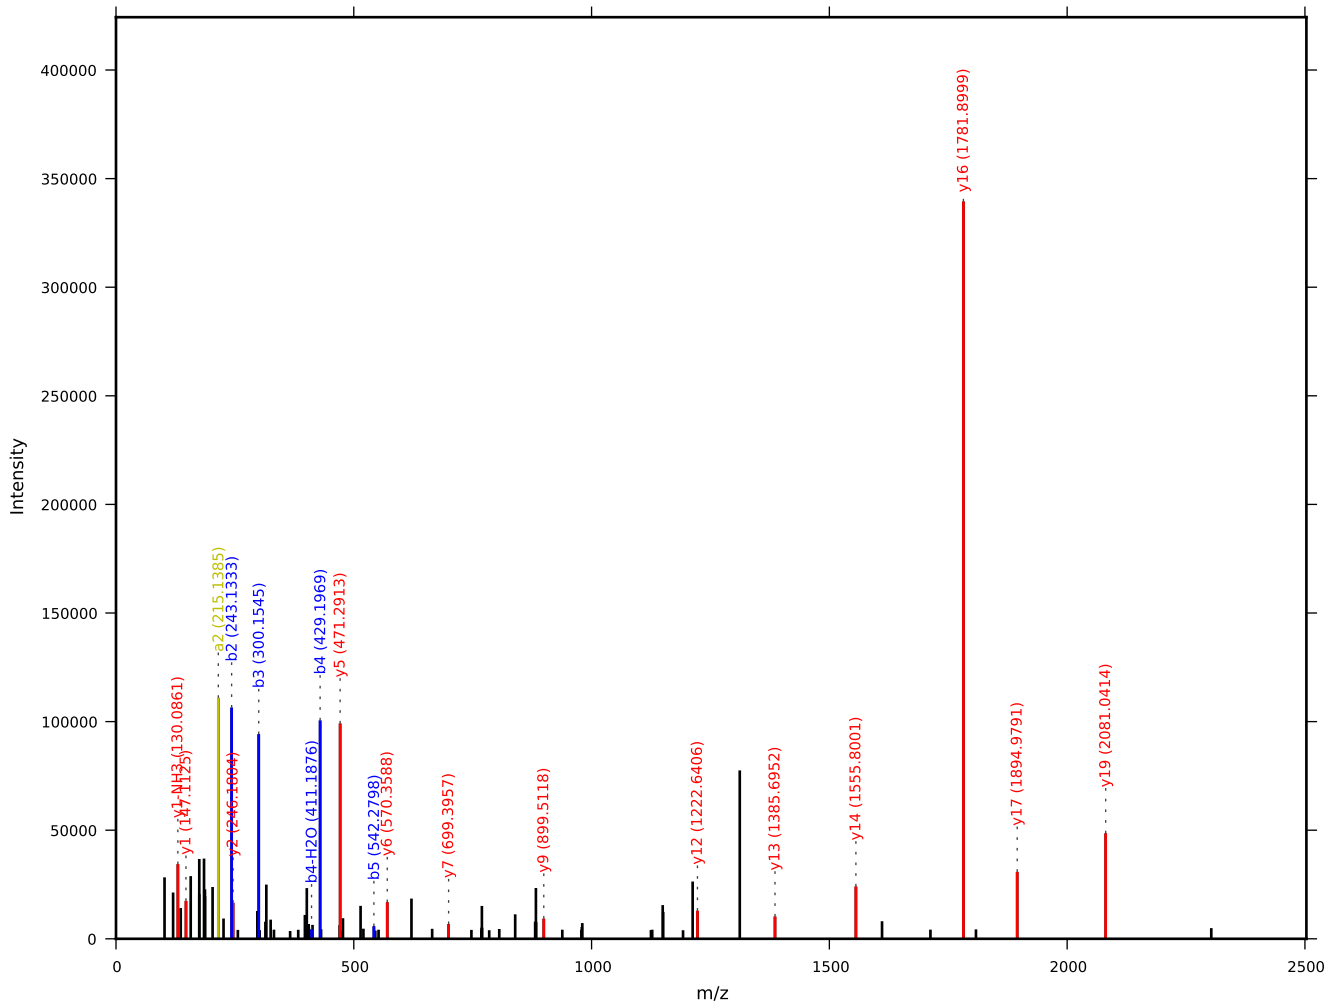

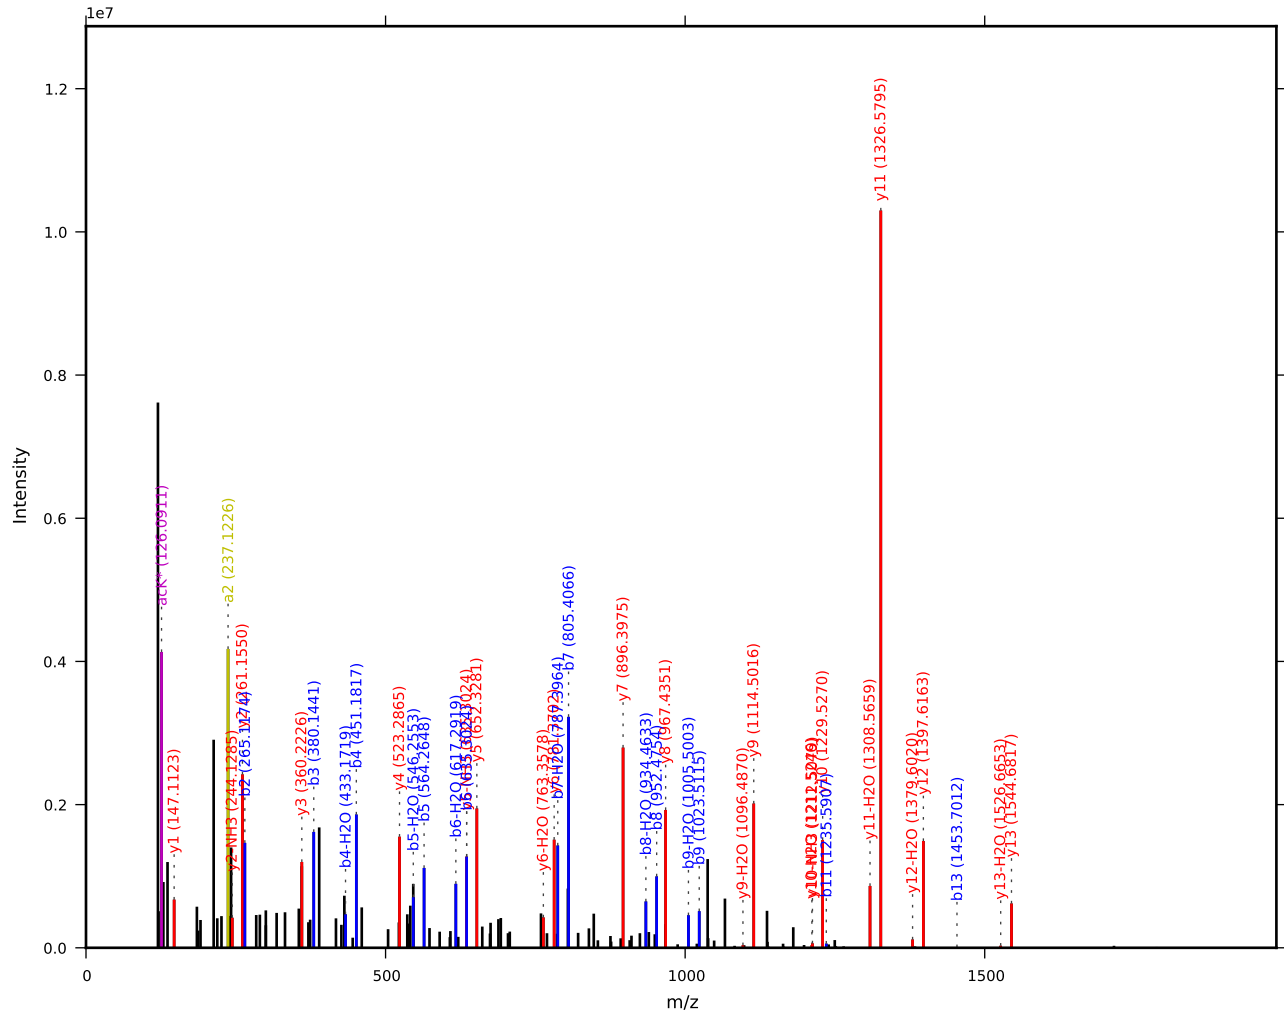

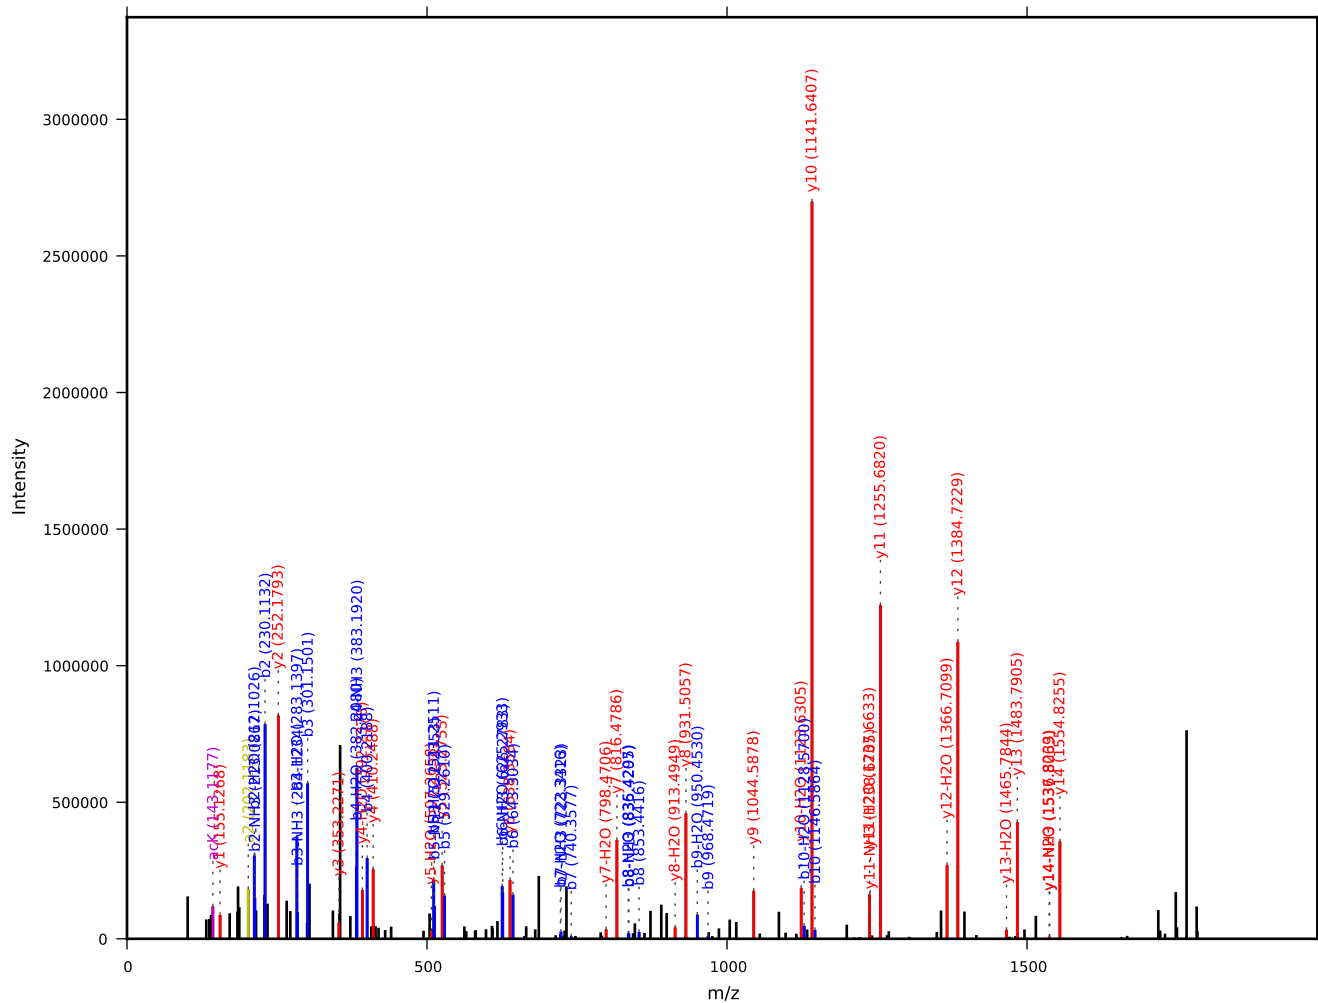

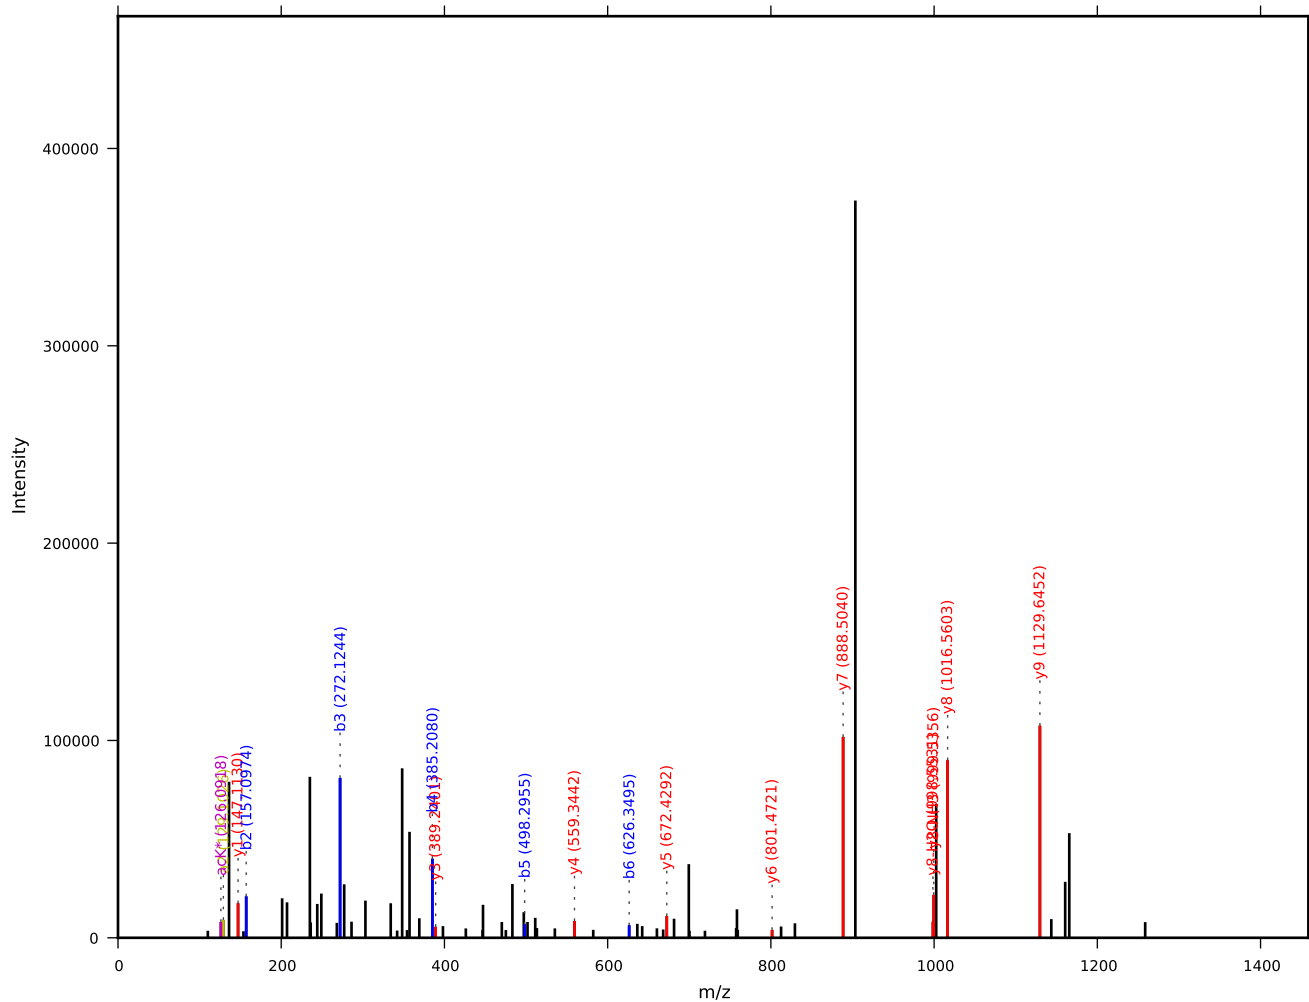

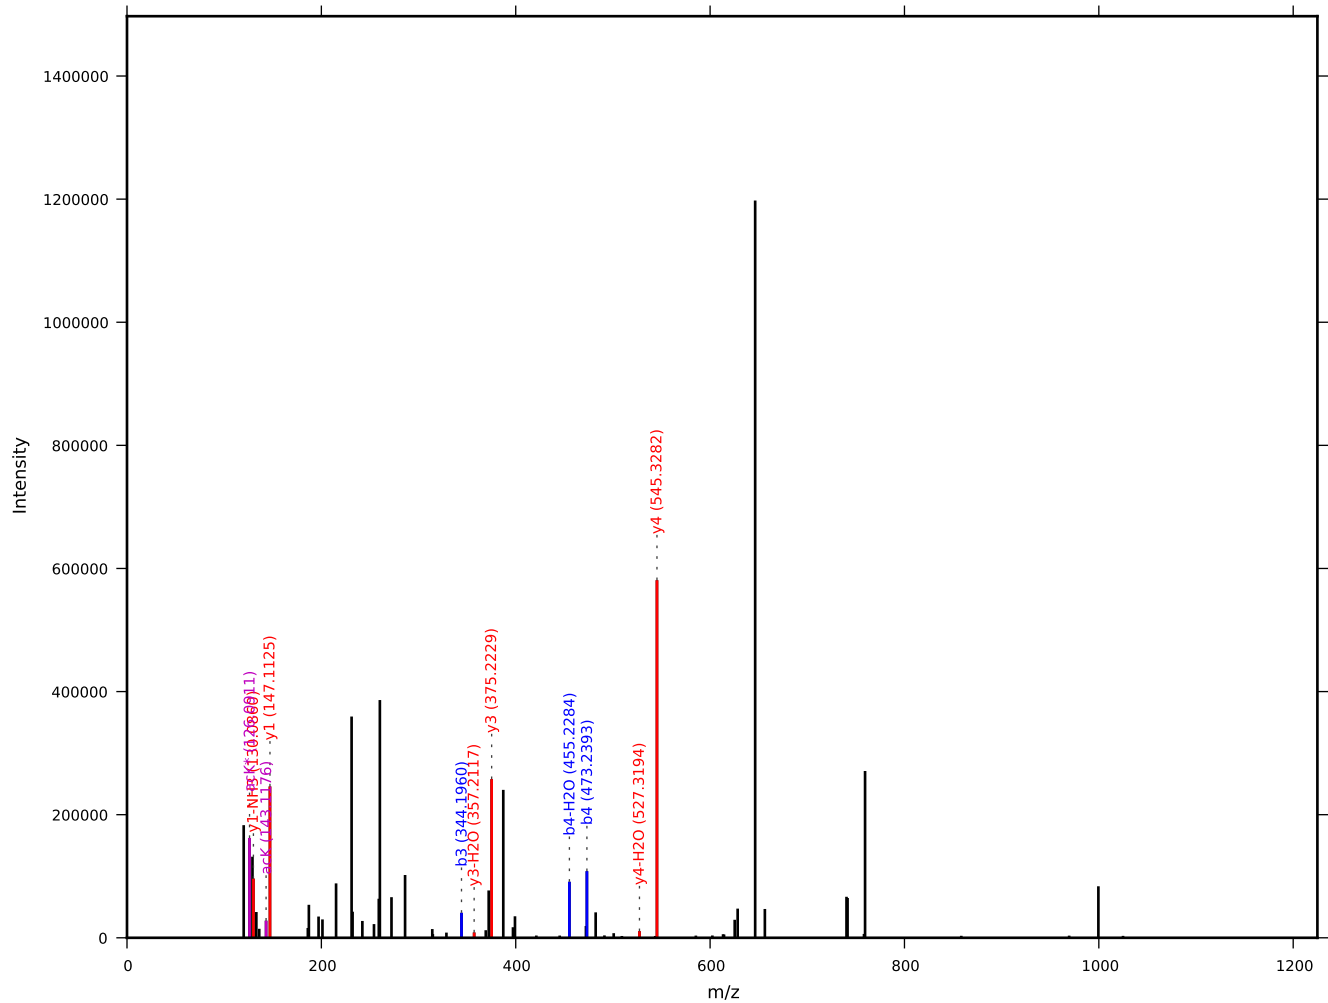

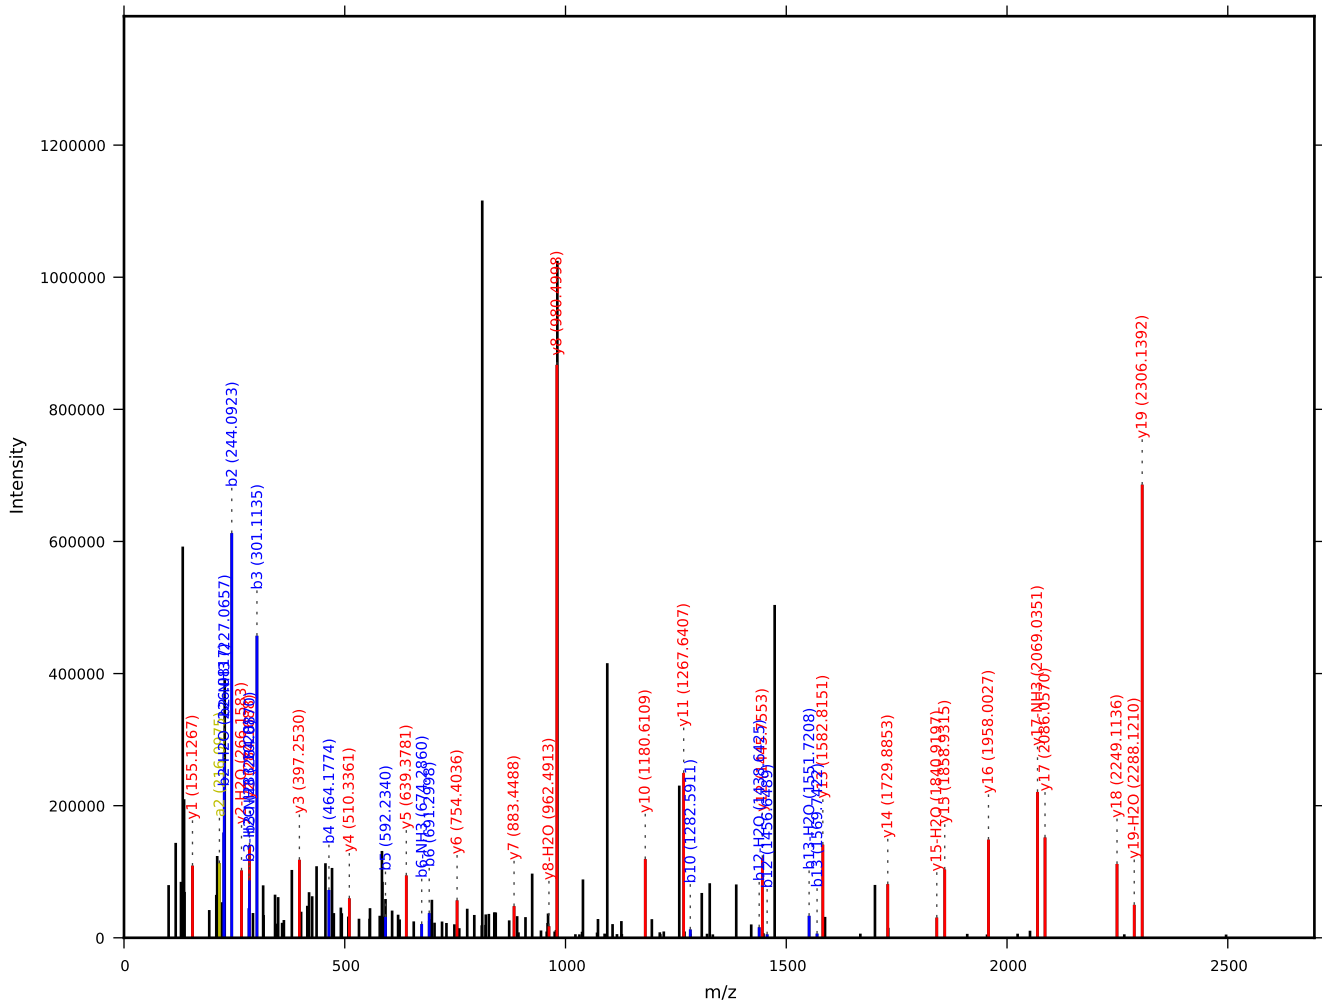

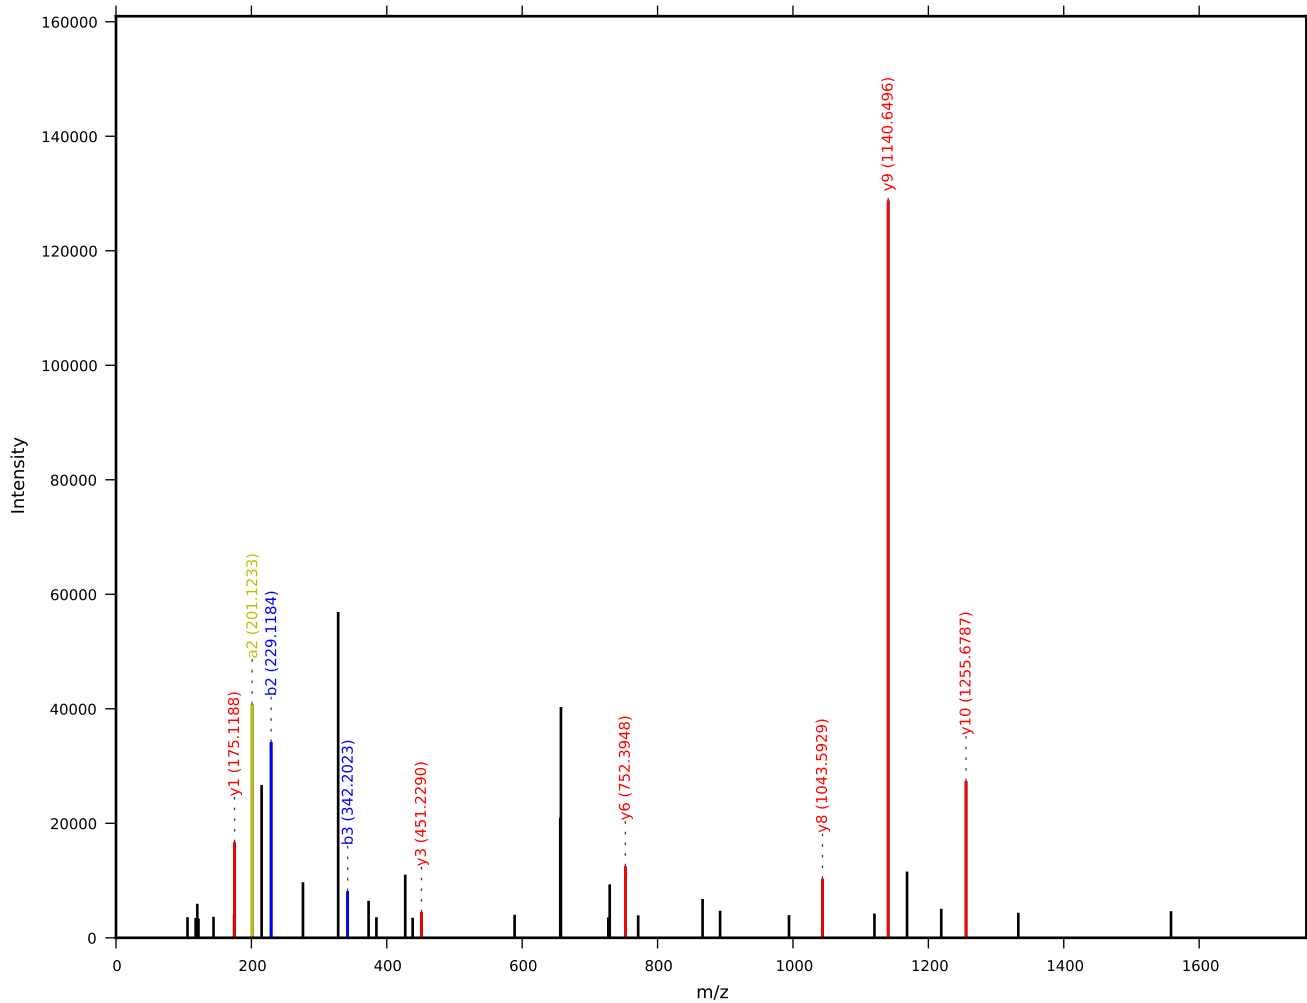



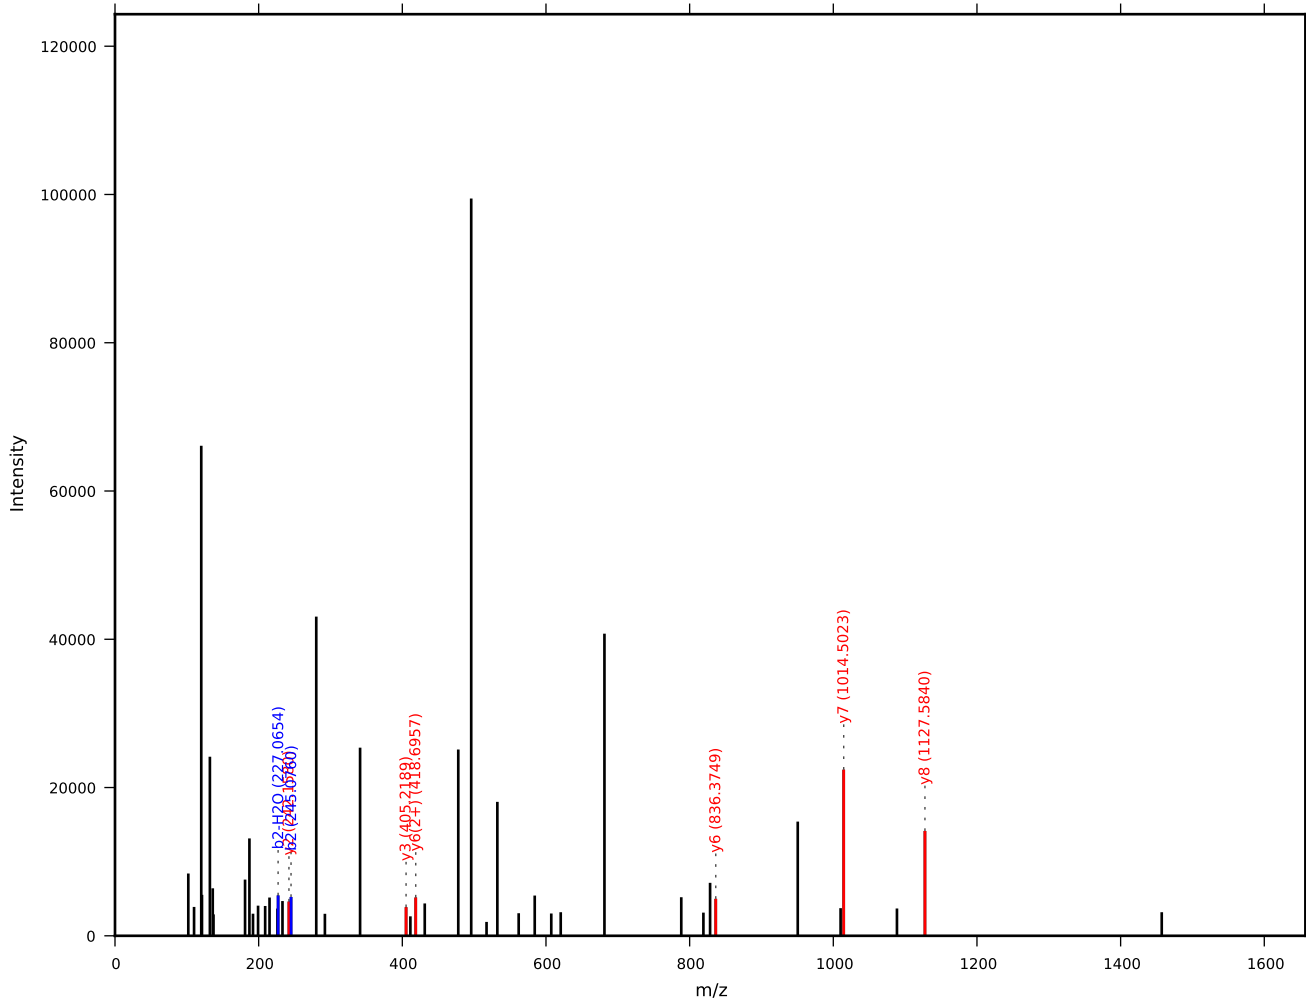

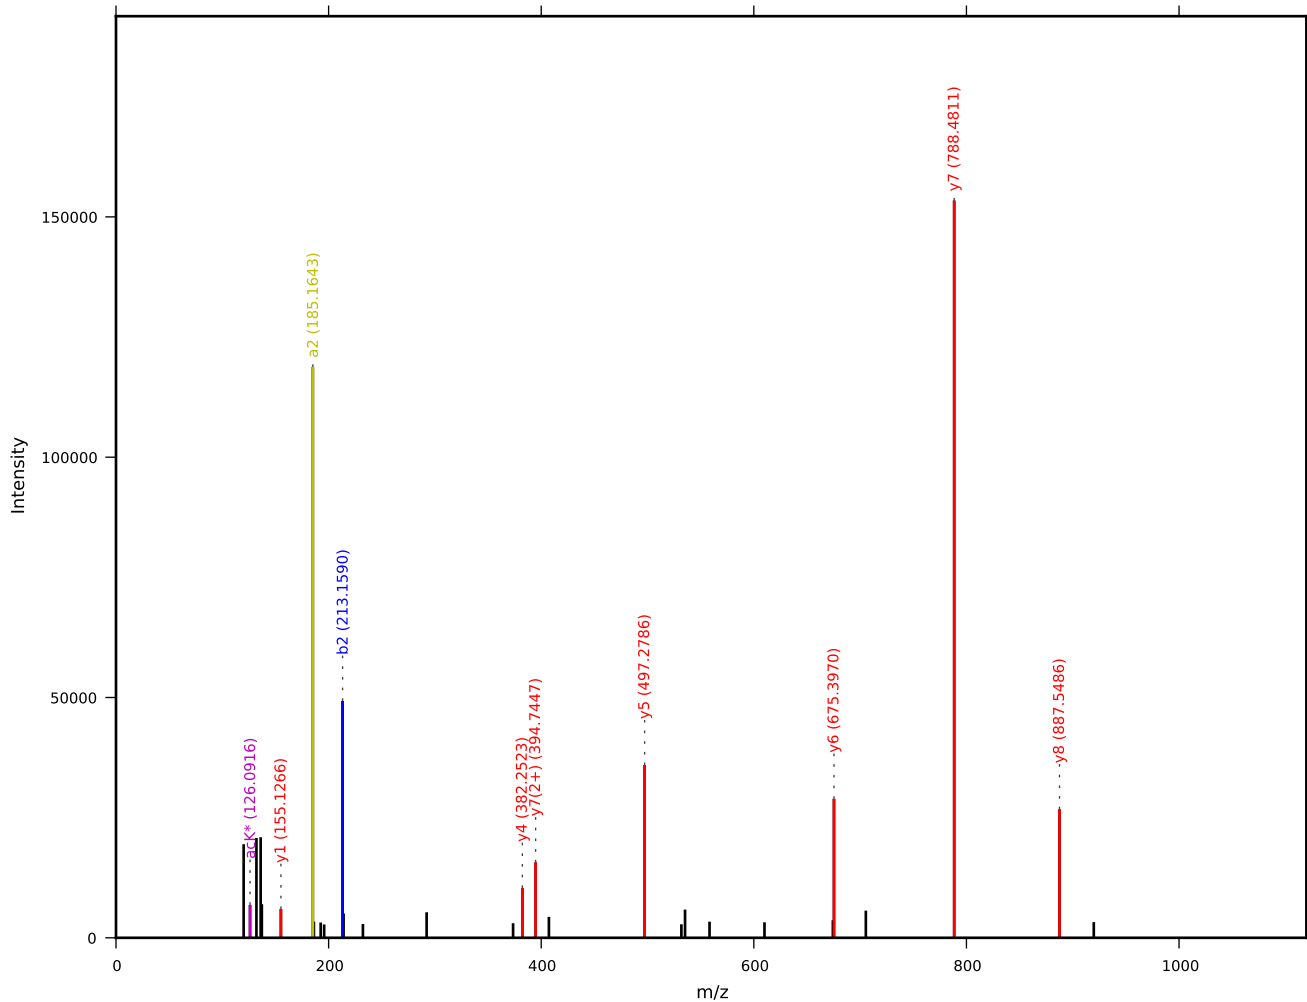

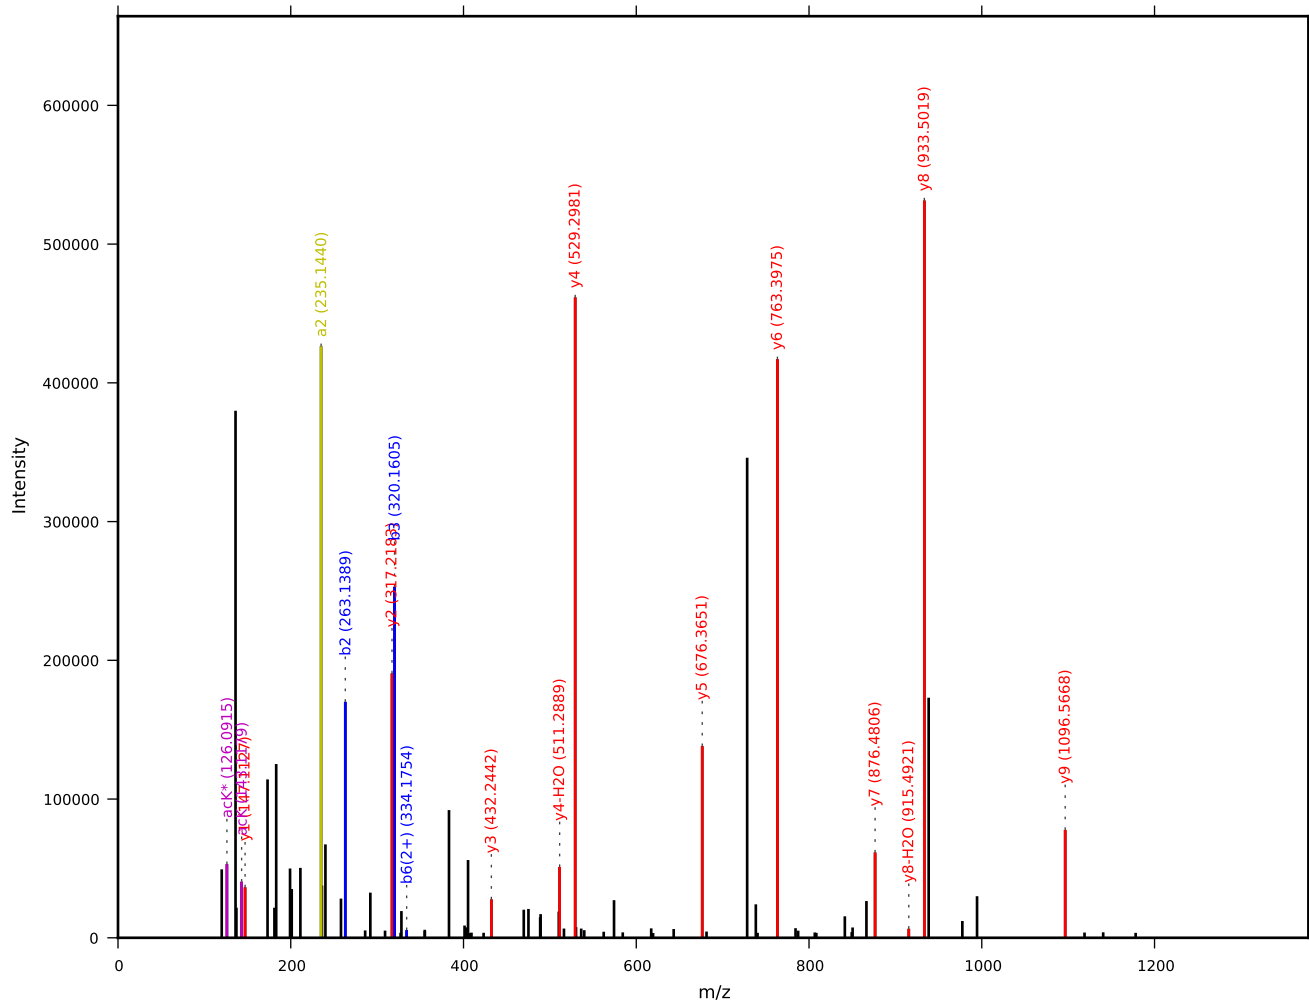

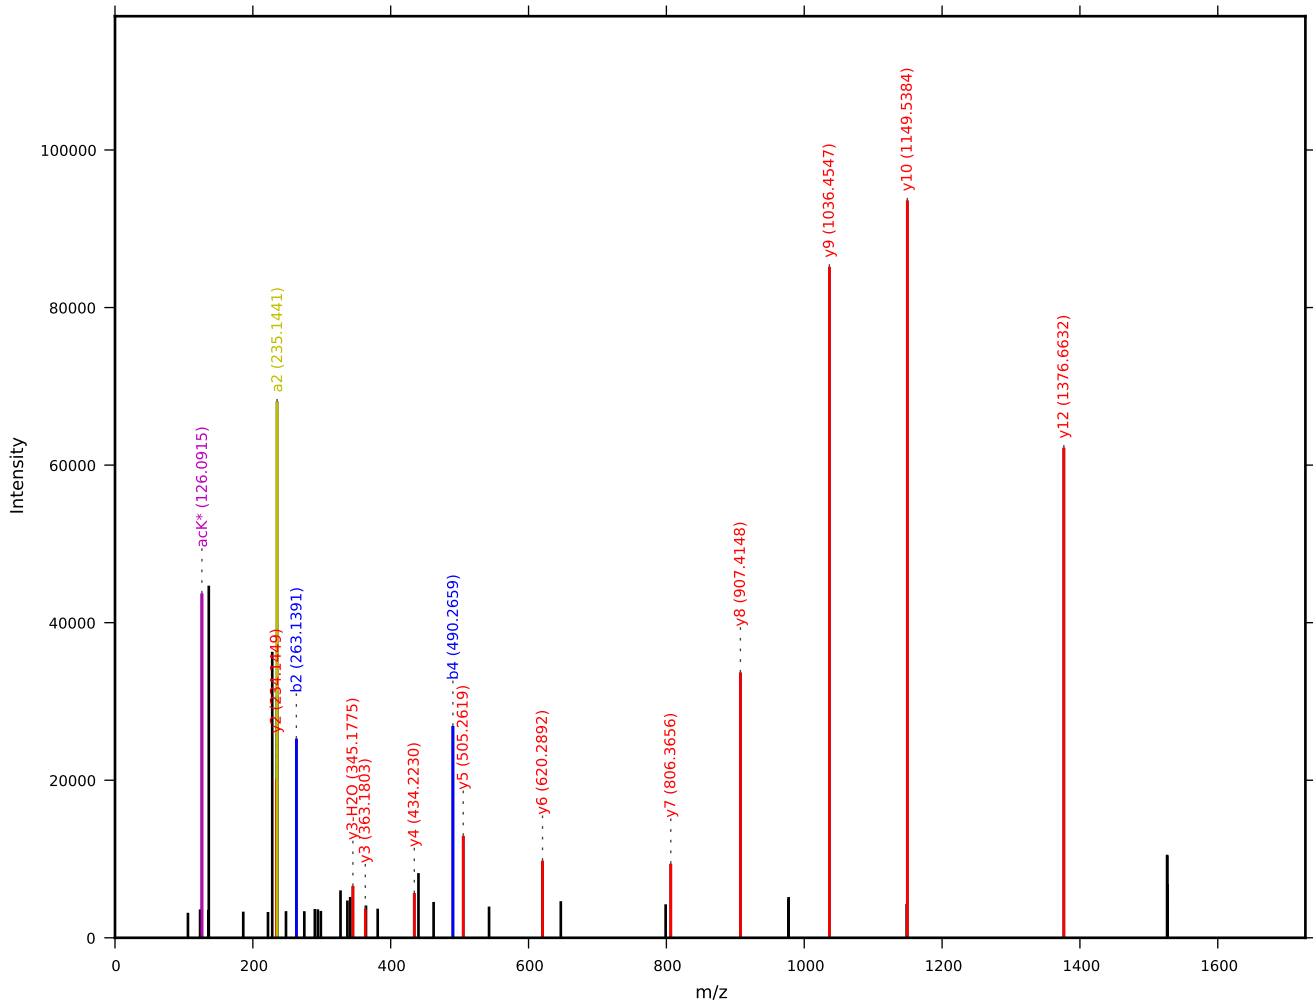

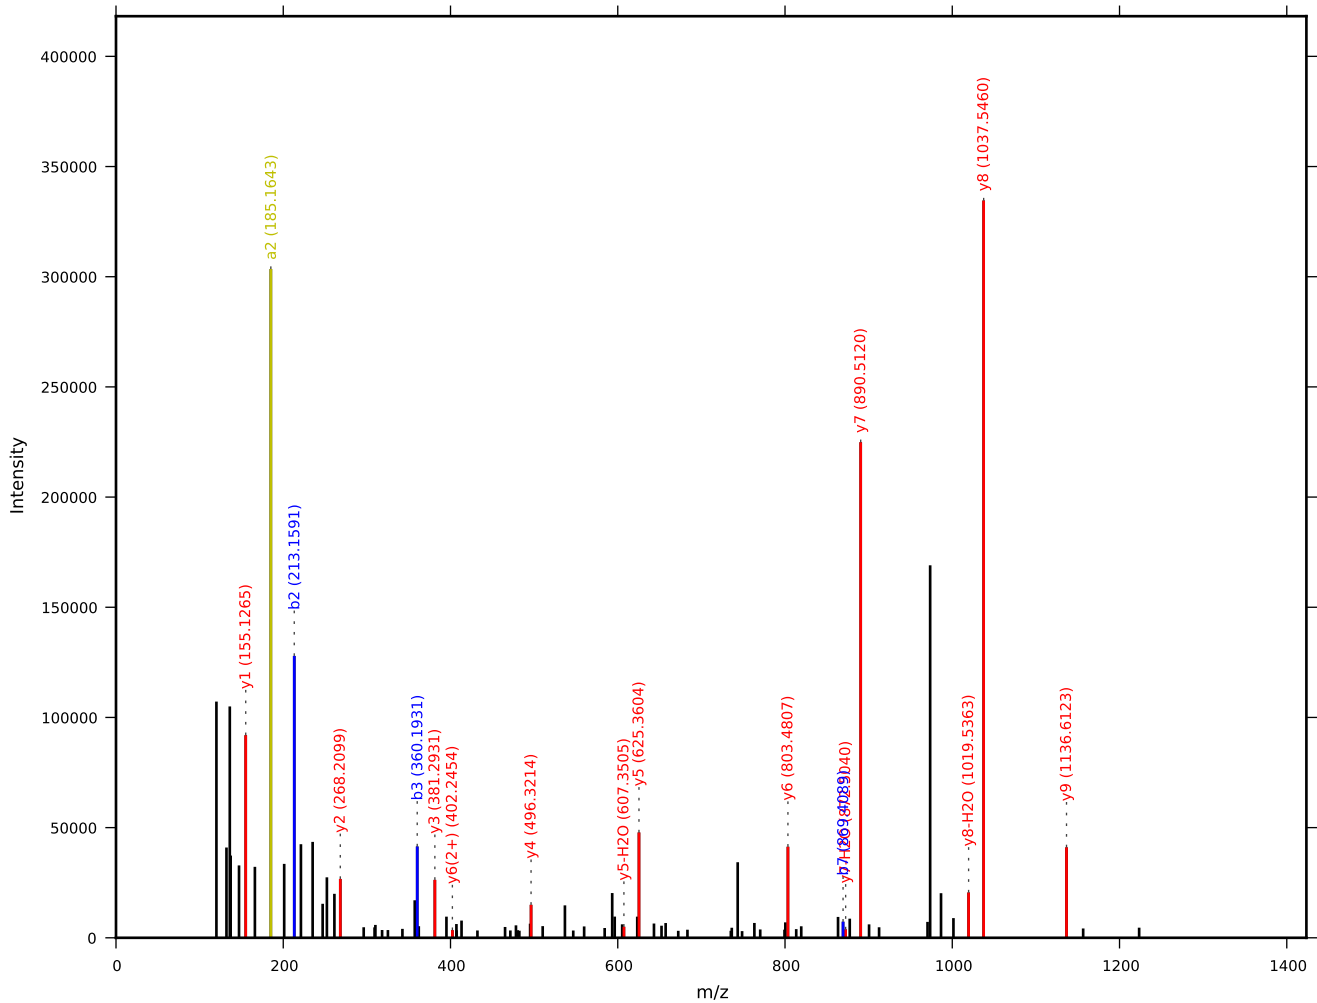

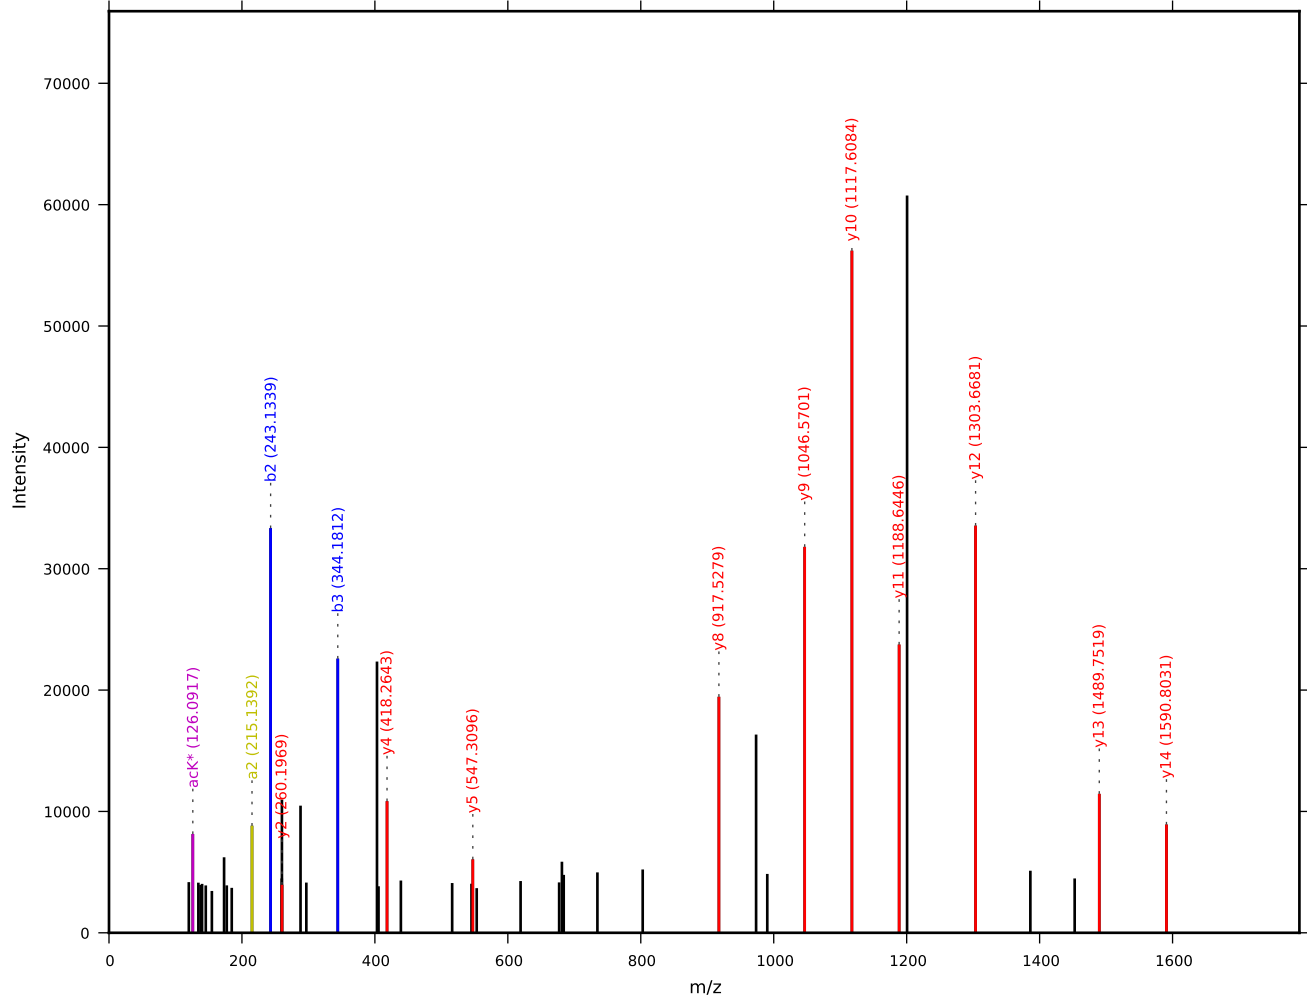

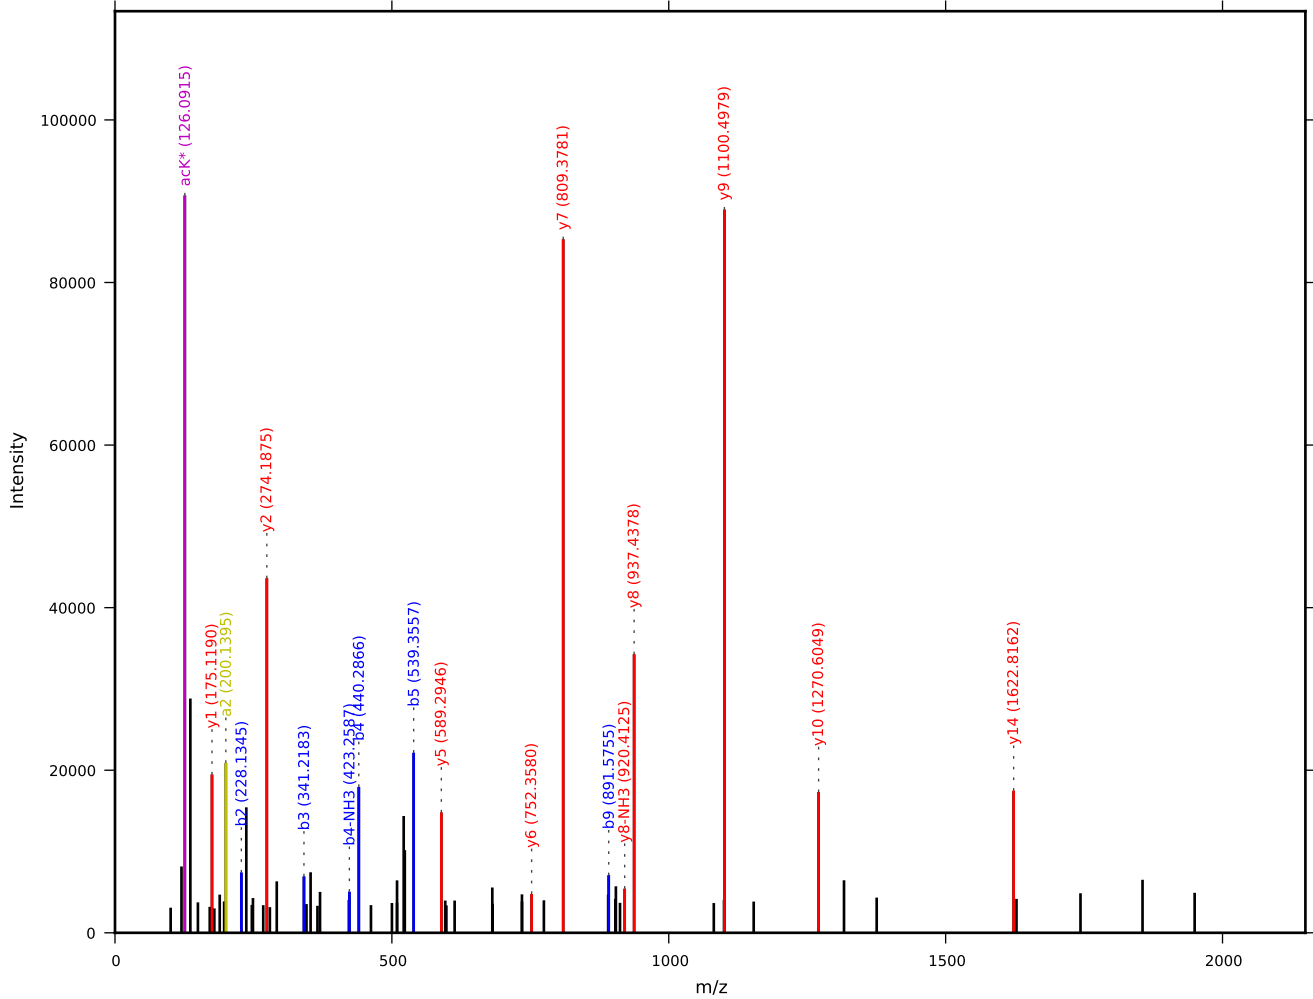

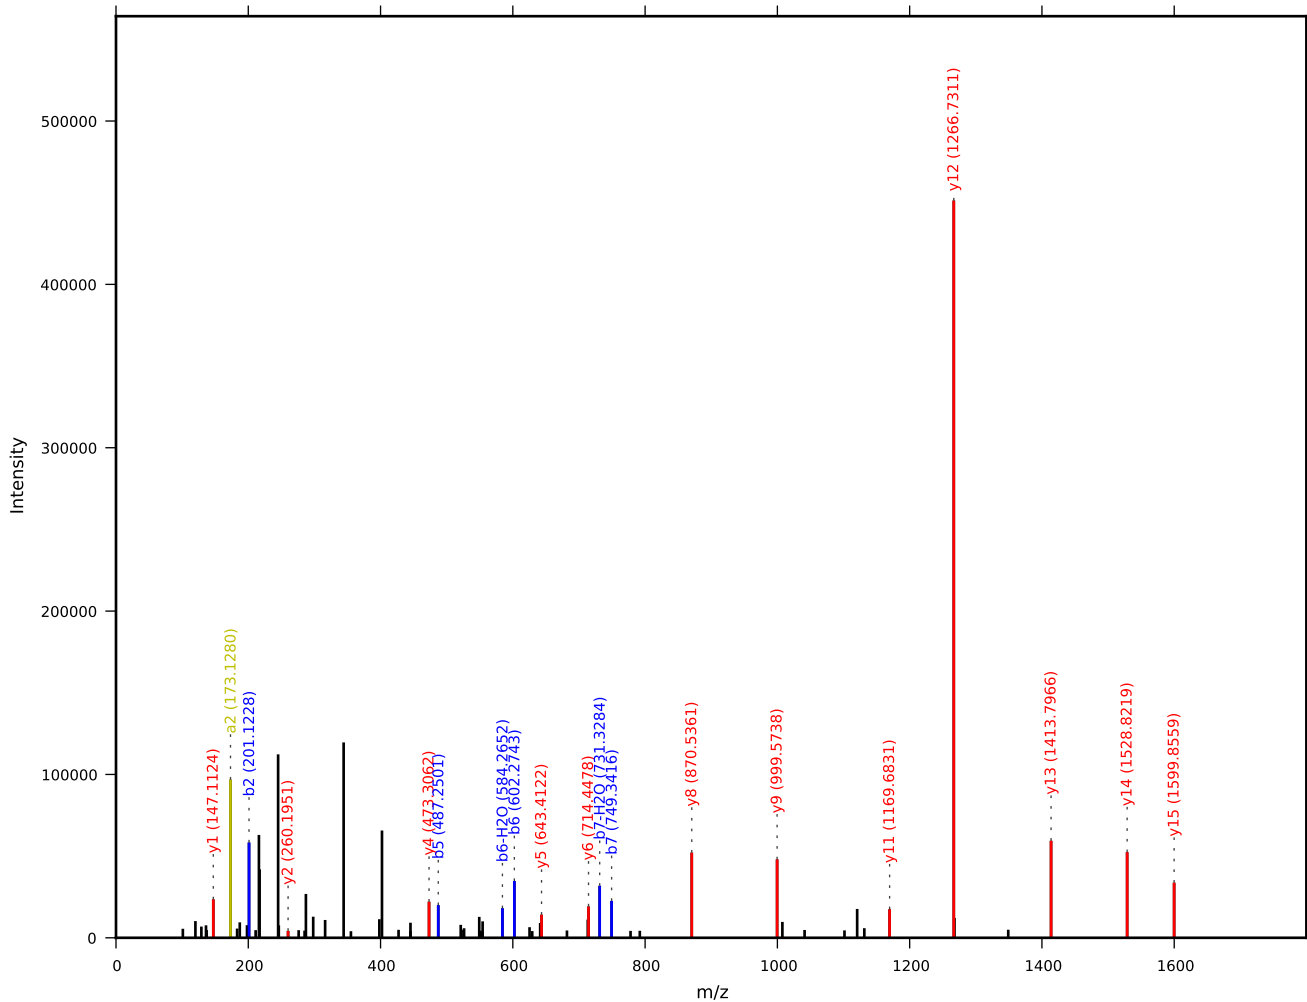



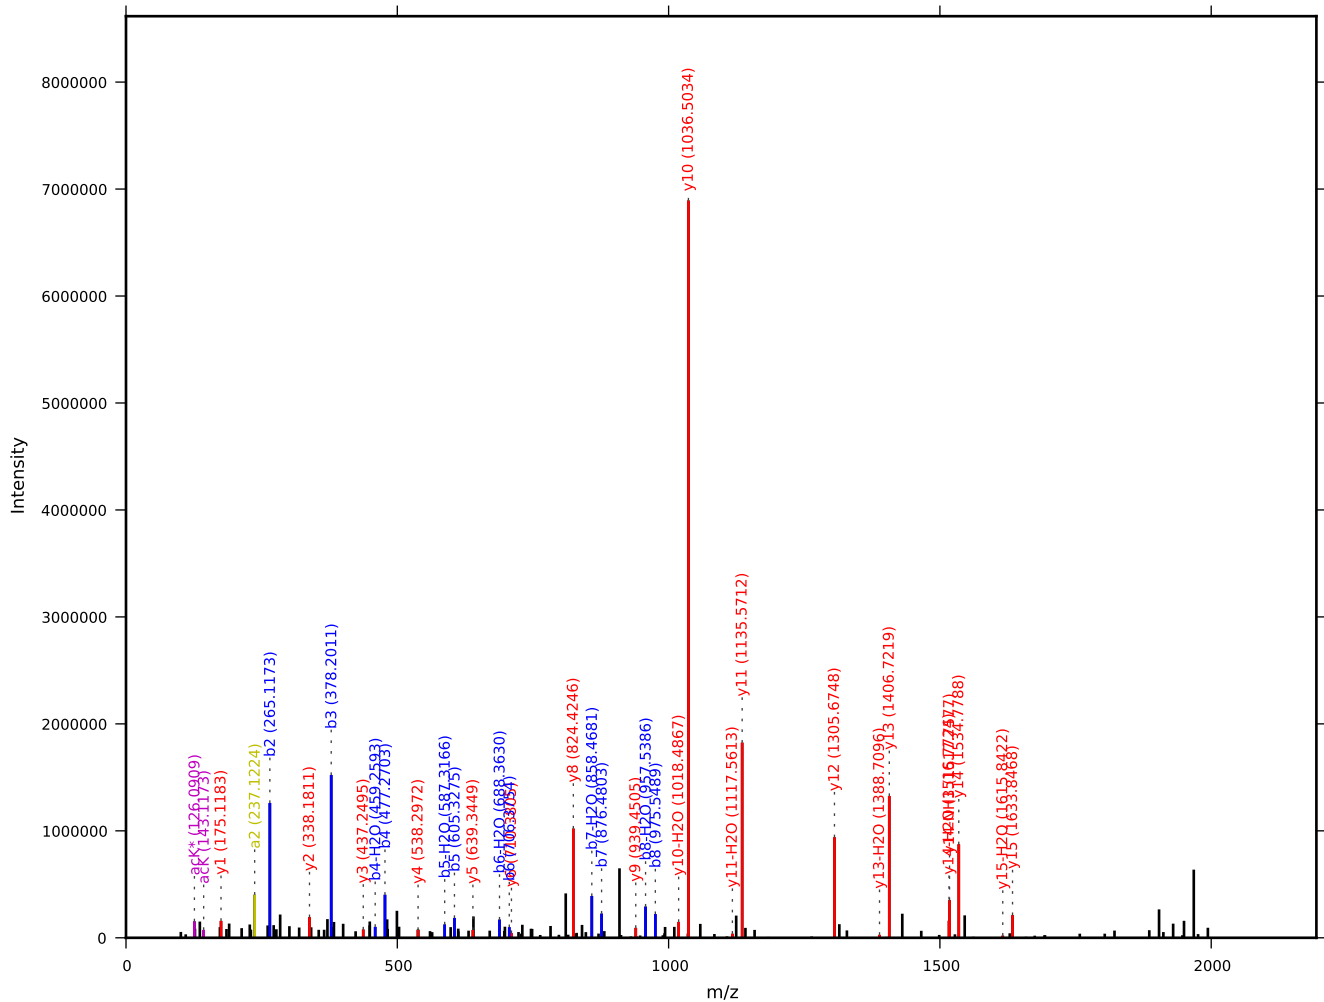

Mass: 1572.9483 Charge: 2 m/z: 787.48143  
Modified Peptide: \_LIVNLDVPVK(ac)FLR\_ Score: 43.991 PEP: 0.0014174

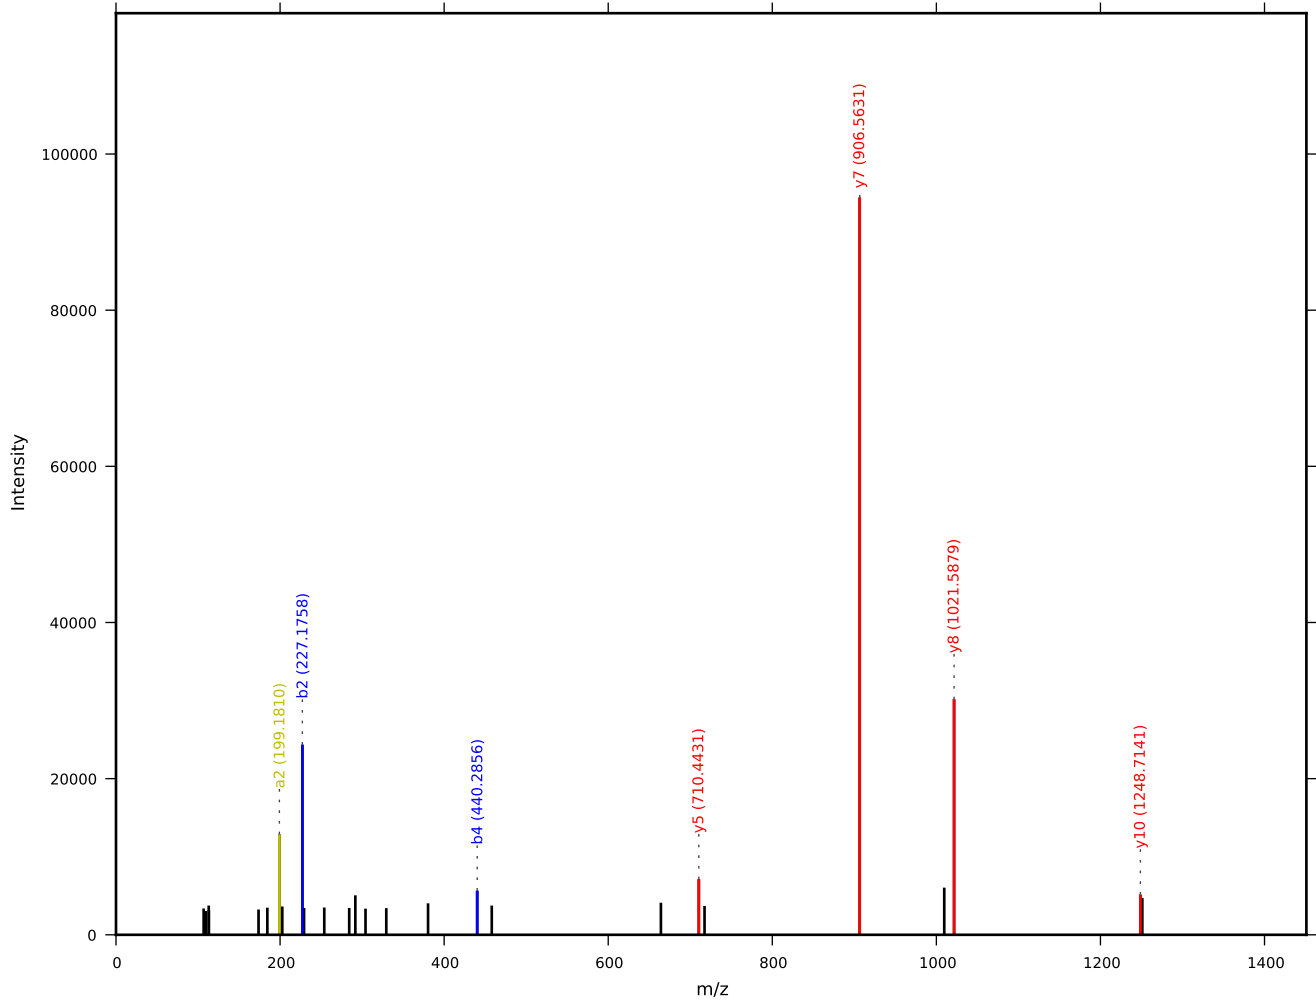

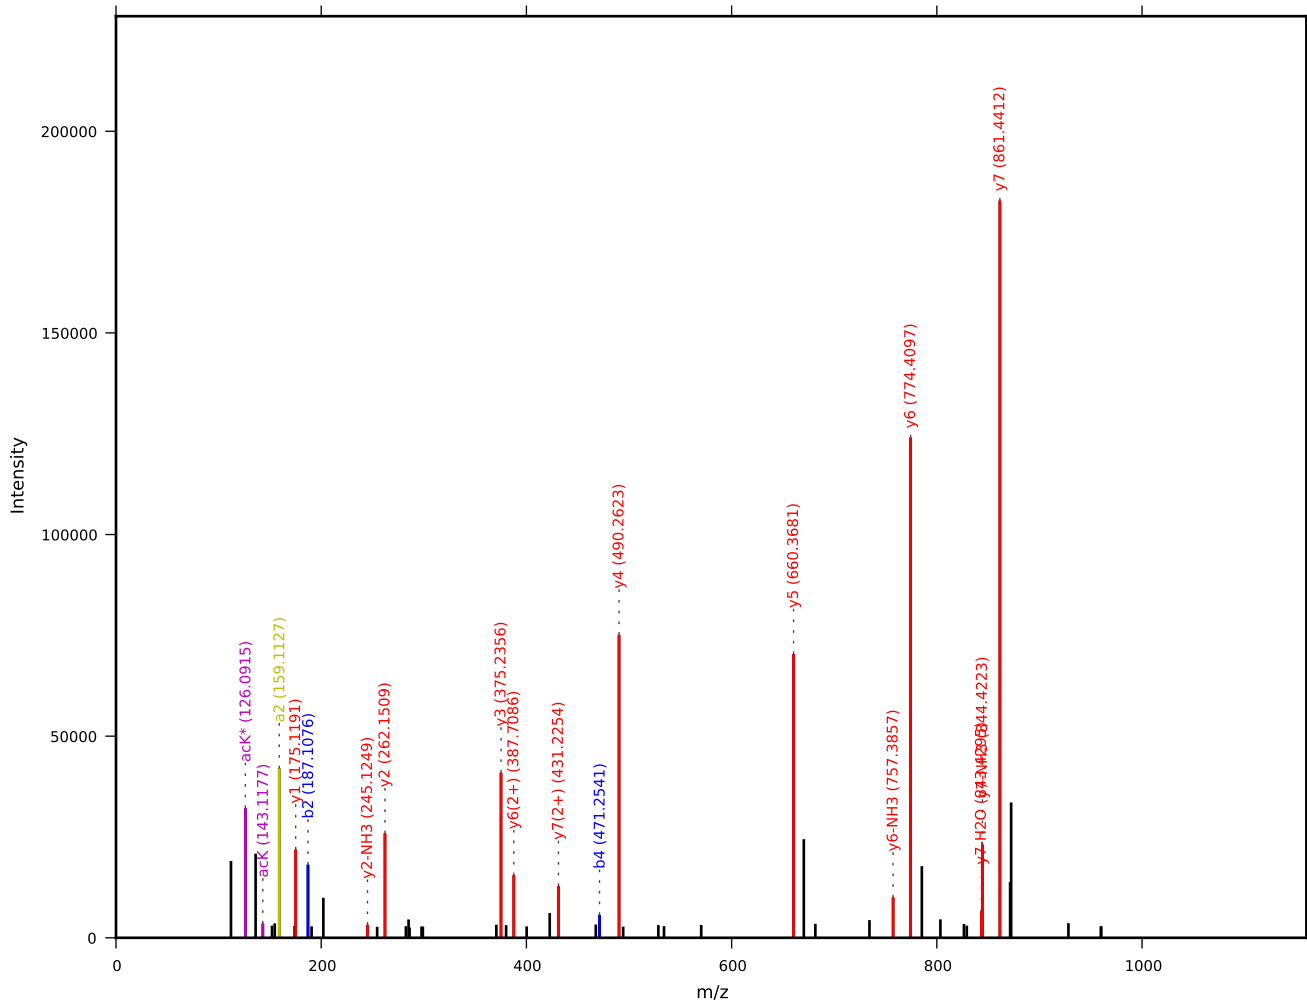

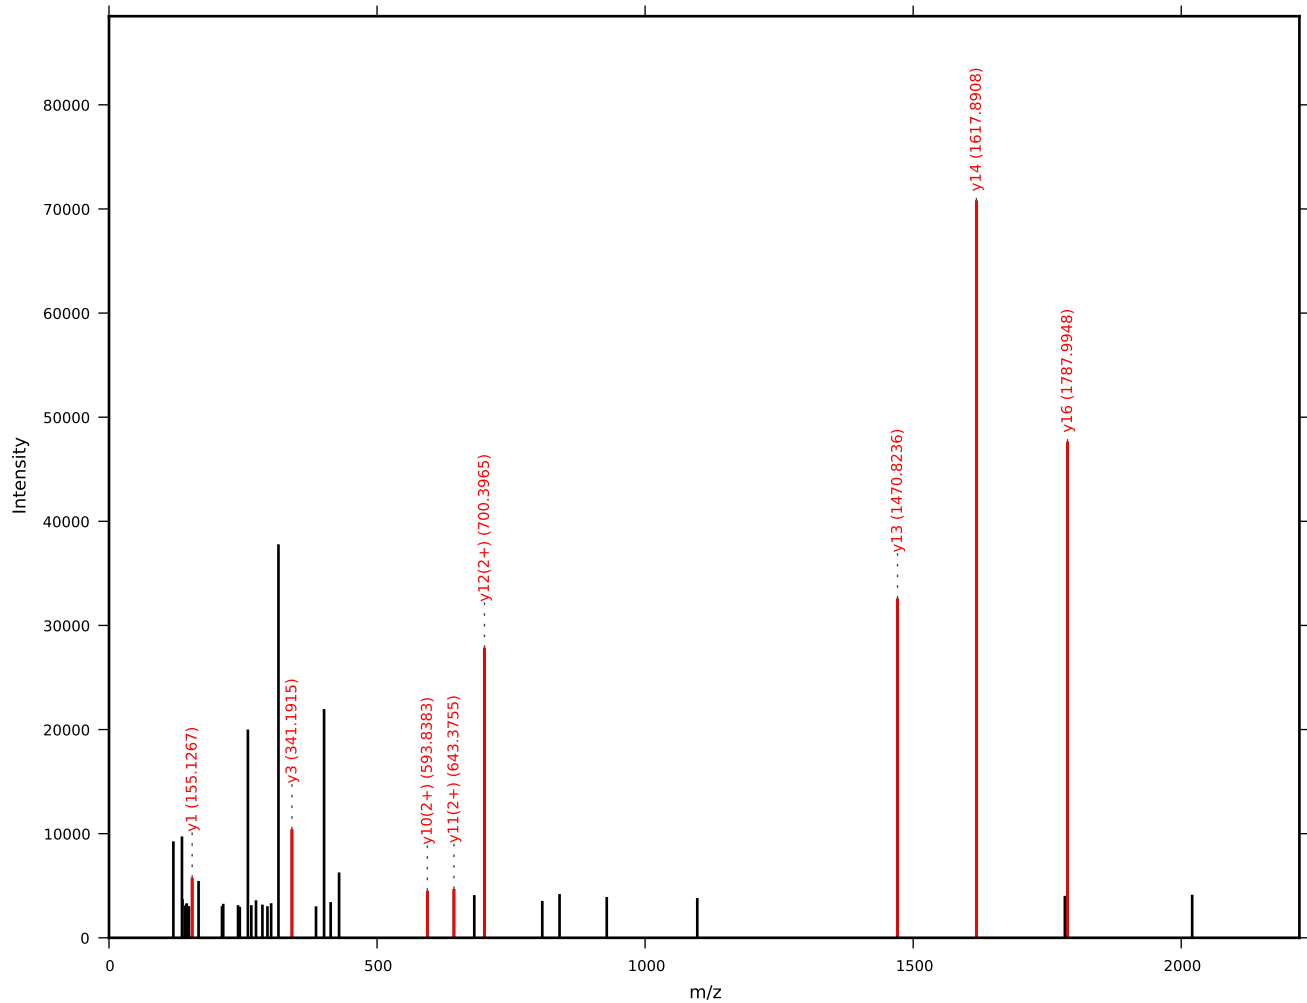

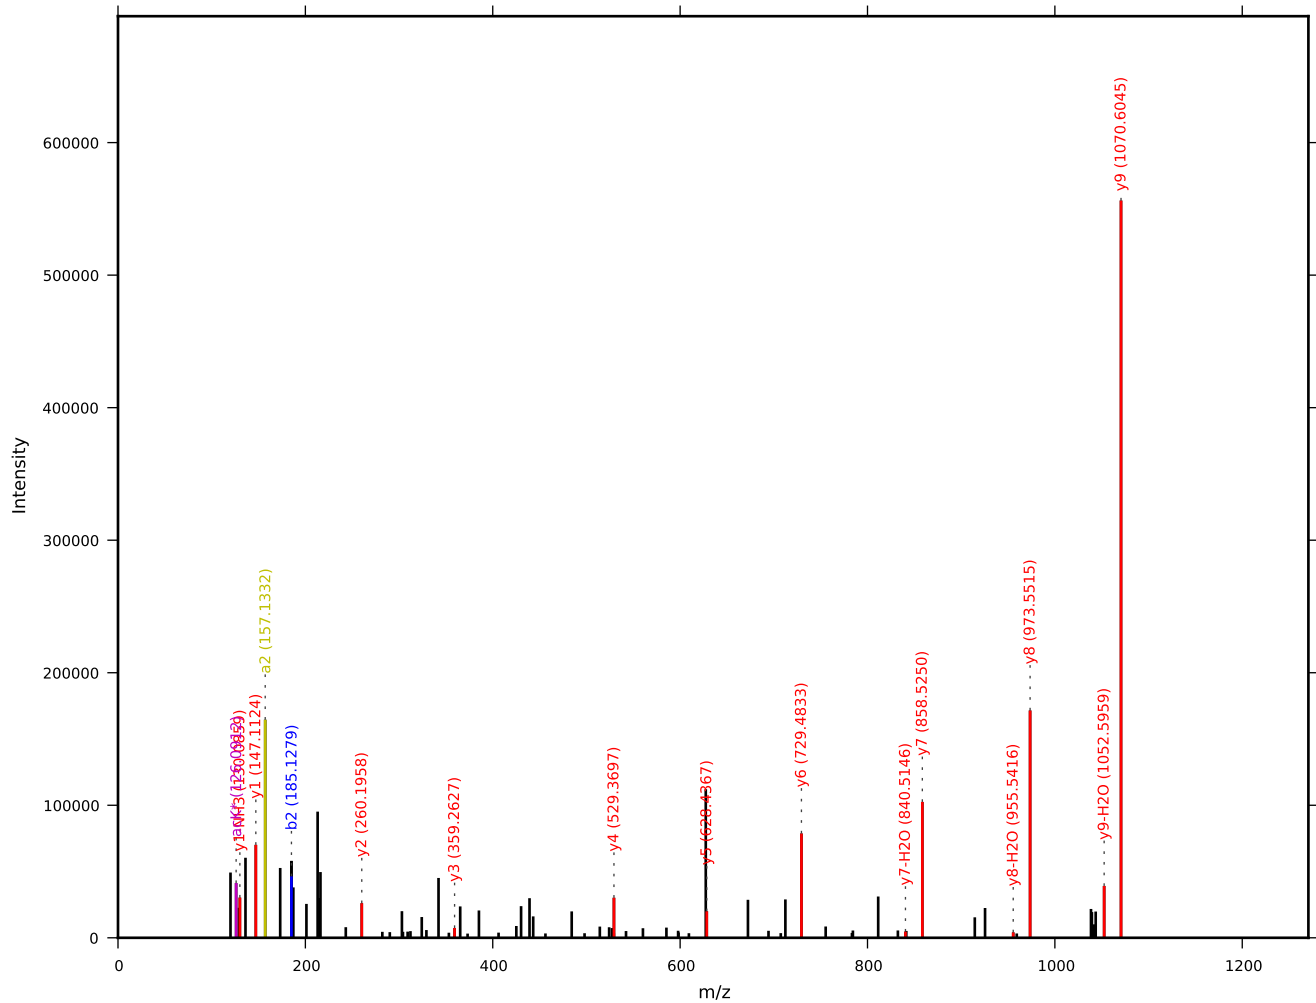

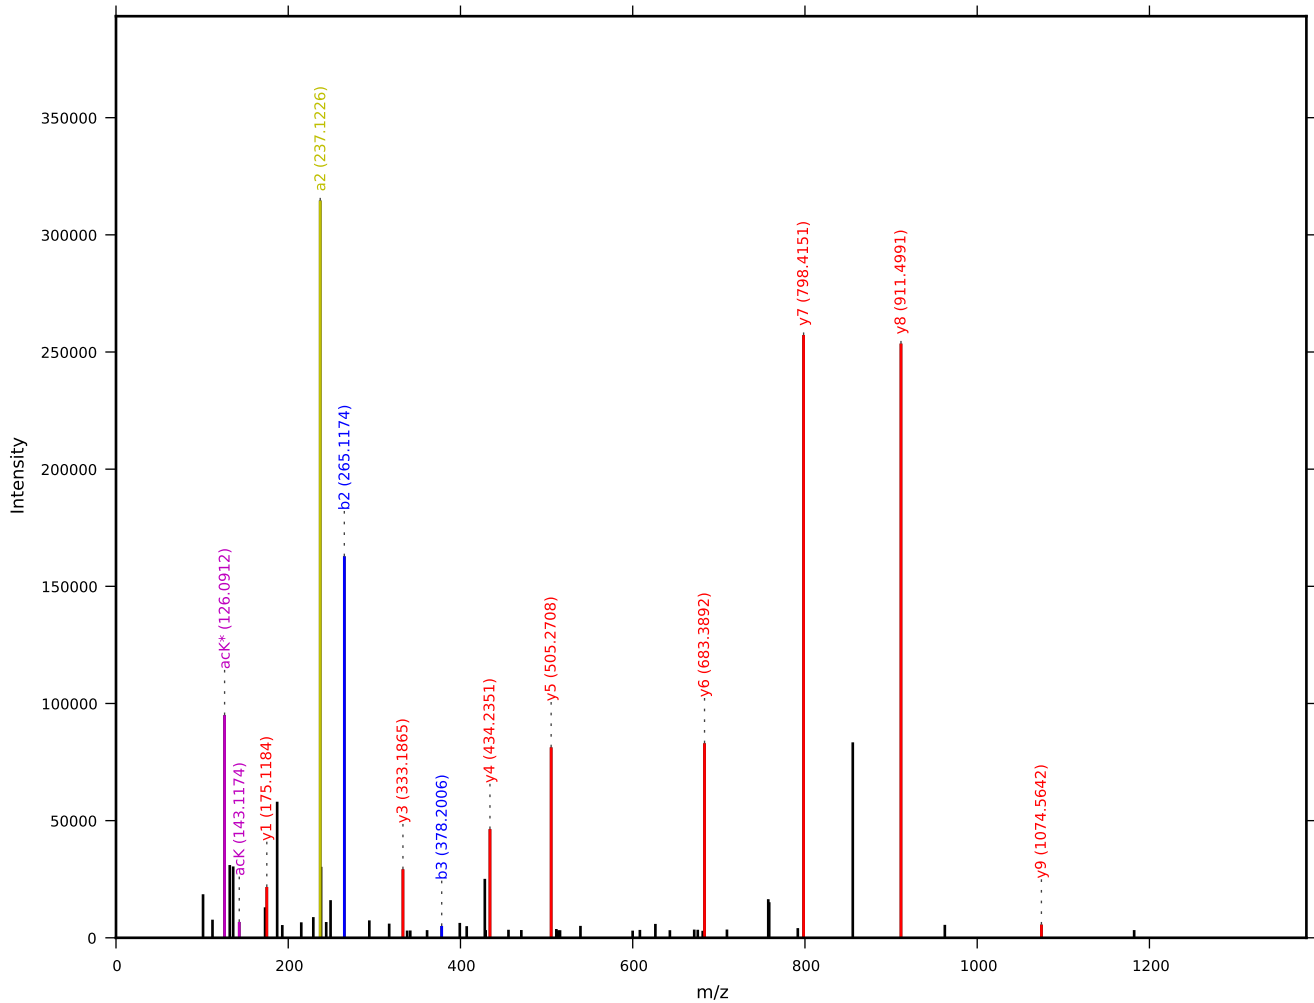

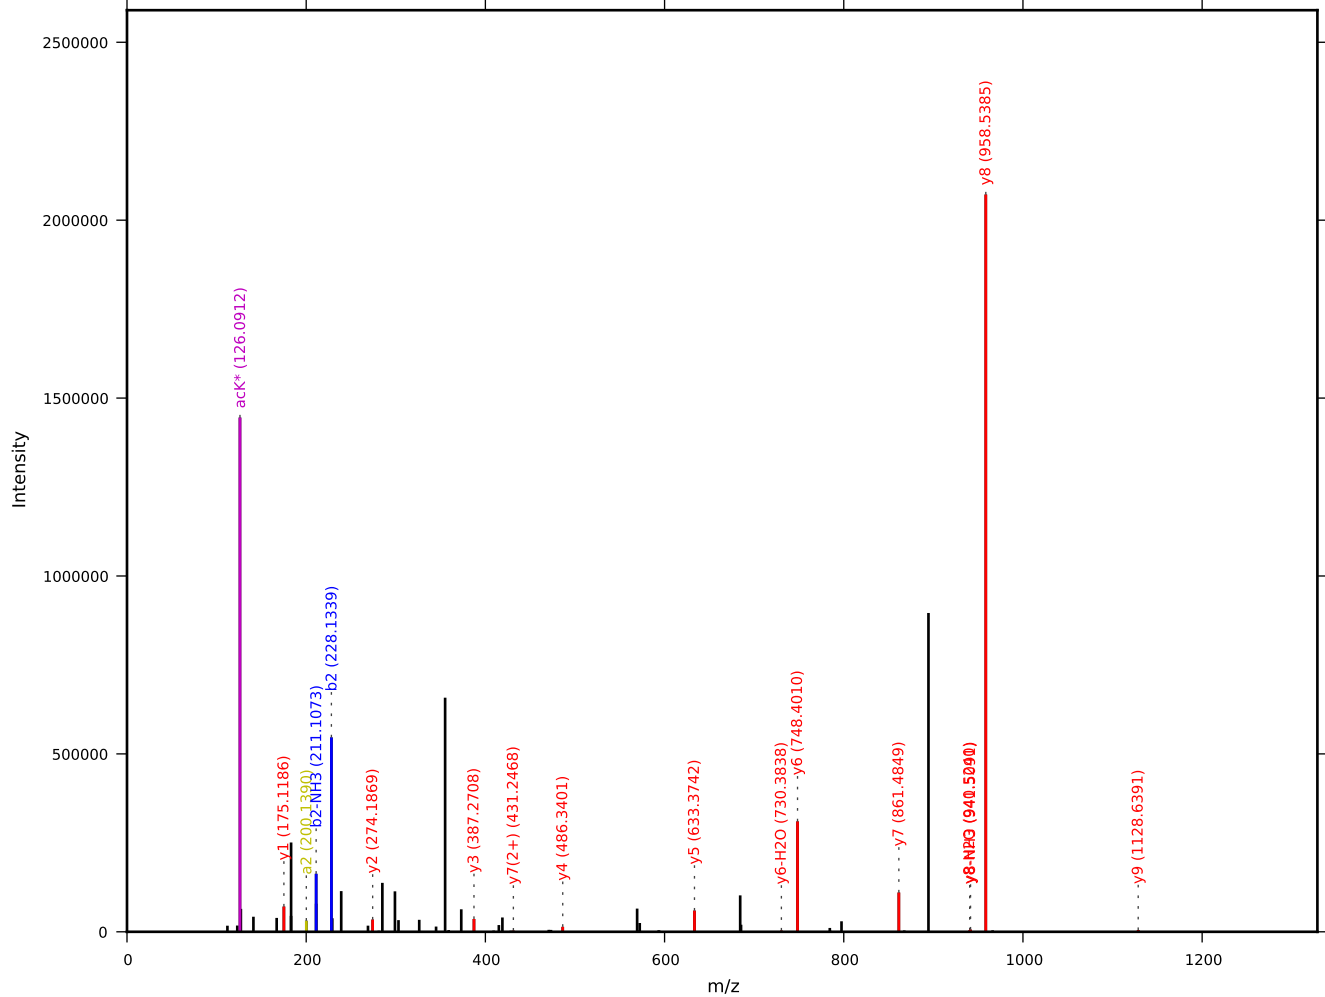

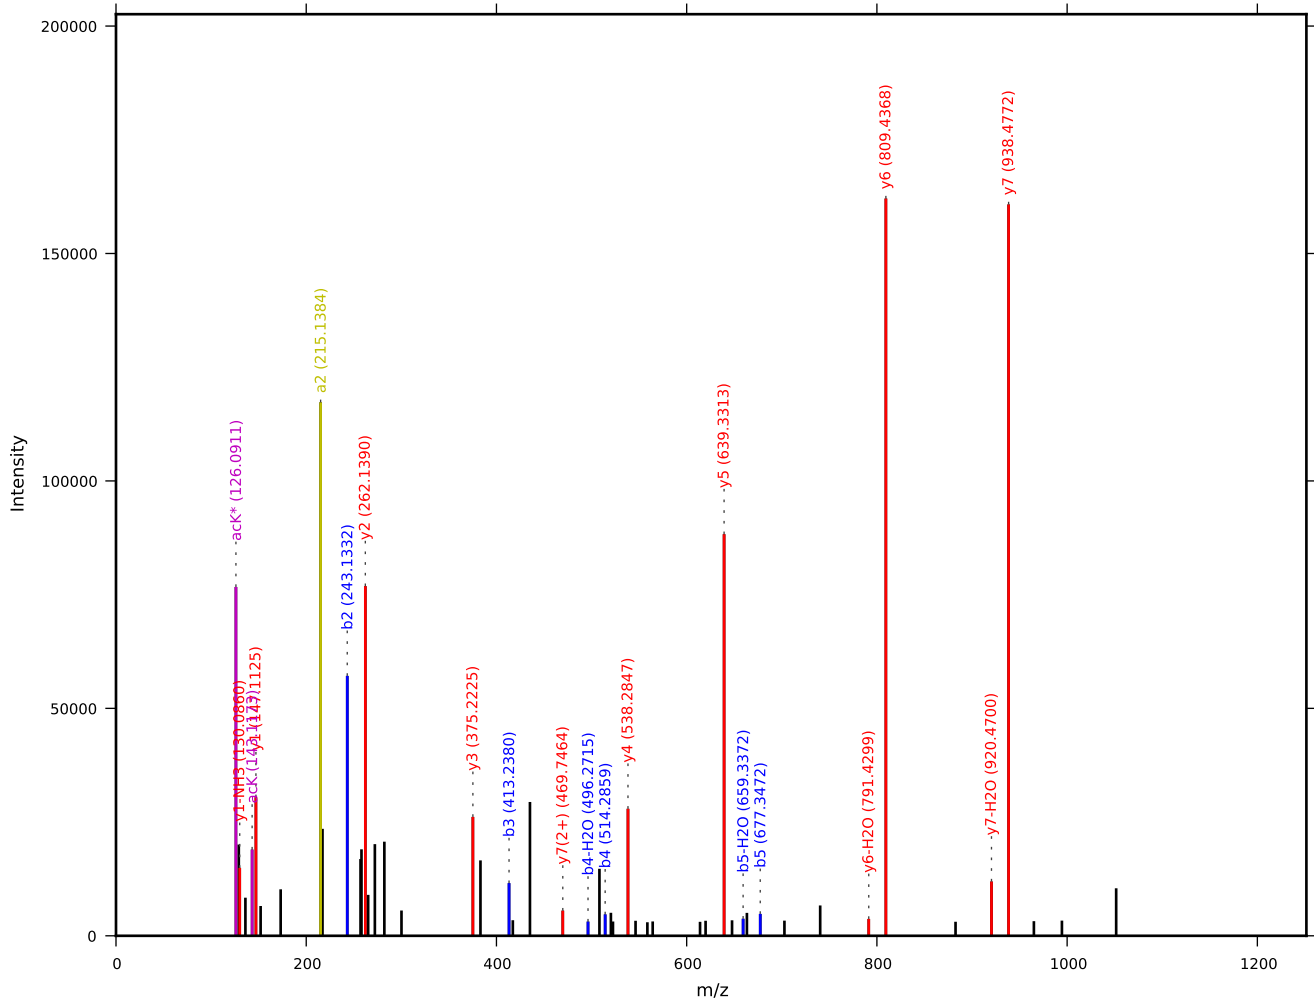



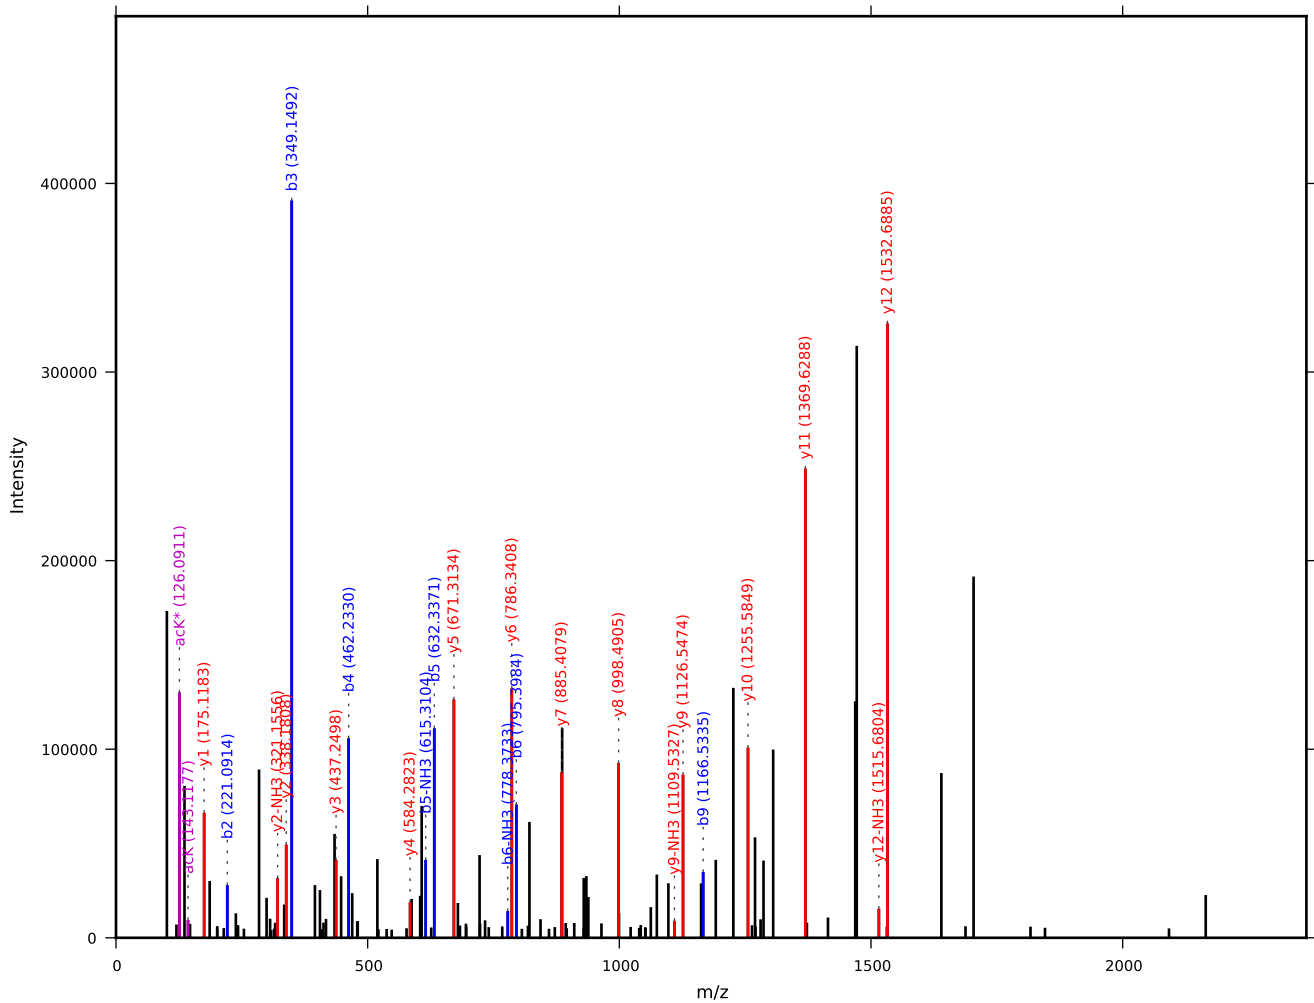

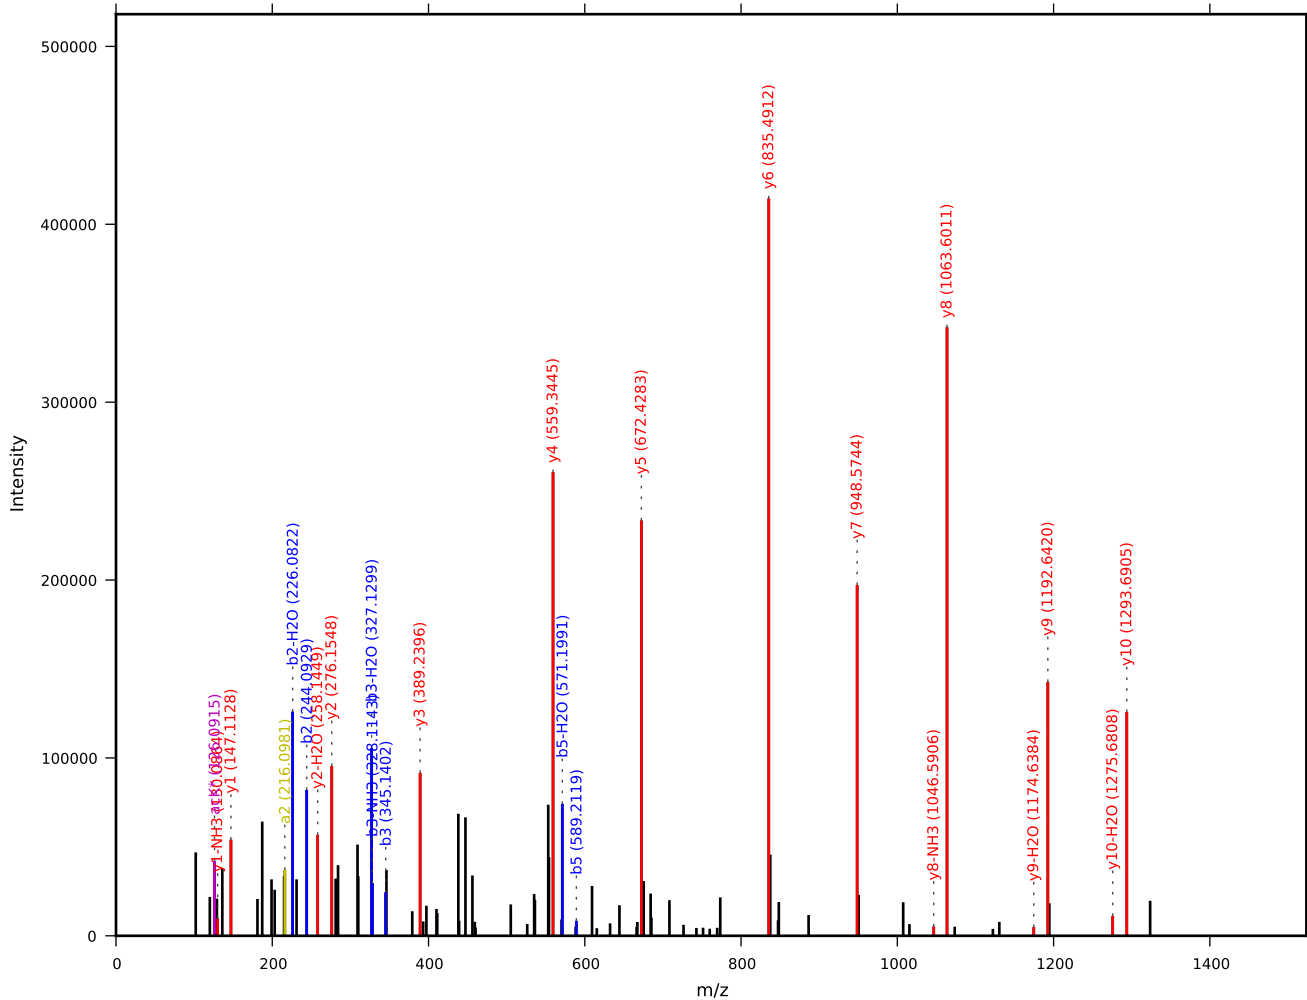

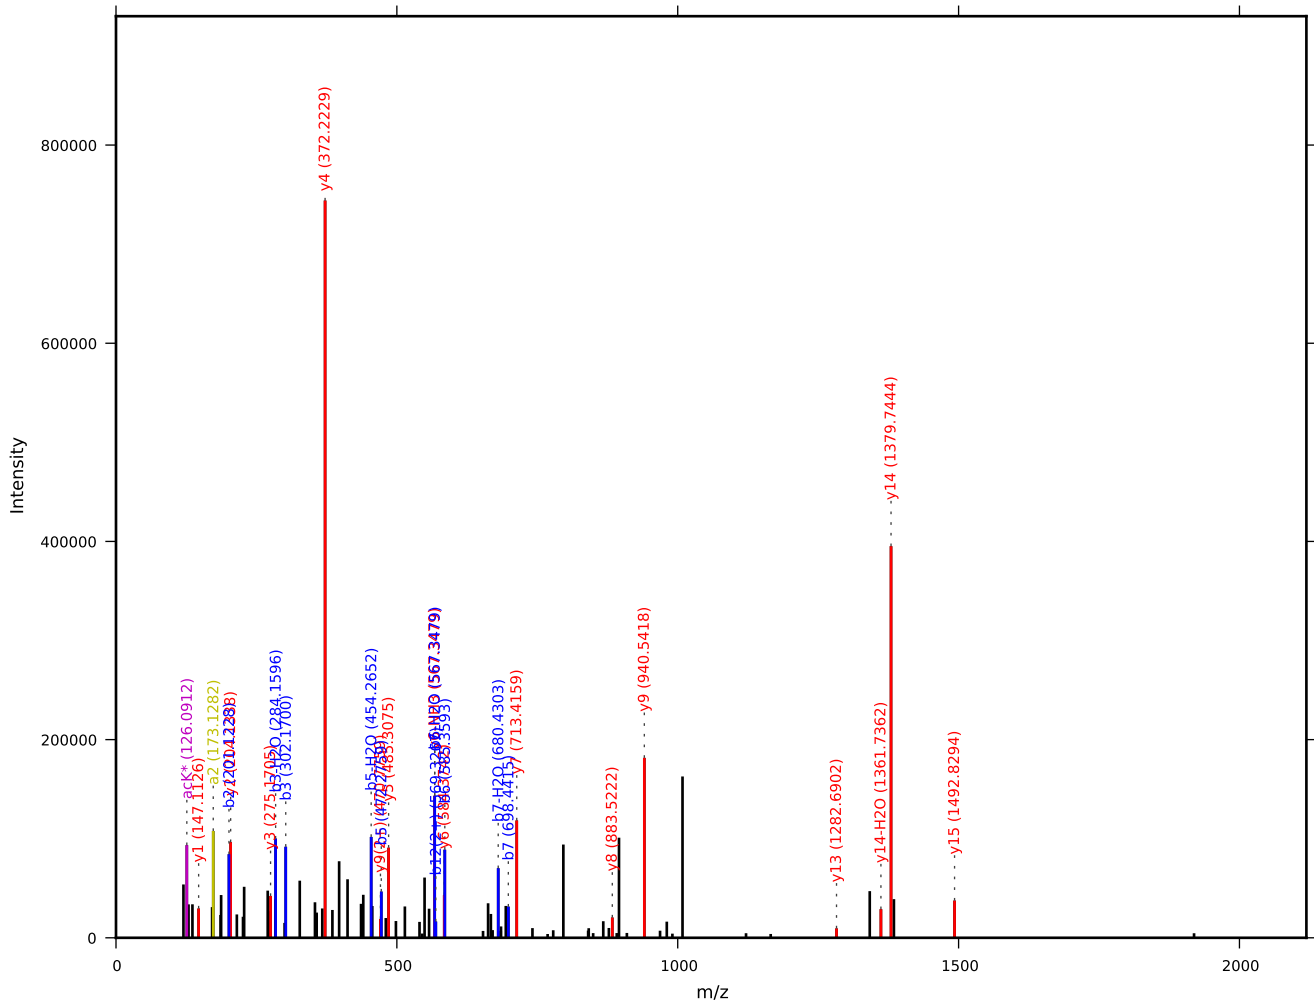

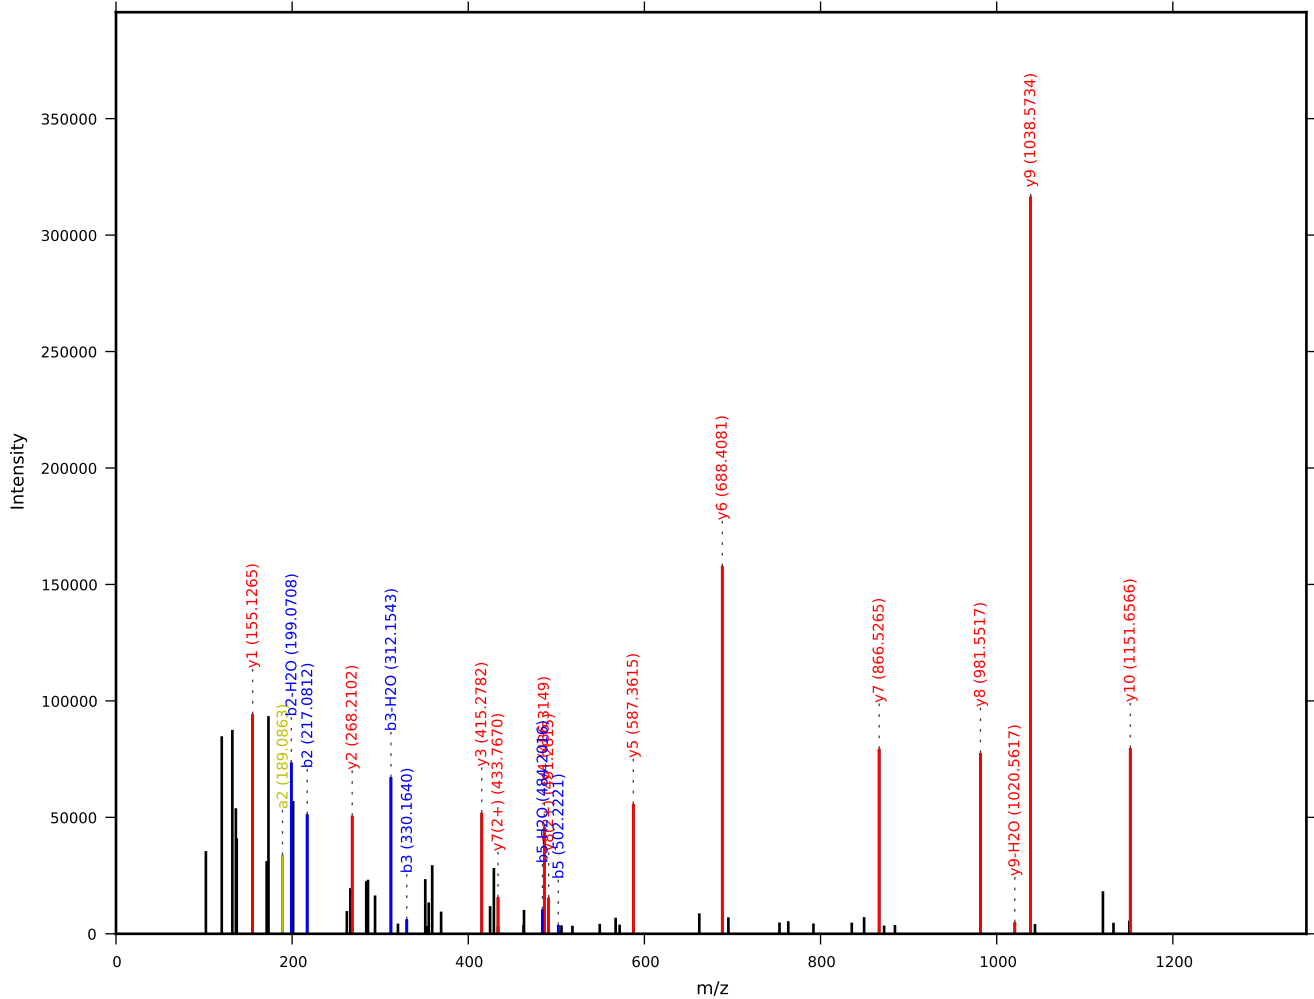

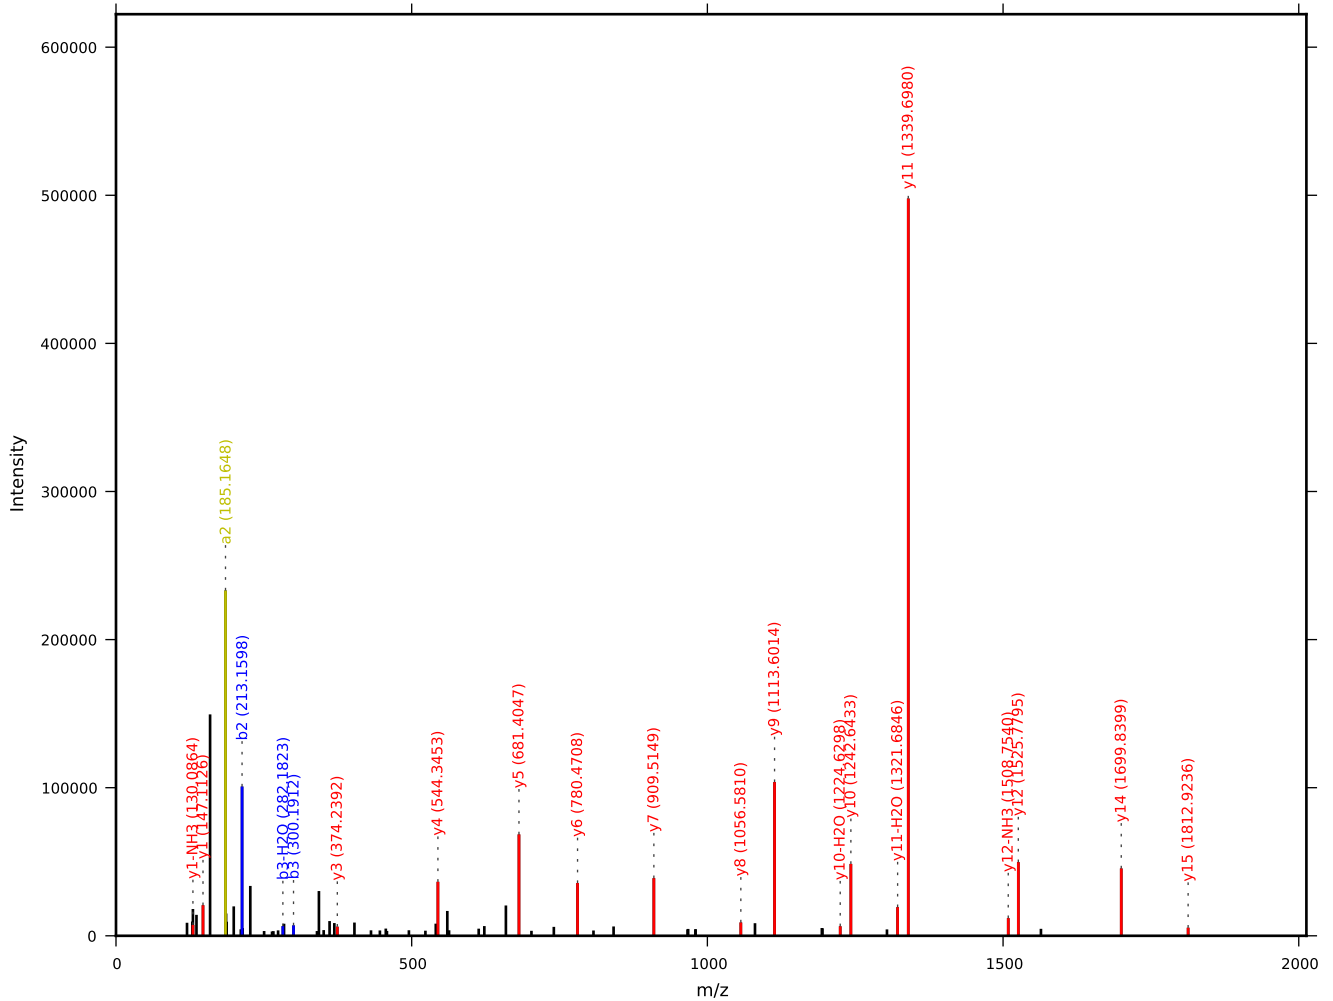

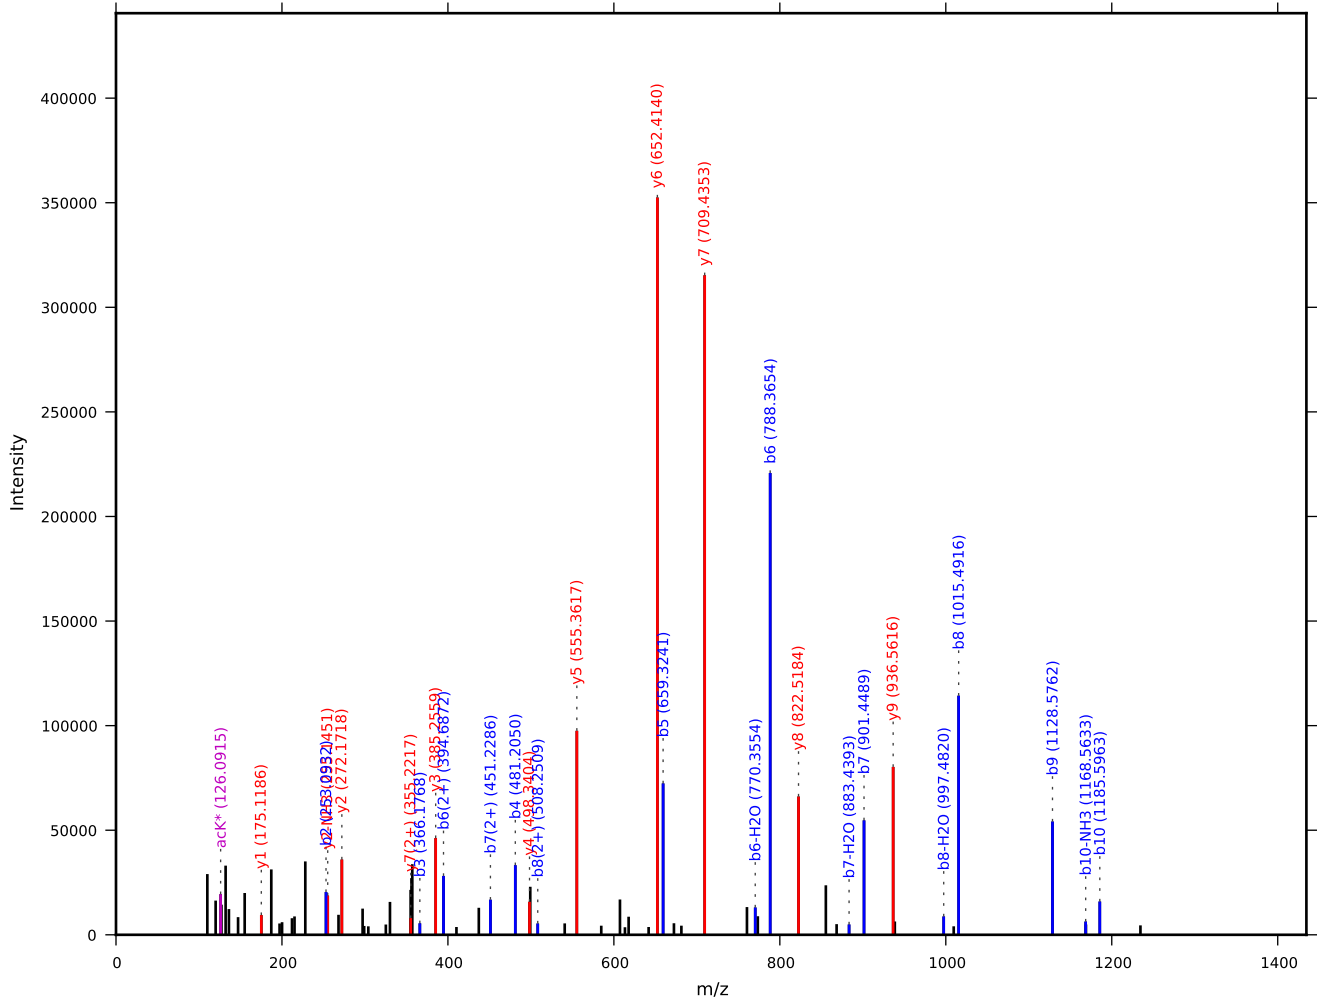

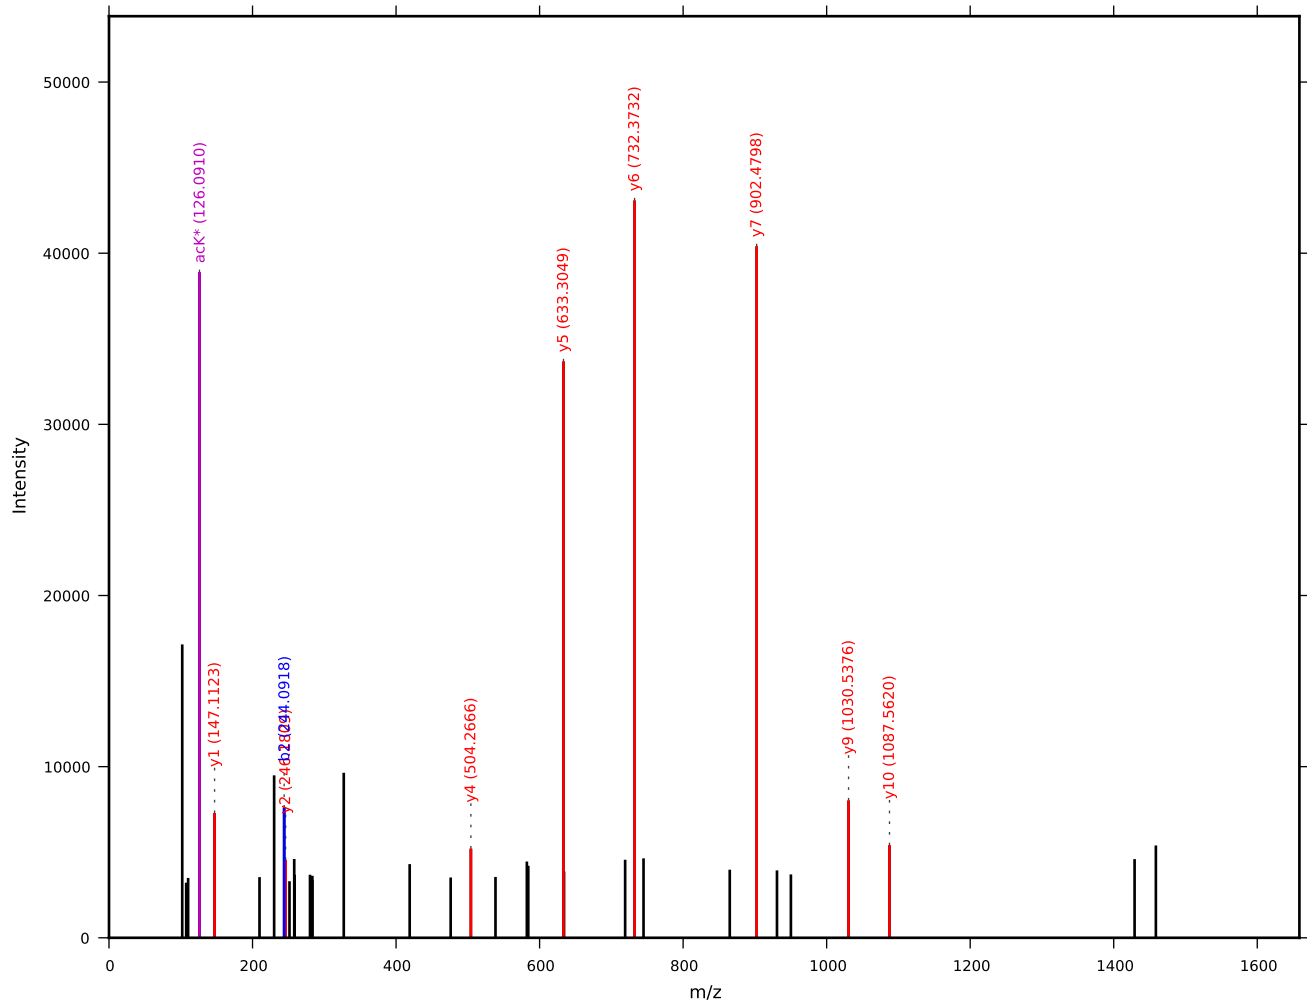

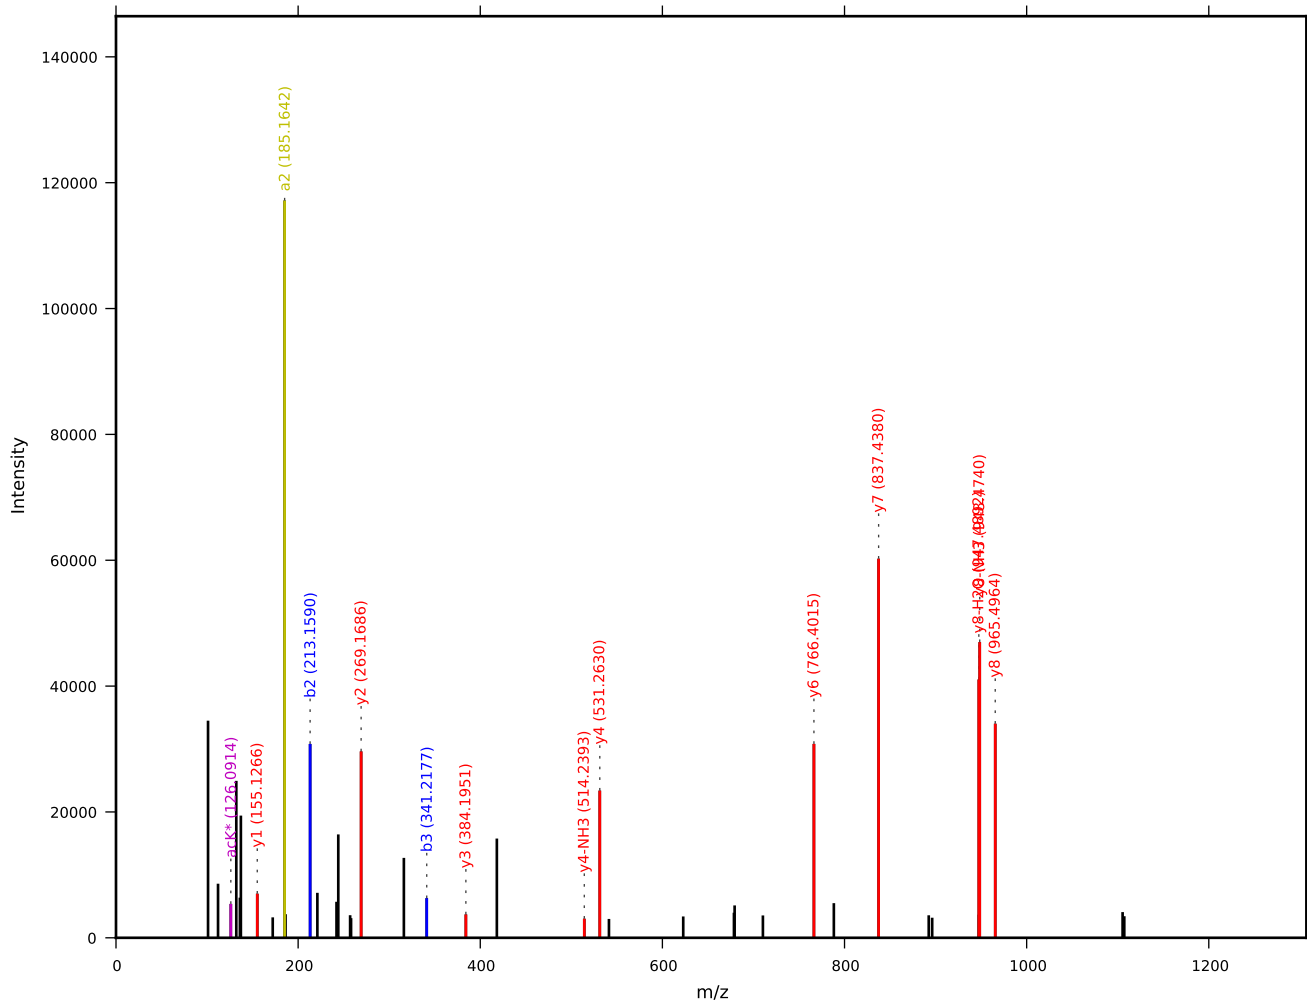



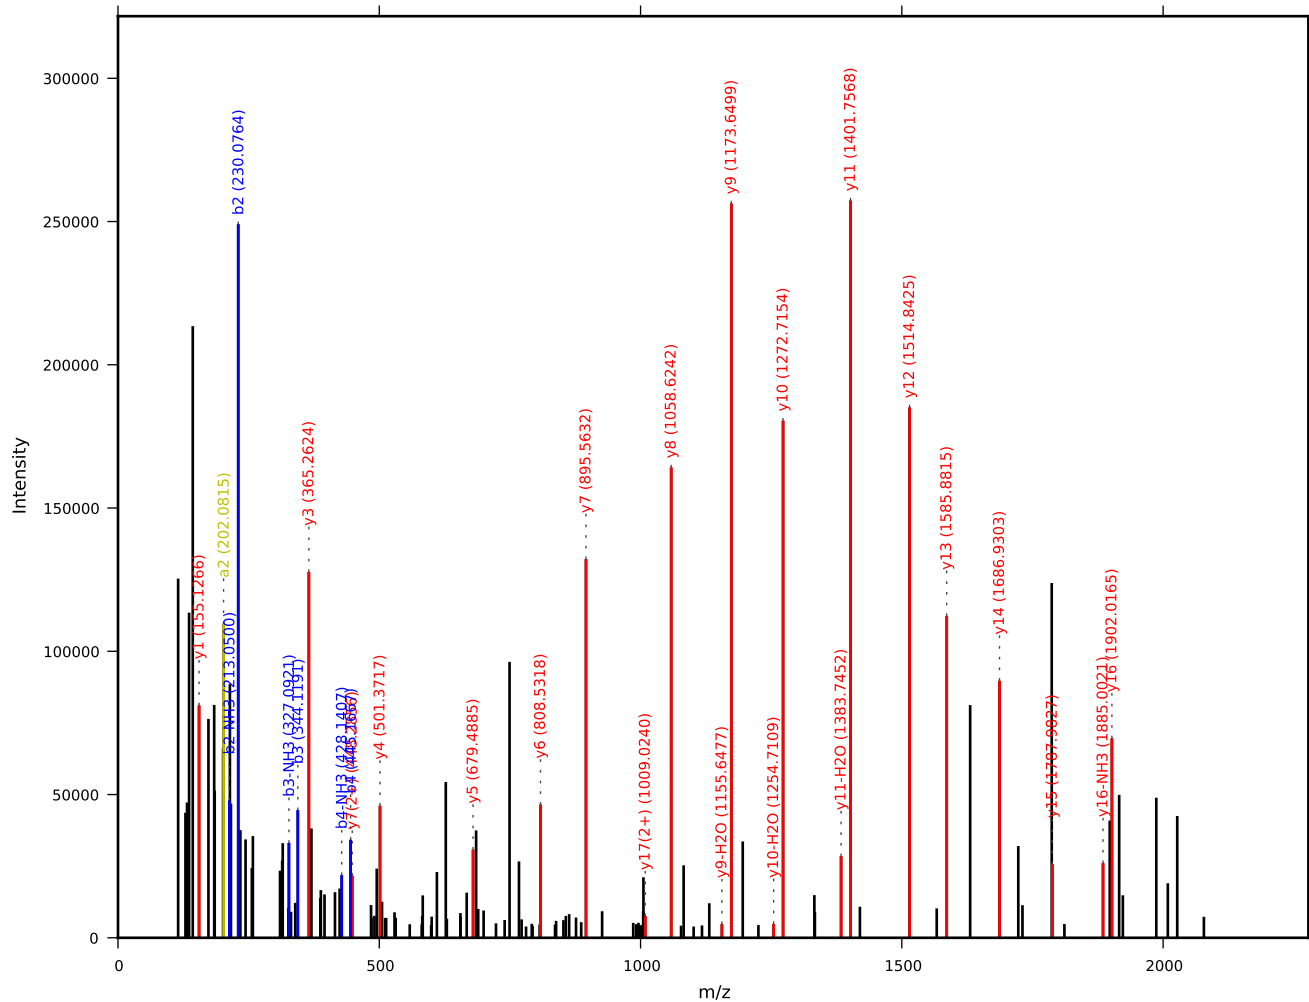

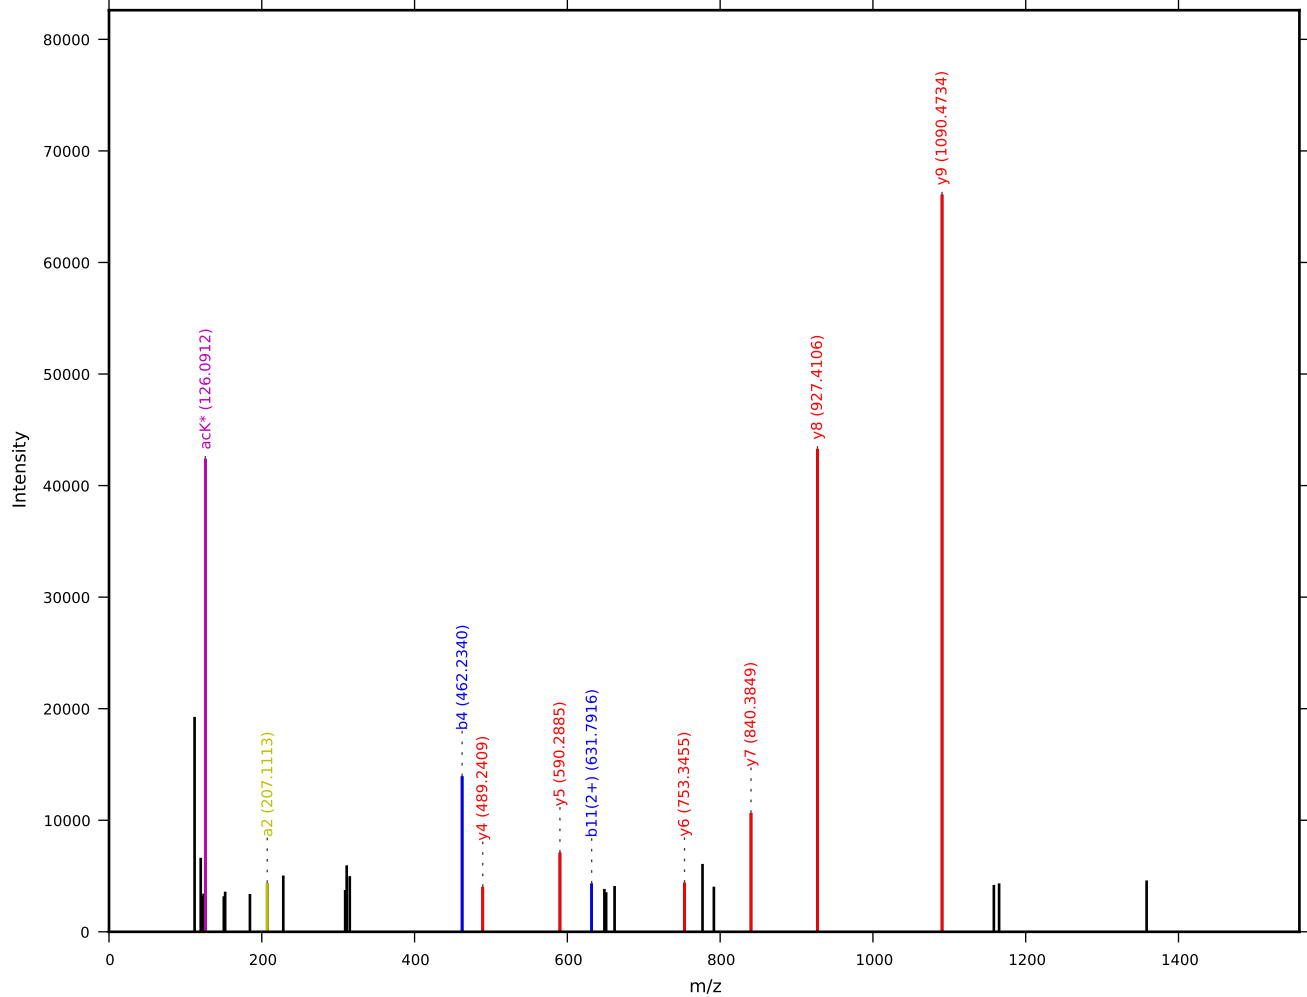

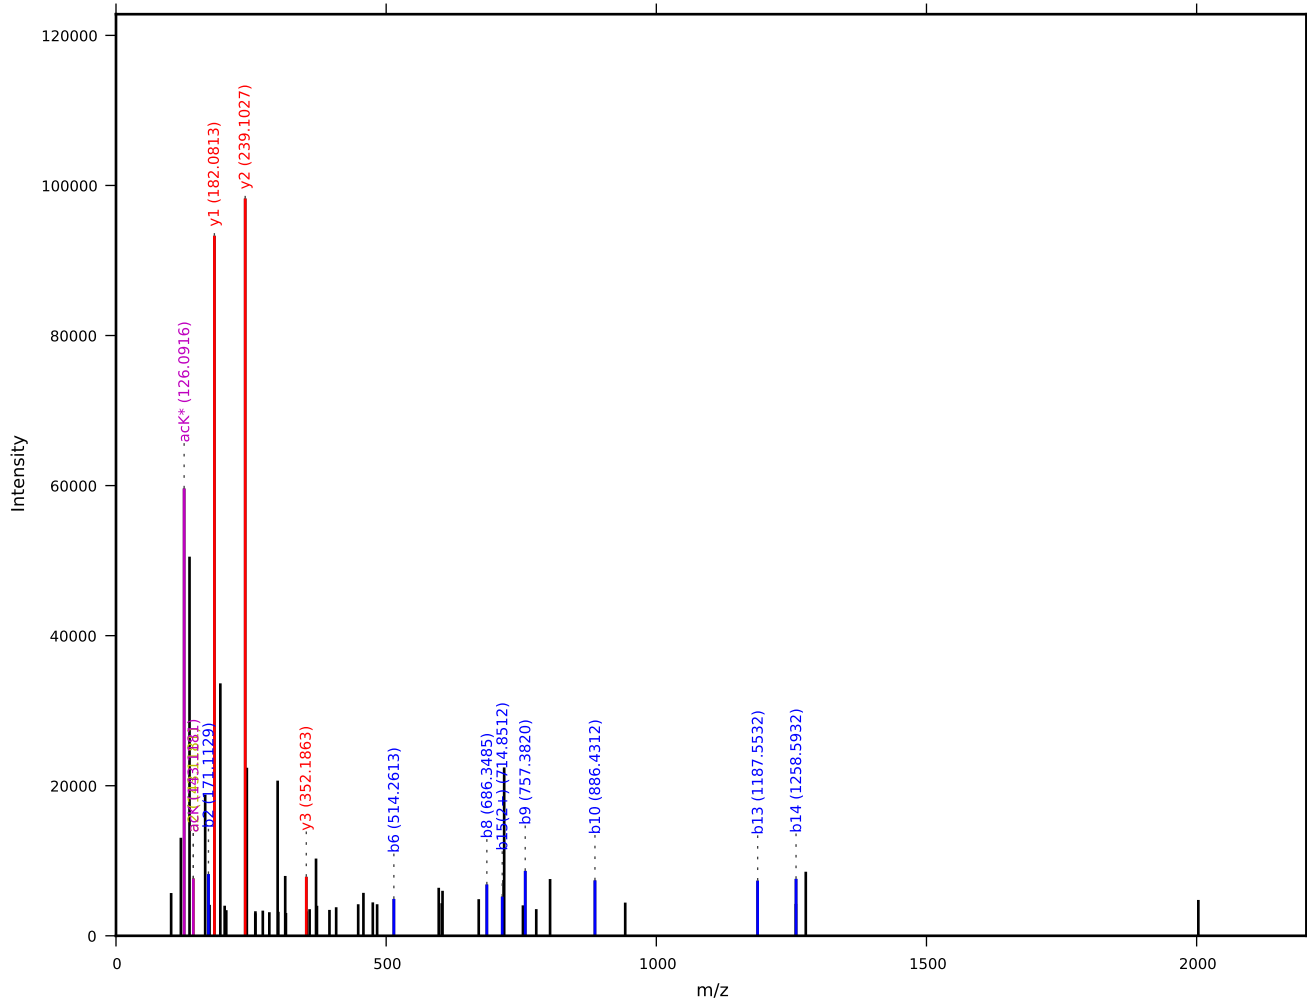

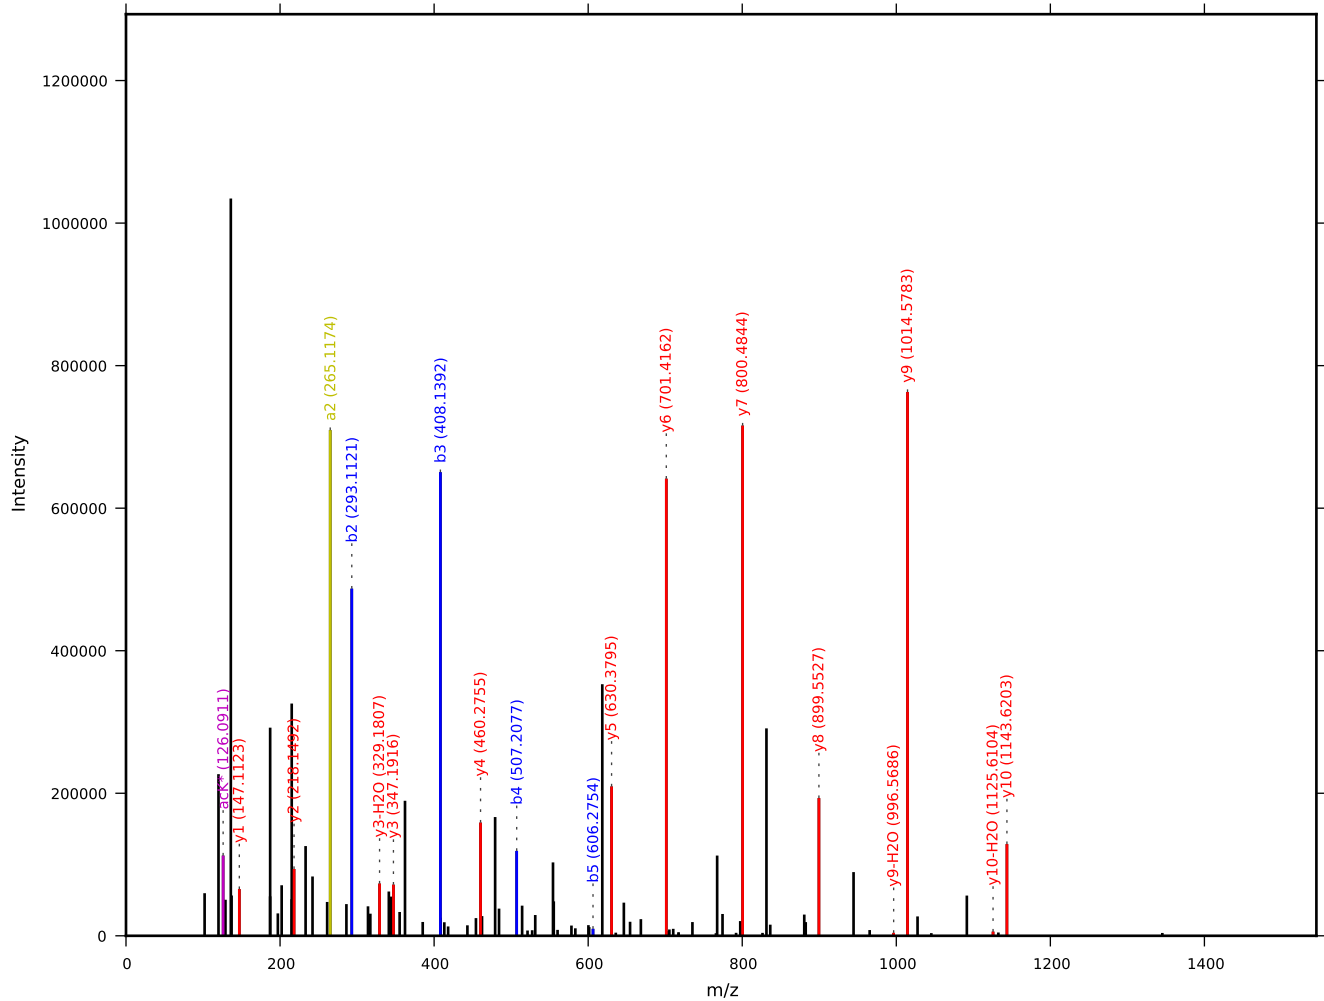

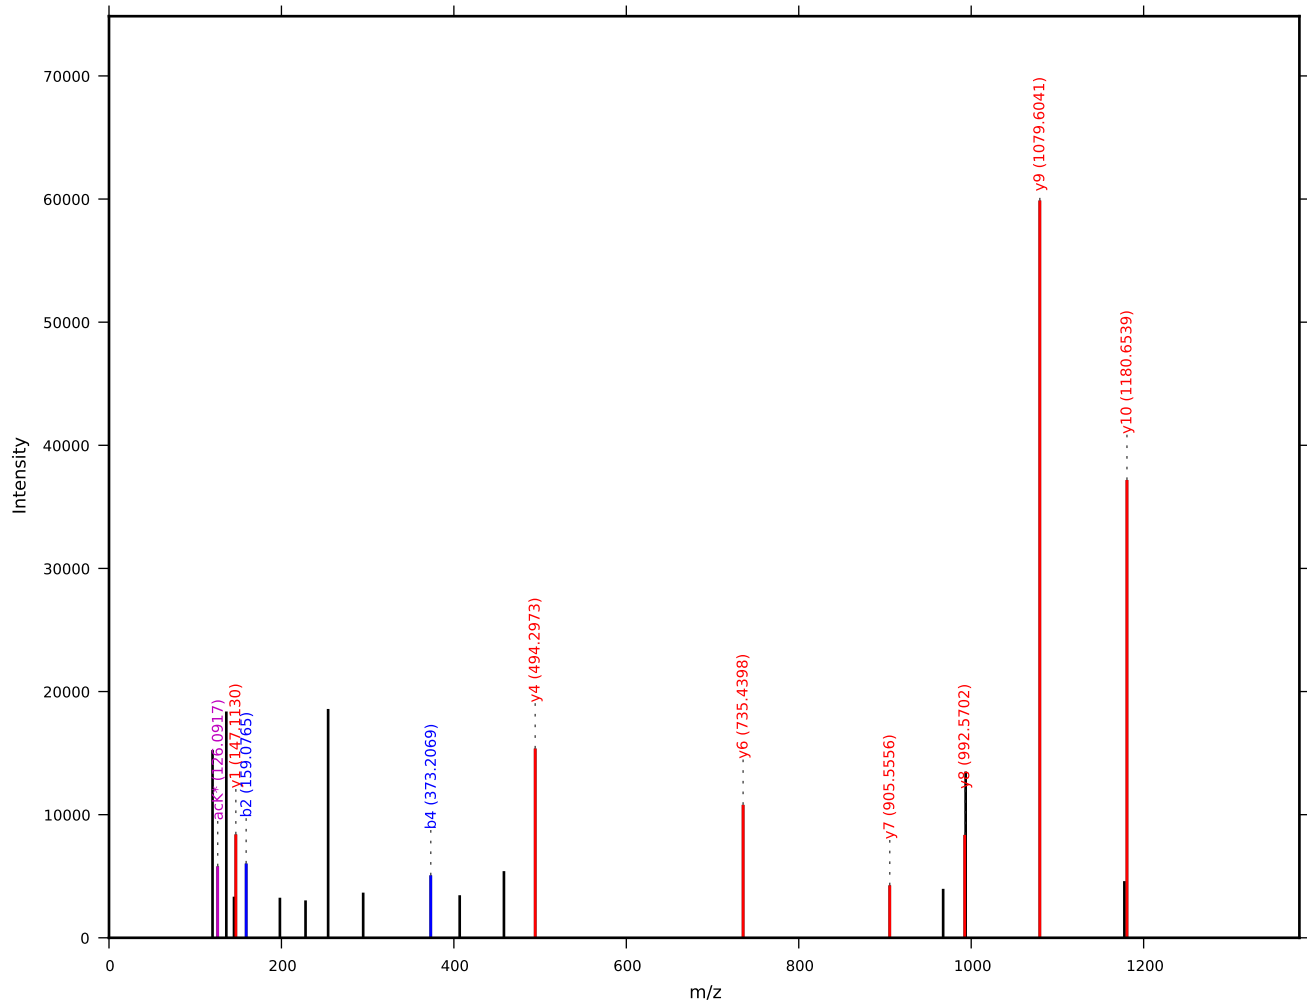

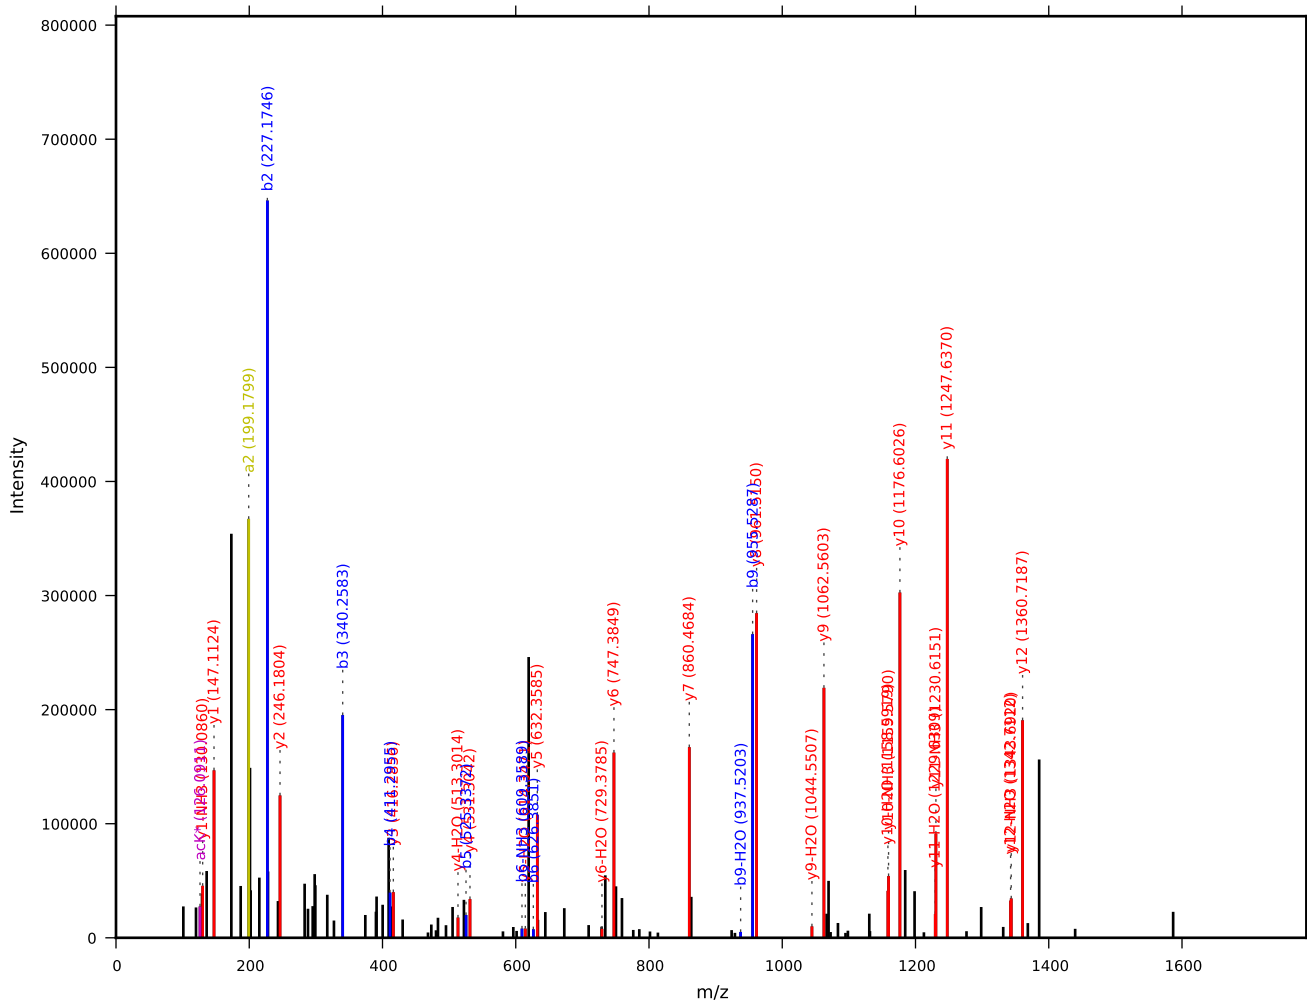

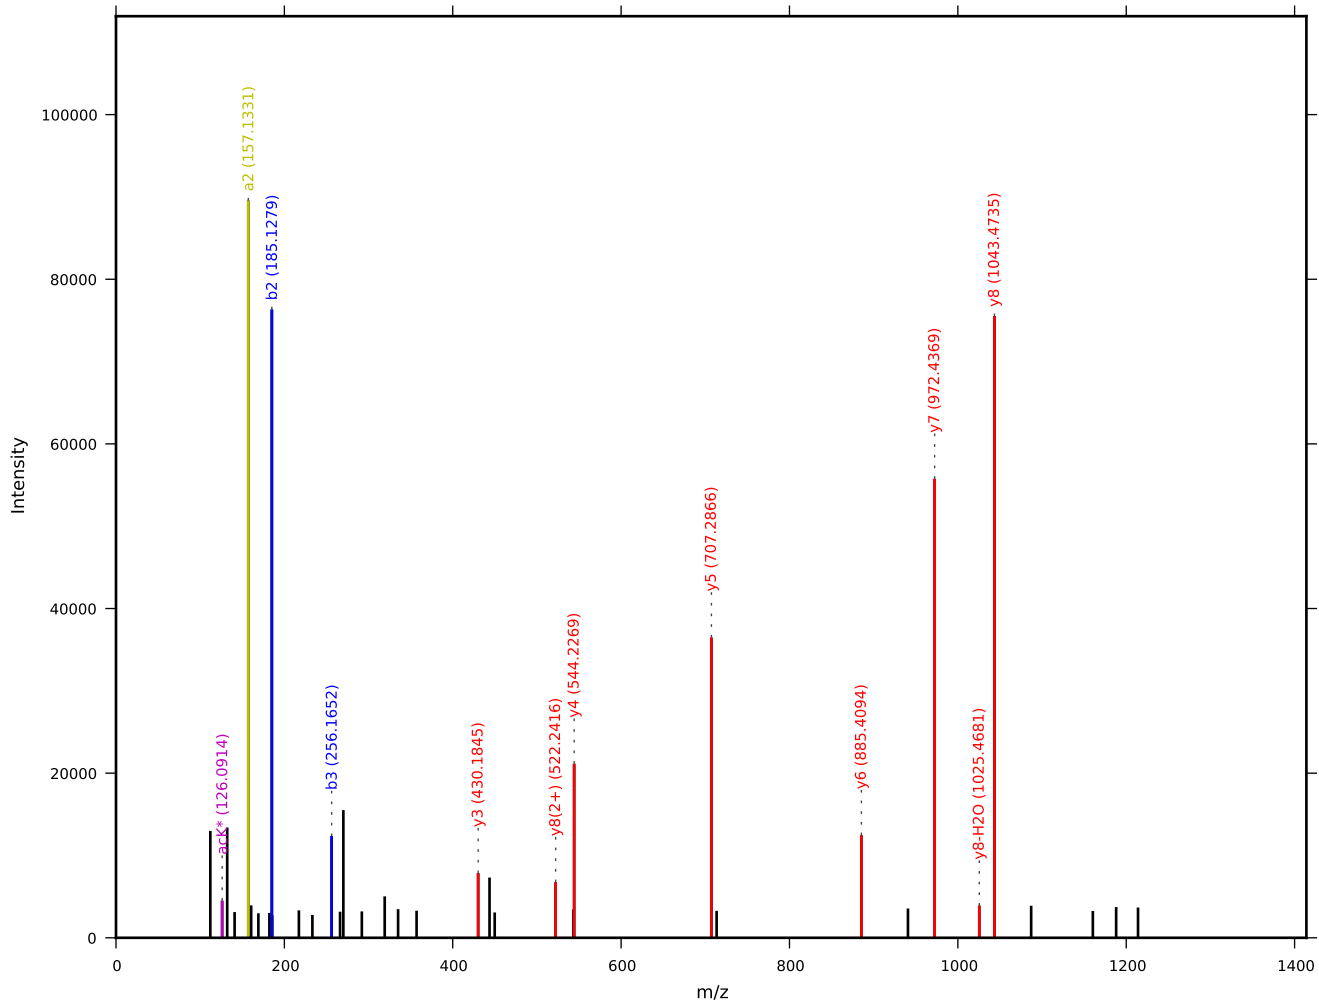

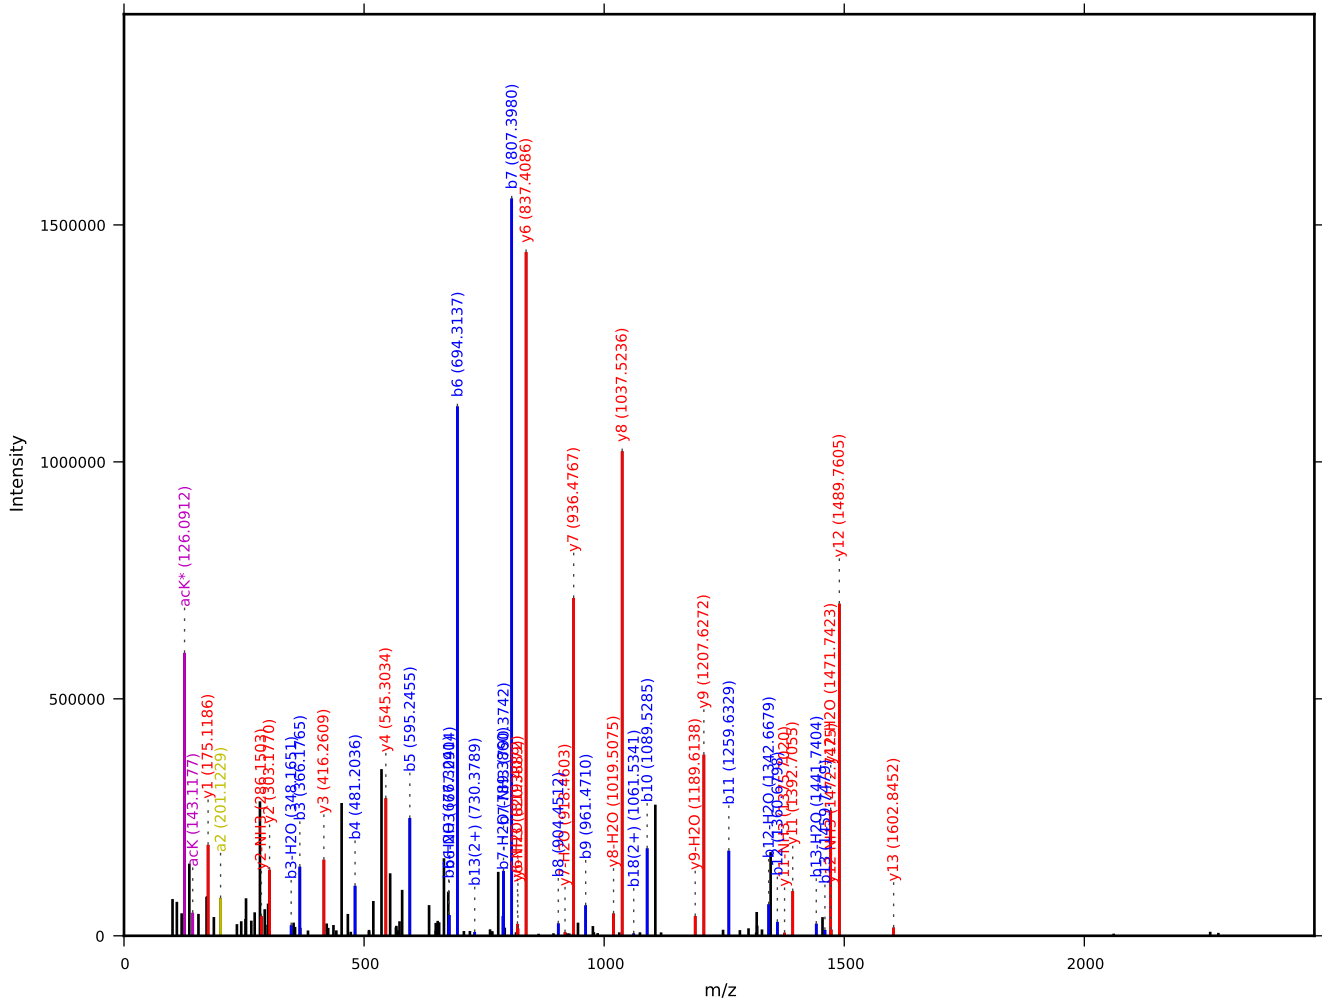



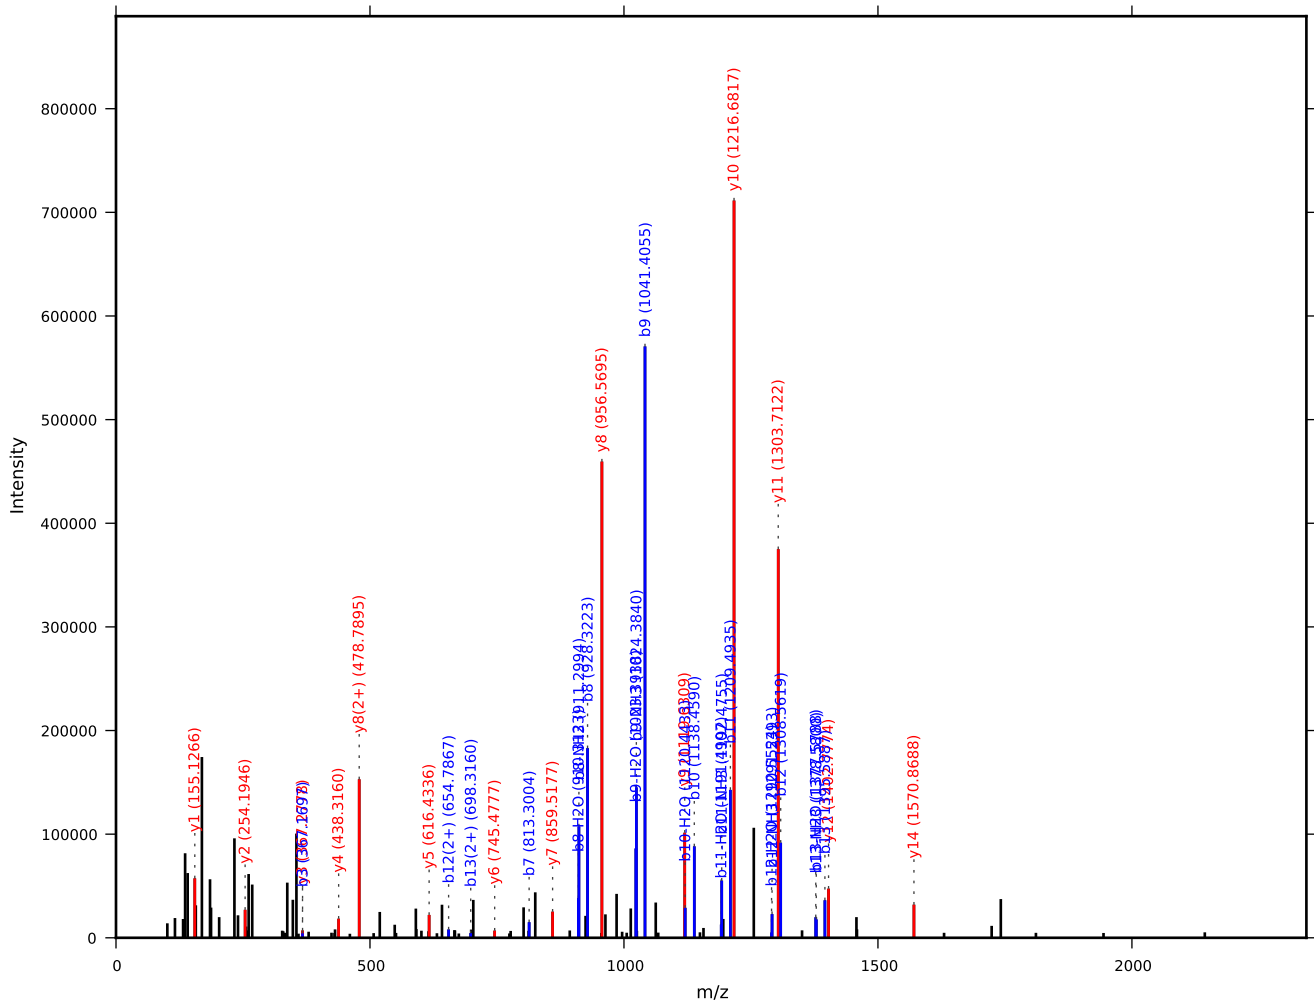

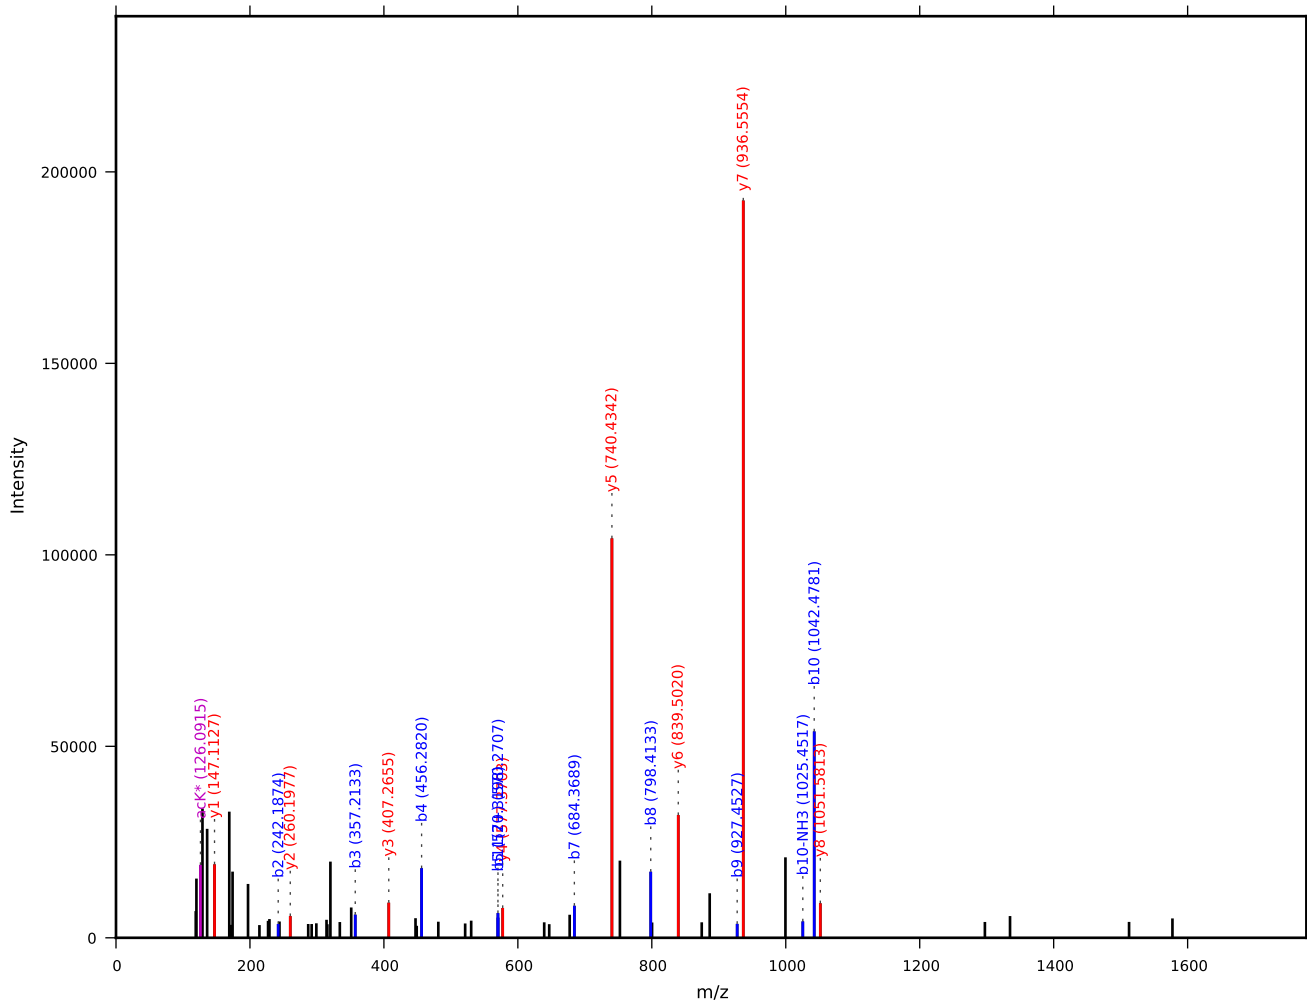

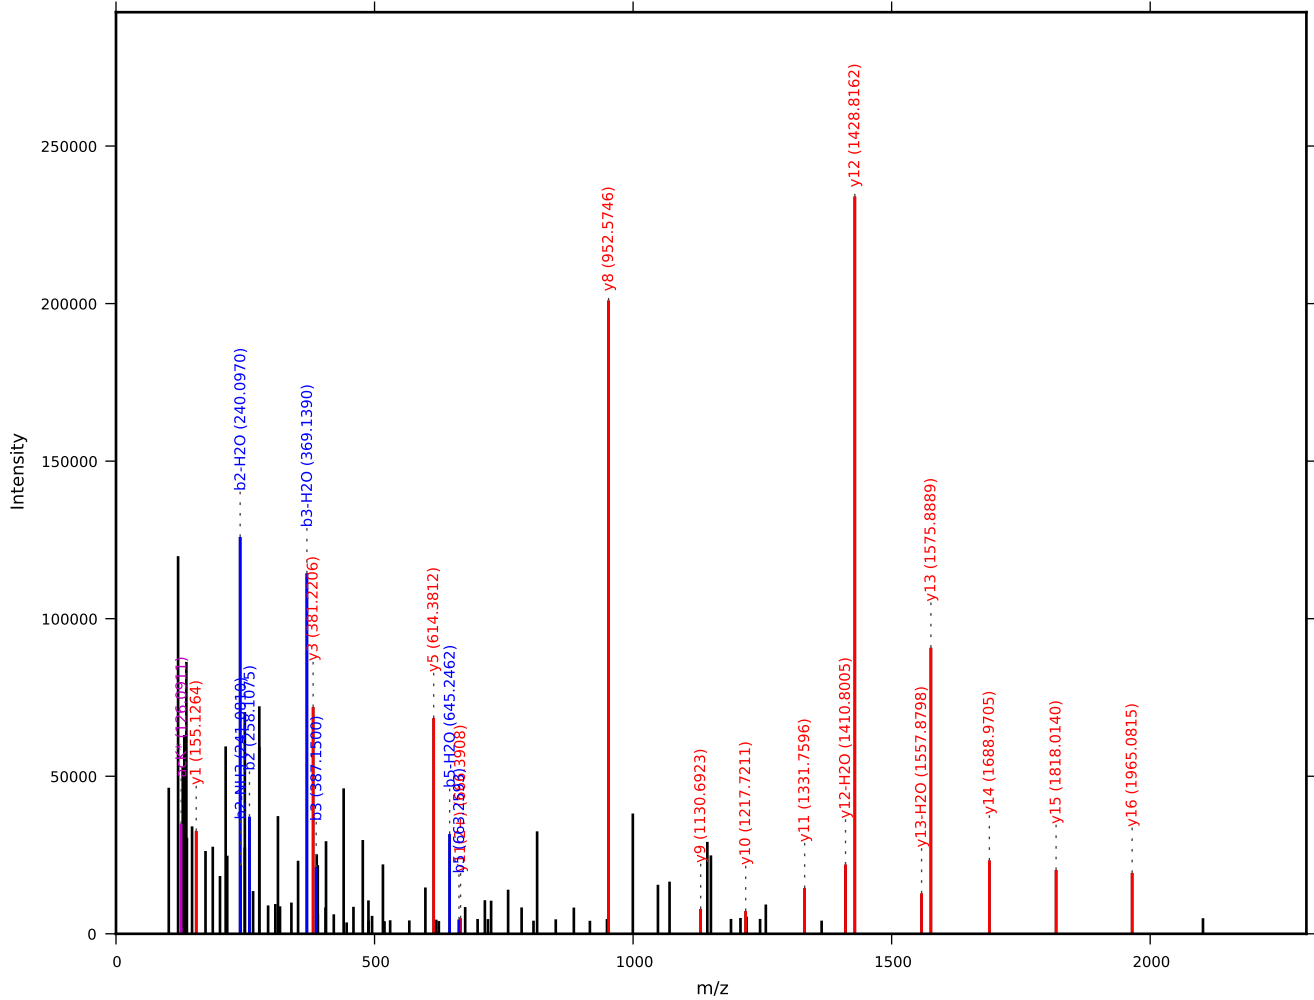

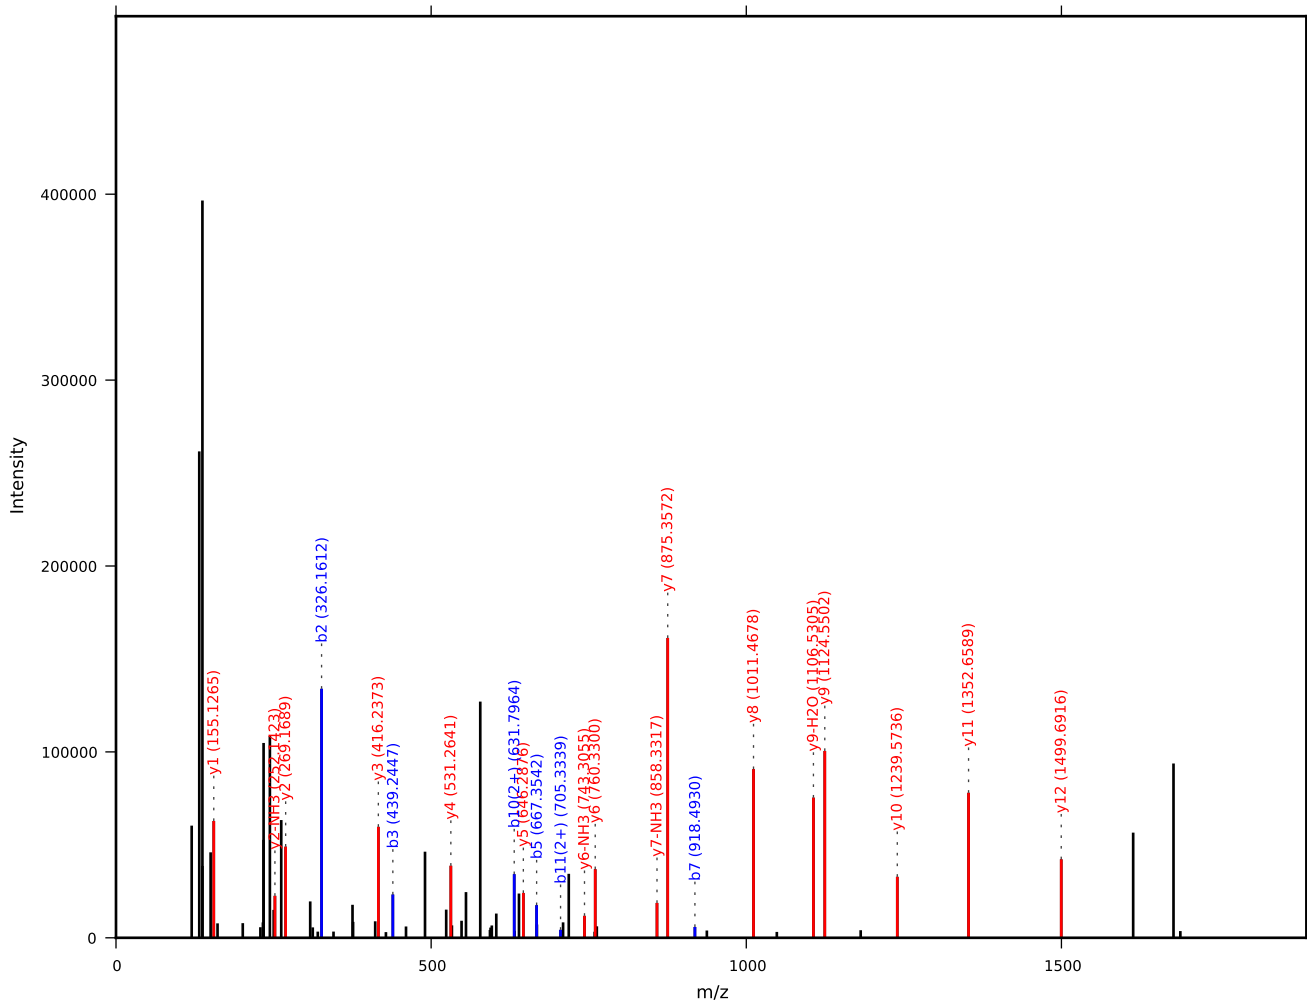

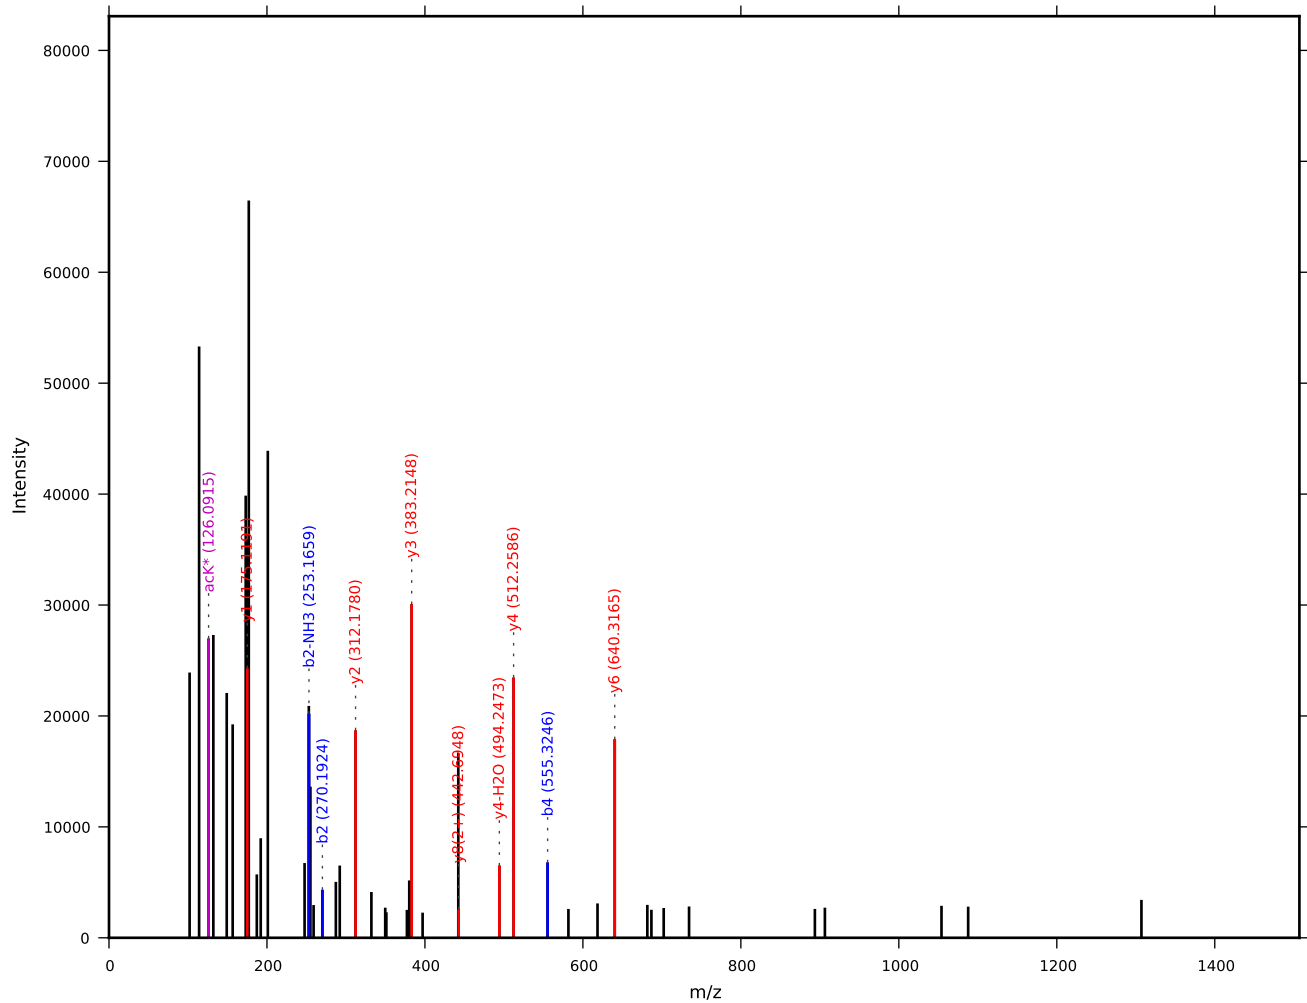

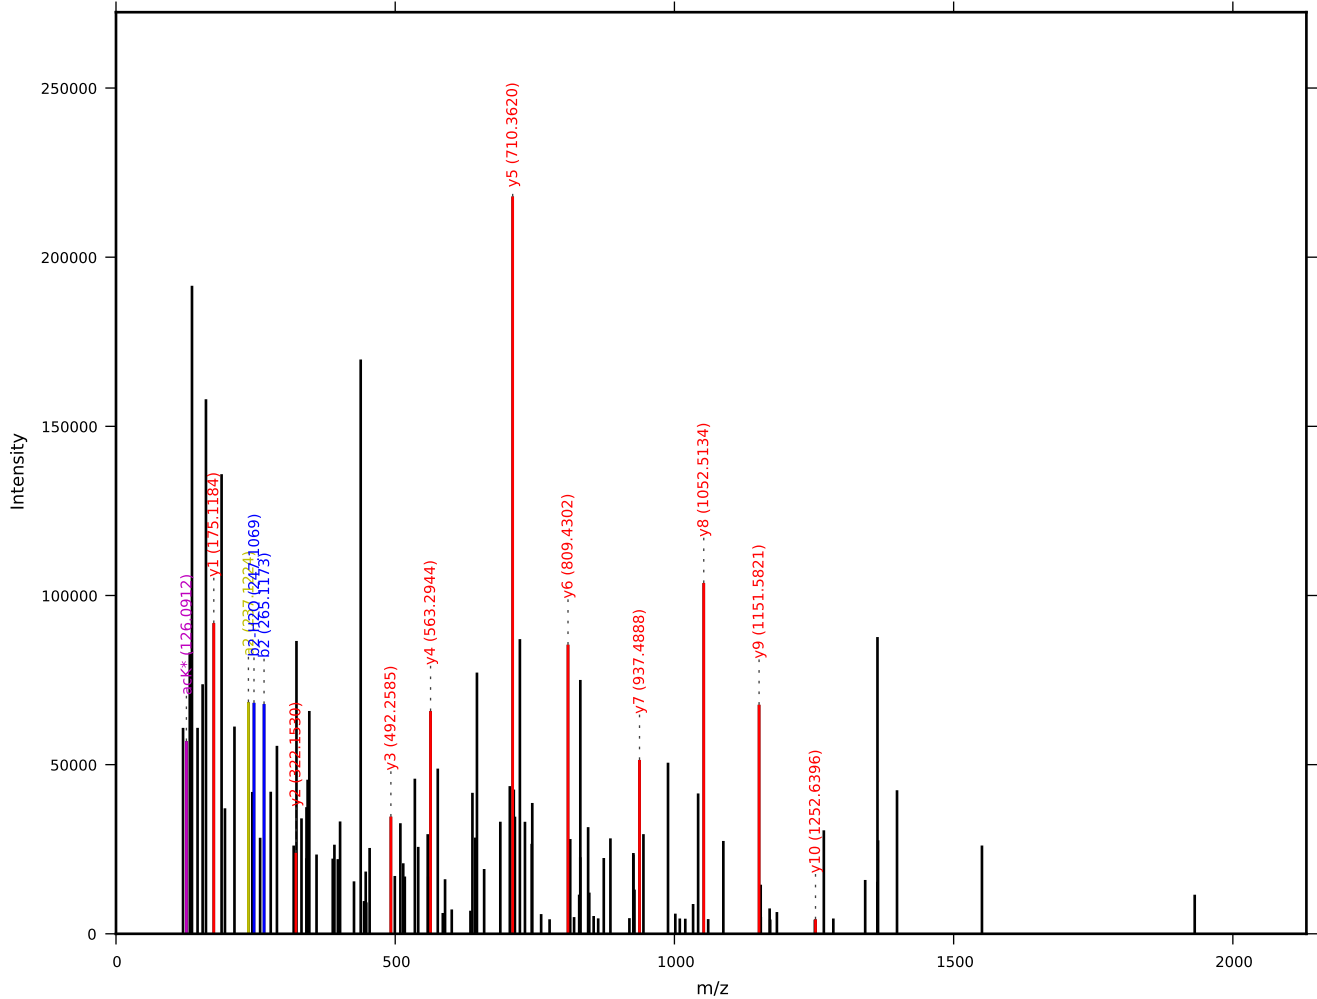

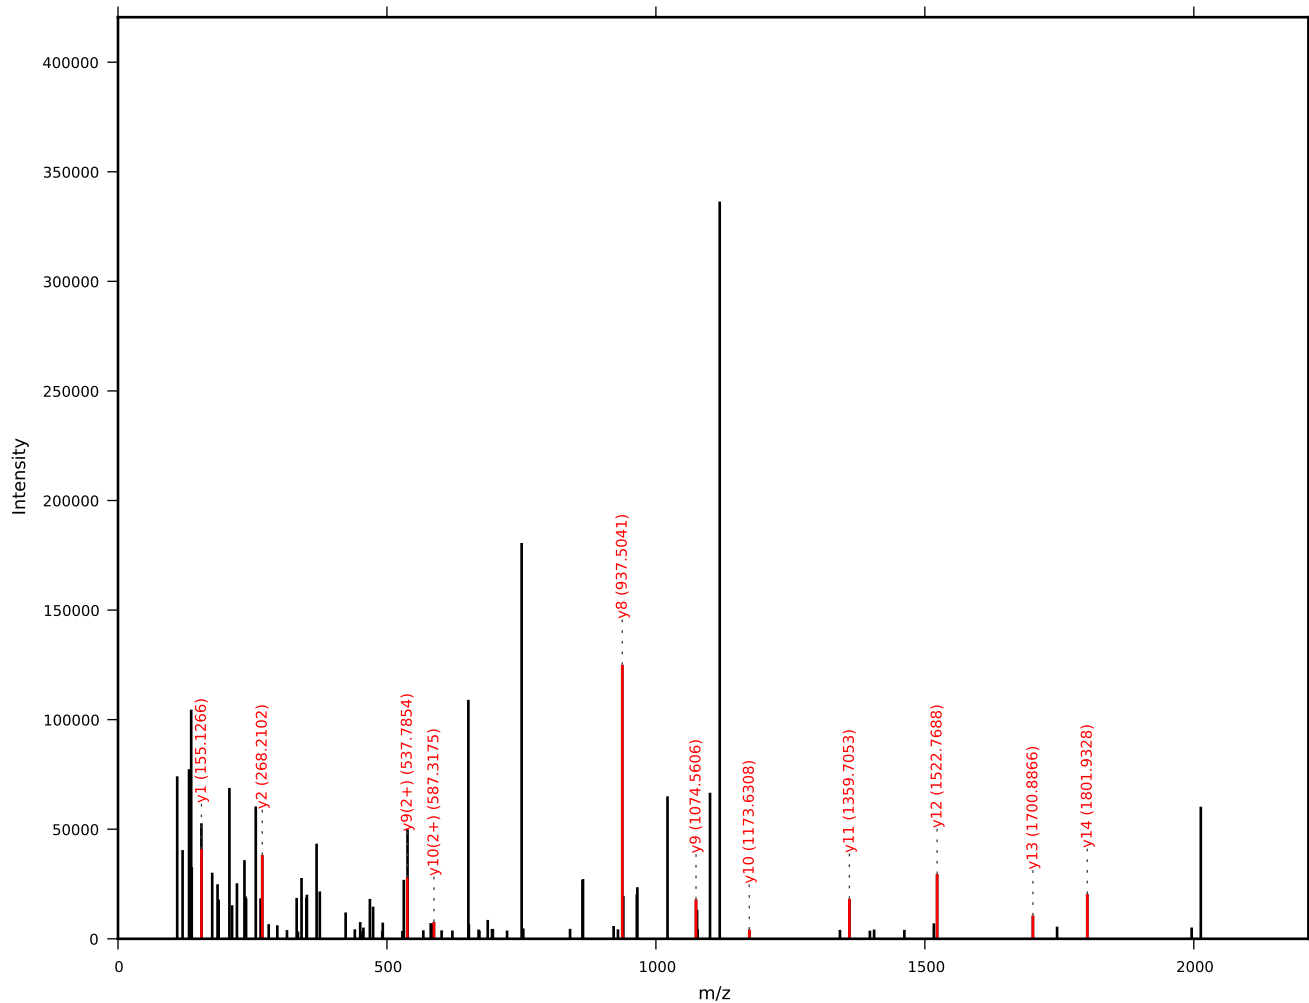

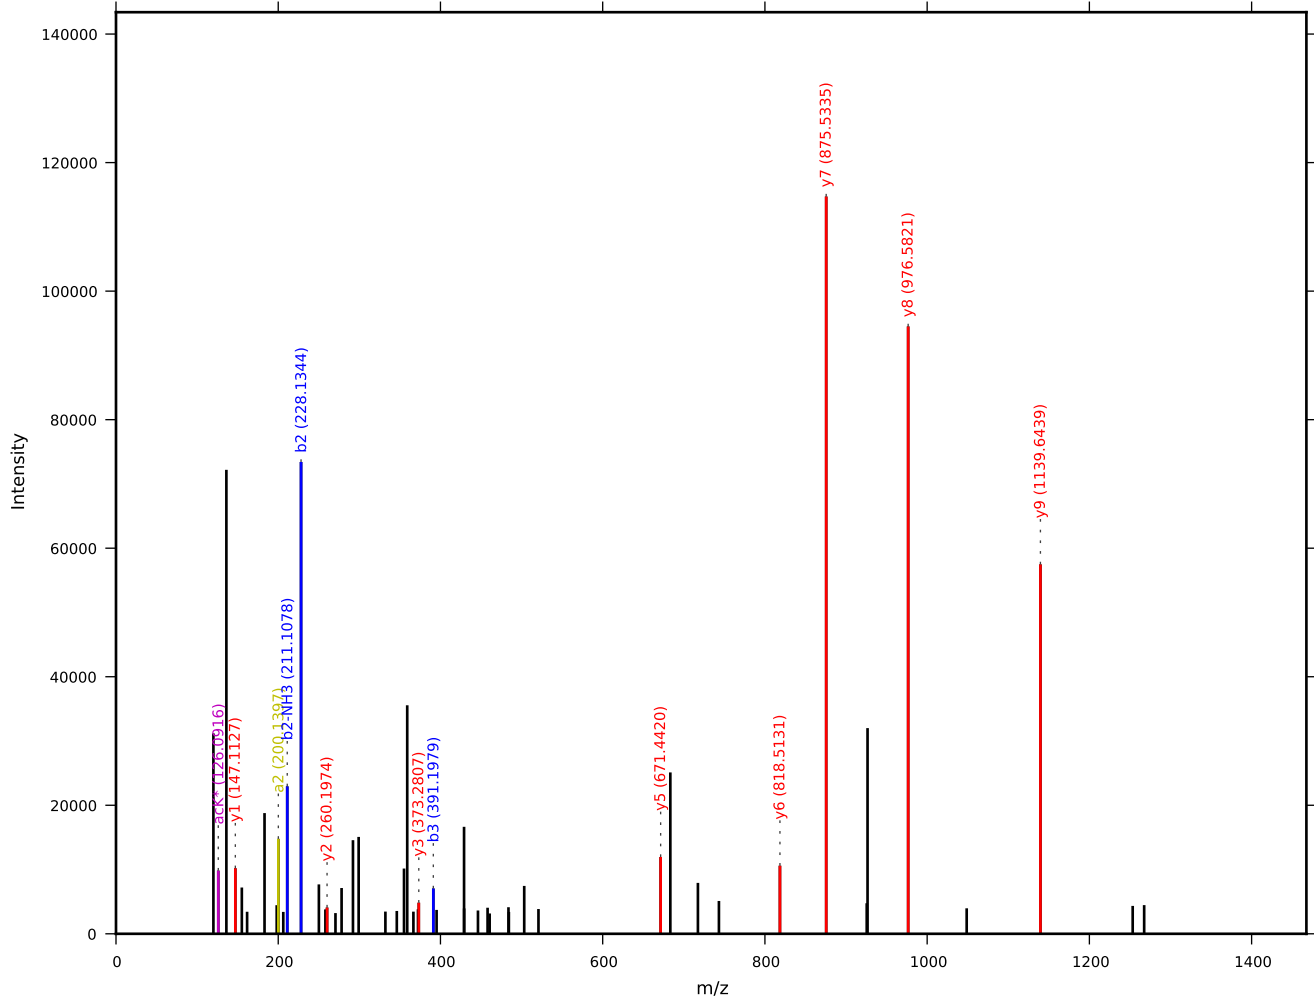



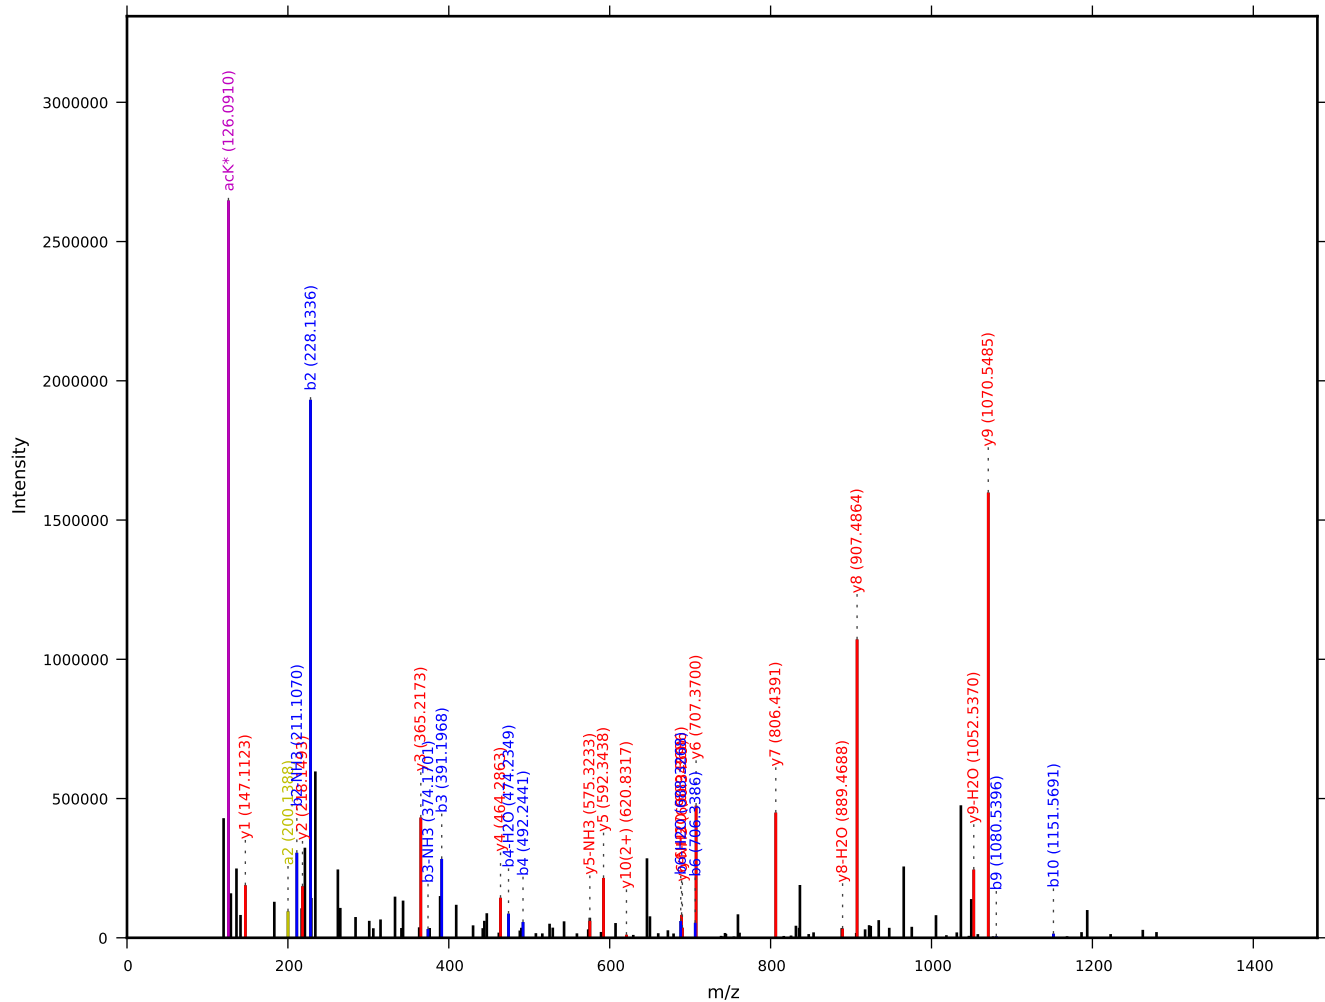

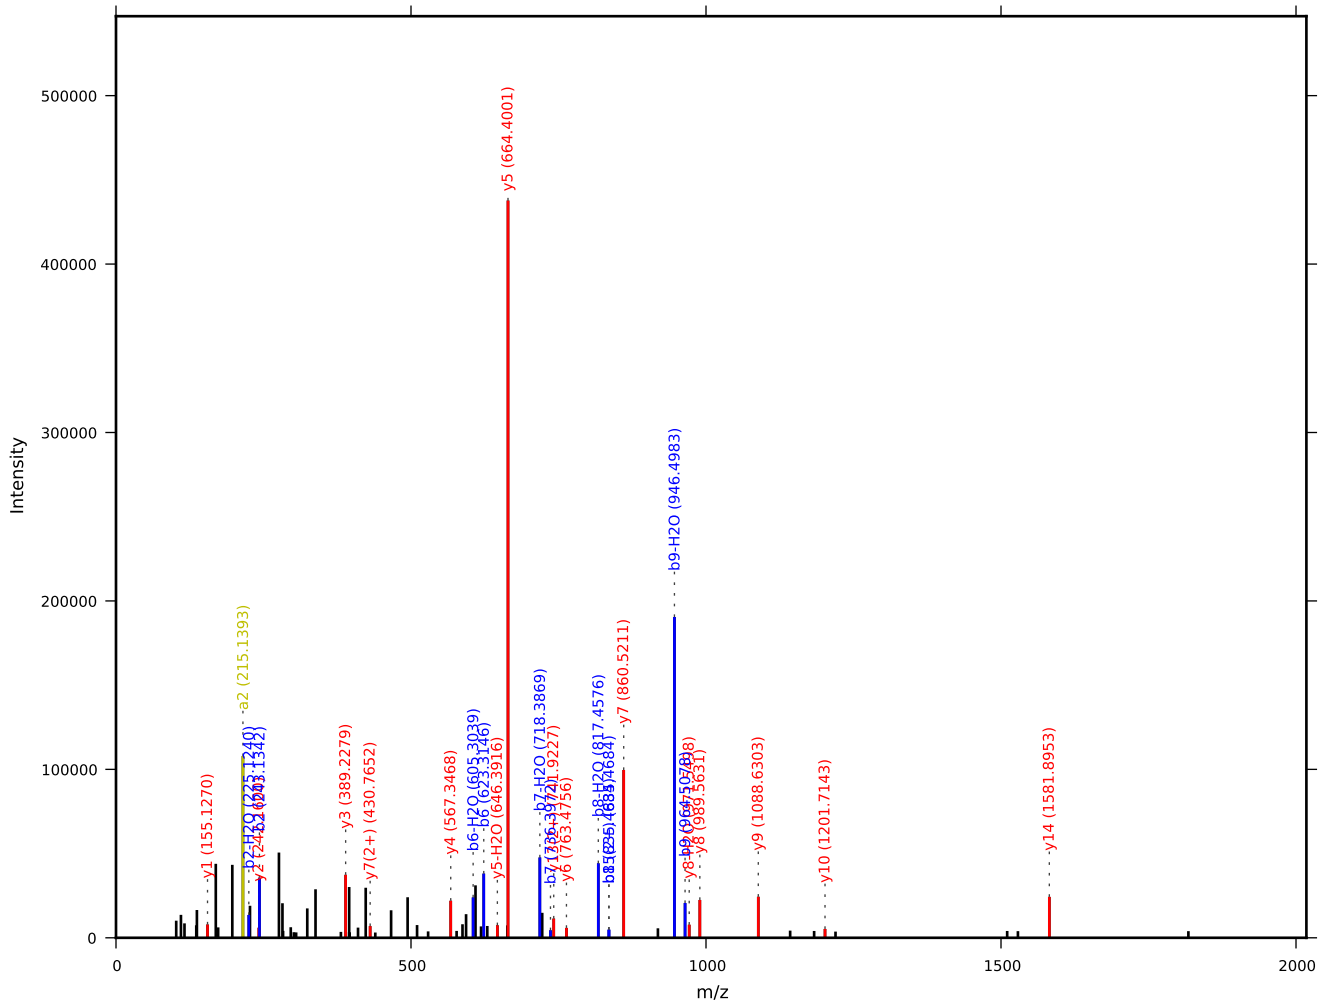

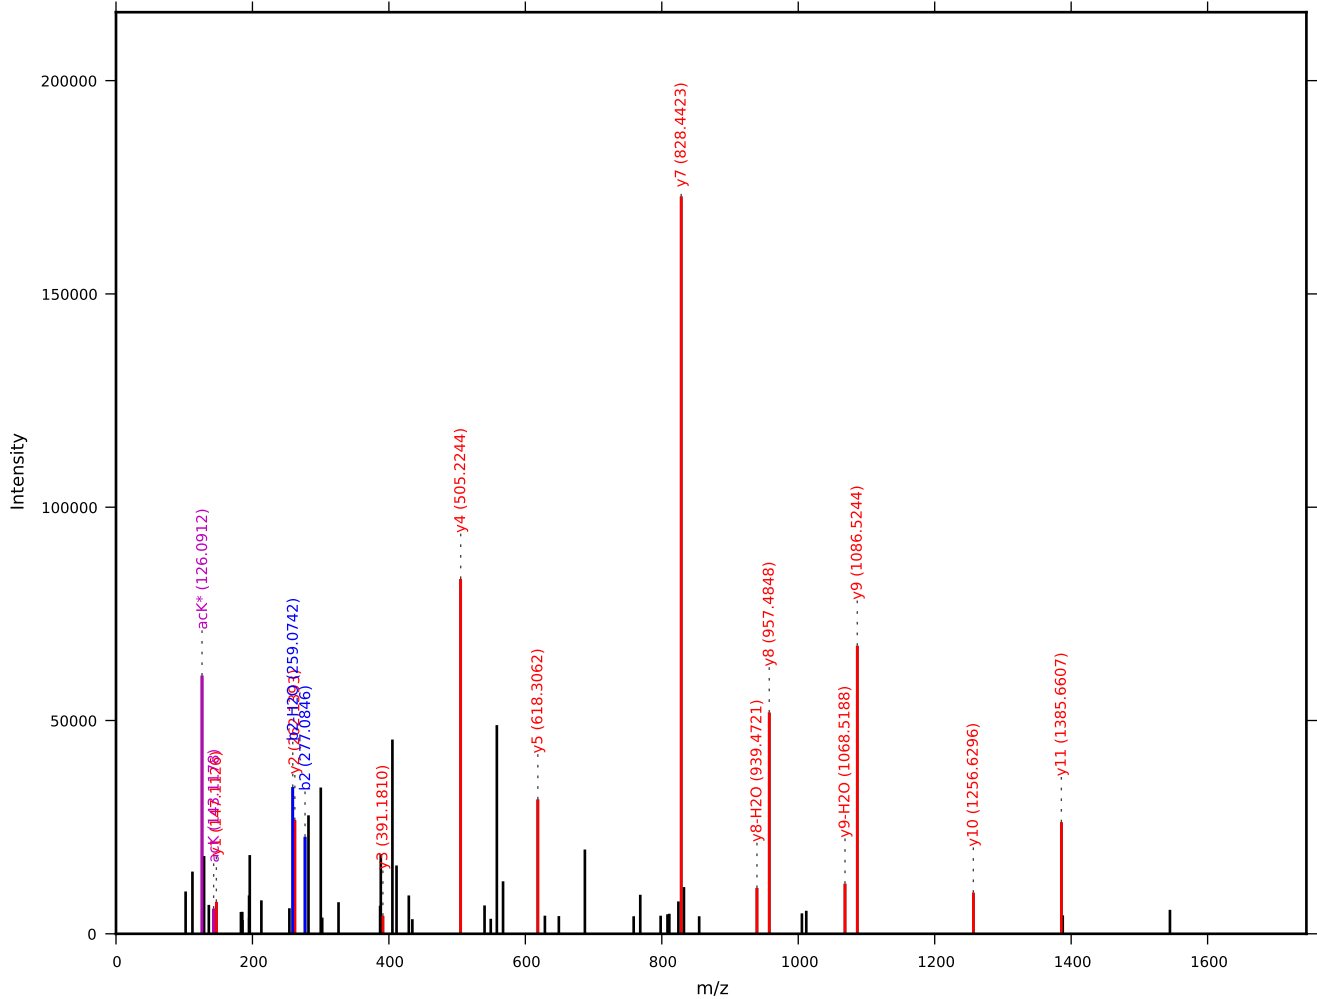

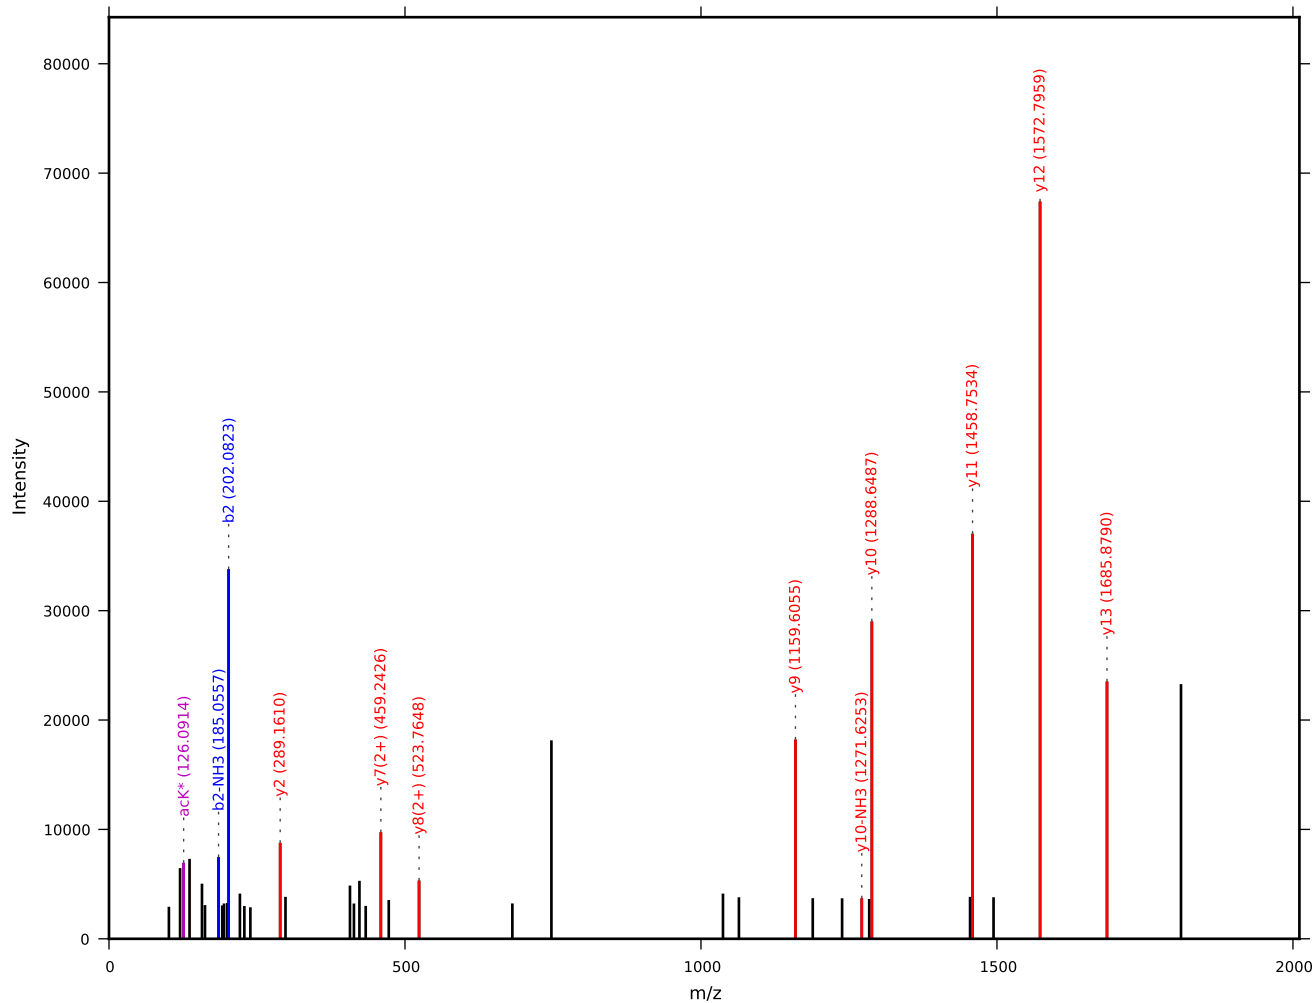

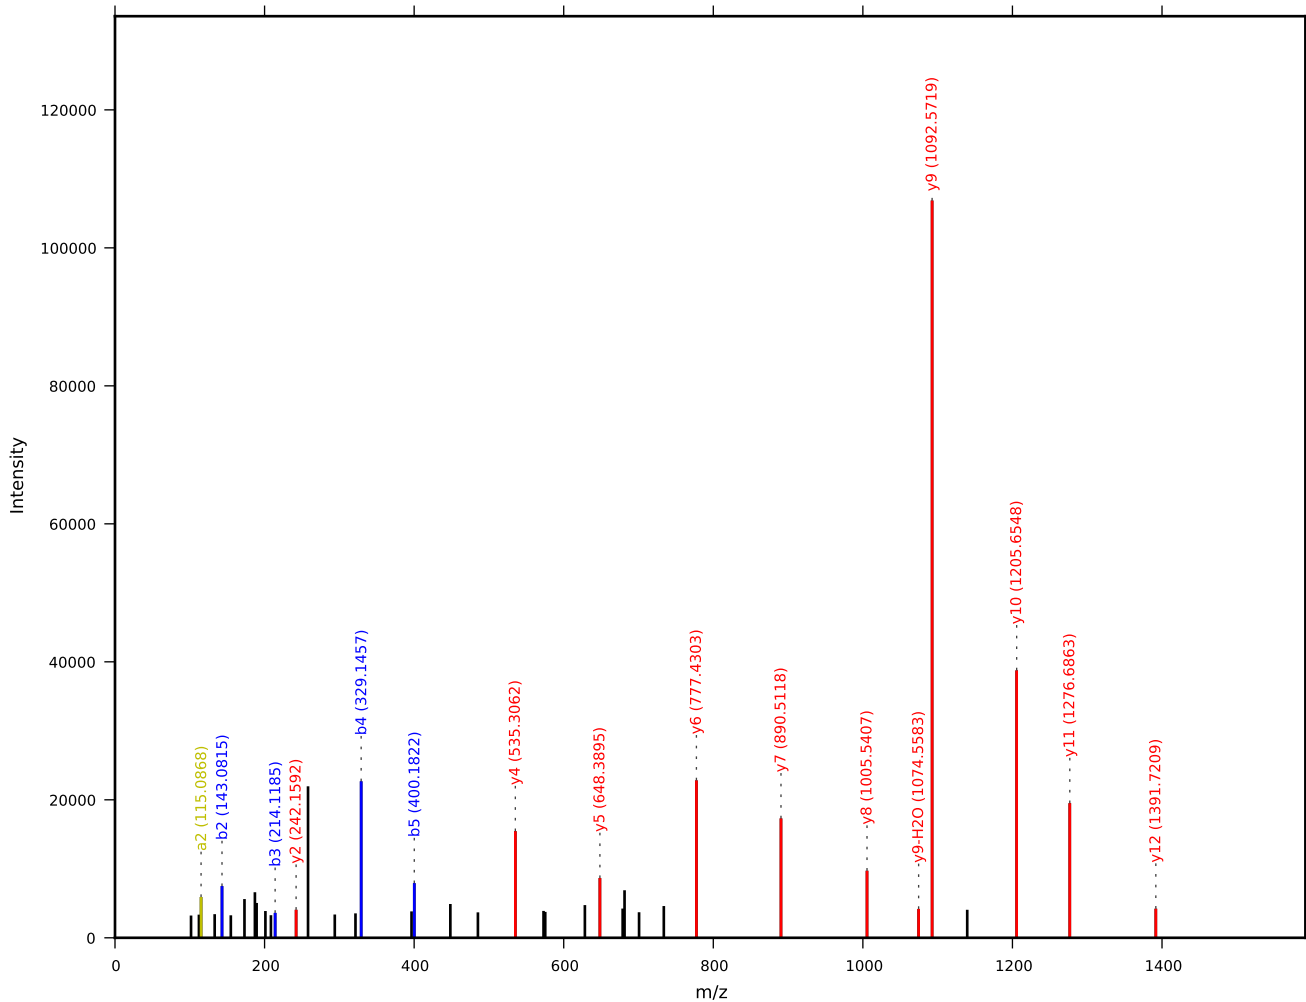

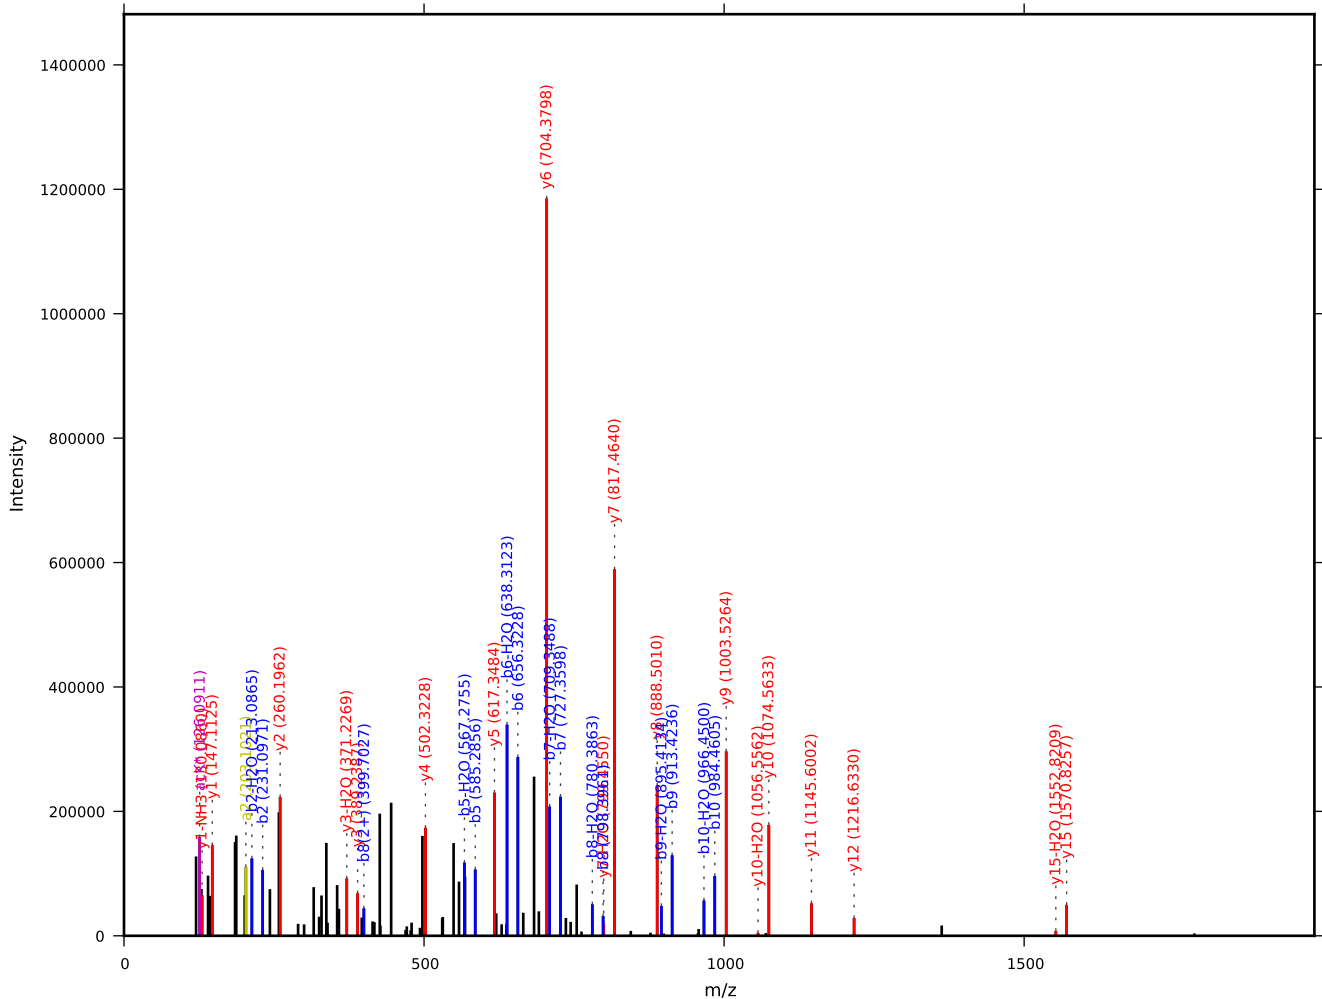

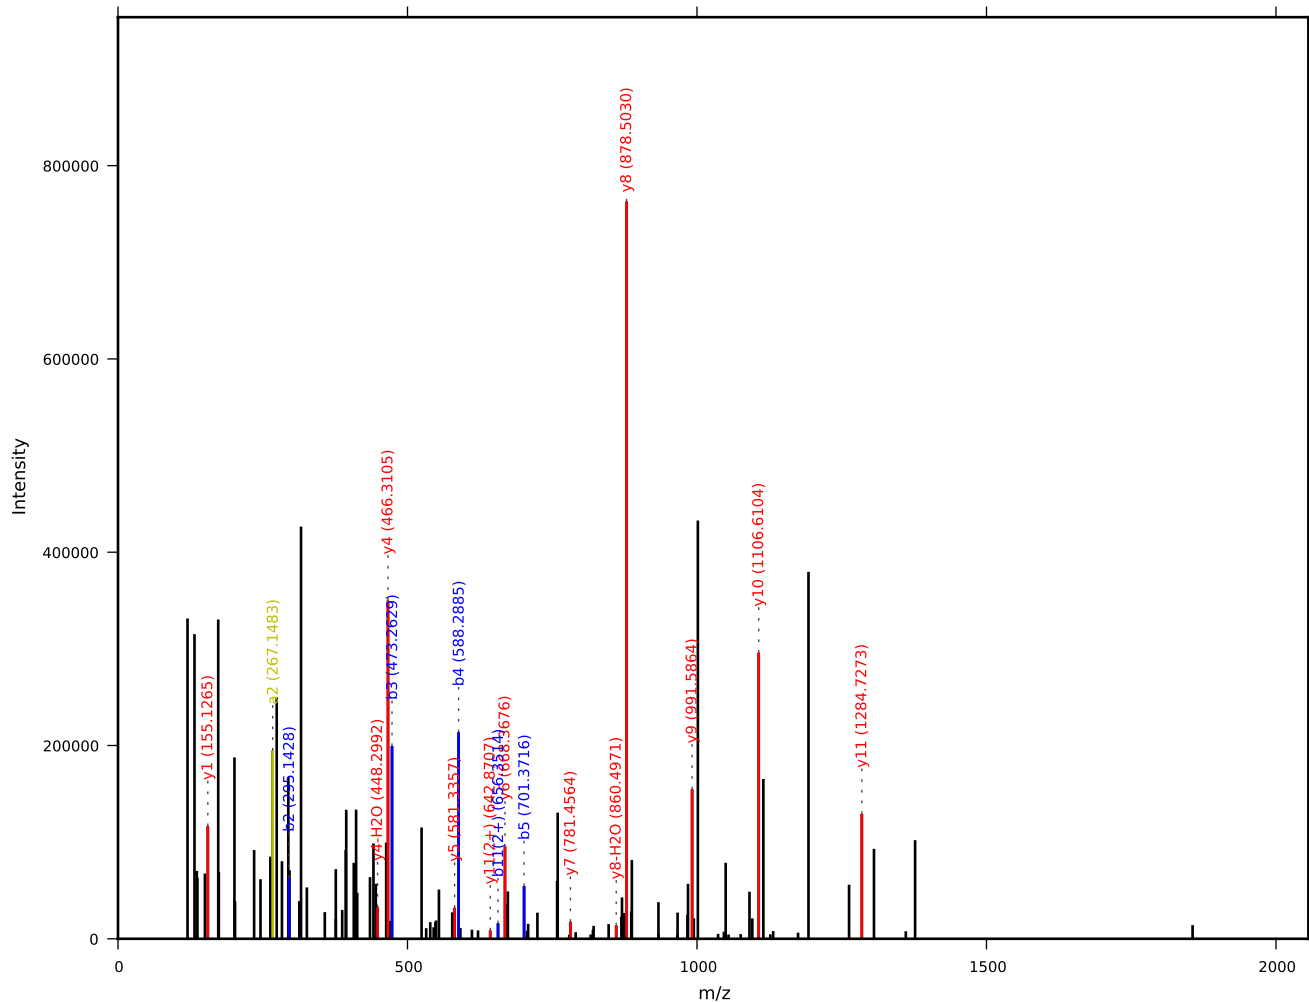

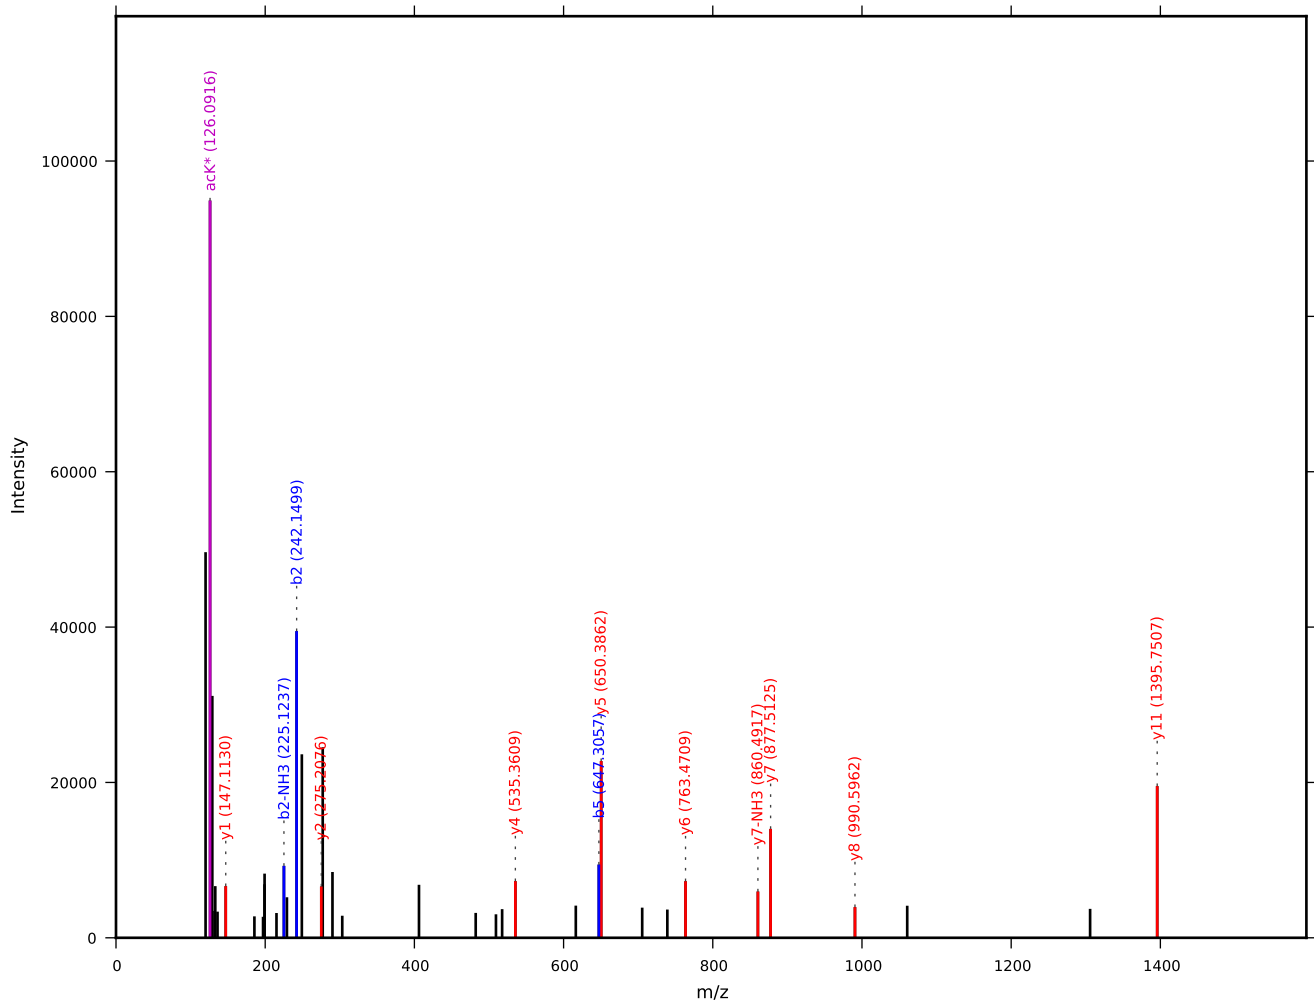



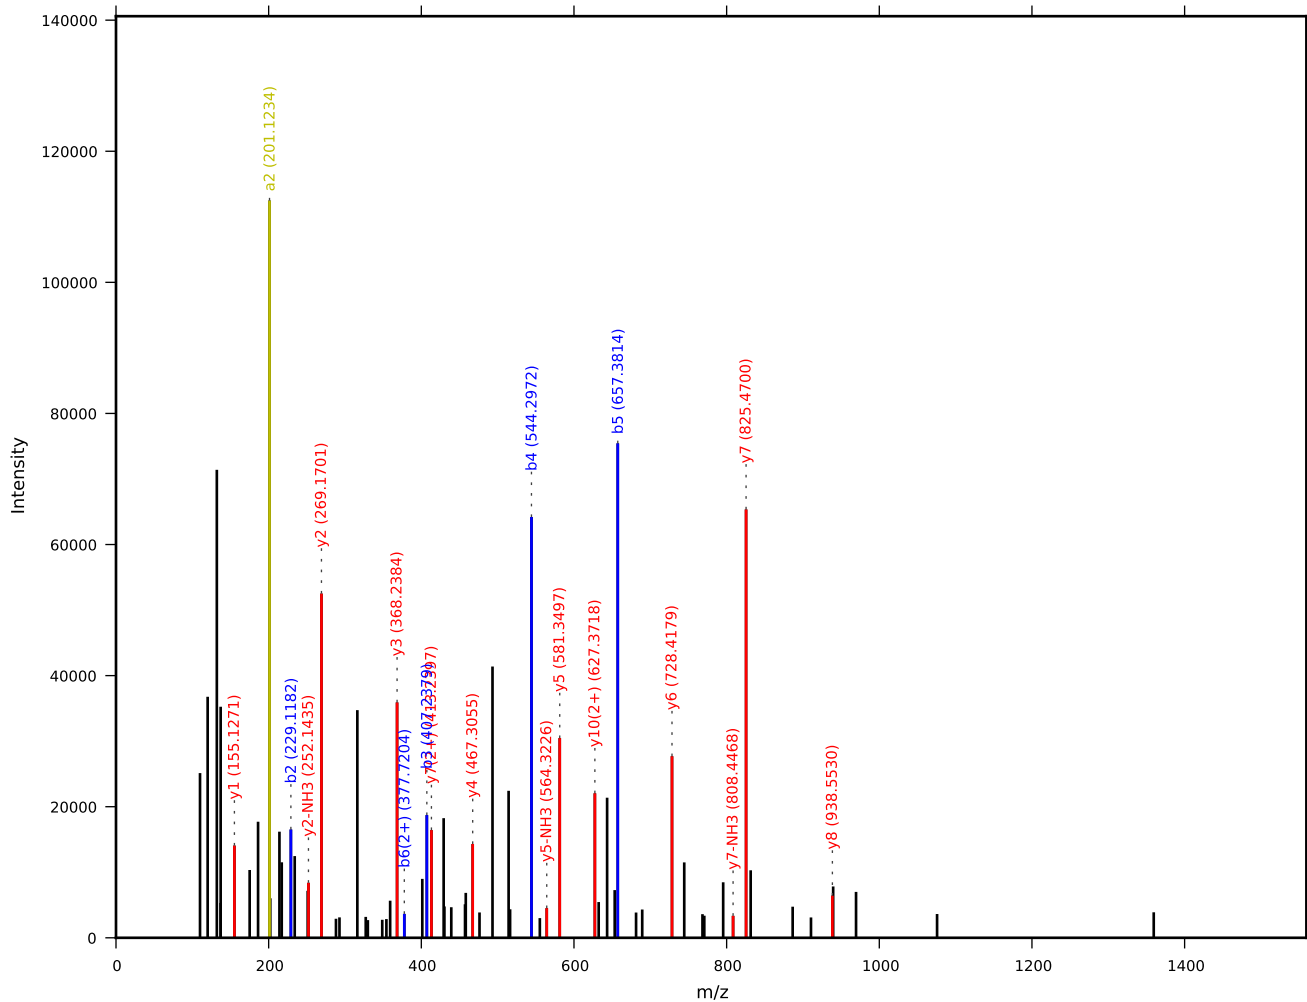

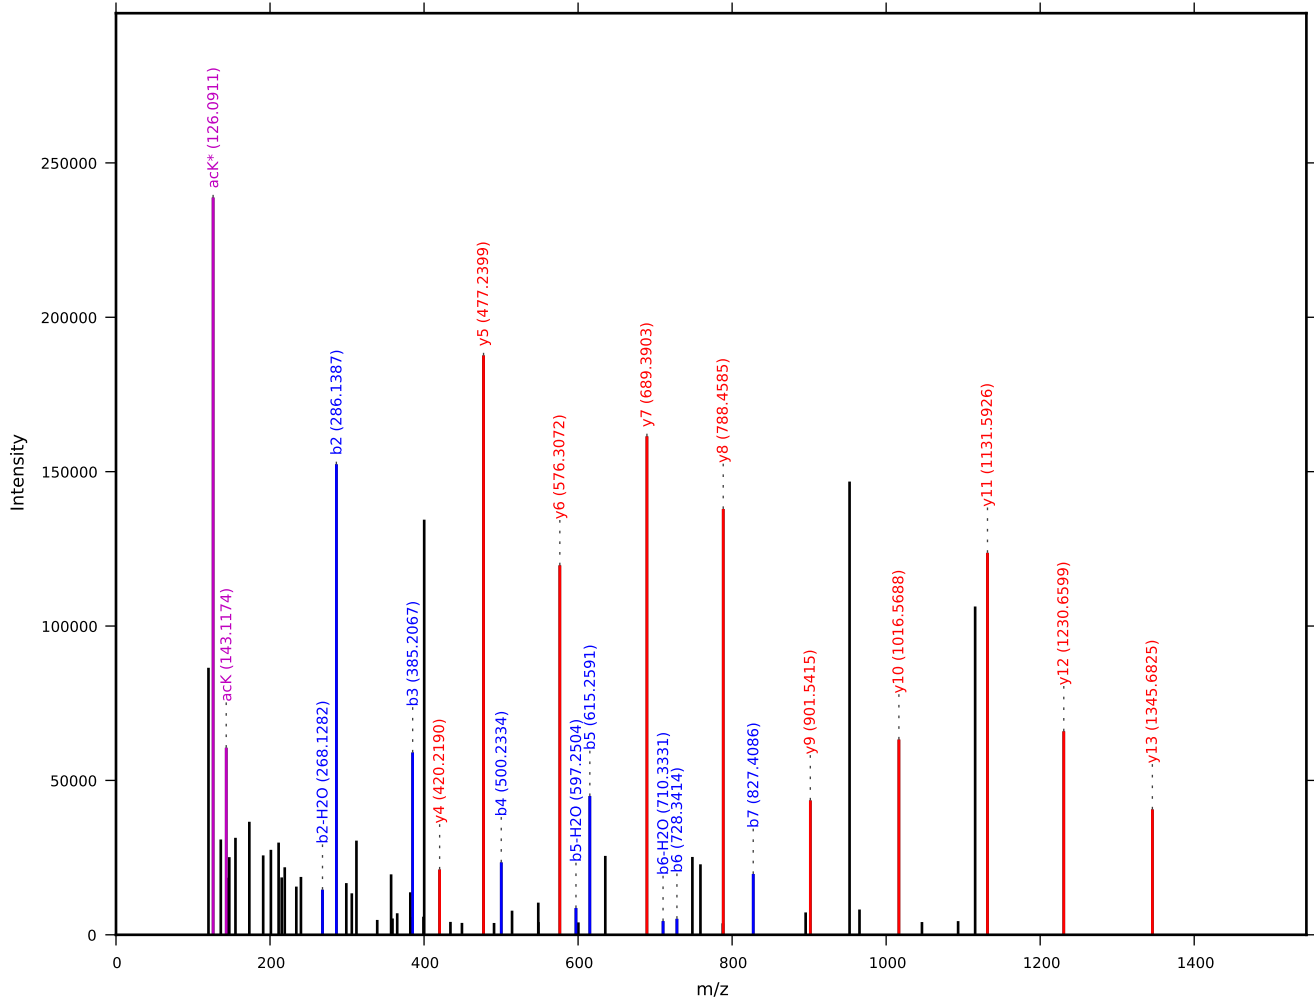

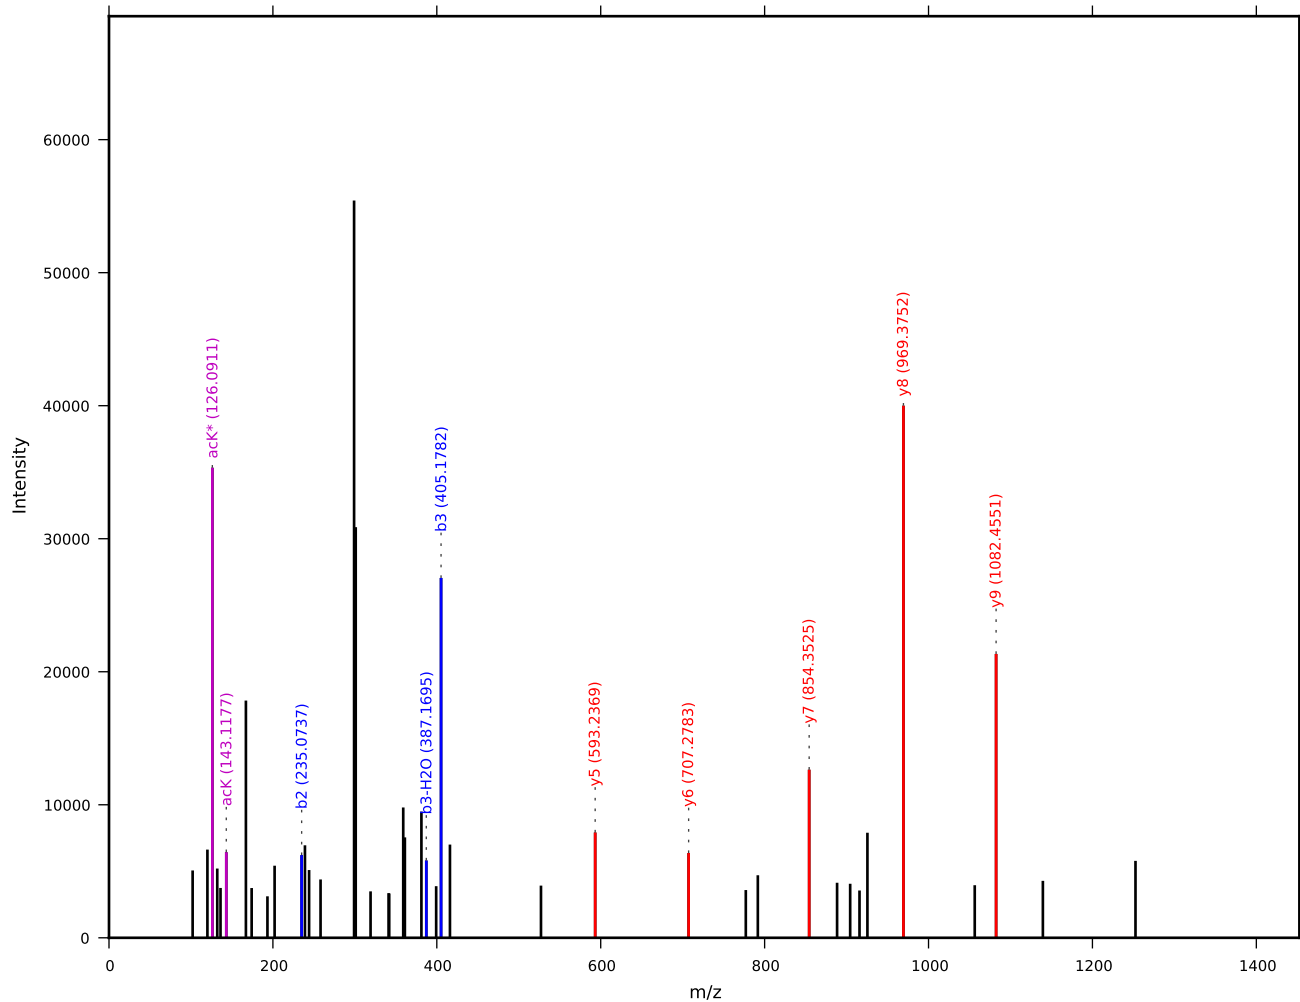

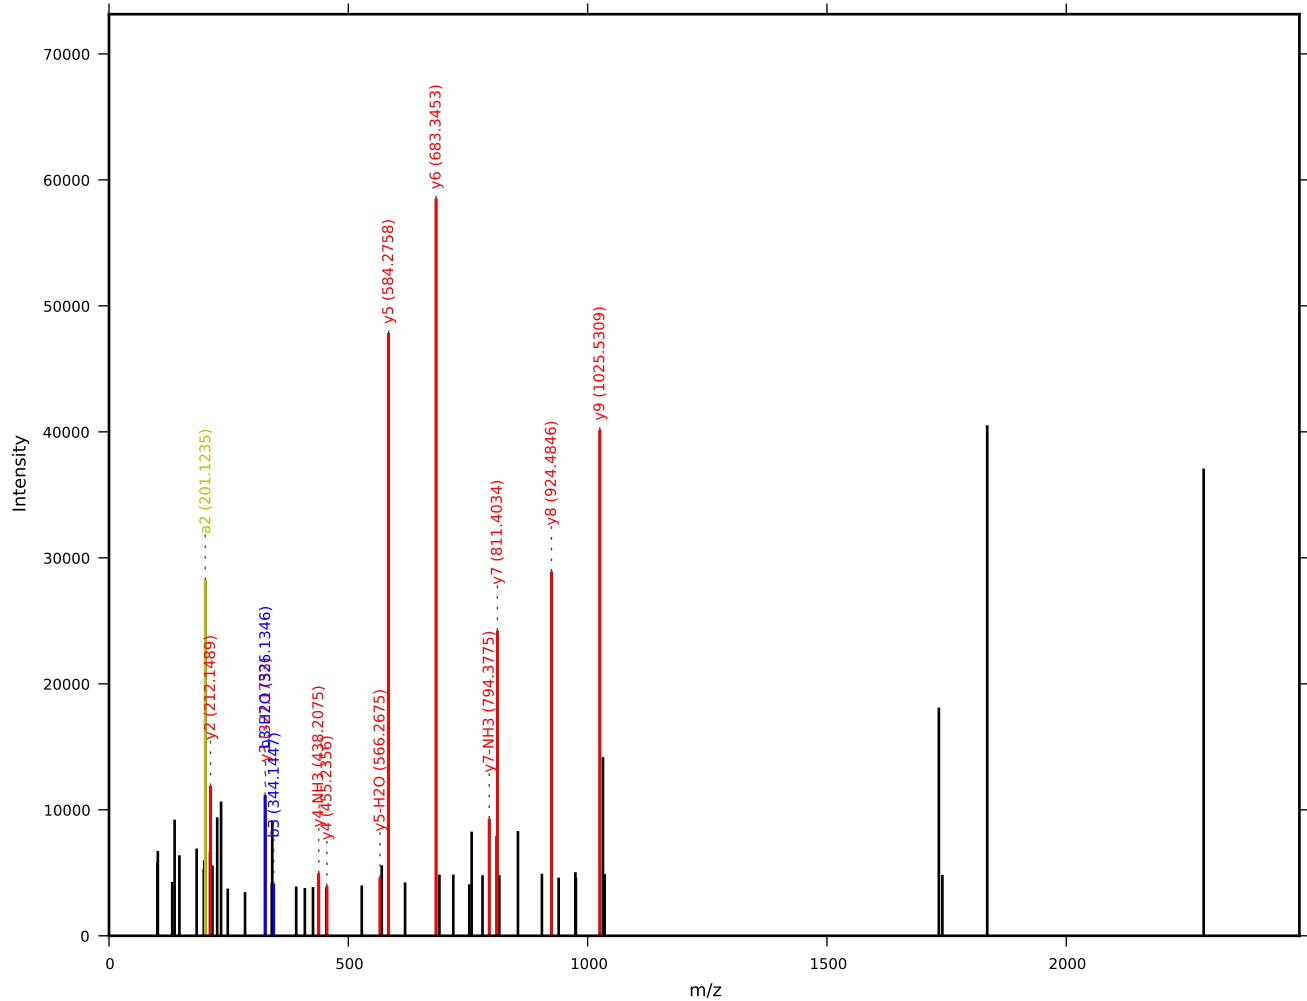

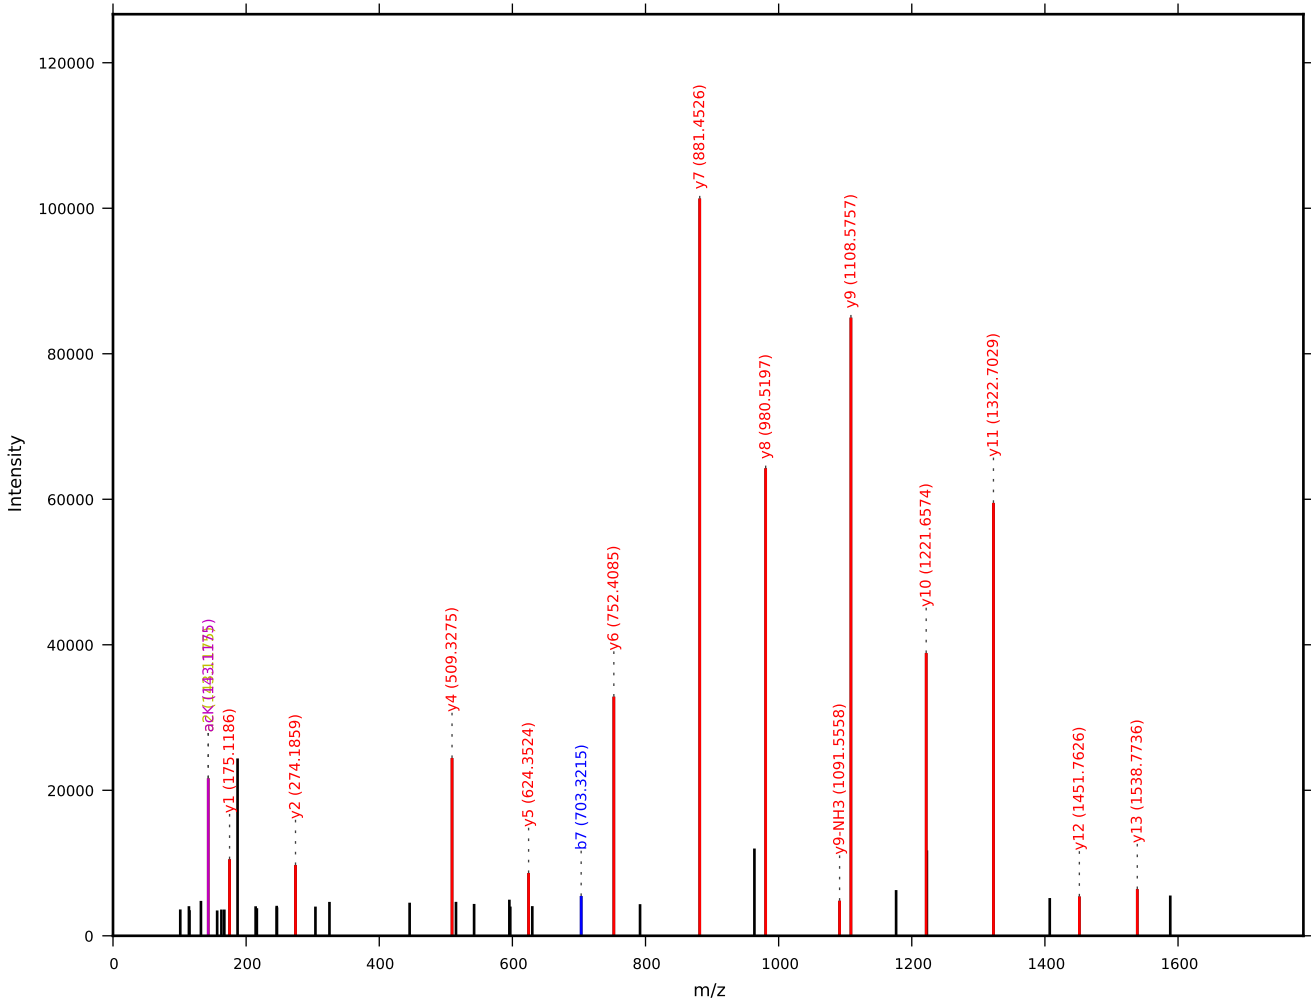

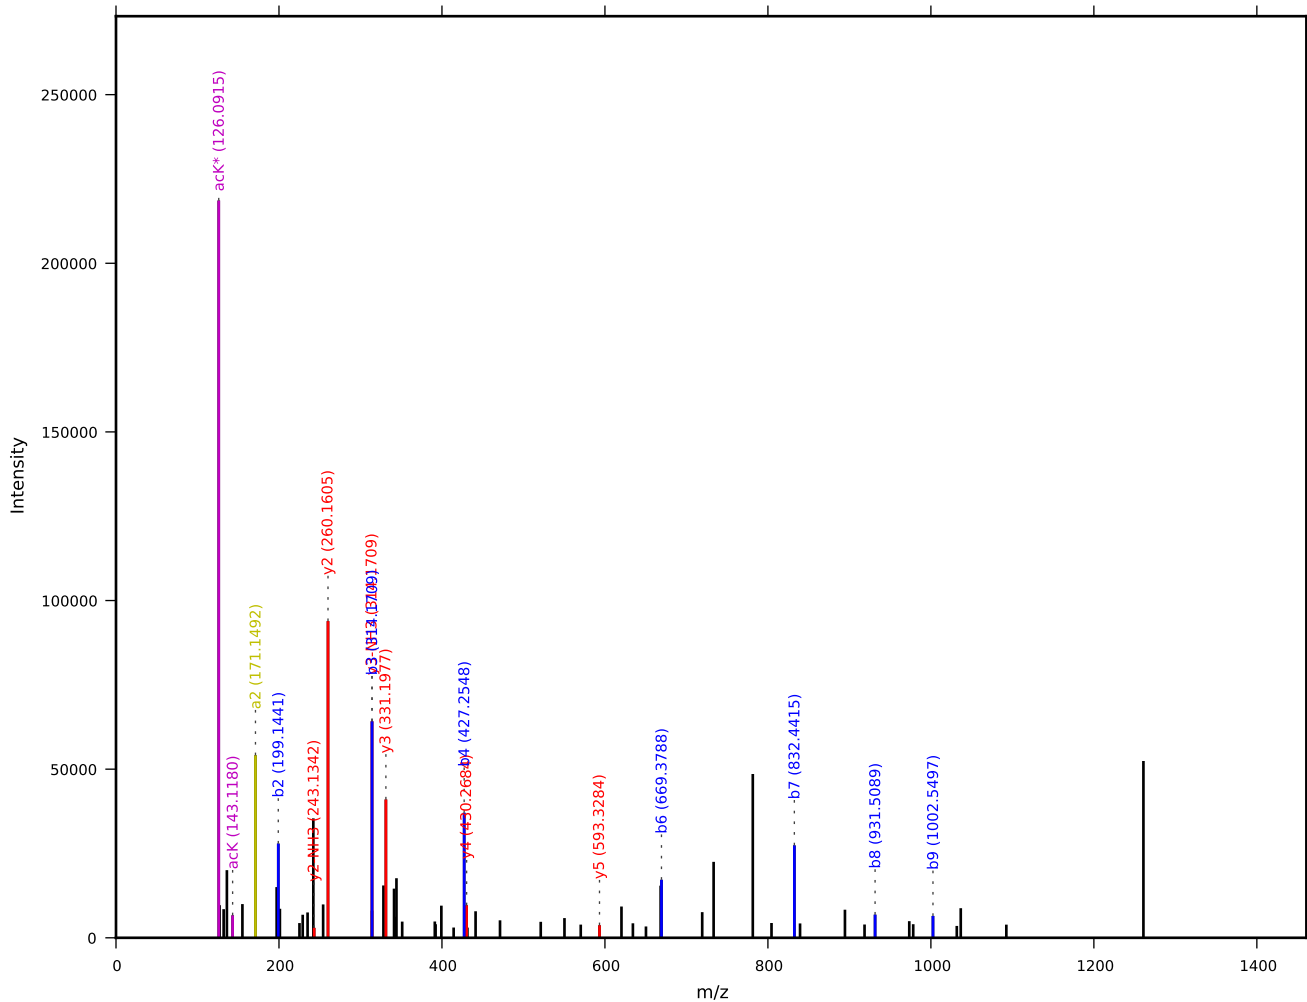

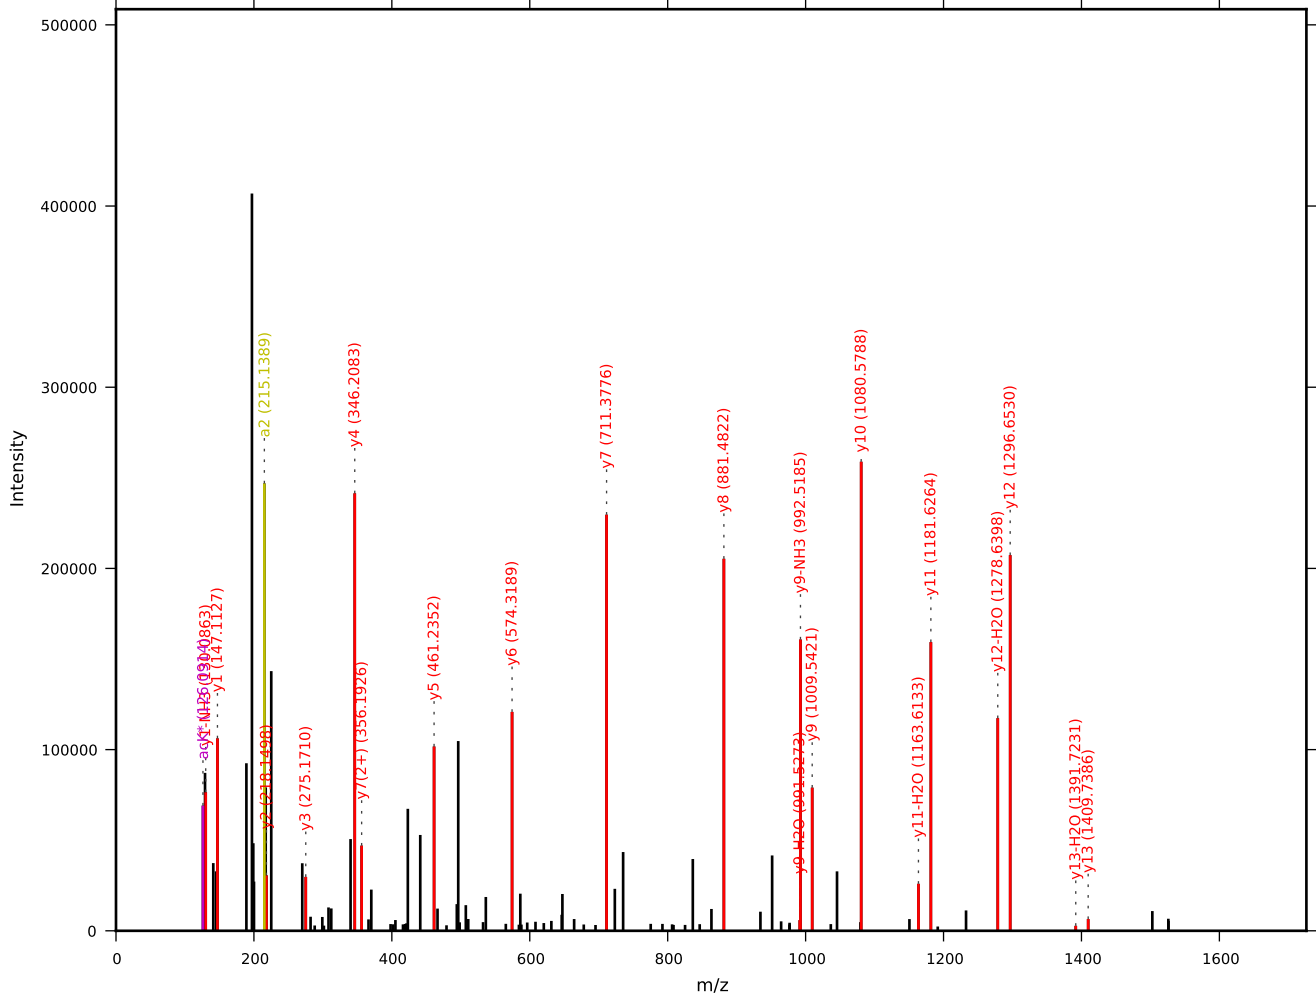

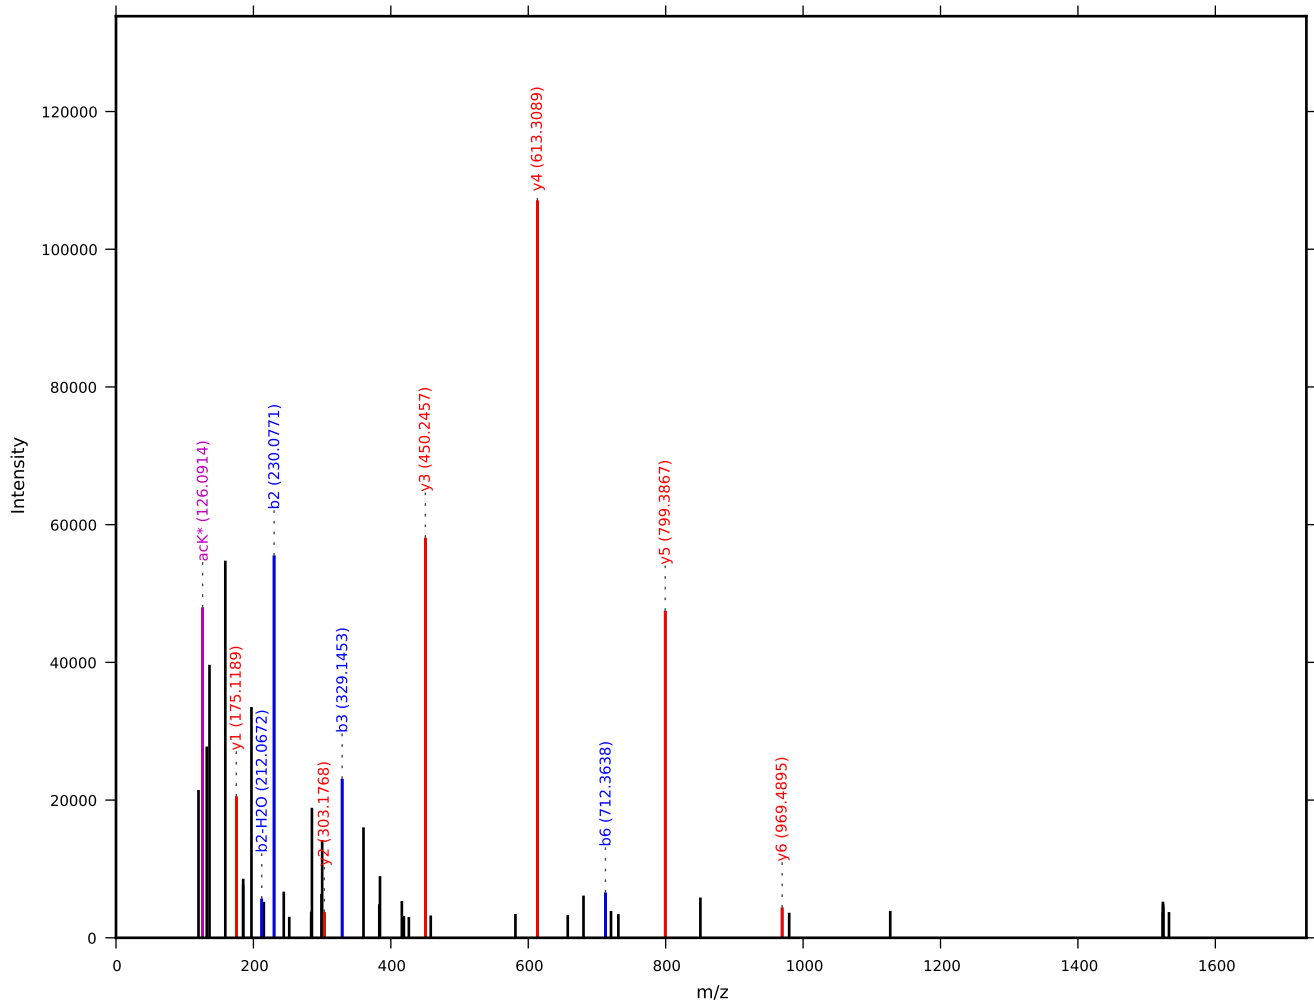



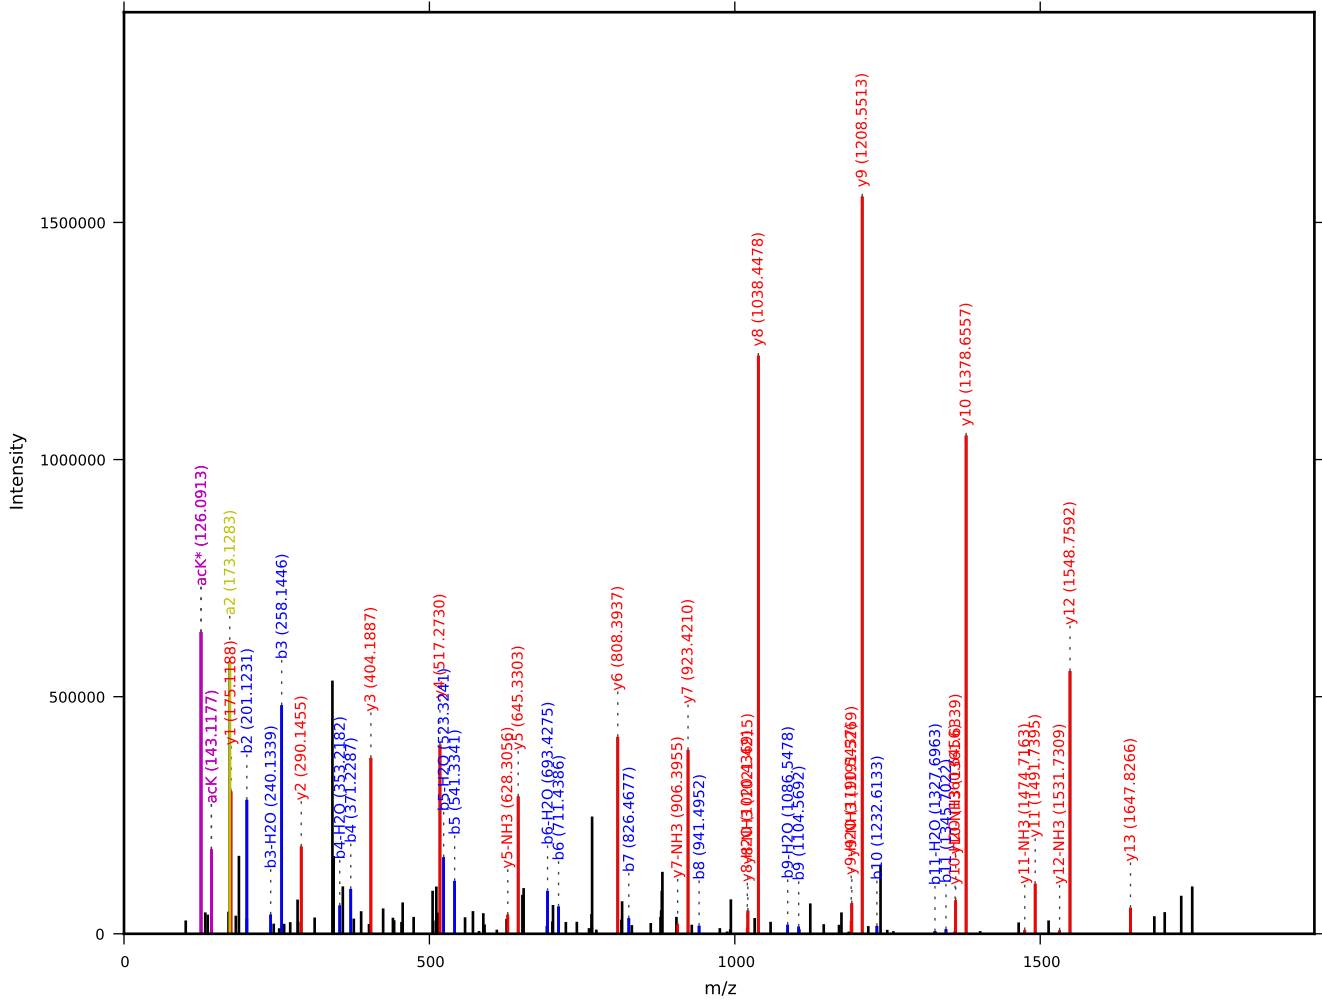



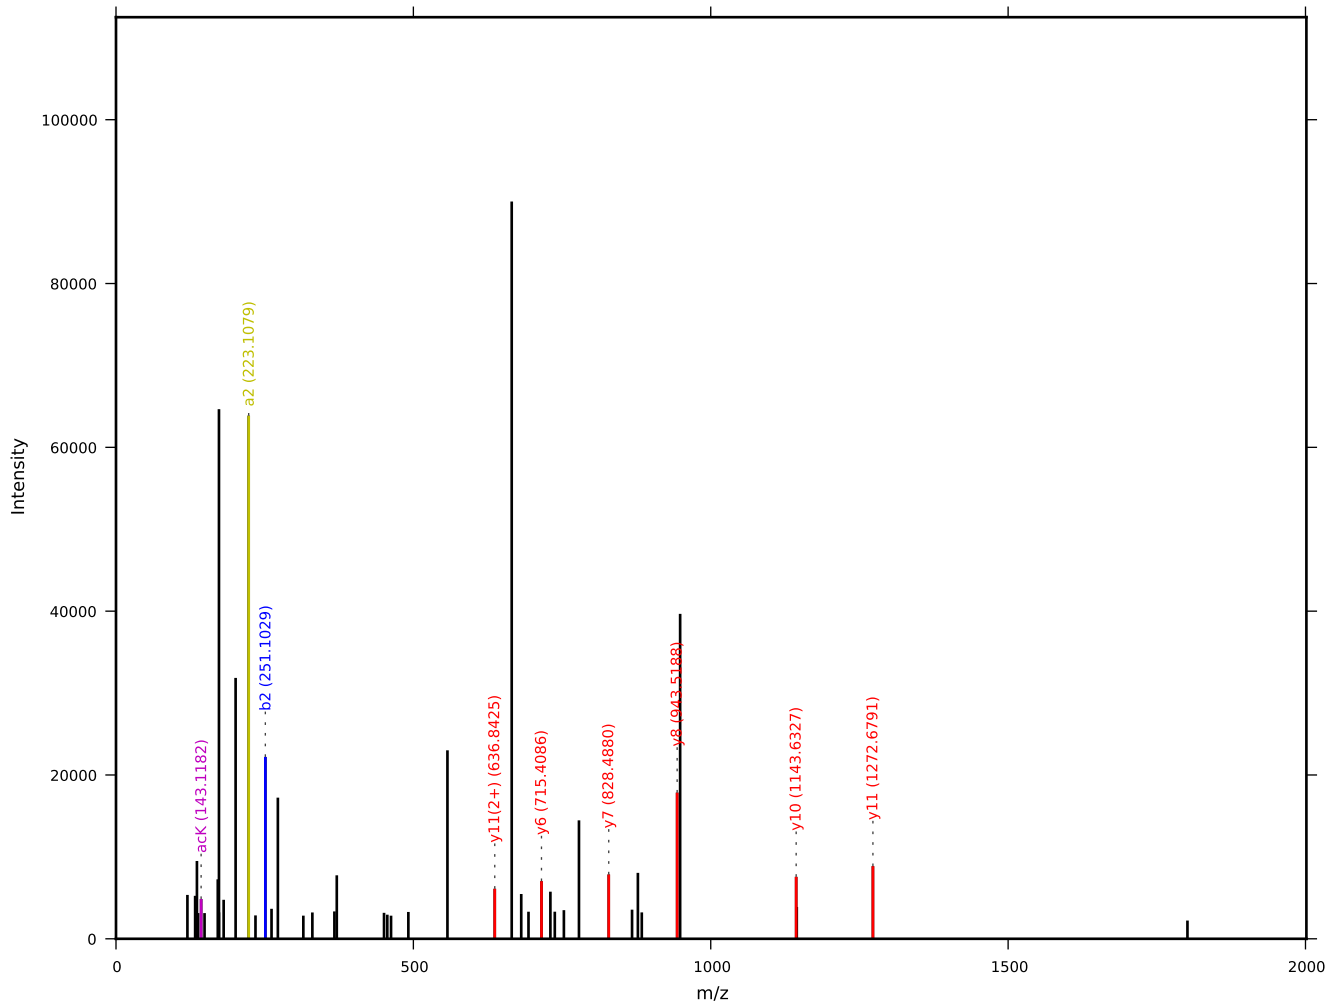

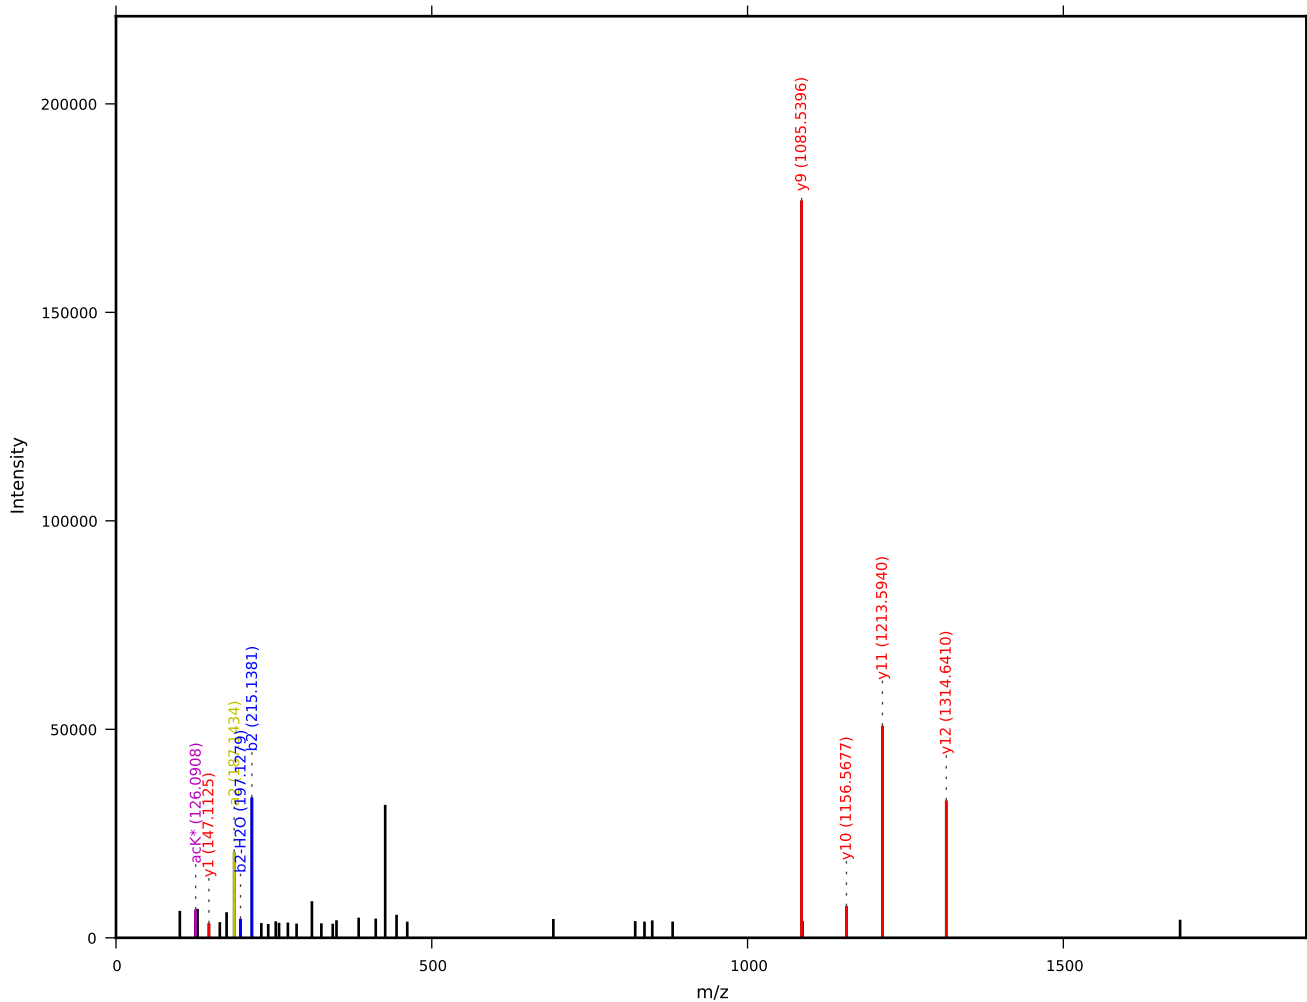

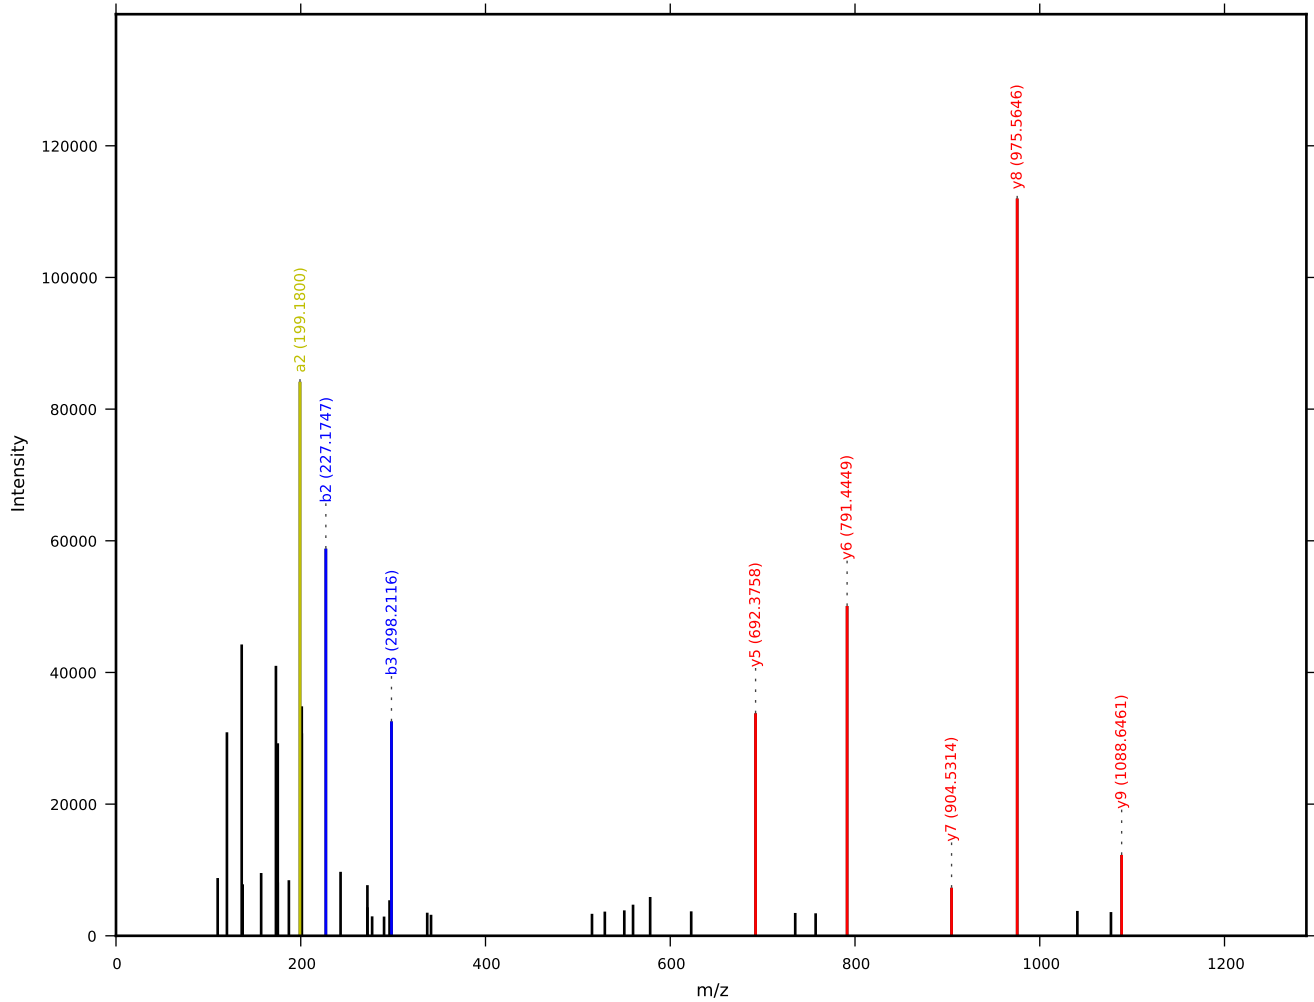

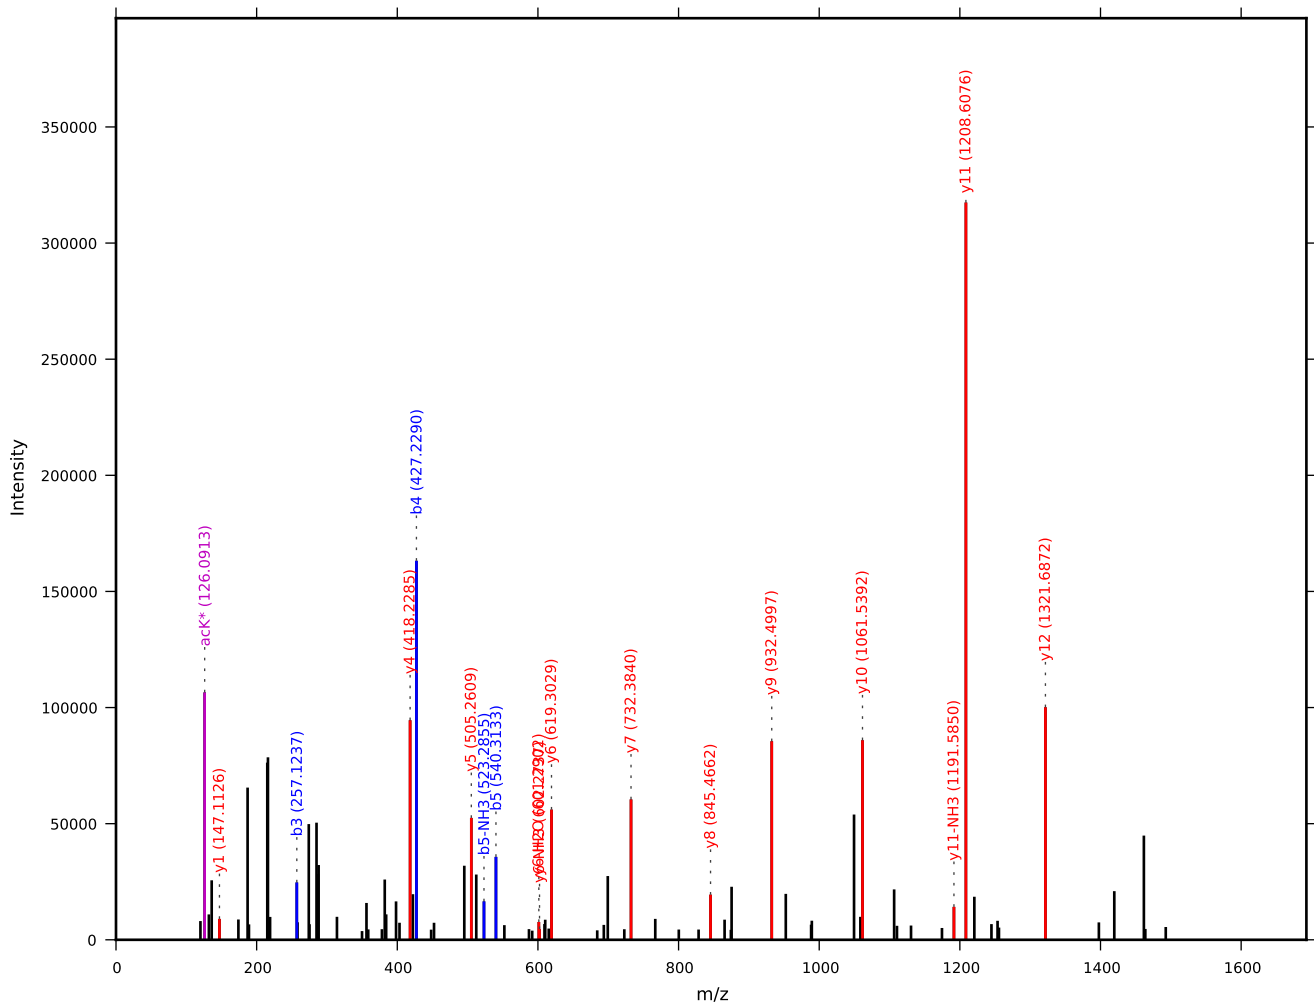

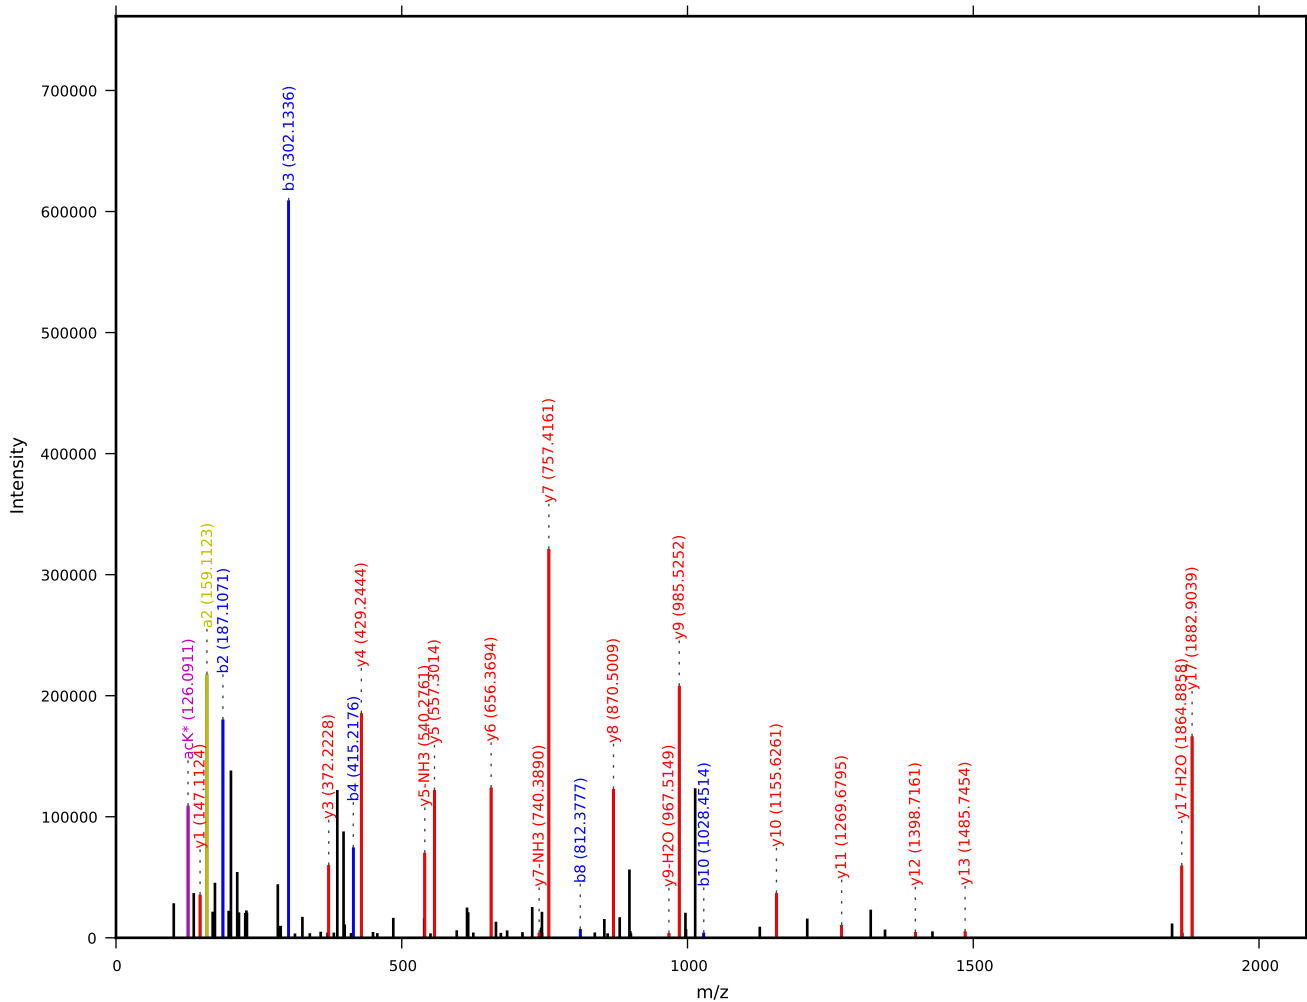

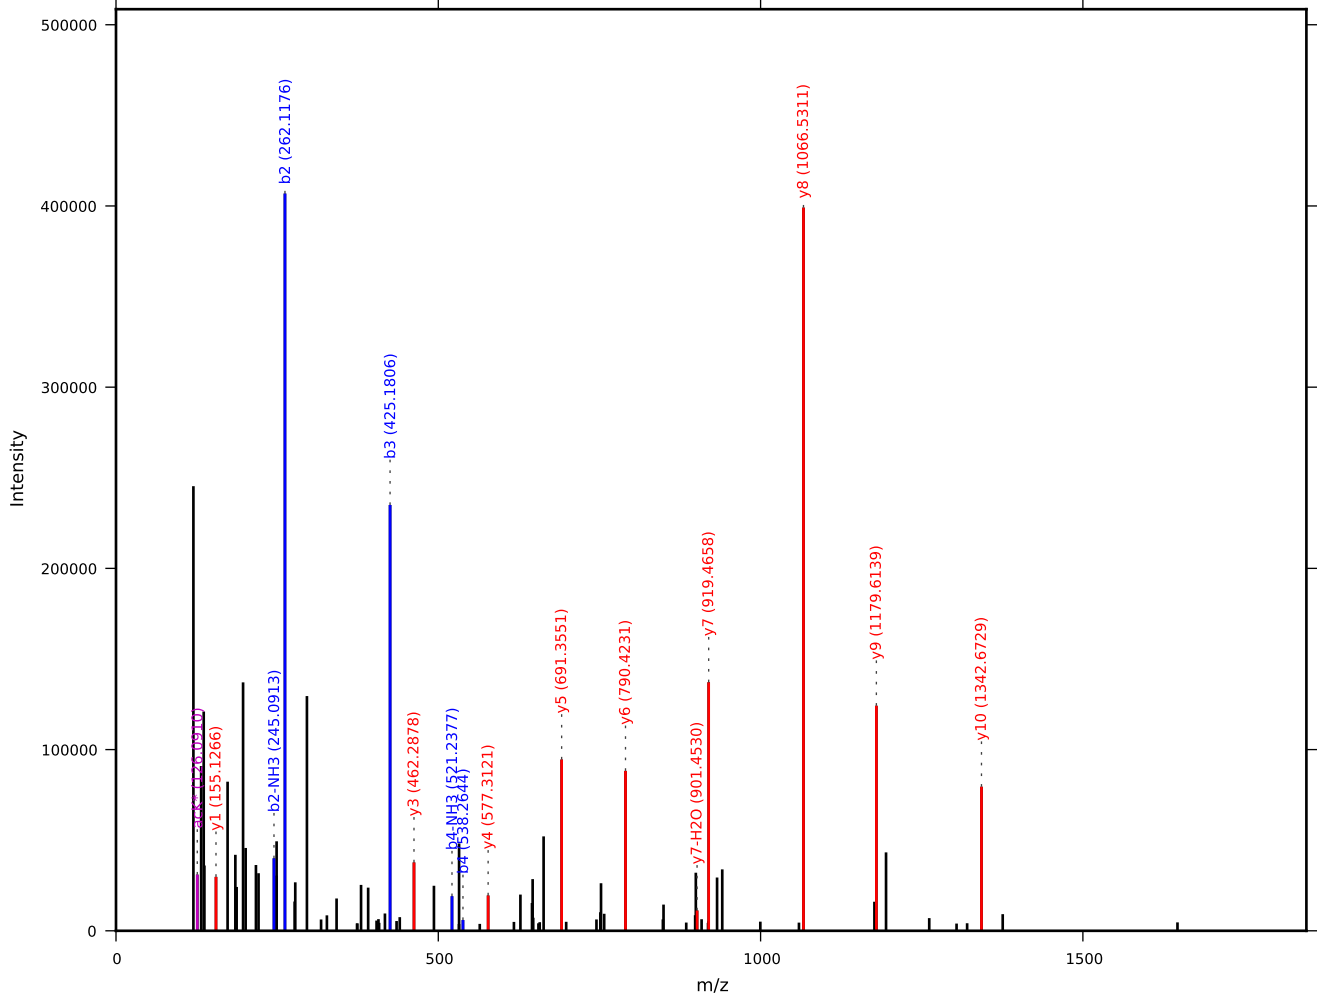



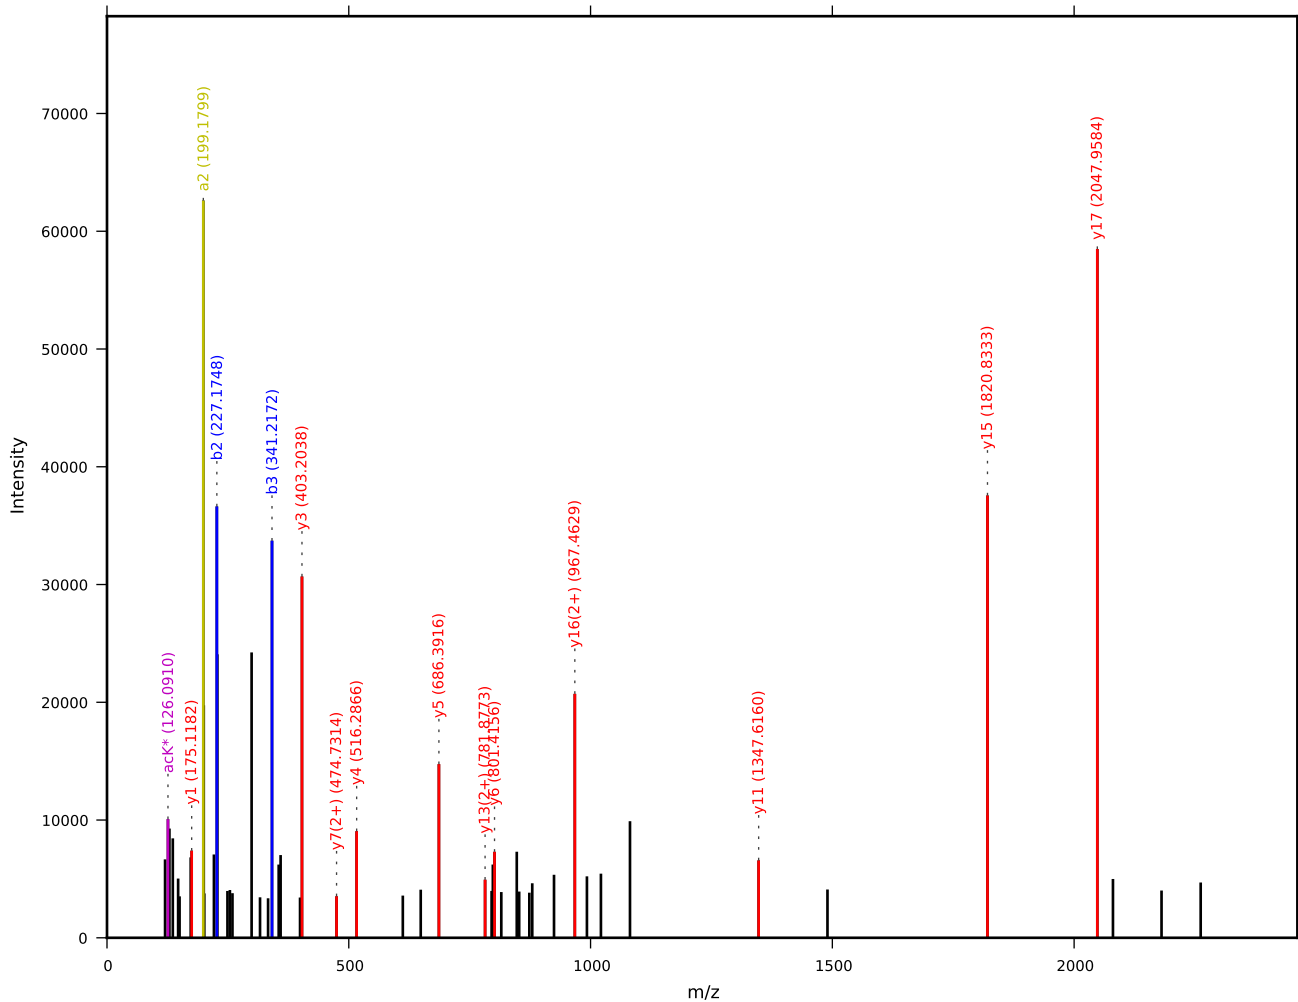

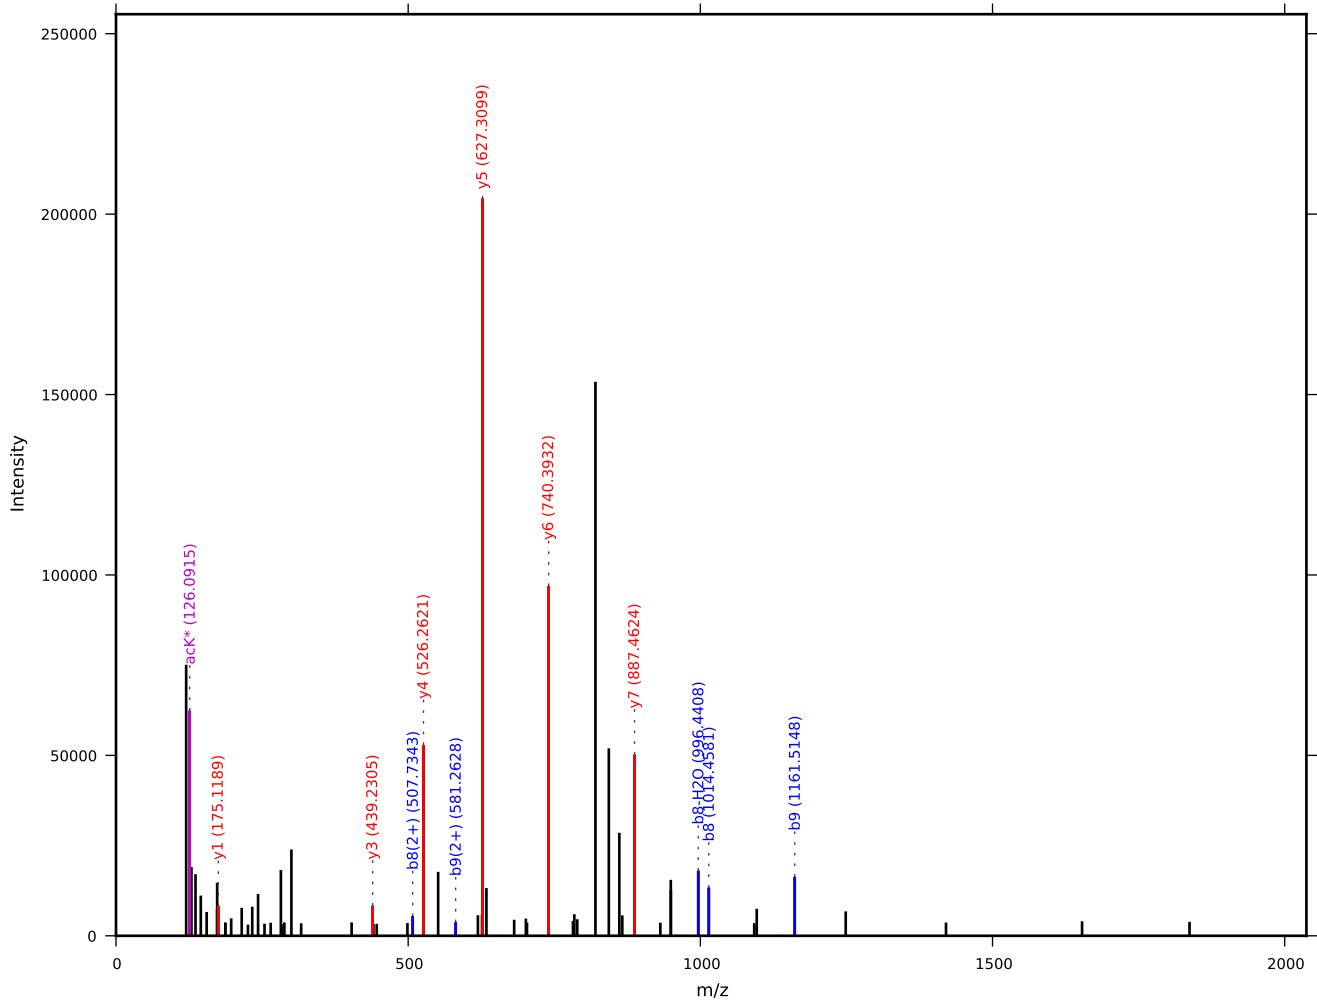

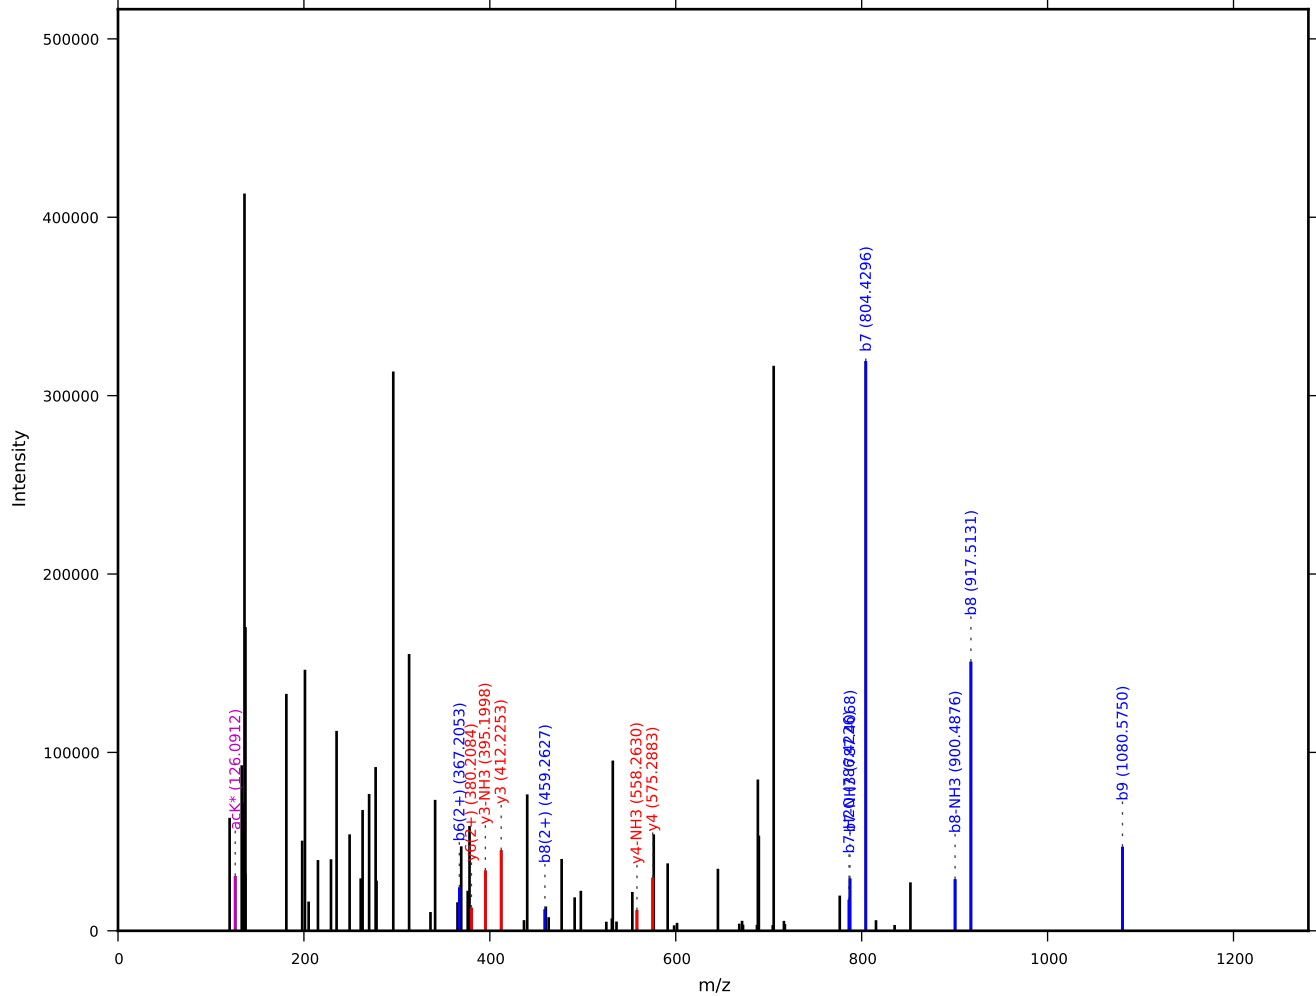

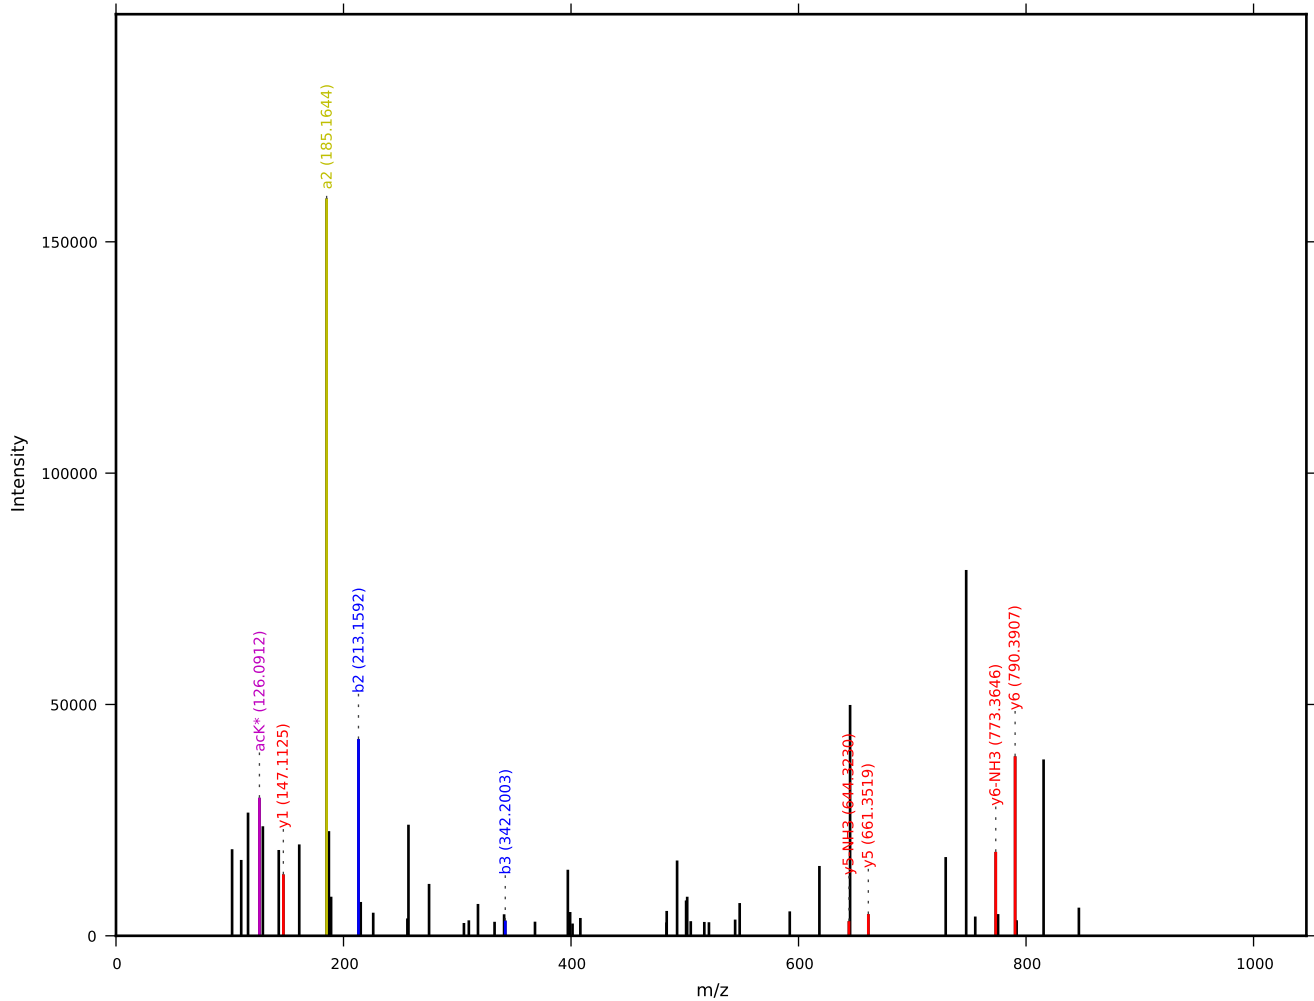

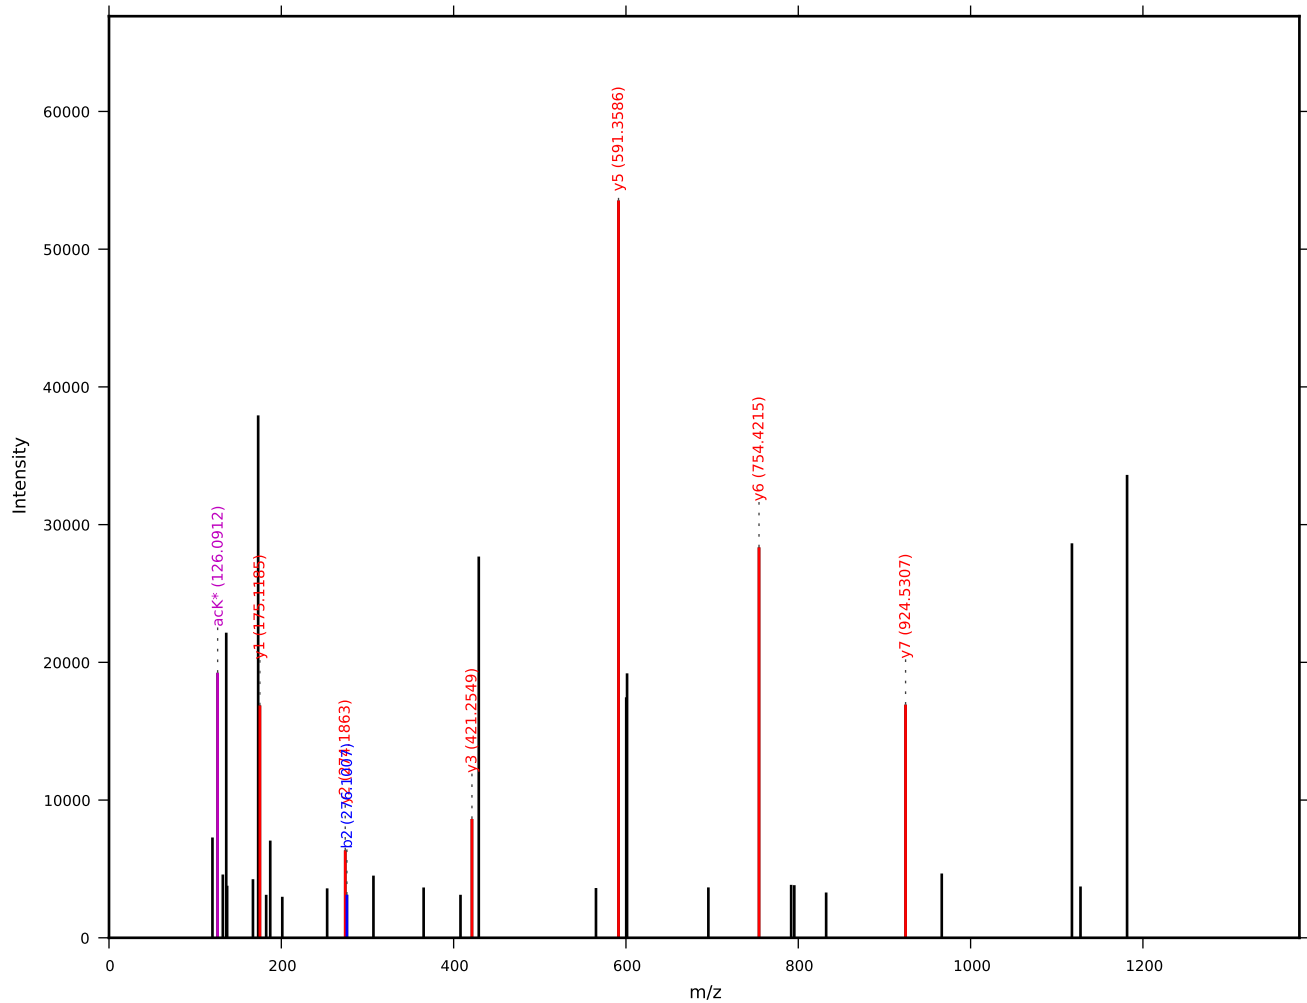

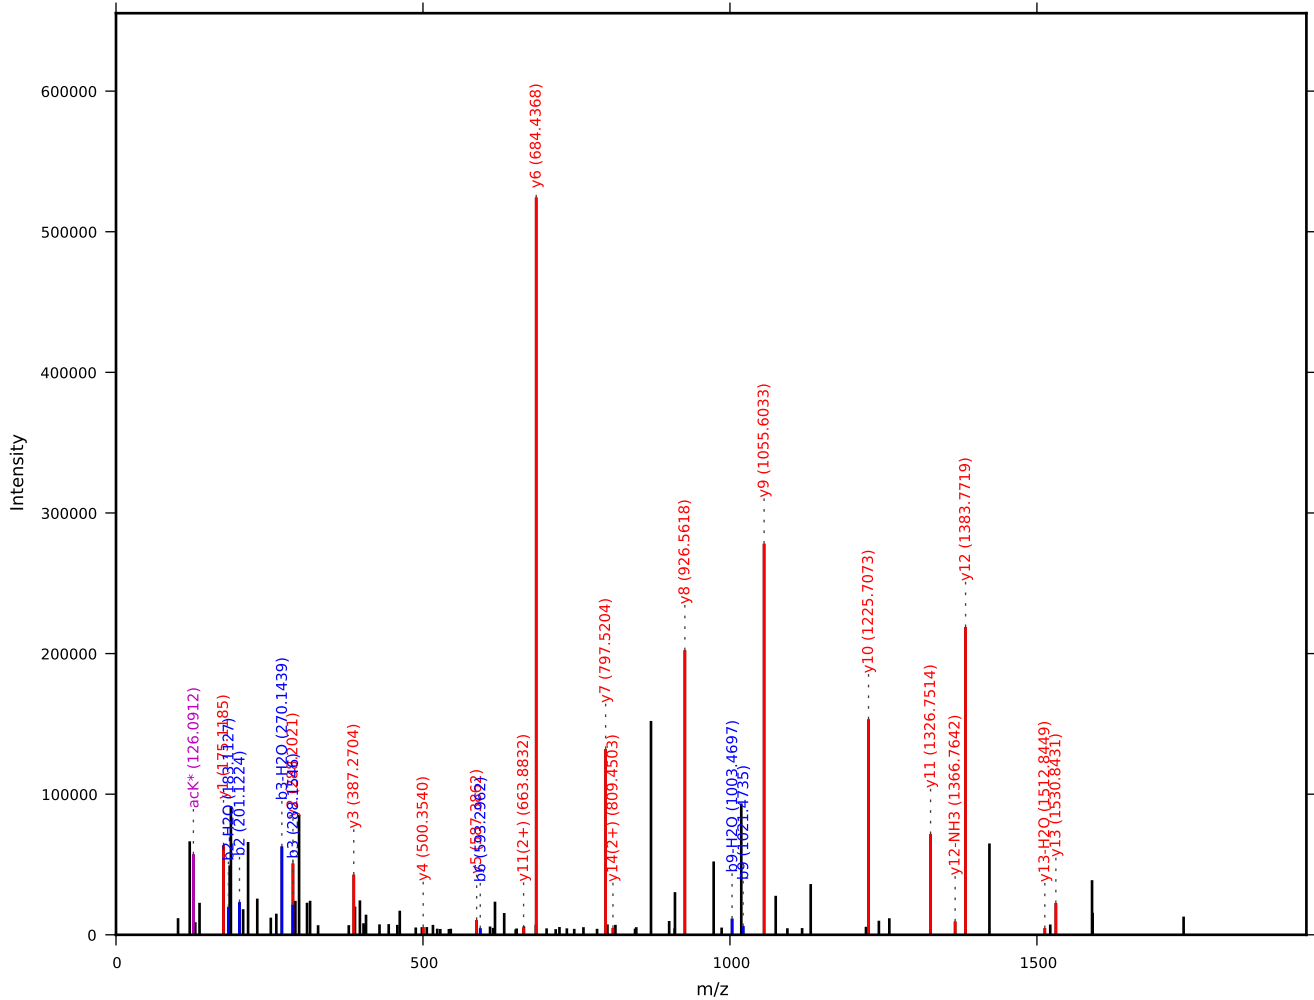

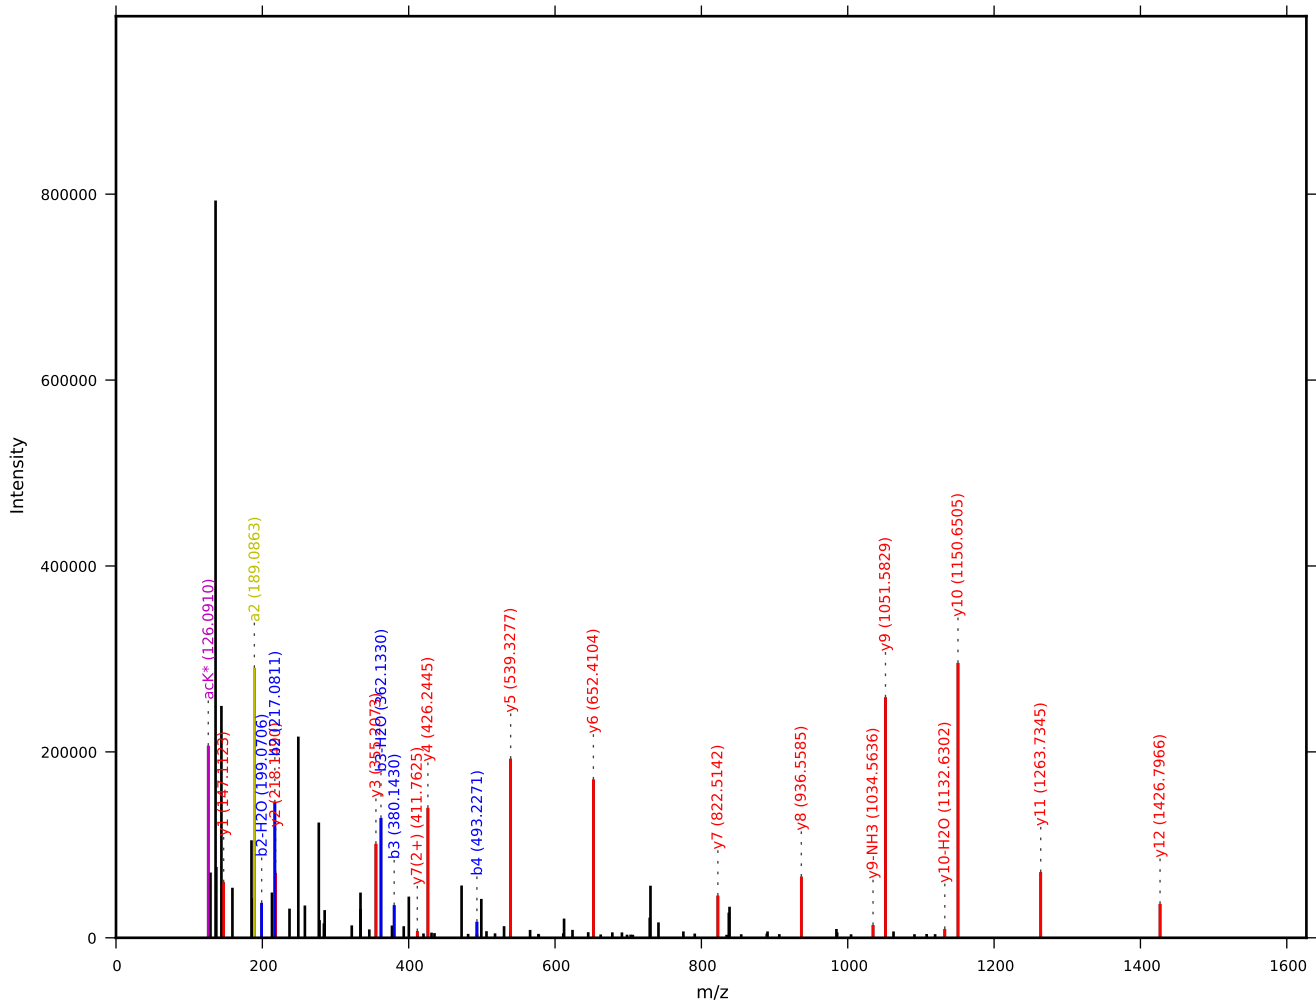

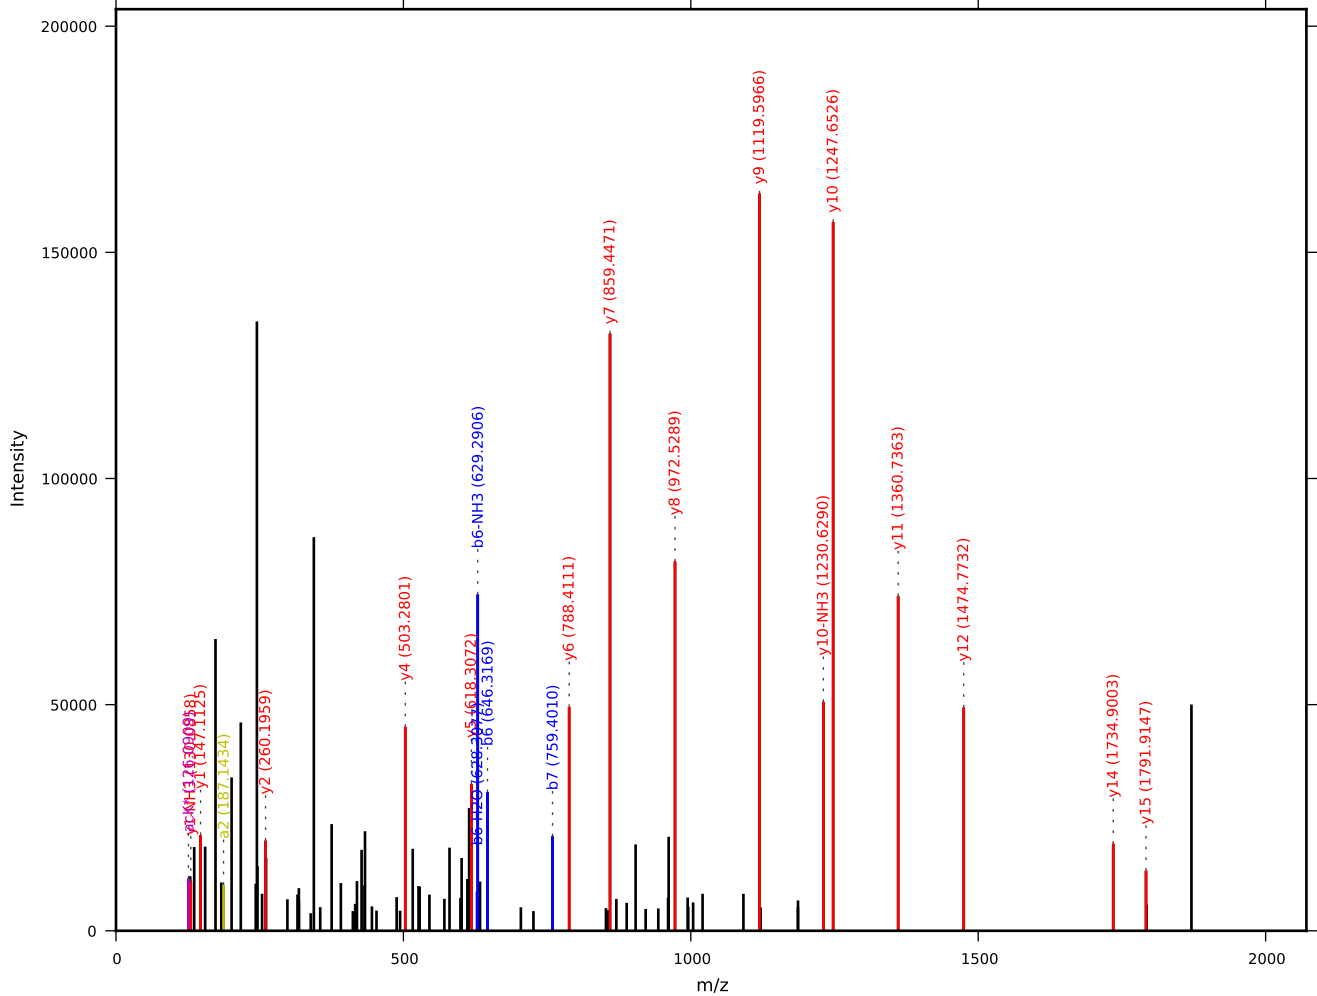



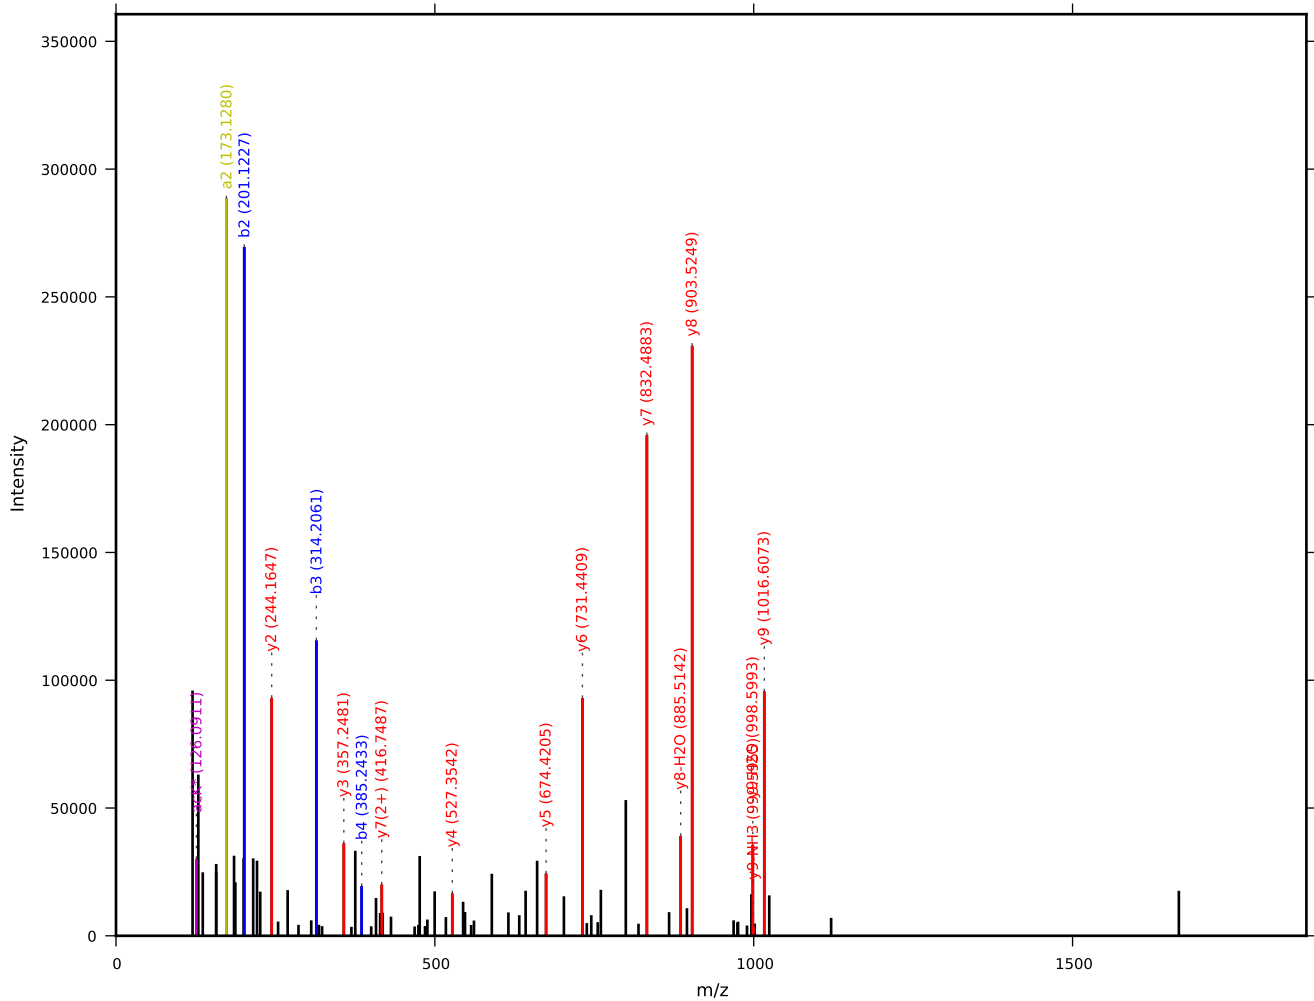

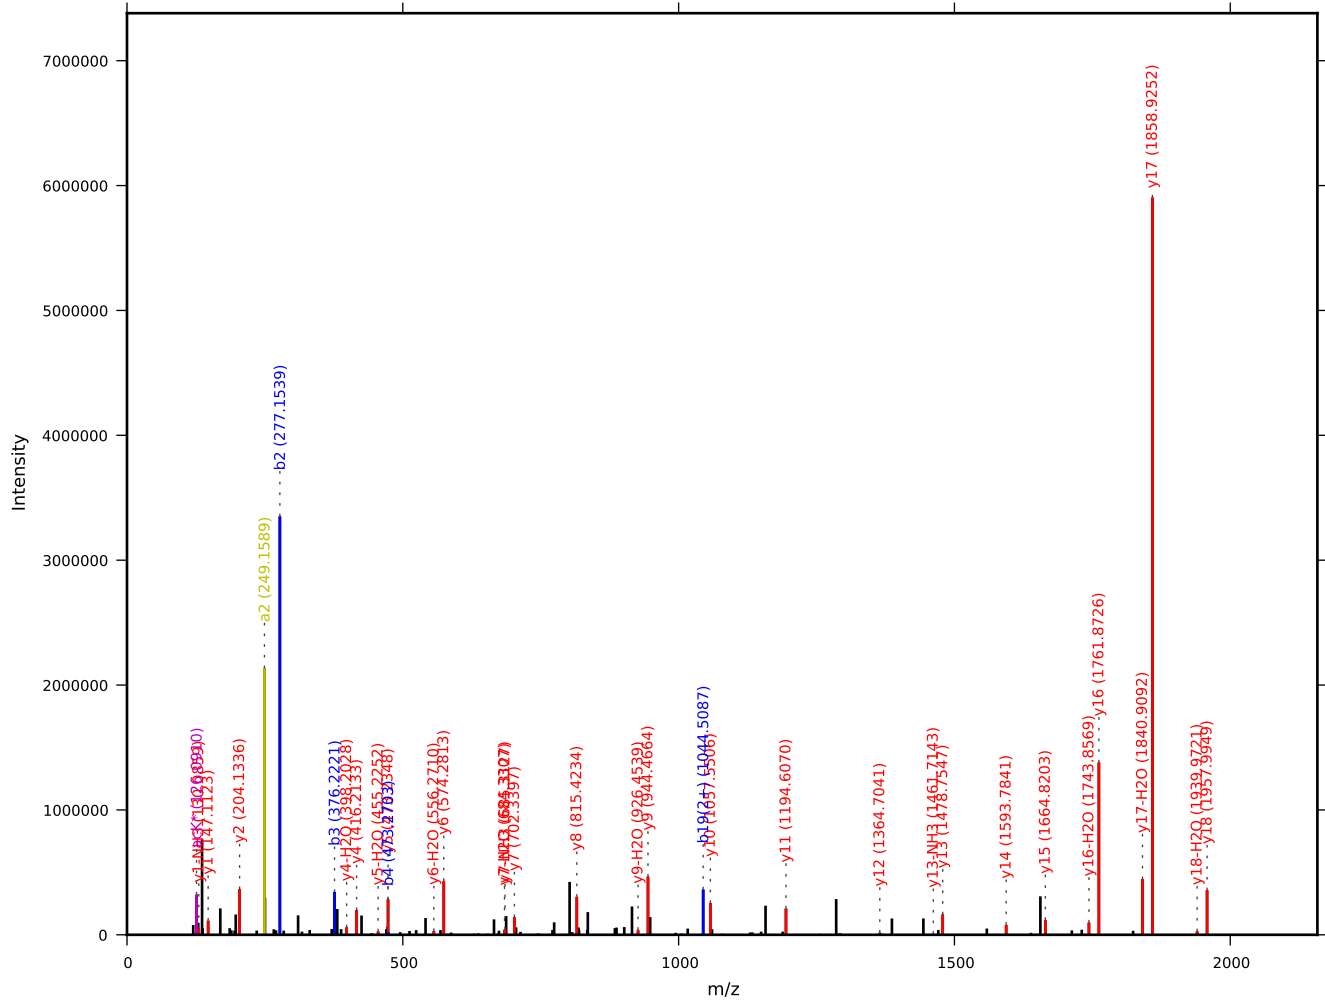

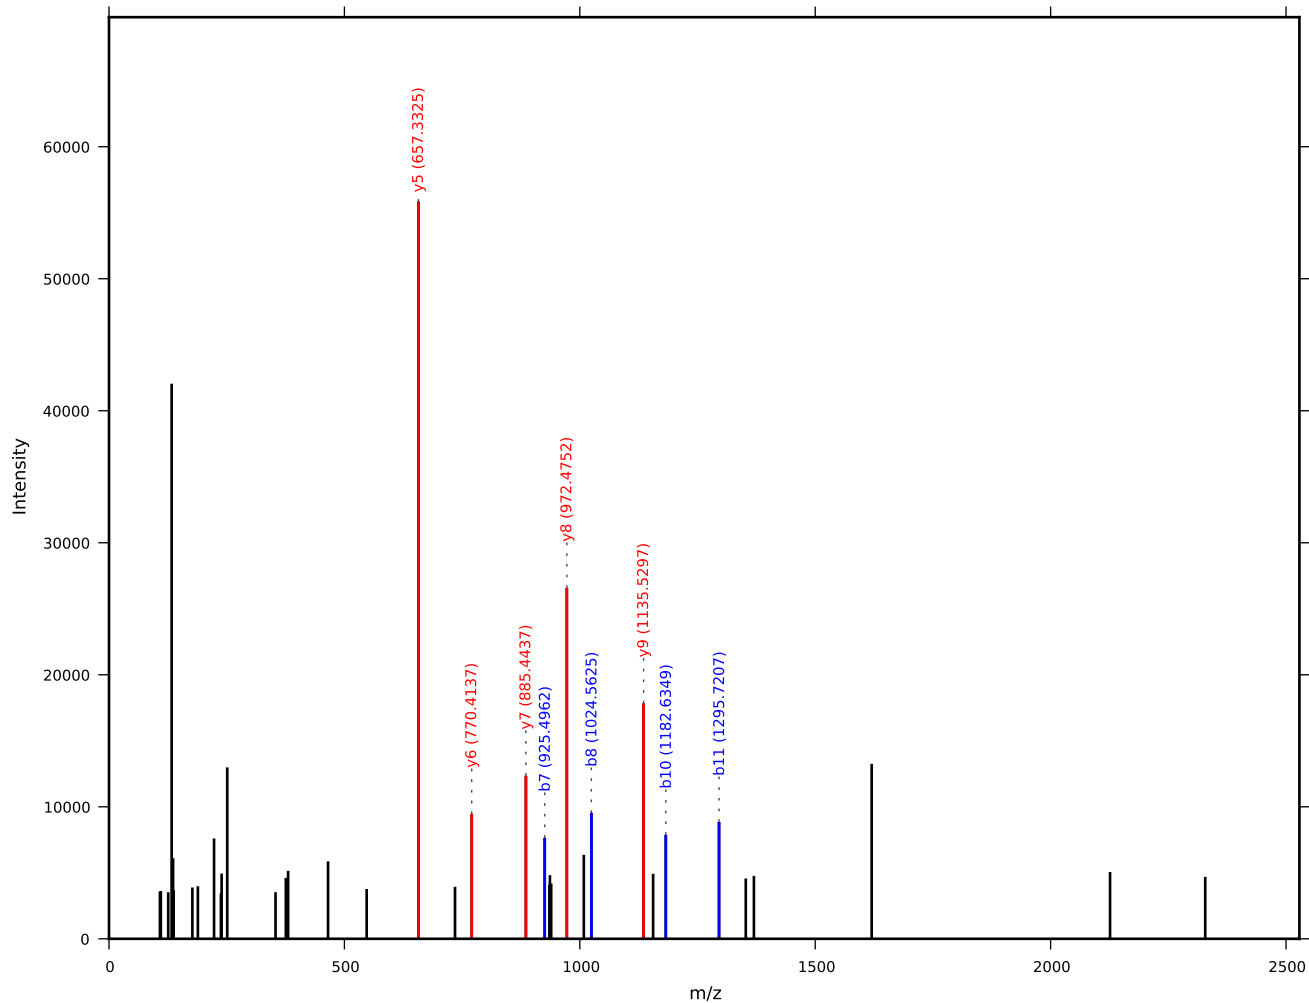

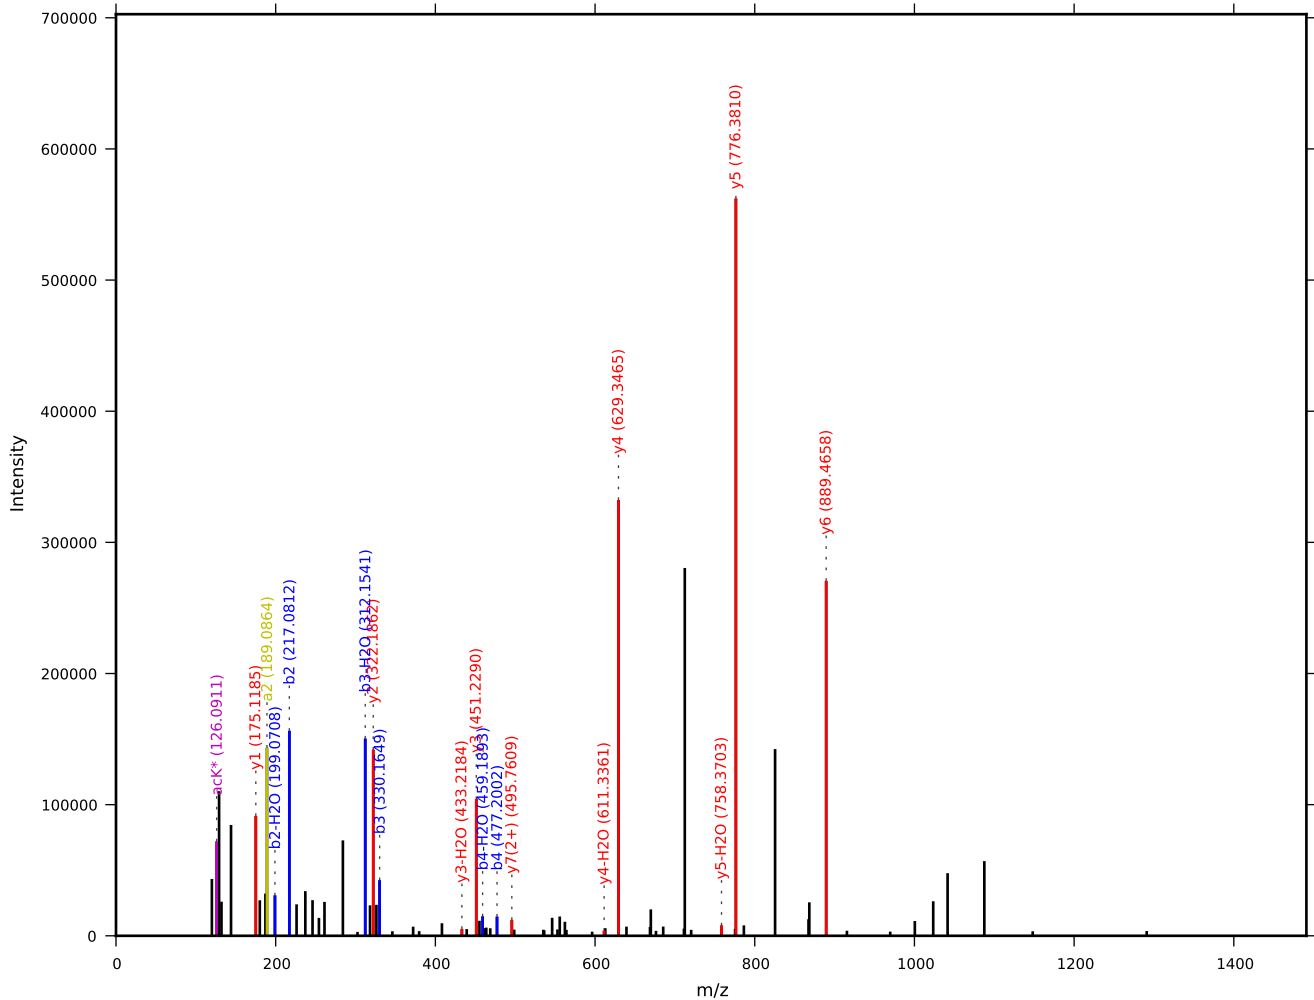

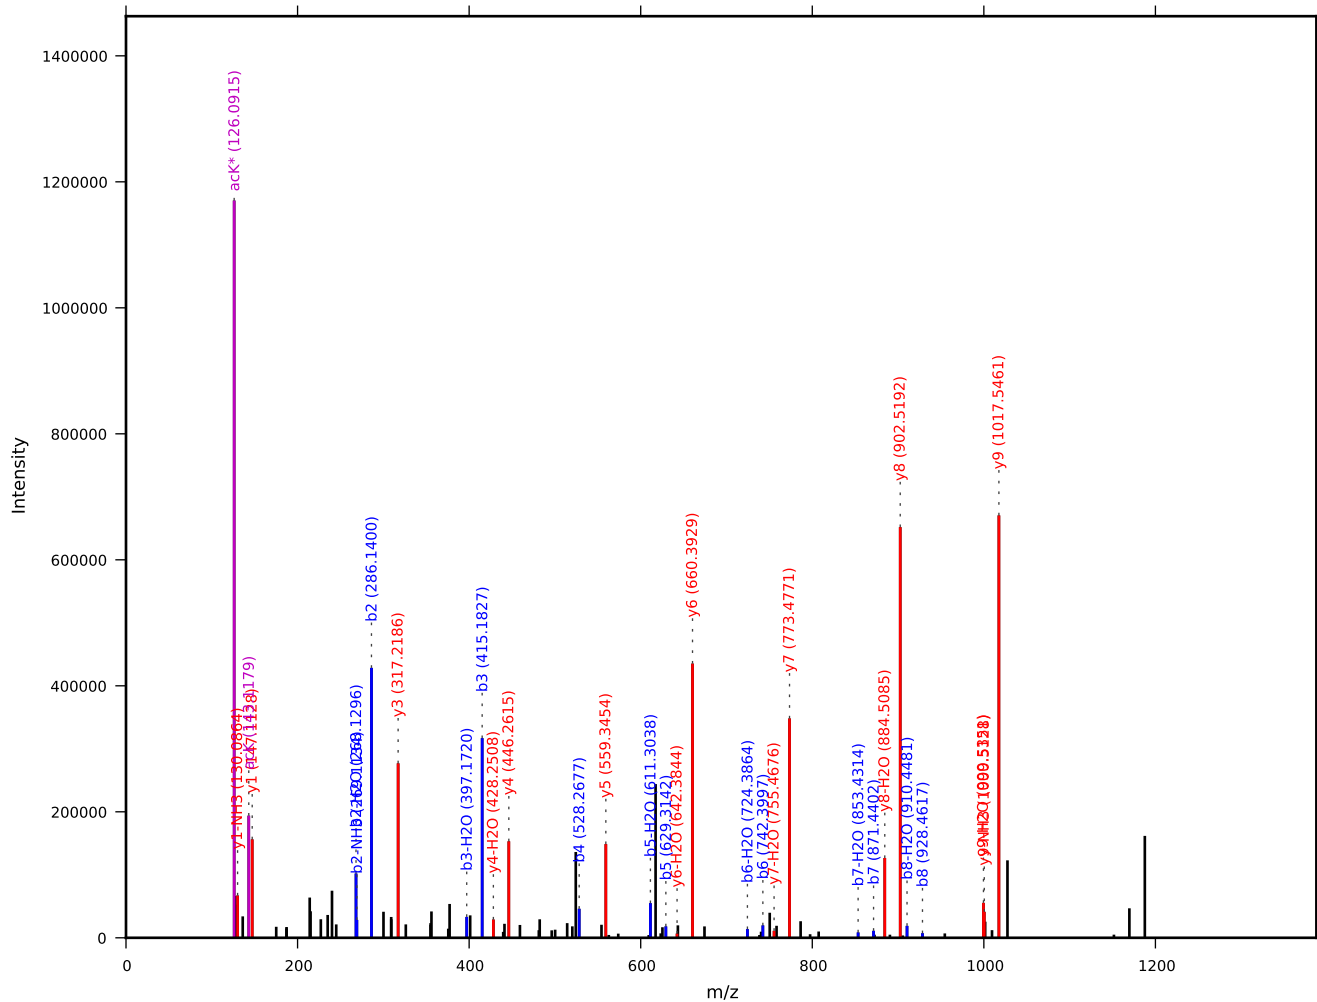

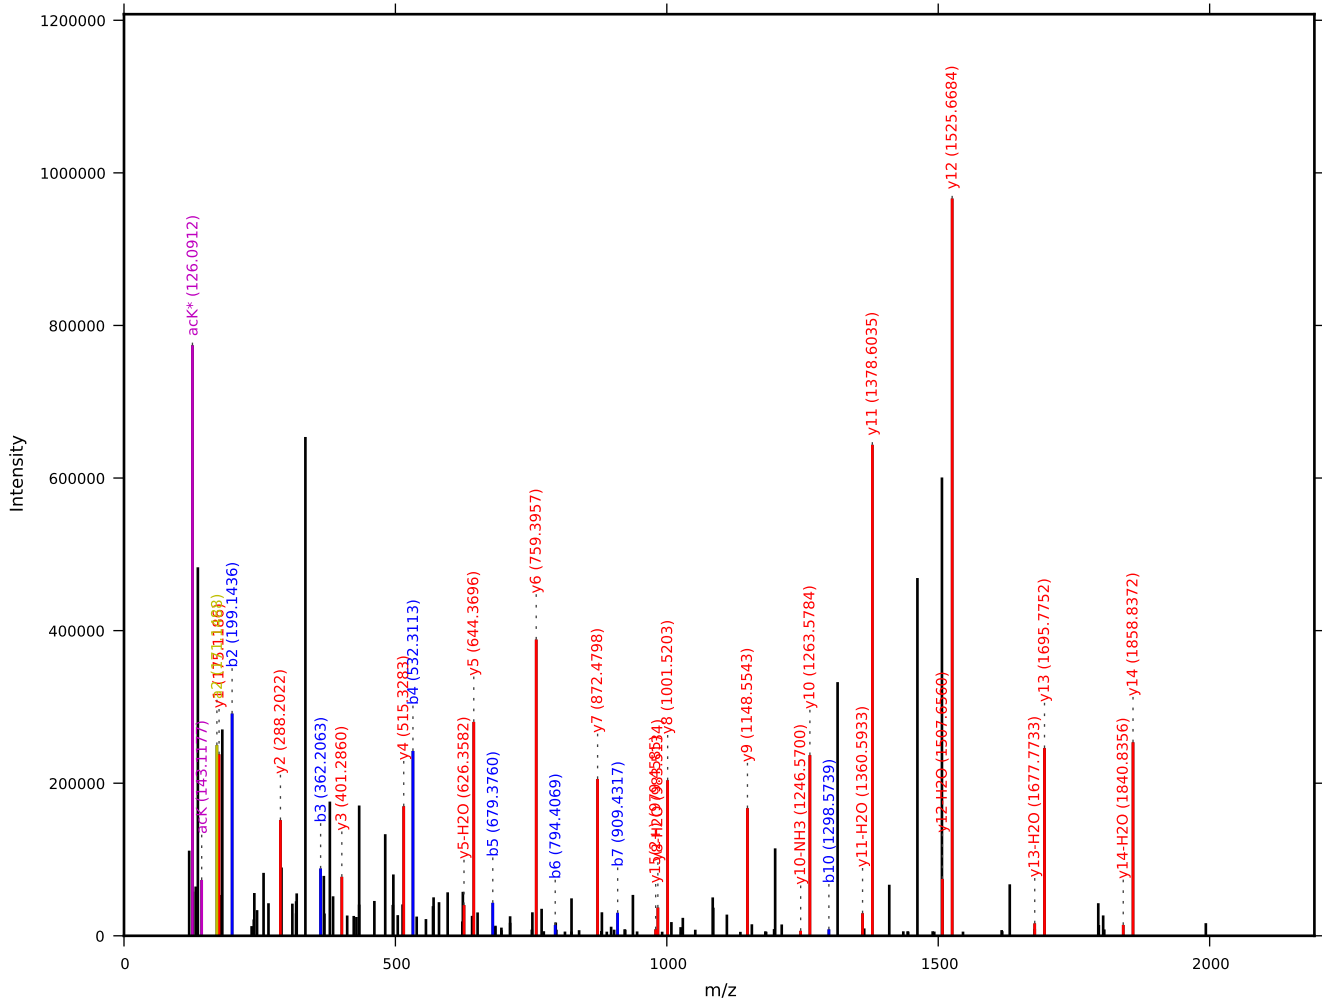

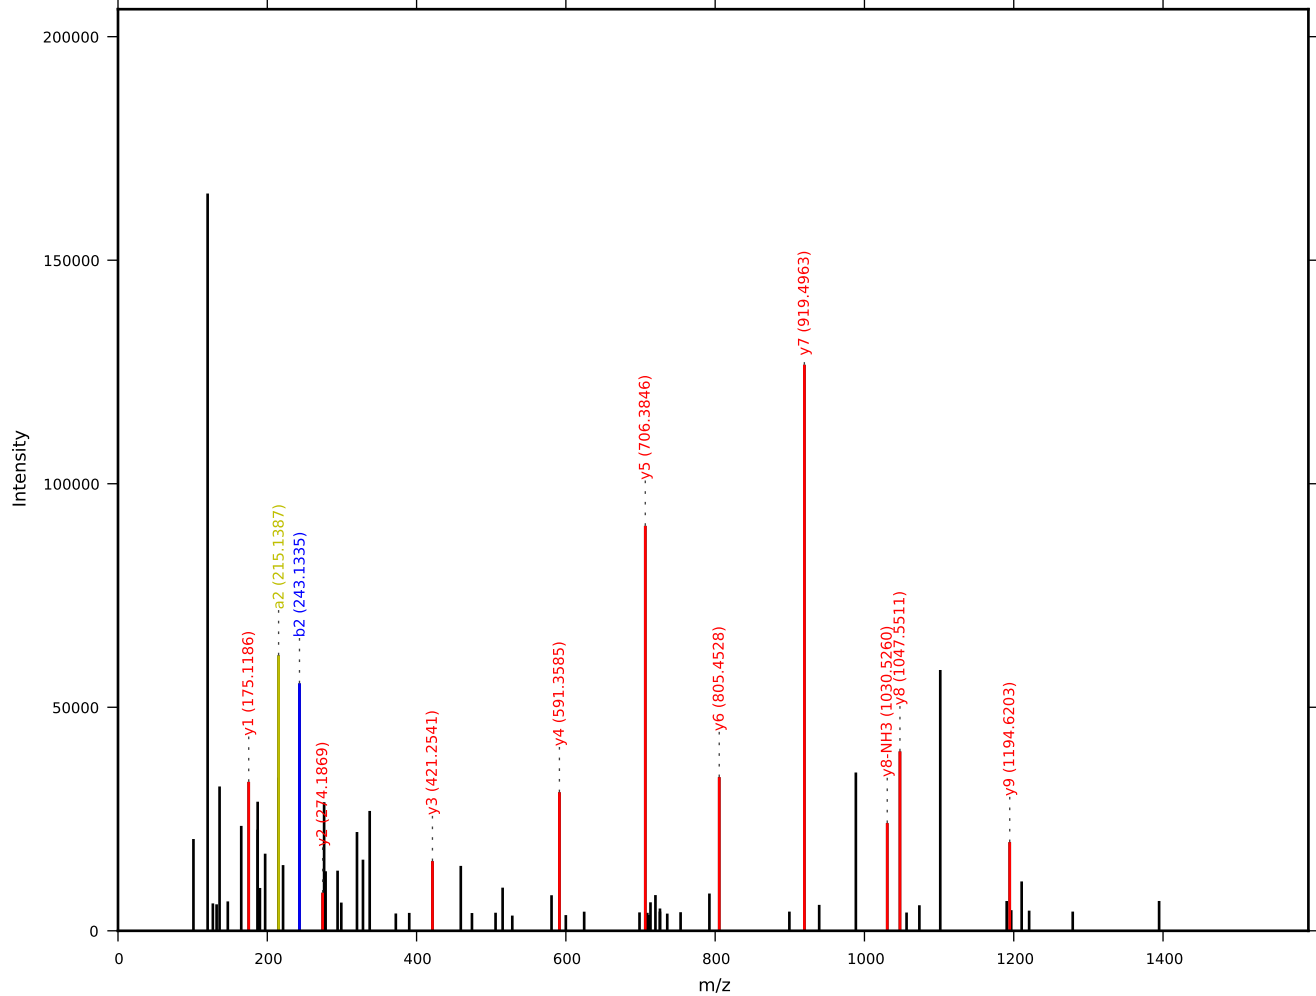

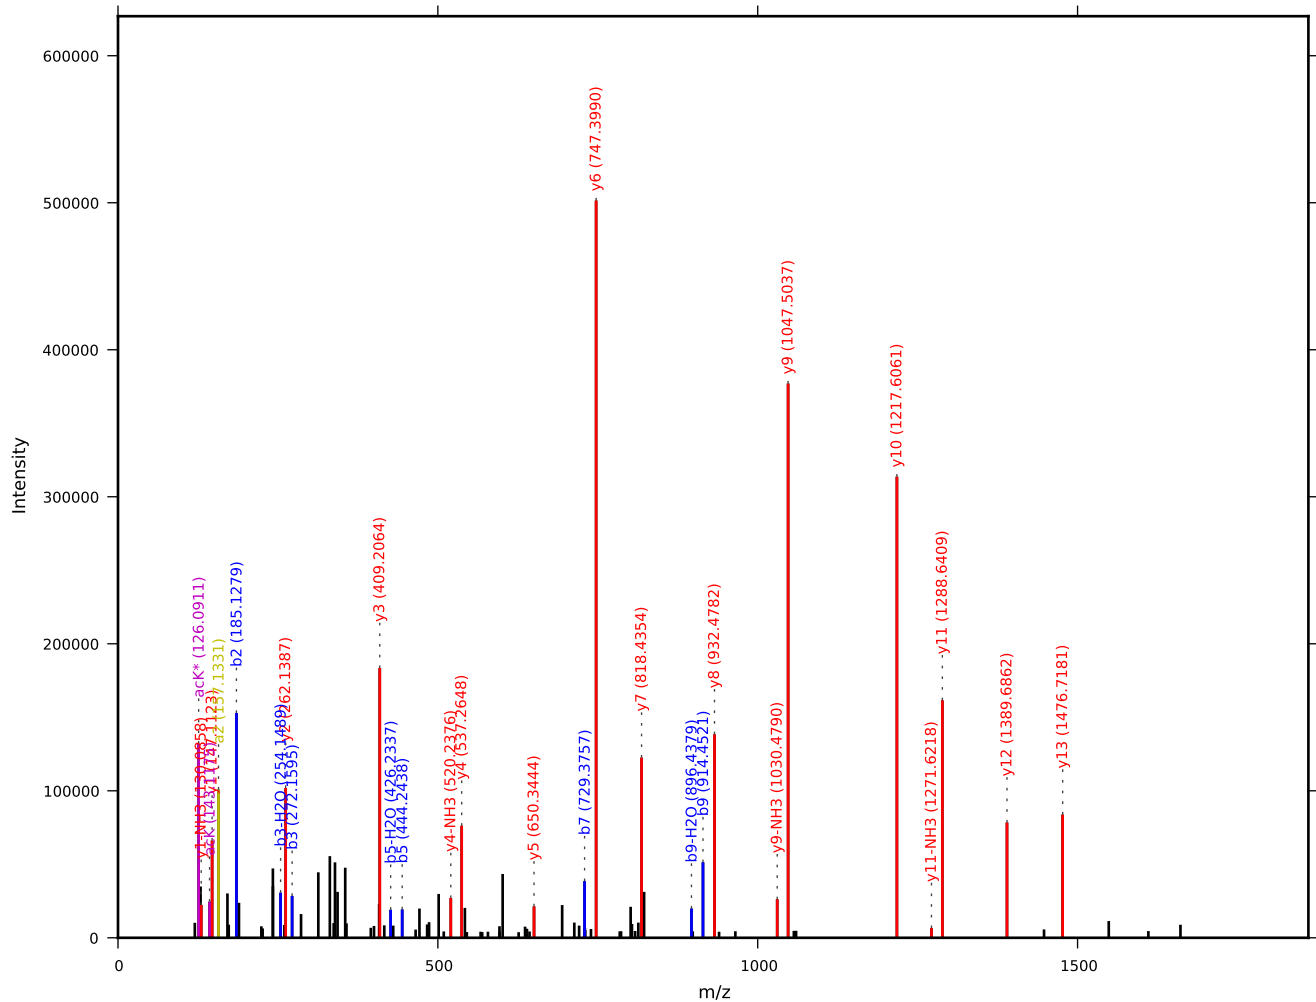



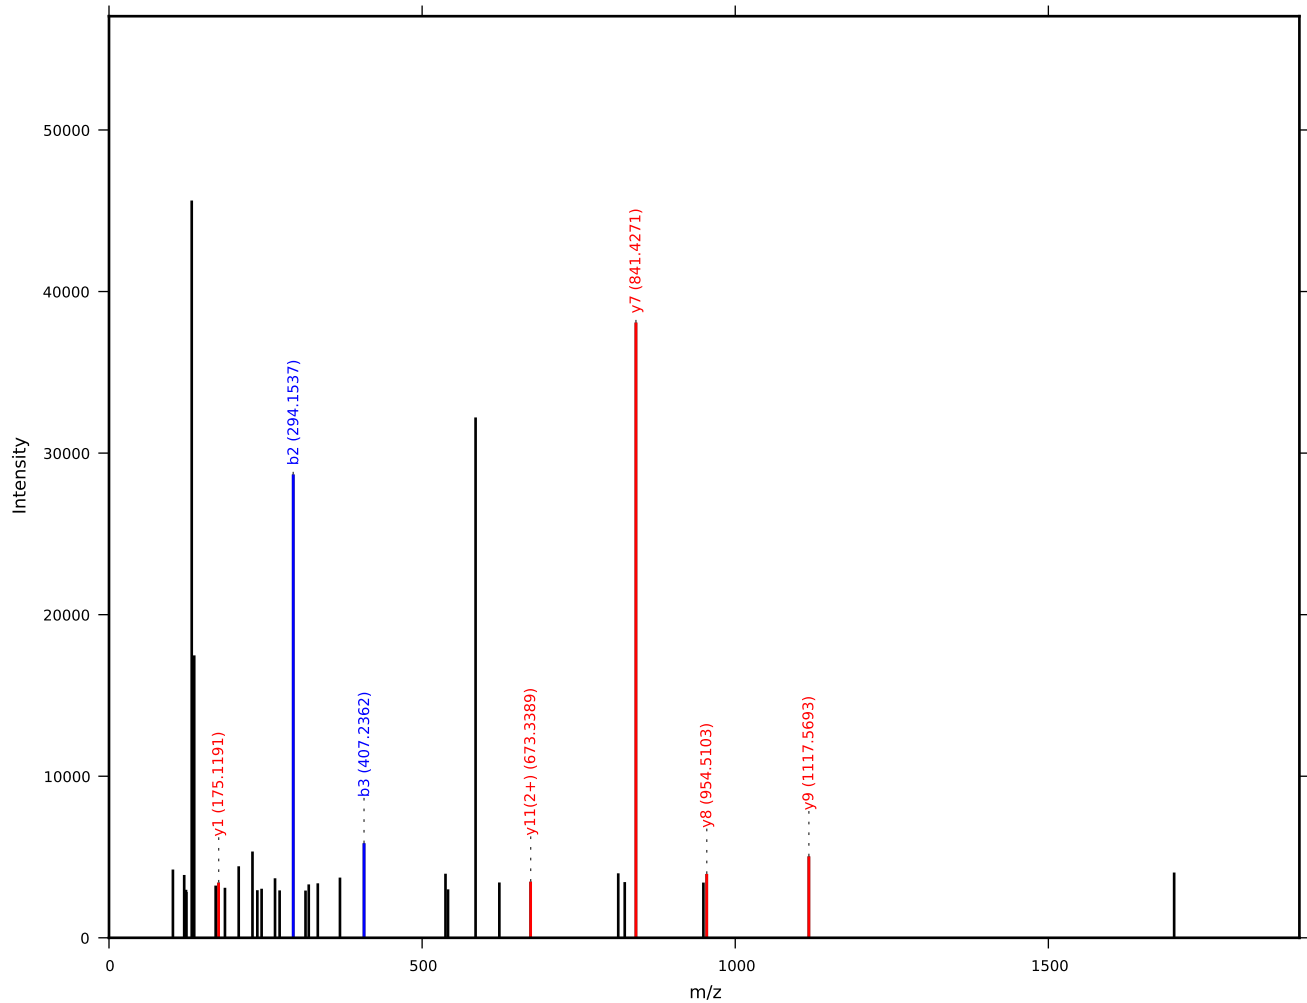

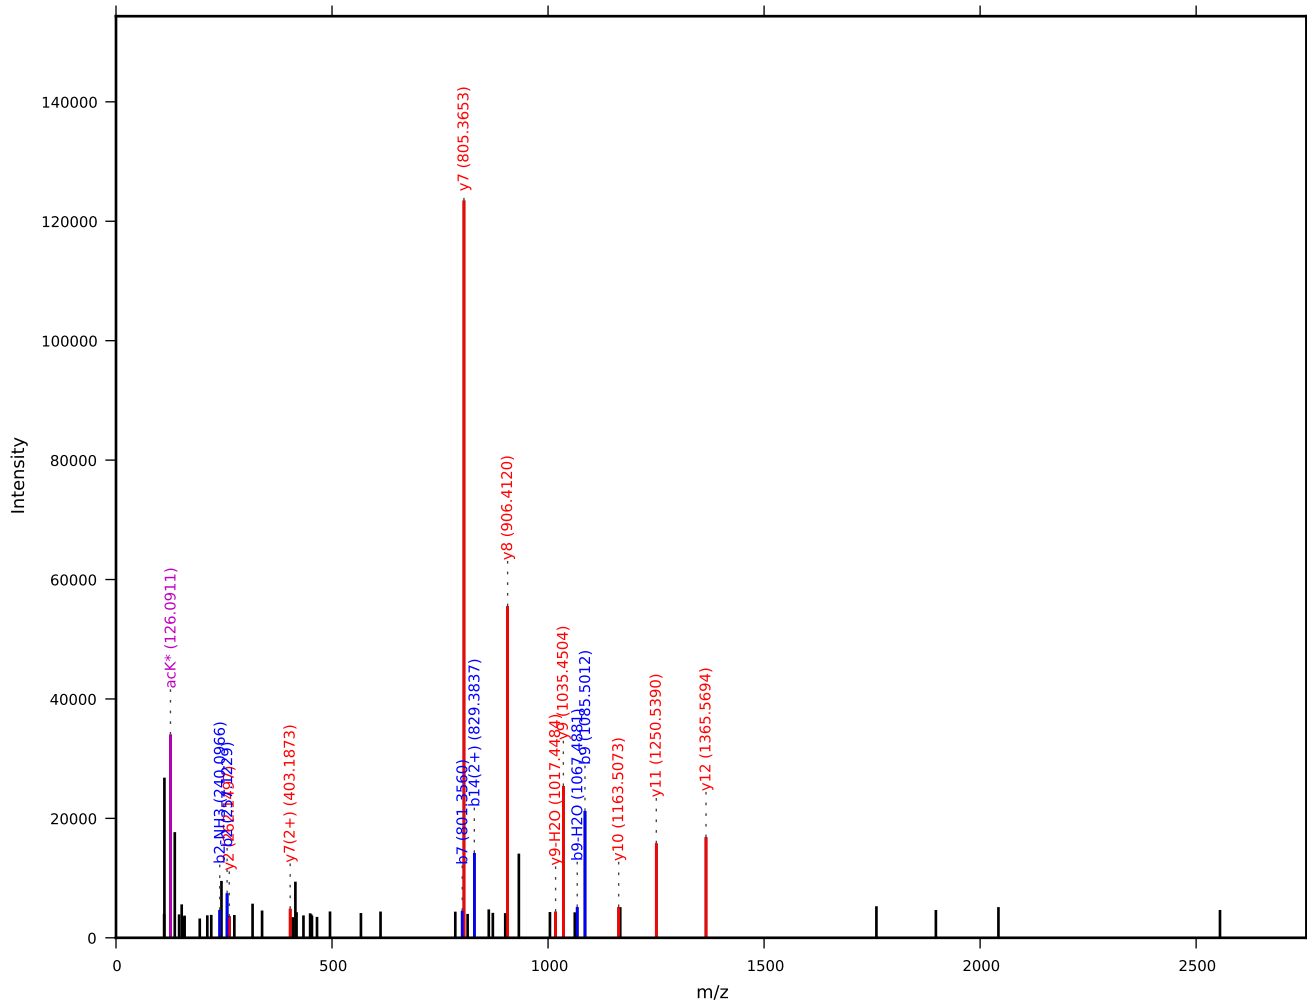

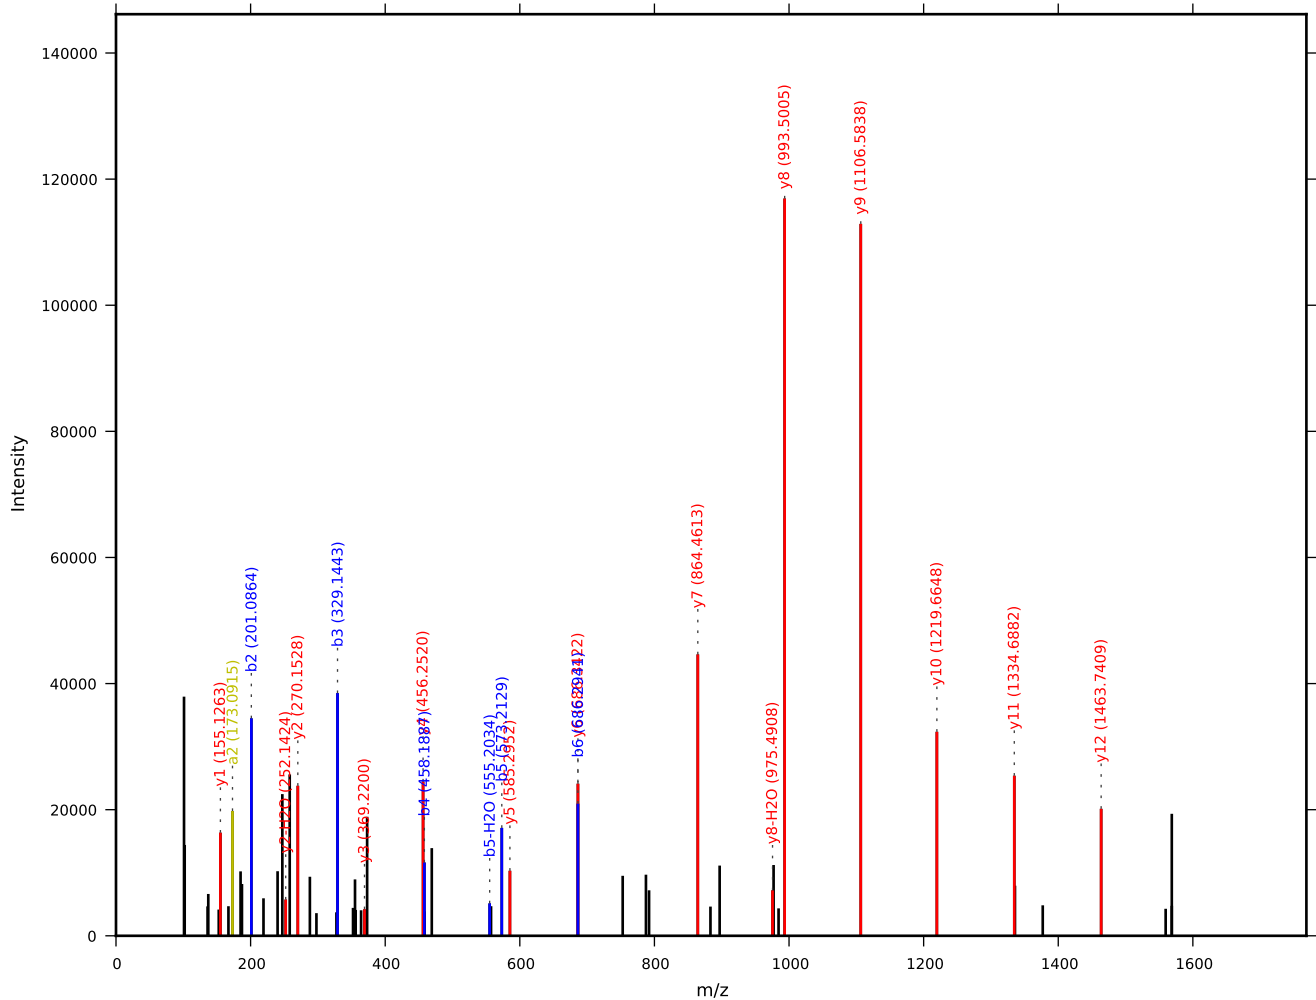

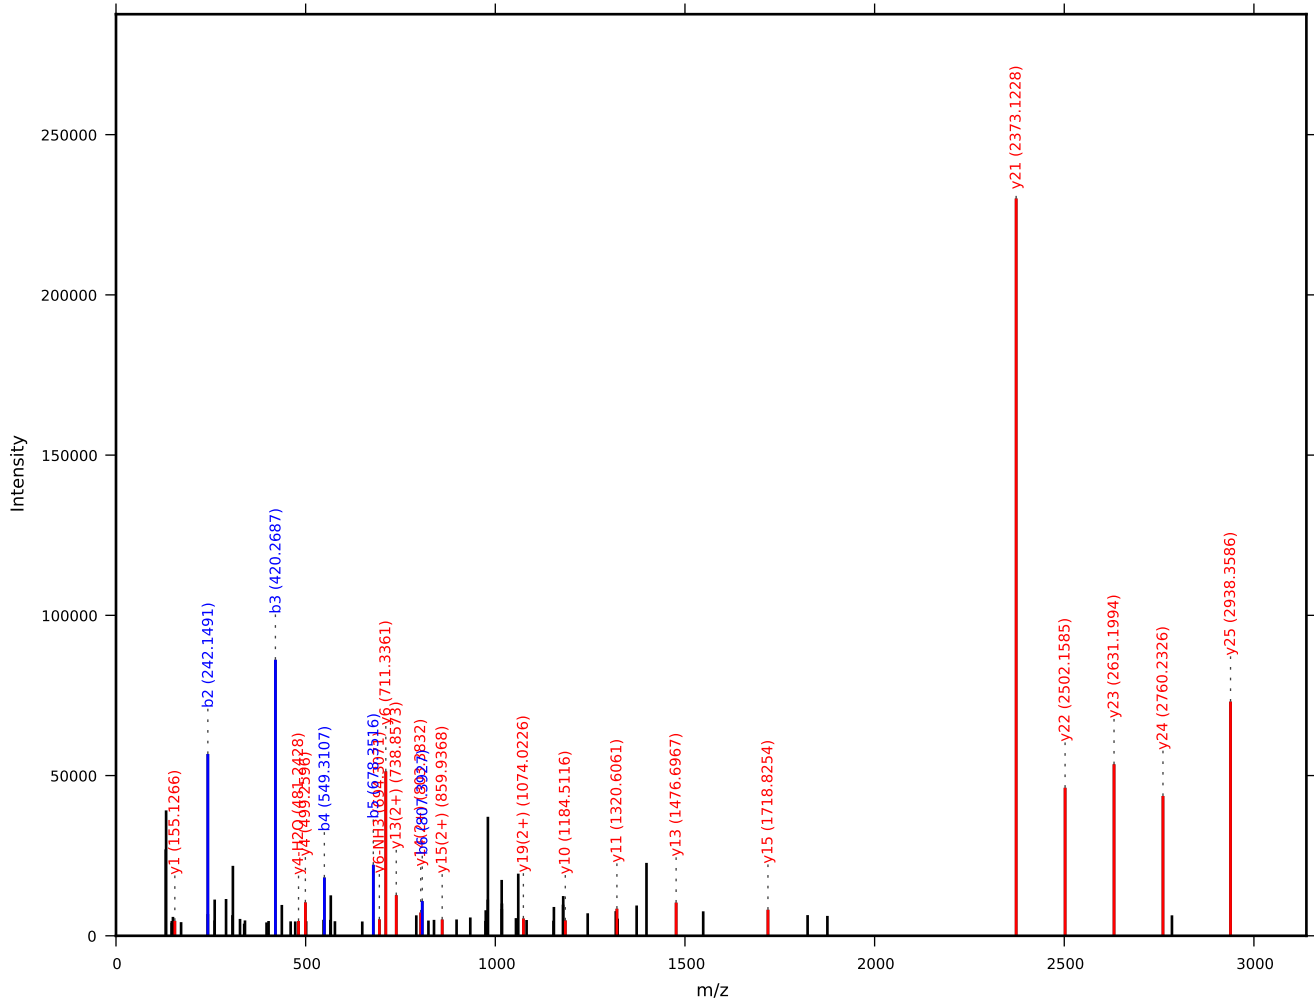

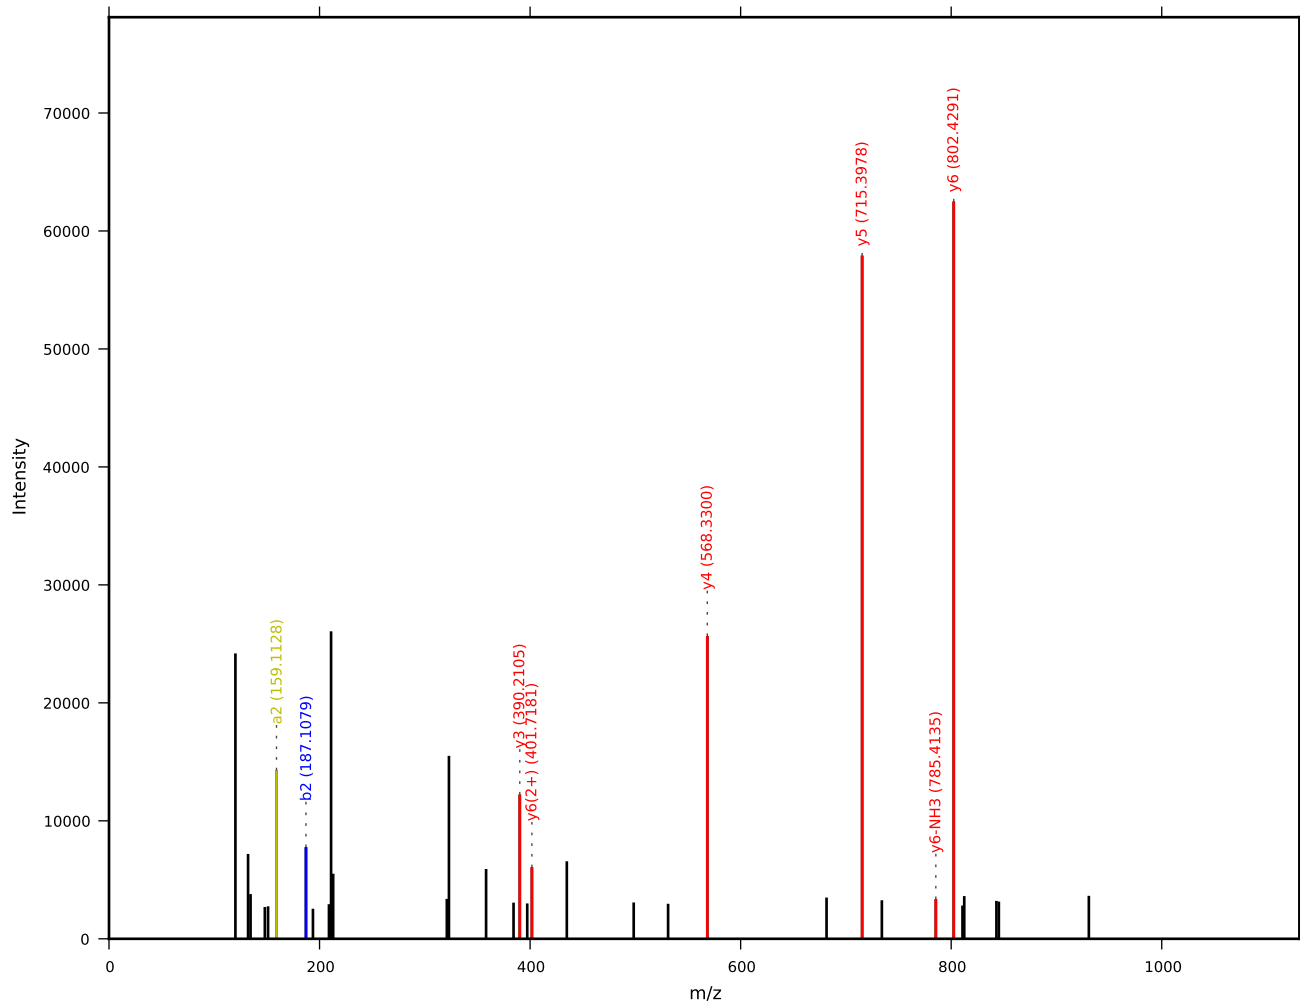

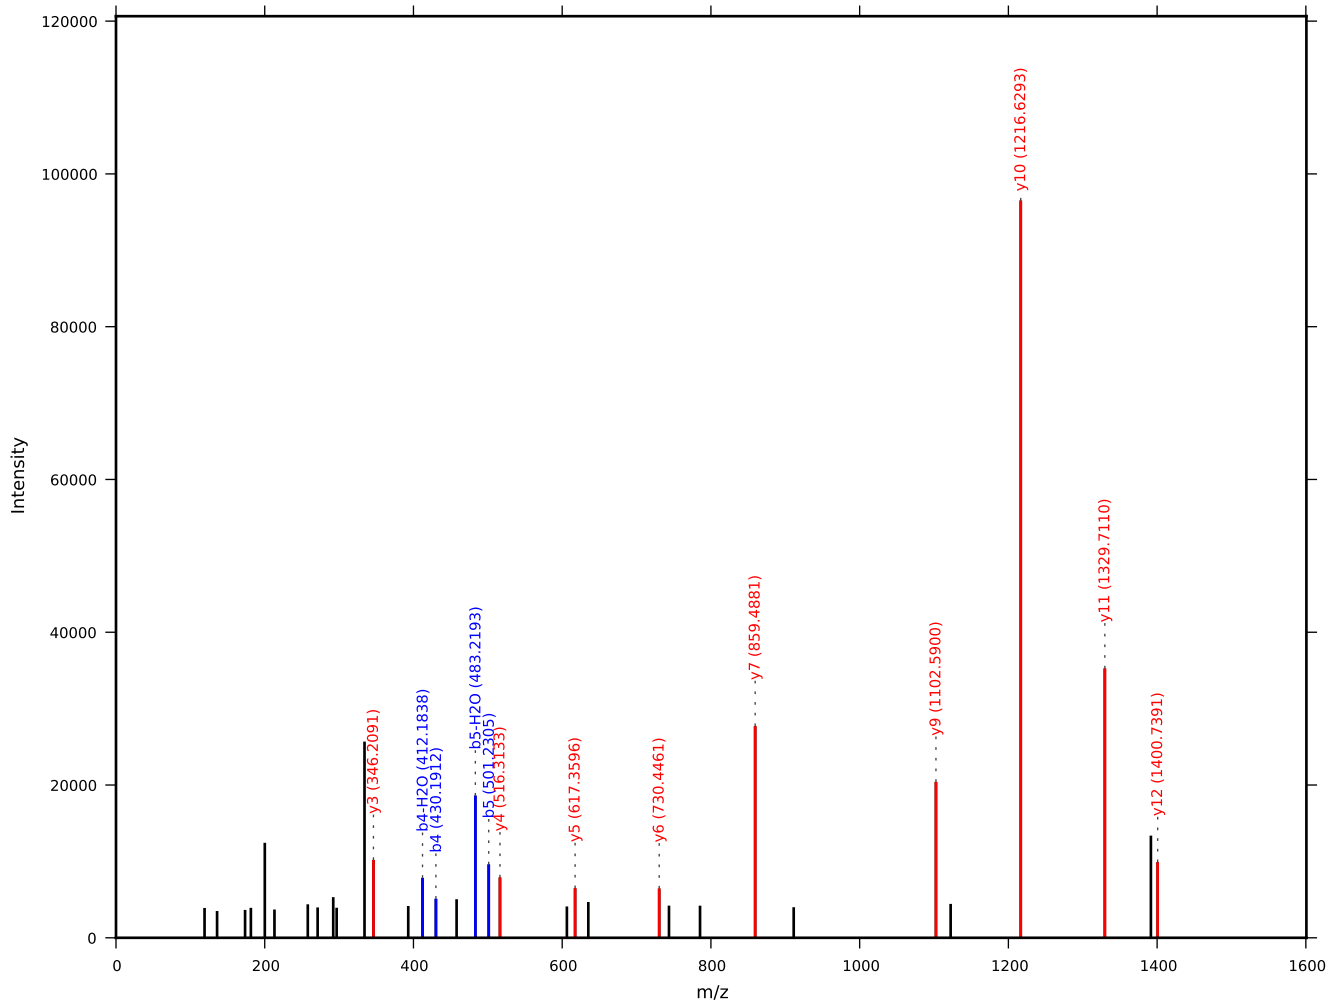

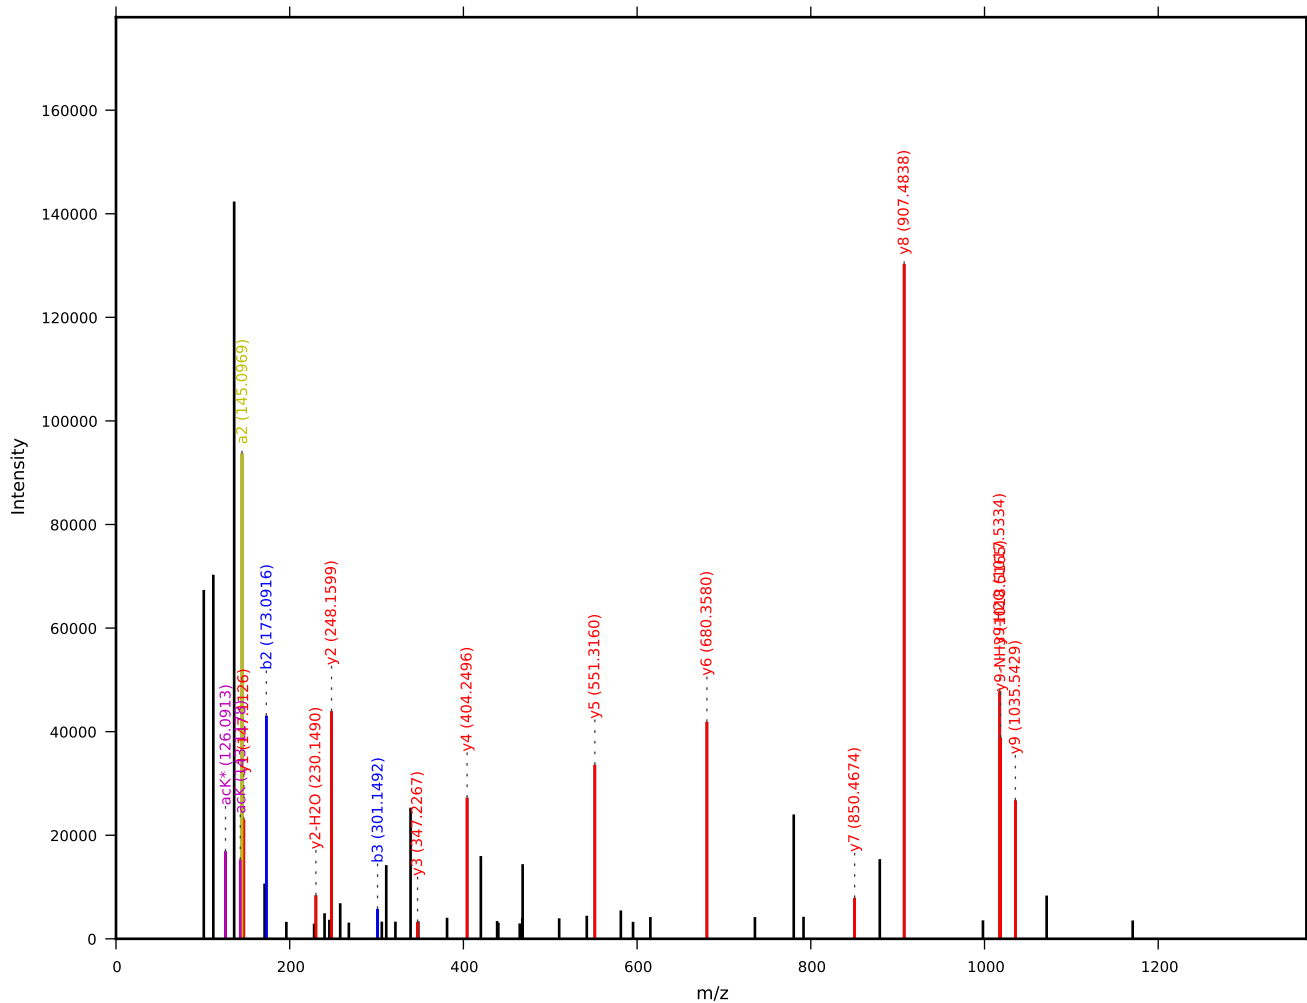

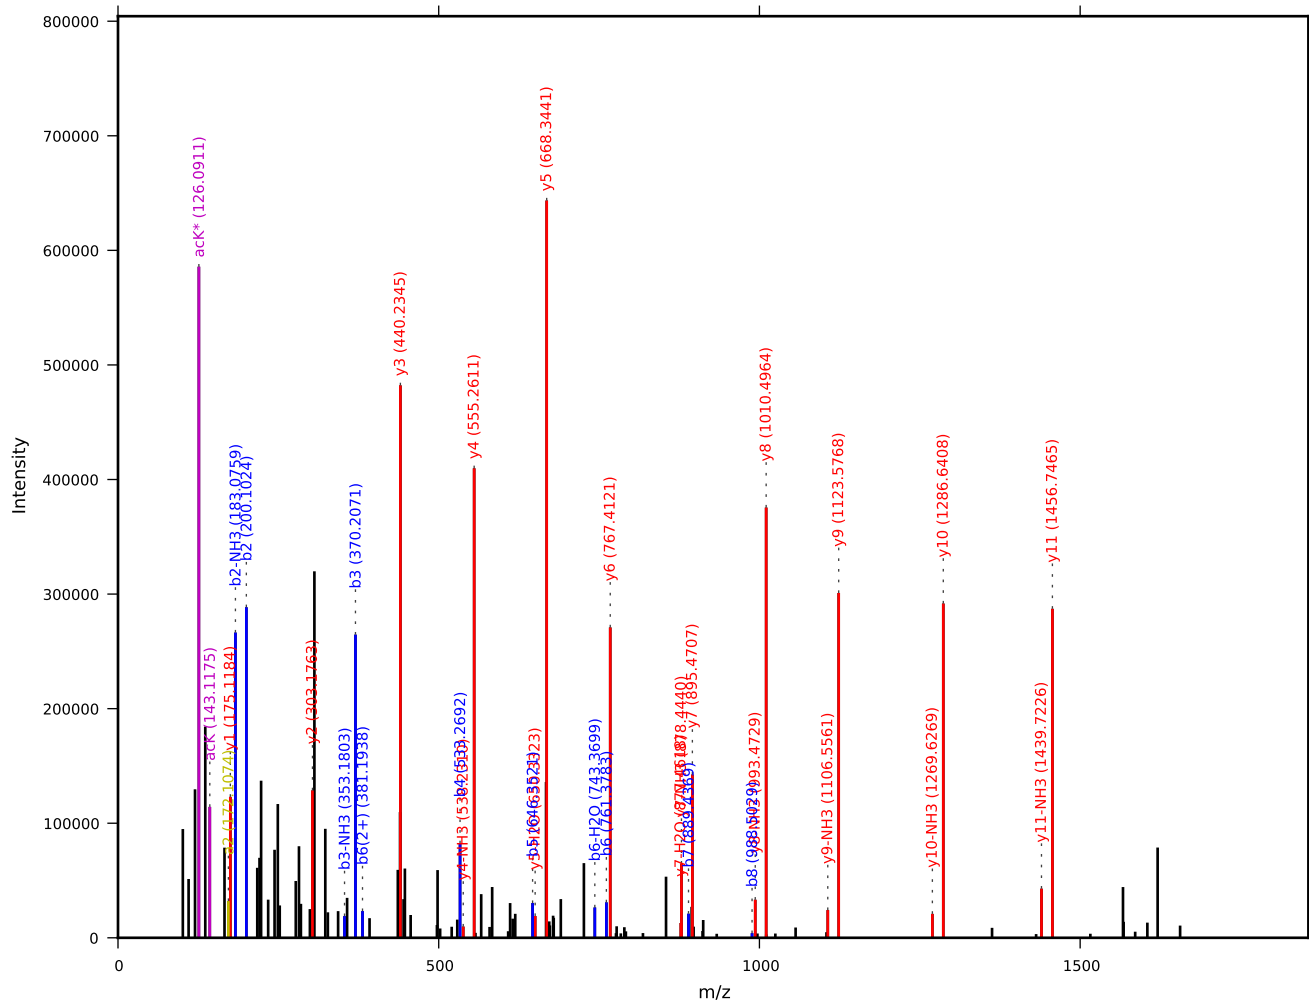



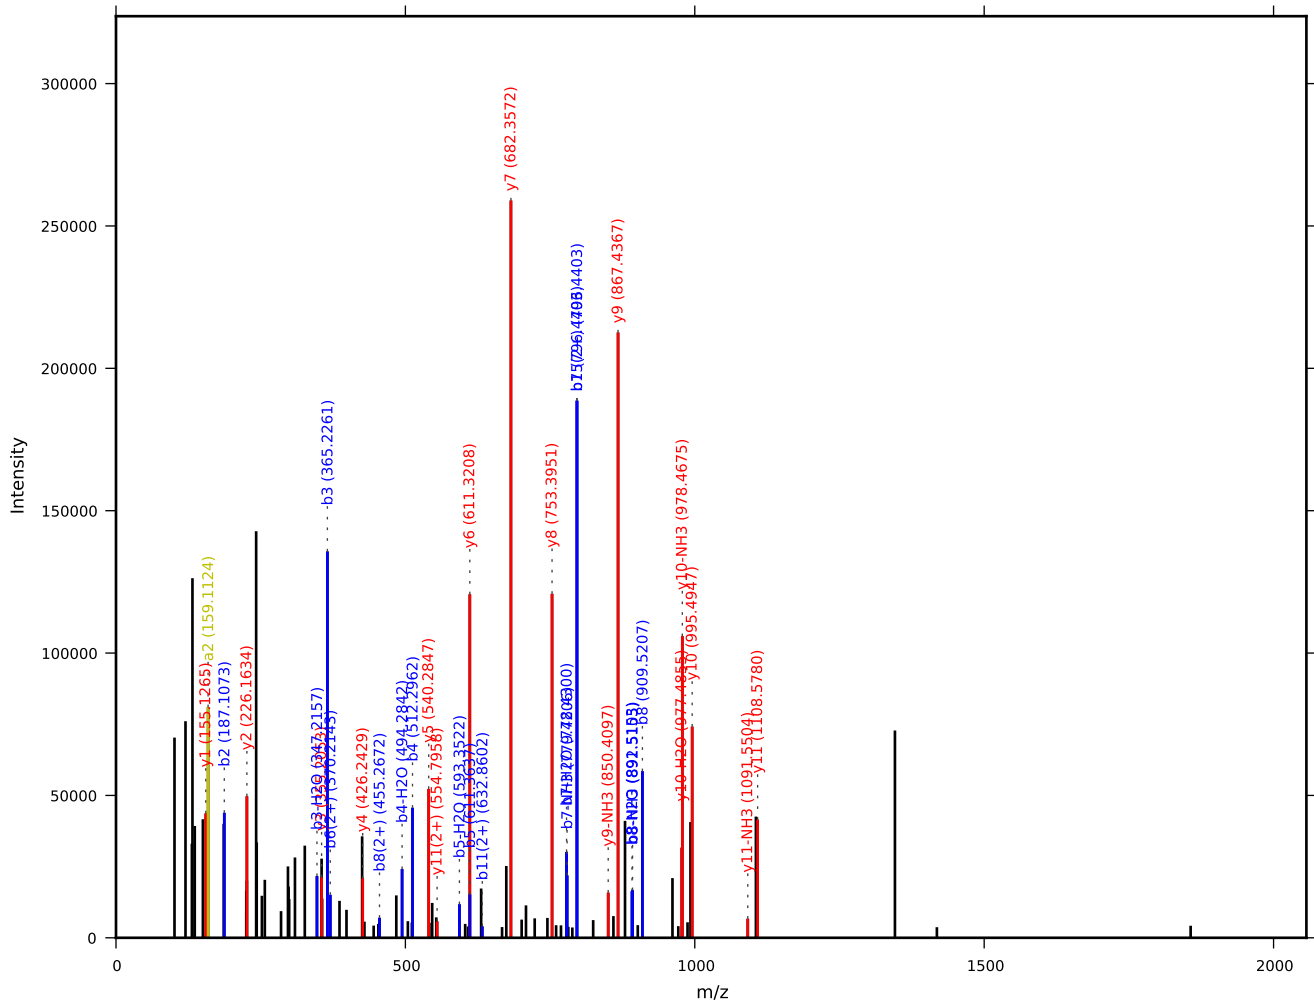

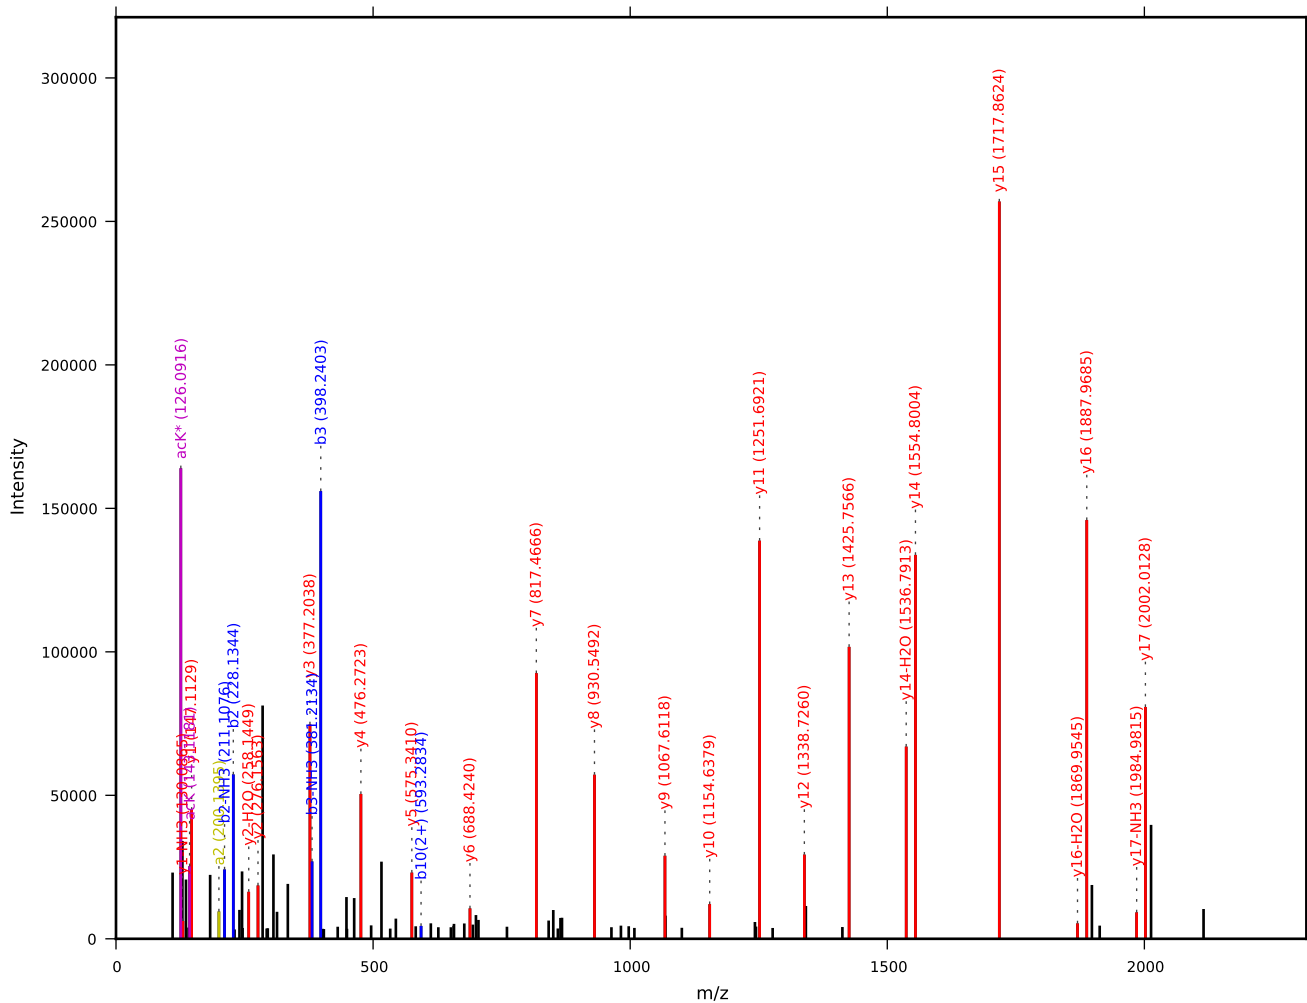

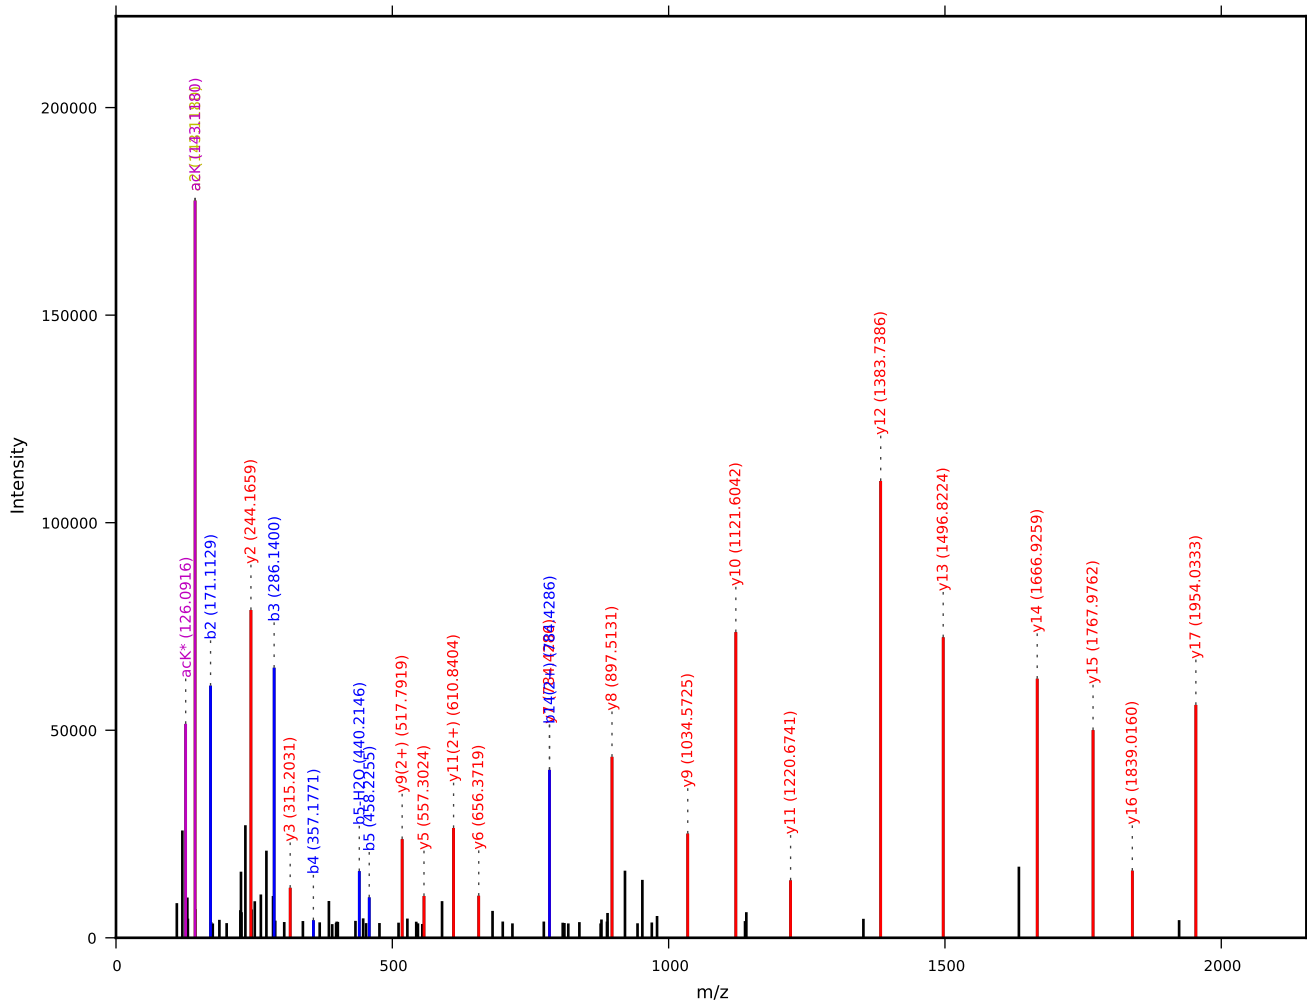

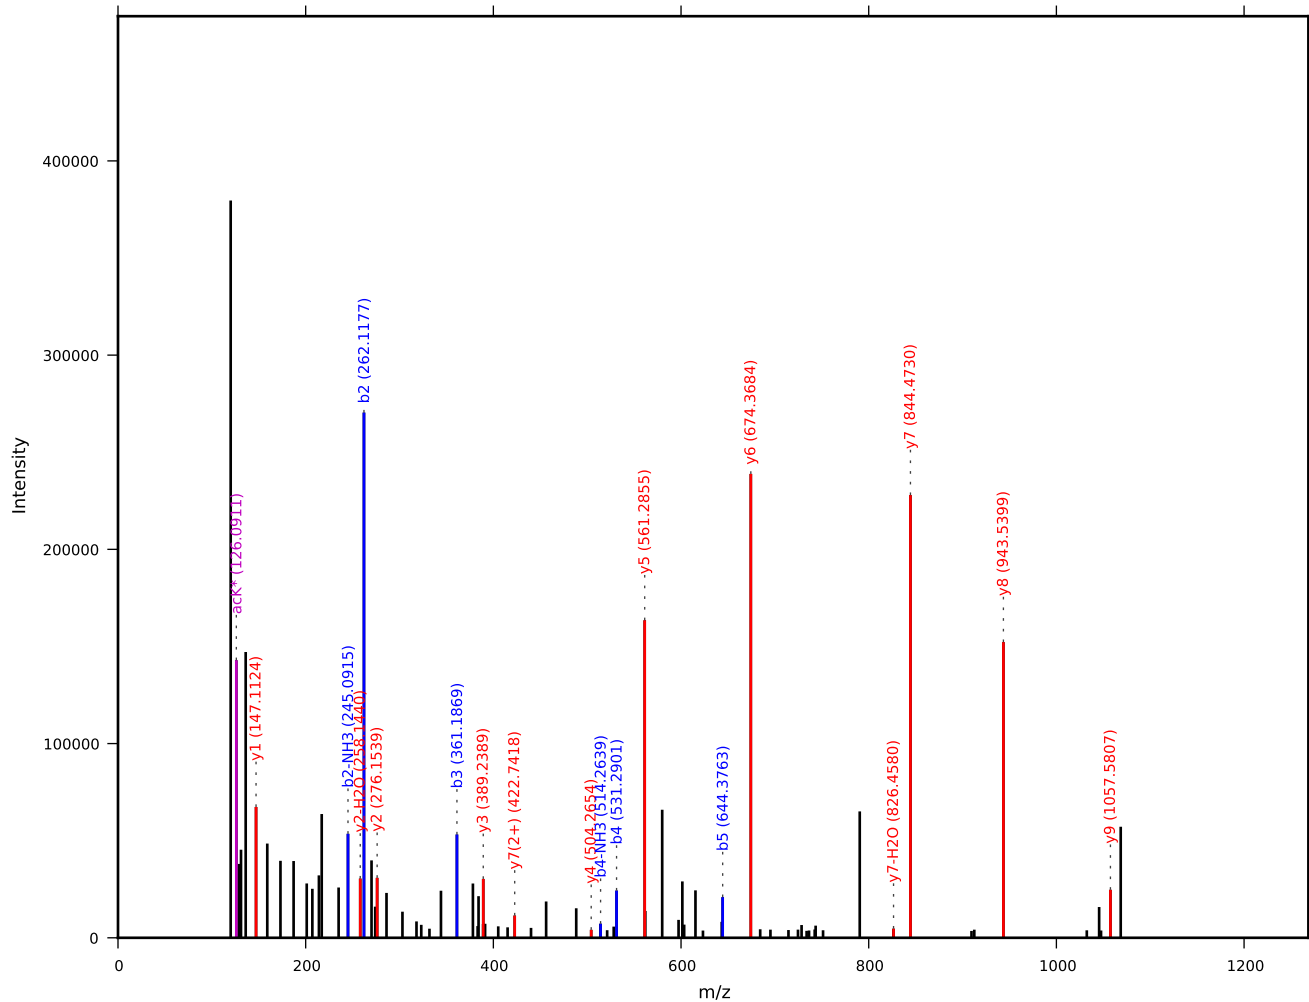

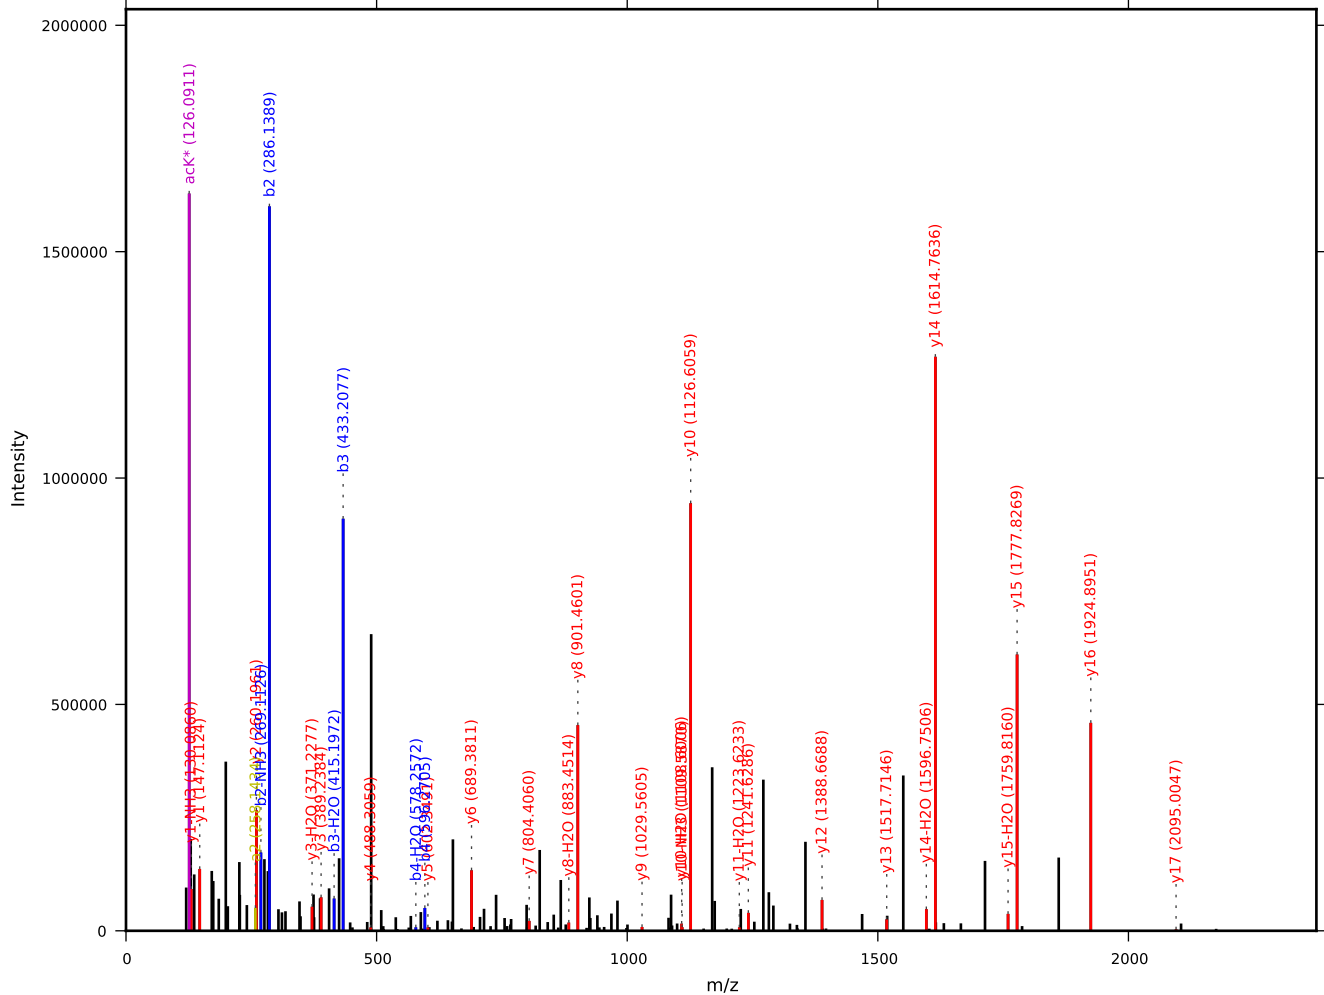

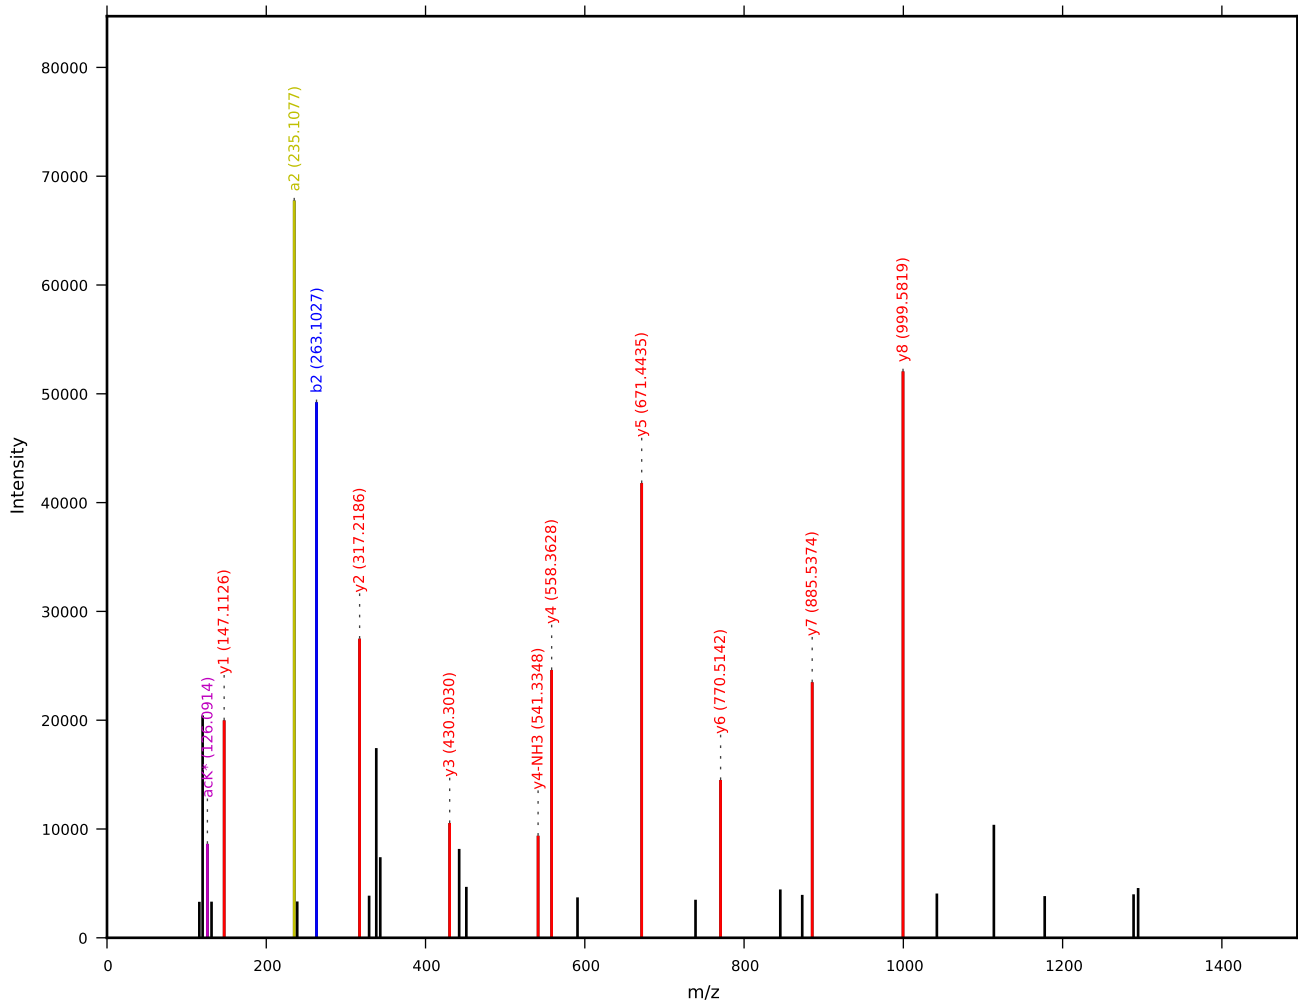

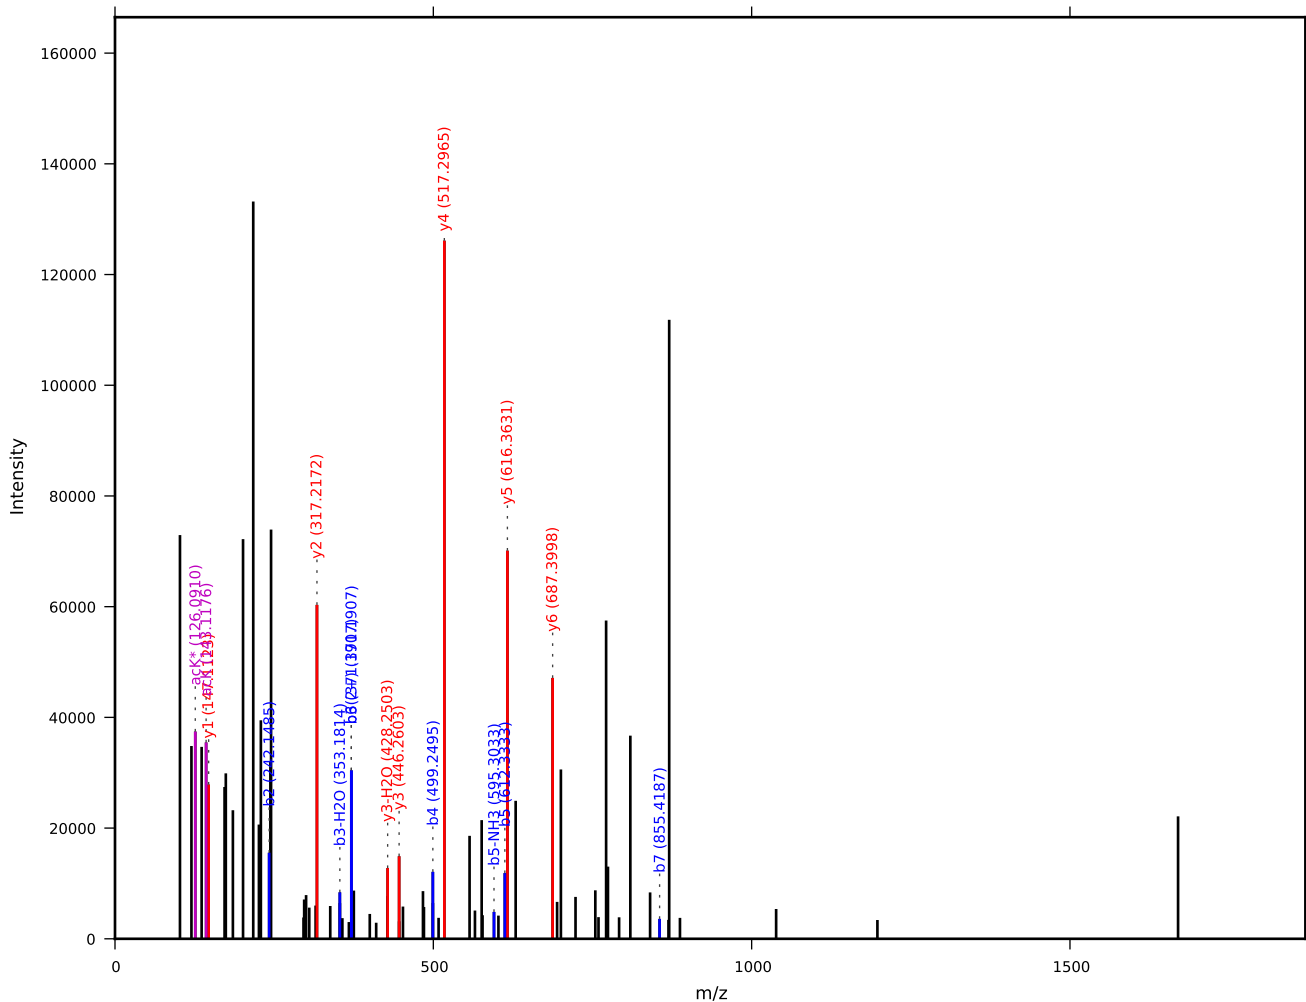

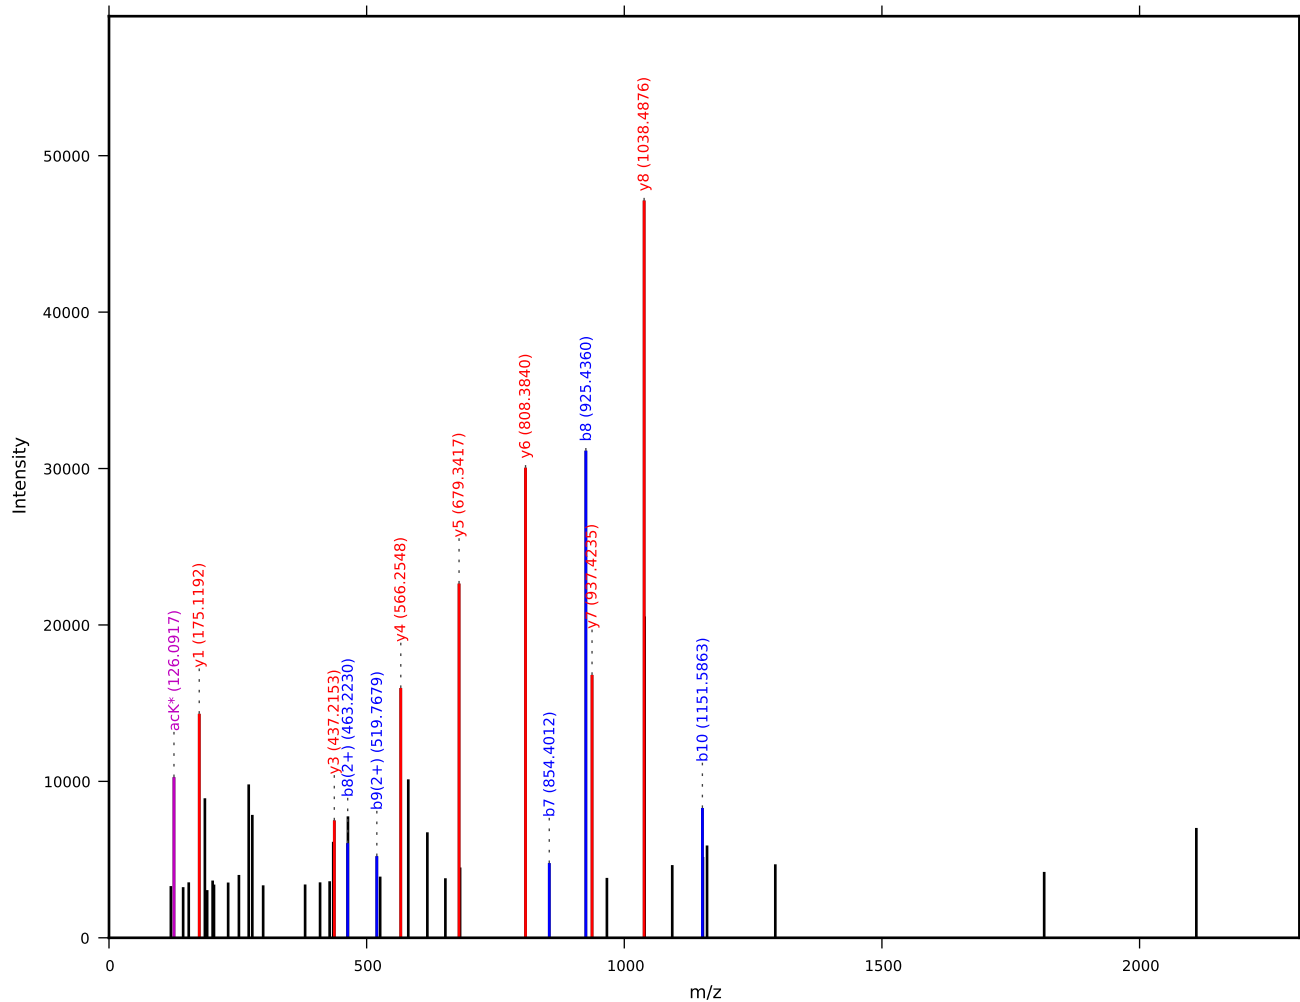



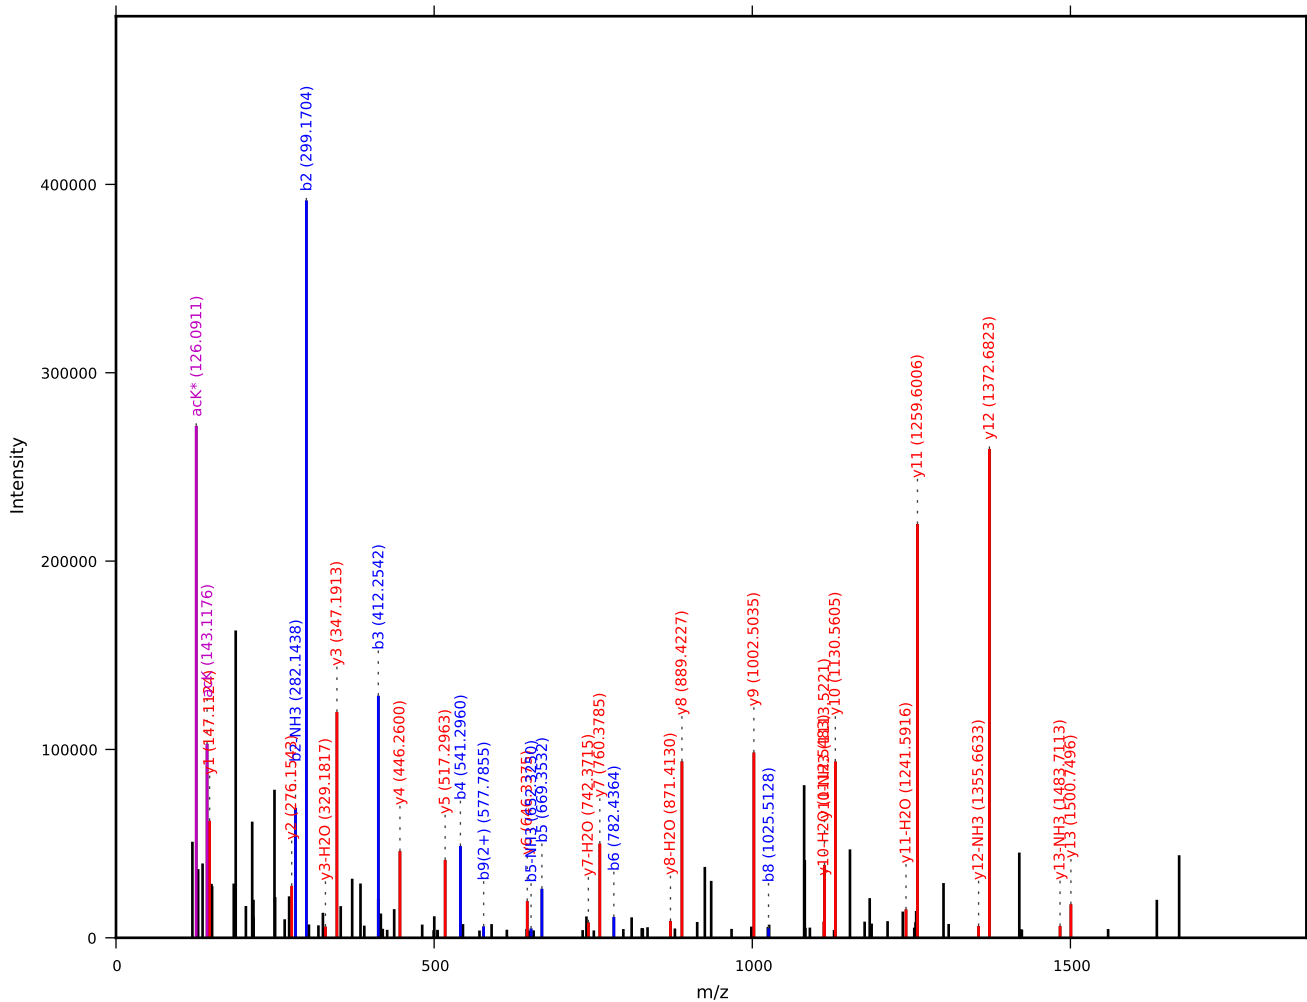

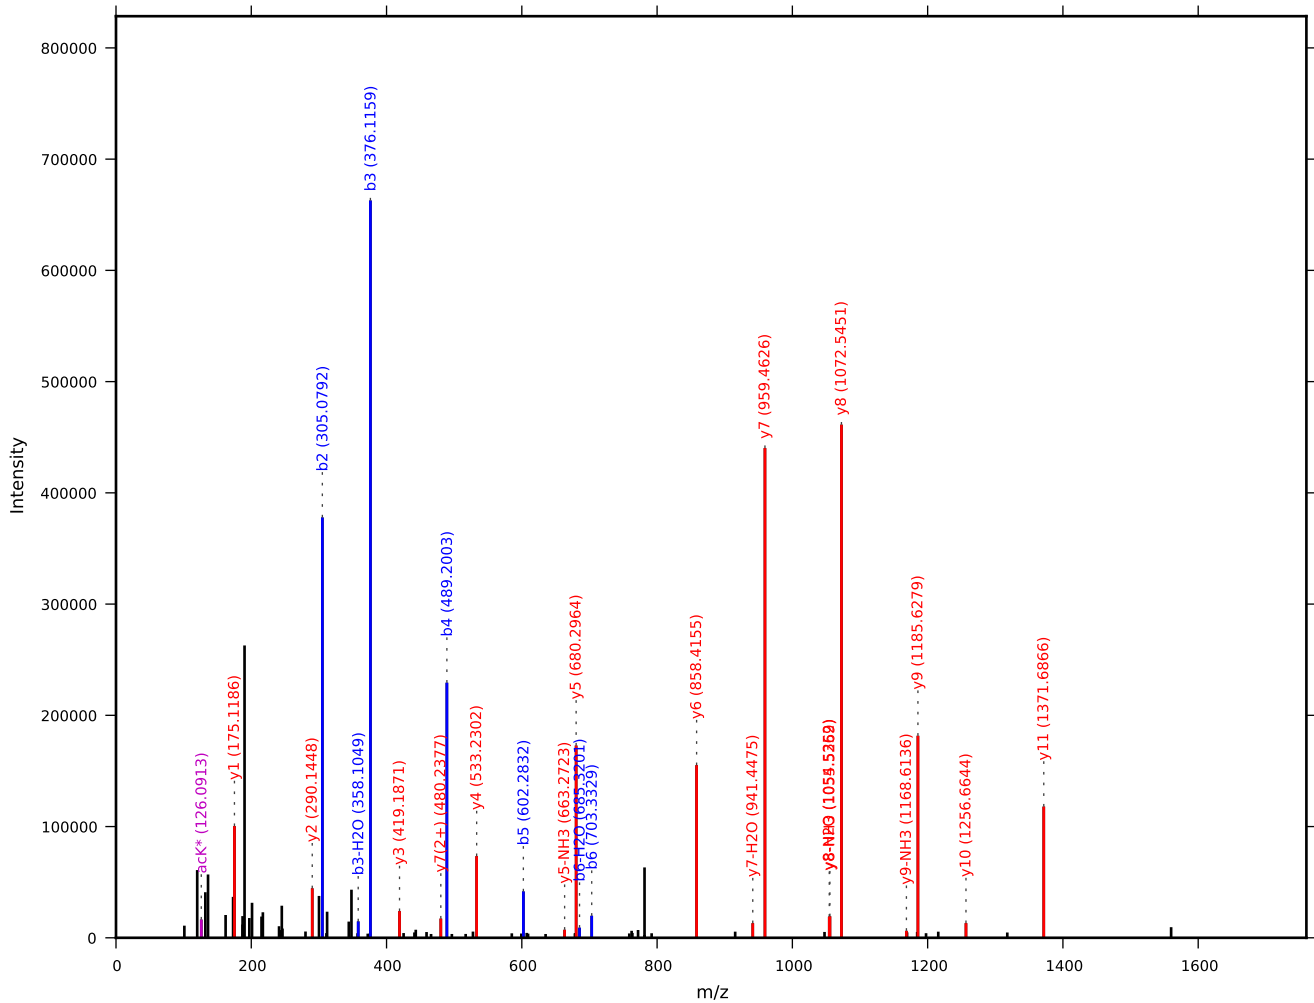

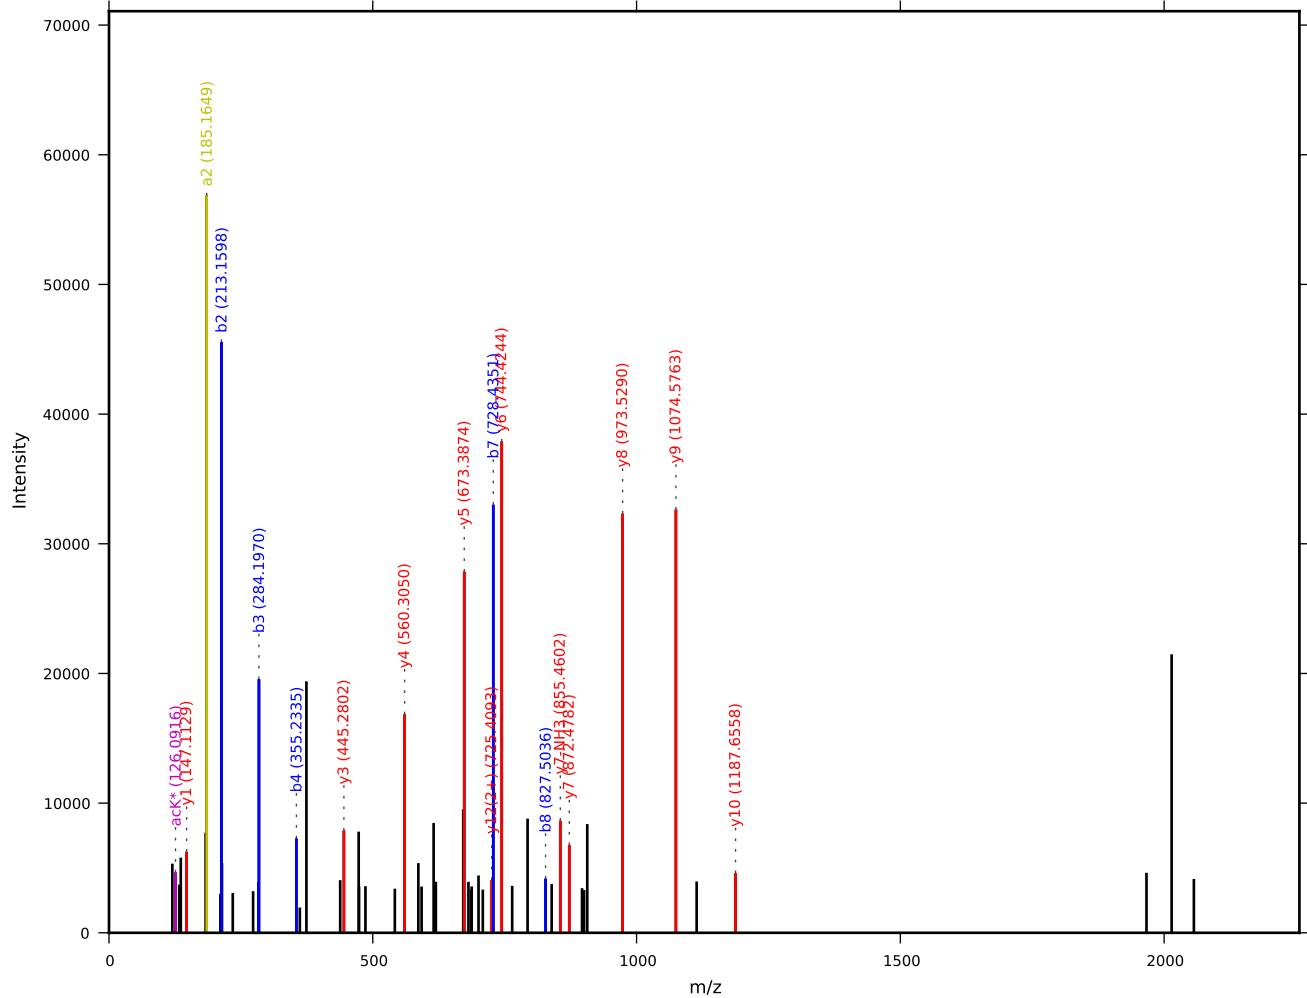

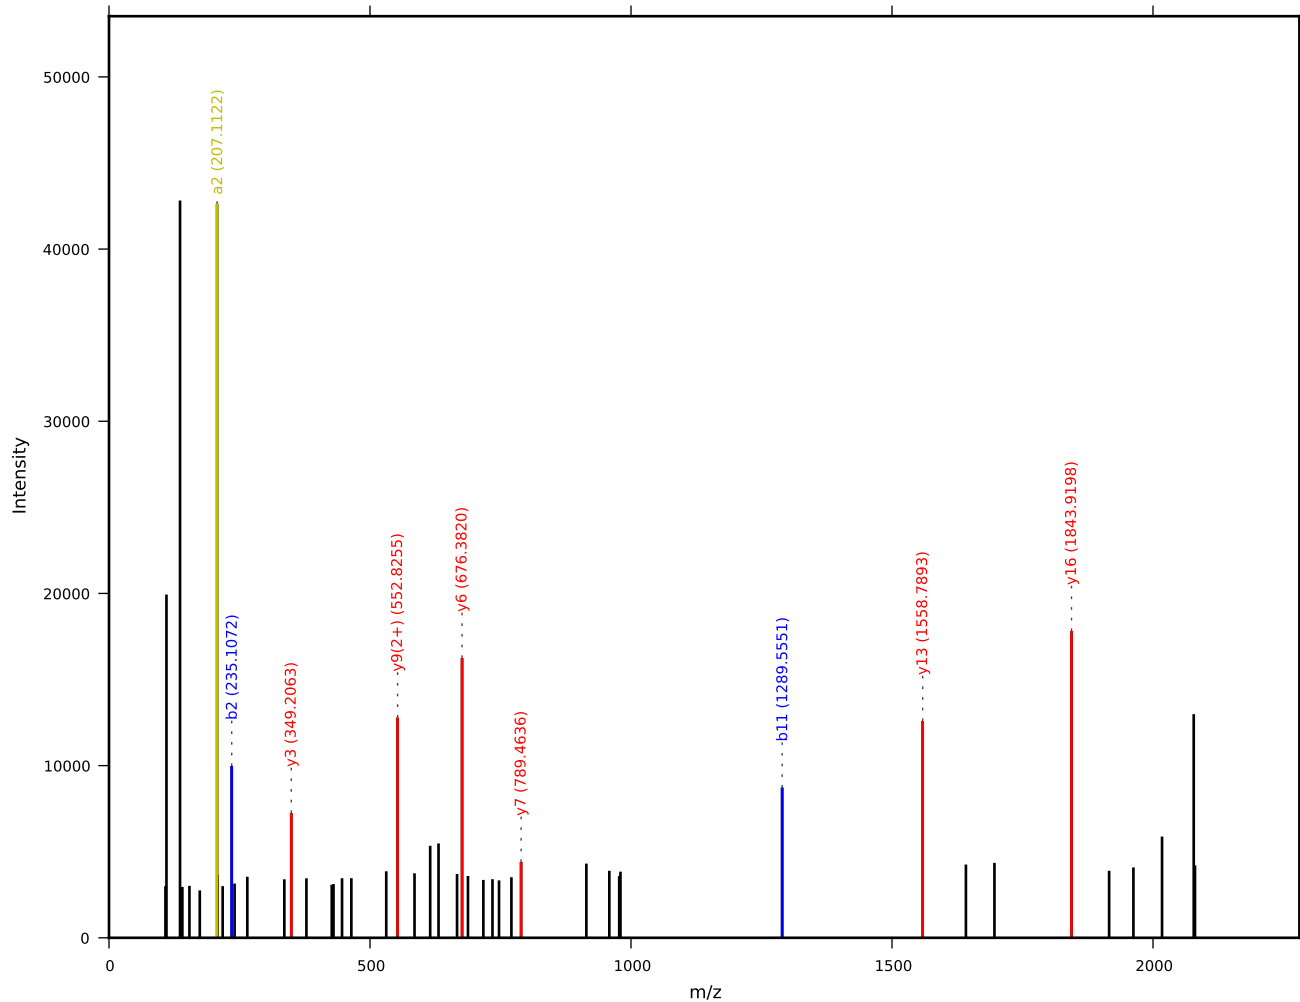

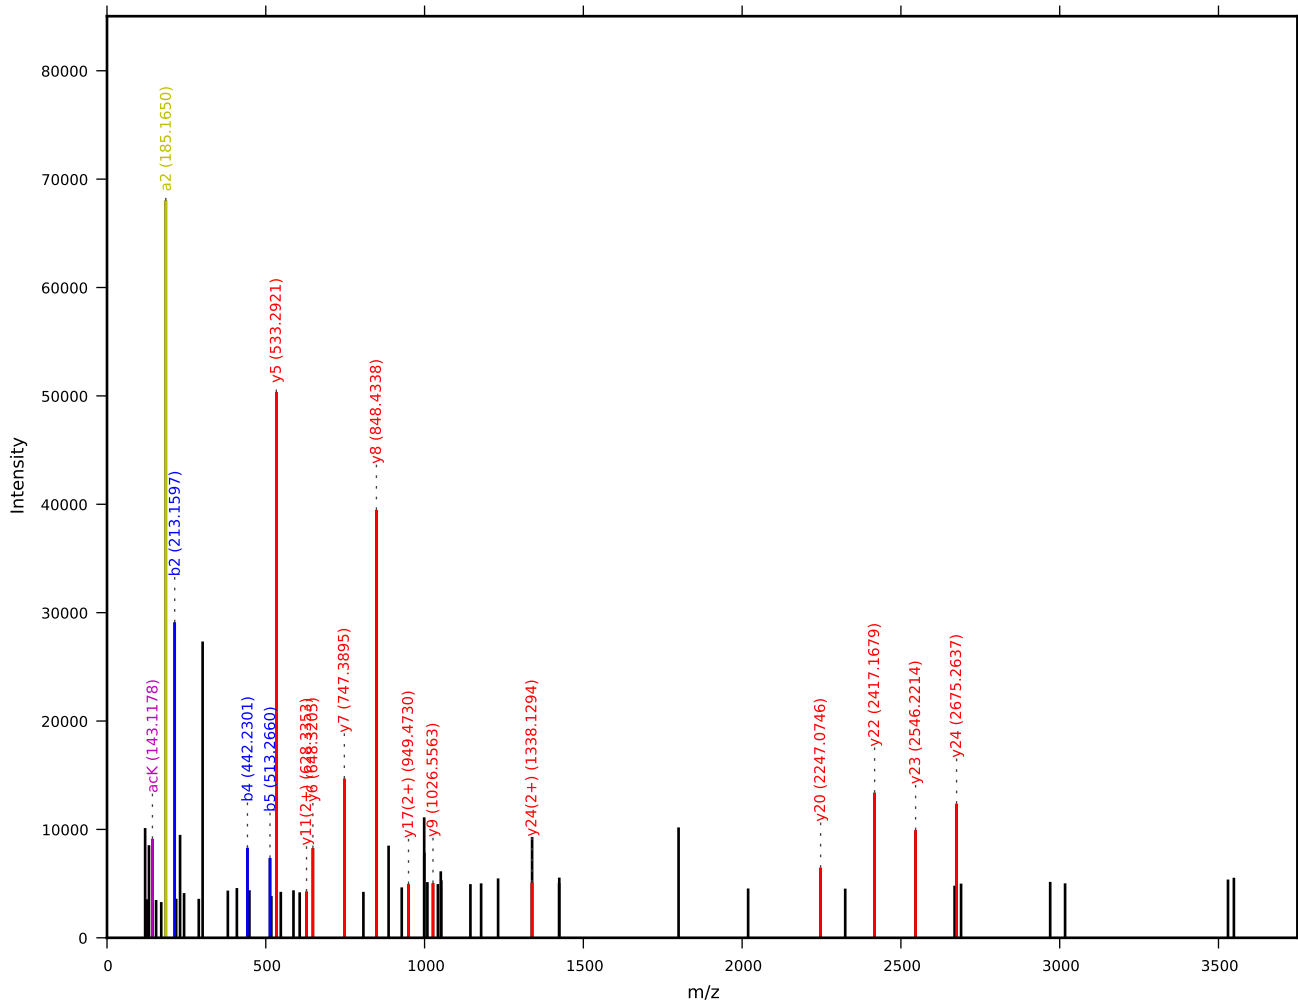



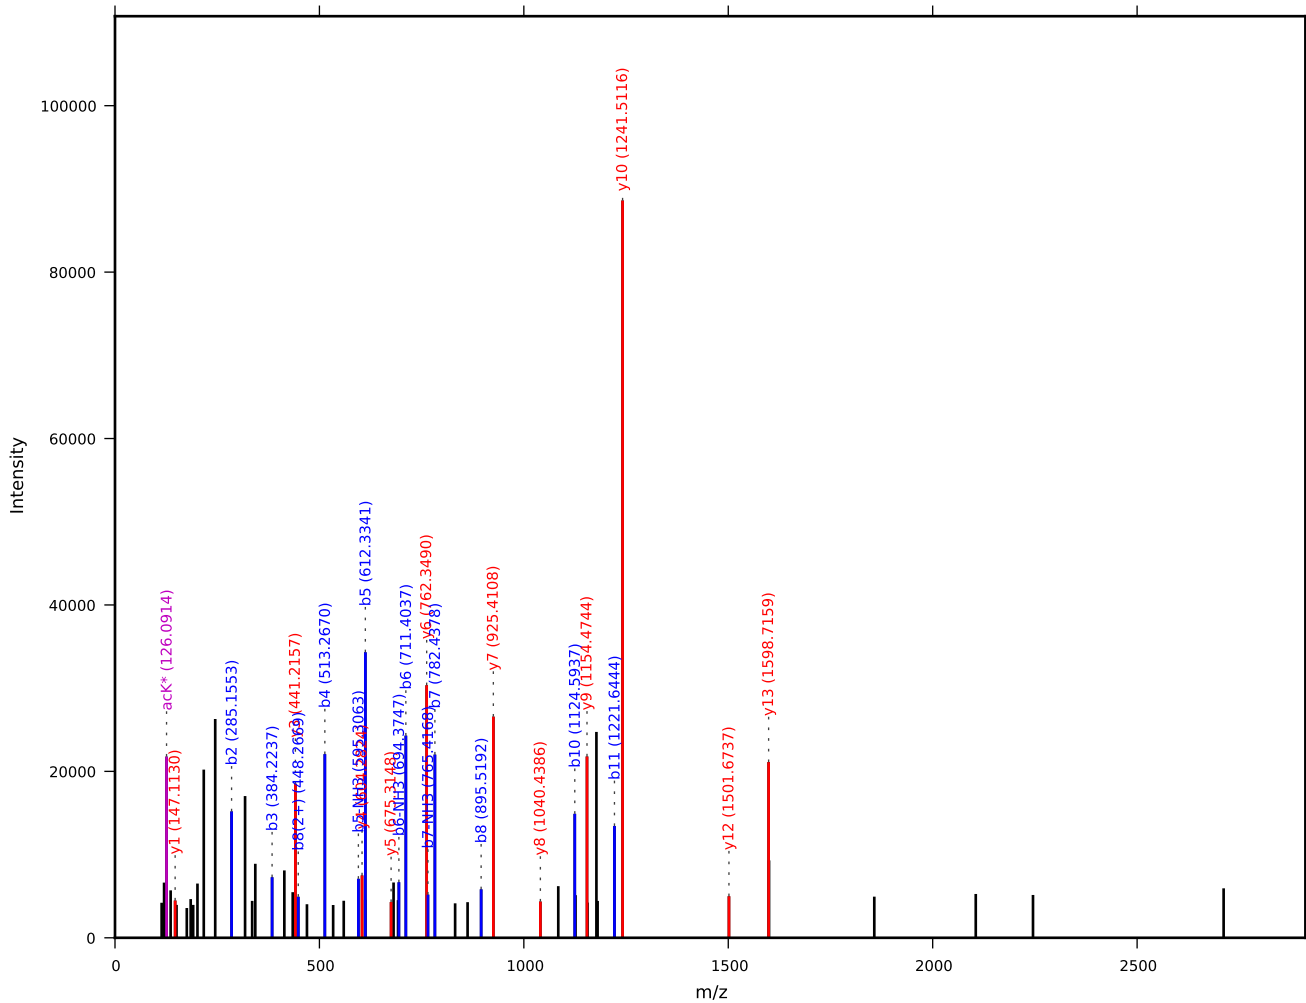

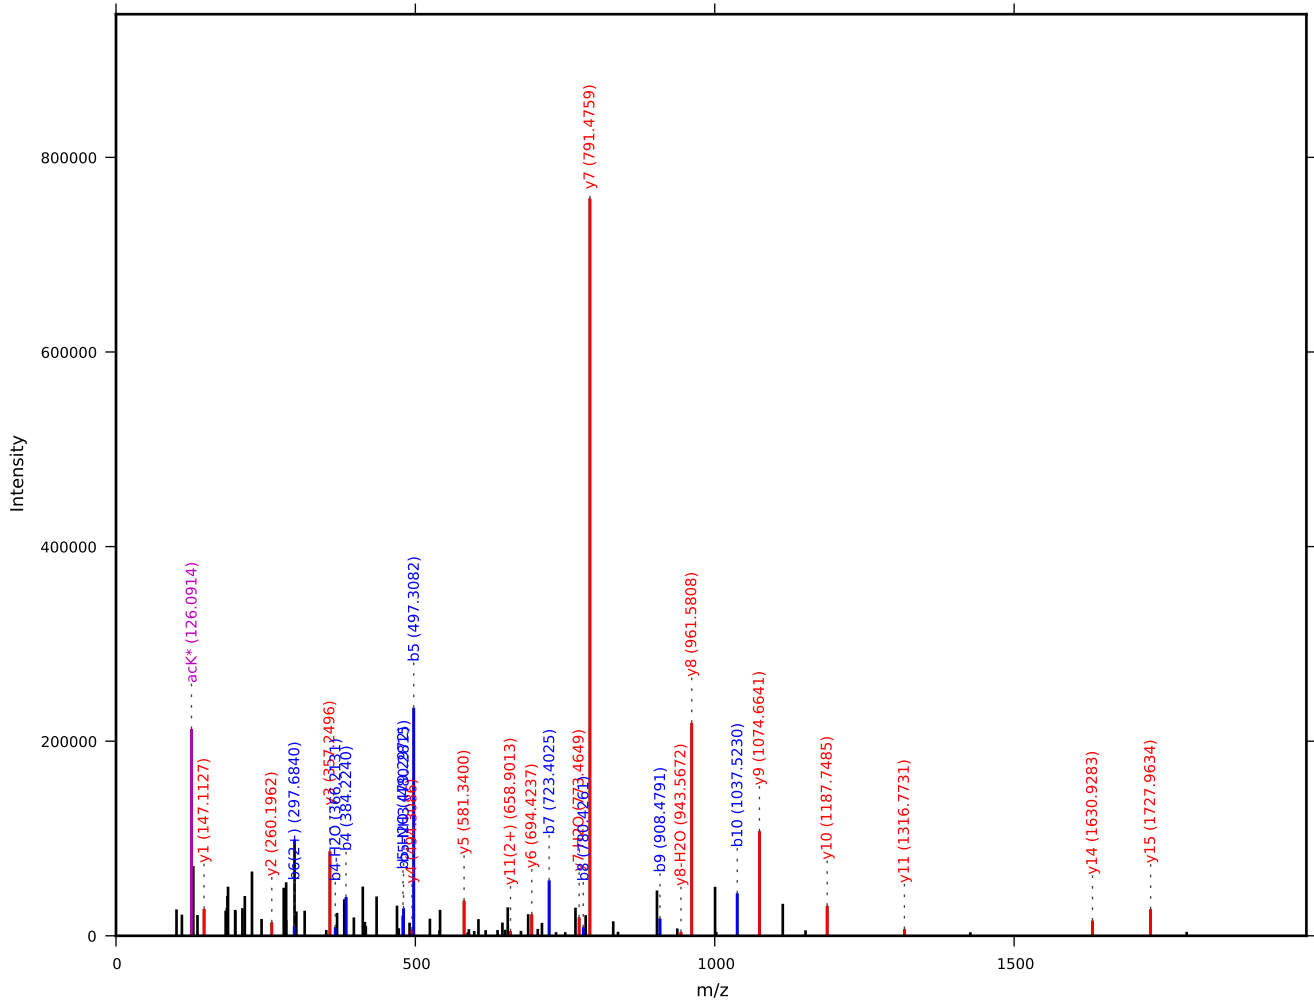



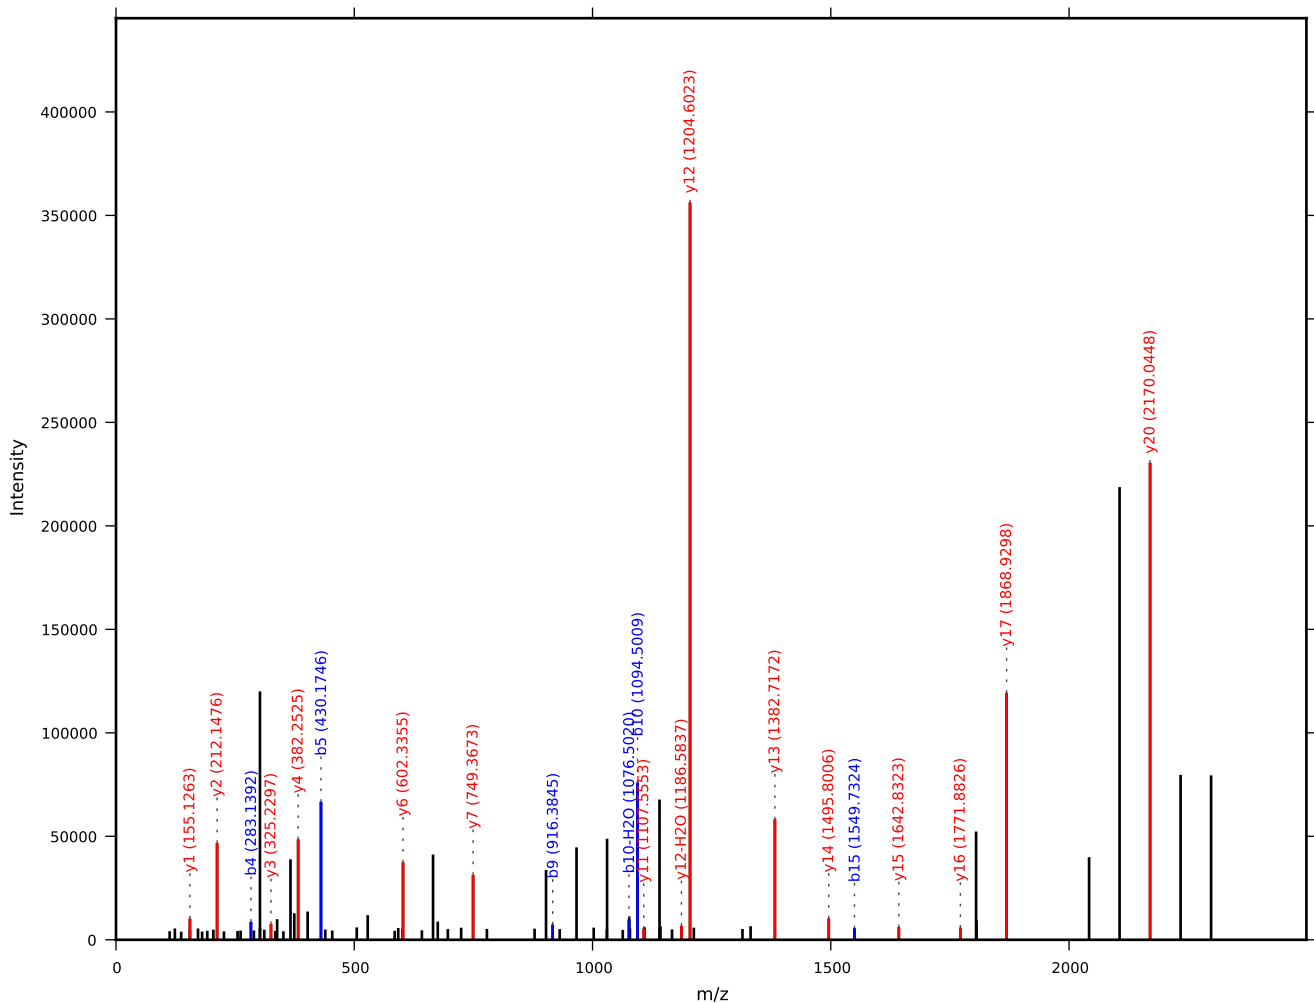

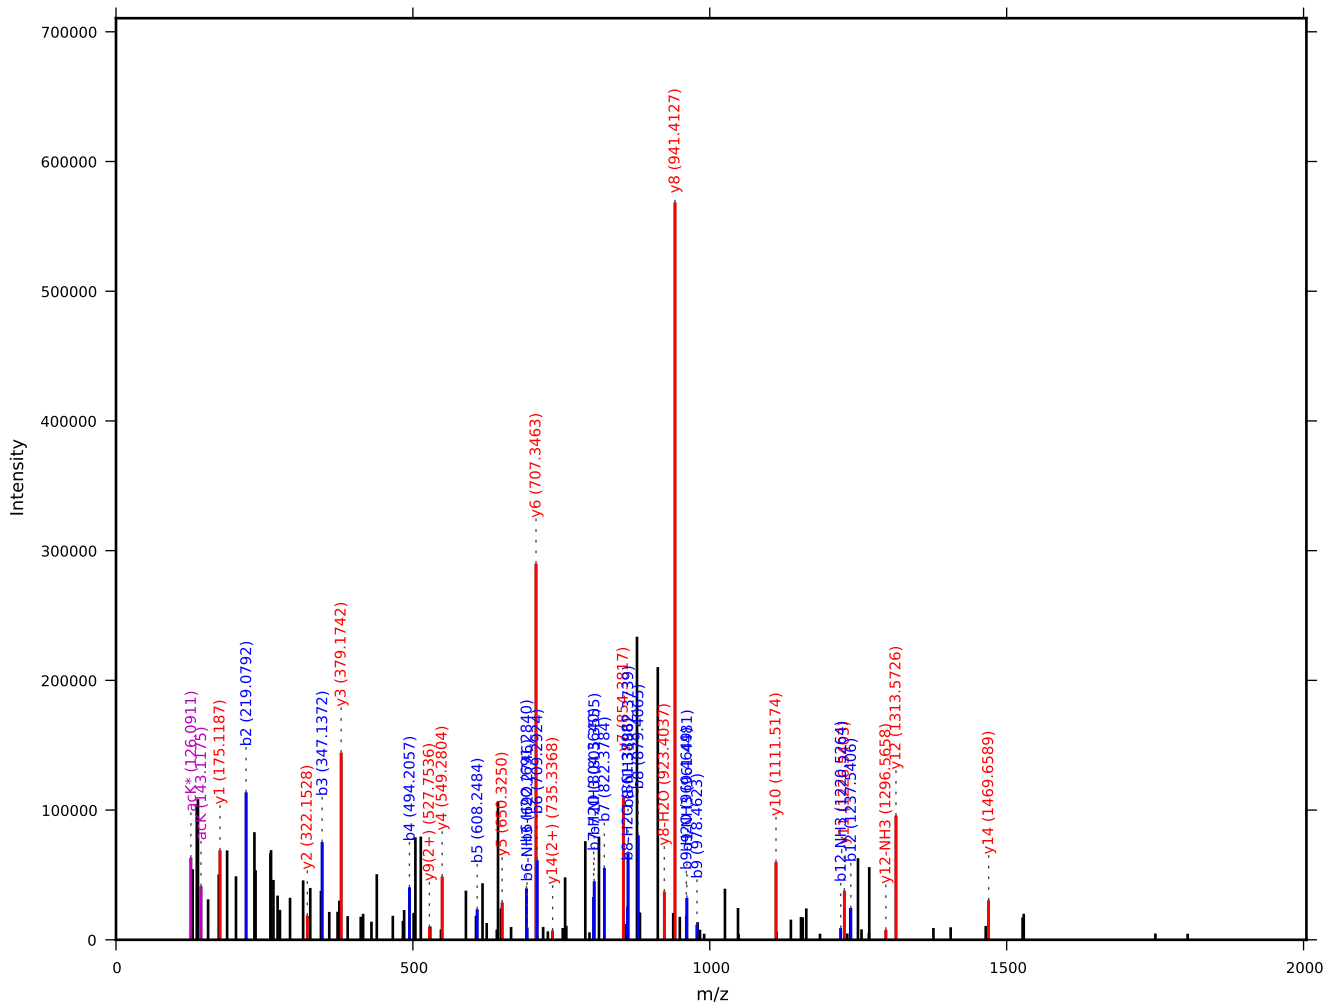

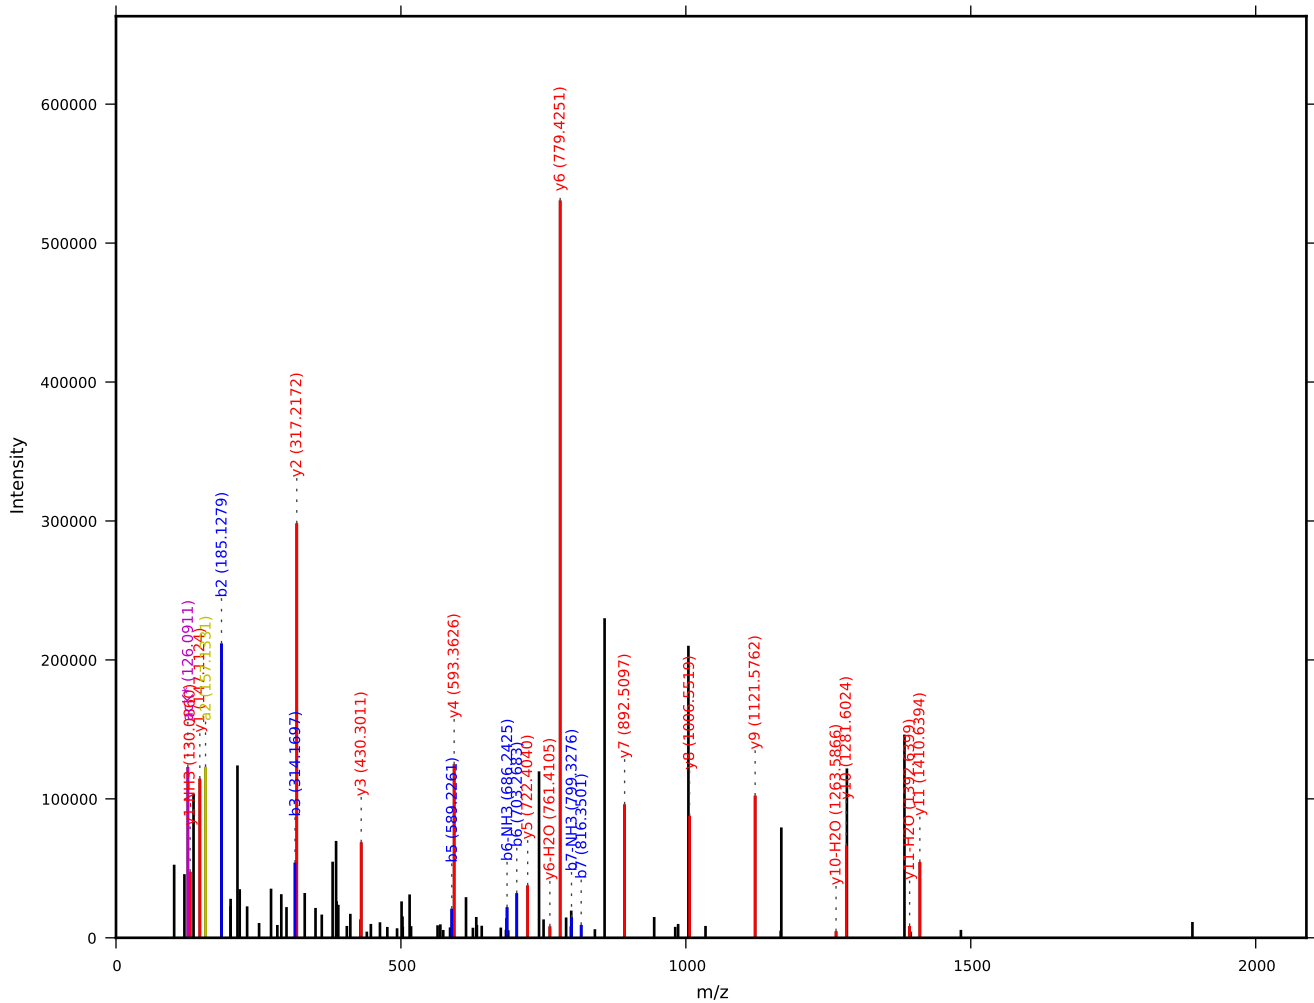

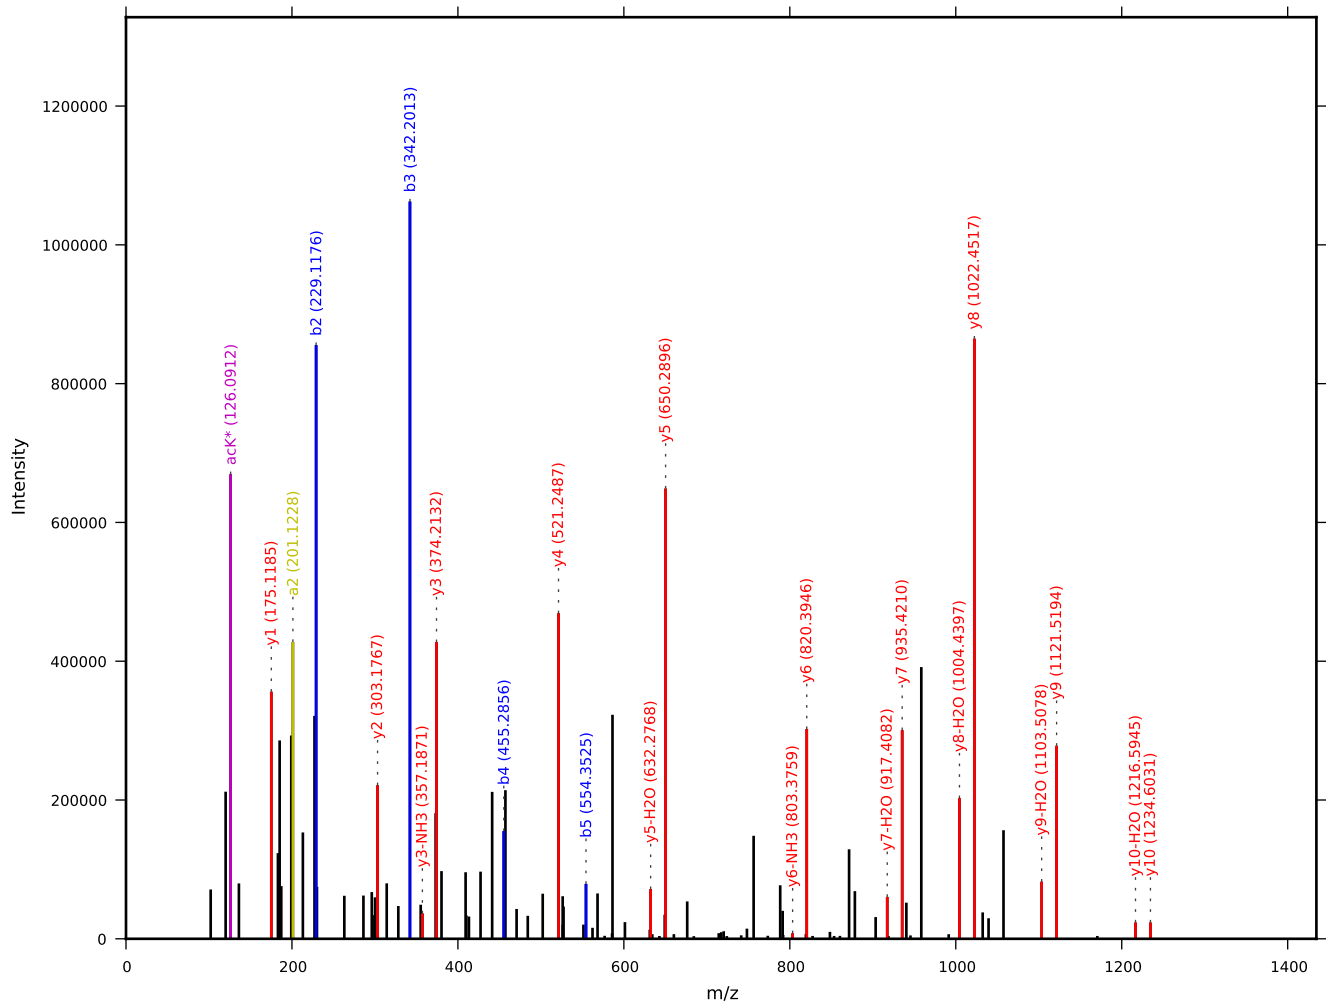

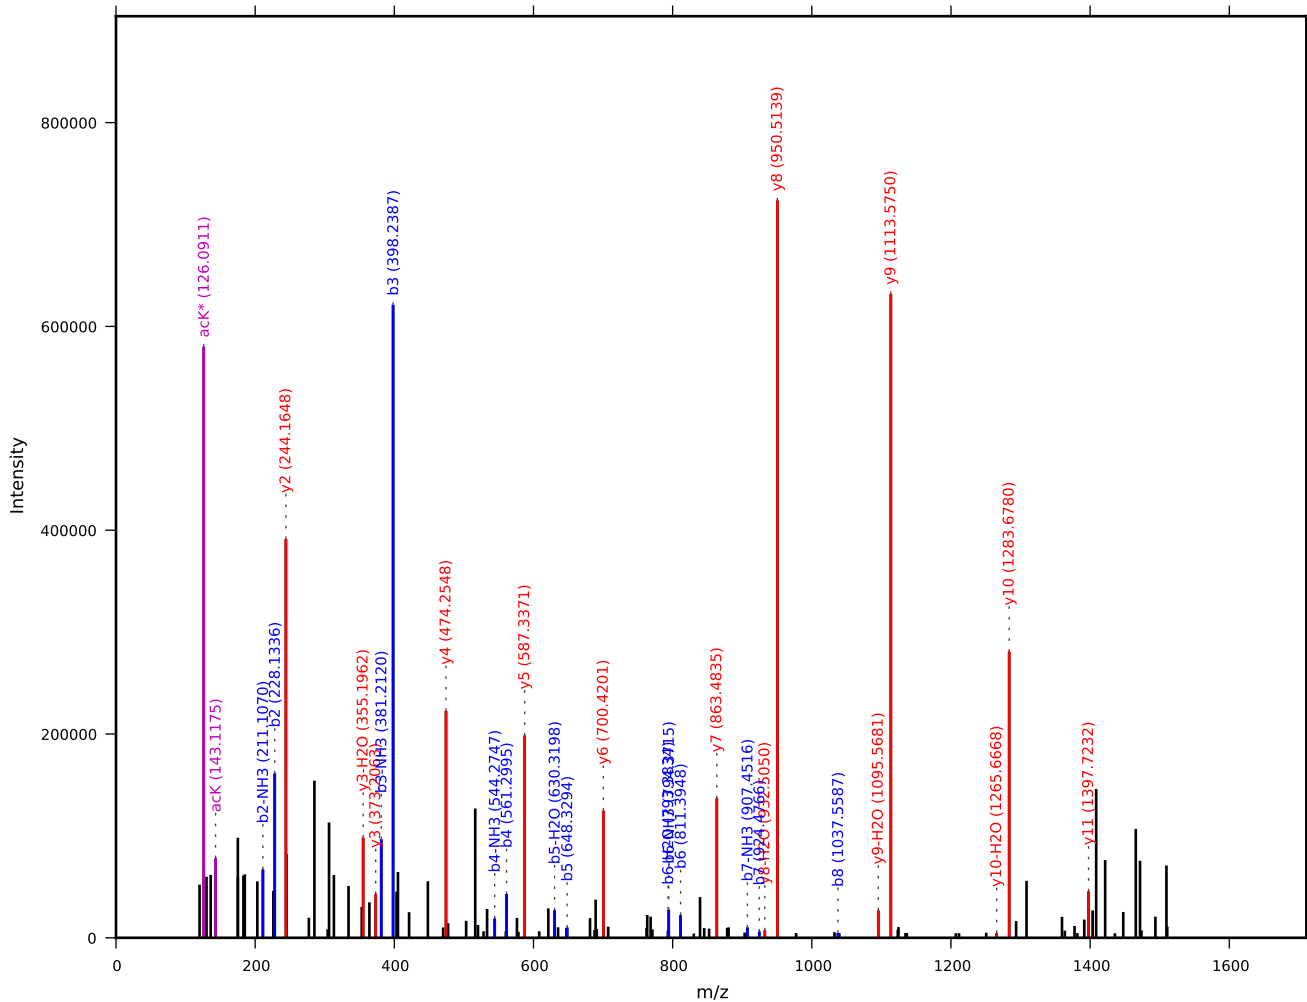

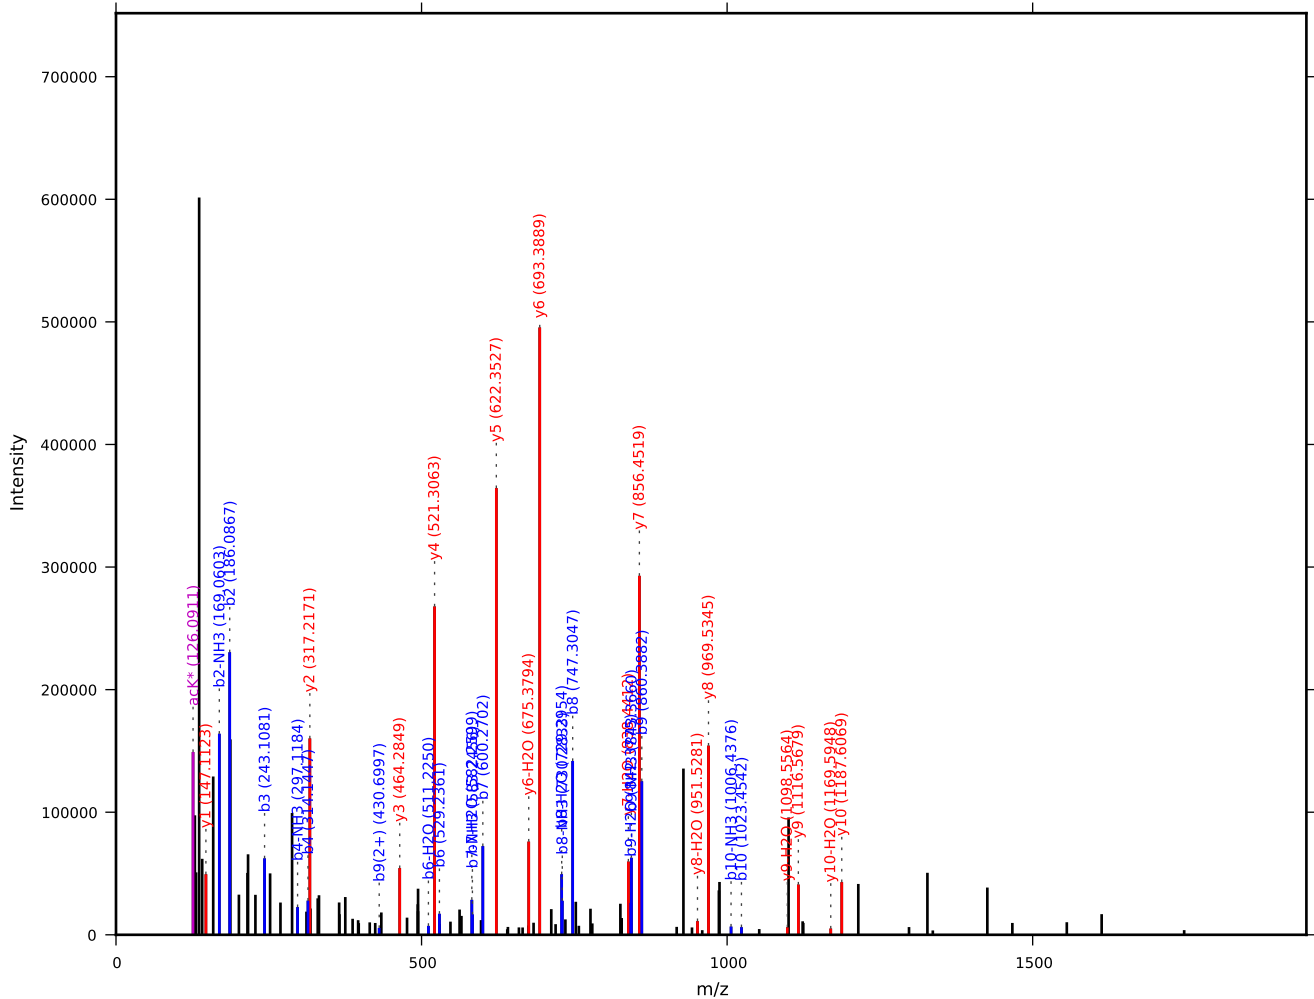

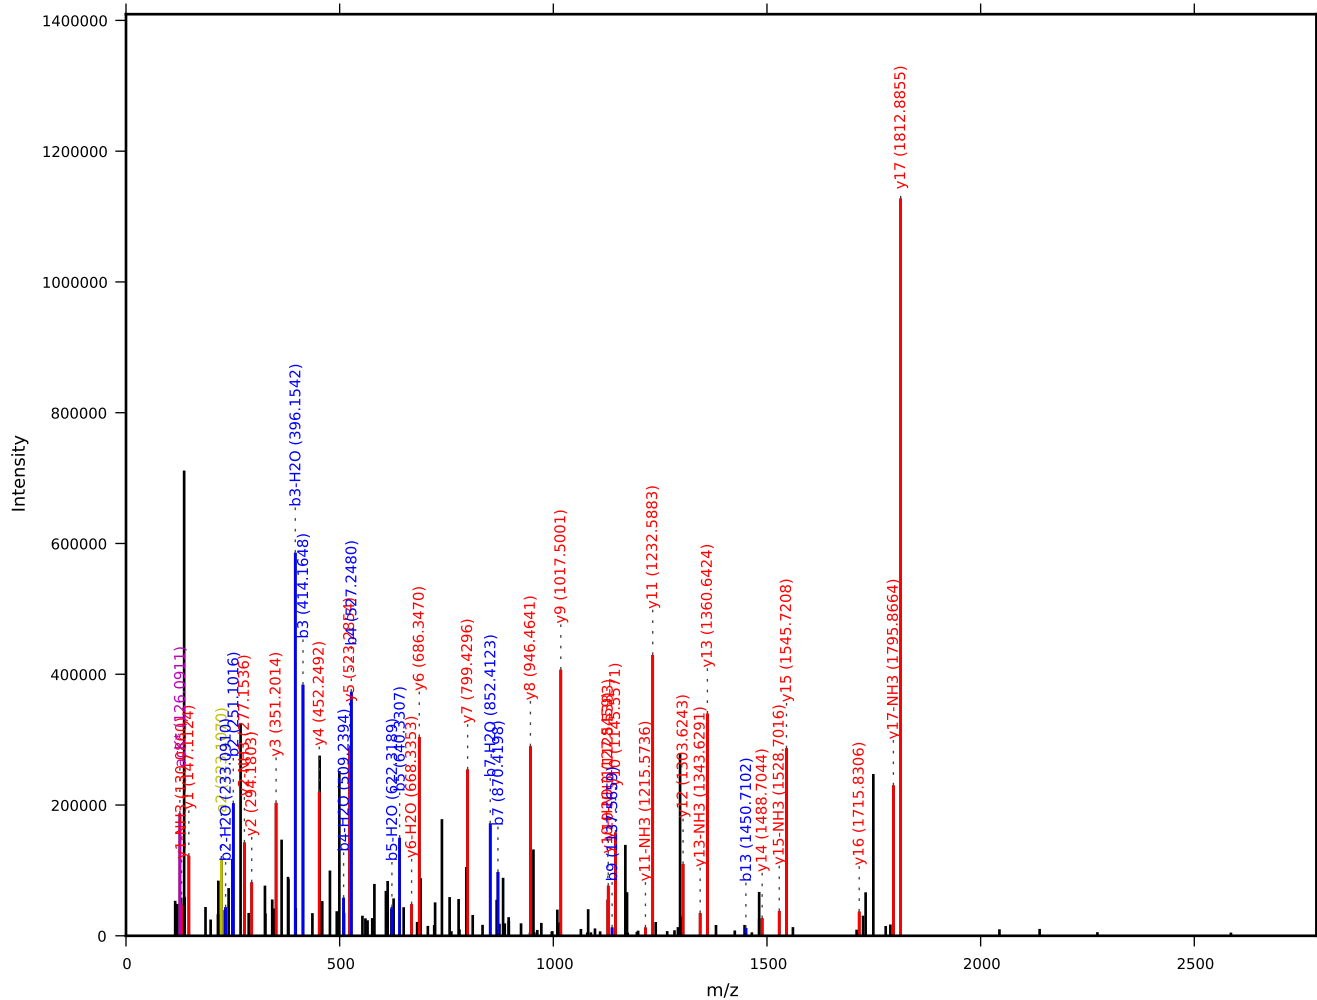

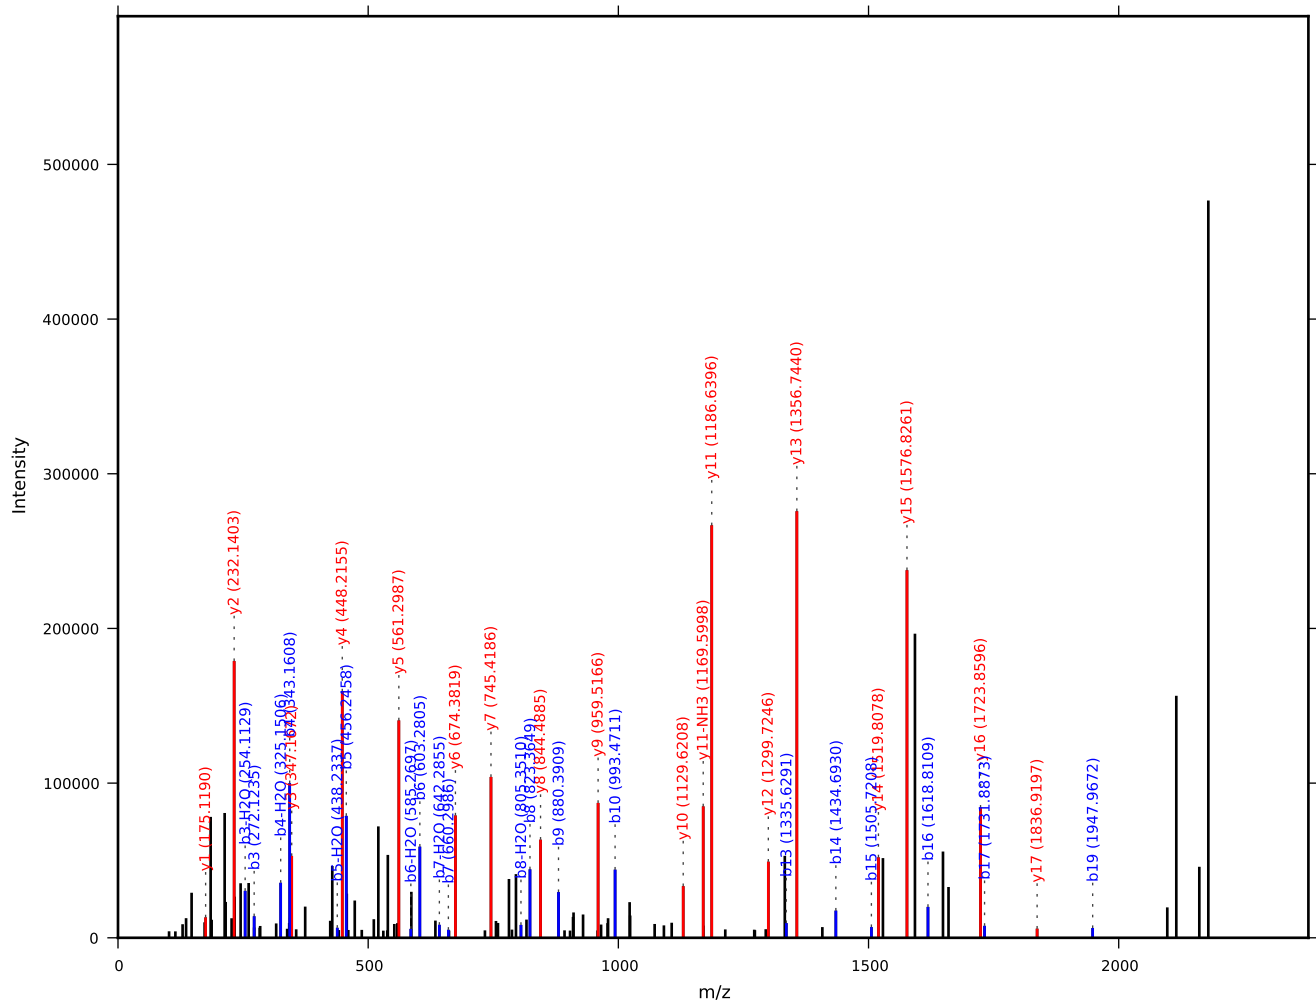



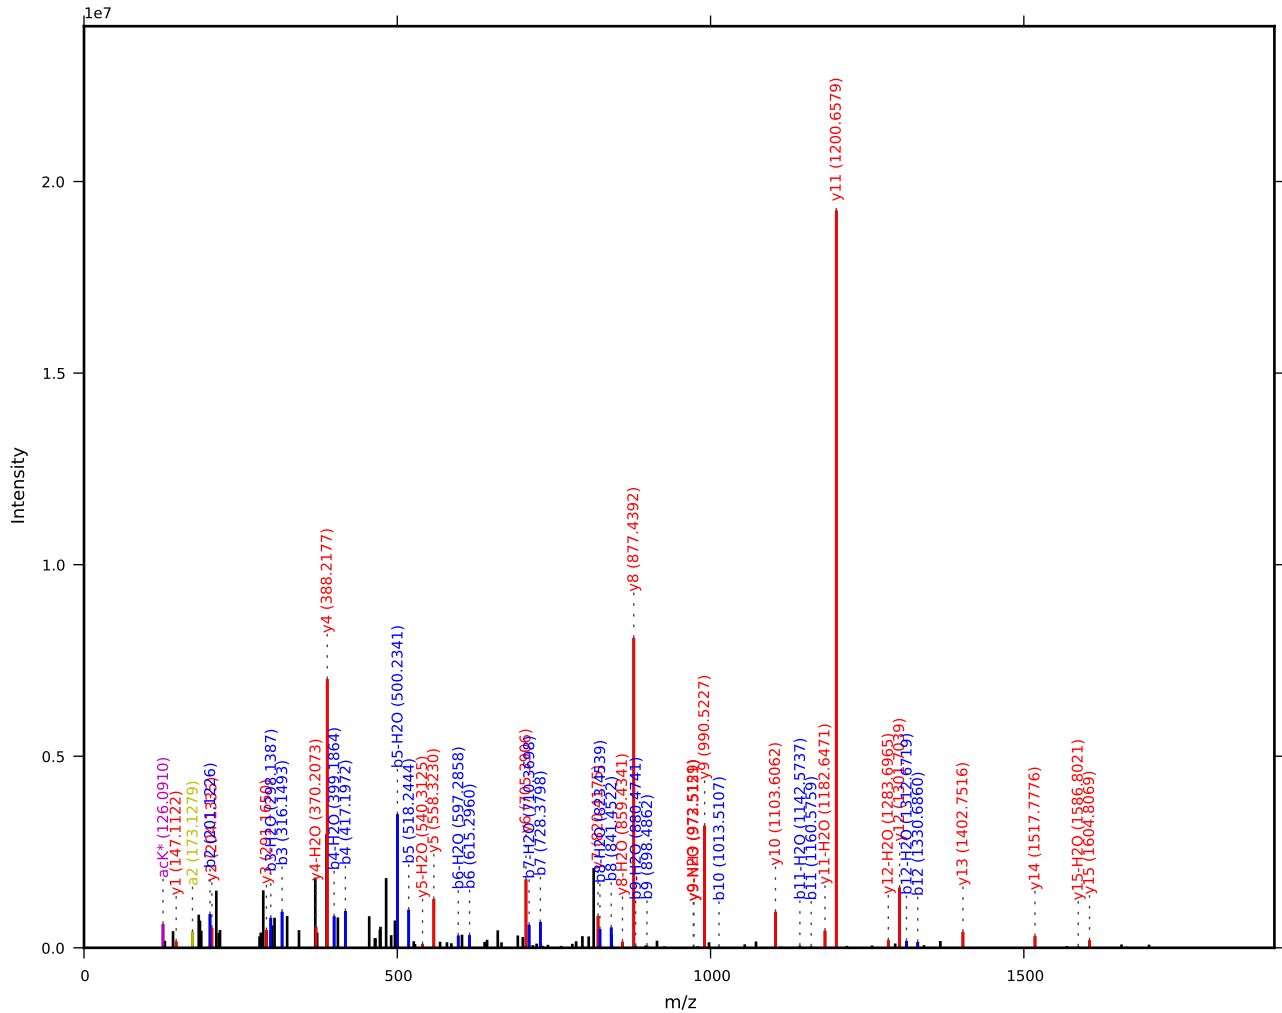

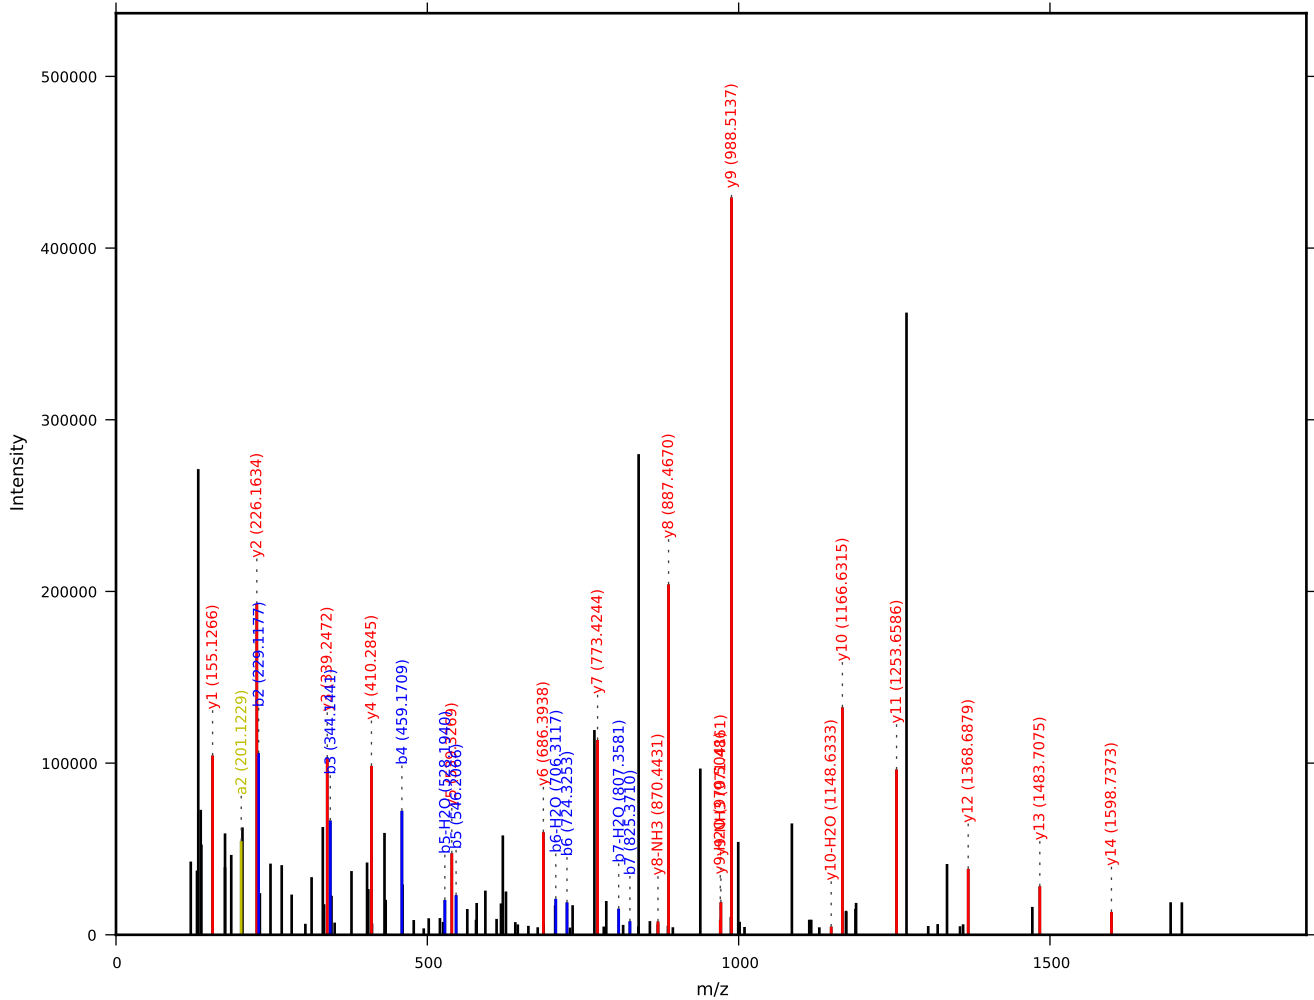

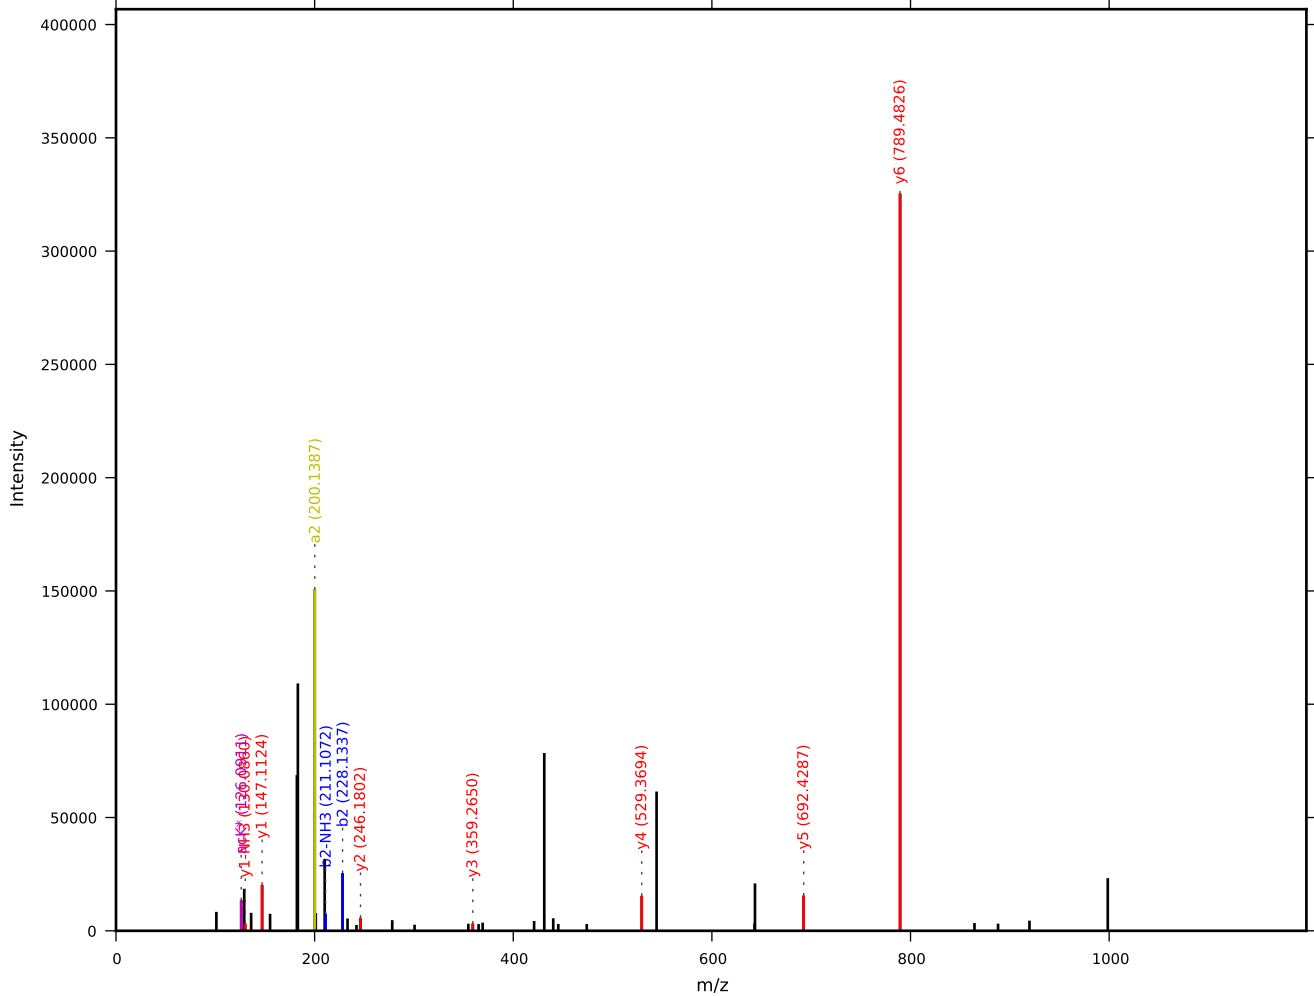

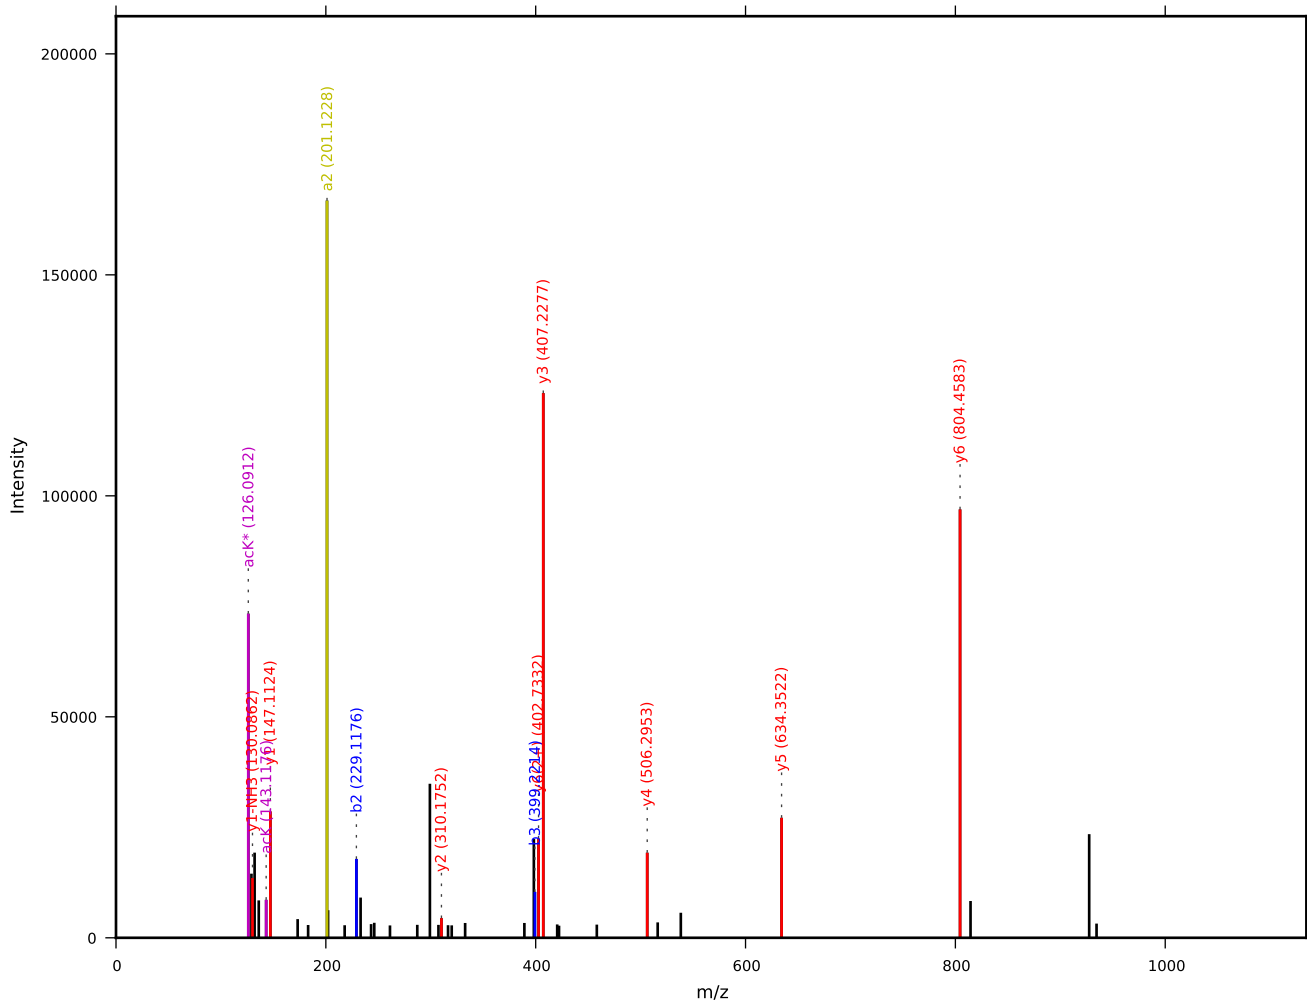

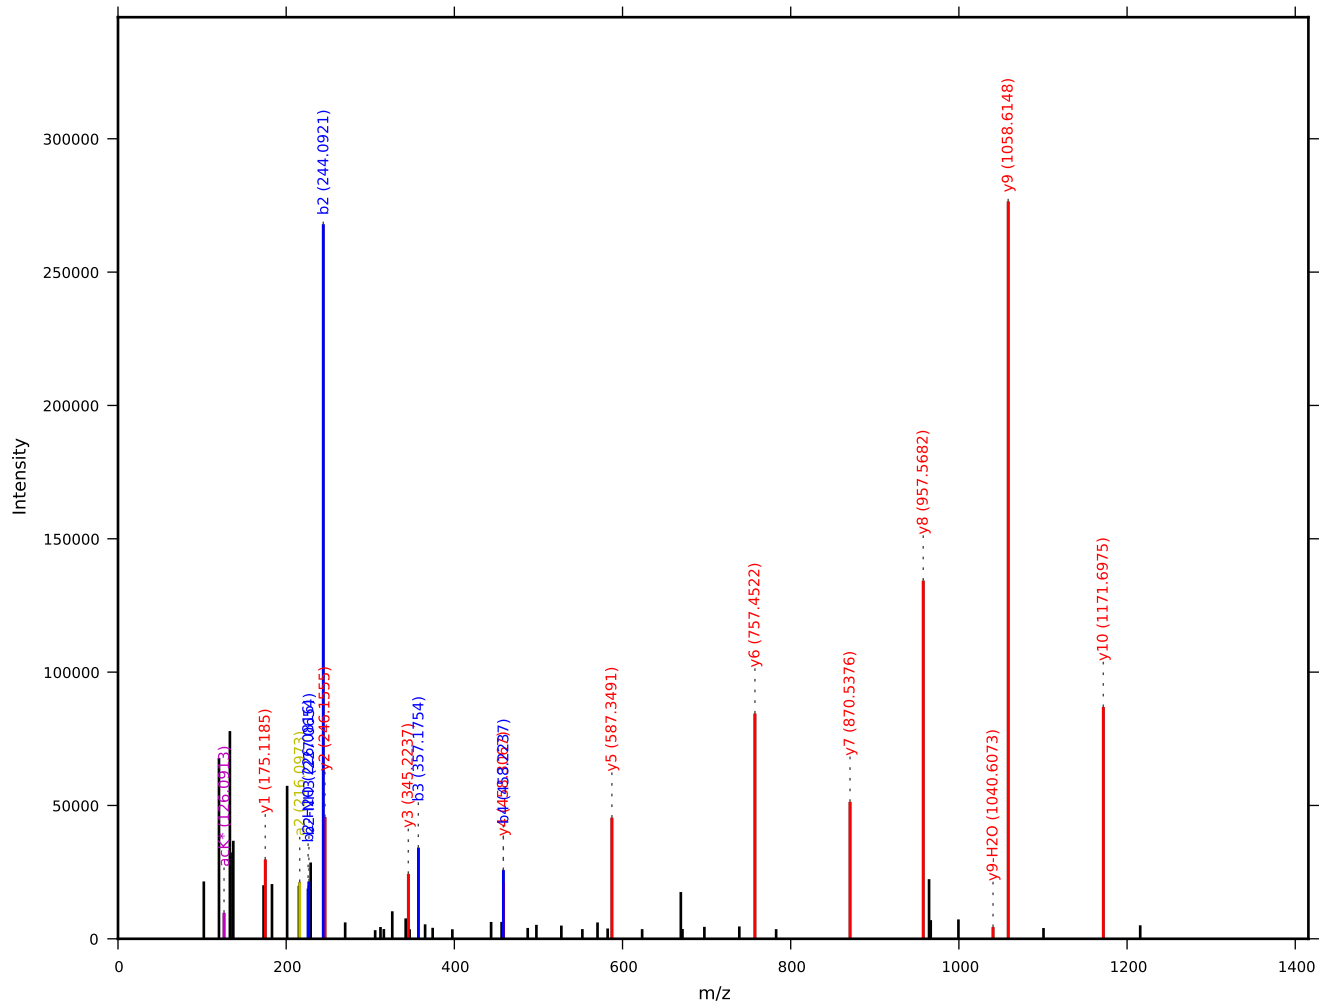

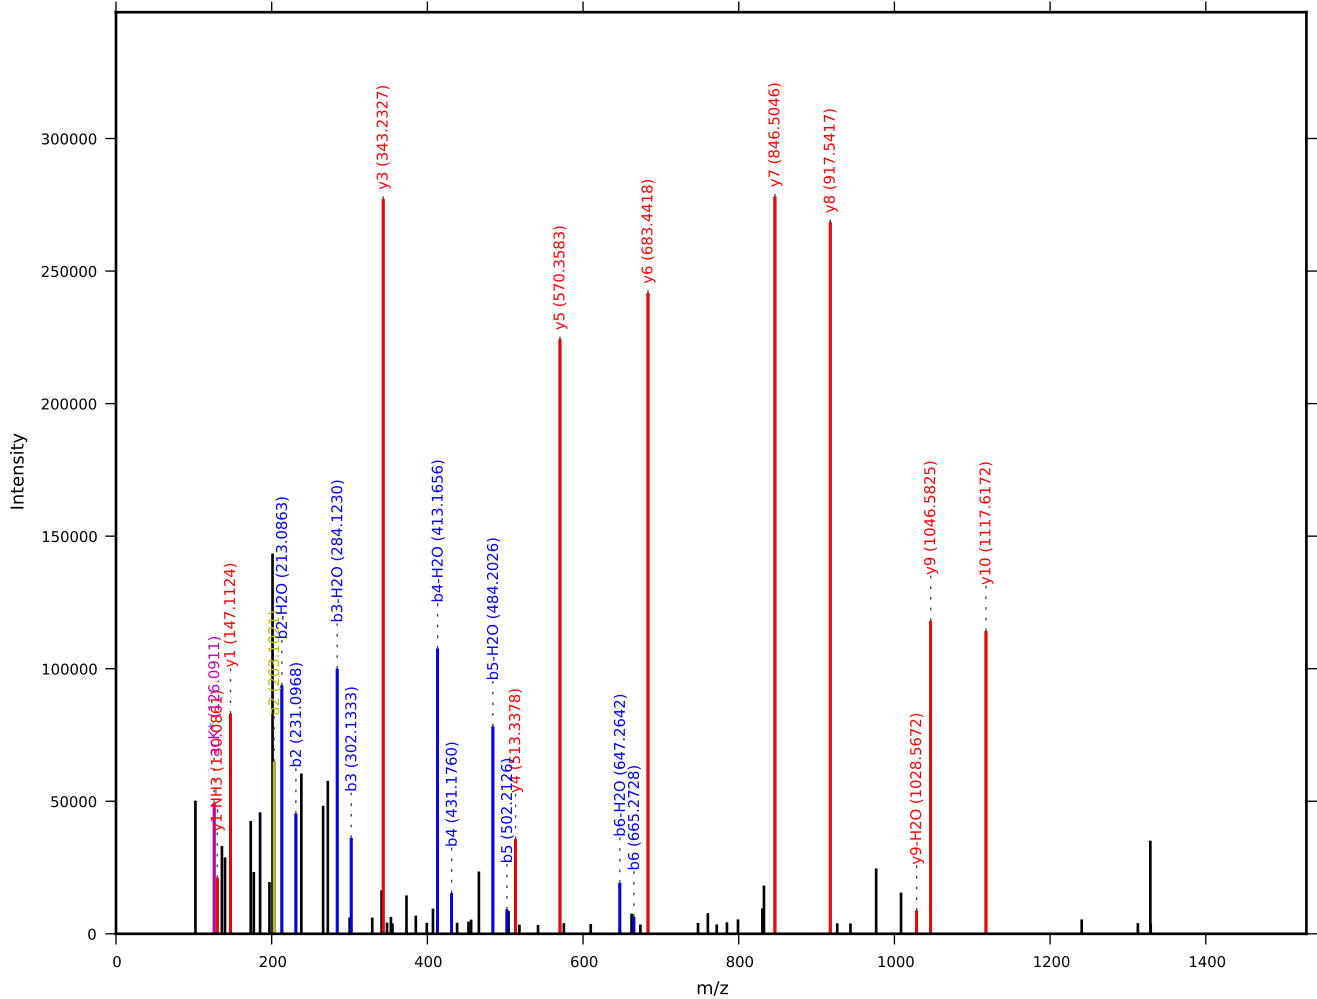

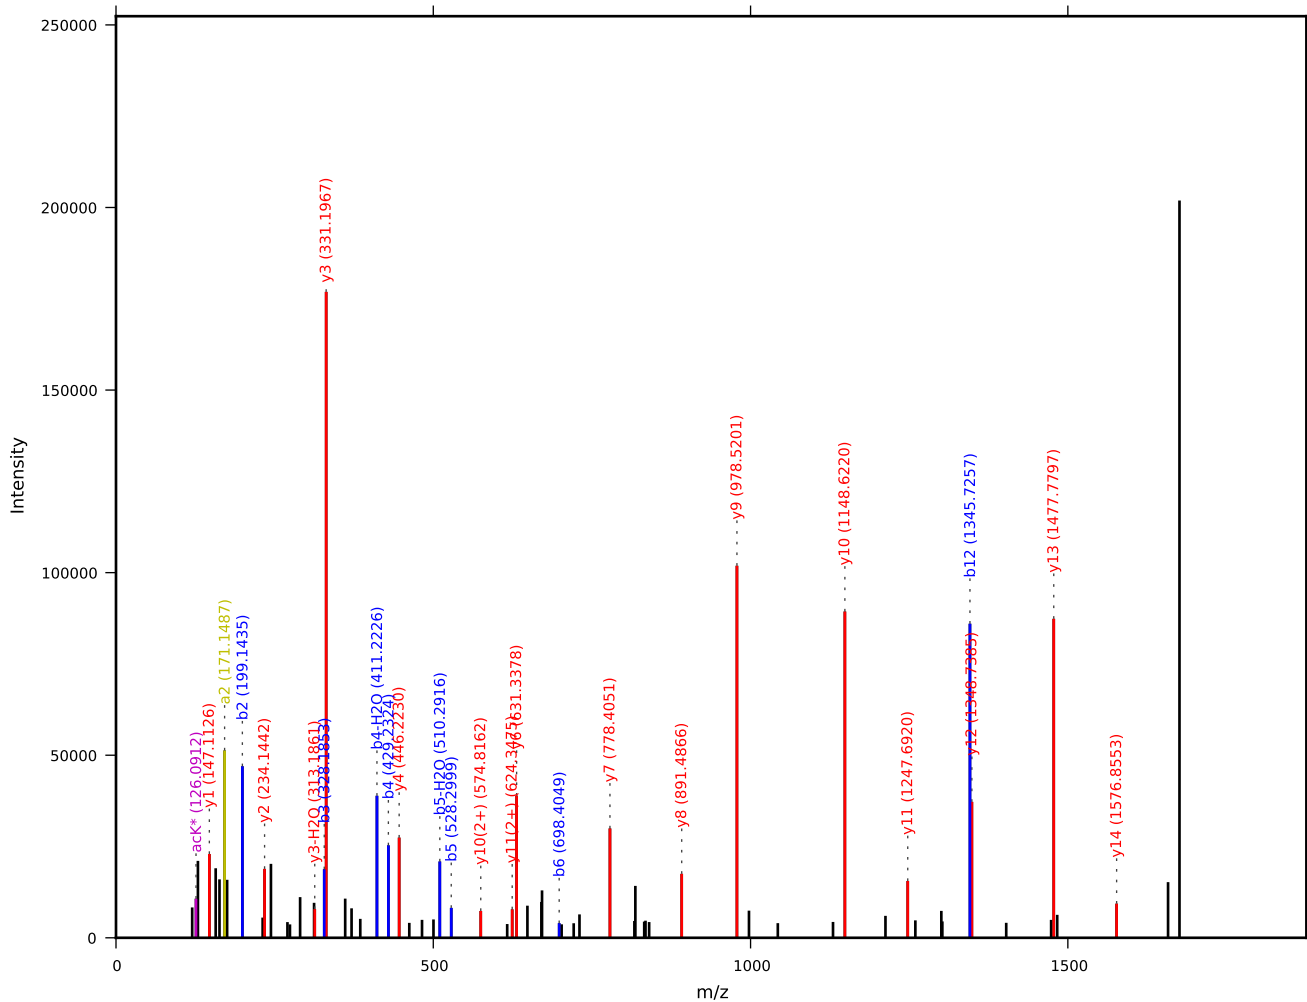

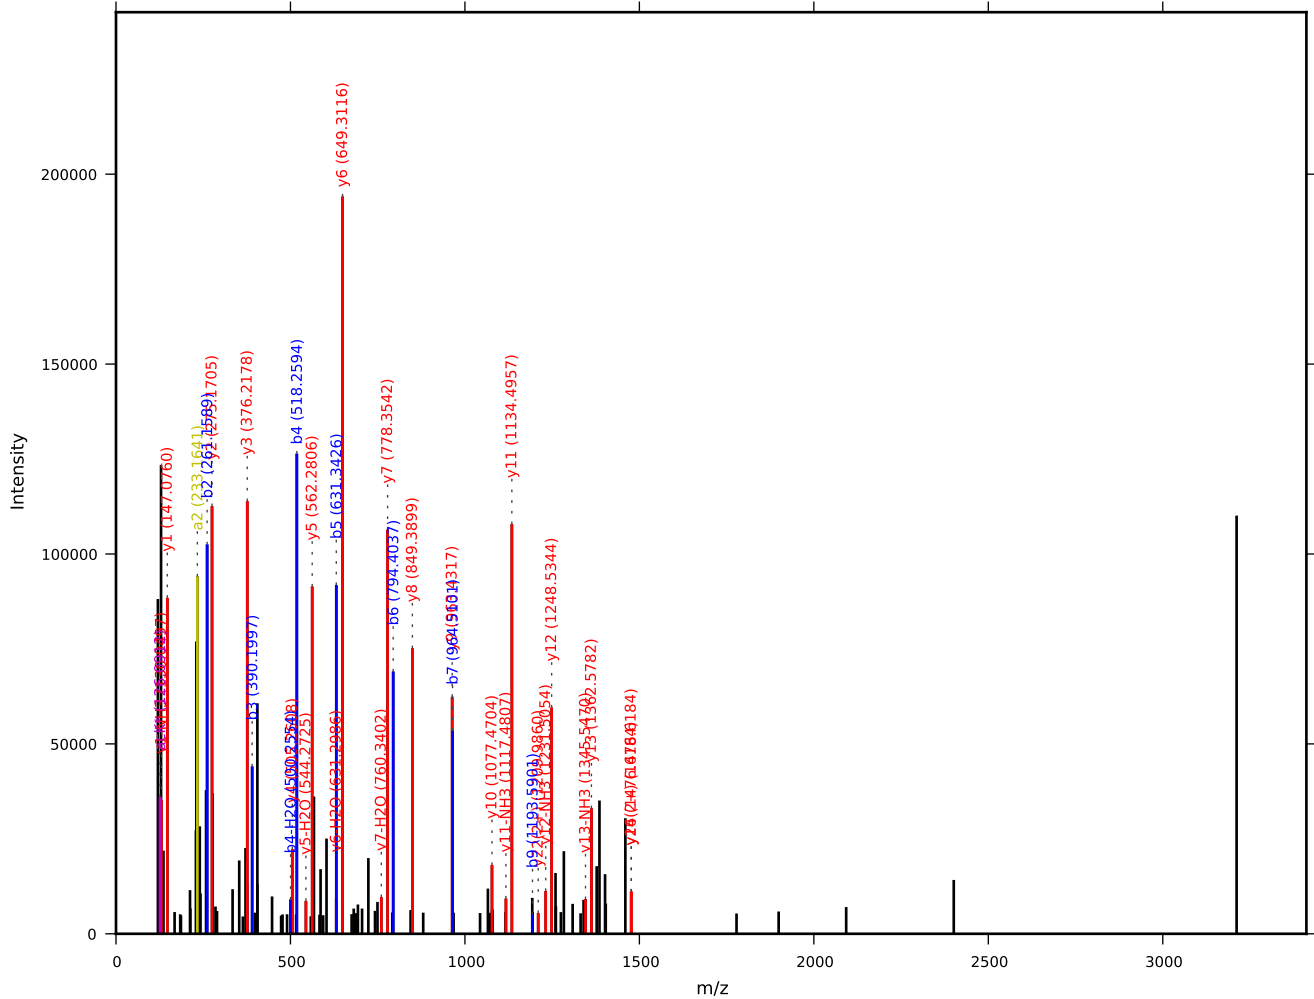



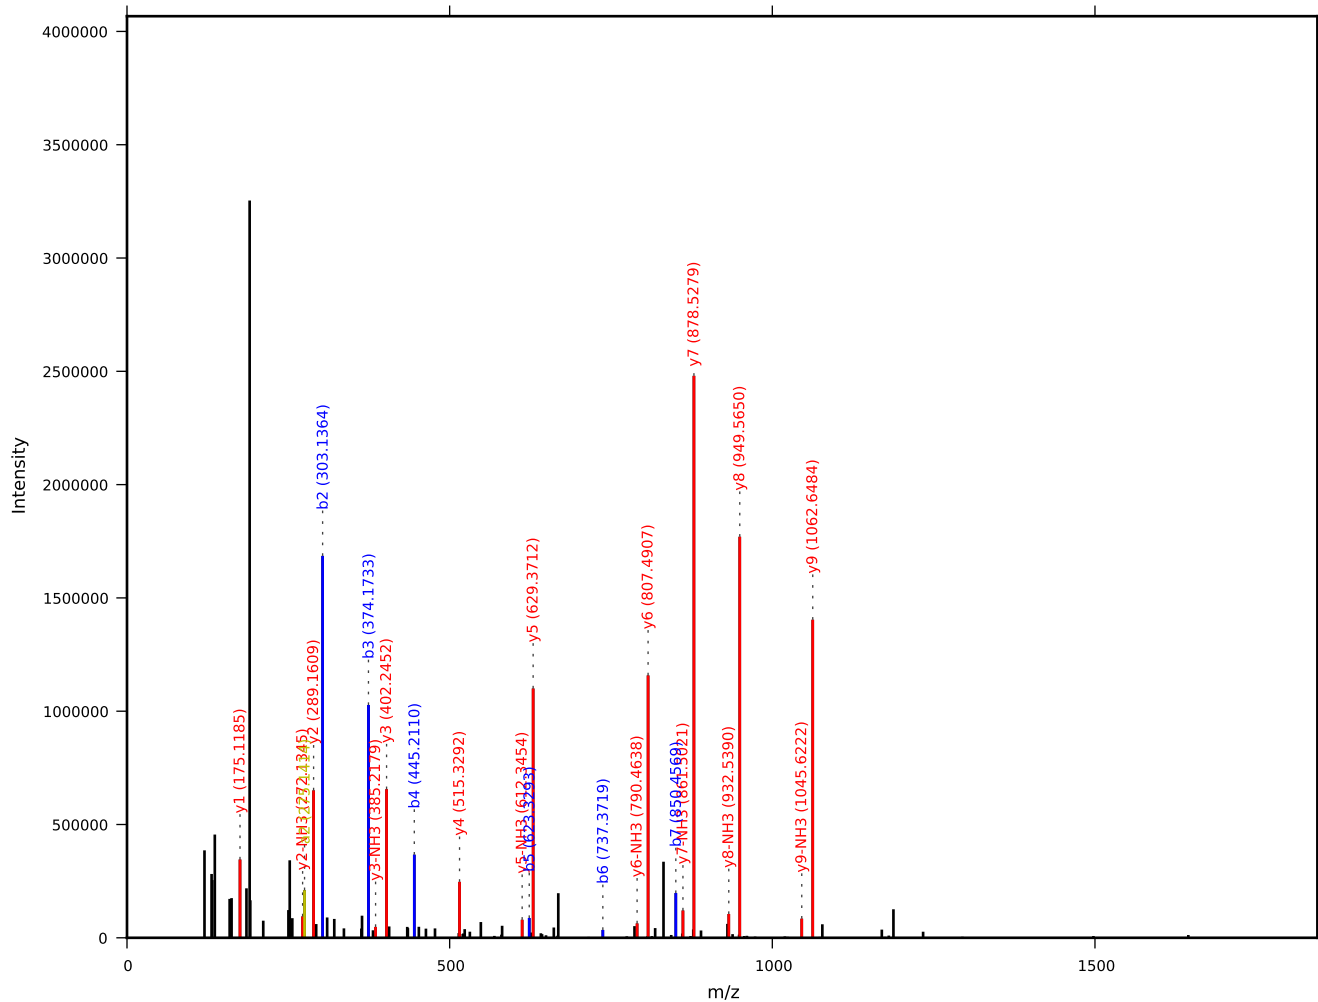

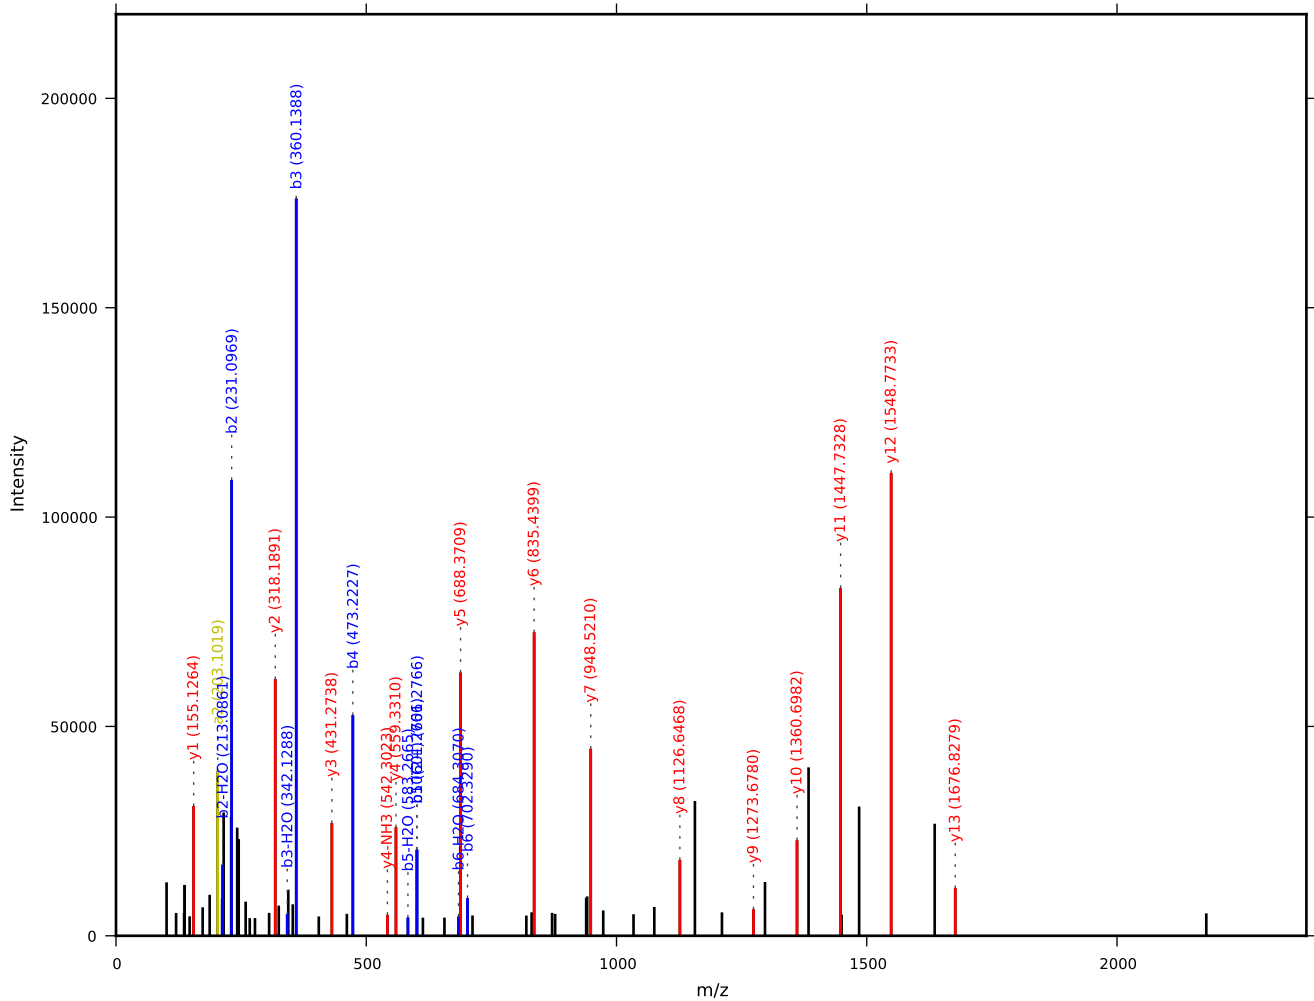

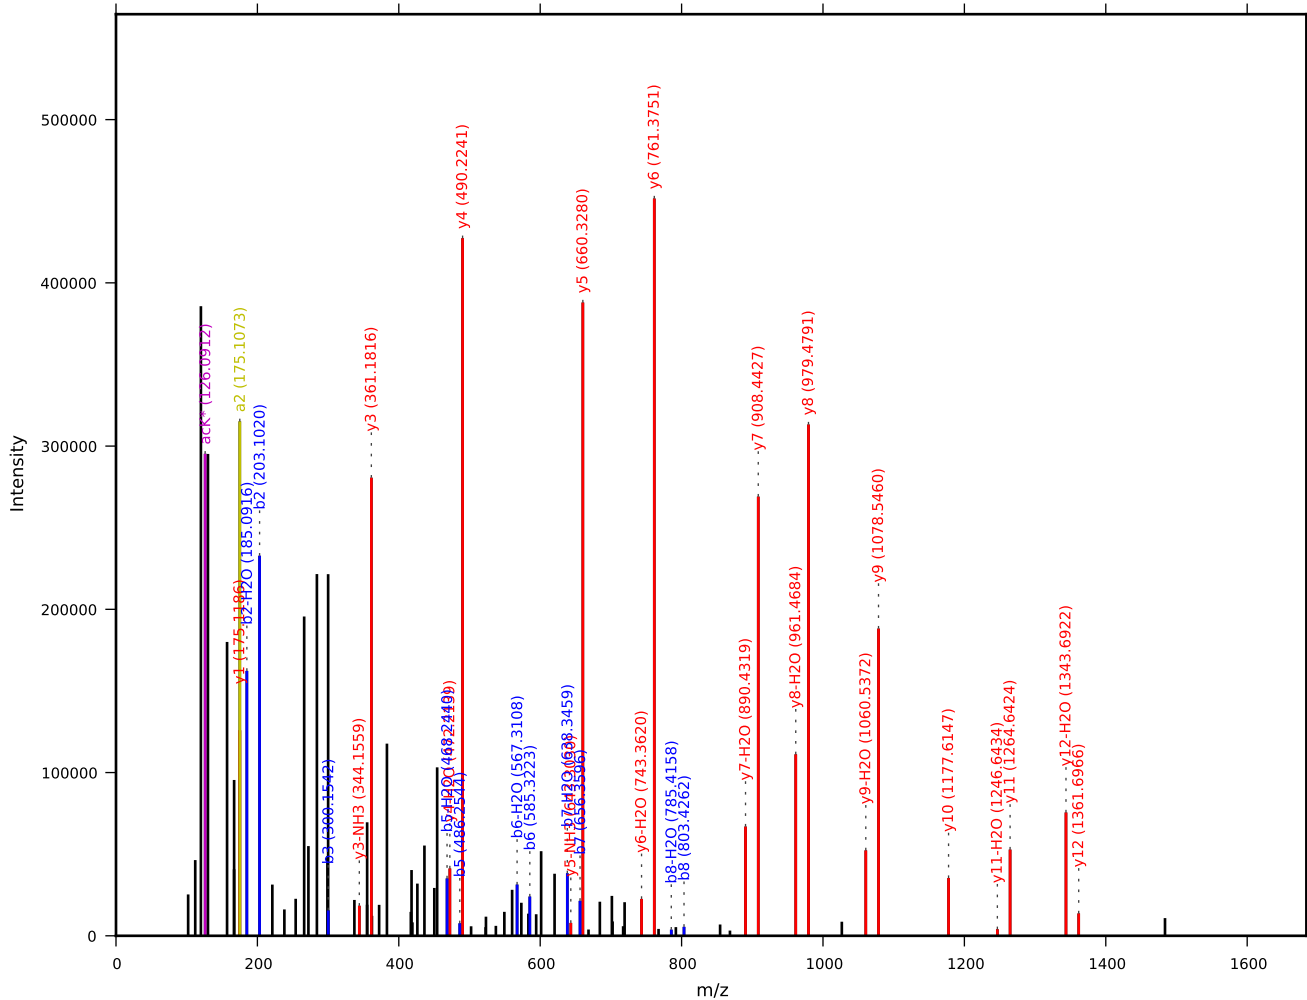

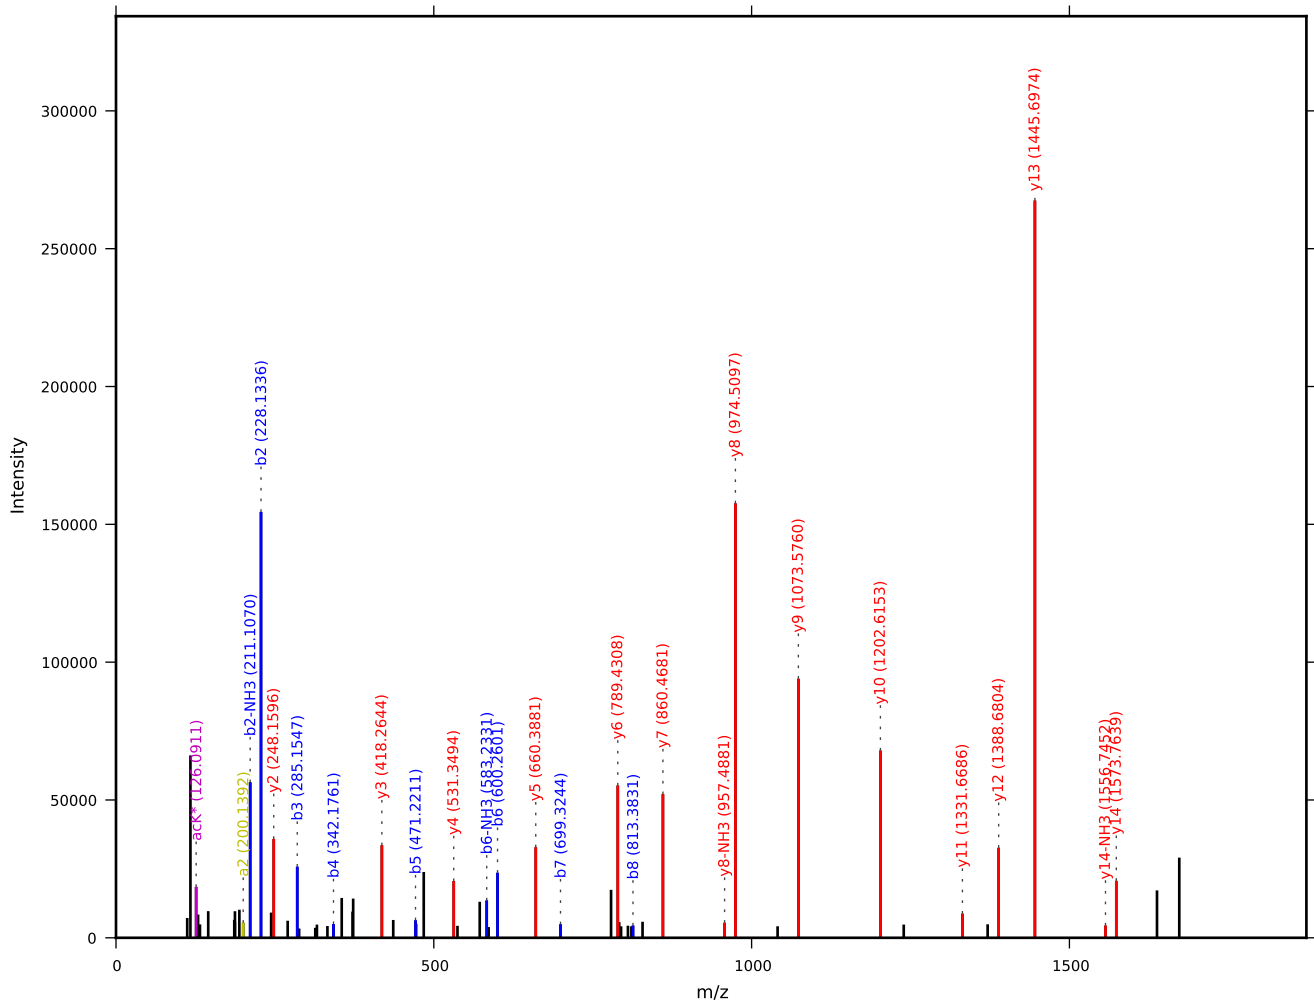

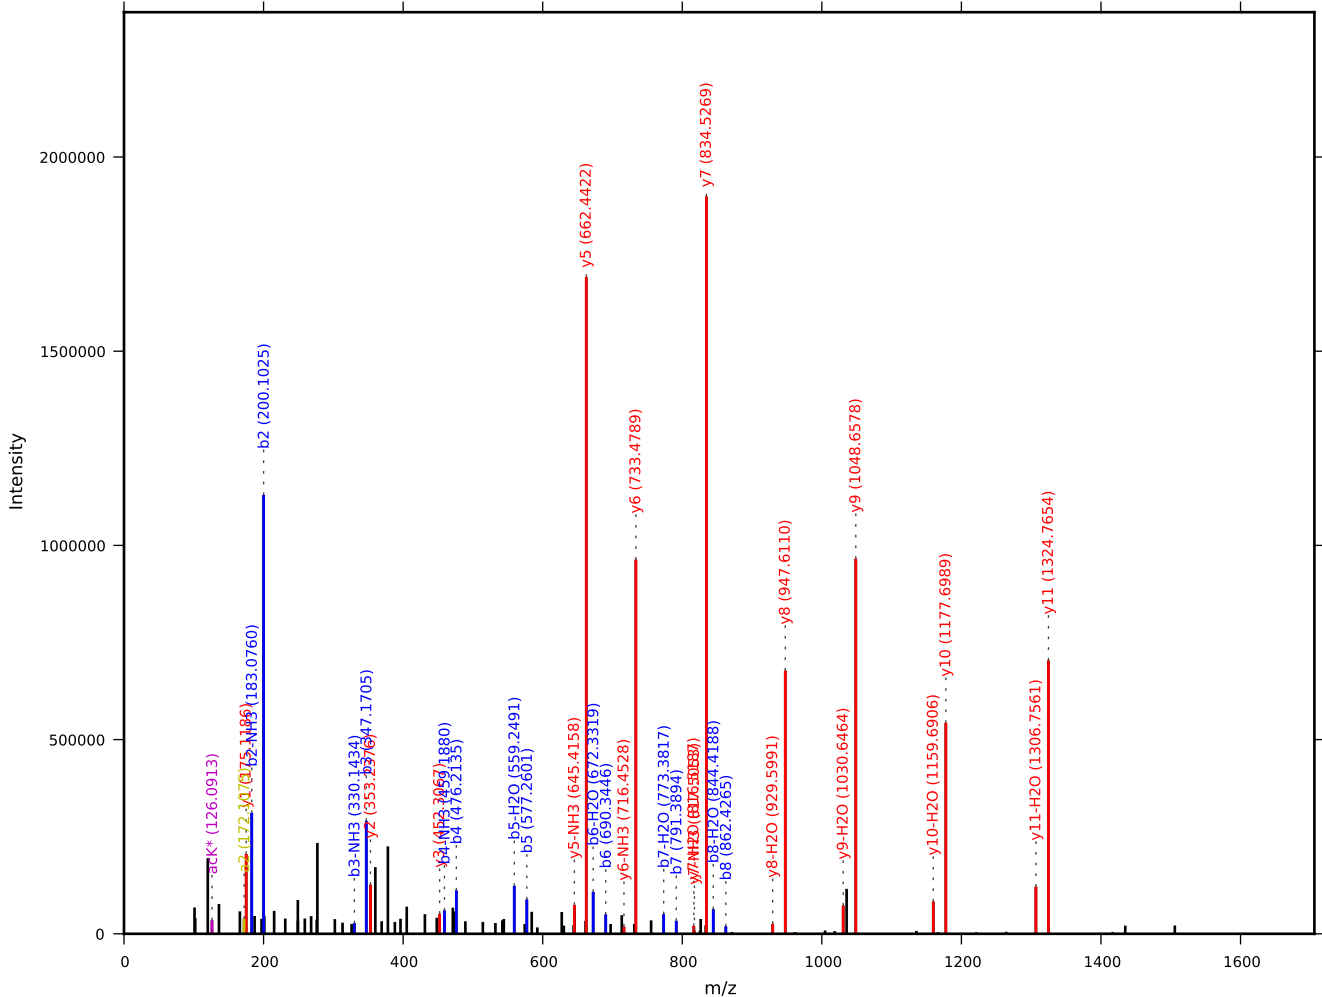

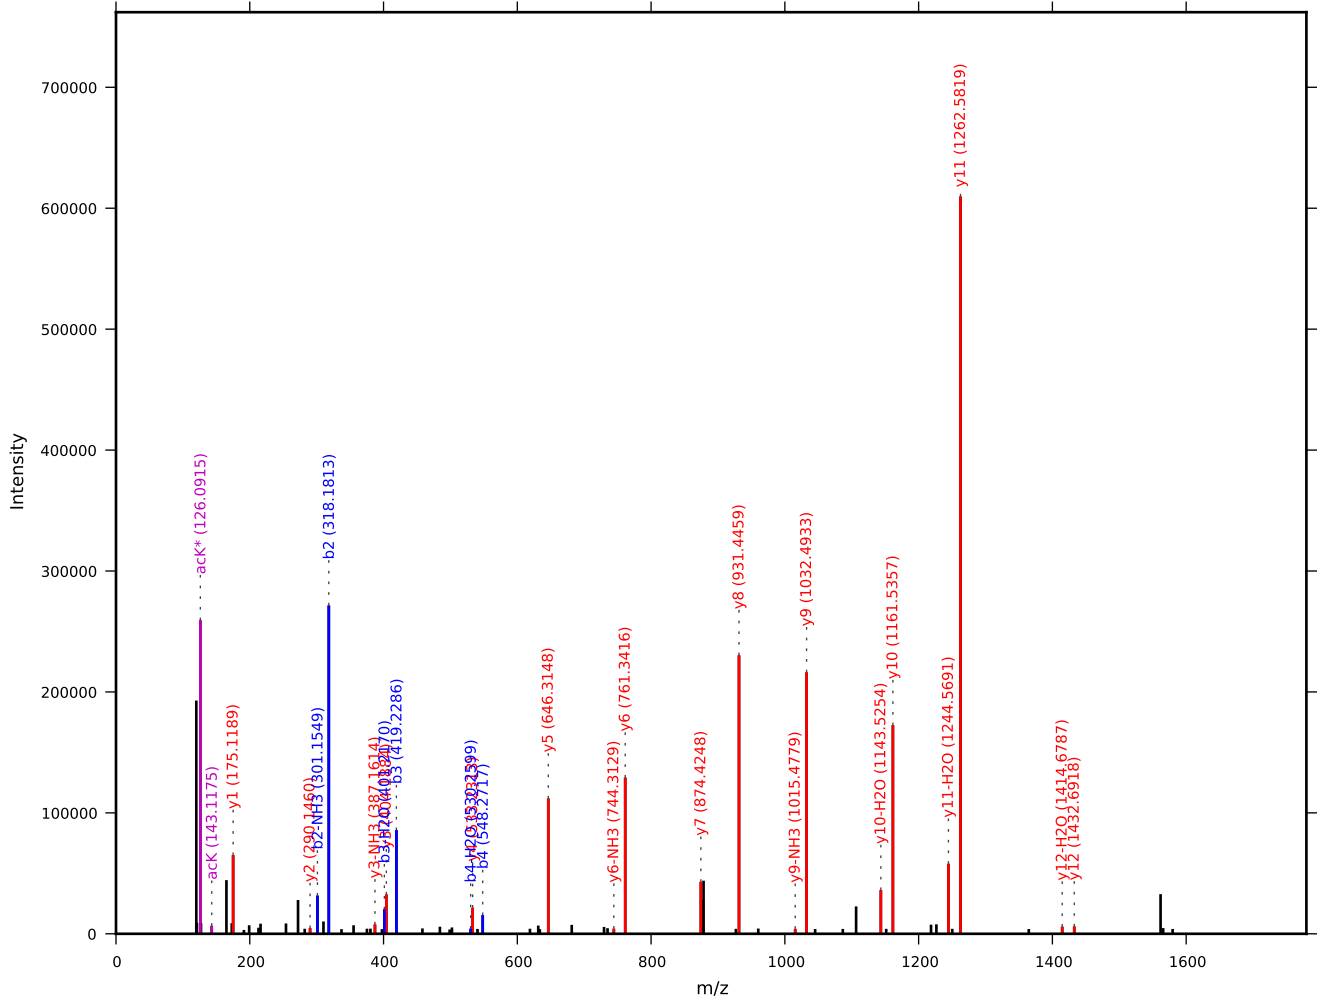

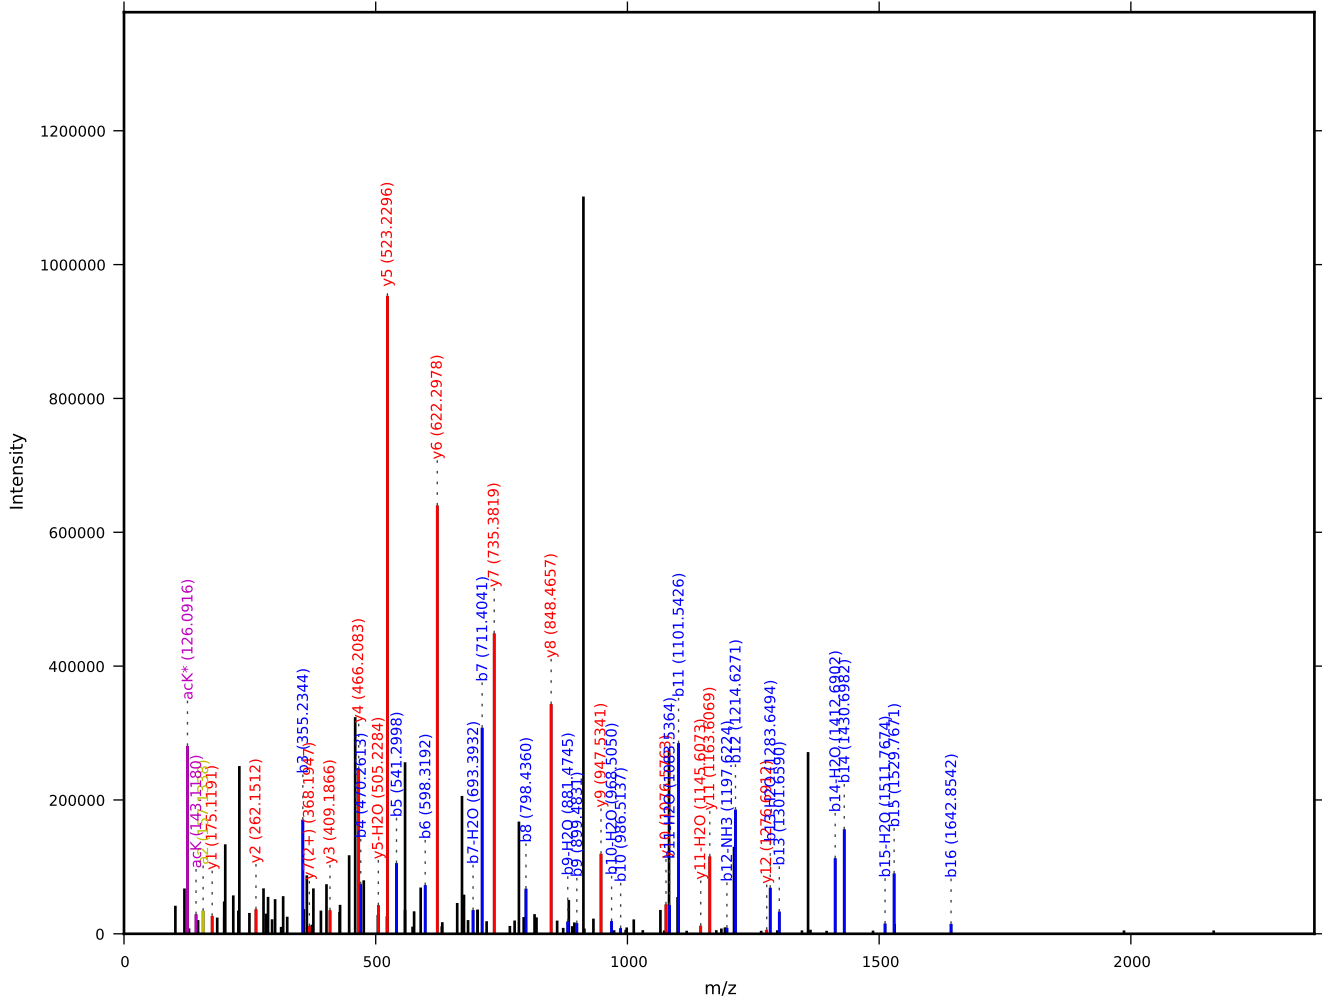

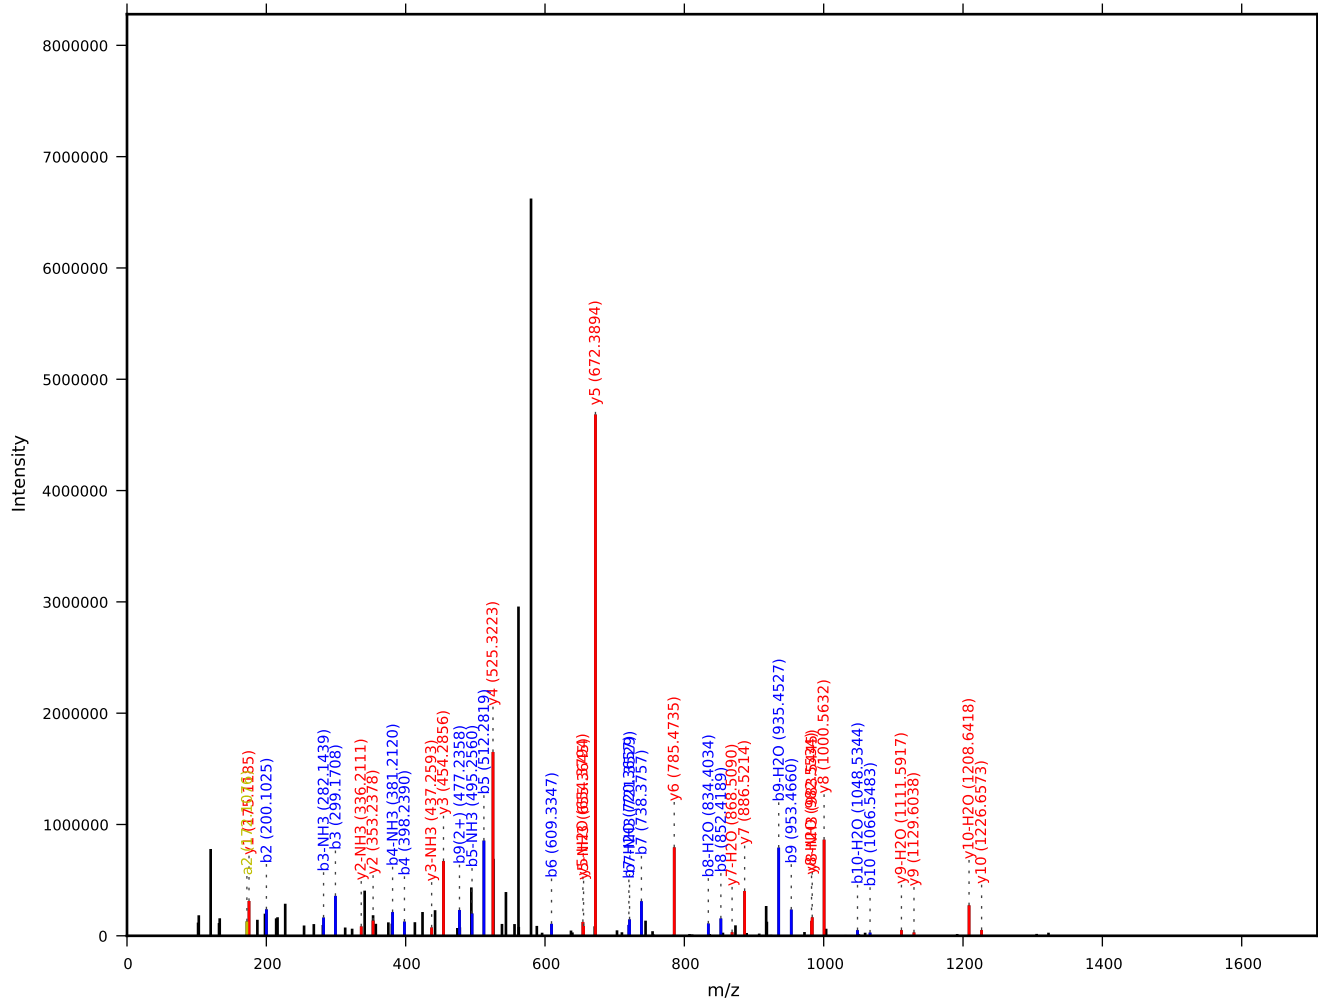



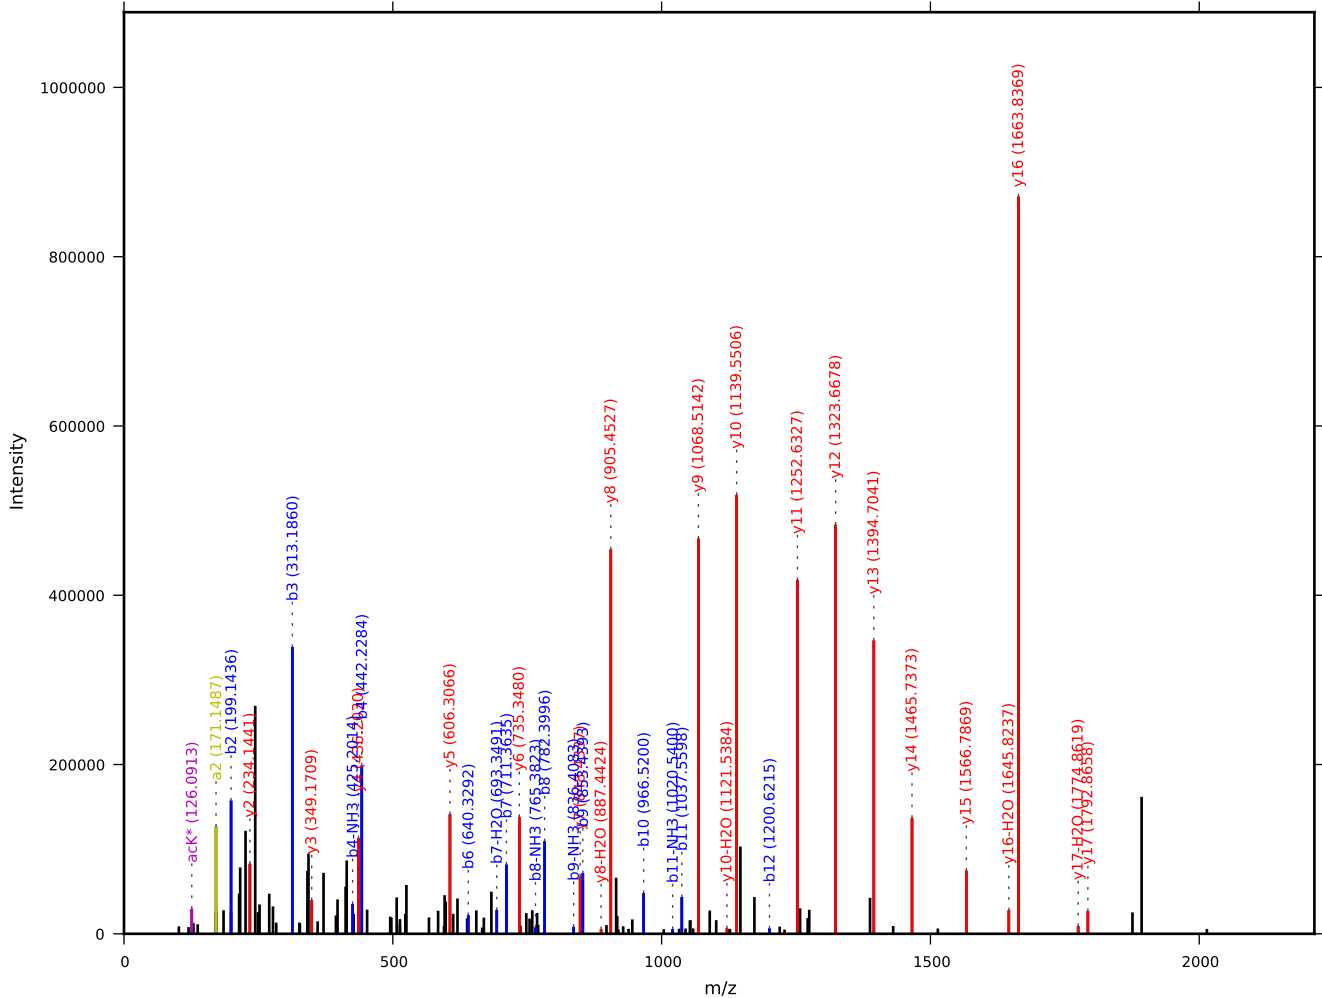

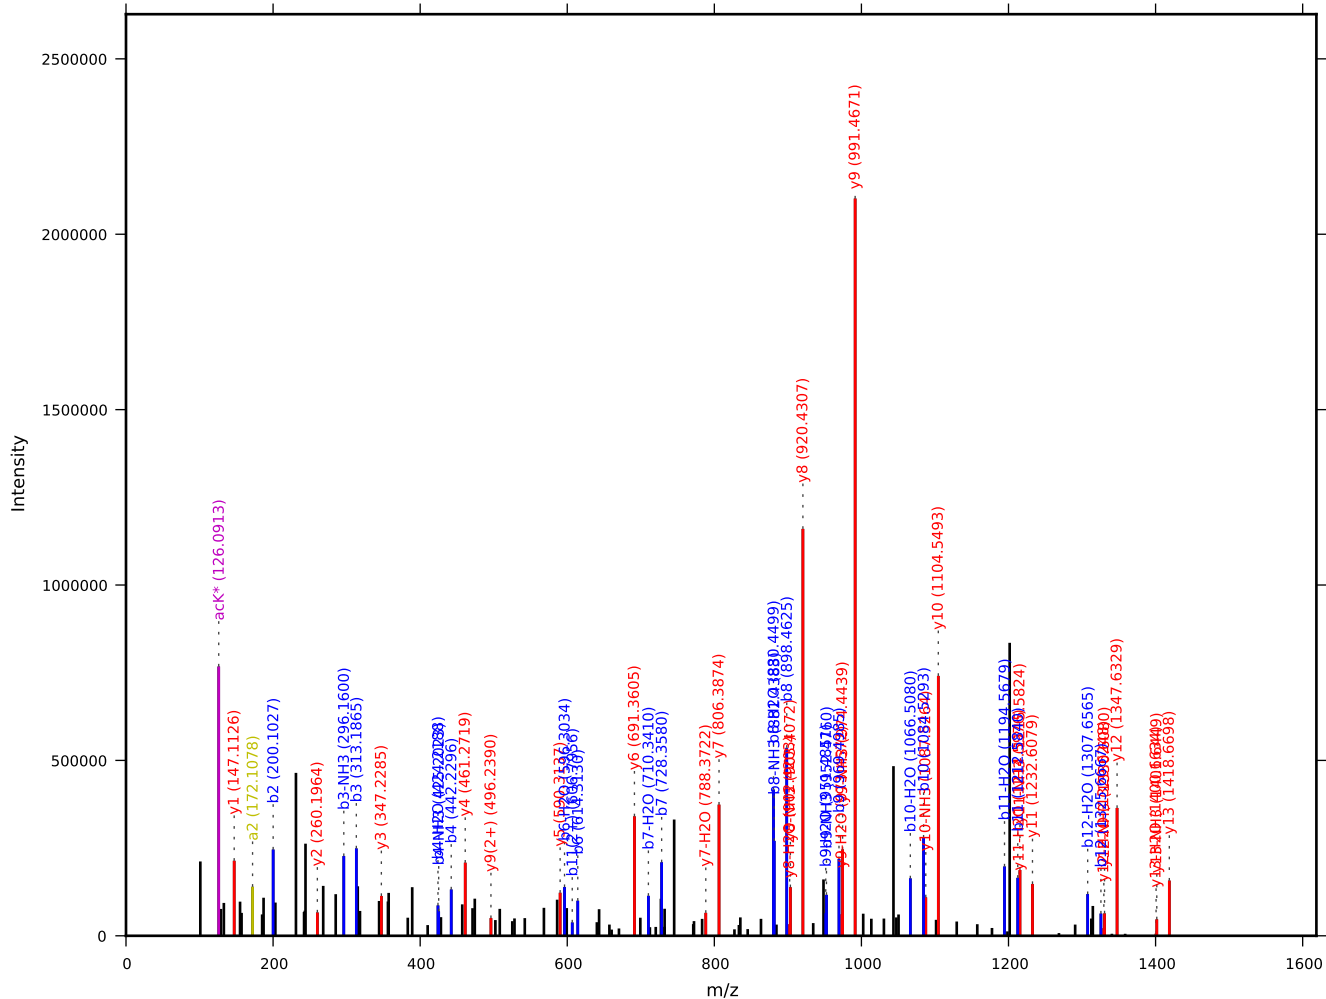

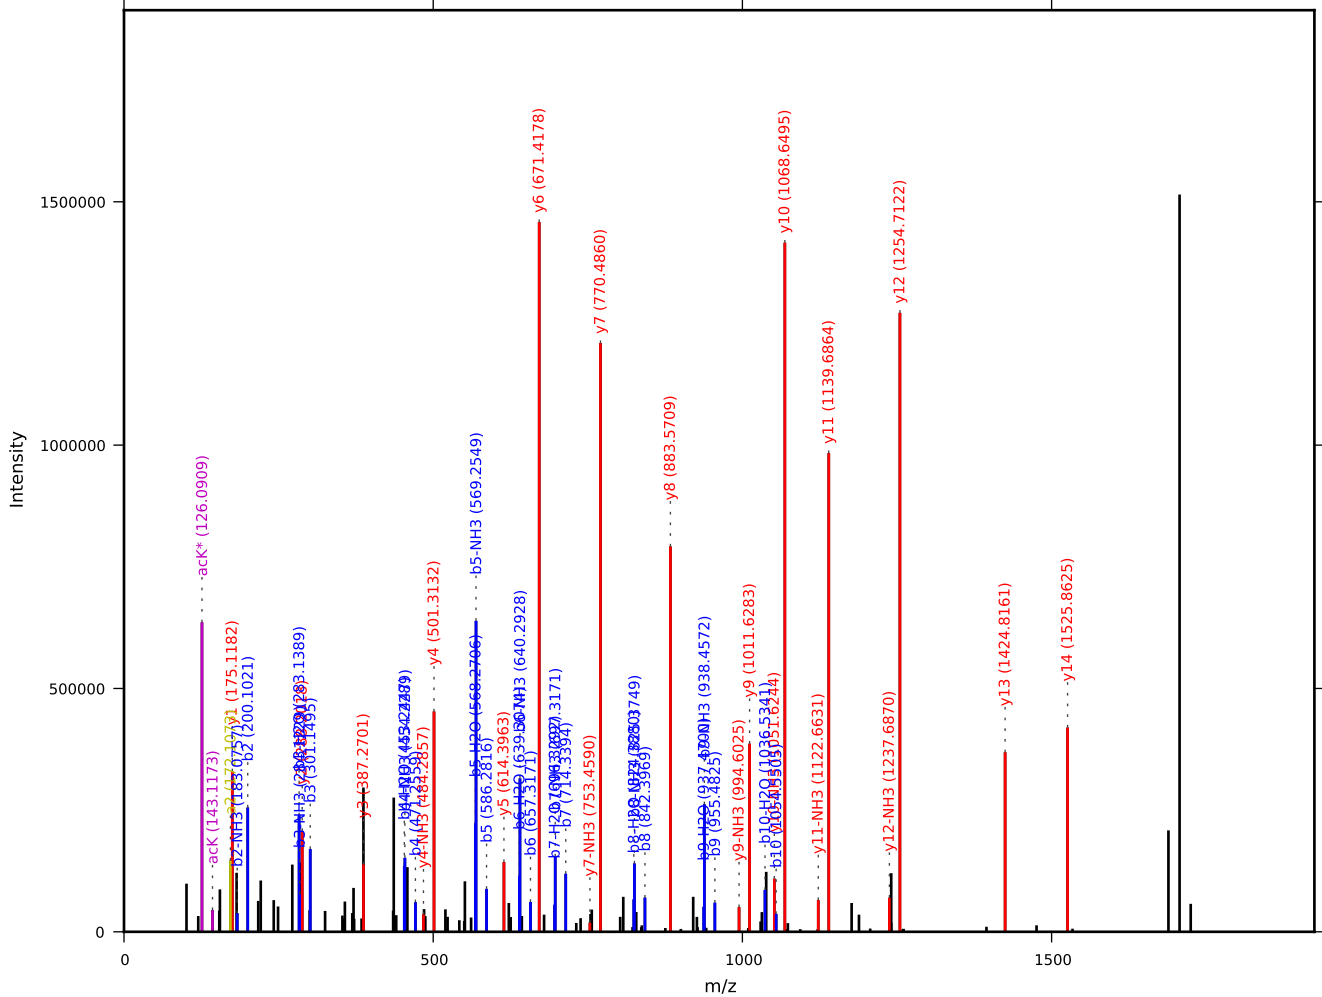

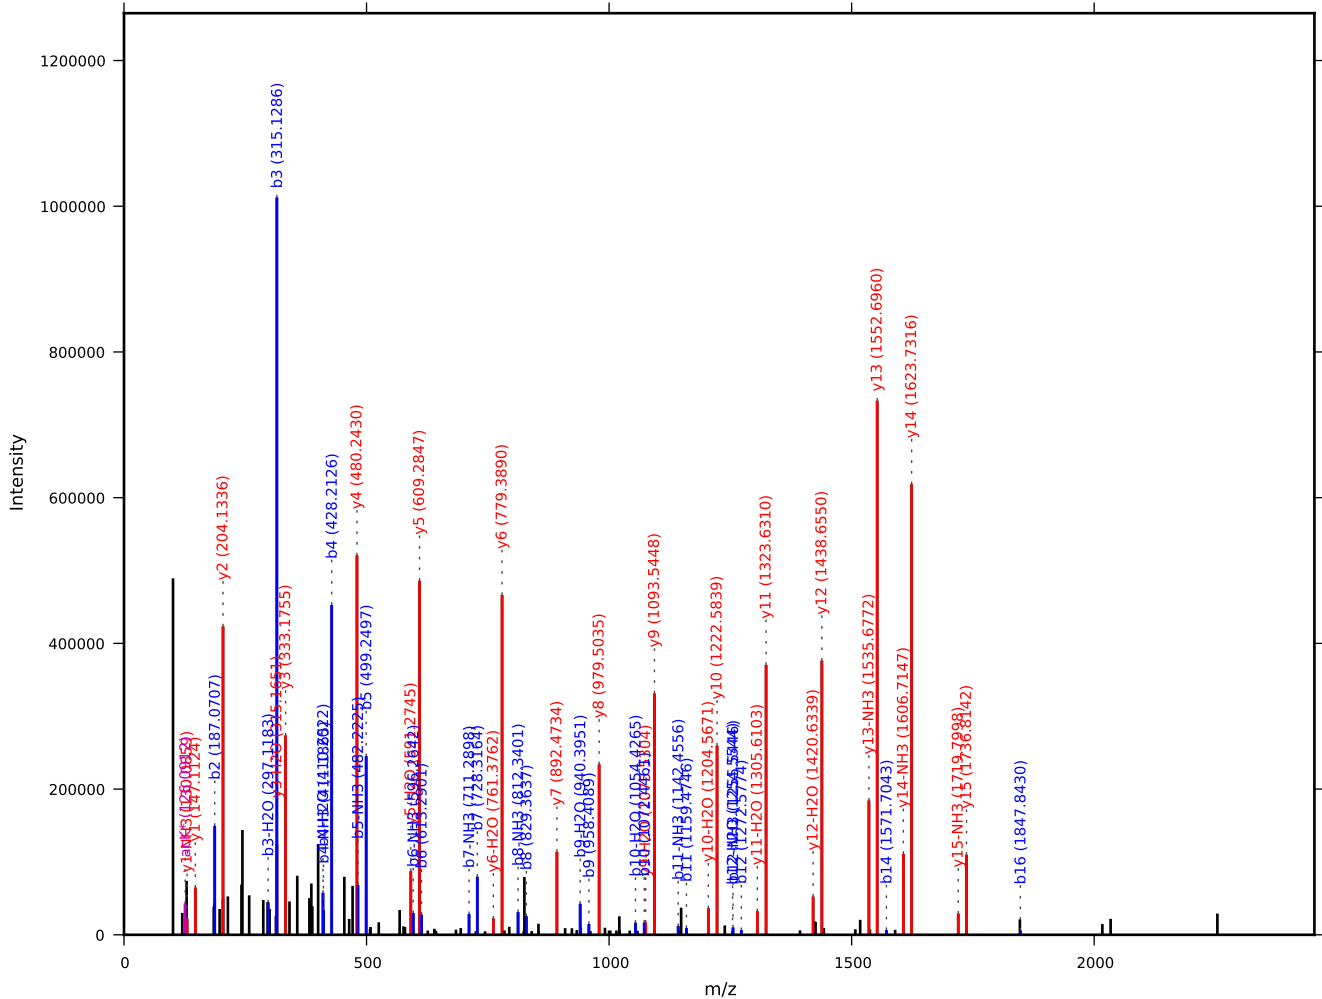

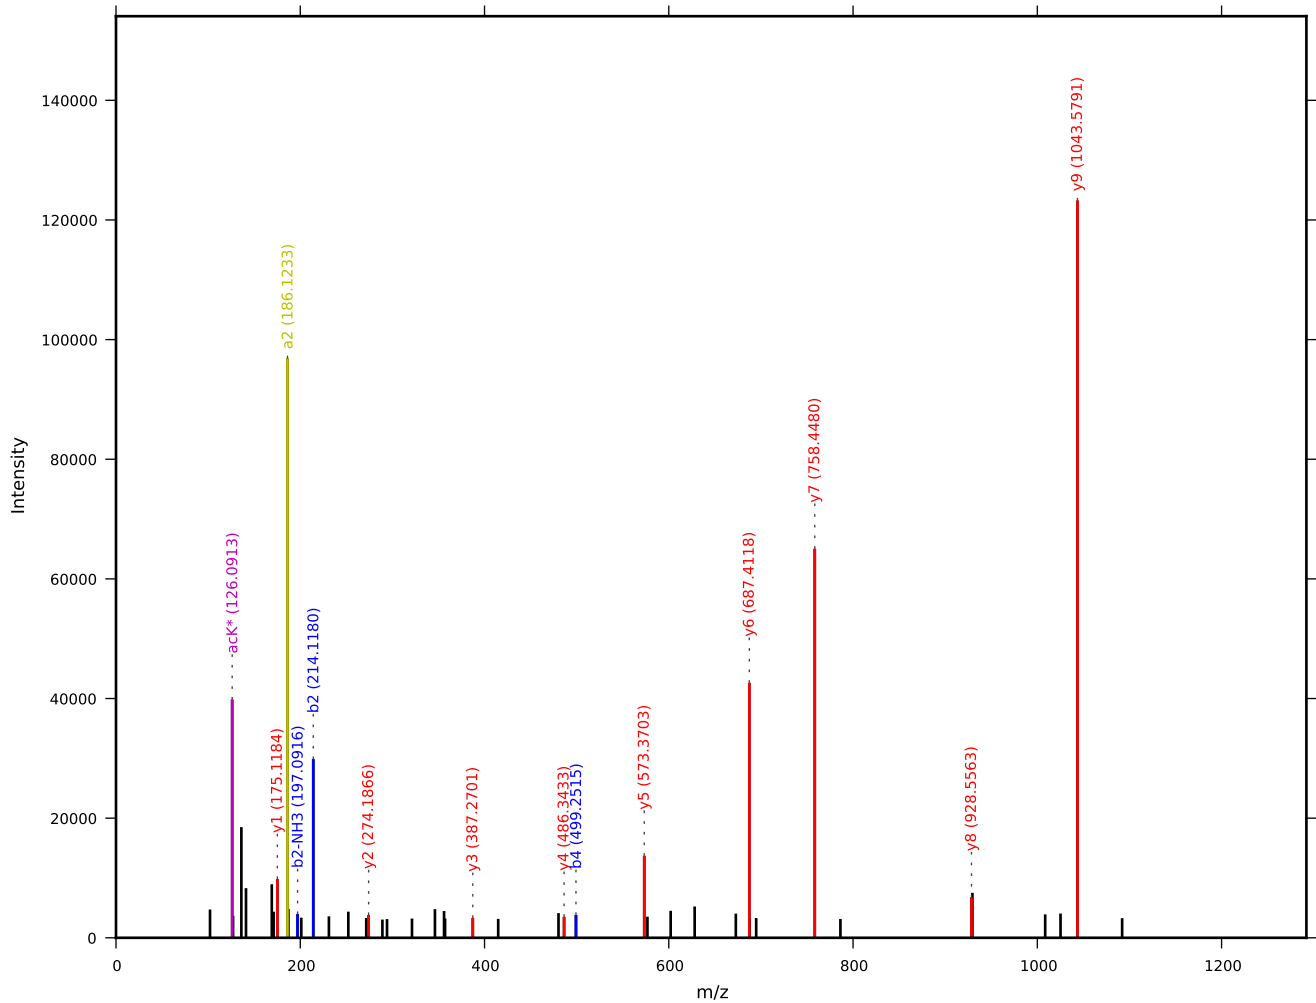

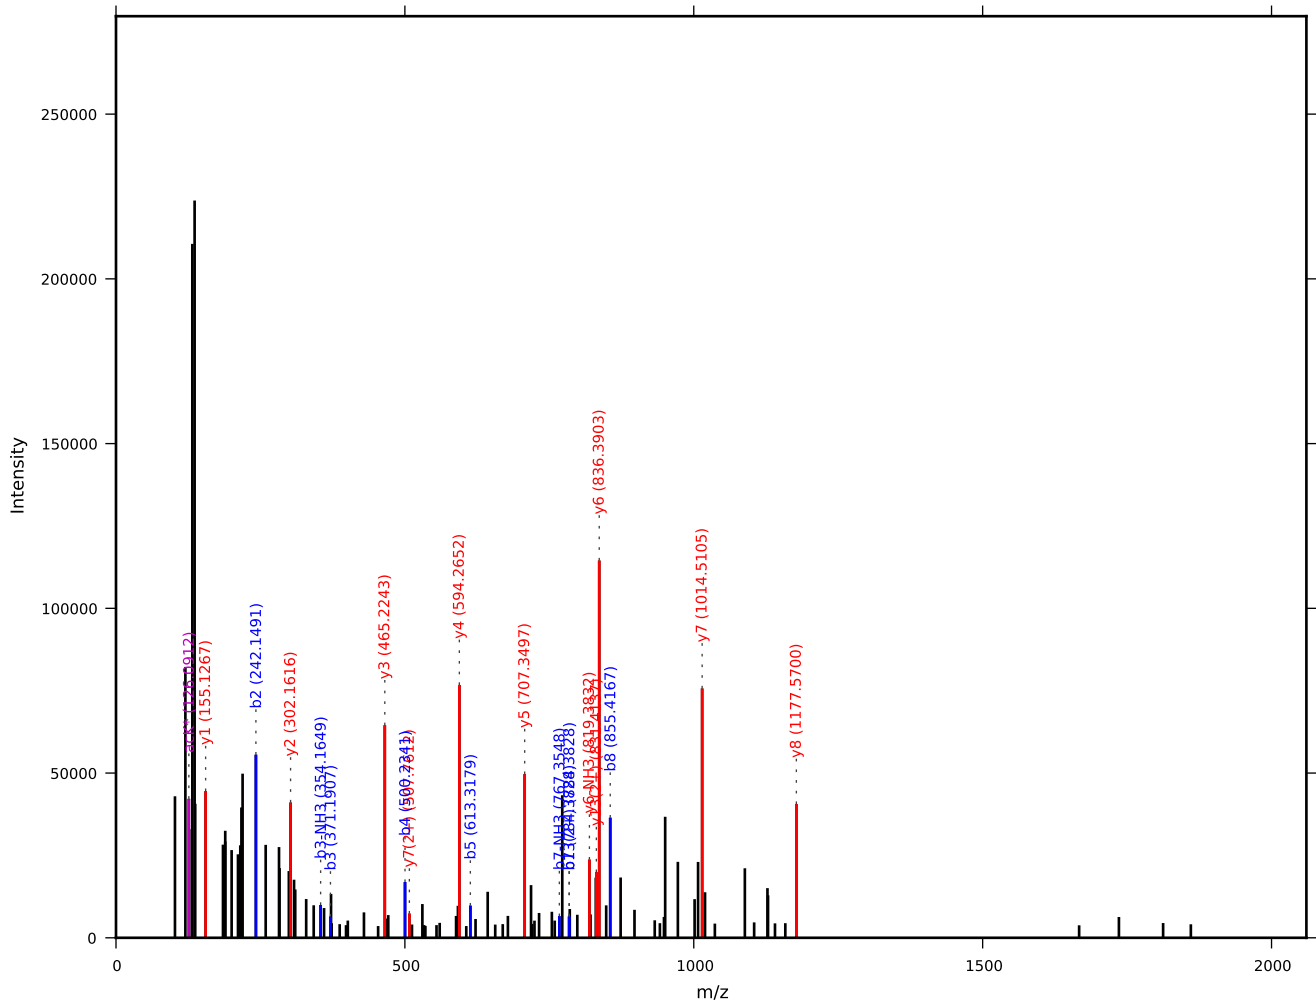

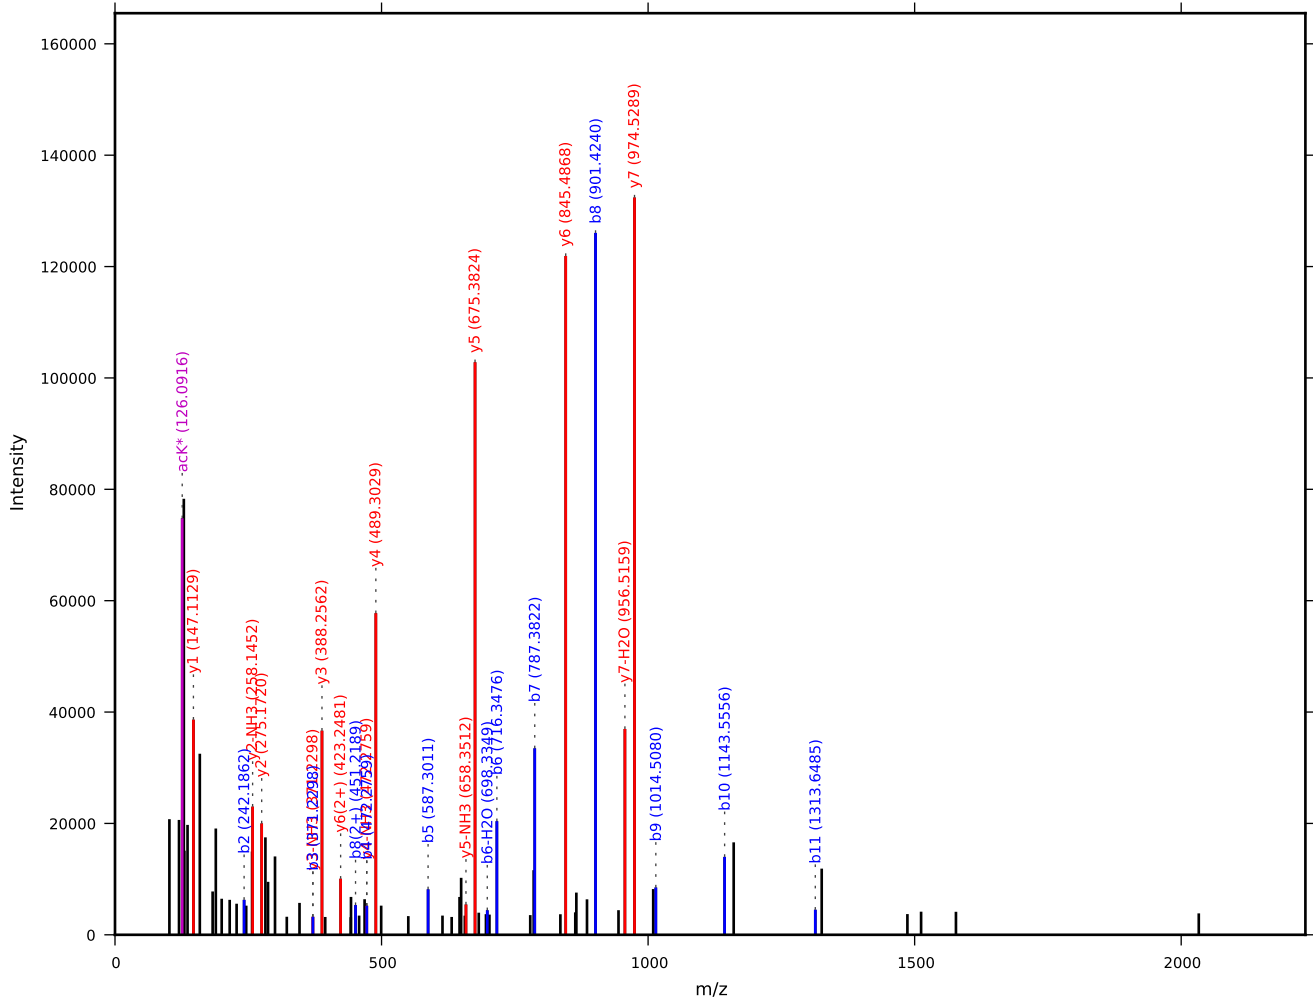

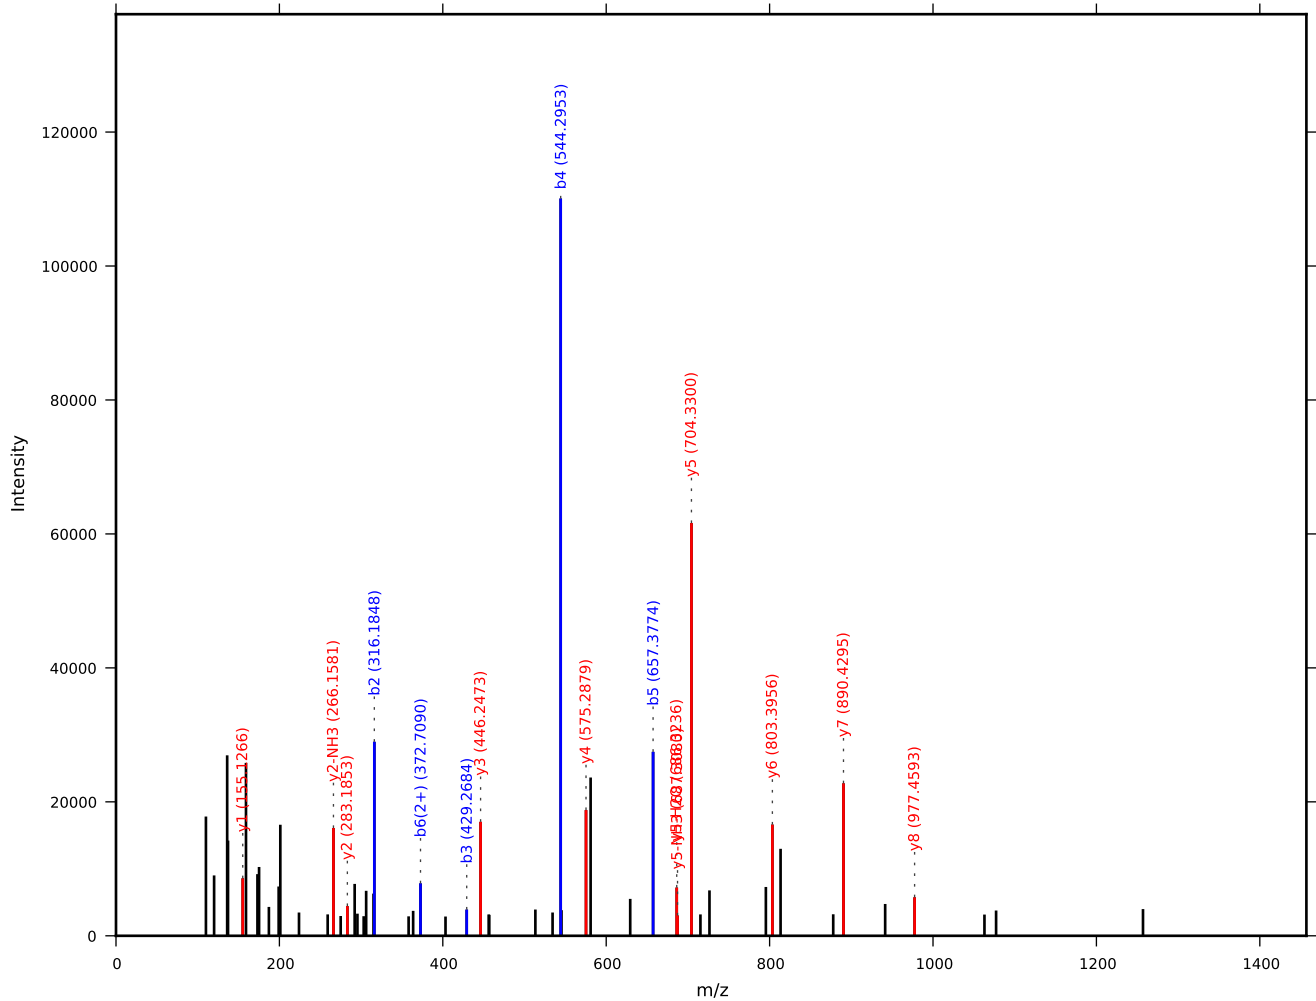



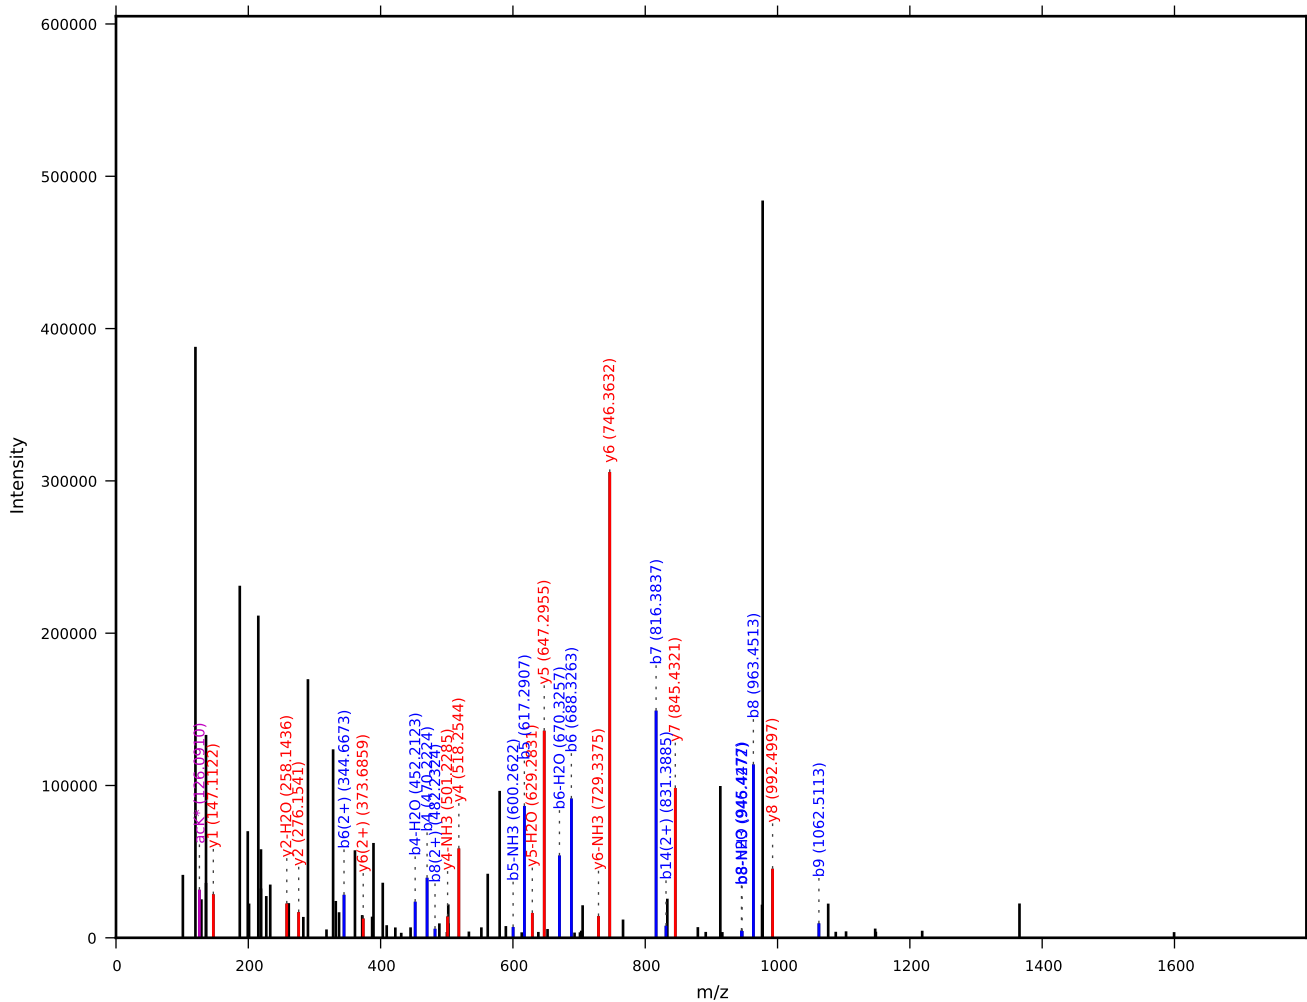

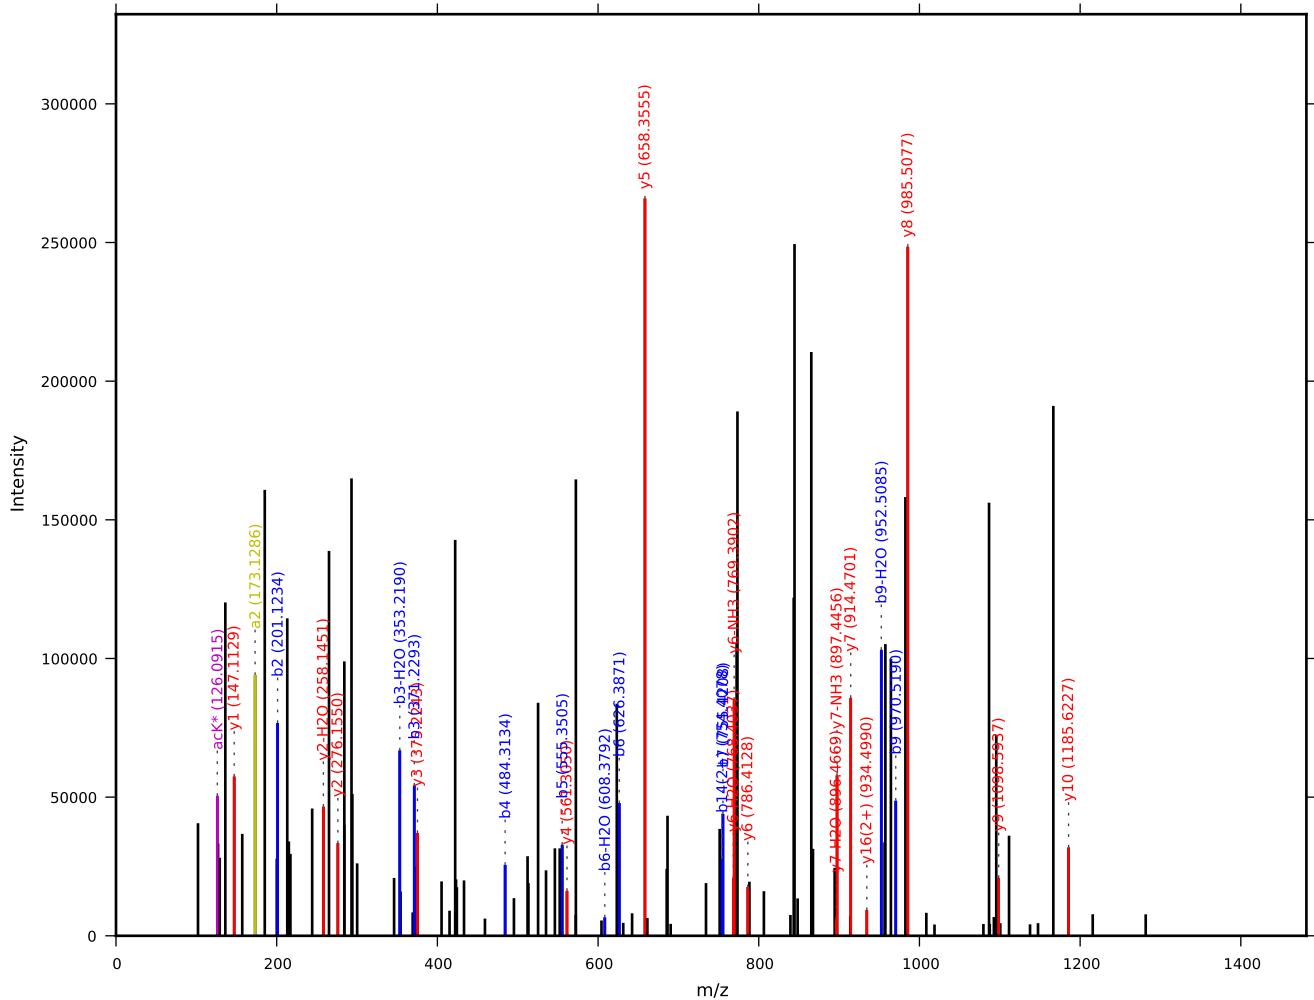

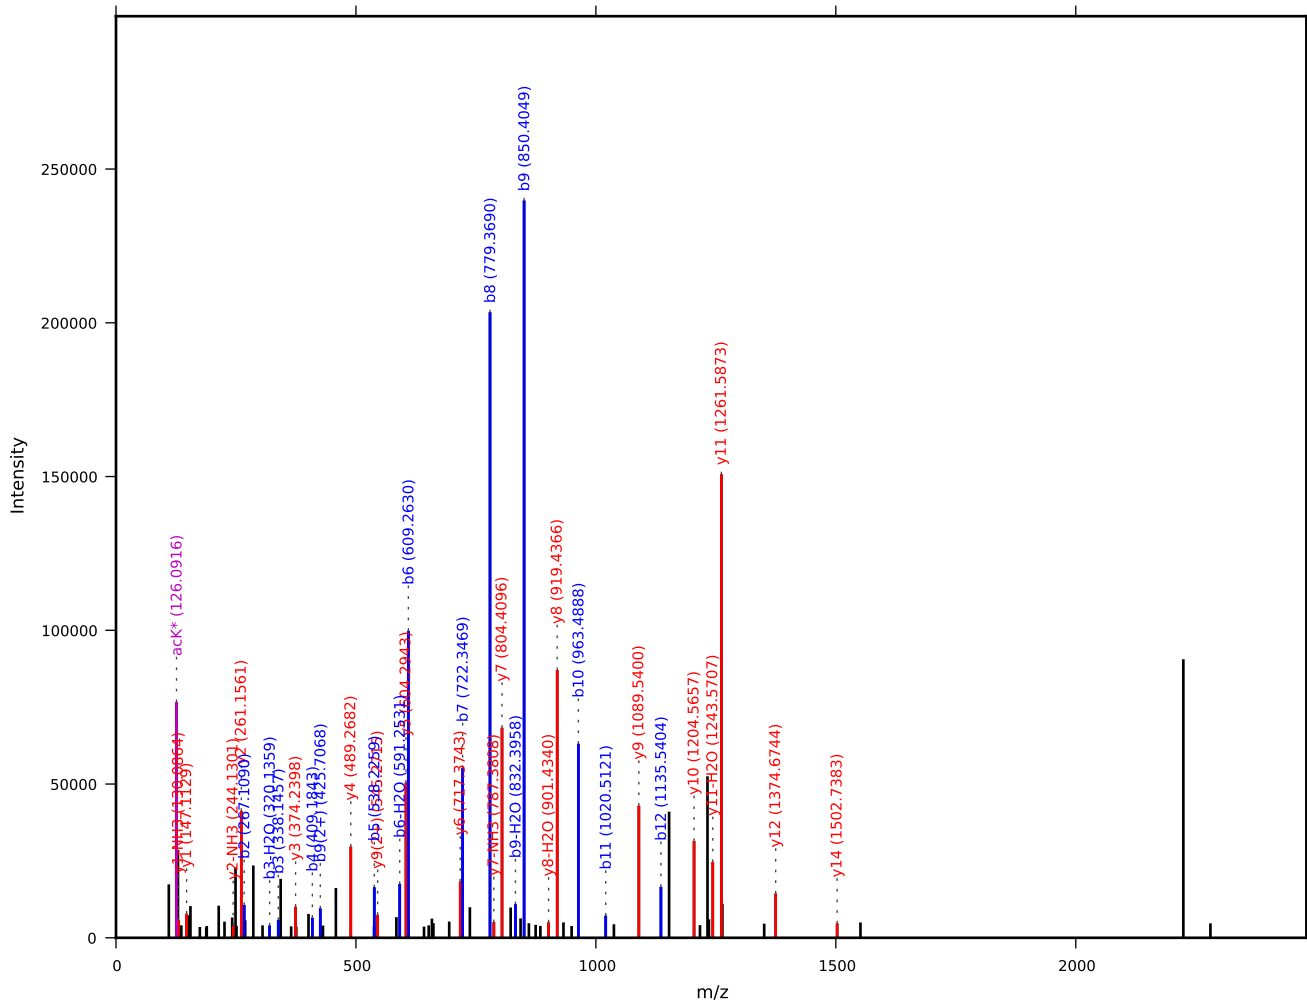

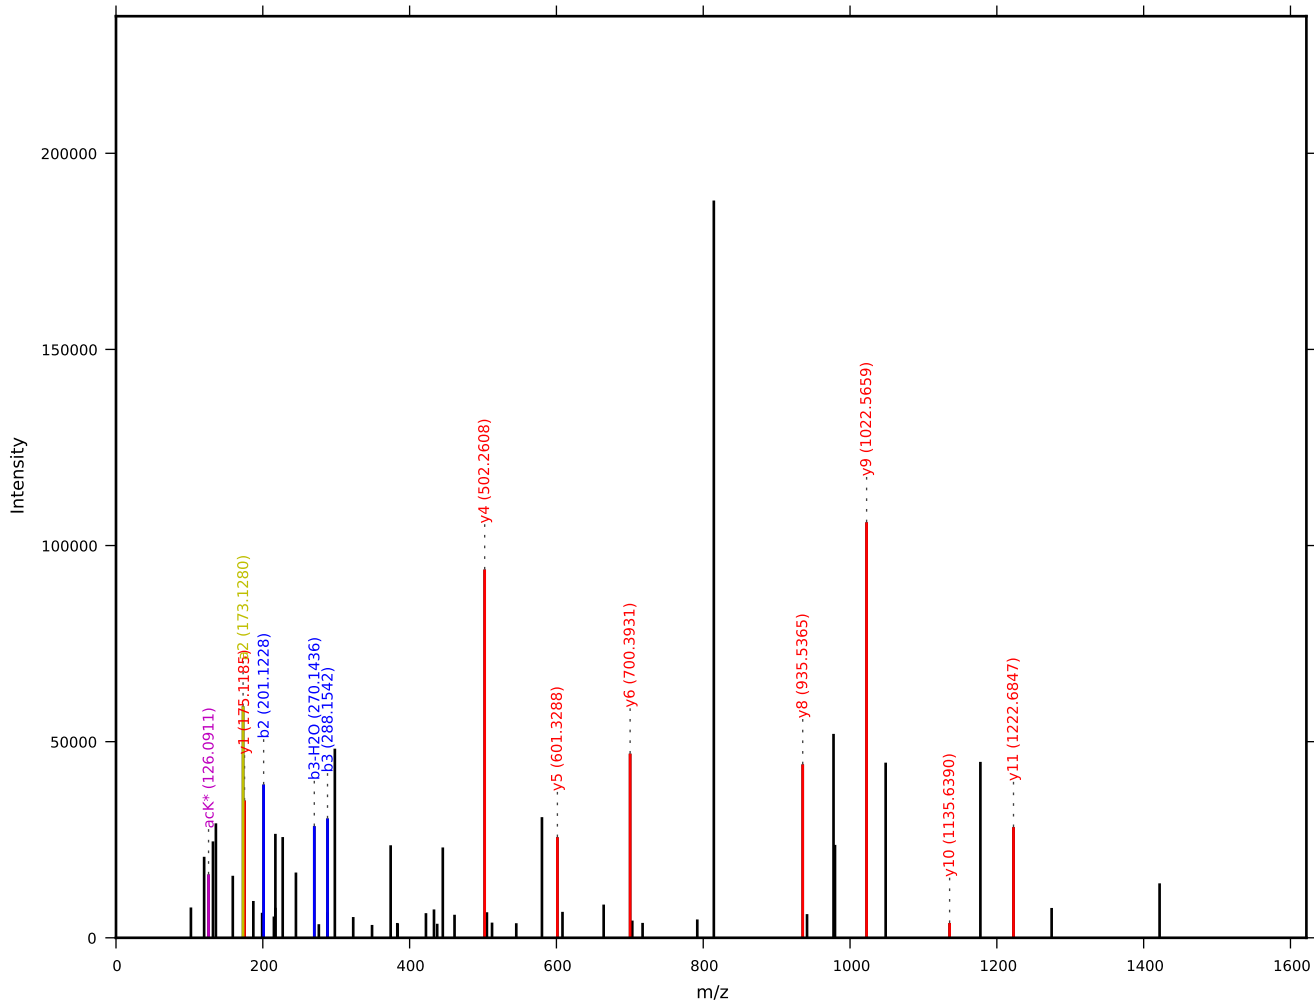

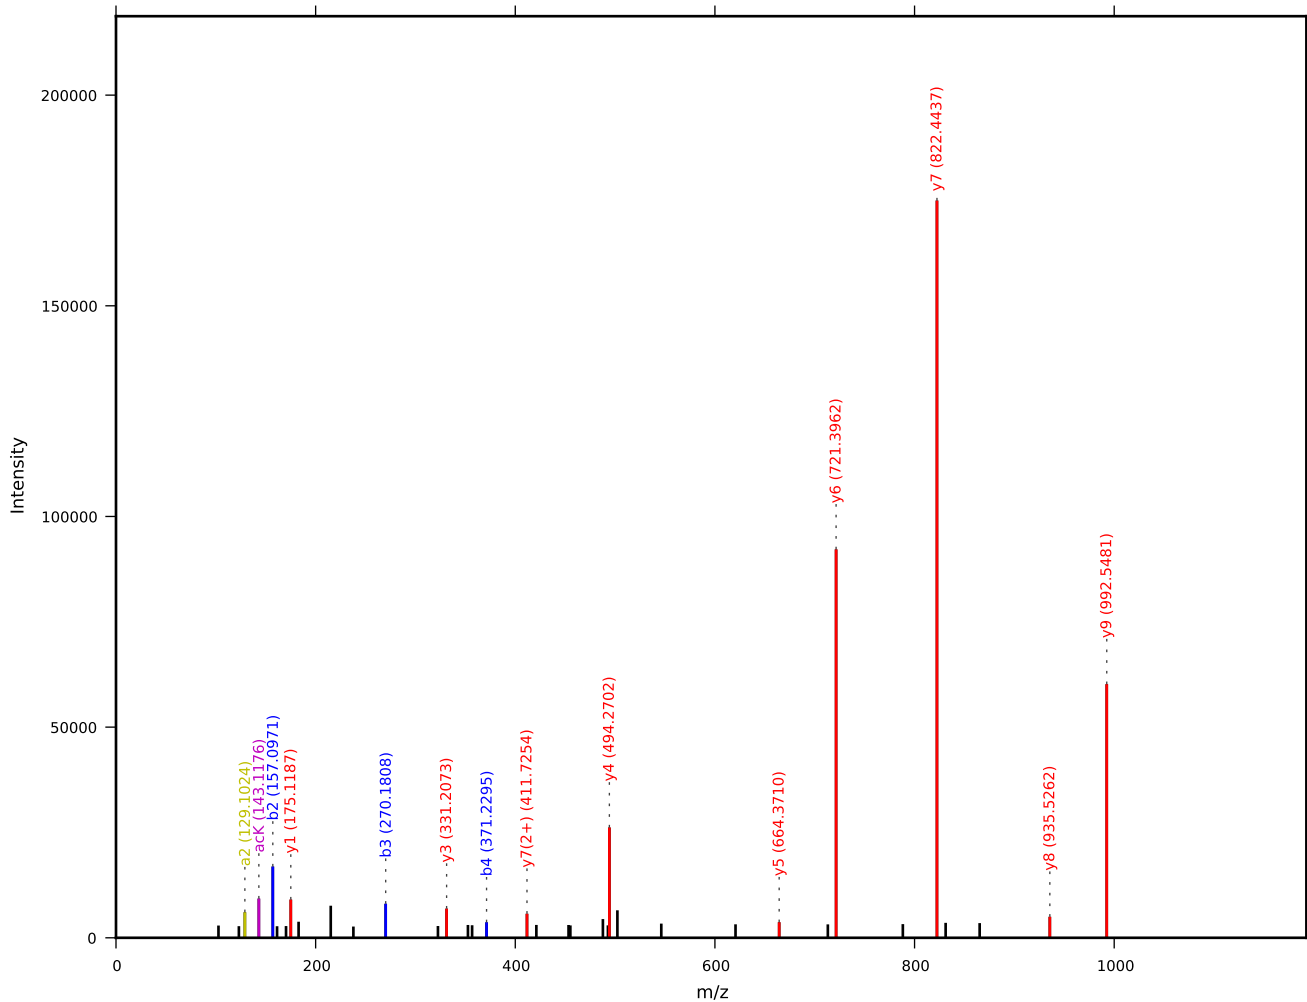

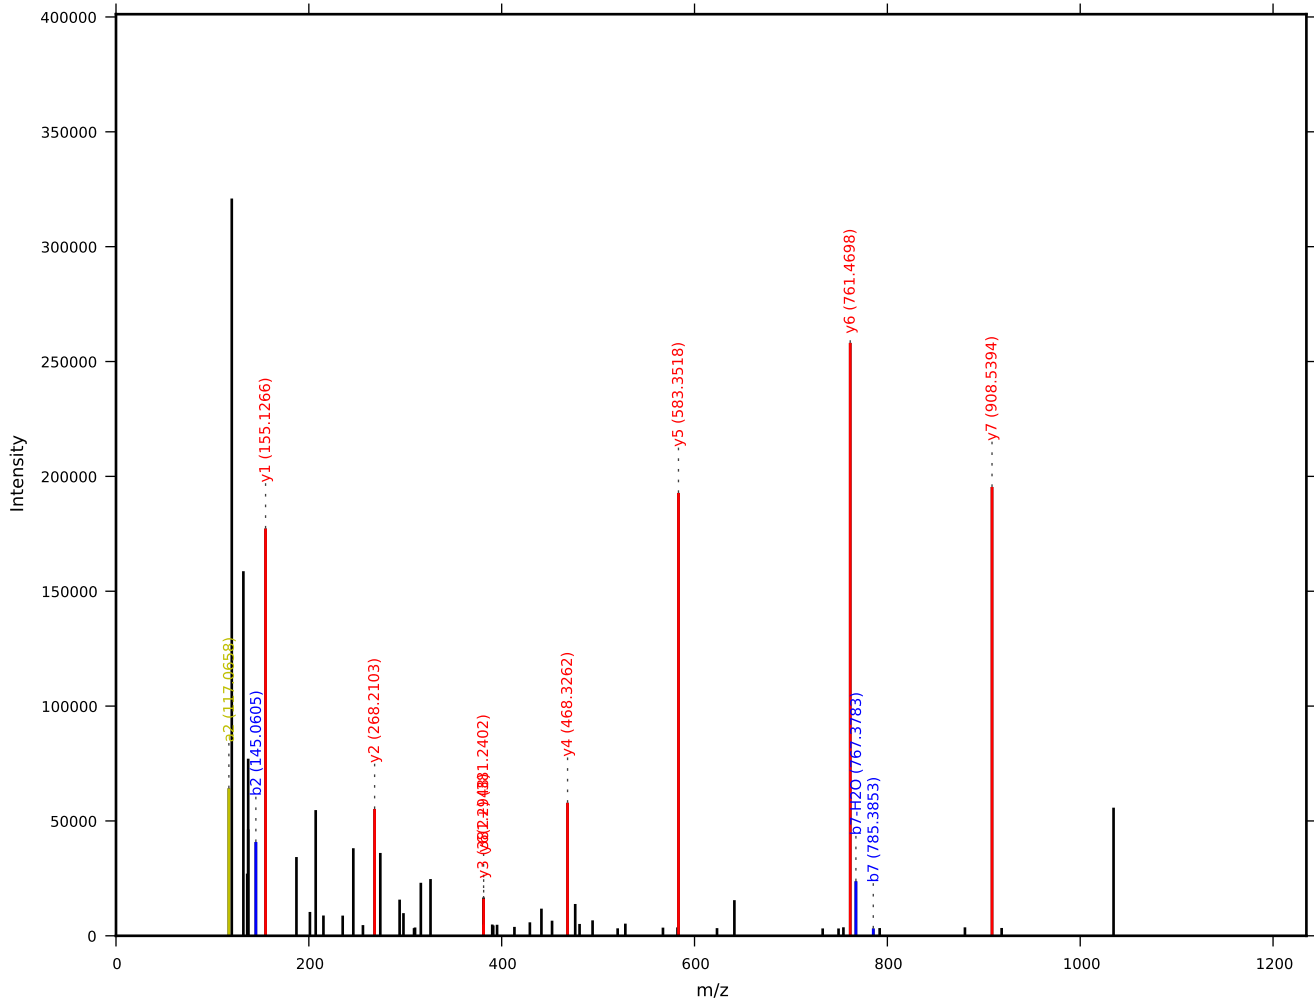

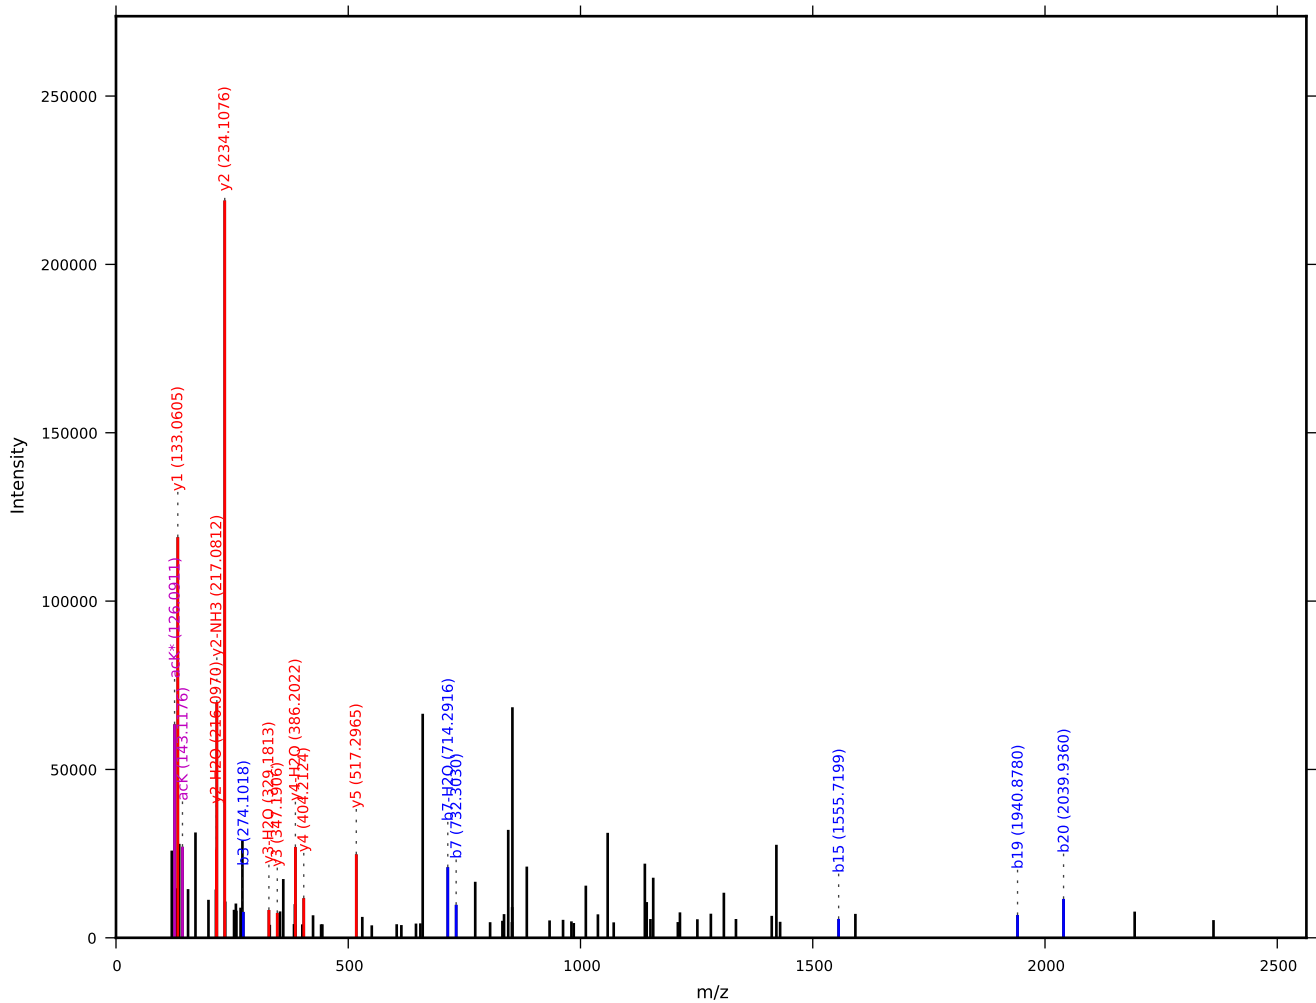

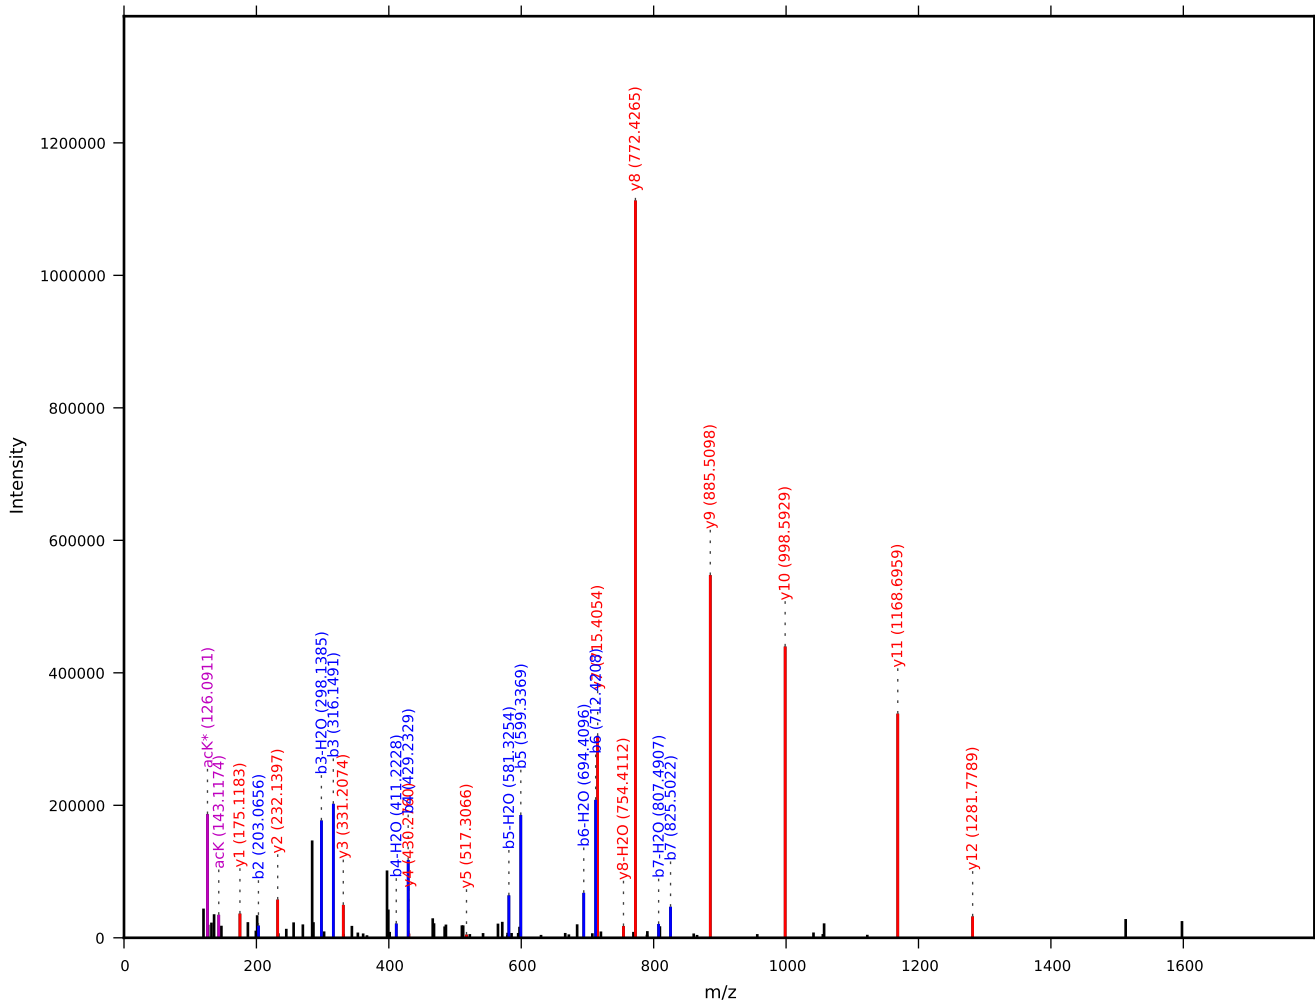



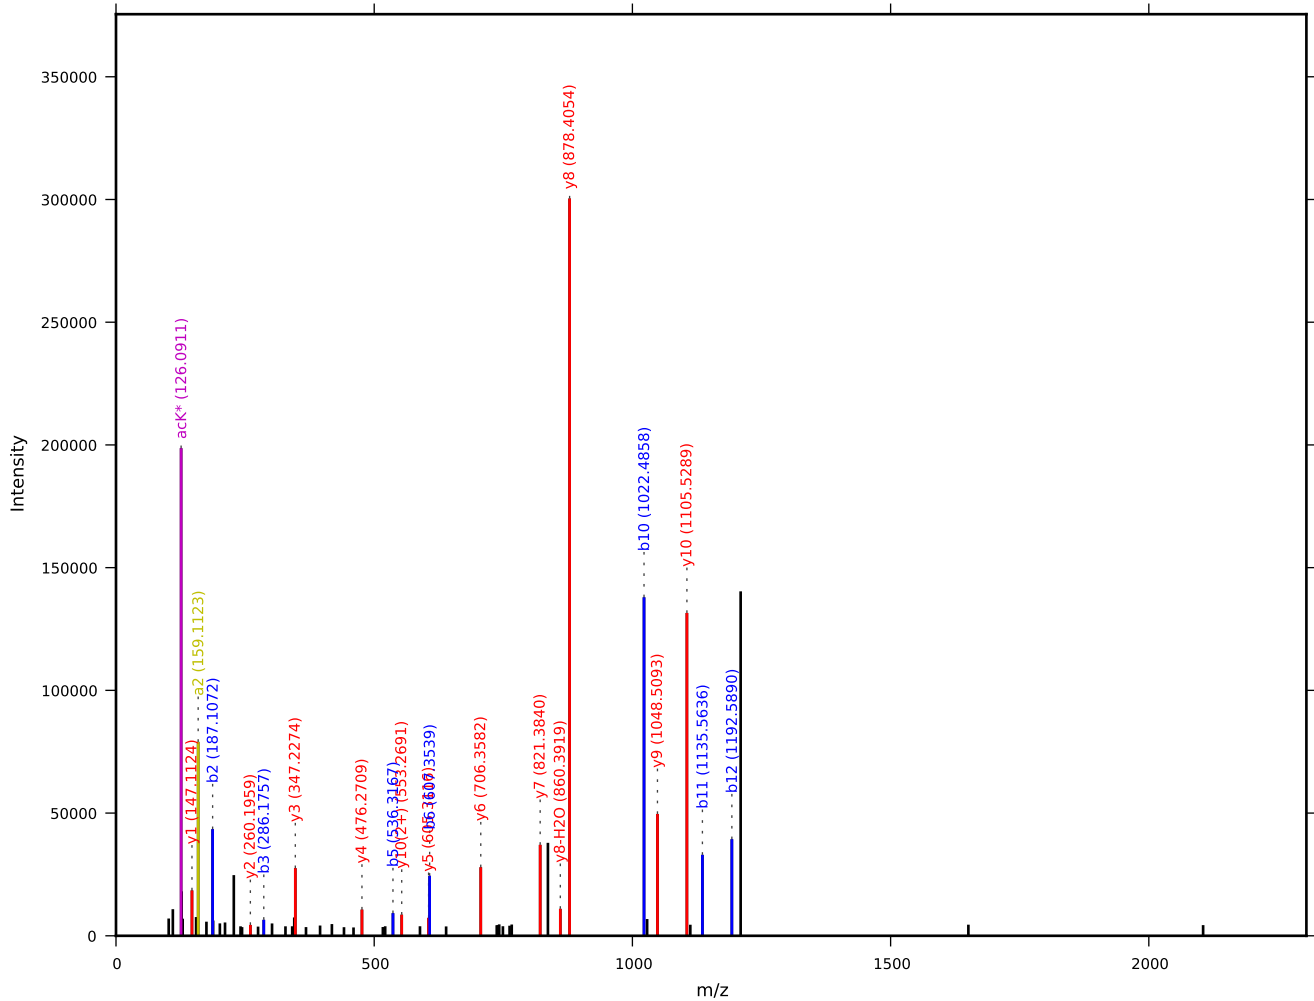

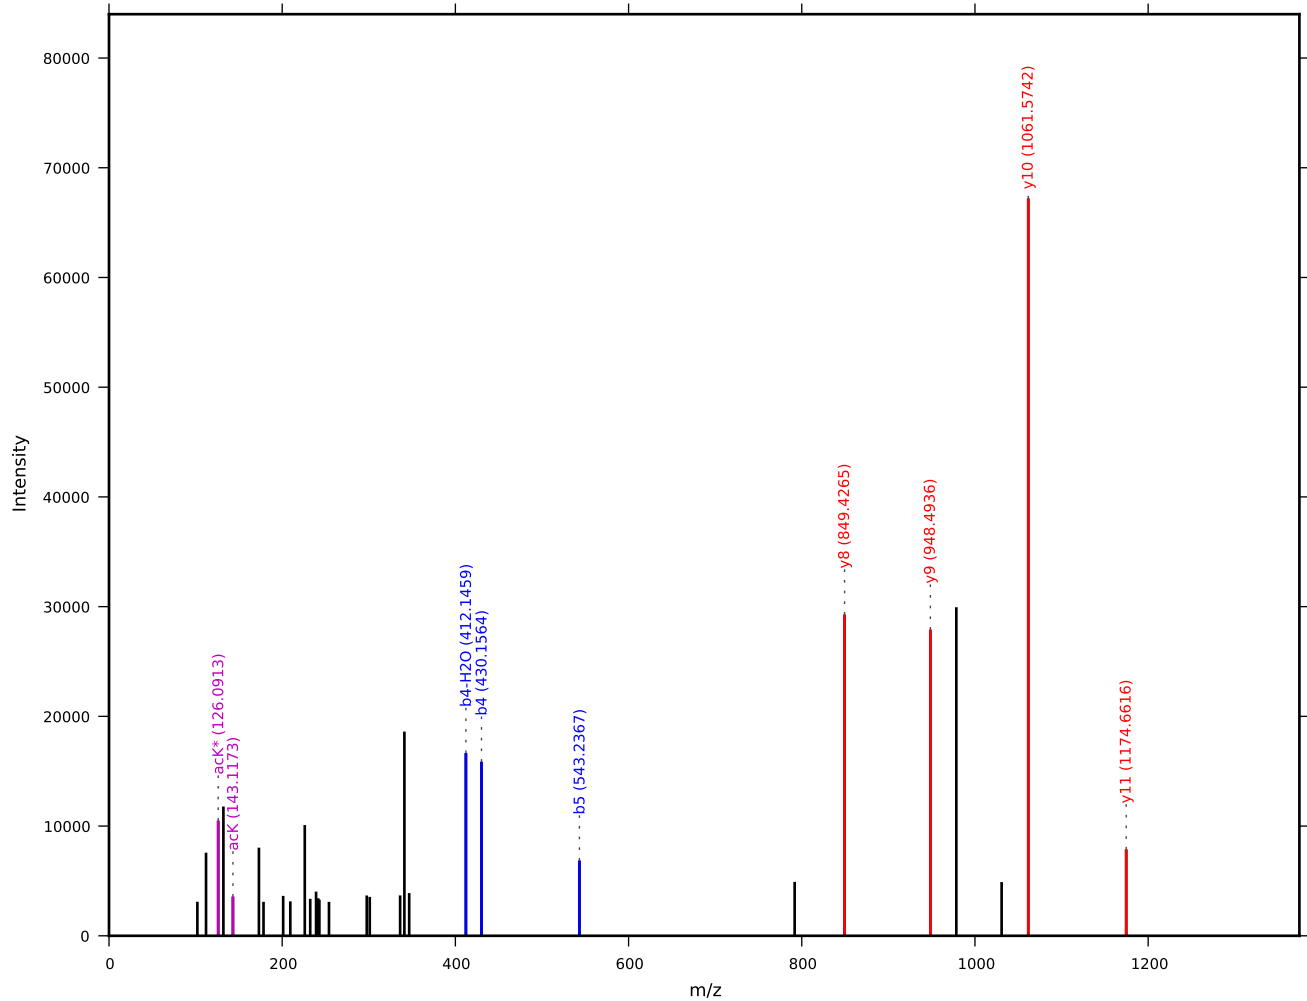

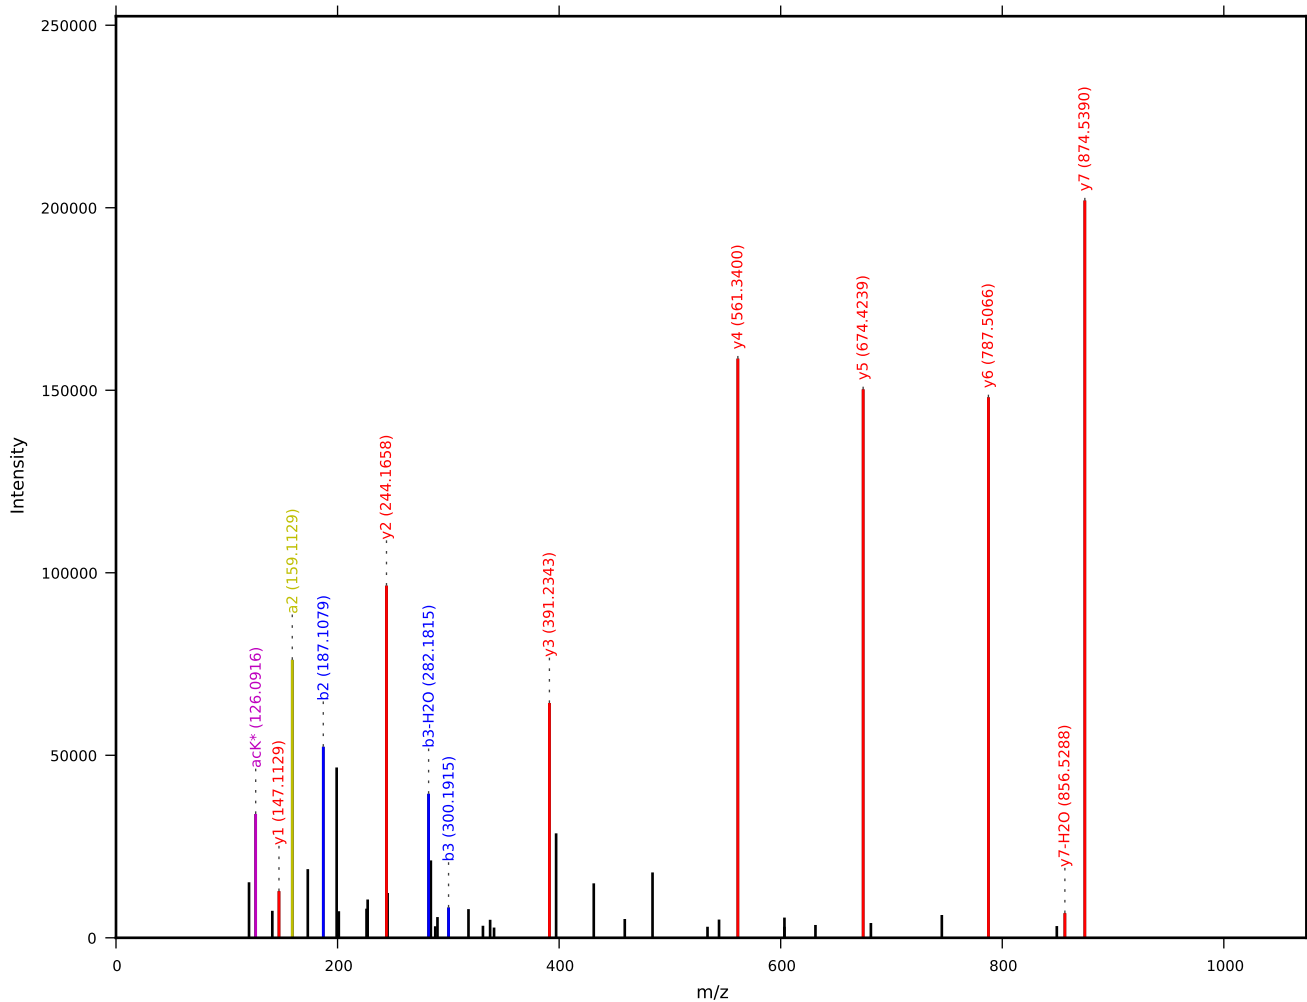

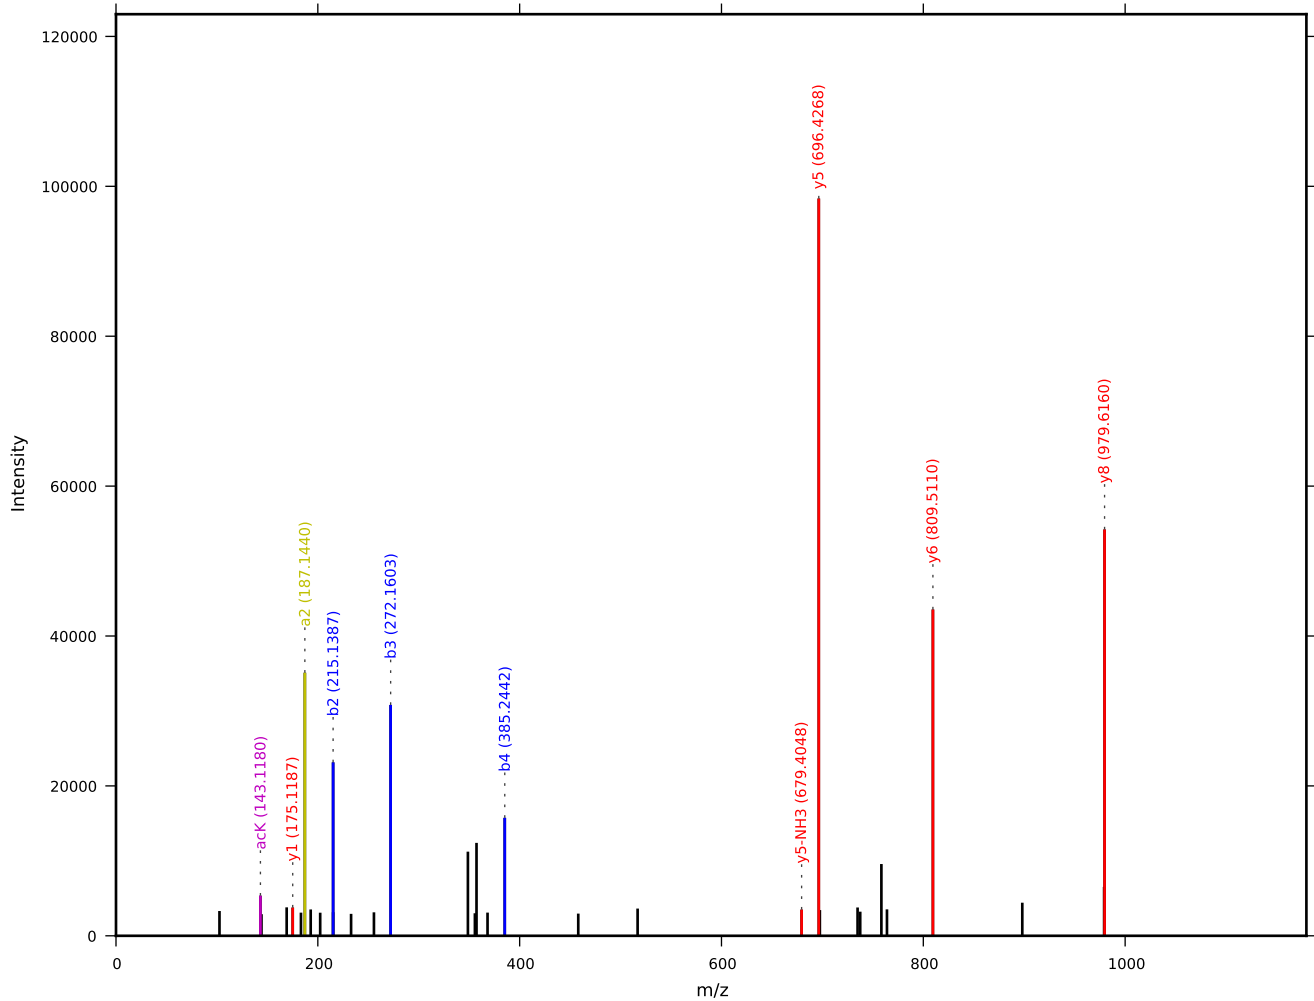

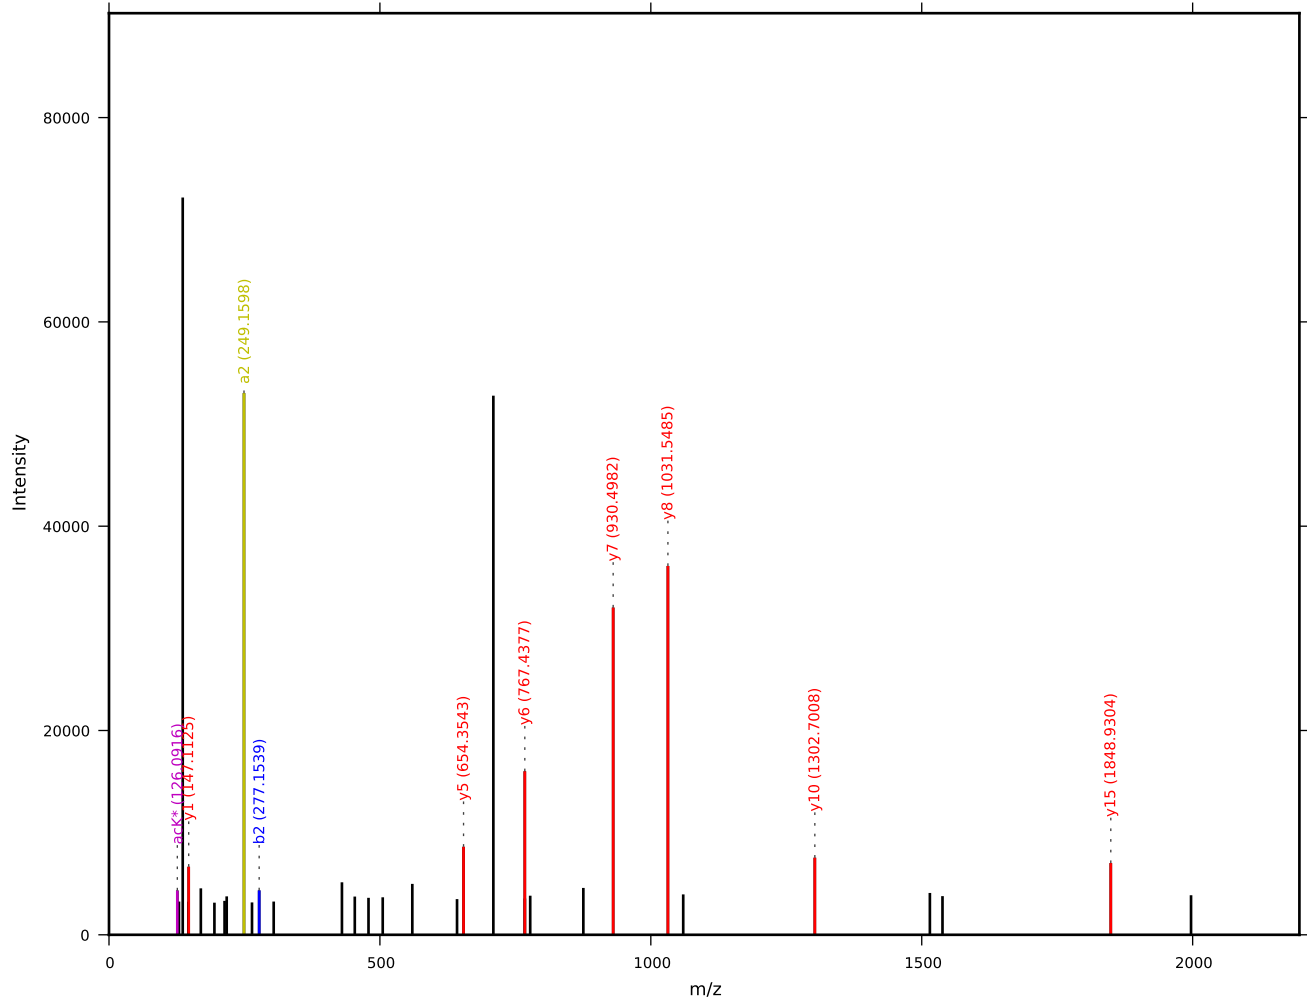

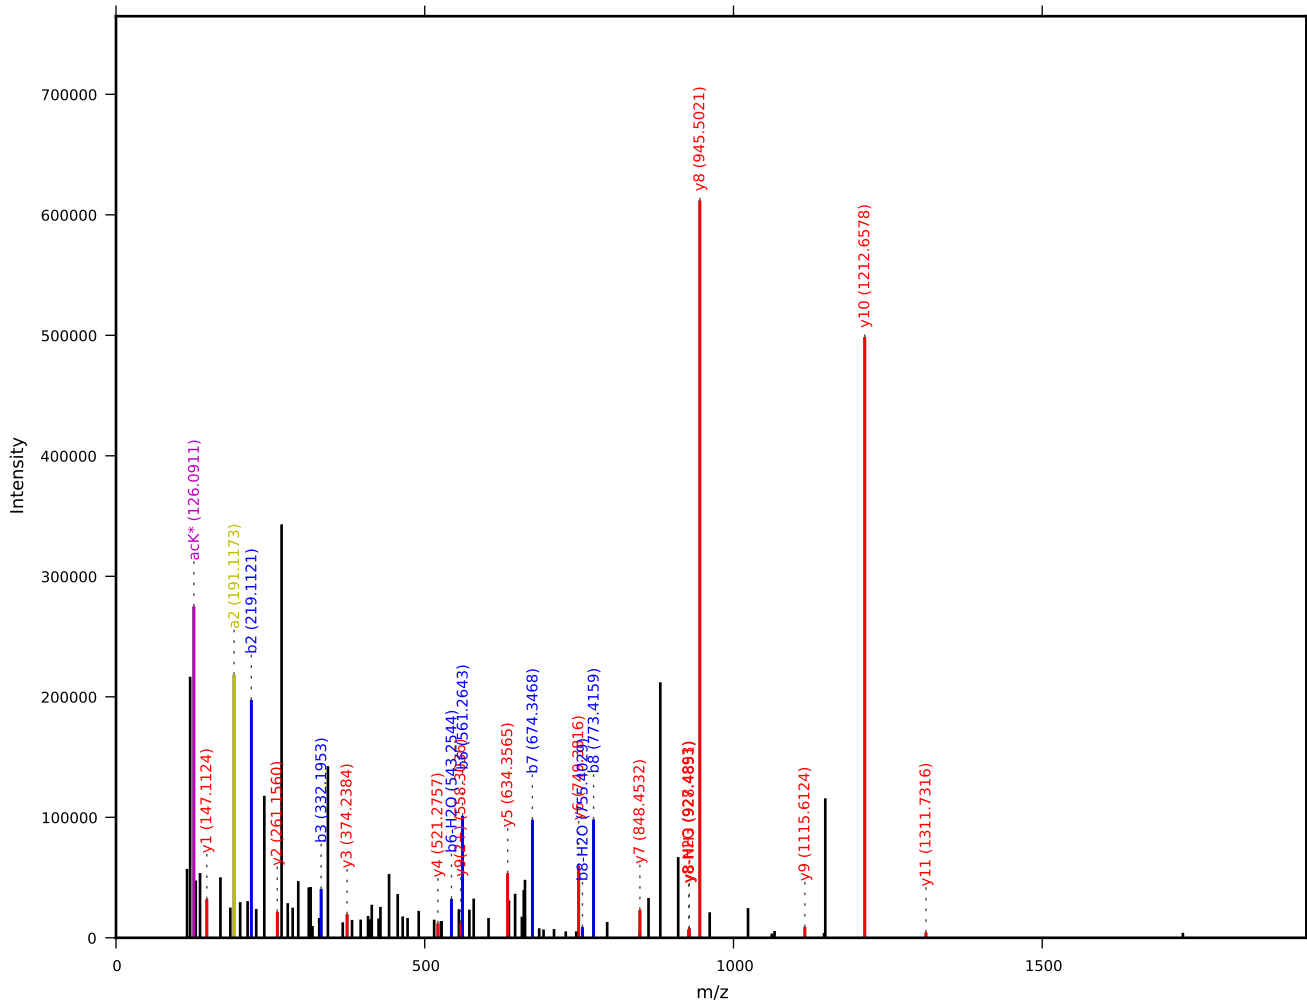

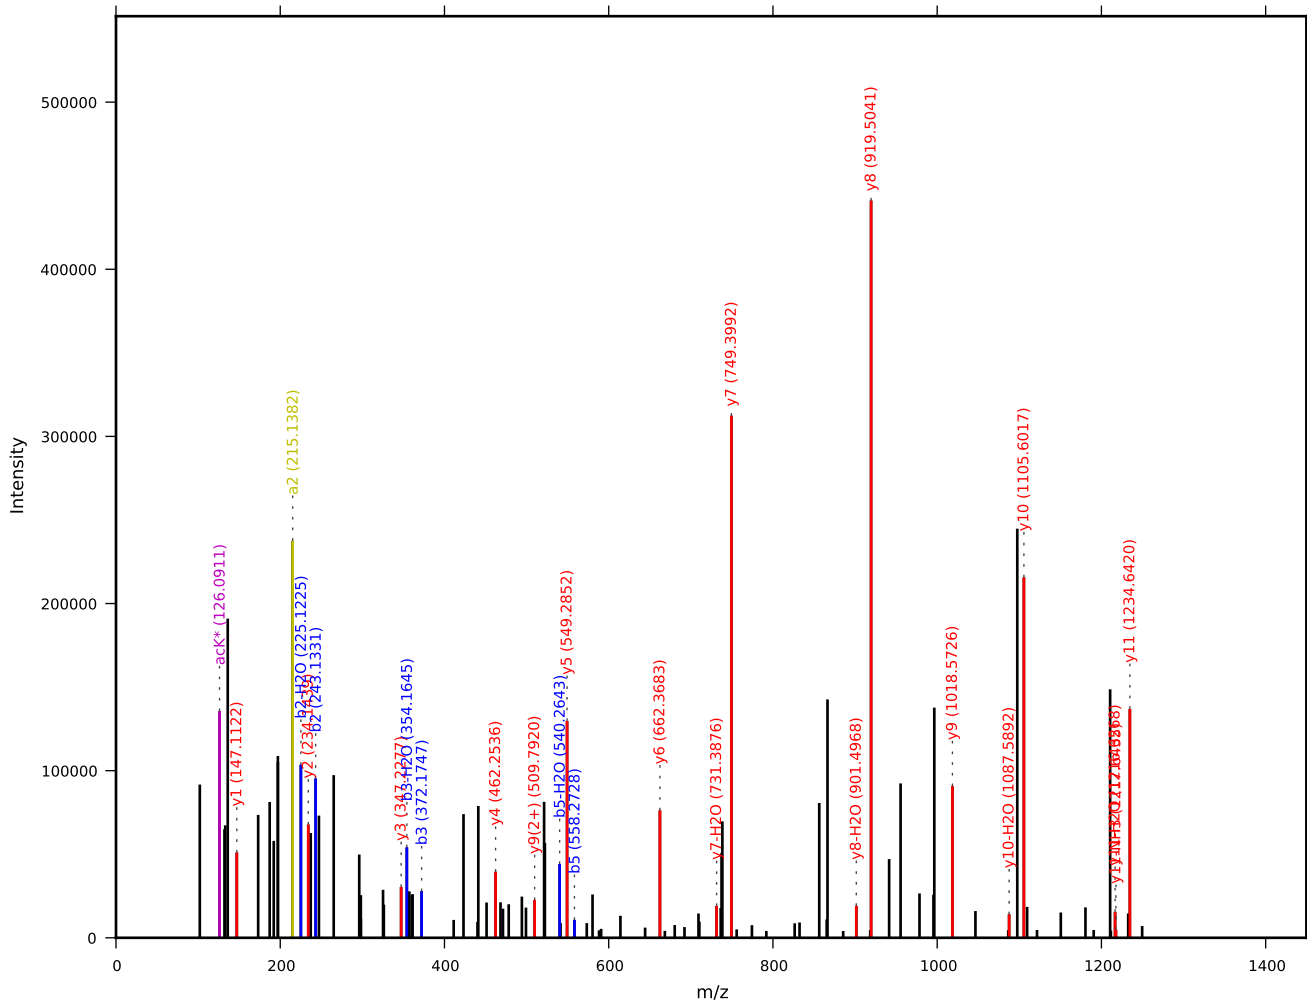

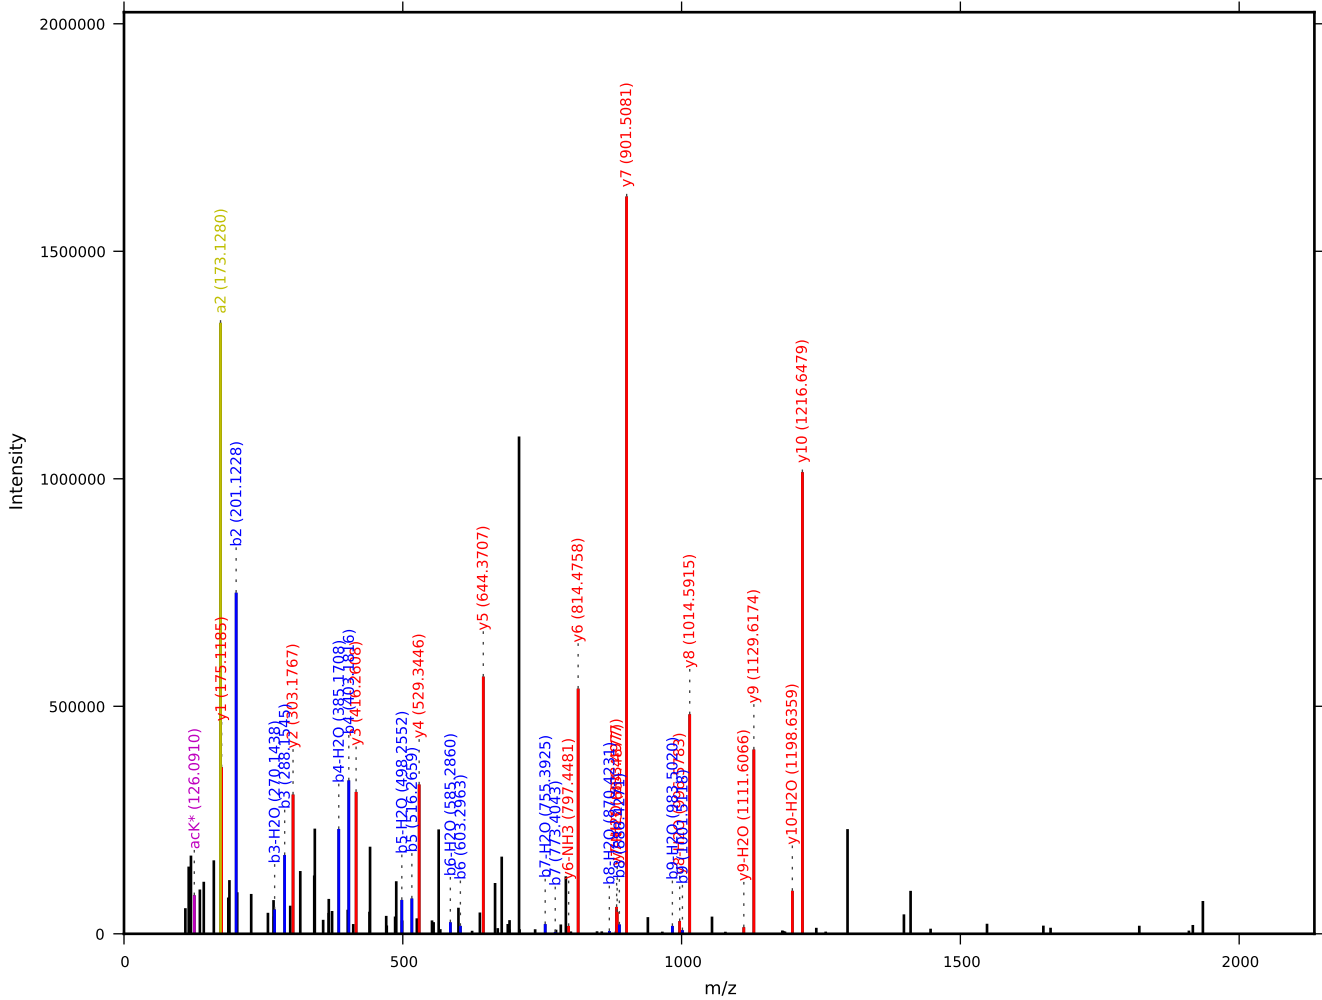



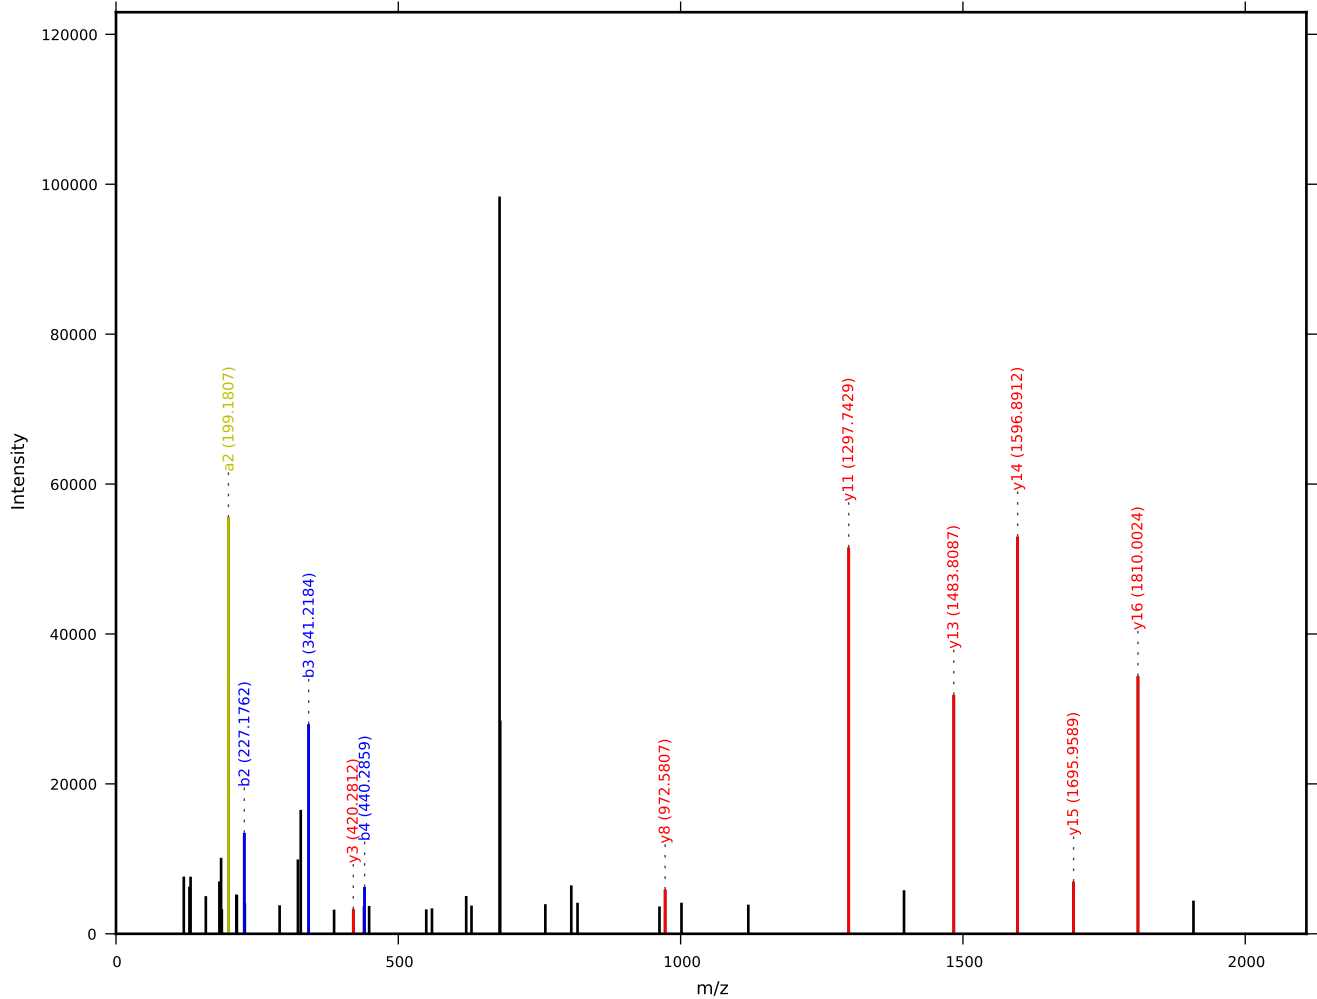

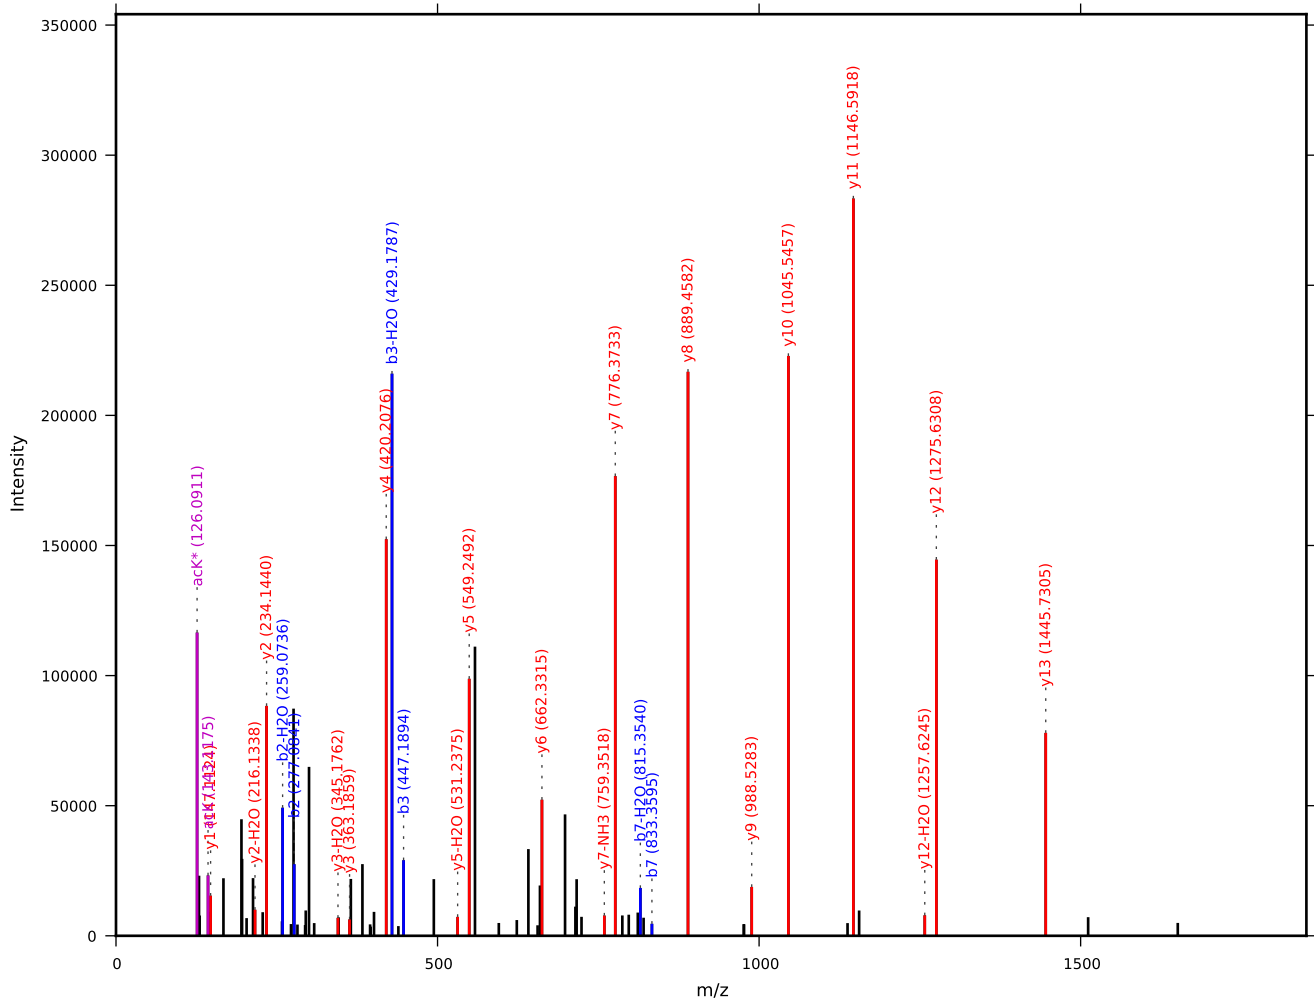

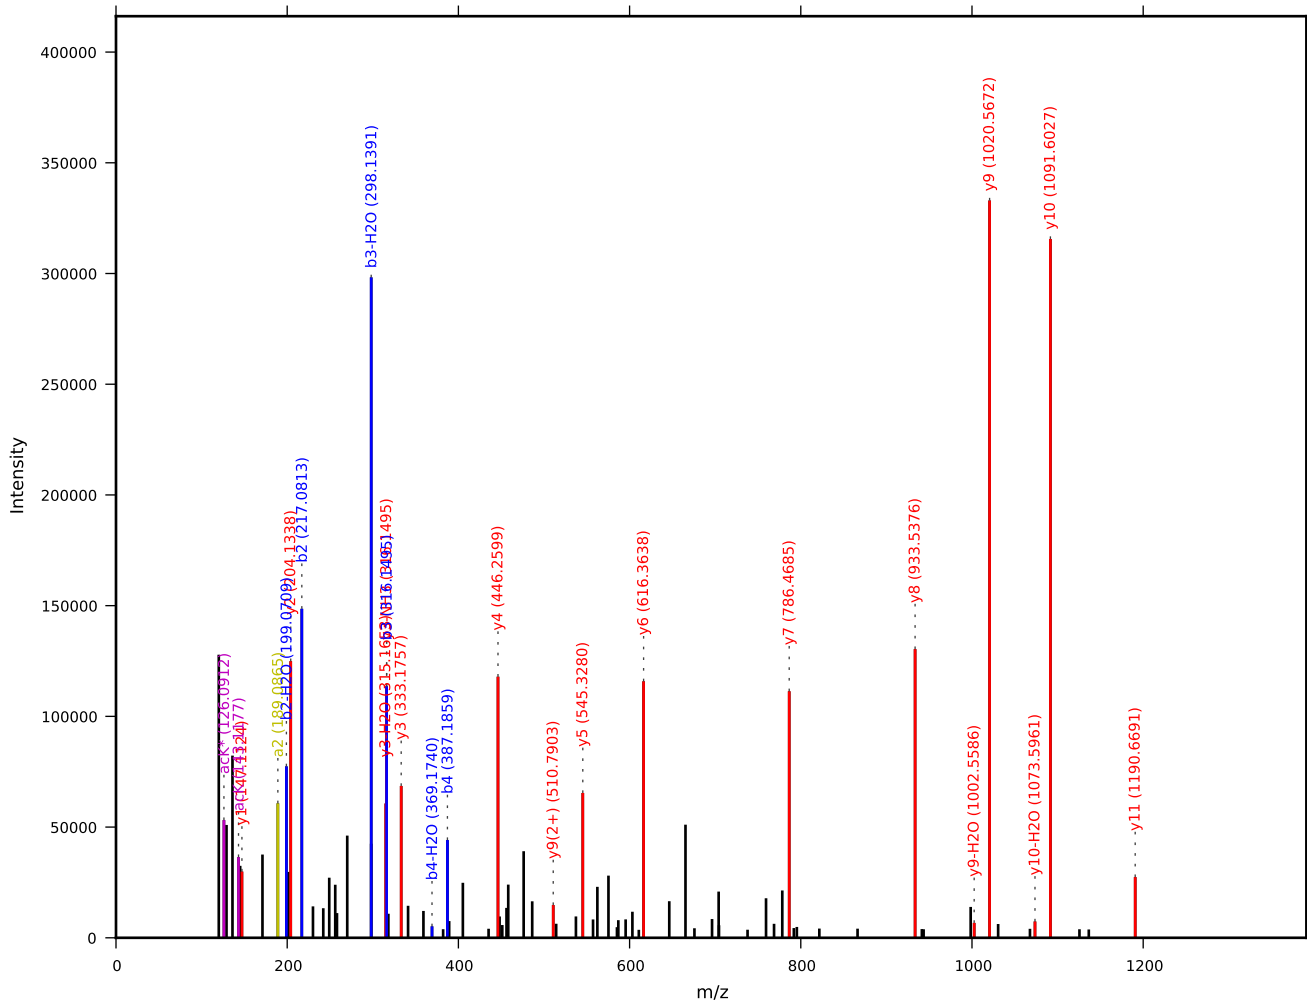

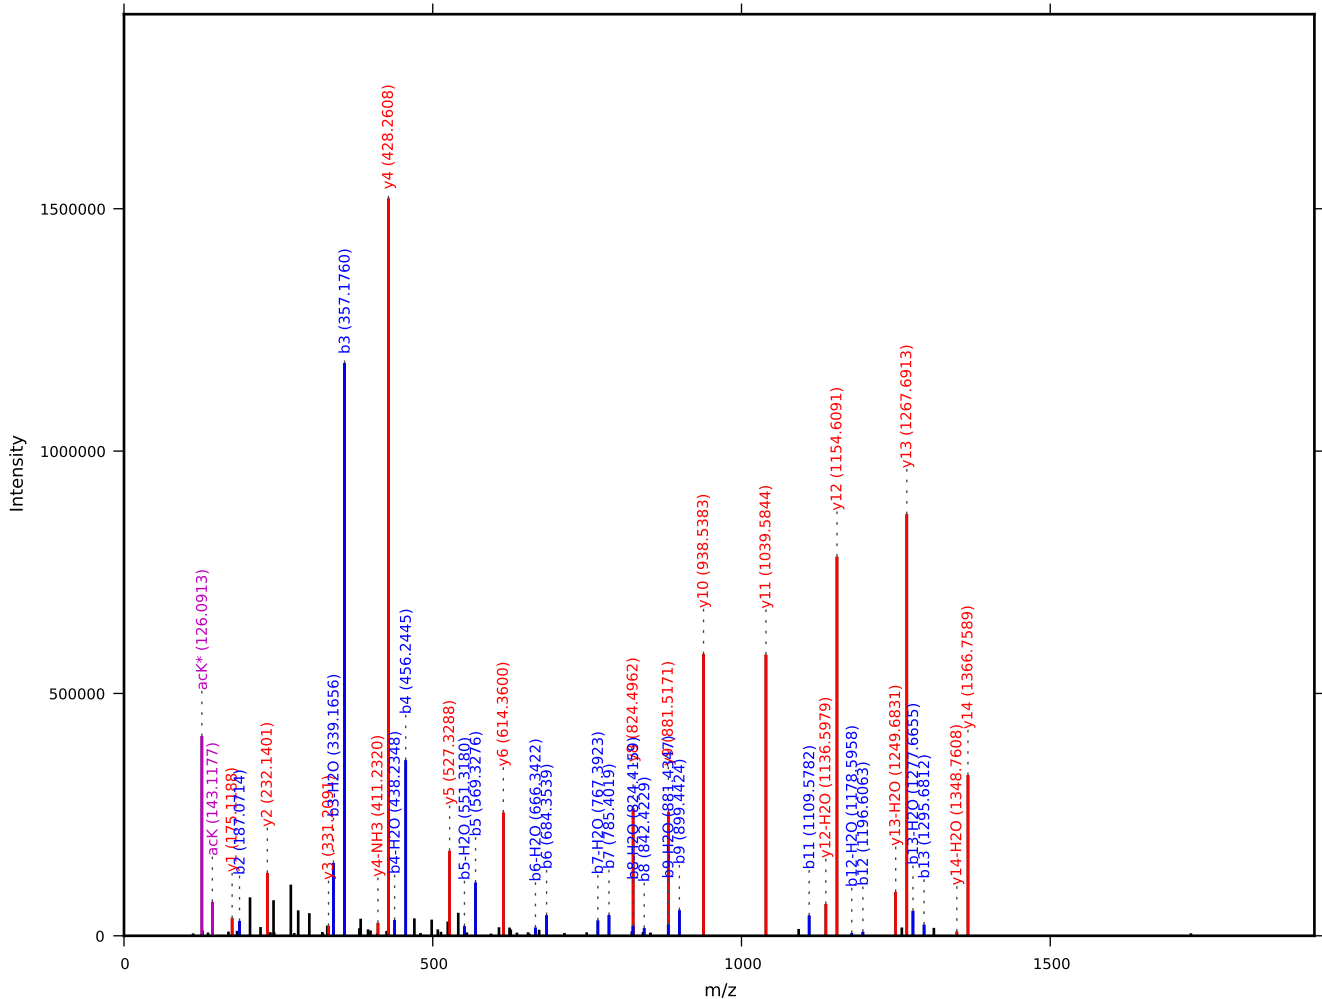

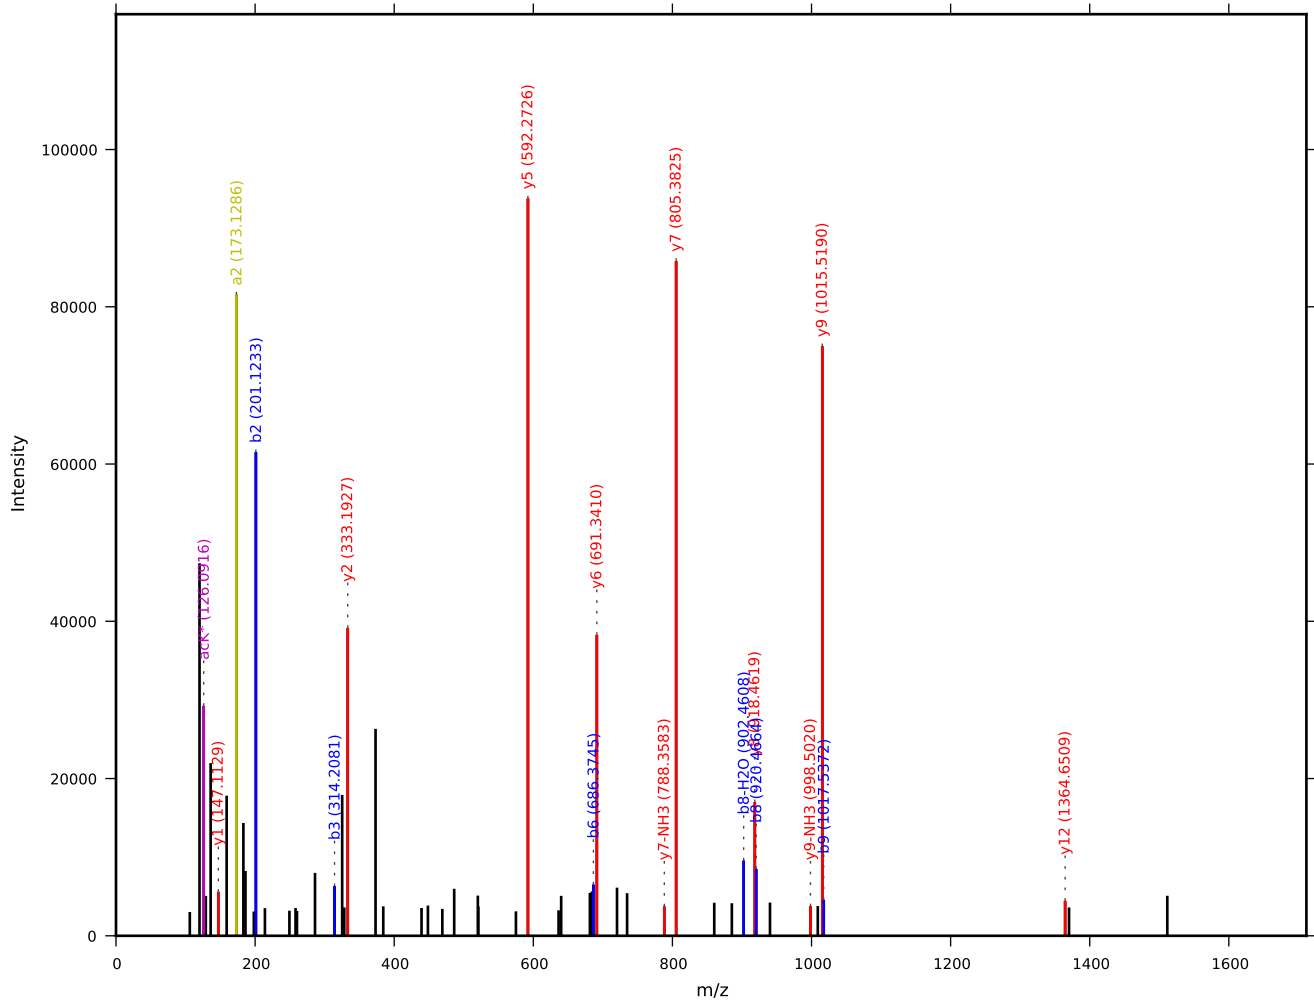

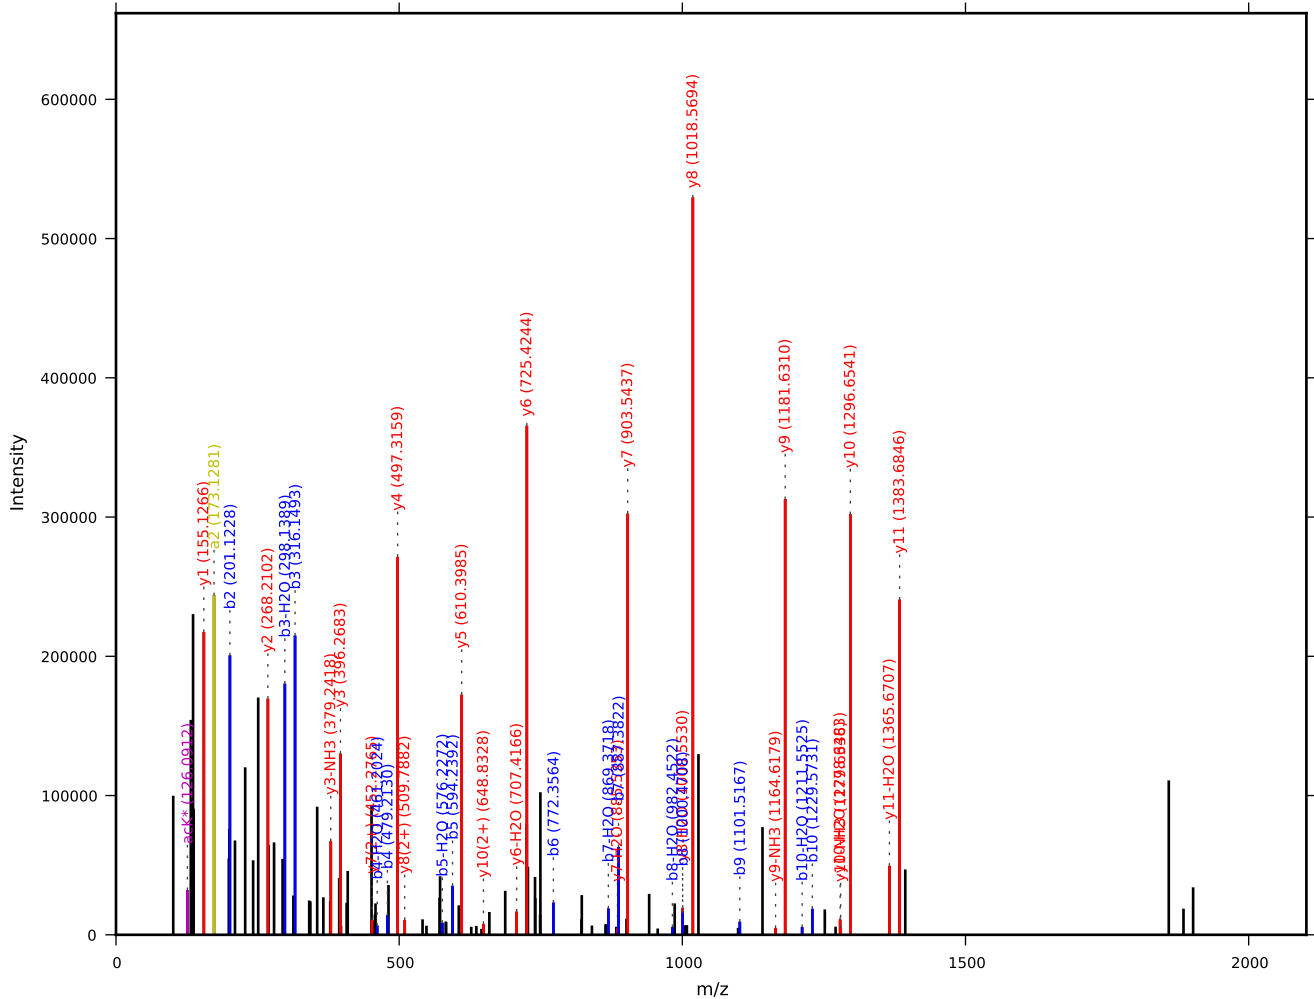

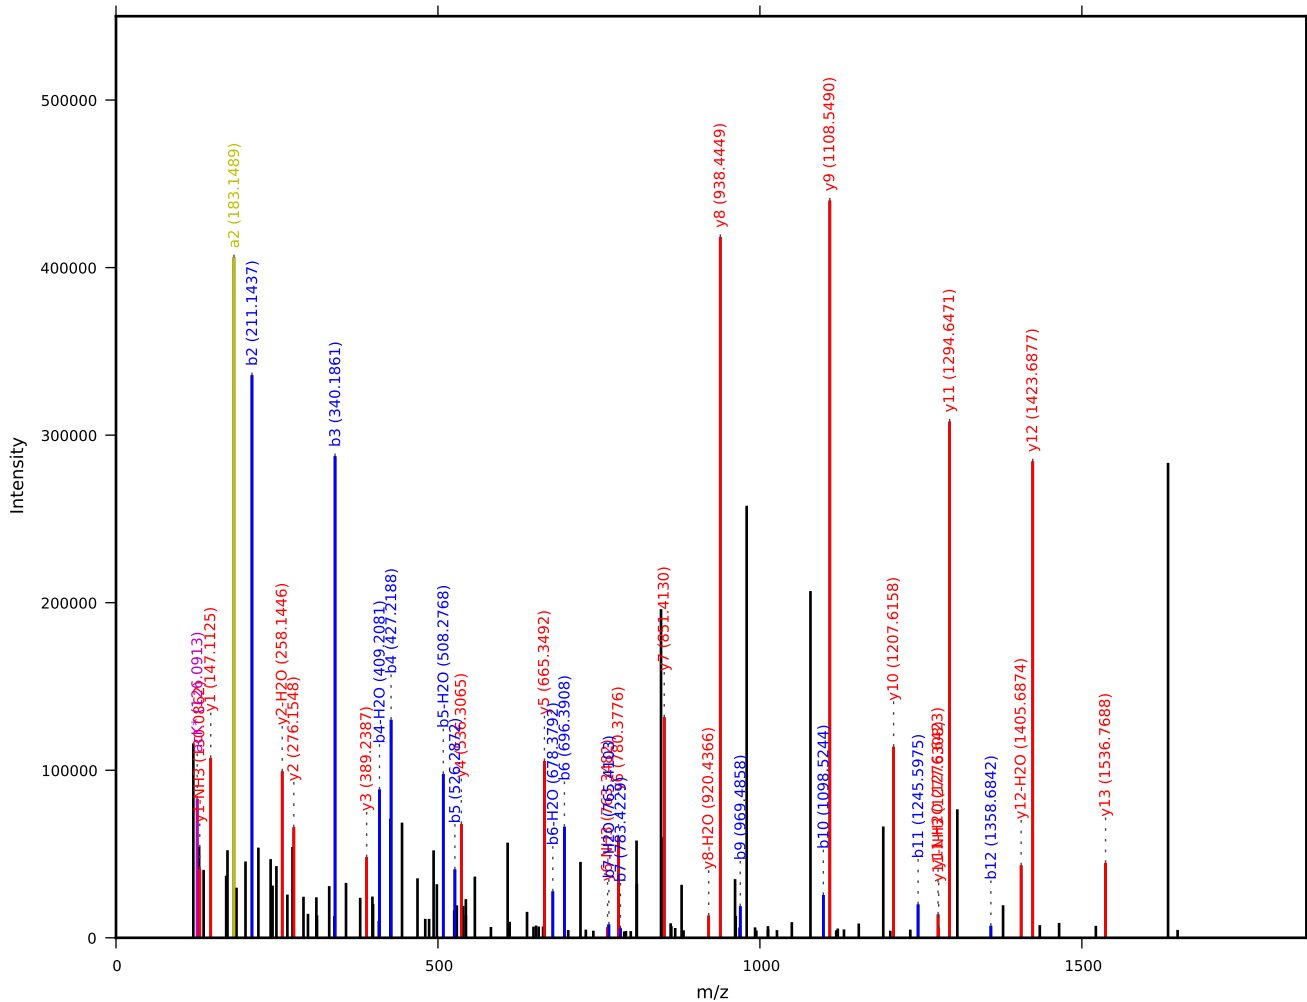

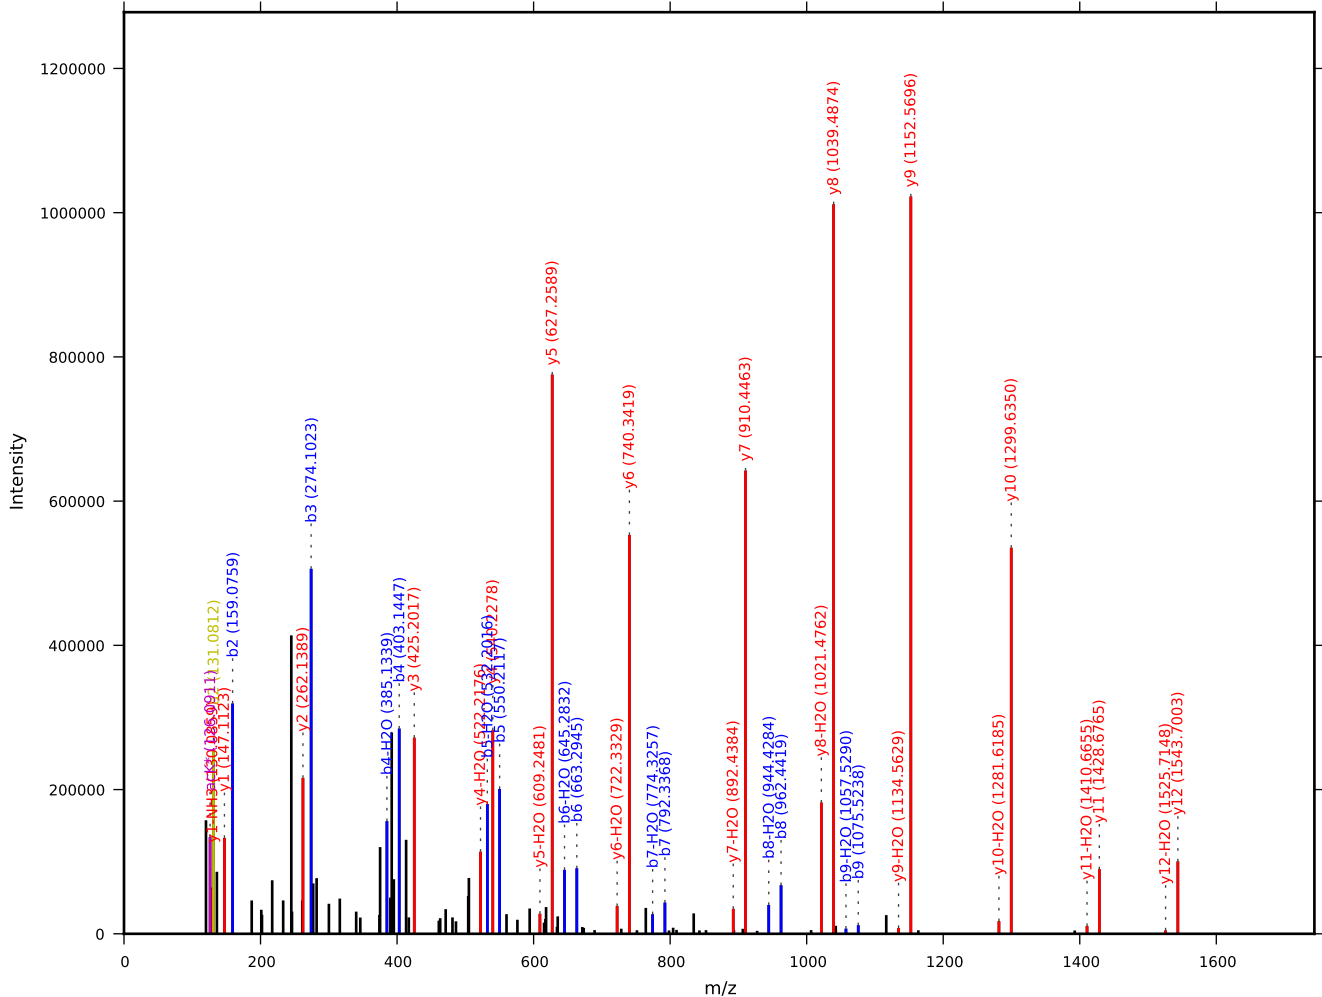



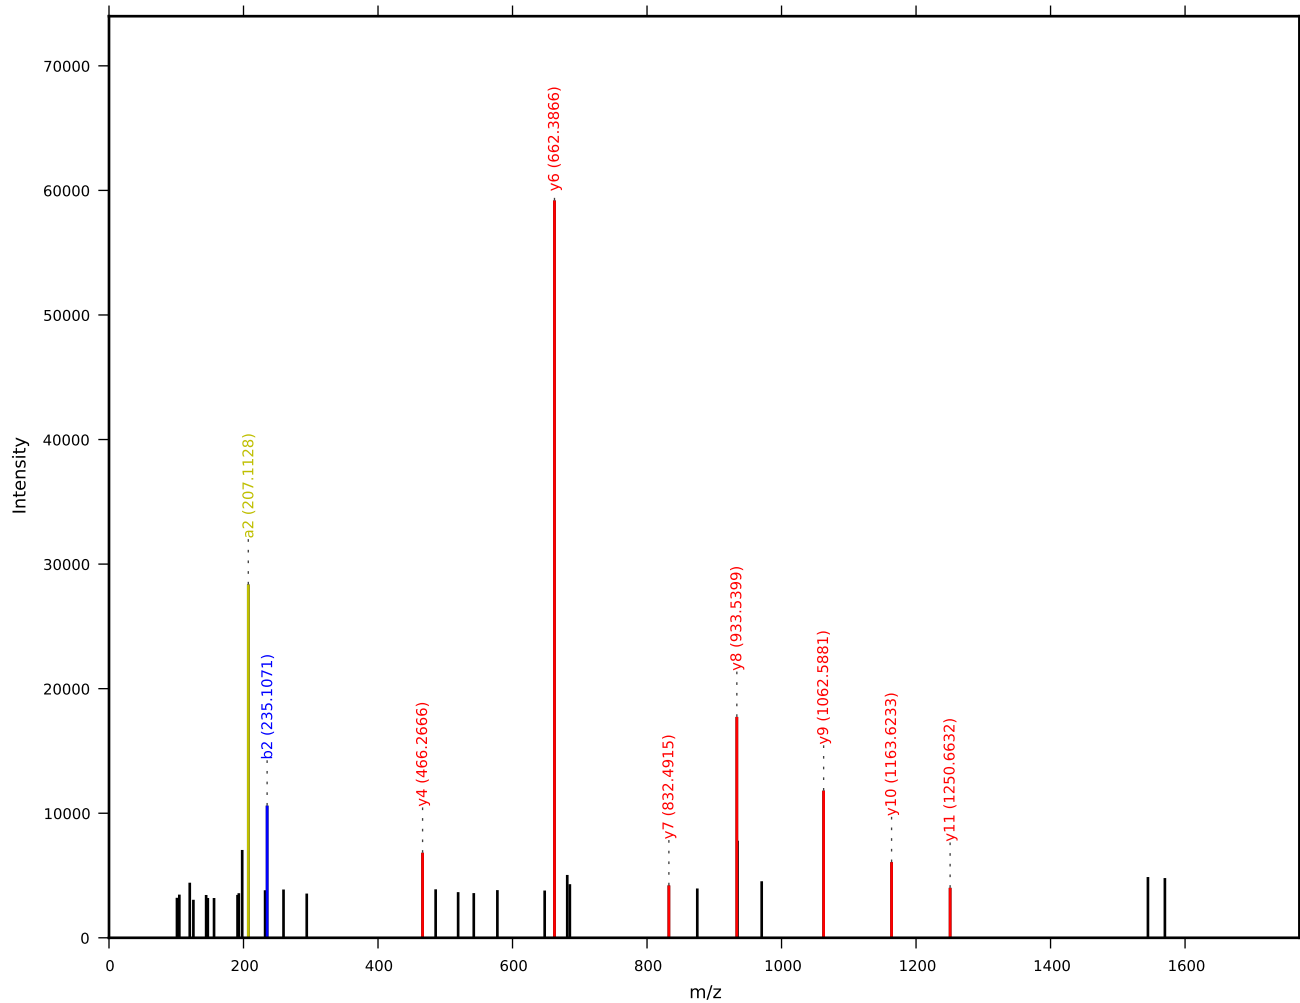

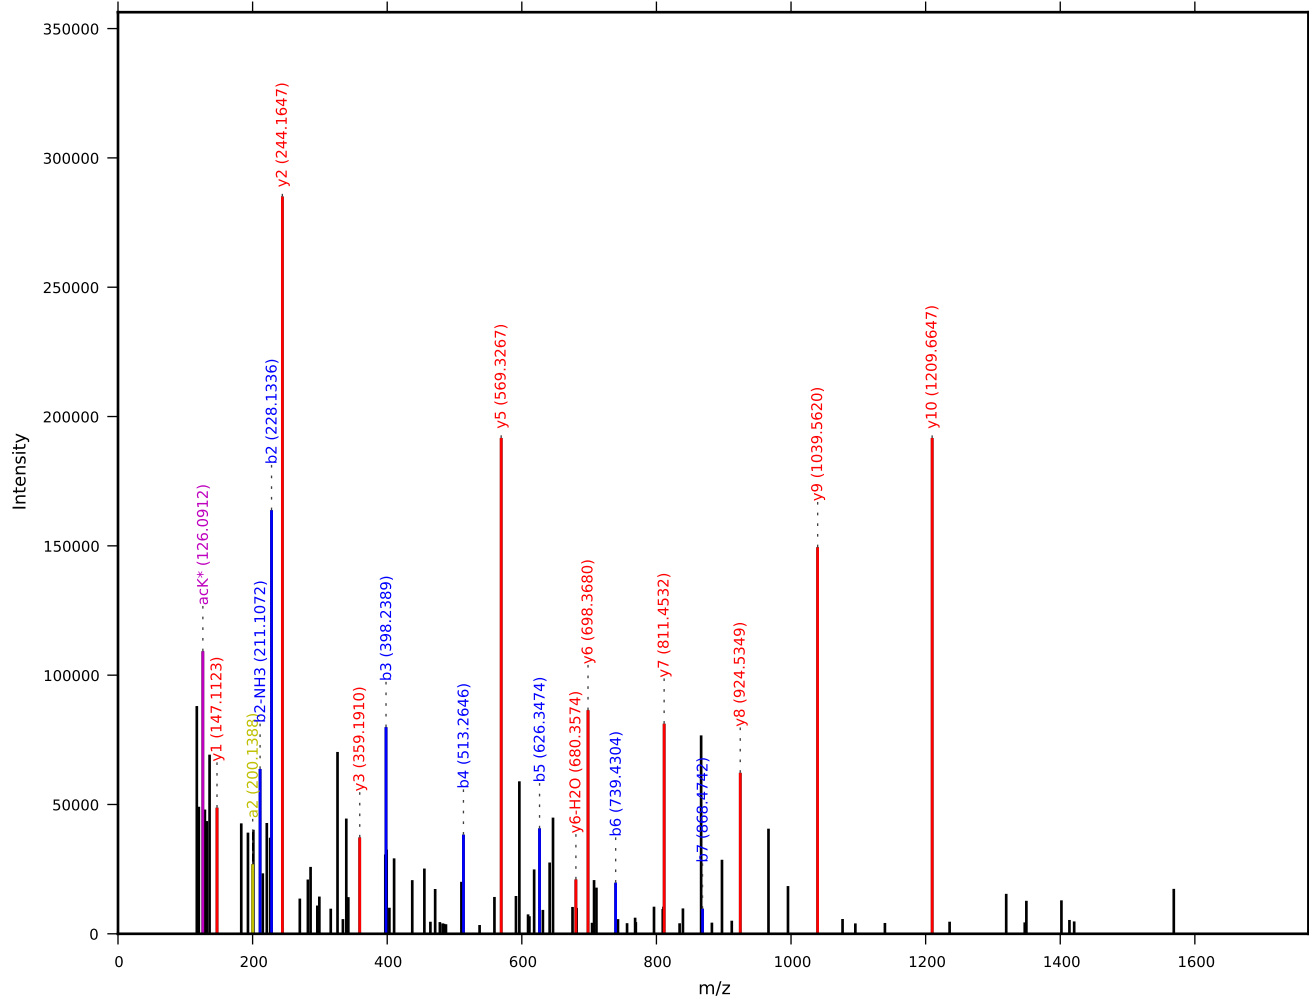

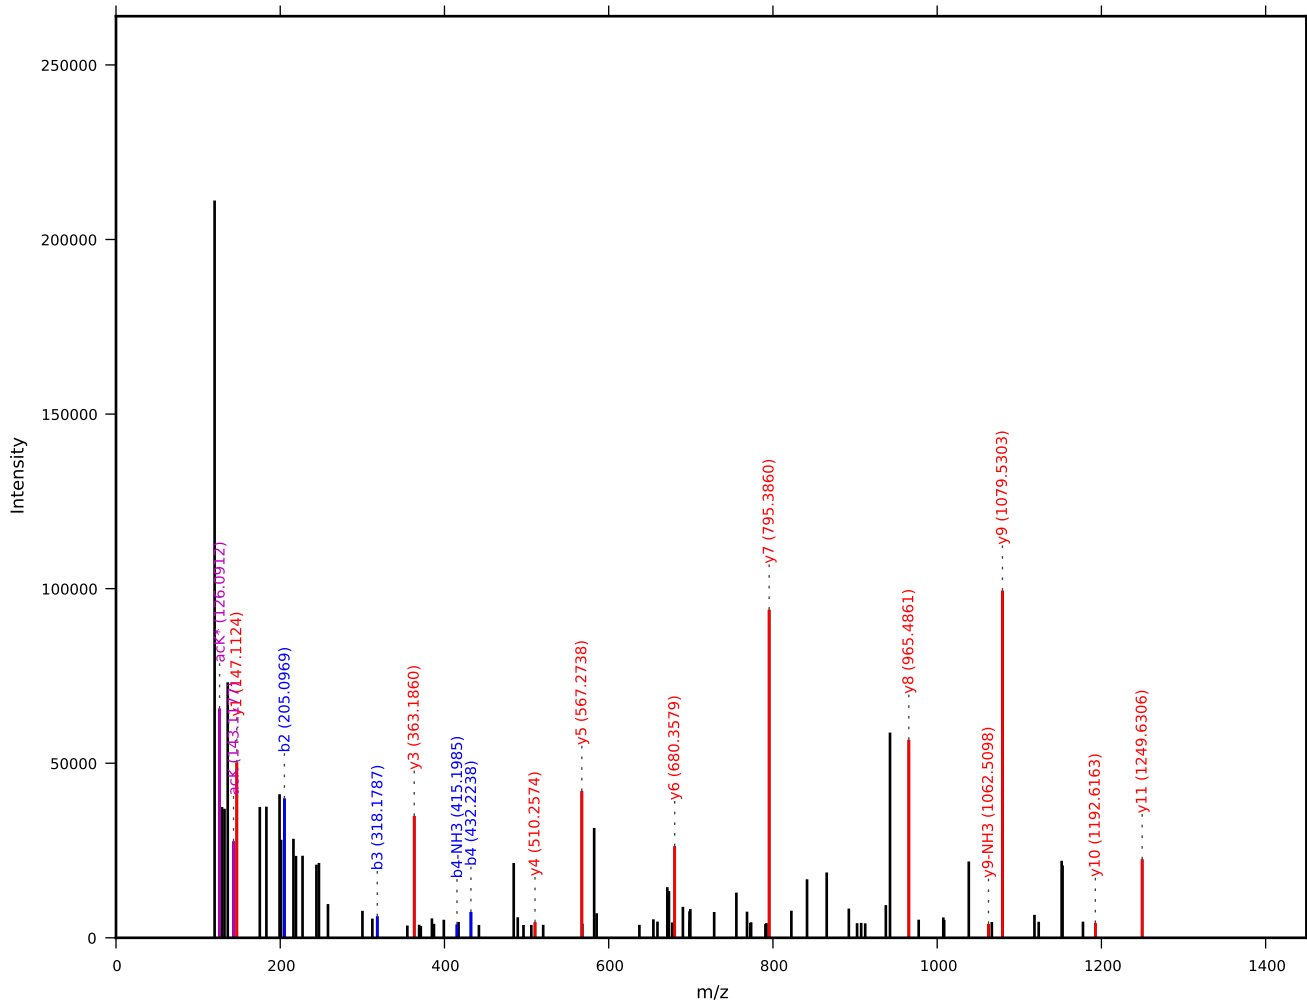

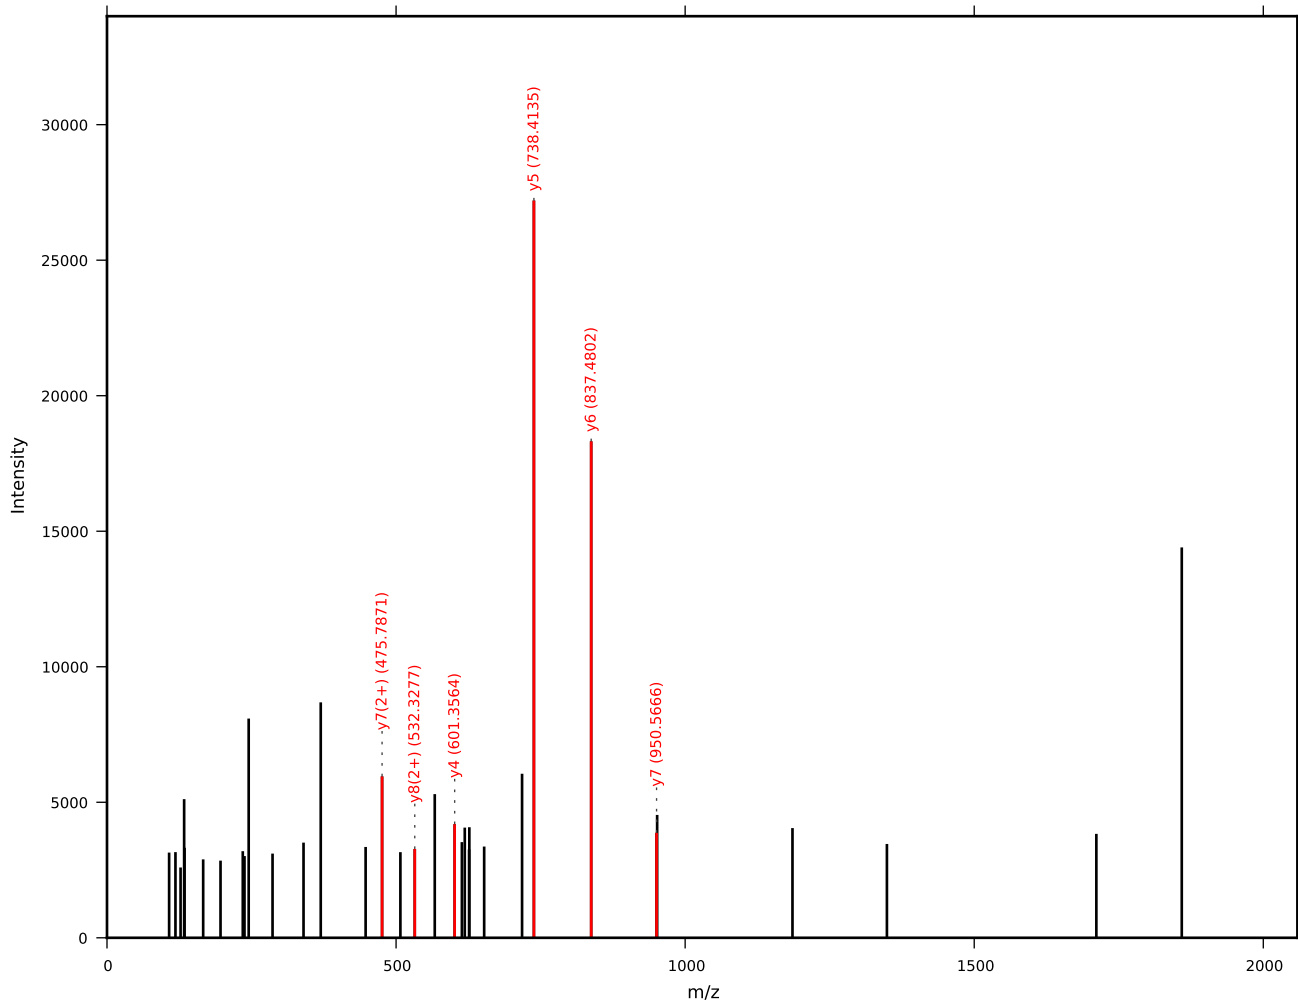

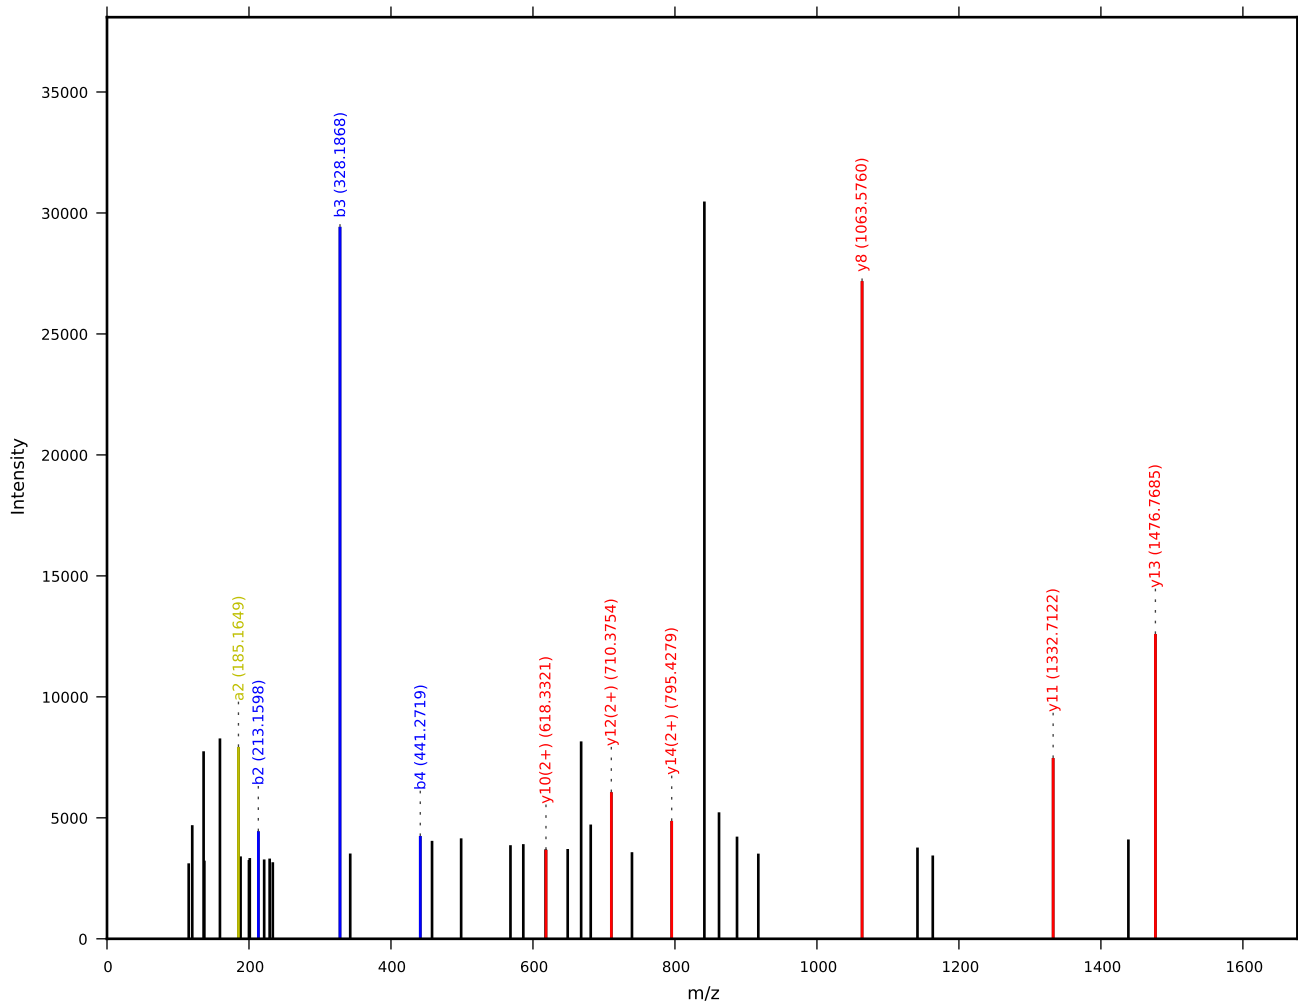

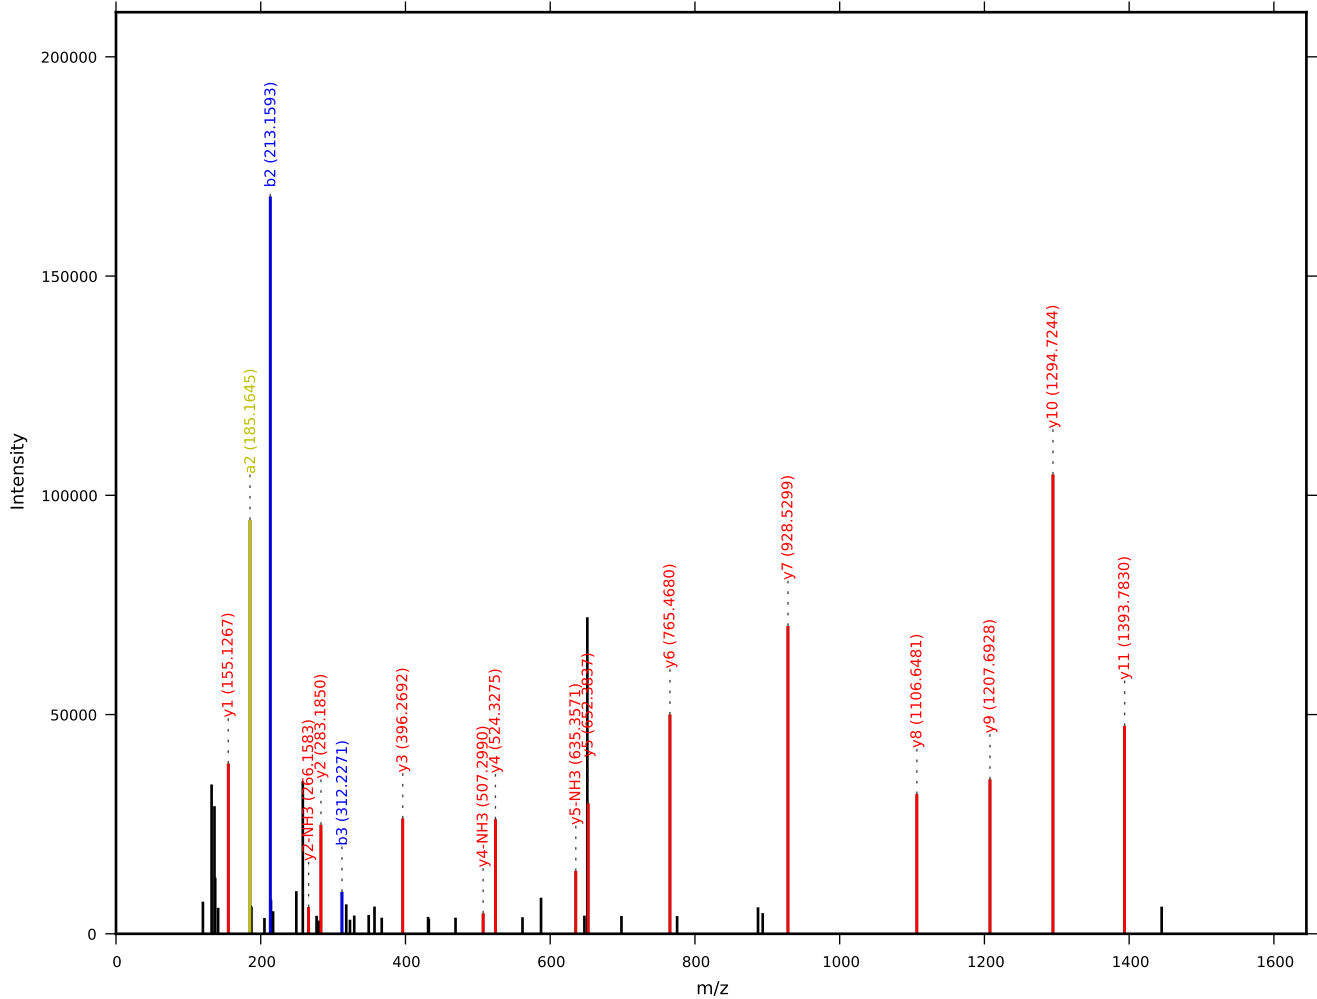

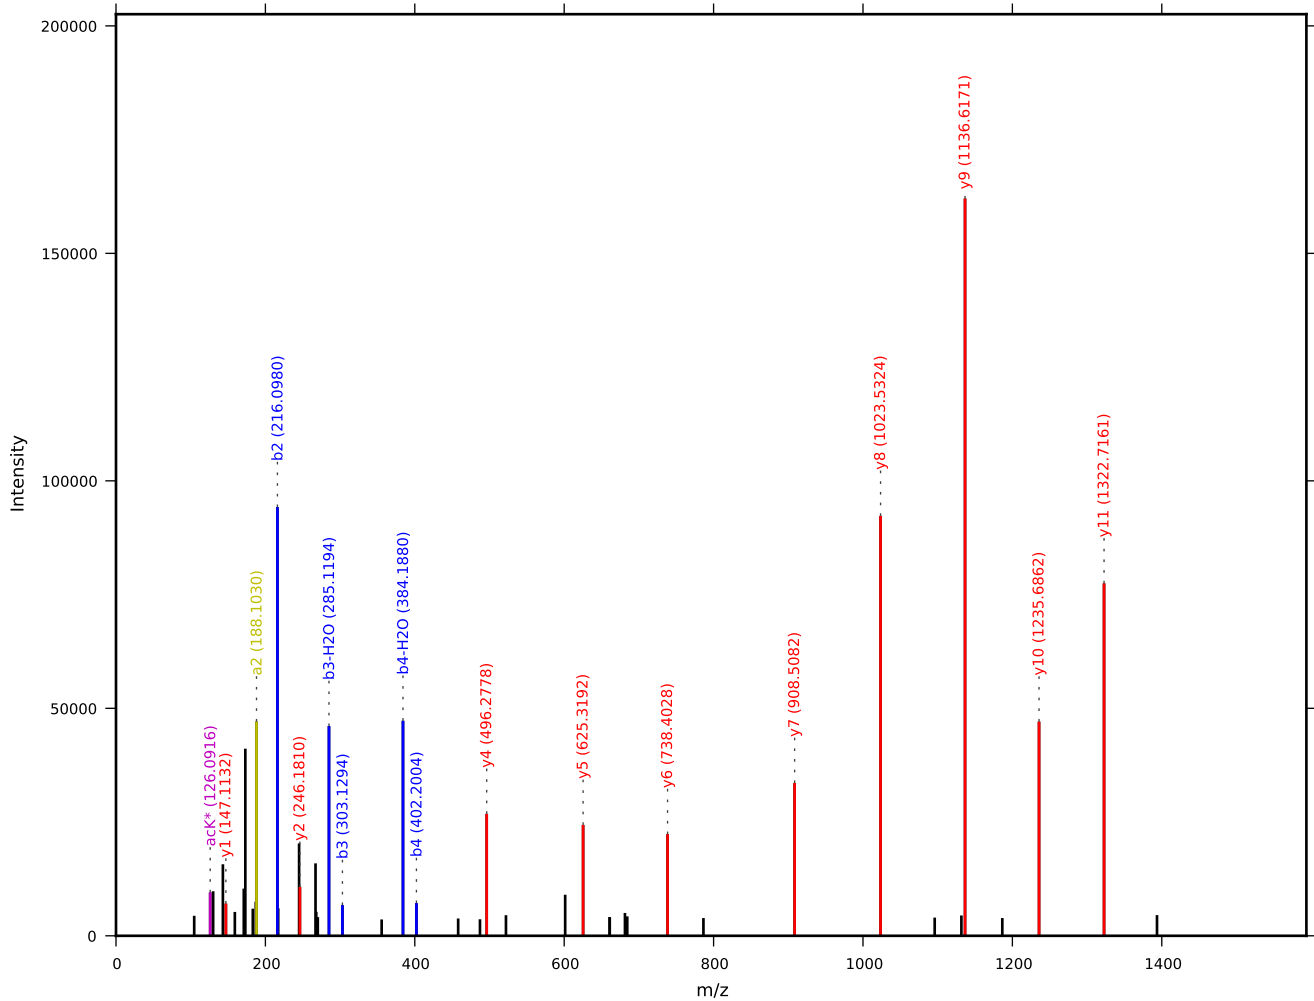

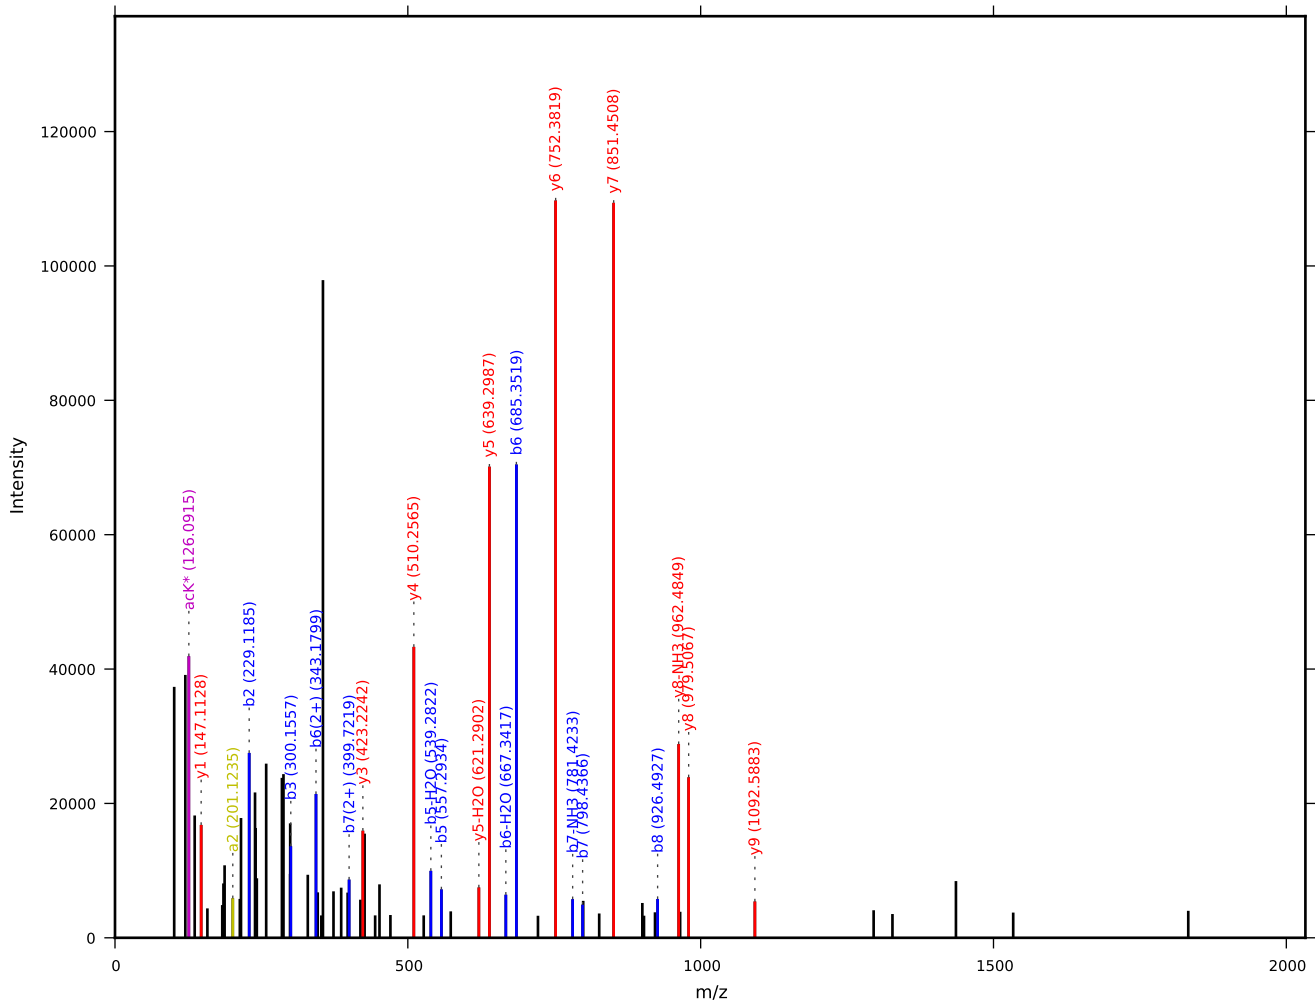



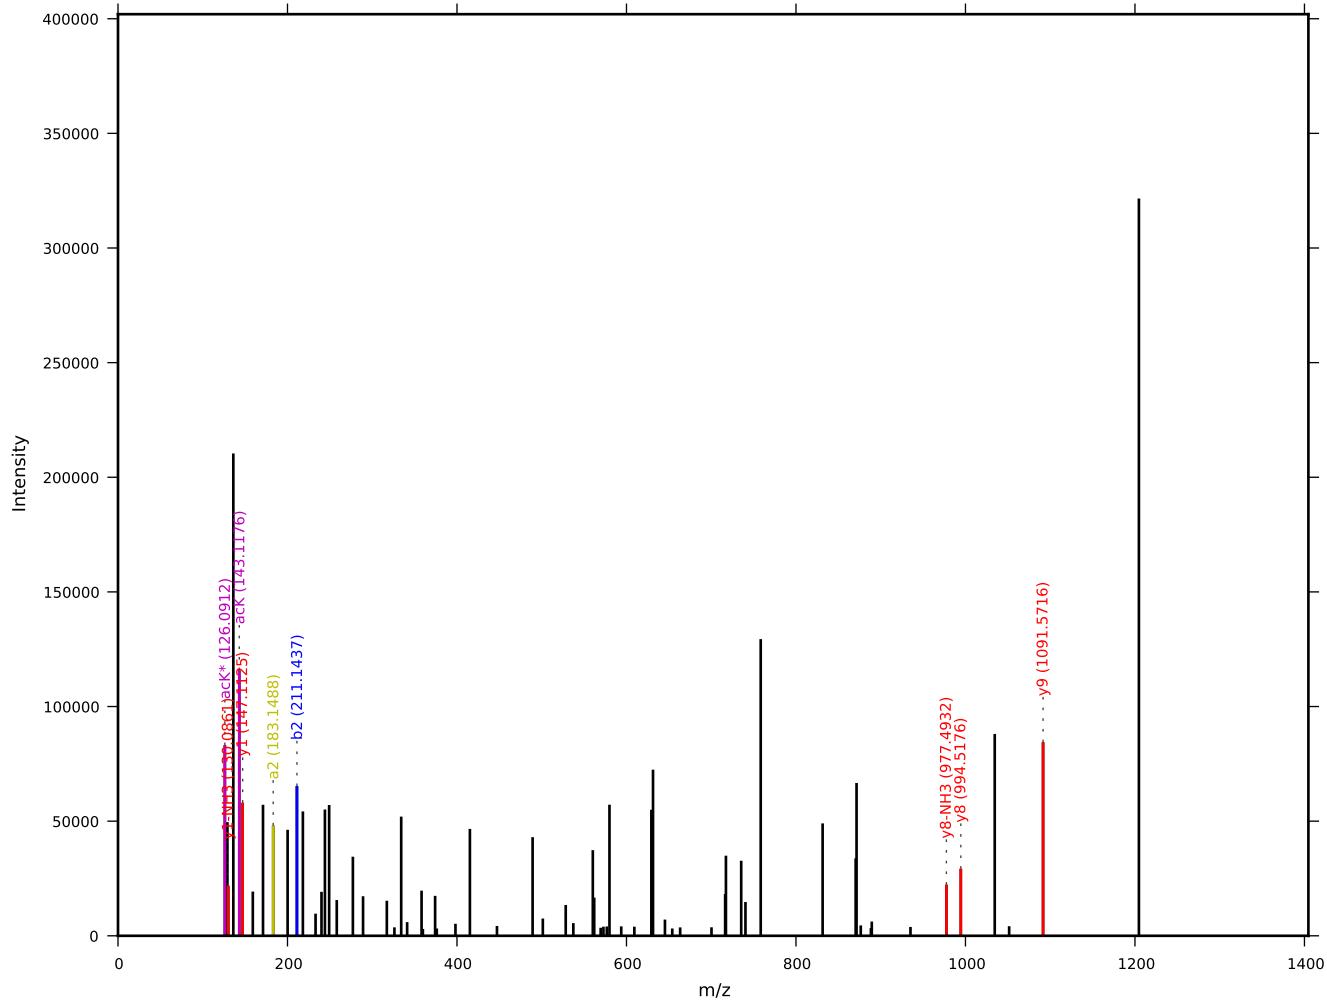

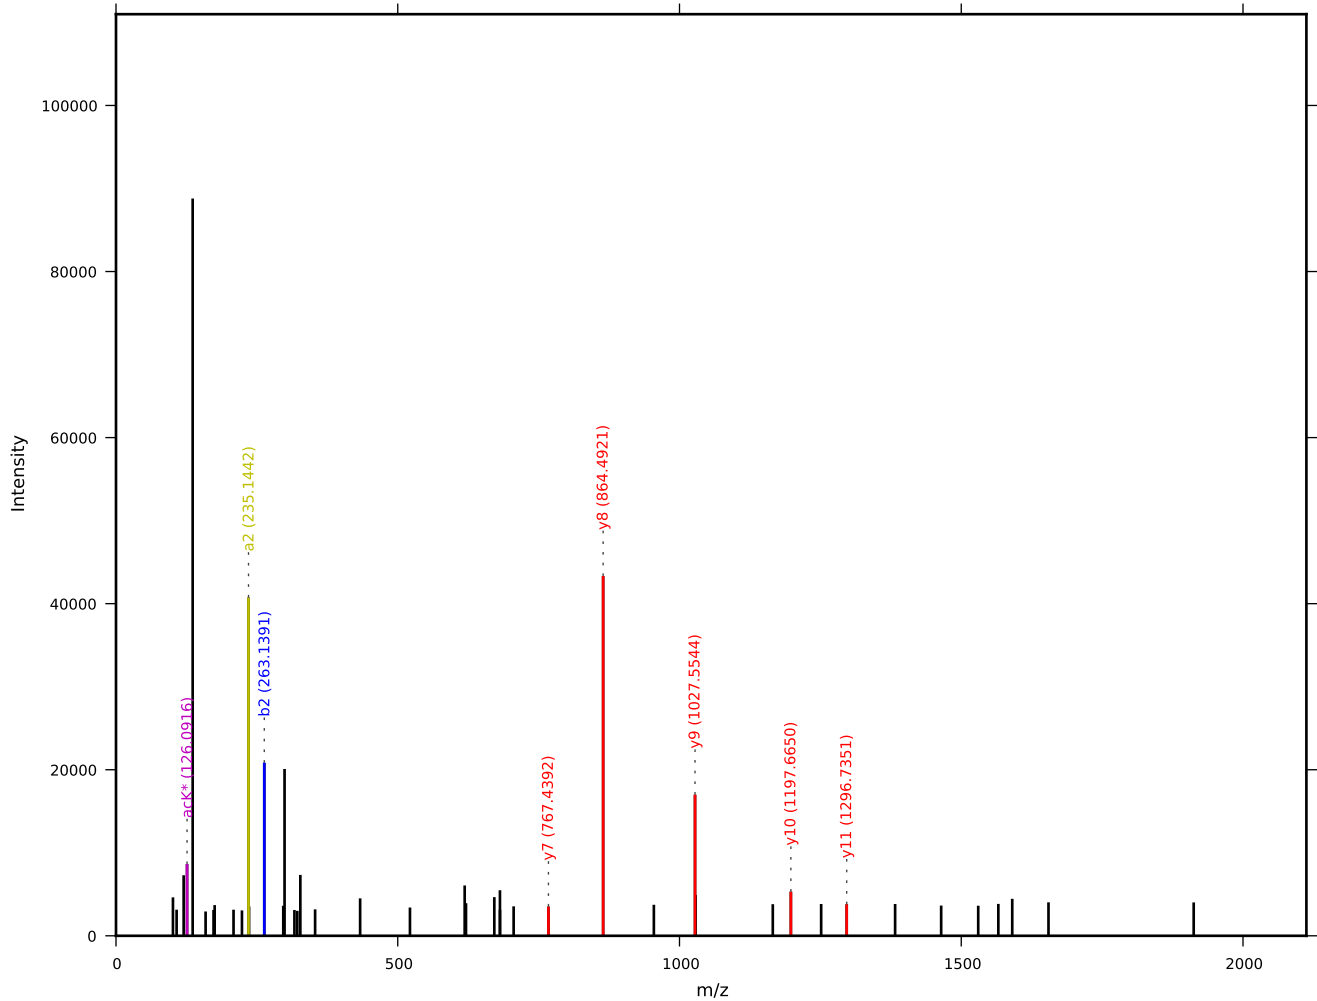

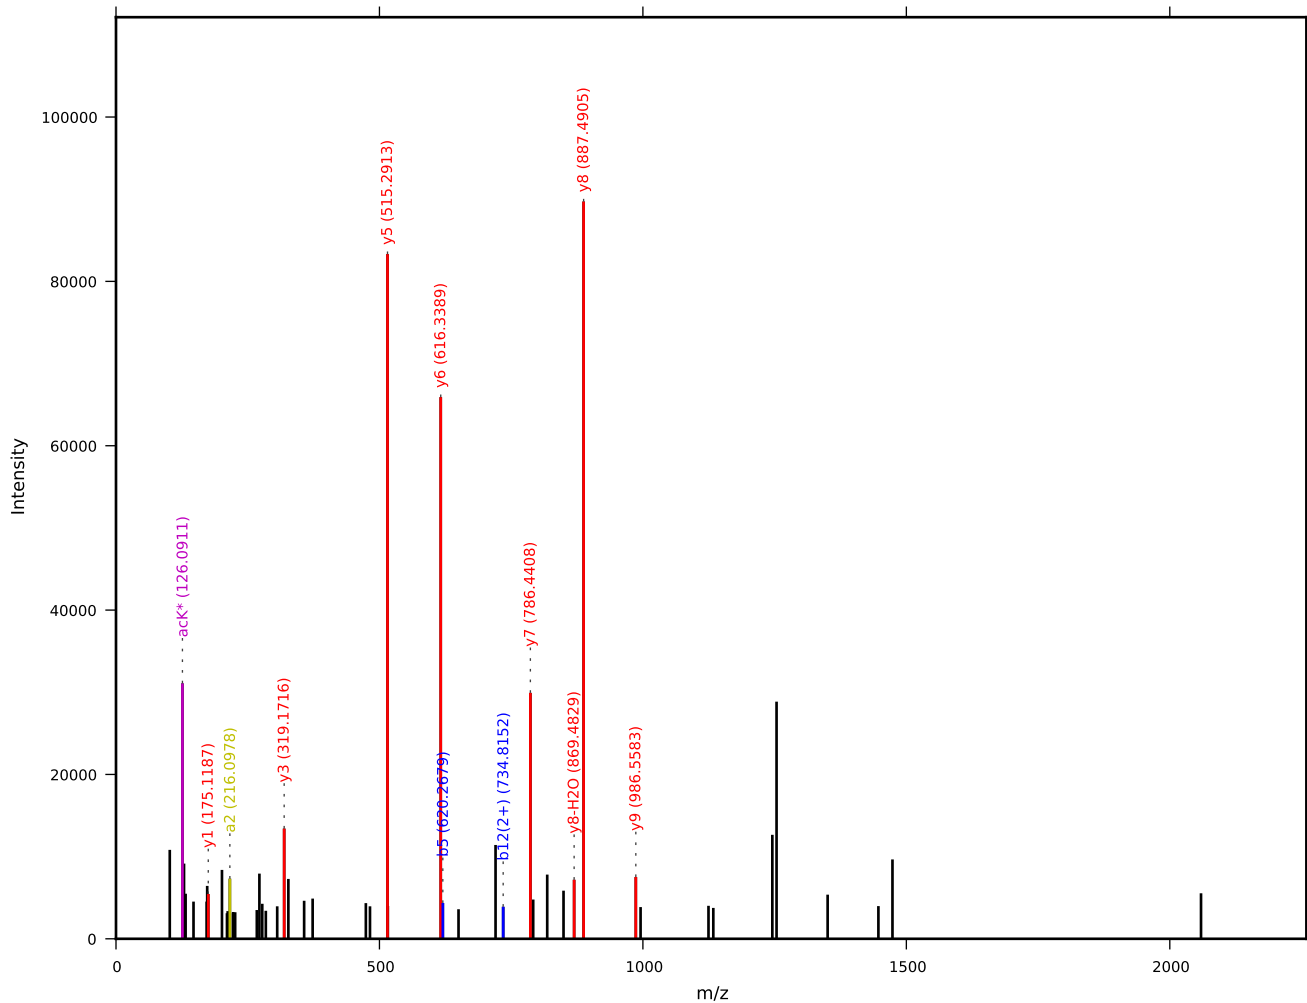

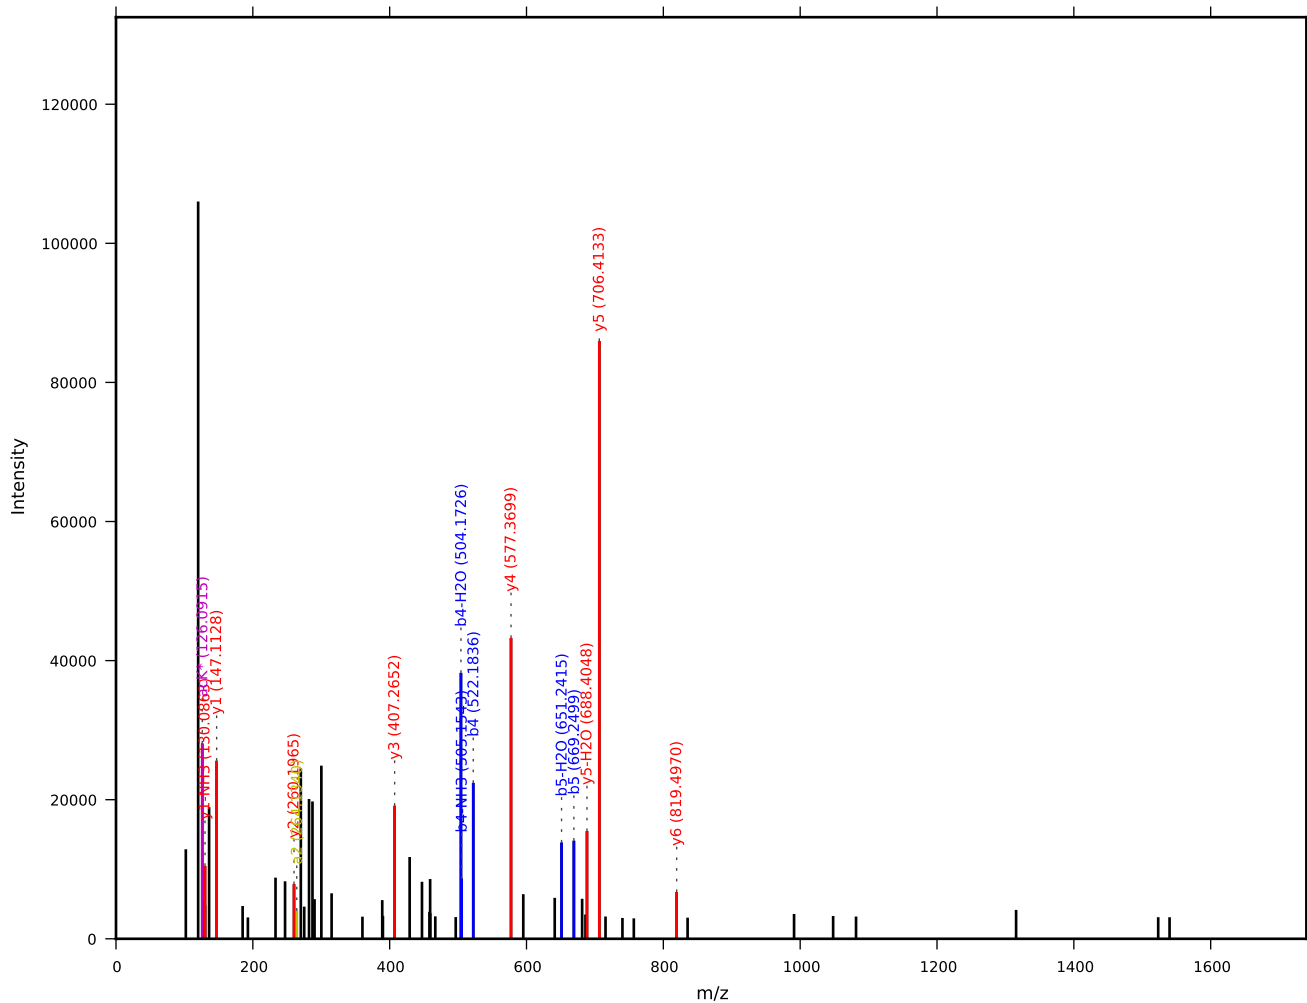

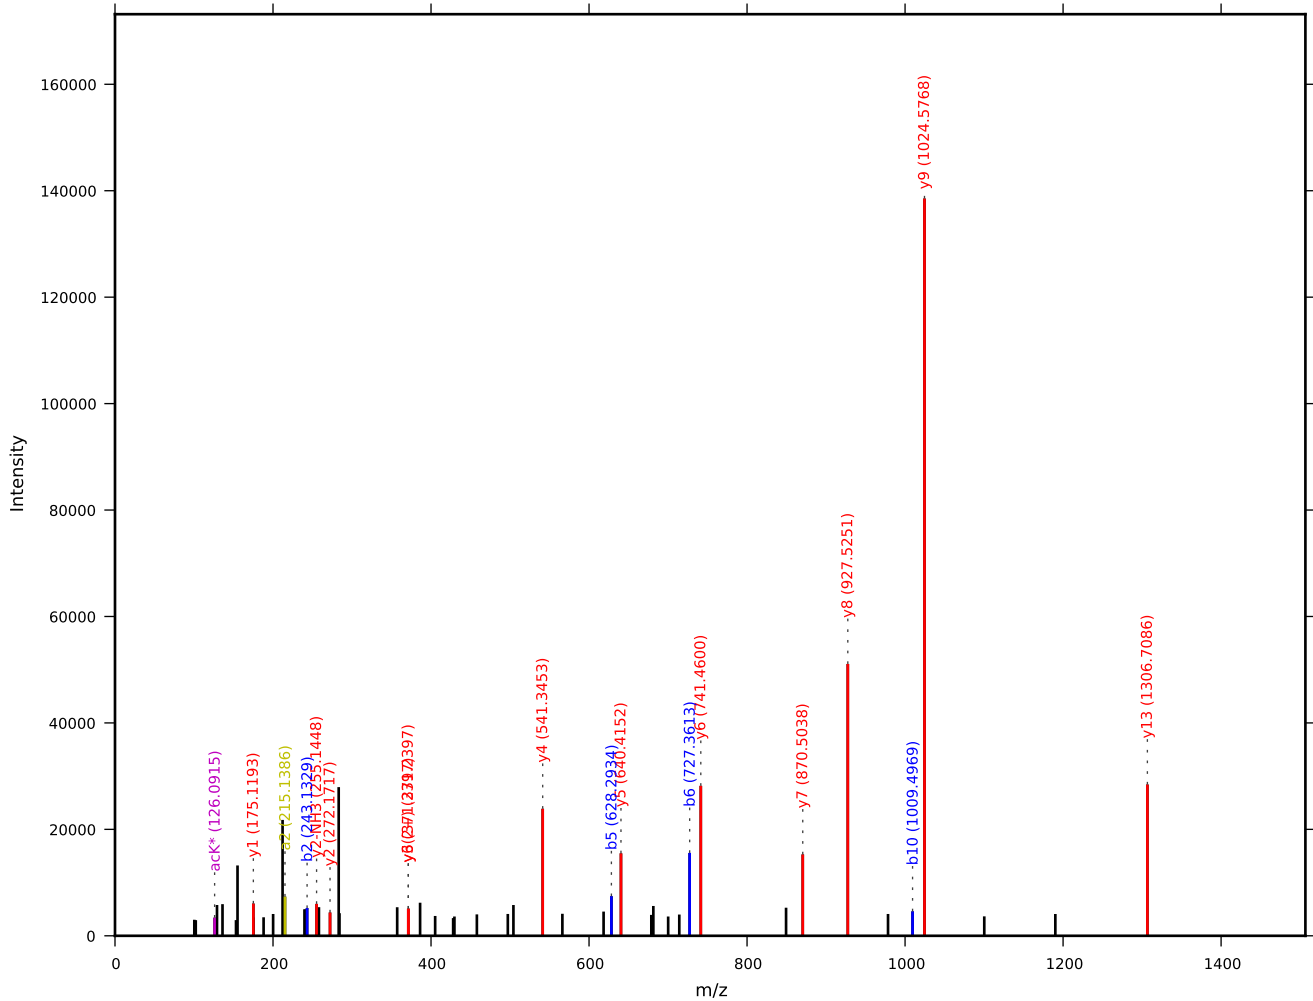

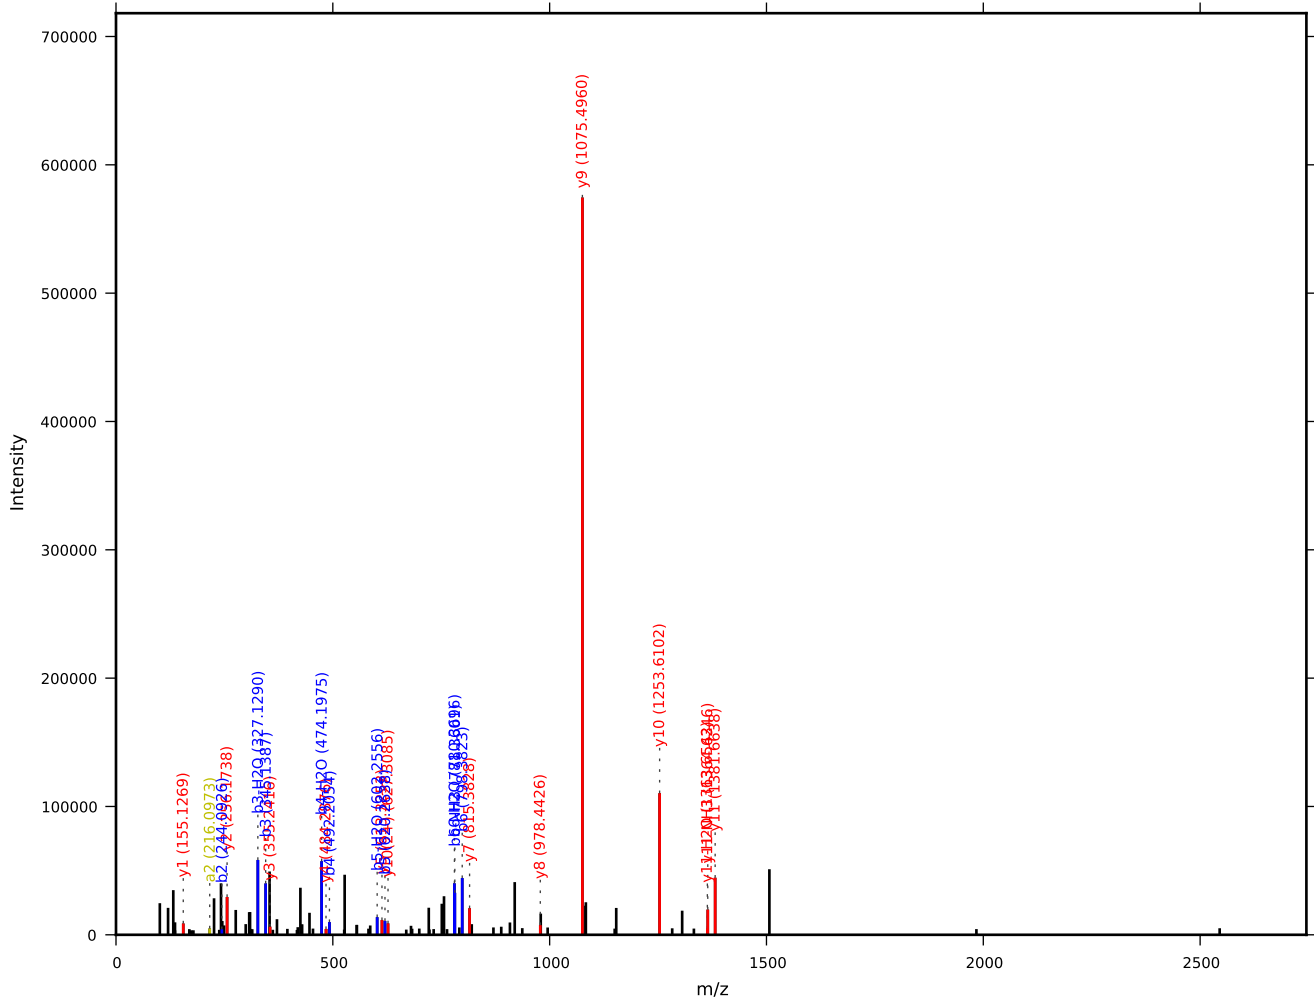

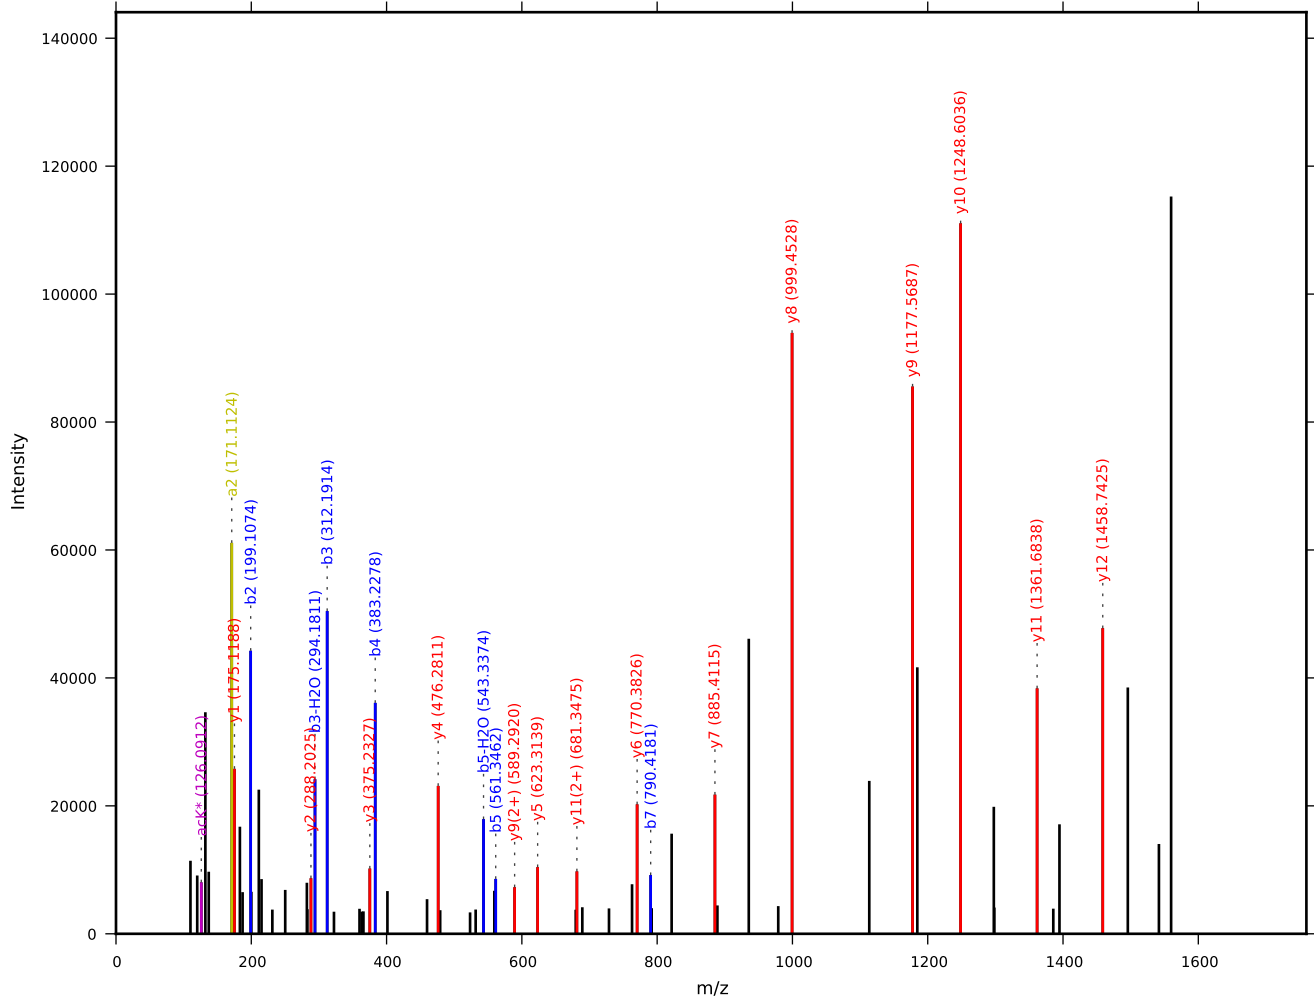

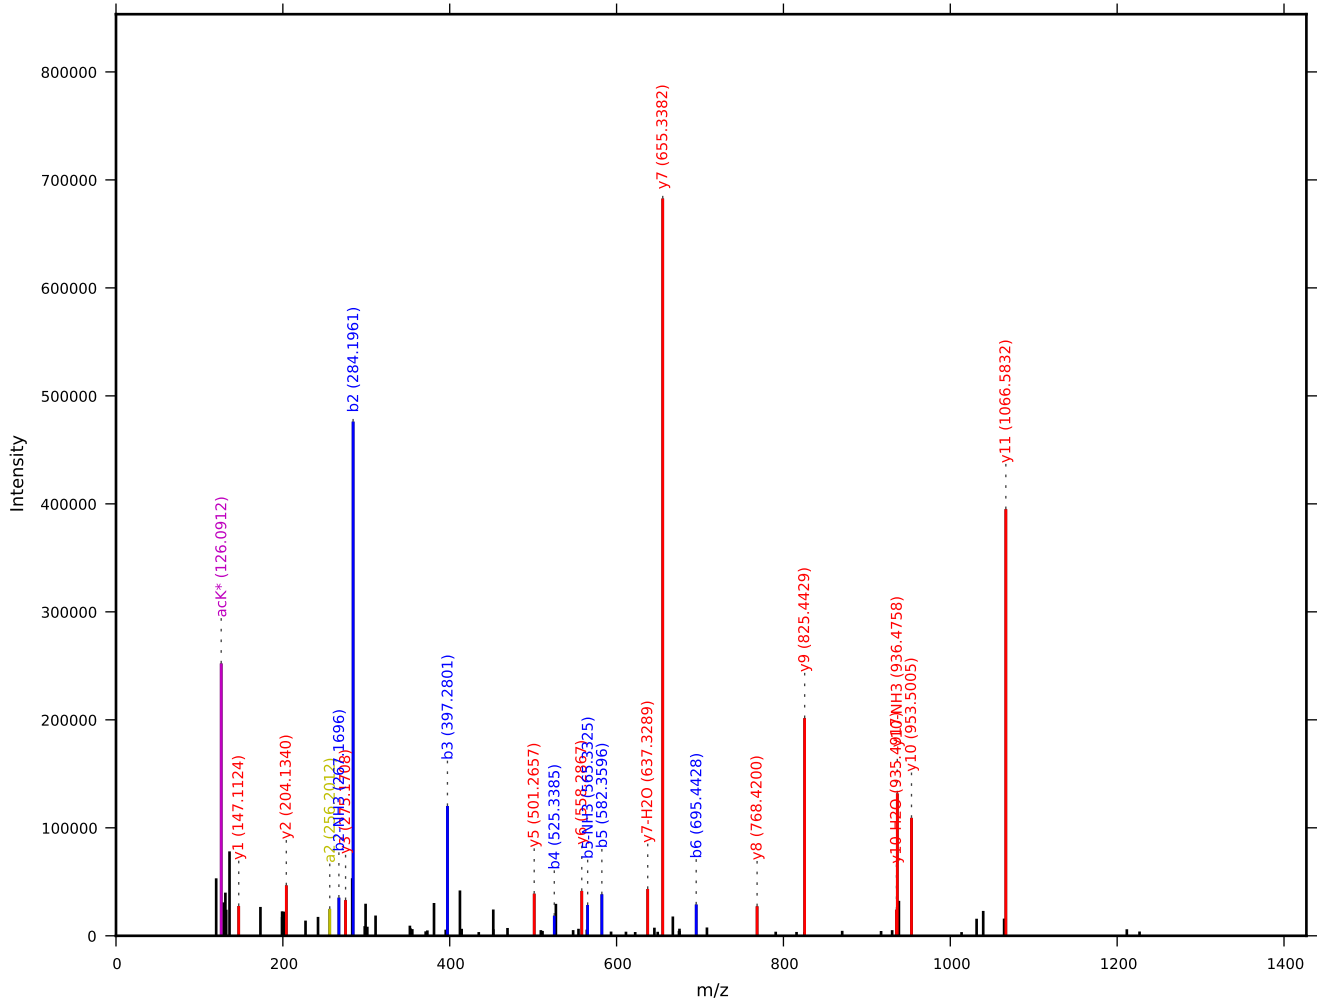



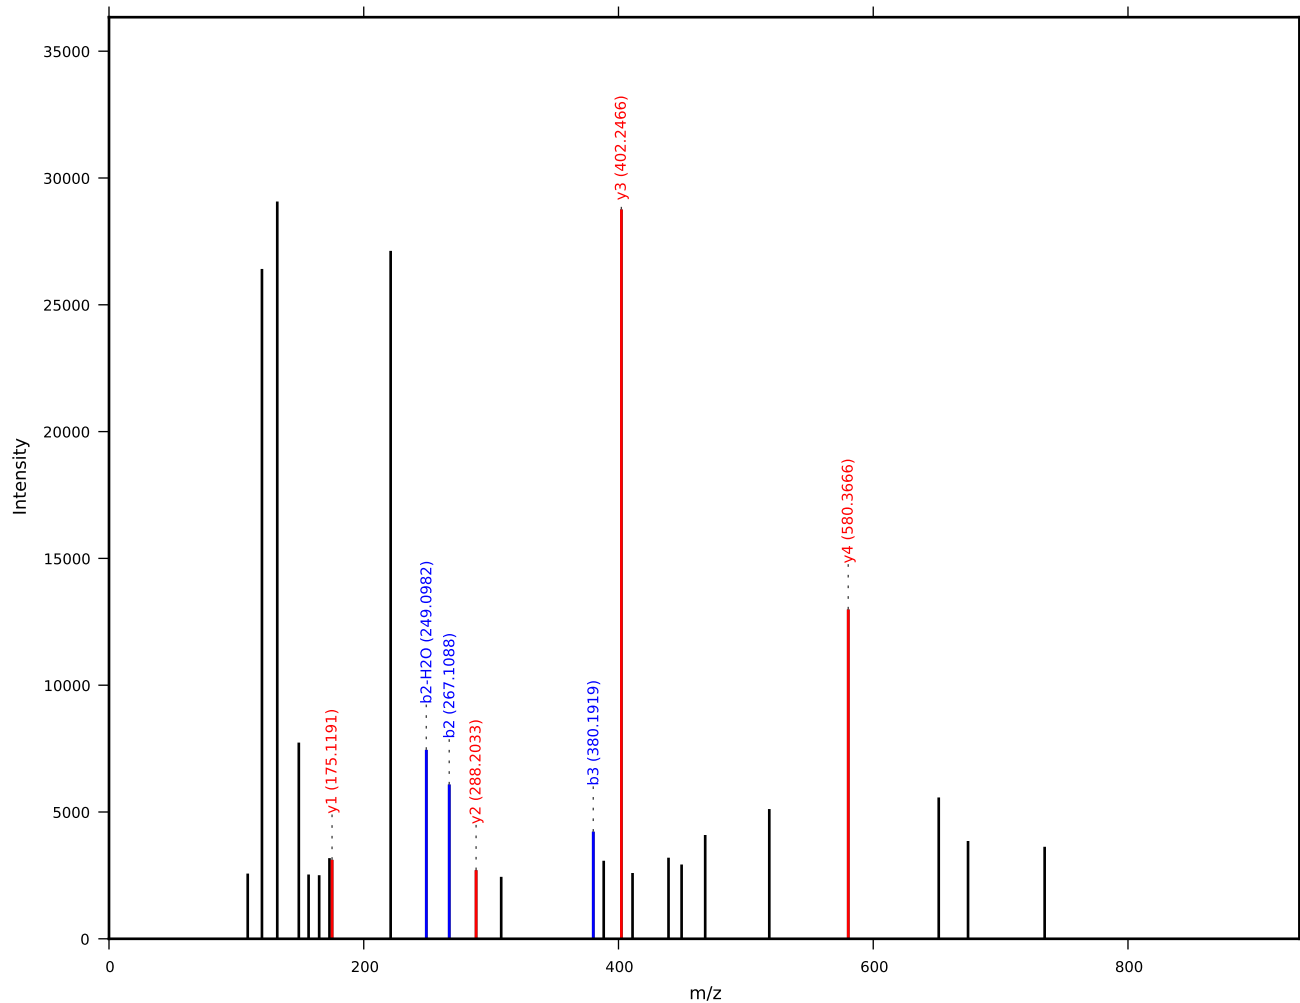

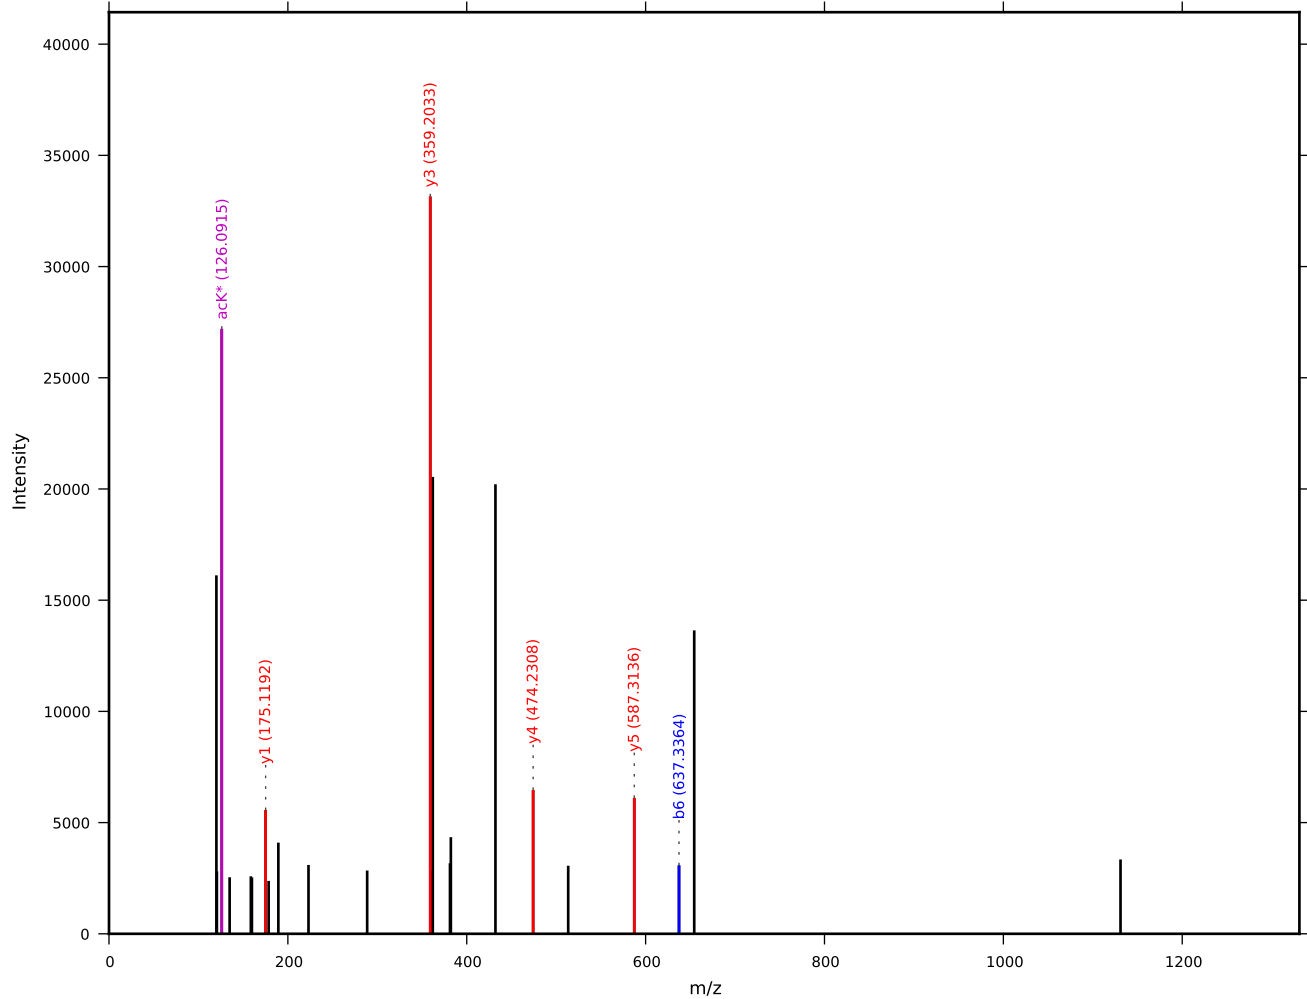

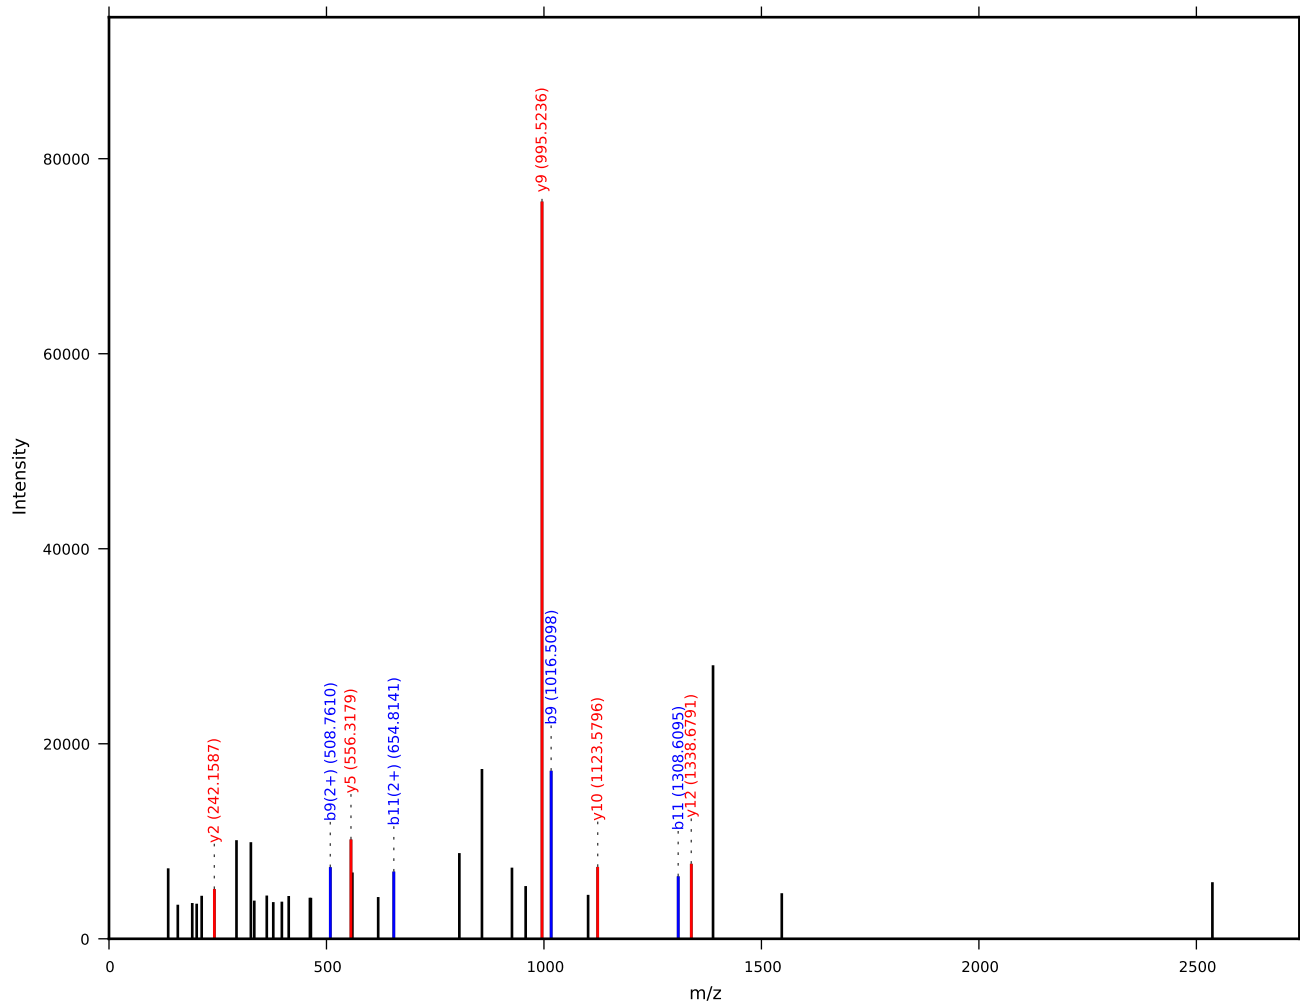

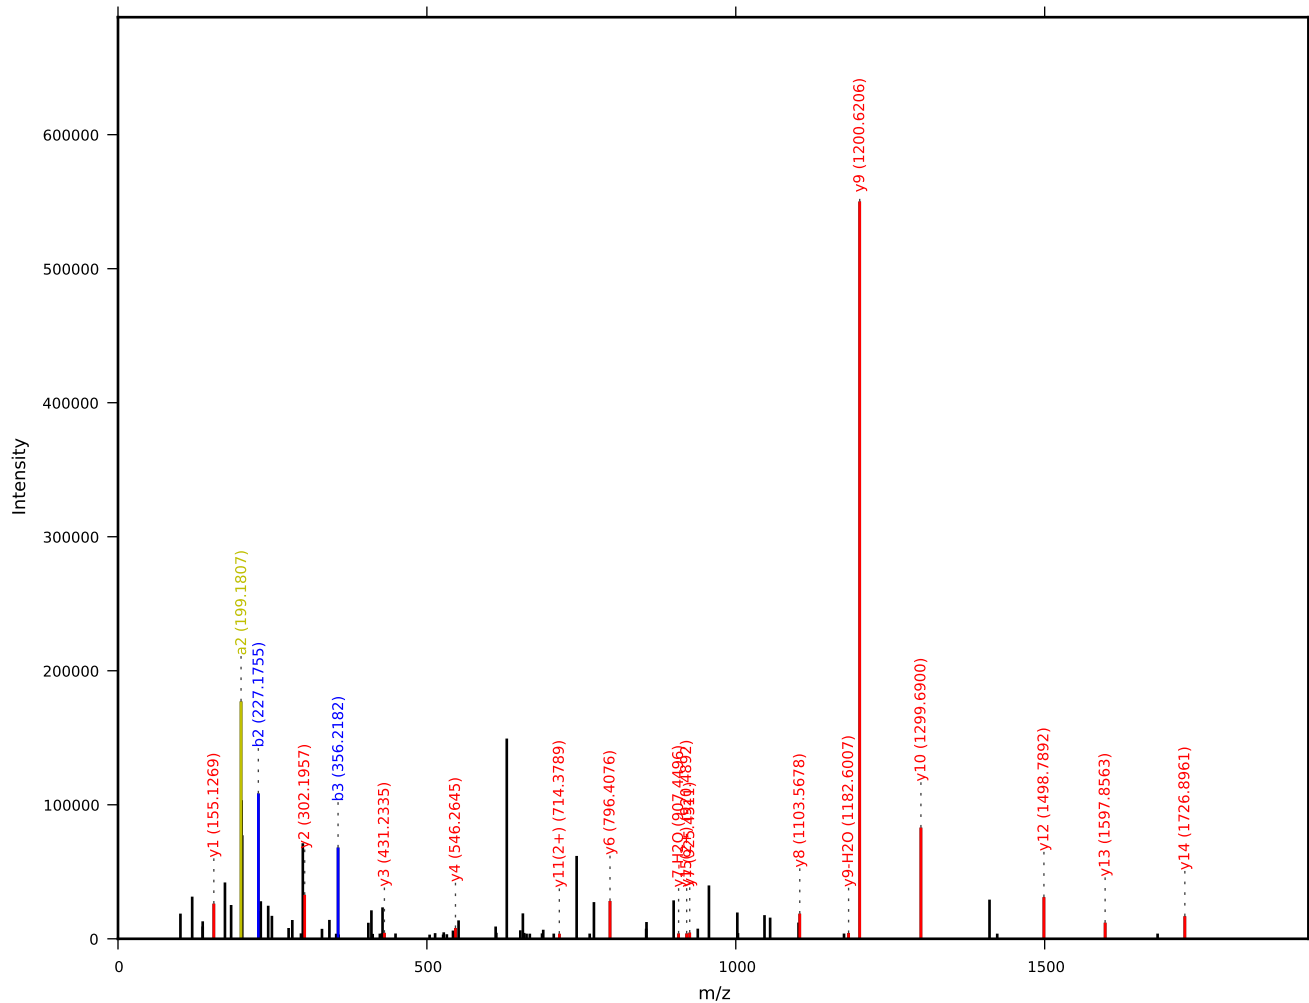

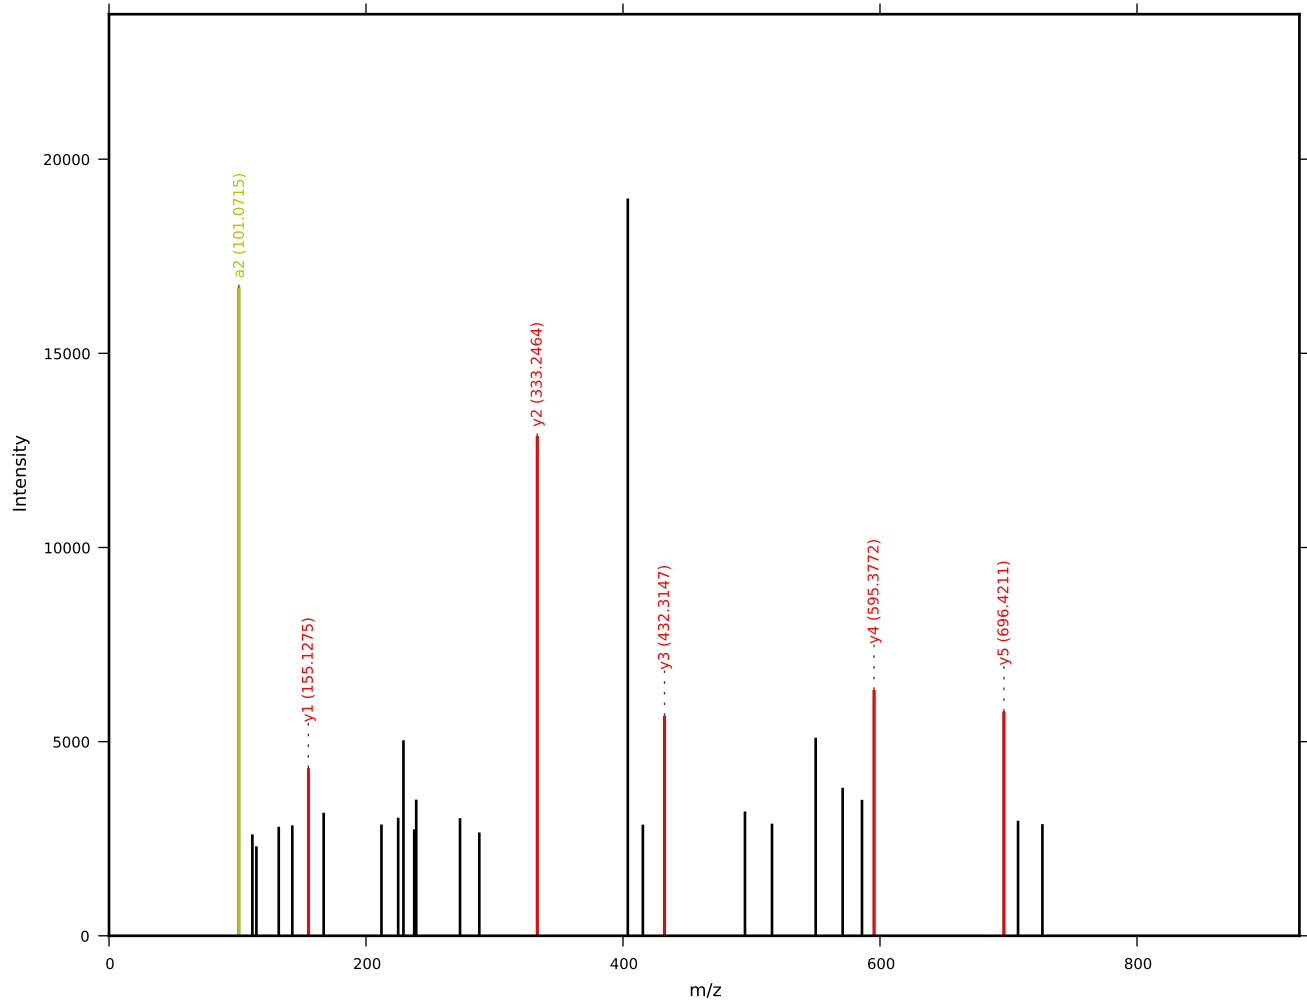

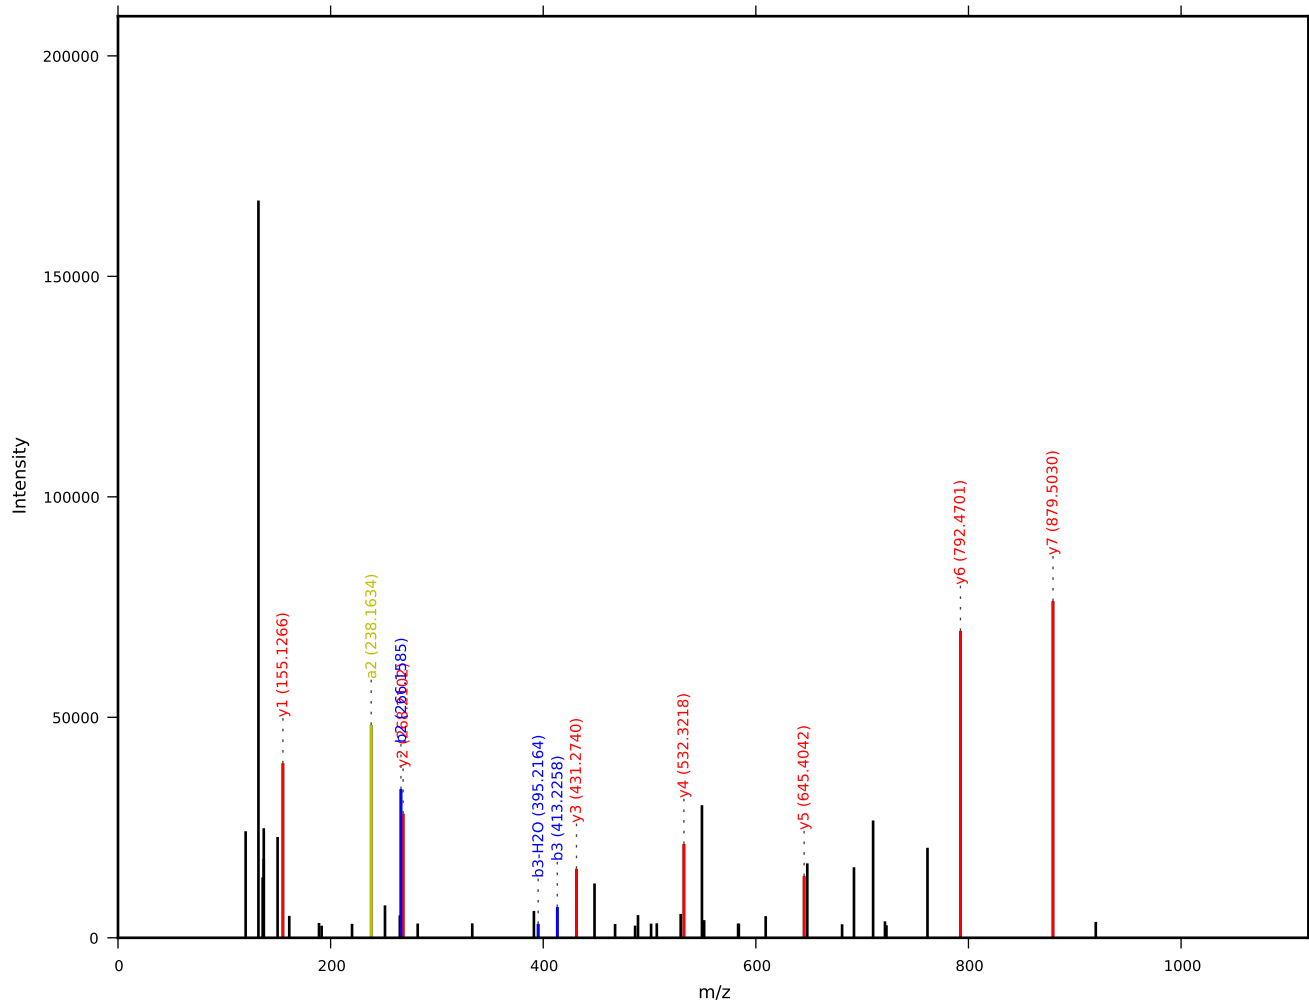

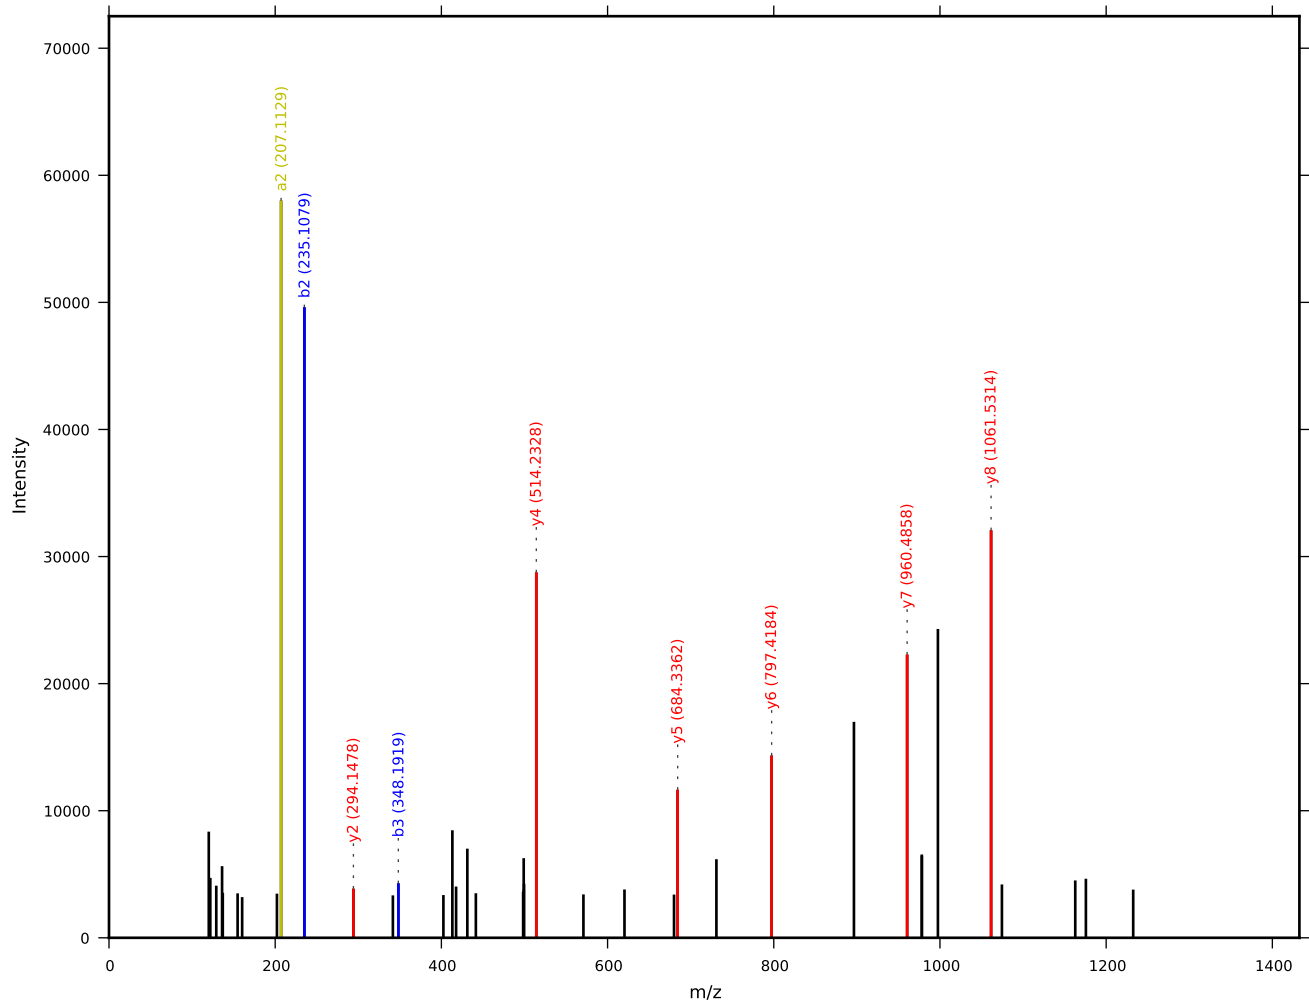

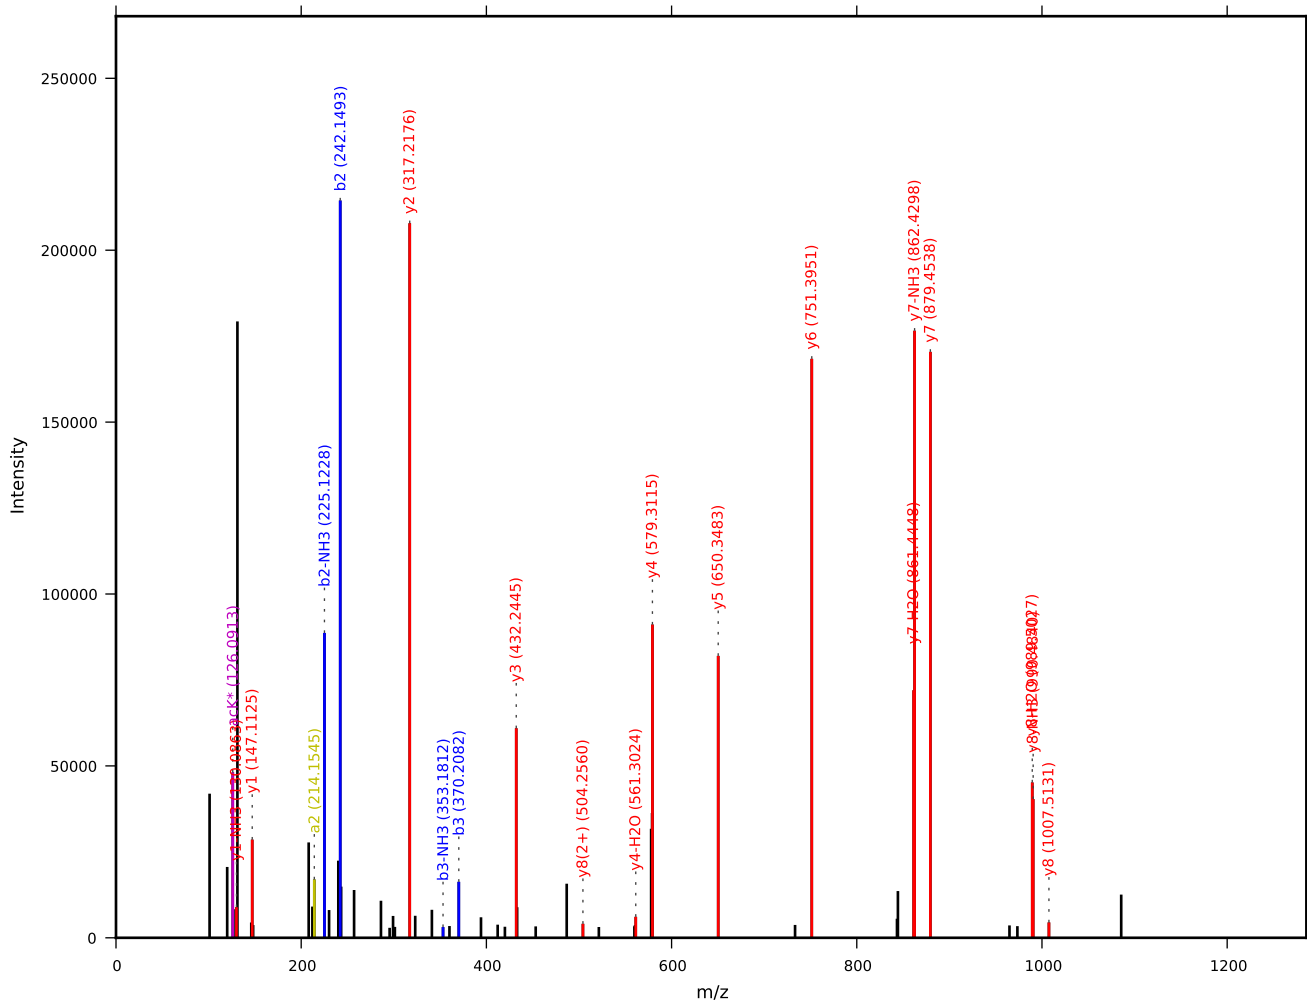



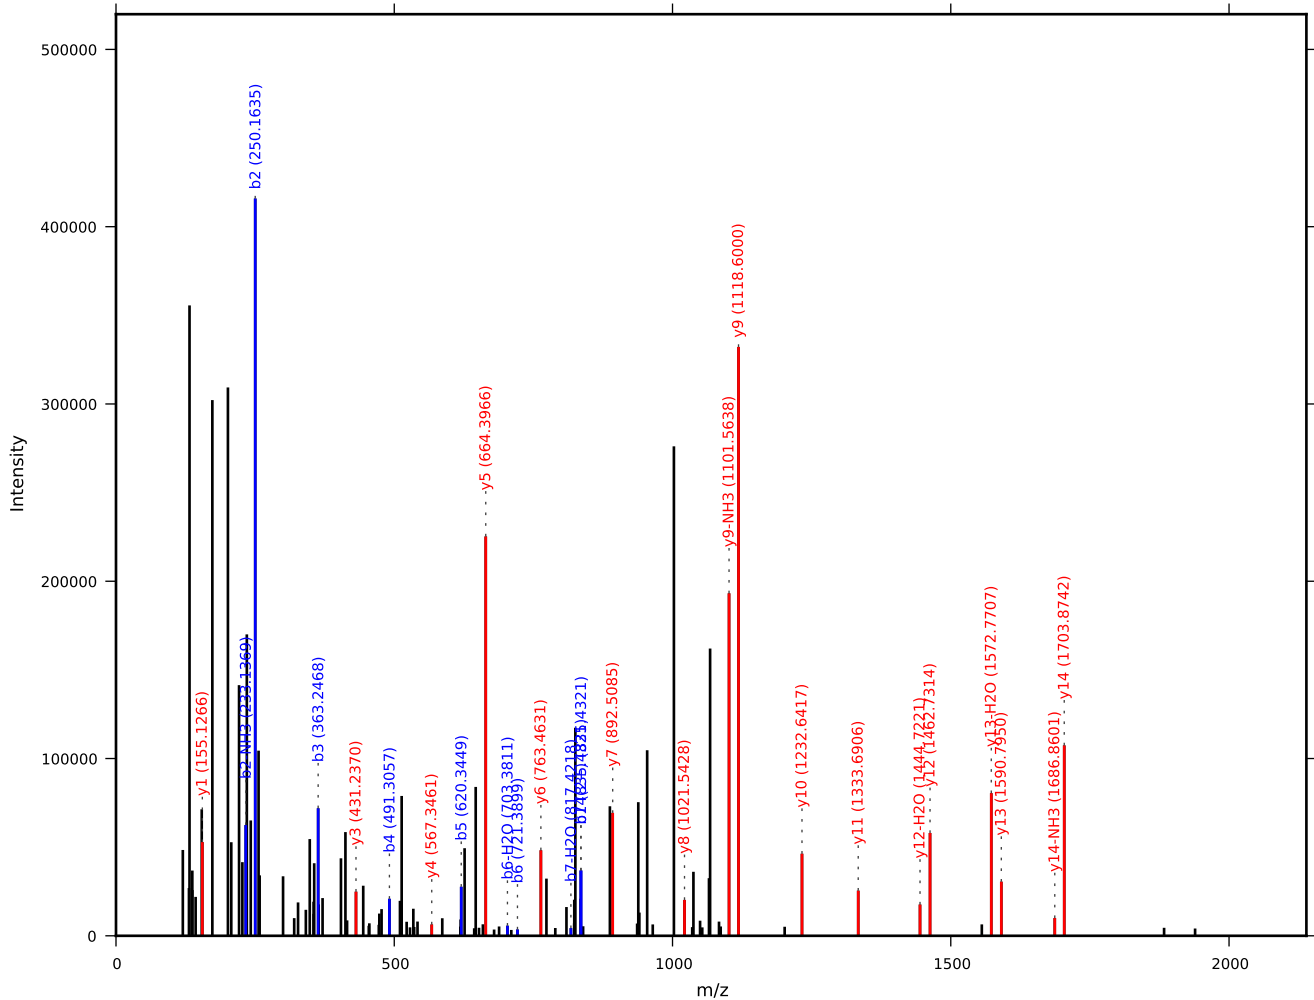

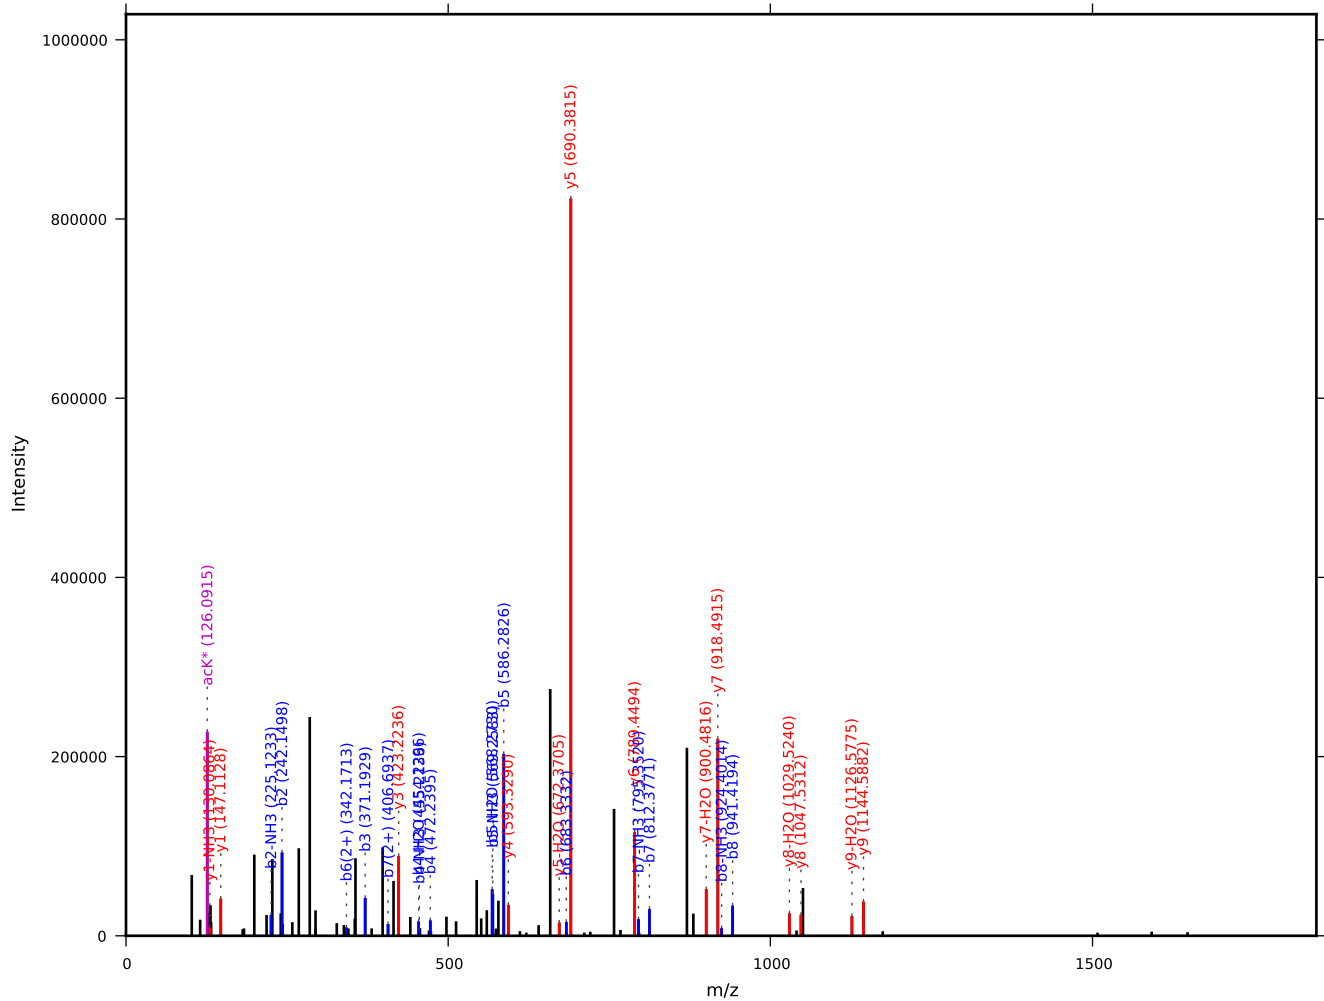

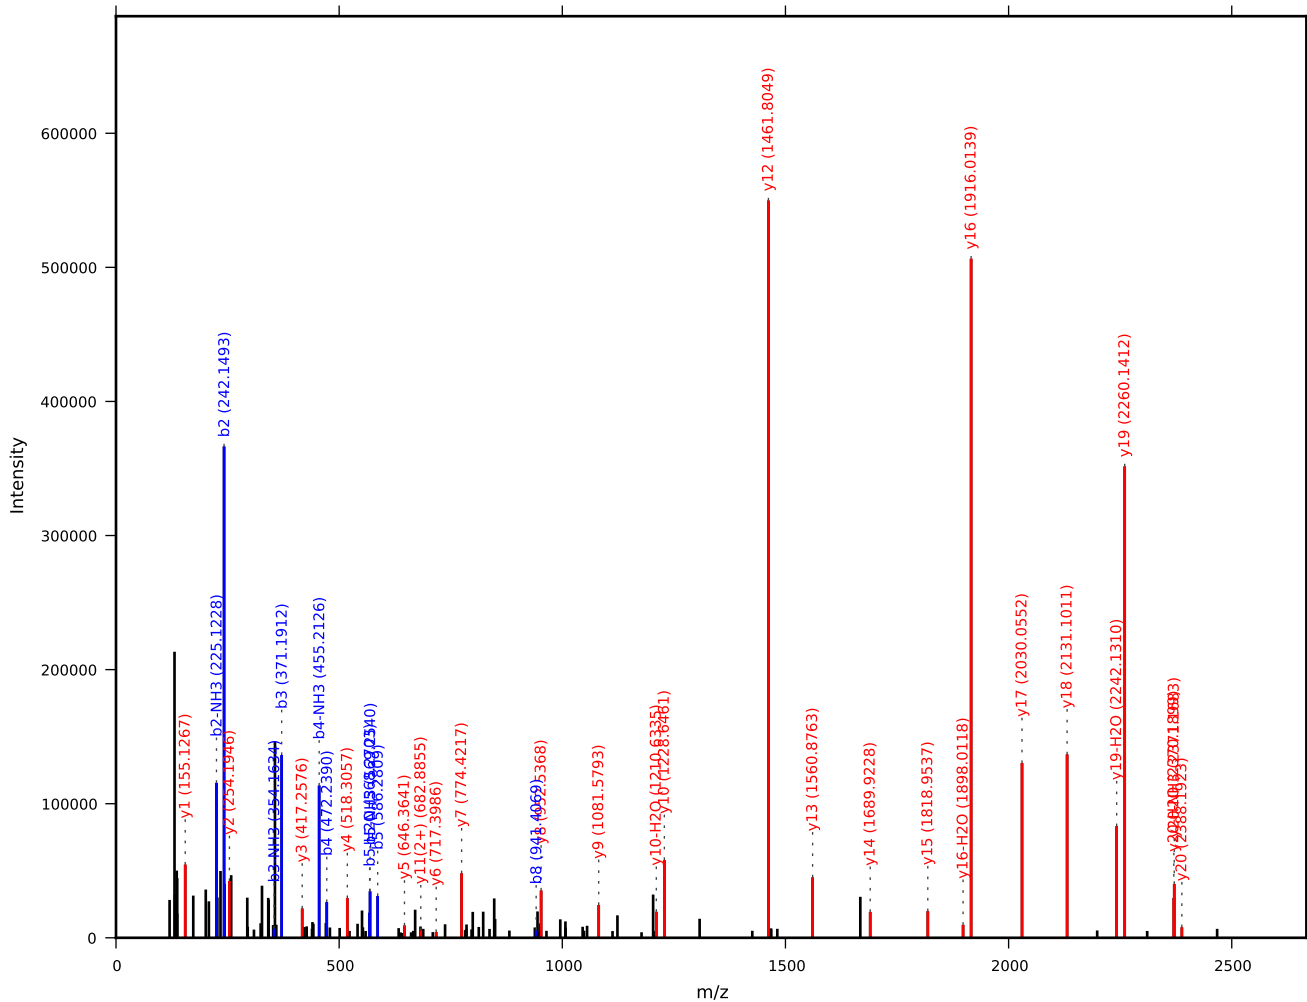

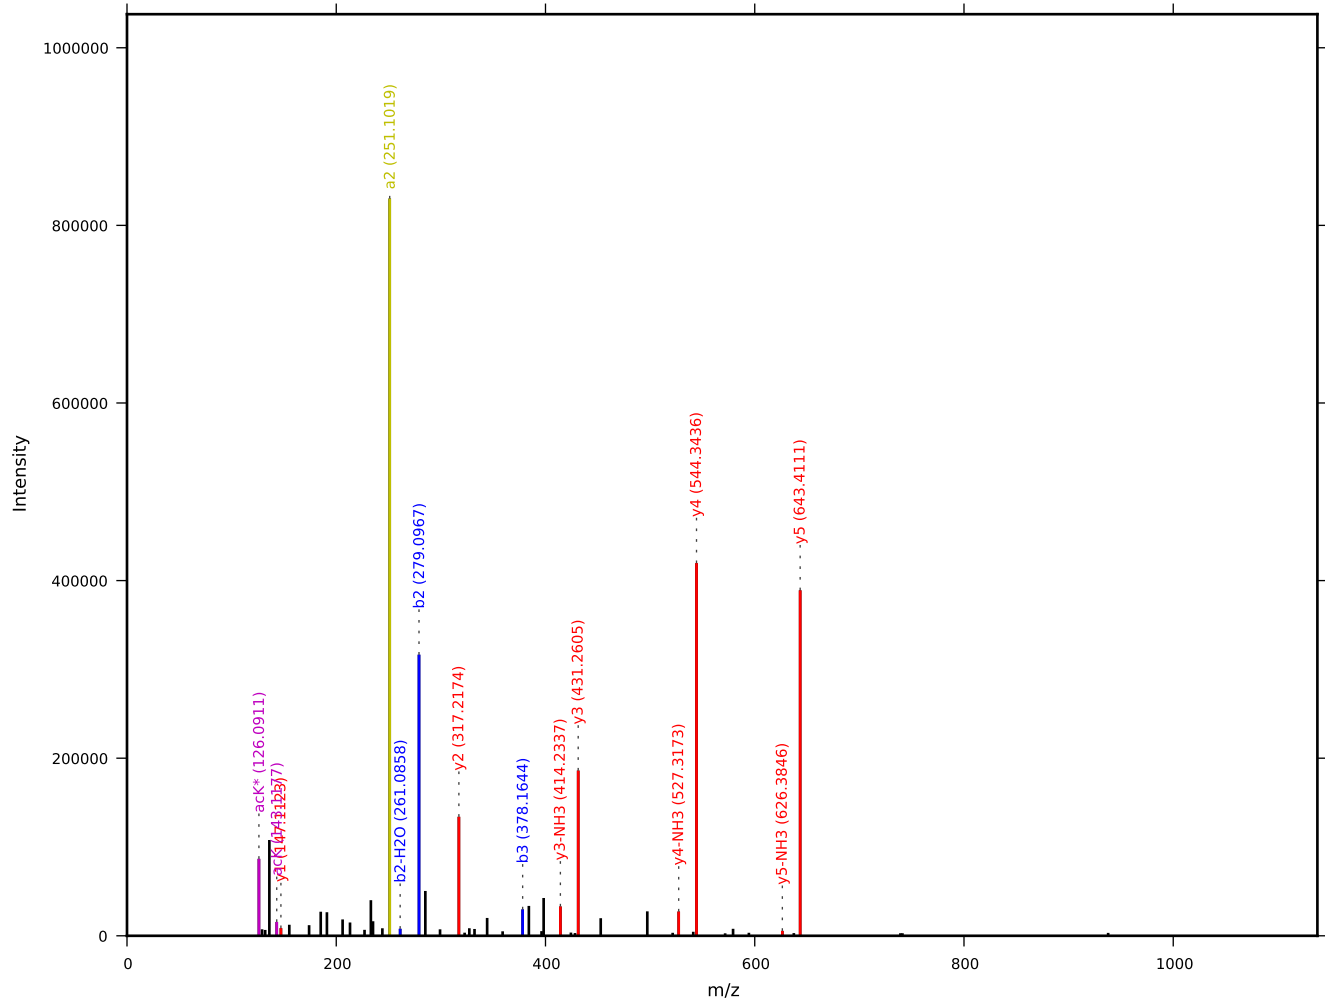

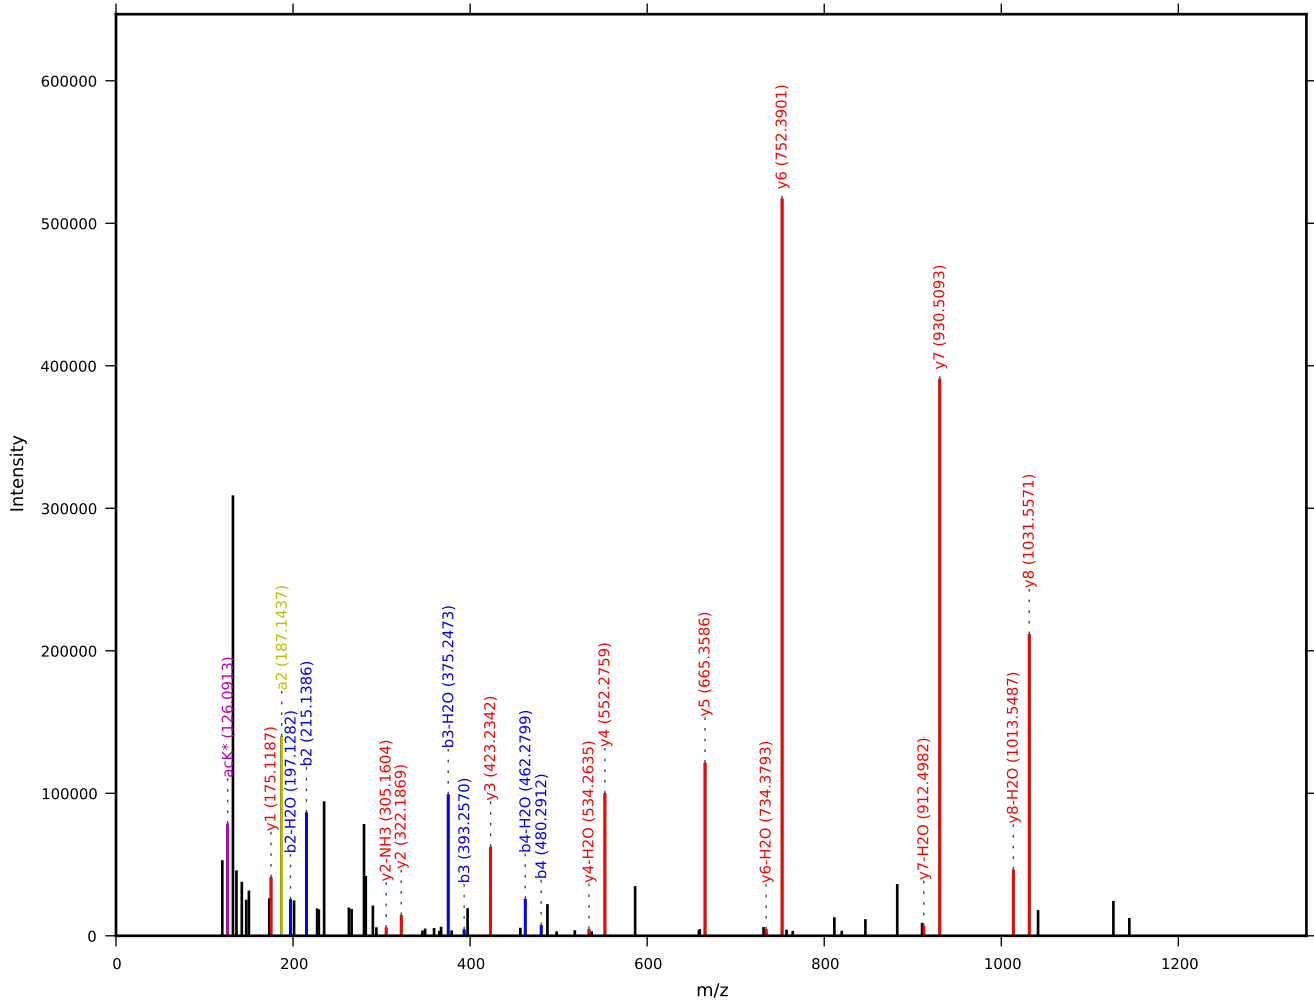

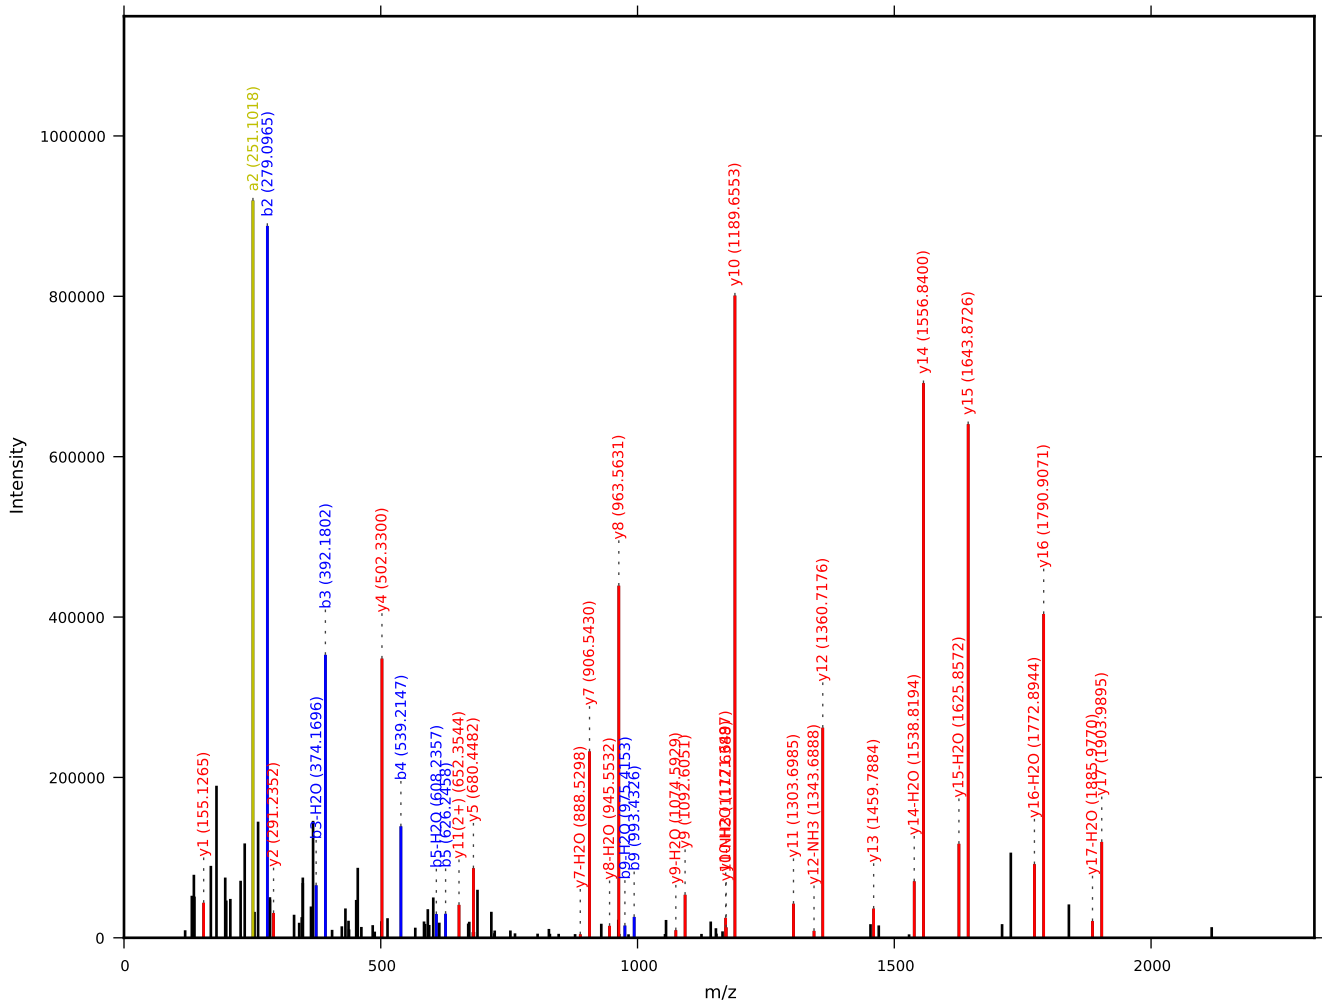

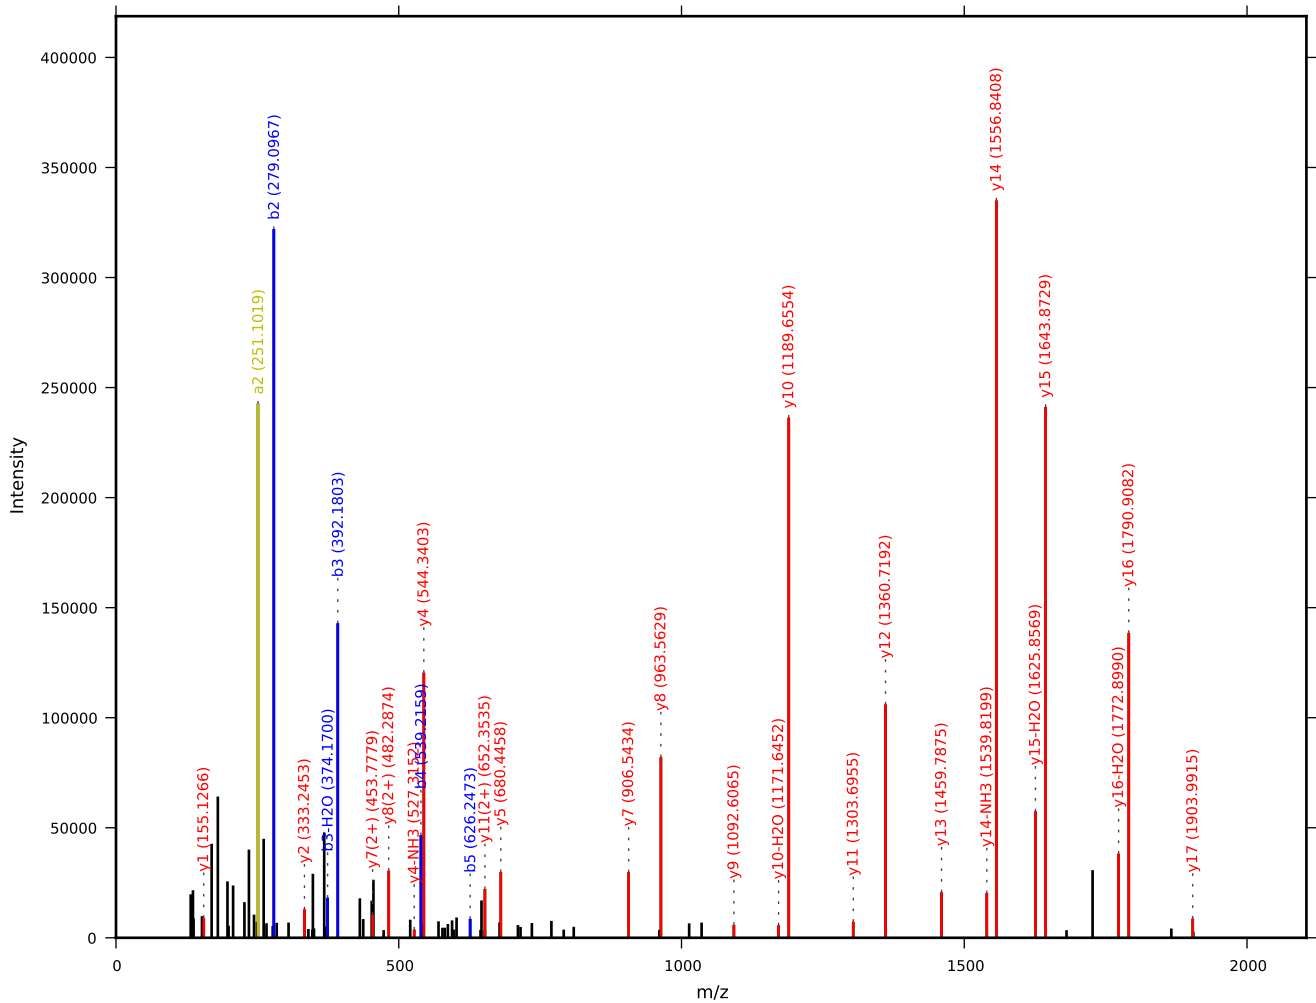

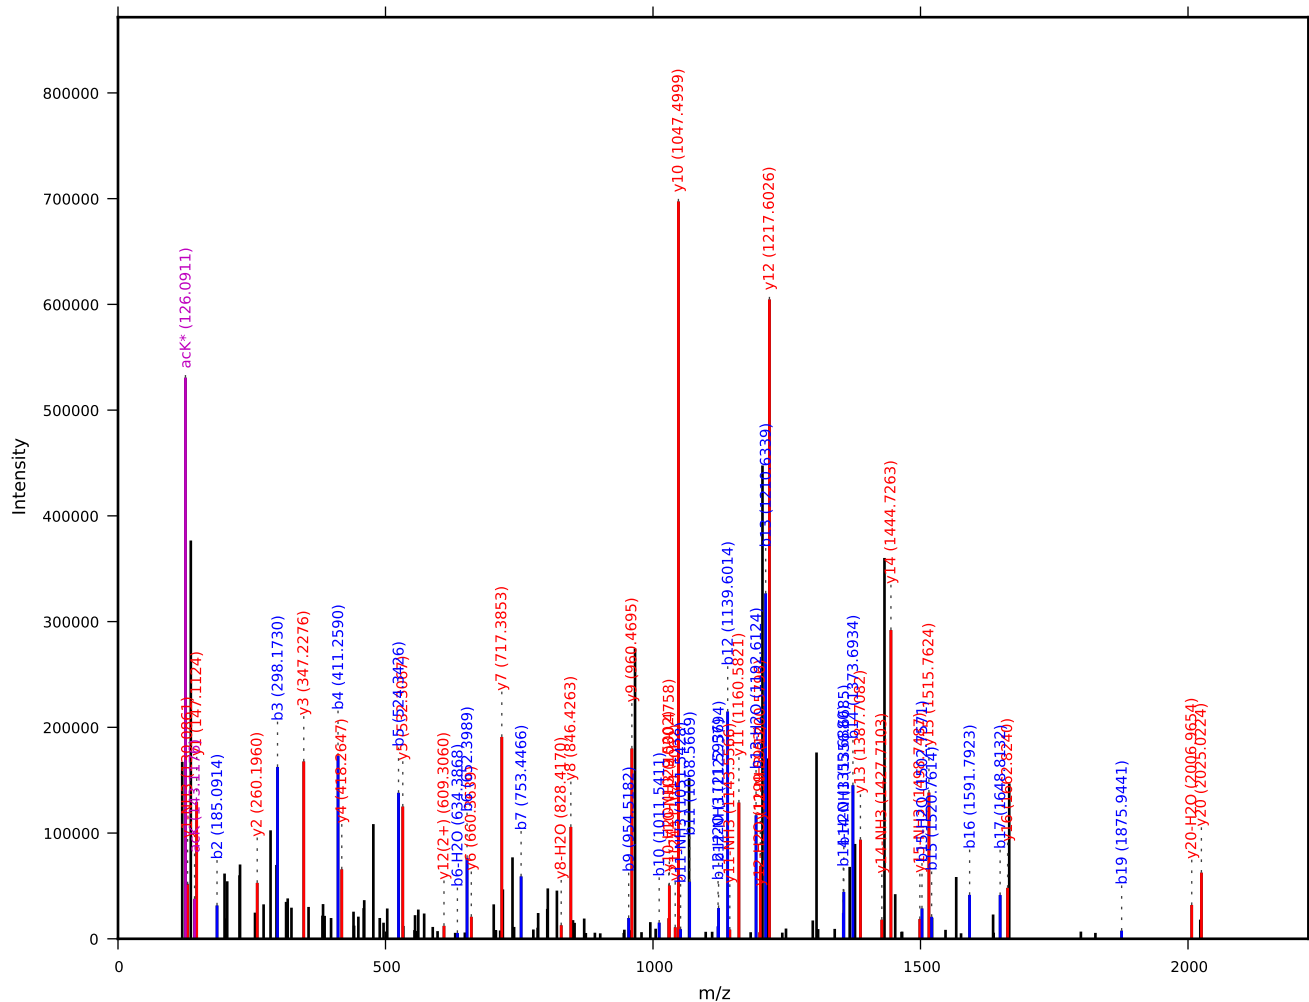



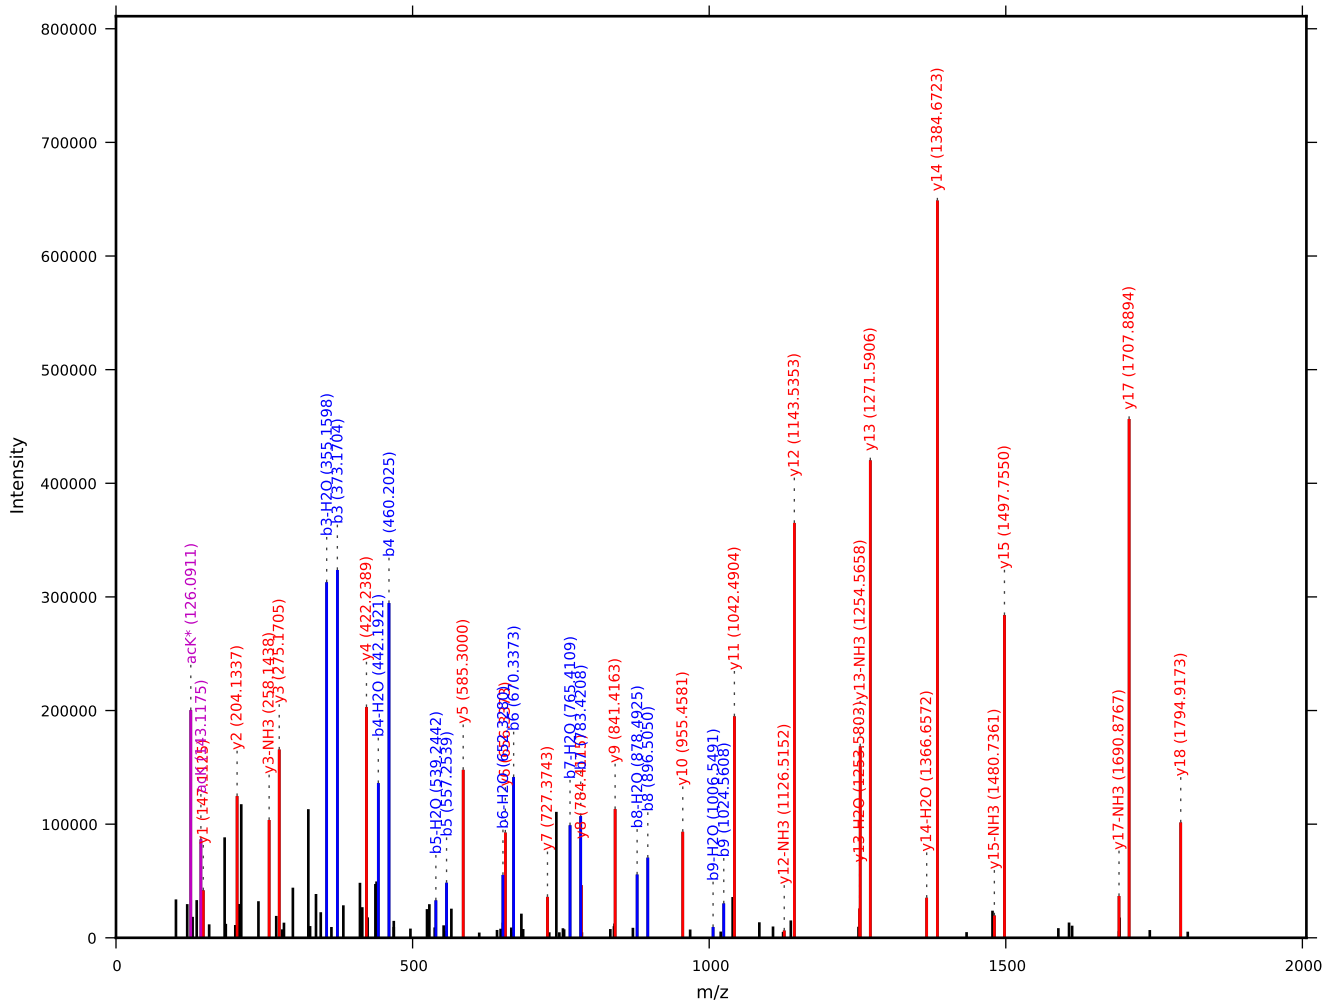

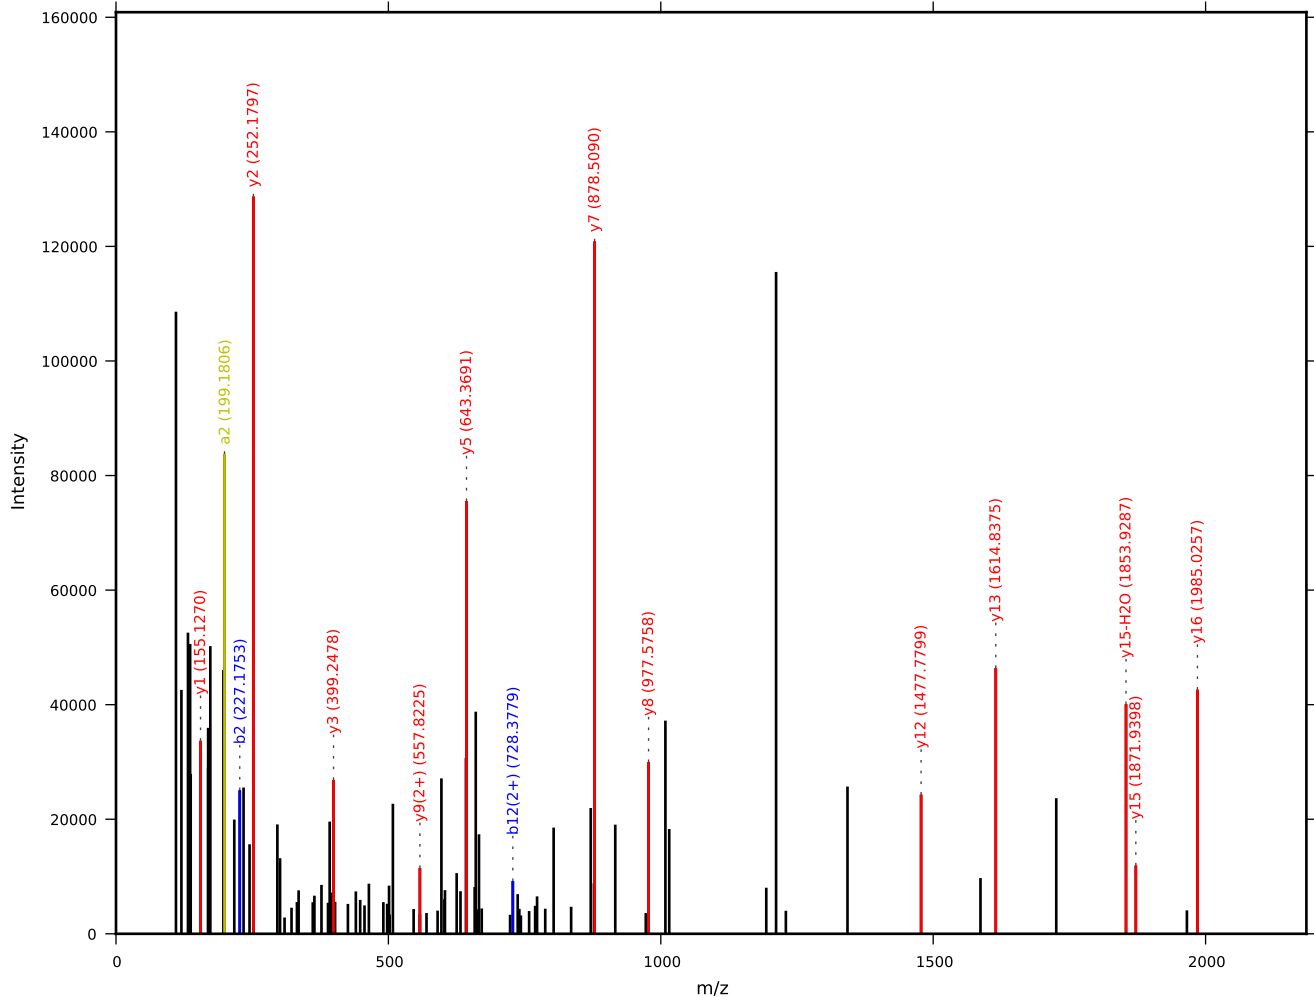

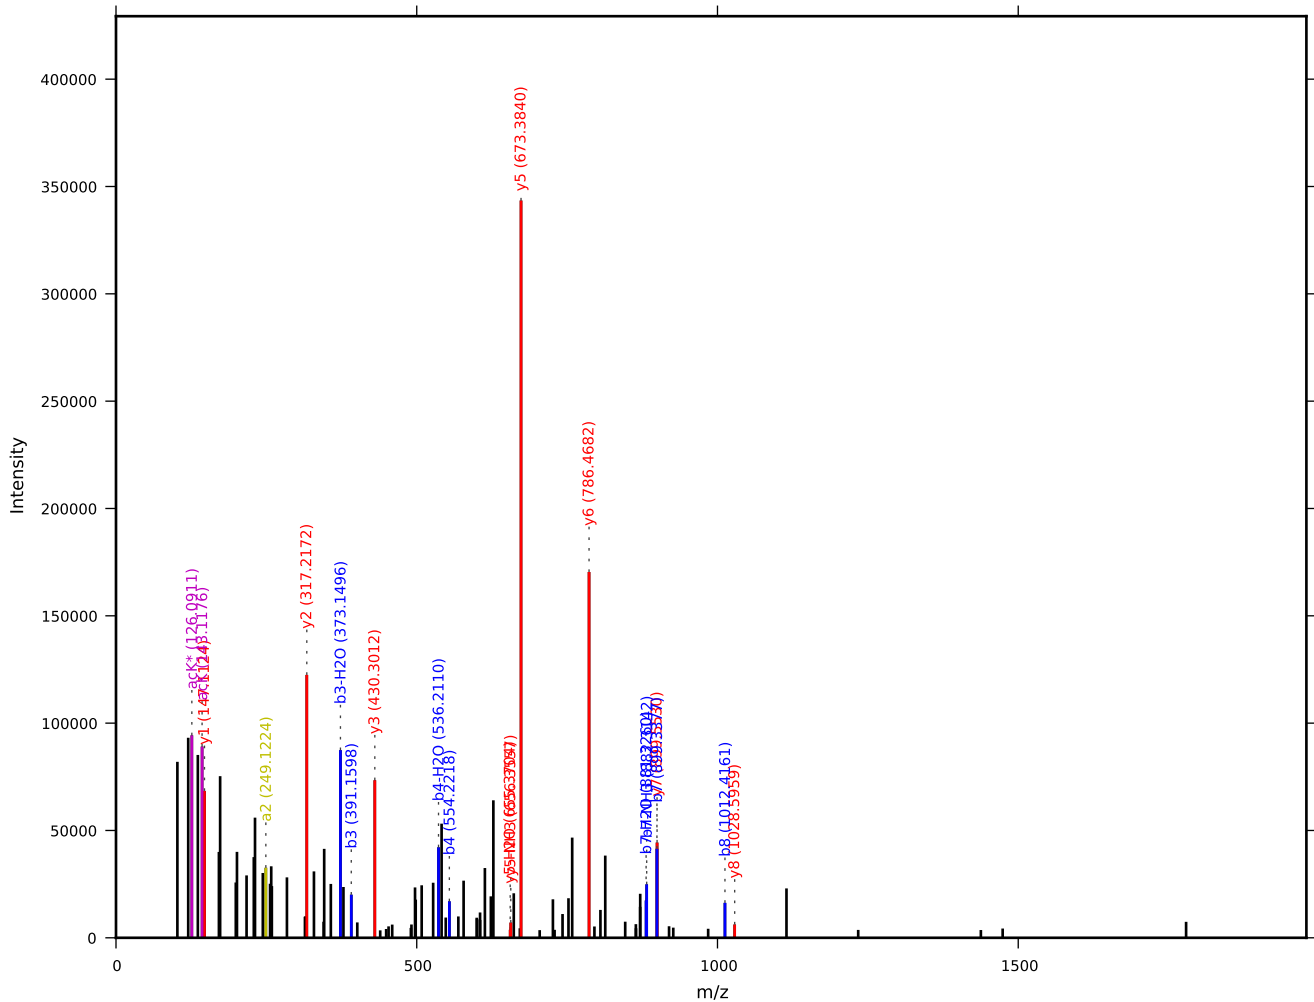

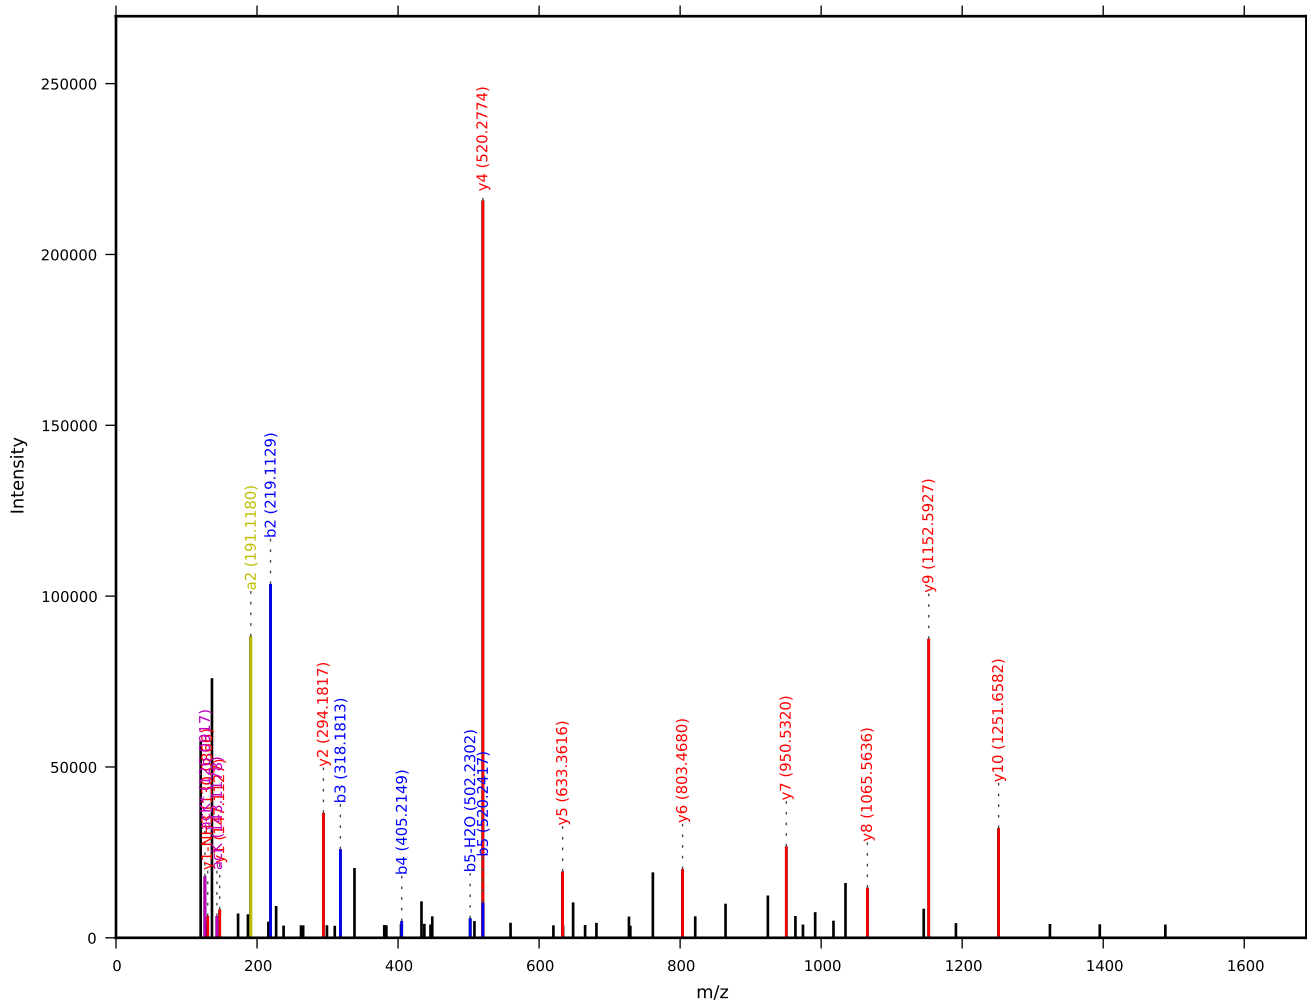

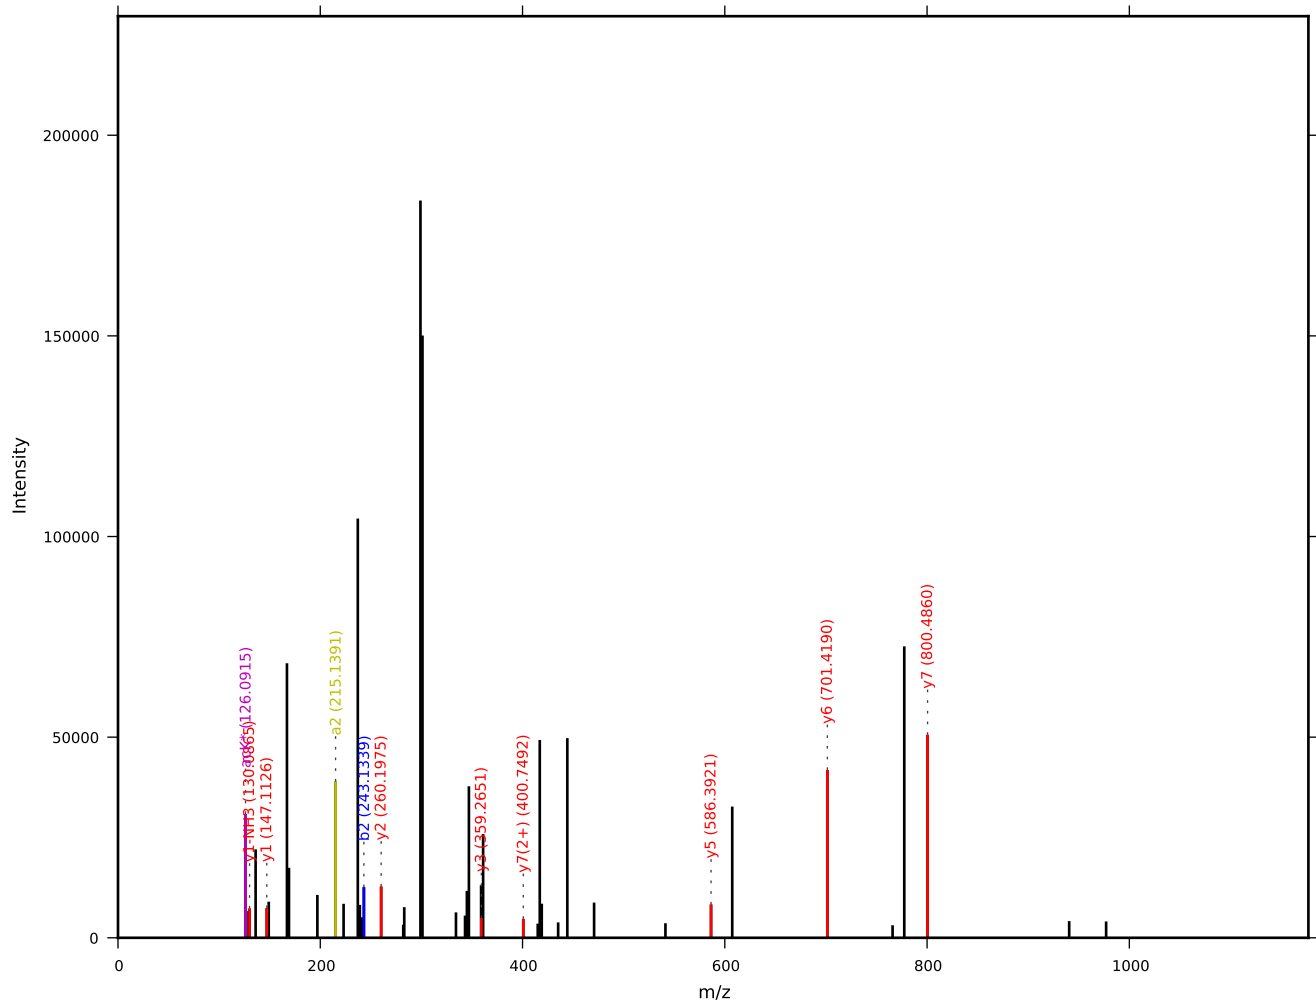

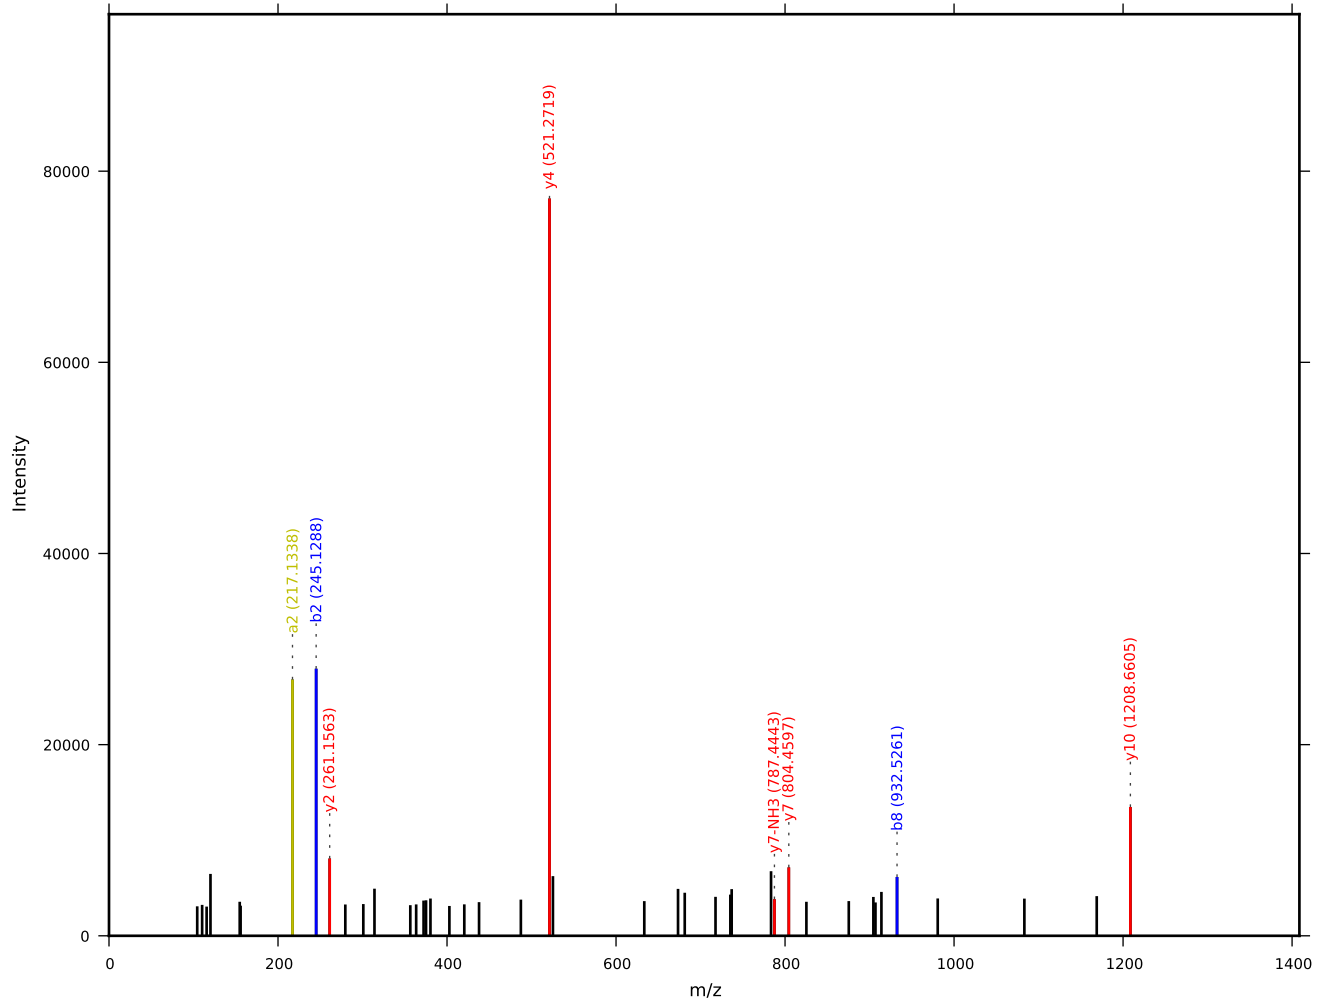

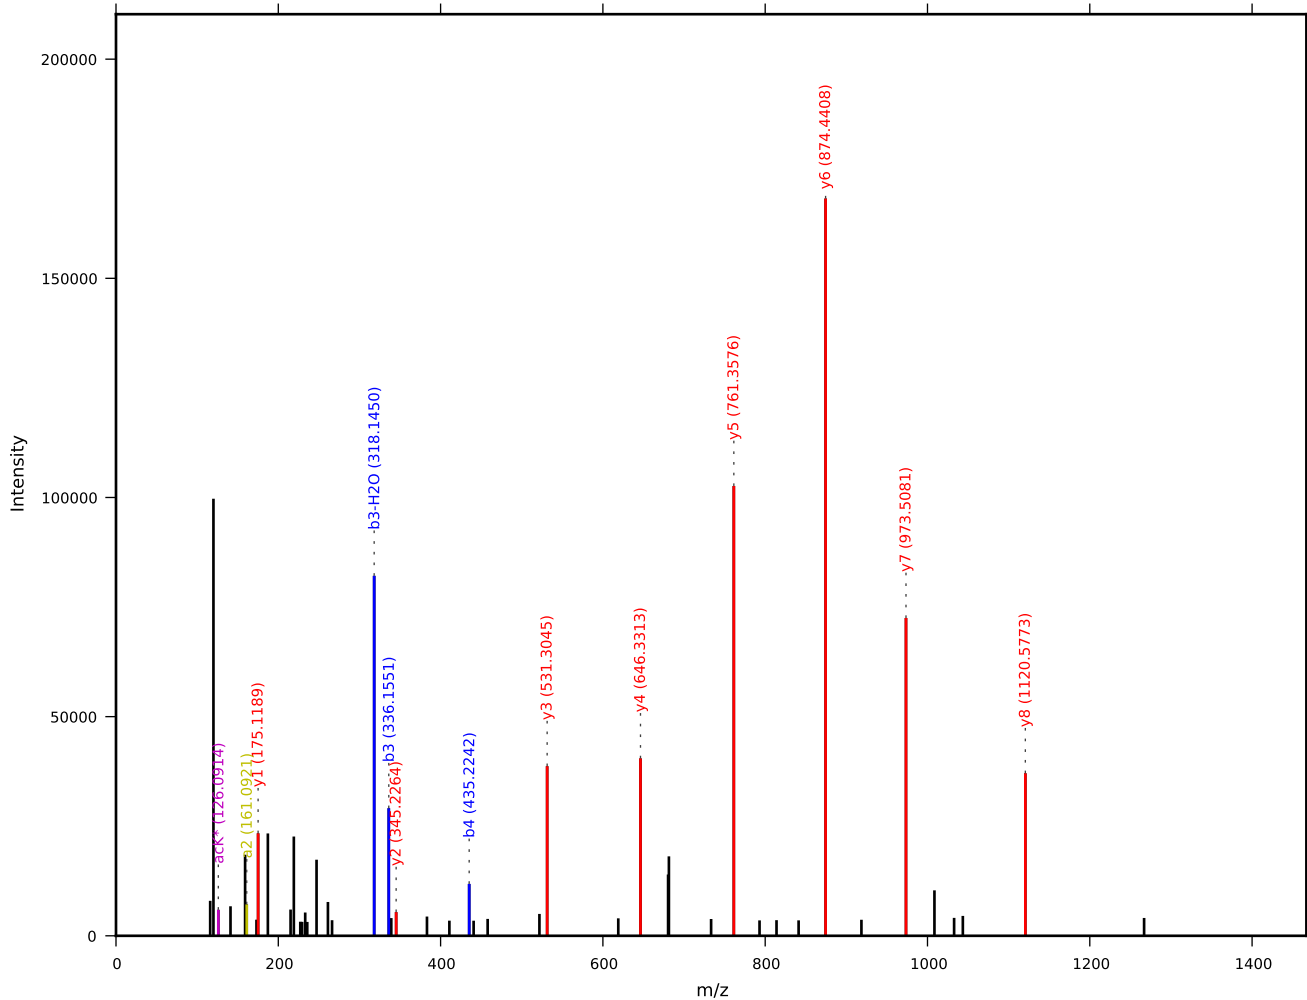

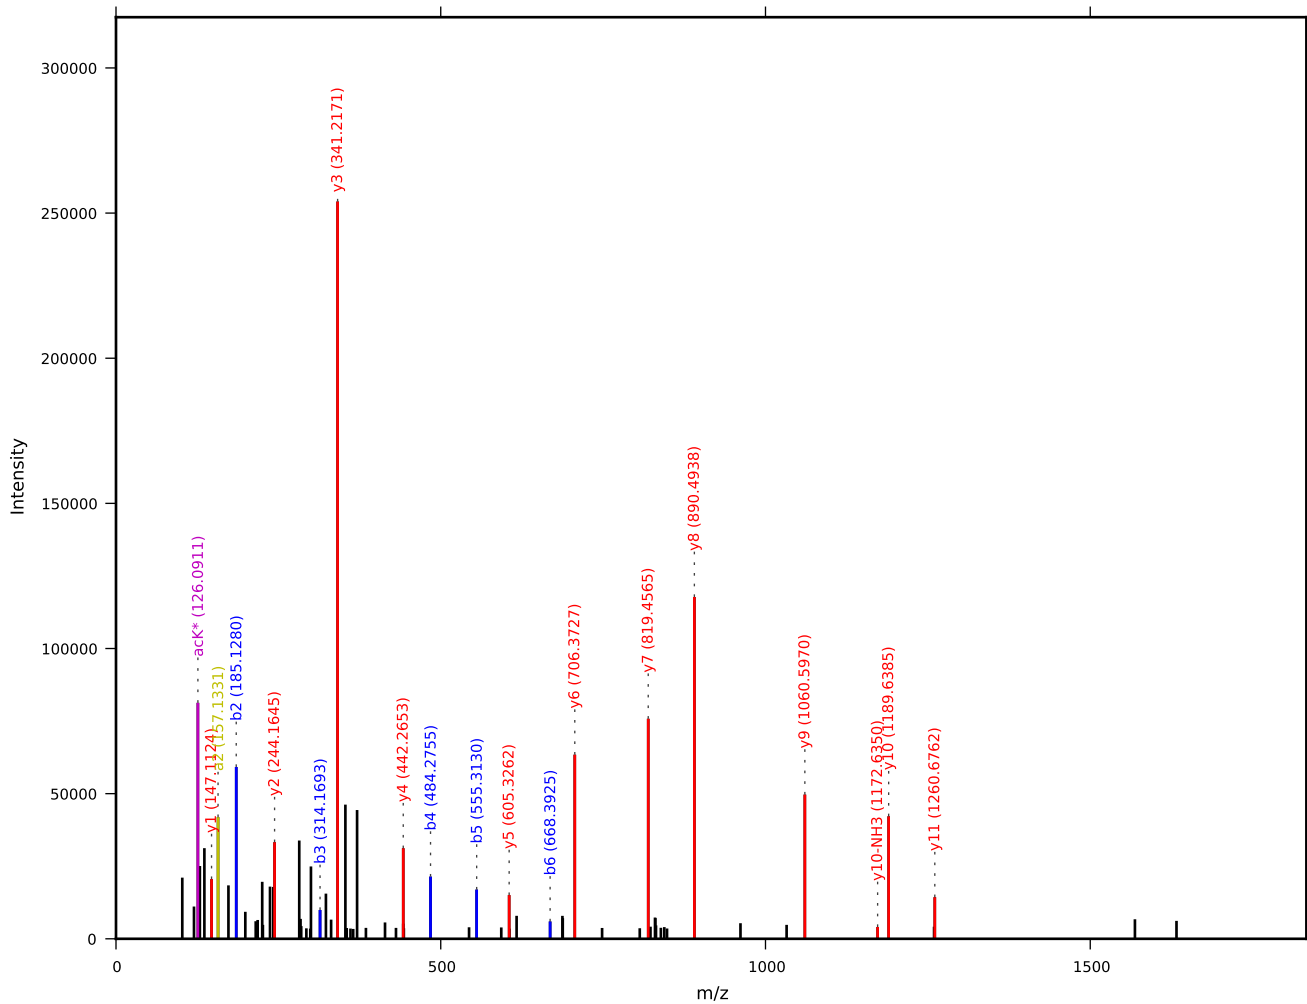



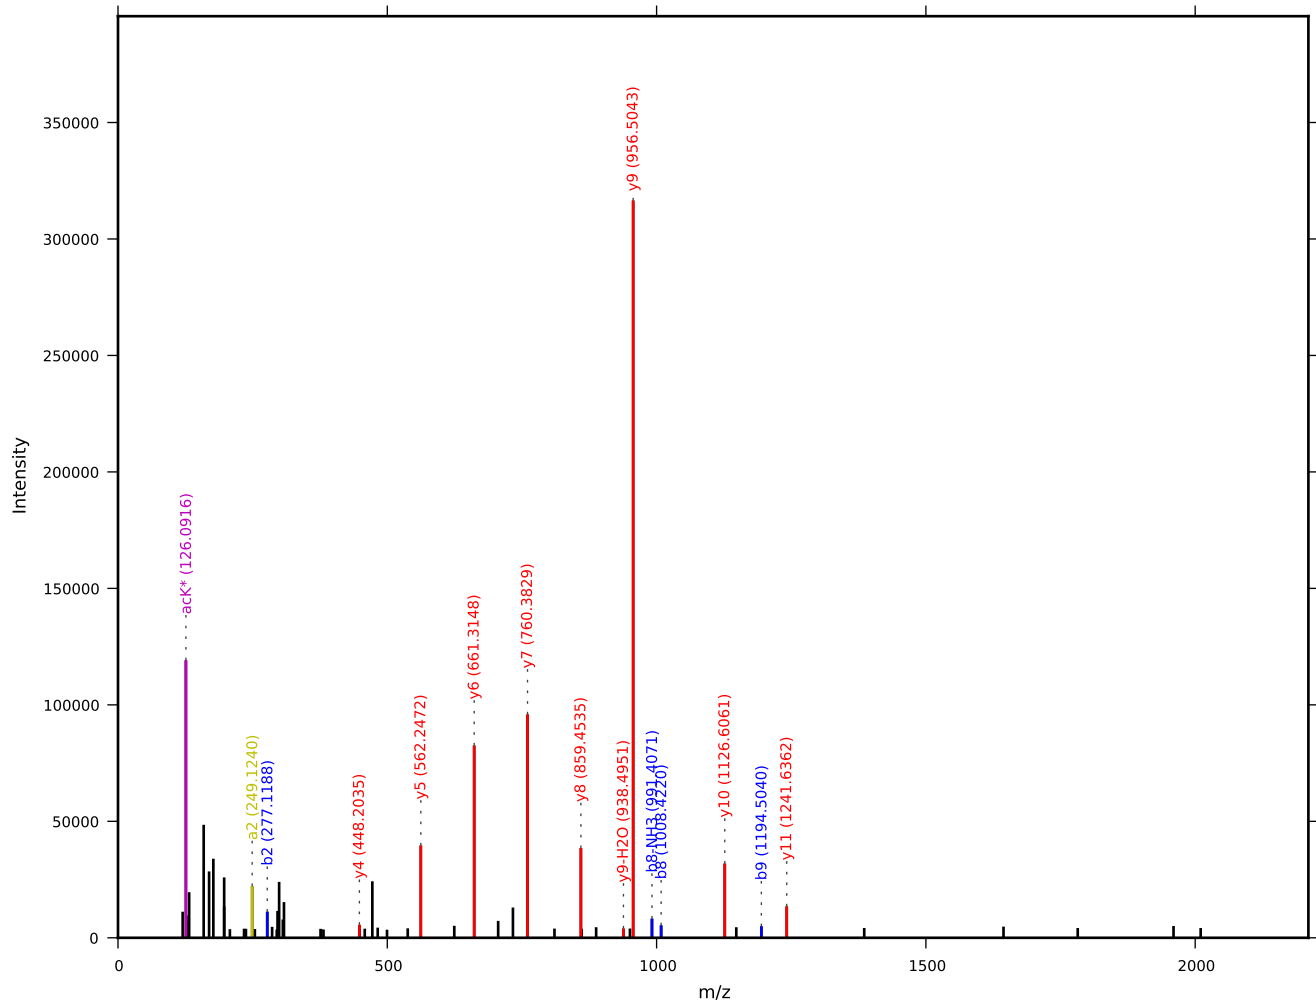

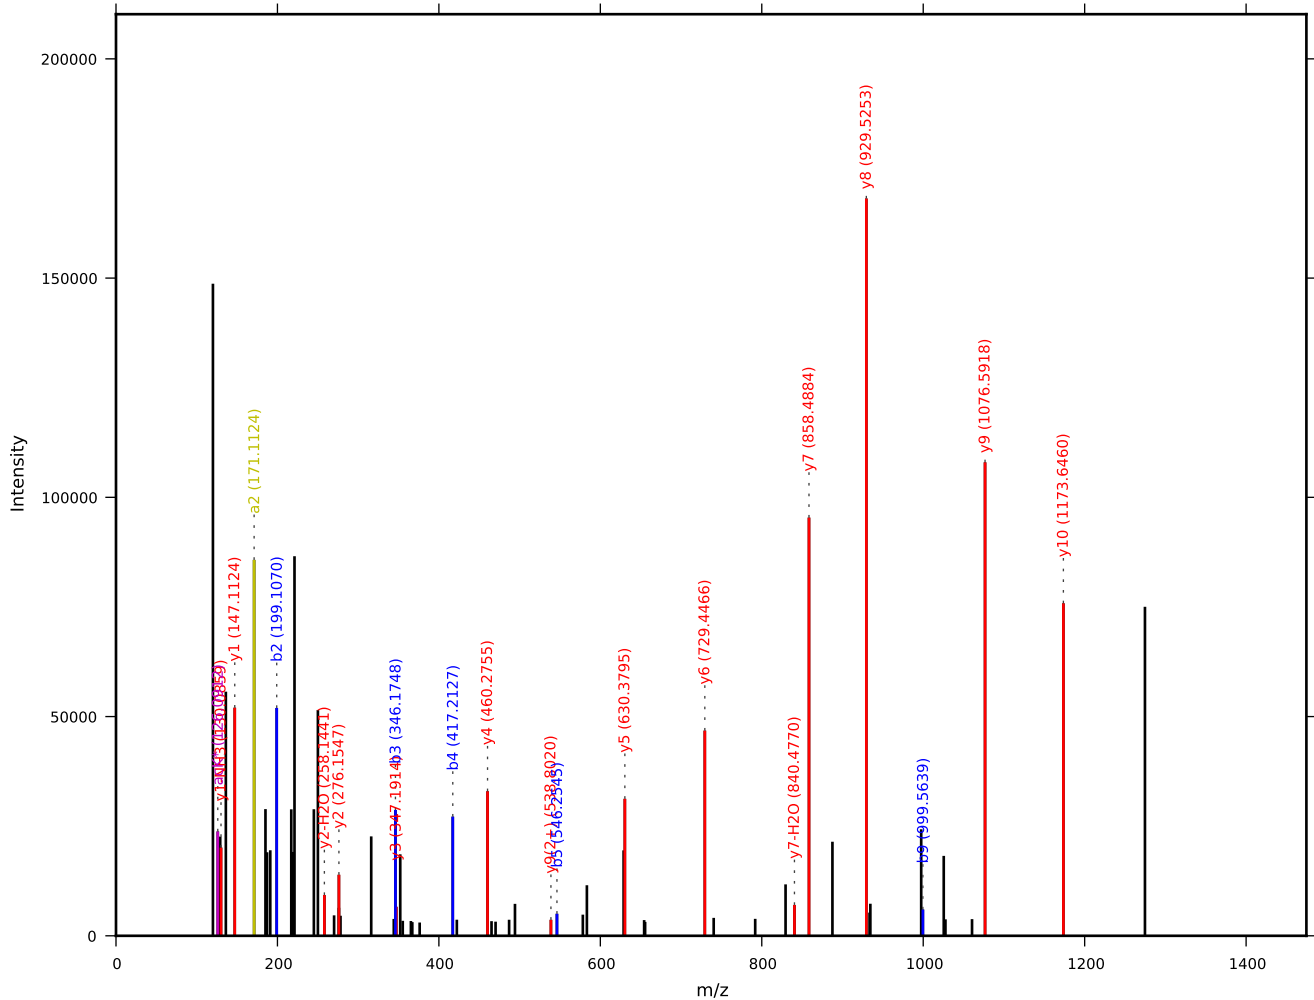

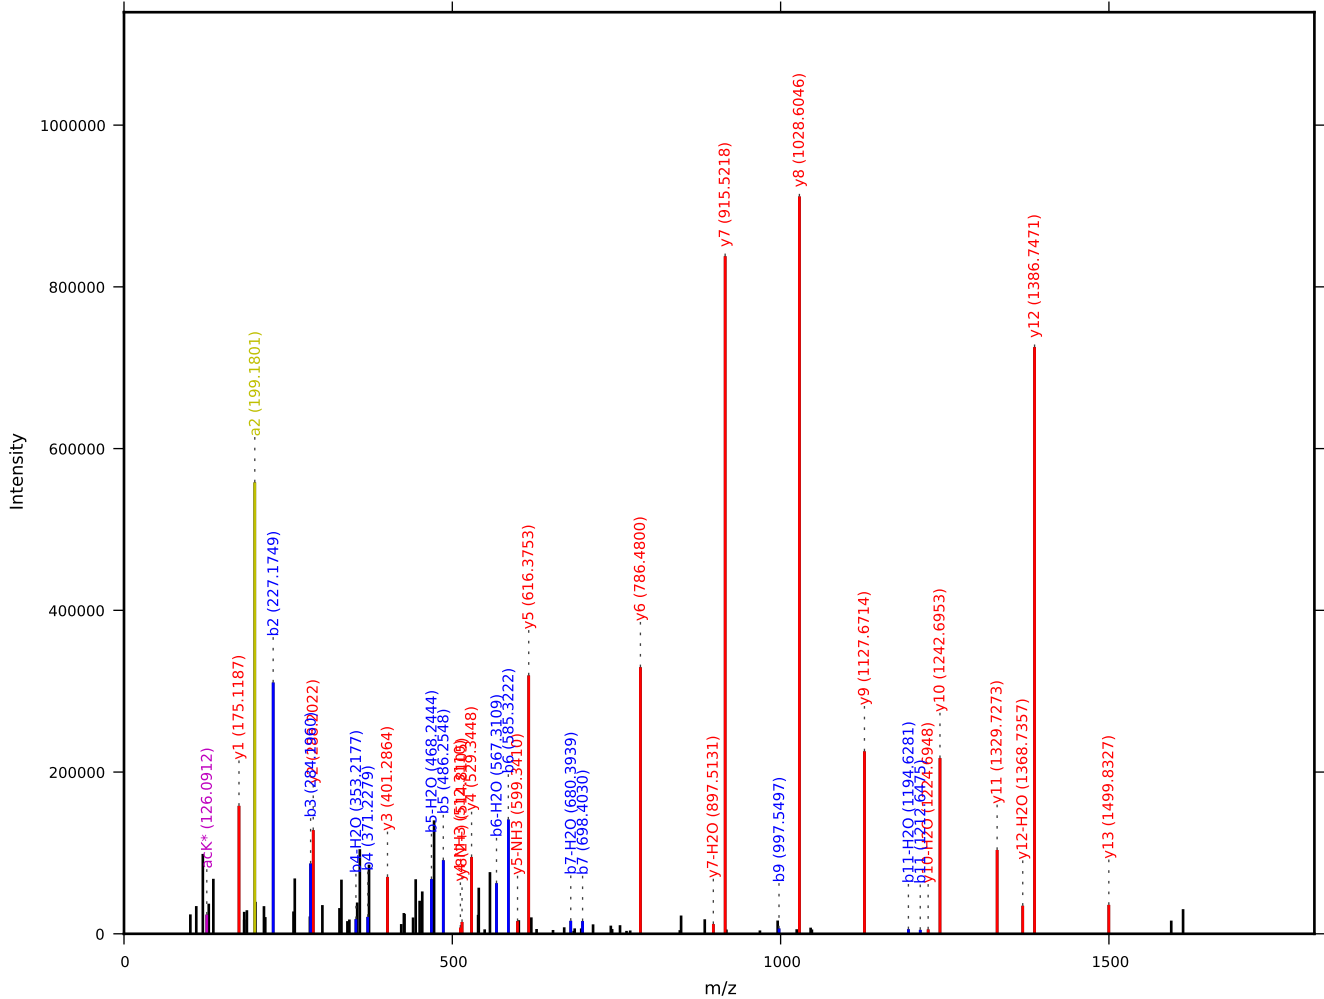

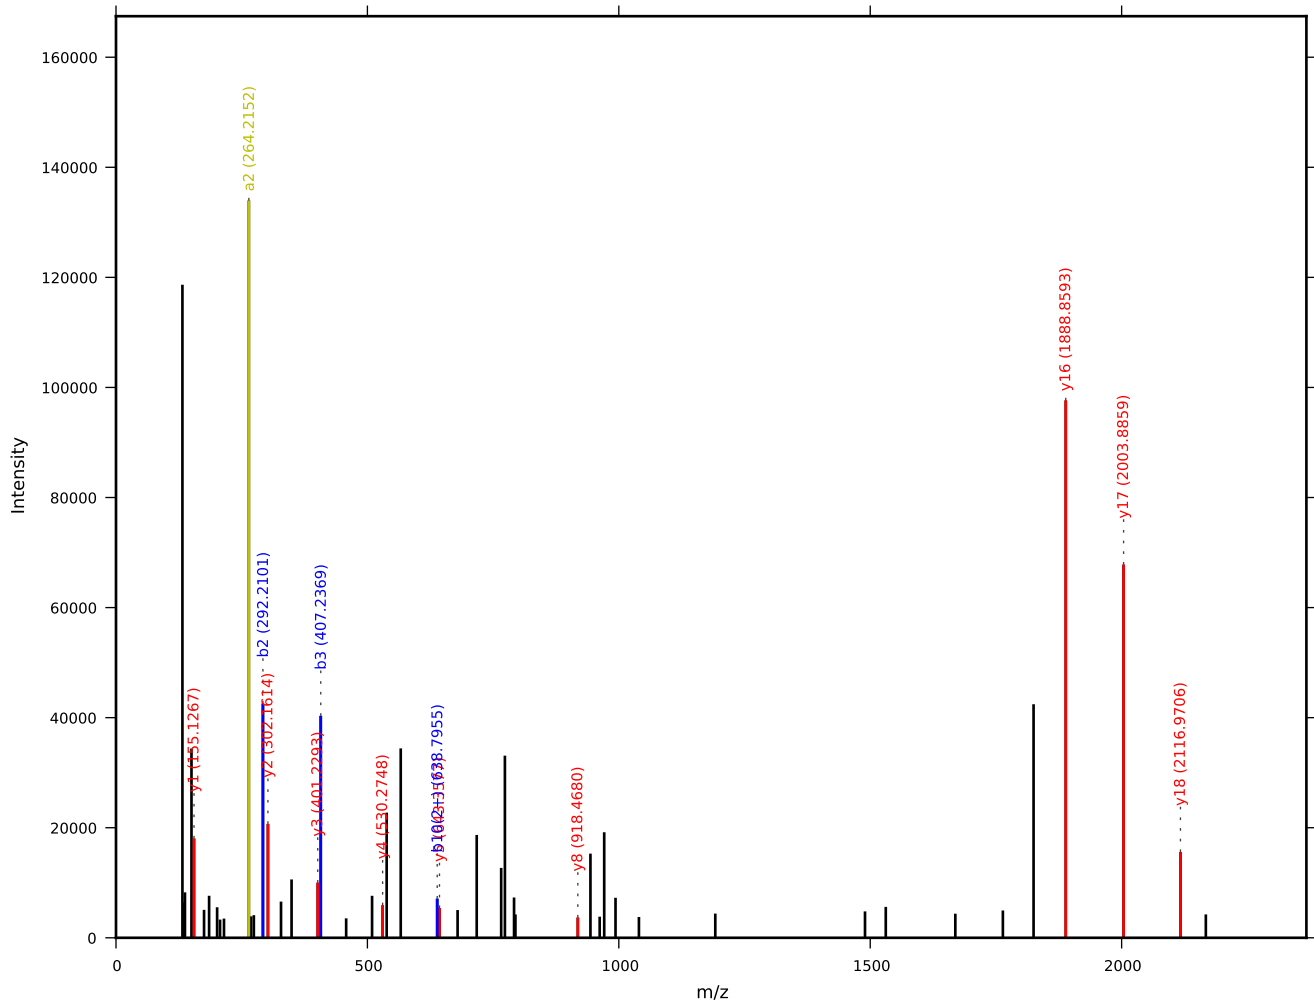

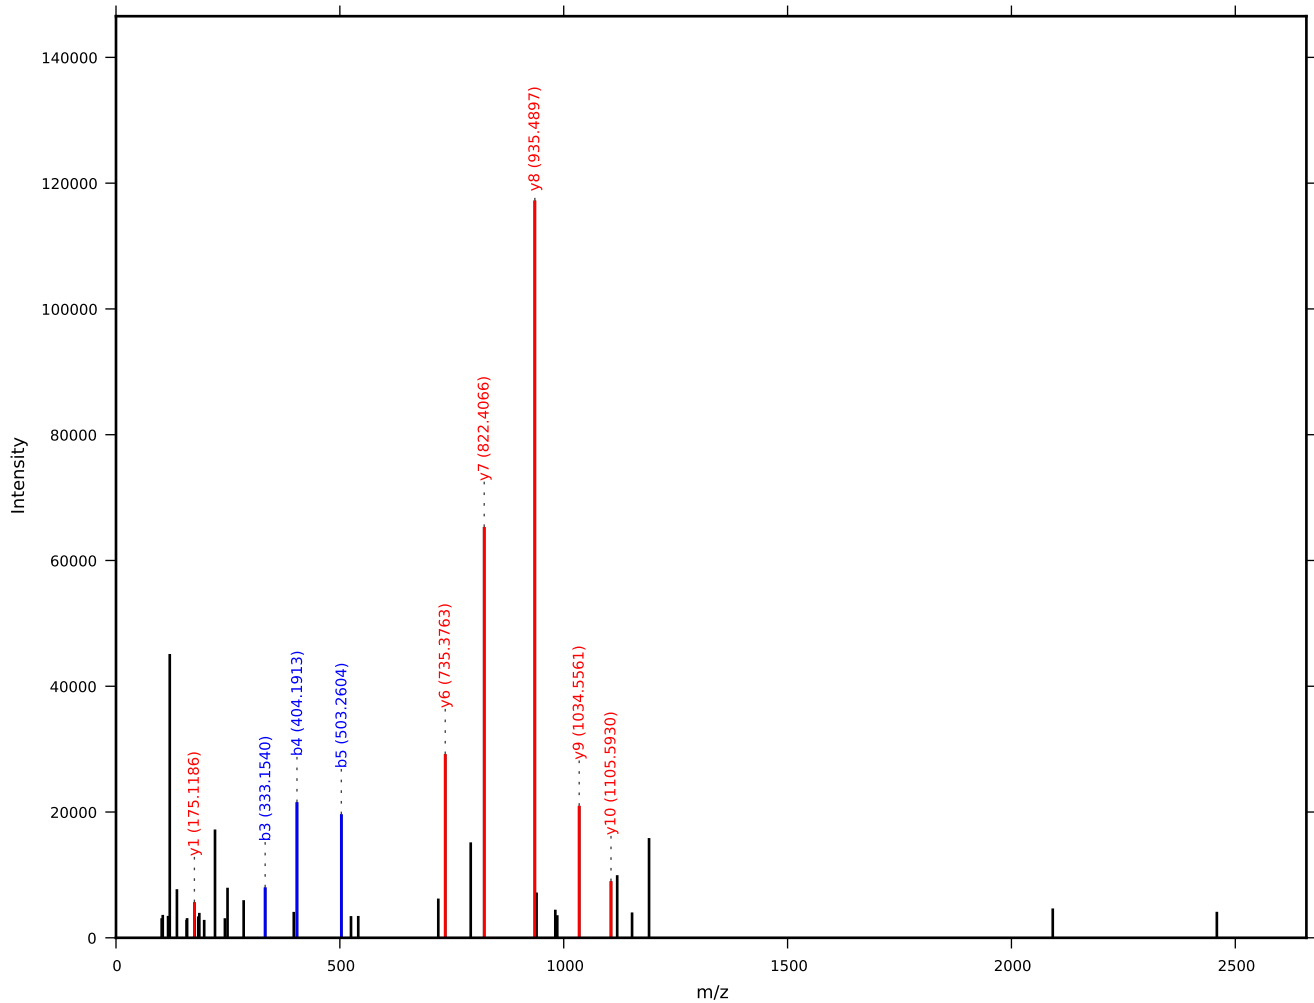

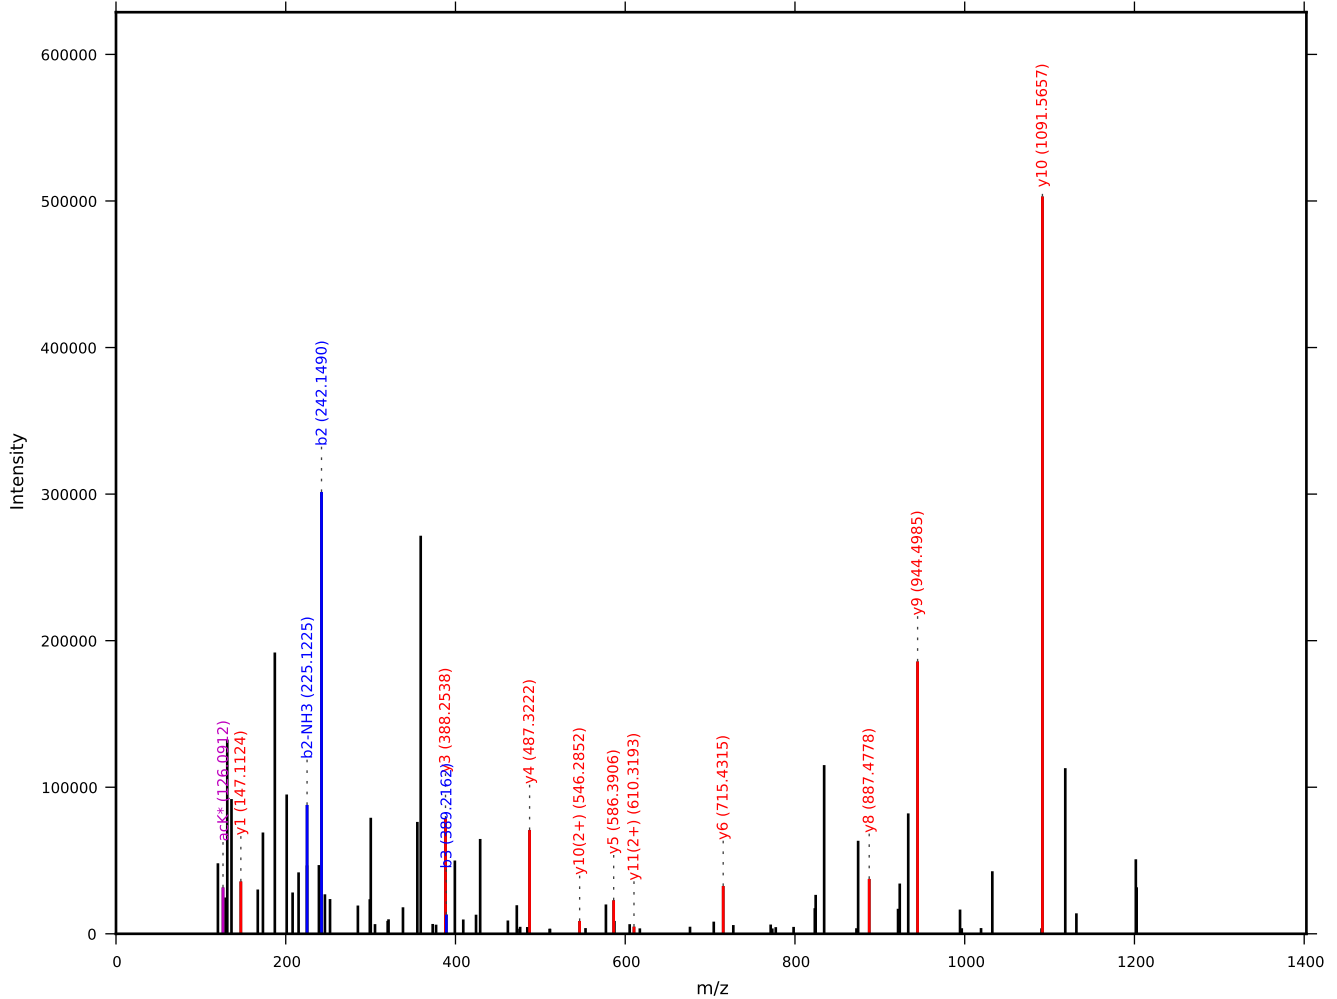

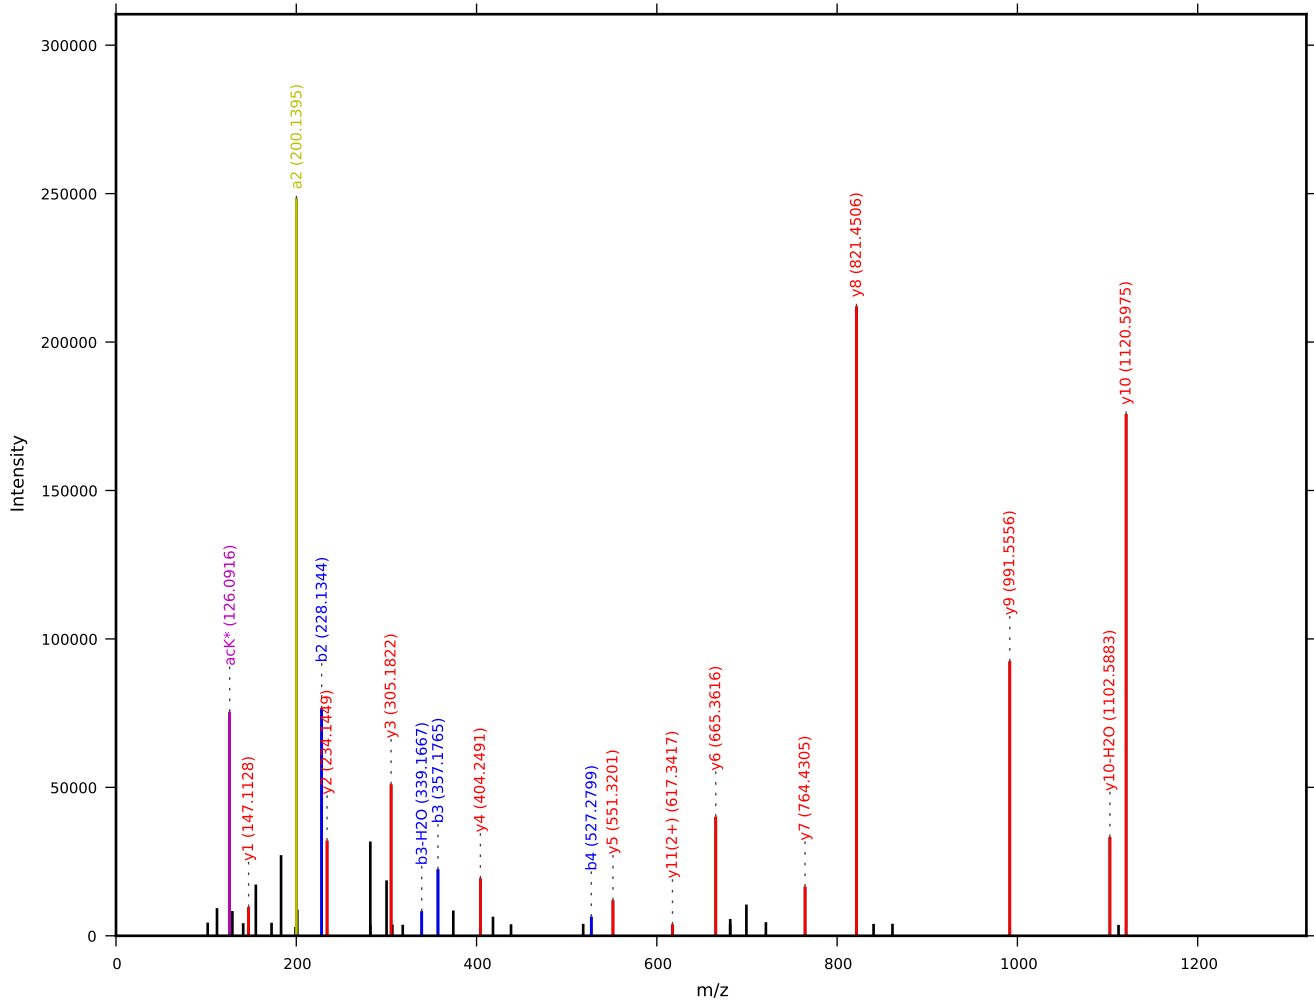

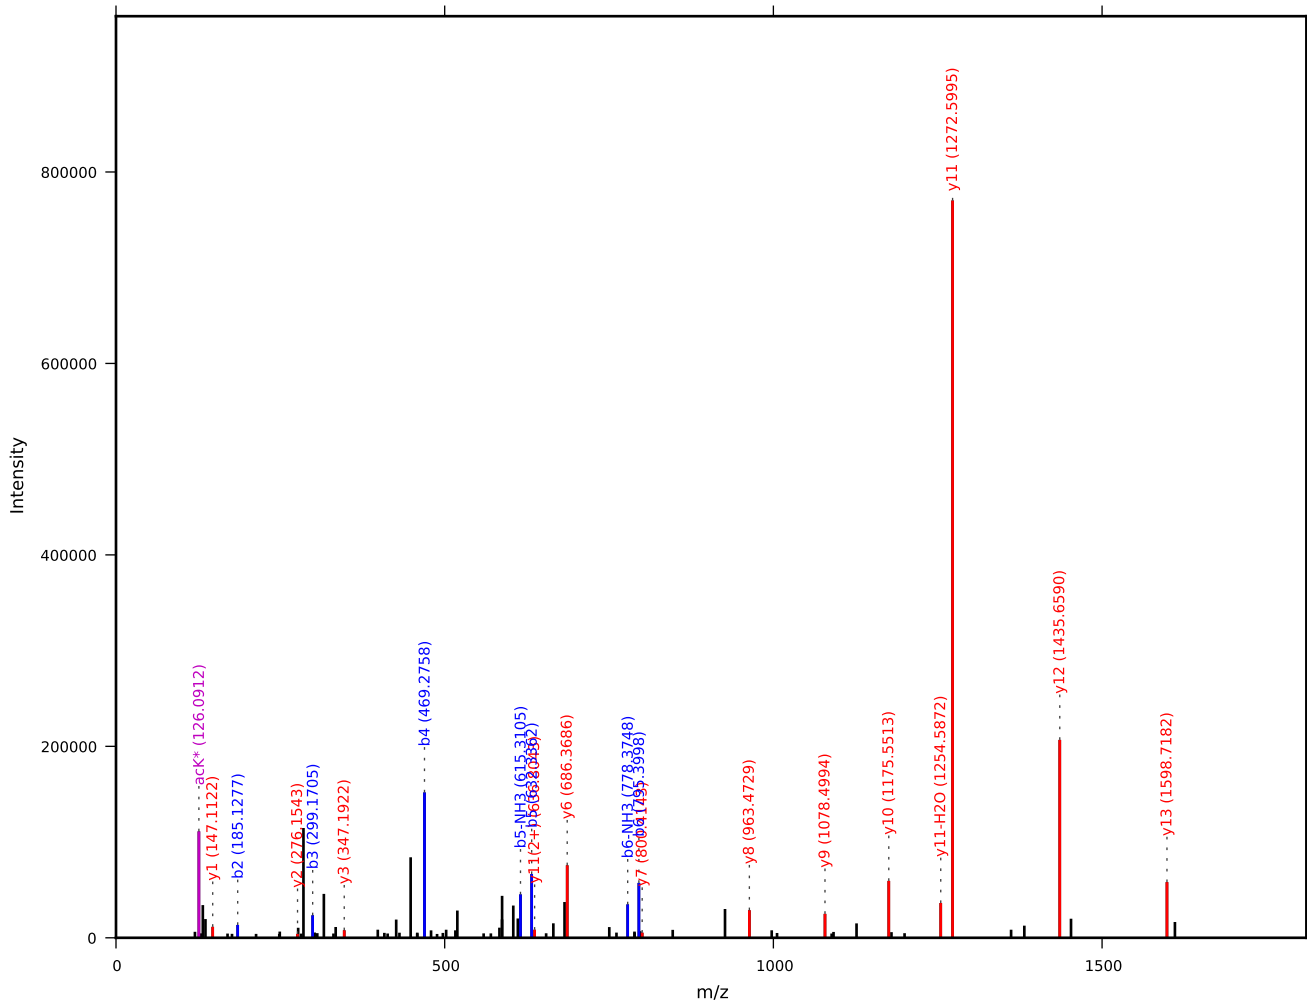



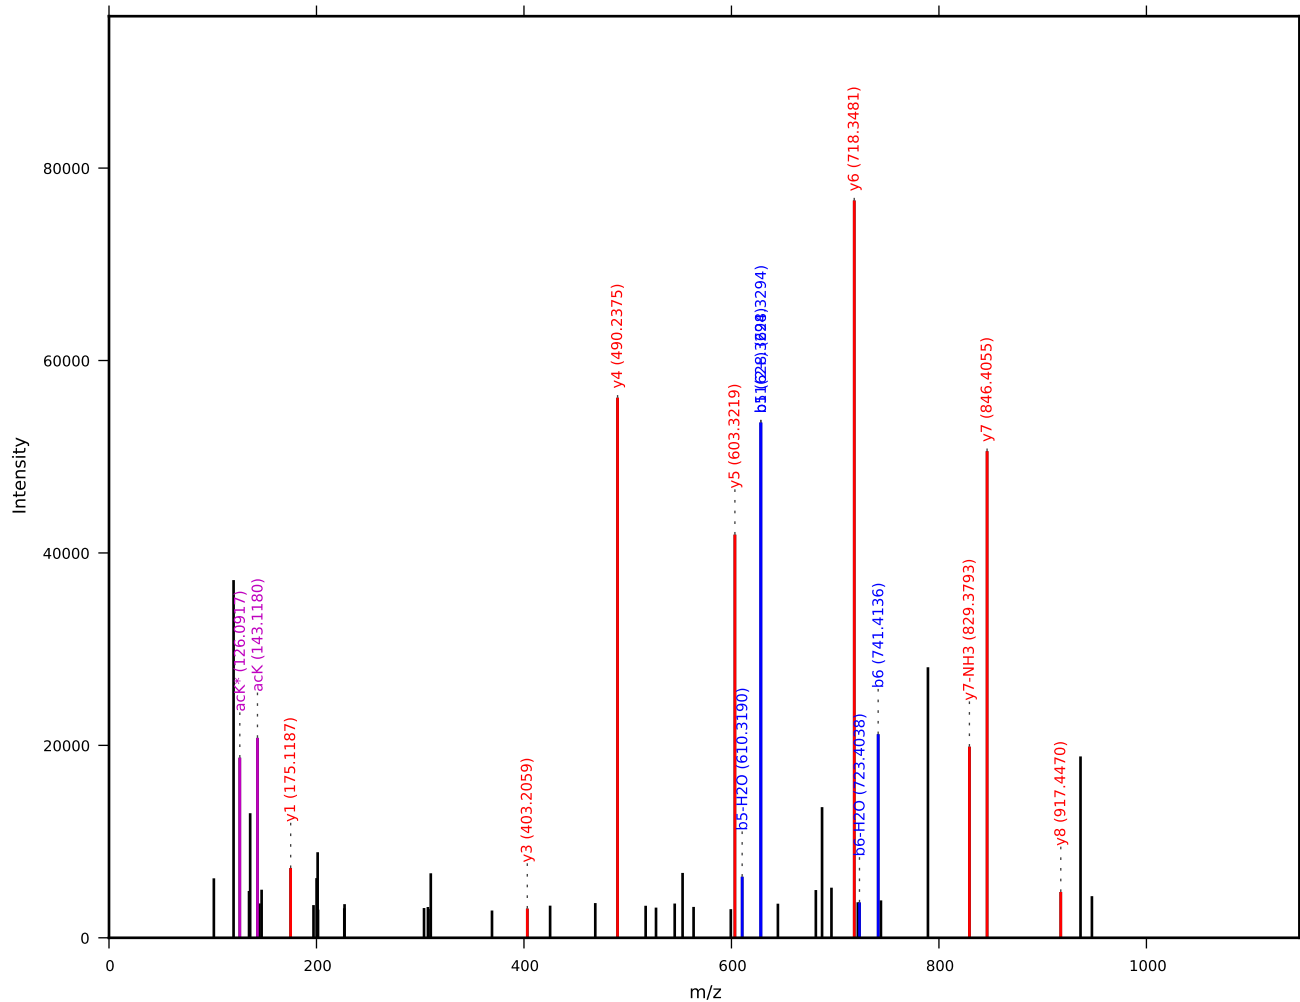

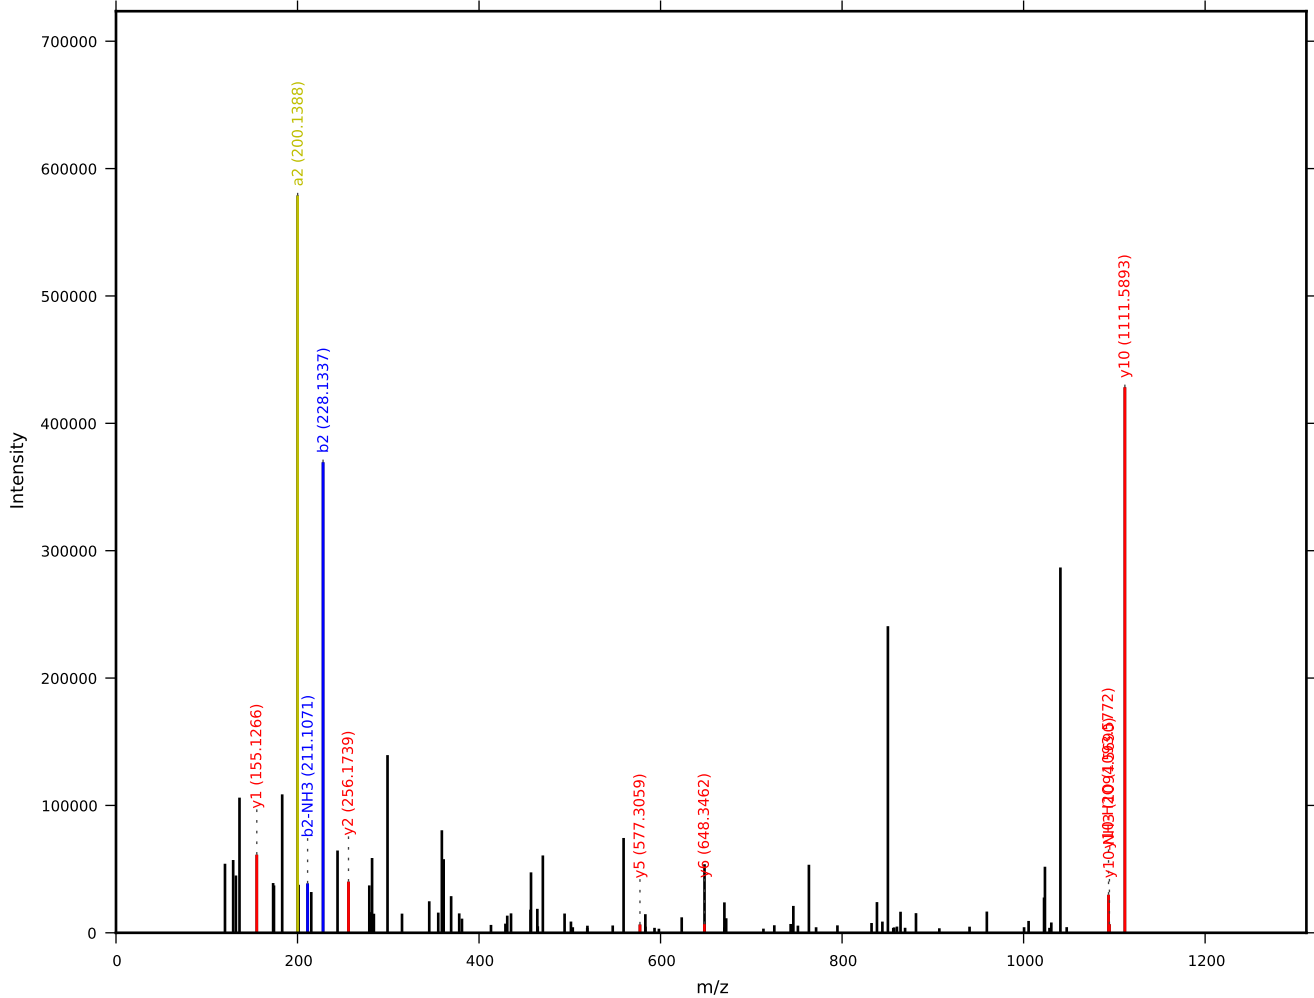

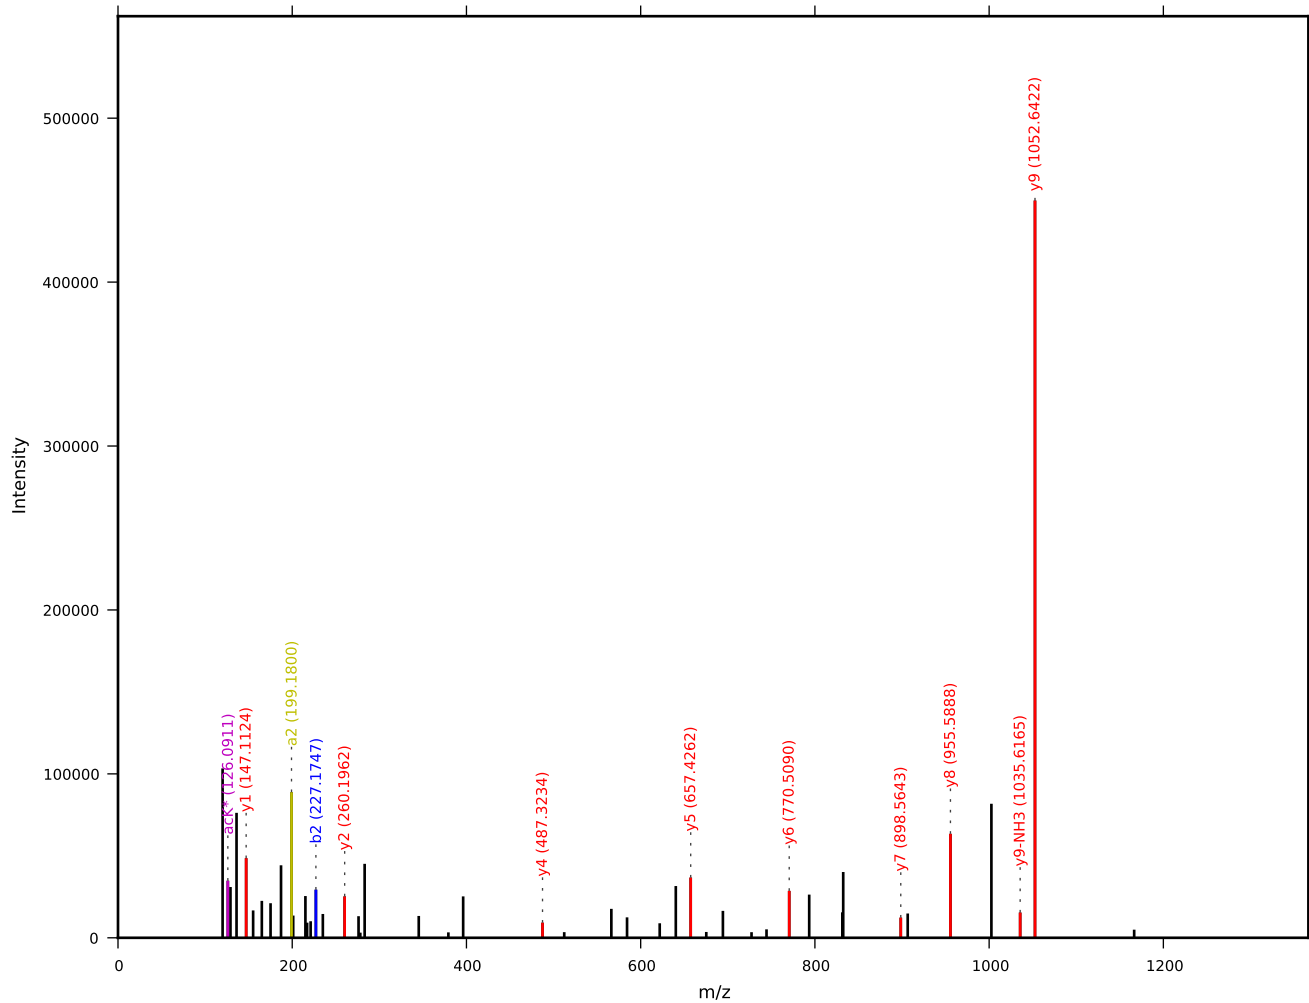

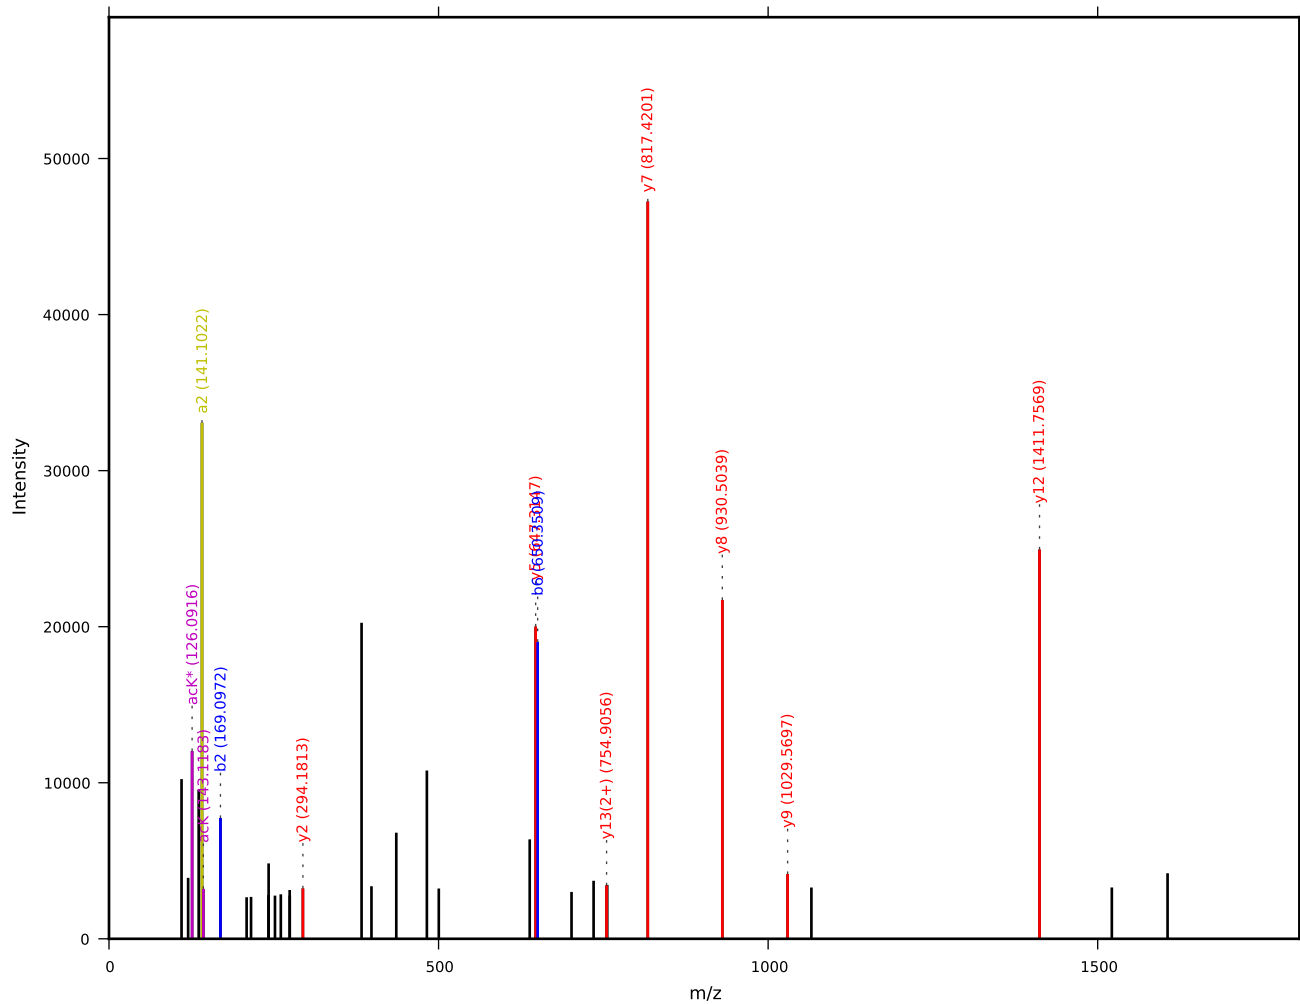

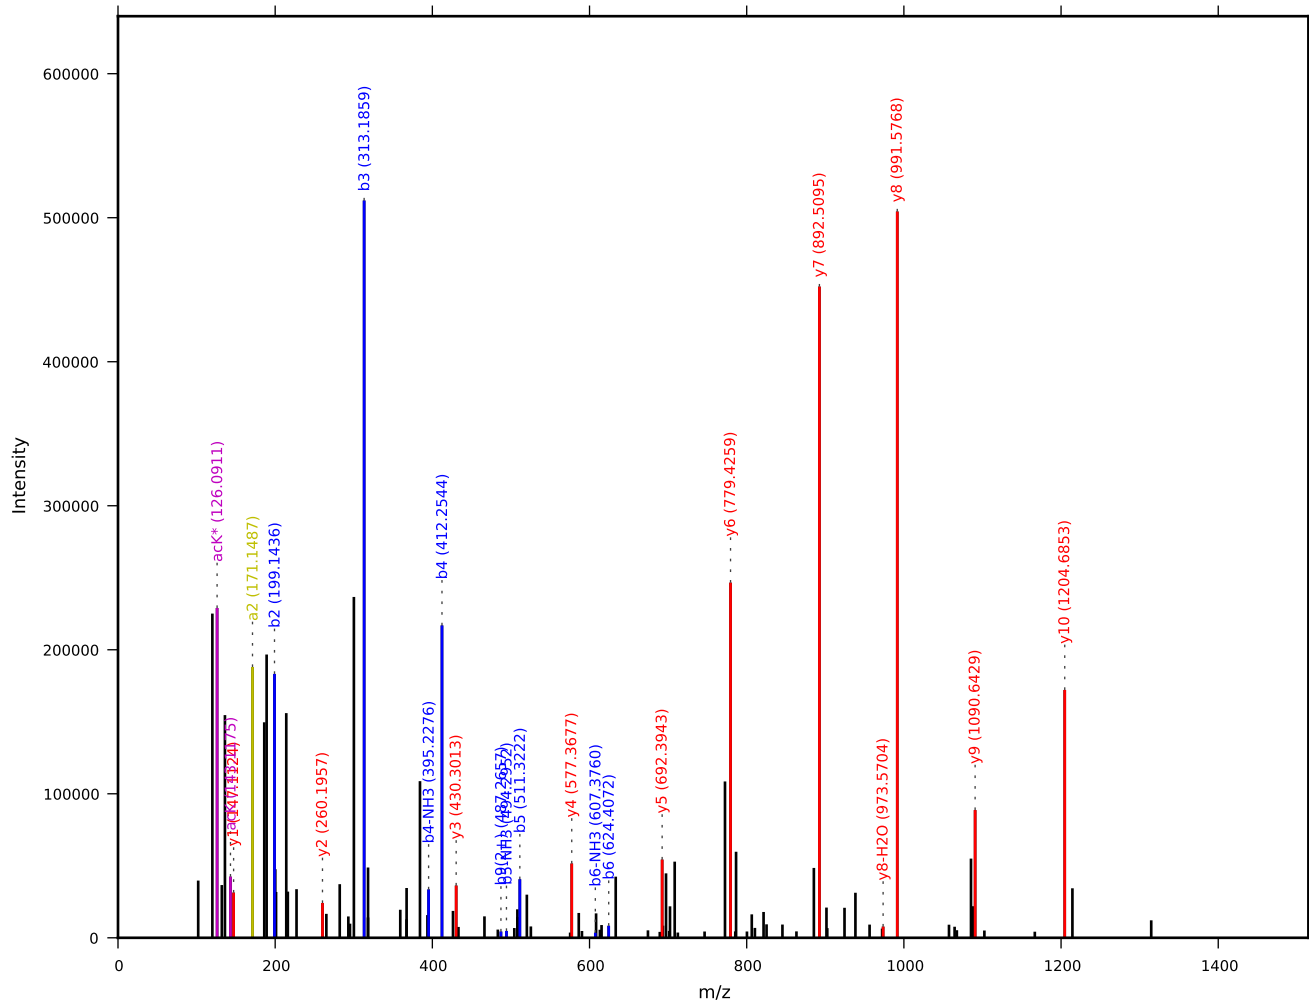

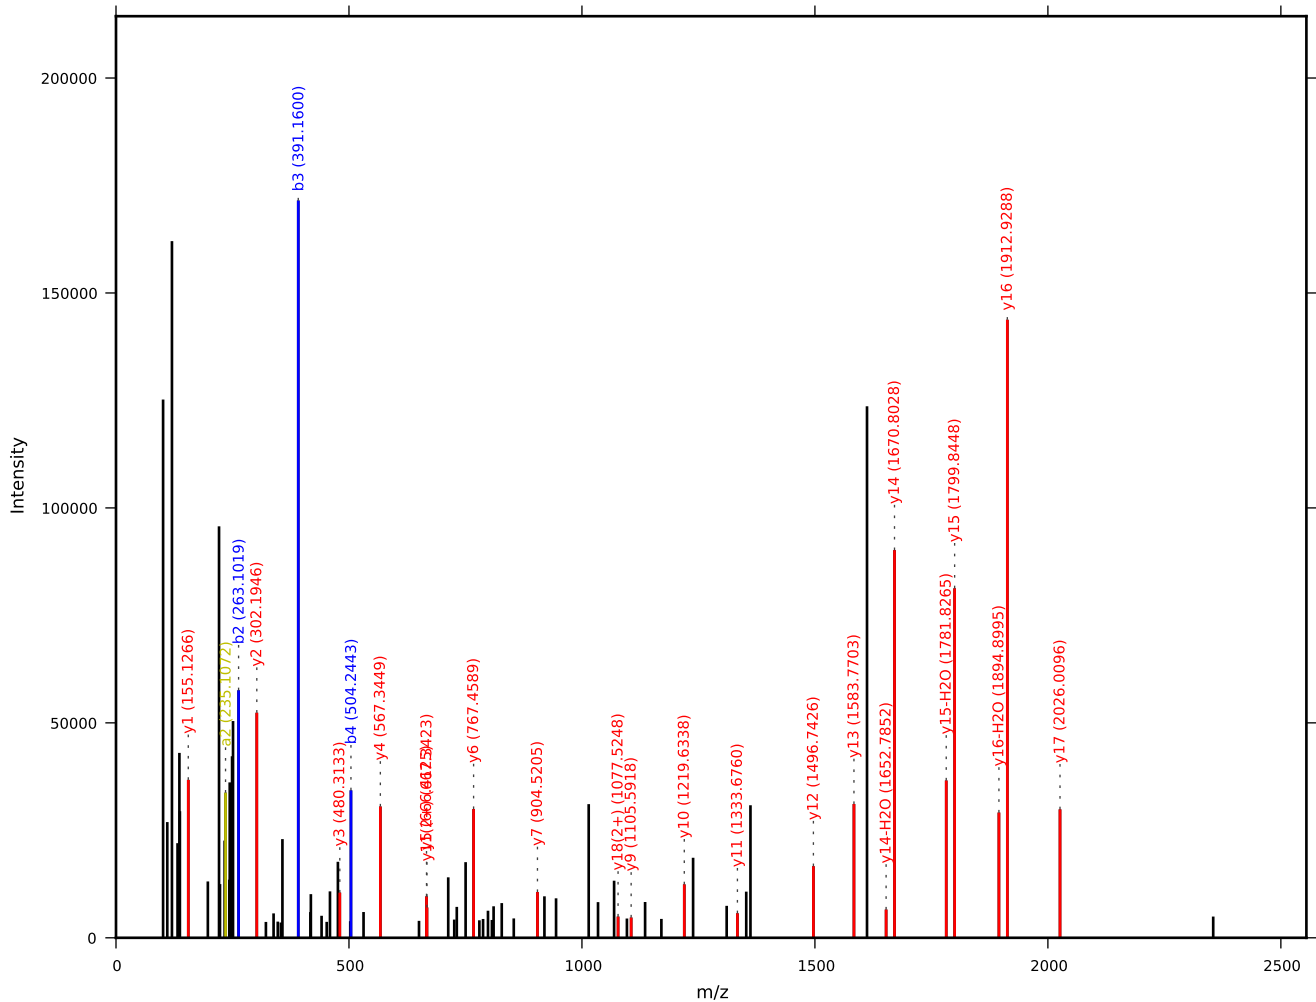

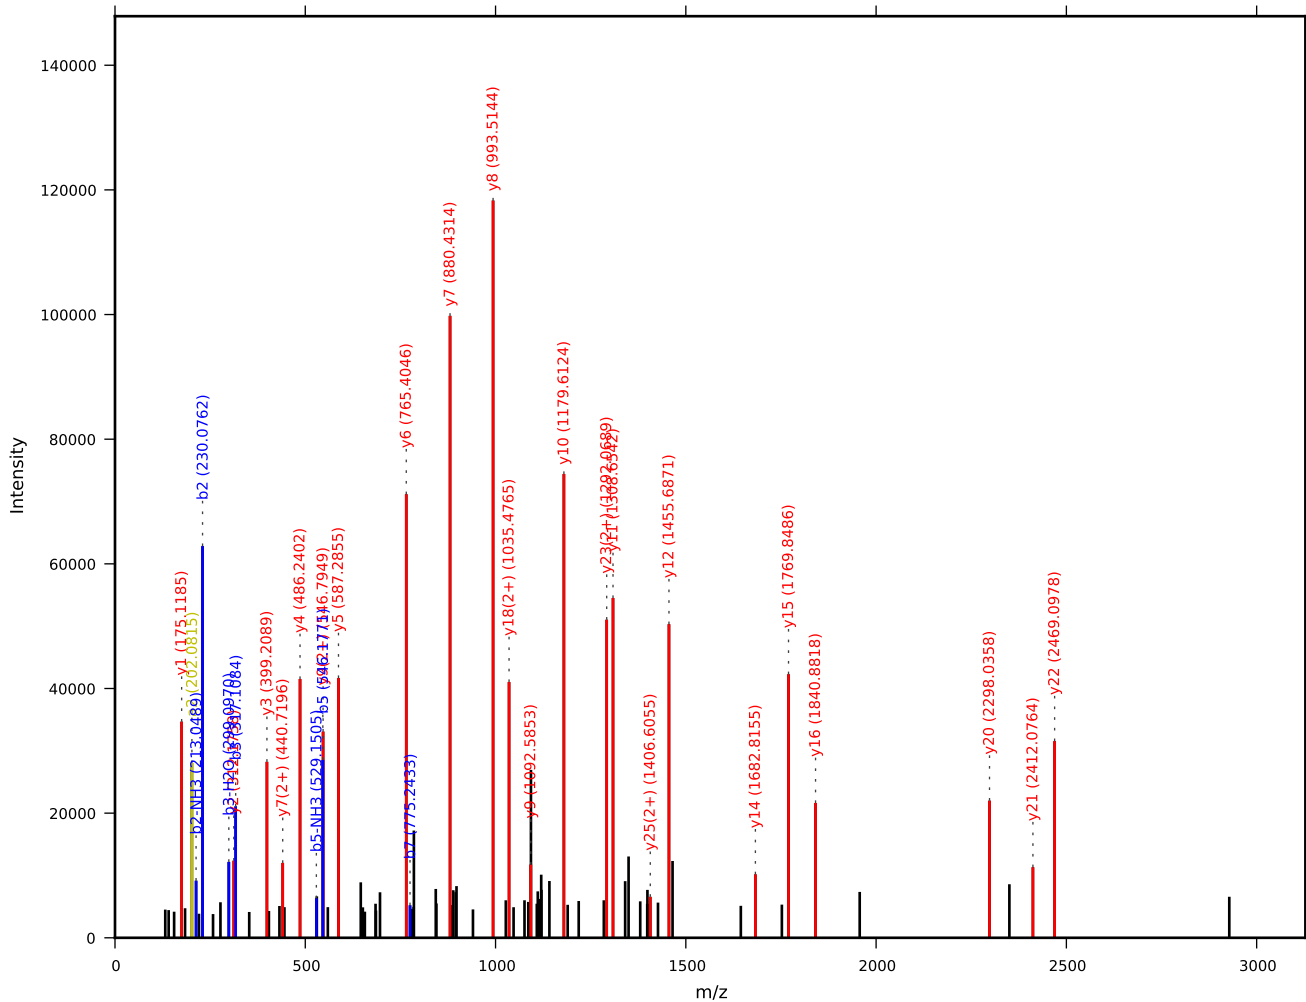

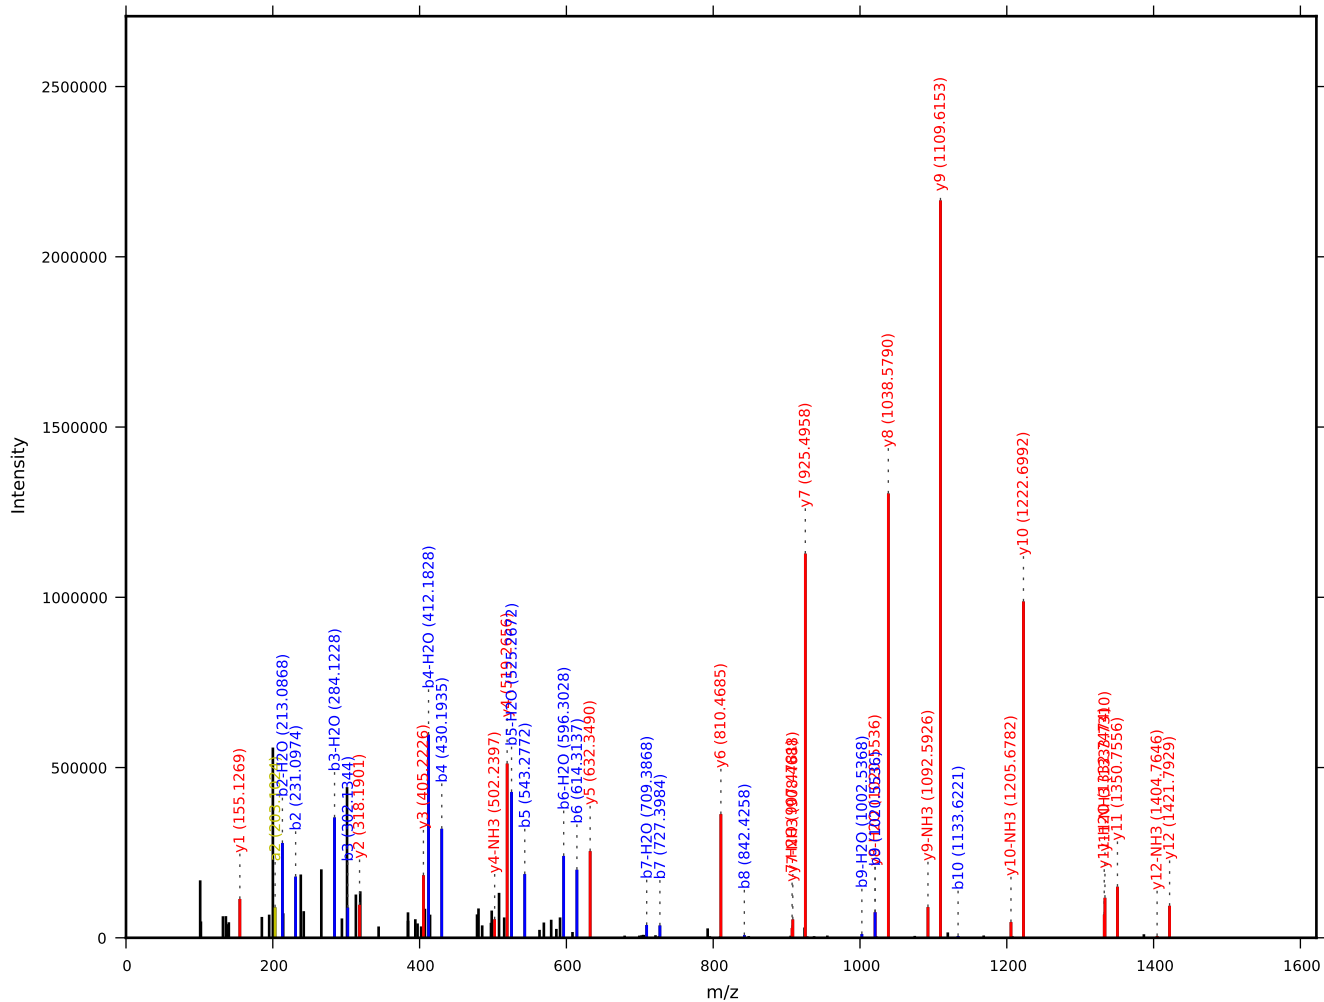



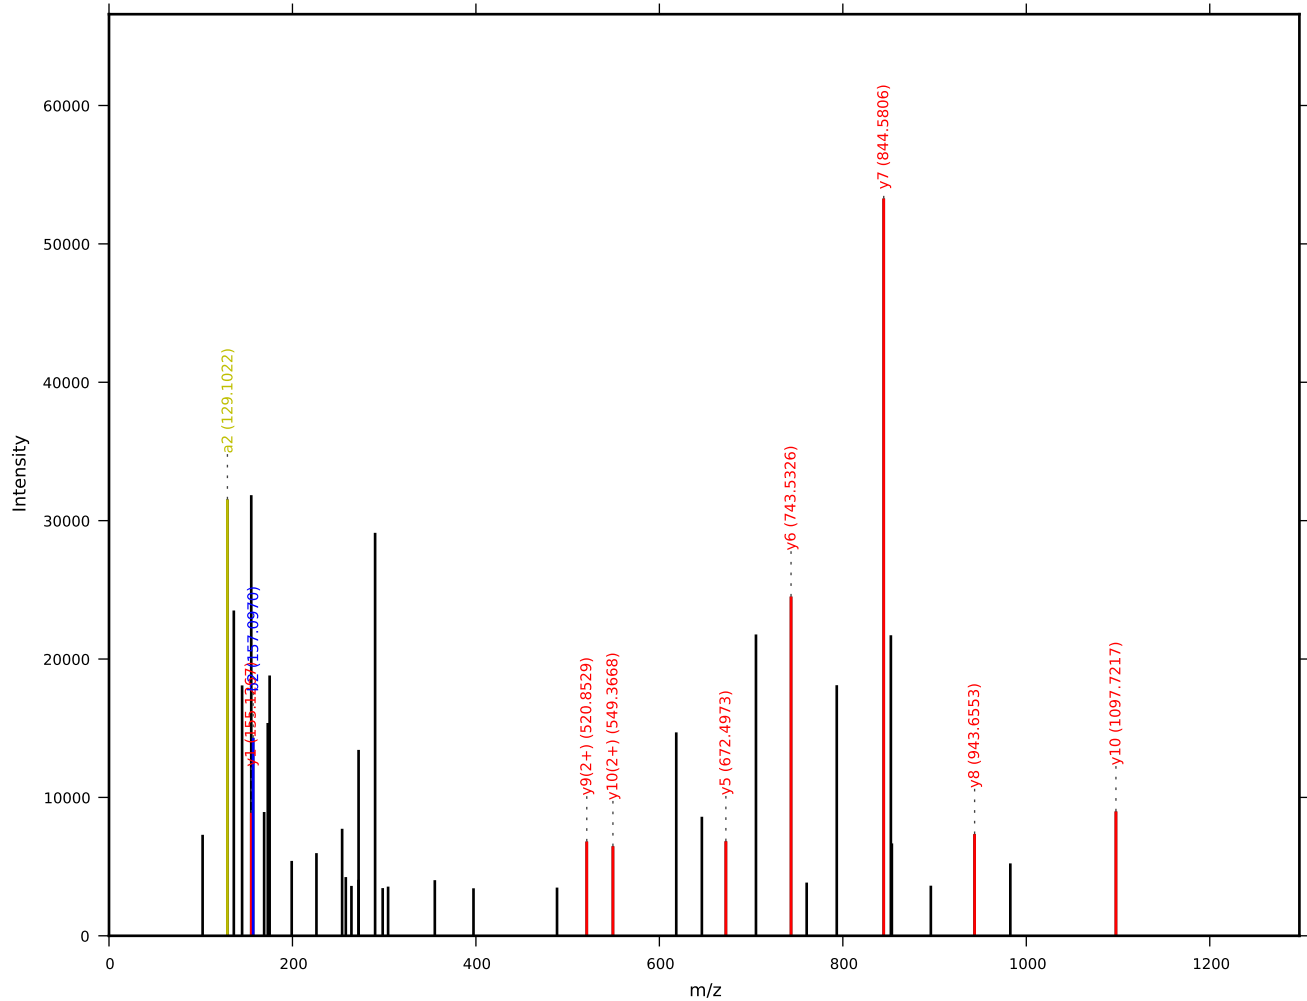

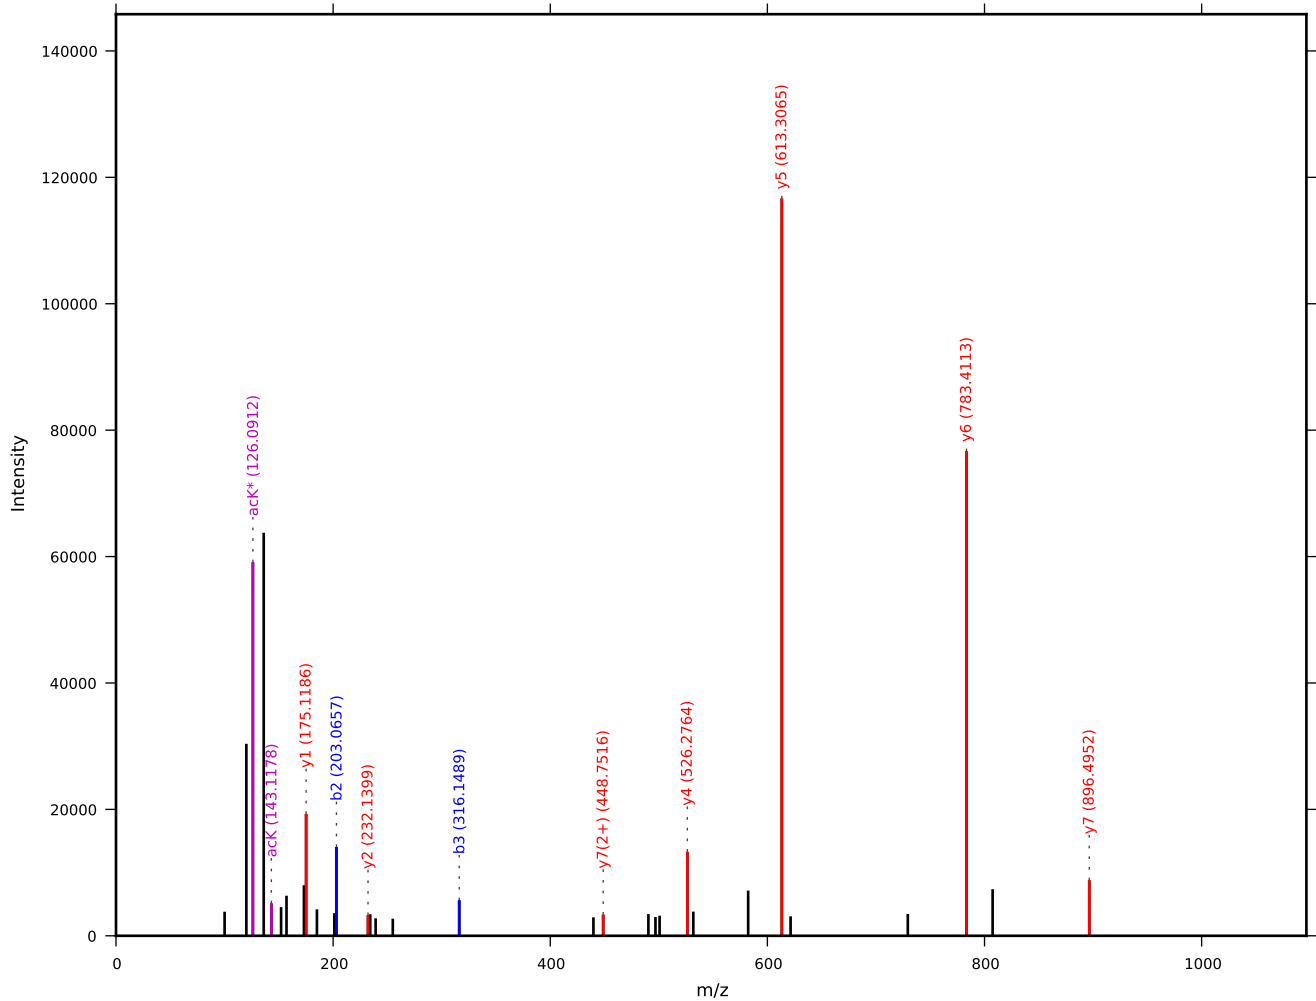

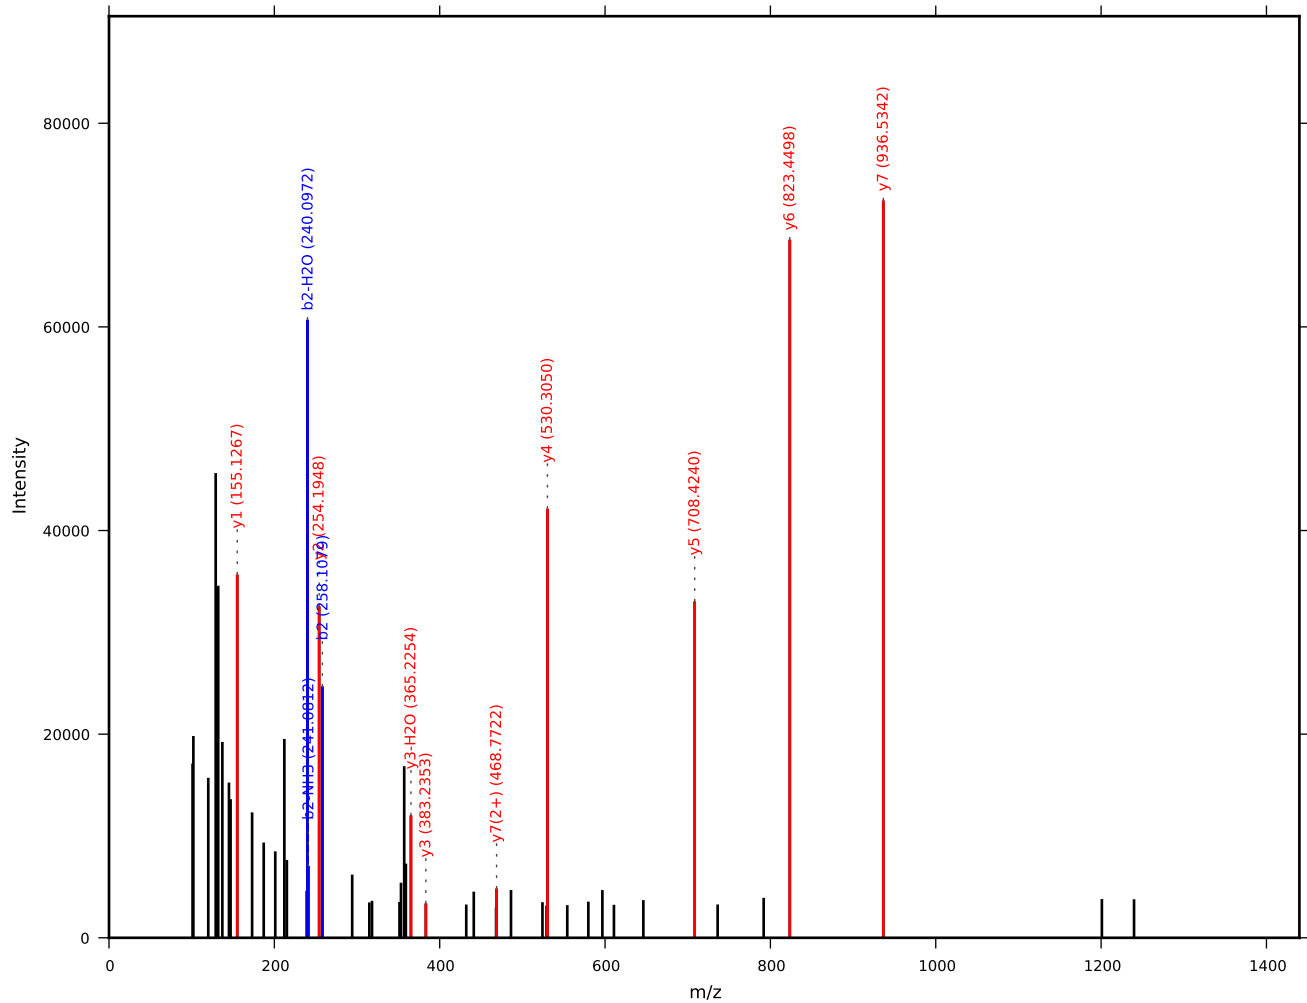

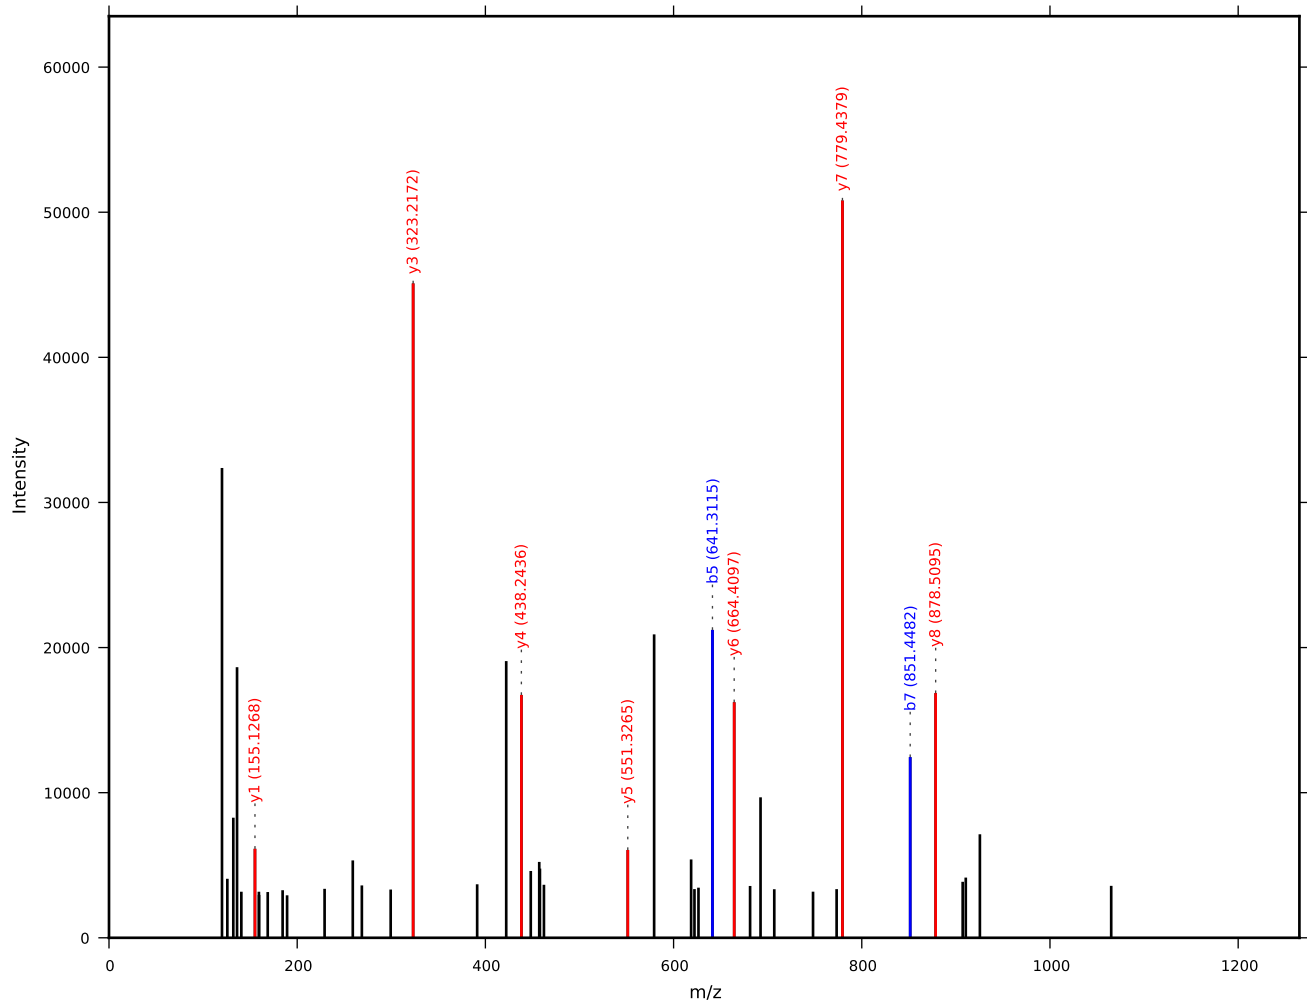

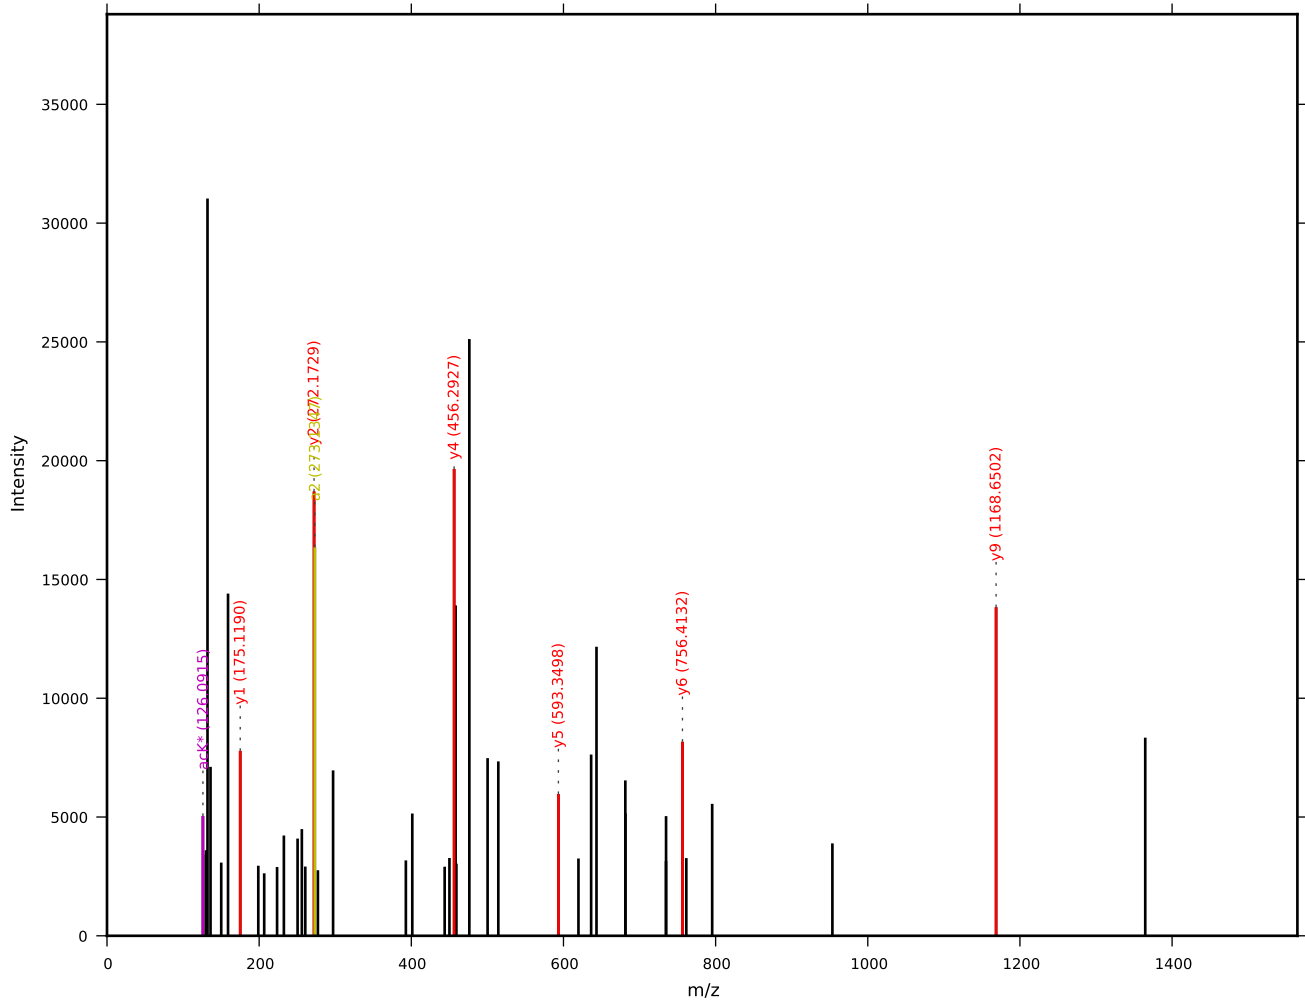

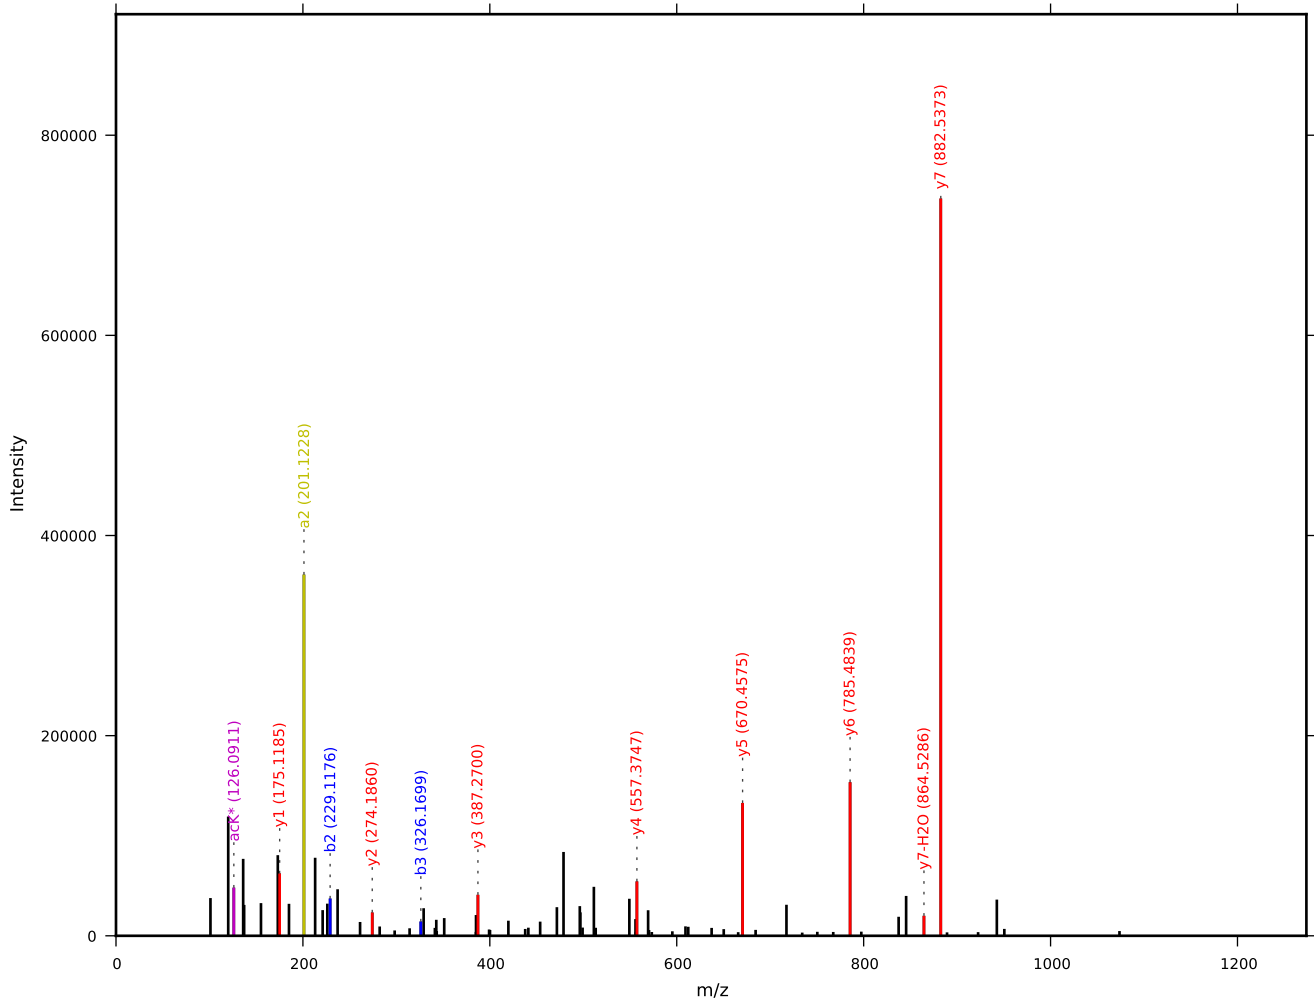

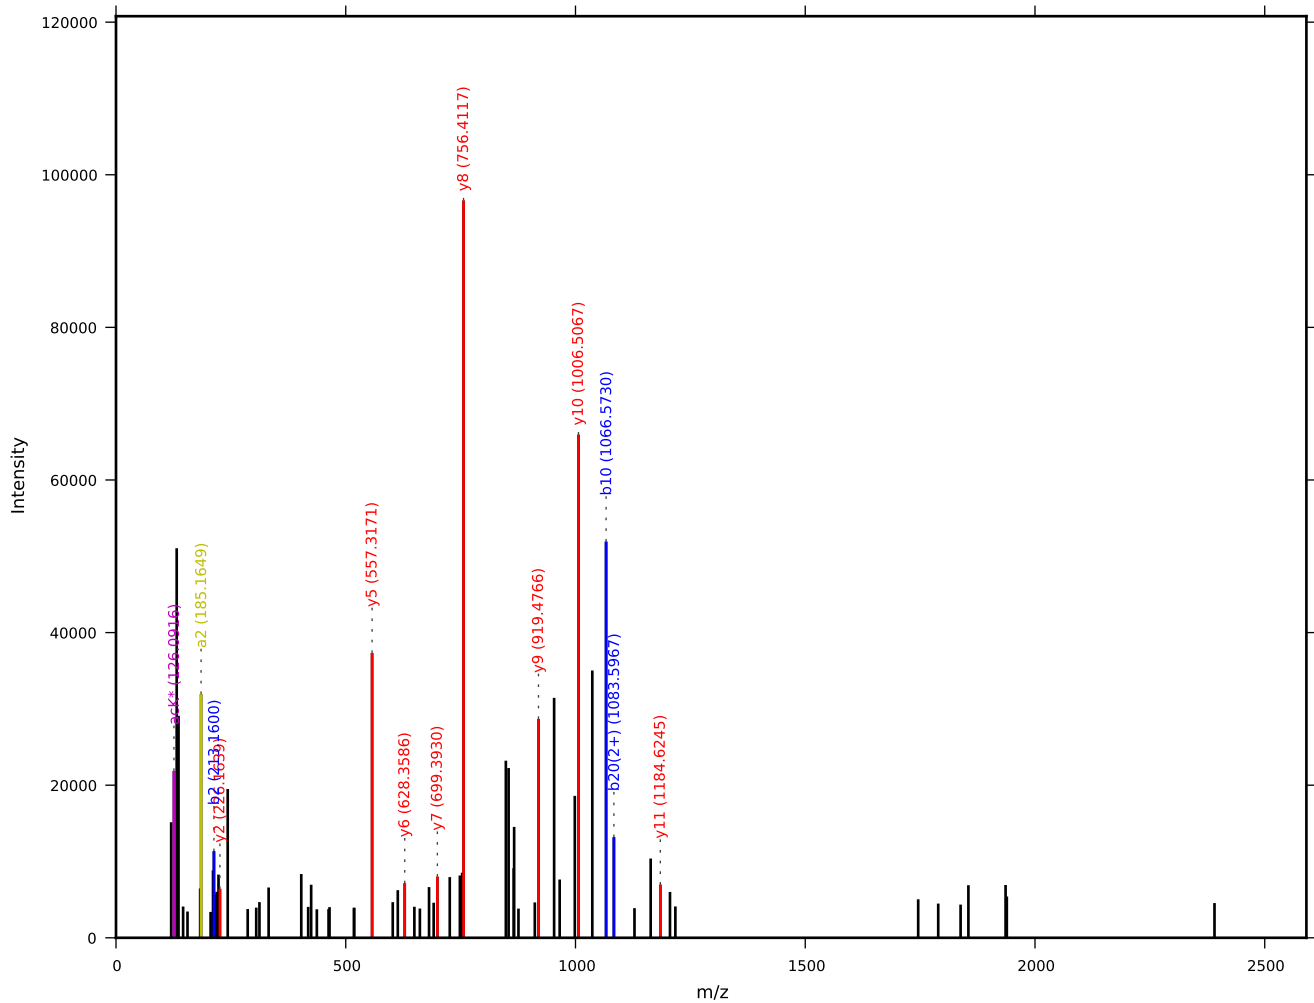

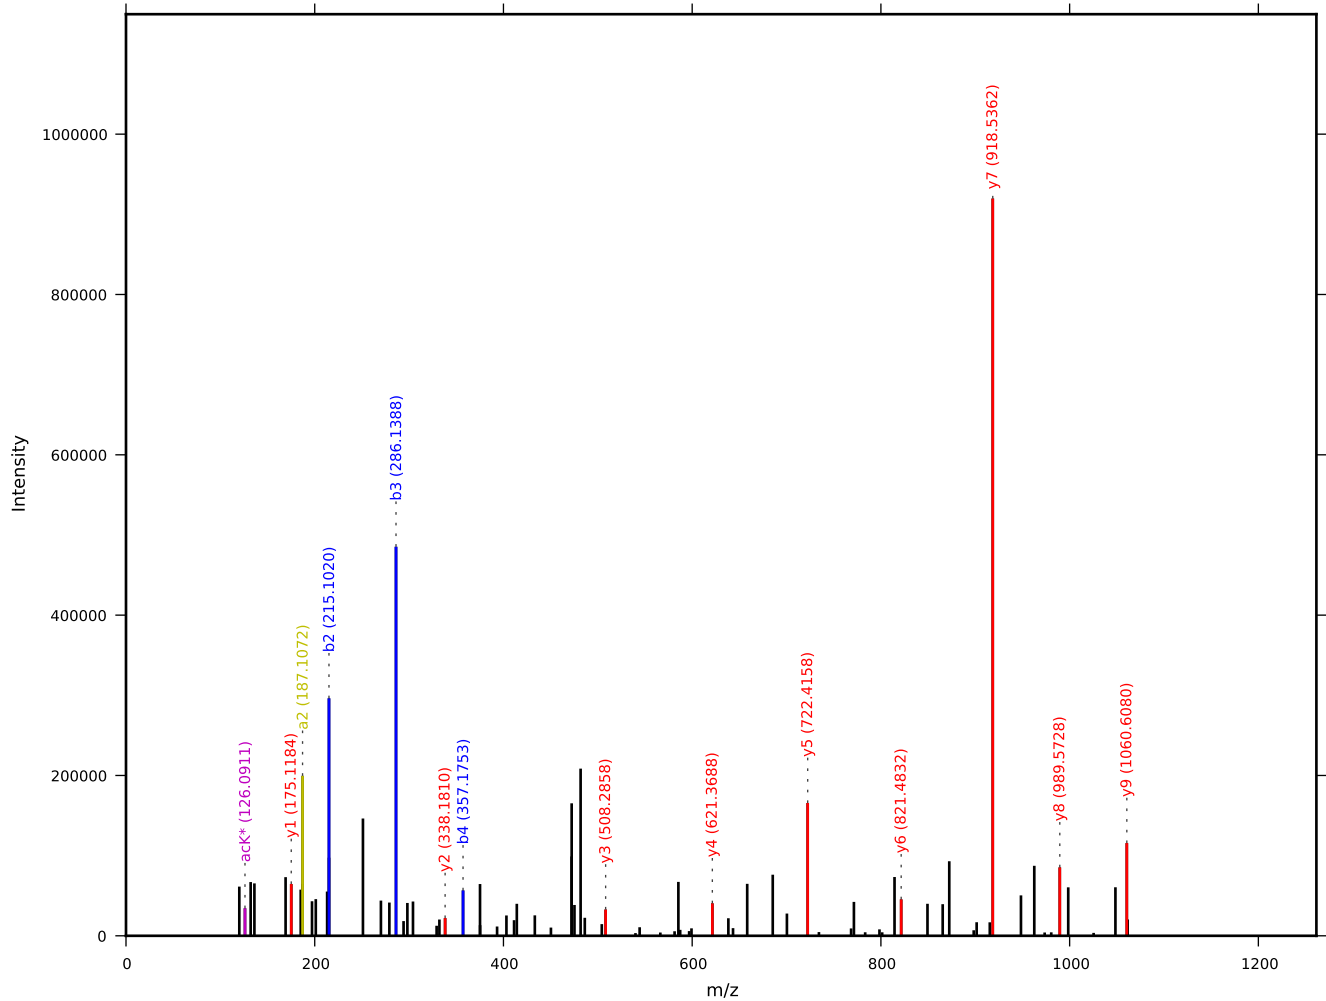



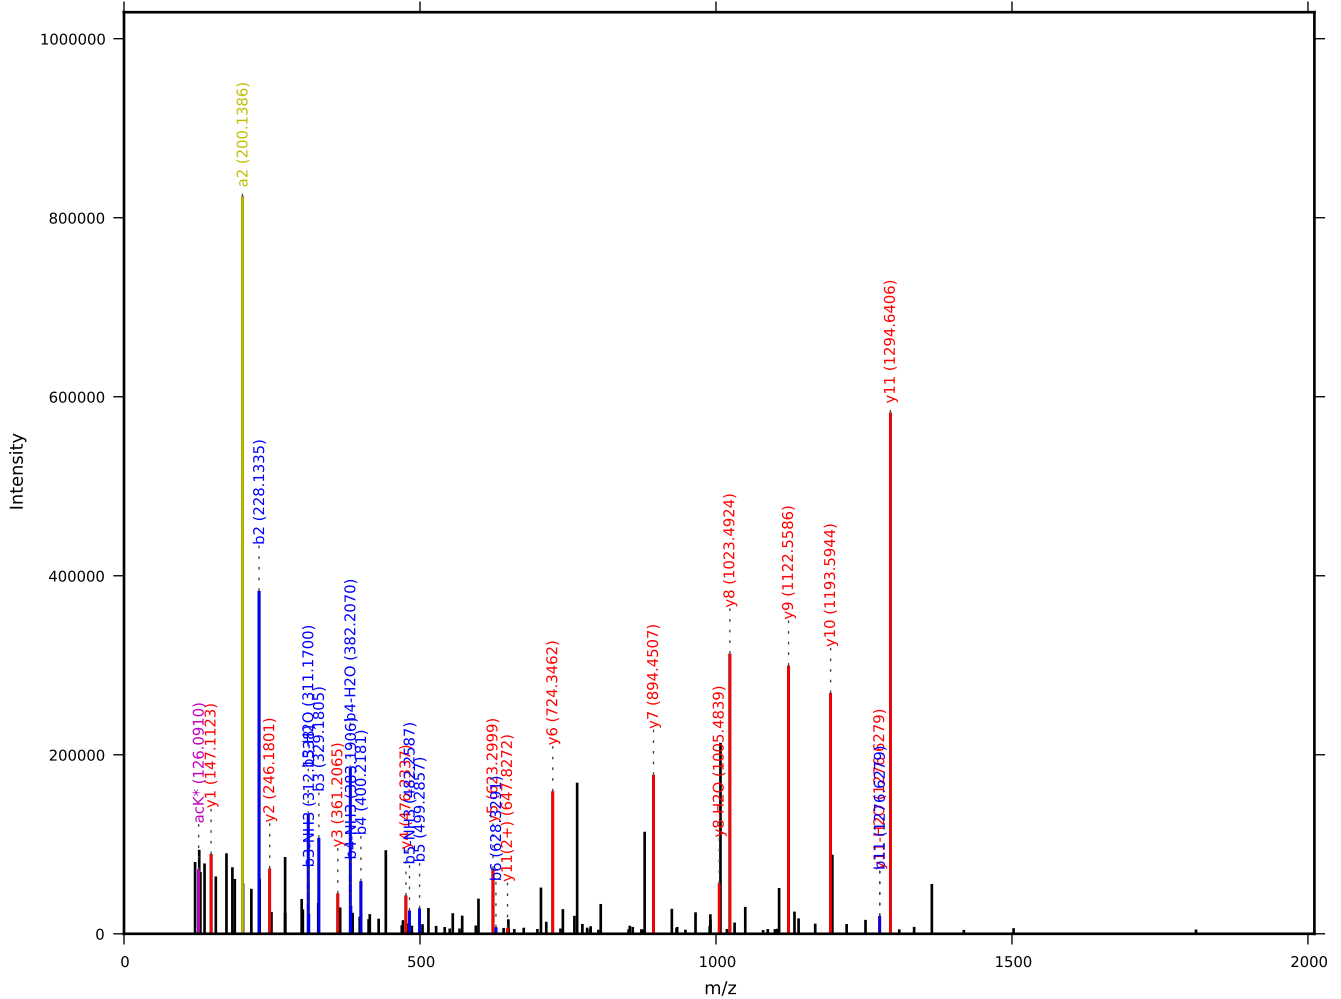

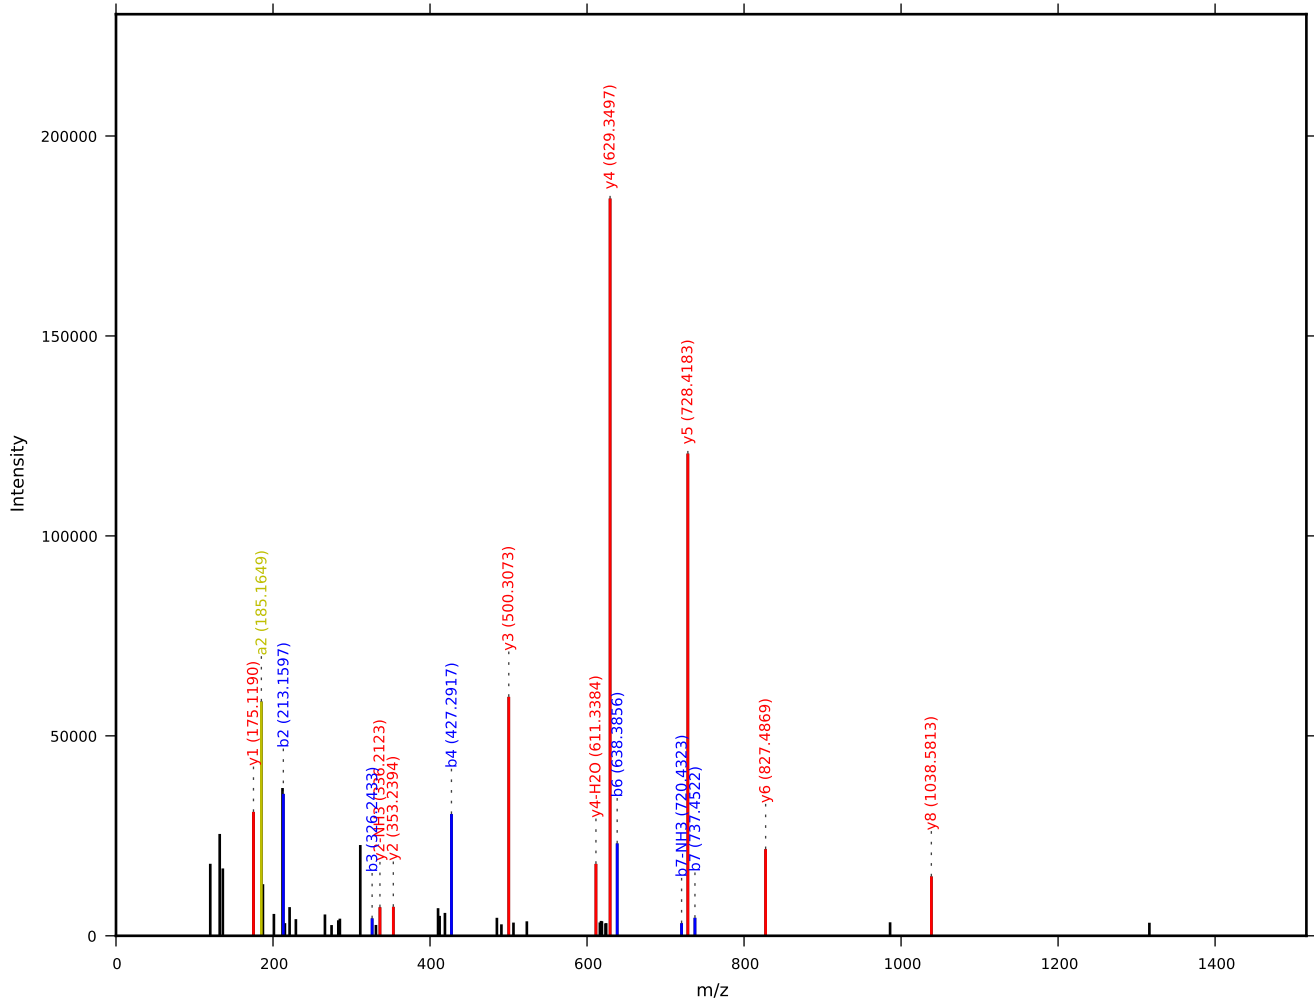

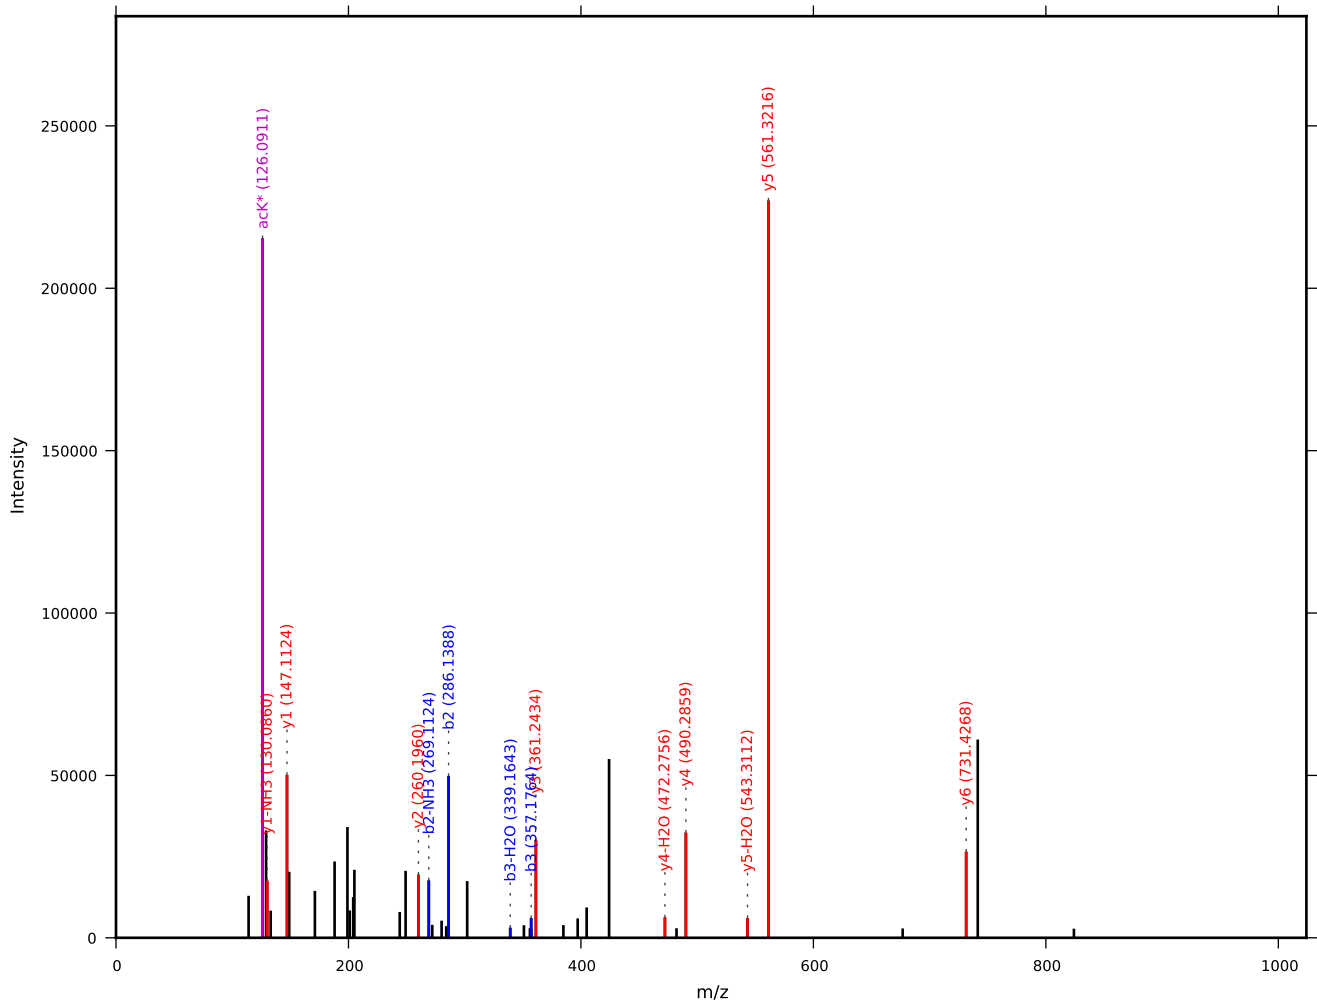

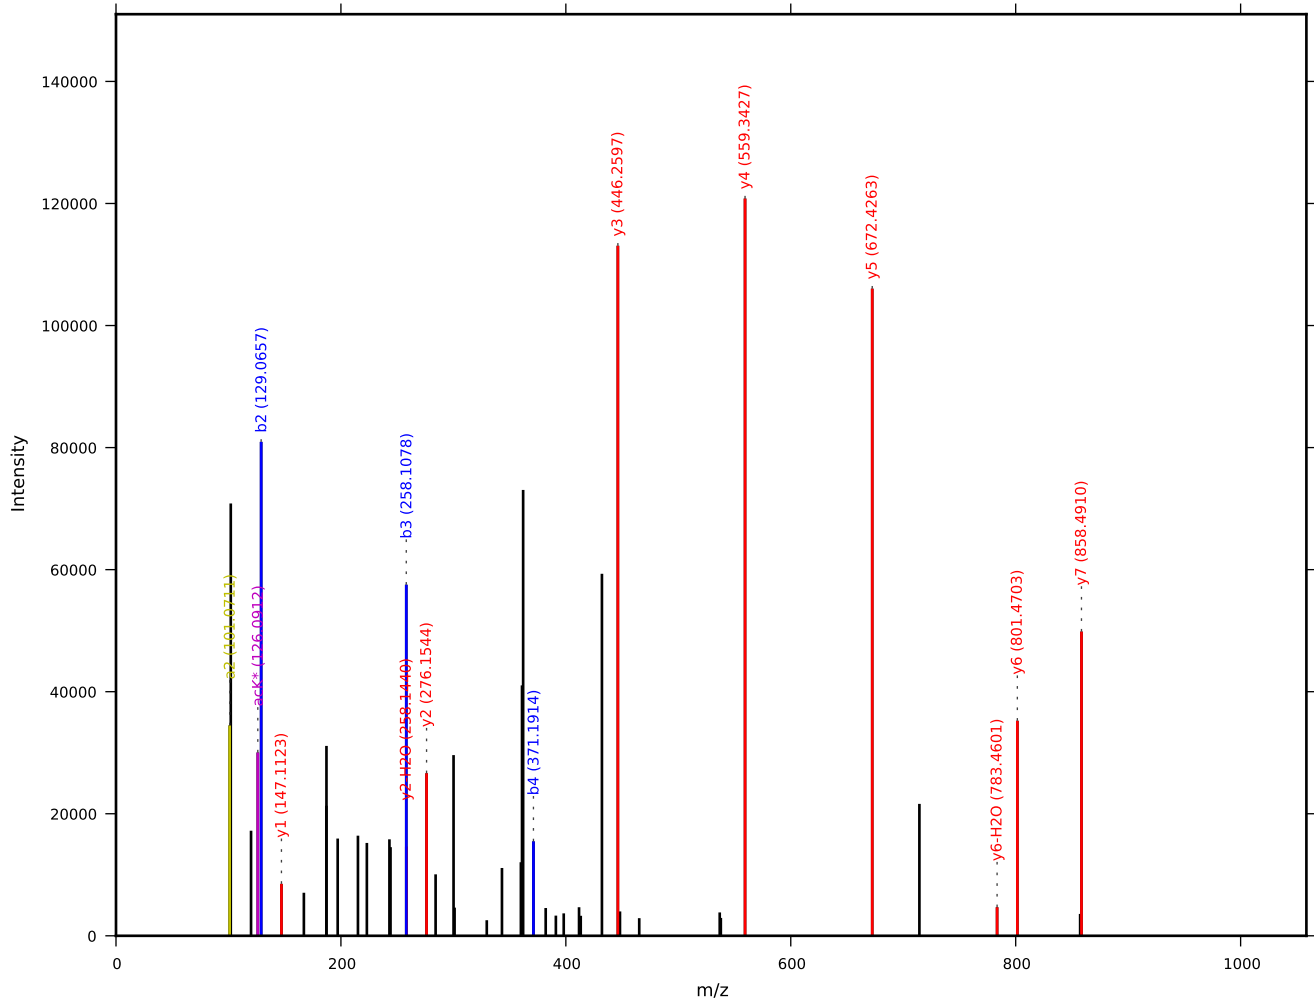

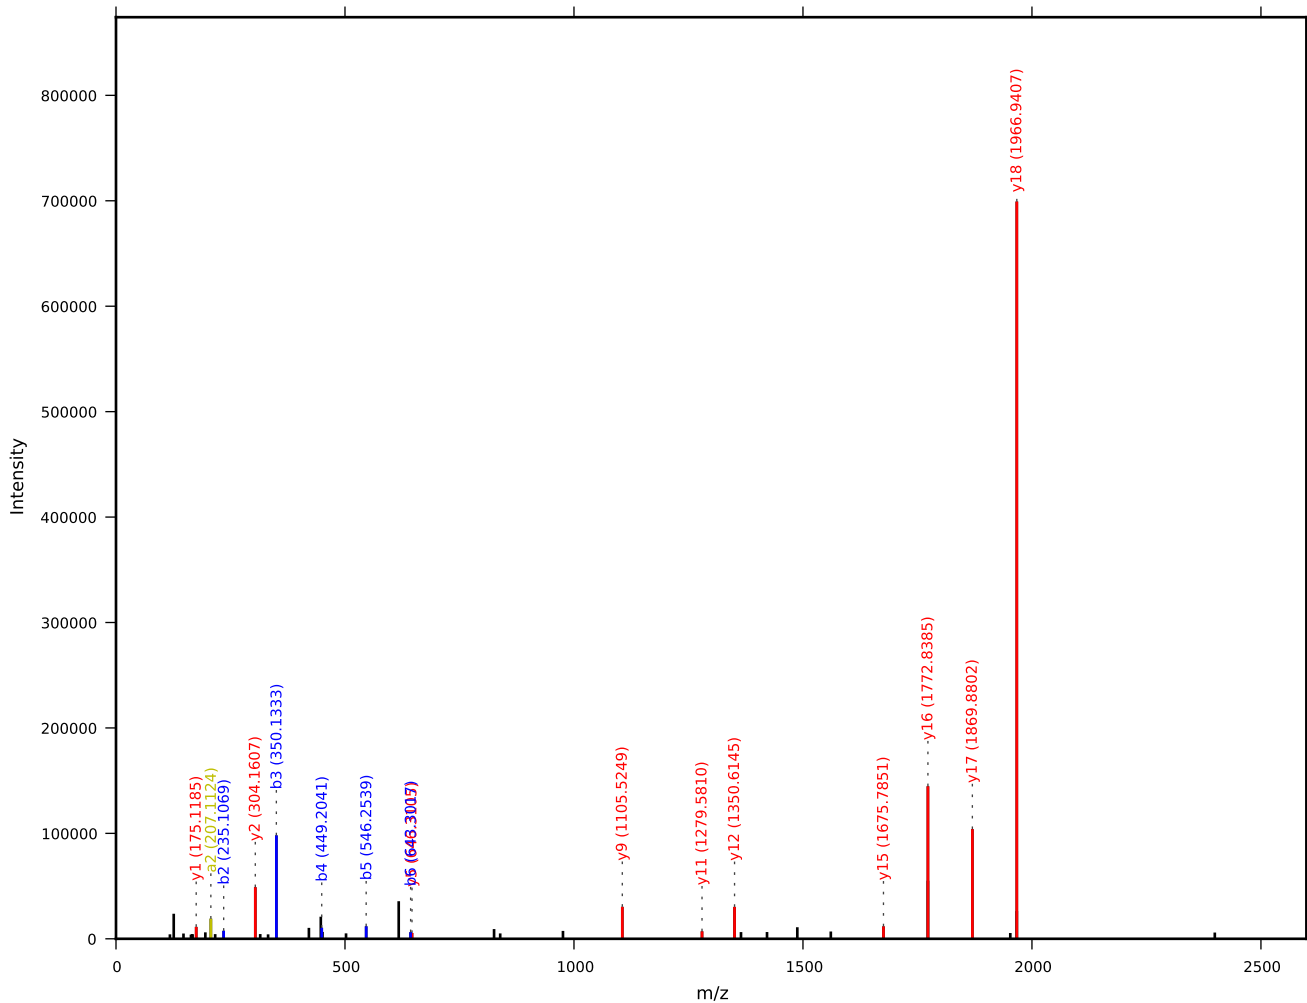

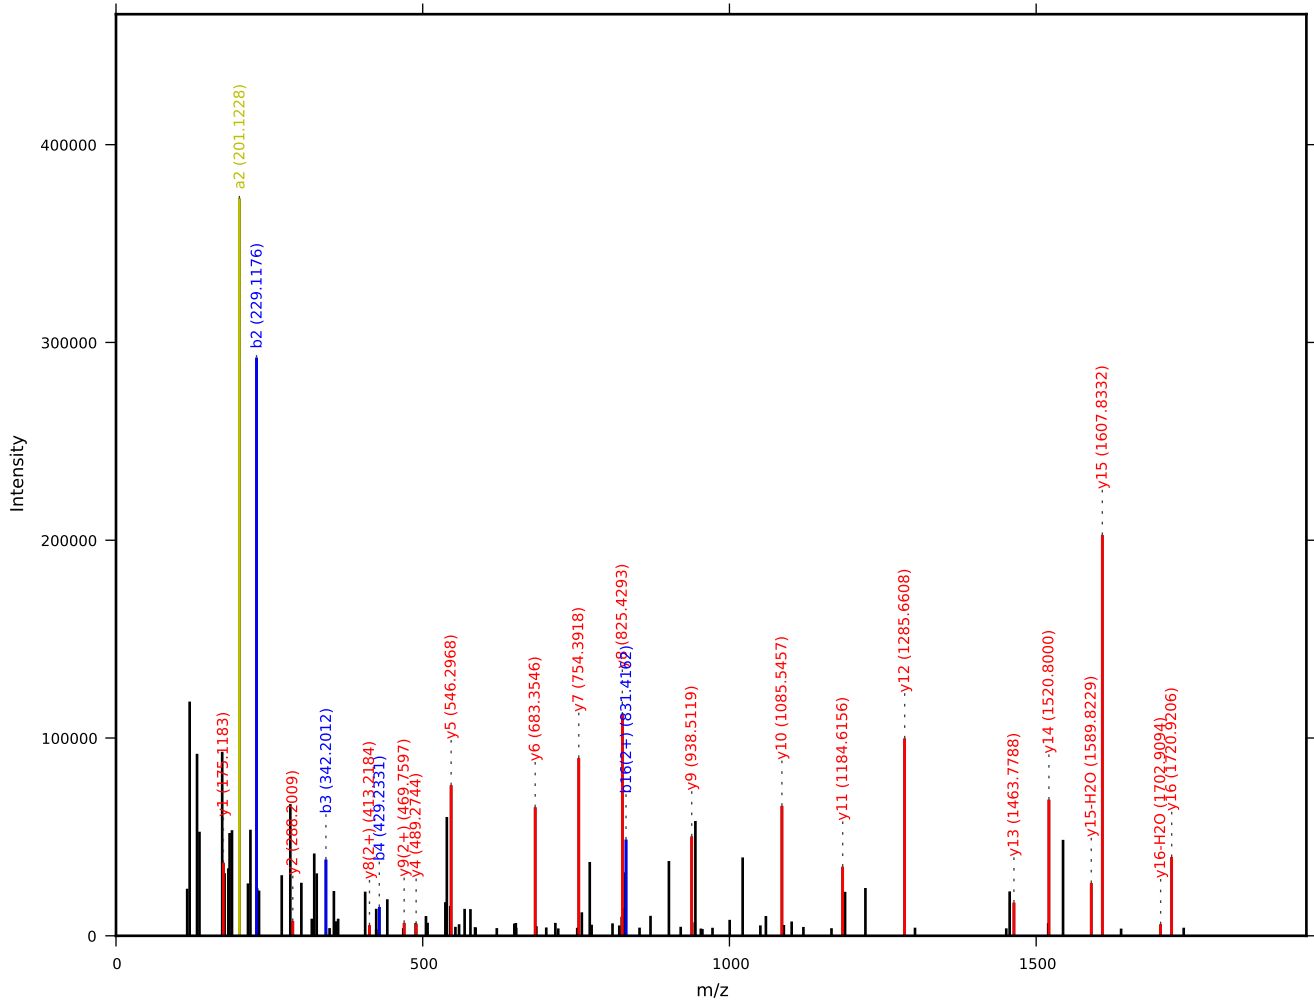

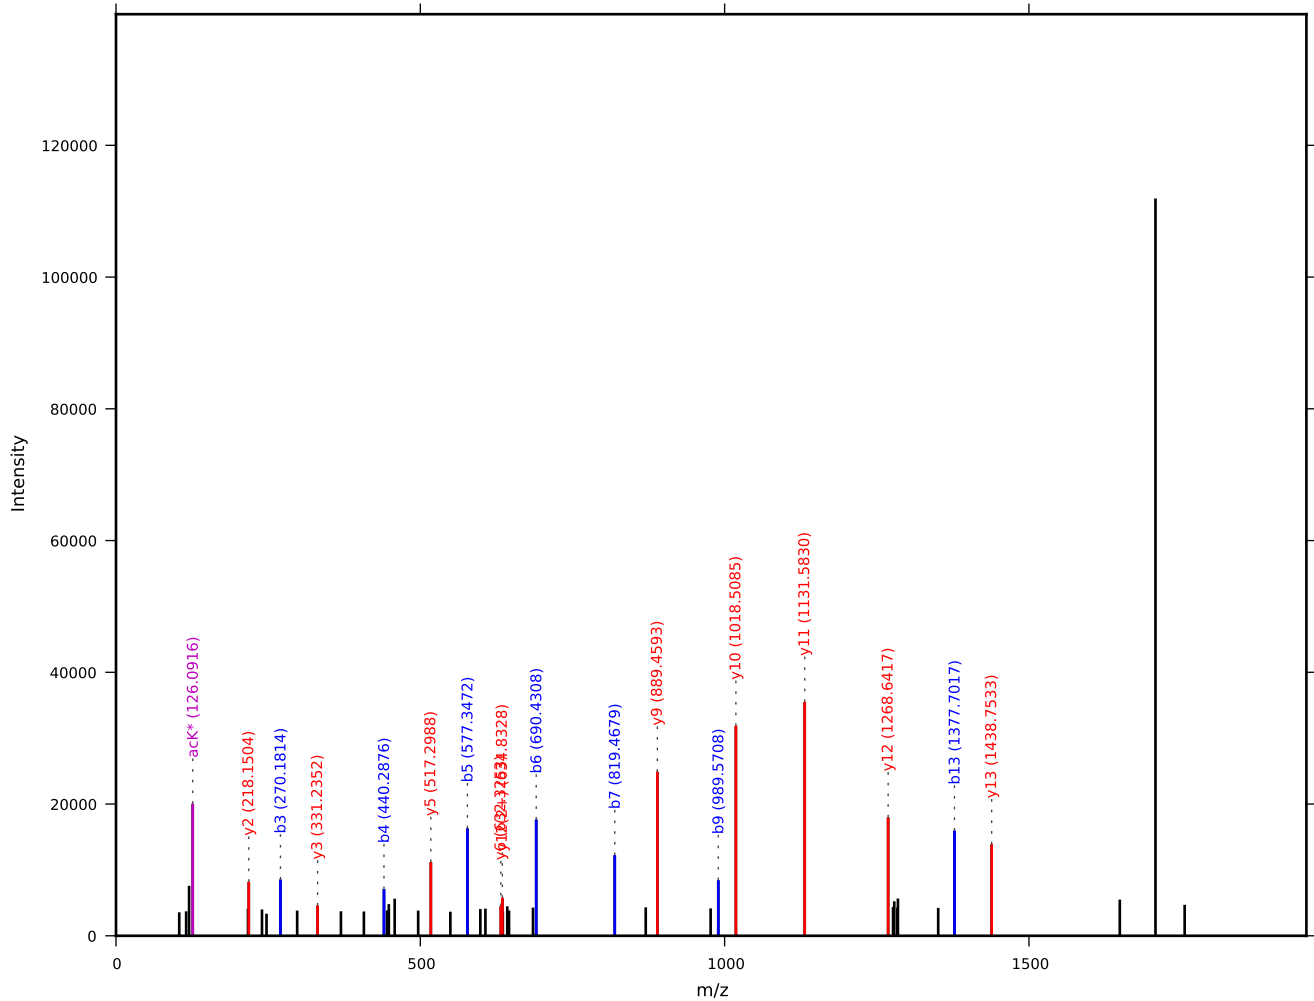

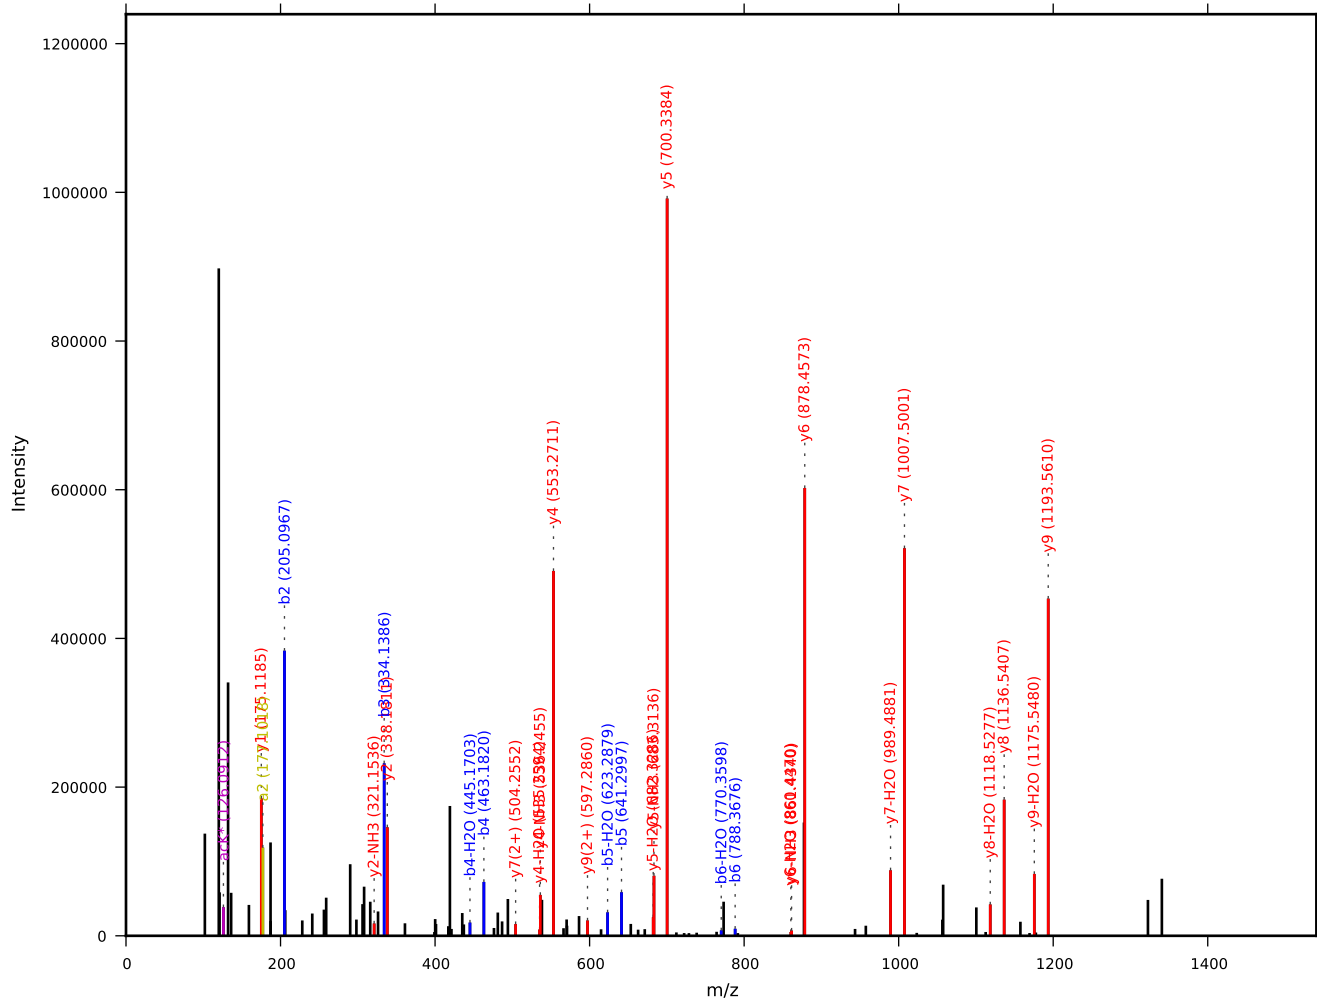



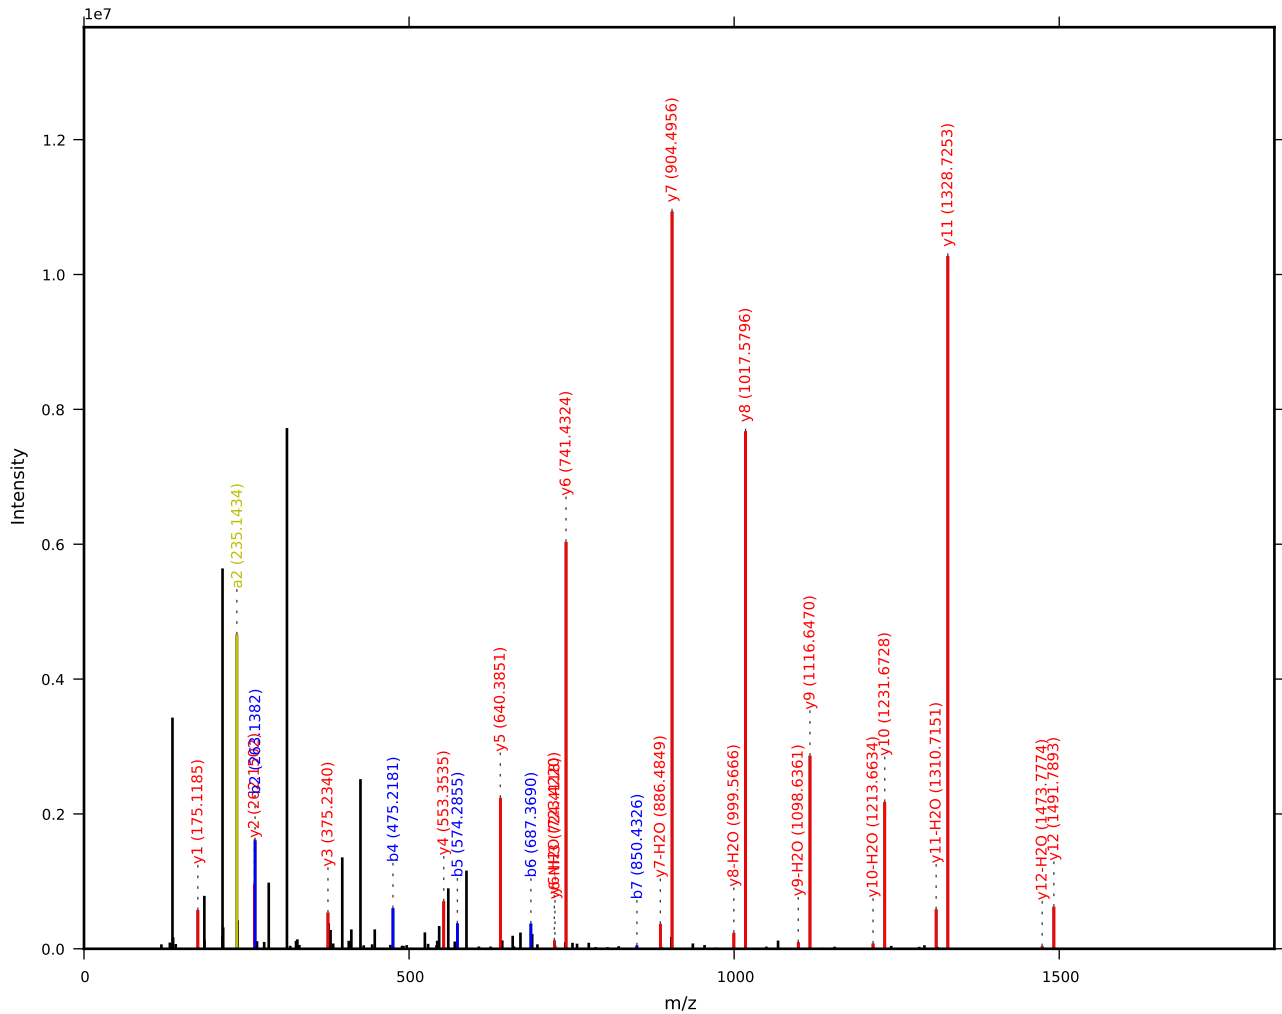

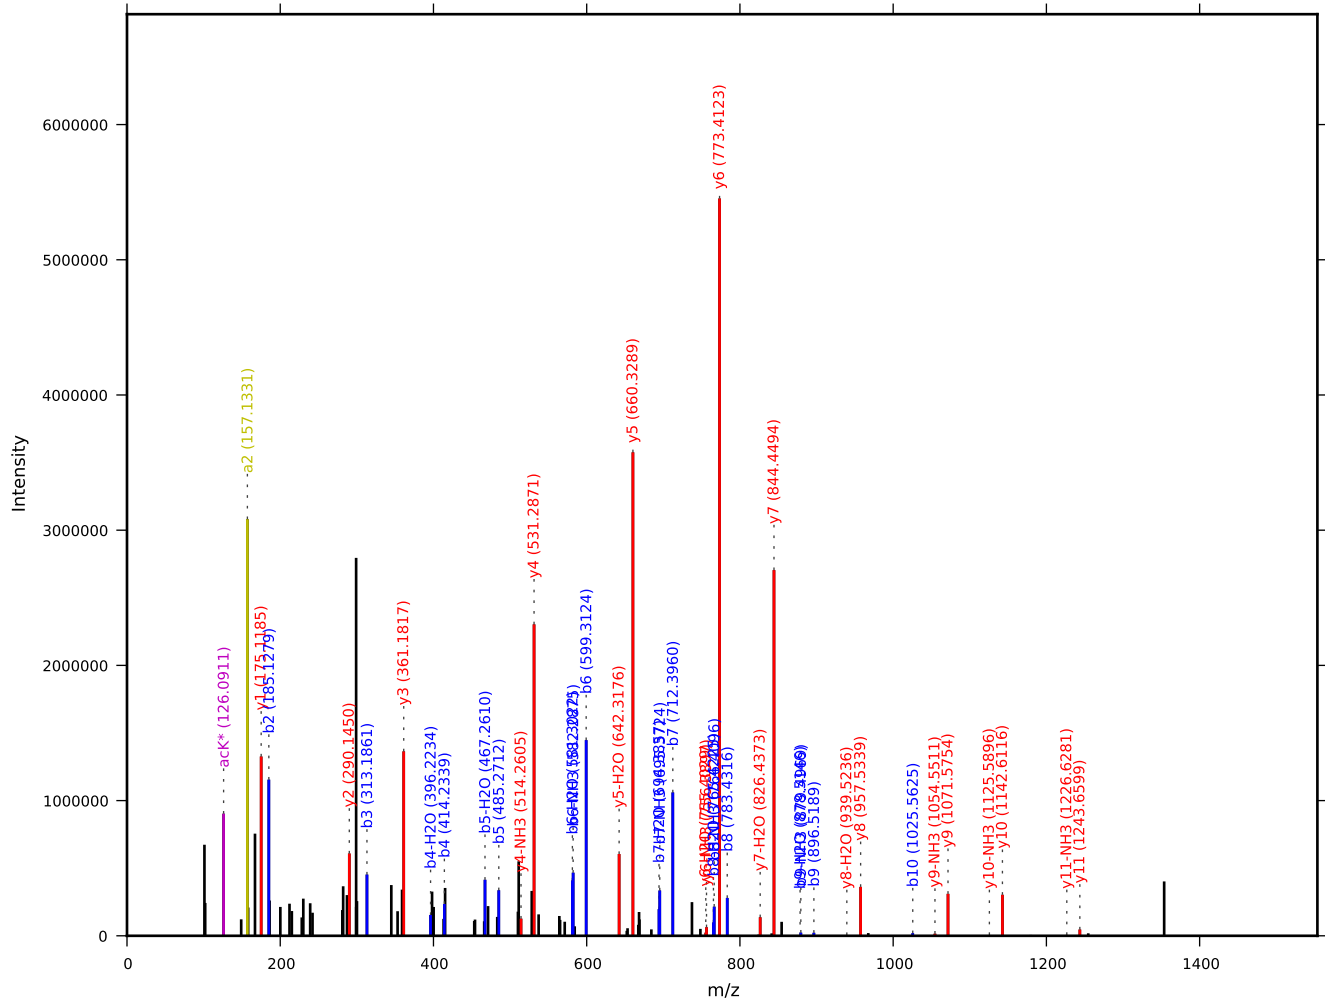

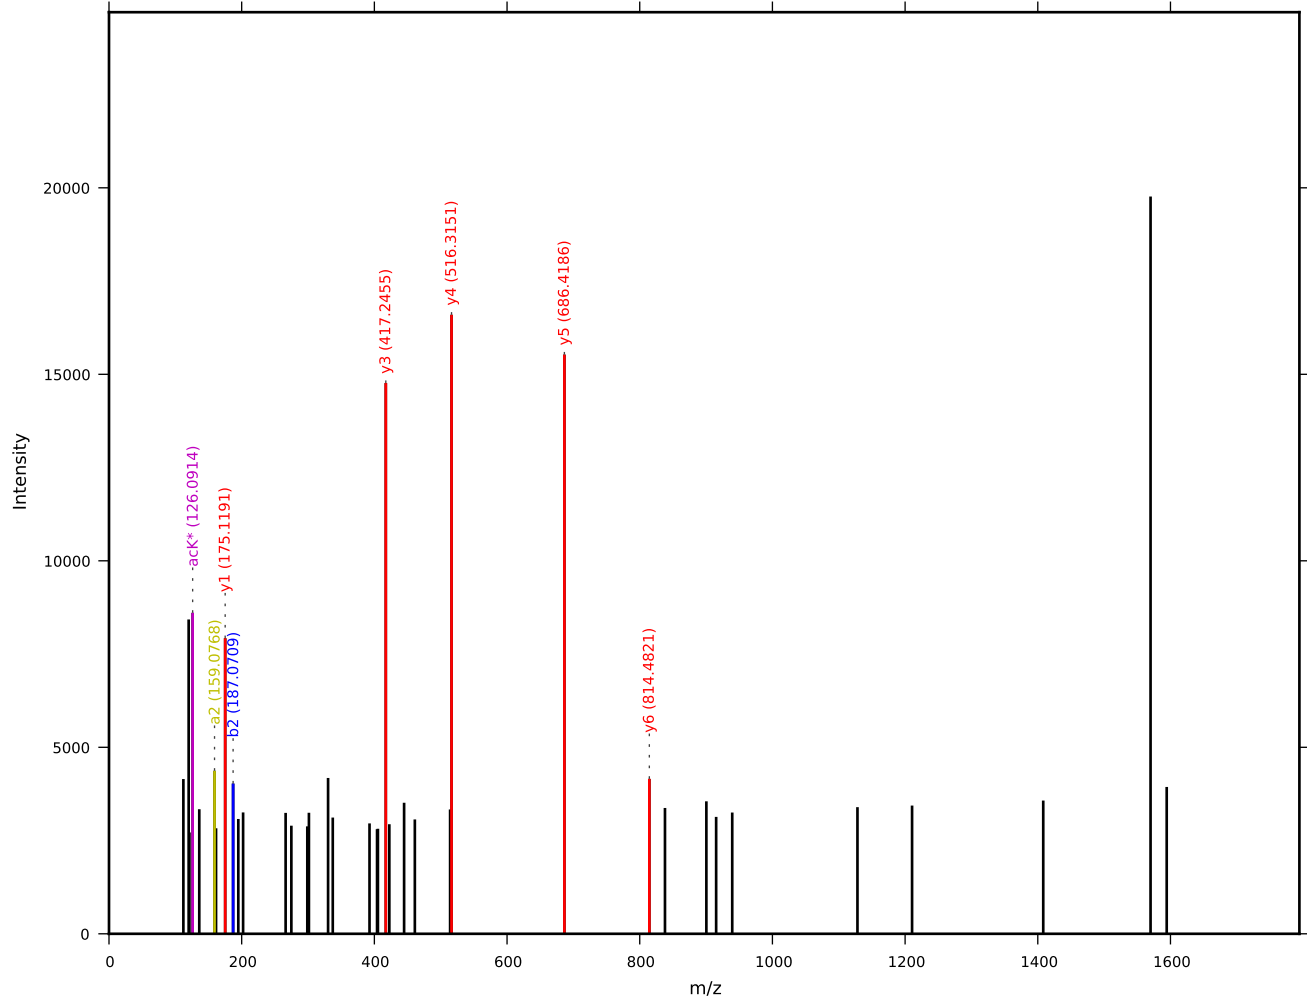

Mass: 1224.6503 Charge: 2 m/z: 613.33241  
Modified Peptide: \_GVSQYLNK(ac)FK\_ Score: 35.541 PEP: 0.0078132

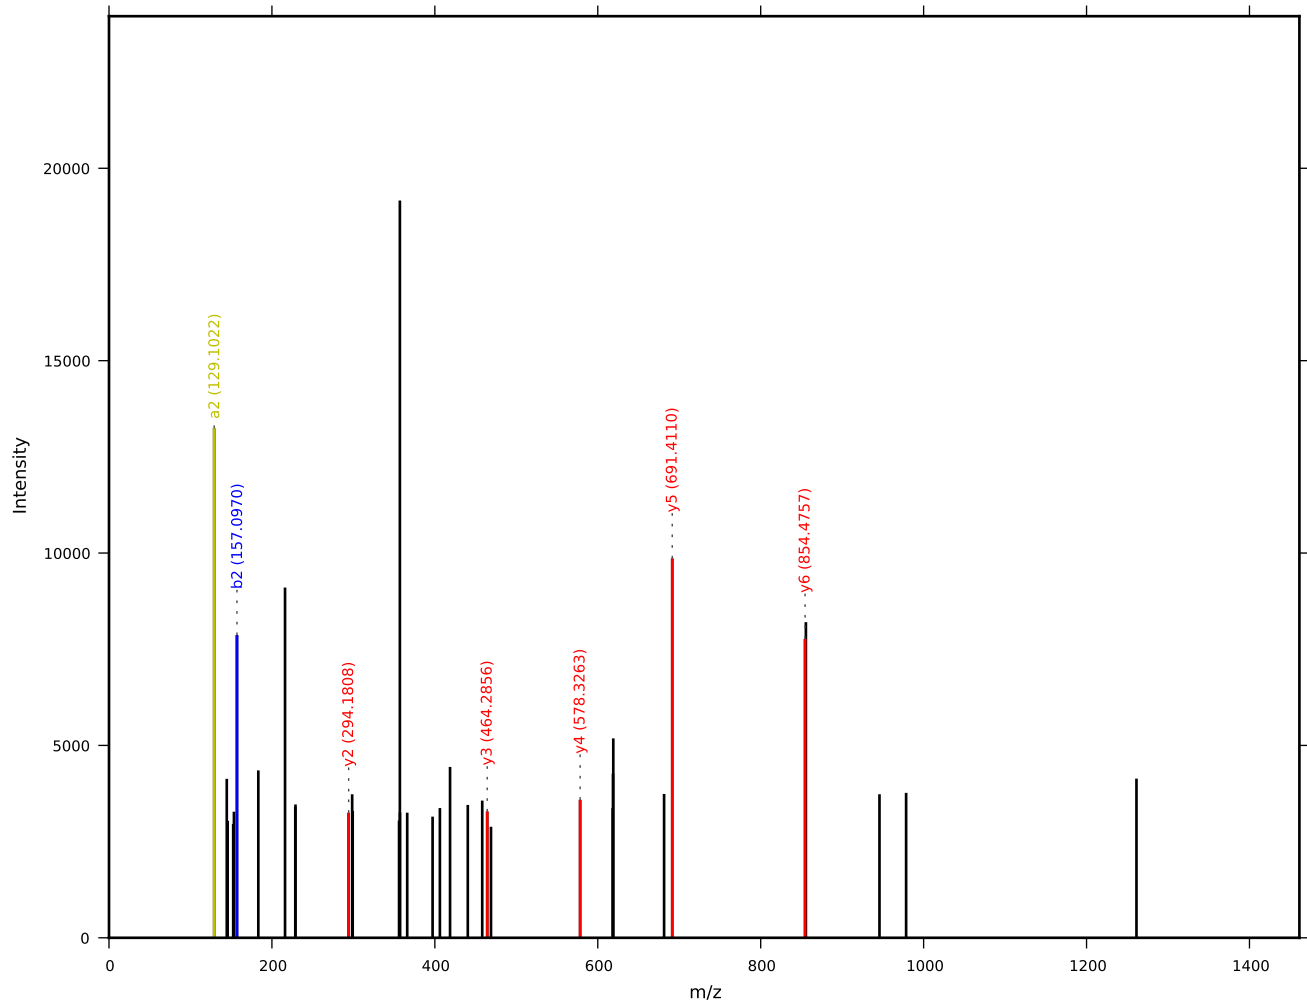

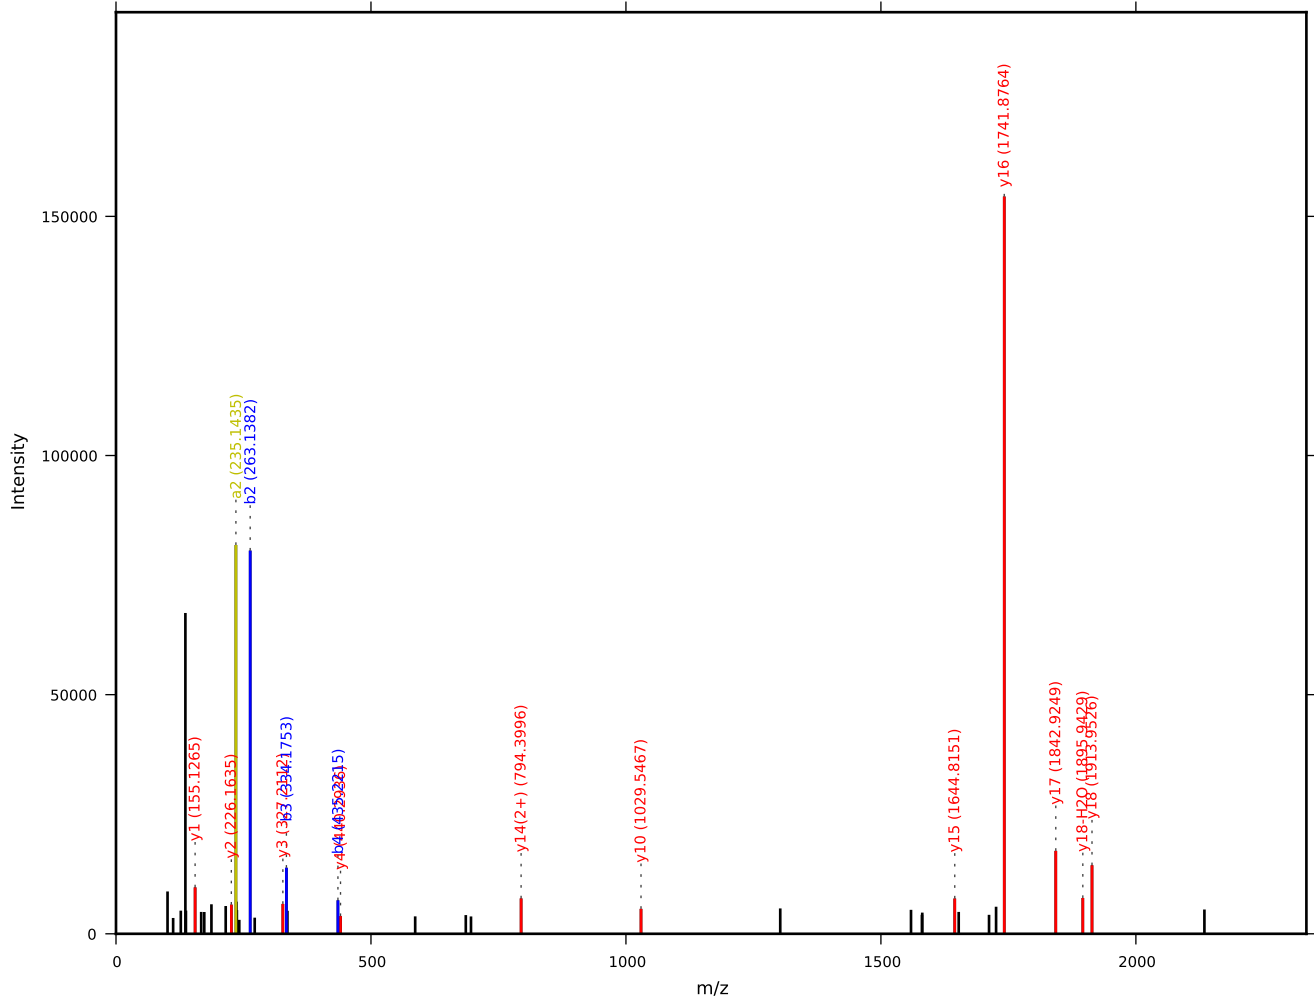

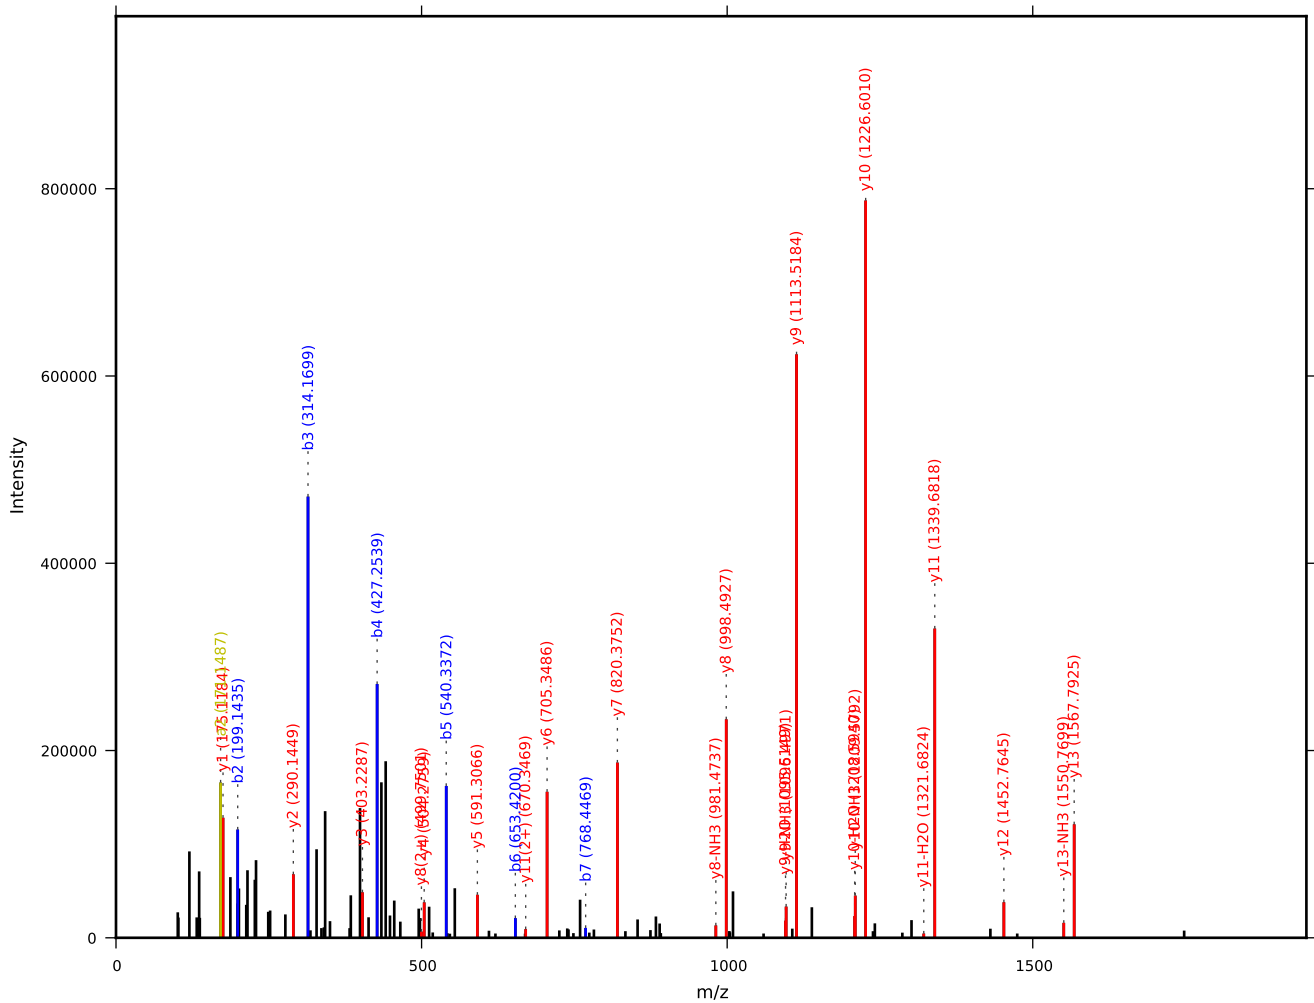

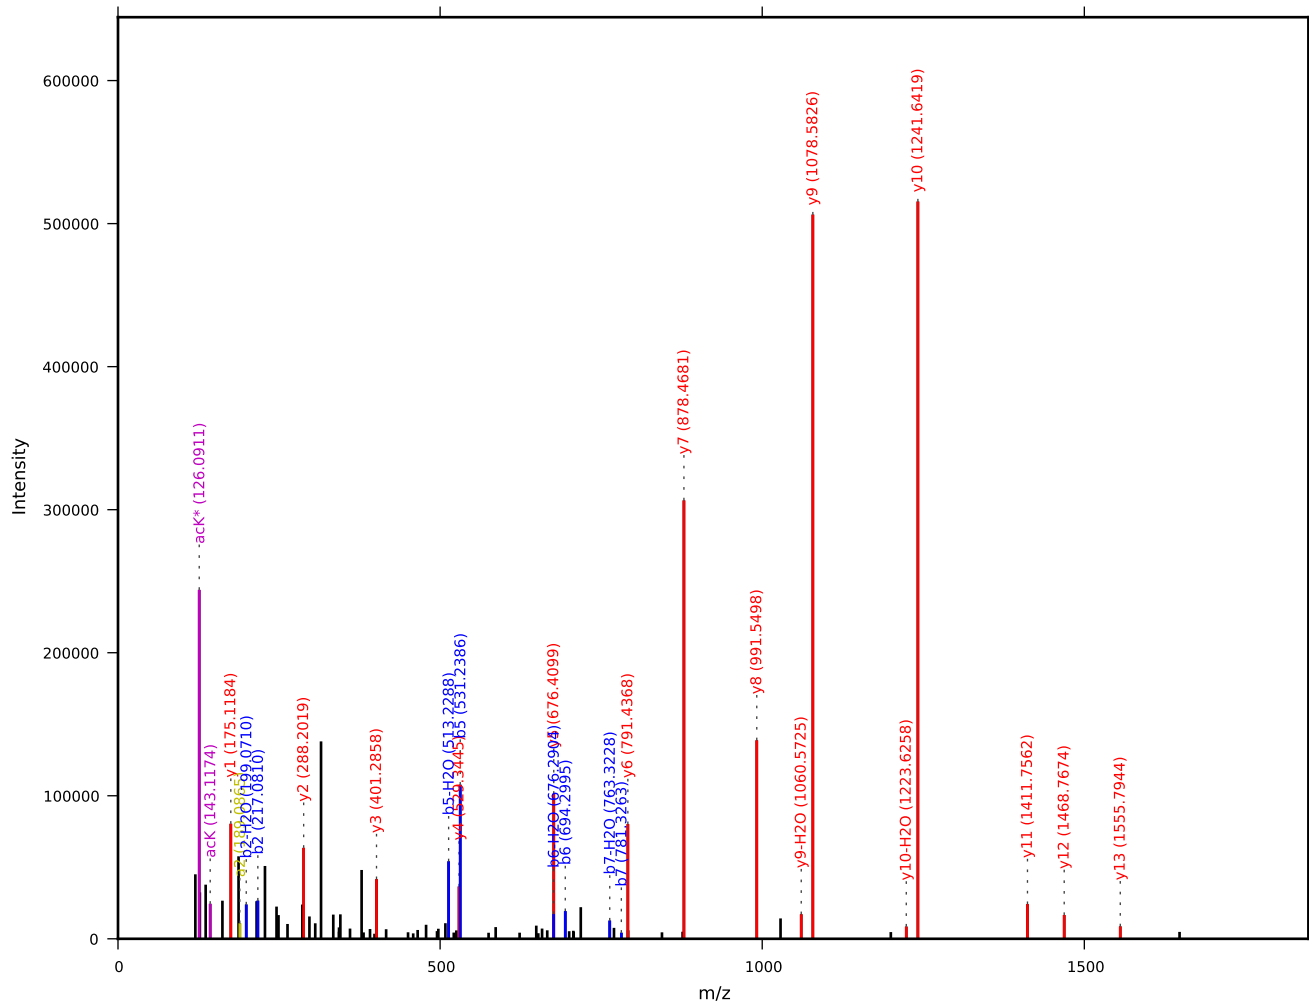

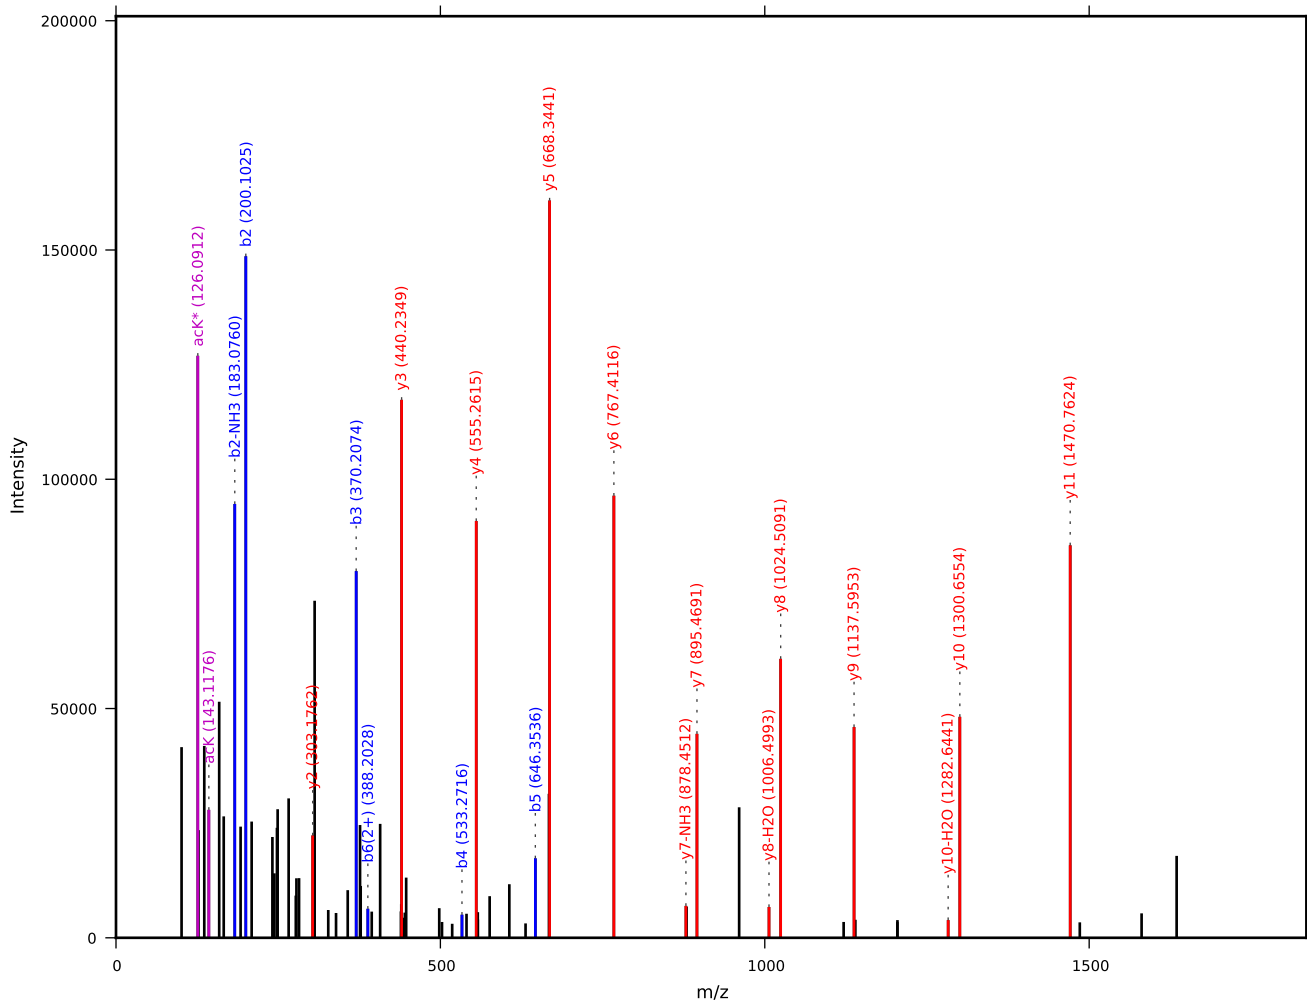



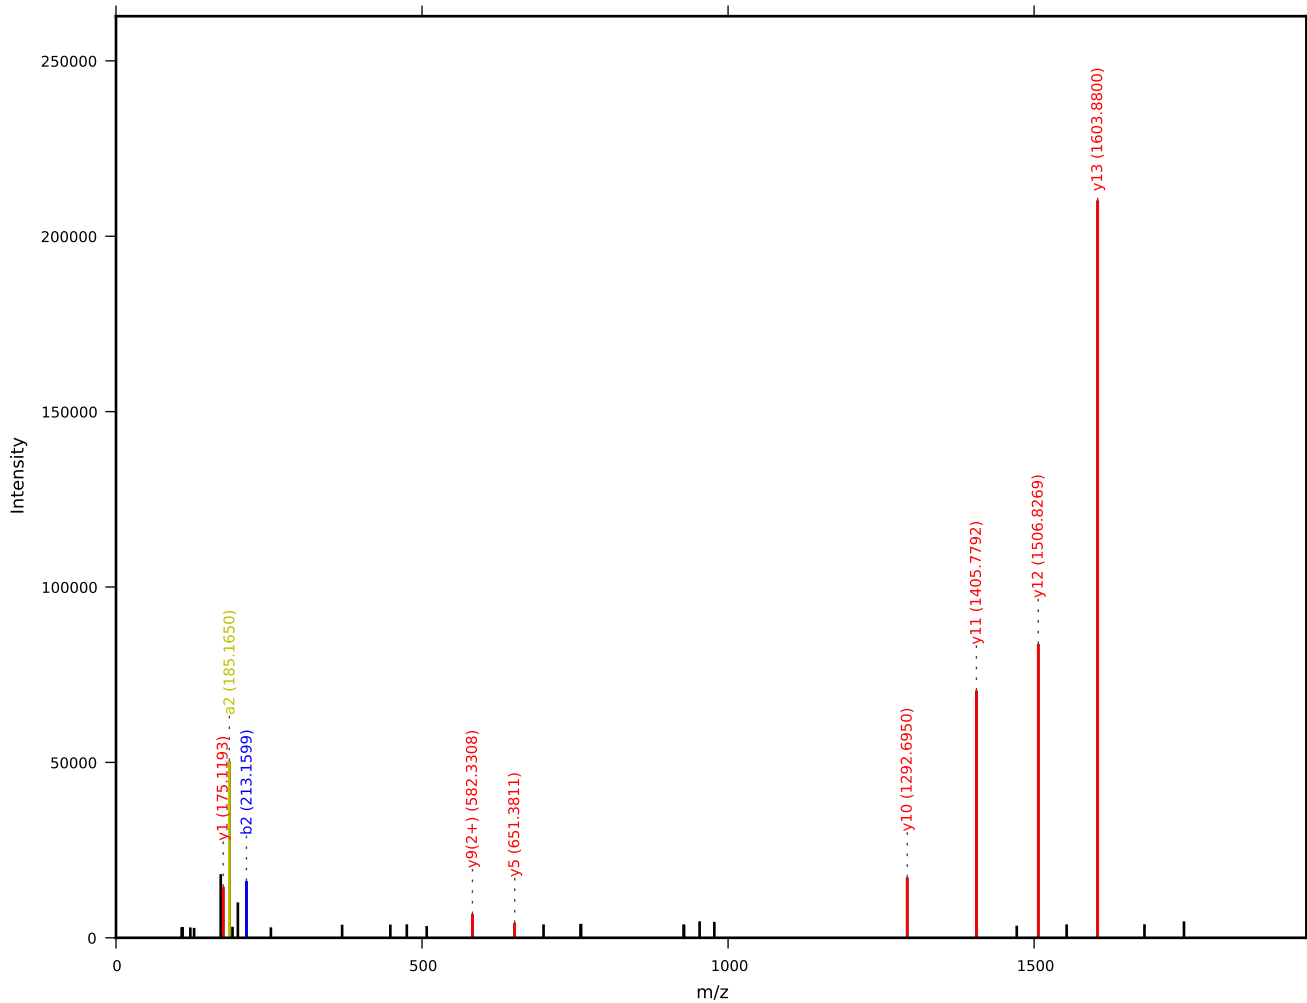

Mass: 947.54402 Charge: 2 m/z: 474.77928  
Modified Peptide: \_LIK(ac)FETR\_ Score: 84.568 PEP: 0.0039755

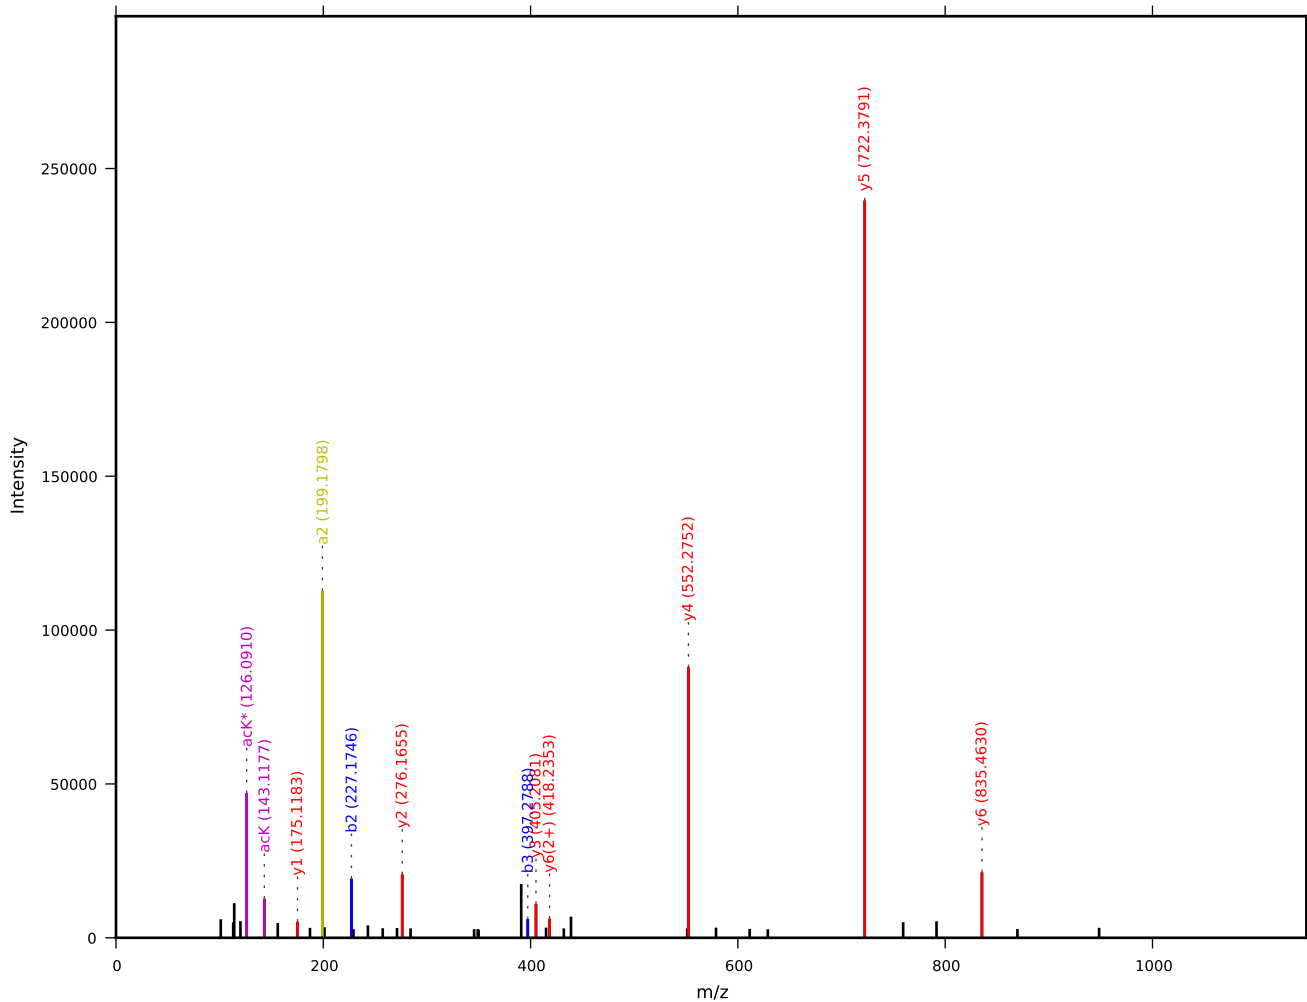

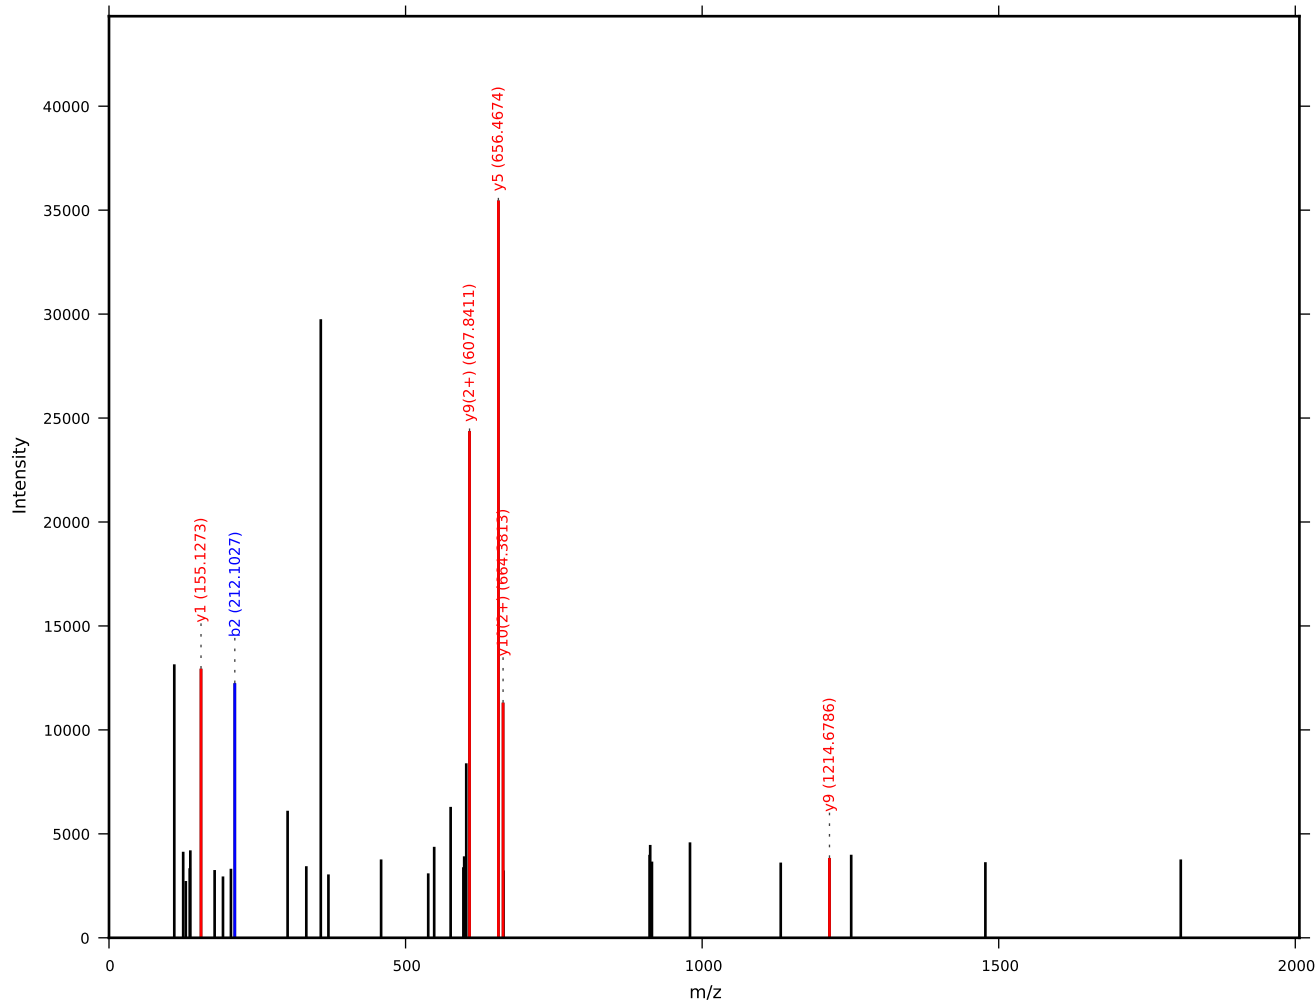

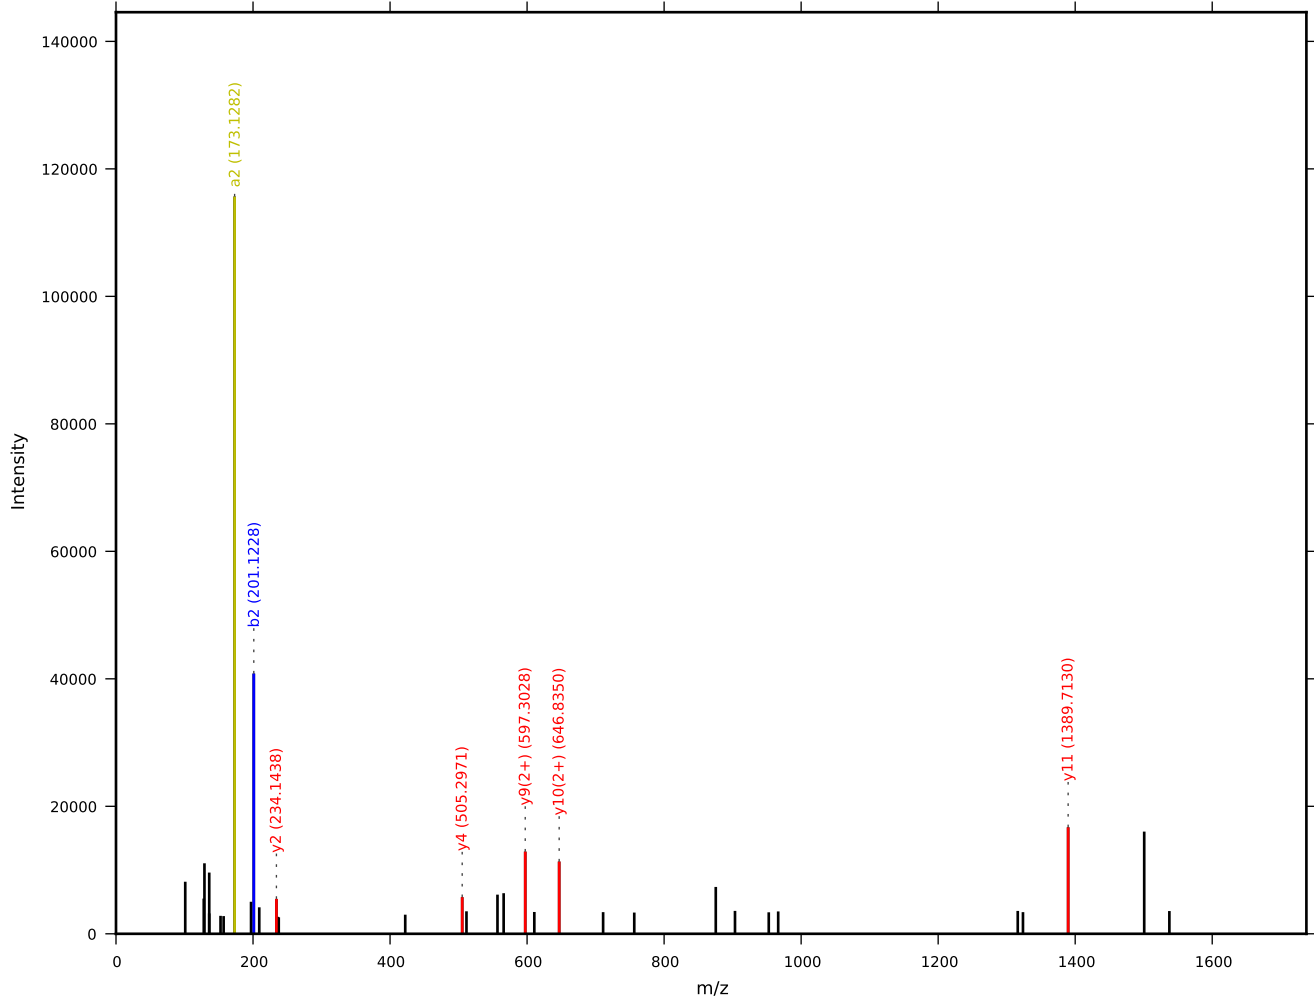

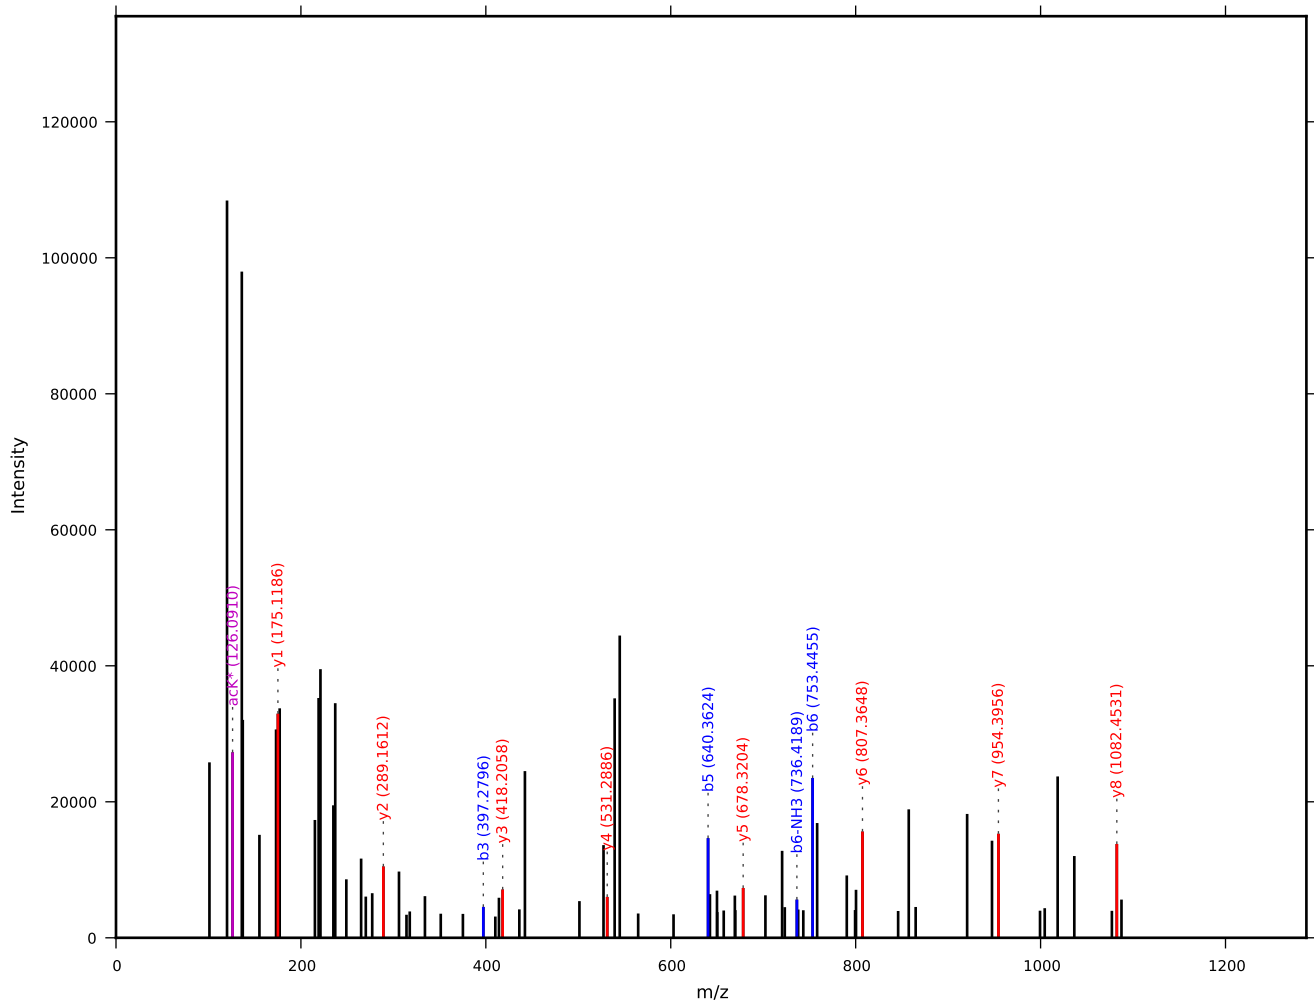

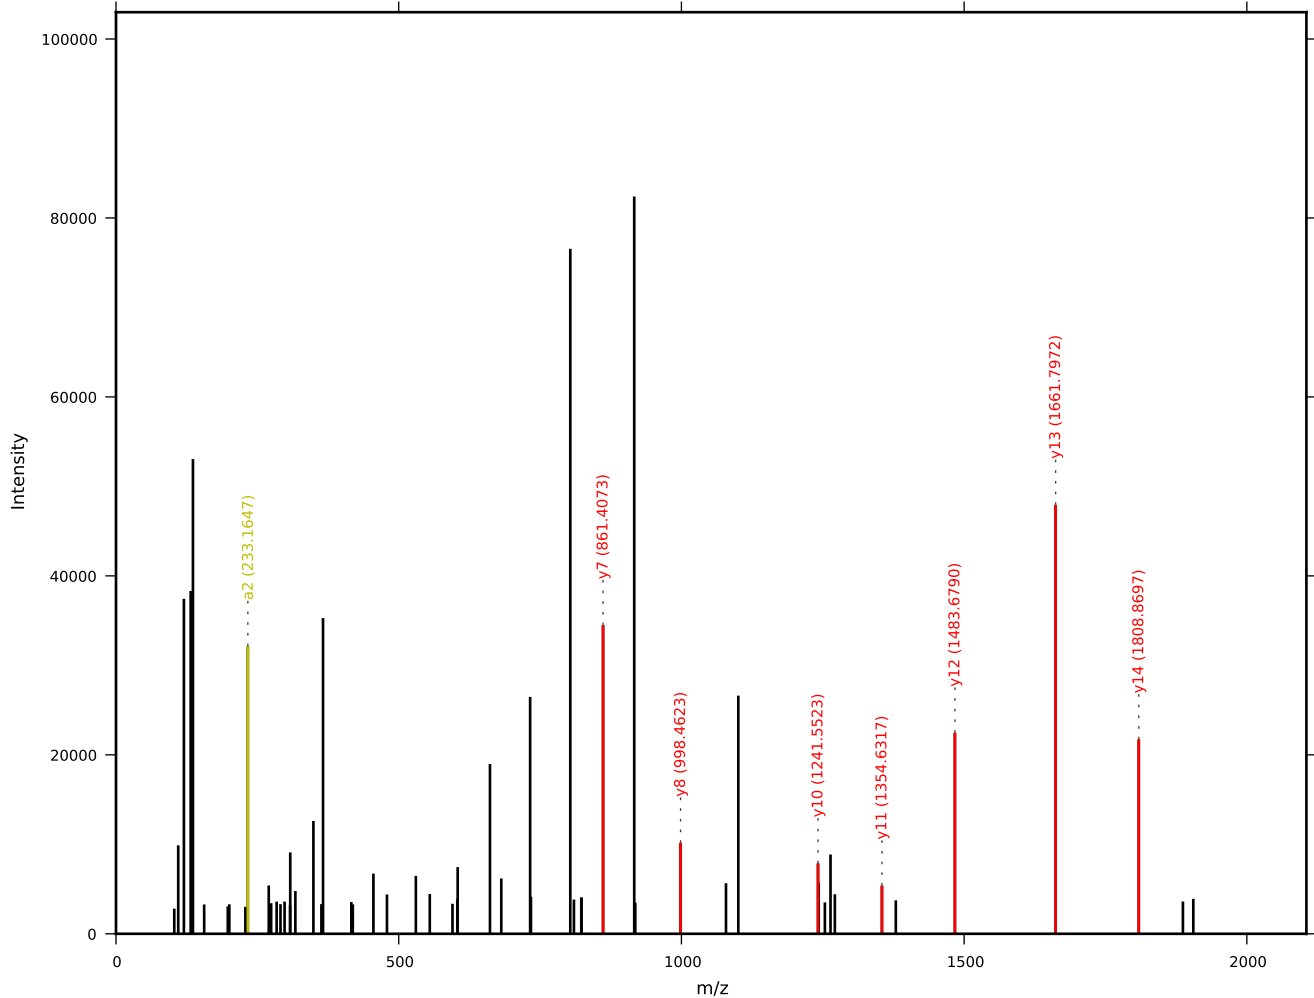

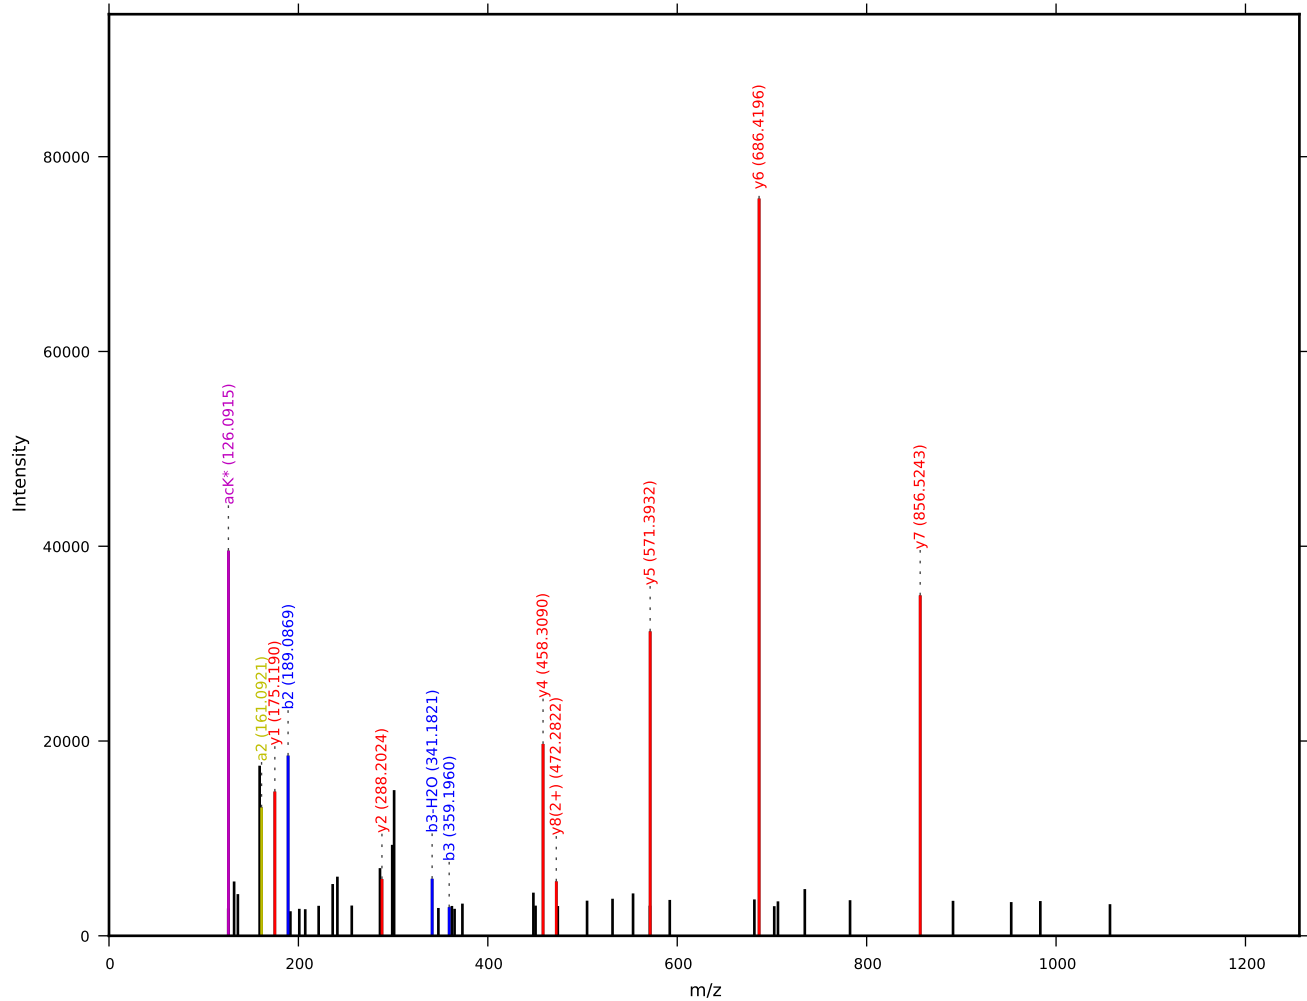

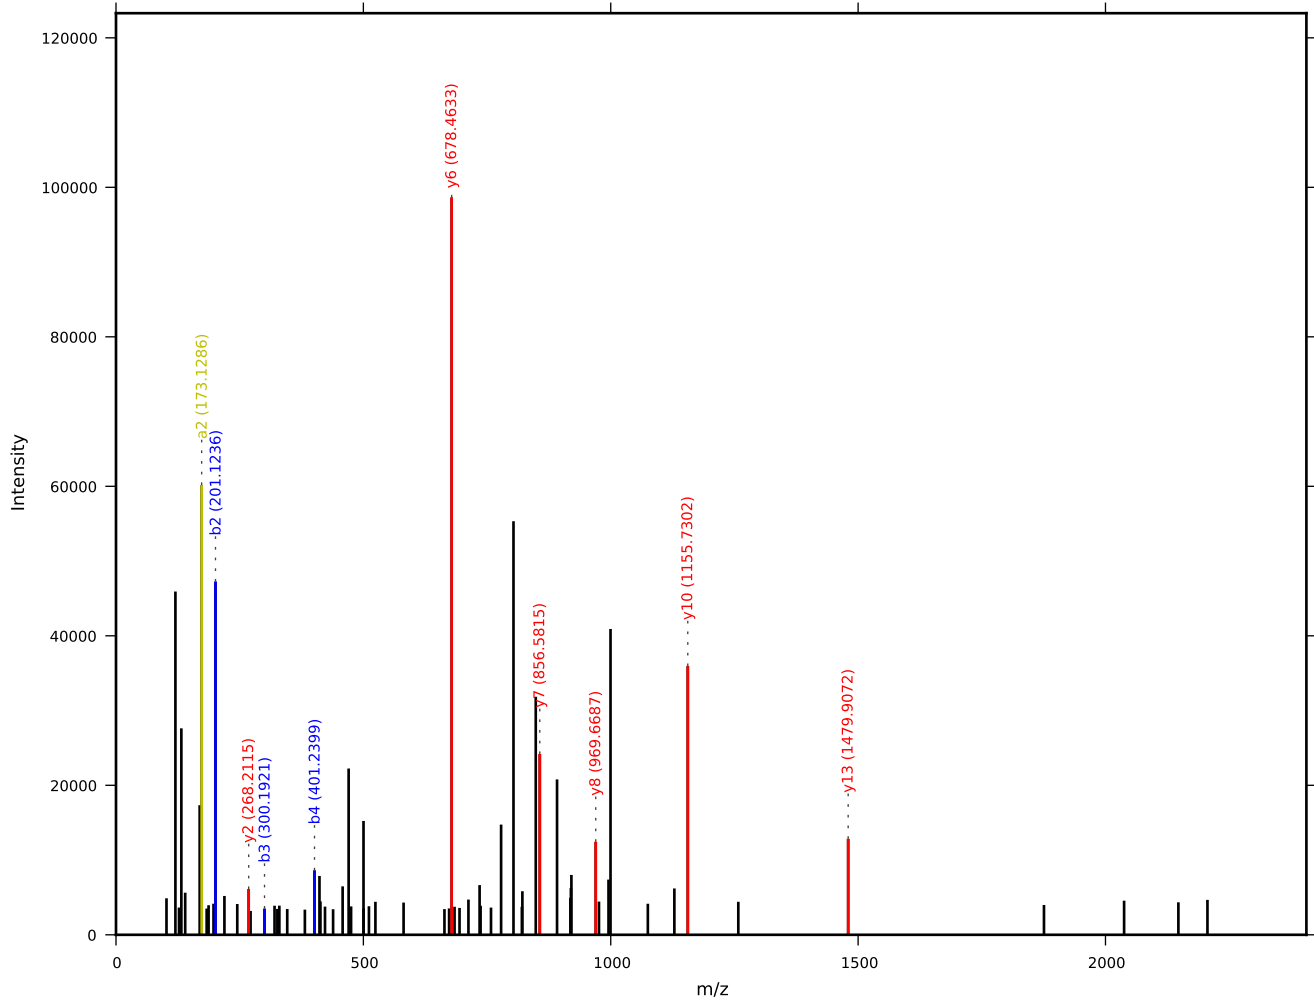



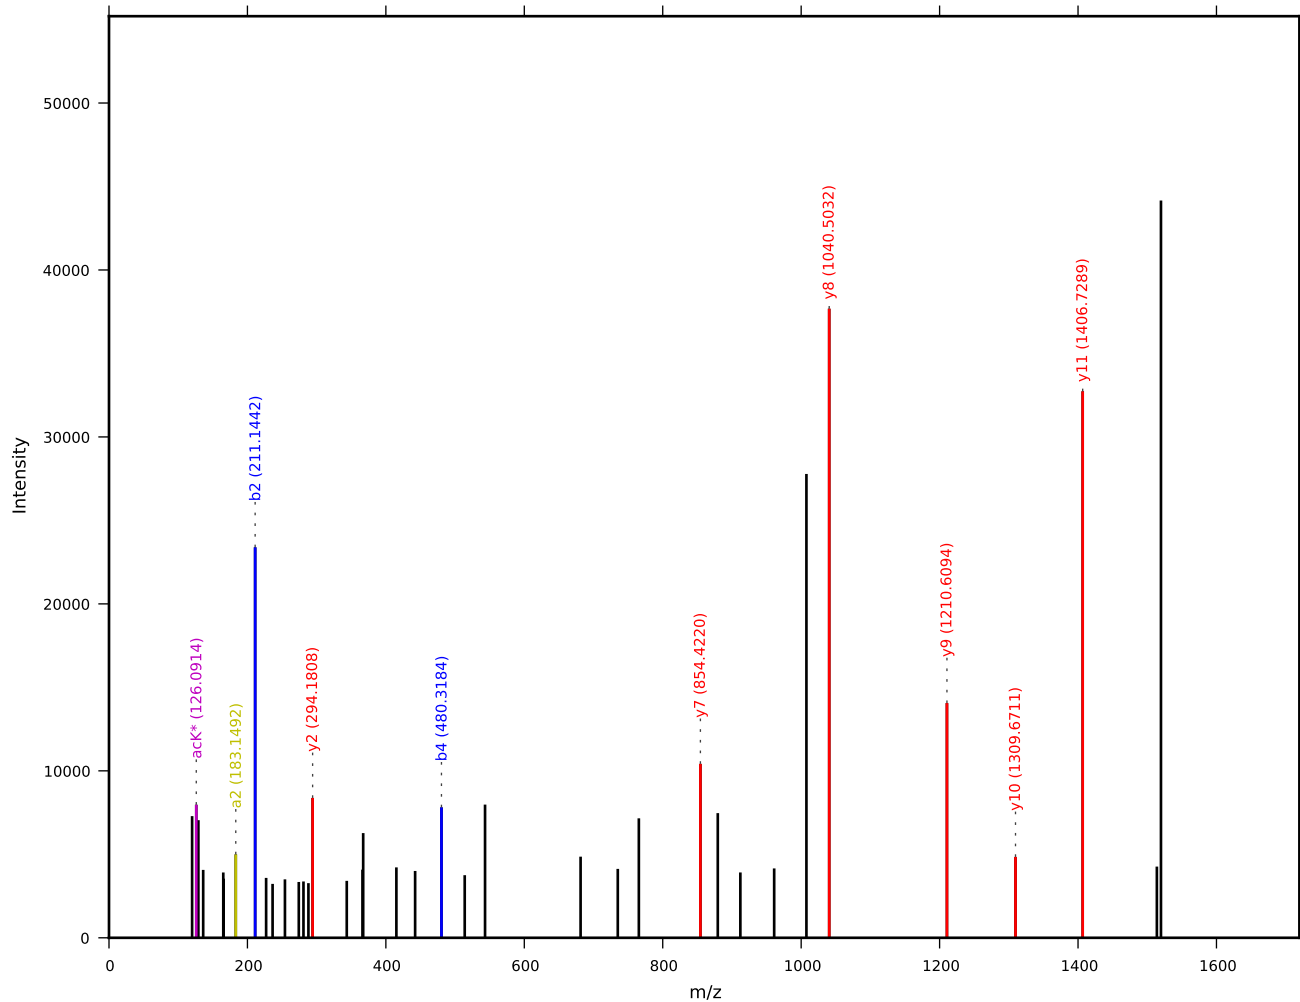

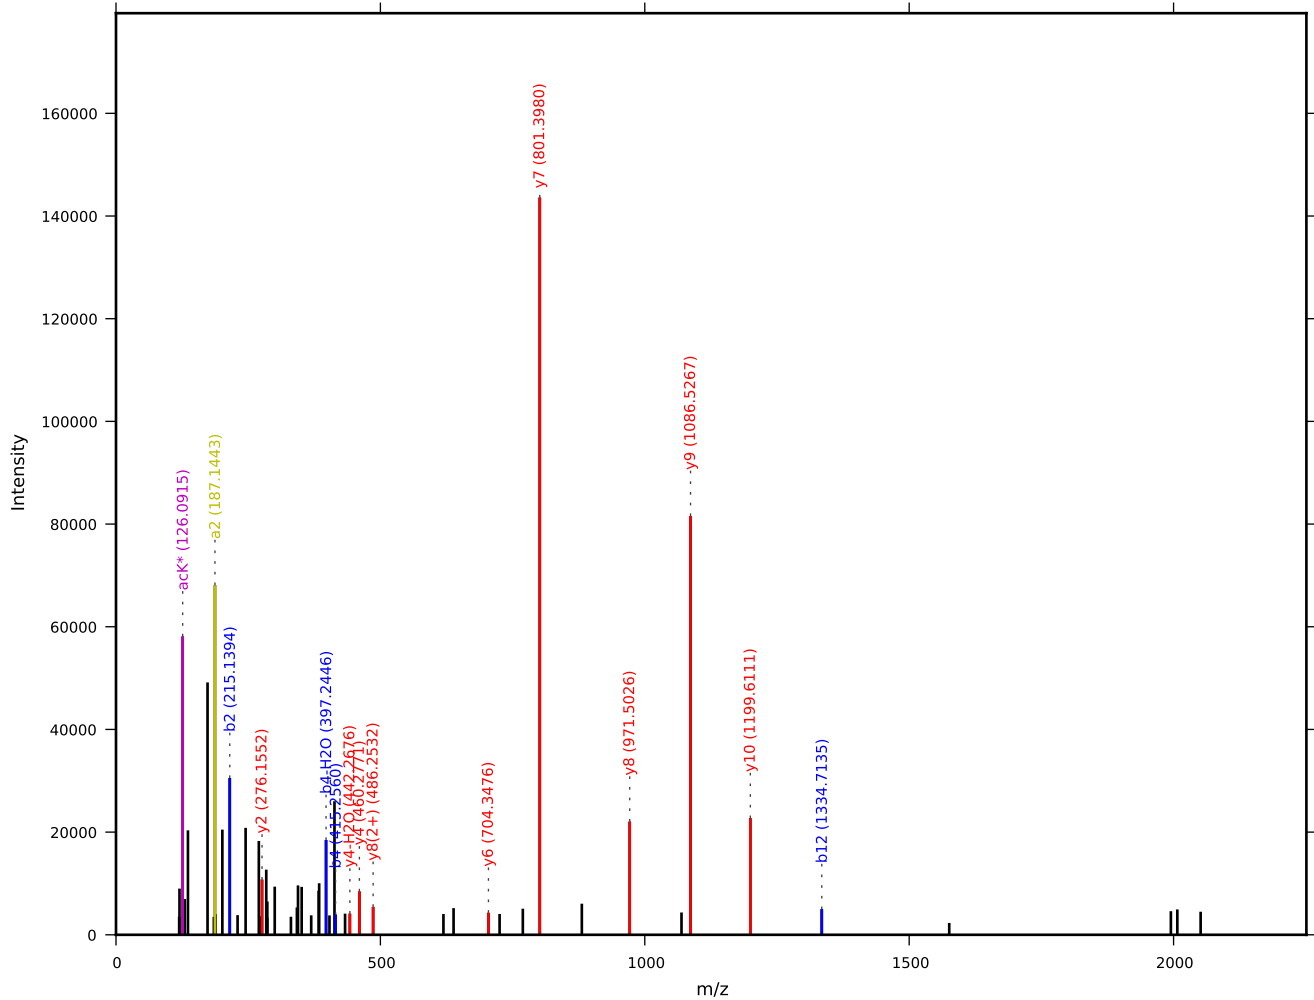

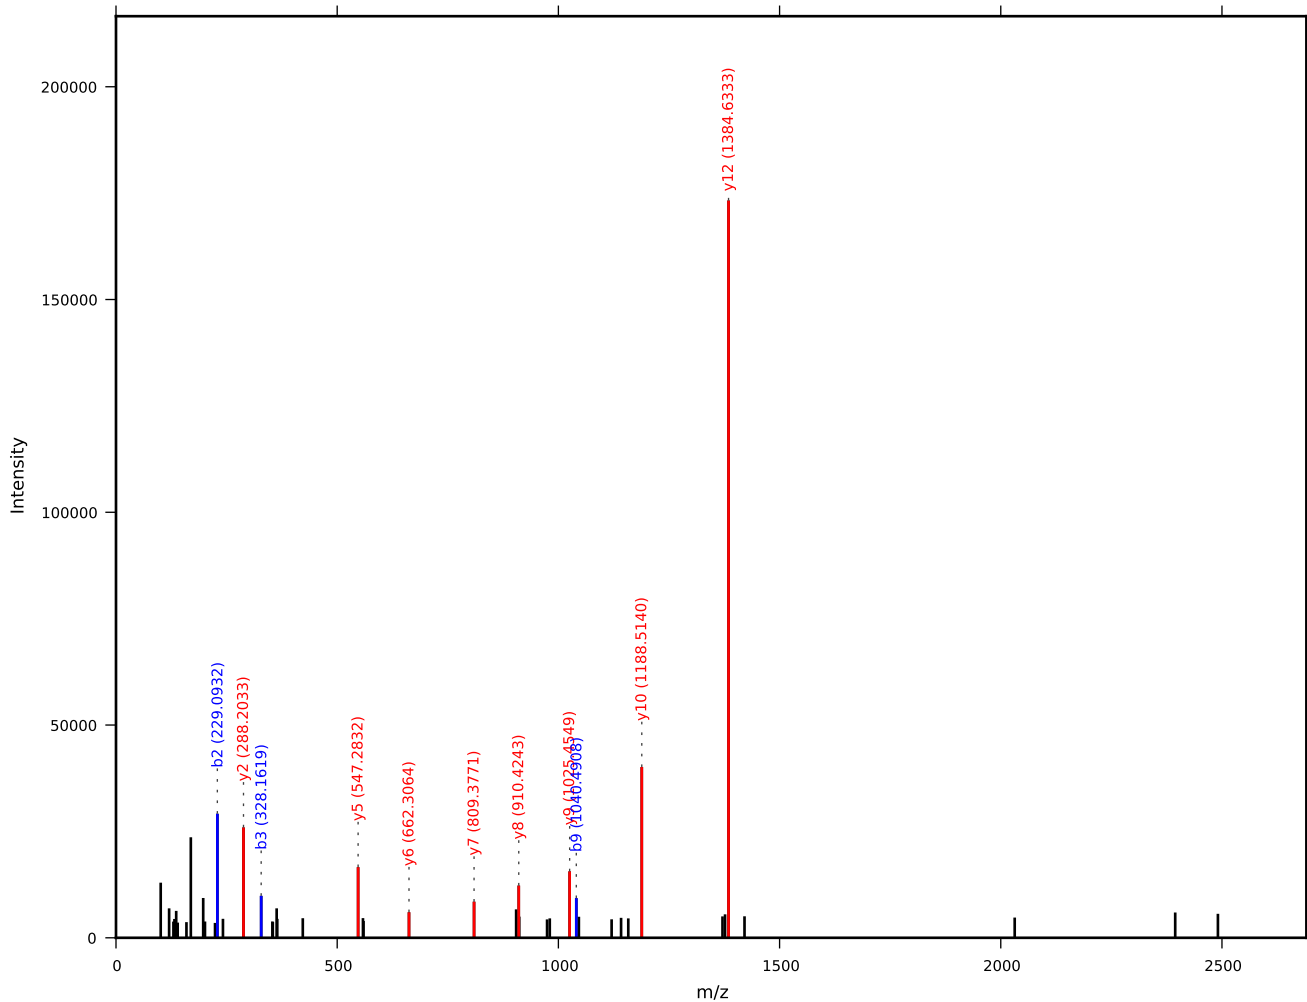

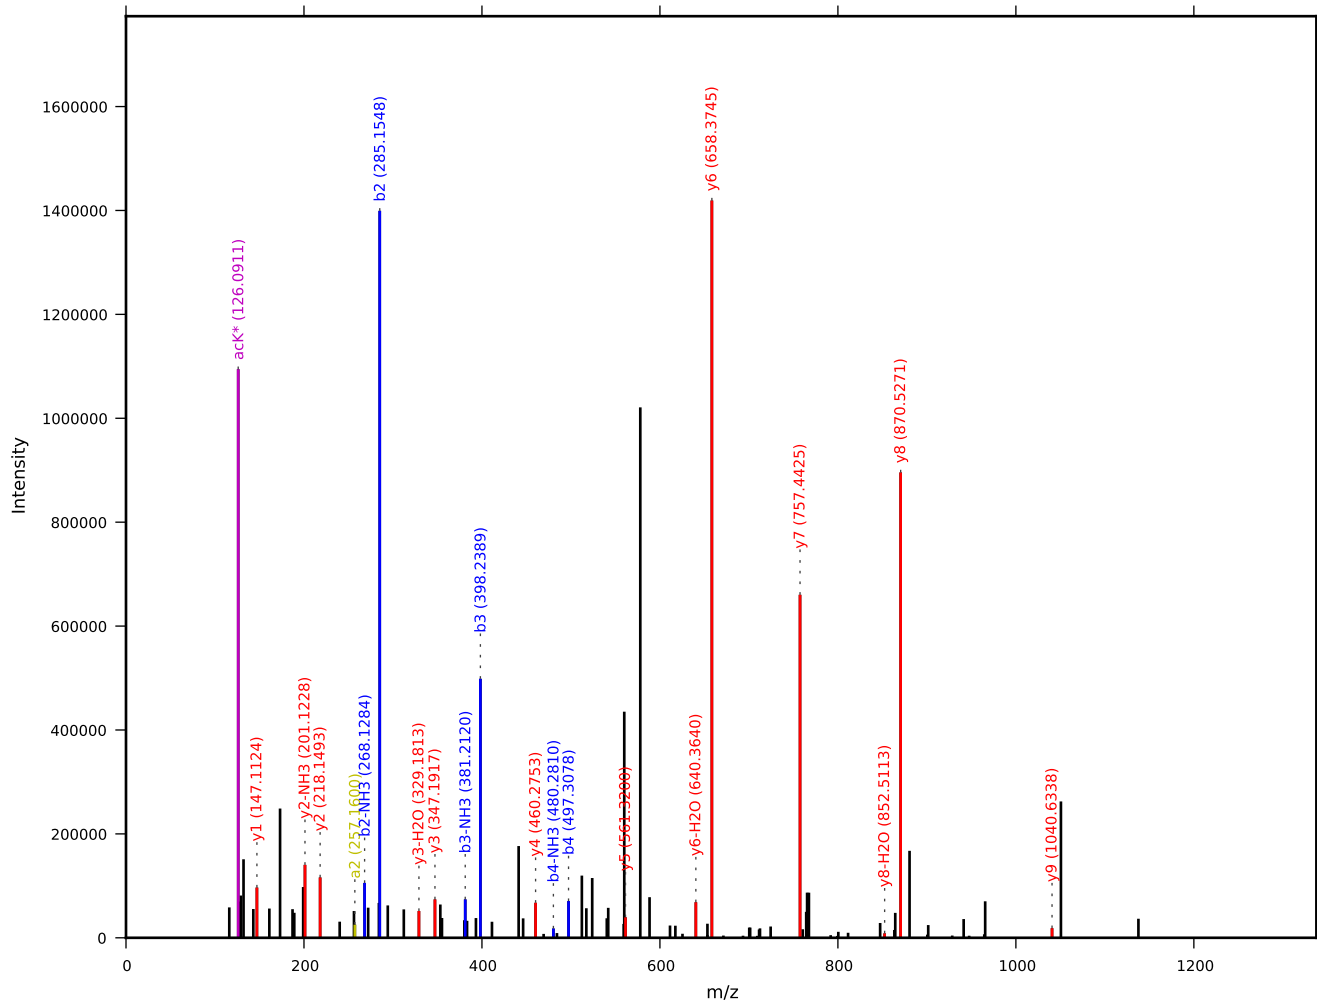

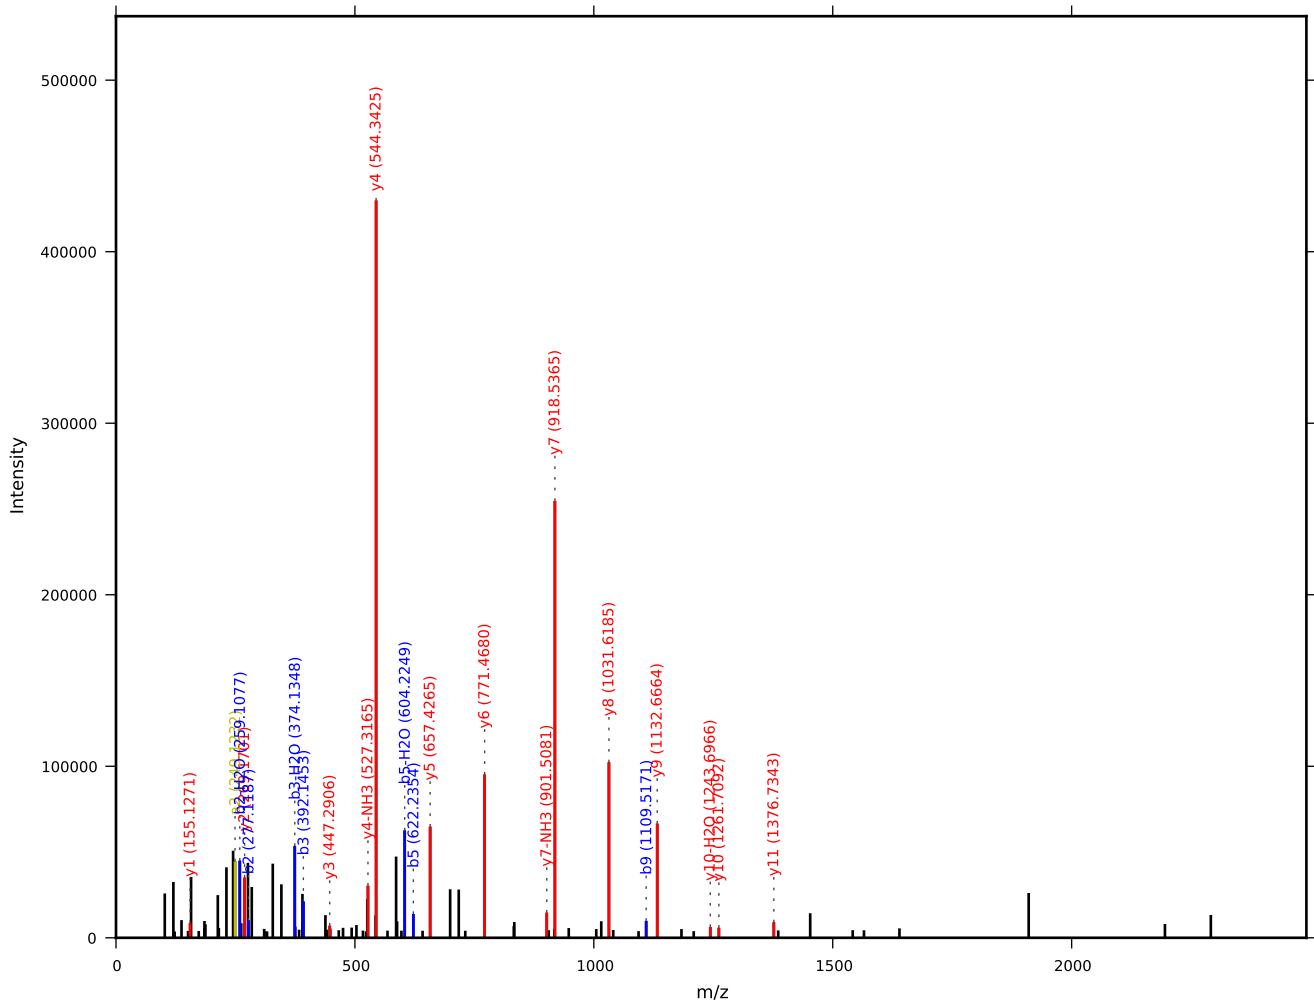

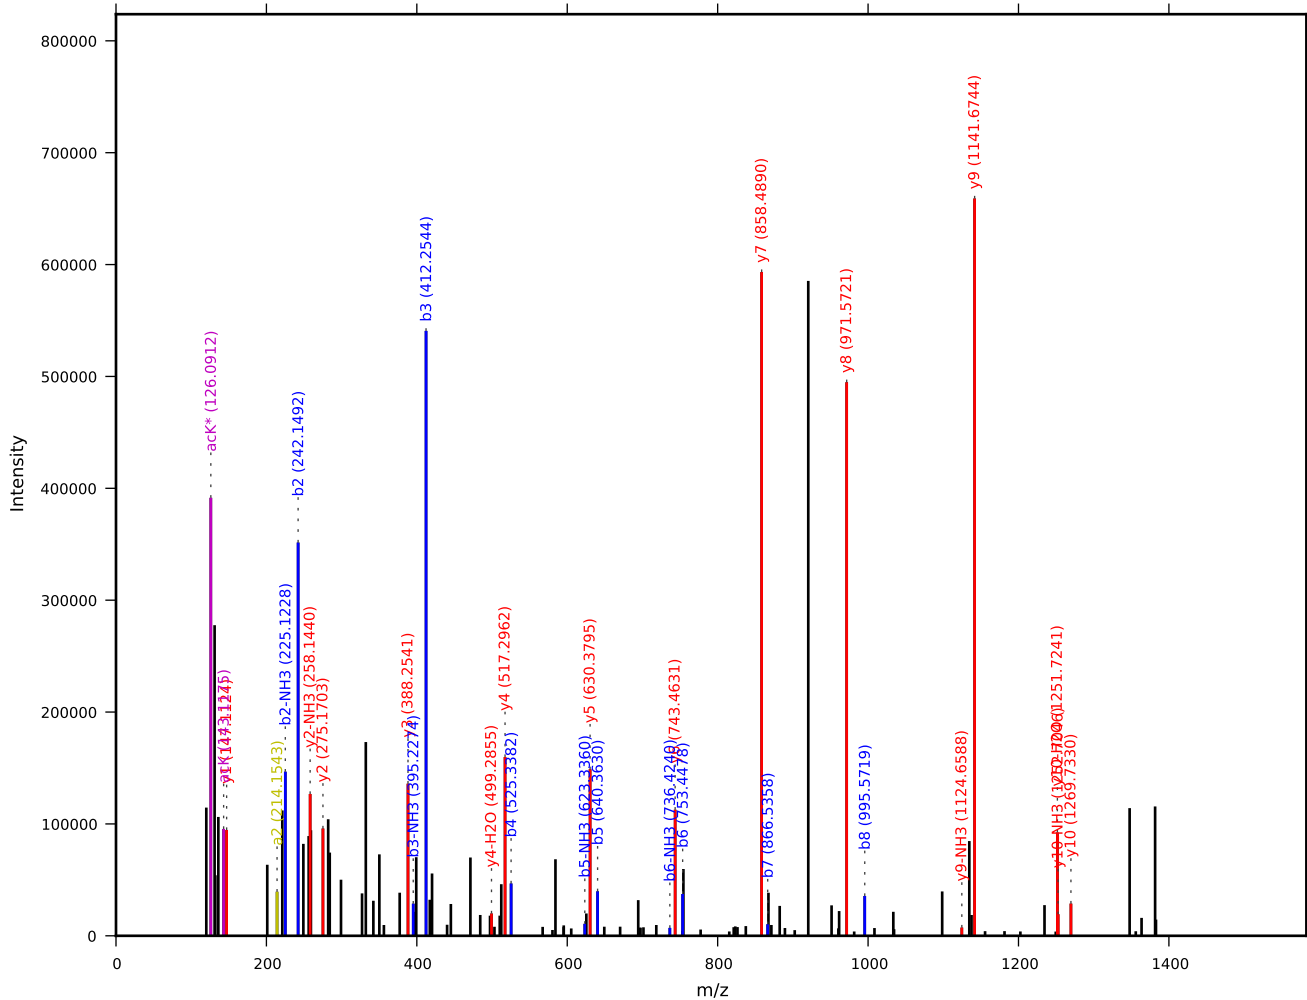

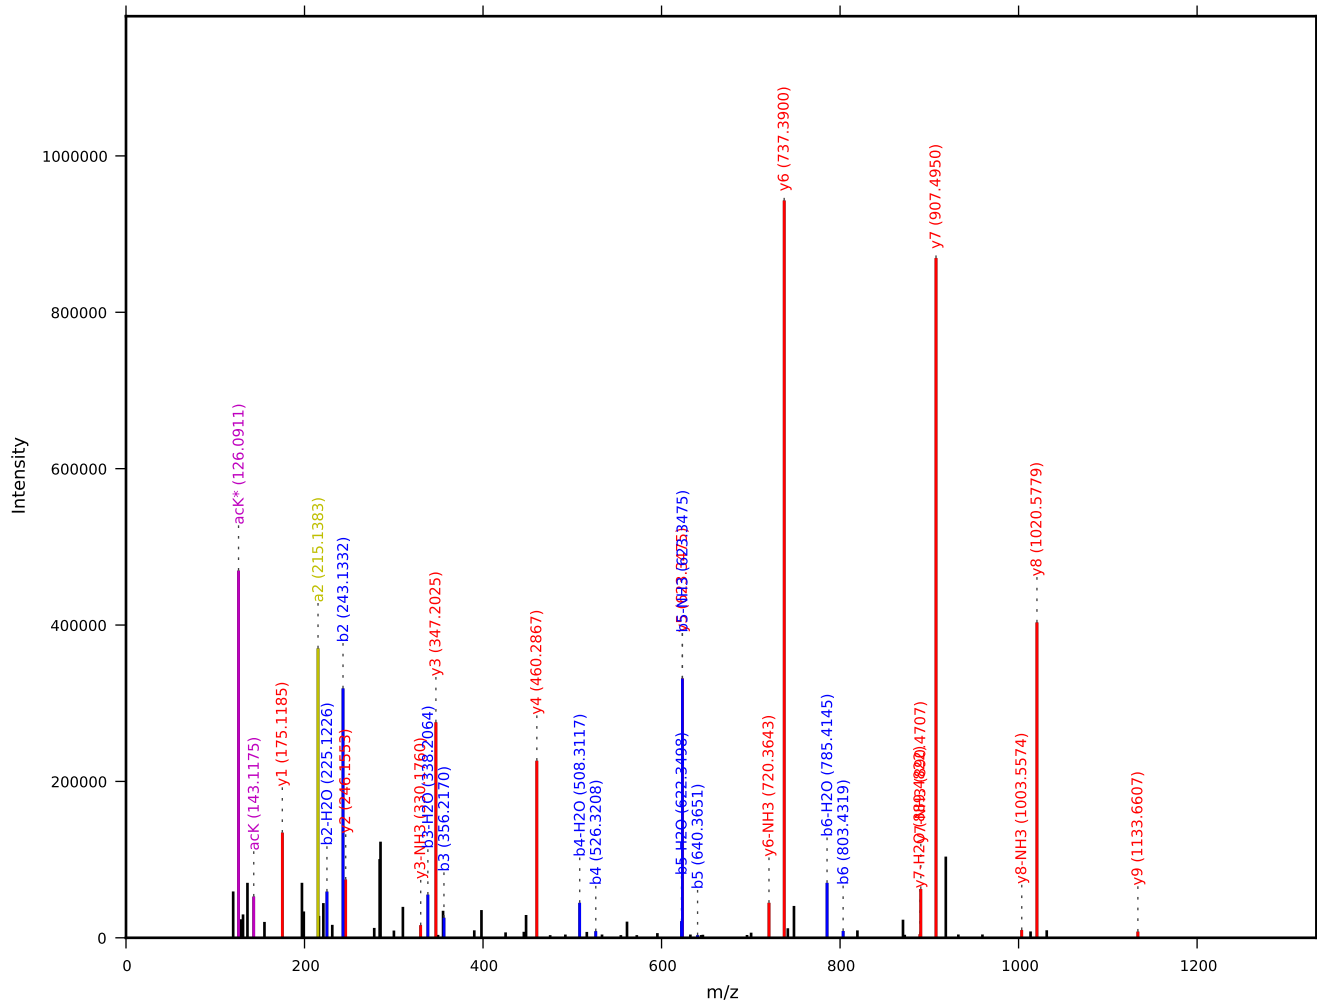

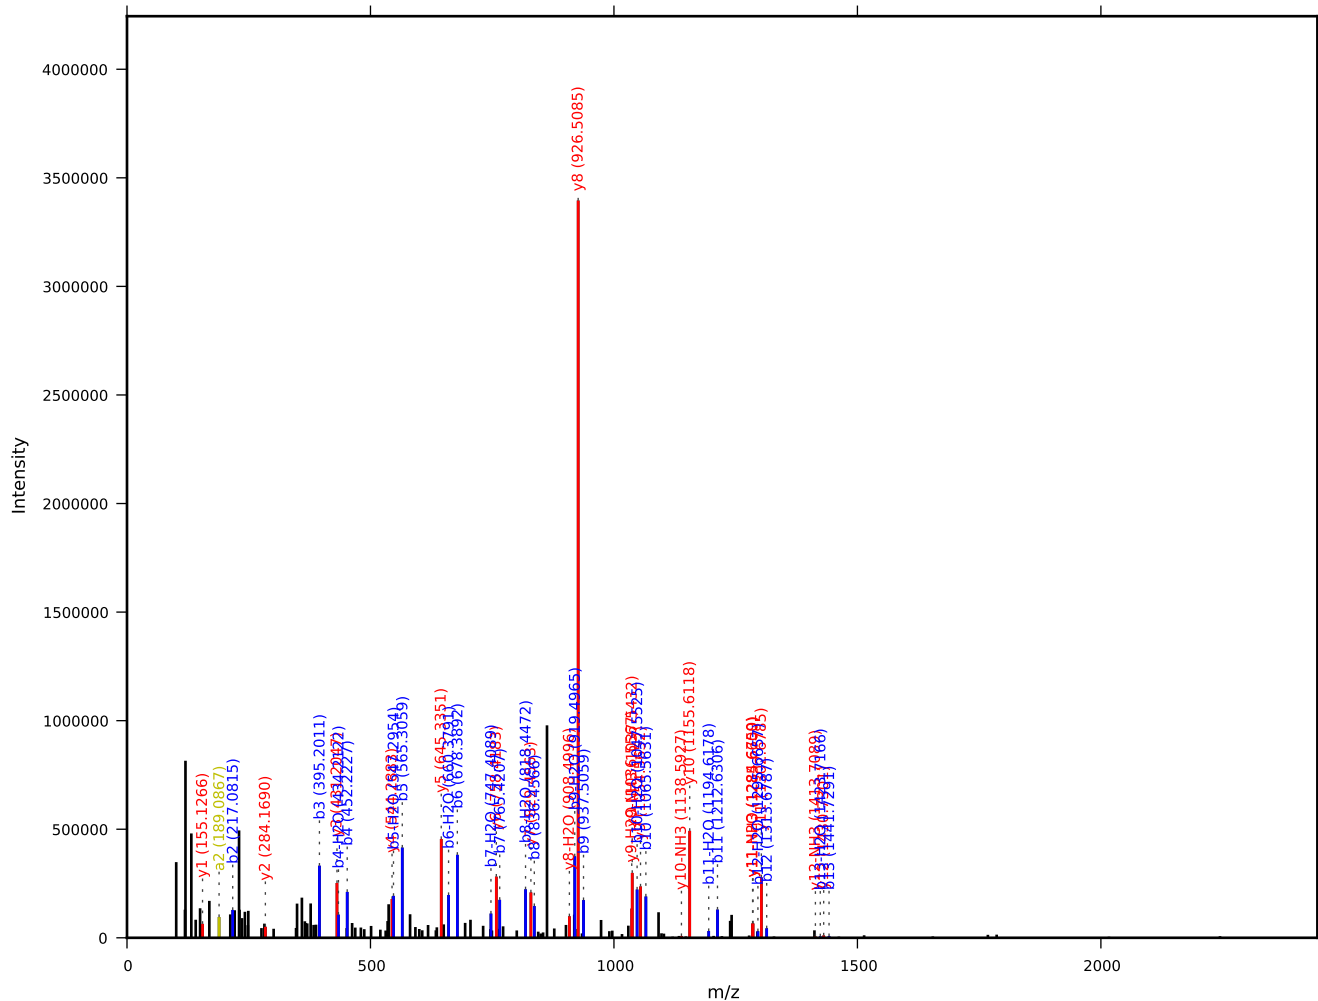



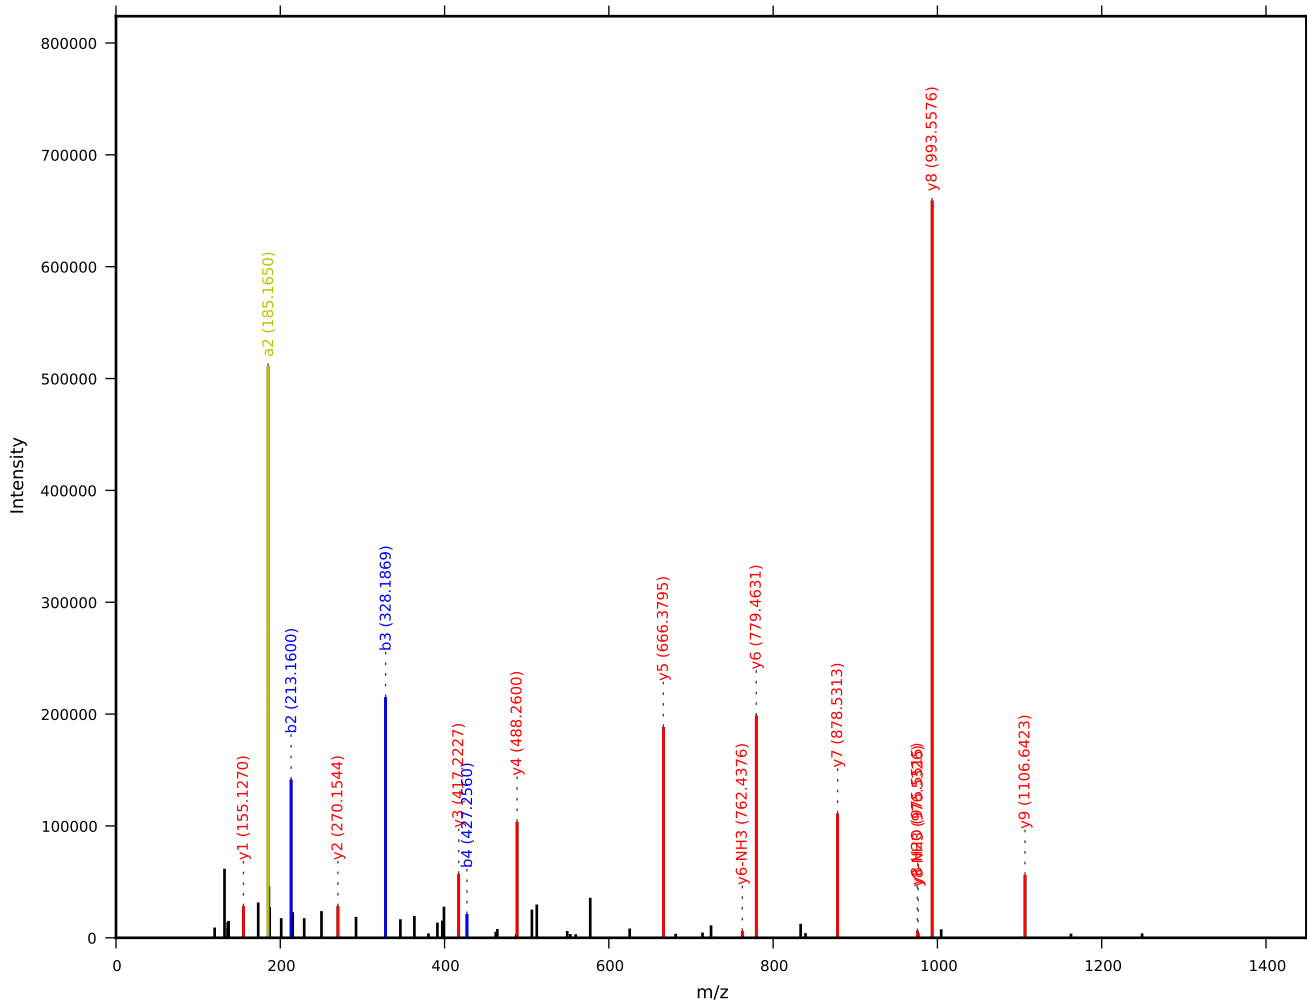

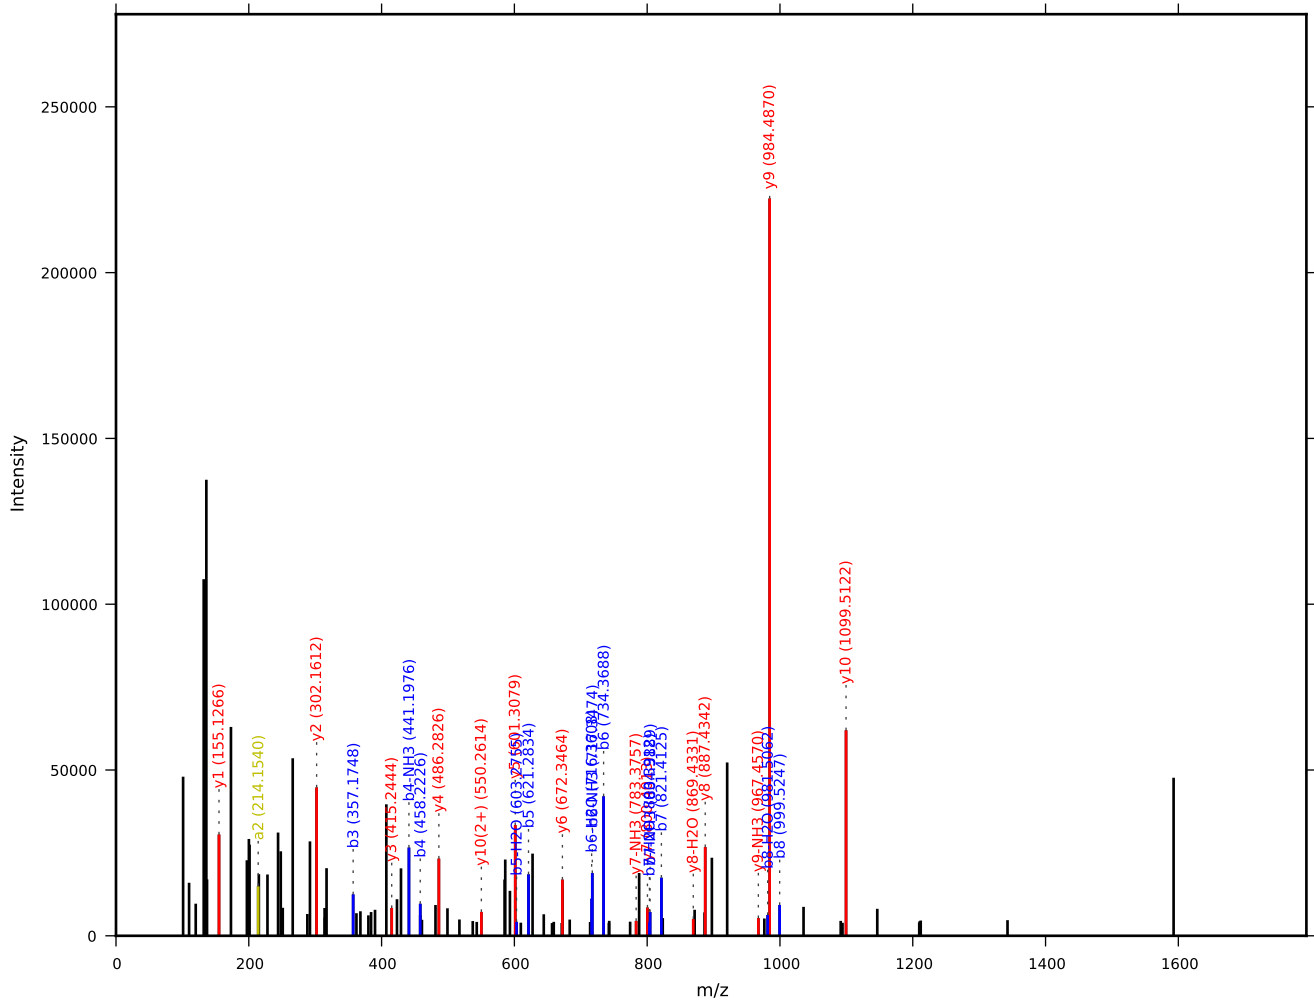

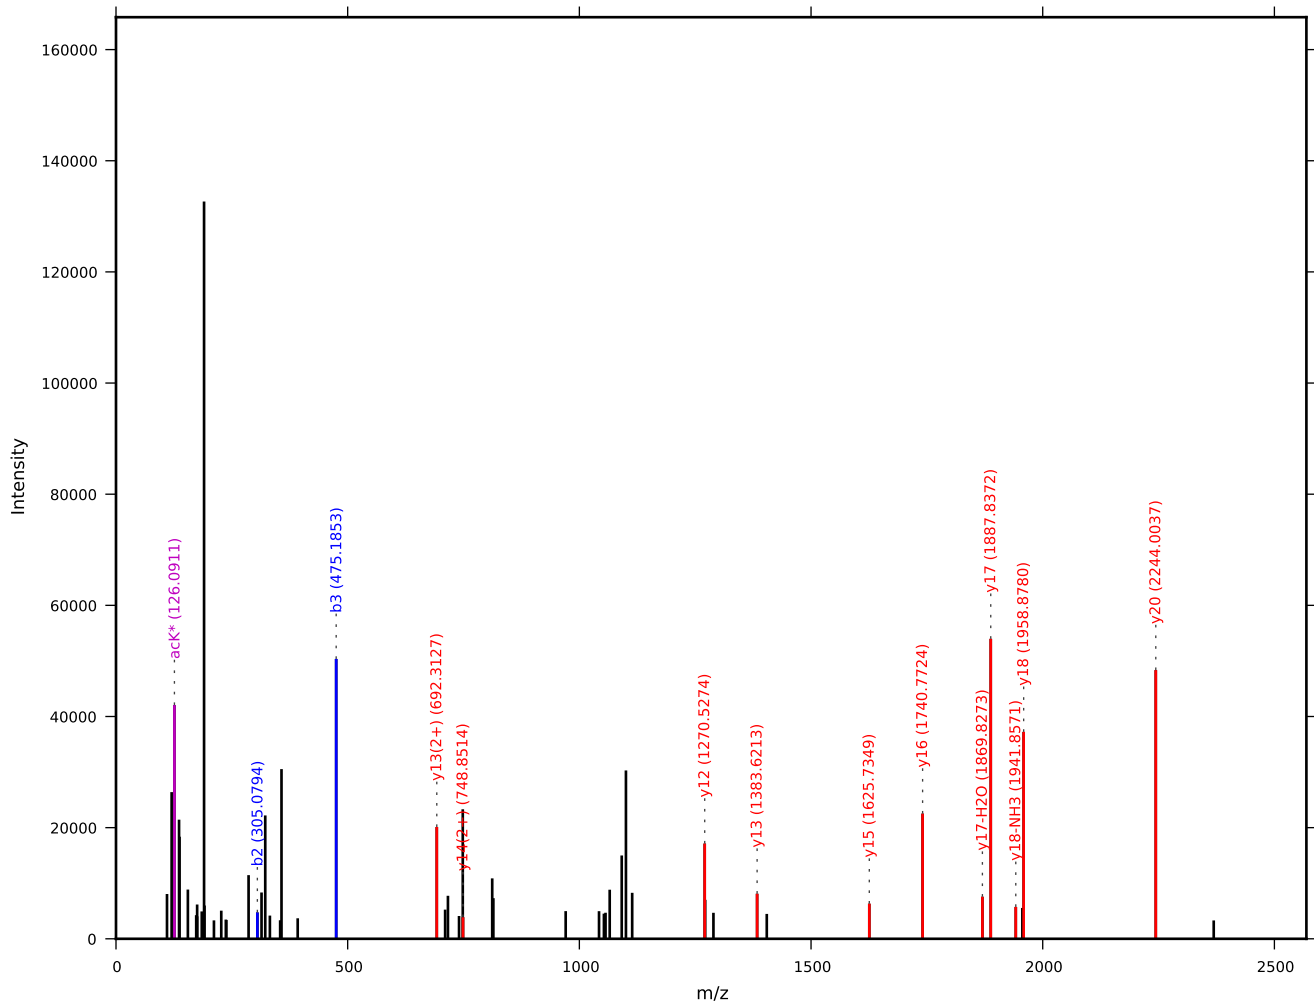

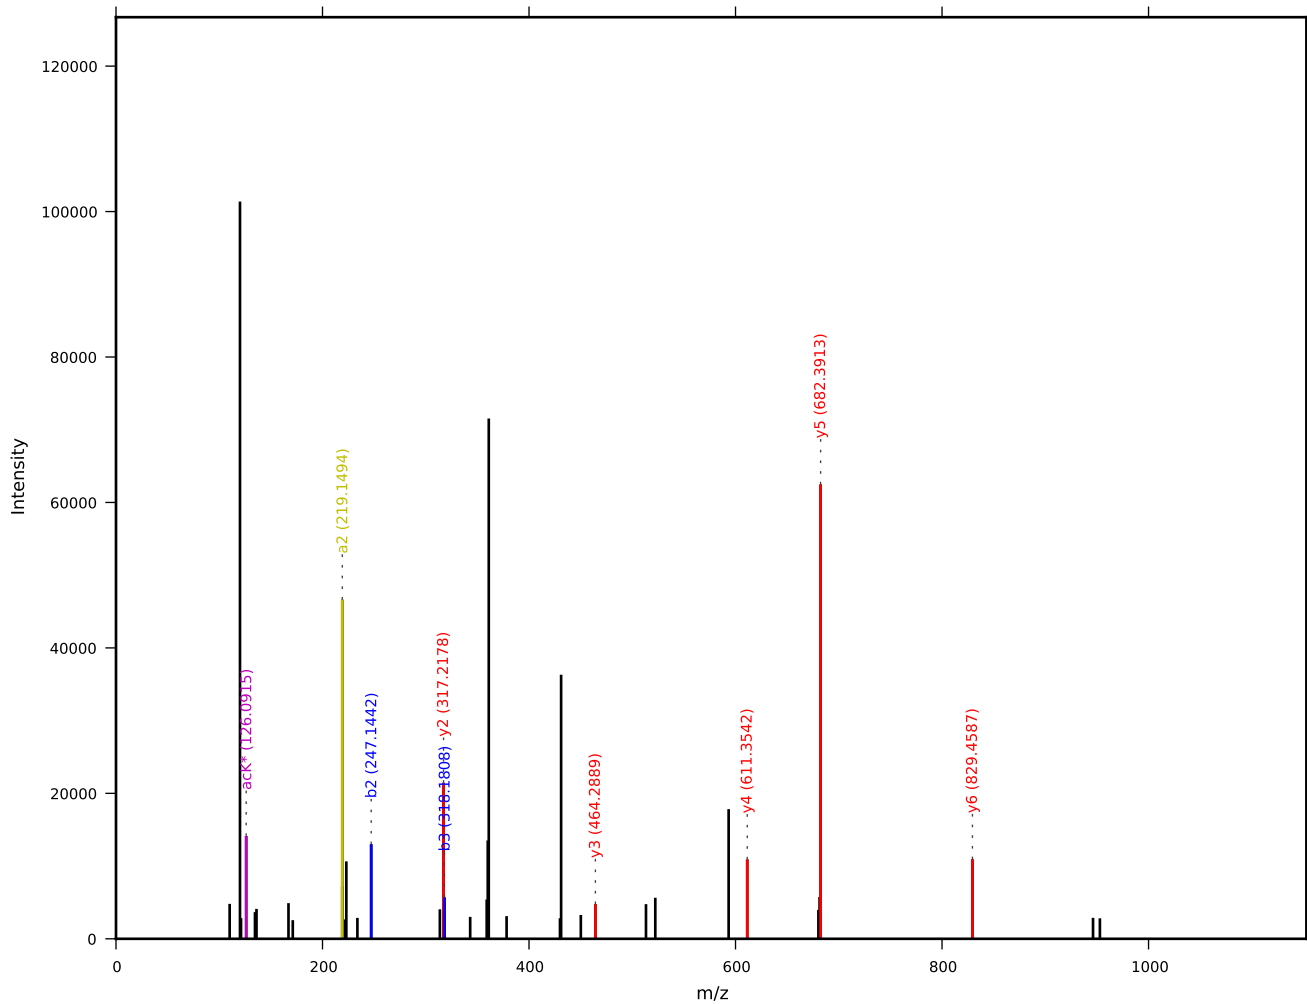

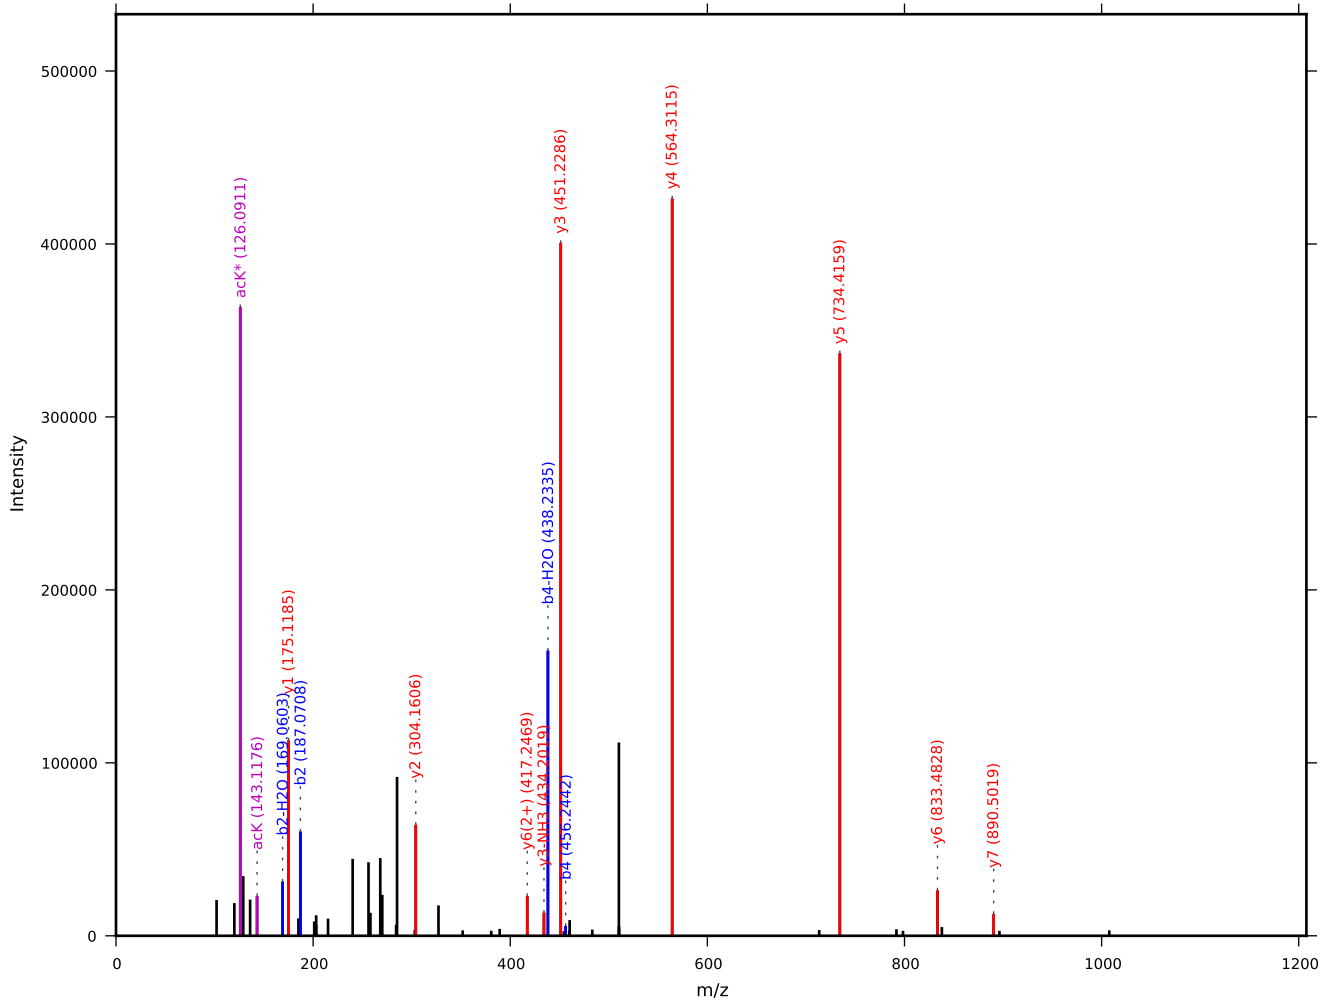

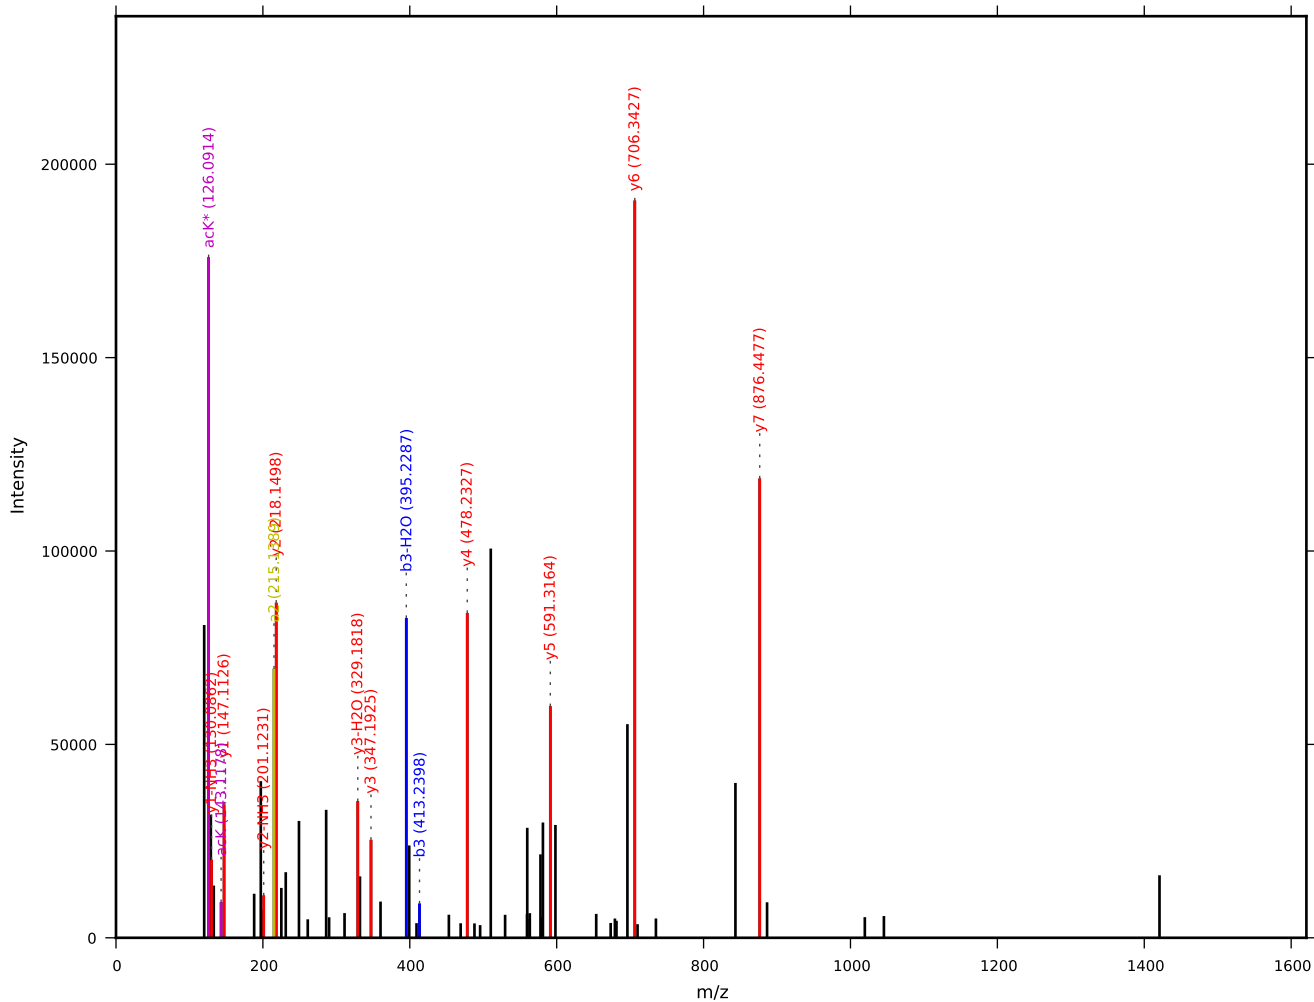

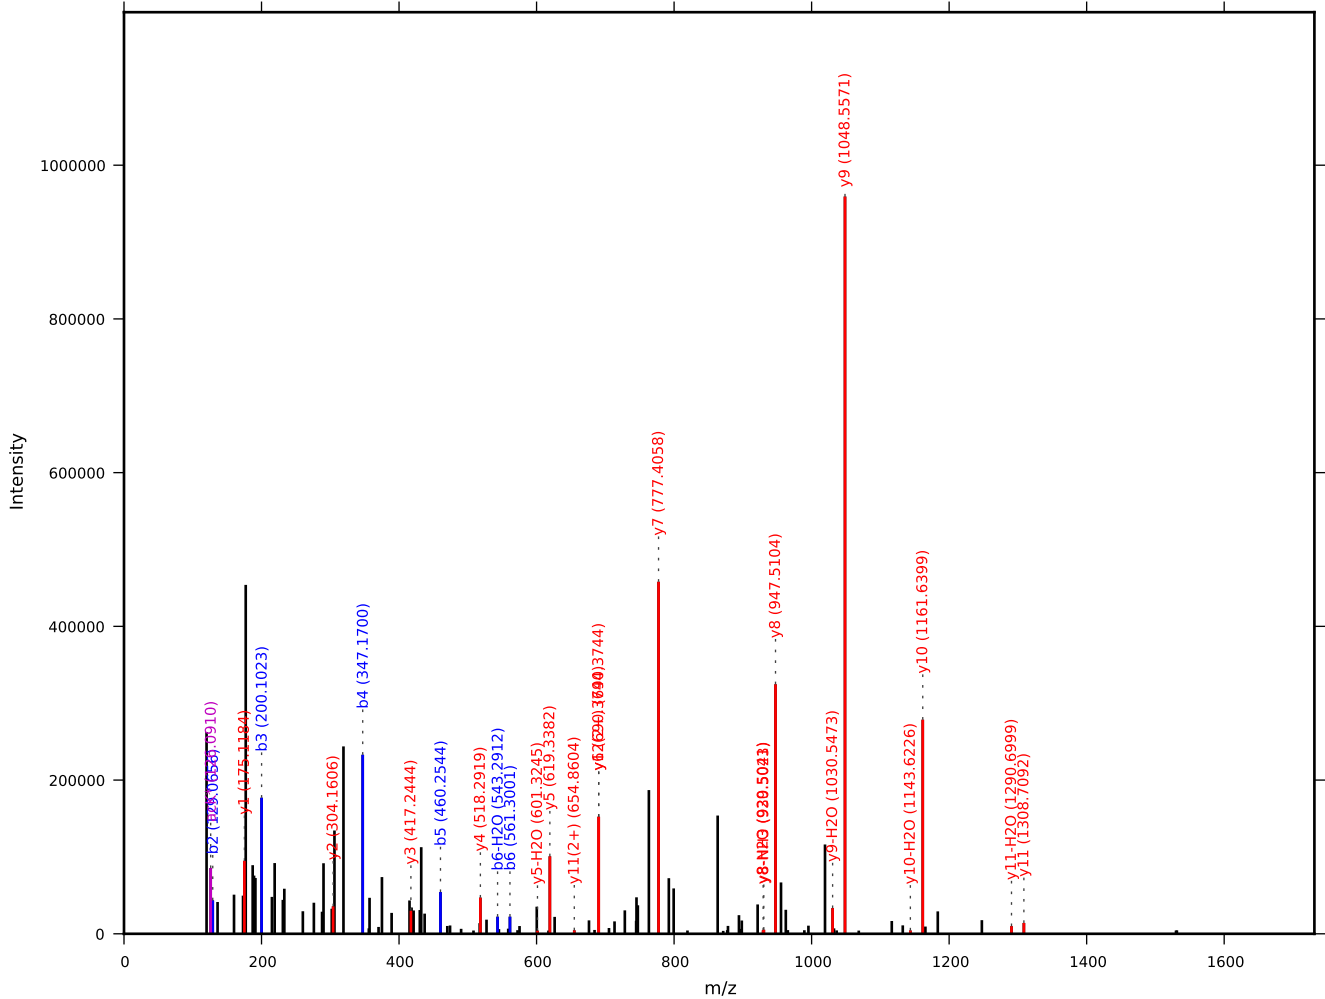

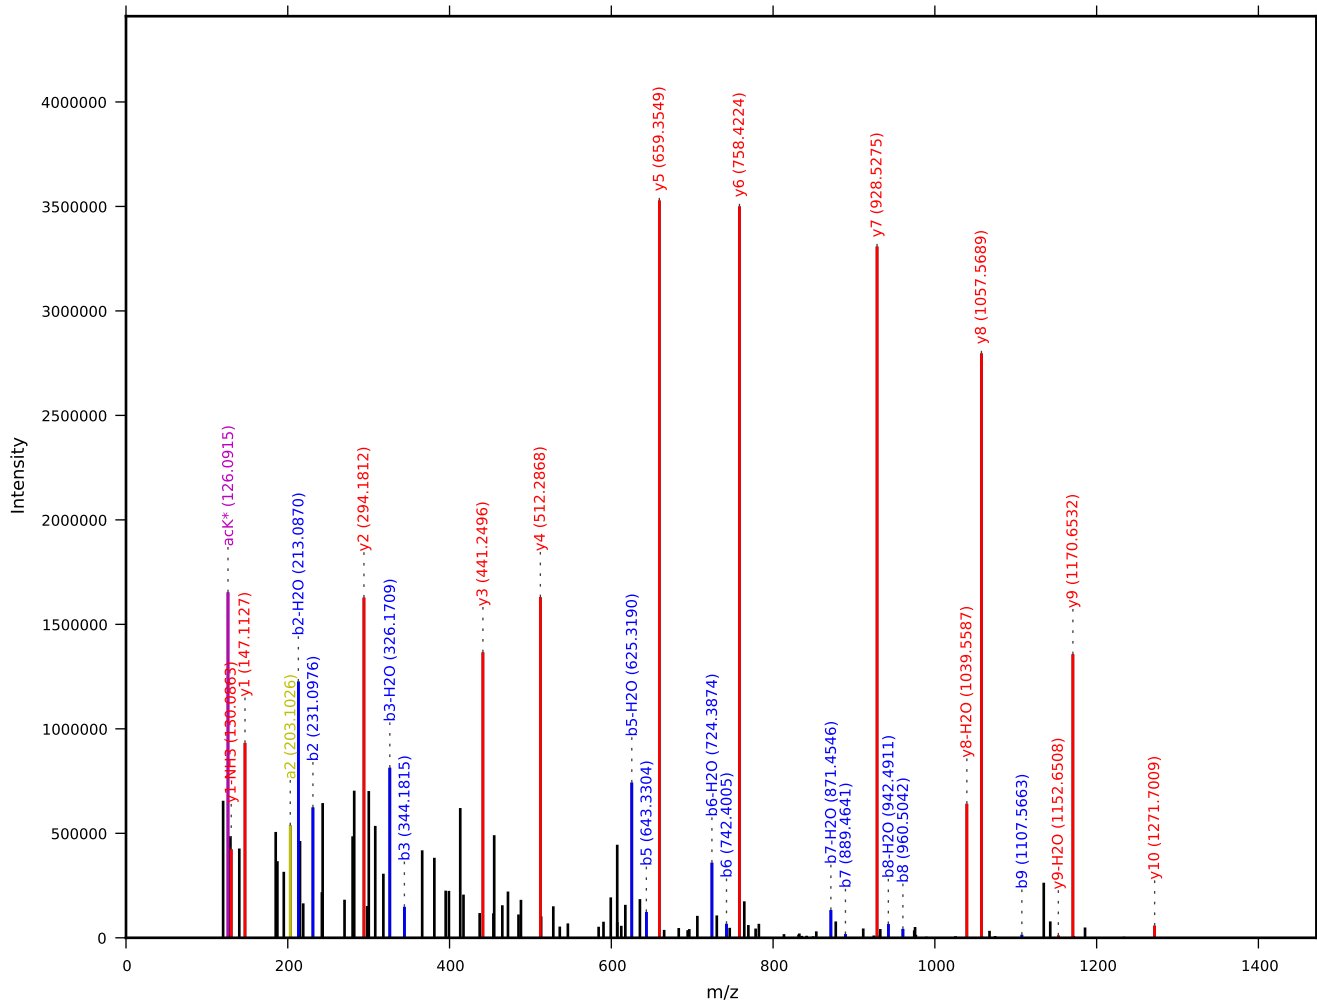



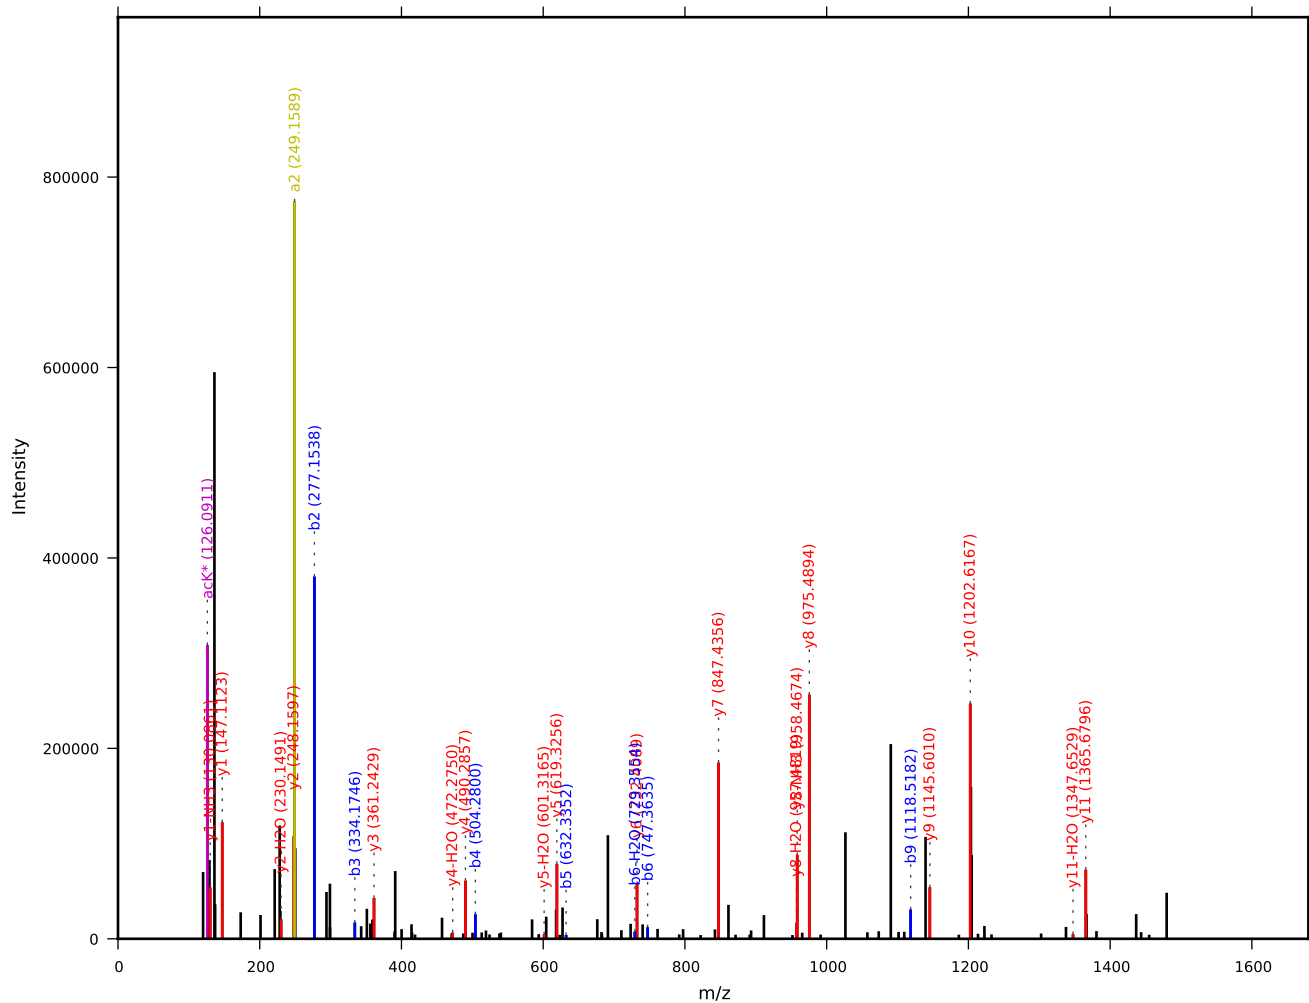

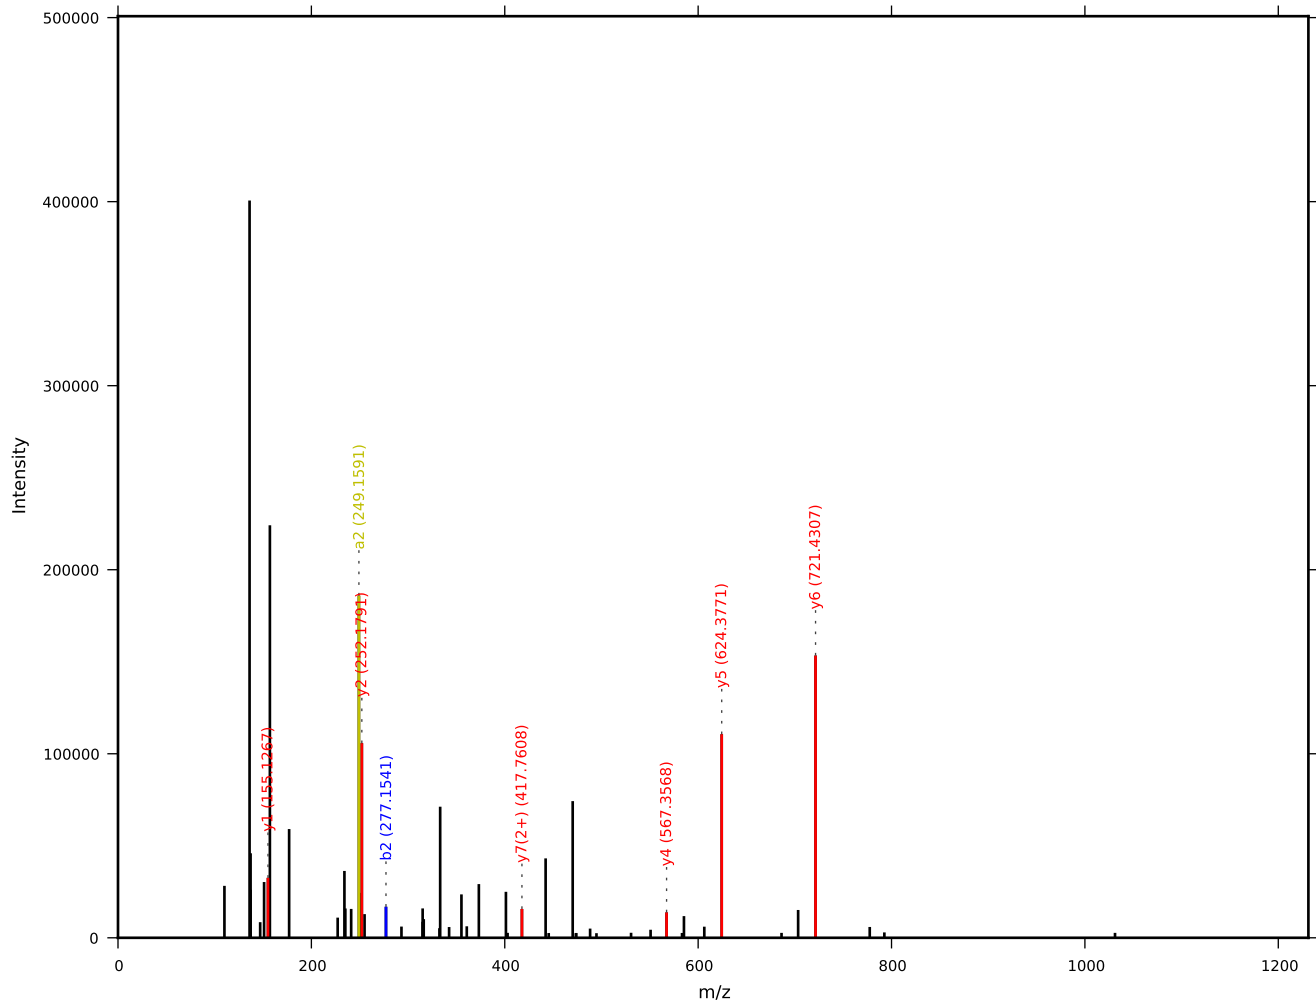

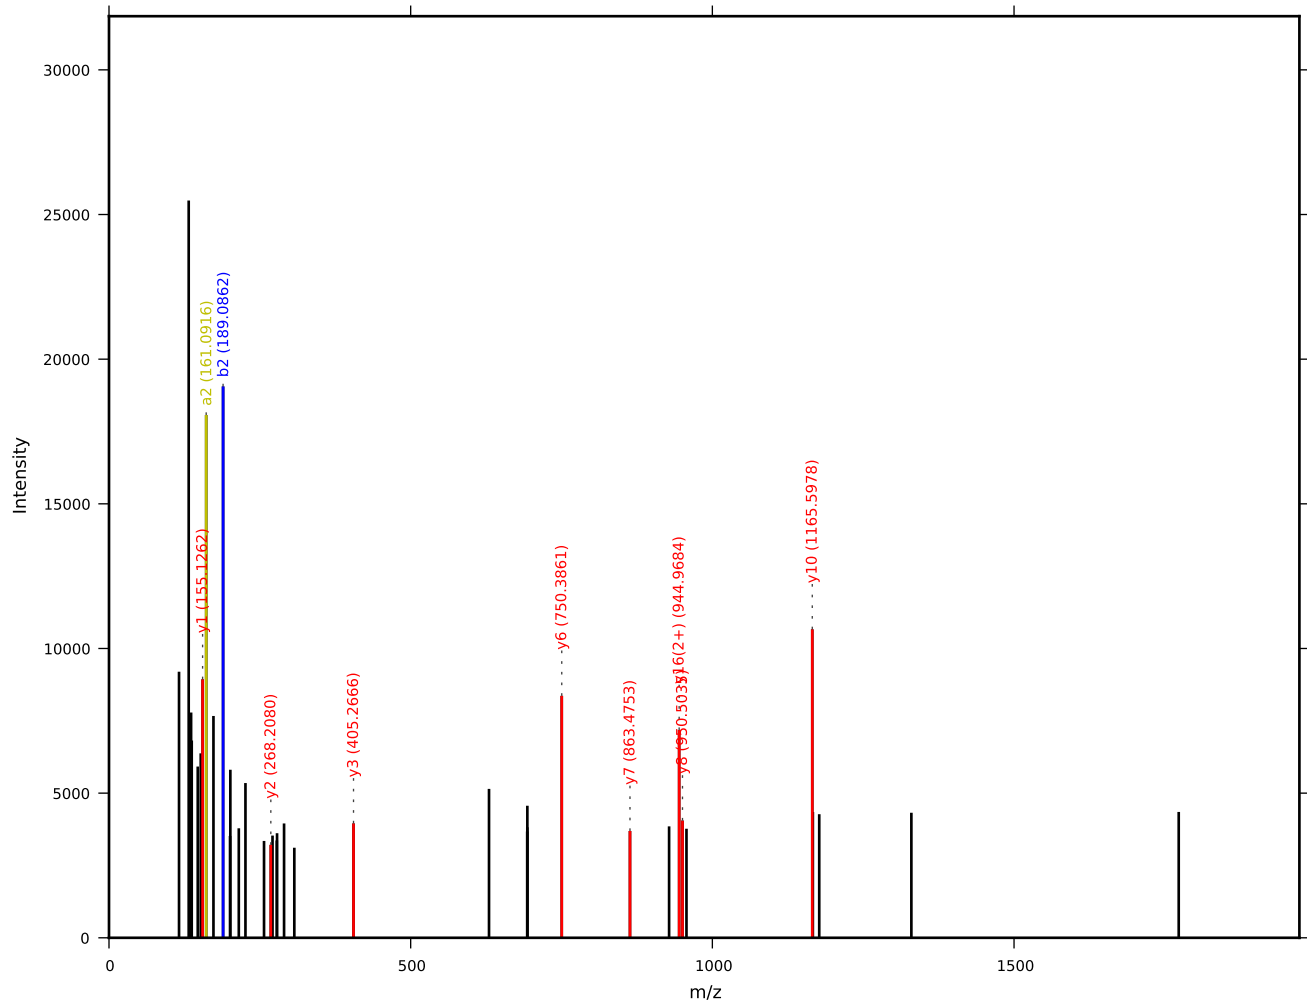

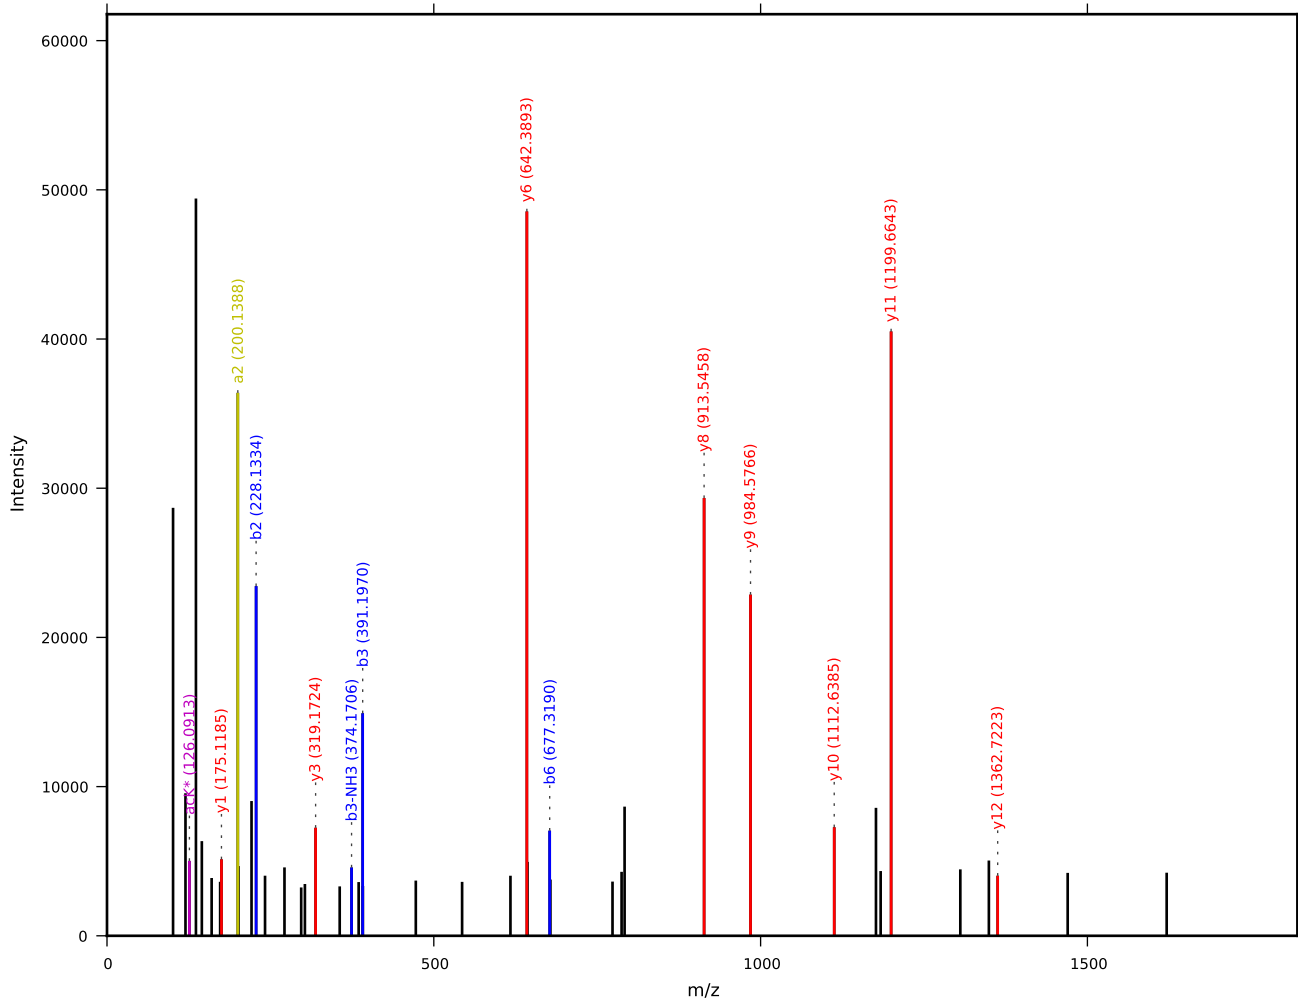

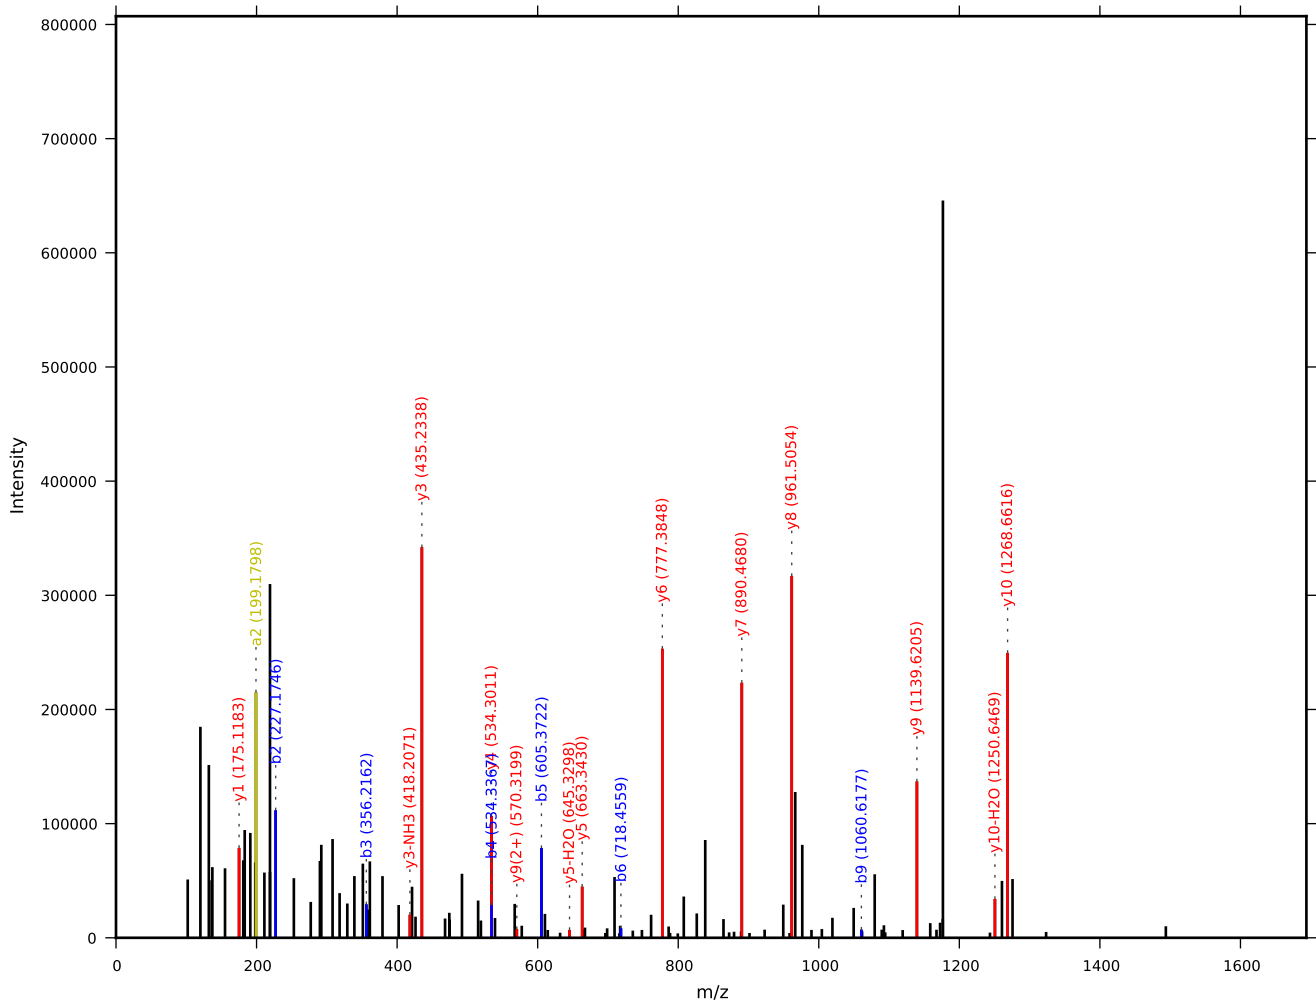

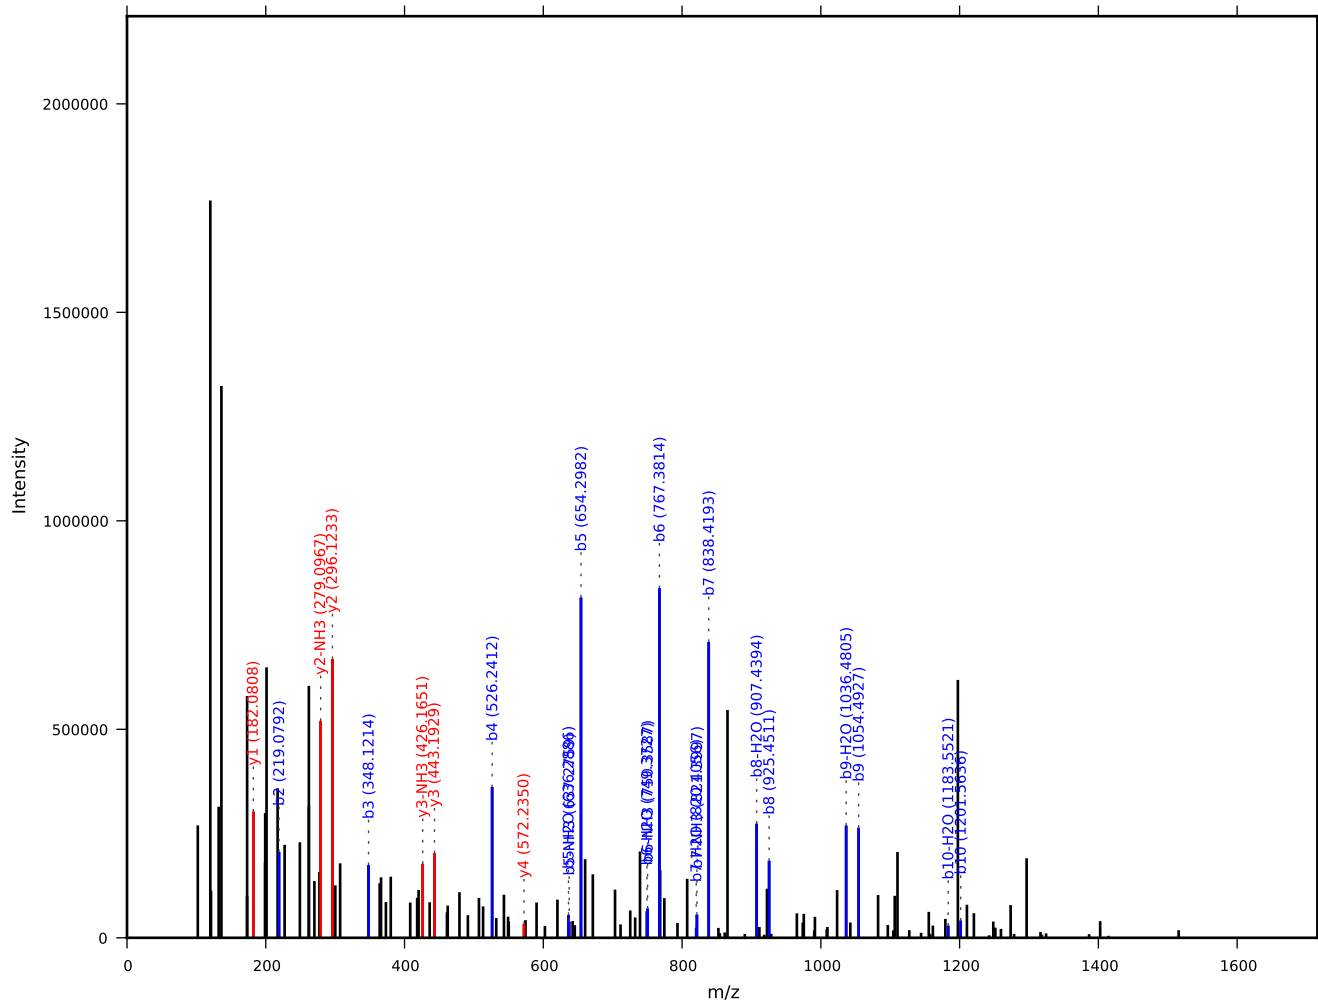

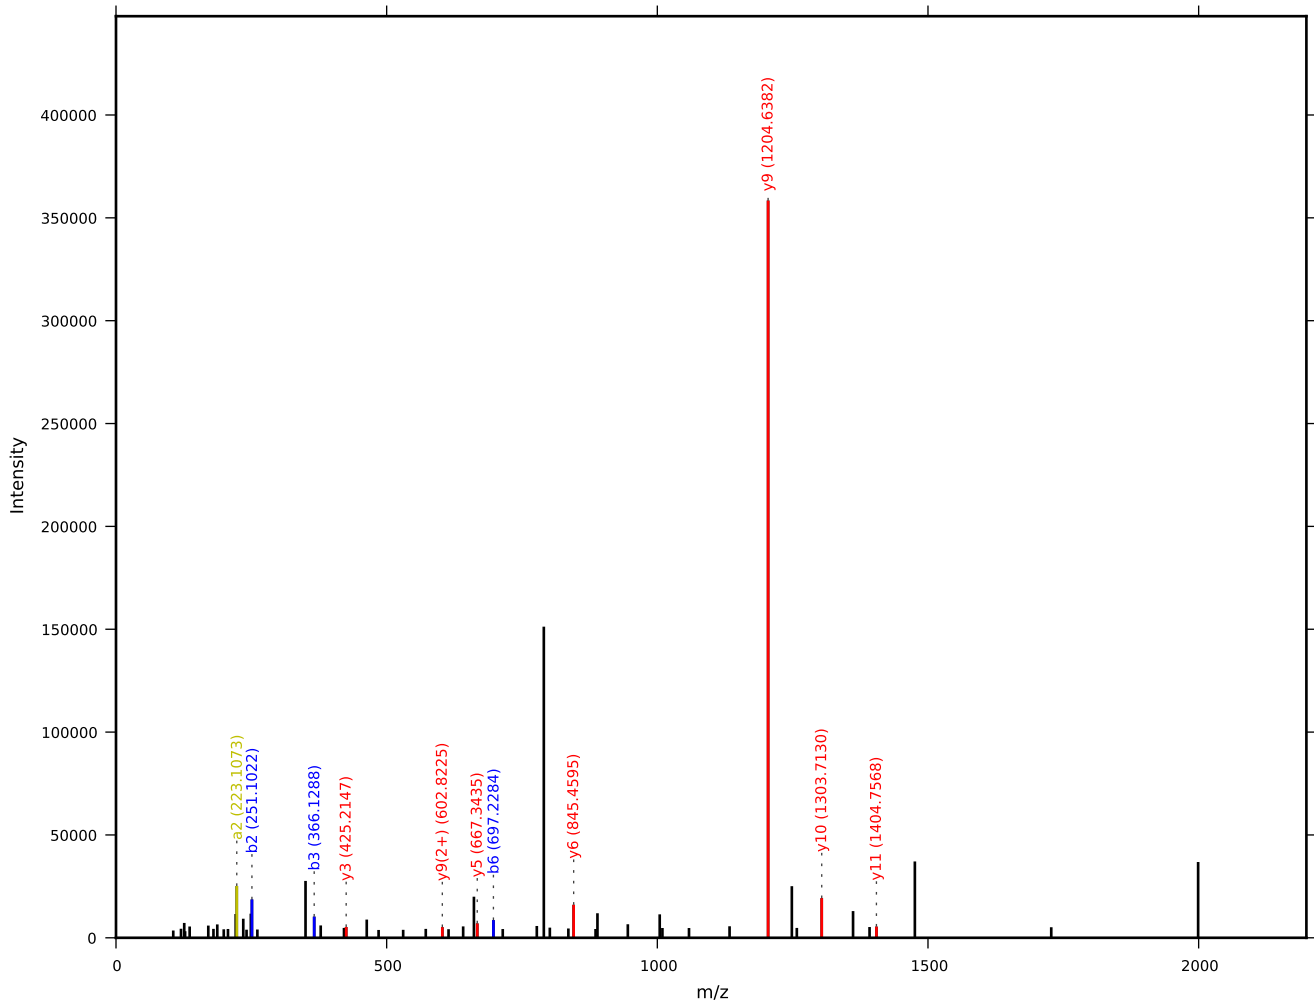

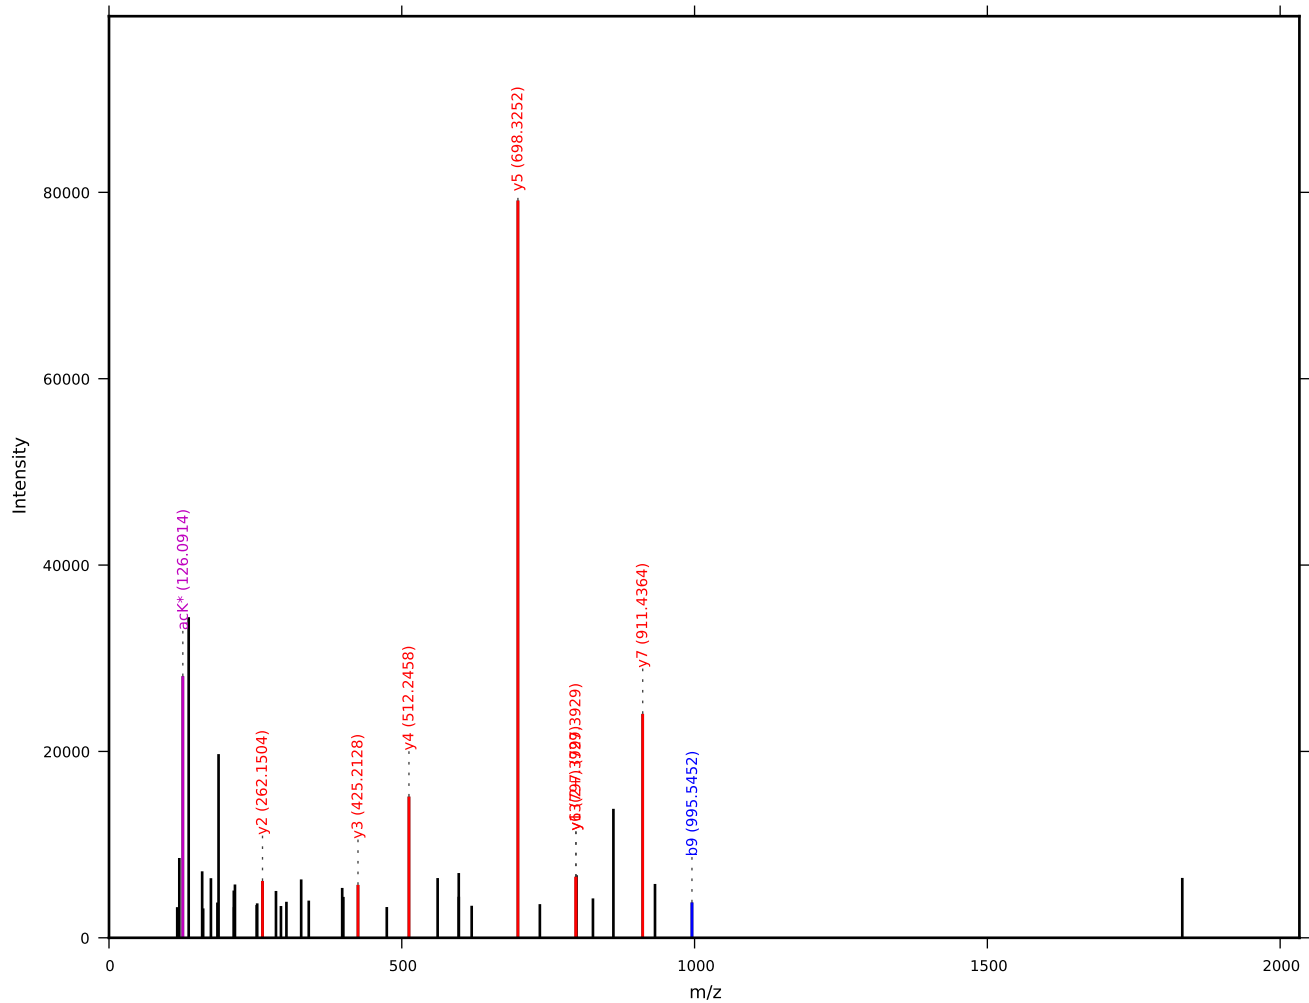



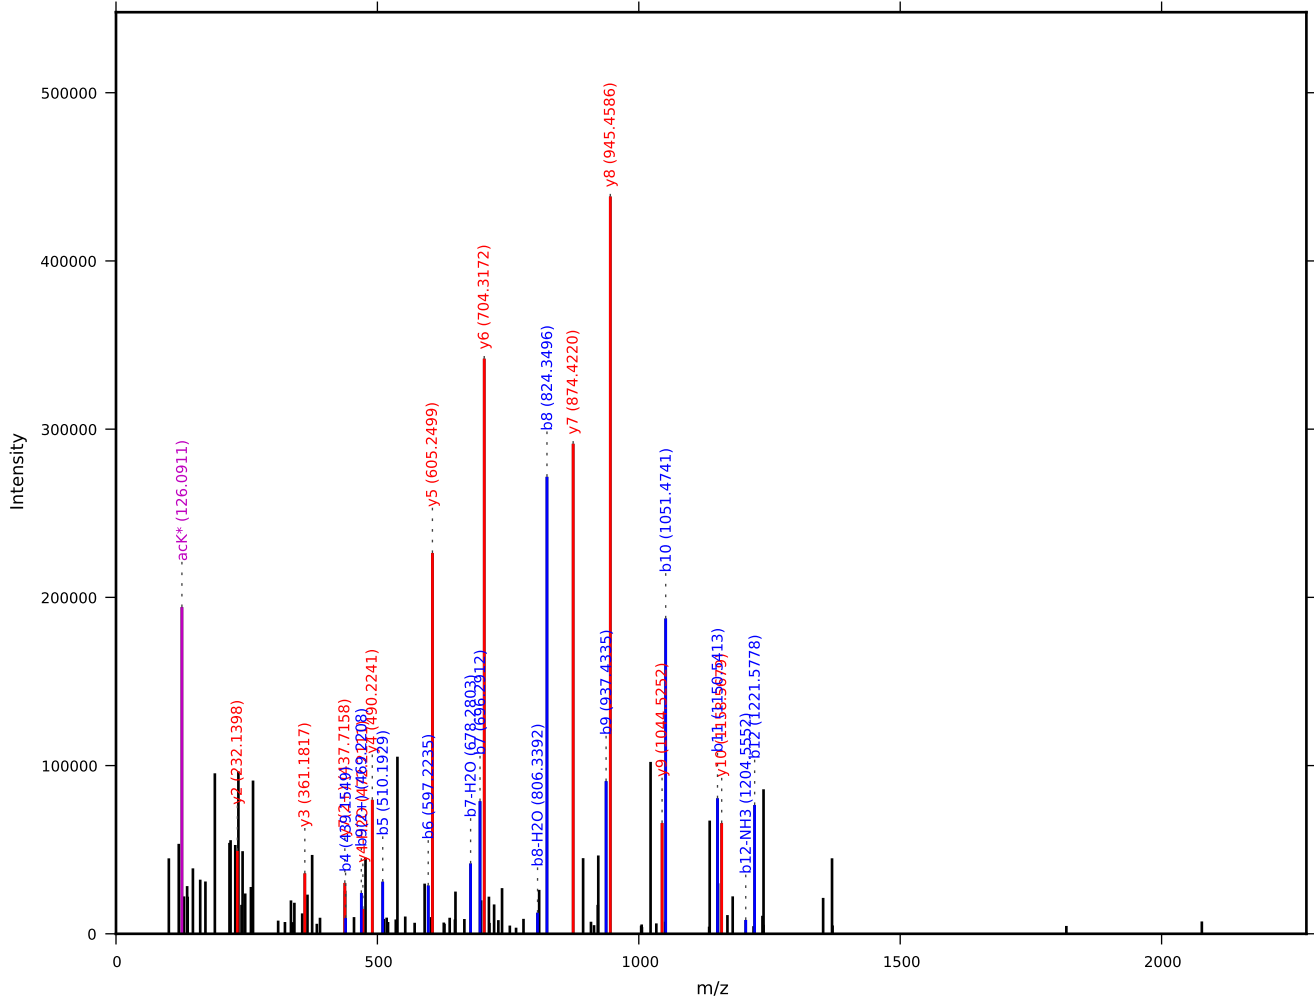

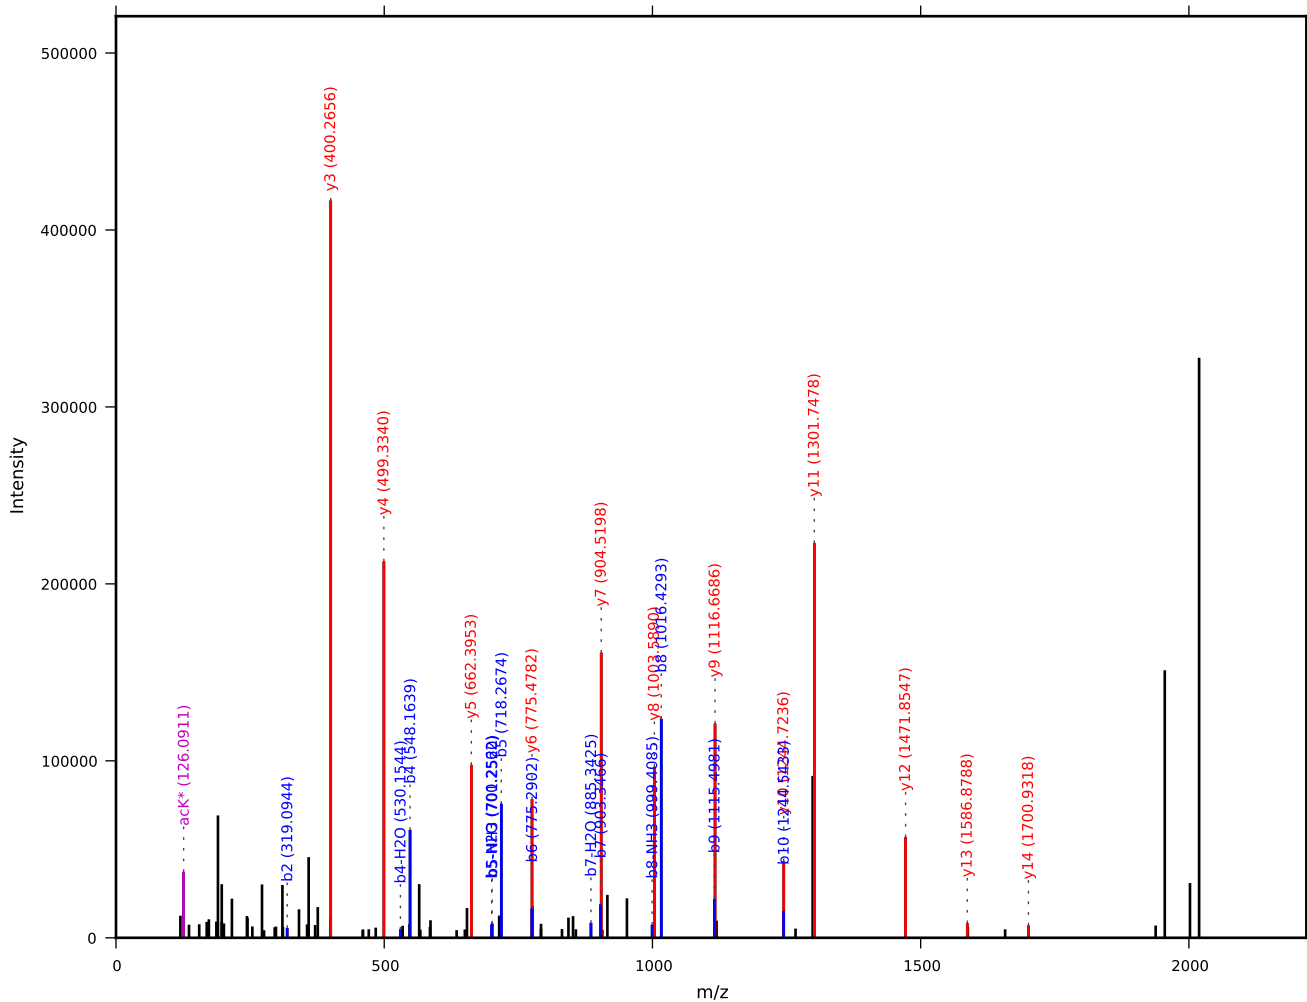

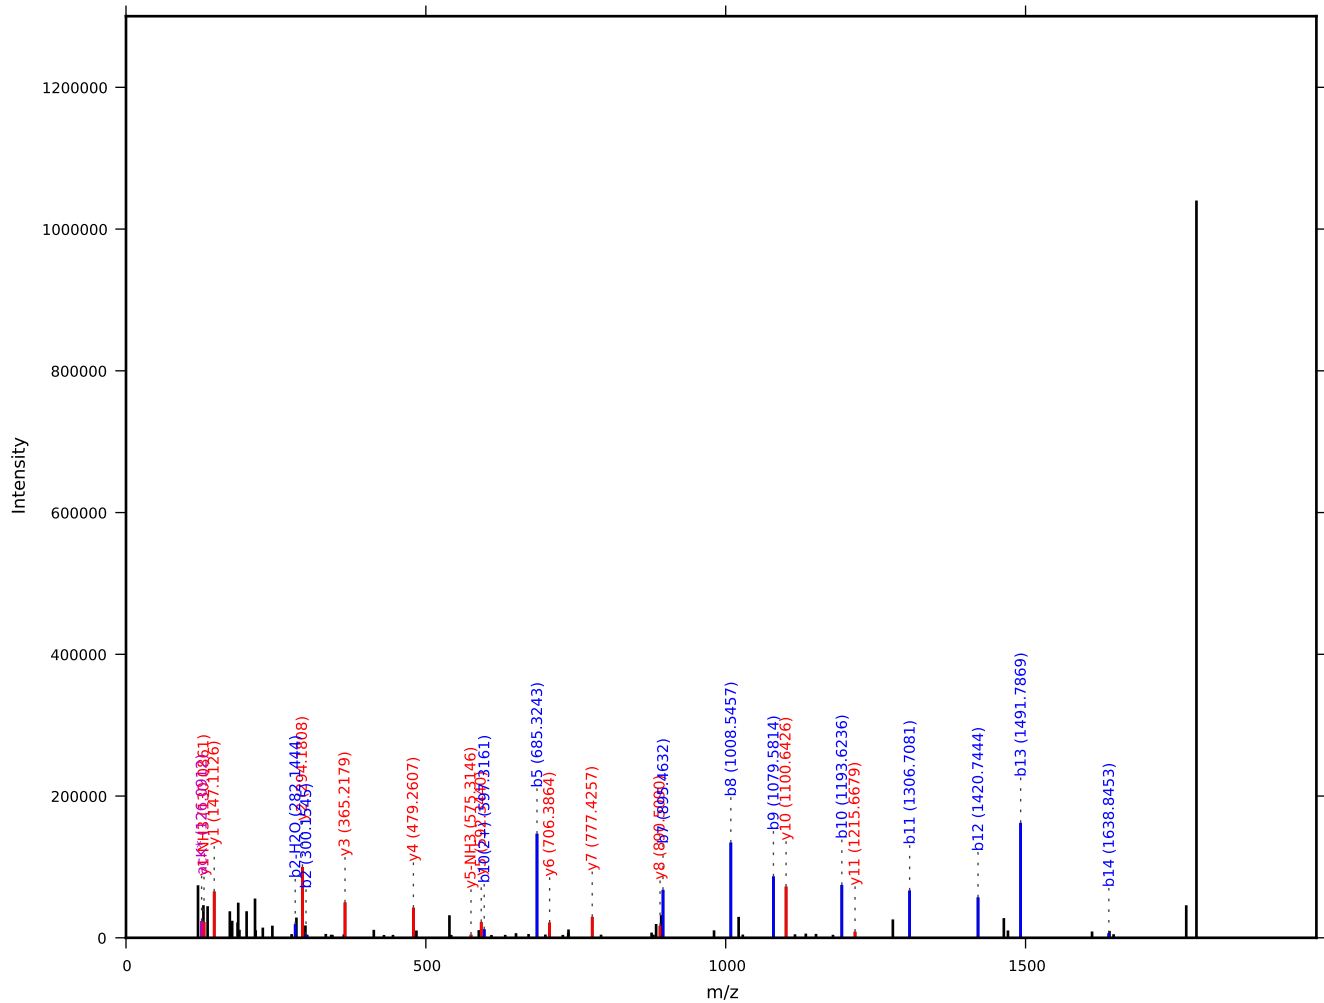

Mass: 1324.7252 Charge: 3 m/z: 442.58233  
Modified Peptide: \_EFLK(ac)HIINNR\_ Score: 43.512 PEP: 0.0028425

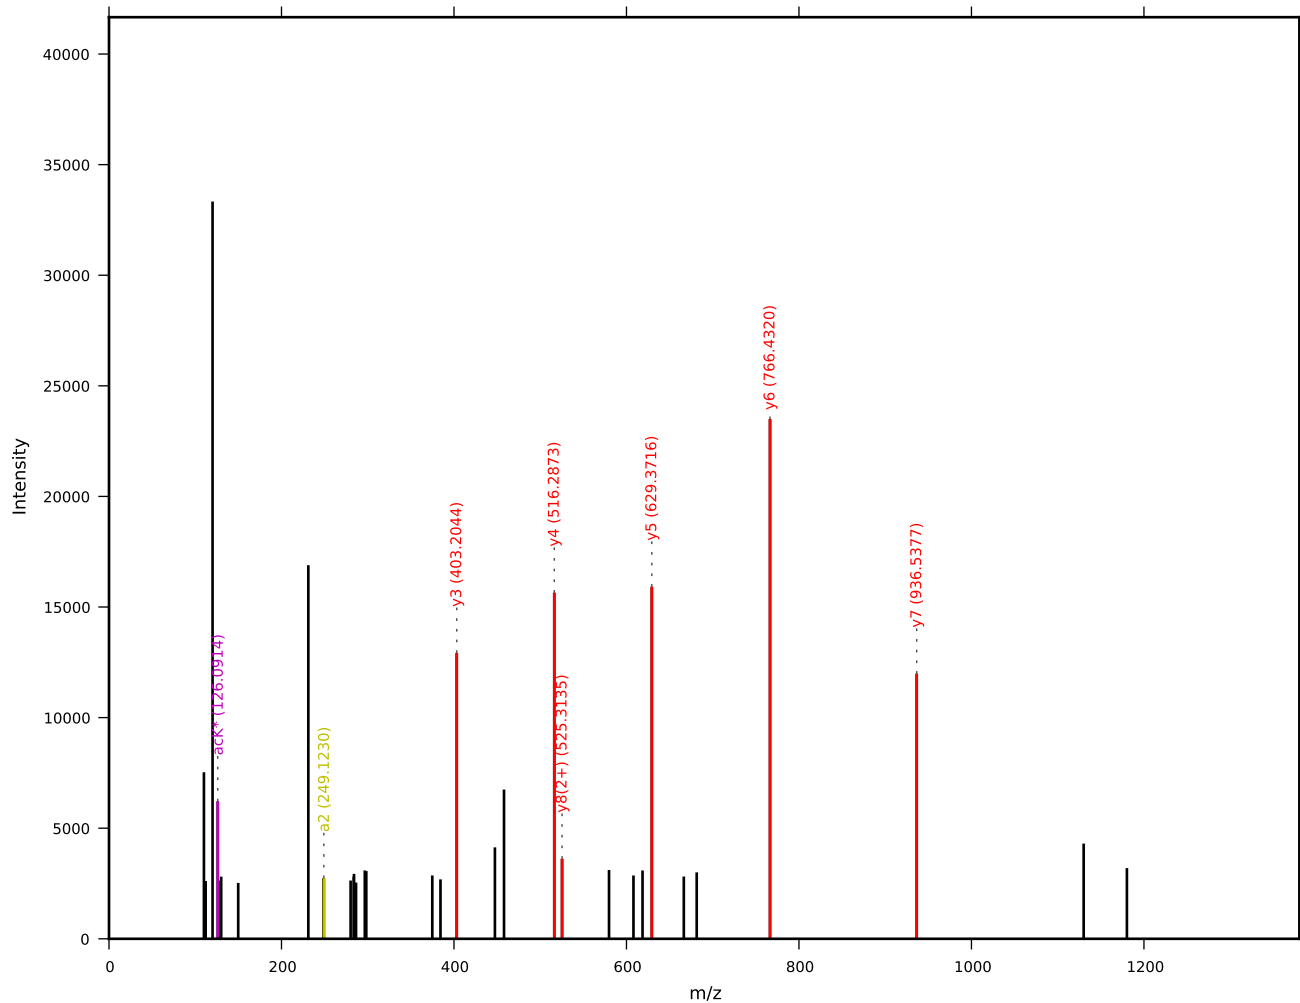

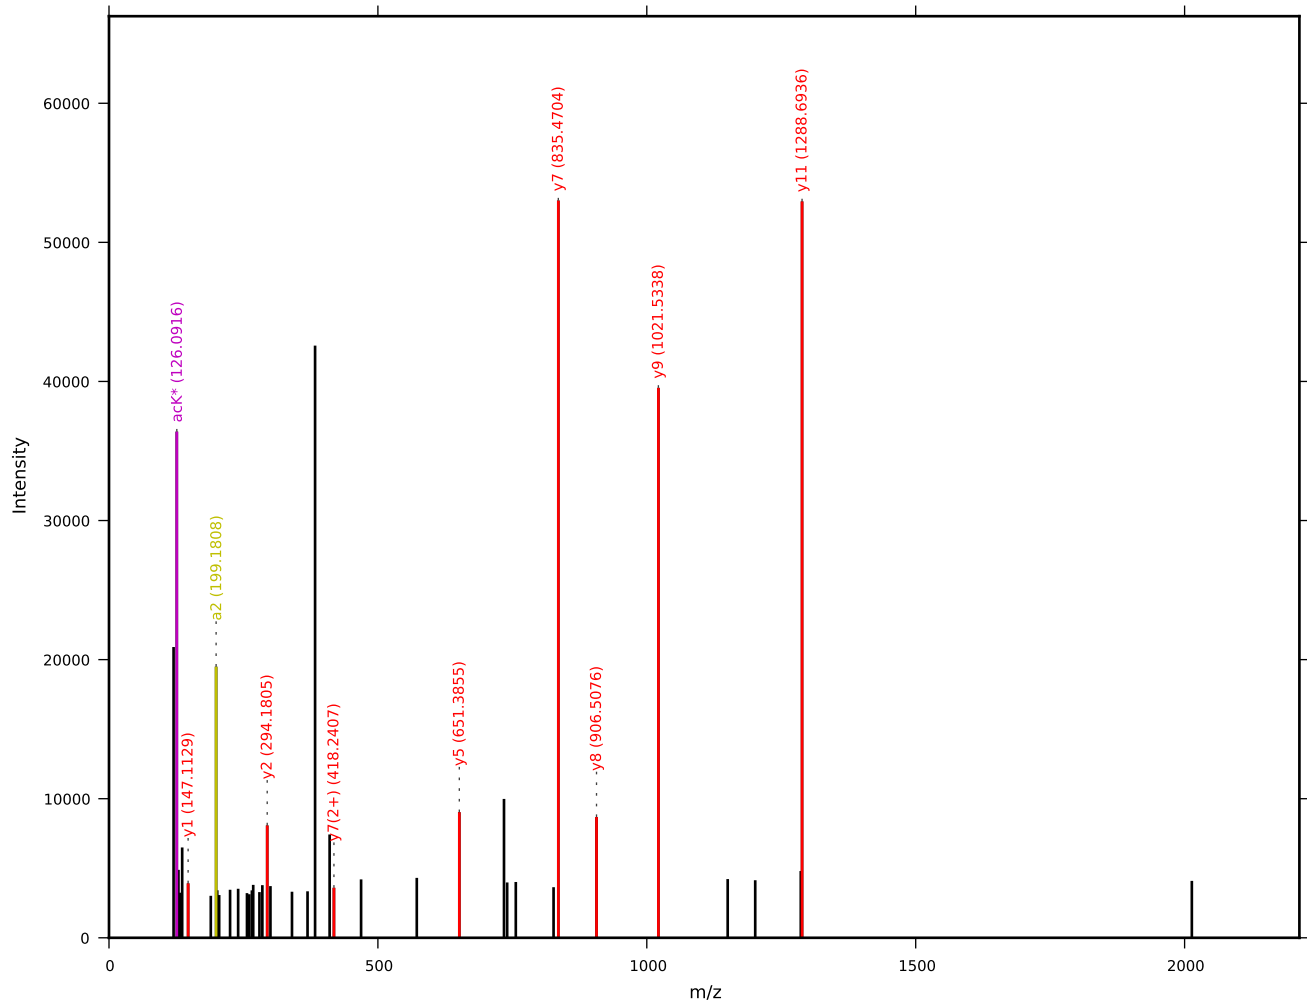

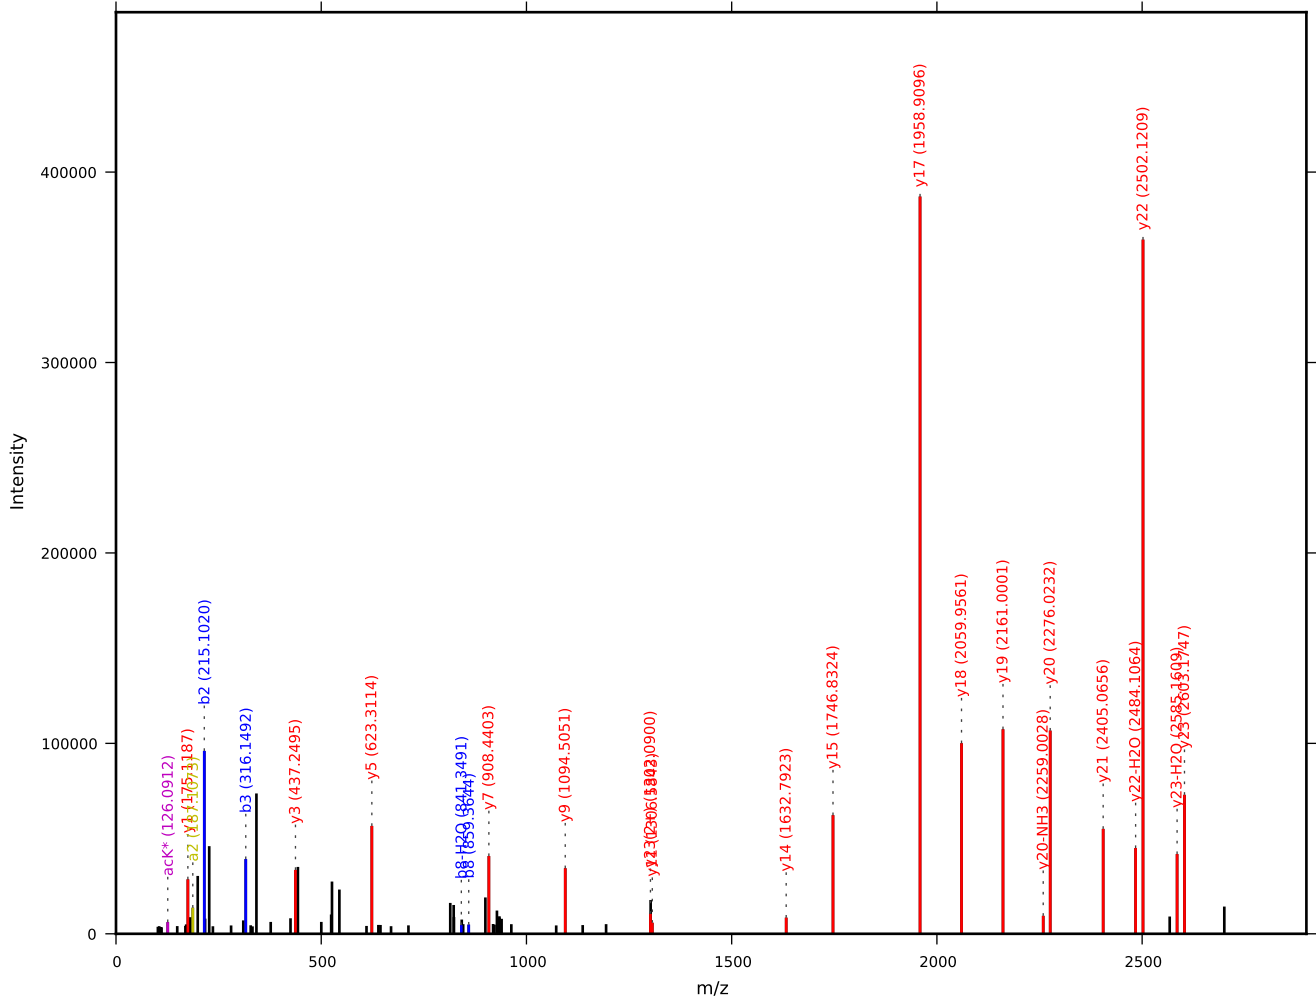

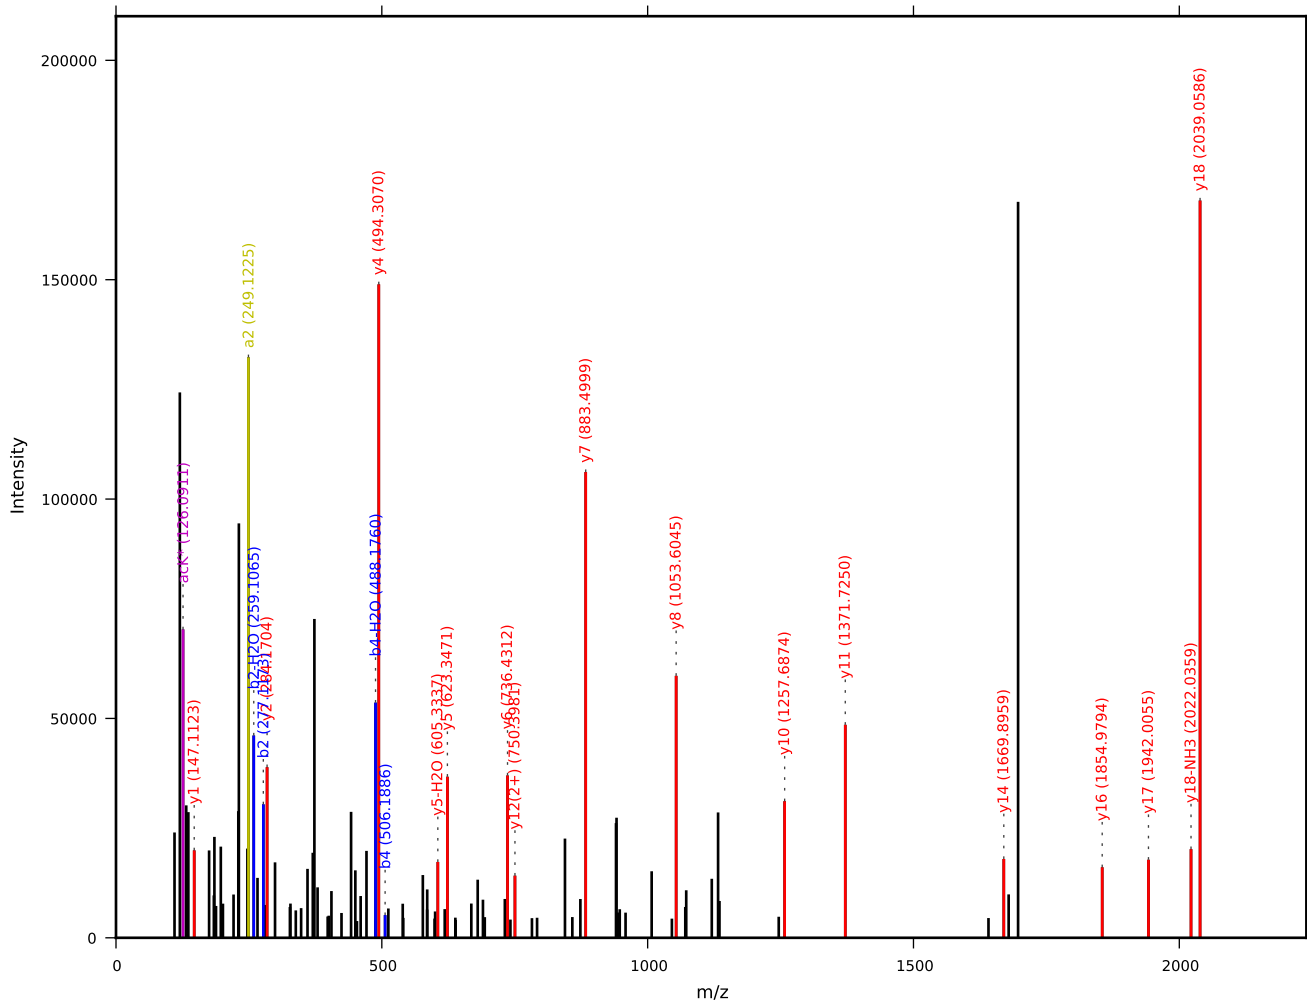

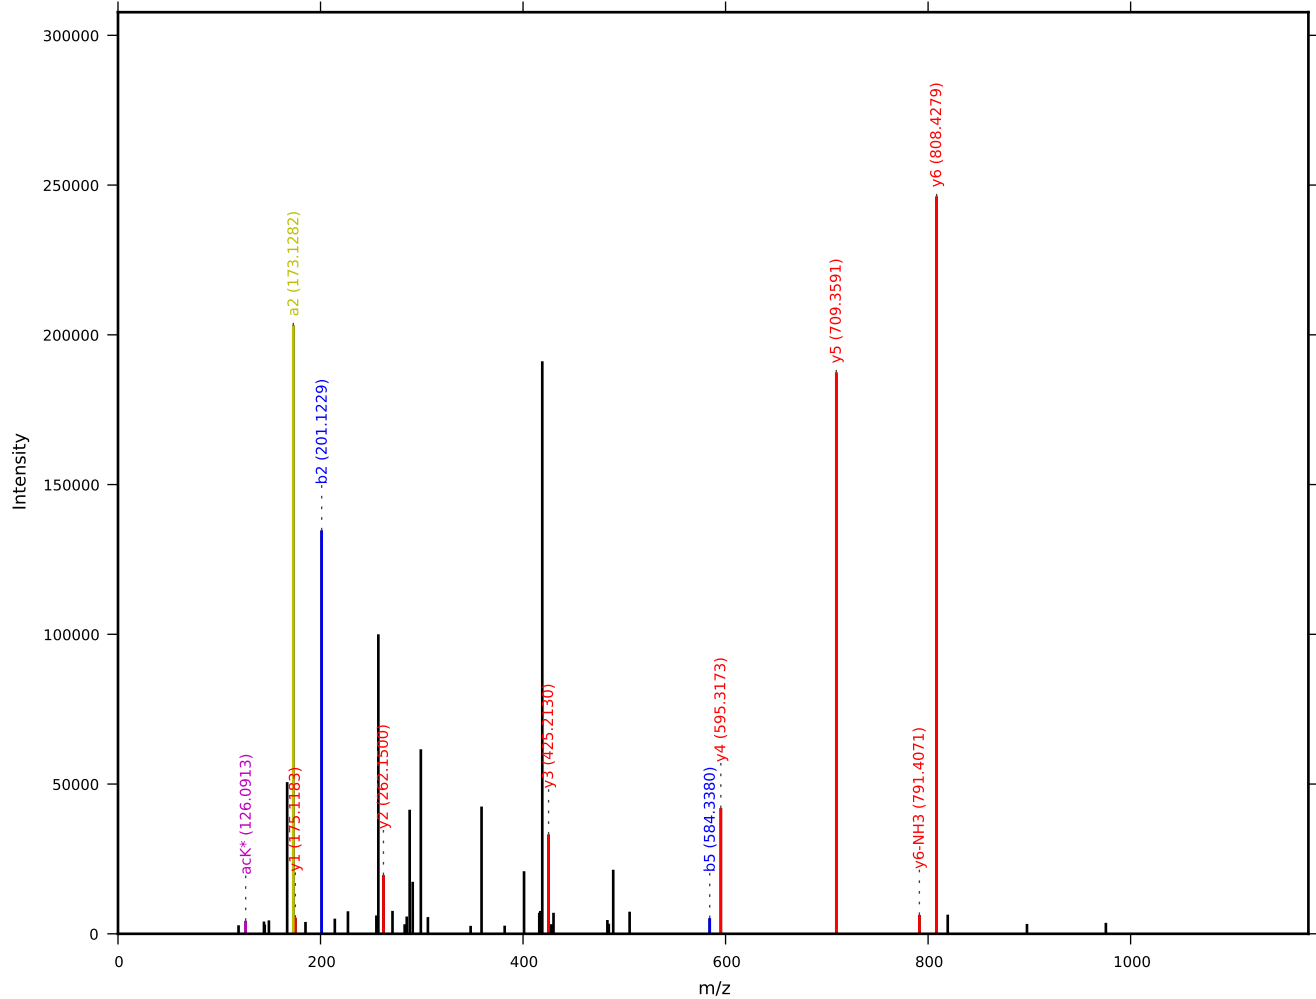



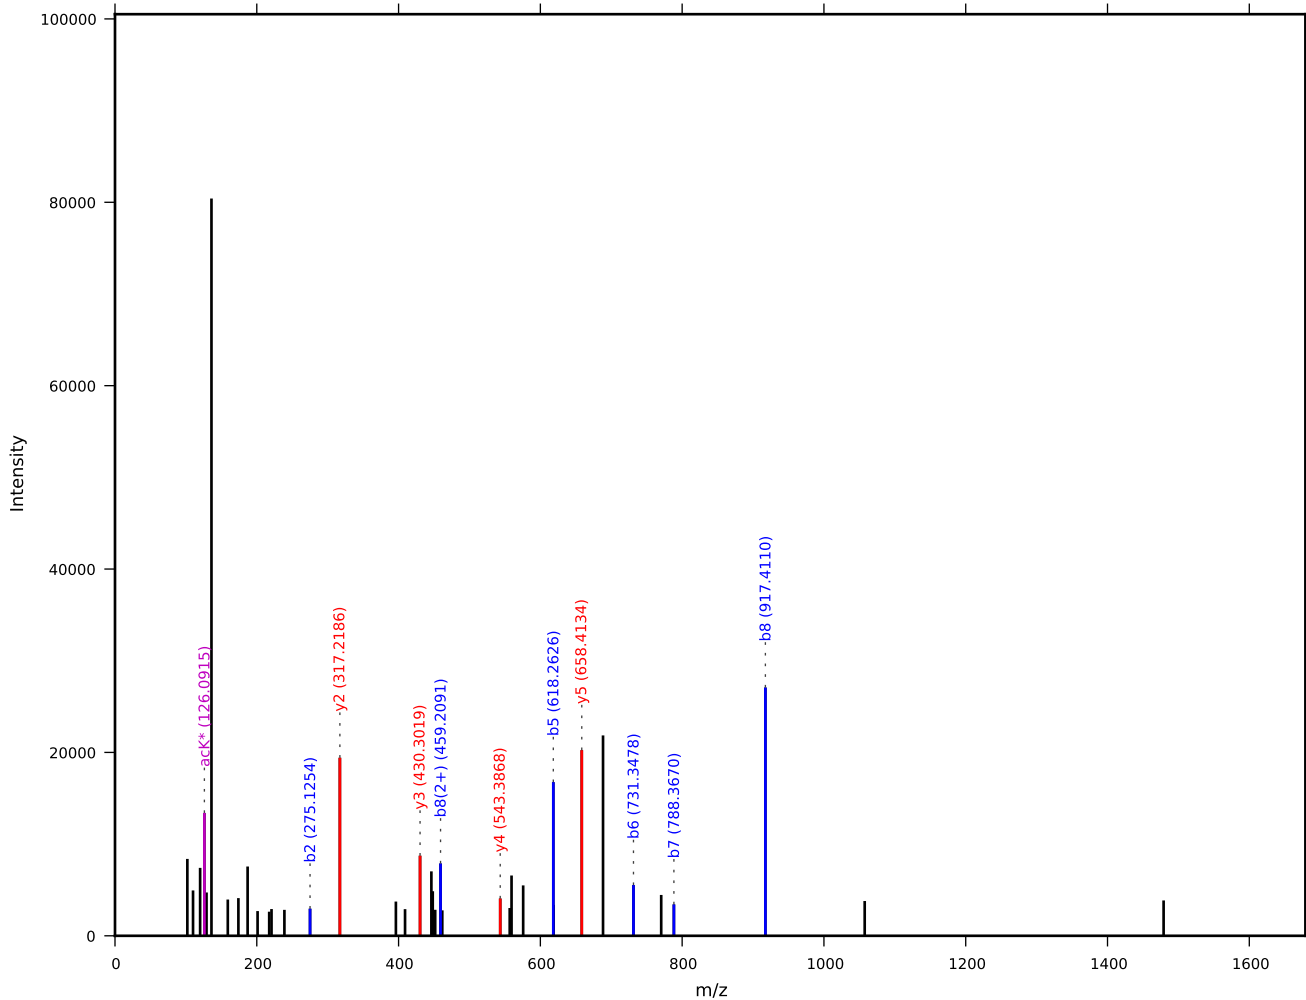

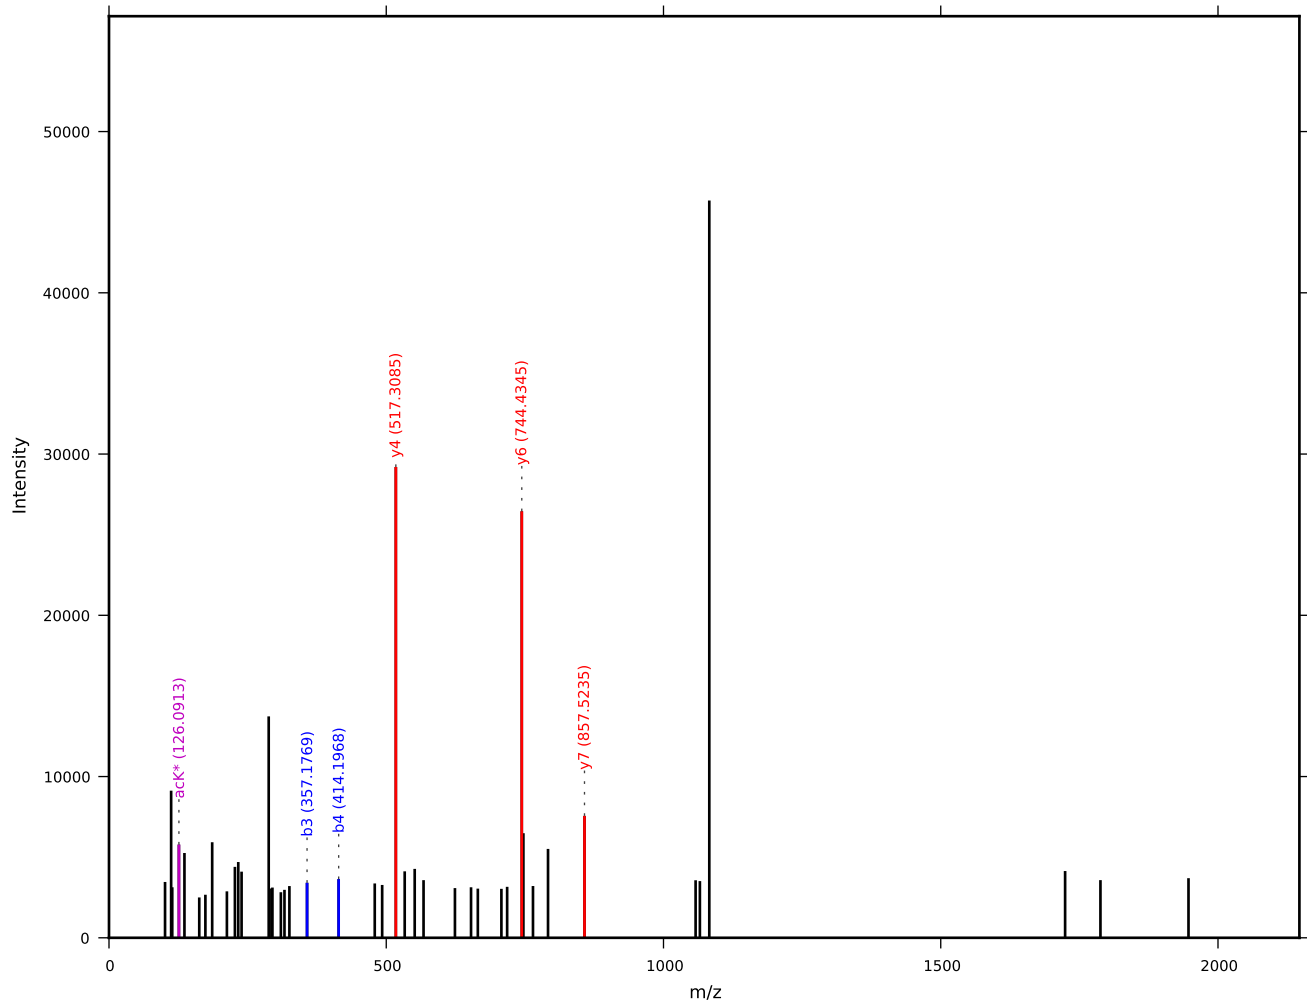

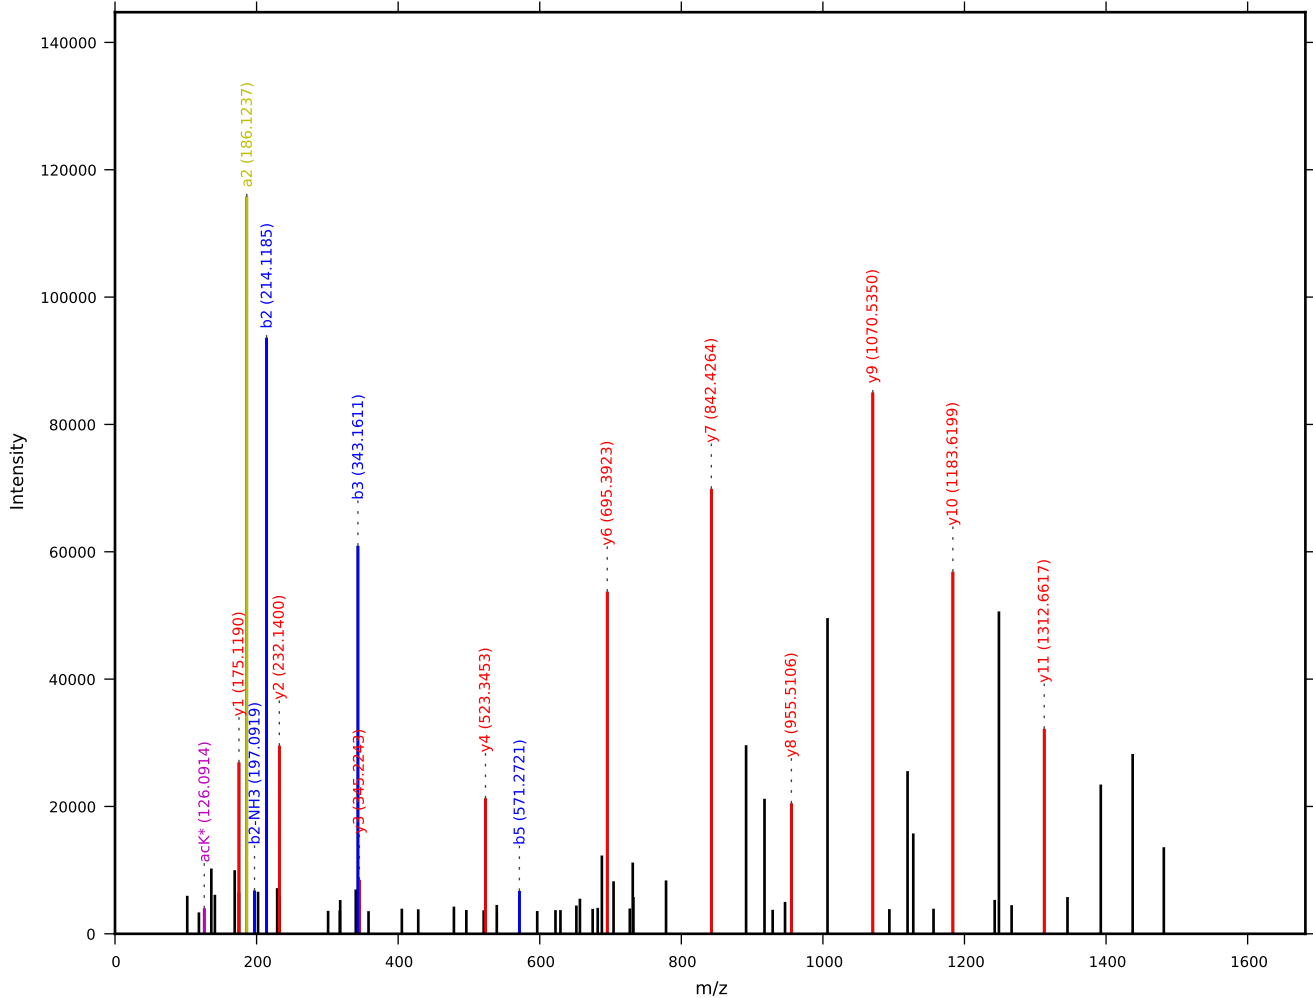

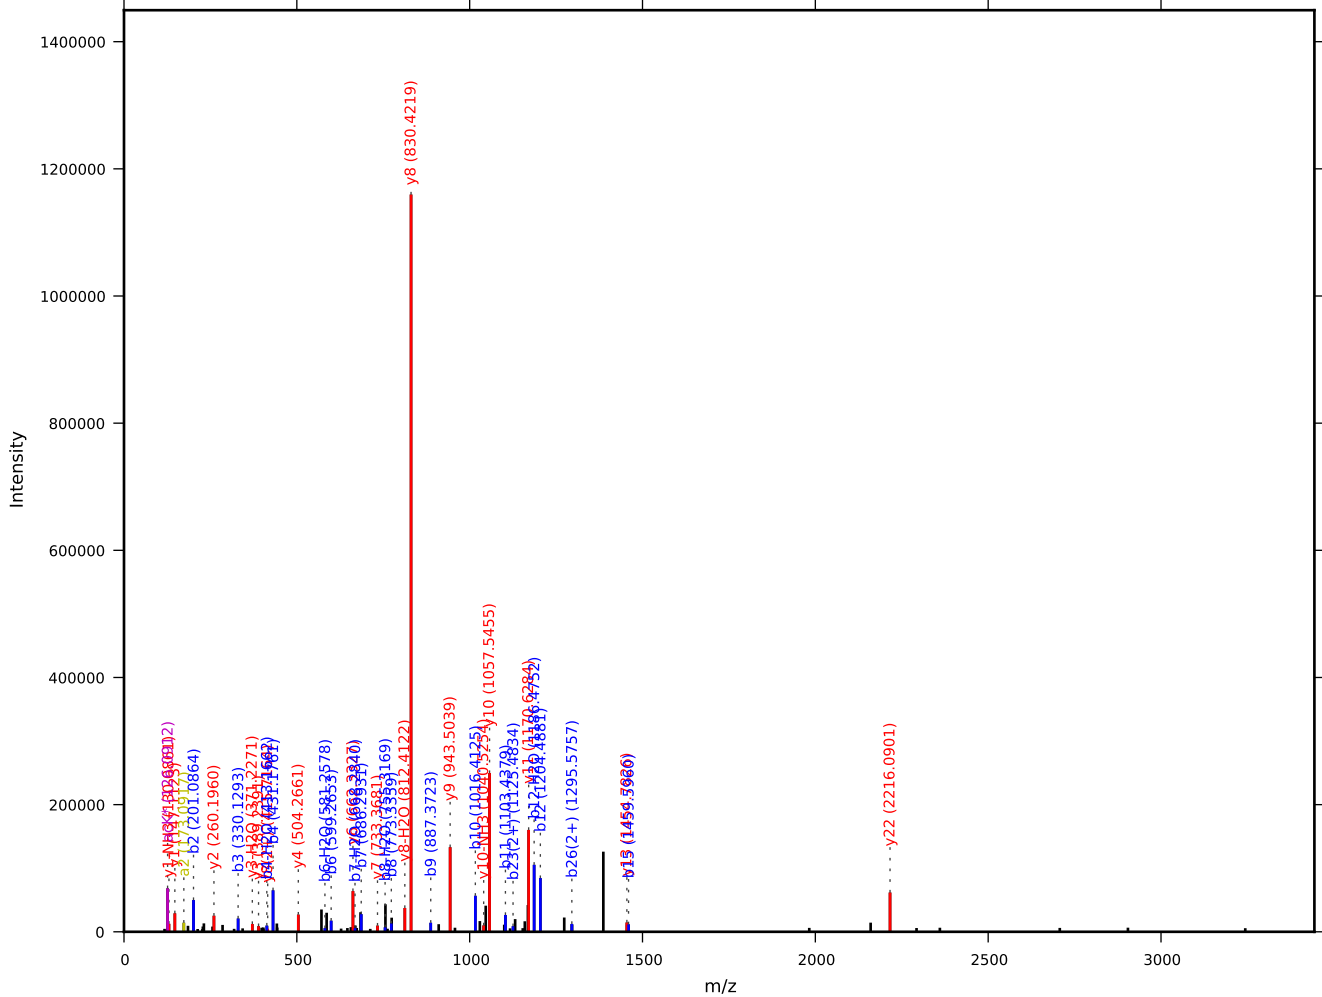

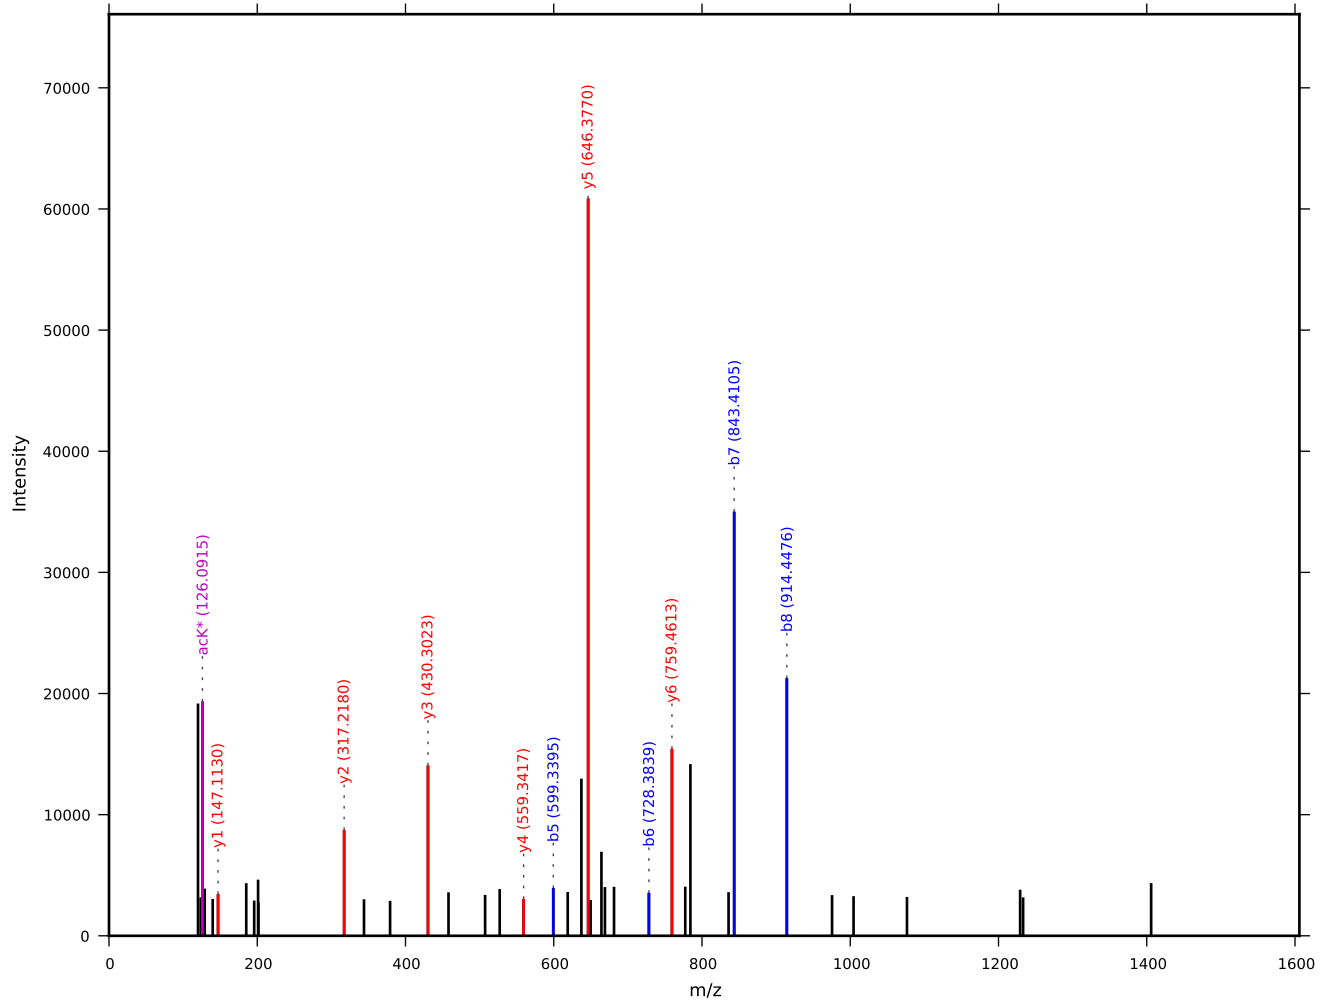

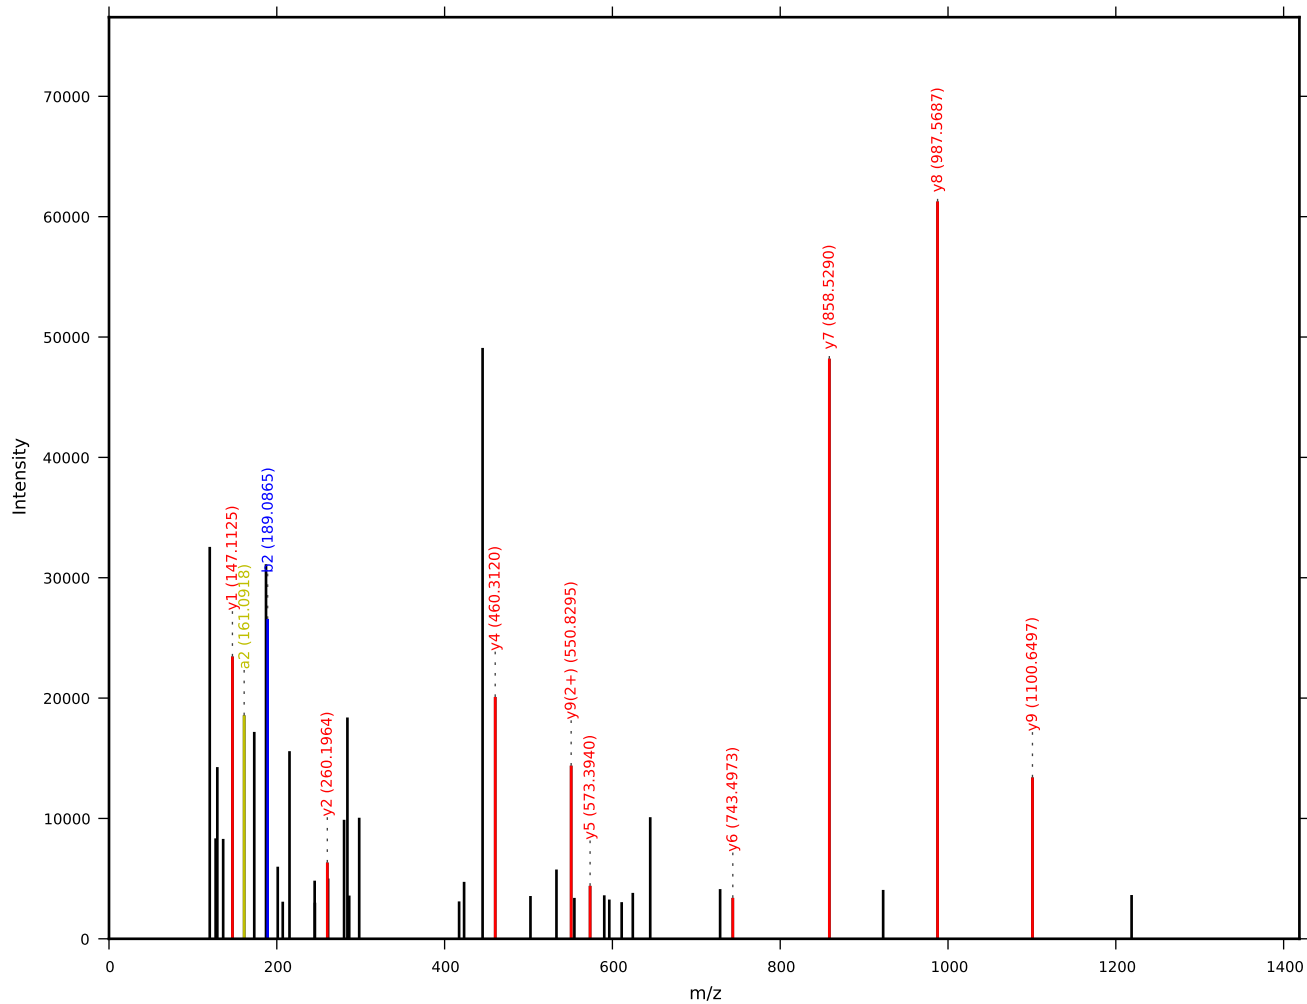

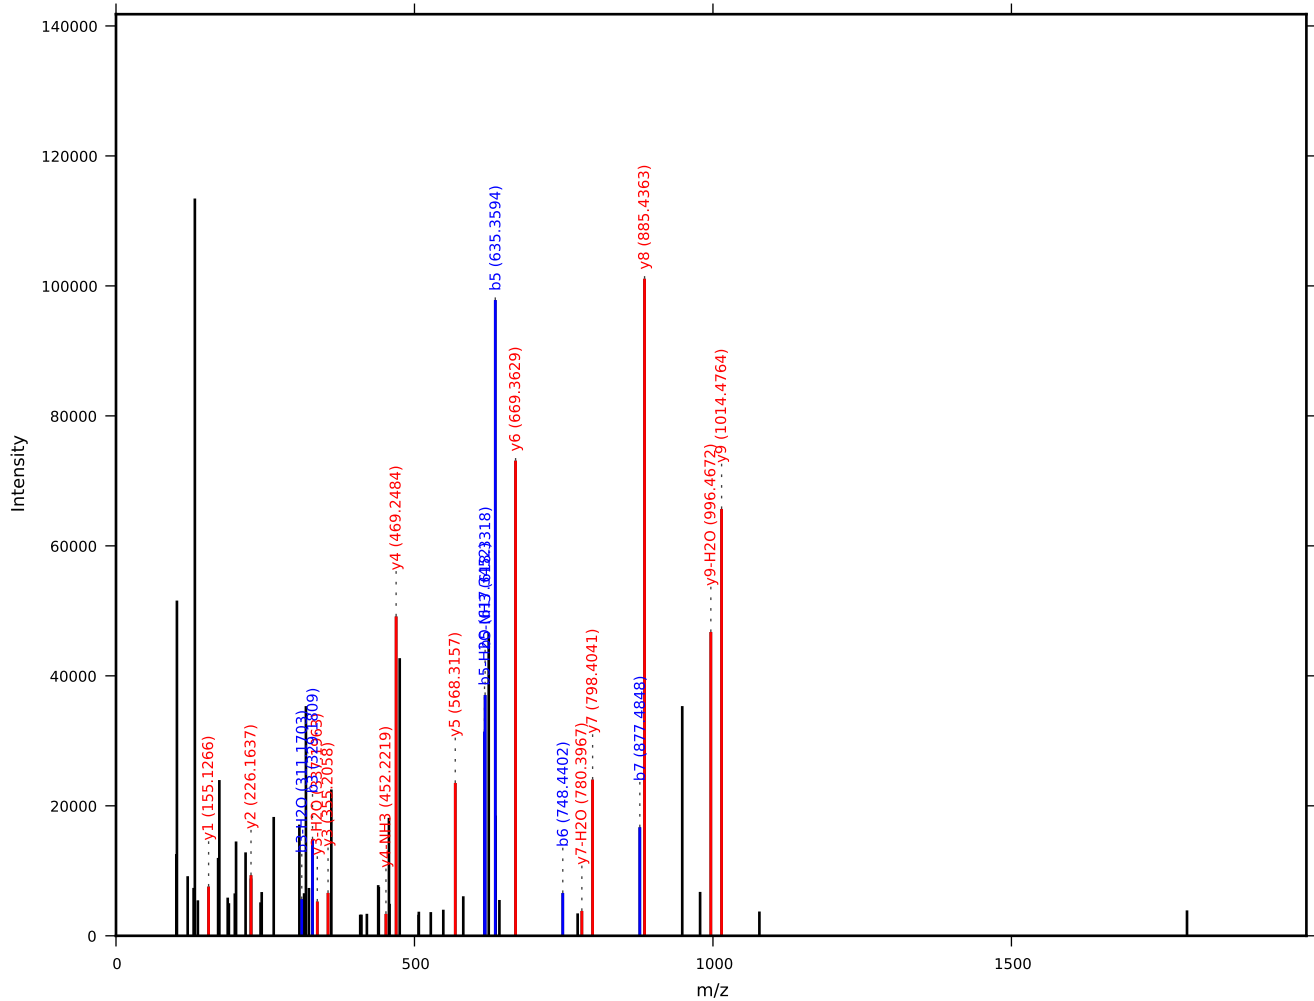

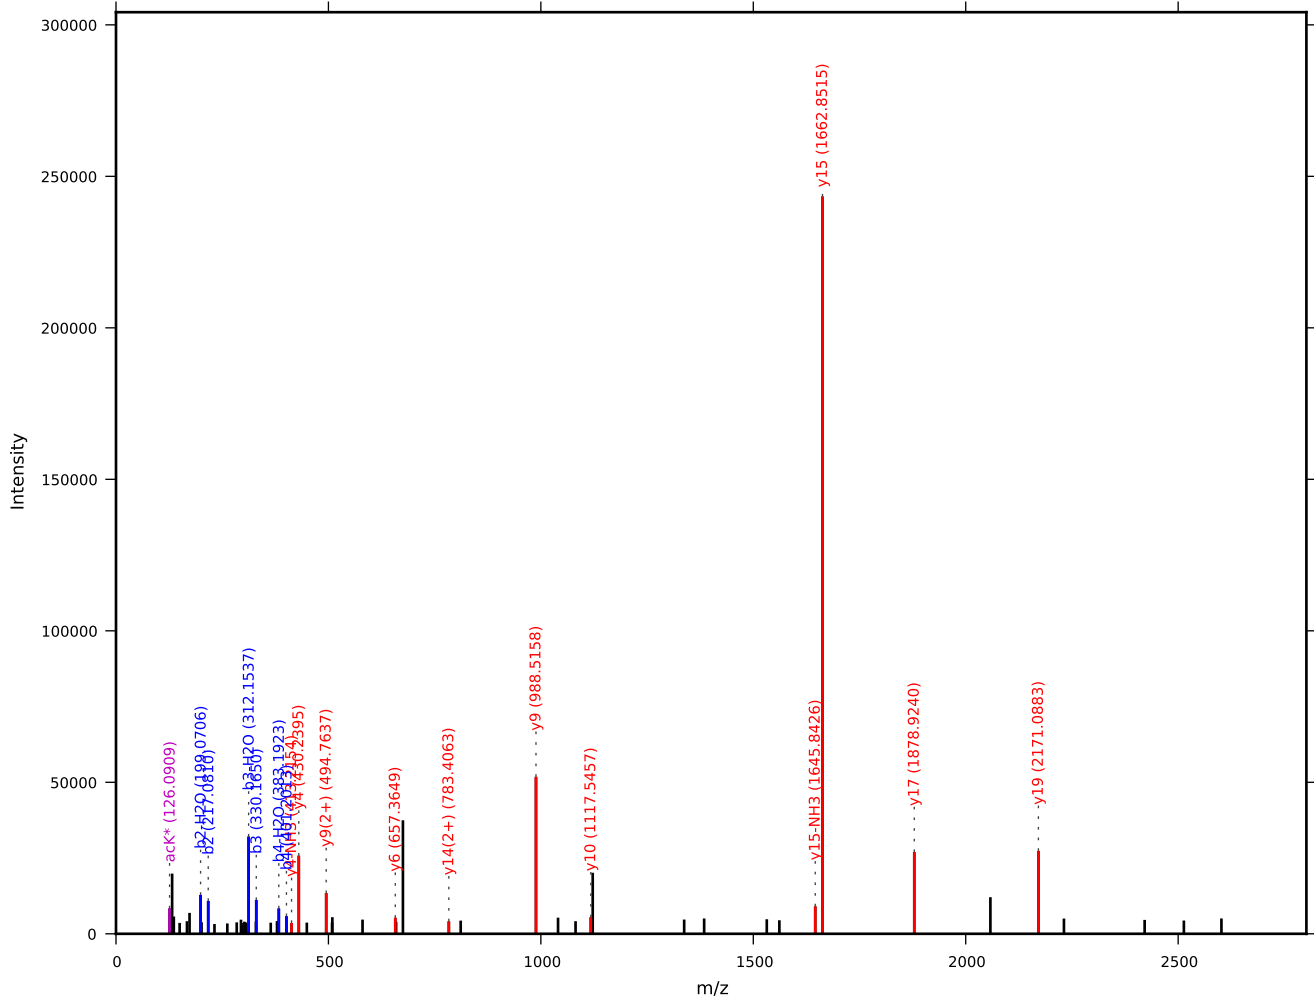



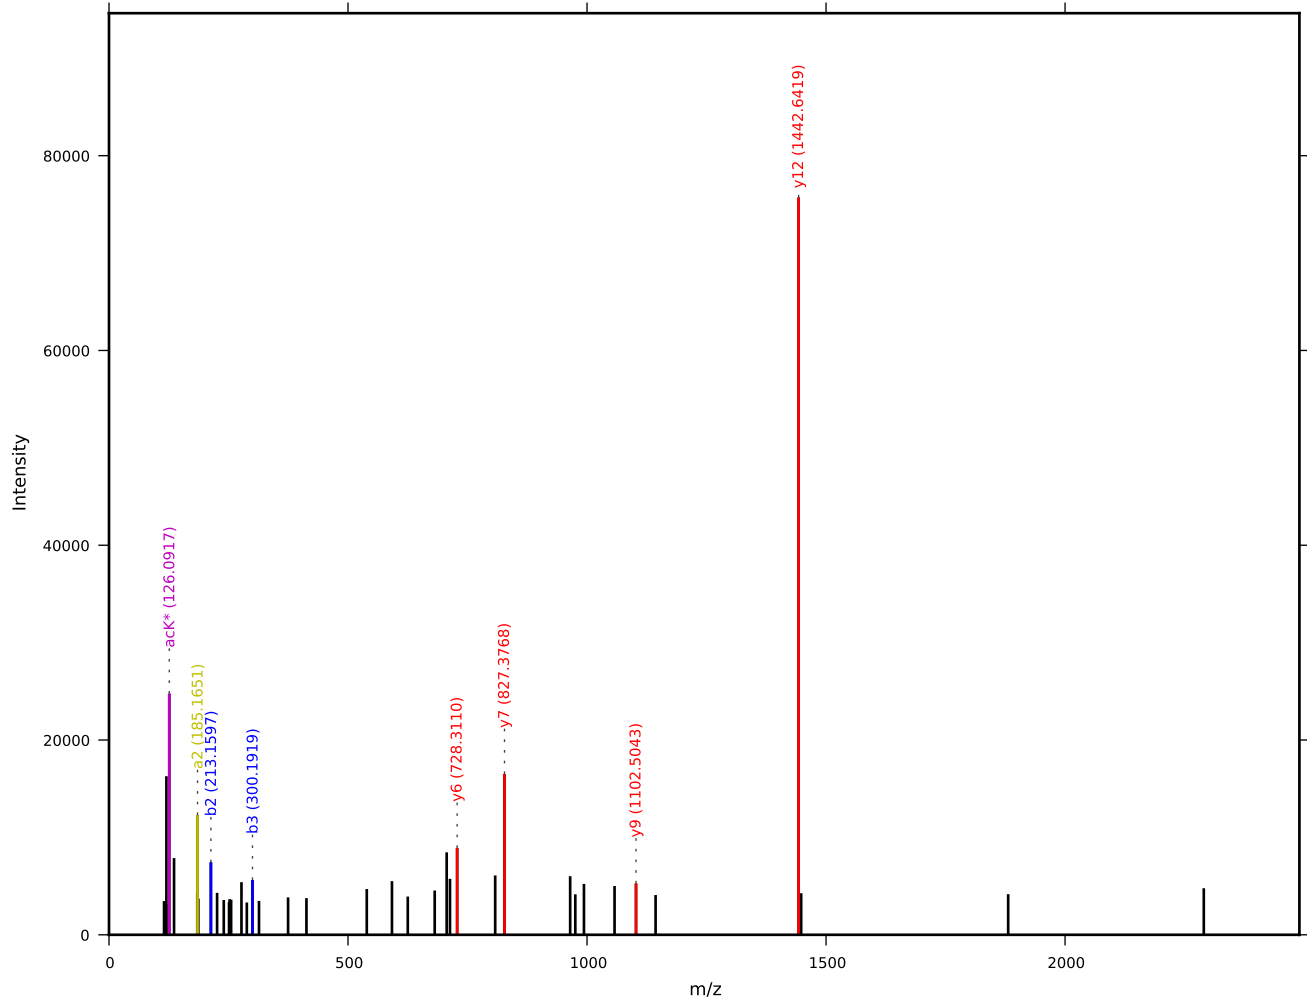

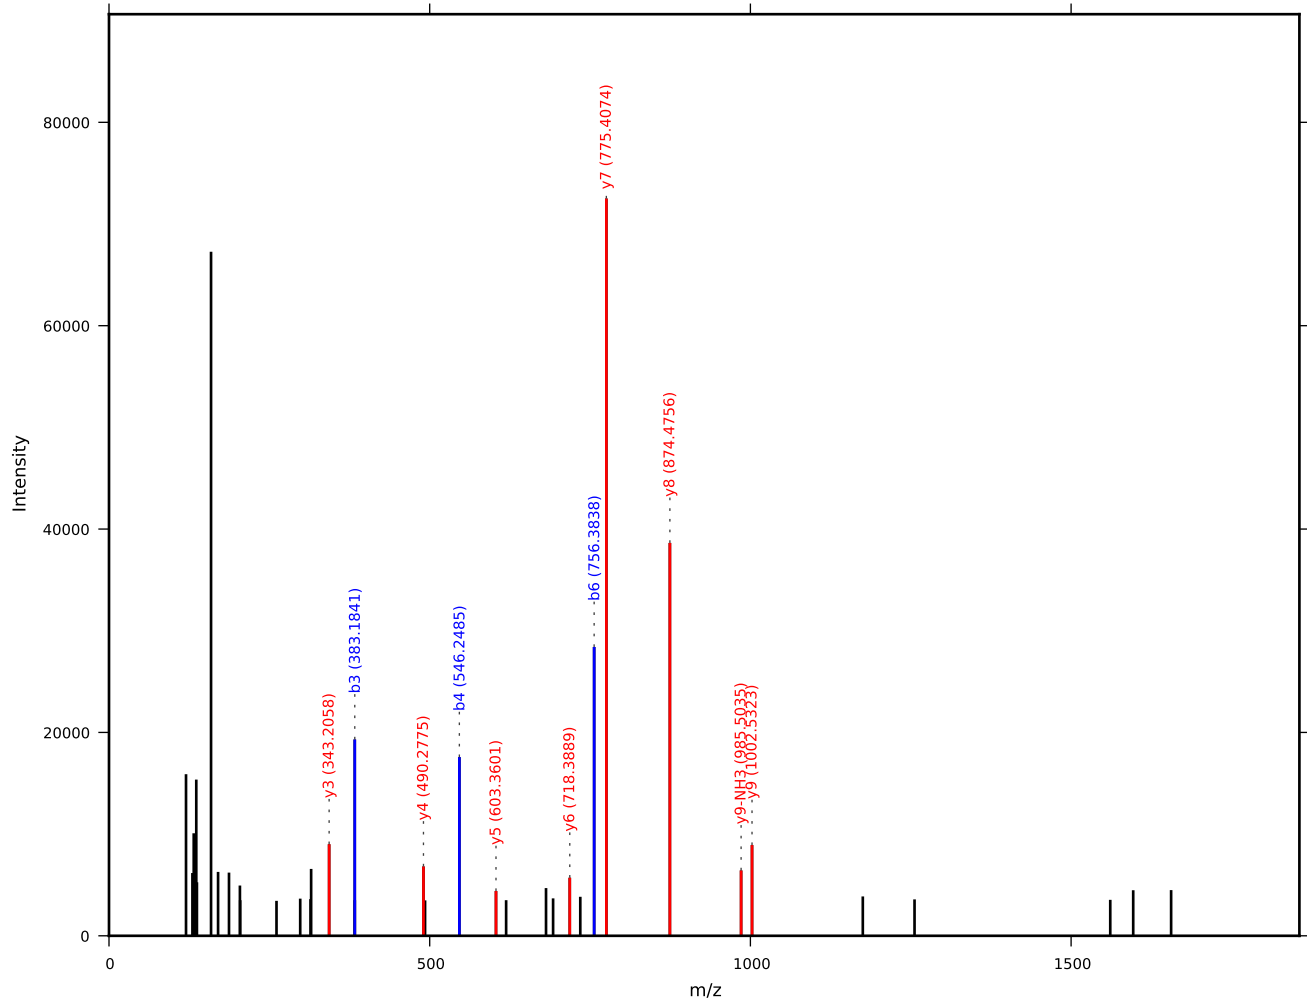

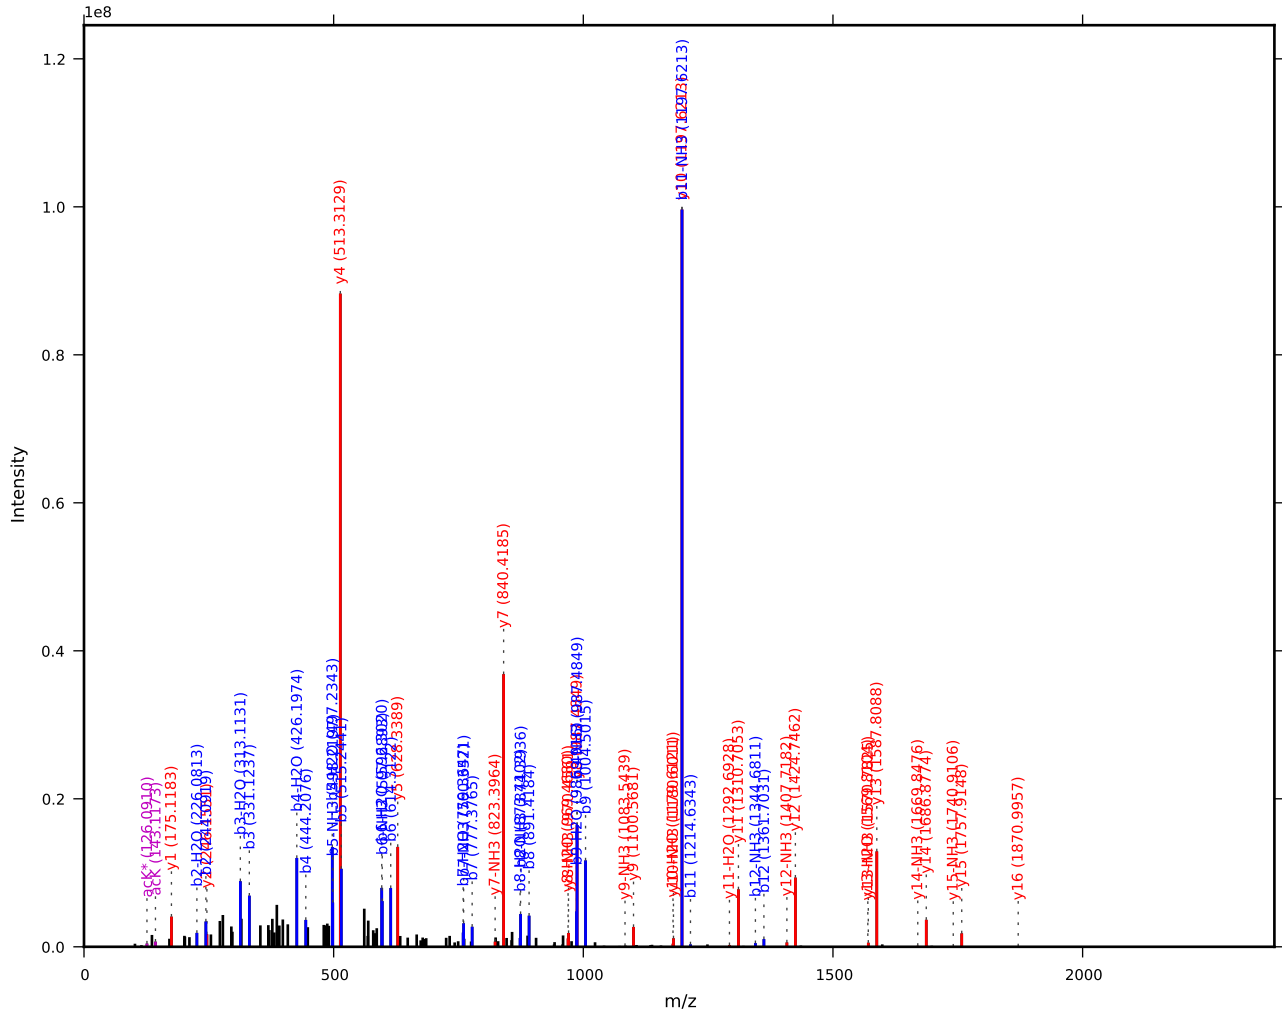

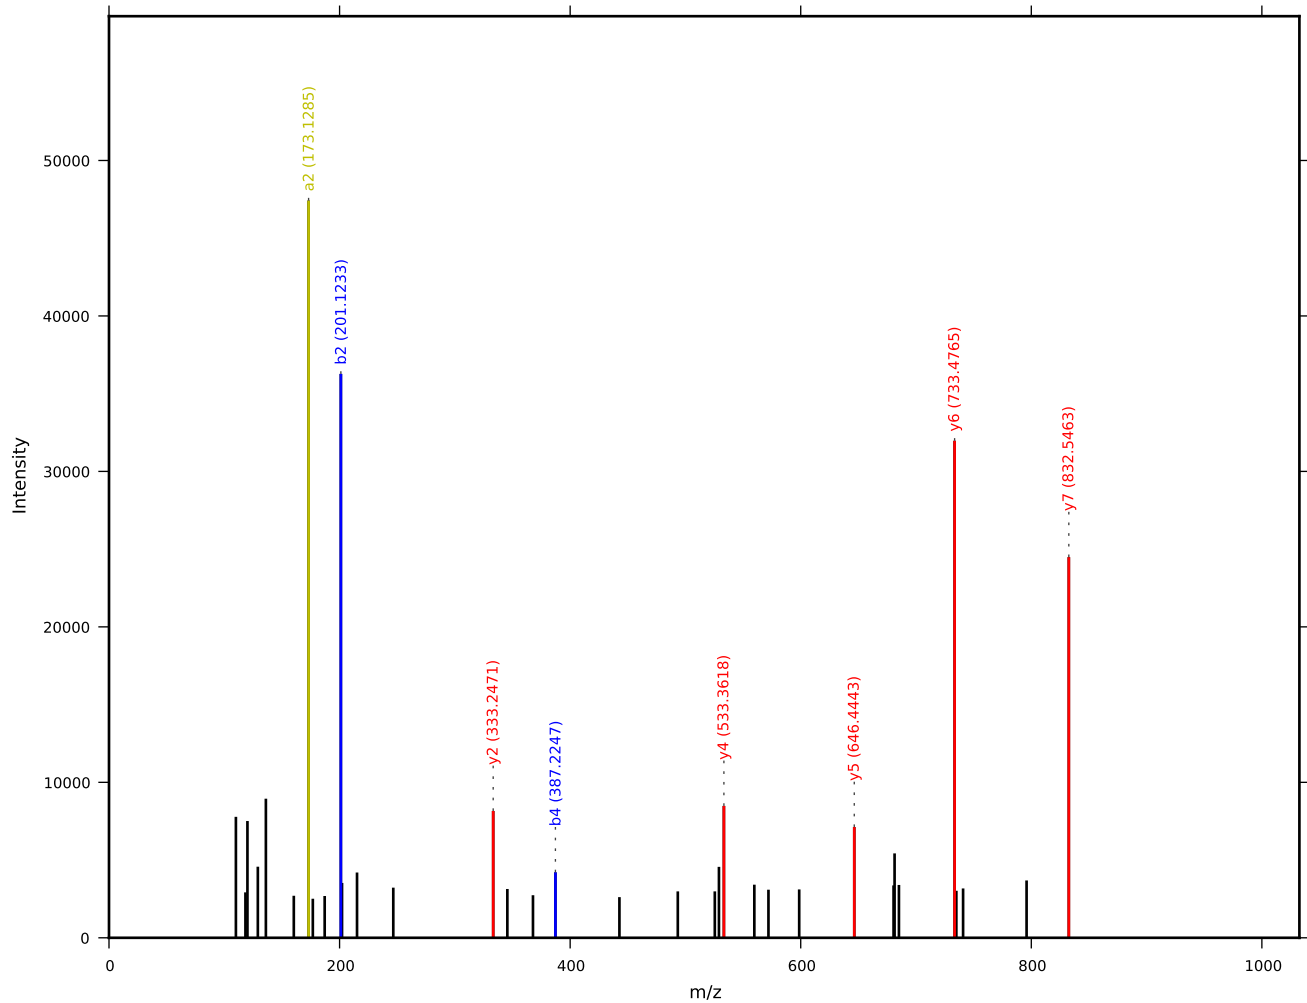

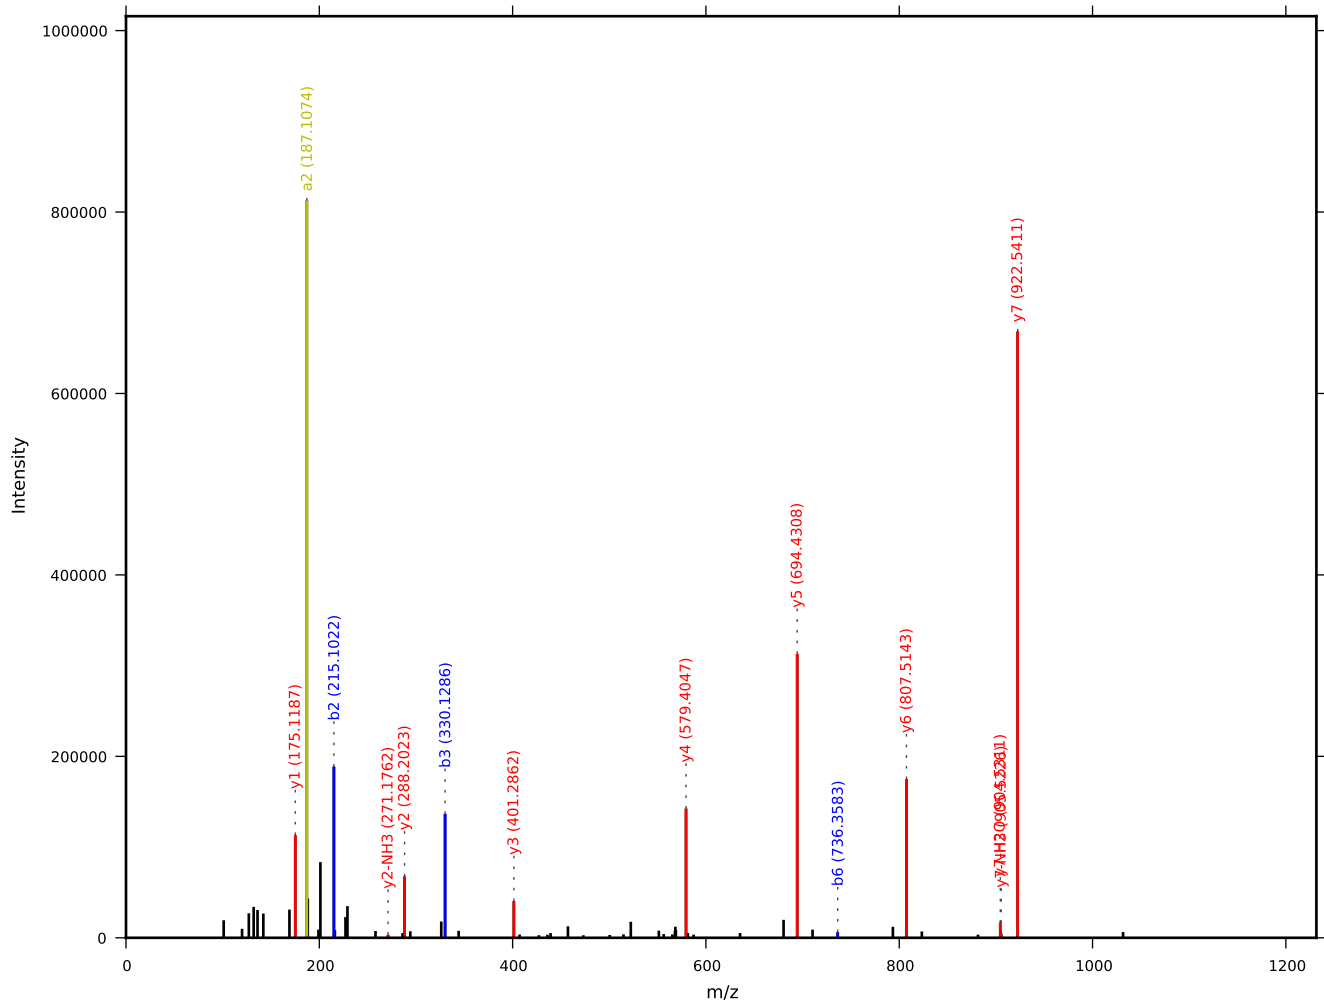

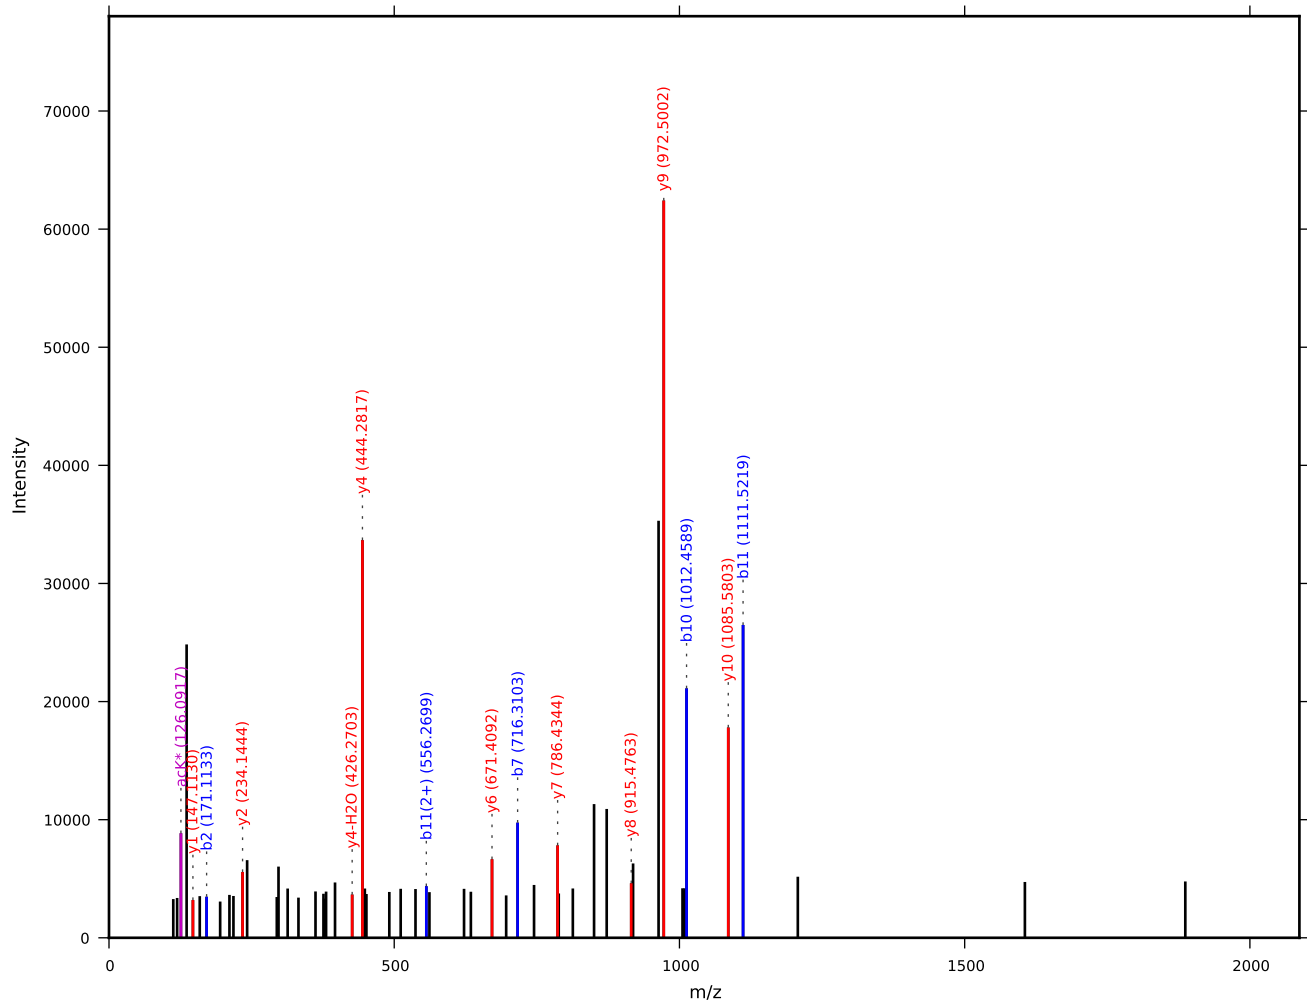

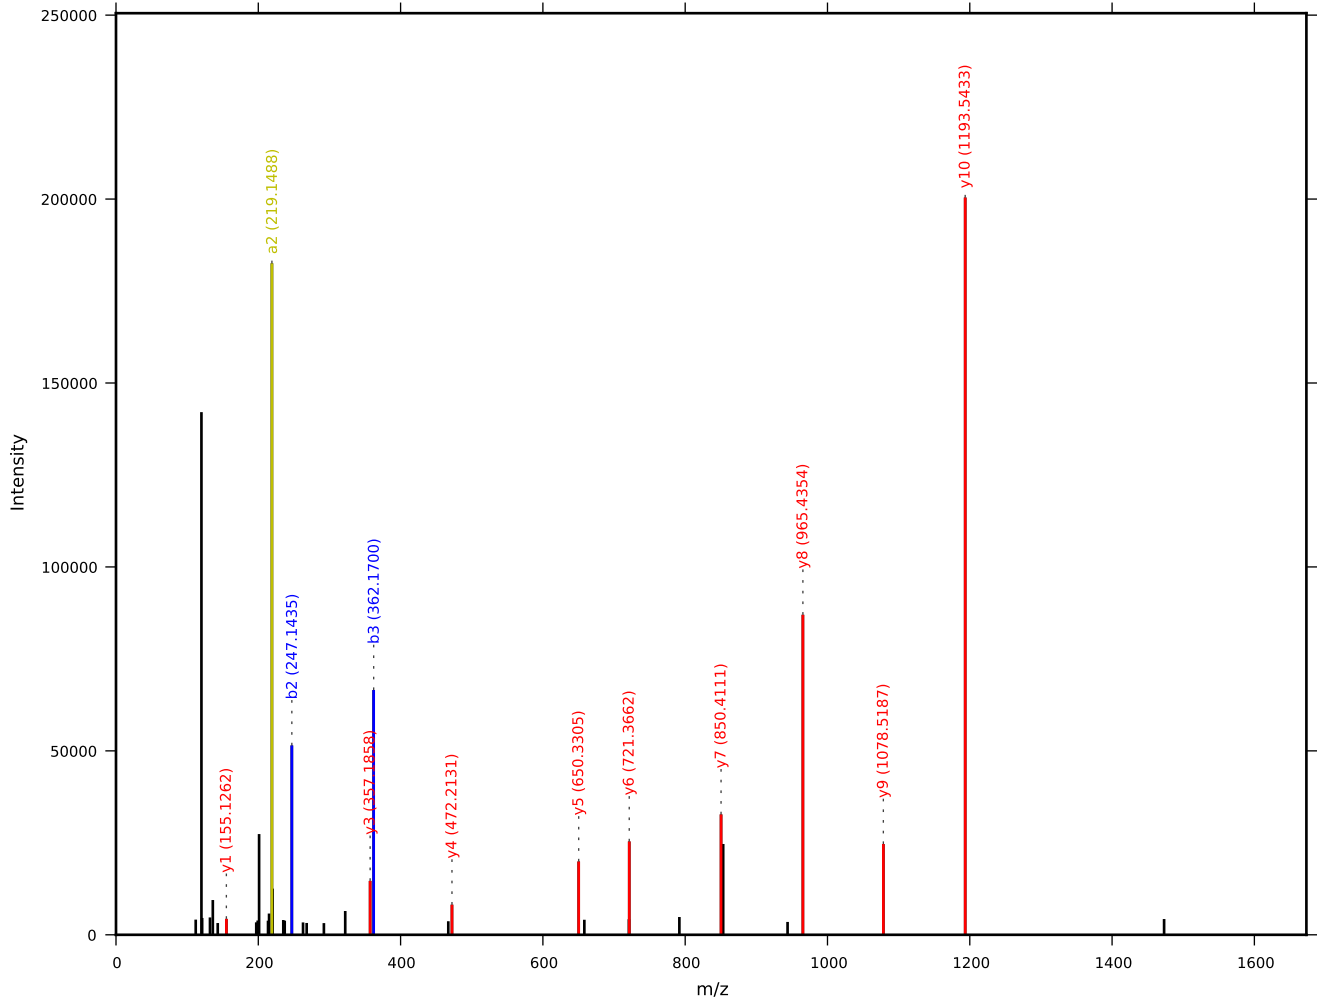

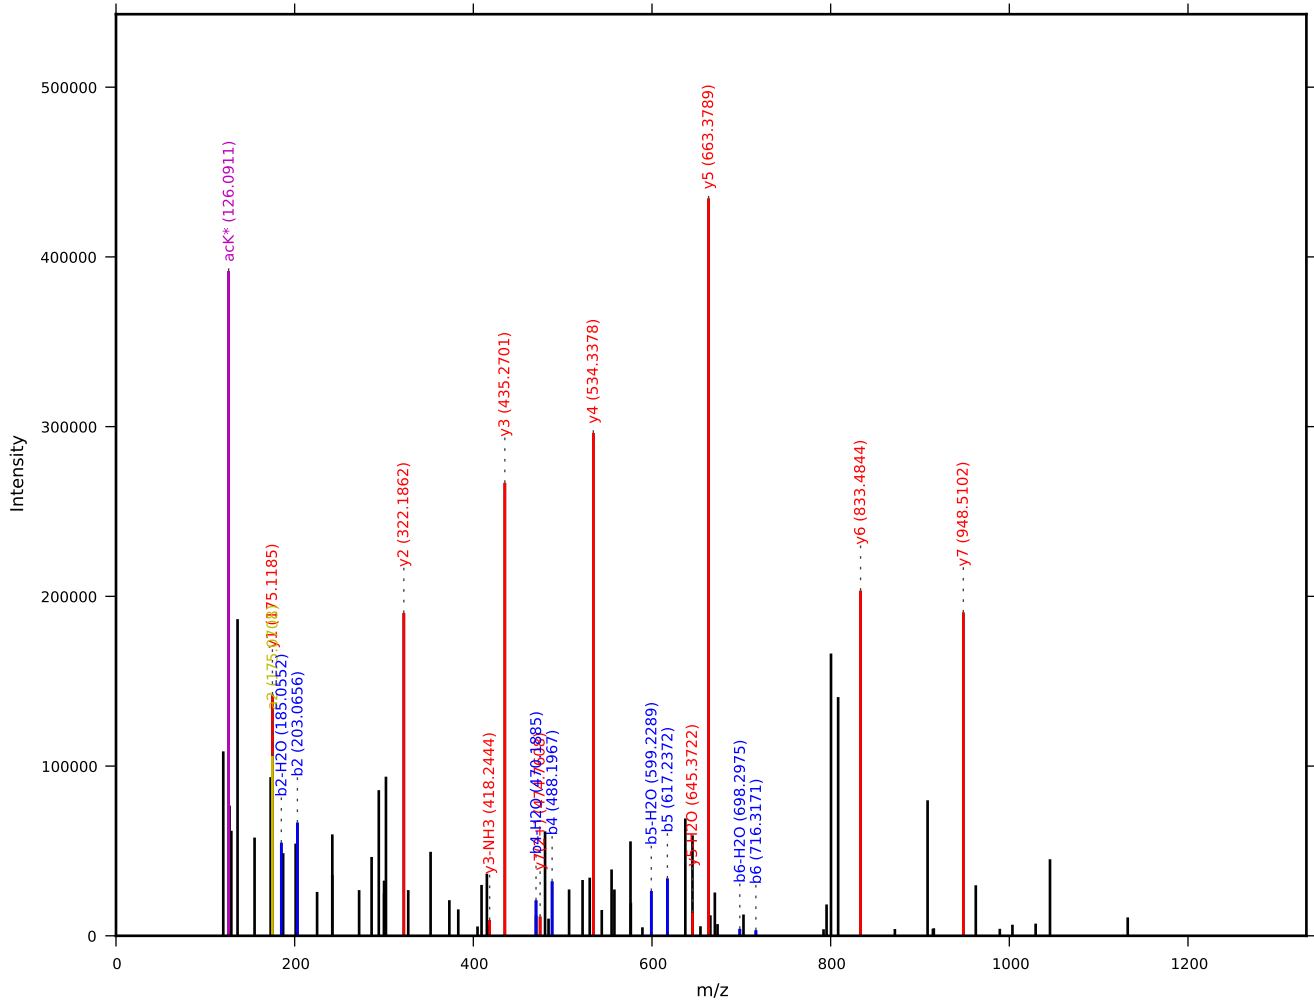



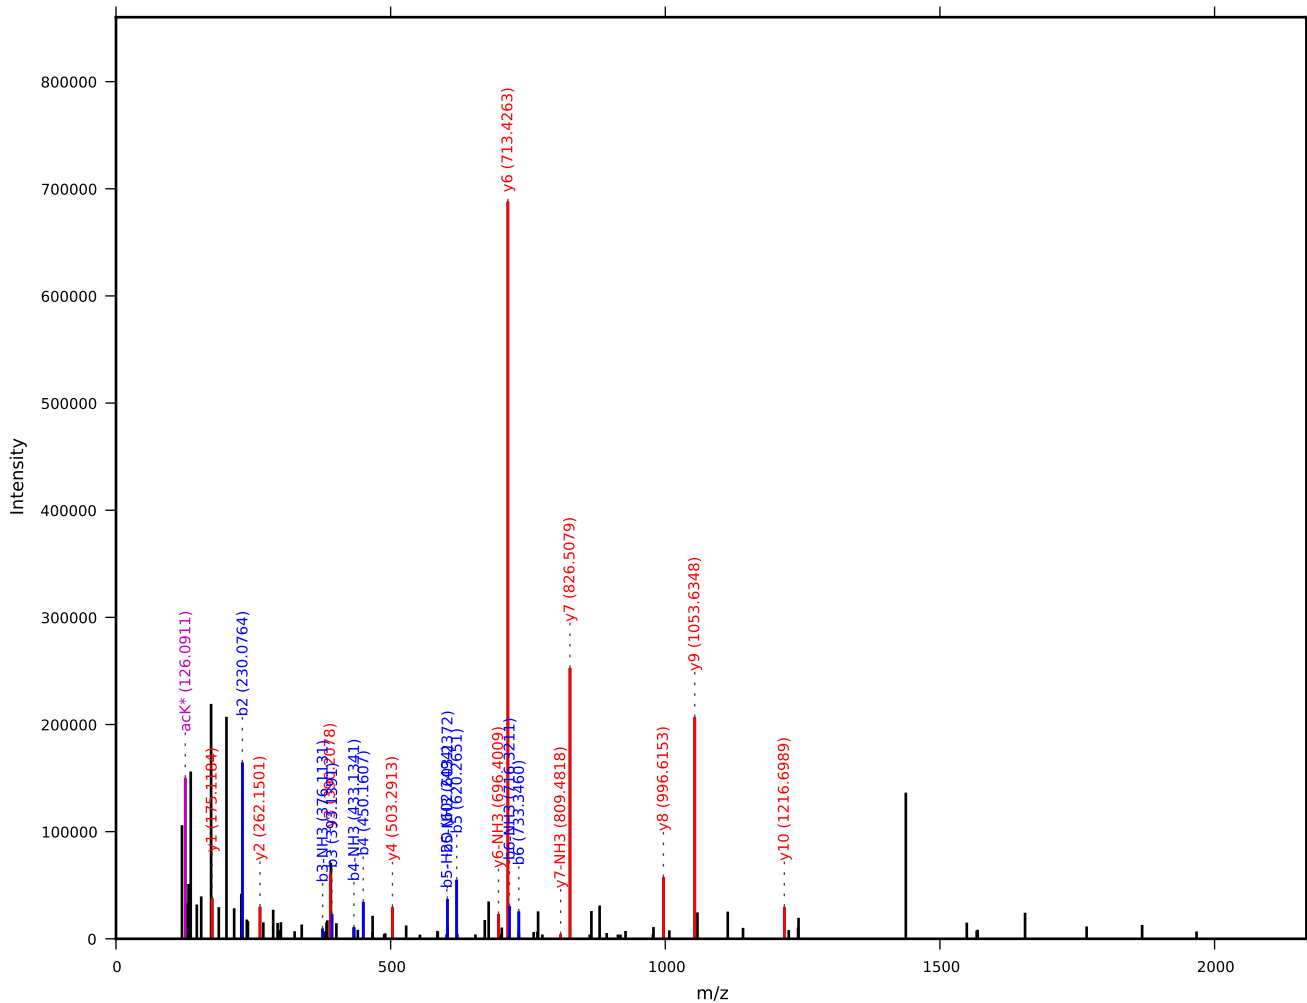

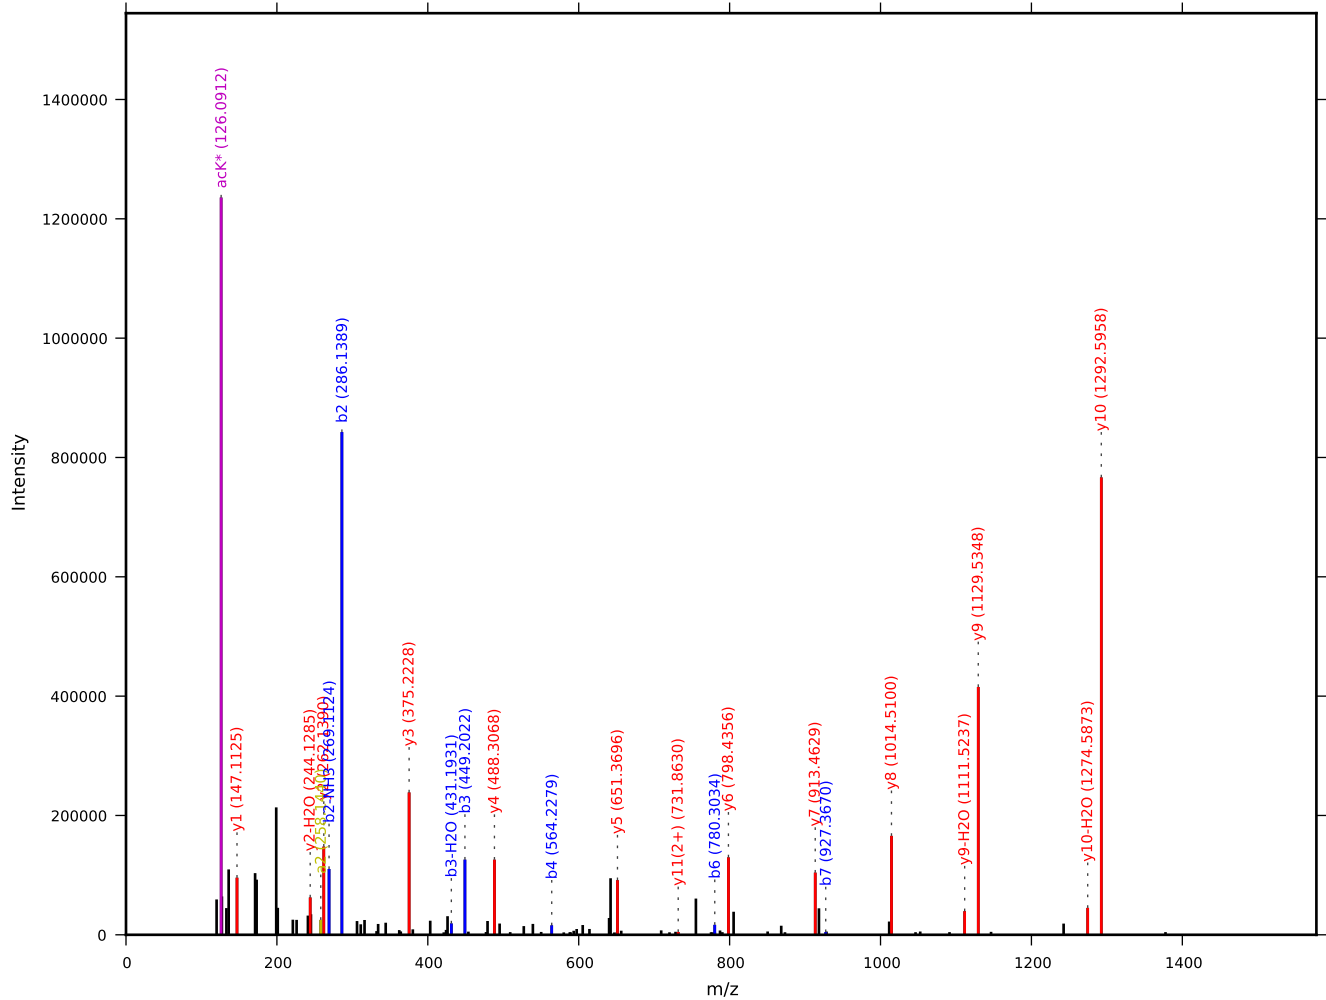

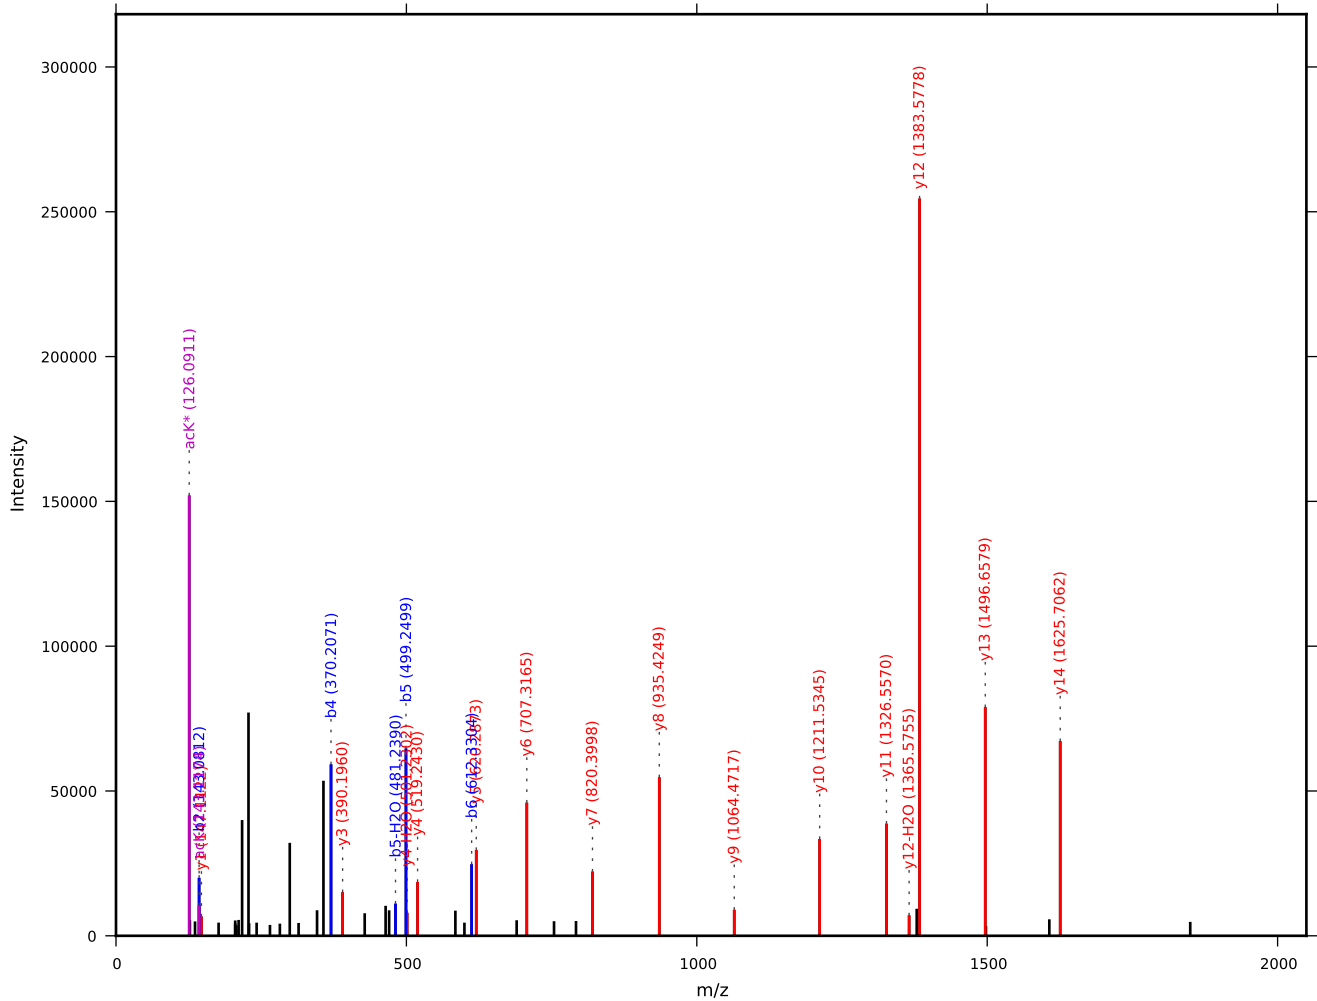

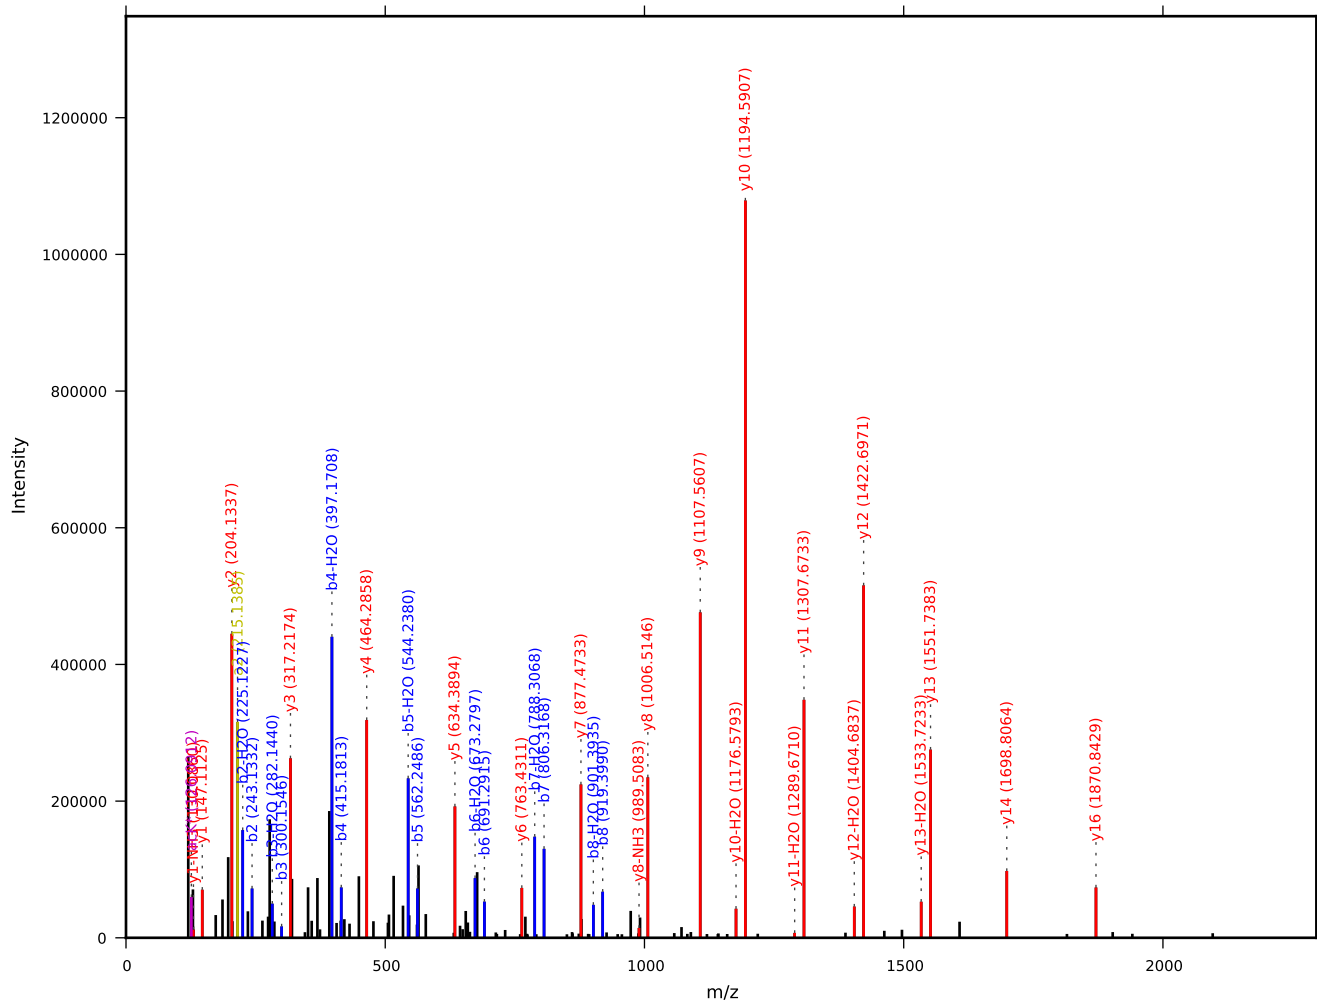

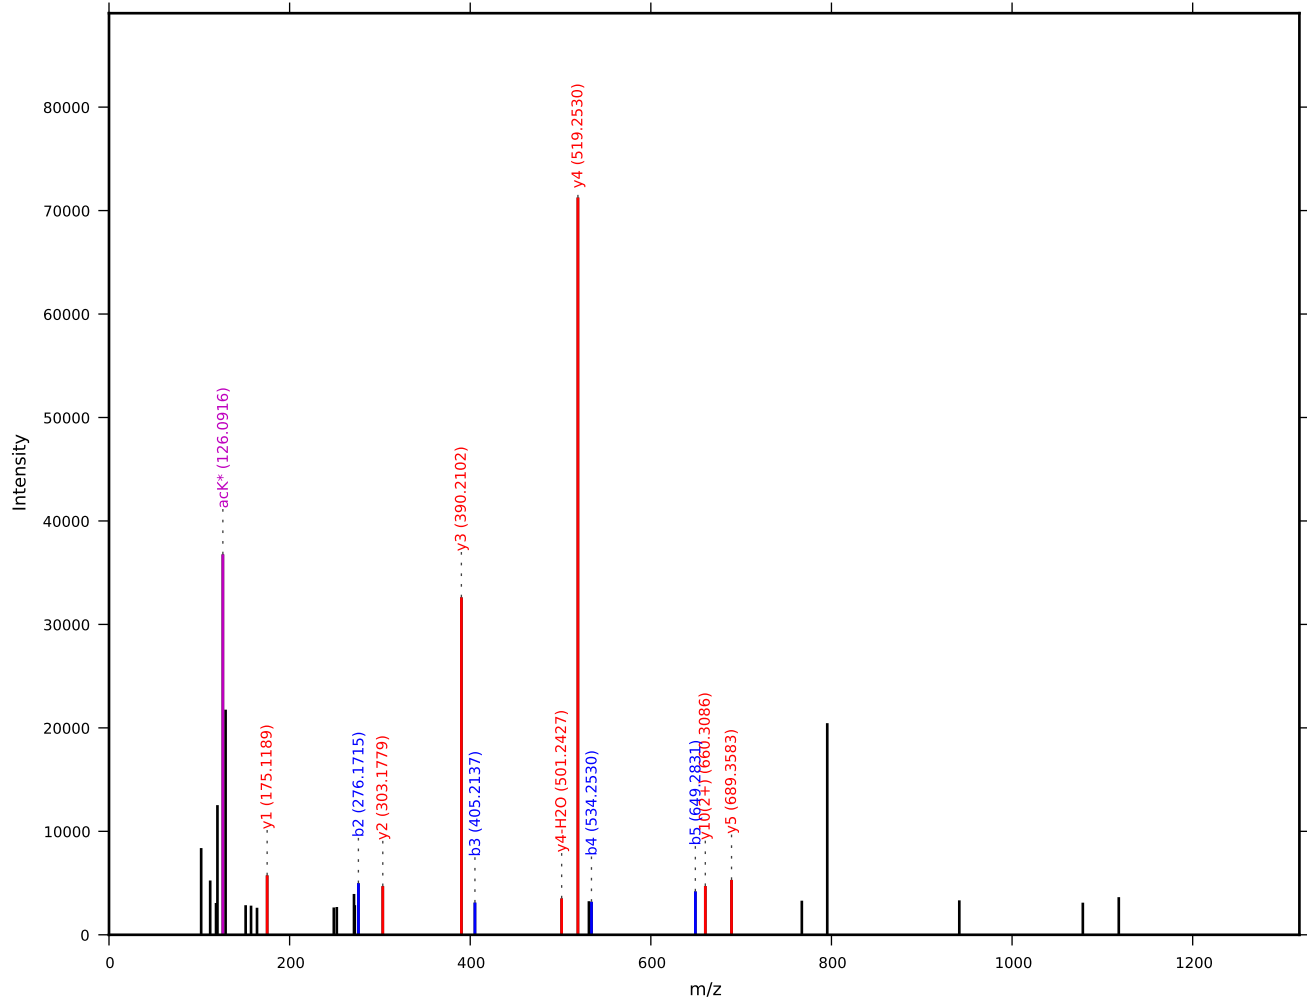

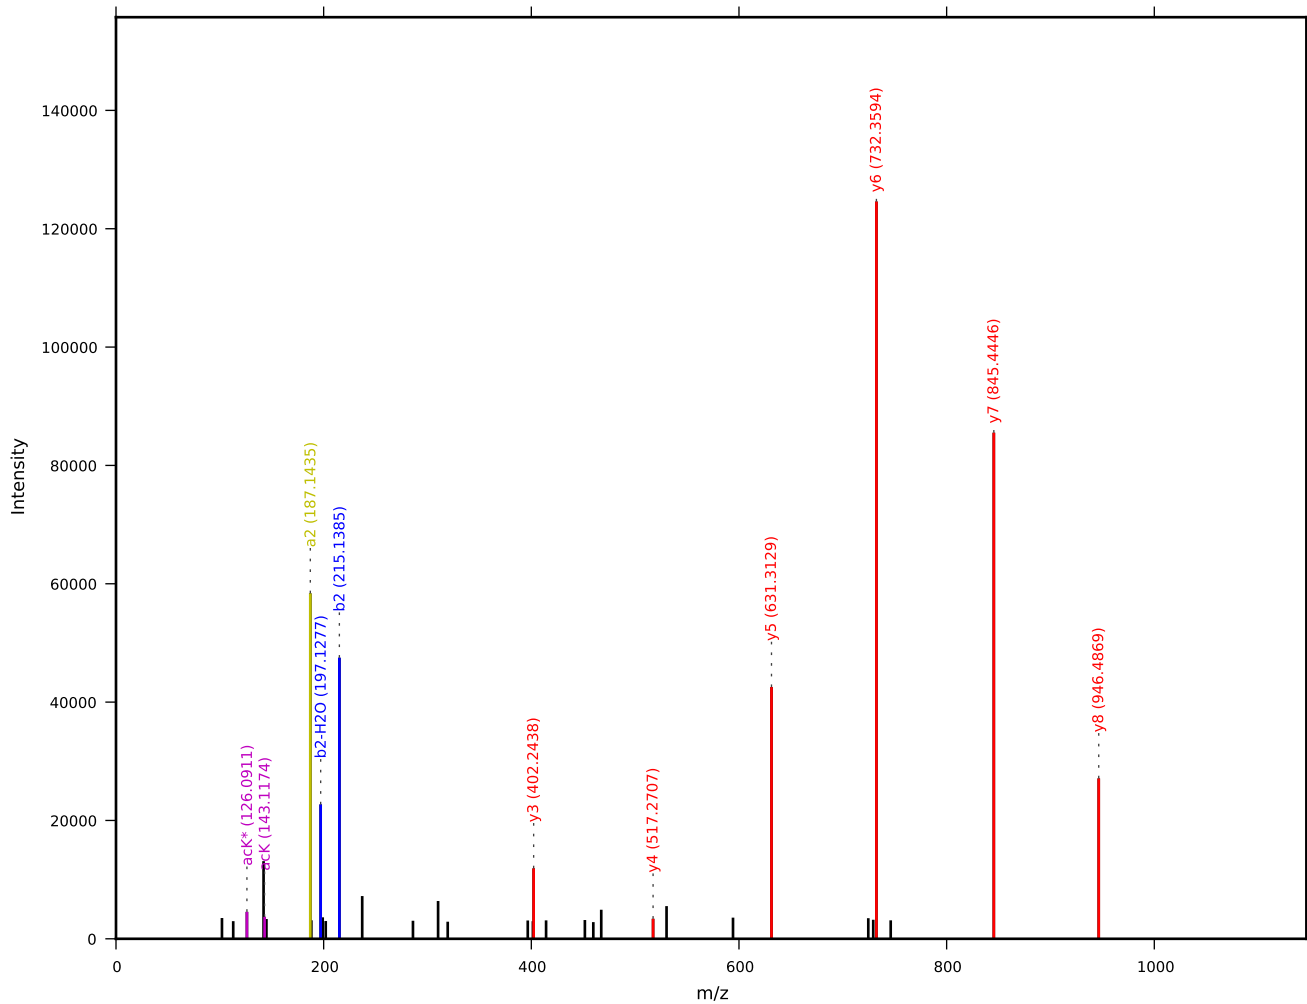

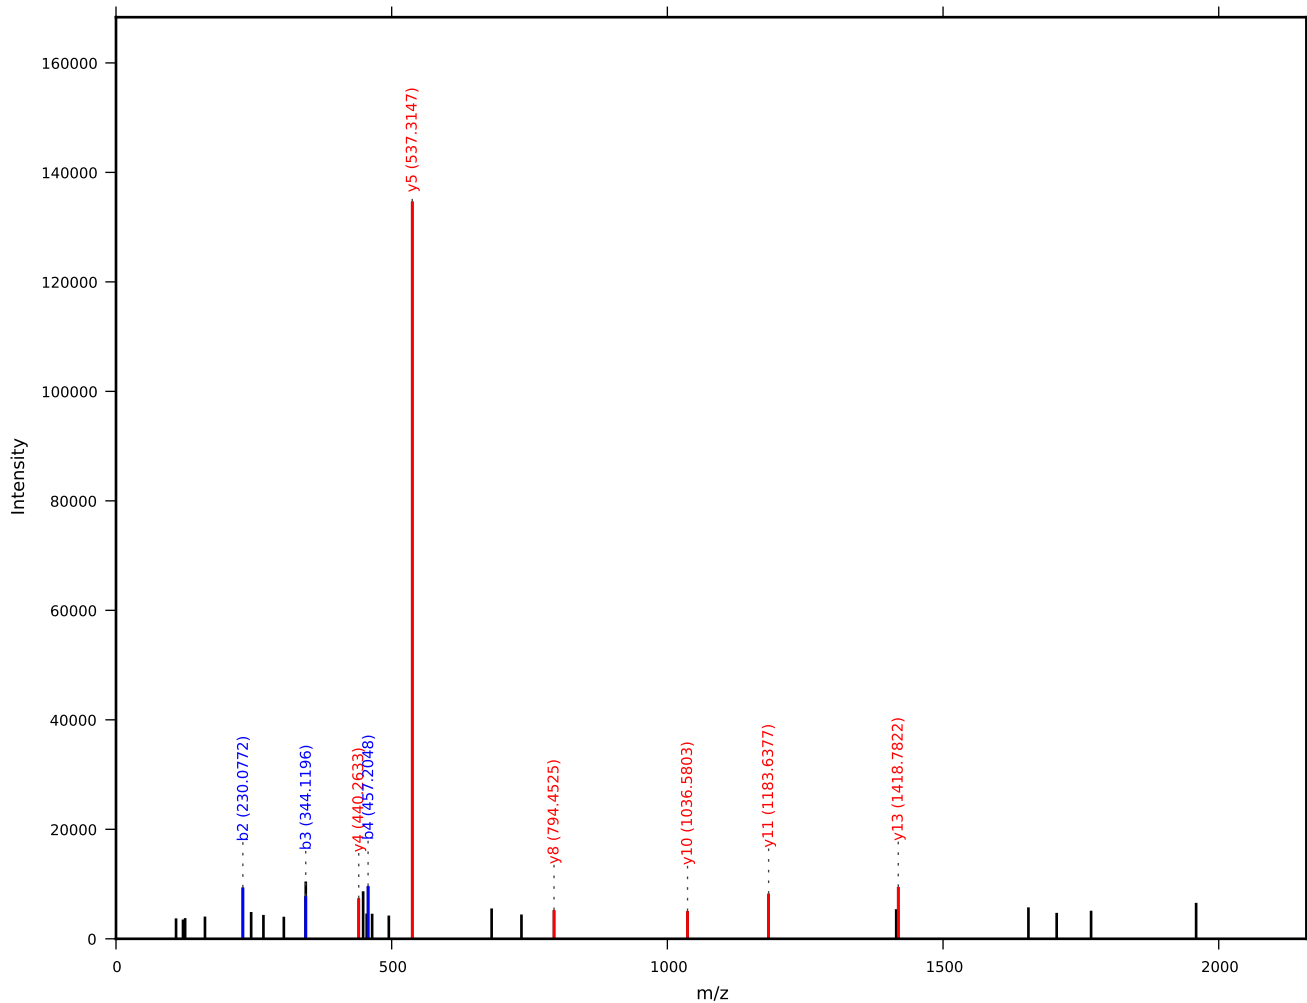

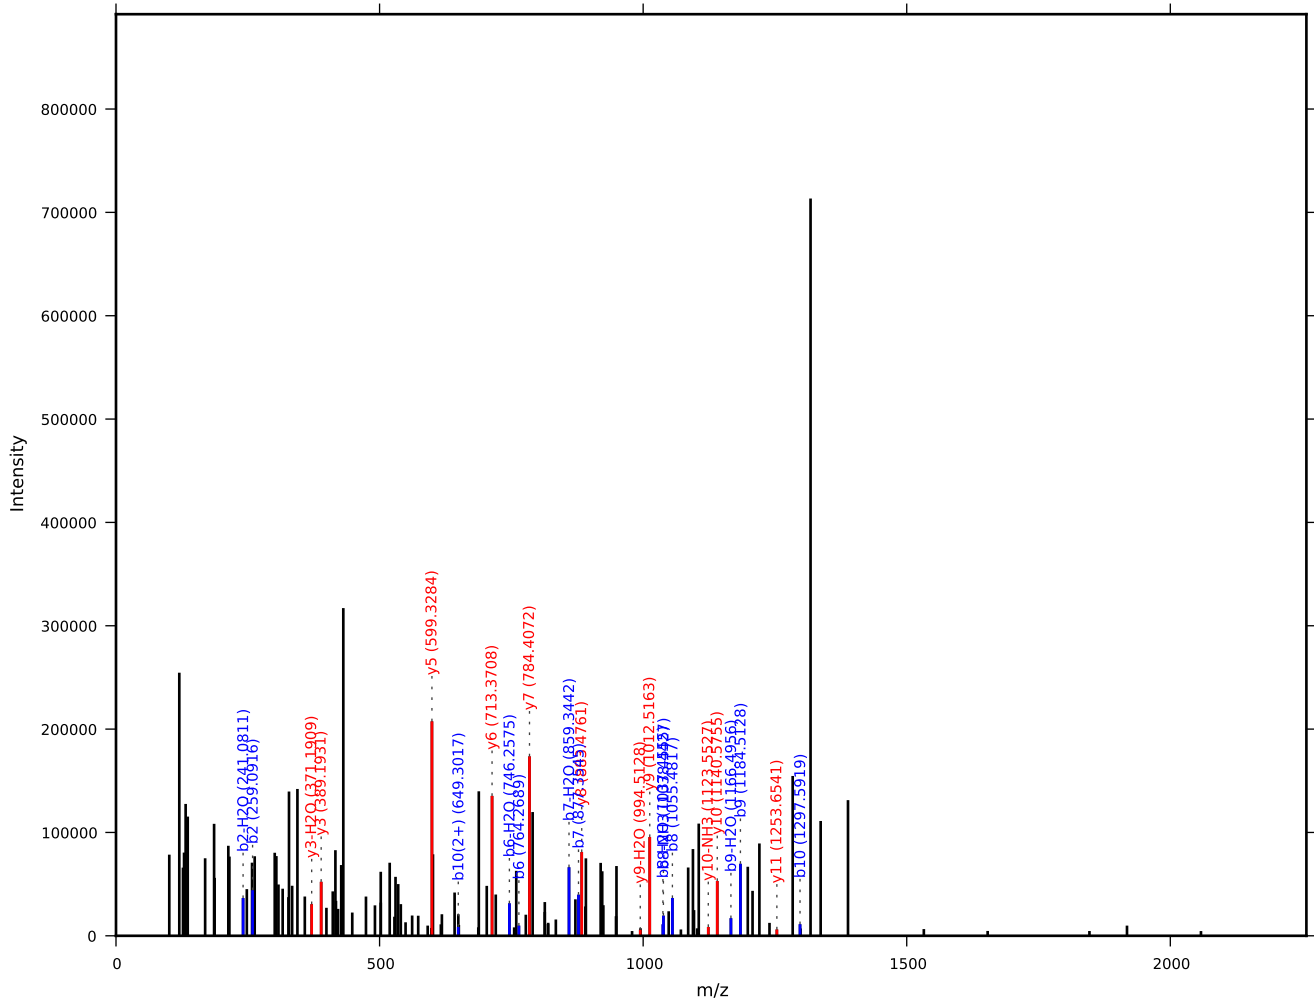



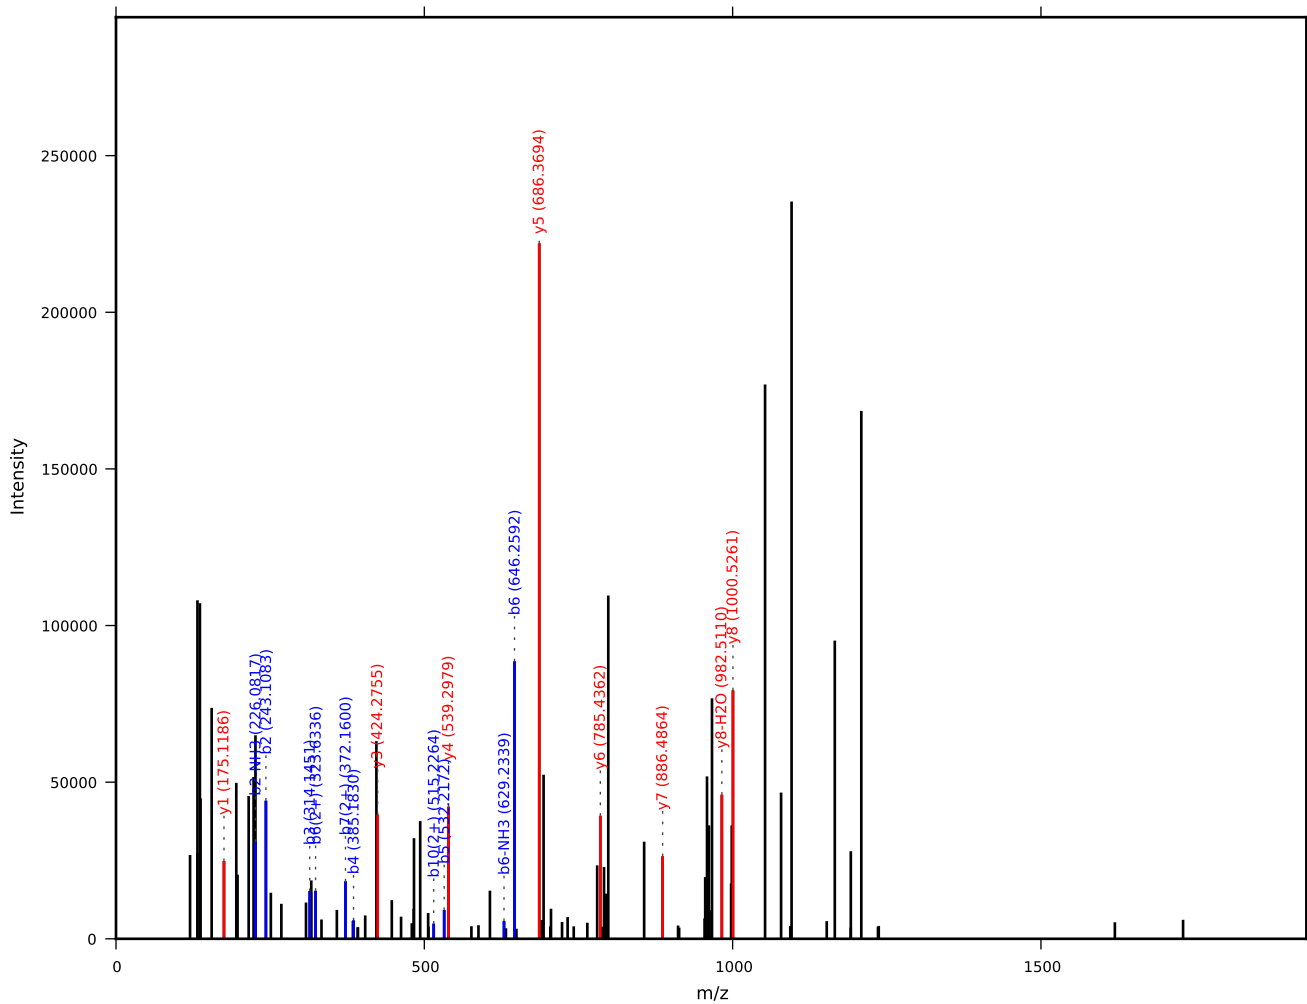

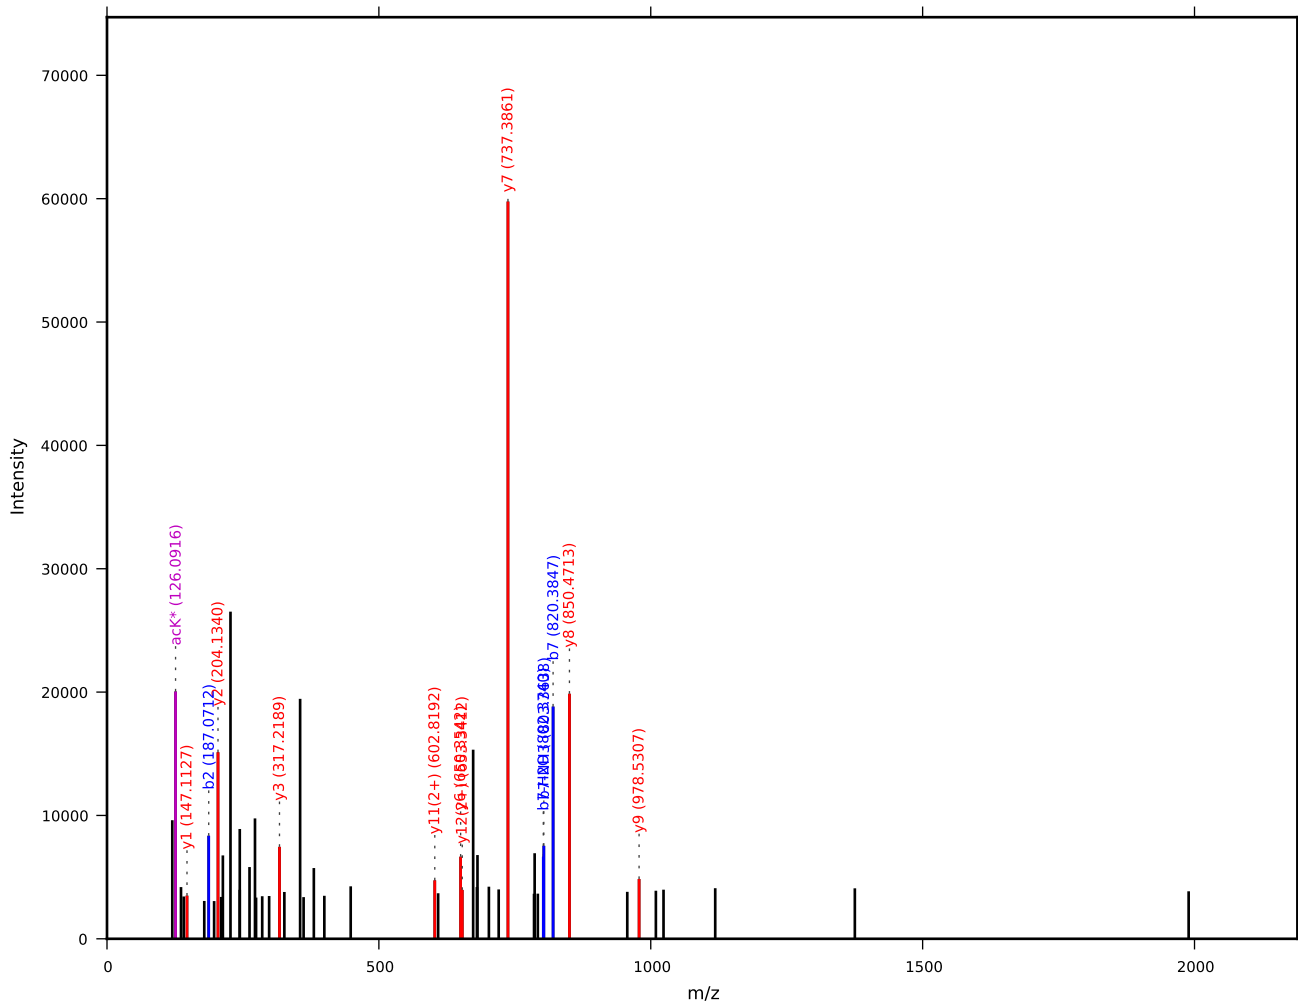

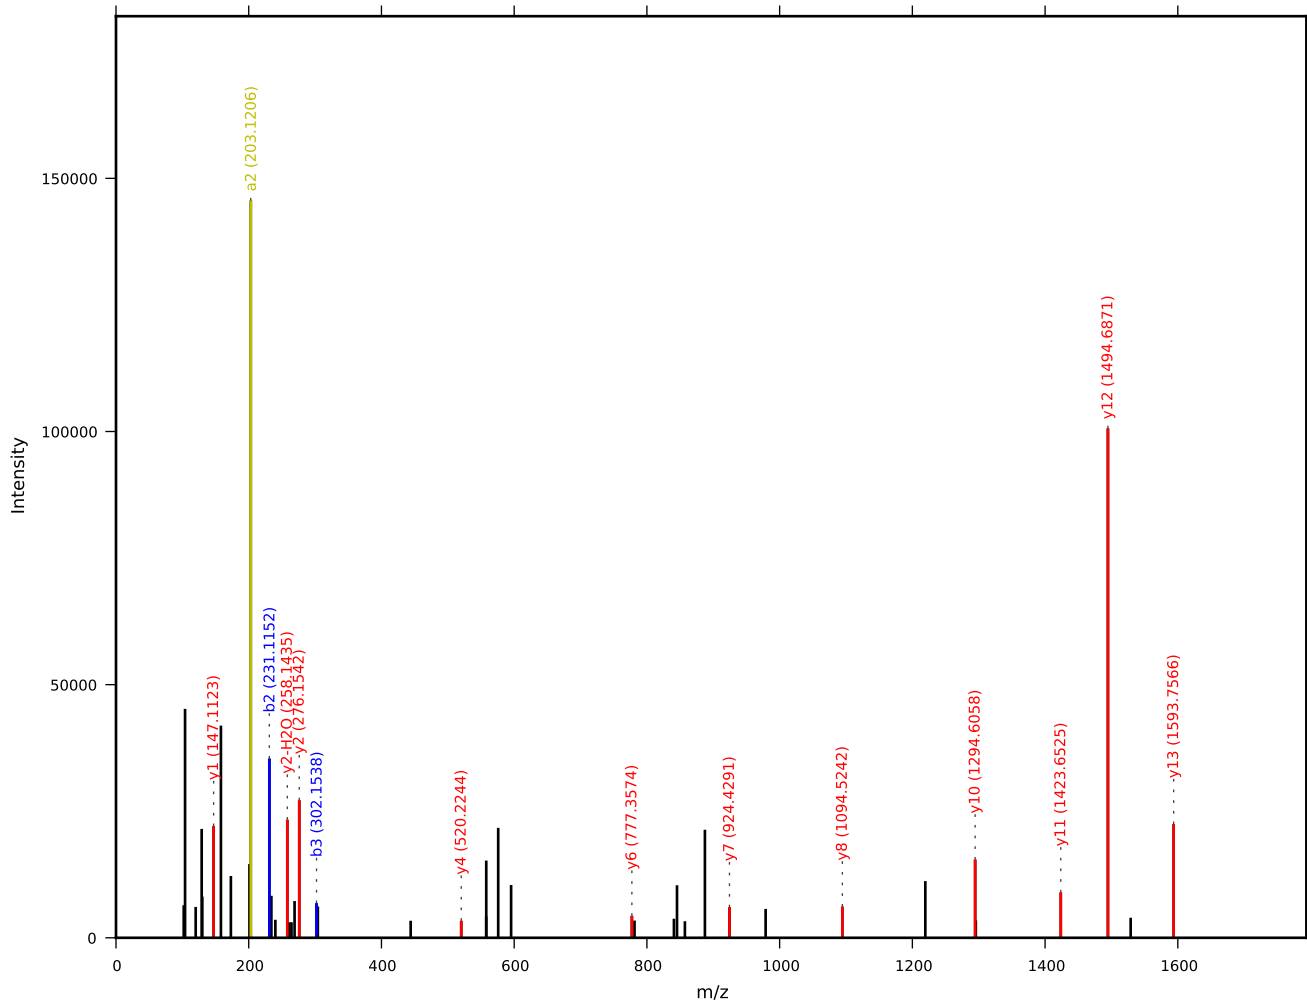

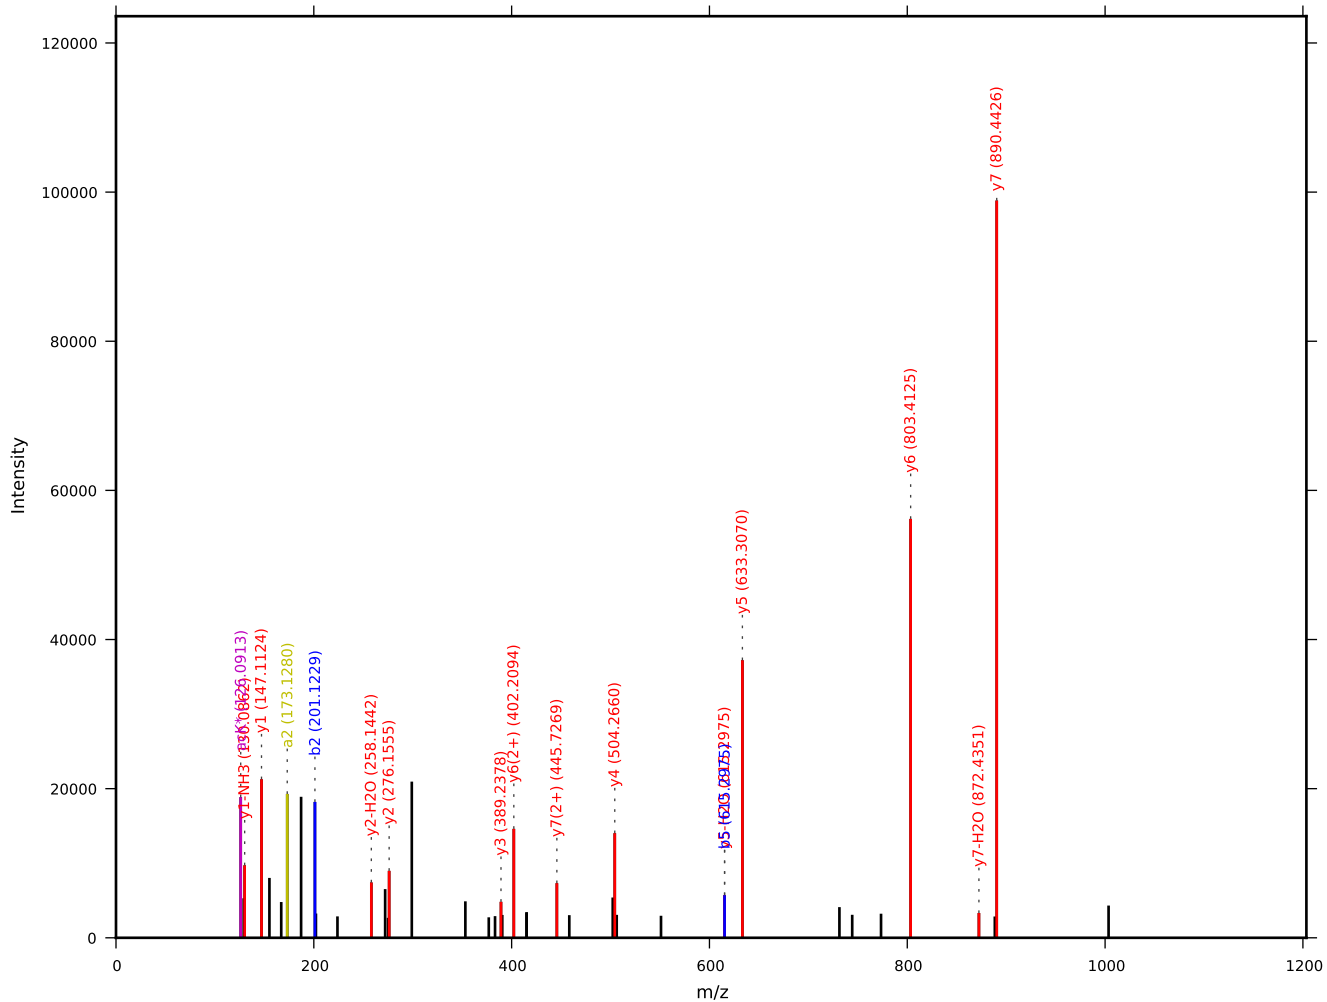

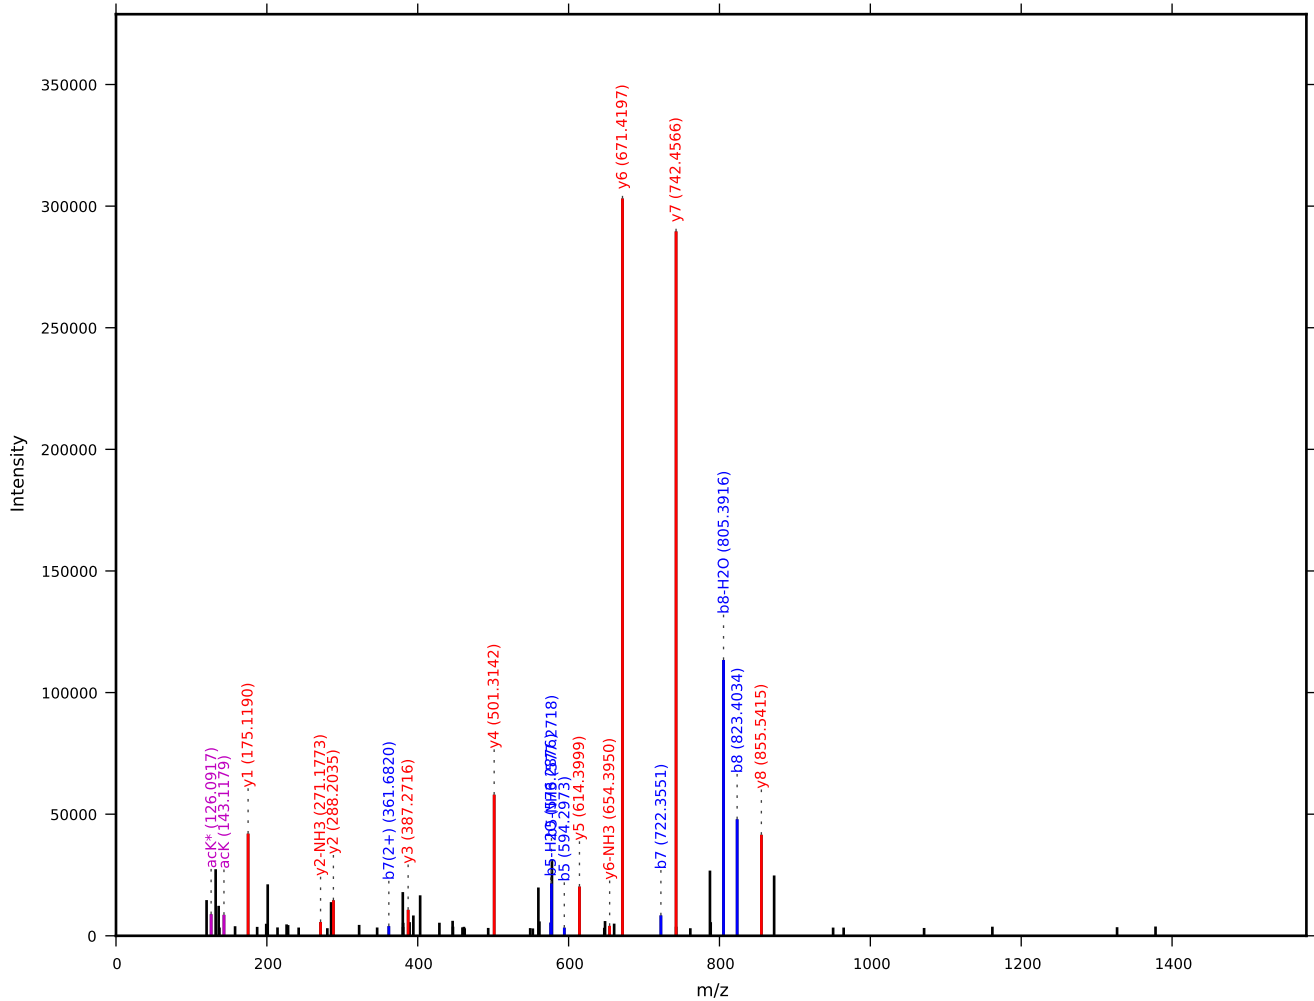

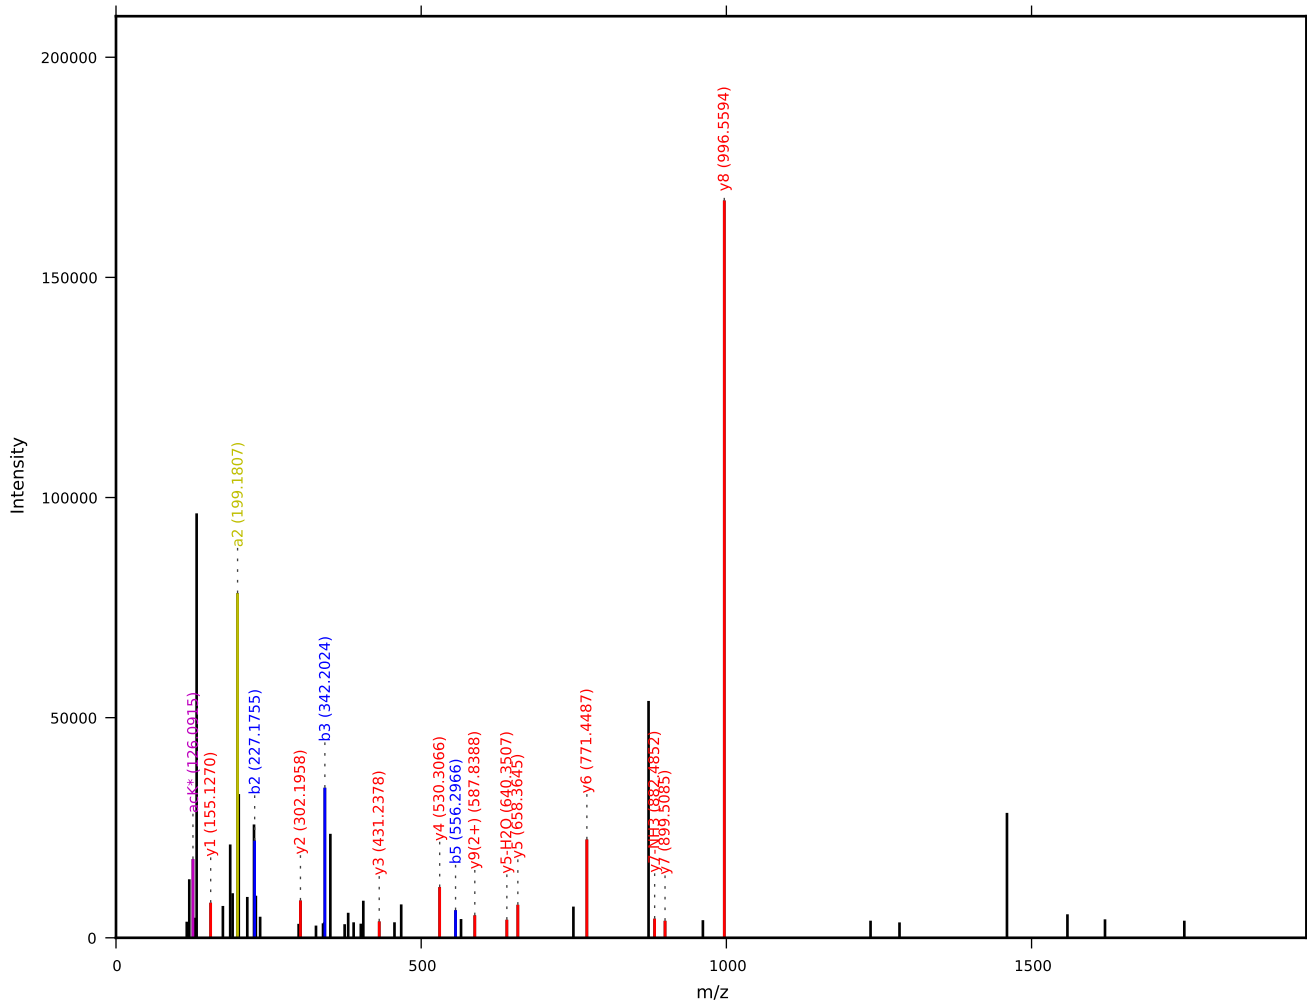

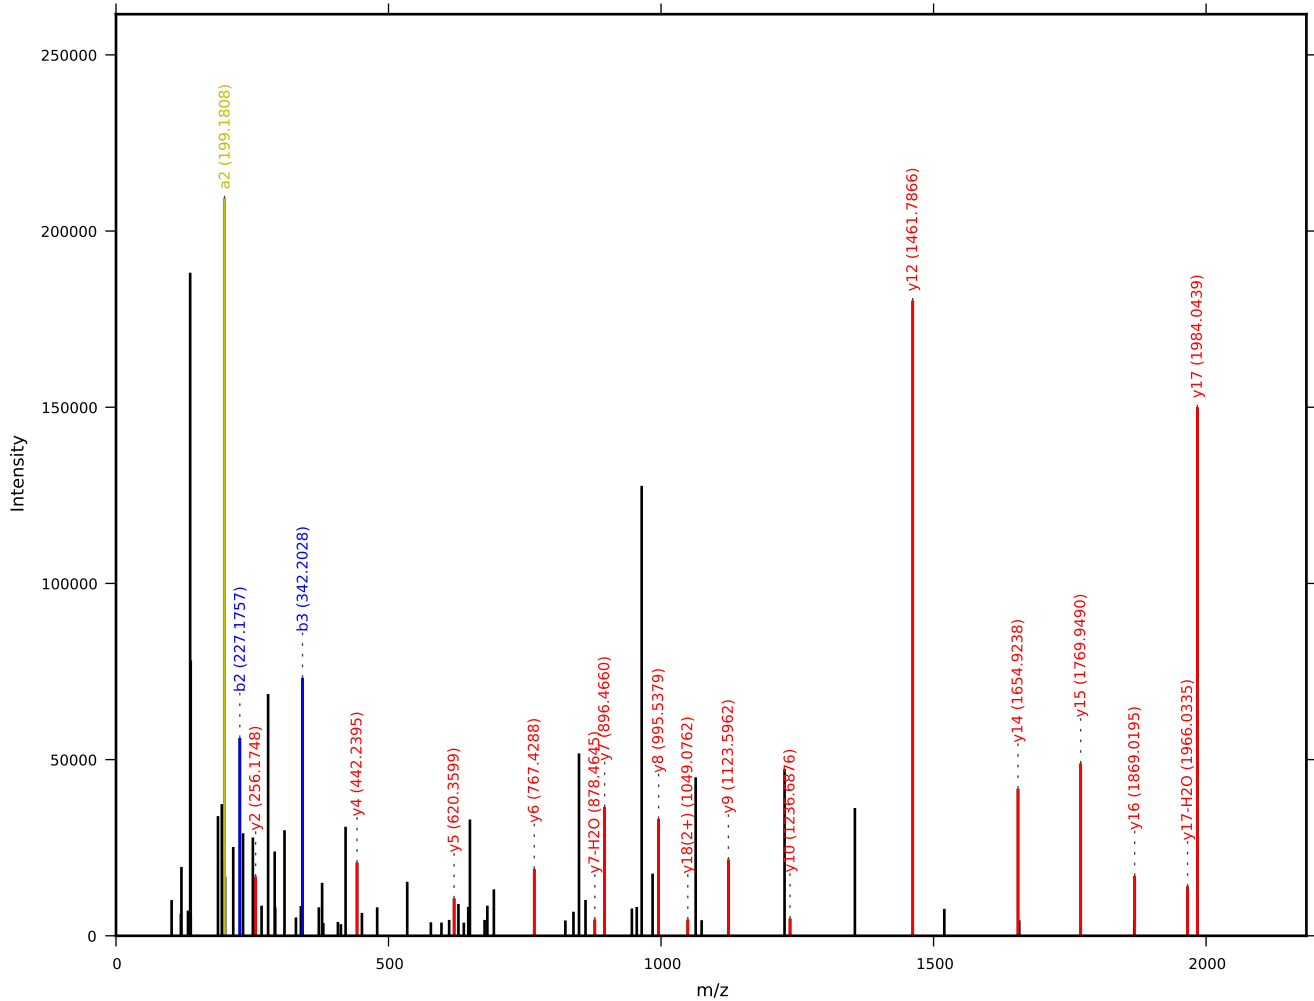

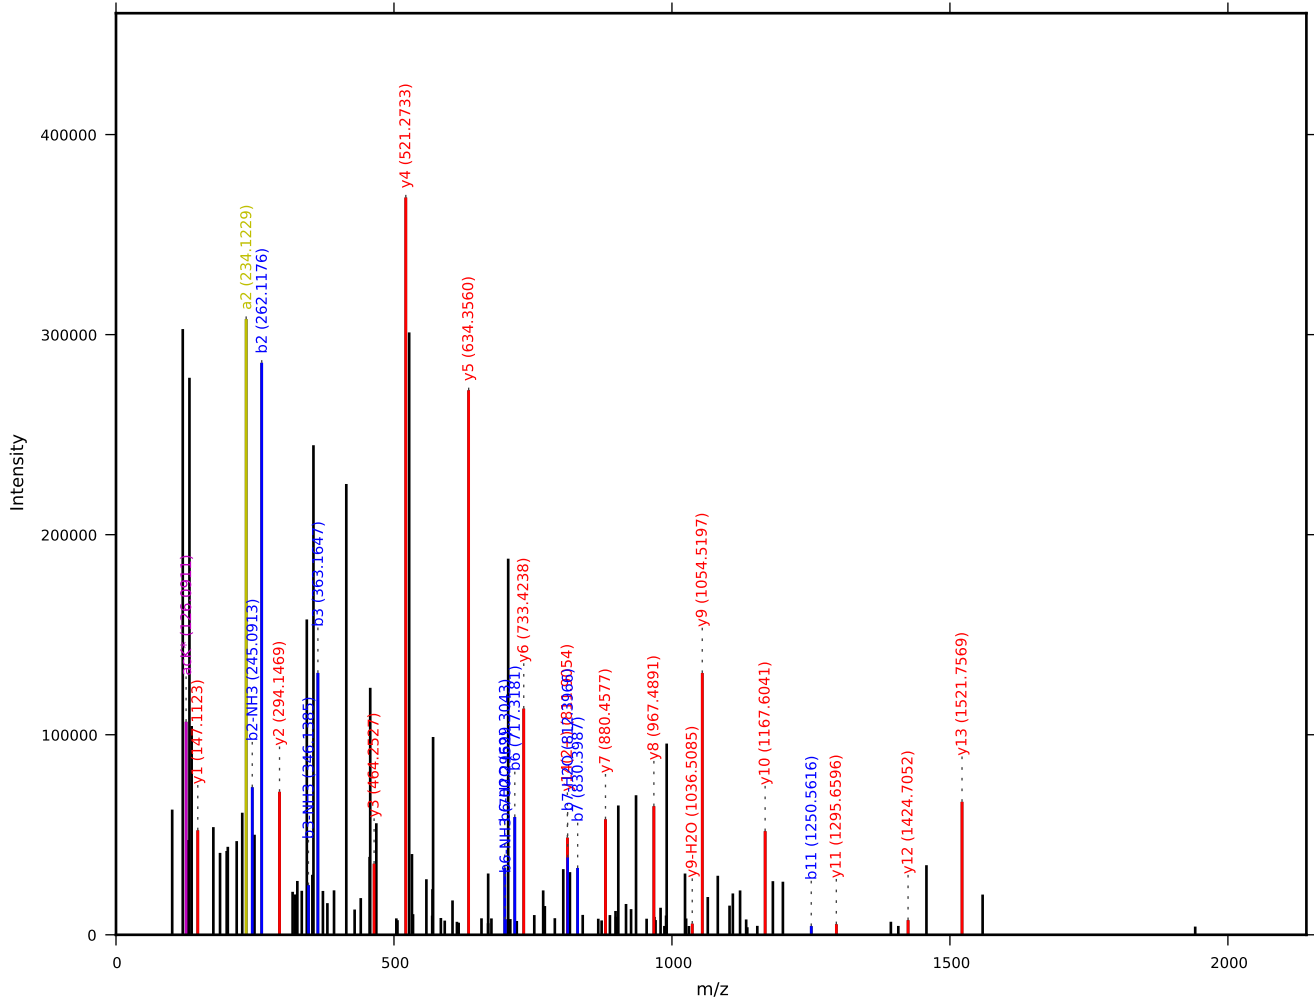



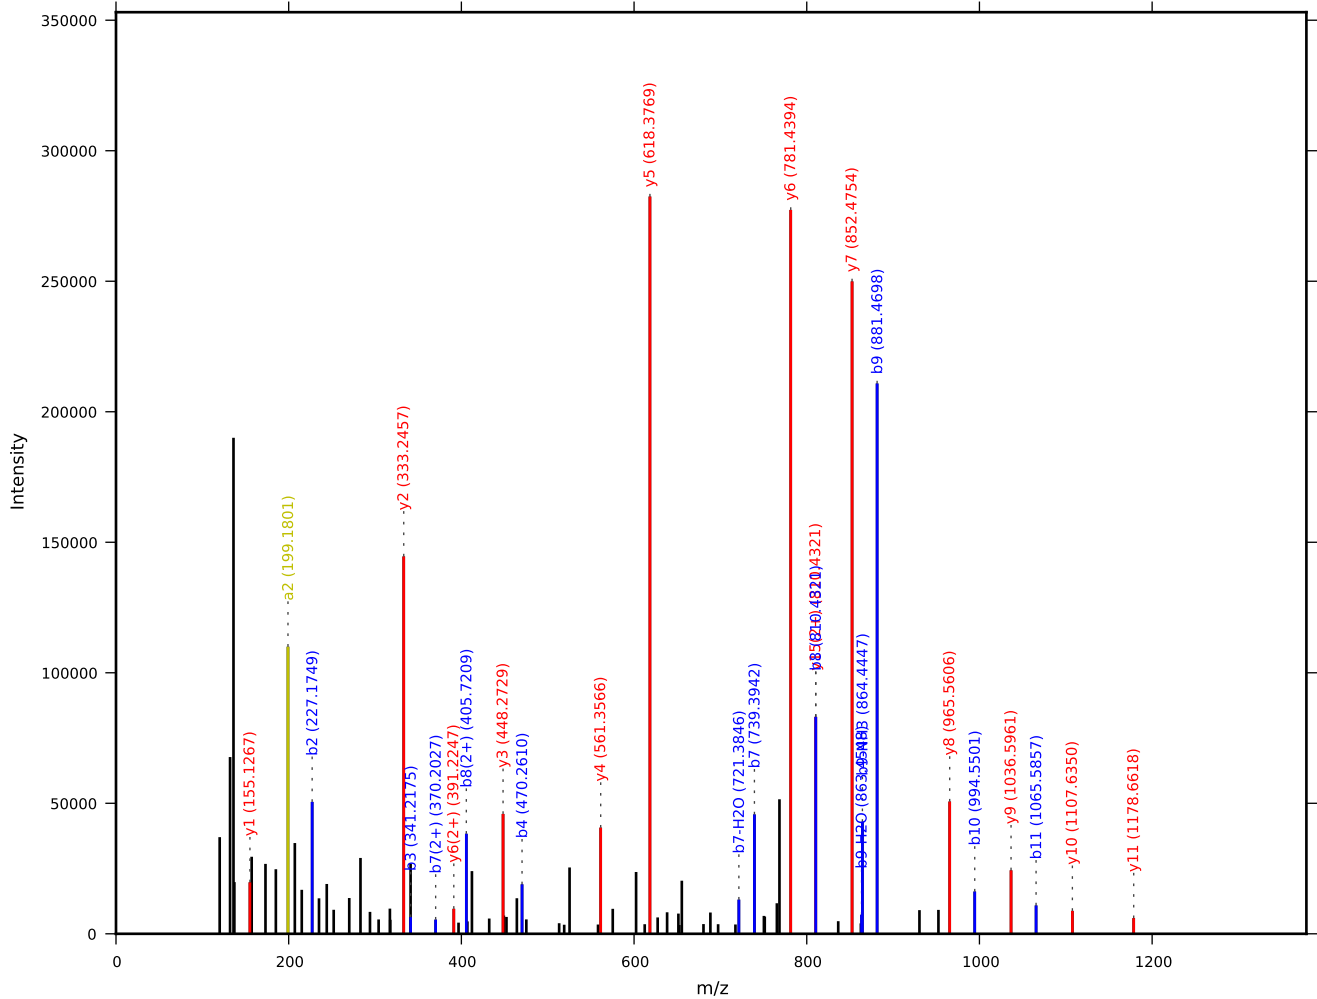

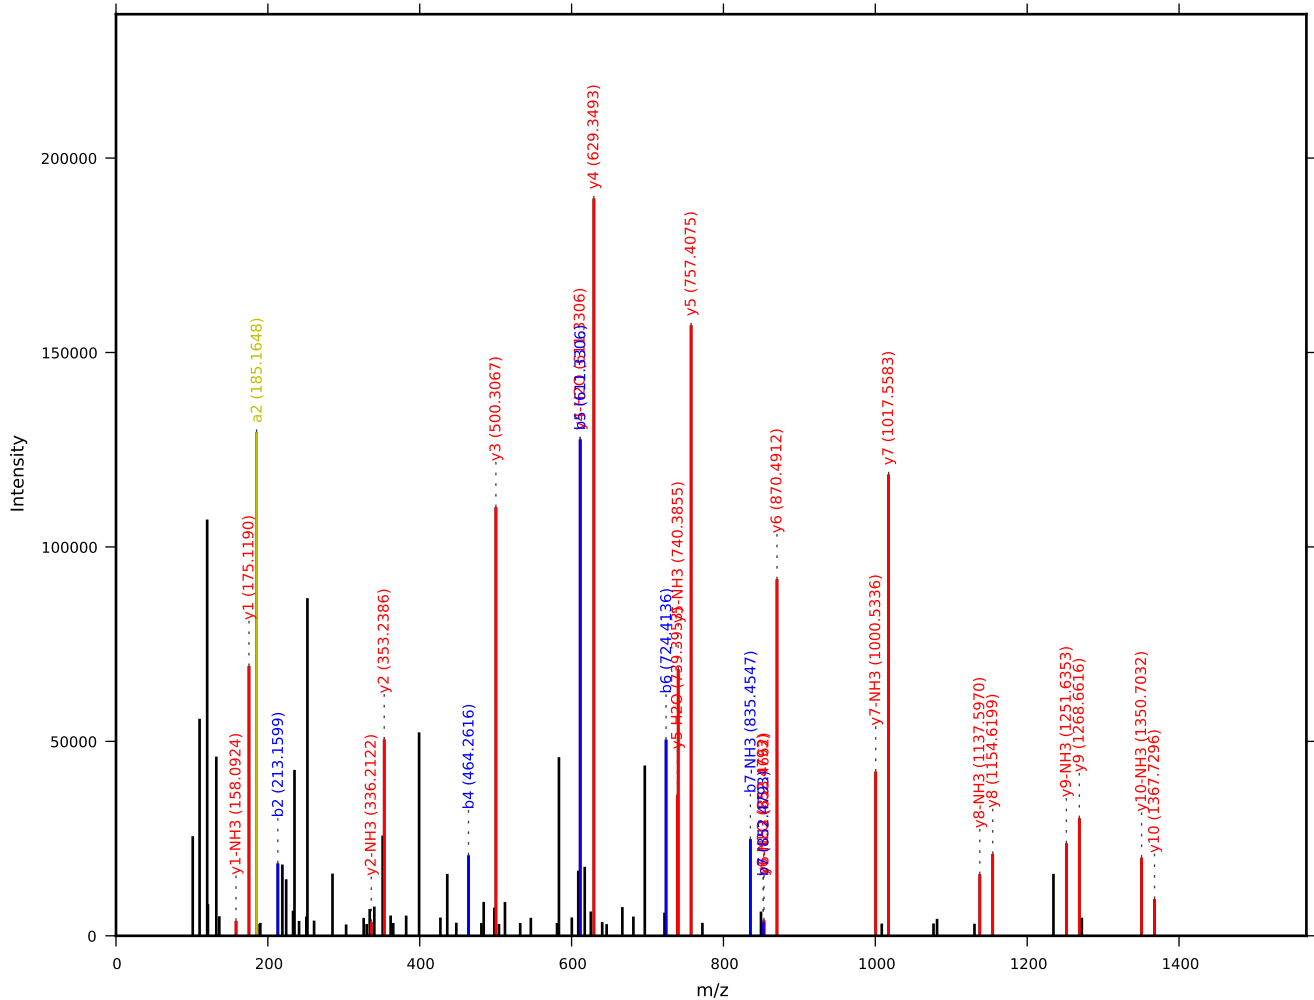

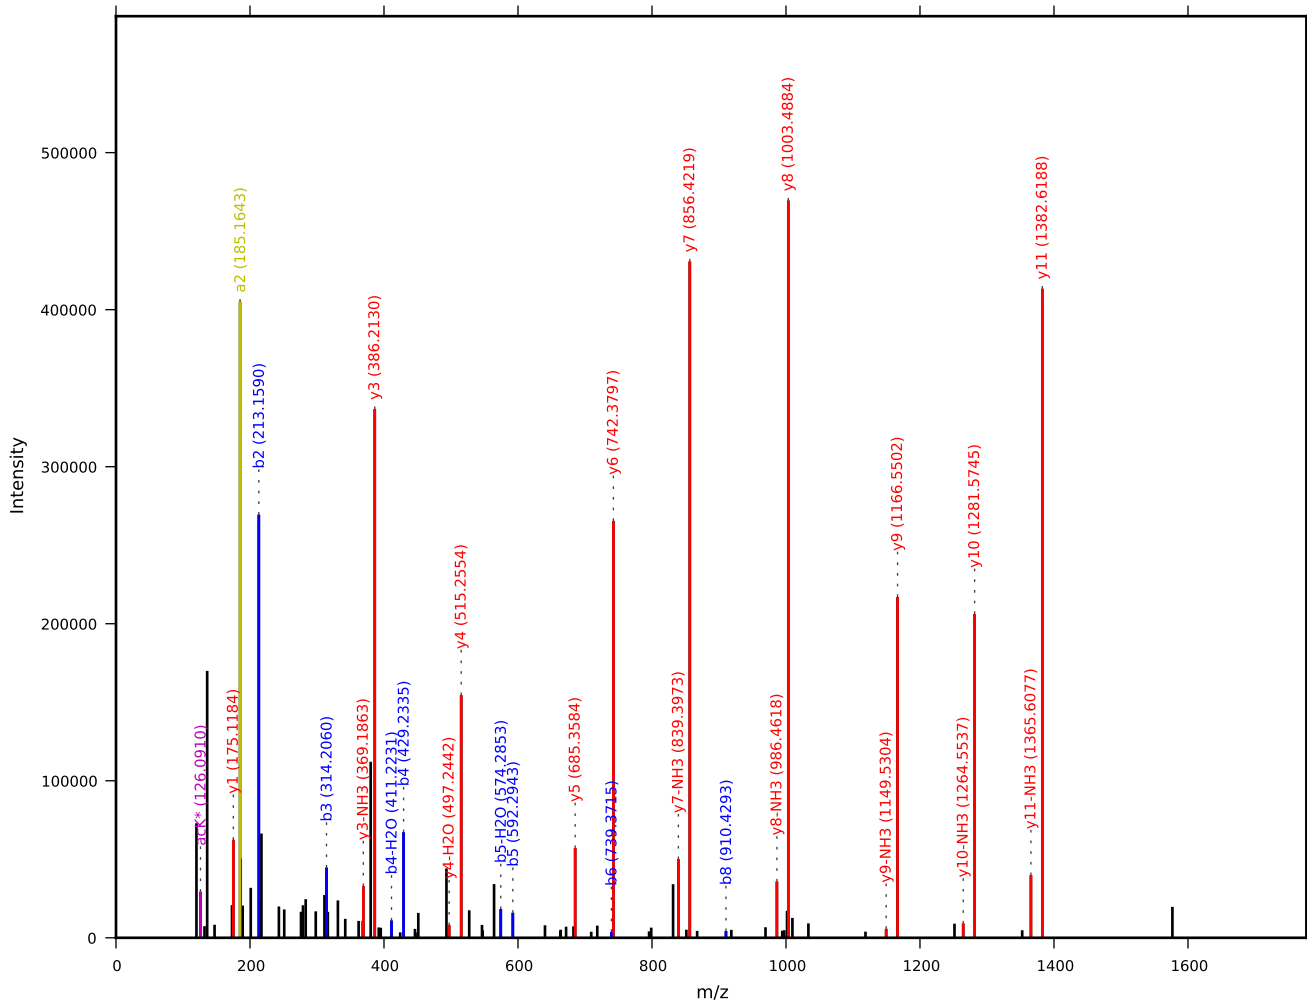

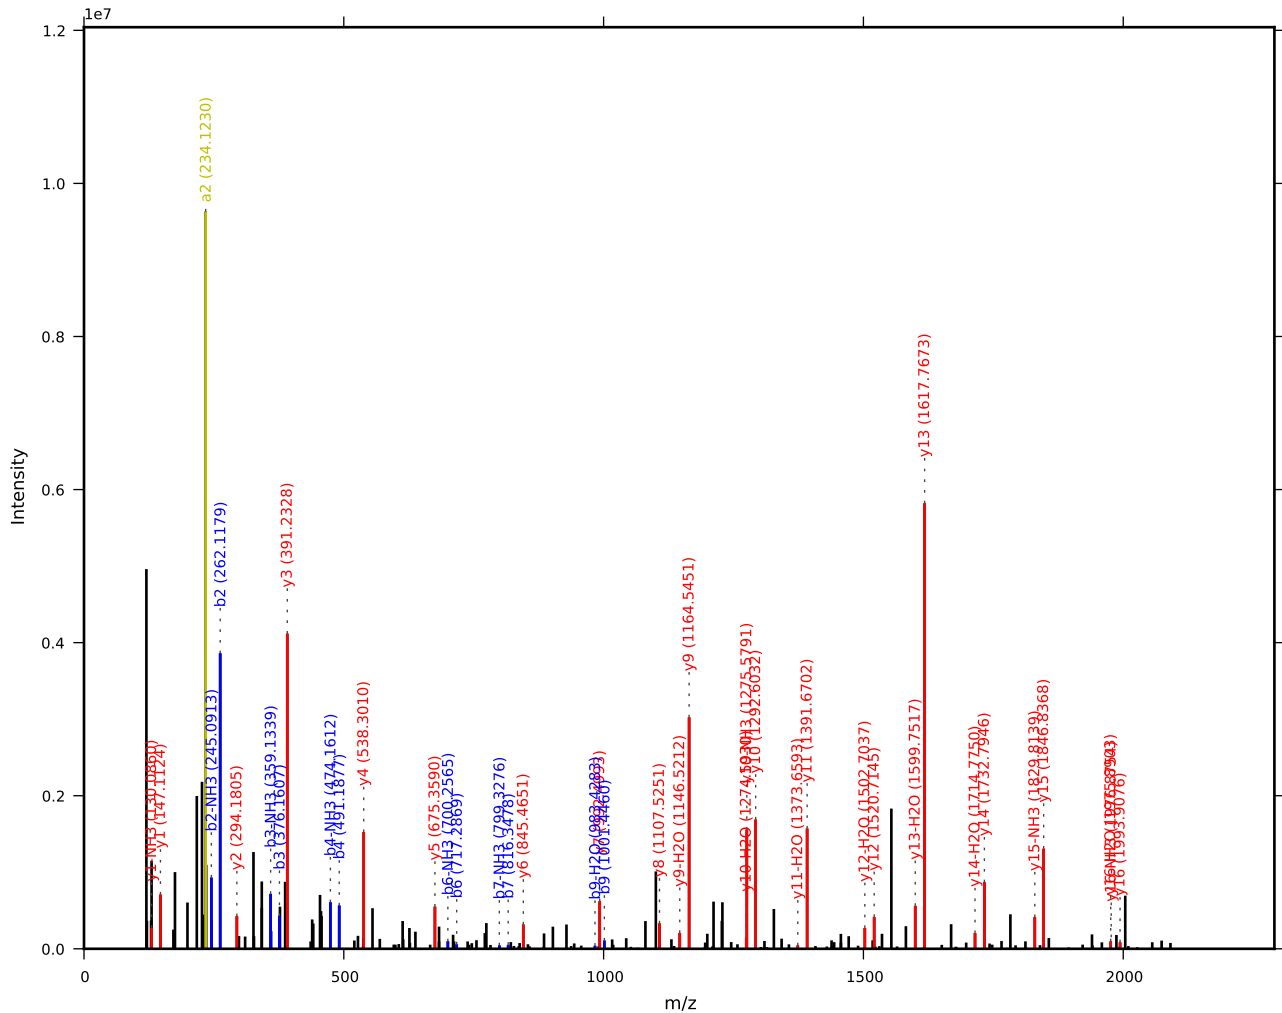

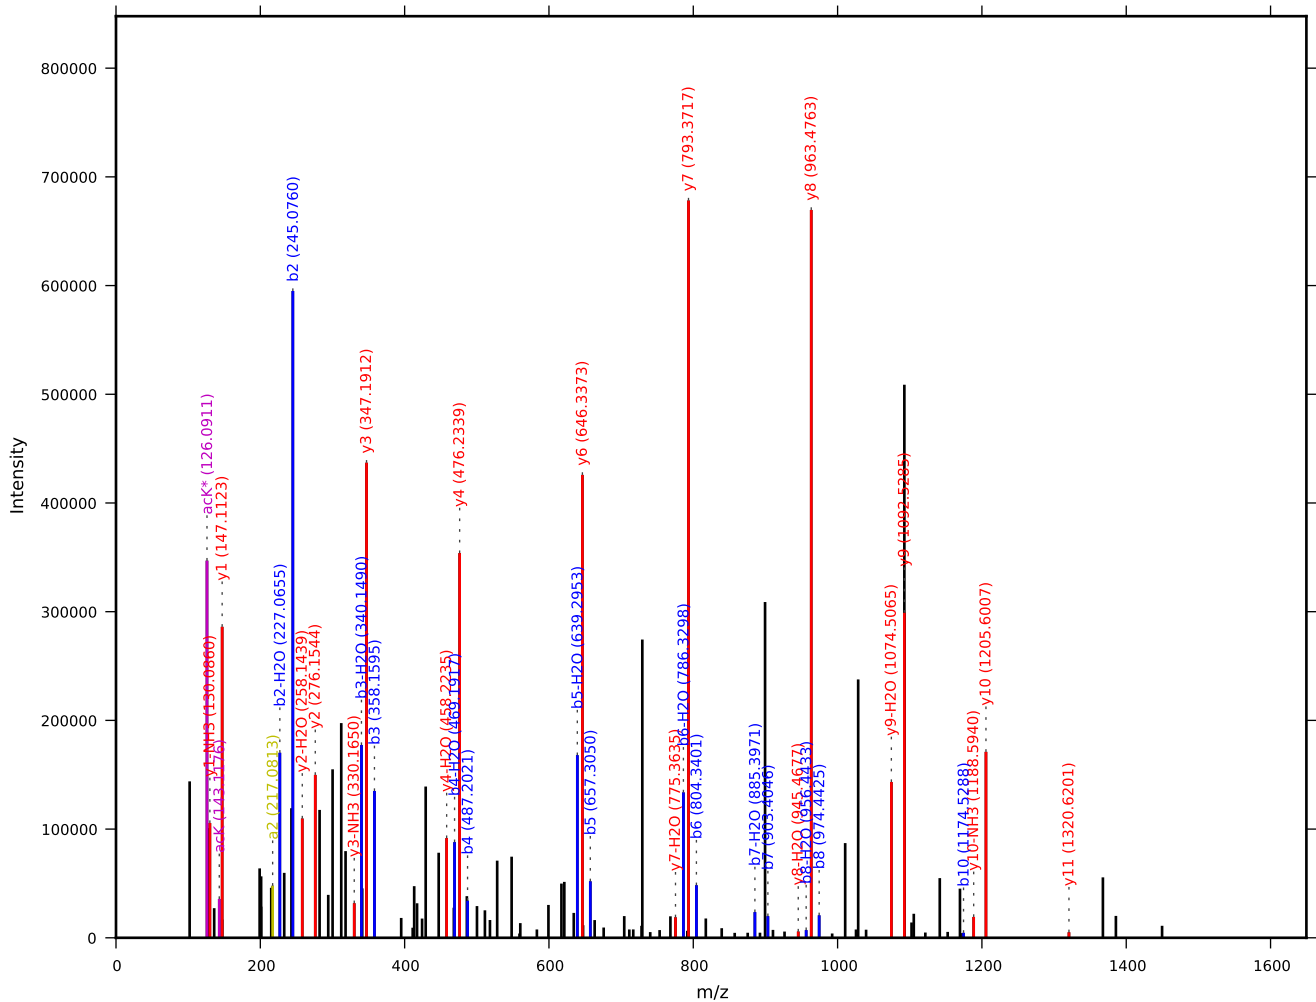

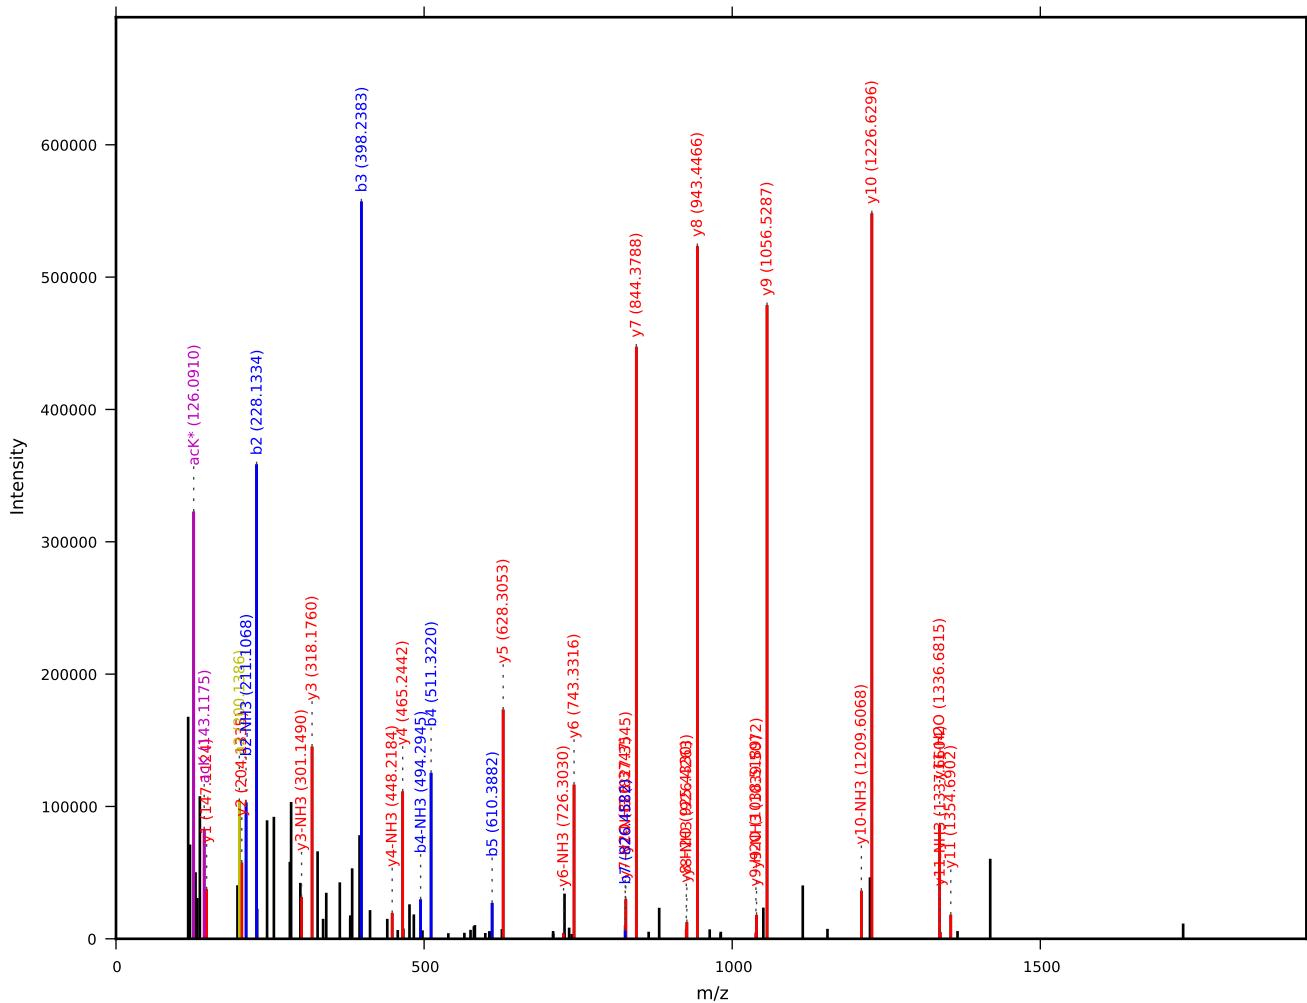

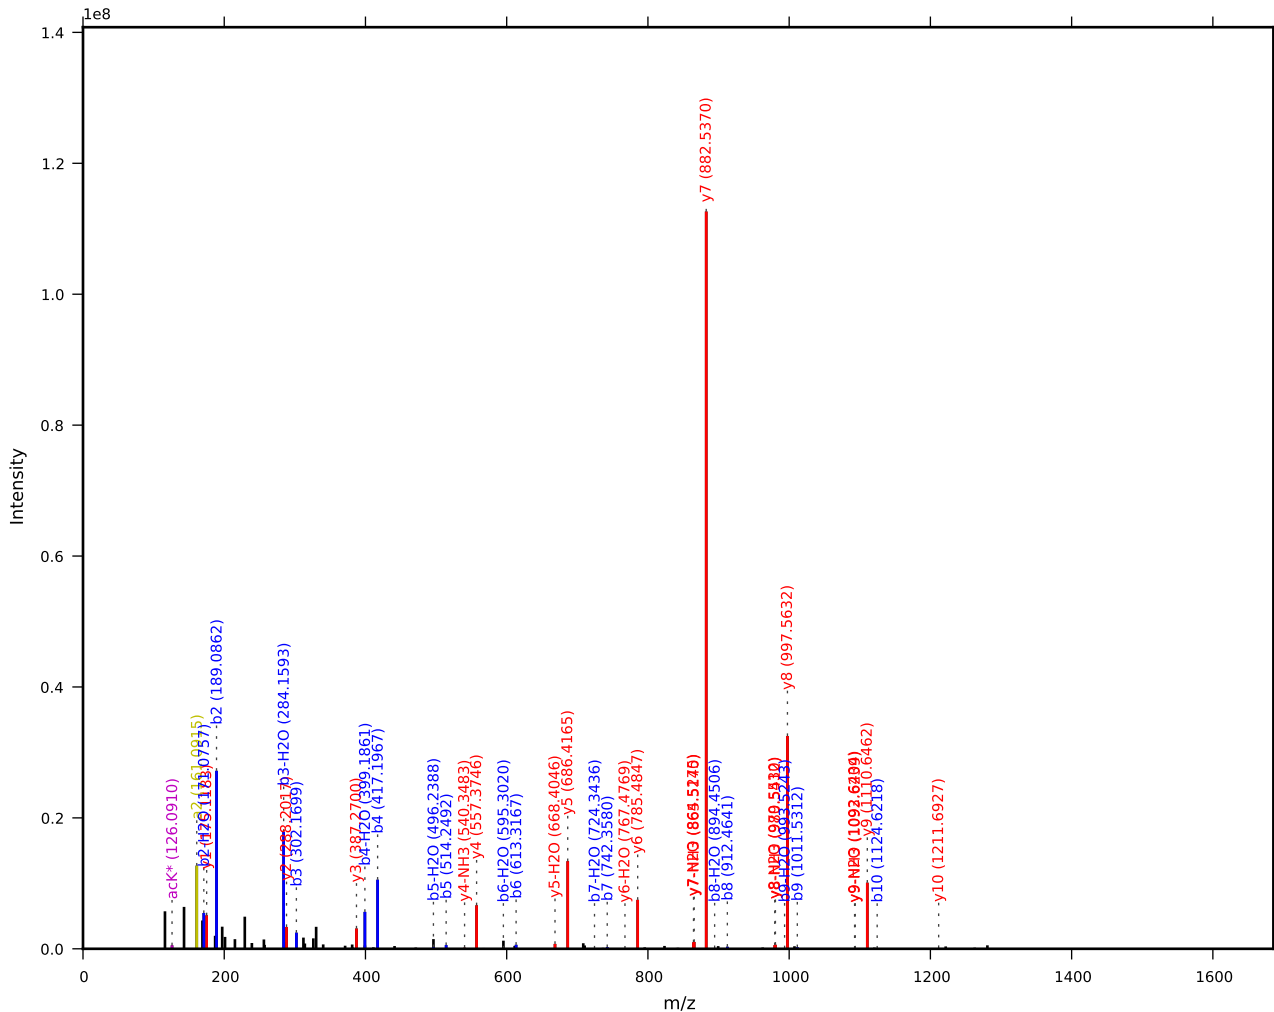

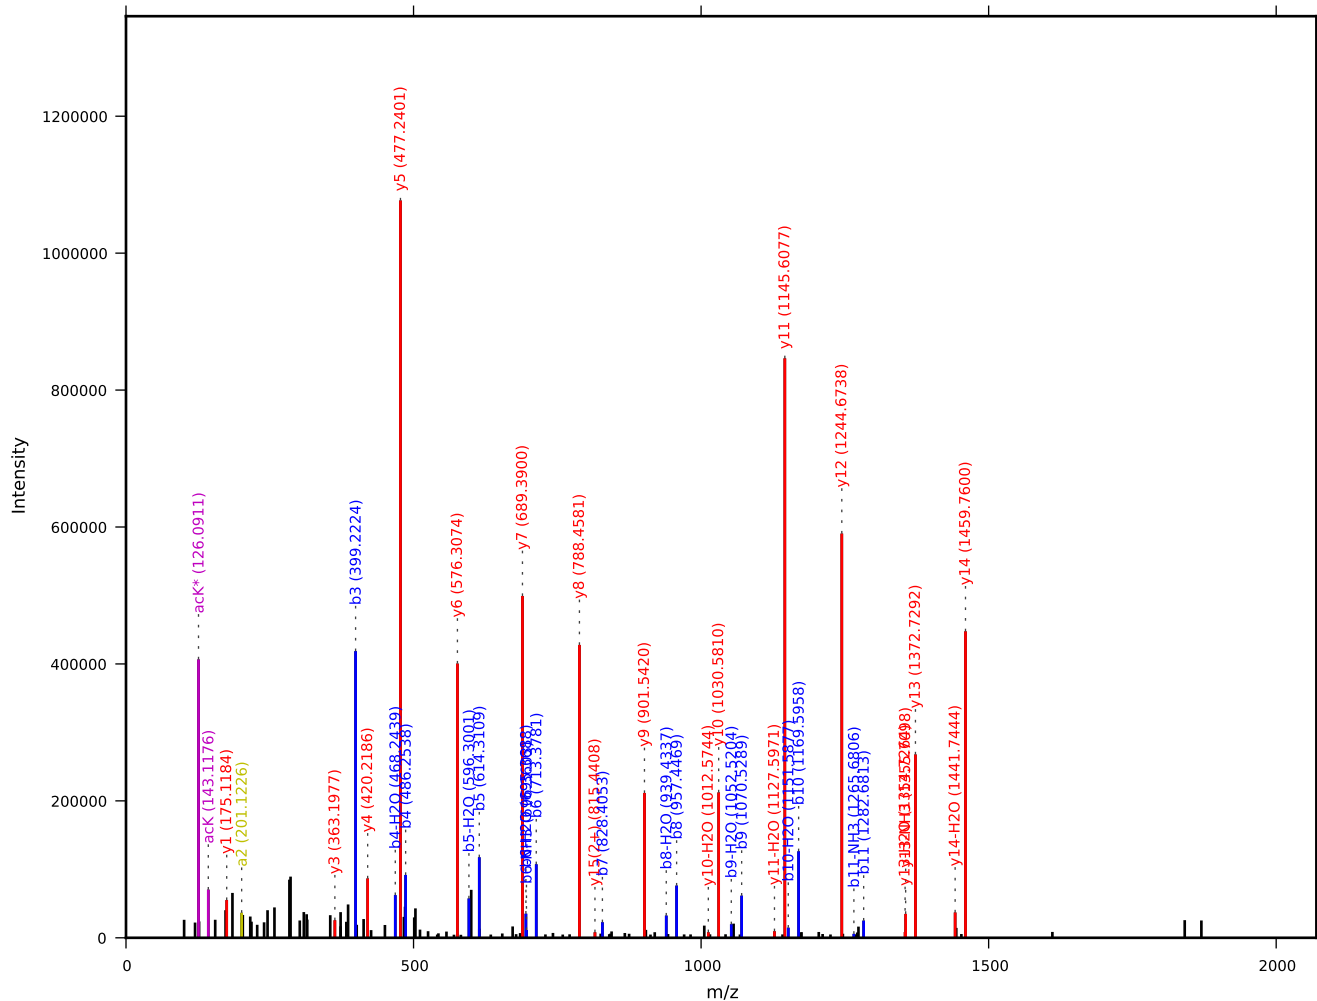



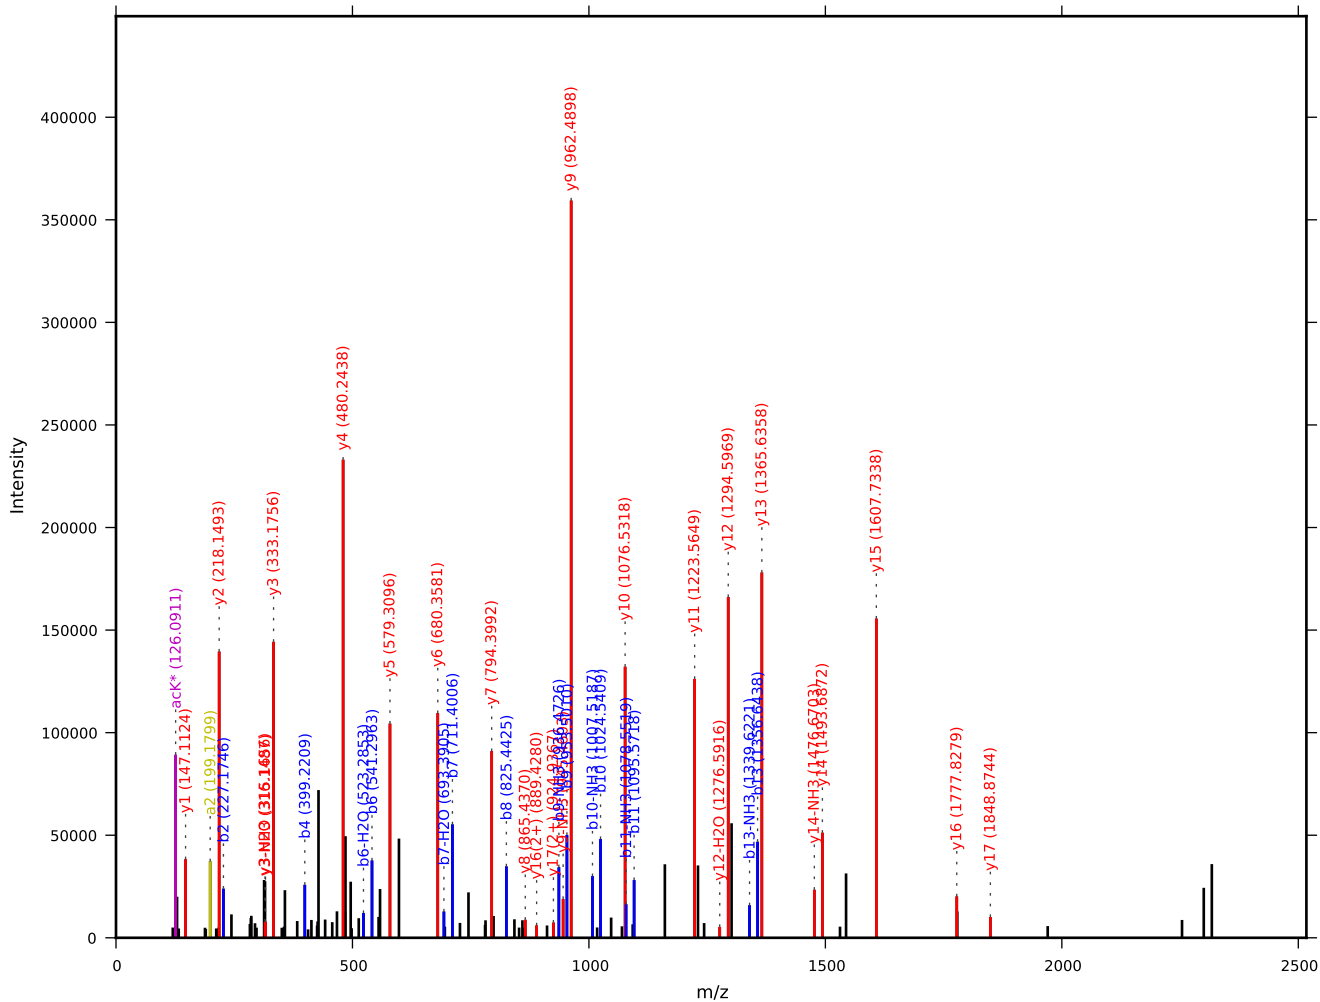

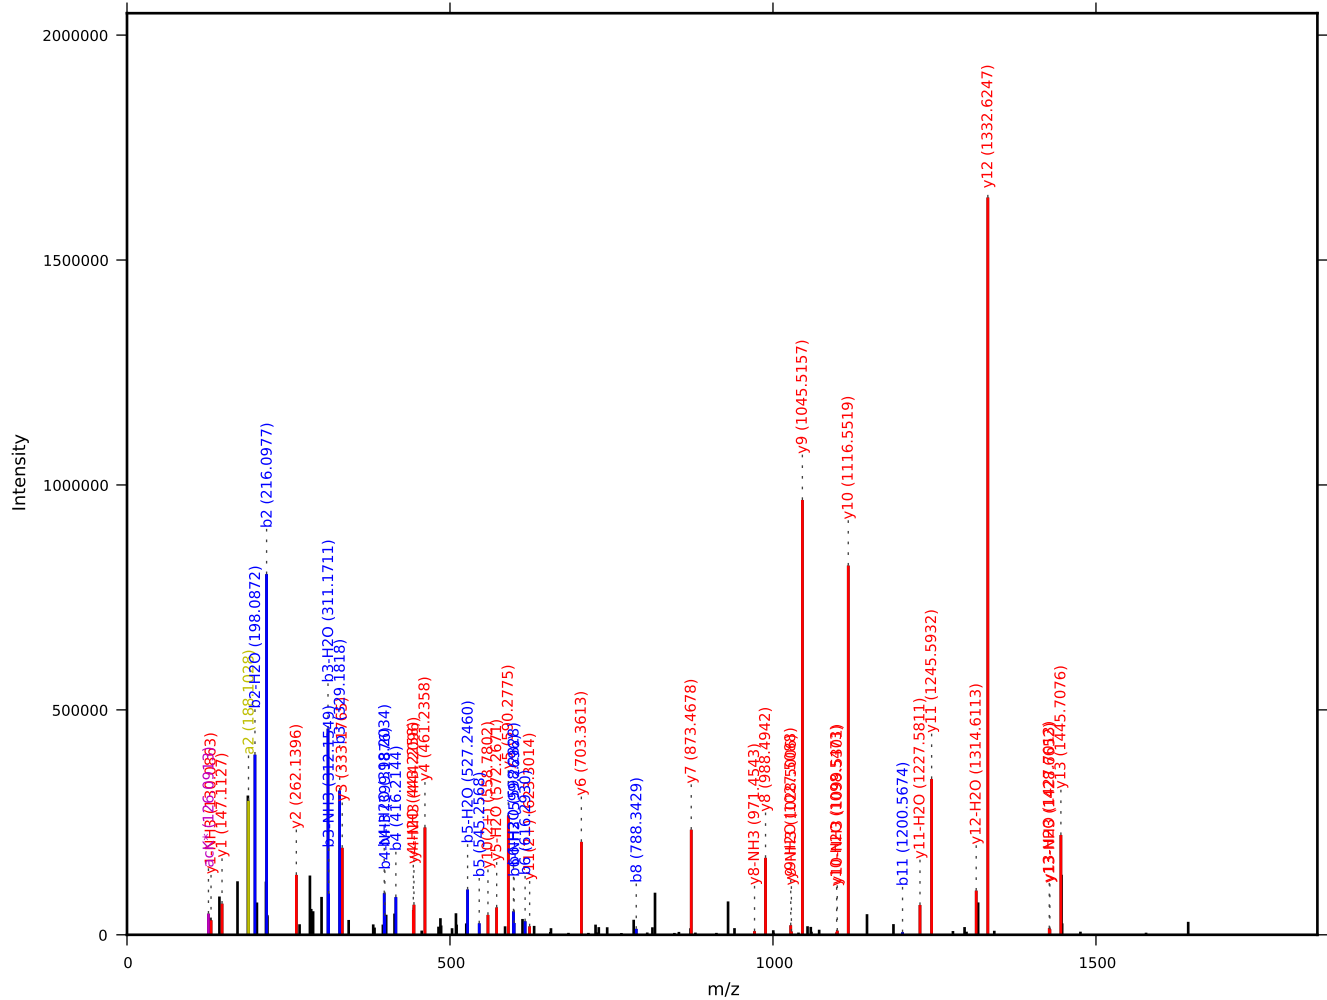

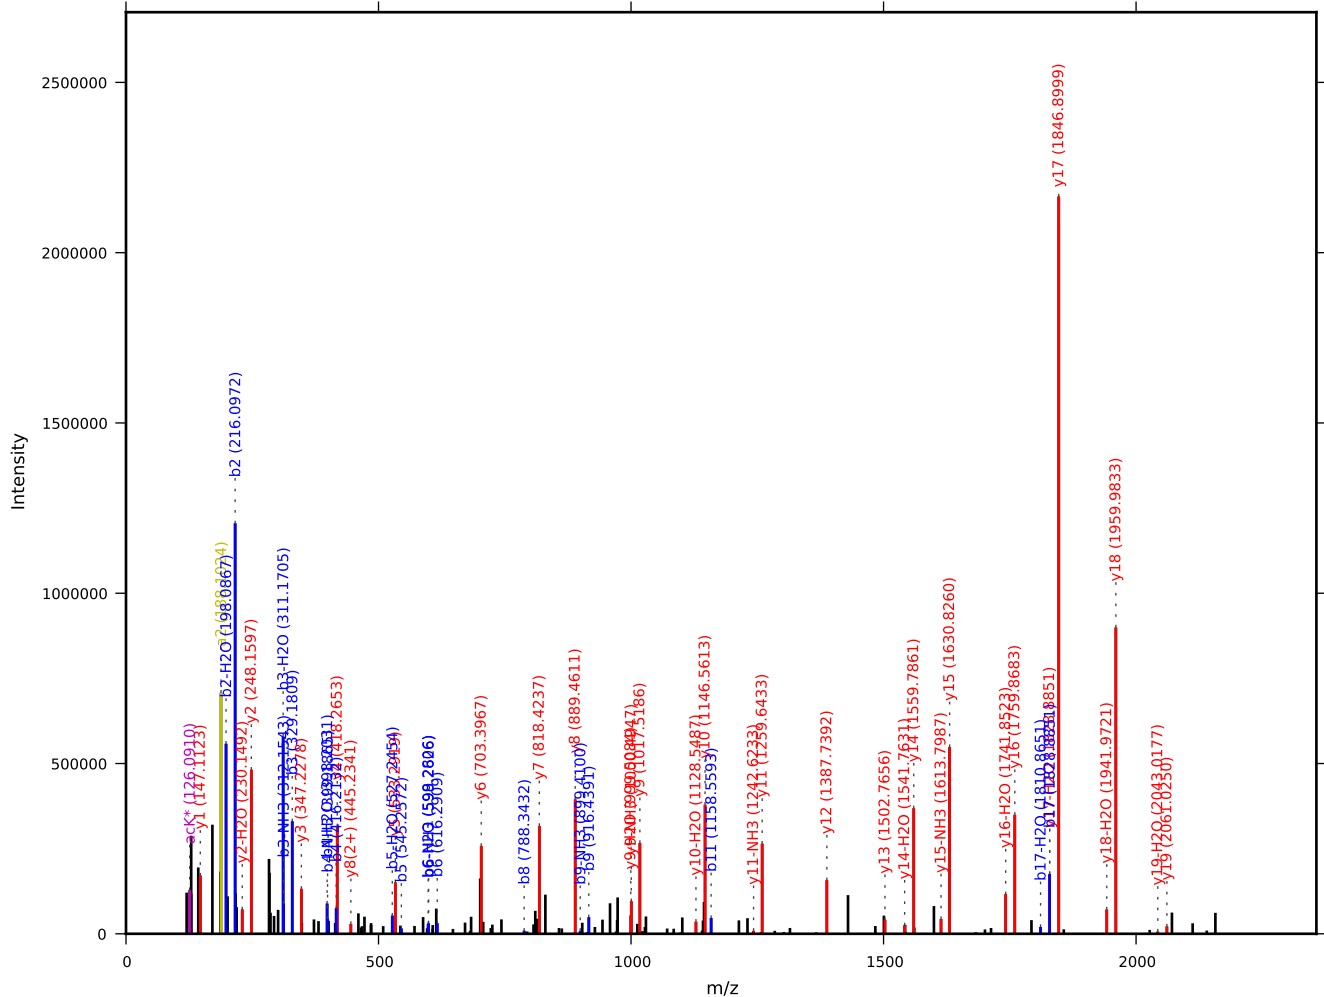

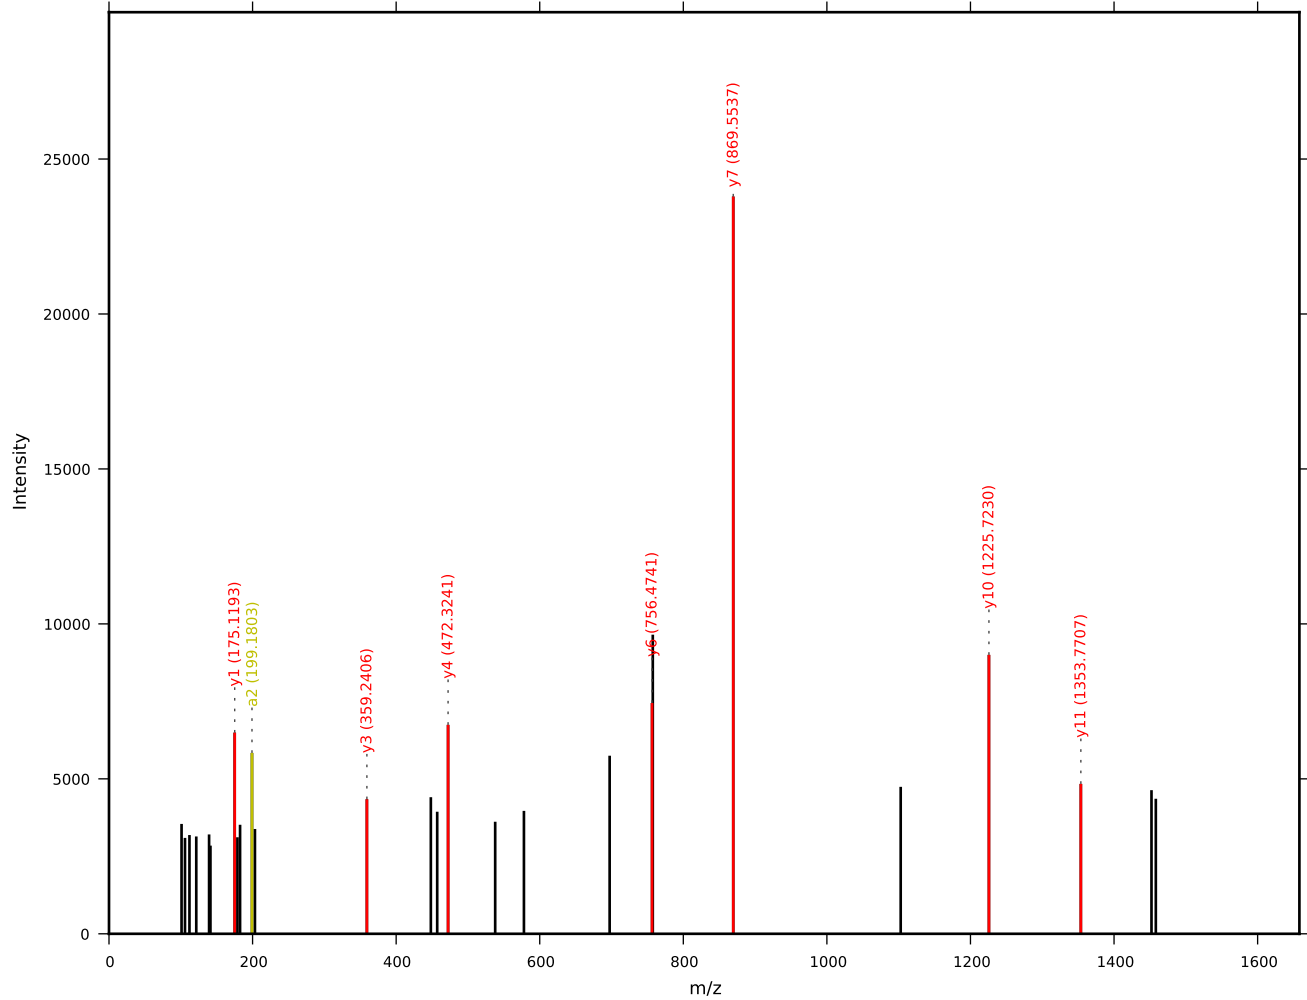

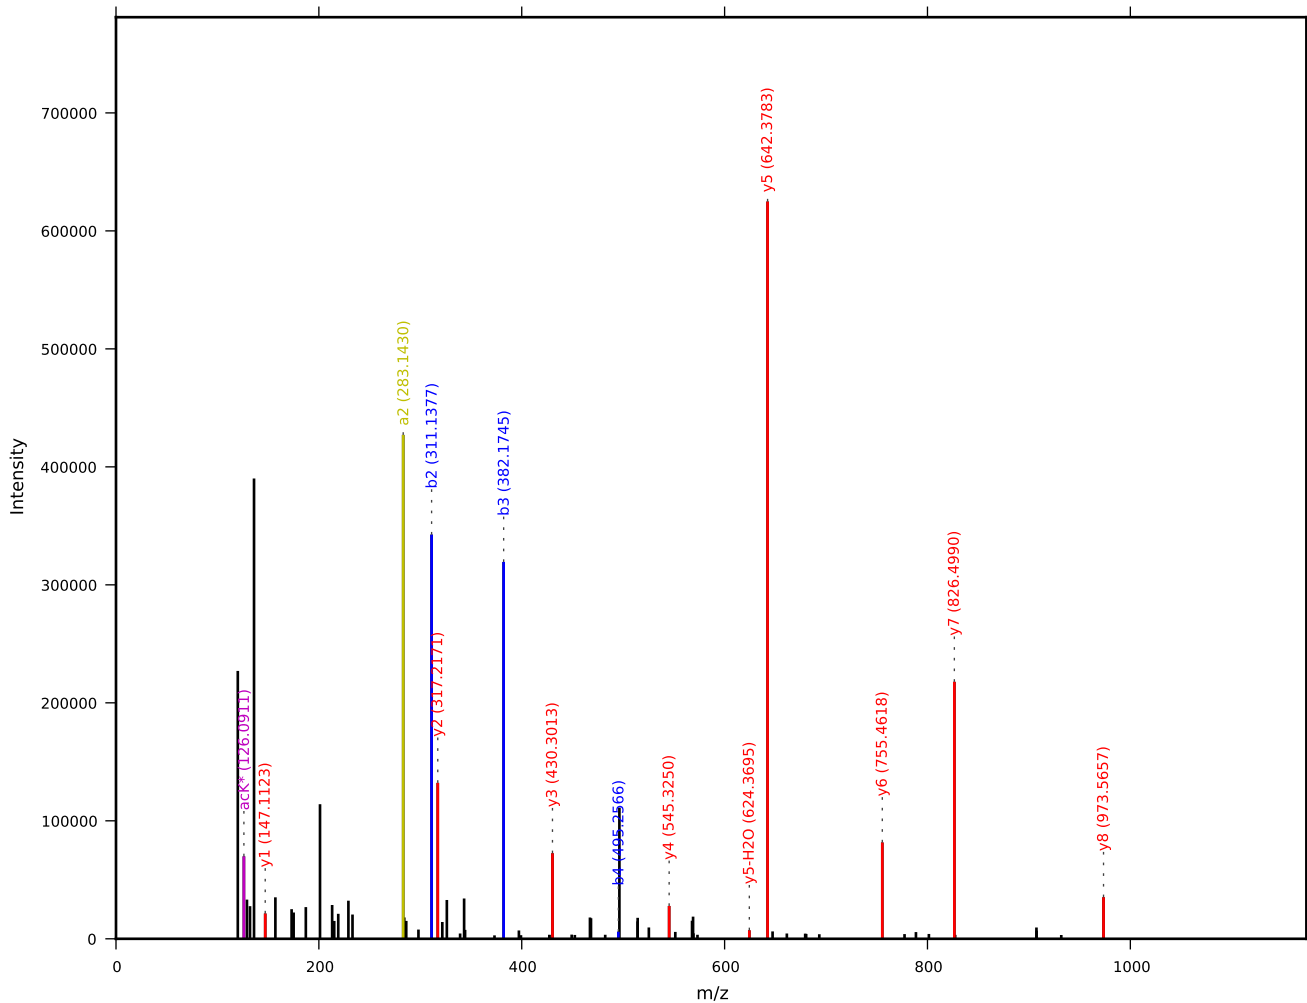

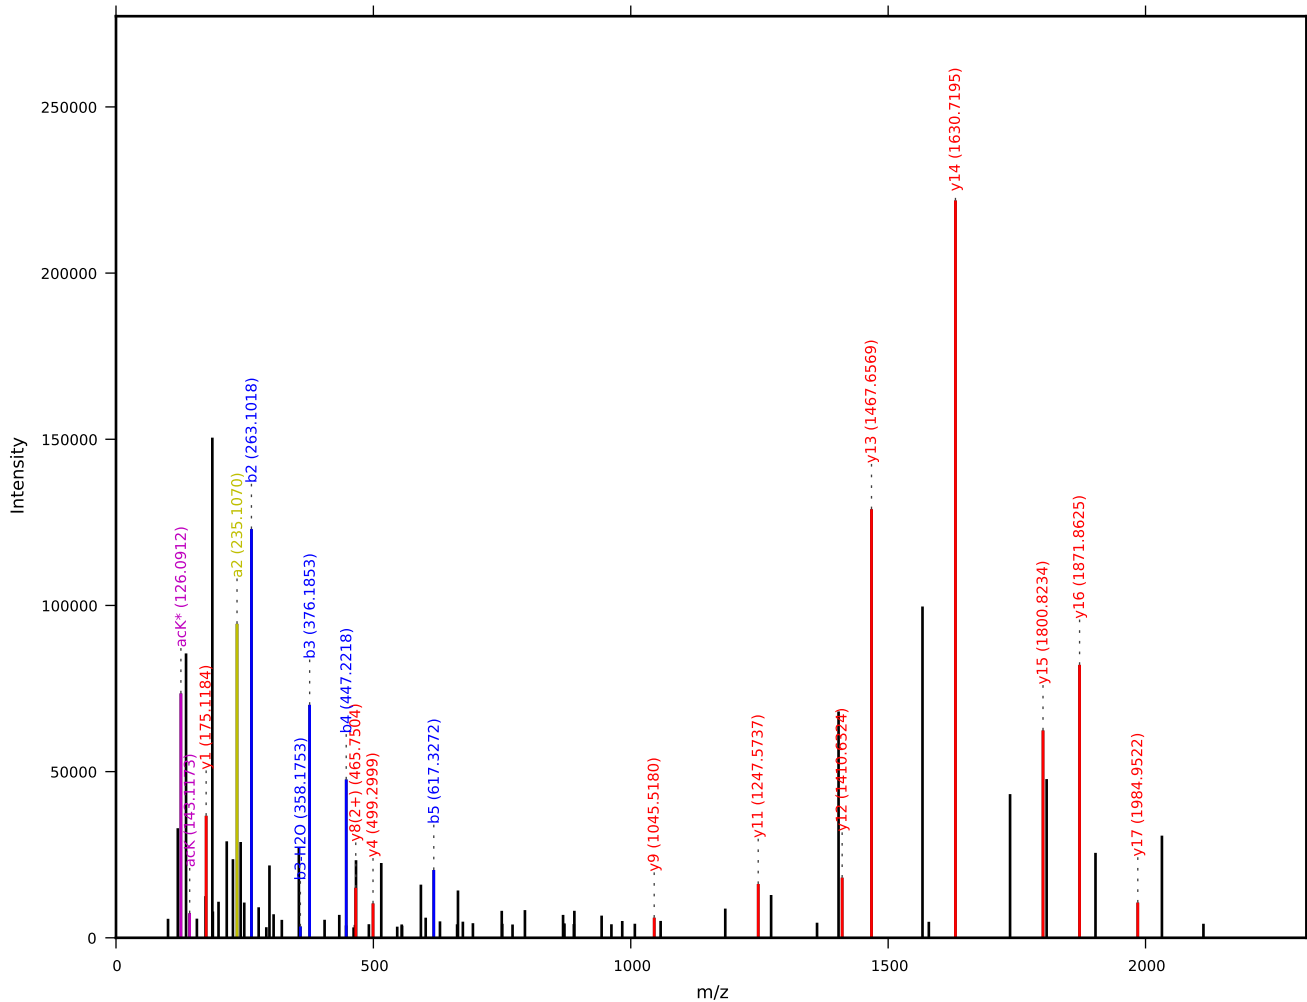

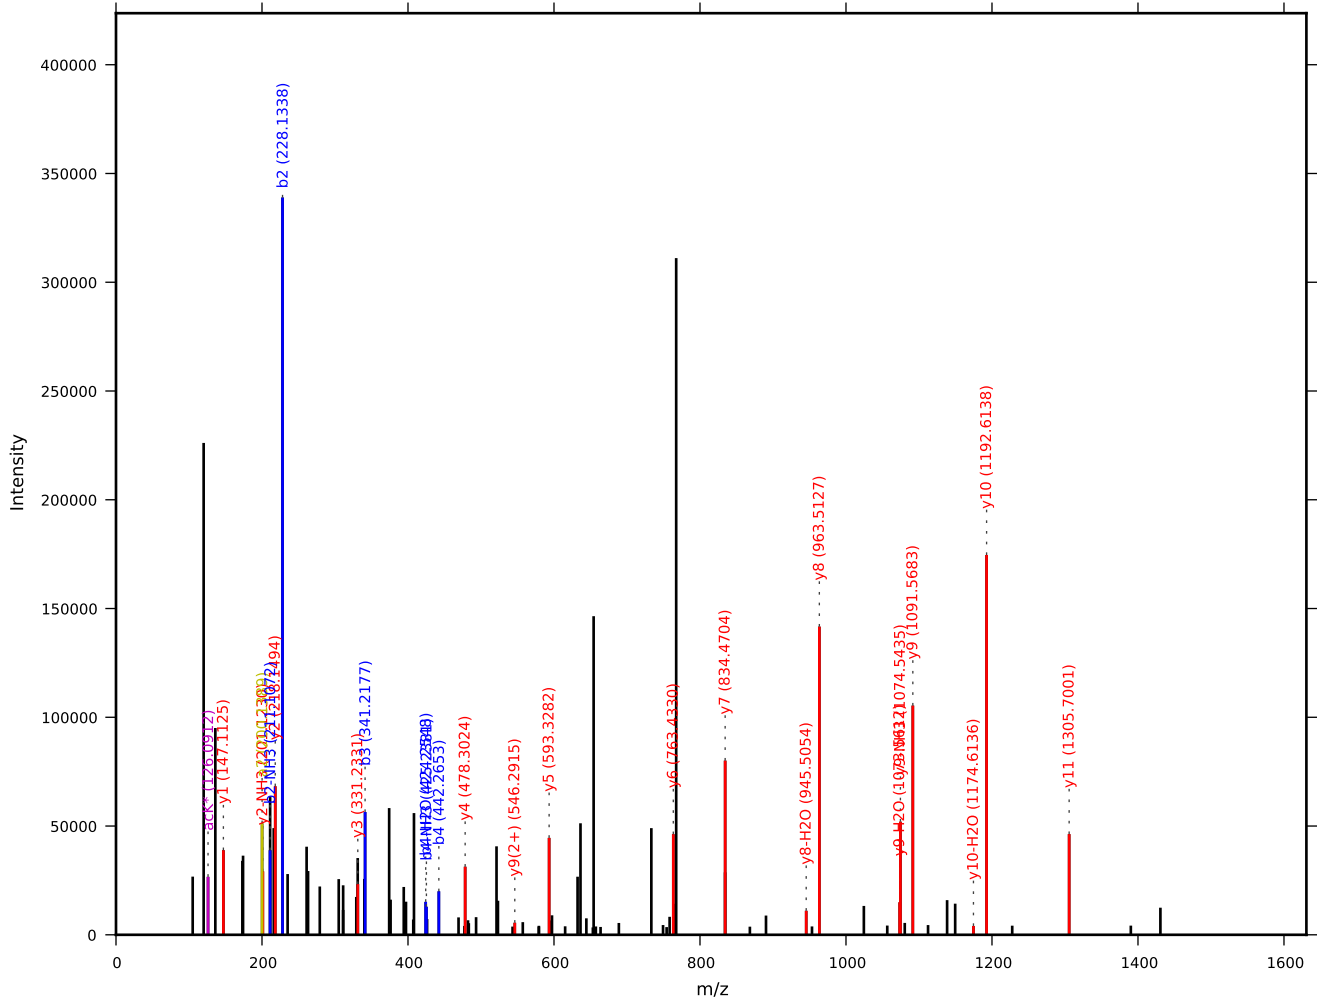

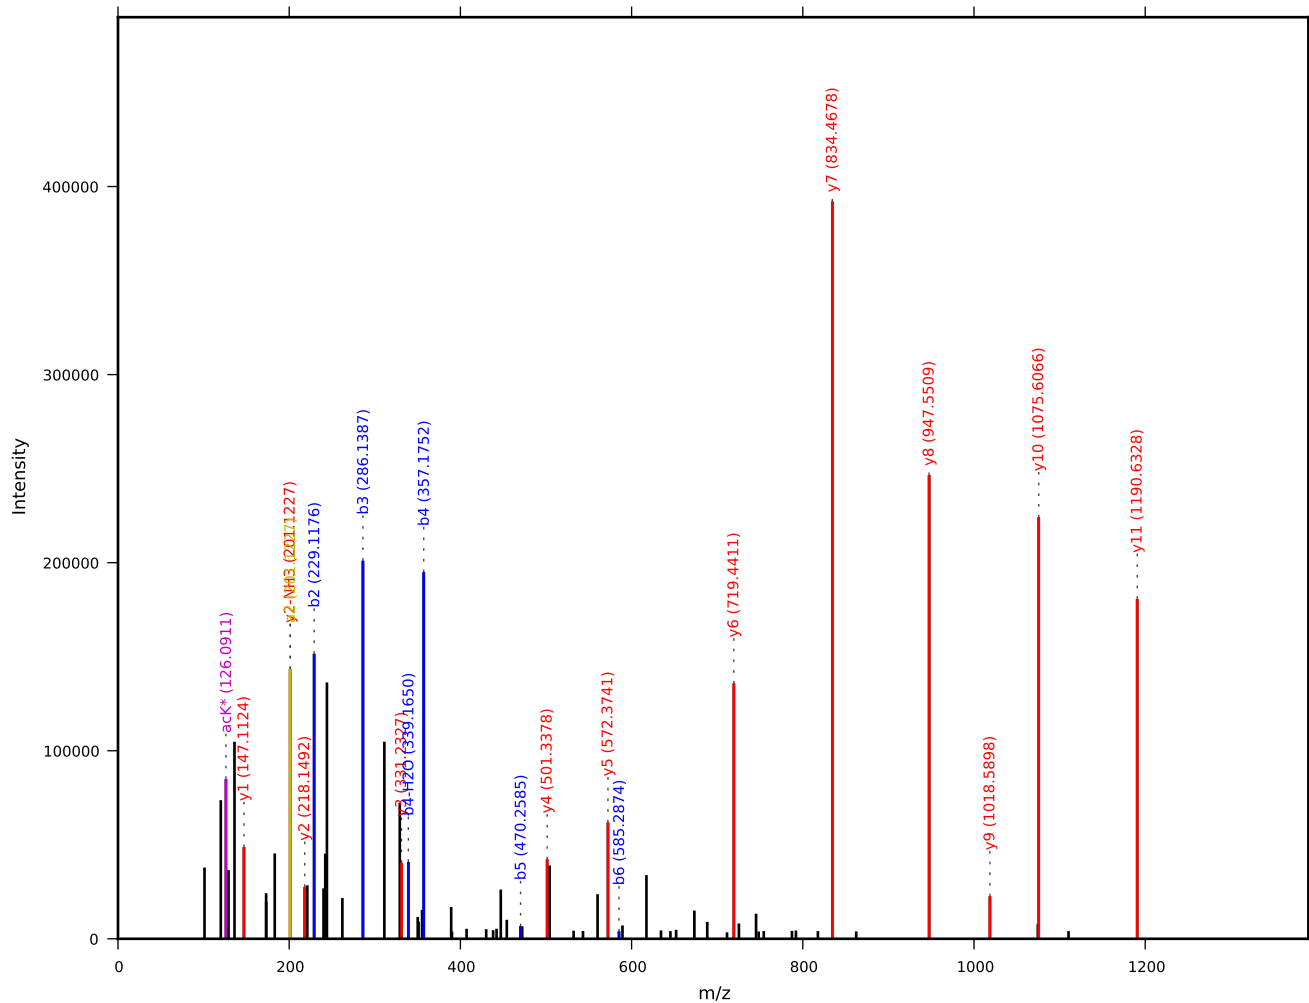



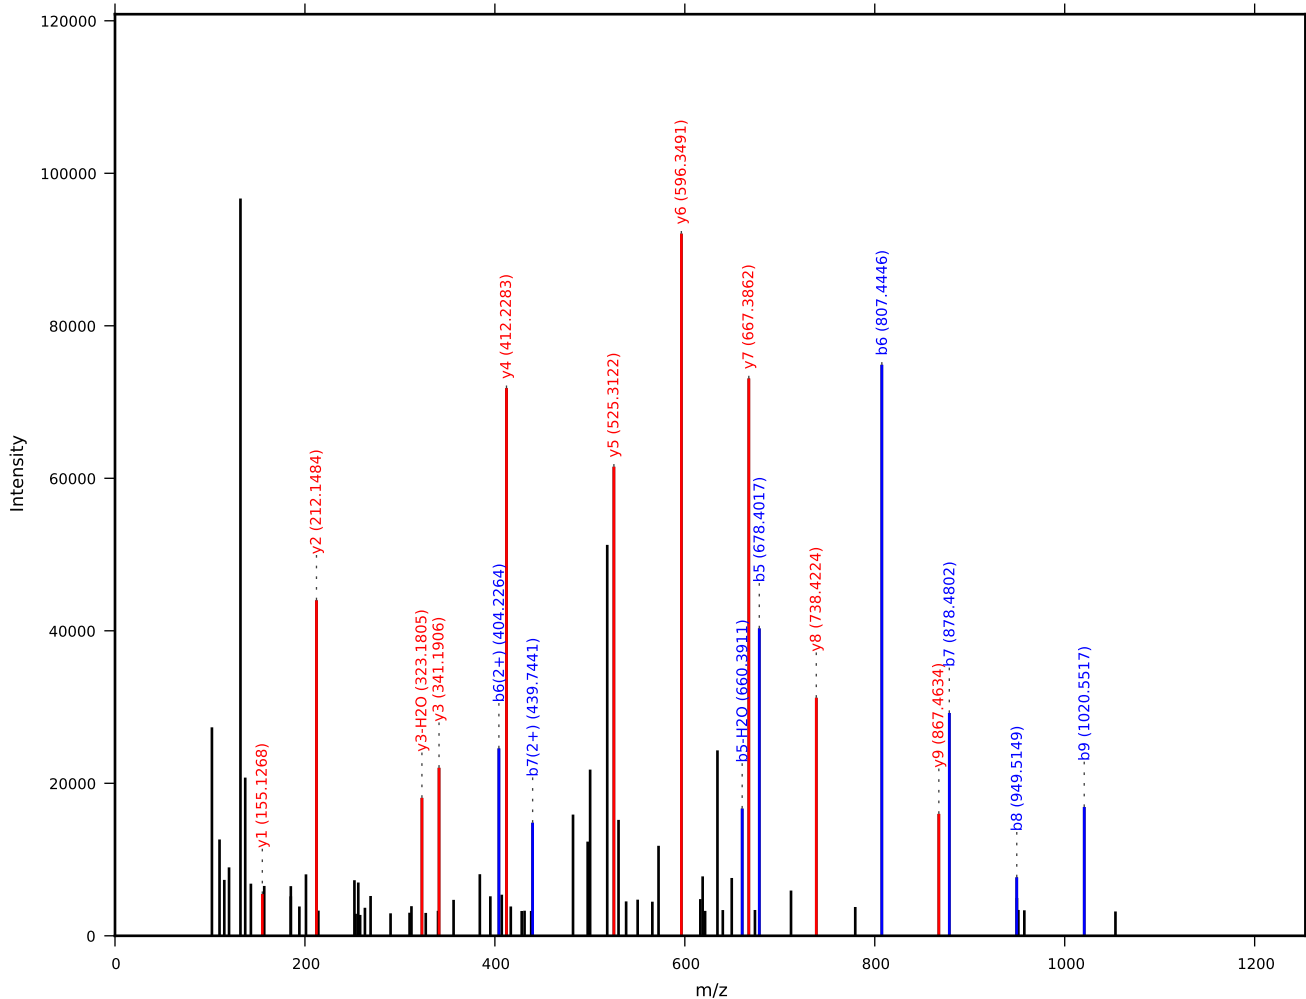

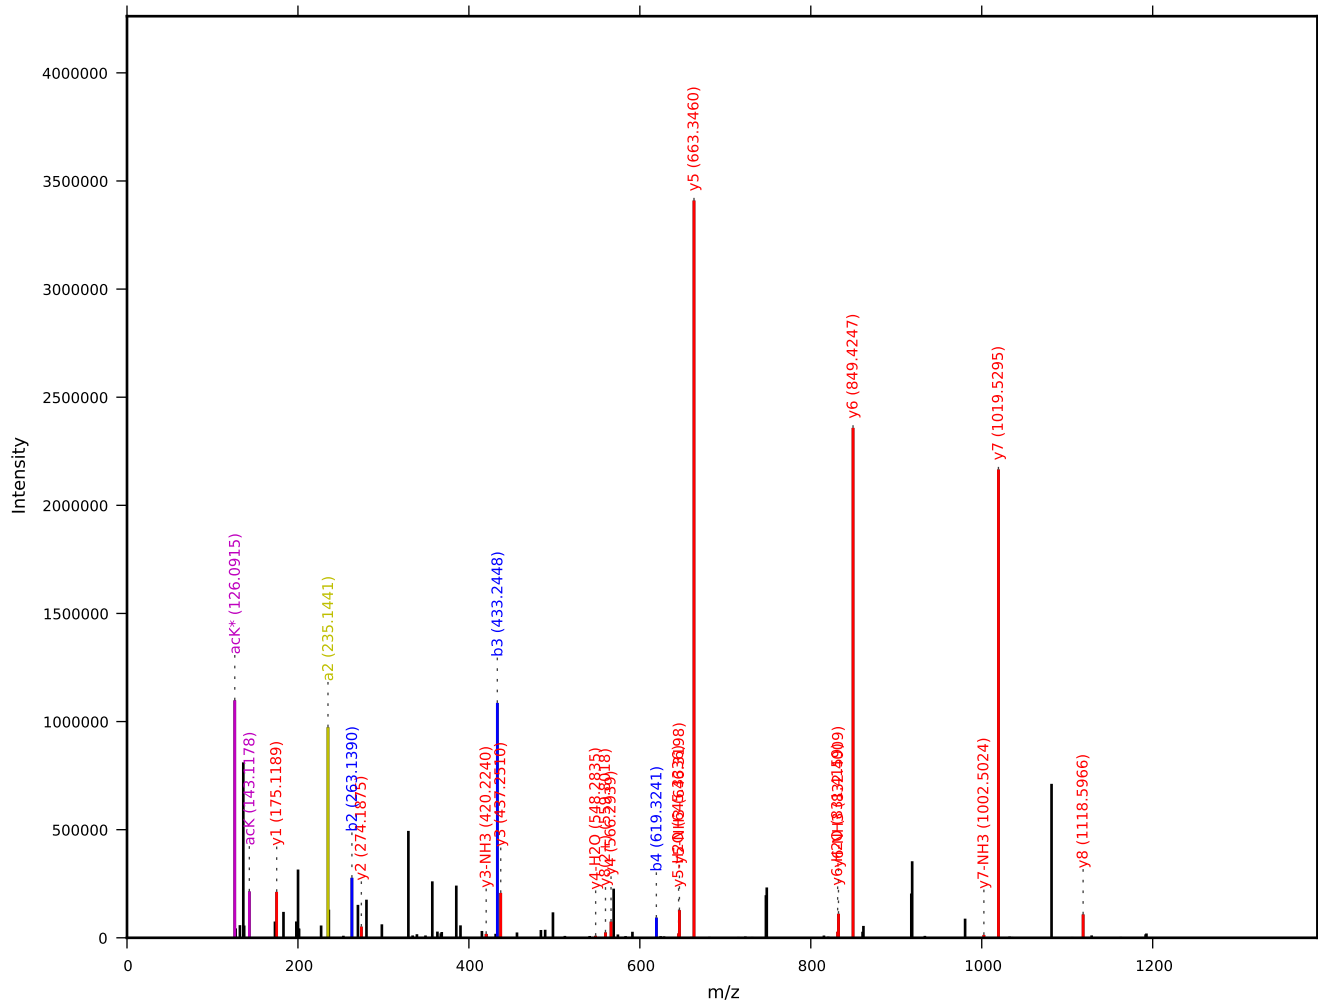

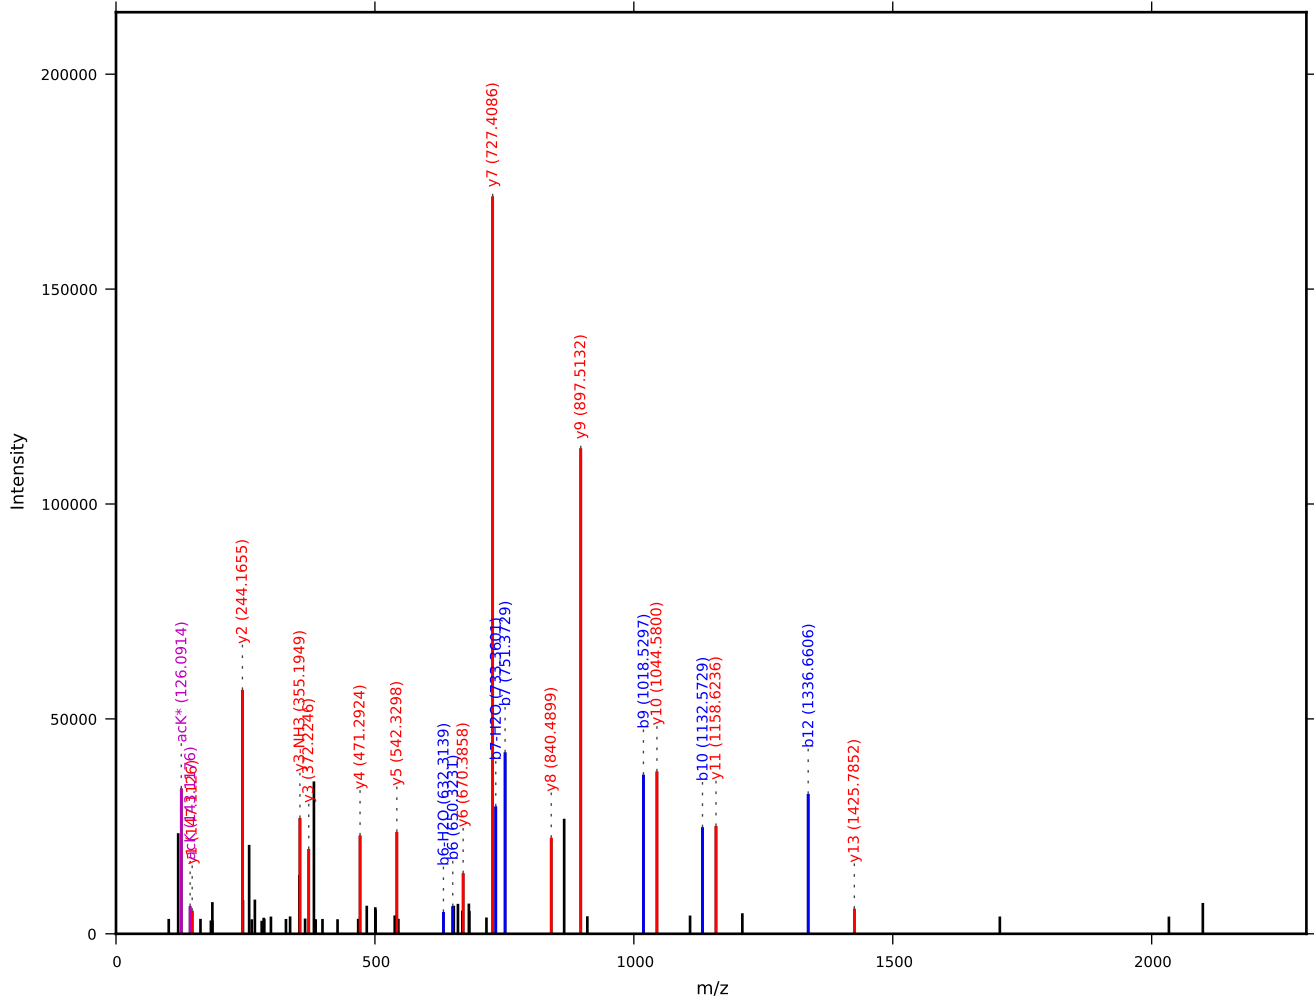

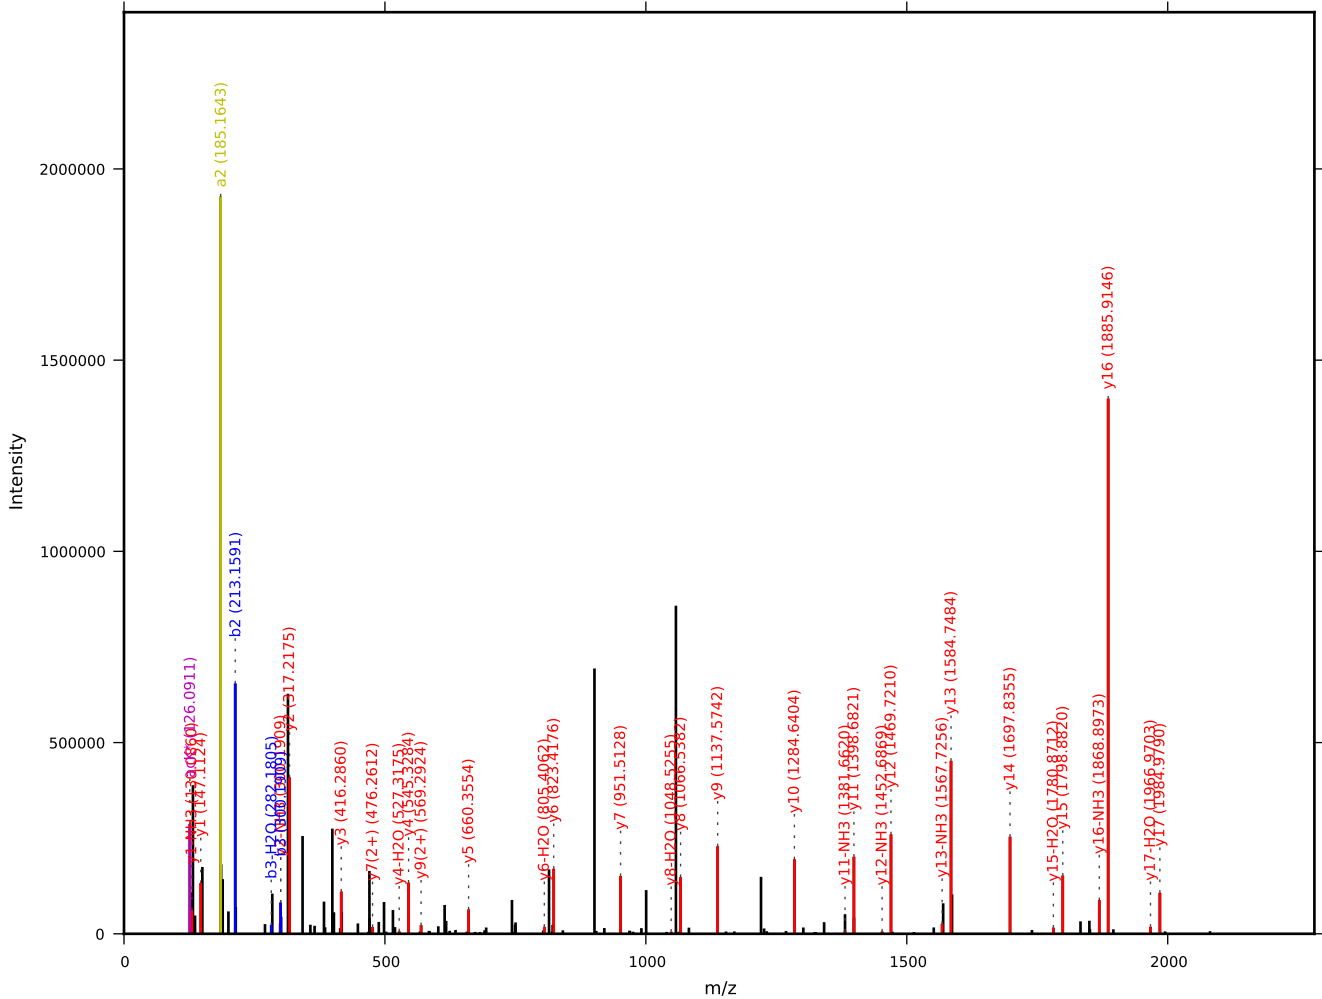

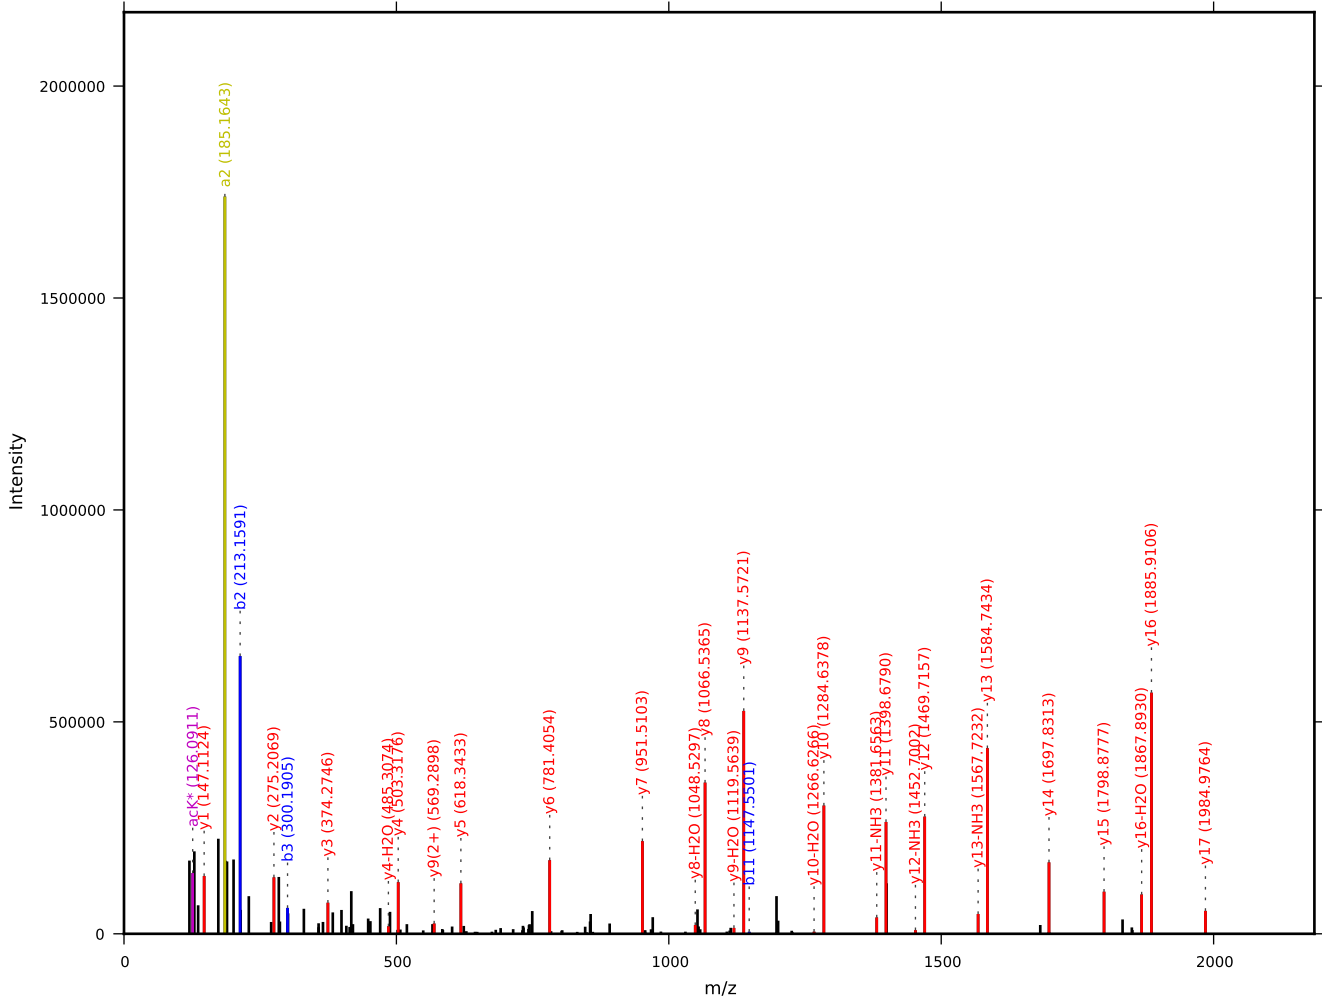

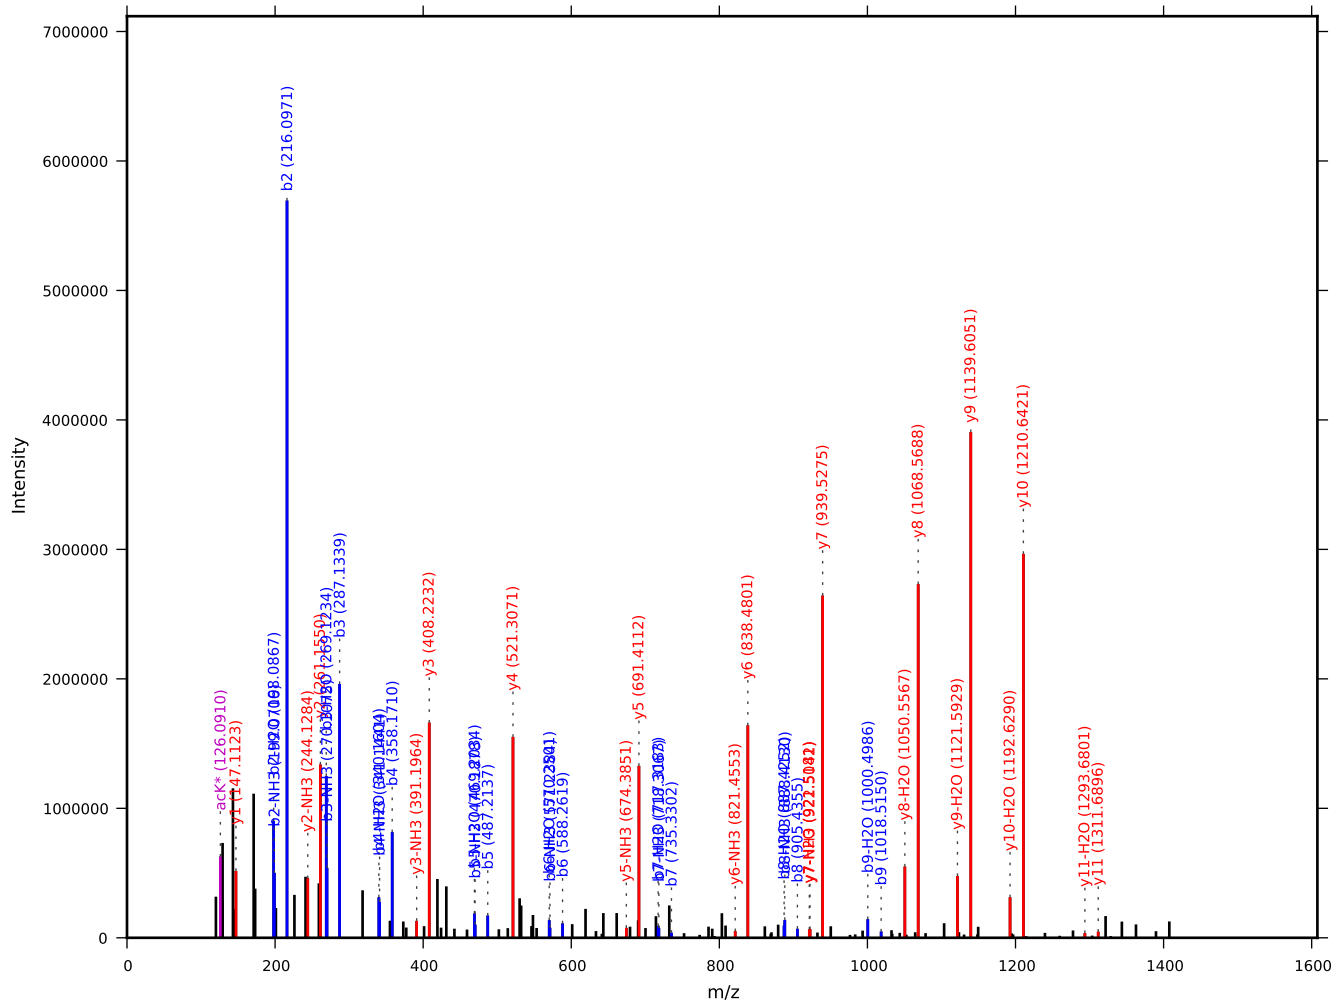

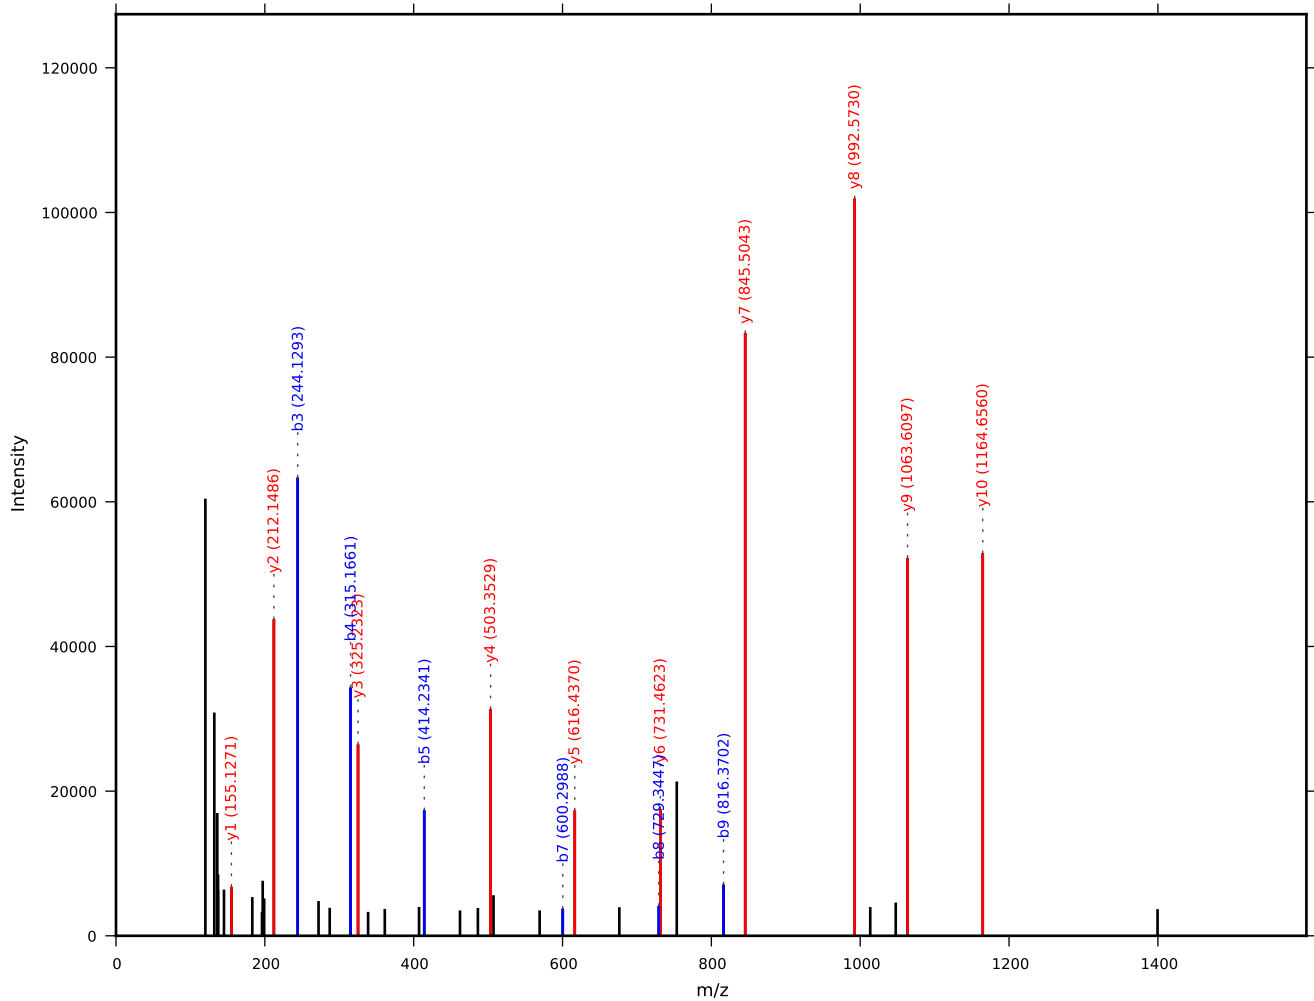

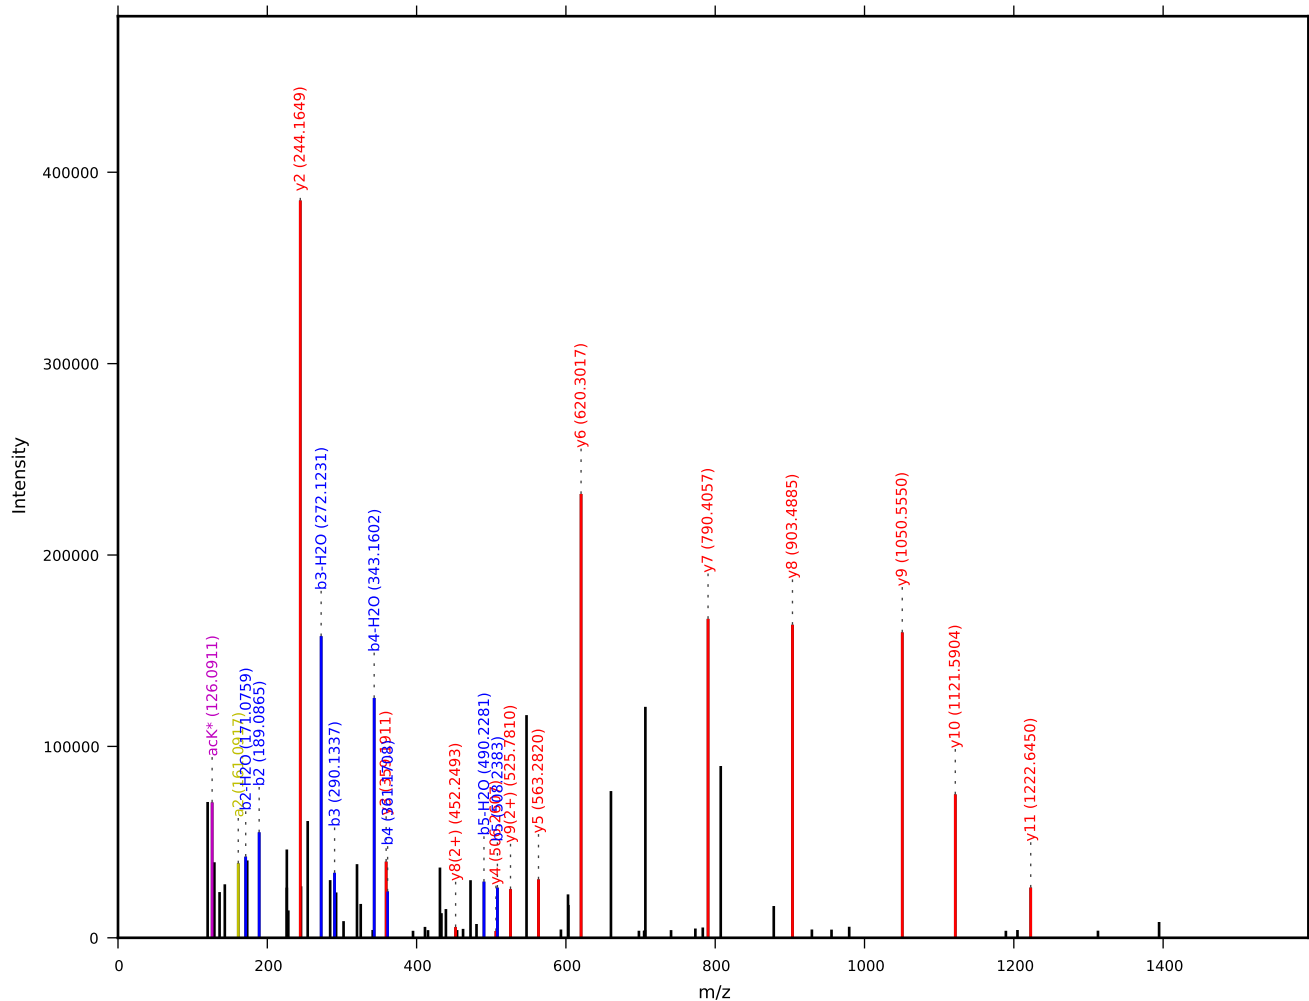



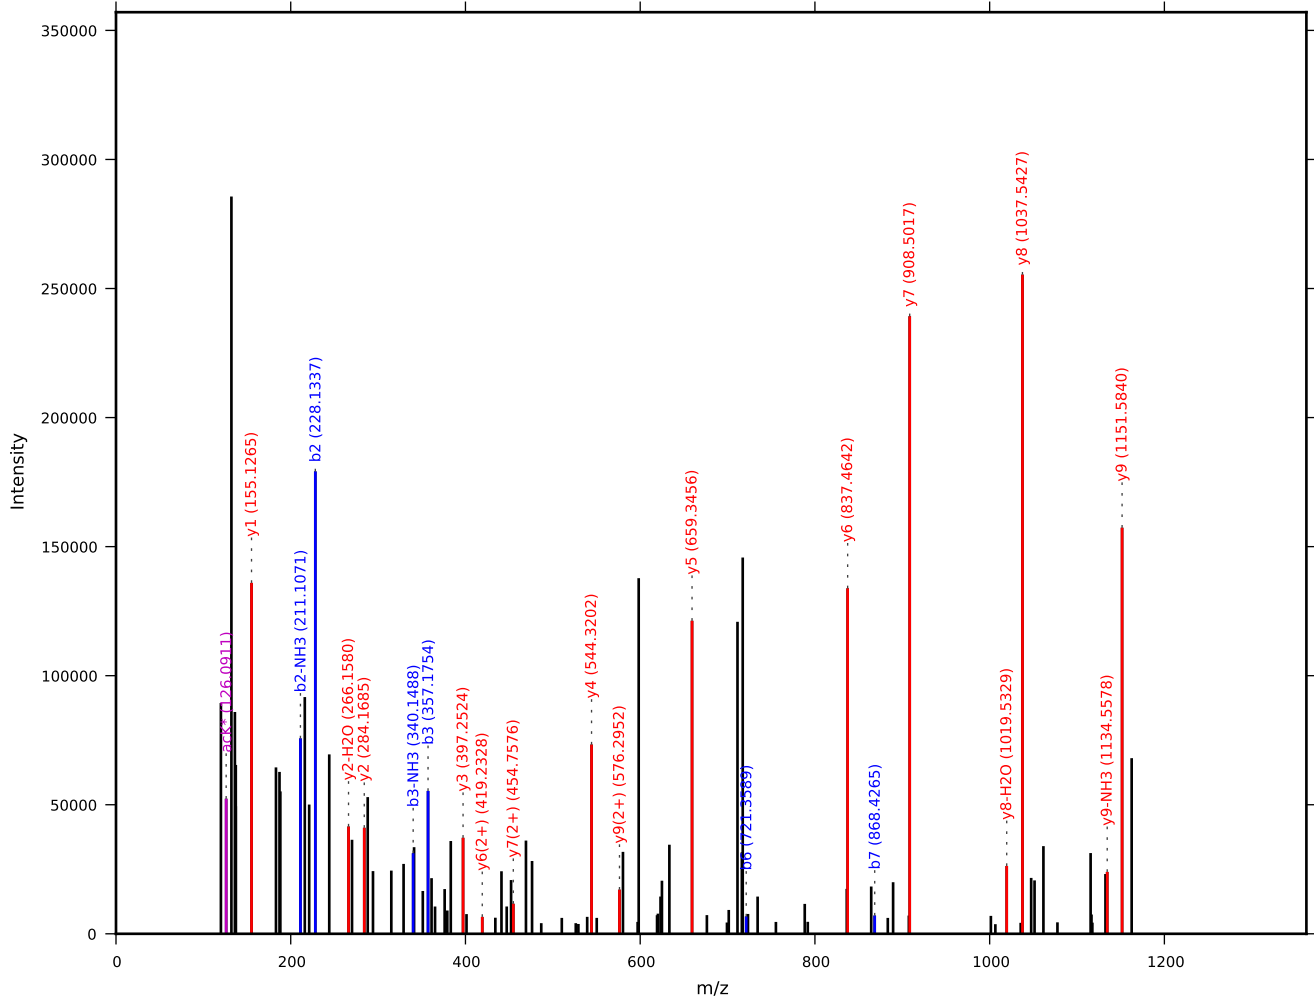

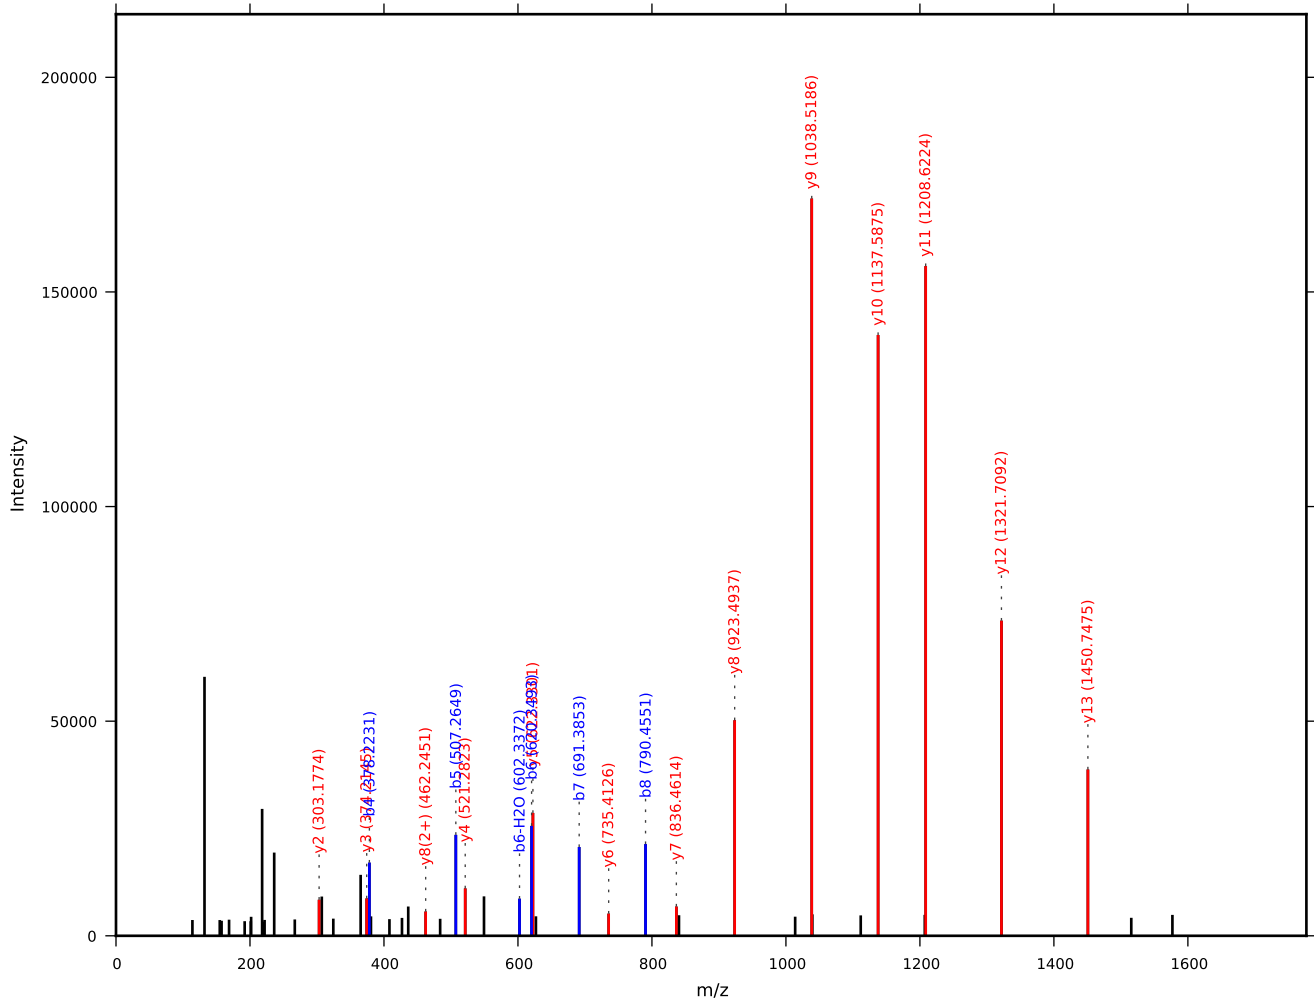

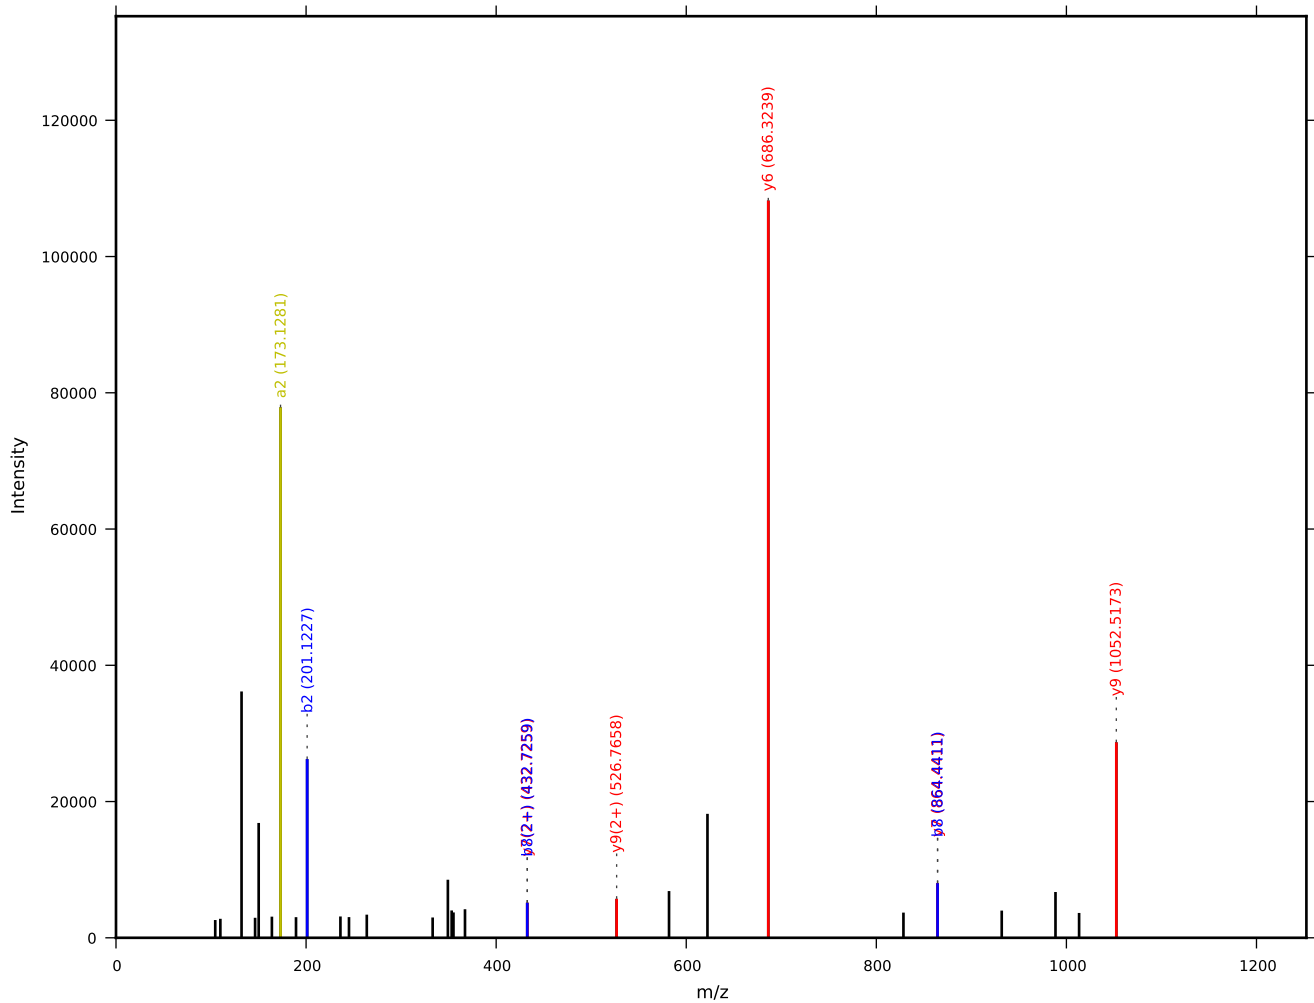

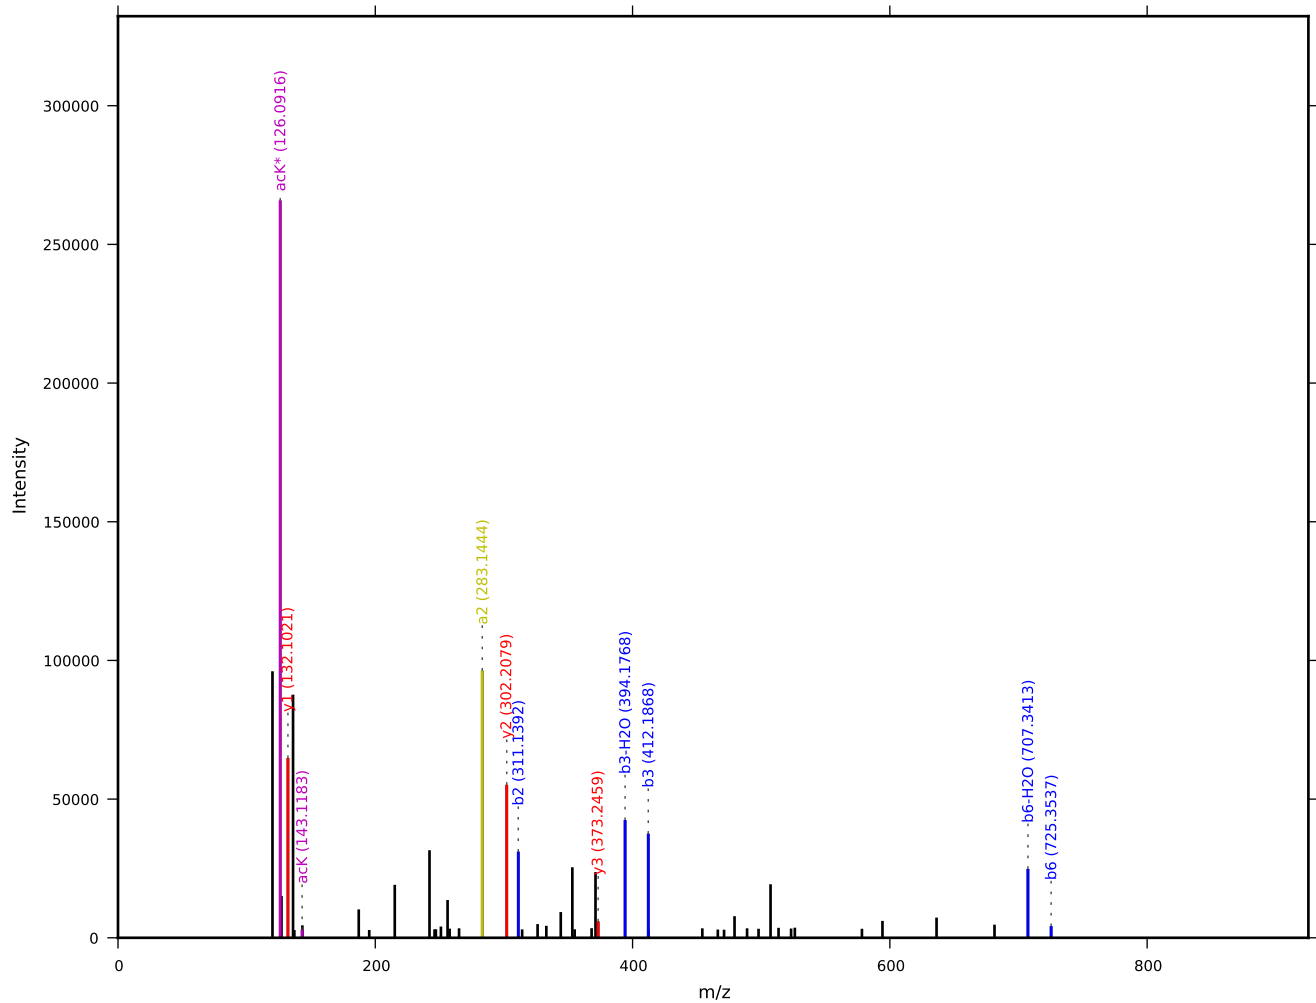

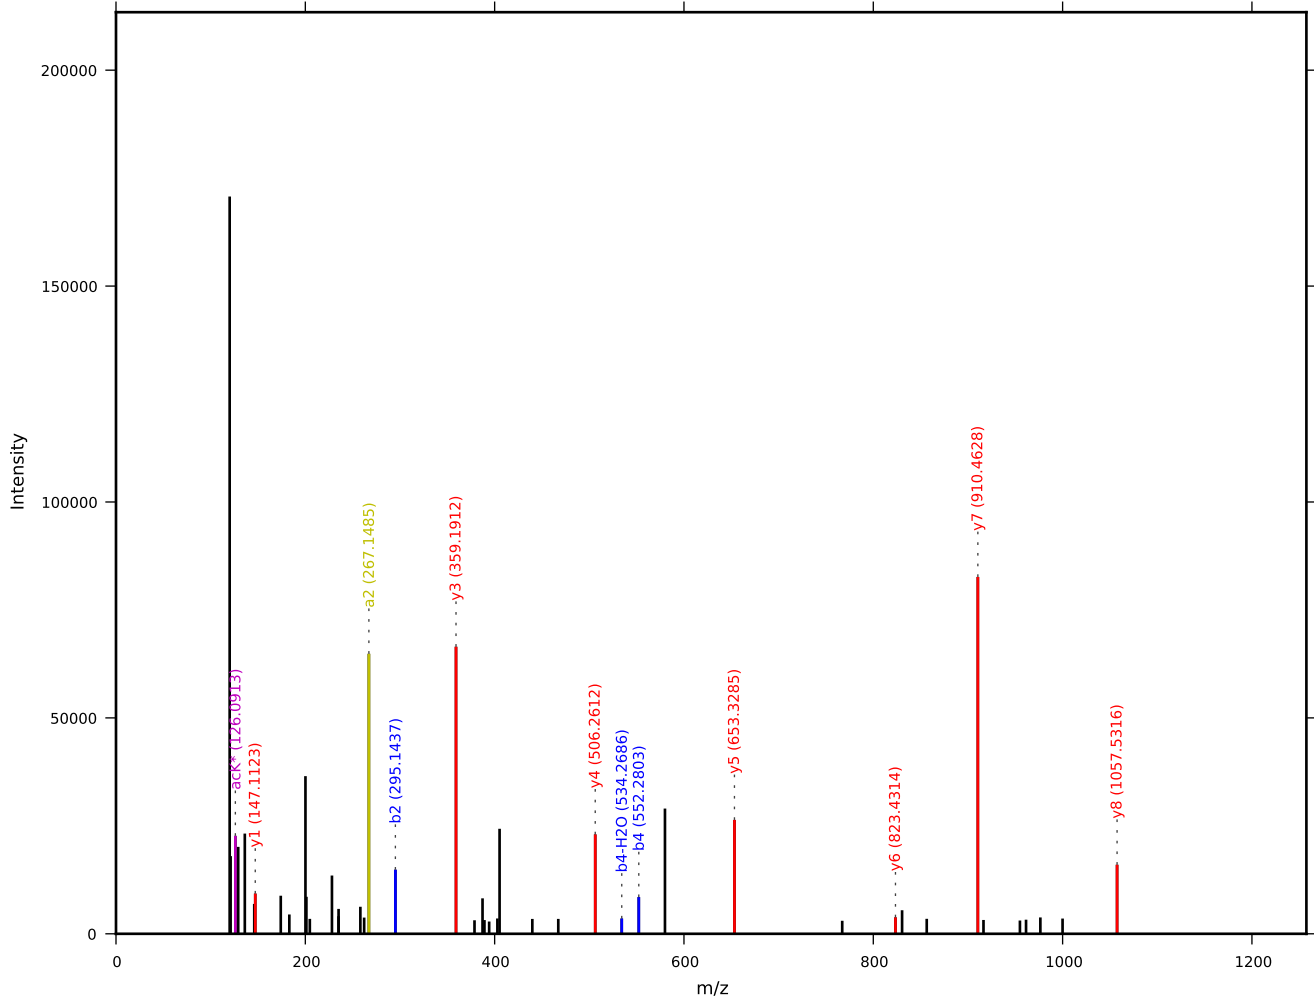

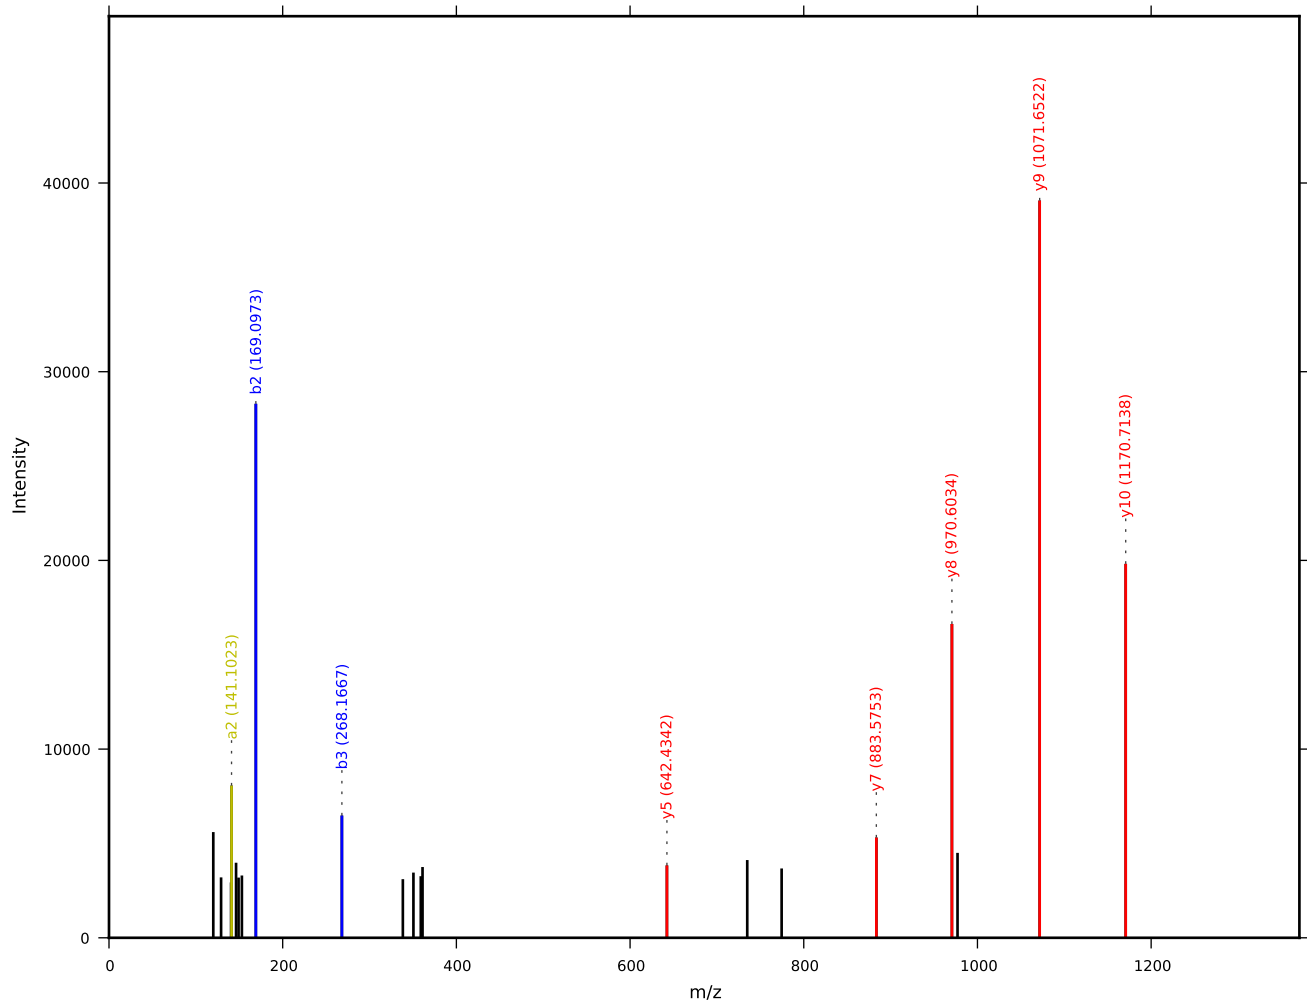

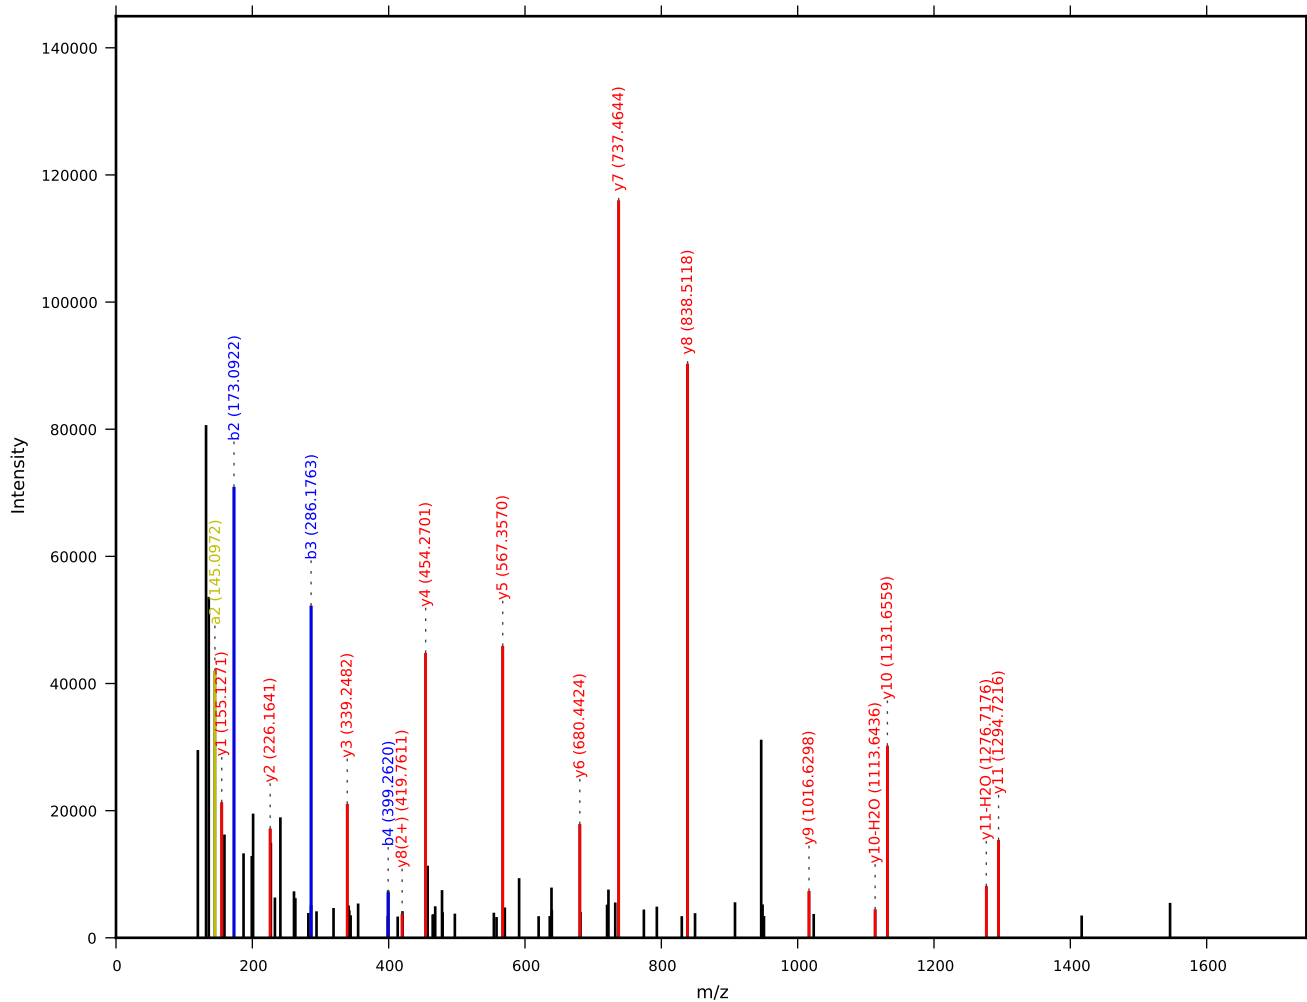

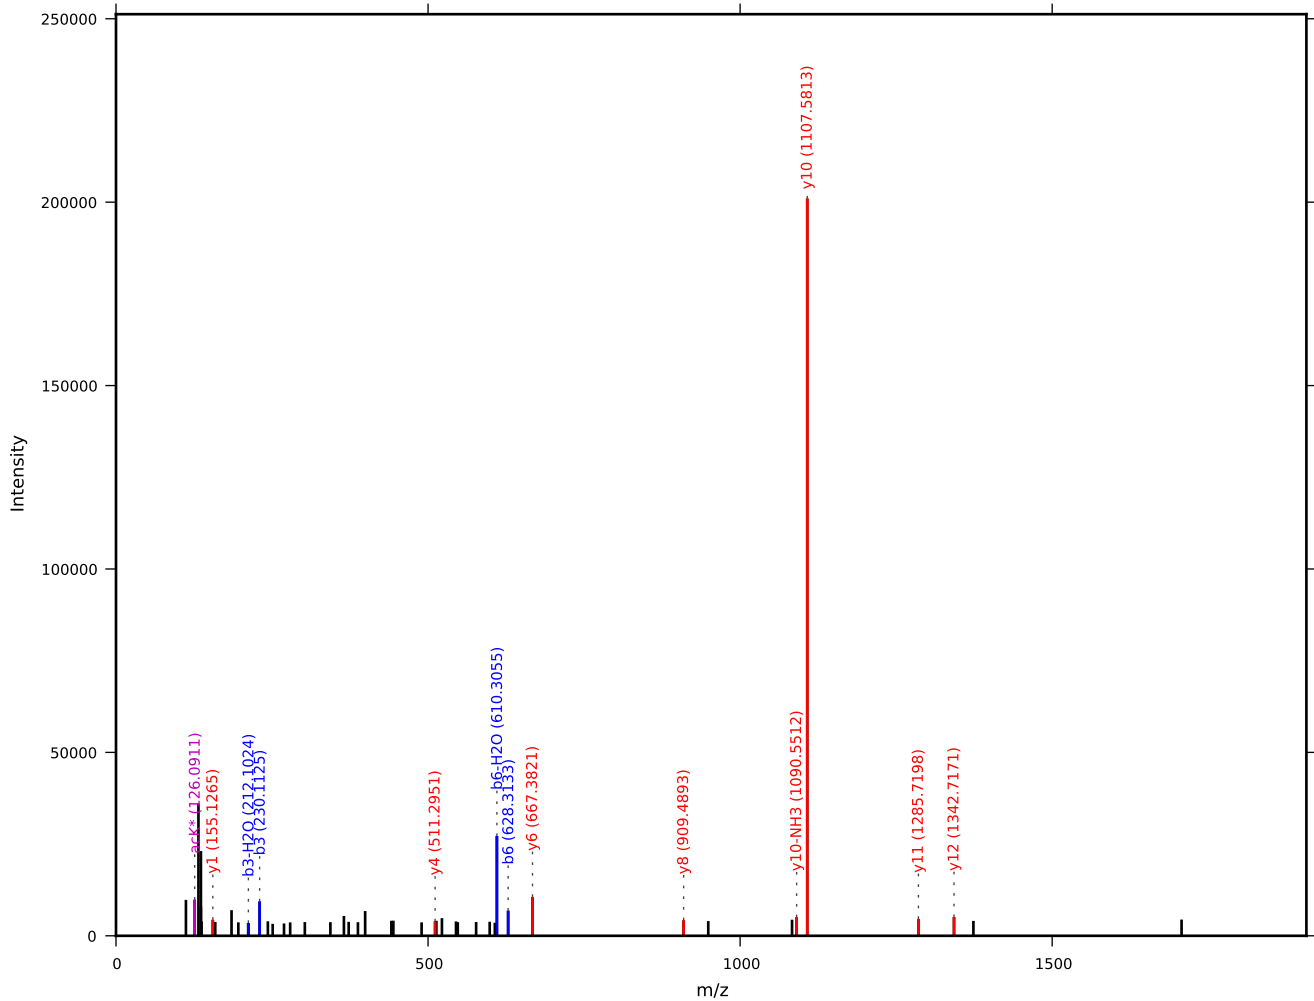



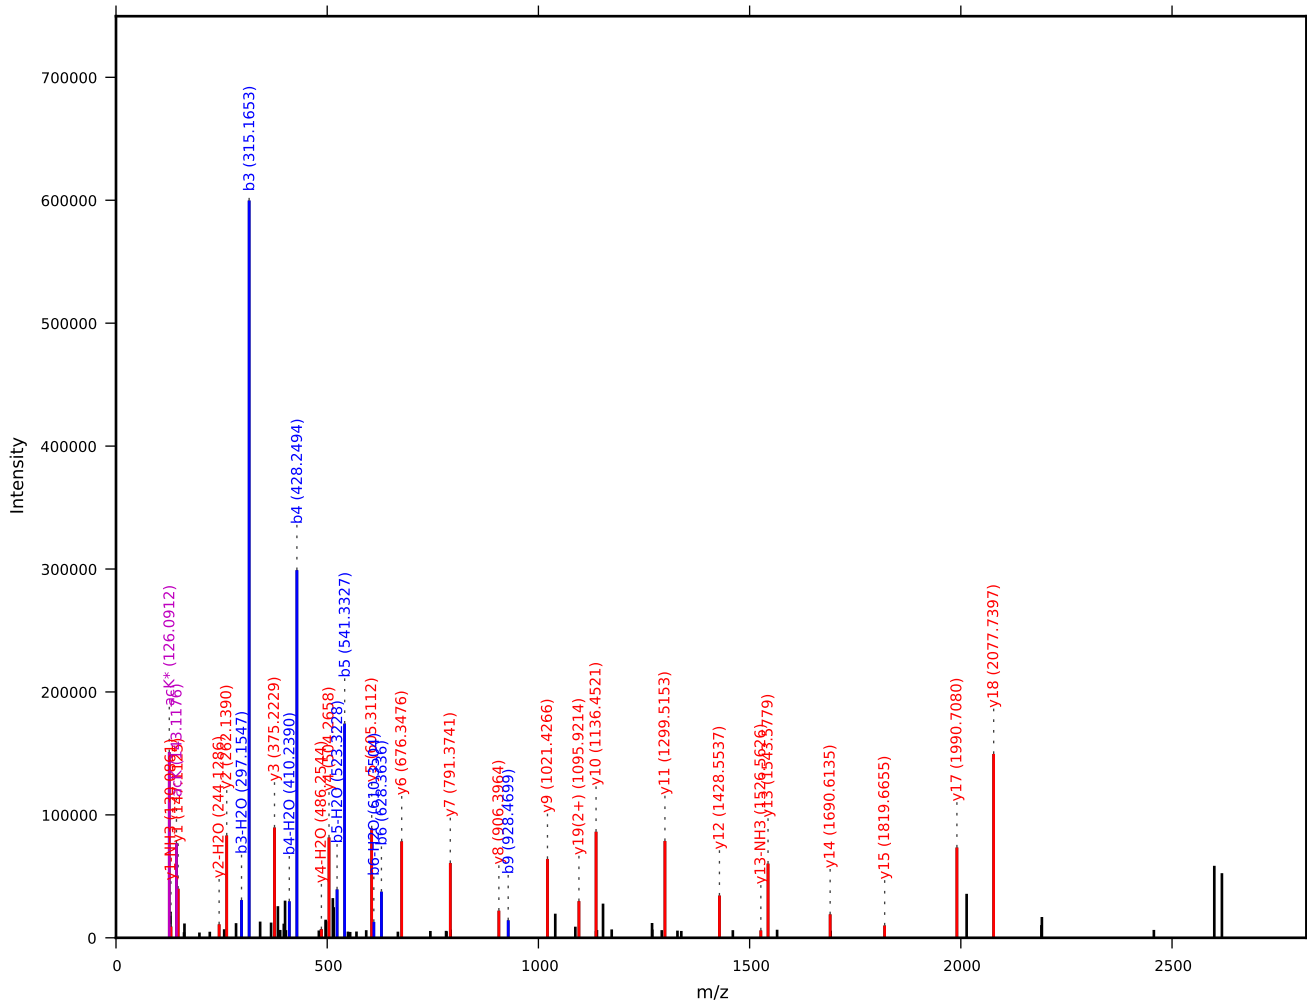

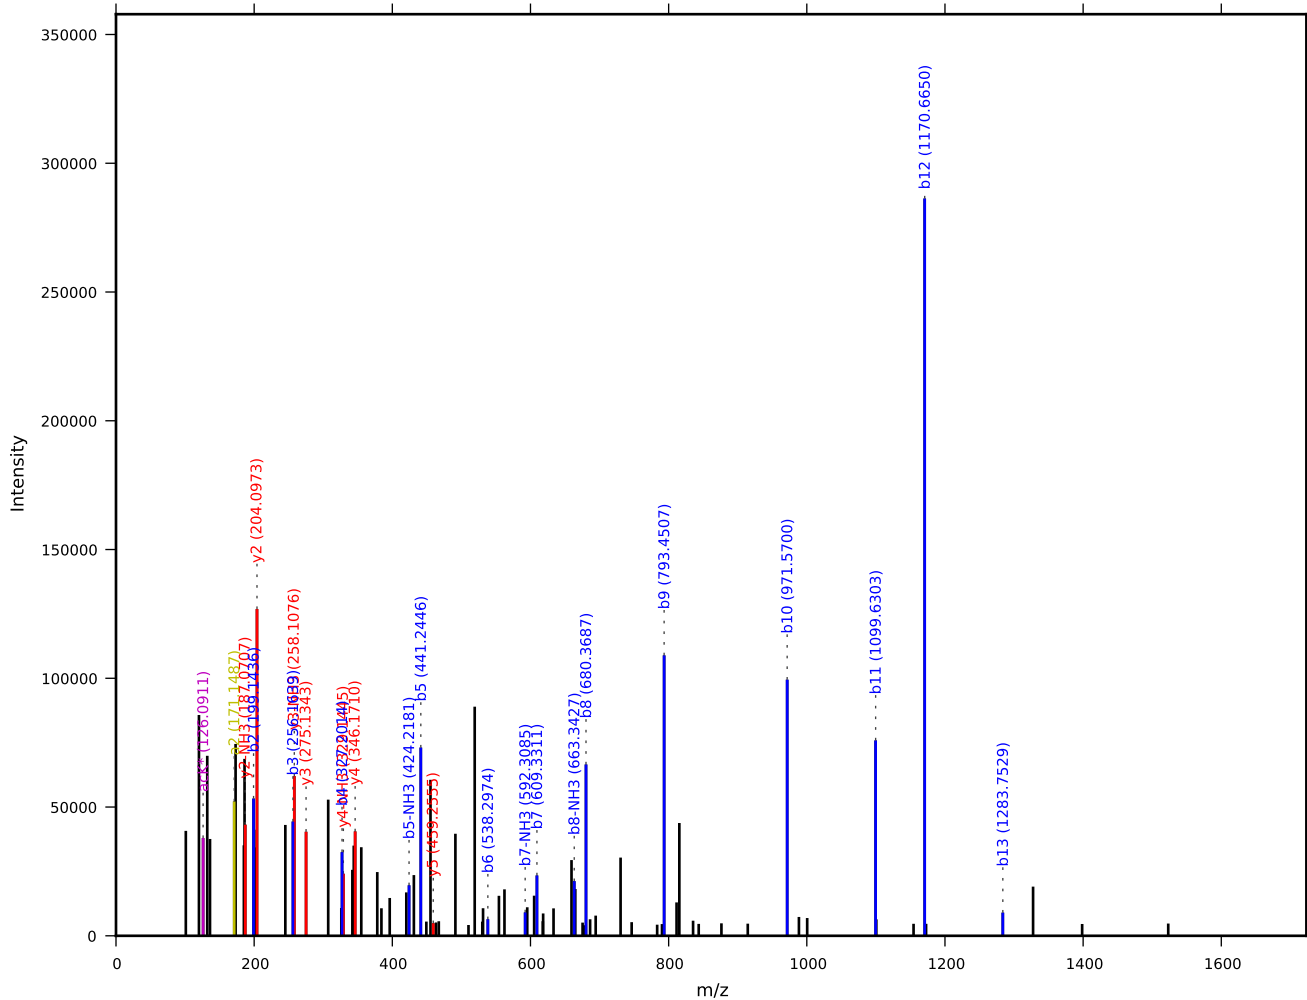

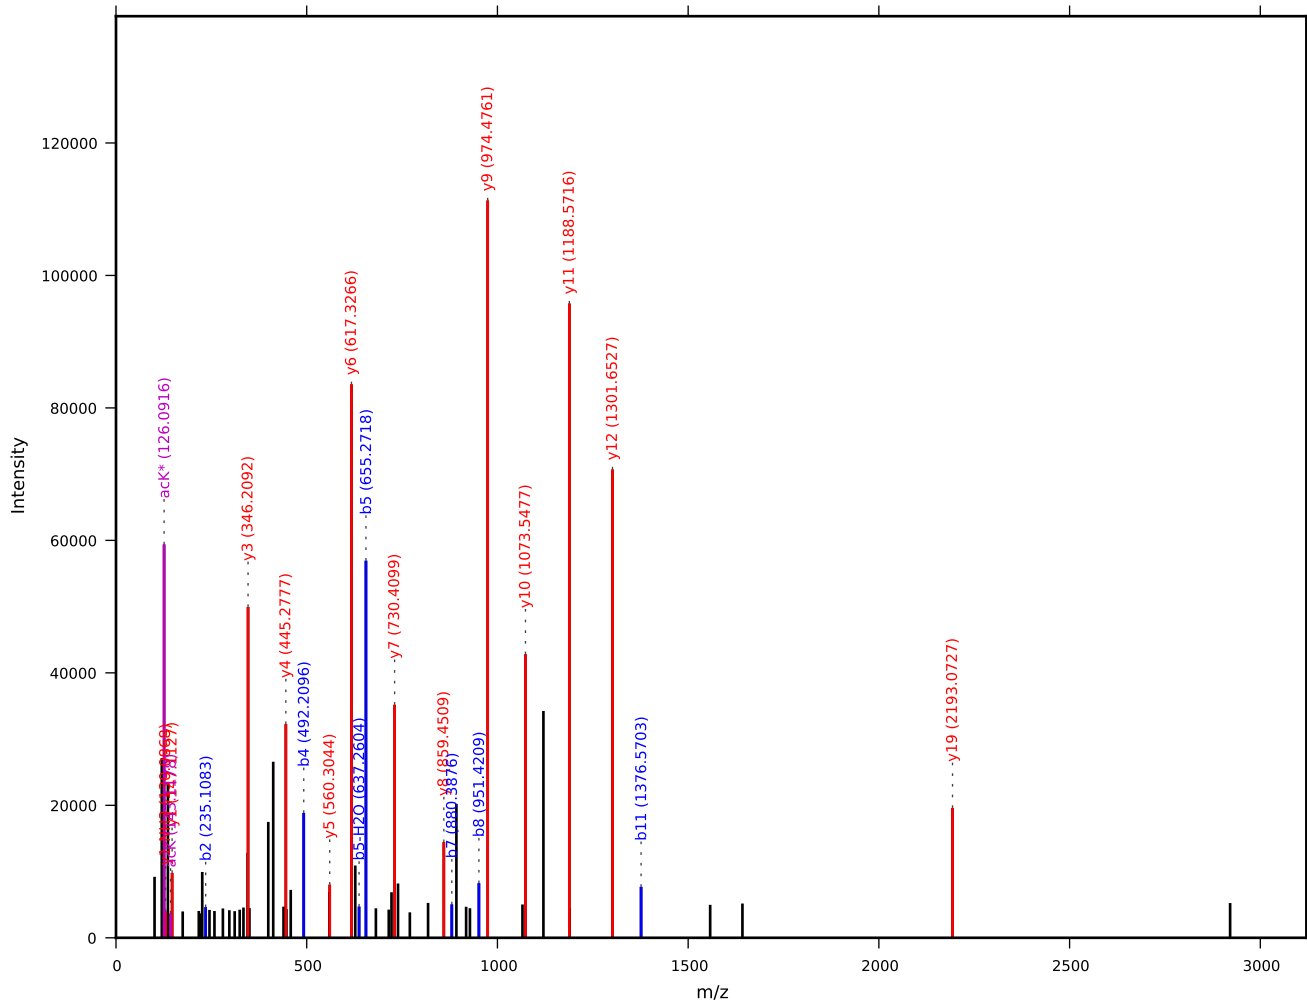

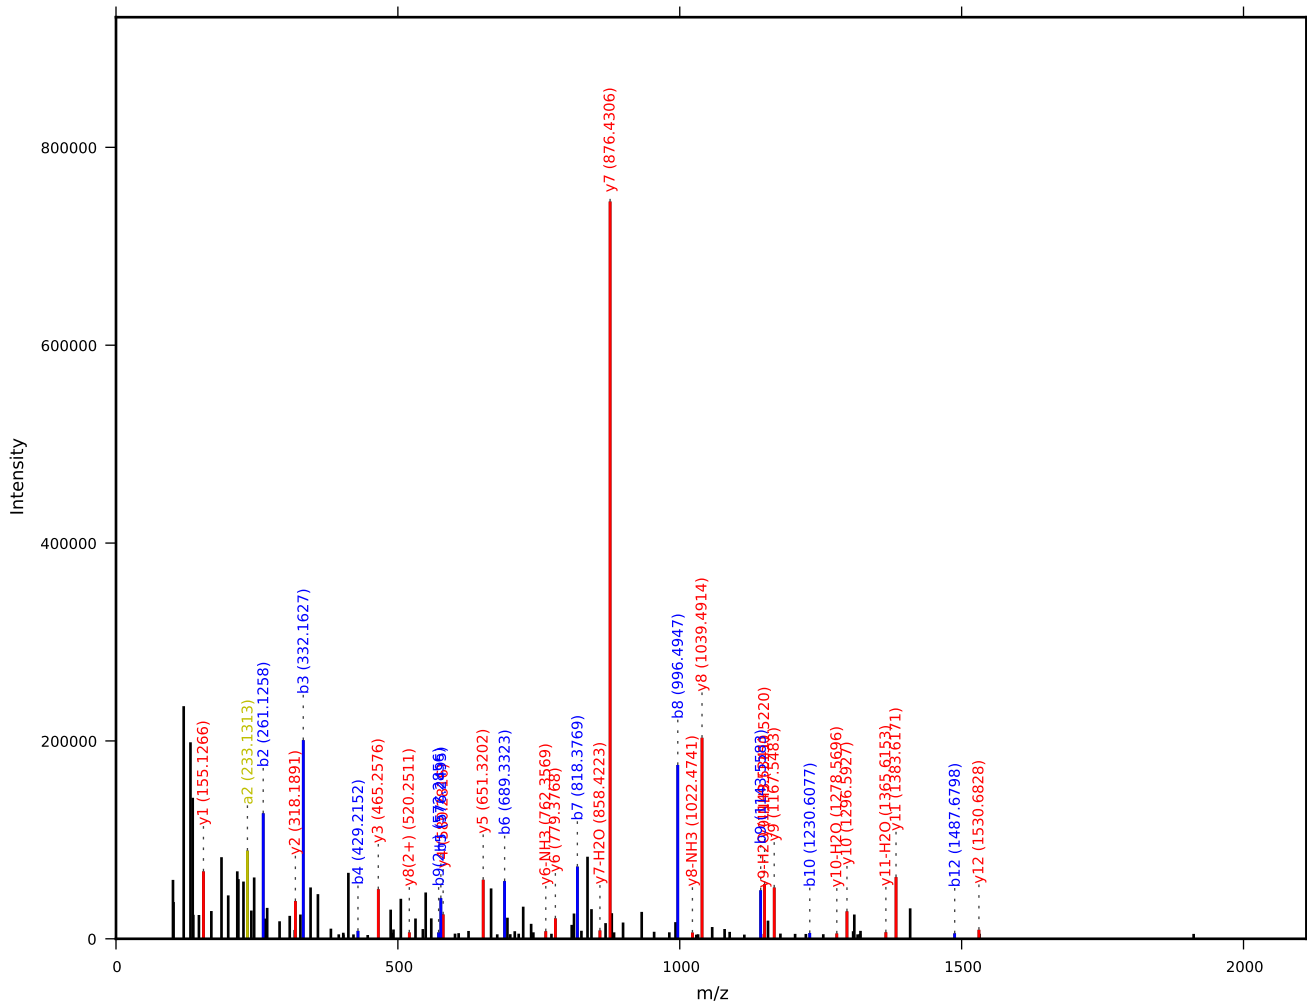

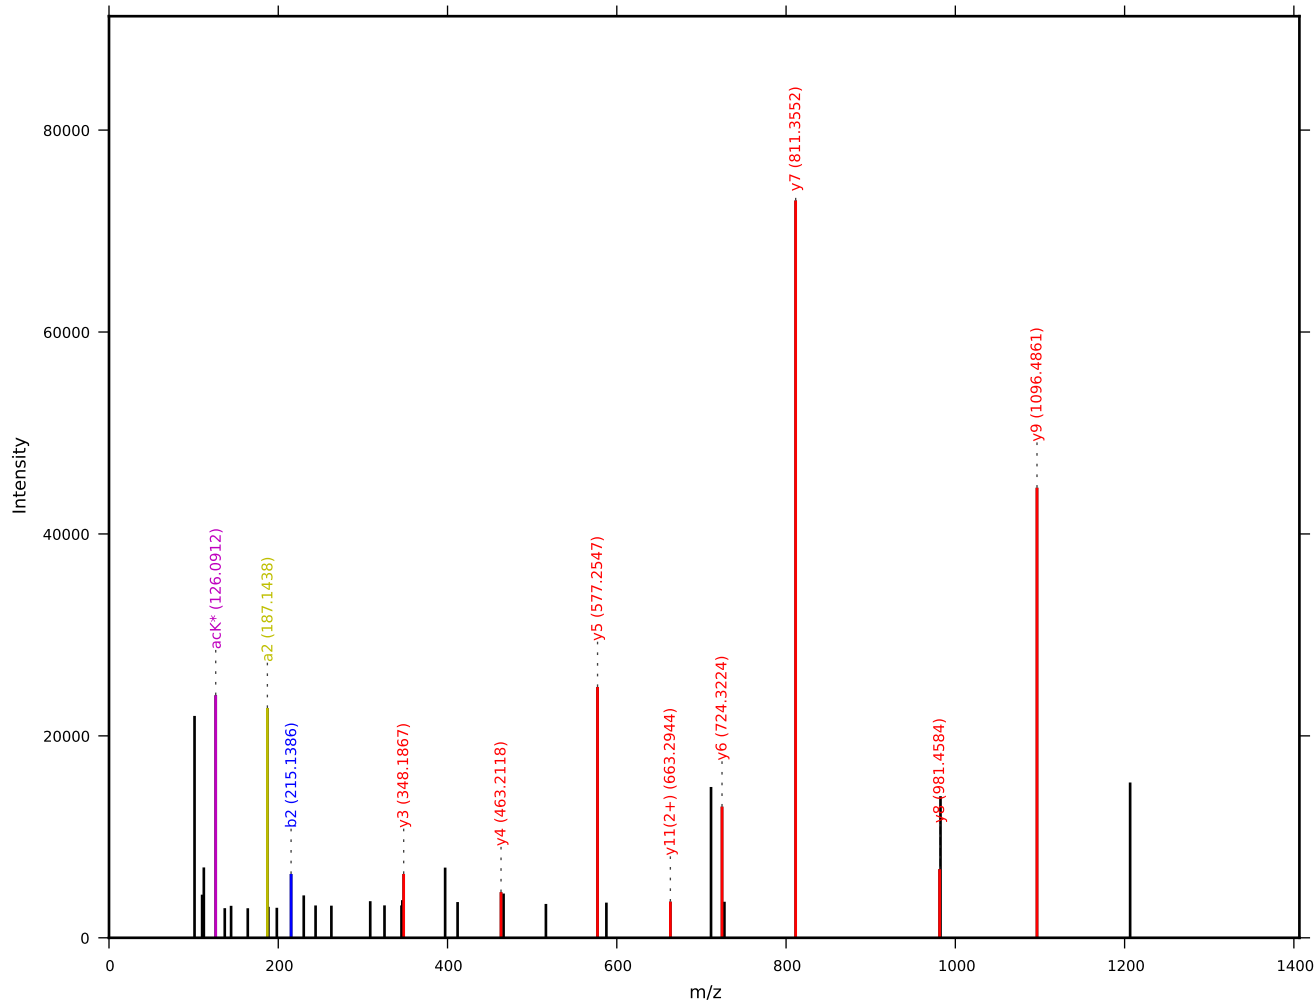

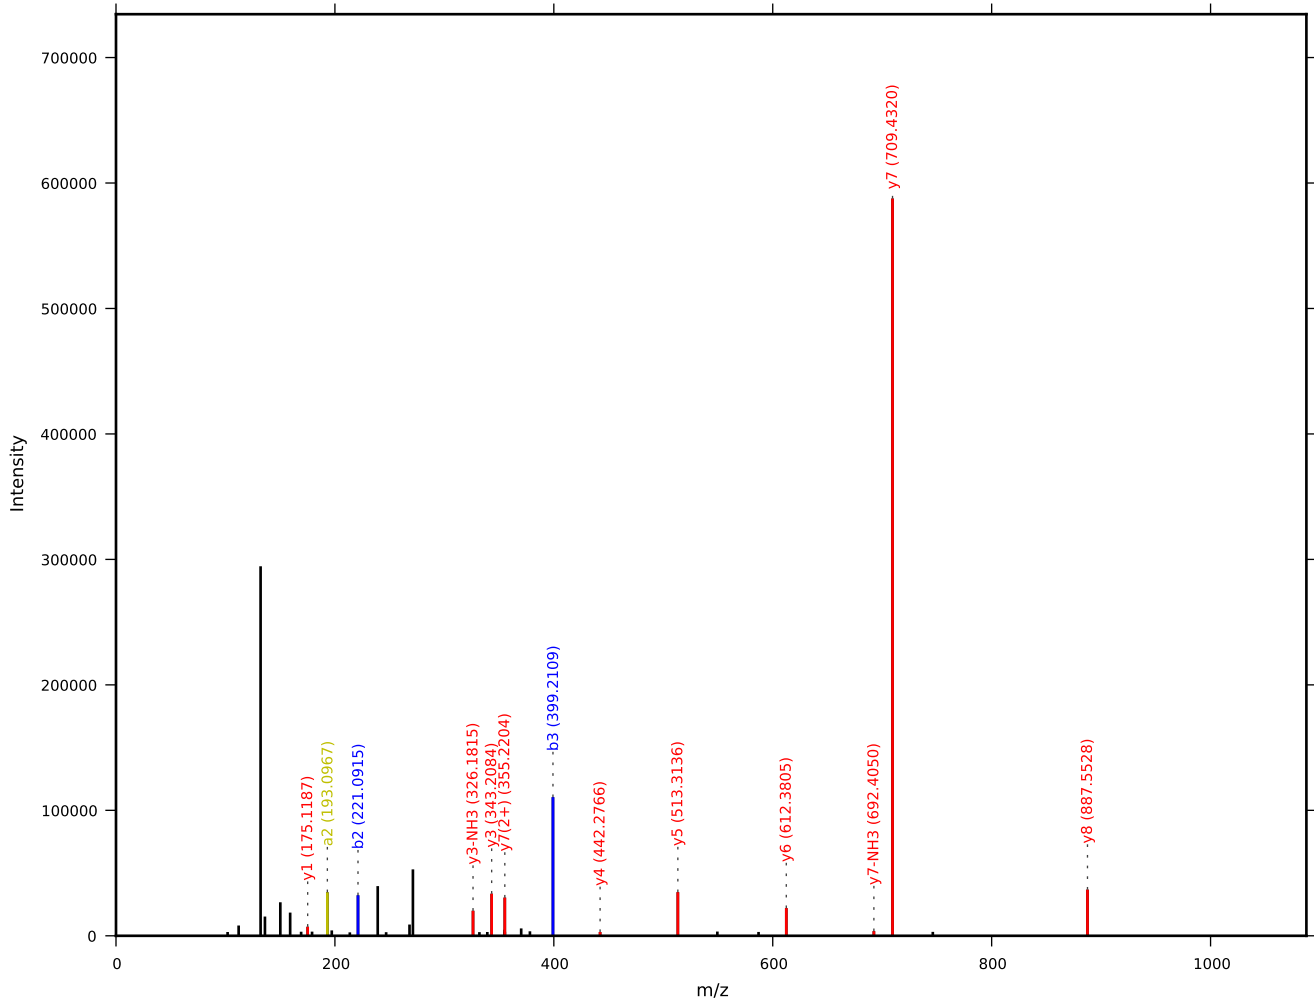

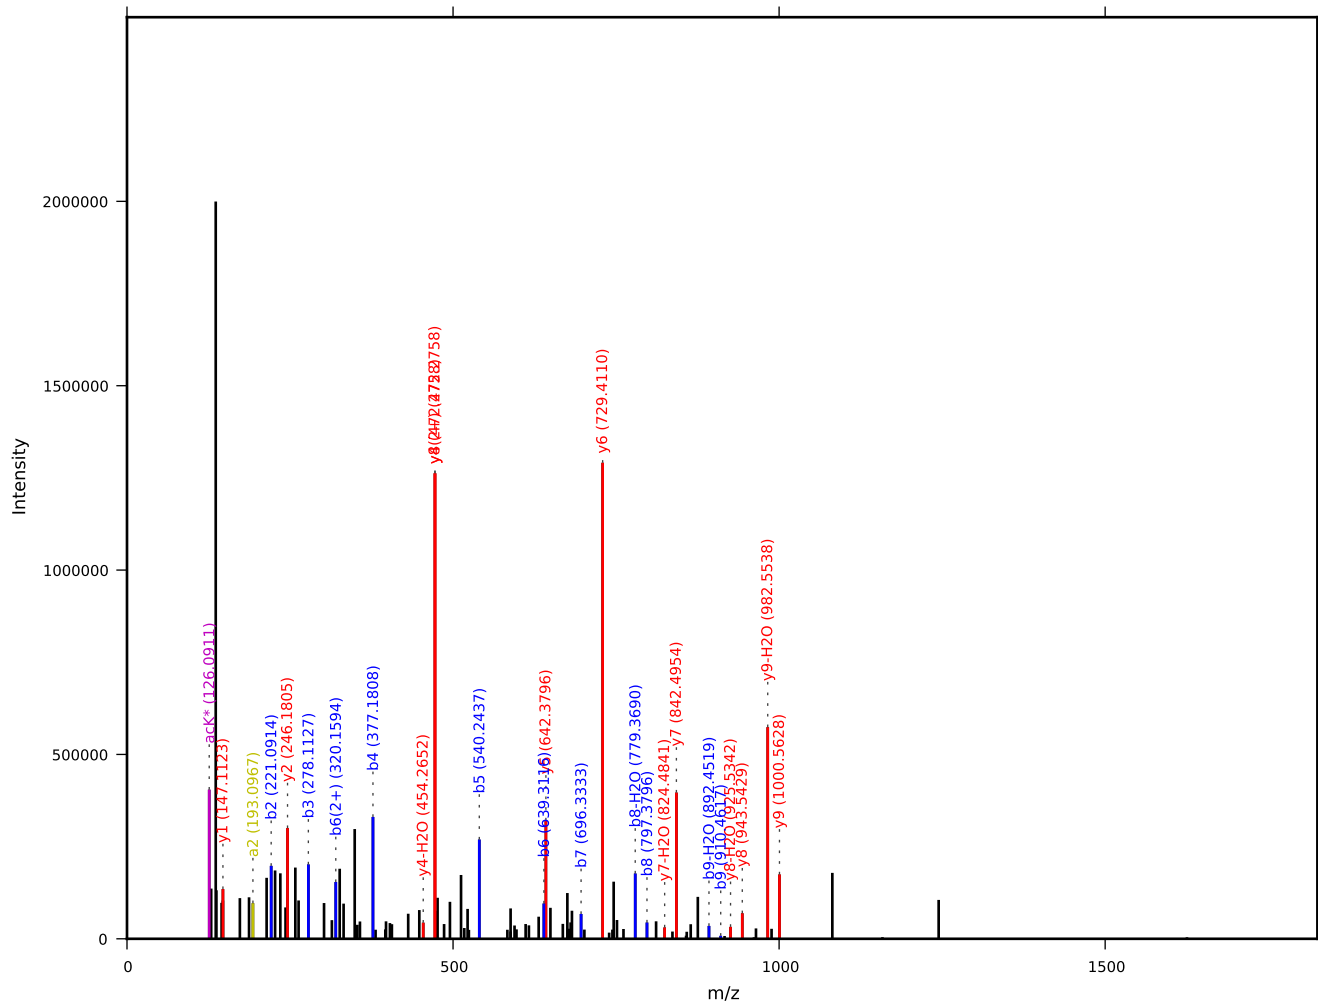

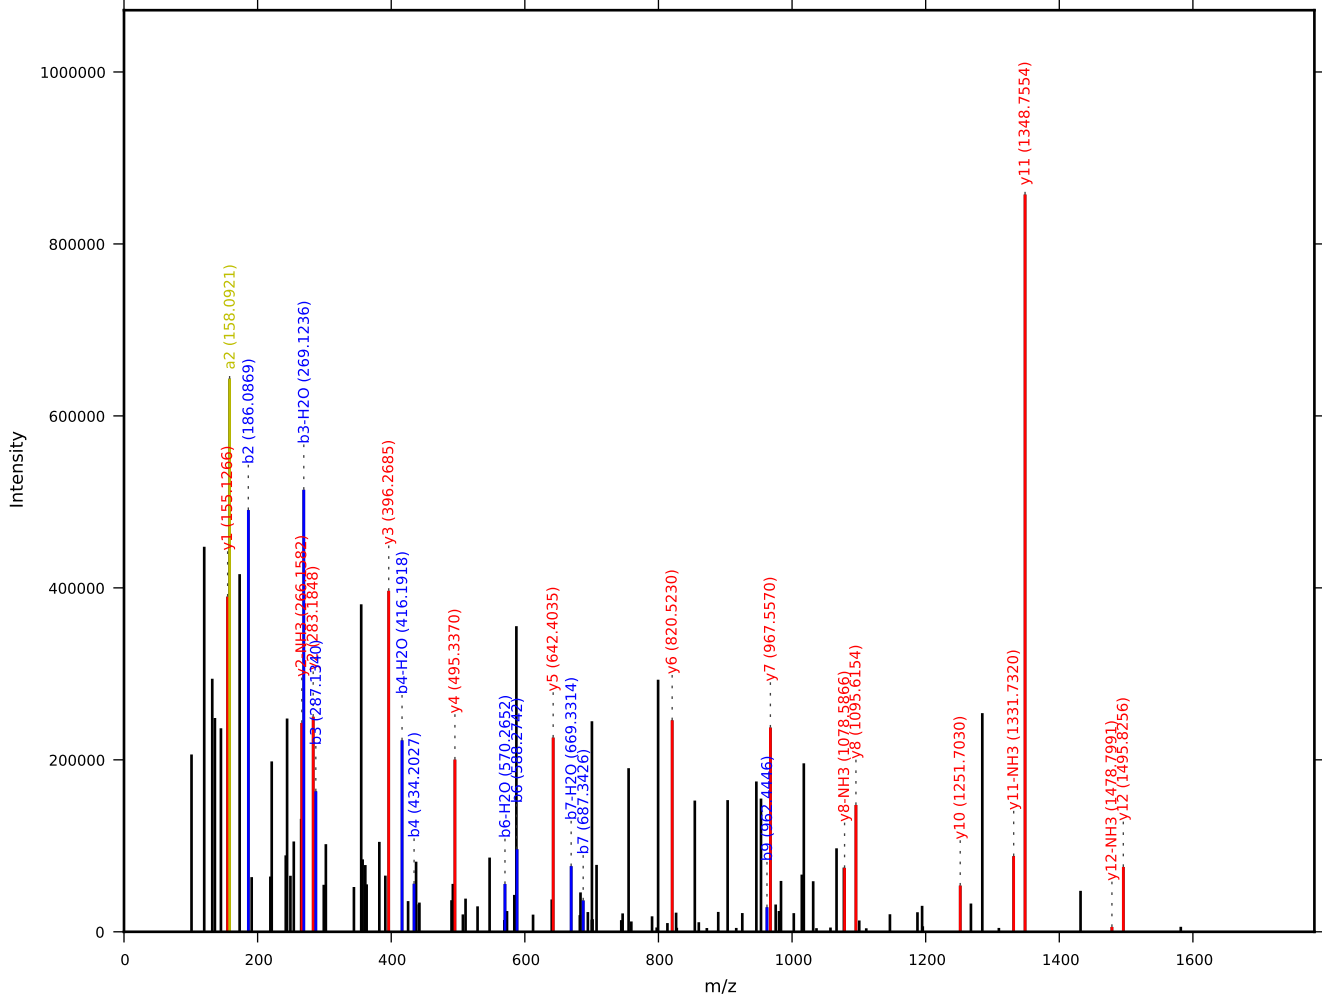



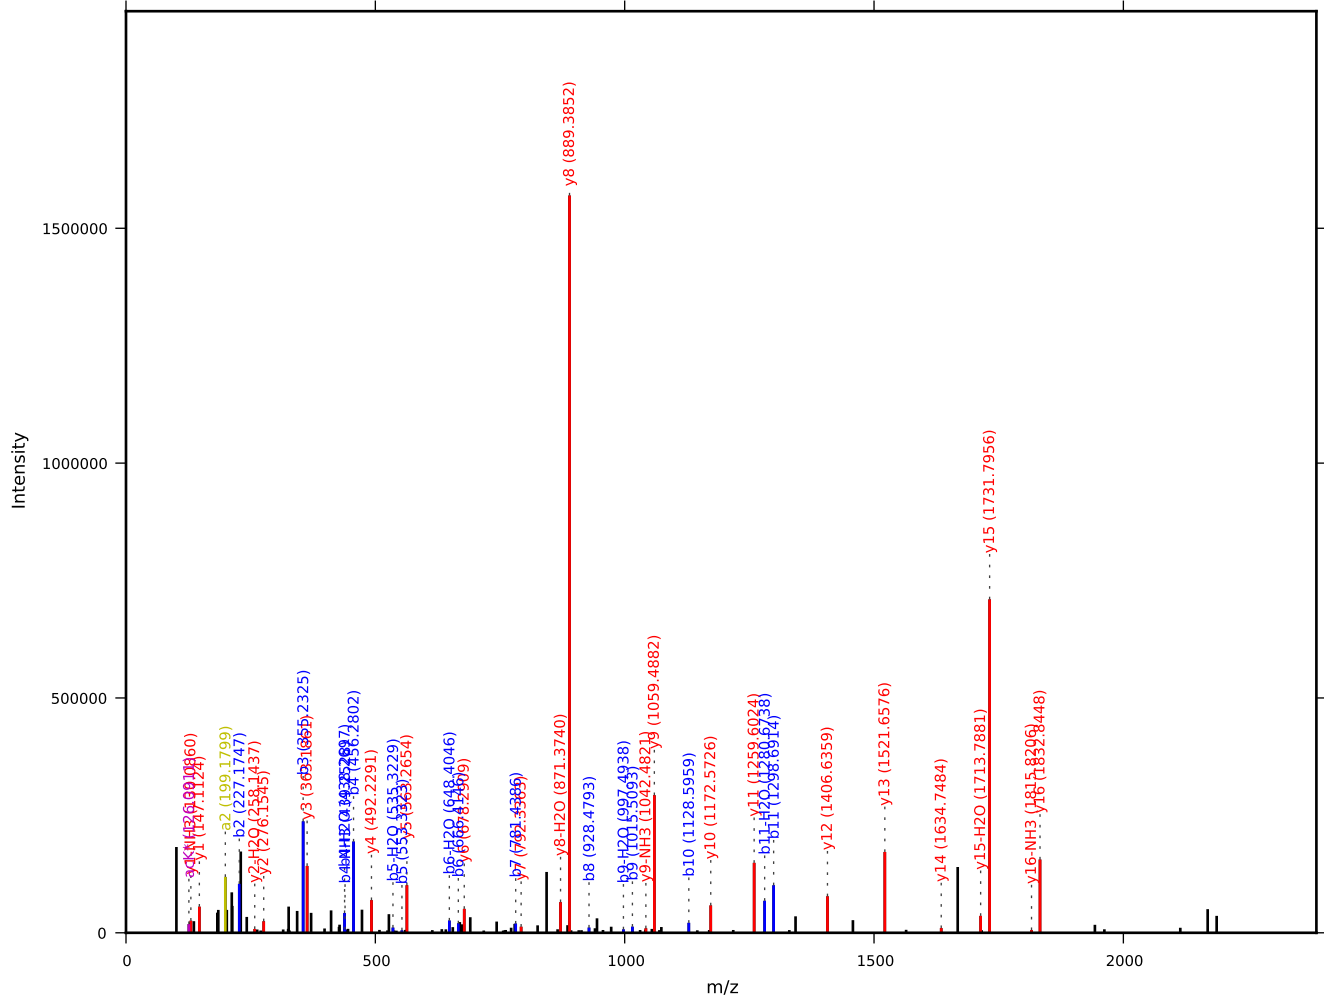

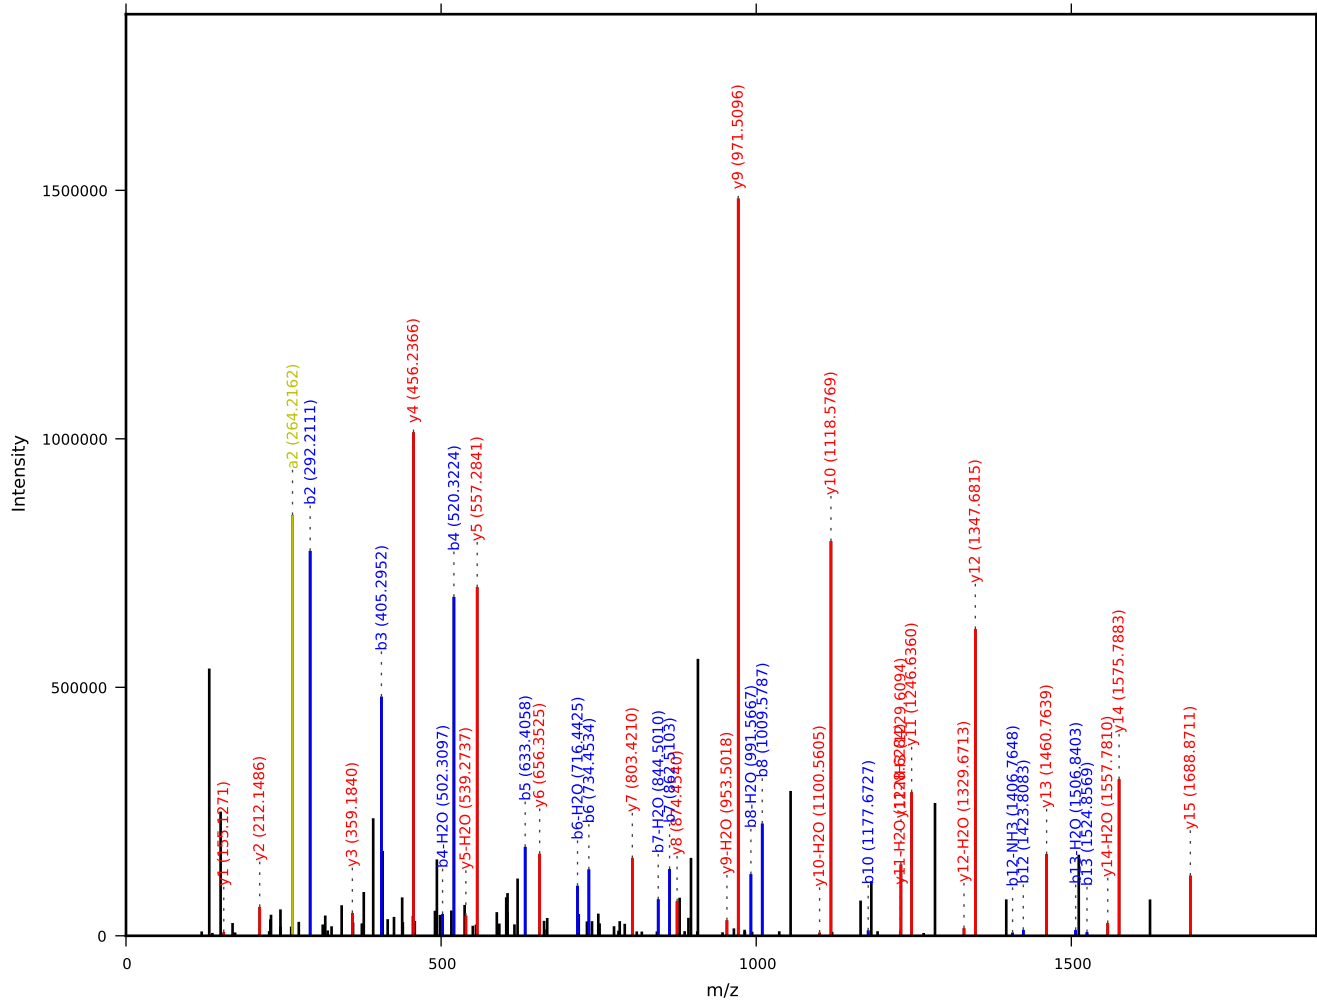

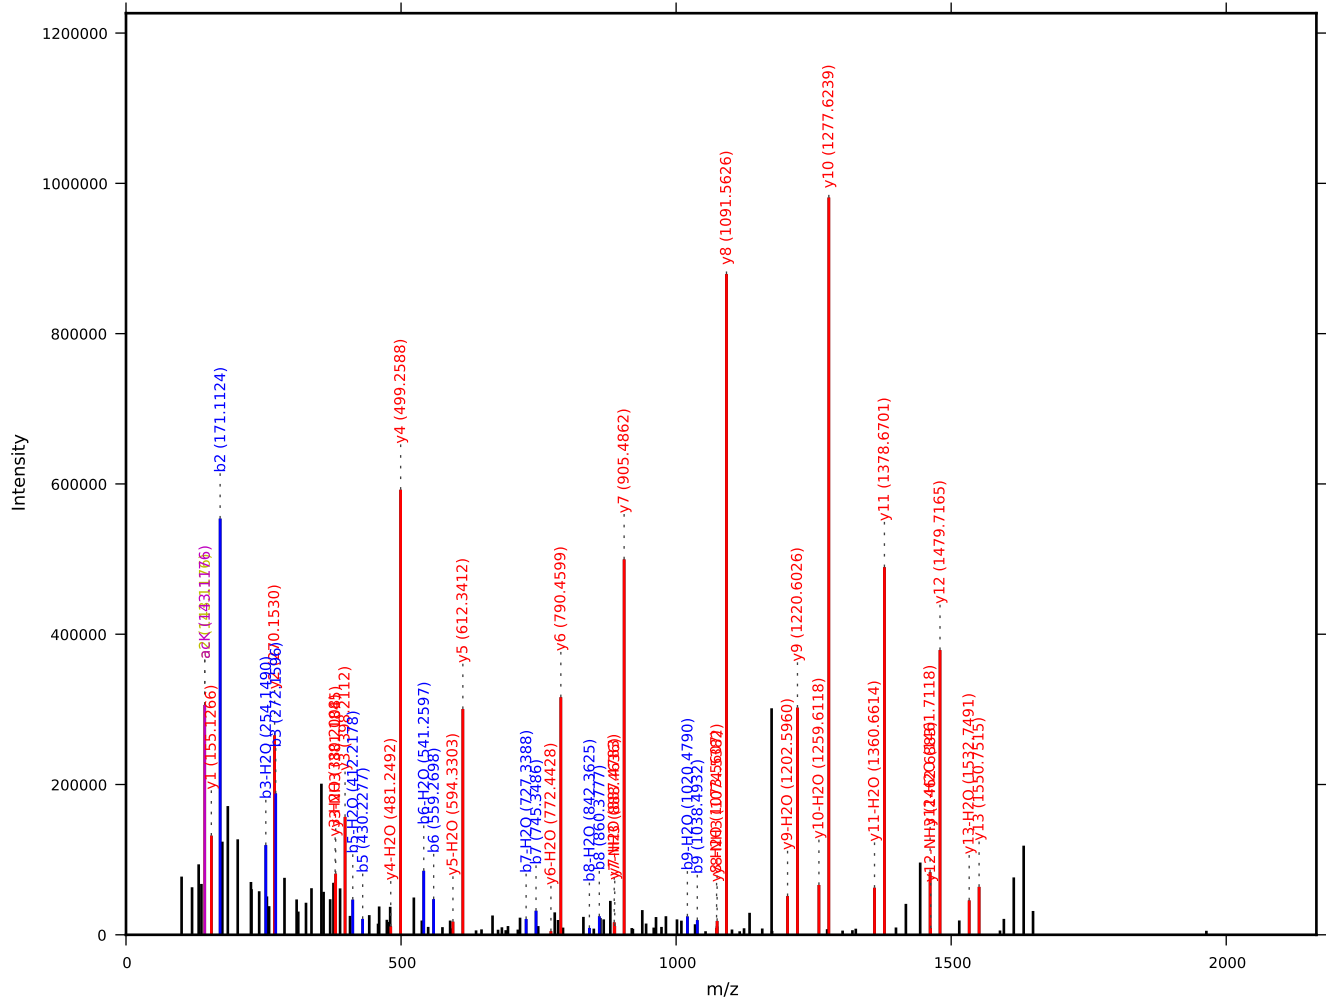

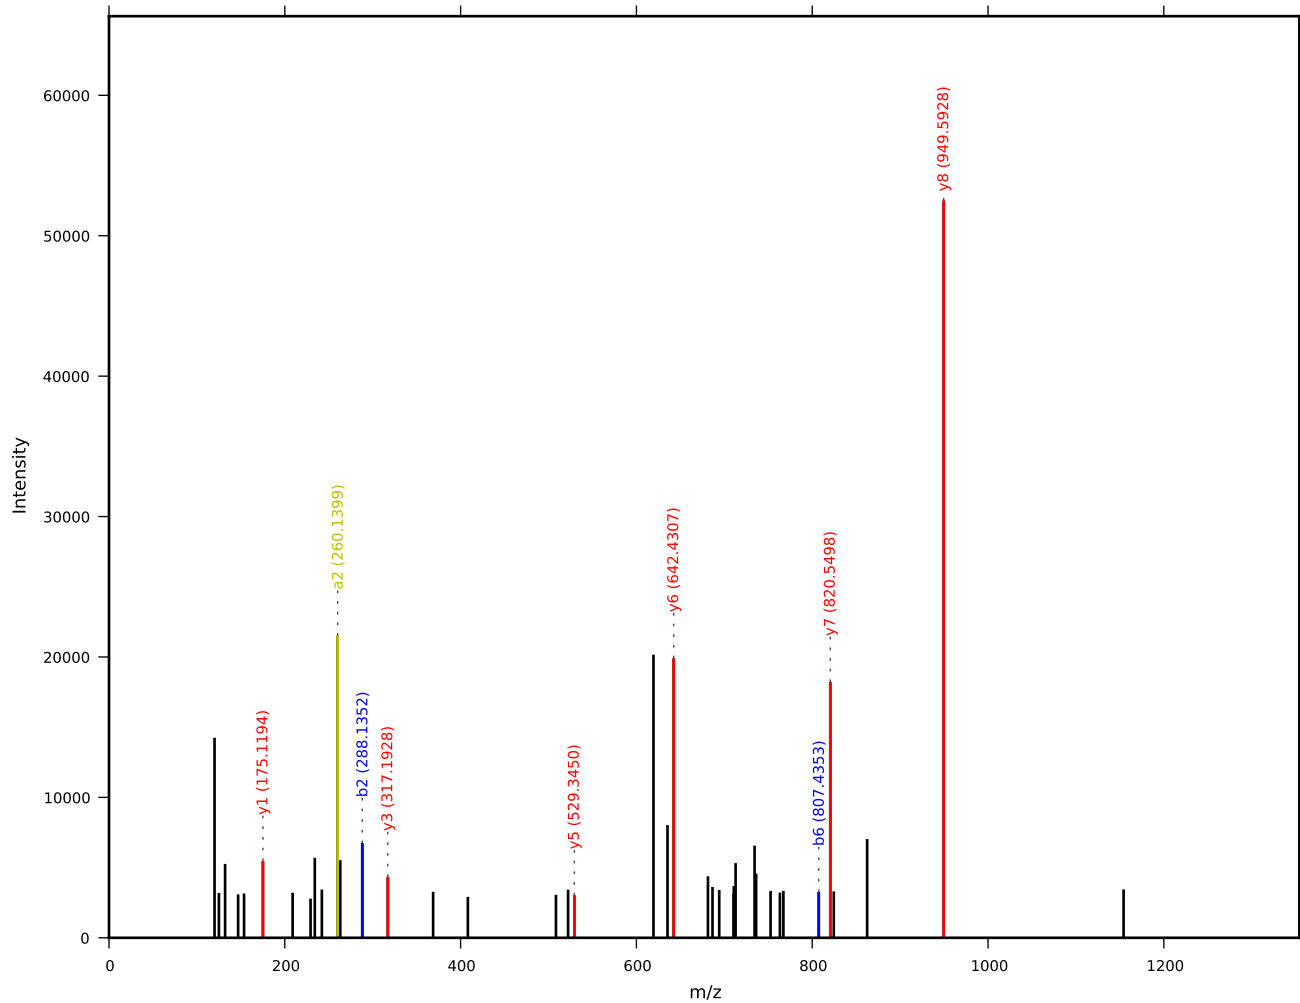

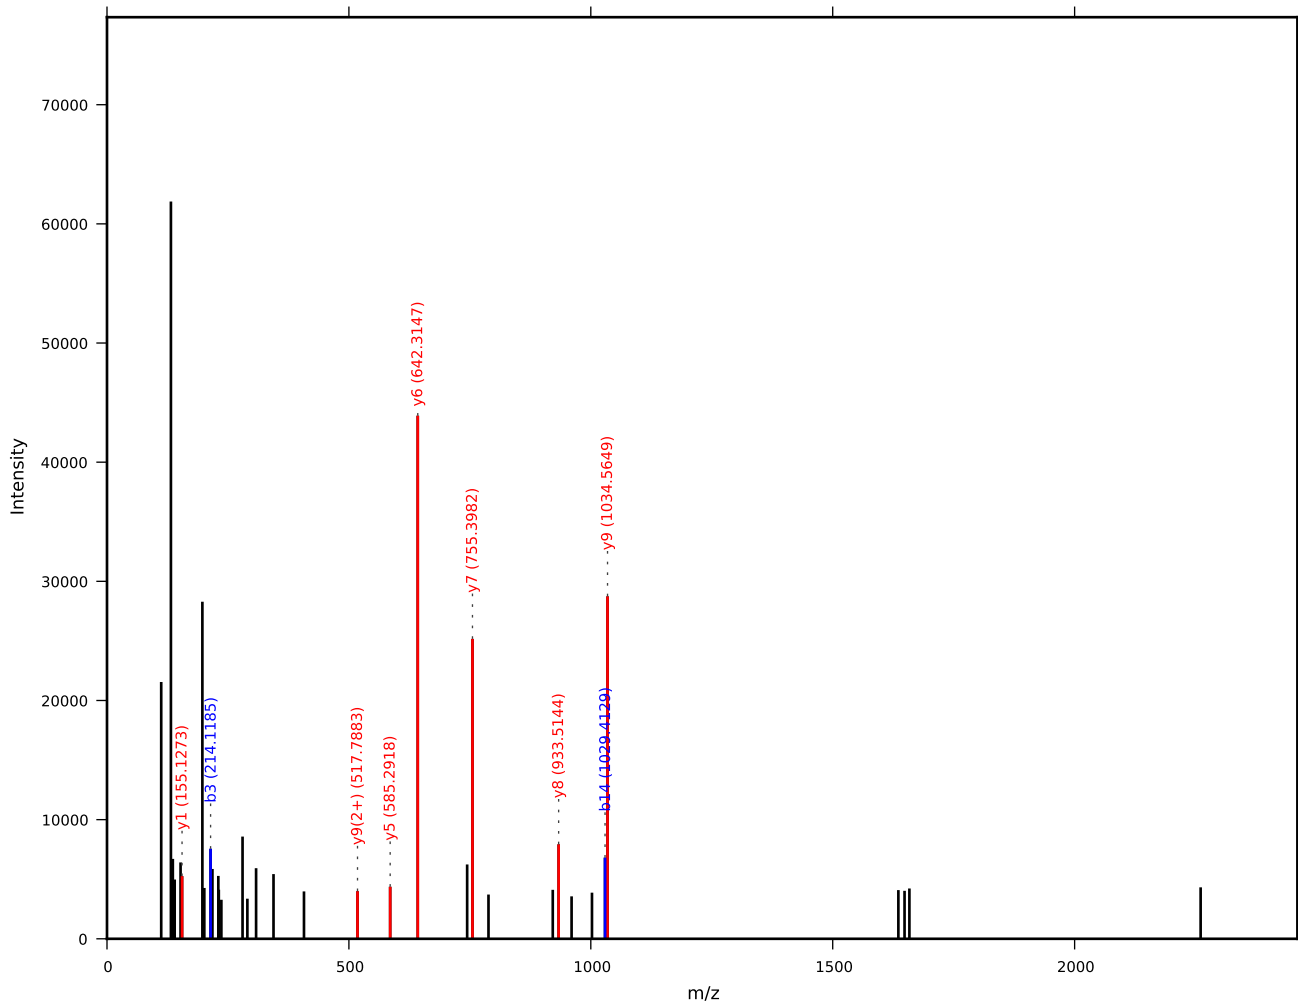

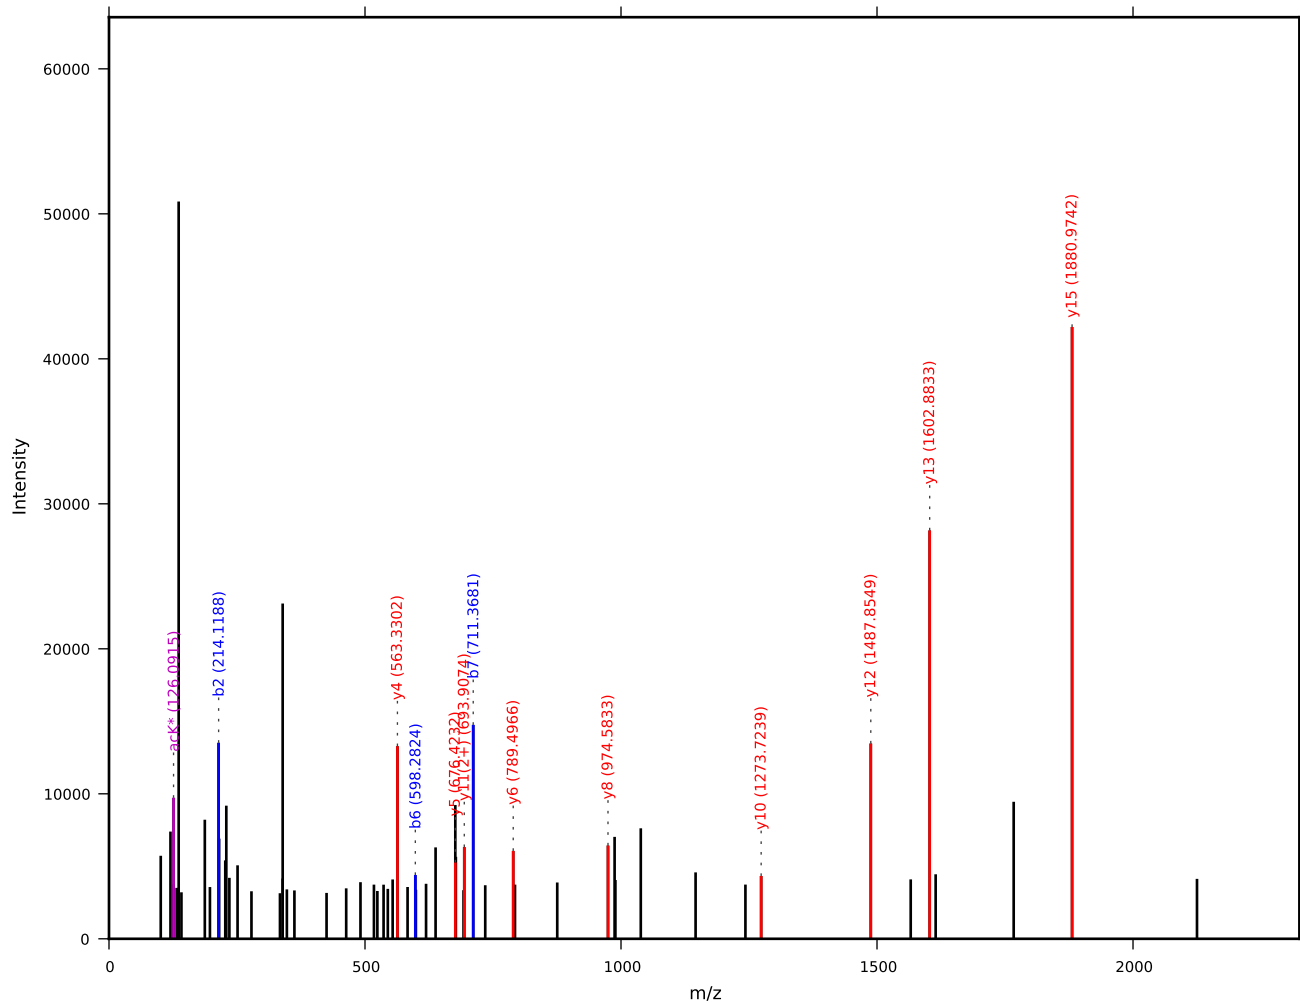

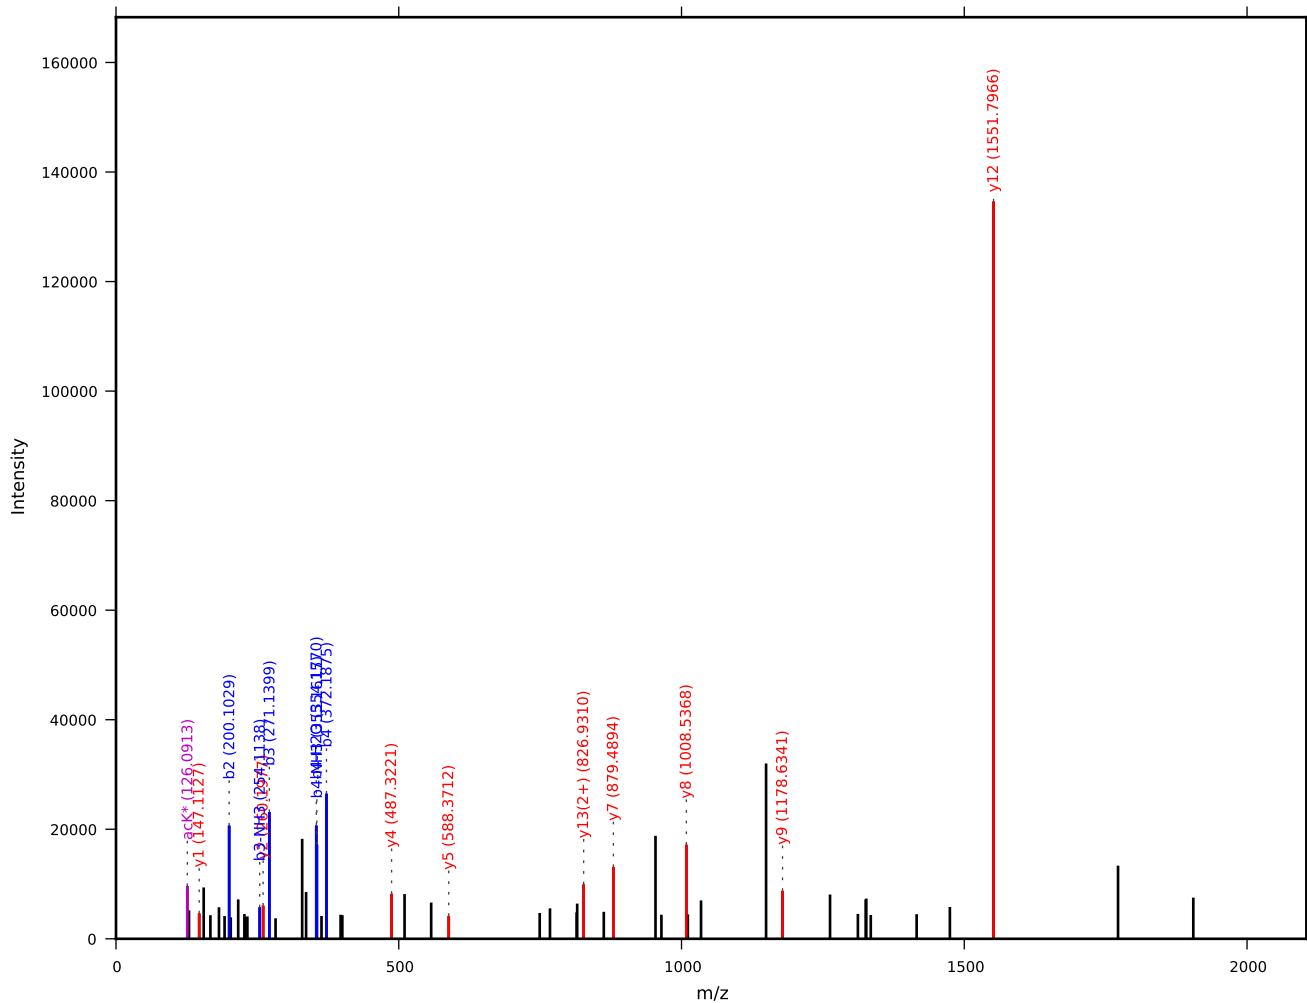

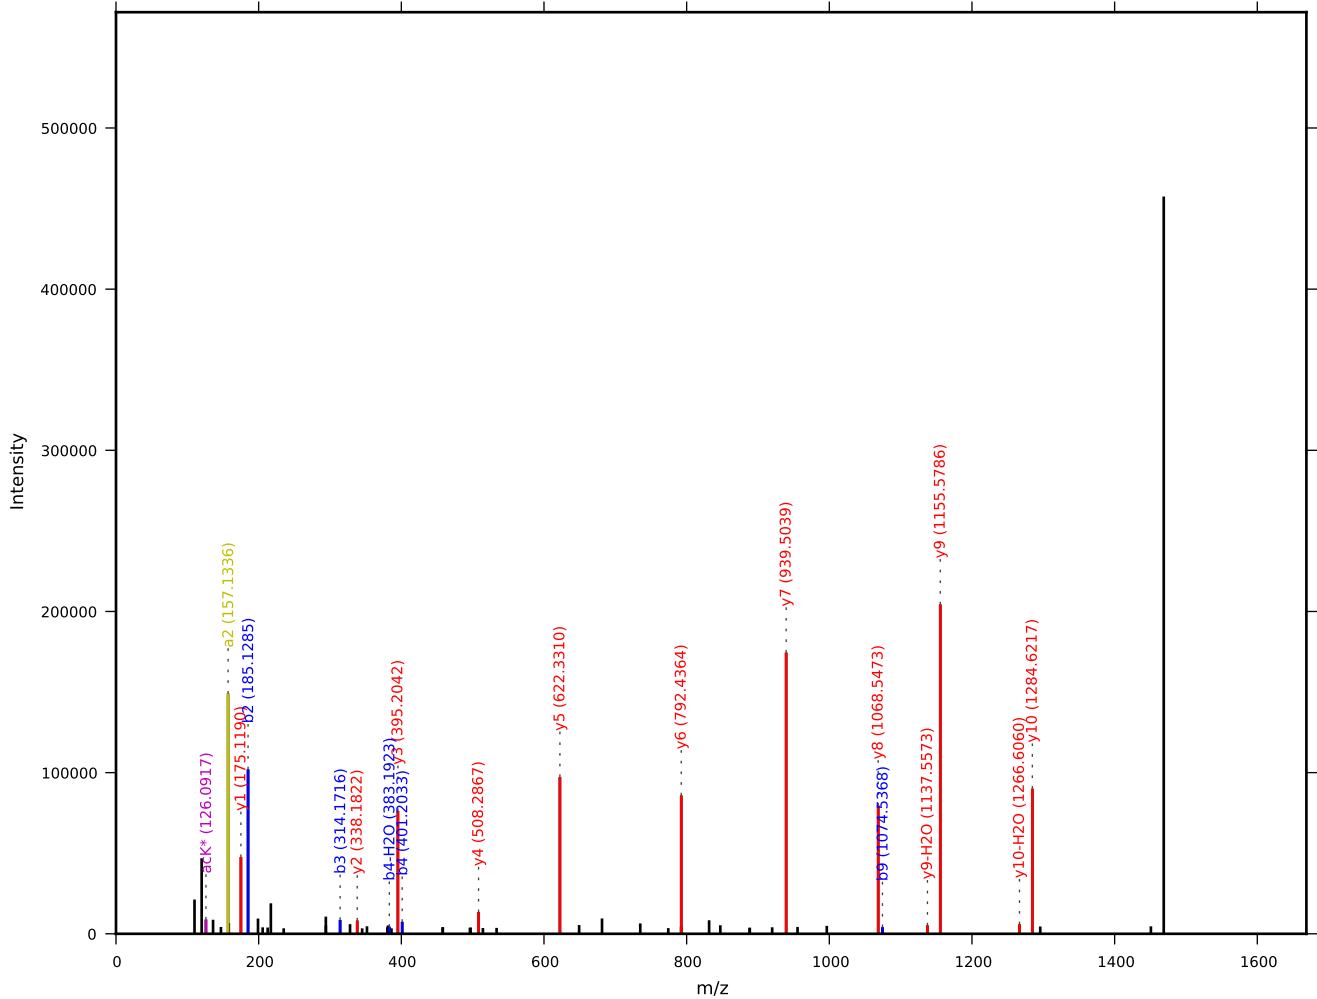



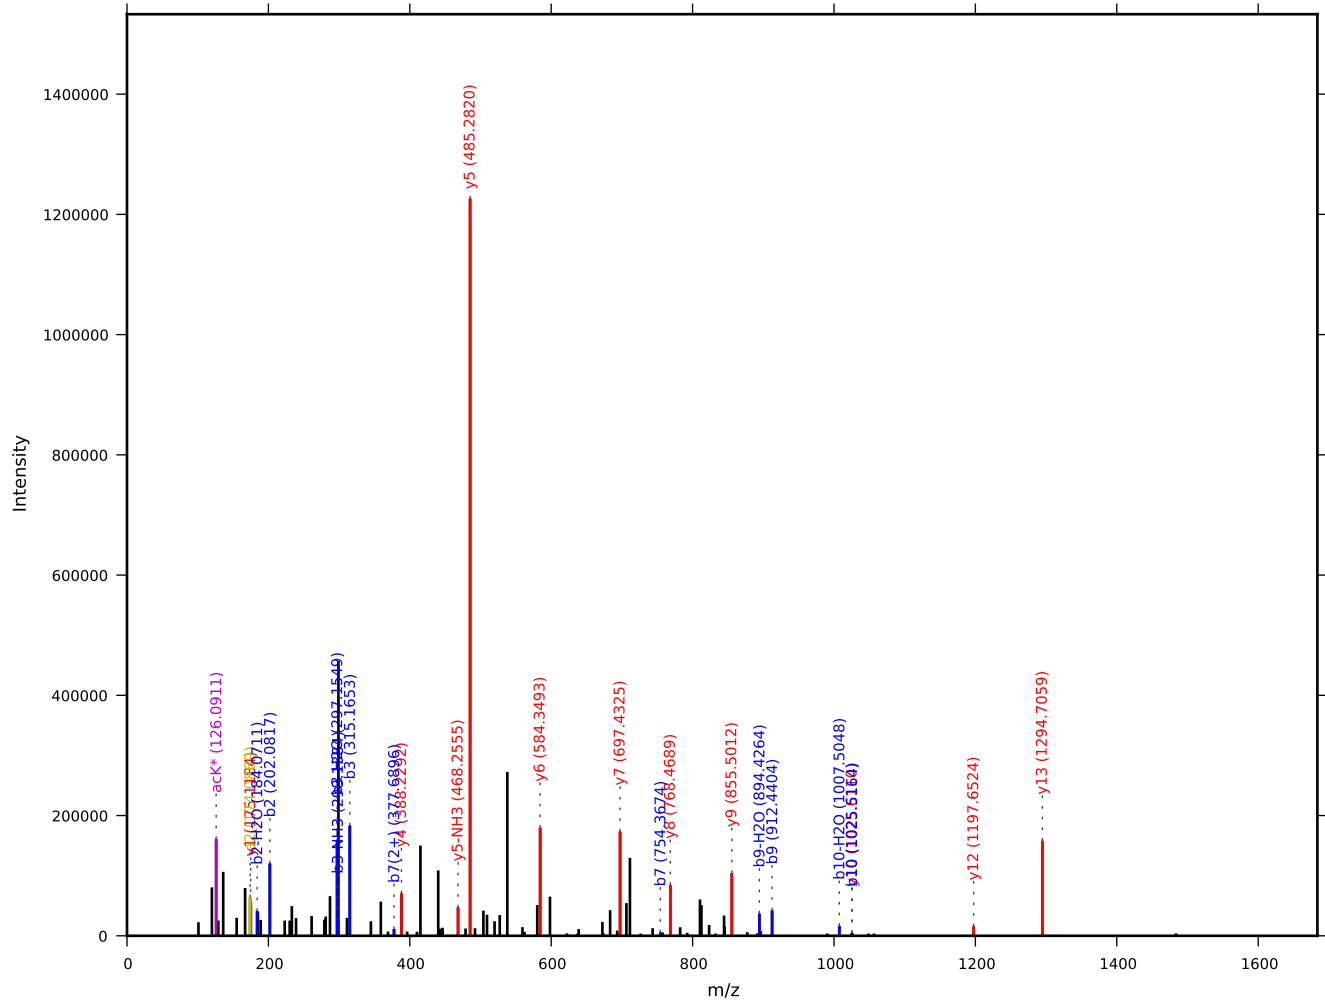

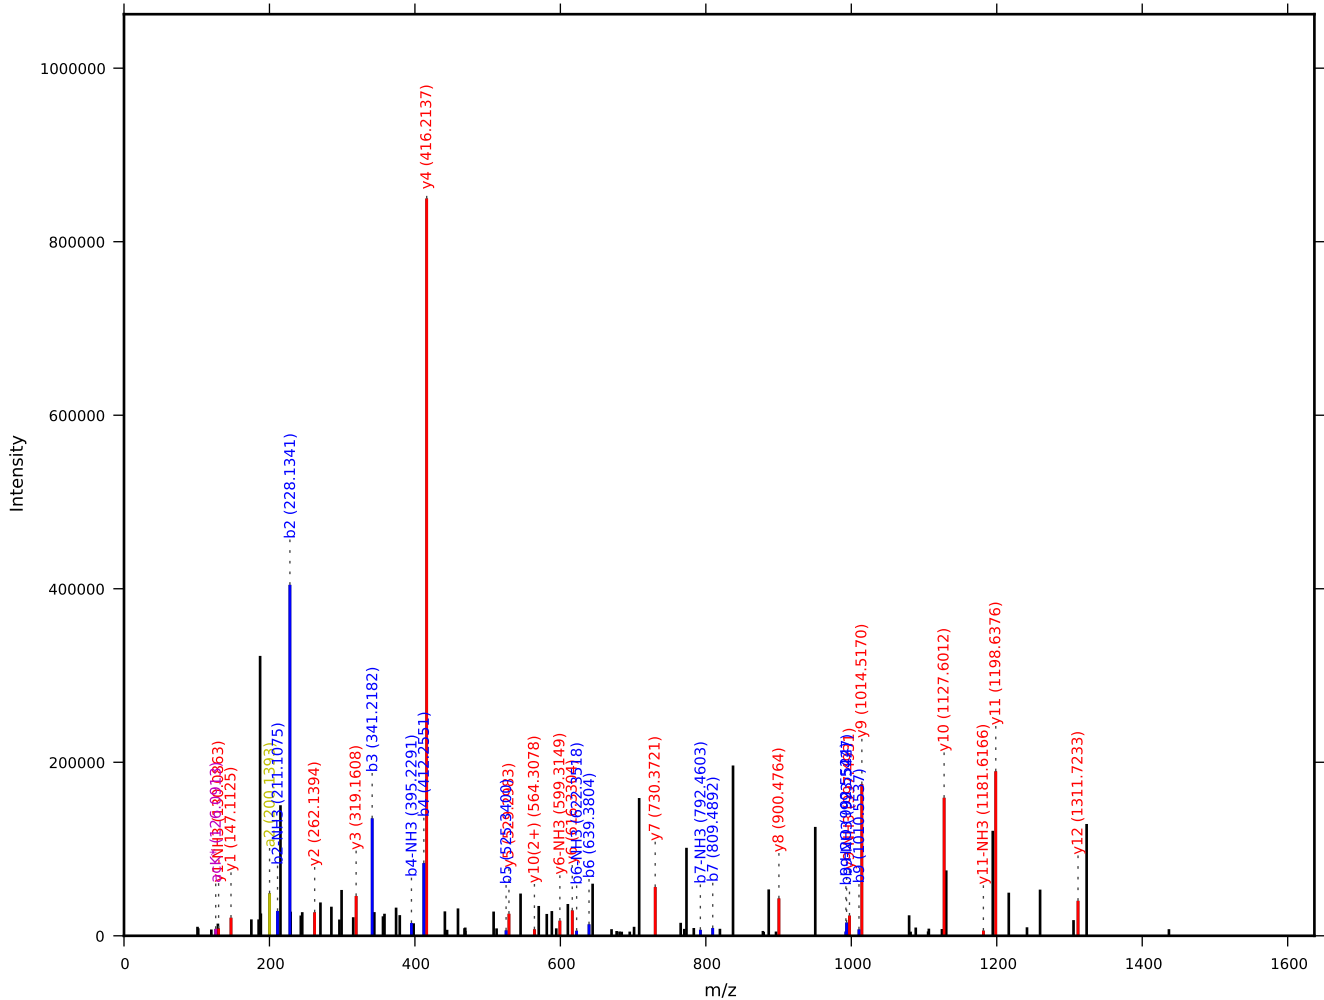

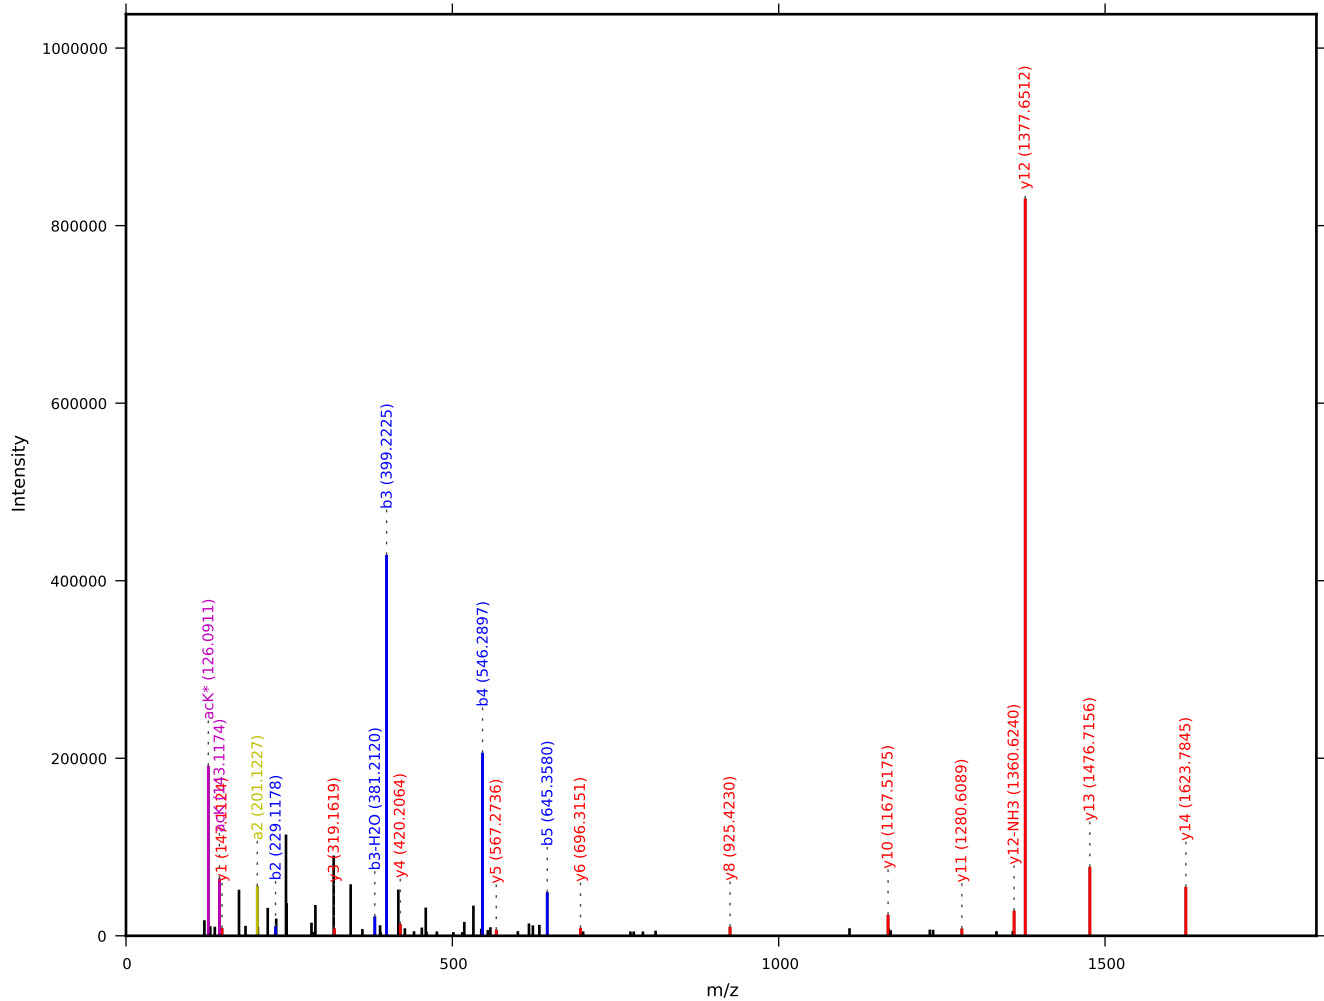

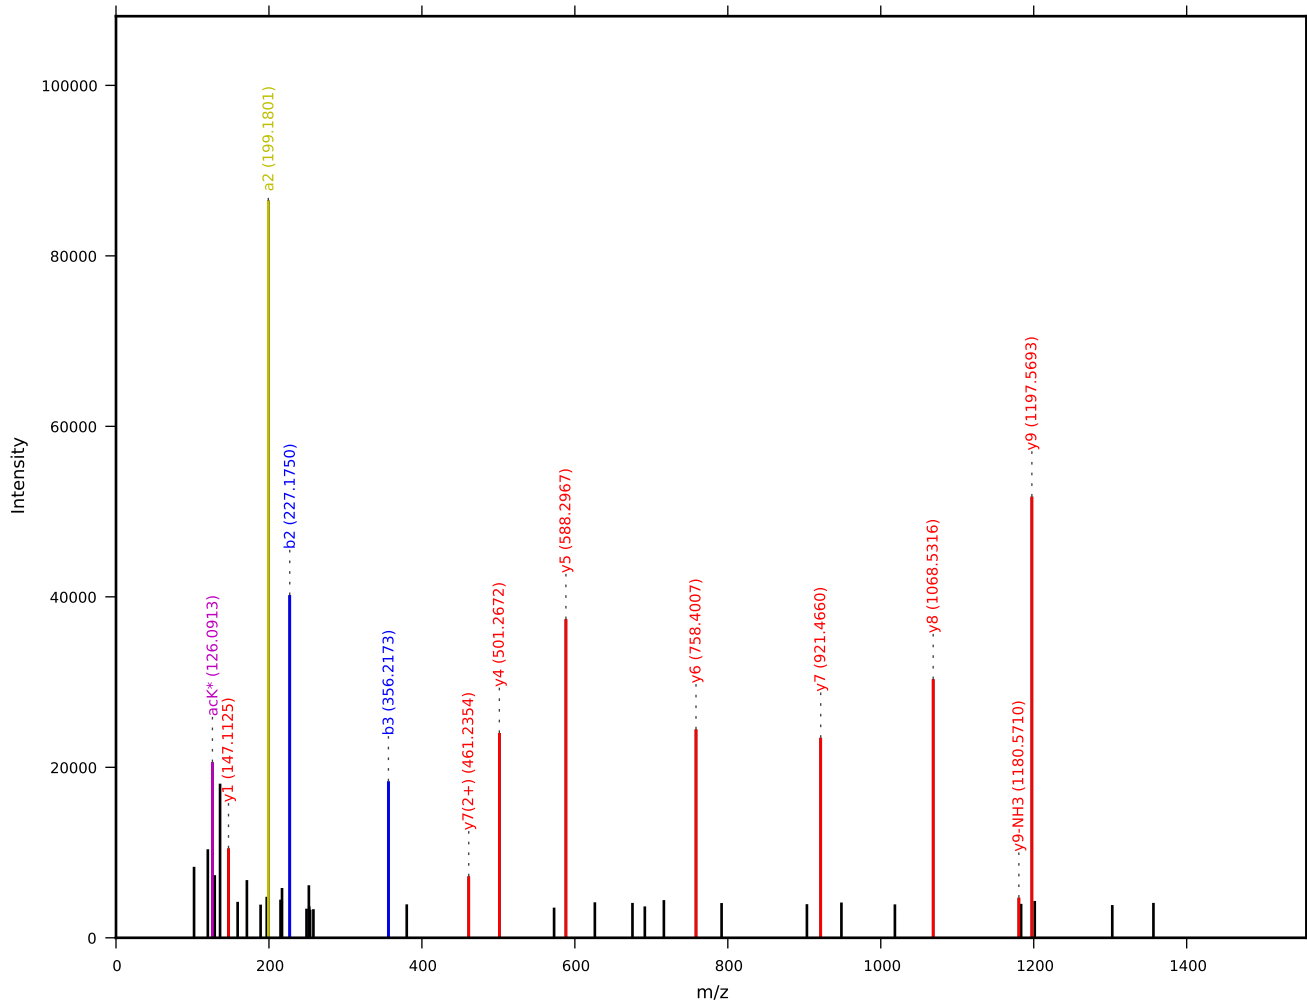

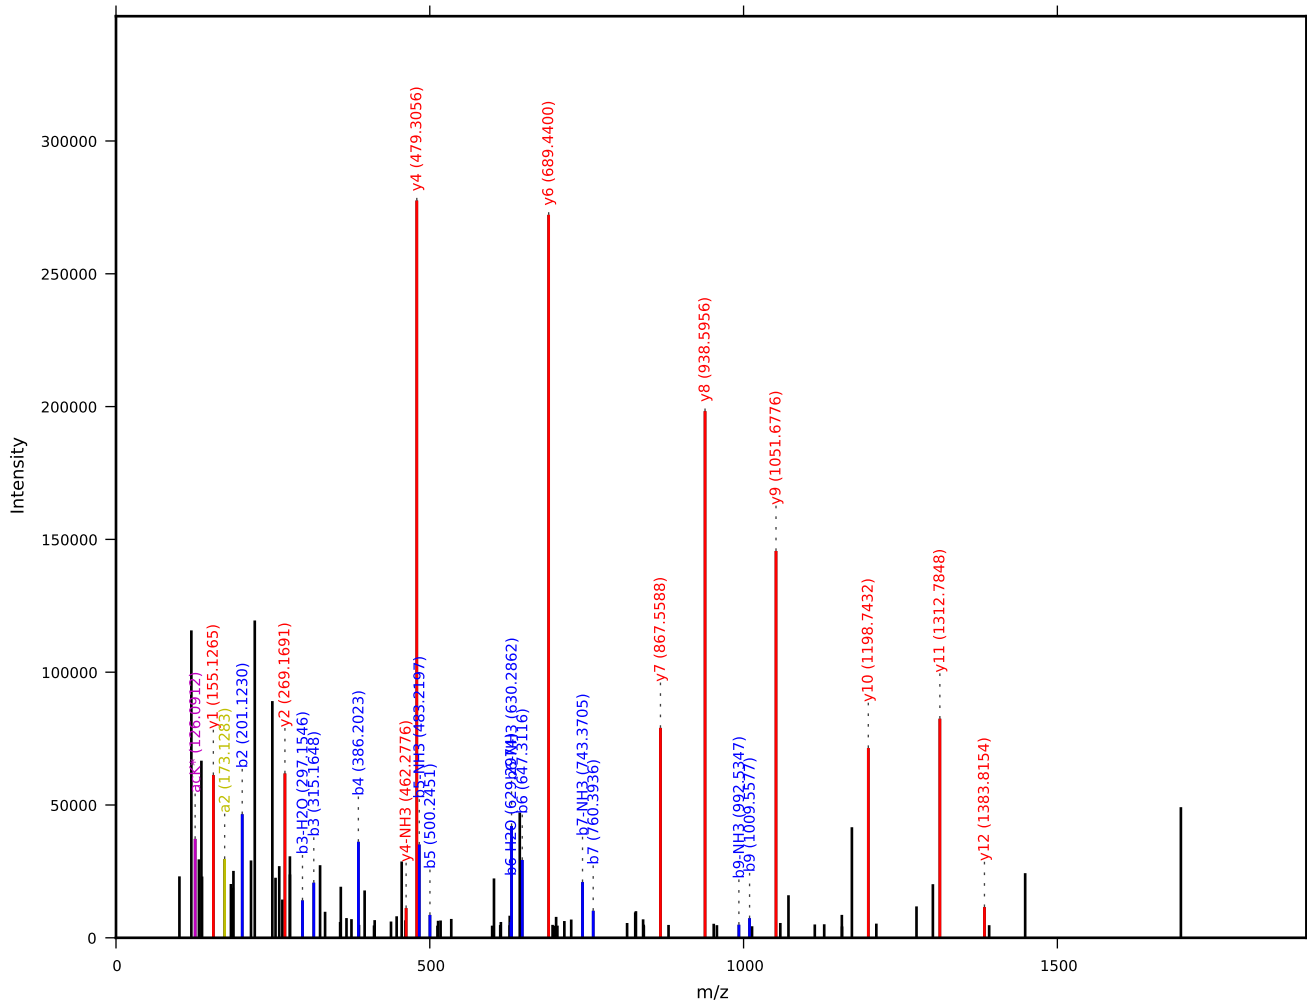

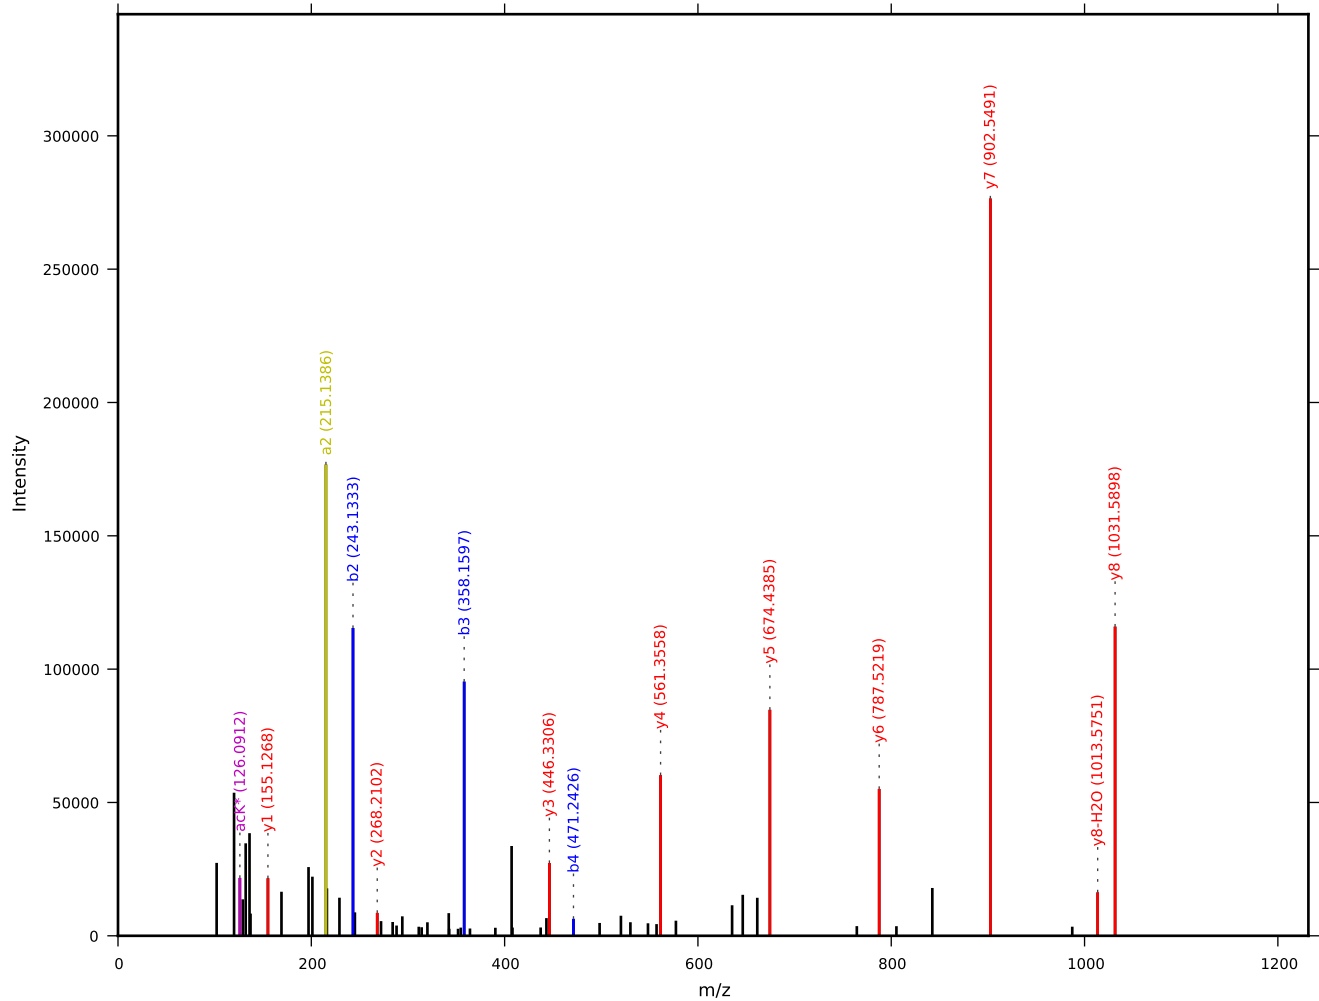

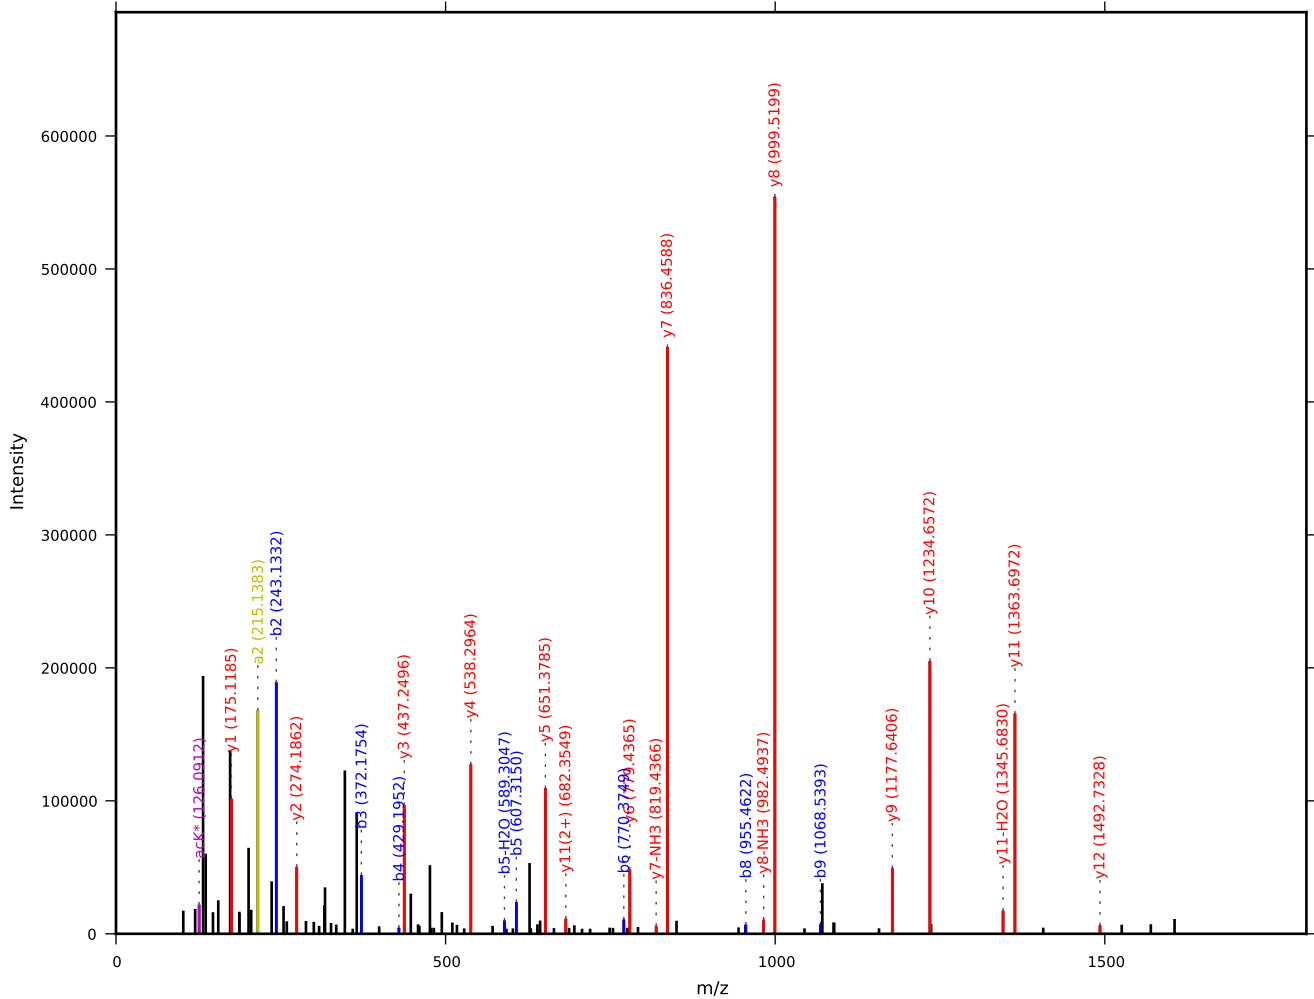

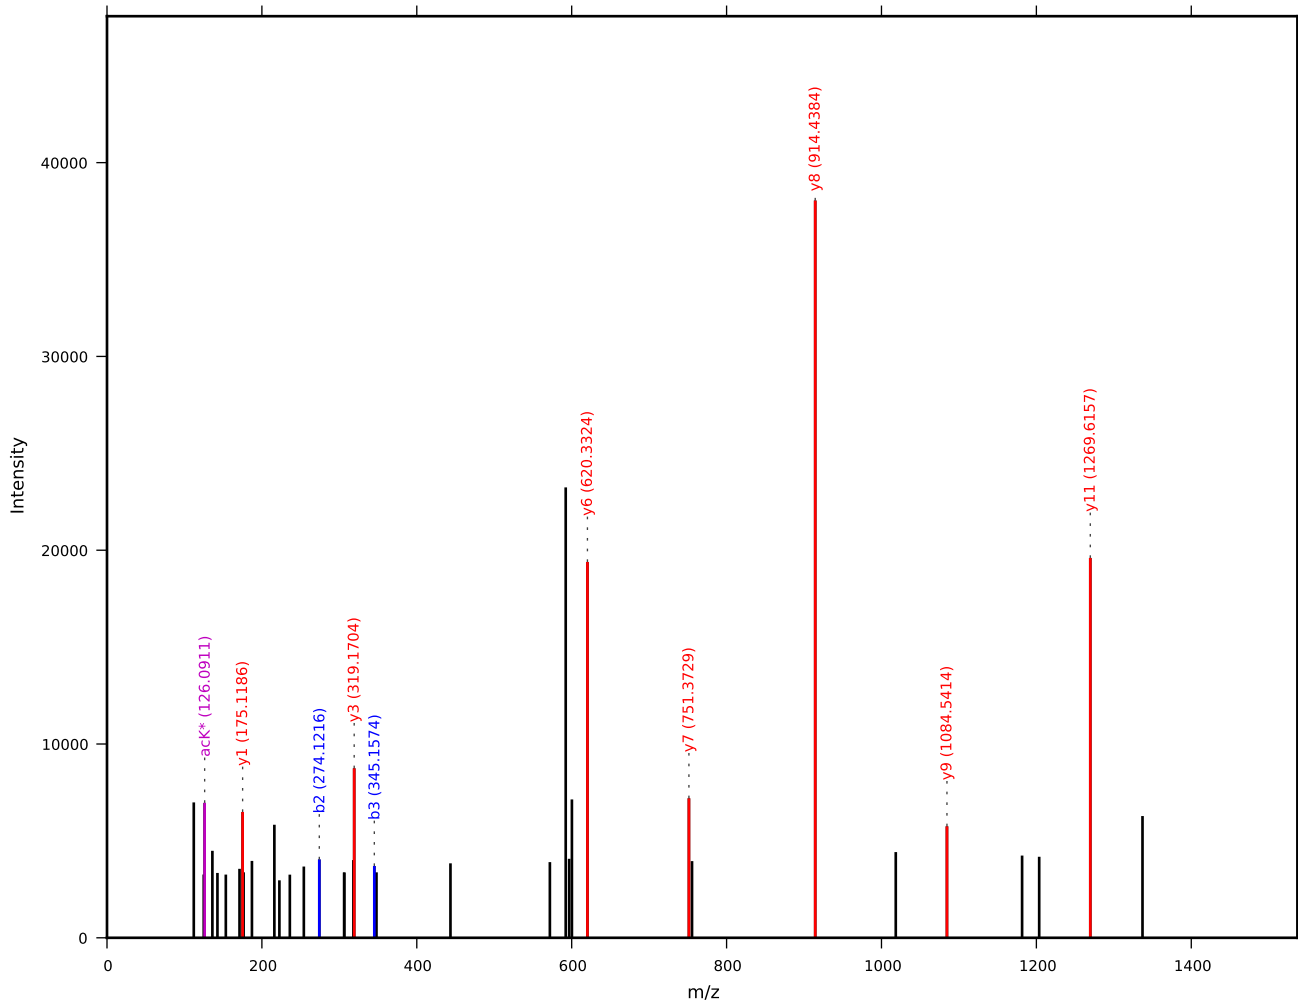



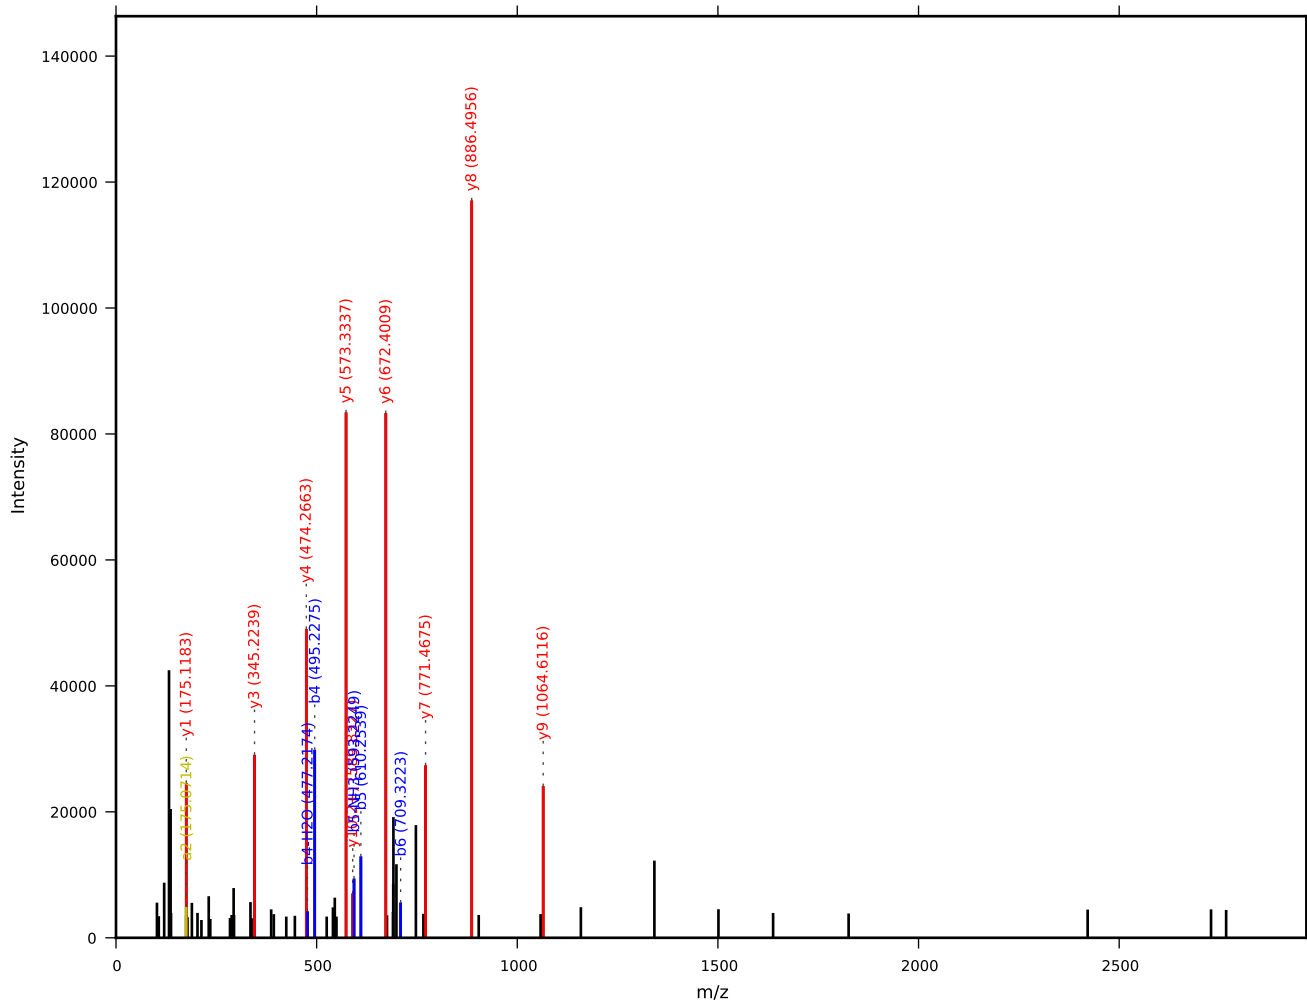

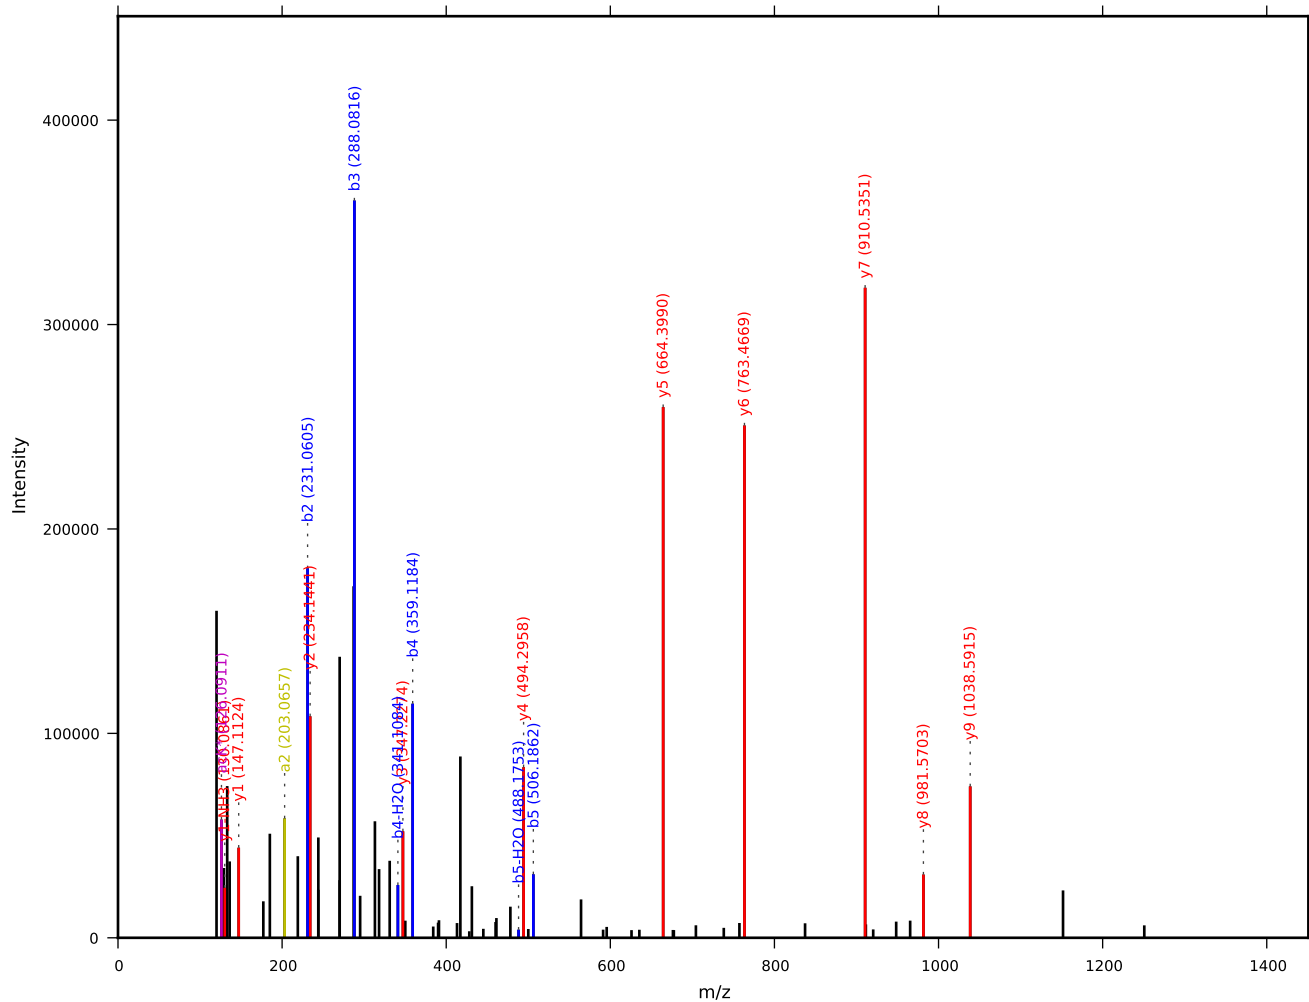

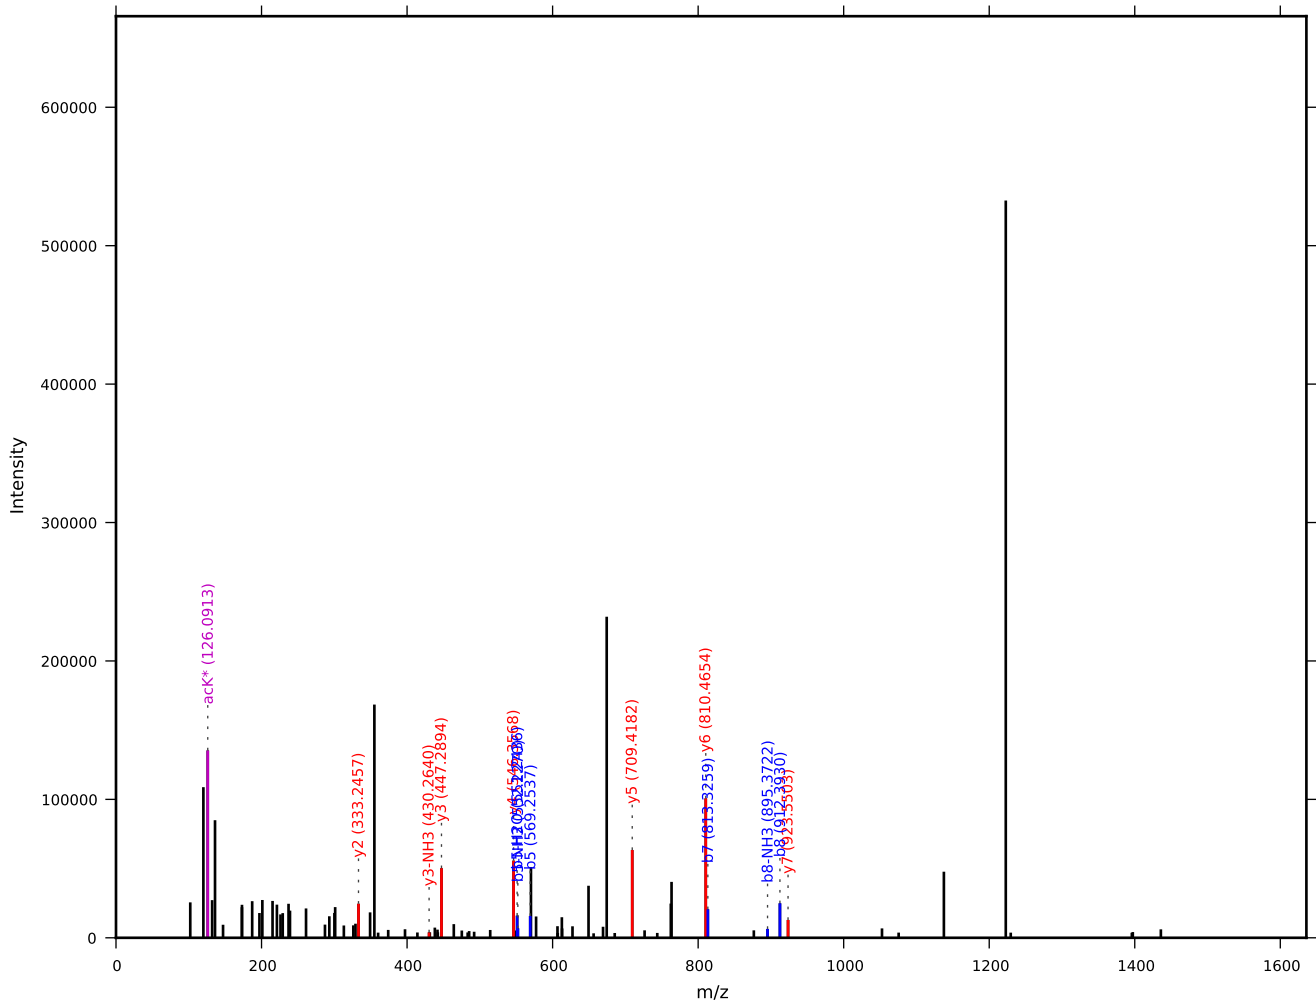

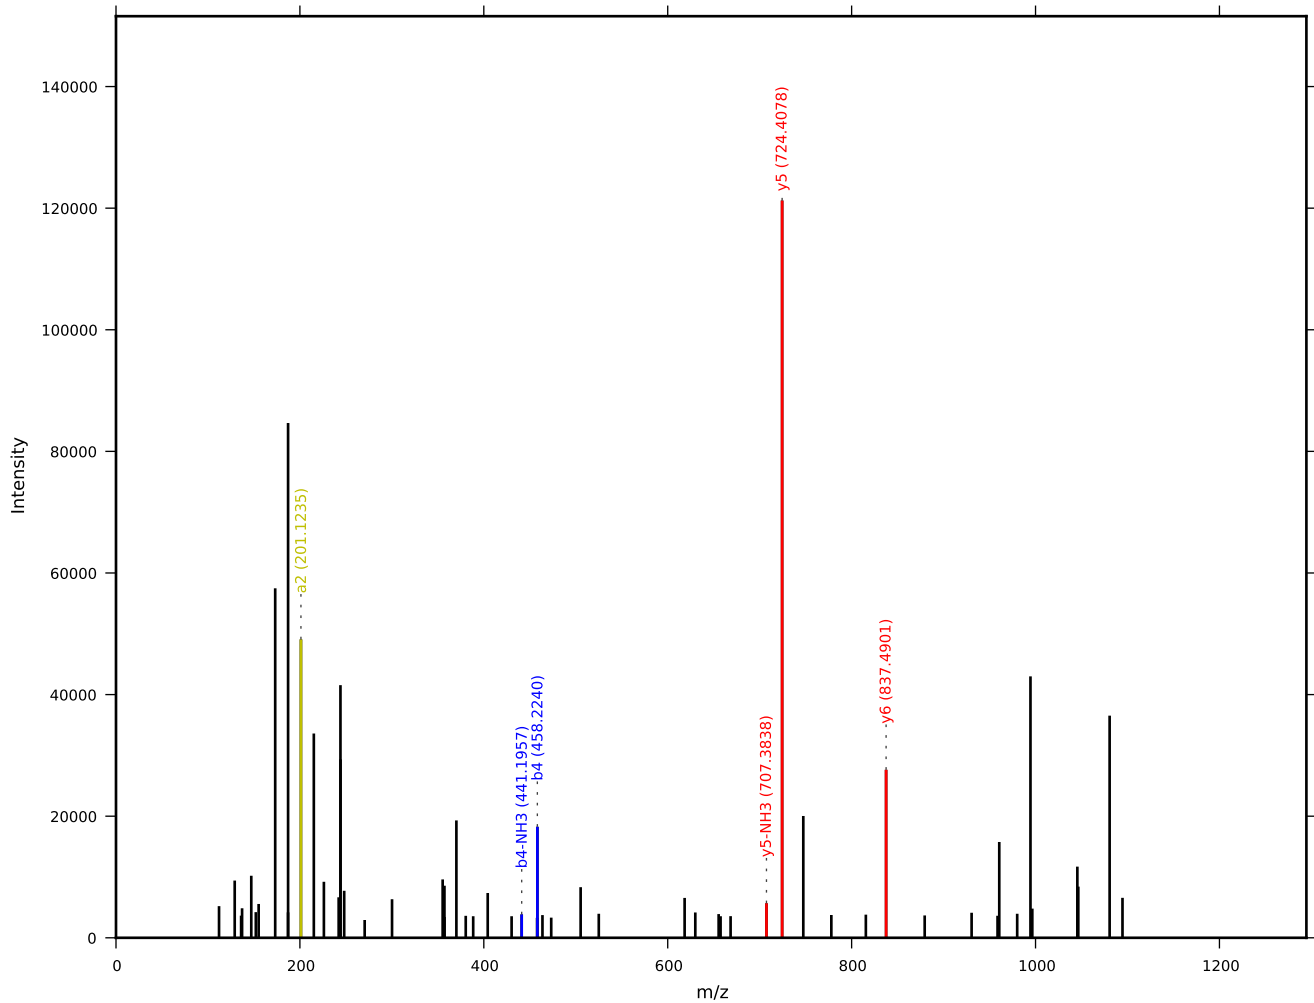

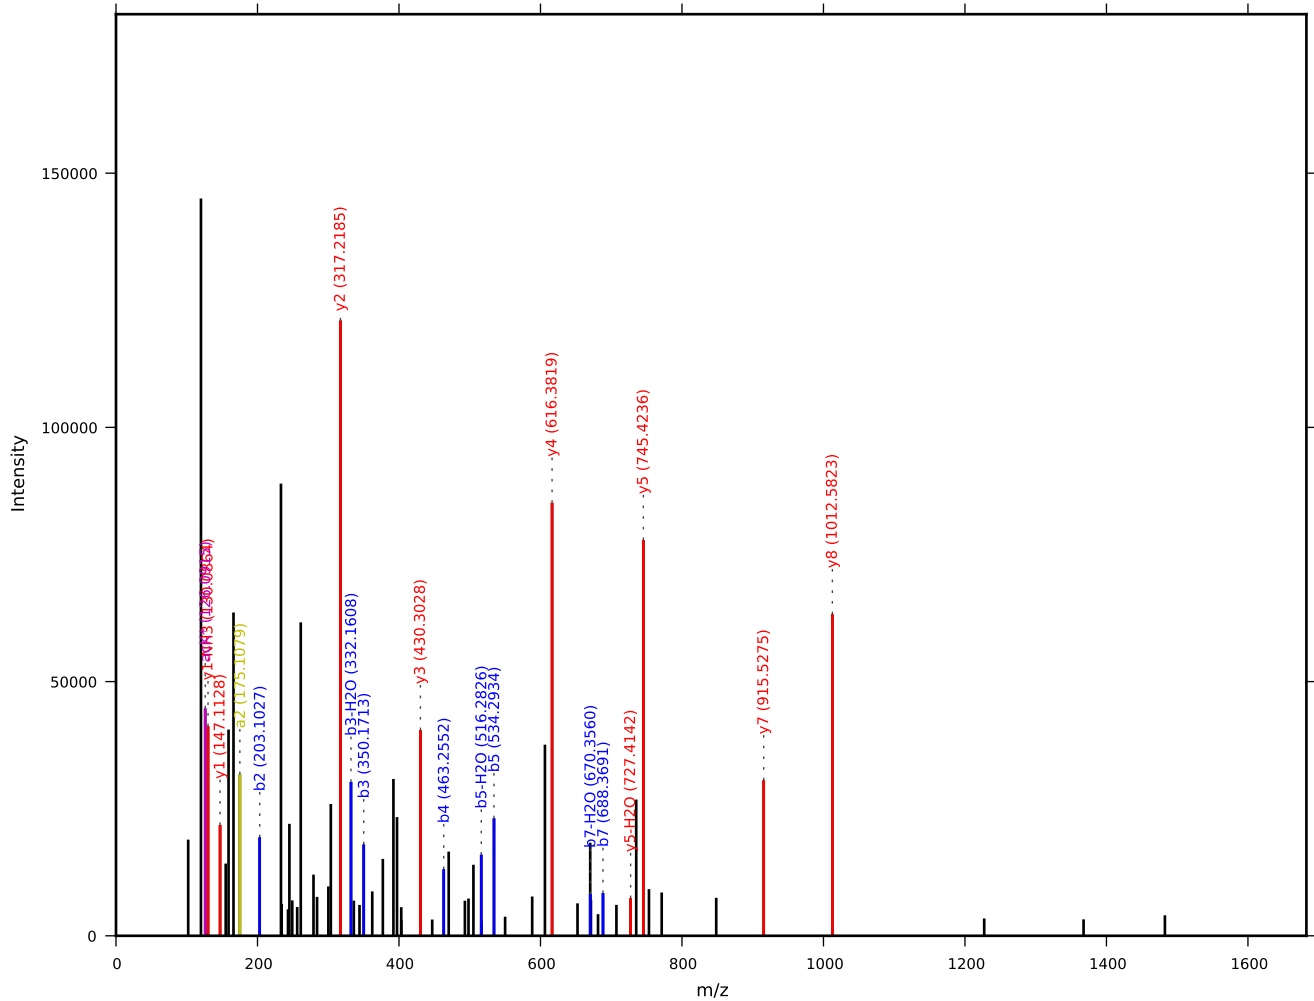

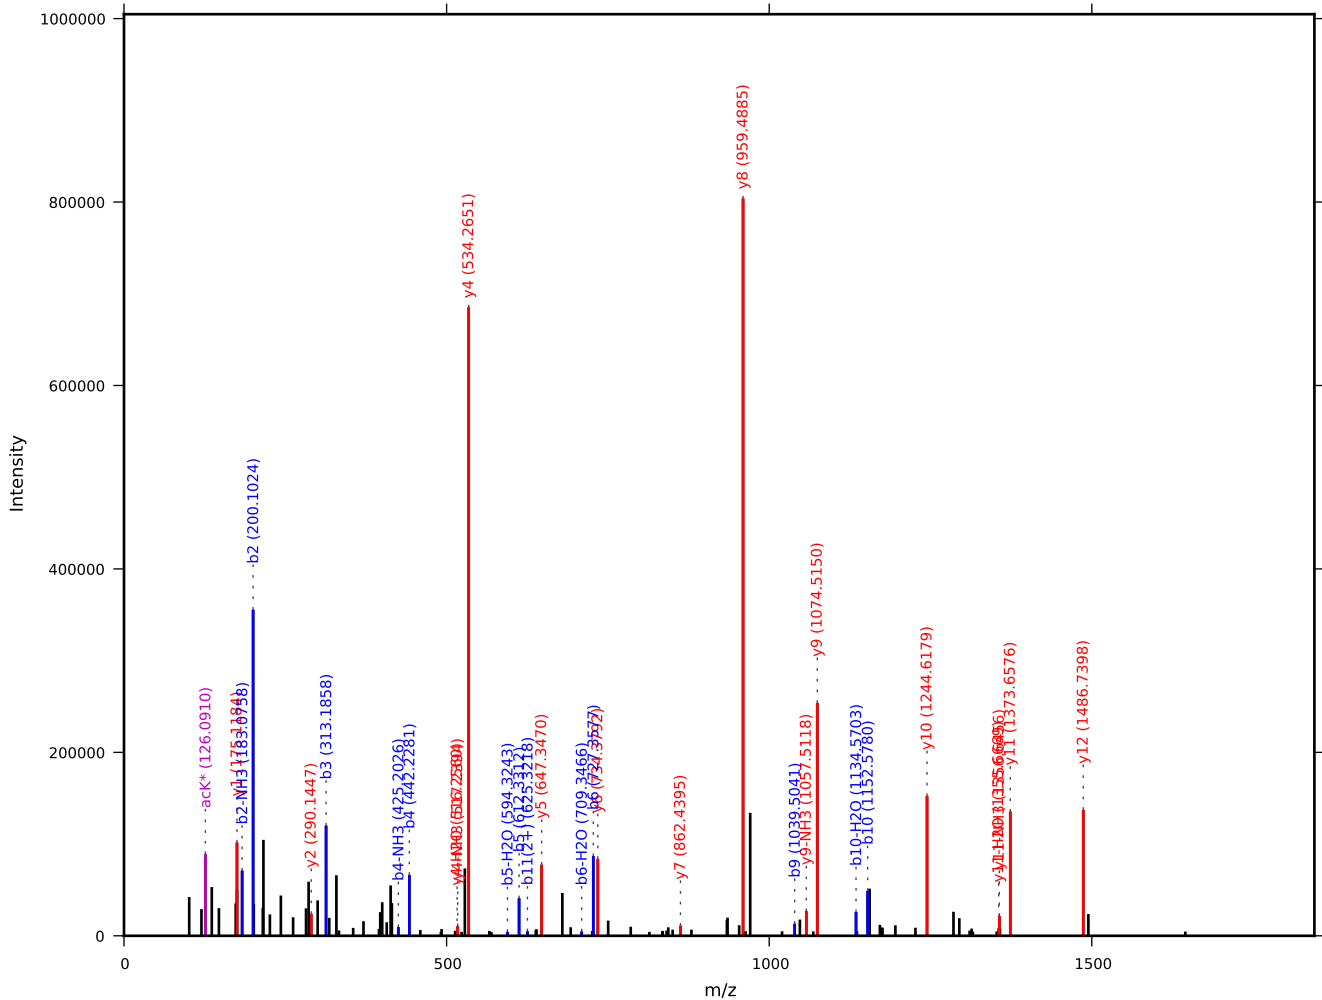

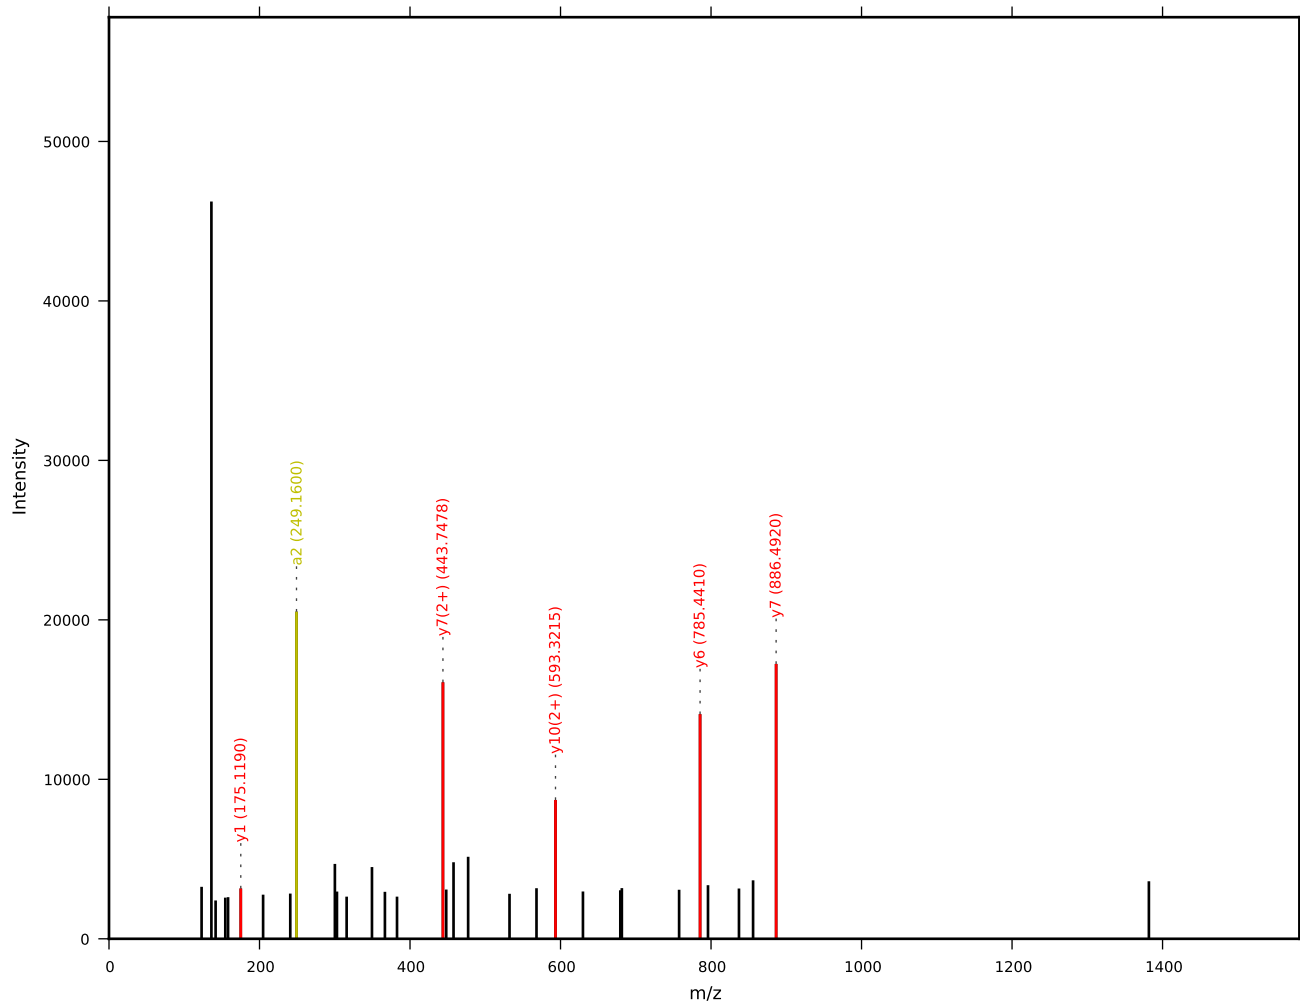

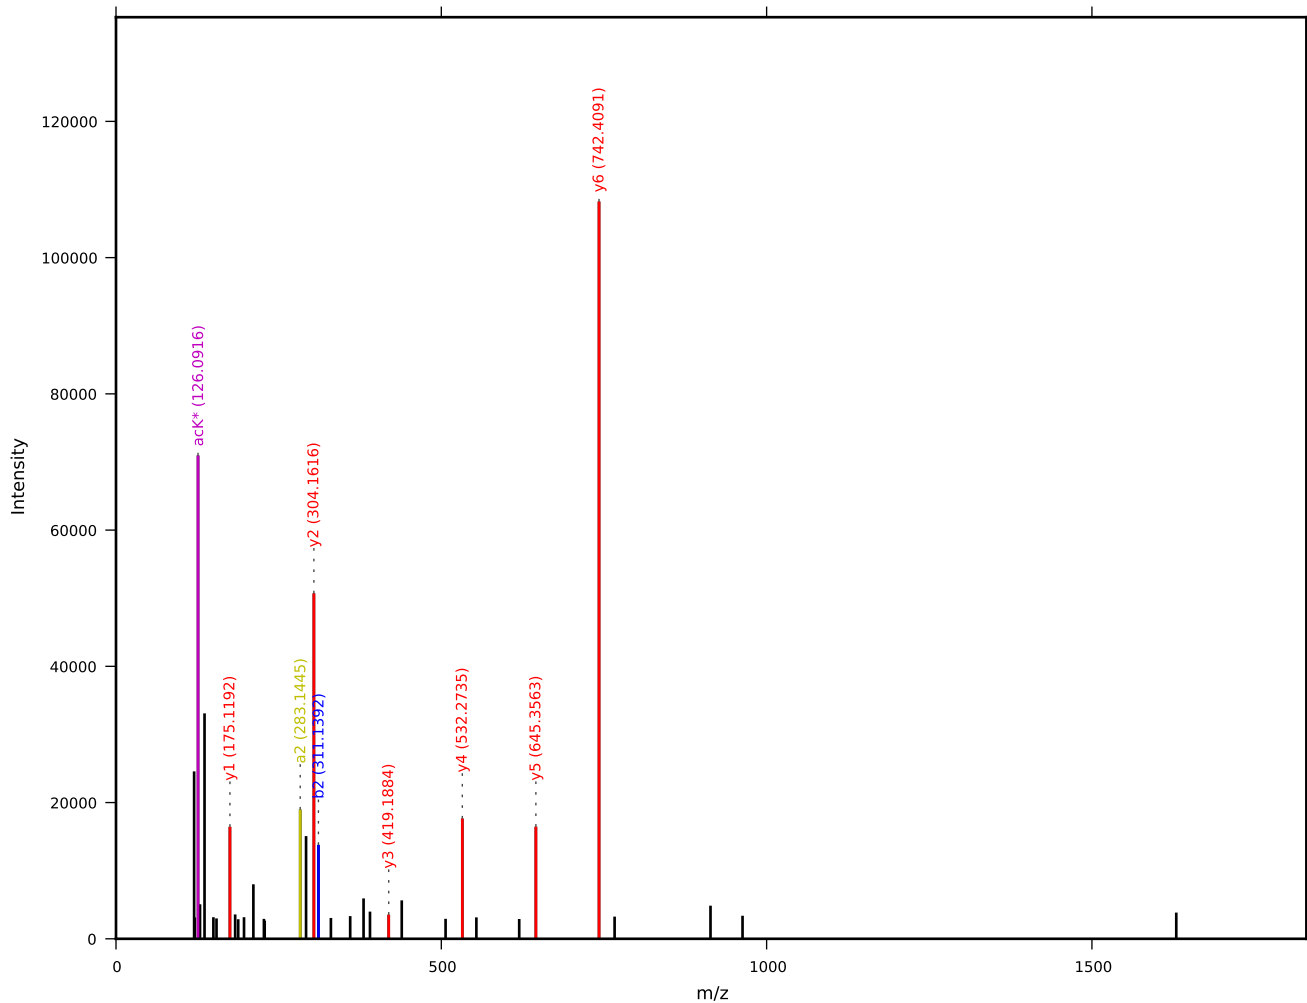



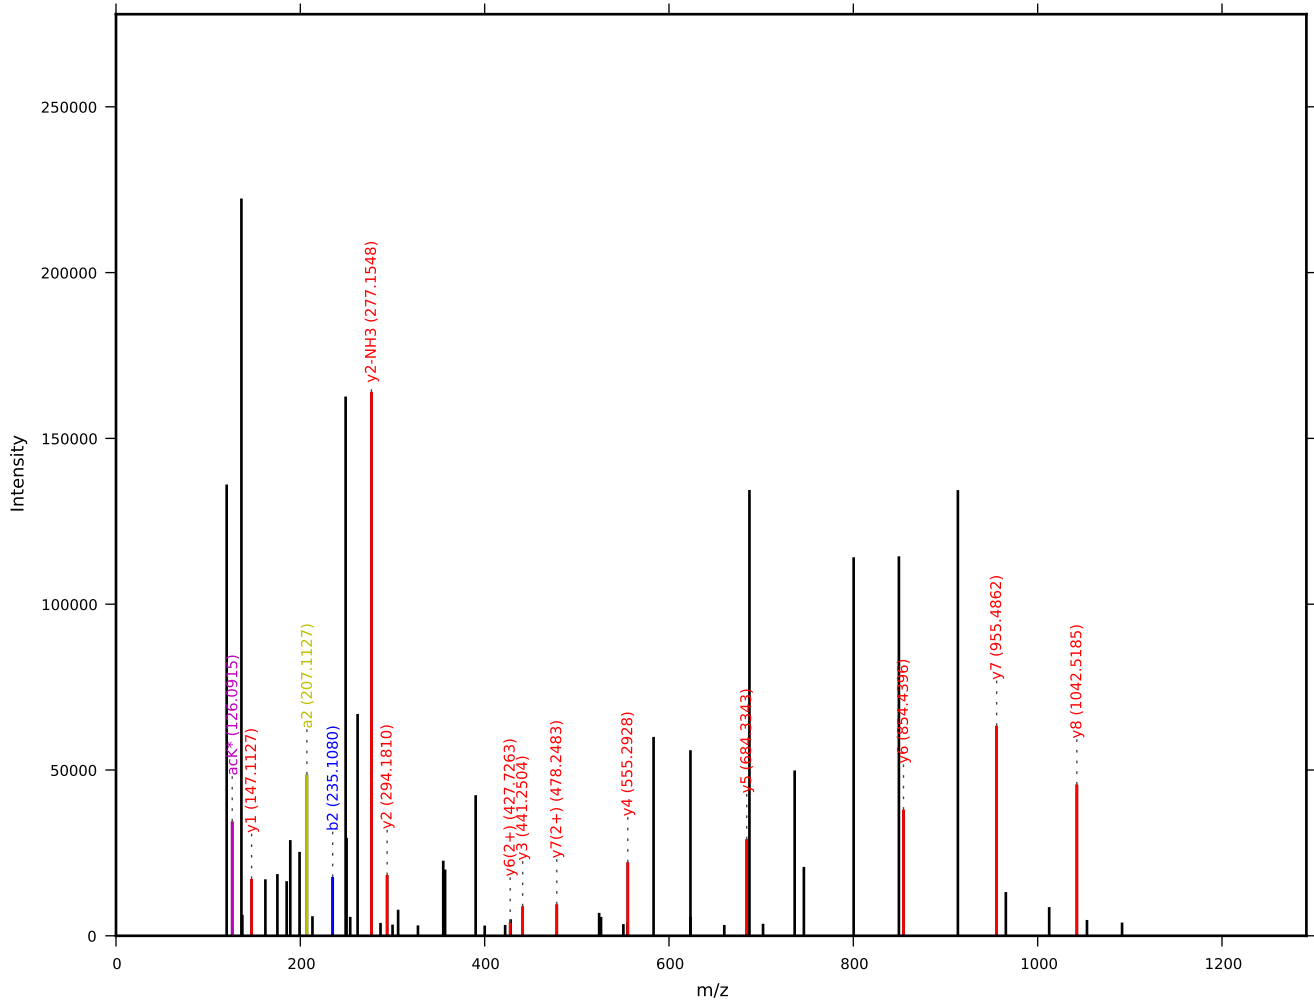

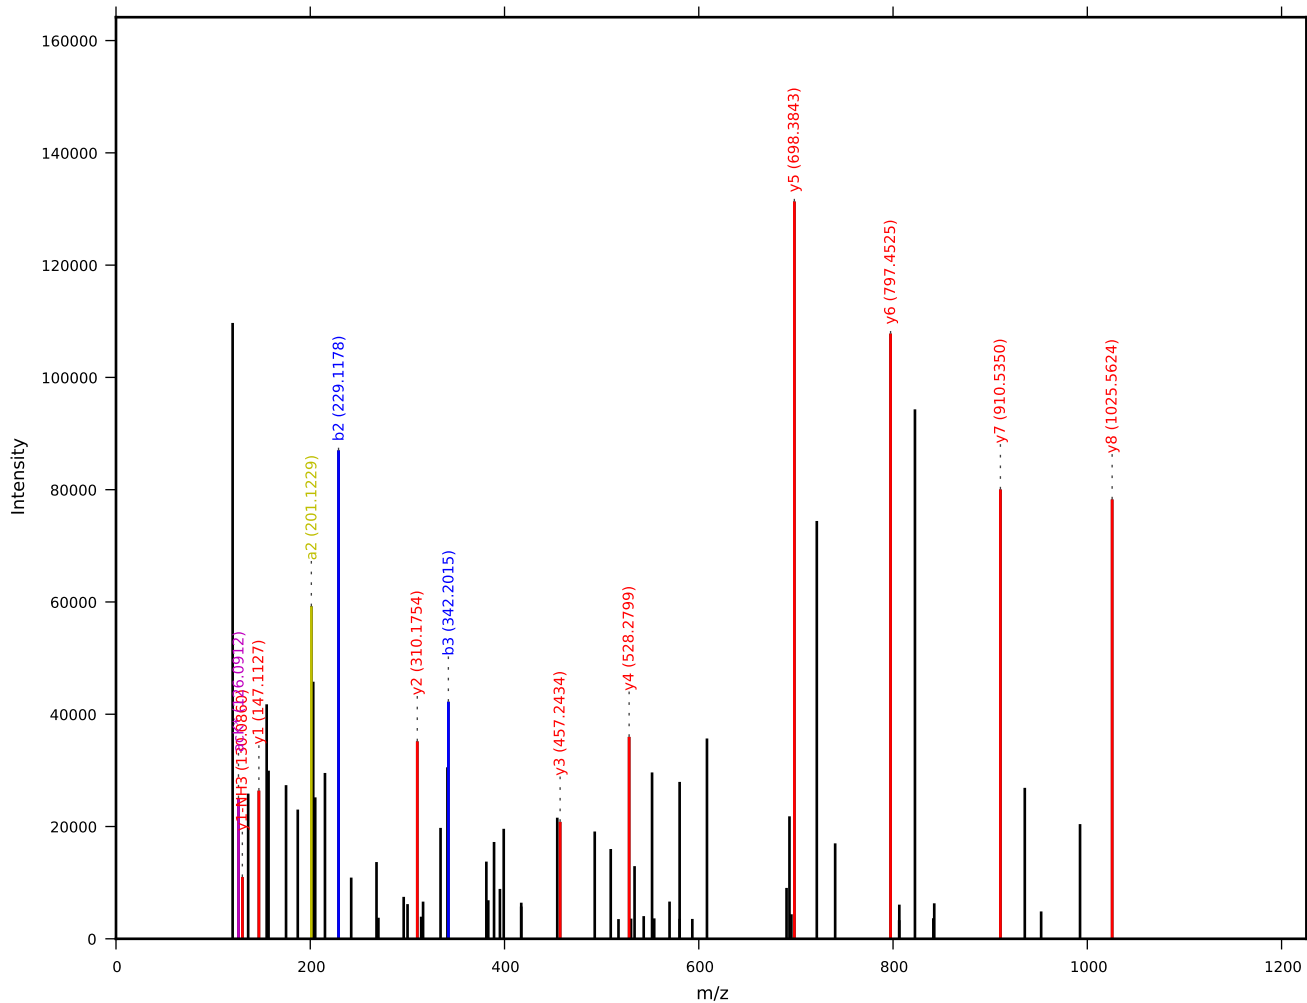

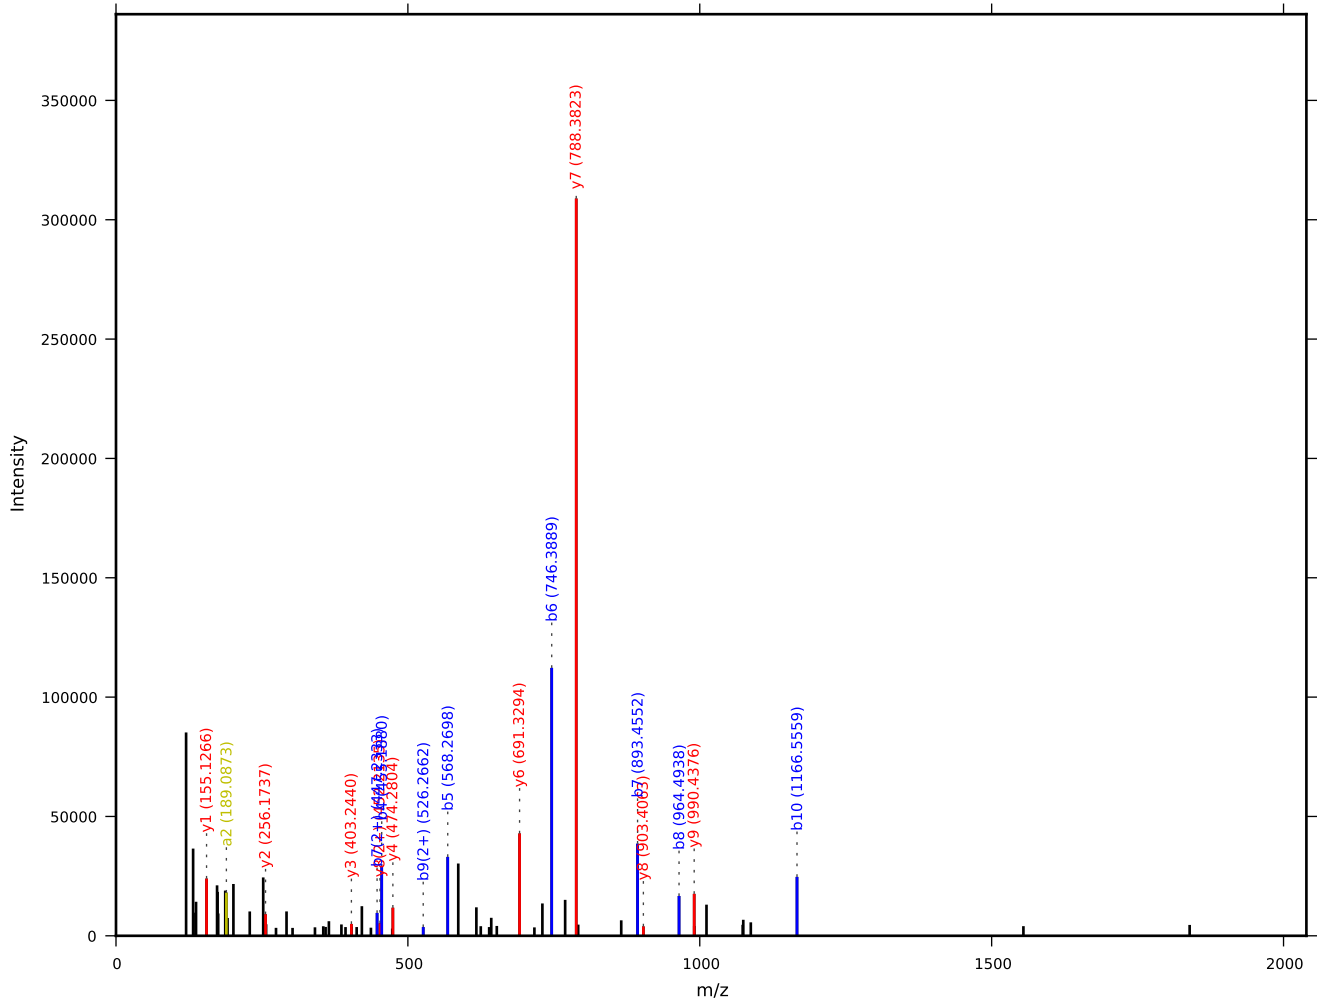

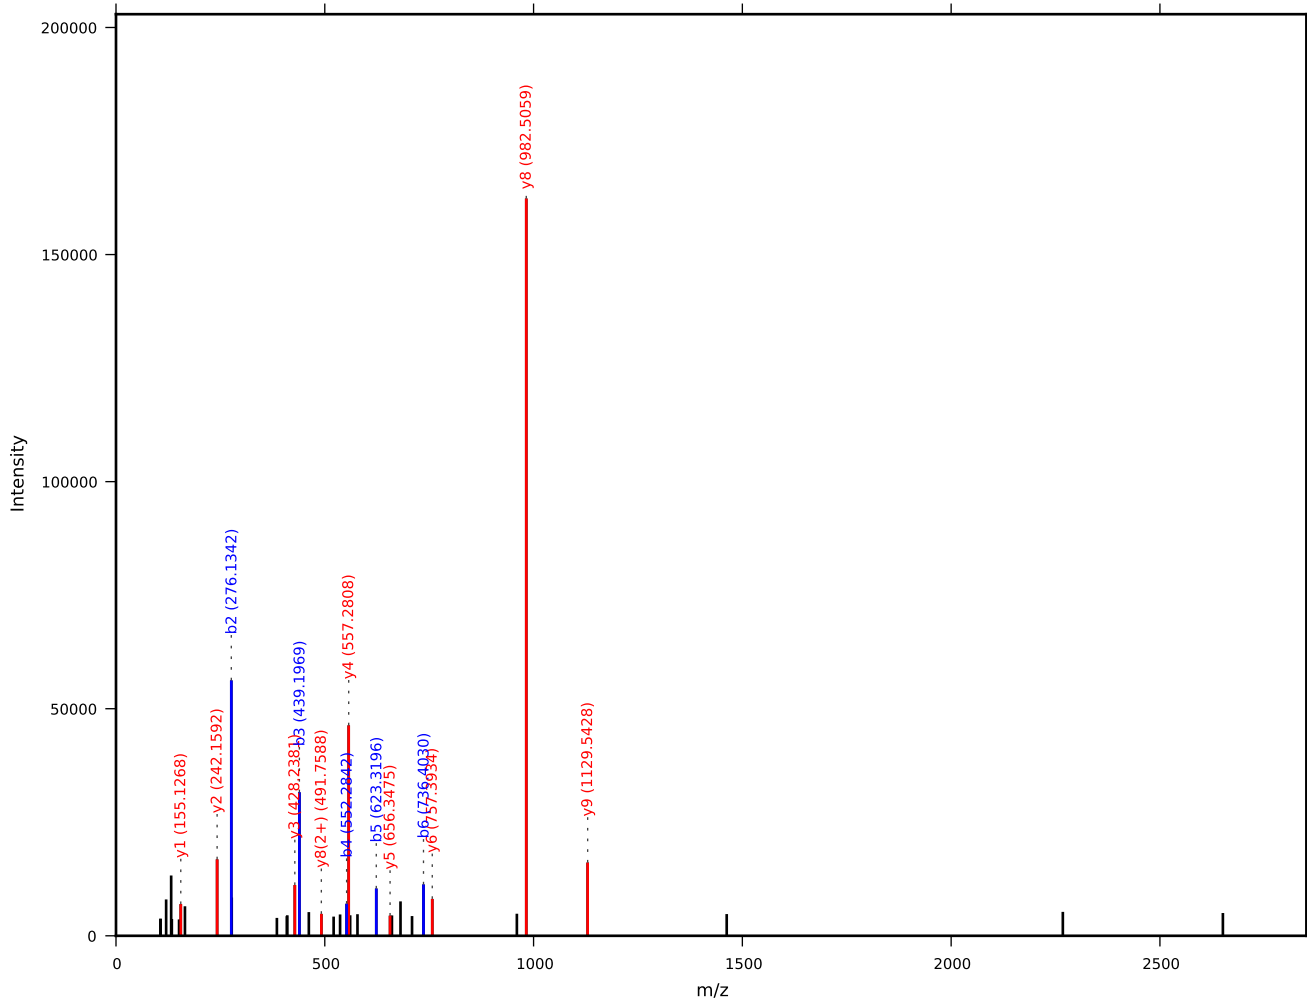

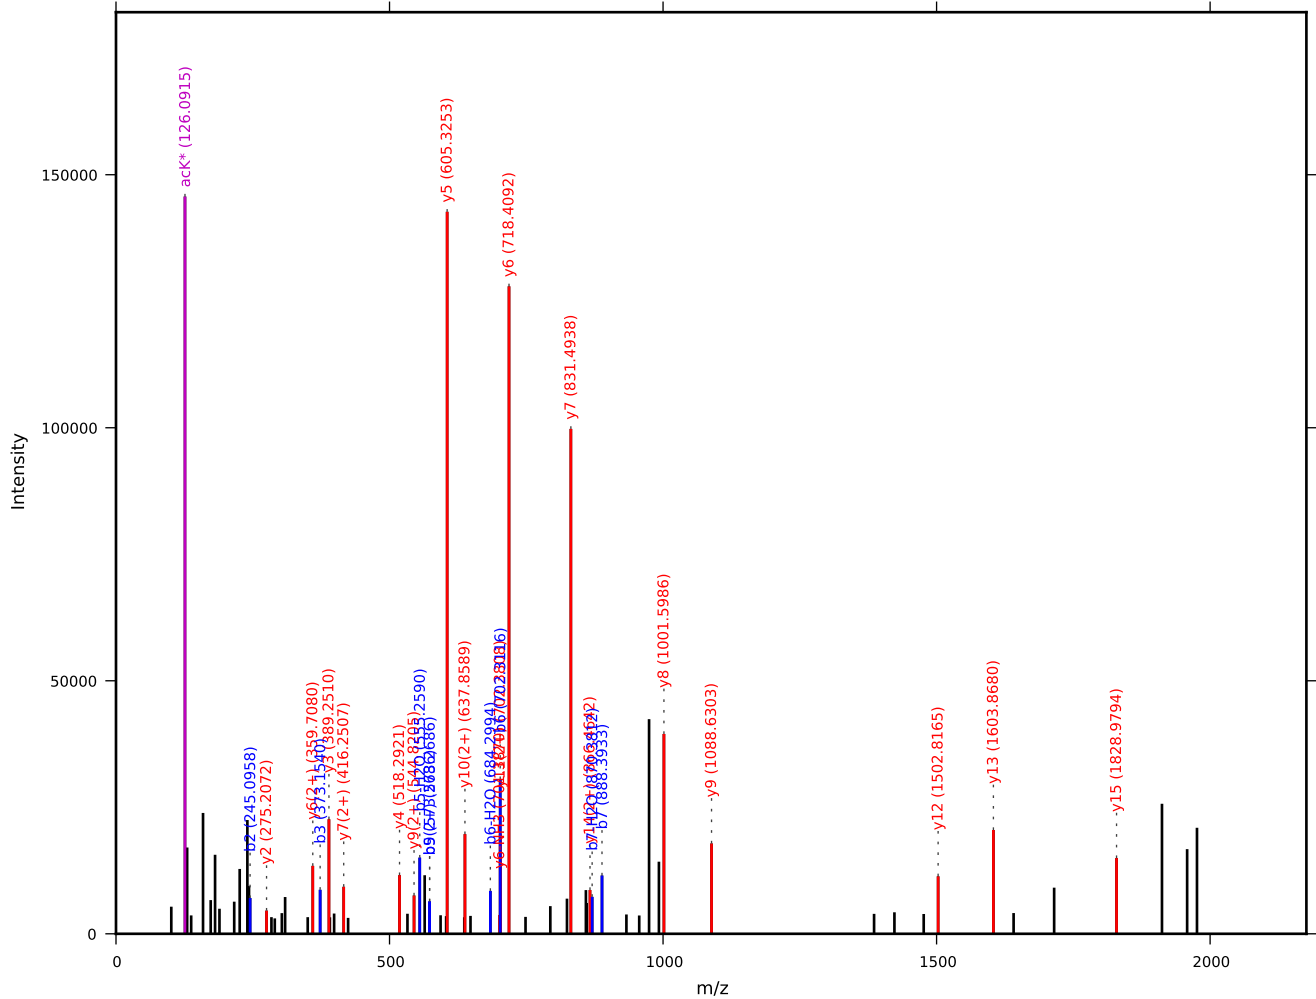

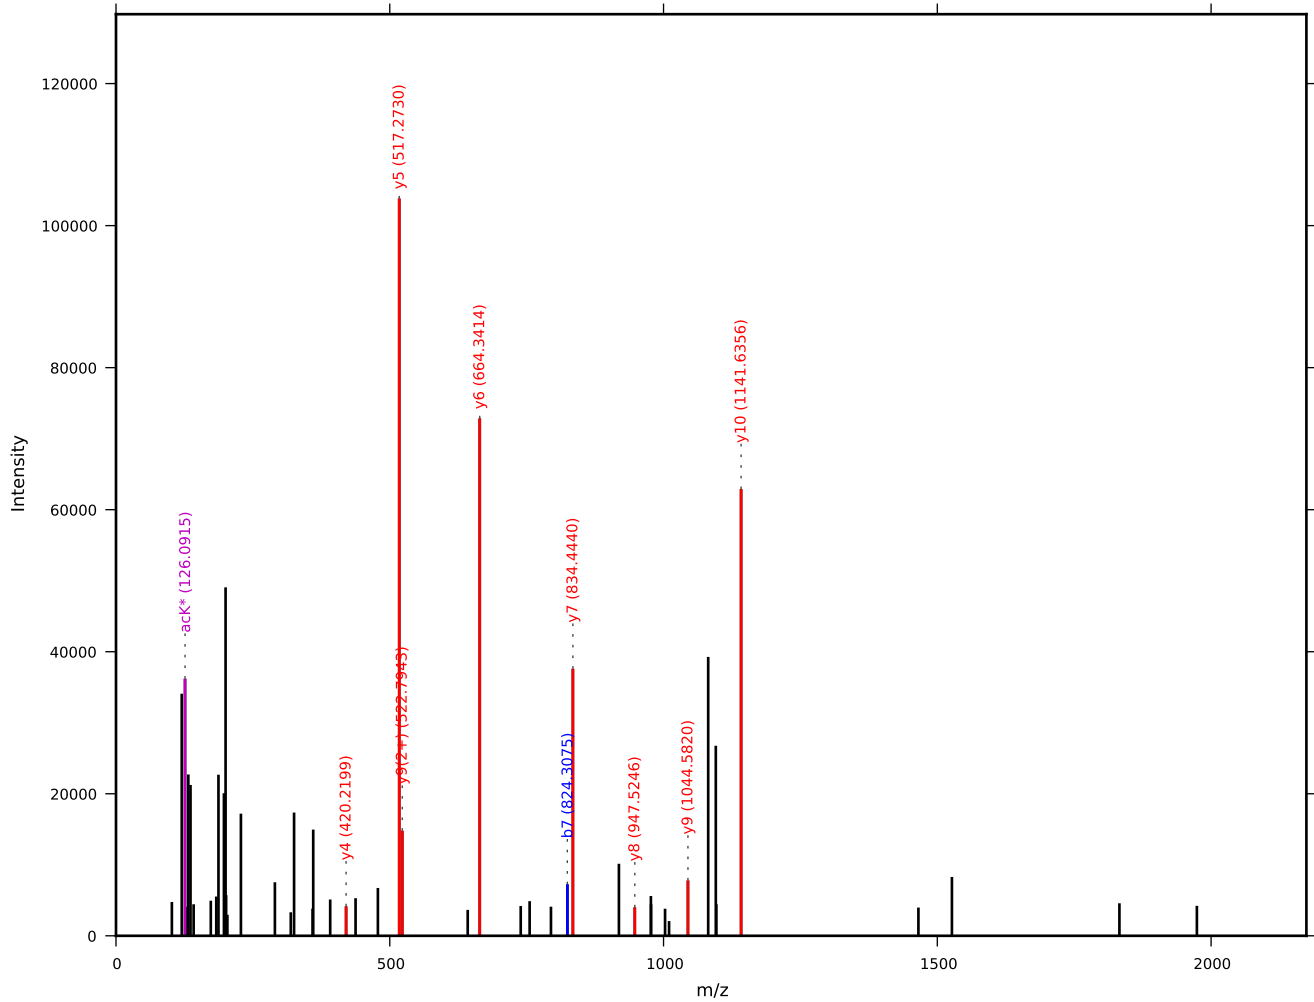

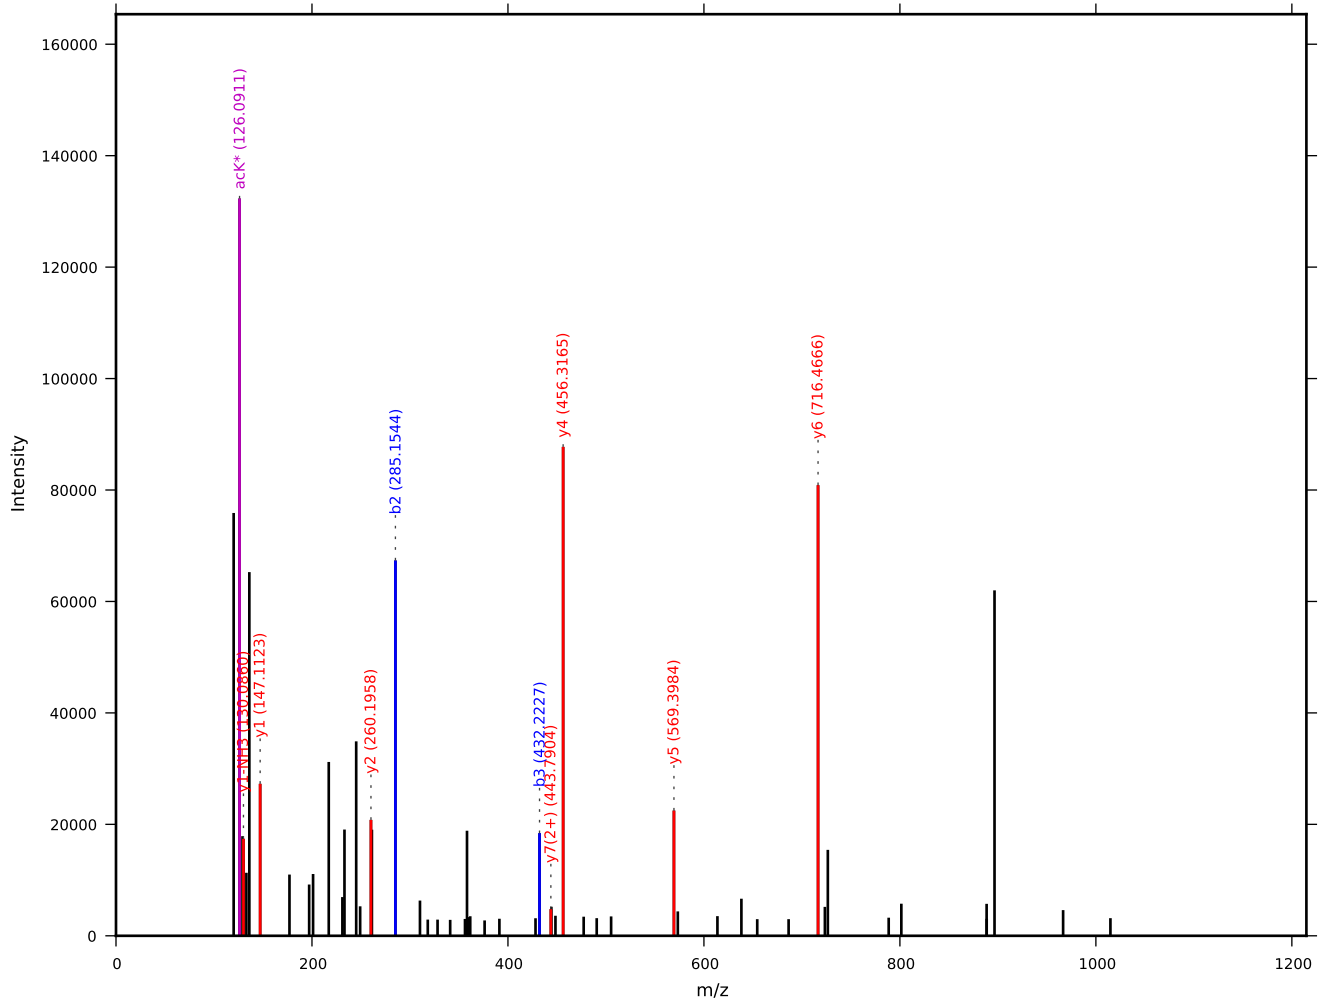

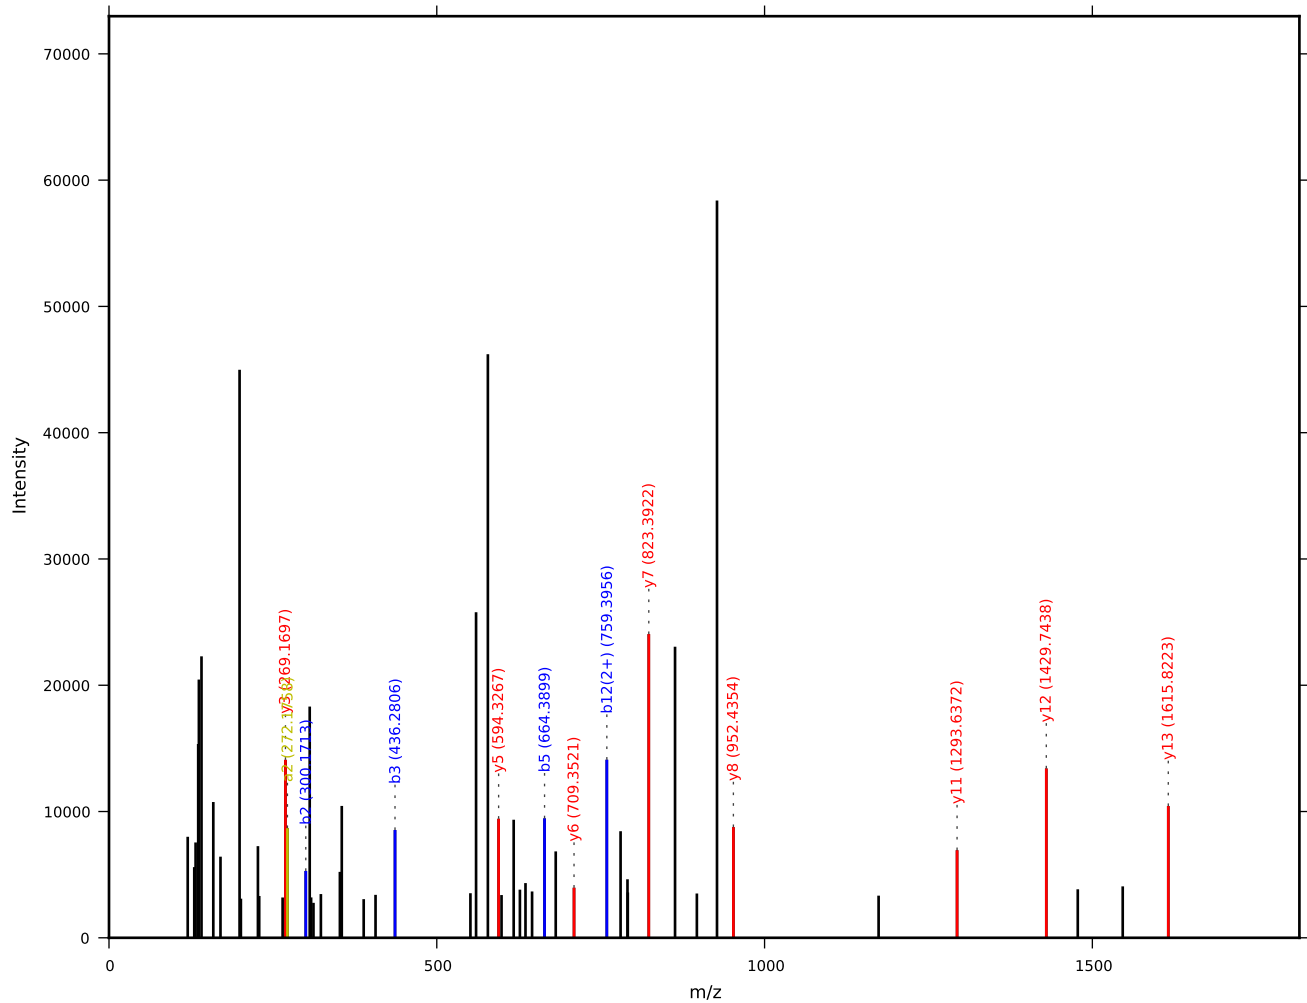



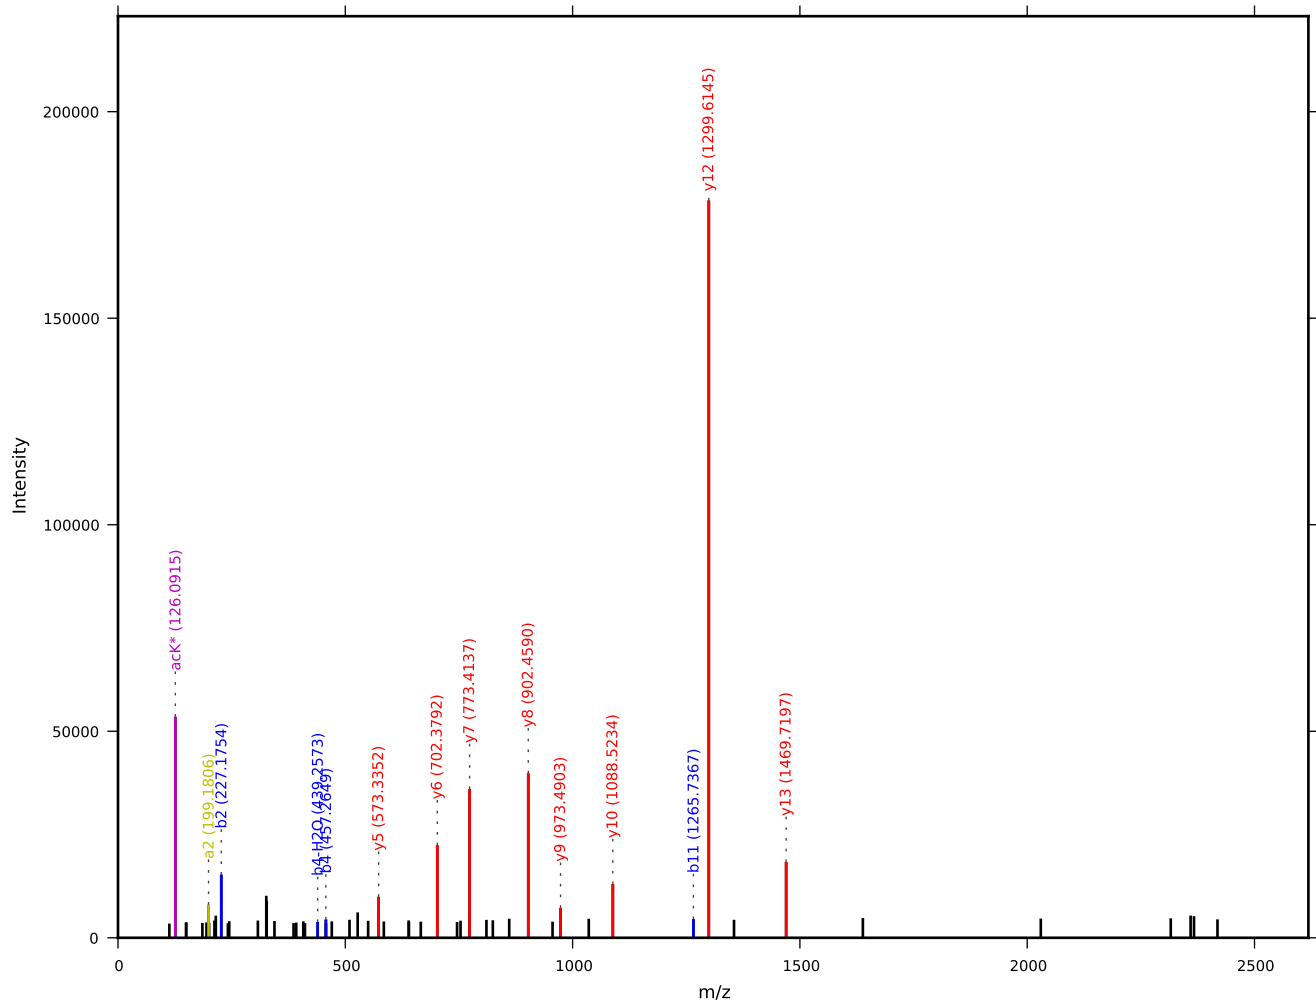

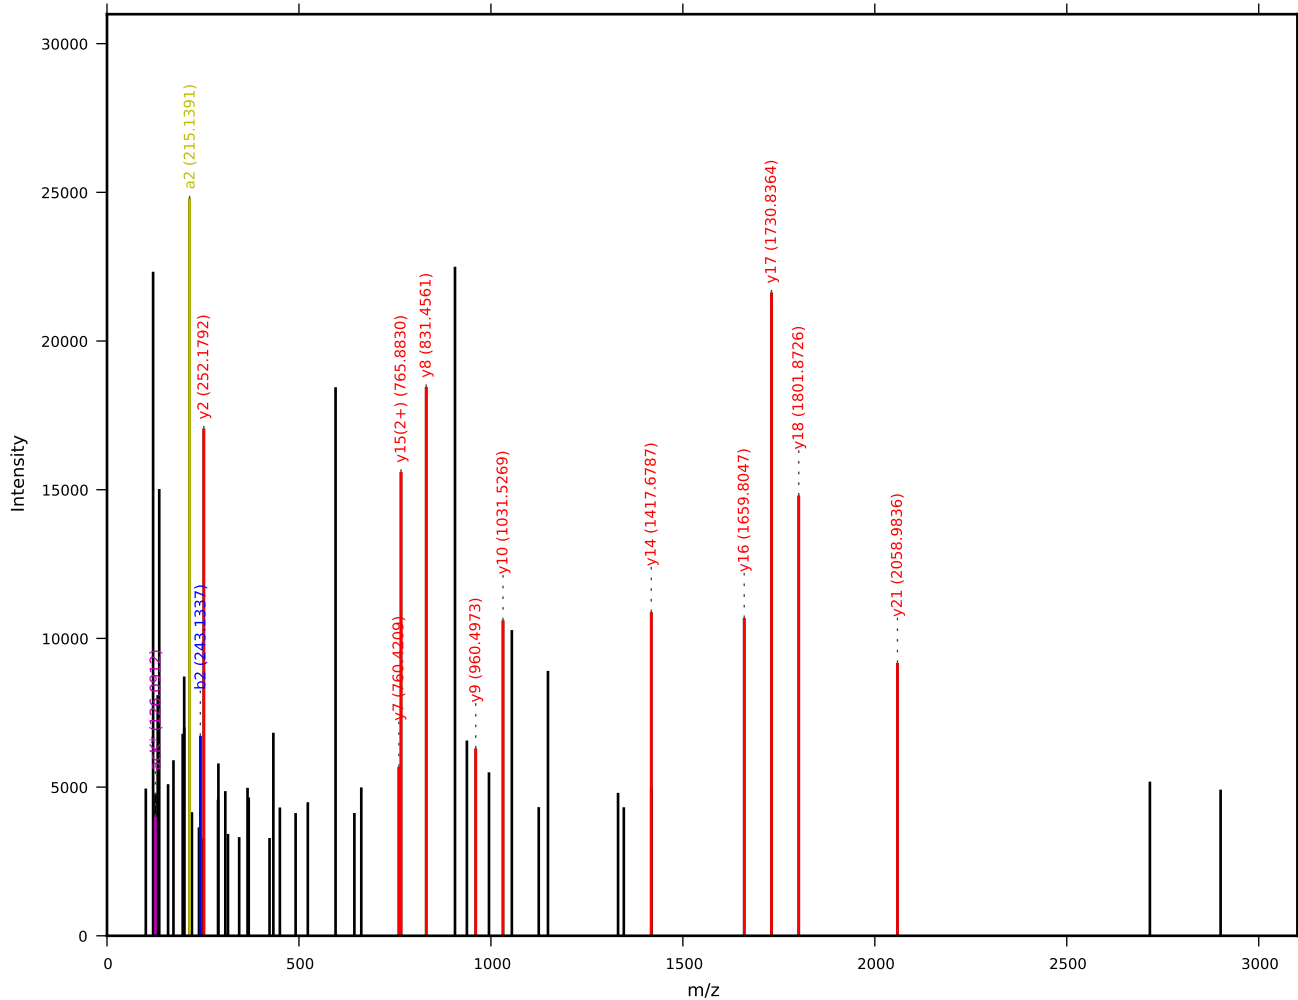

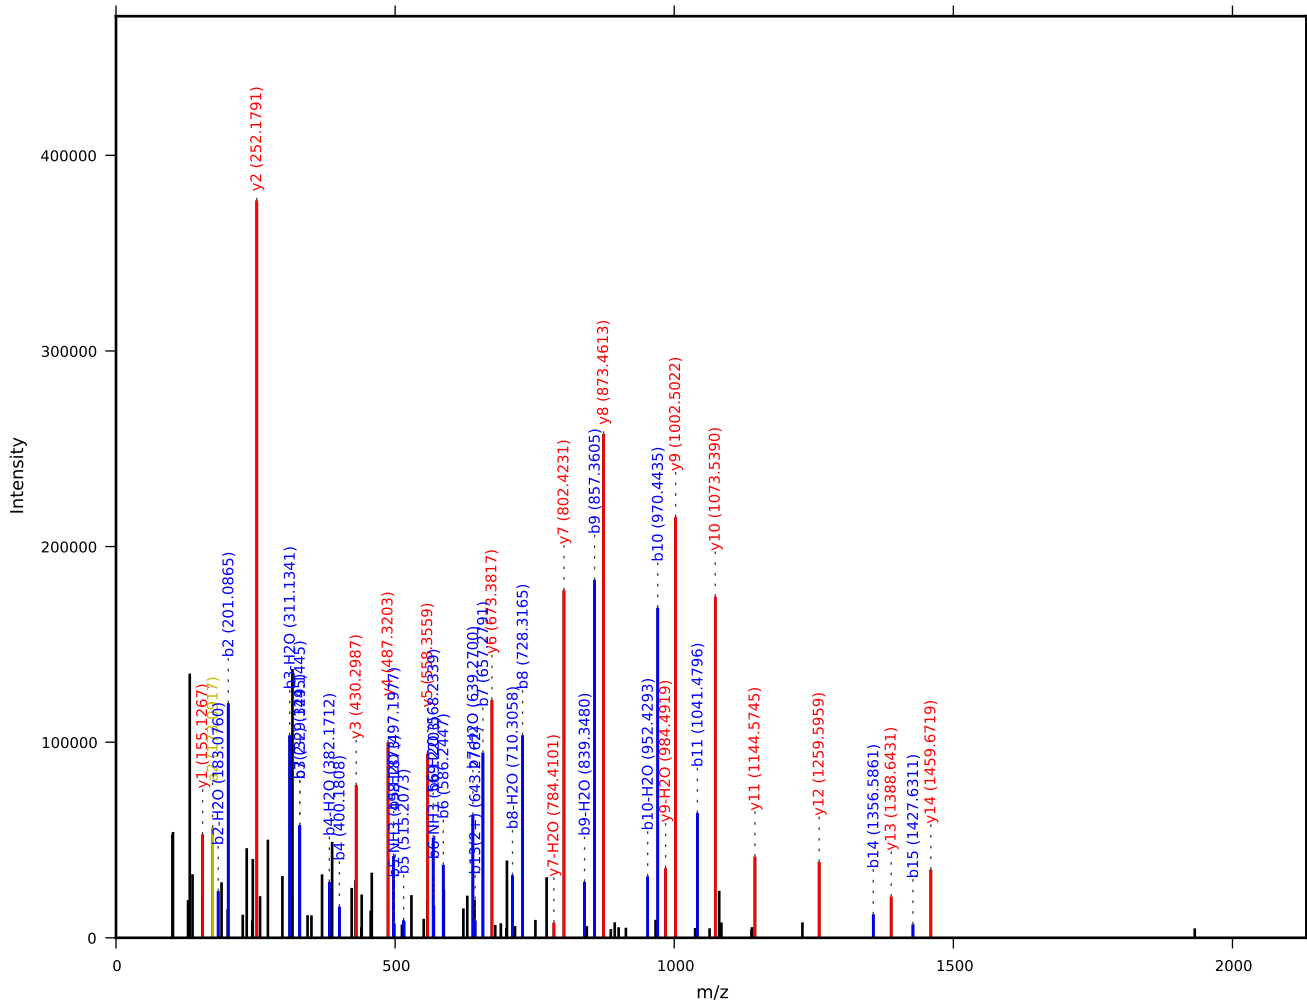

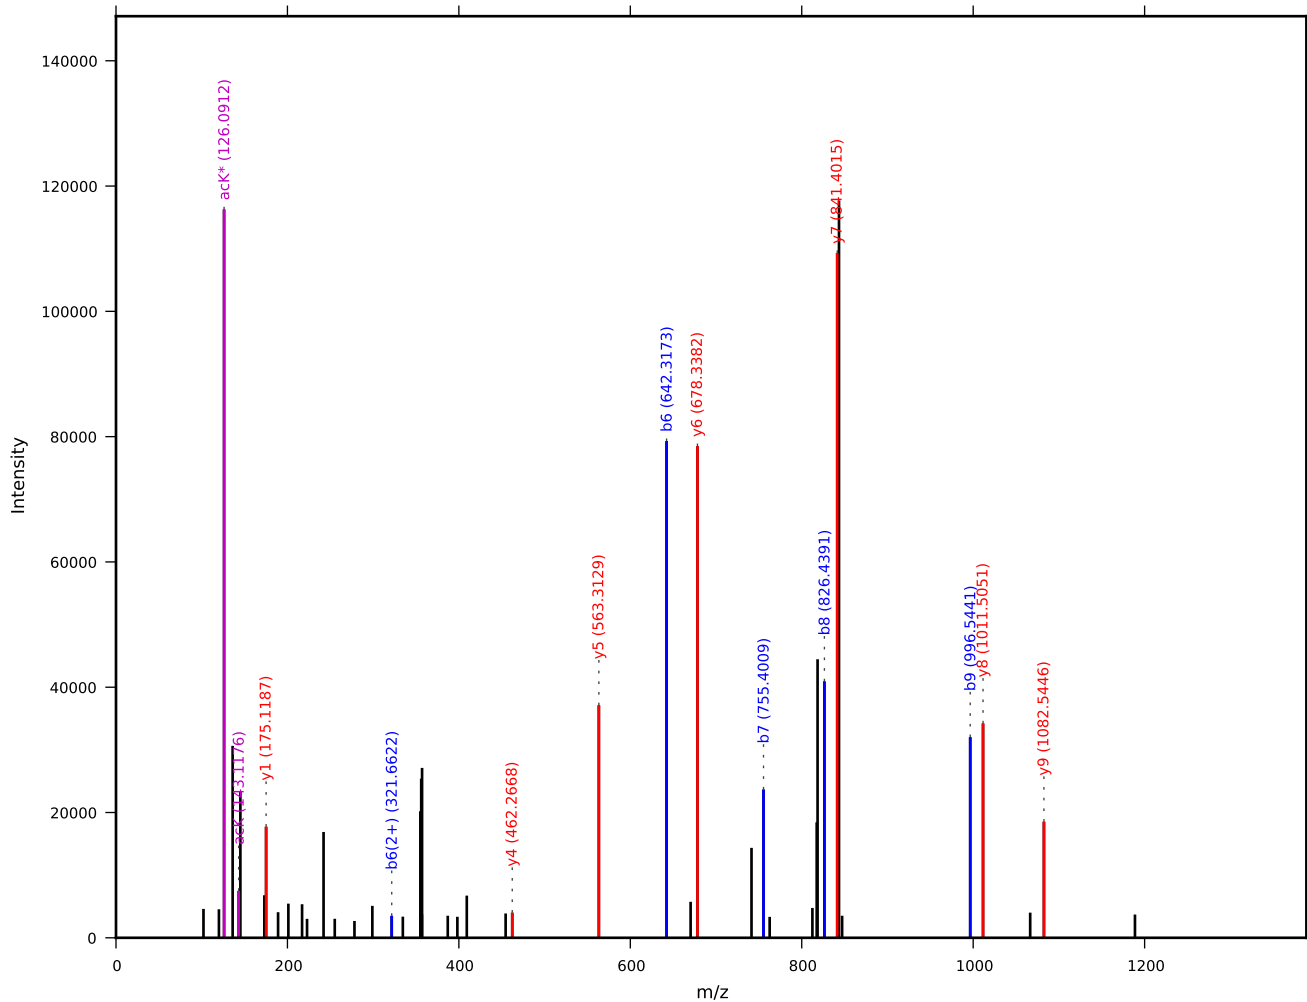

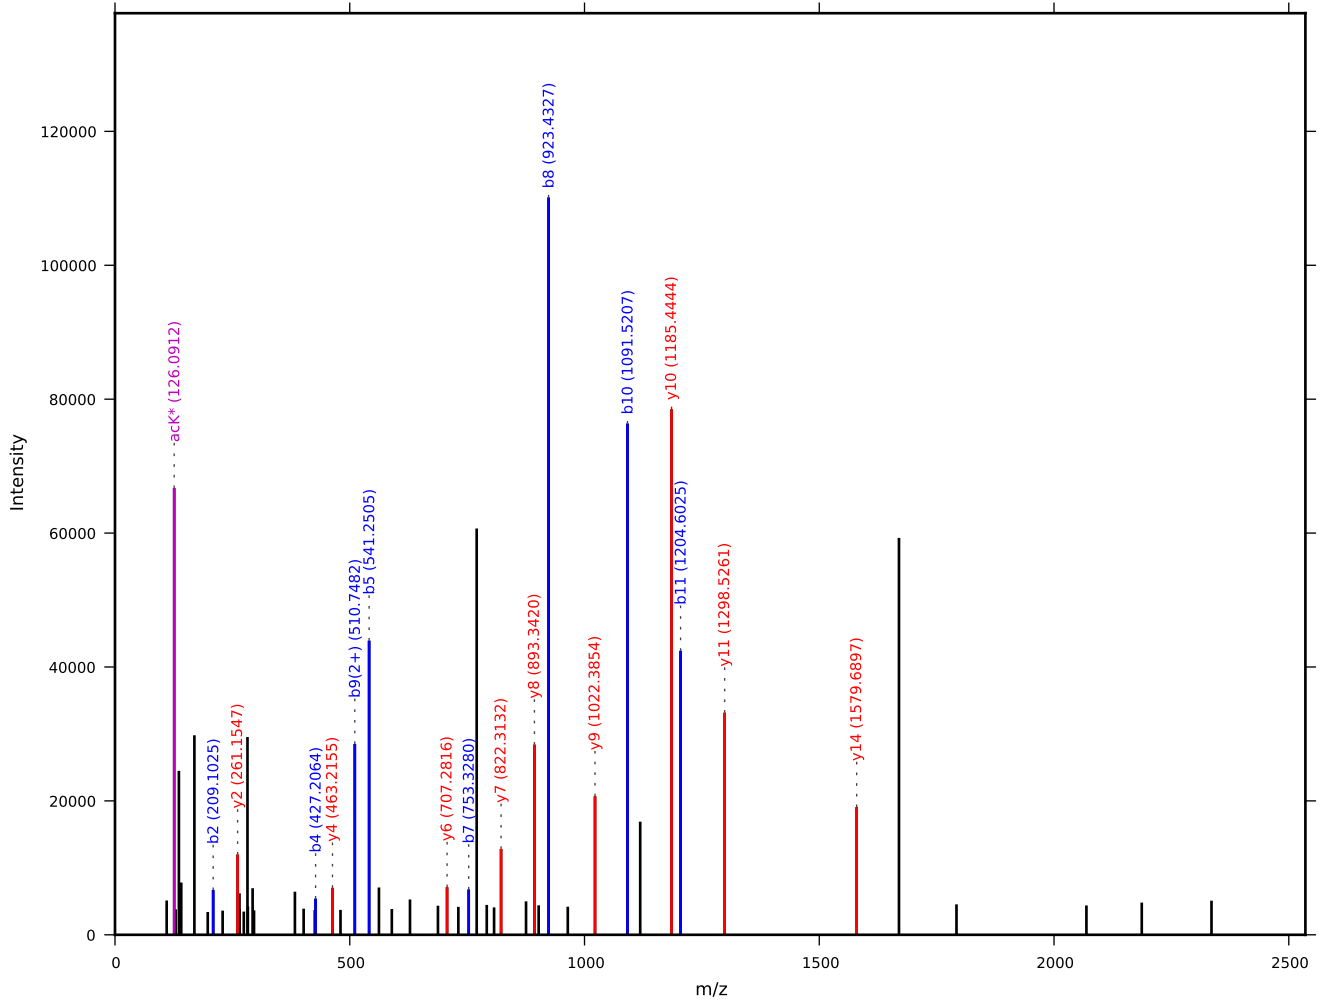

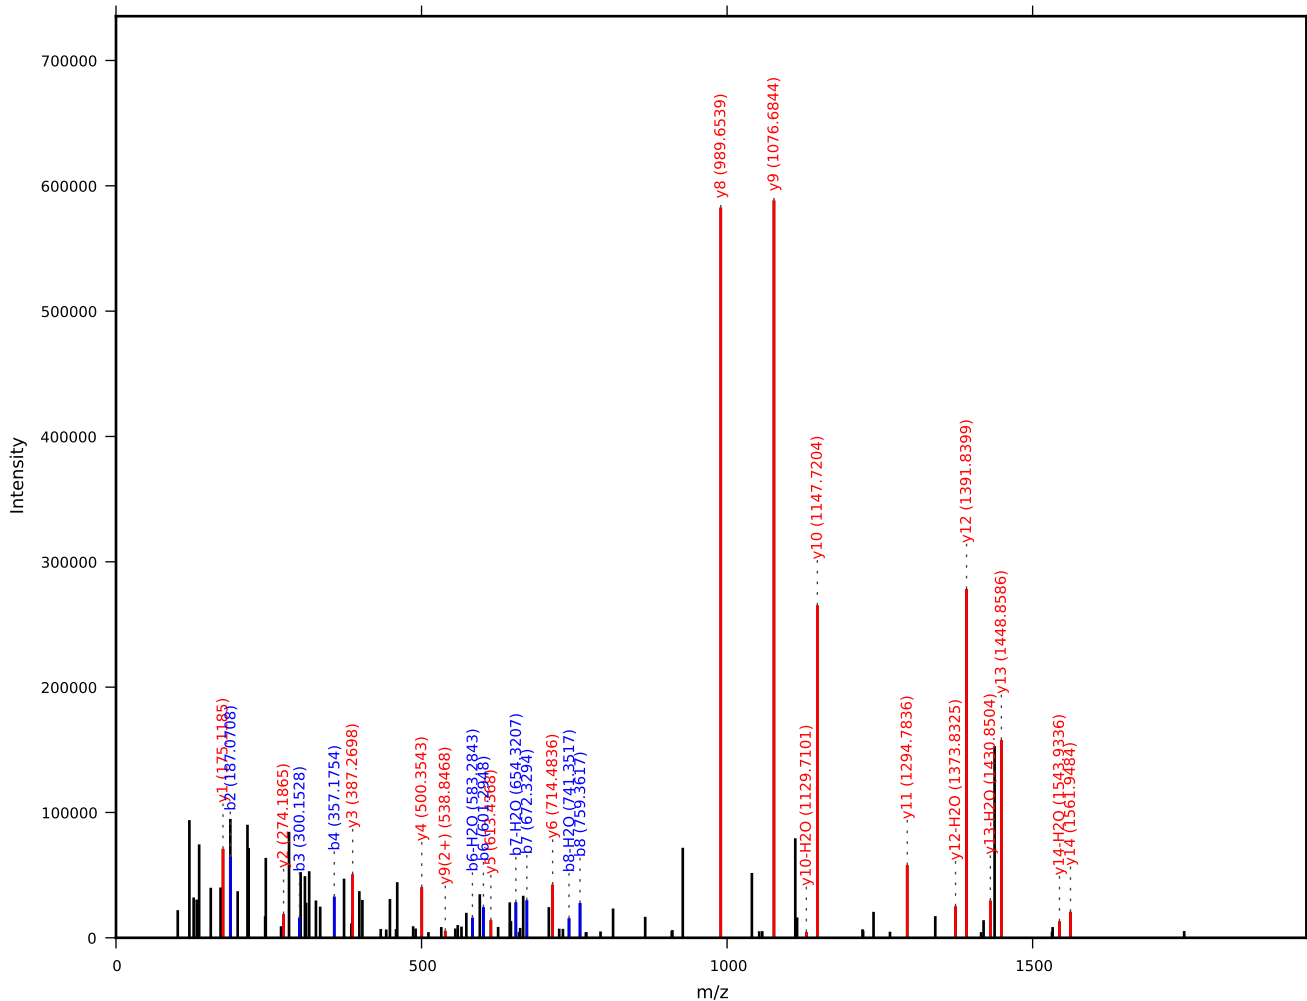

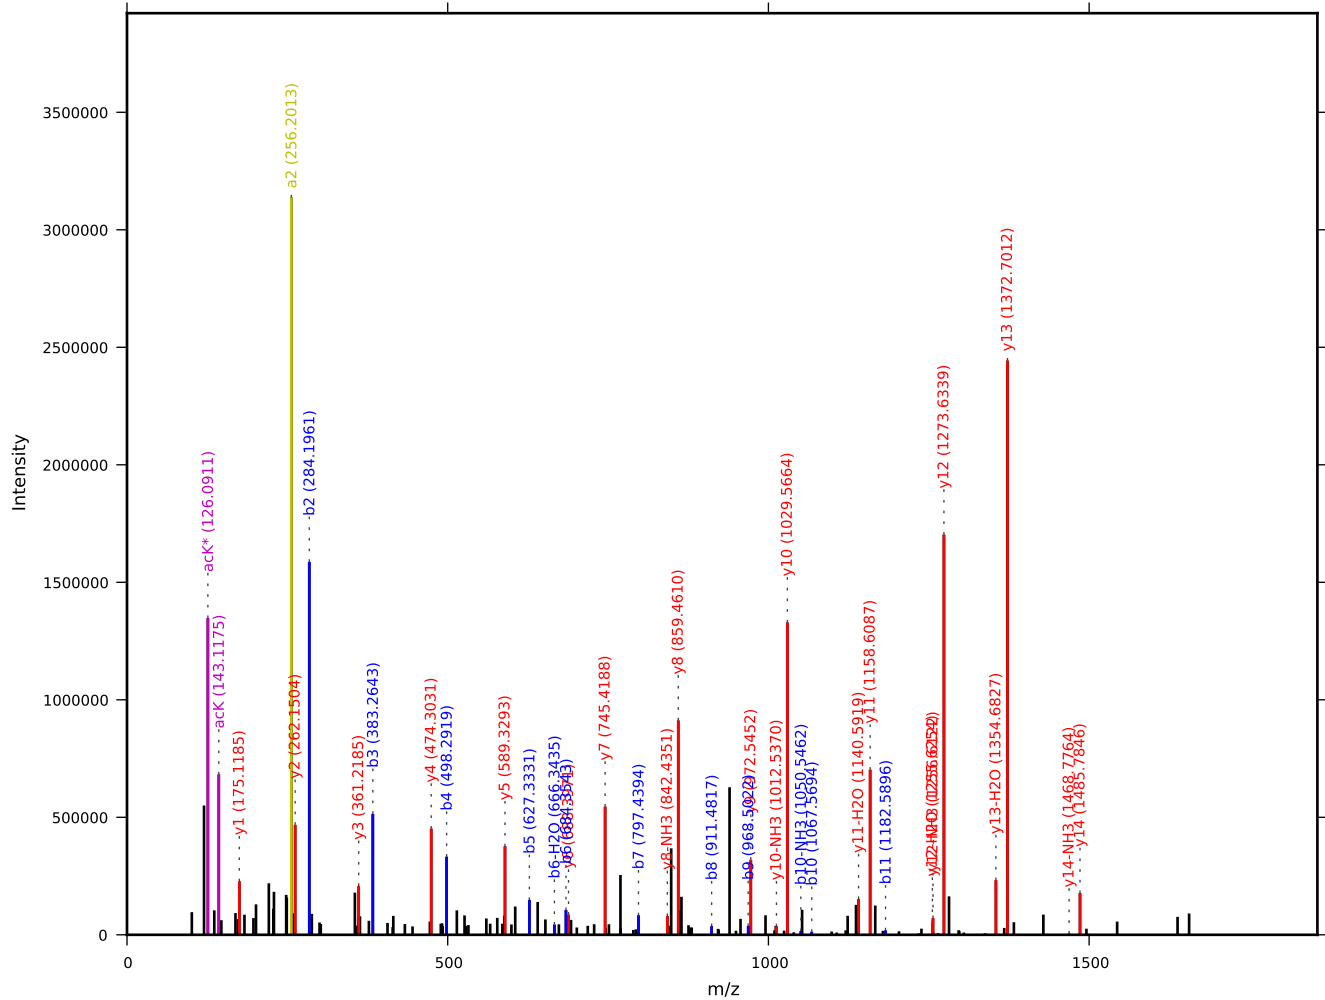

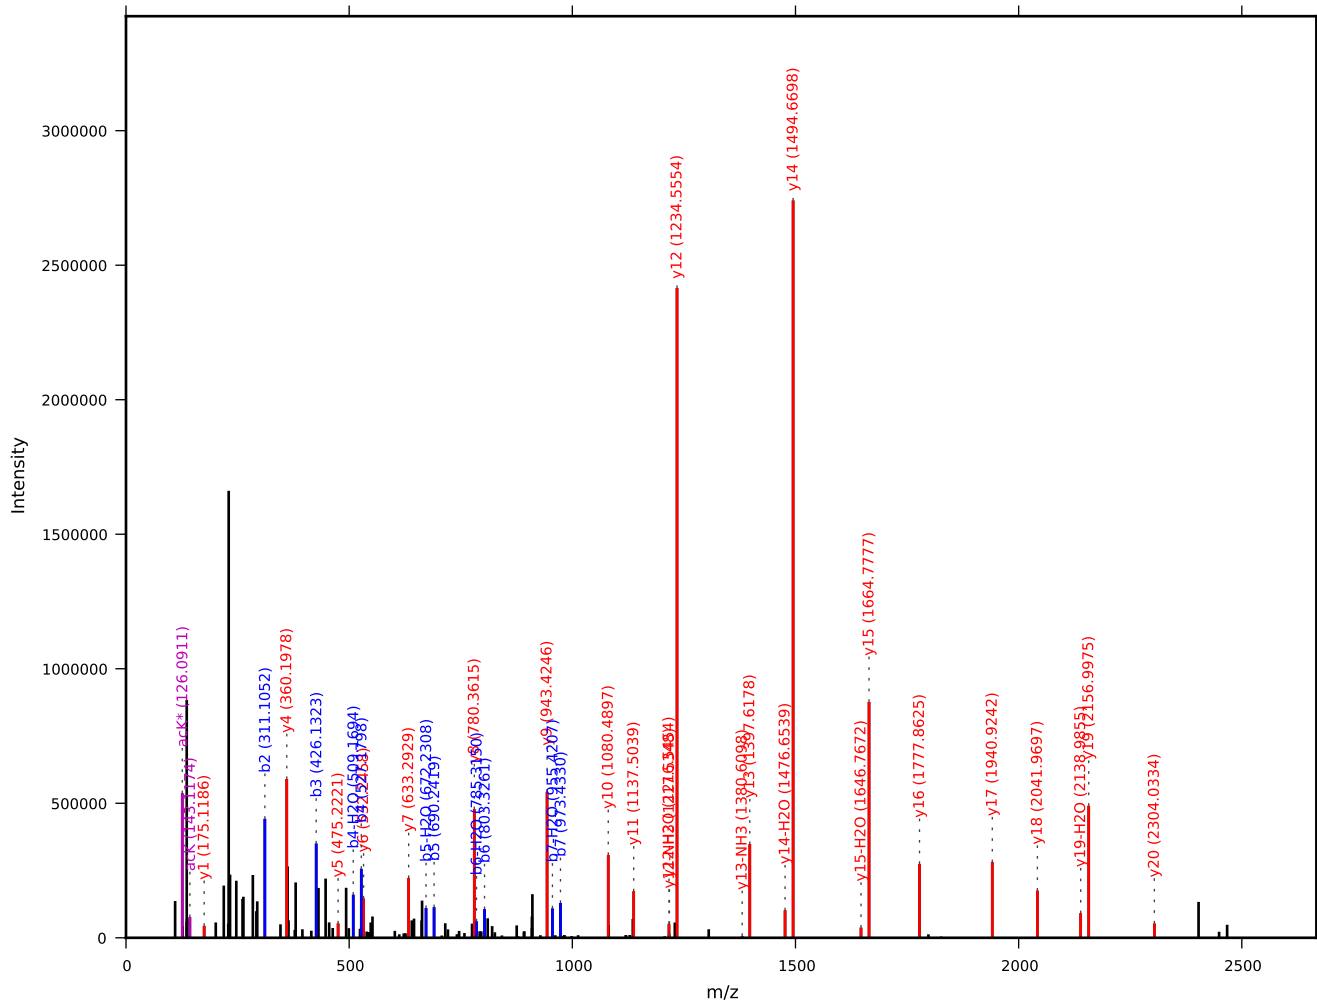



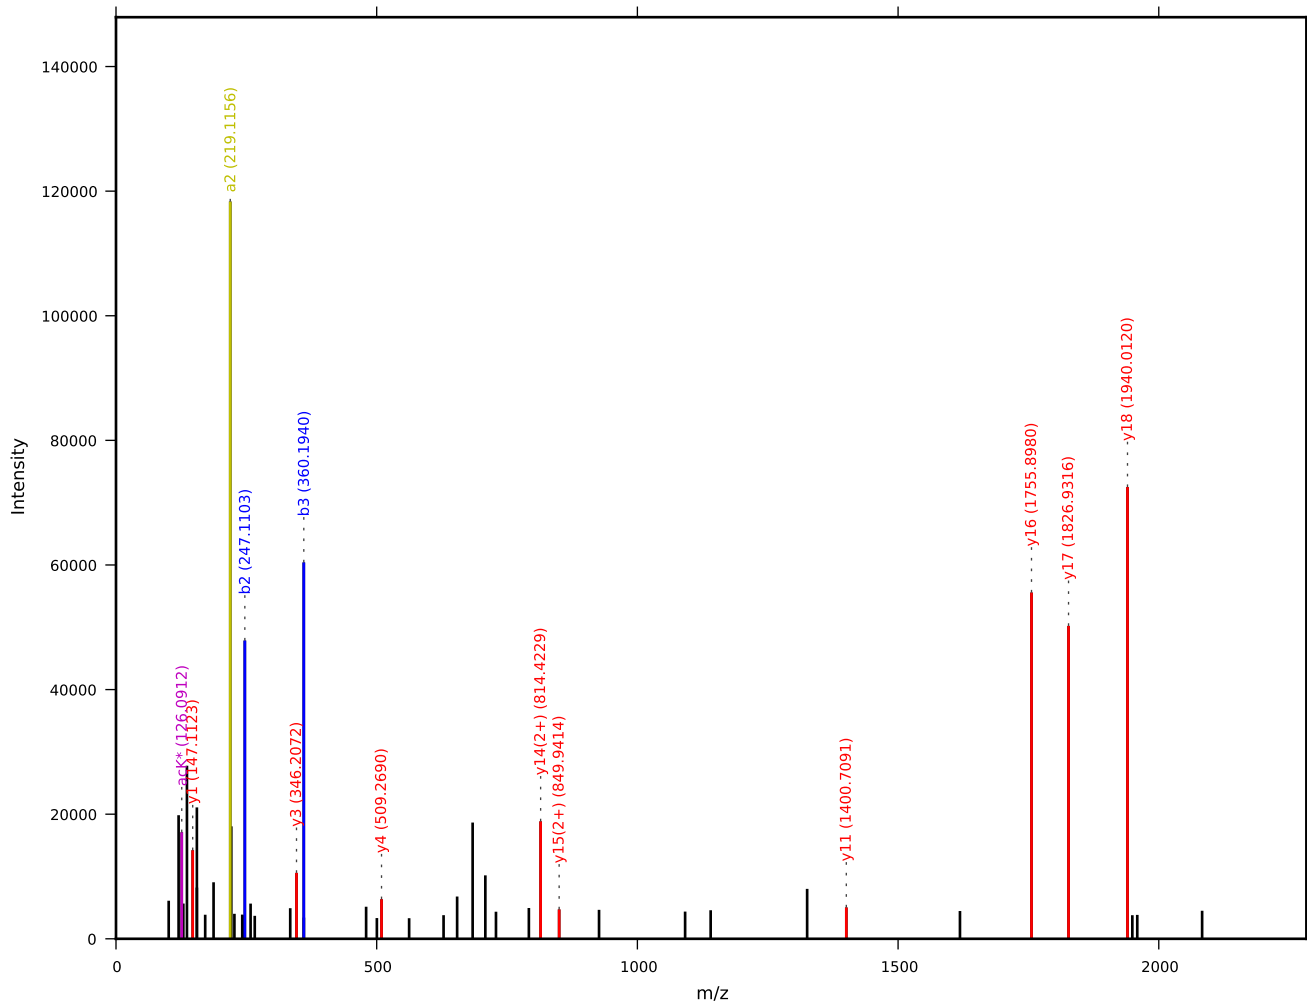

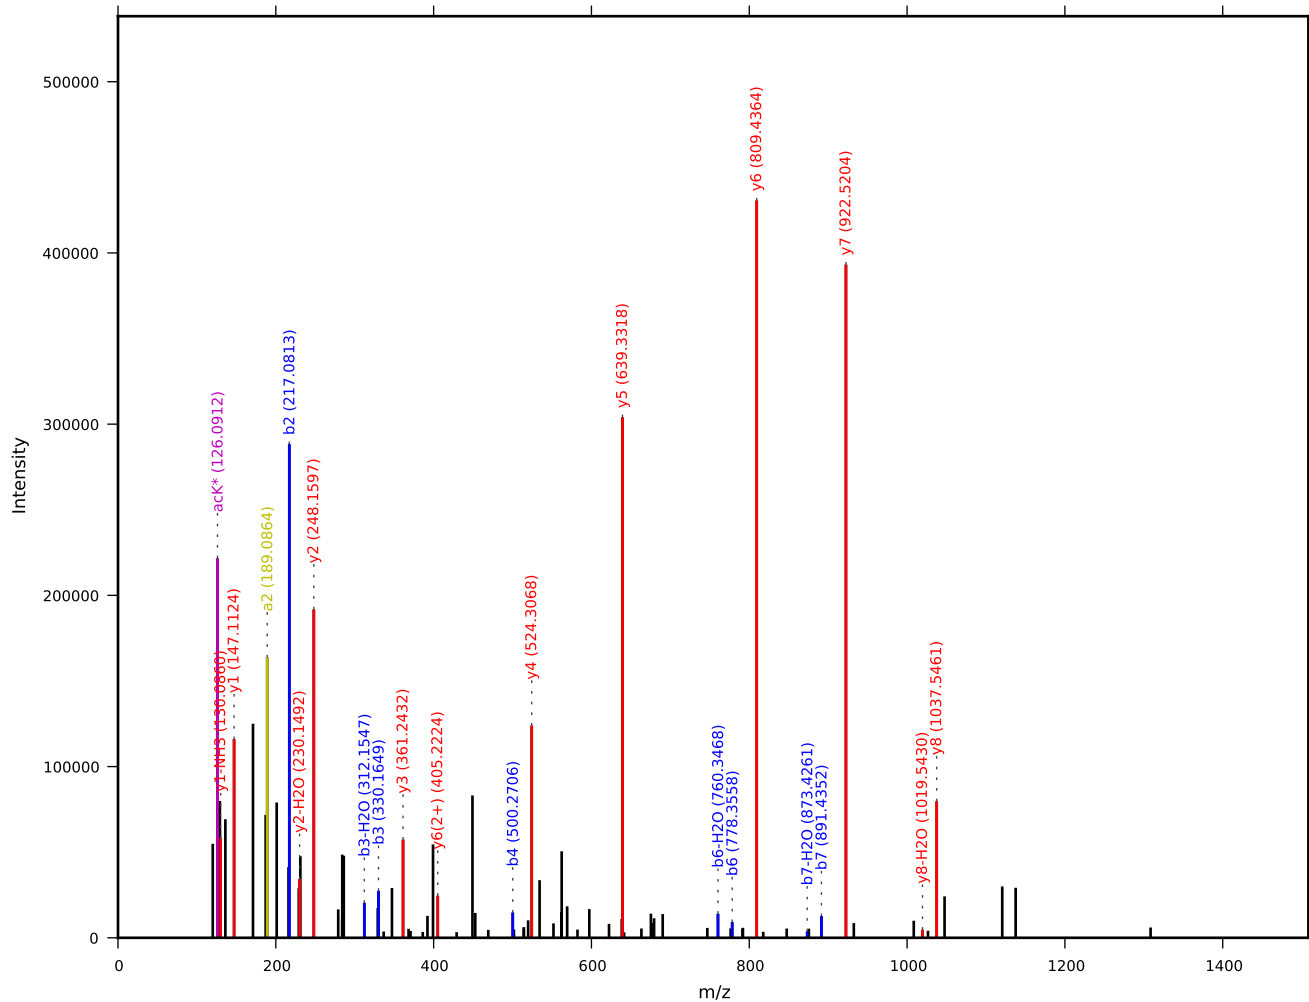

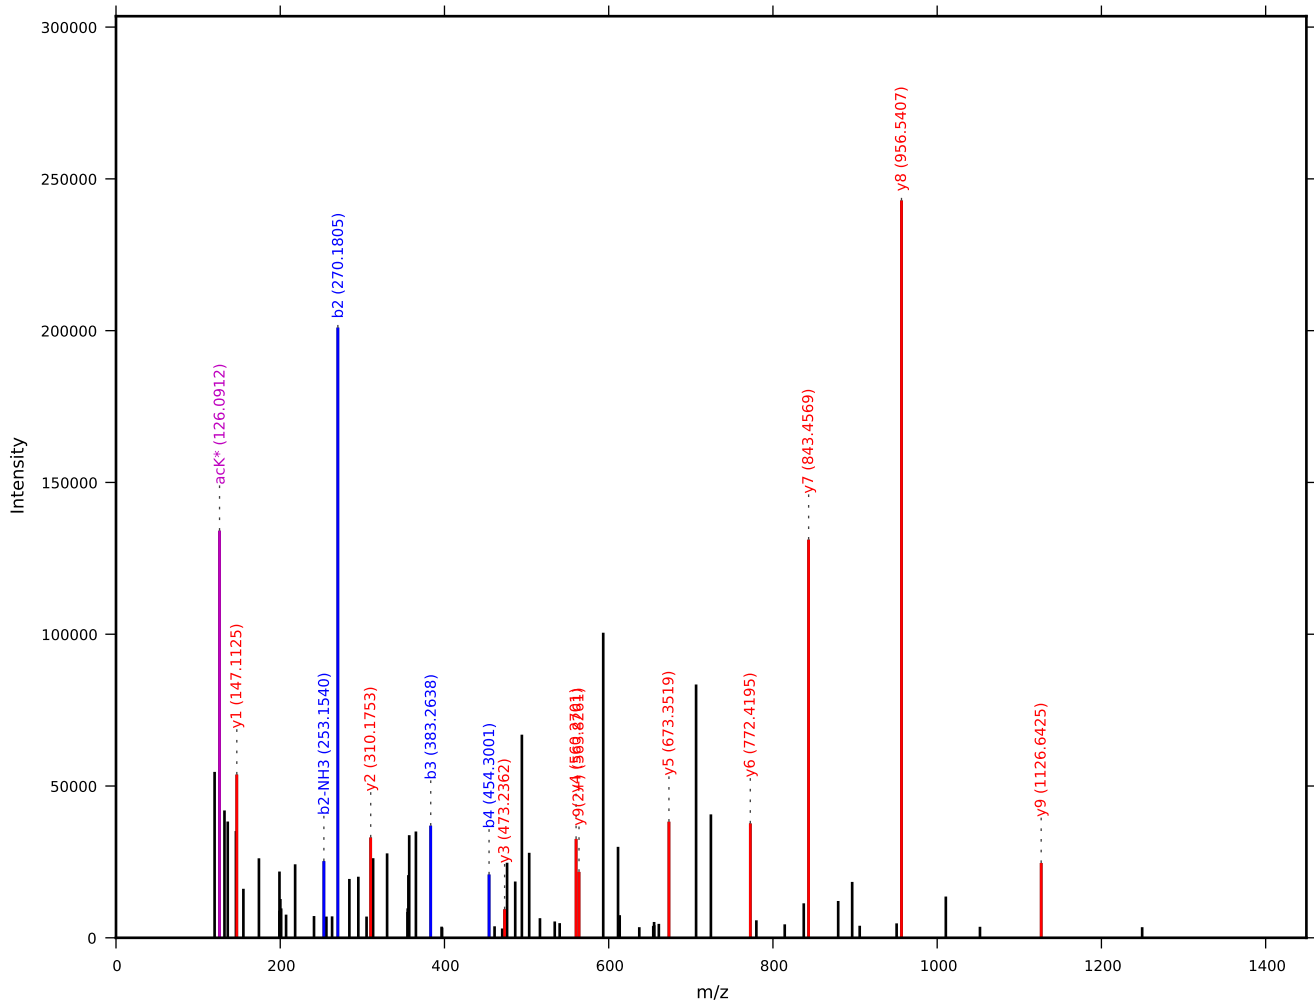

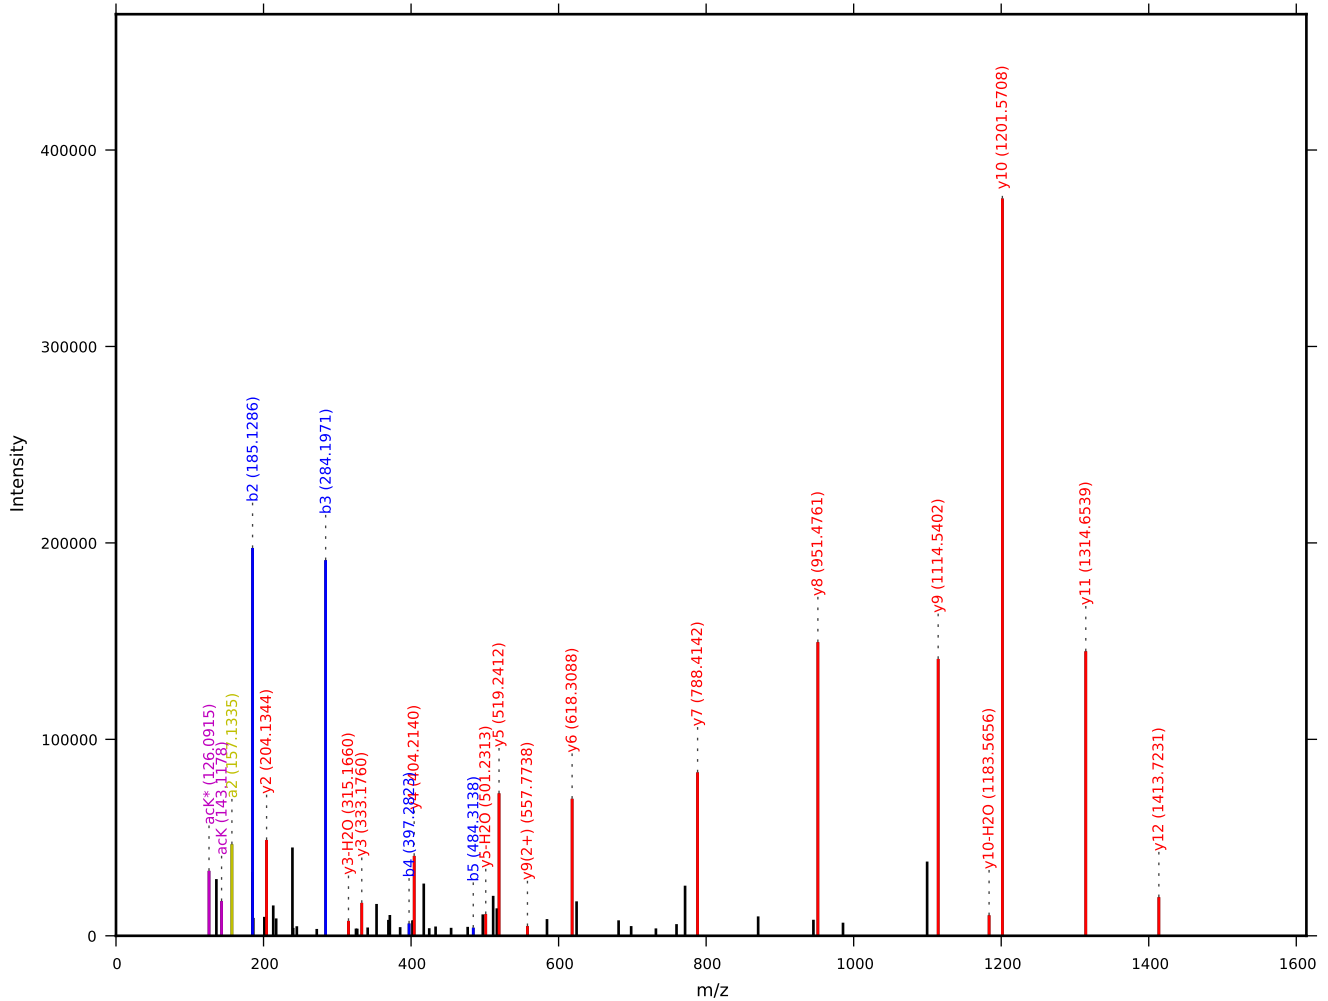

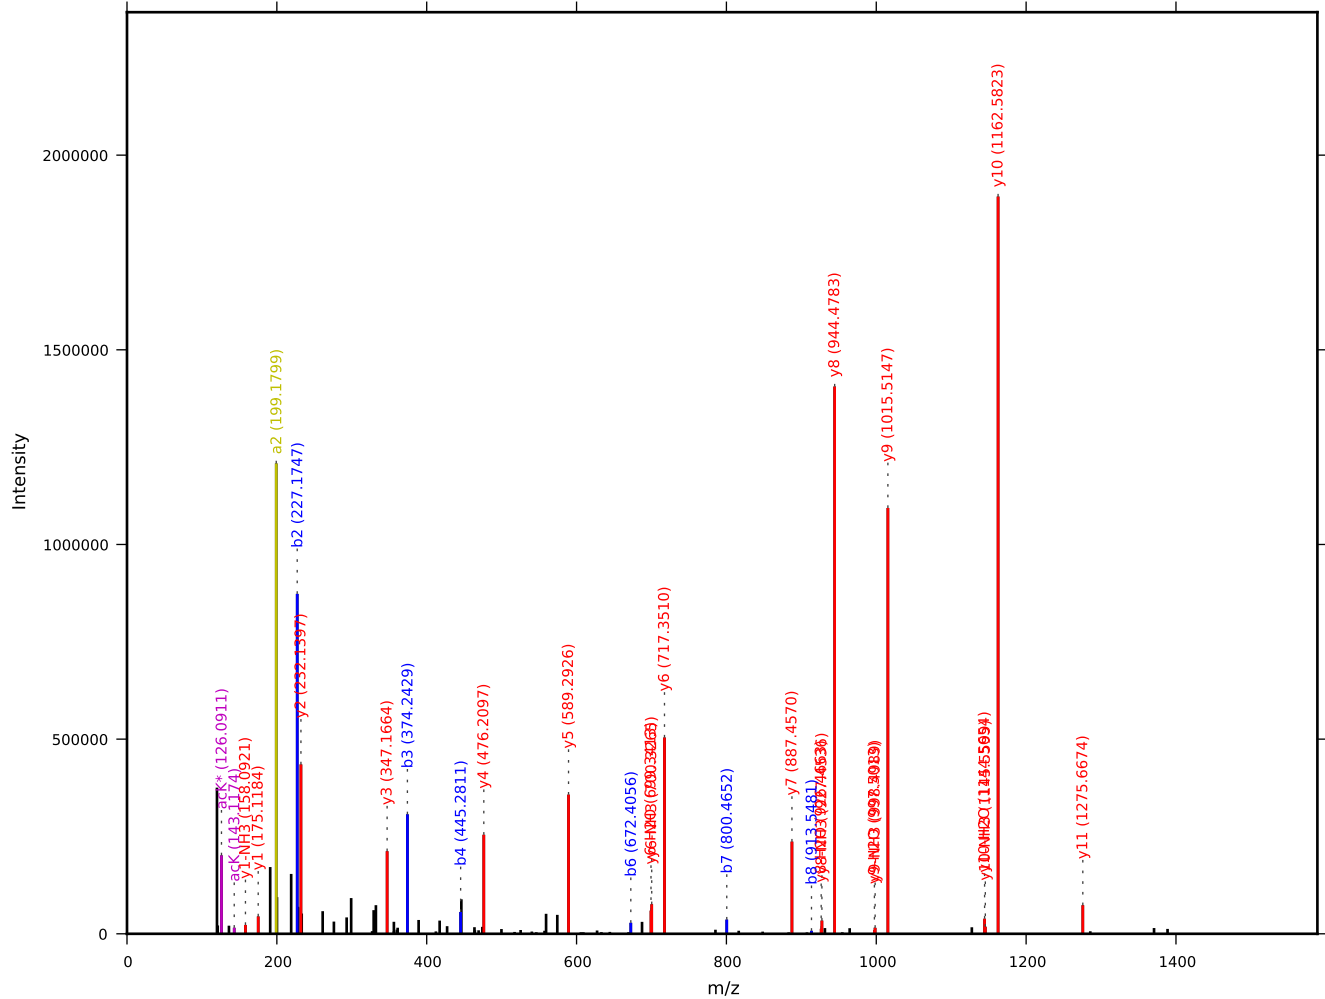

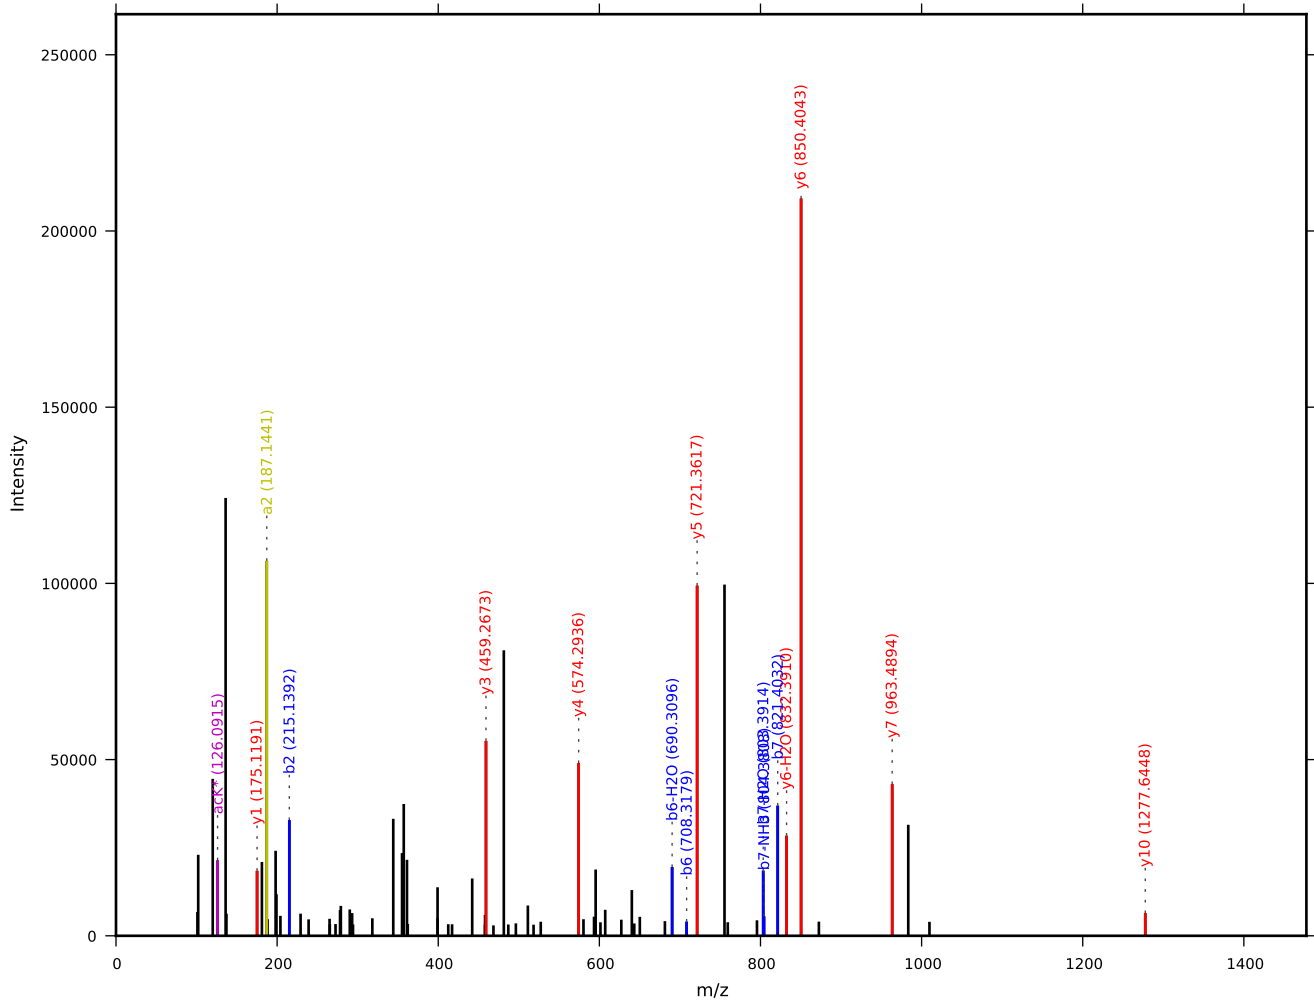

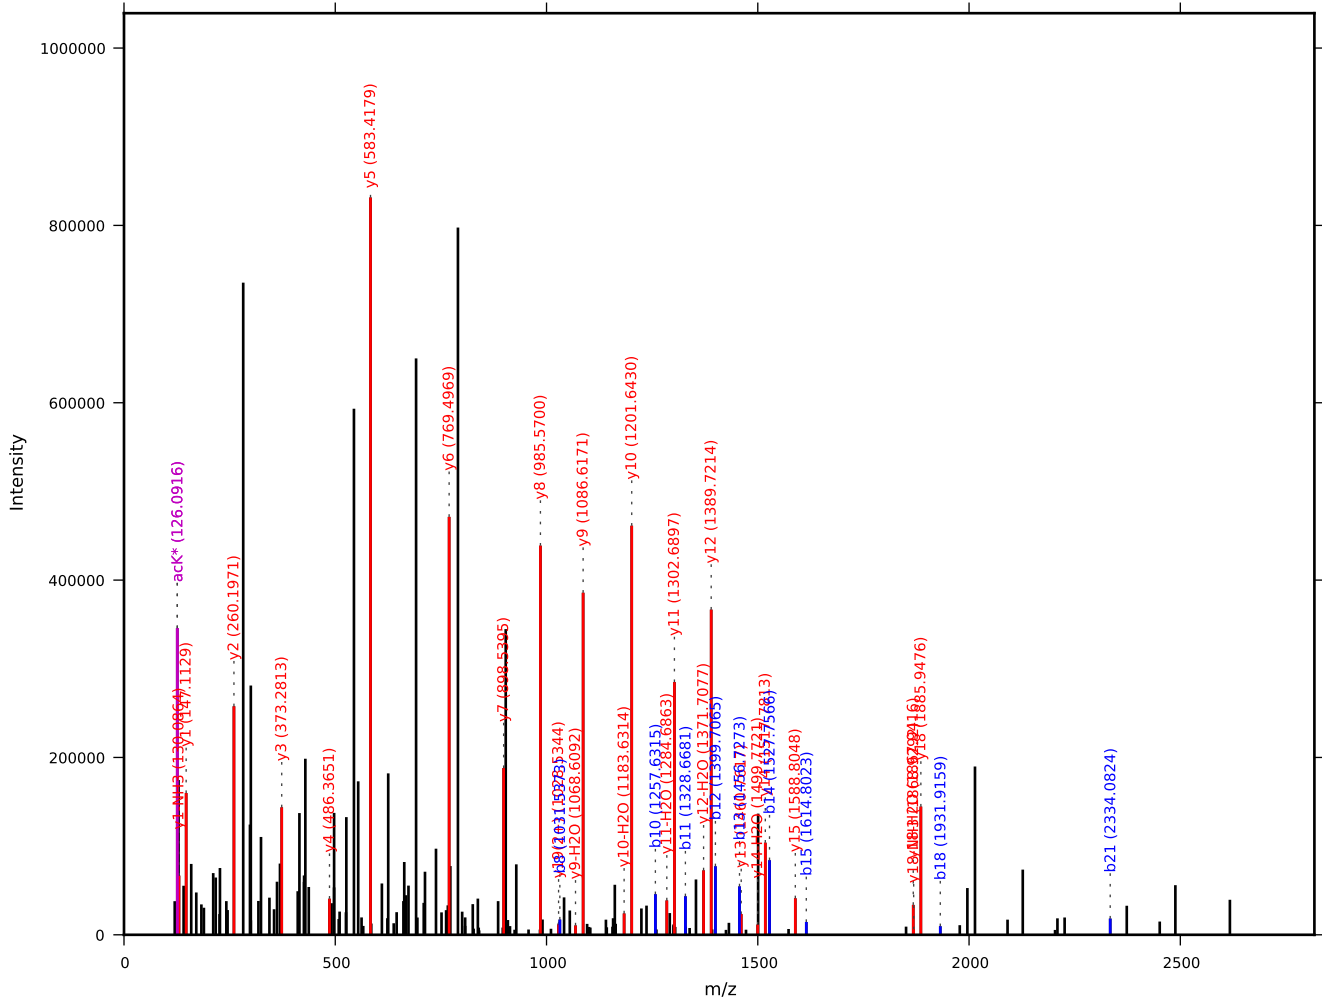





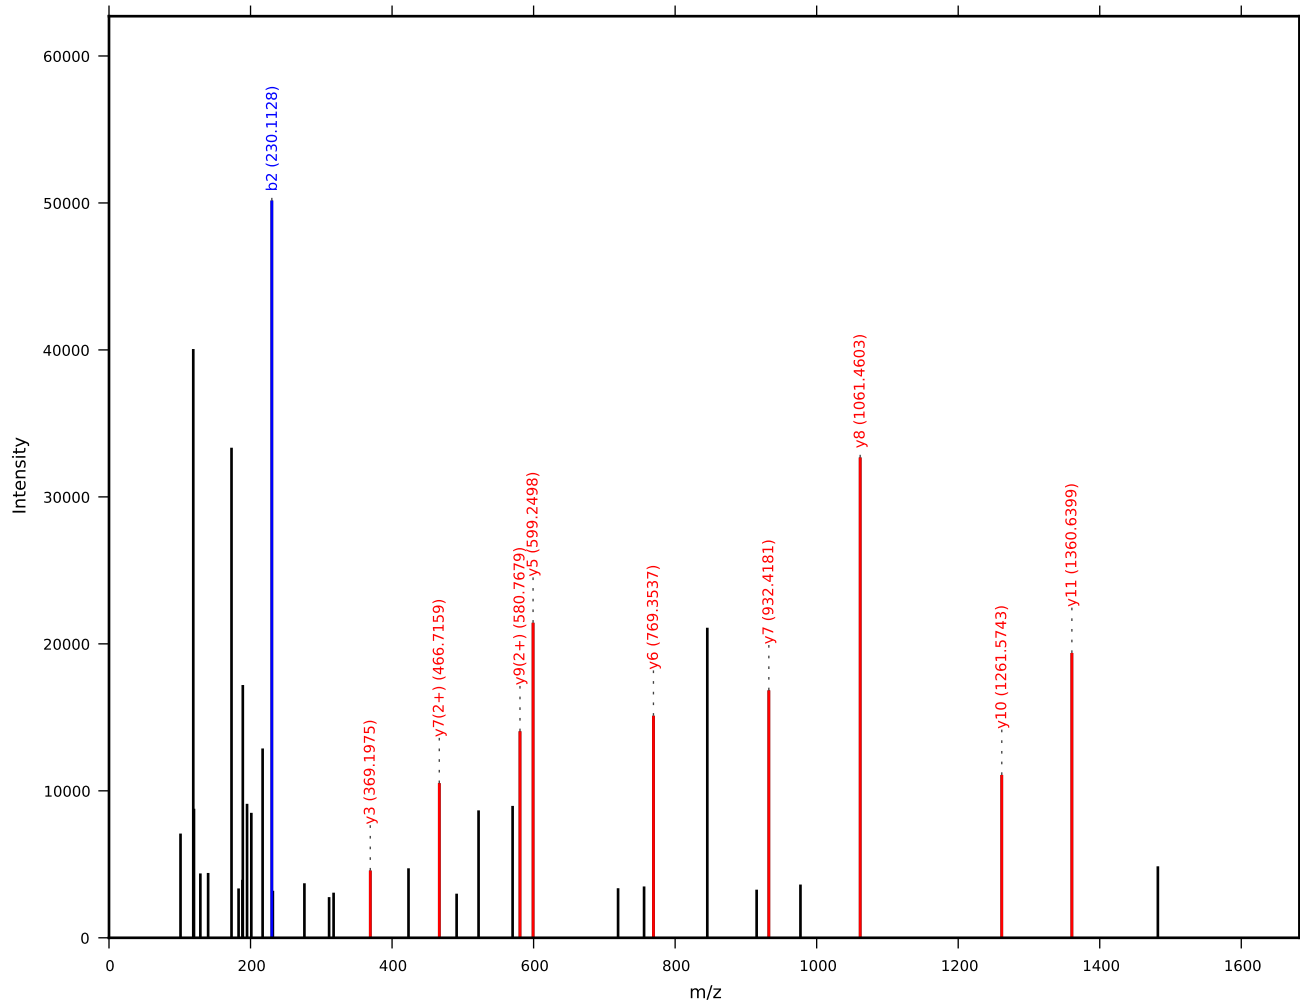

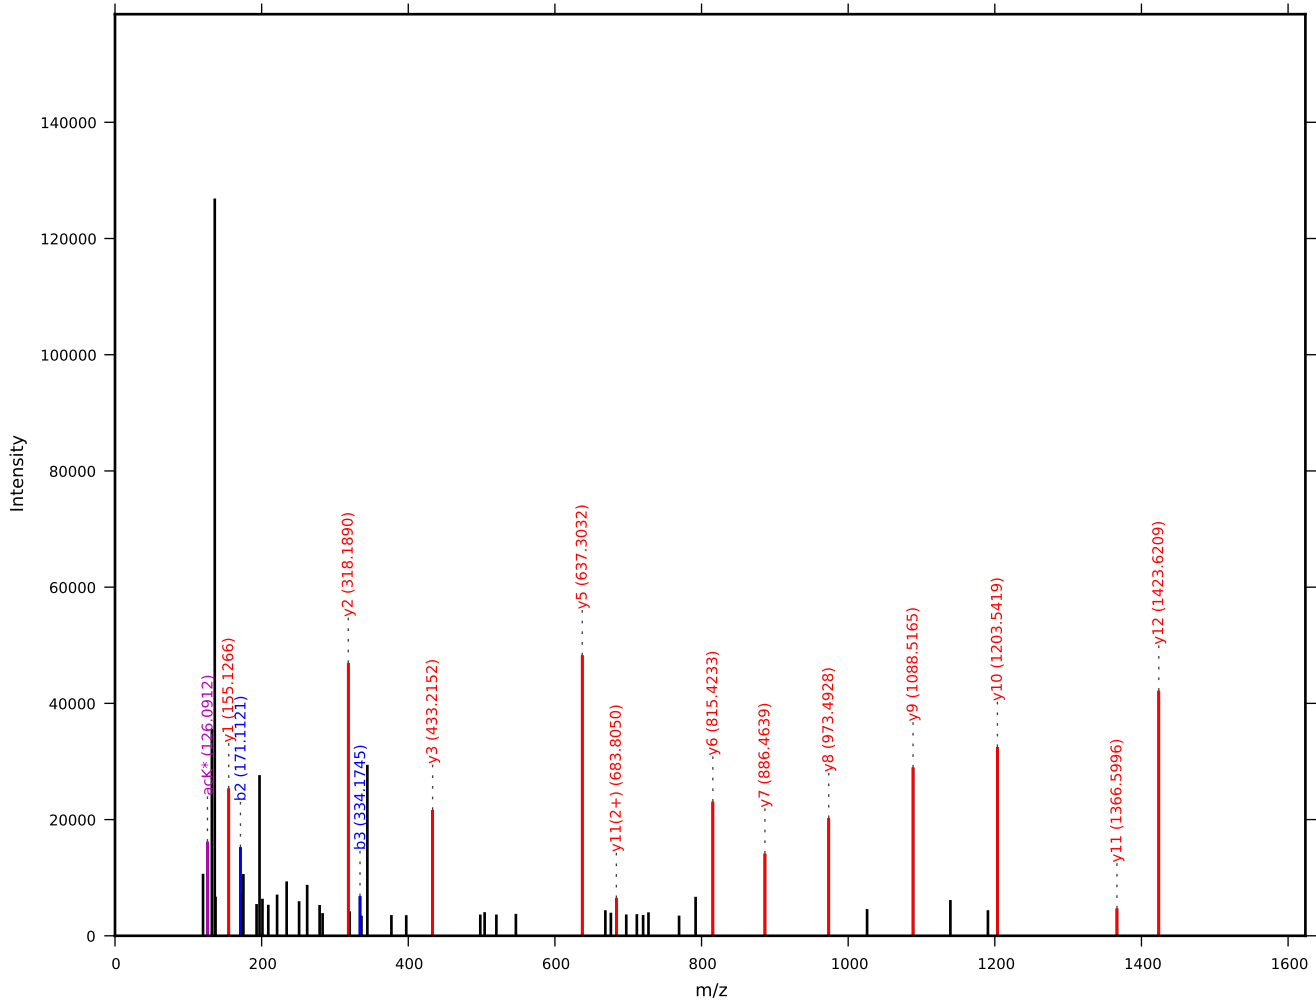

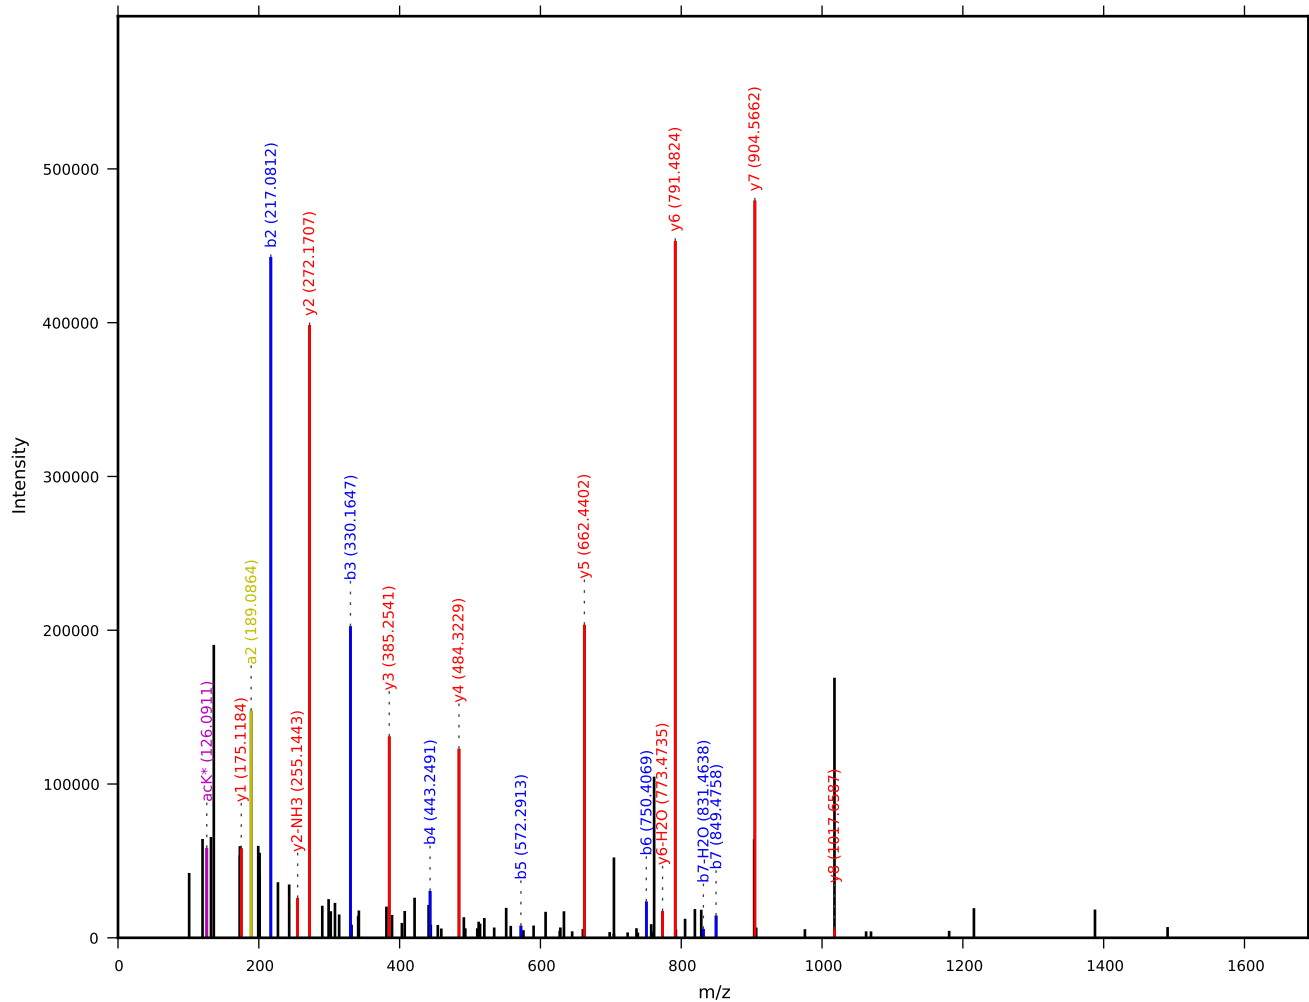

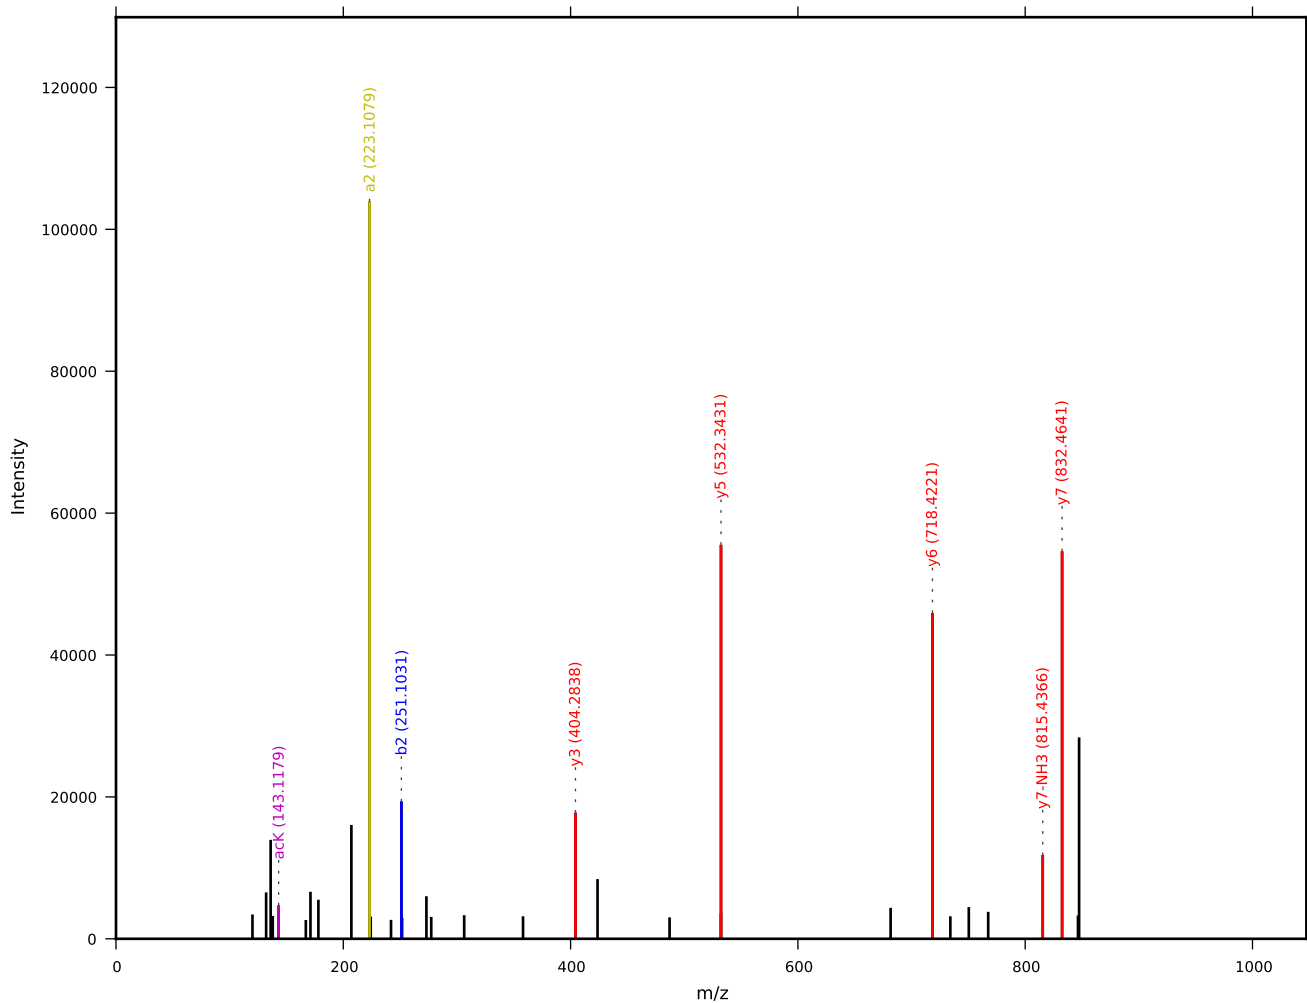

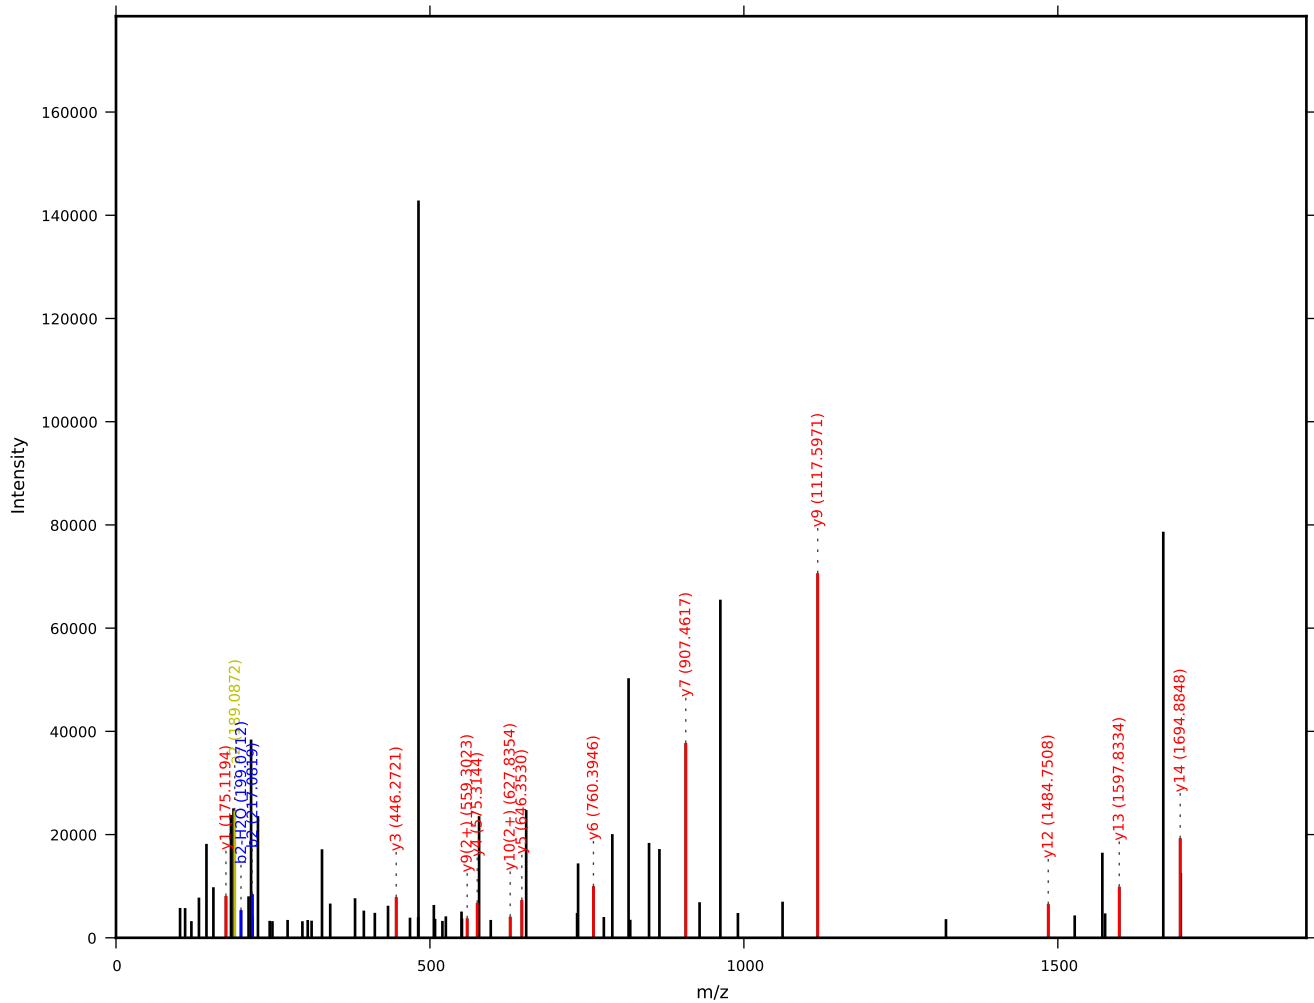

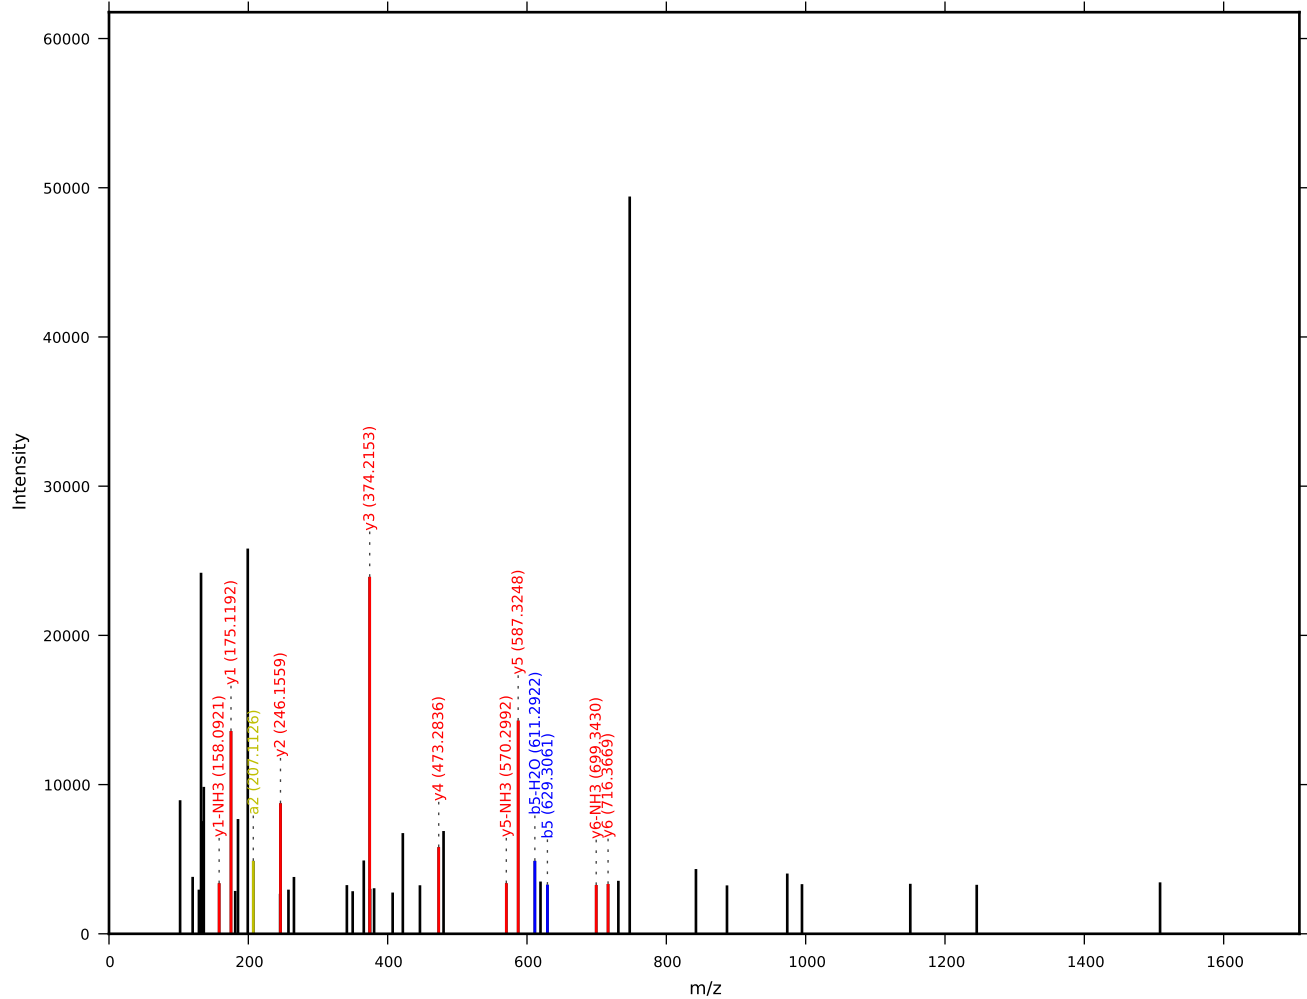

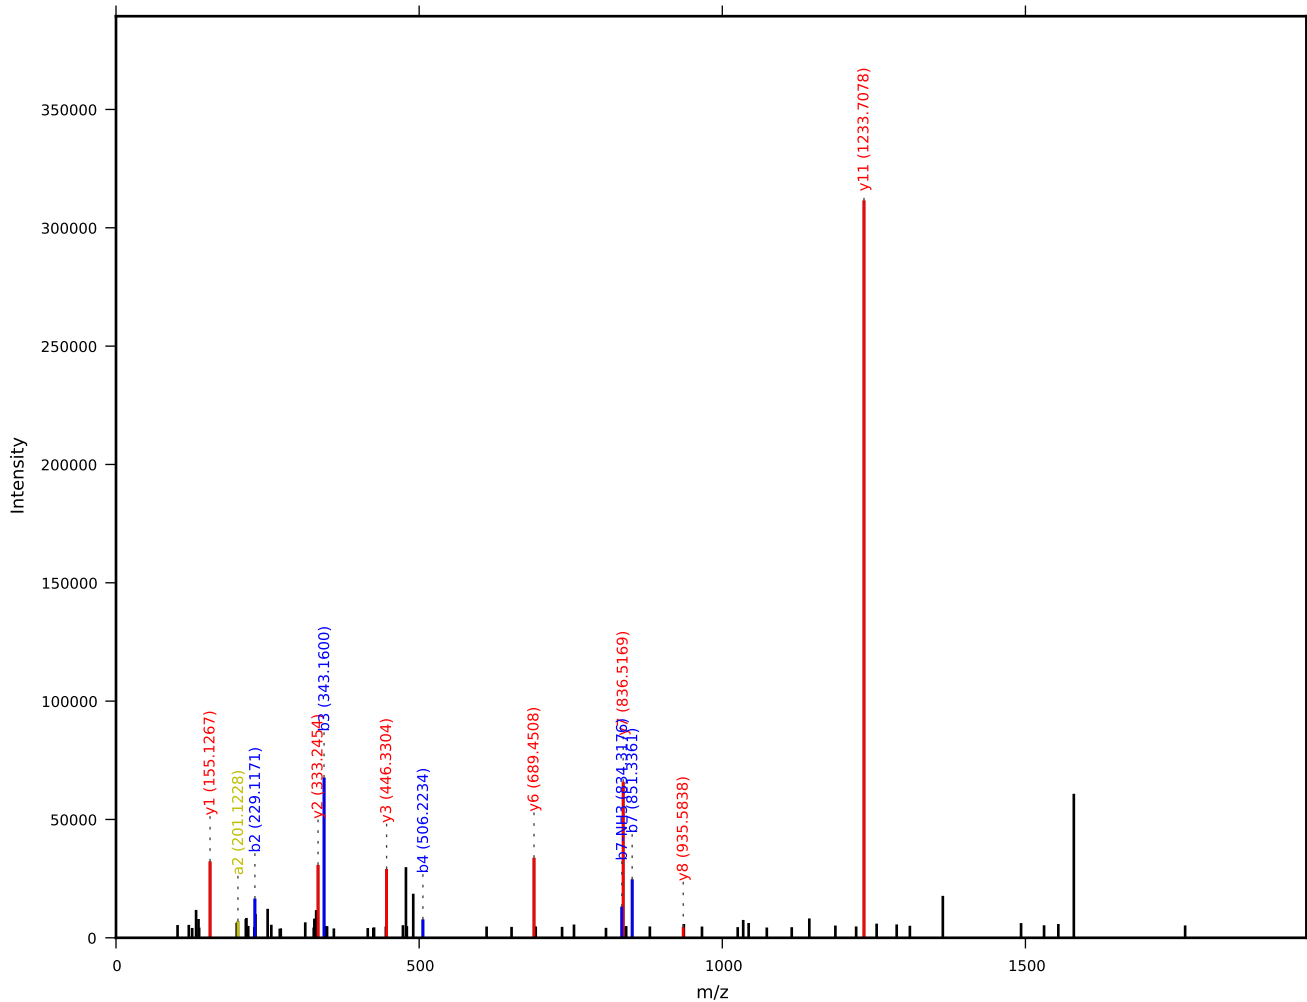

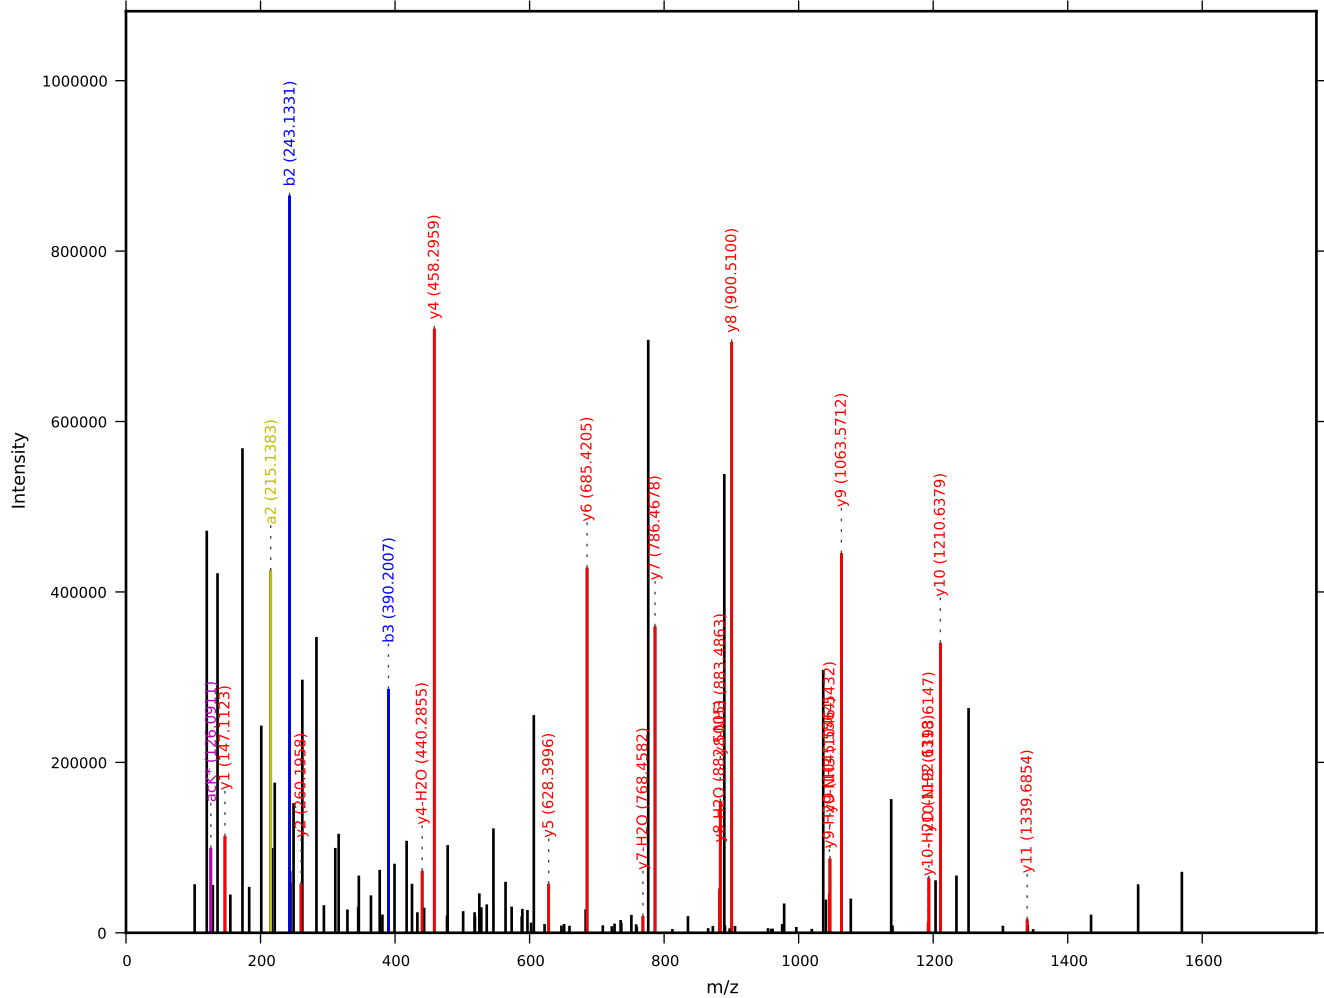



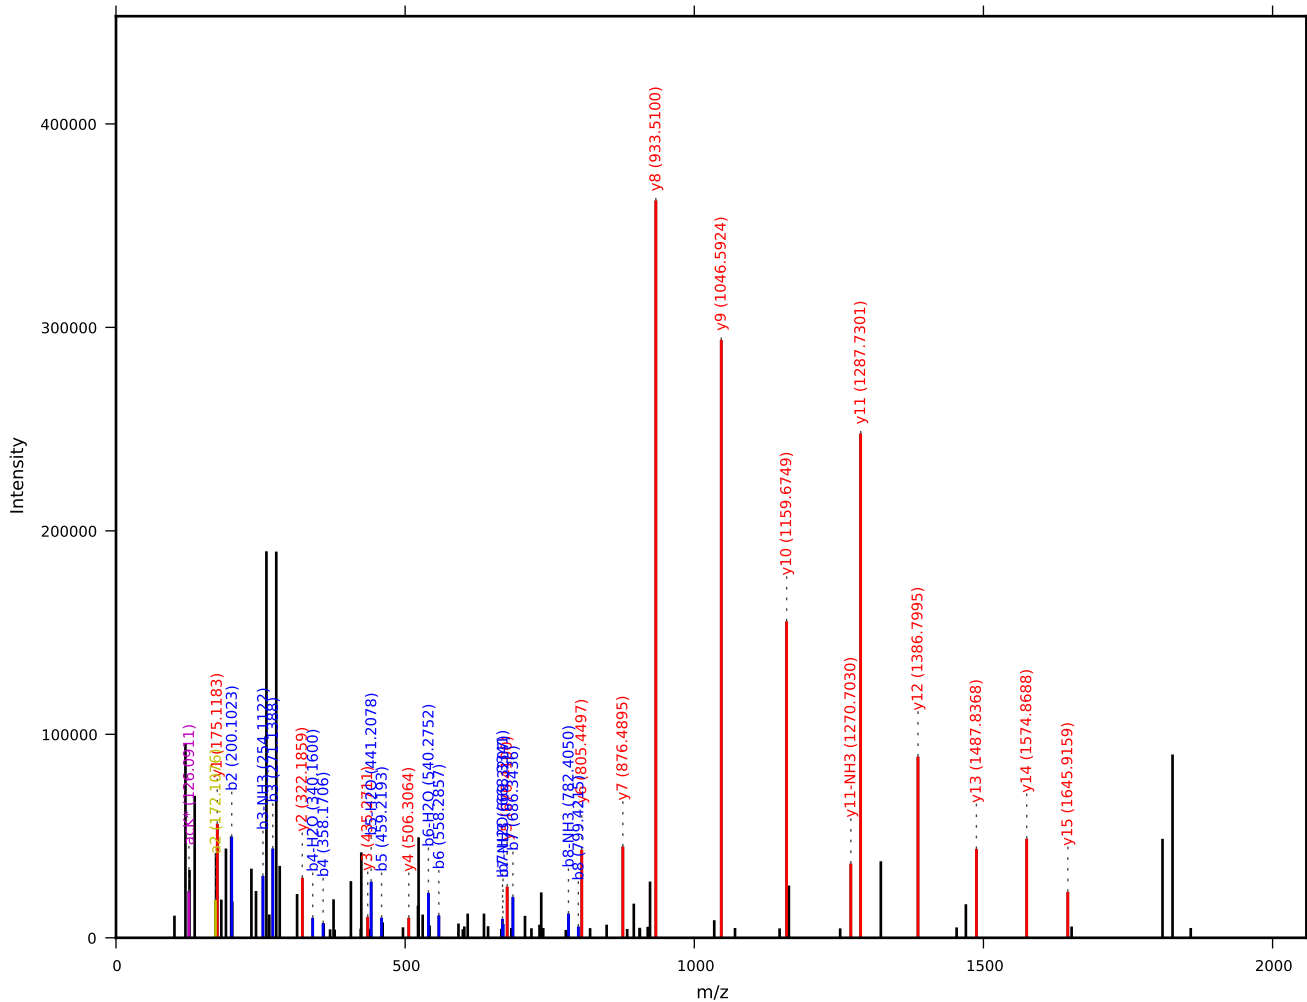

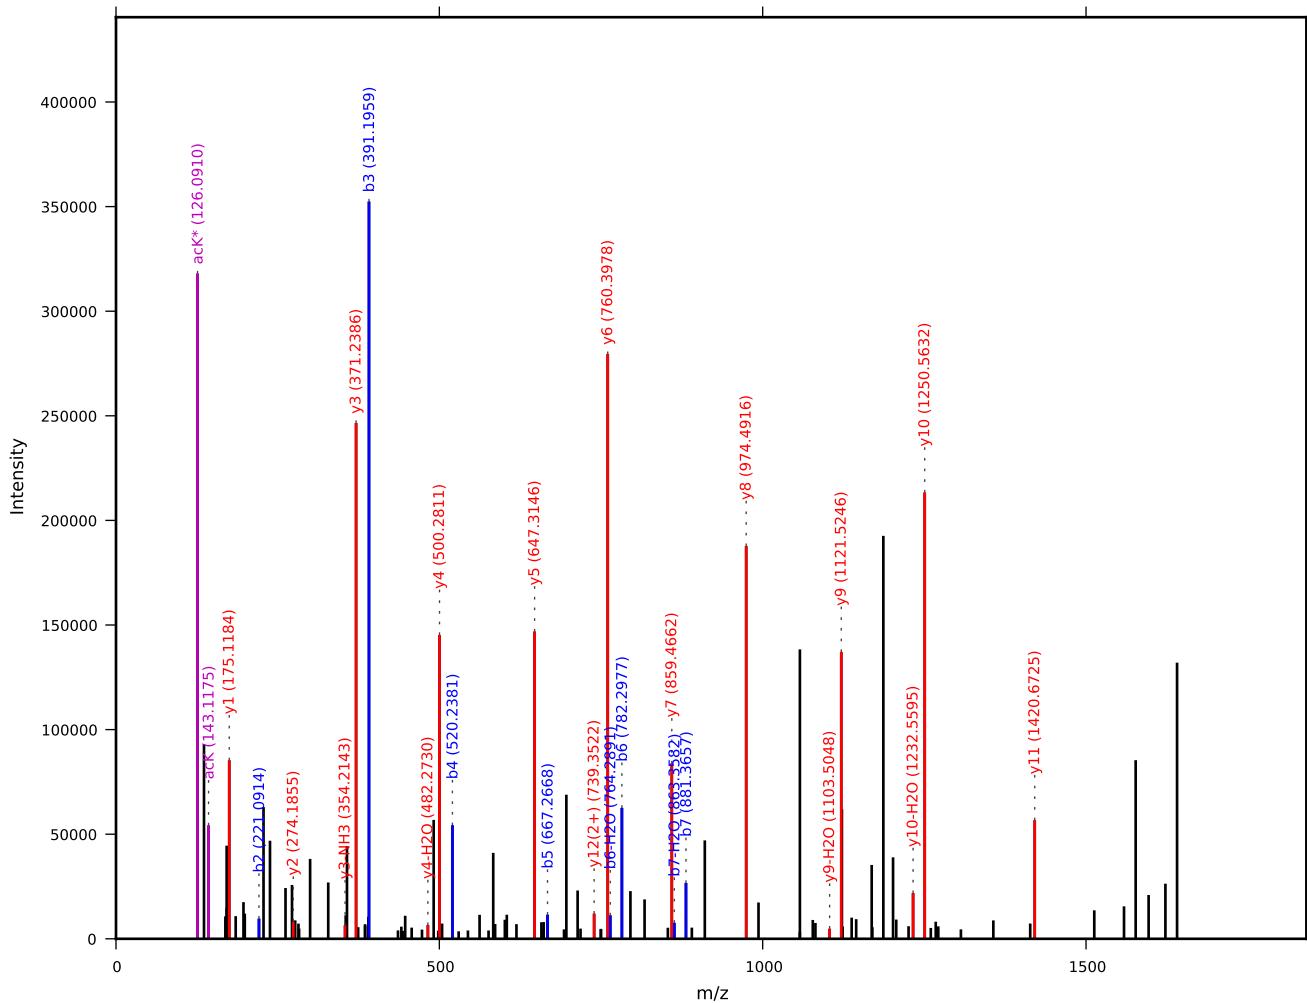

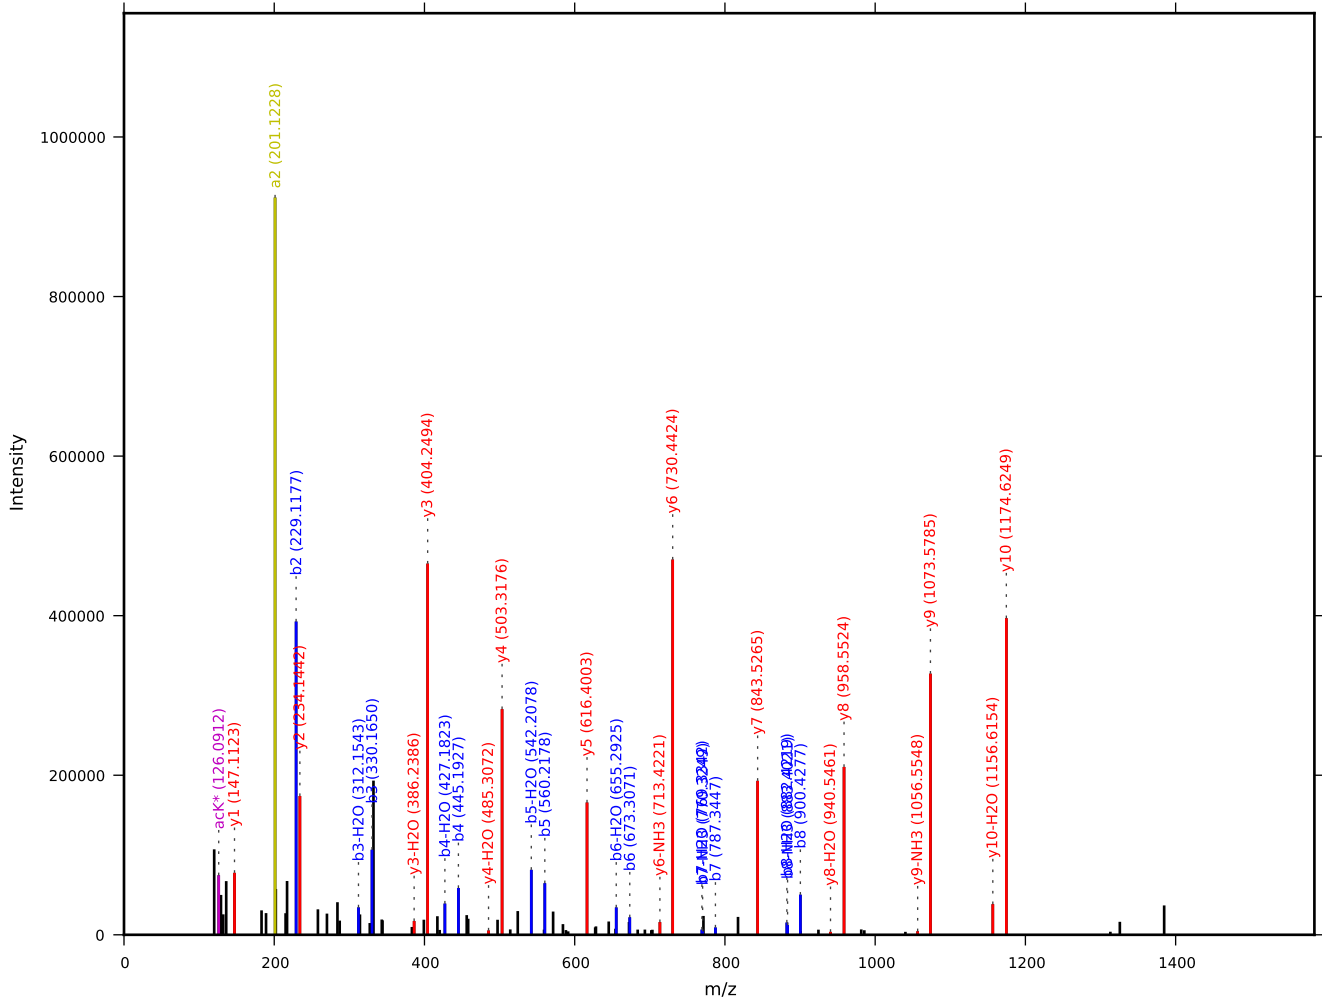

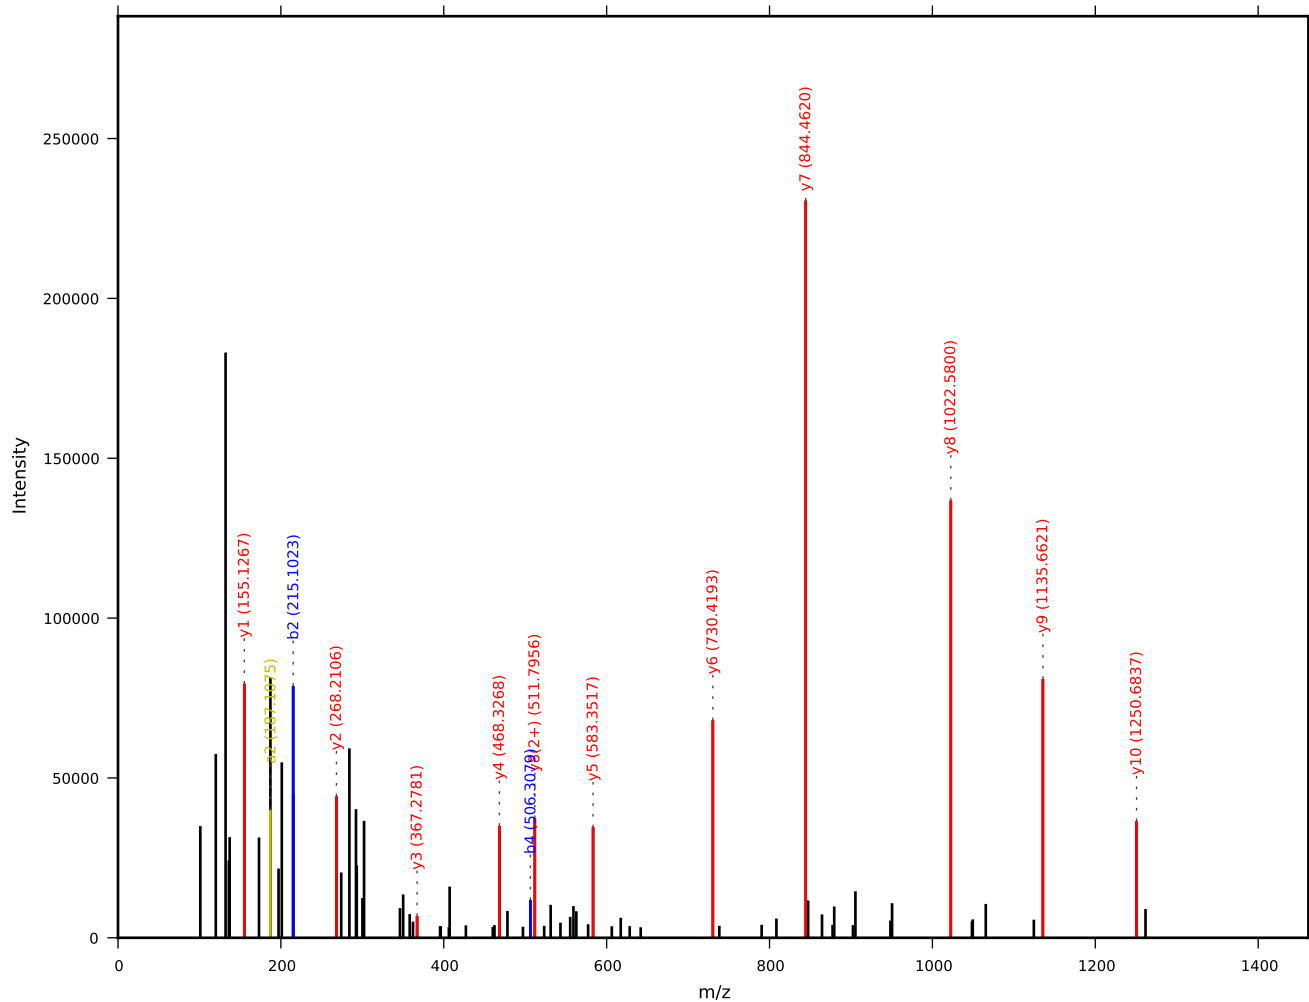

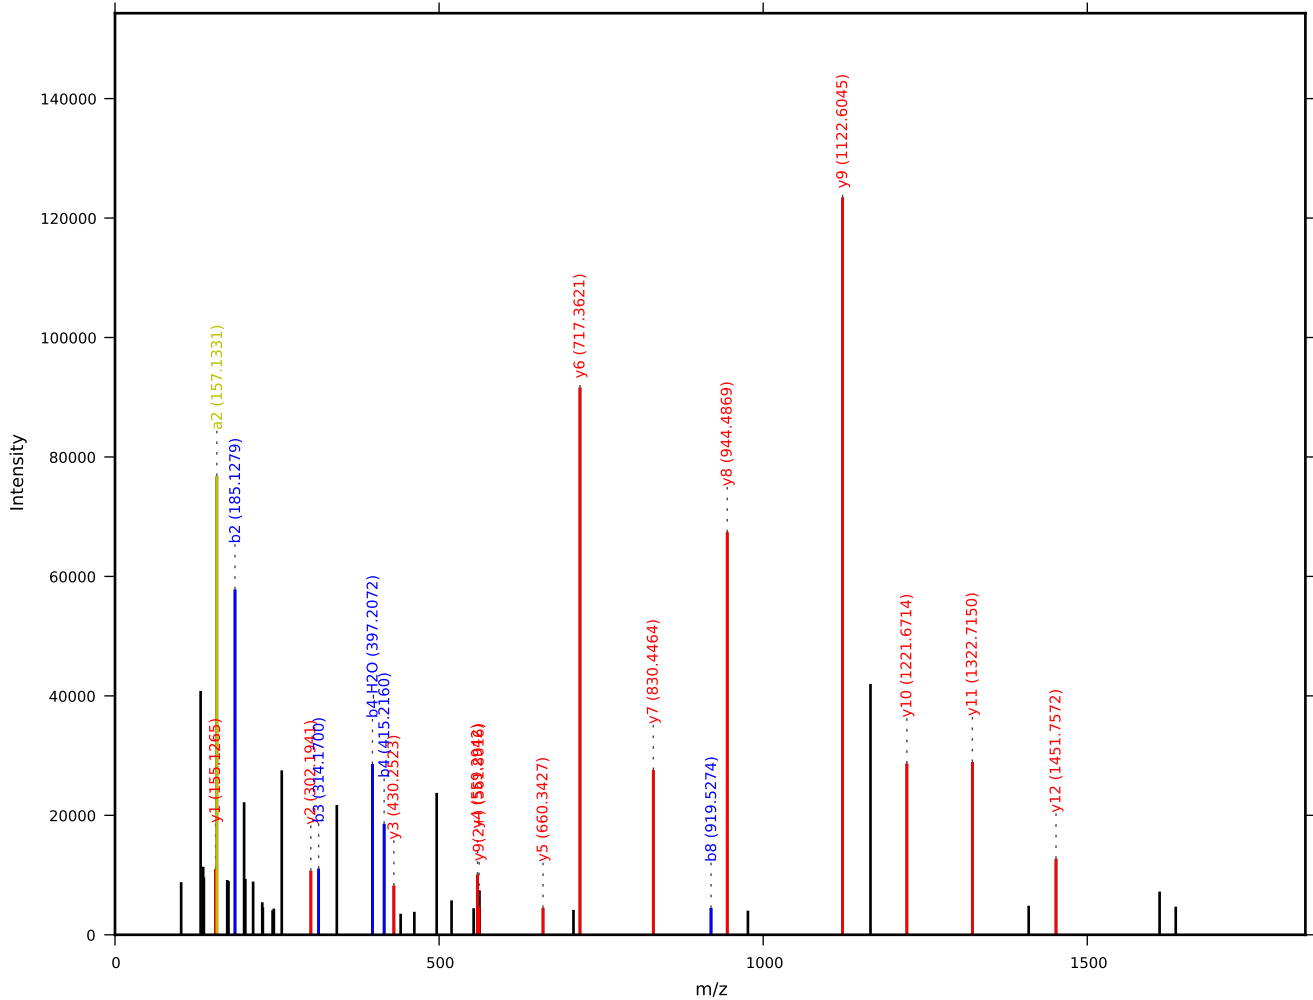

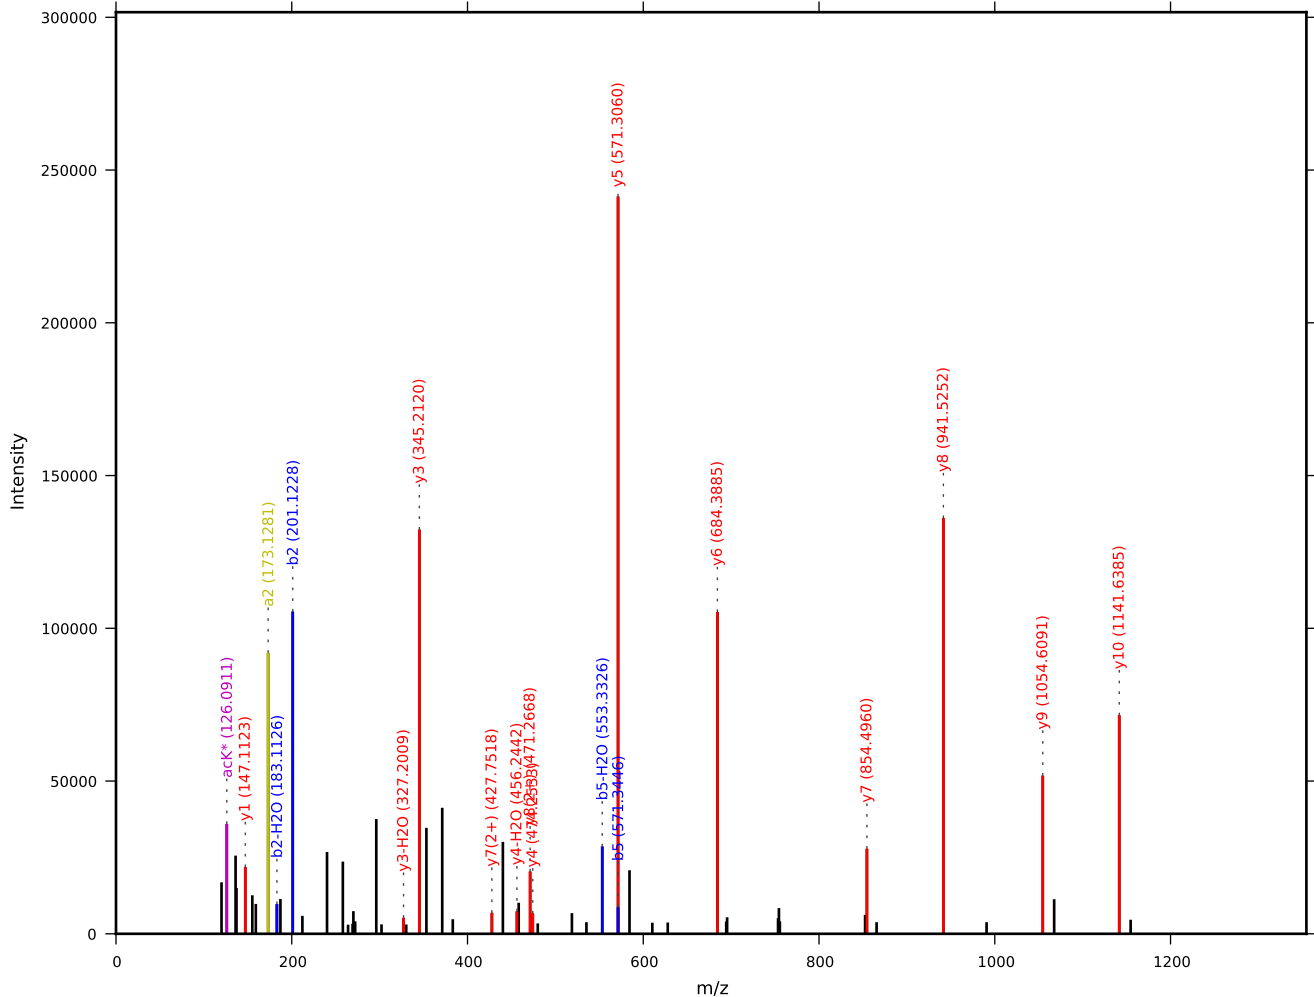

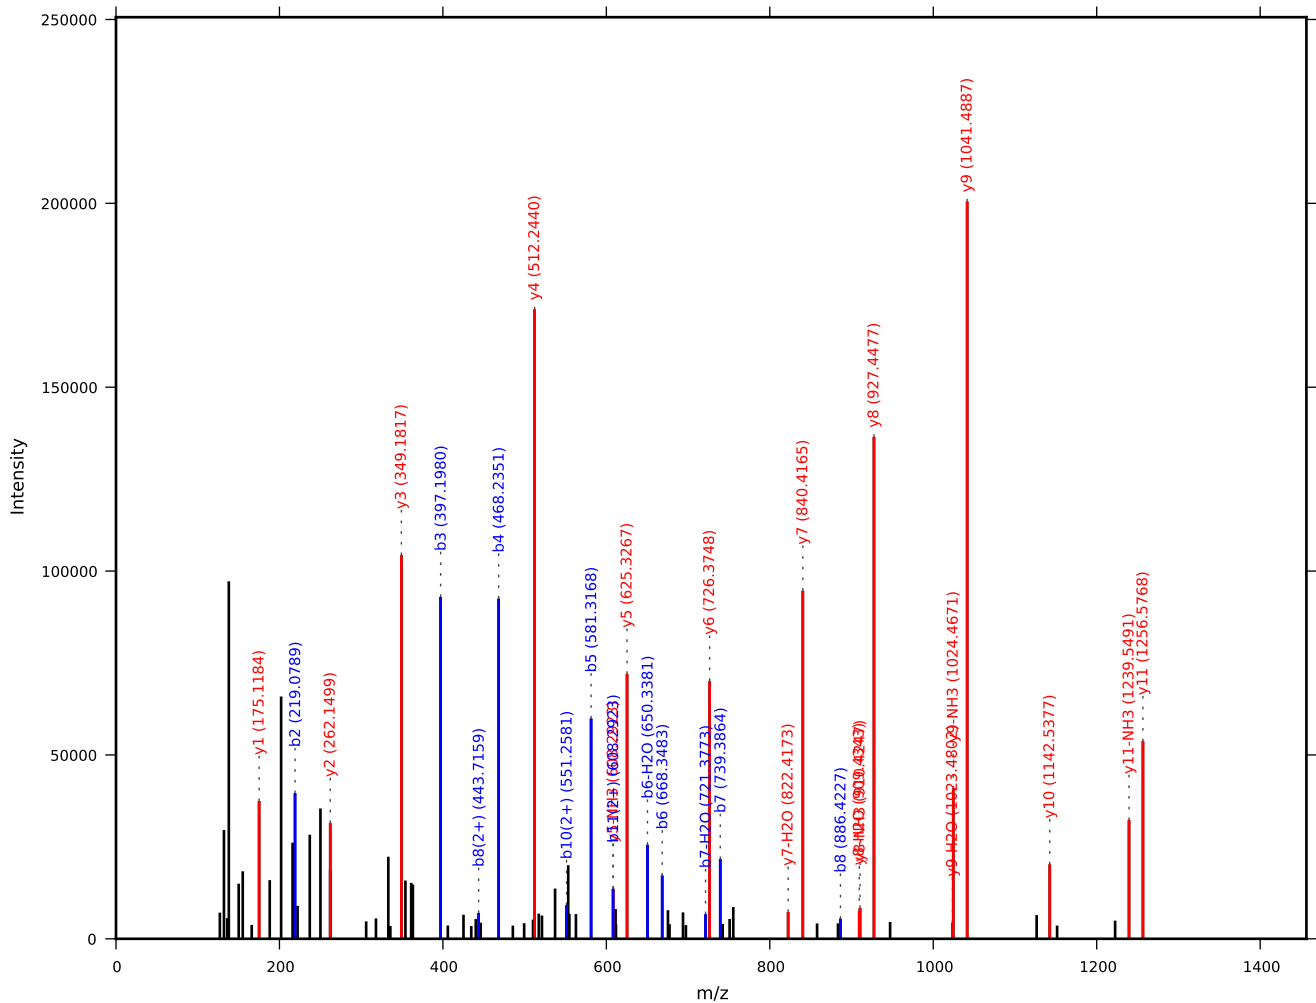

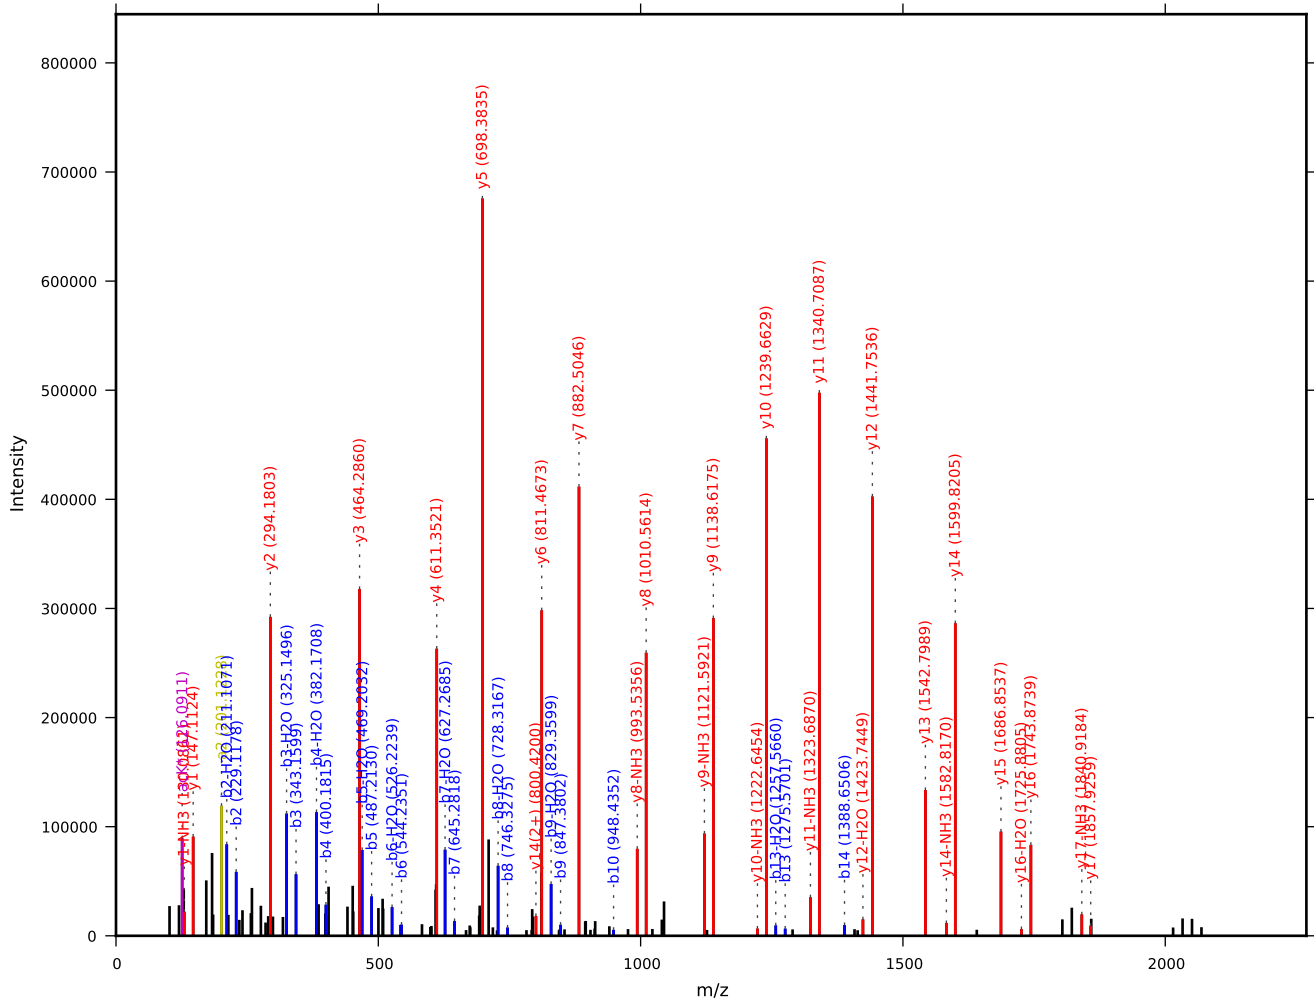



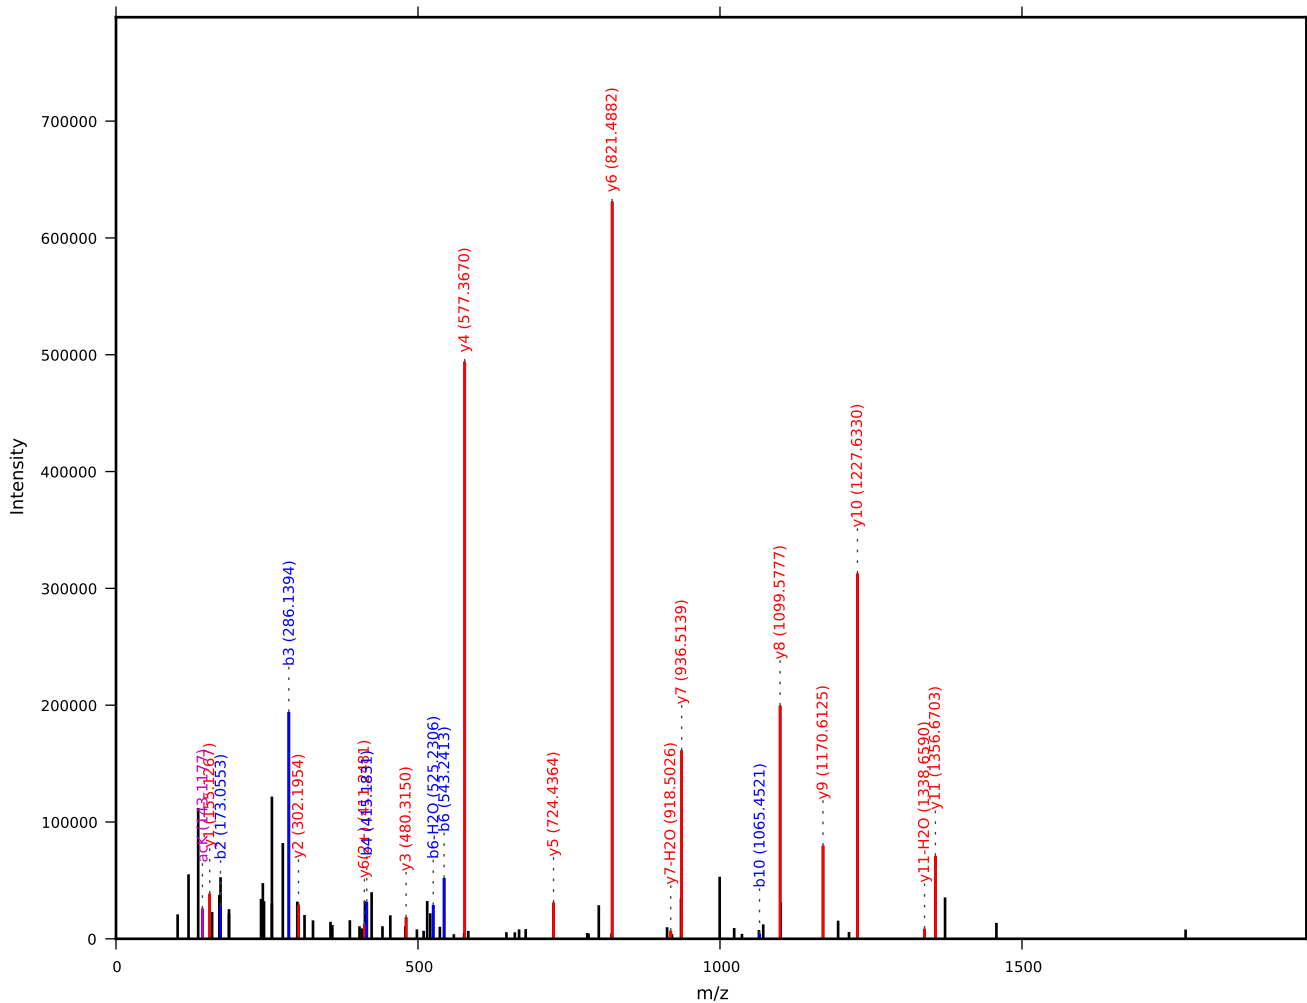

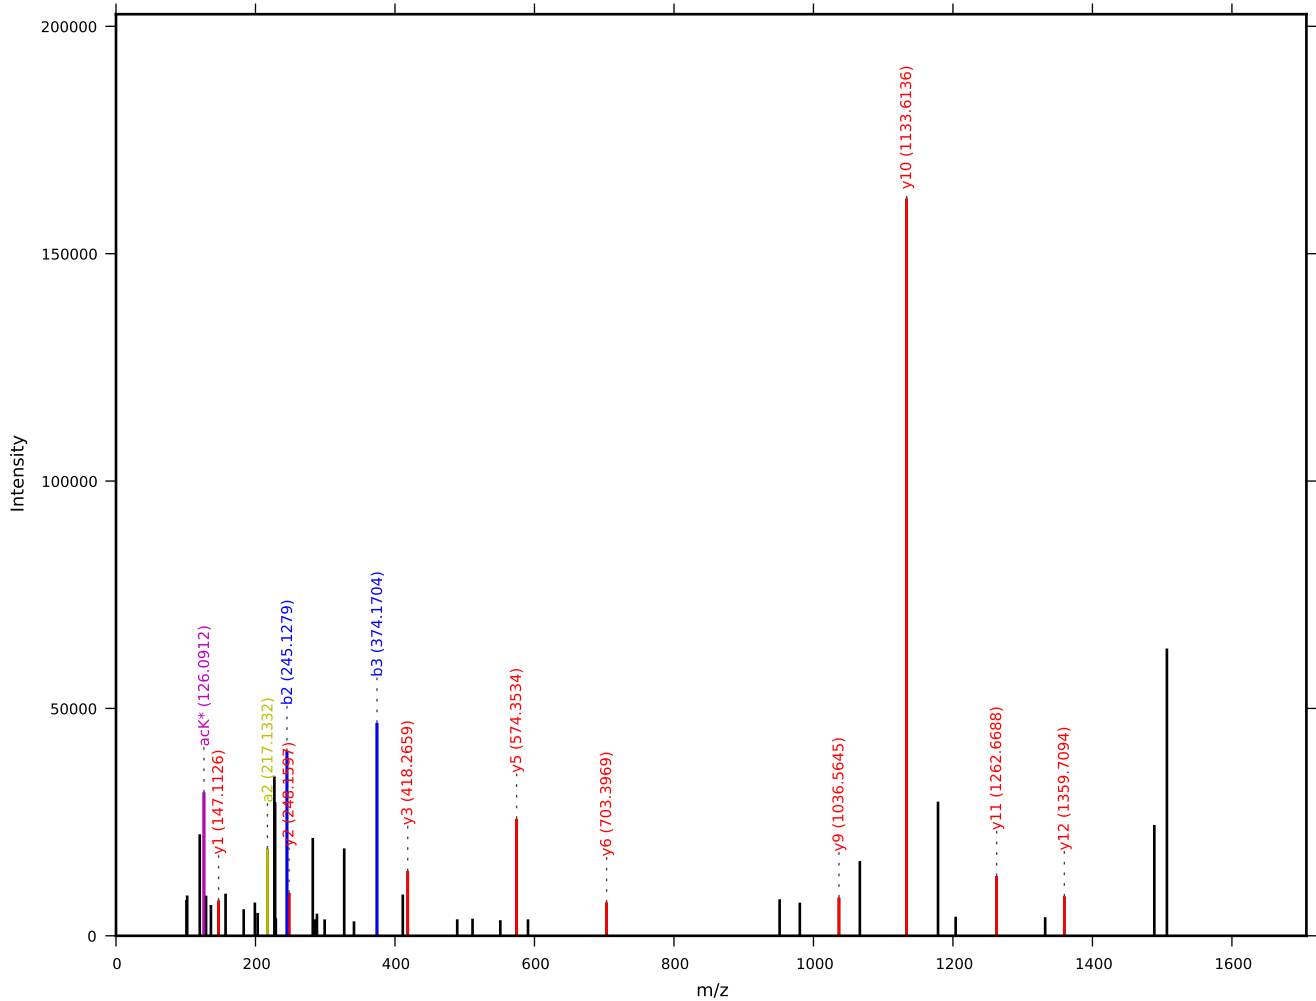

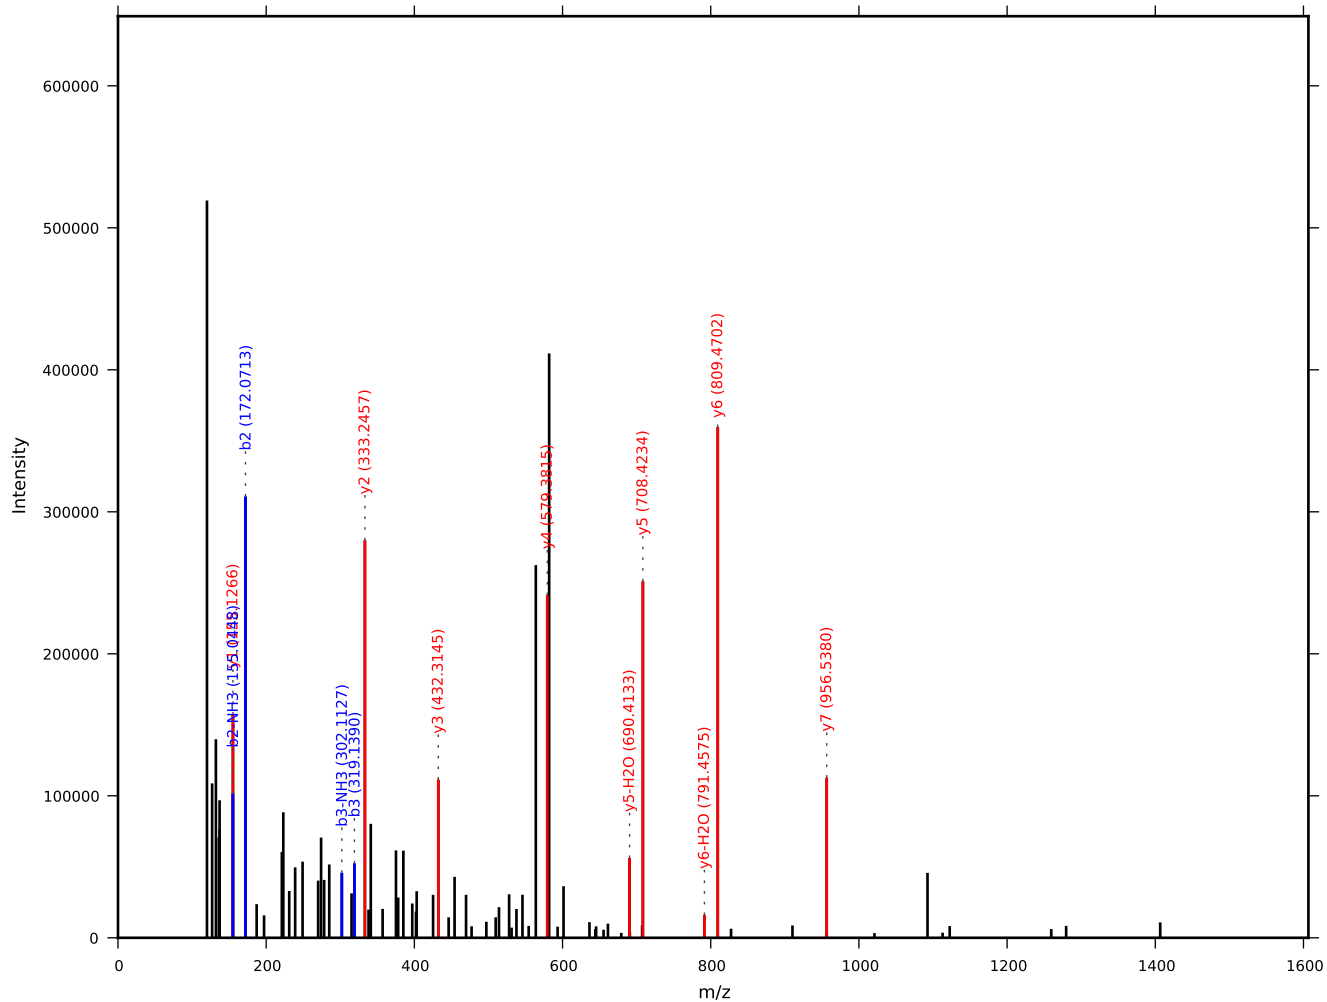

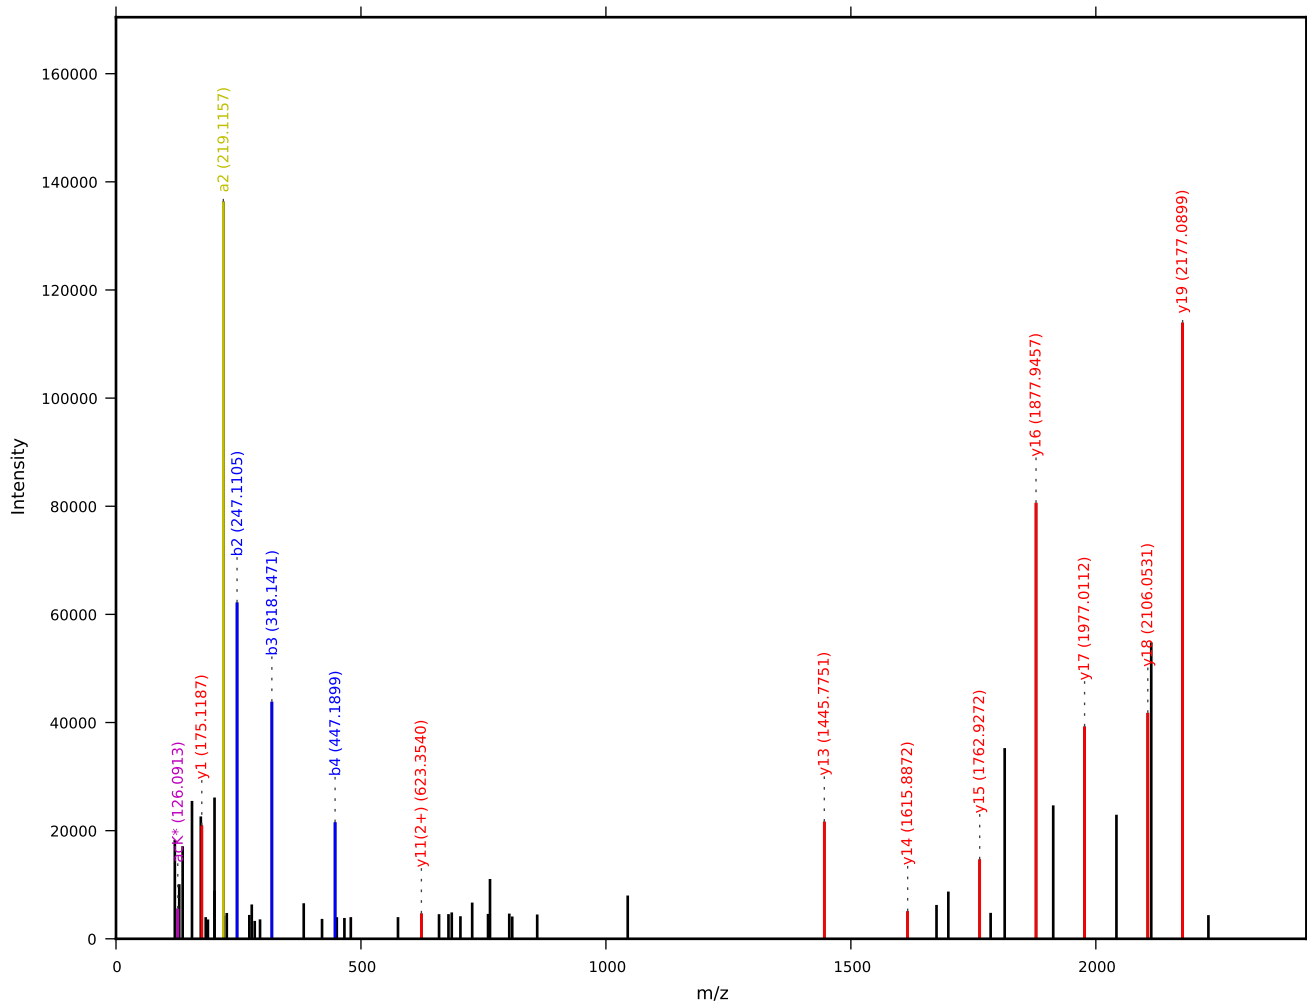

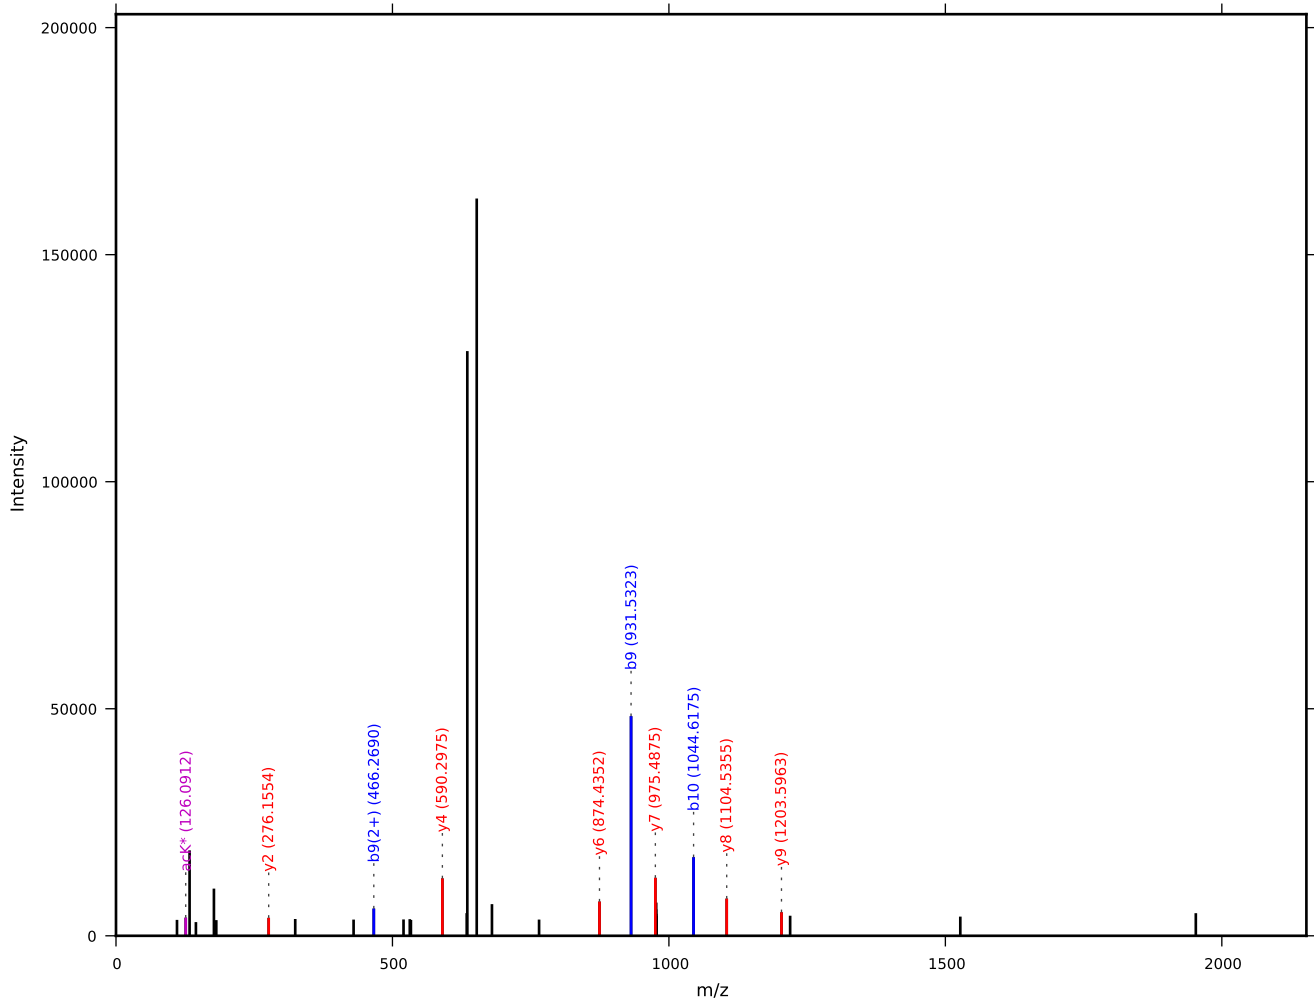

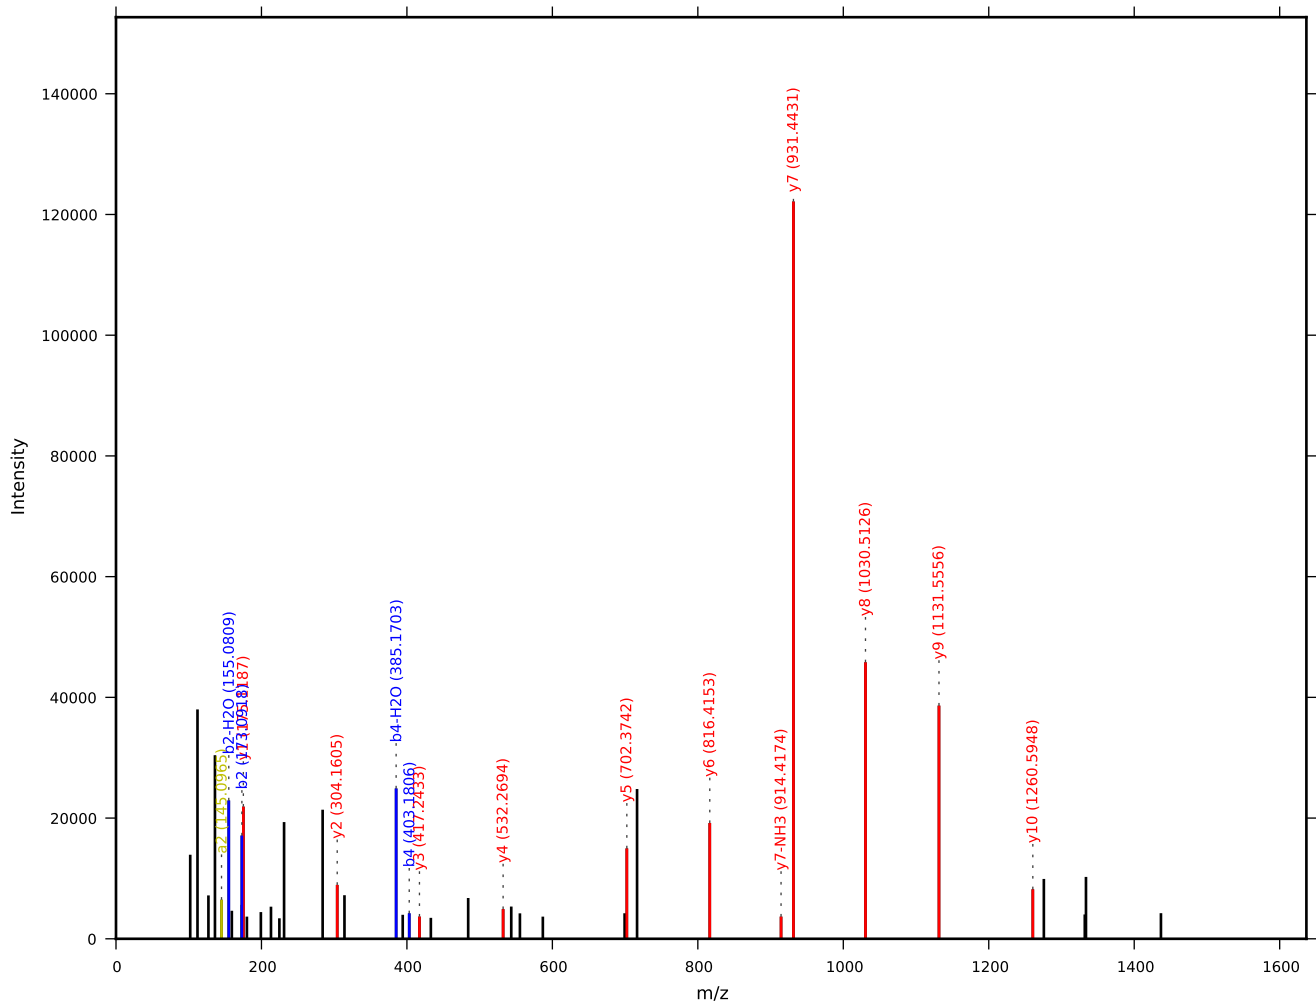

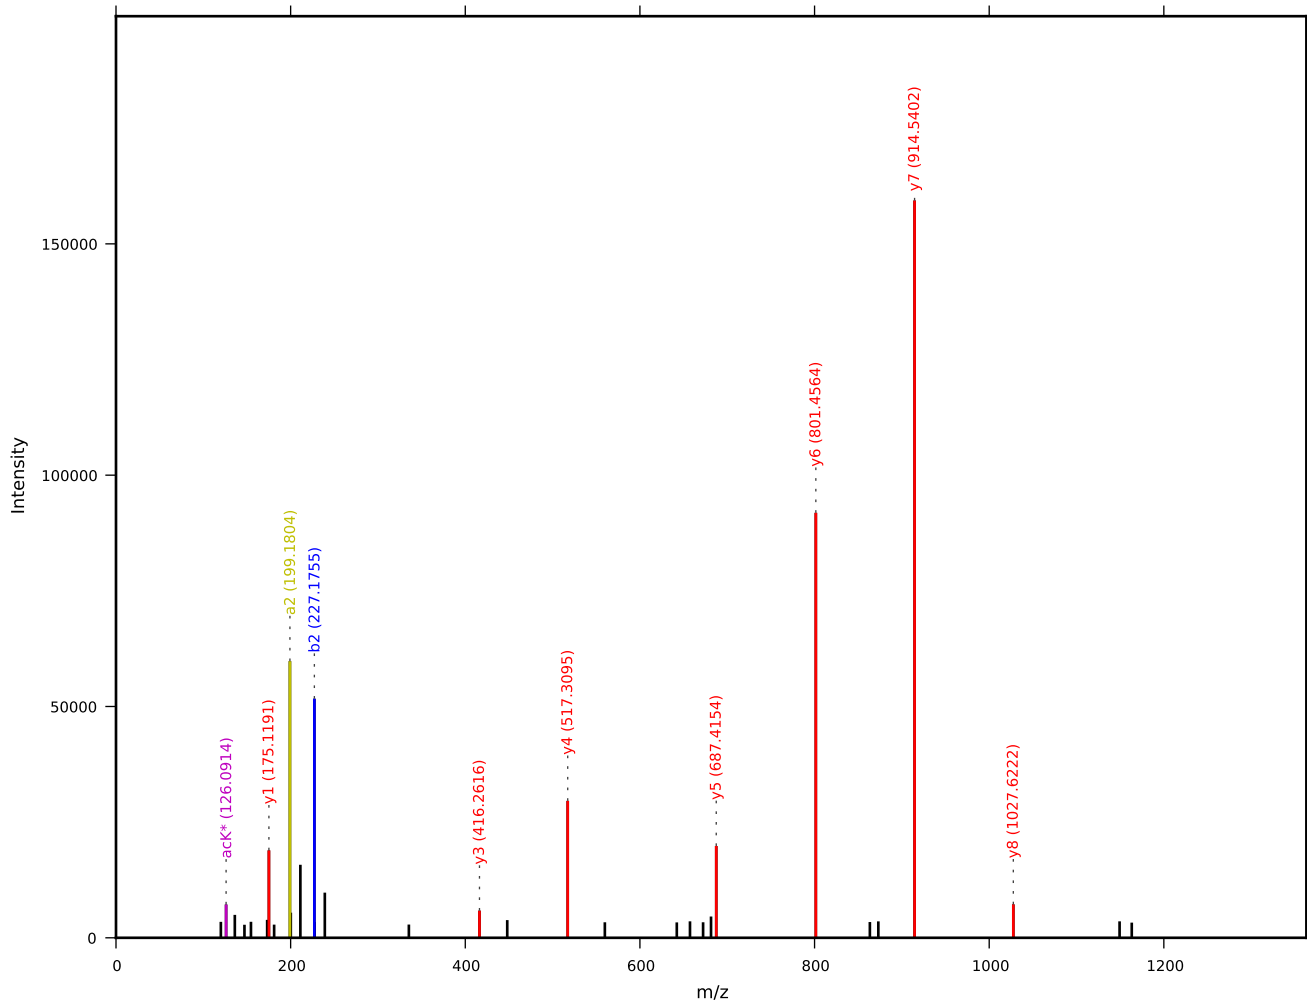

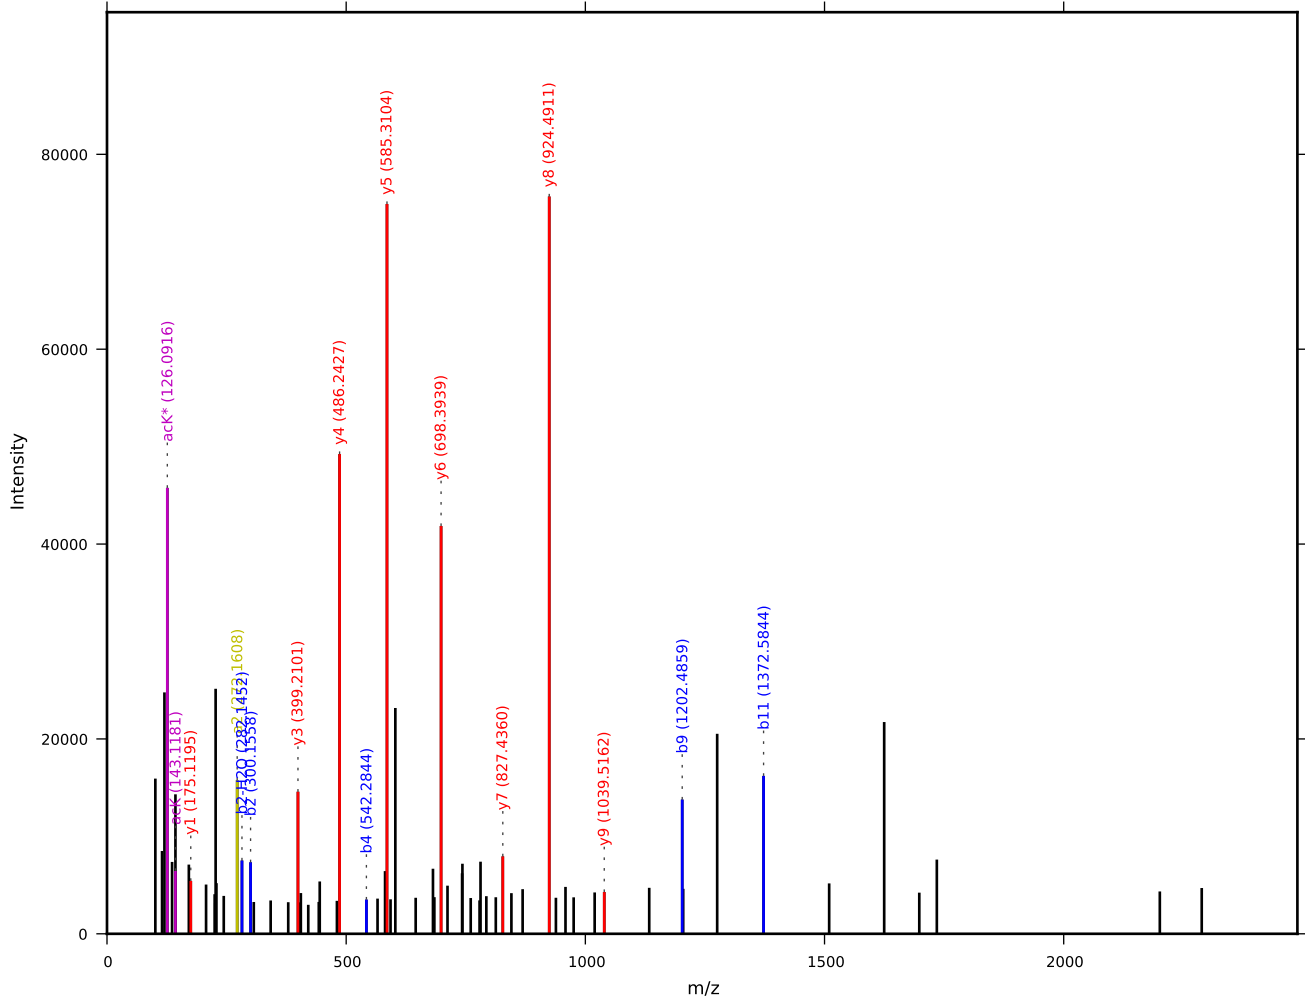



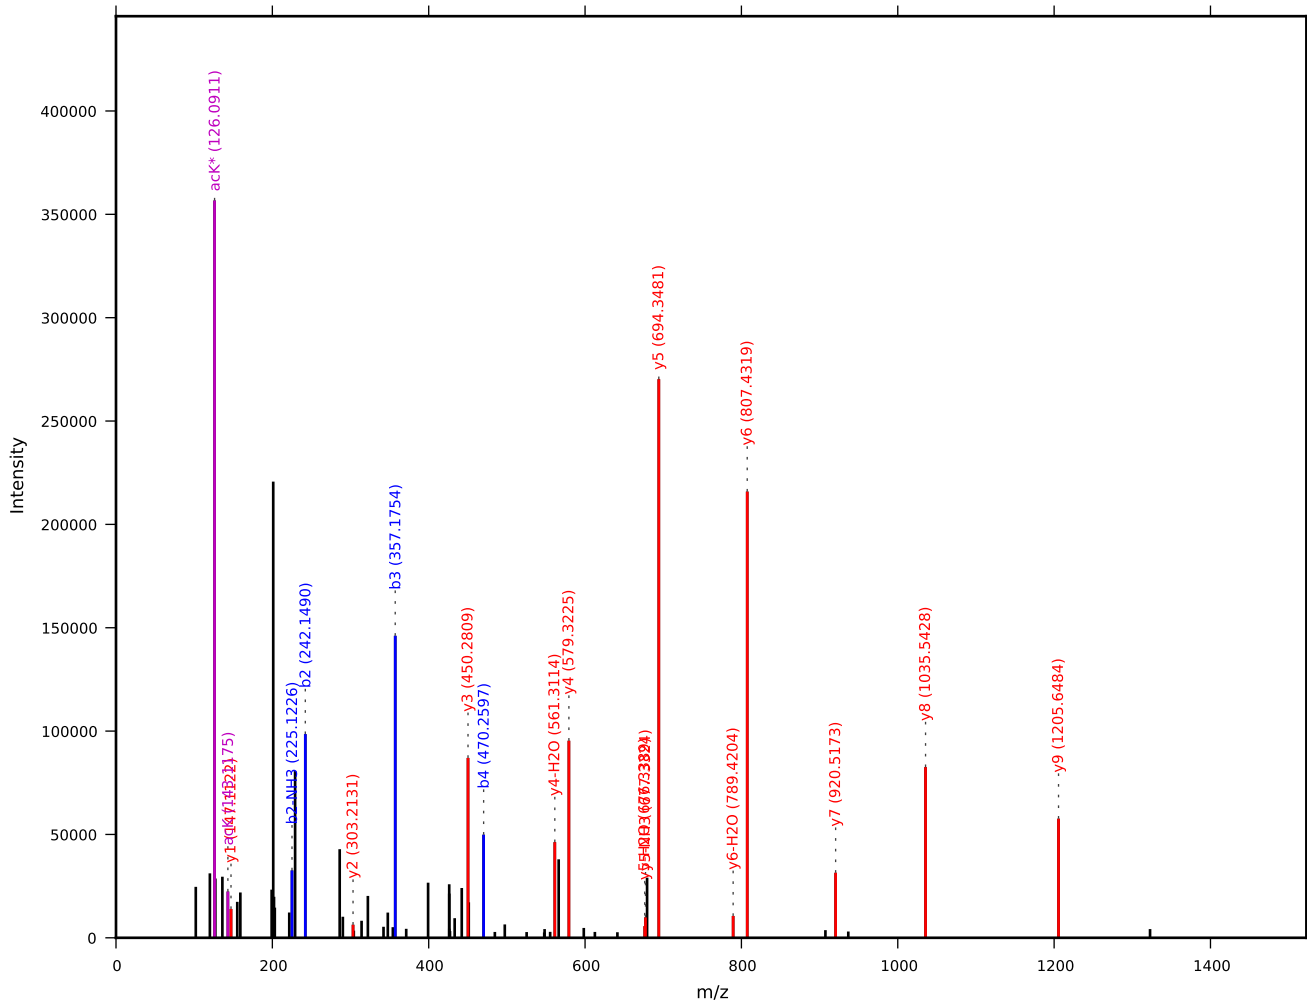

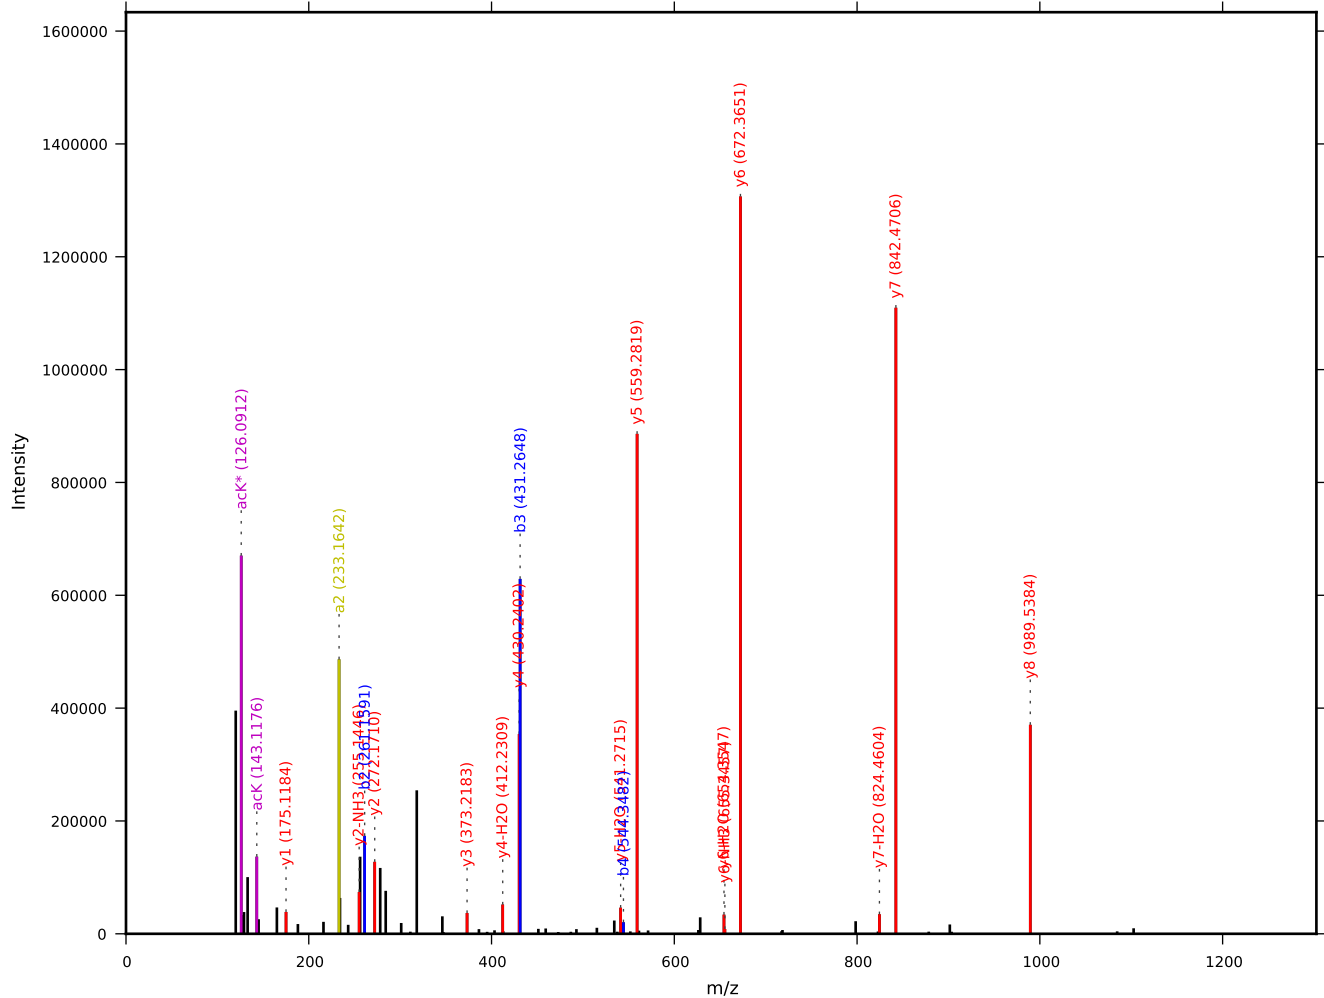

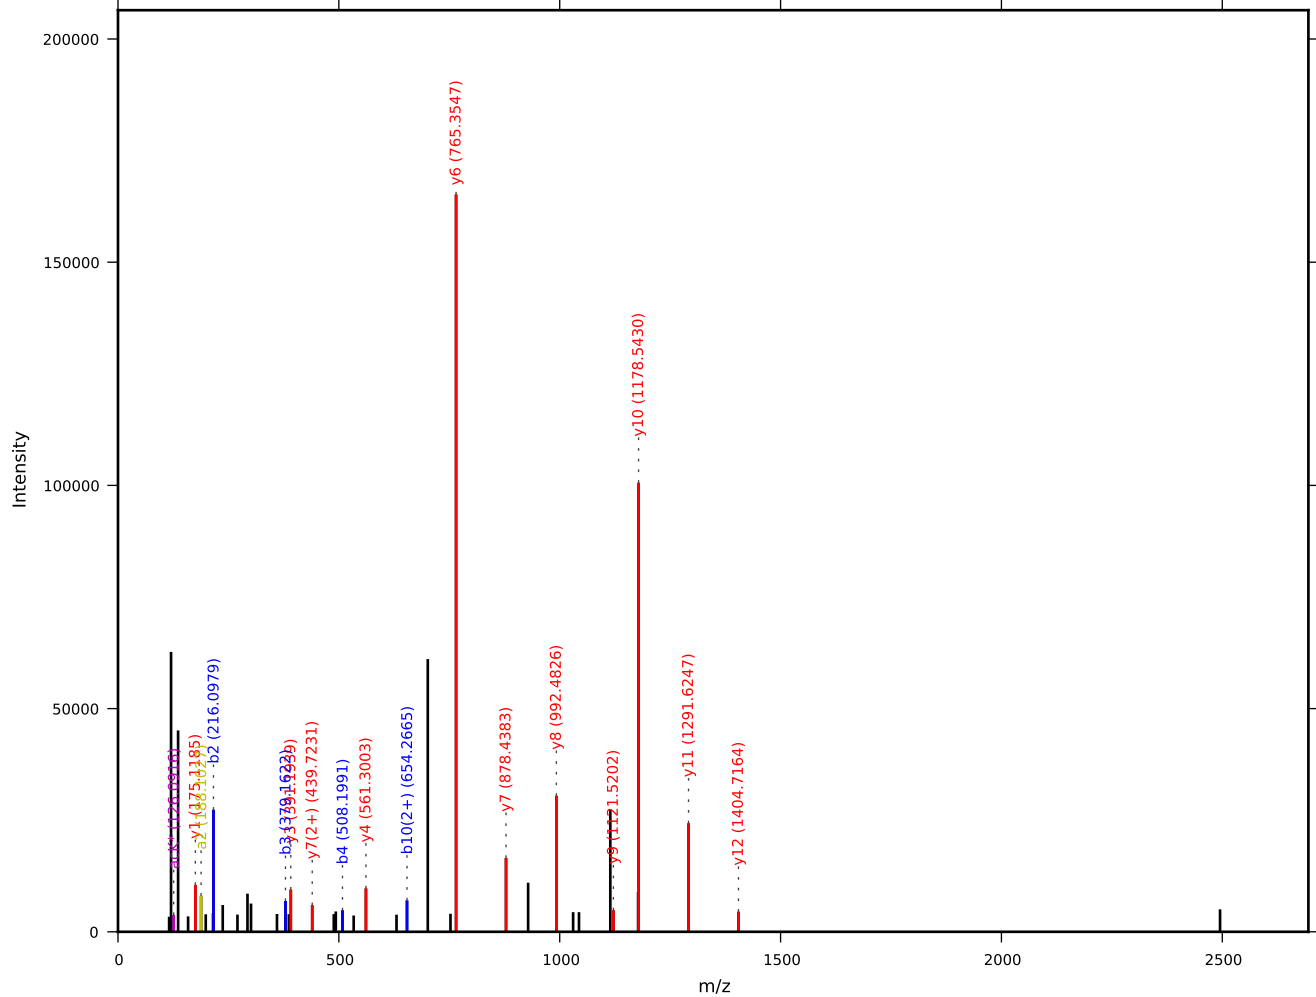

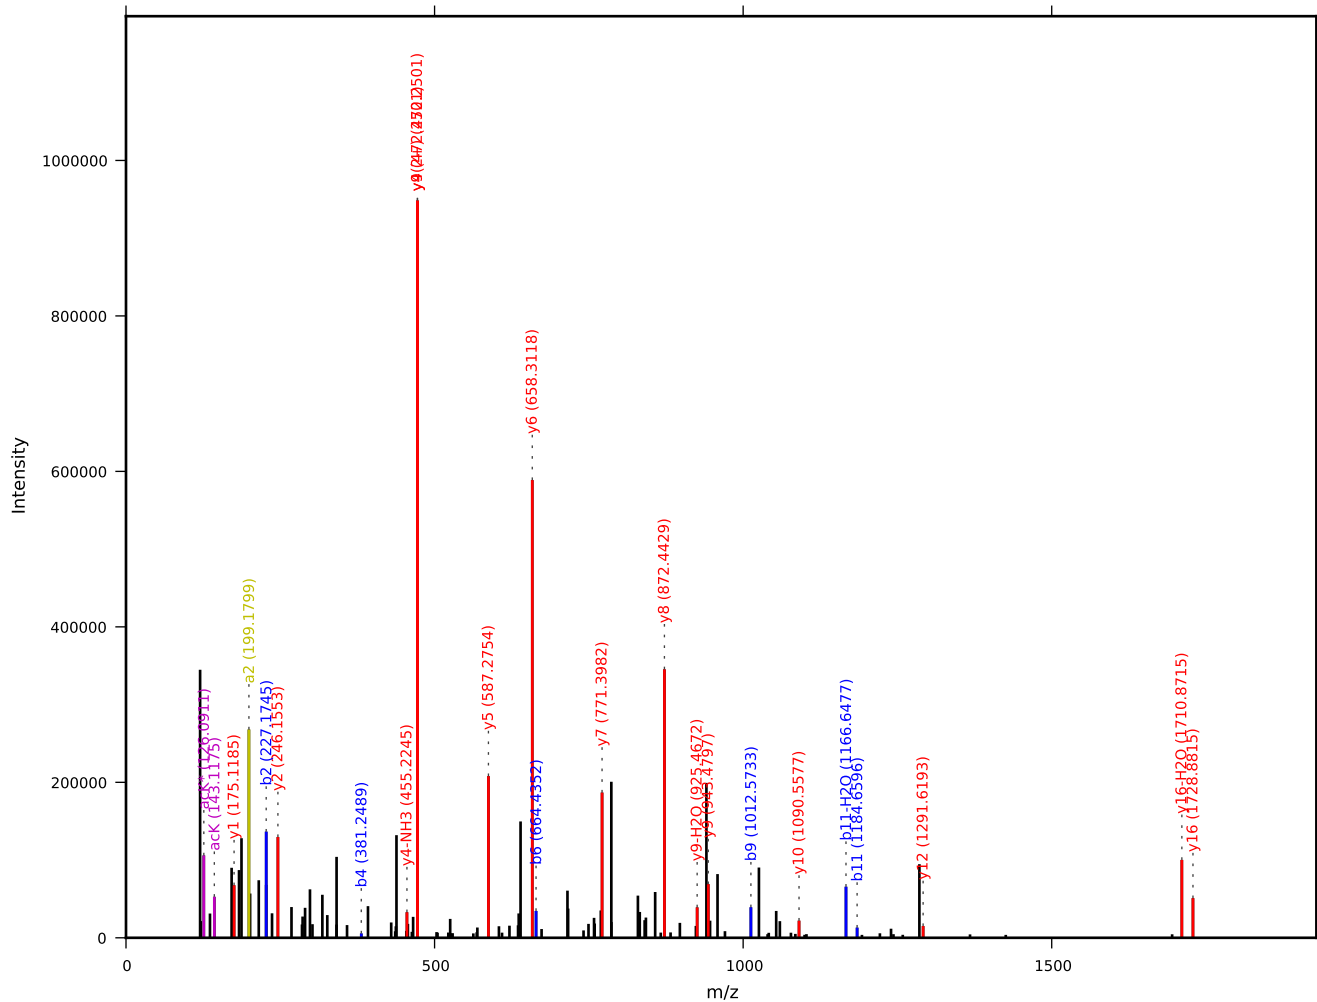

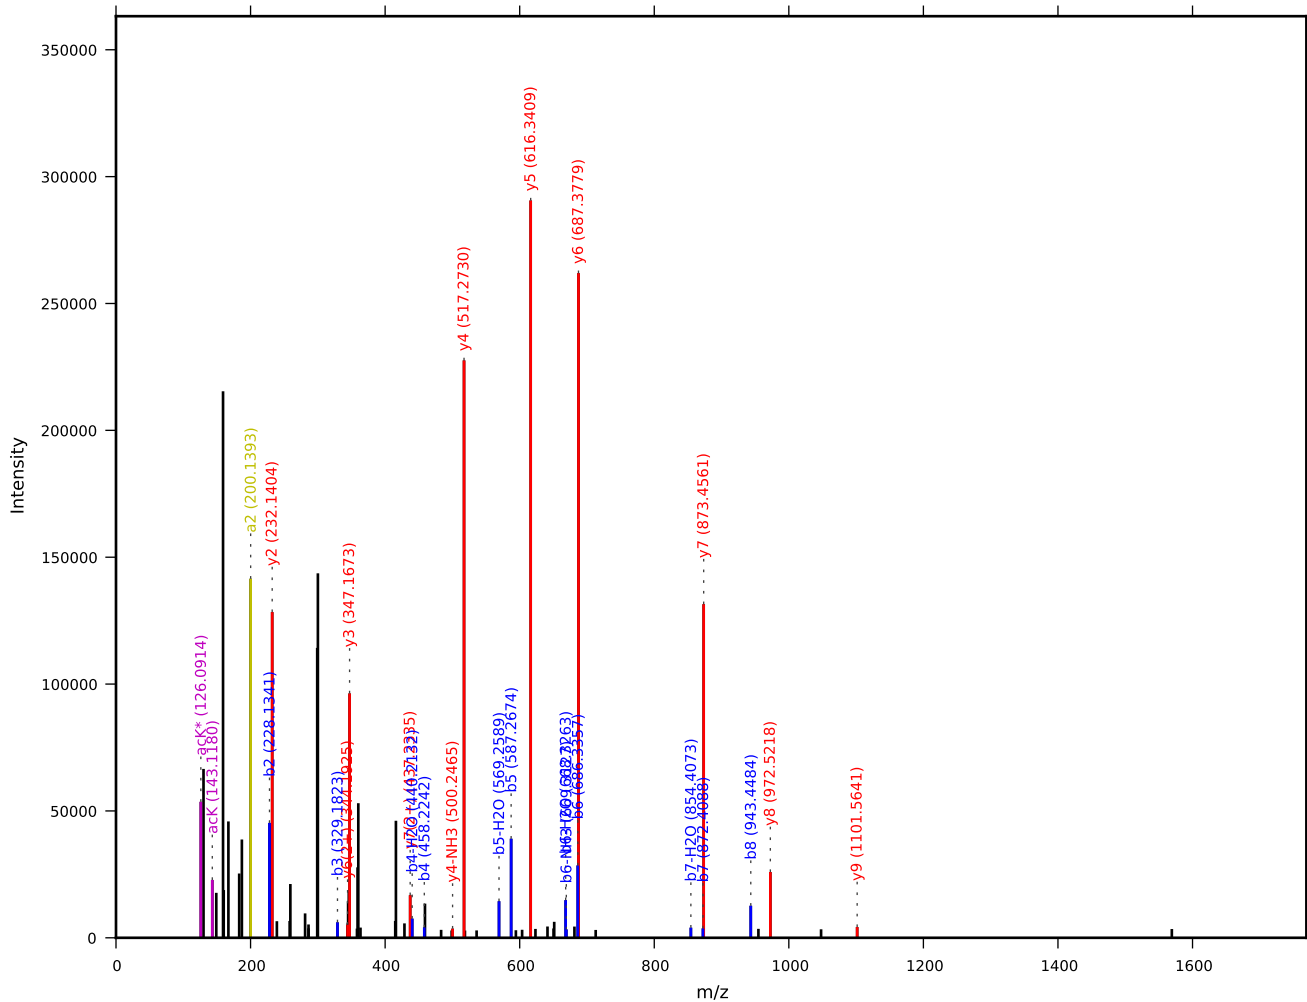

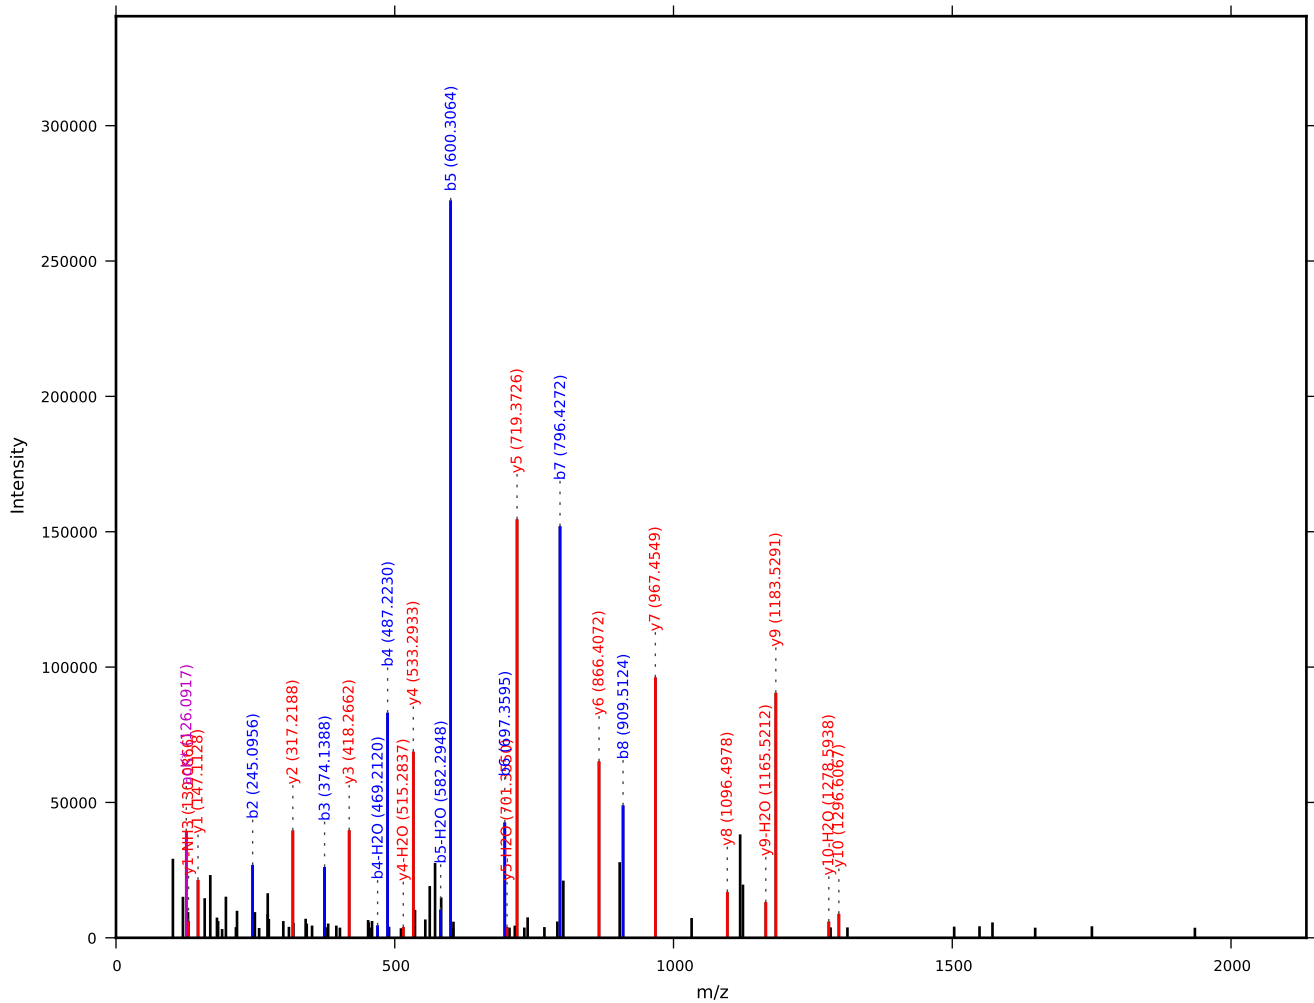

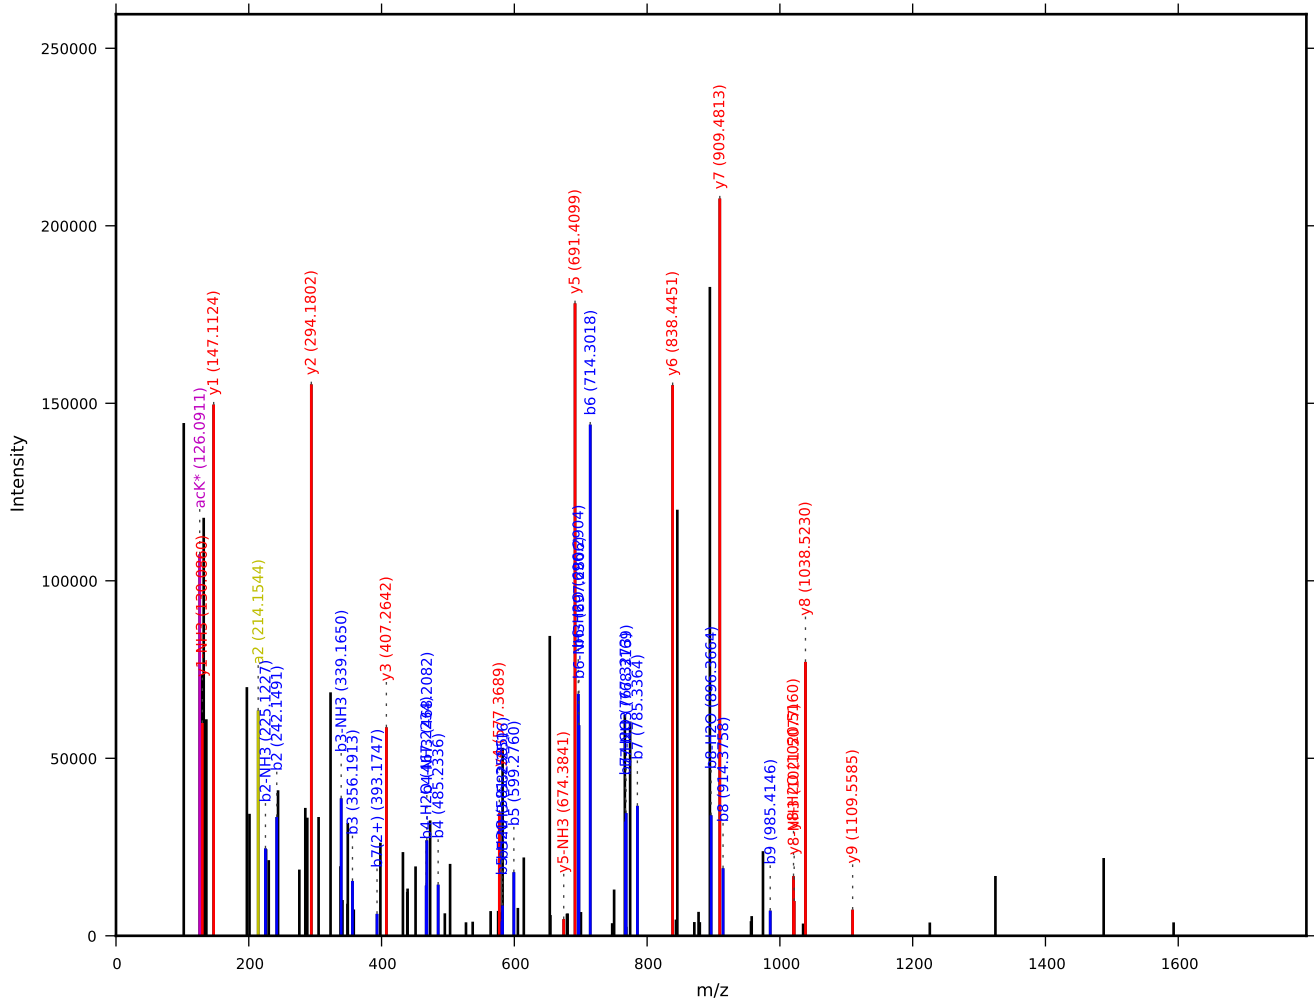

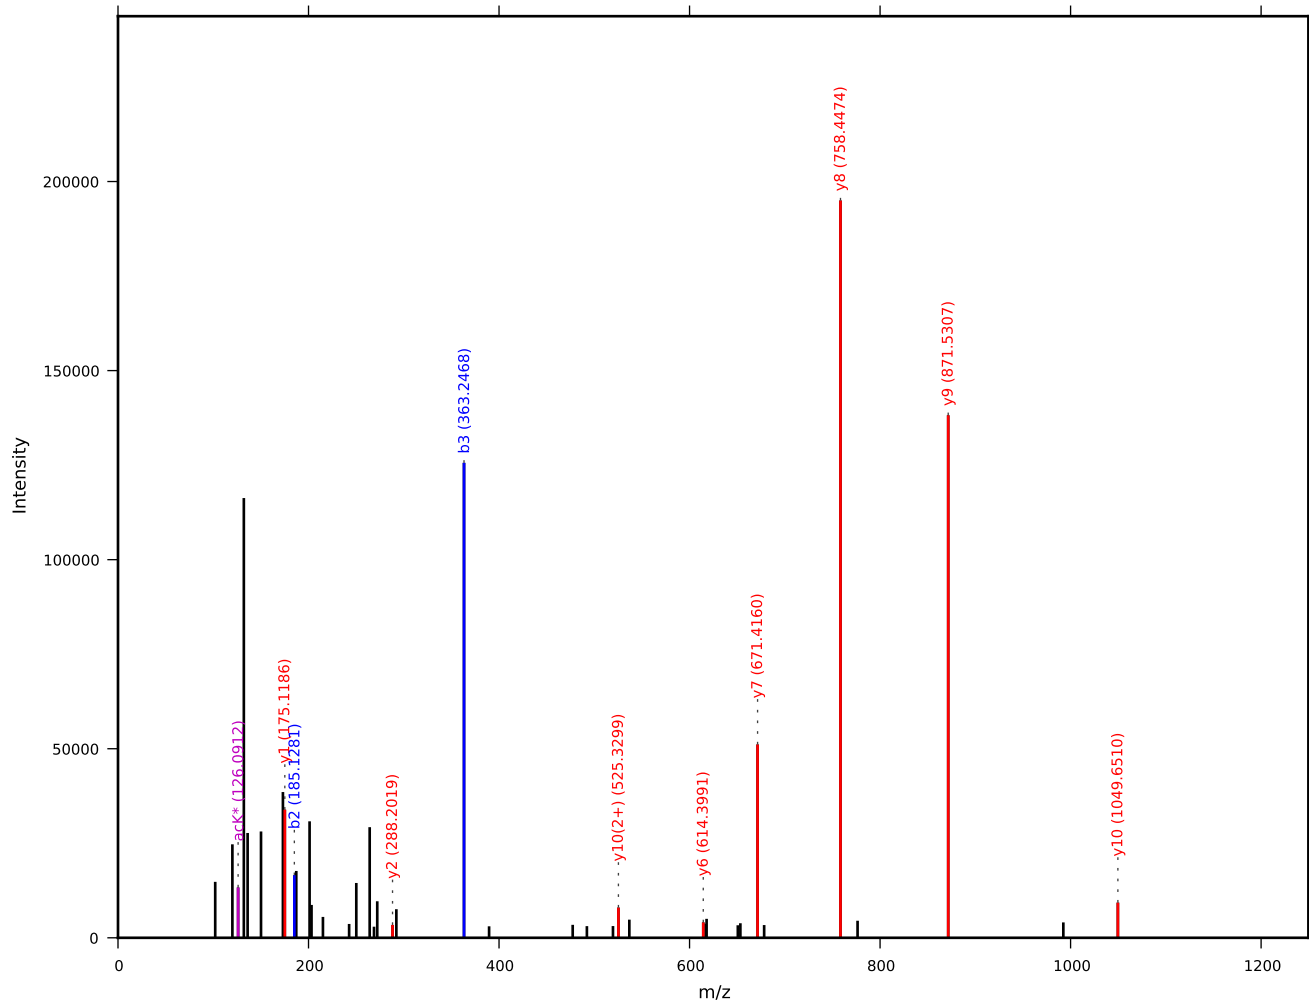



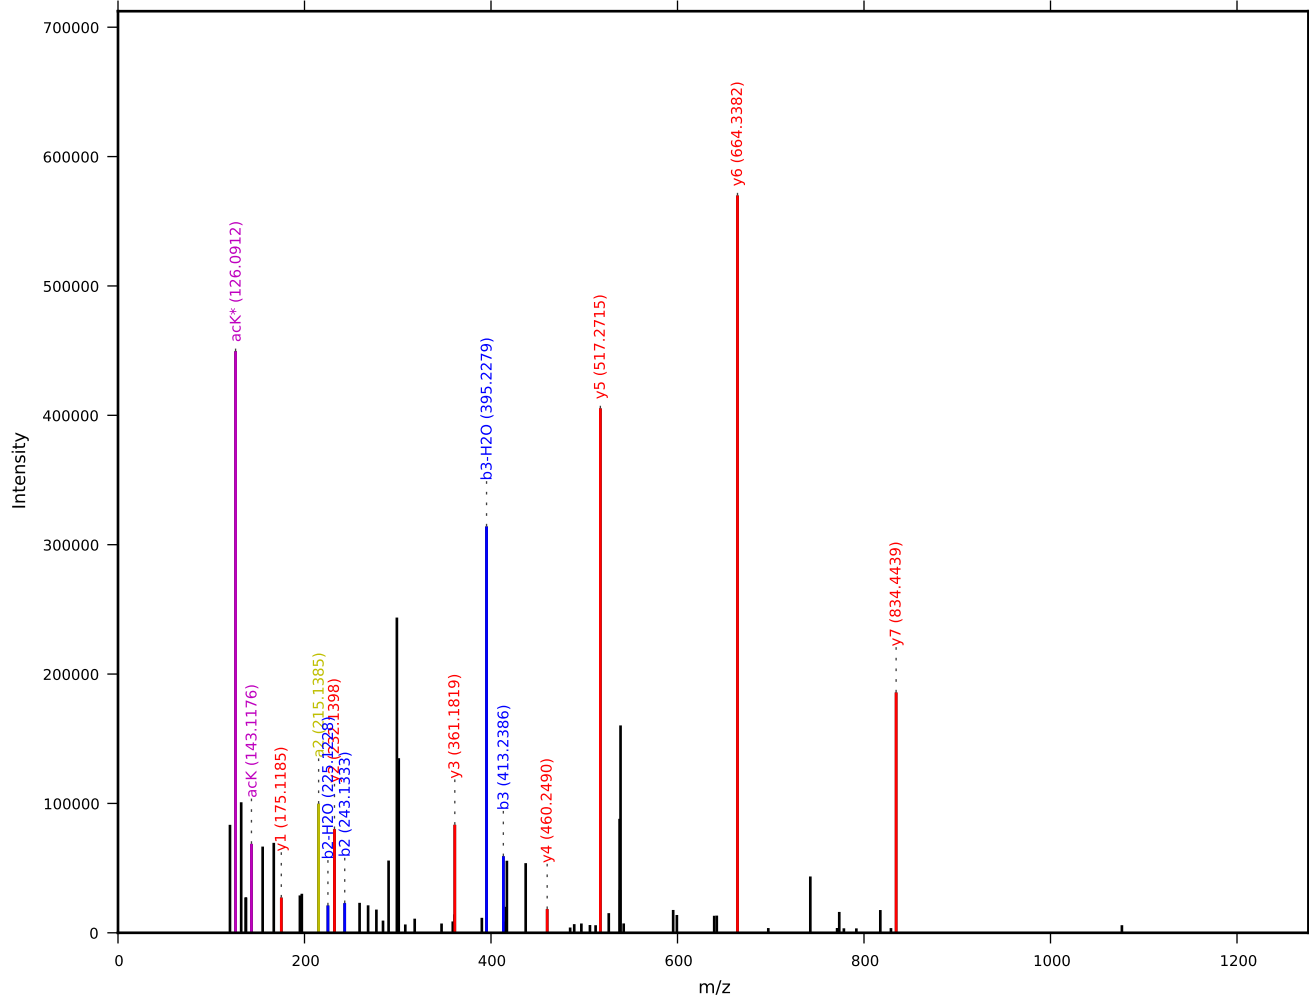

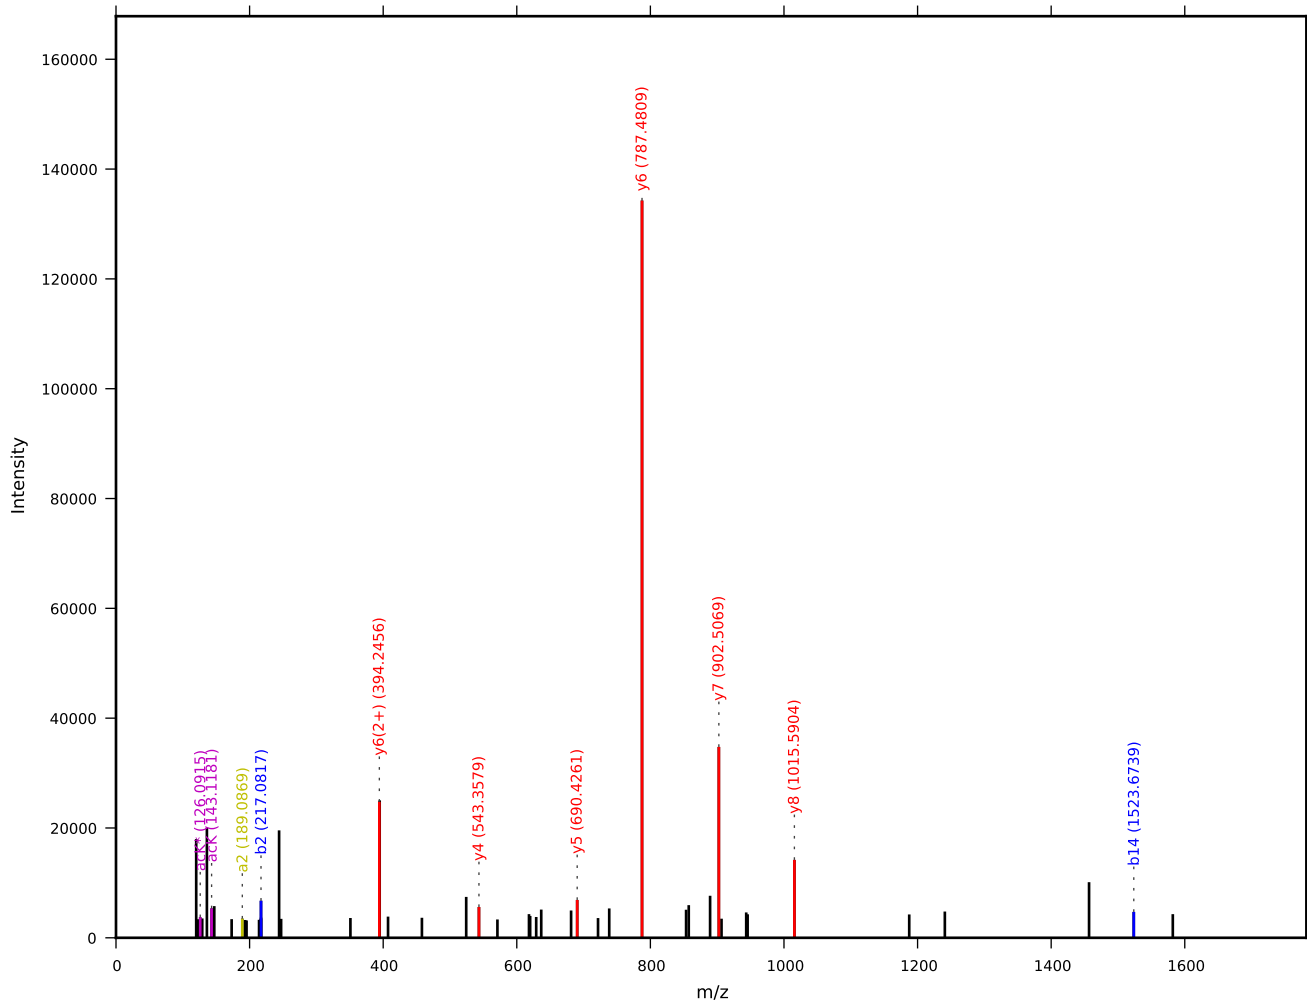

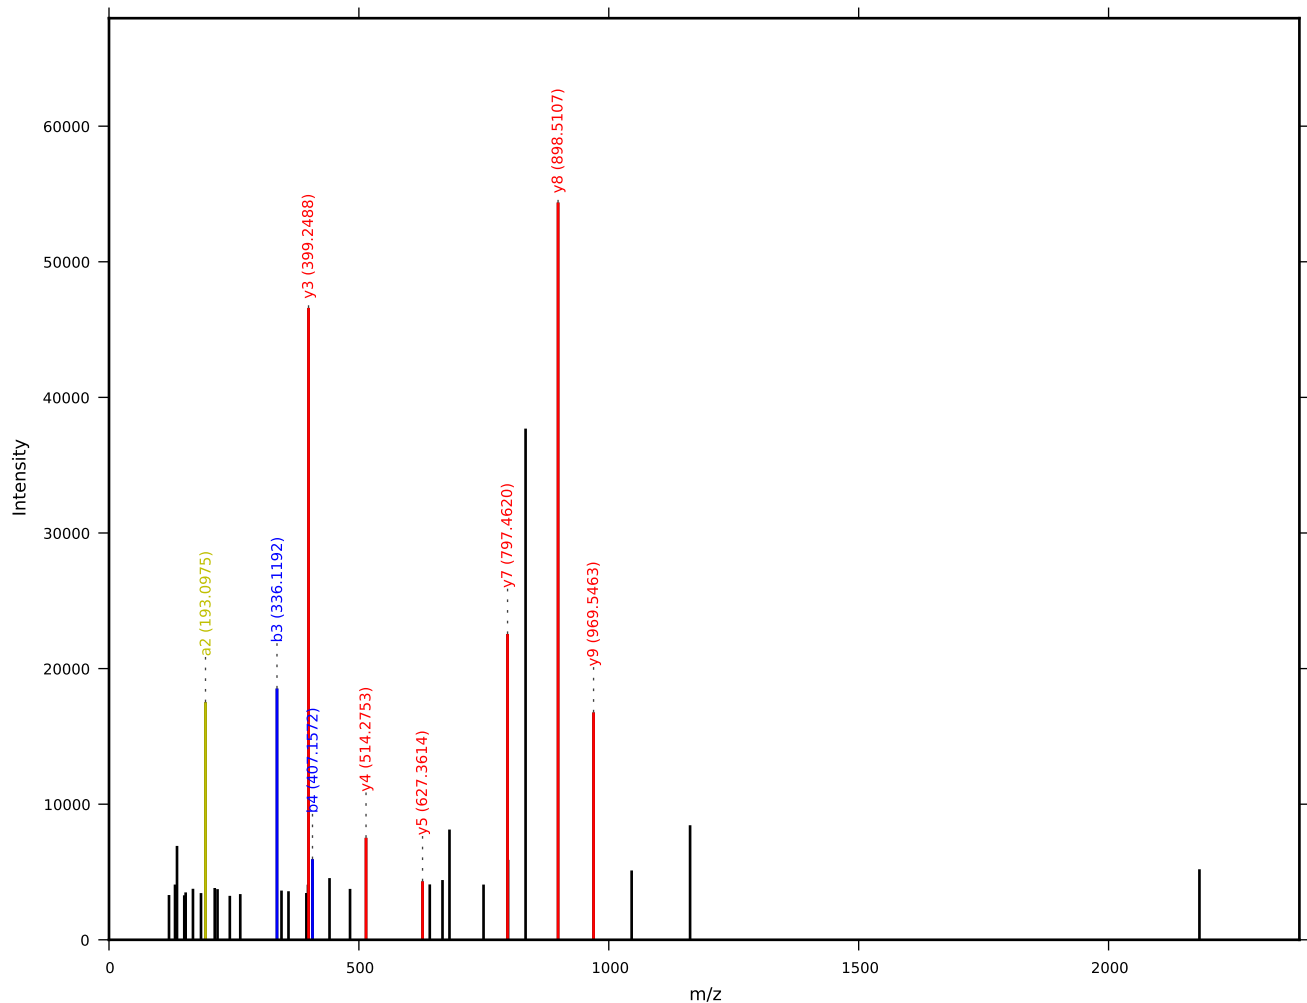

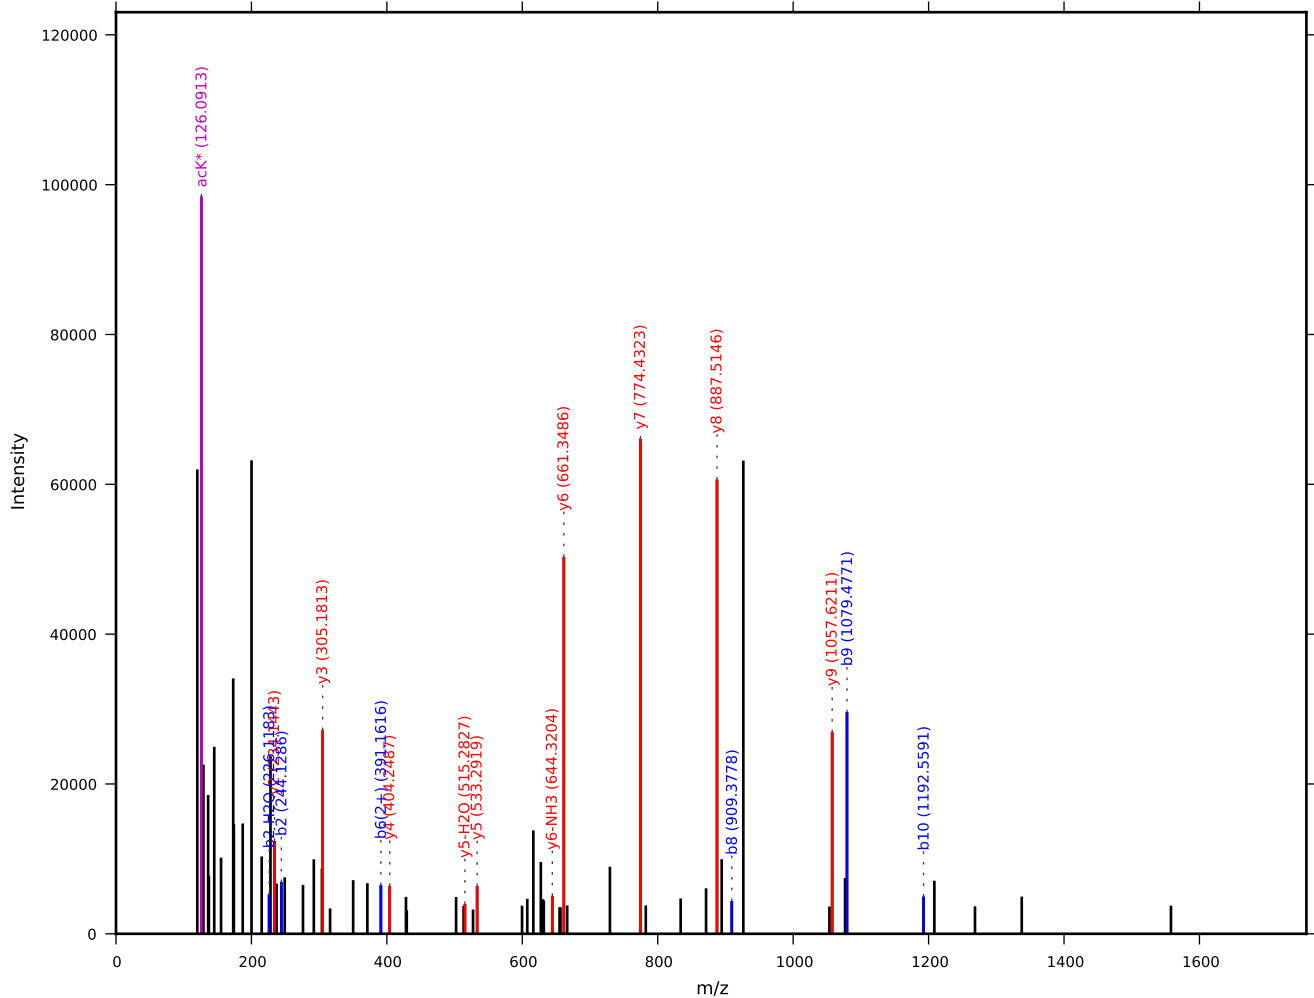

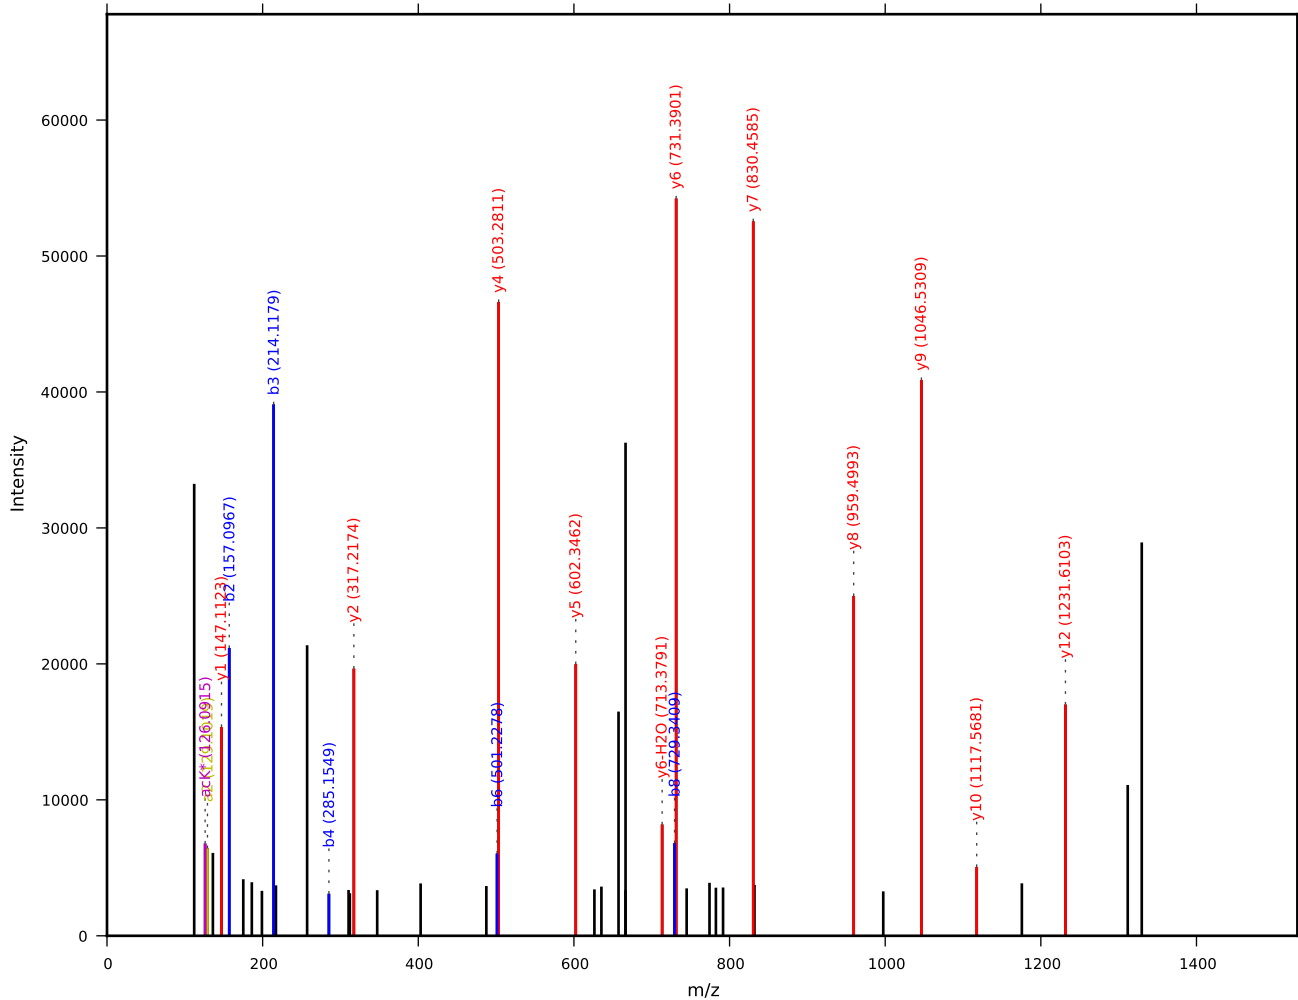

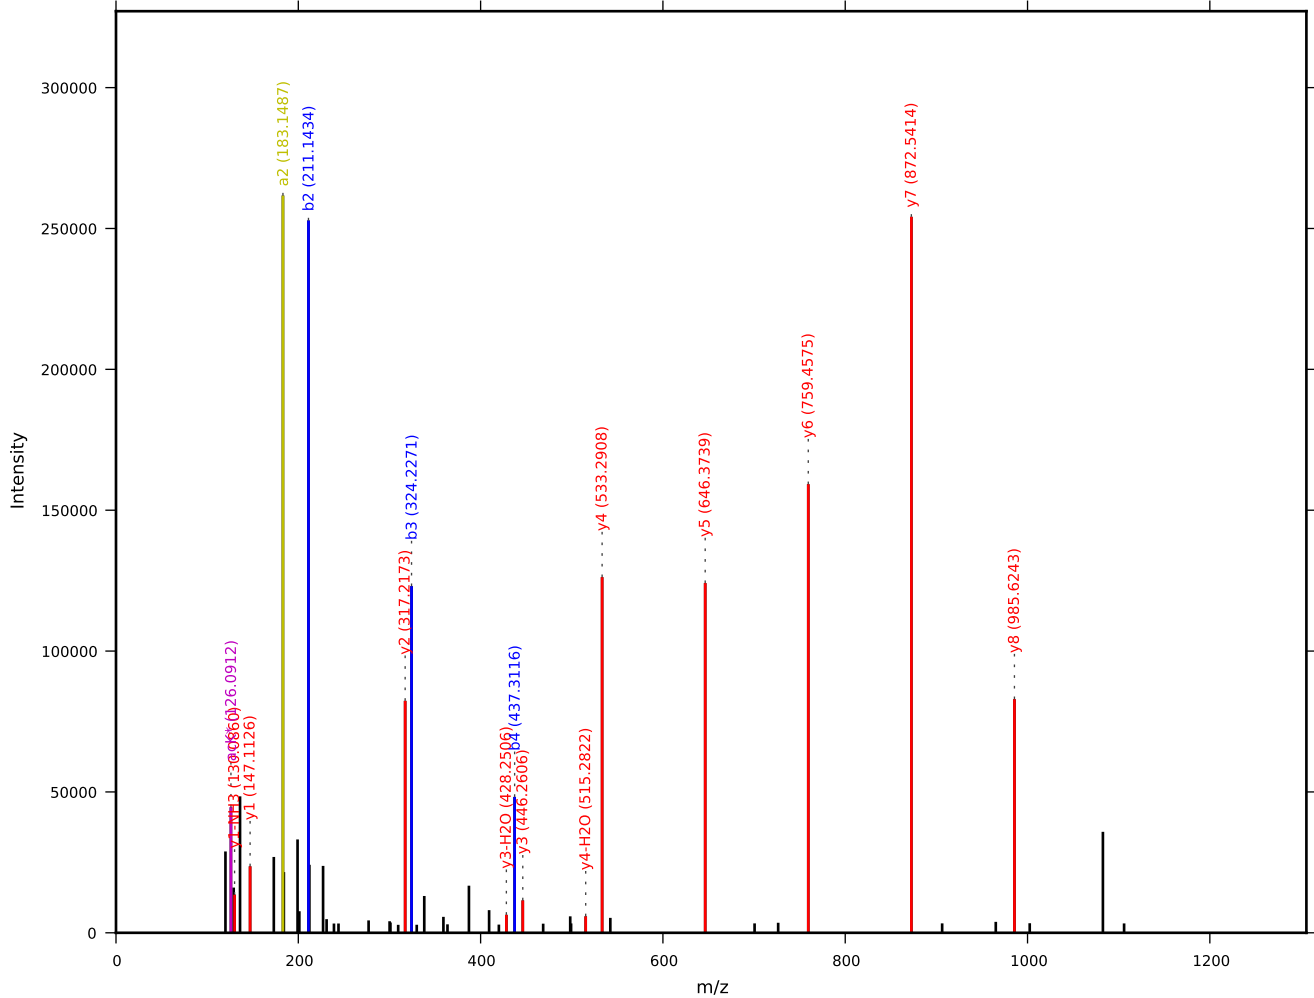

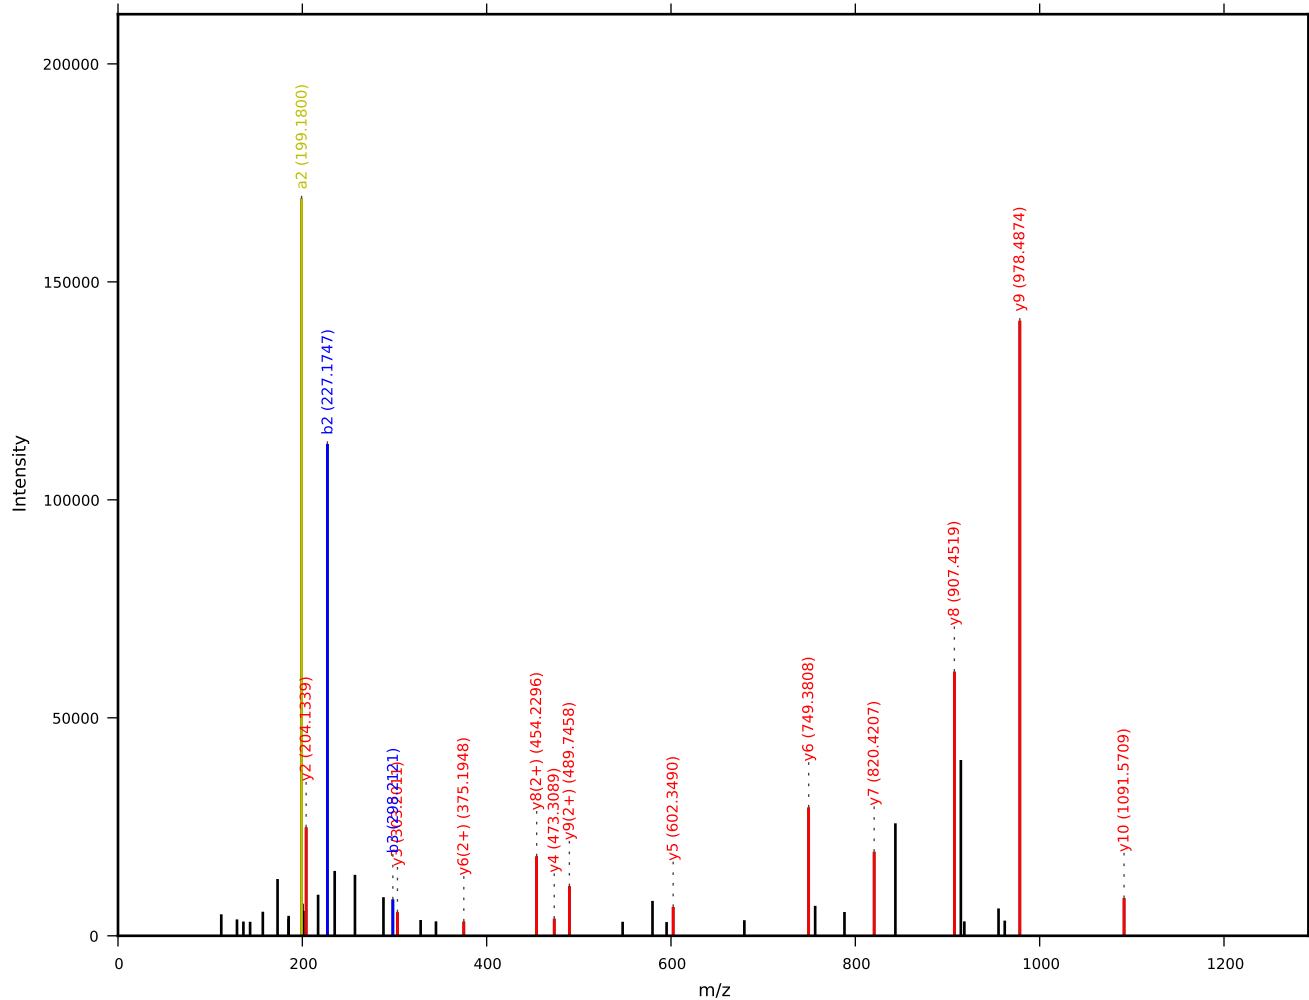

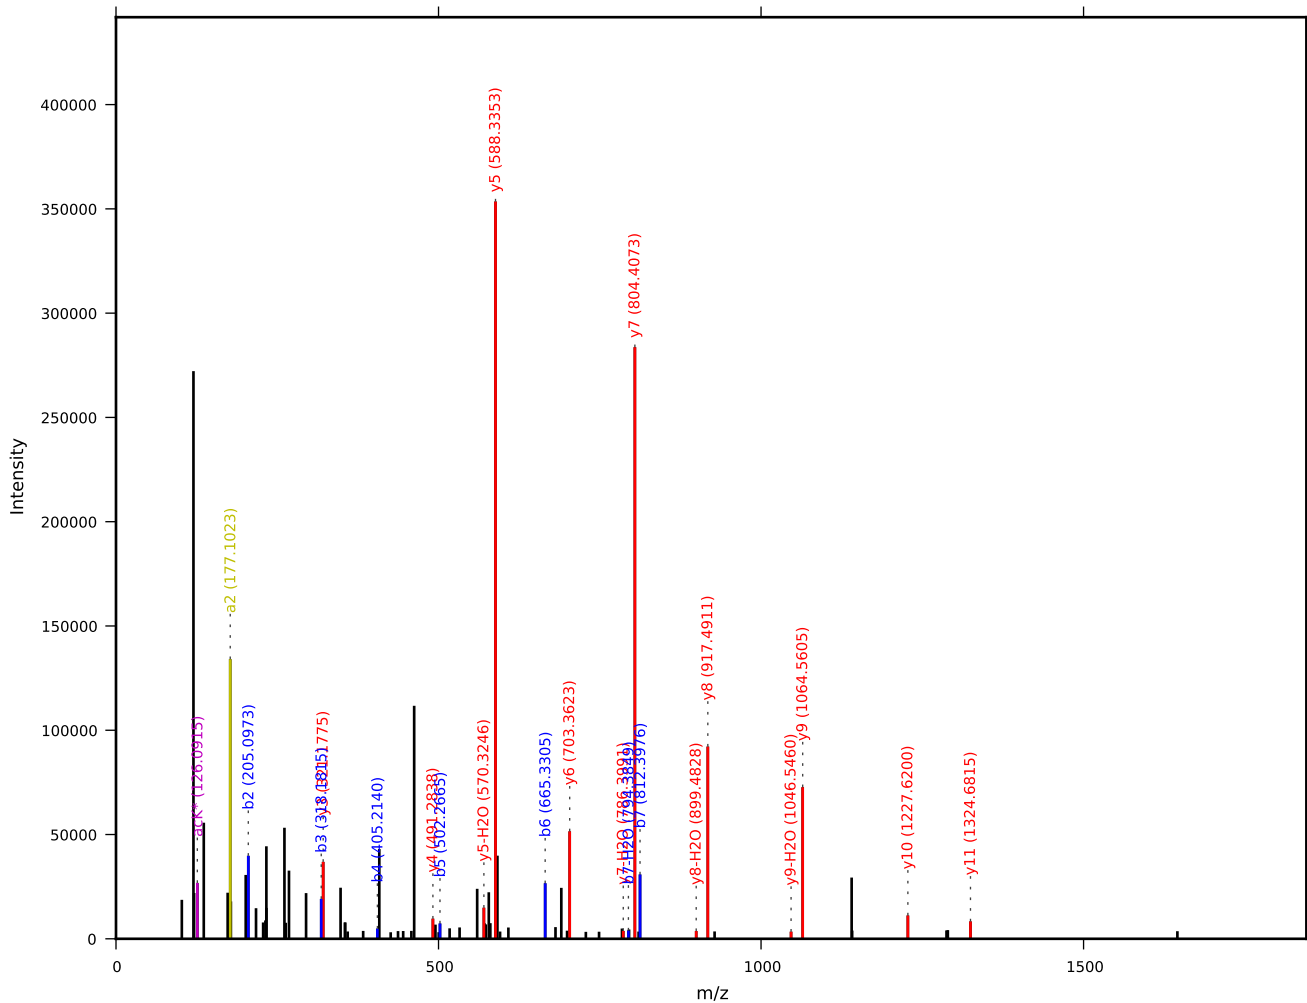



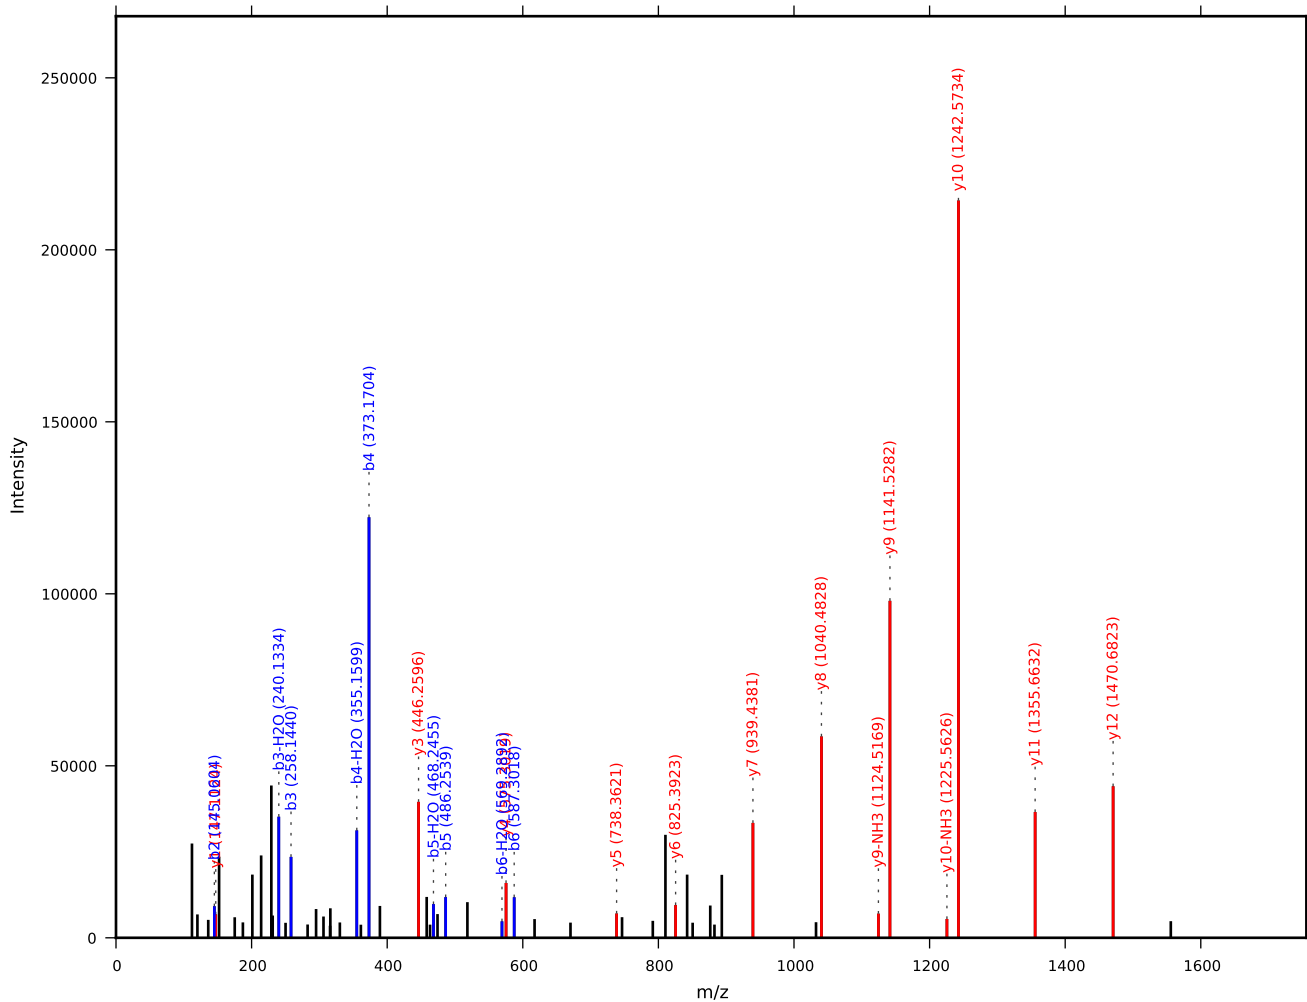

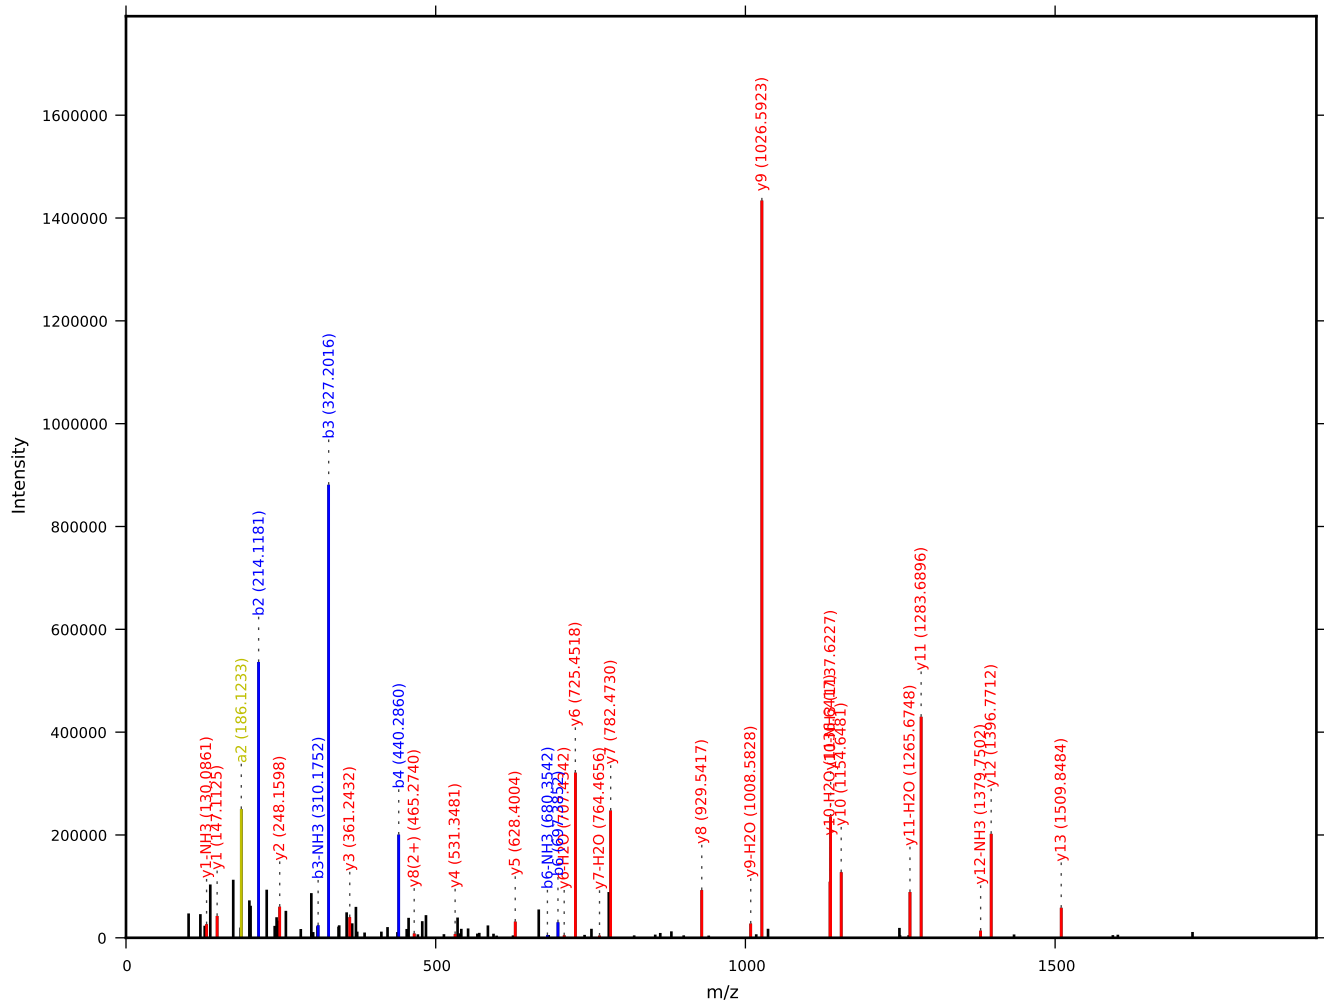

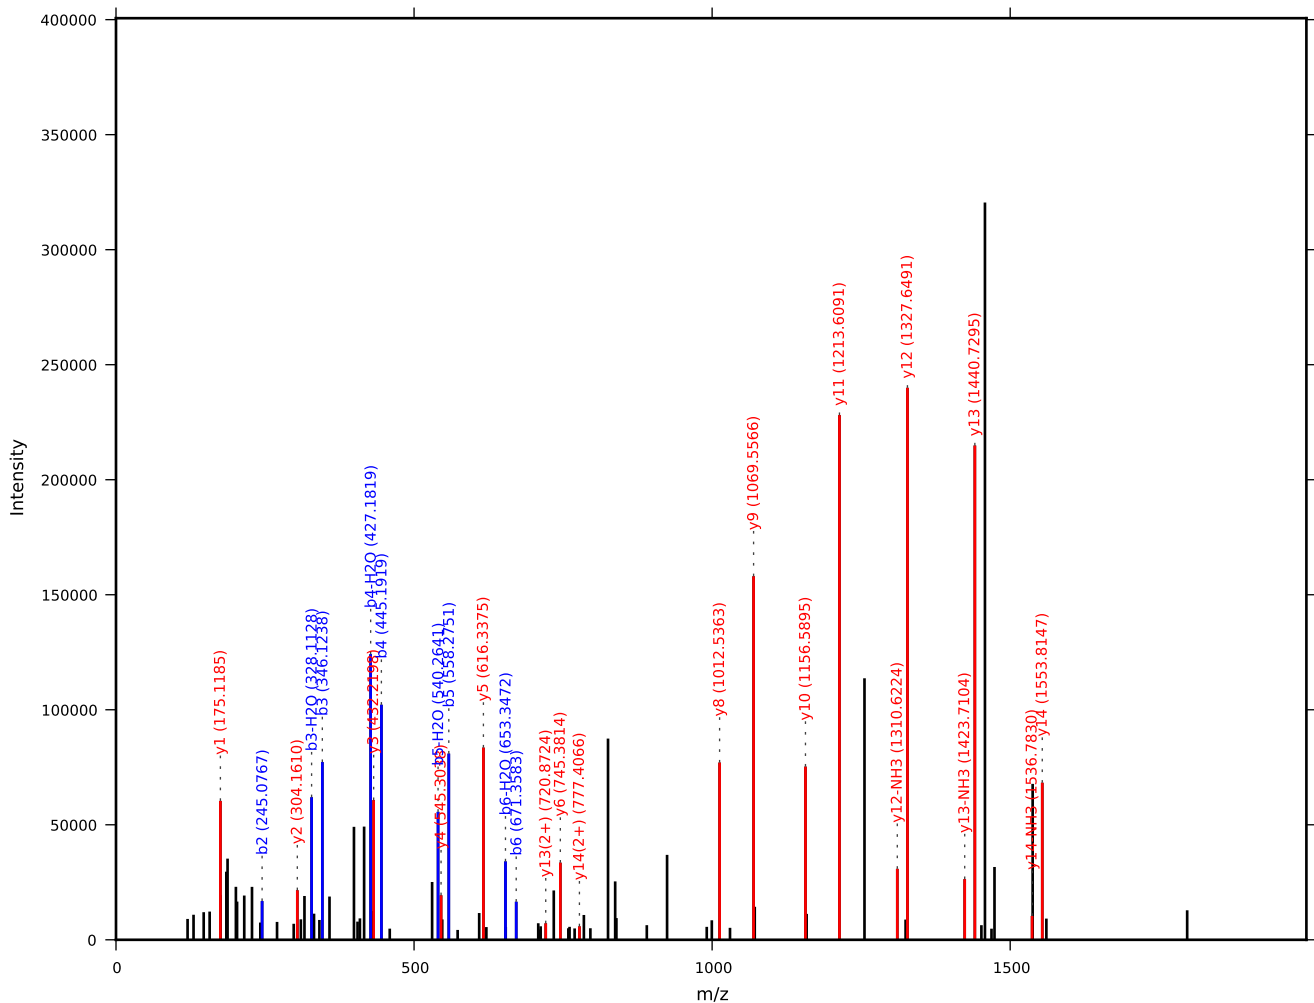

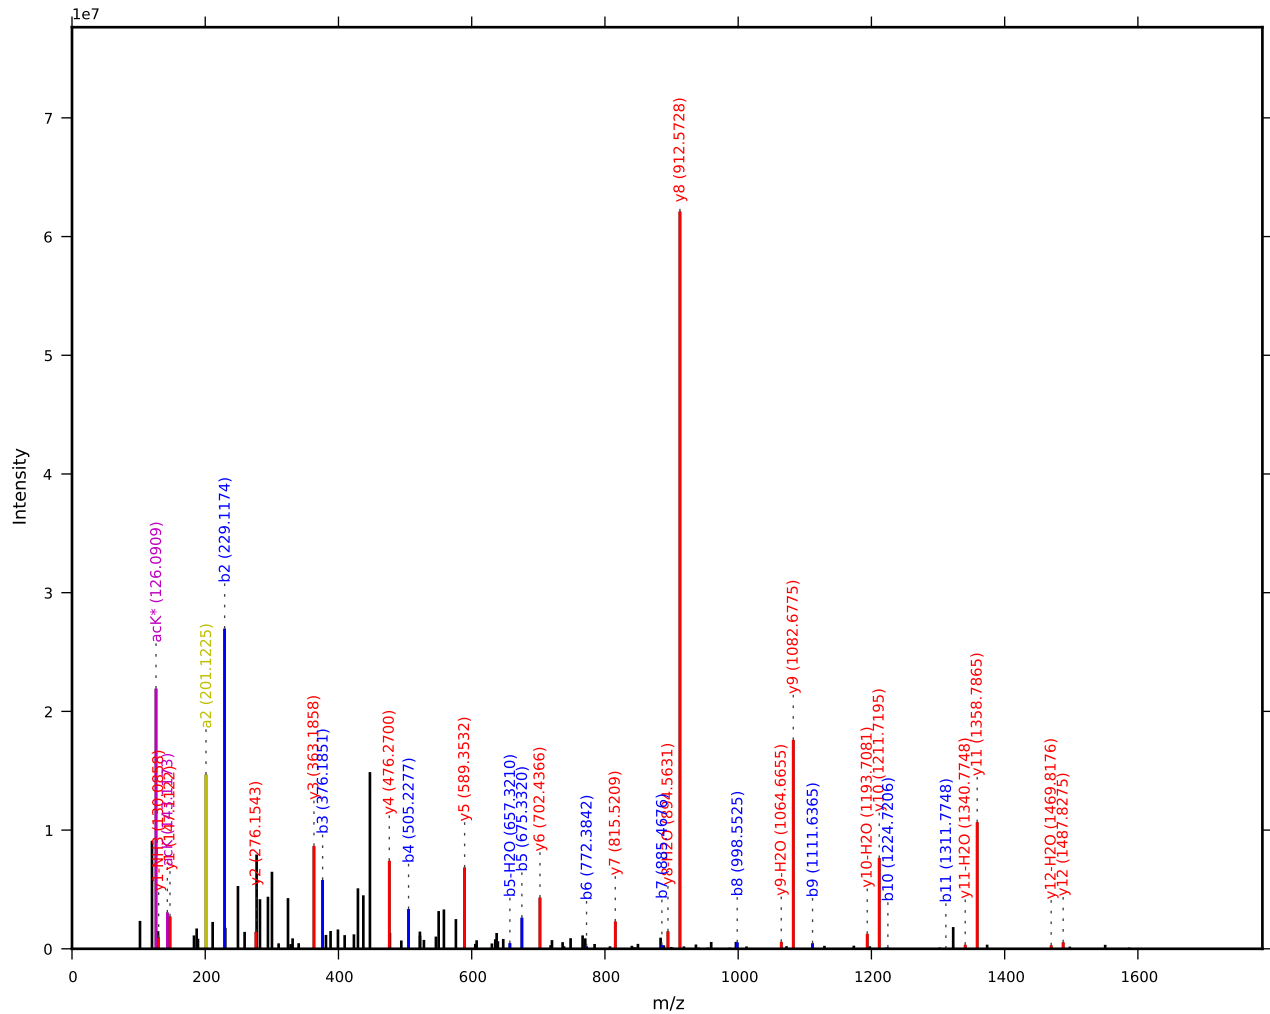

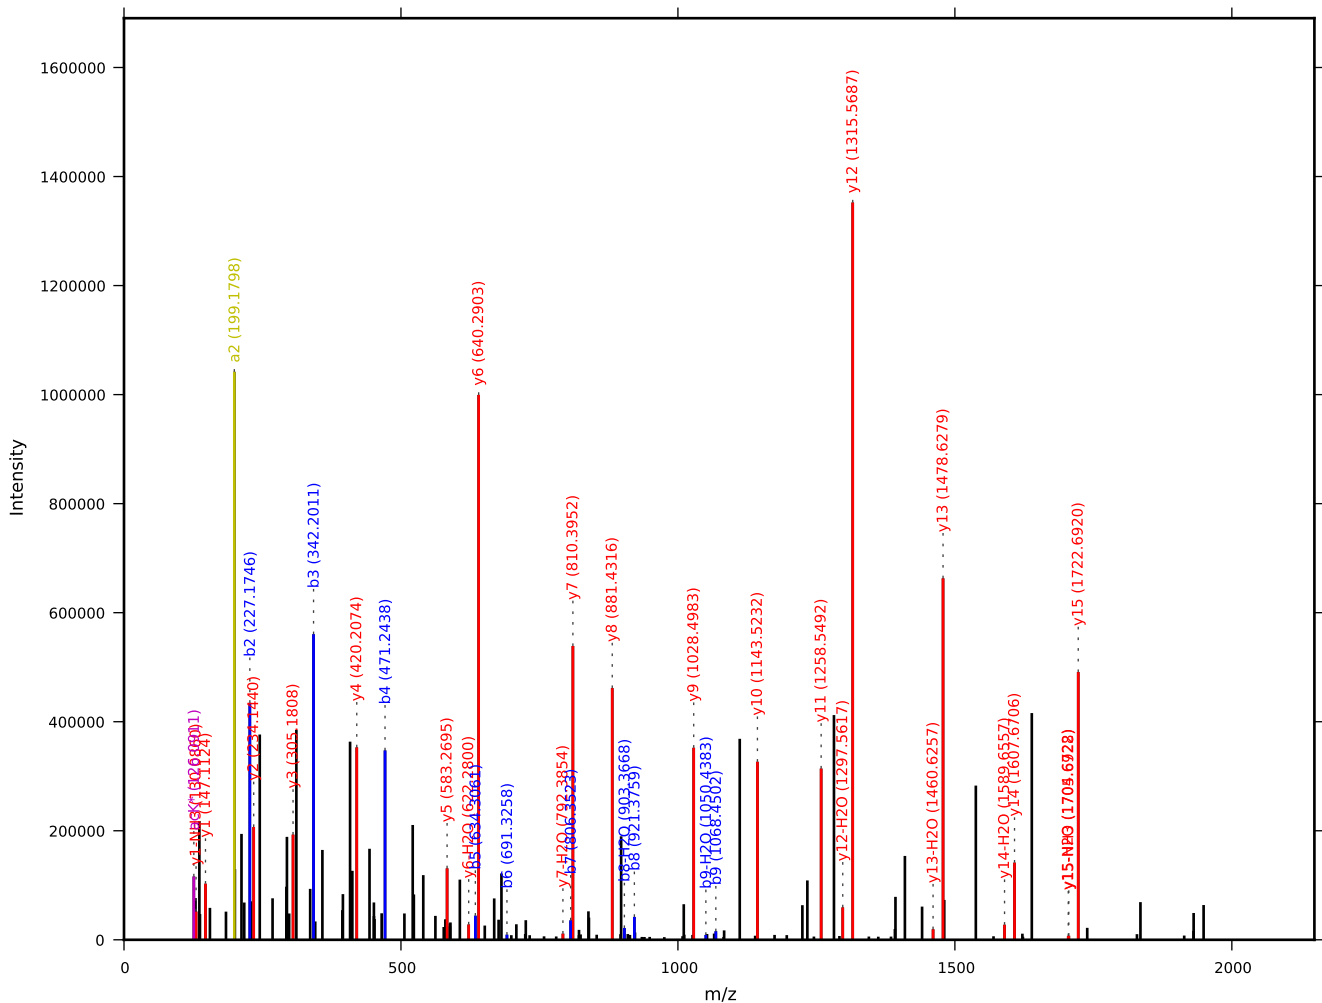

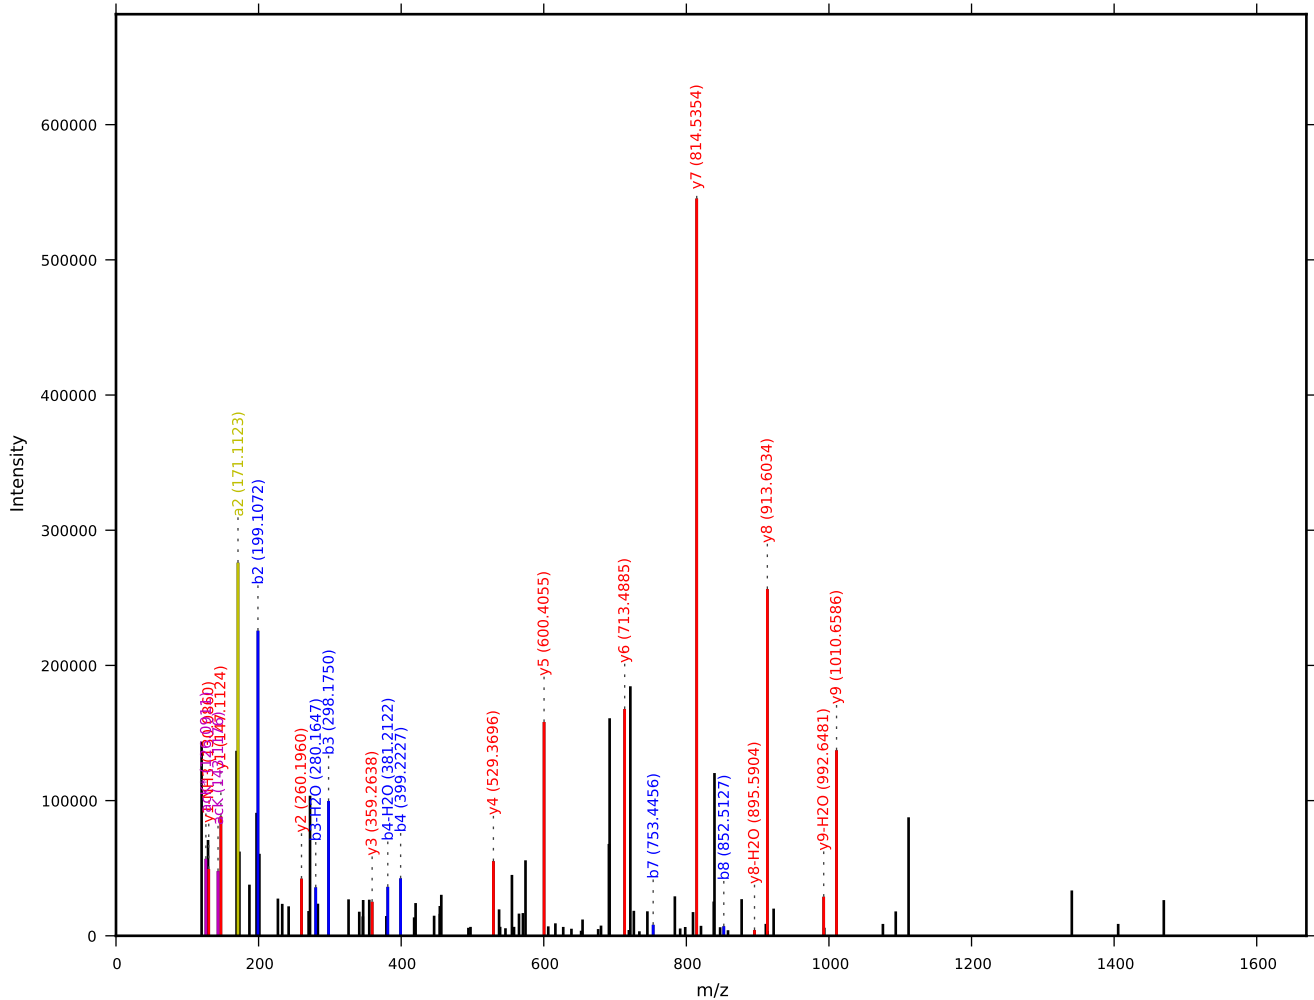

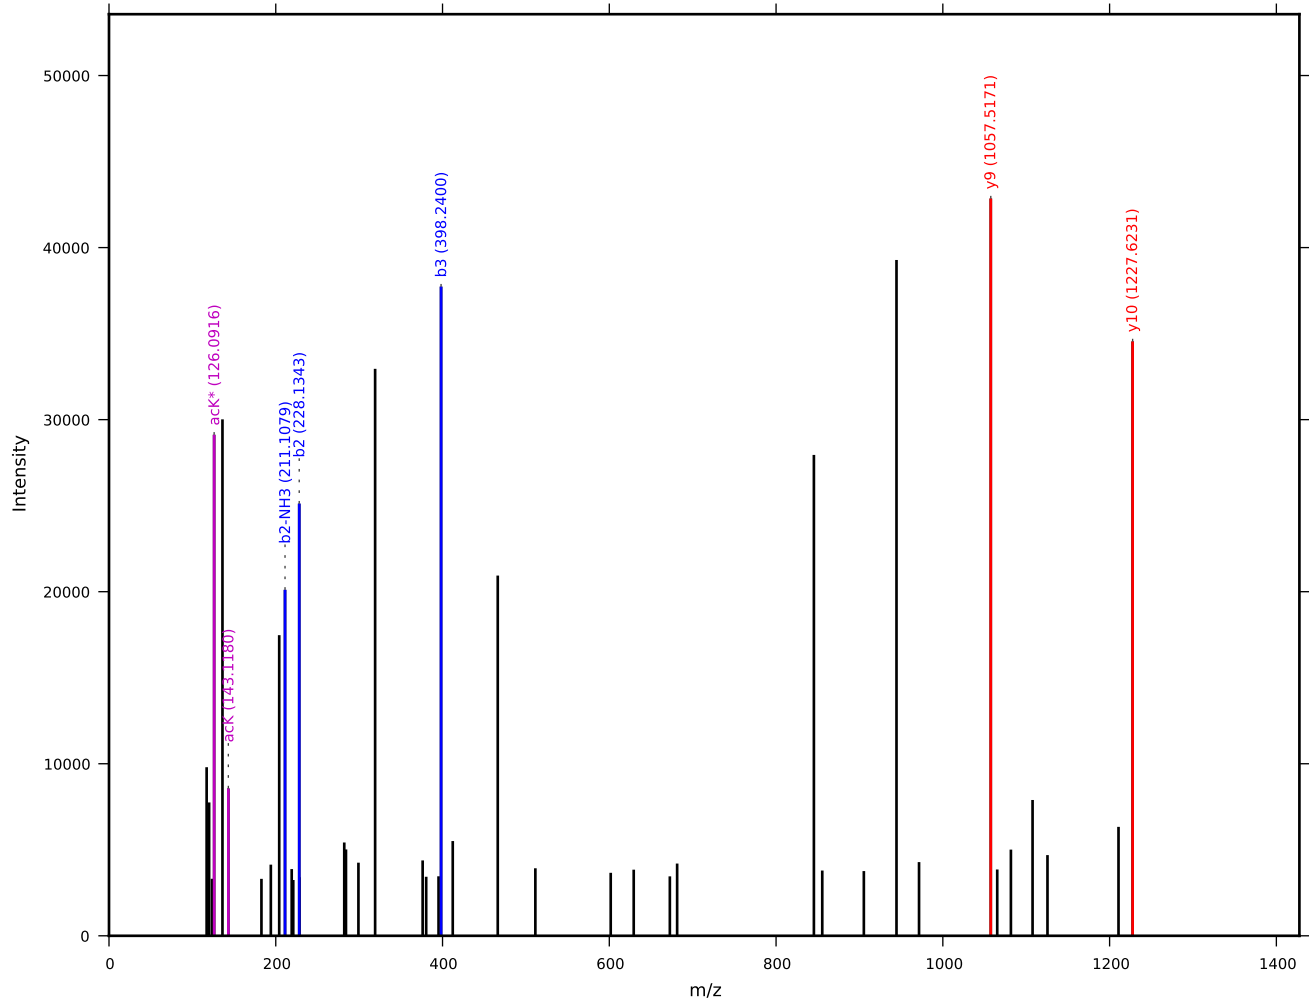

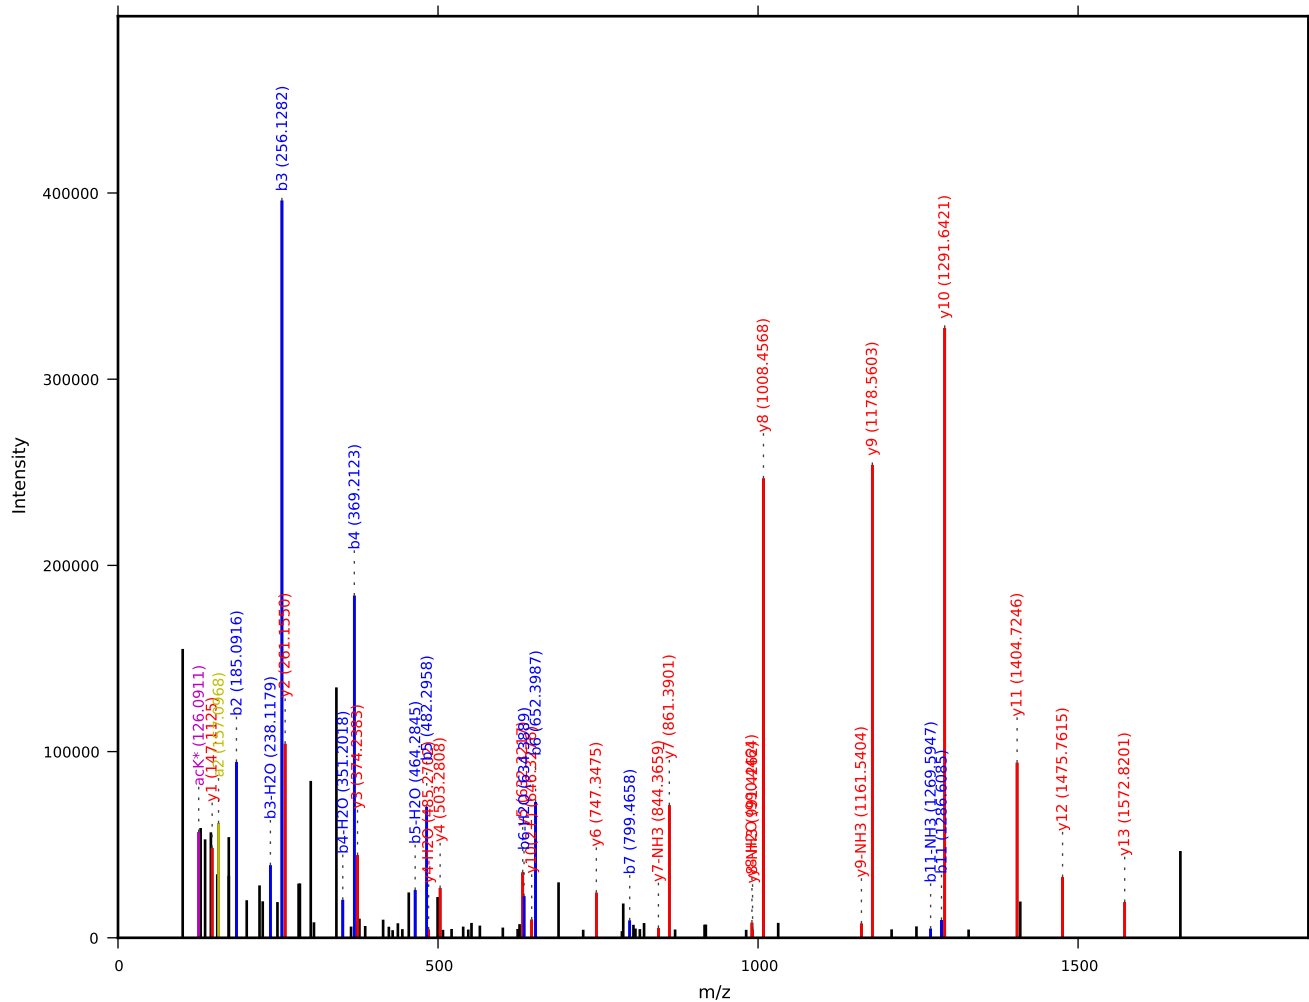



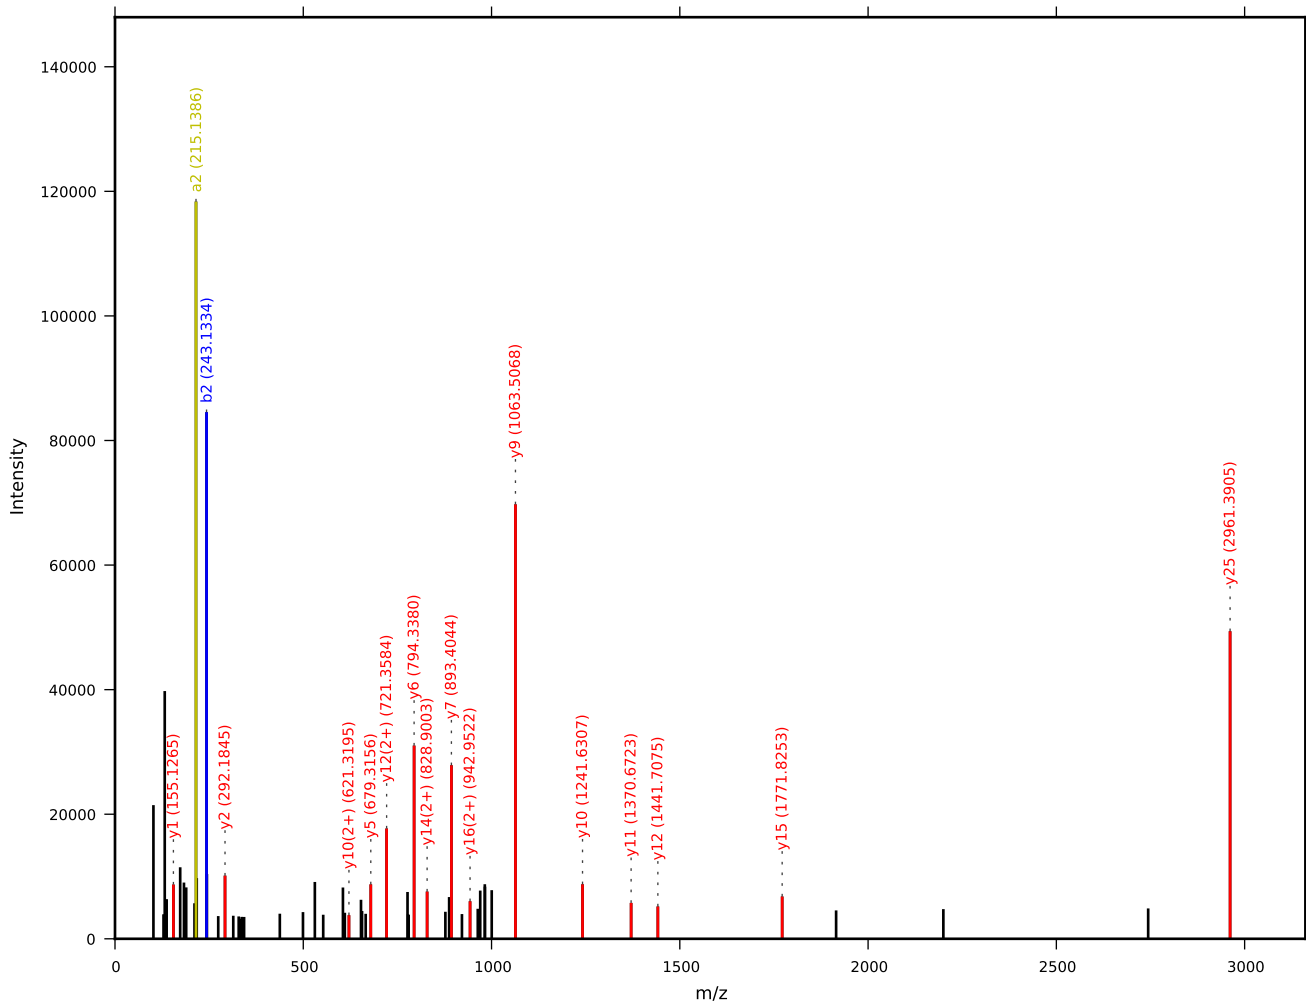

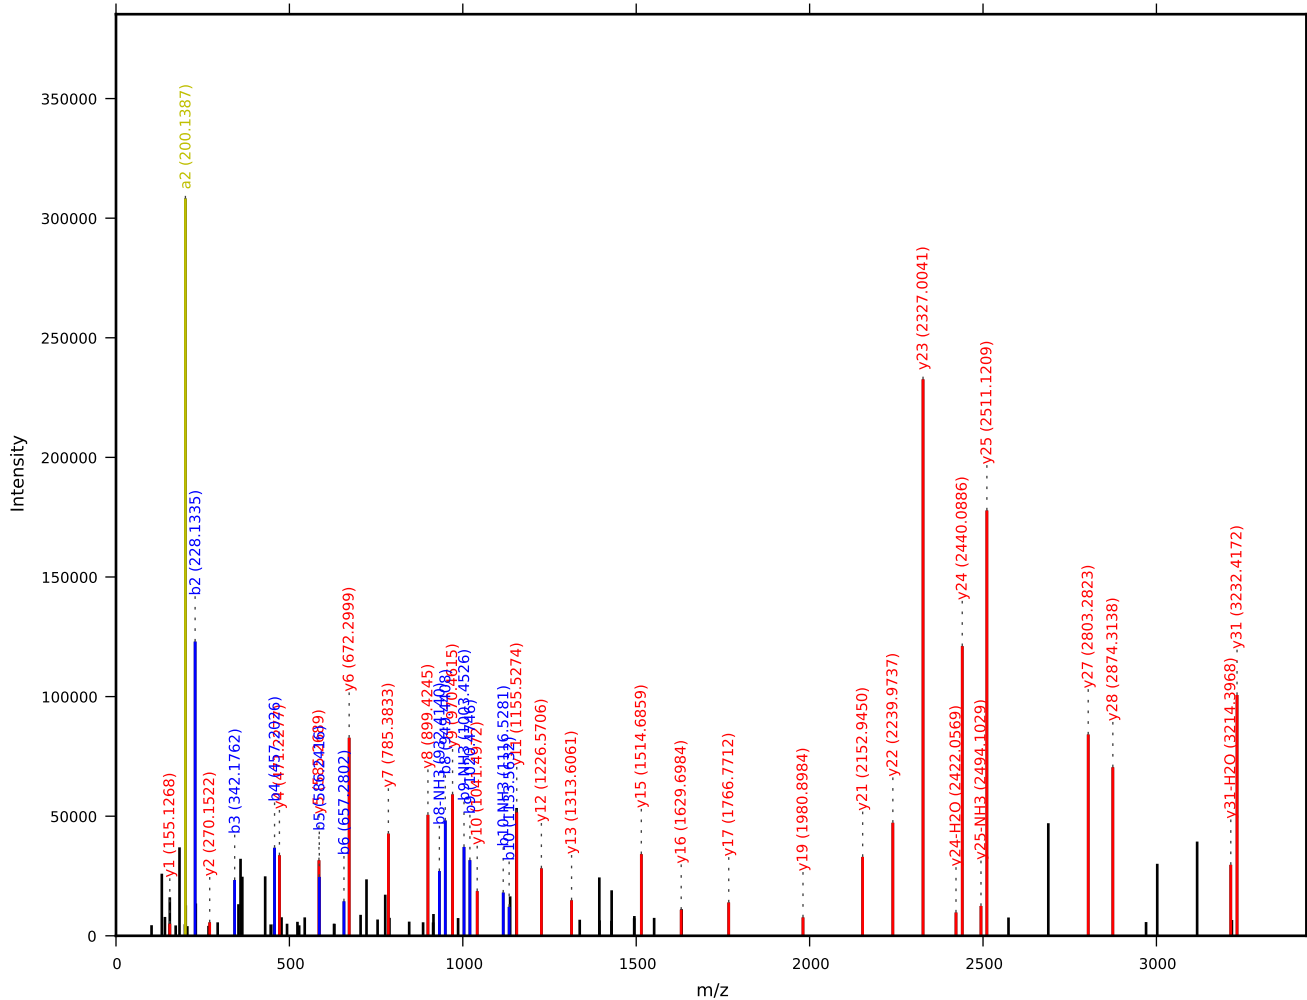

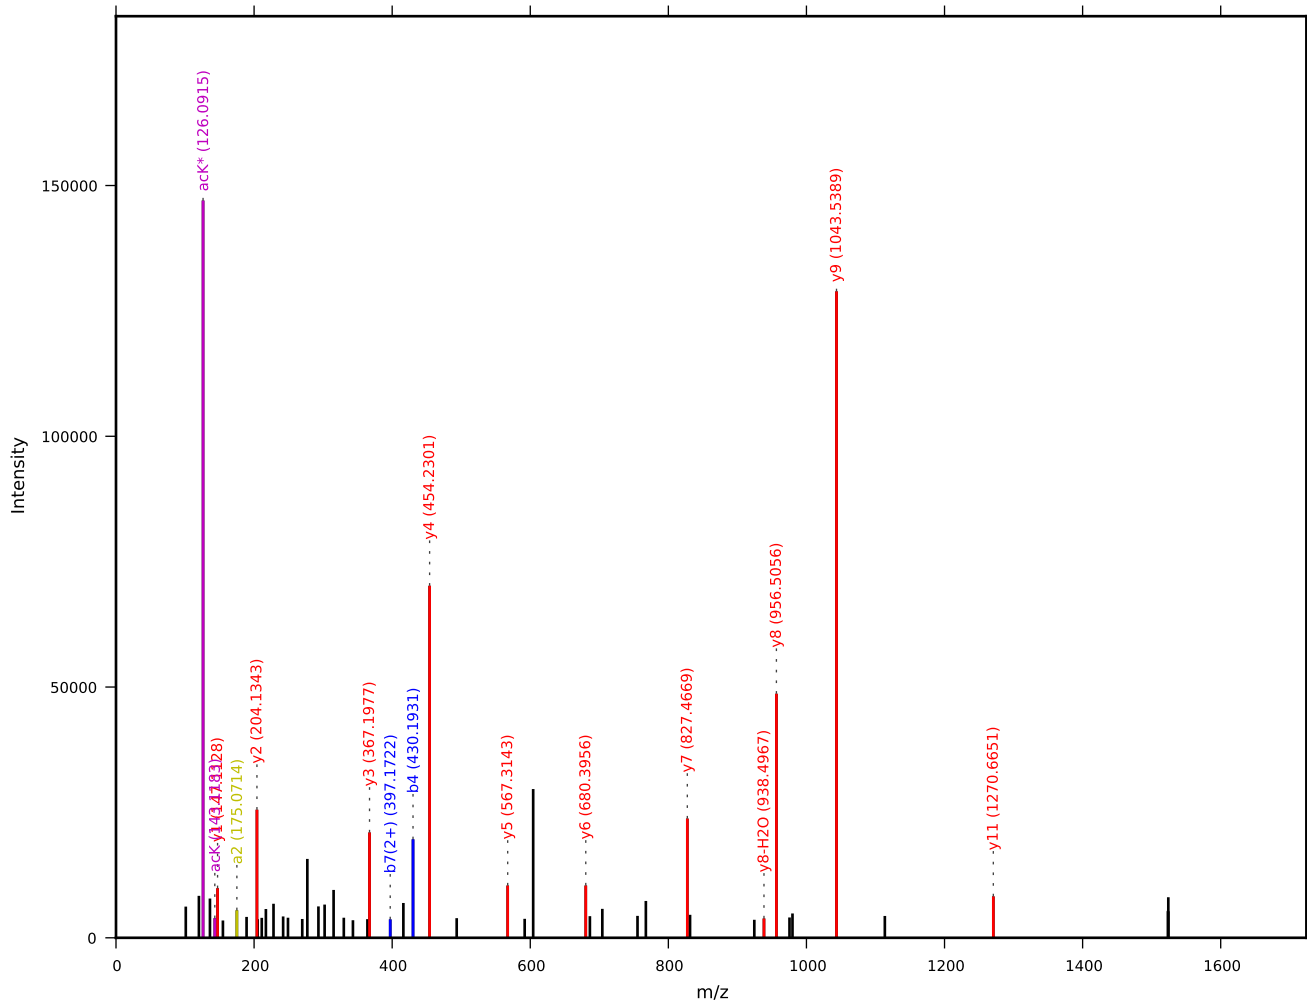

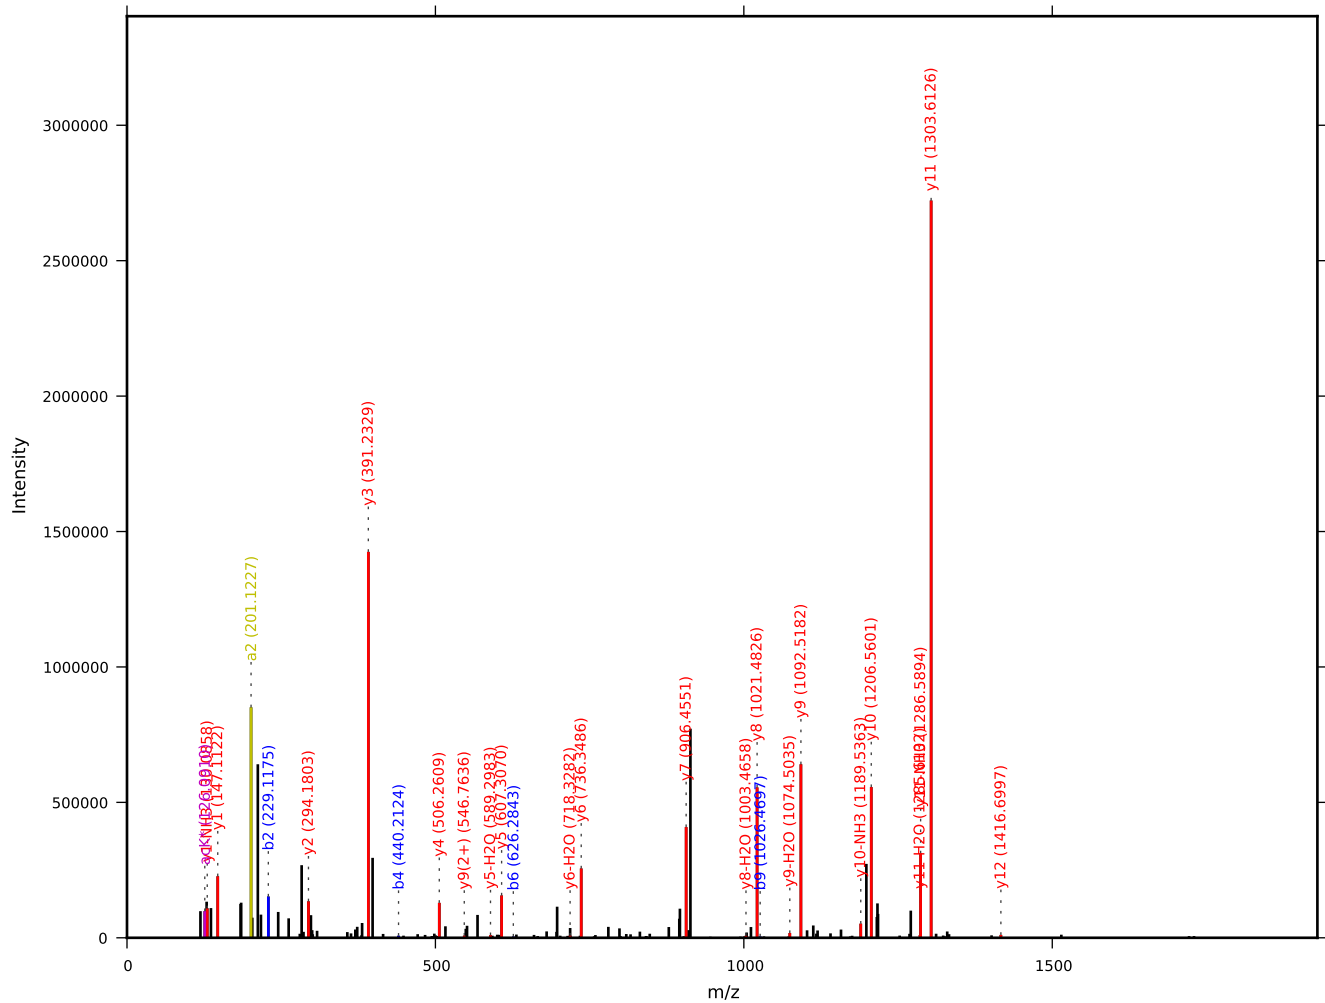

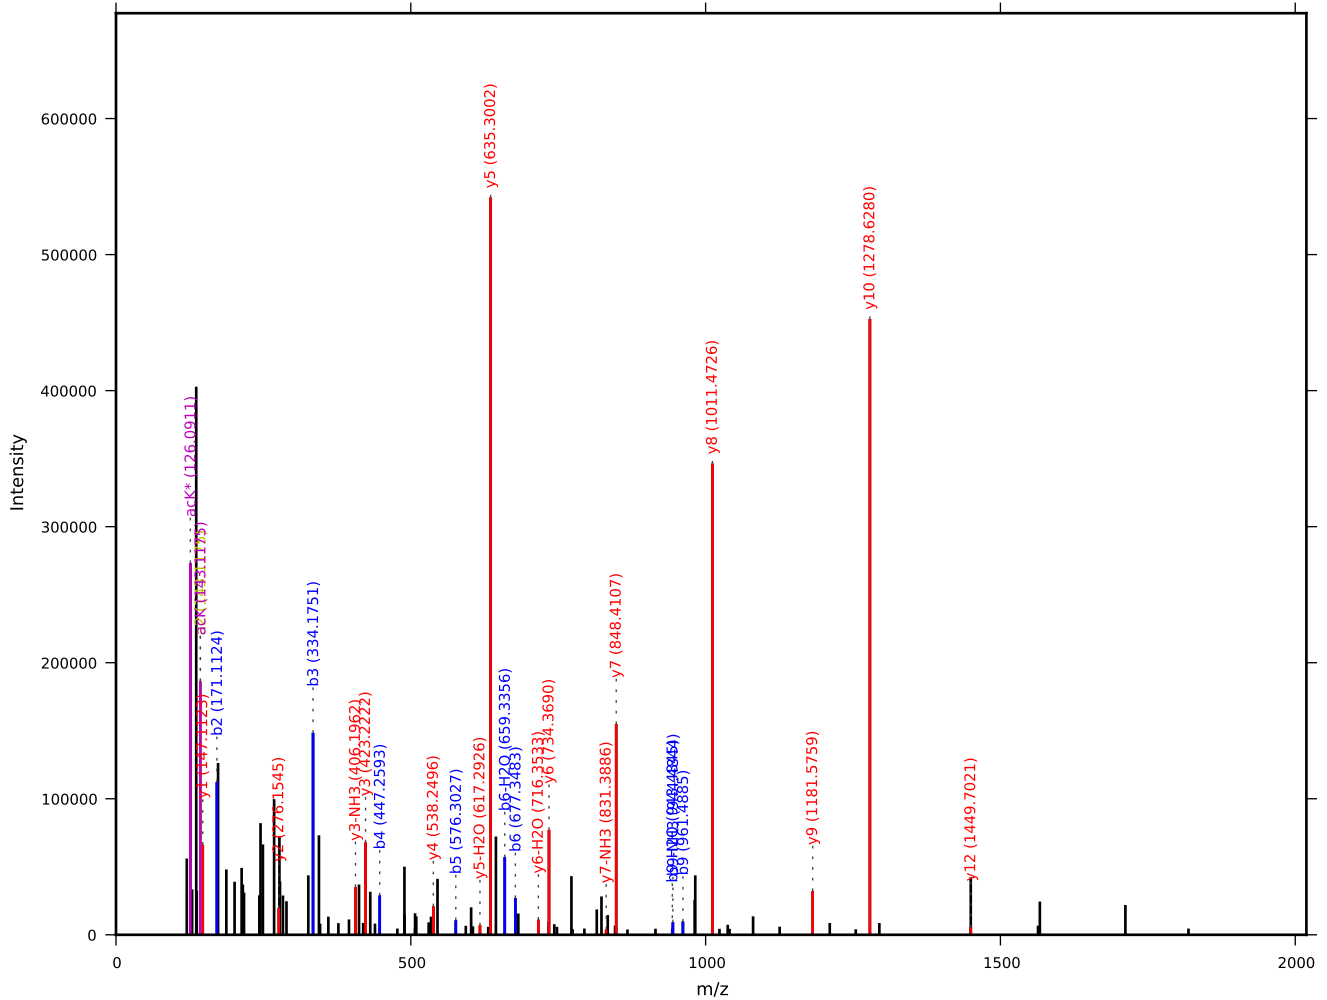

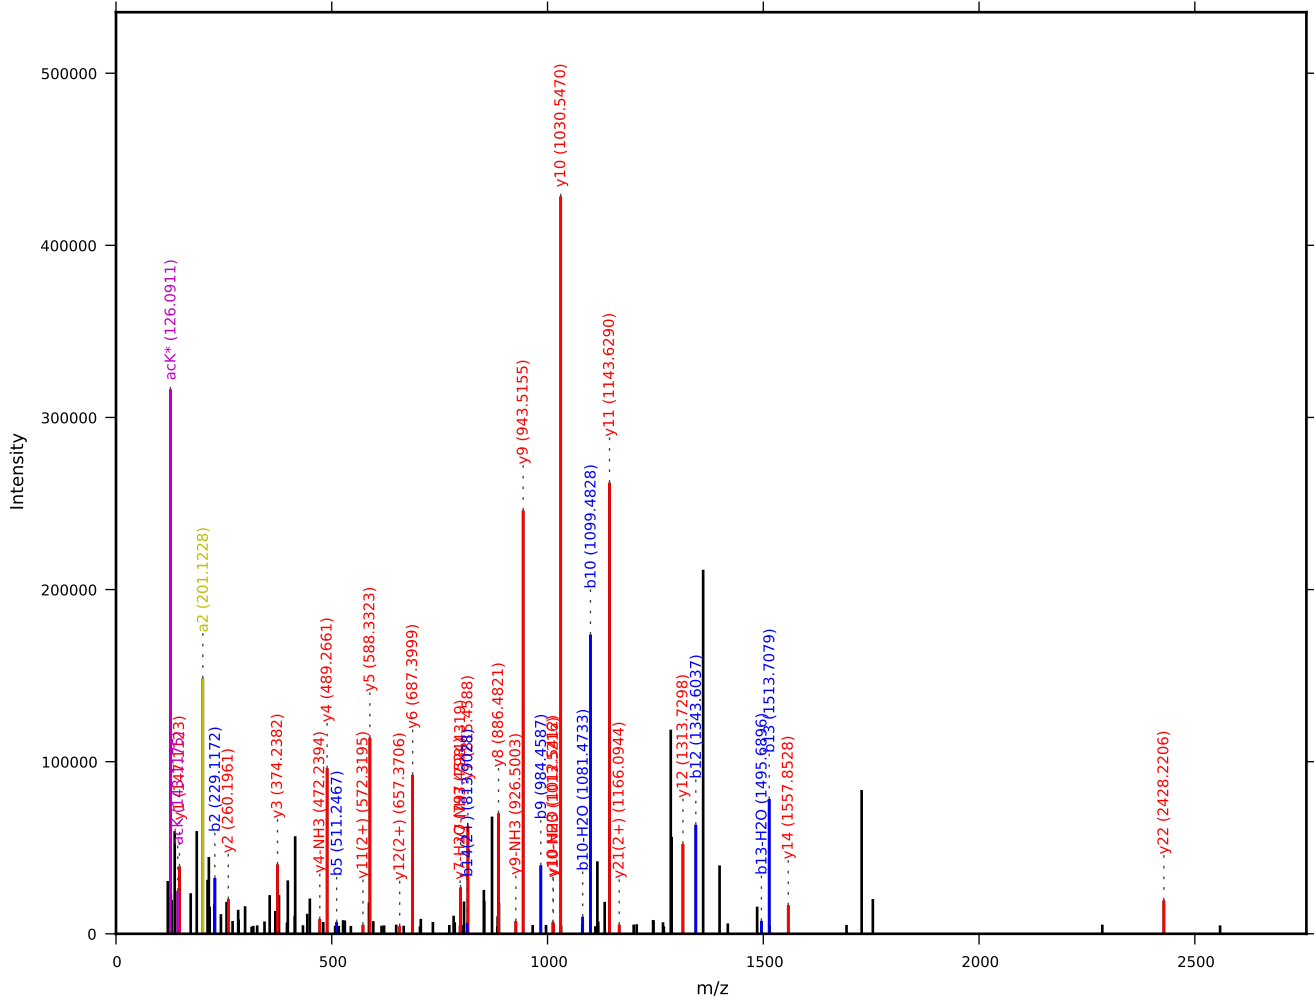

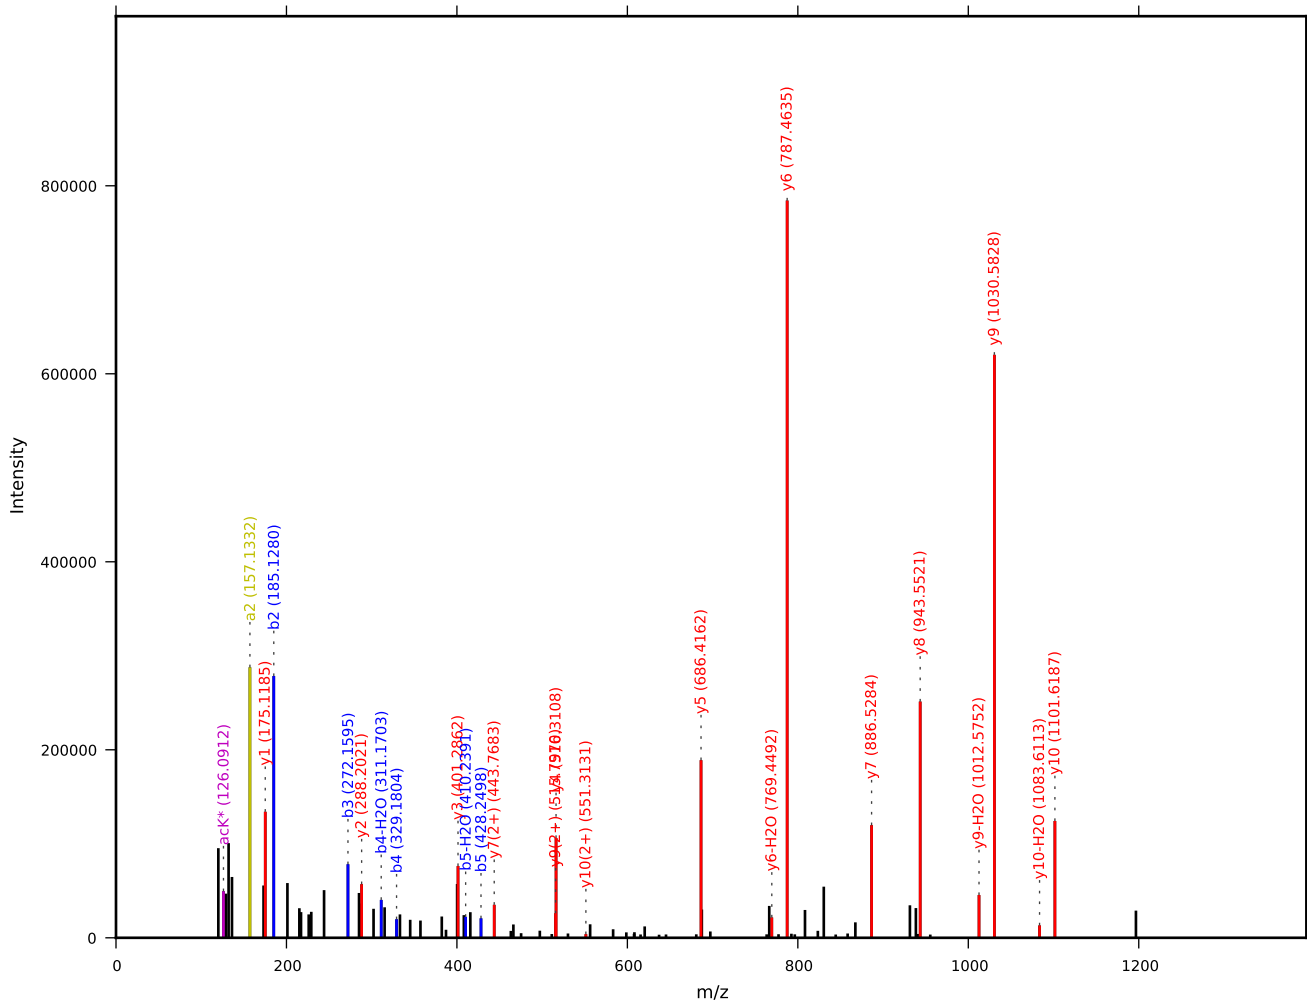

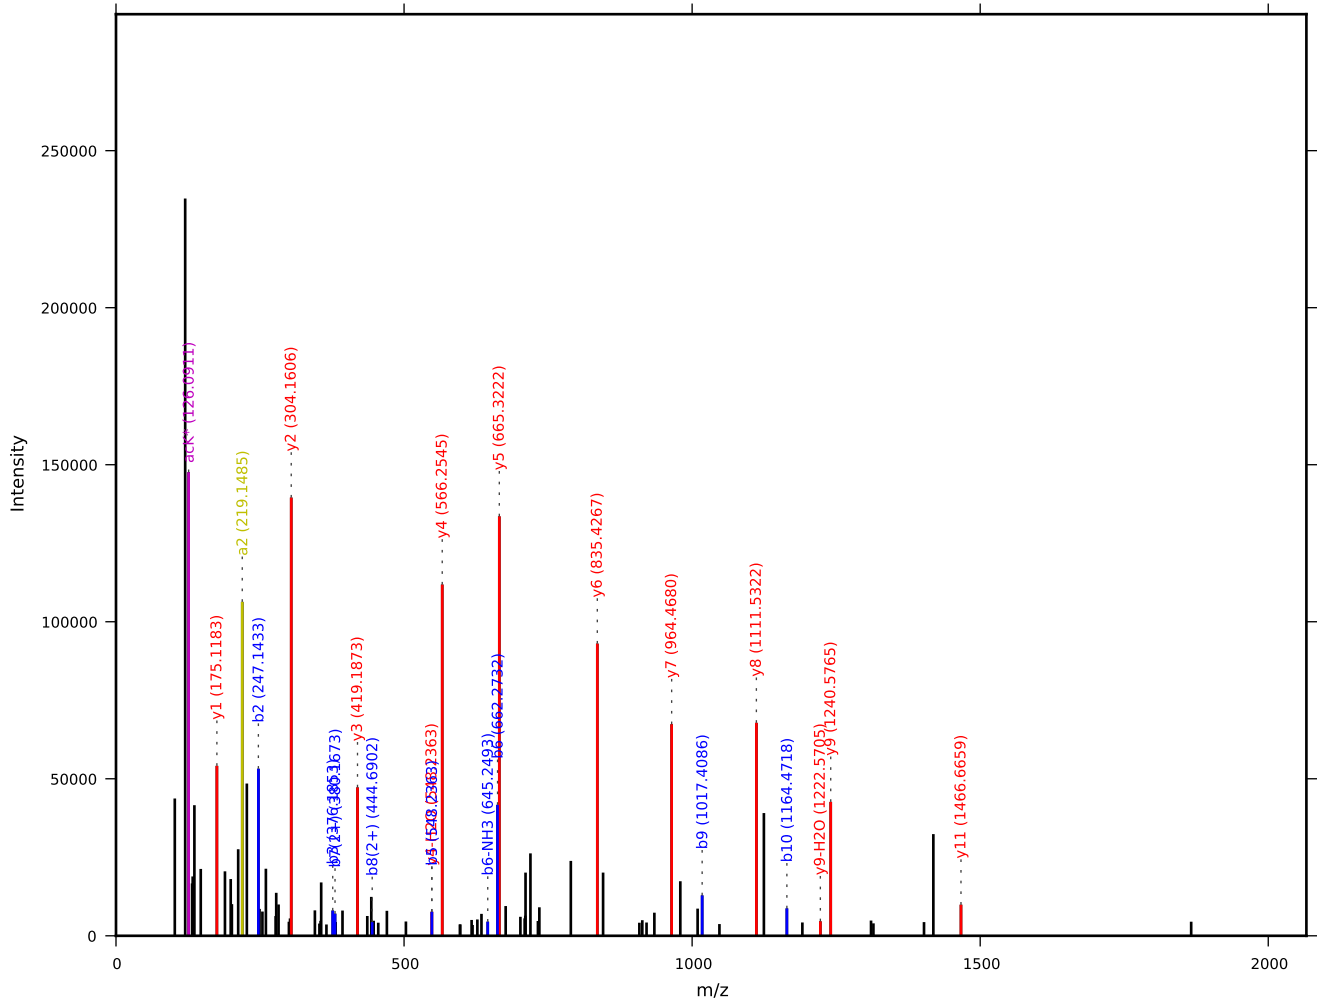



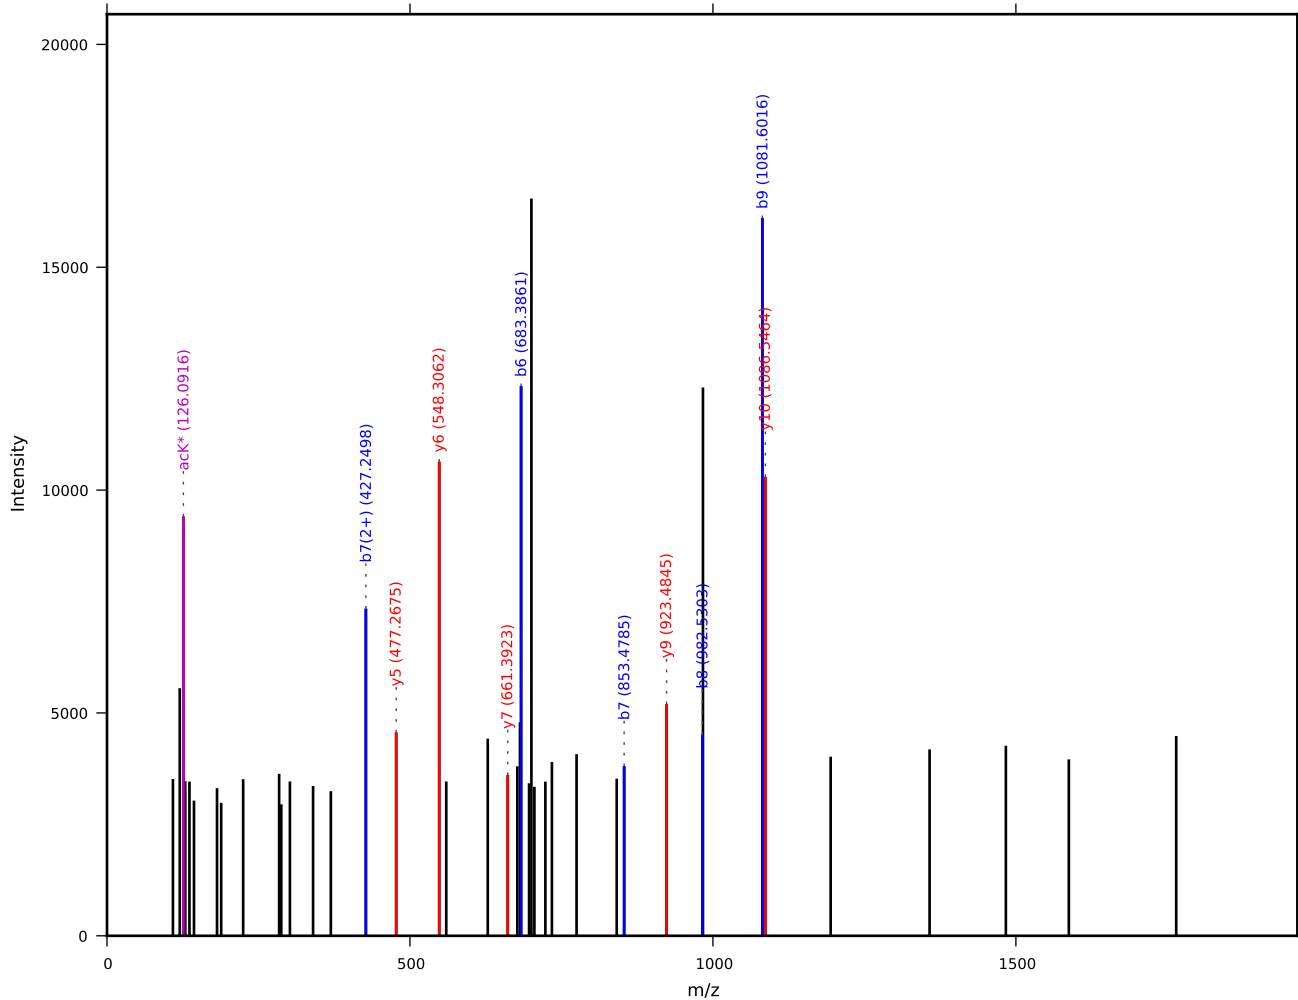

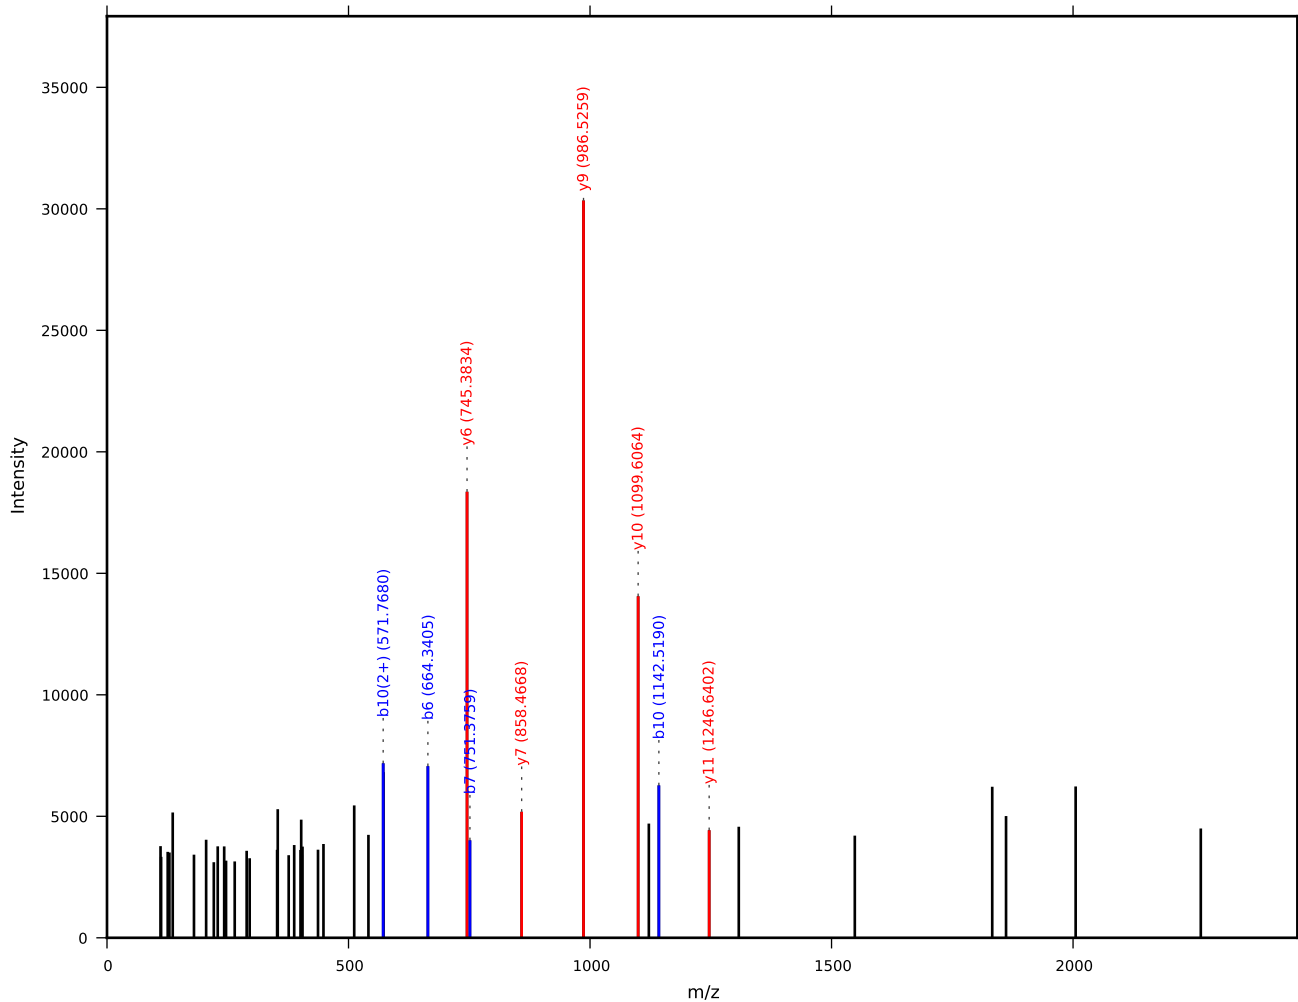

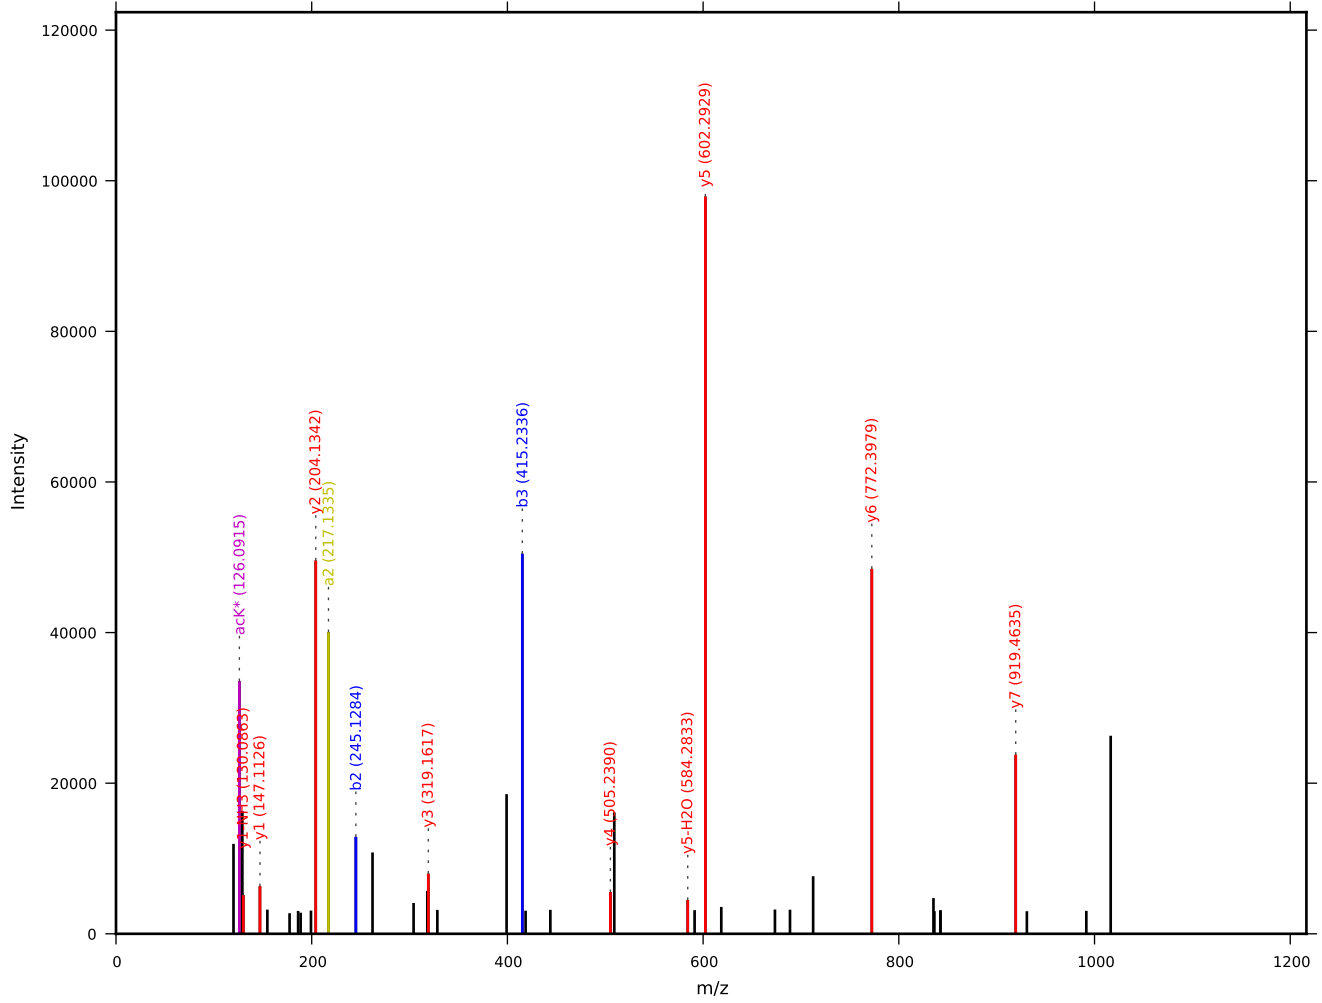

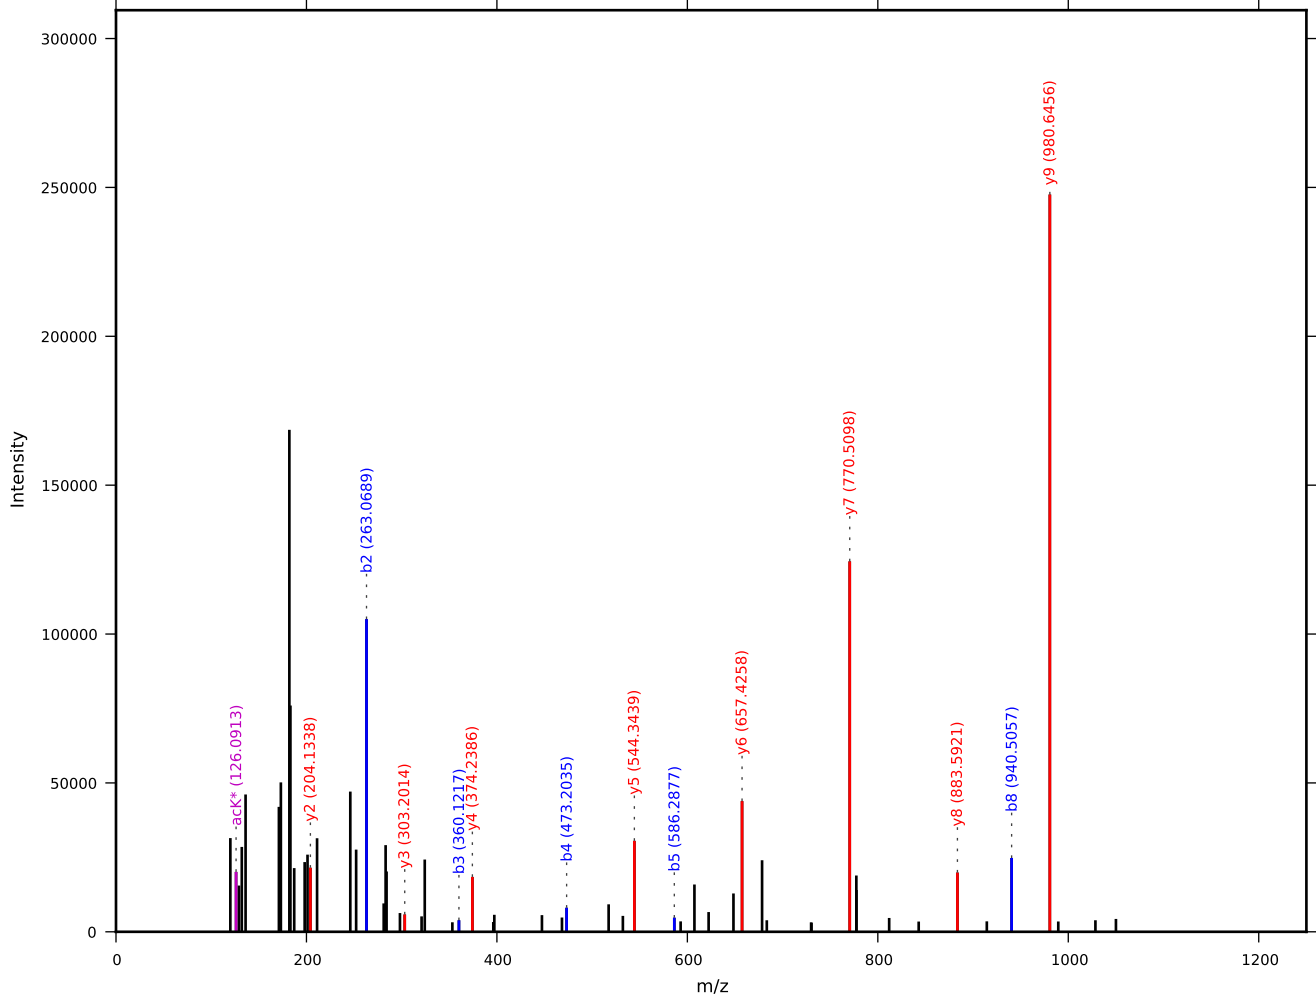

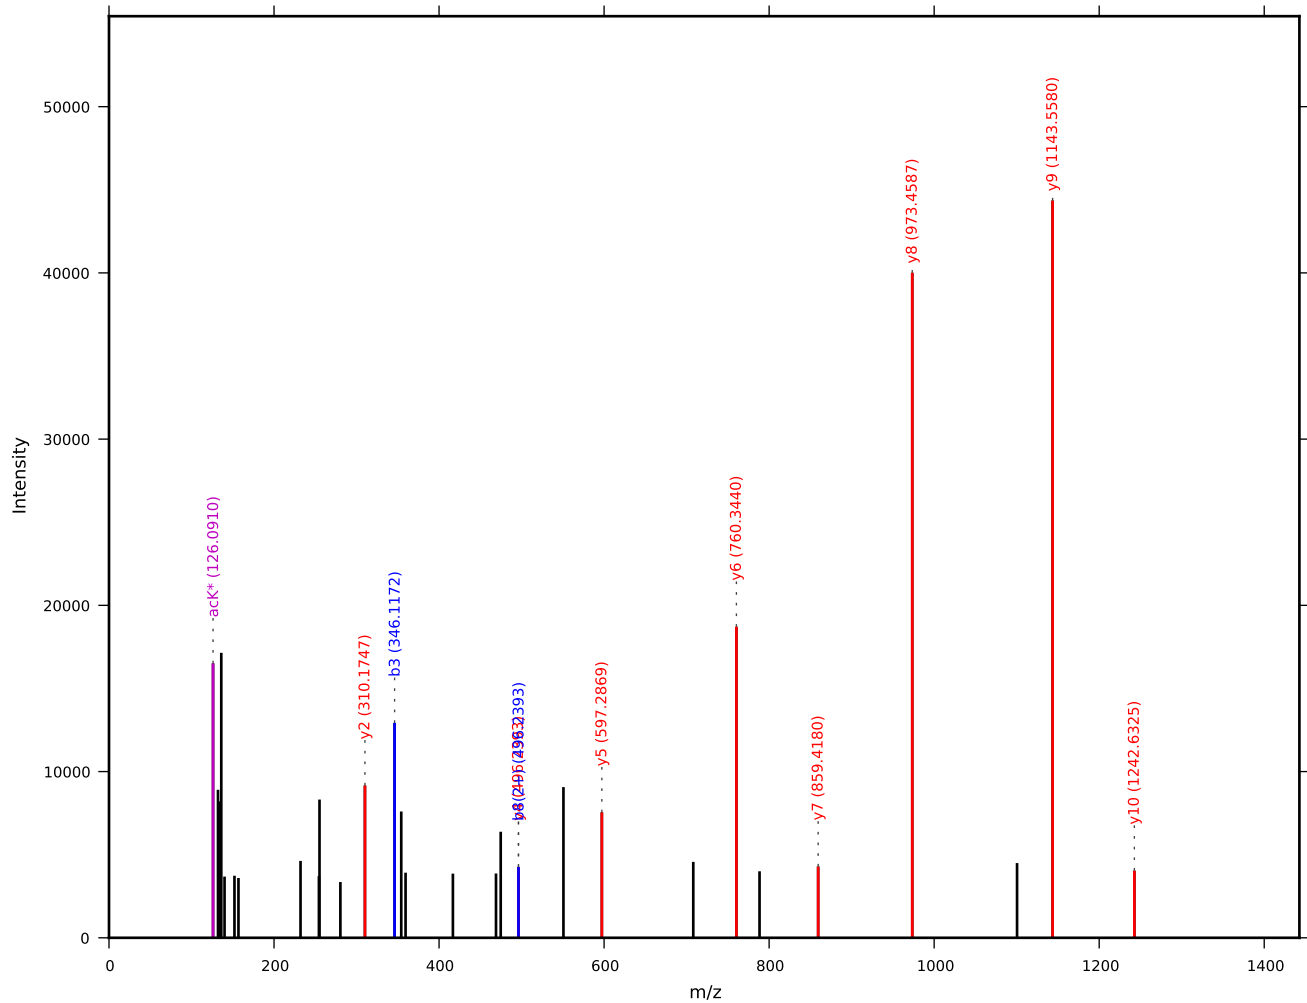

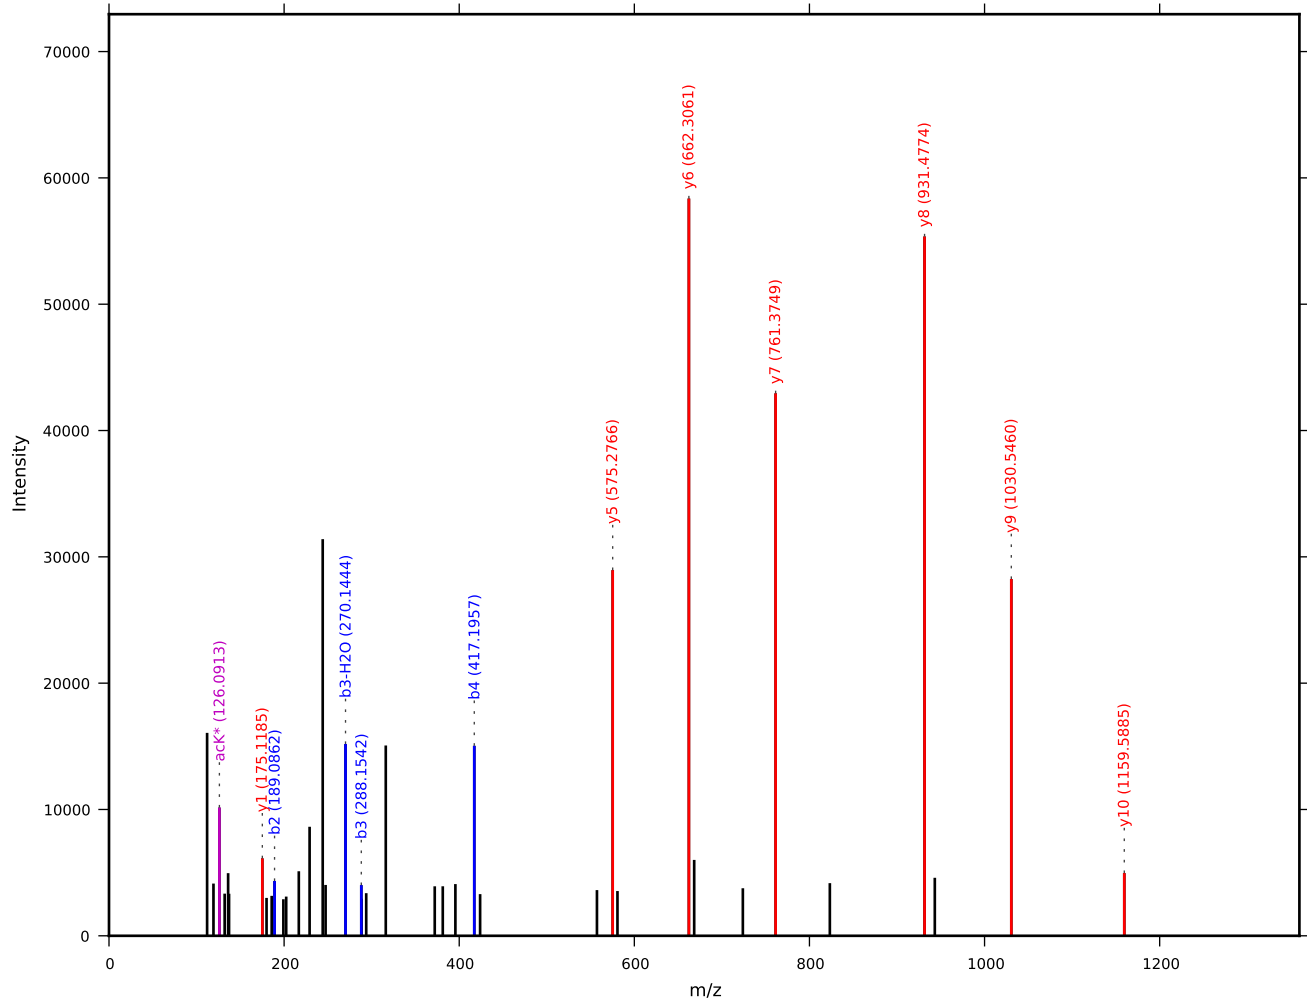

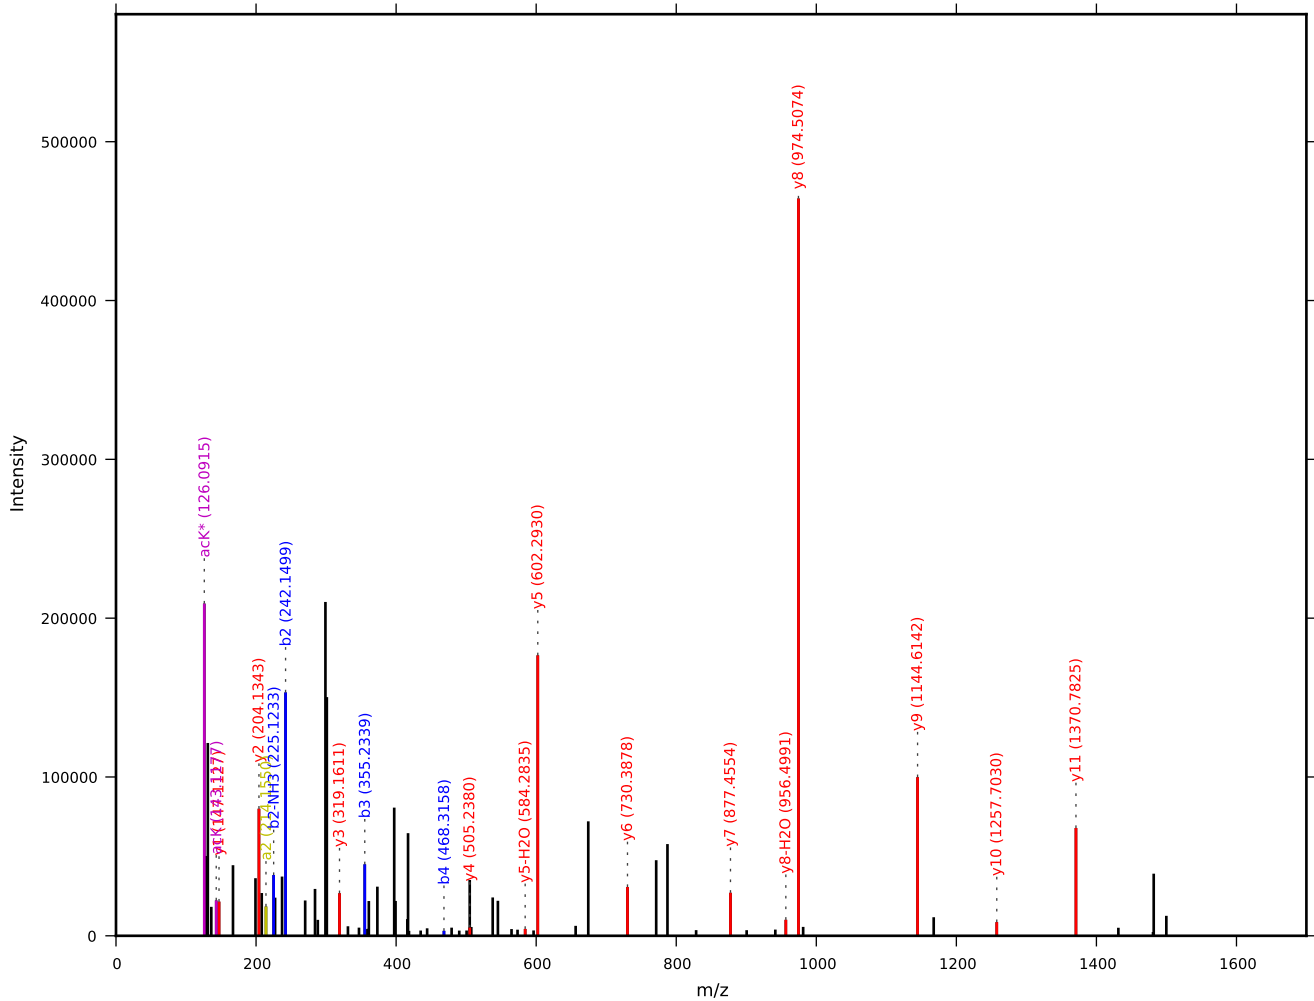

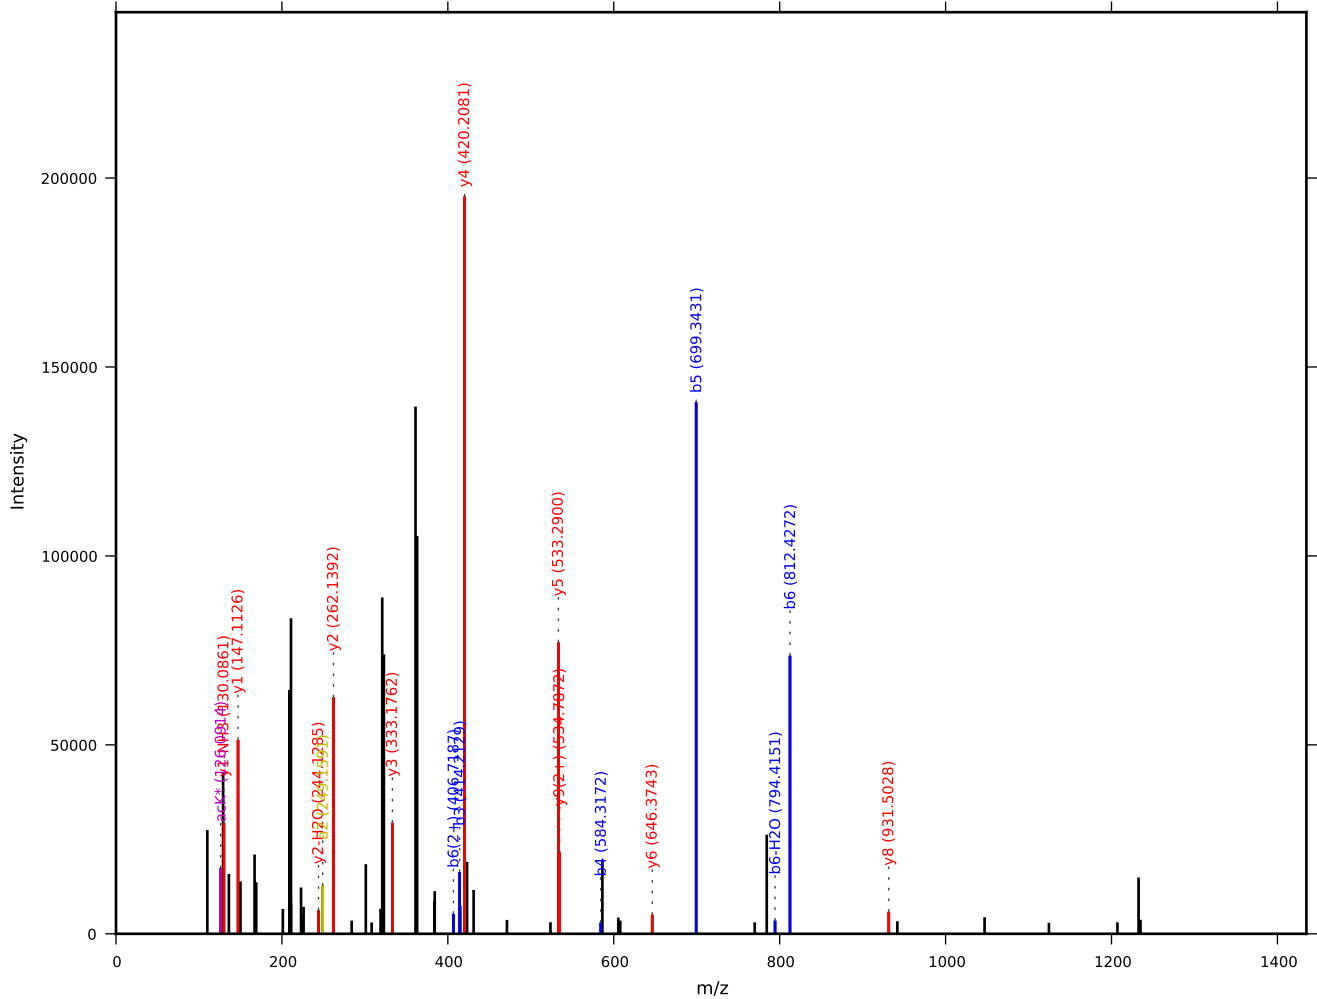



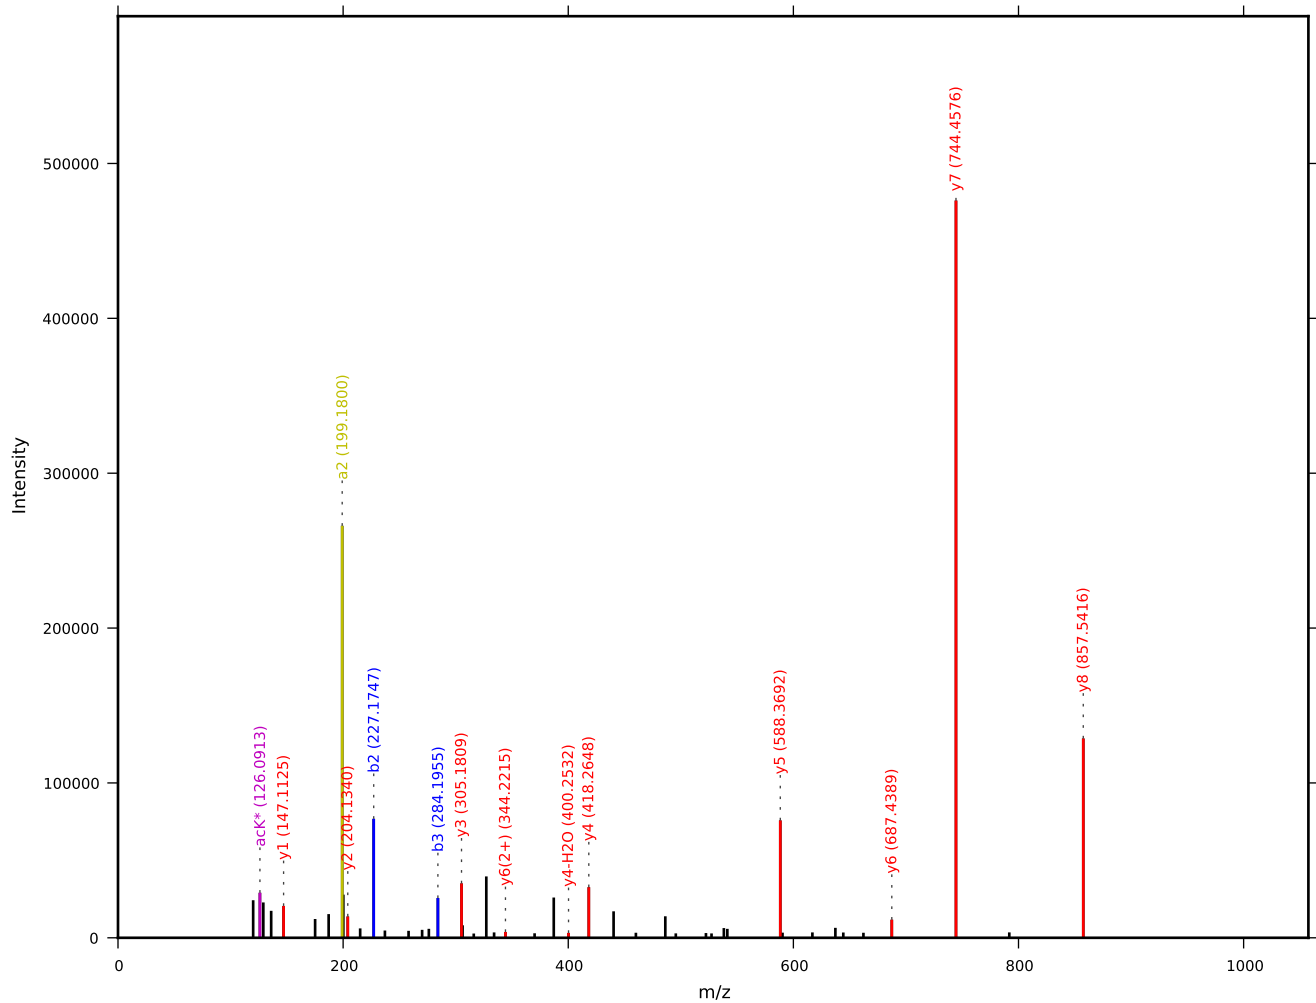

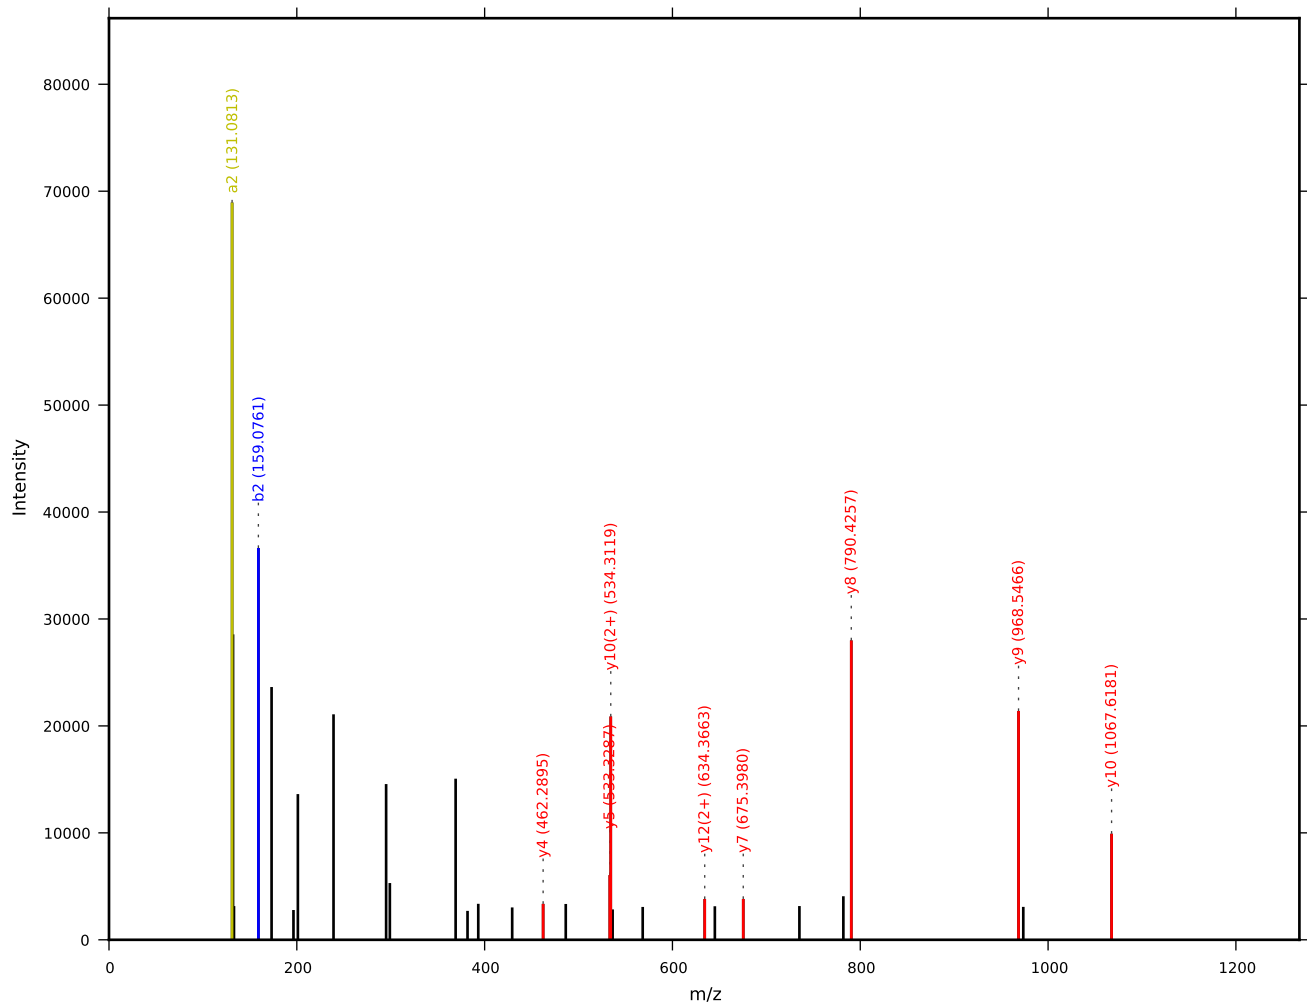

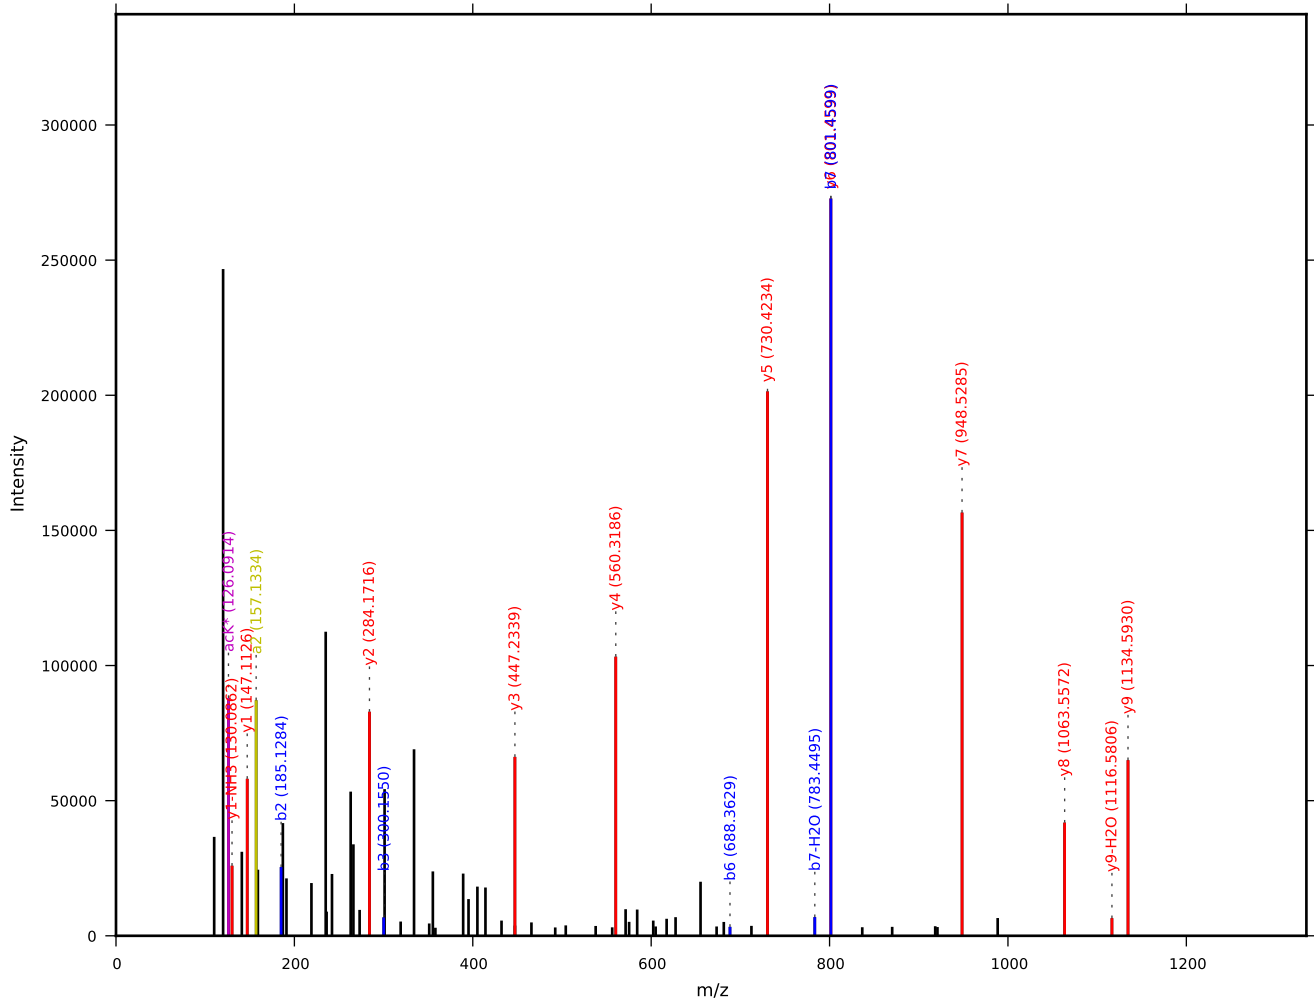

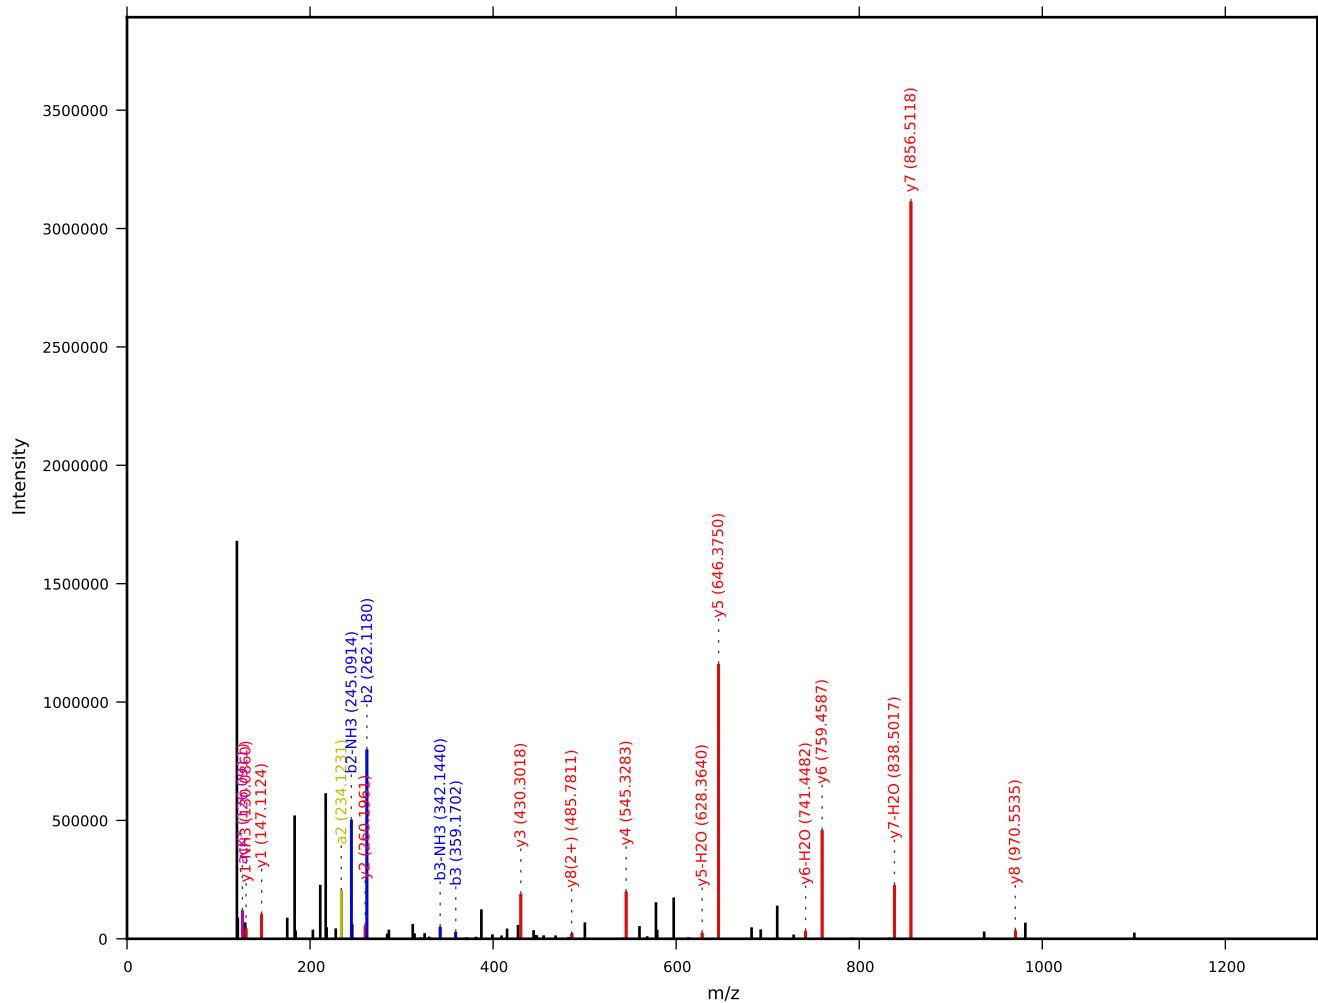

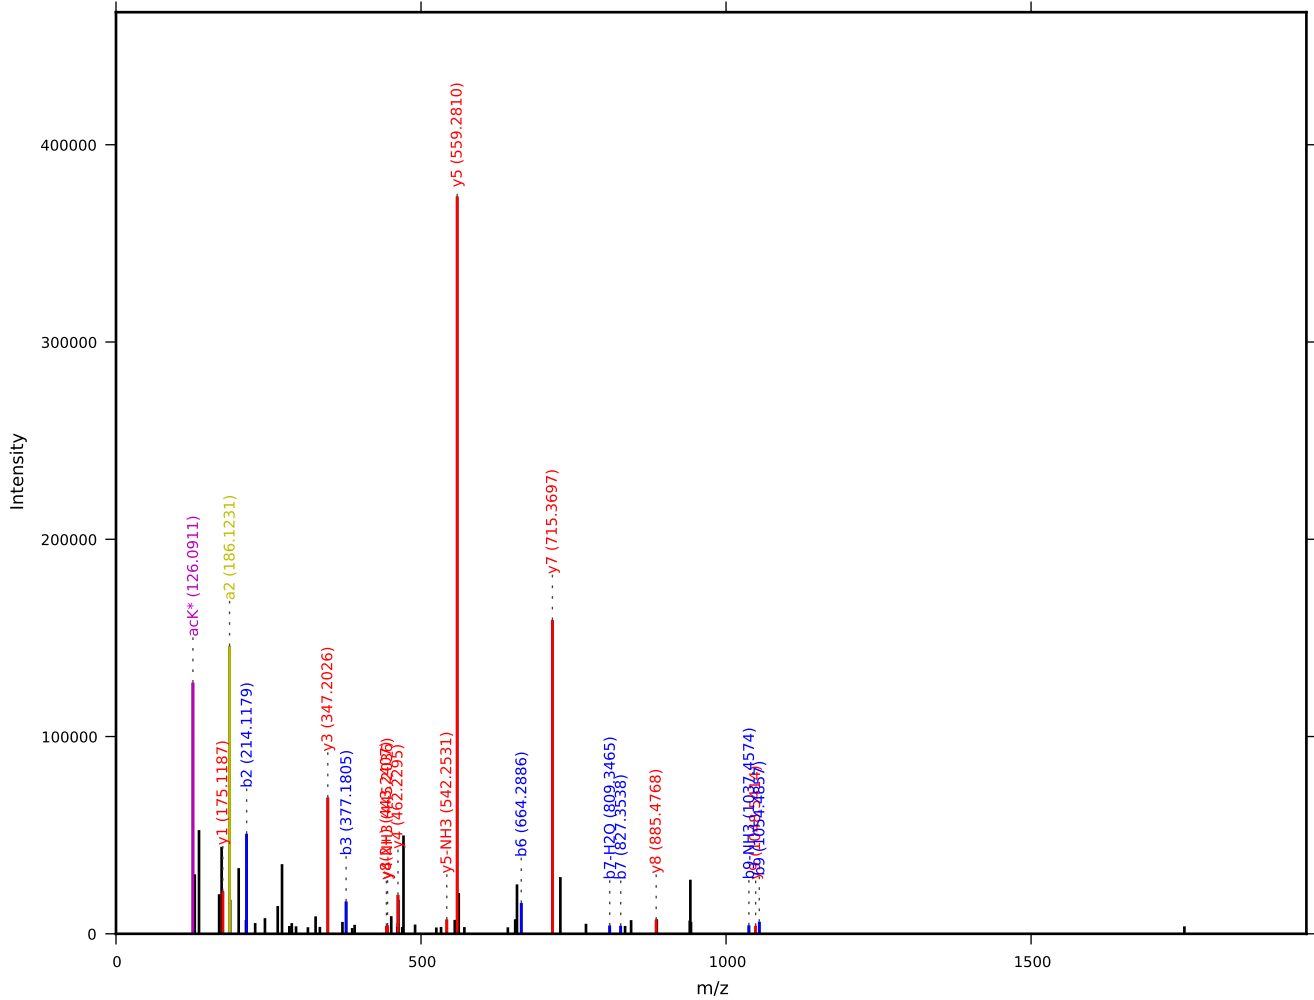

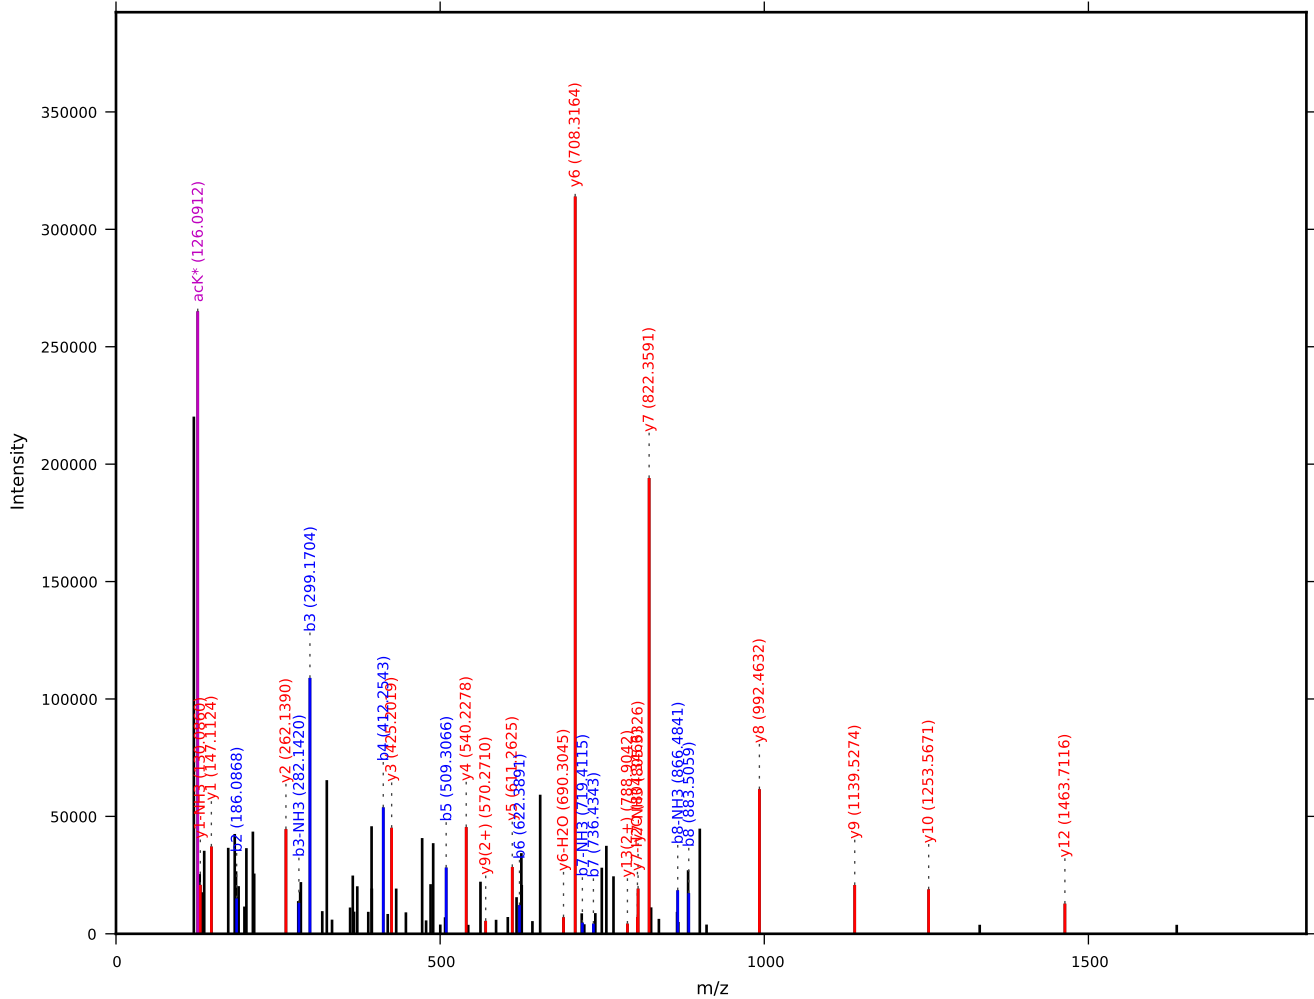

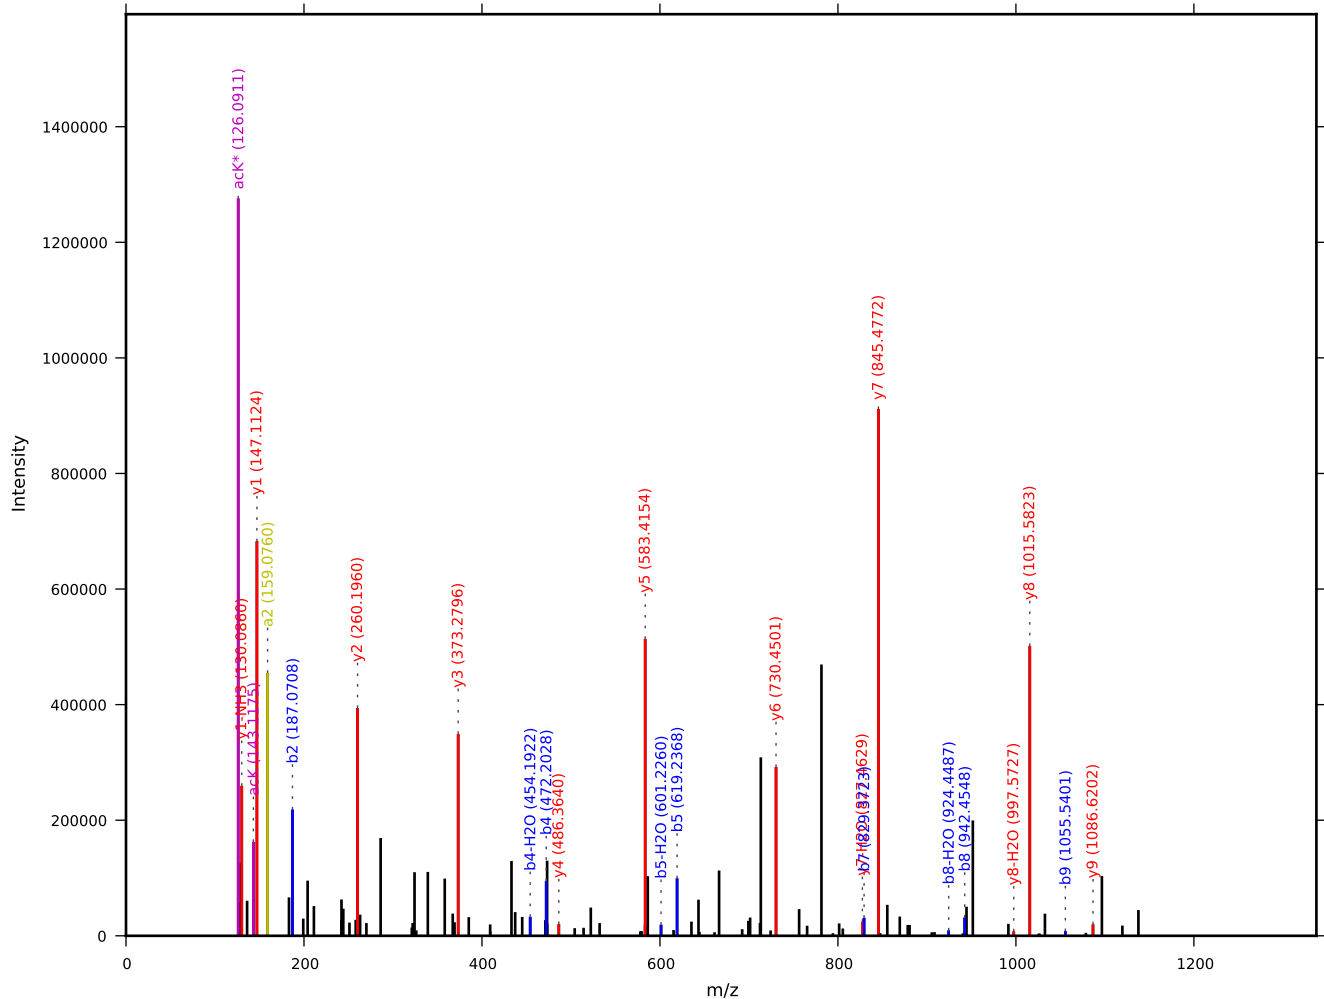

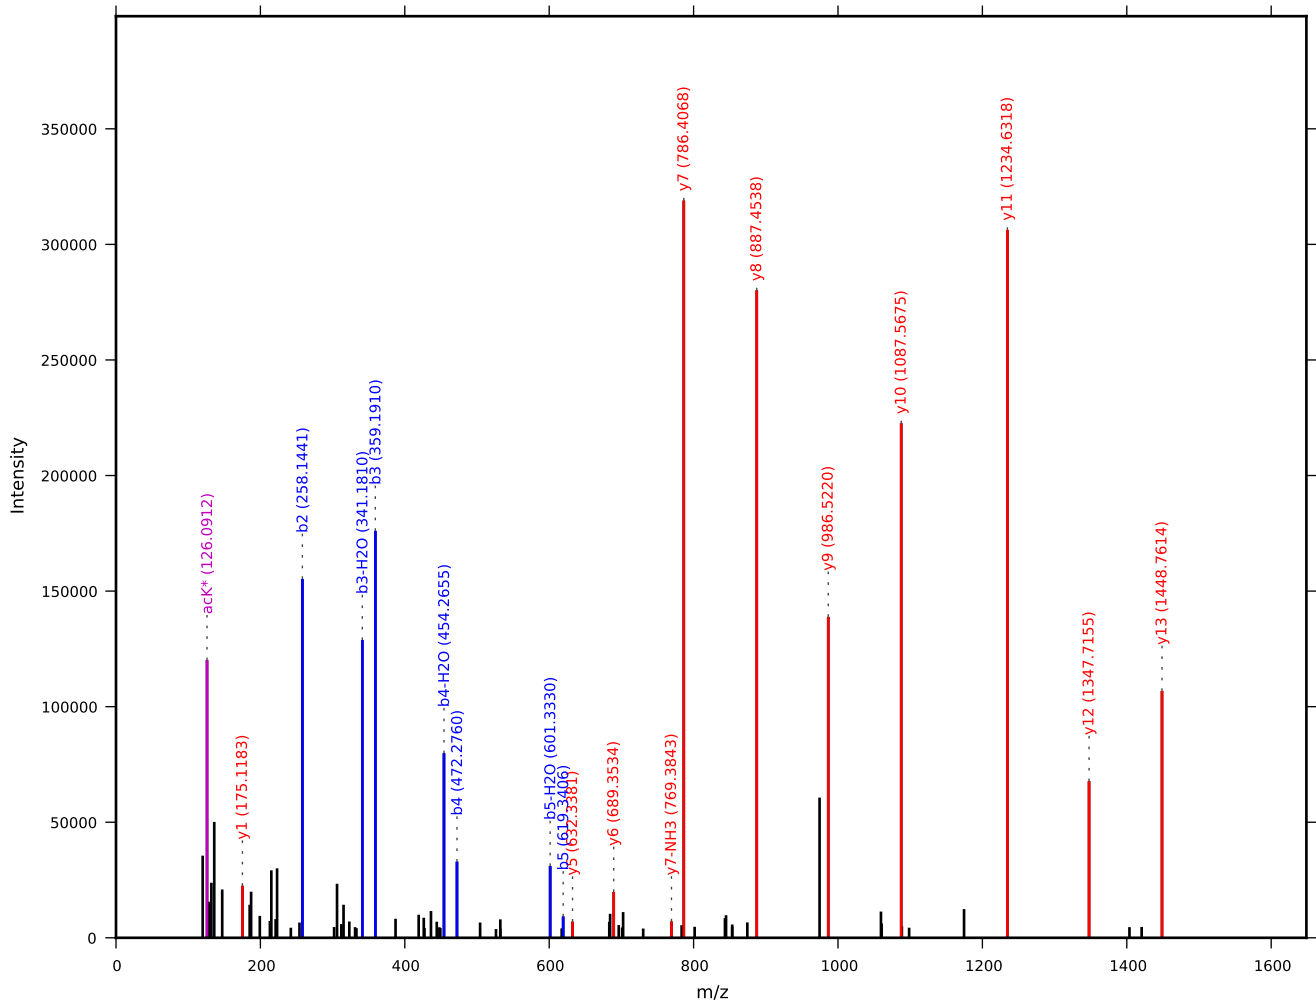



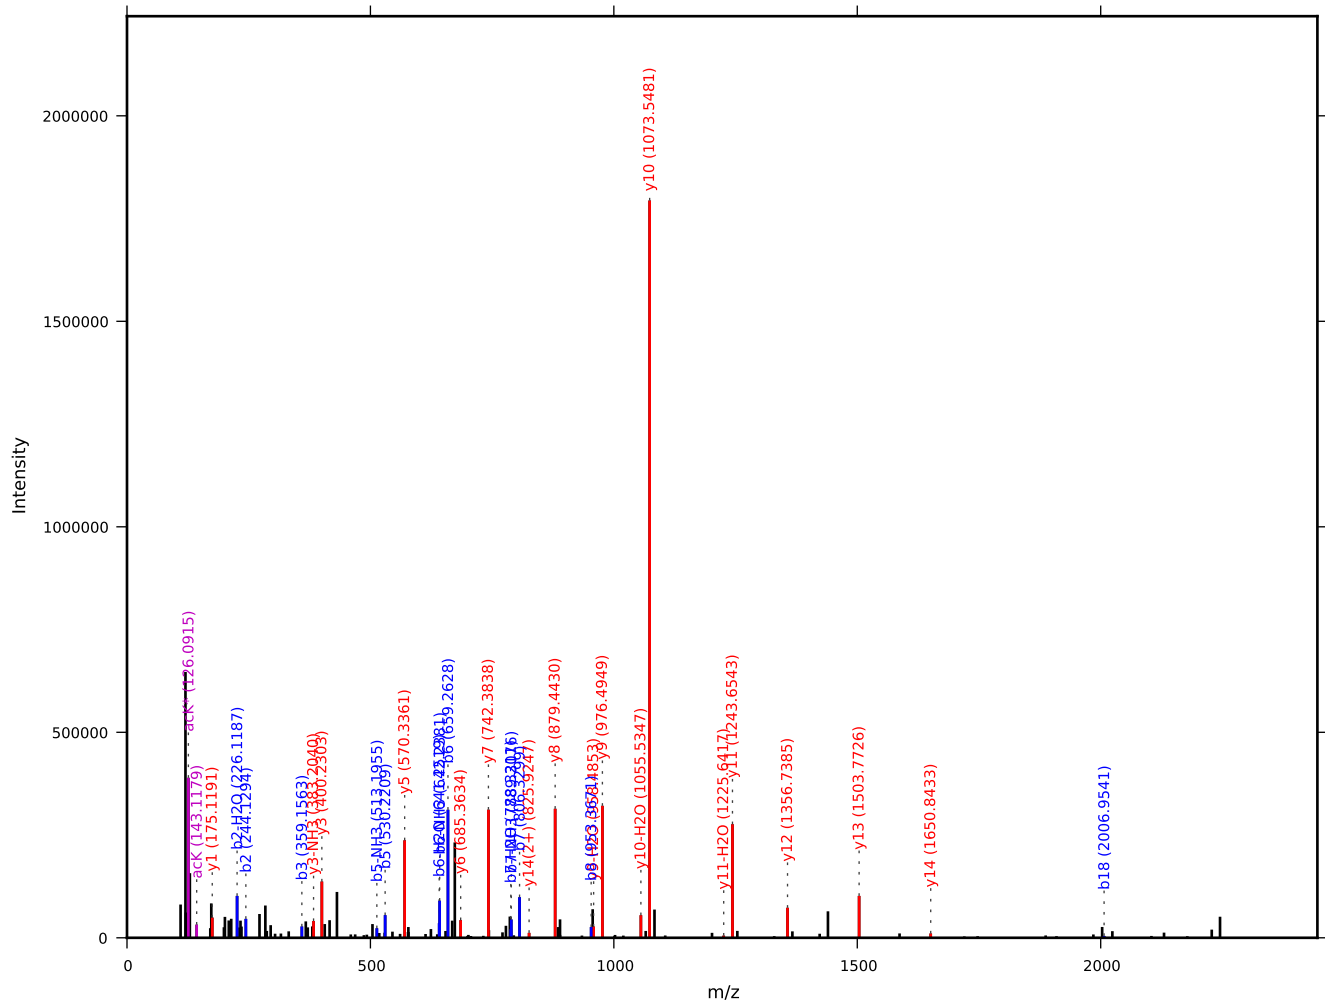

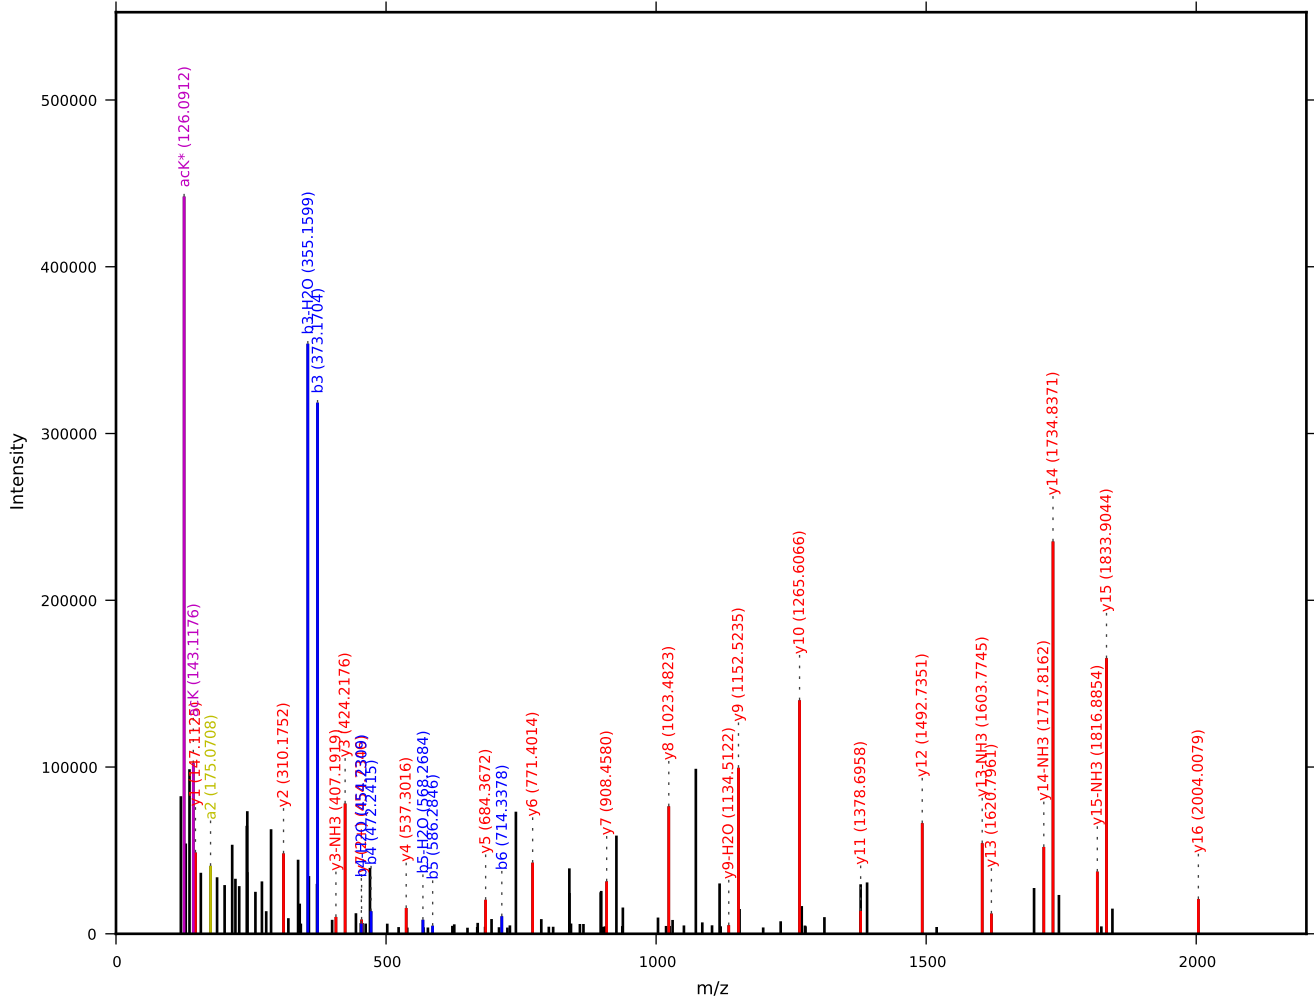

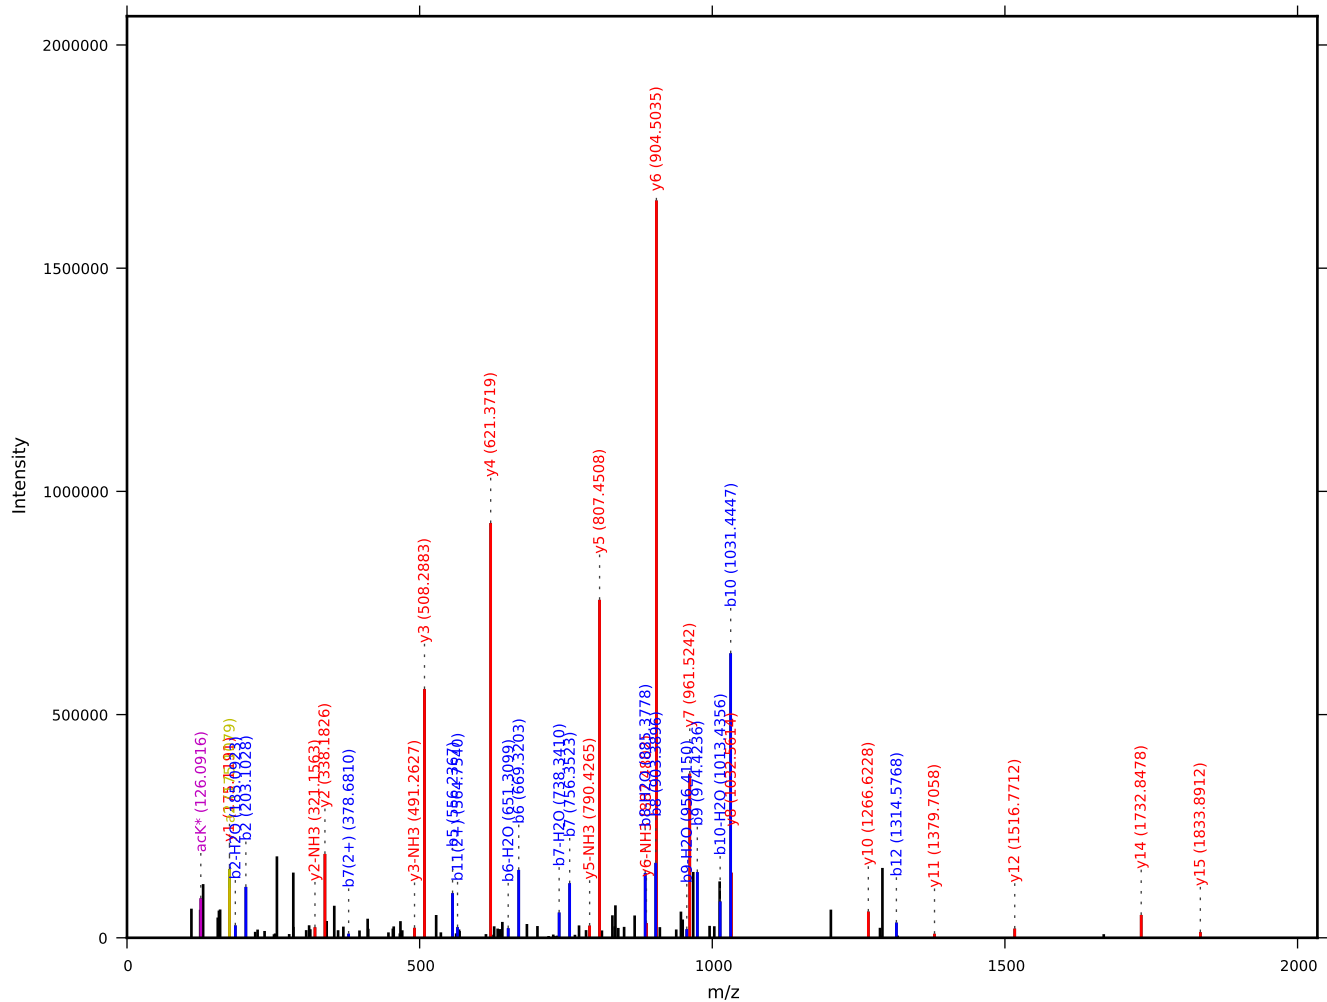

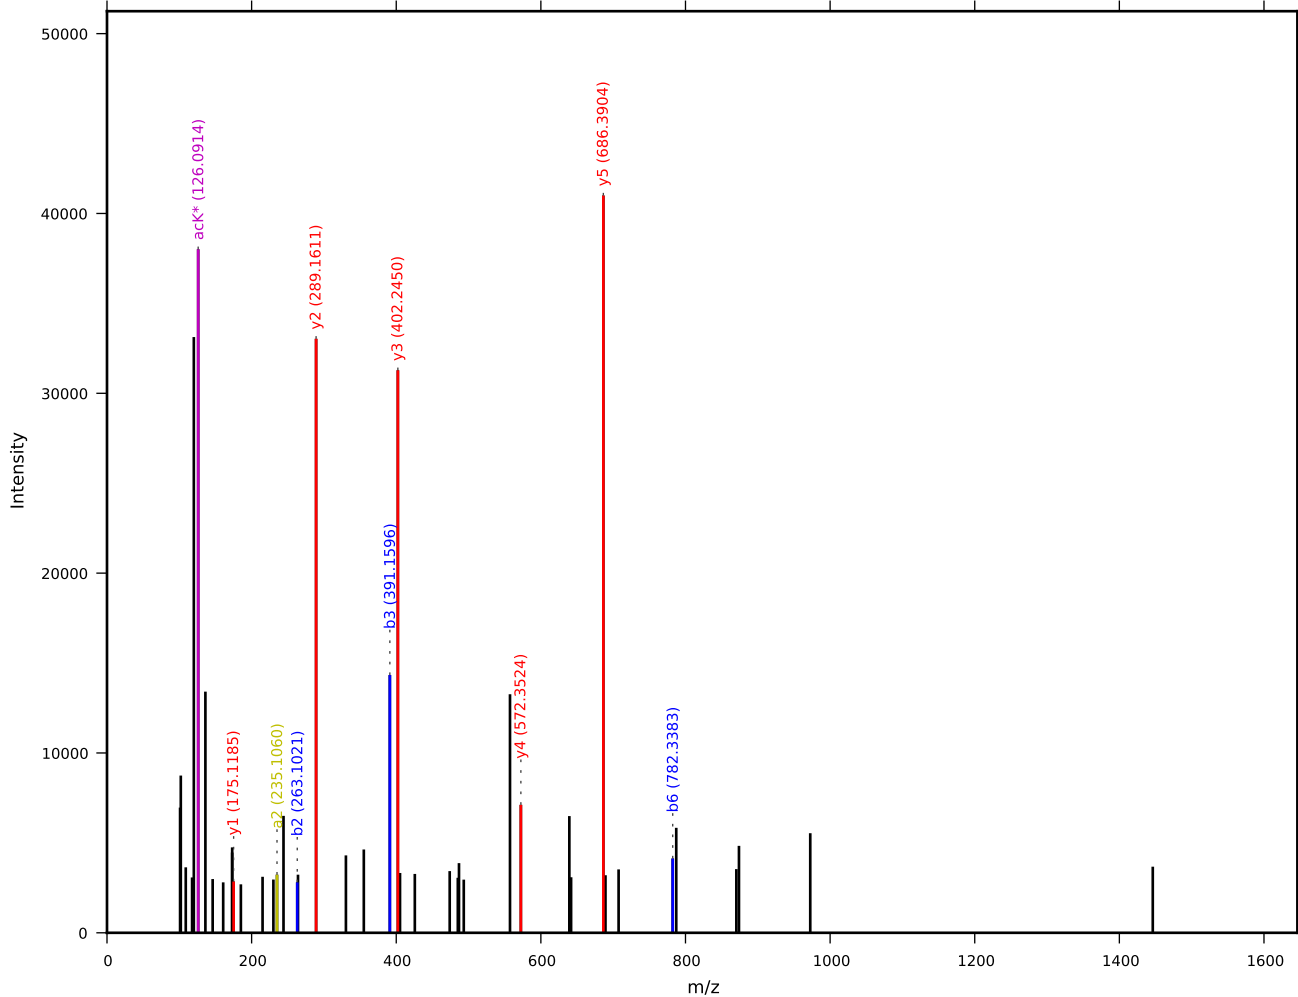

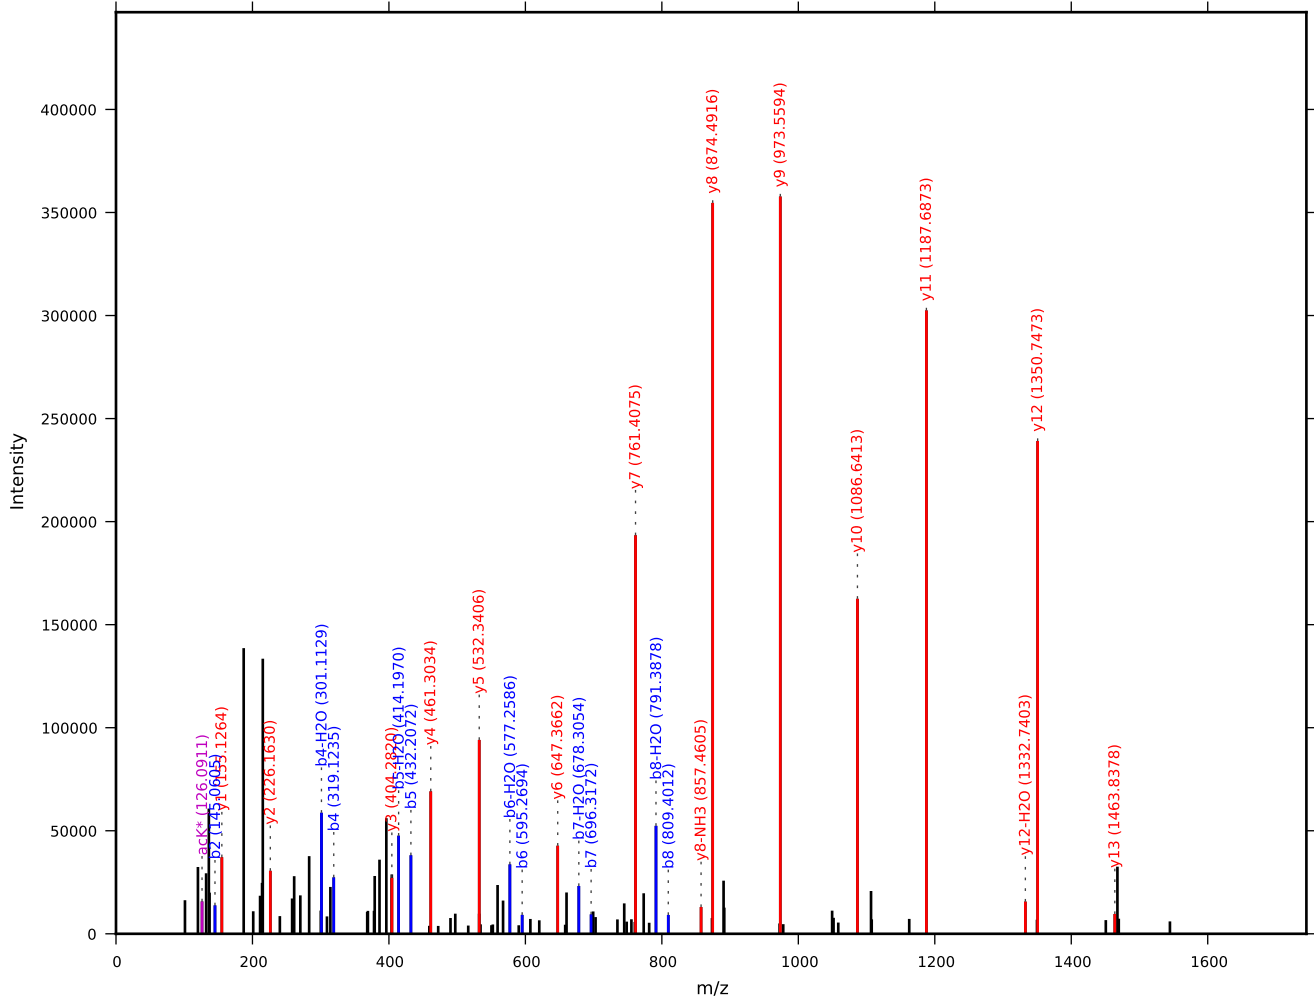

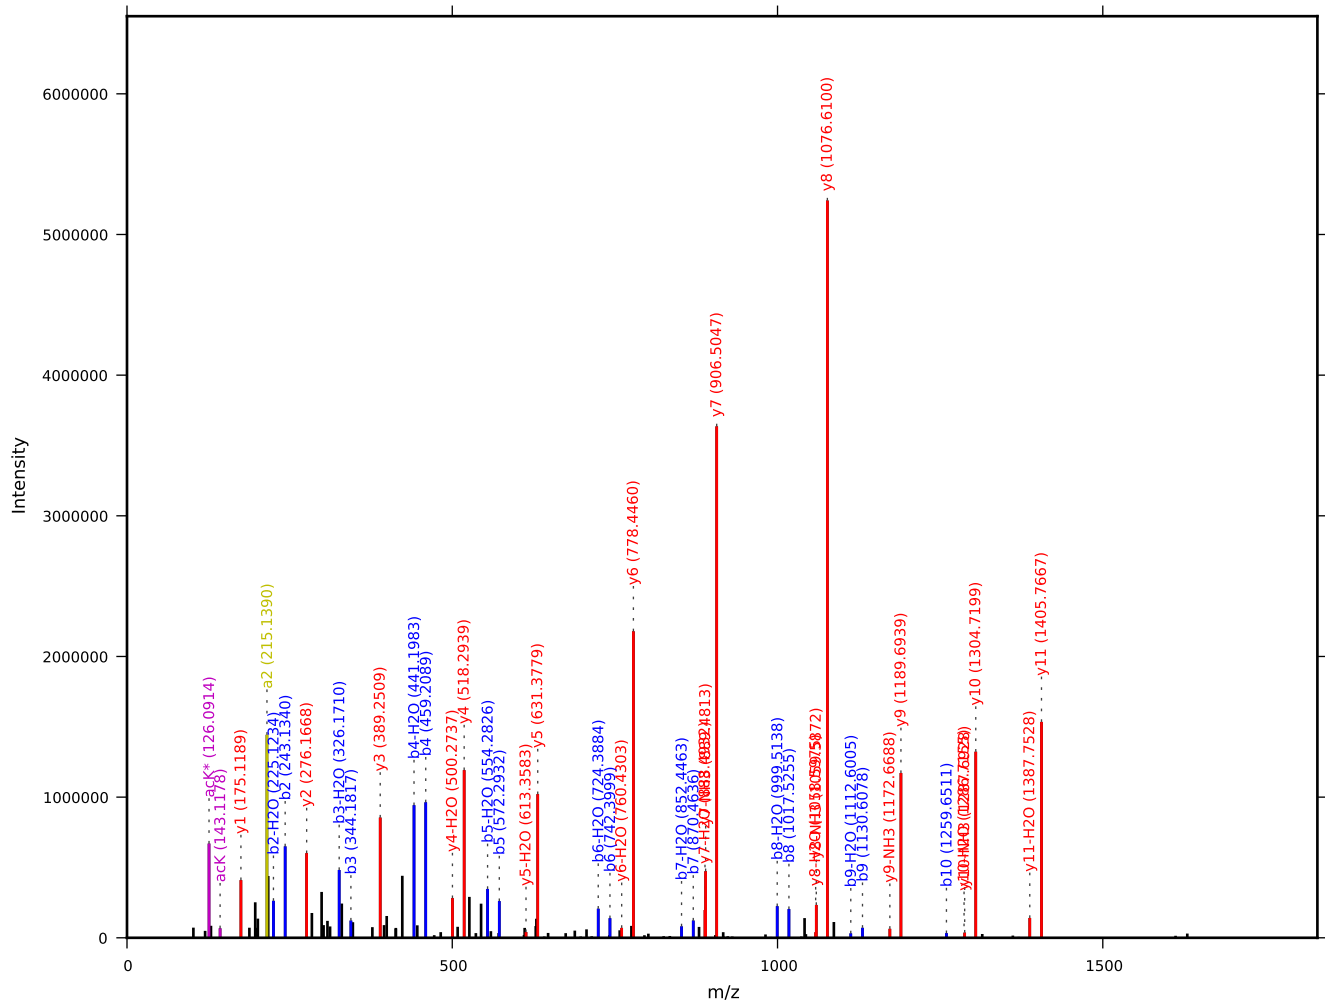

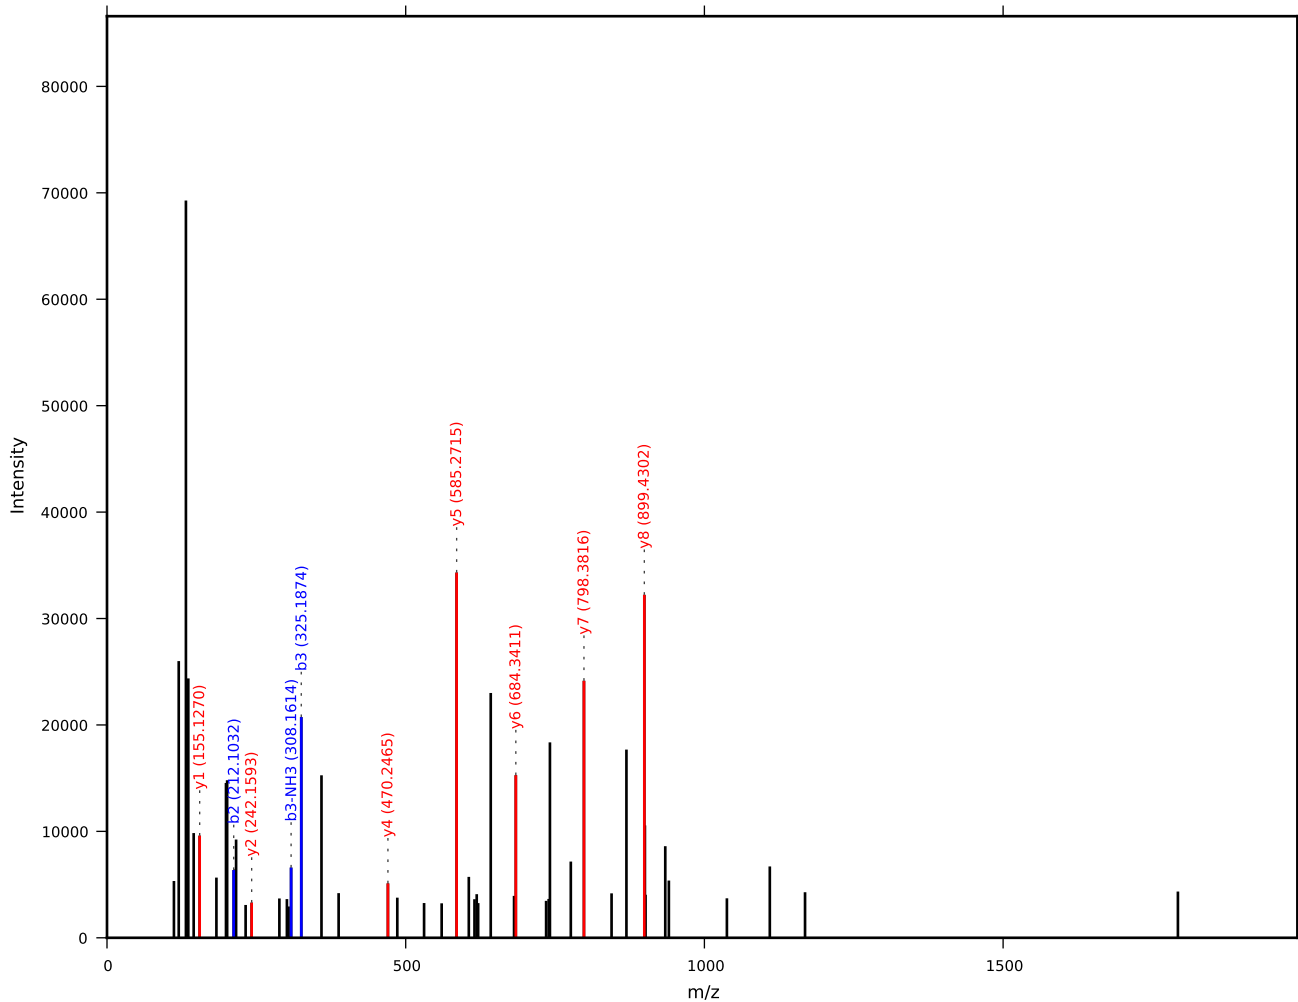

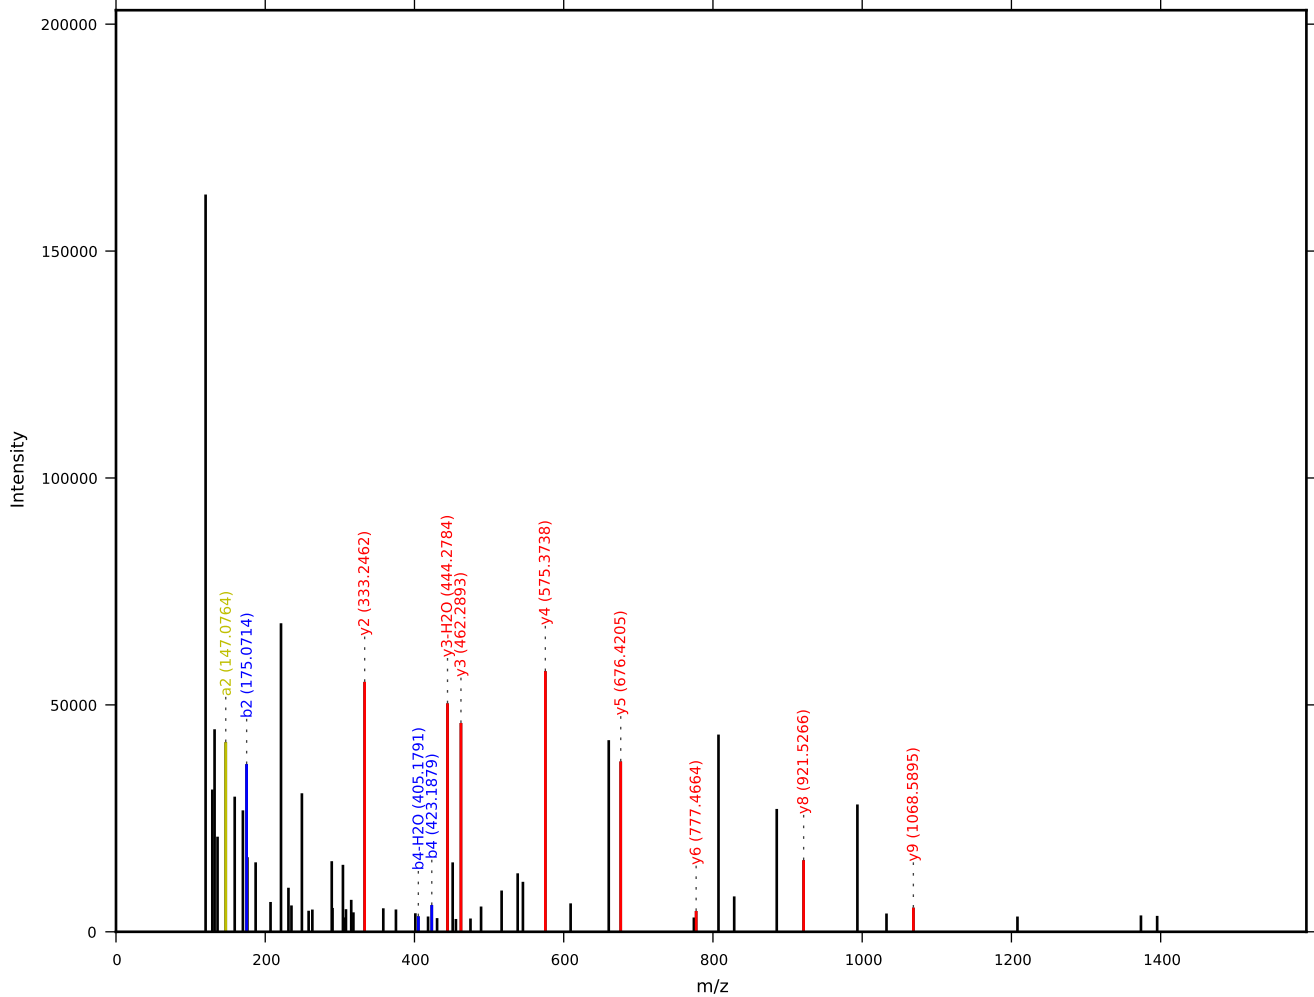



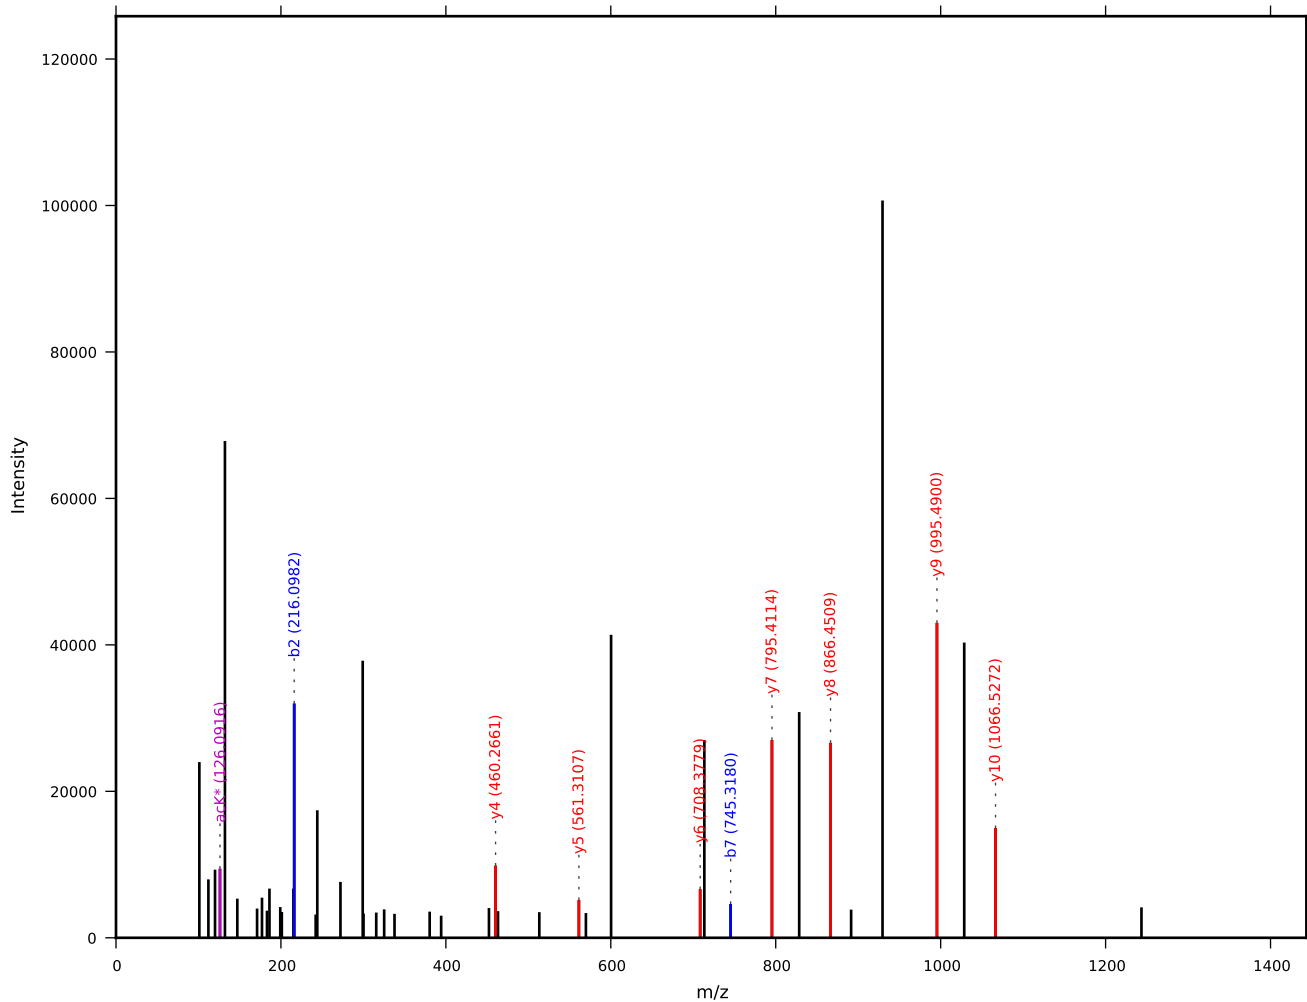

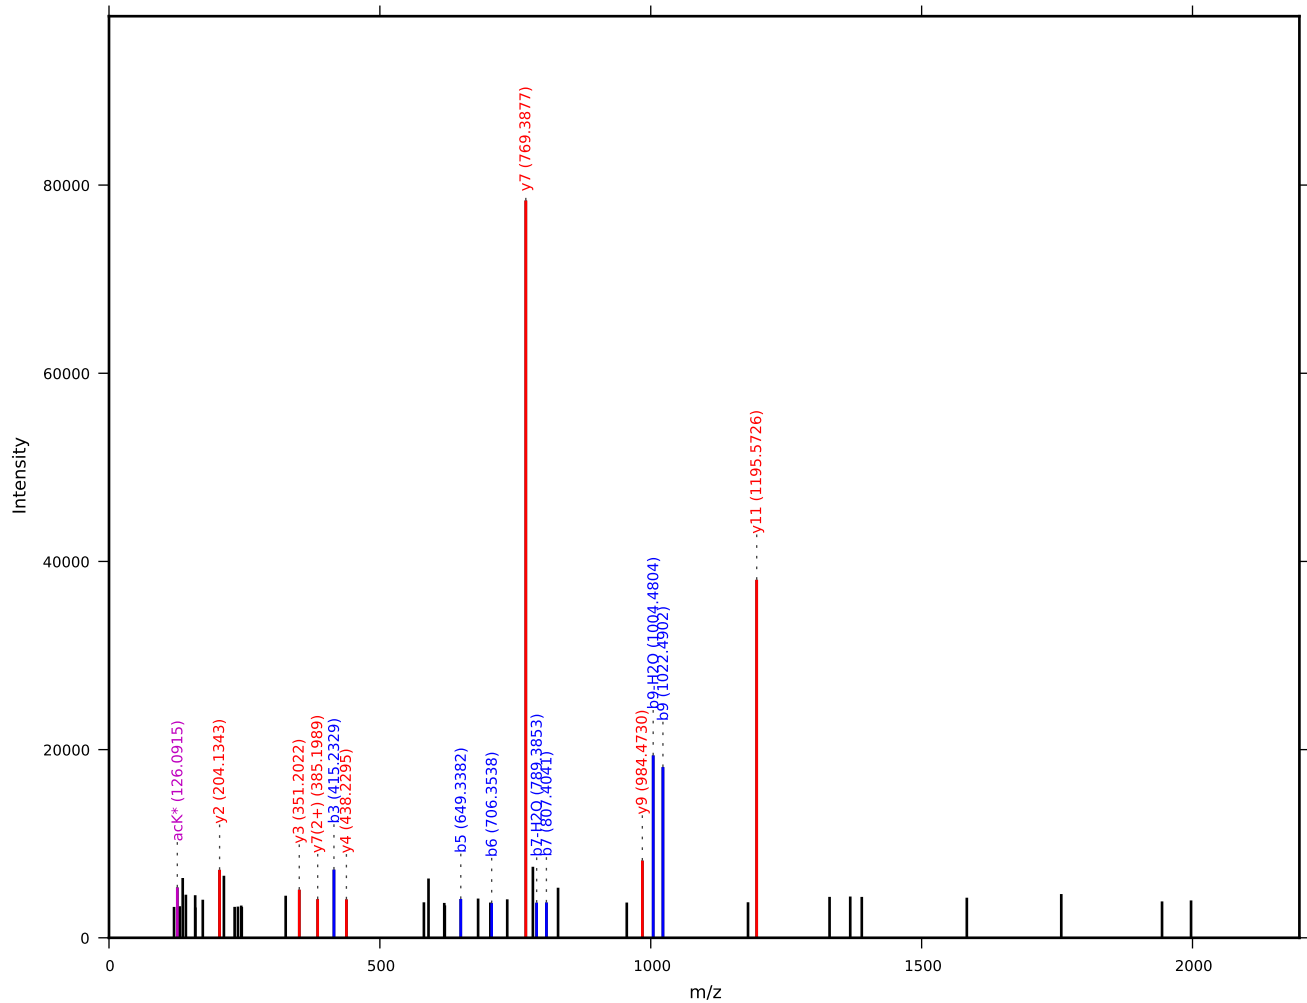

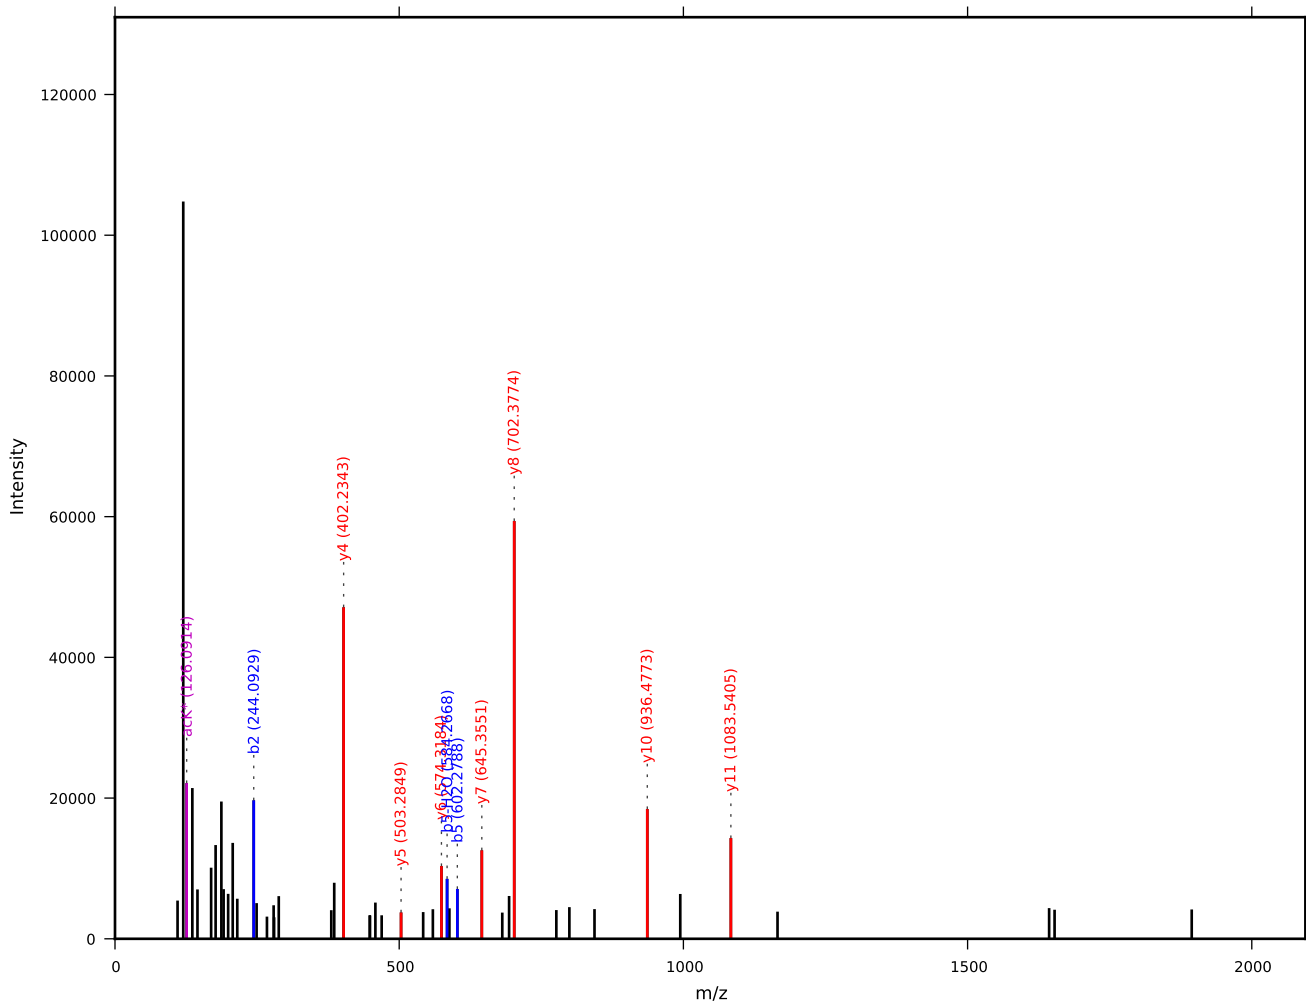

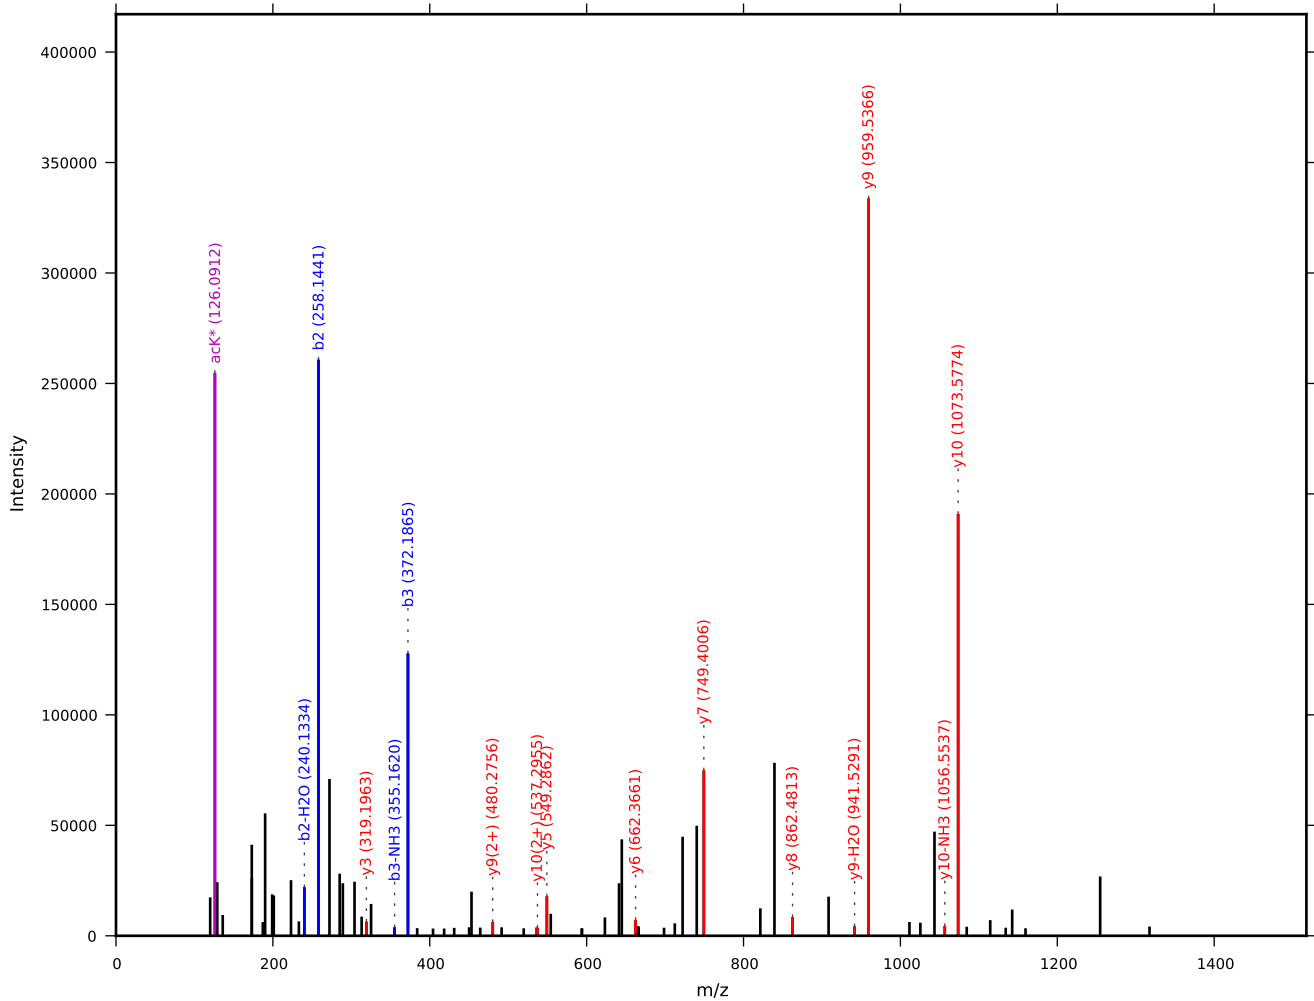

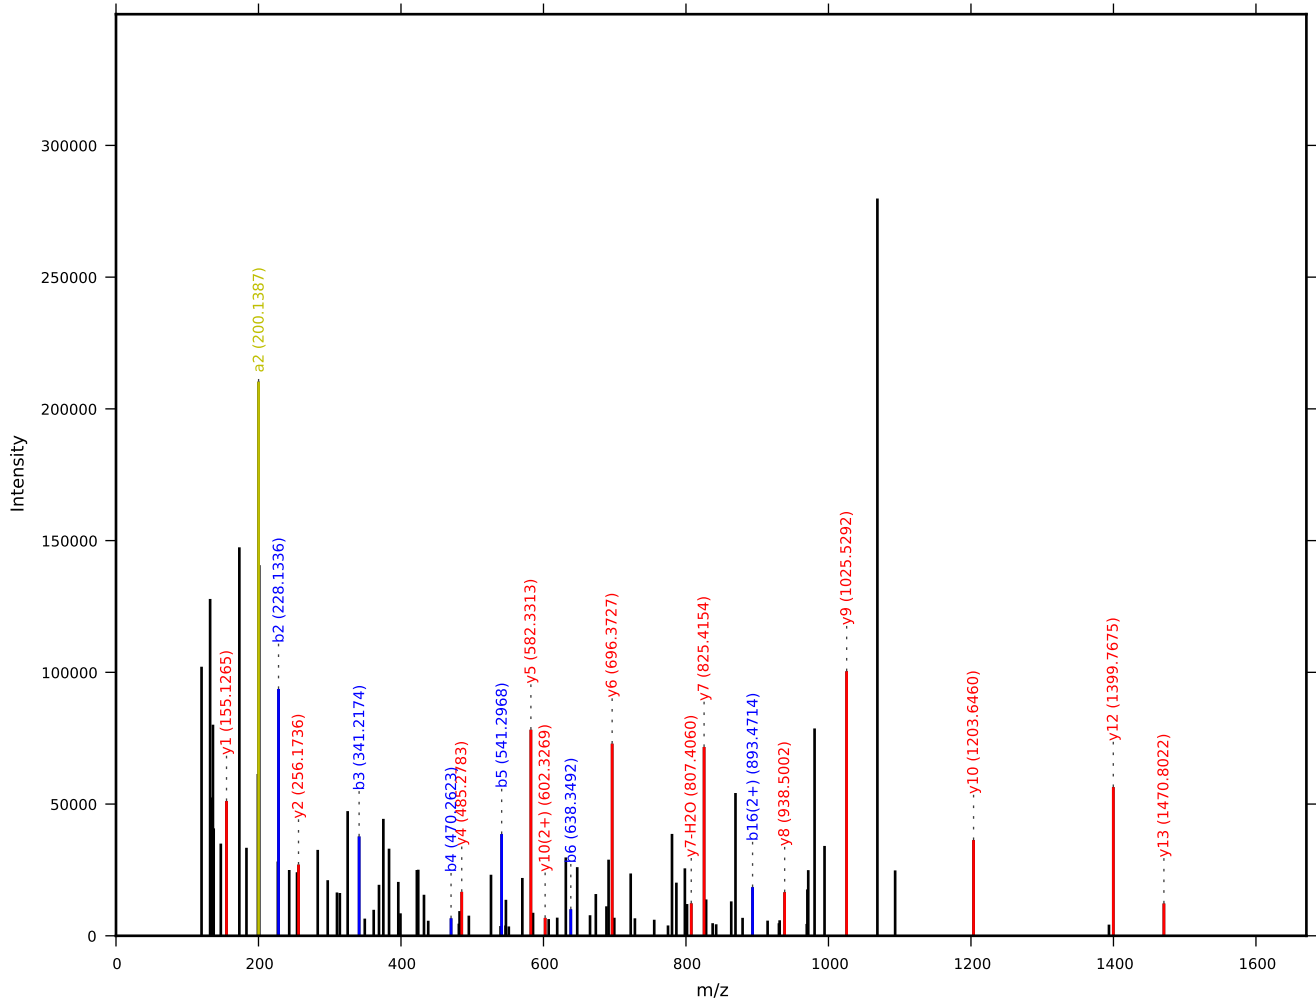

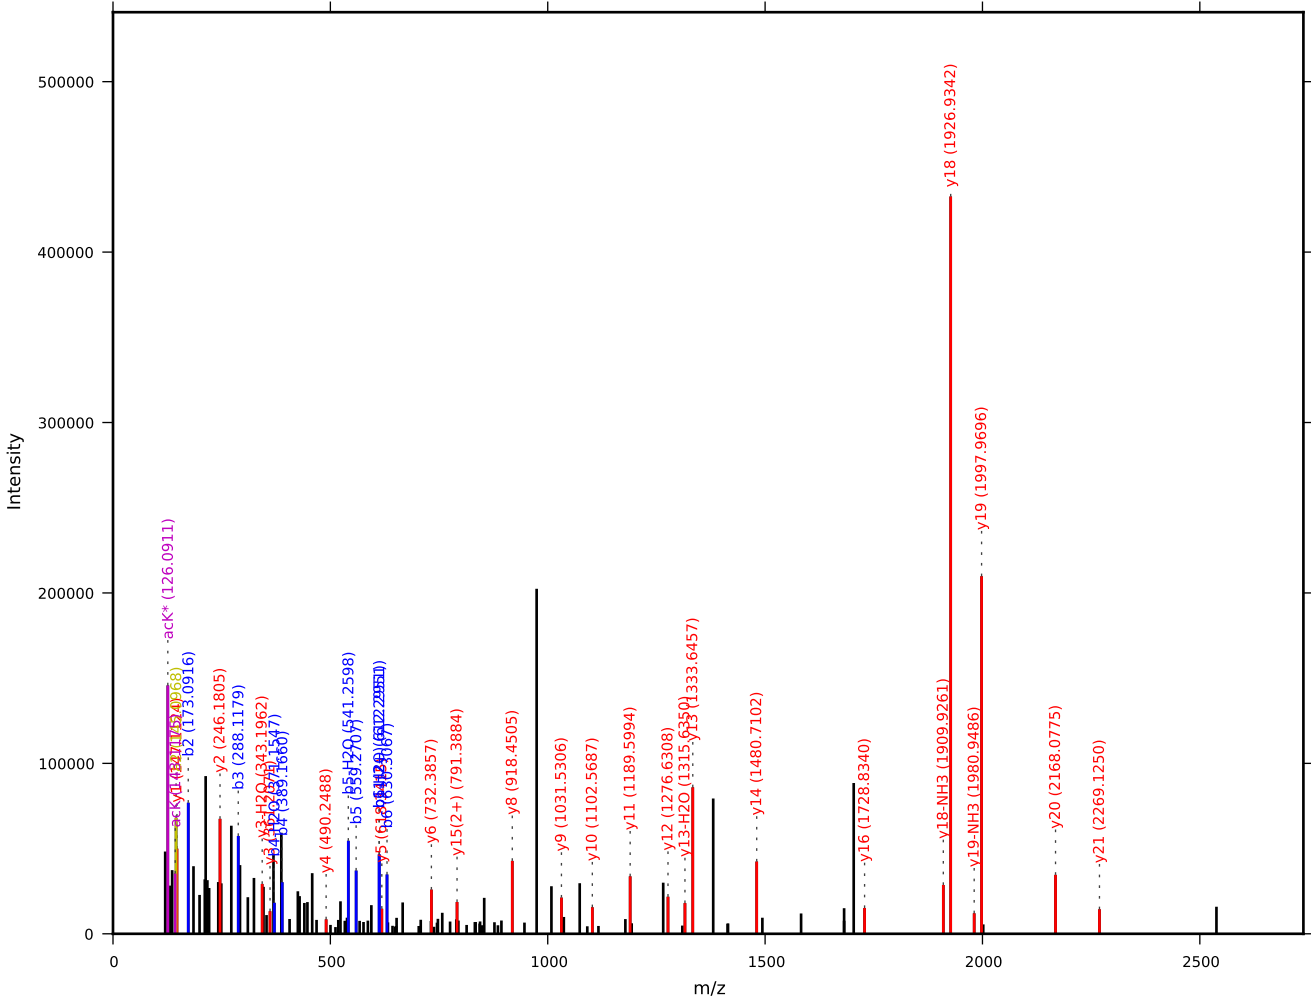

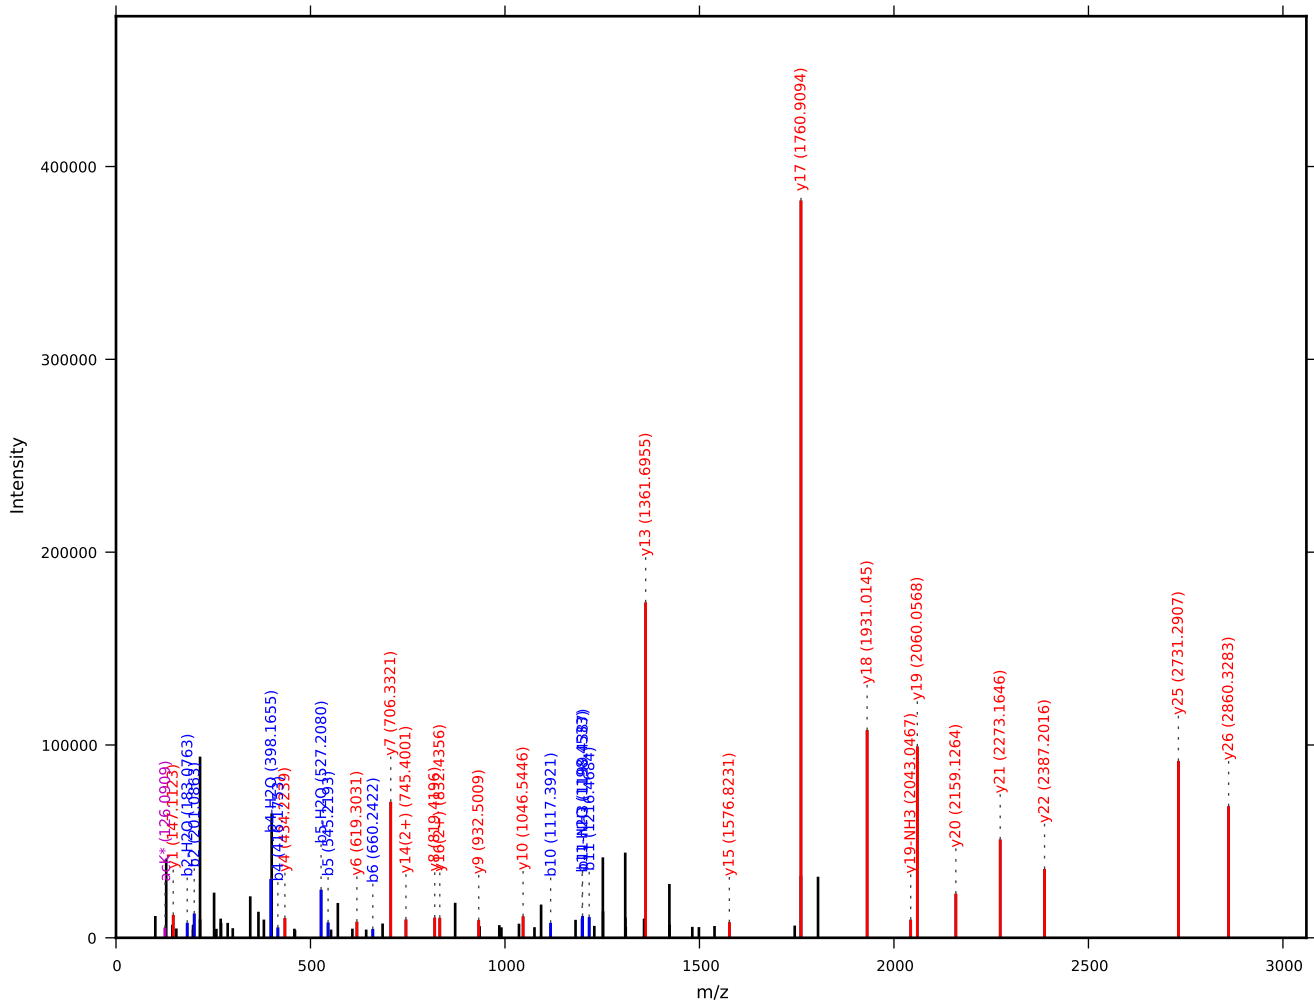

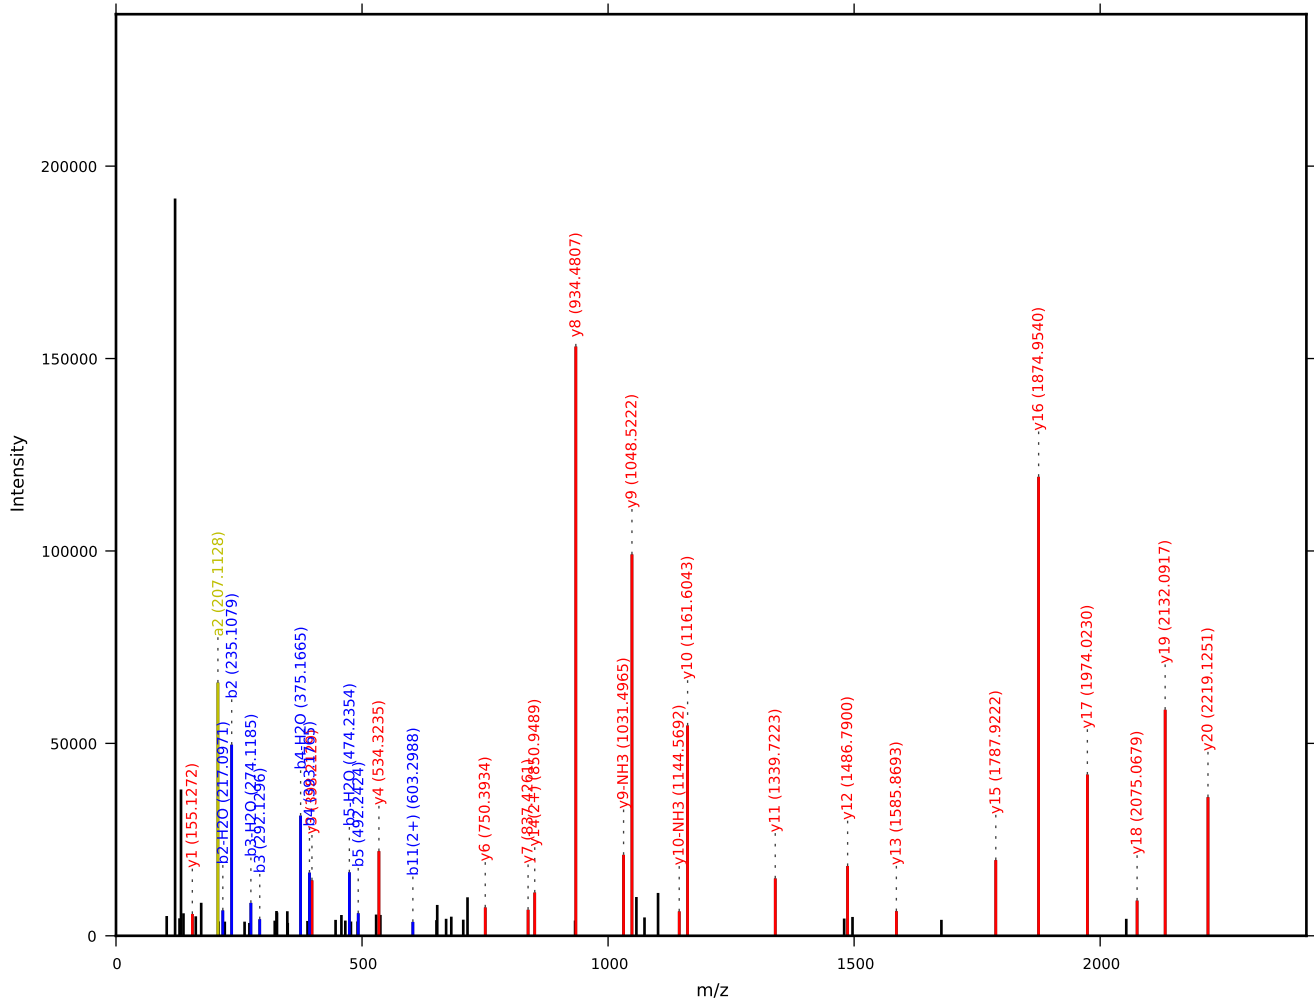



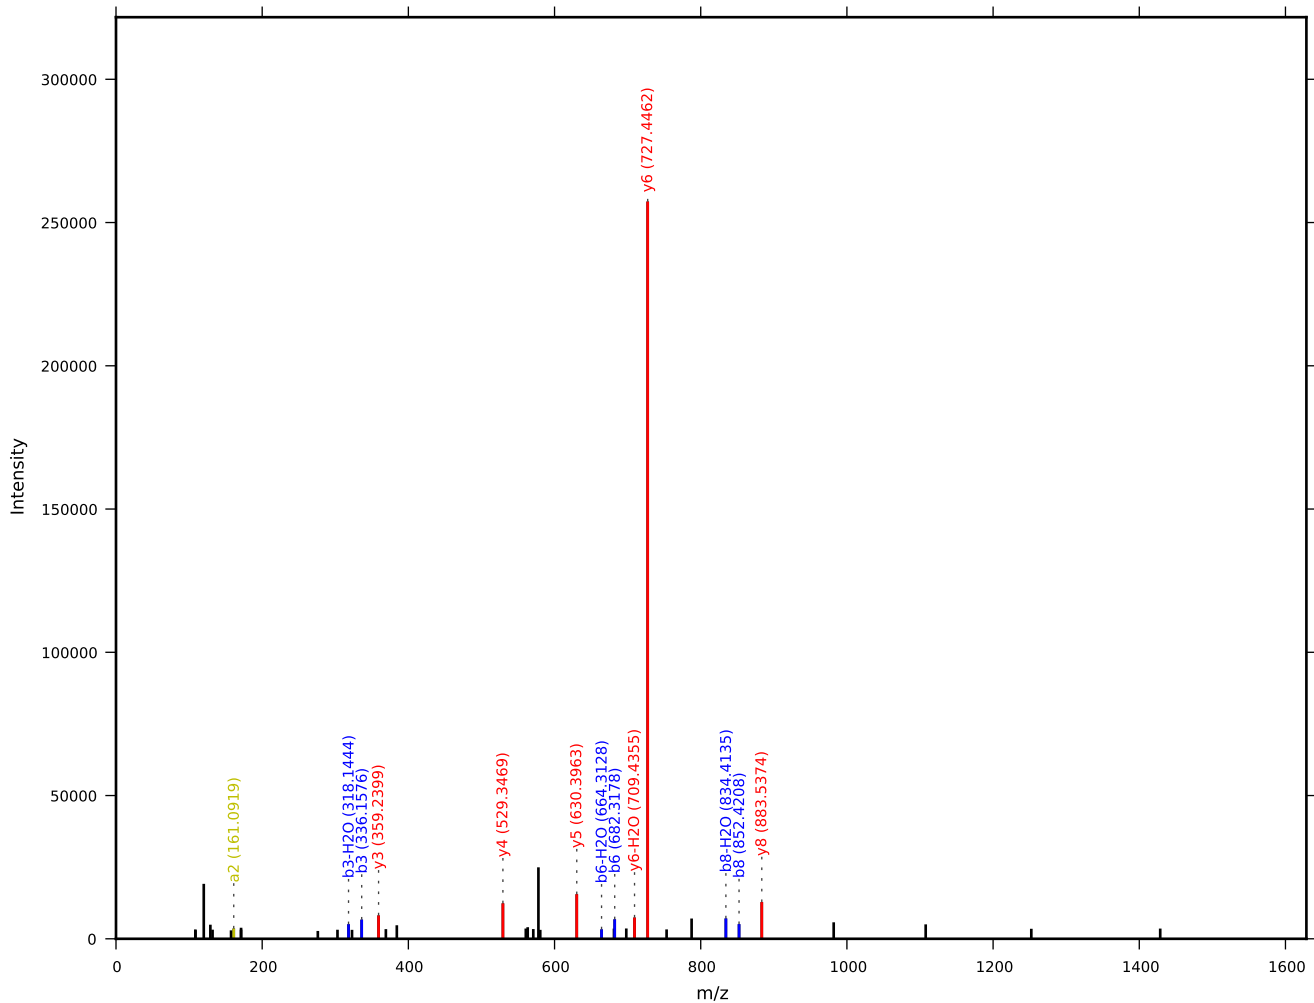

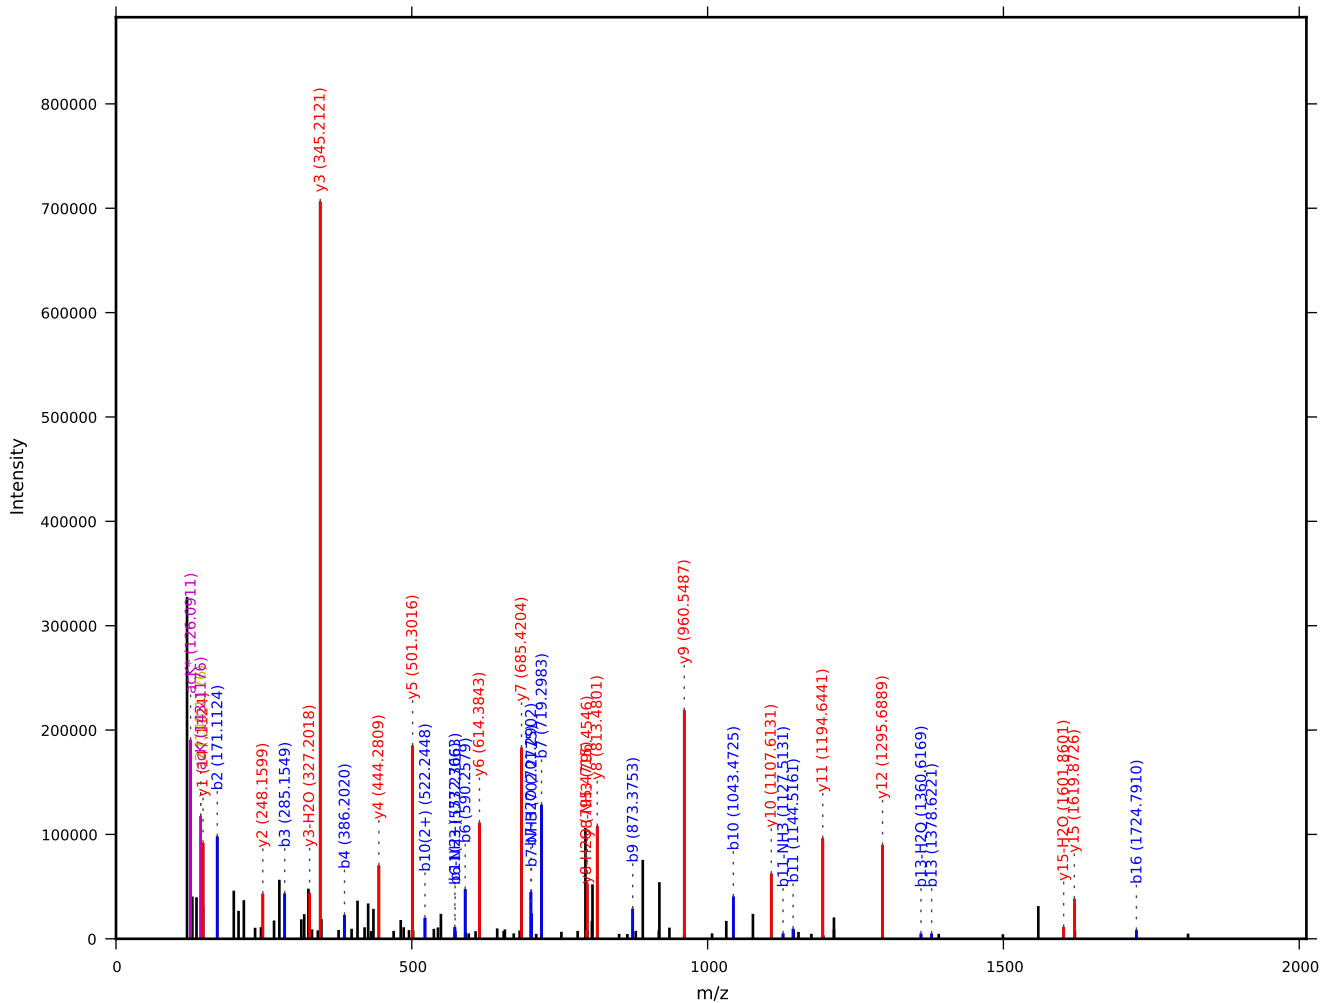

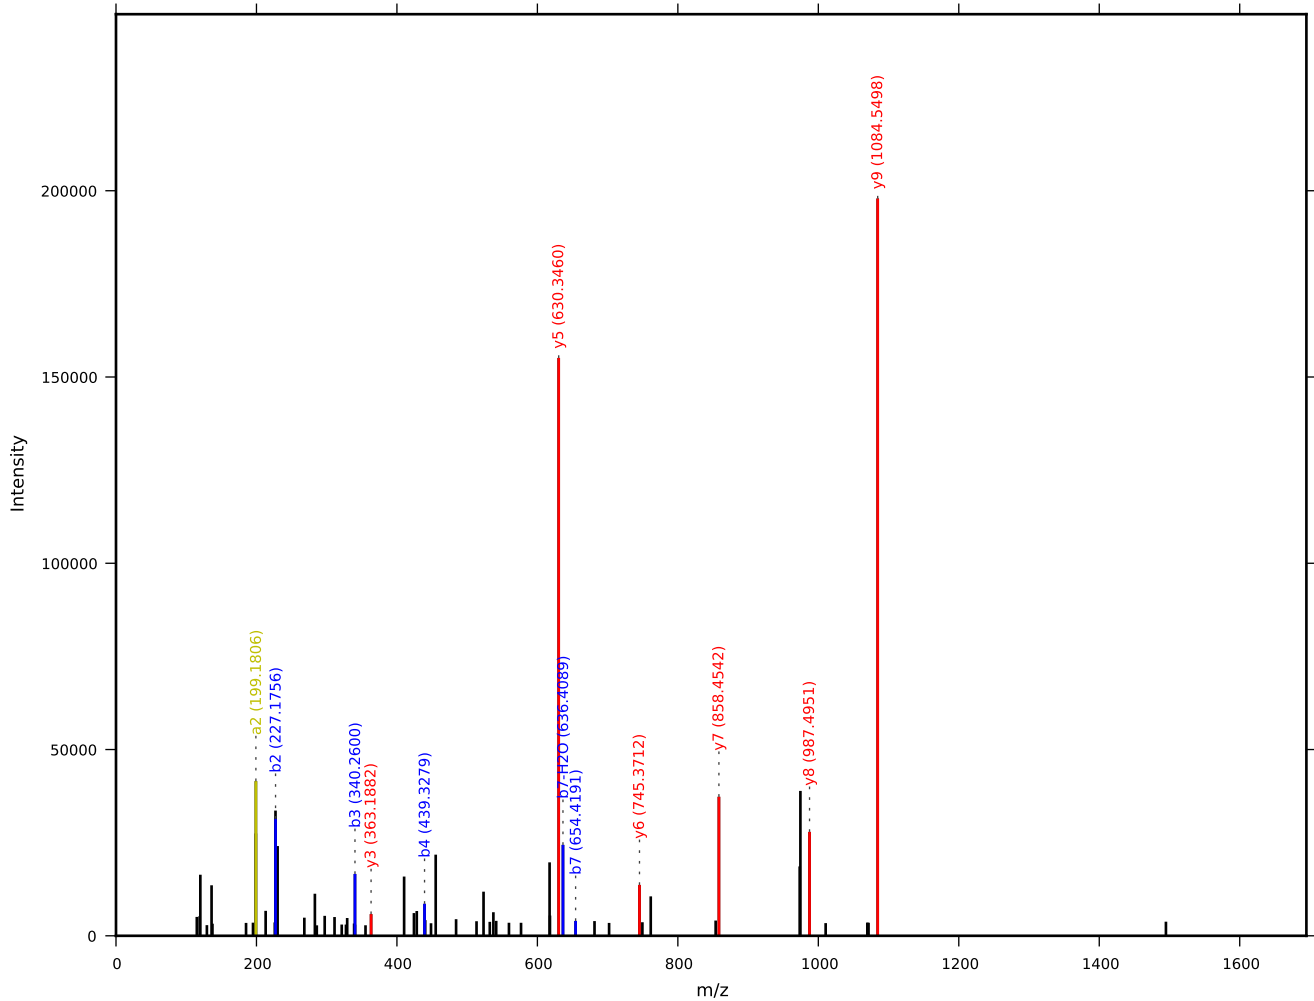

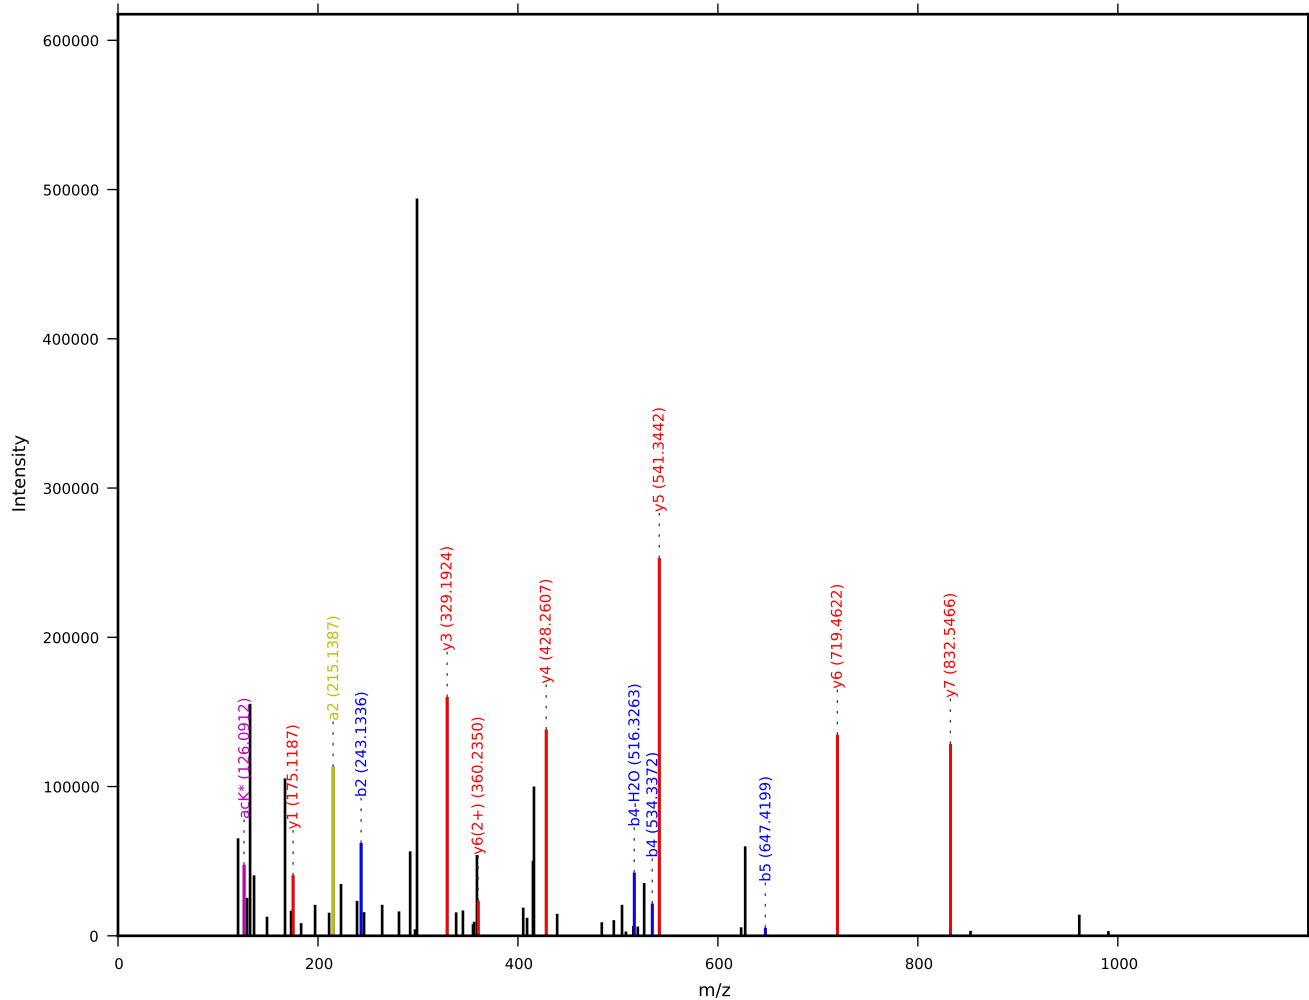

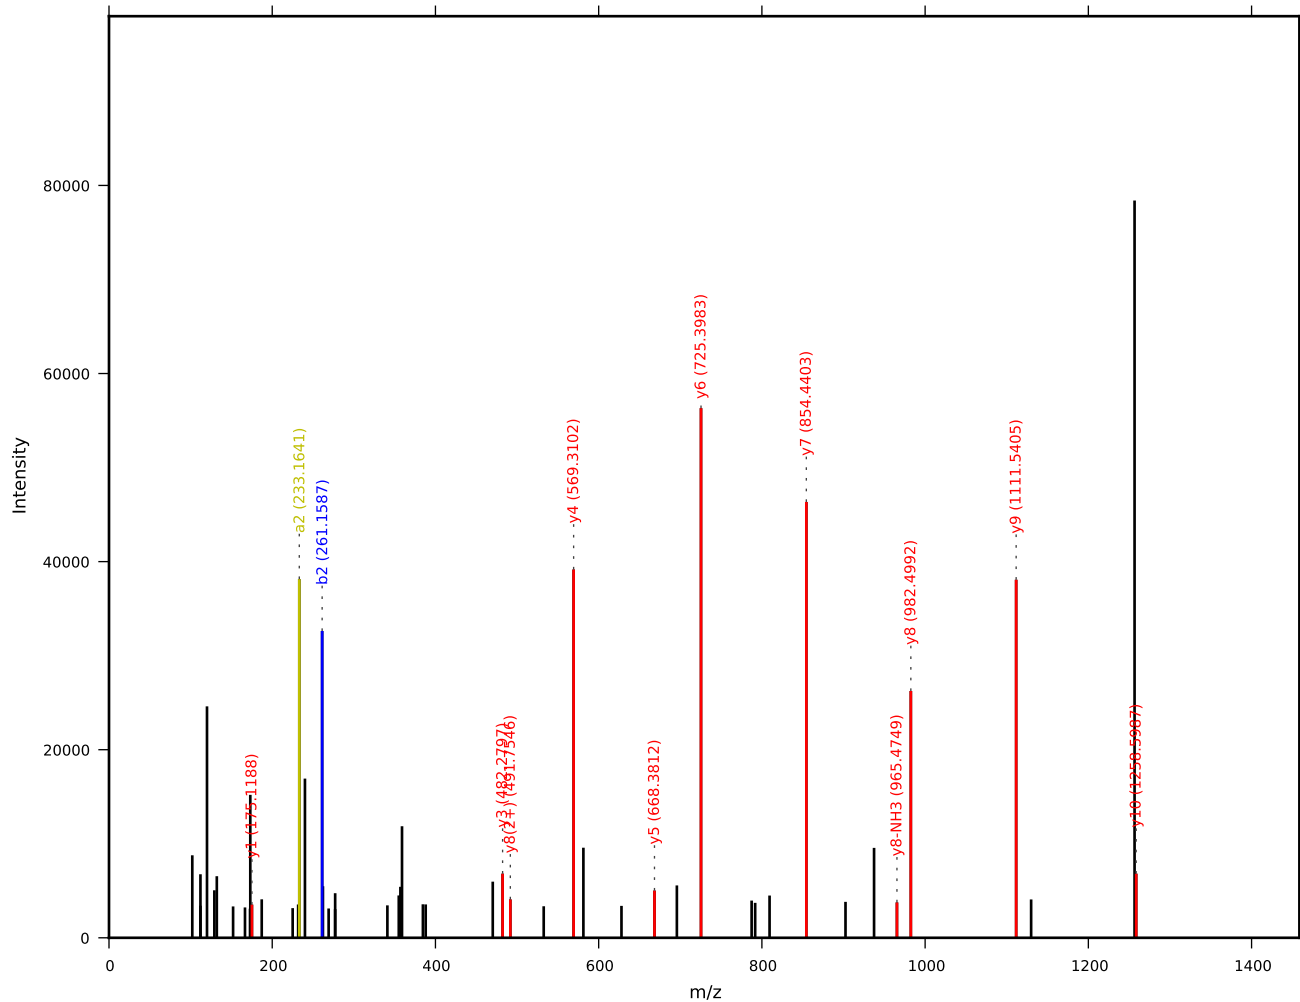

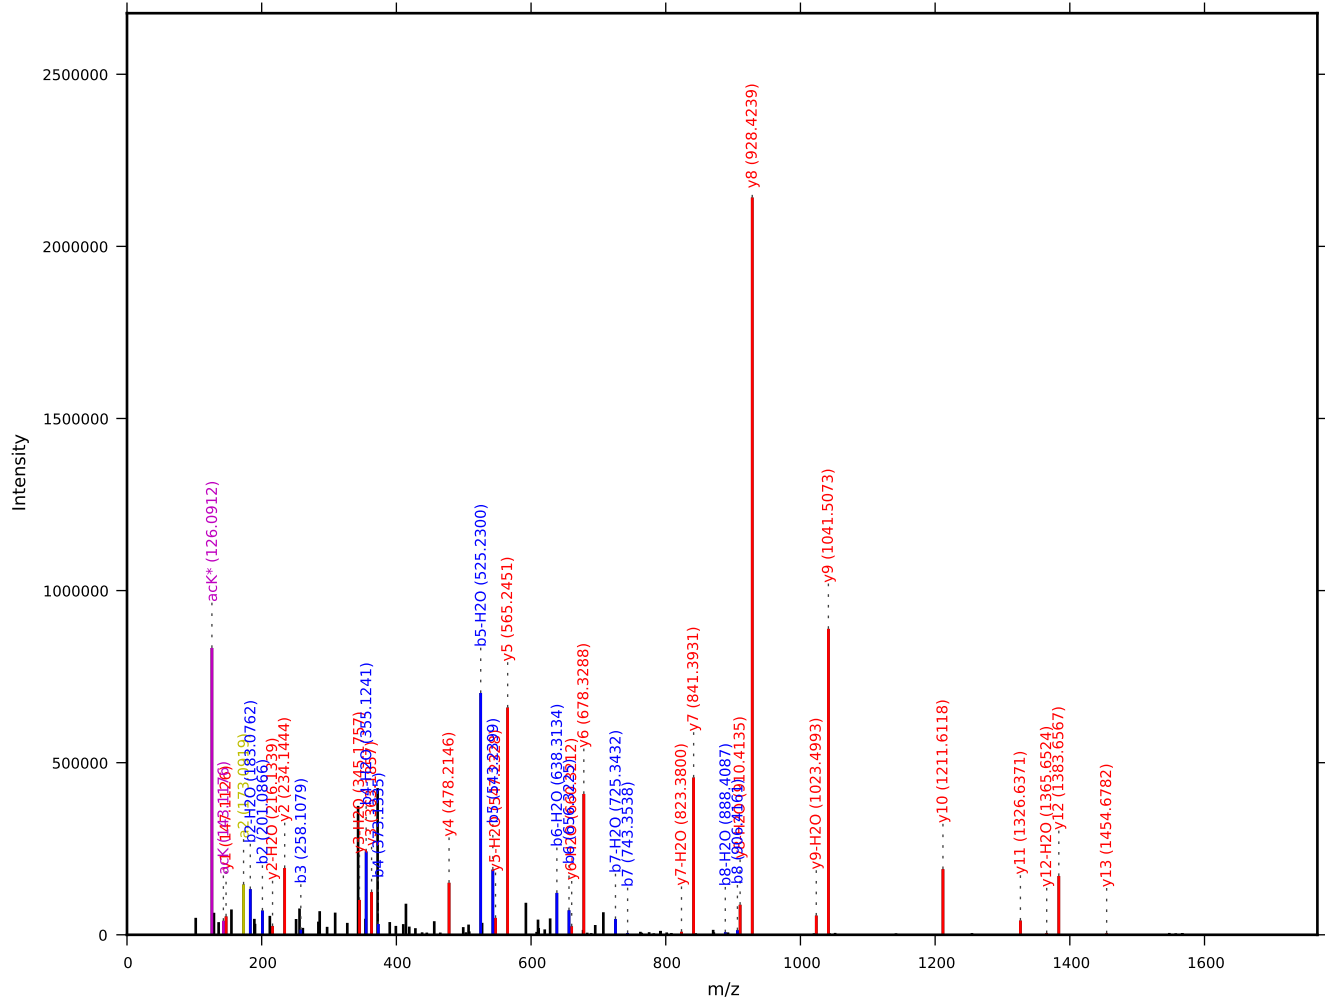

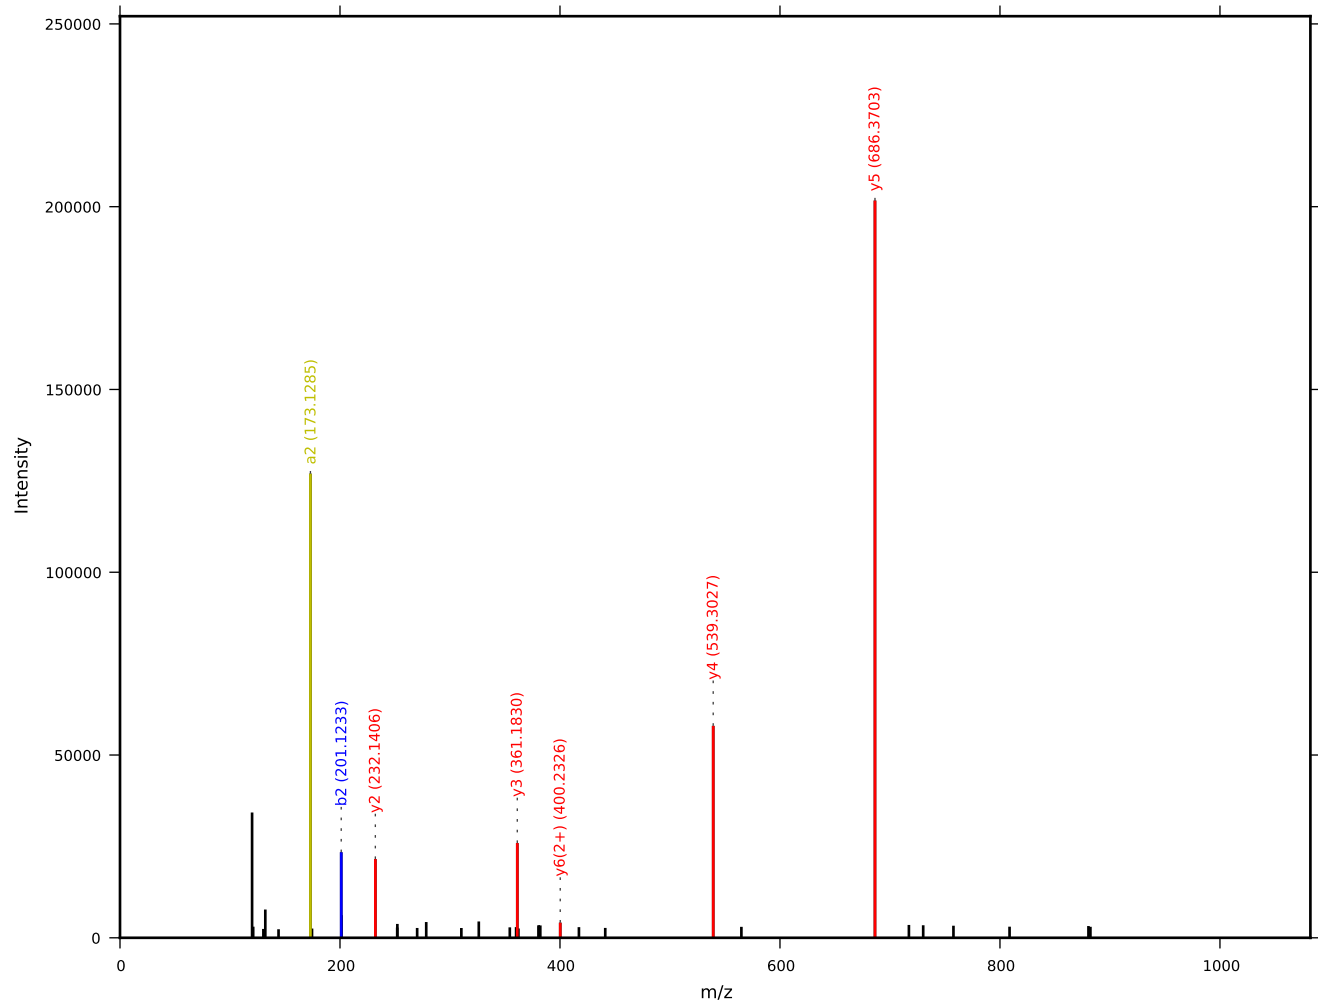

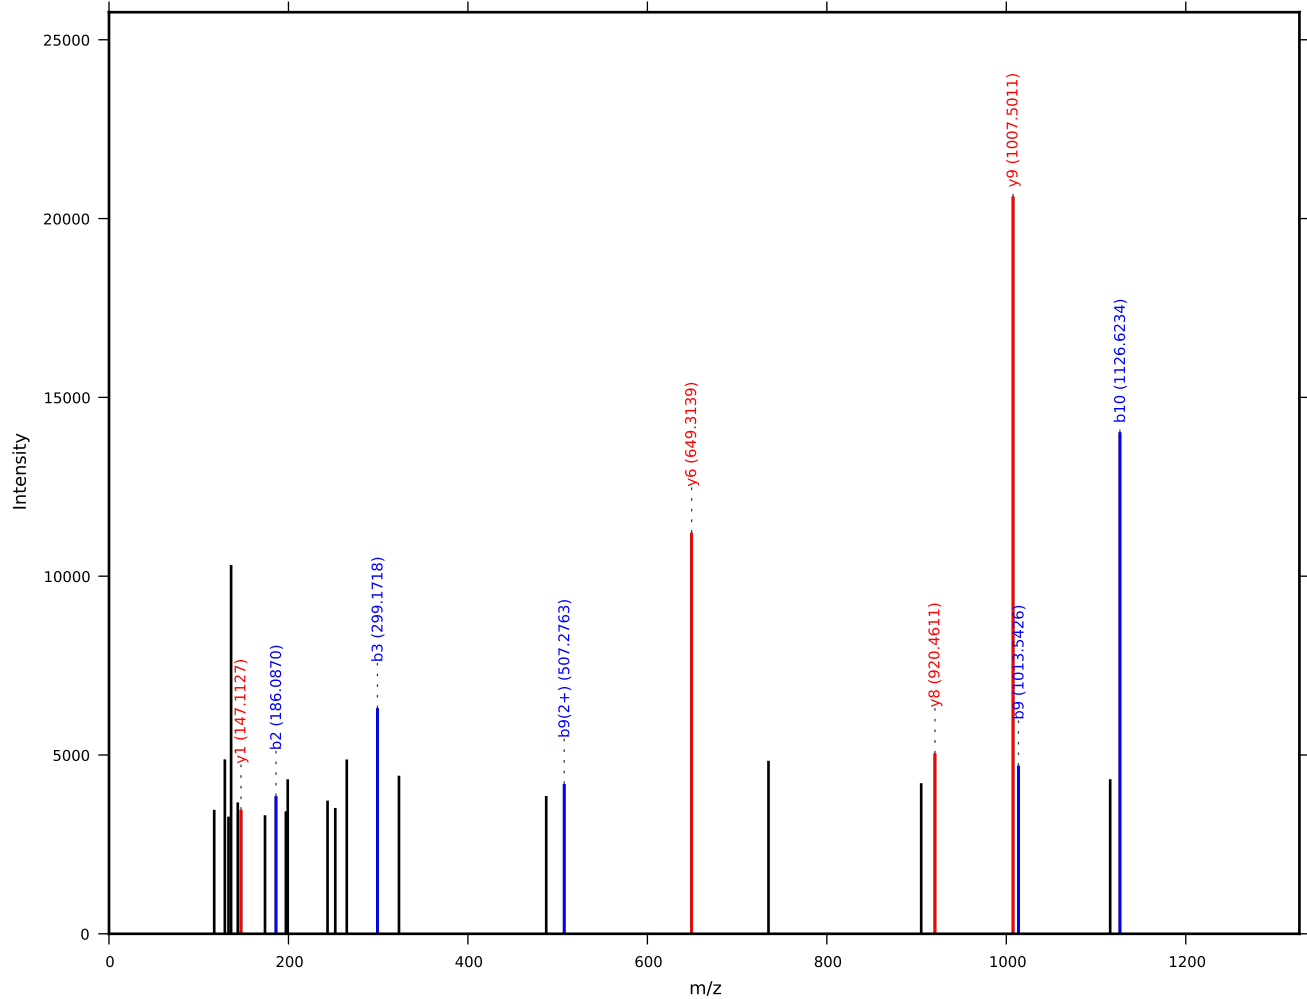



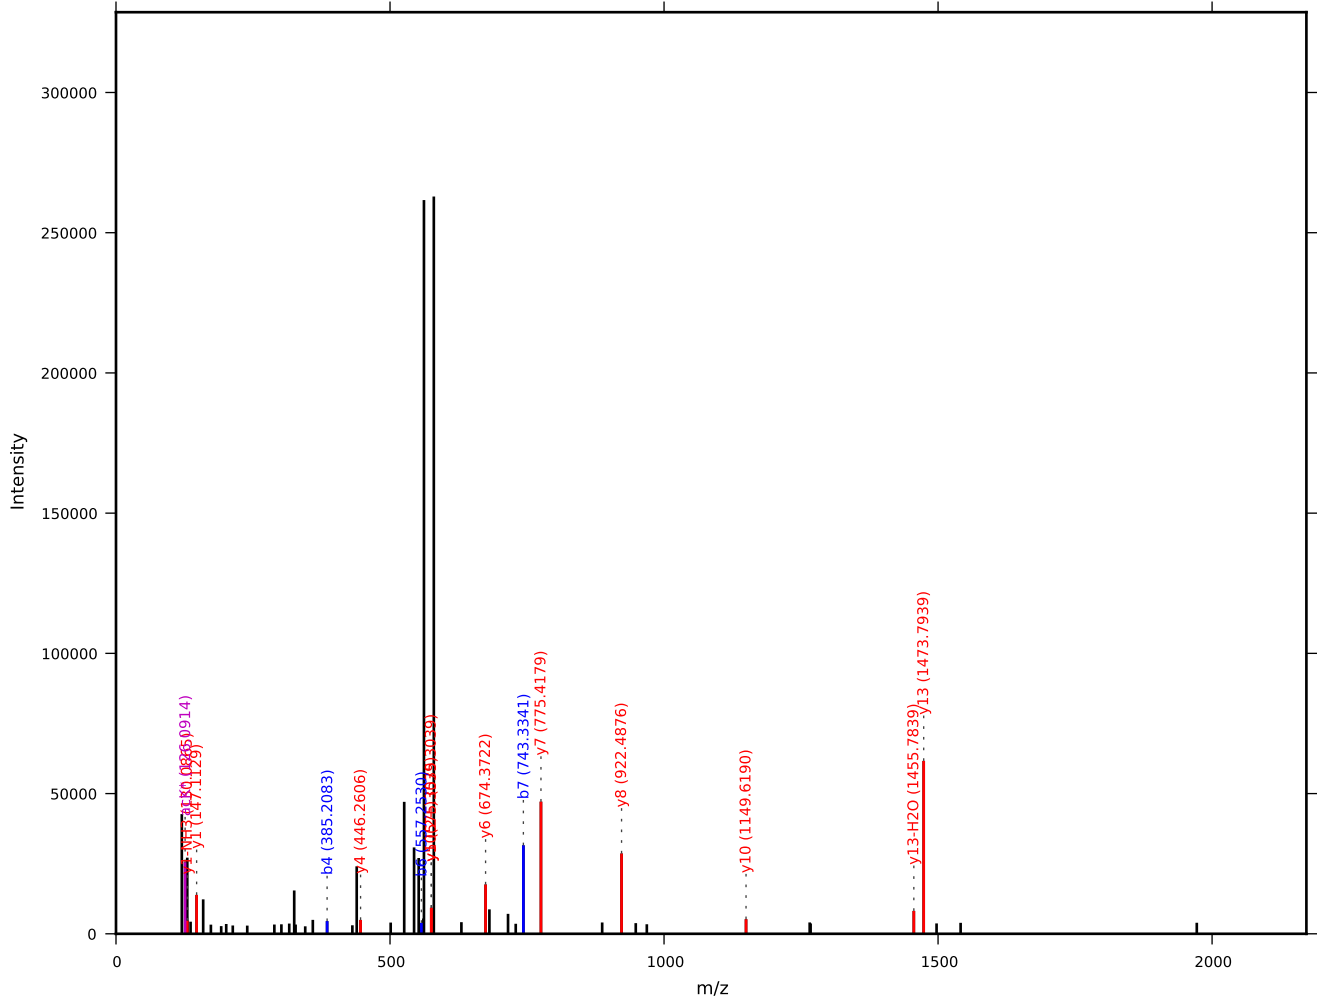

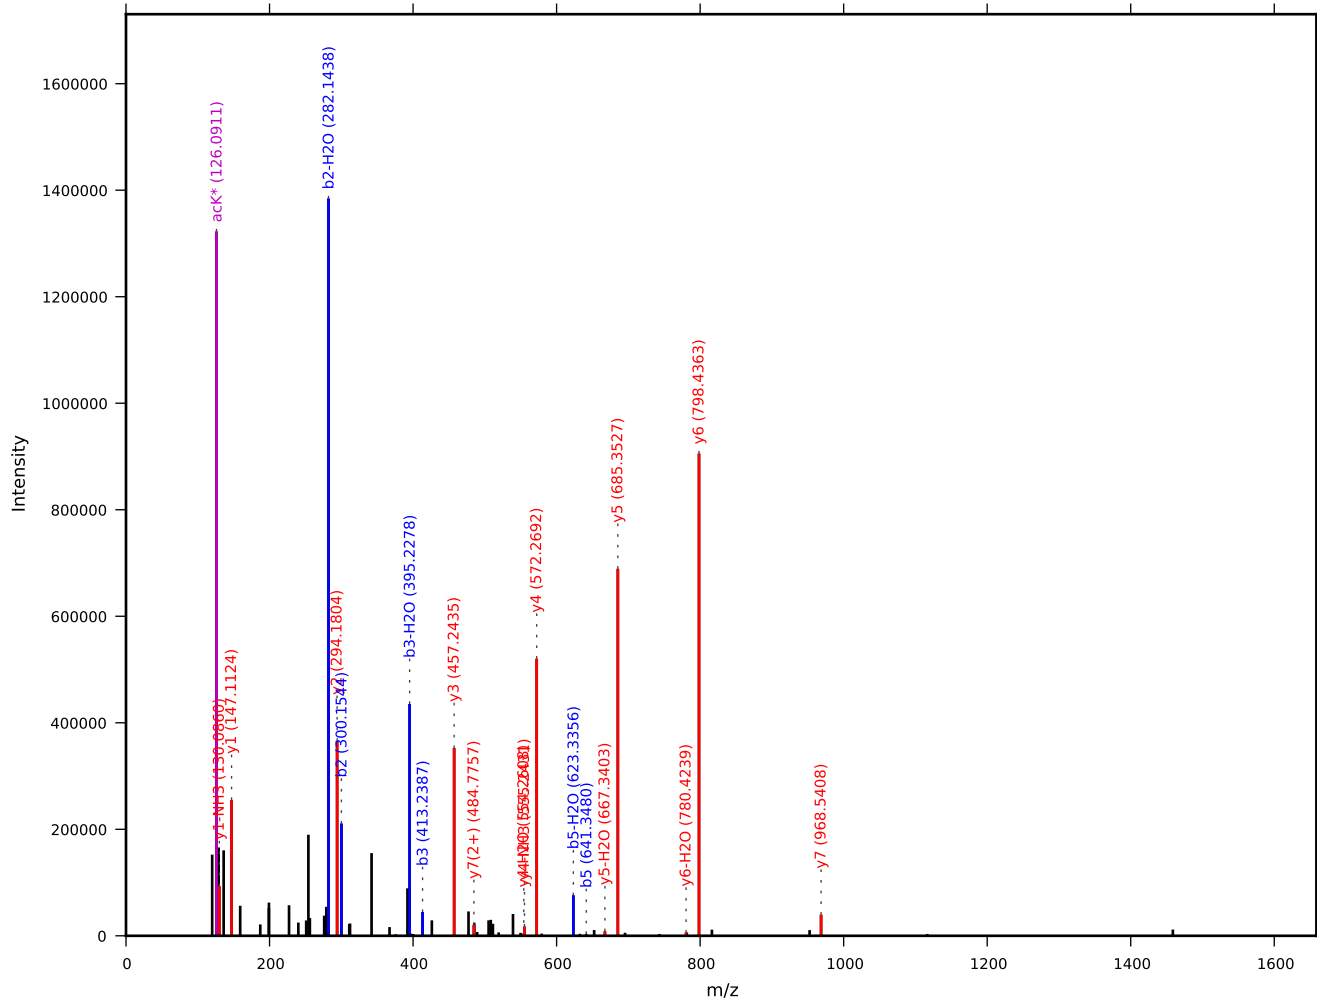

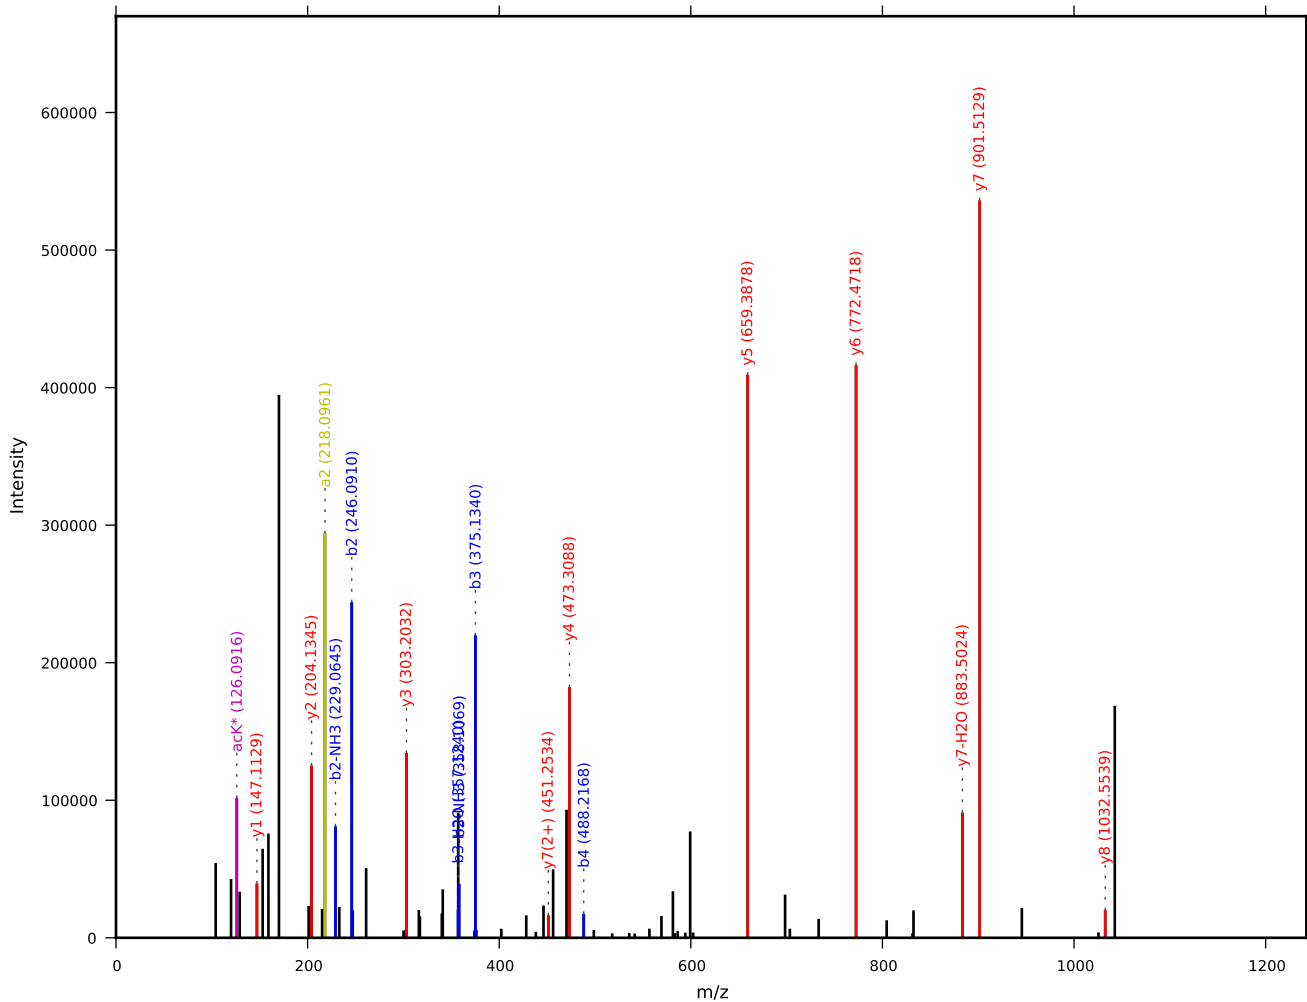

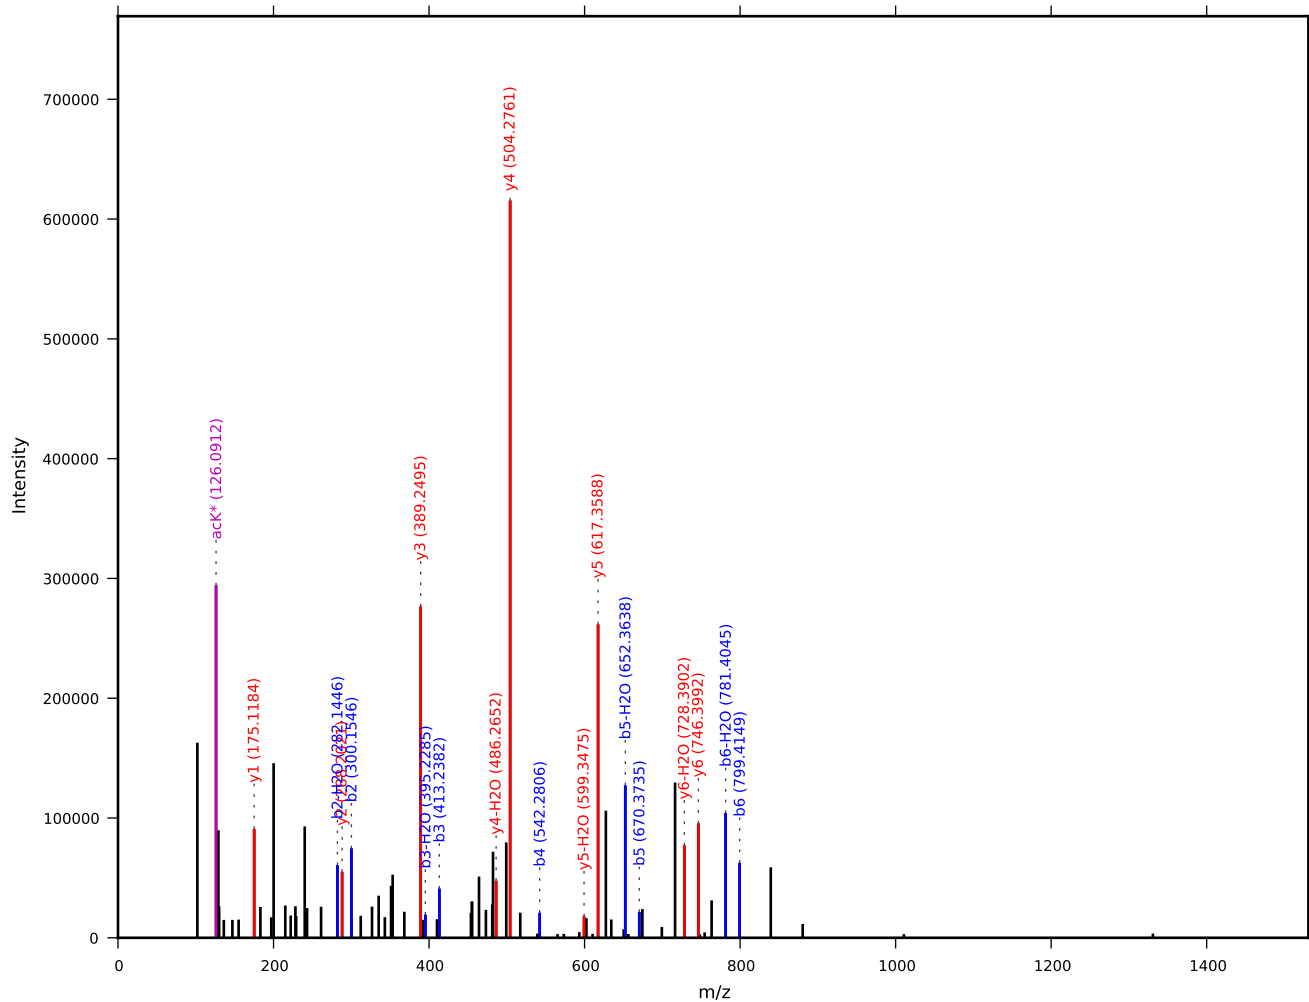

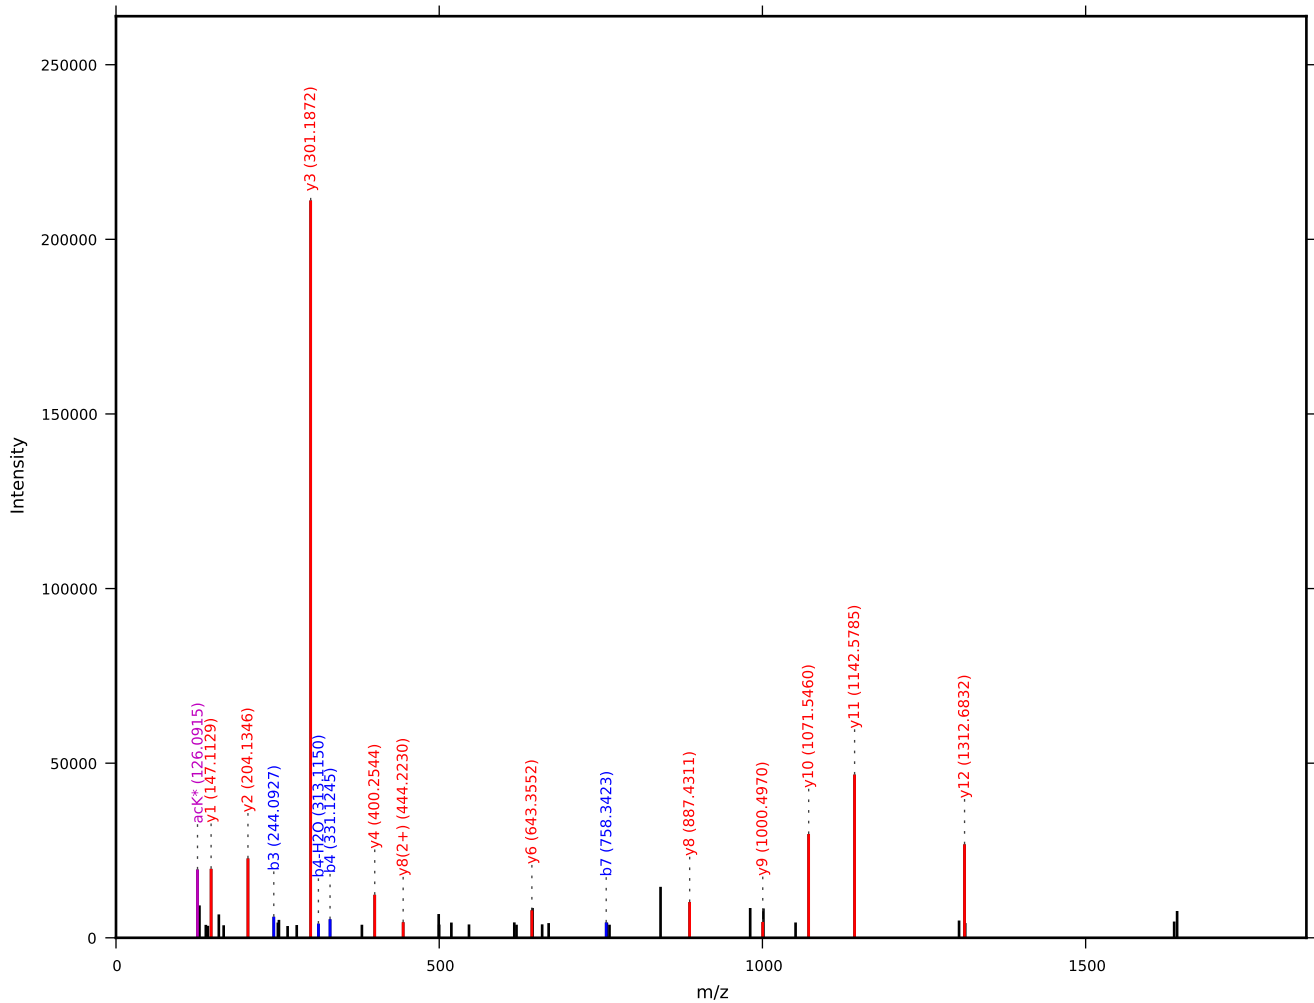

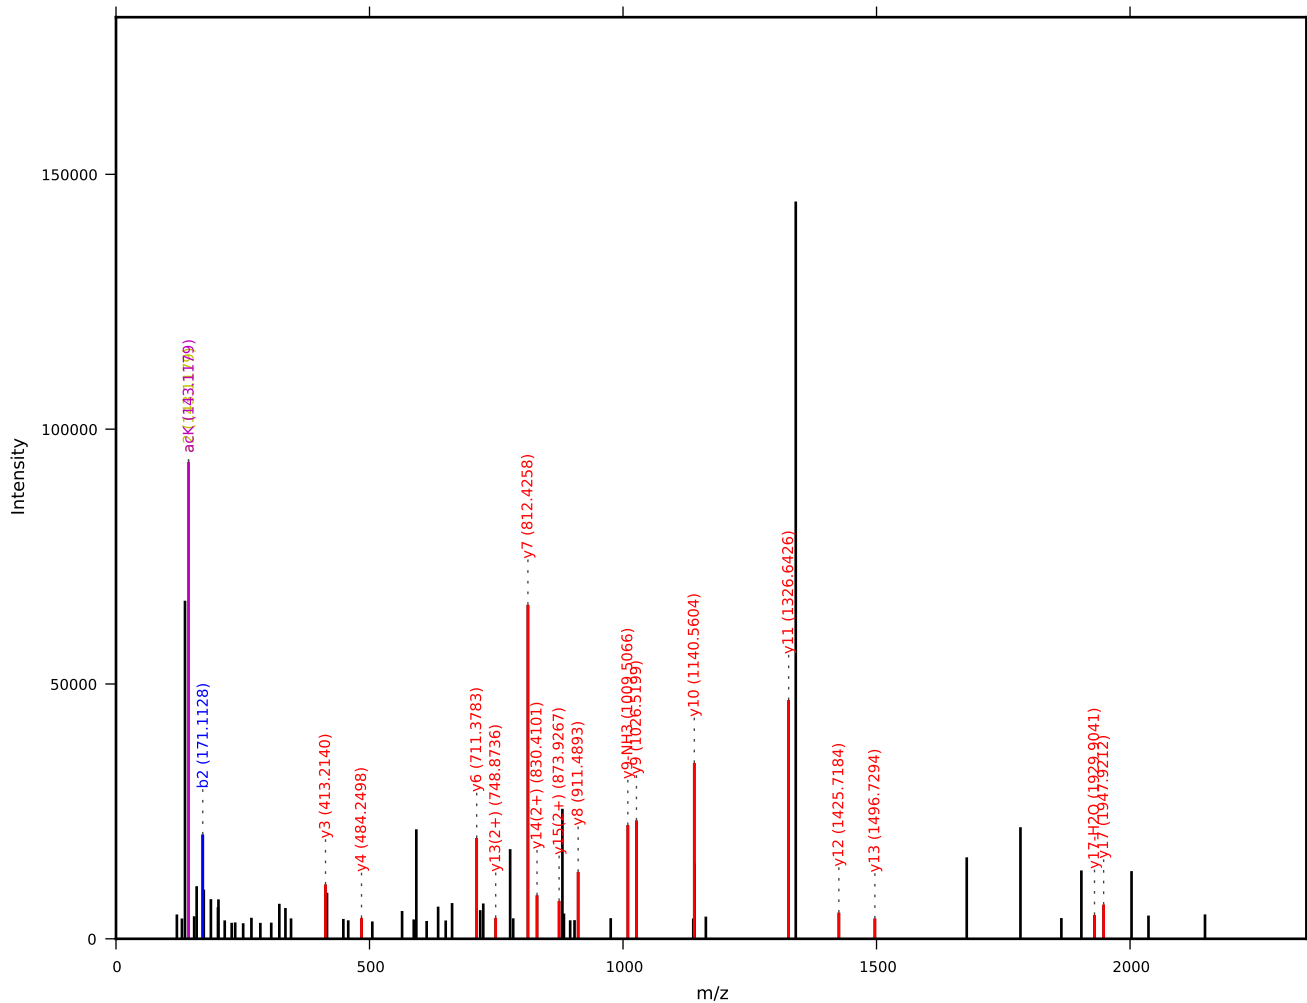

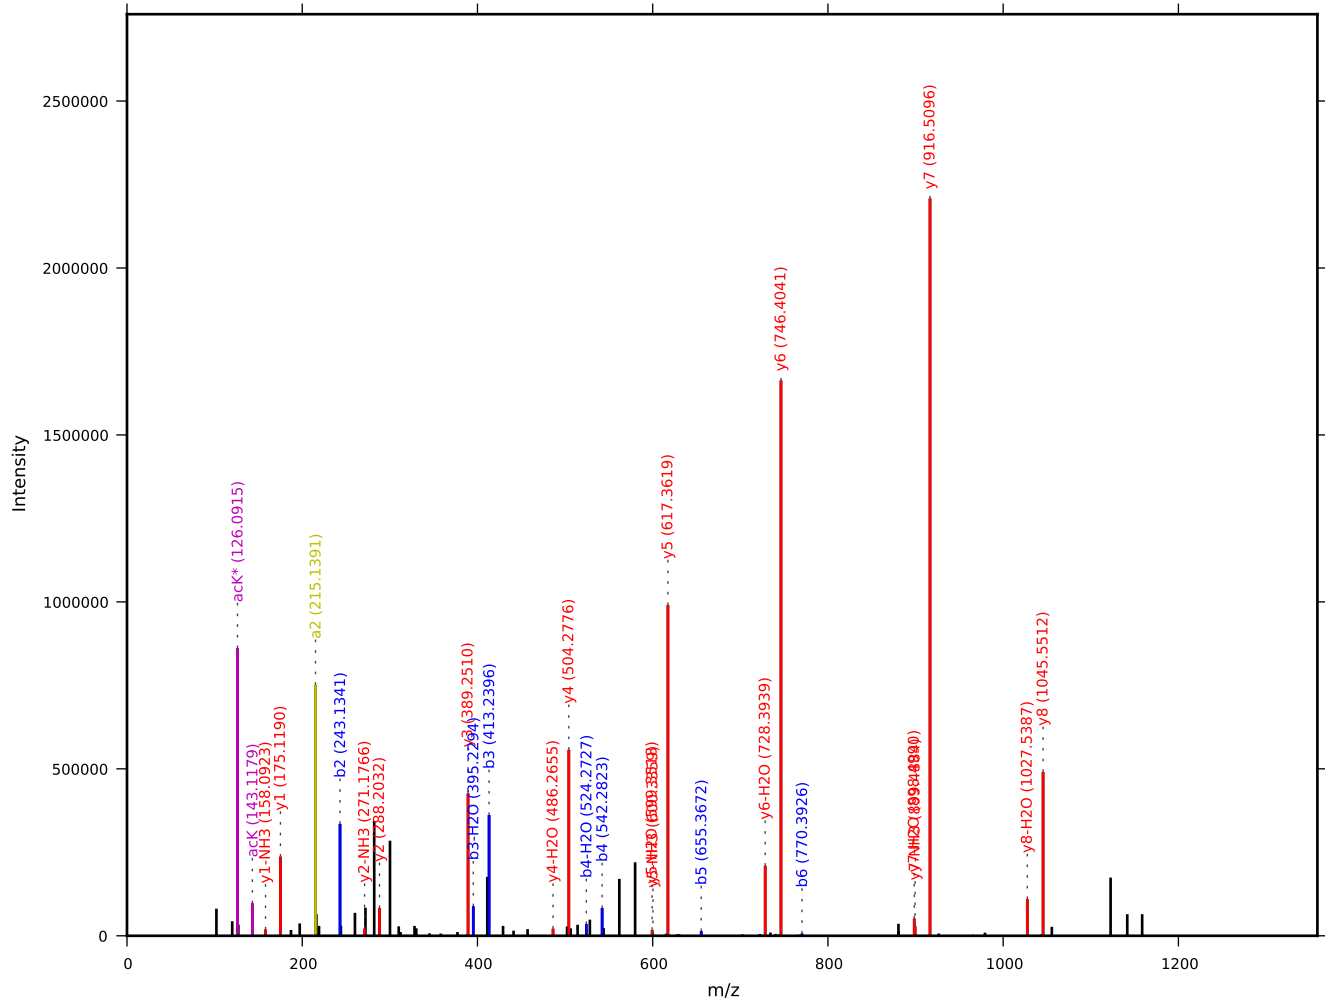

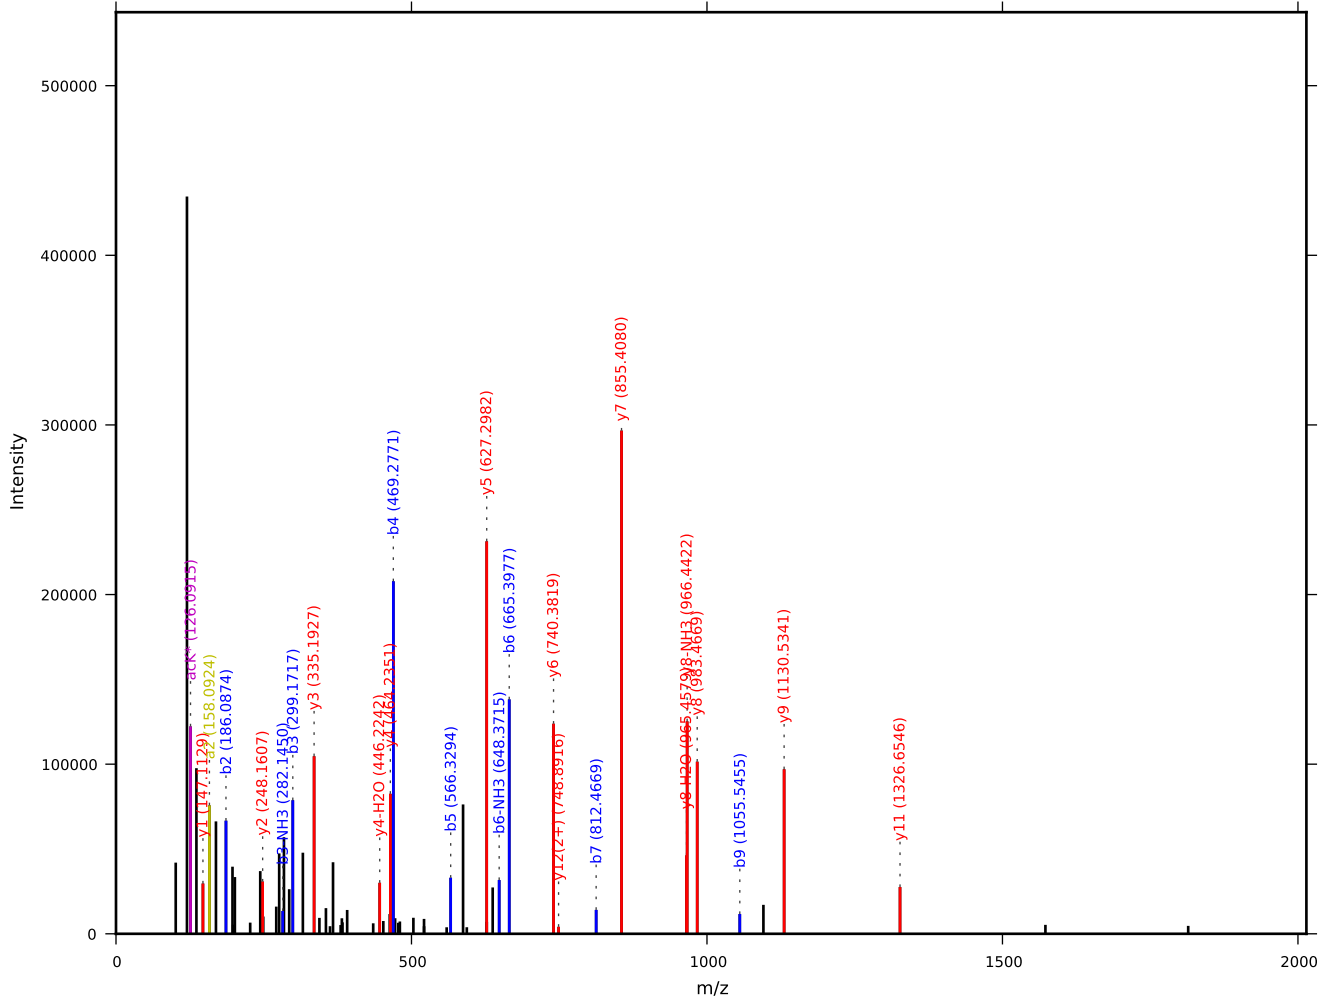



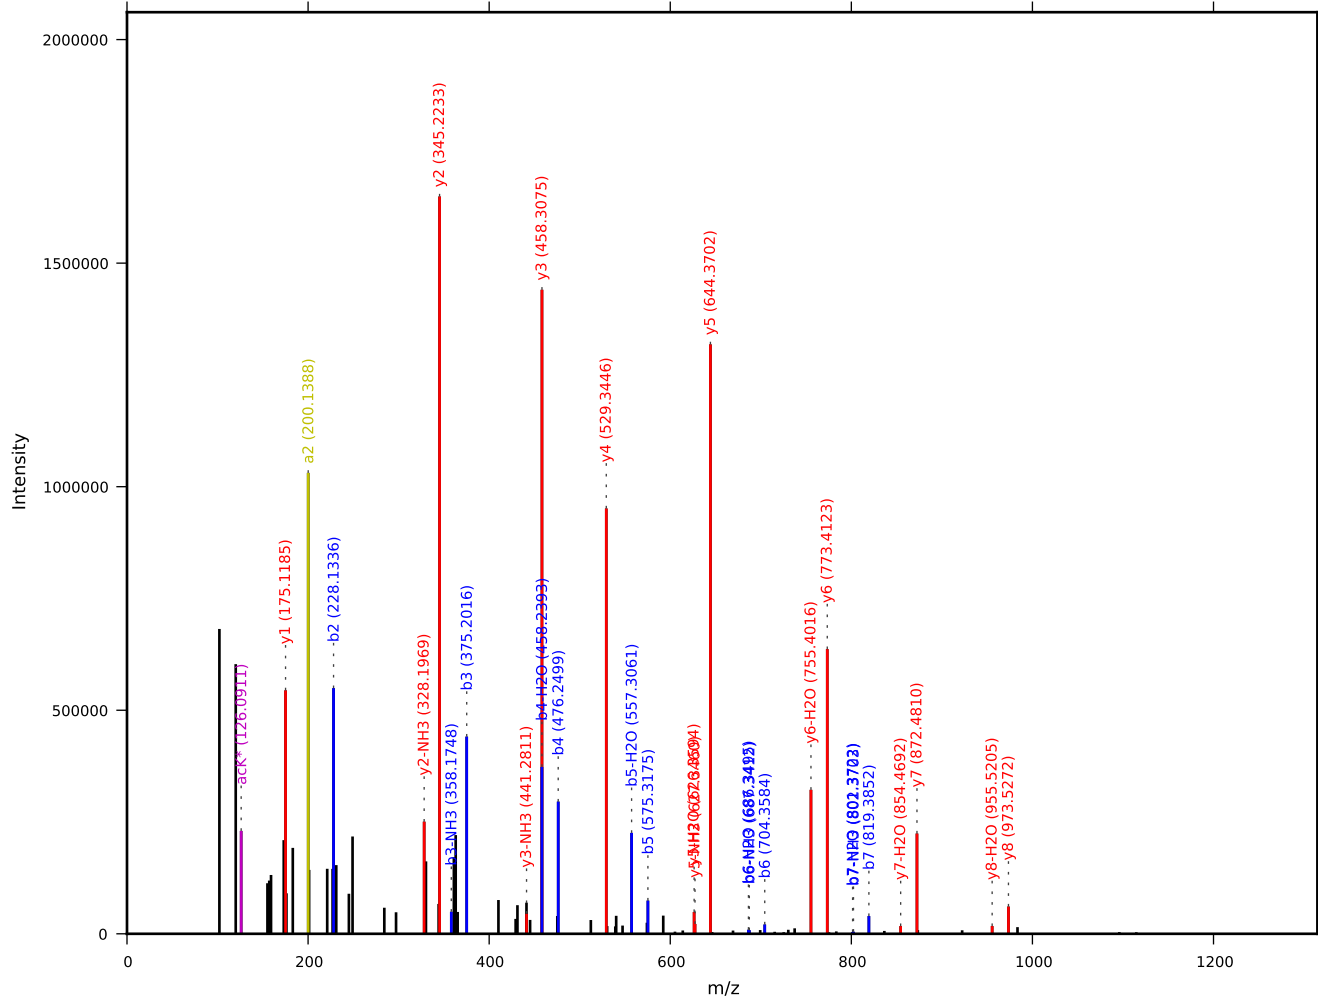

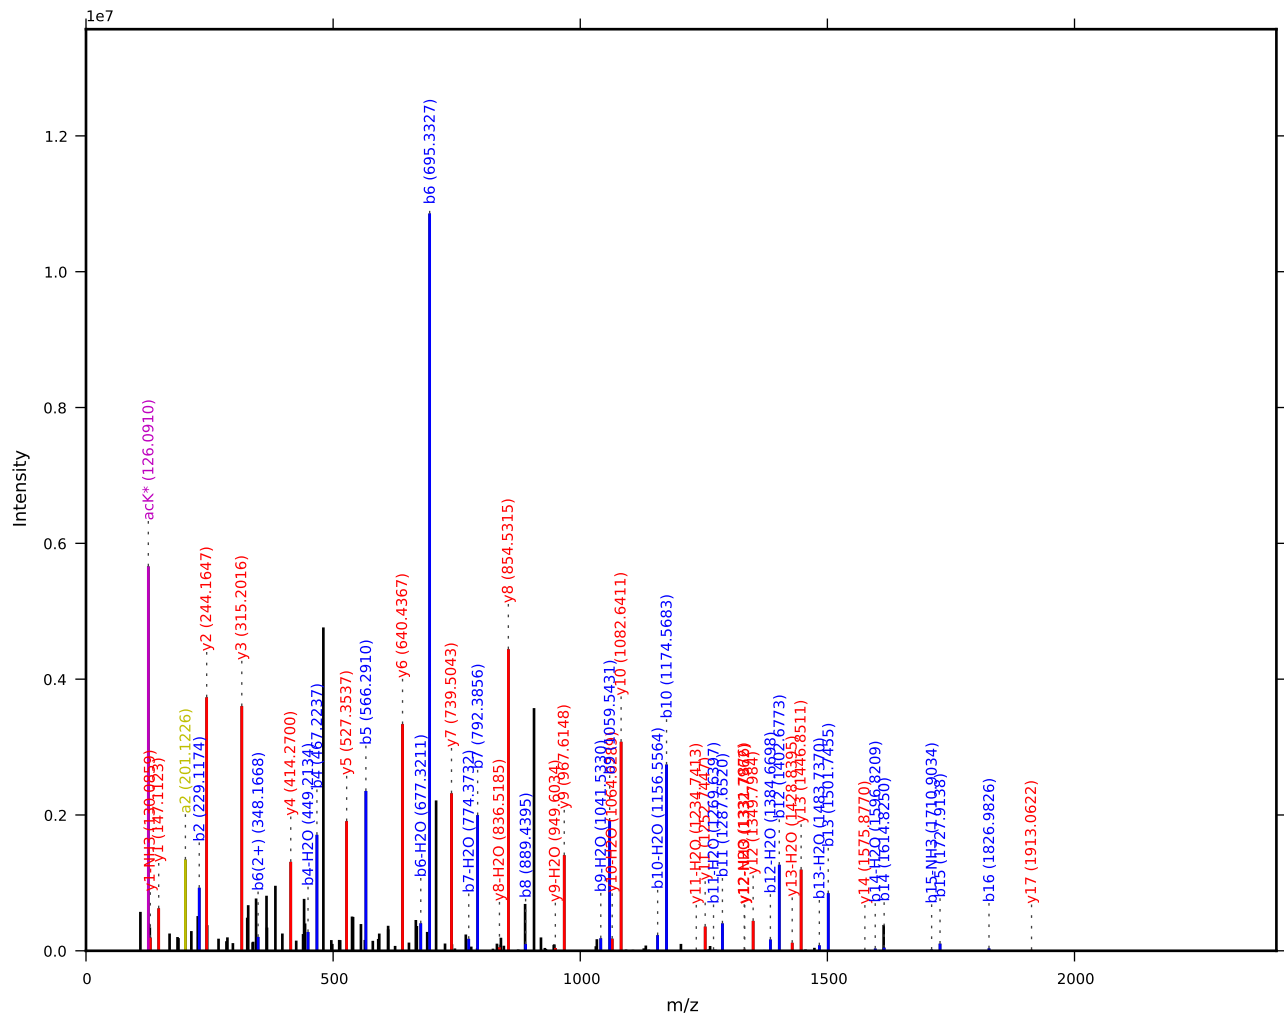

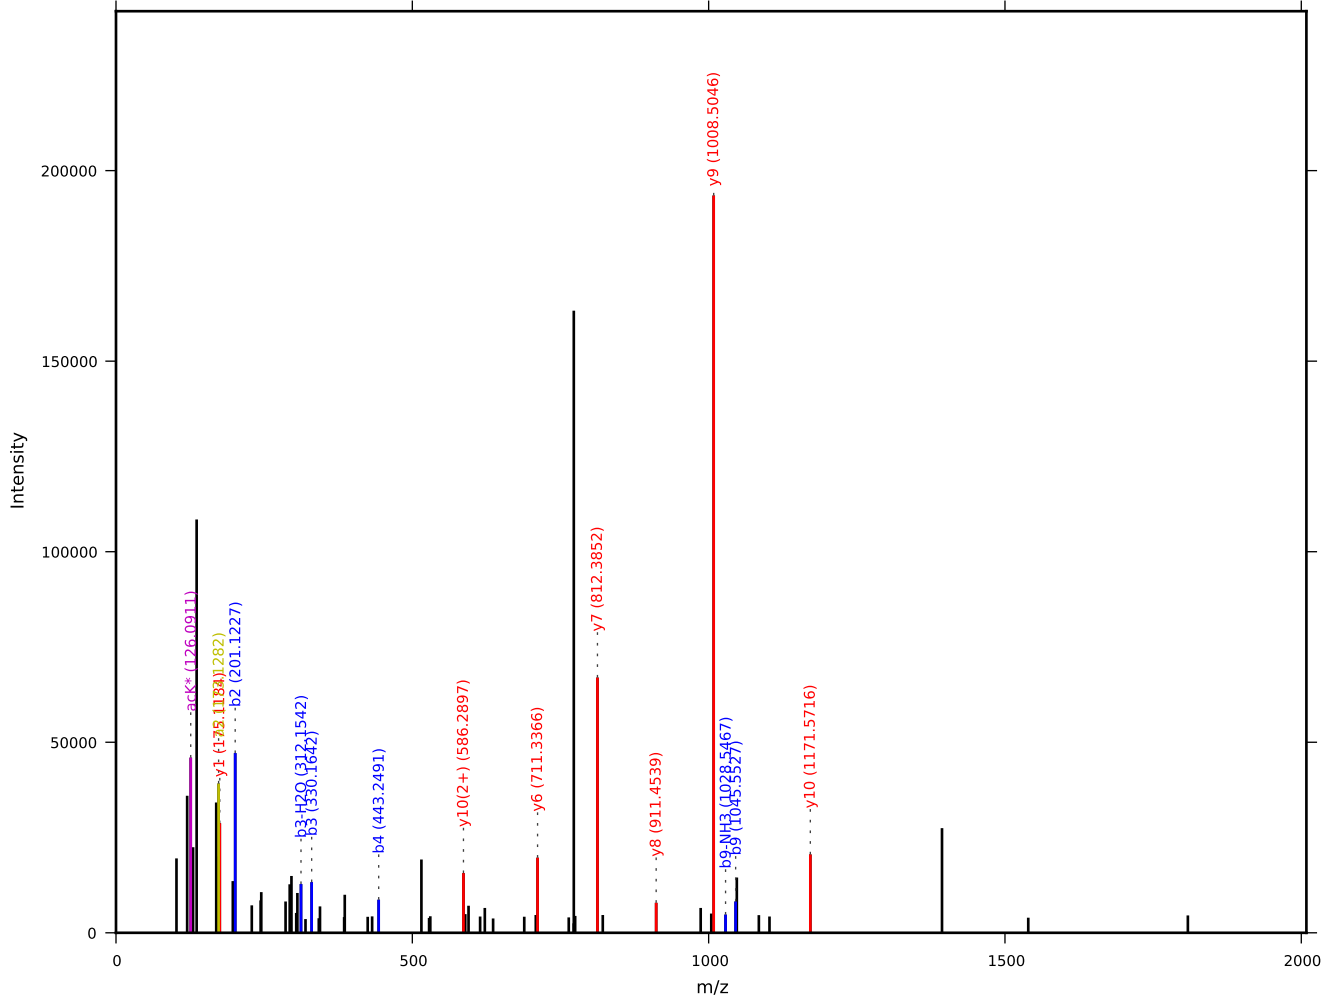

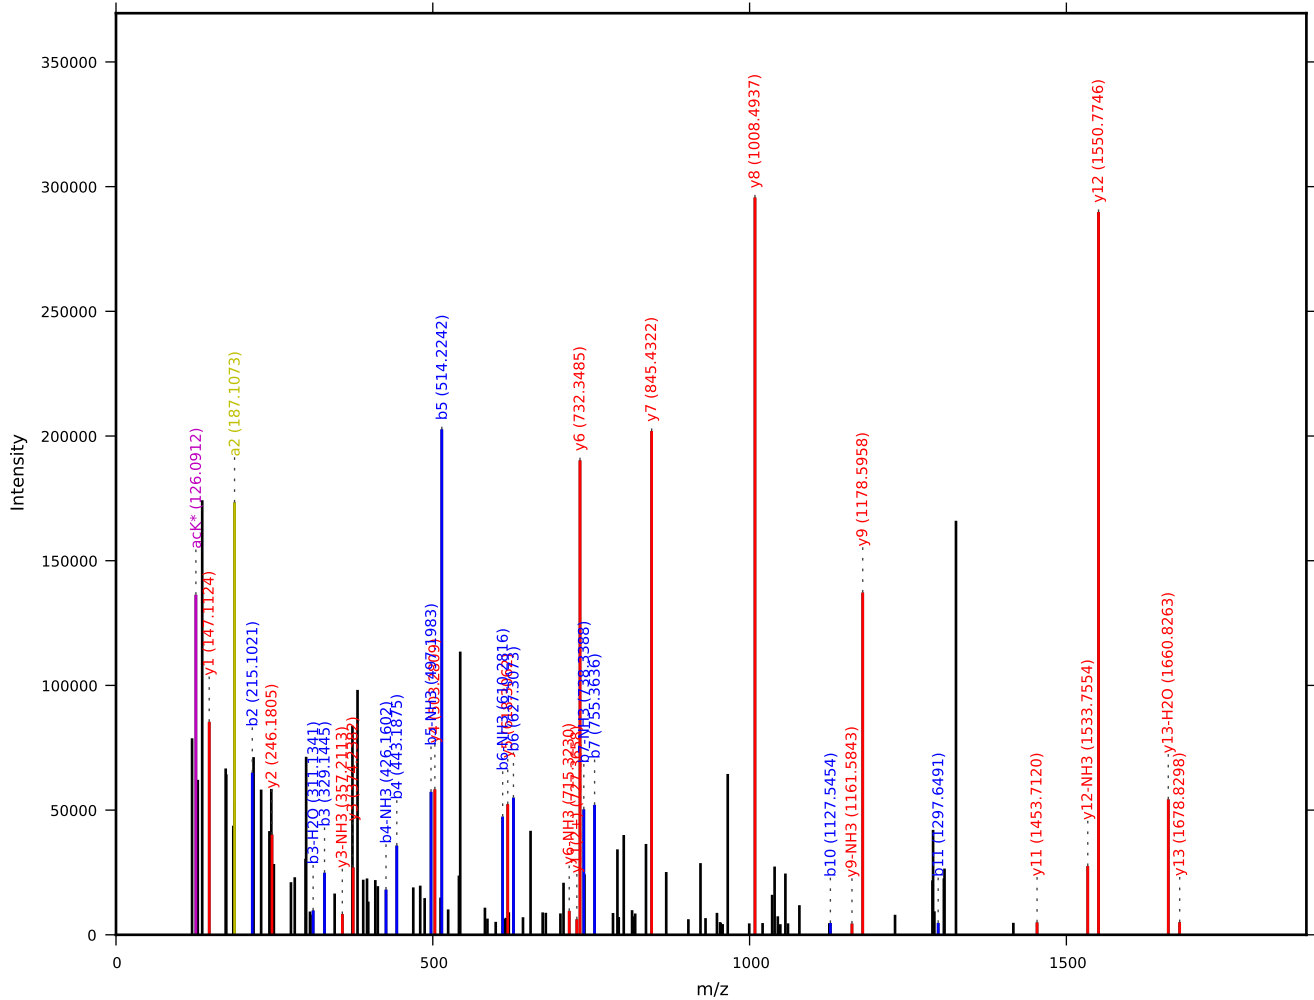

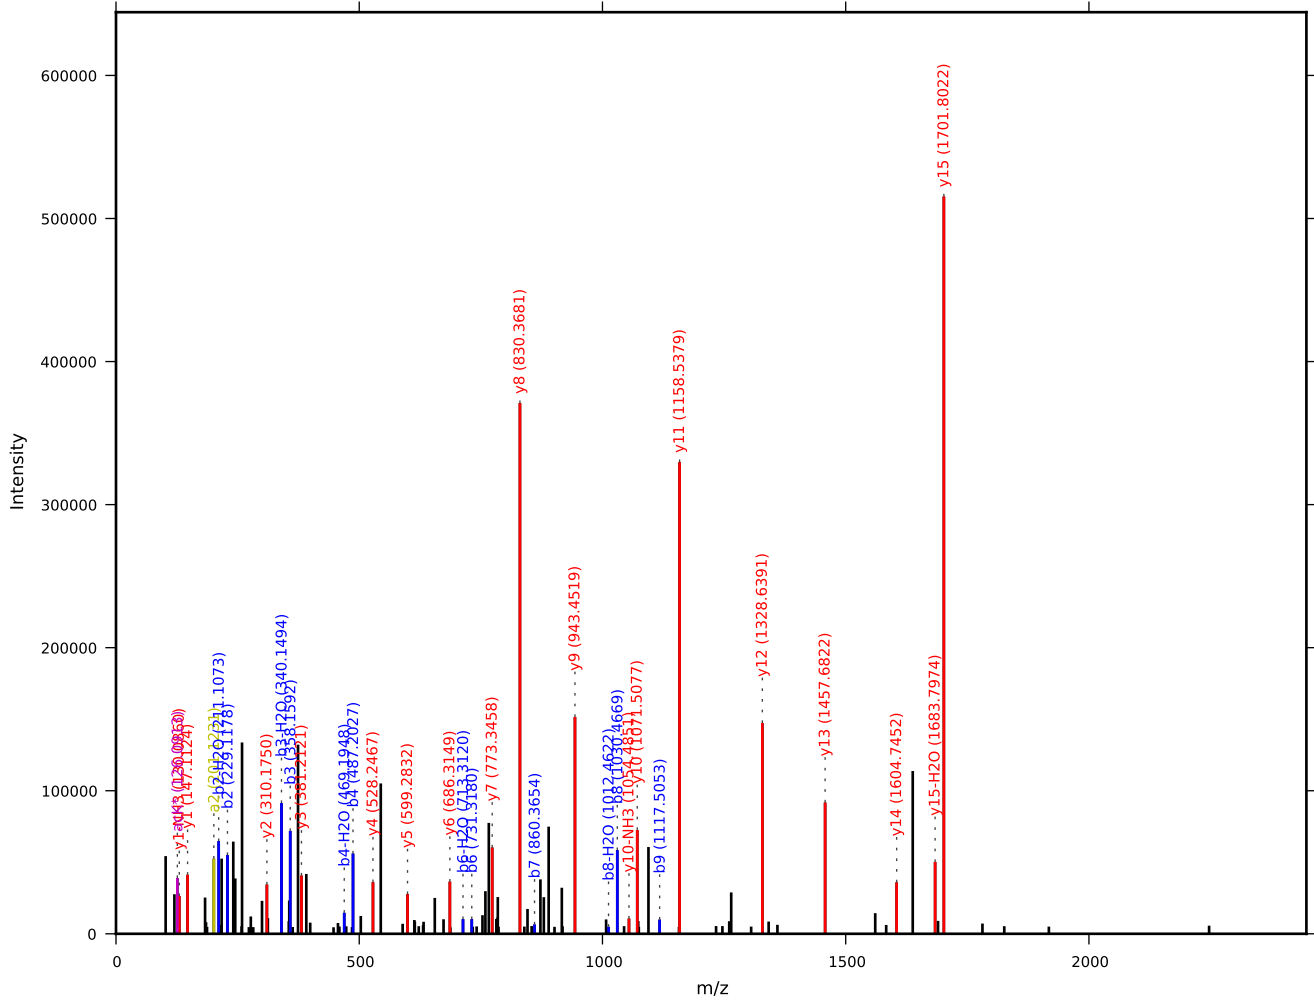

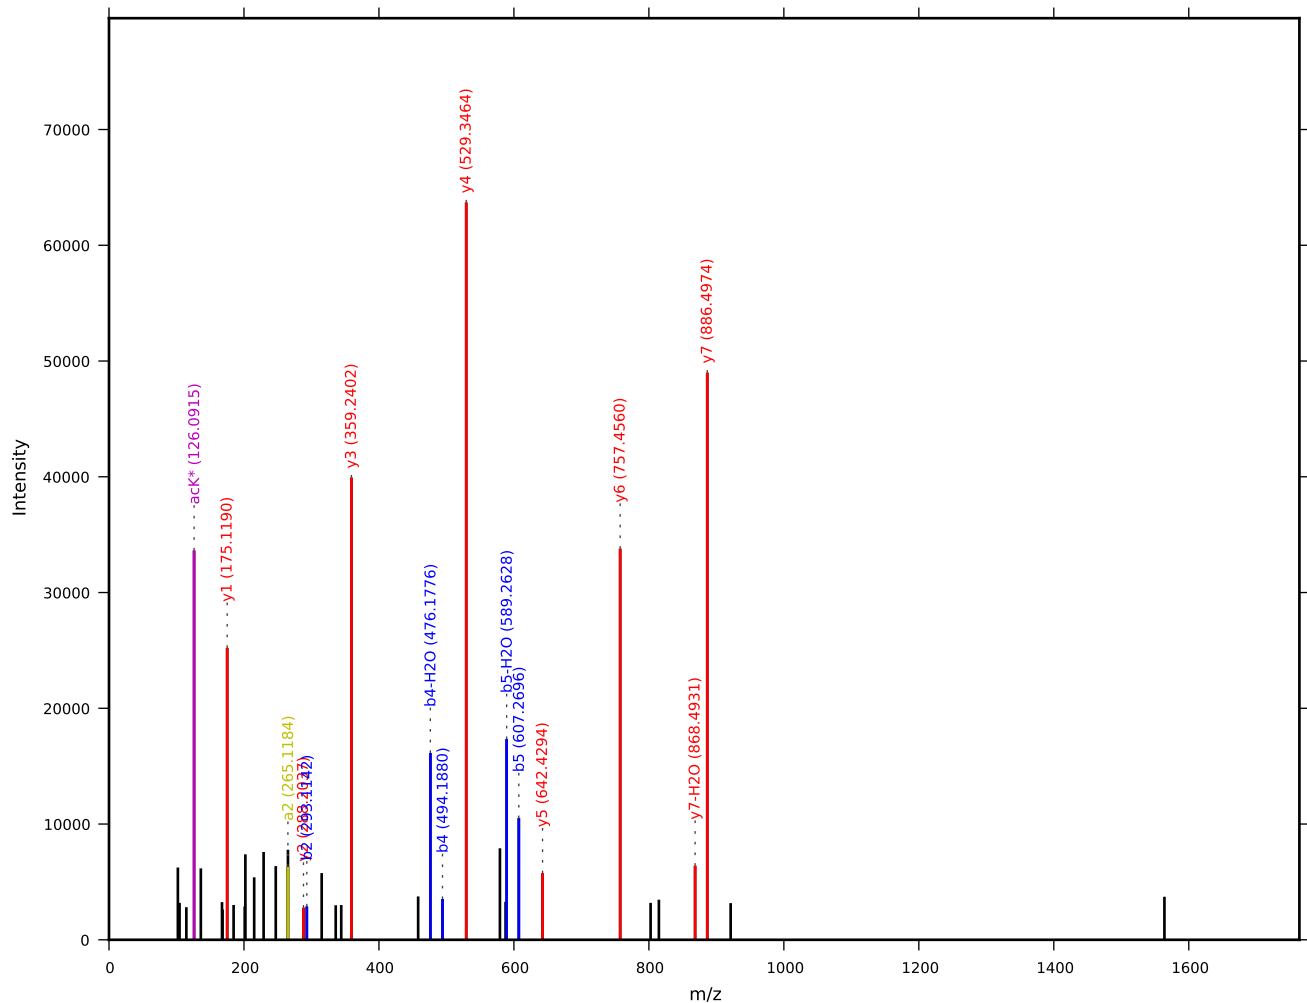

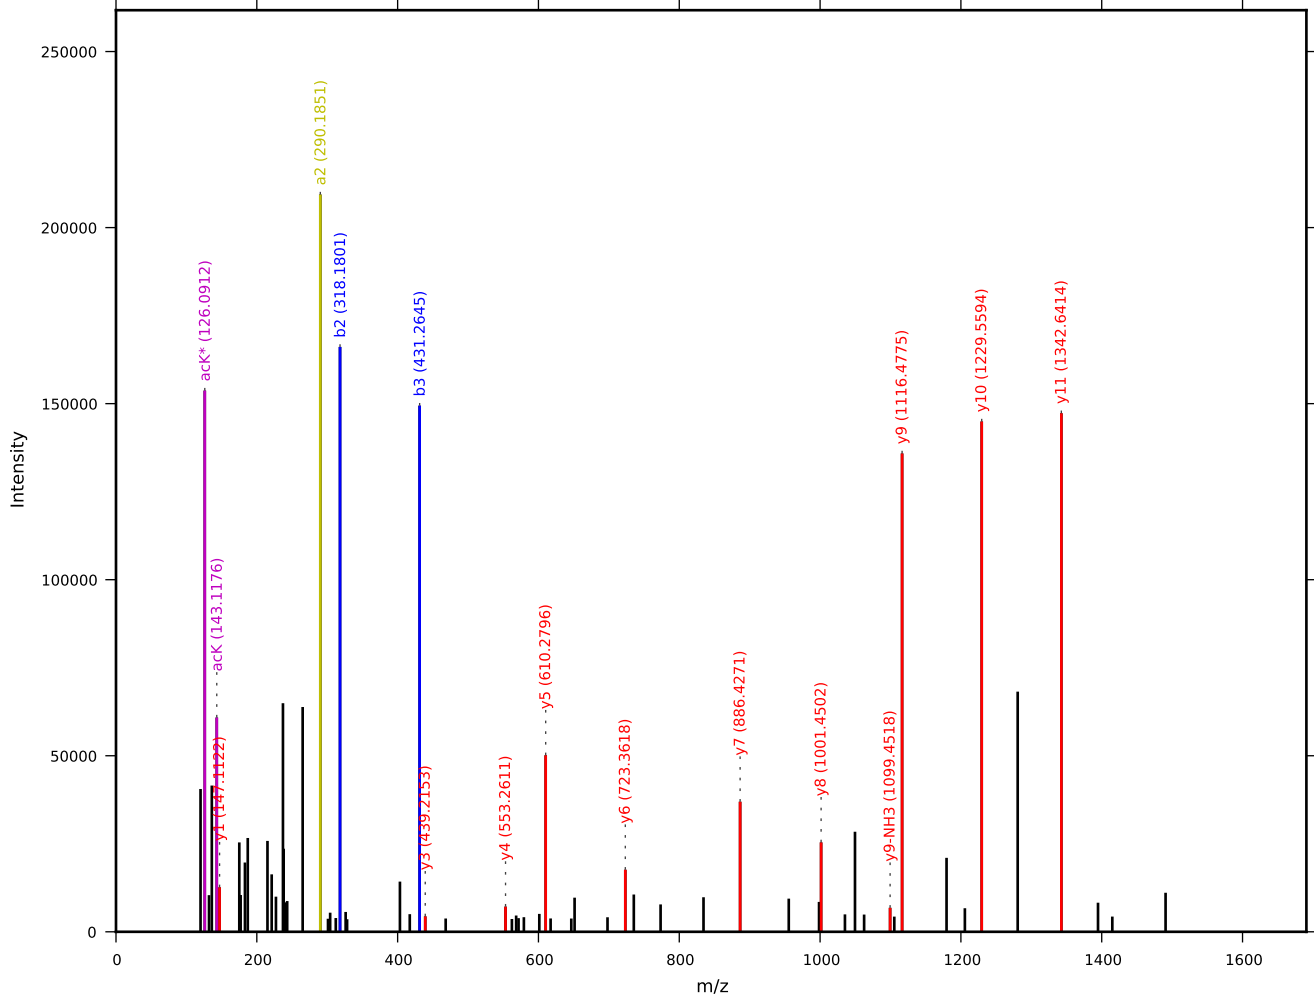

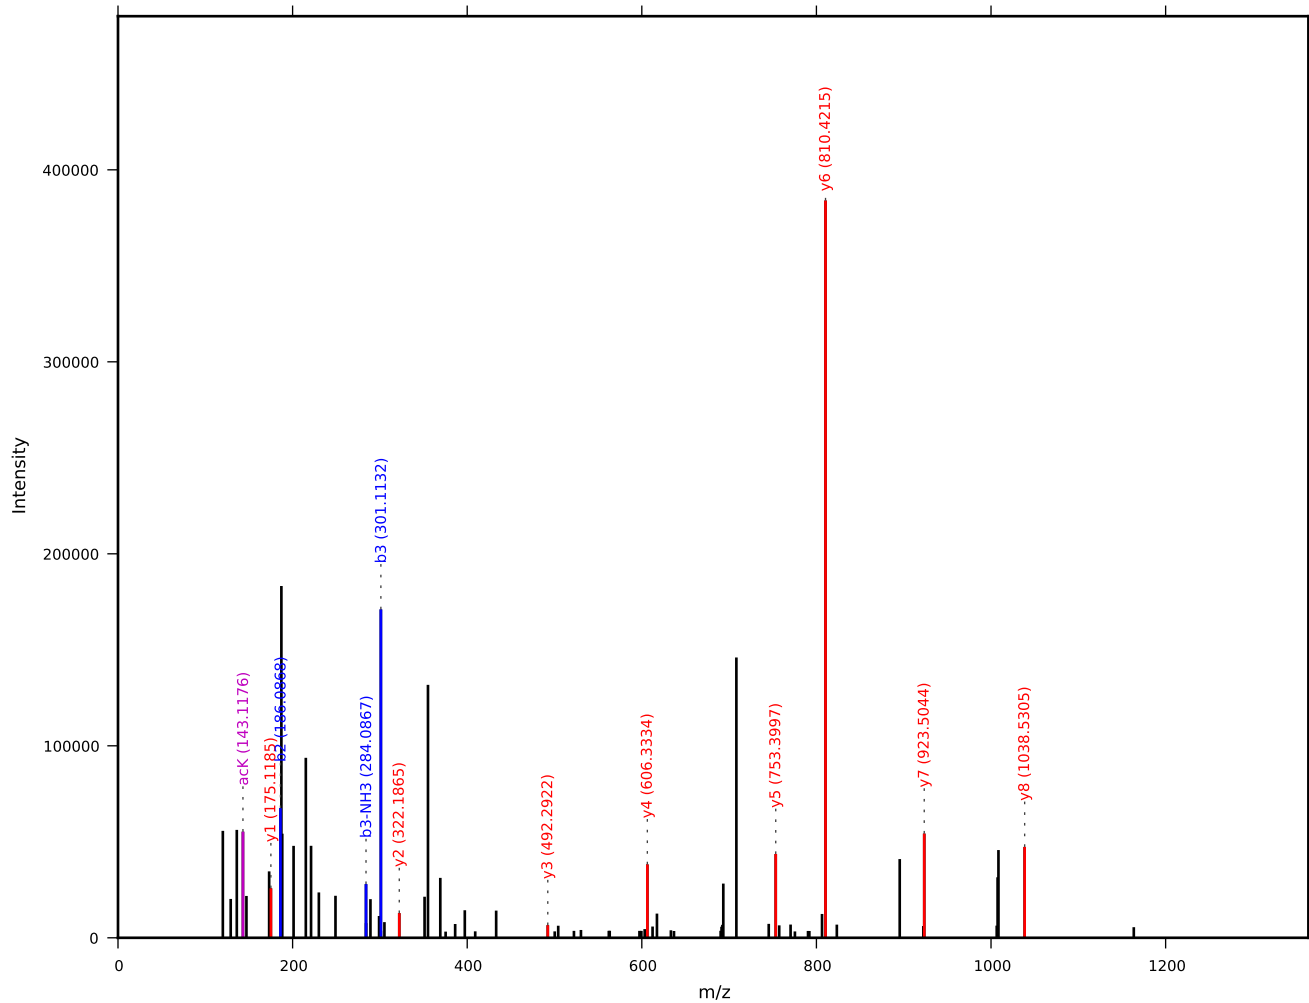



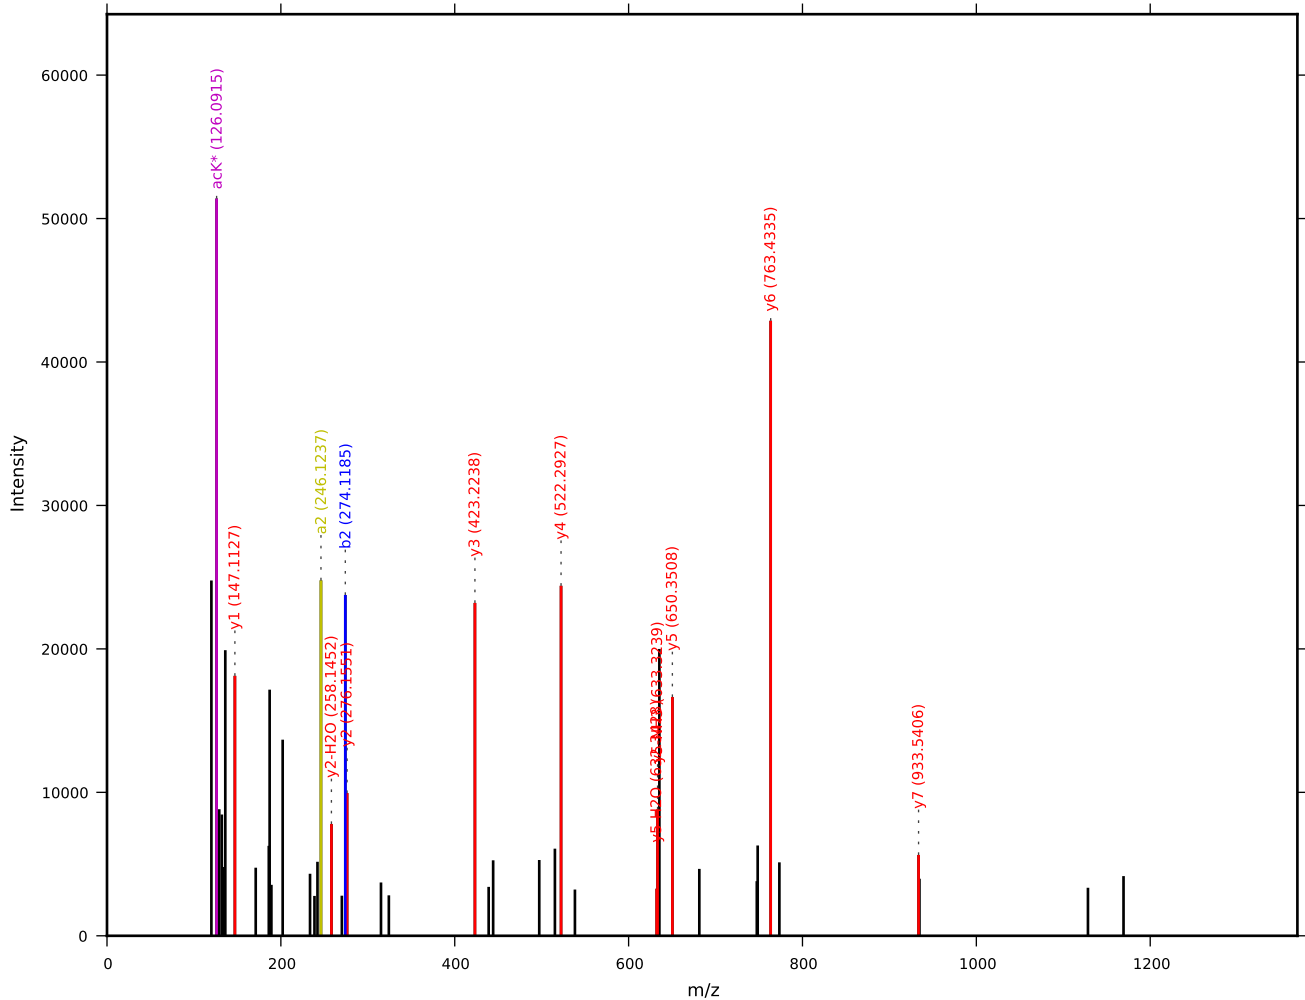

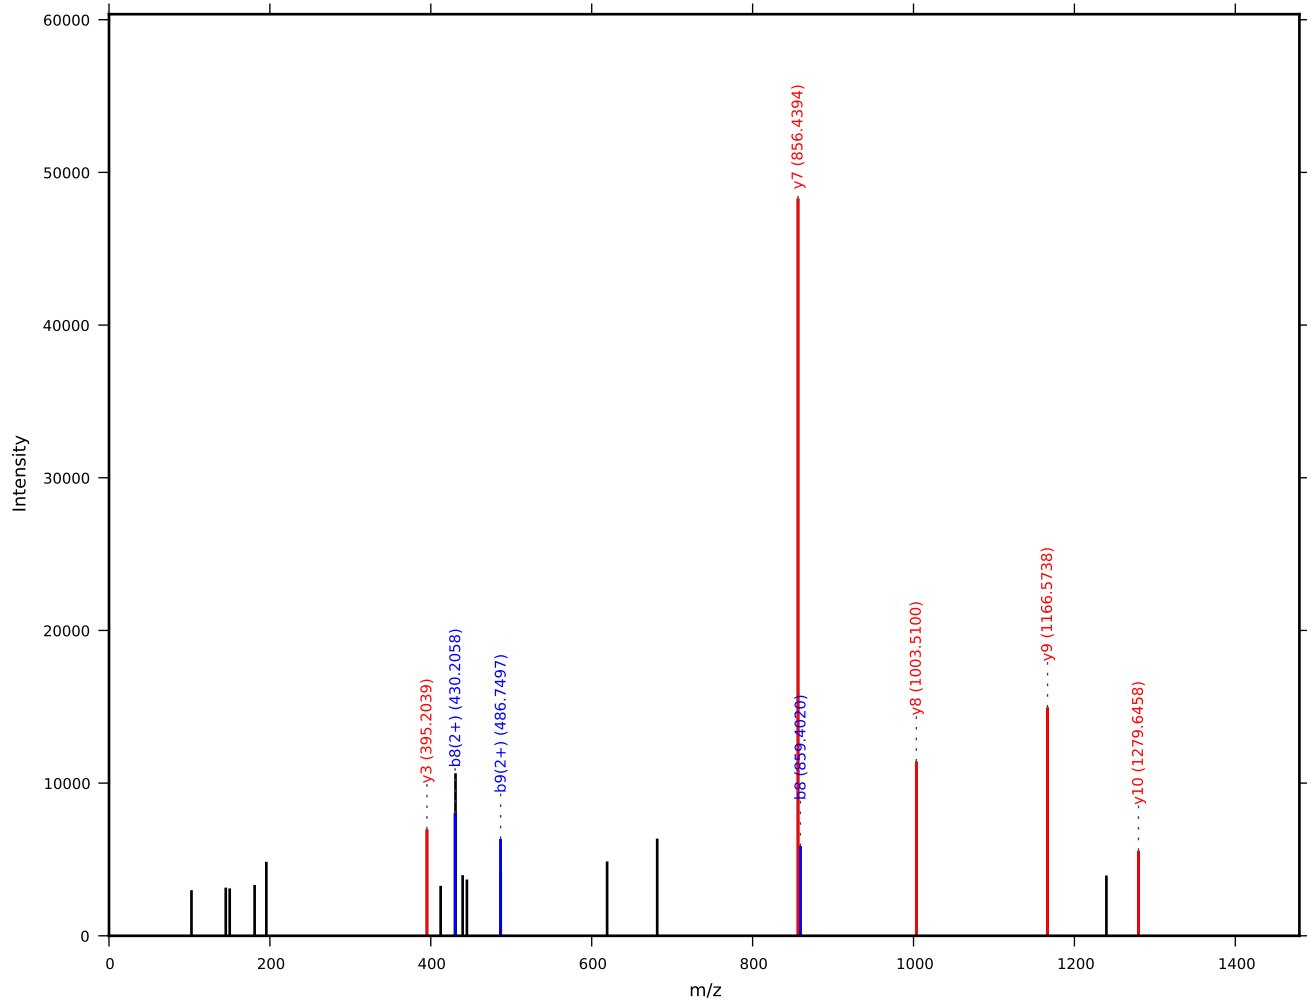

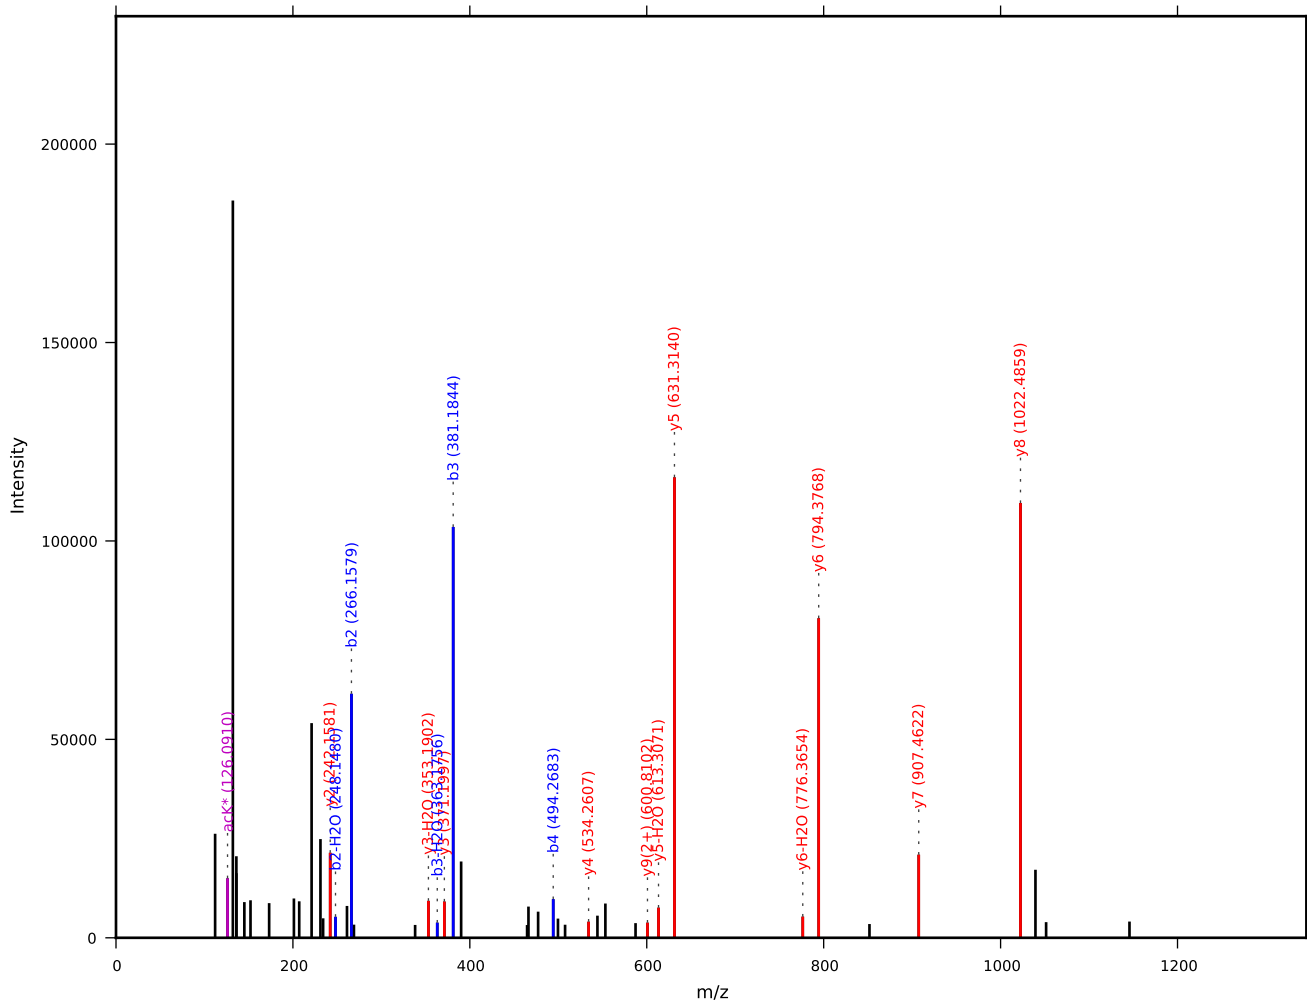

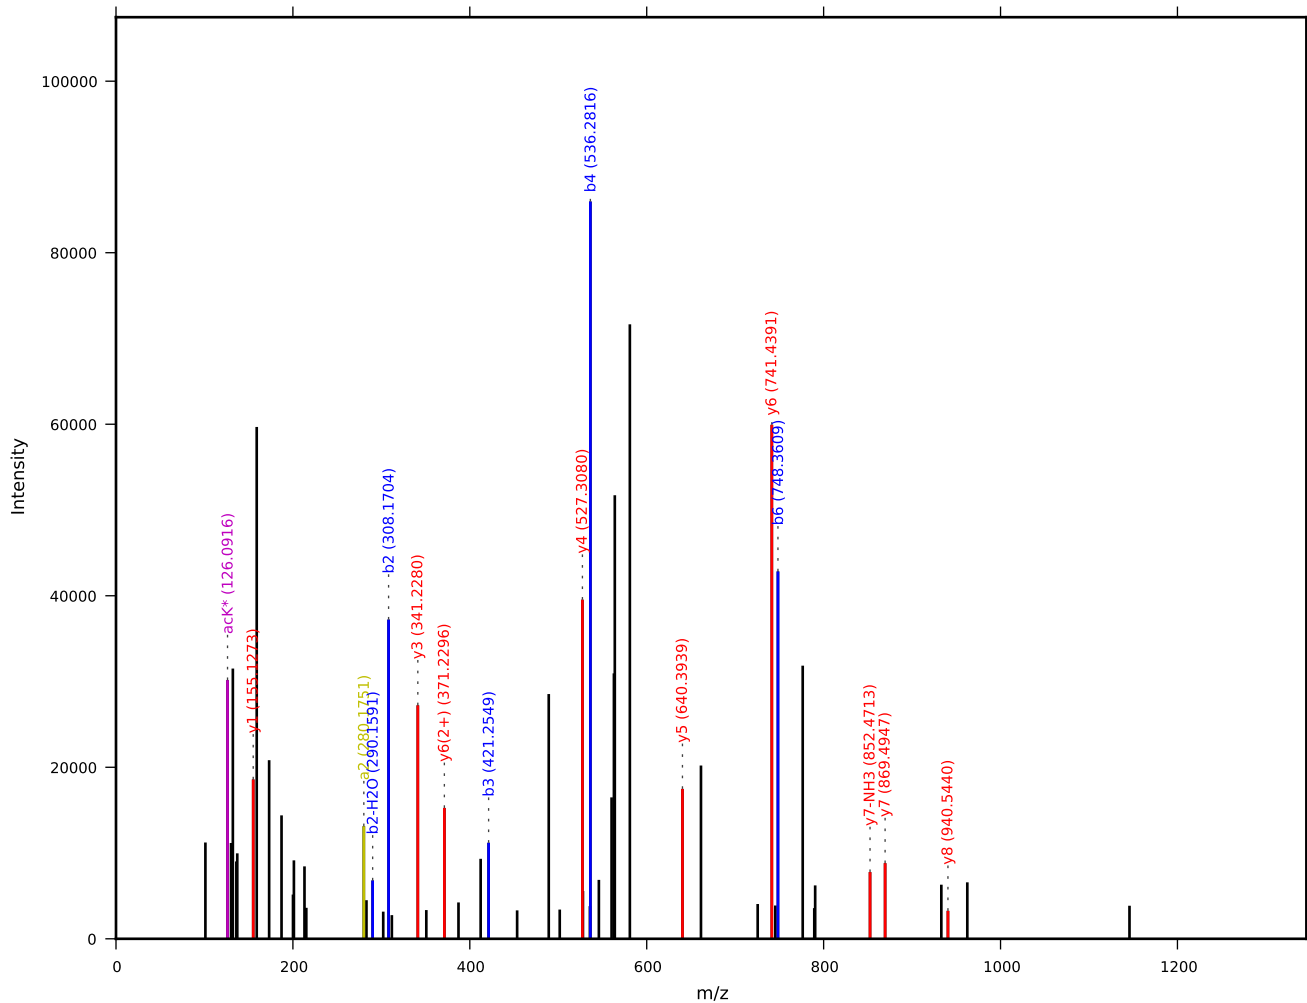

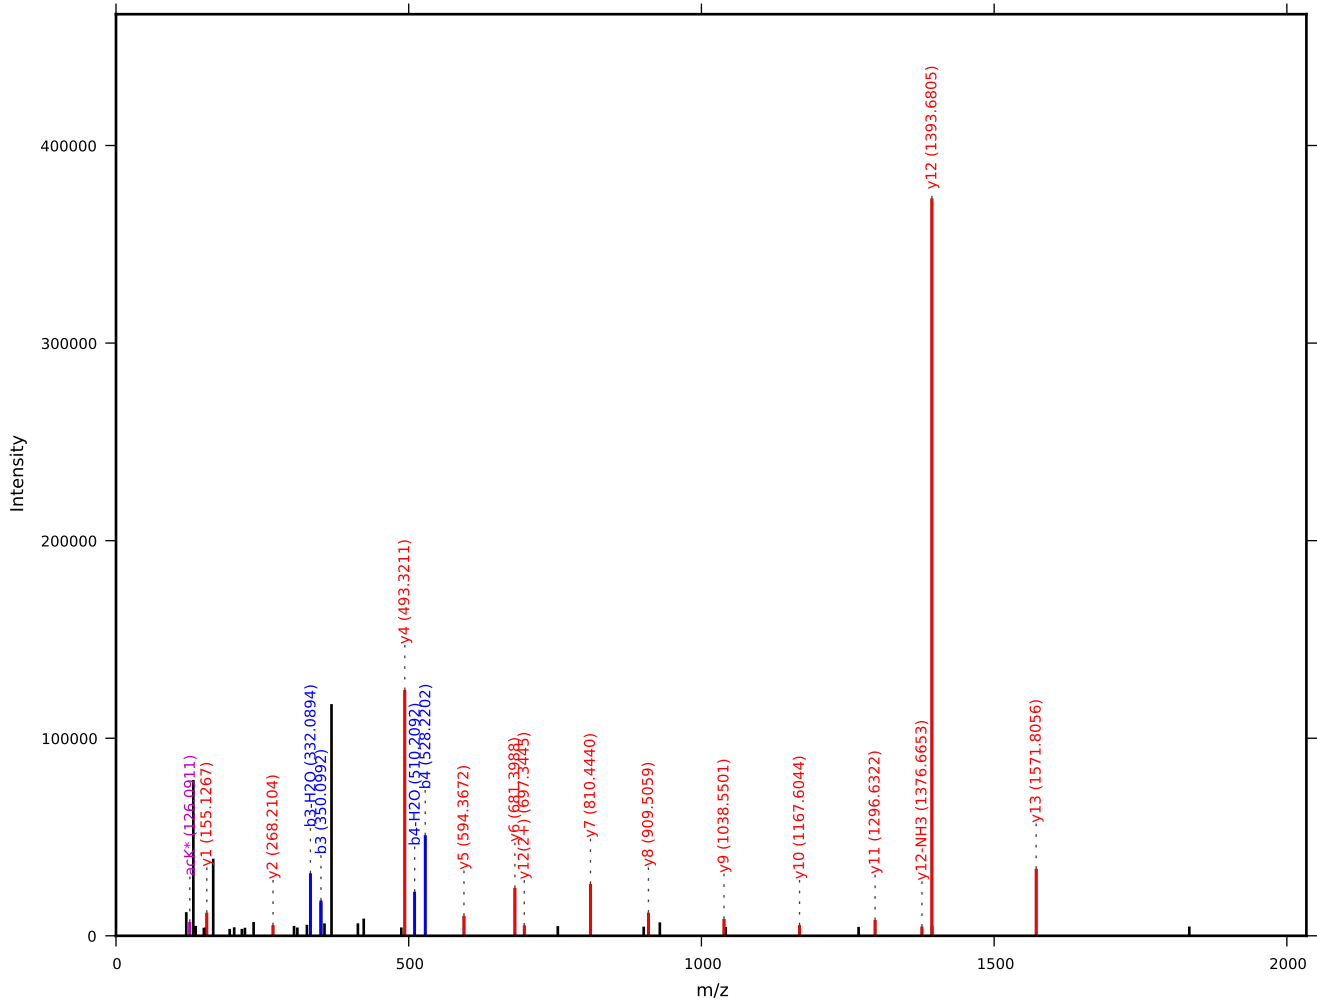

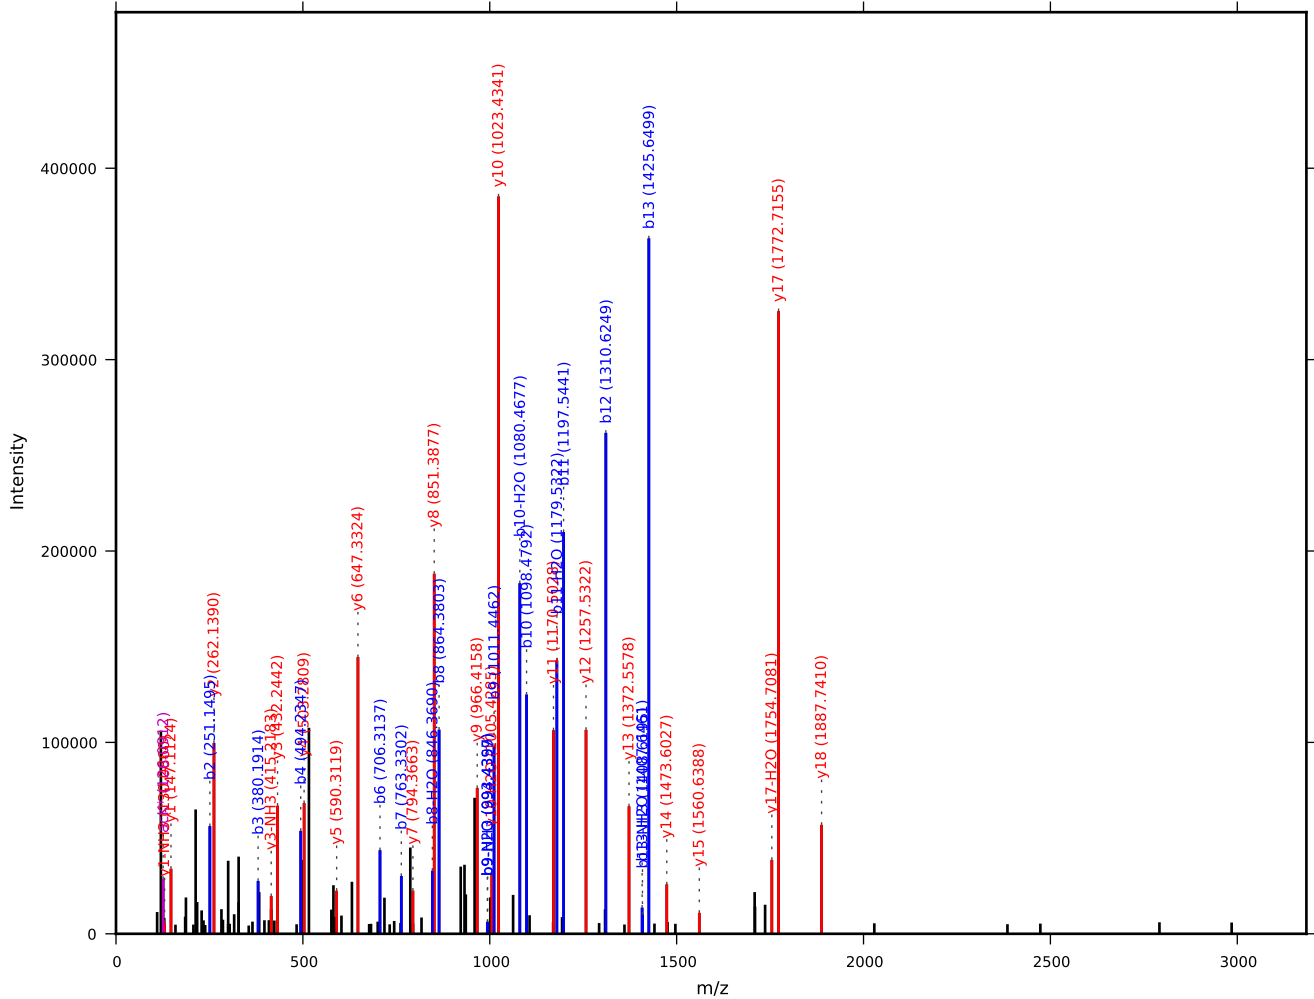

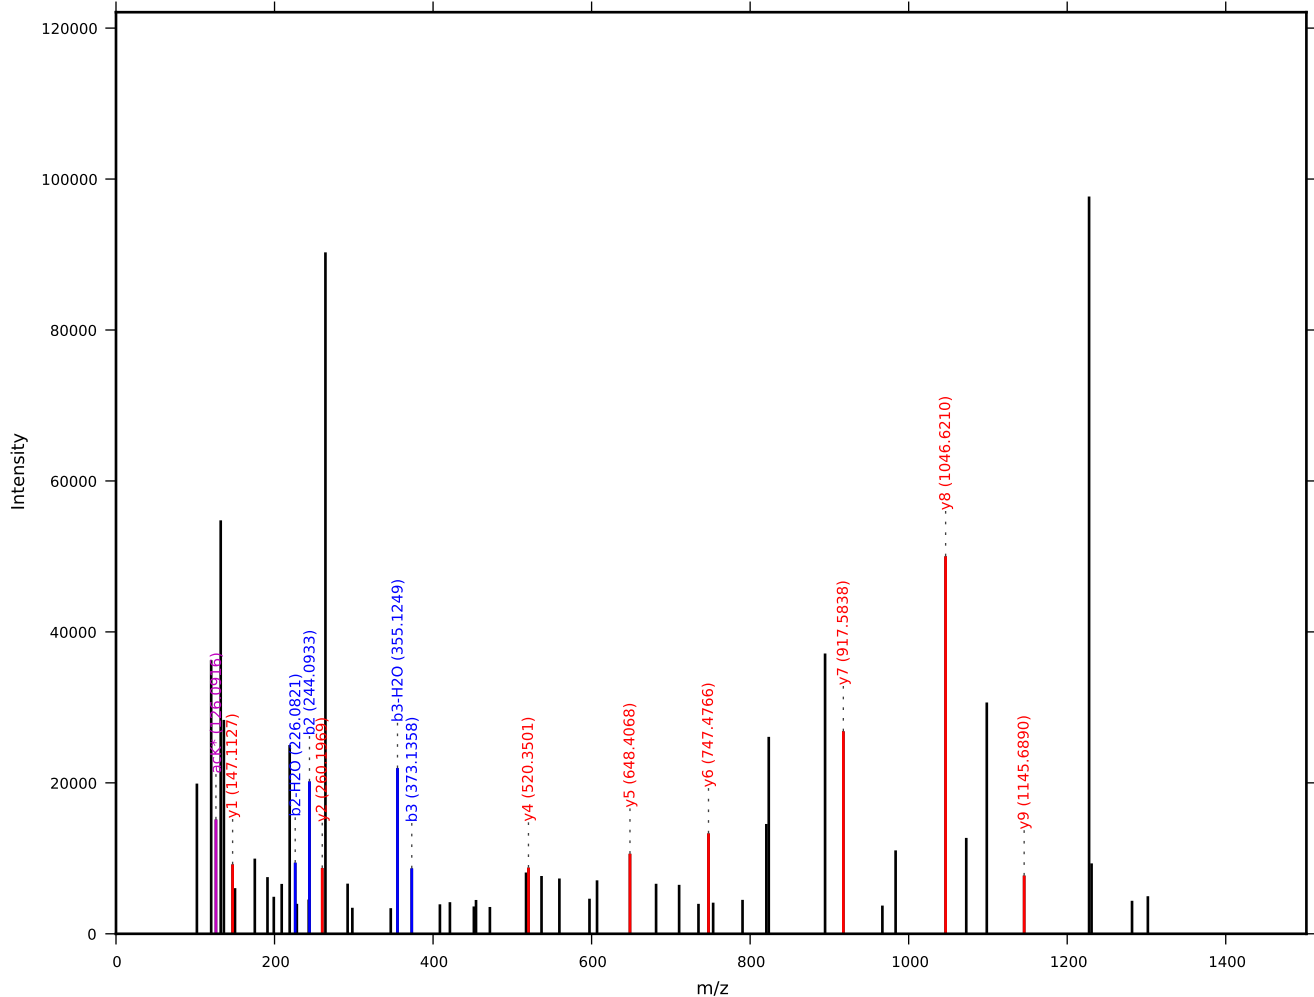

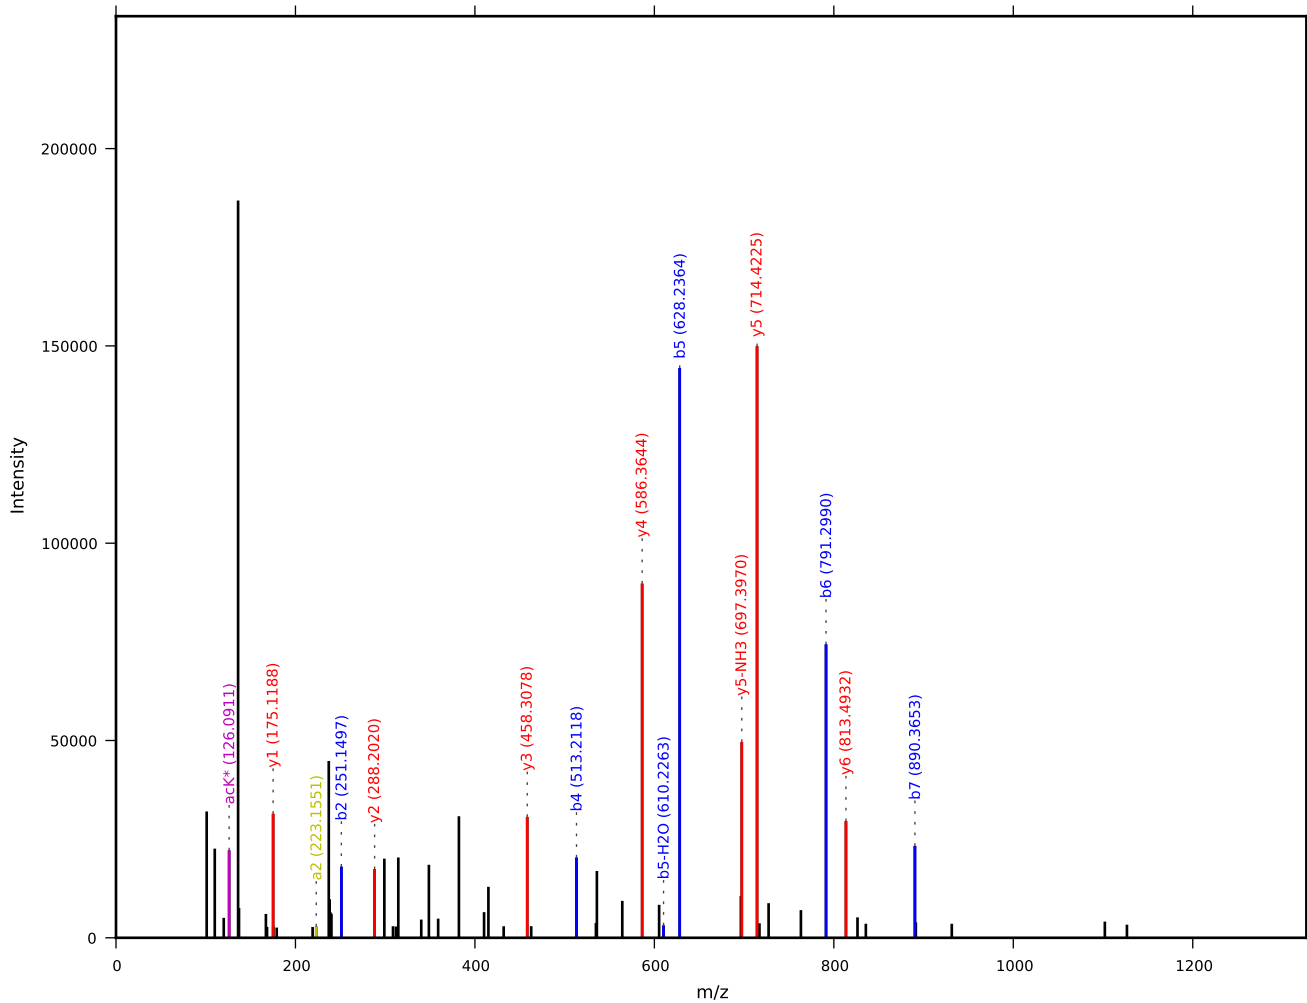



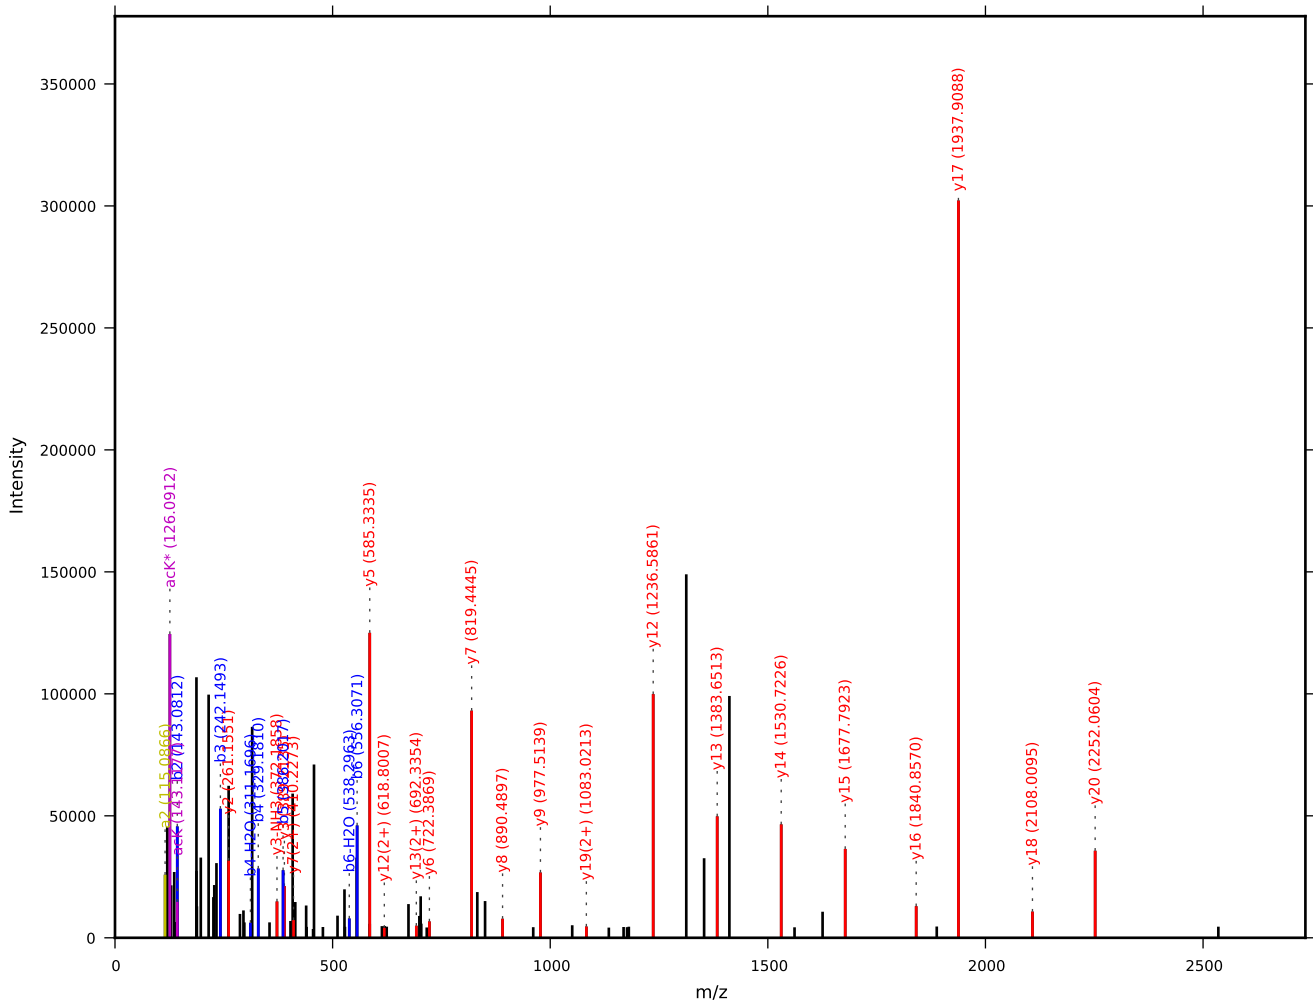

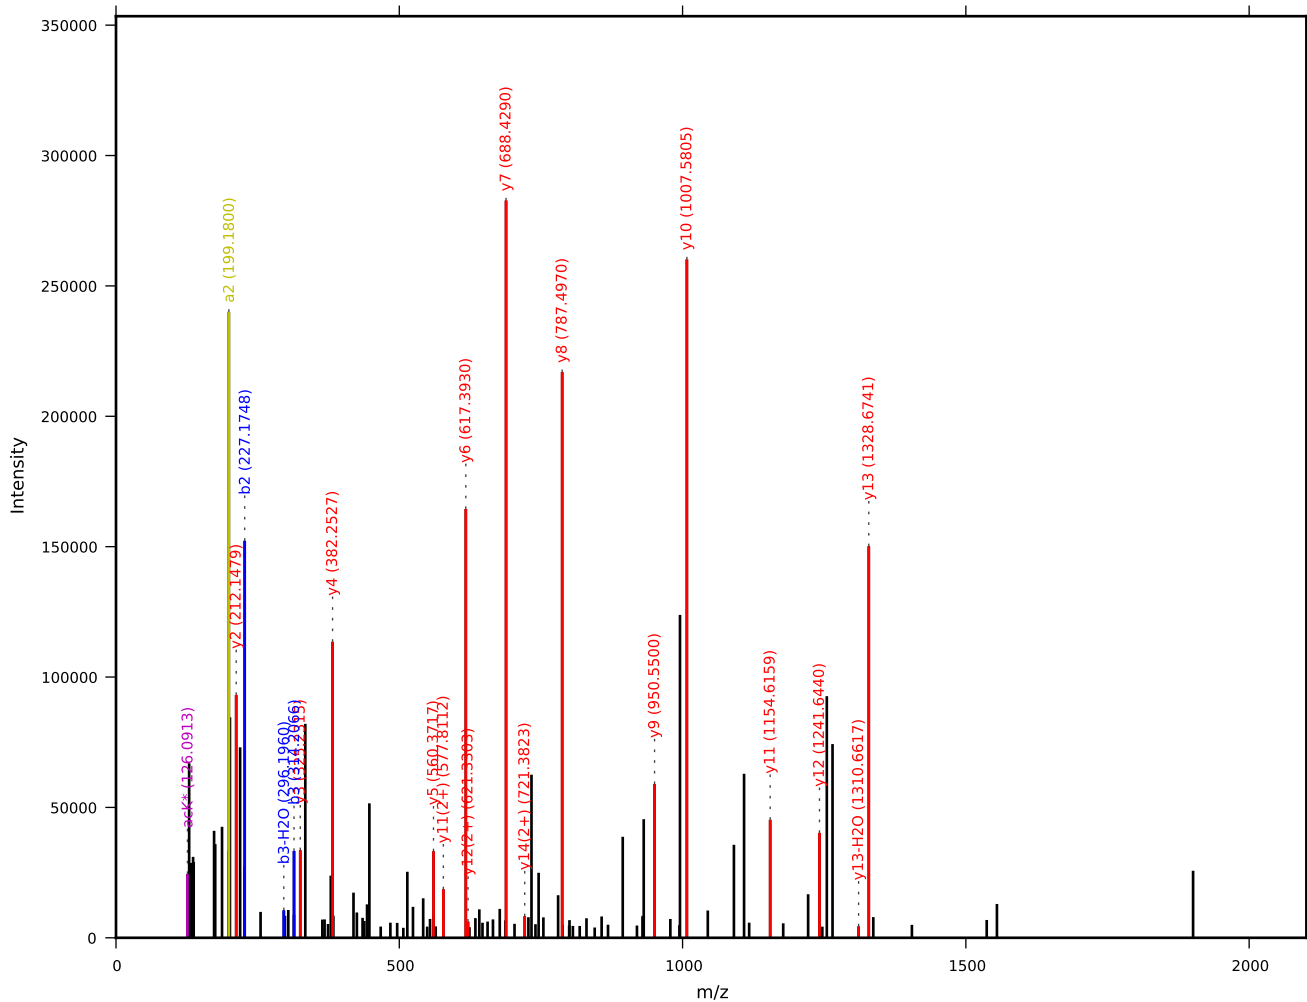

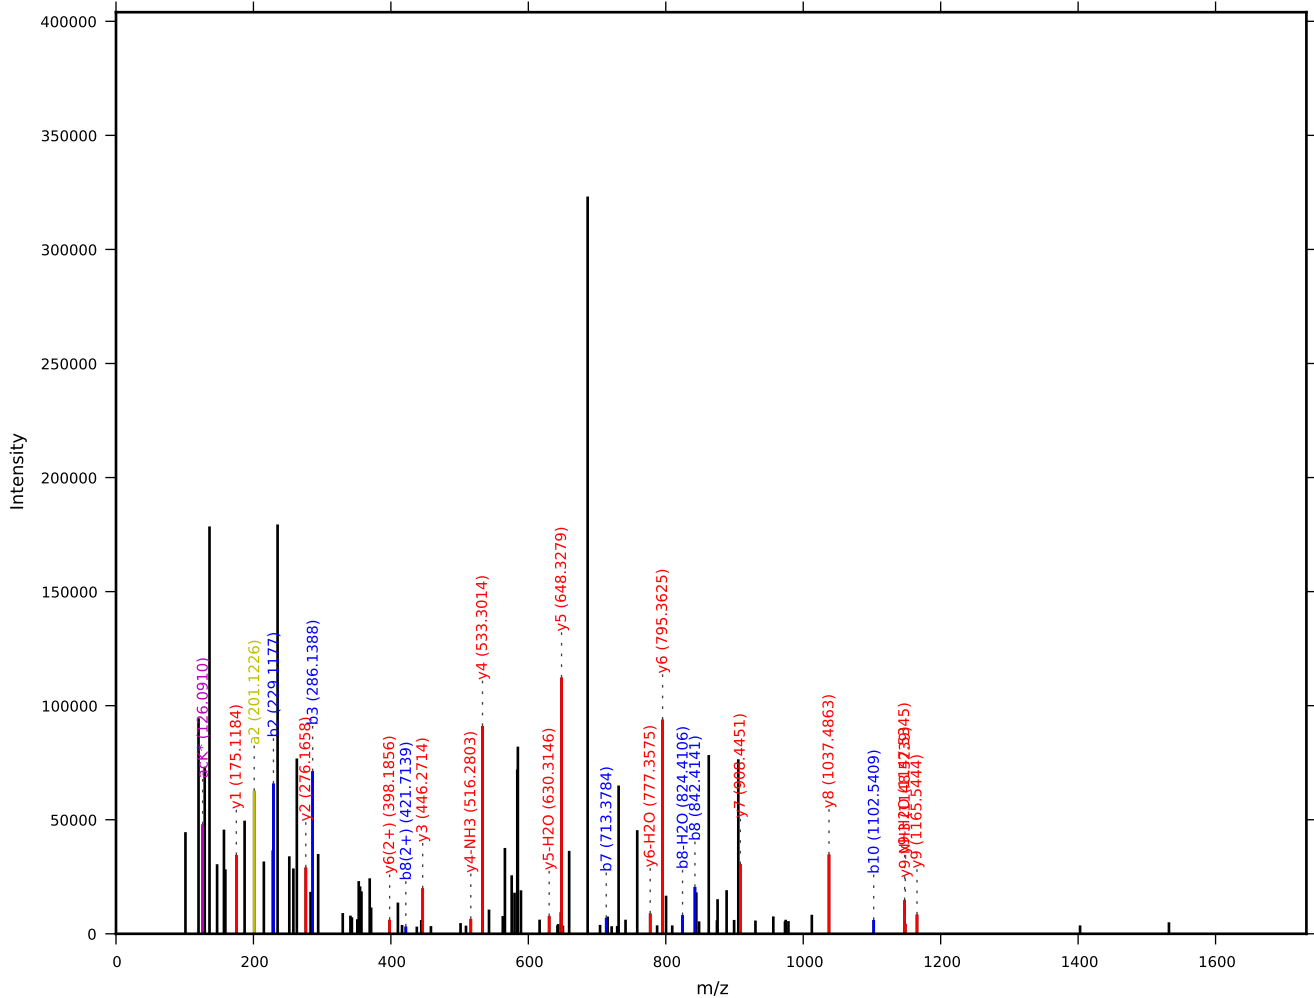

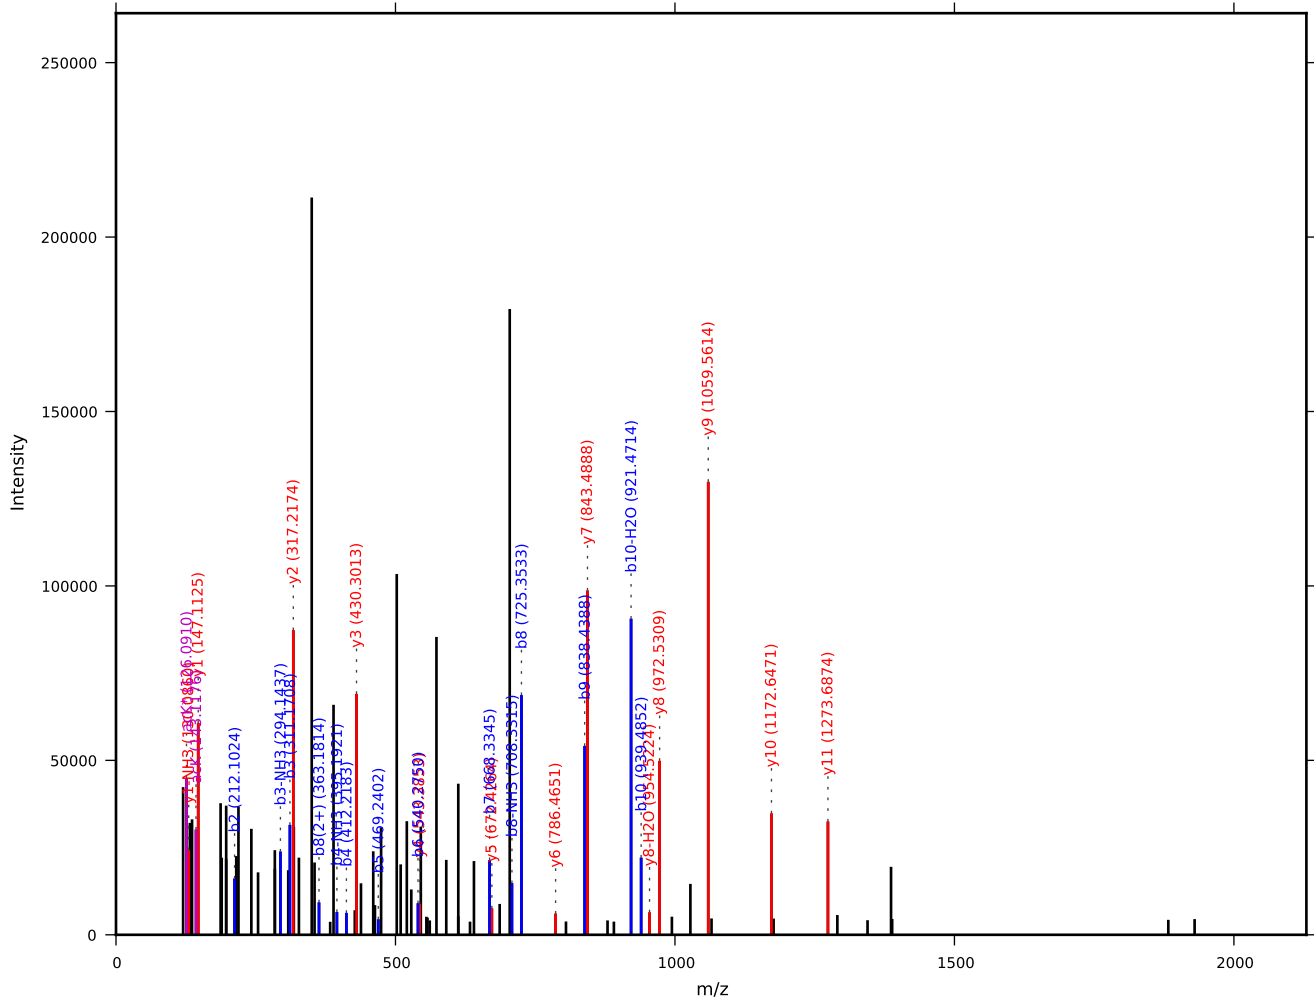

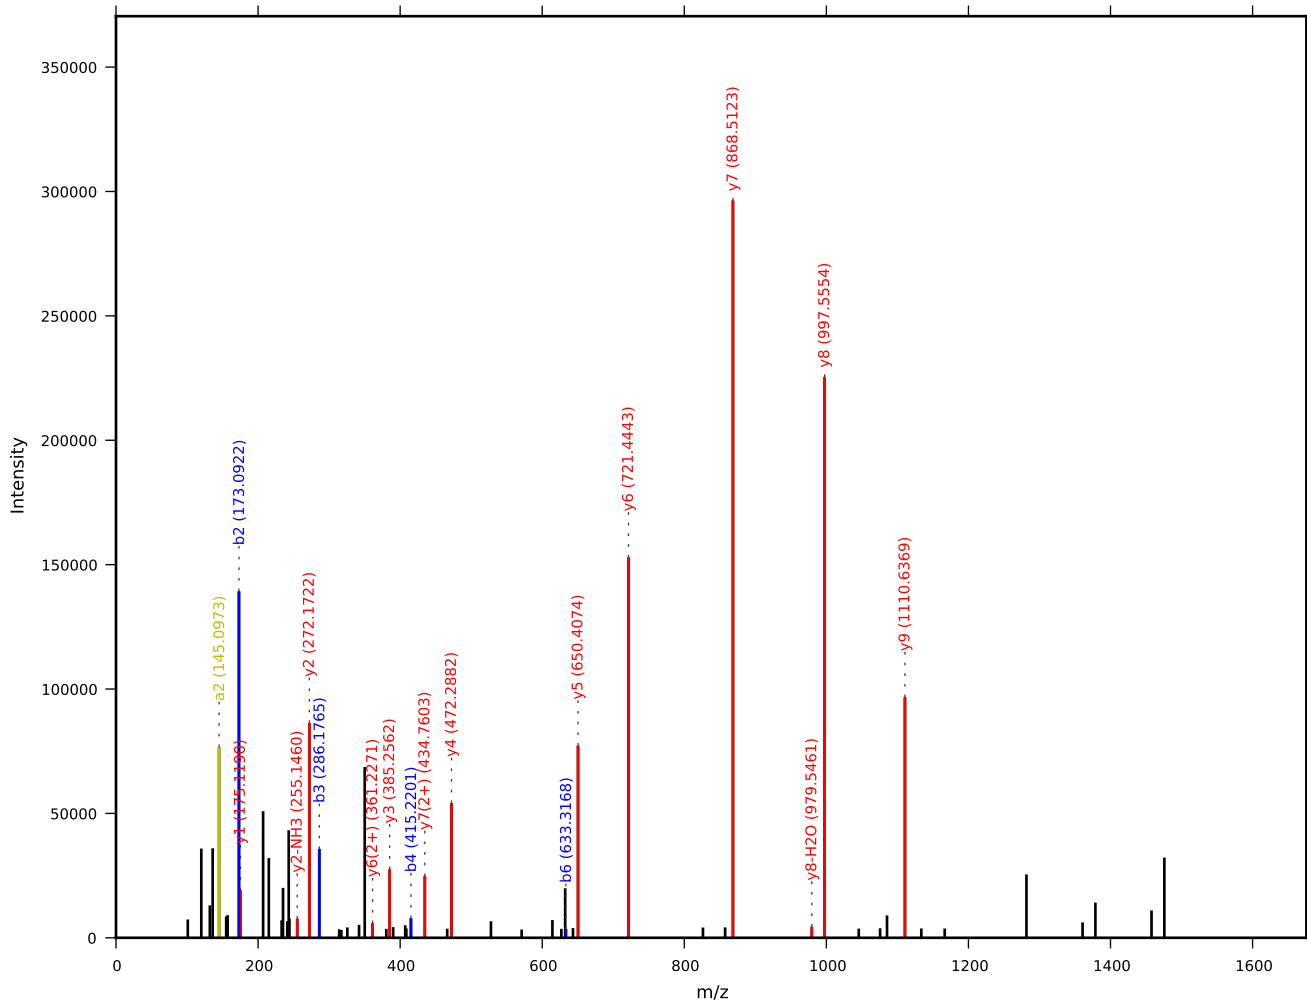

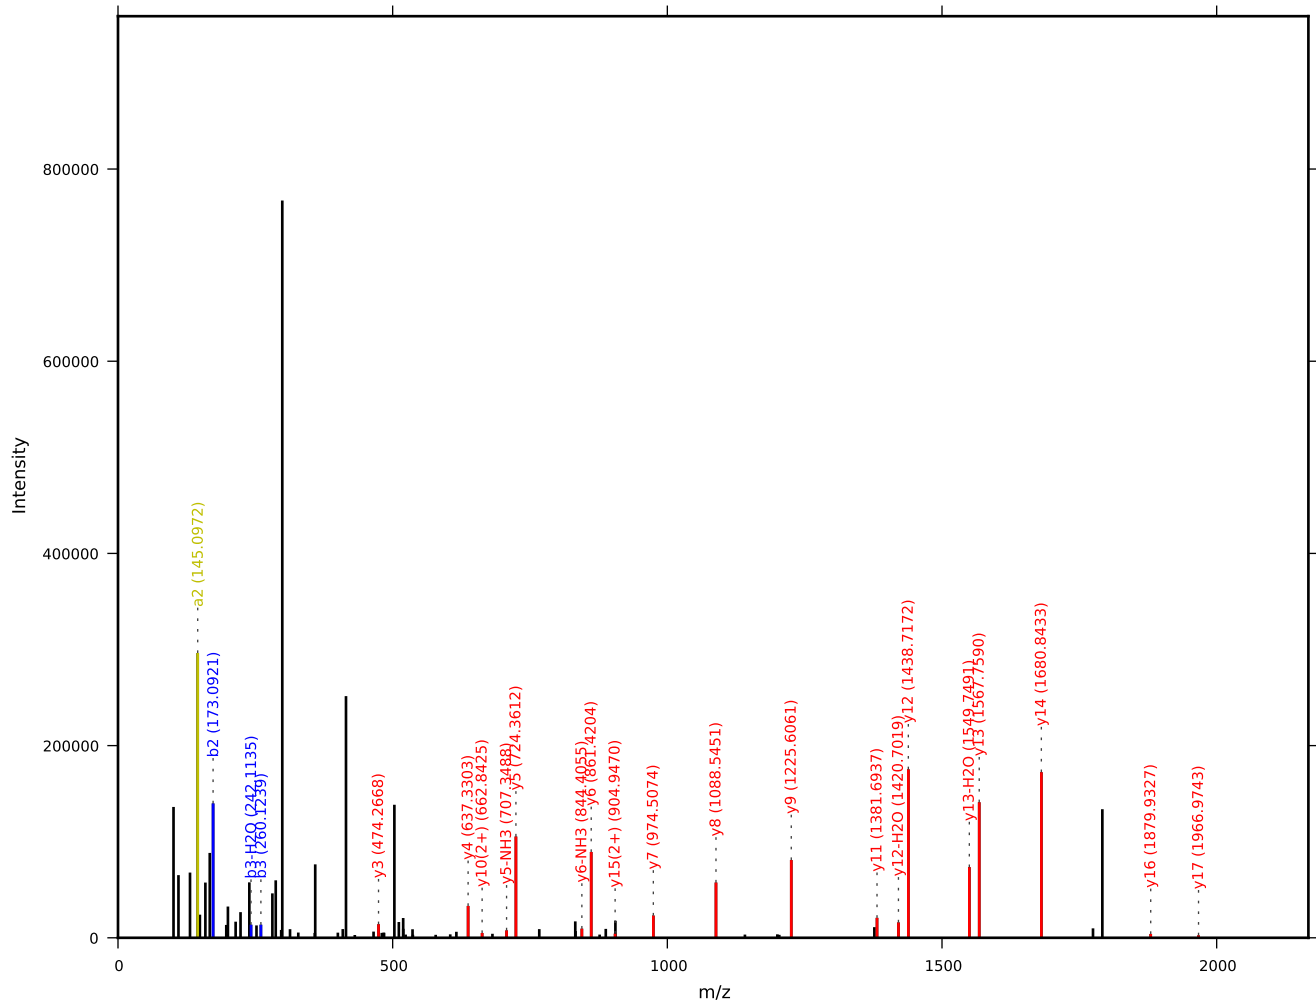

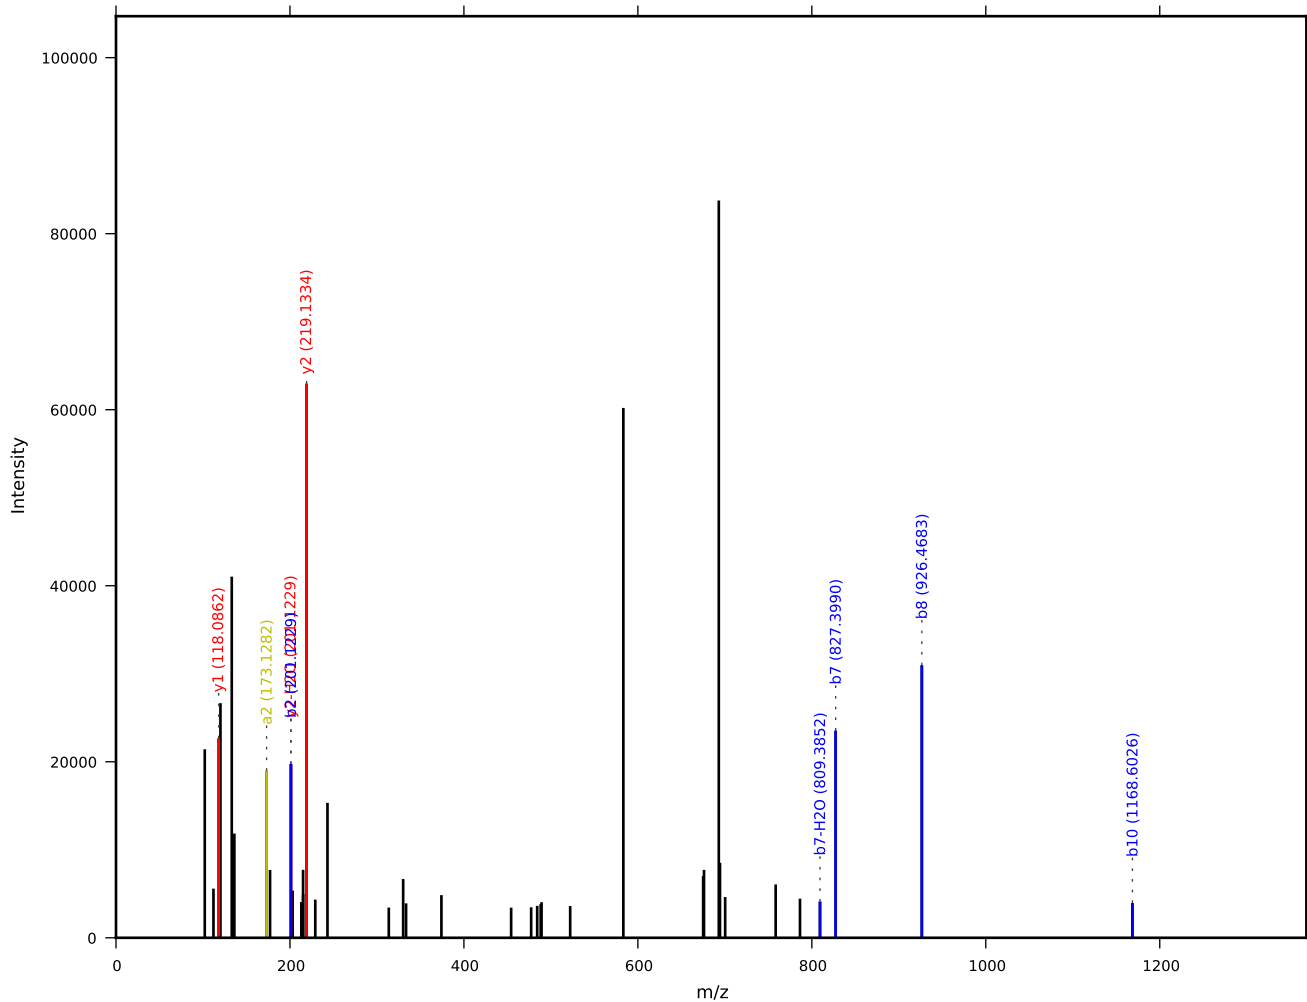

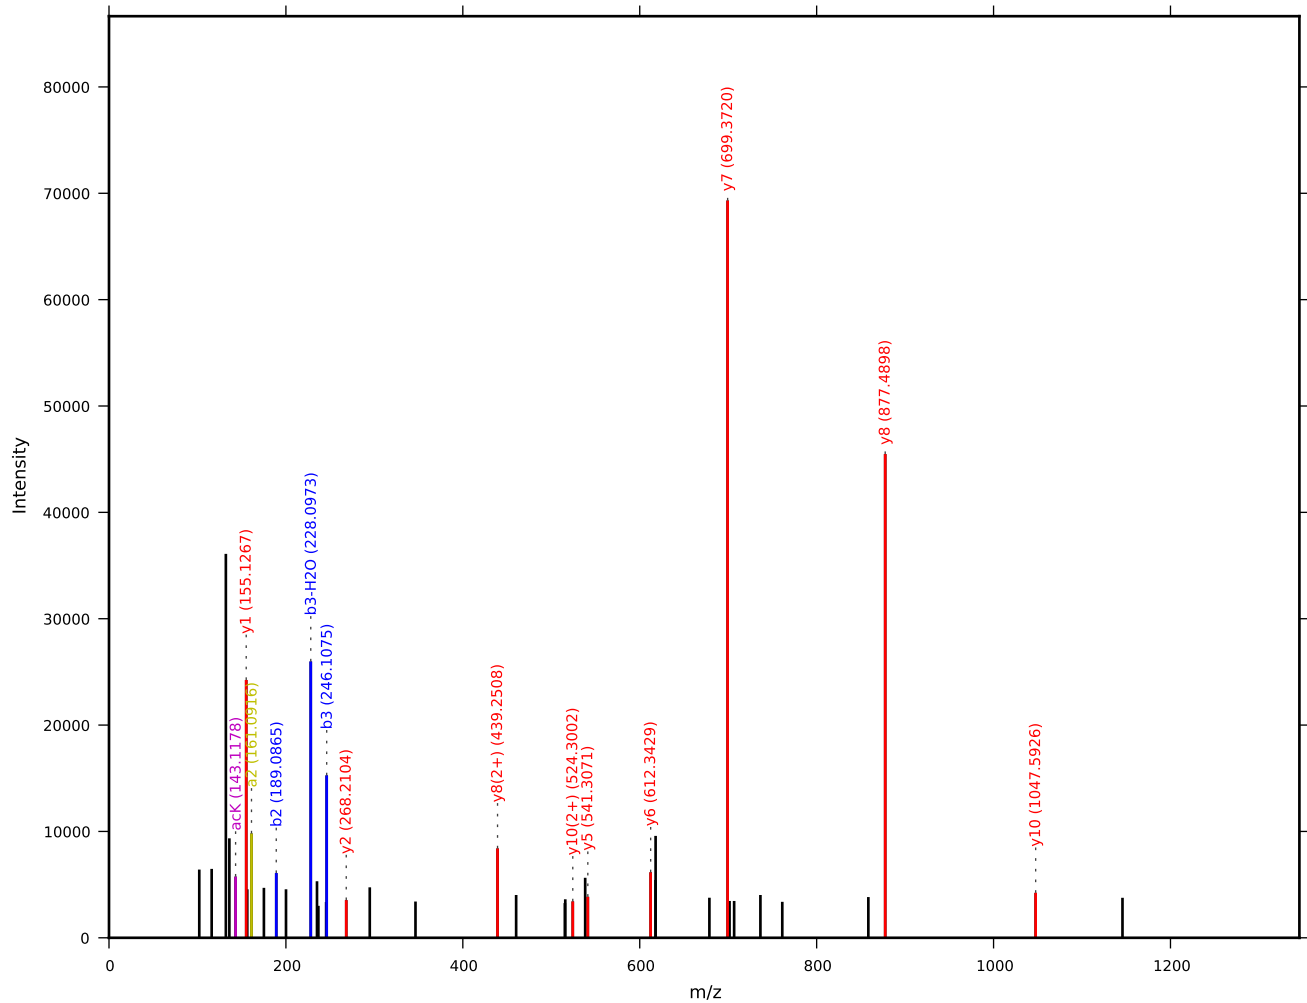



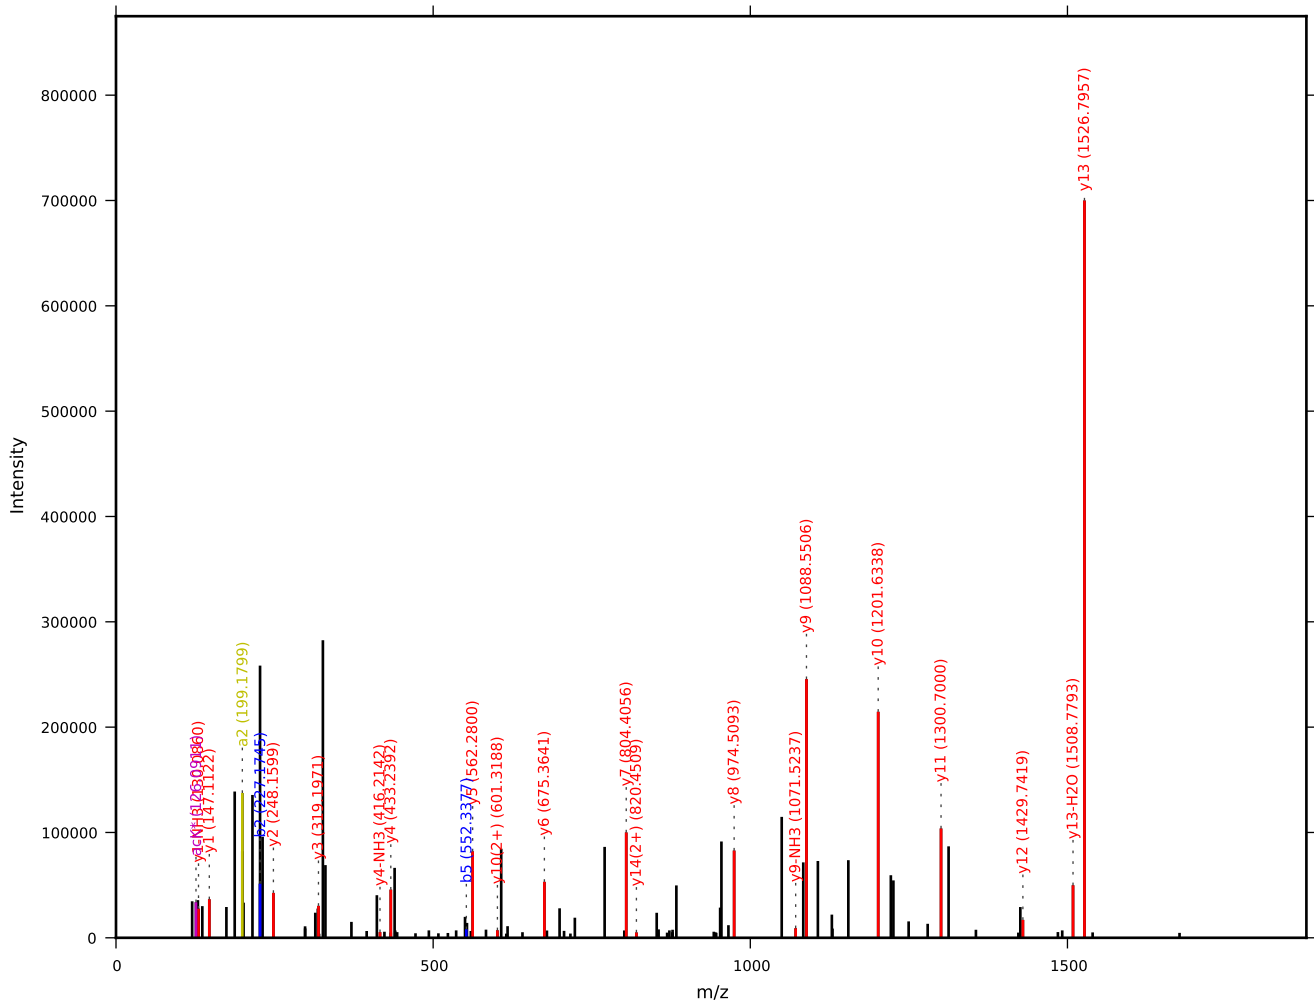

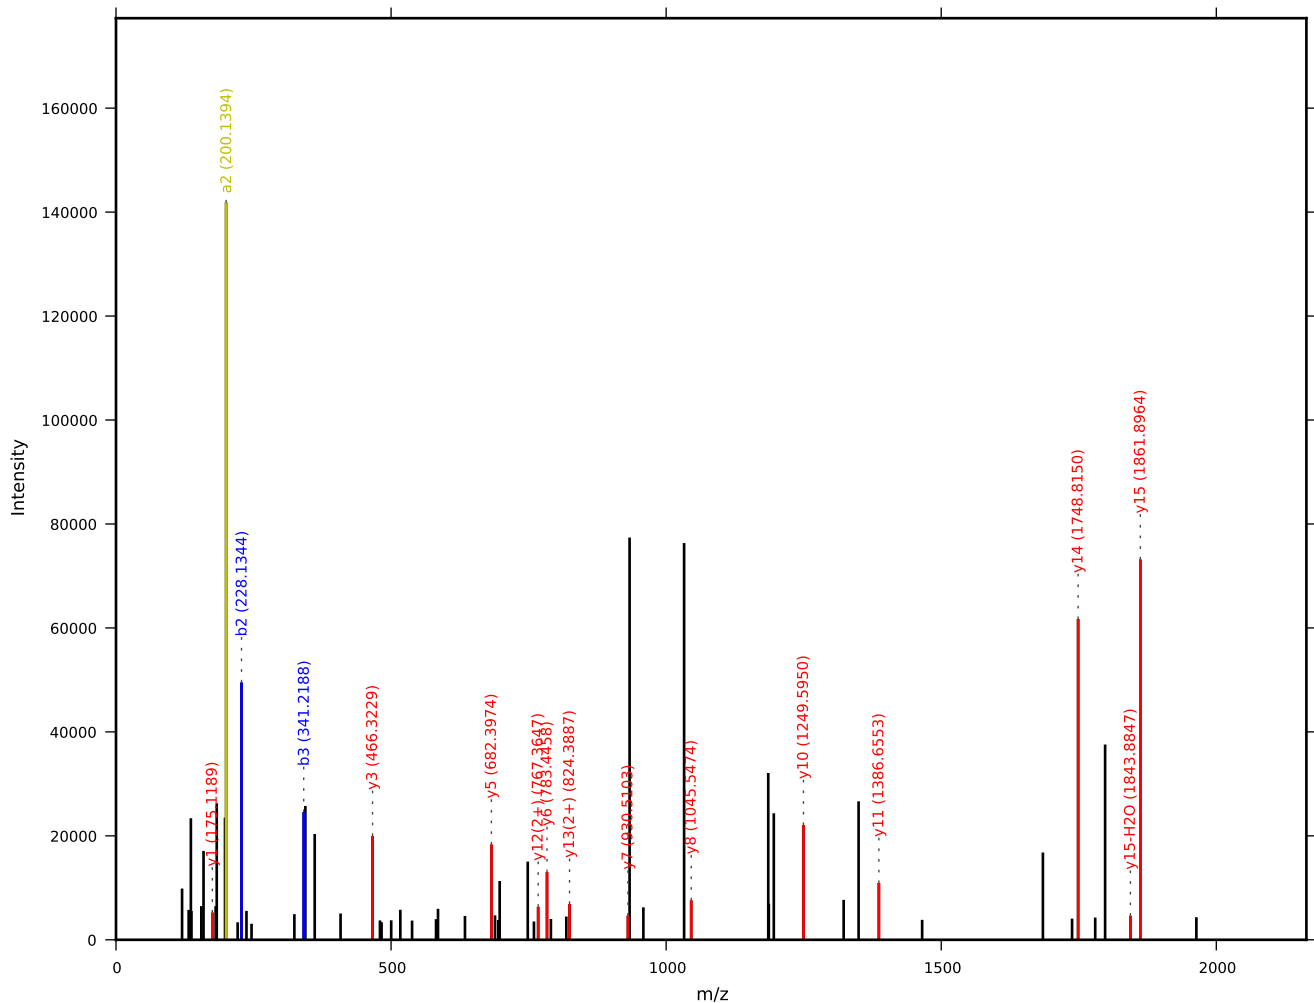

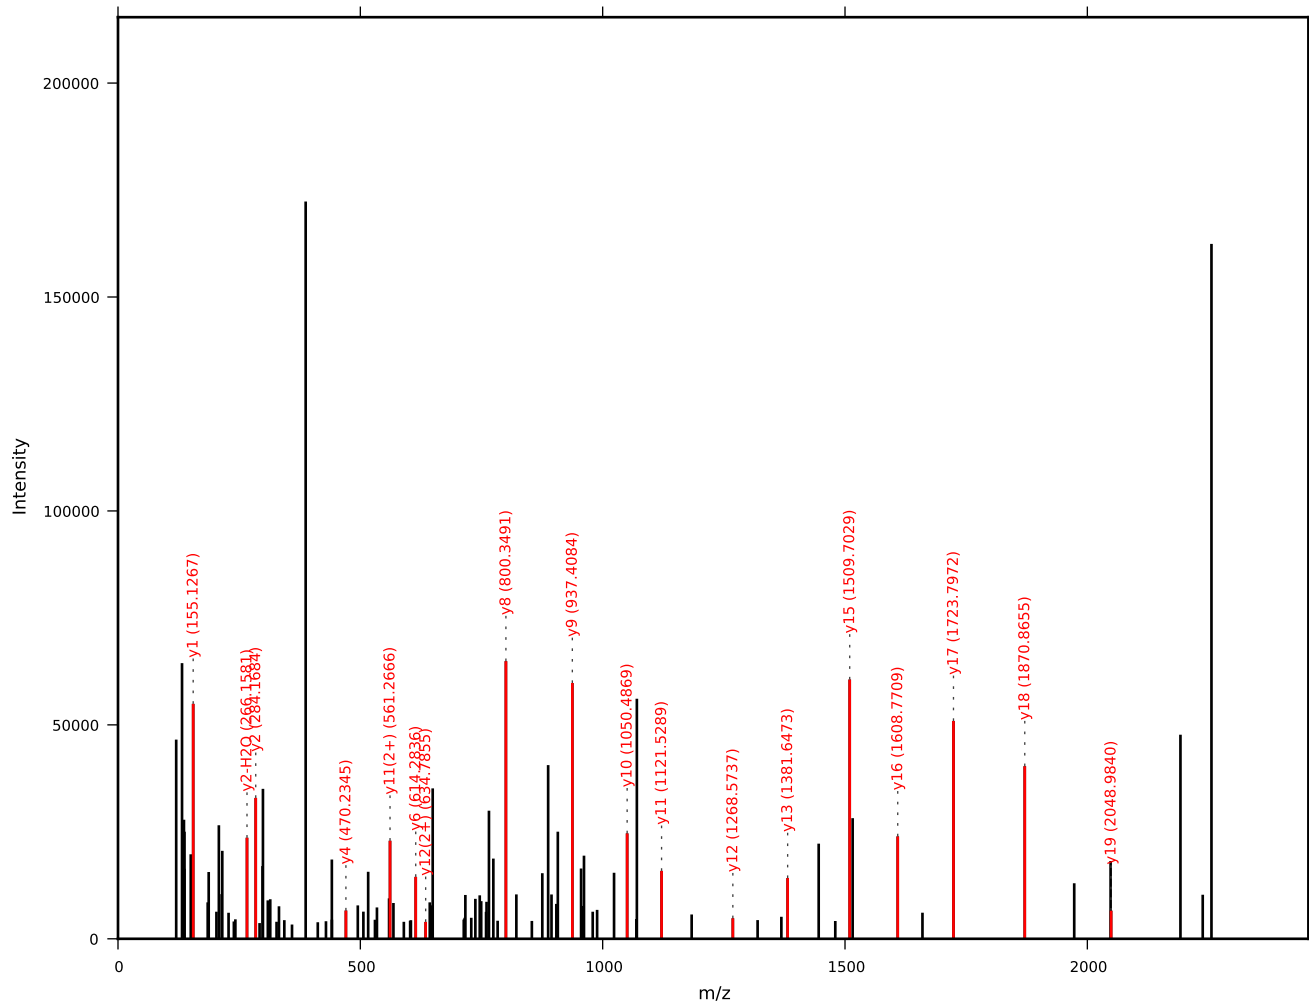

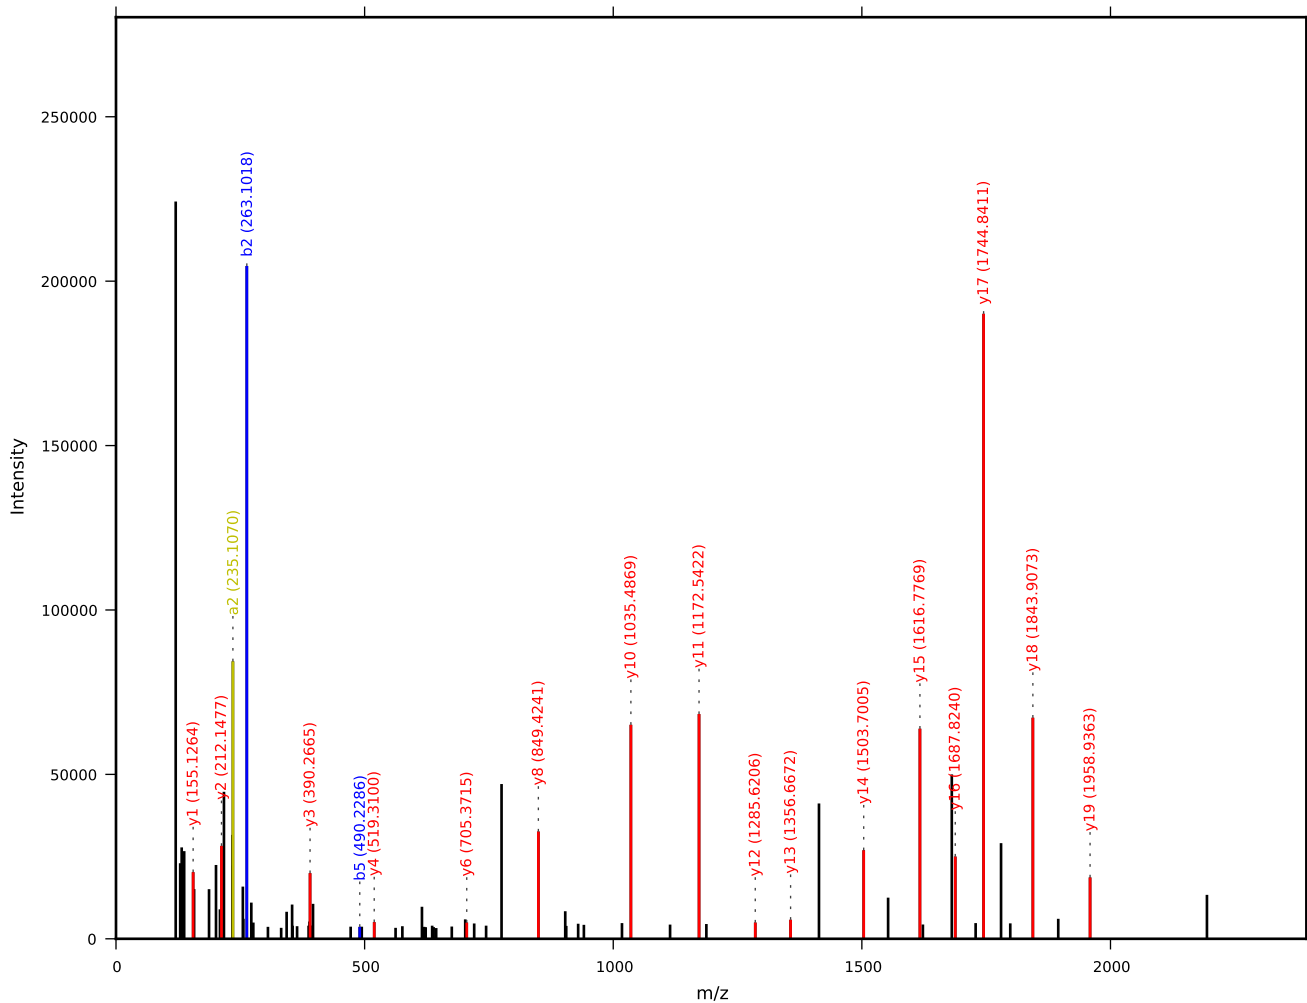

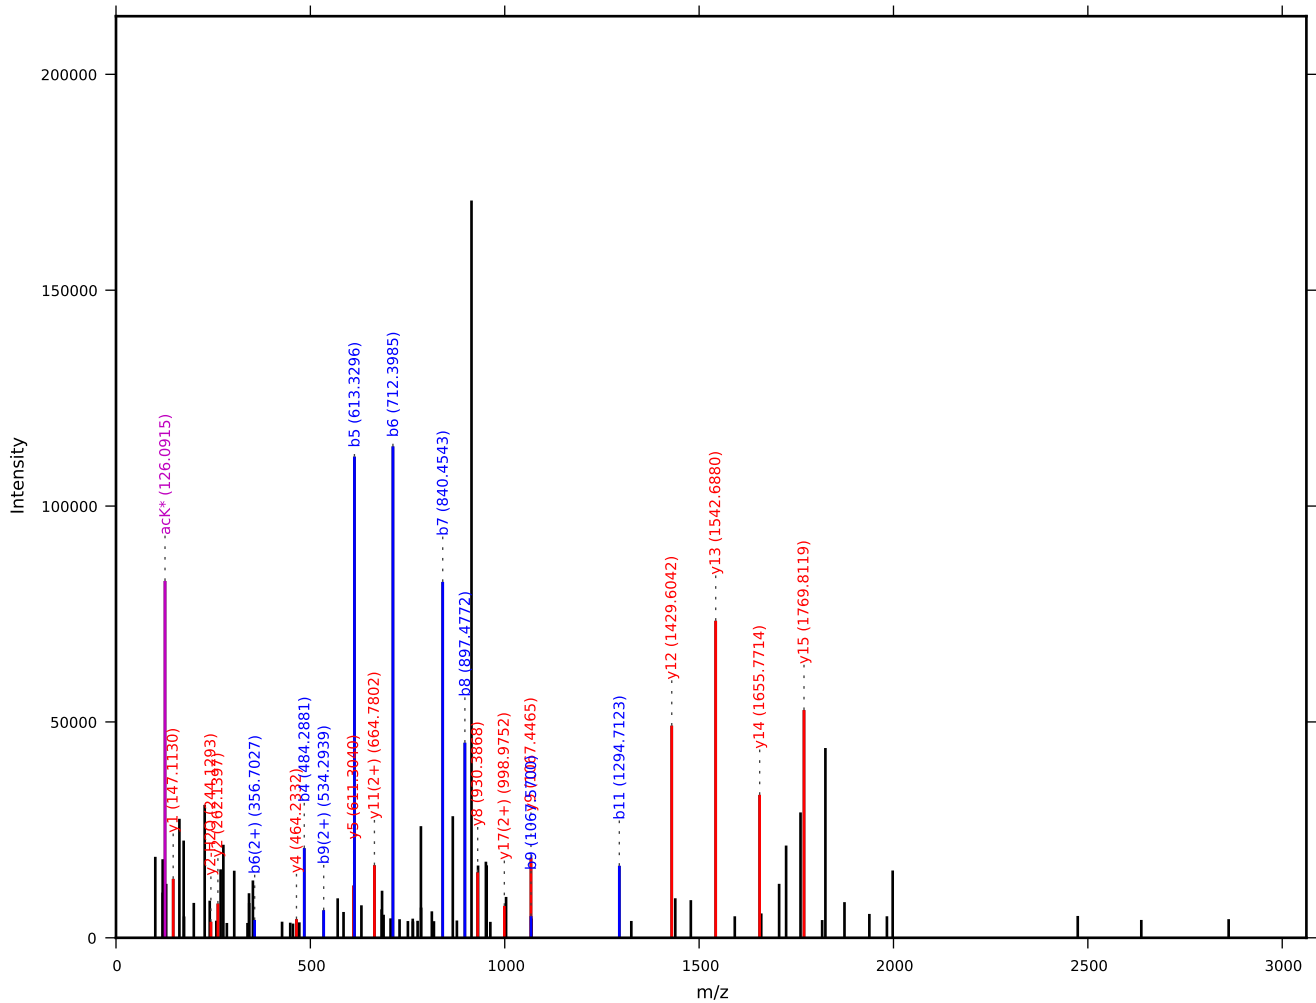

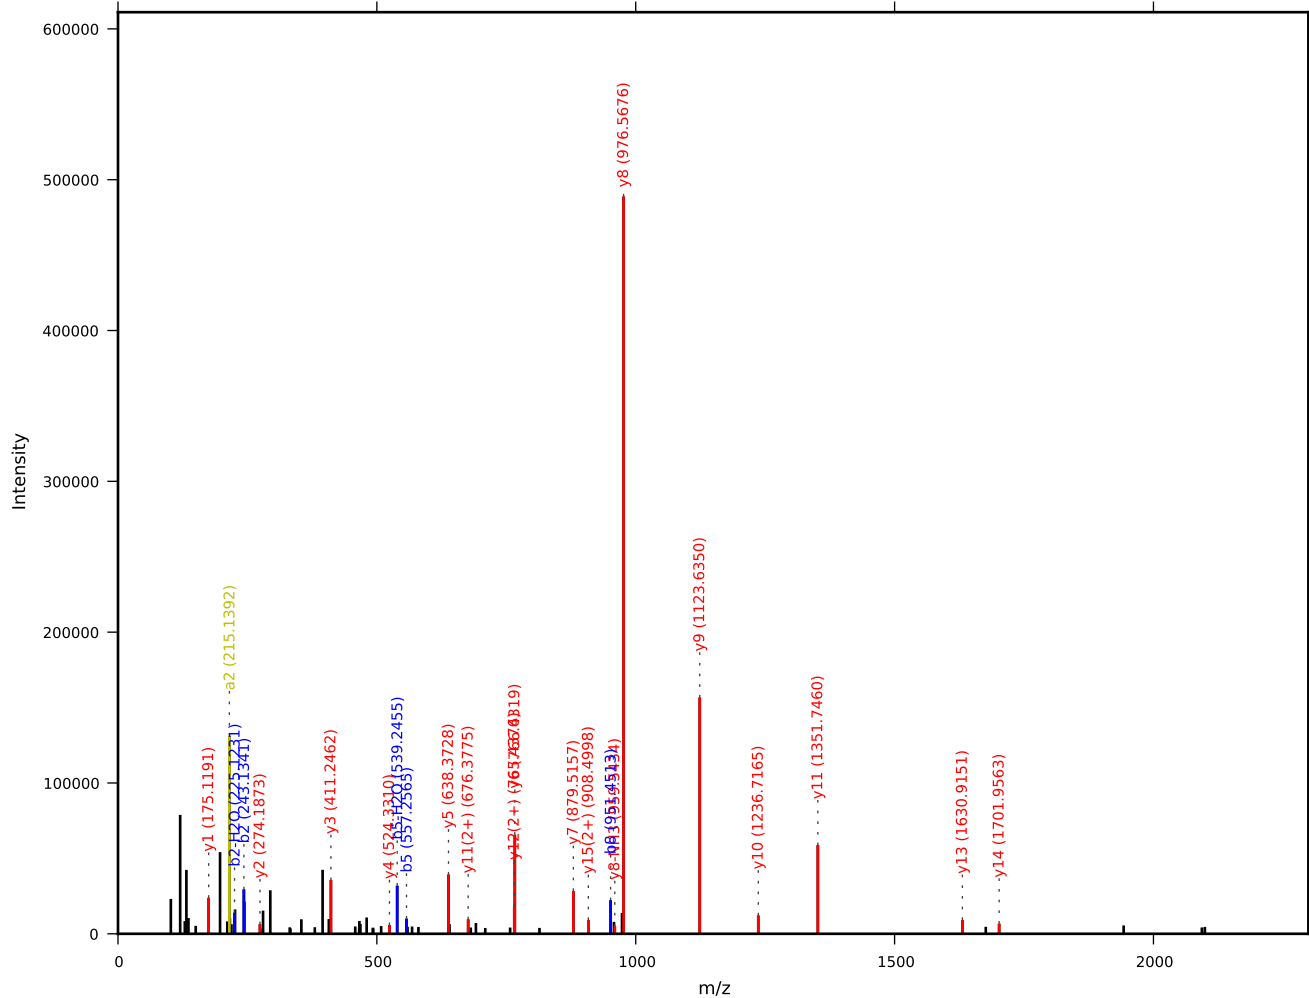

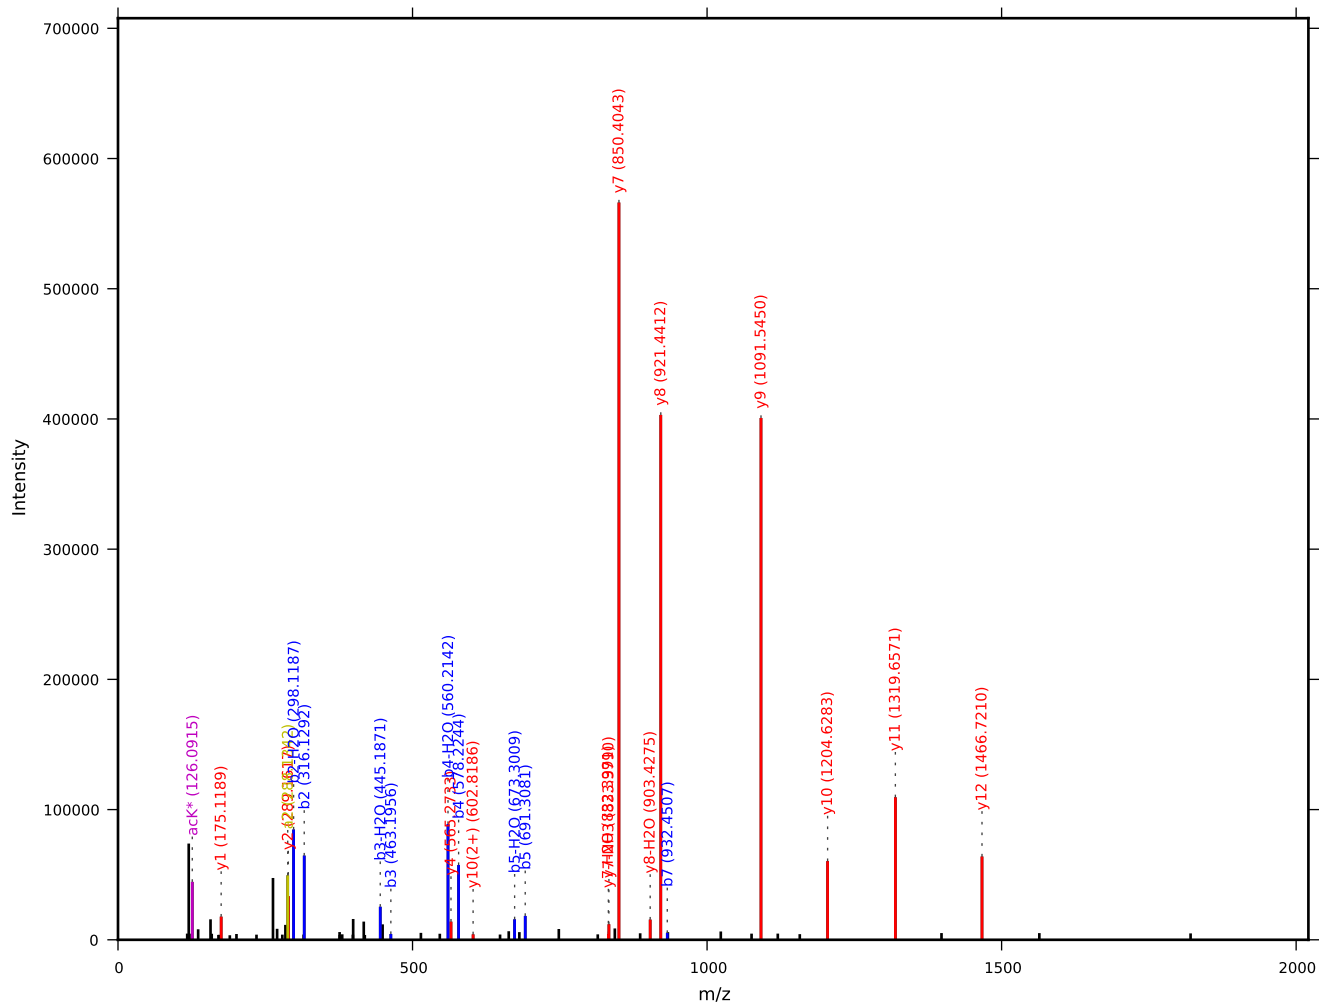

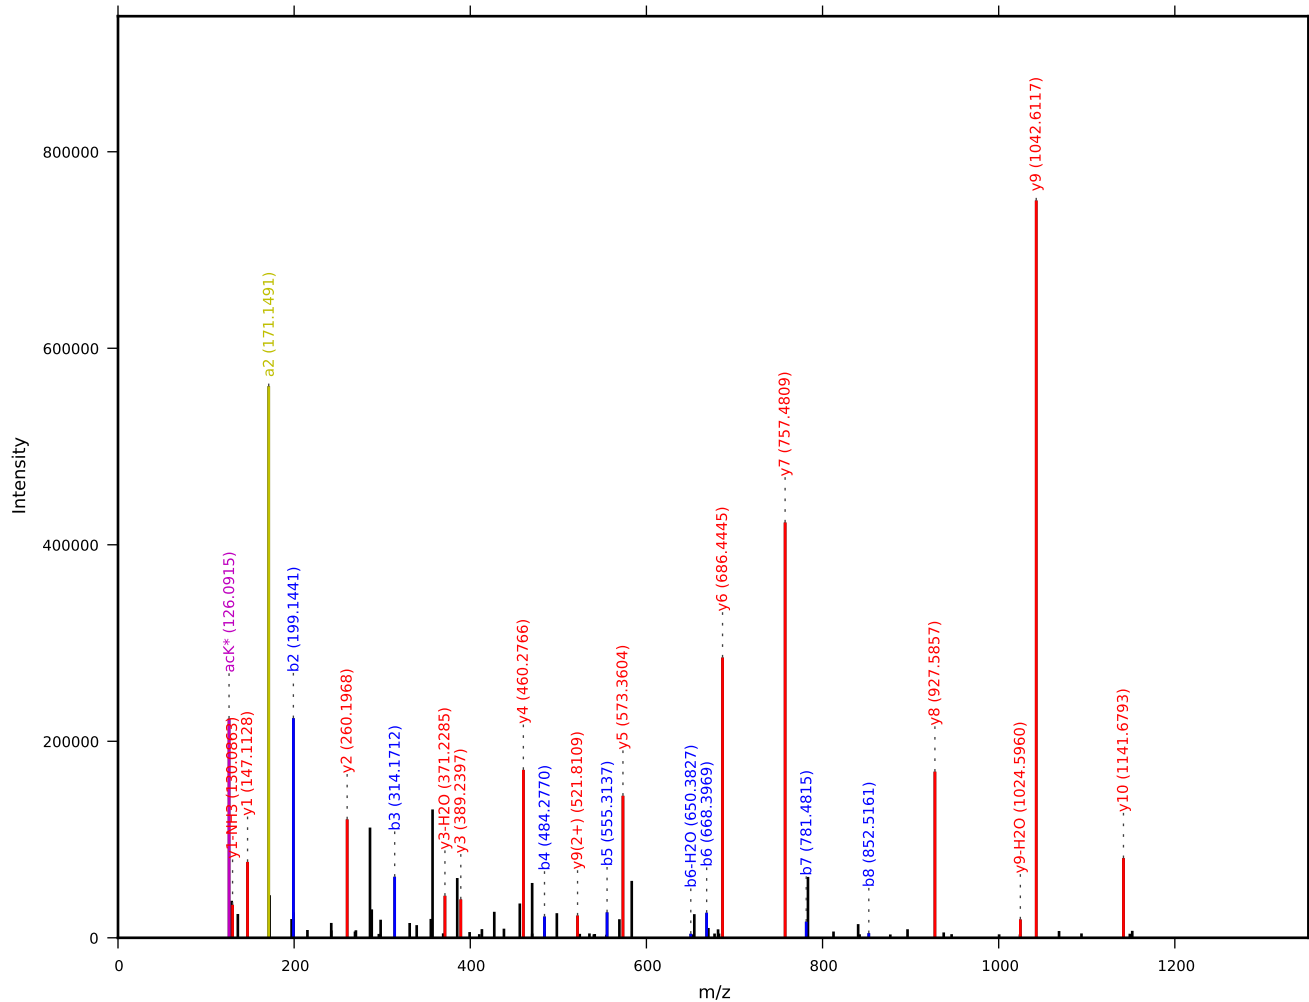



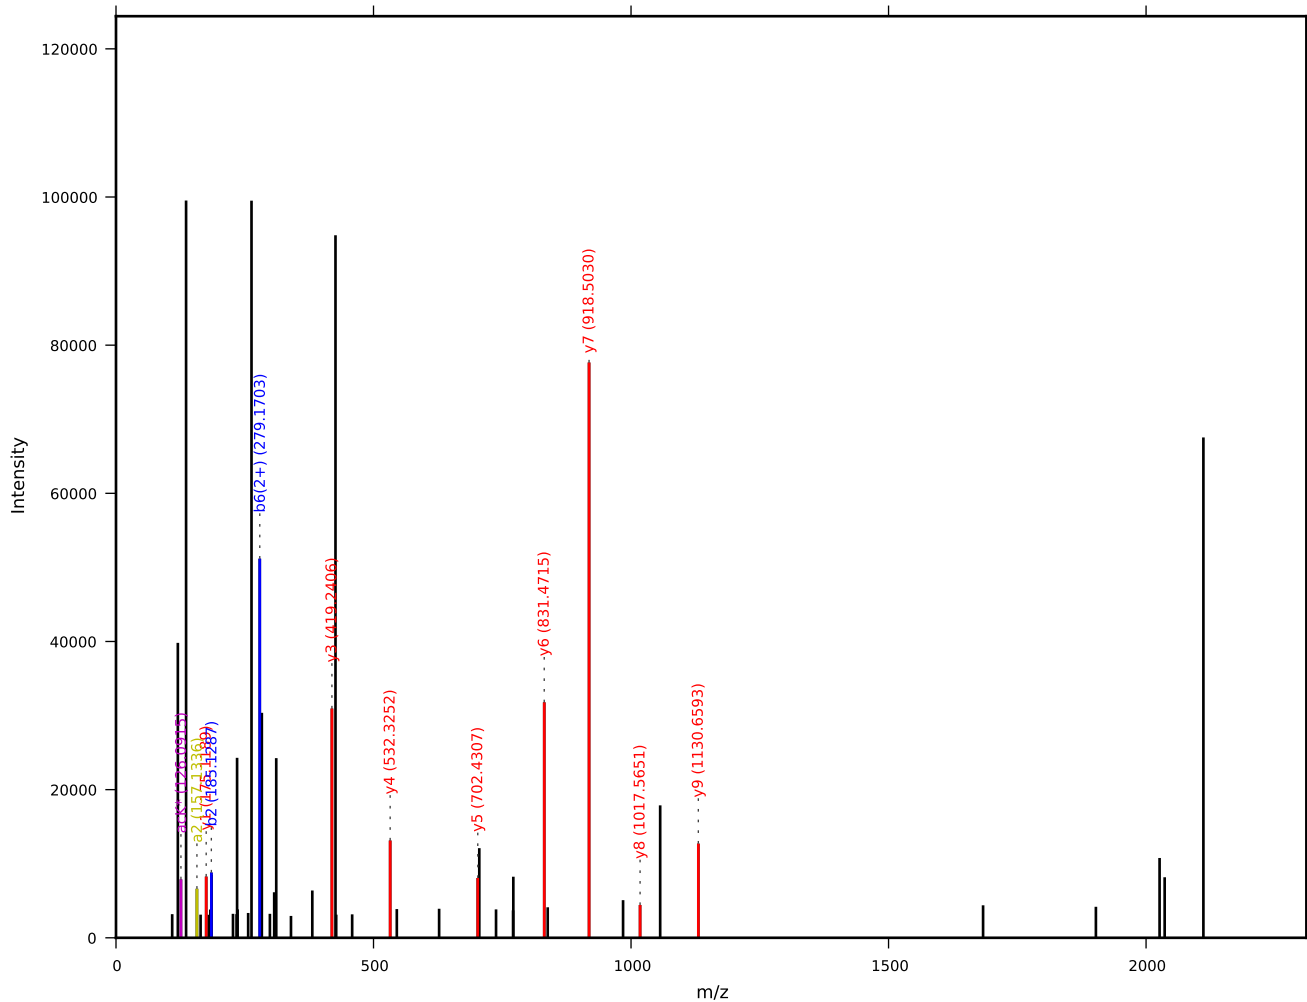

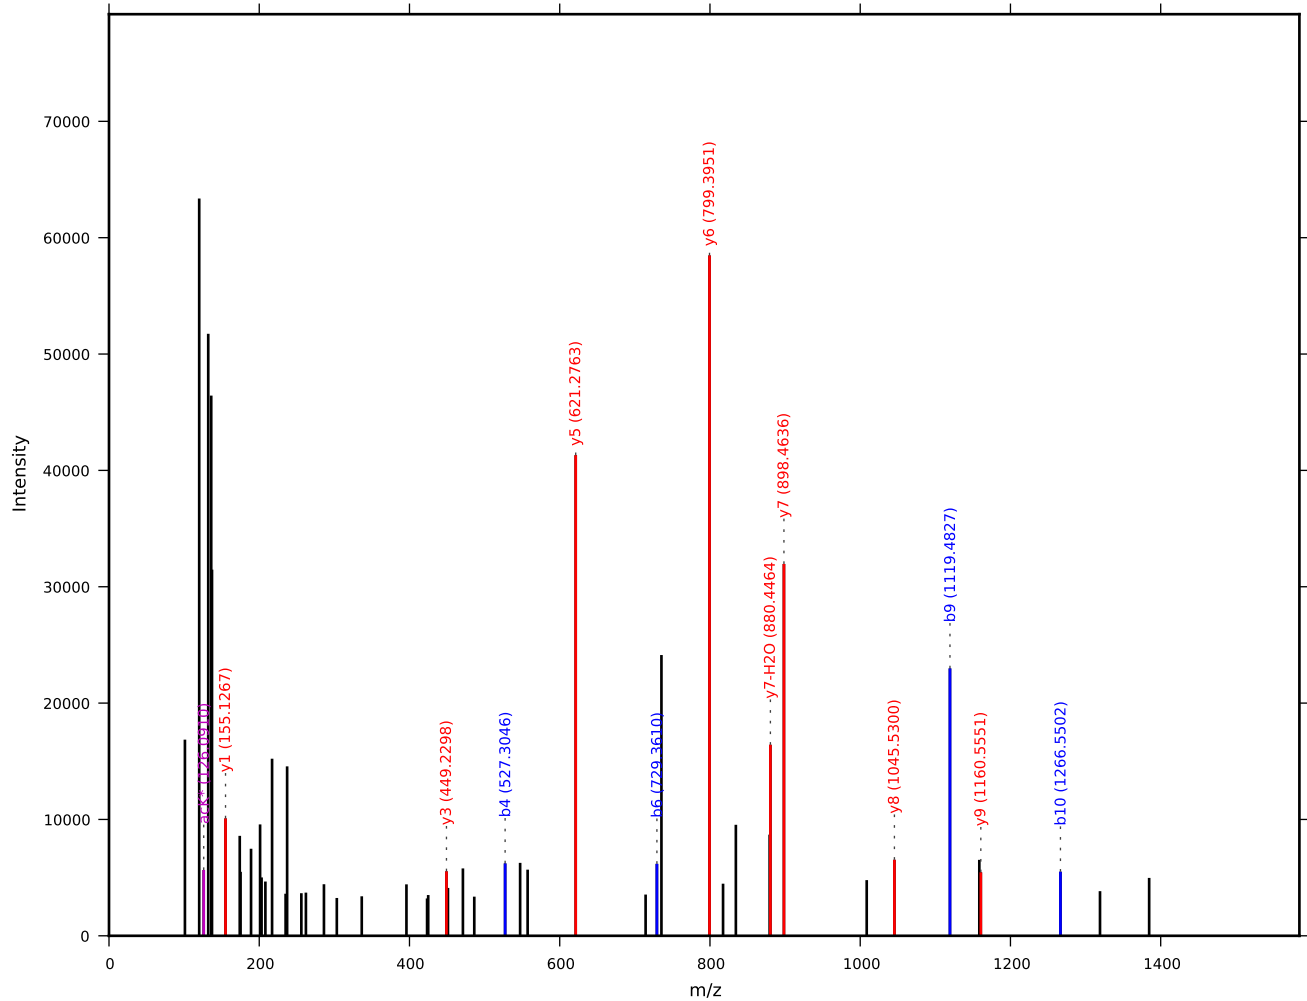

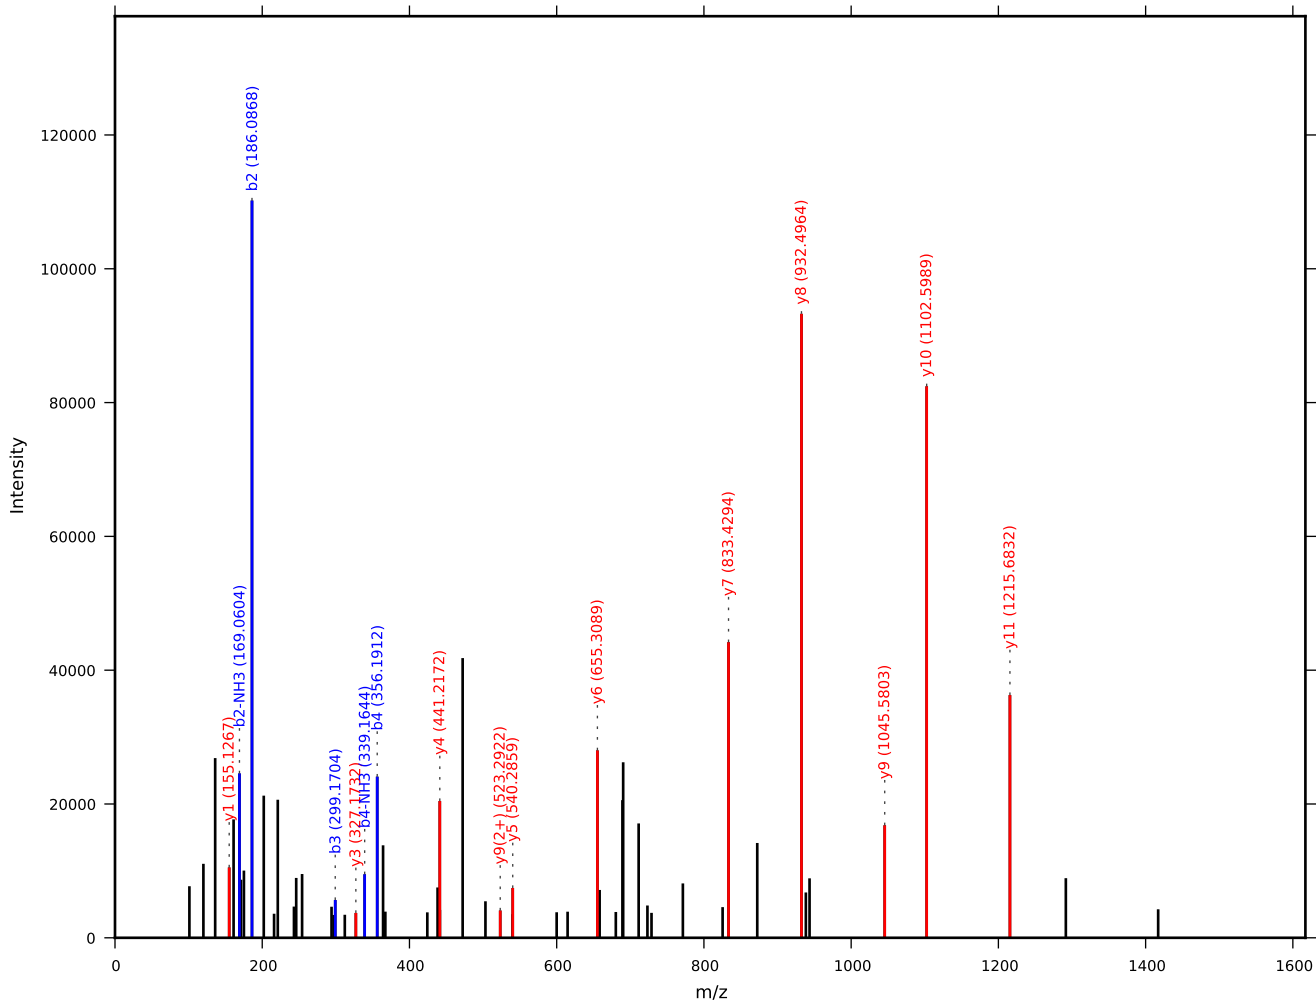

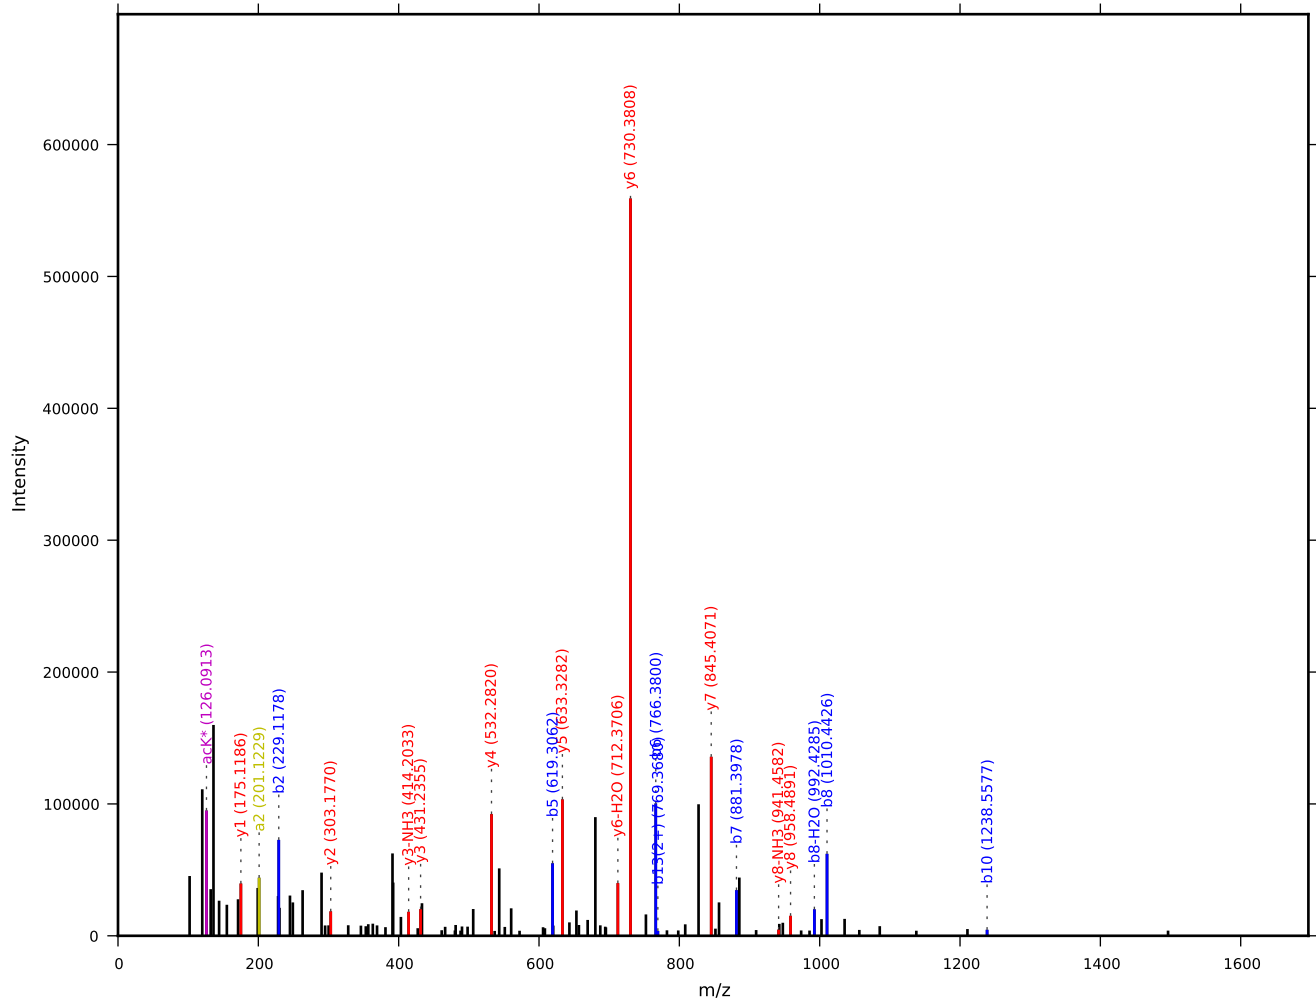

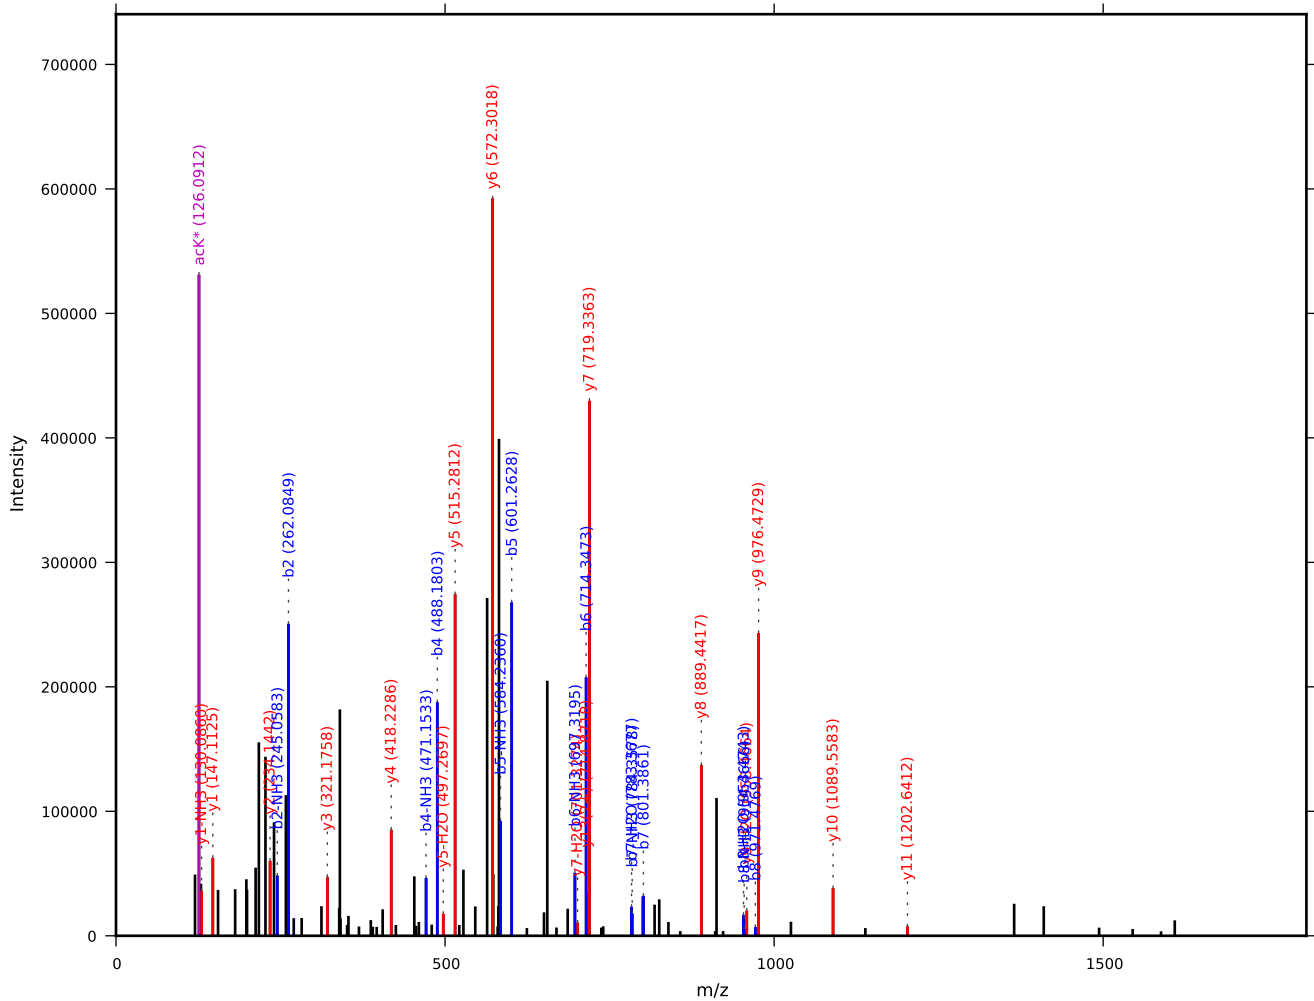

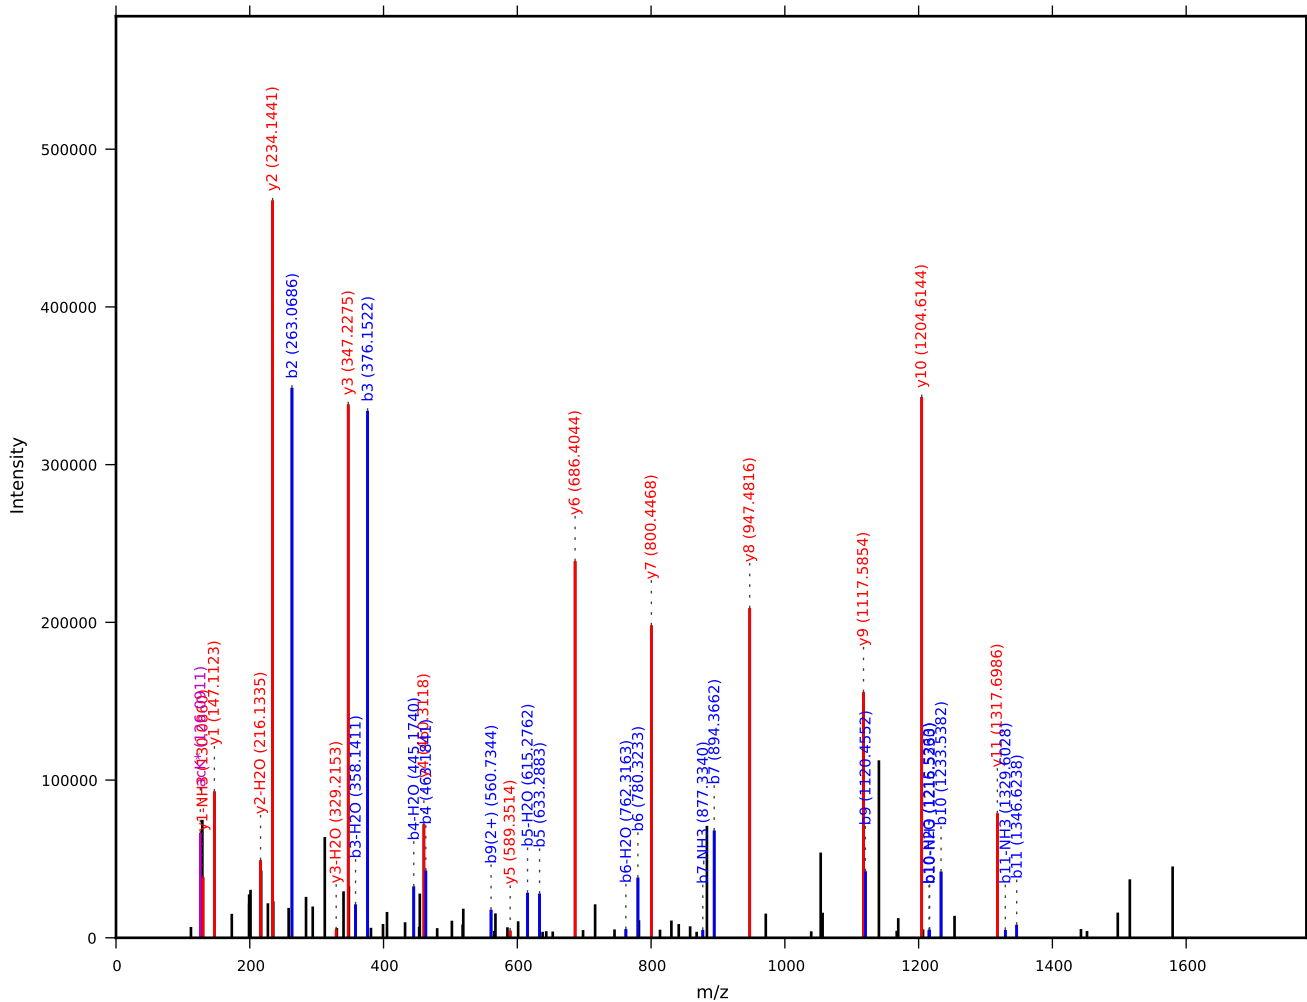

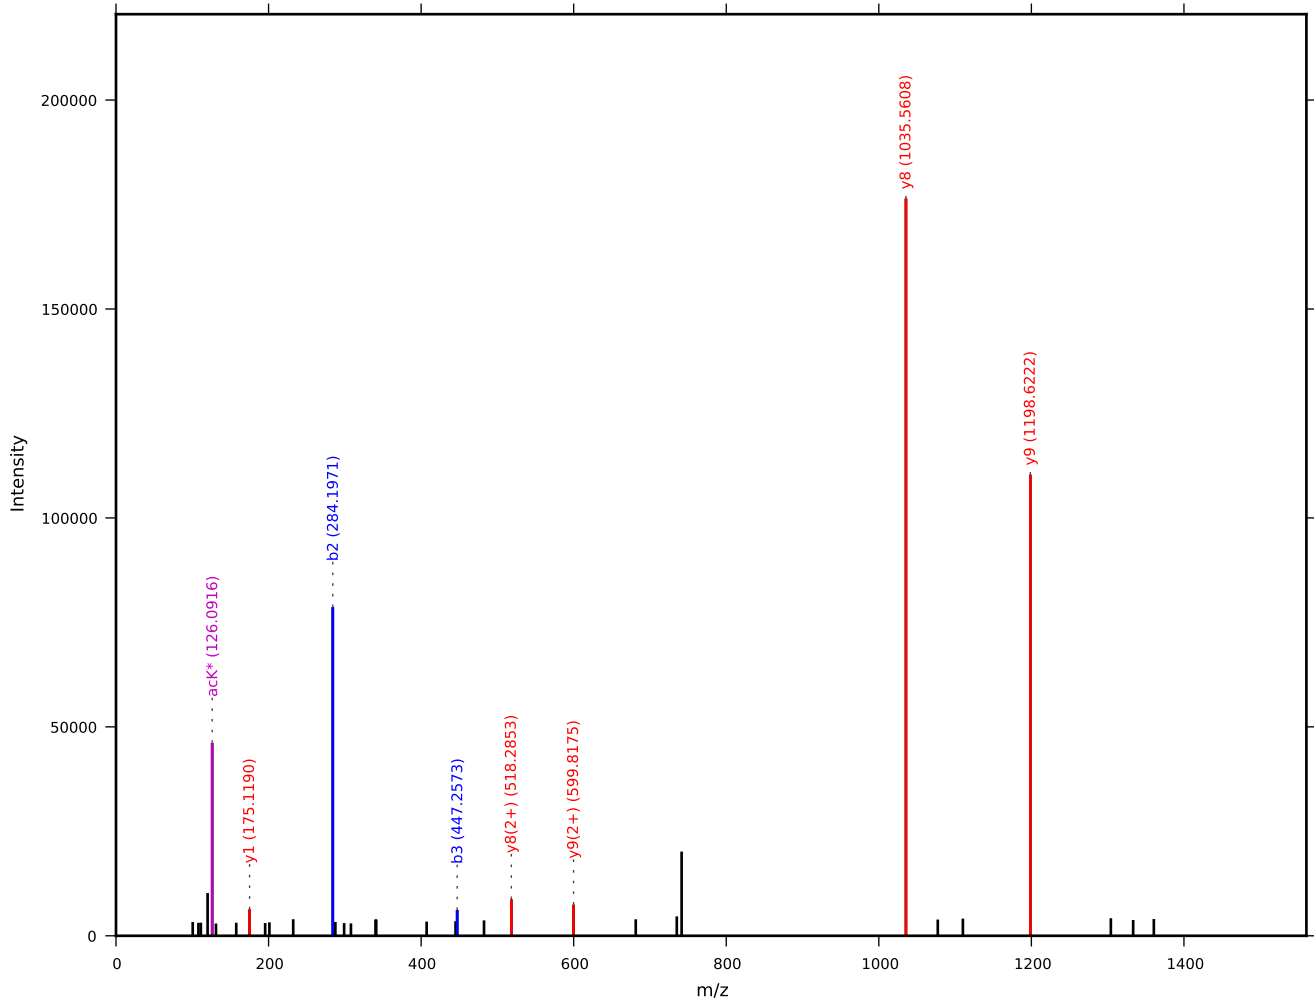

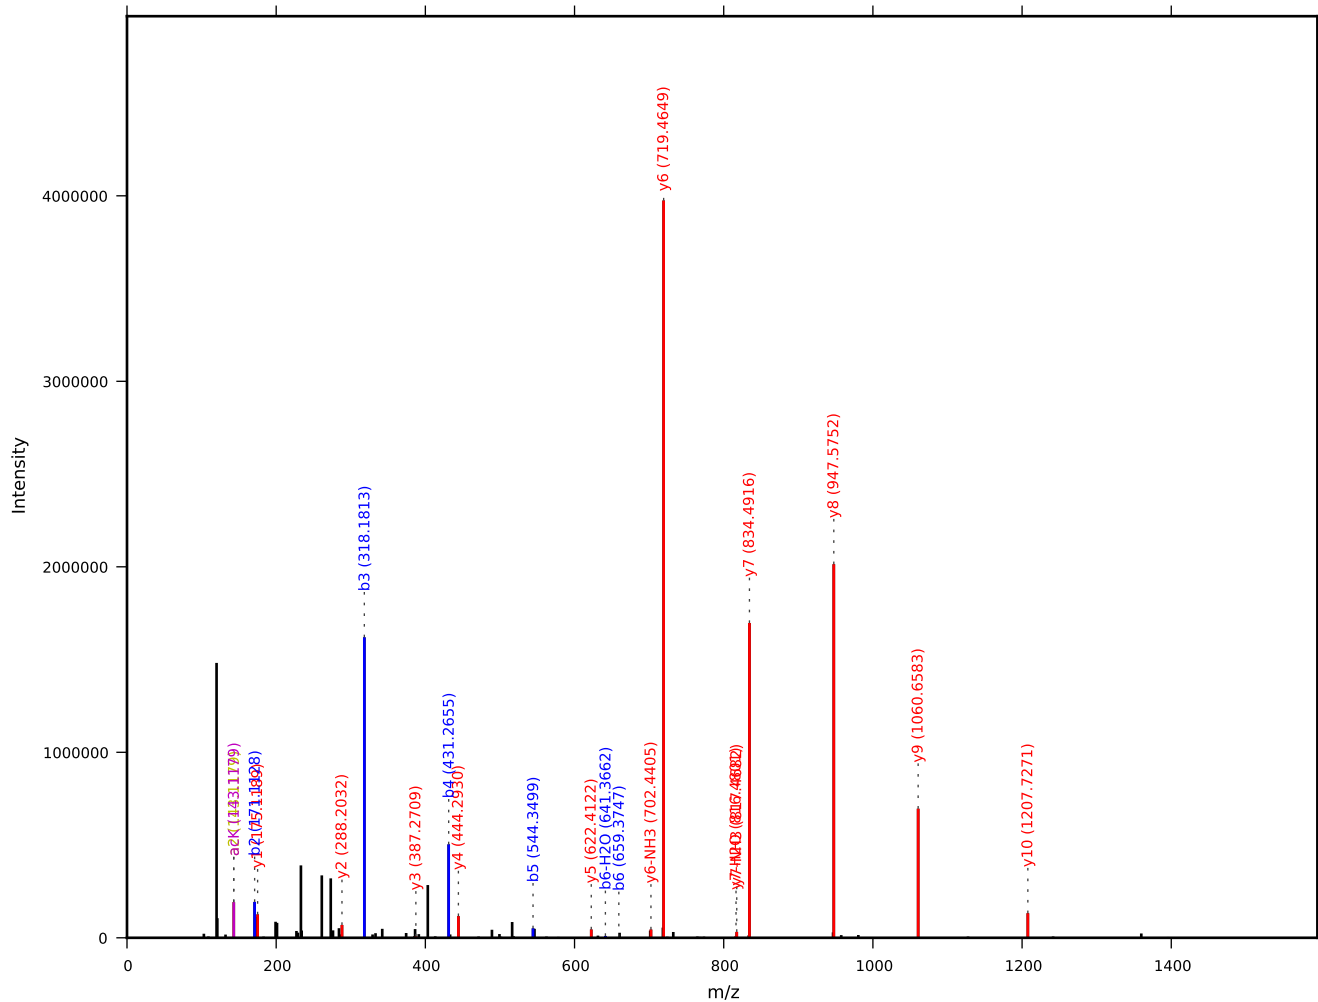



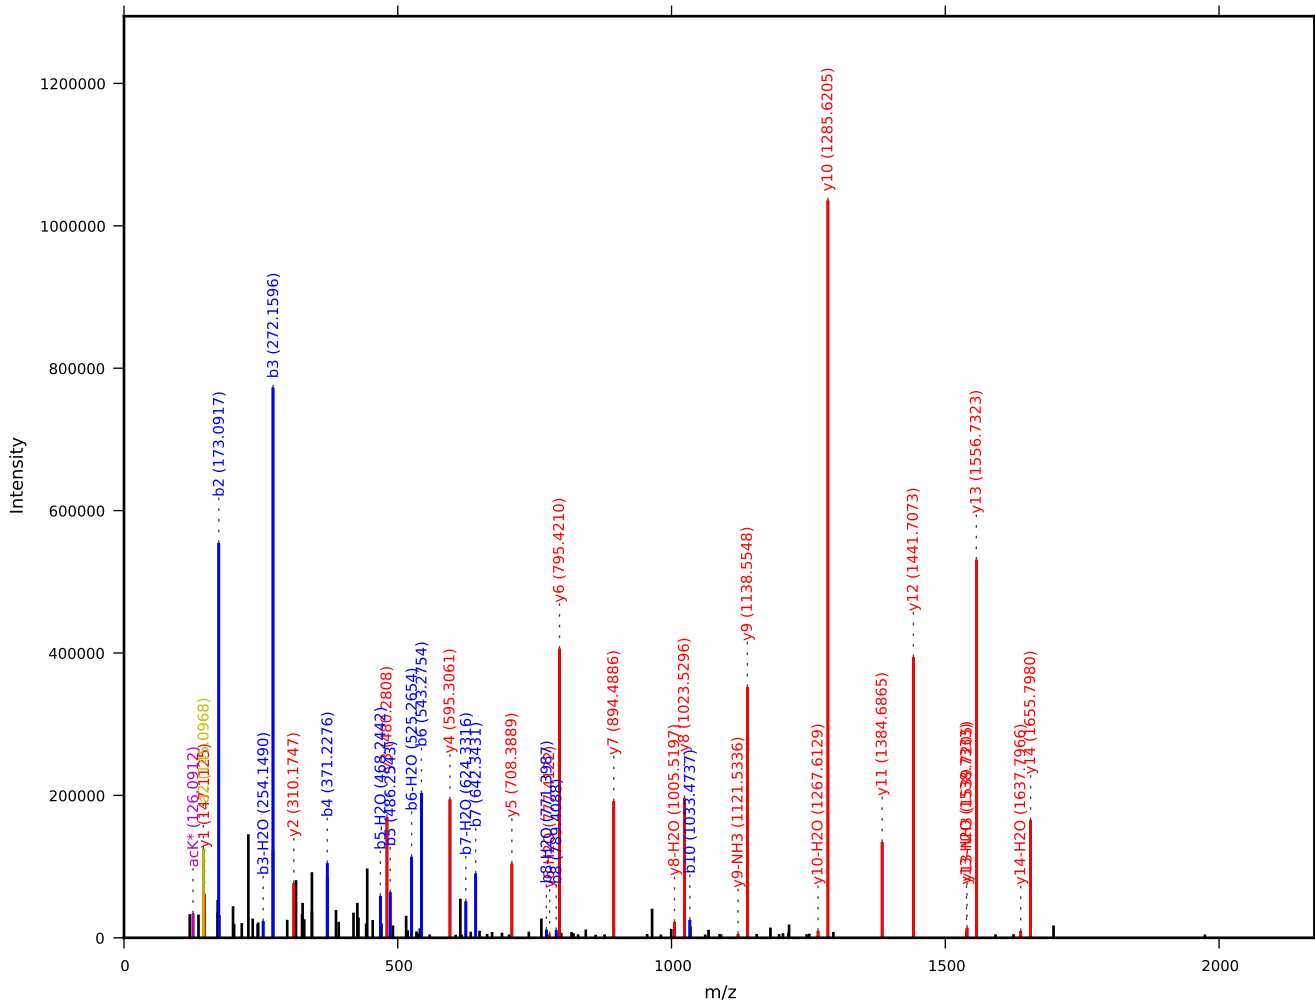

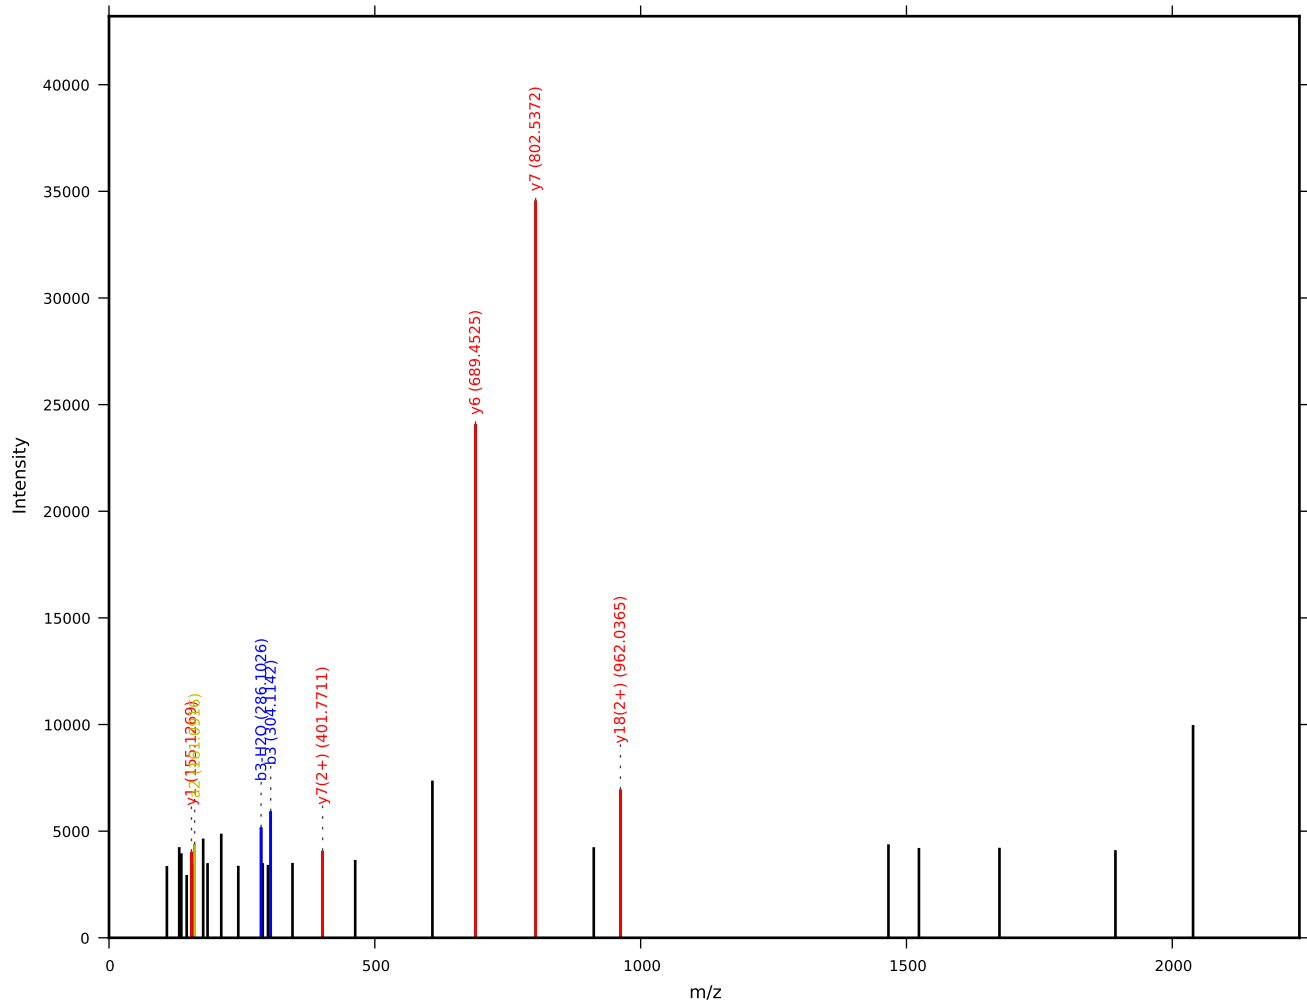

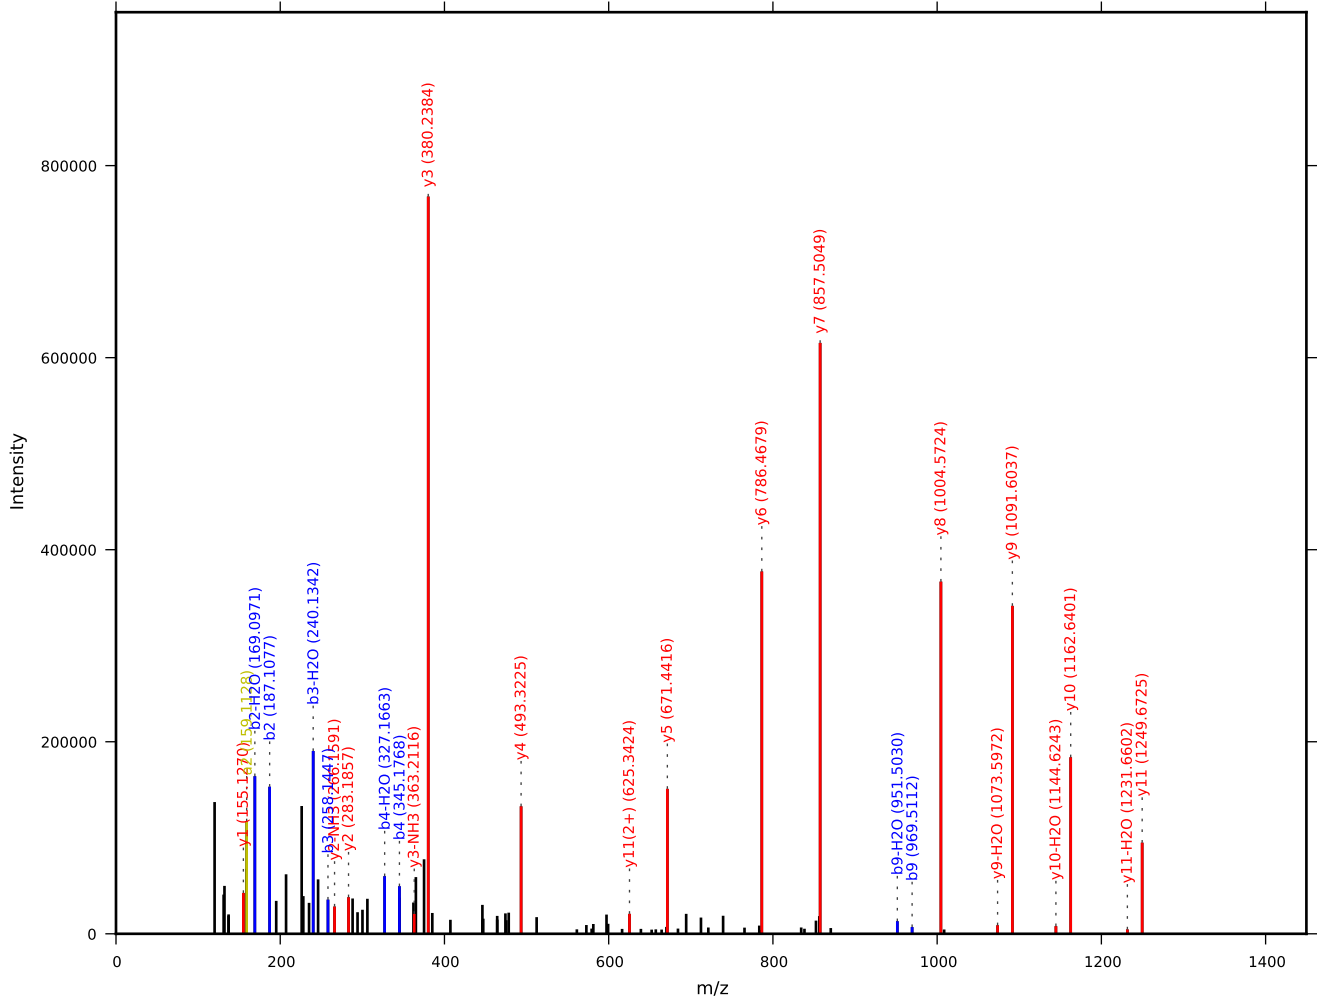

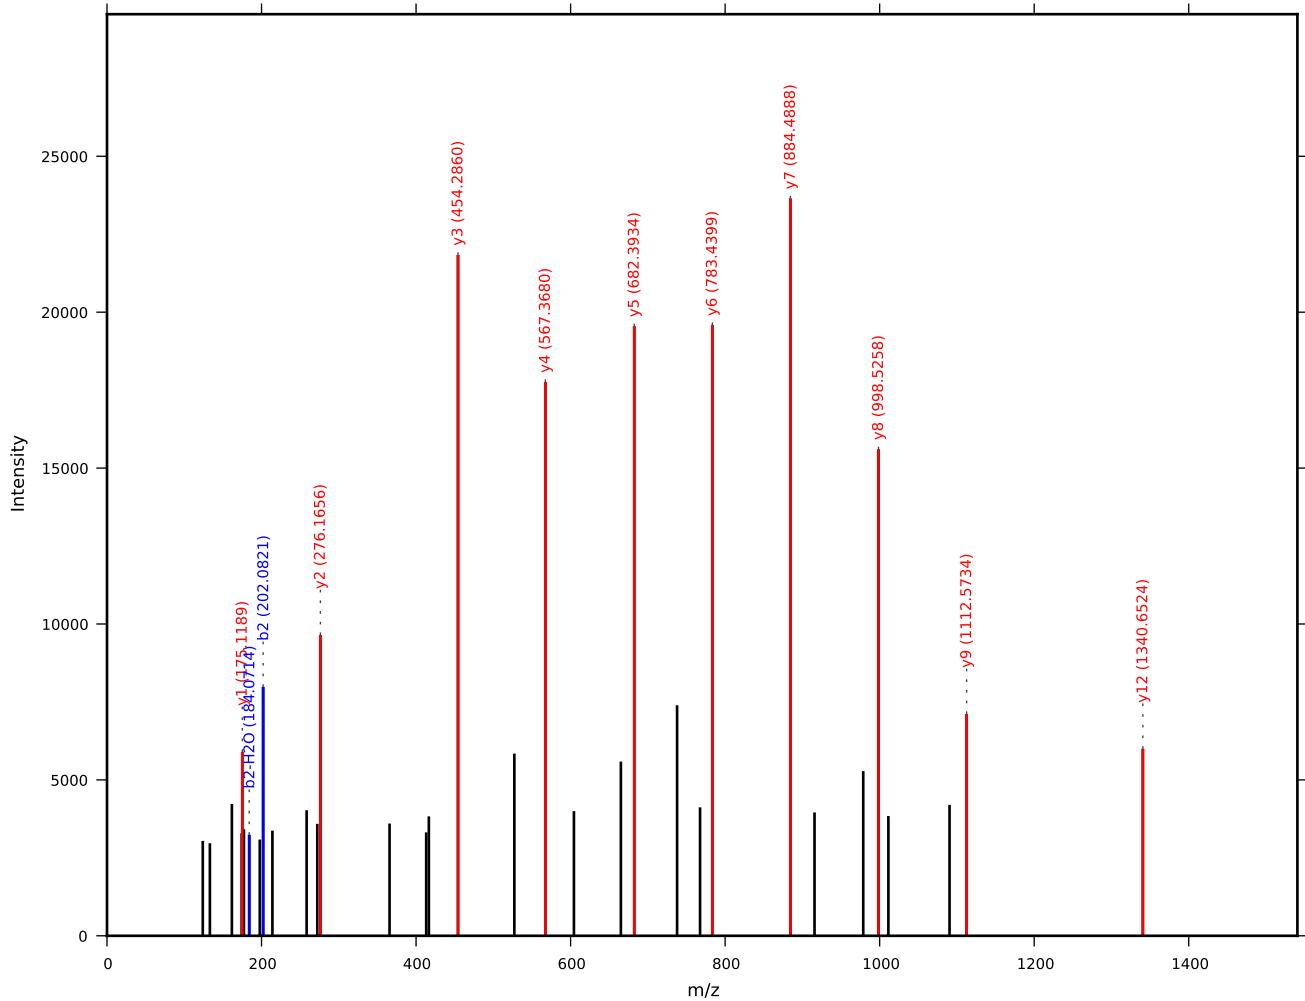

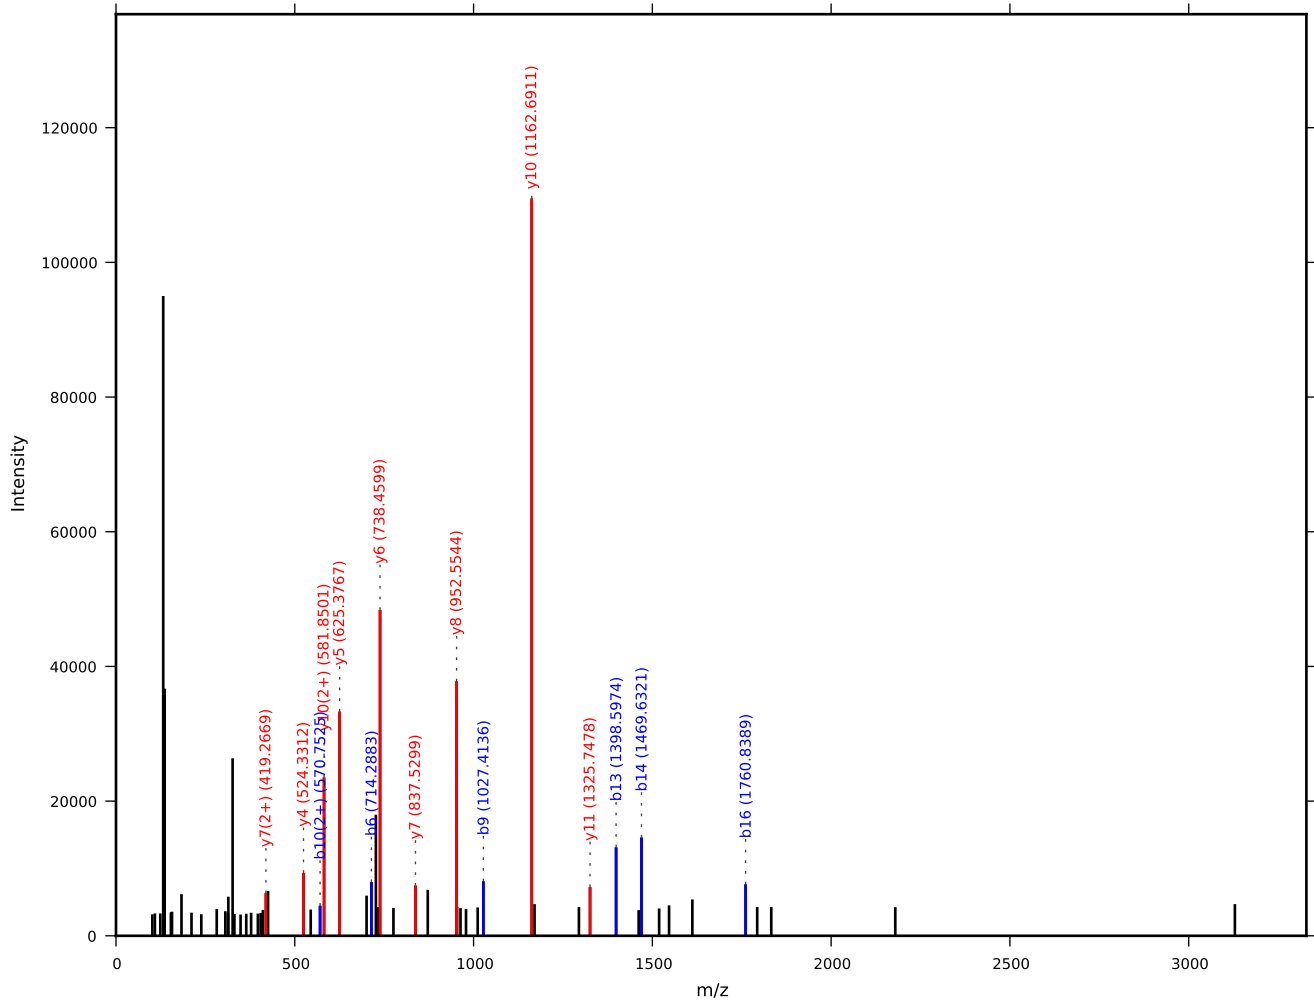

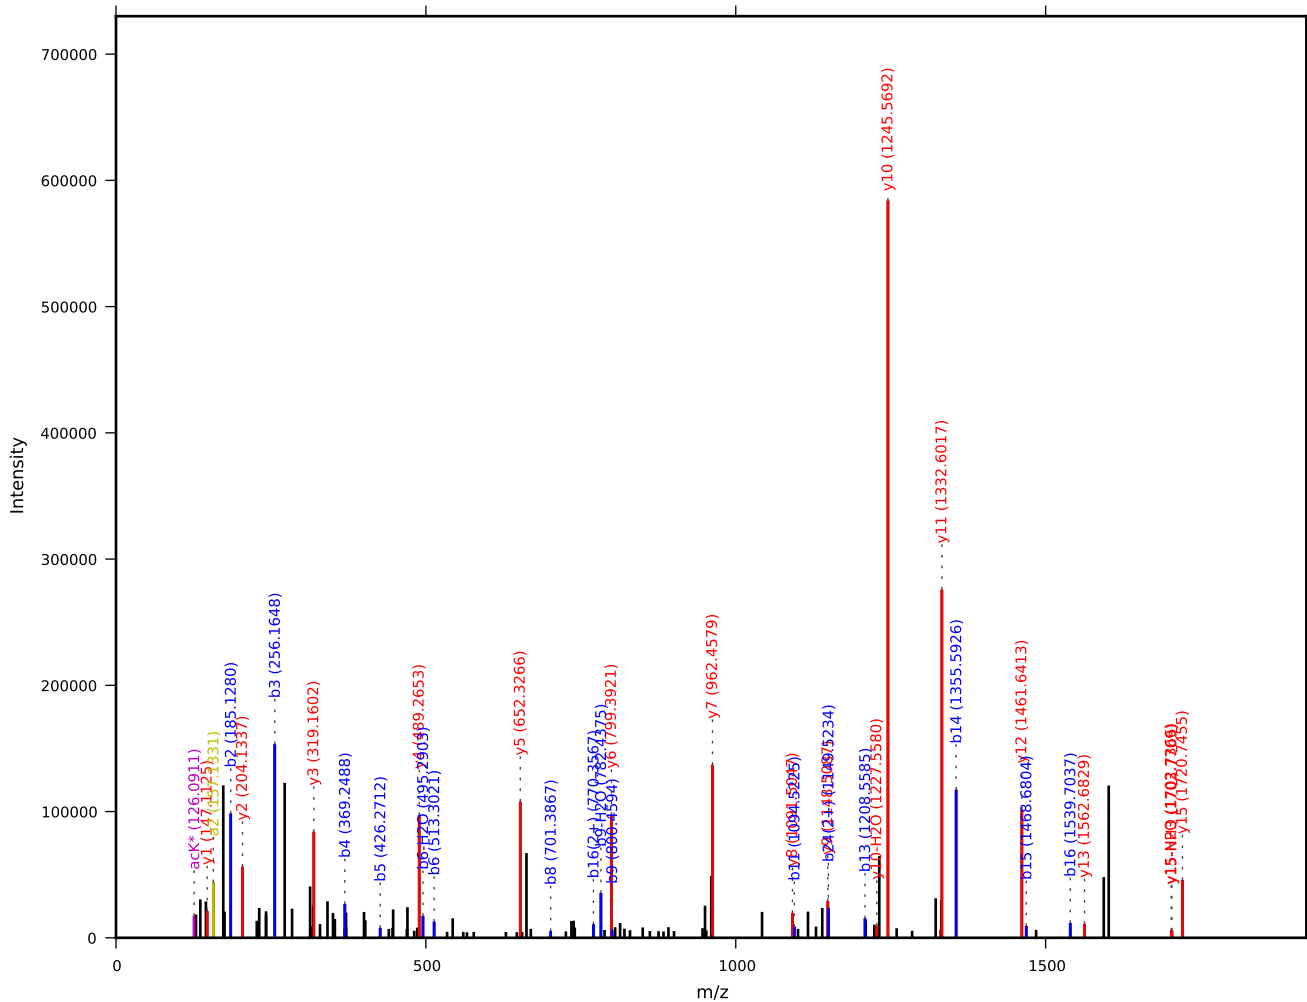



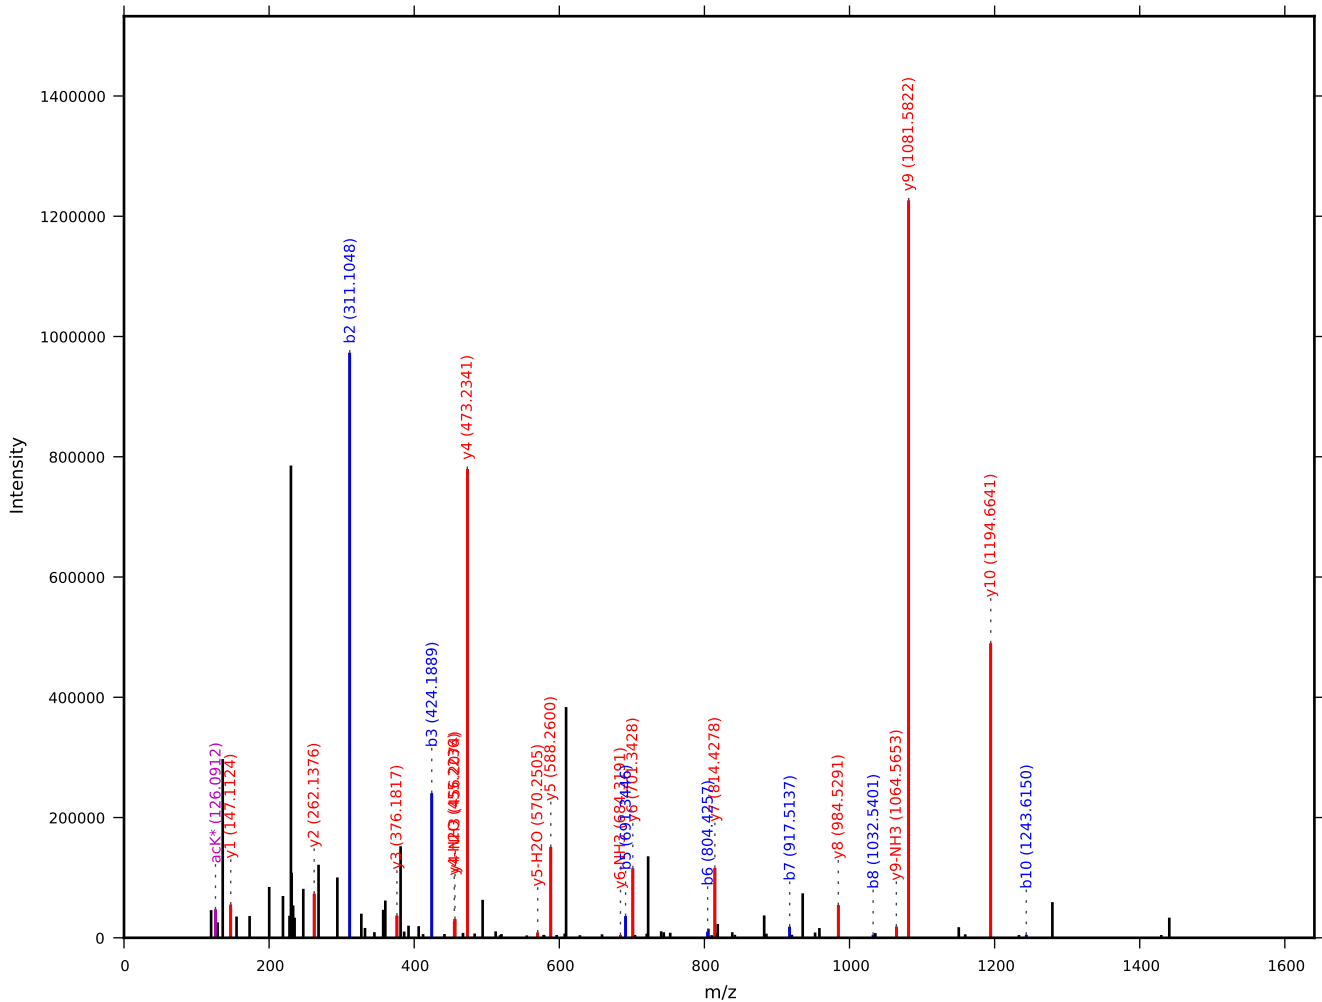



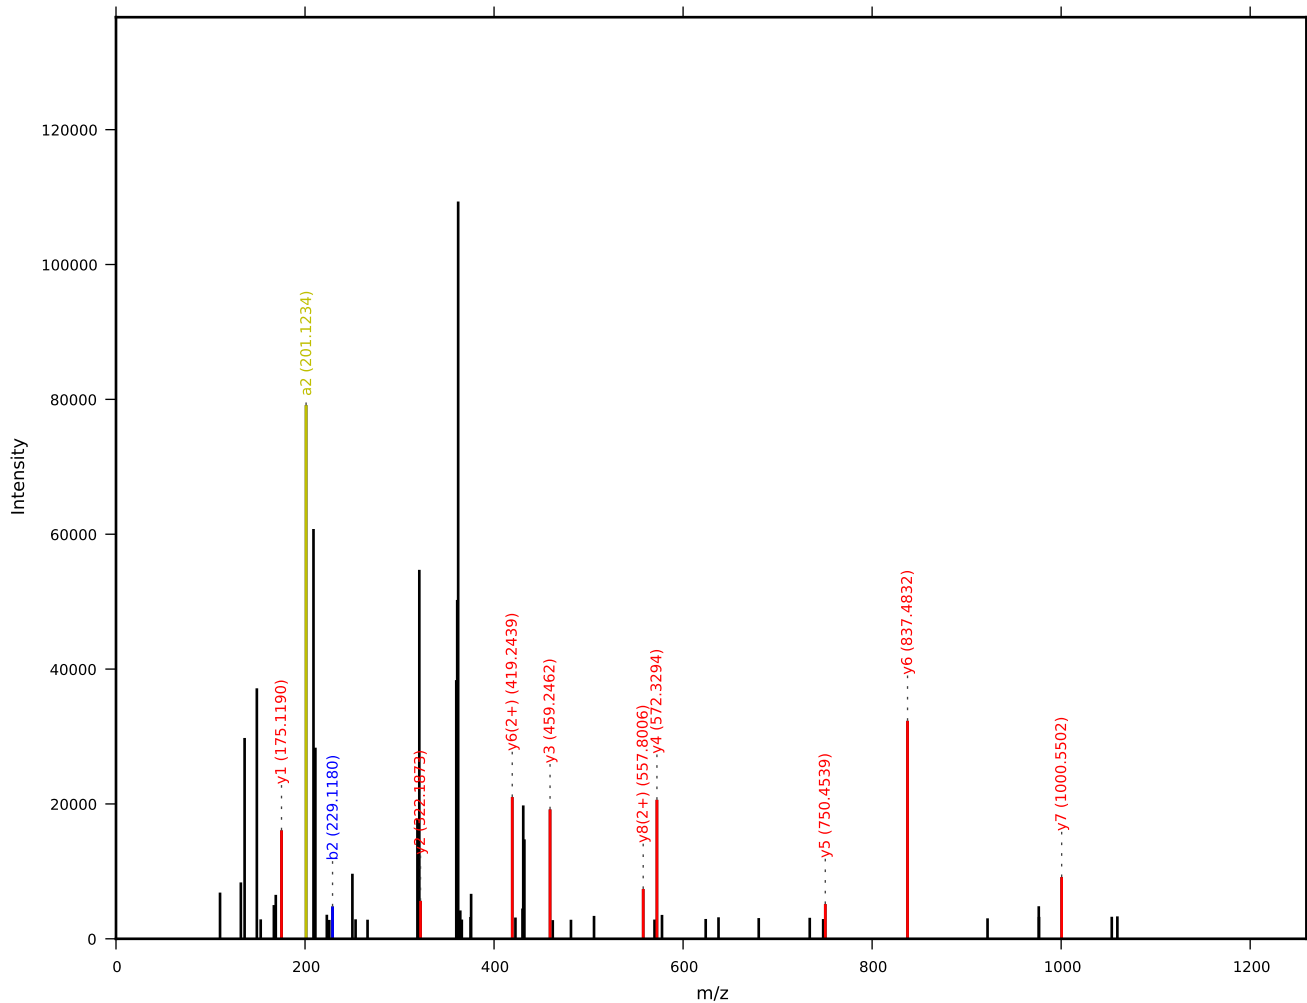

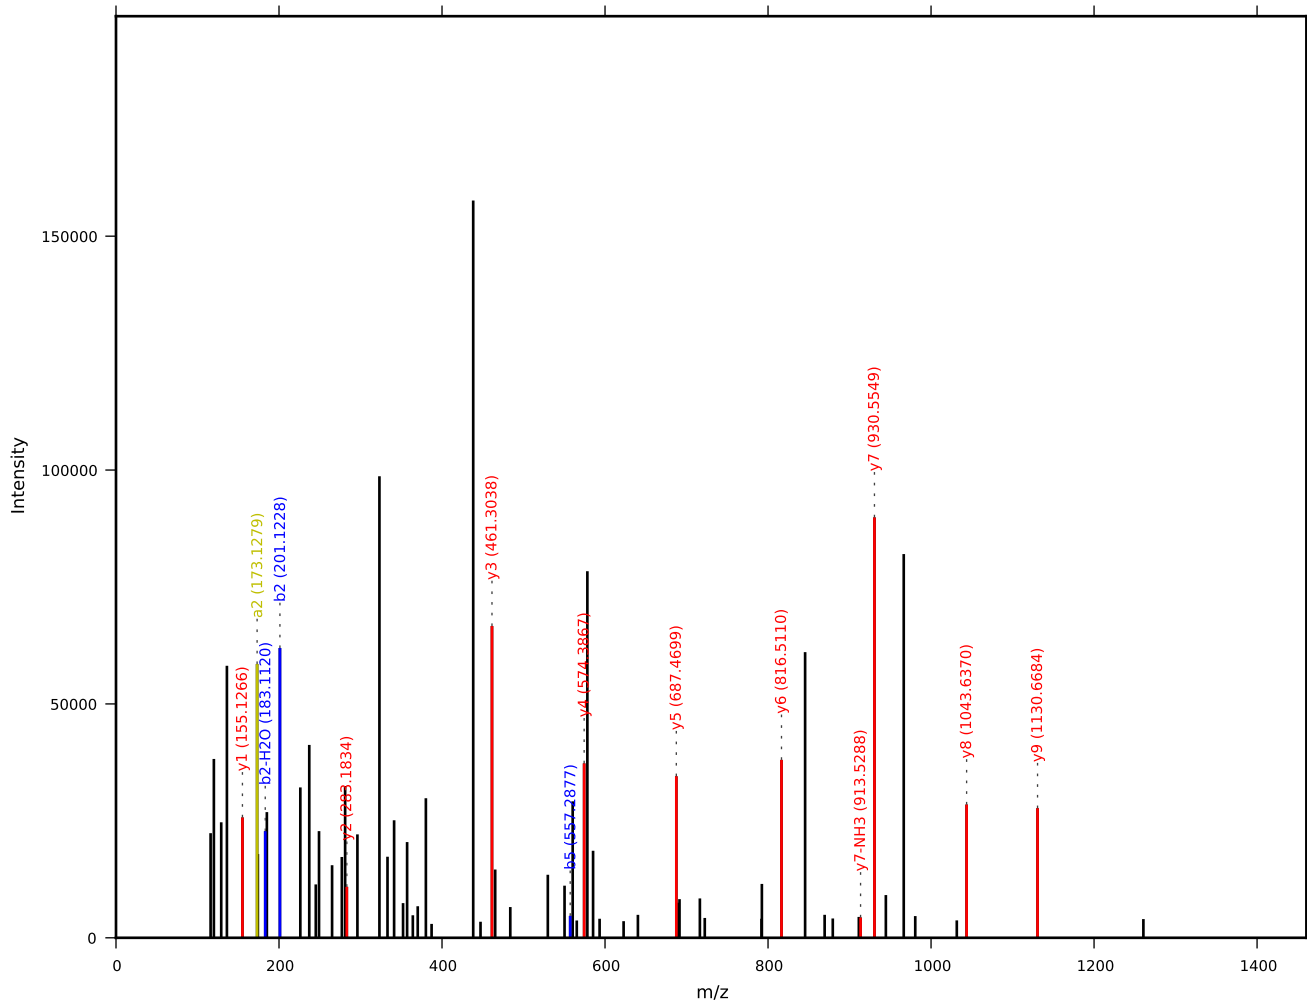

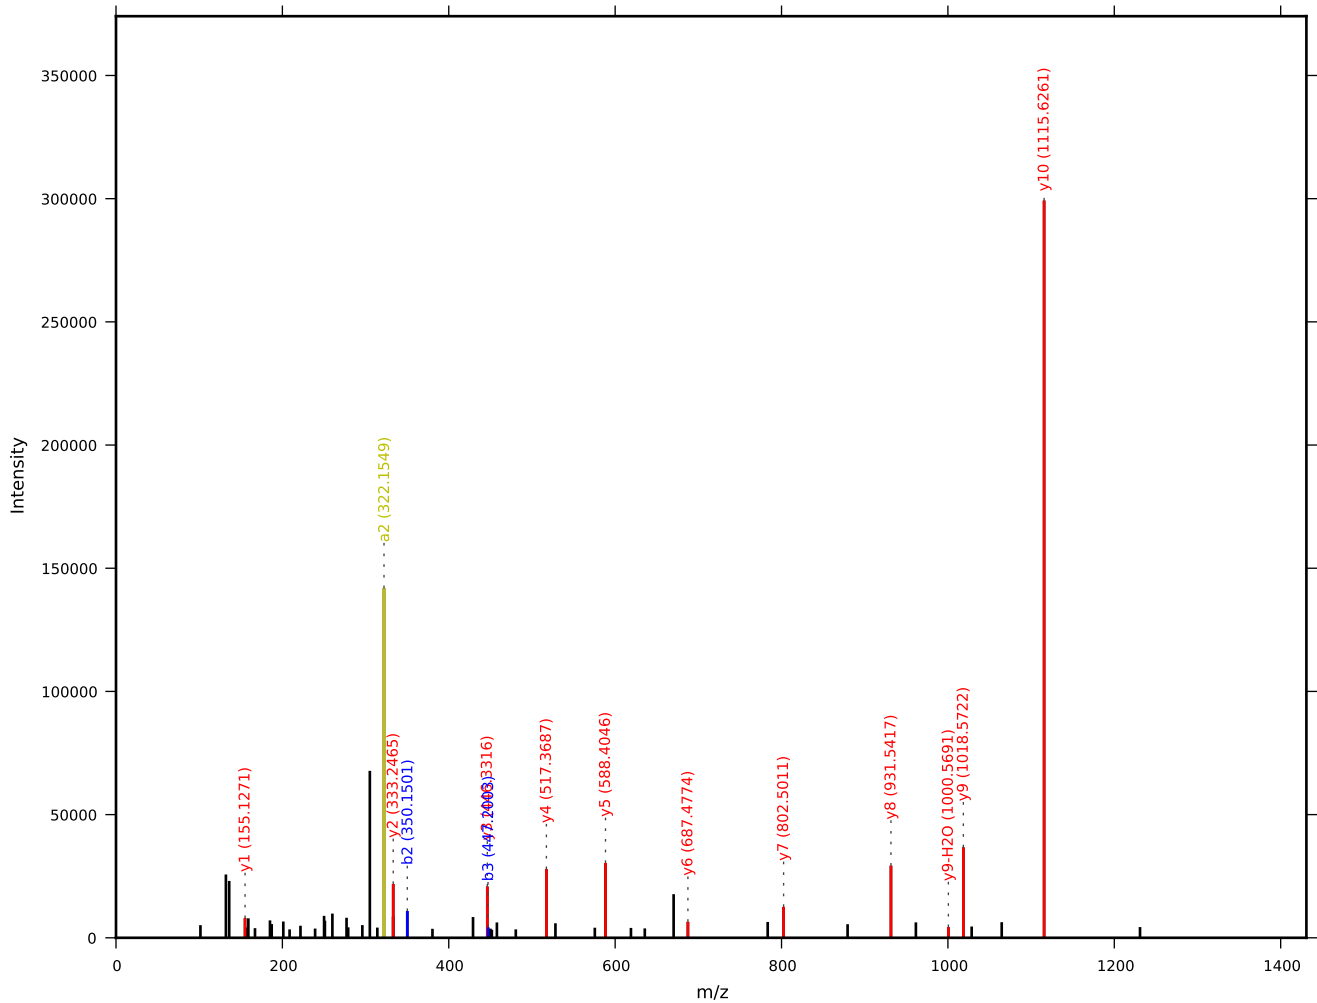

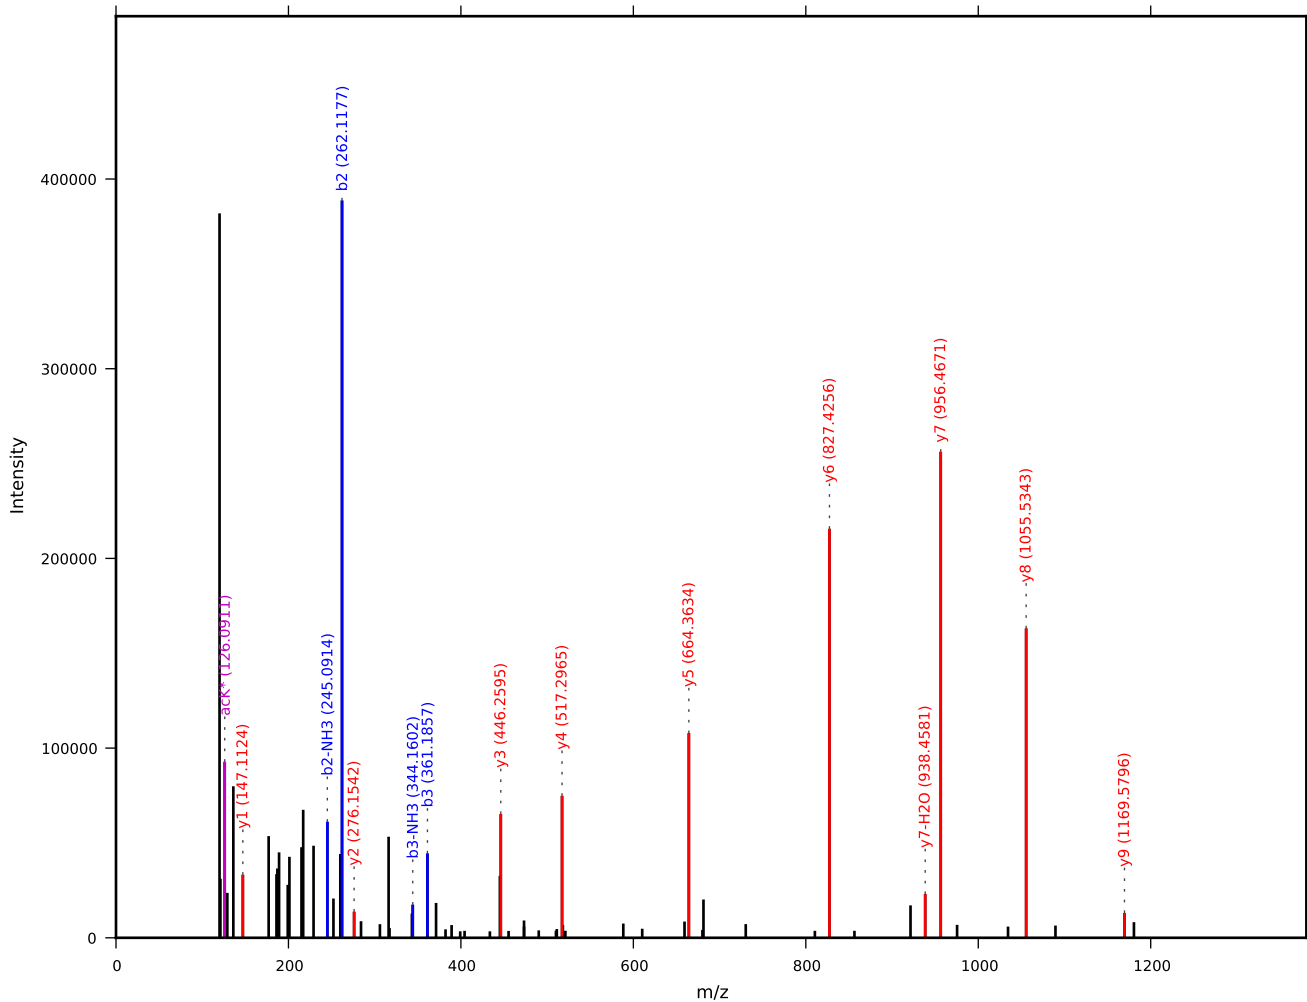

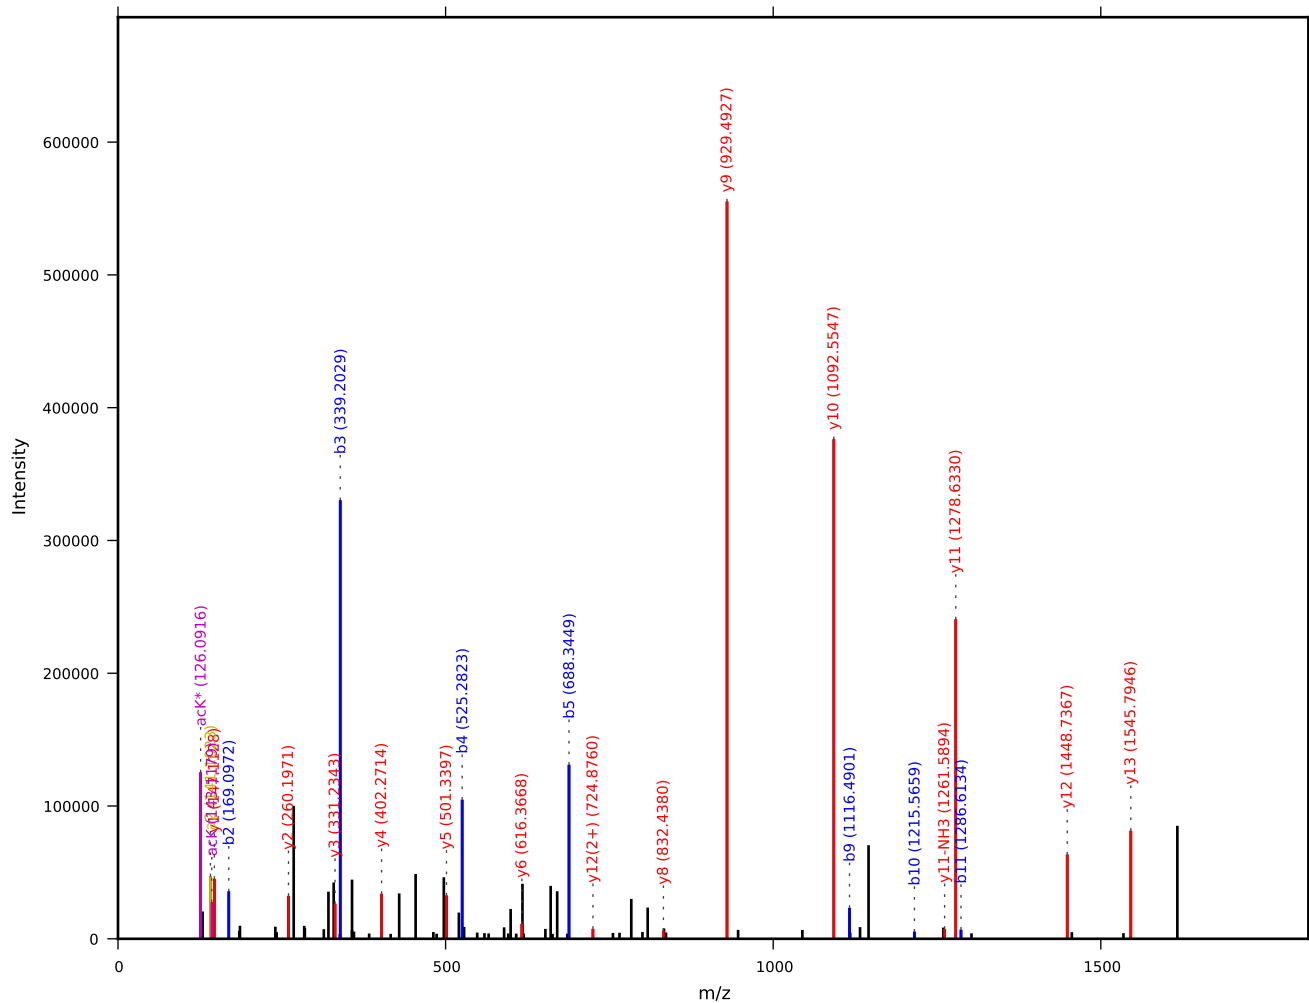

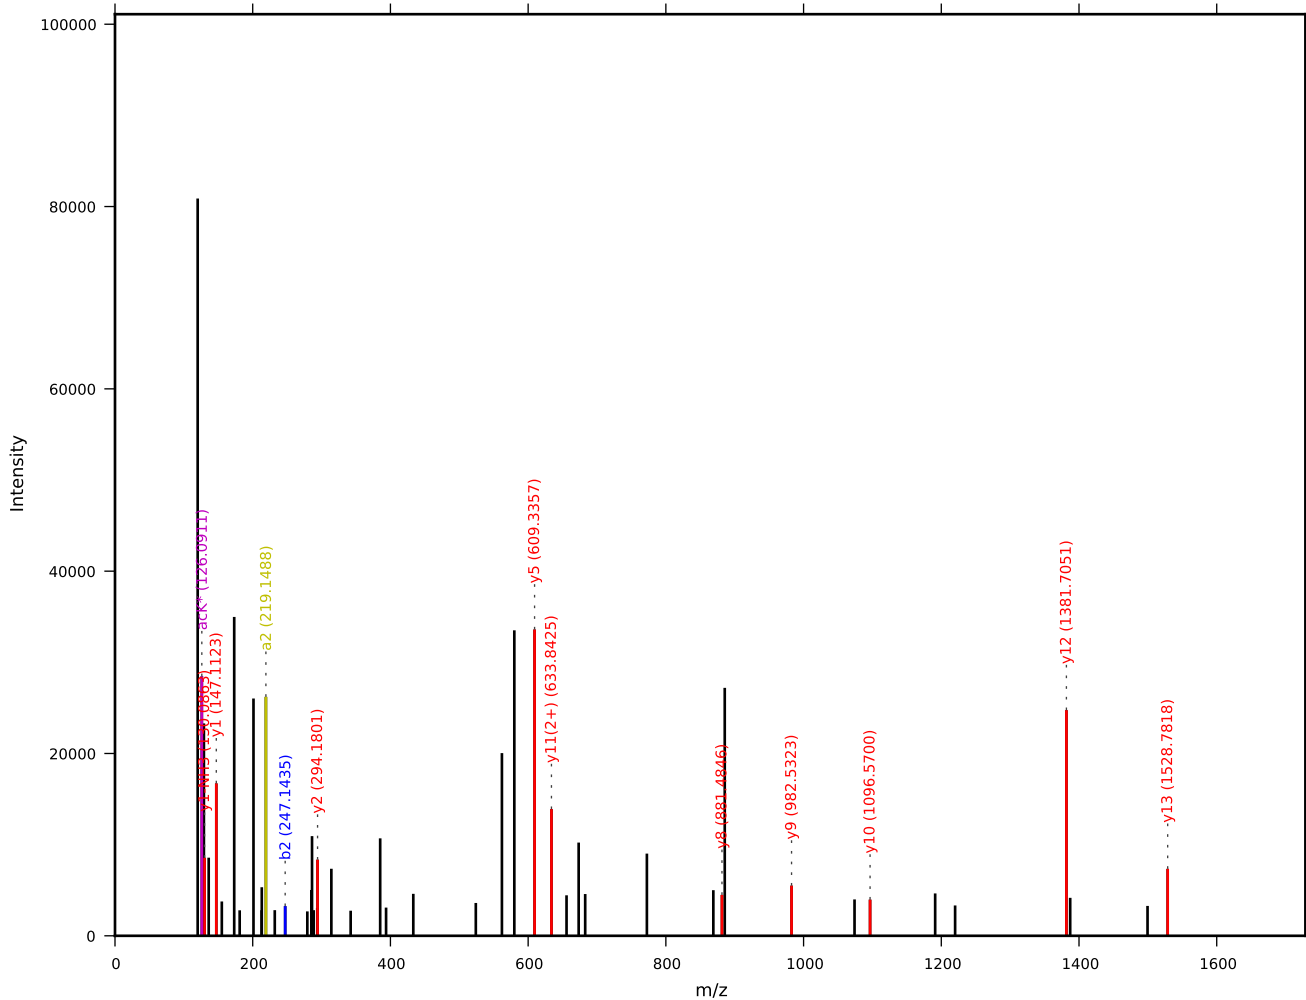

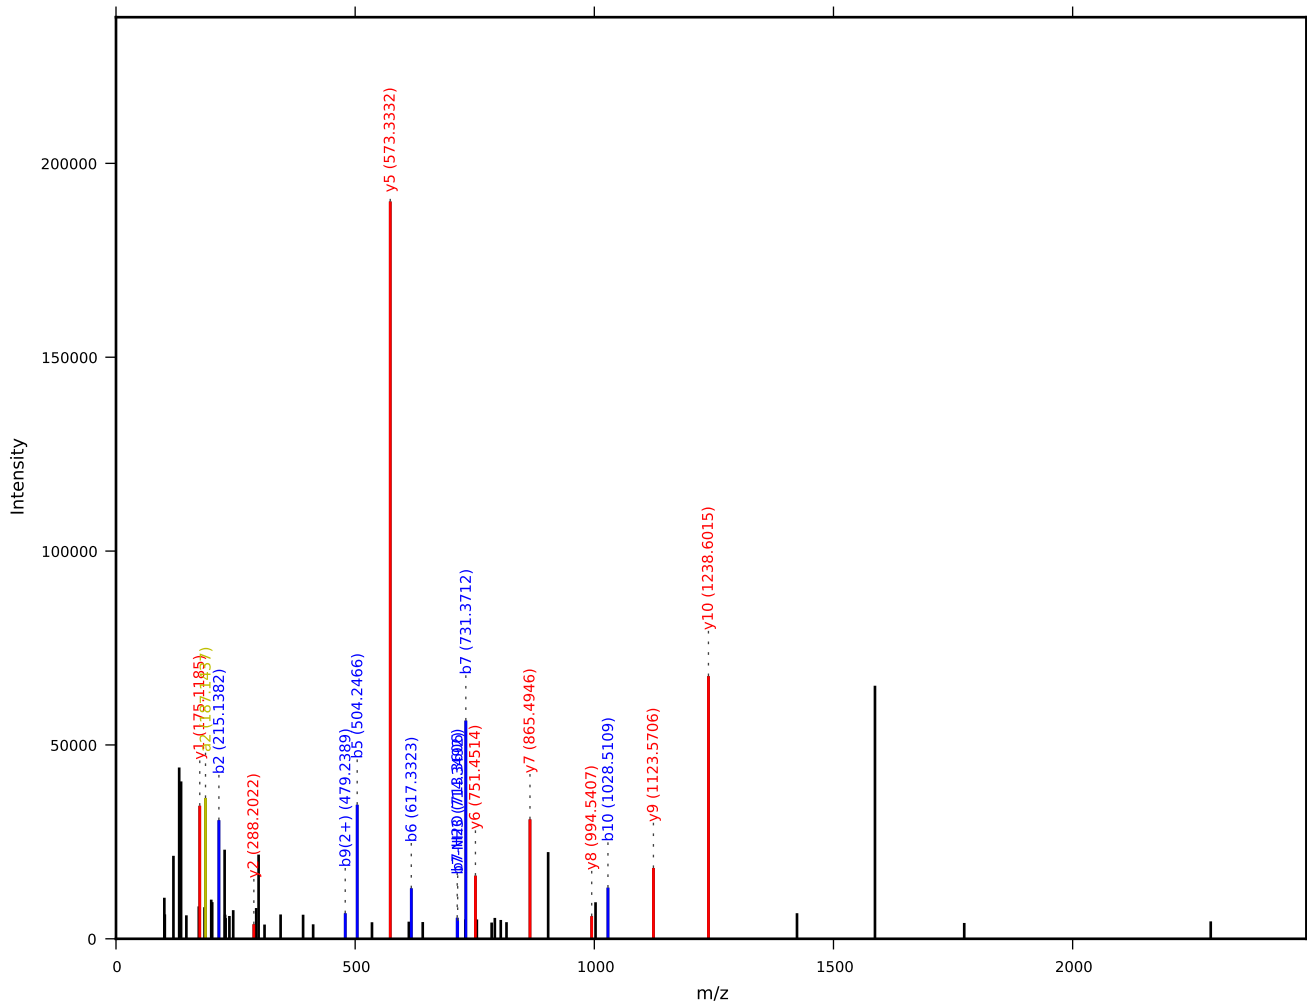

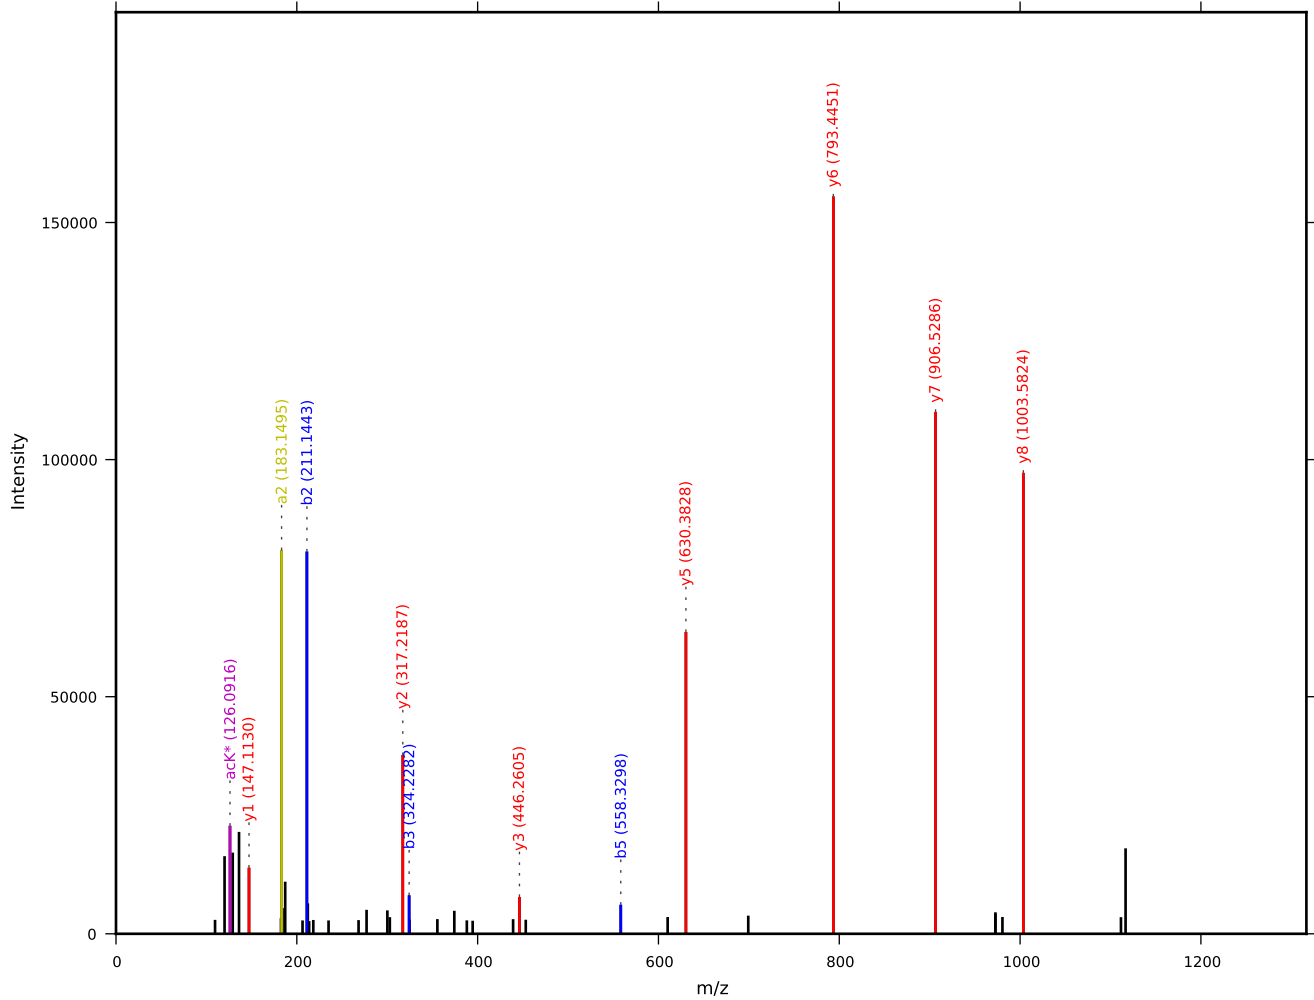



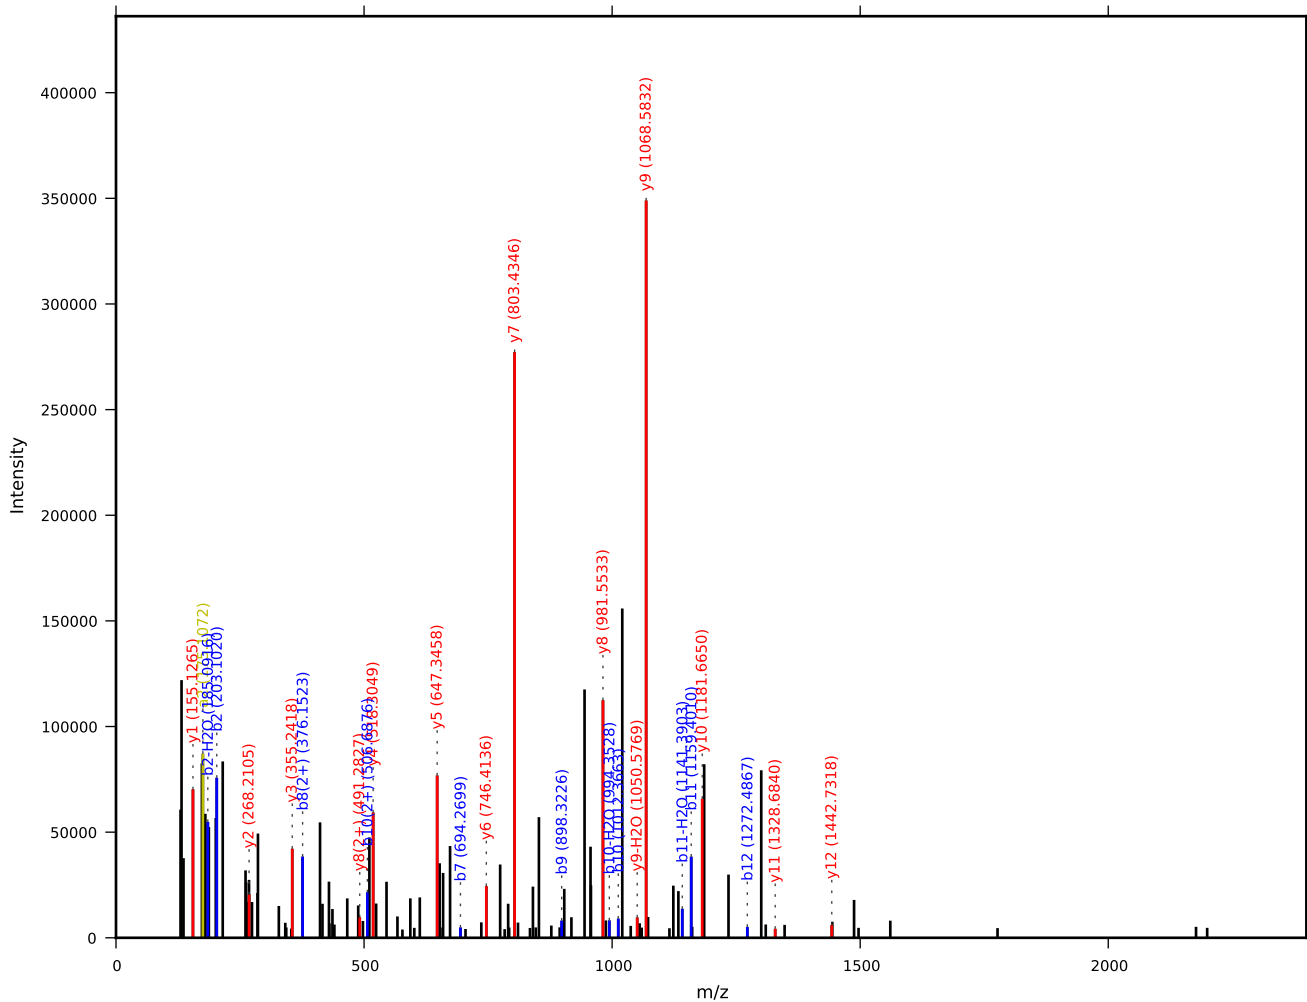

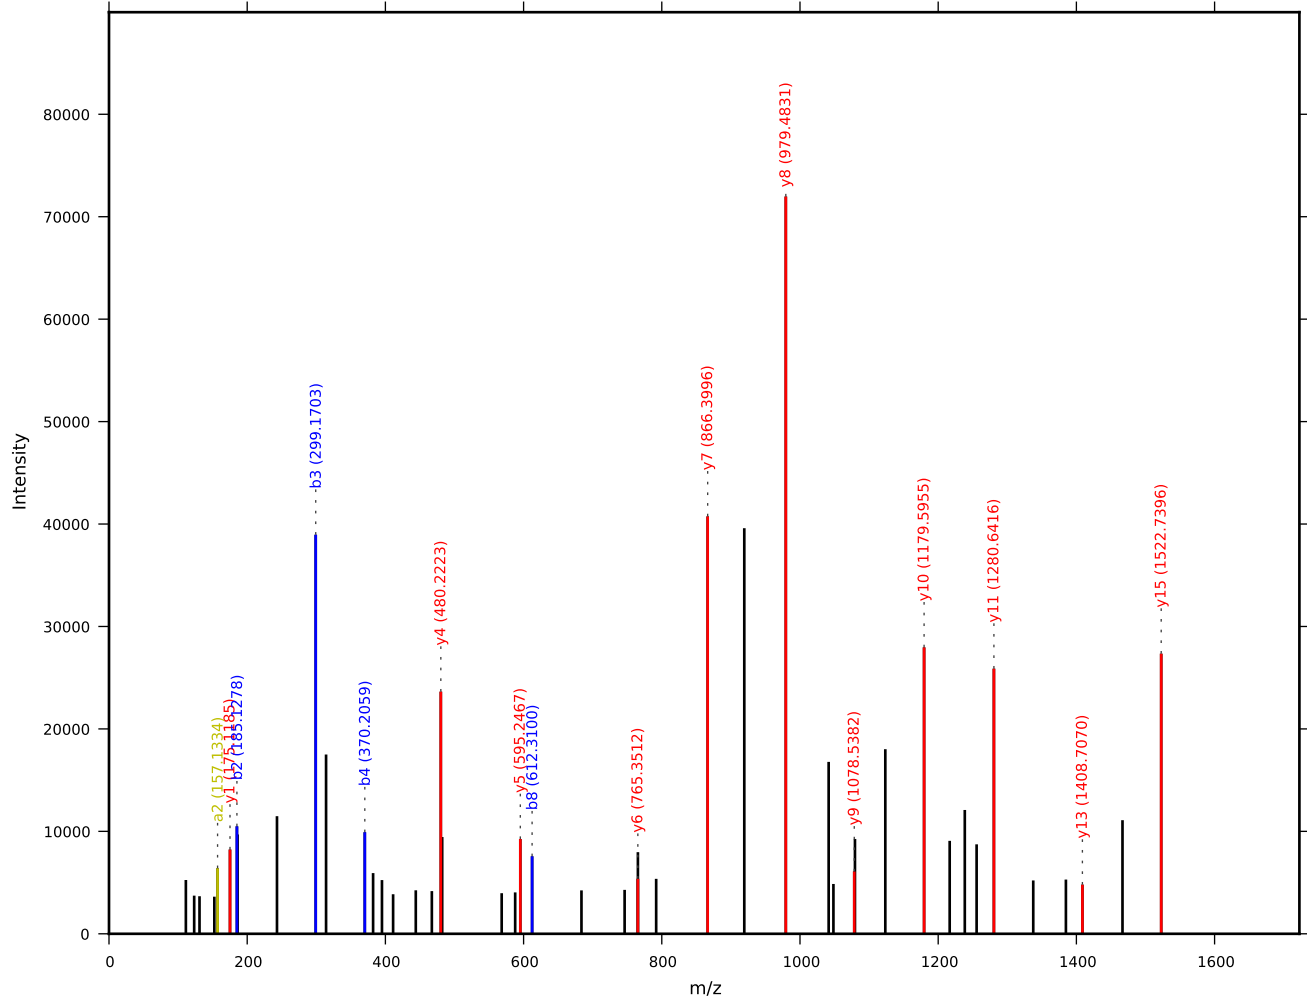

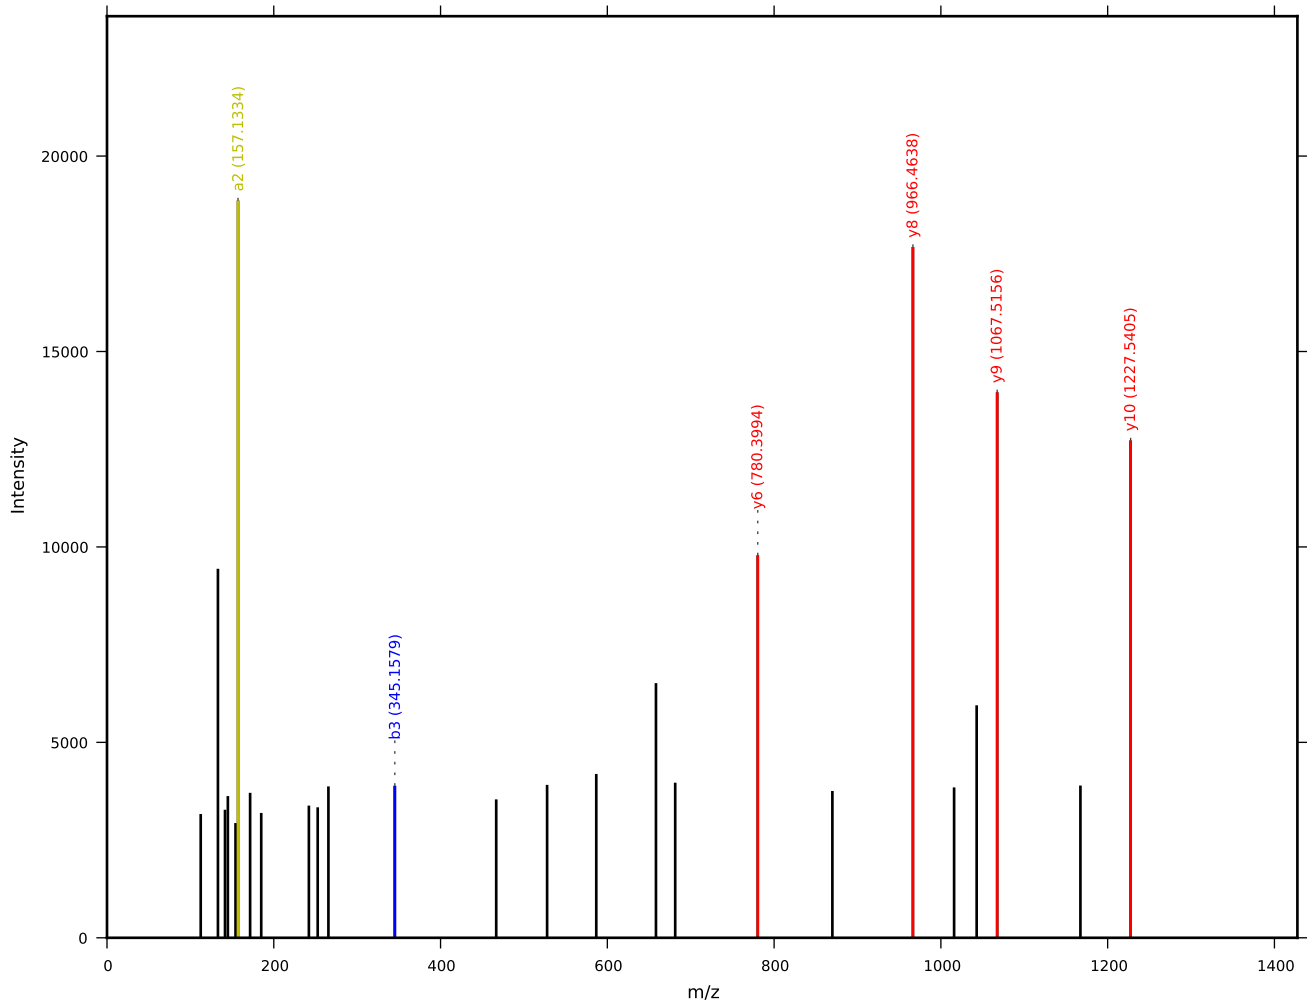

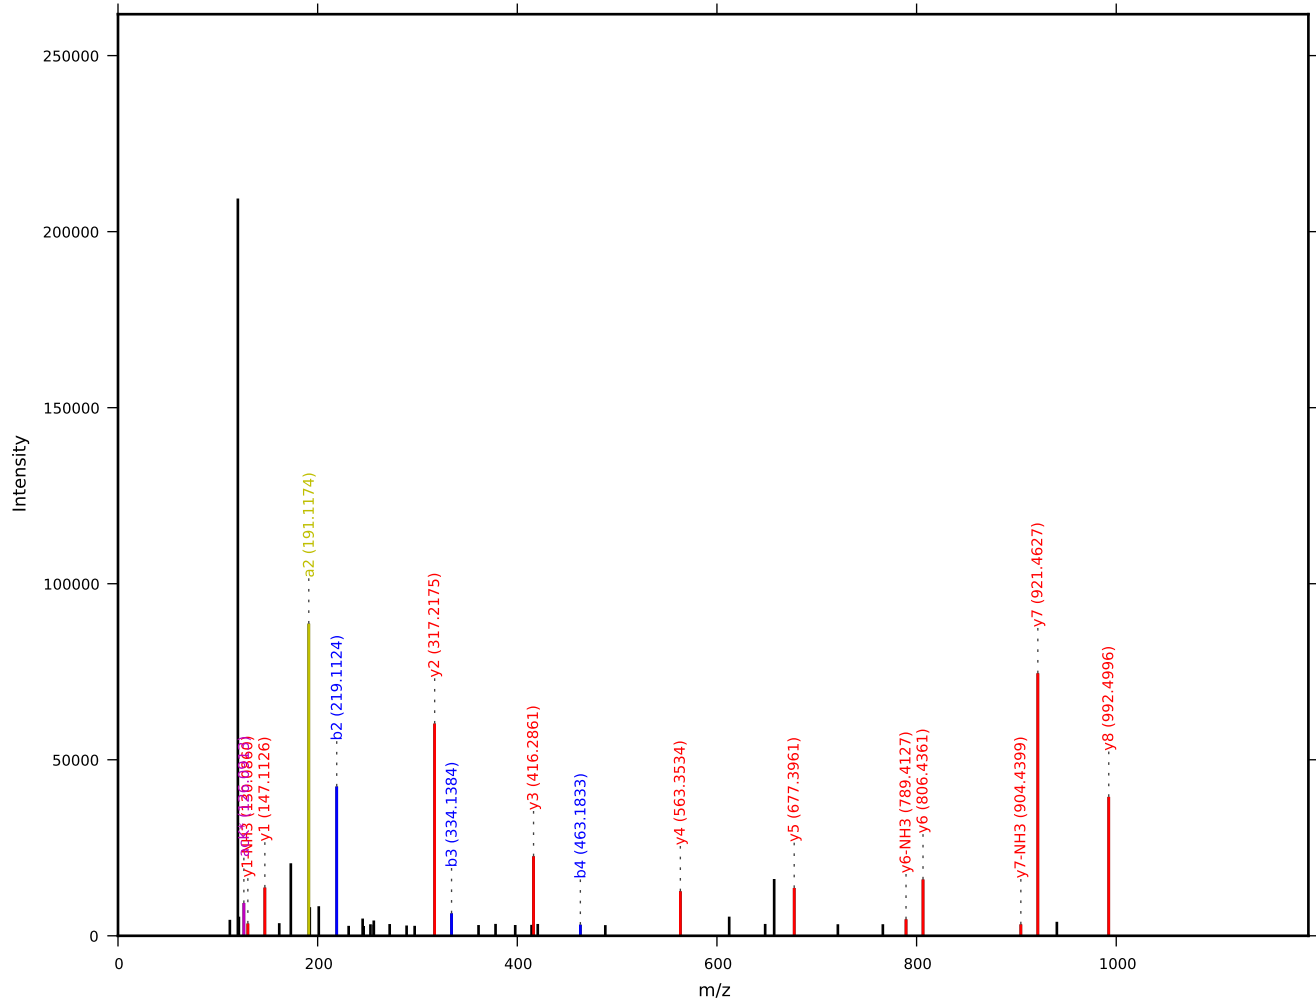

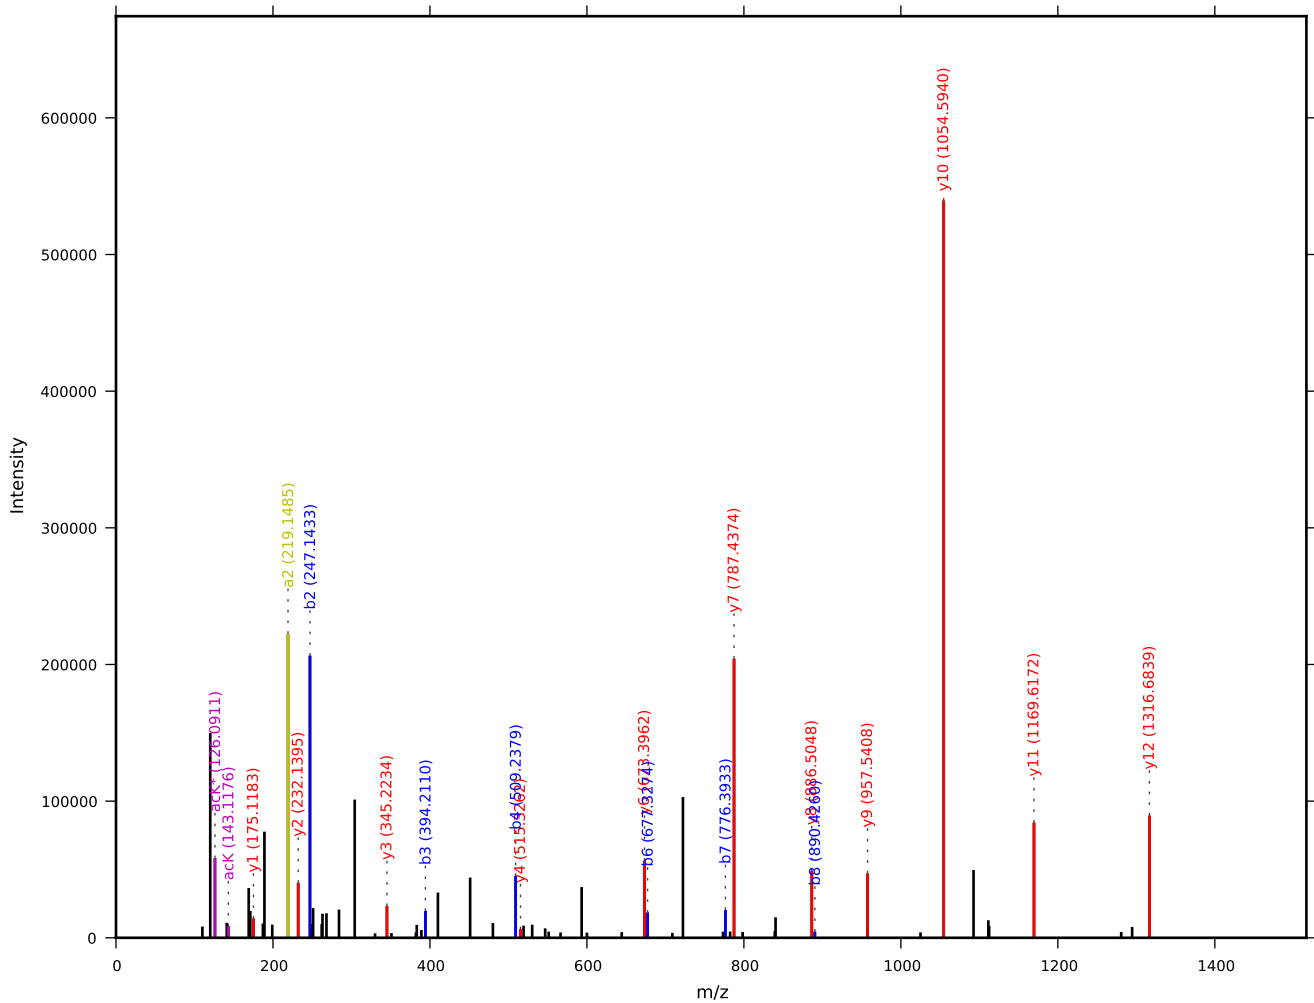

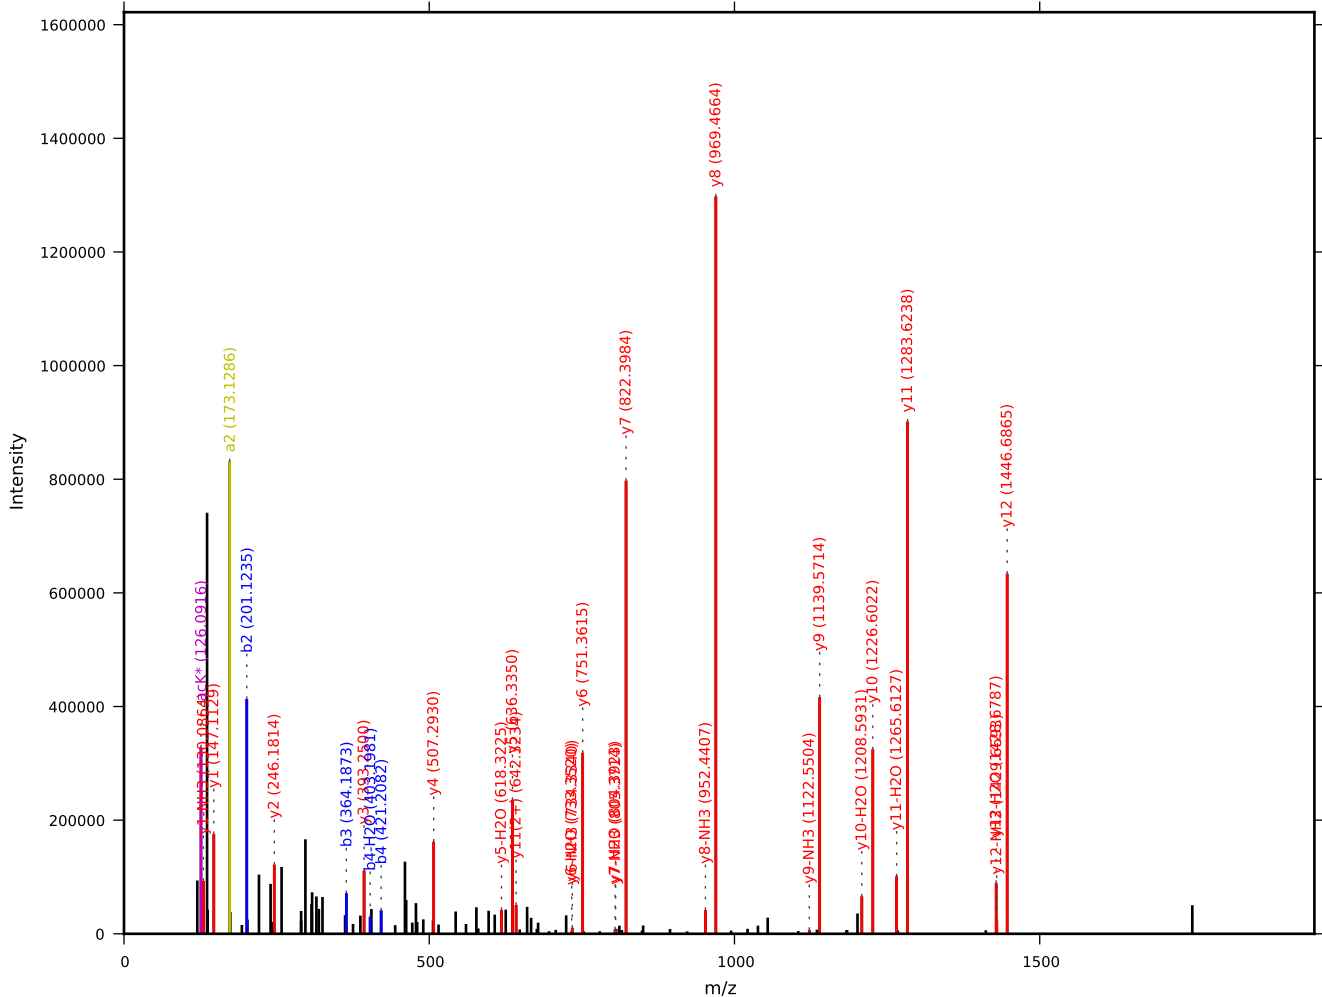

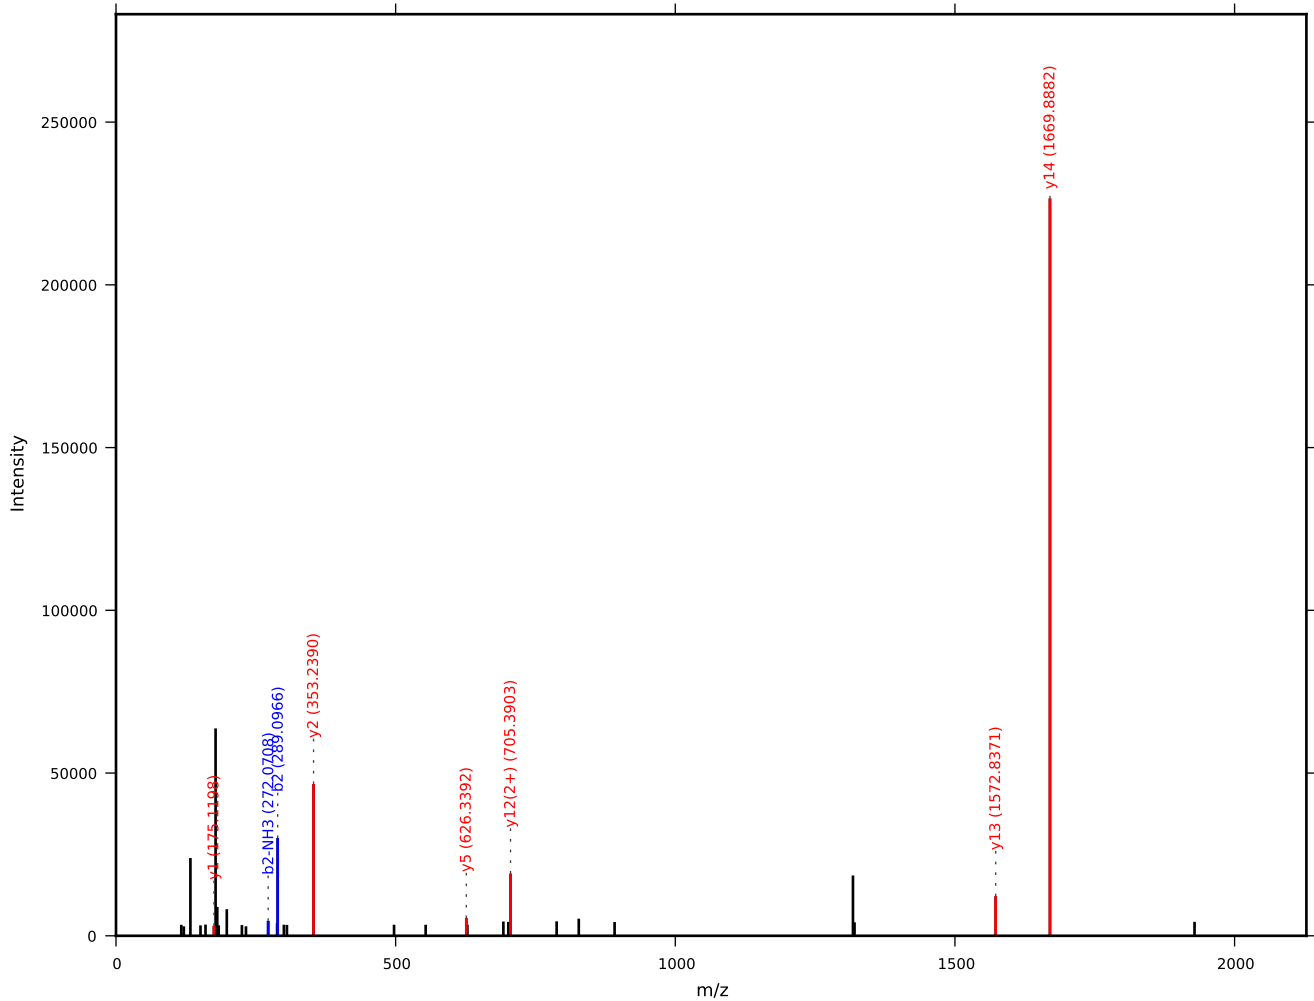

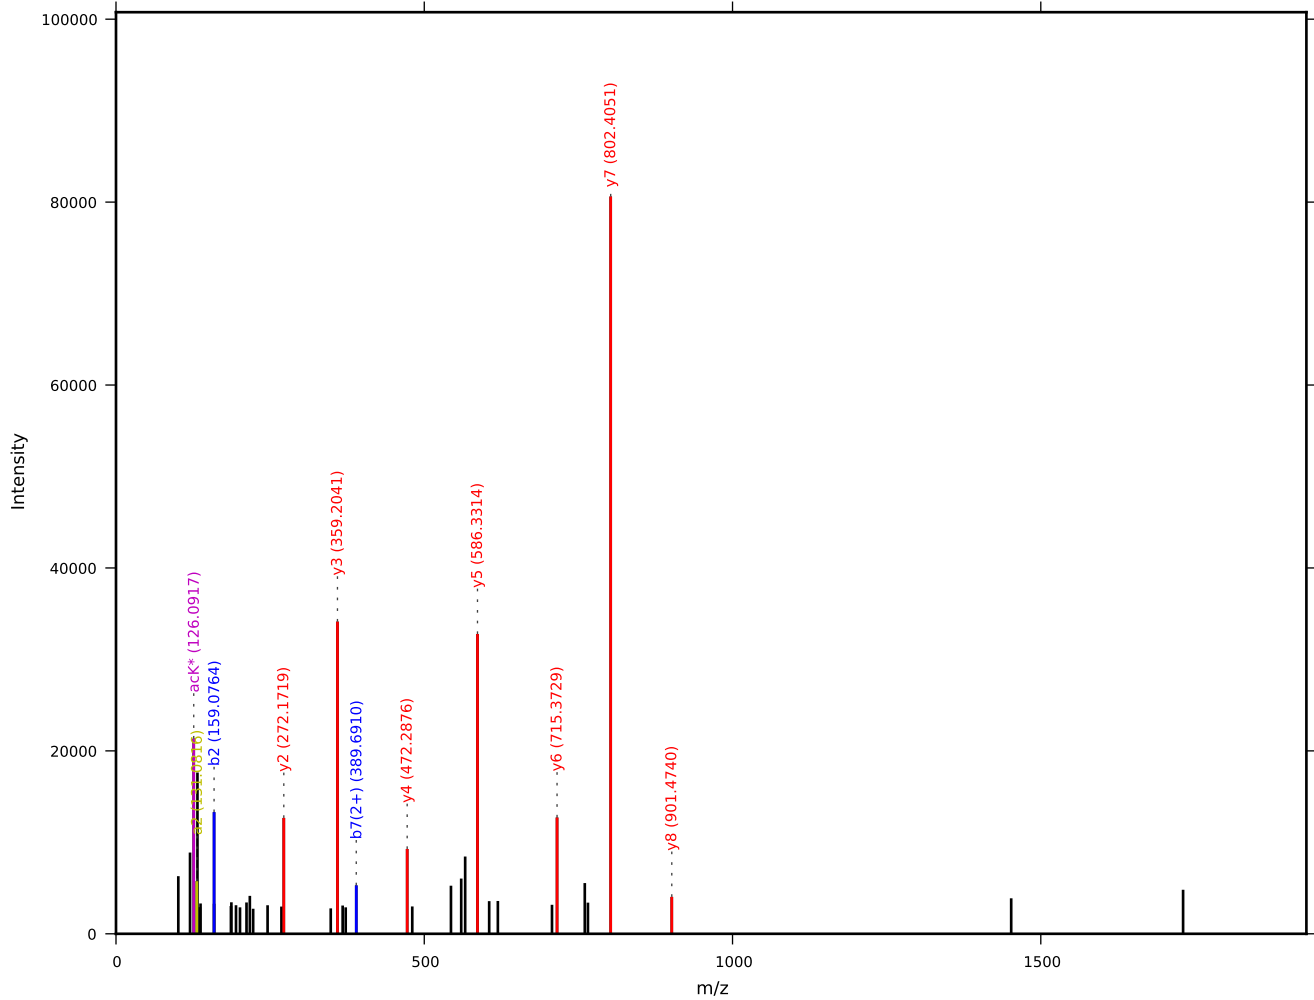



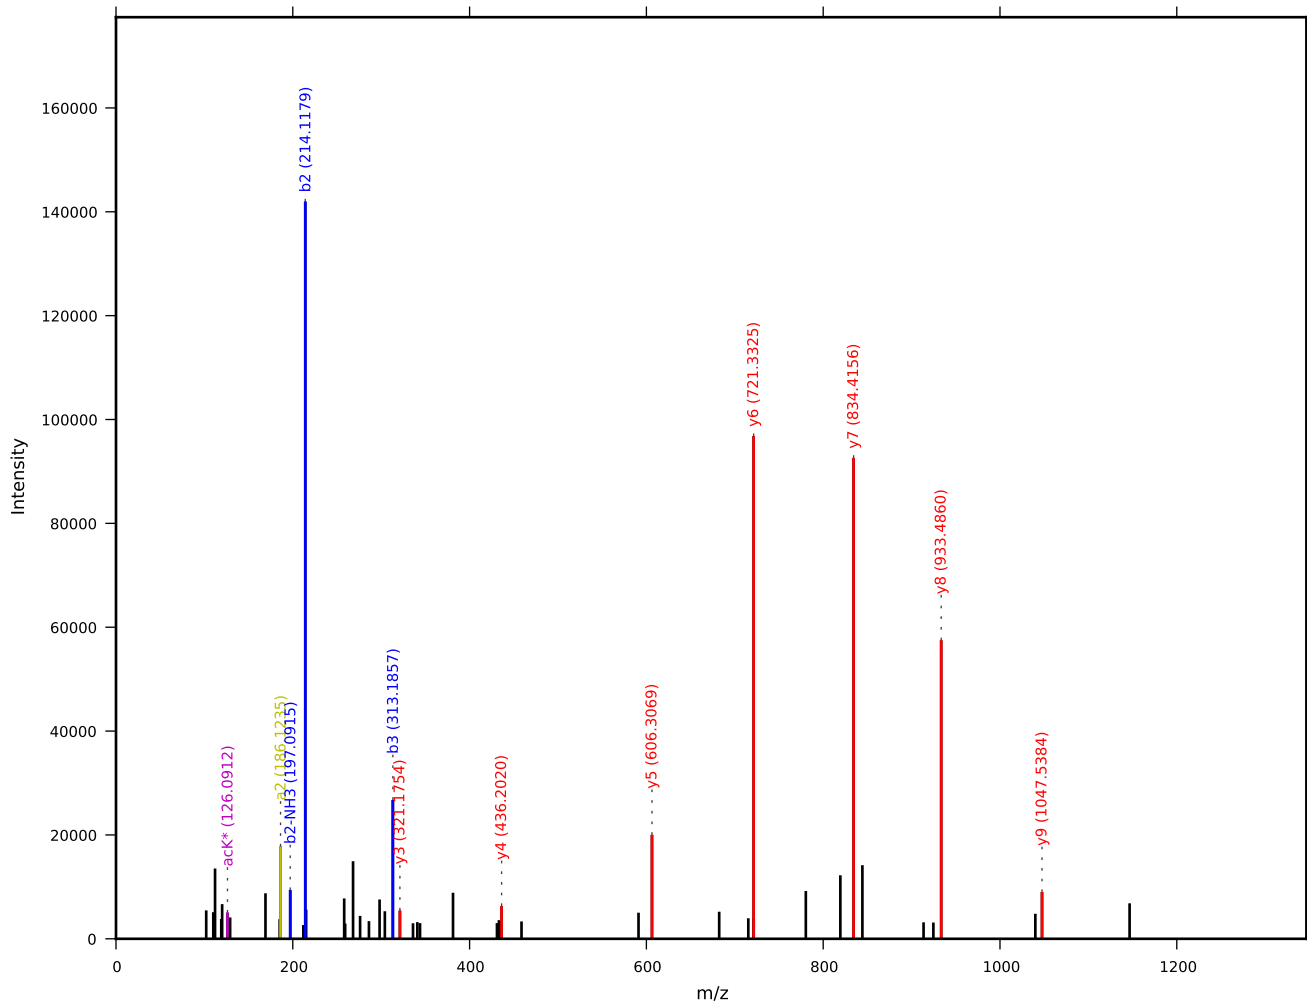

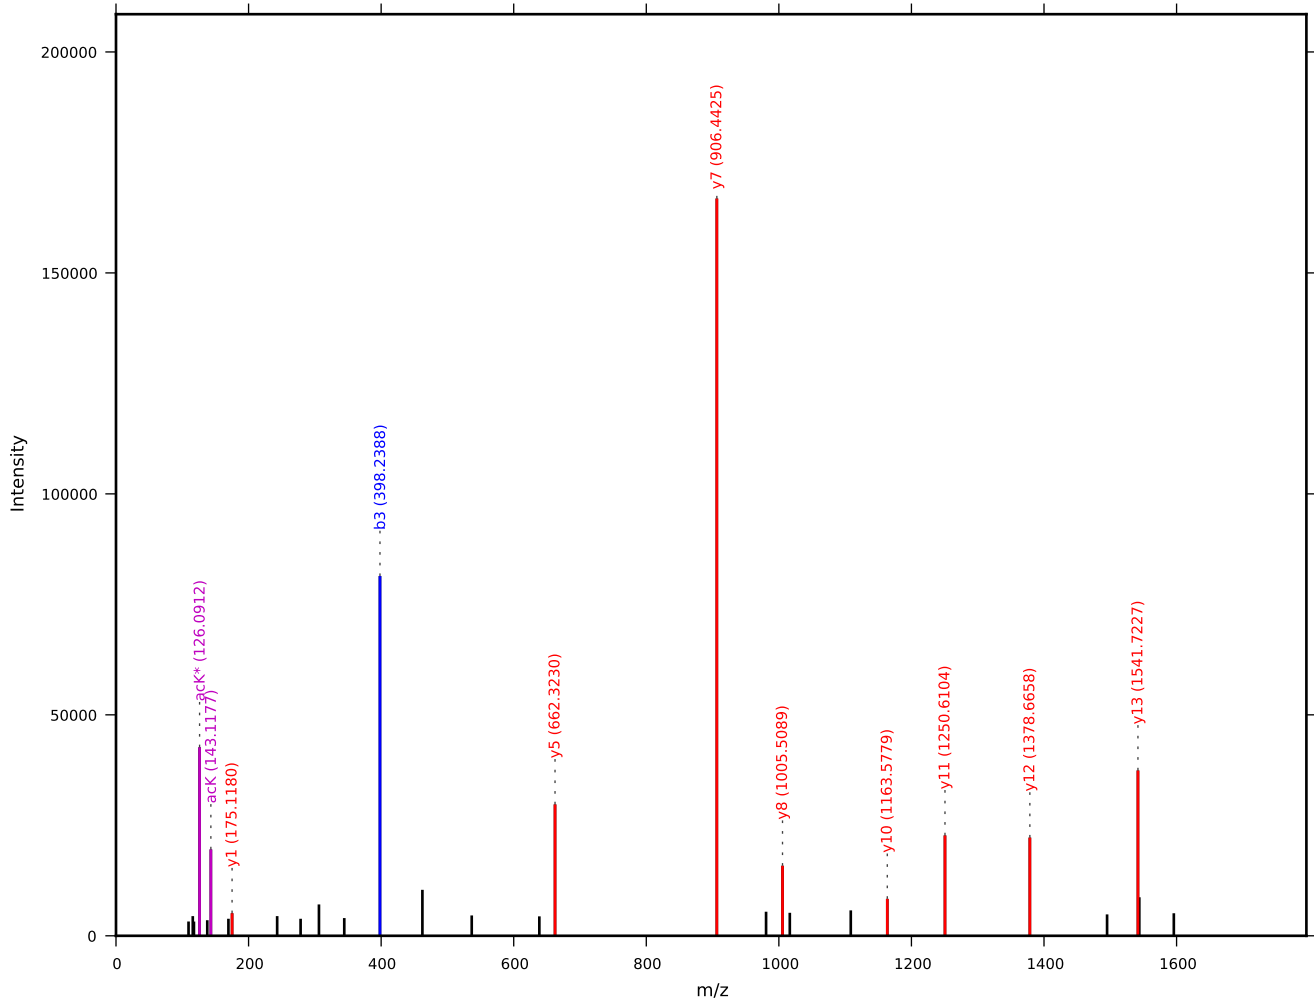

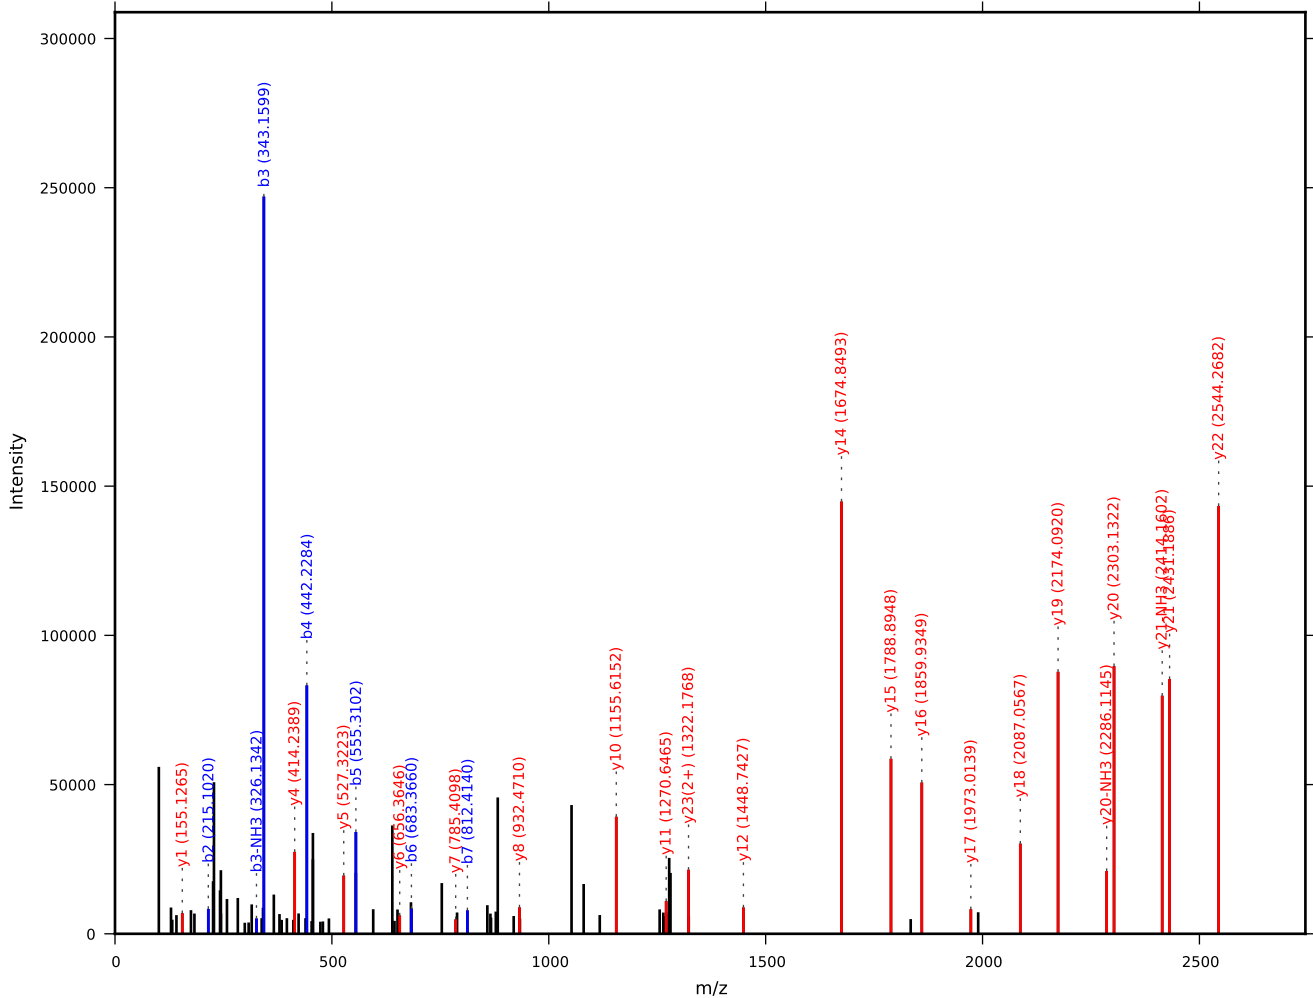

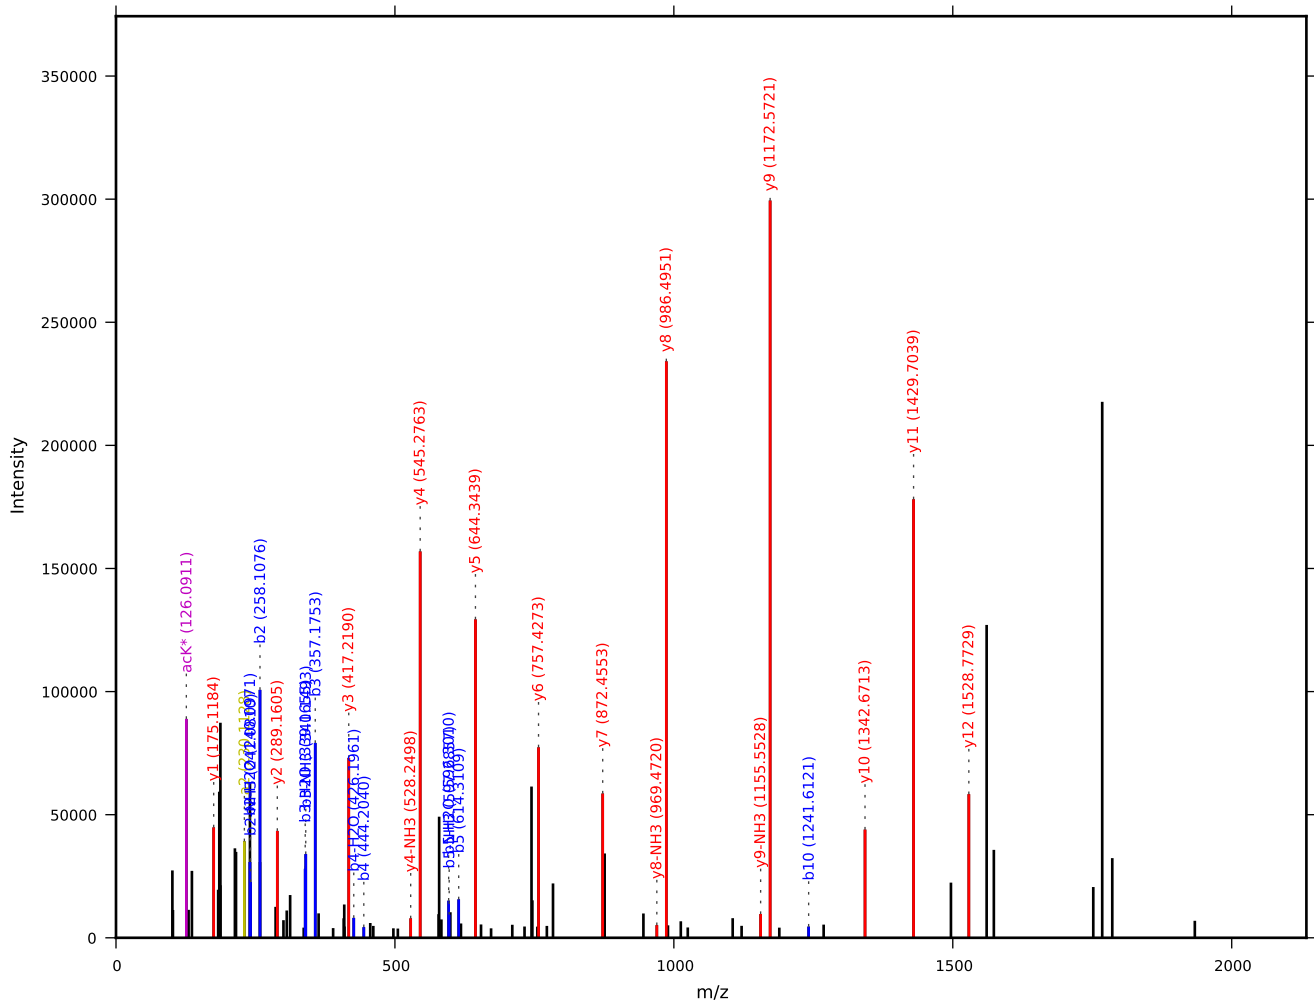

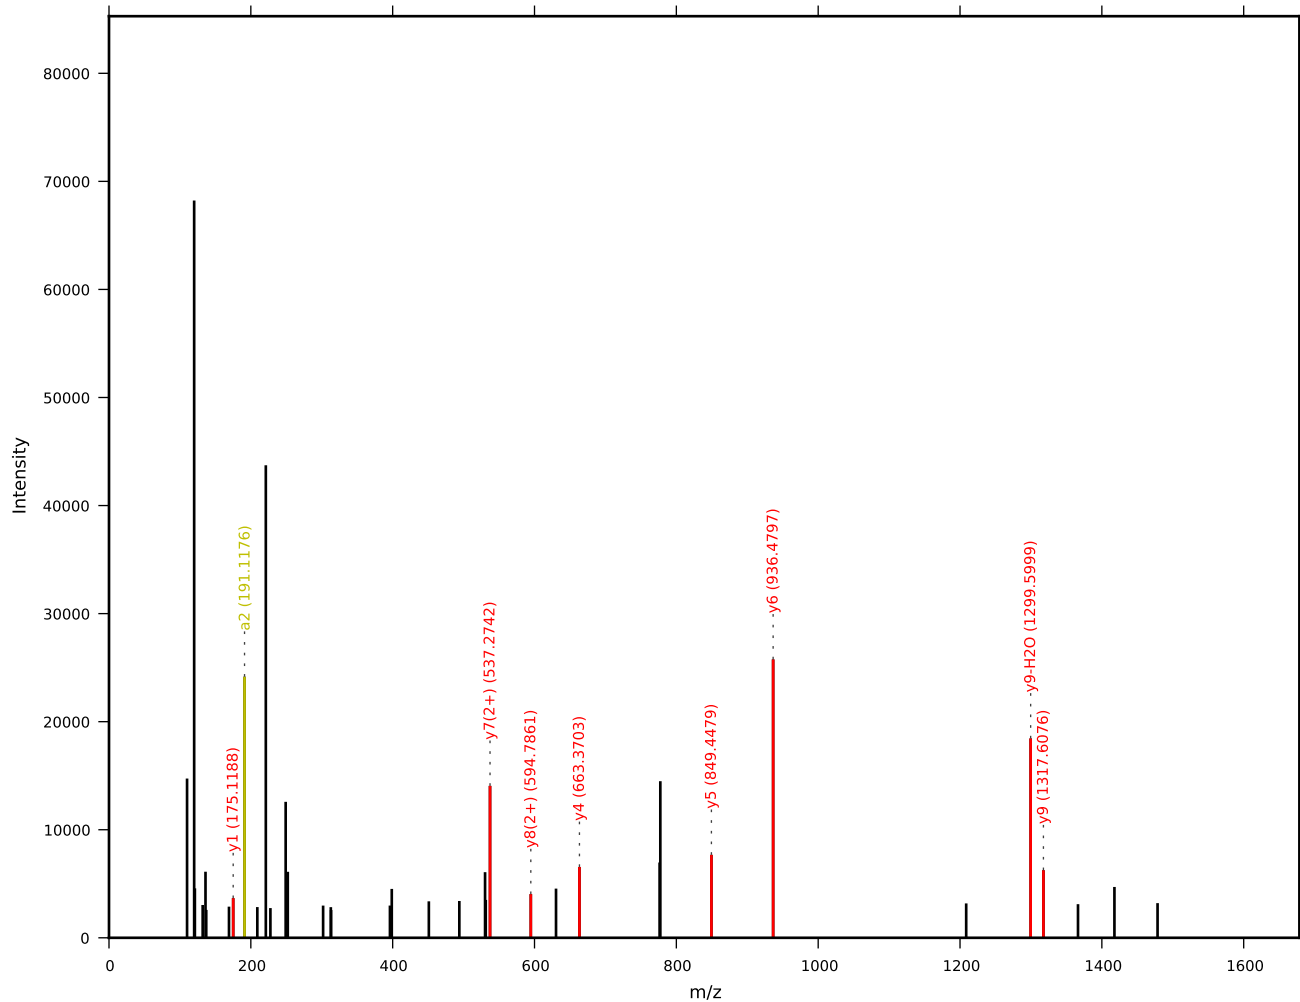

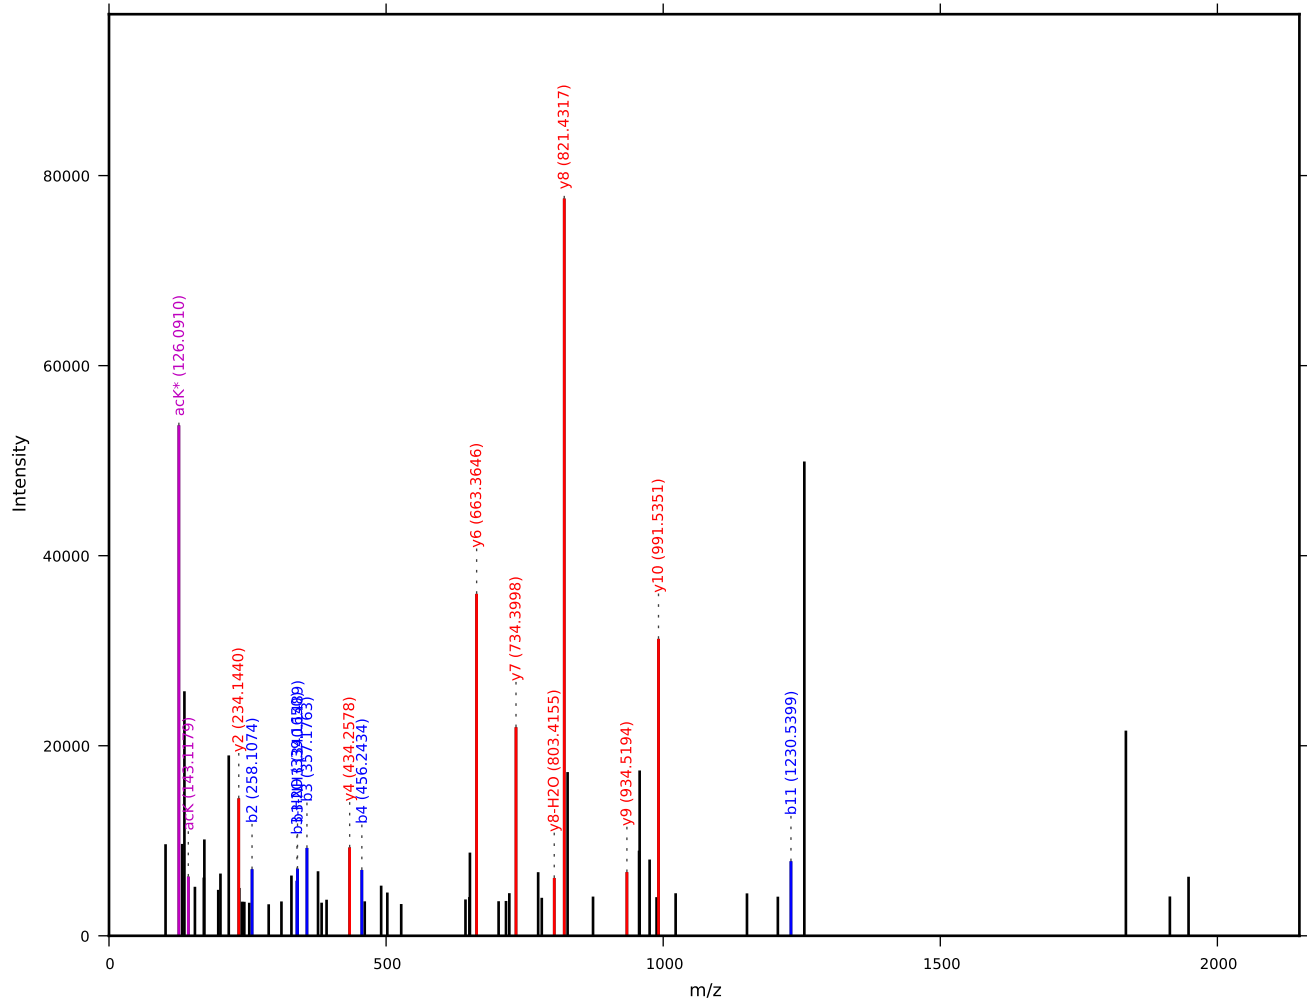

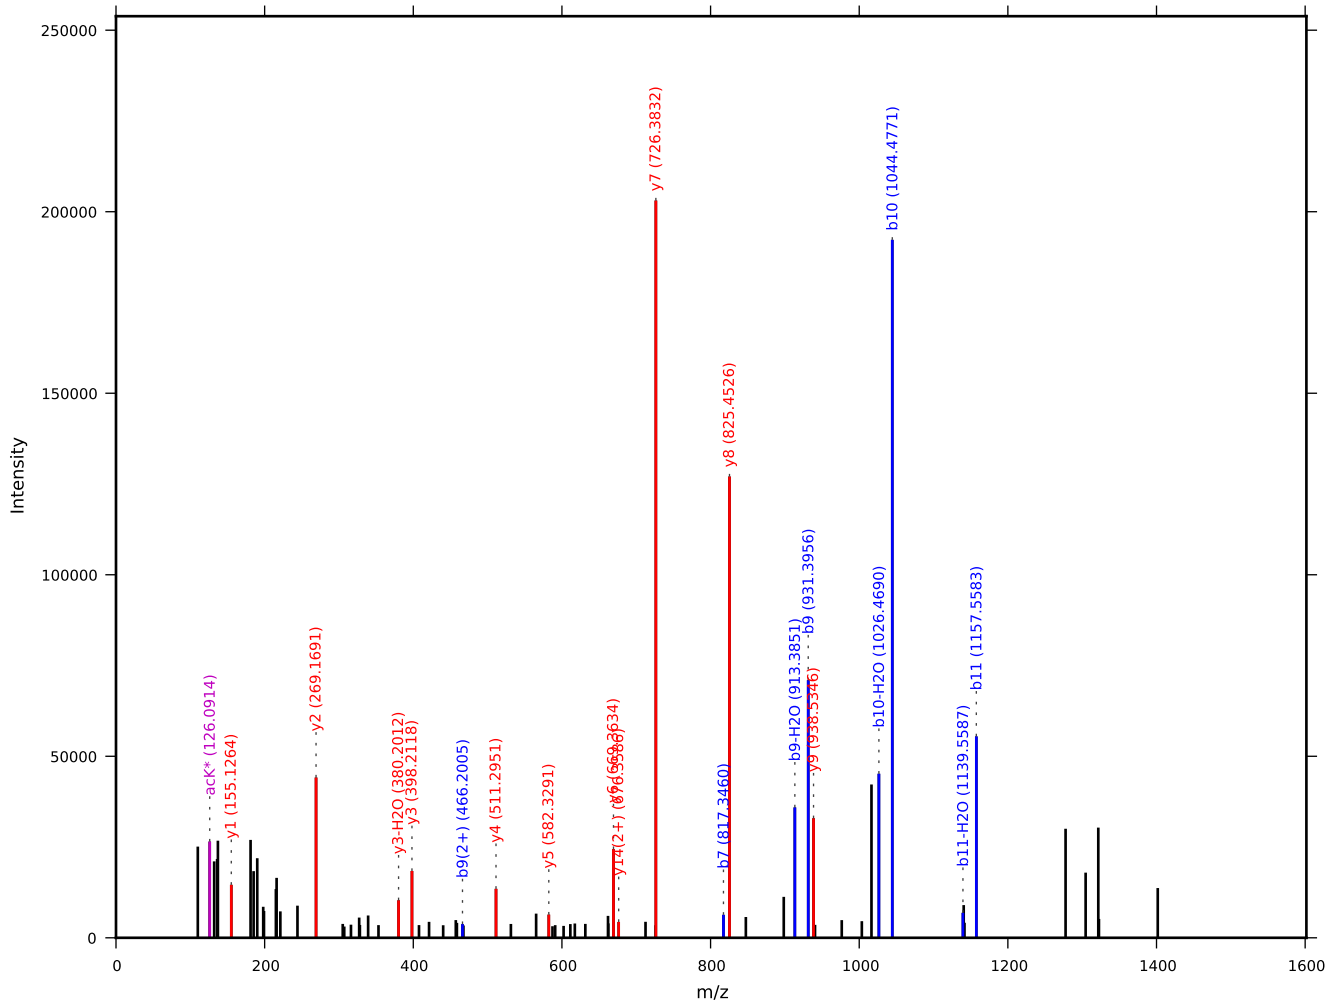

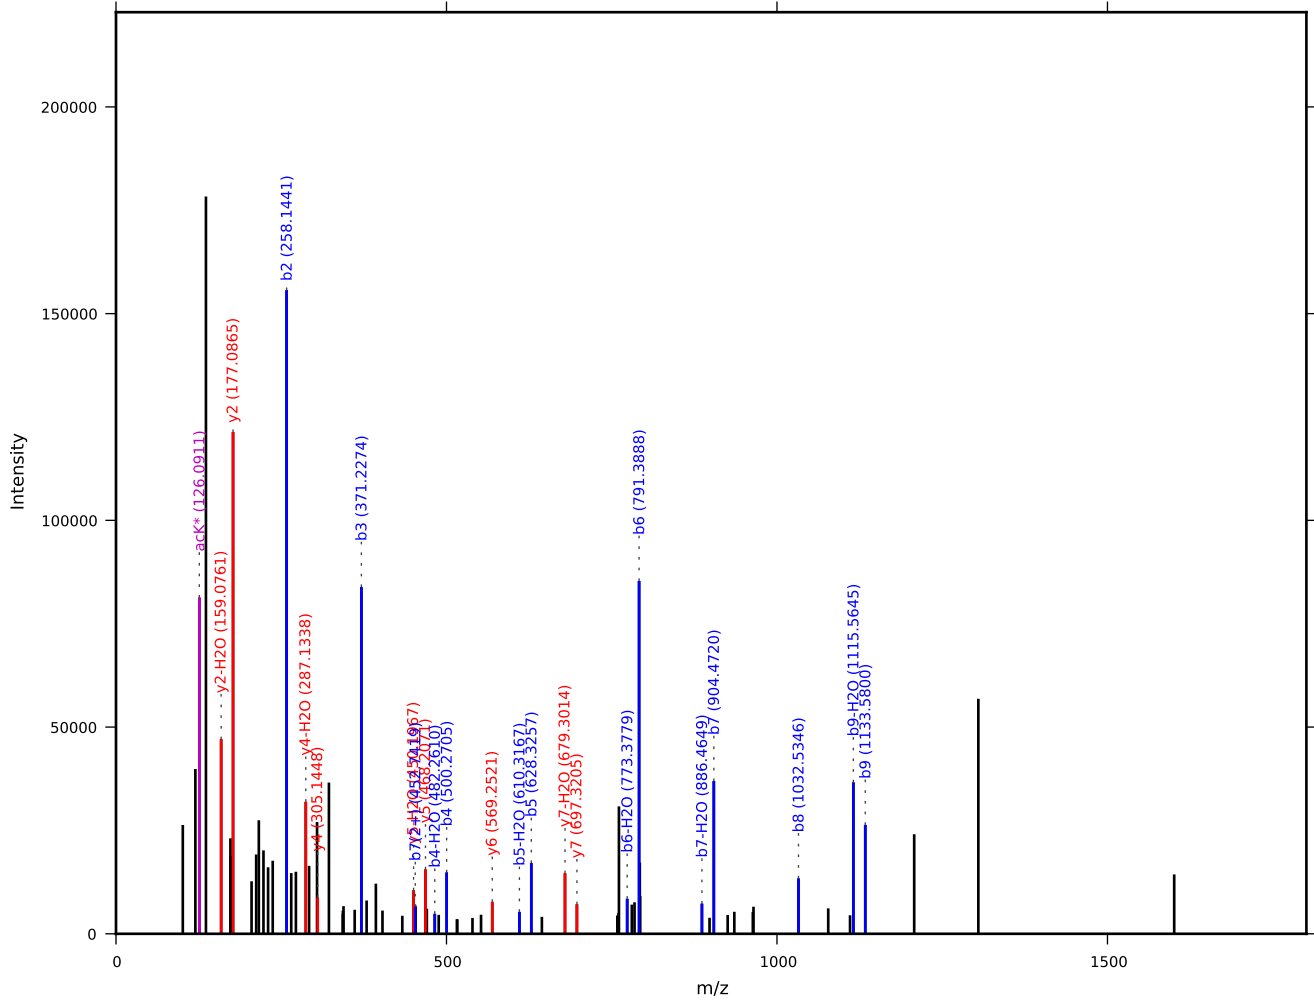



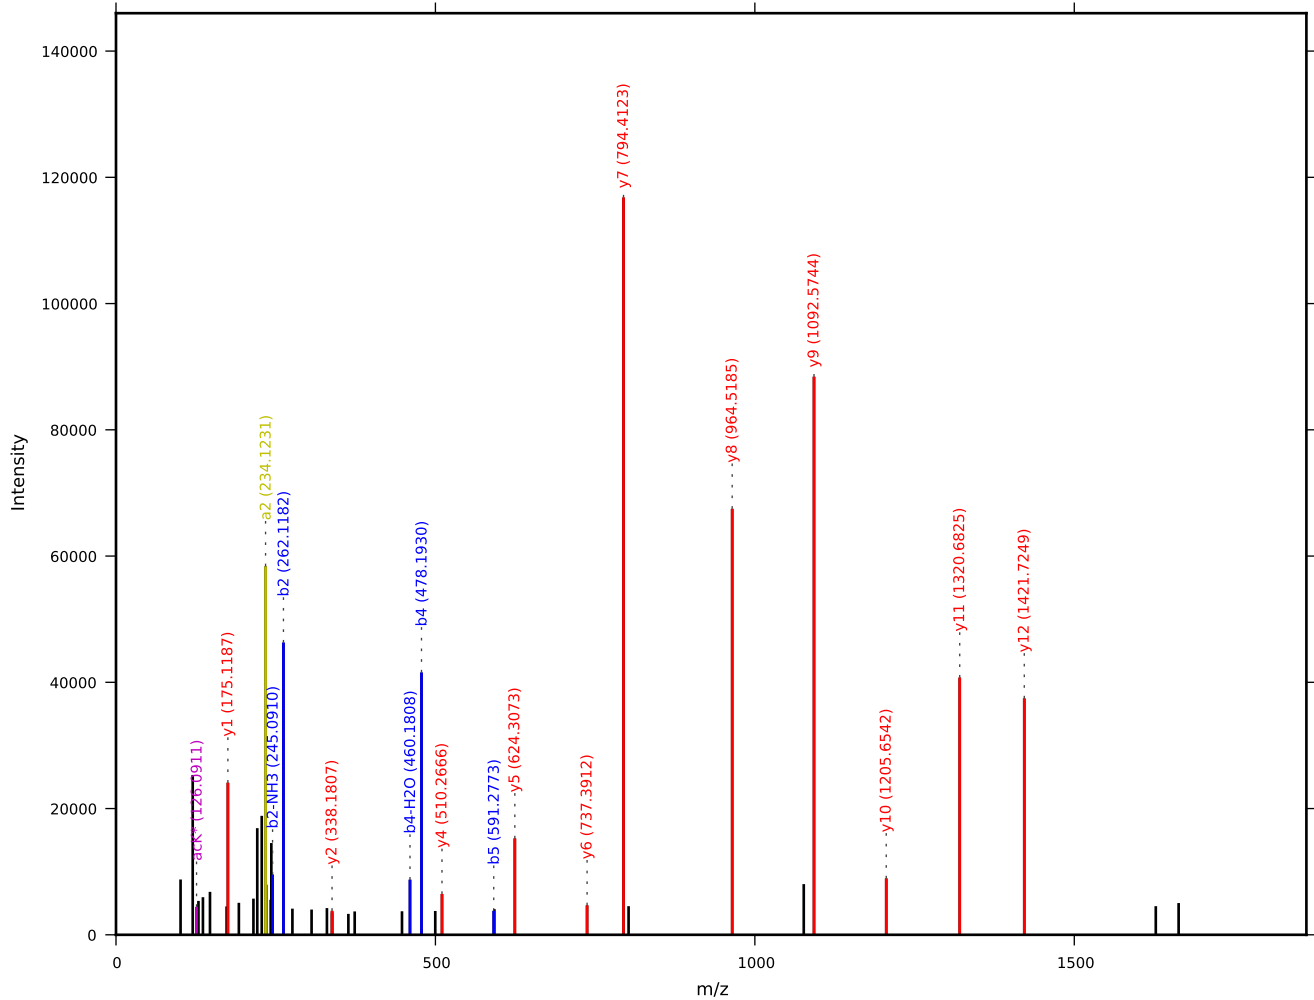

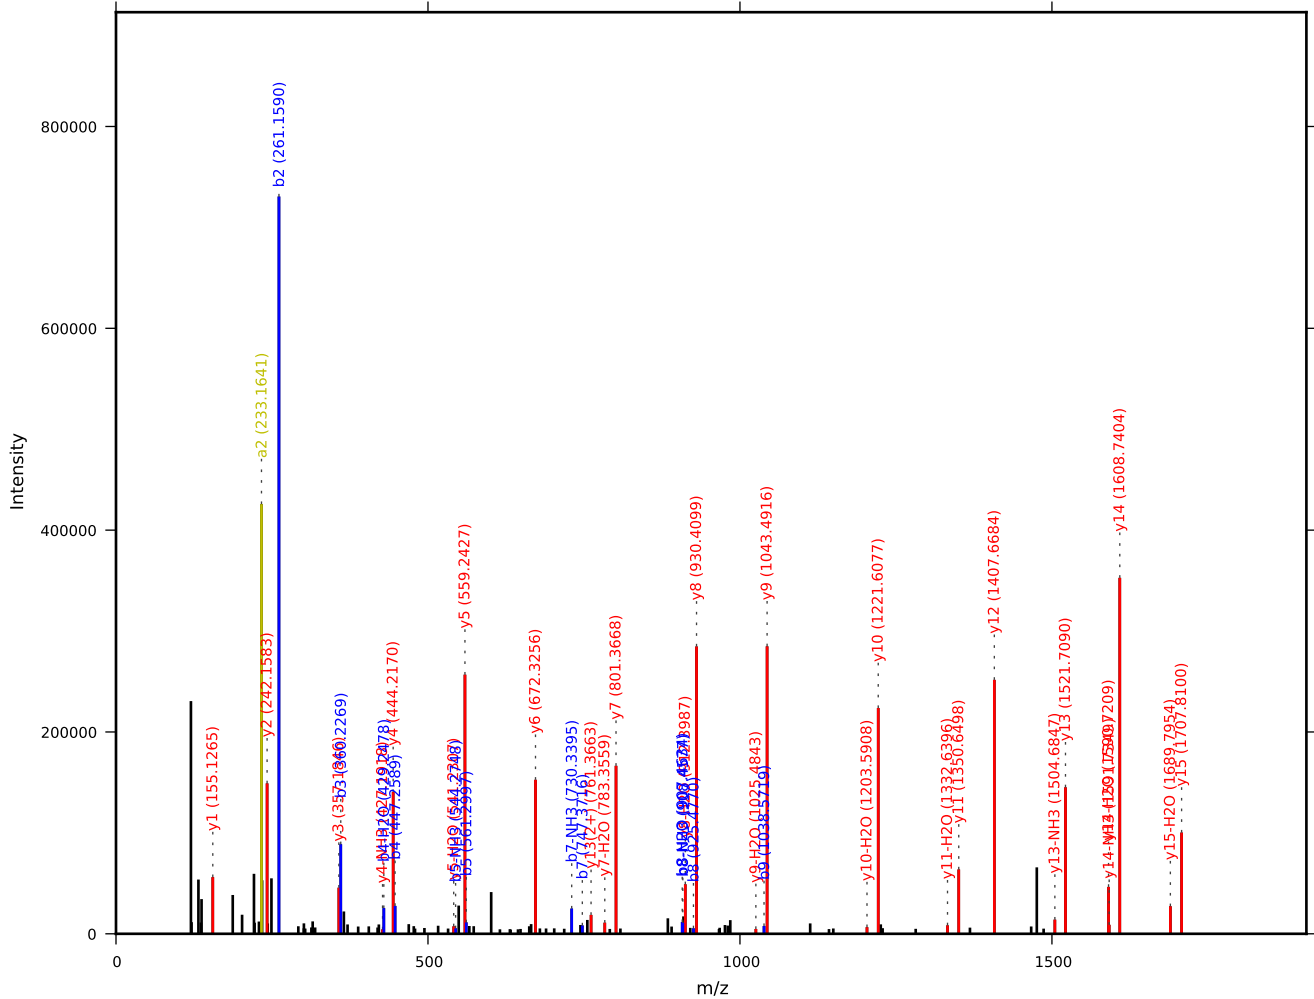

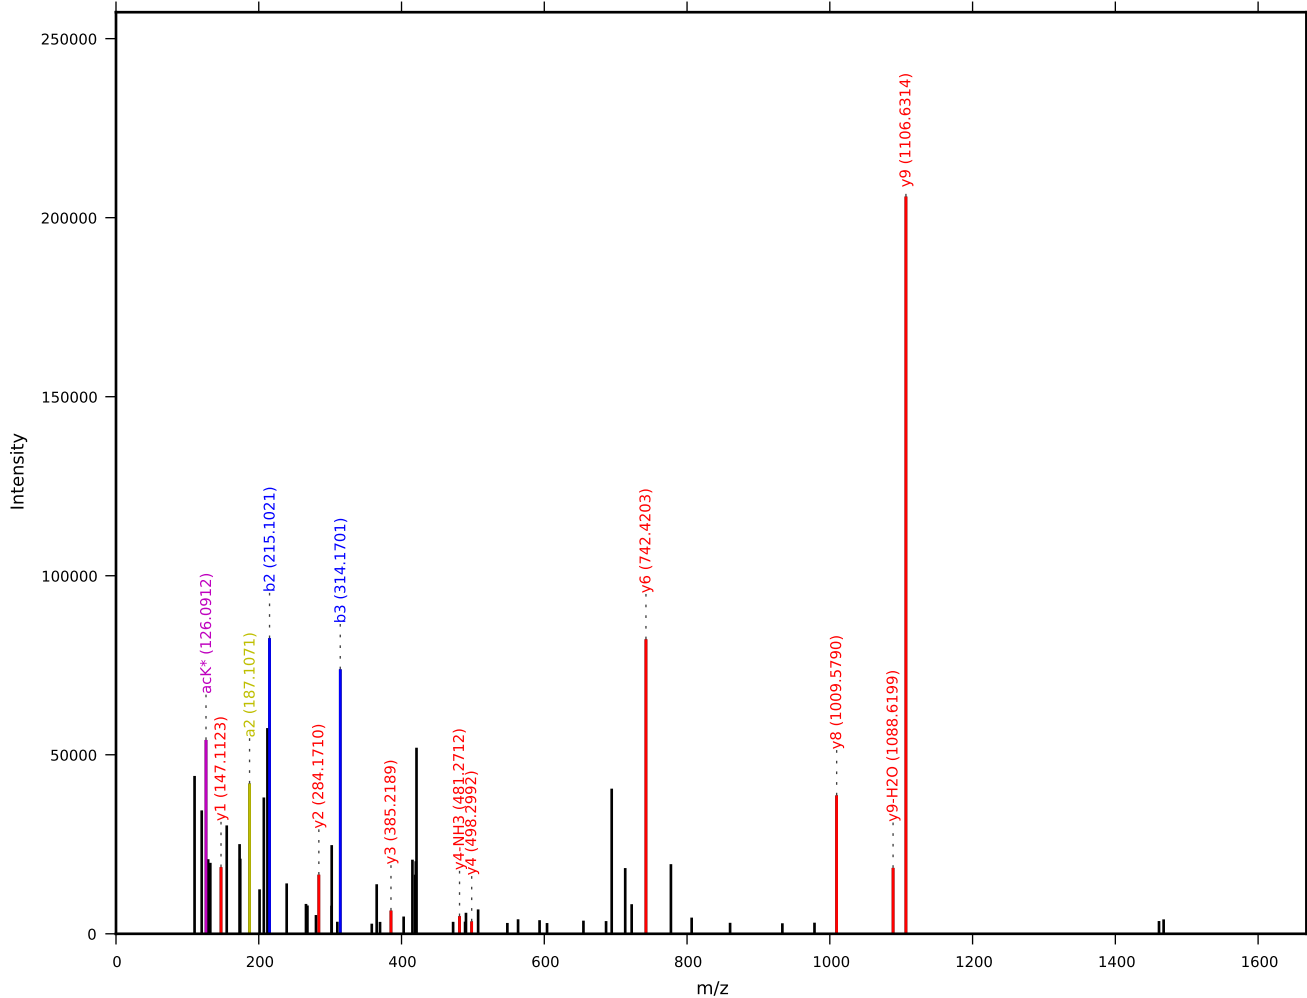

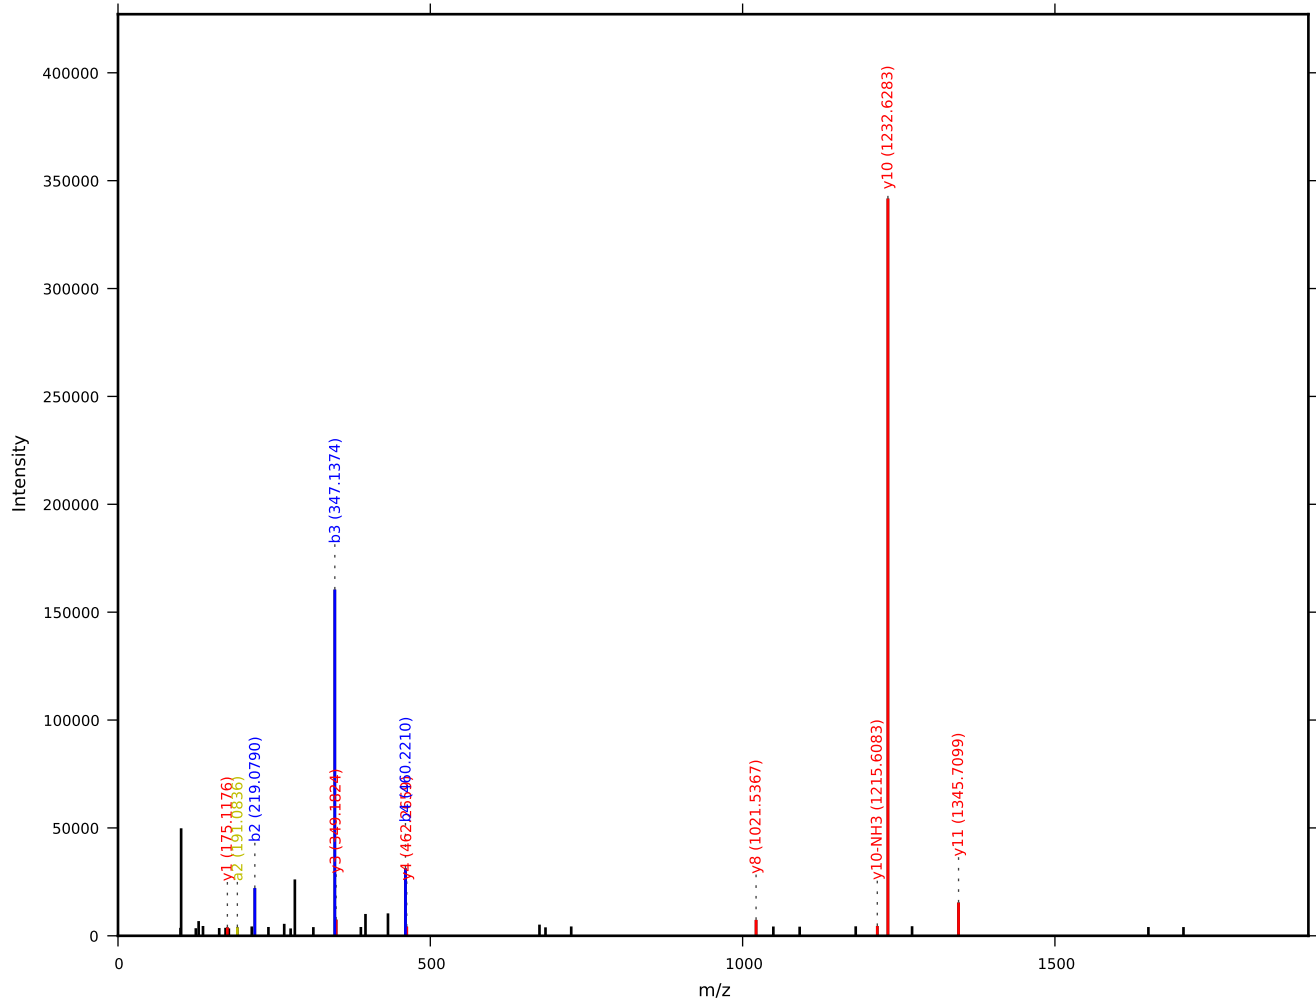

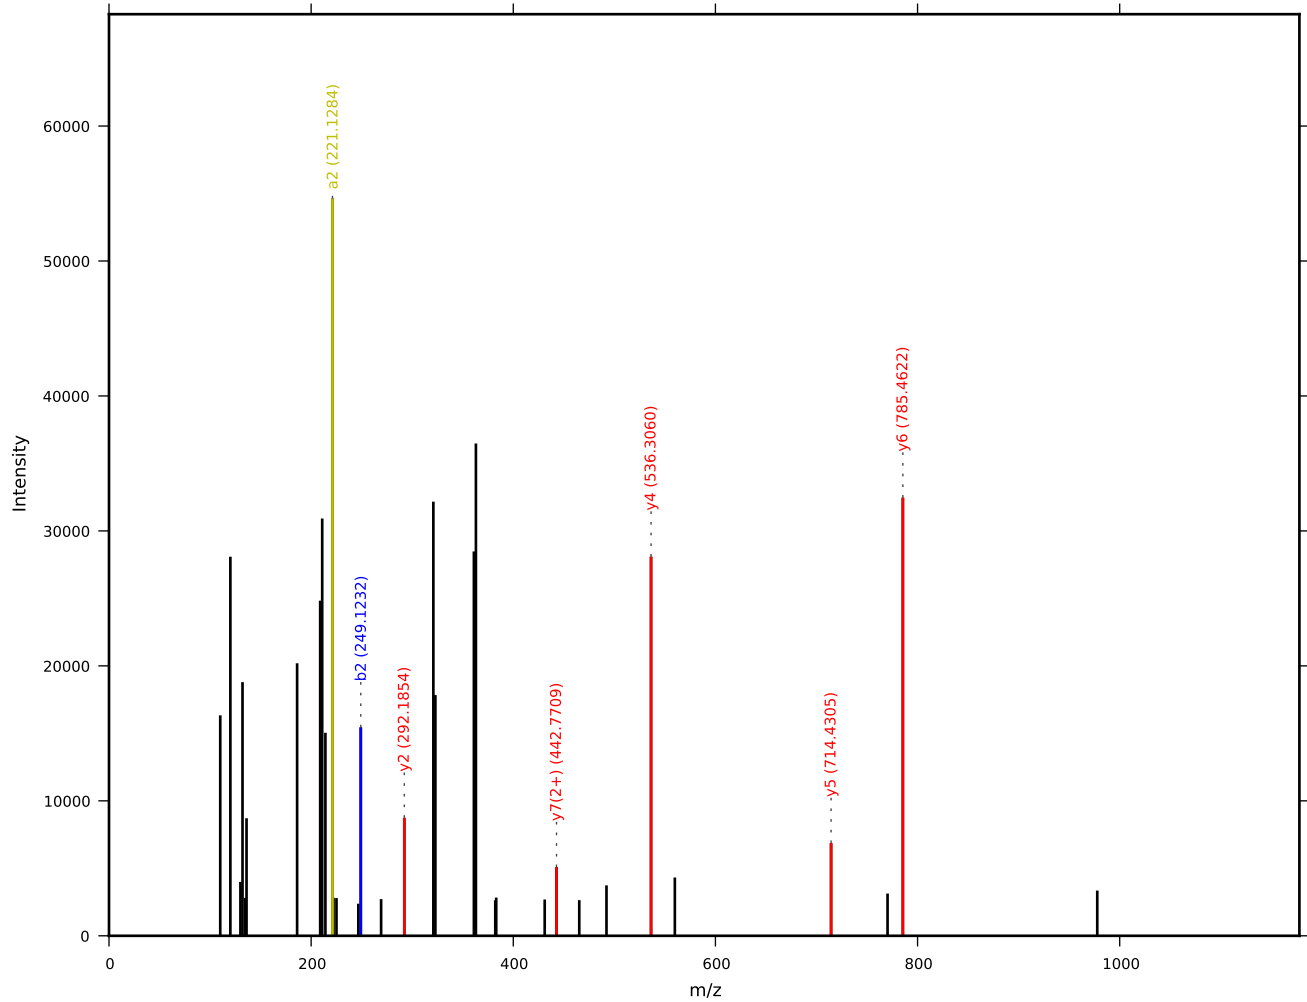

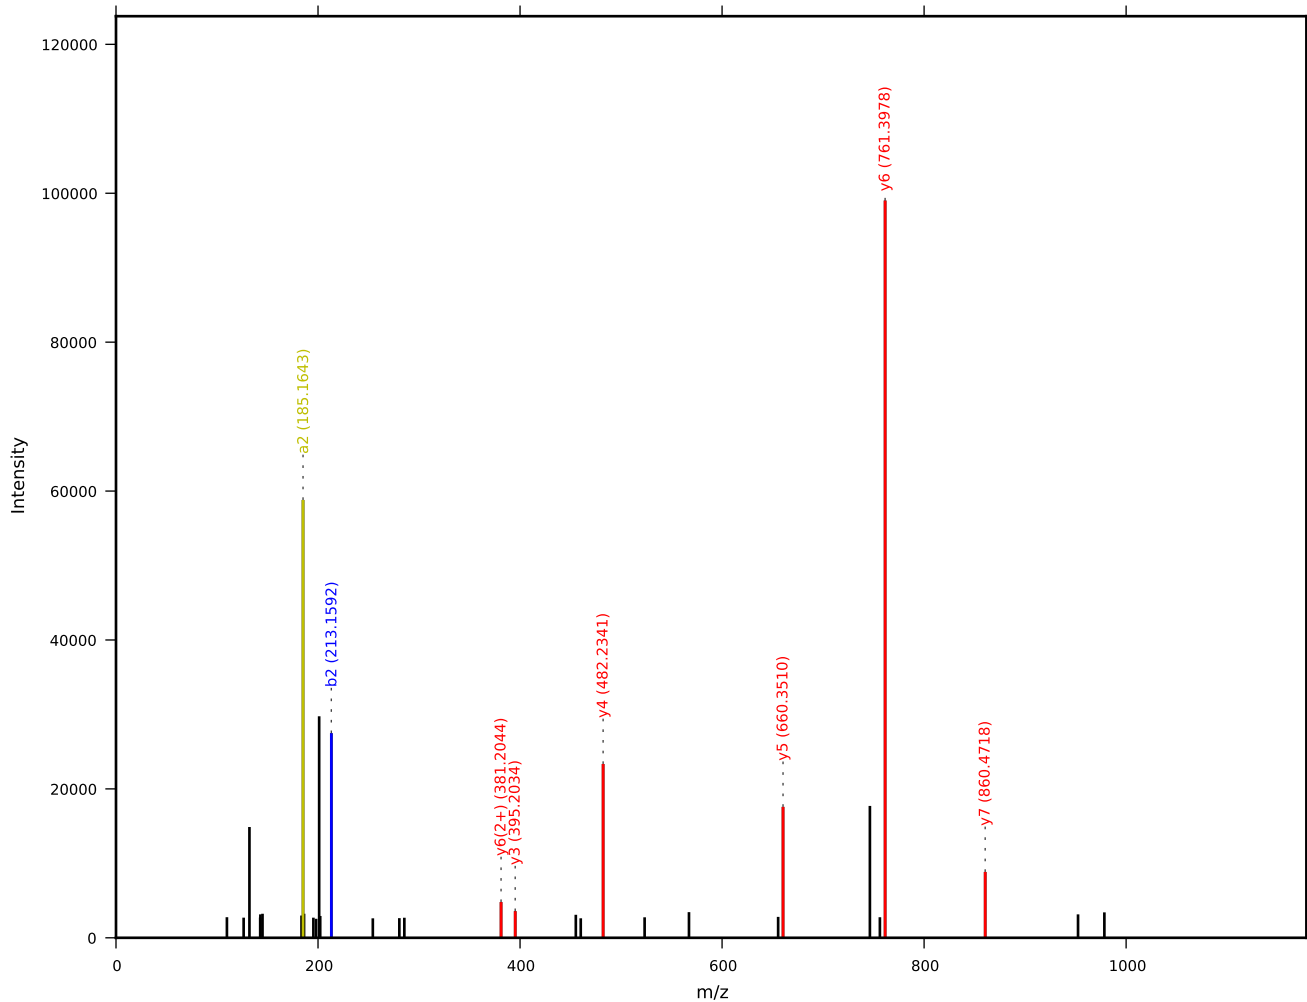

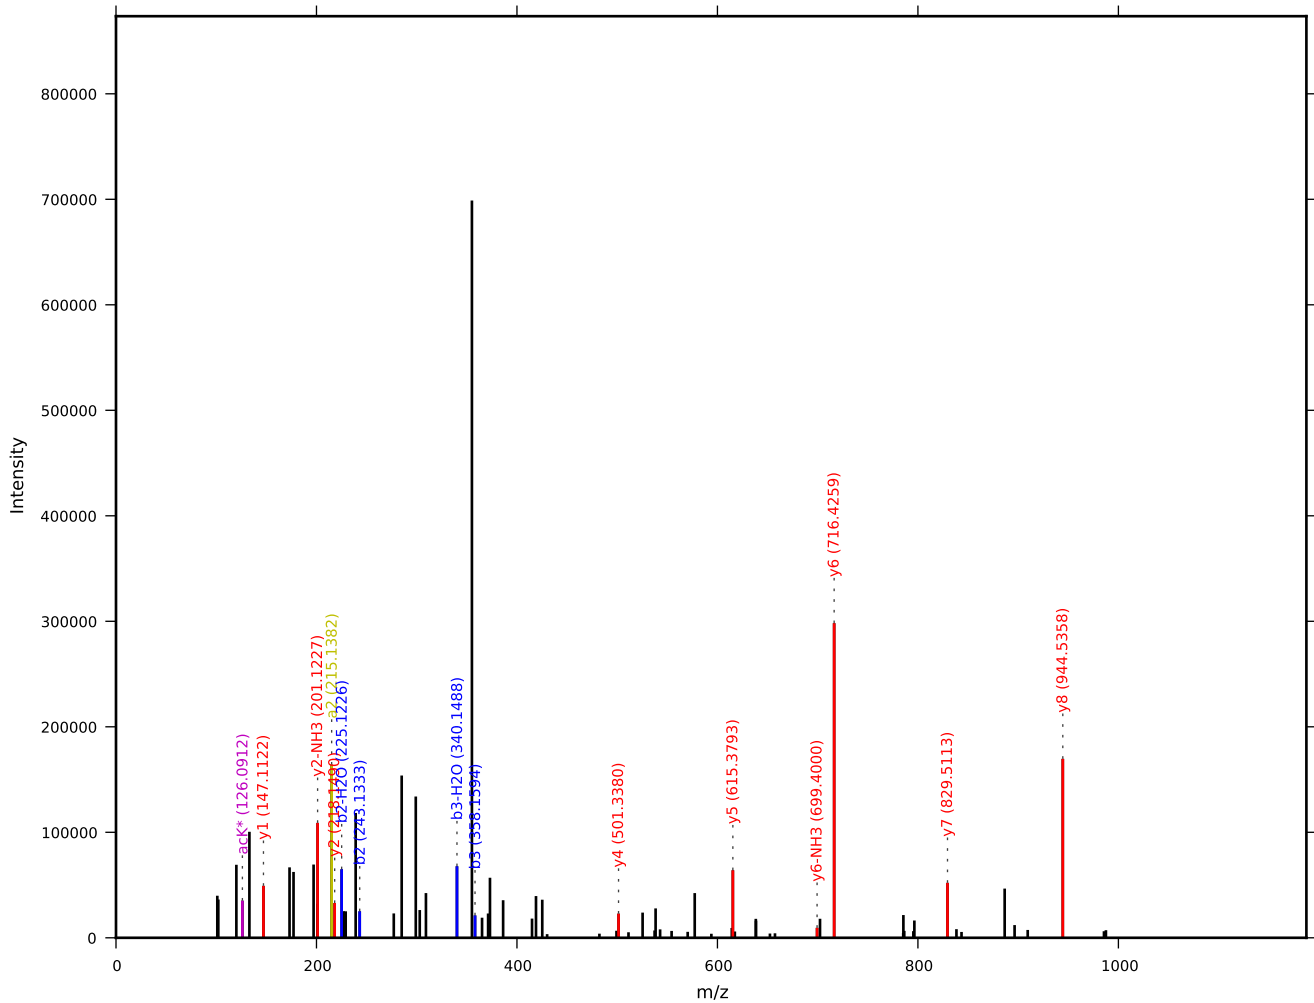

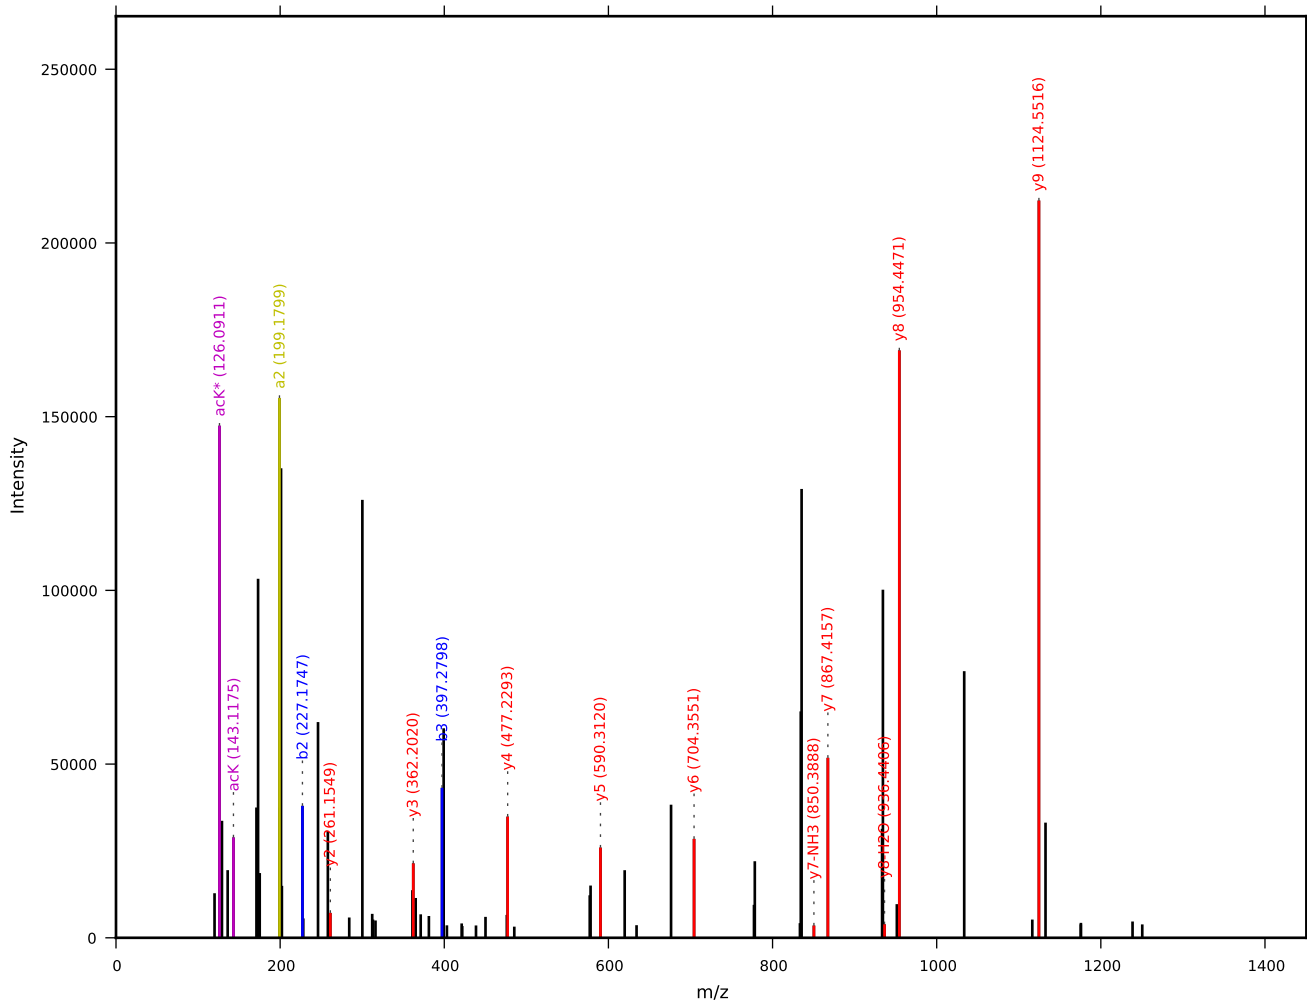



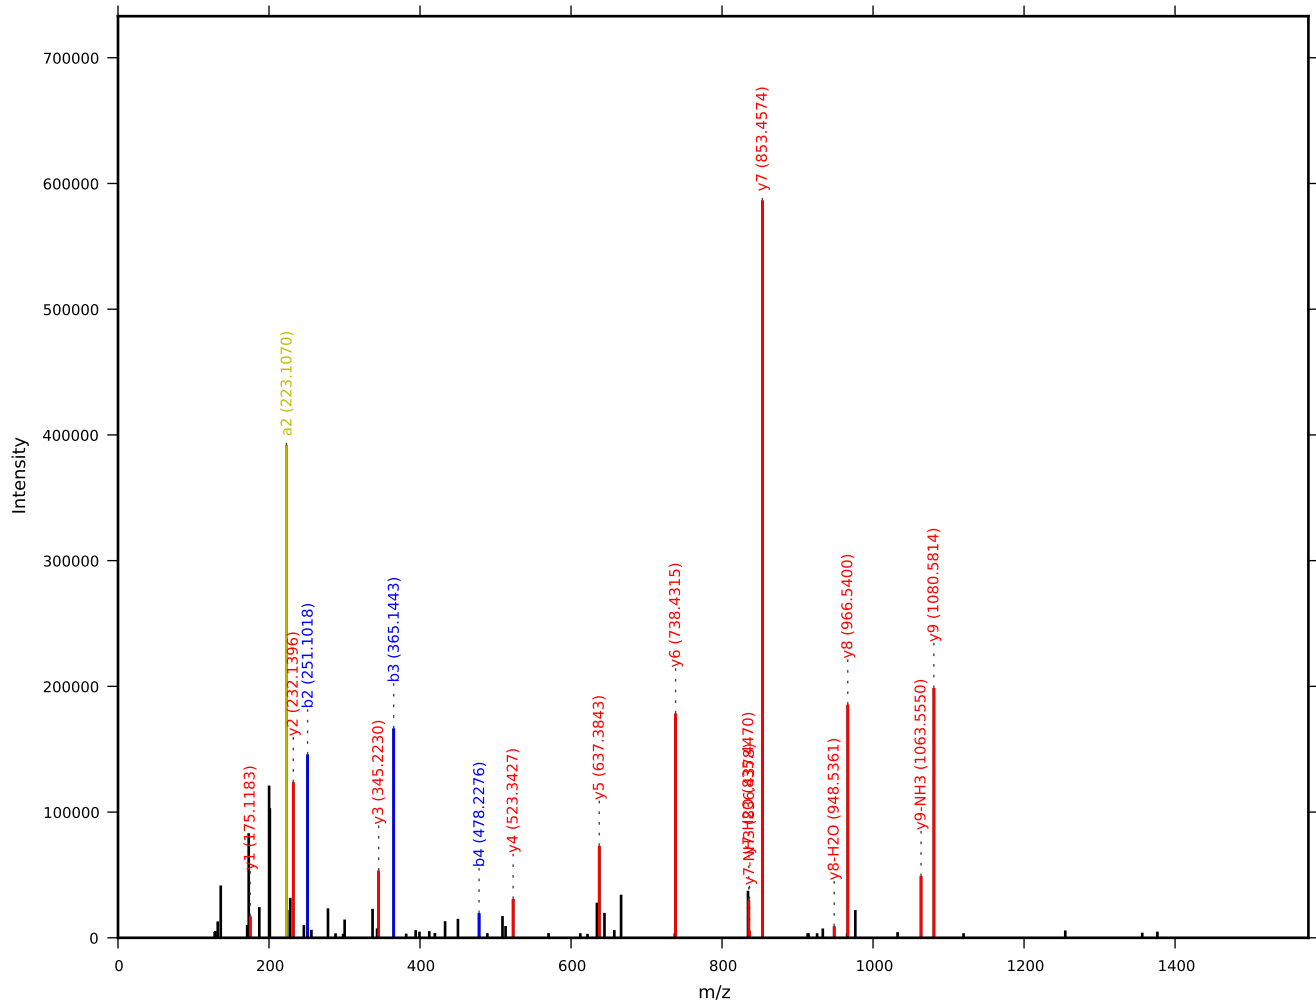

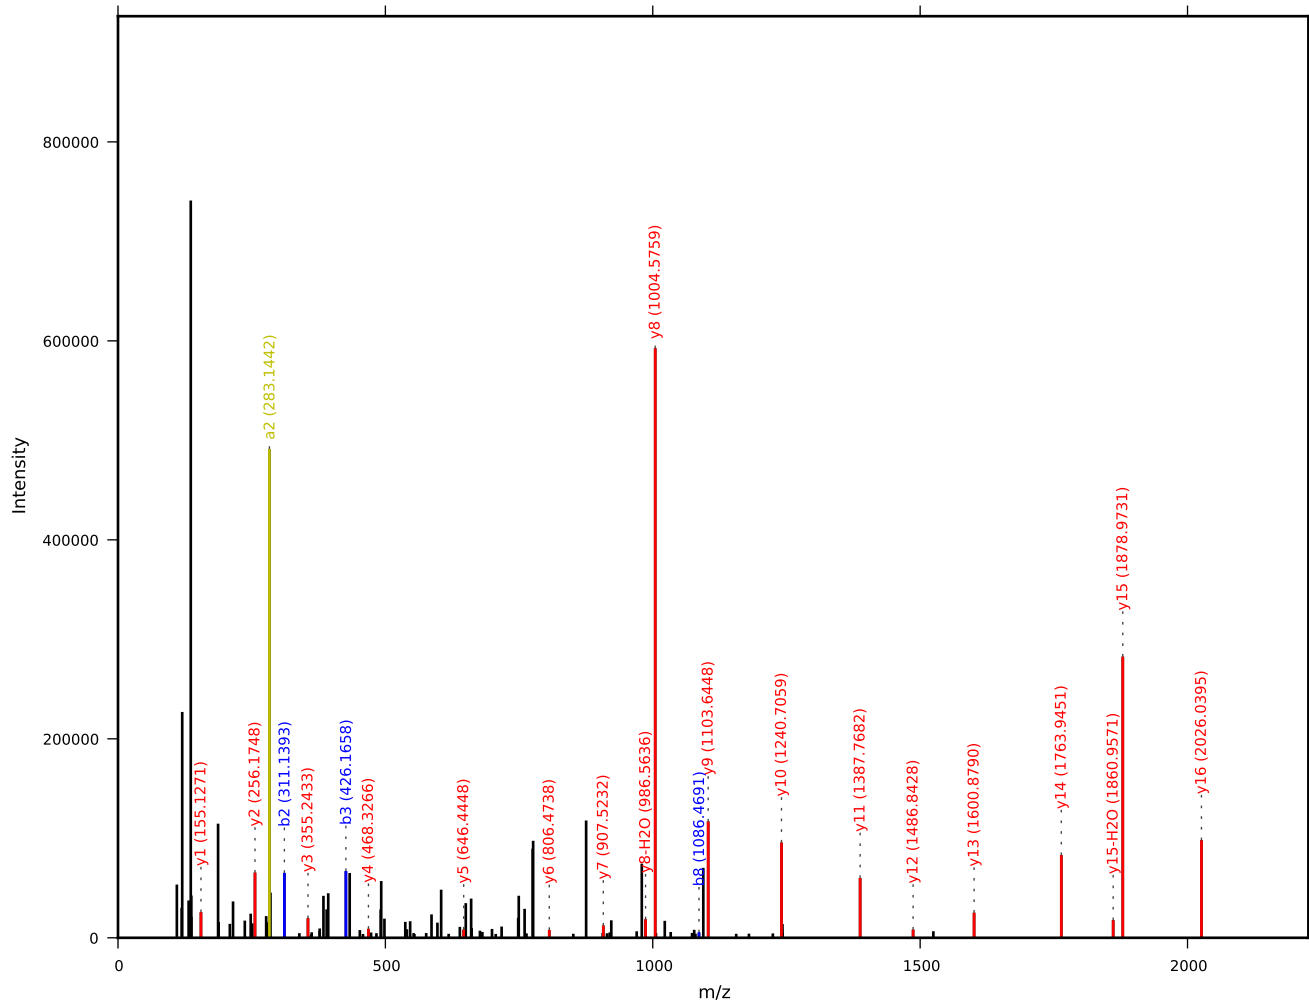

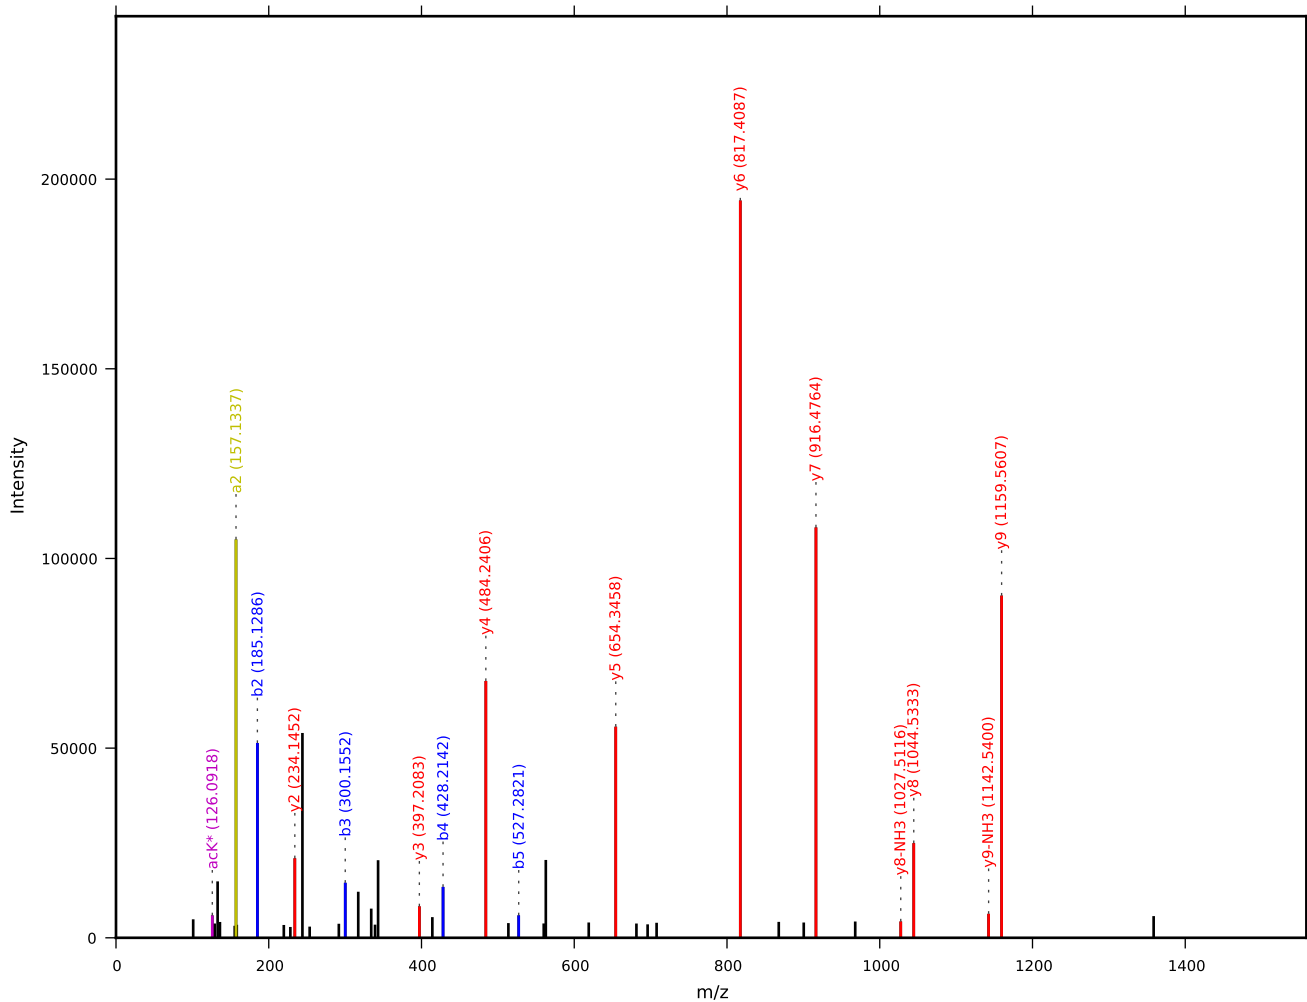

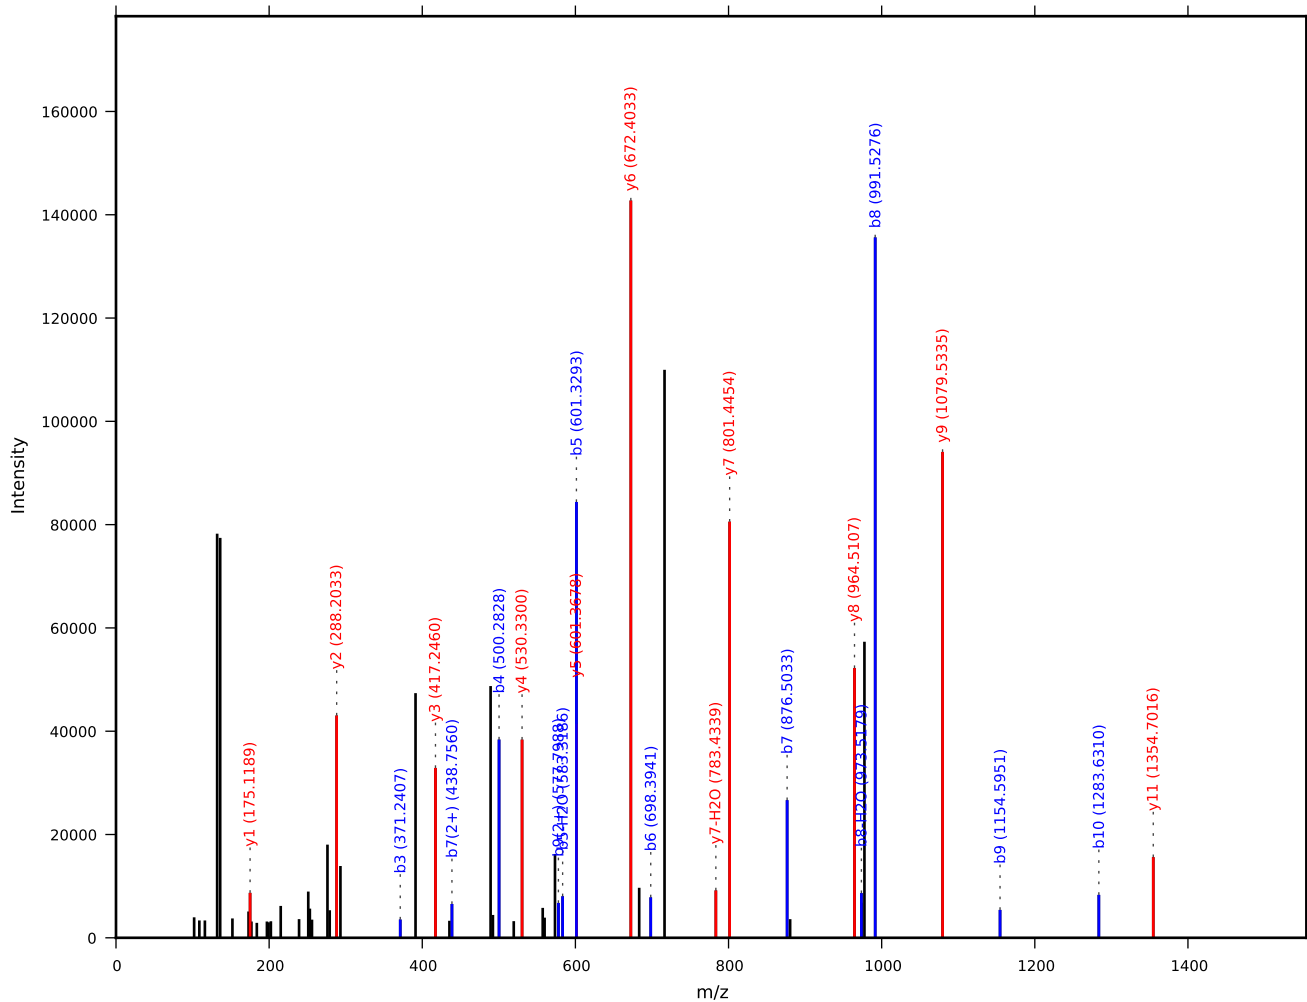

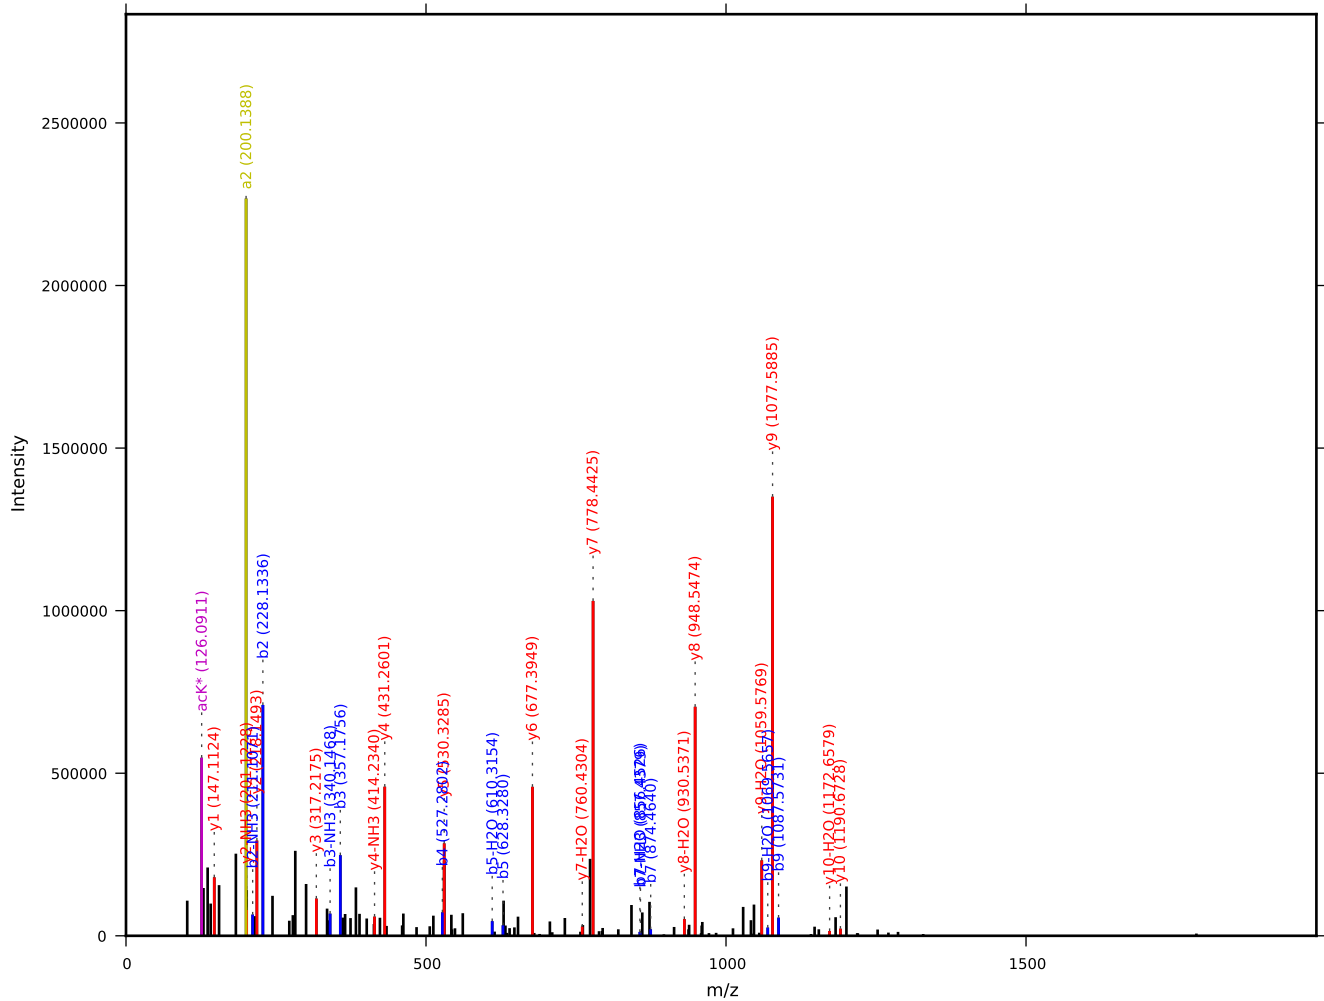

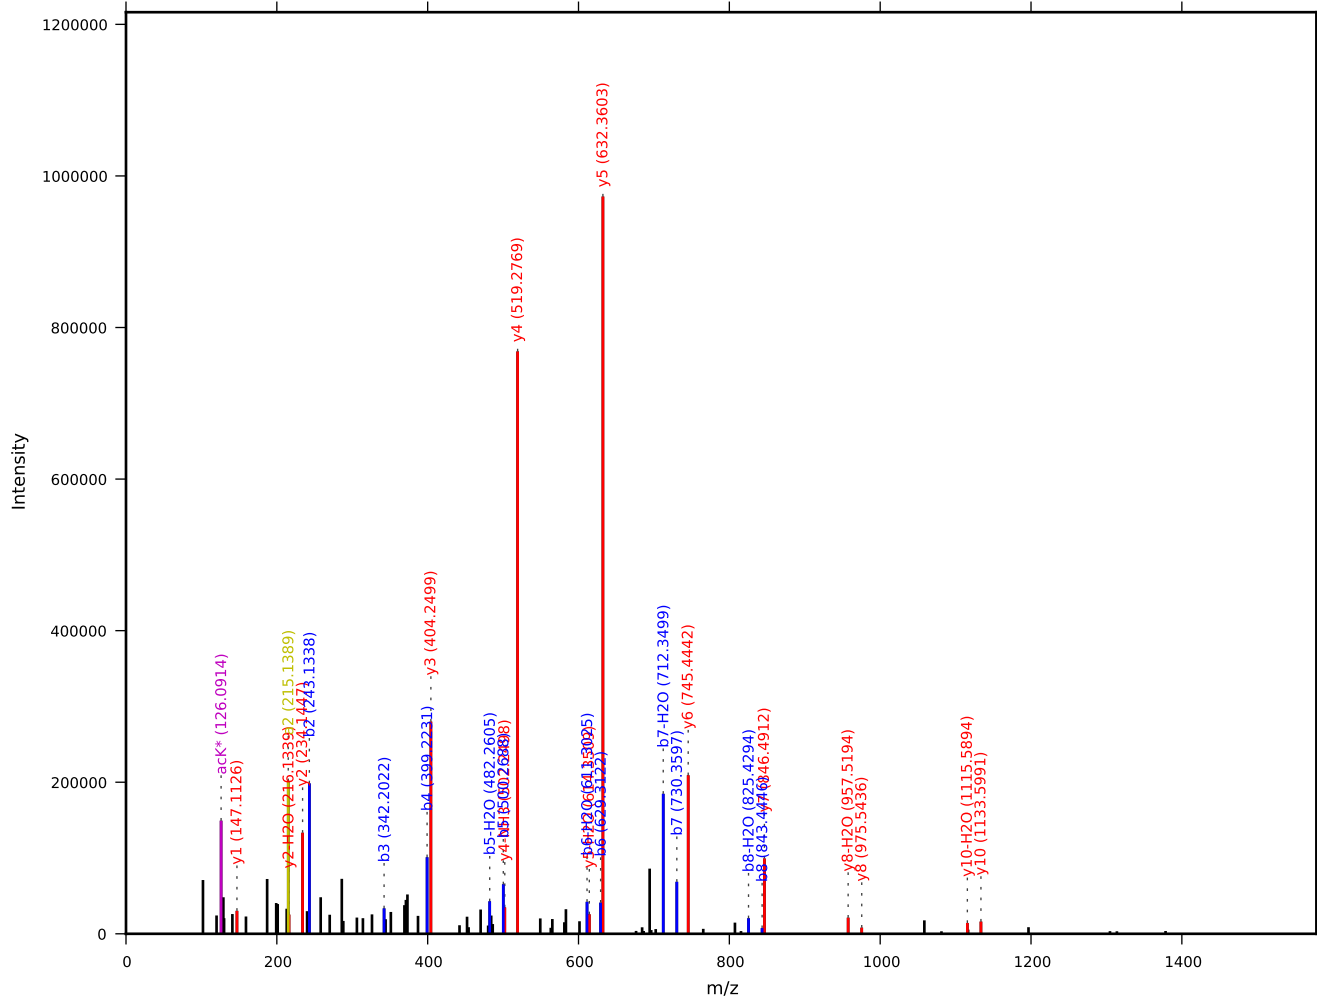

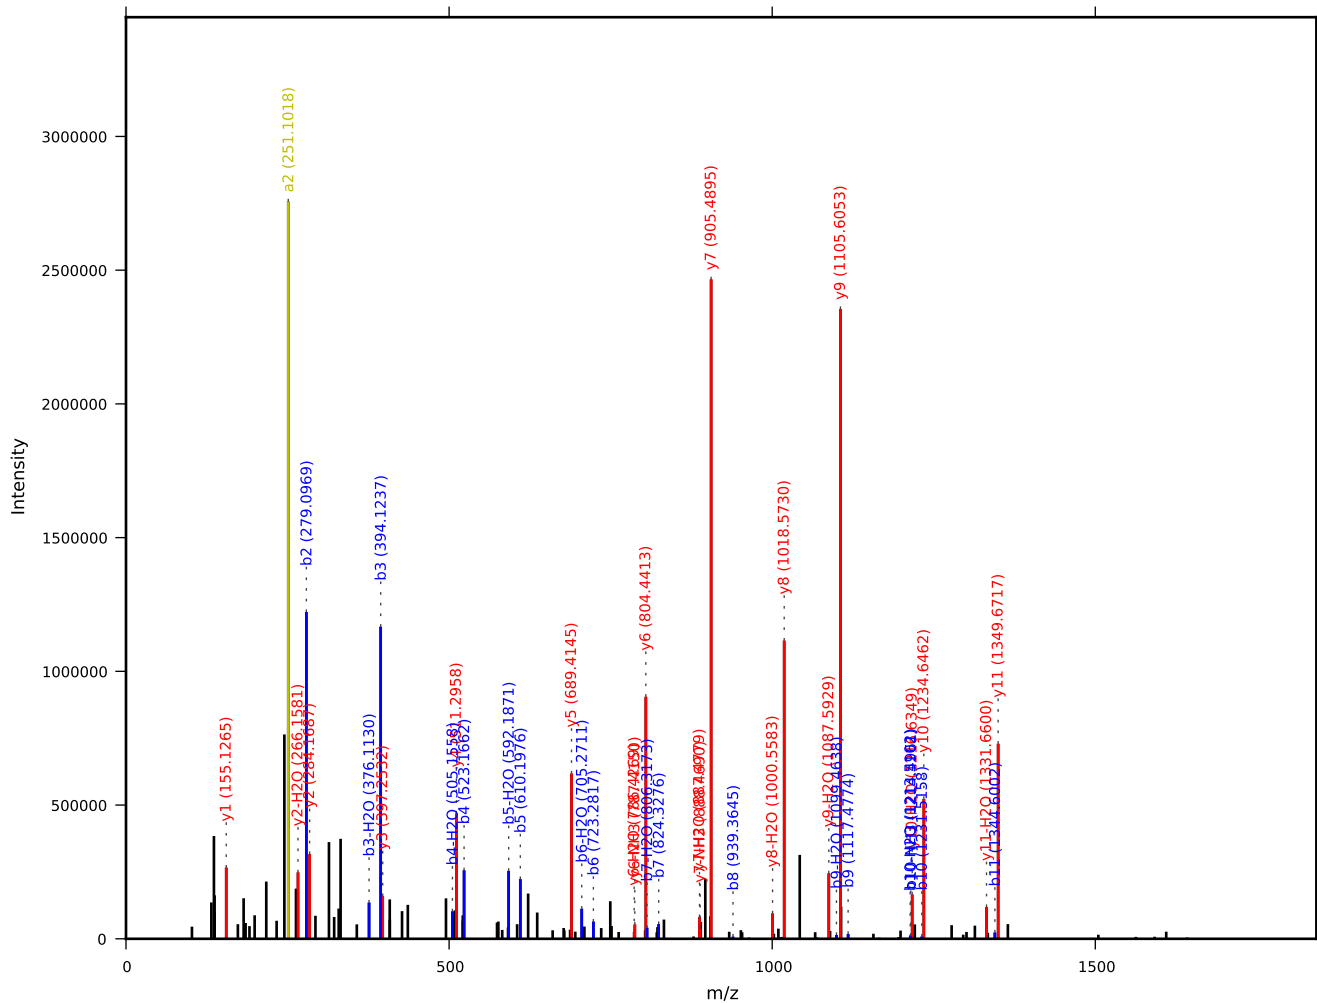

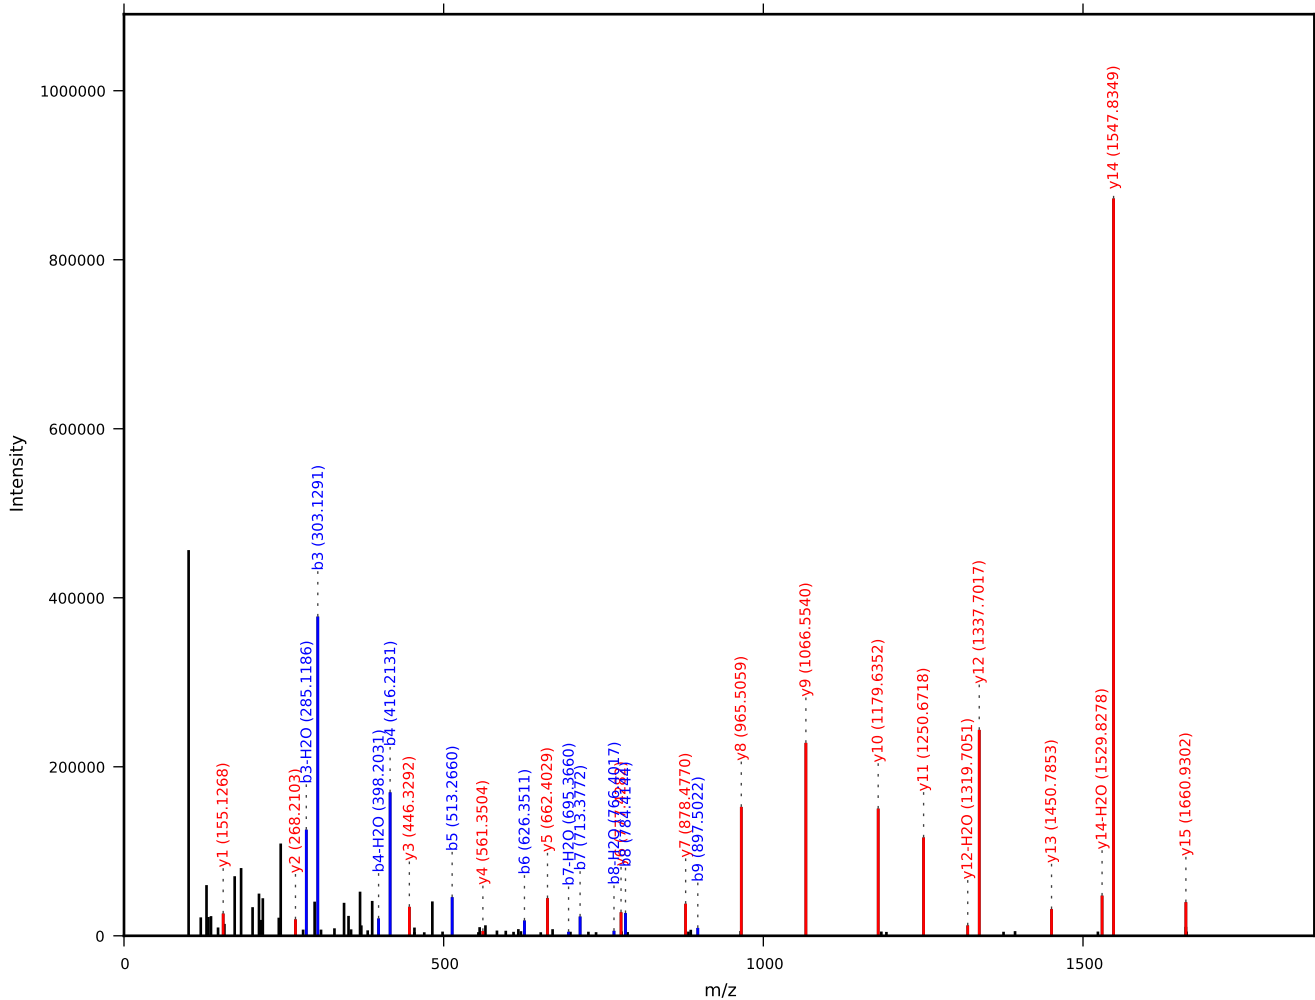



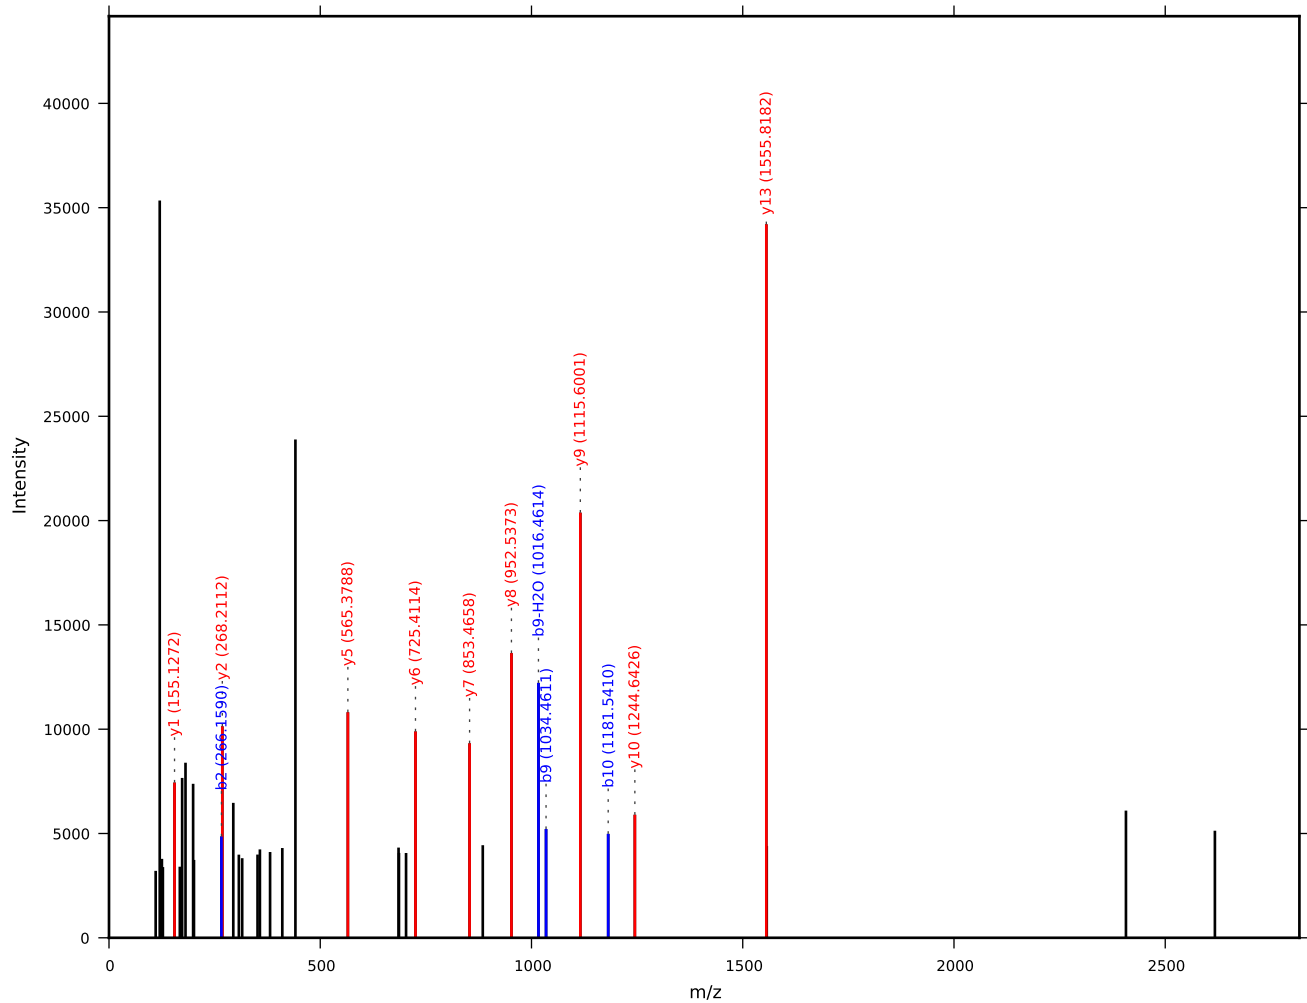

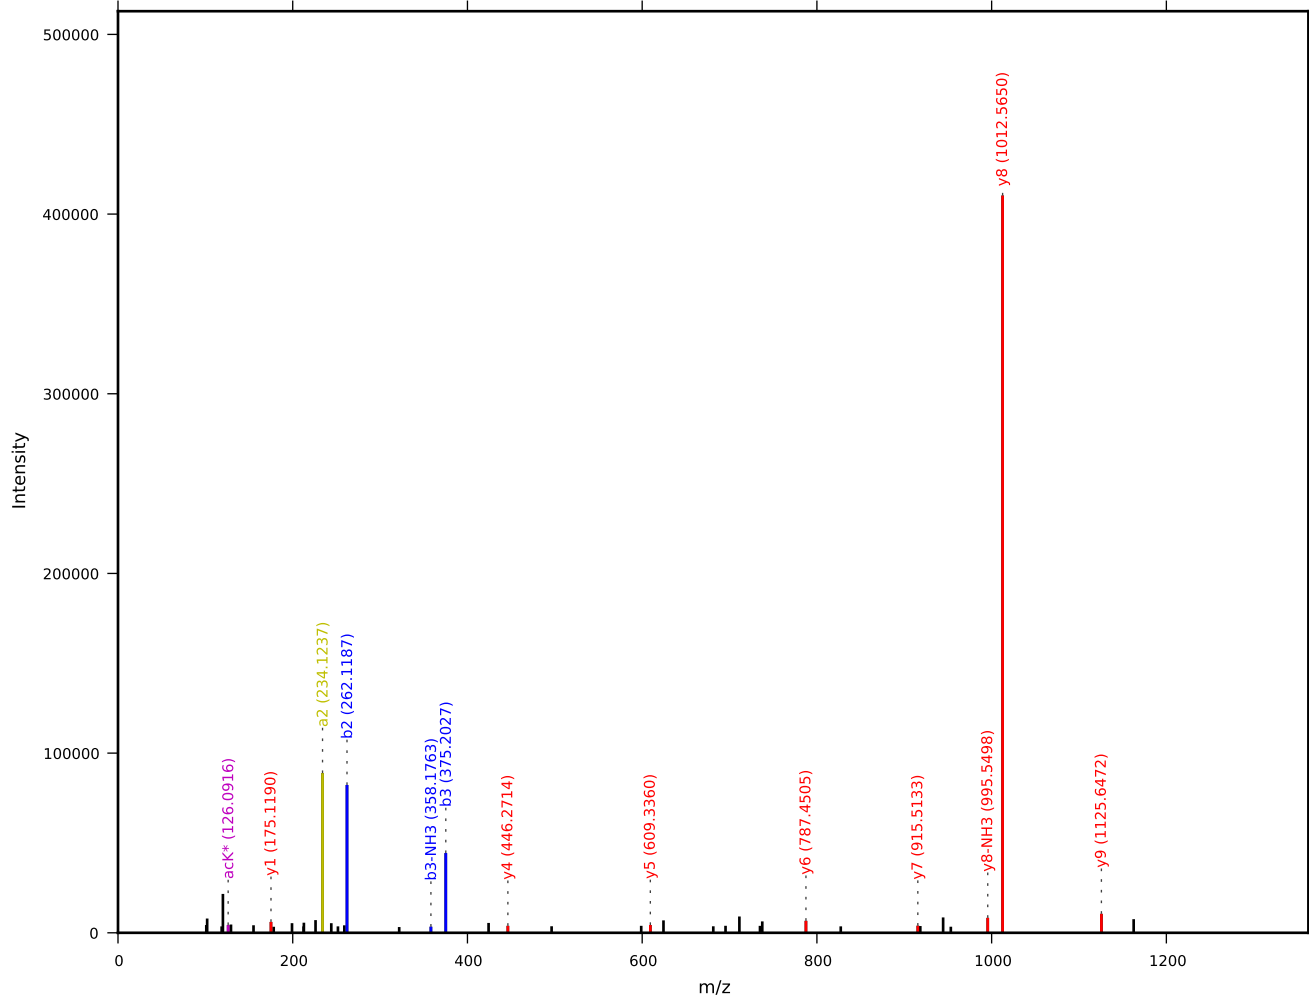

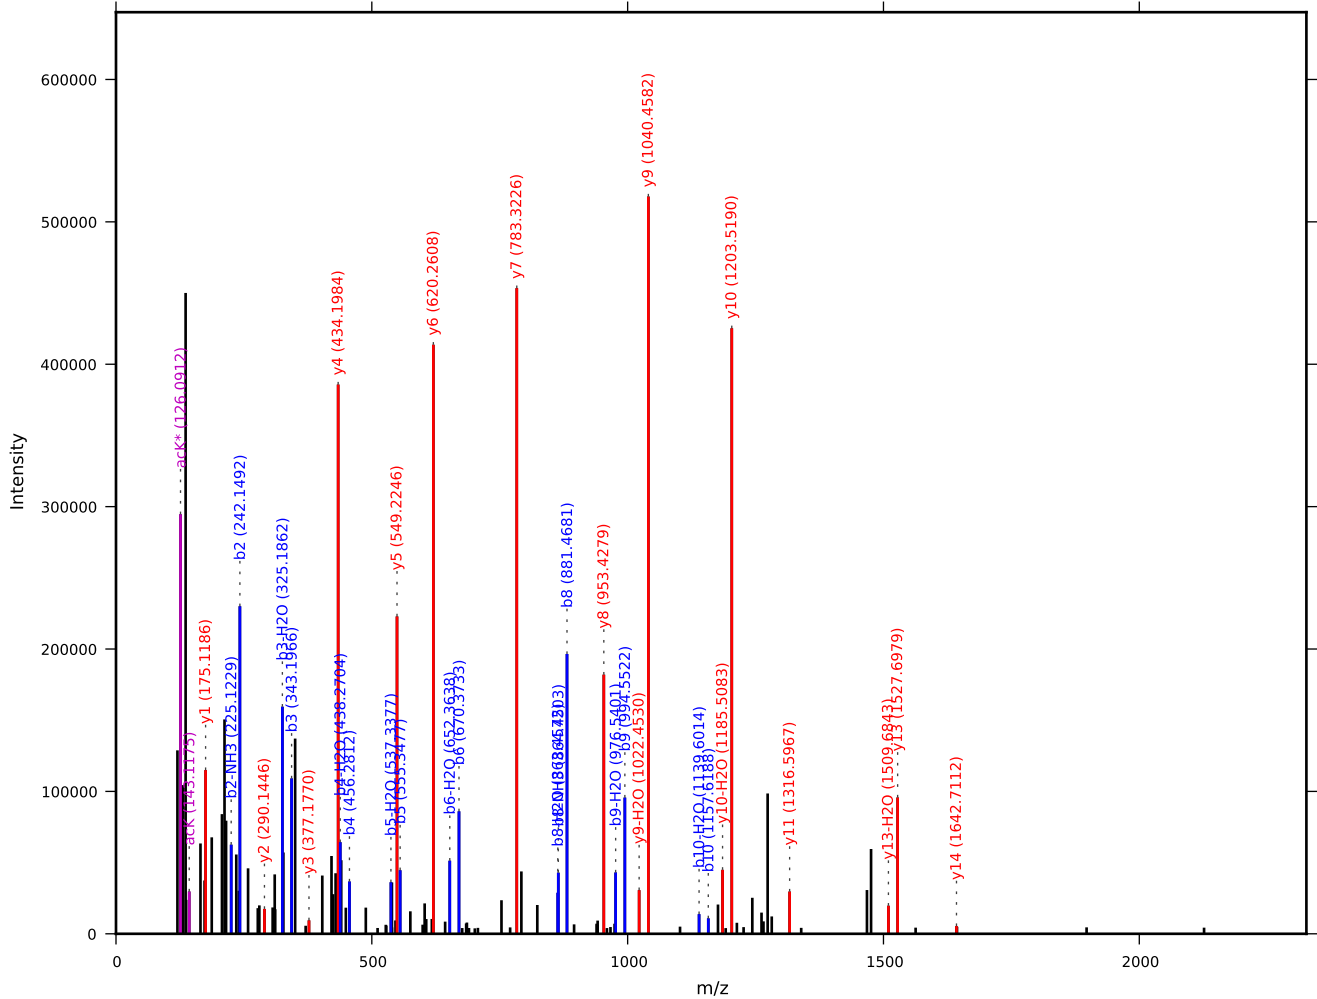

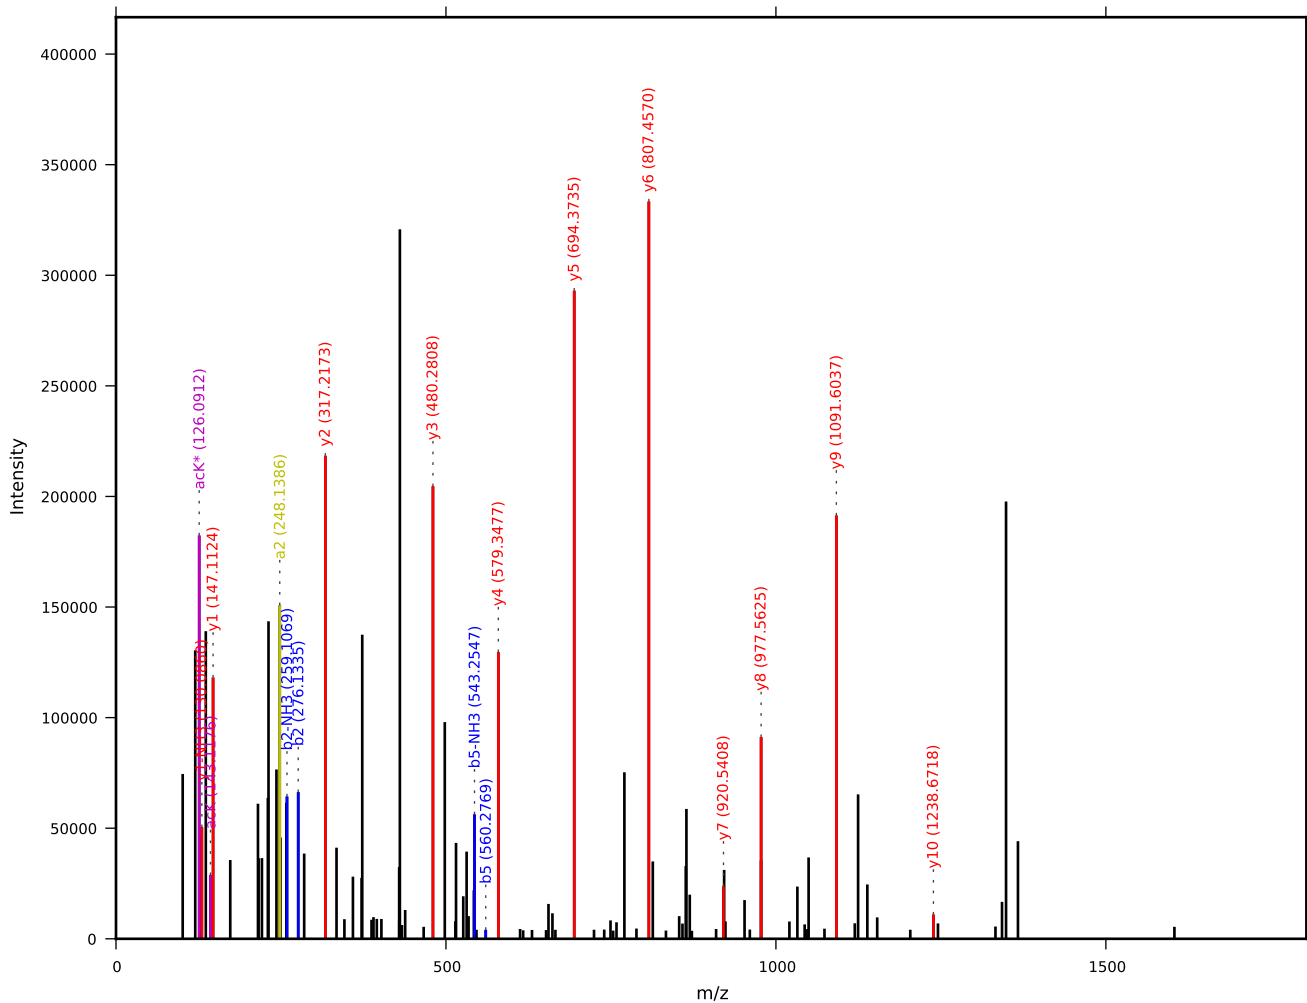

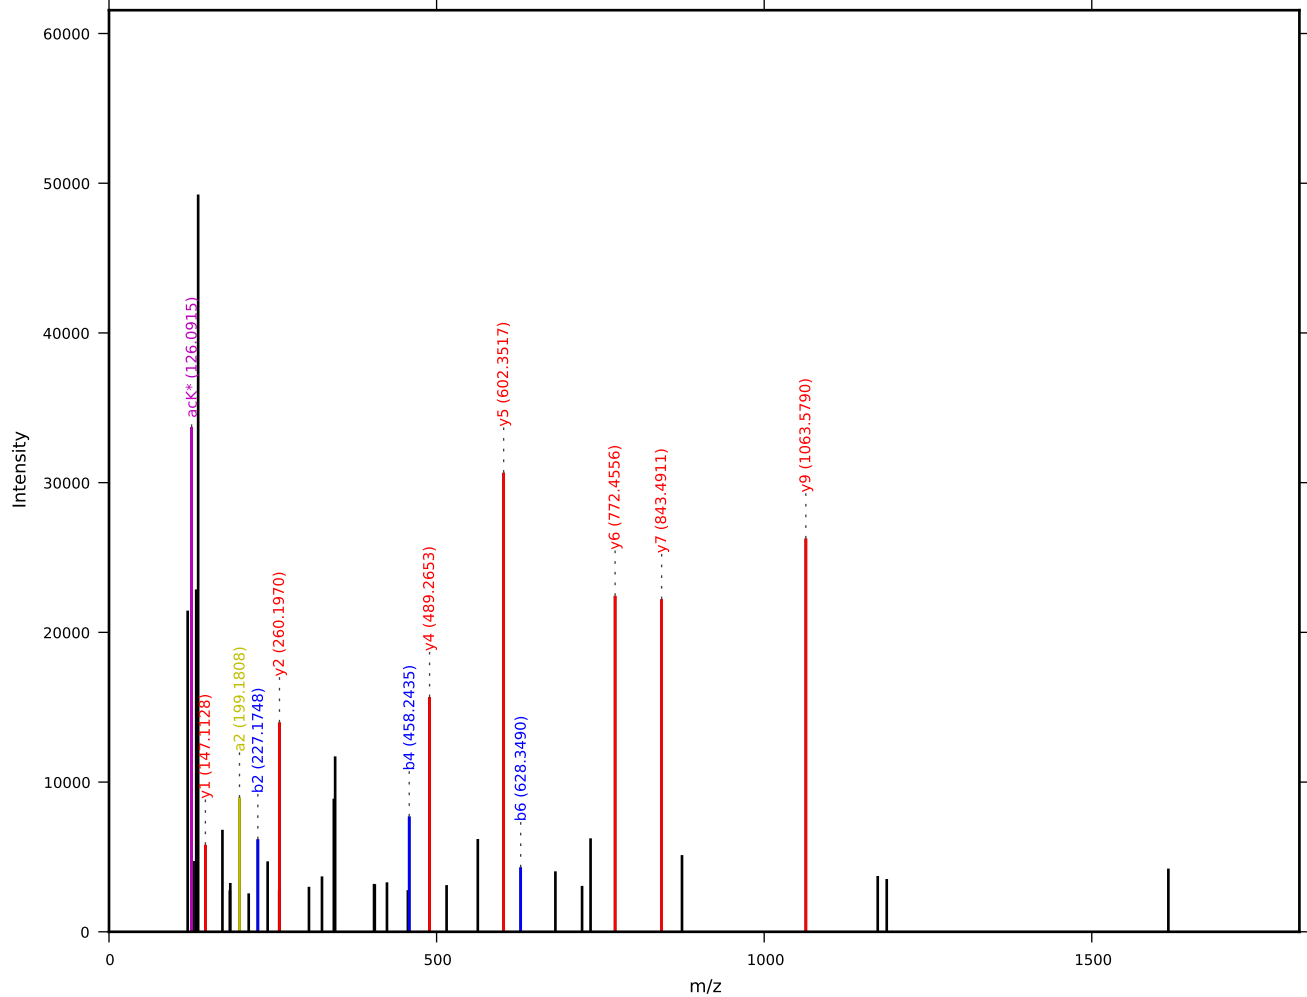

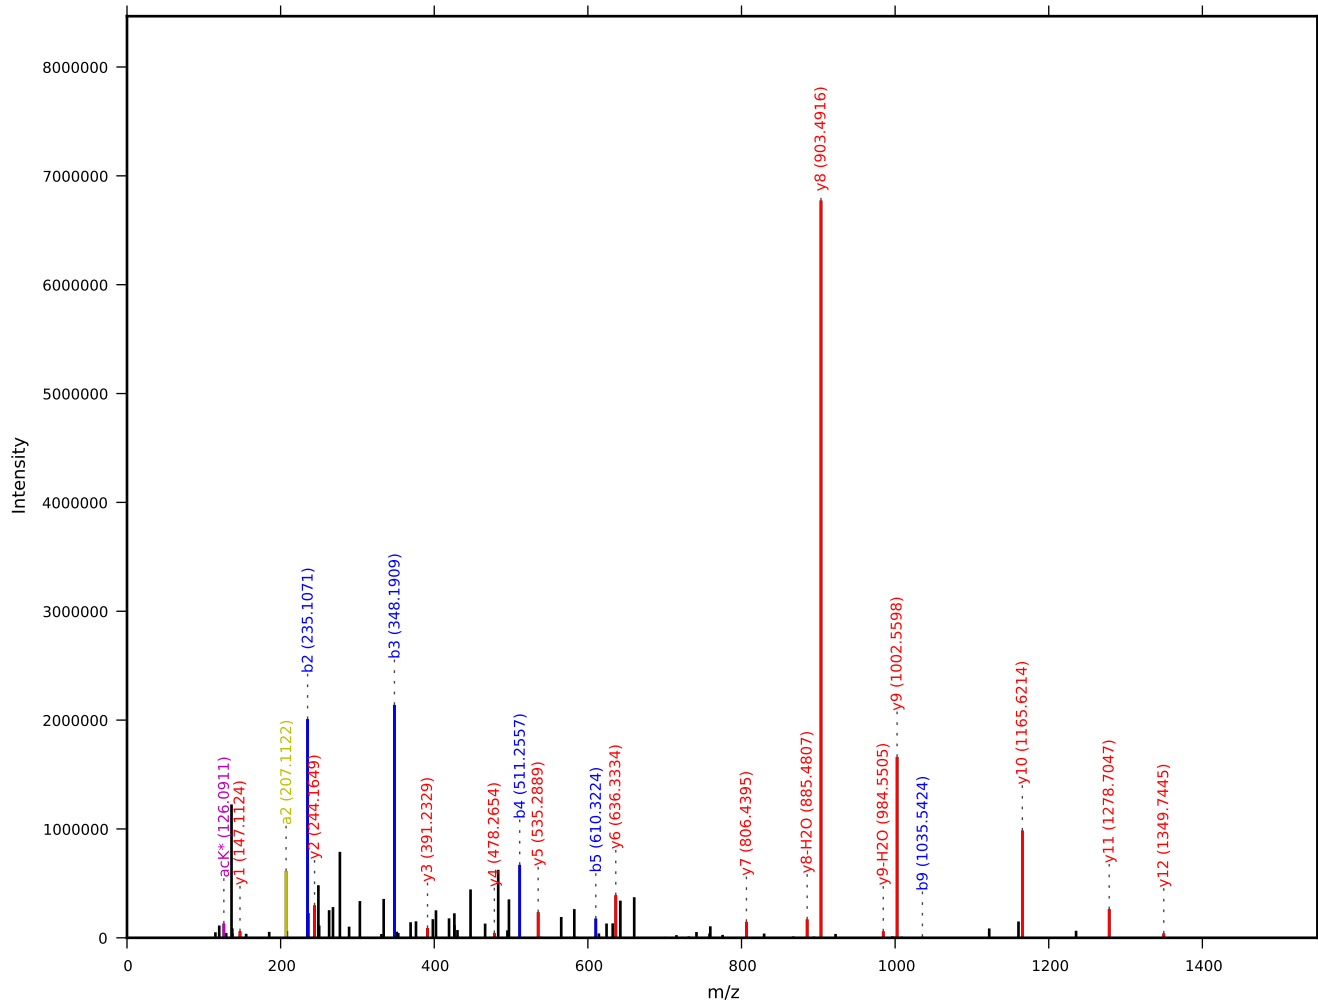

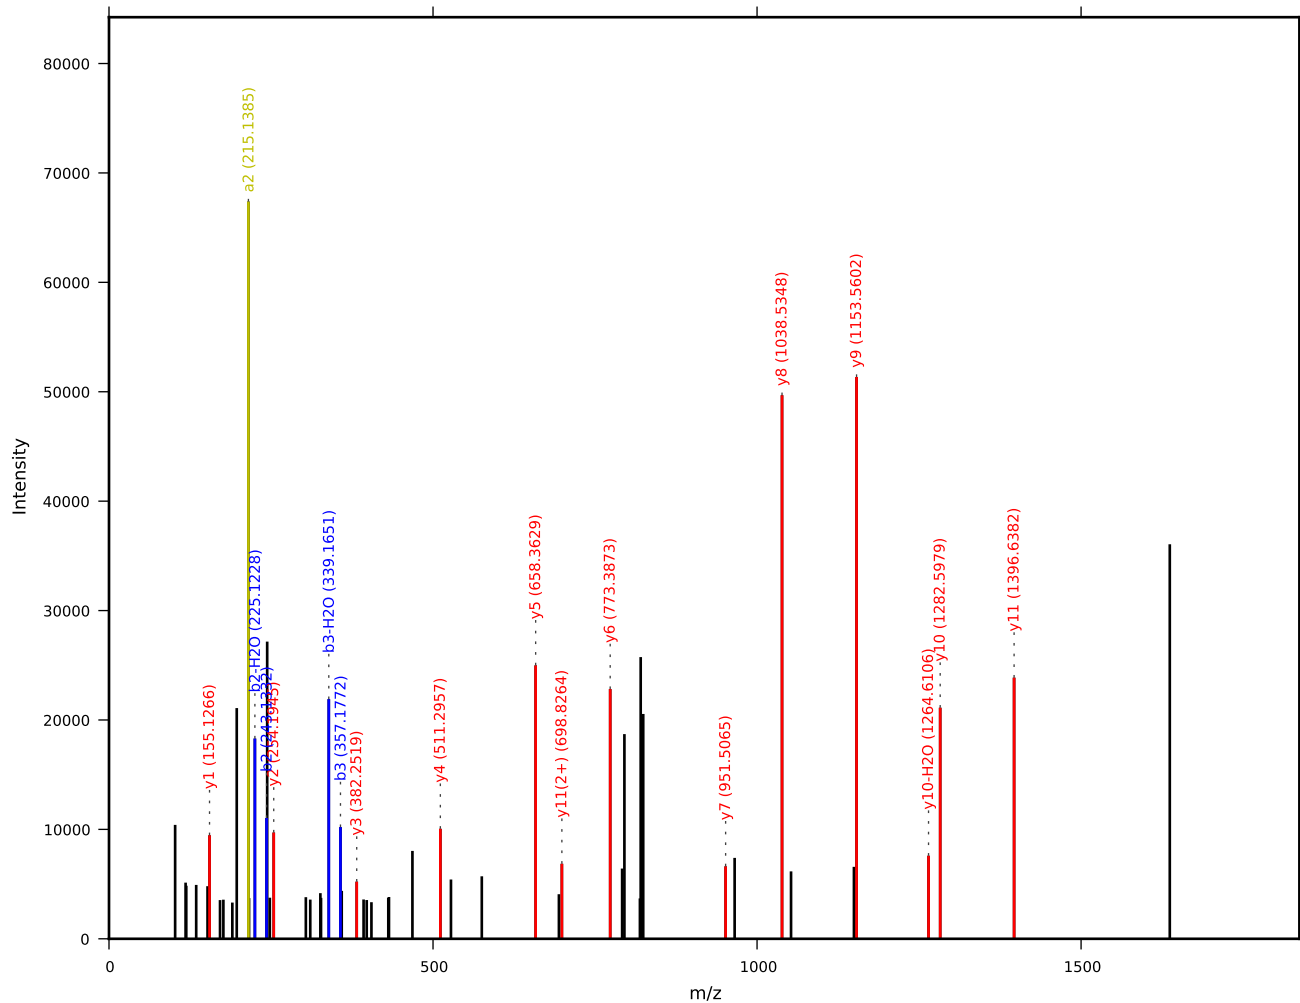

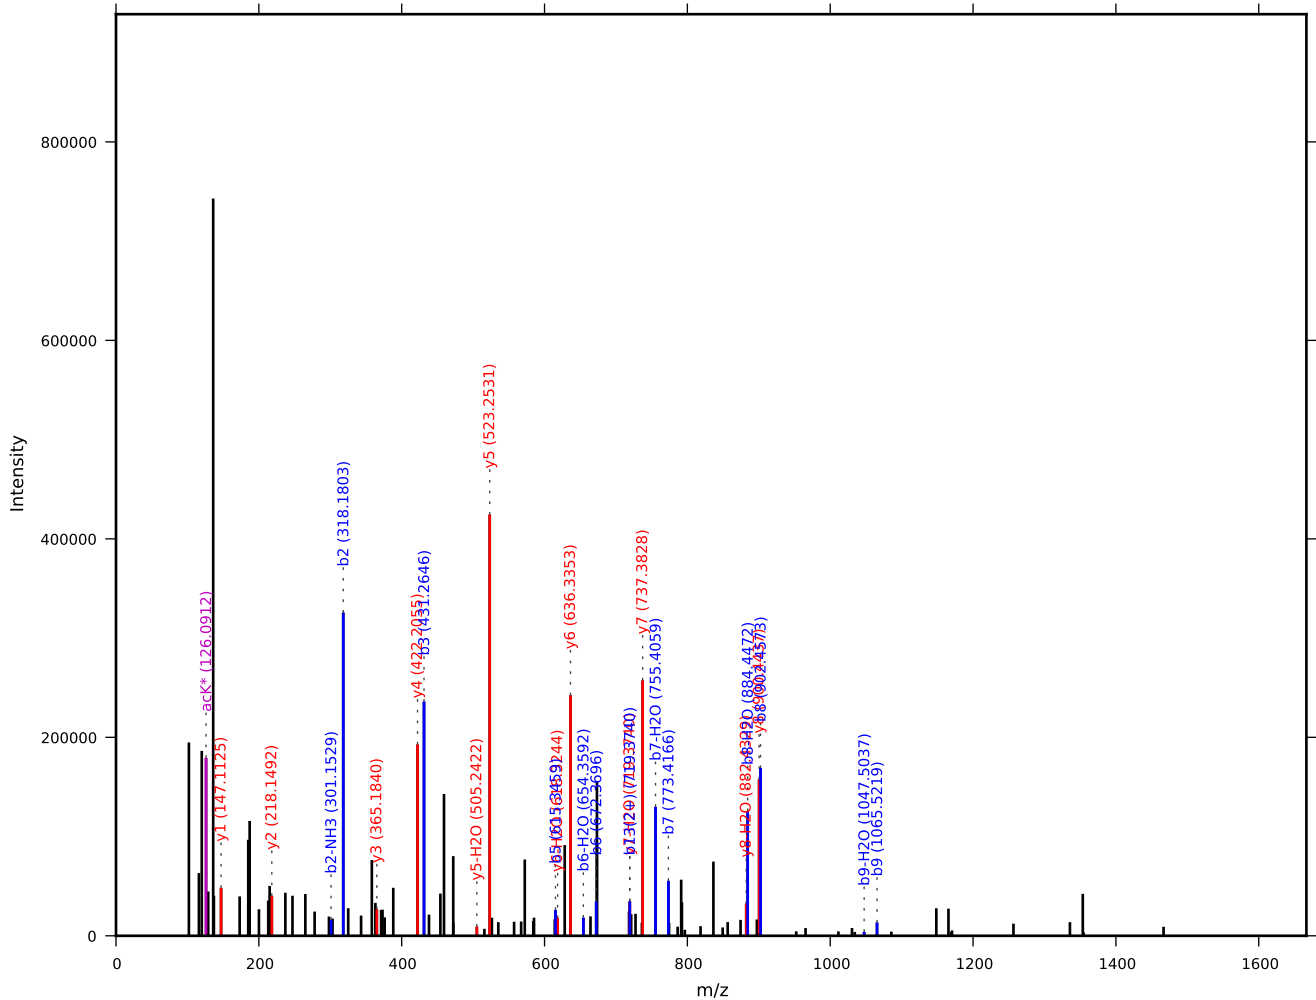



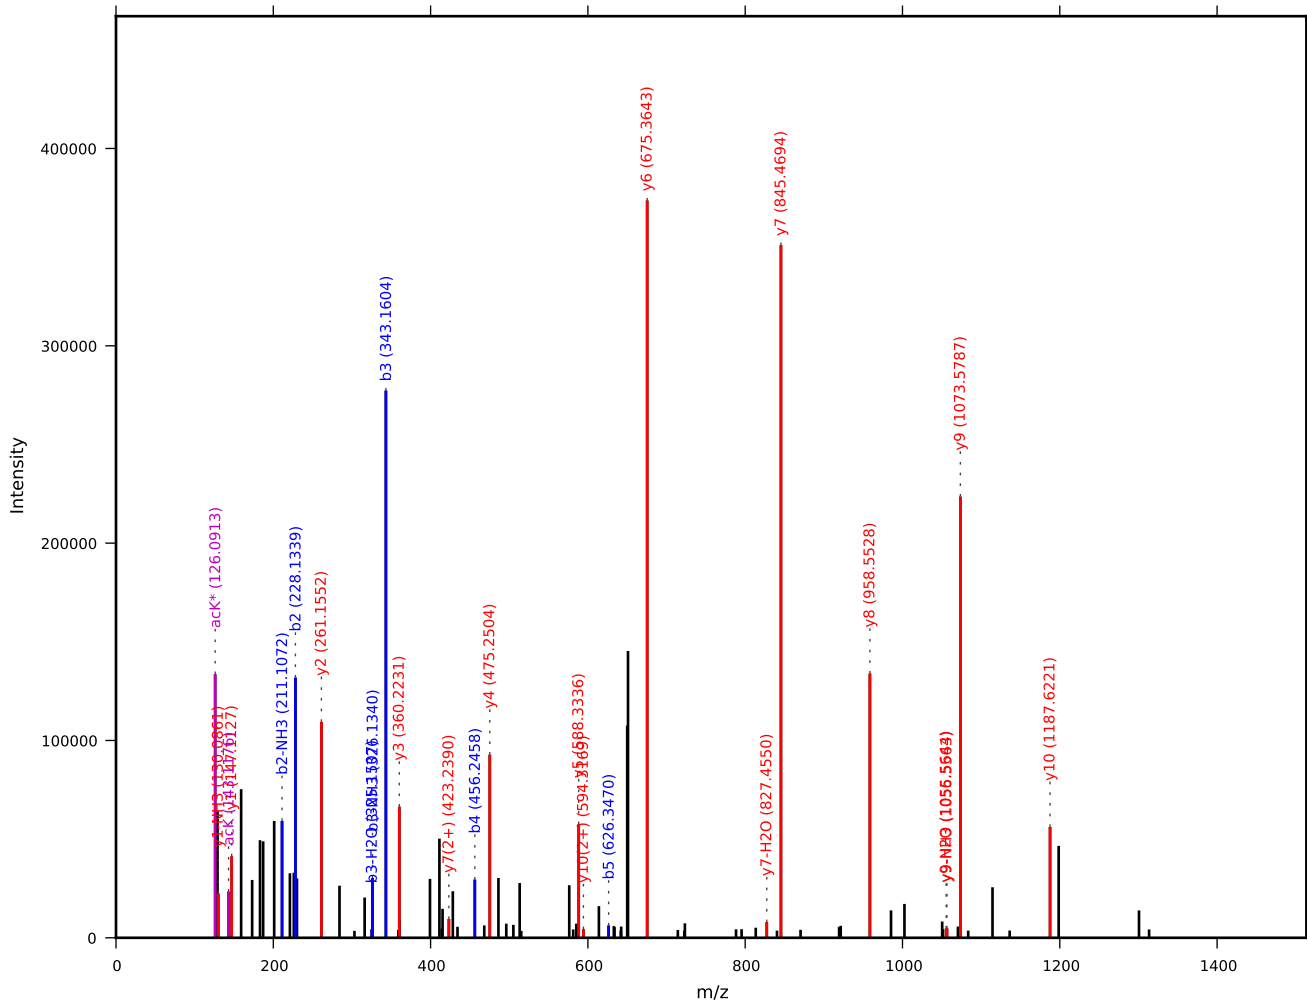

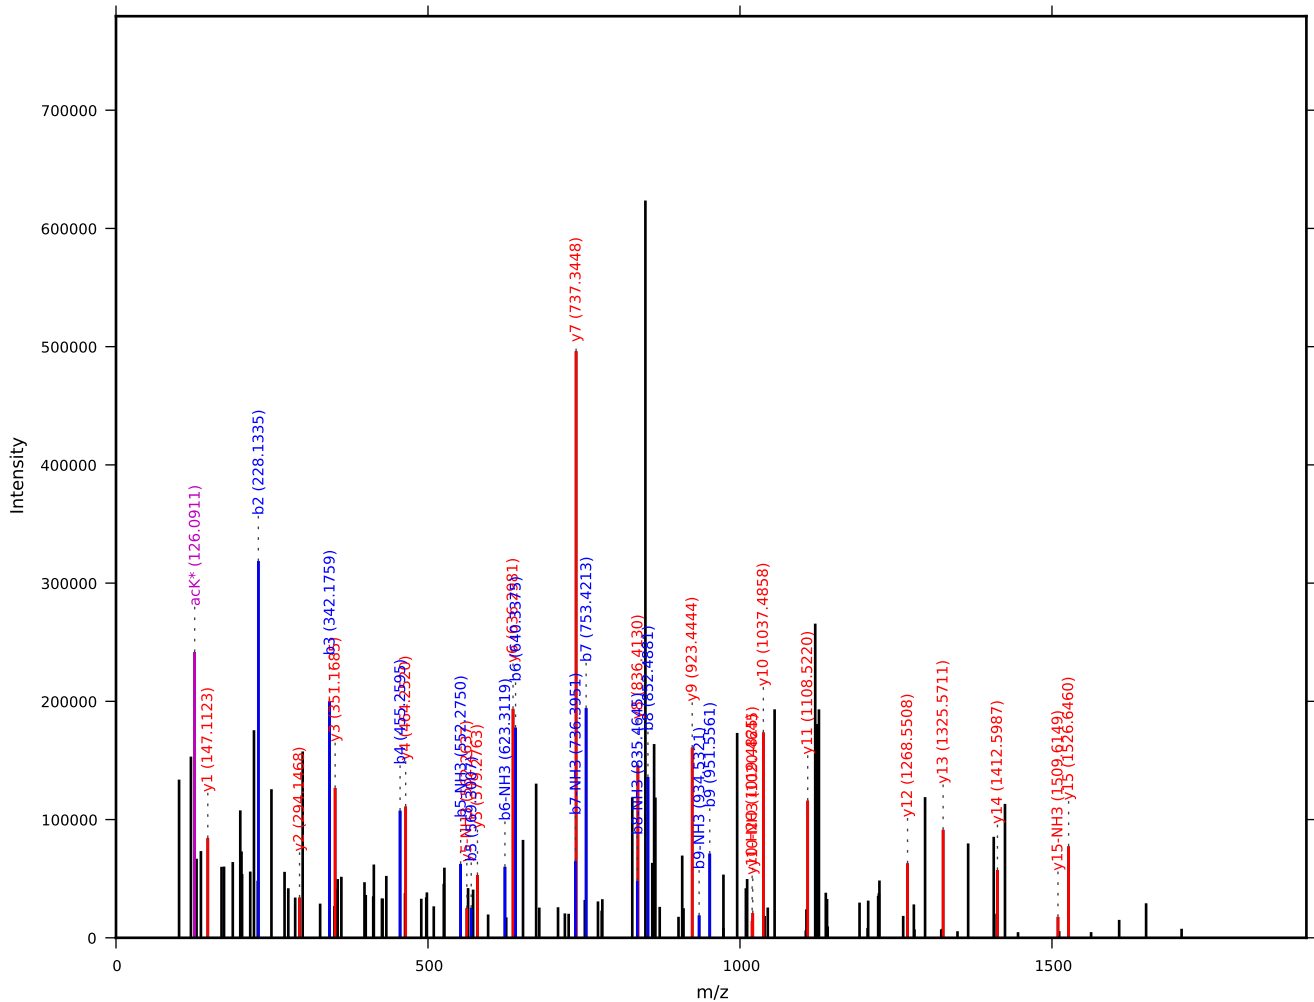

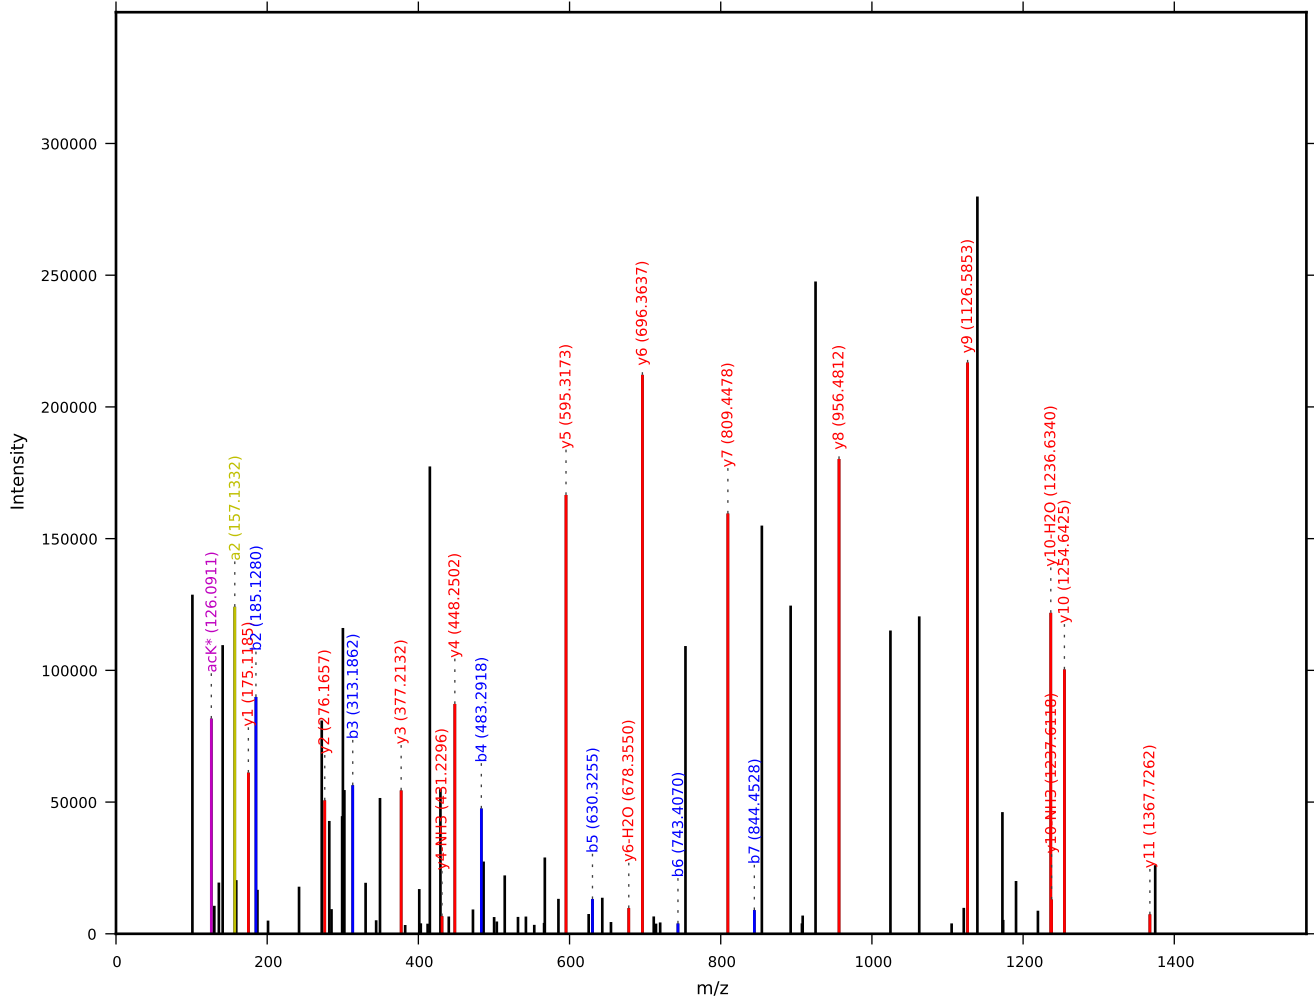

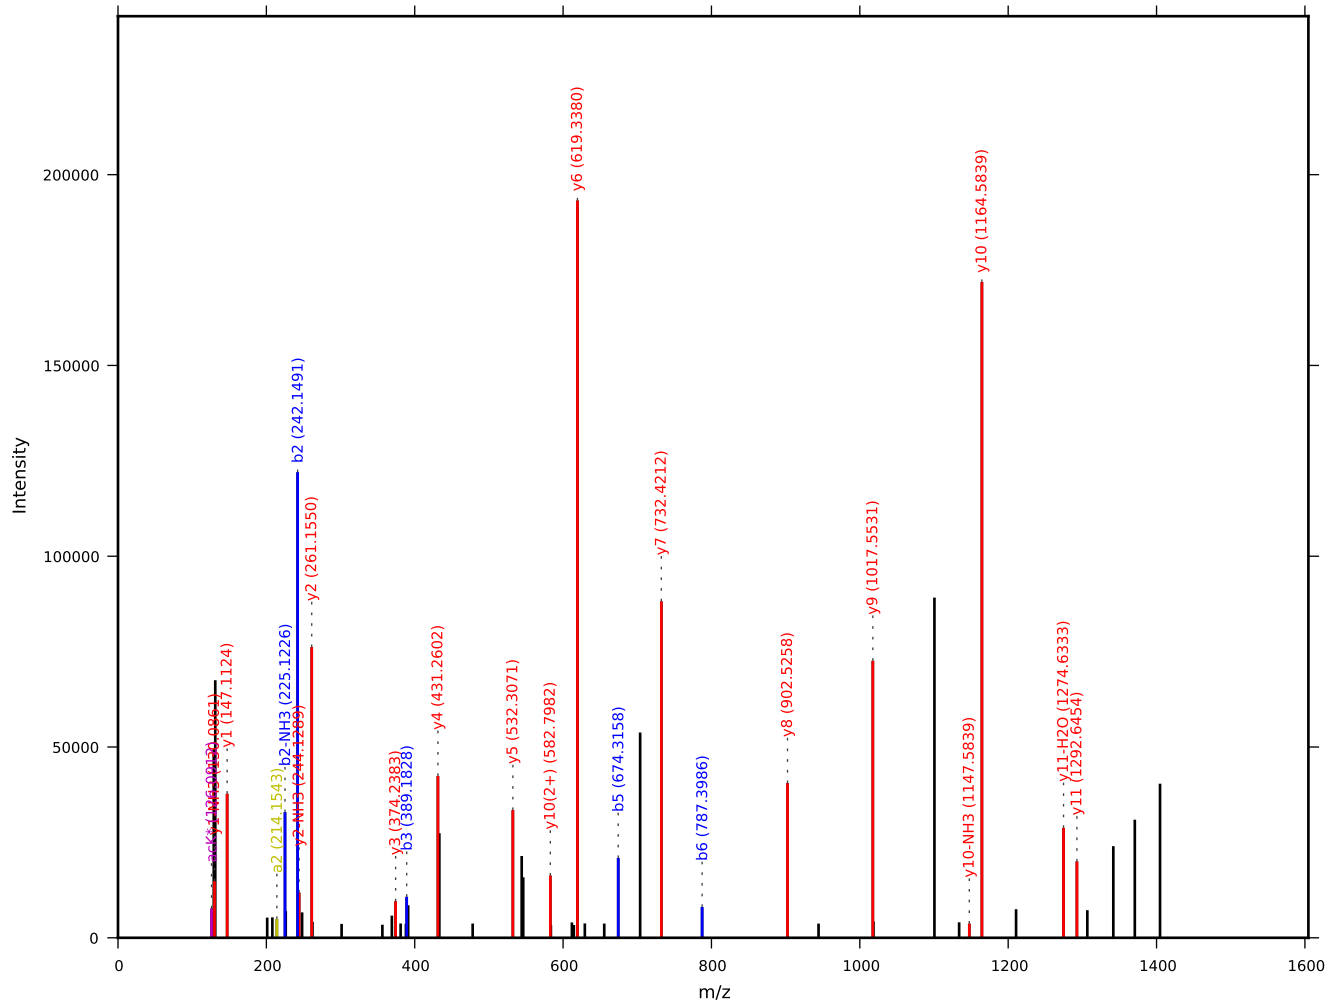

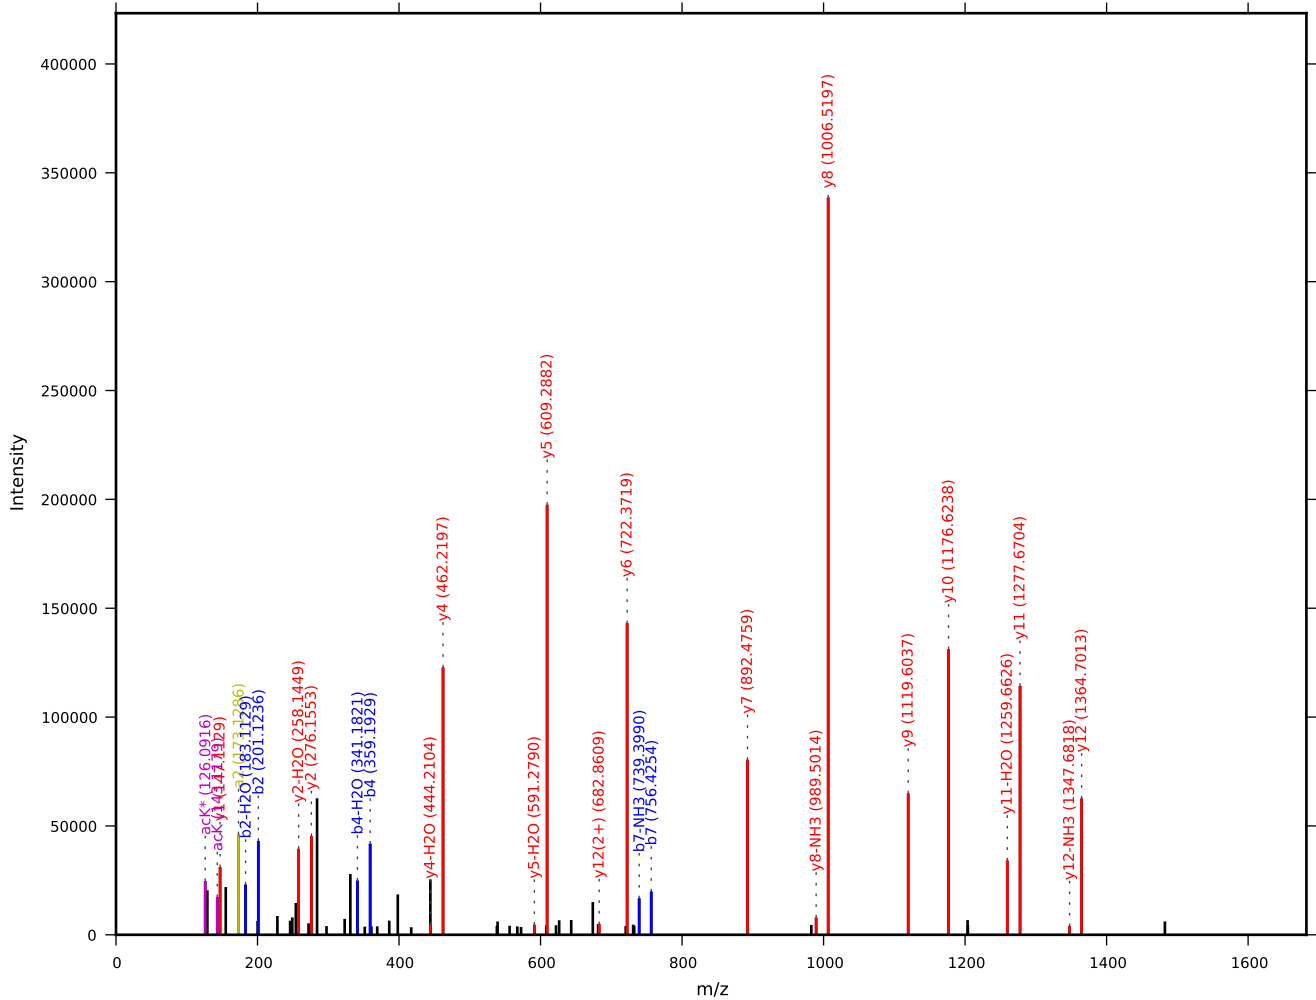

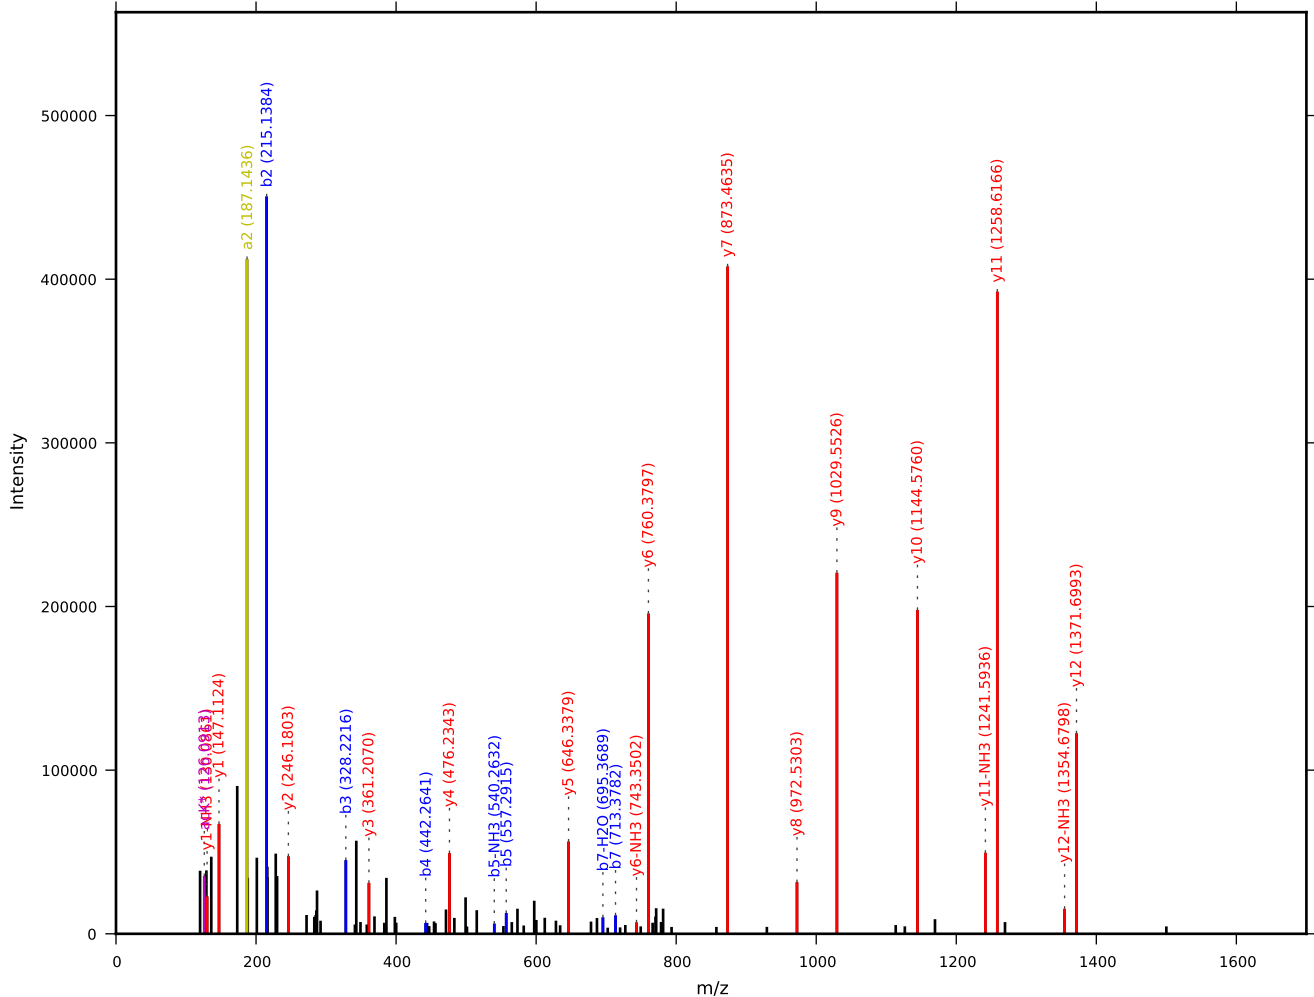

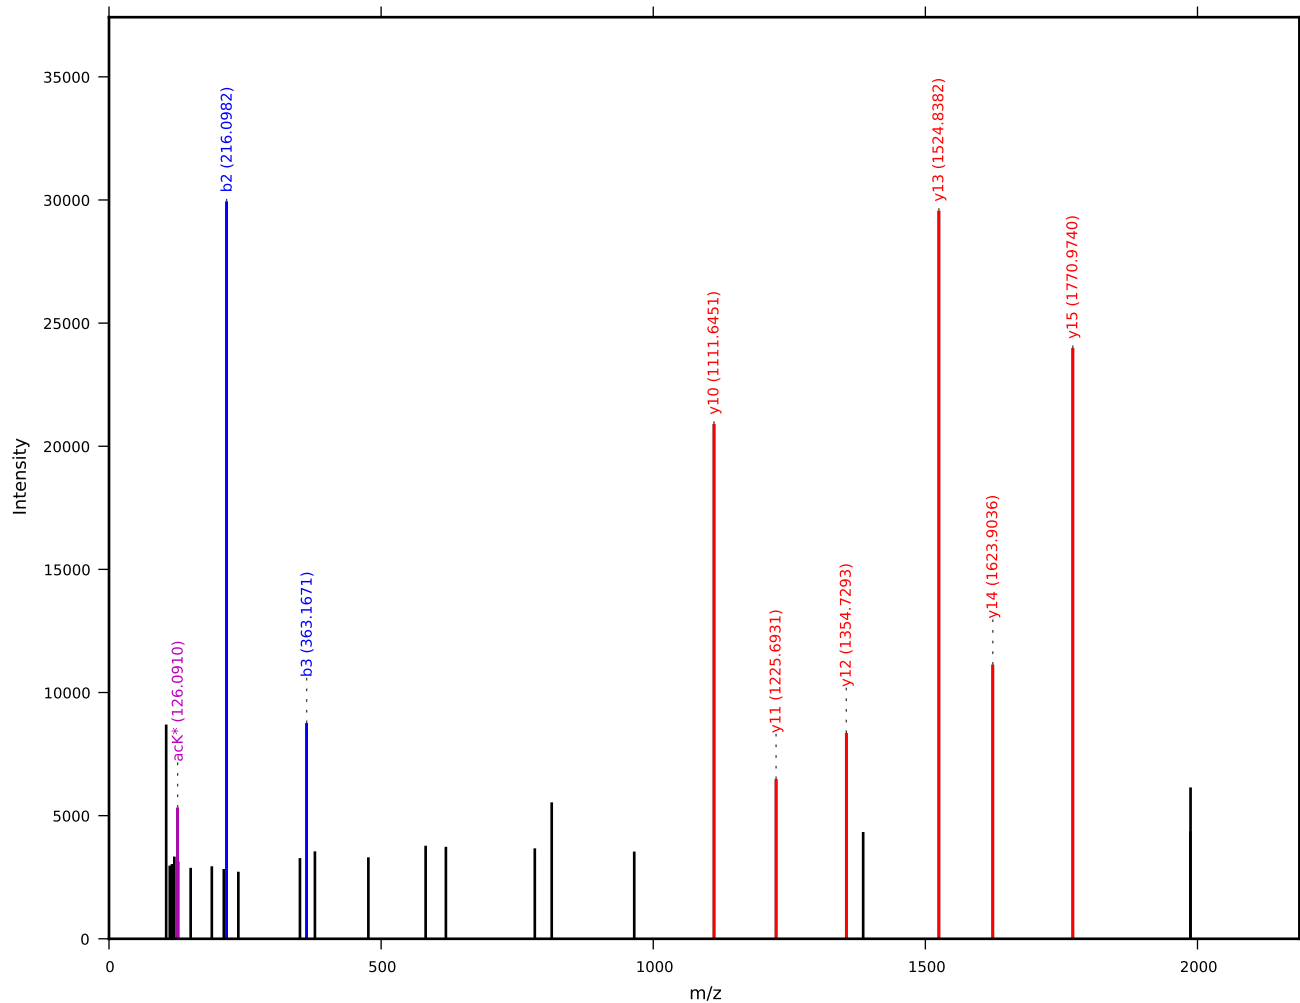

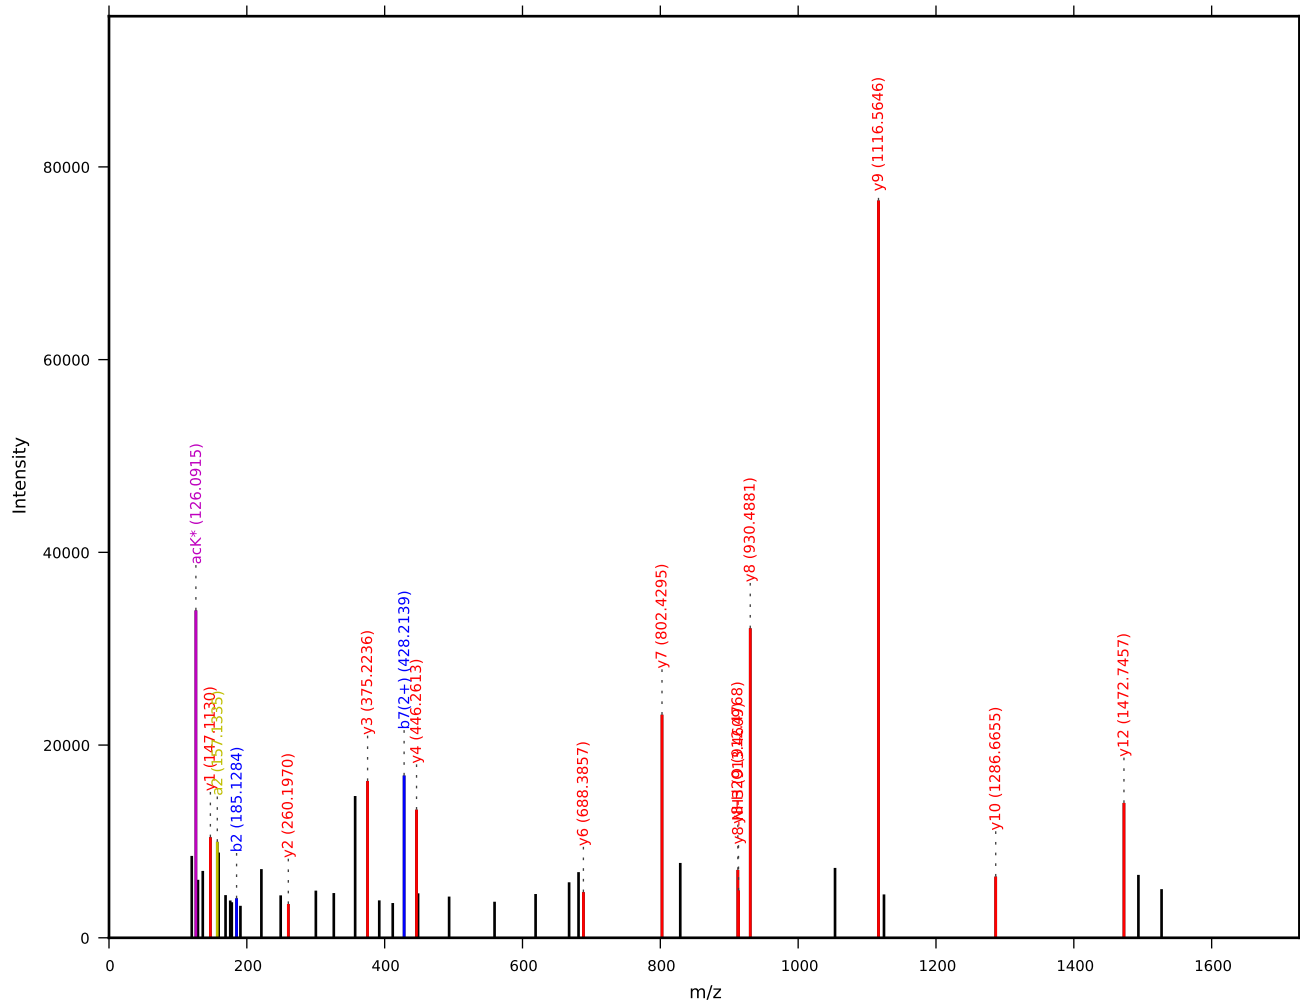



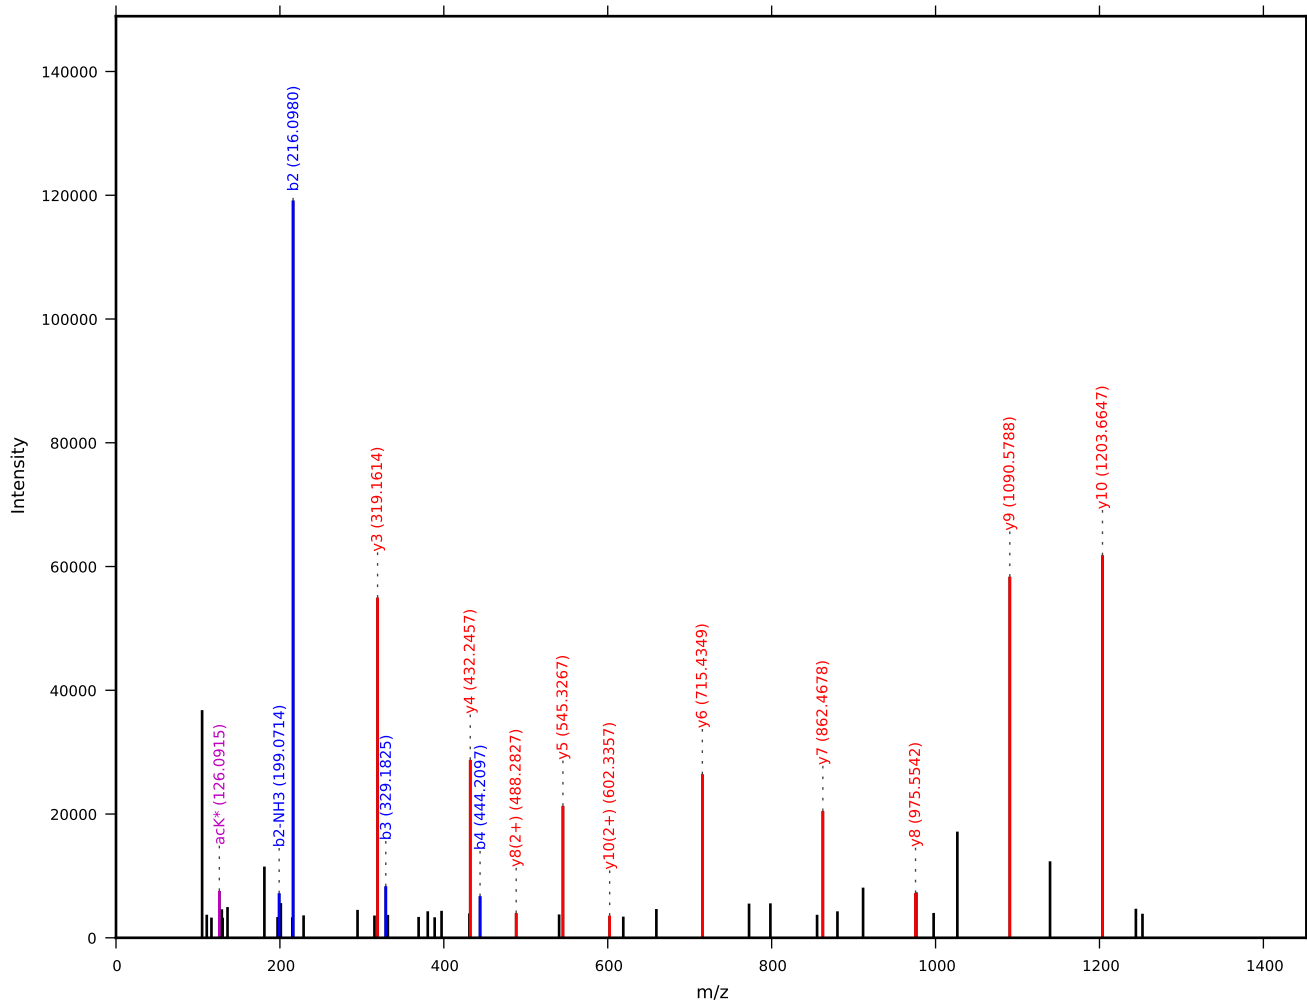

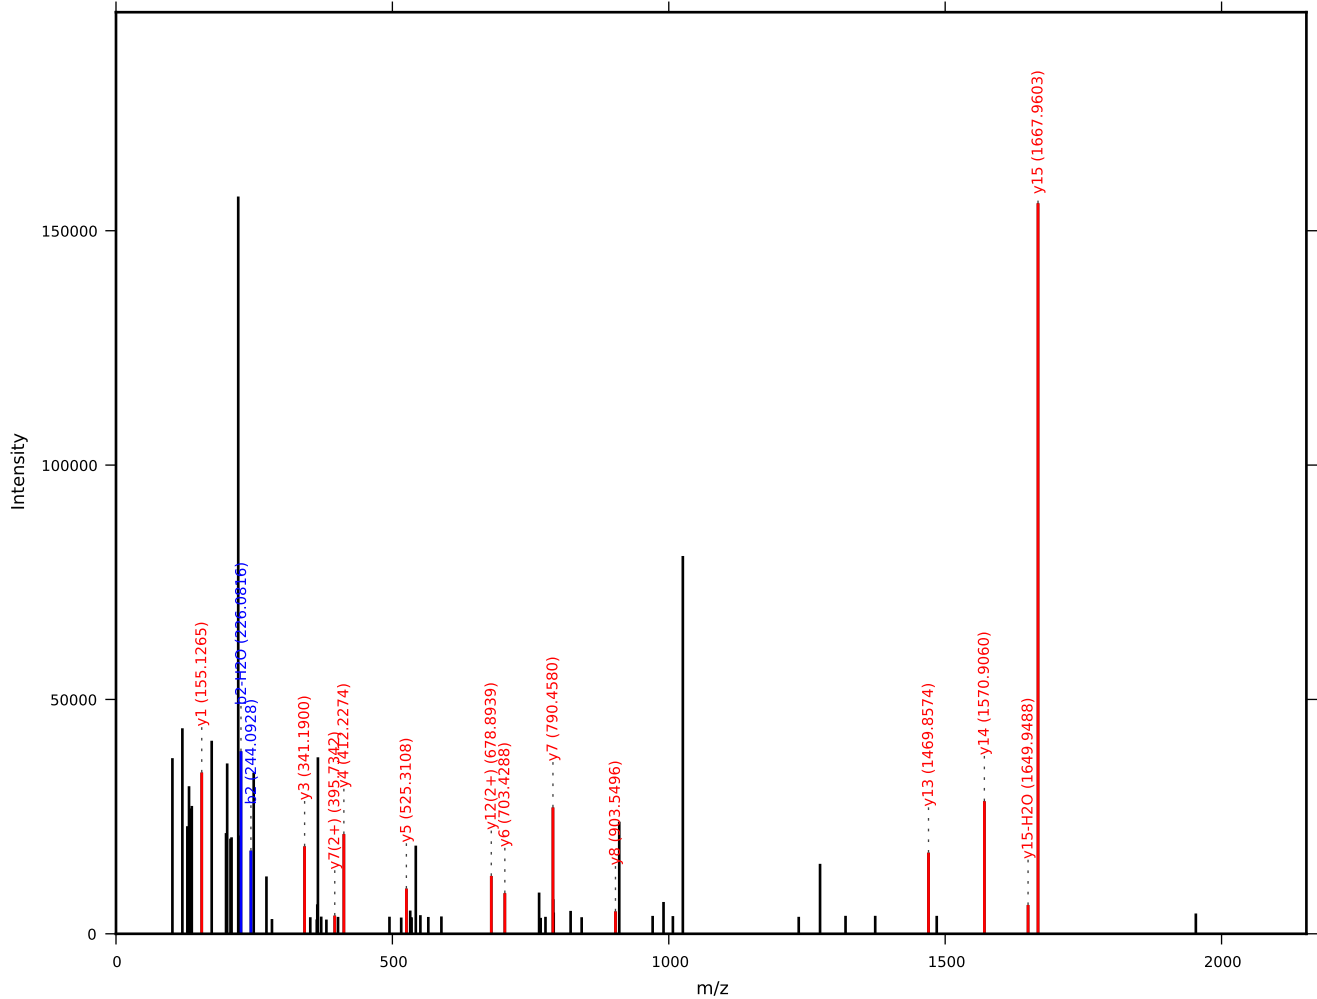

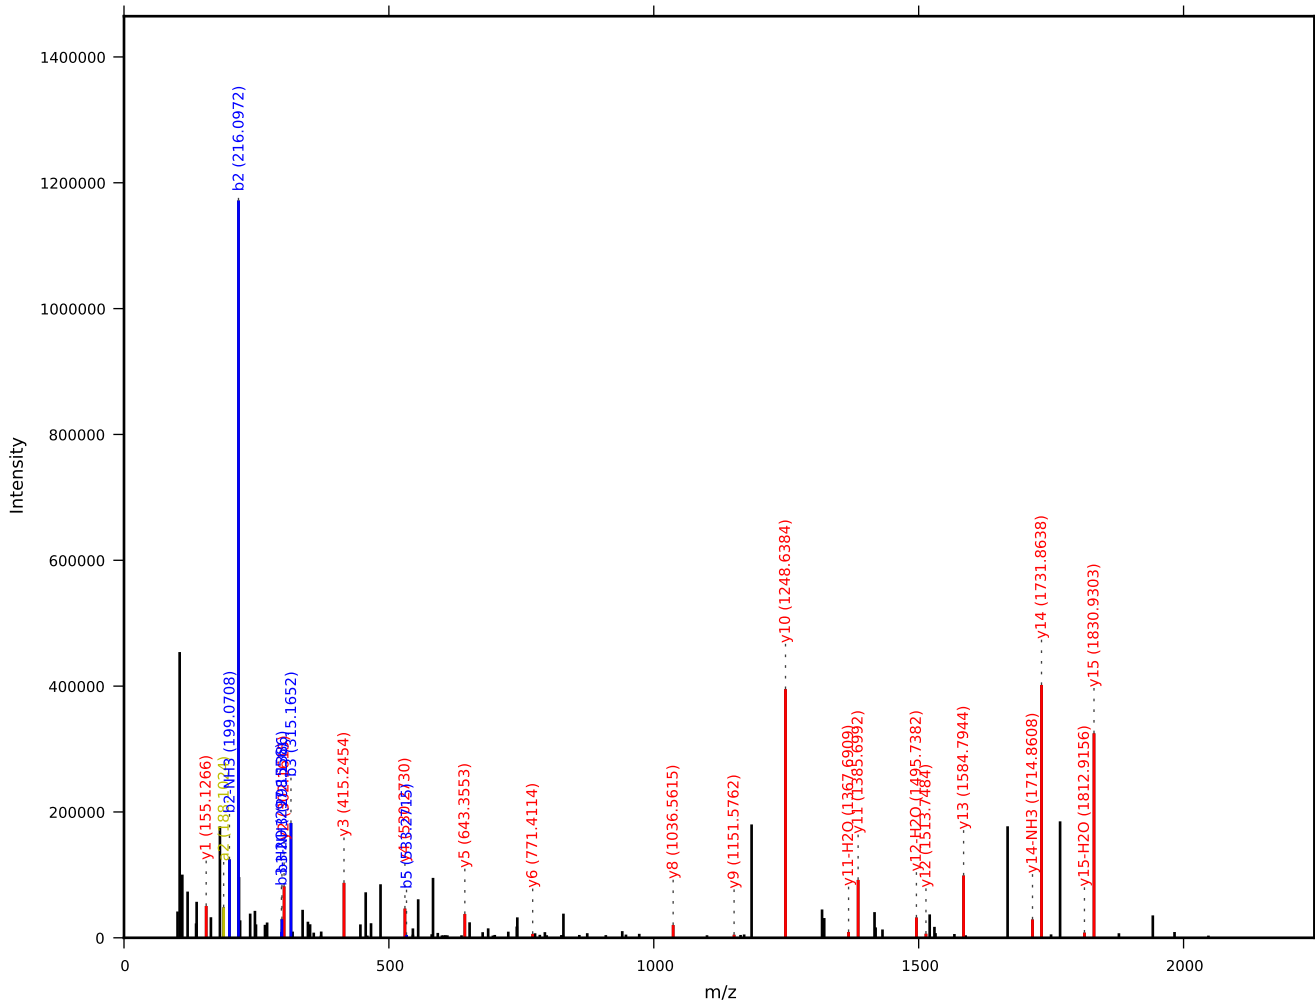

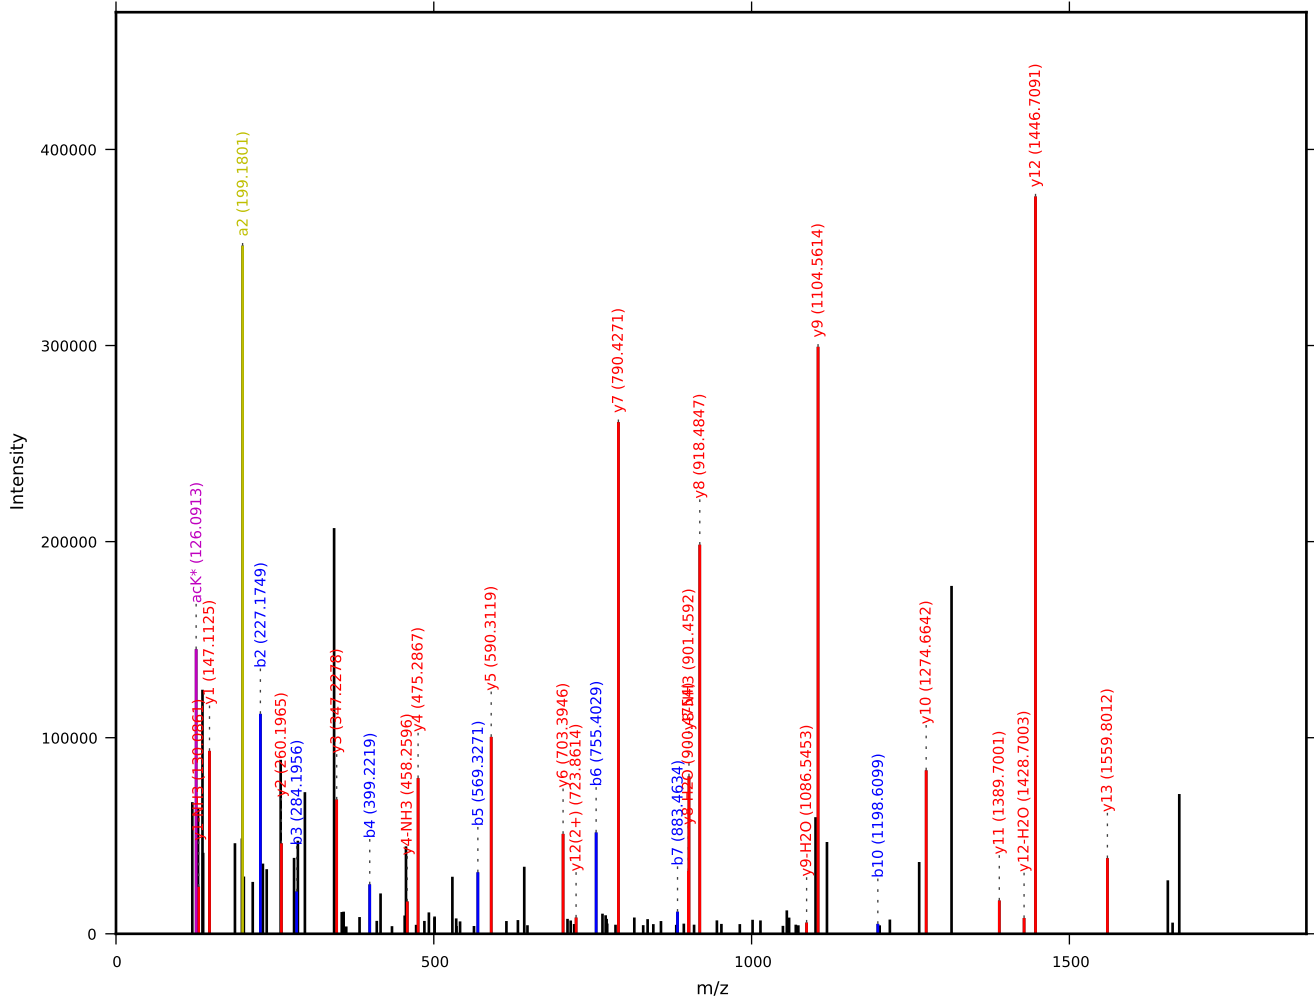

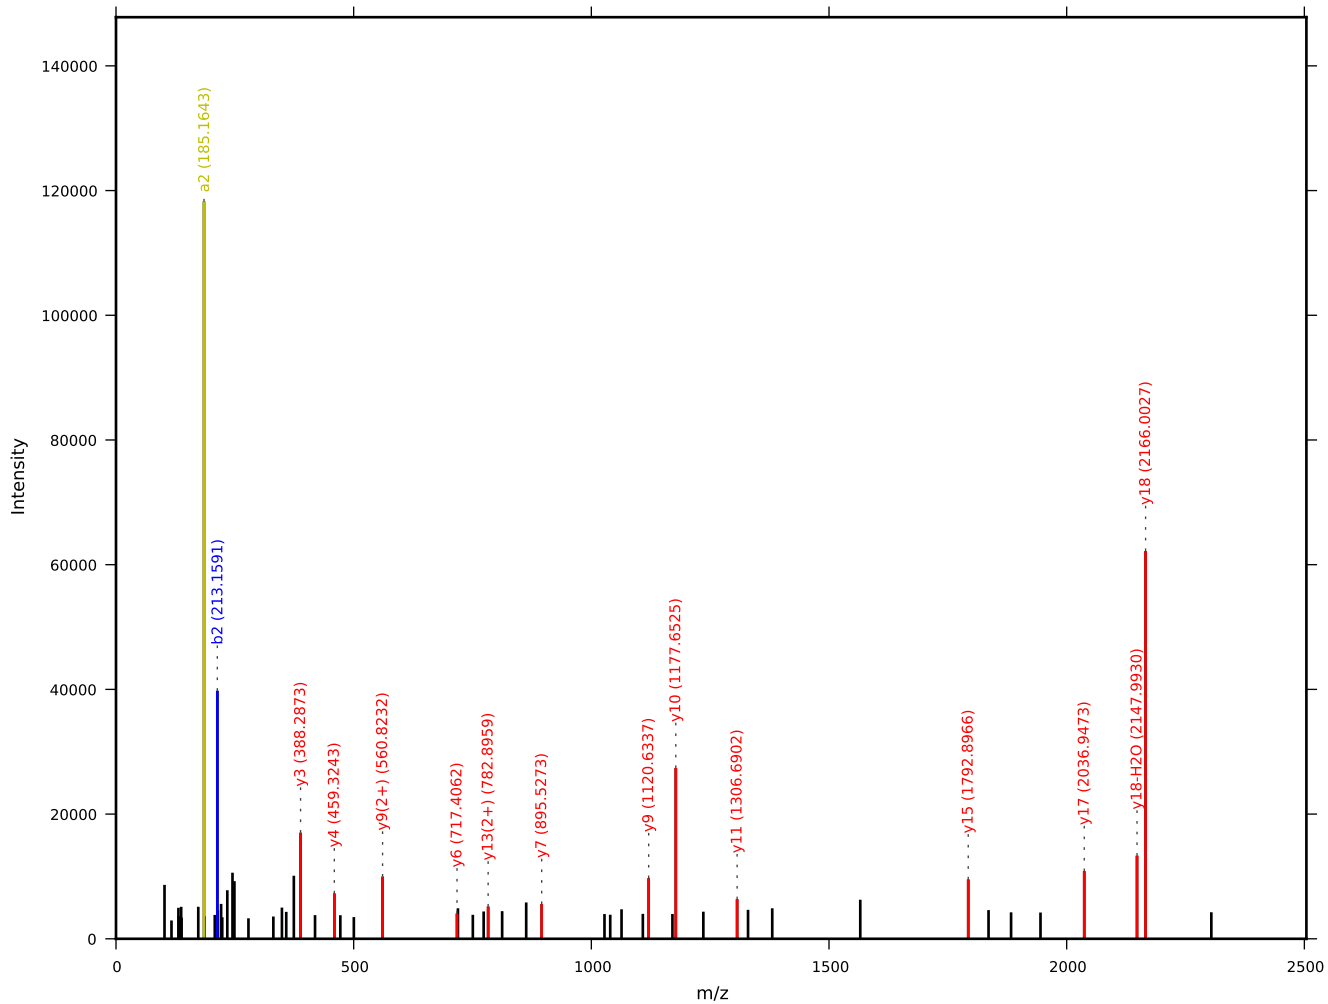

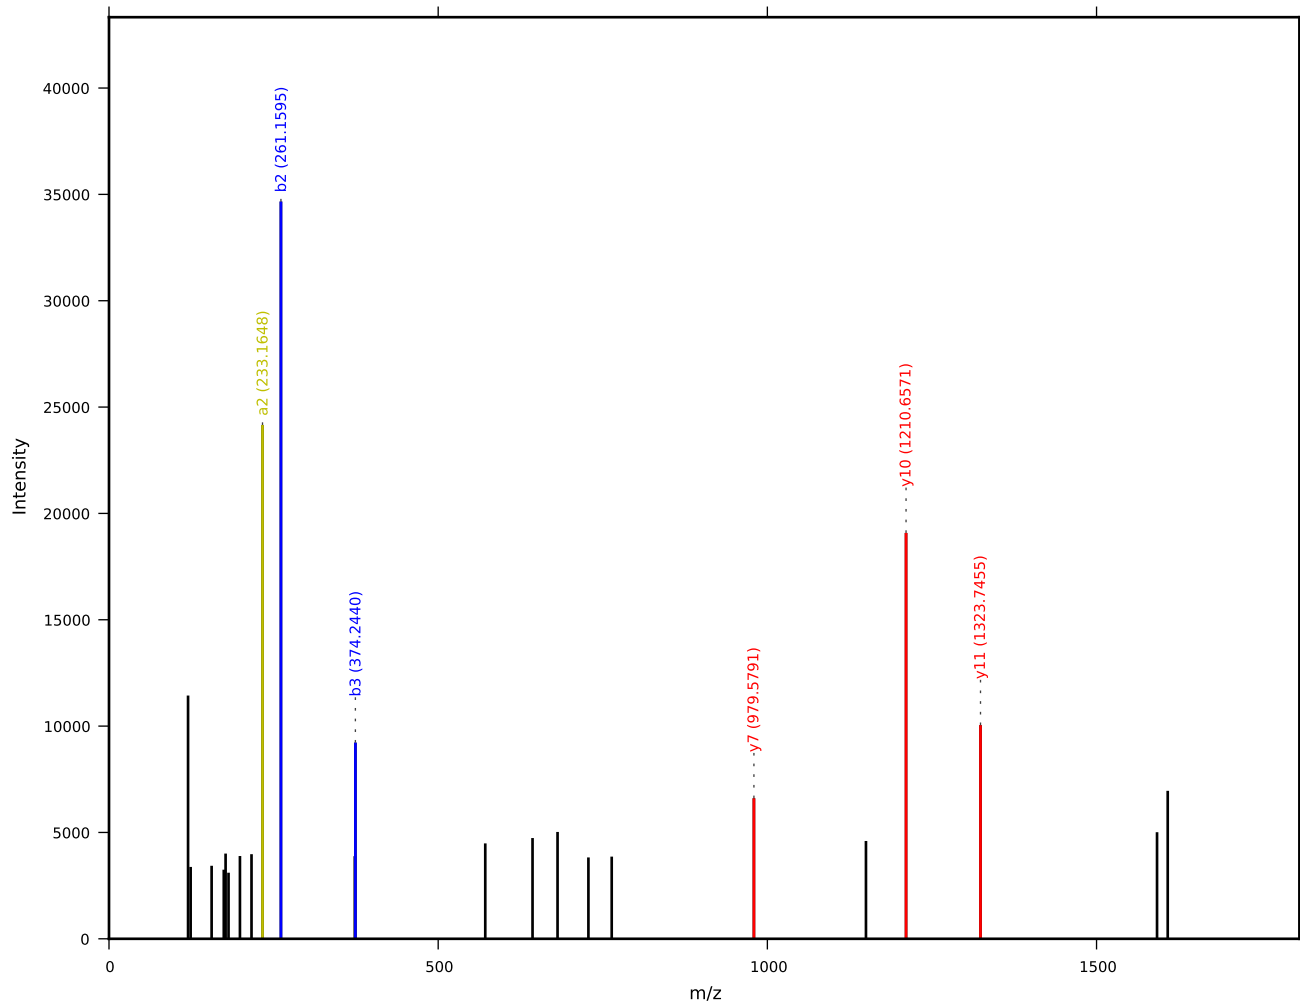

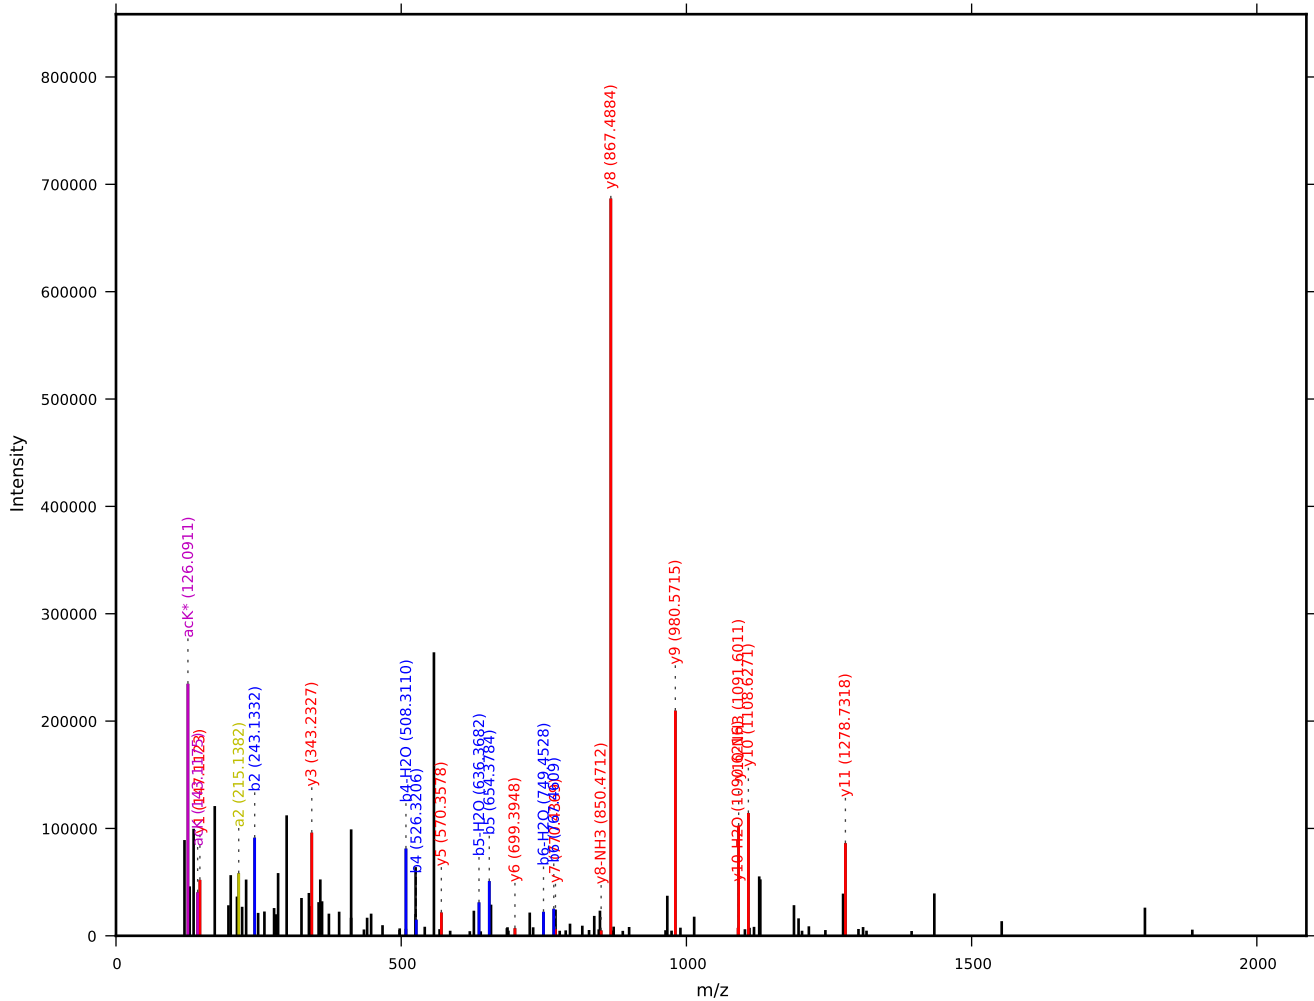

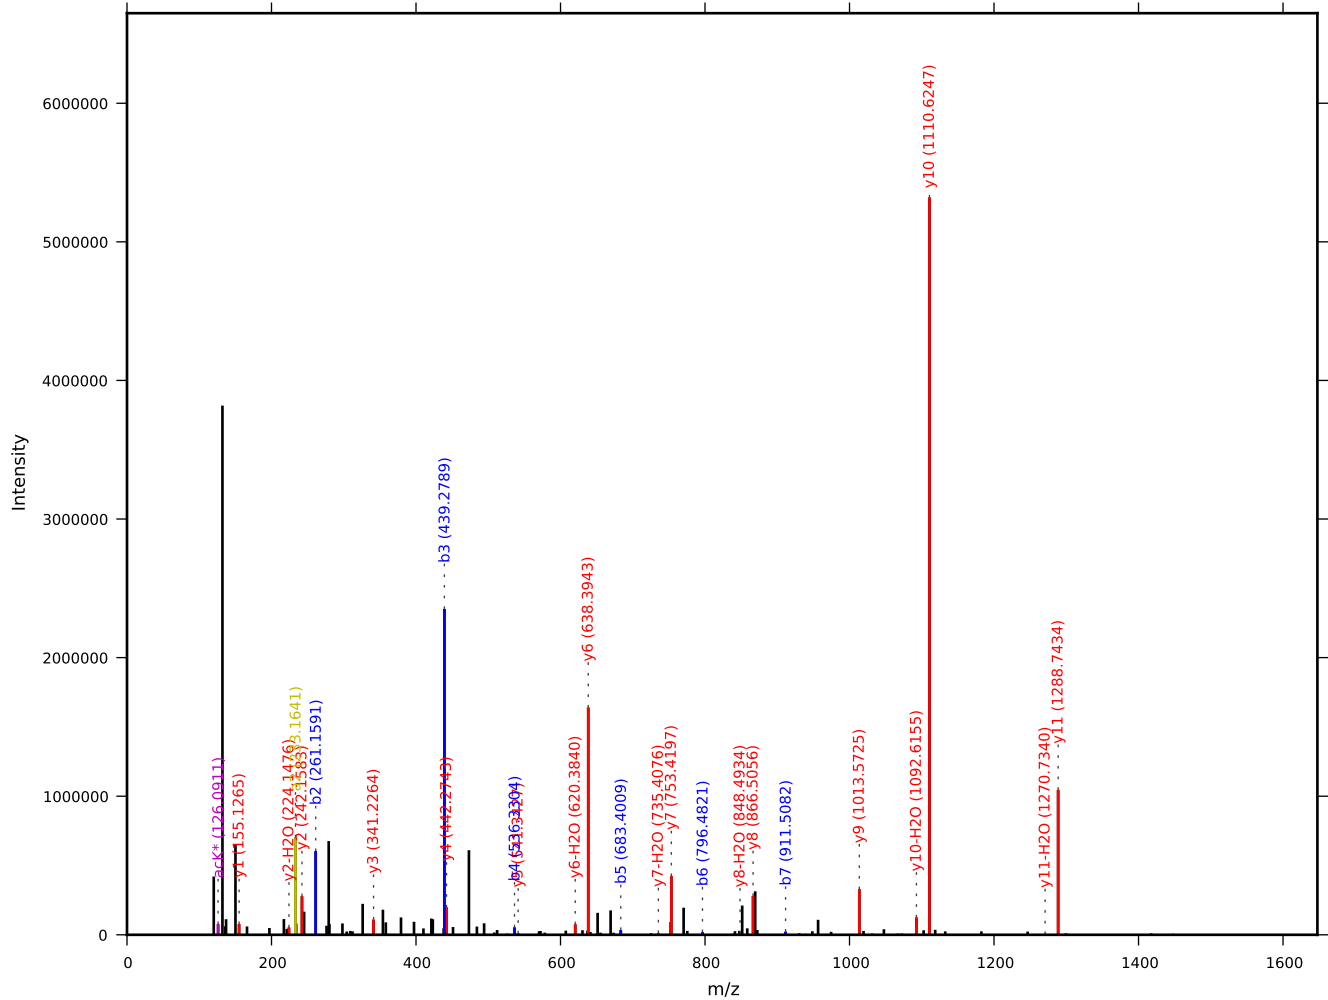



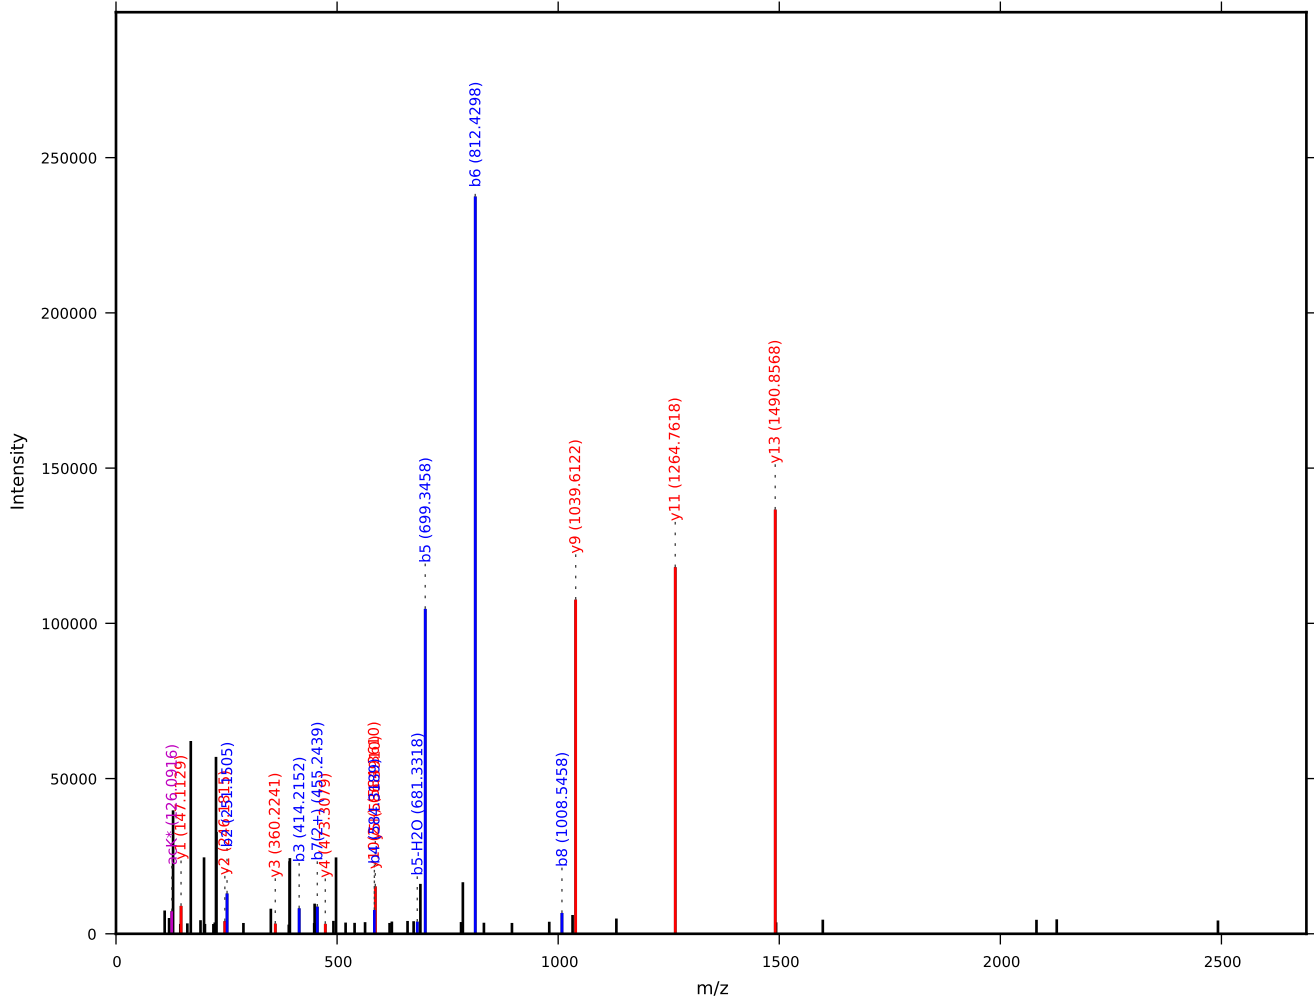

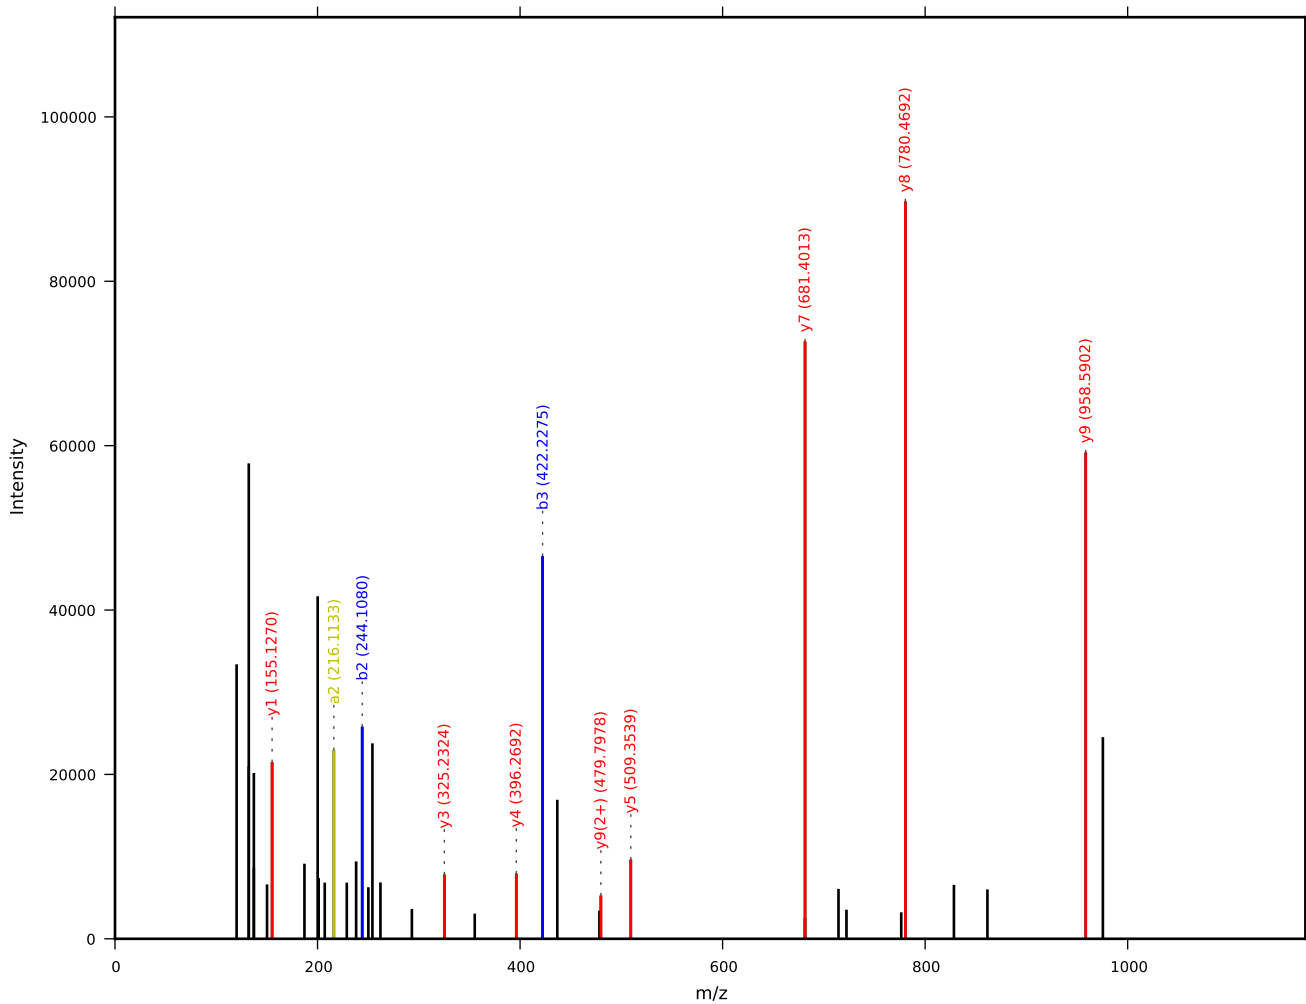

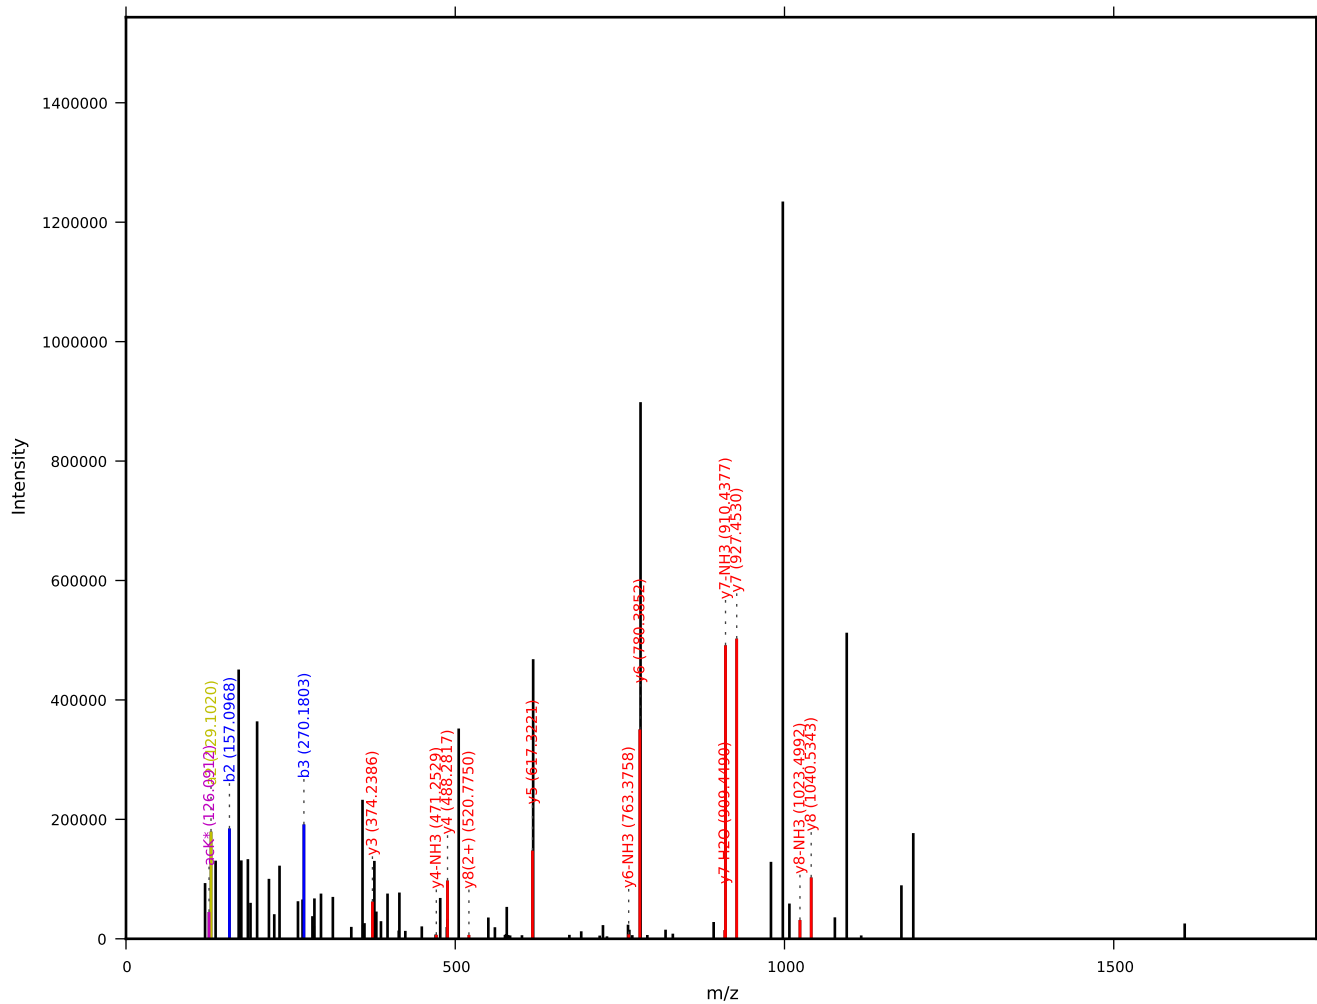

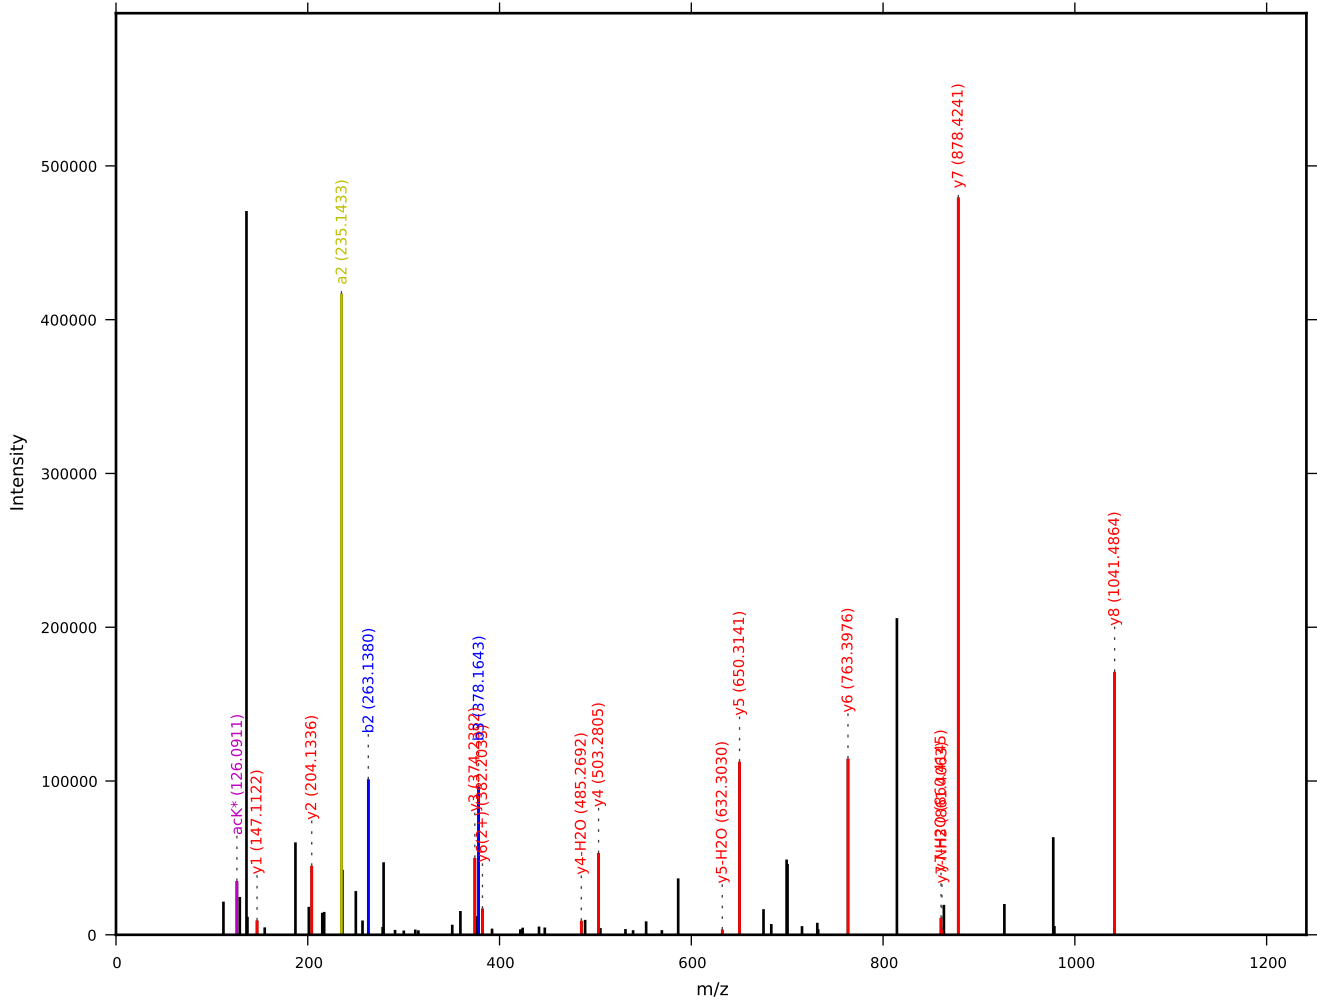

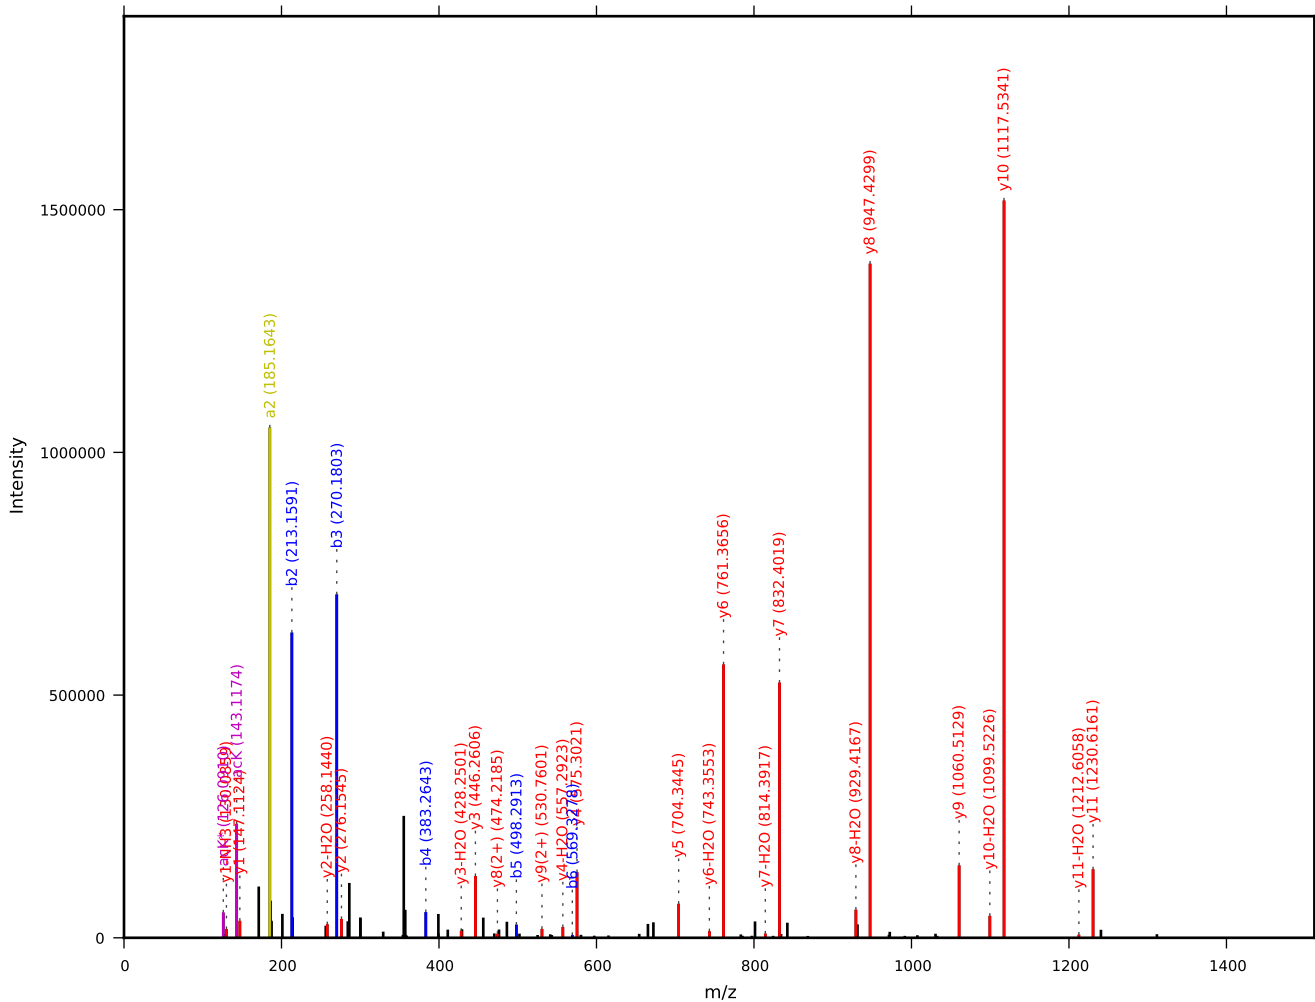

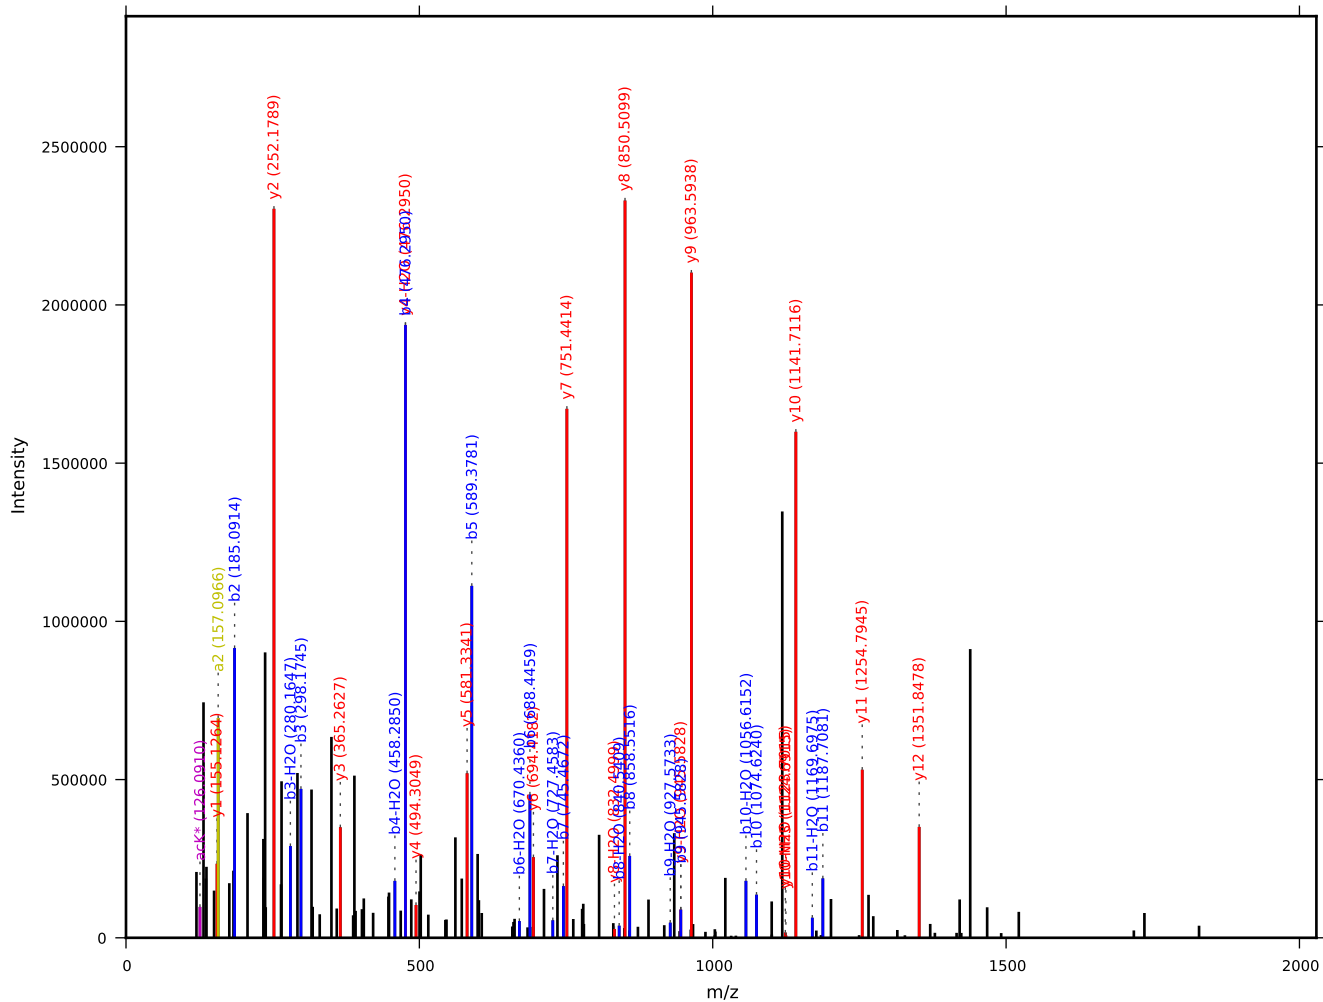

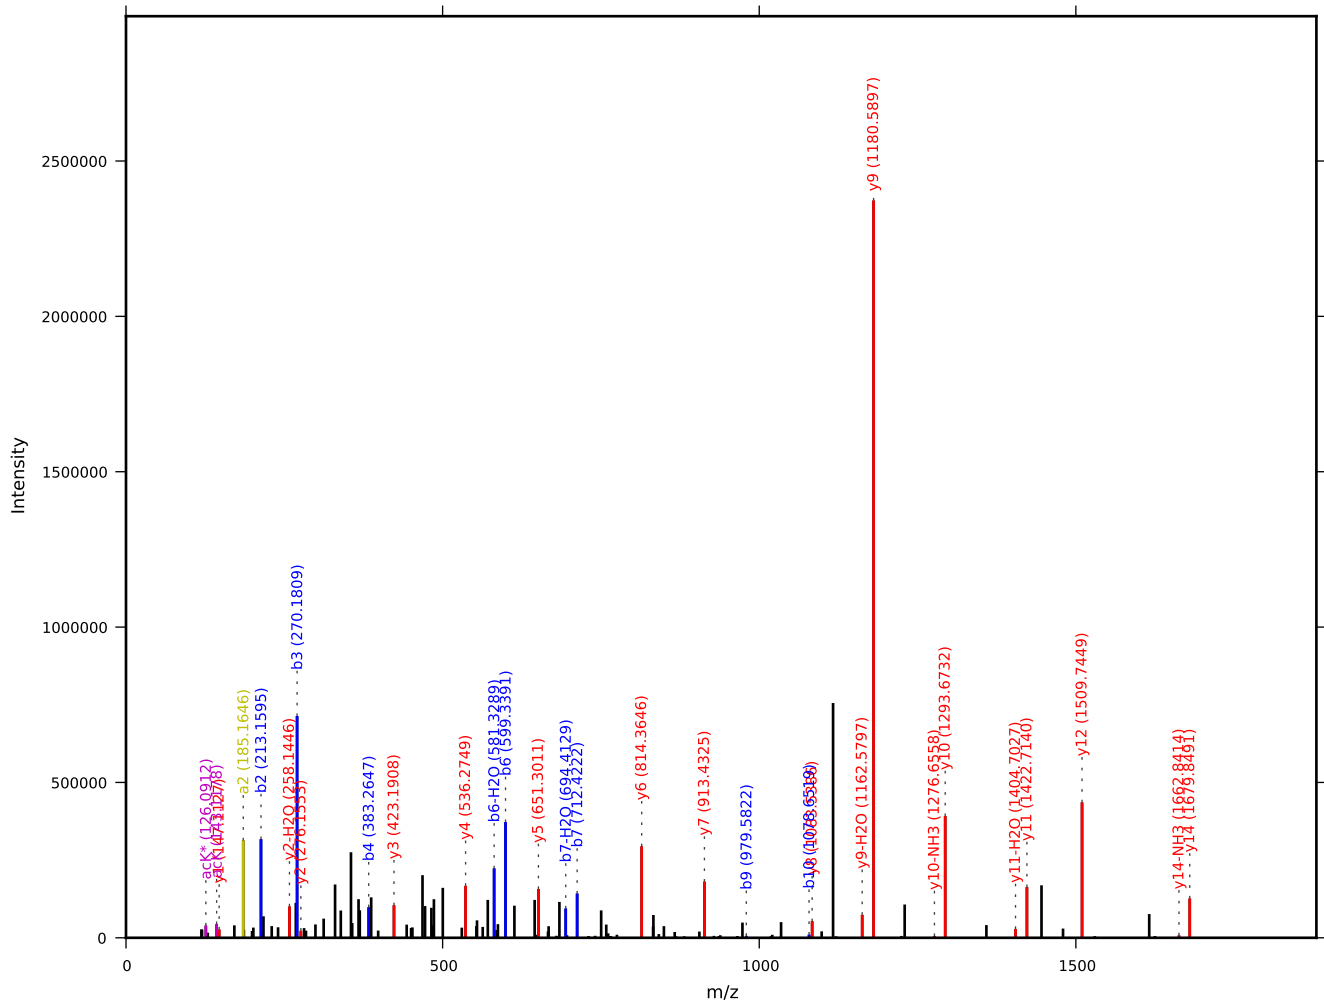

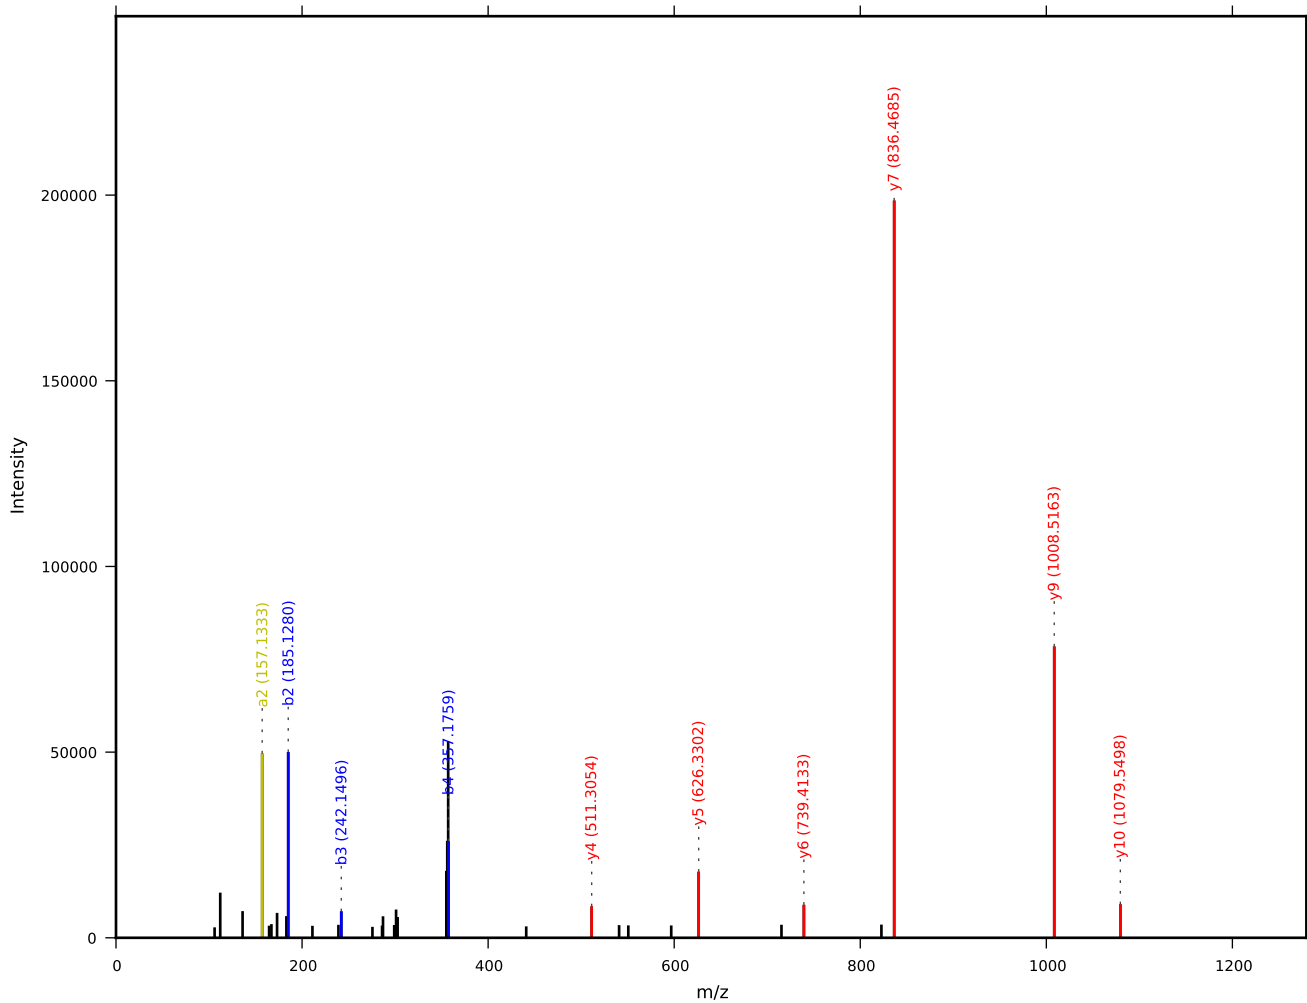



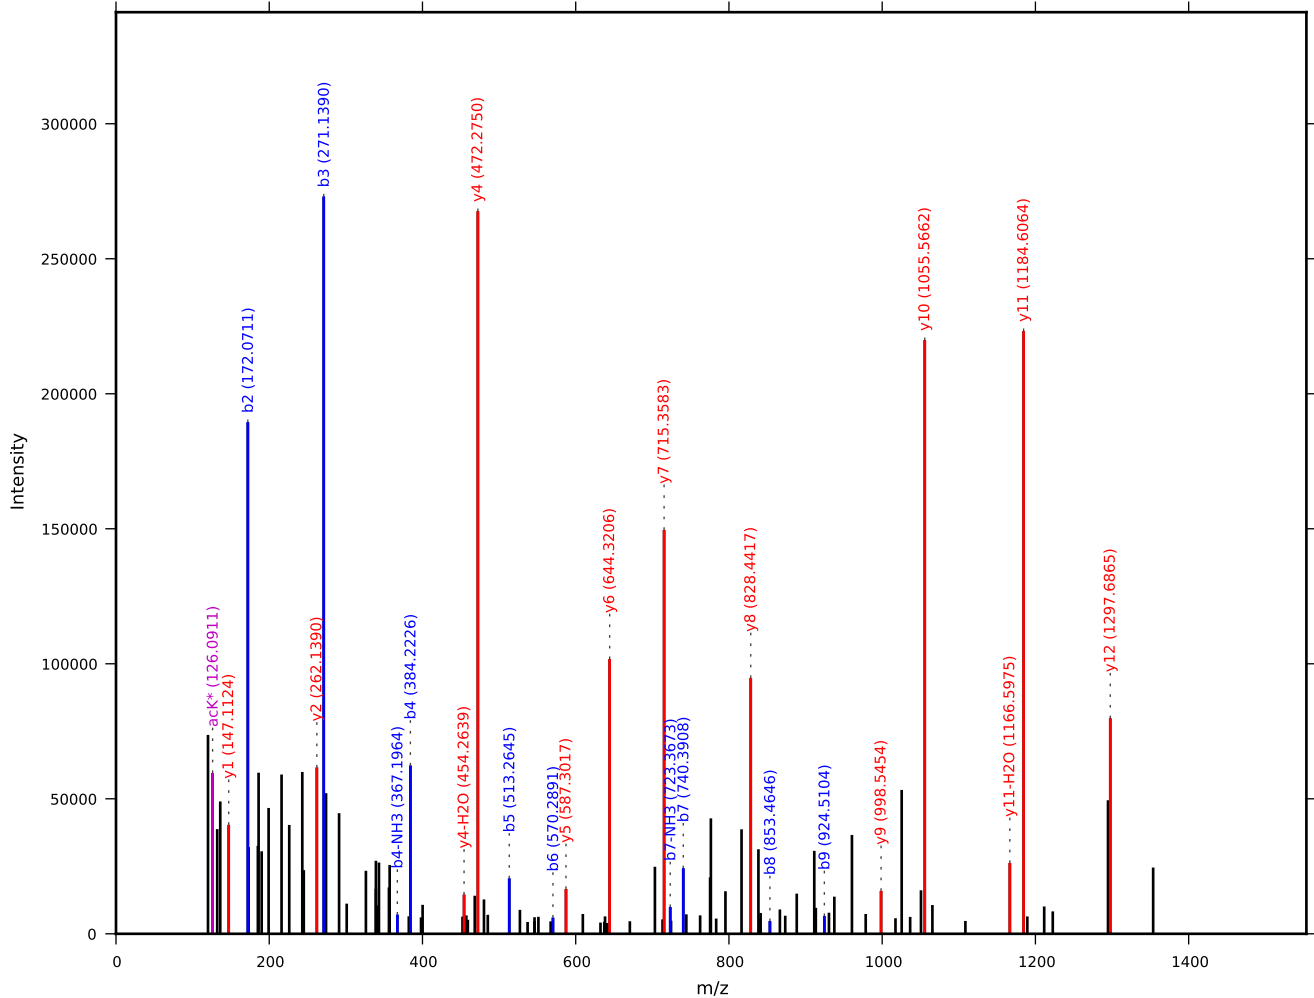

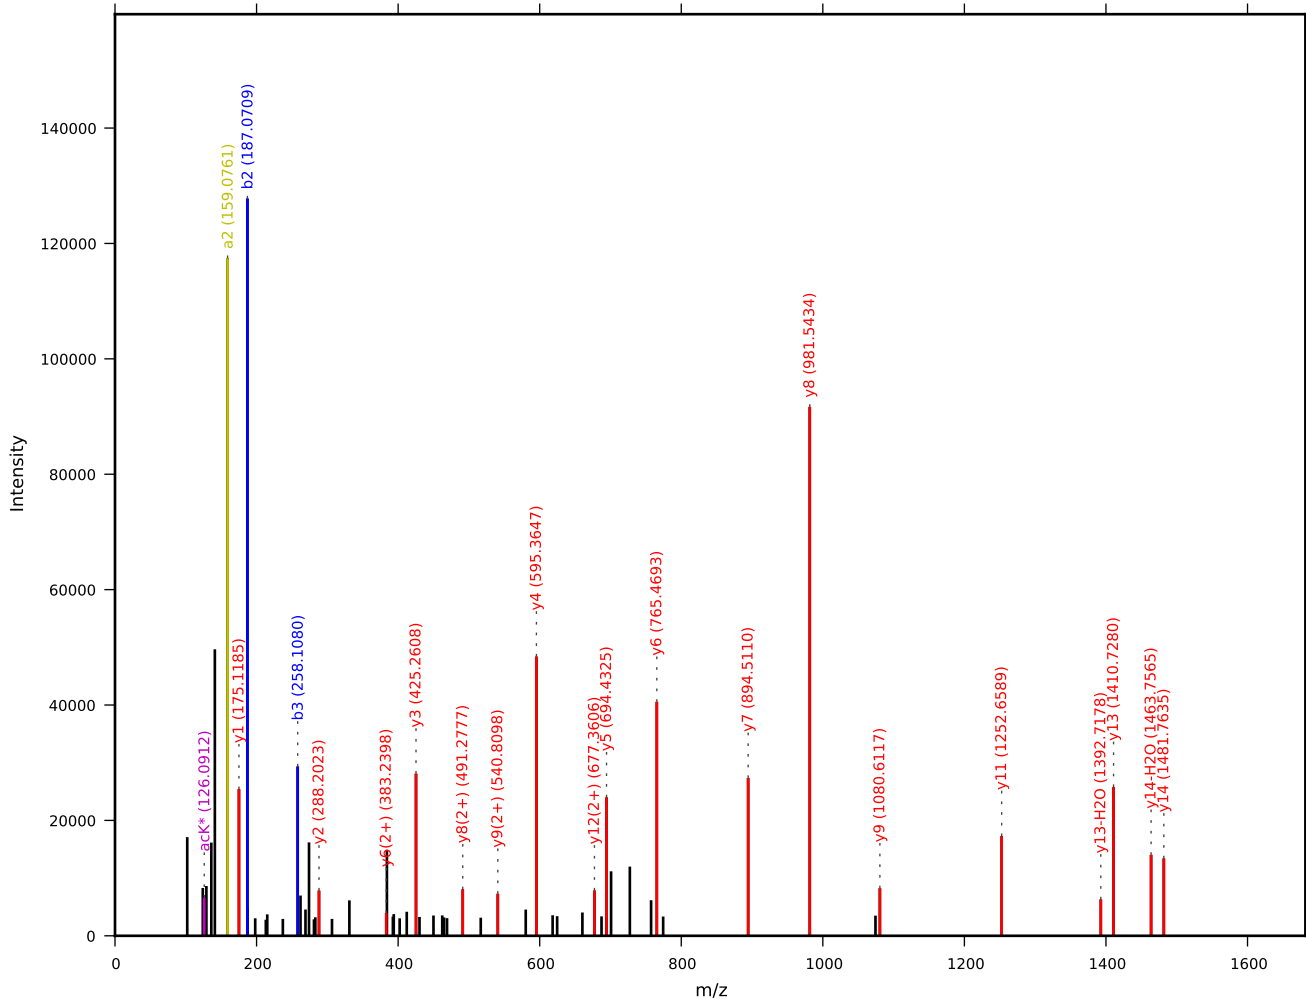

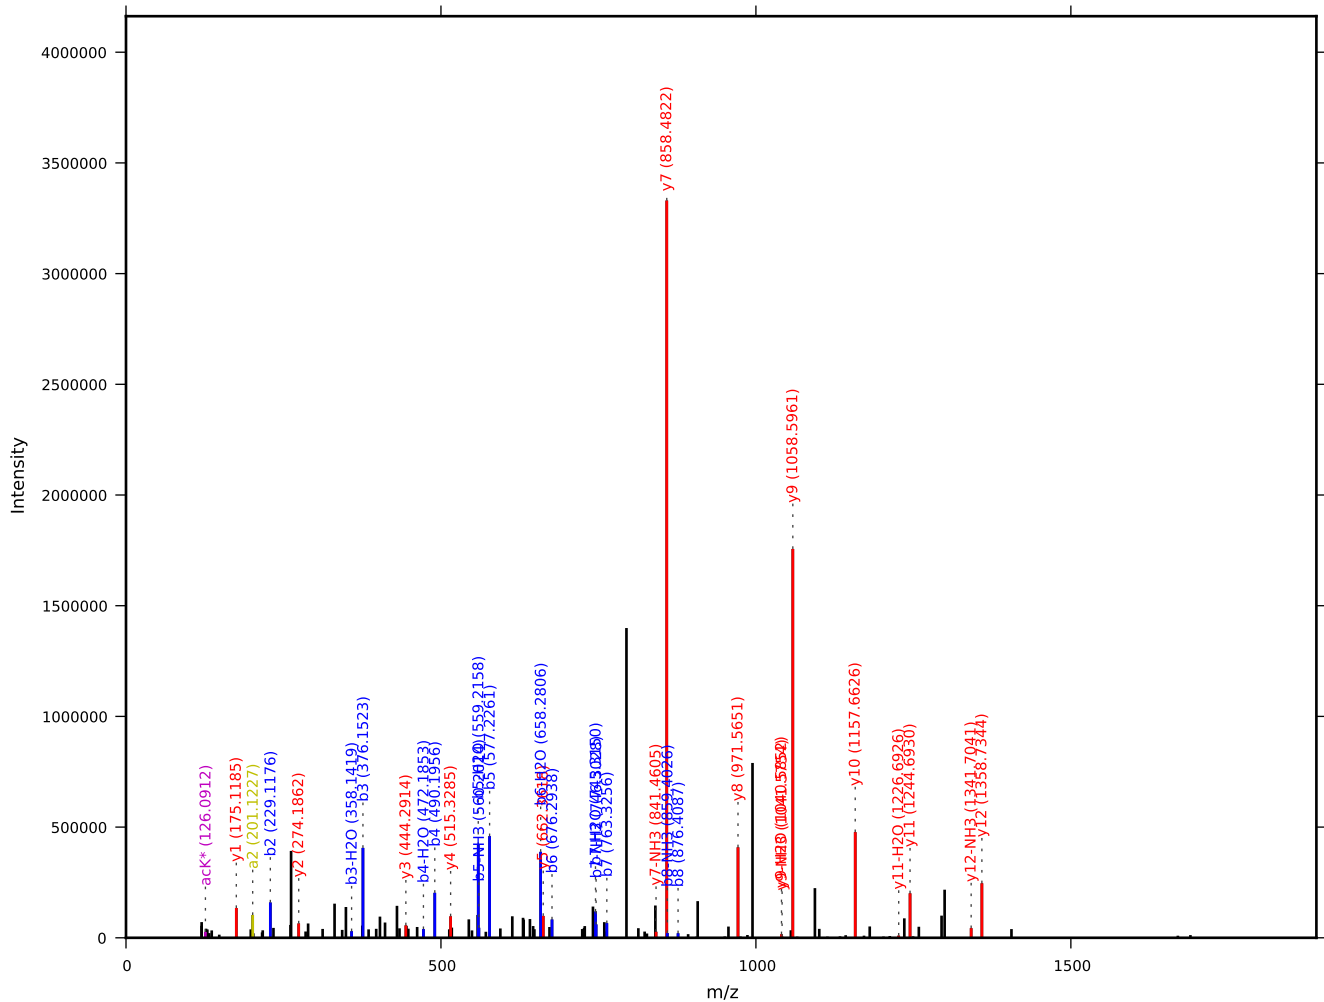

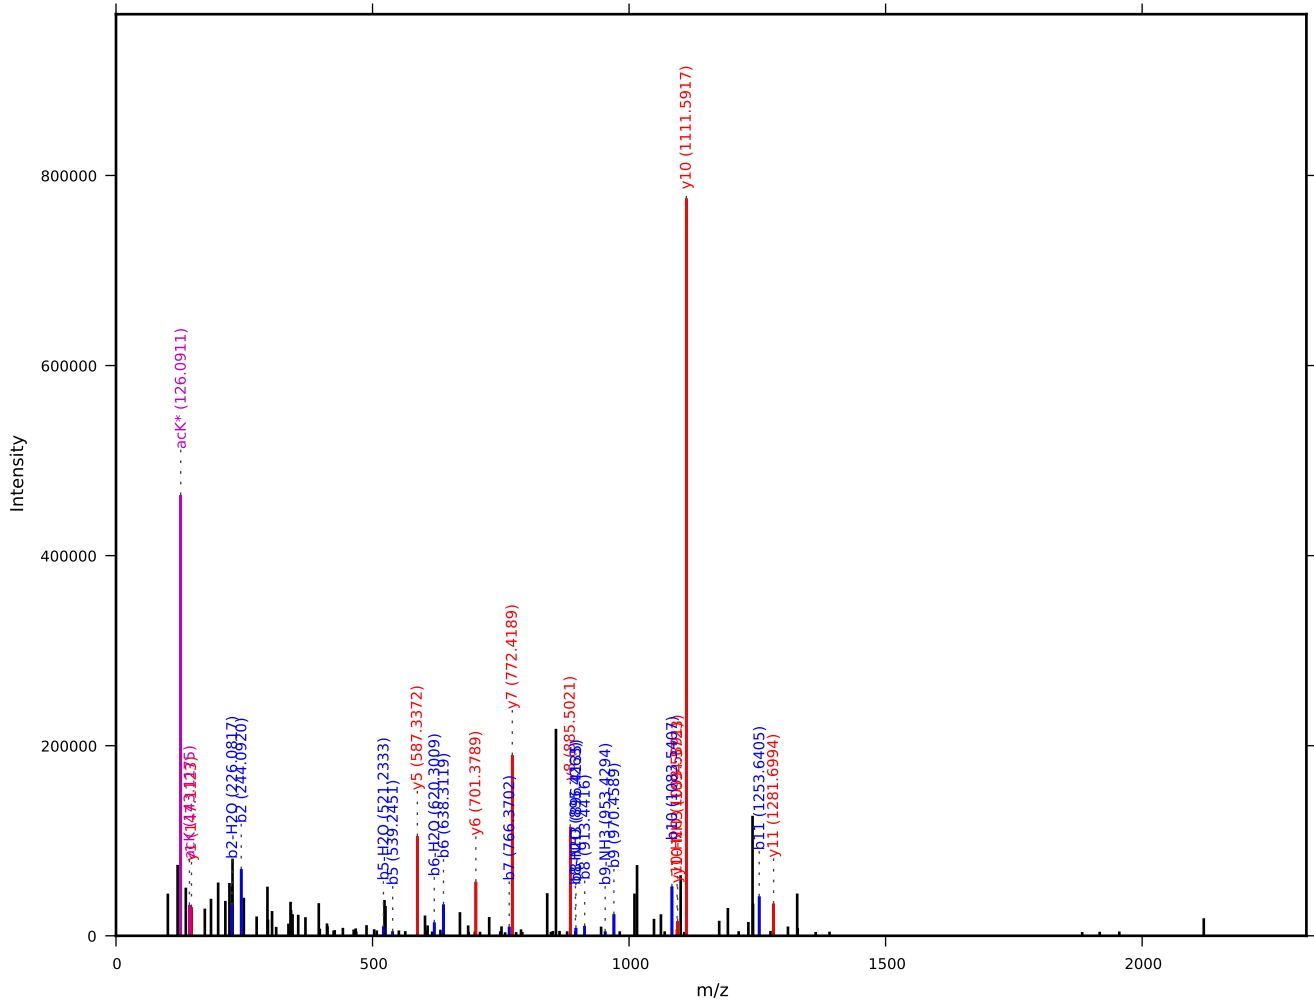

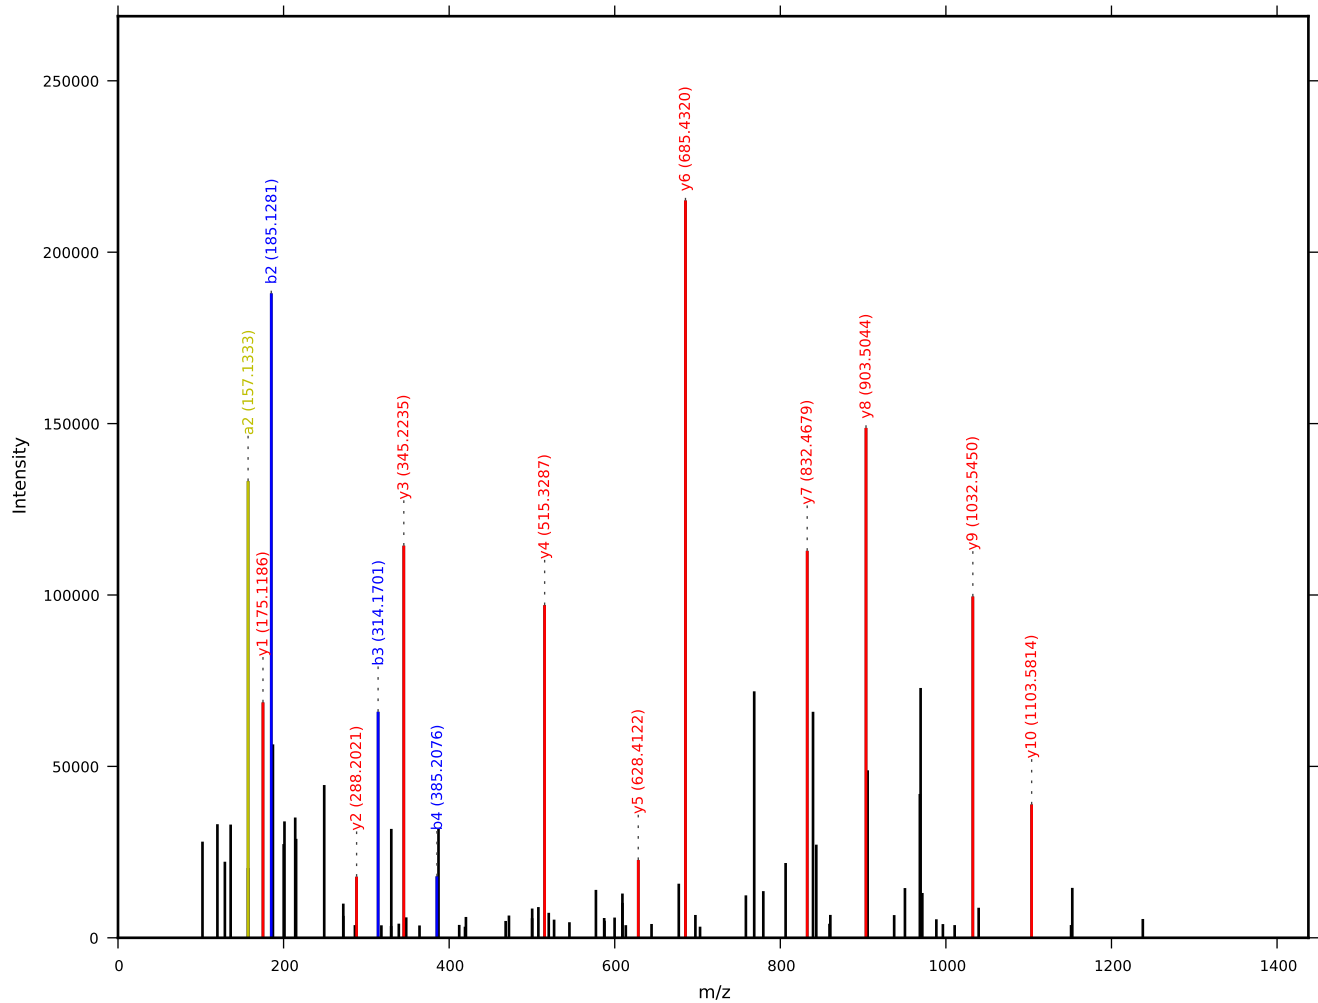

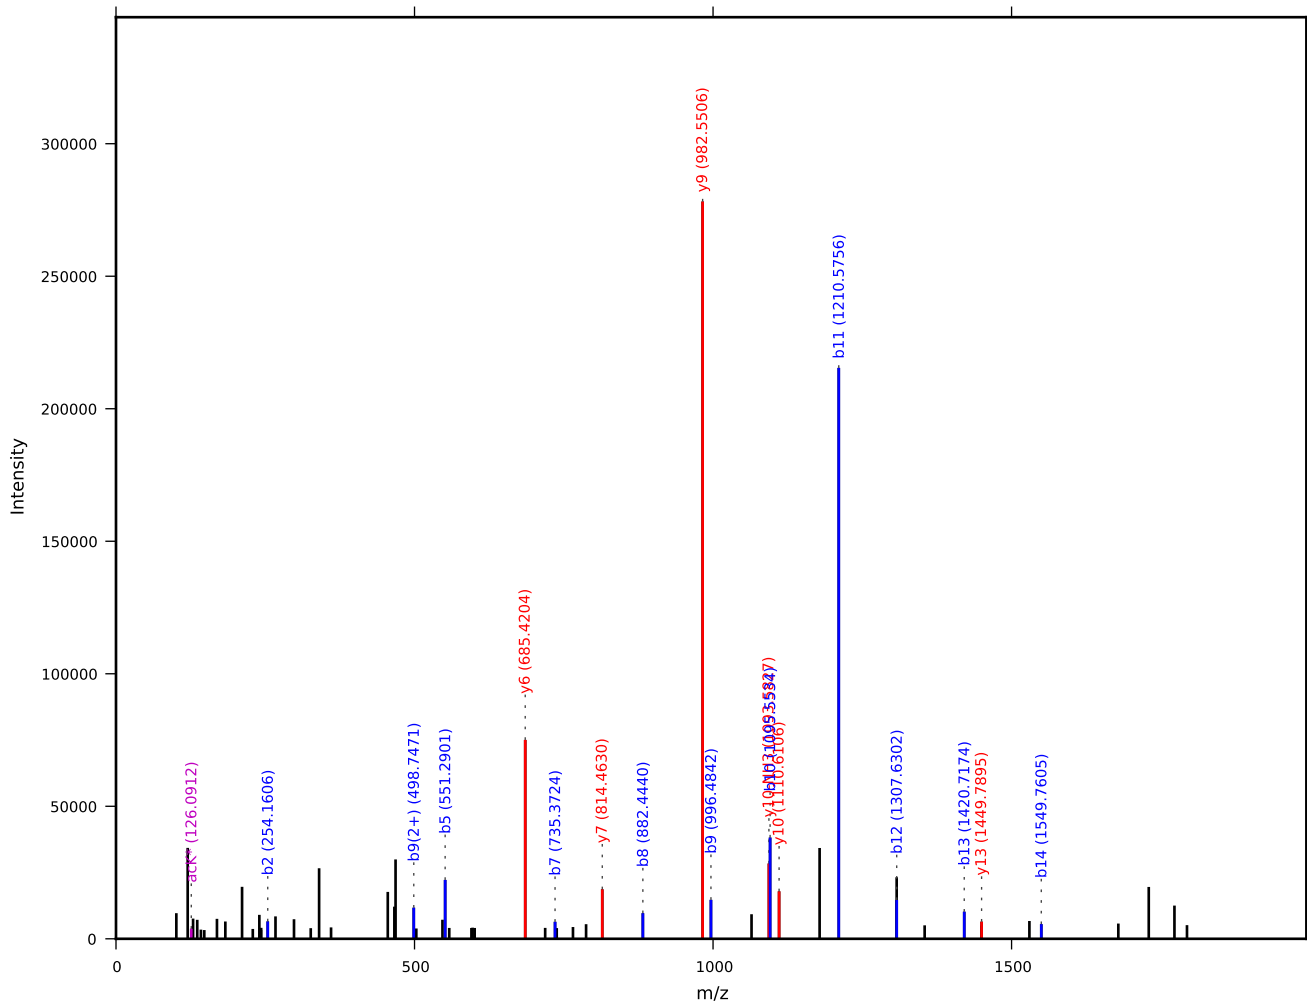

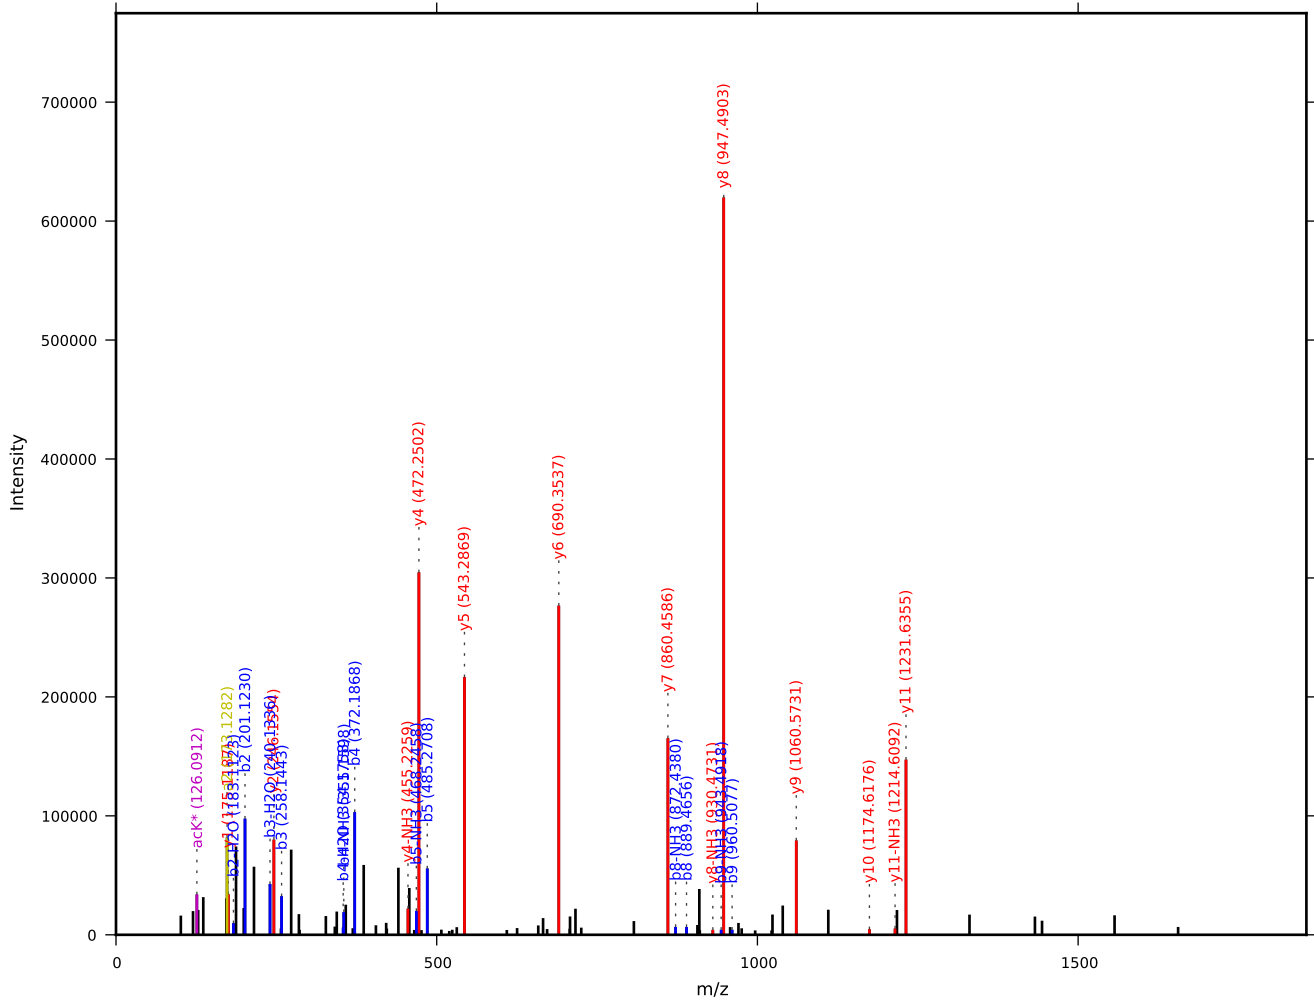

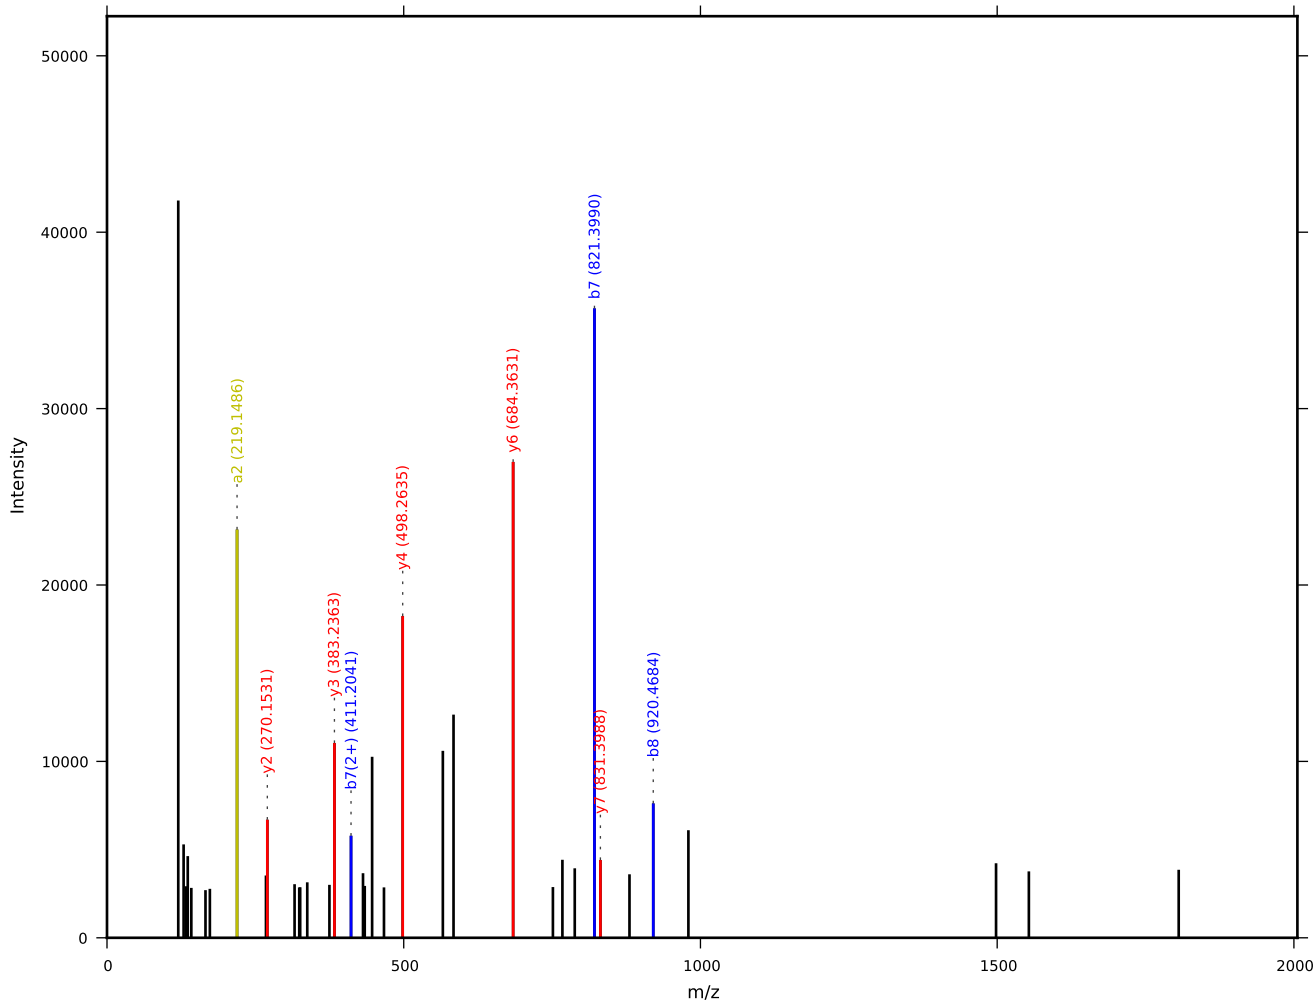



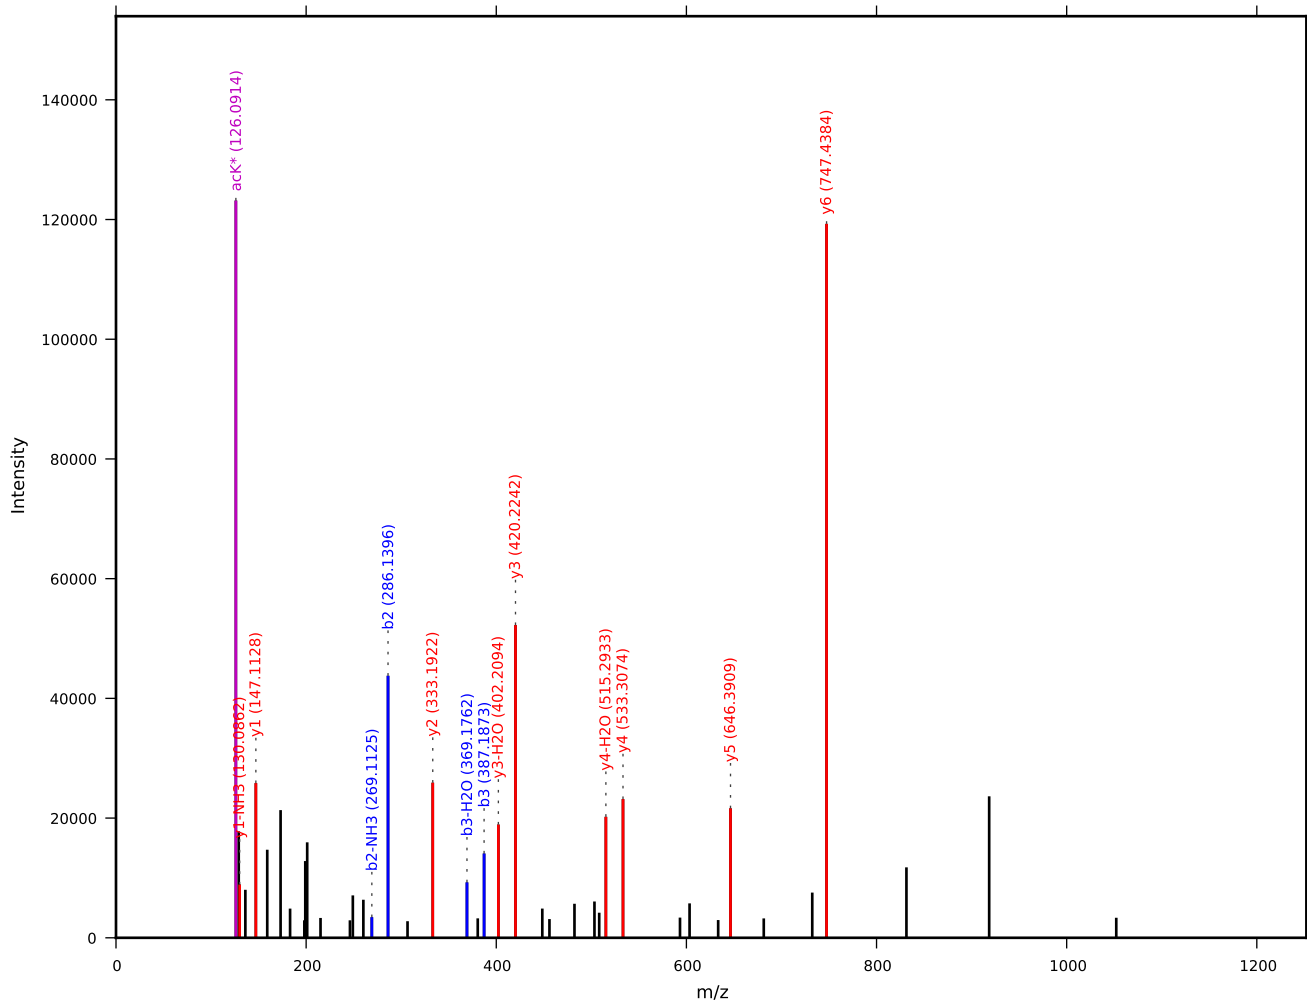

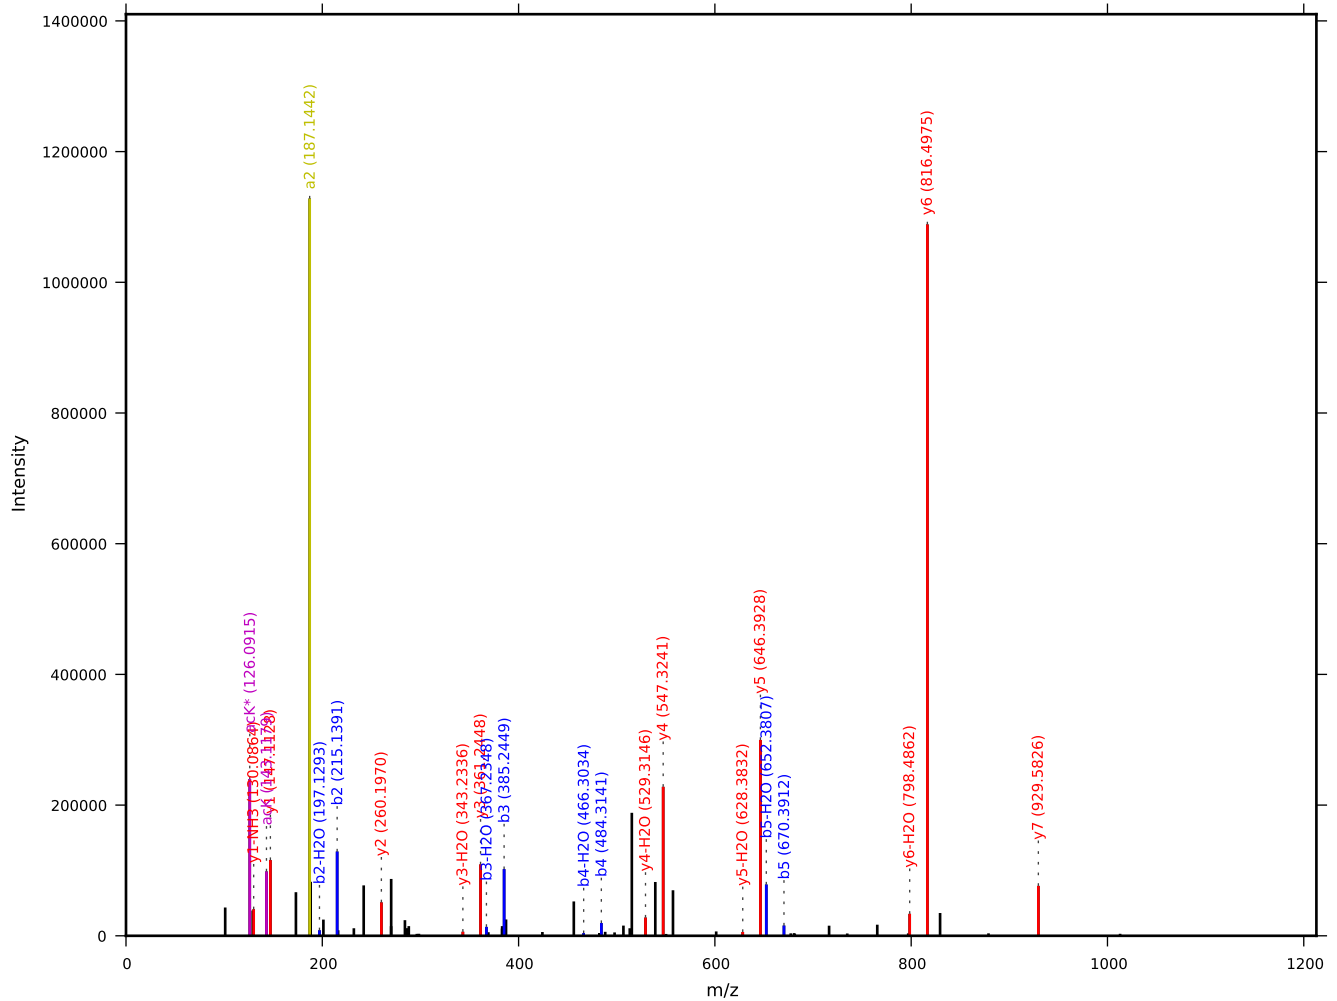

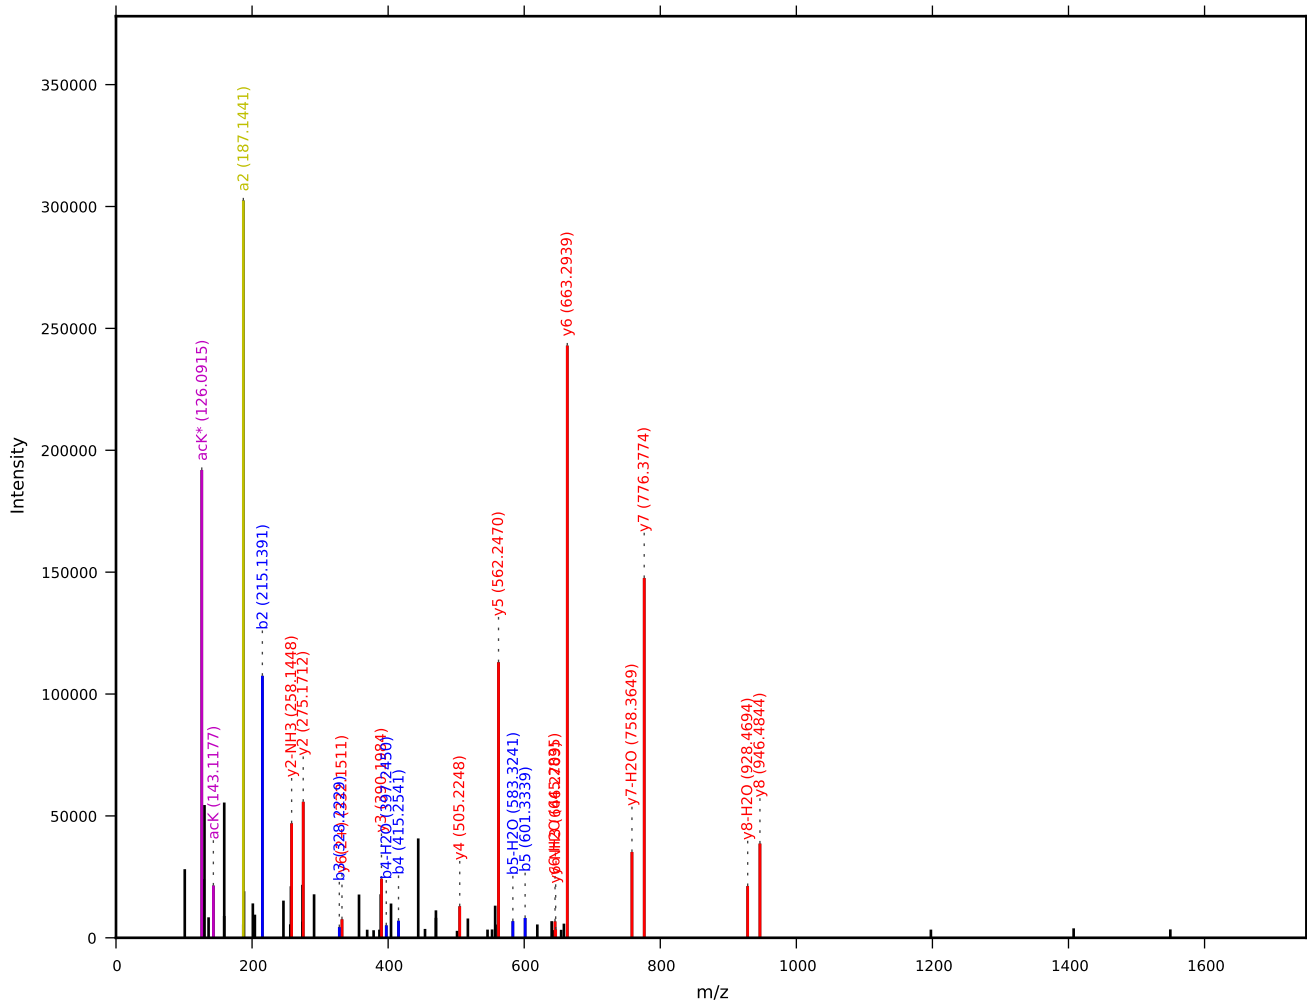

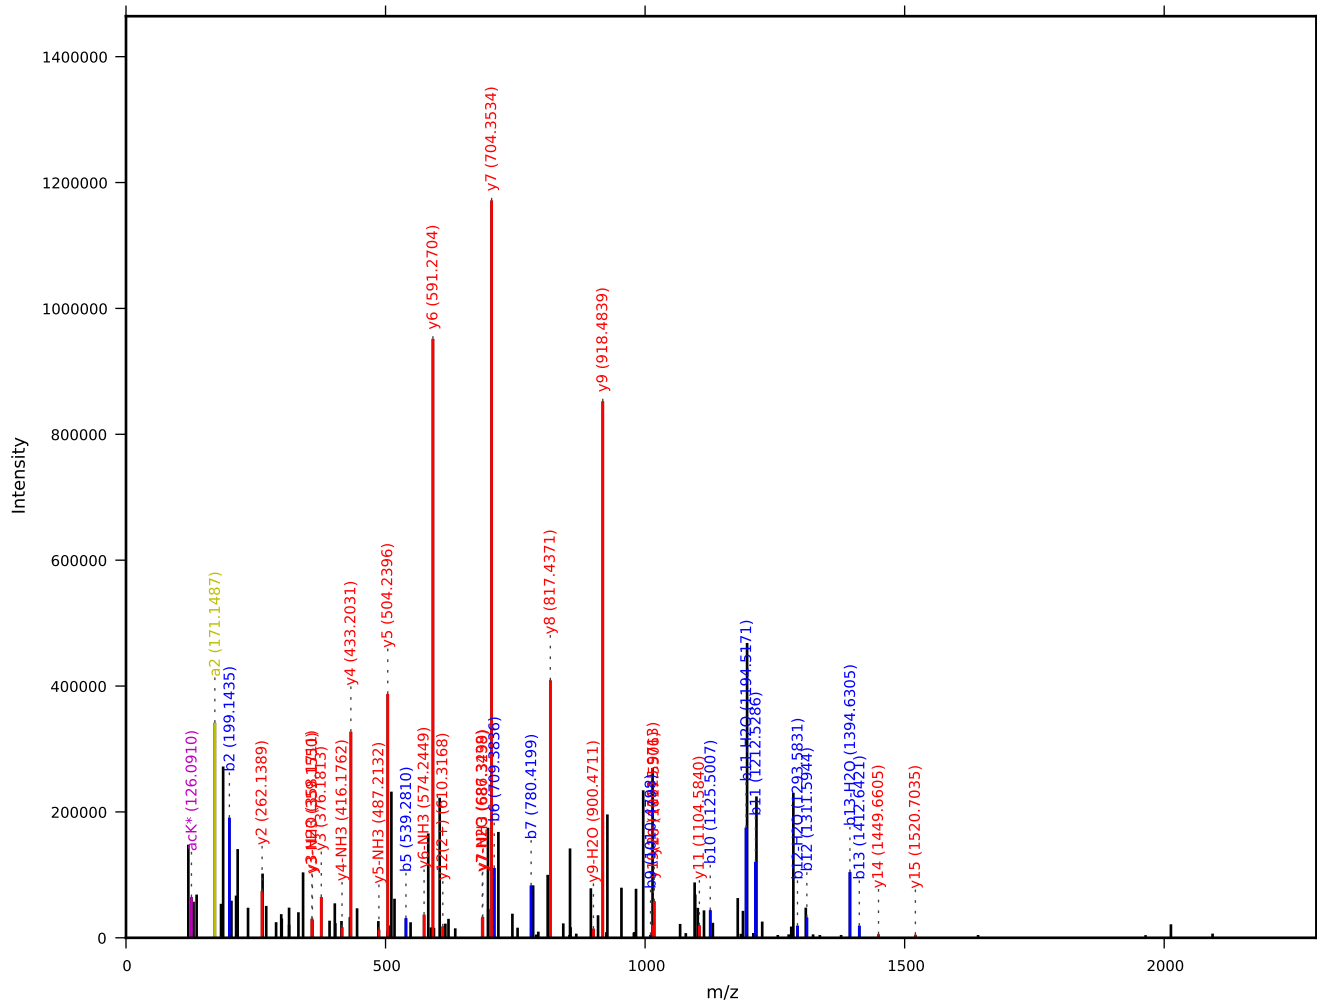

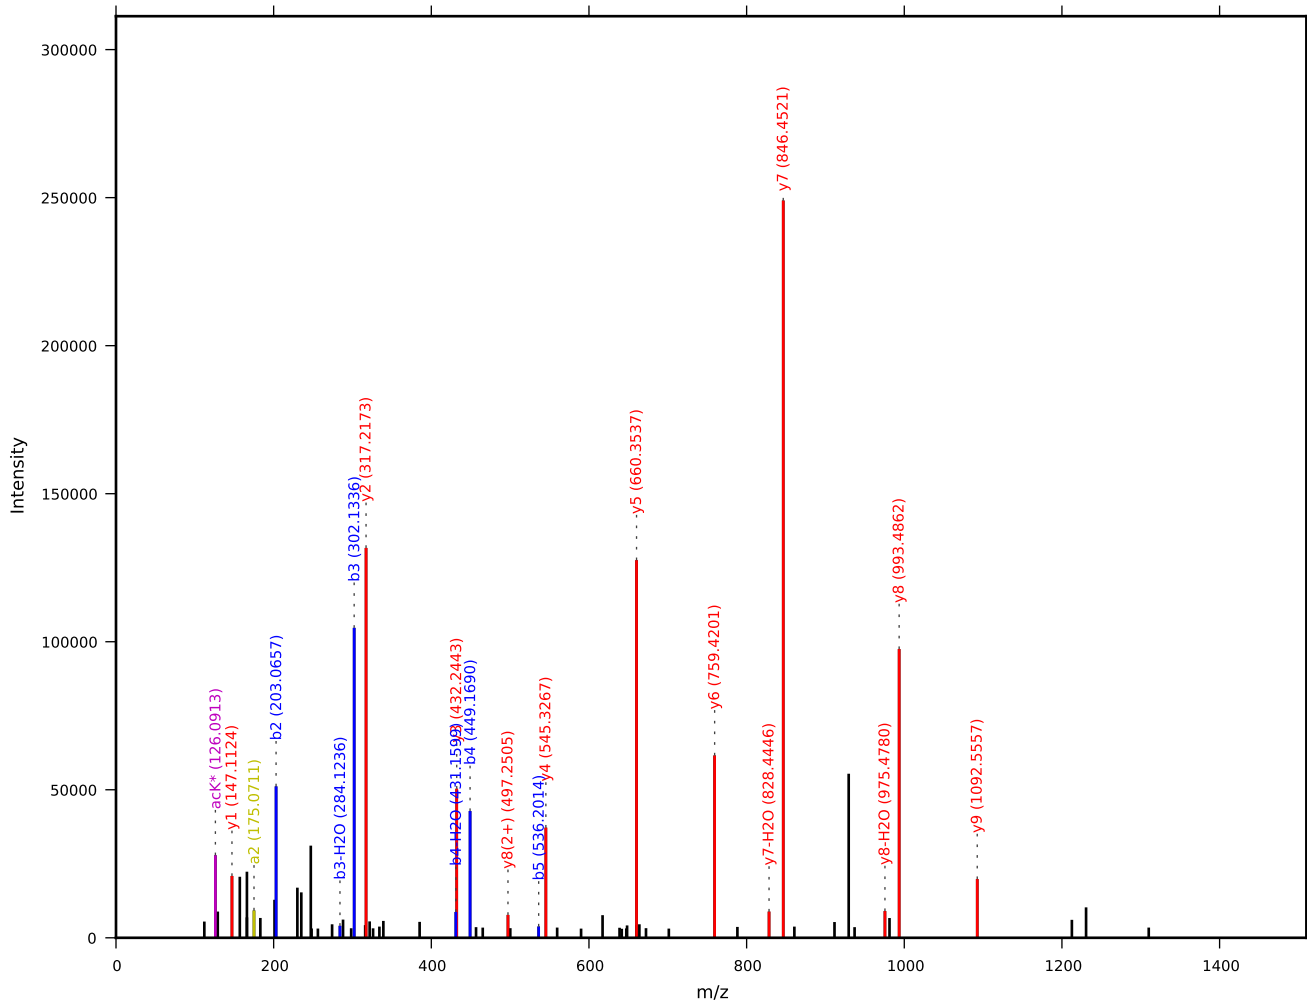

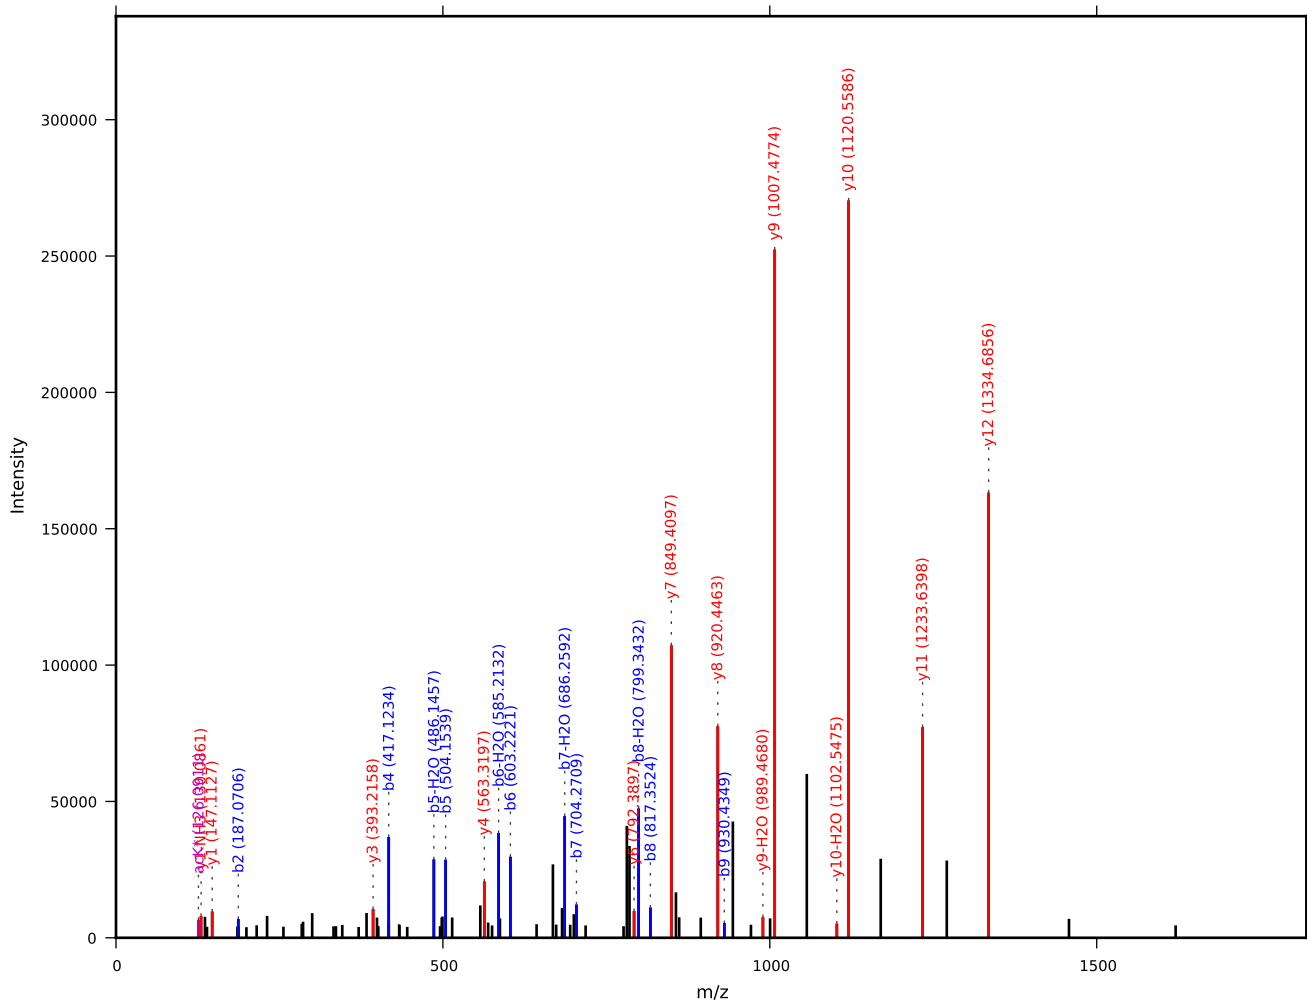

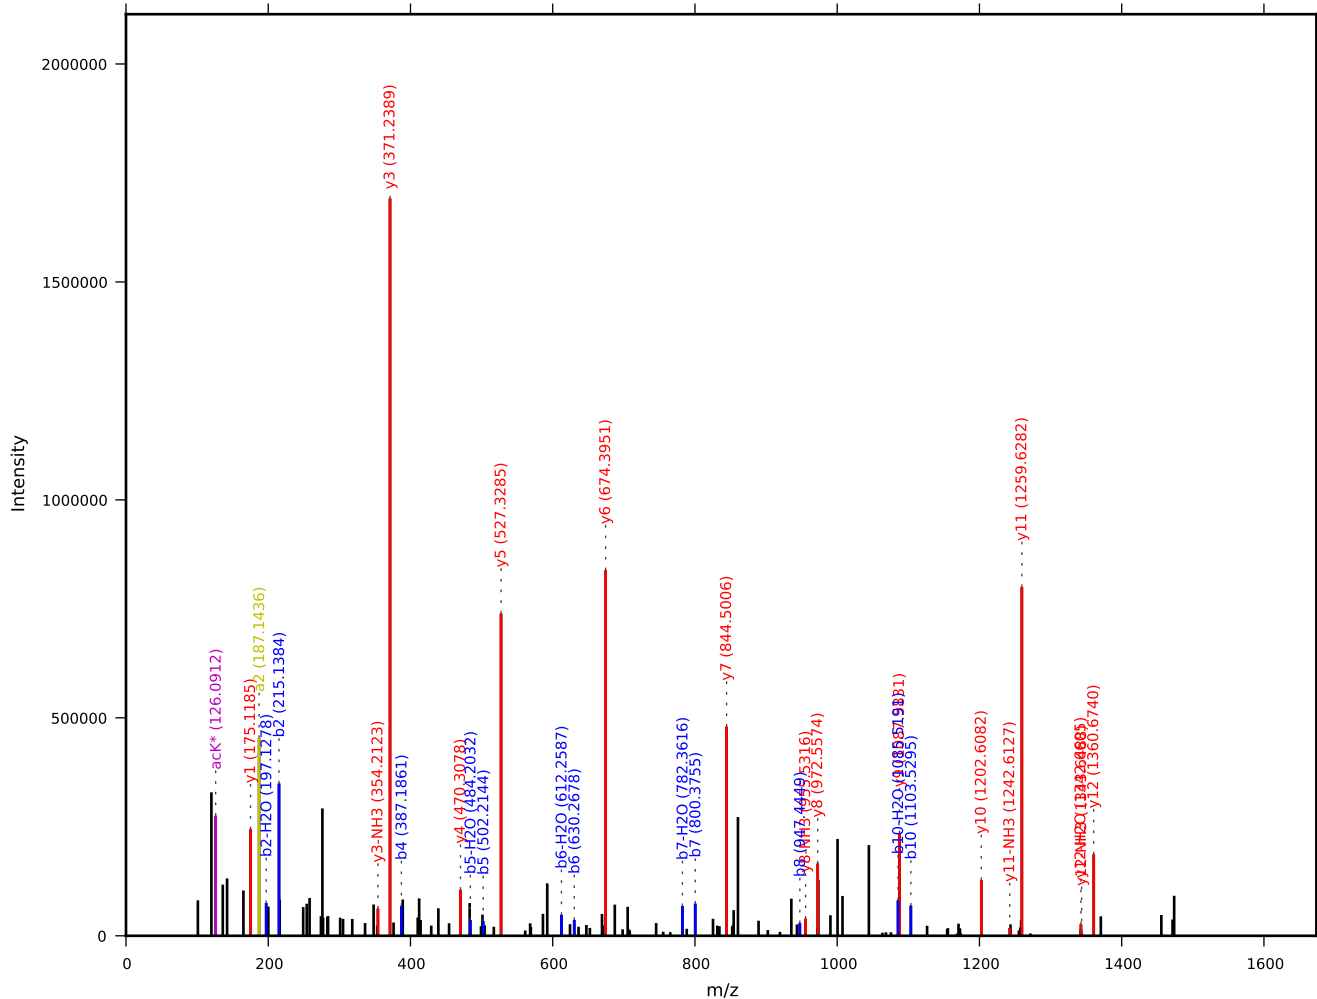

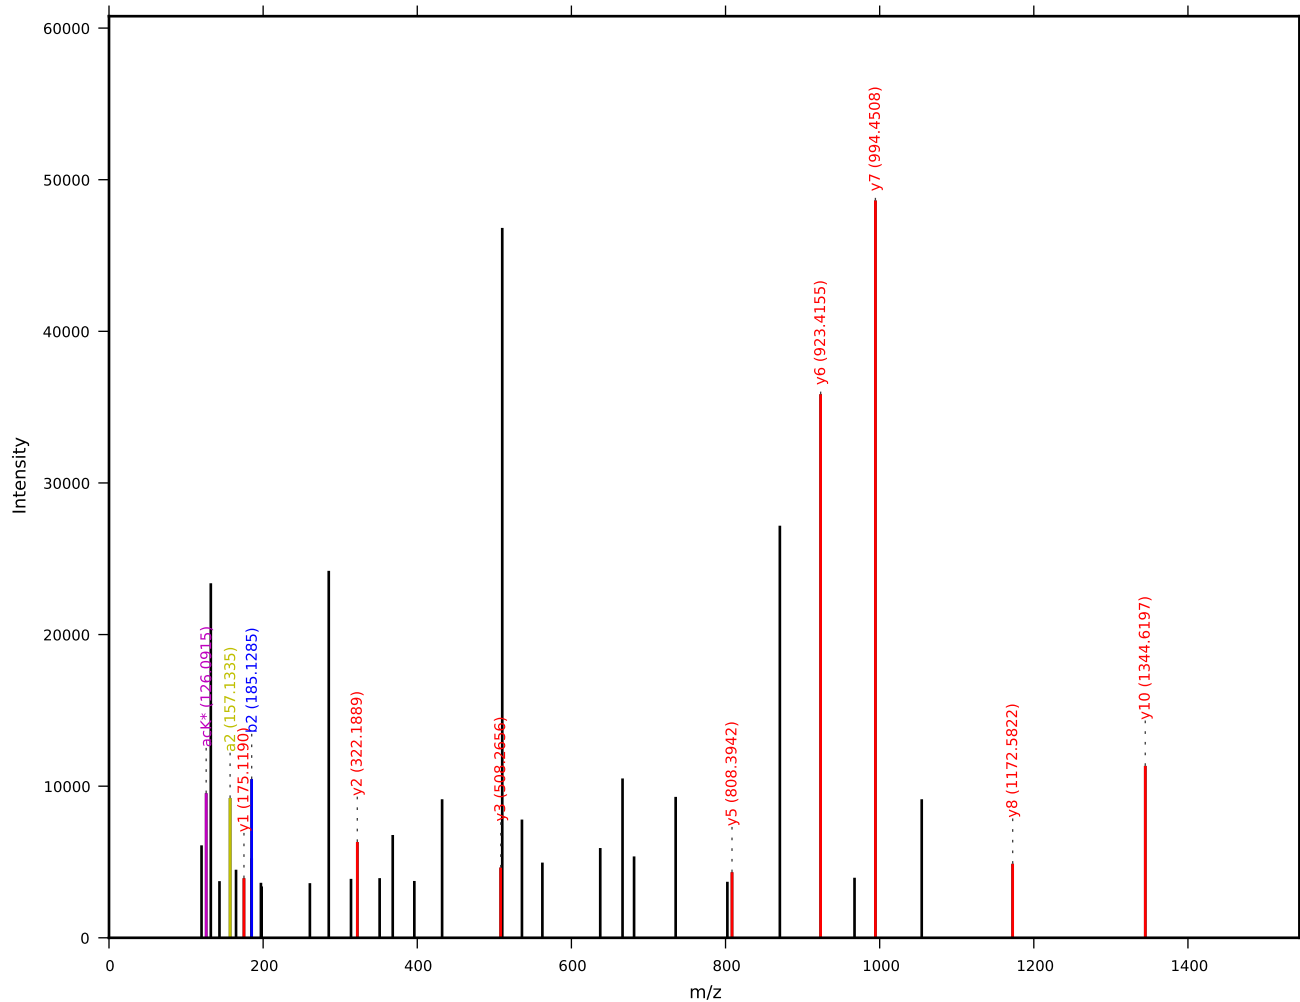



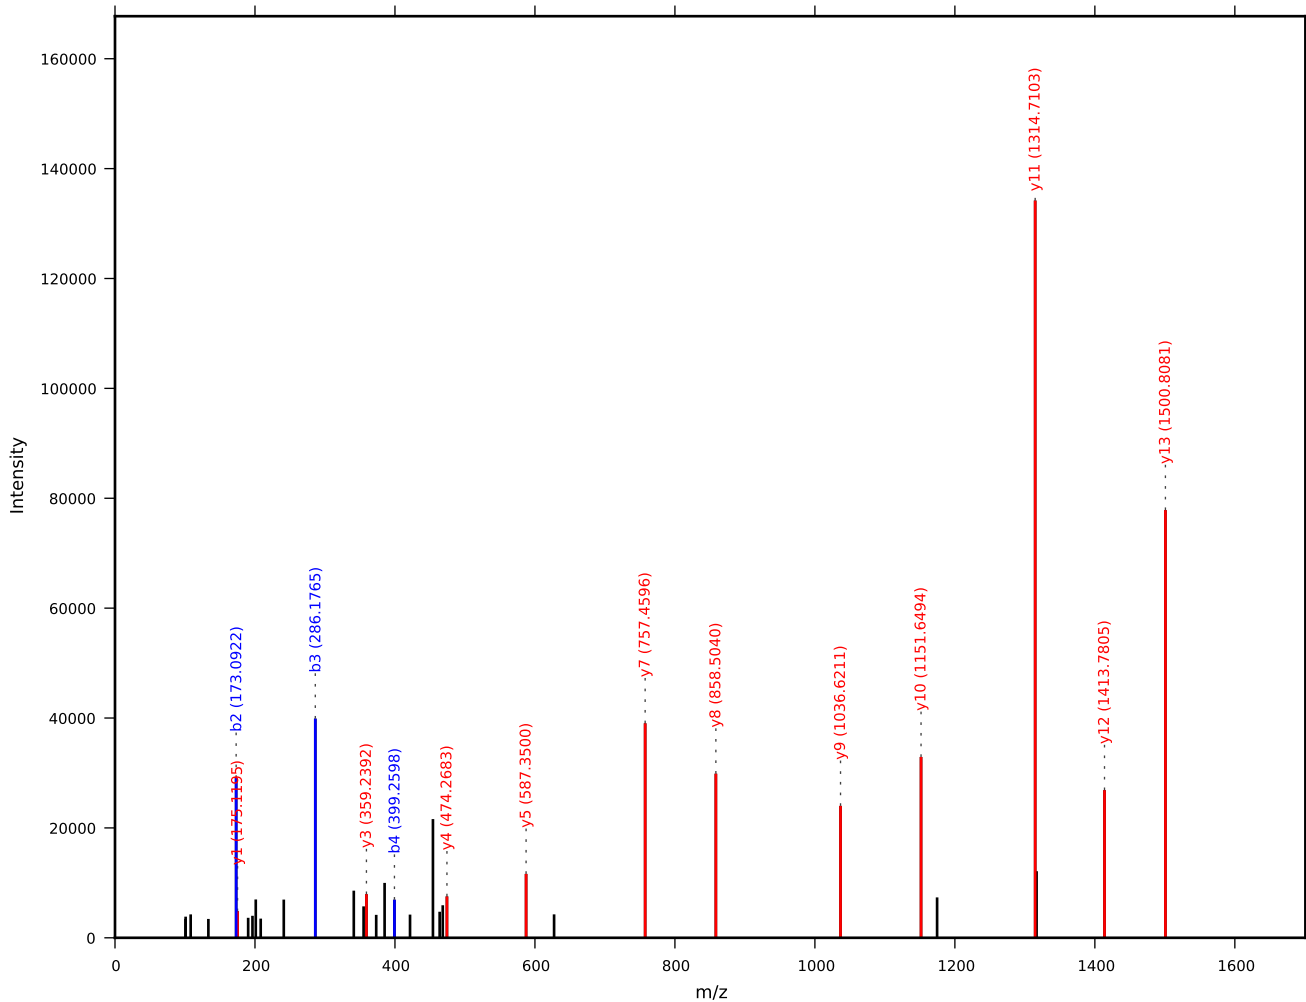

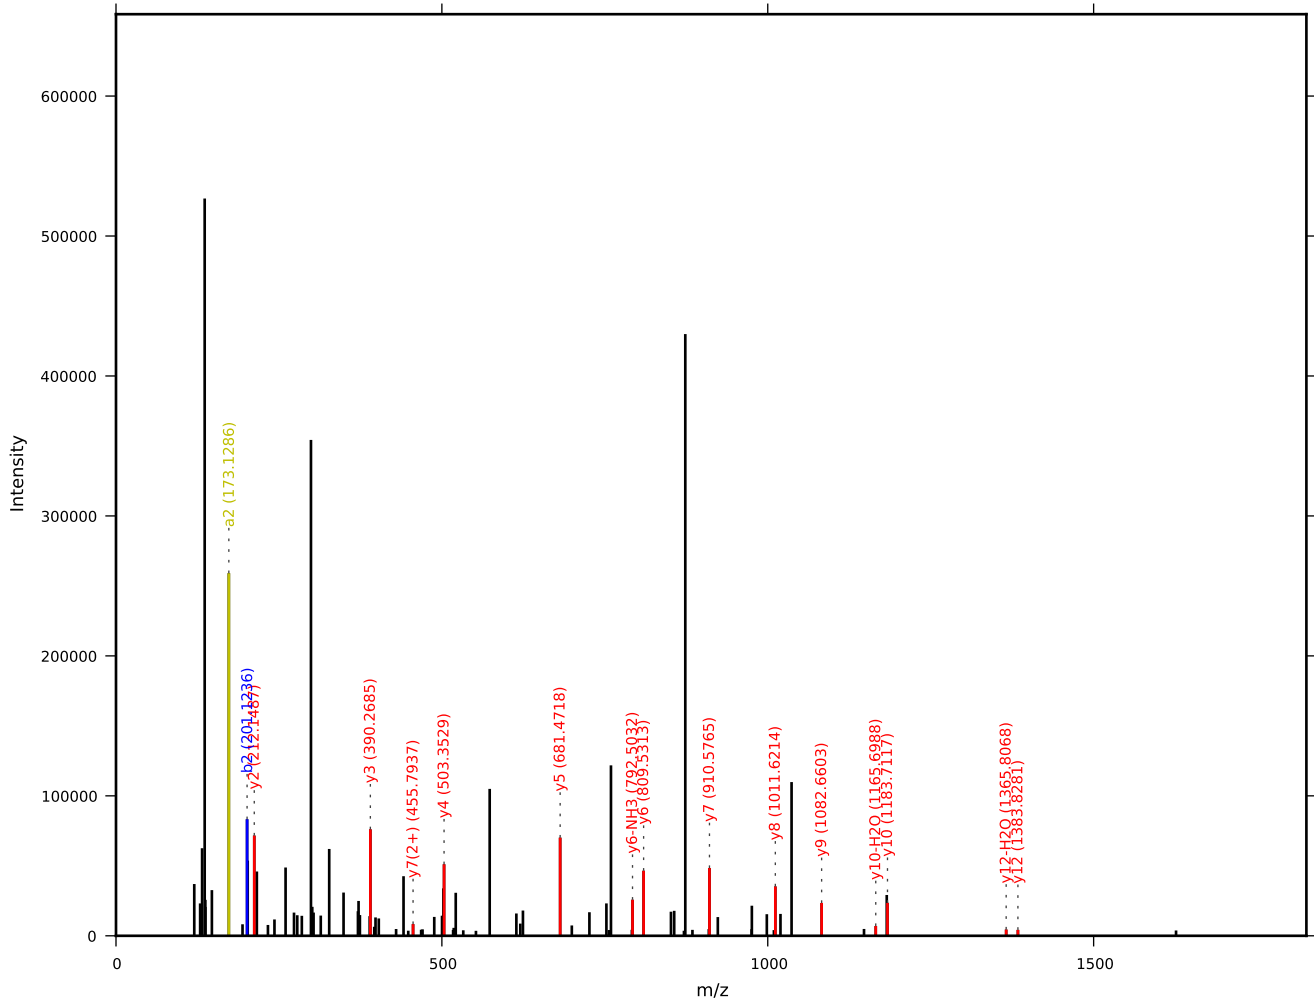

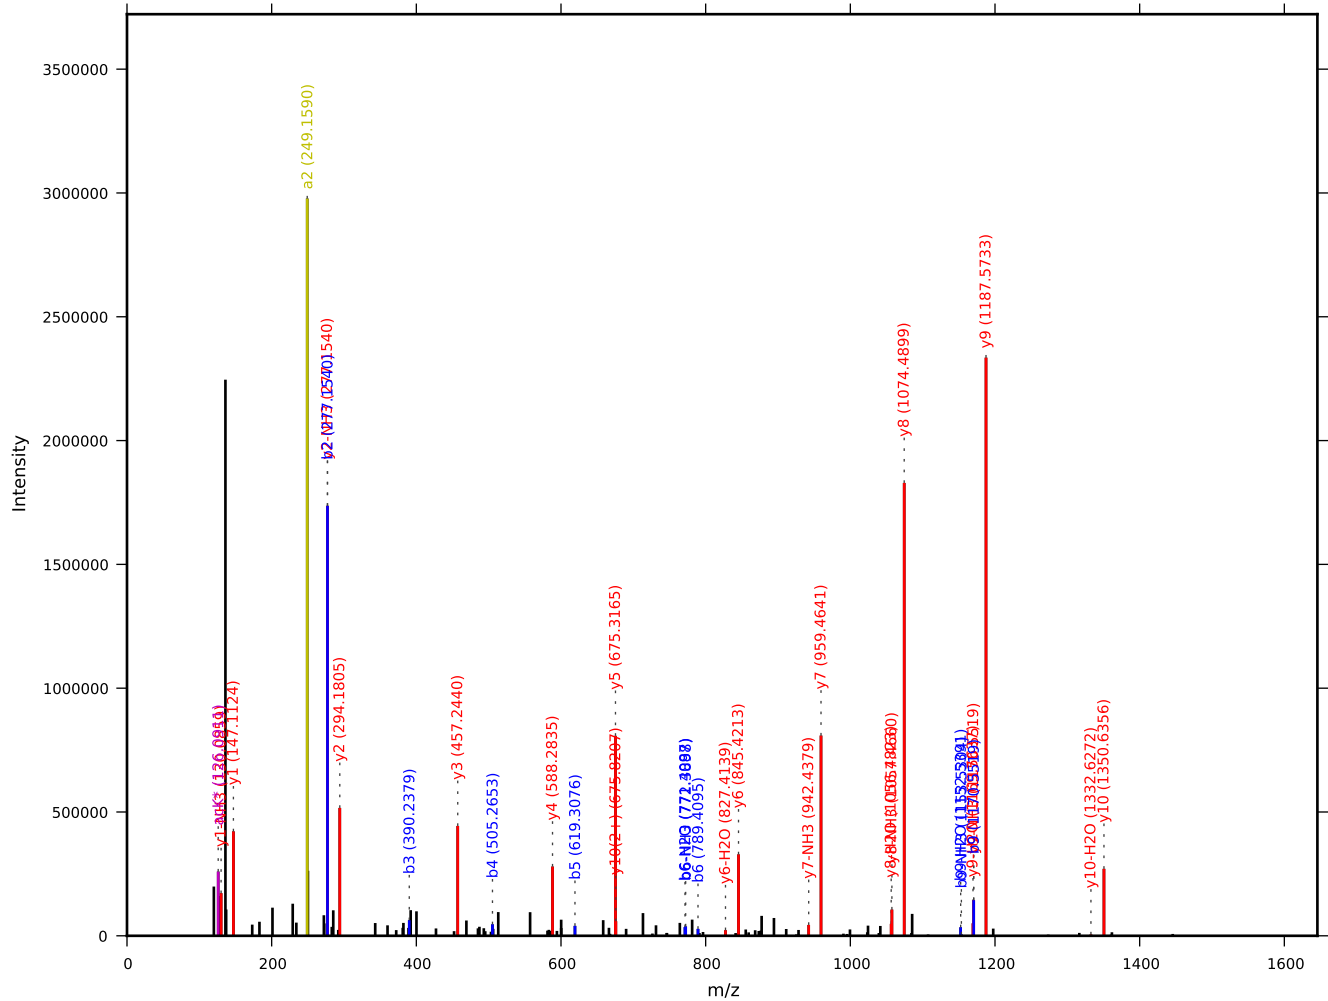

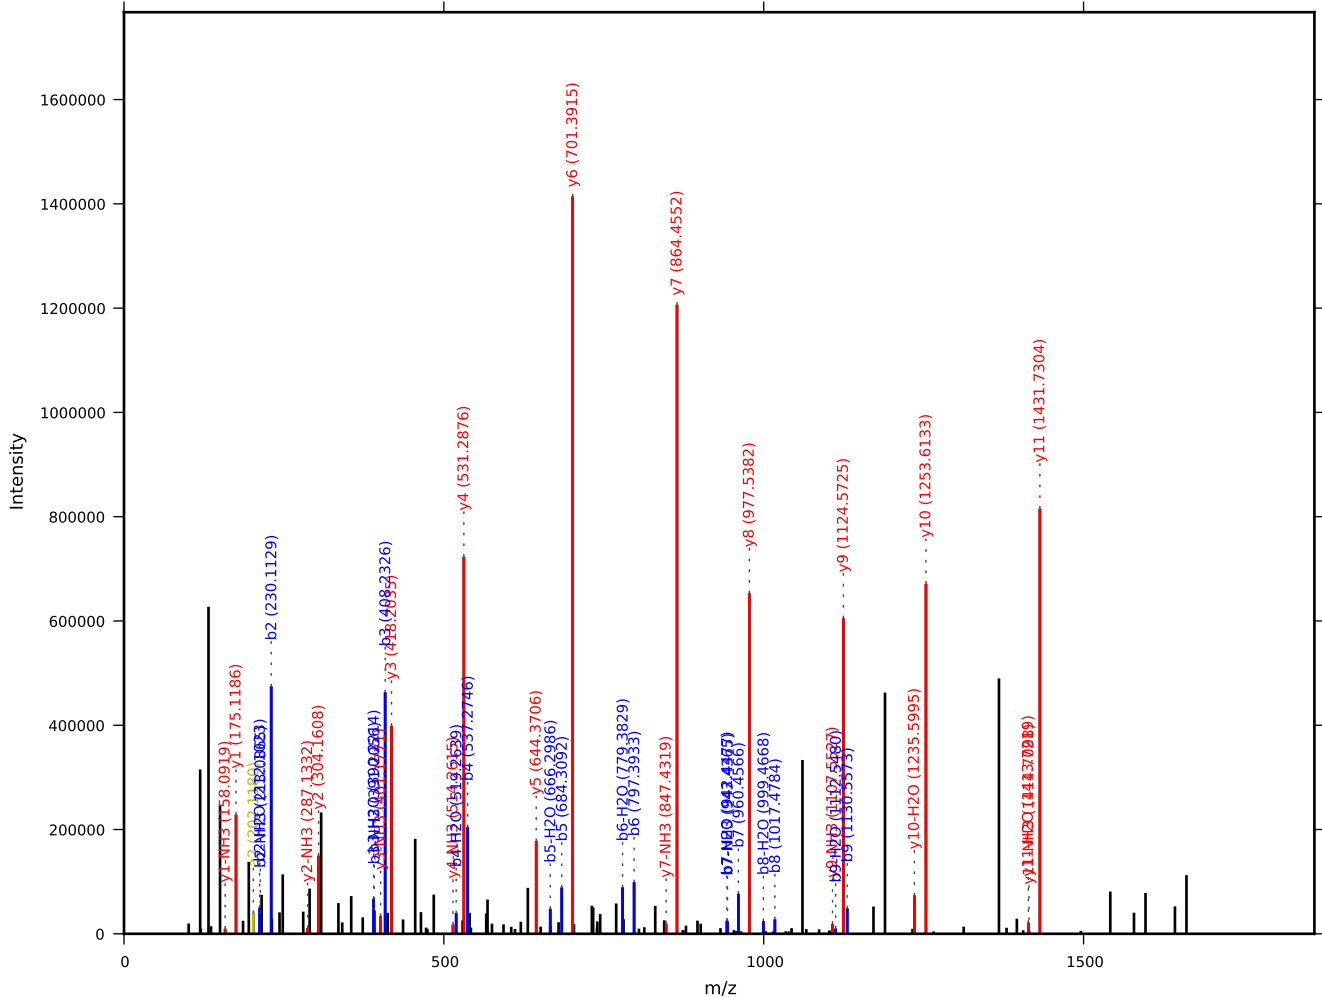

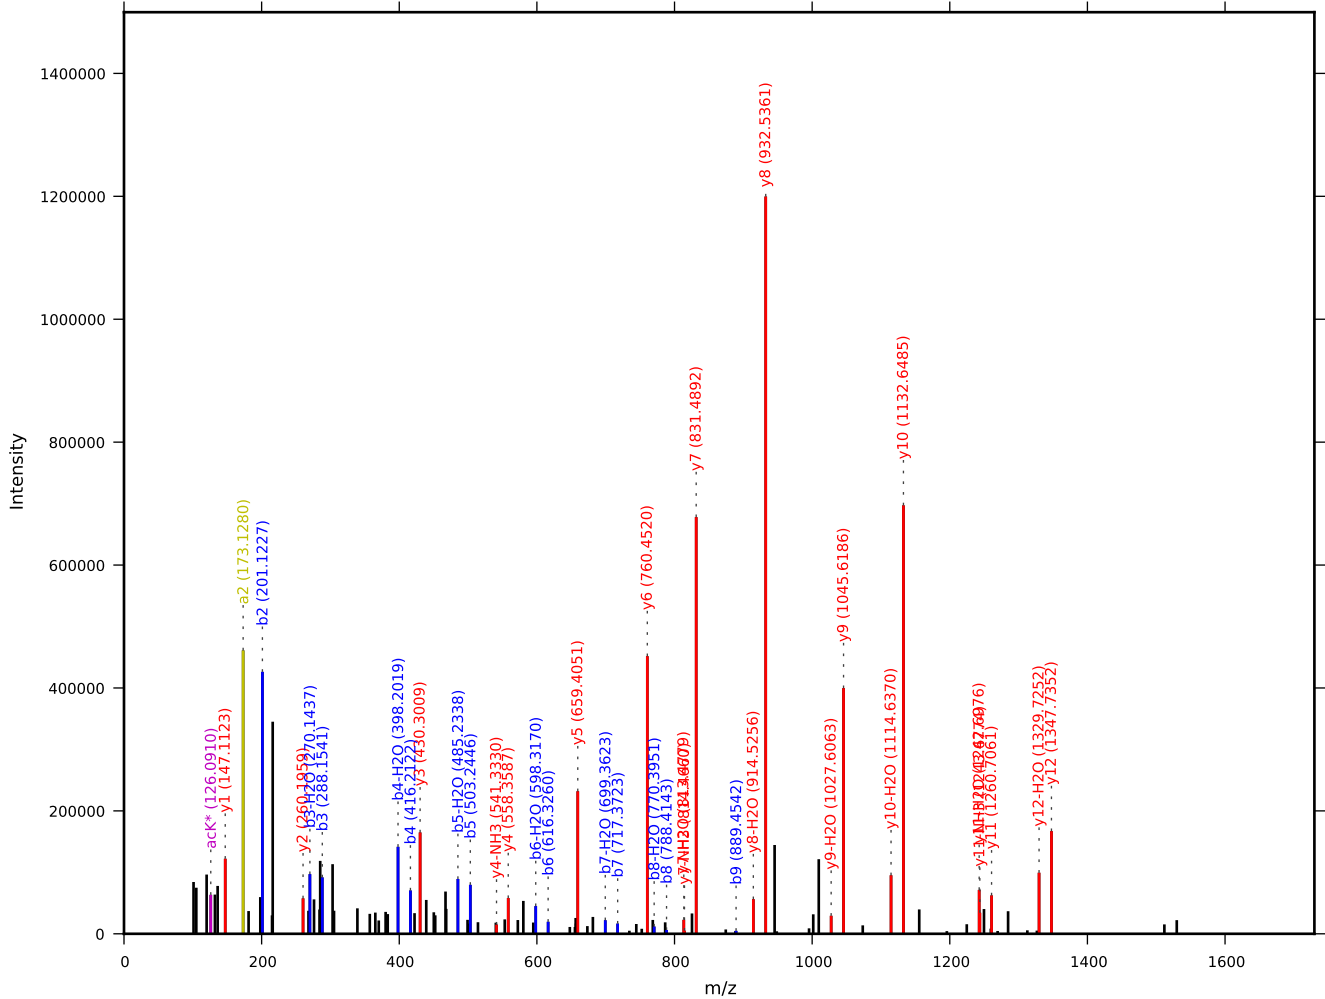

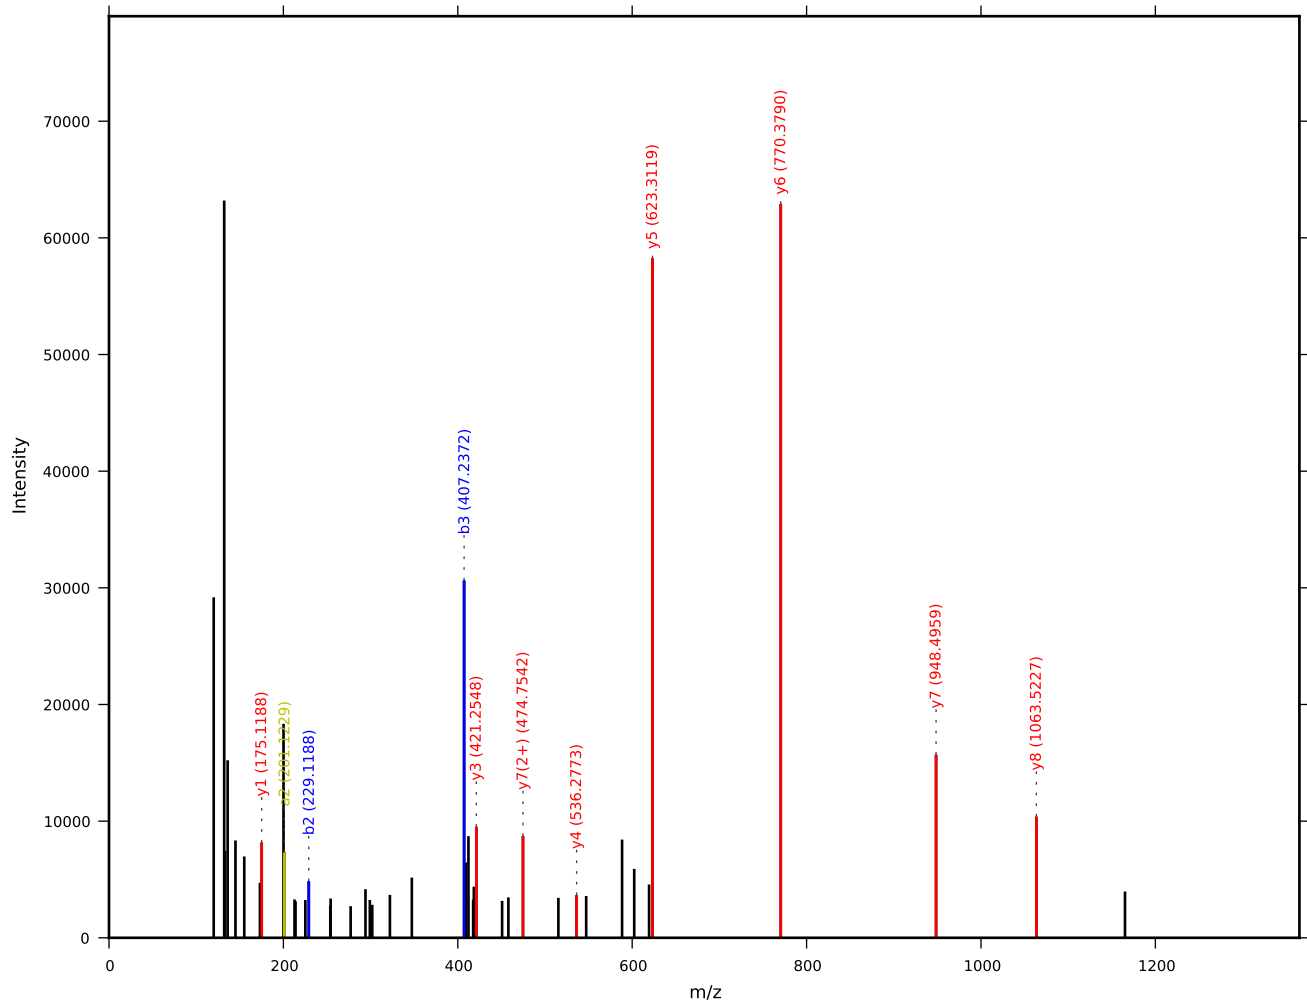

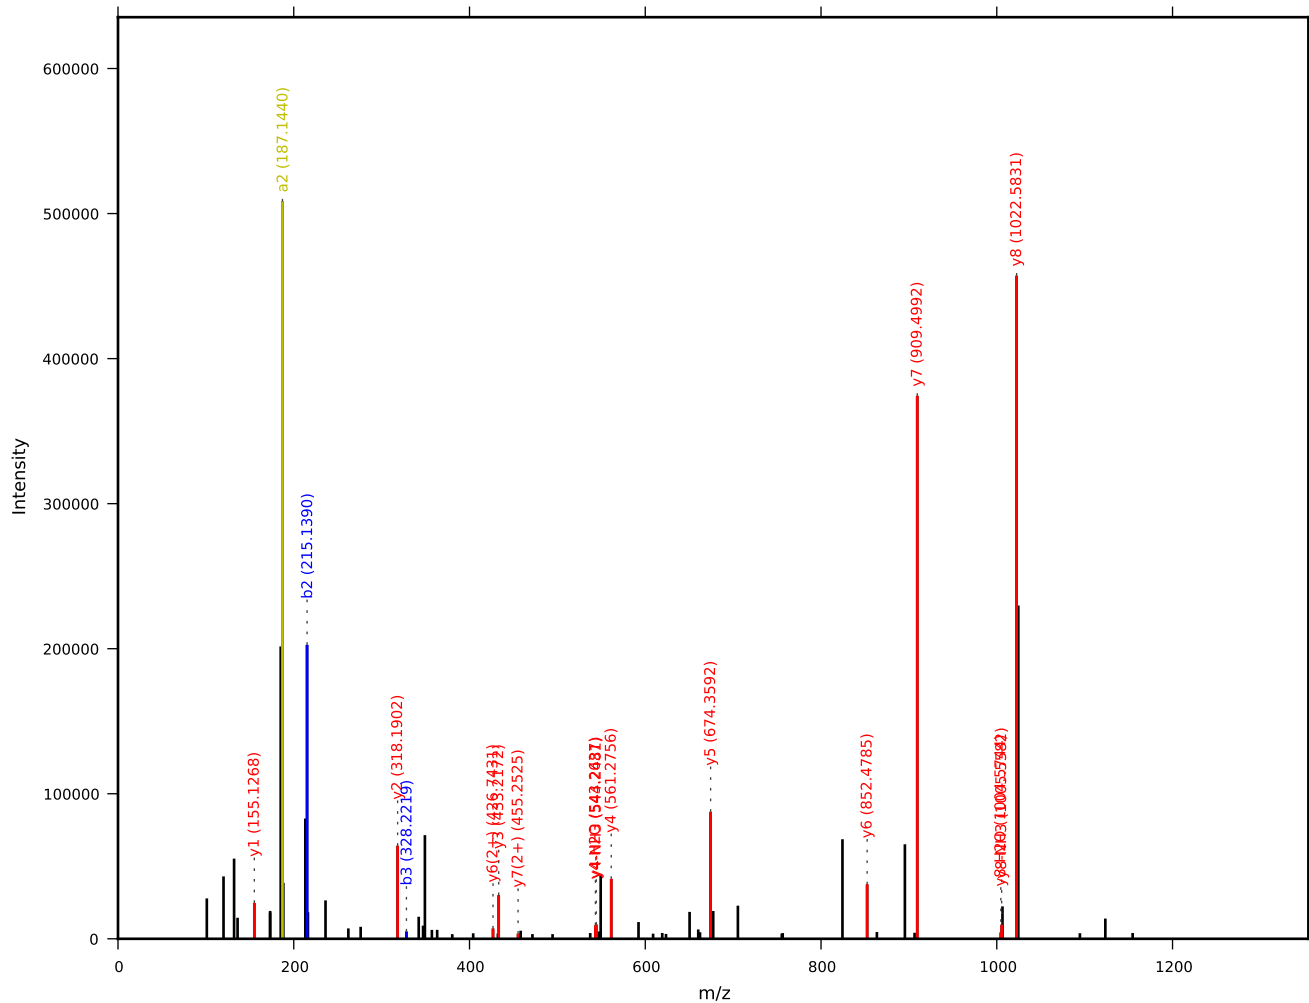

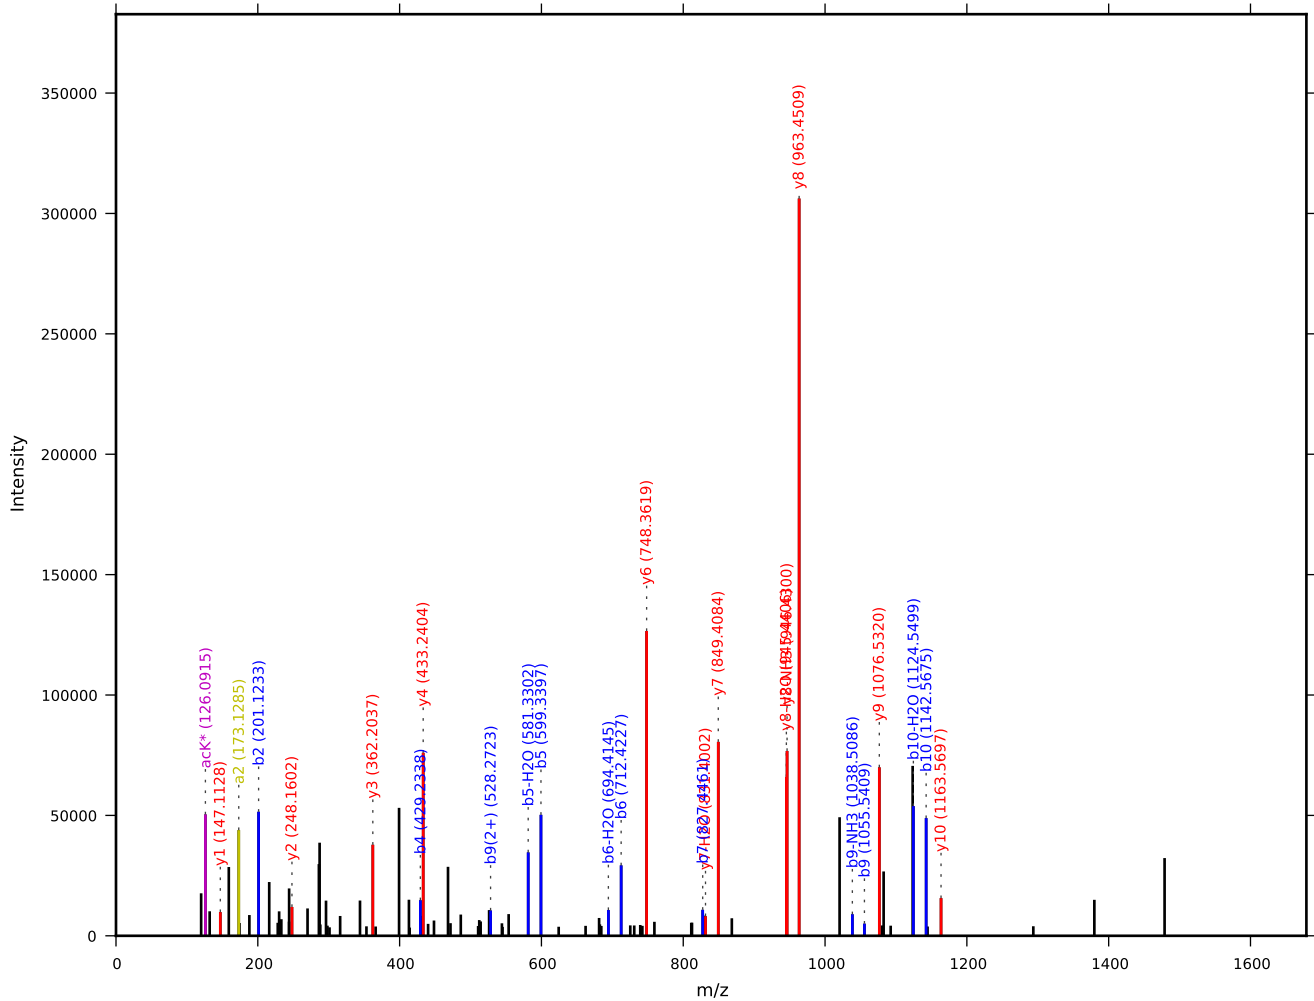



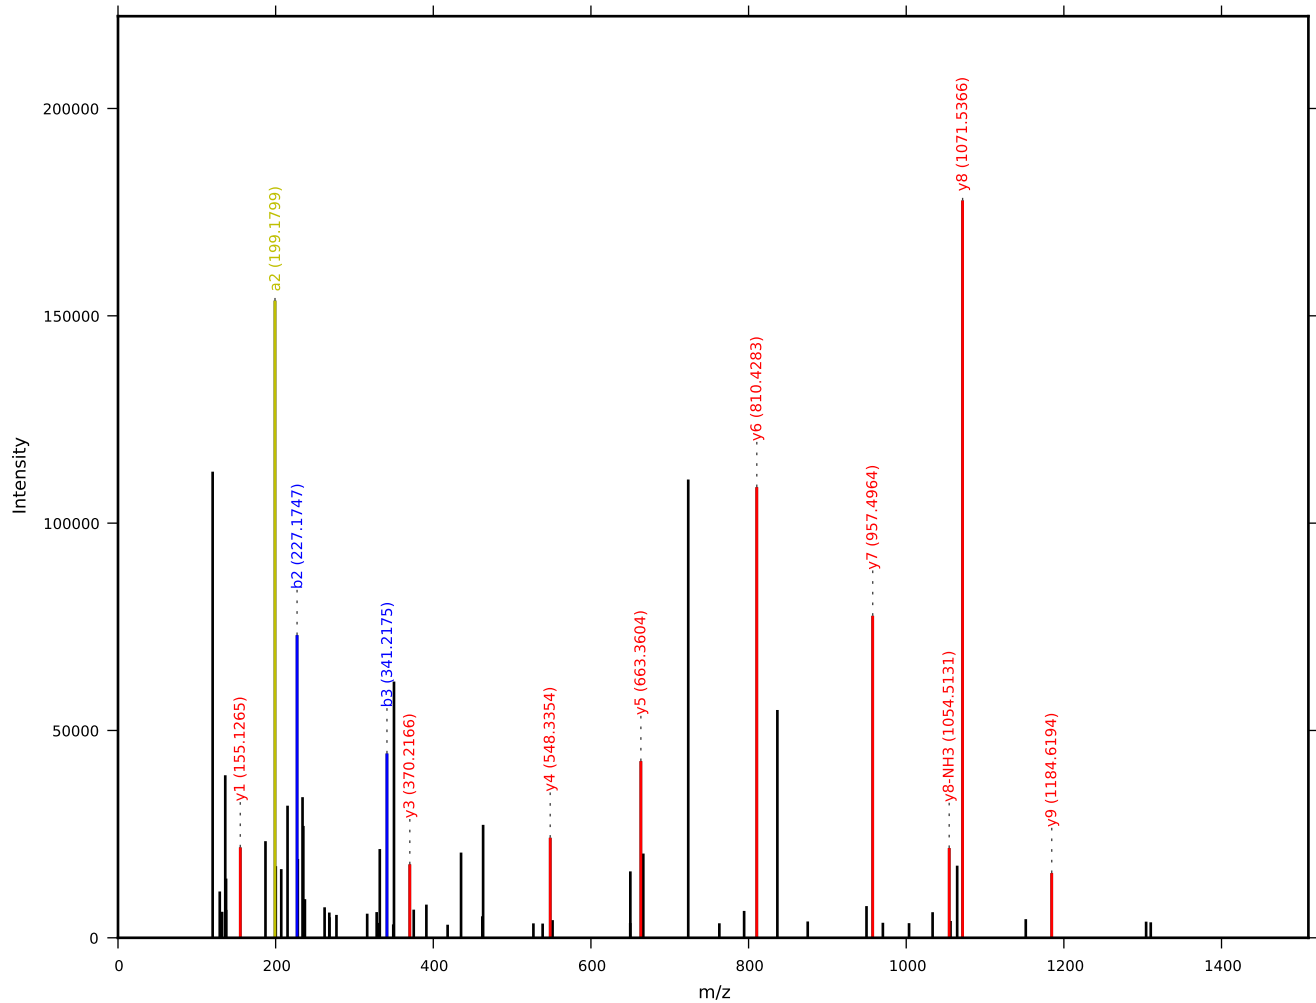

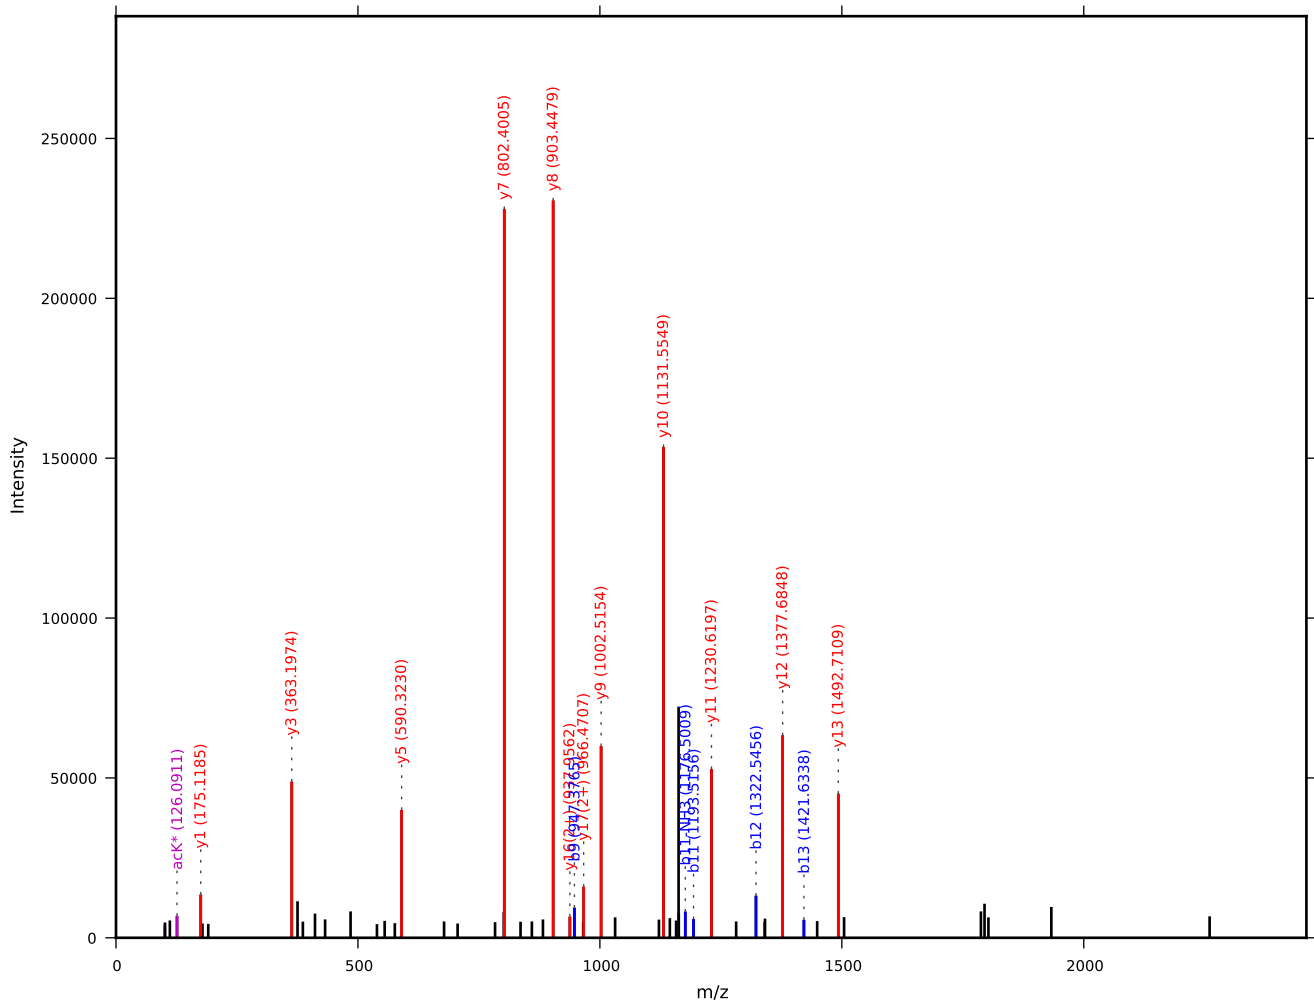

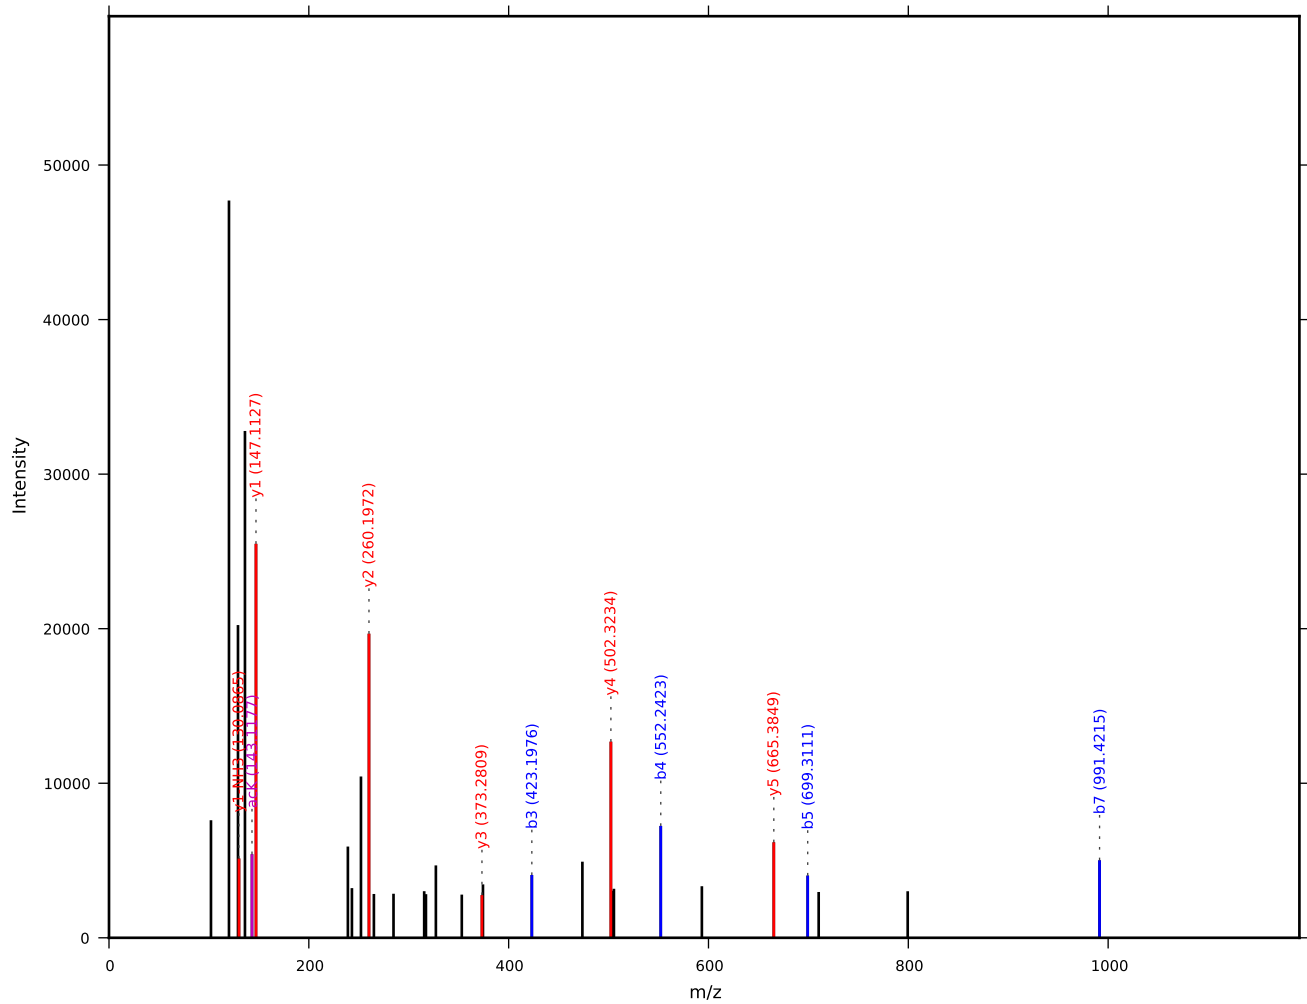

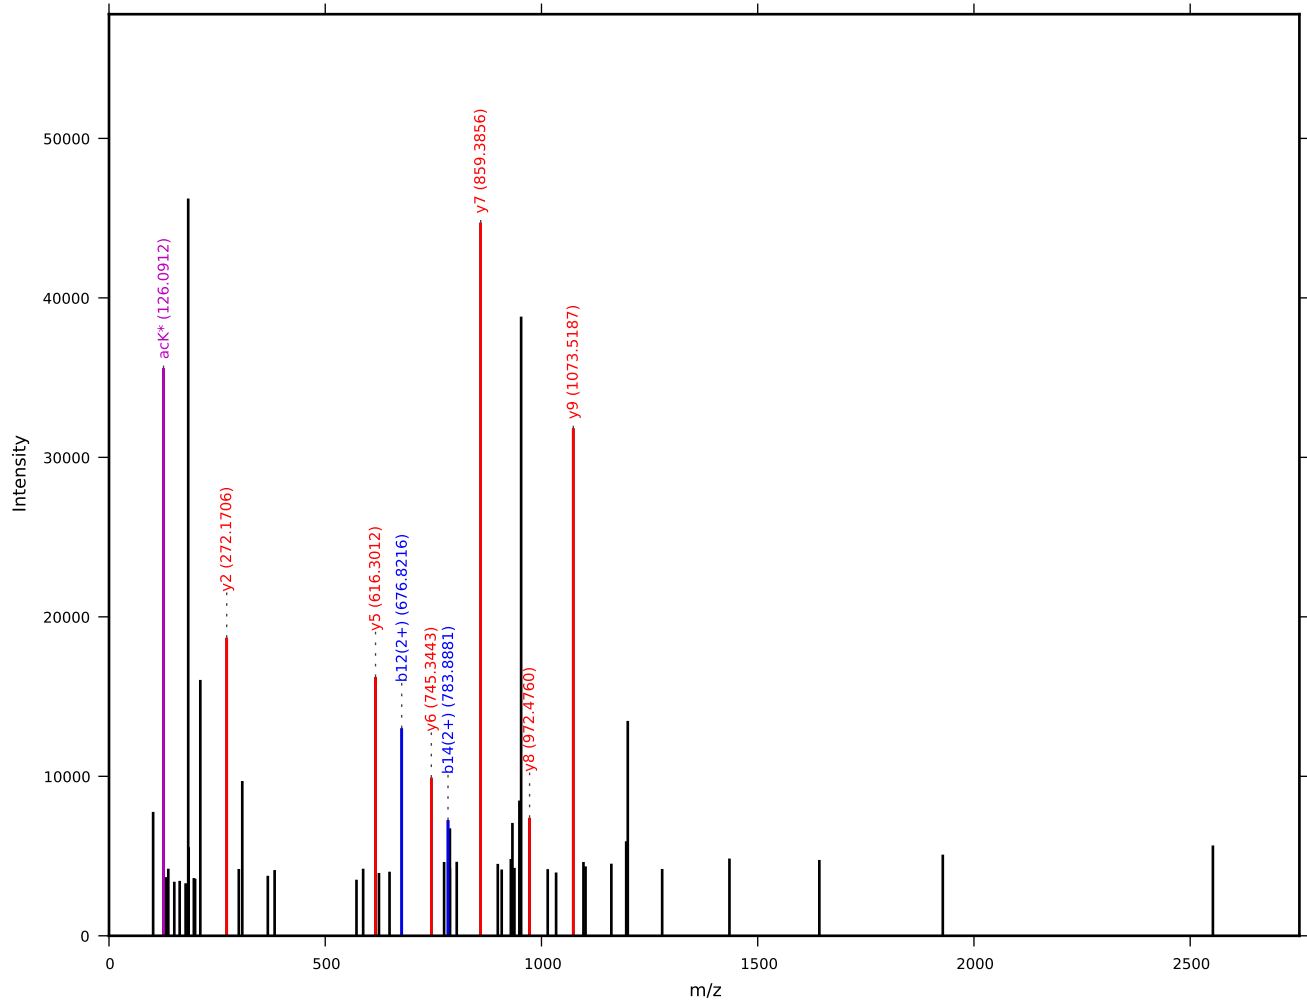

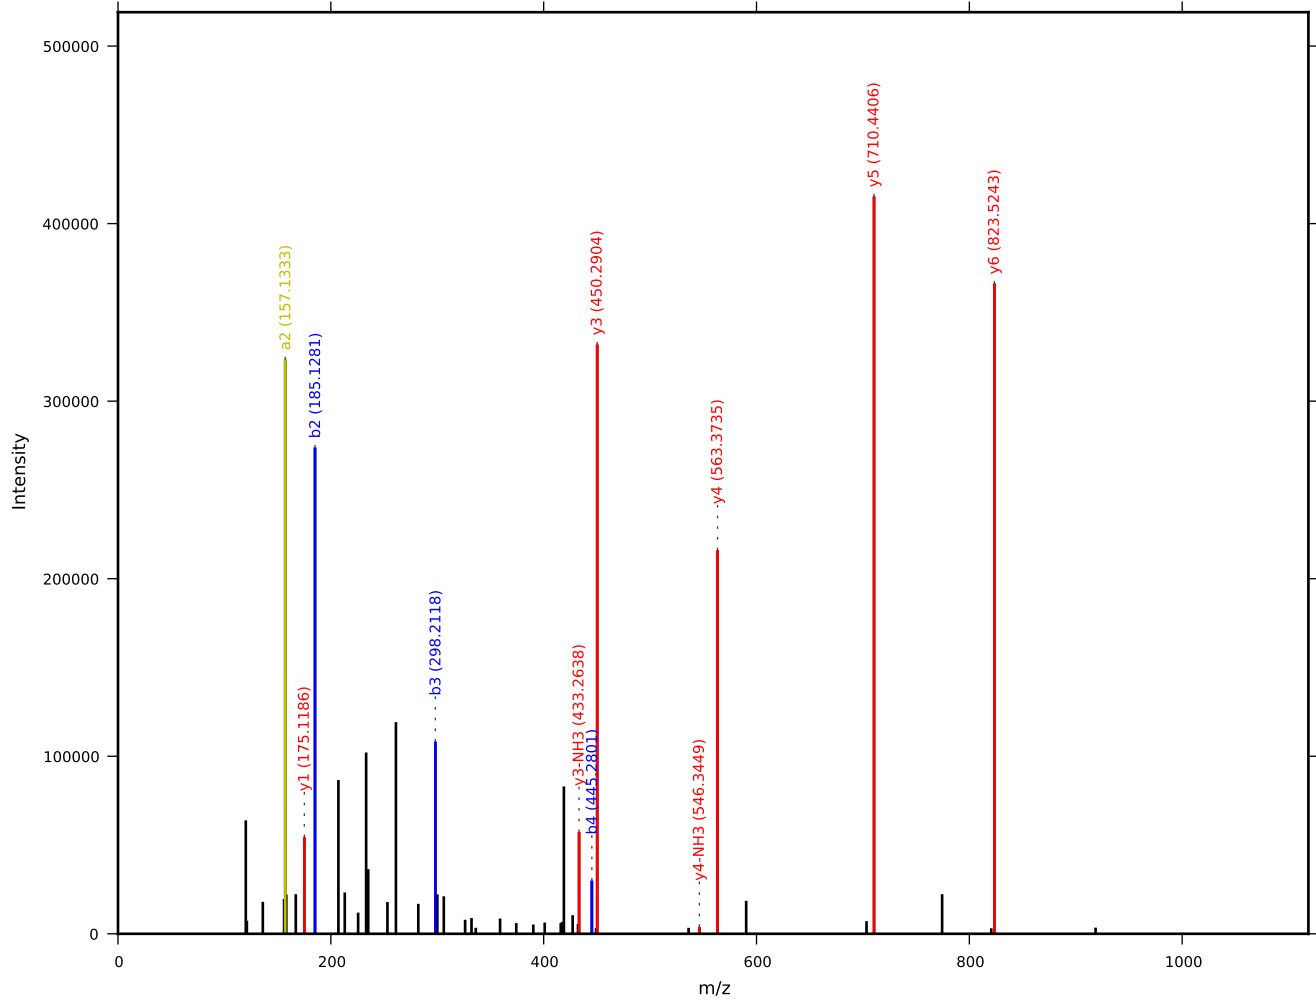

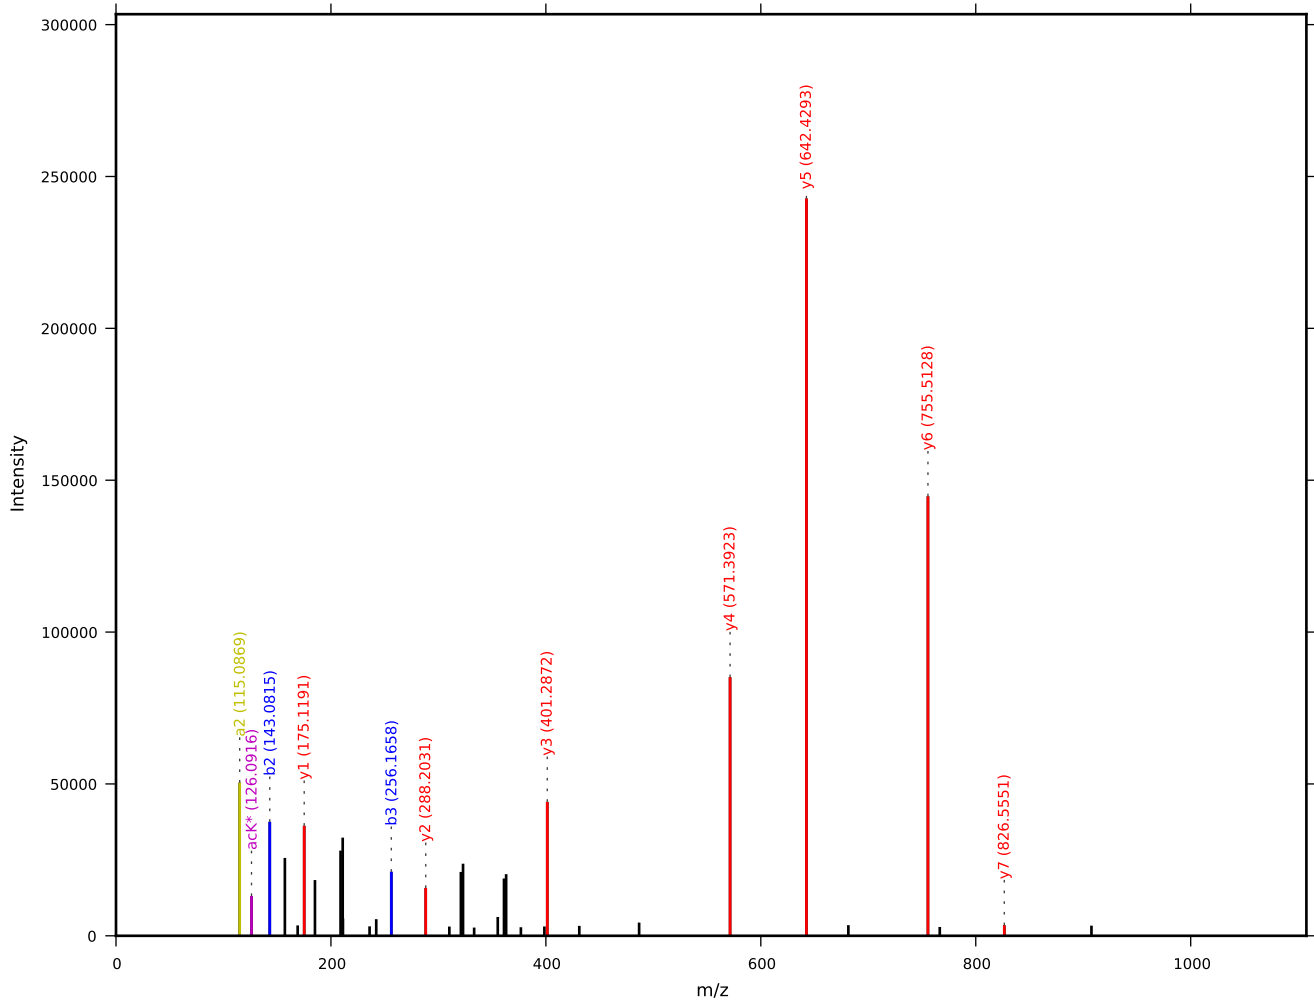

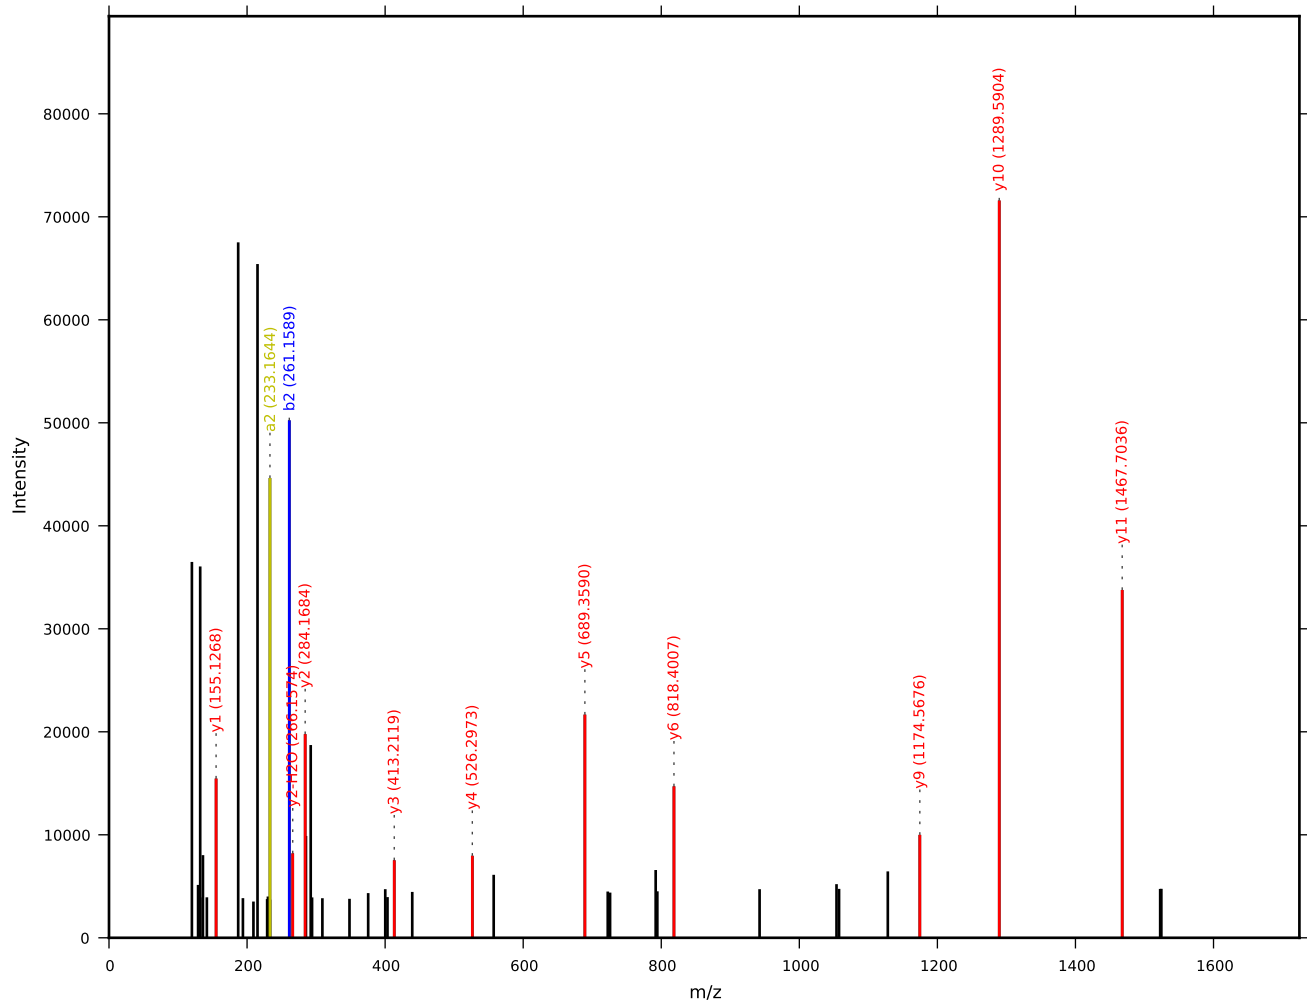

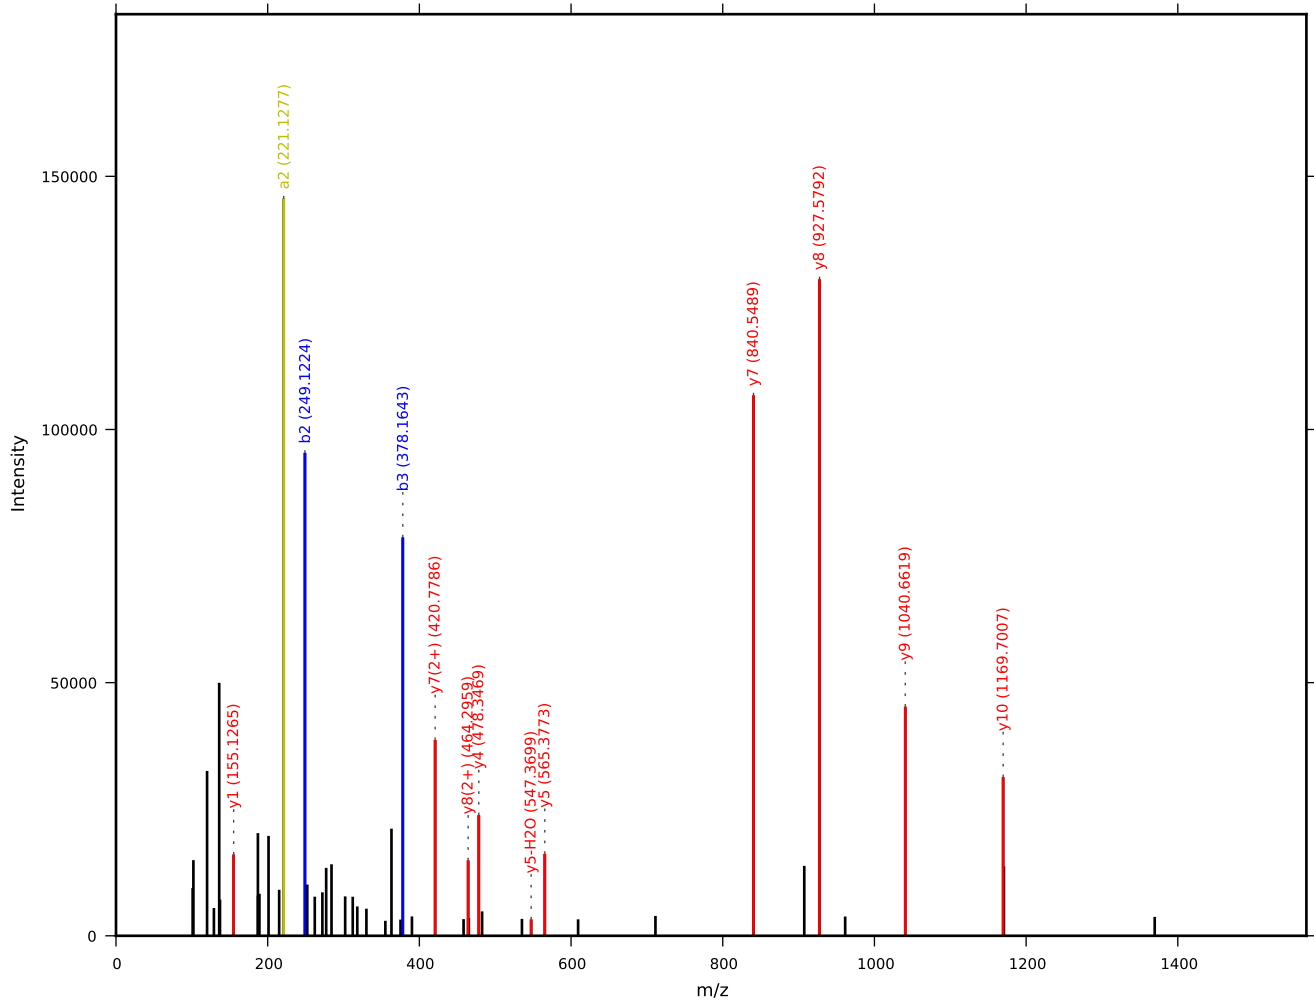



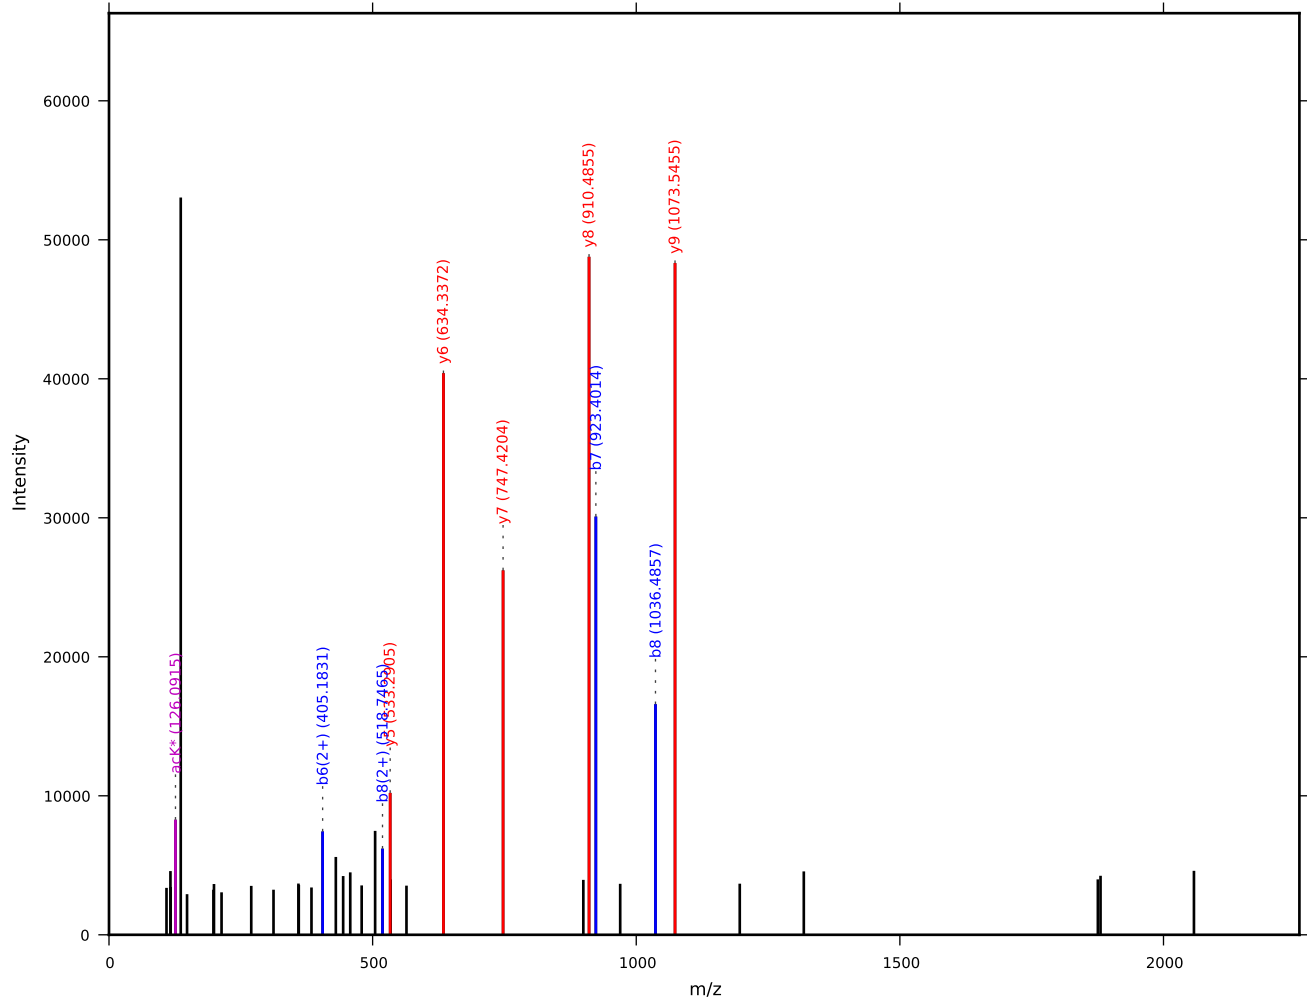

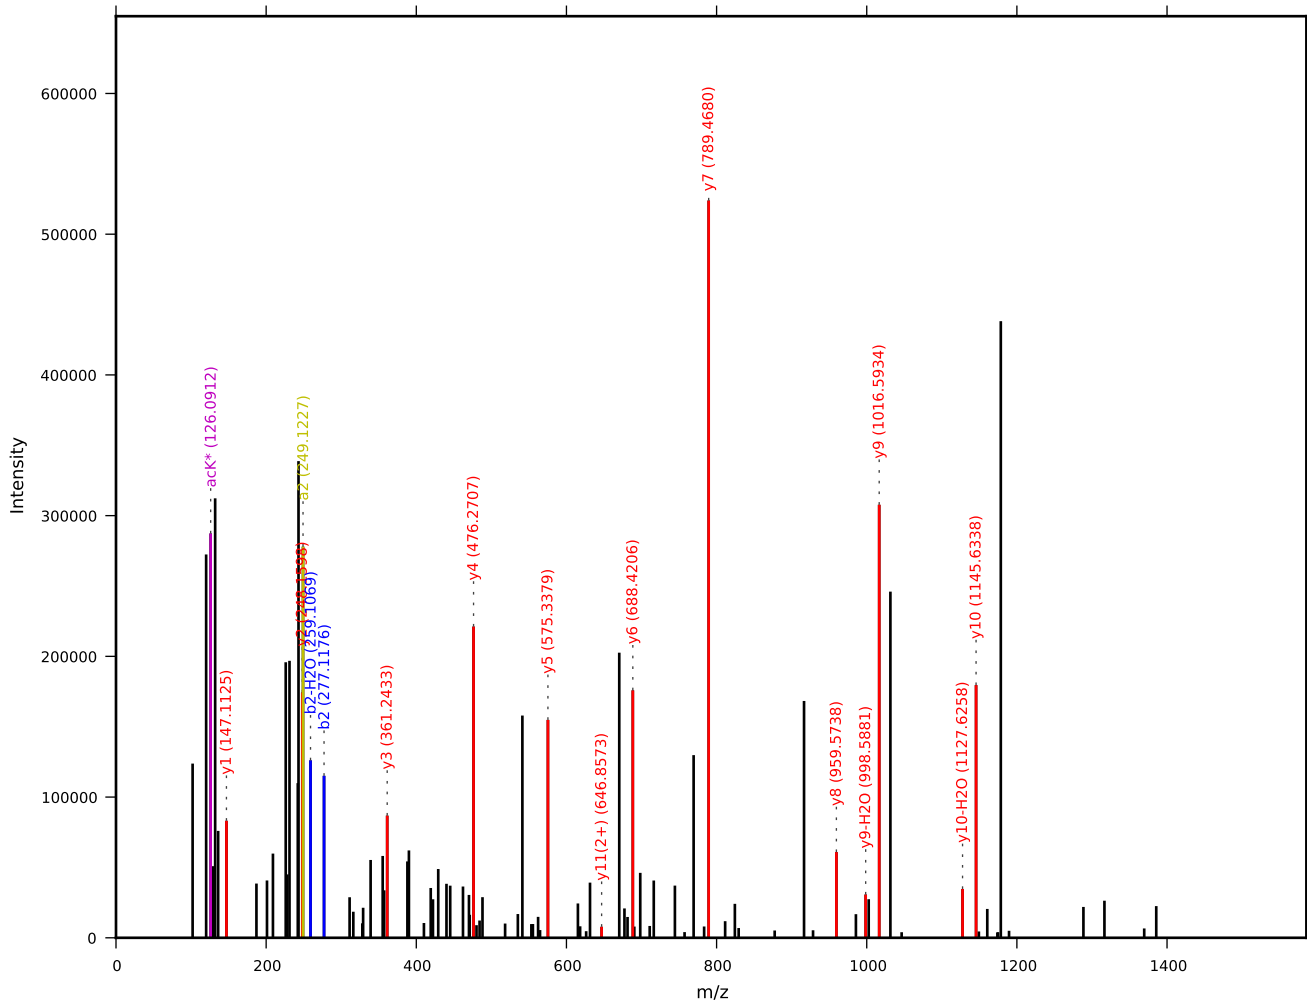

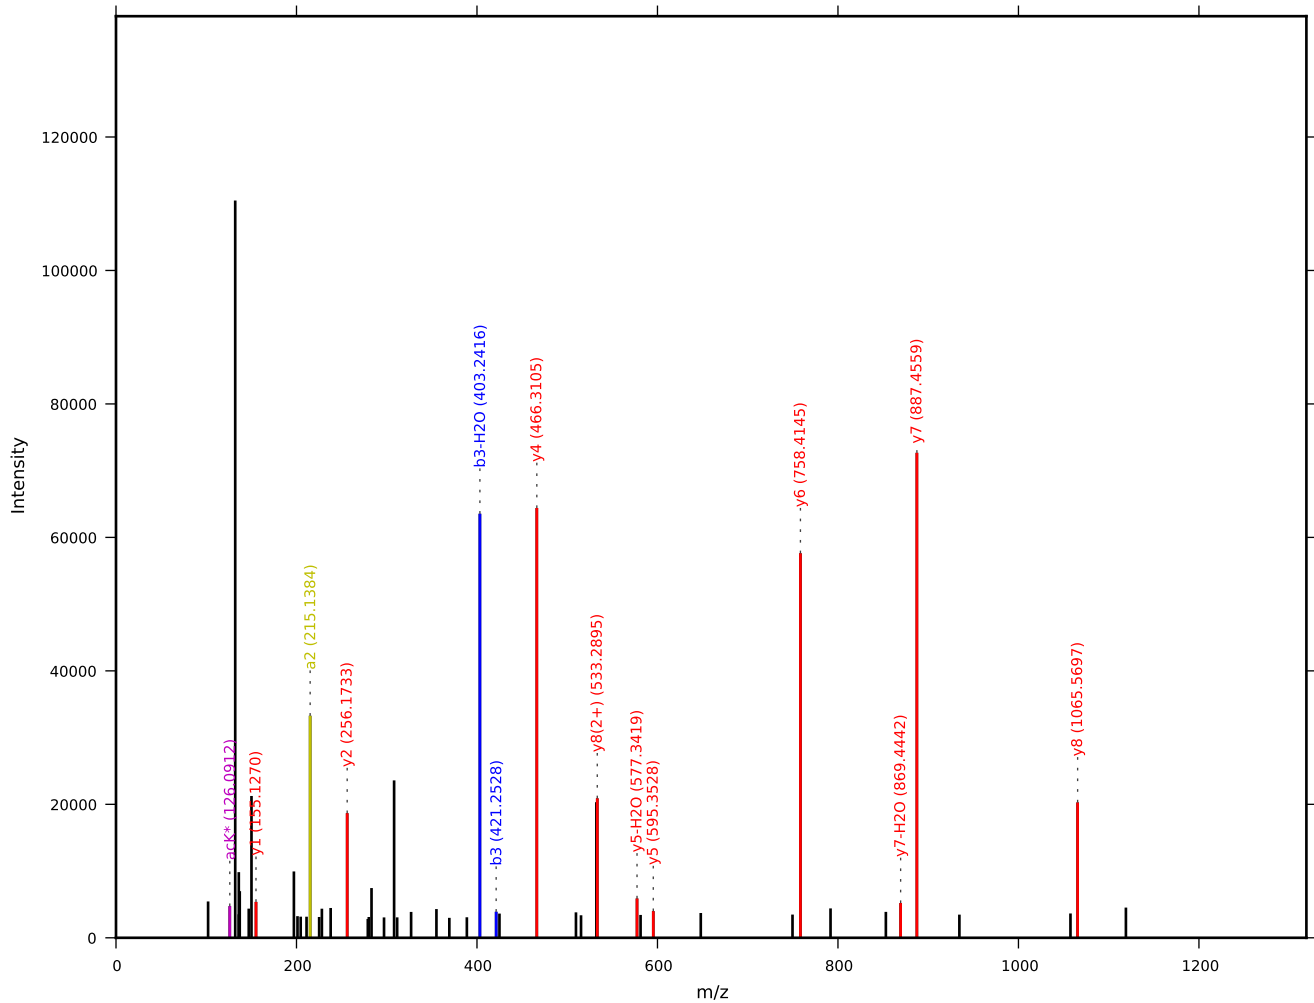

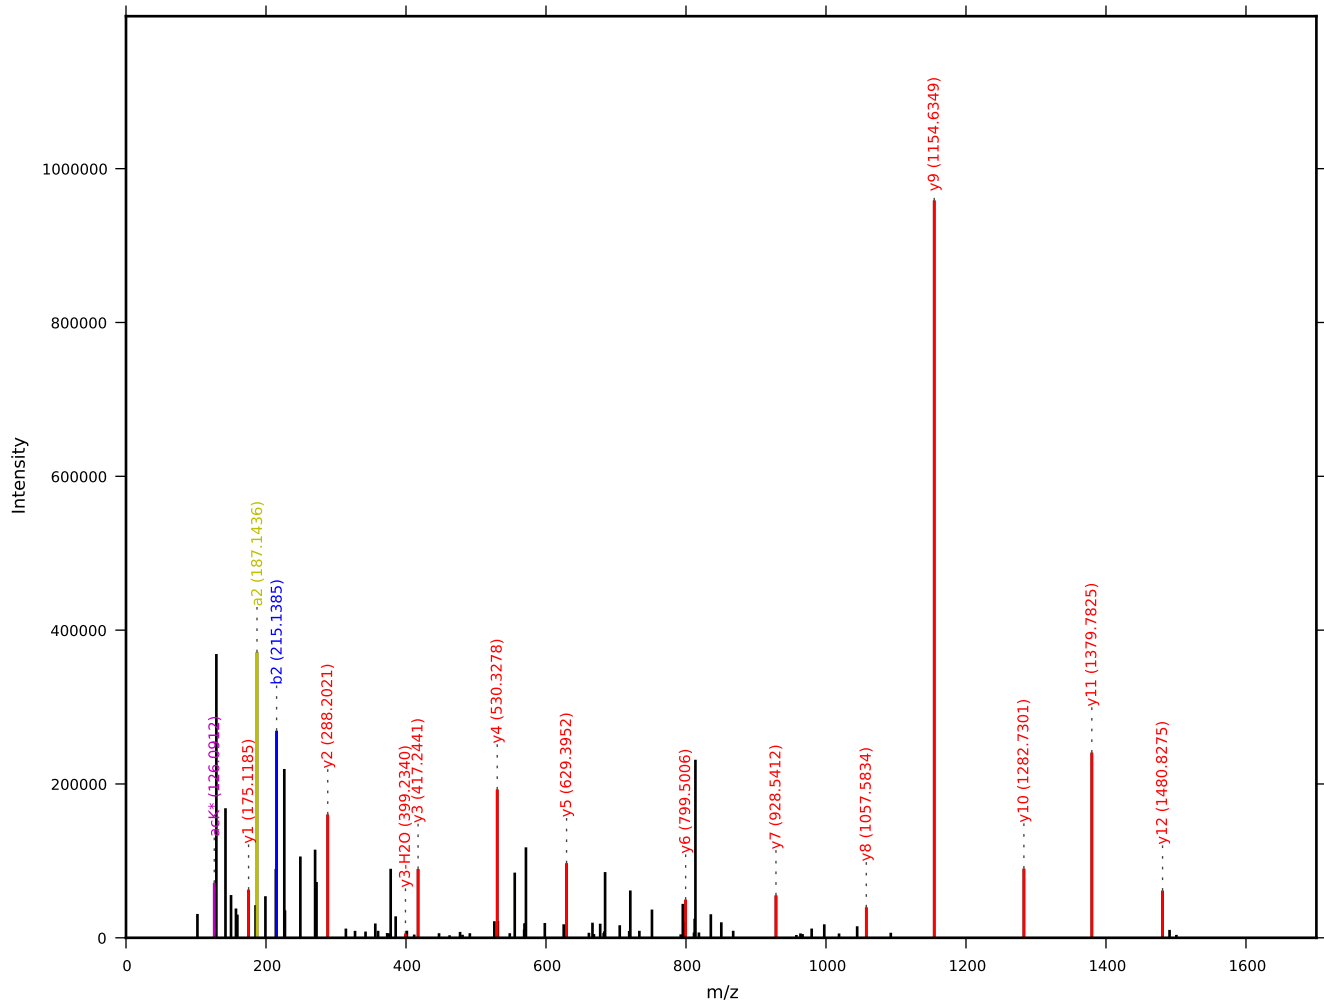

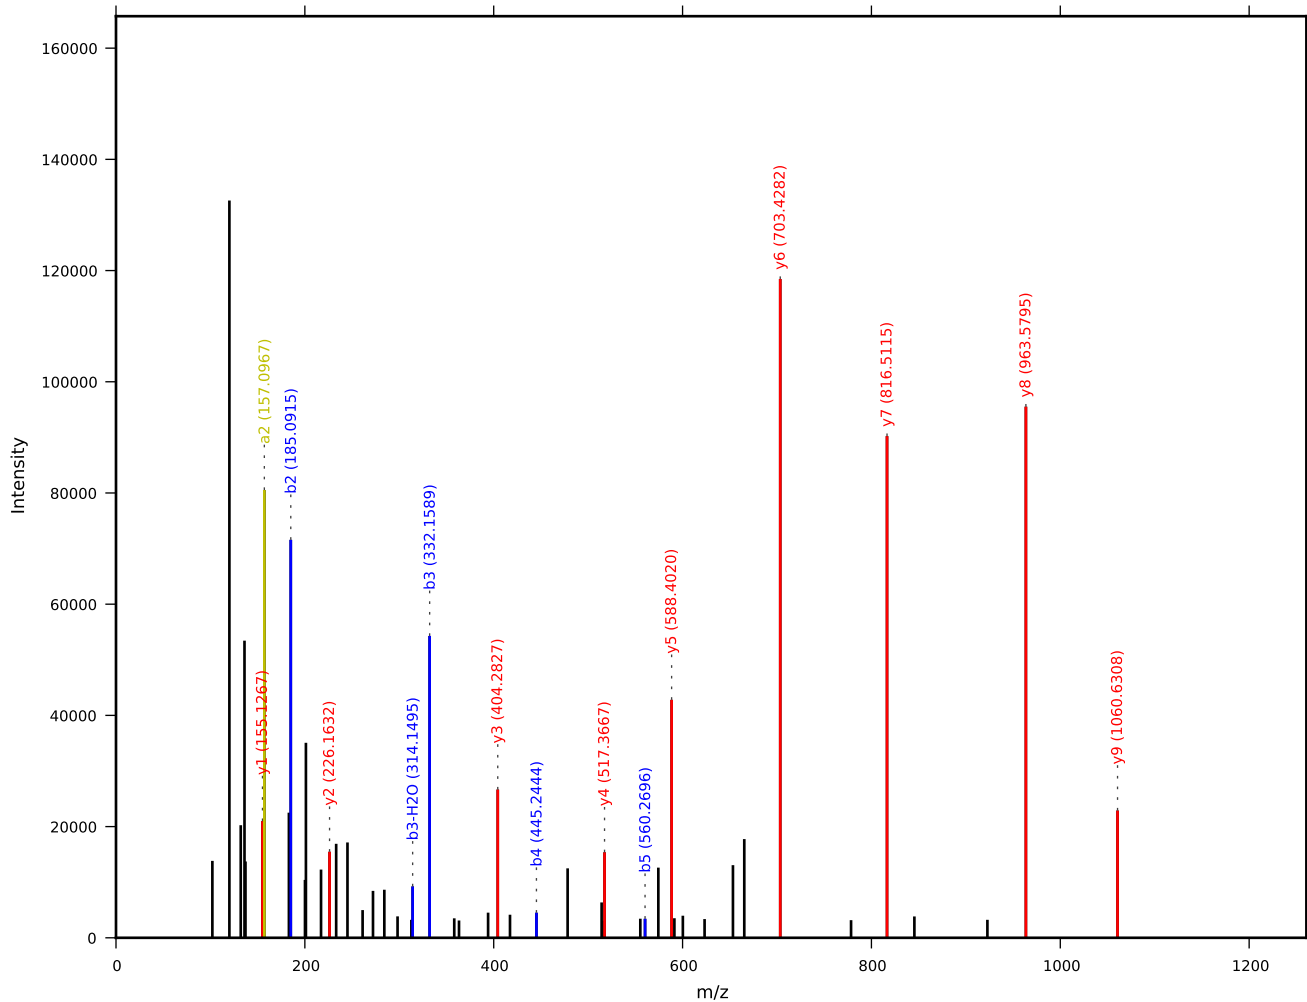

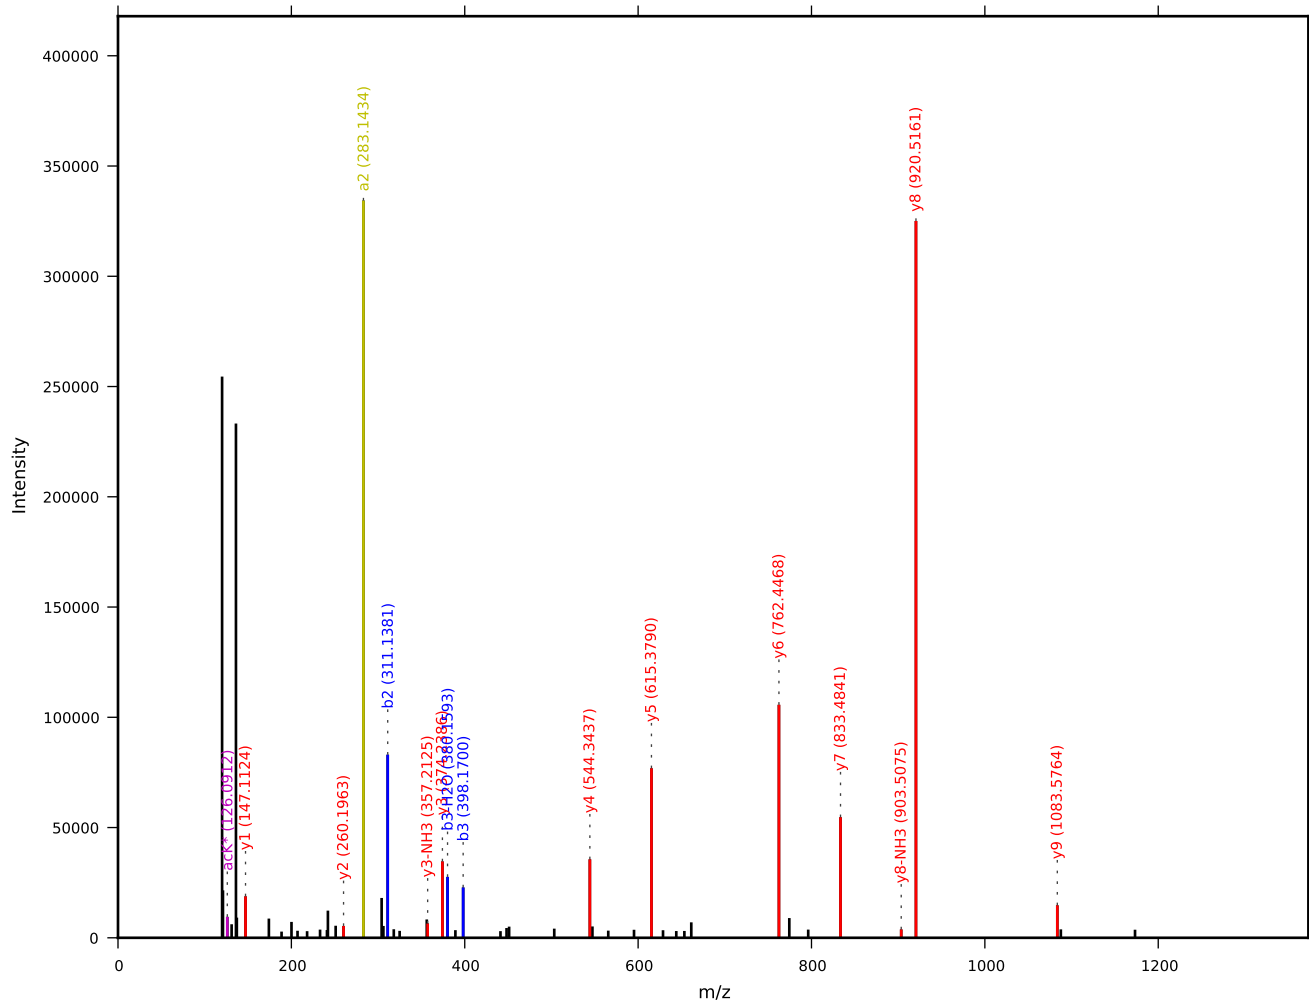

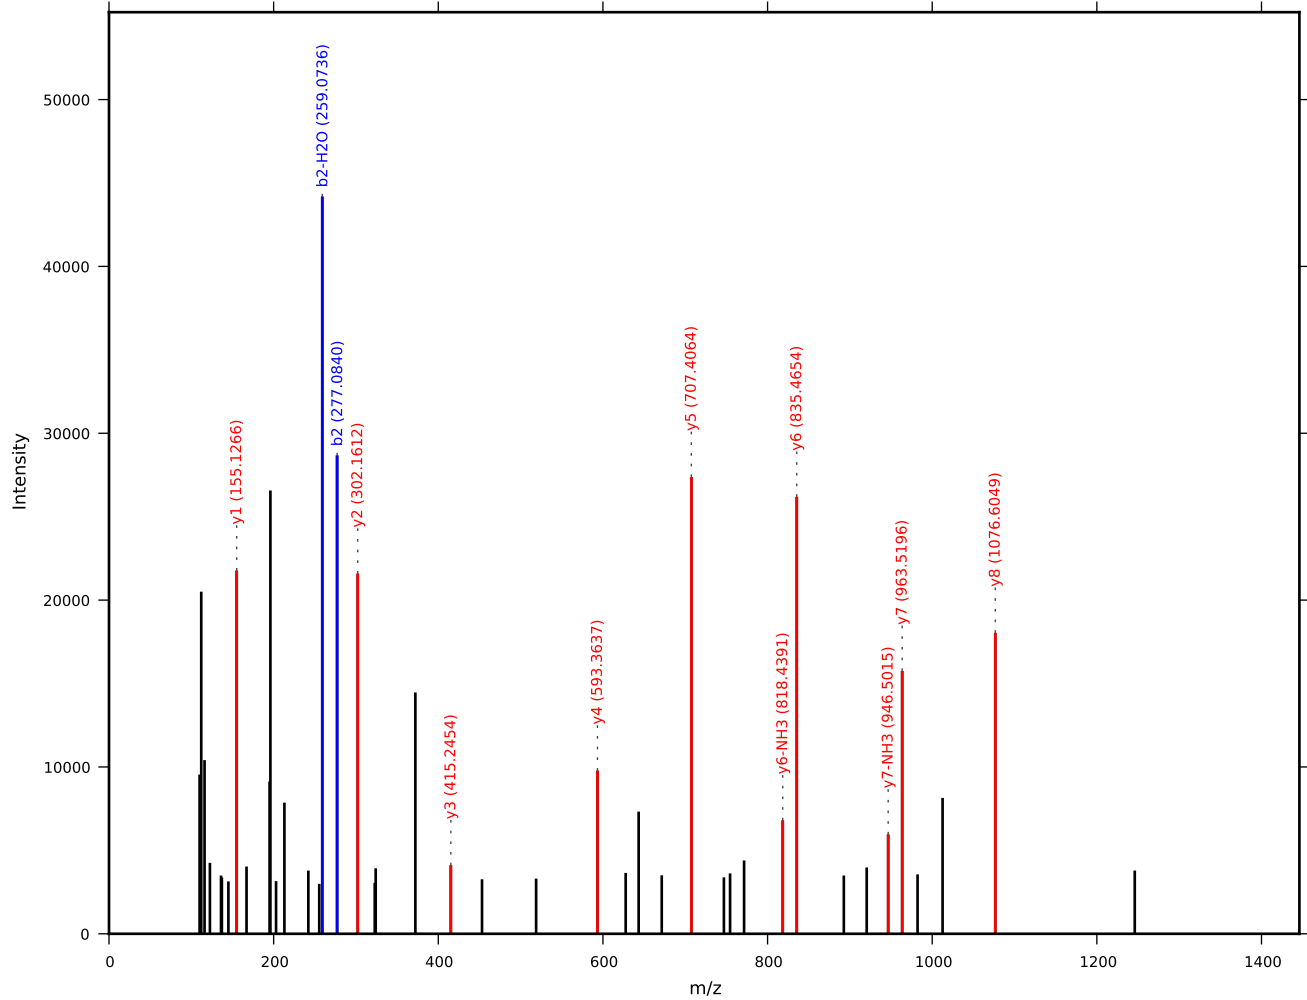

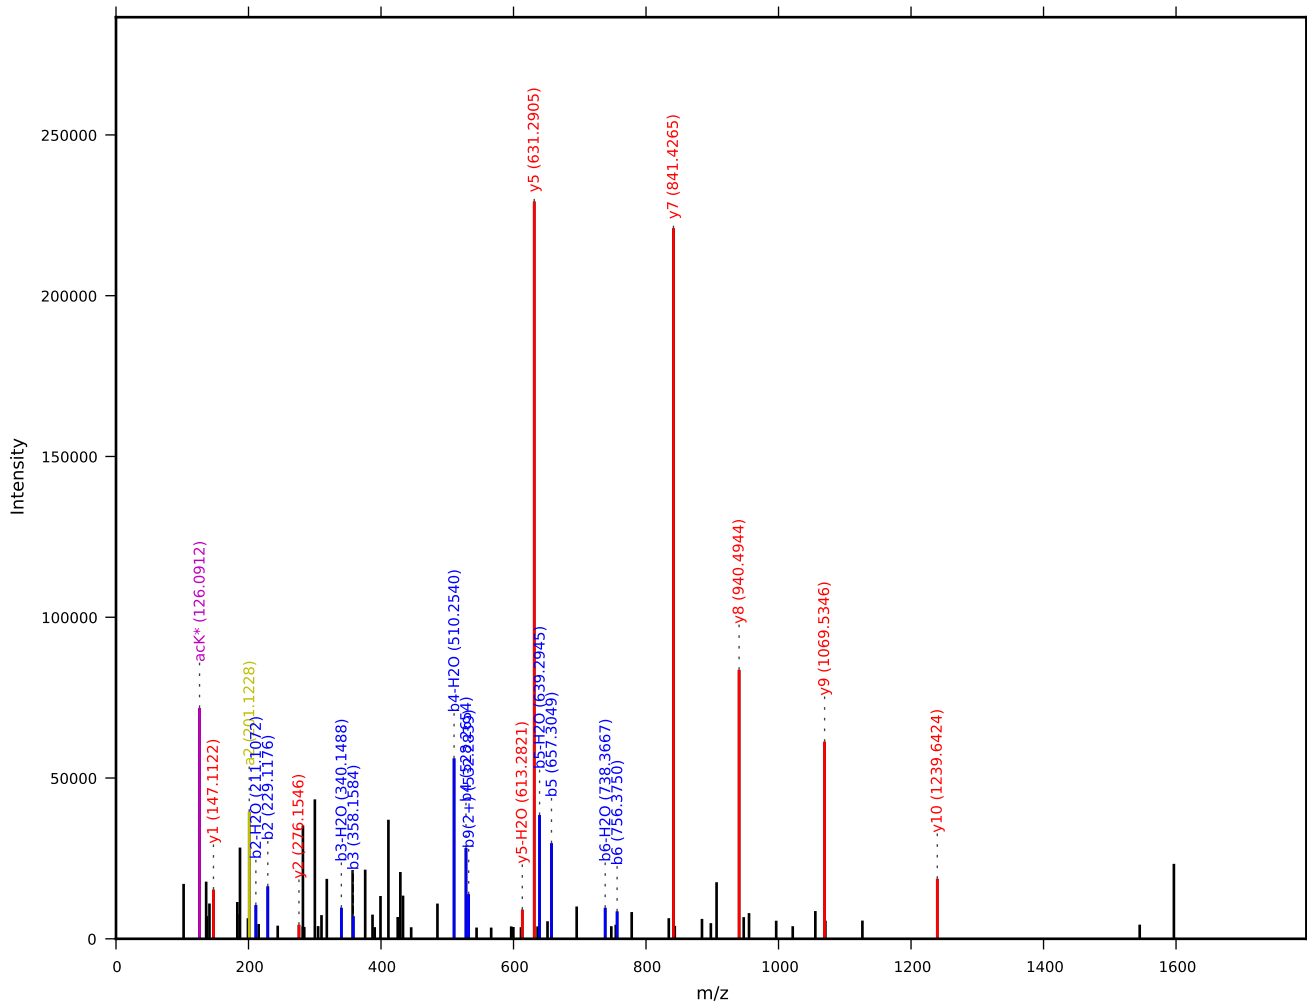



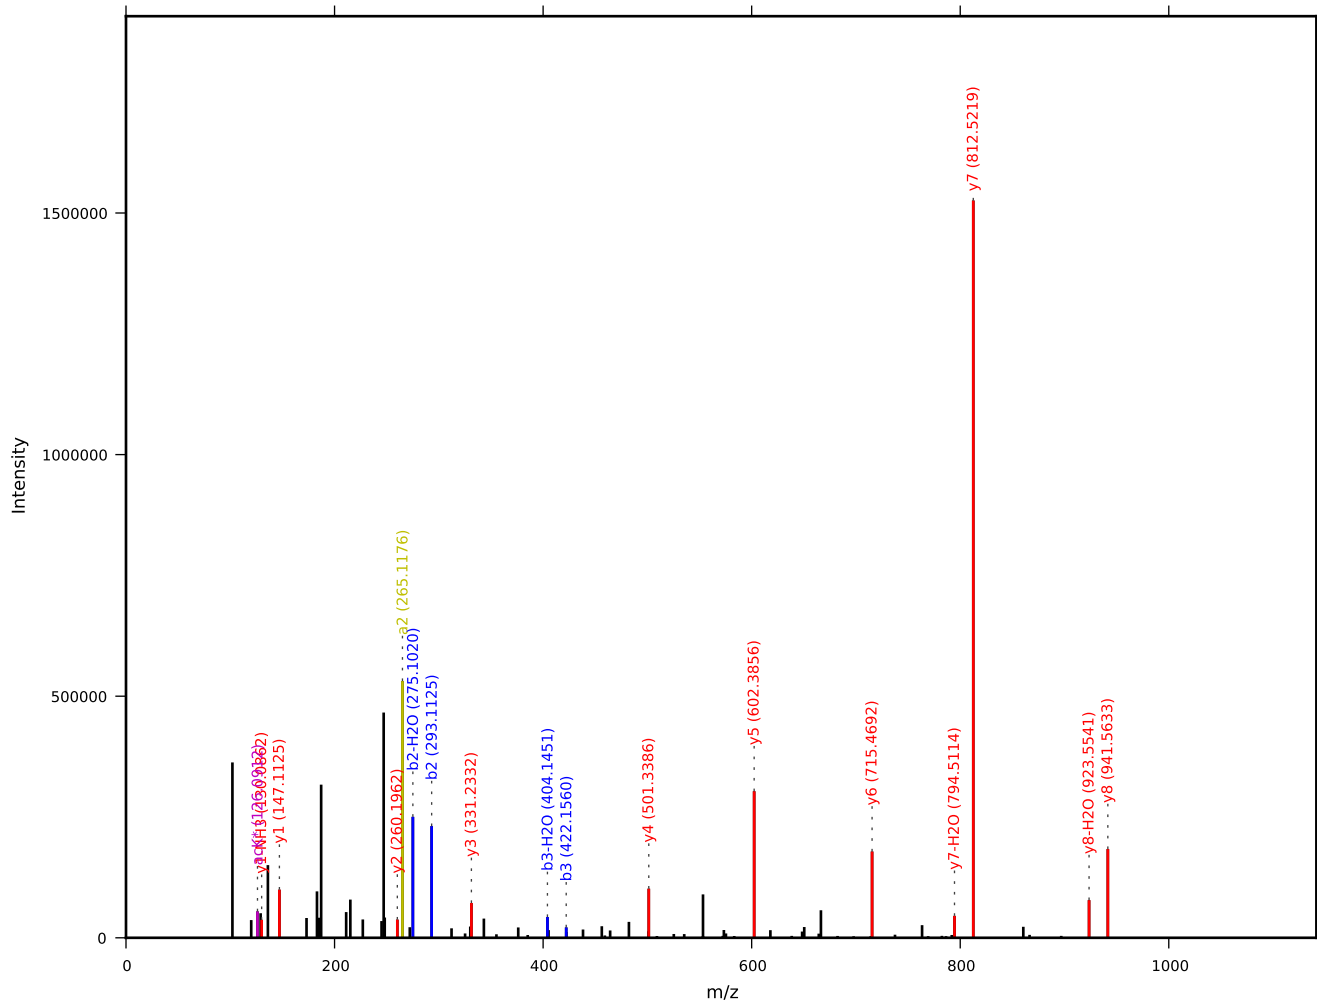

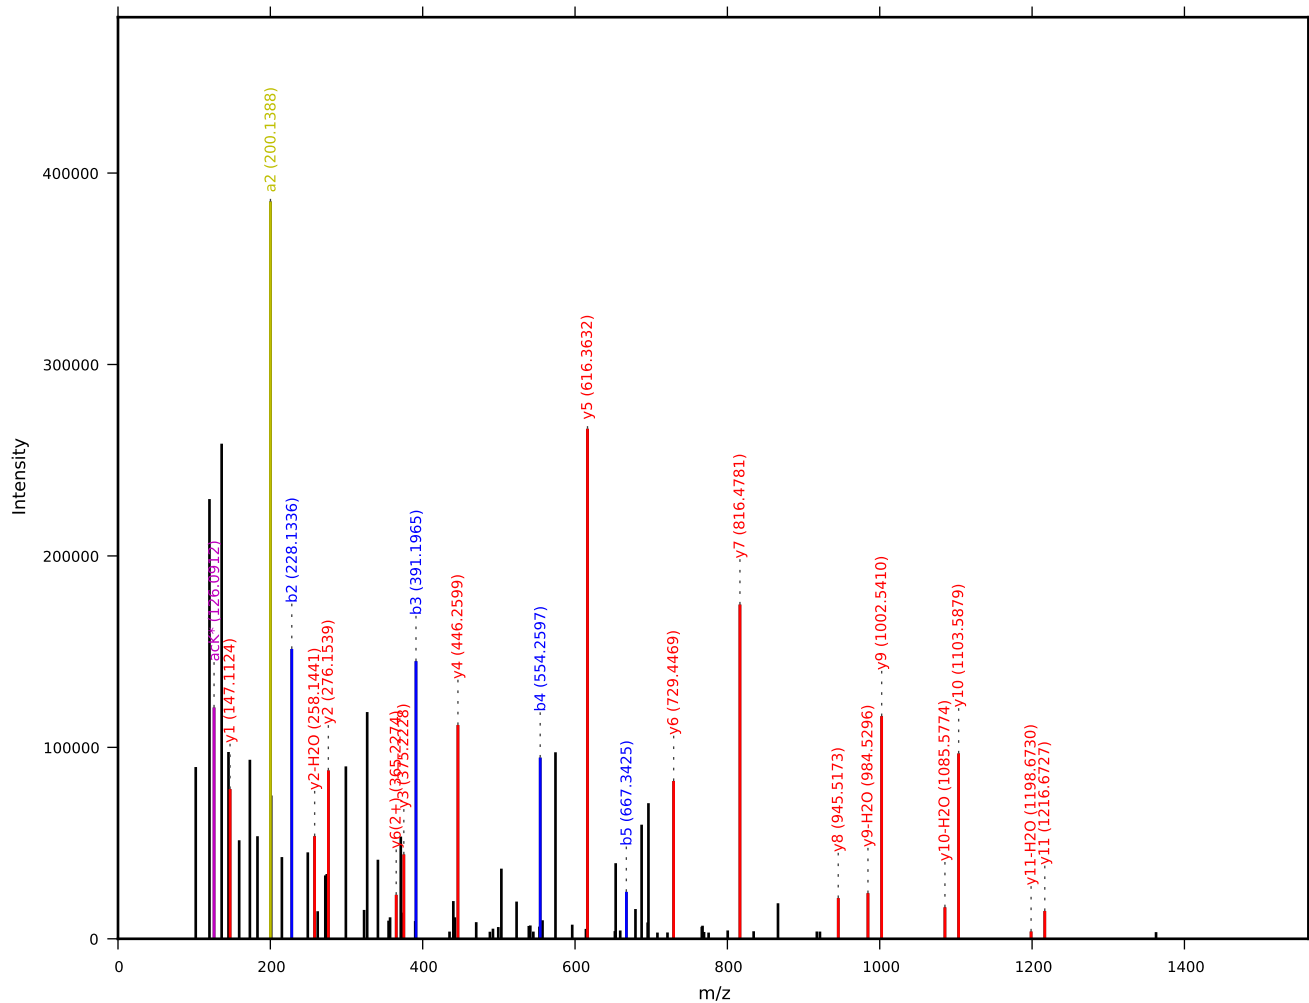

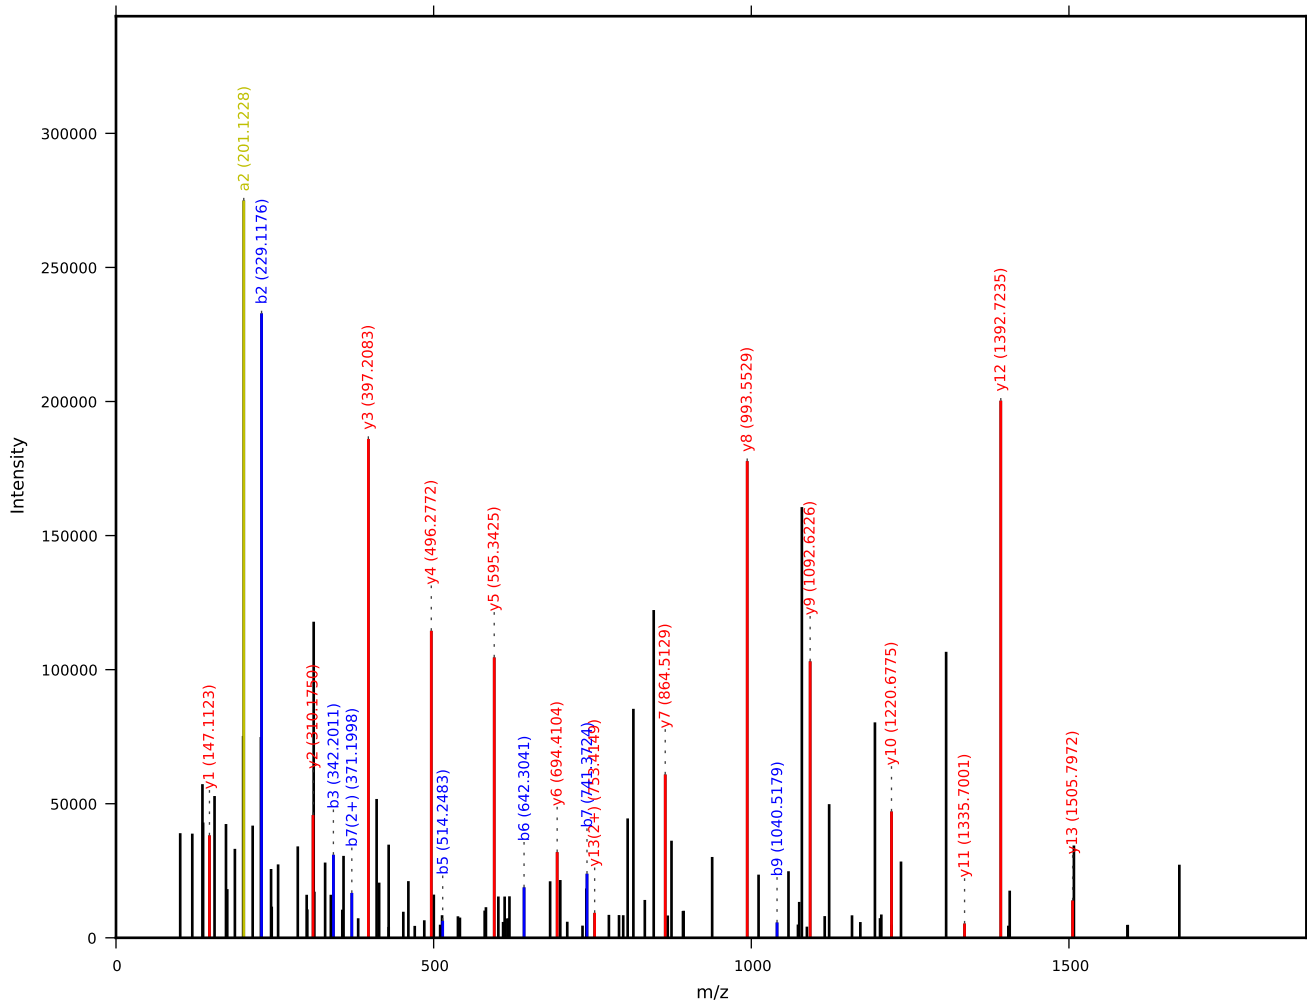

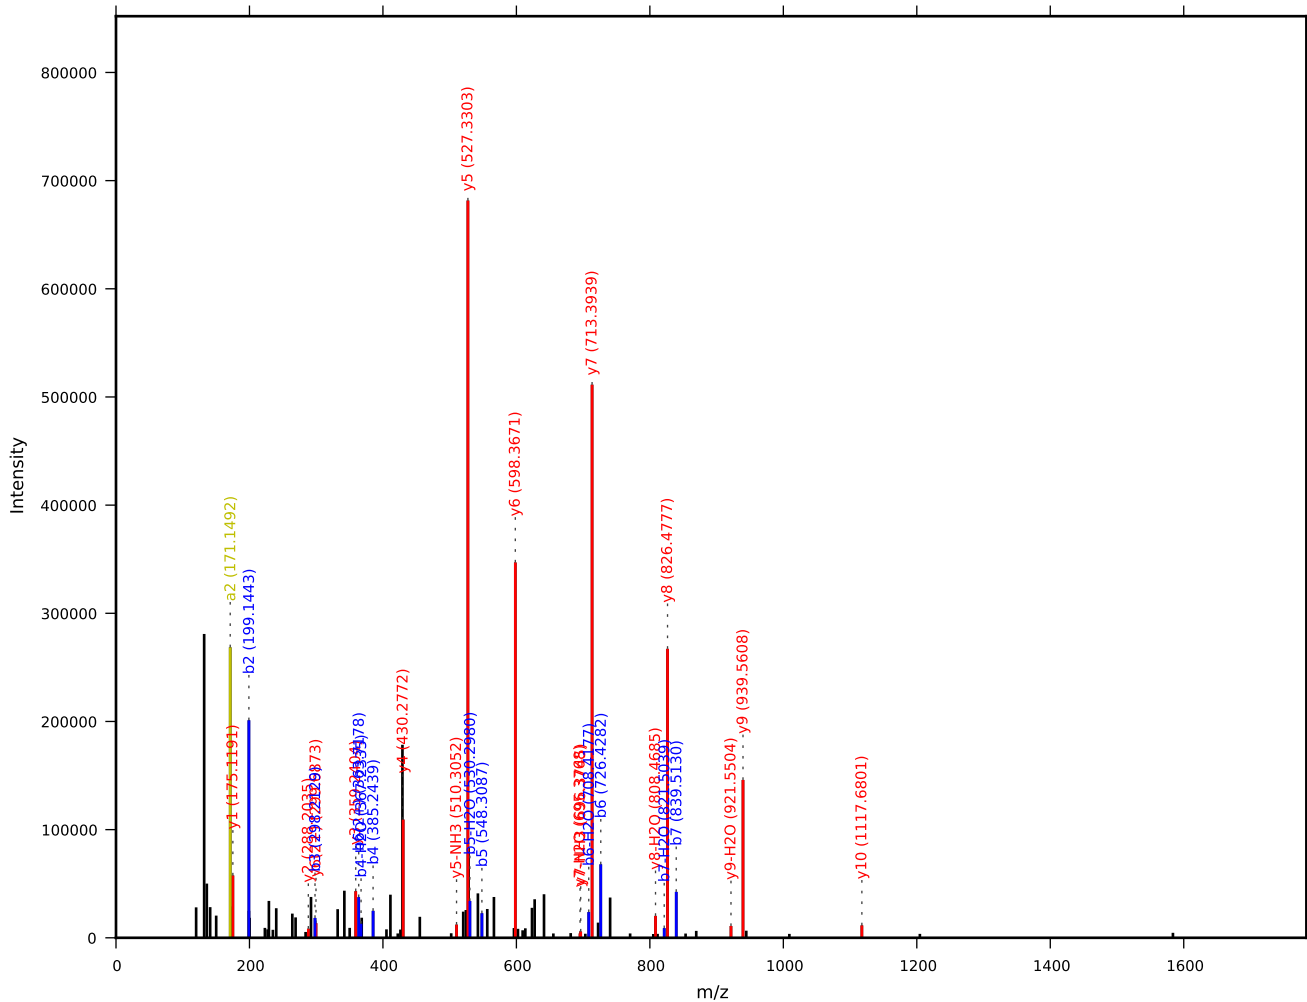

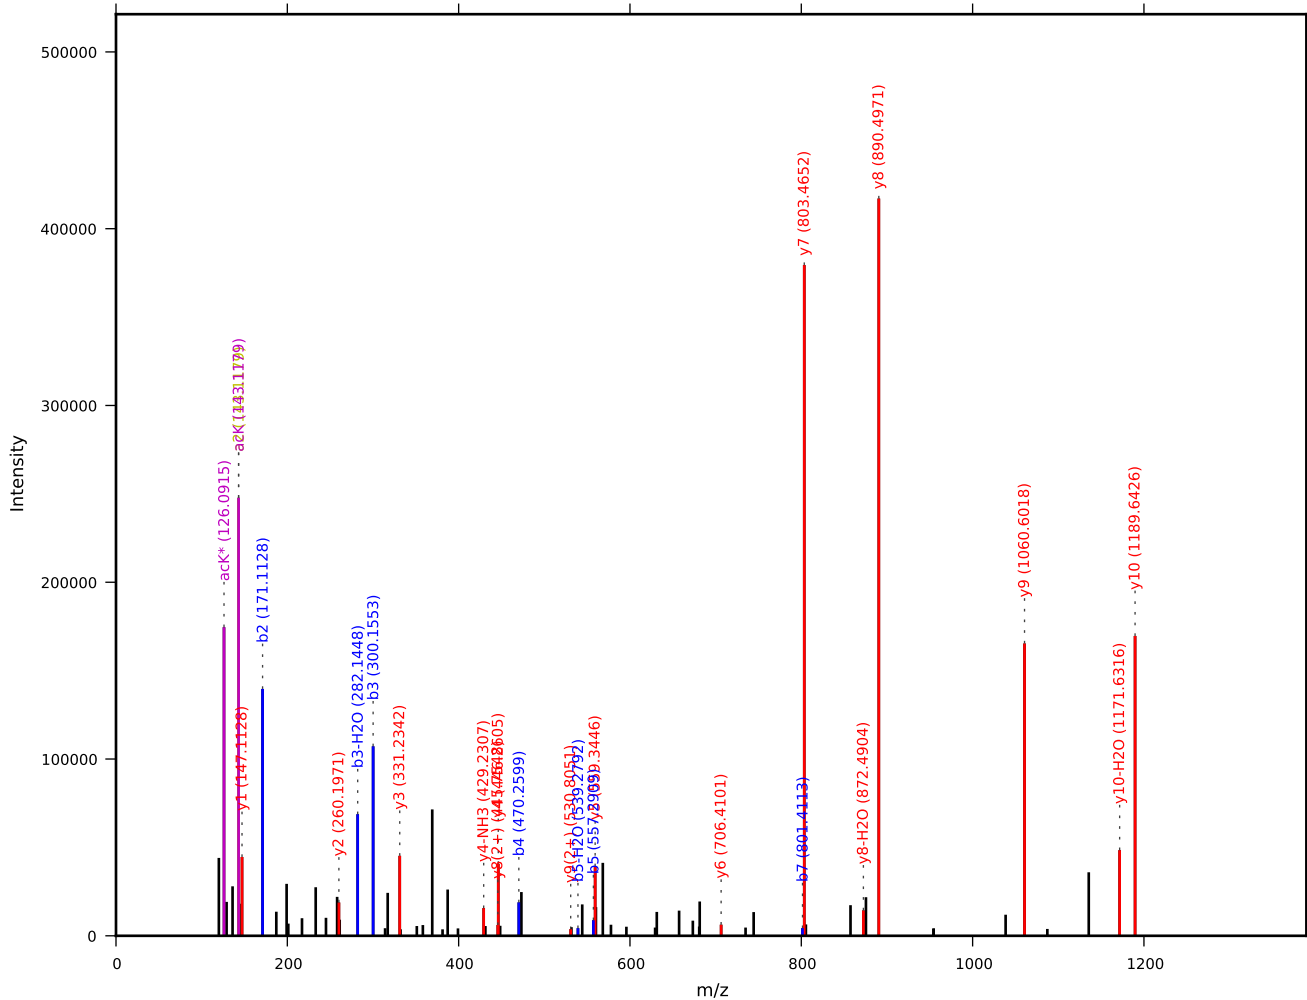

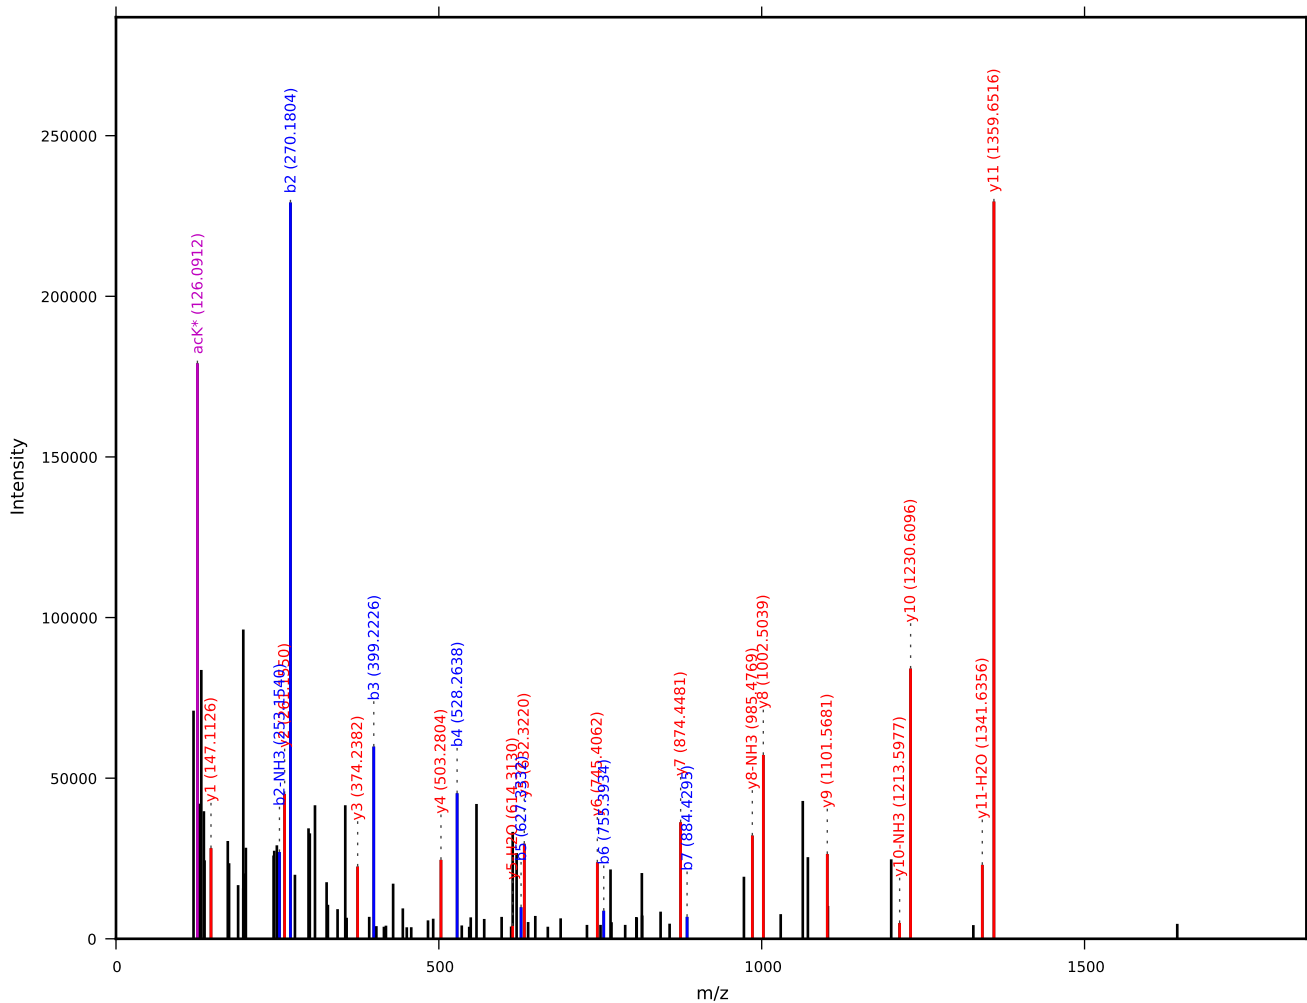

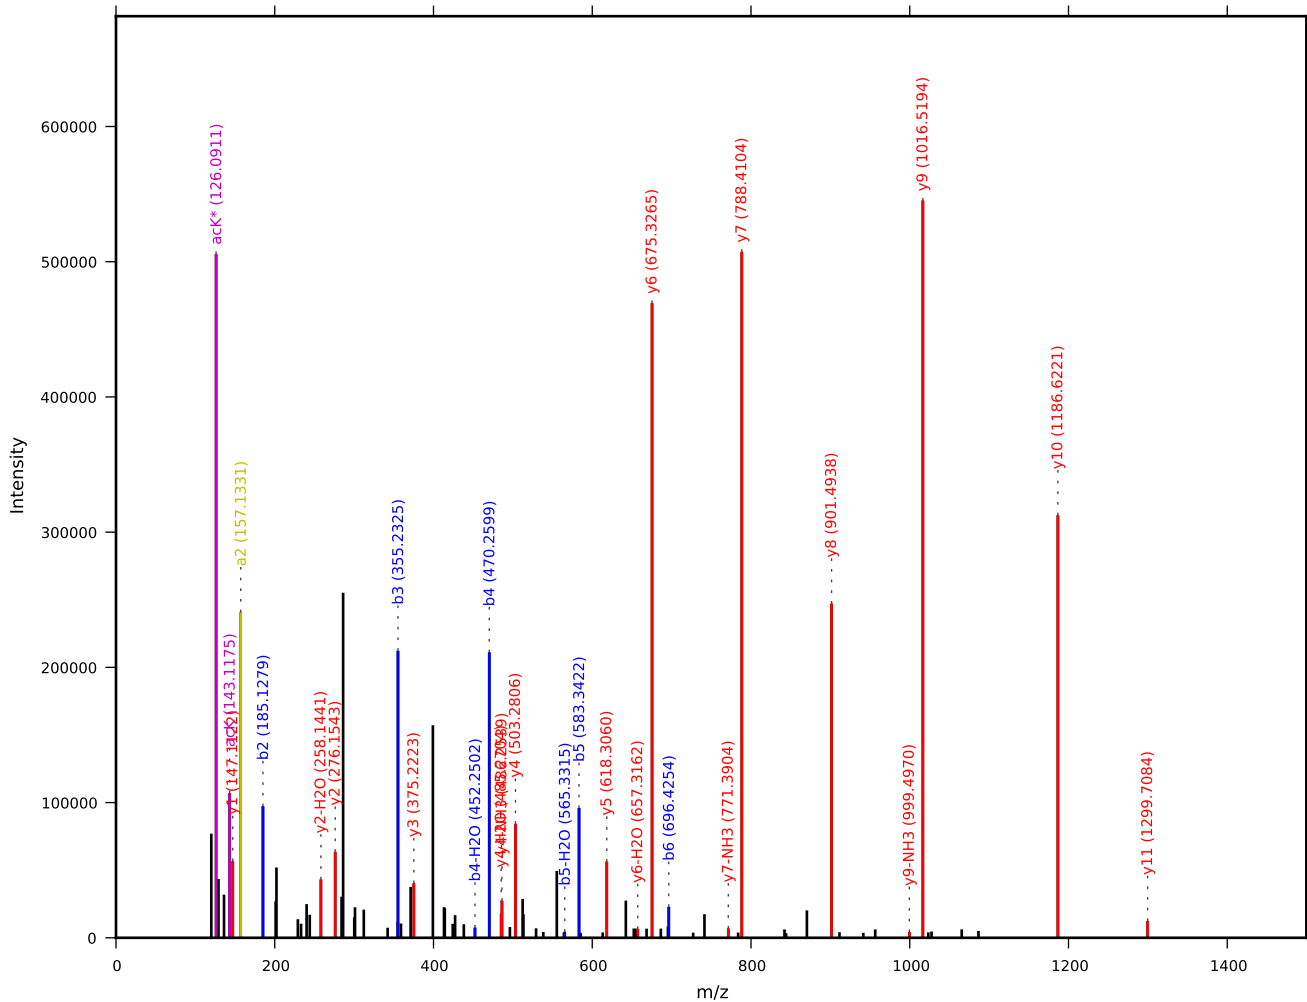

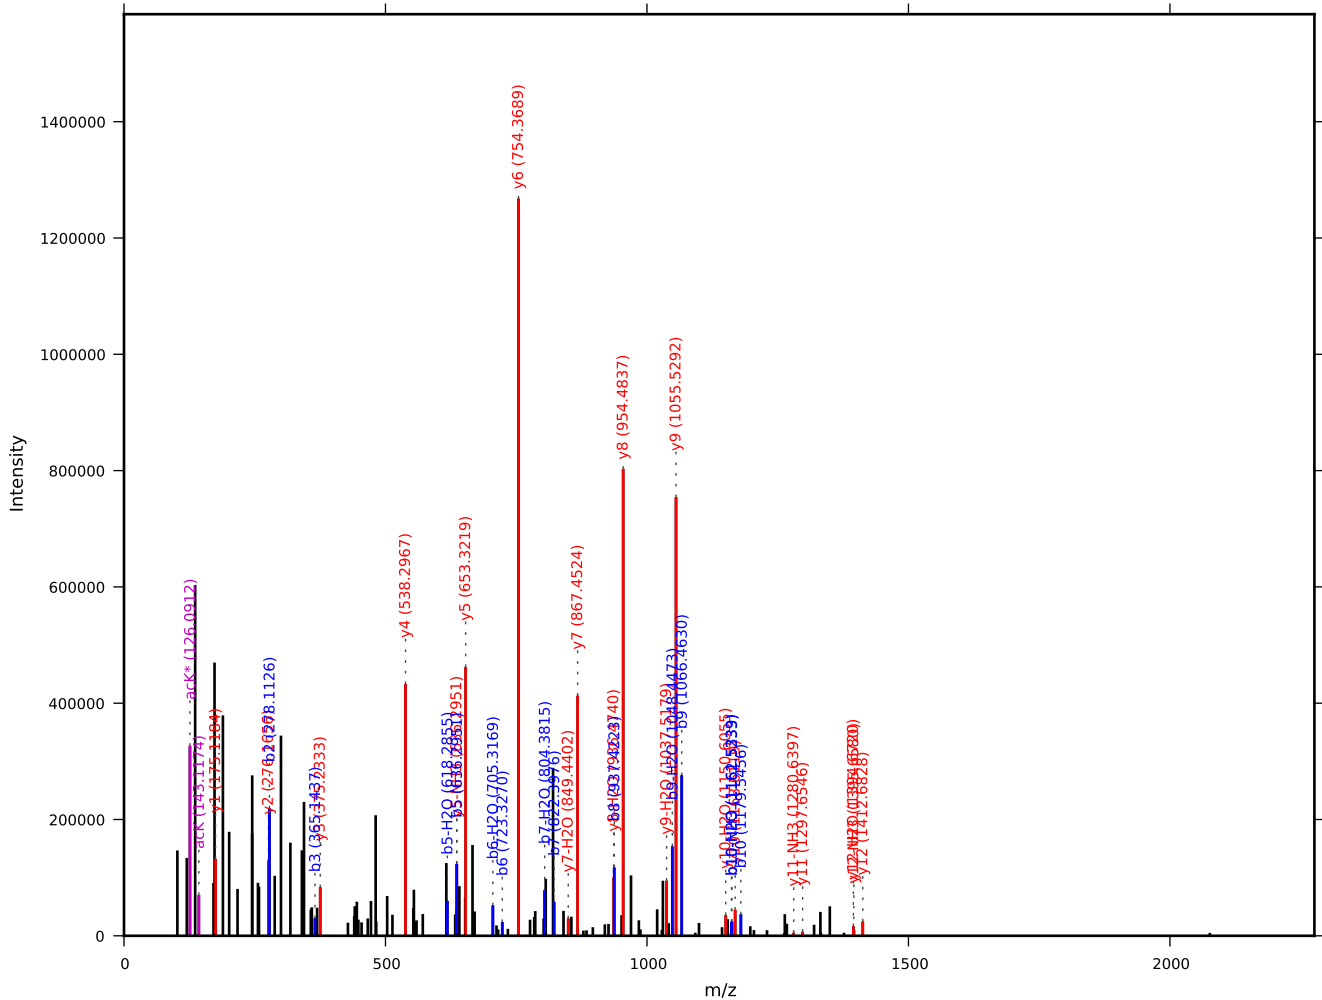



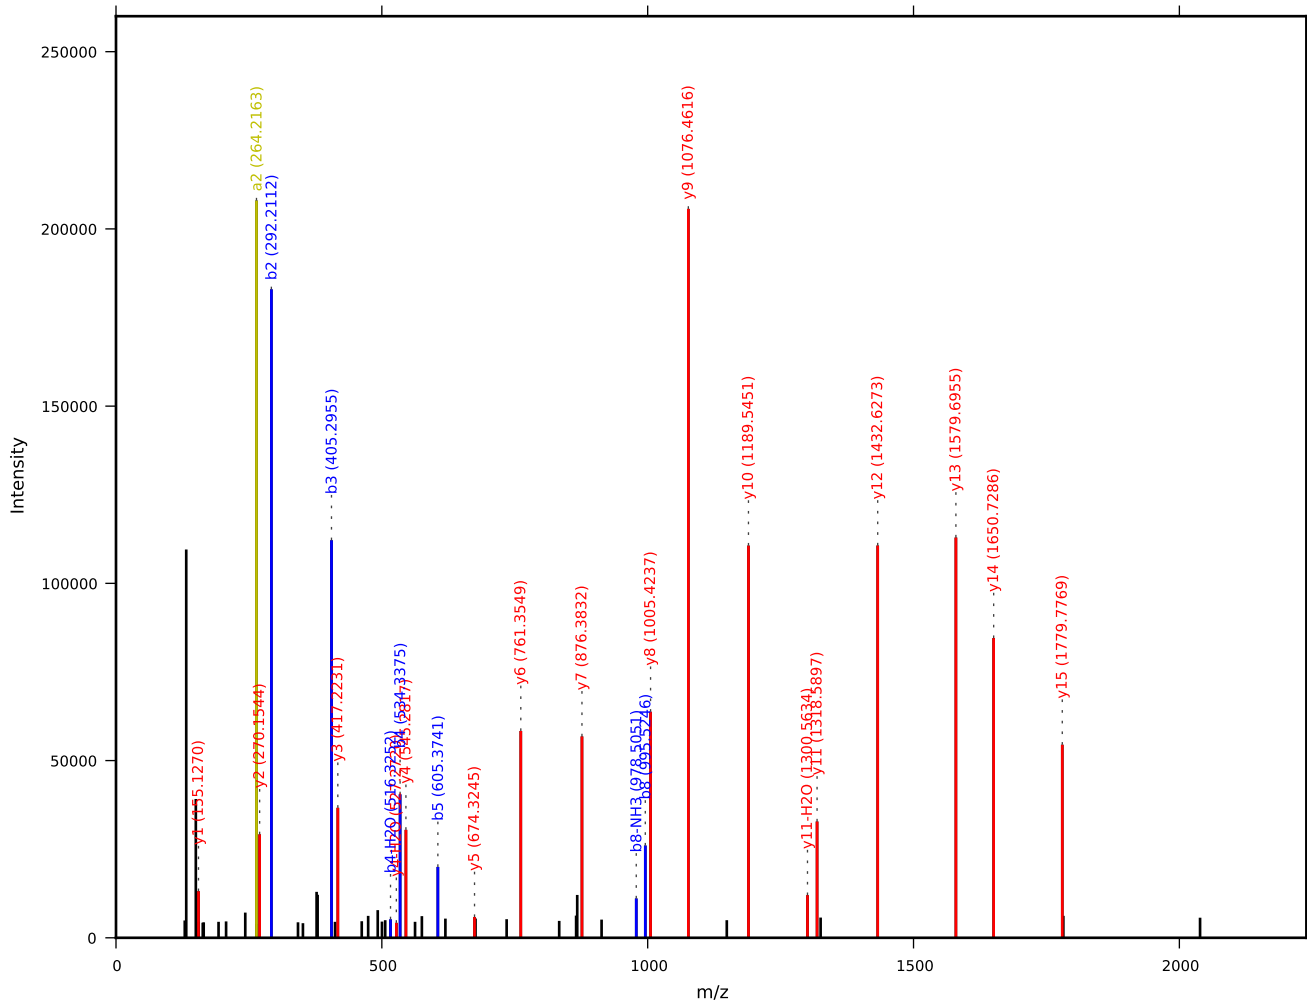

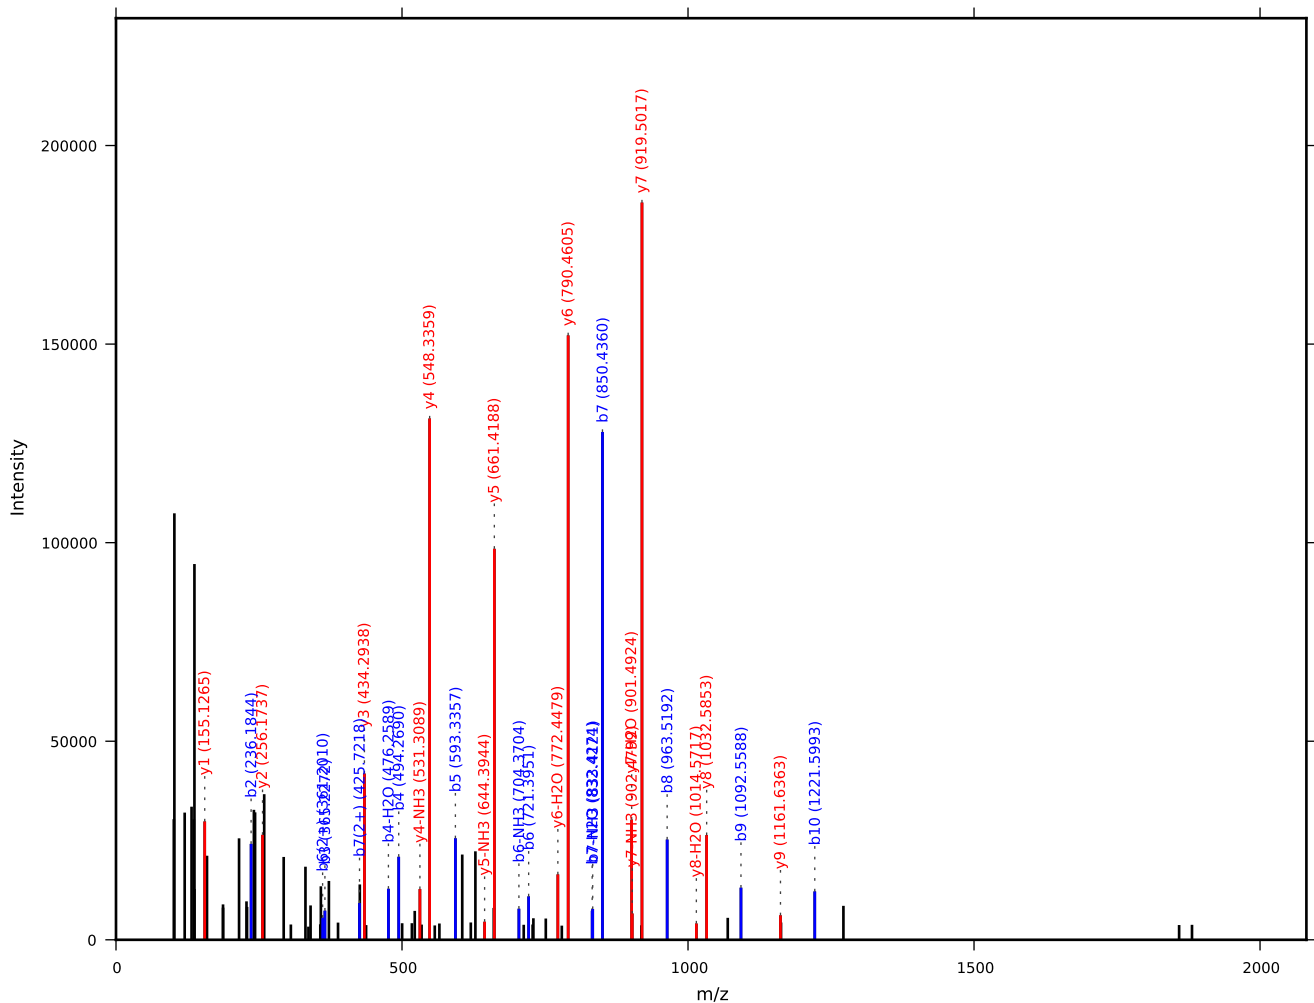

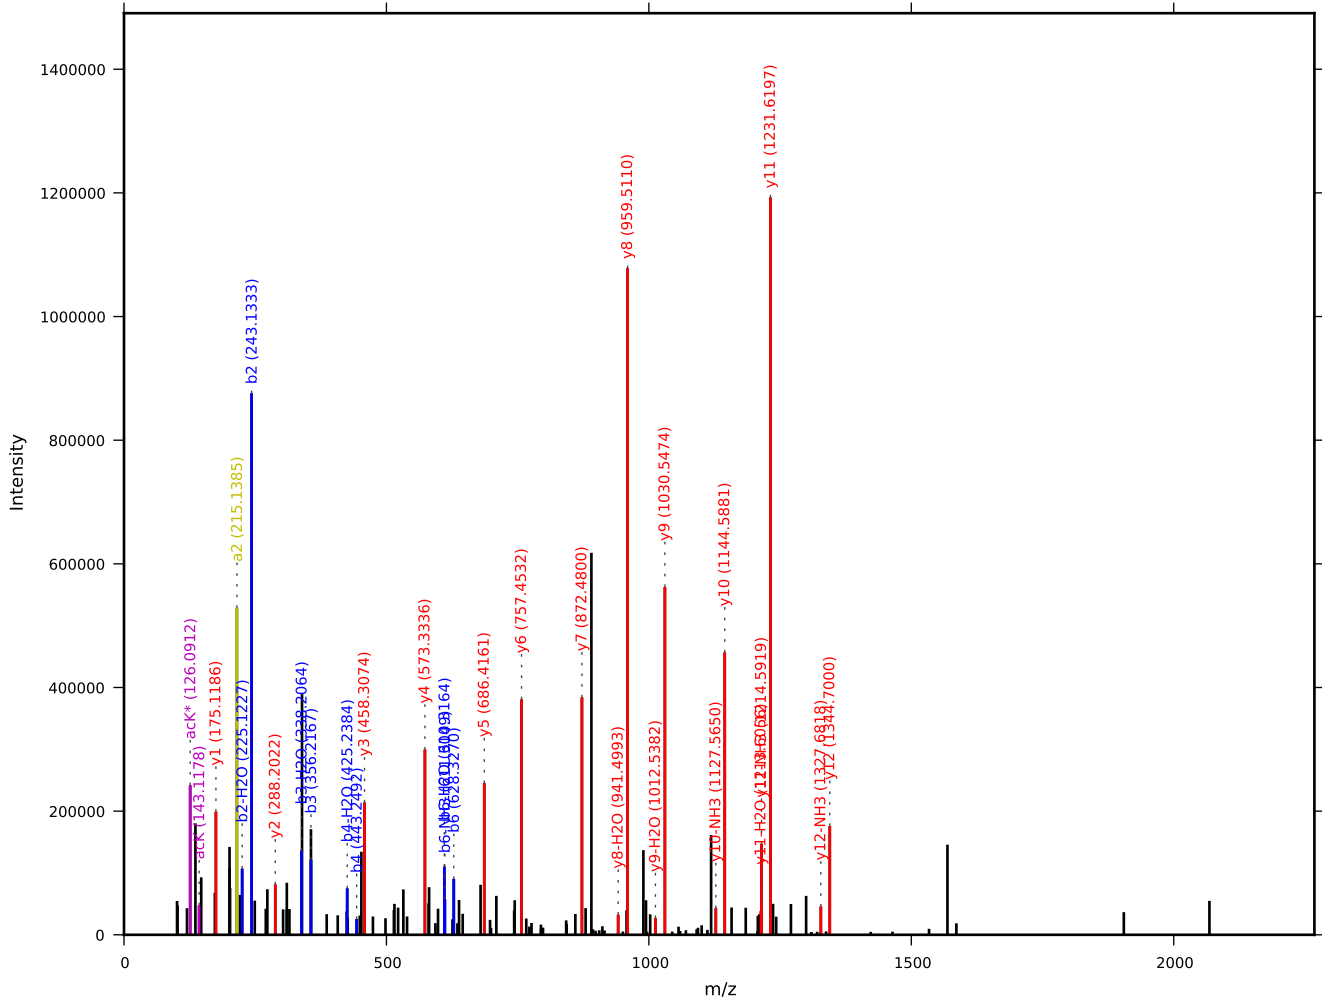

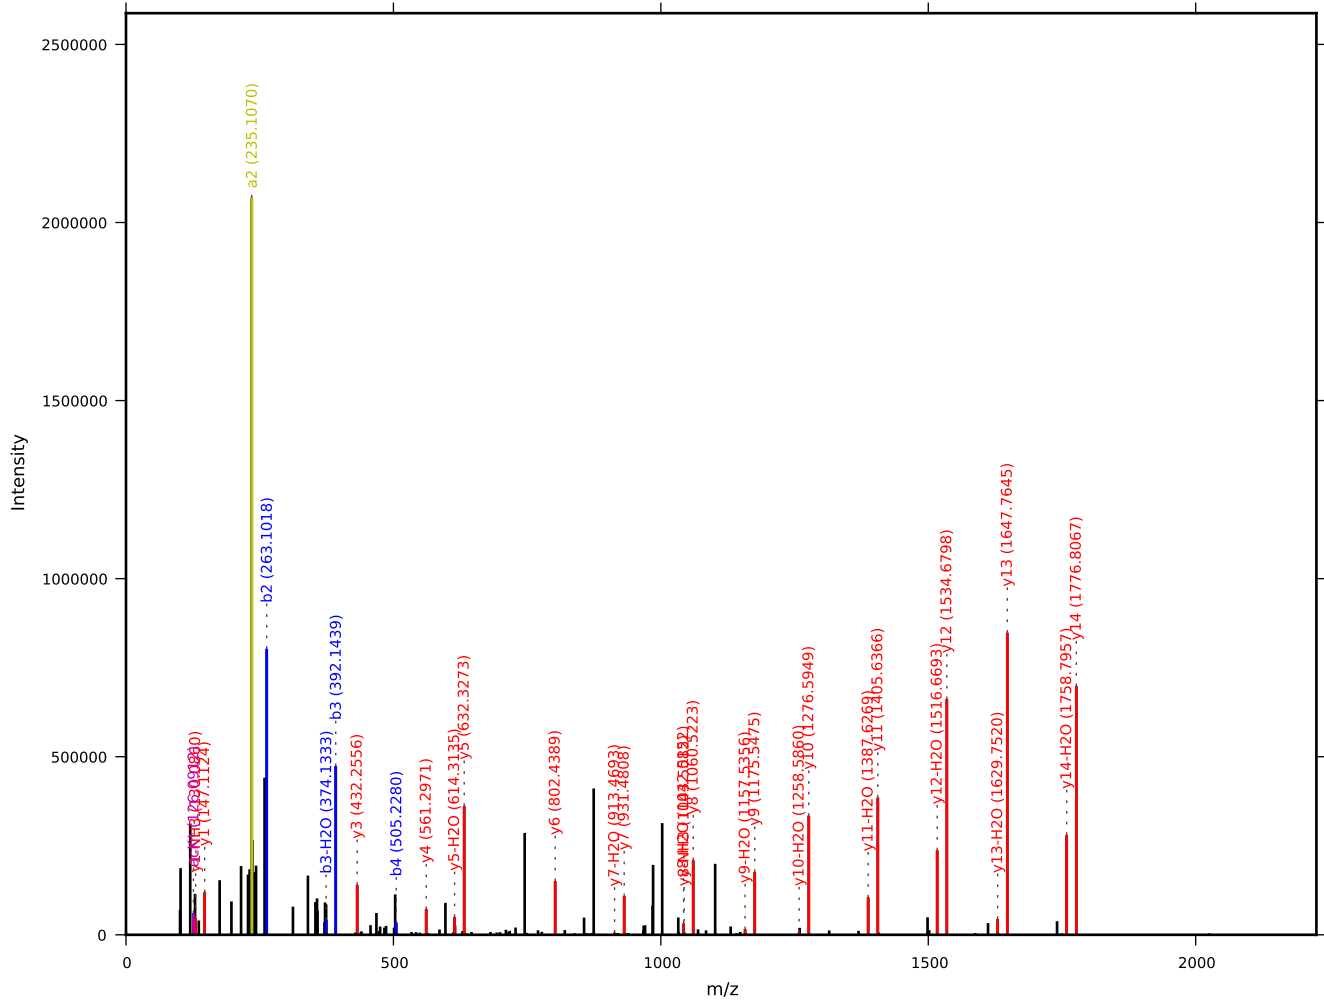

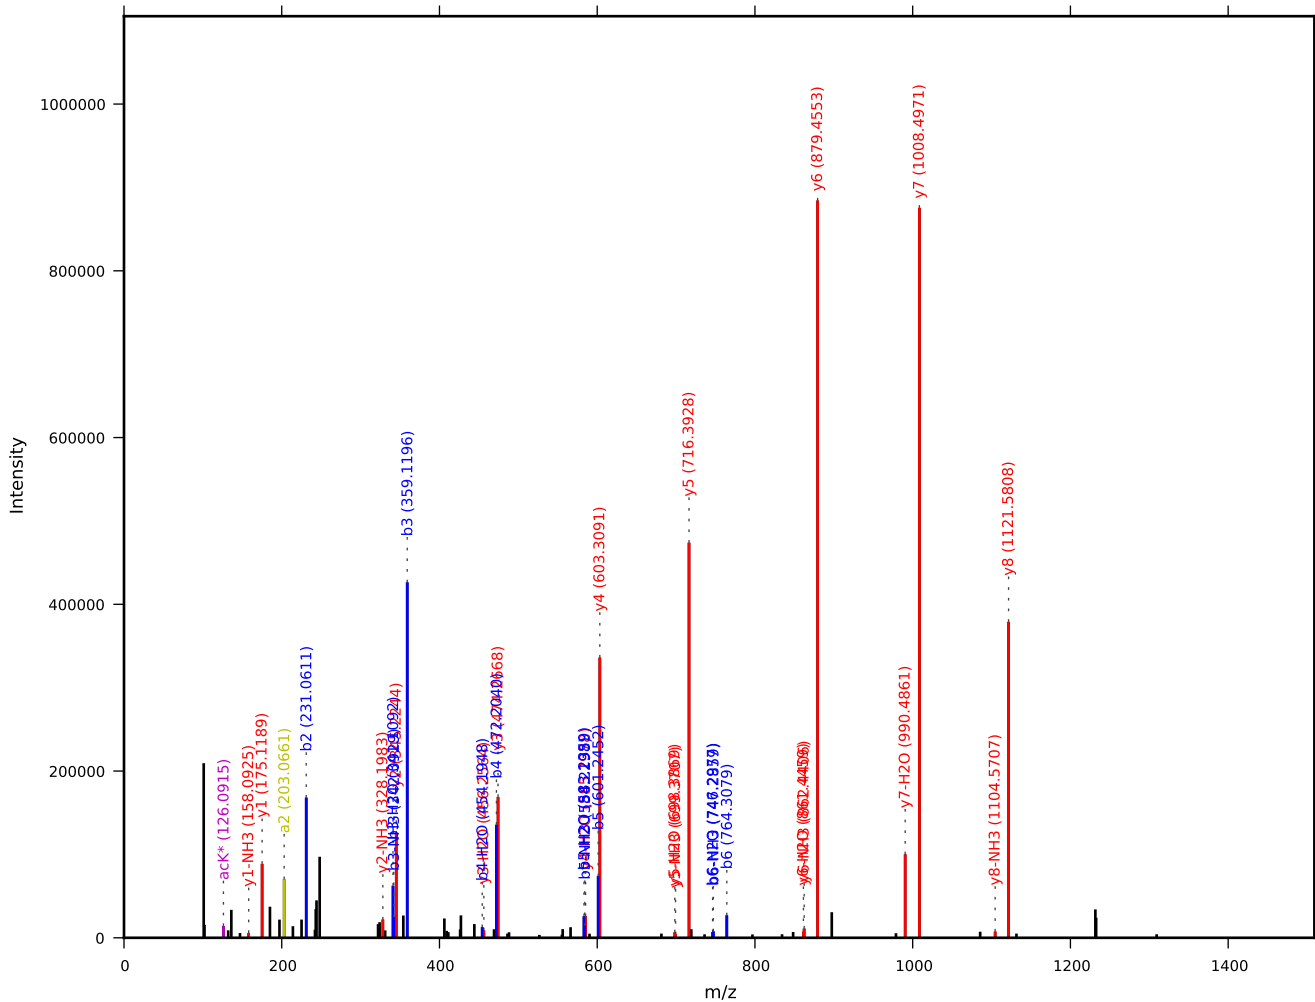

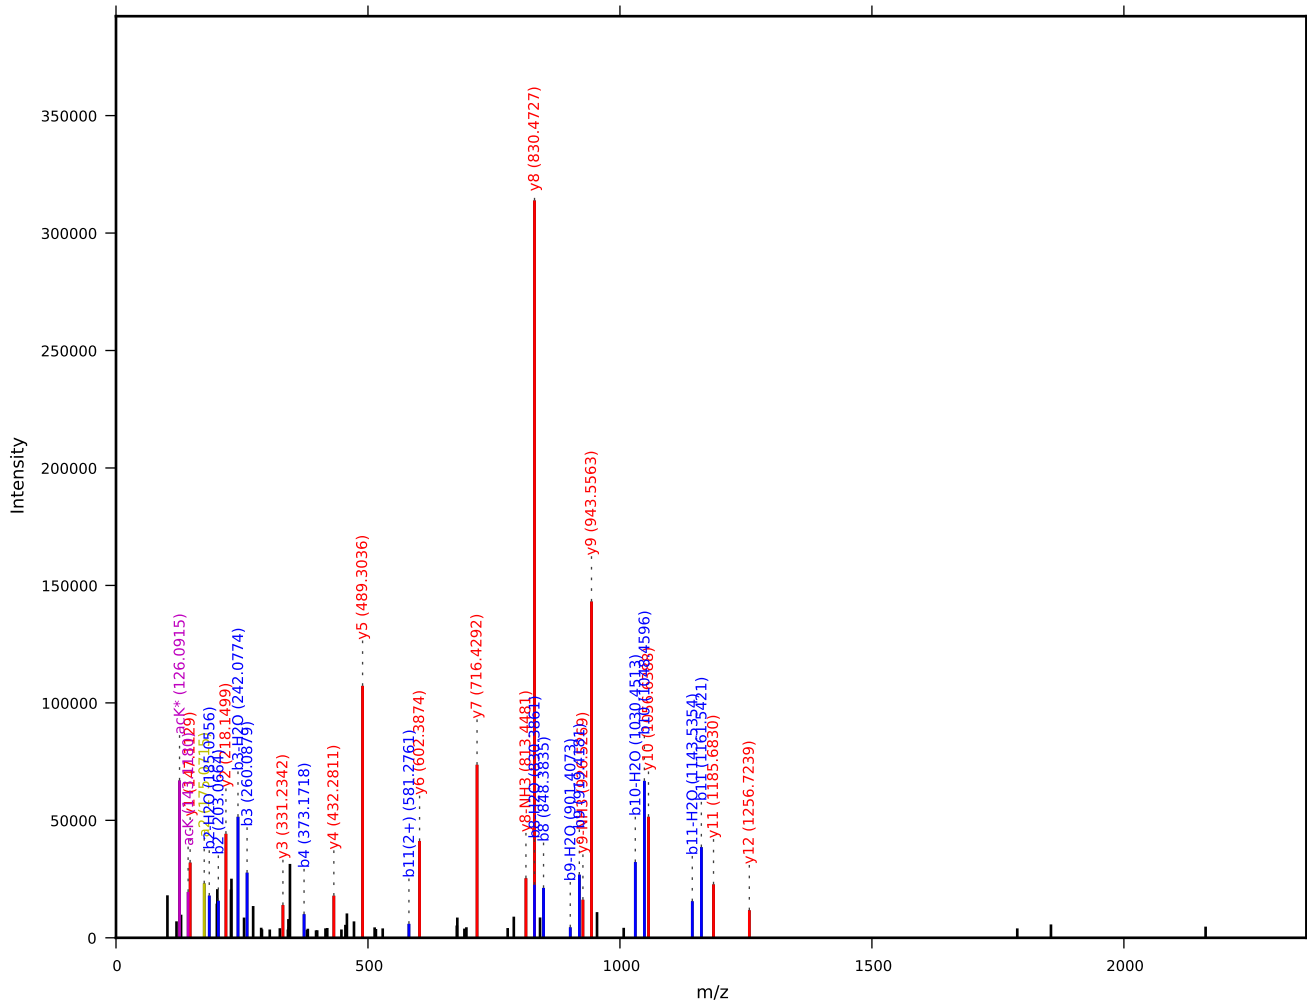

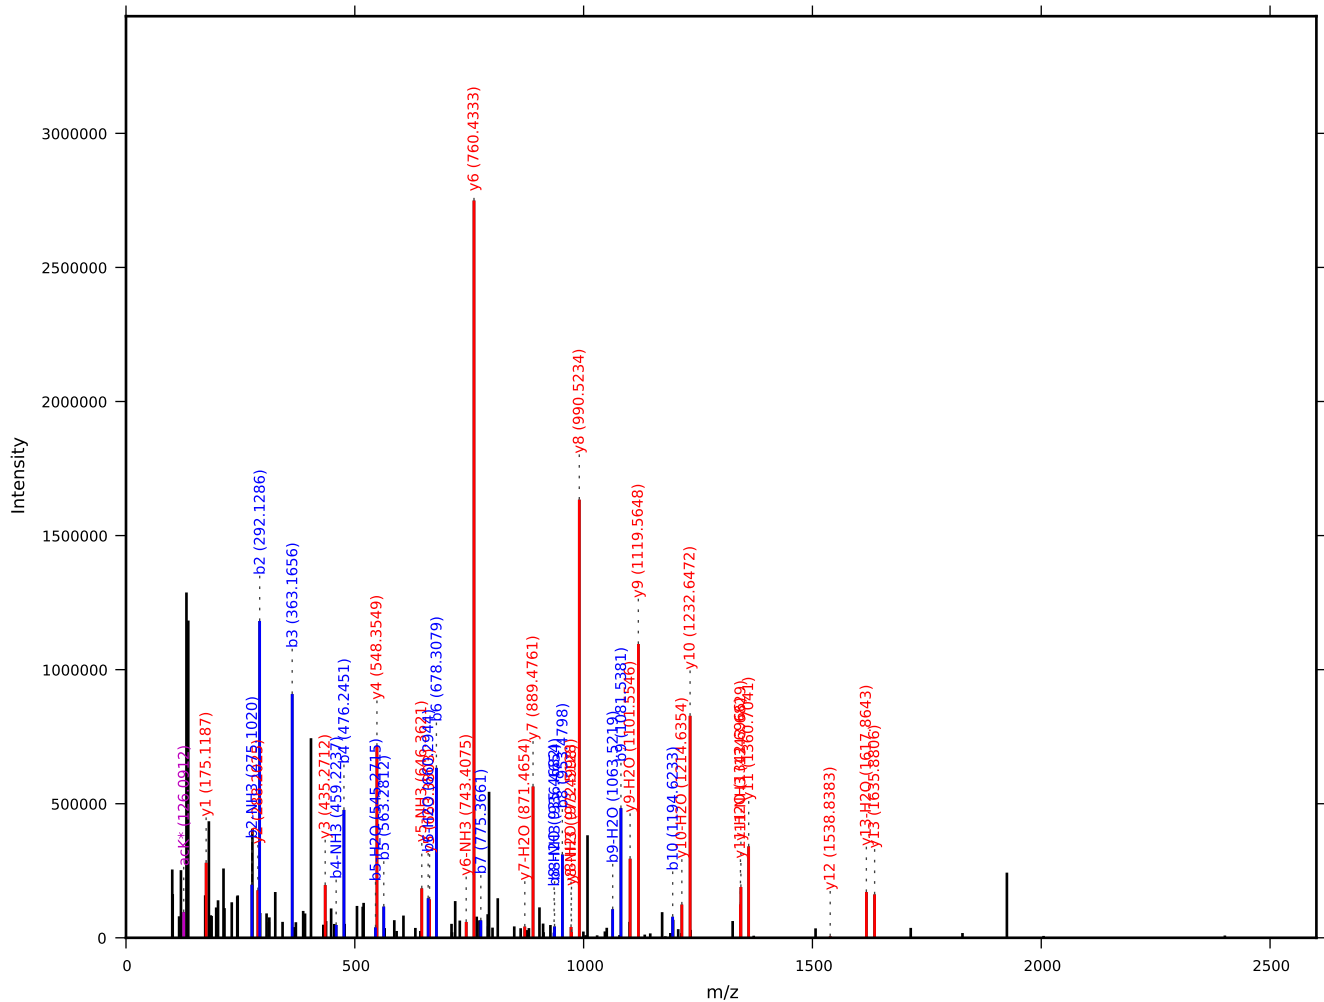

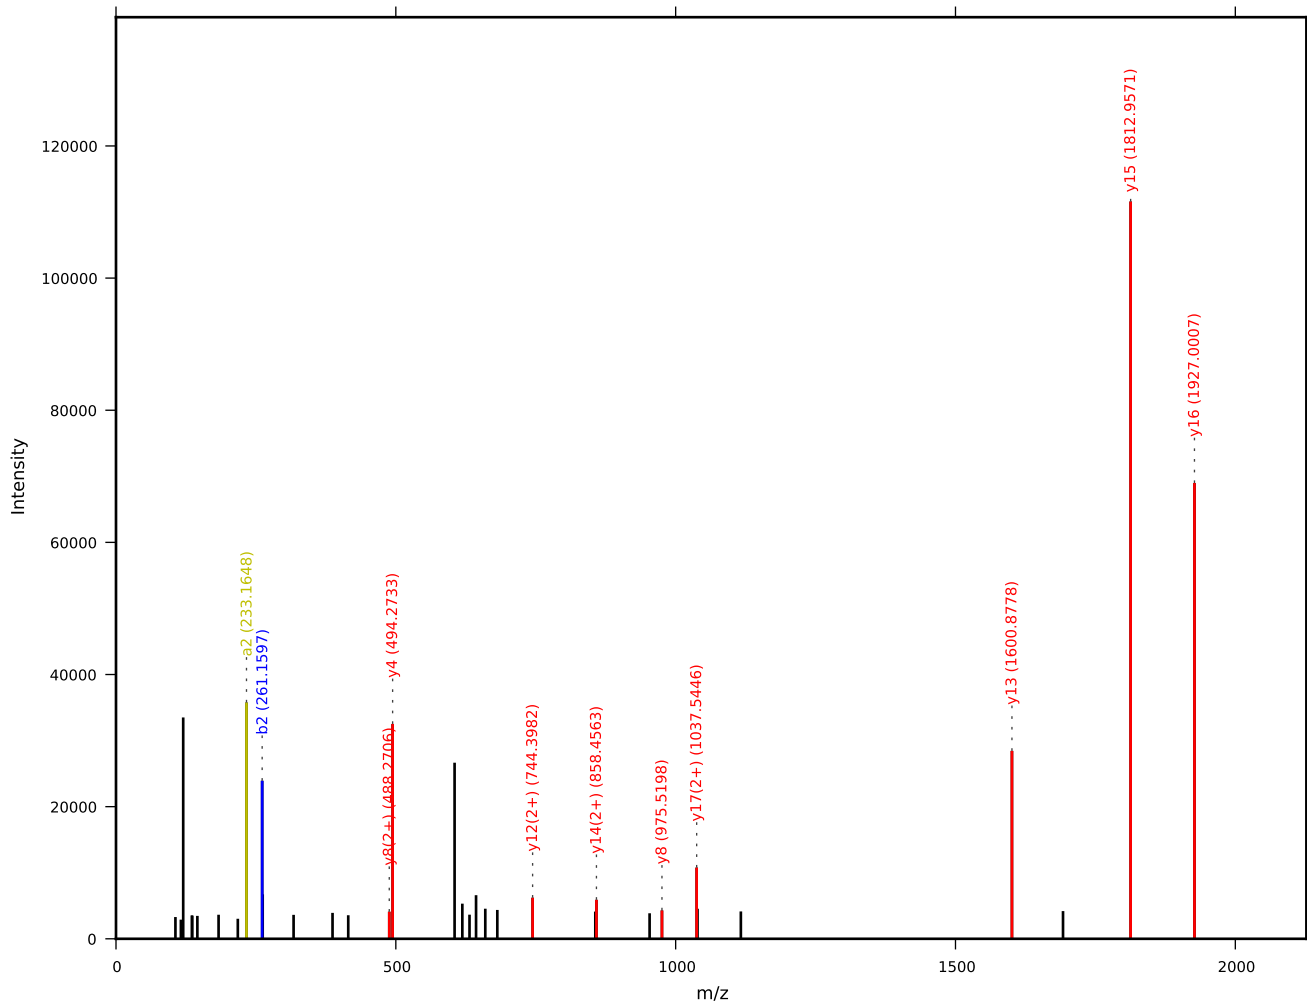



Mass: 875.58152 Charge: 2 m/z: 438.79804  
Modified Peptide: \_FGK(ac)LILK\_ Score: 54.549 PEP: 0.0081728

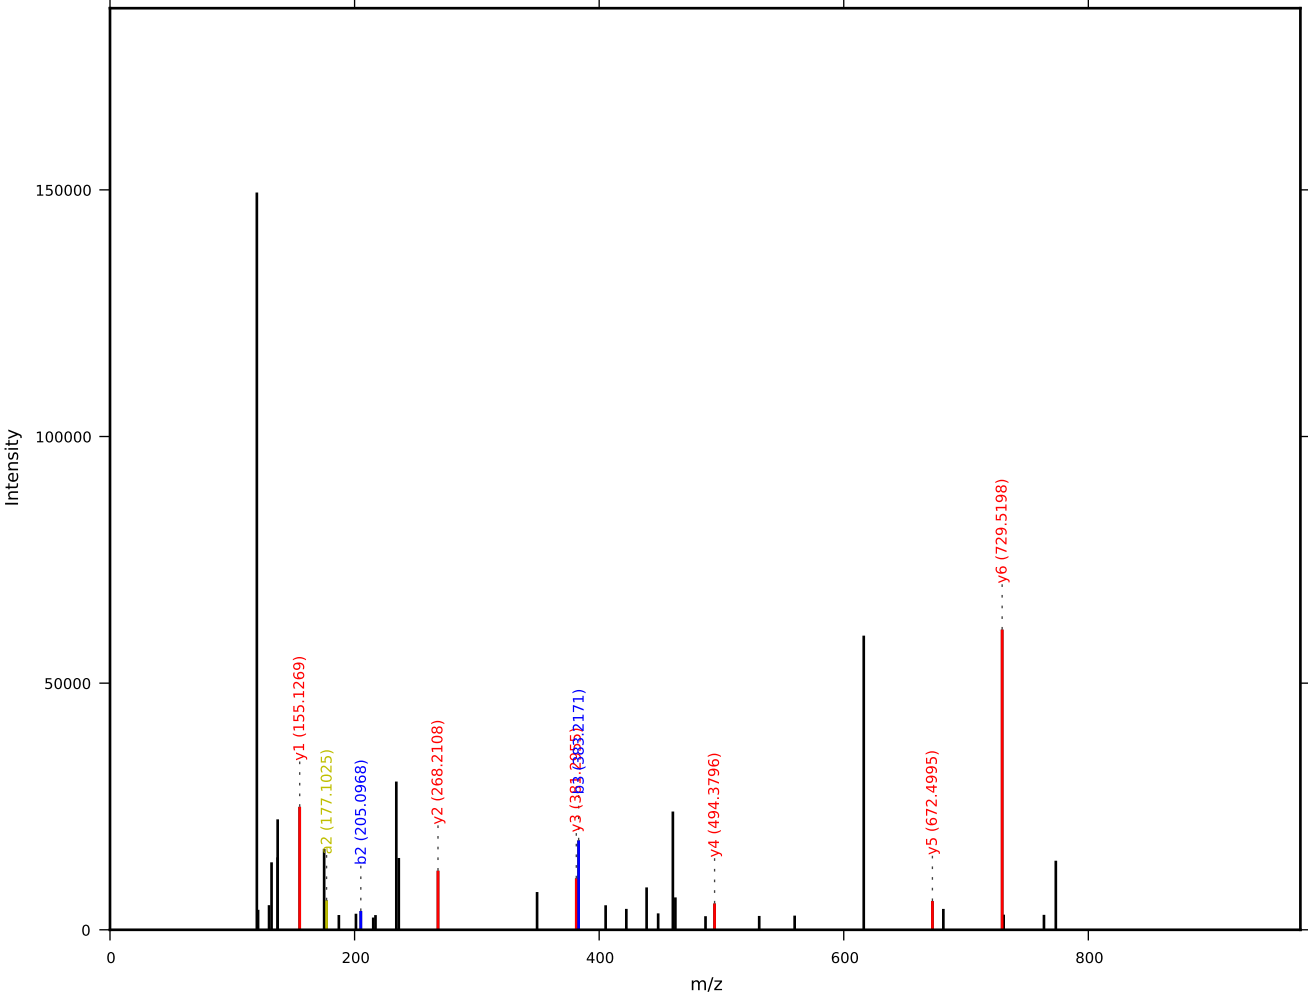

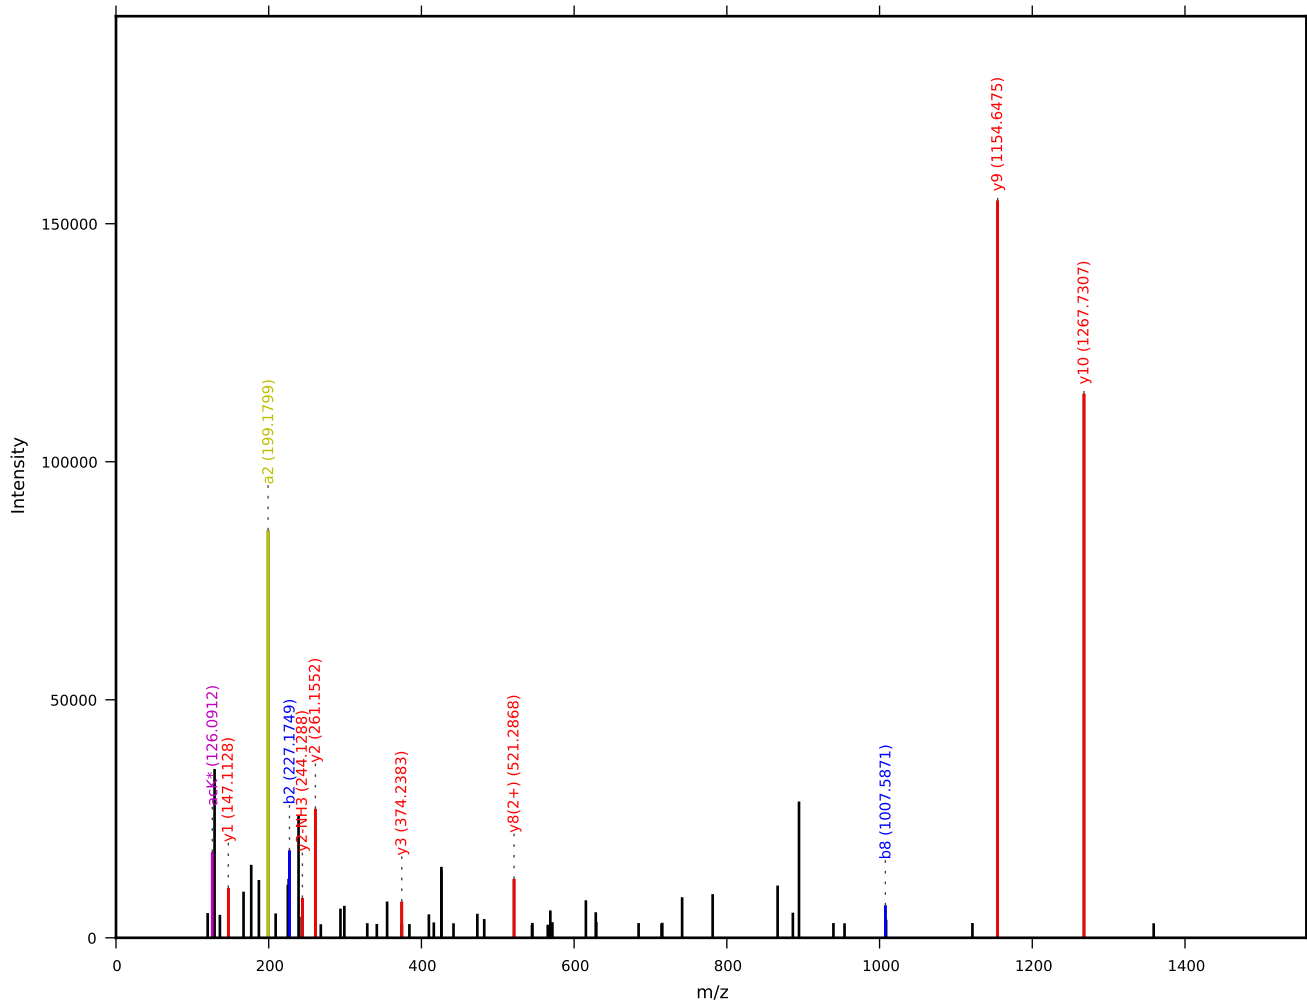

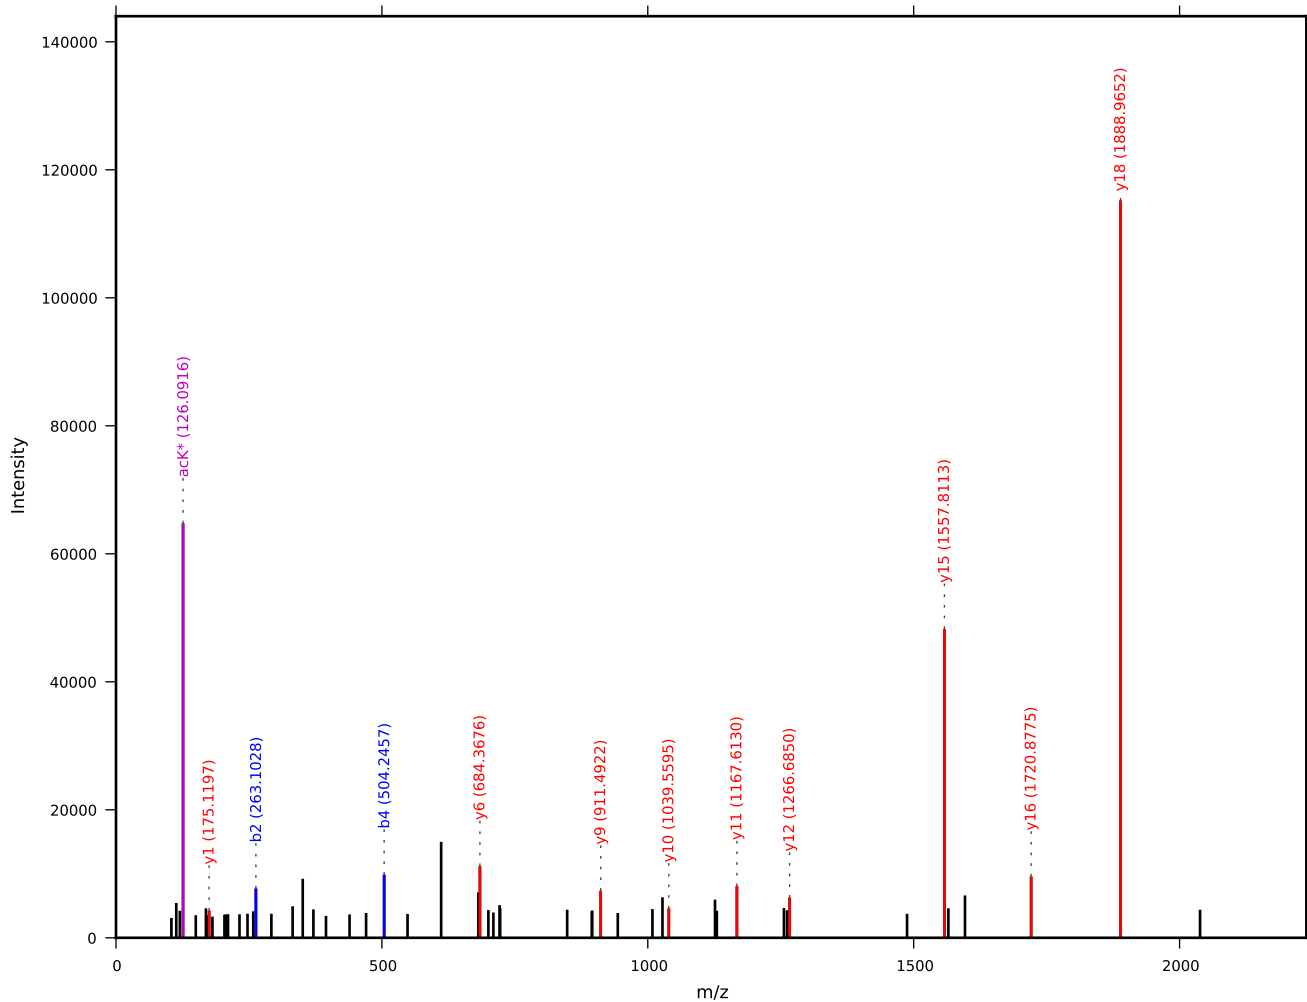

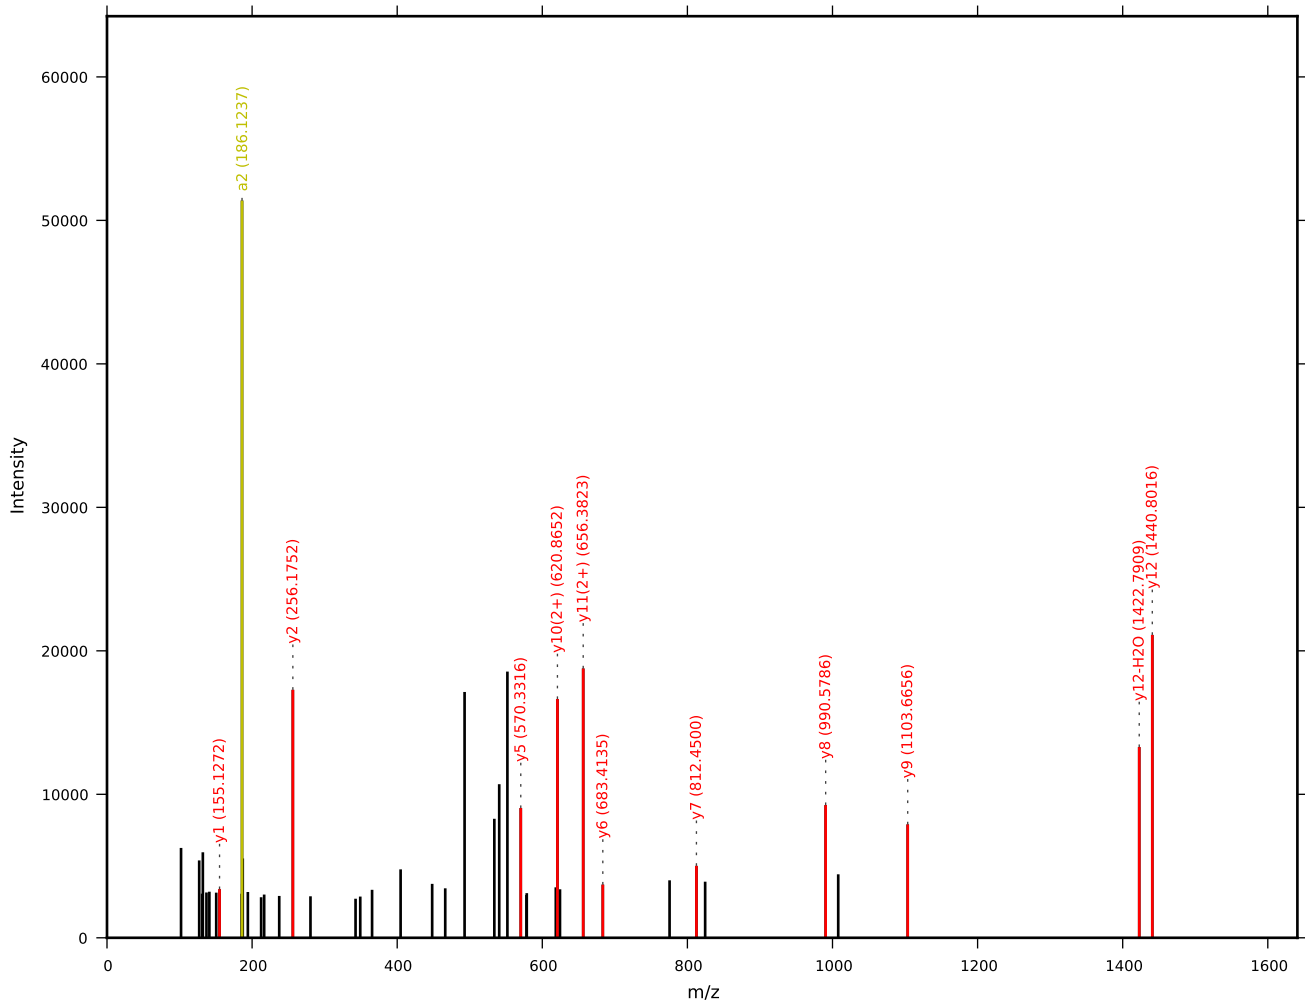

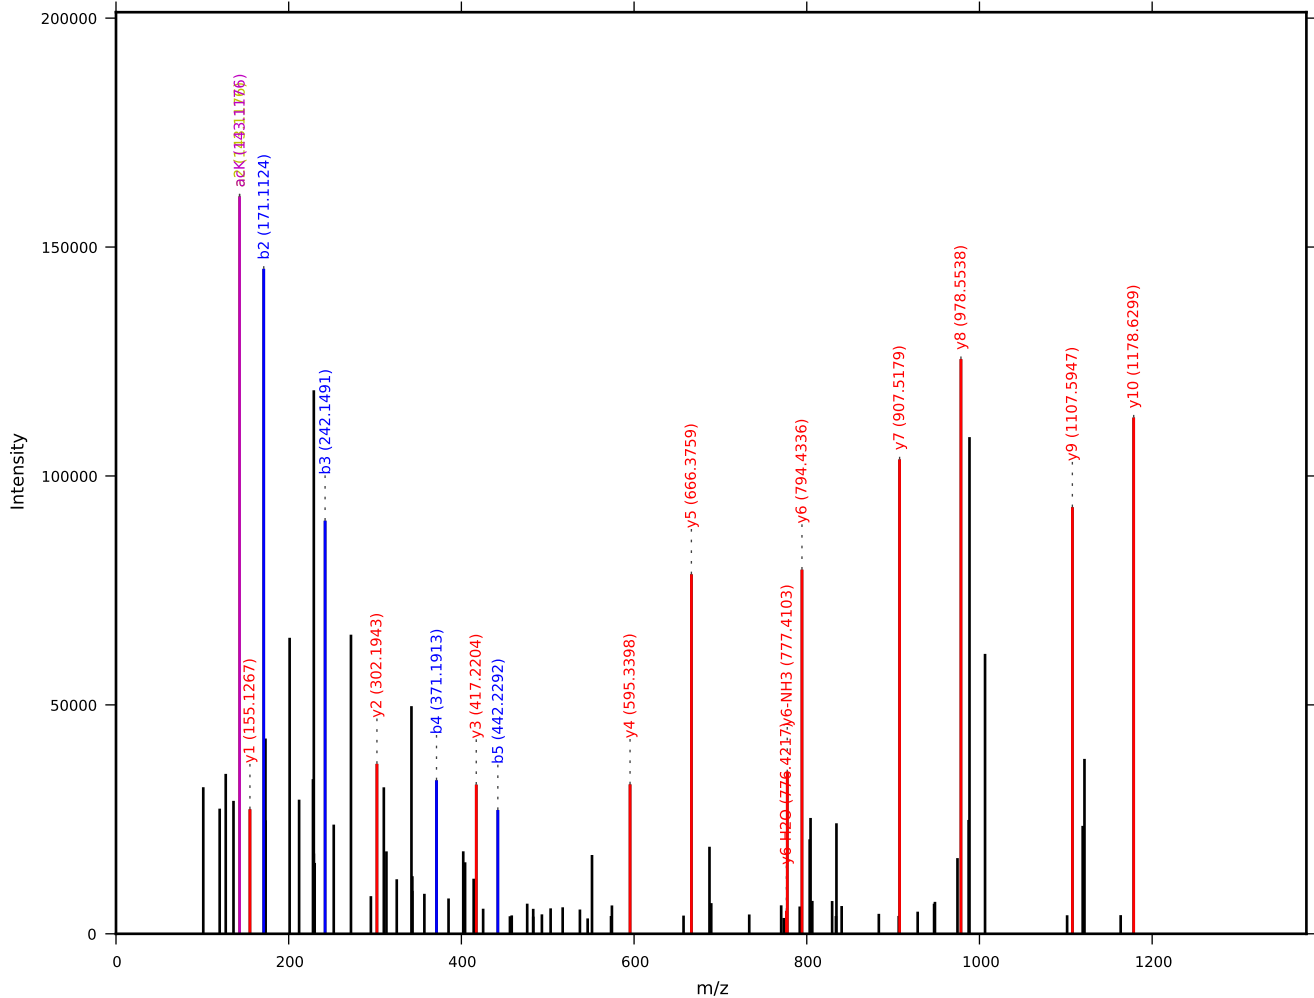

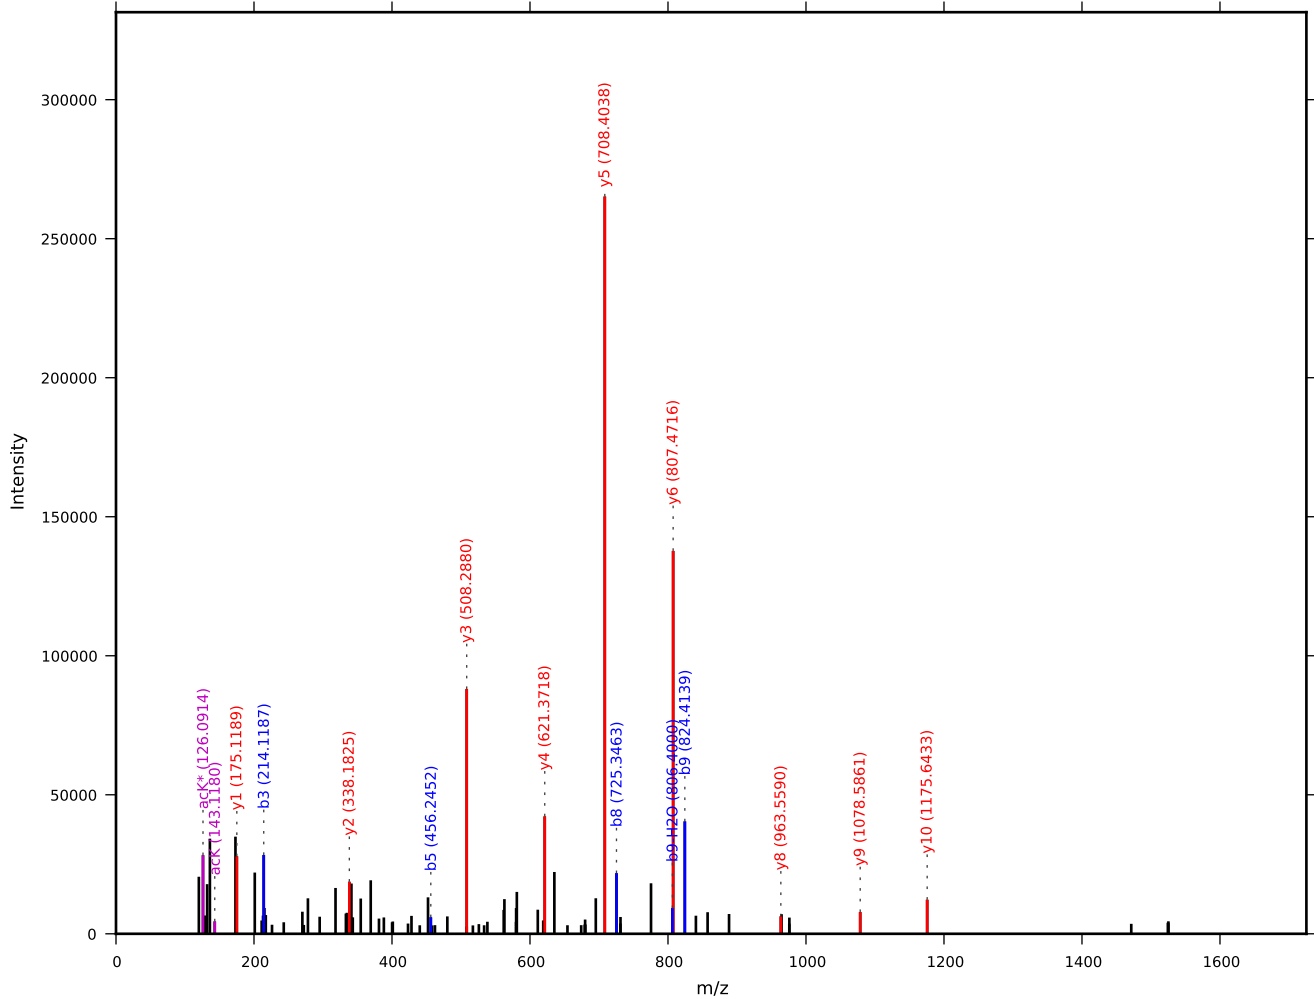

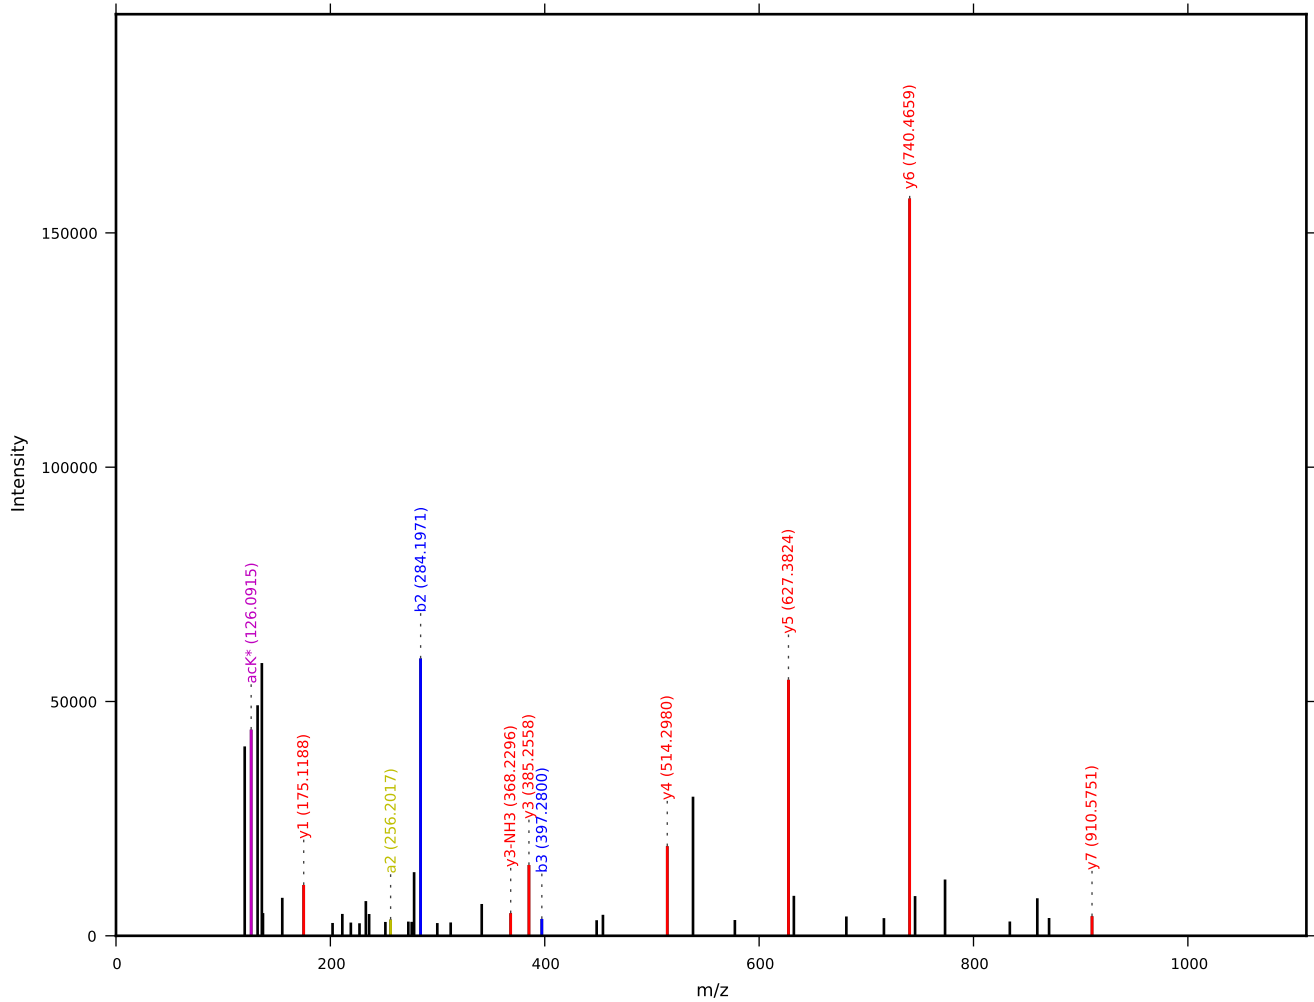

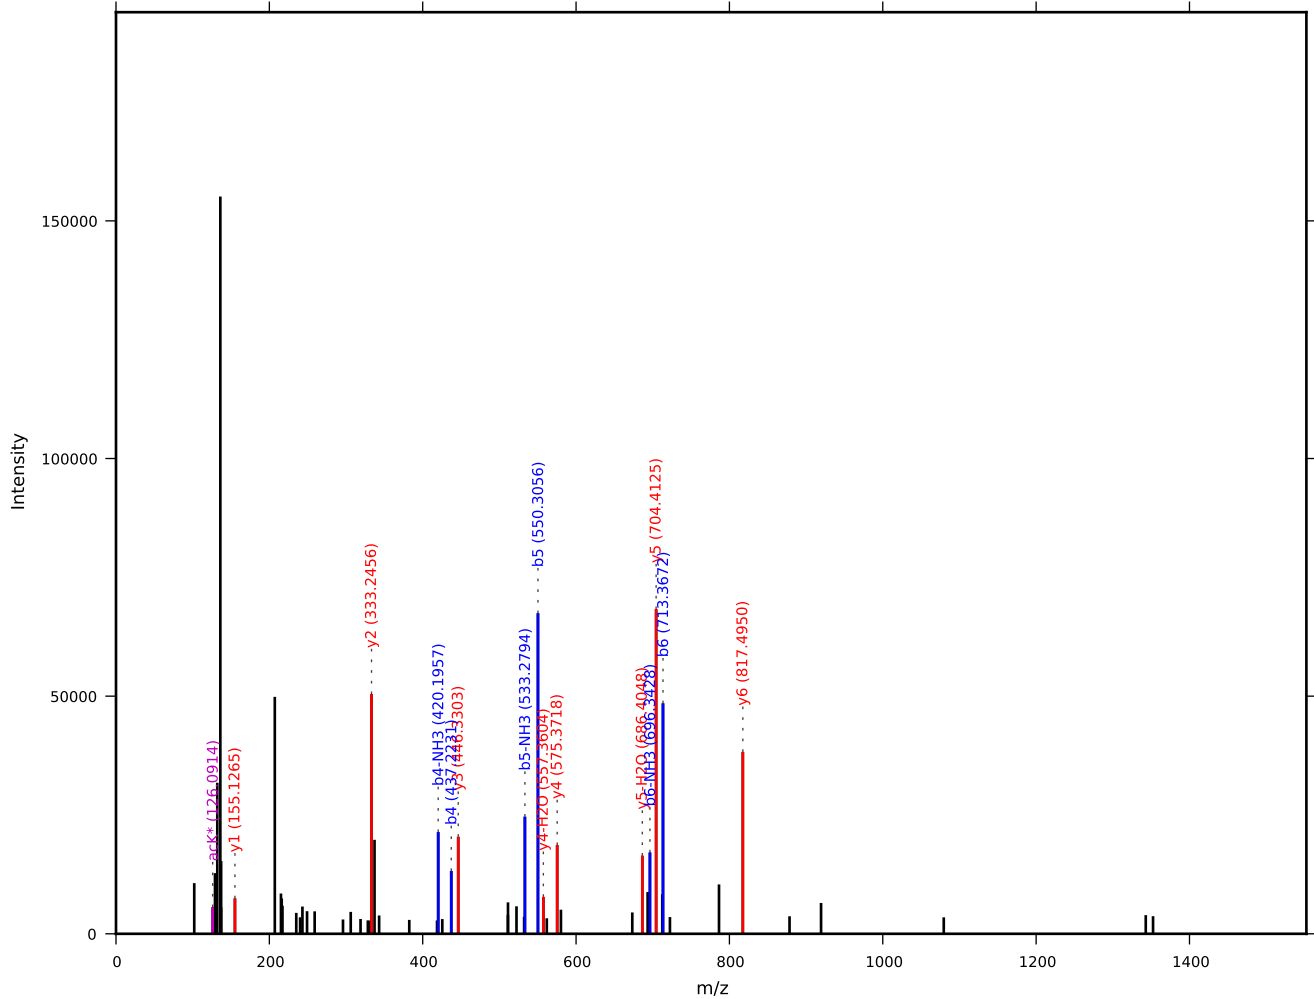



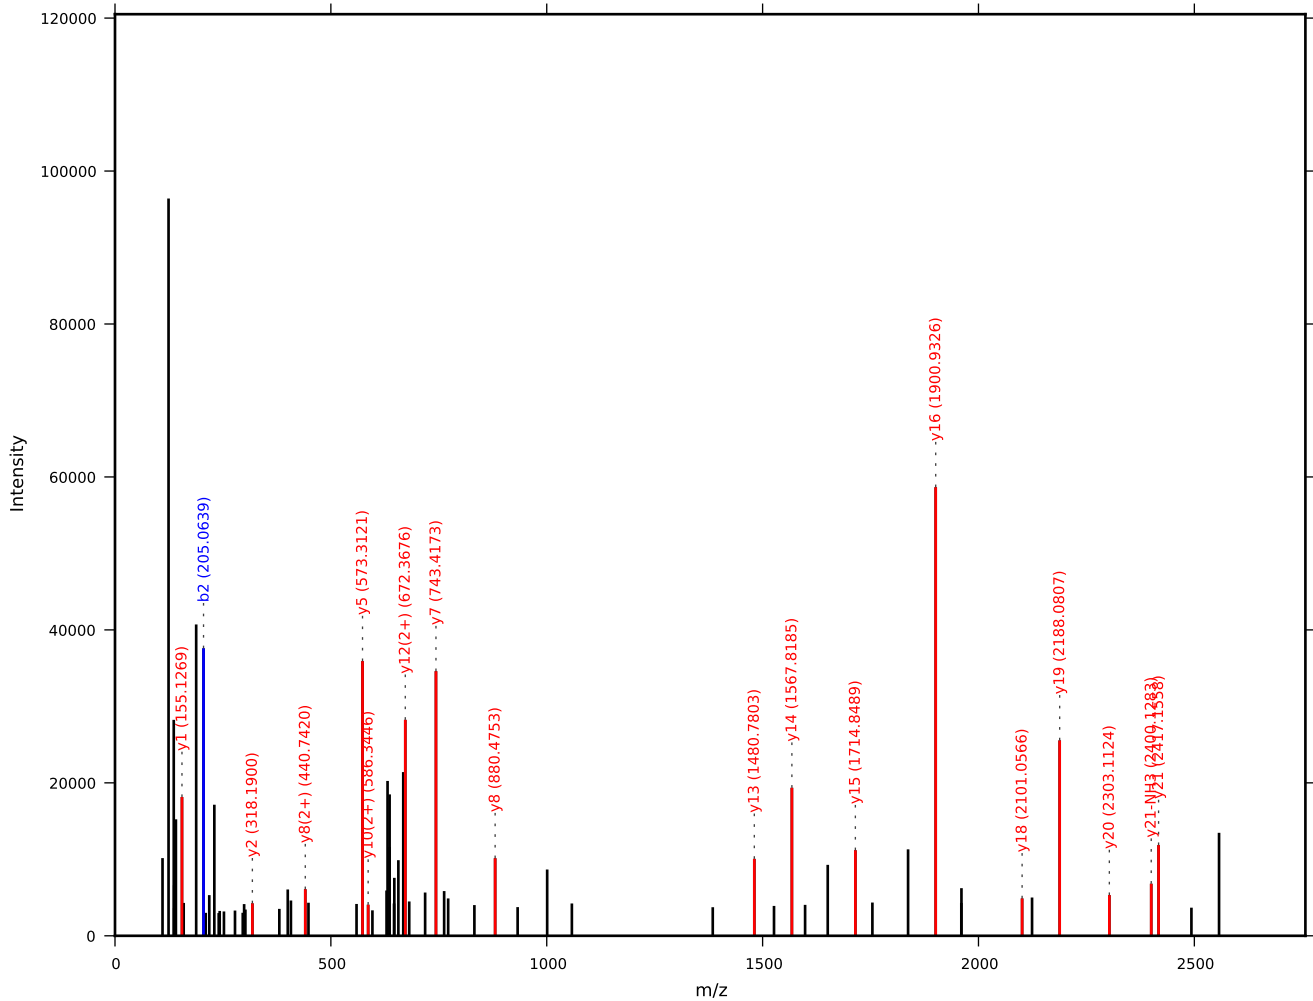

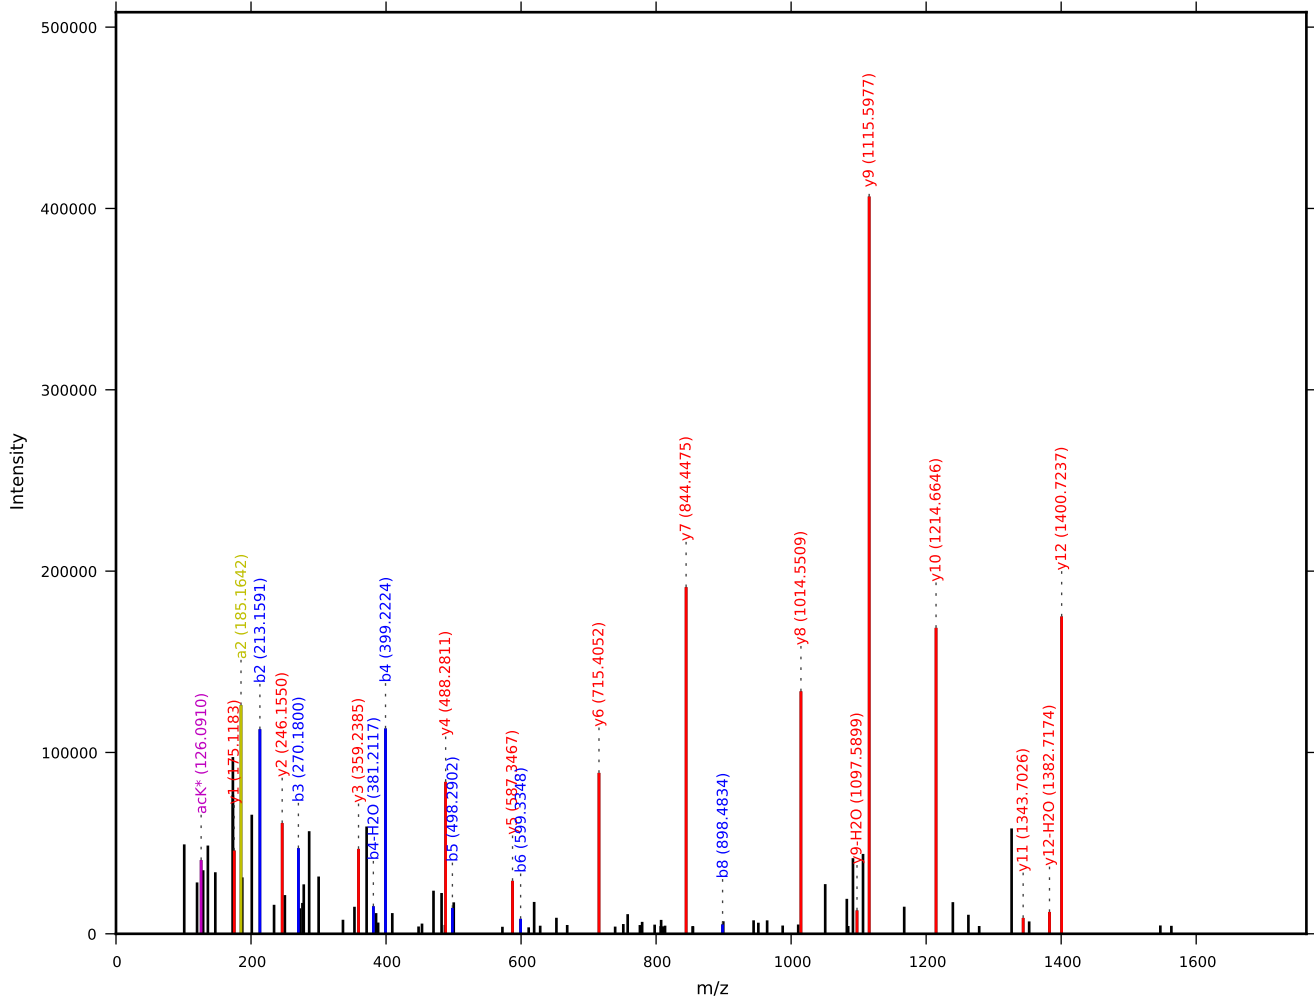

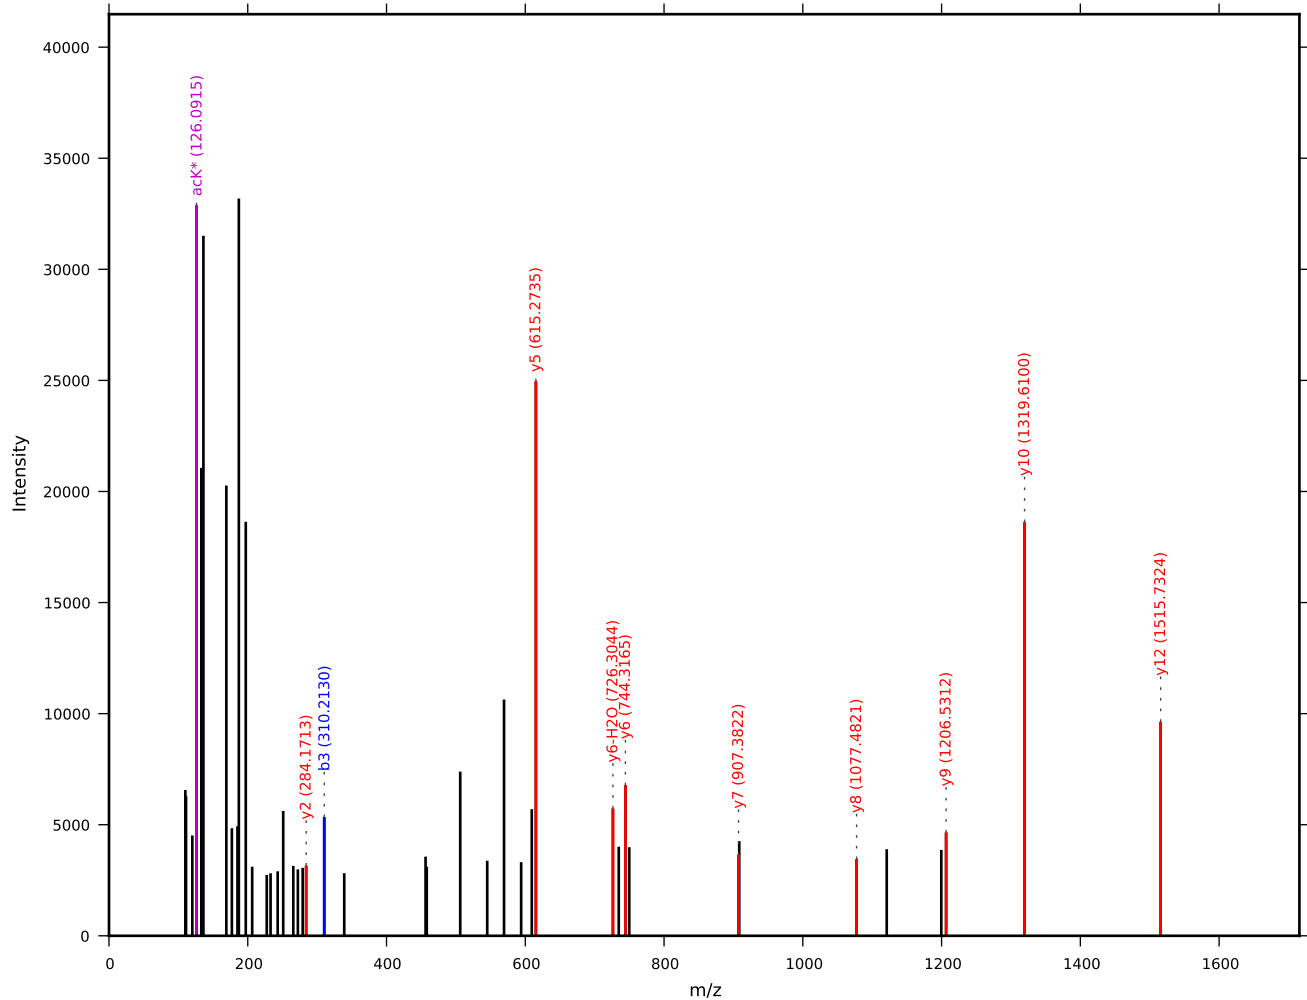

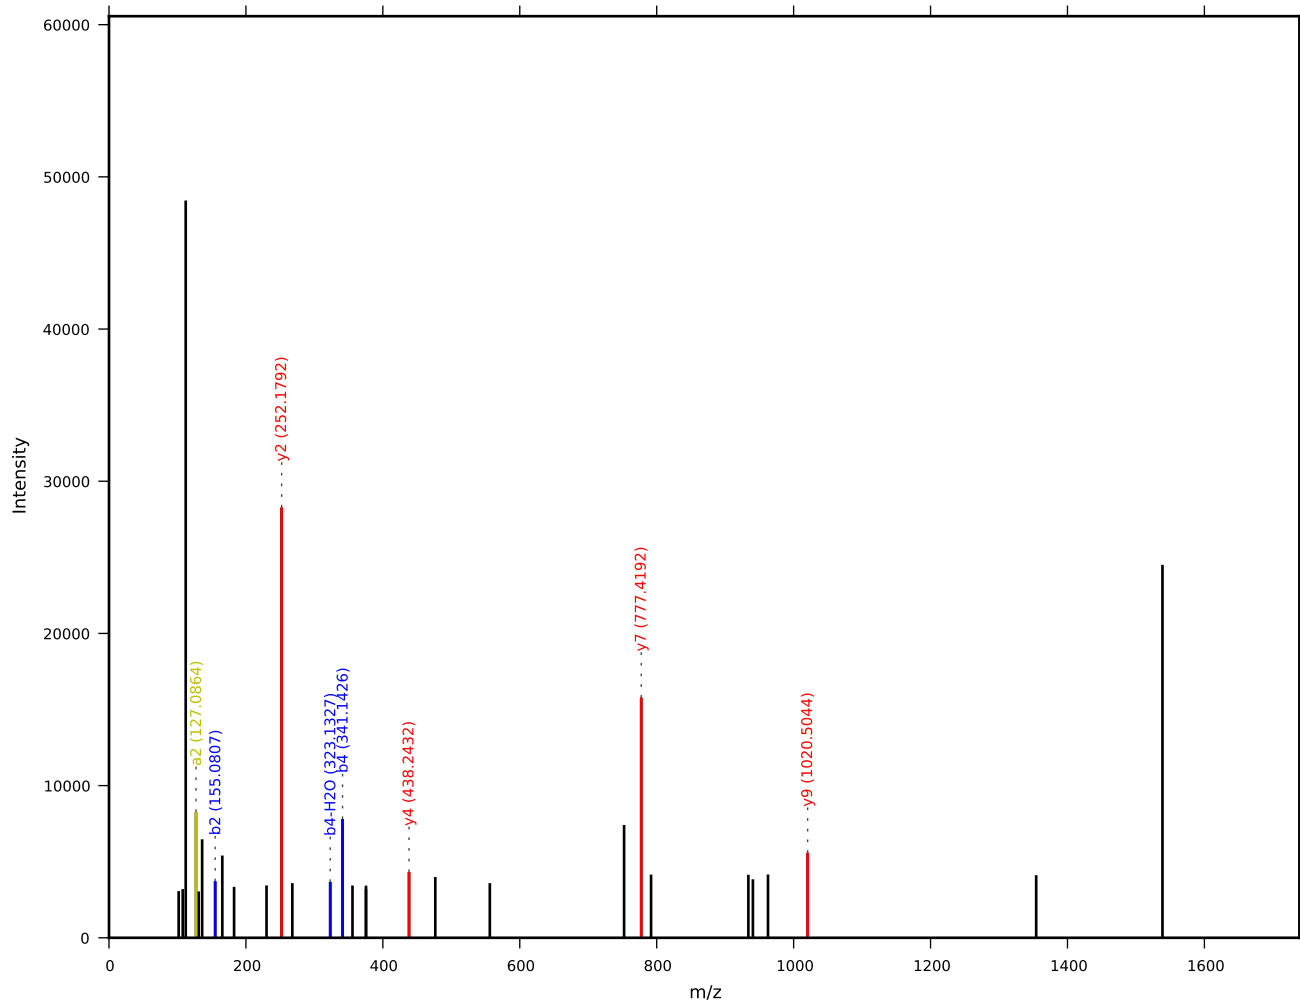

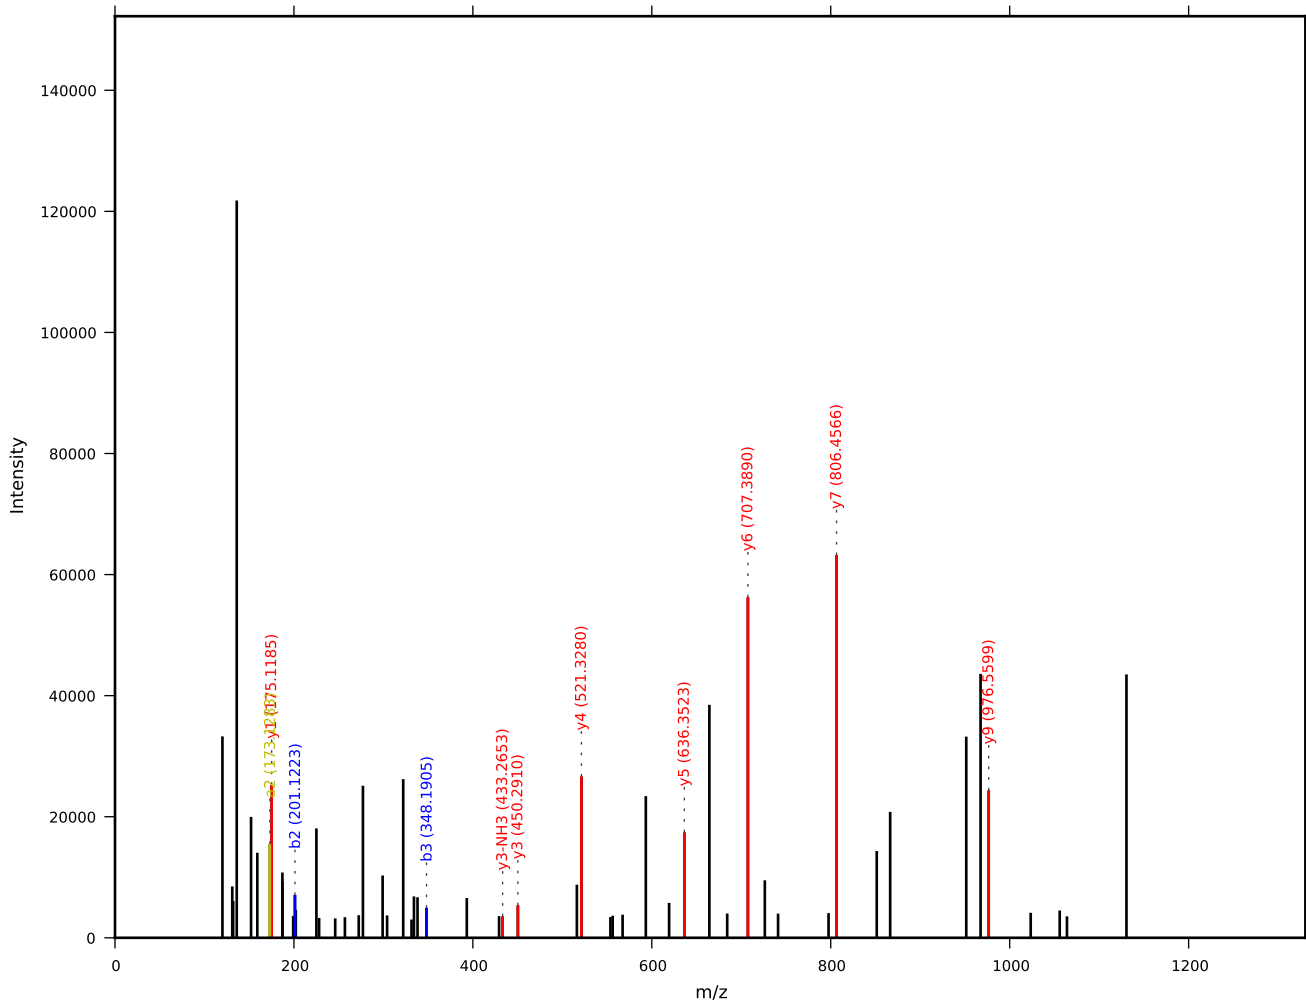

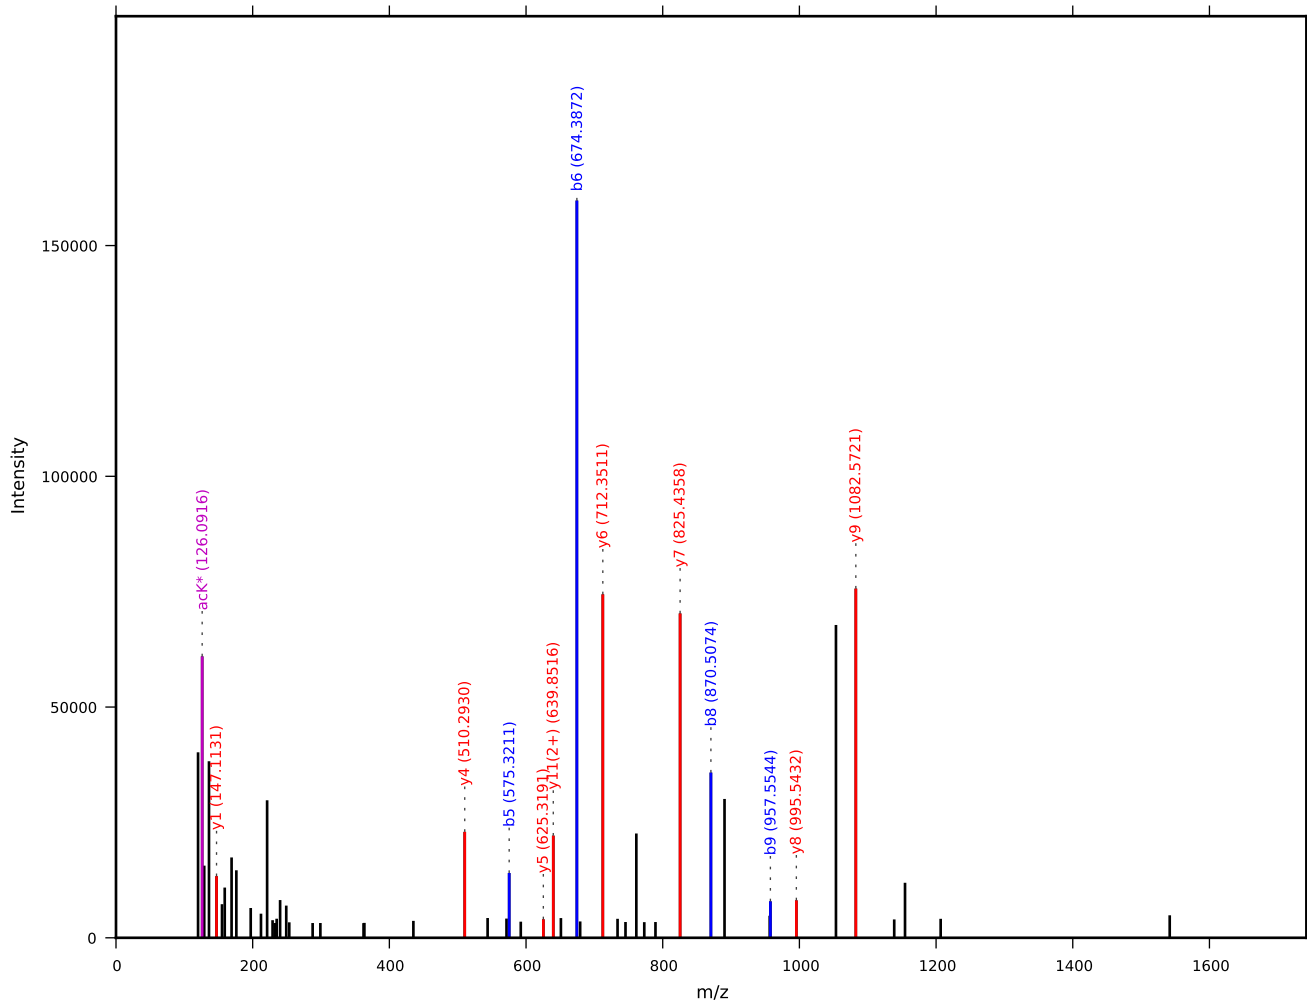

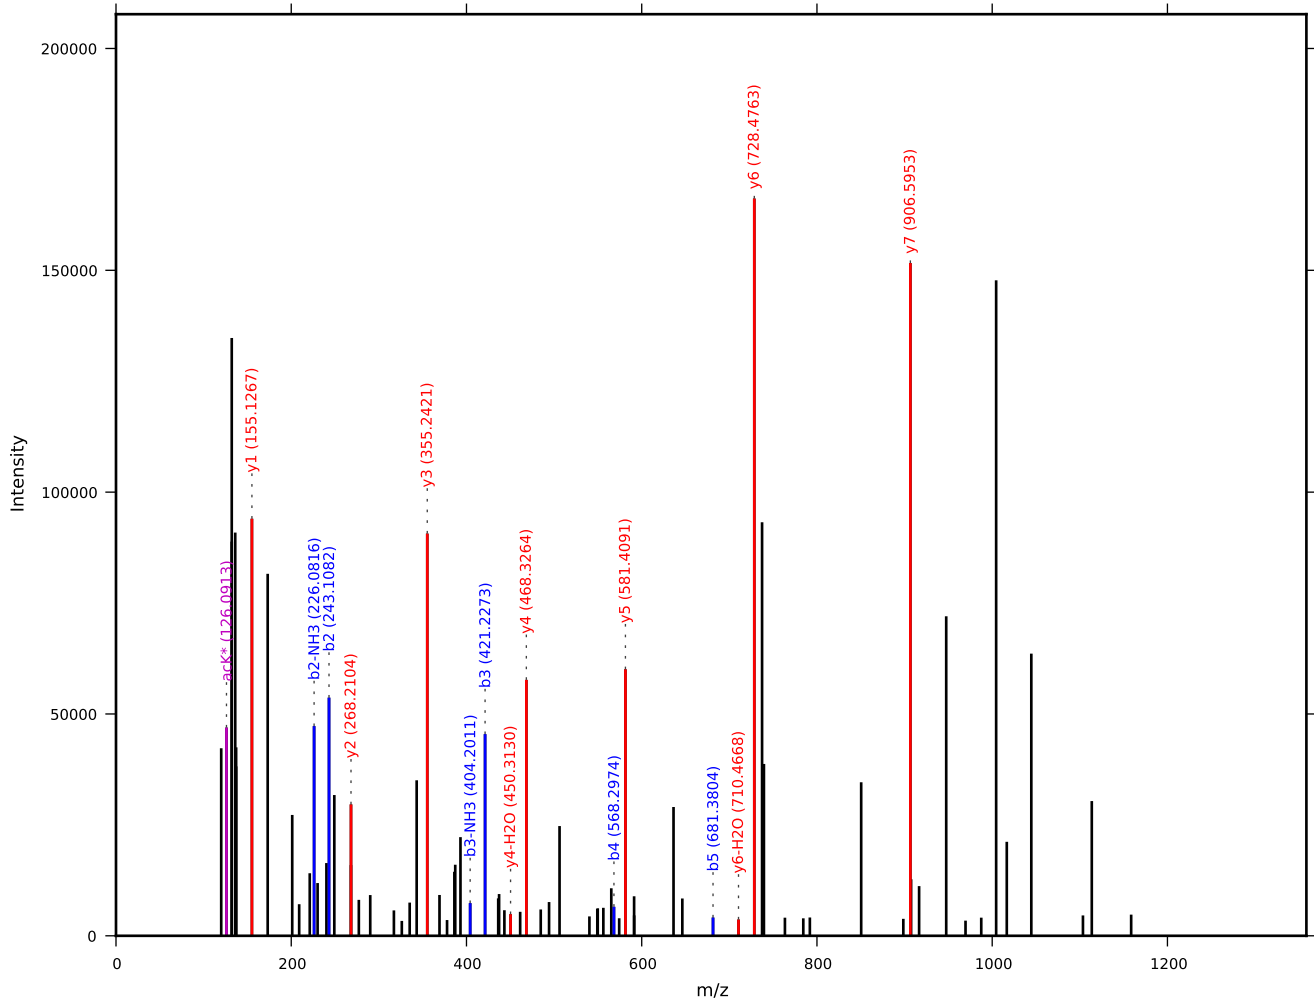

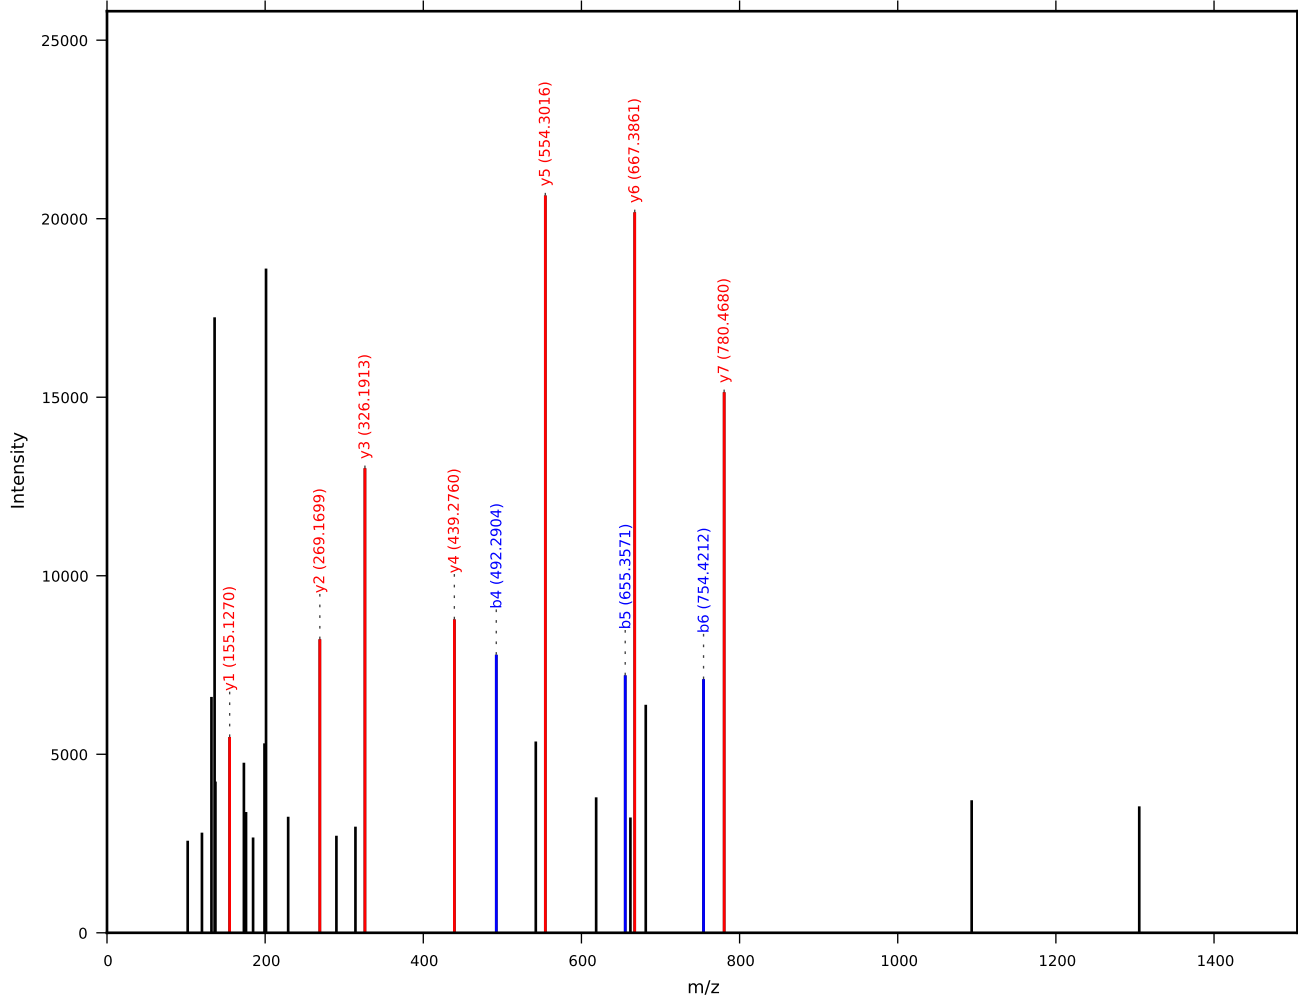



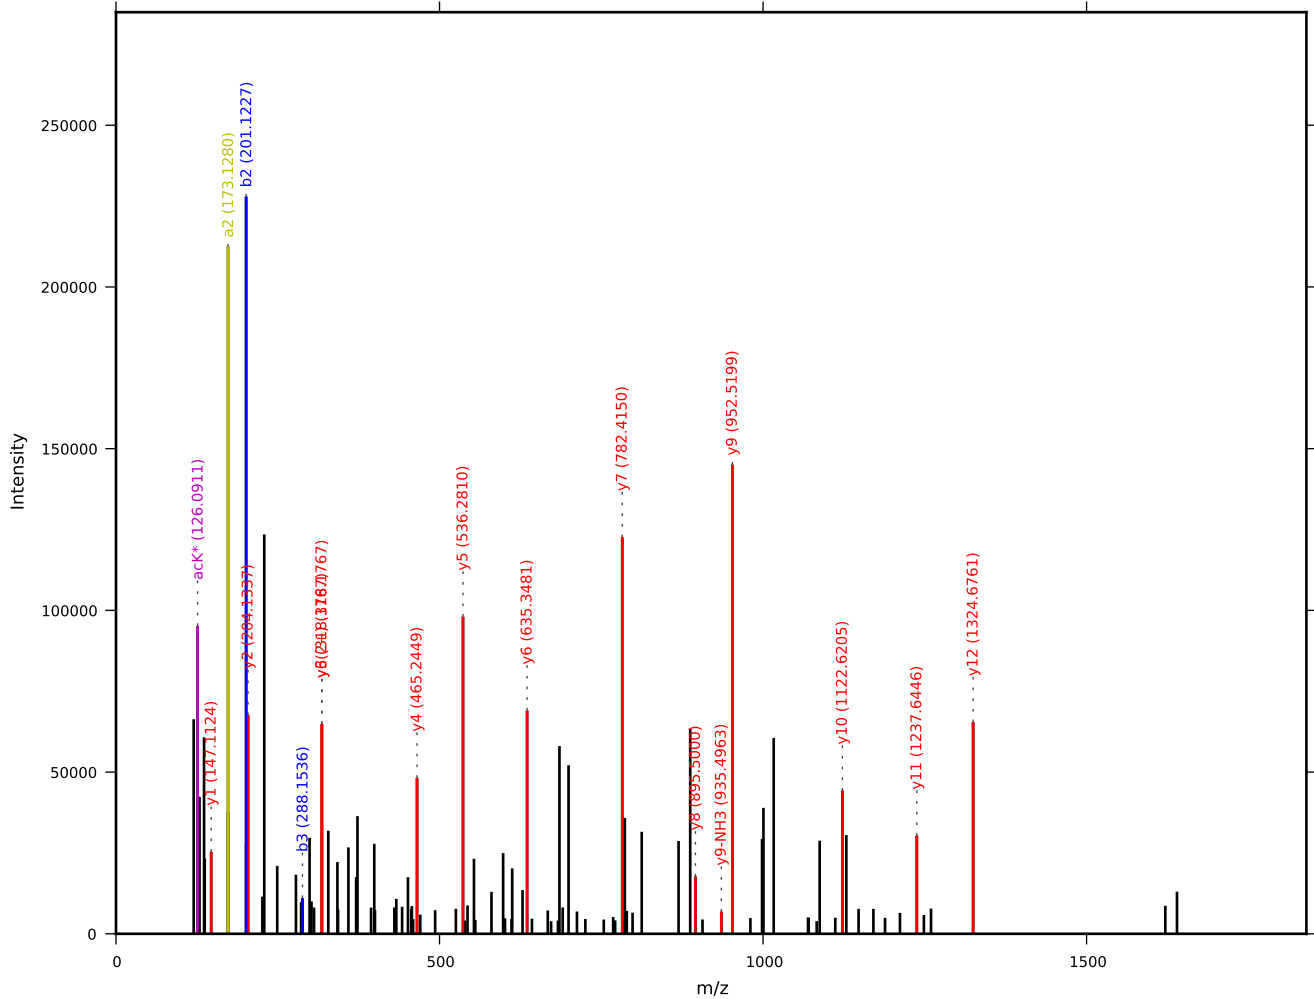

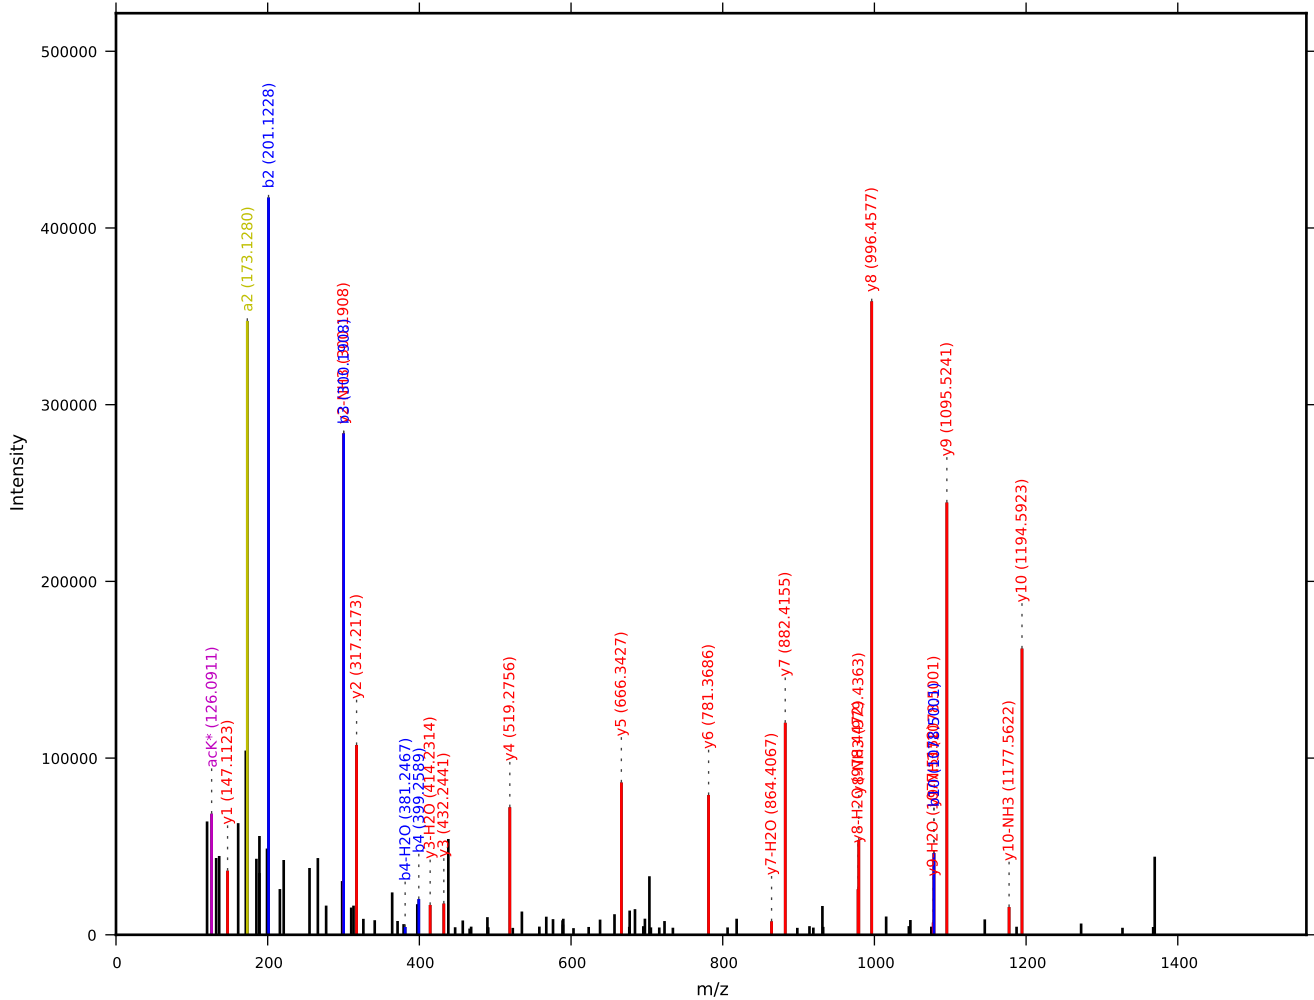

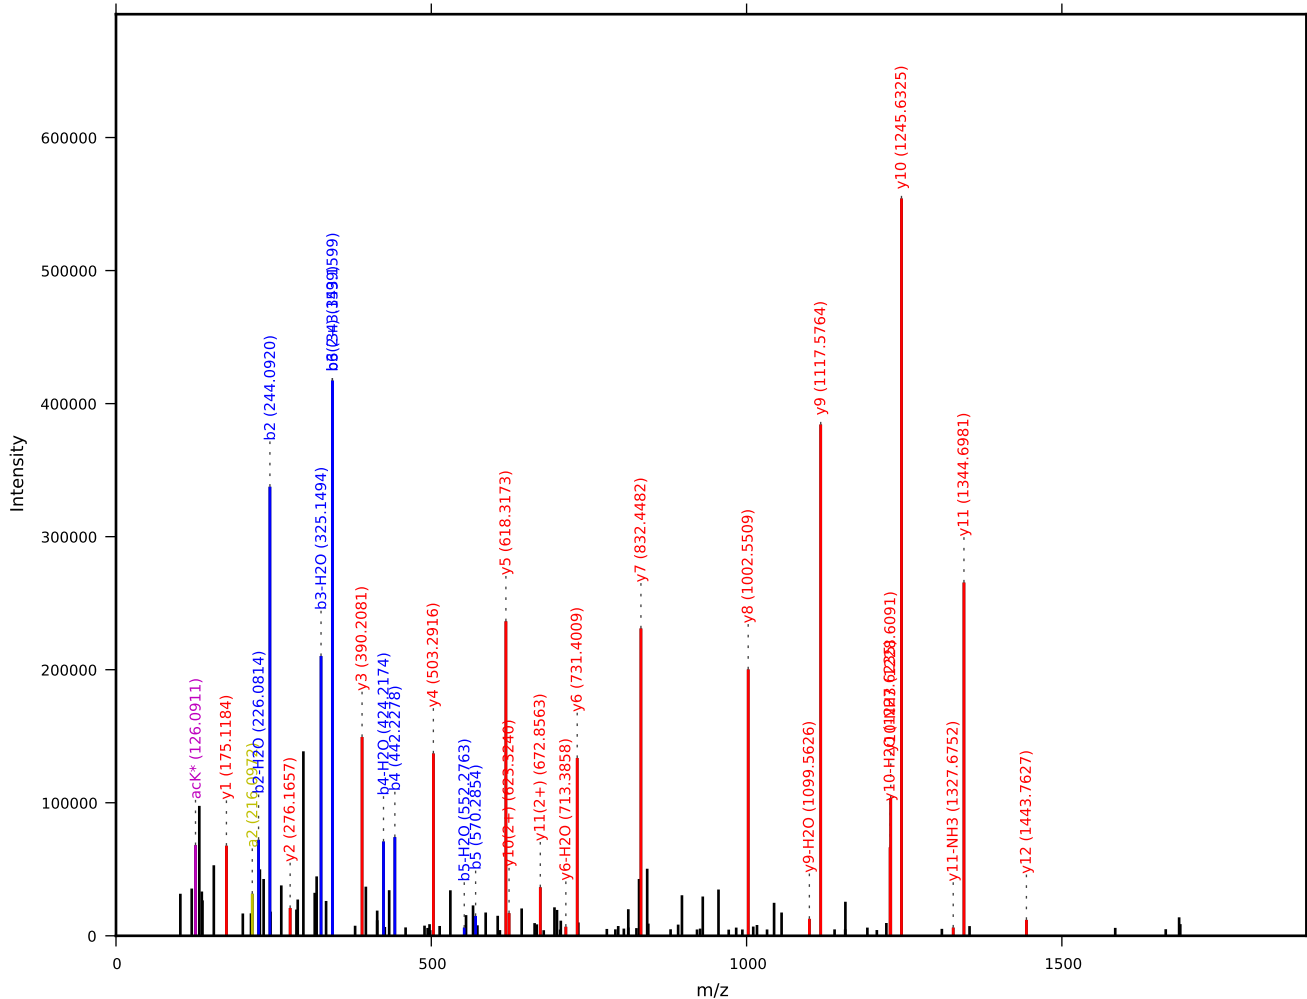

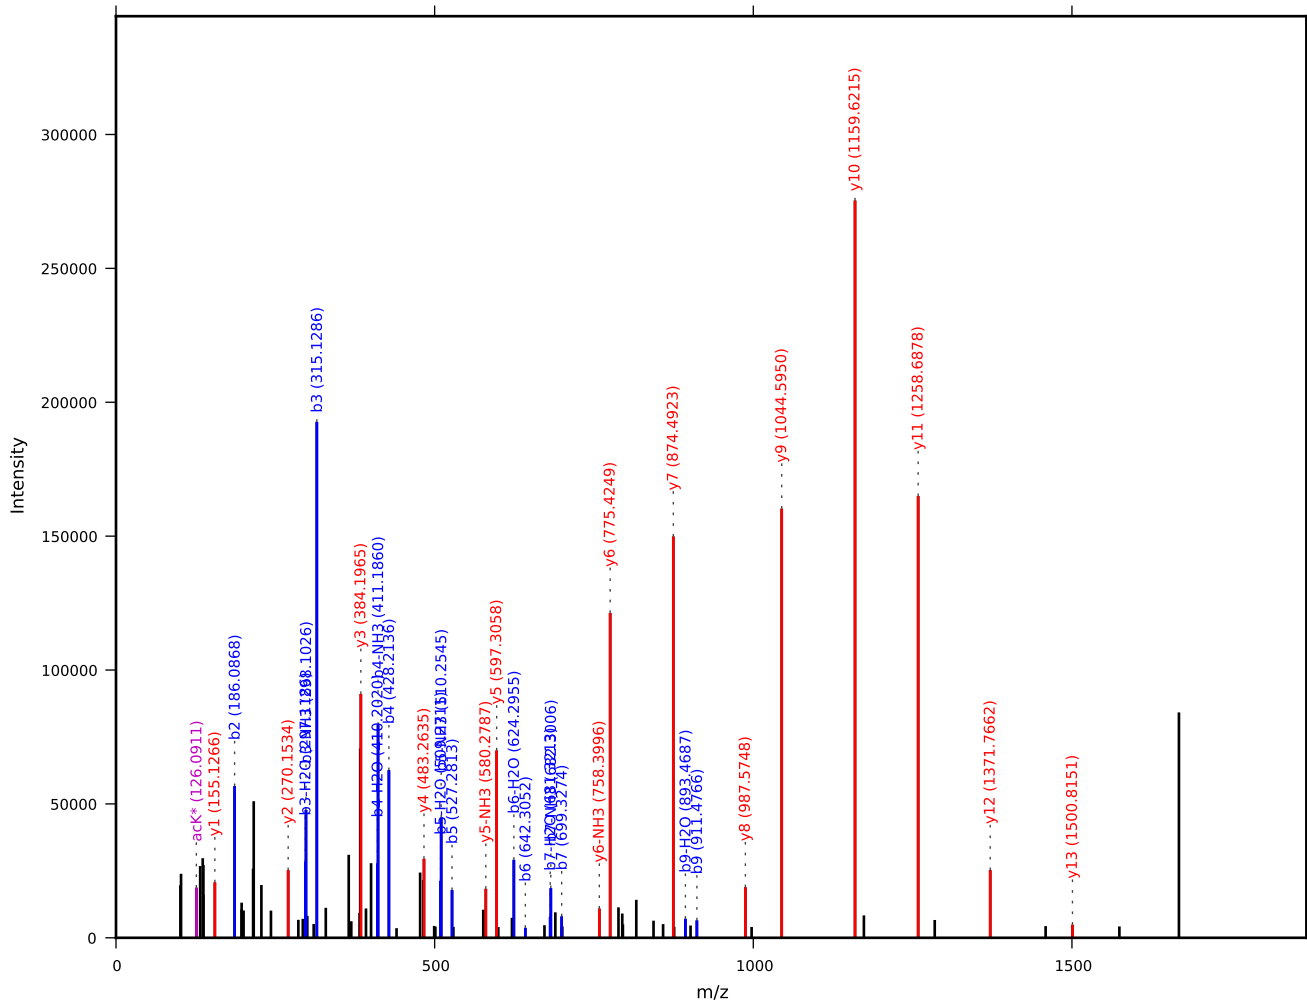

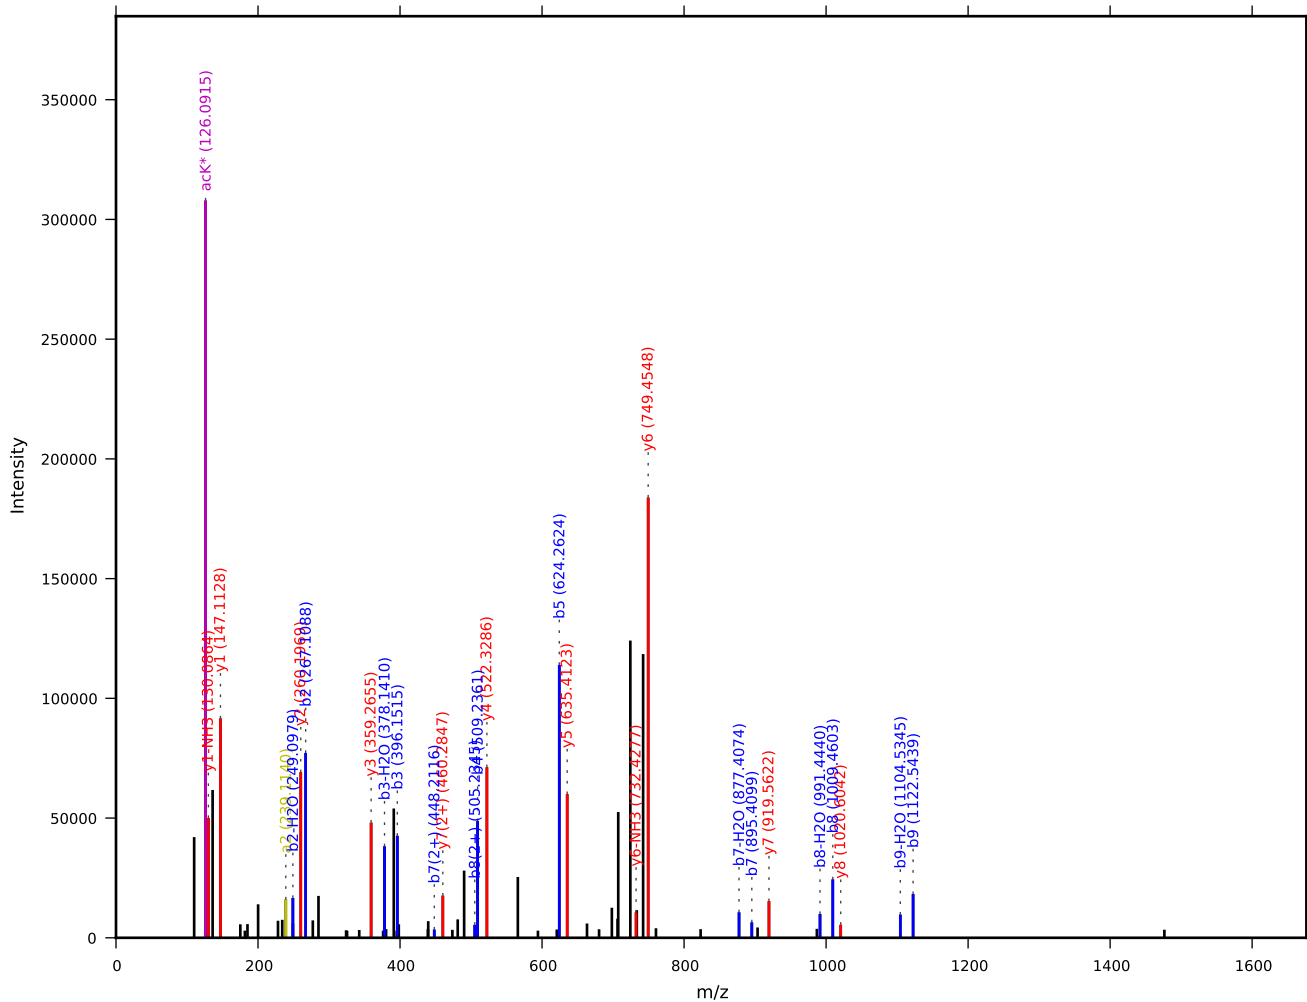

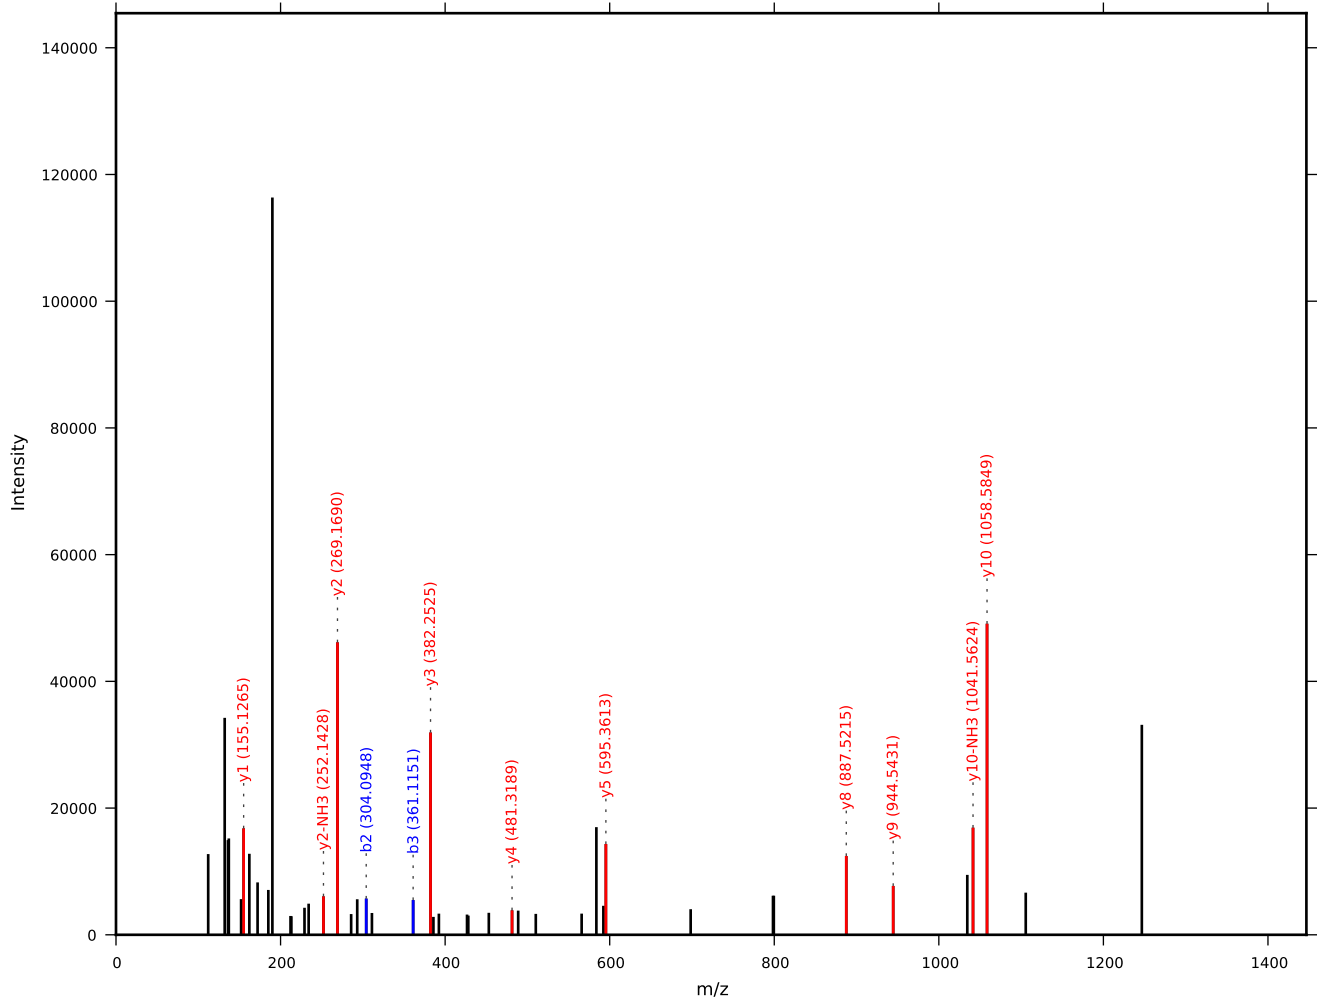

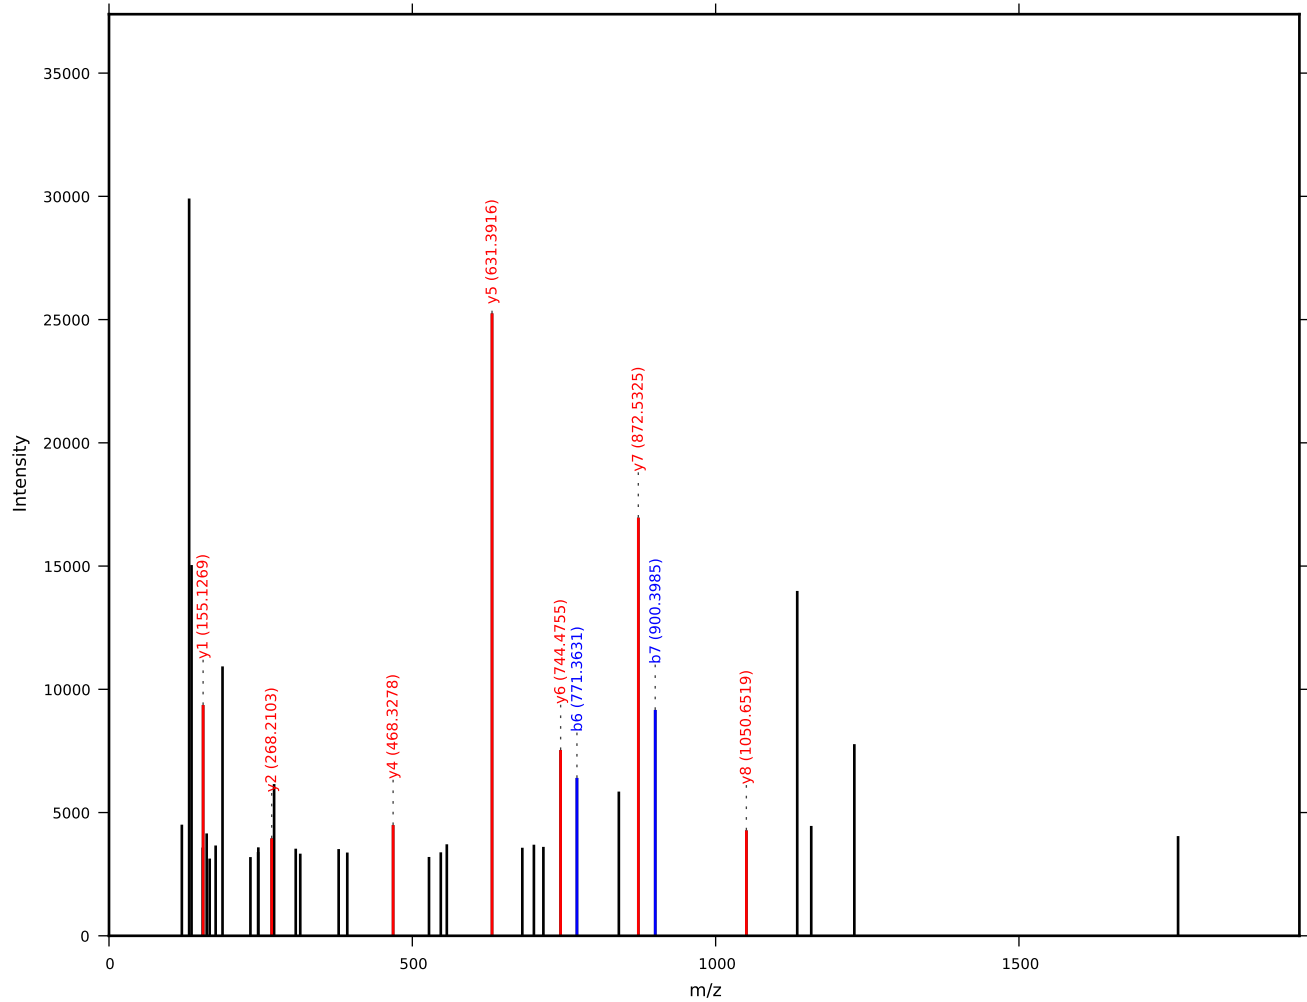

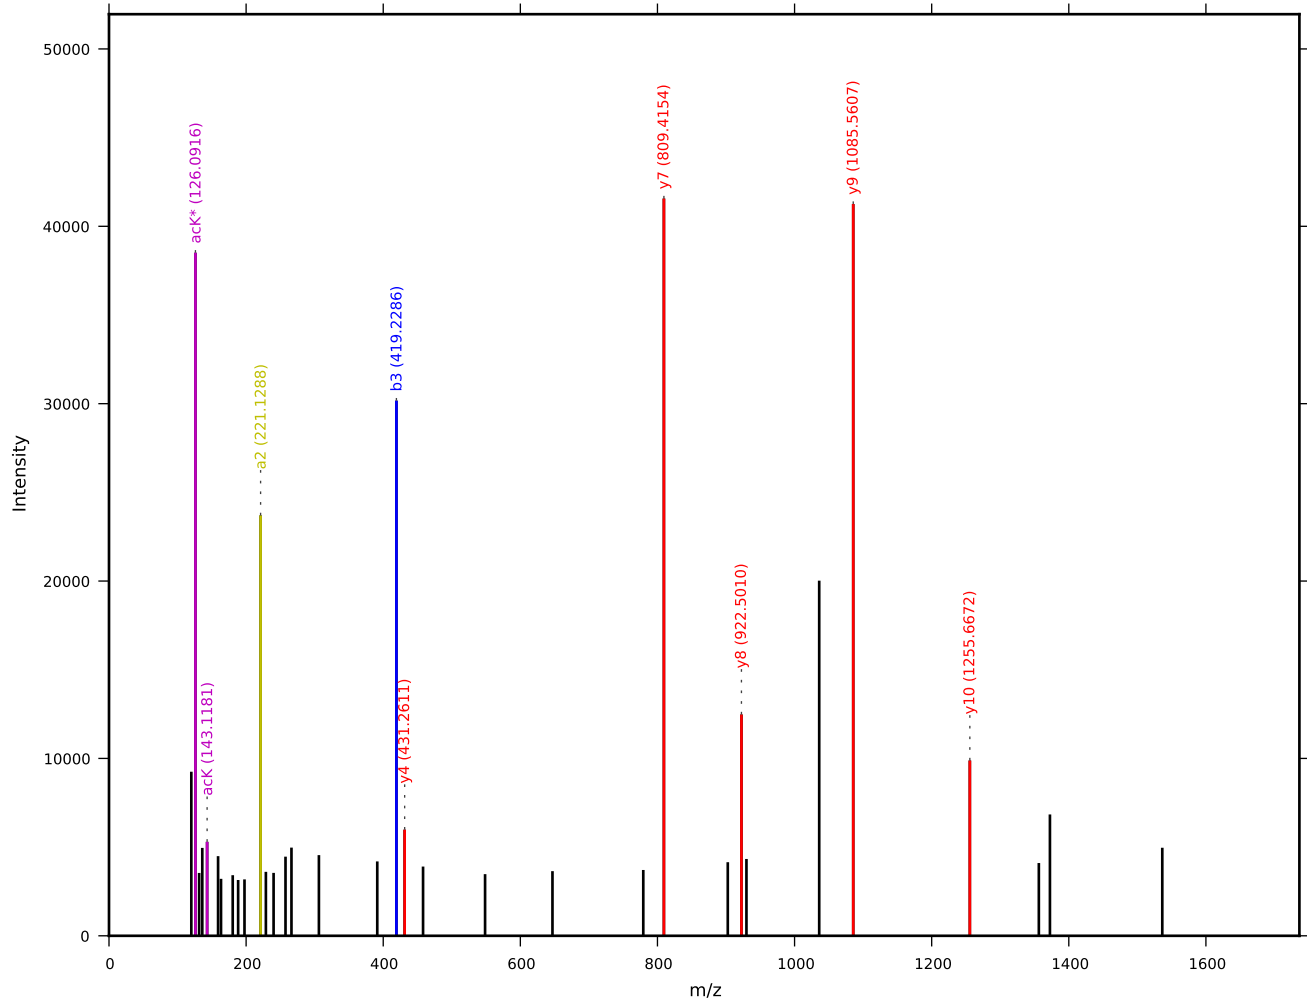



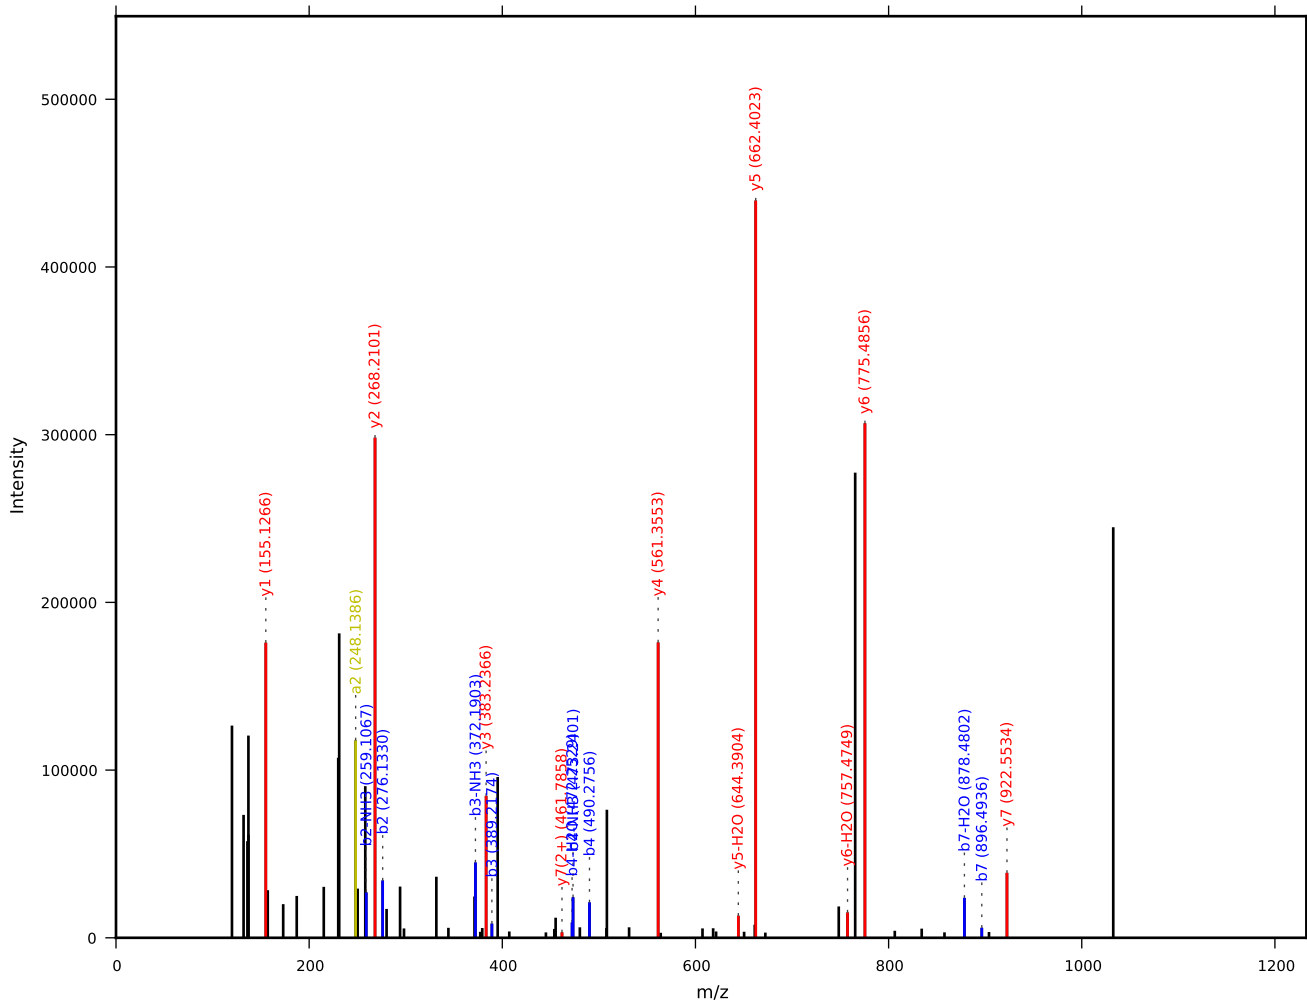

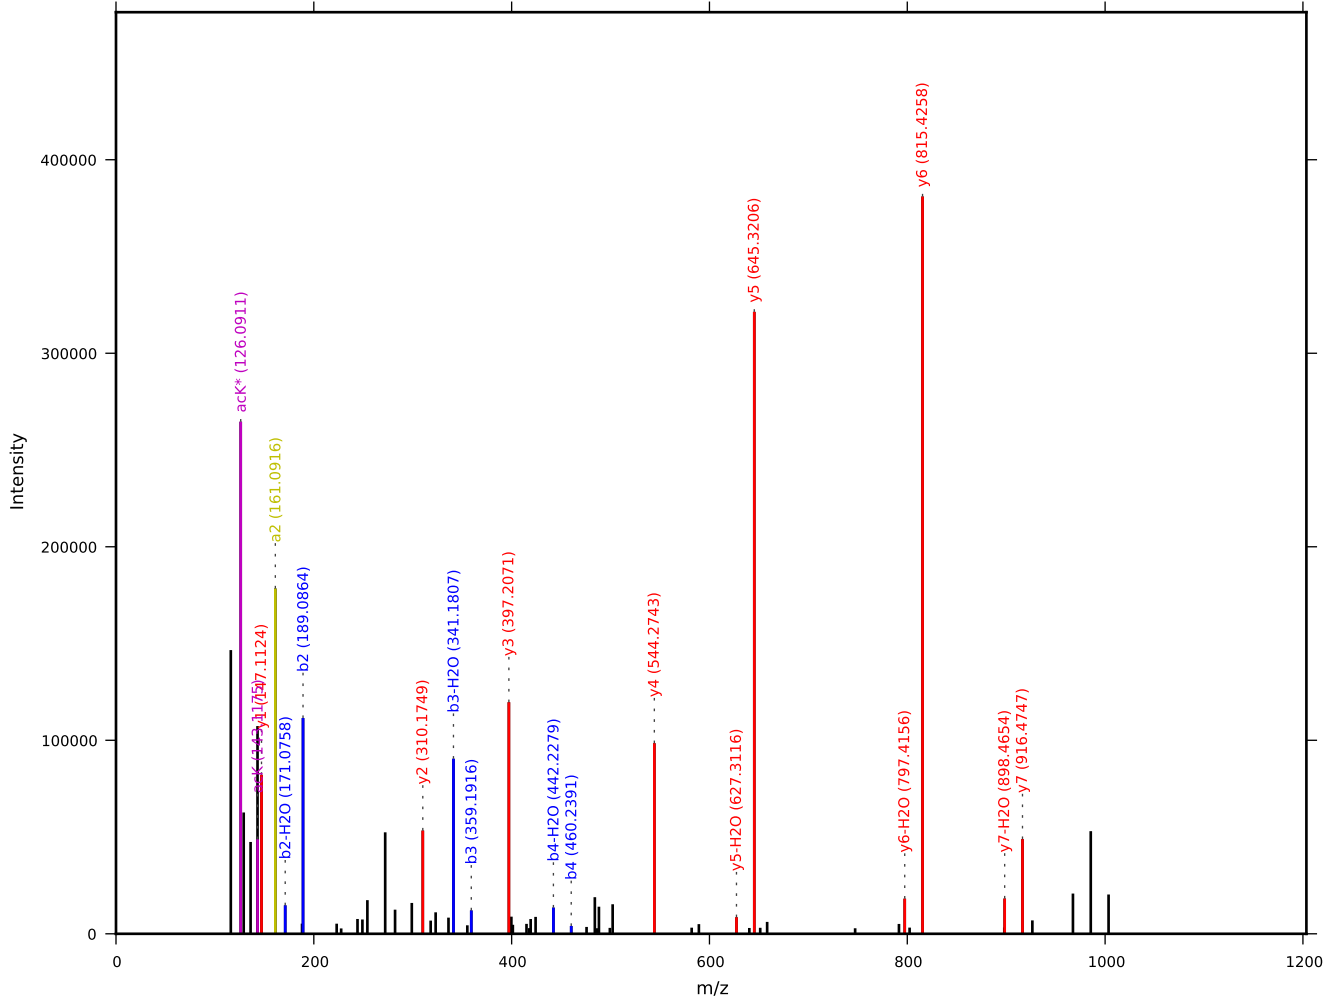

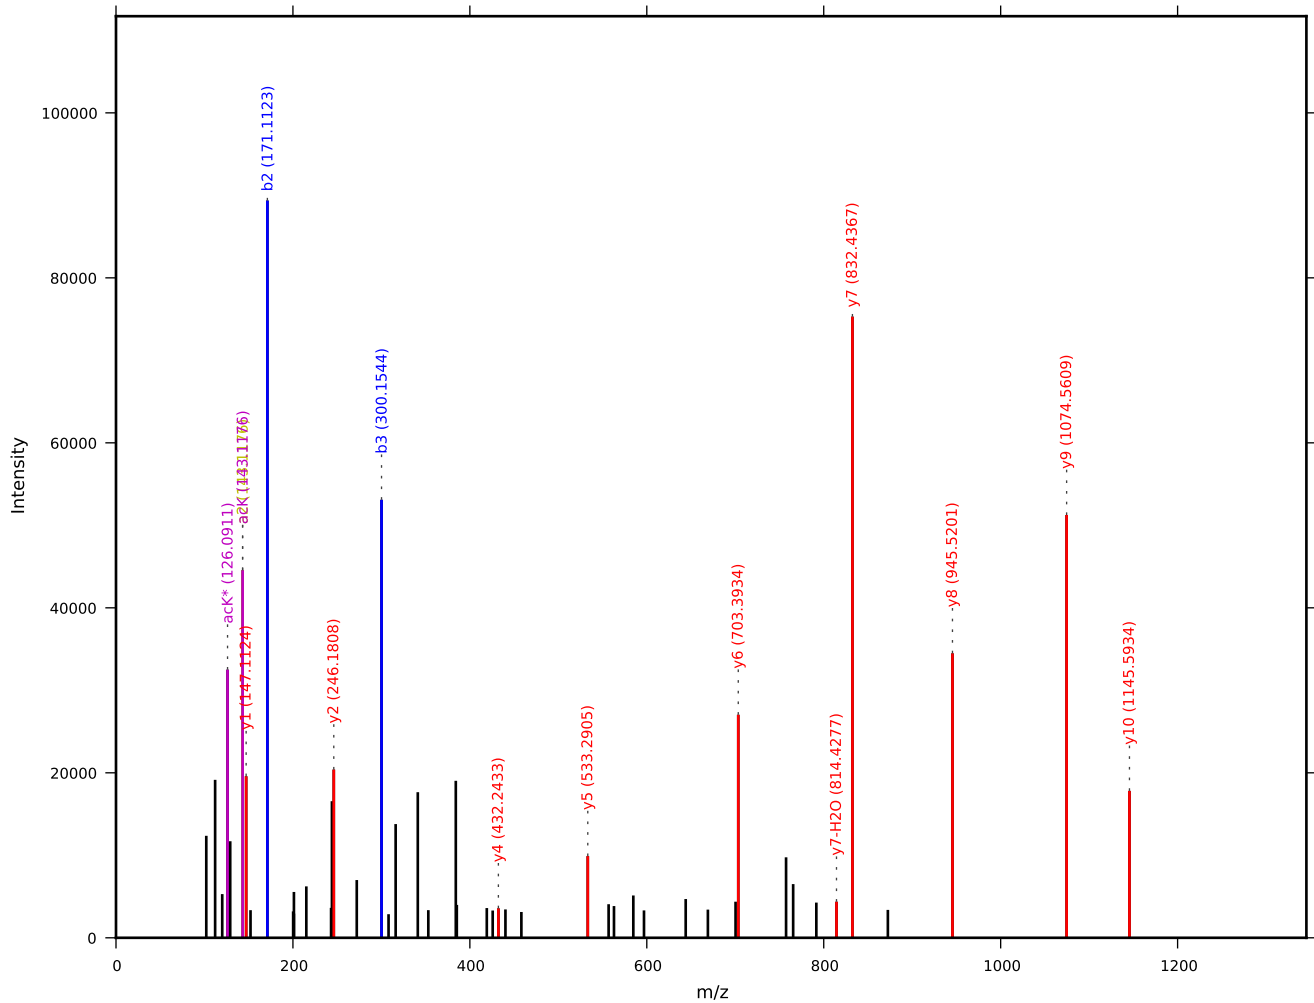

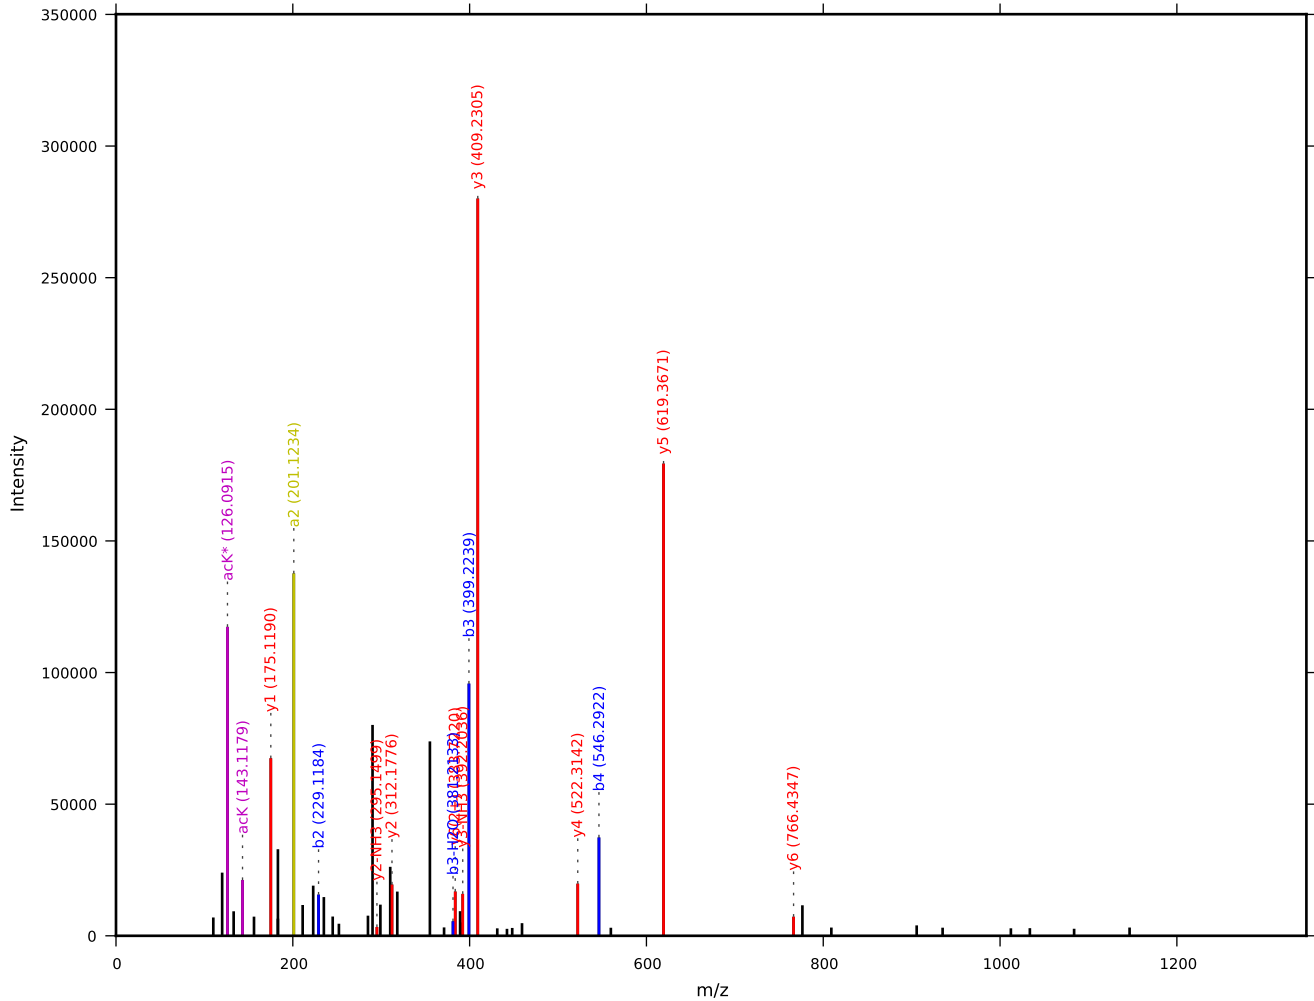

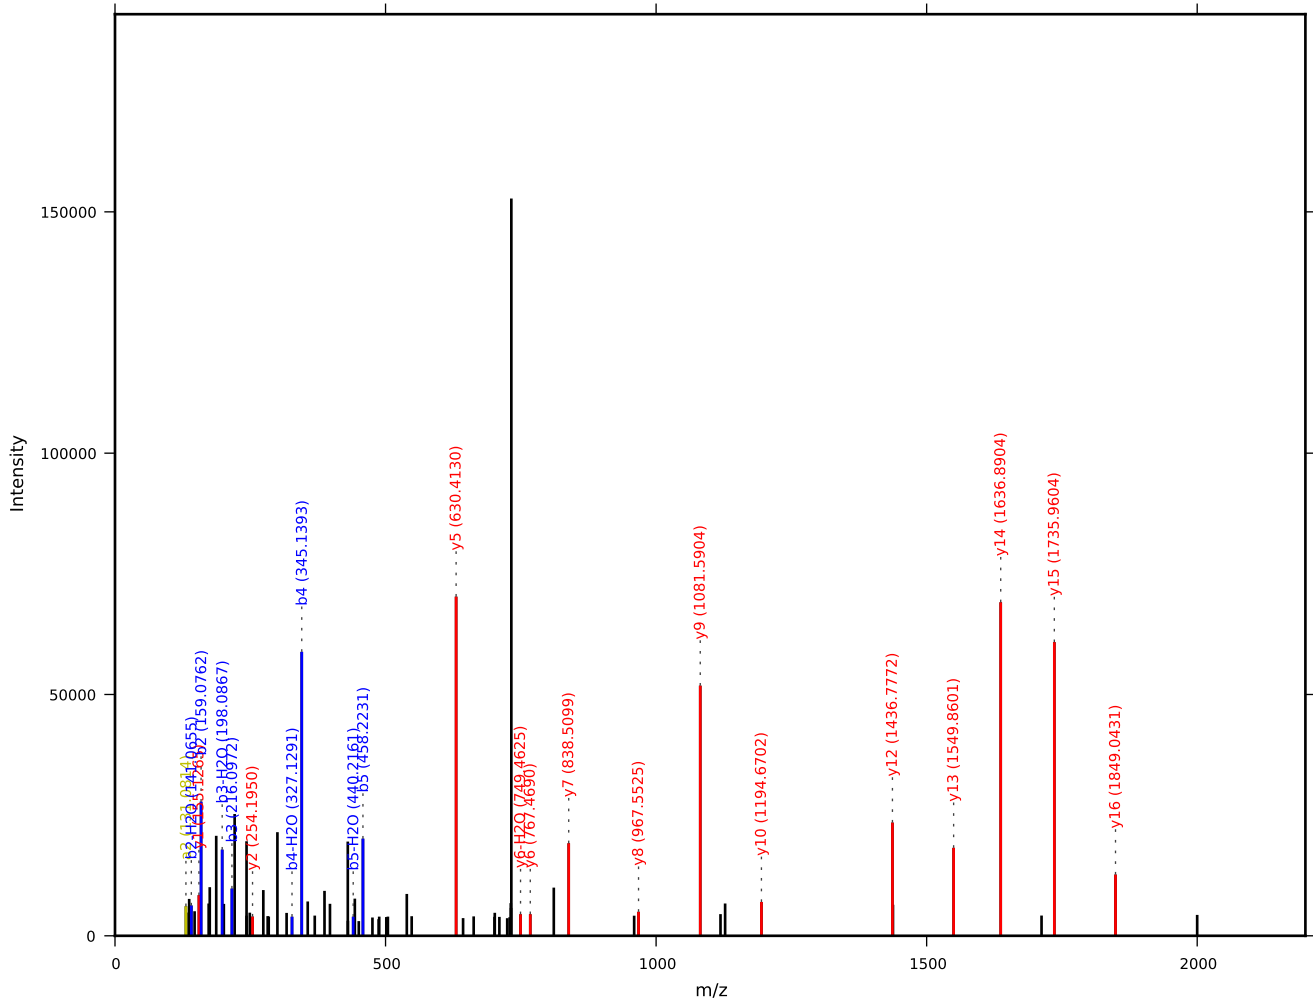

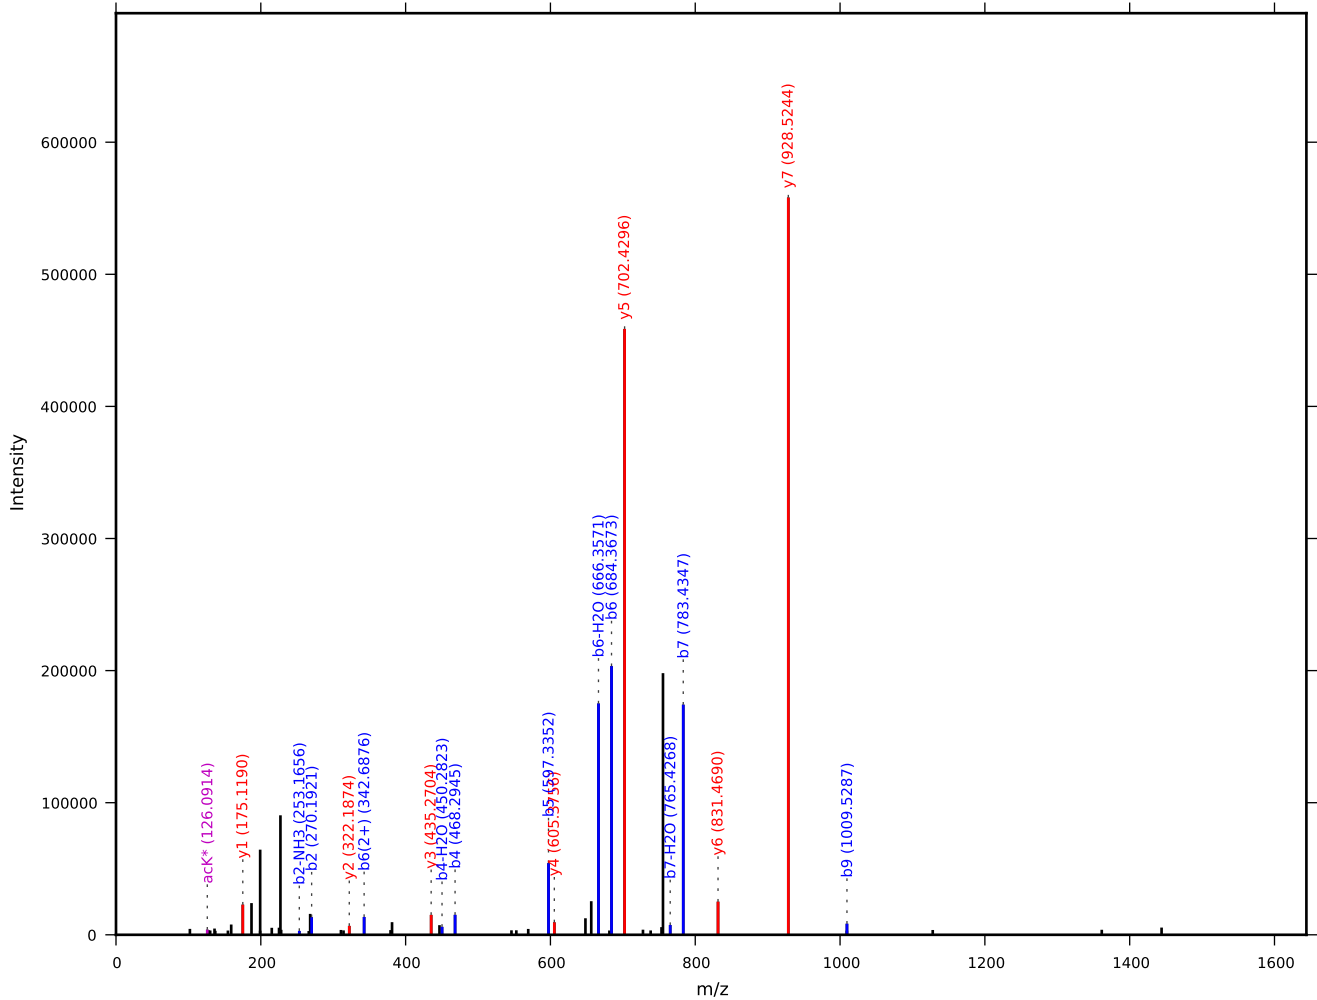

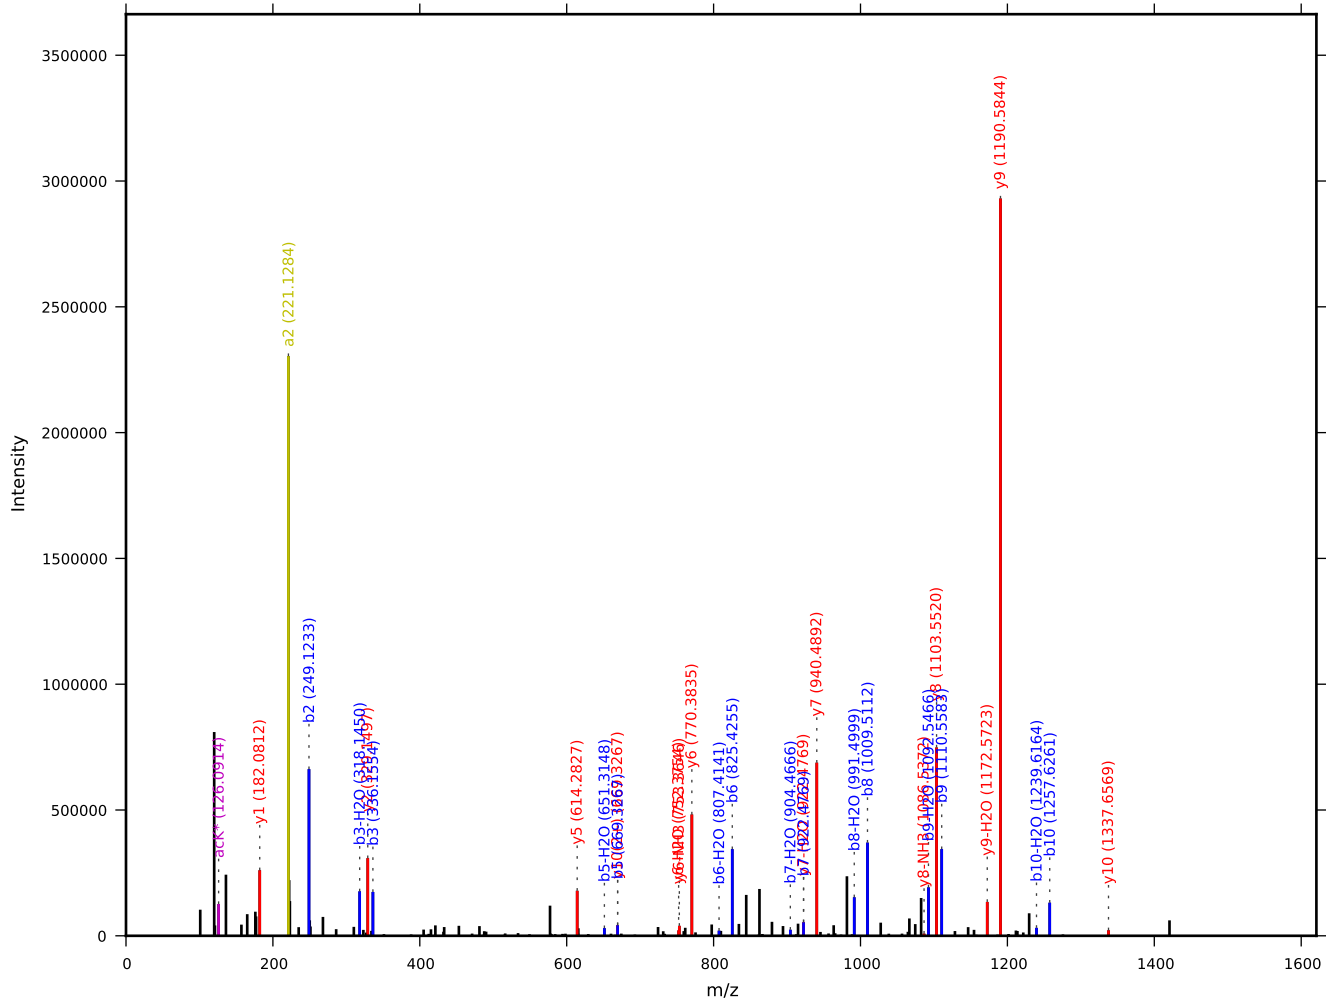

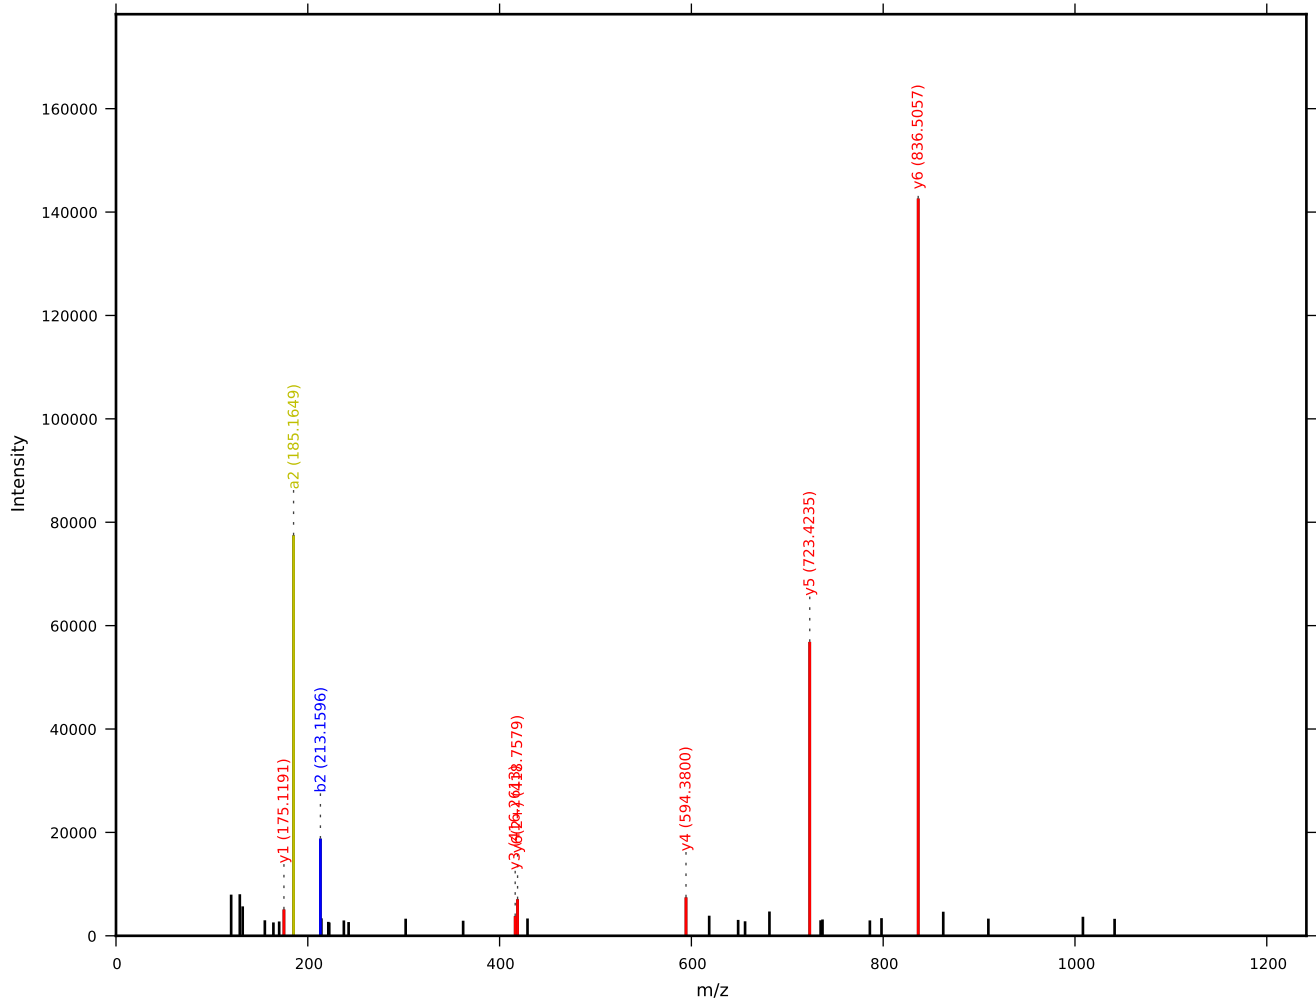



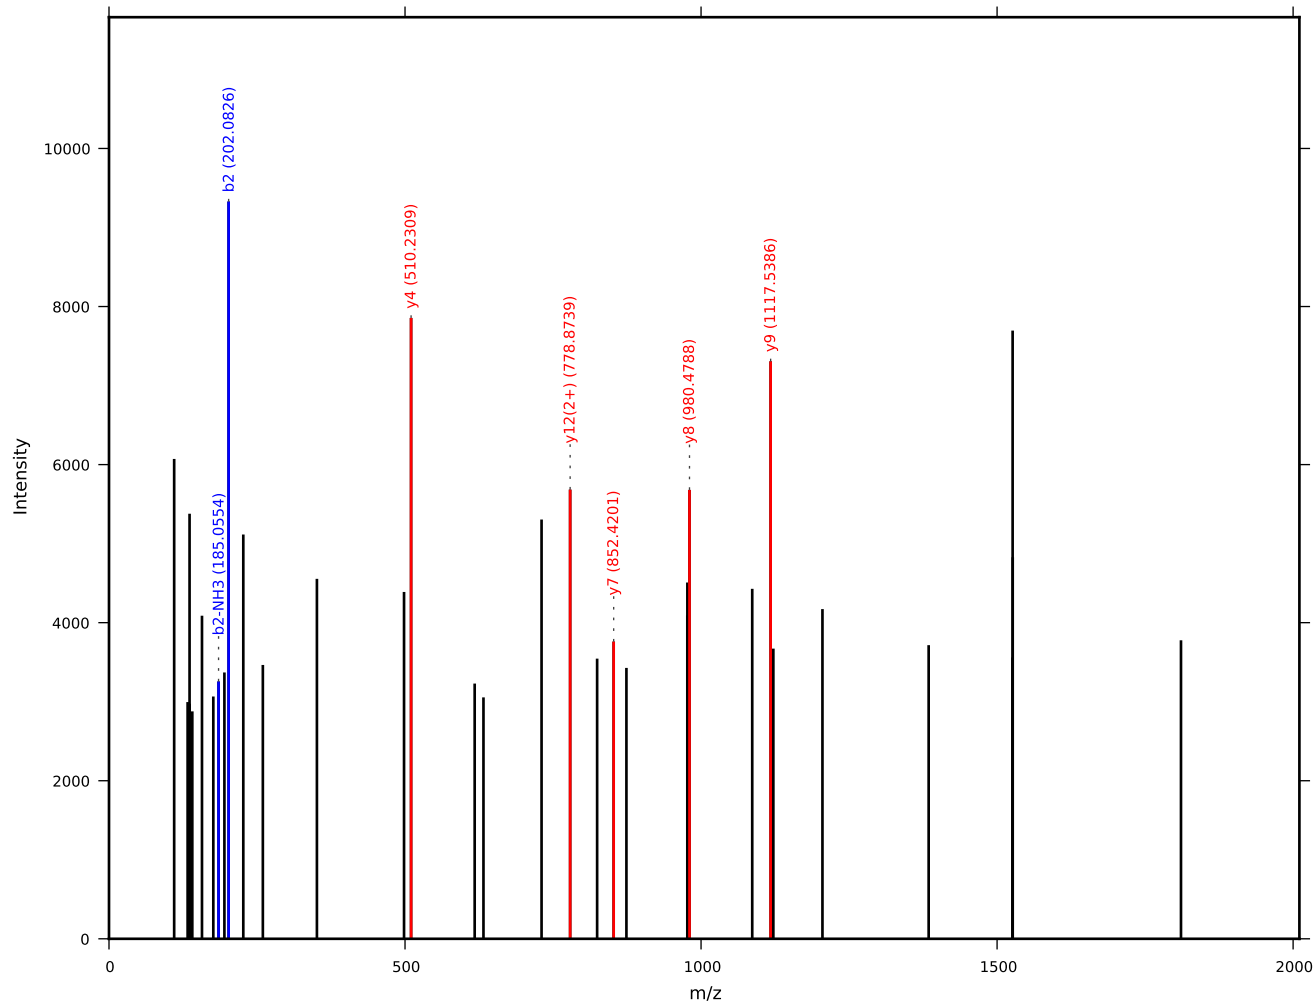

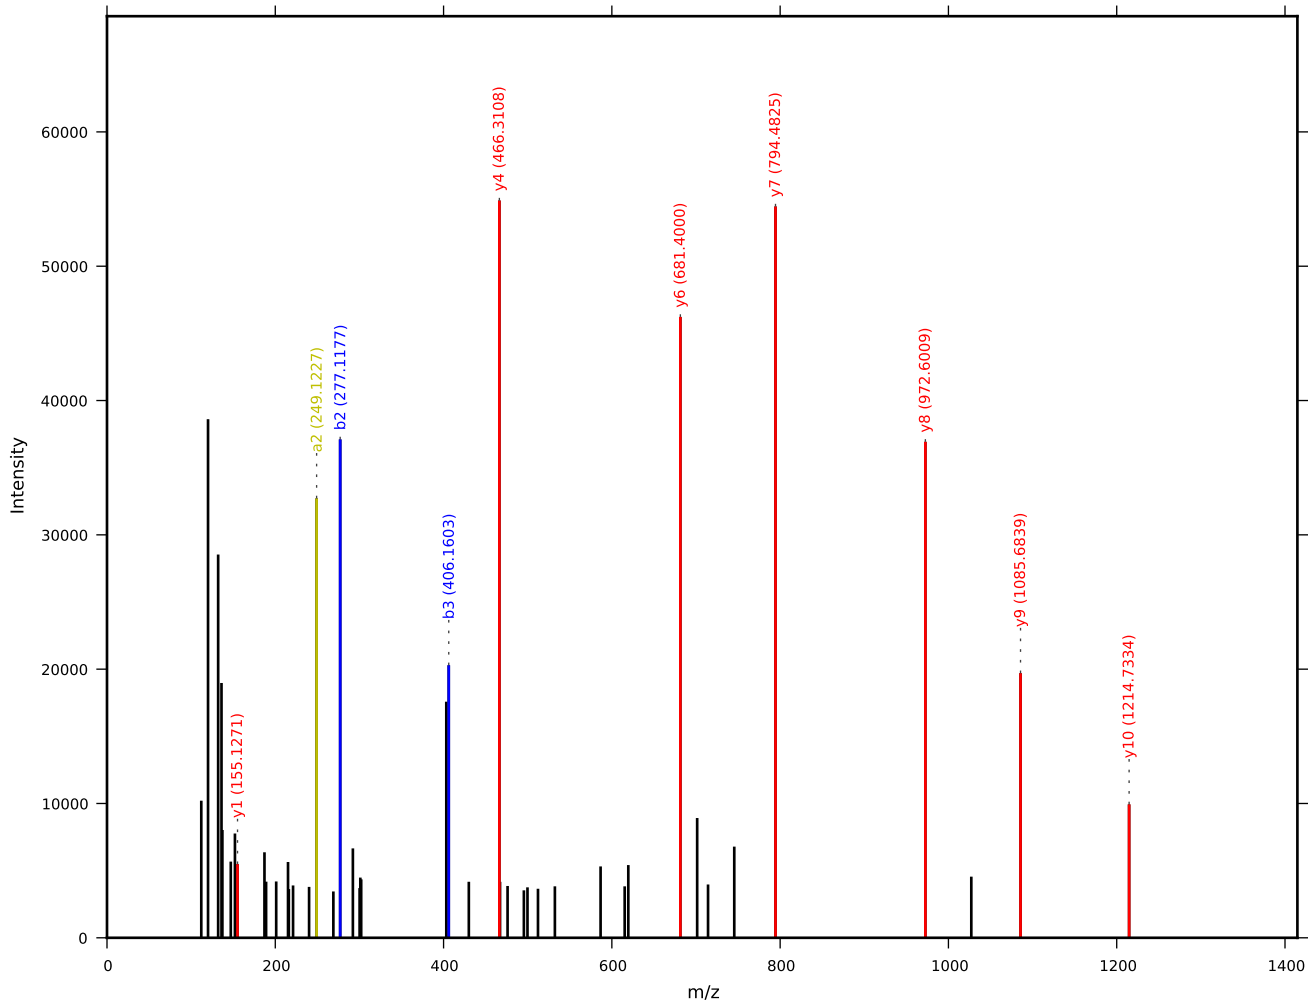

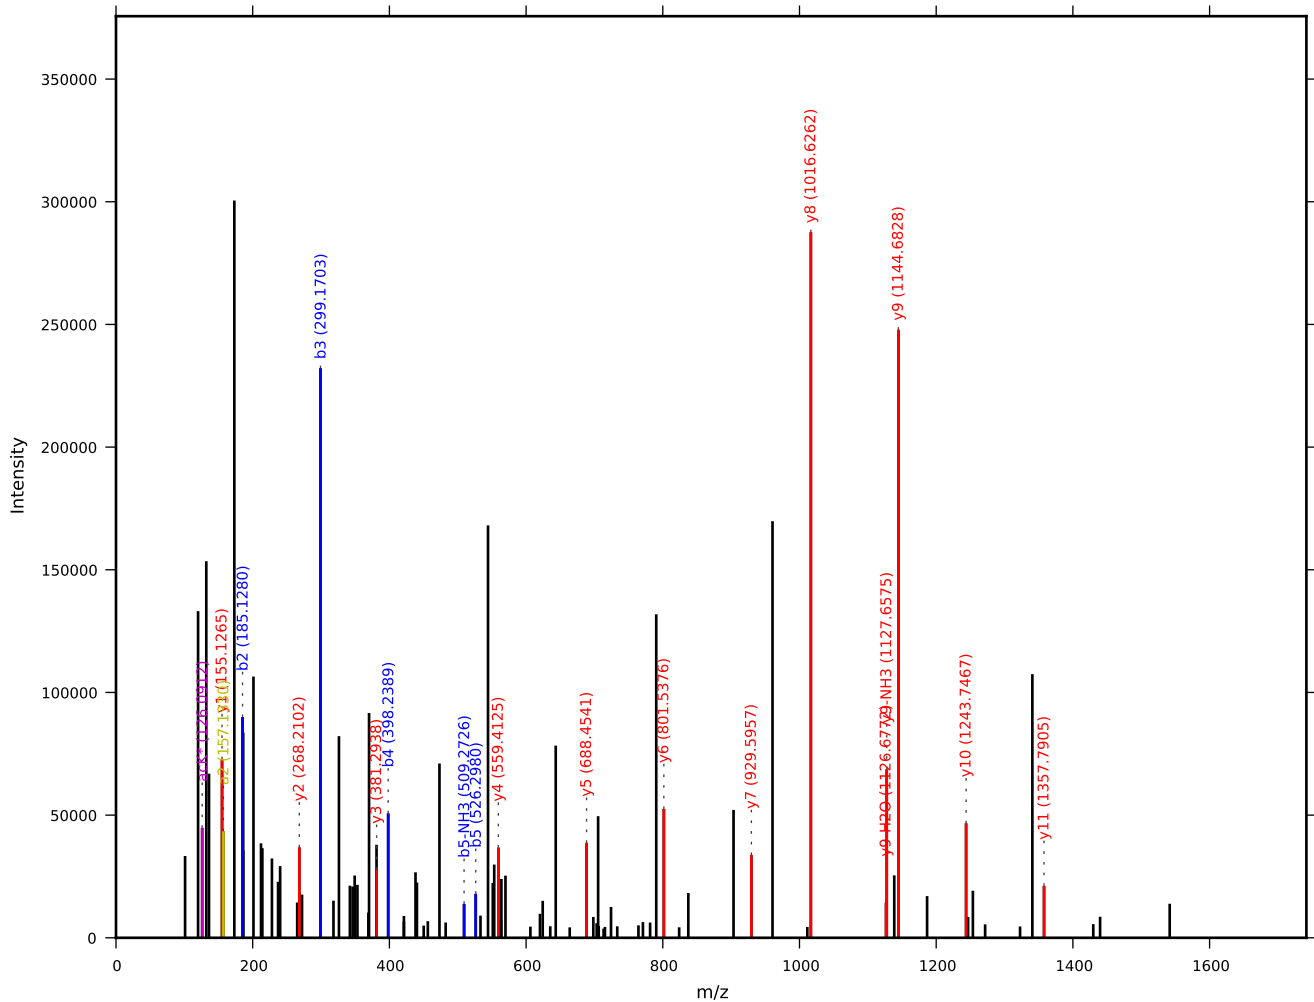

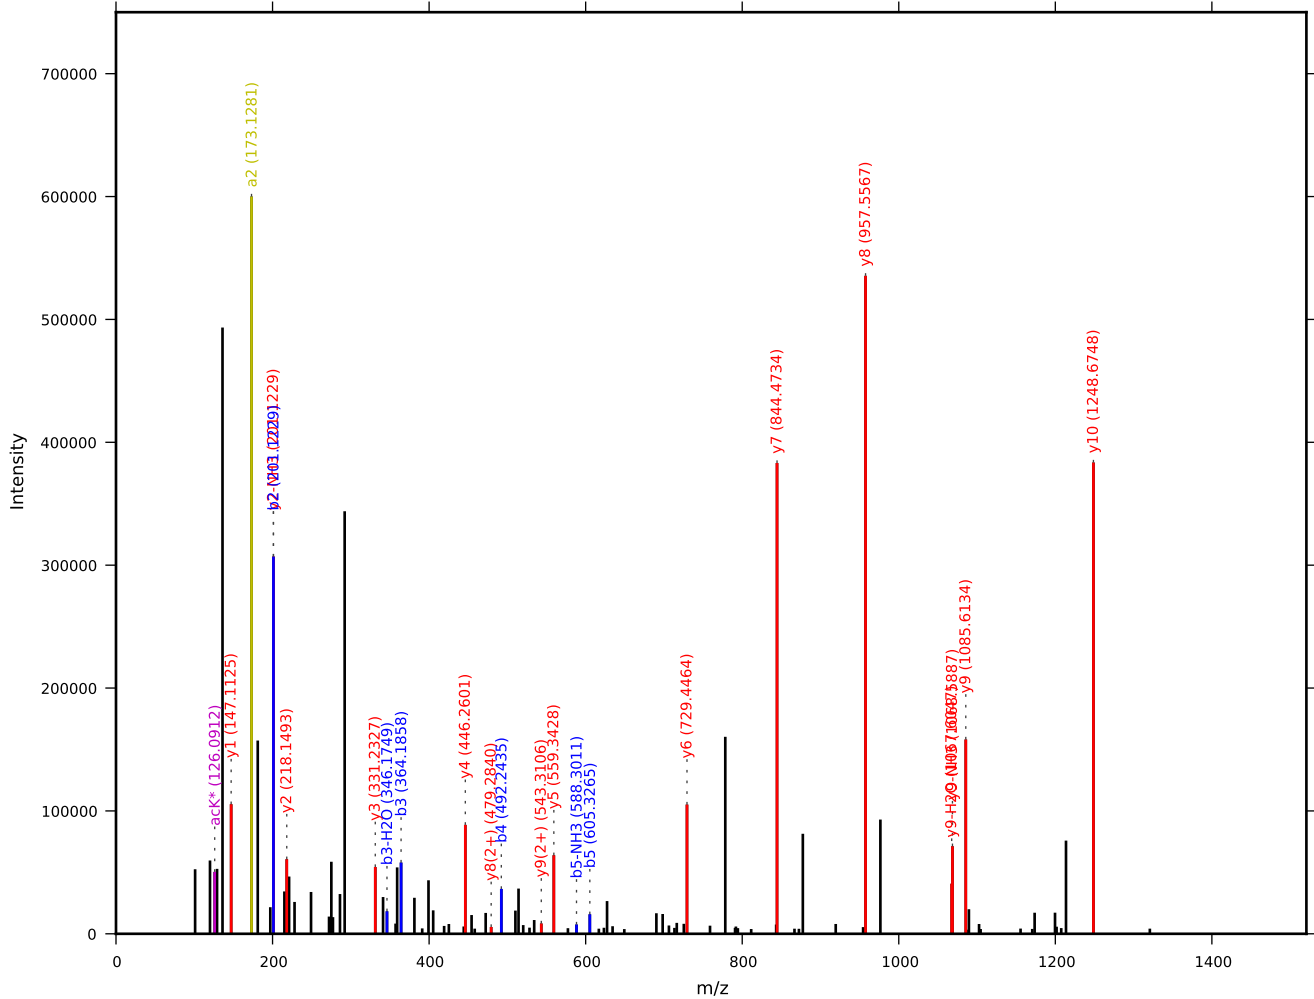

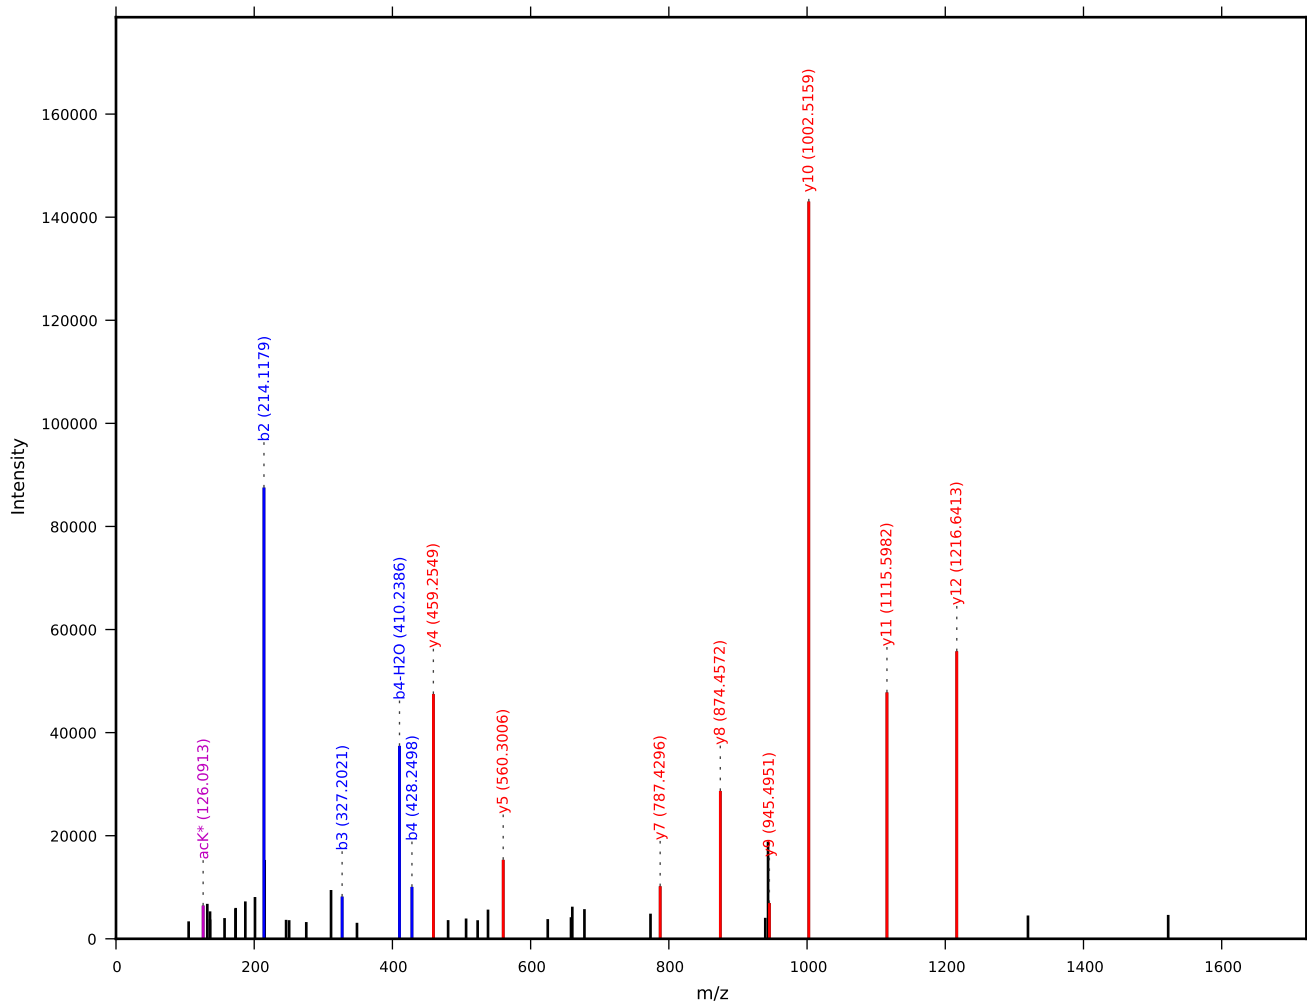

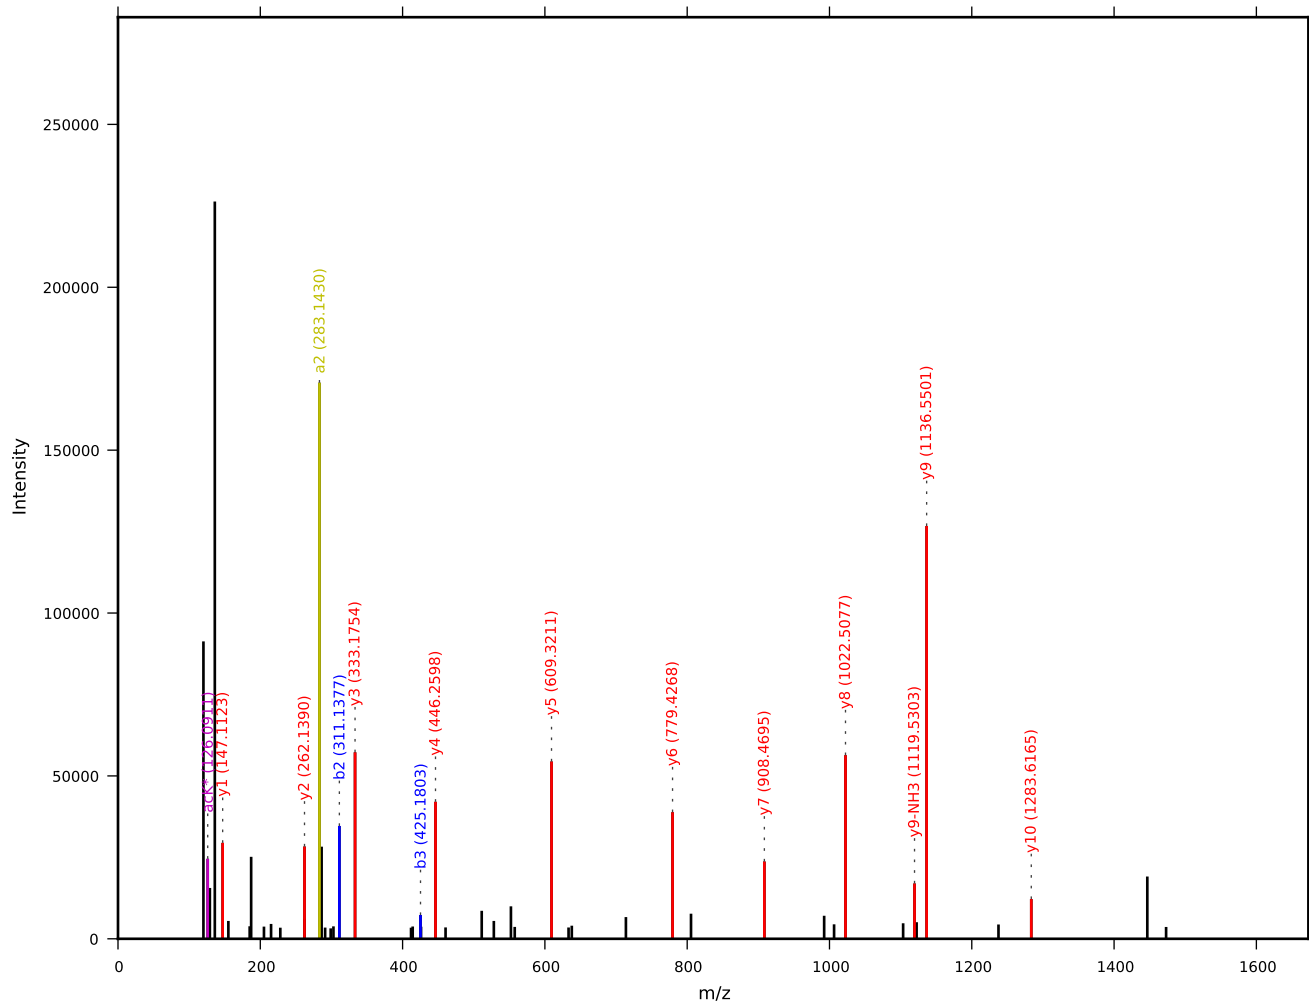

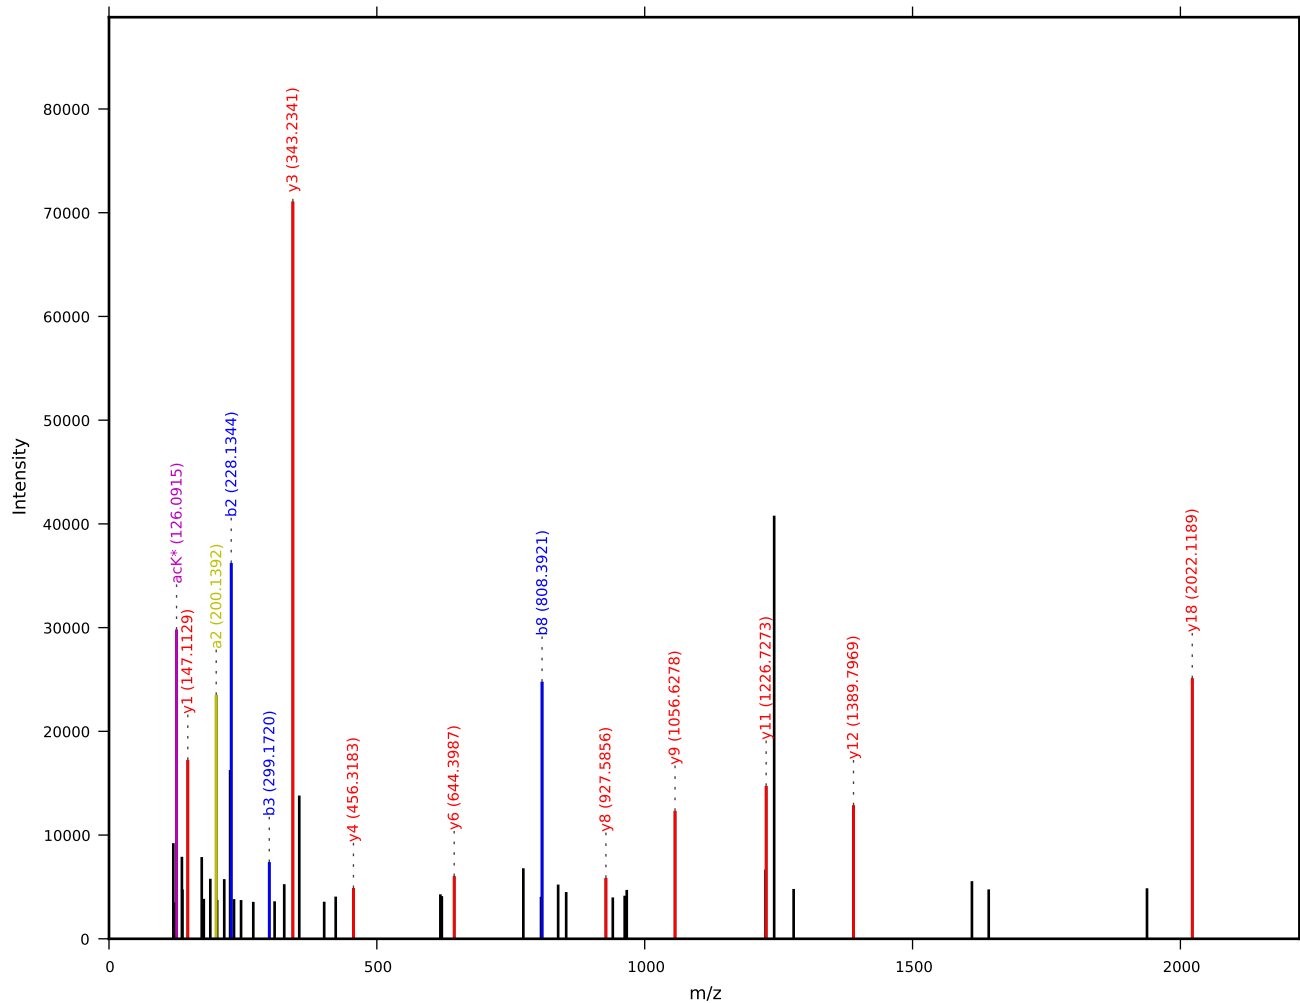

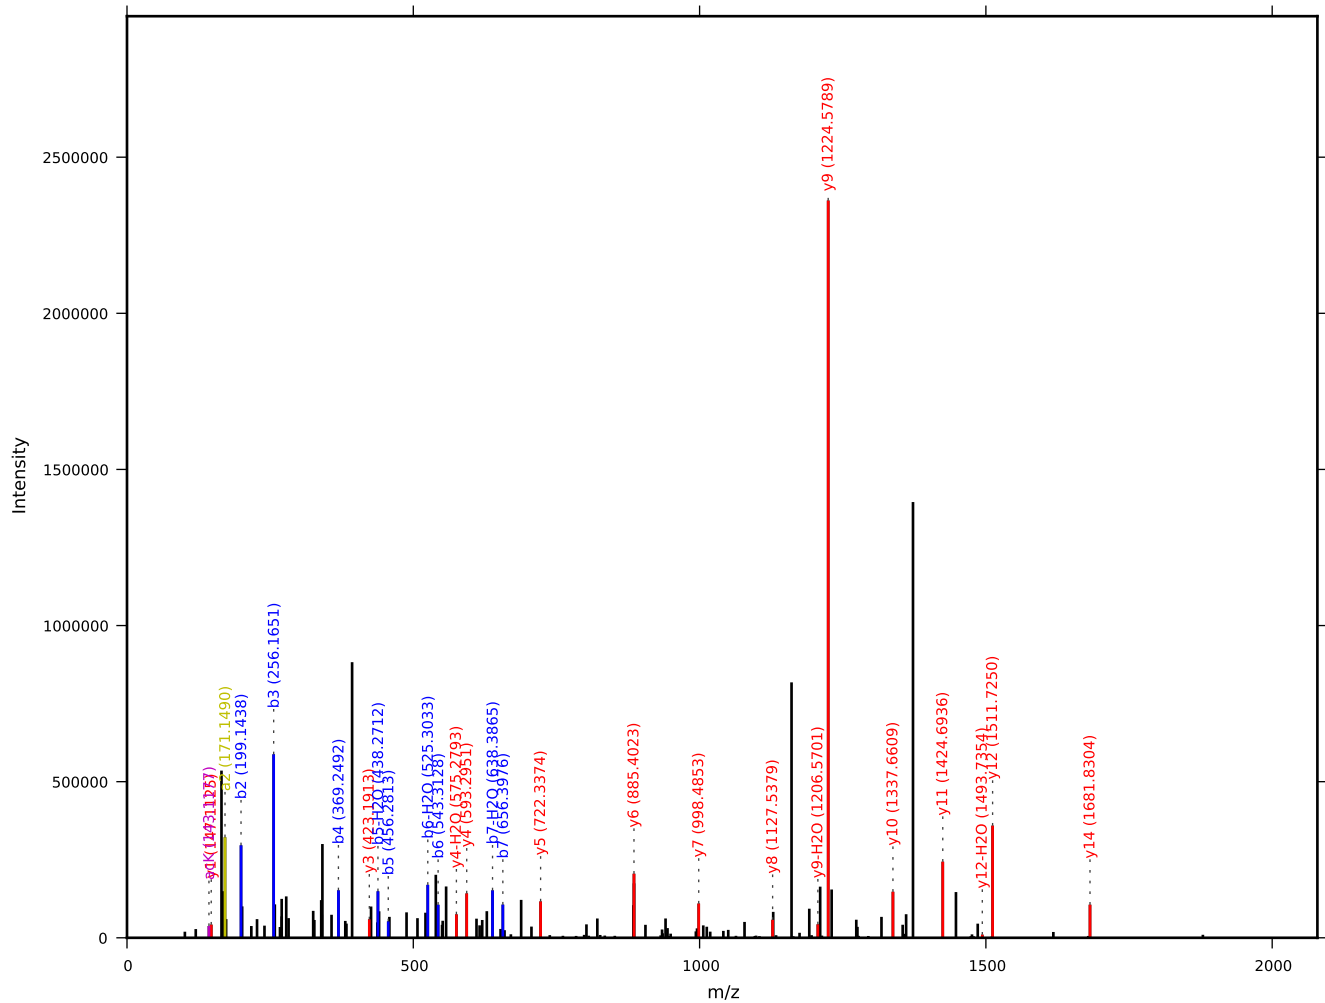



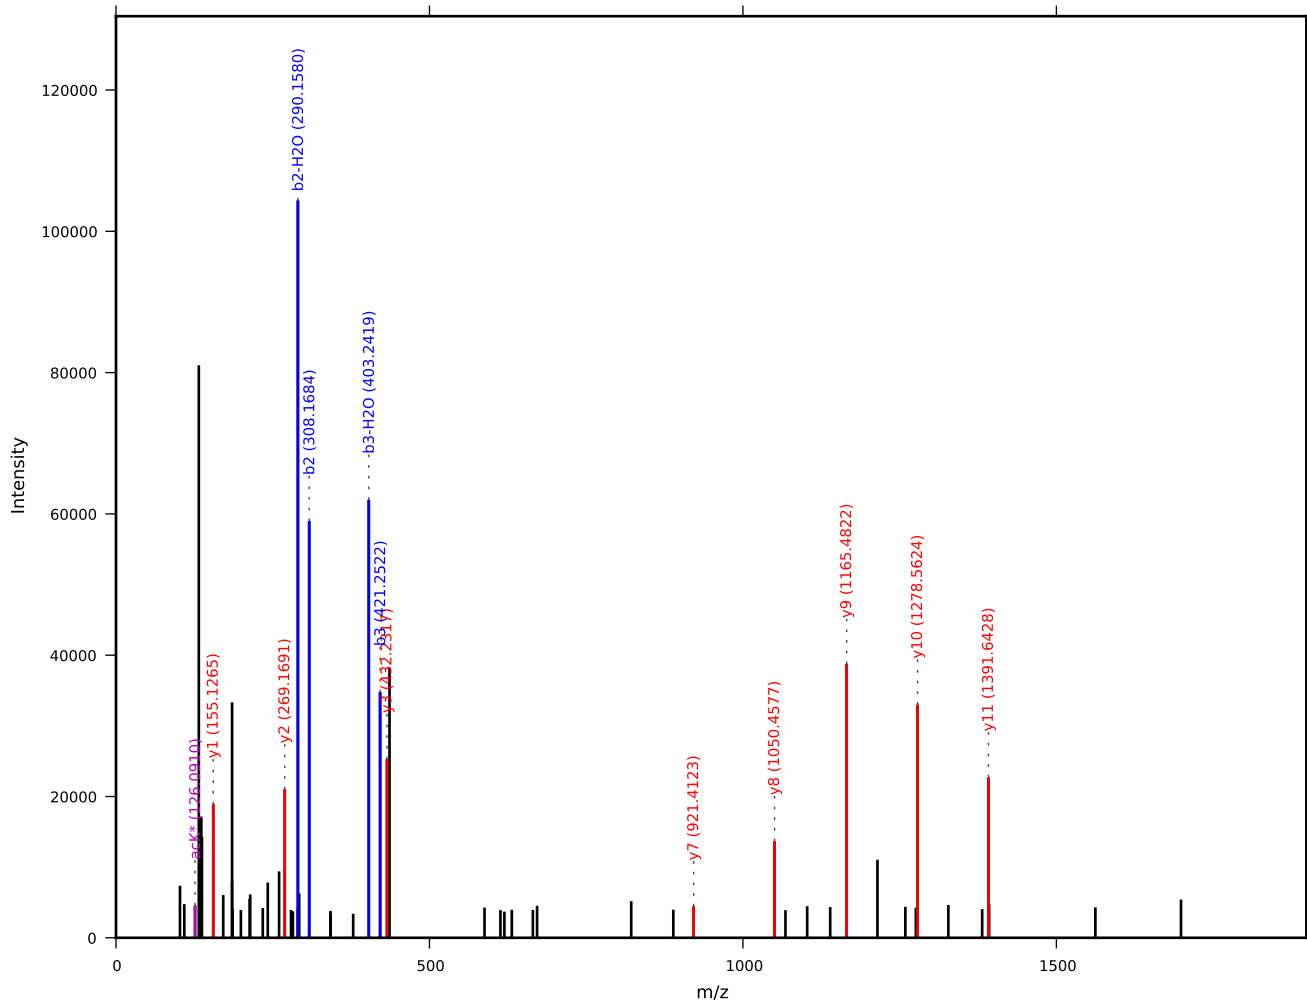

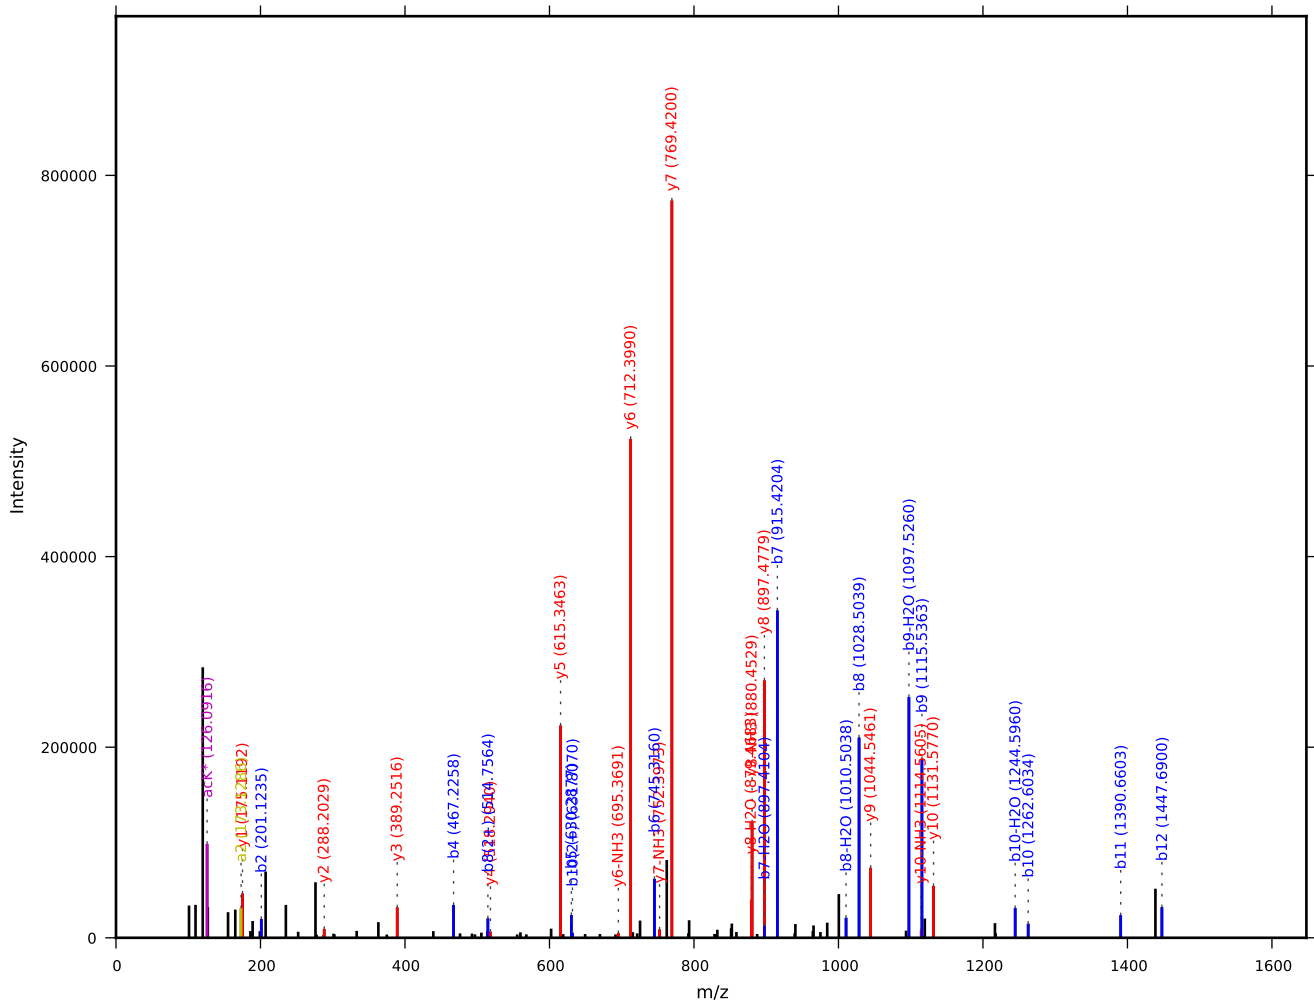

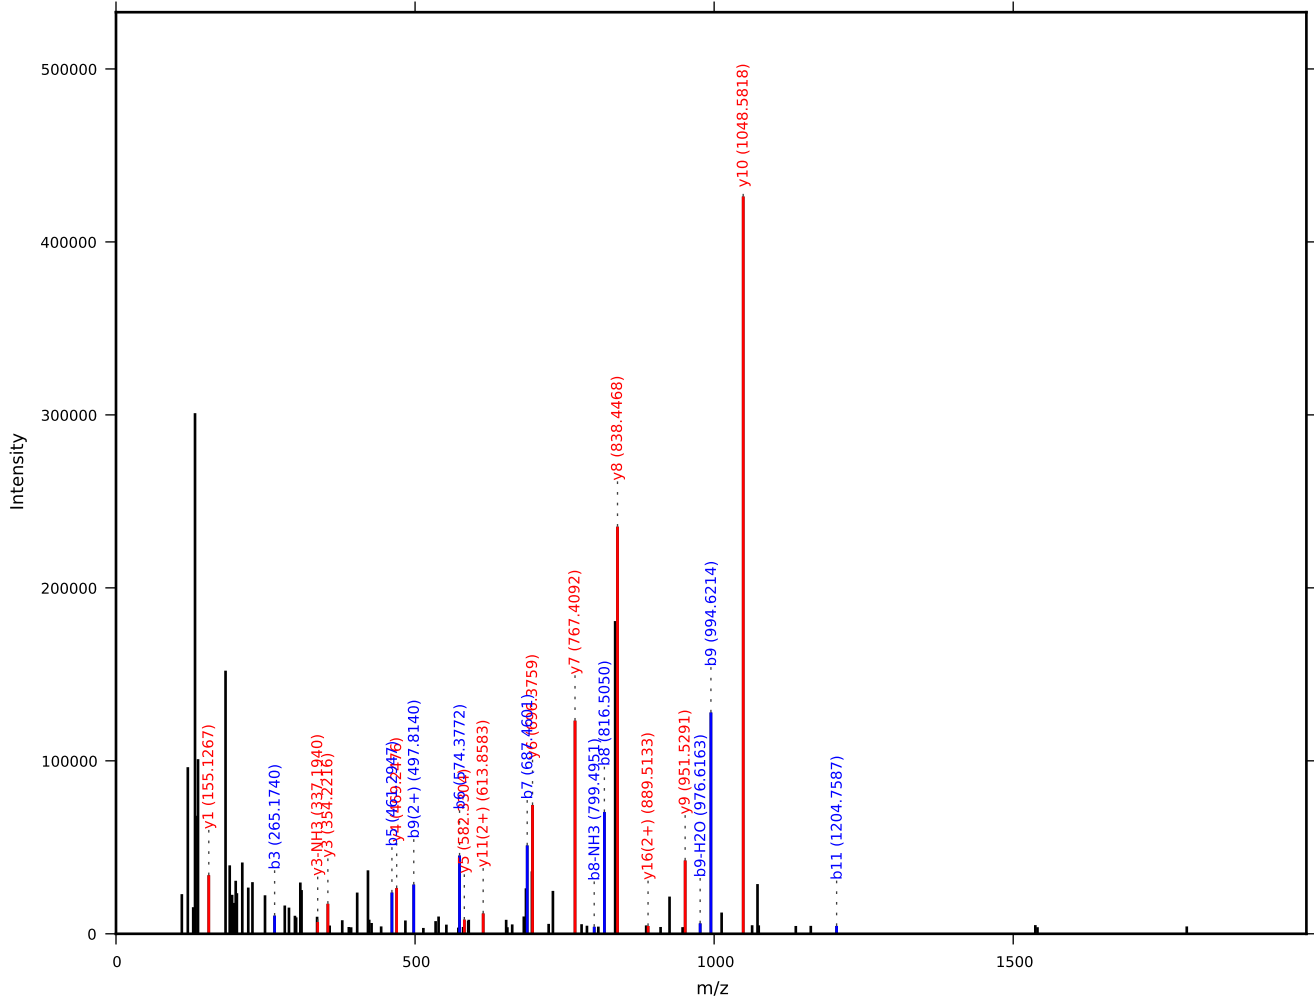

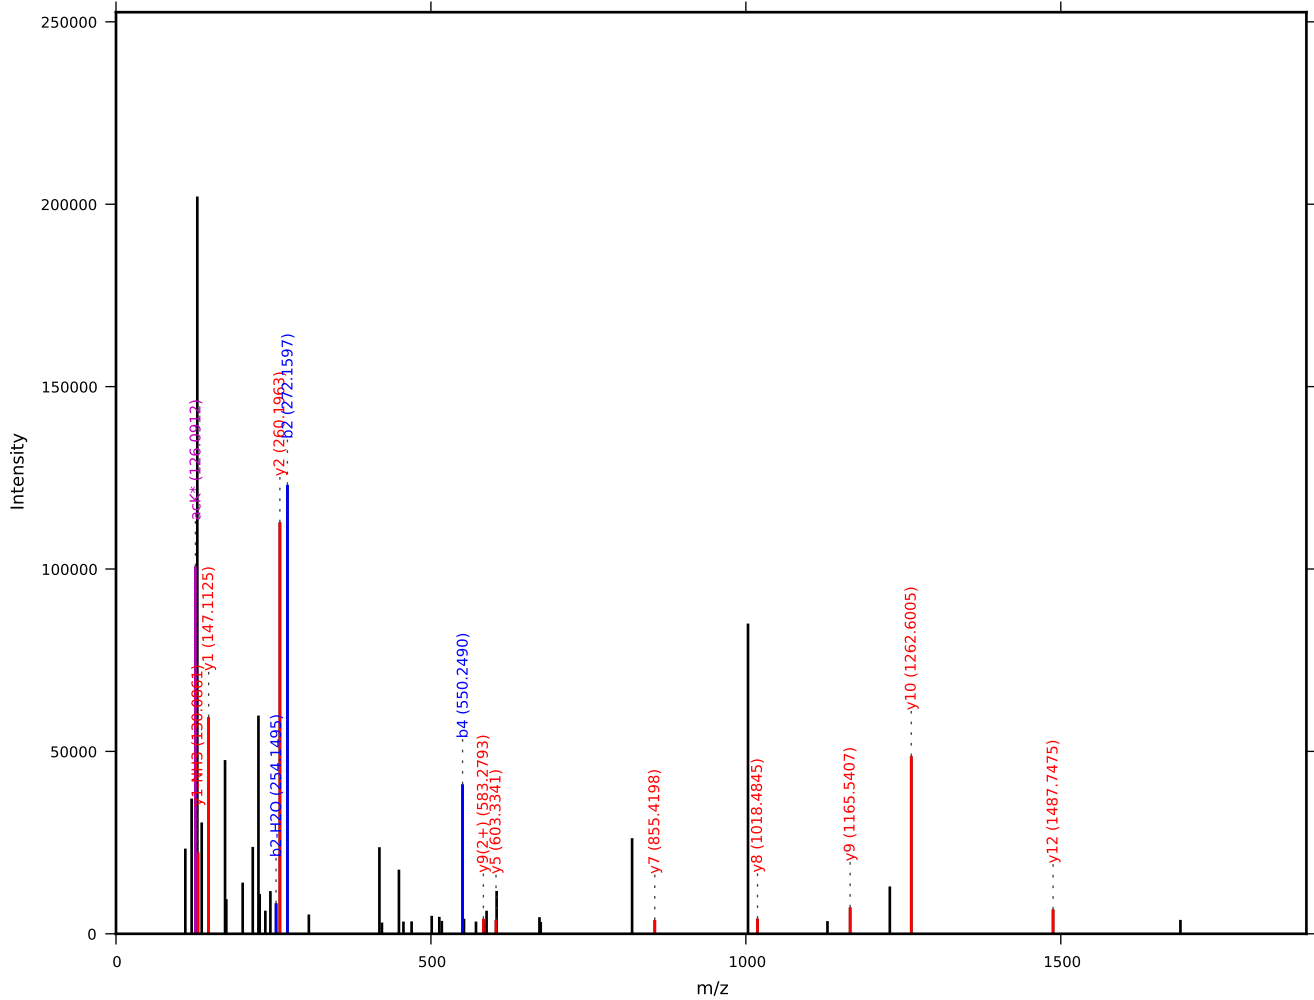

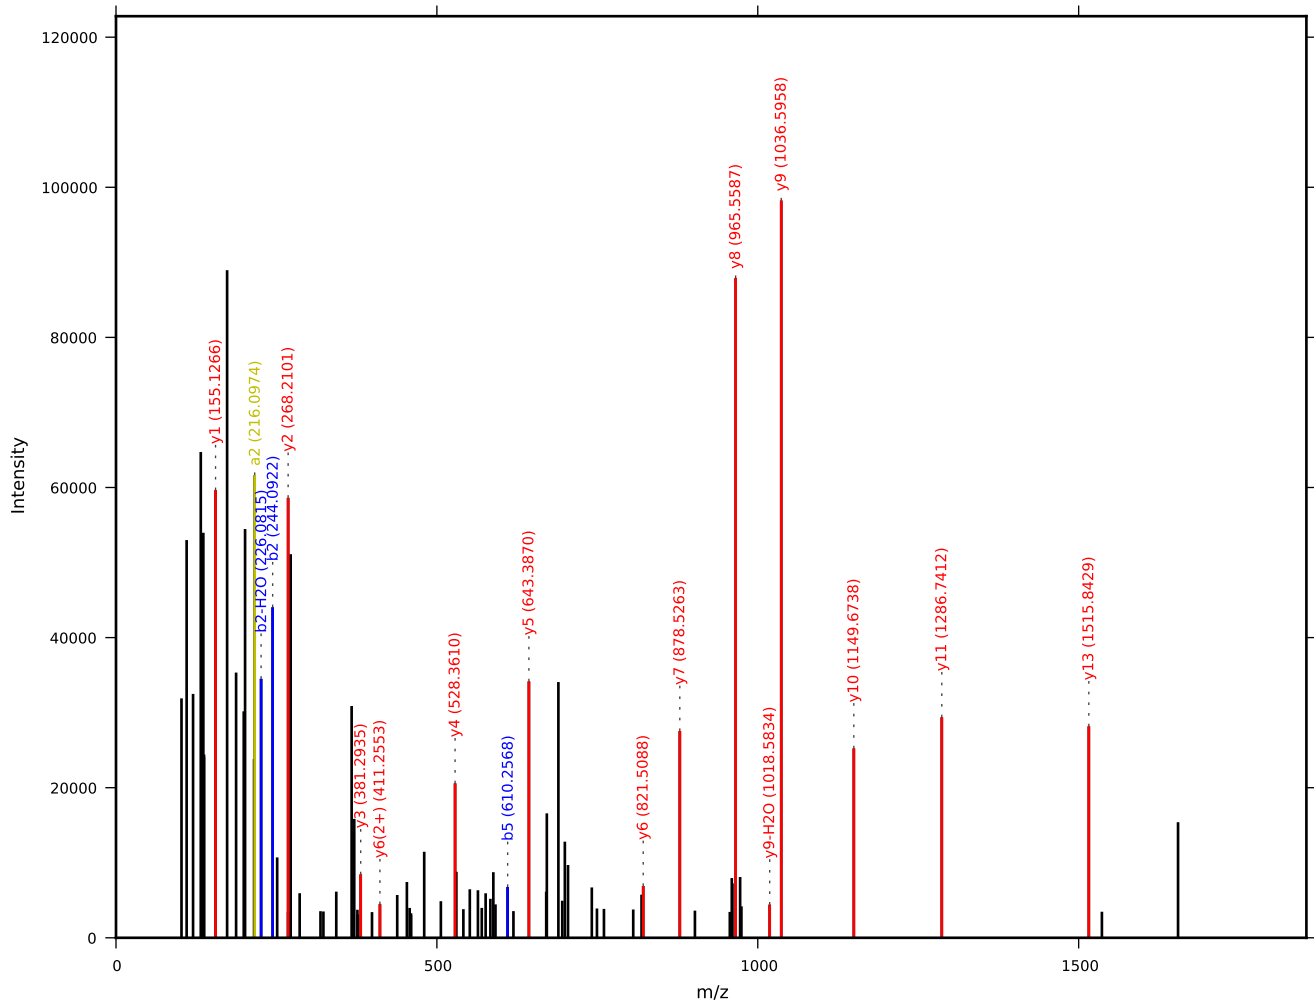

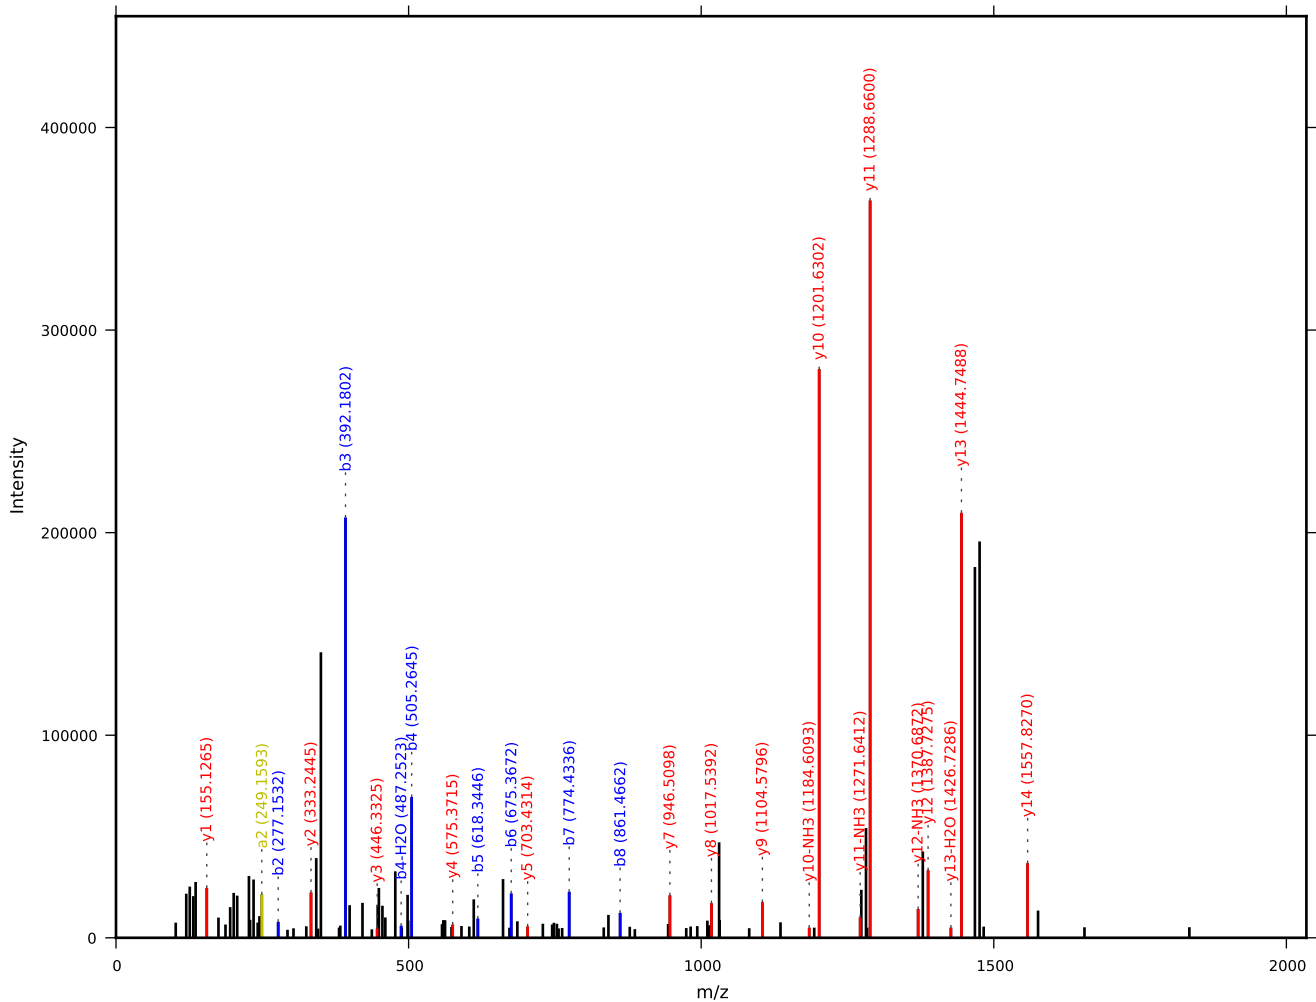

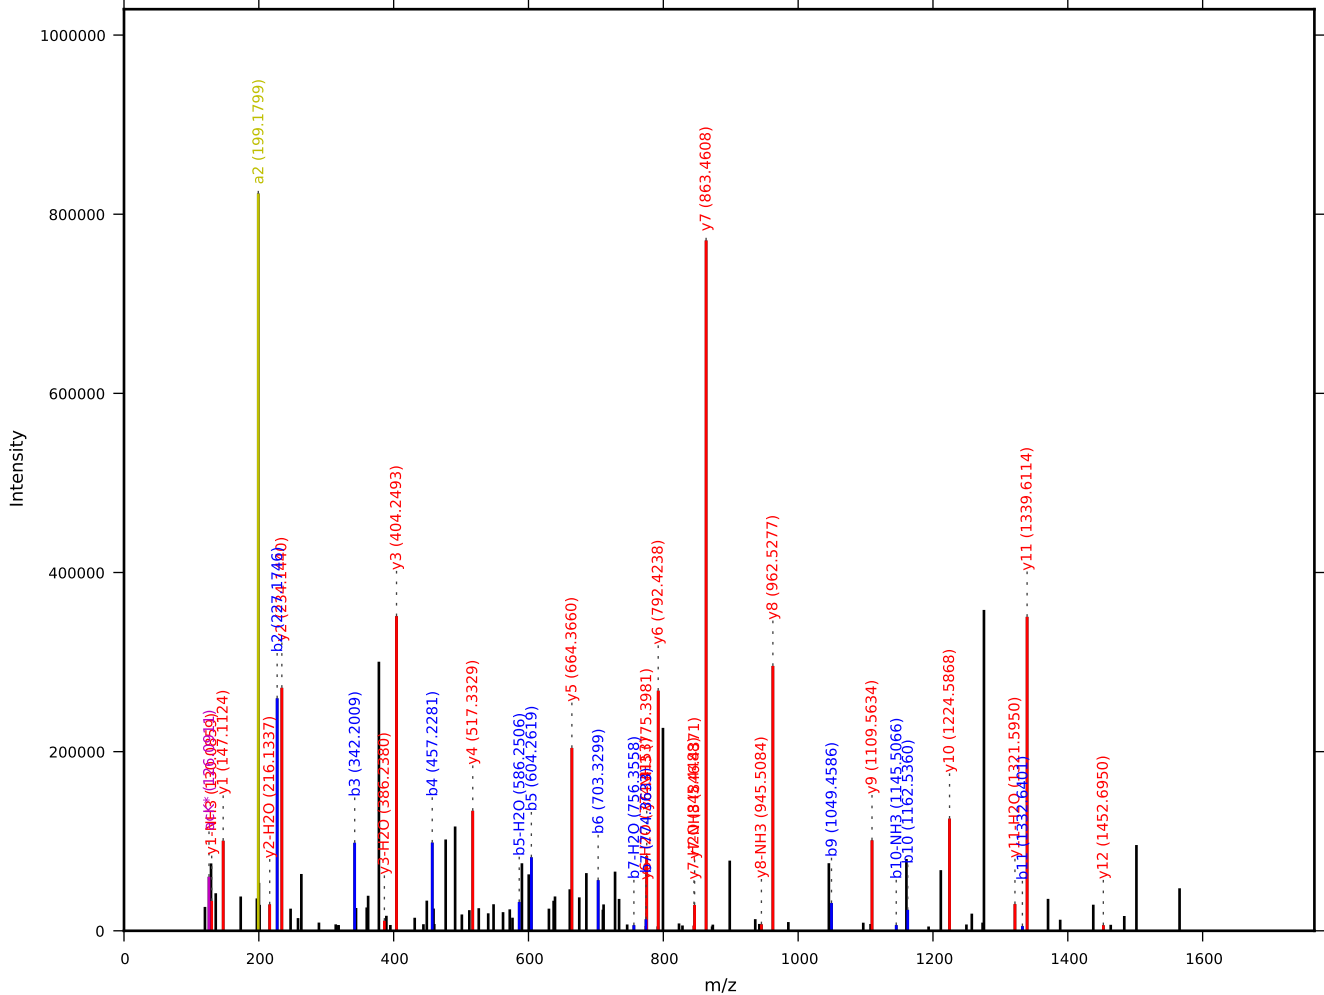

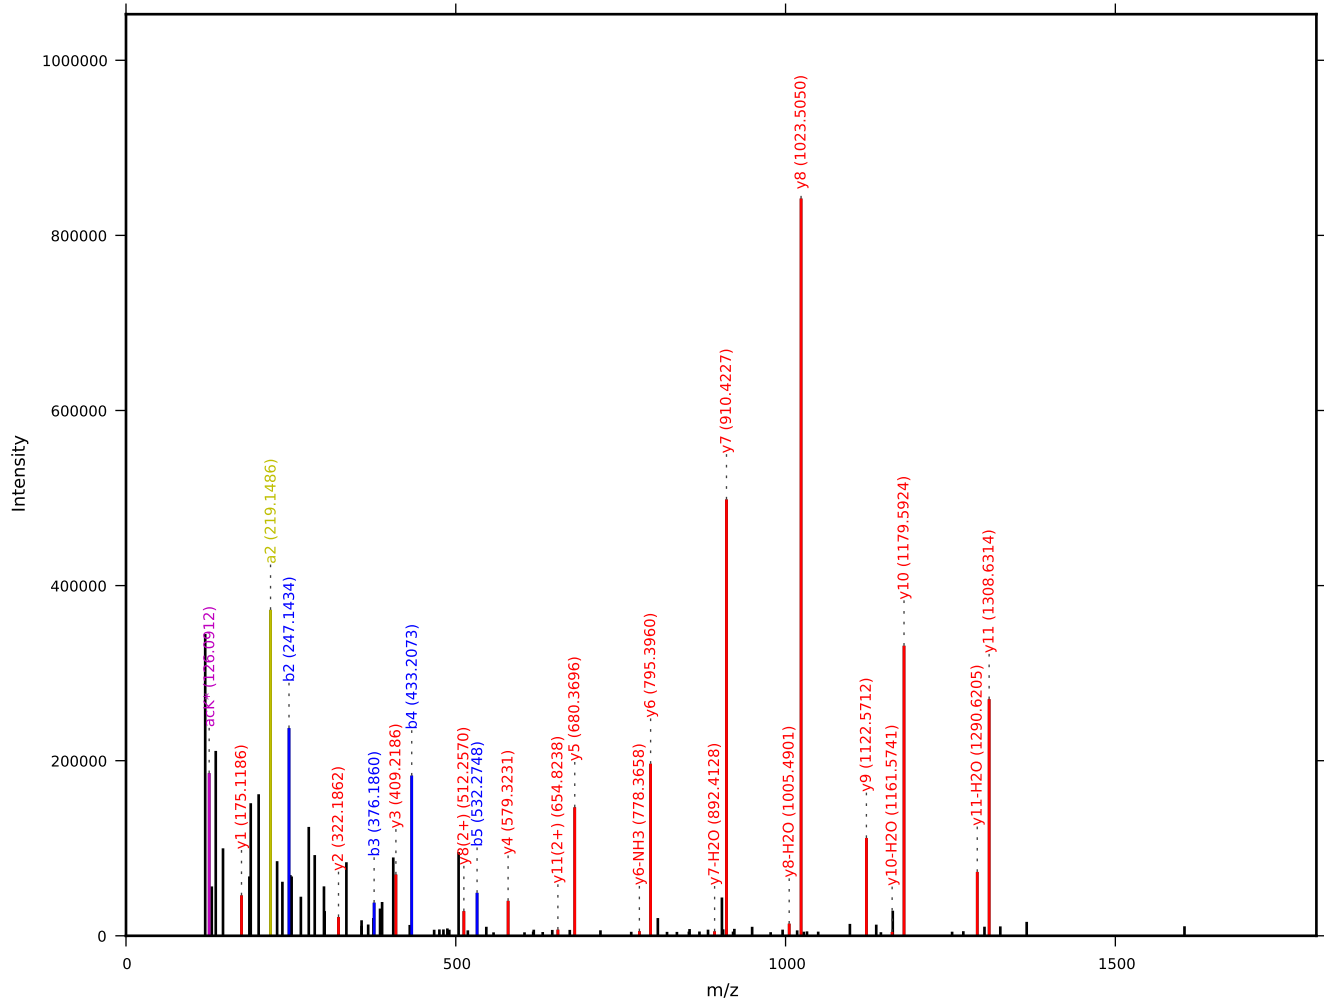



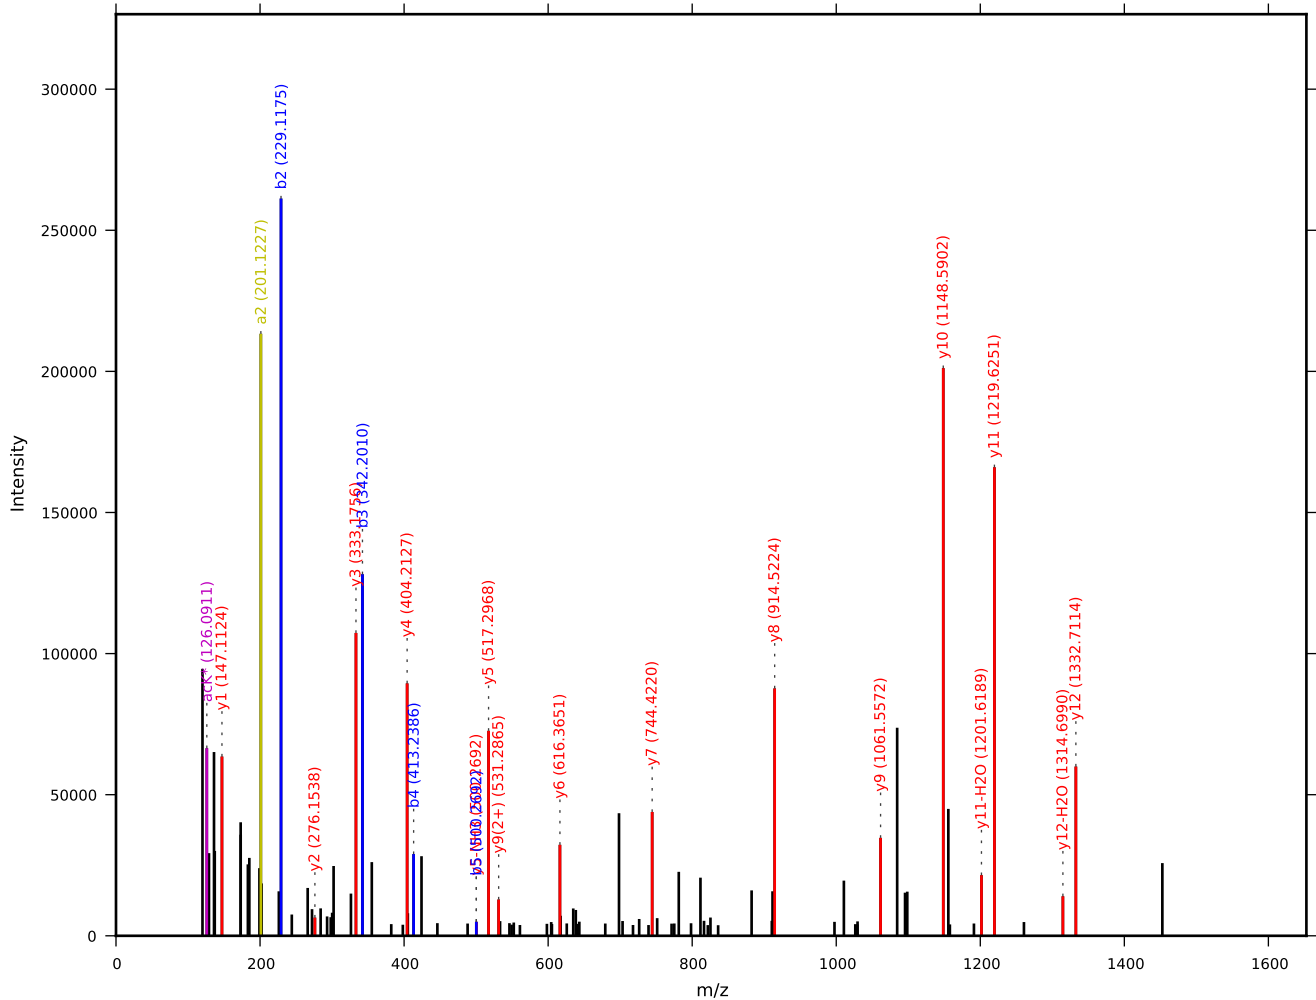

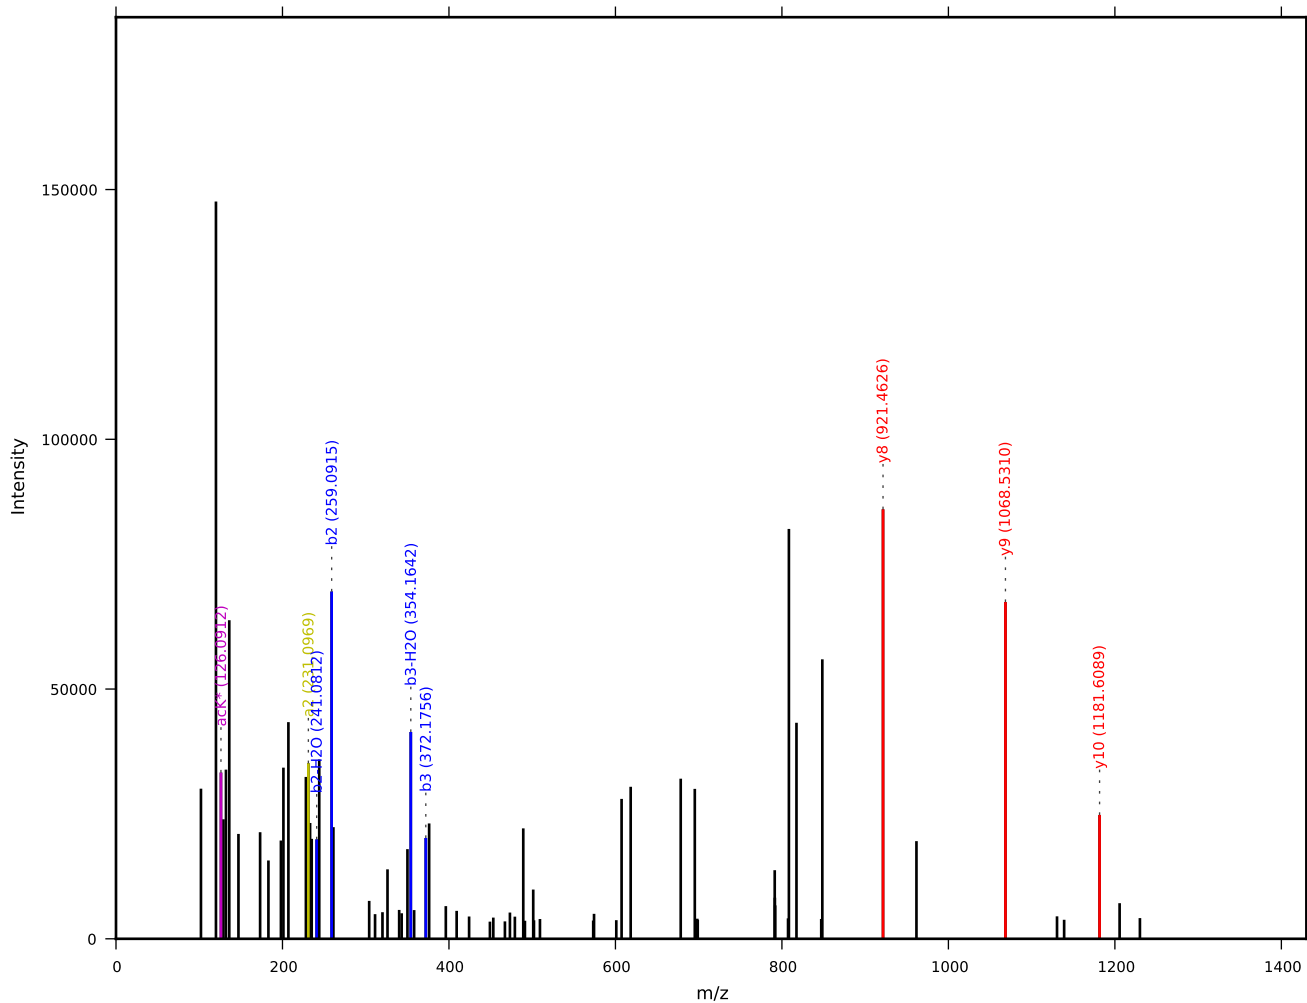

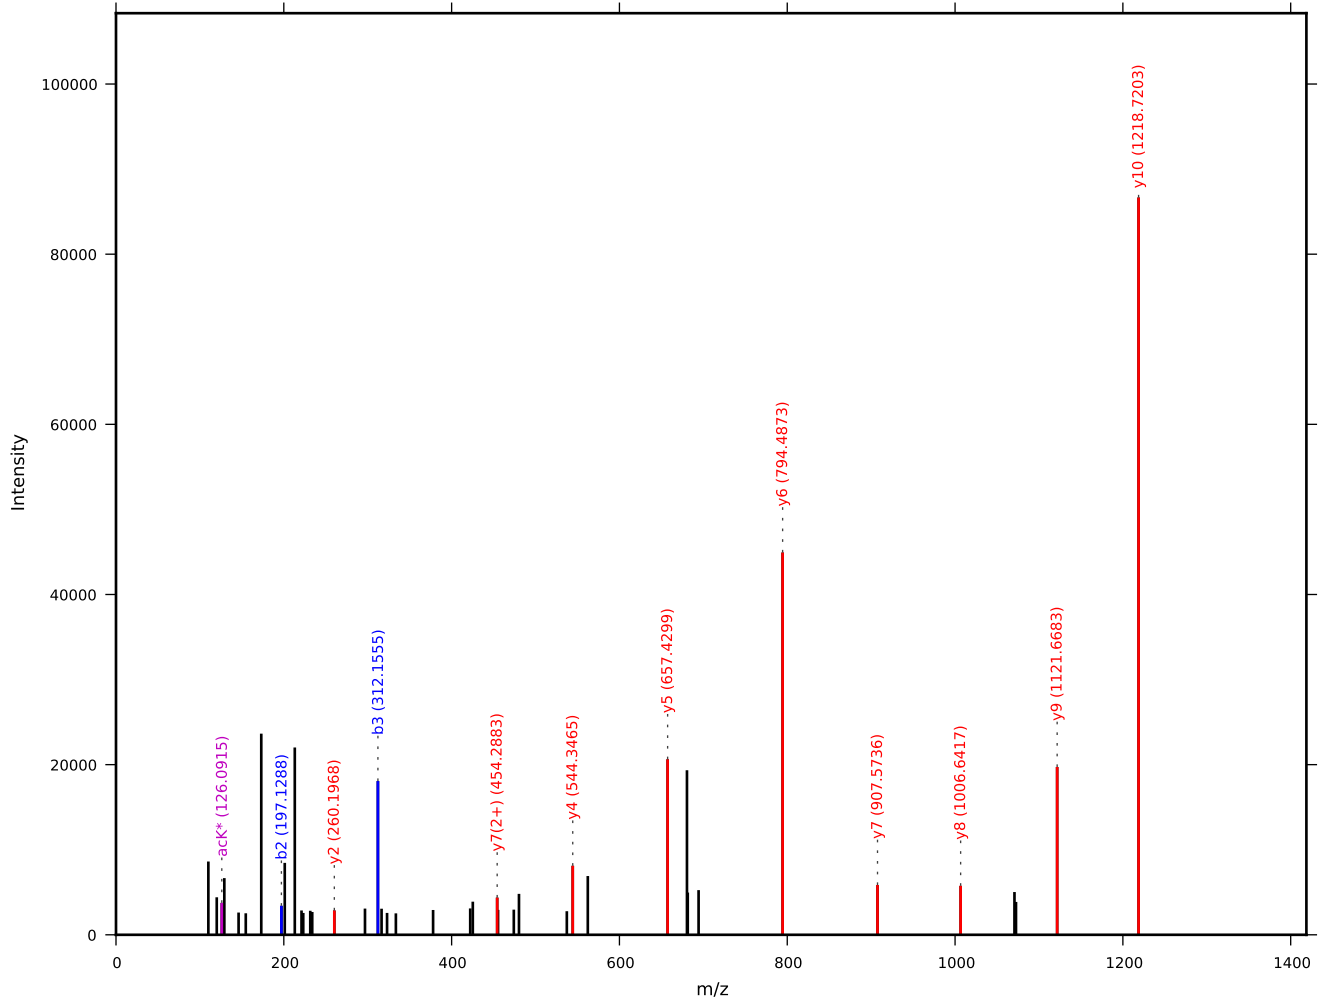

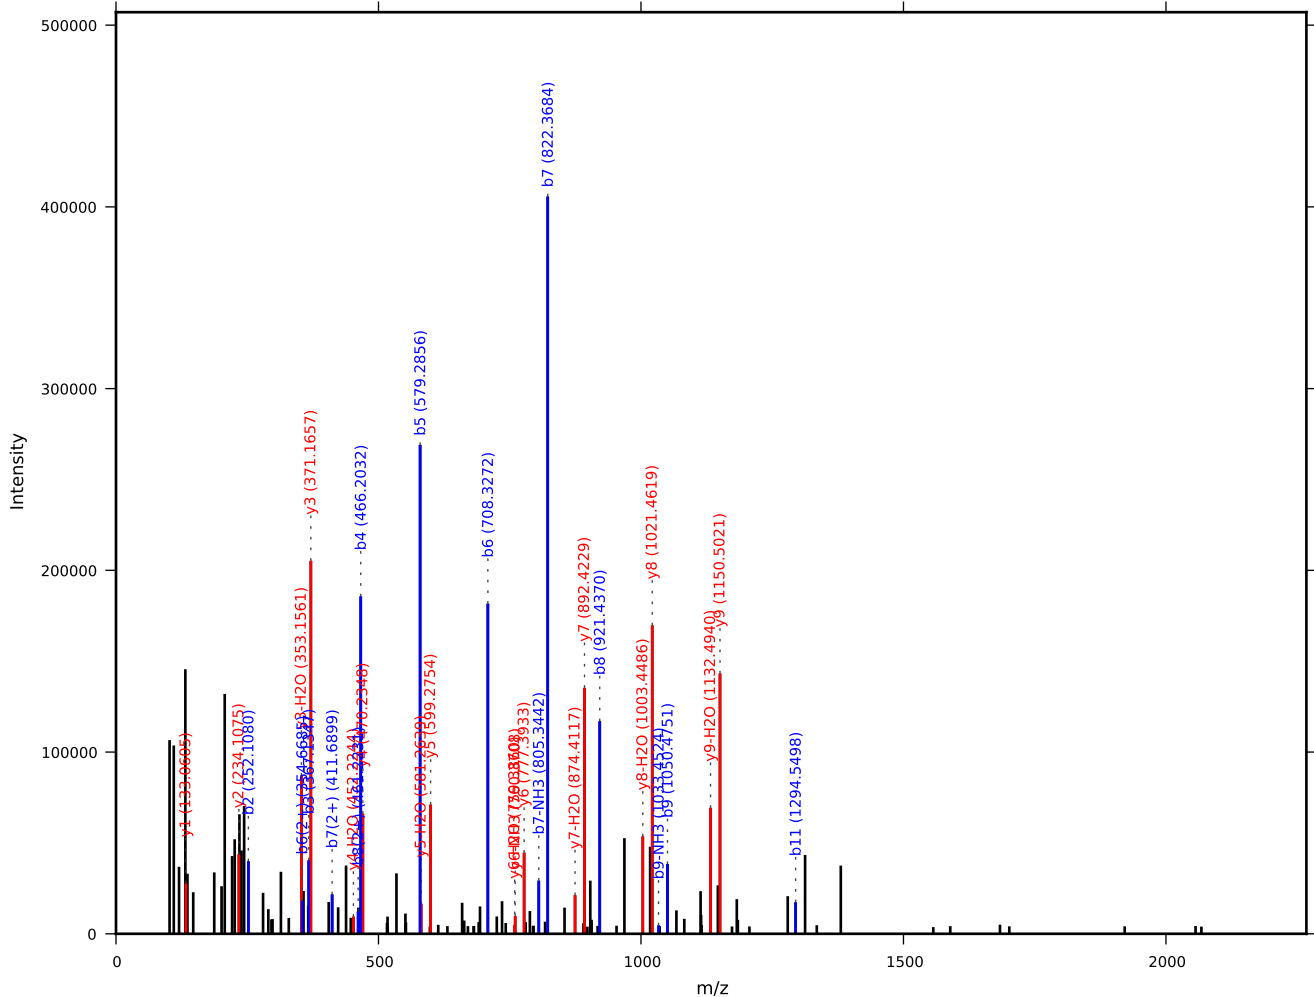

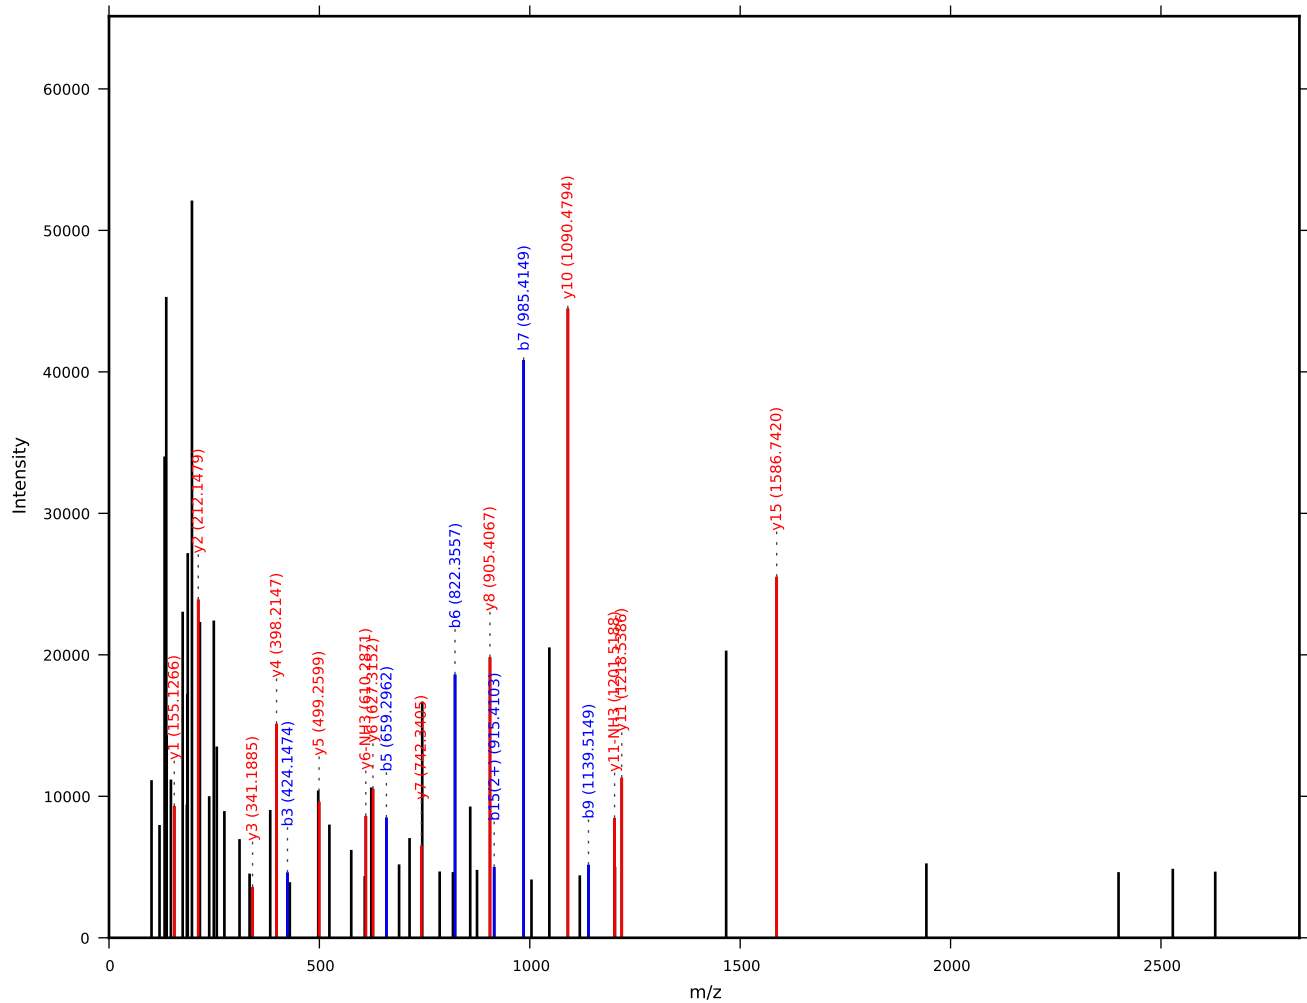

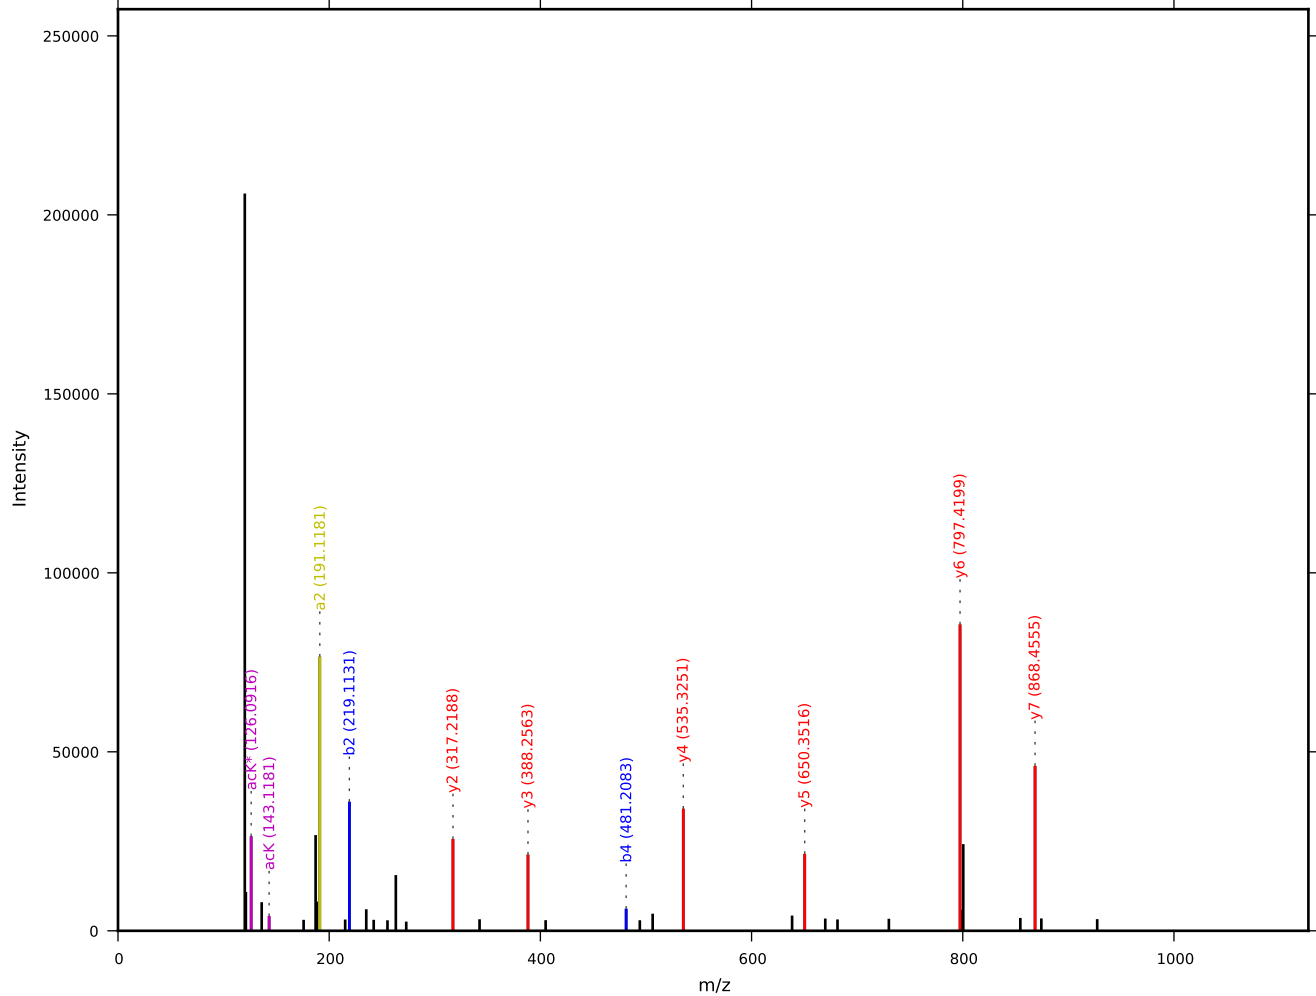

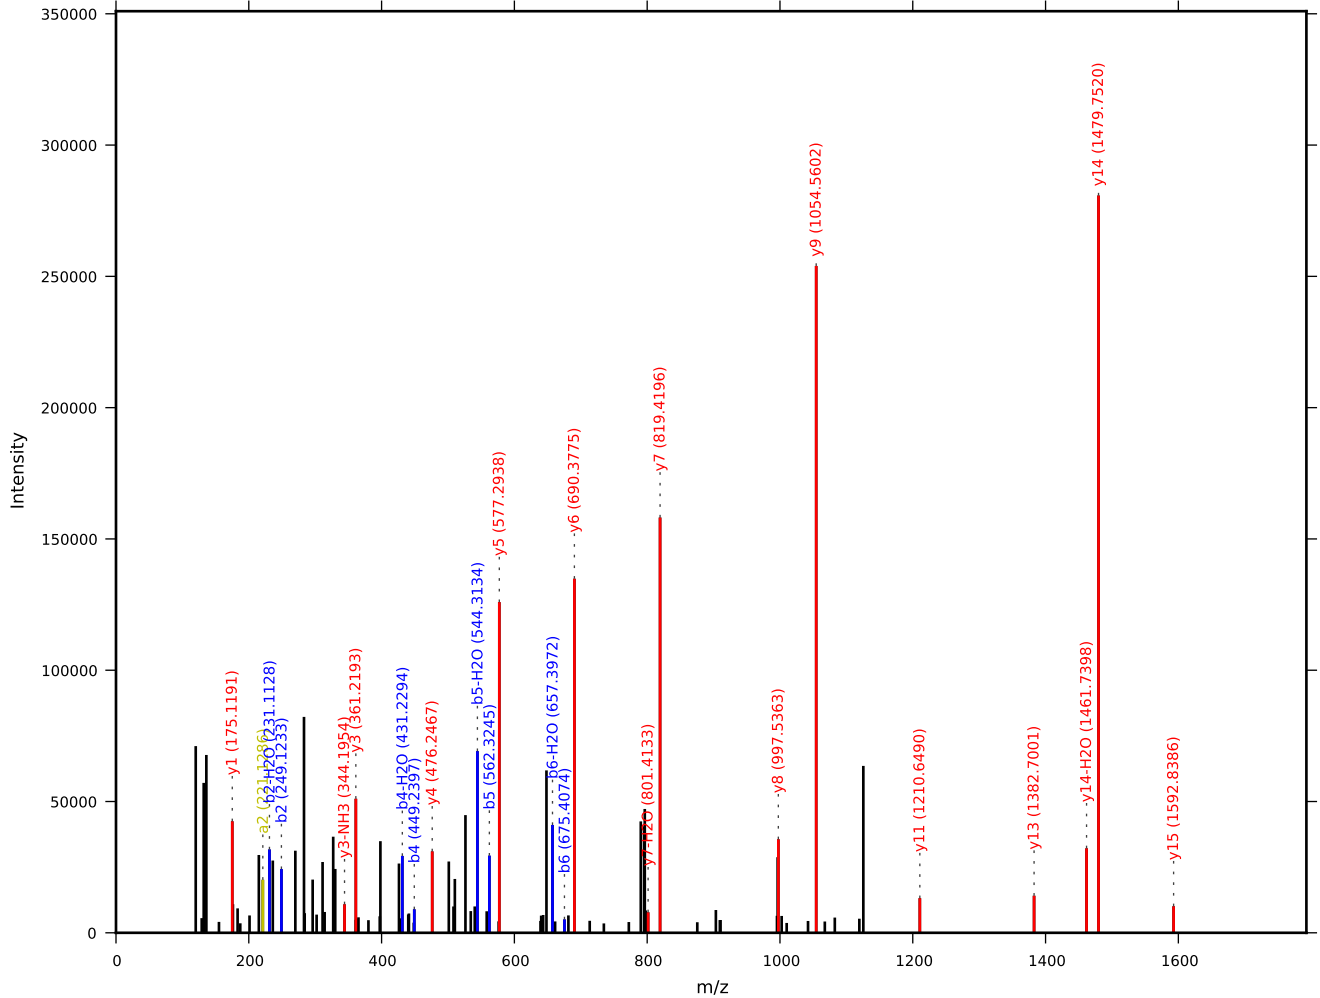

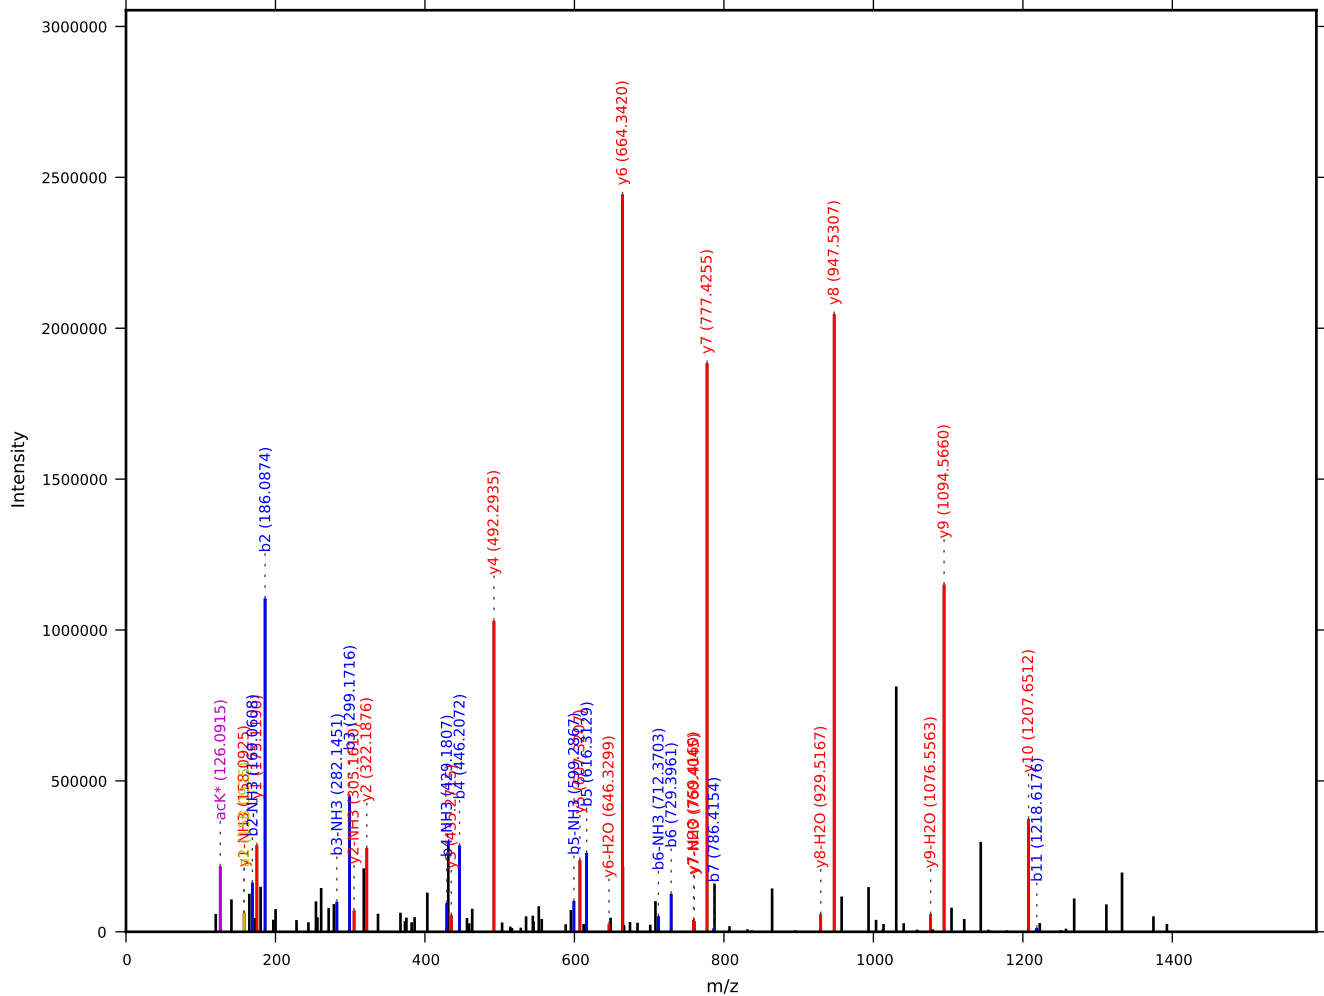



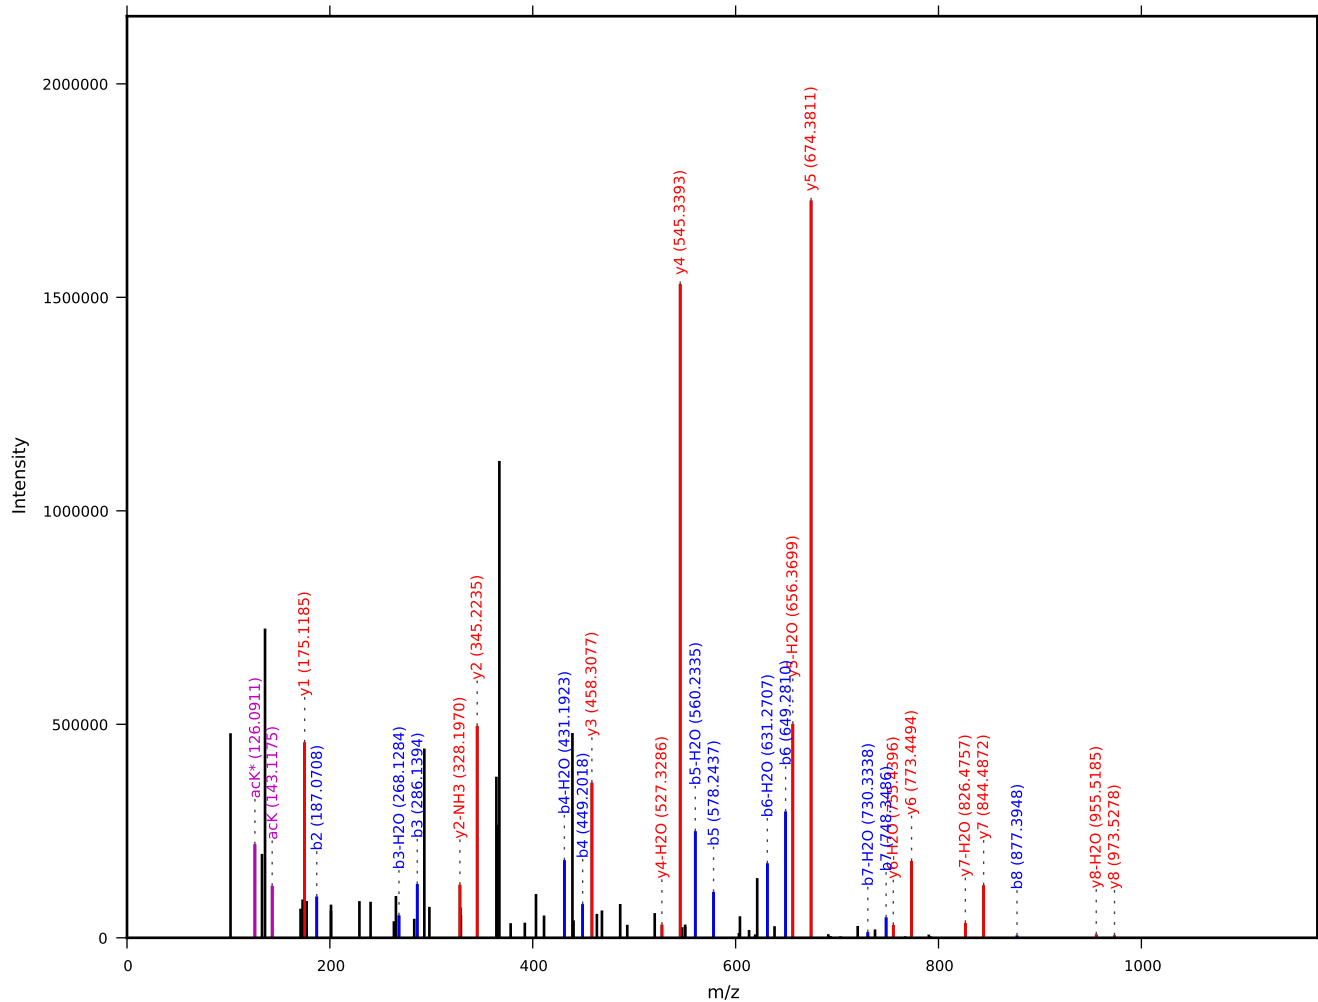

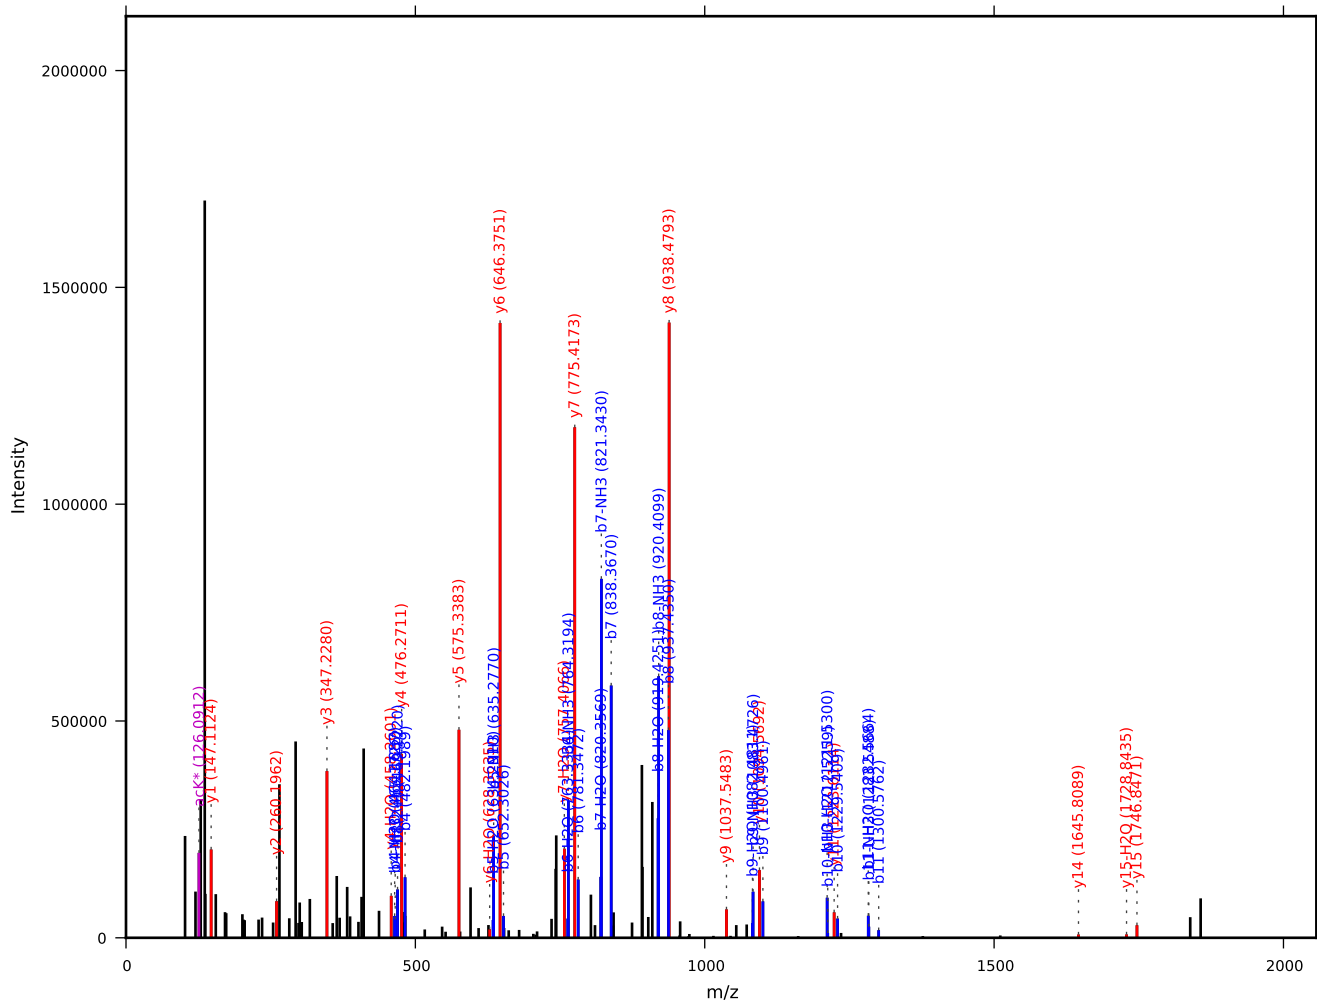

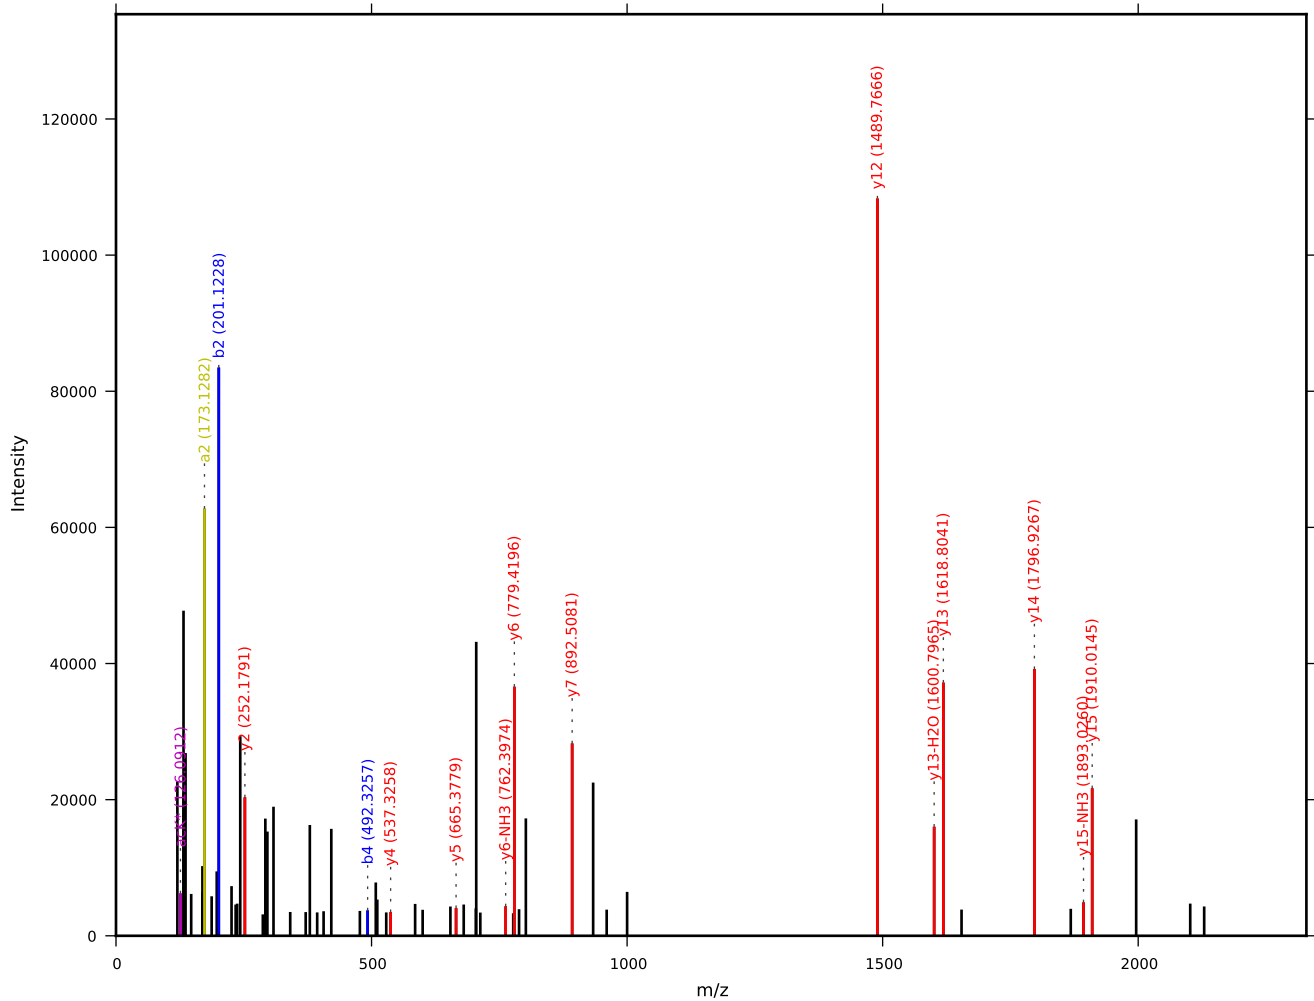

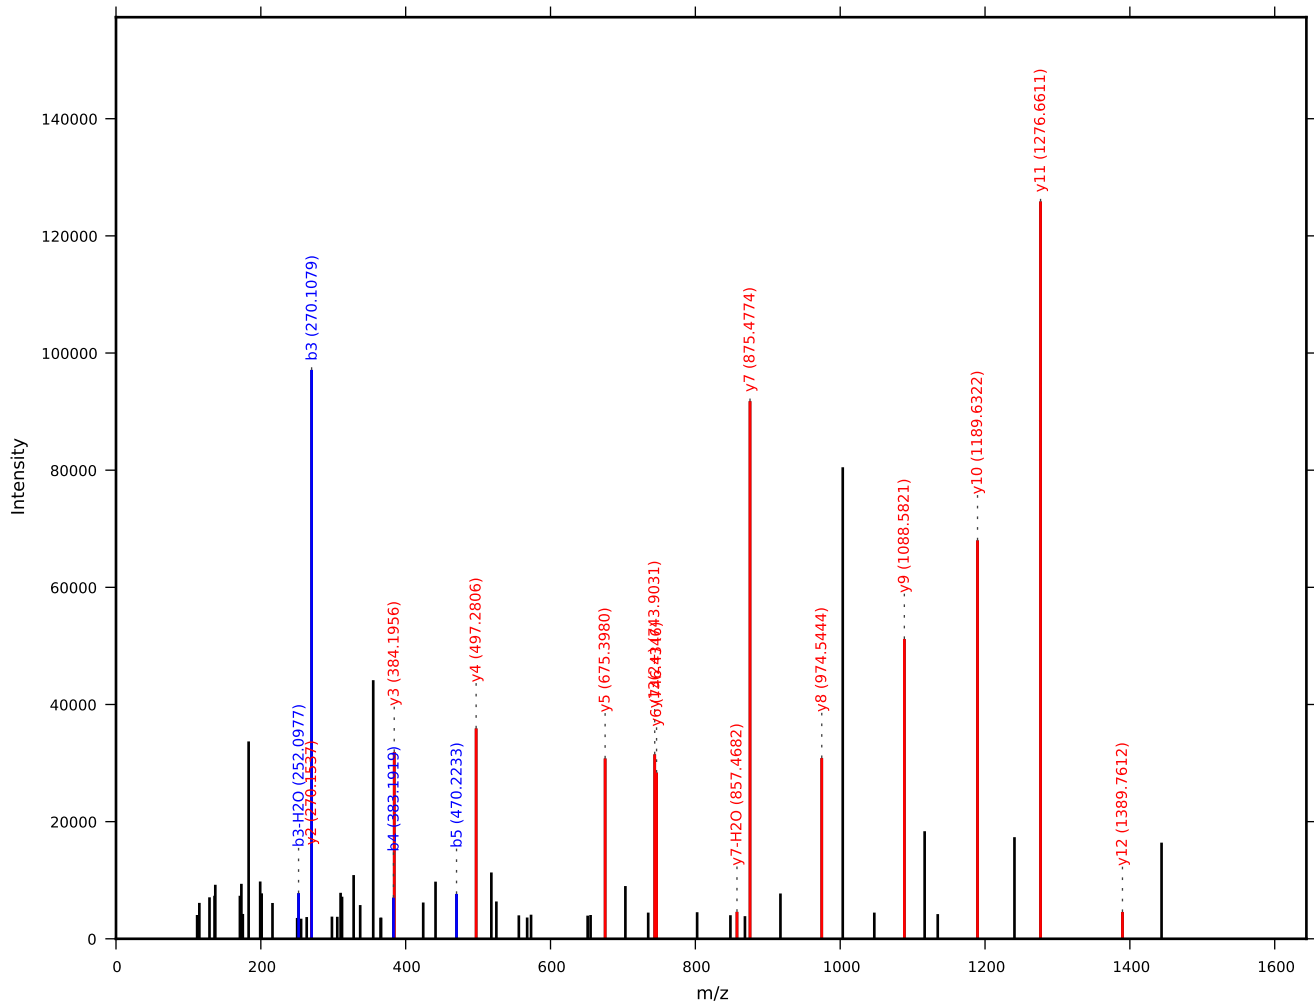

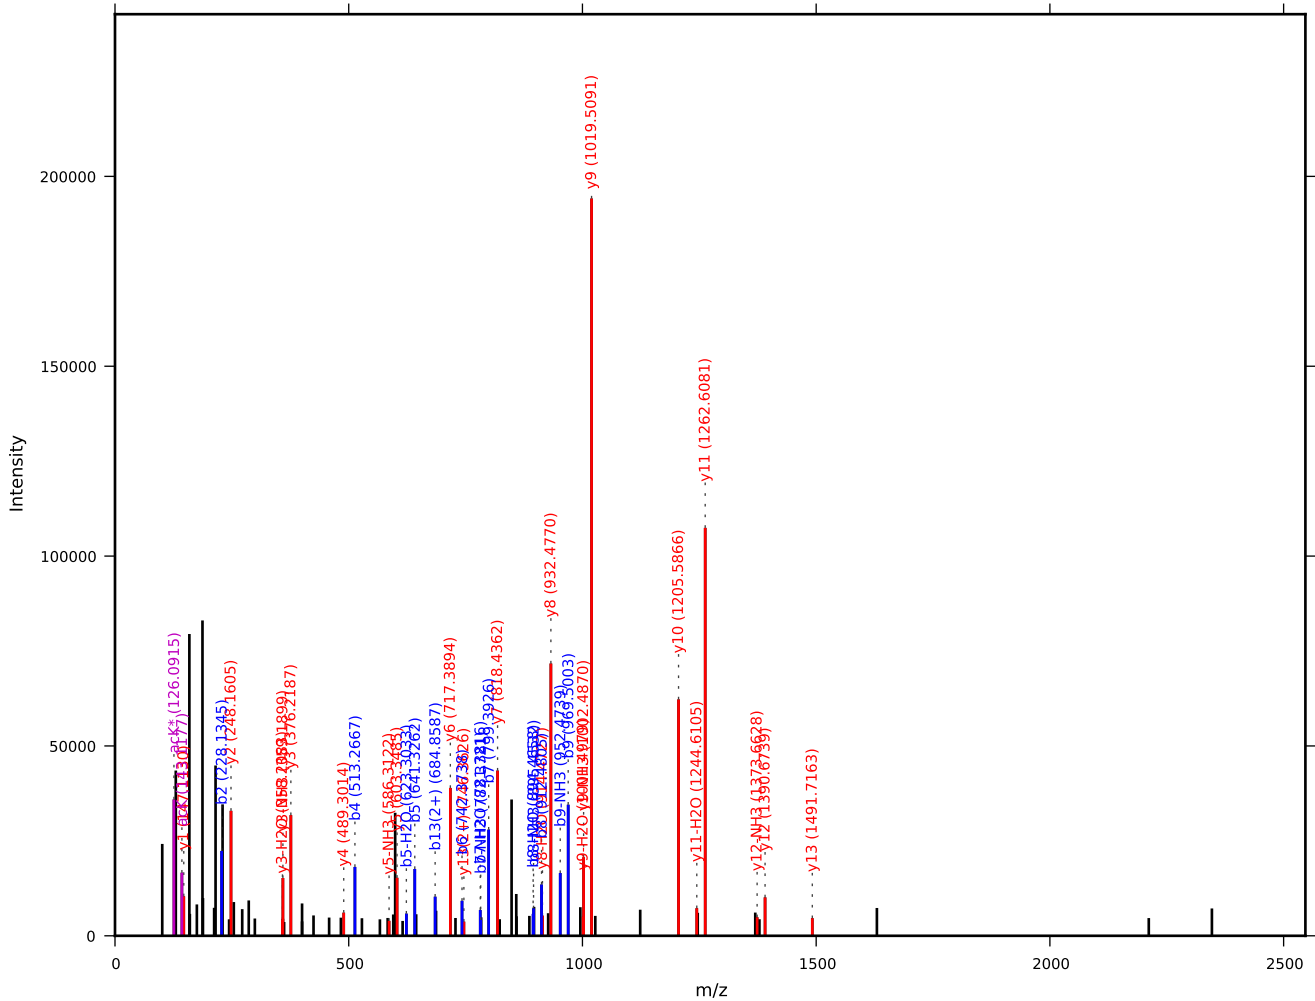

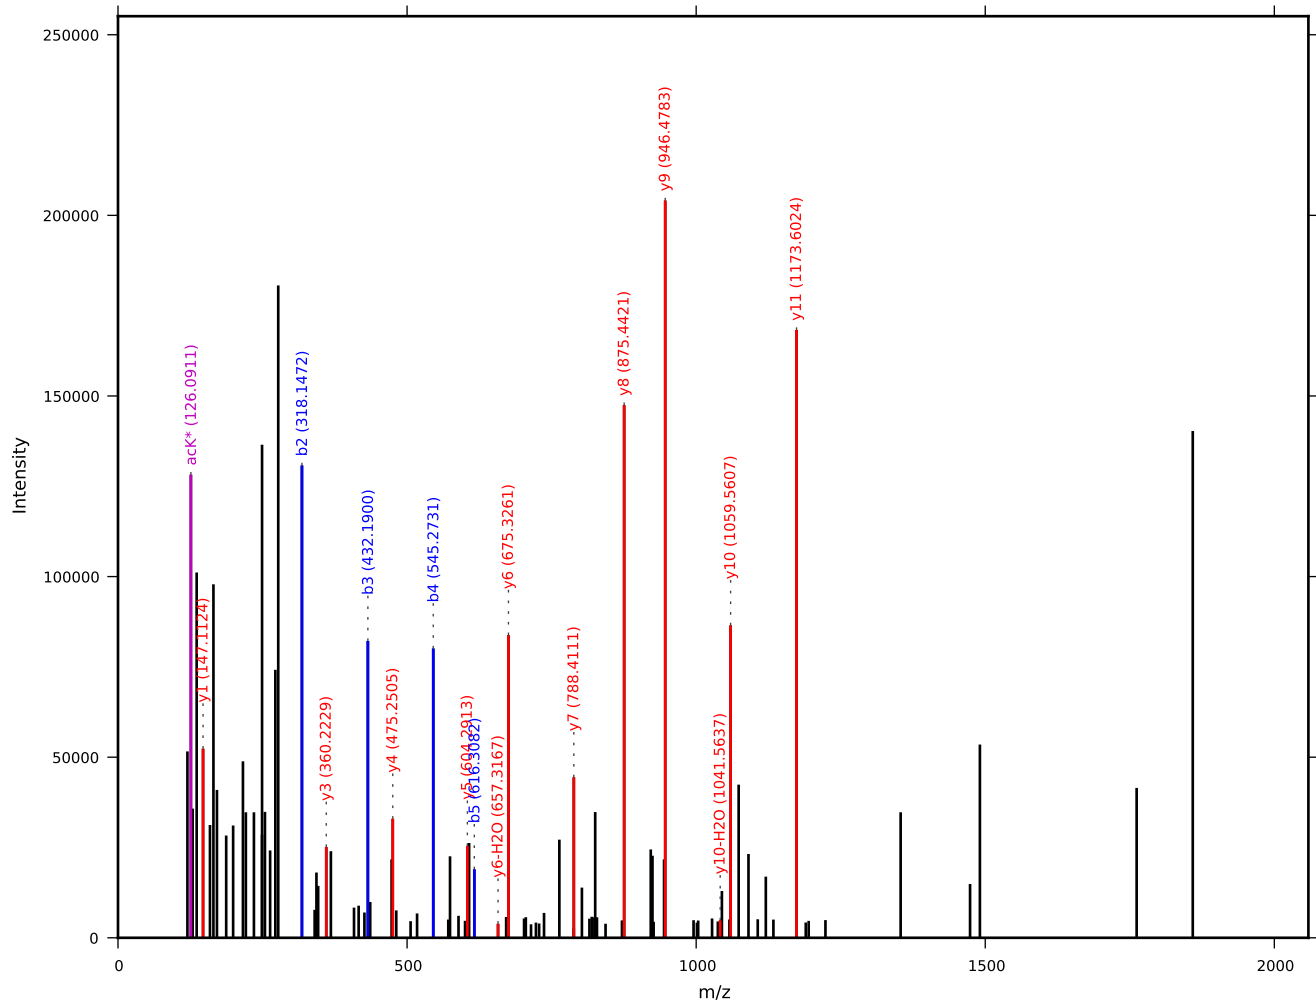

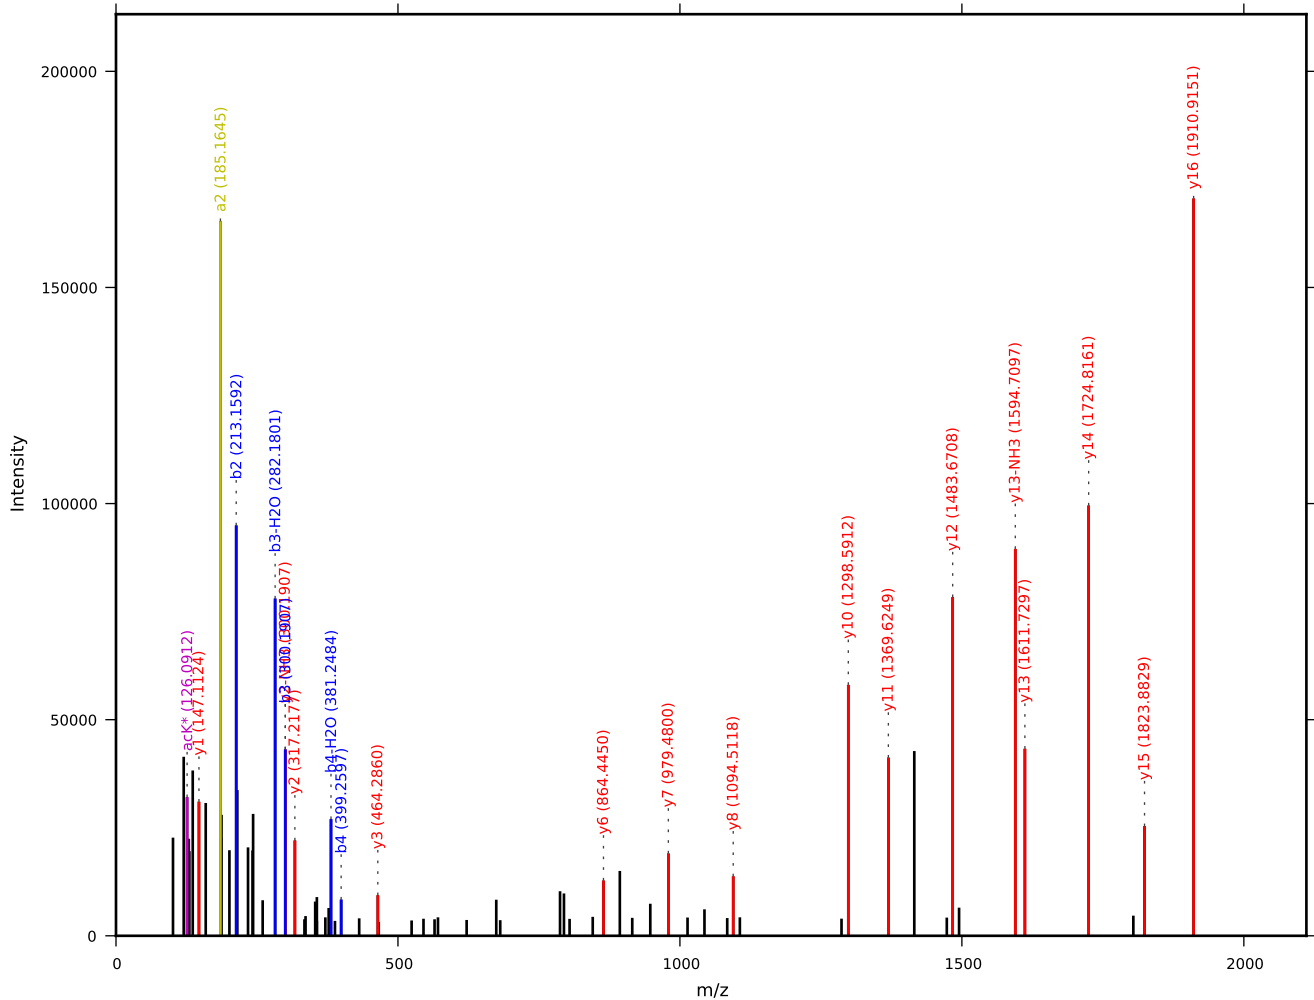

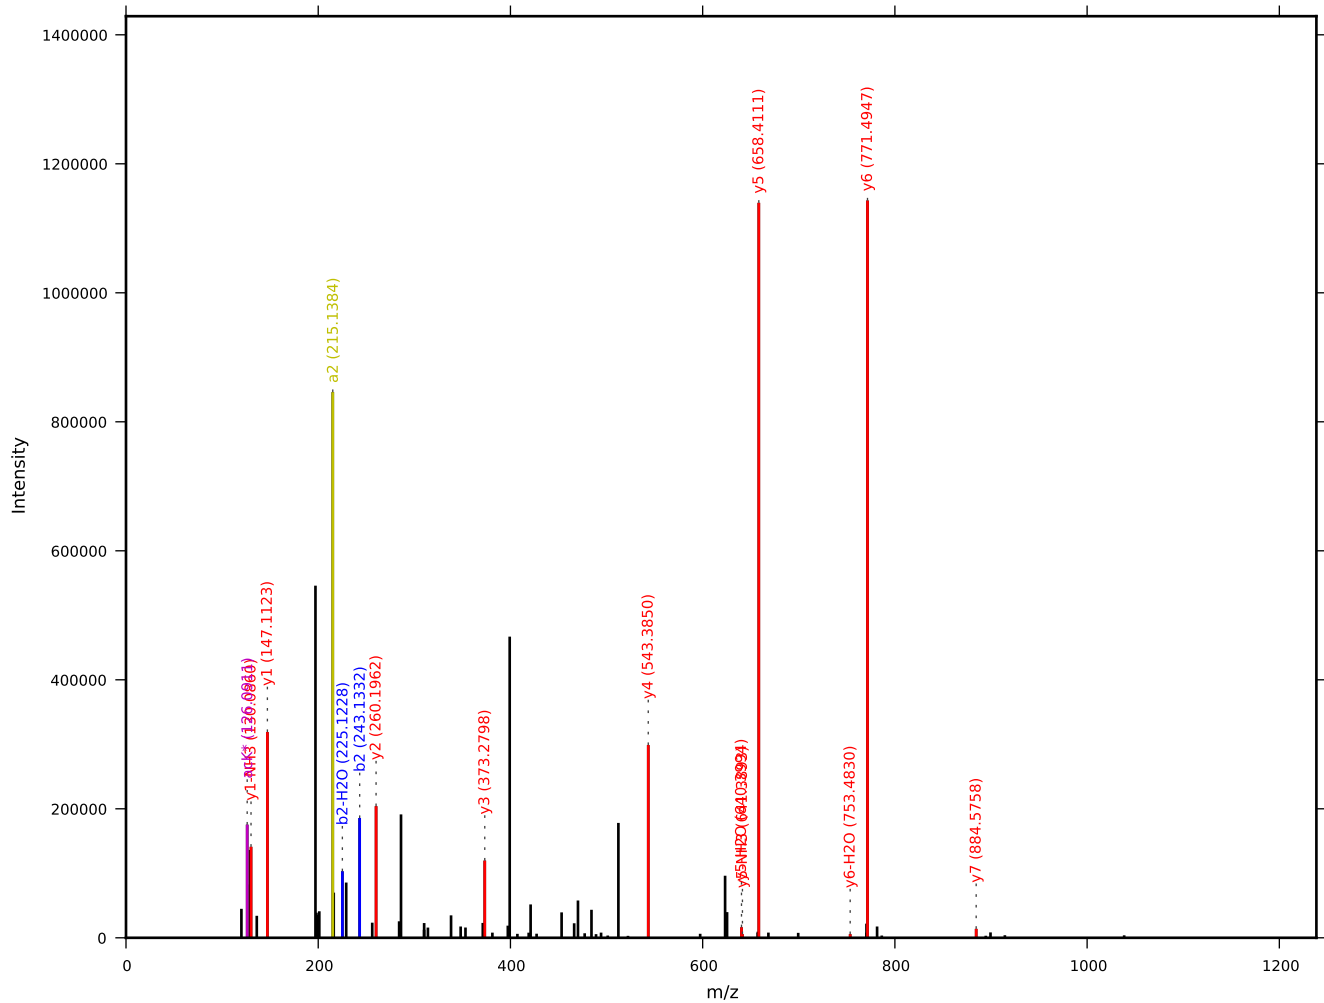



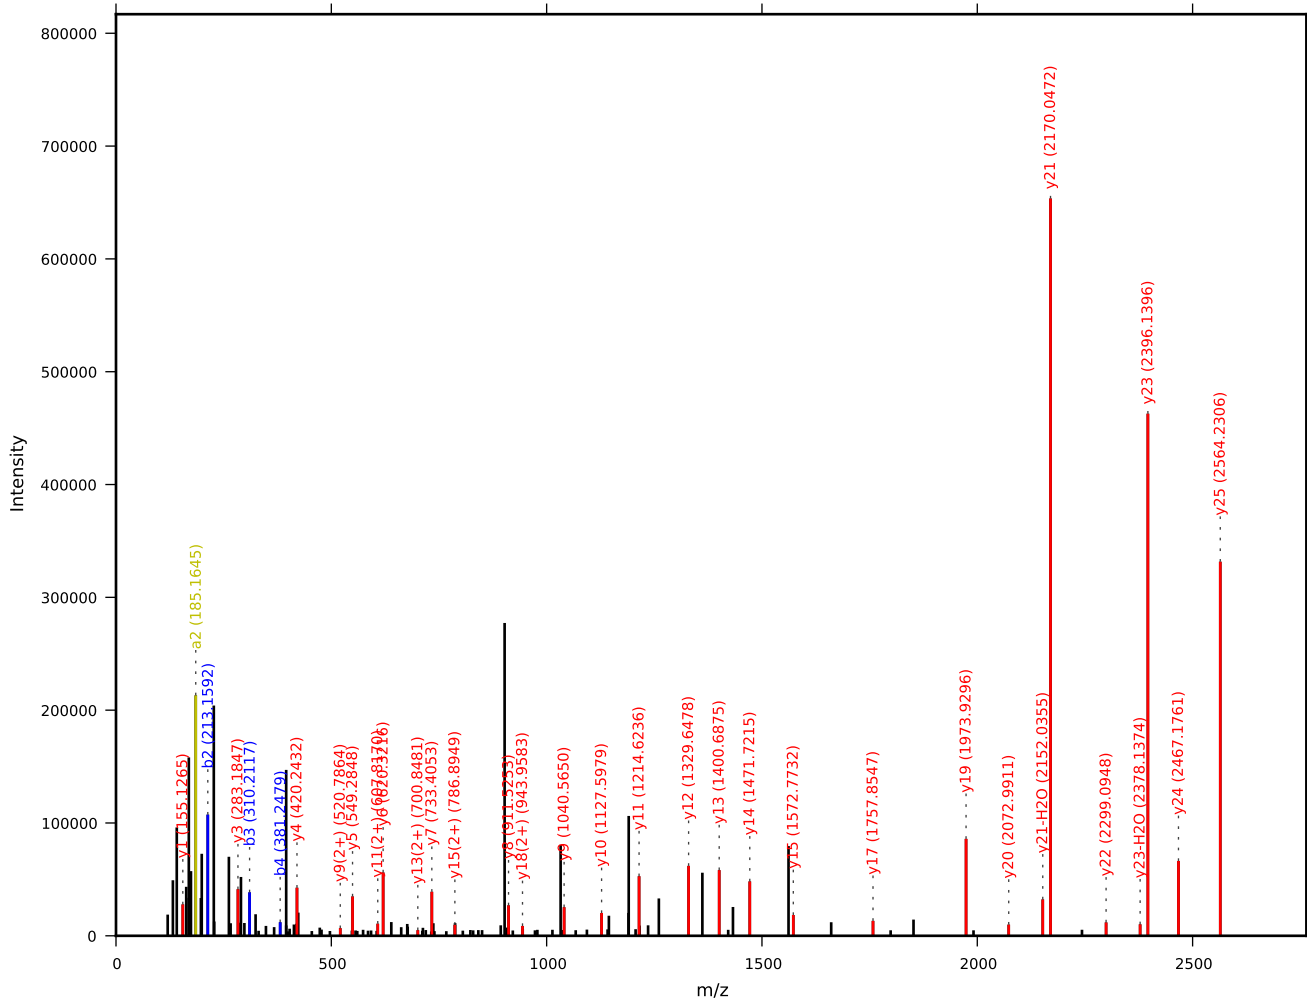

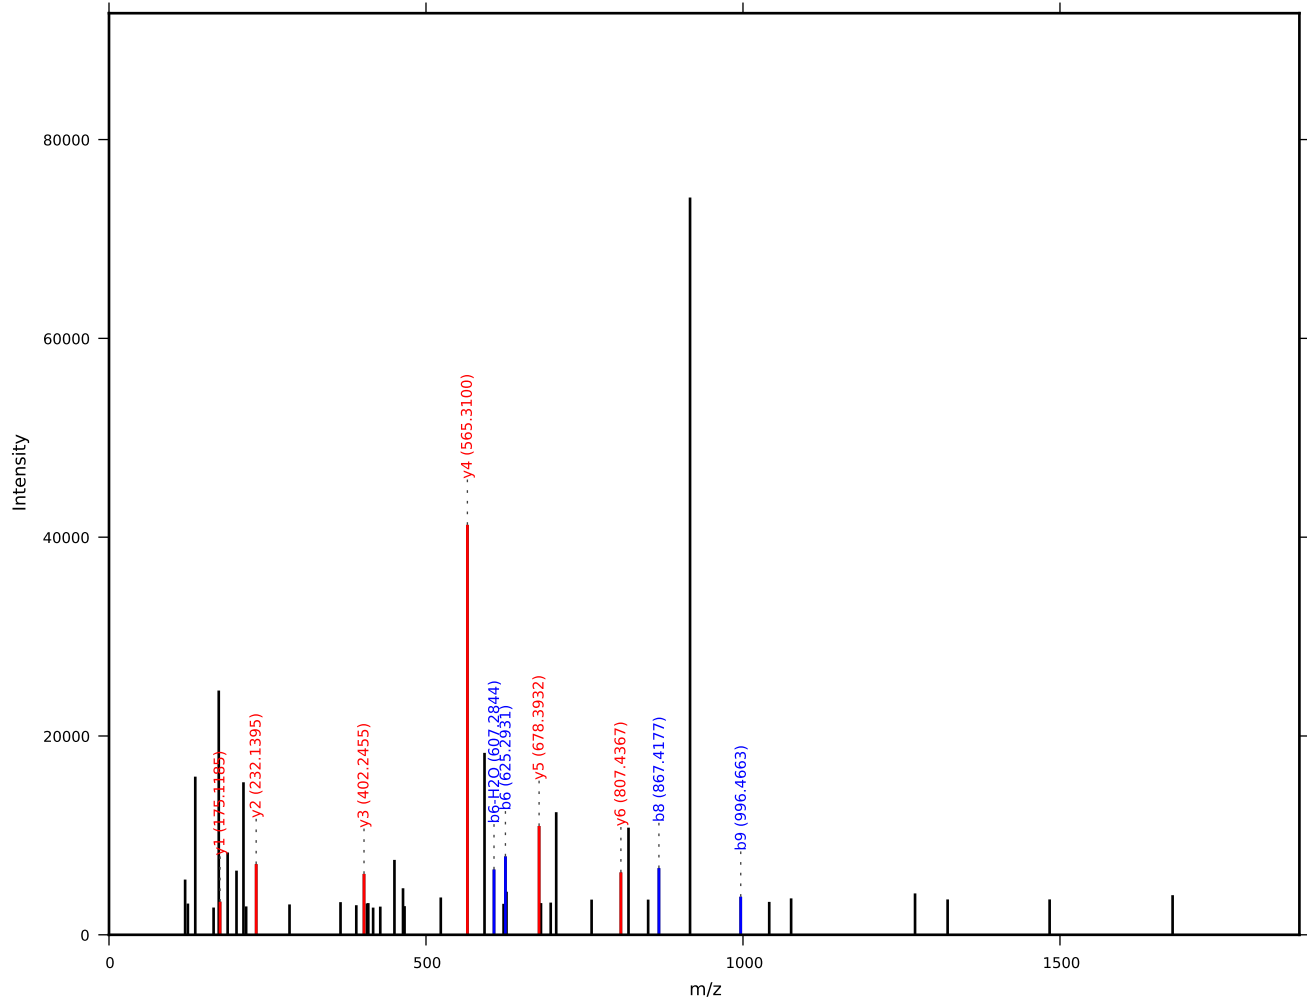

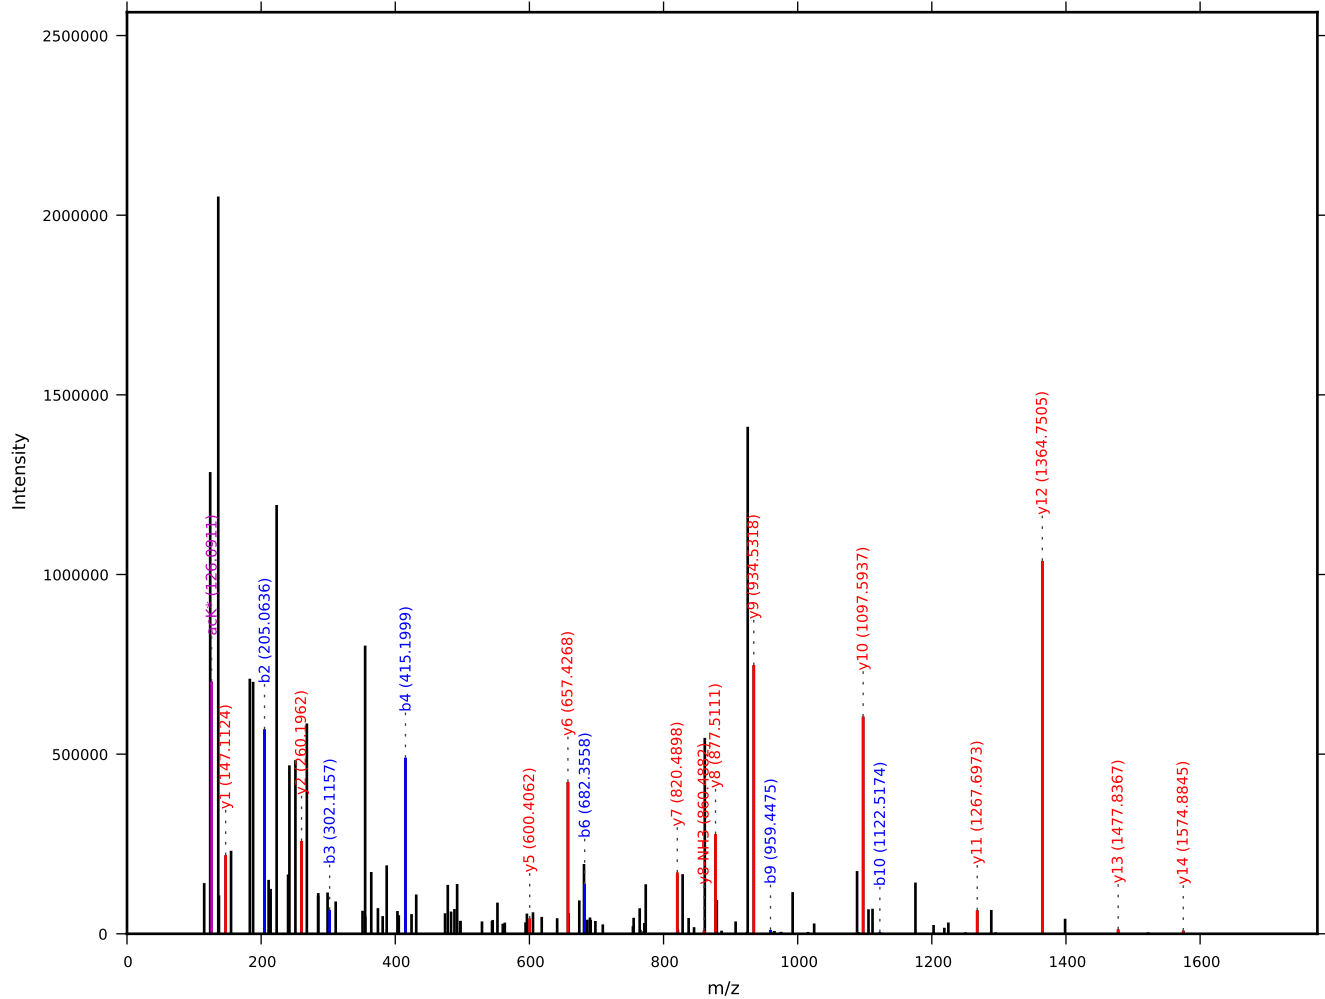

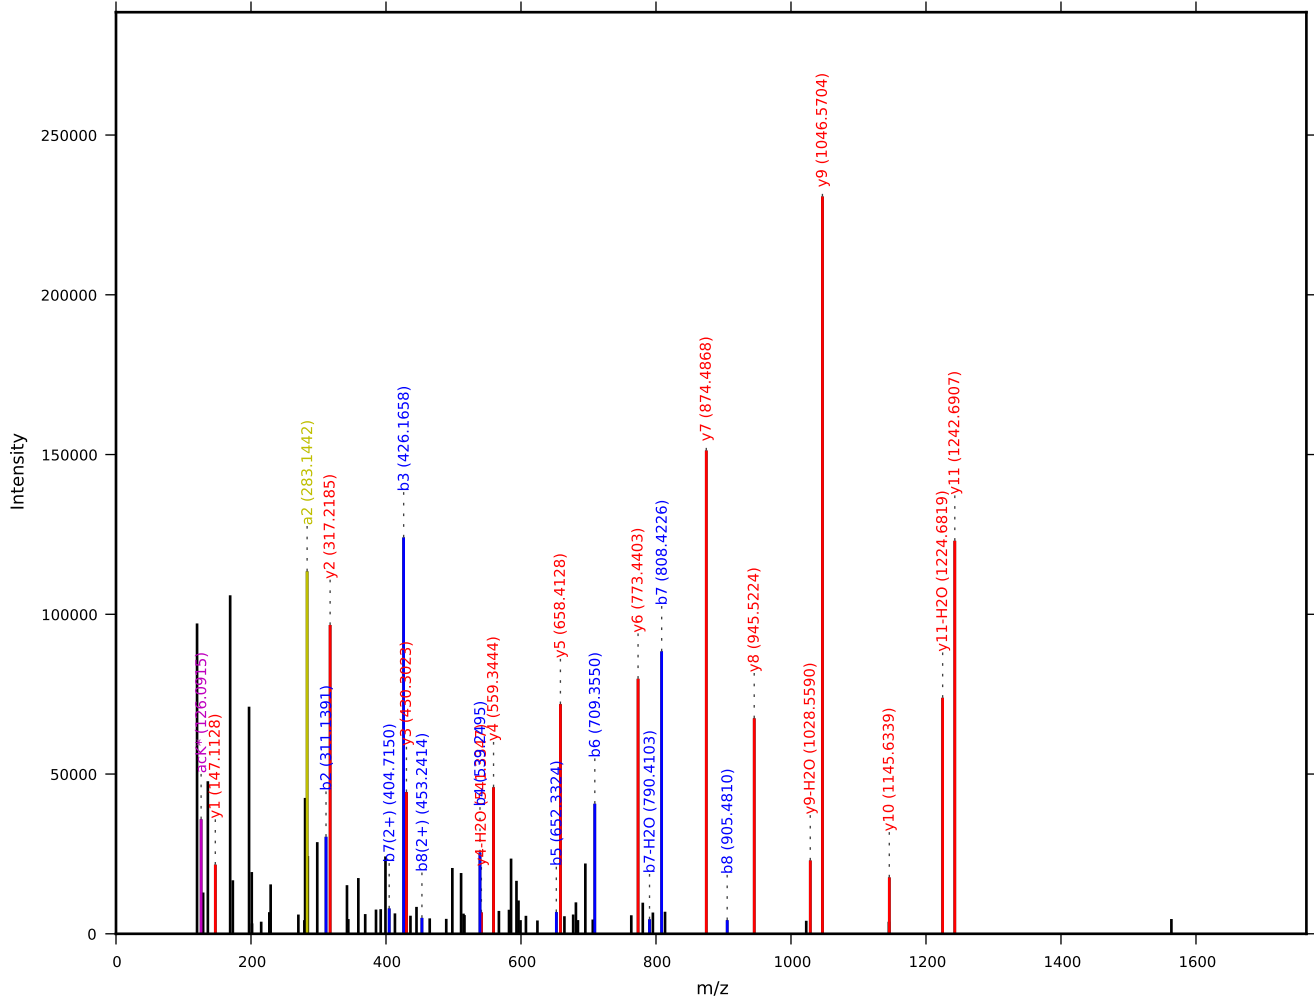

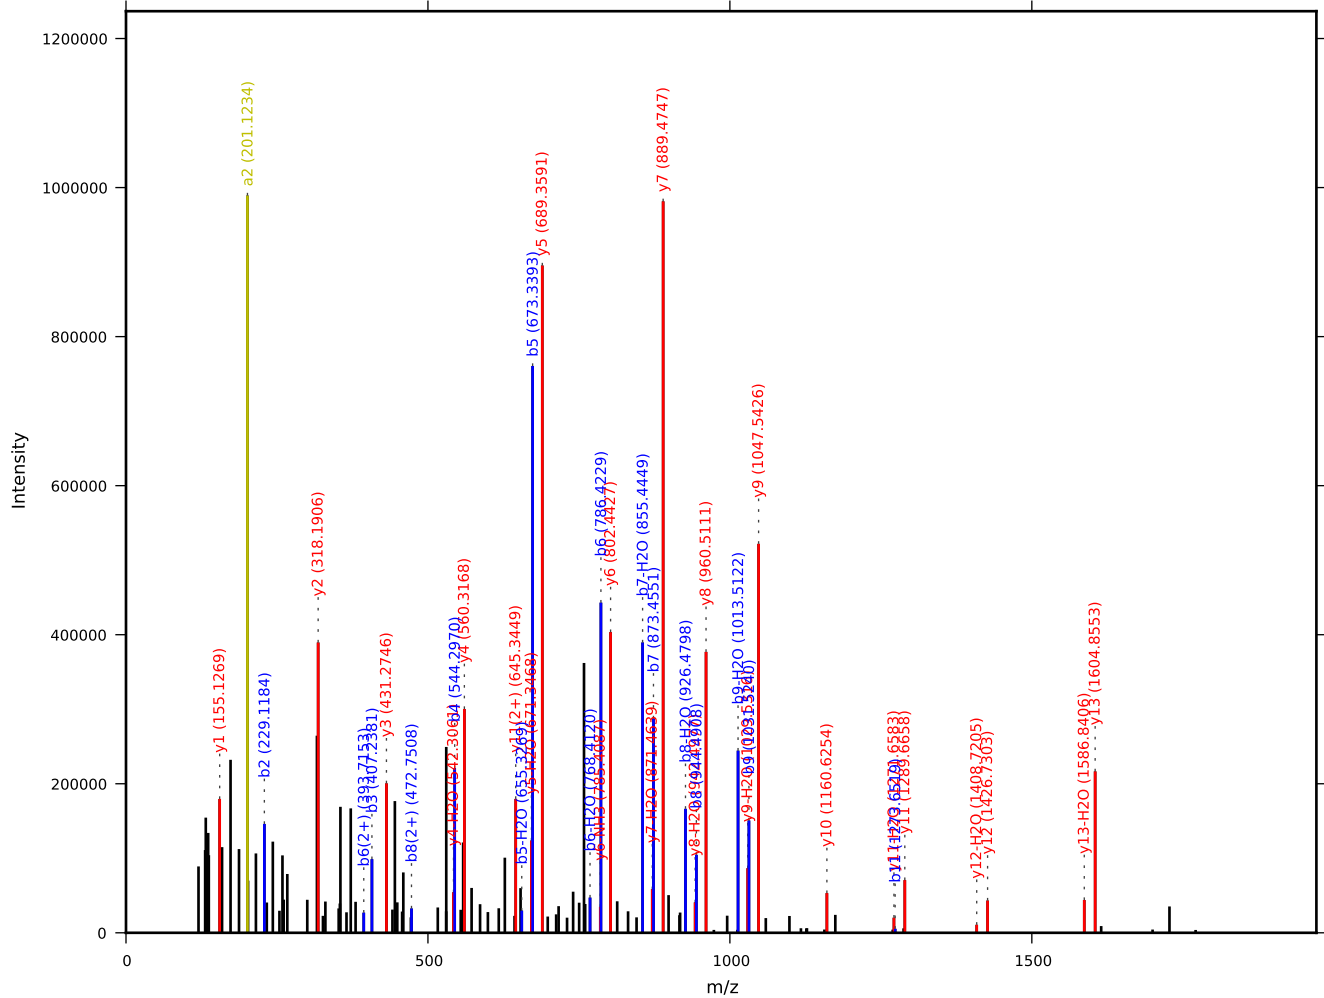

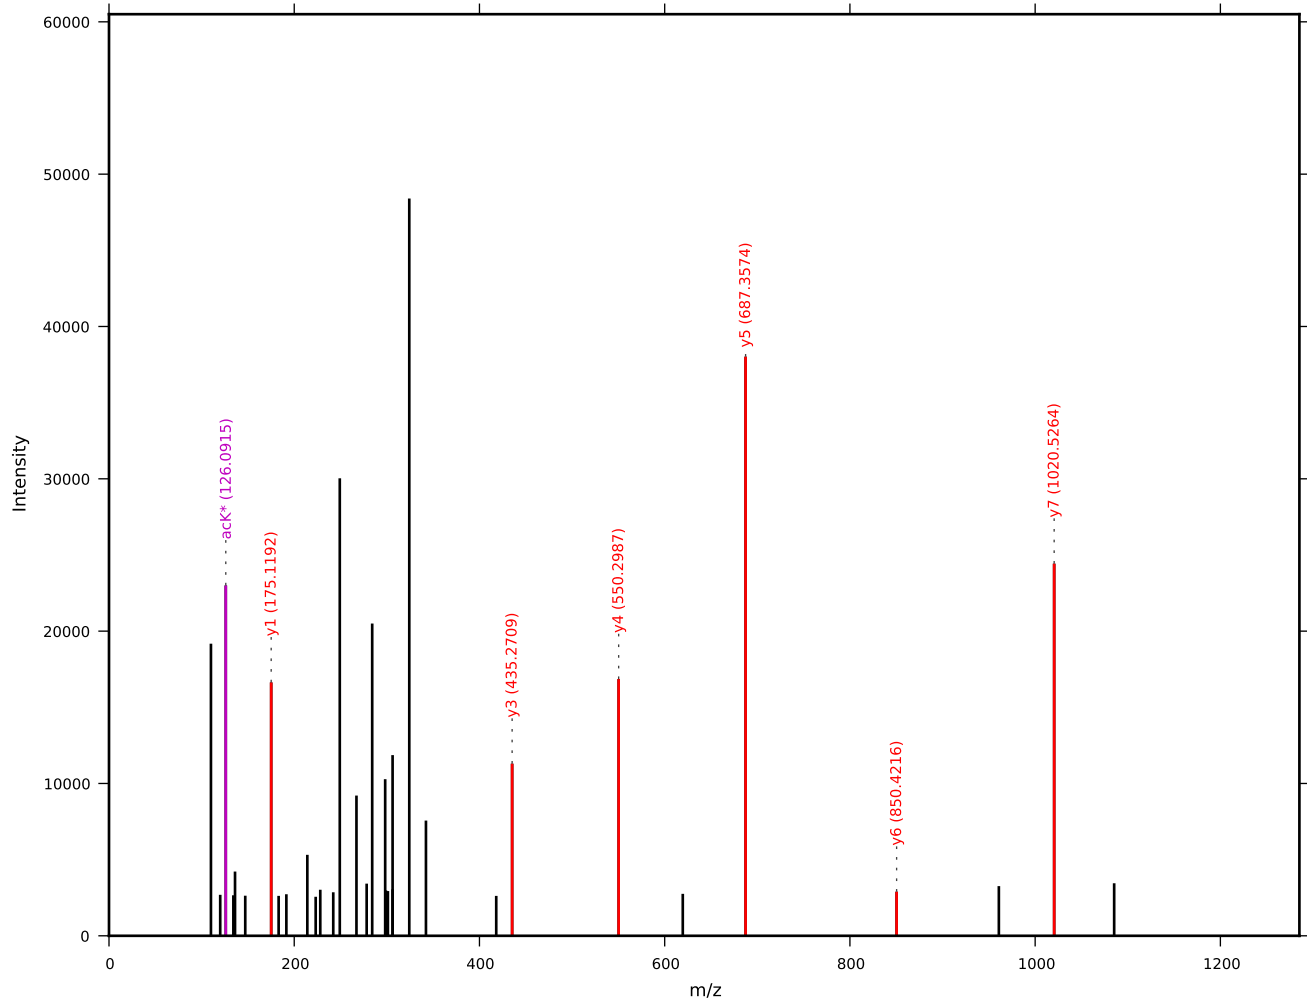

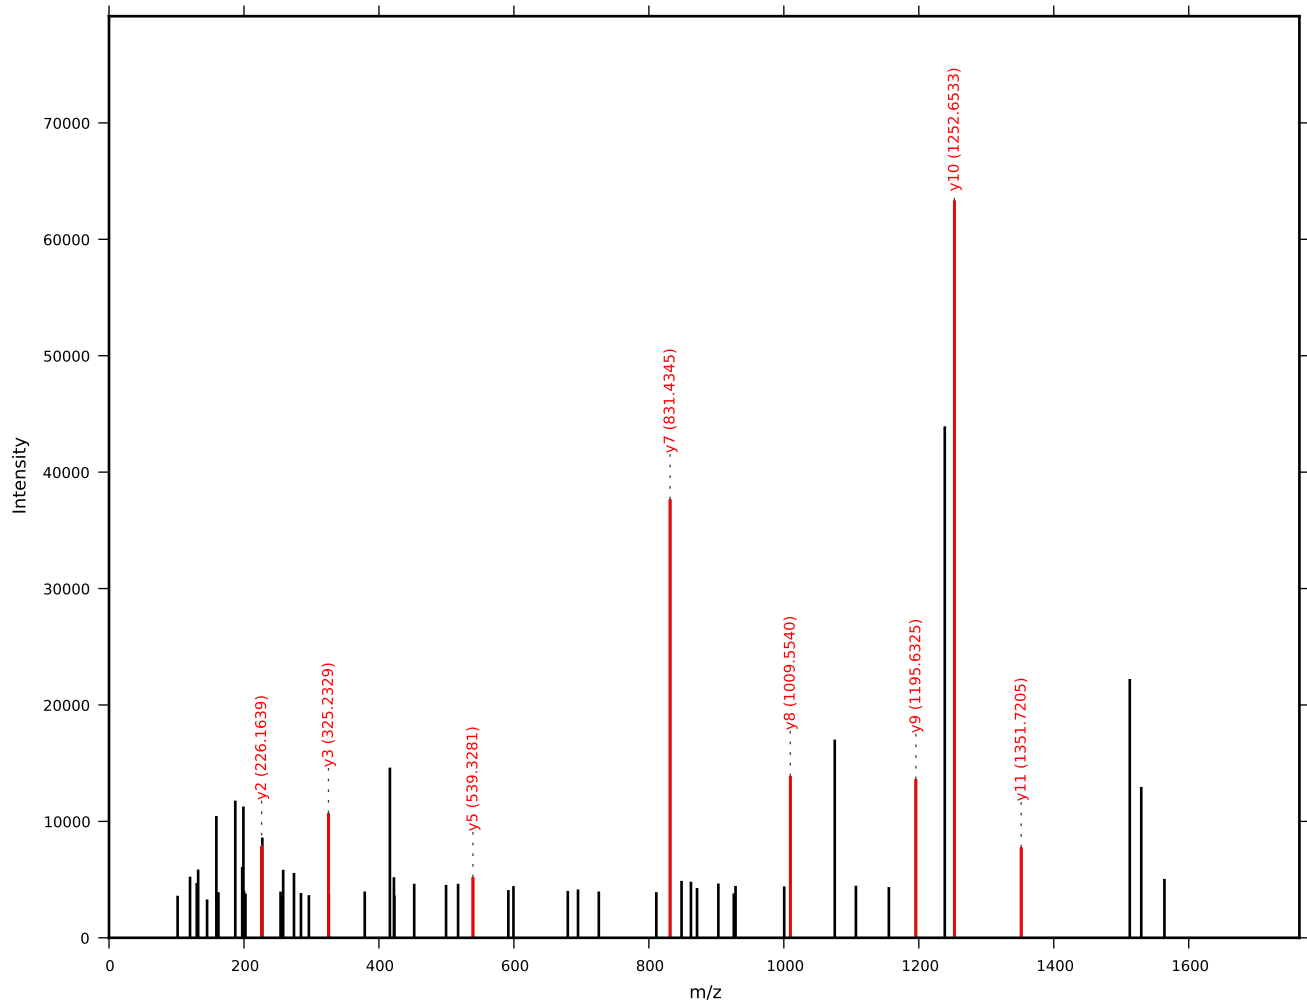

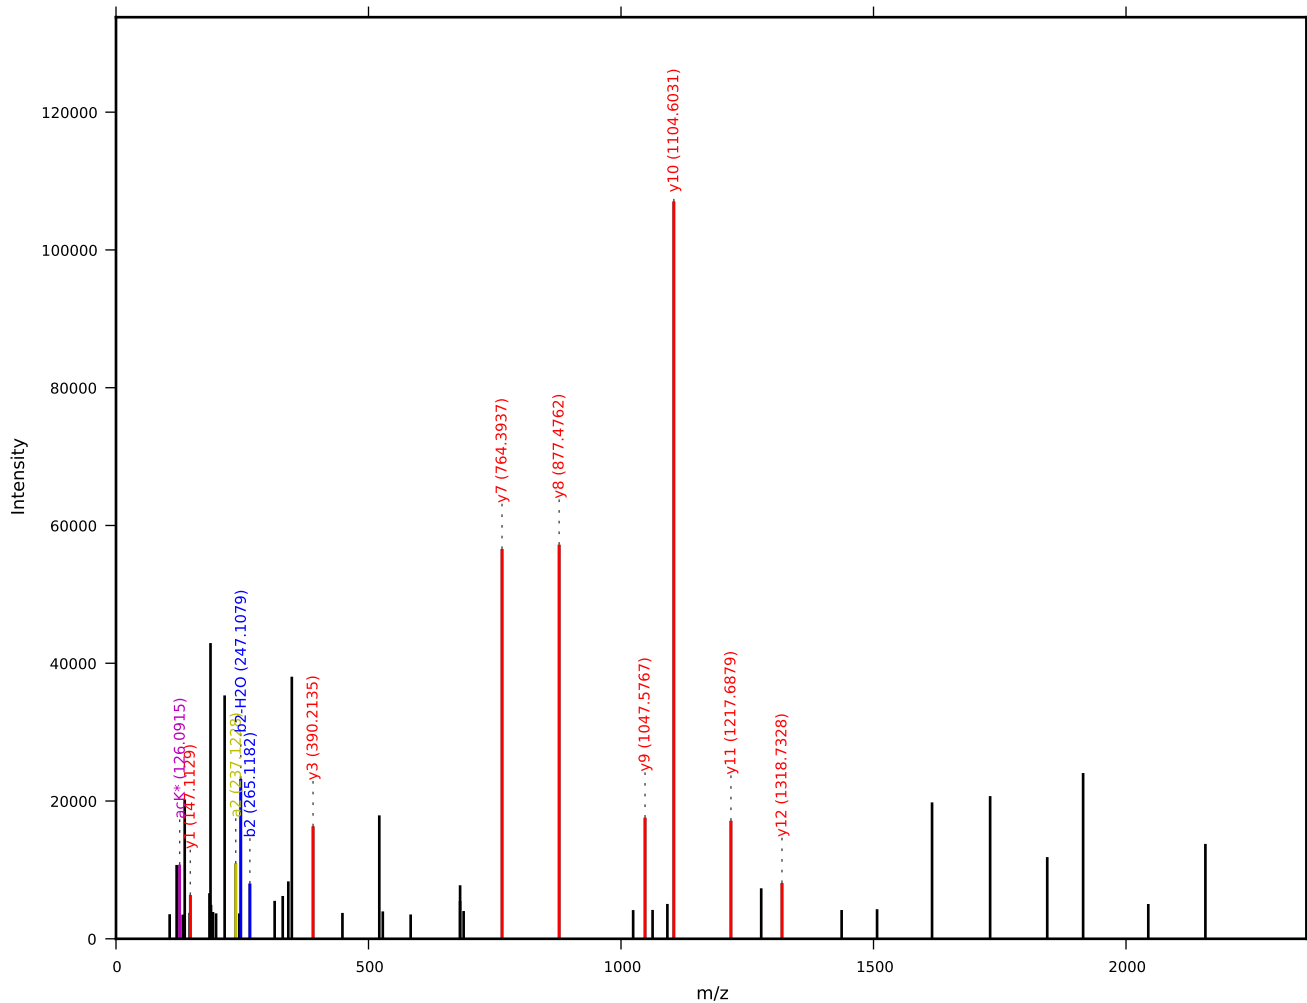



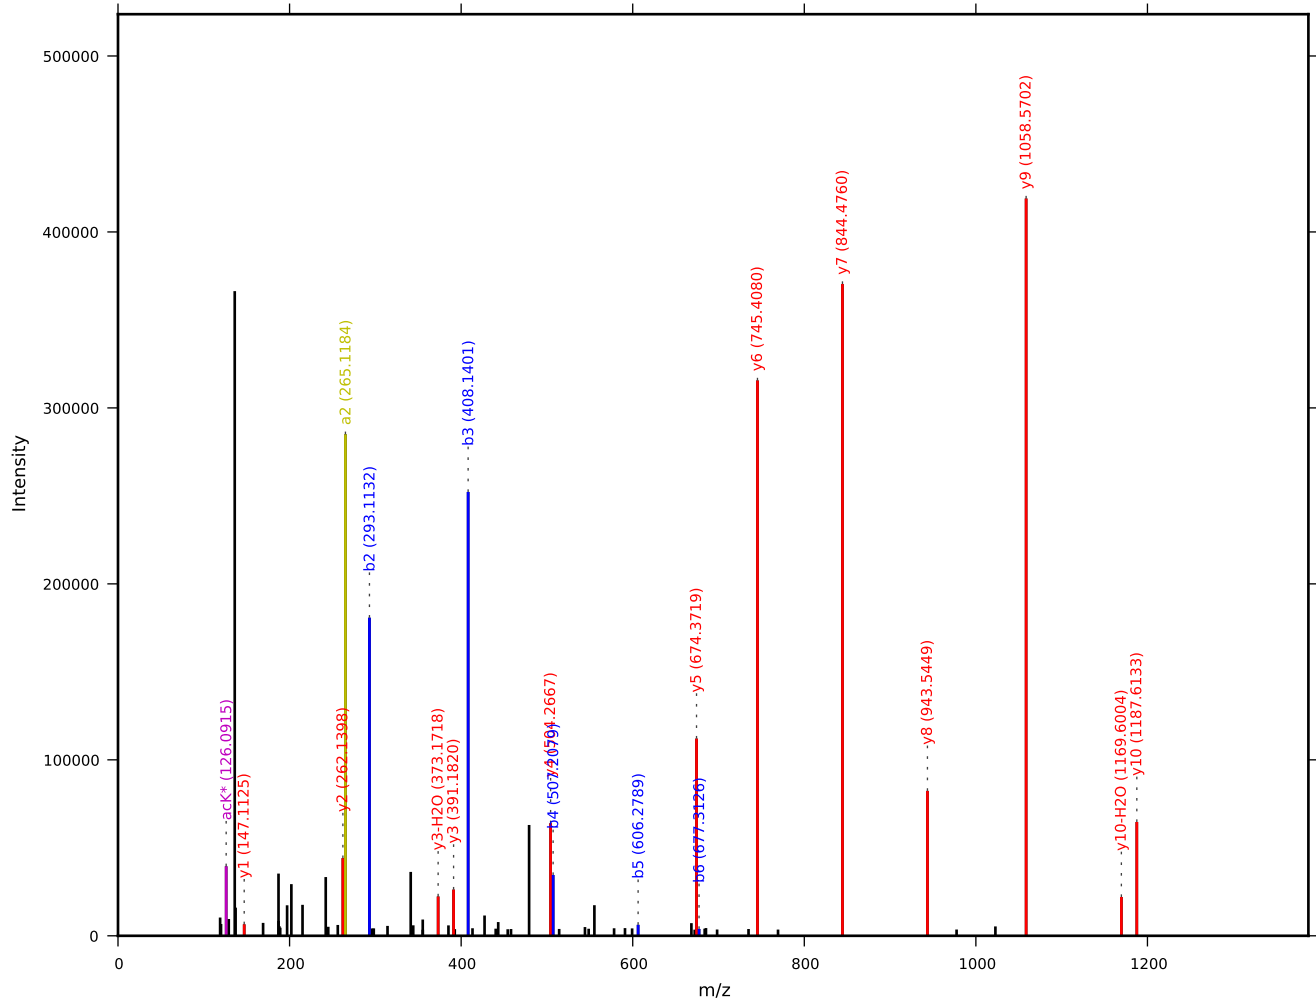

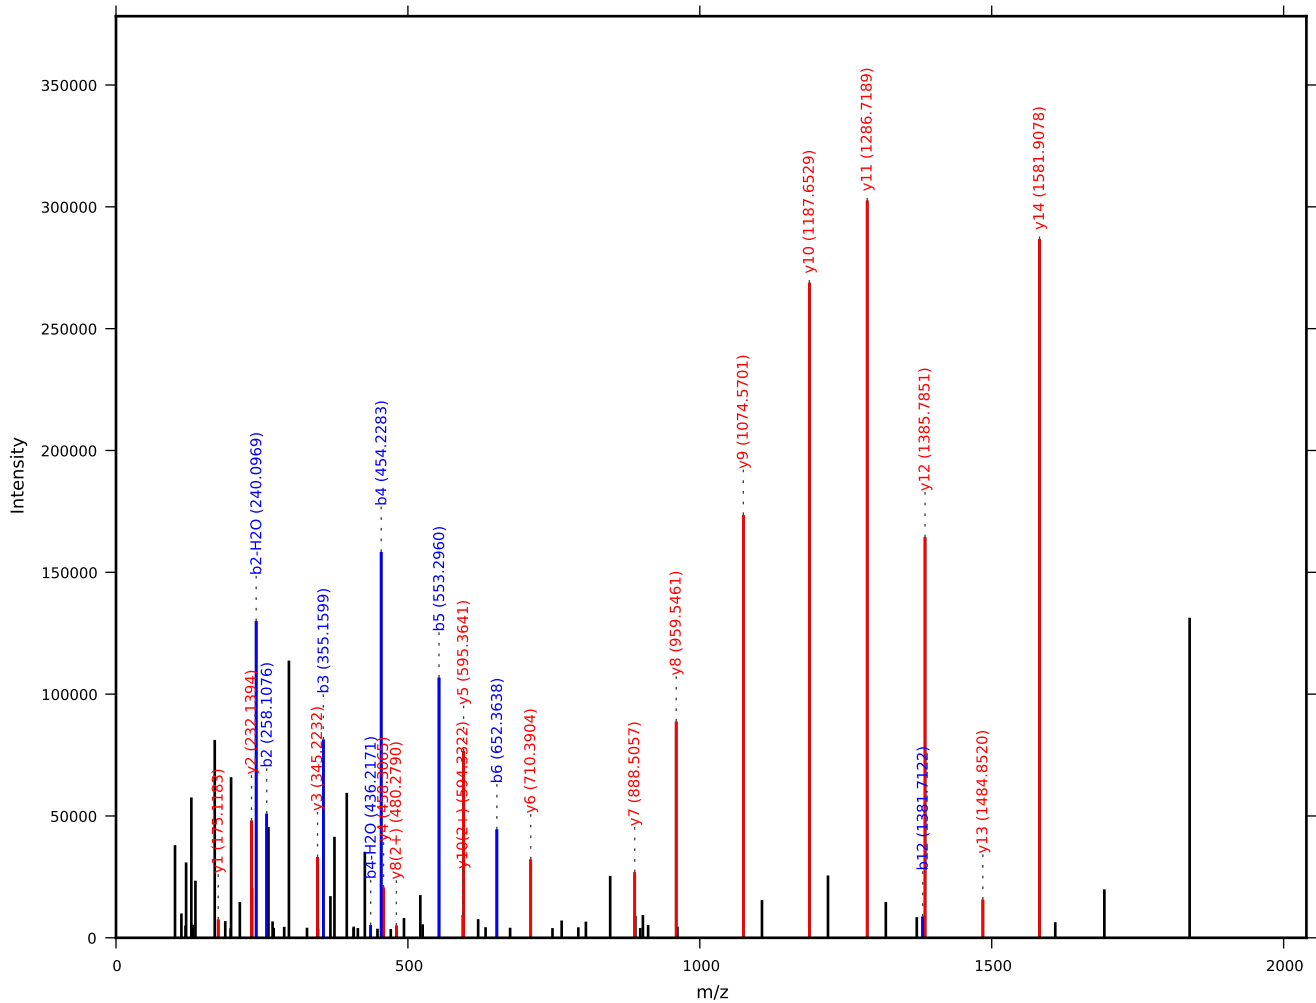

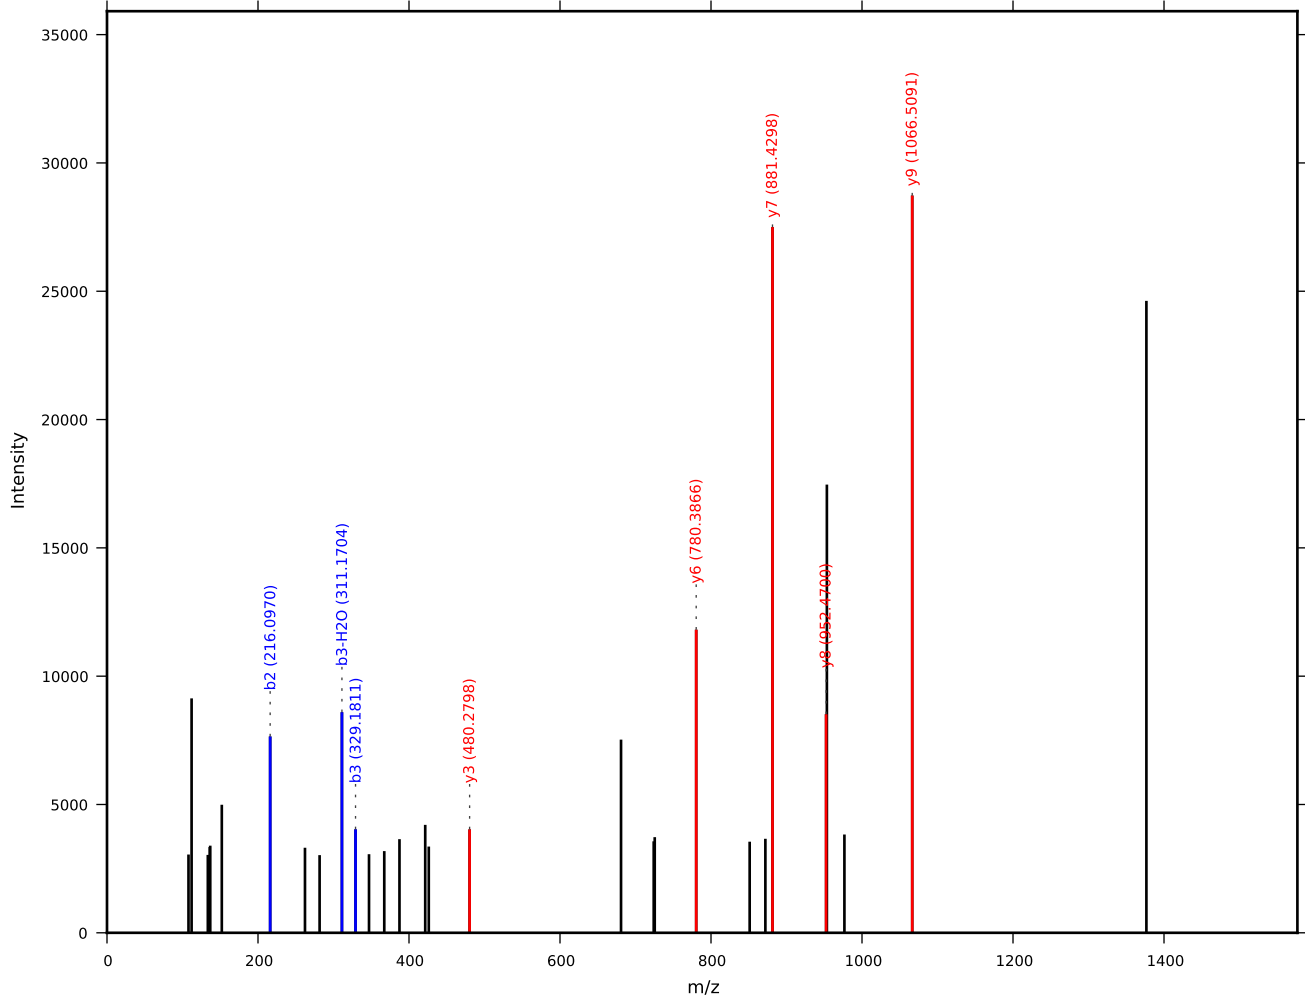

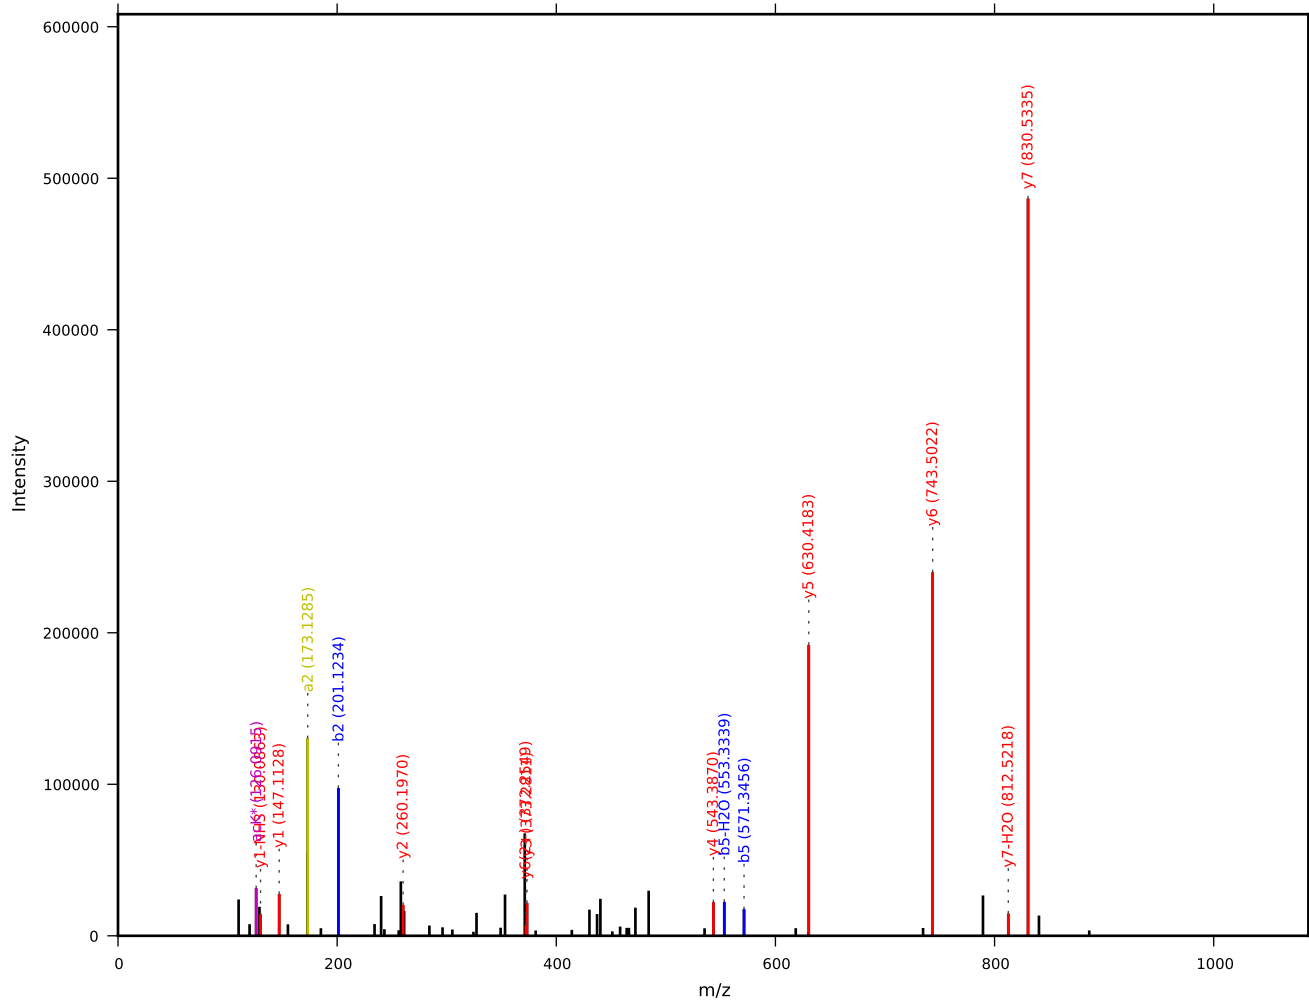

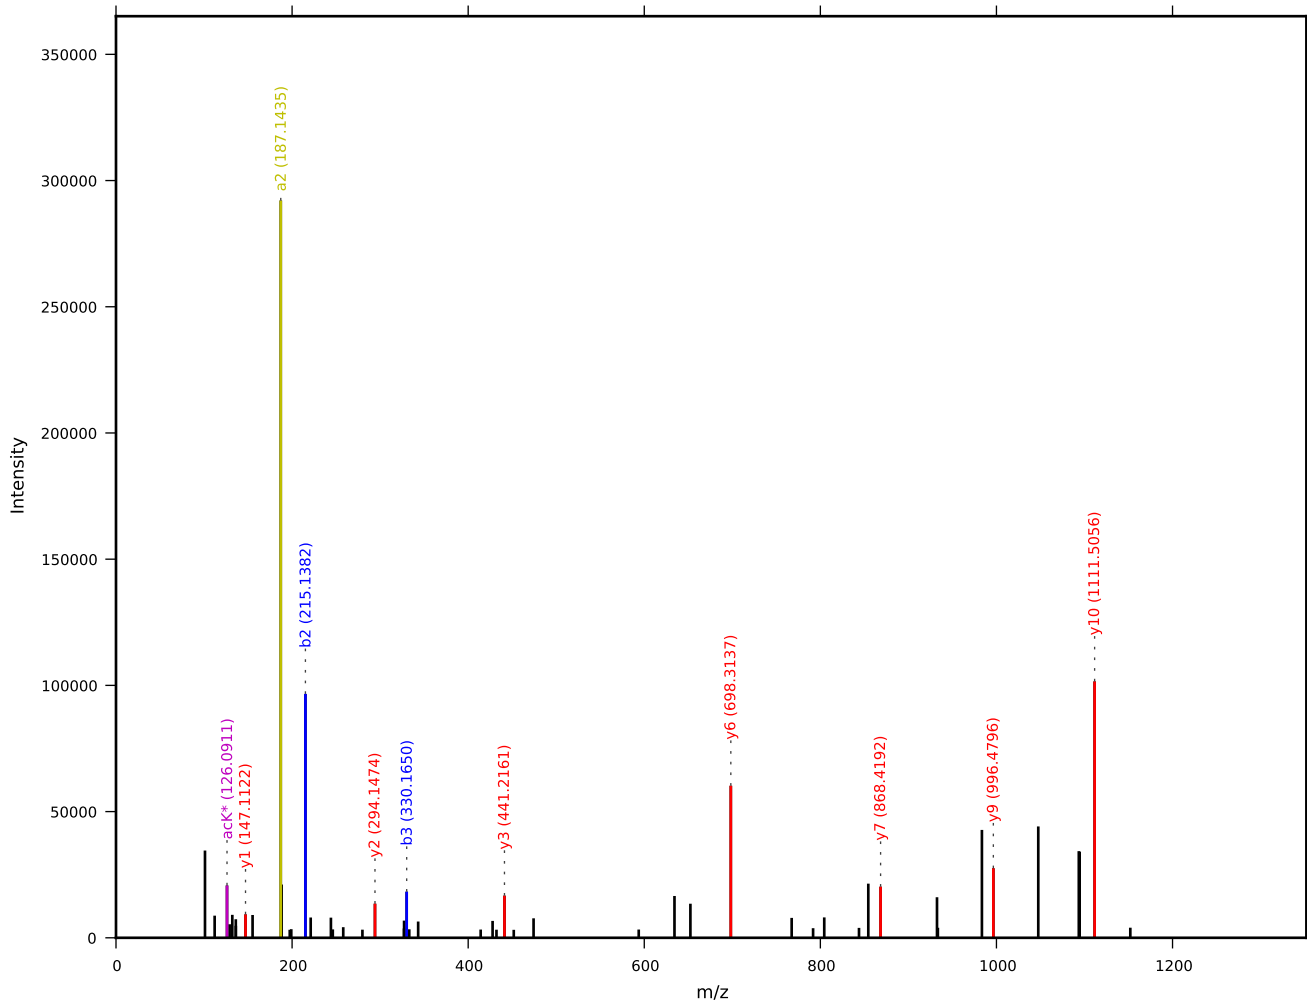

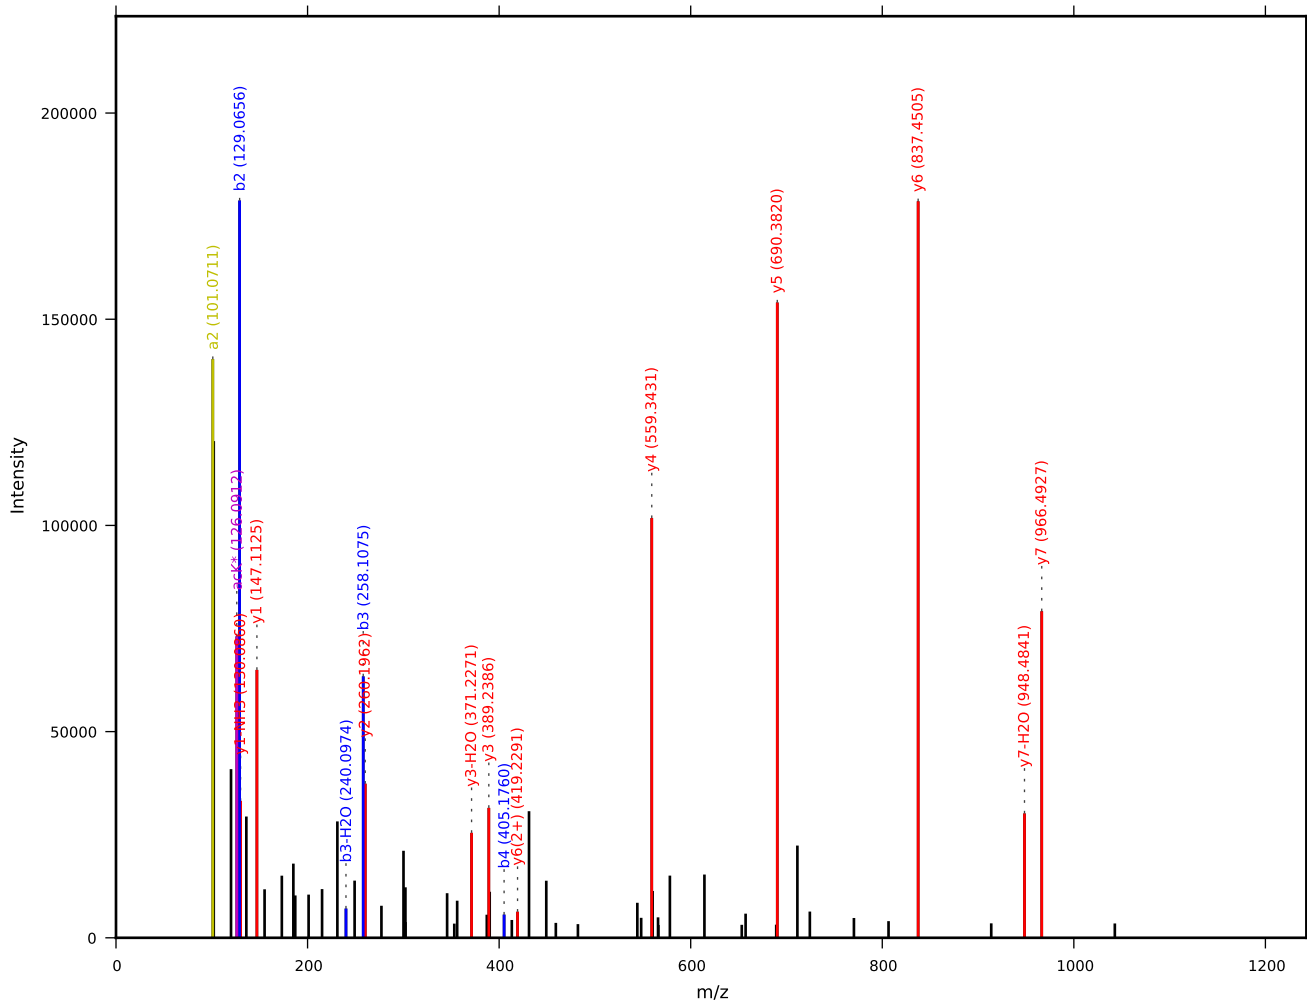

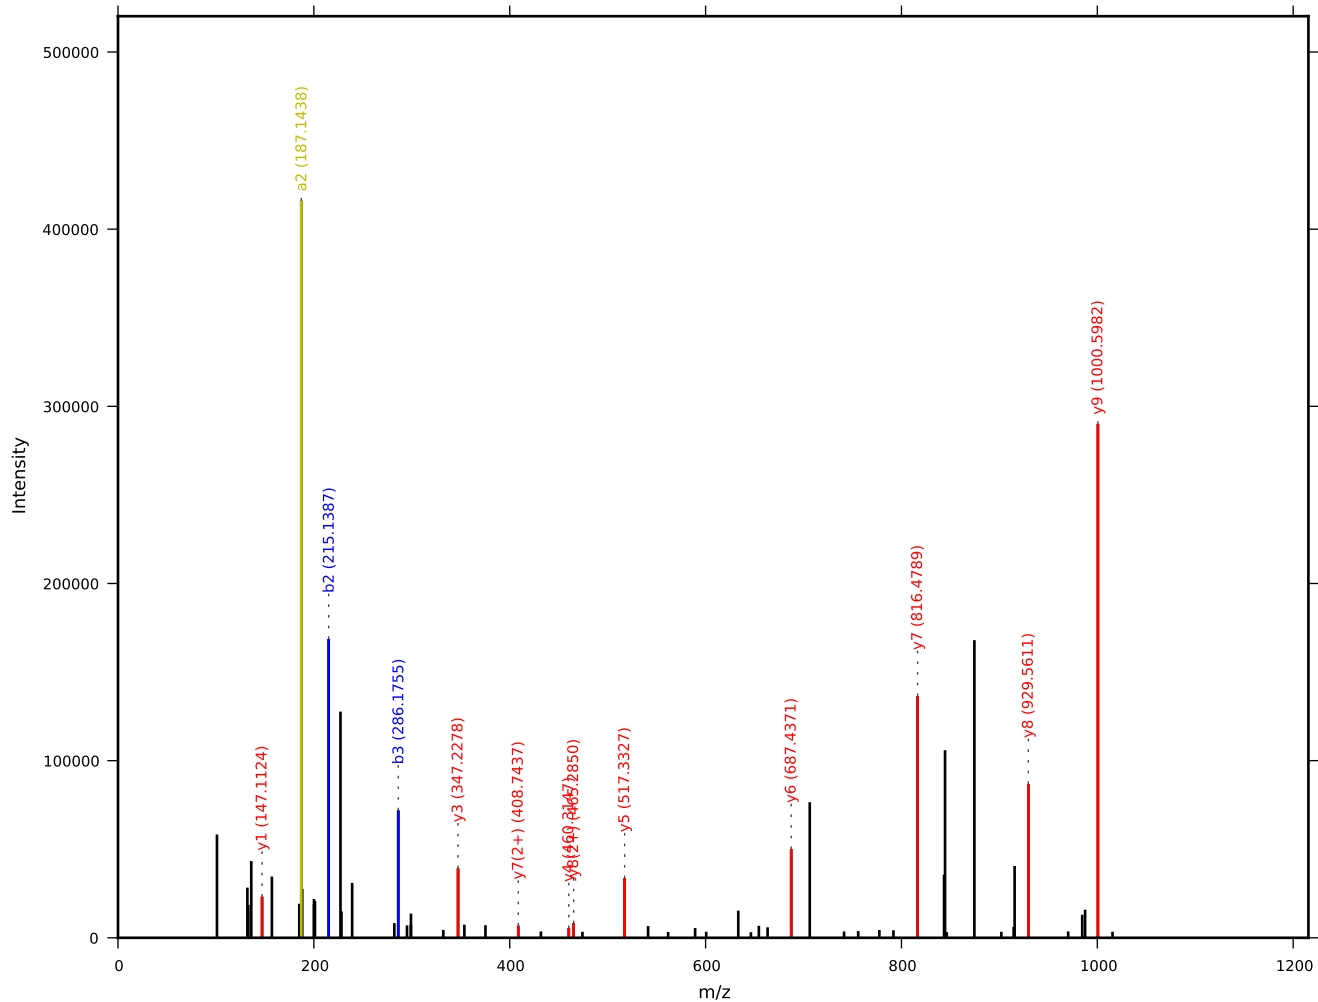

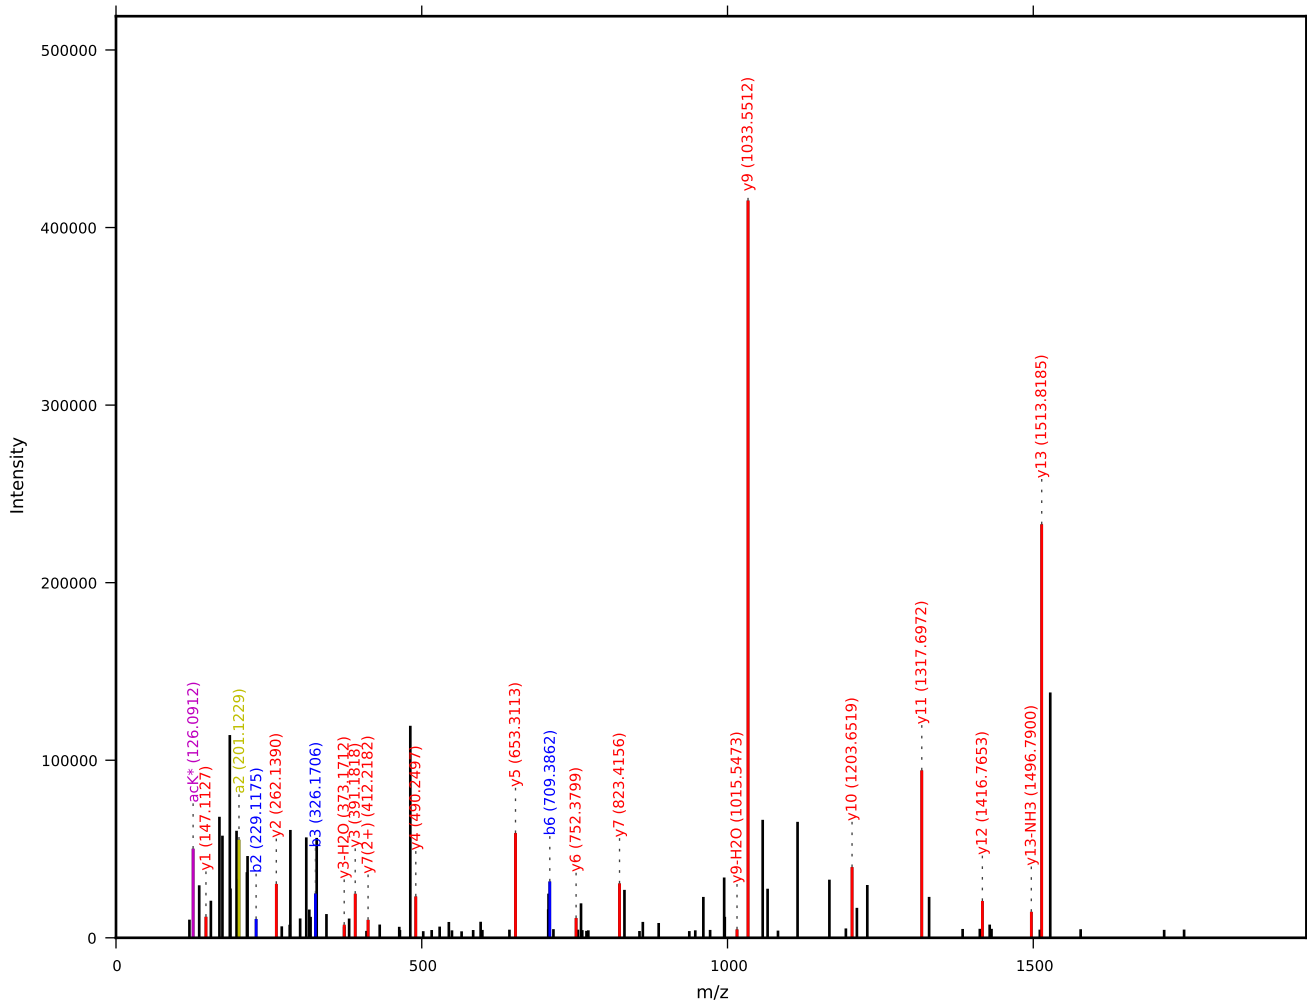



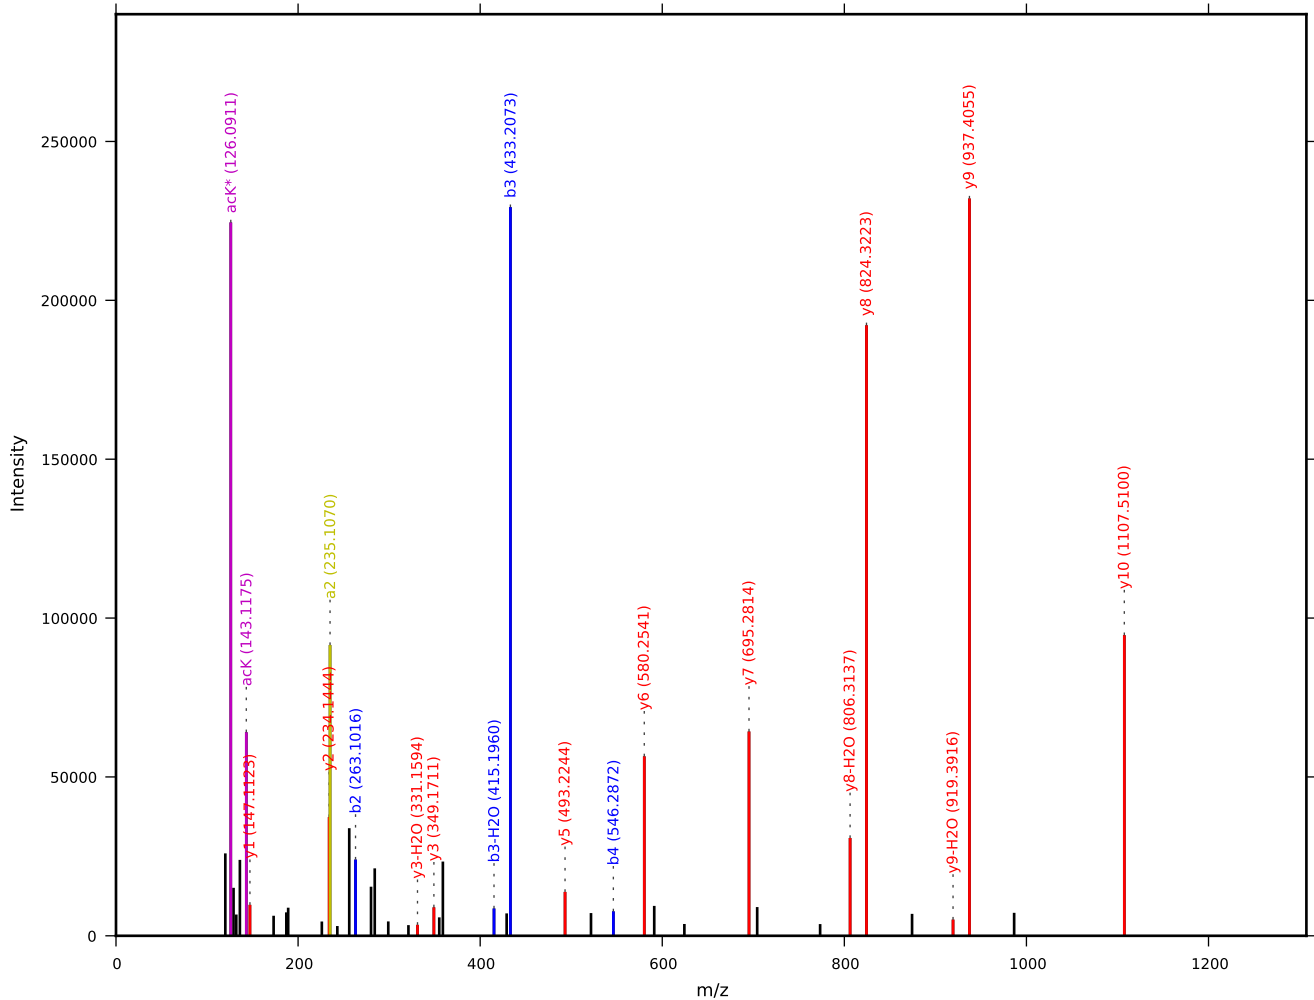

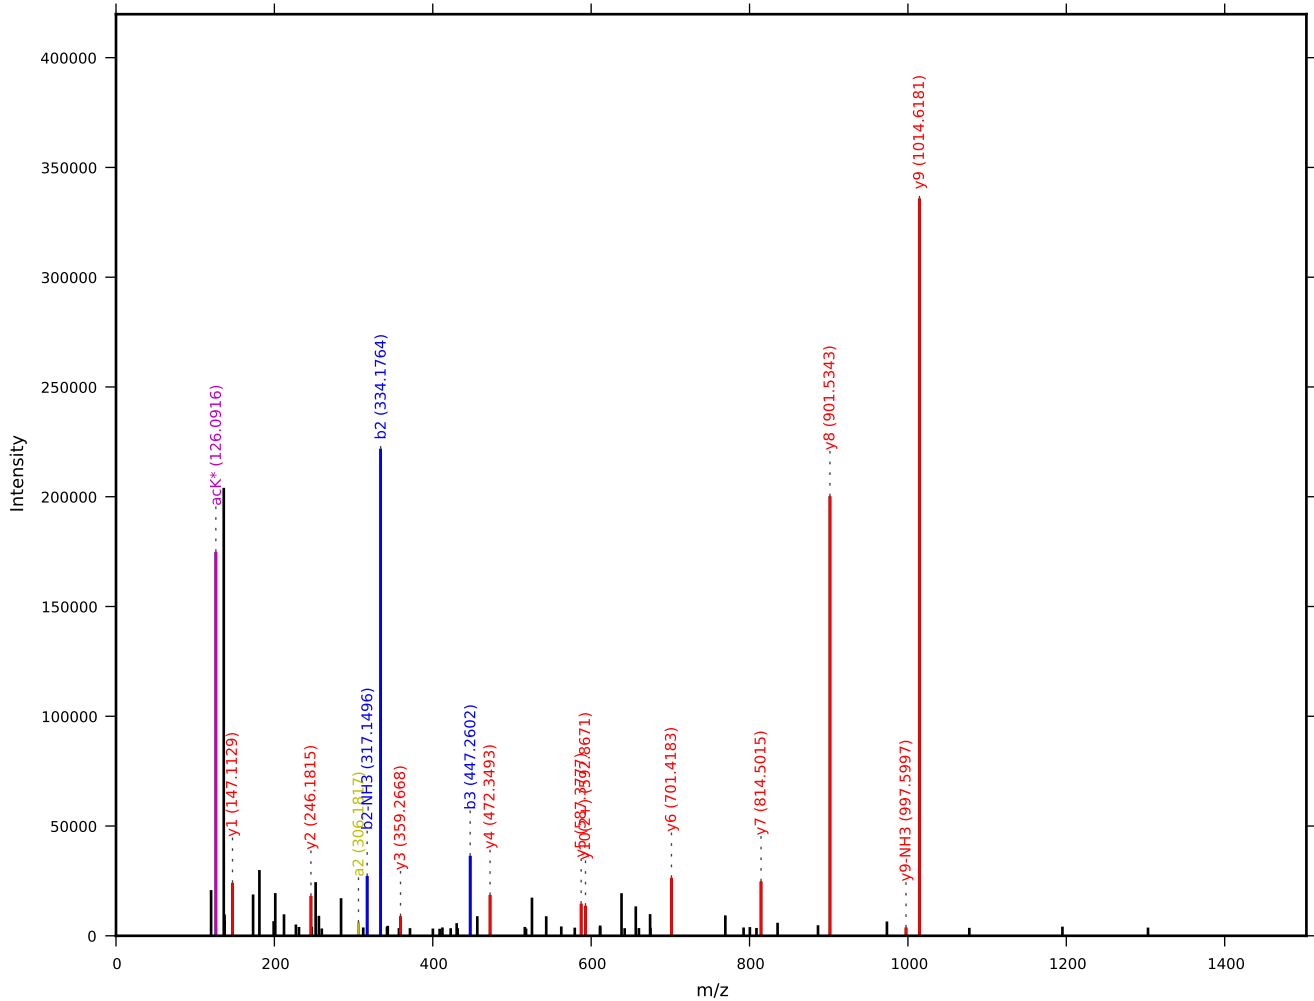

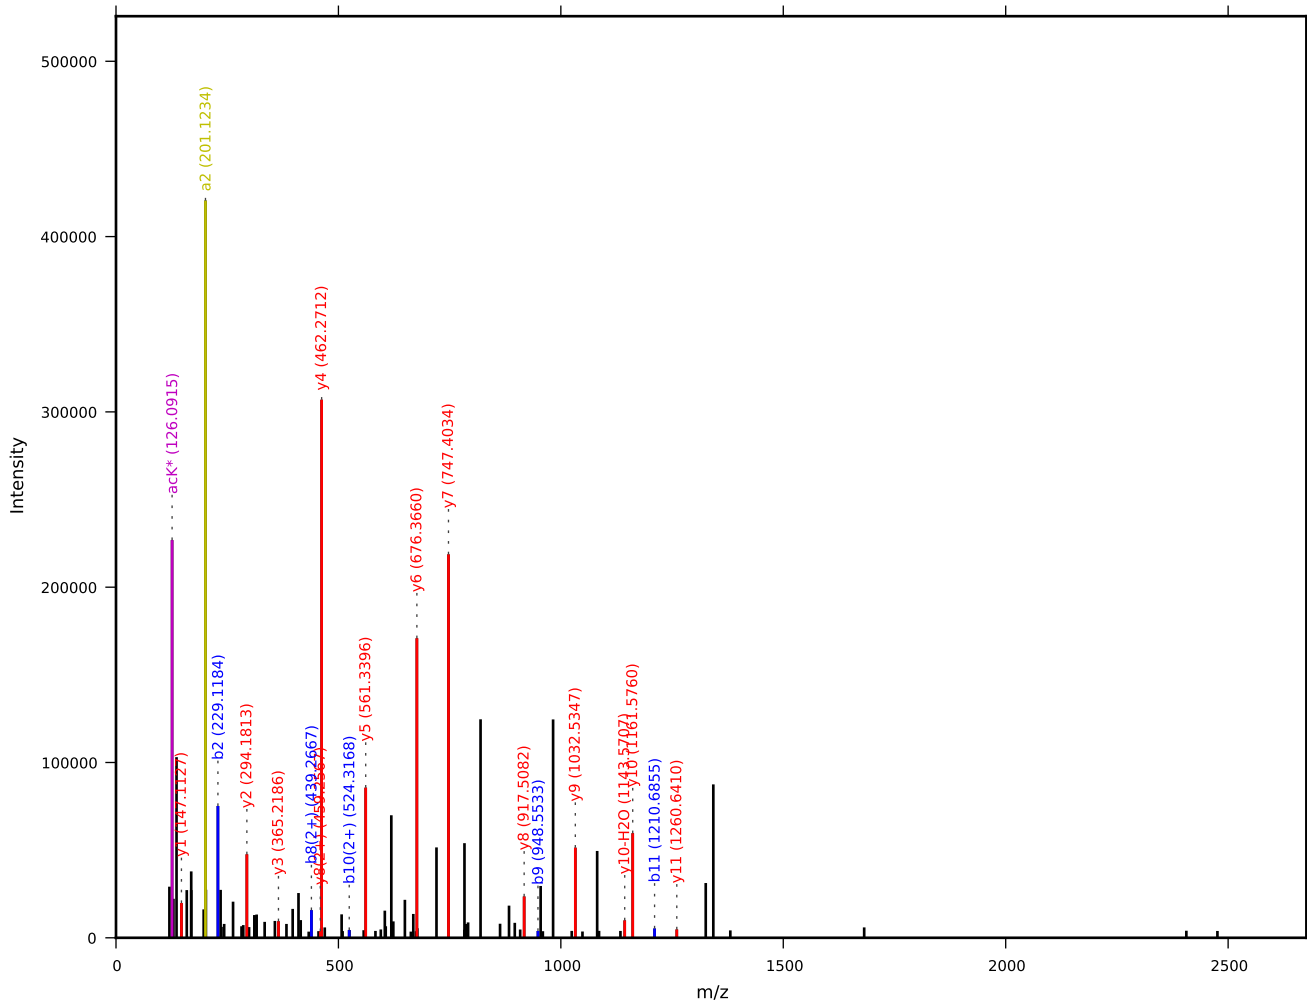

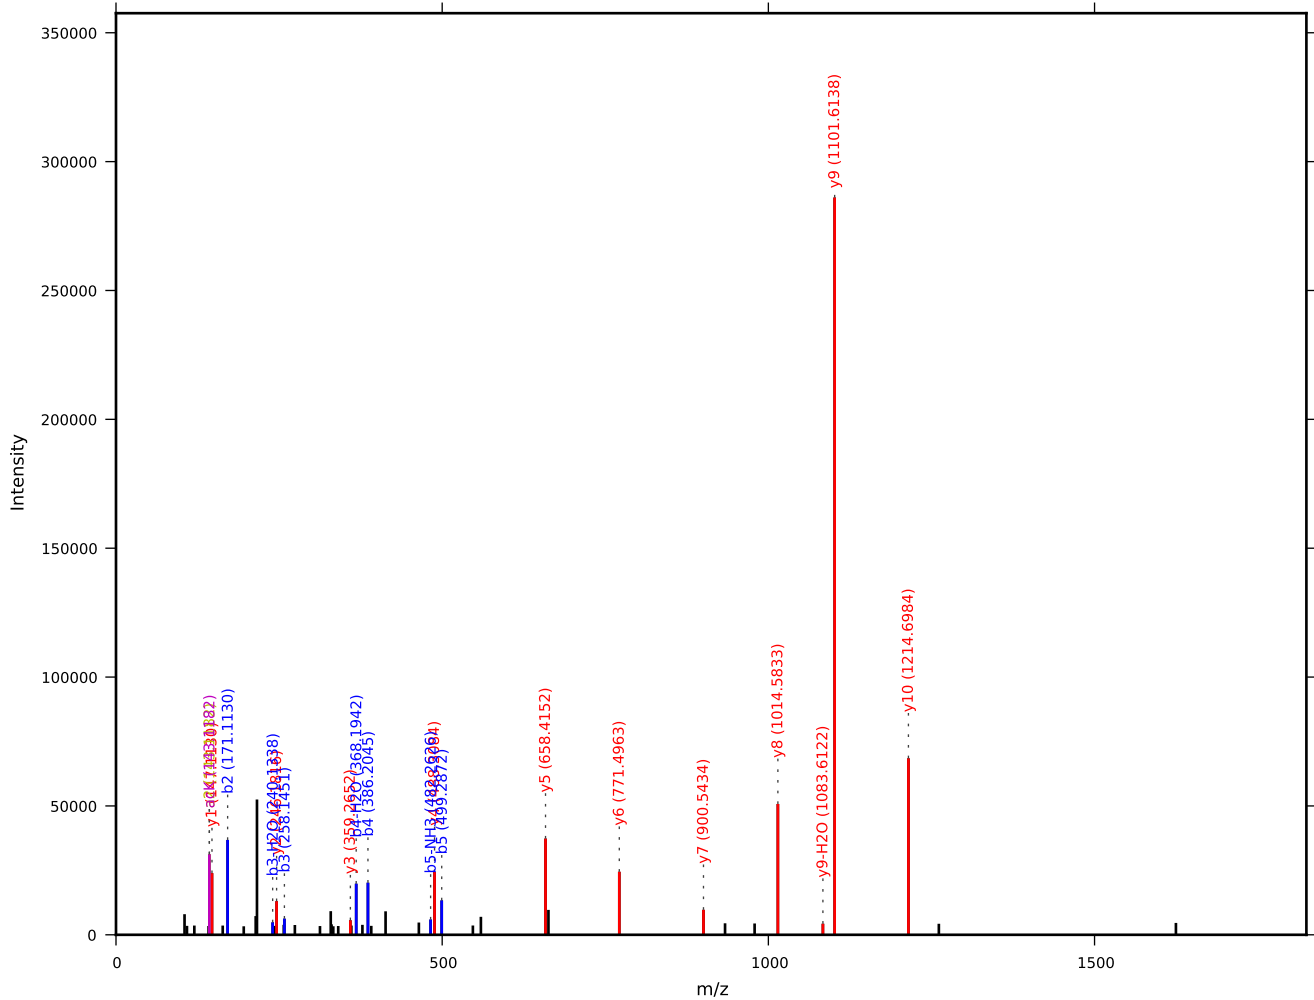

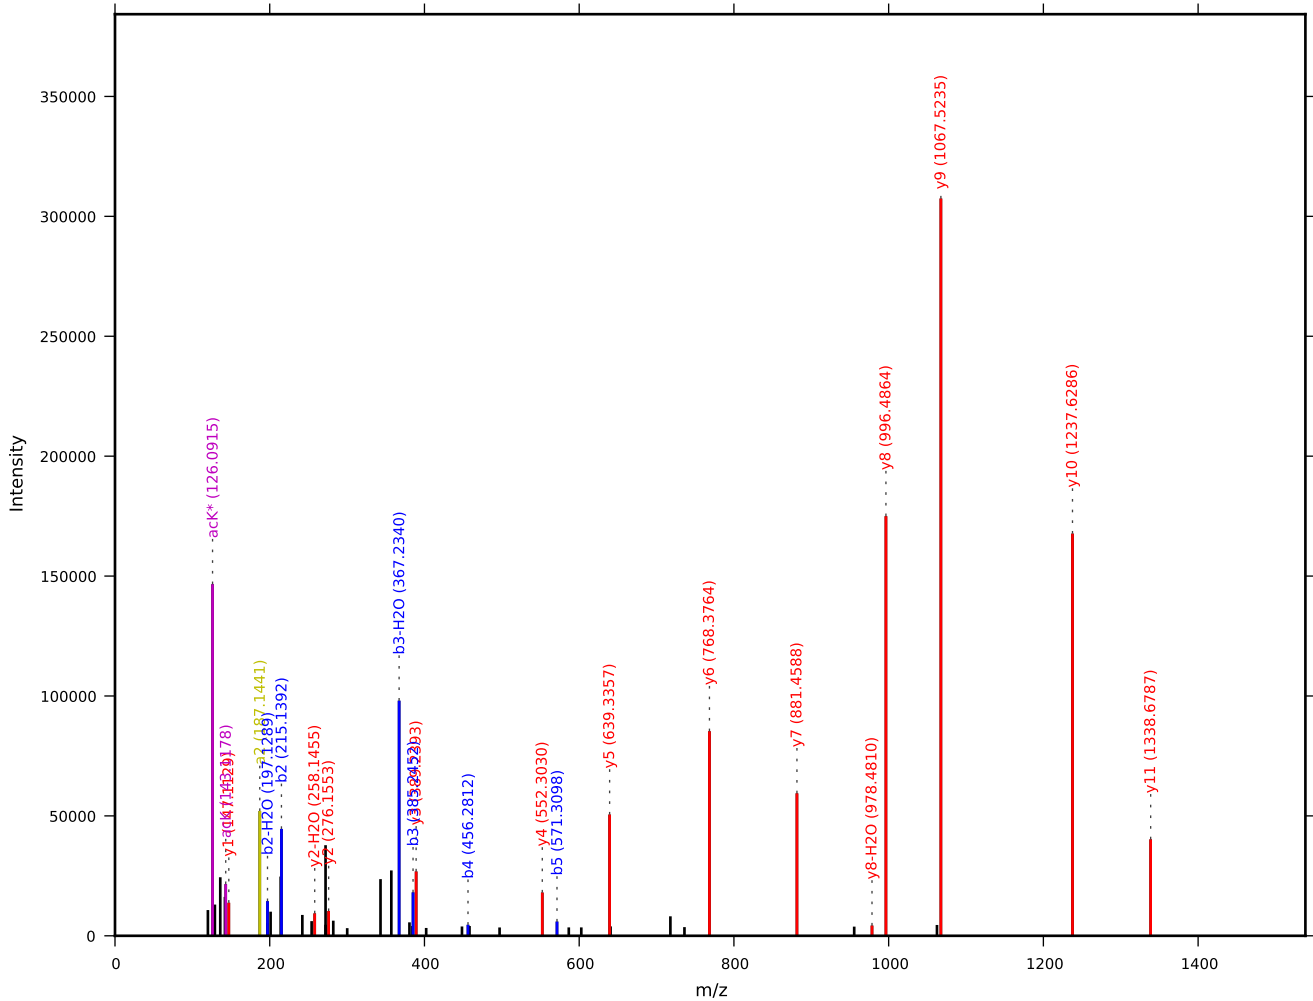

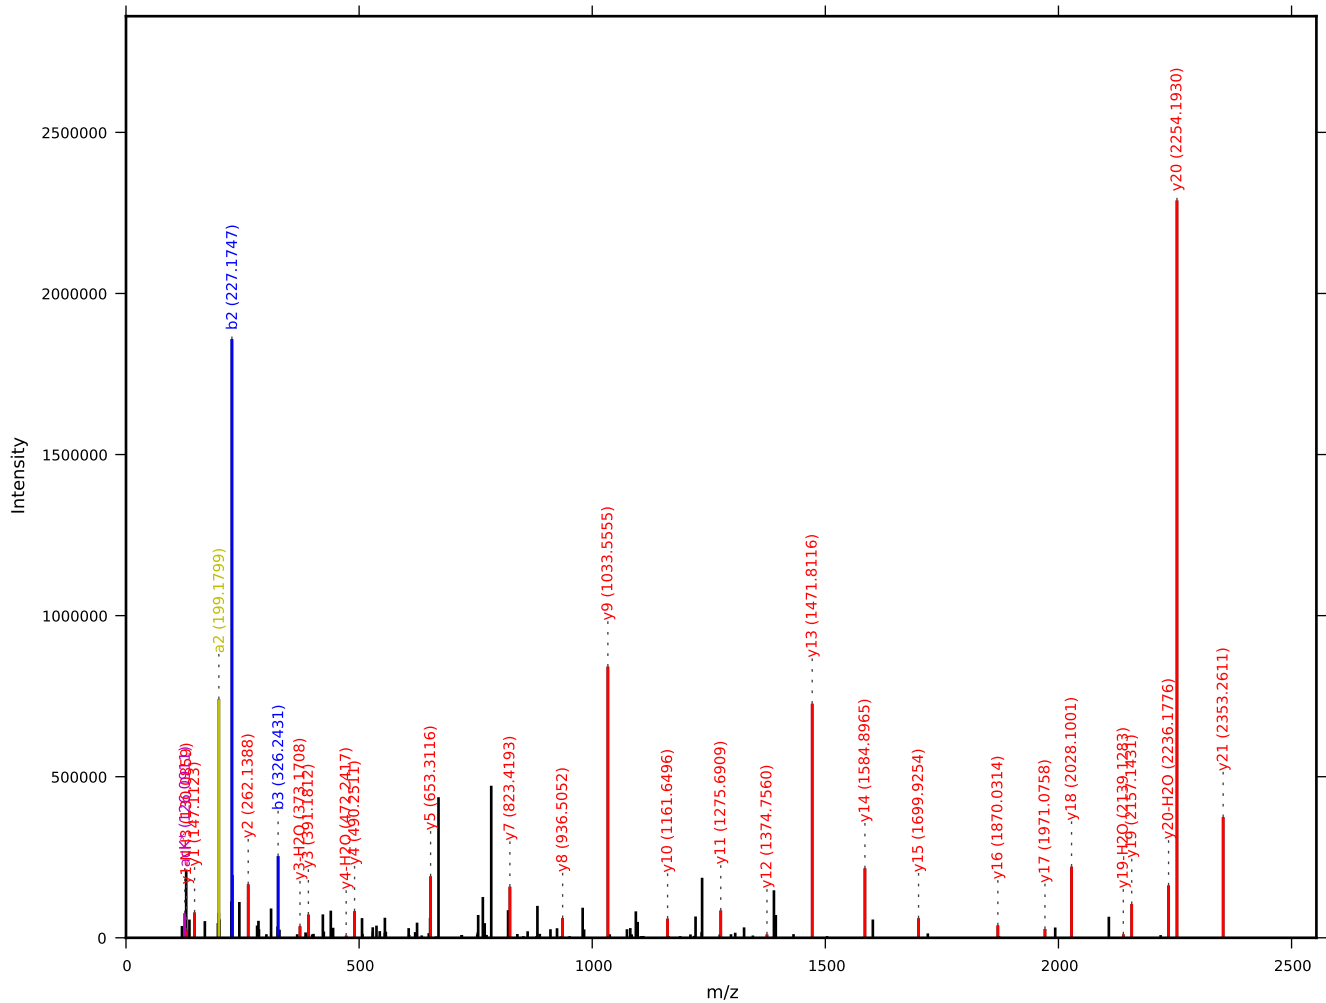

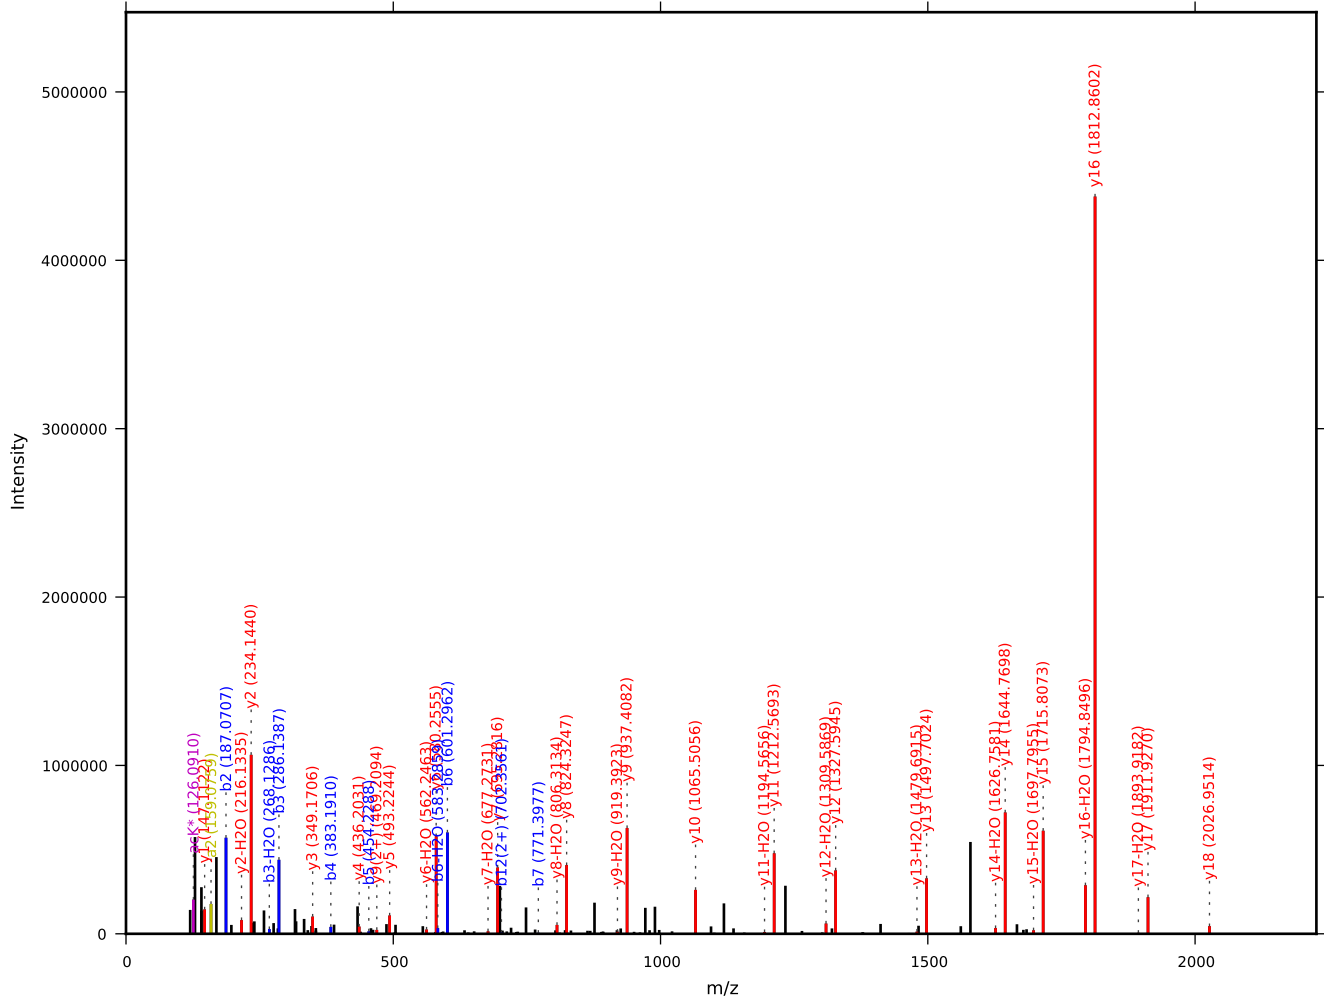

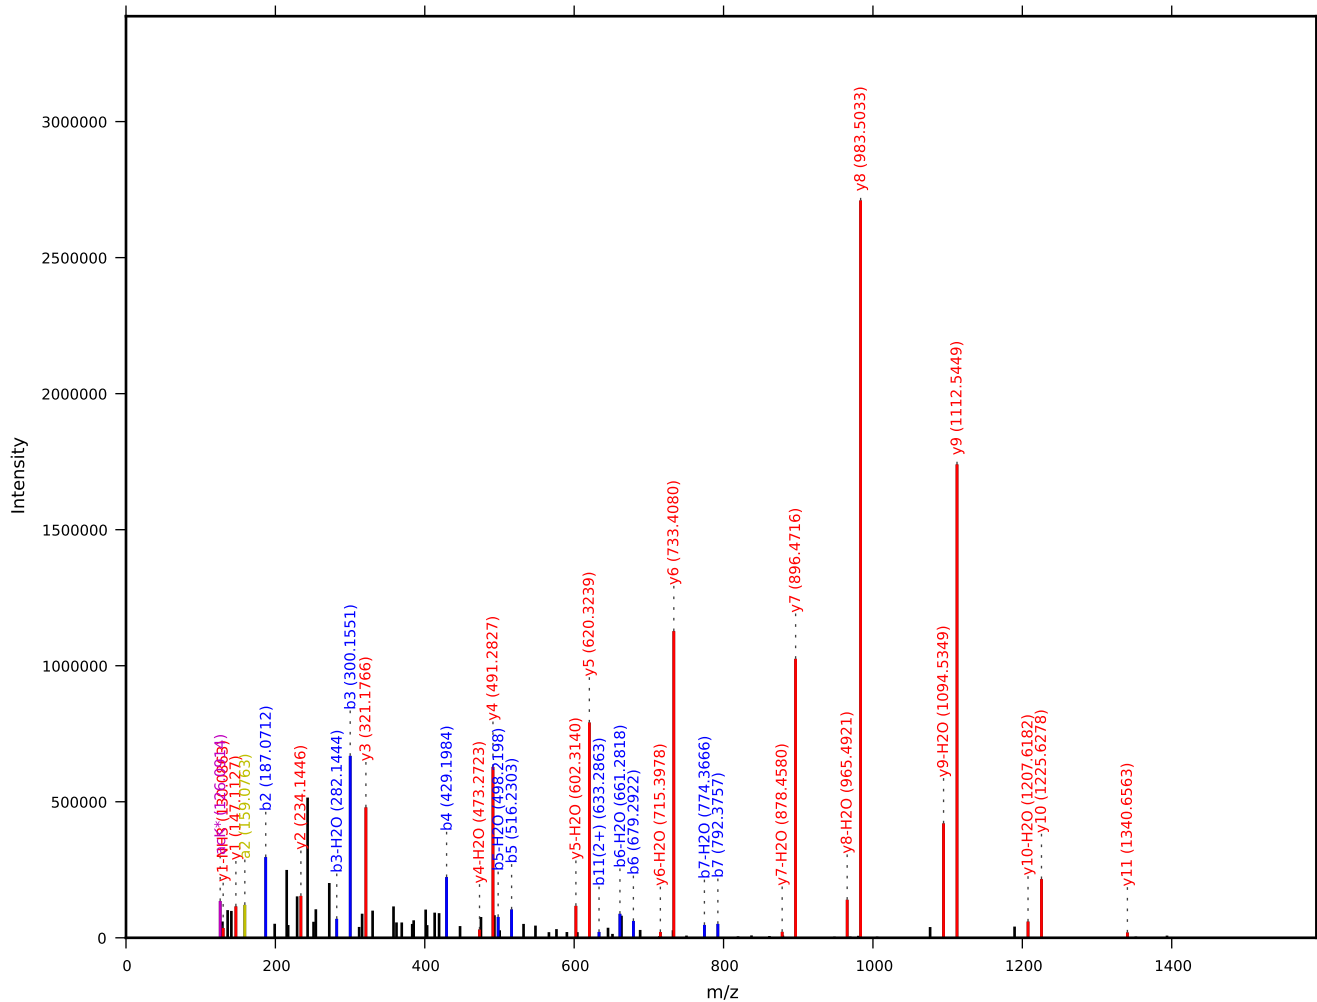



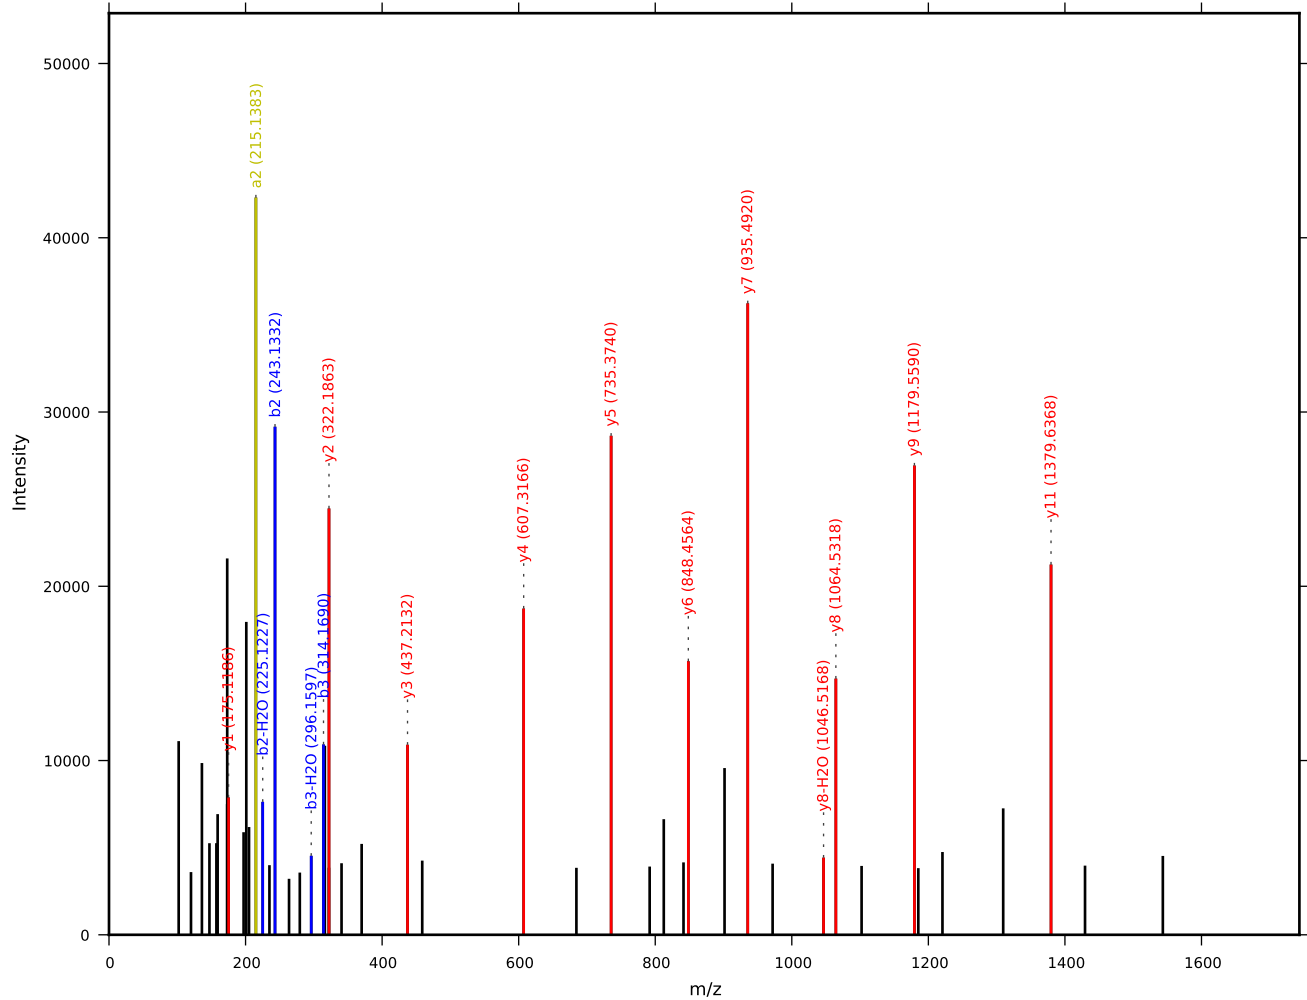

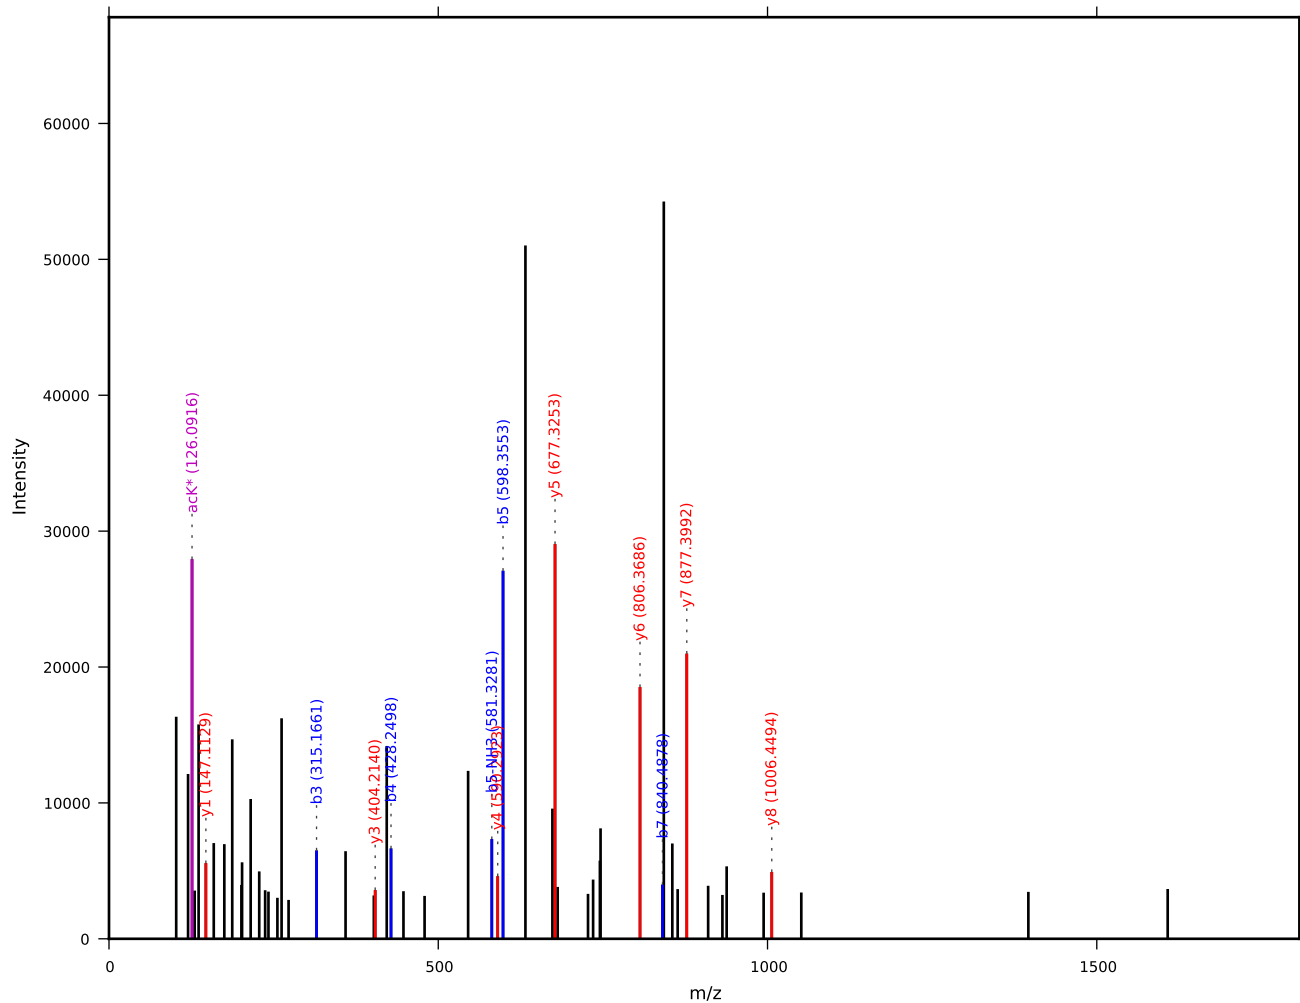

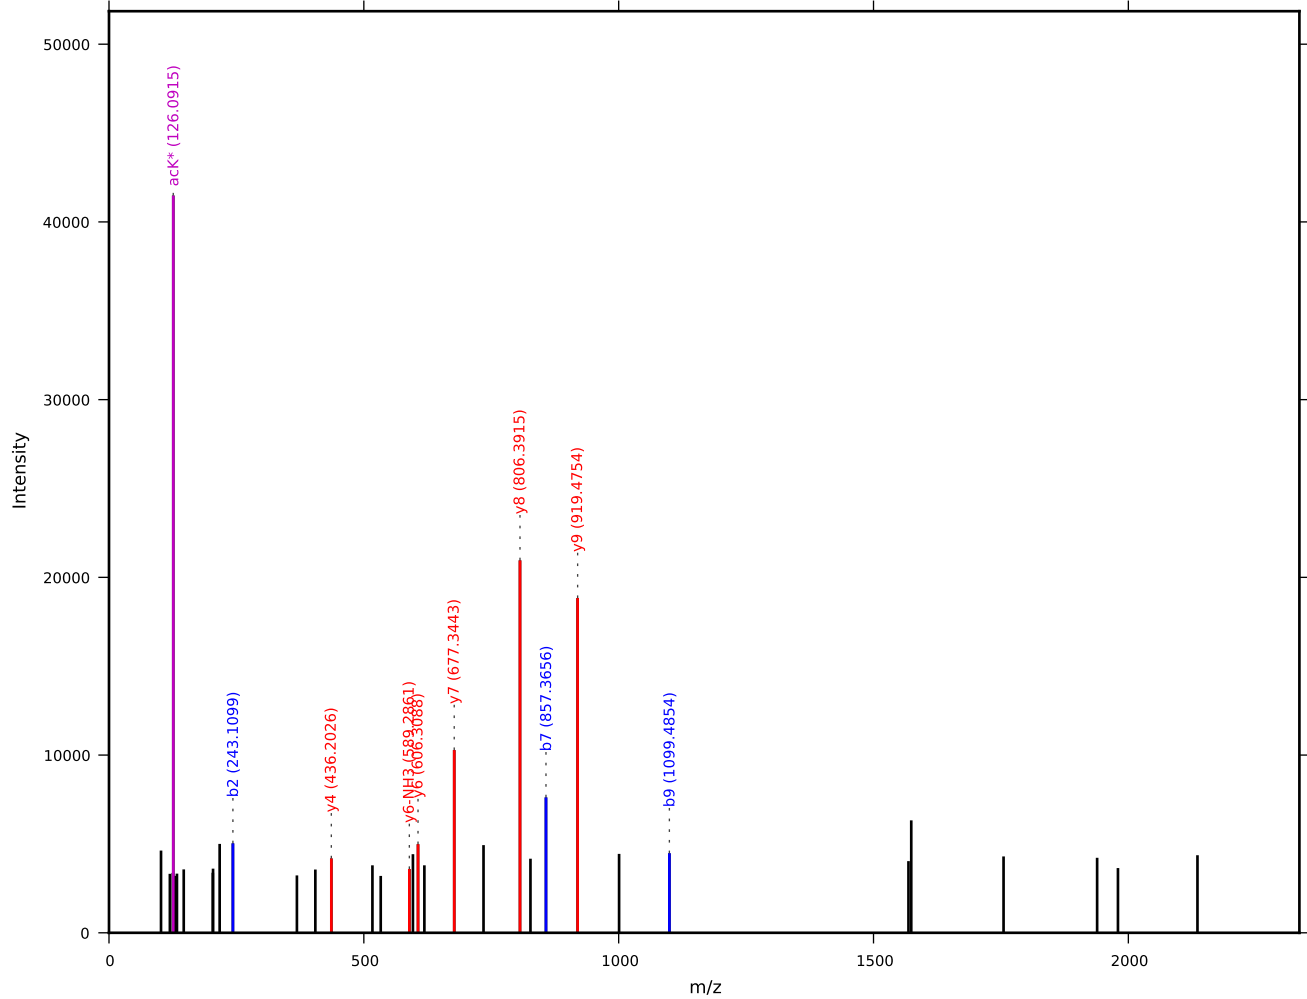

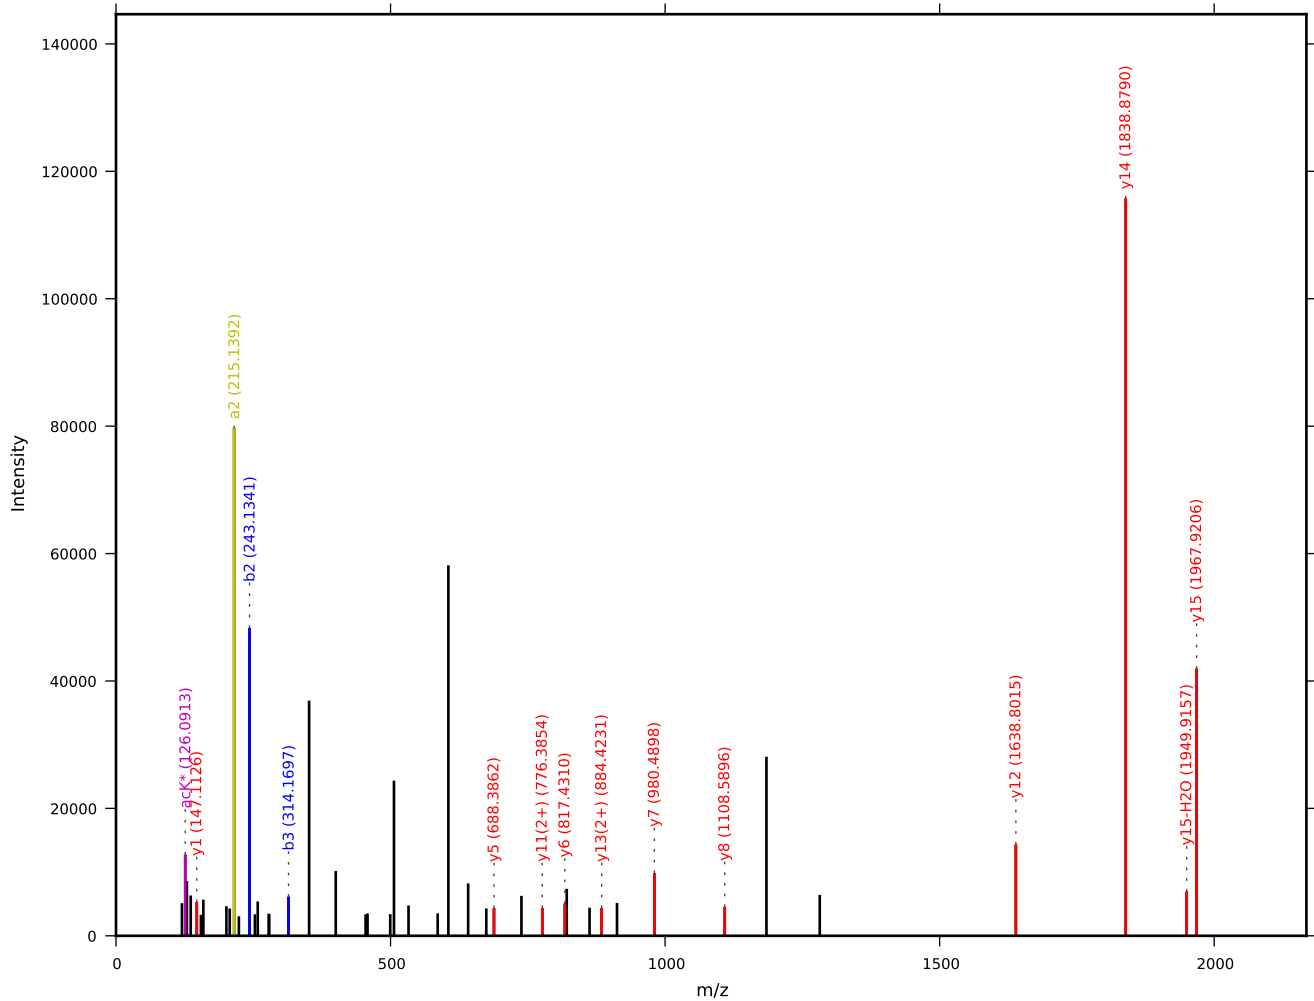

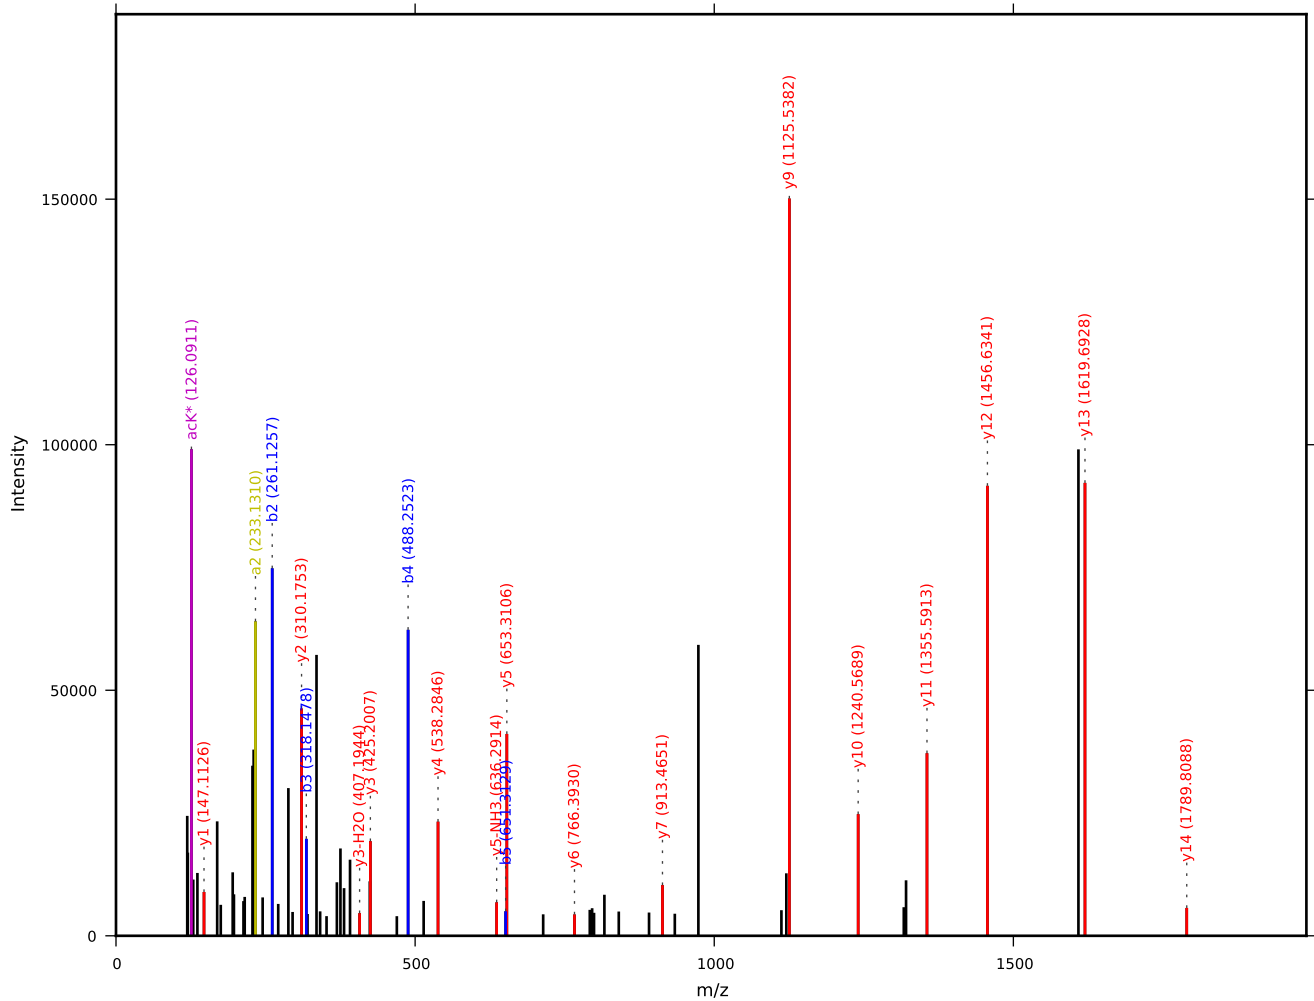

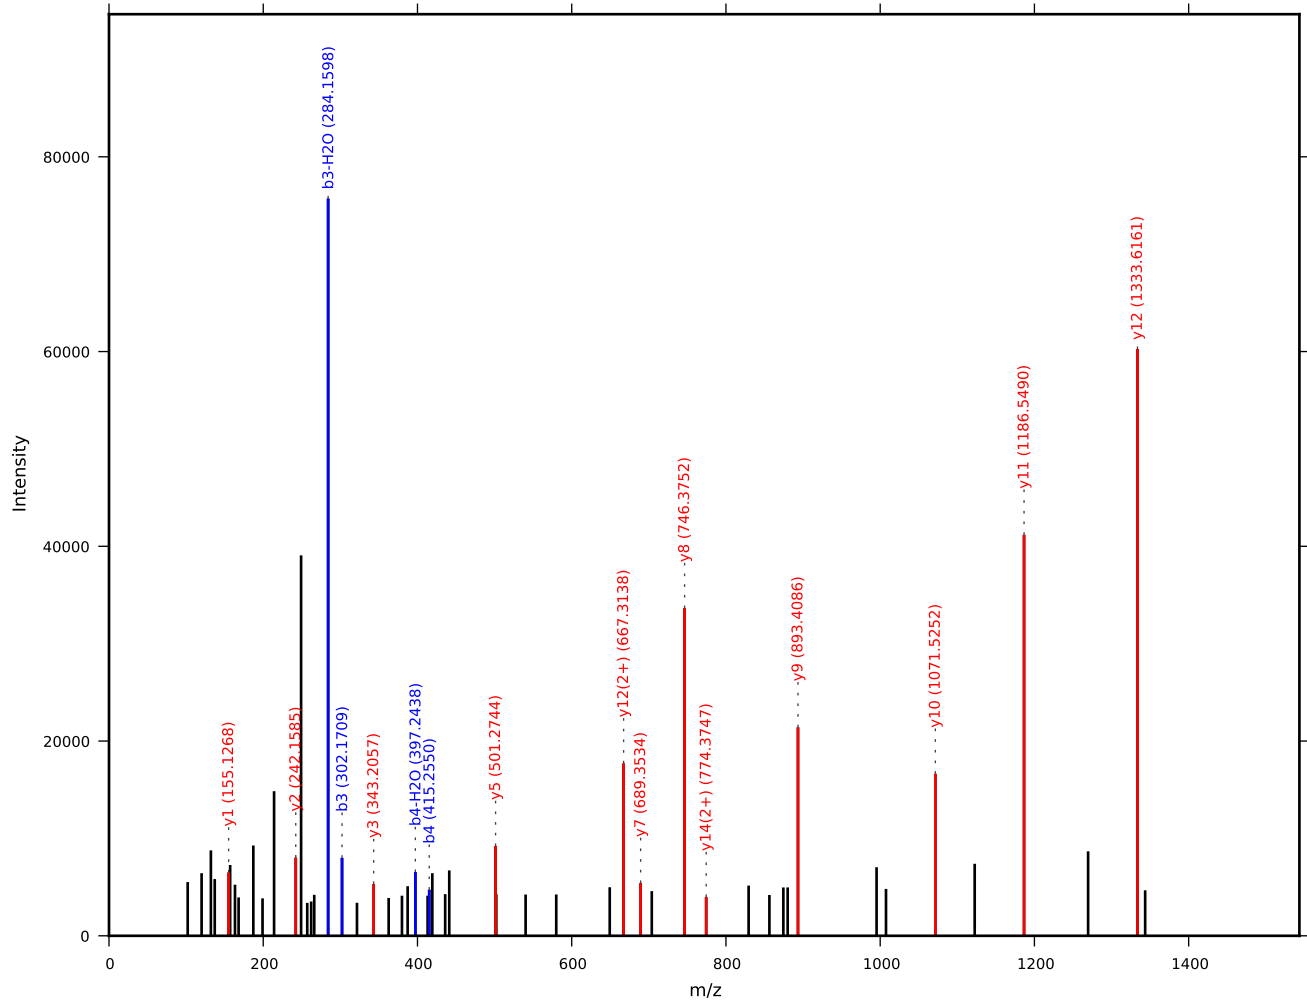

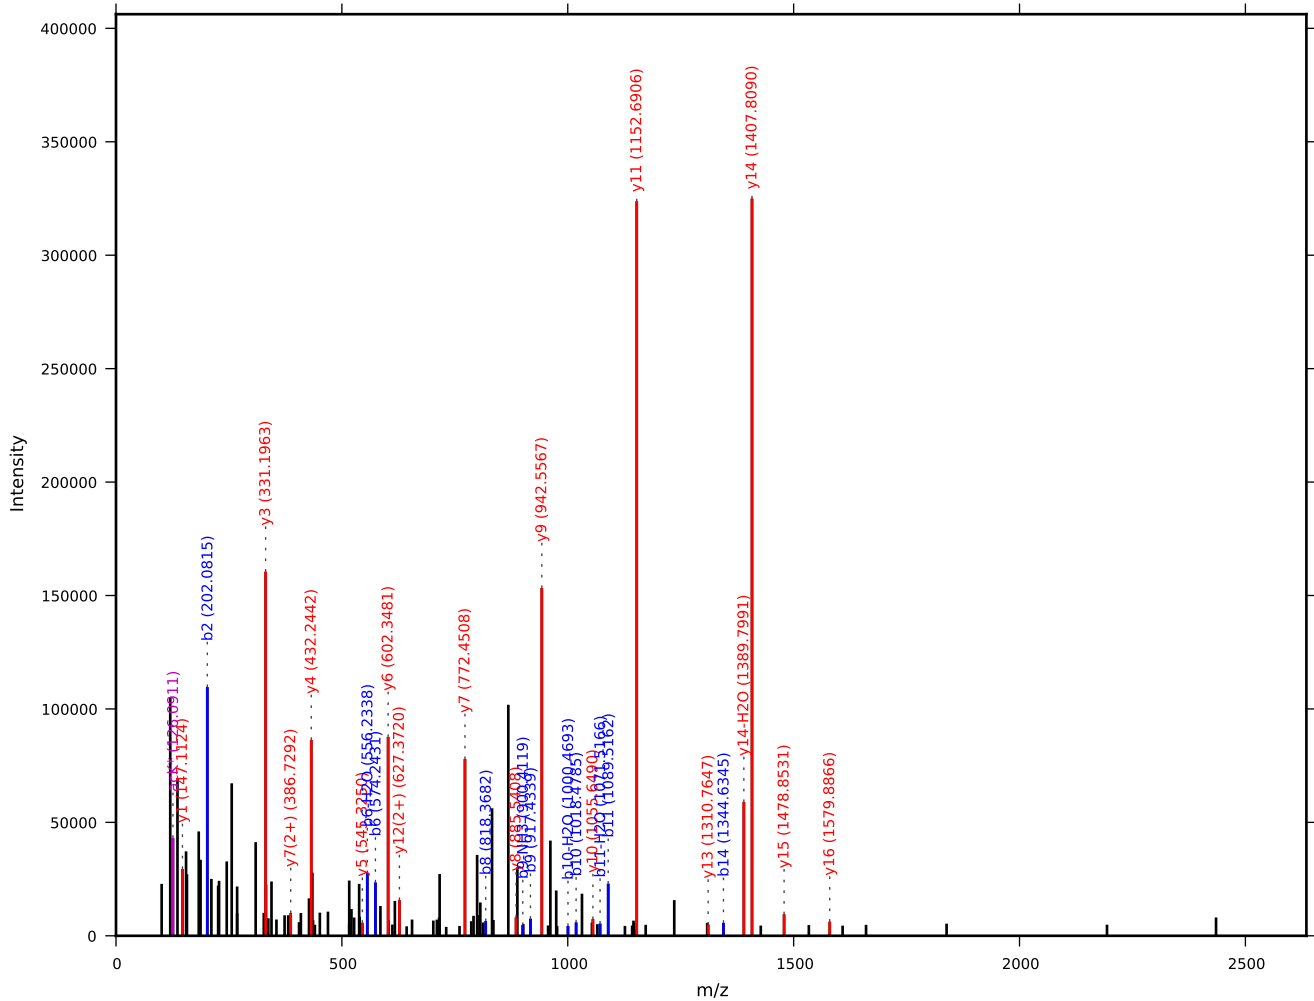

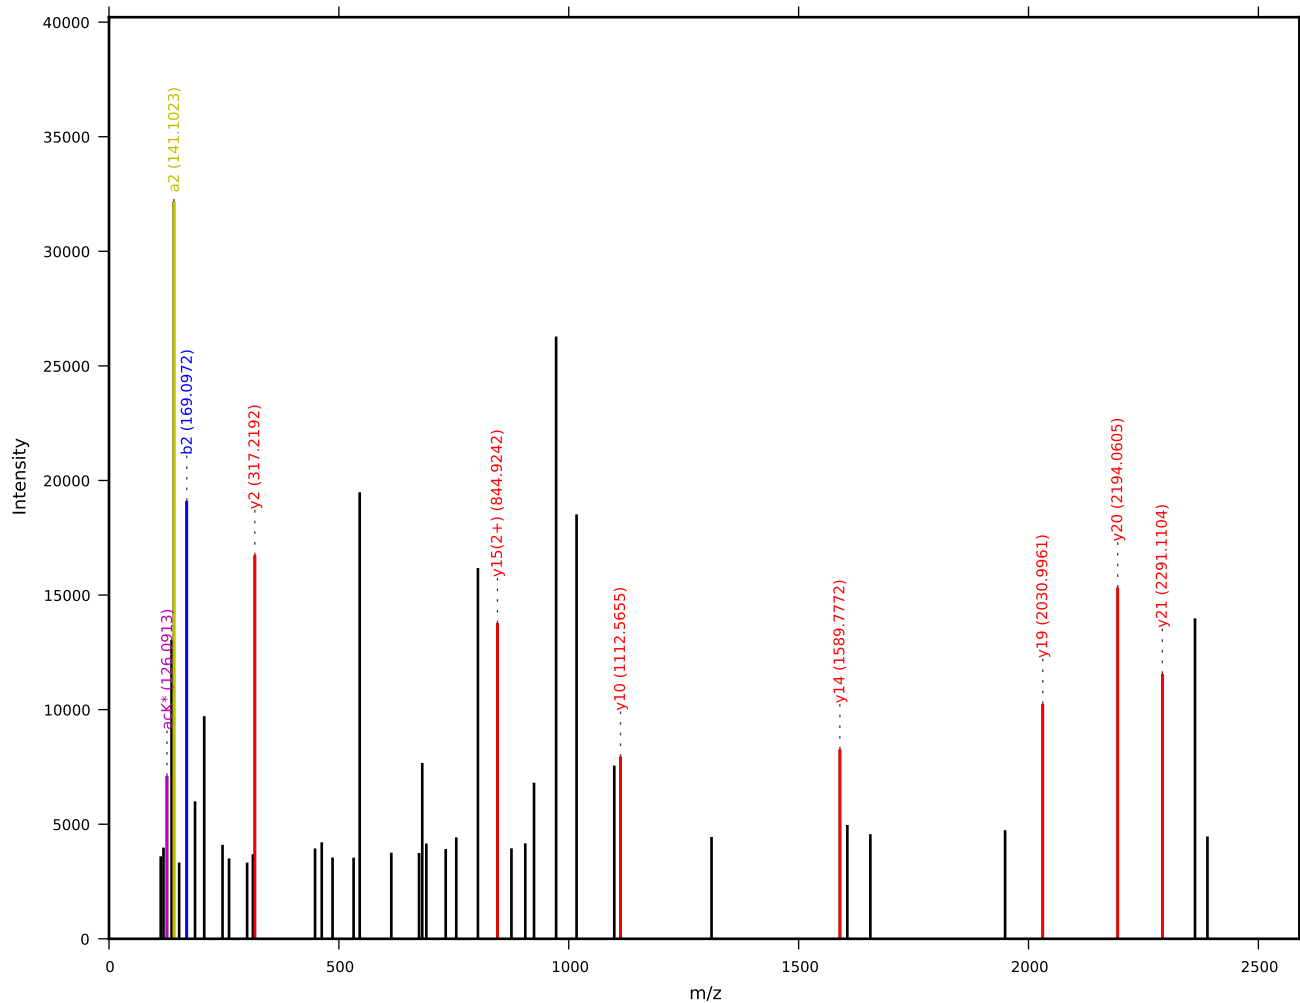



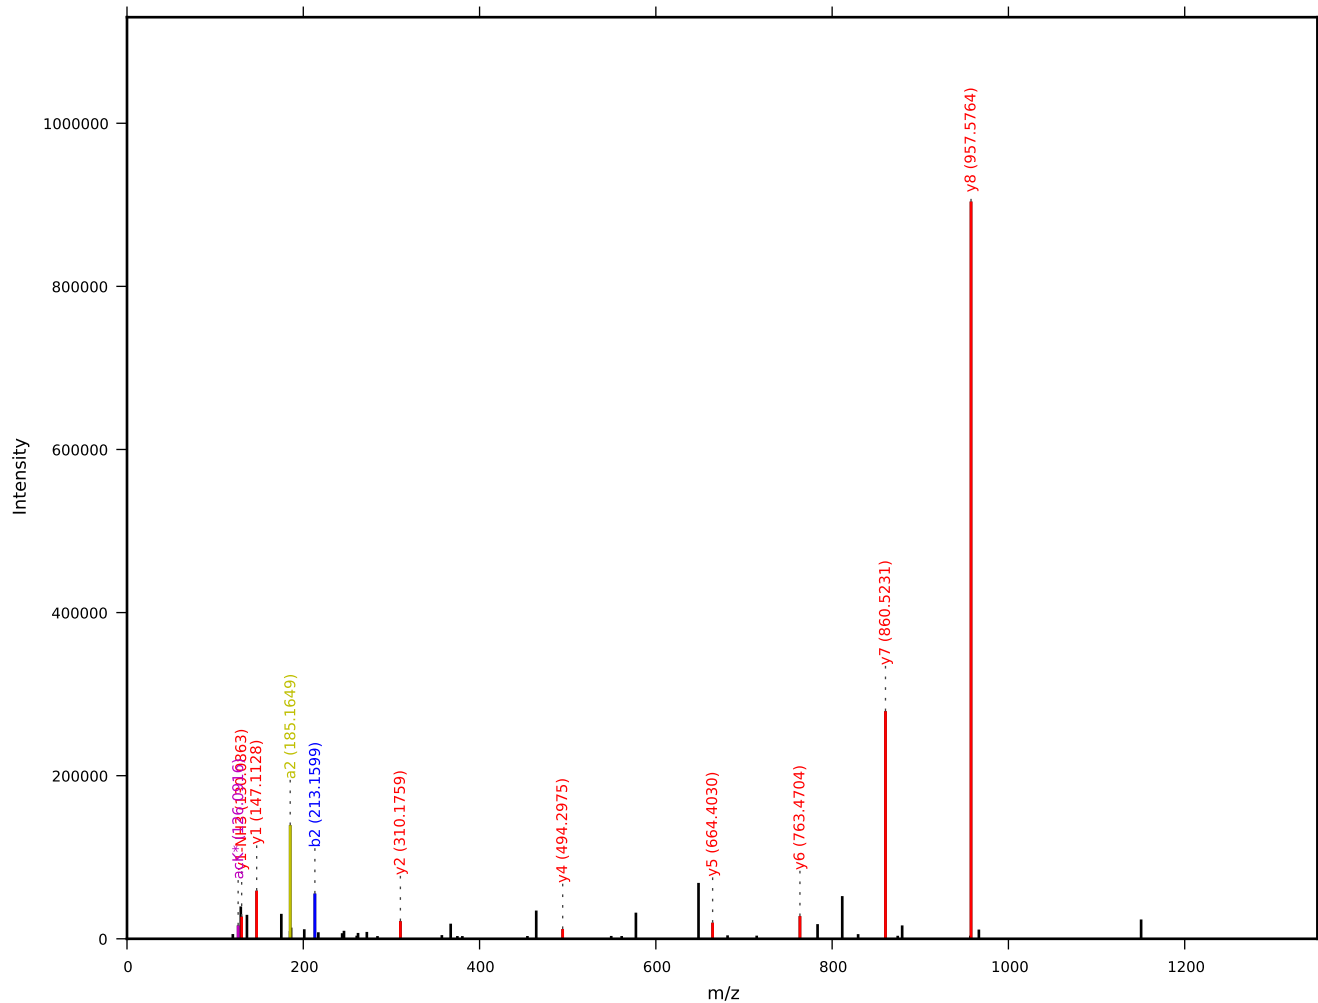

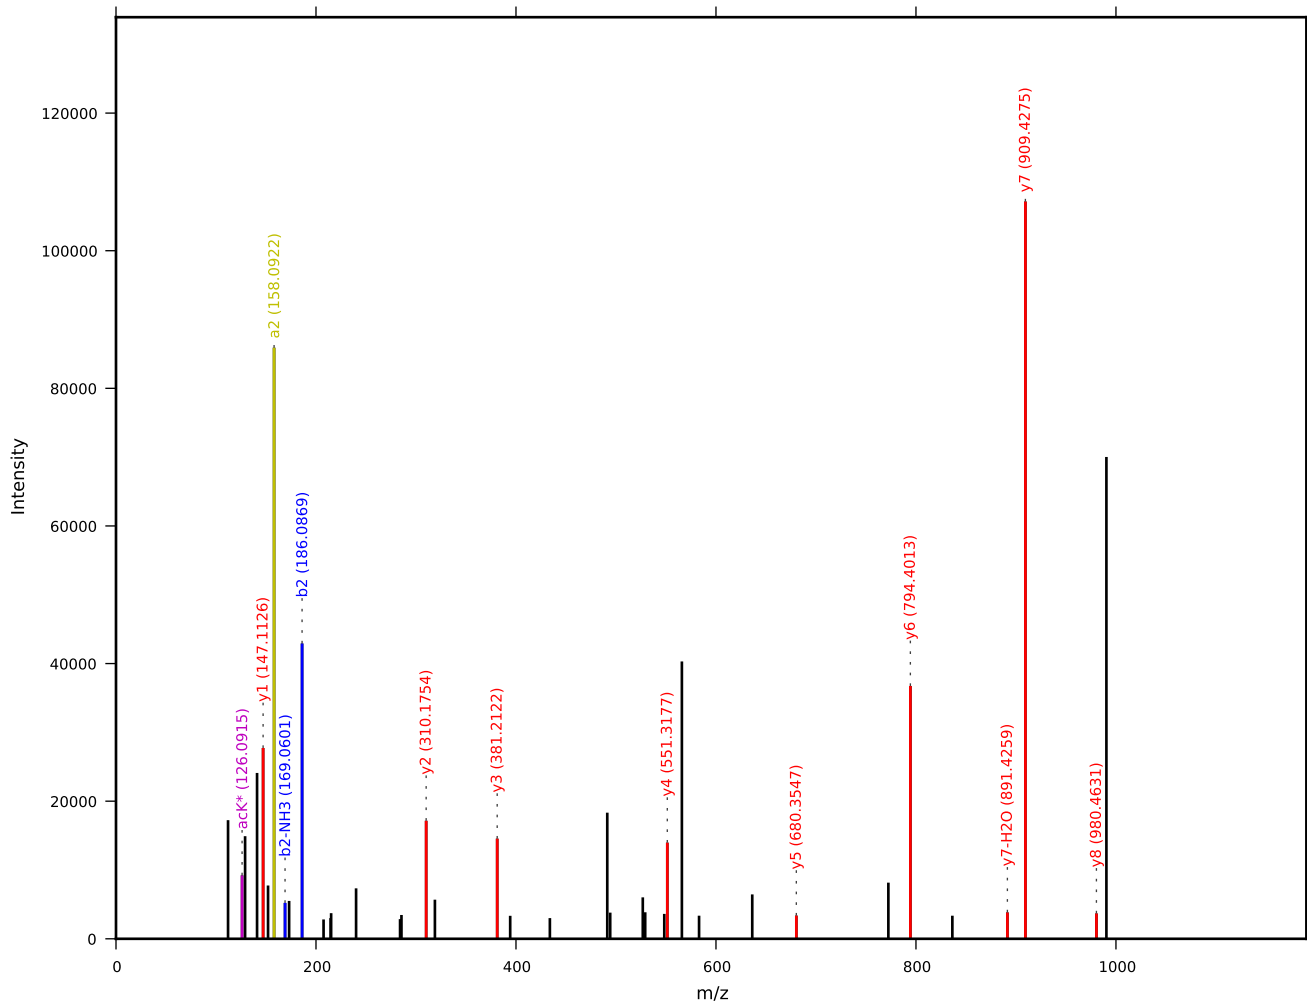

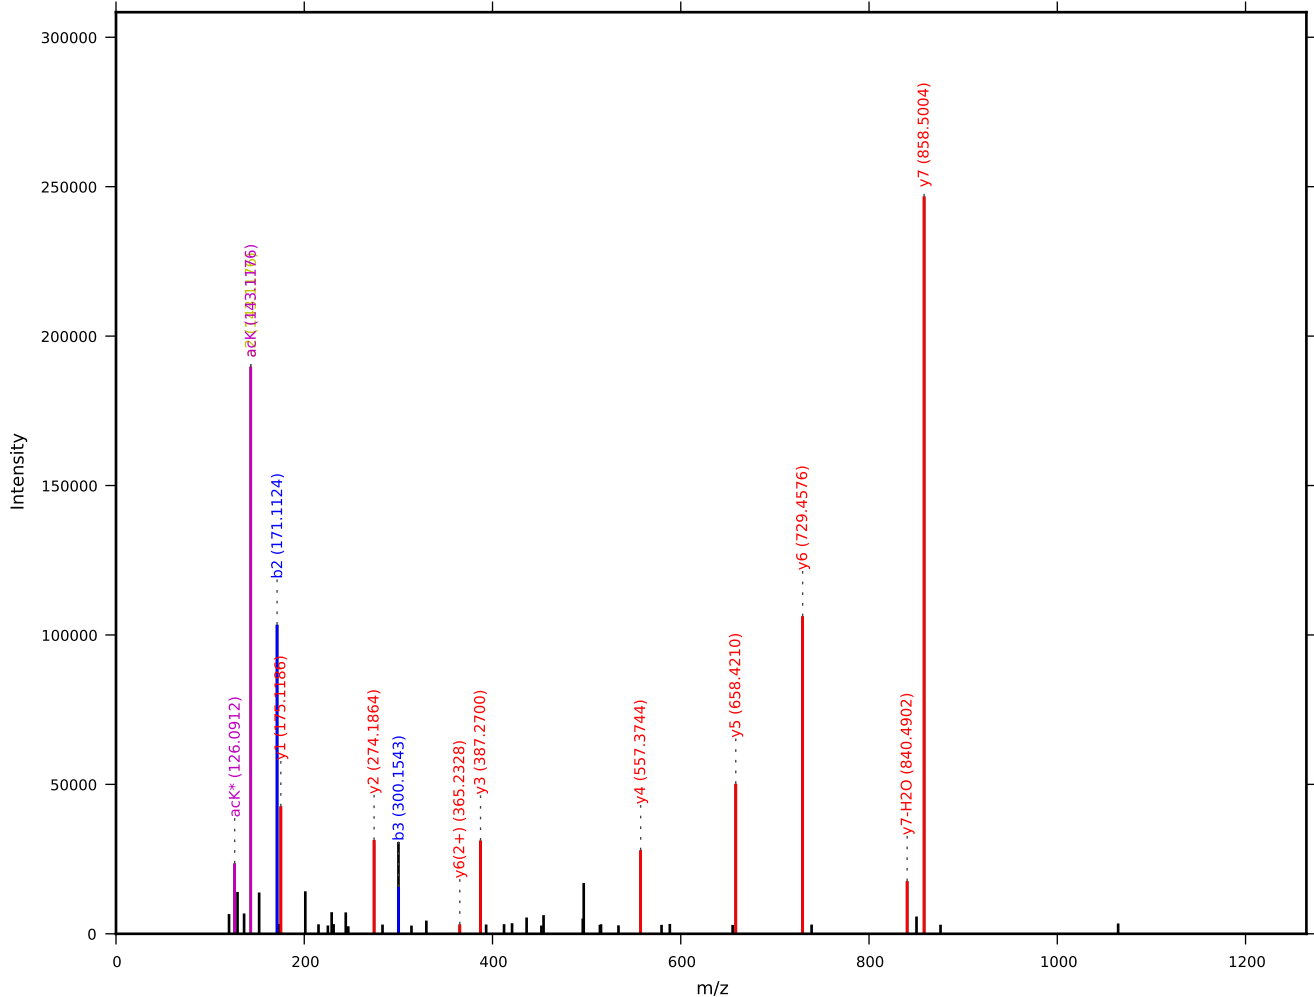

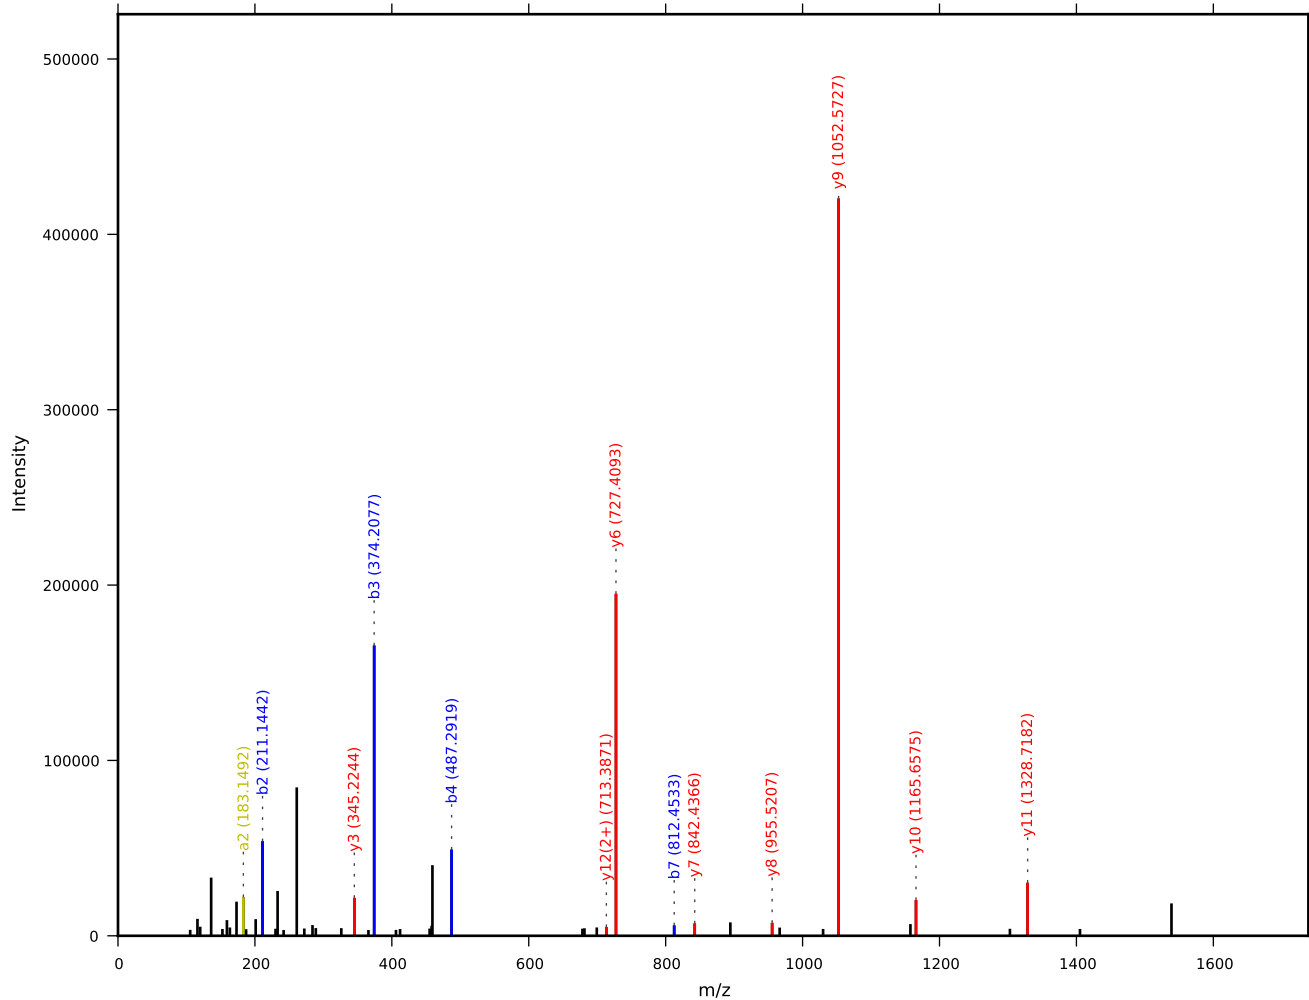

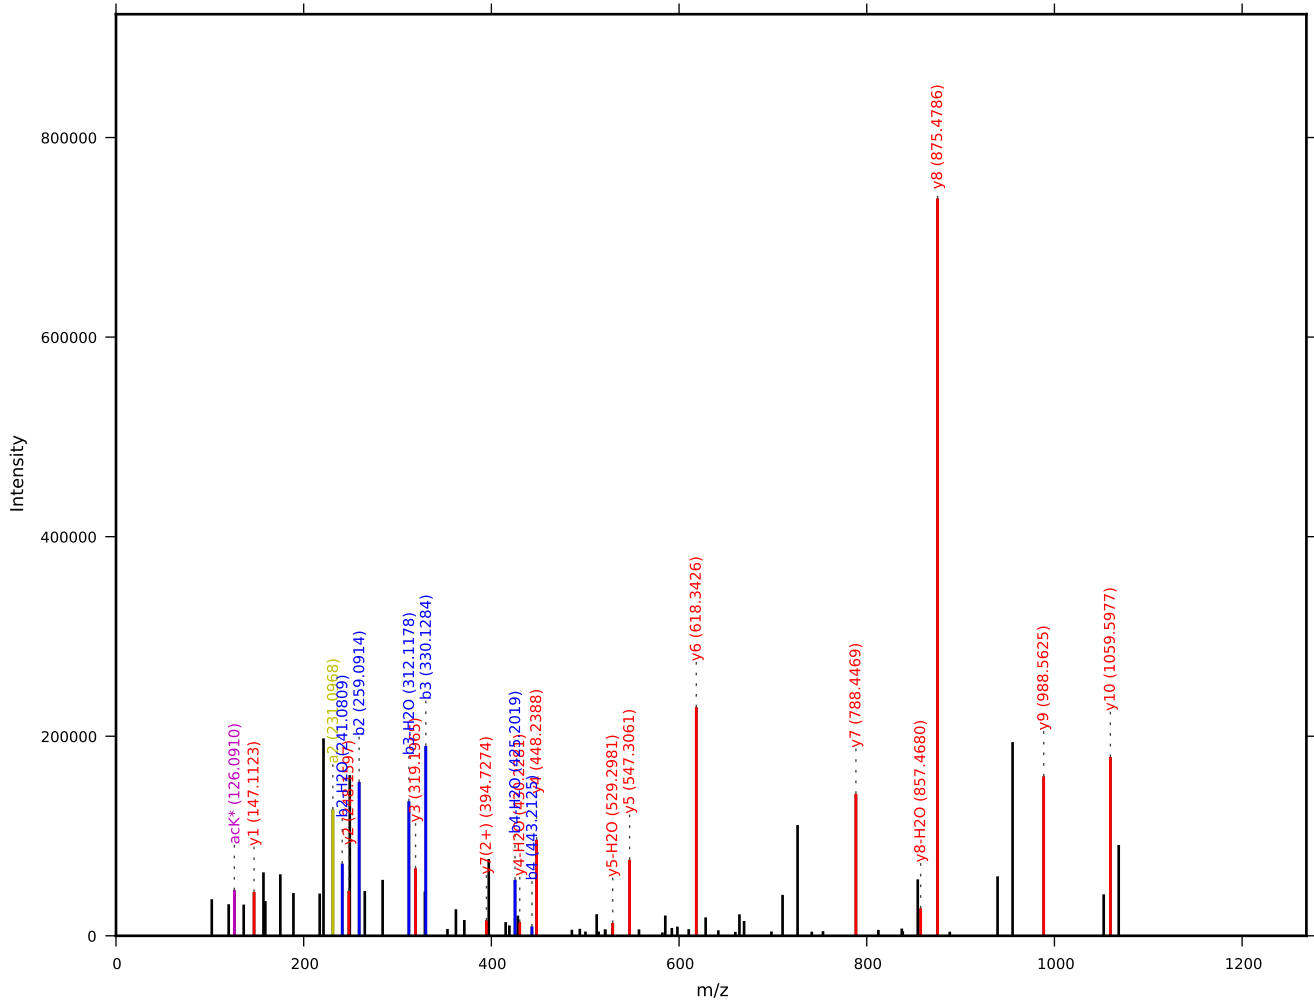

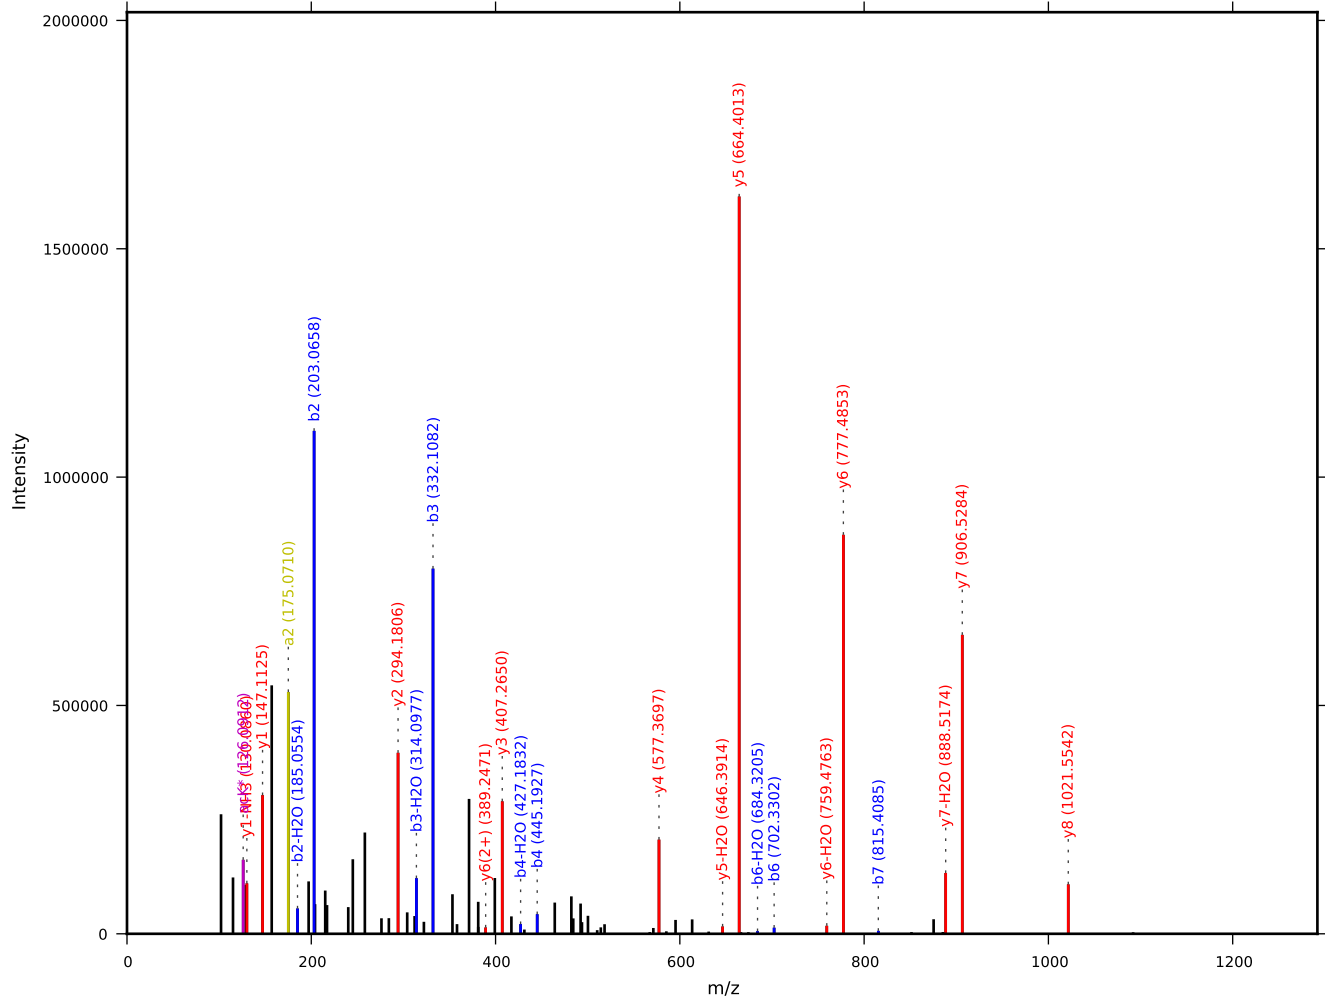

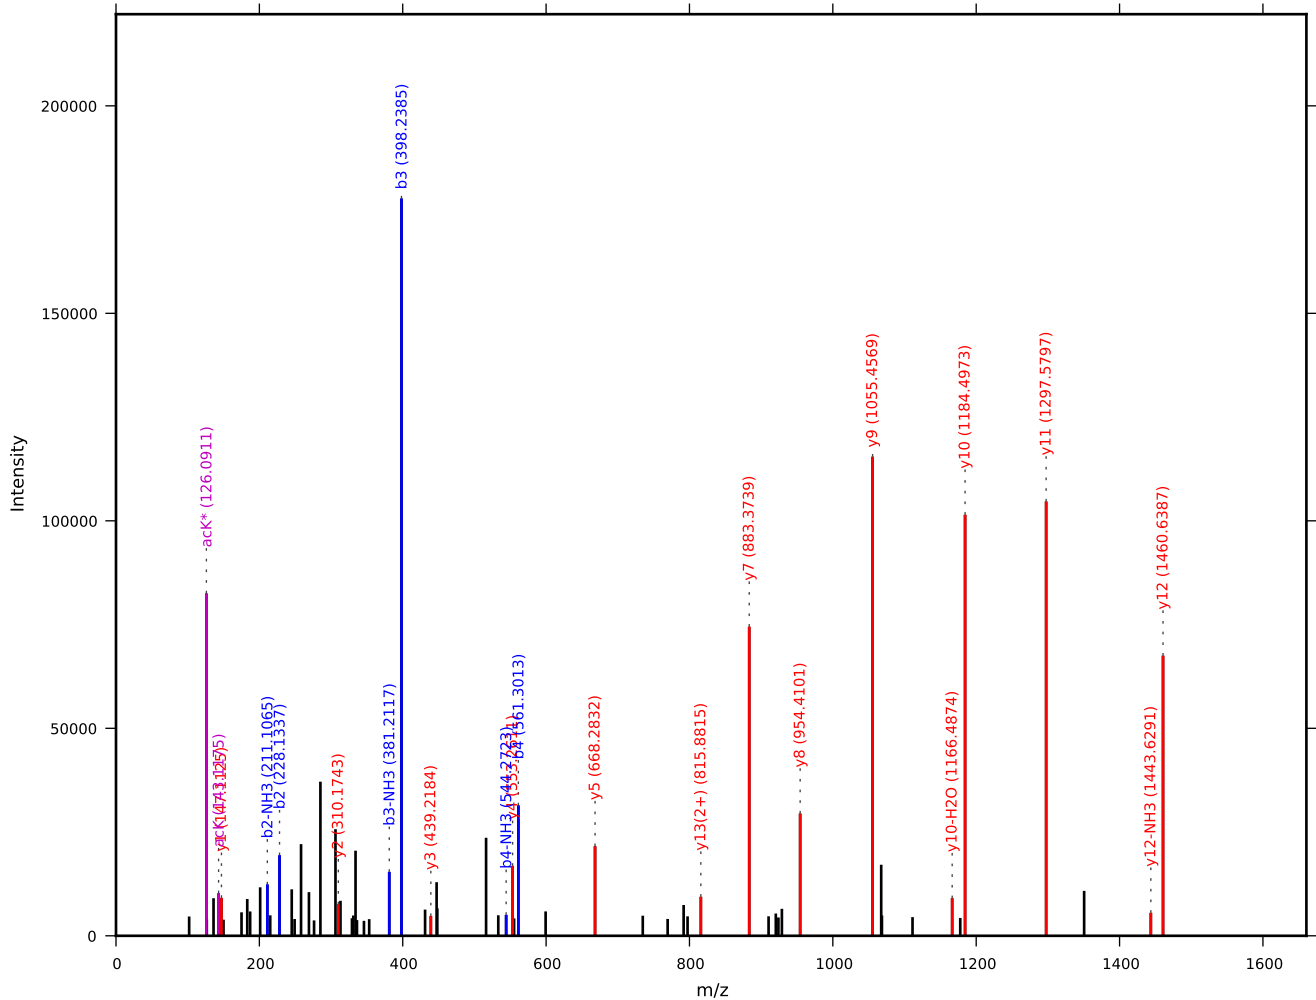

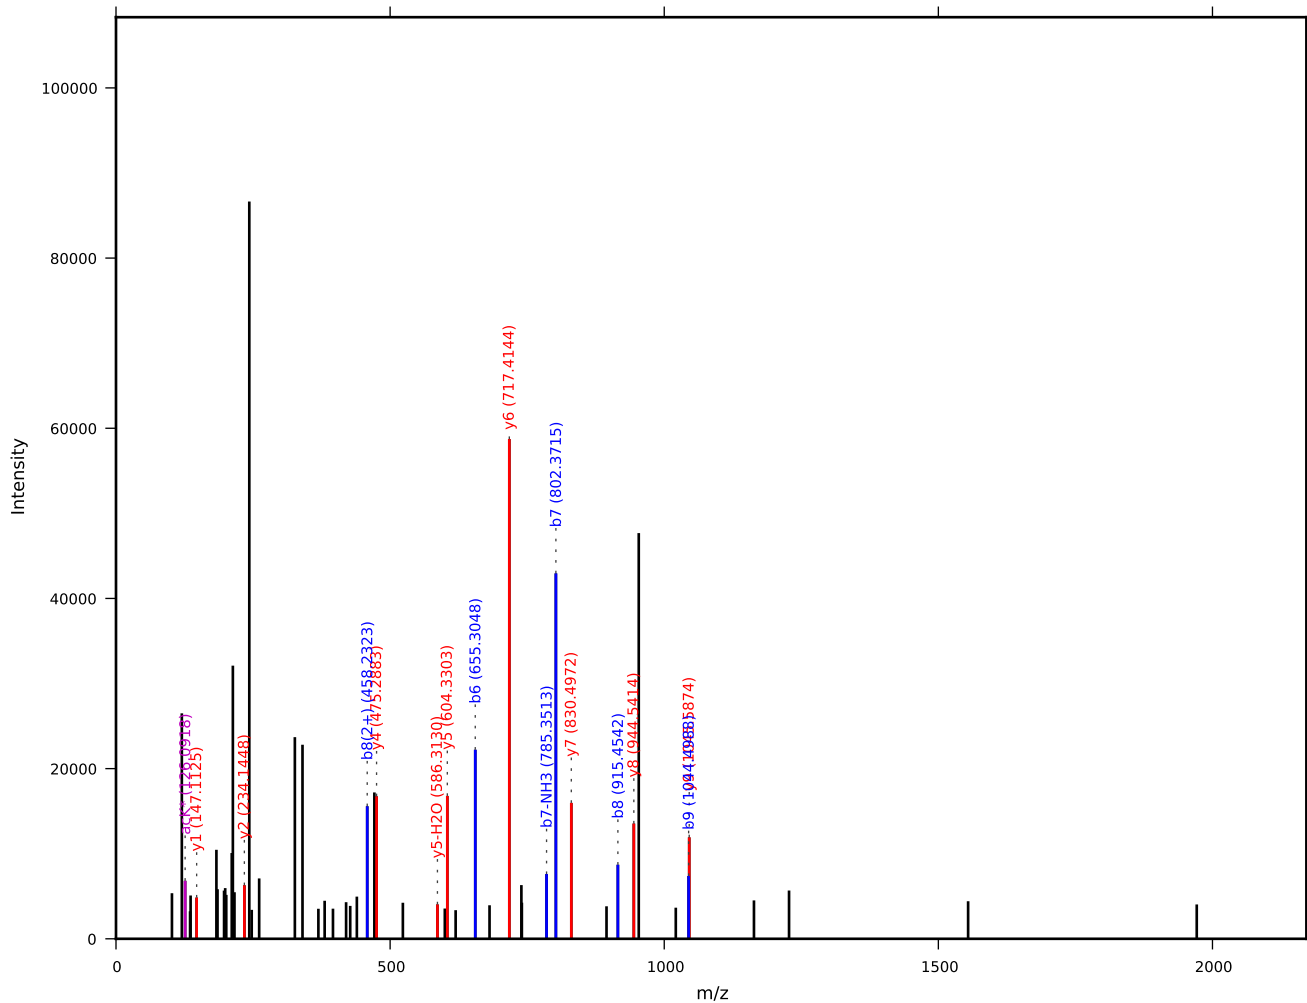



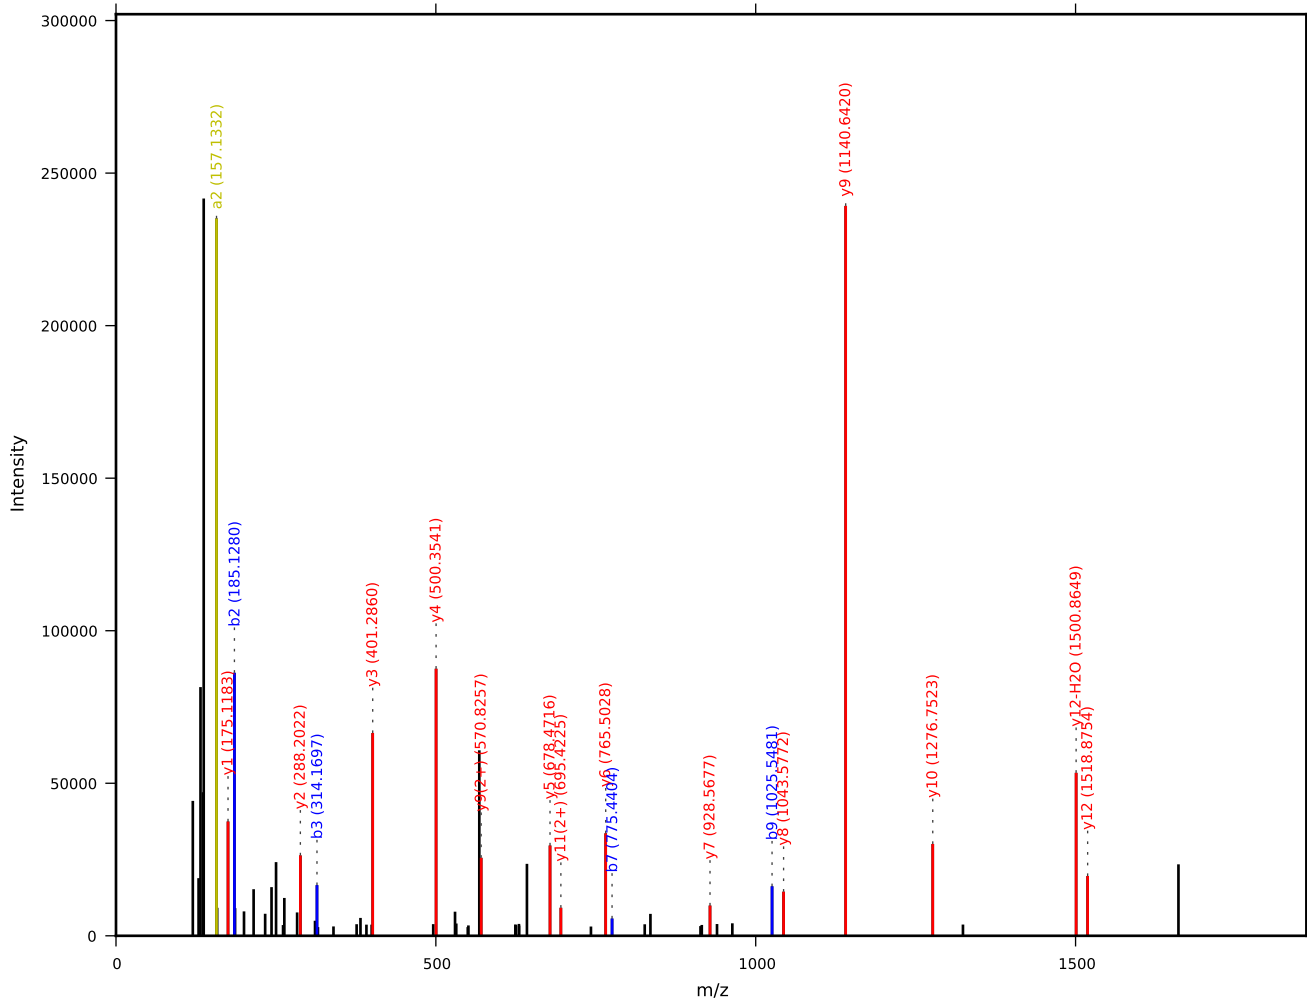

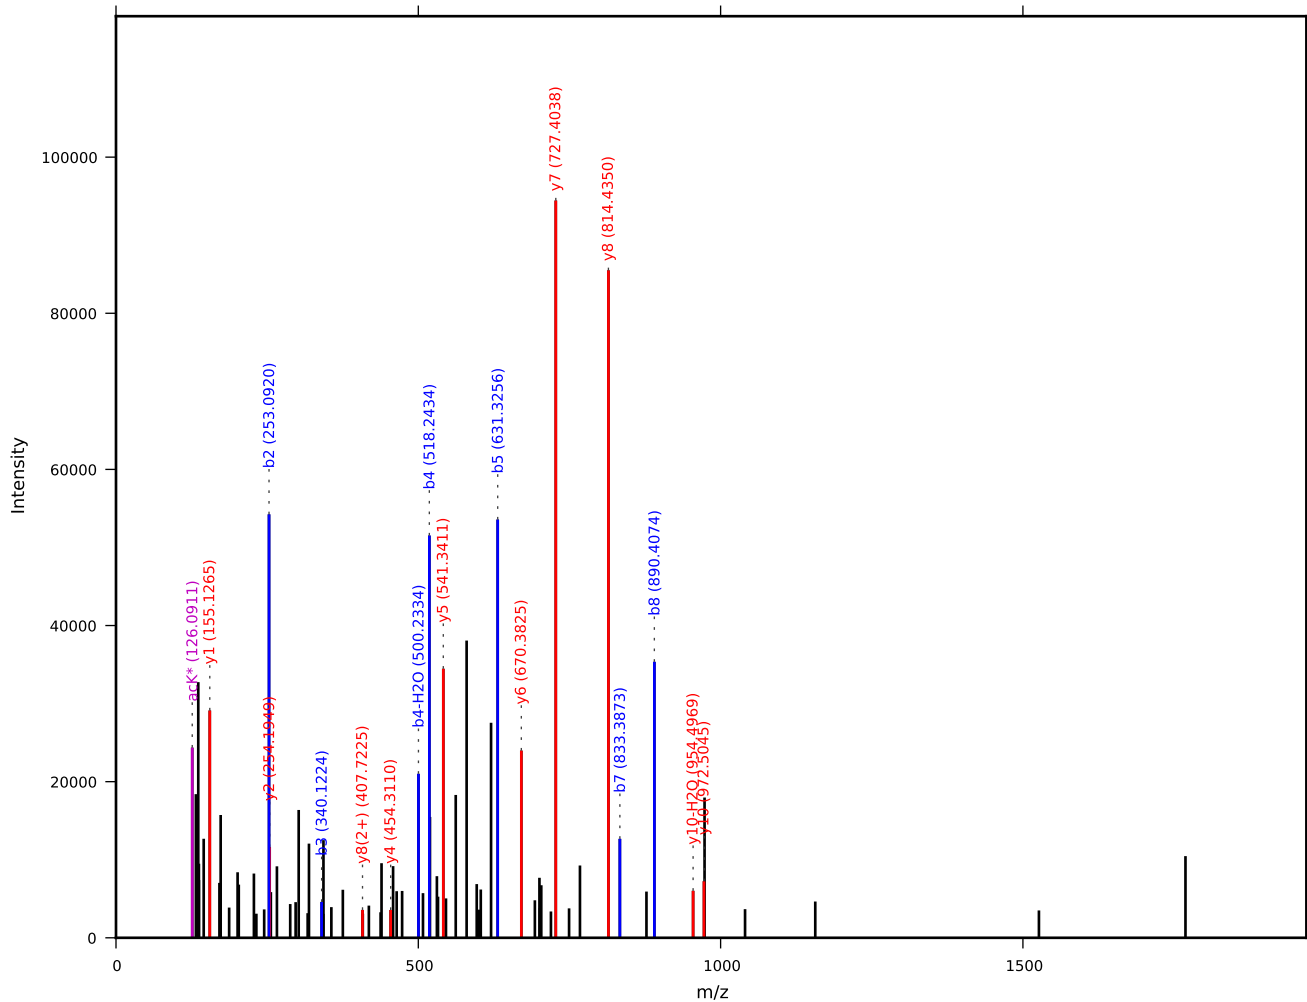

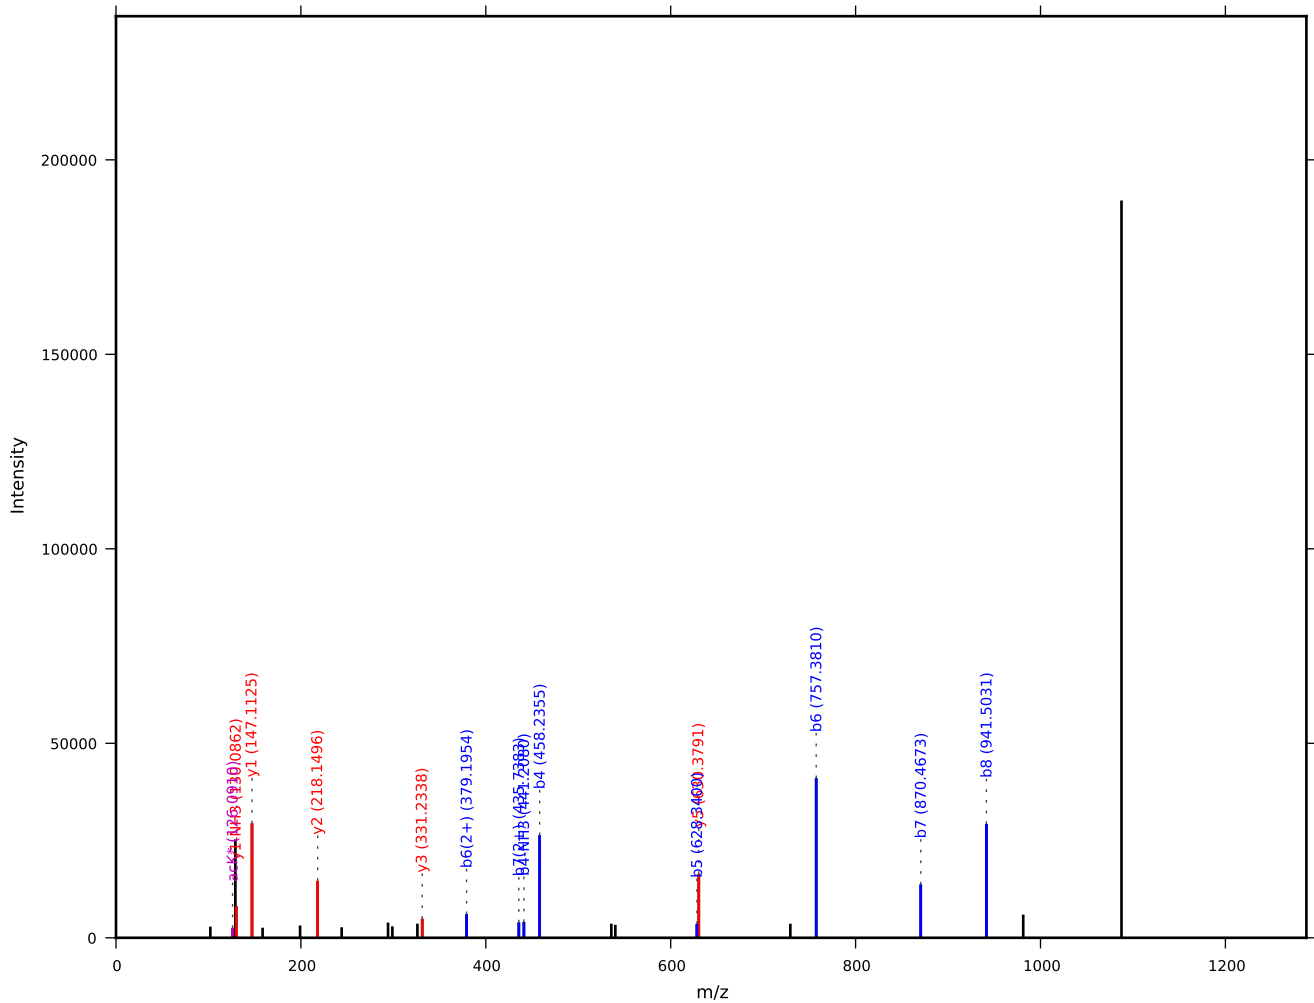

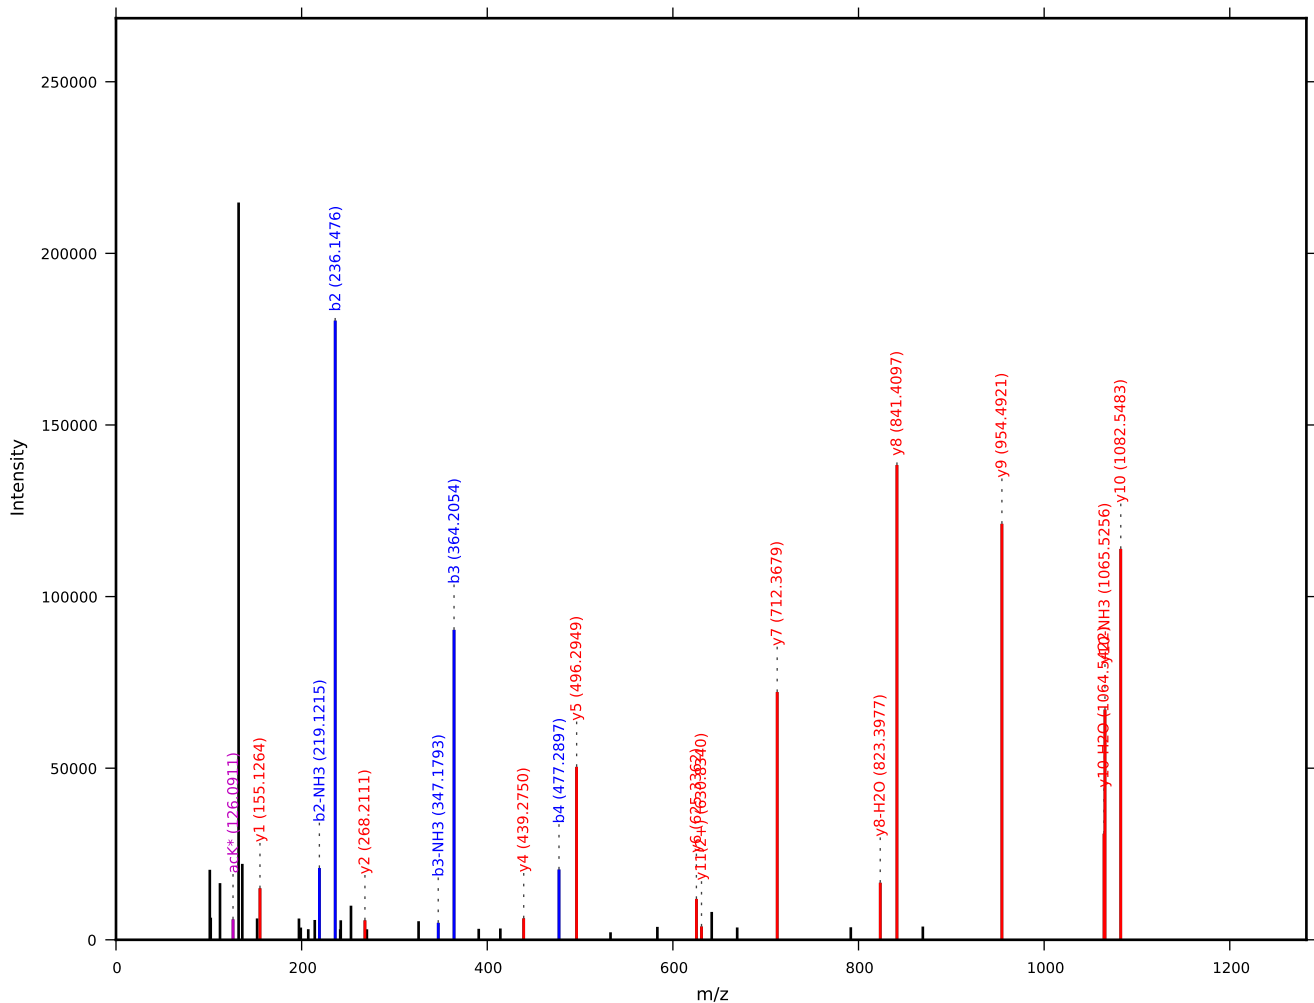

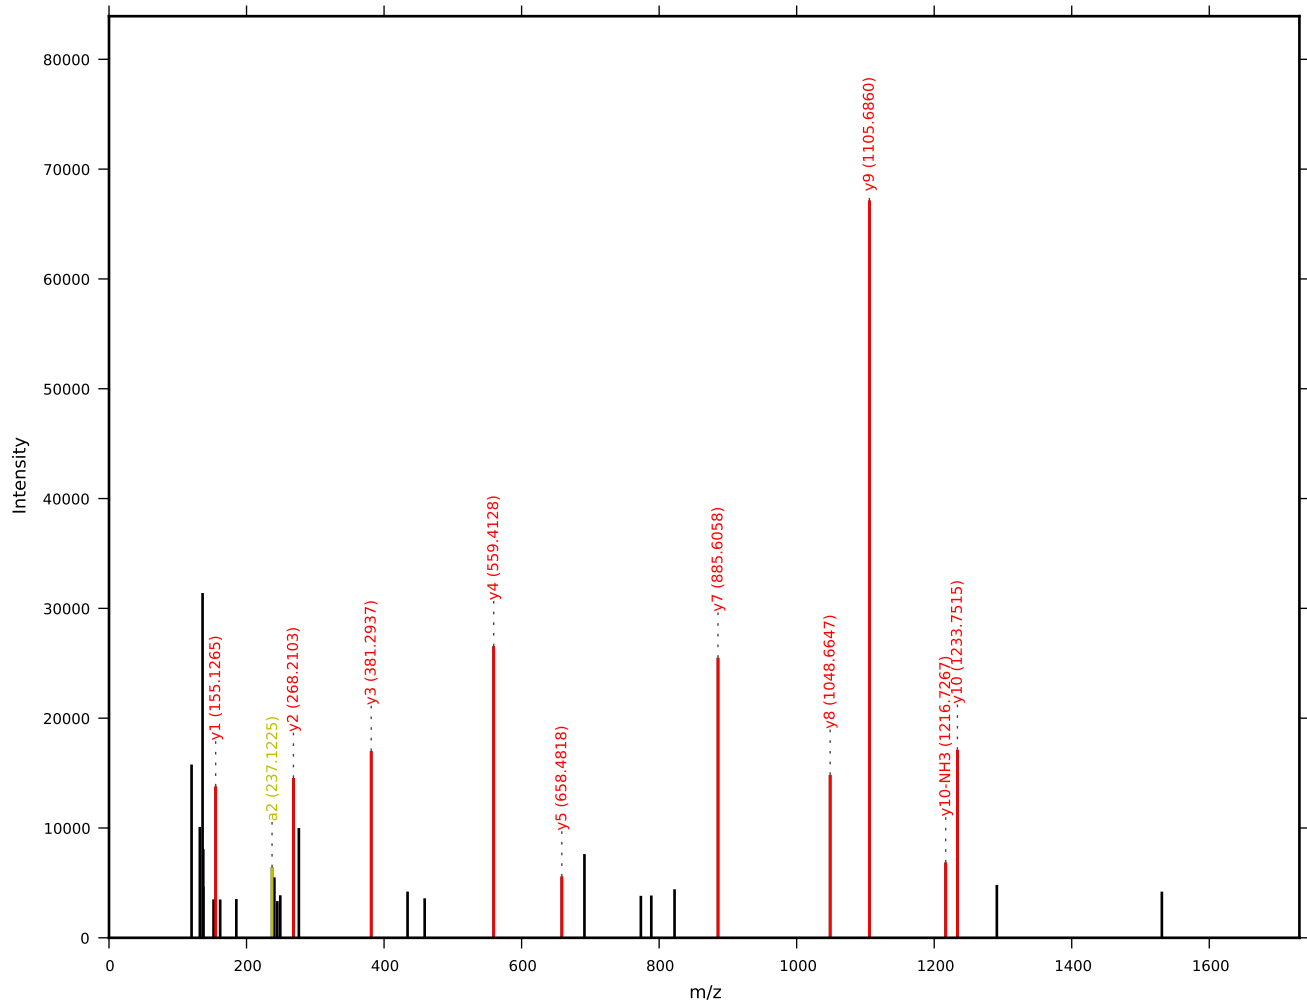

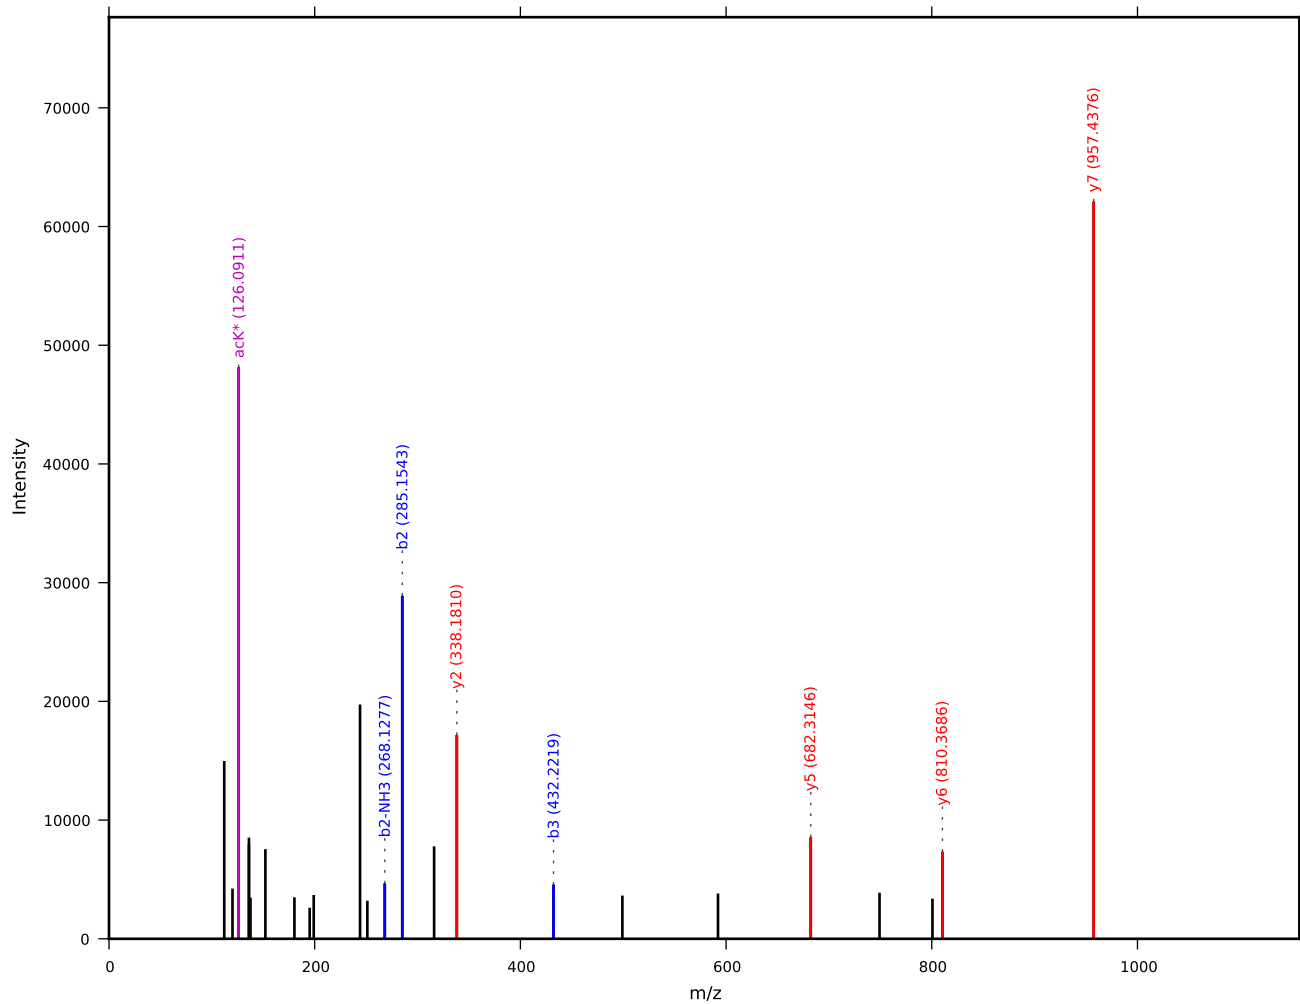

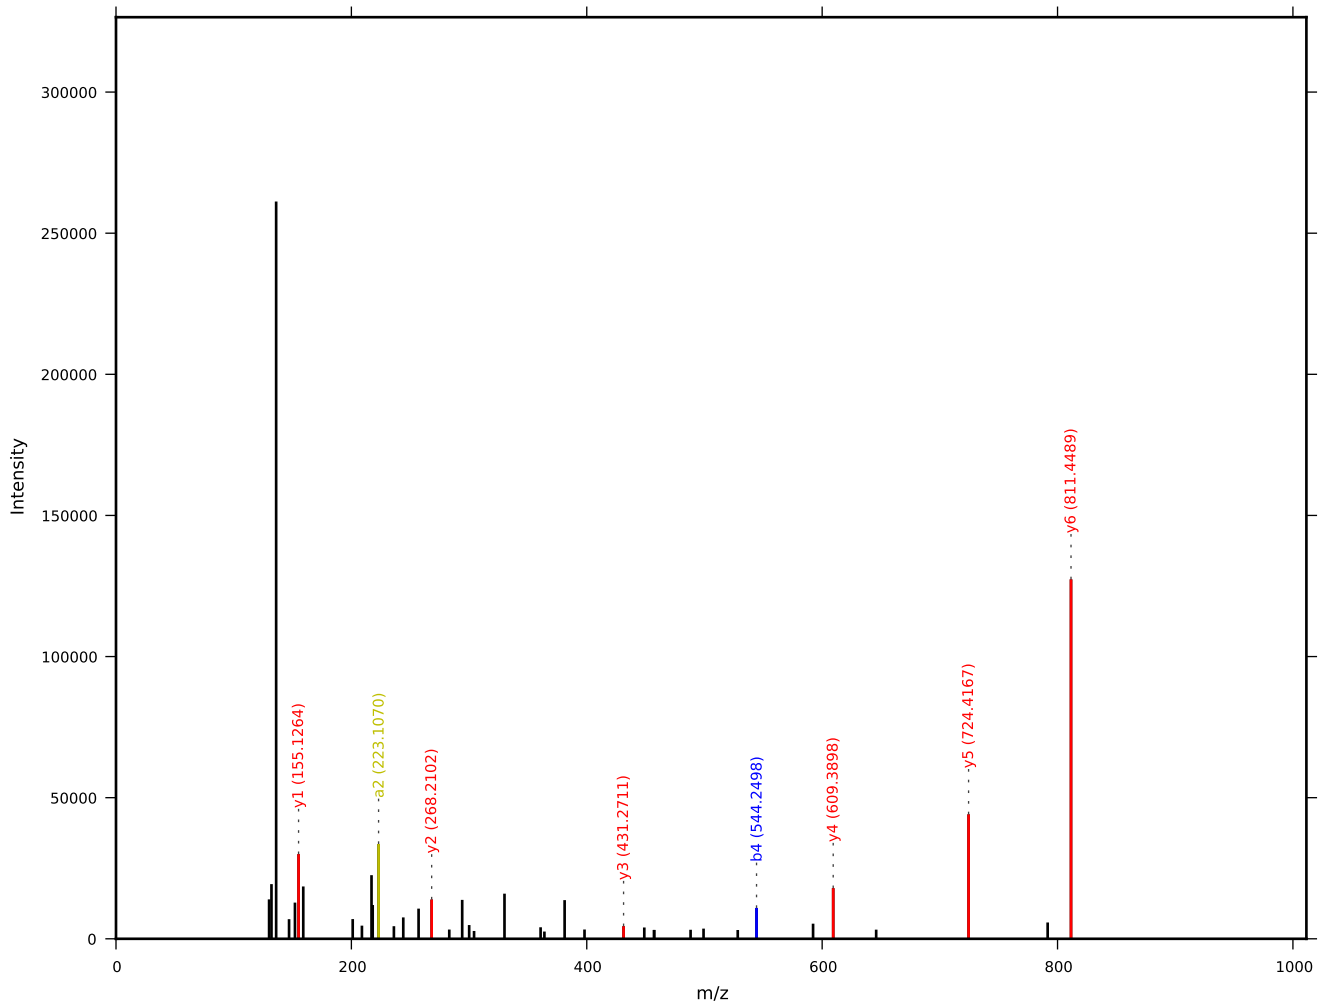

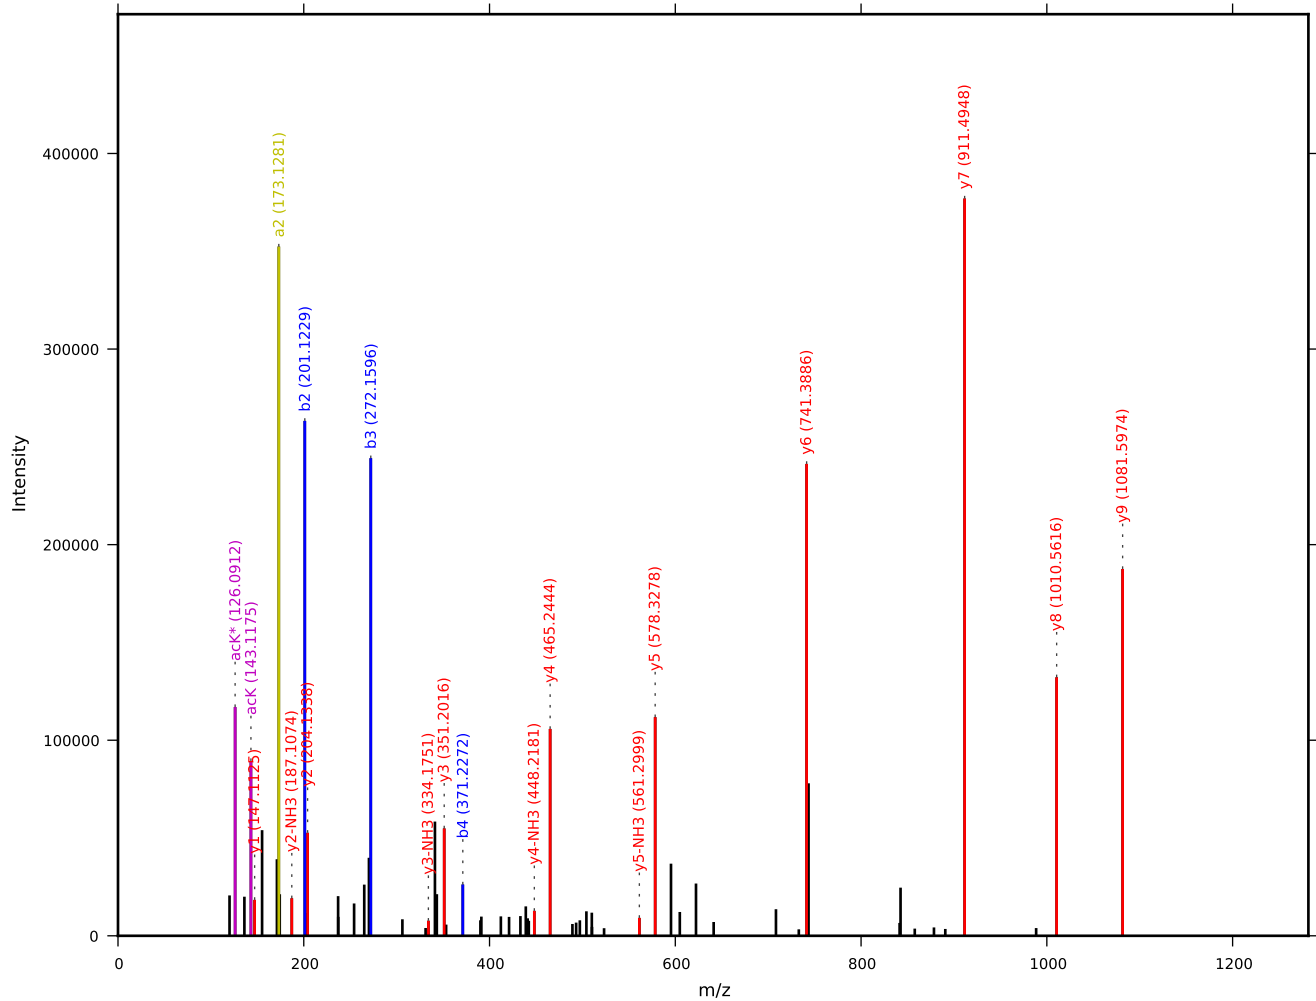



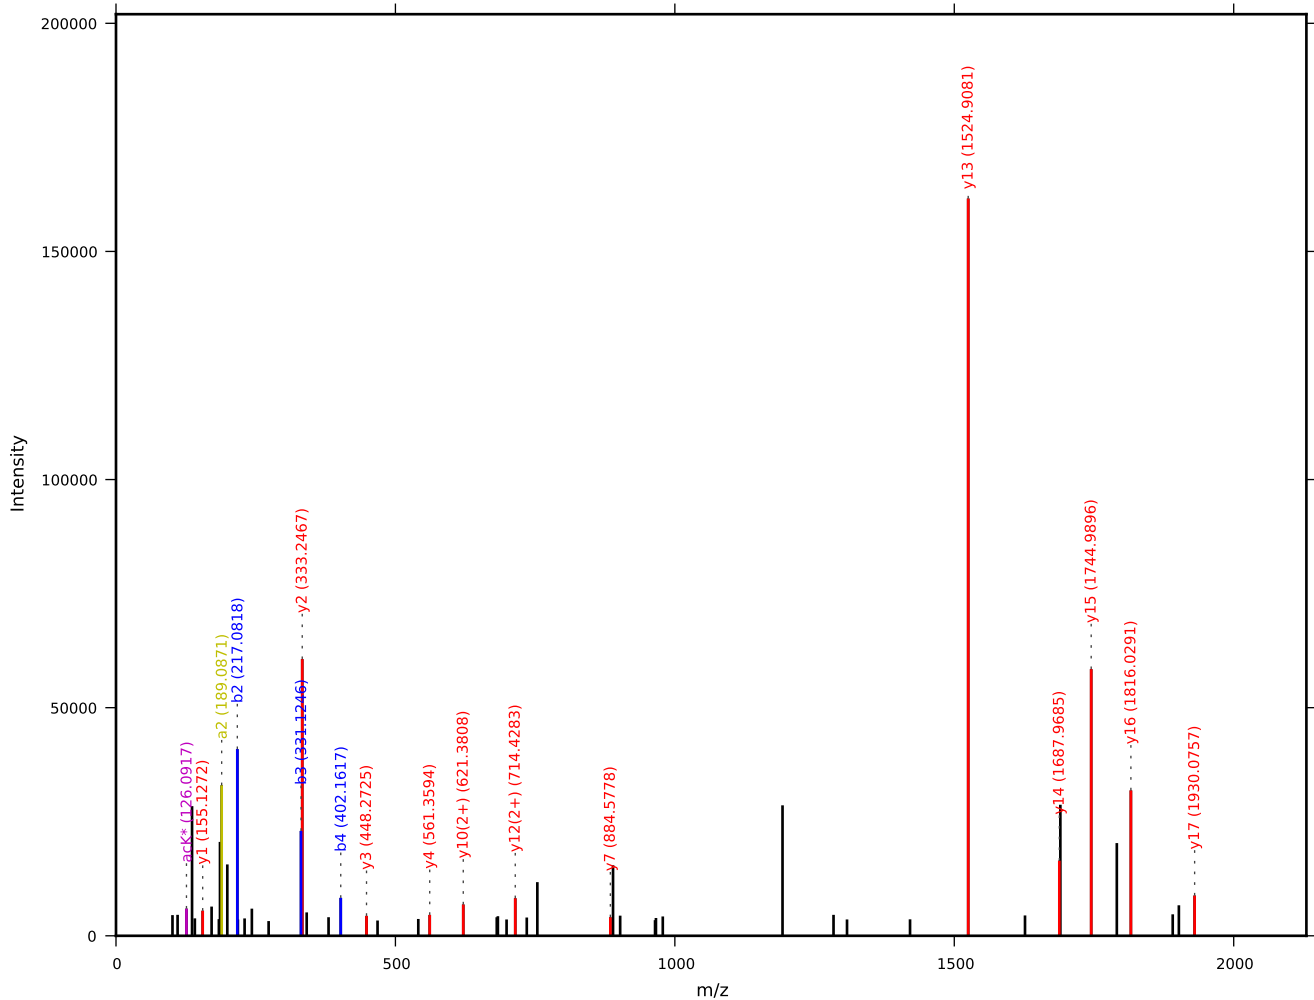

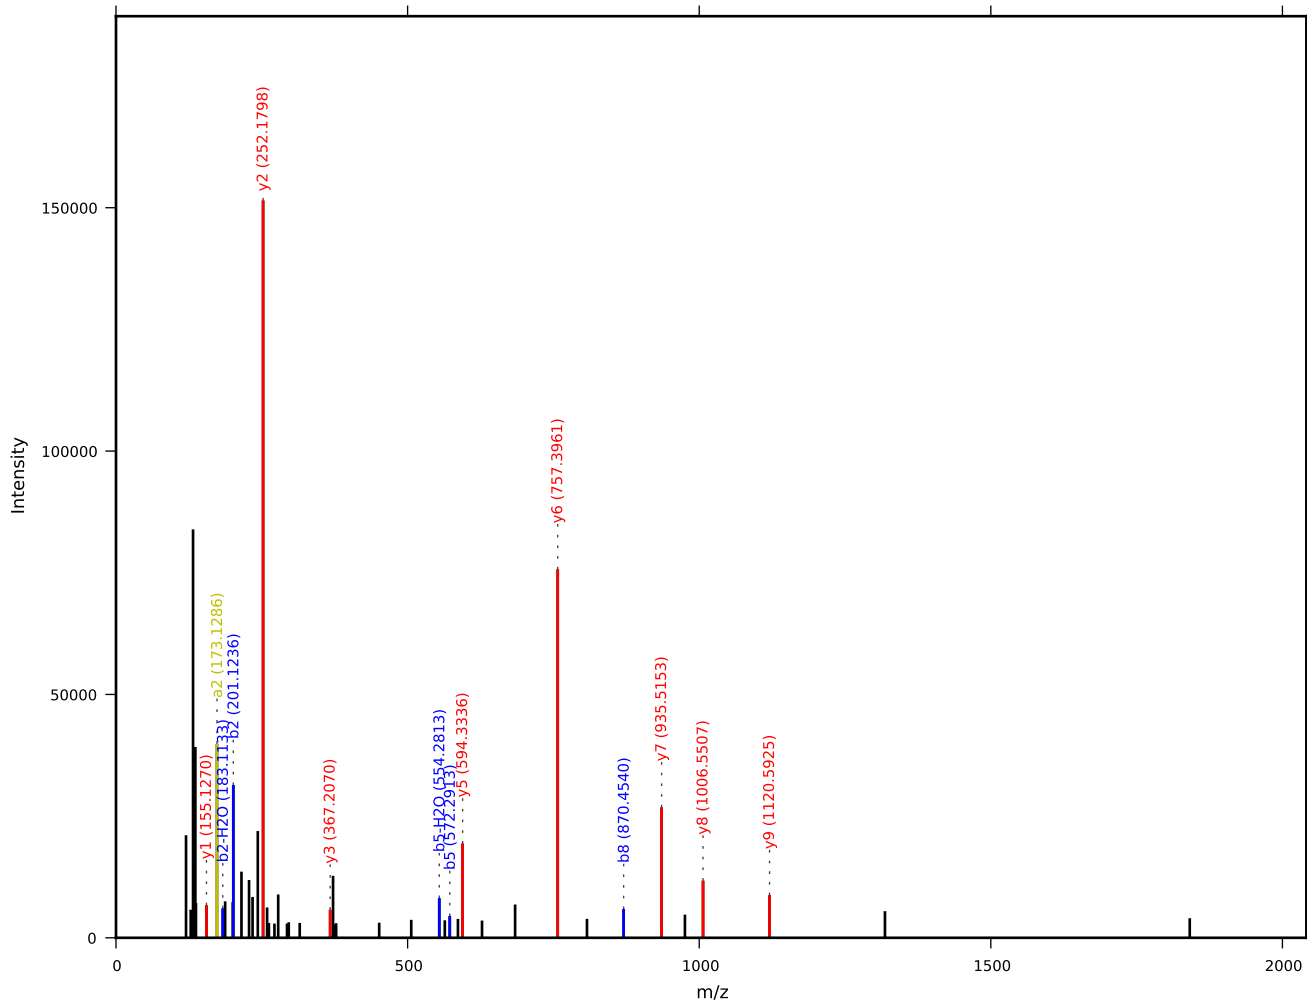

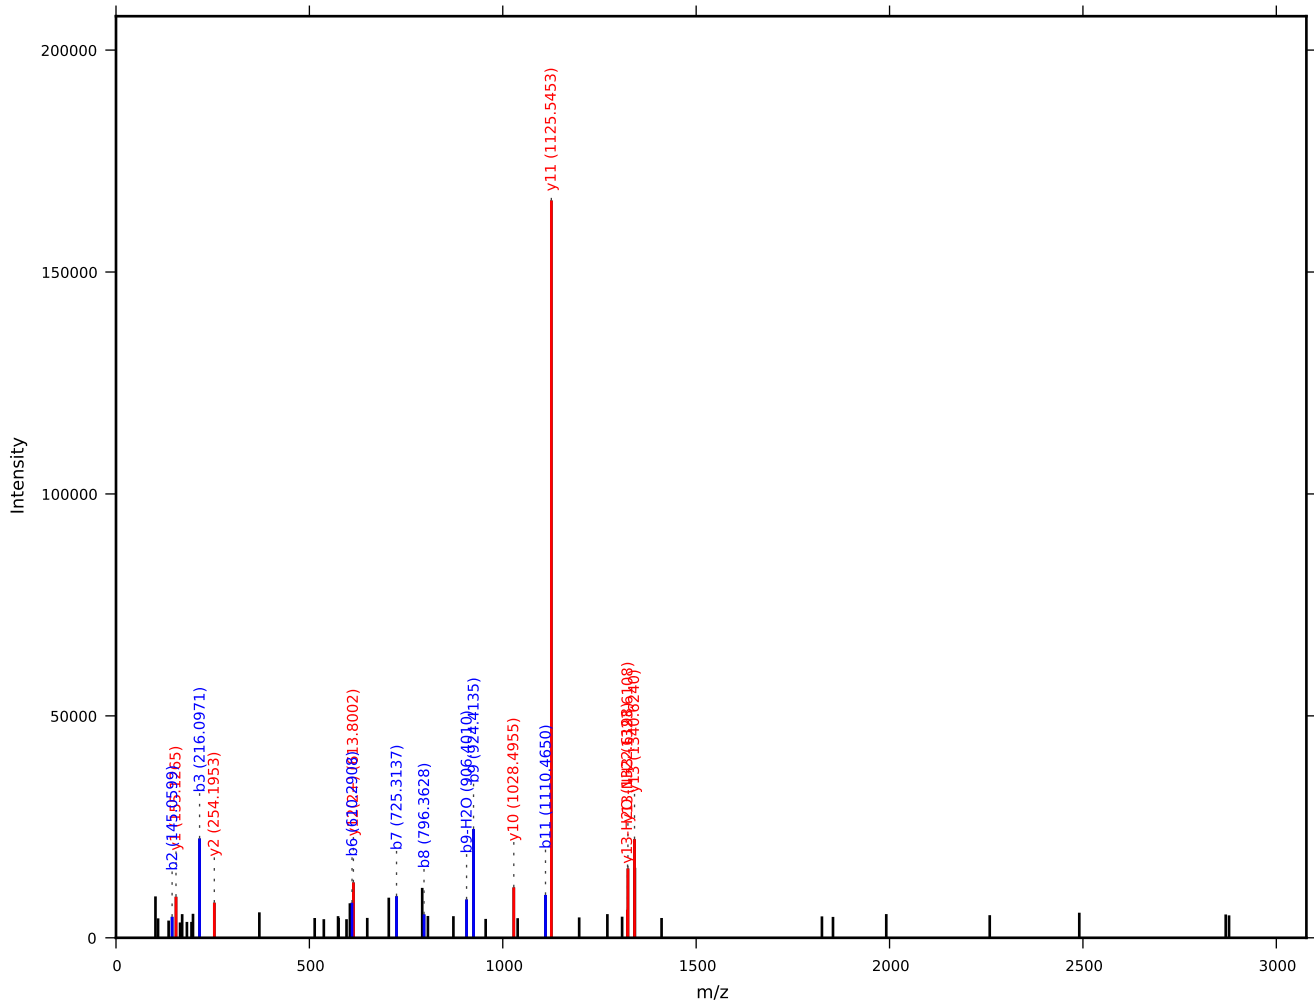

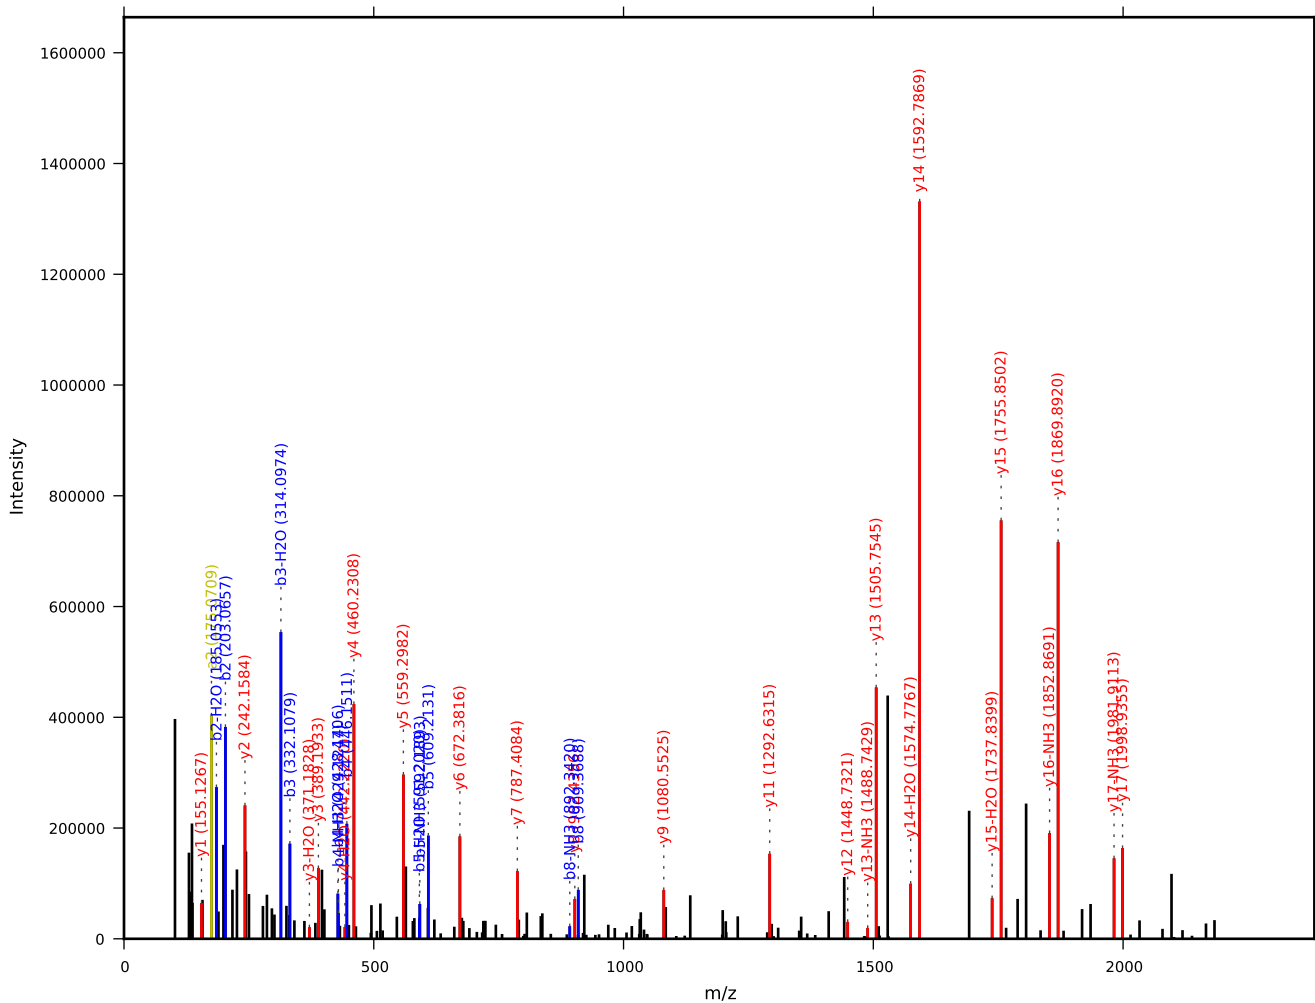

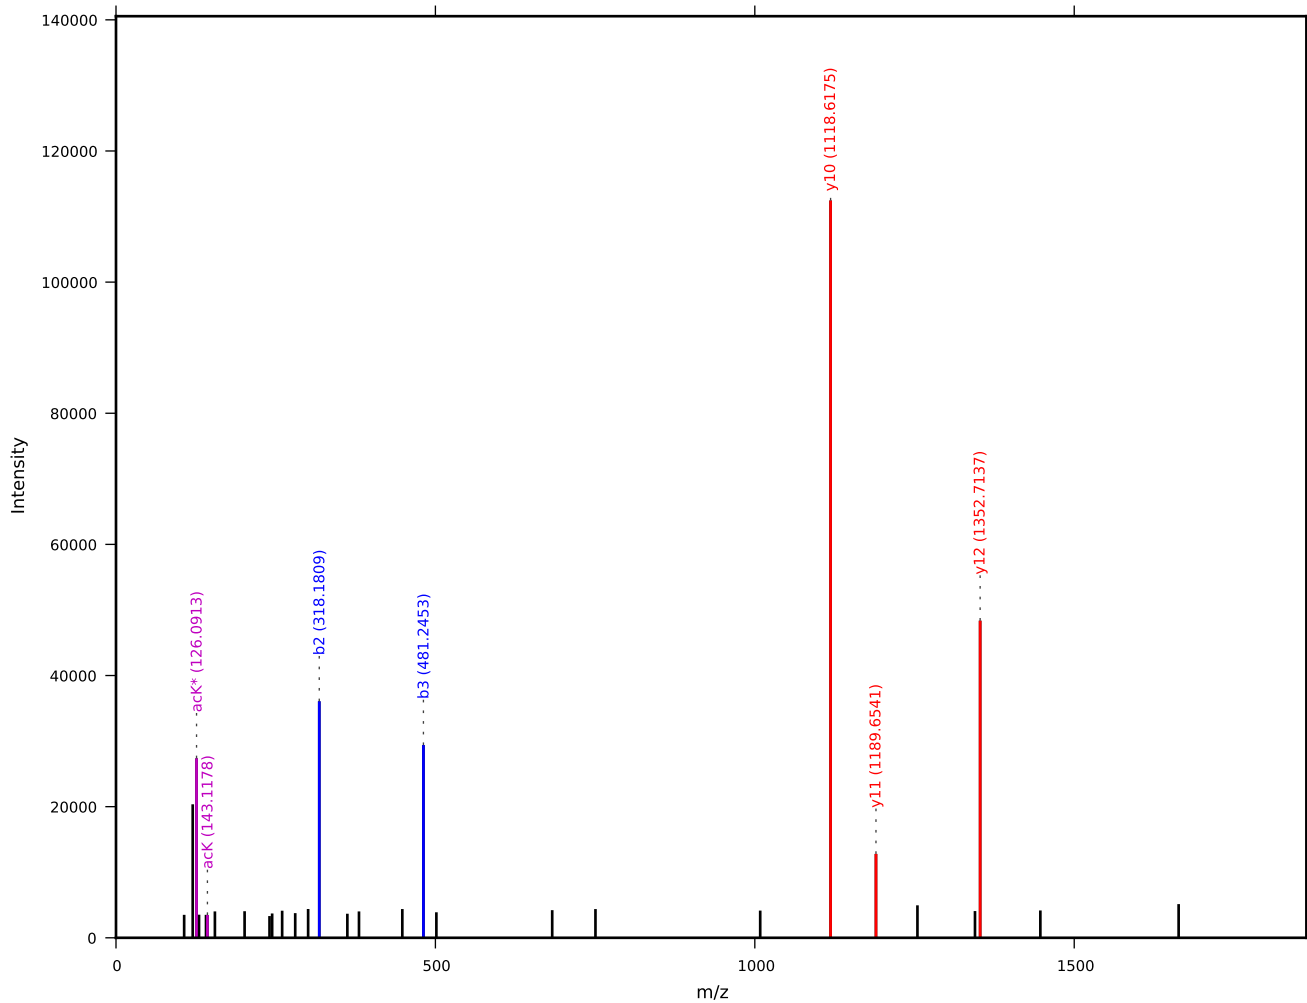

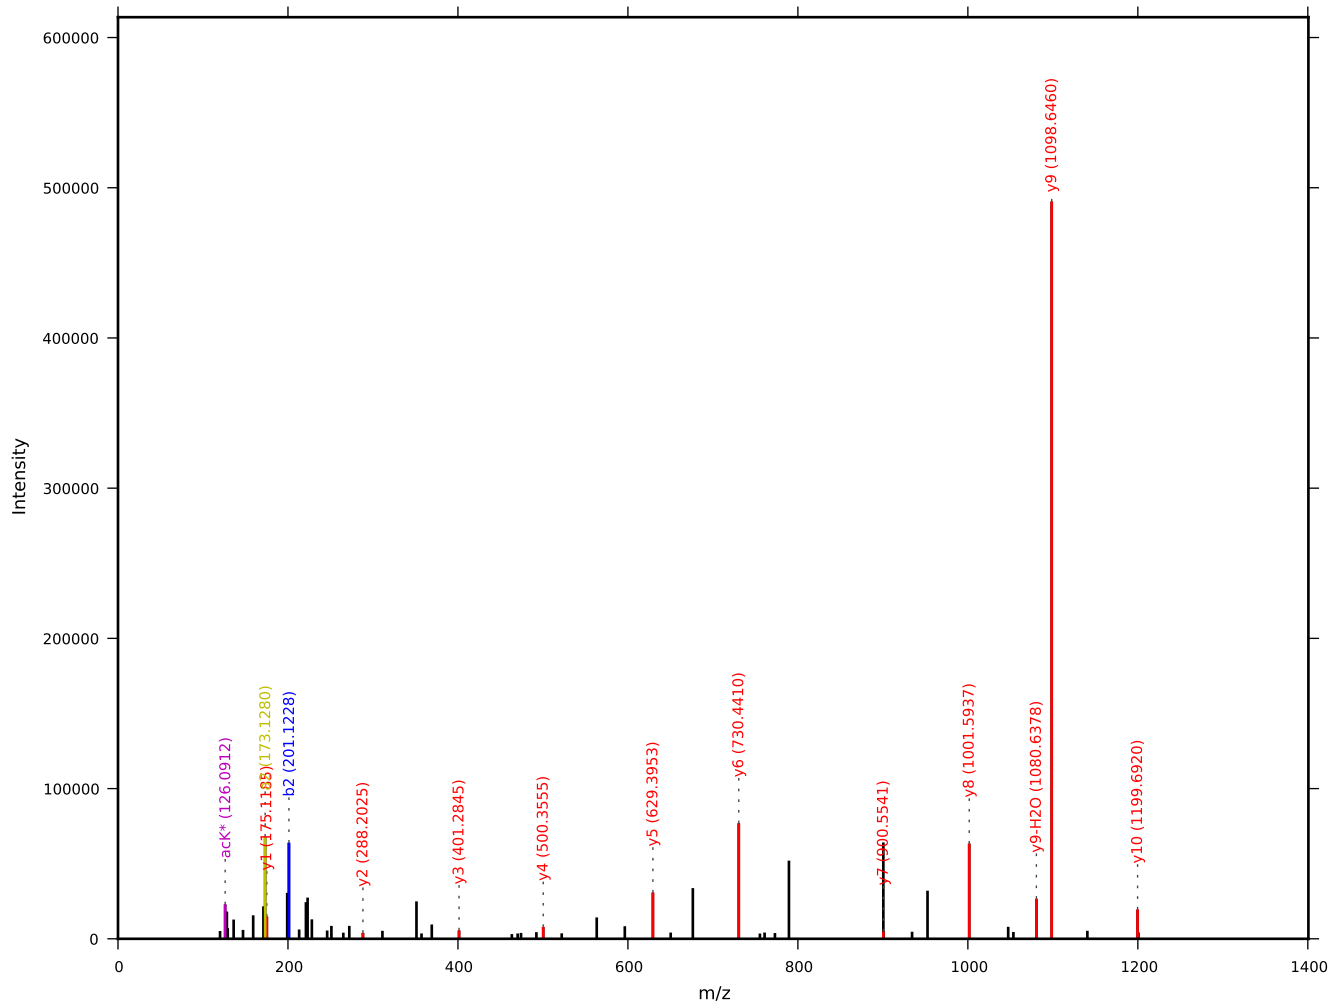

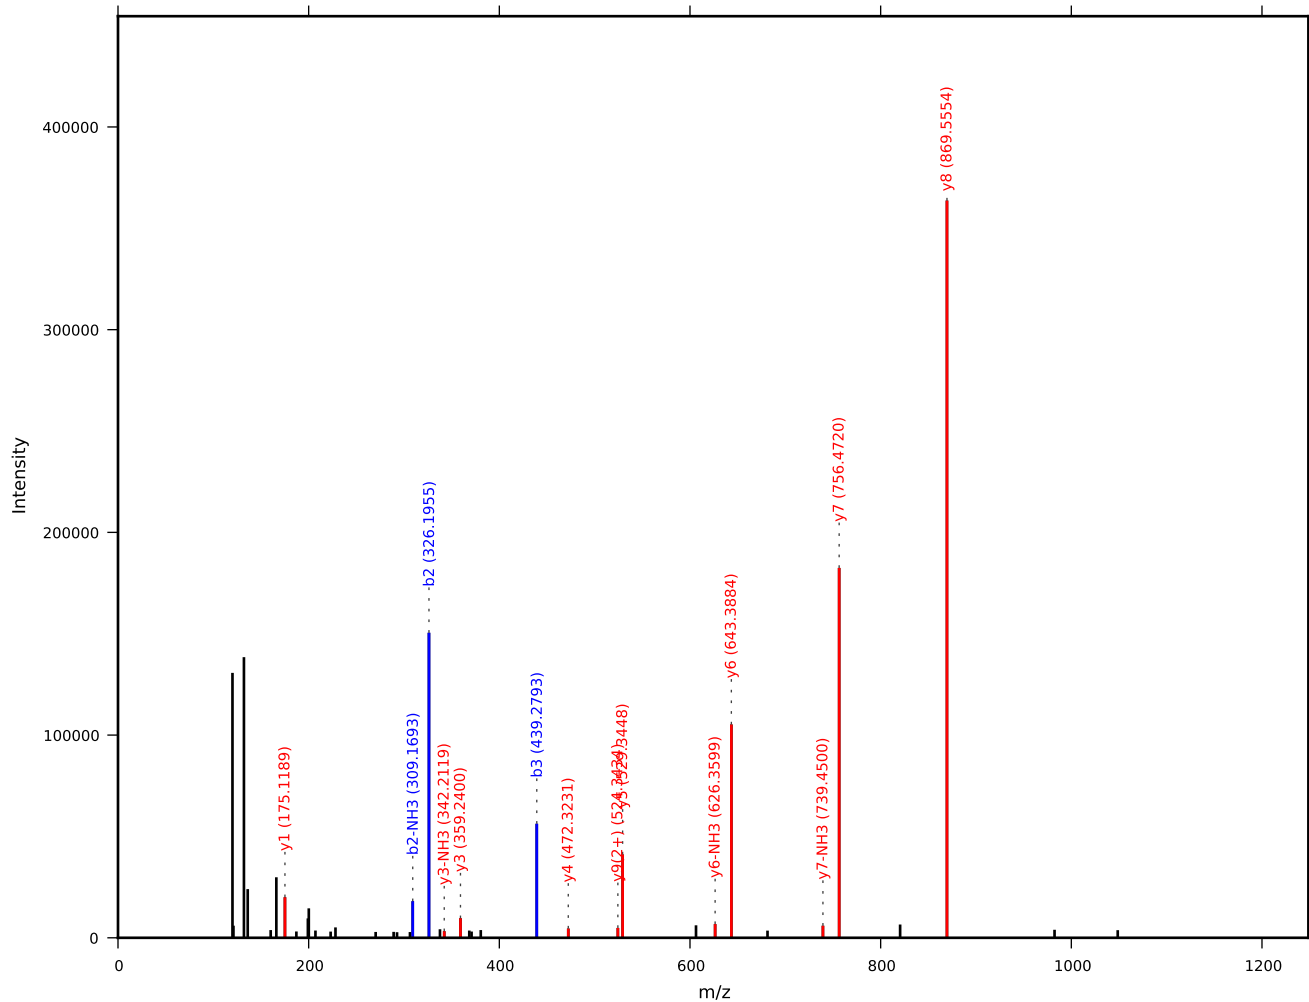

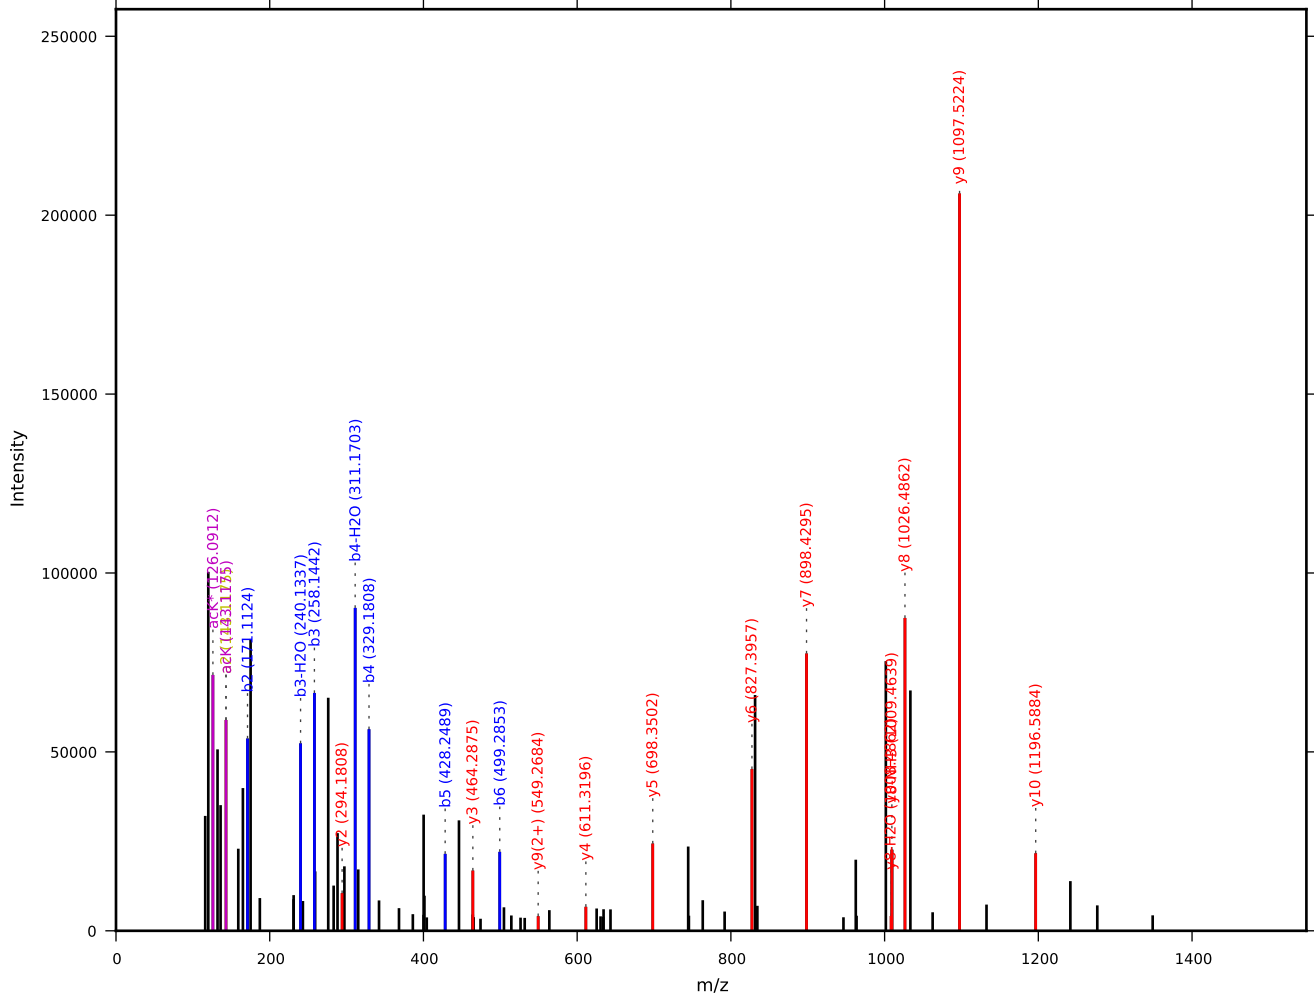



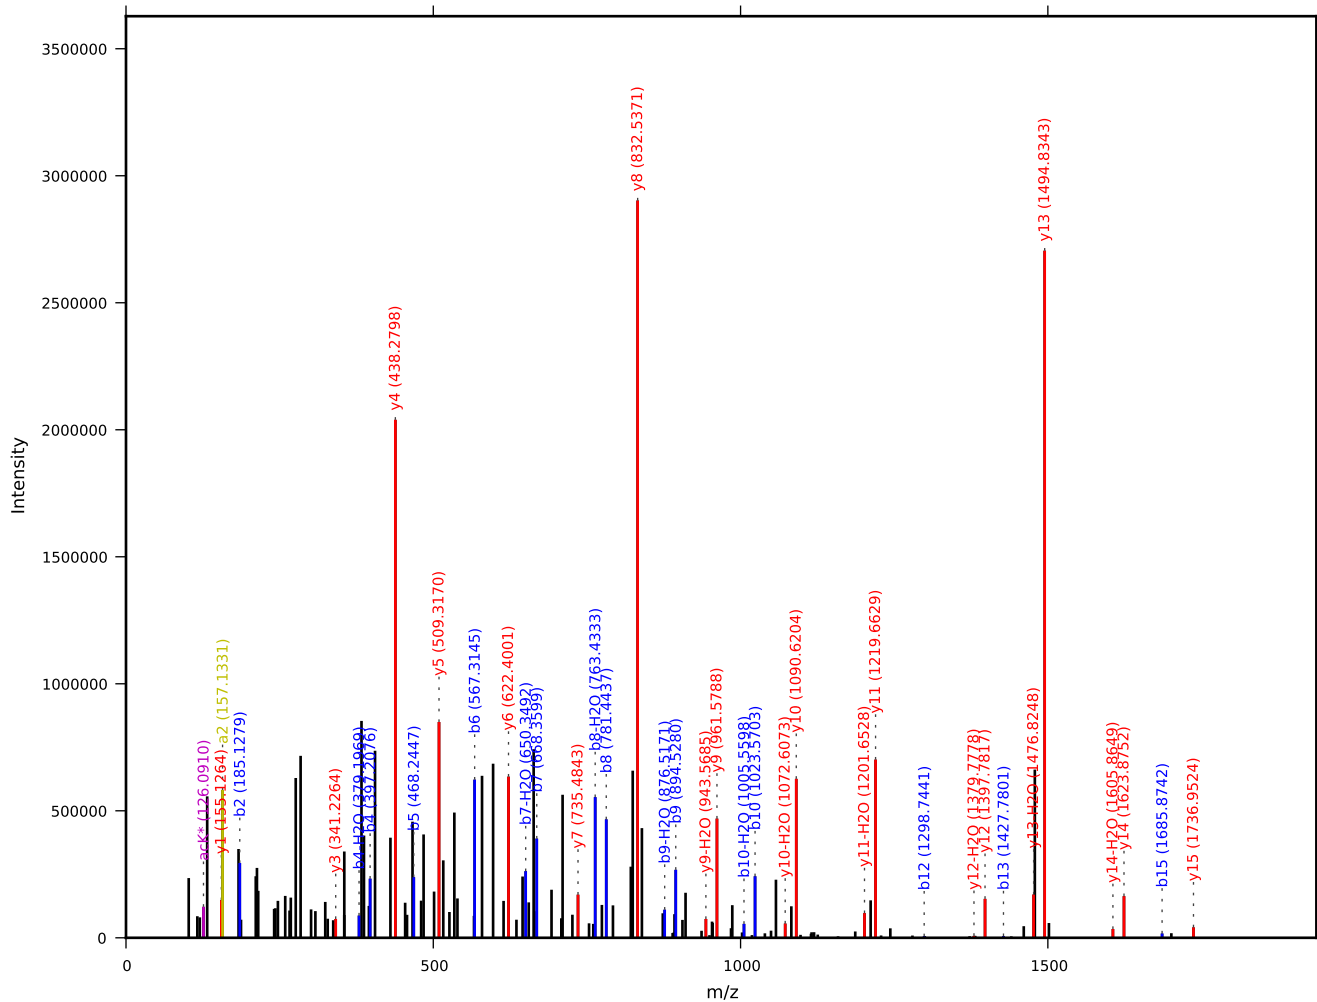

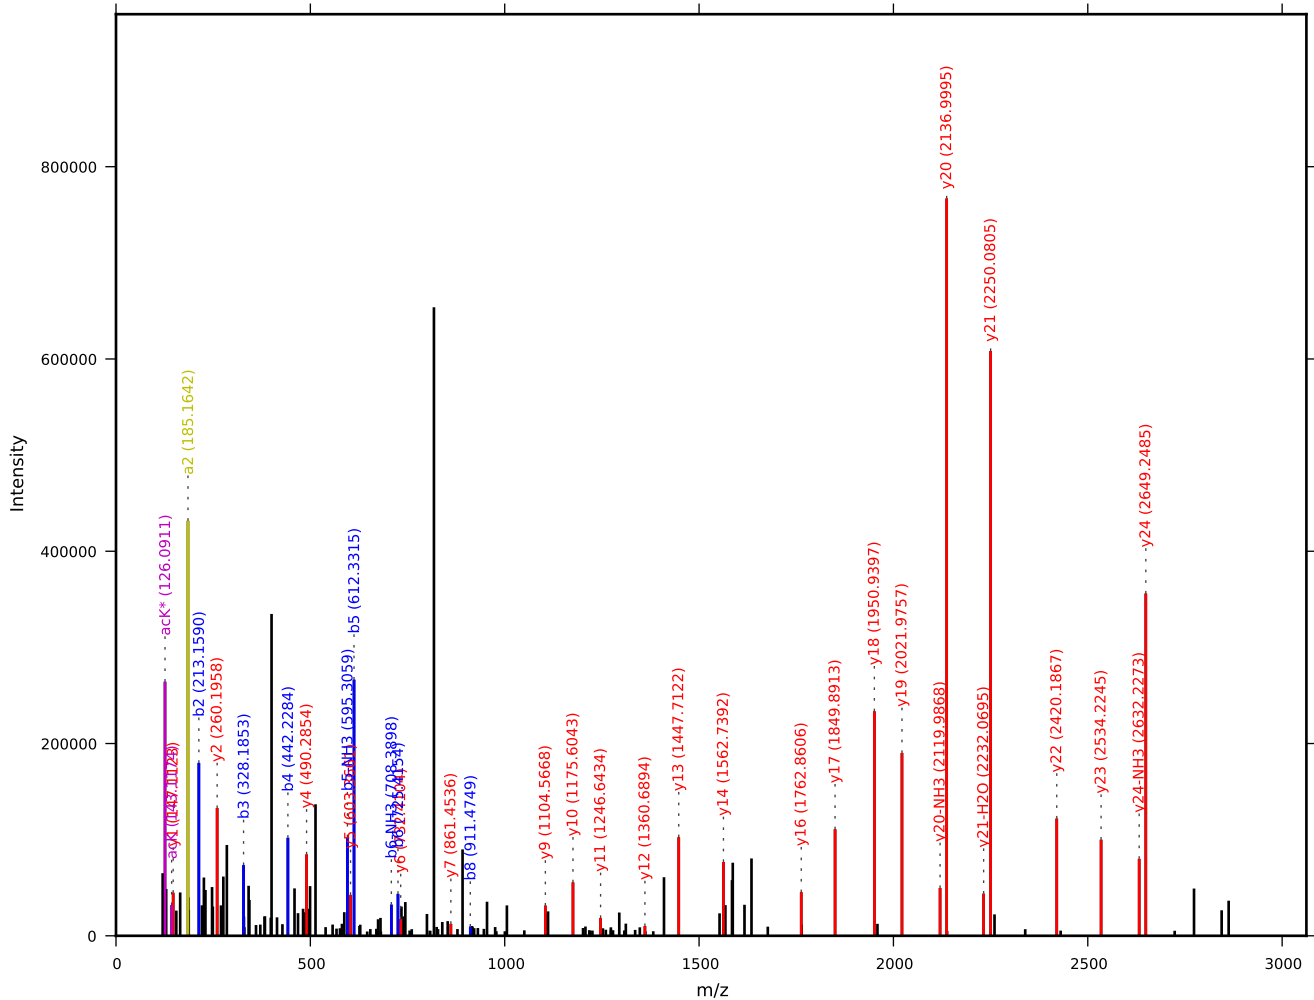

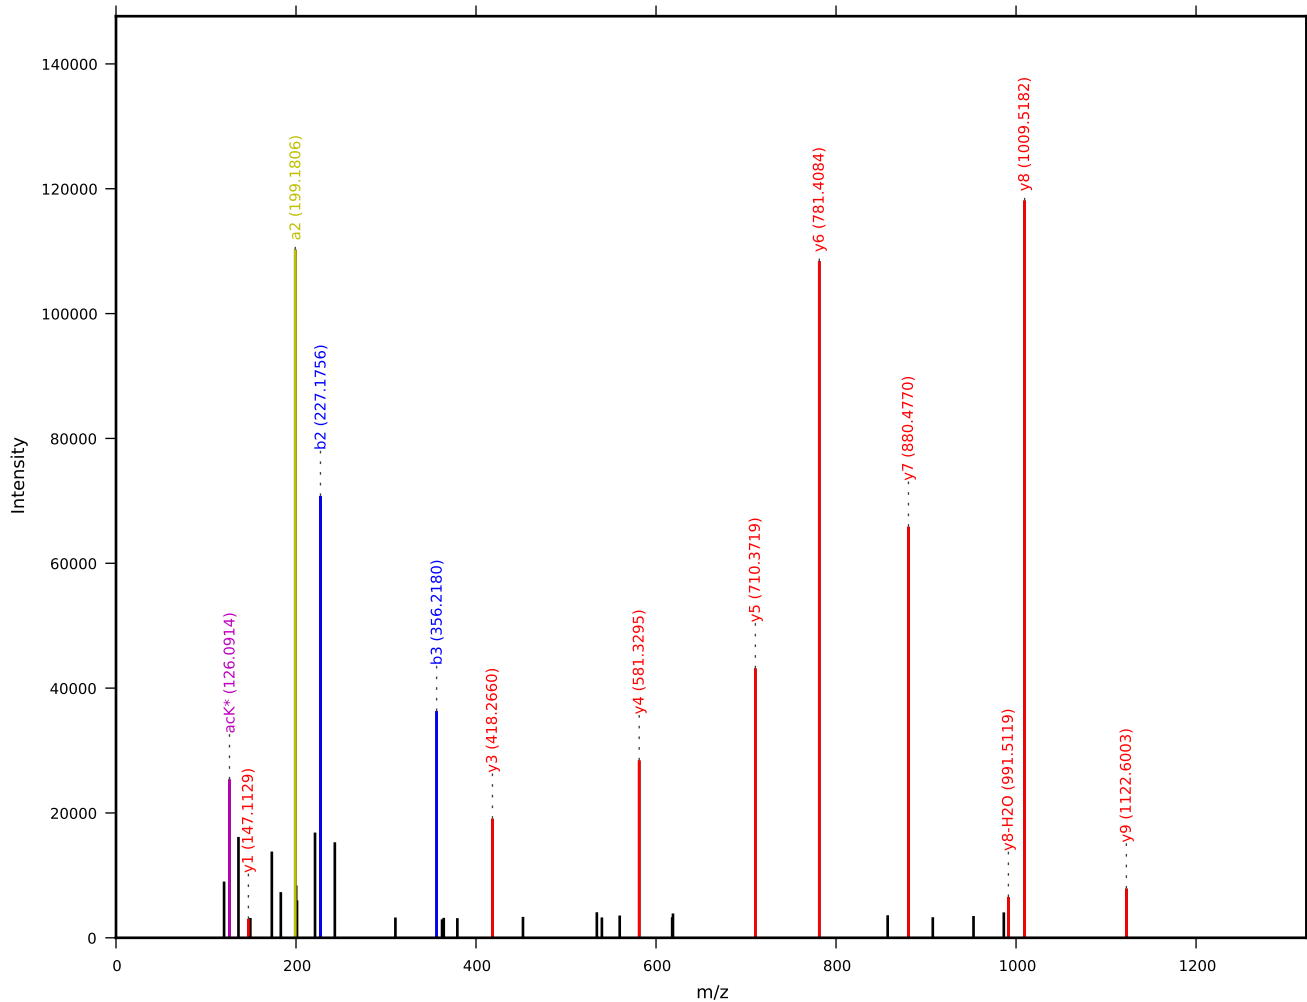

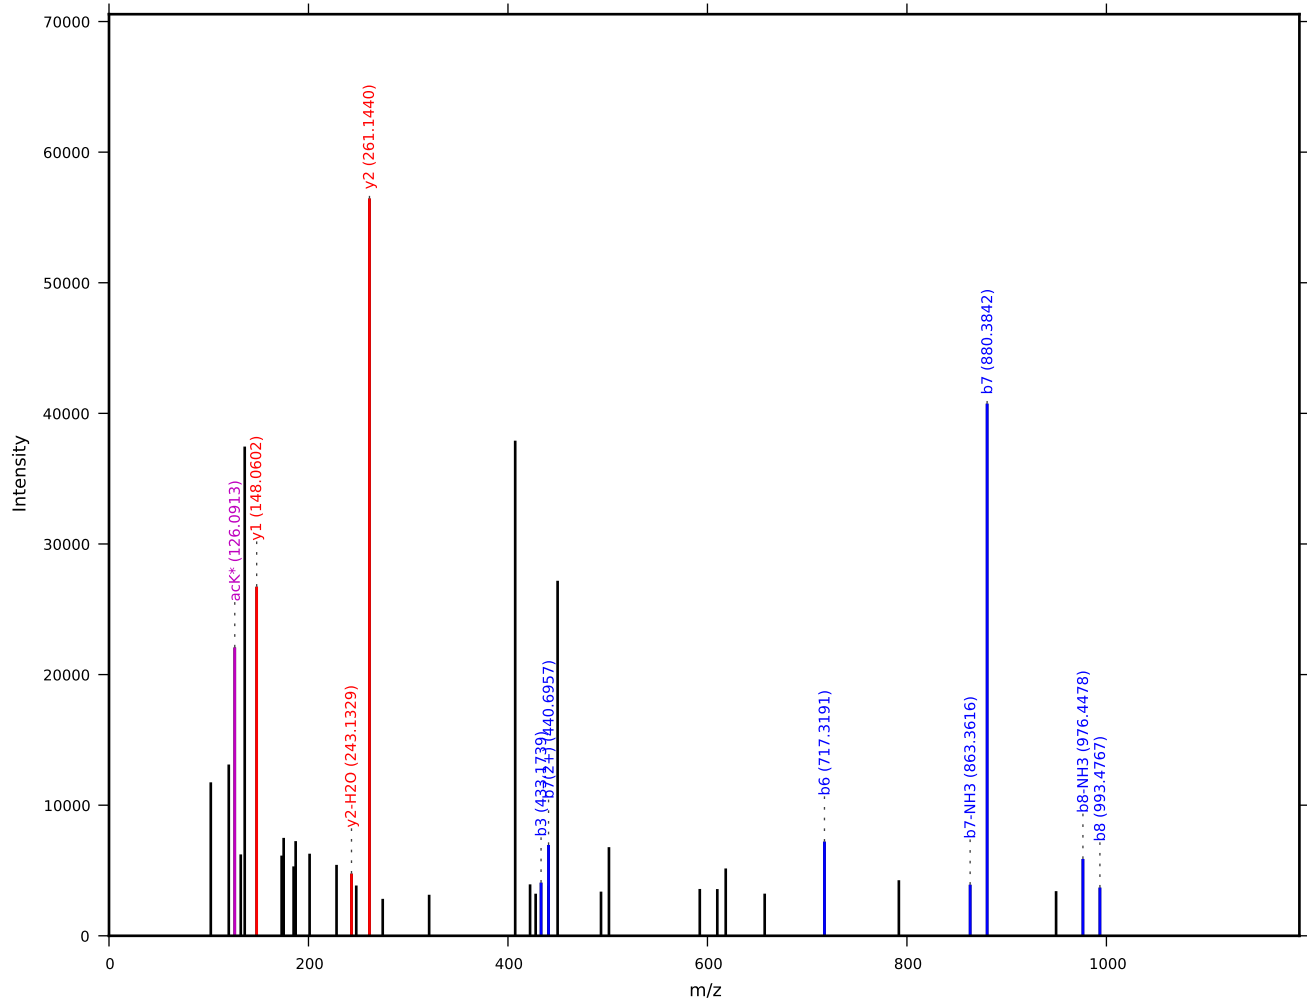

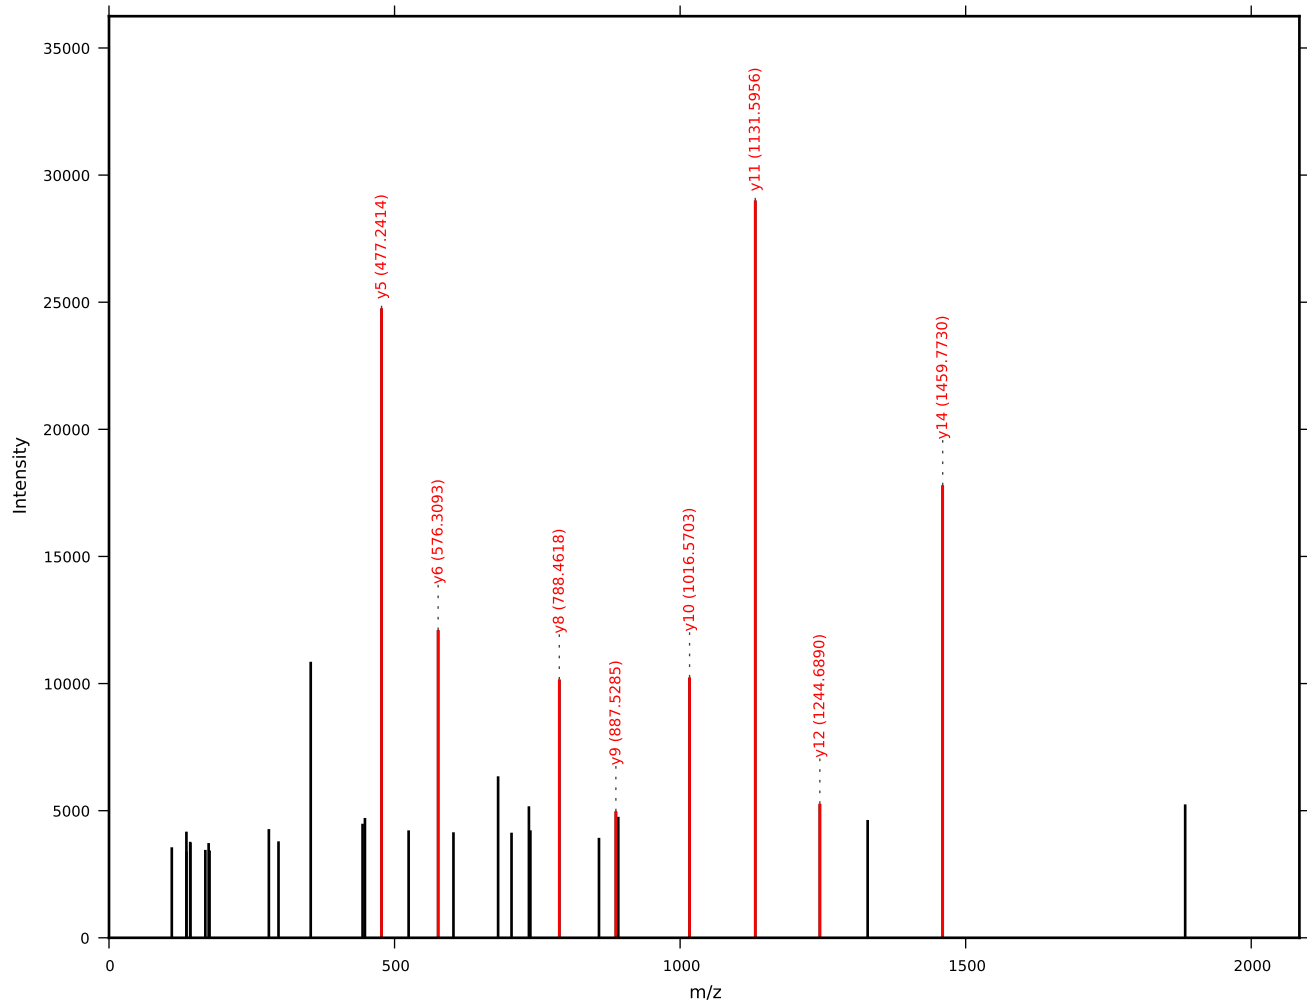

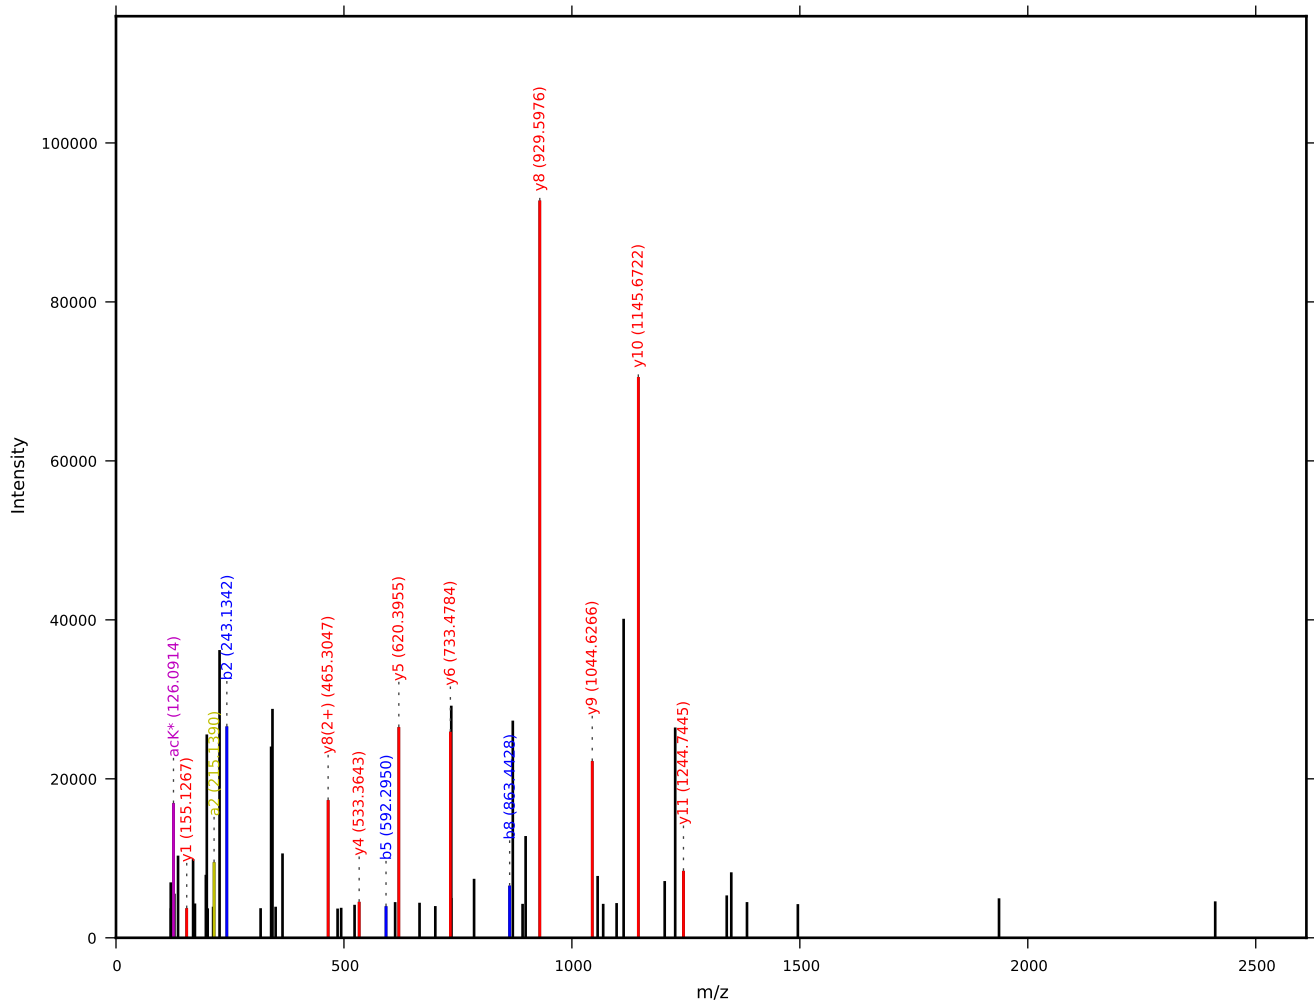

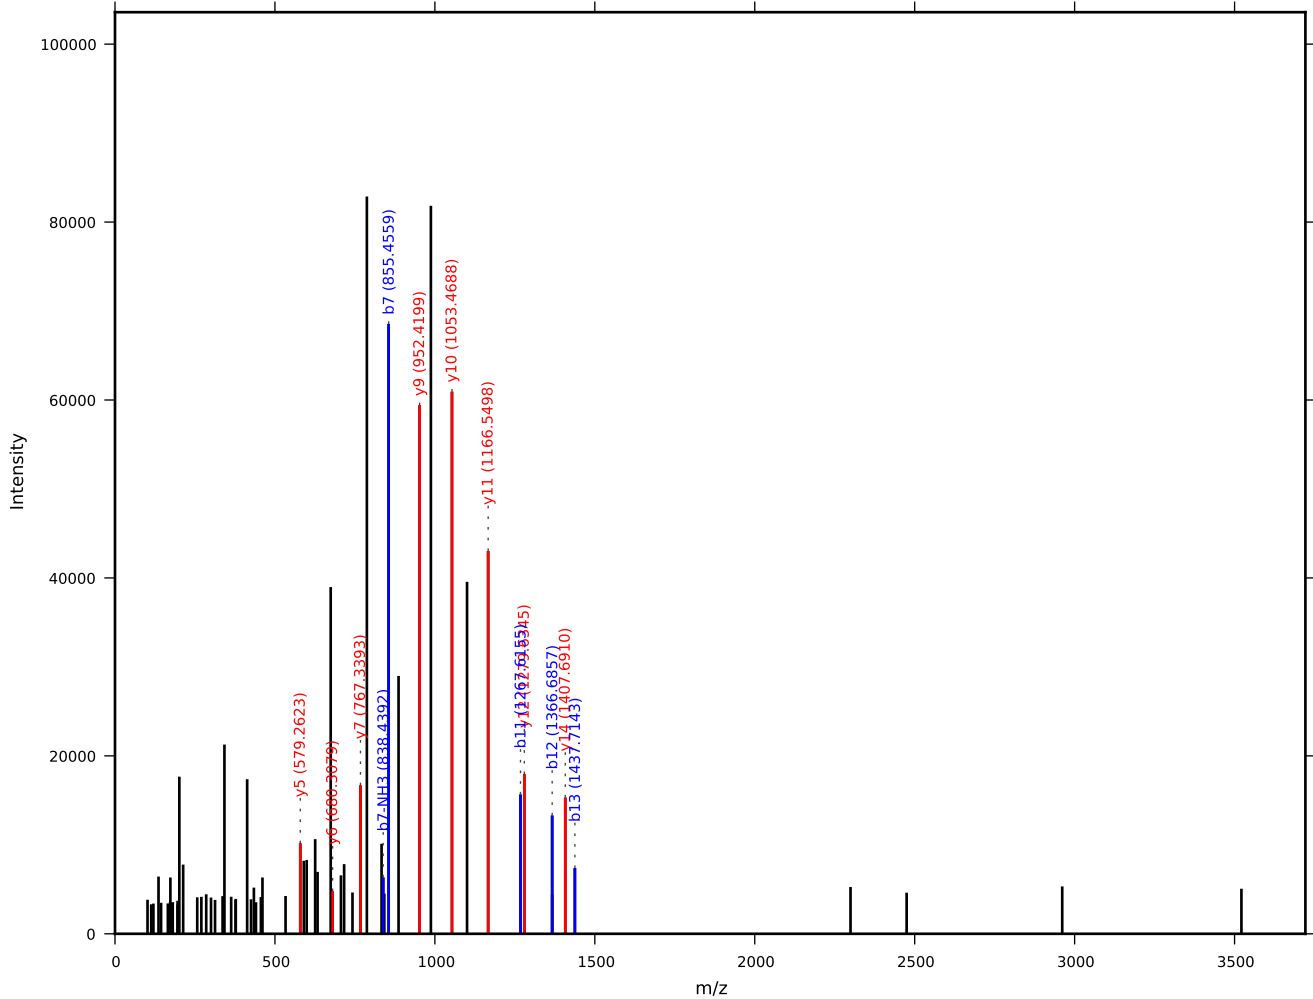

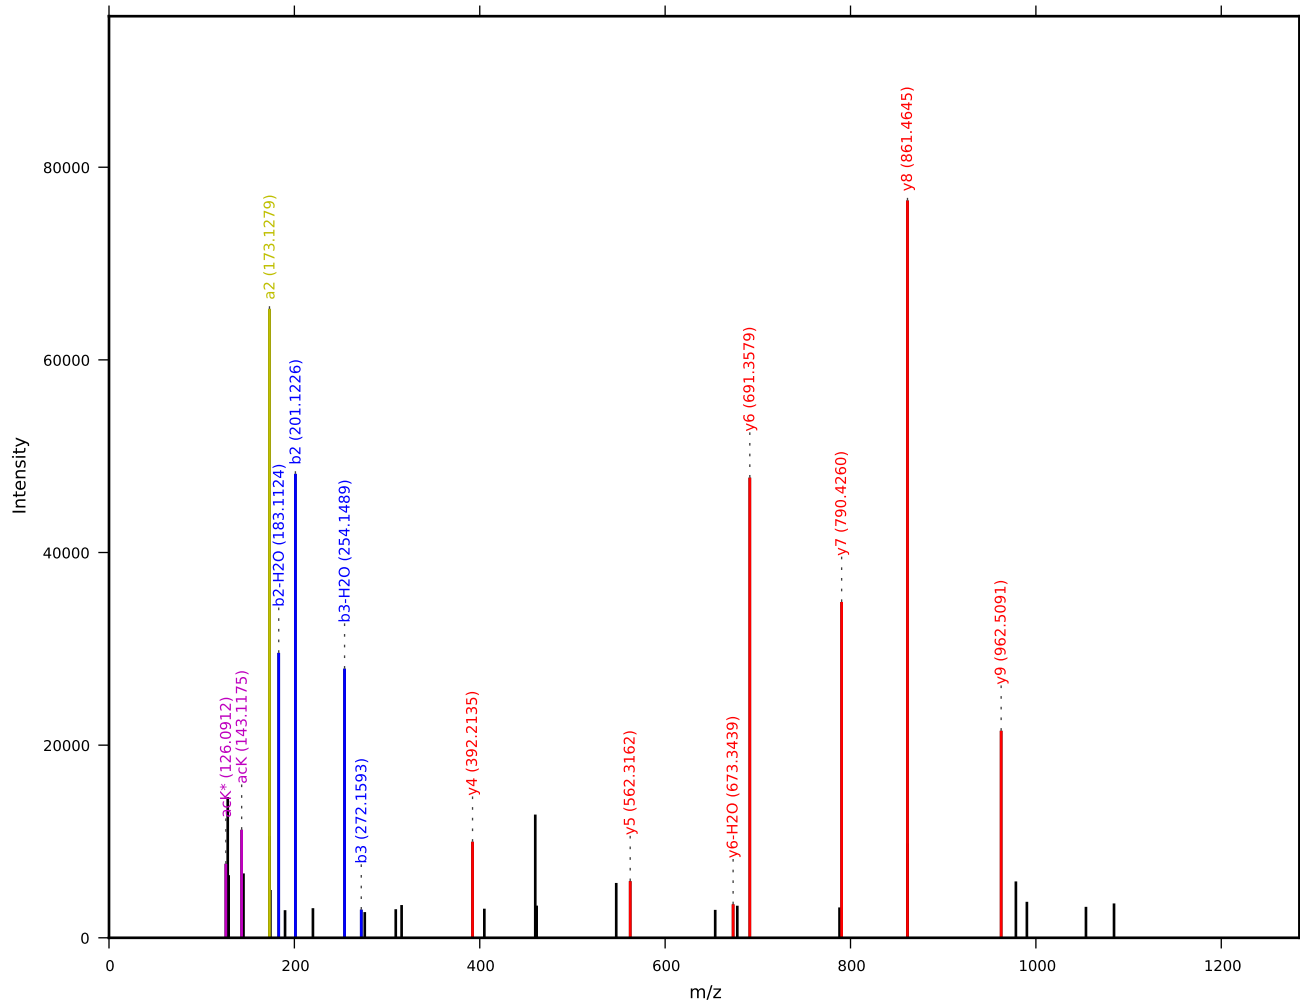



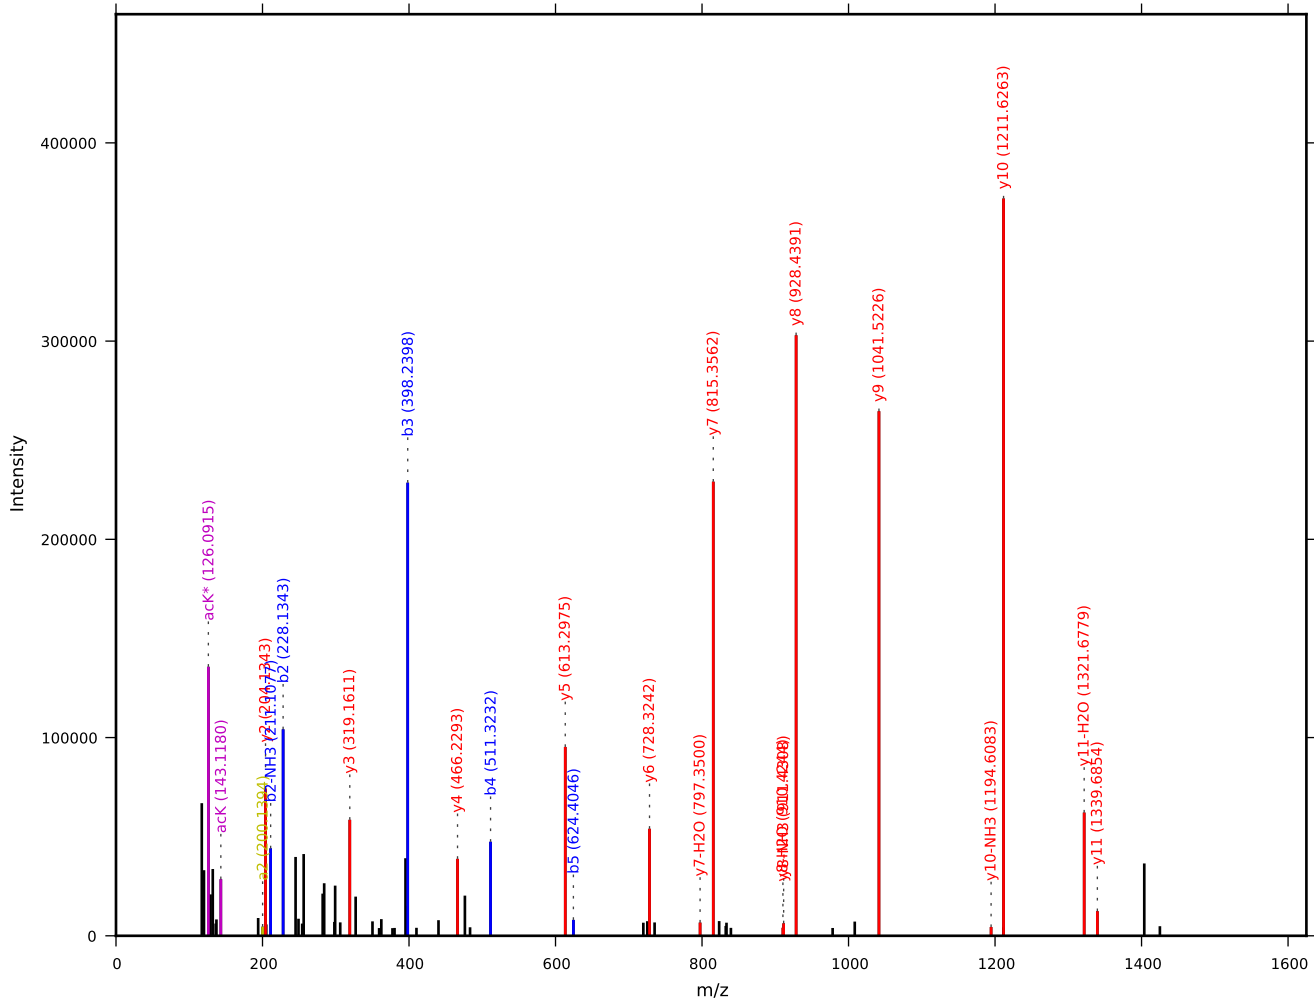

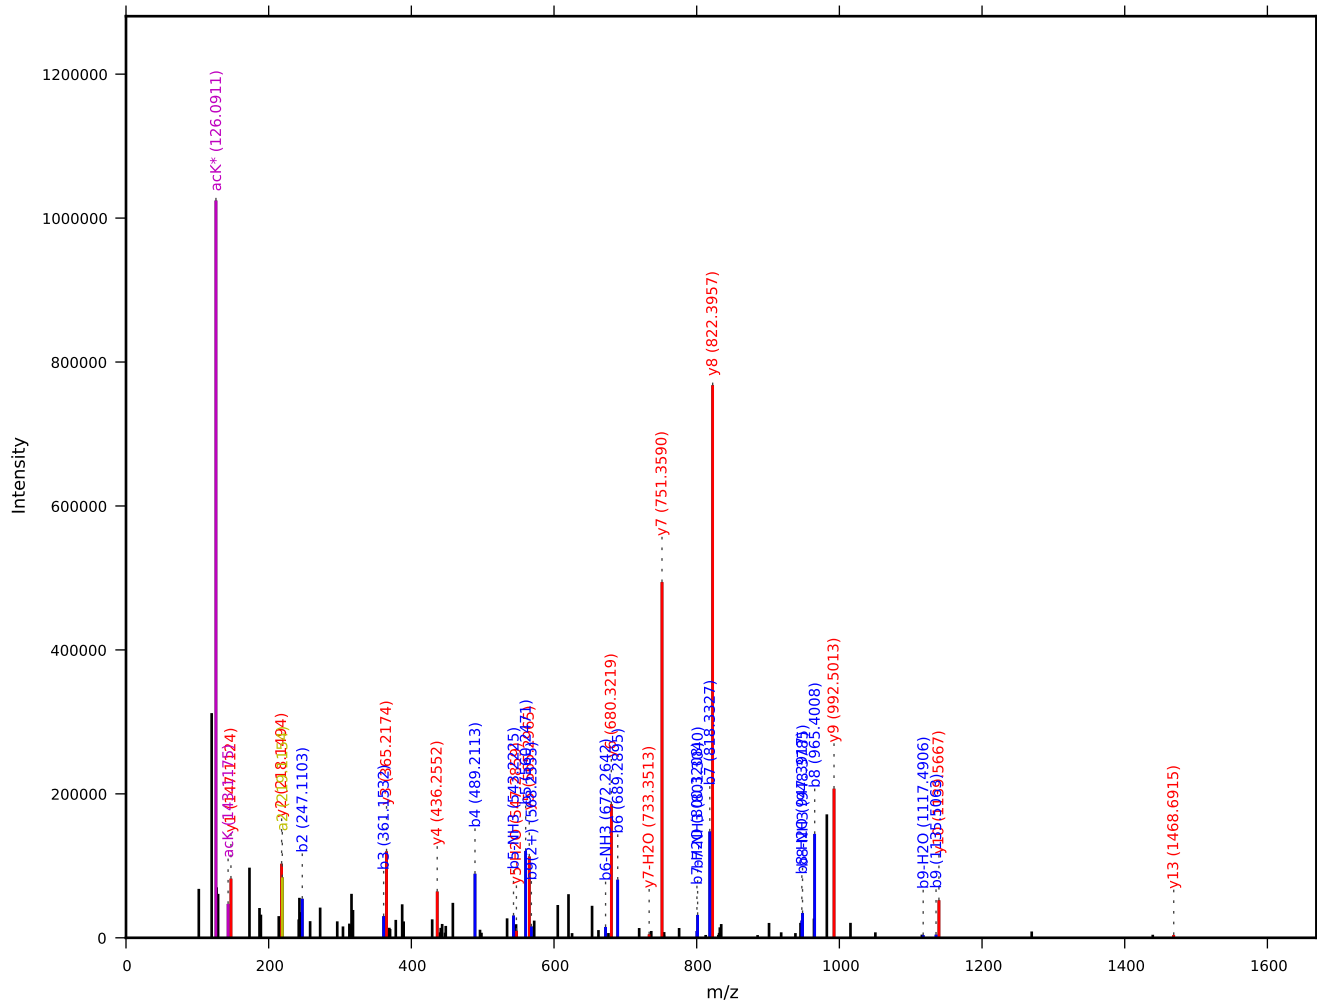

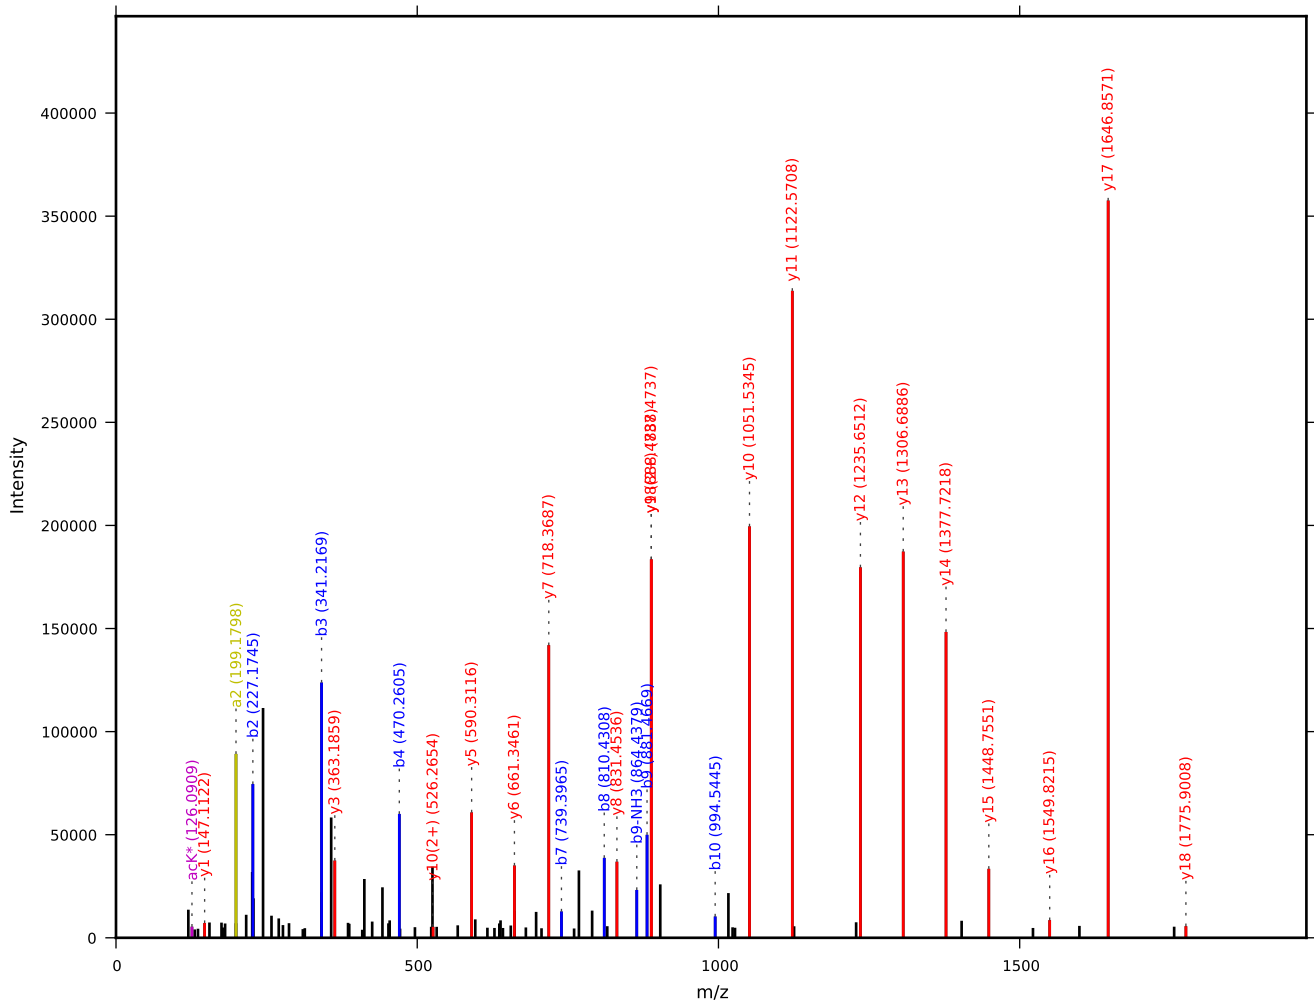

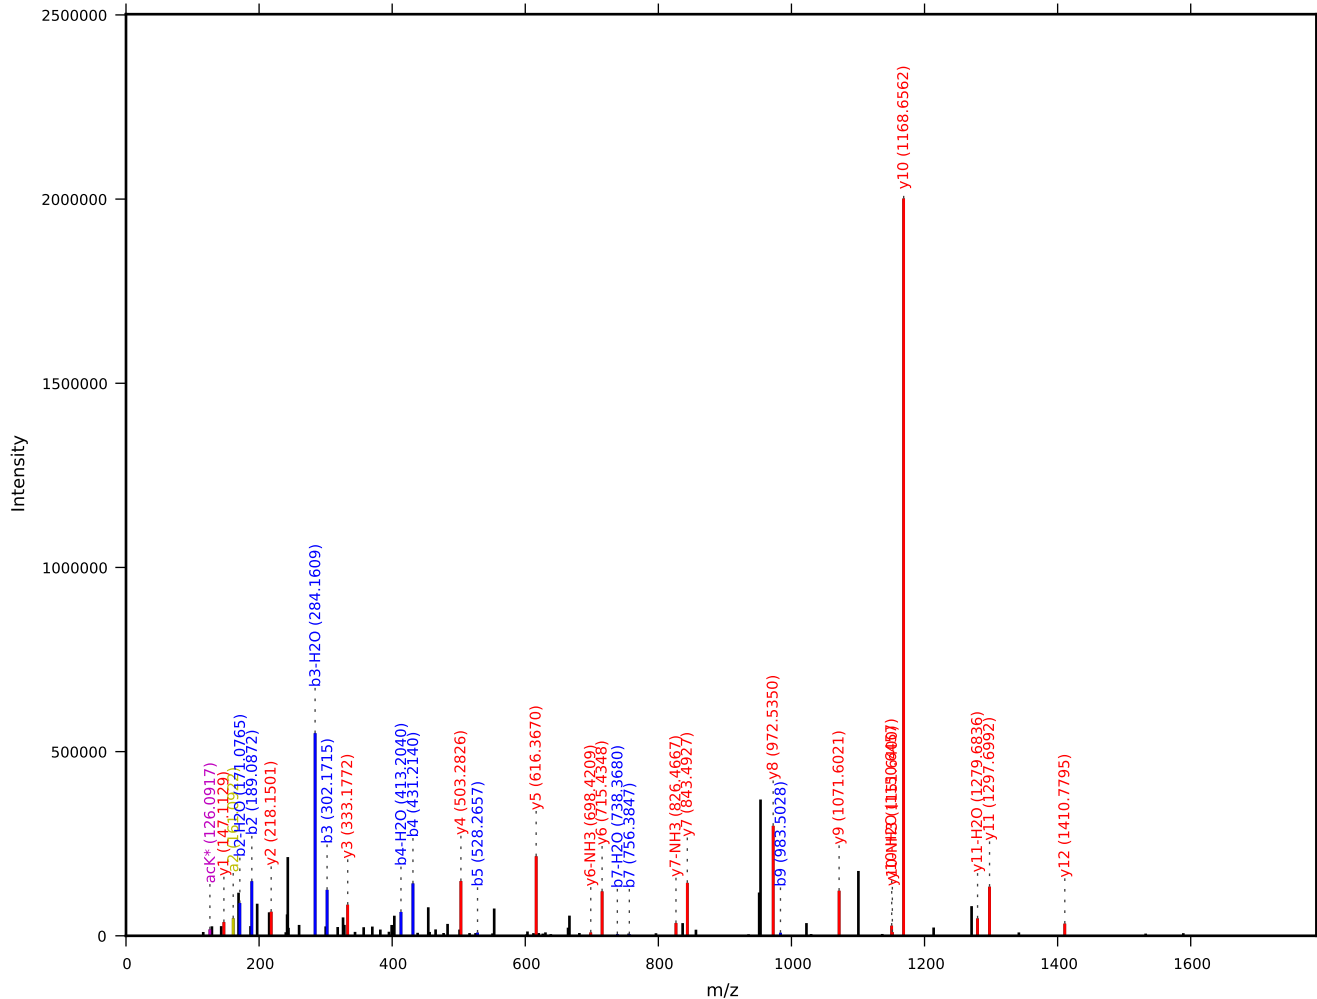

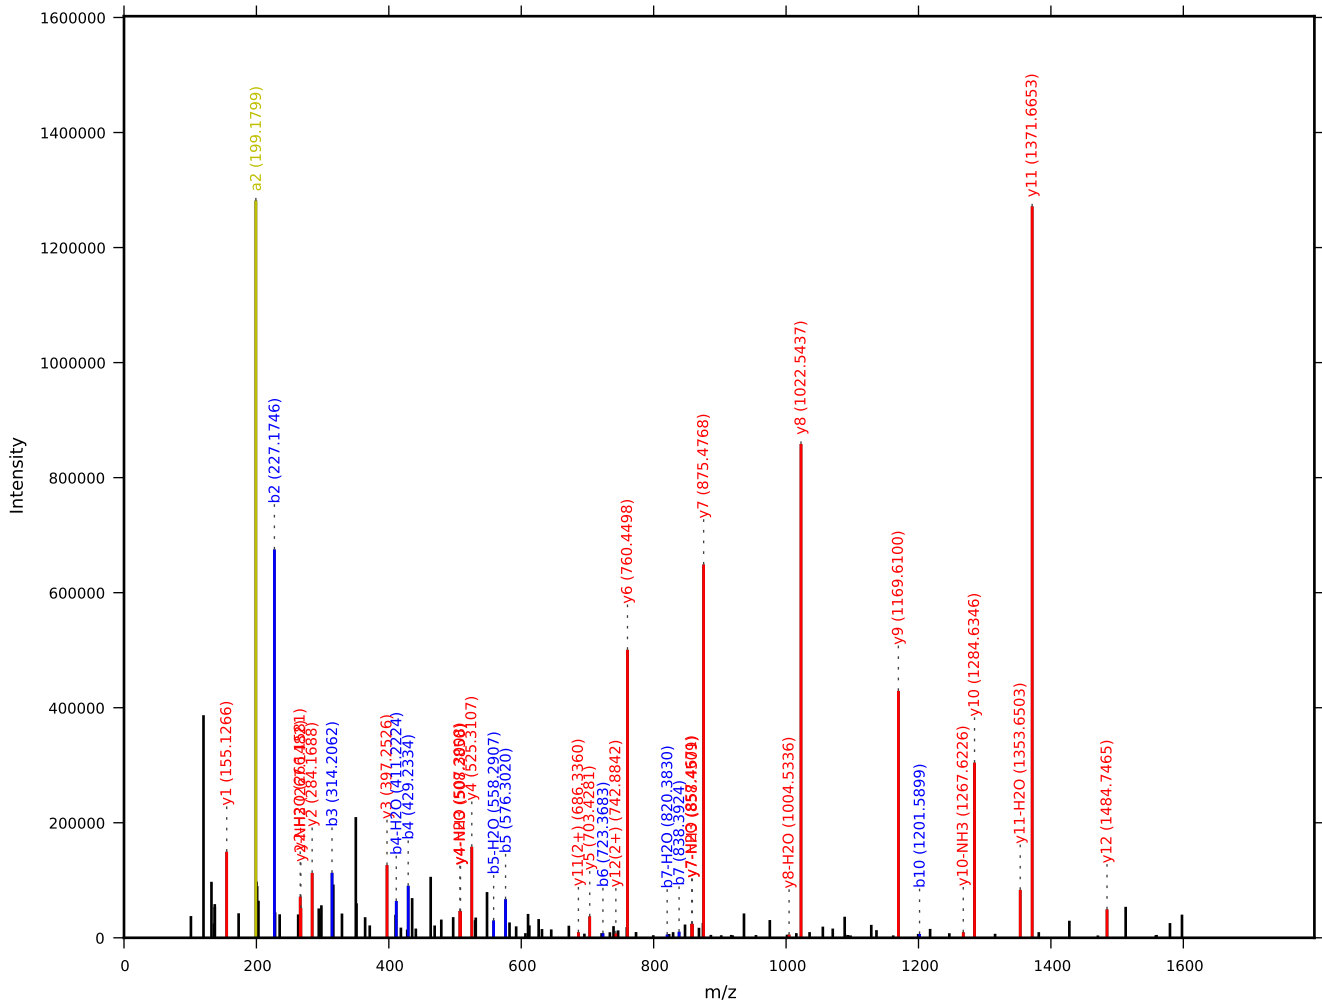

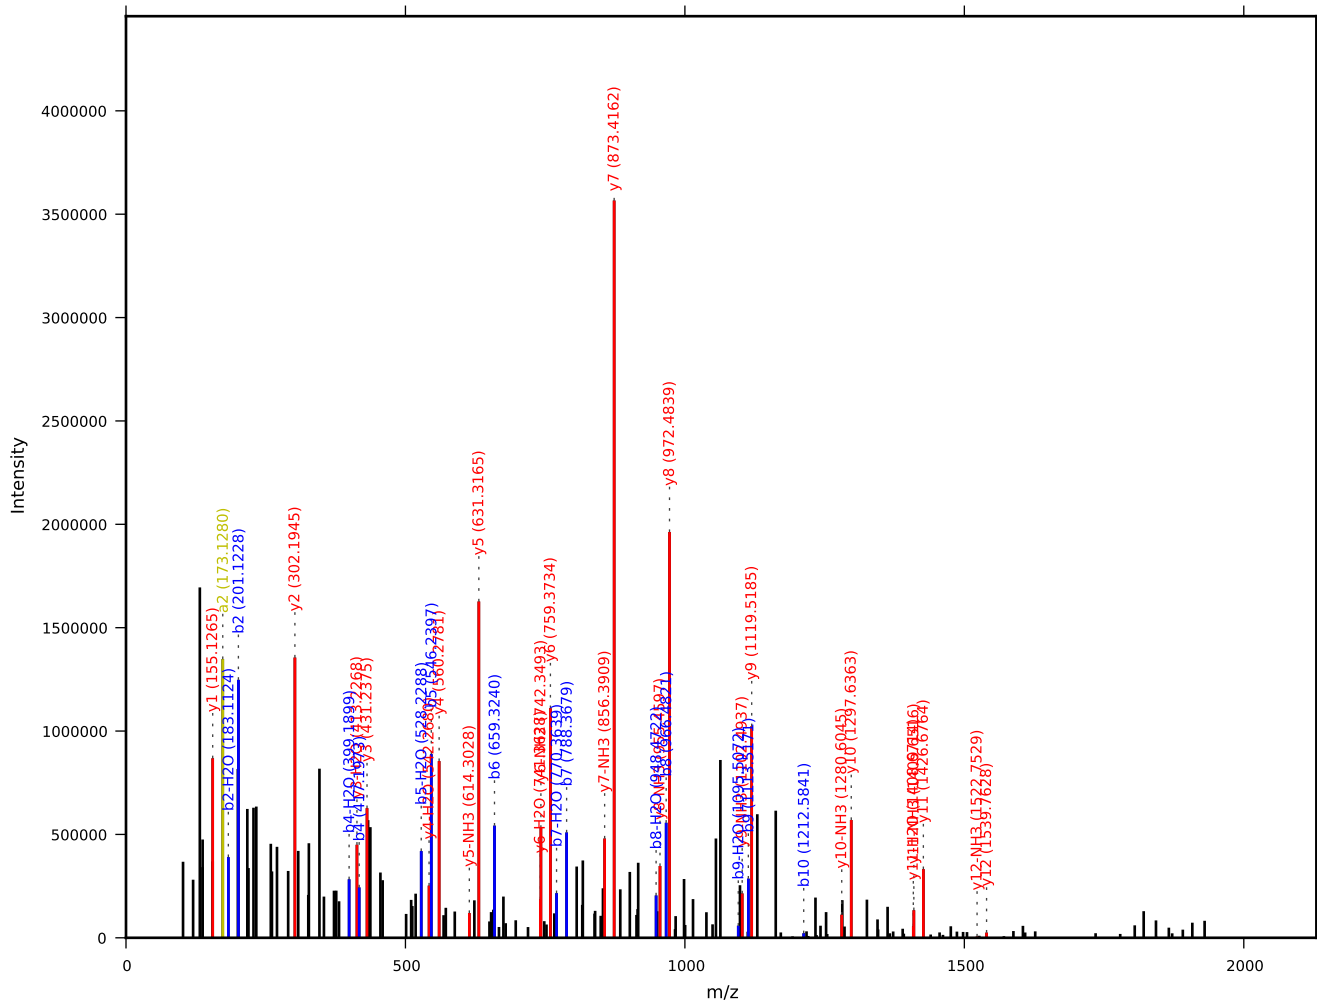

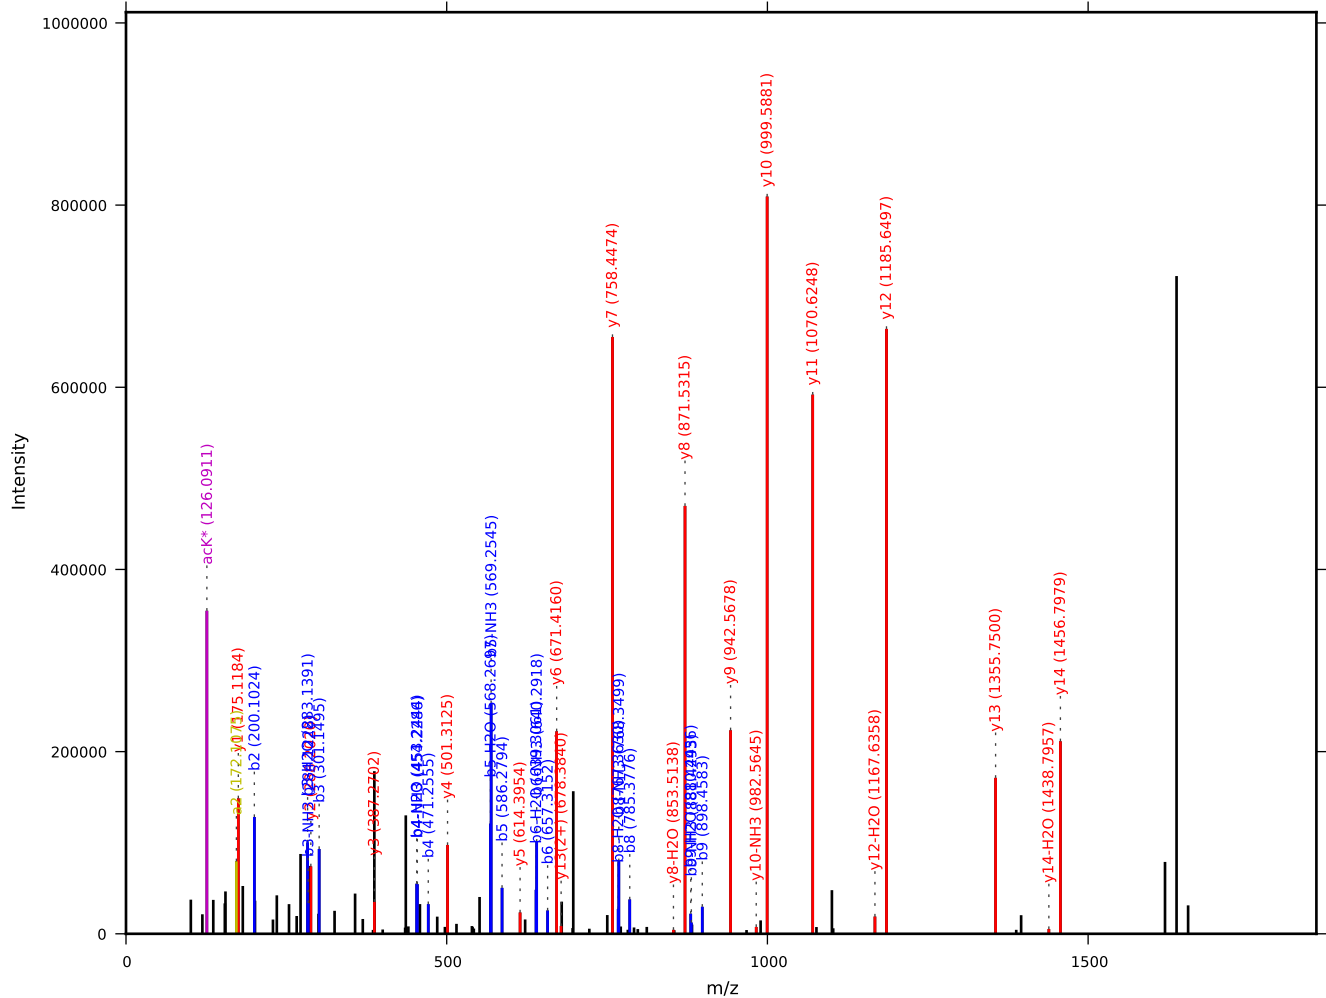

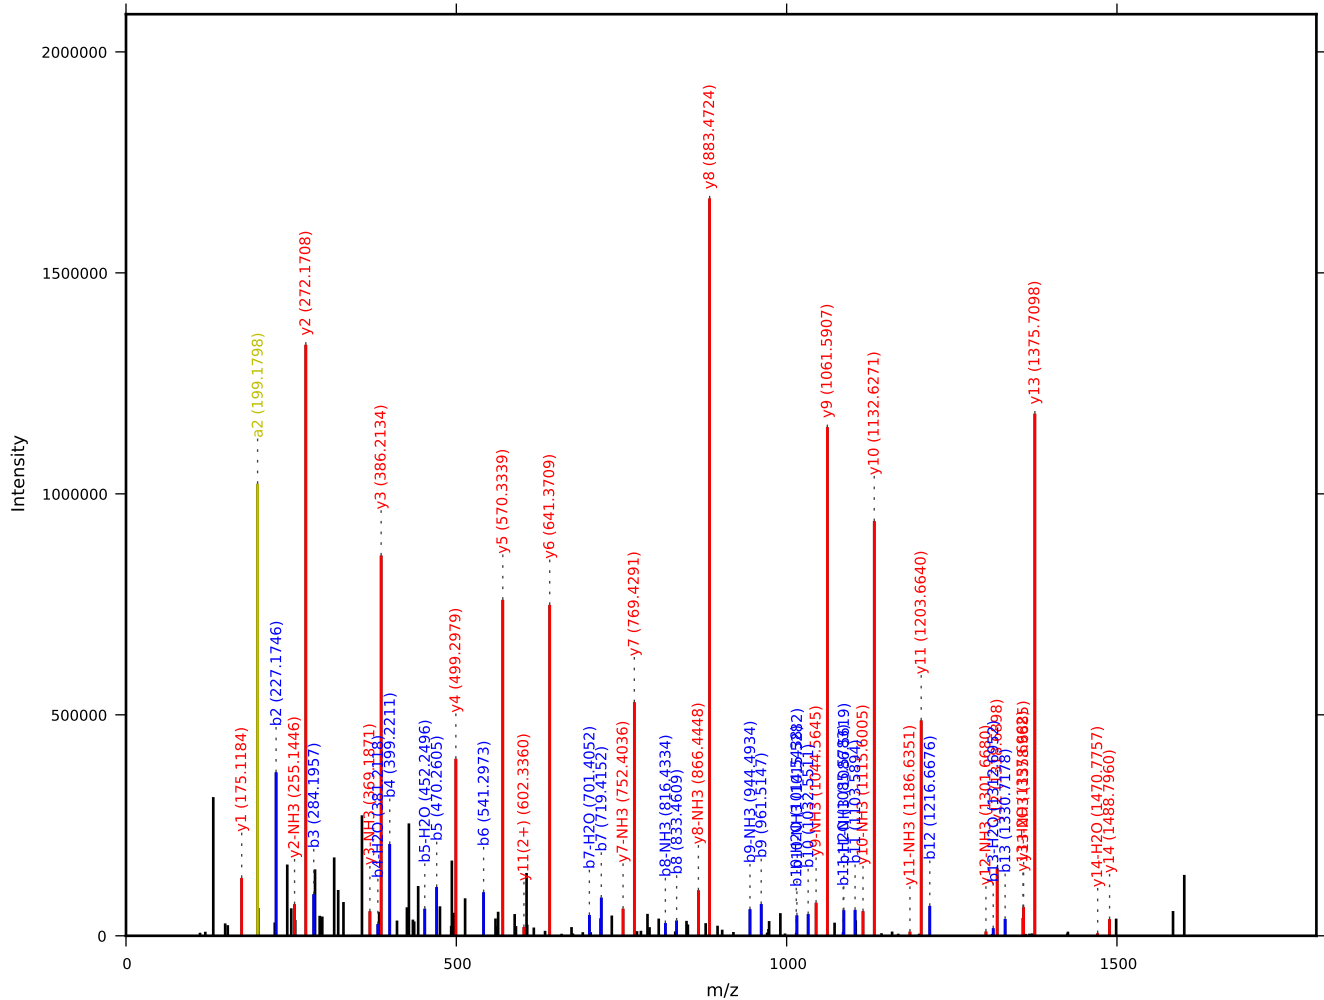



Mass: 1431.754 Charge: 3 m/z: 478.25862  
Modified Peptide: \_NLSEK(ac)RLEEEK\_ Score: 56.359 PEP: 0.0023743

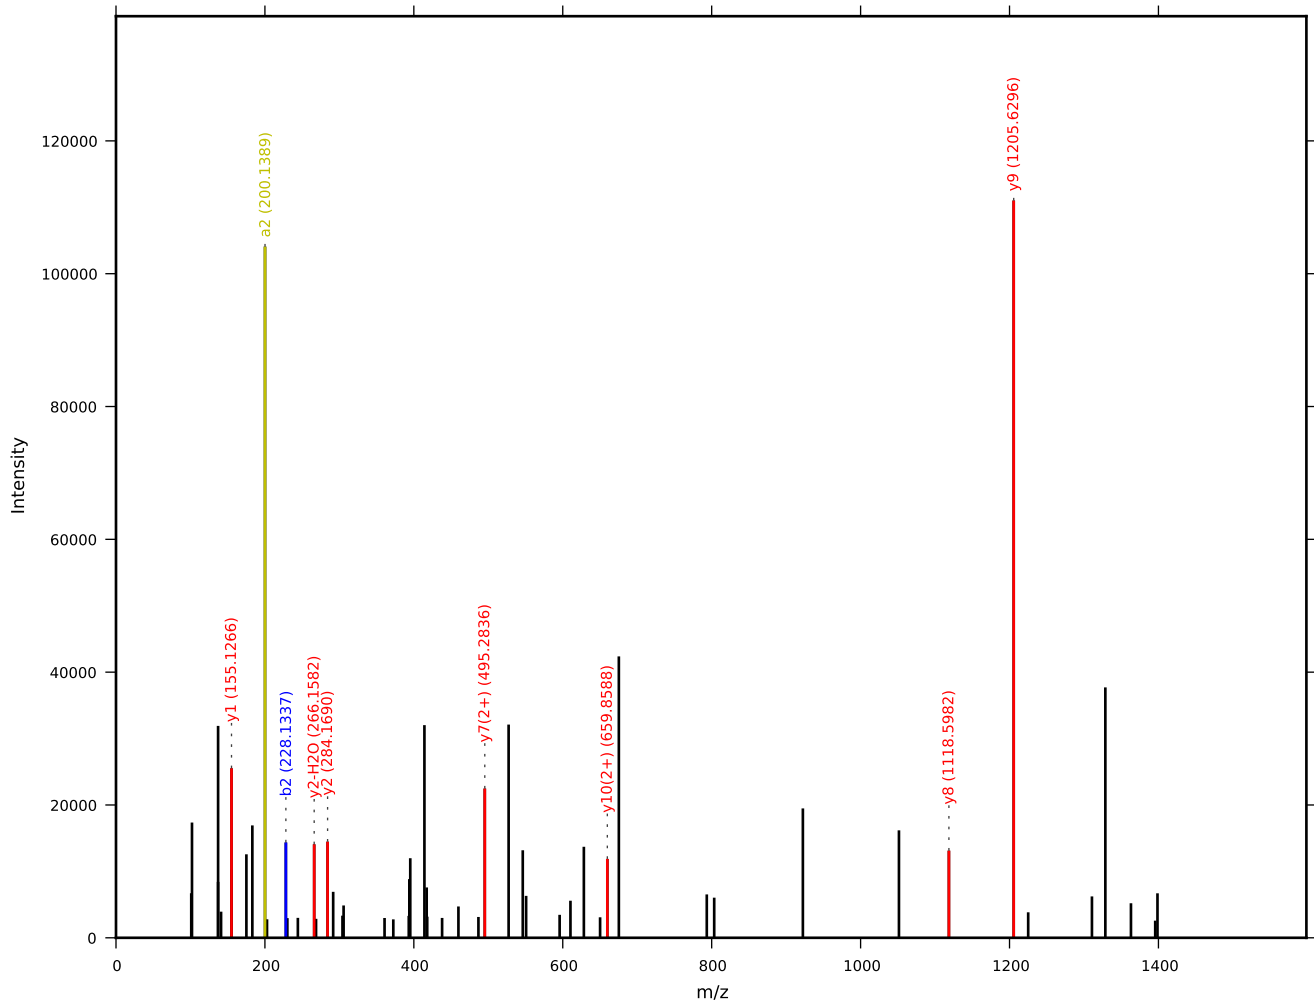

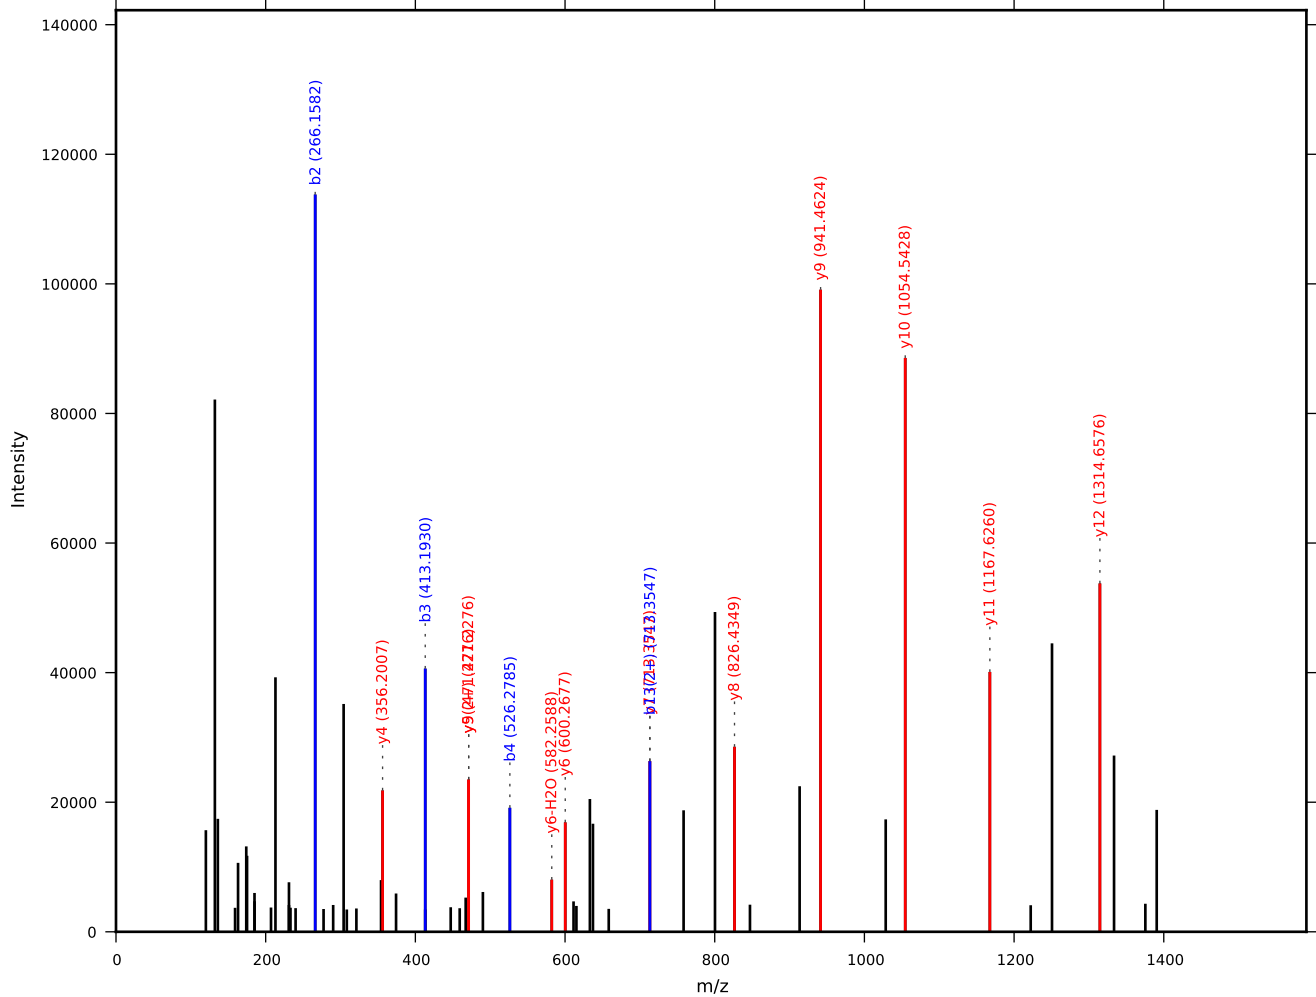

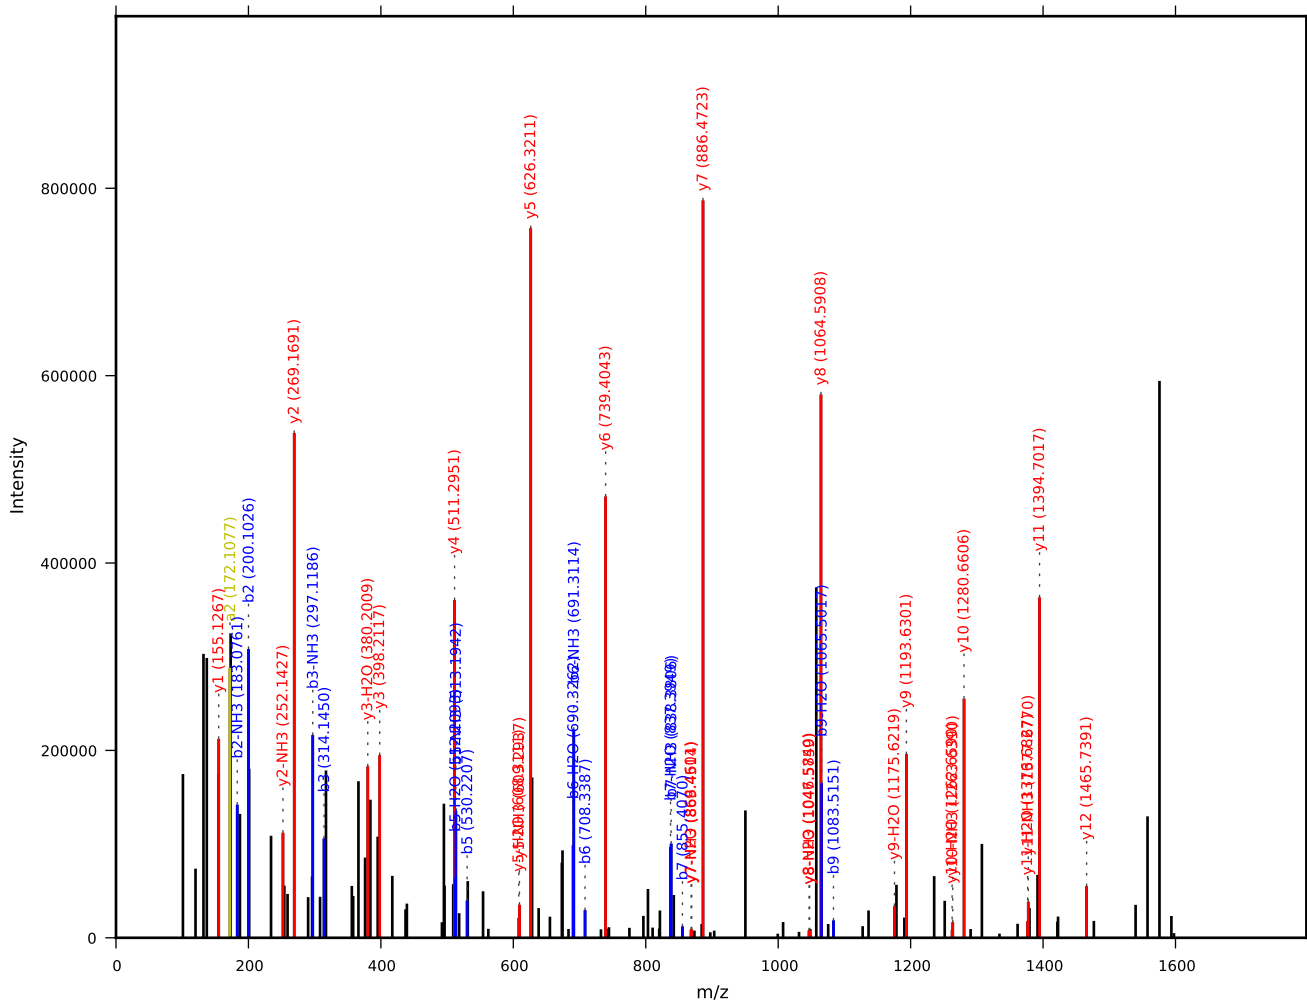

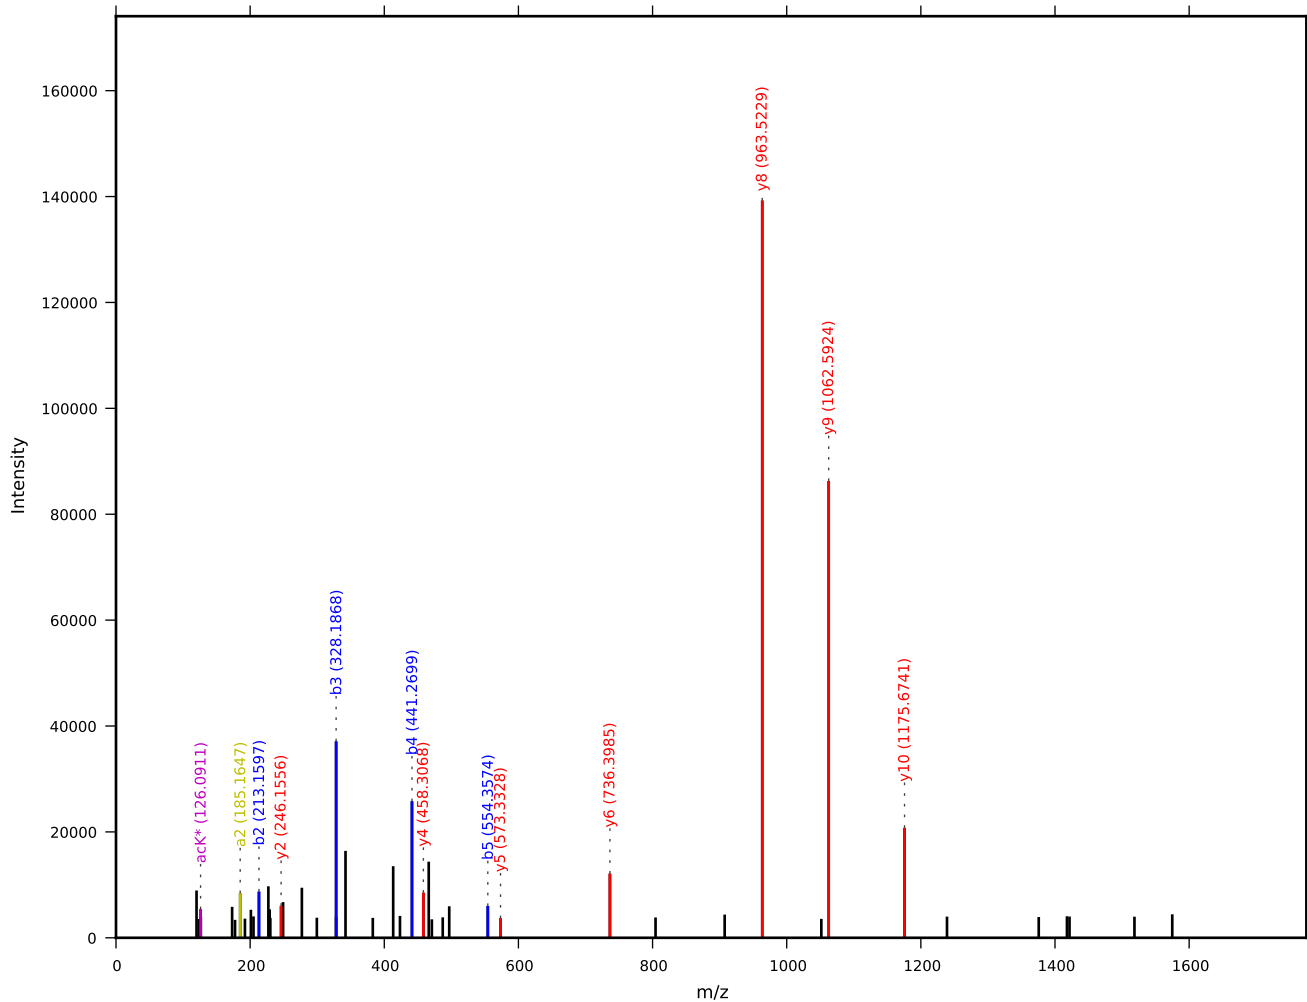

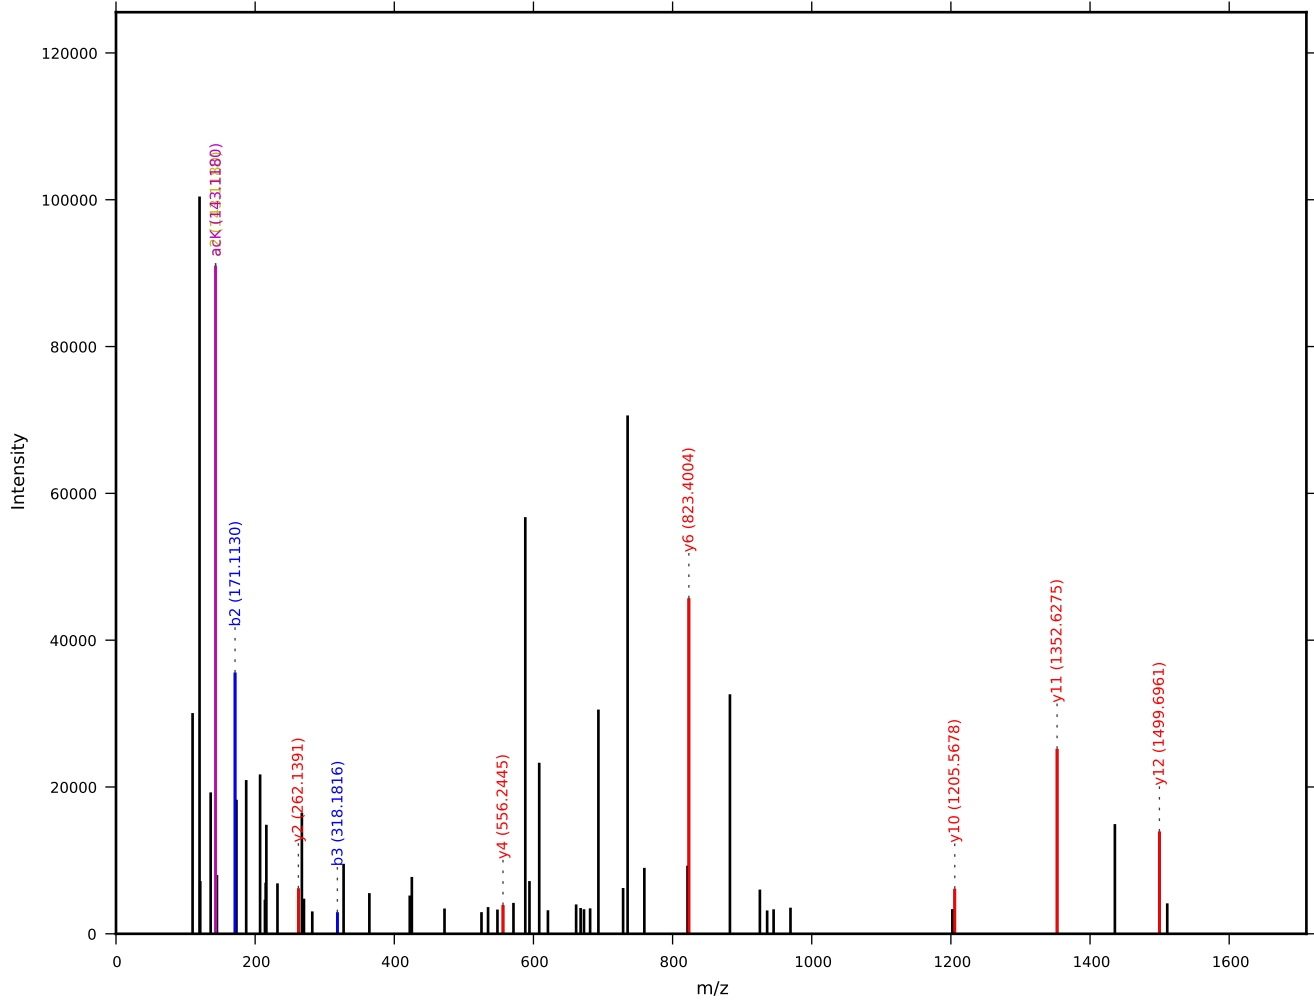

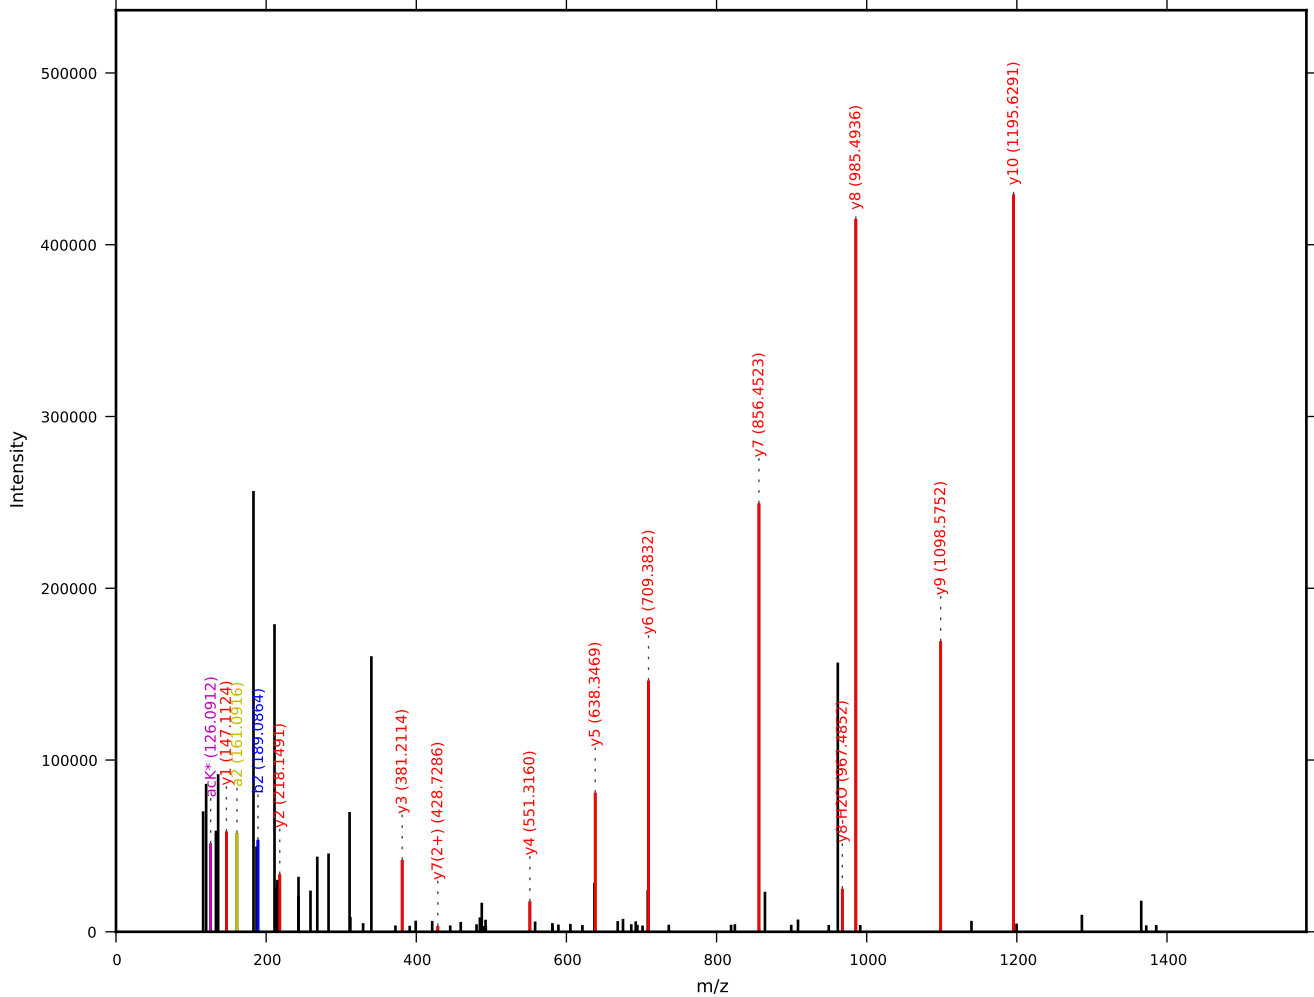

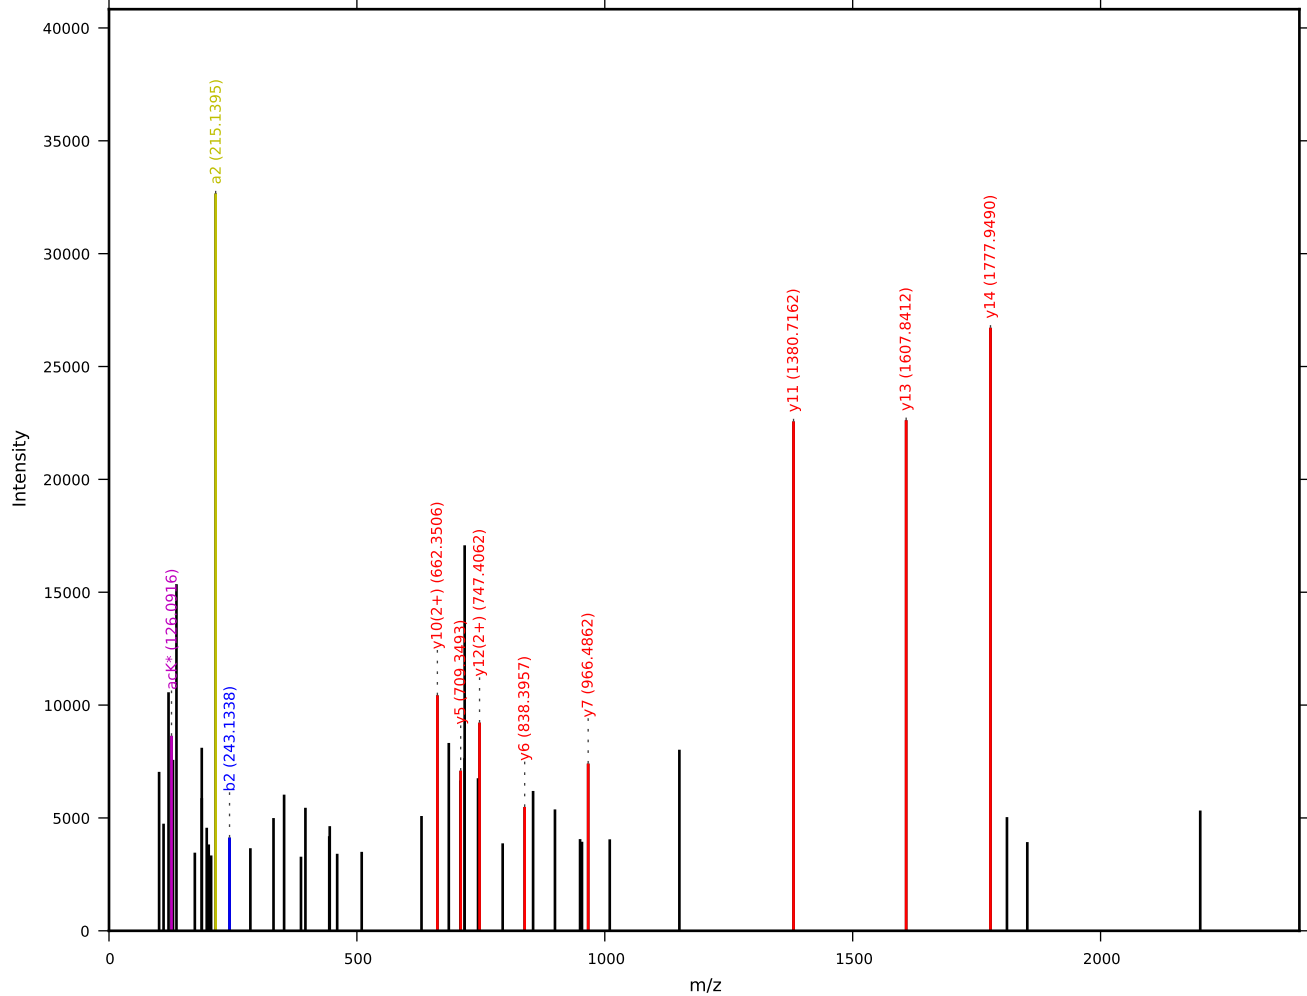

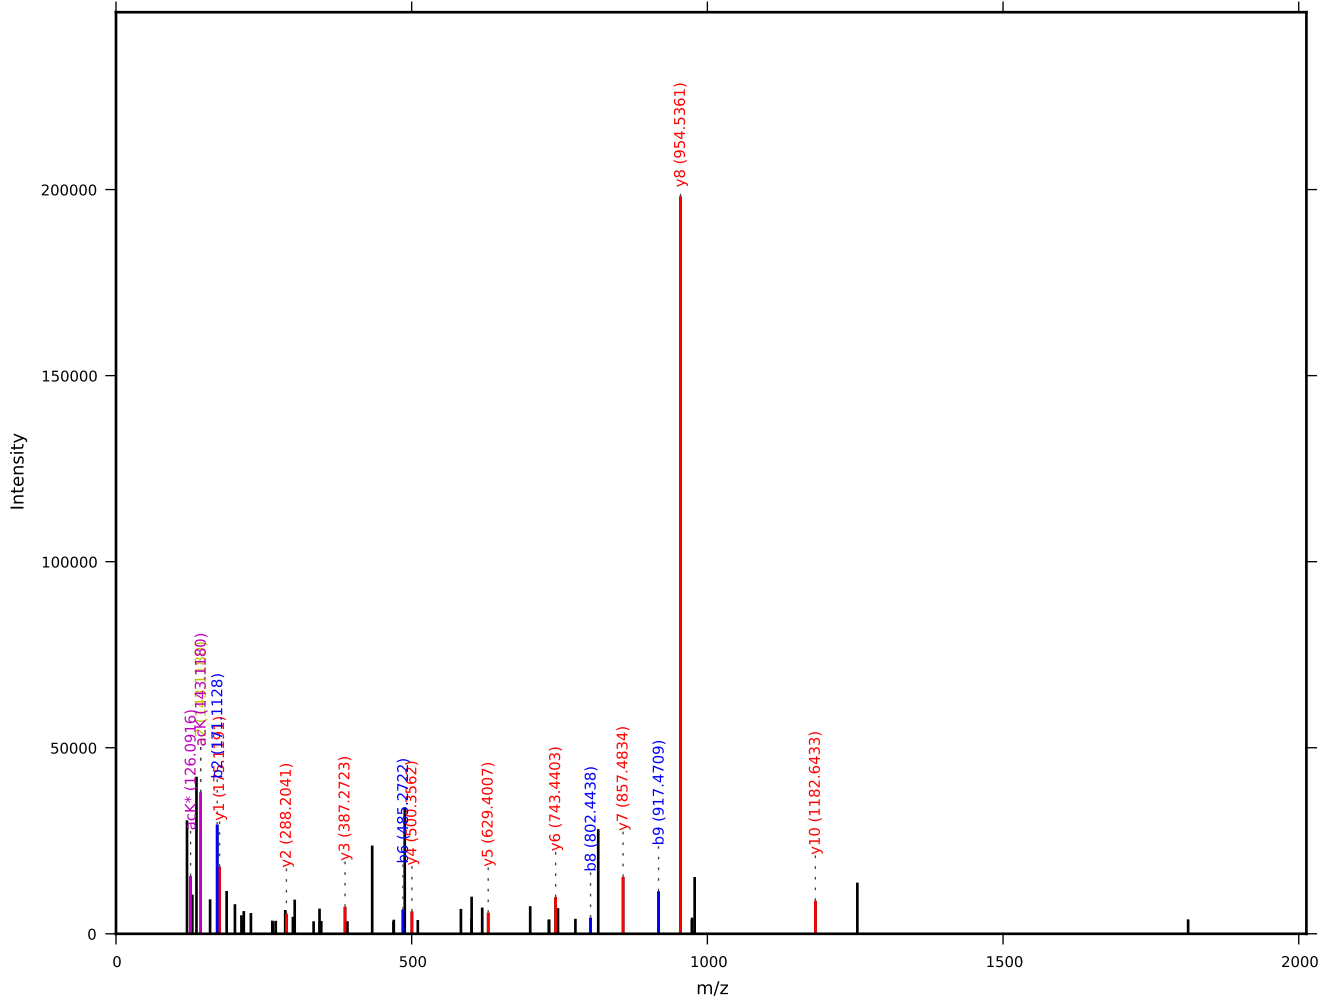



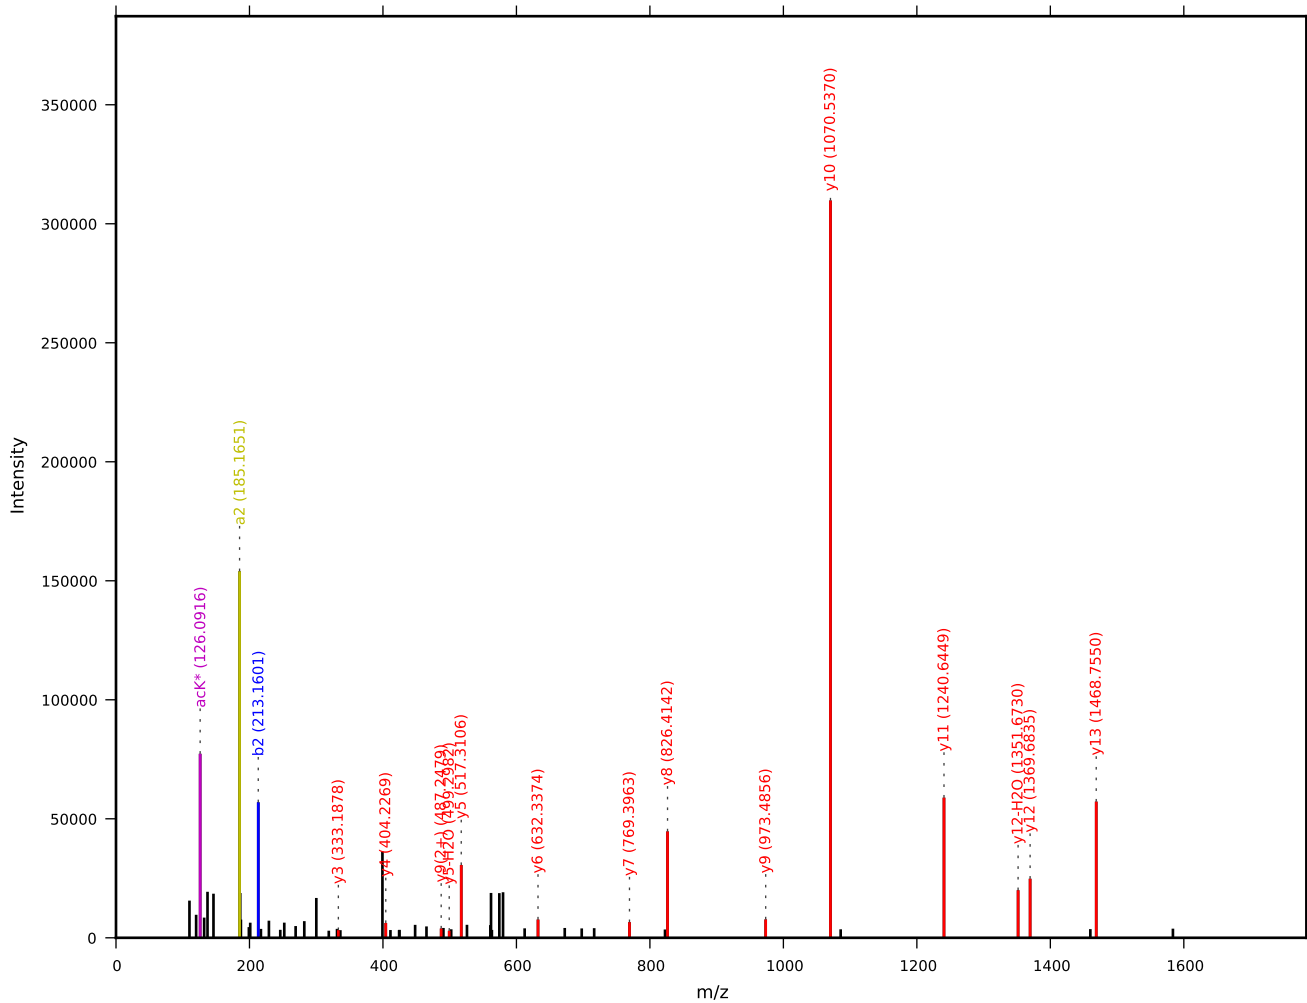

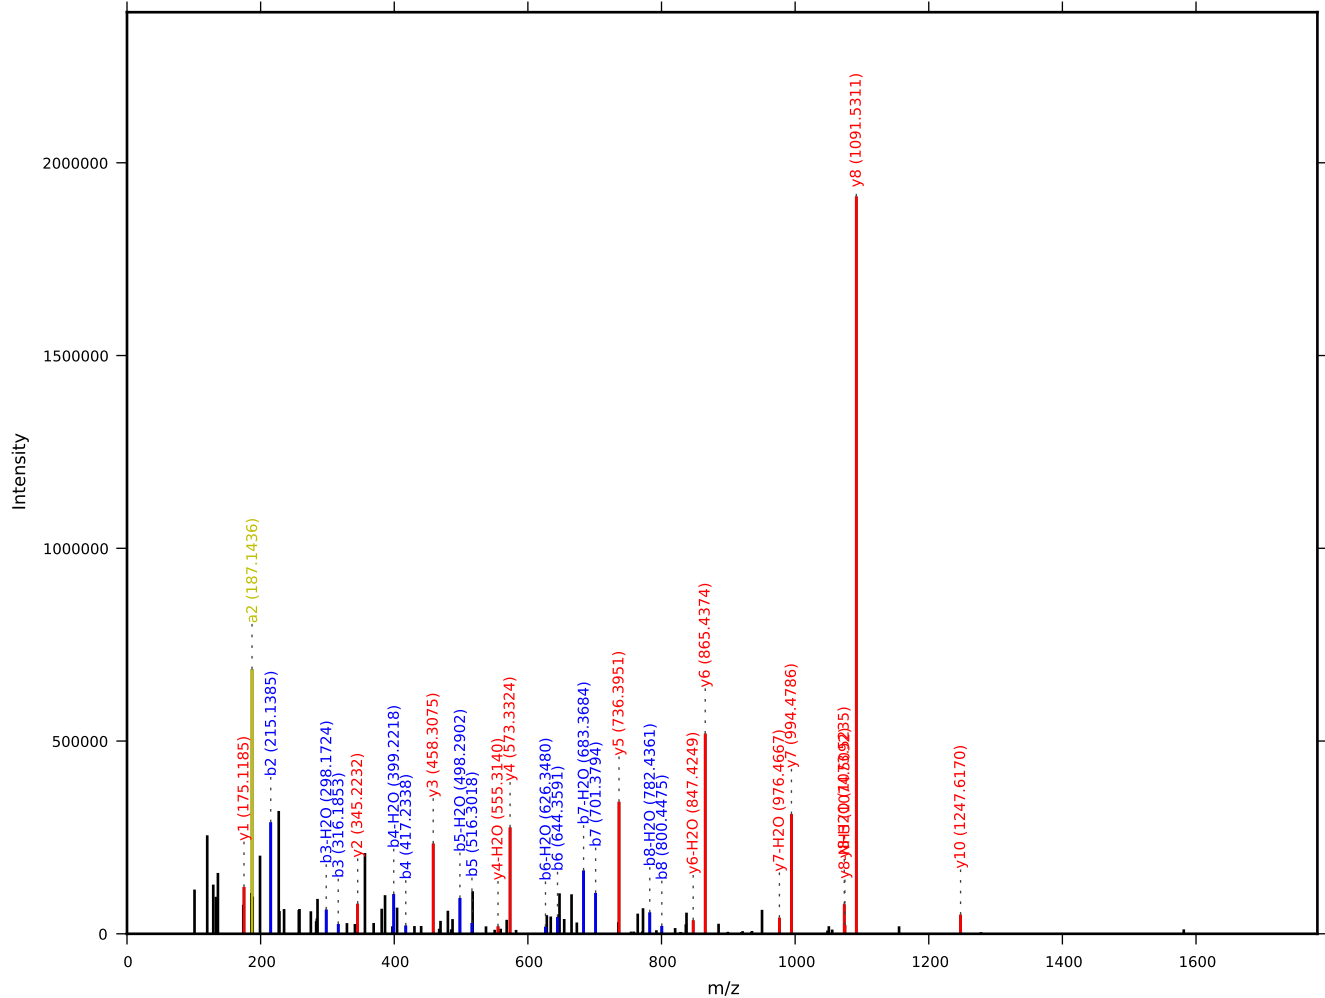

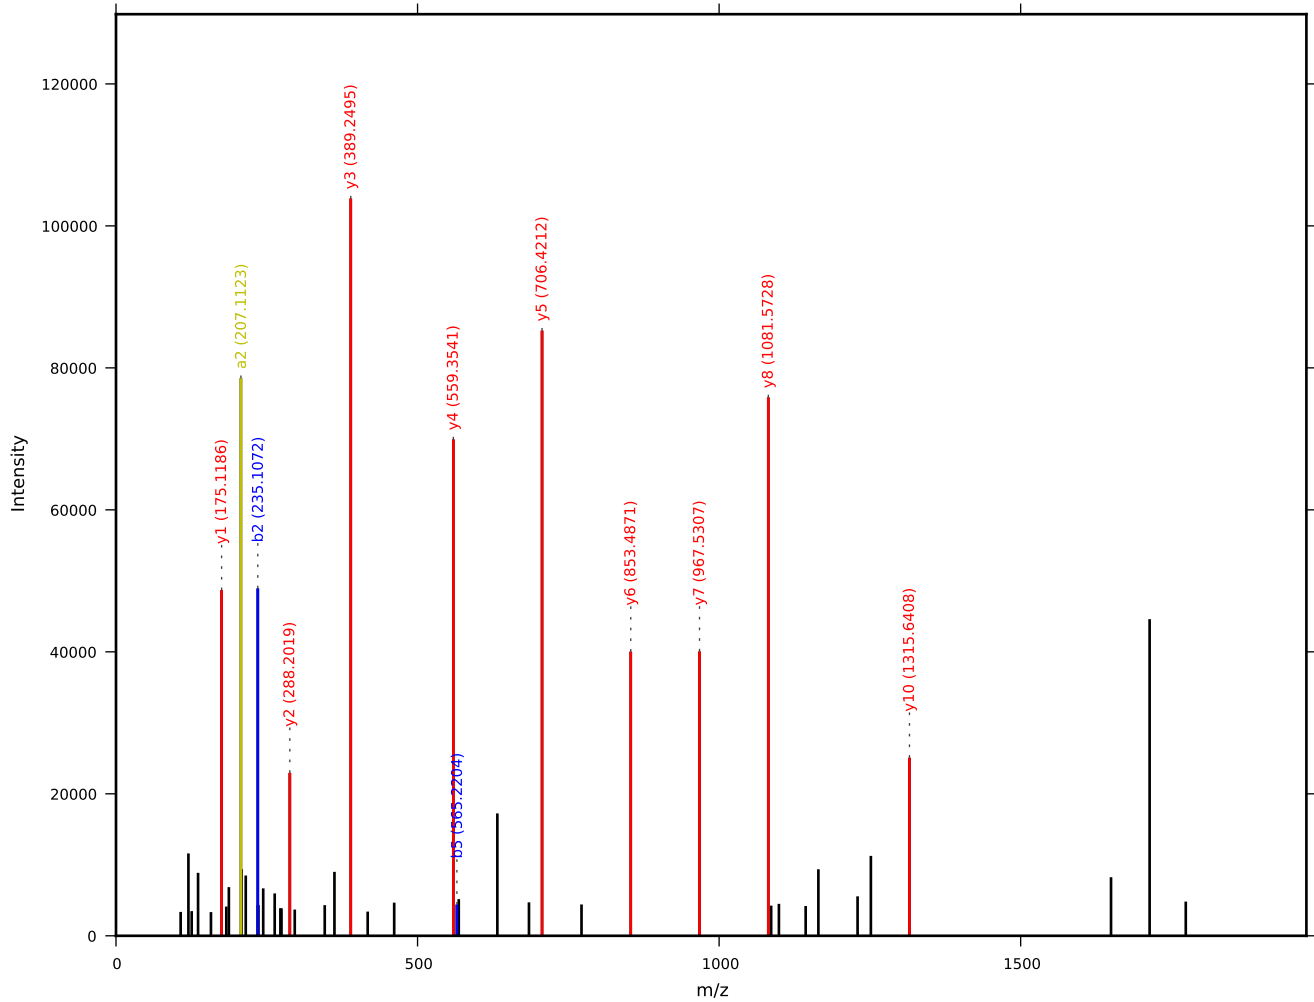

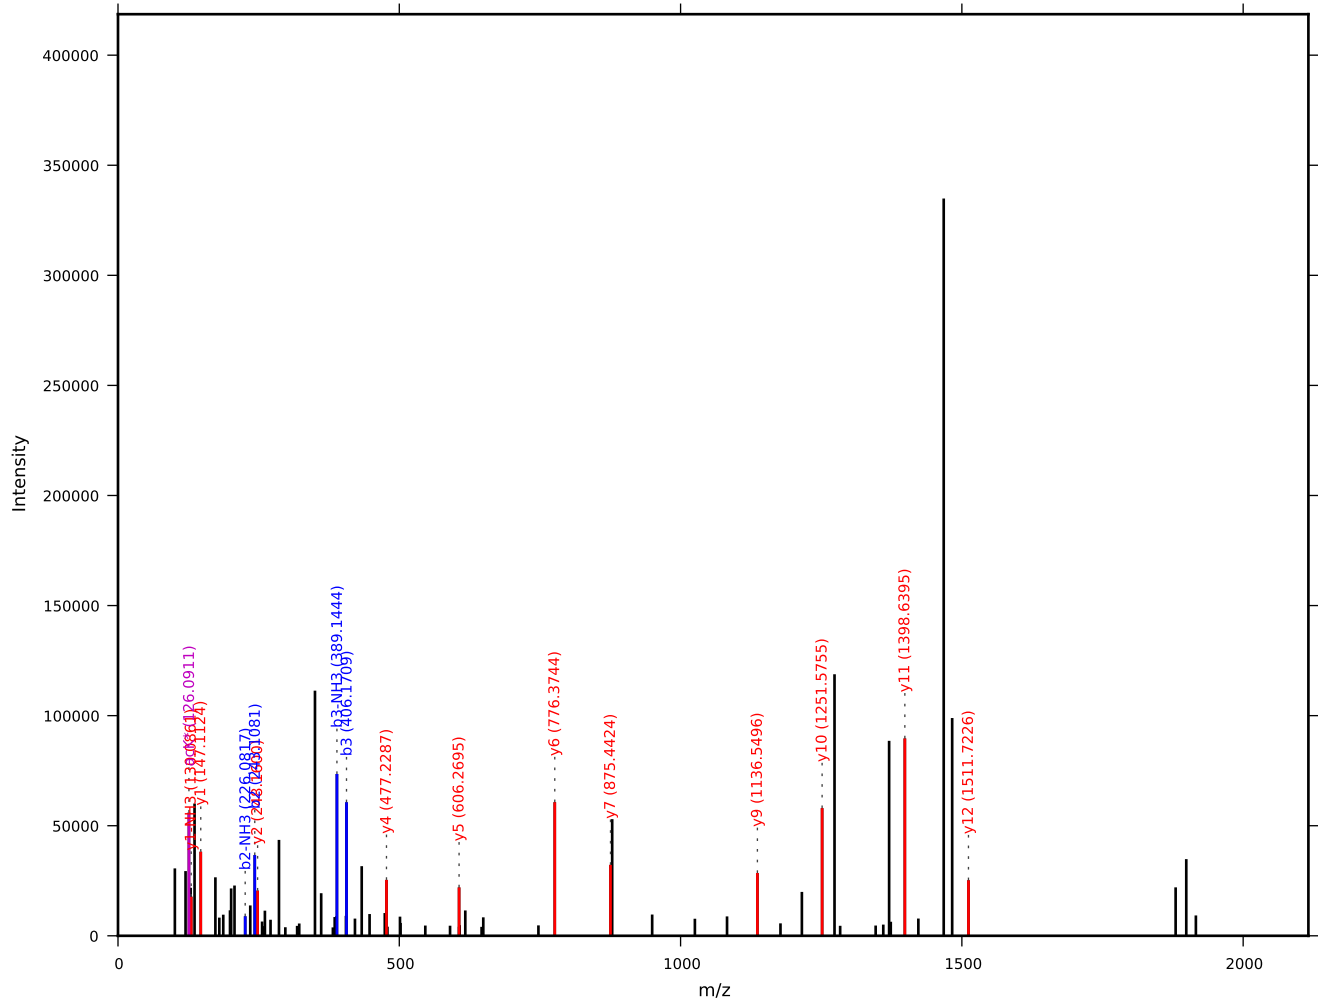

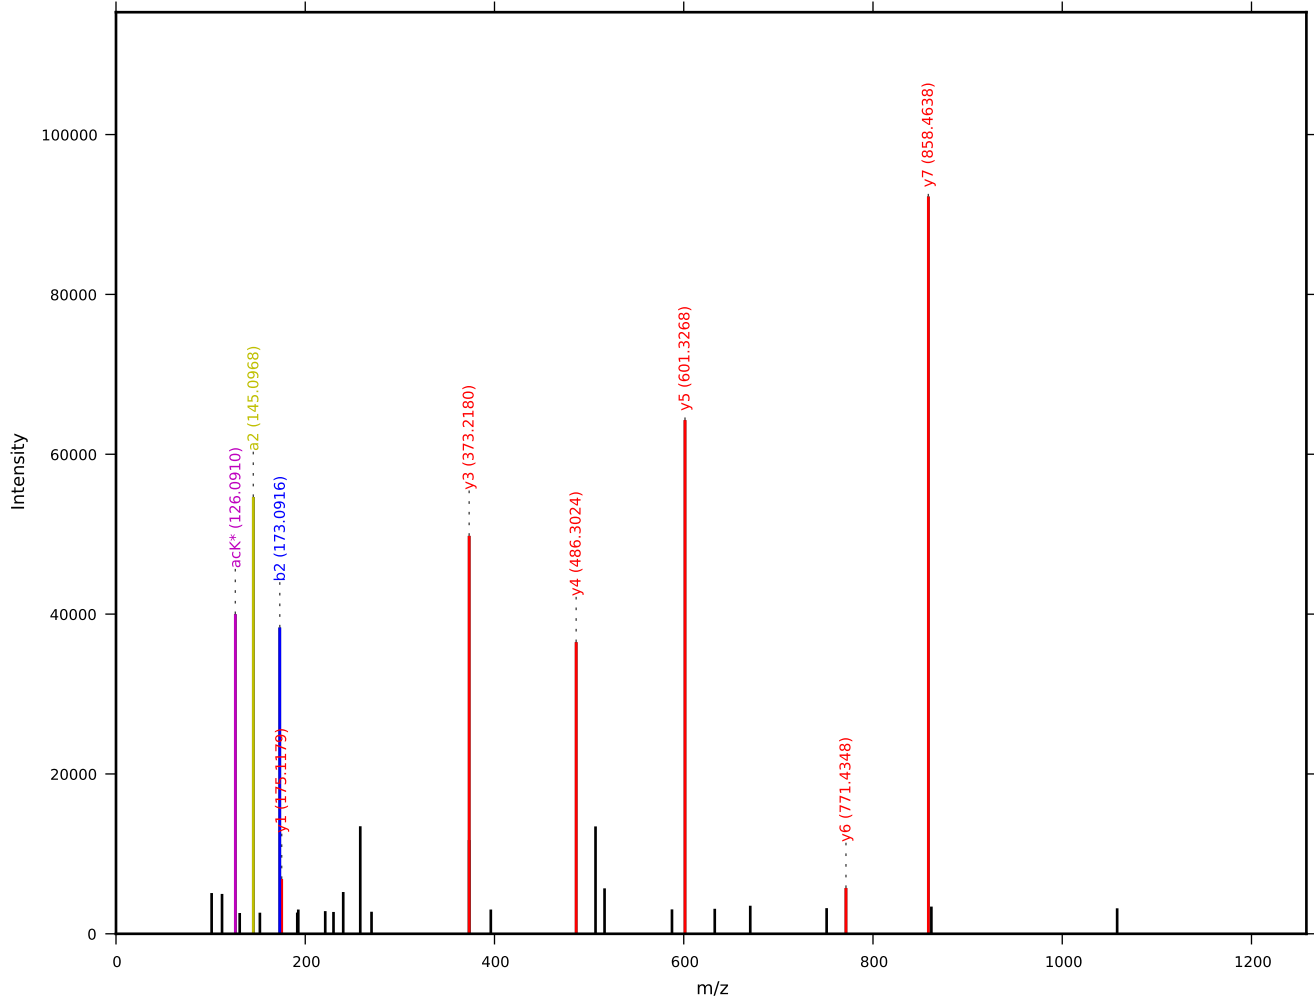

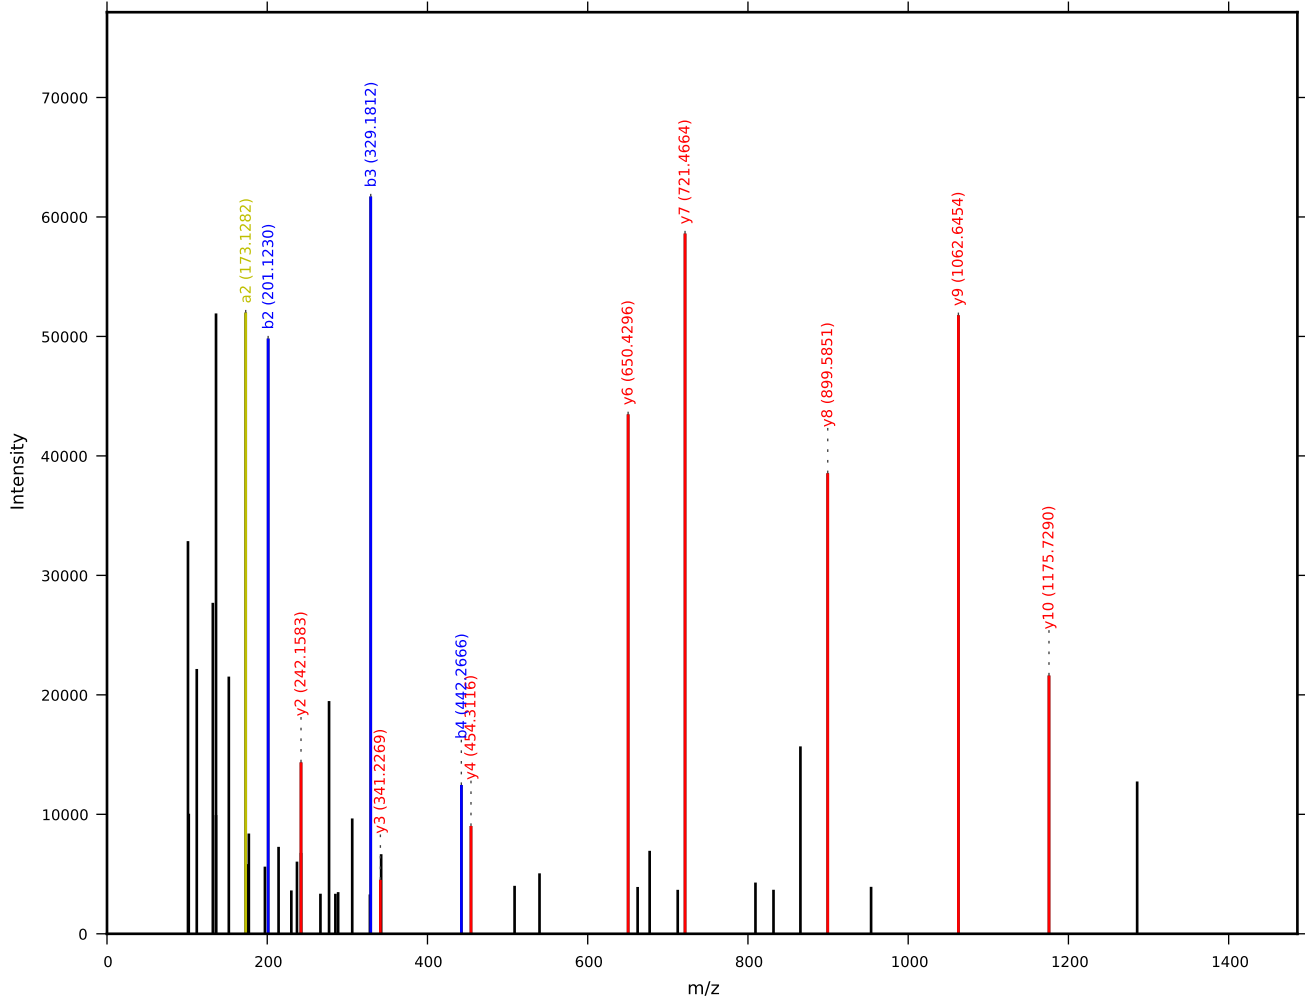

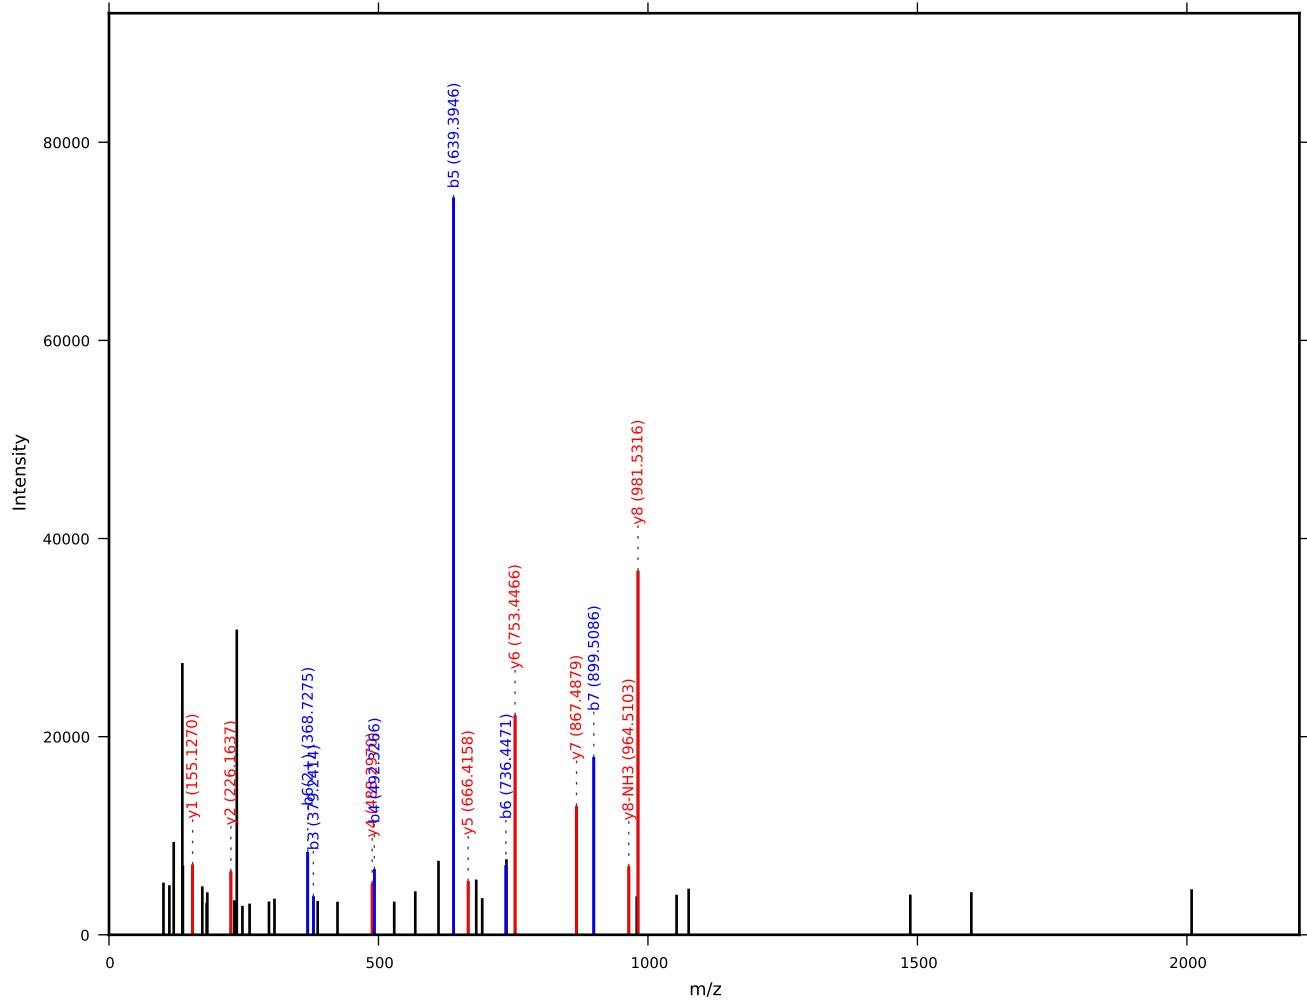

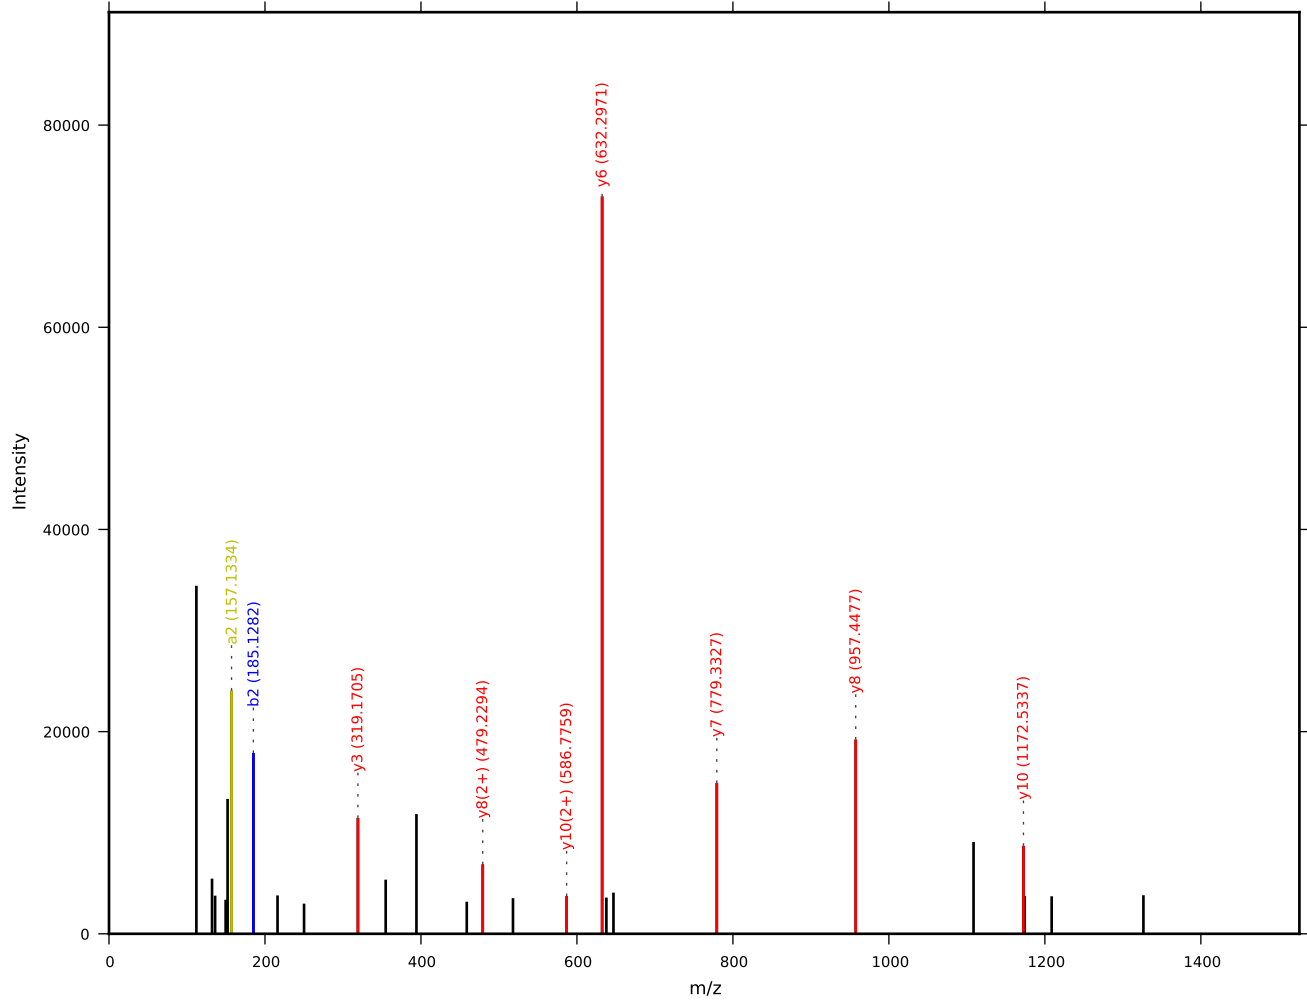



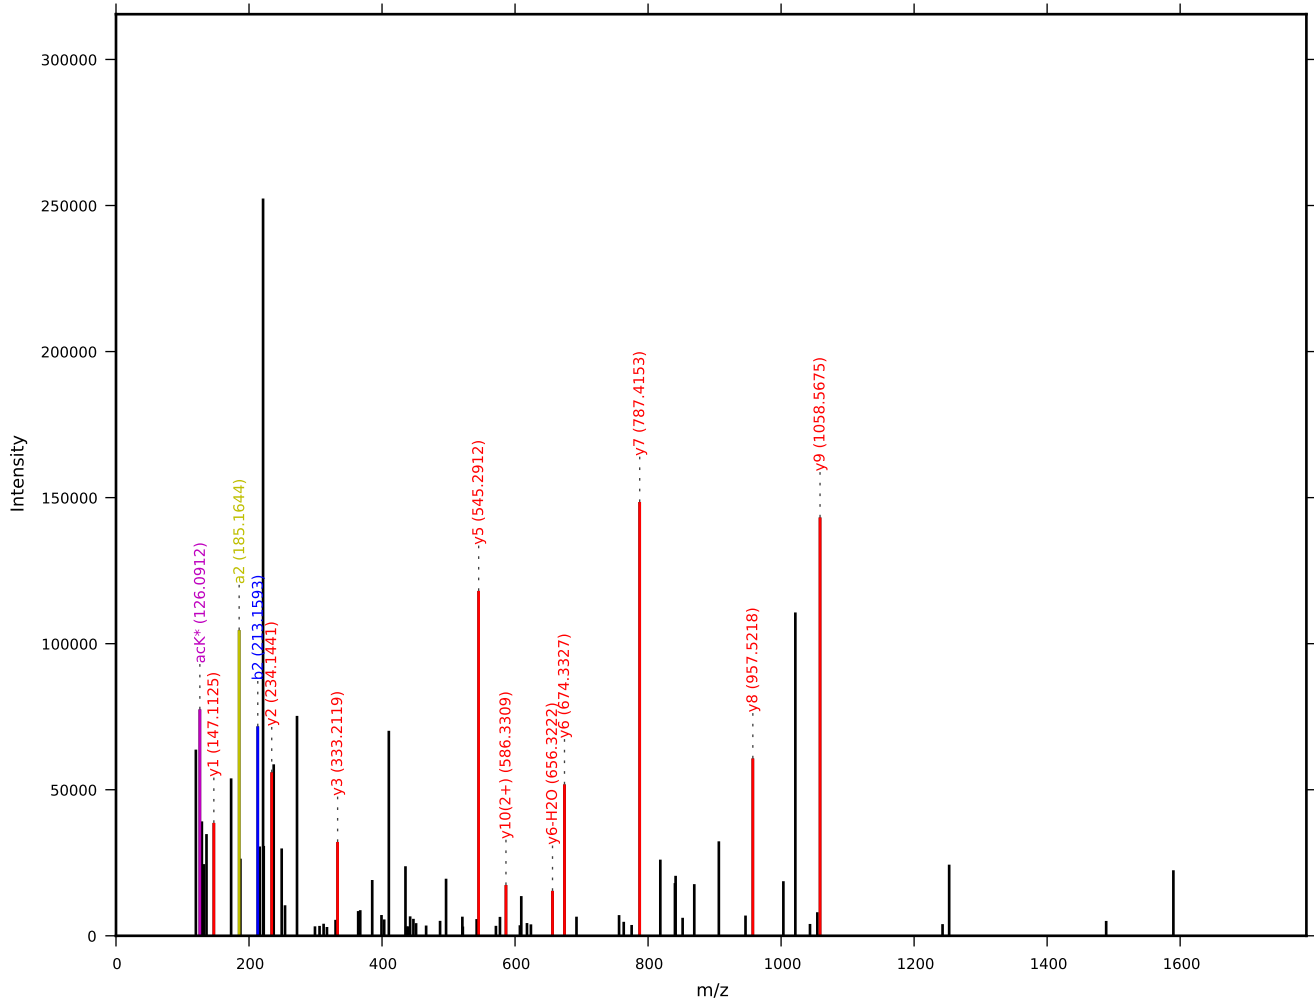

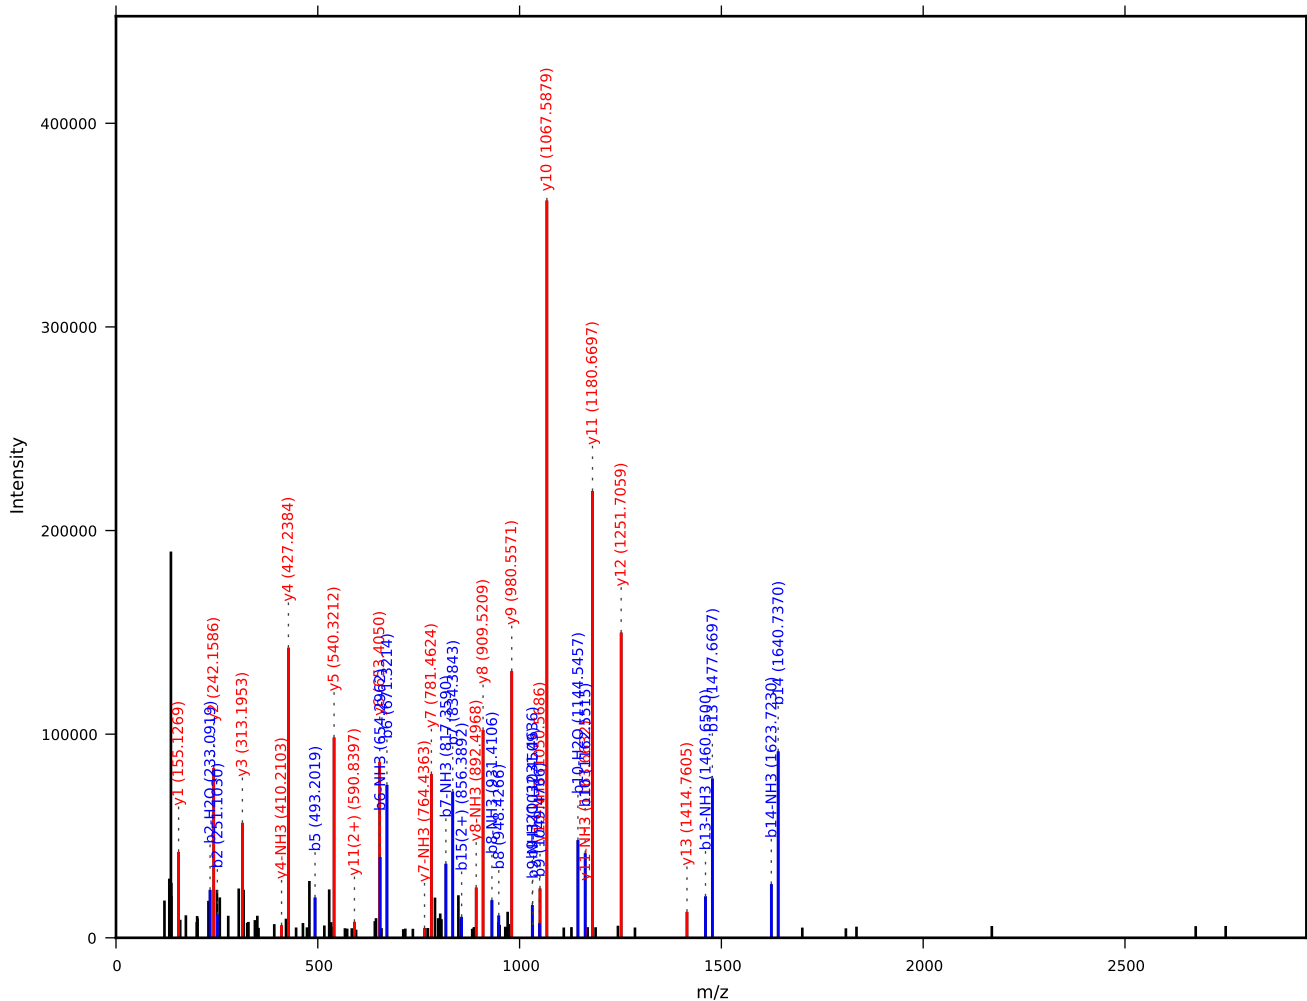

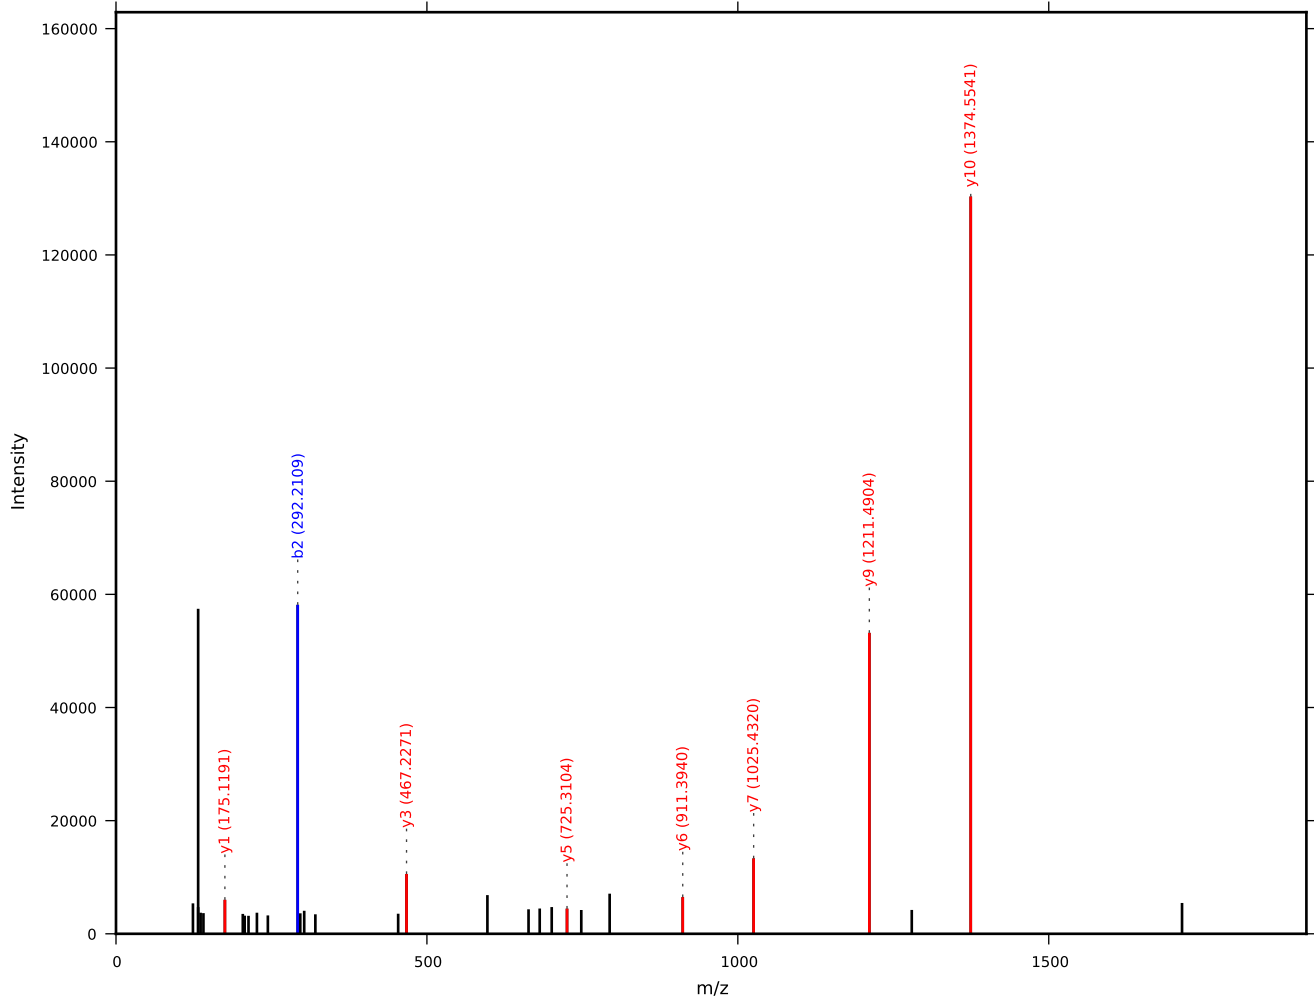

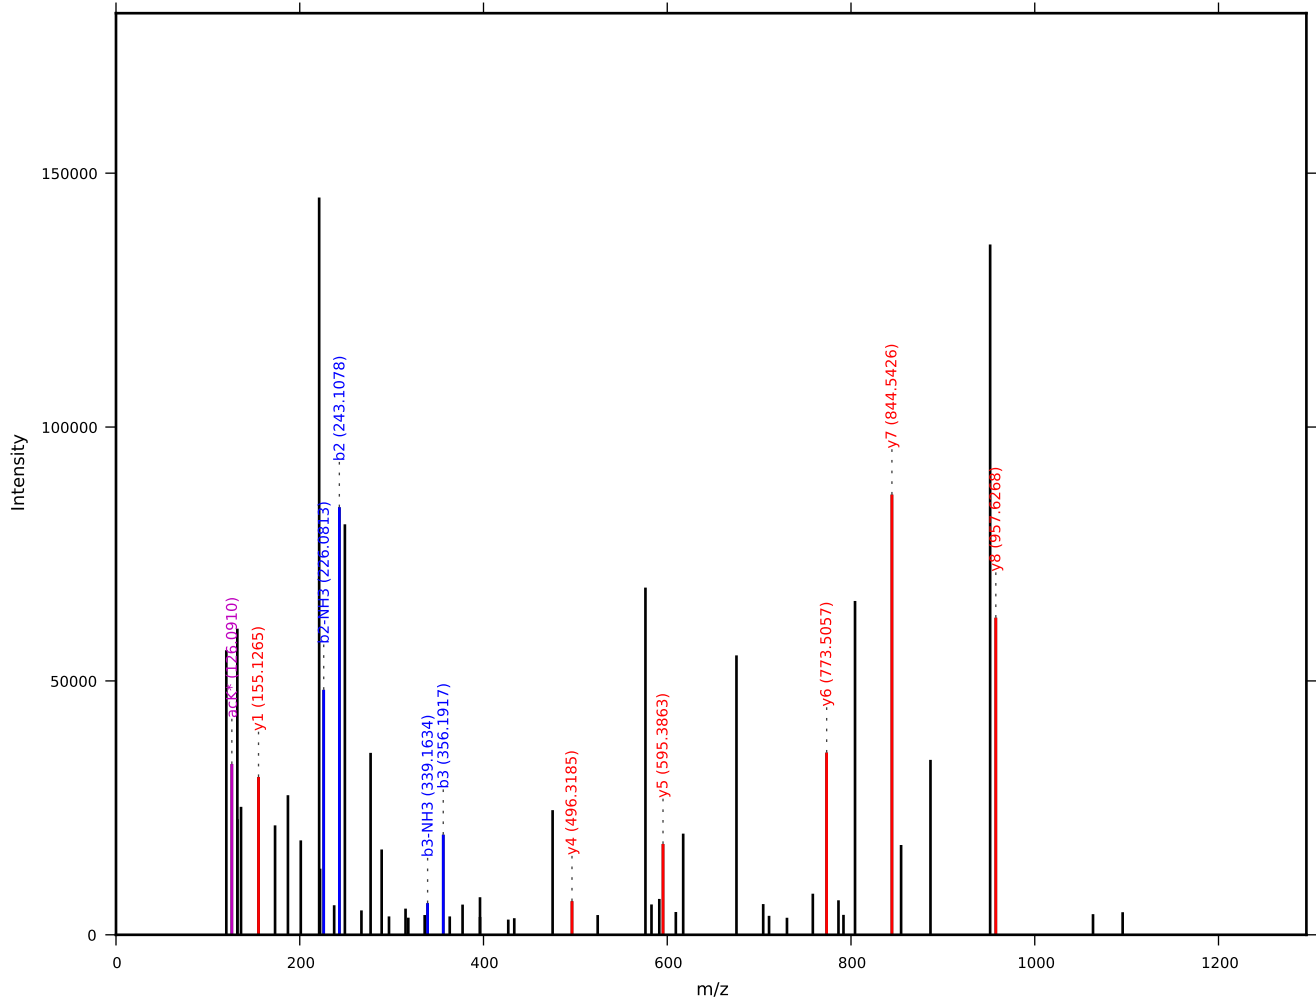

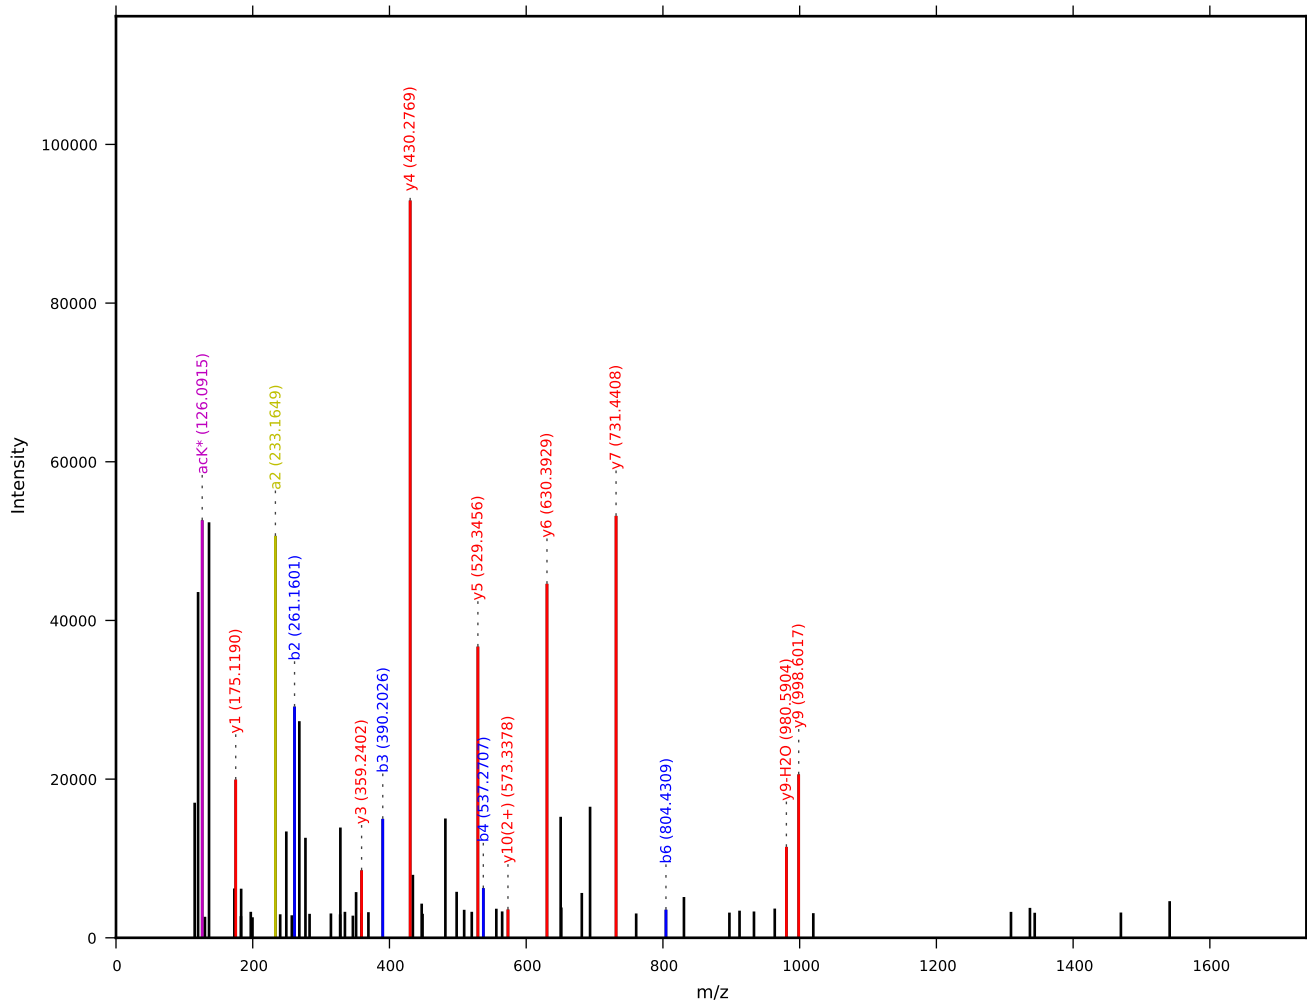

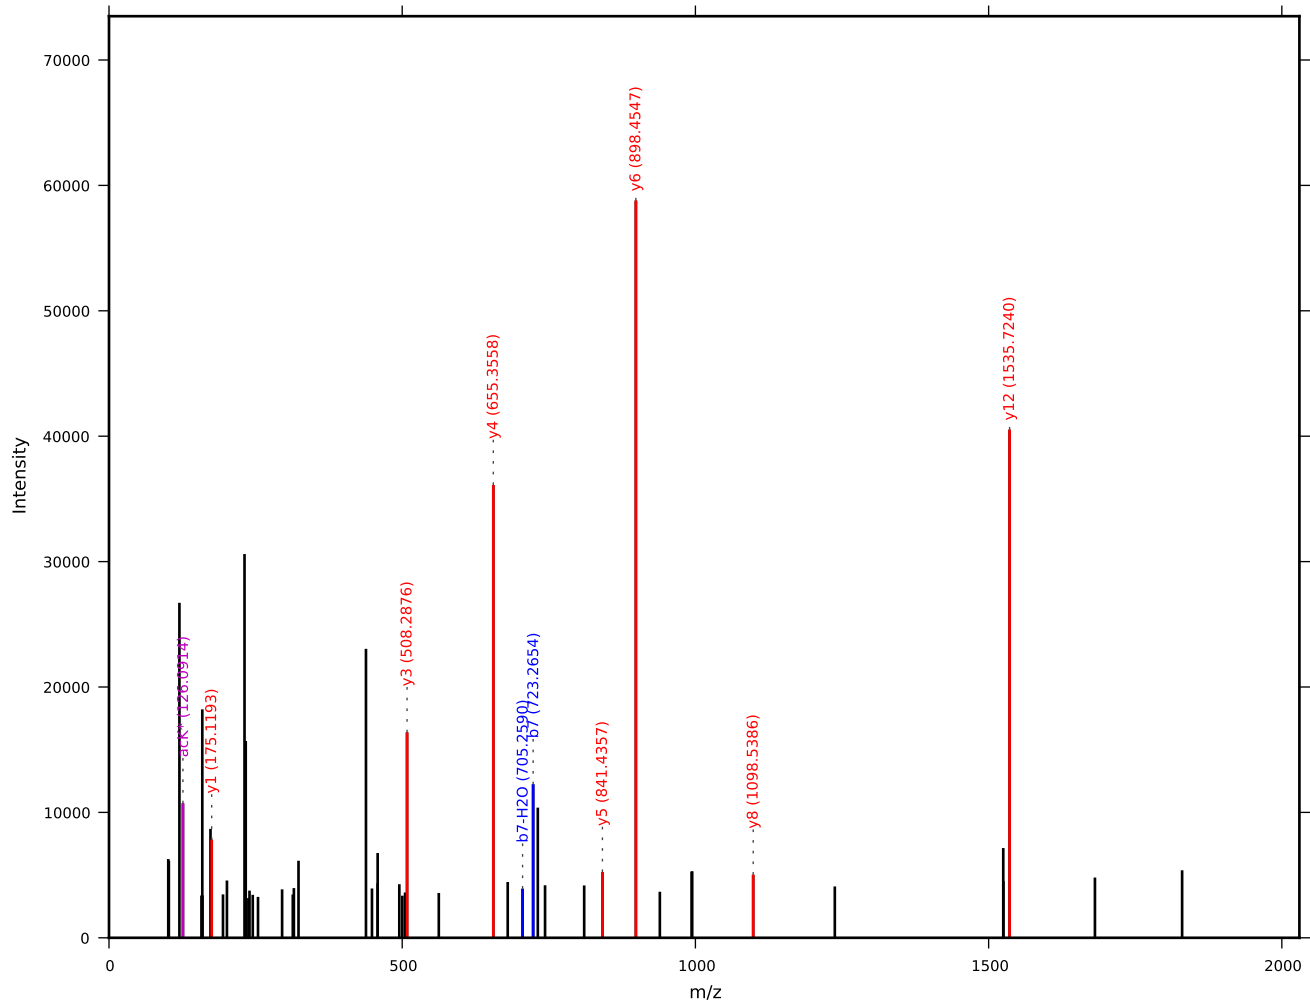

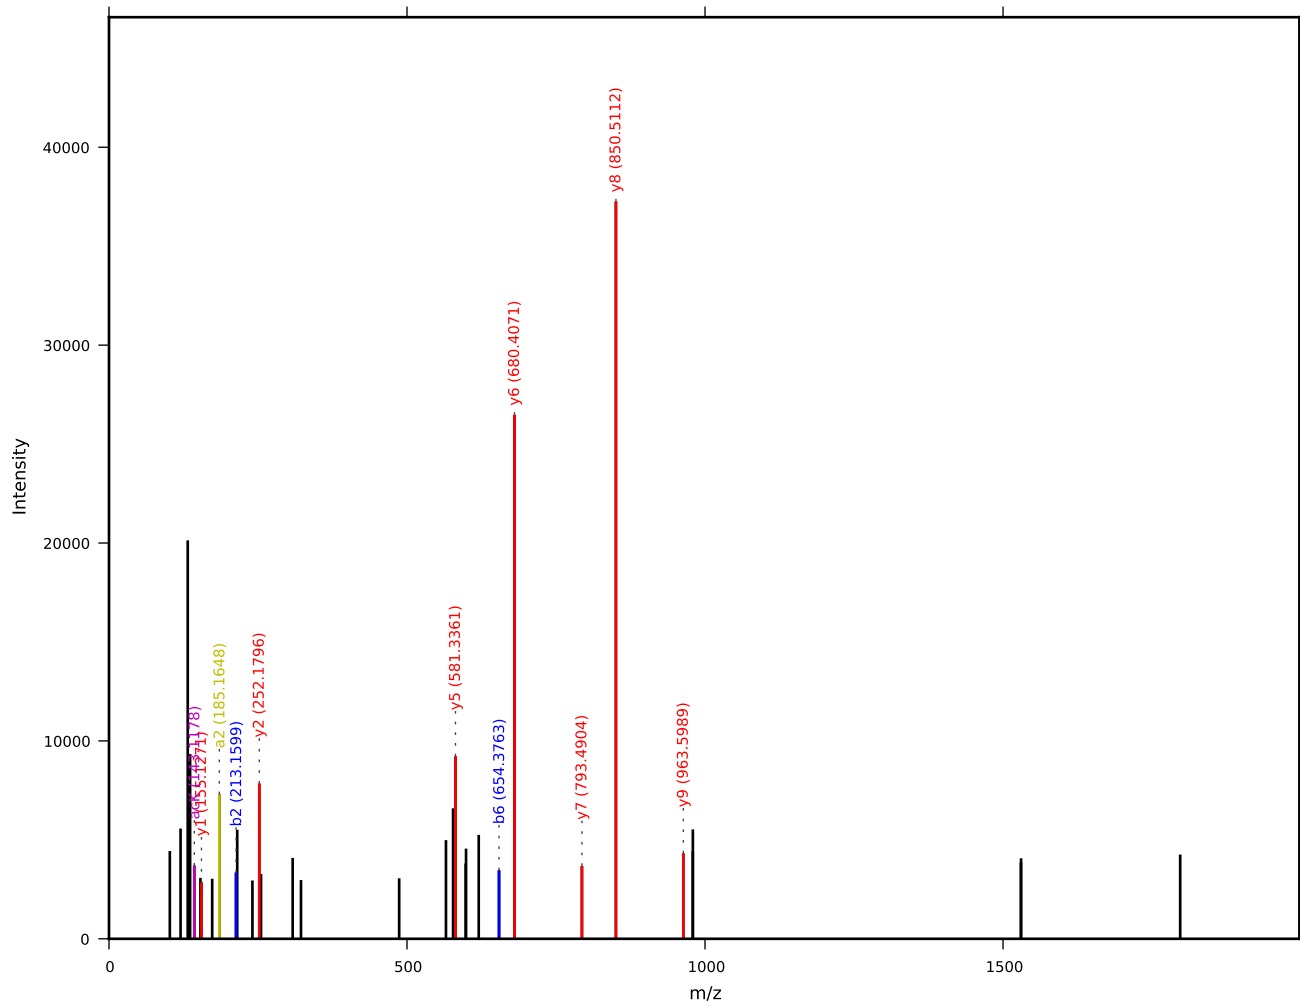

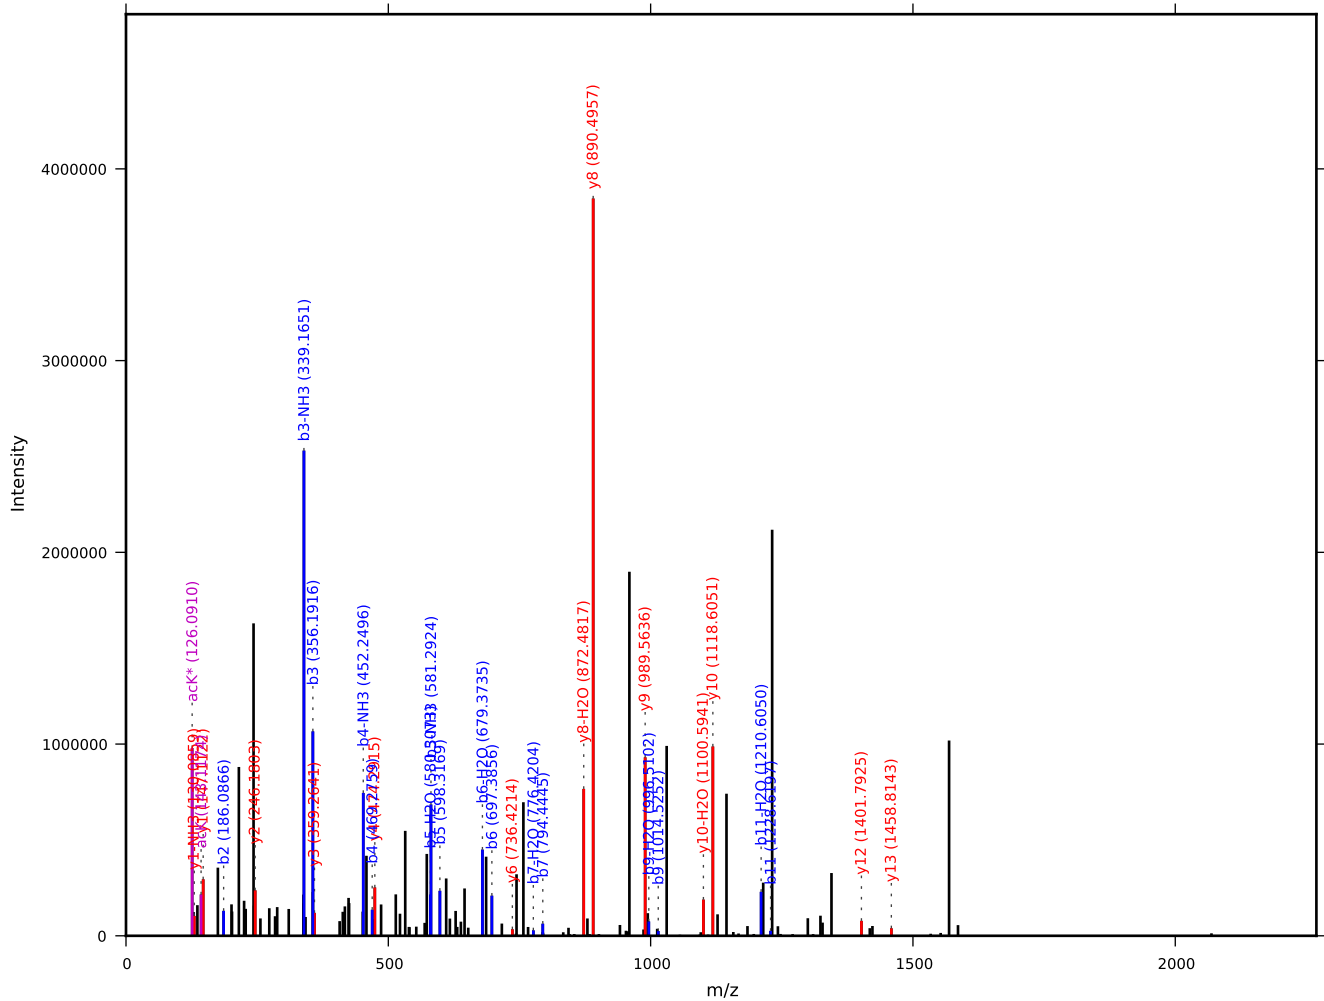



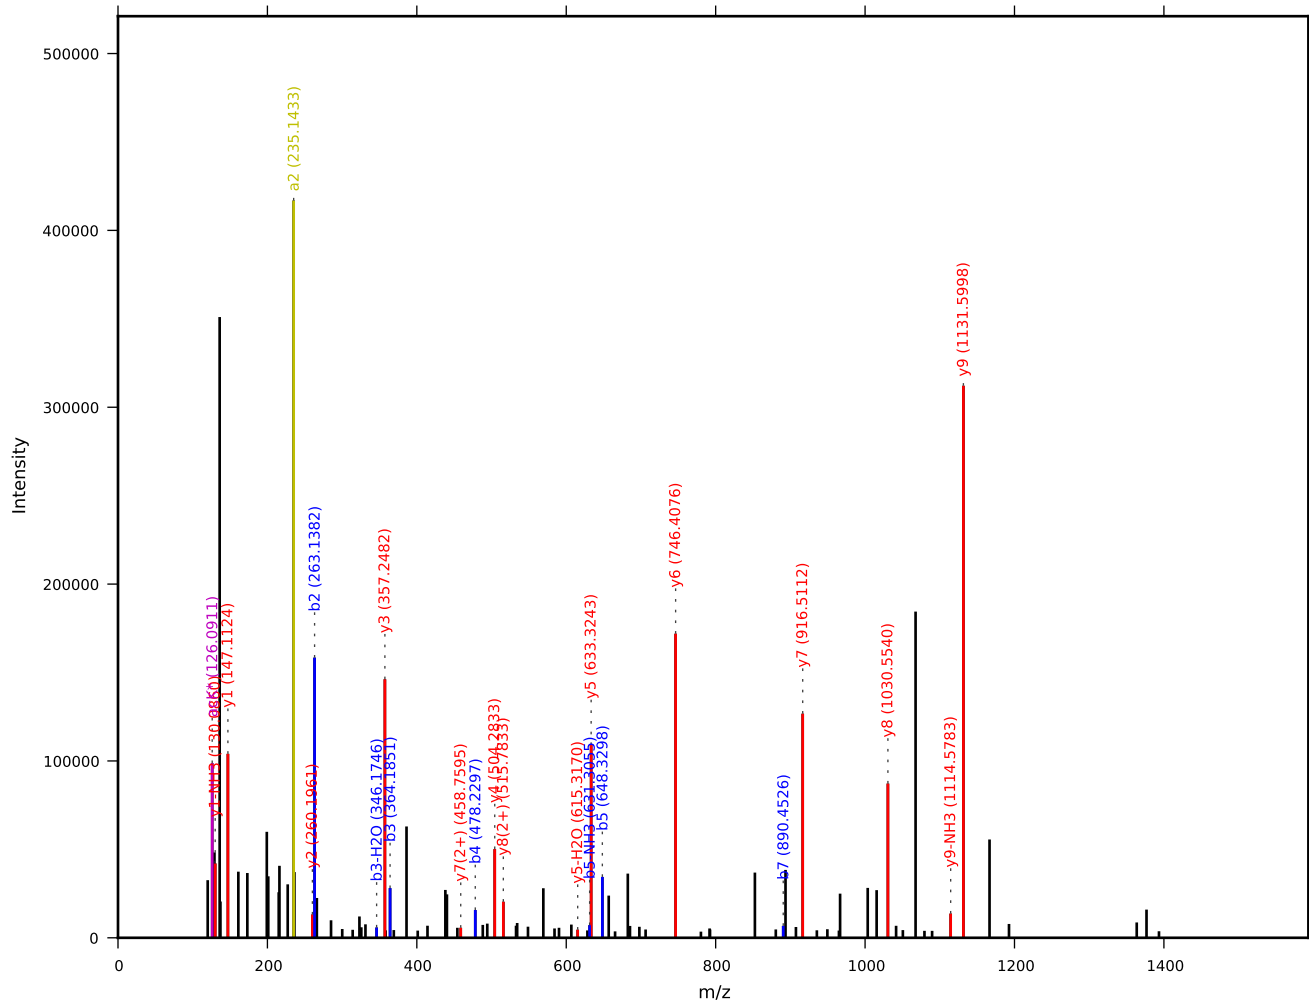

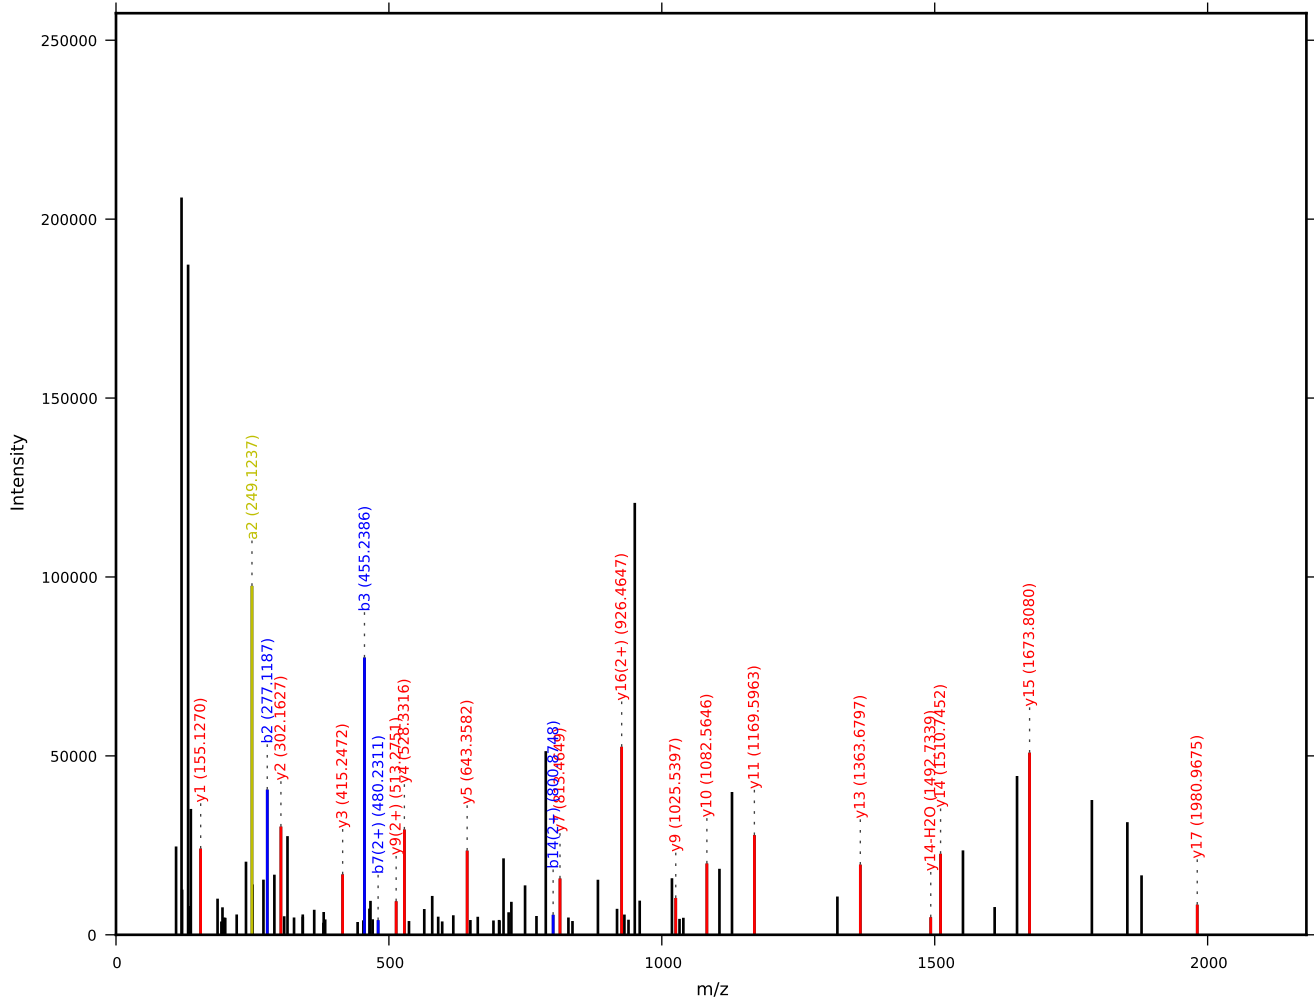

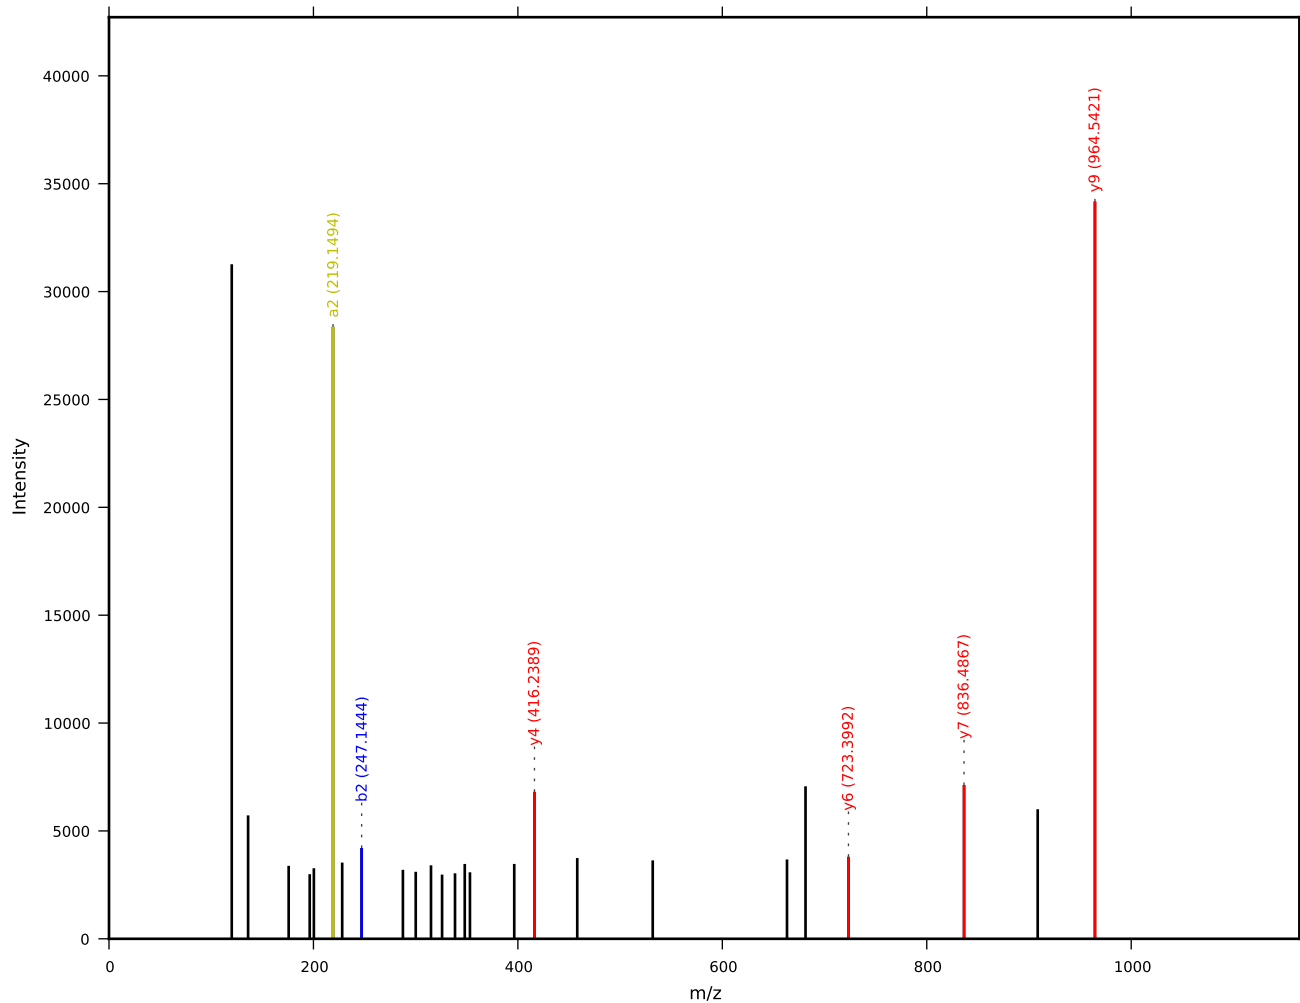

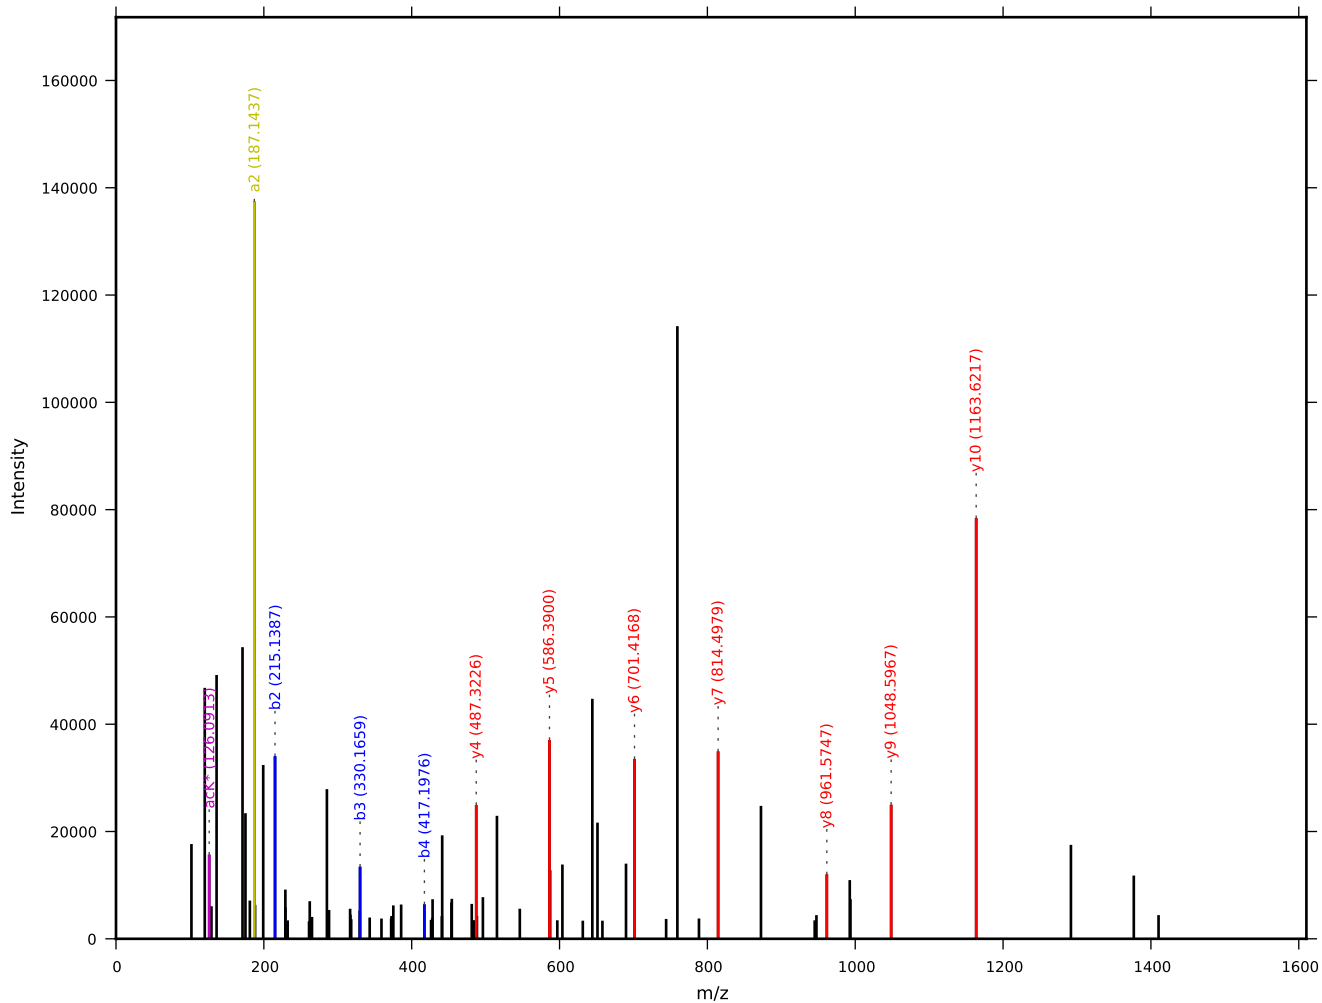

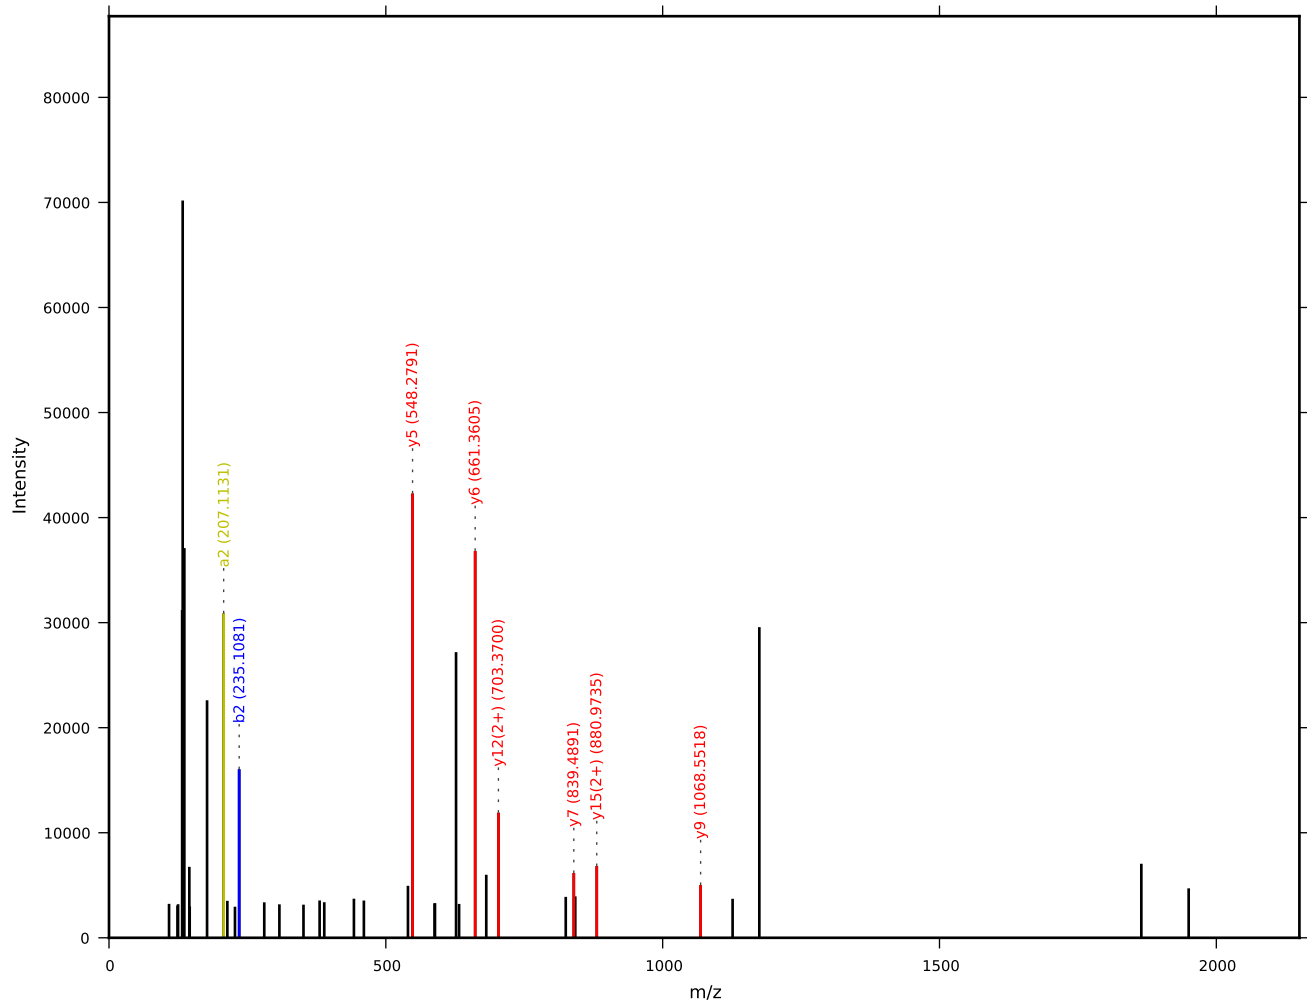

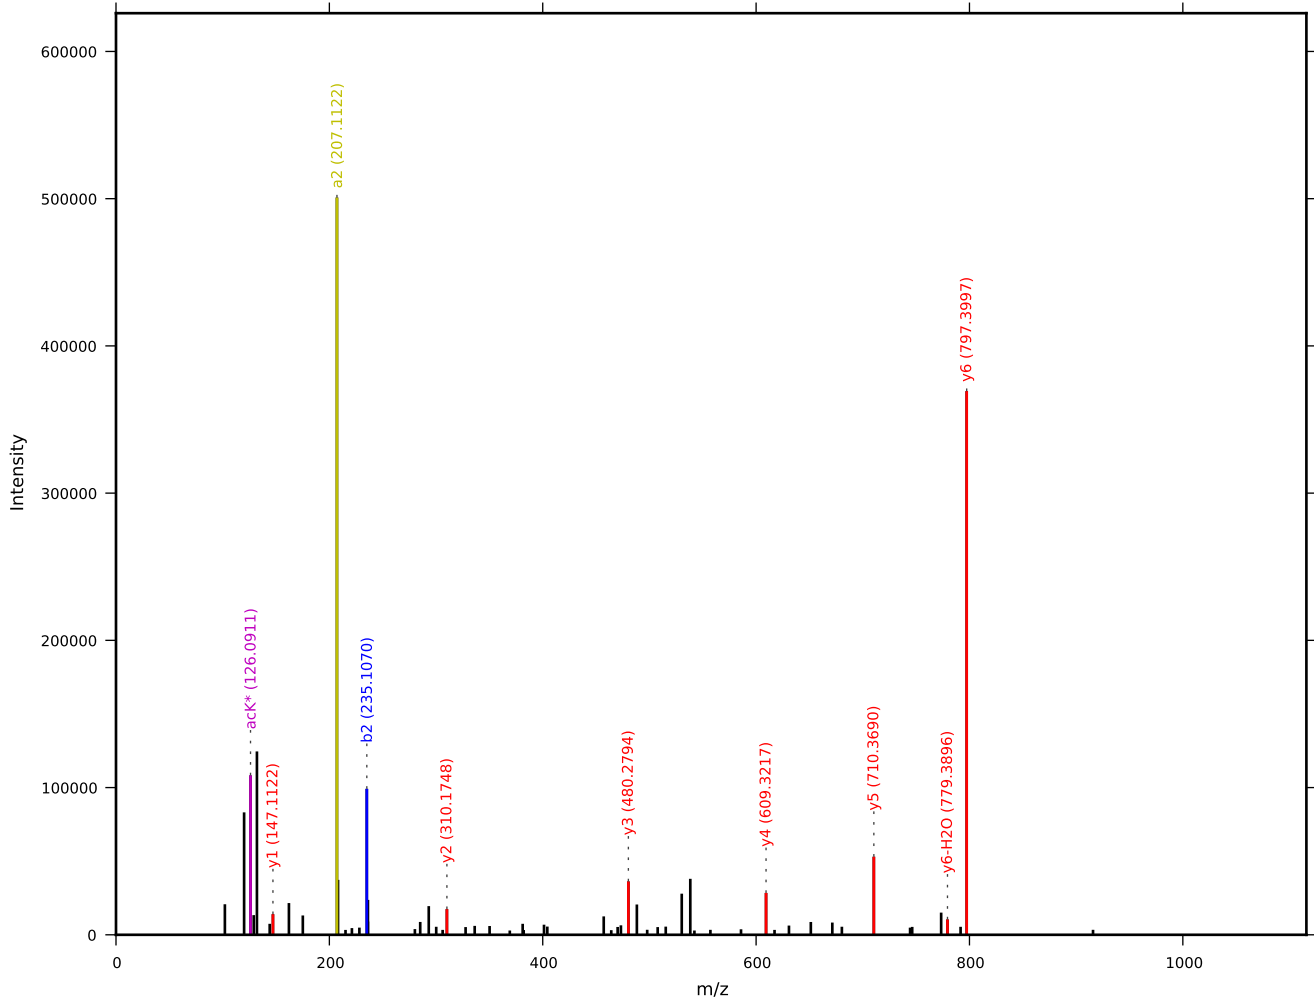

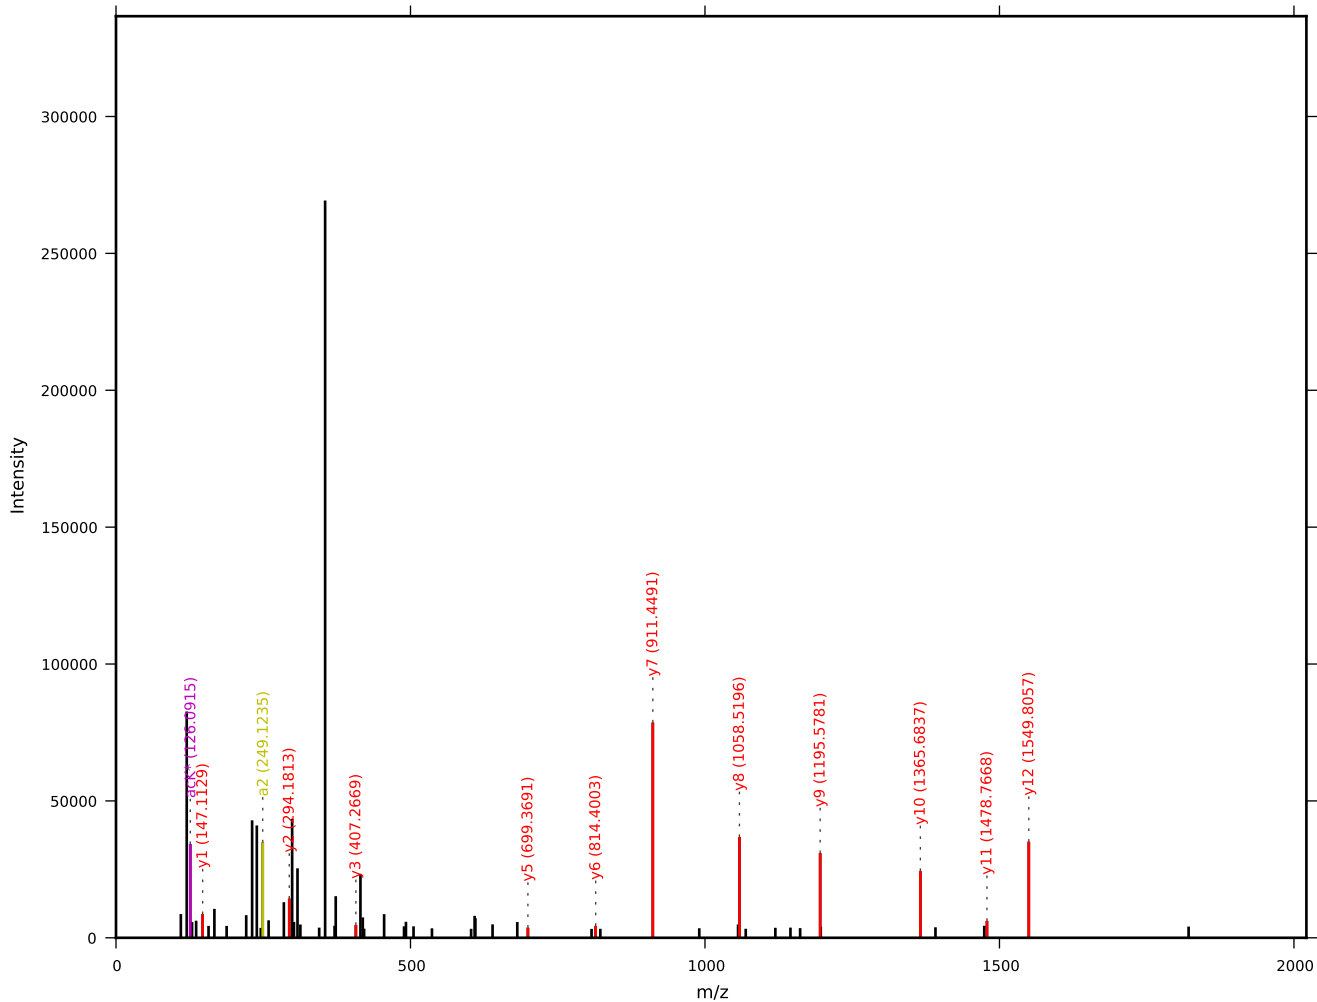

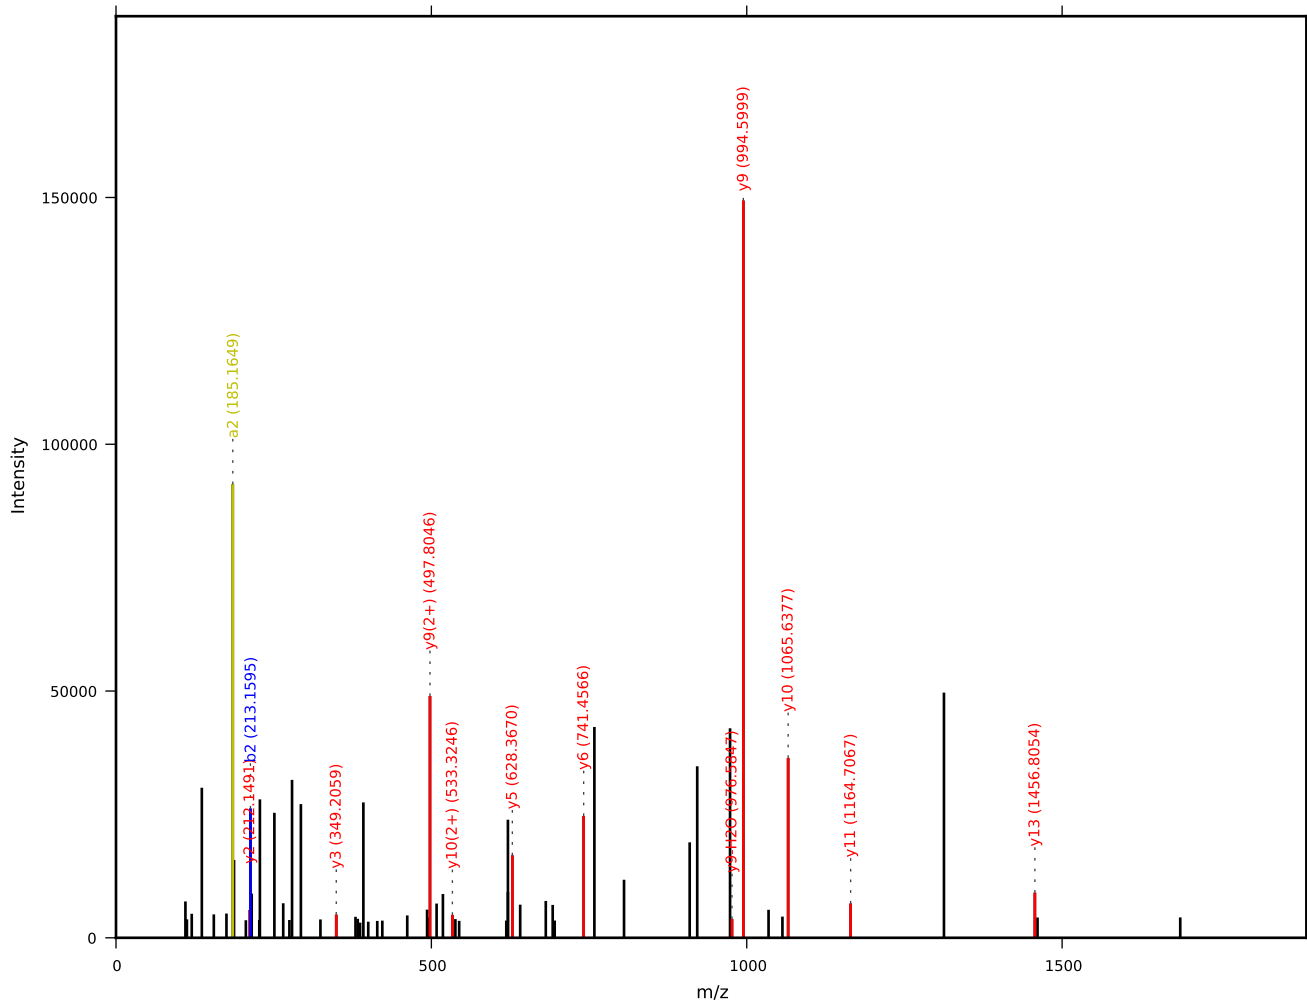



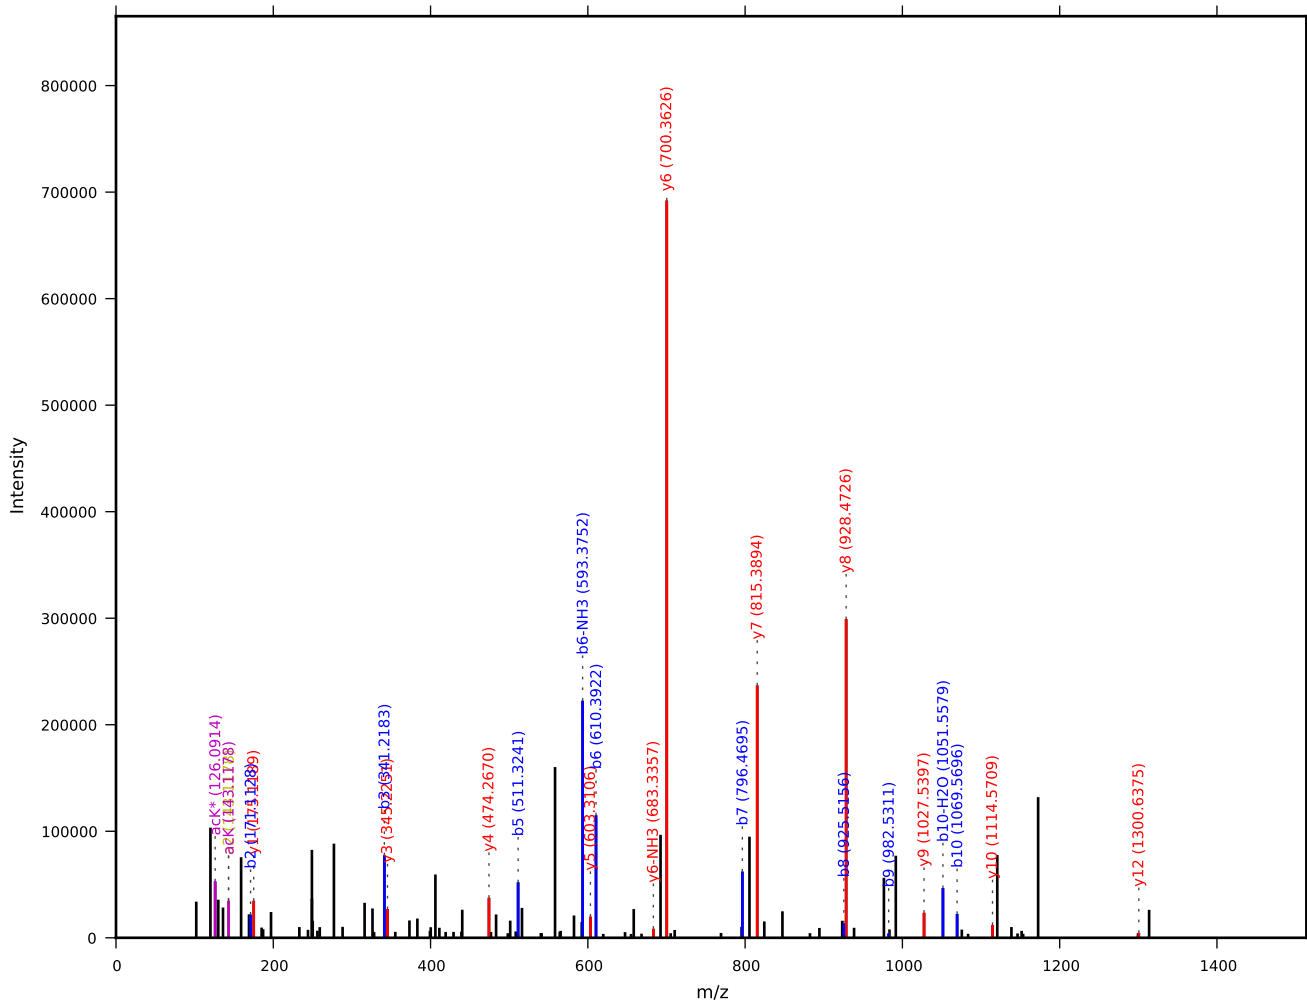

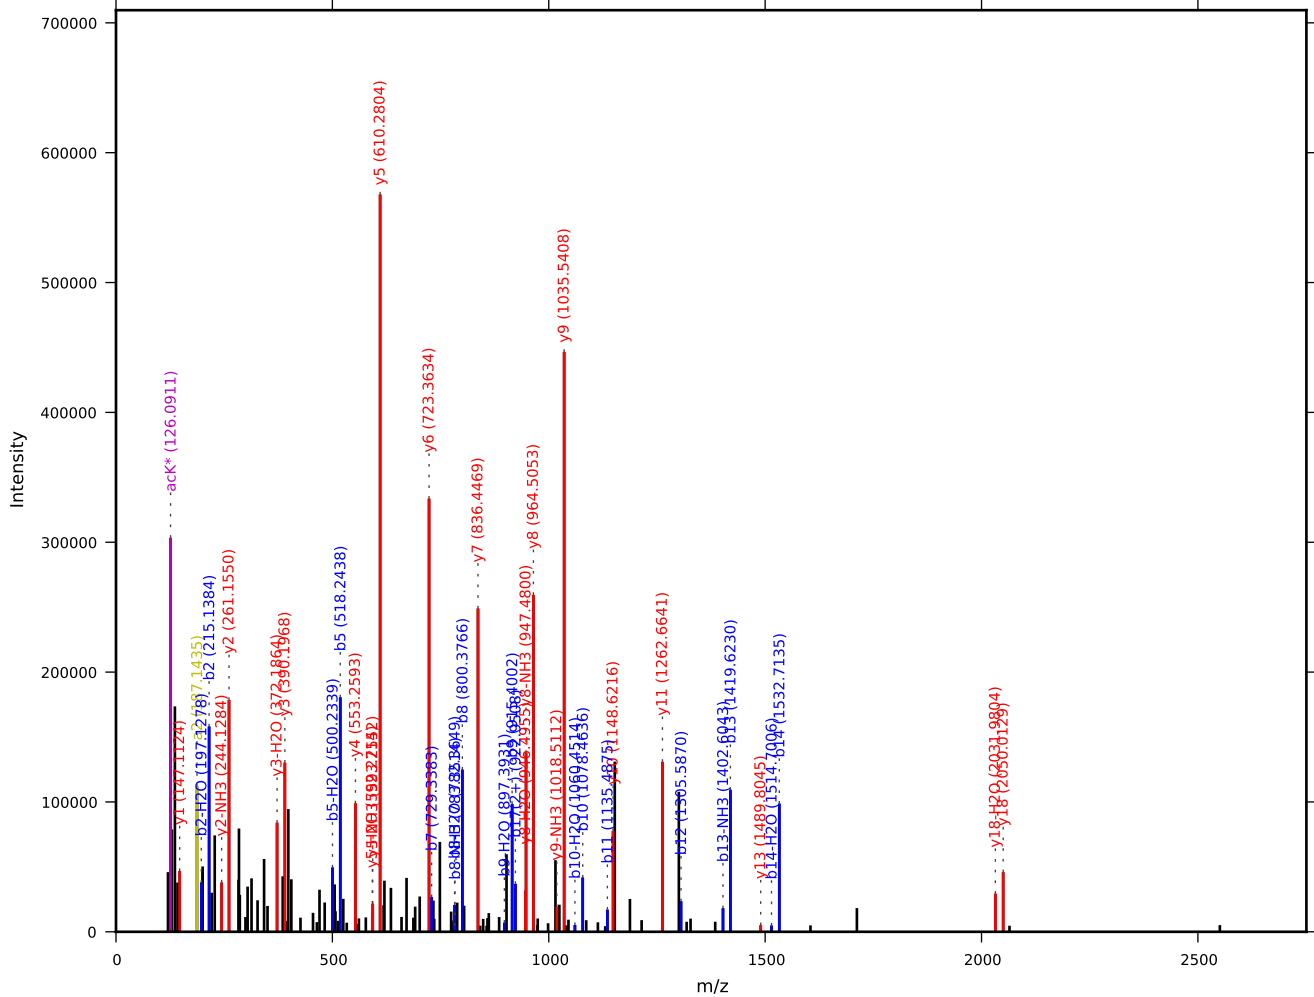

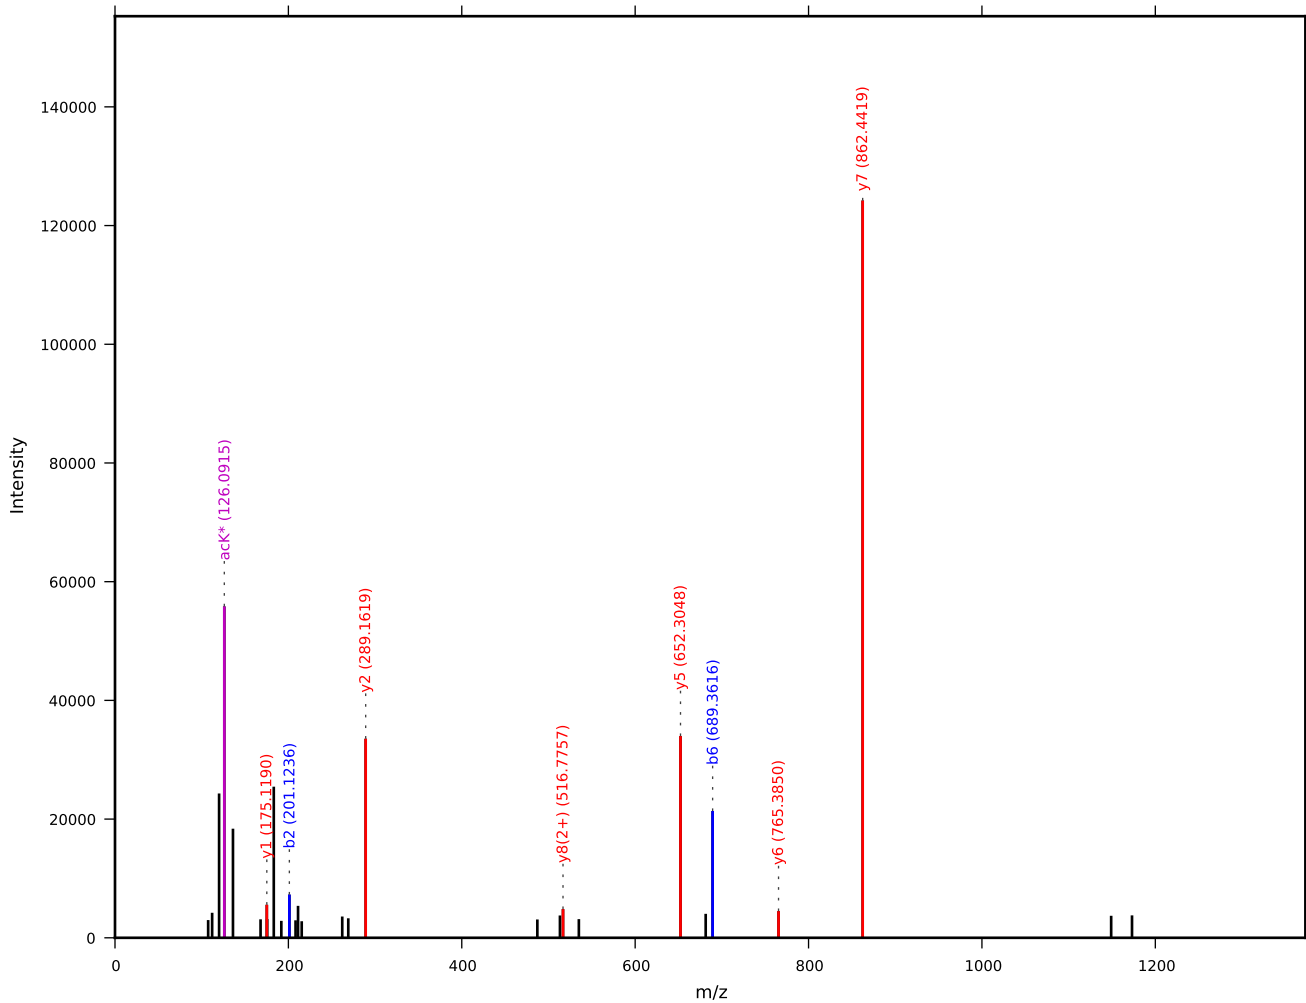

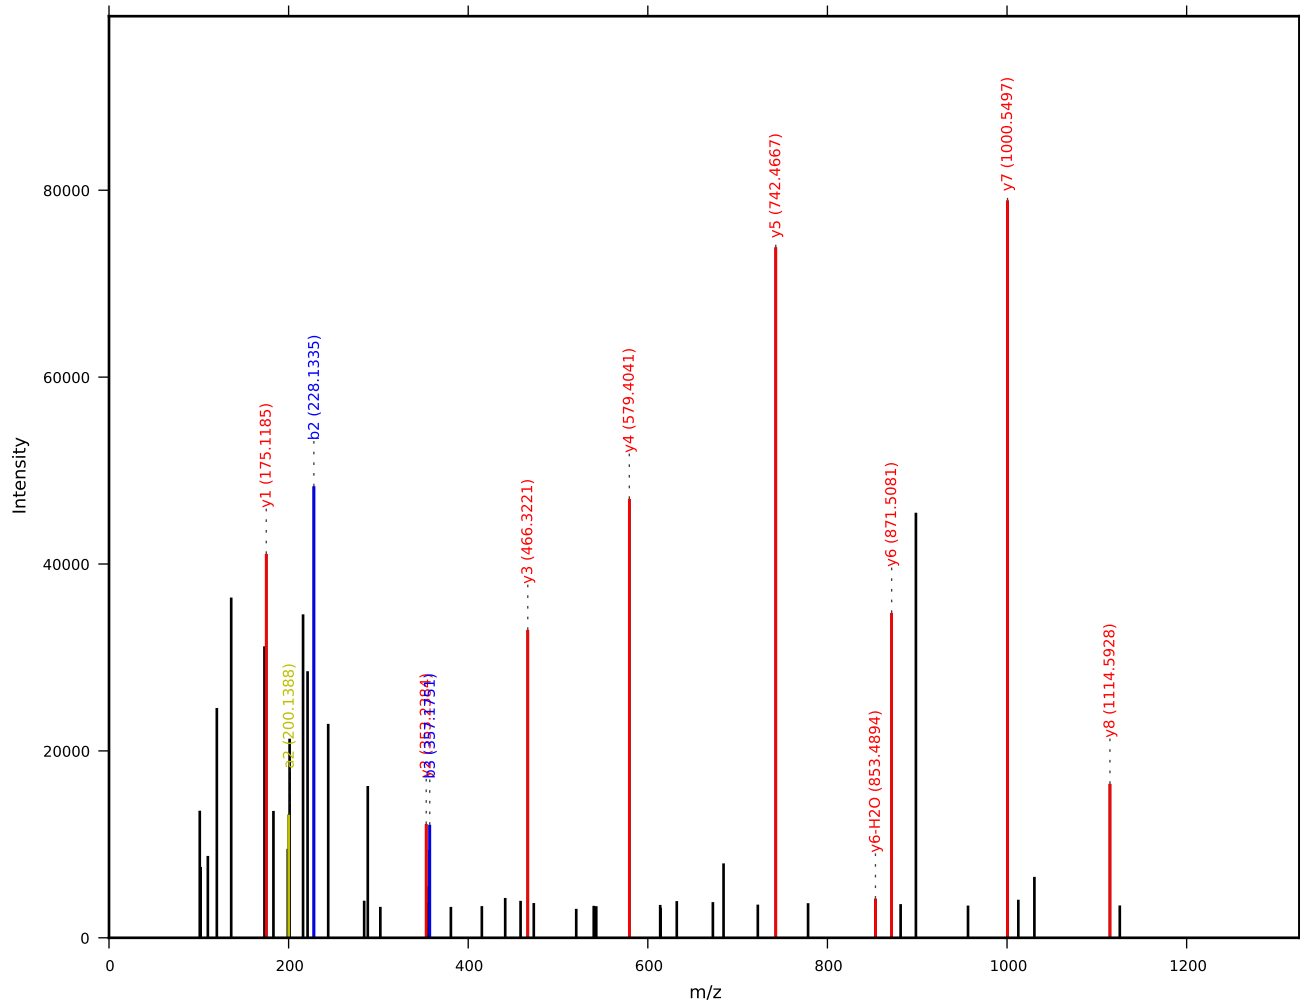

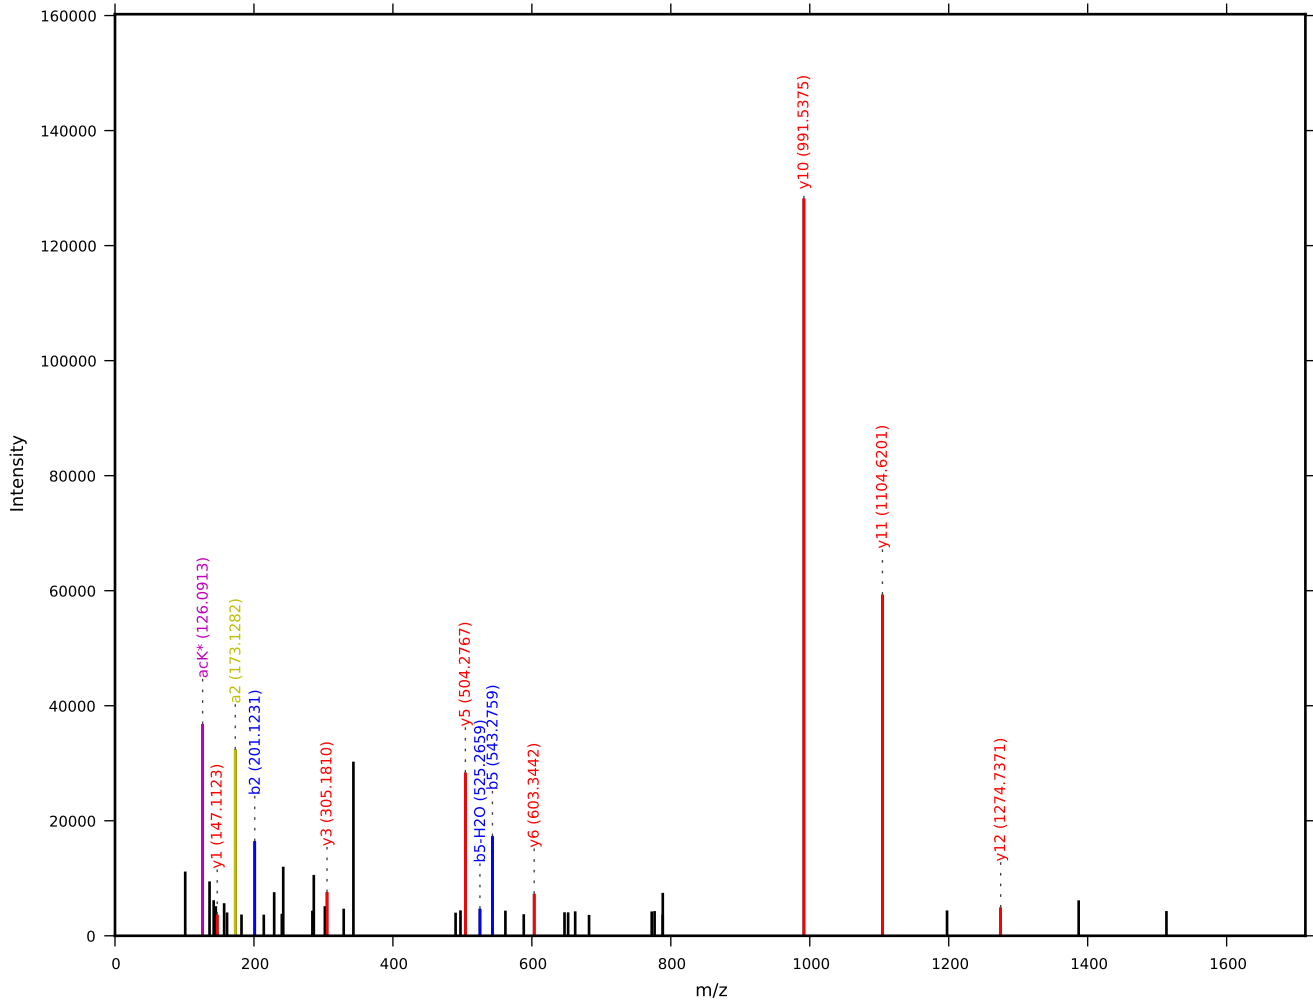

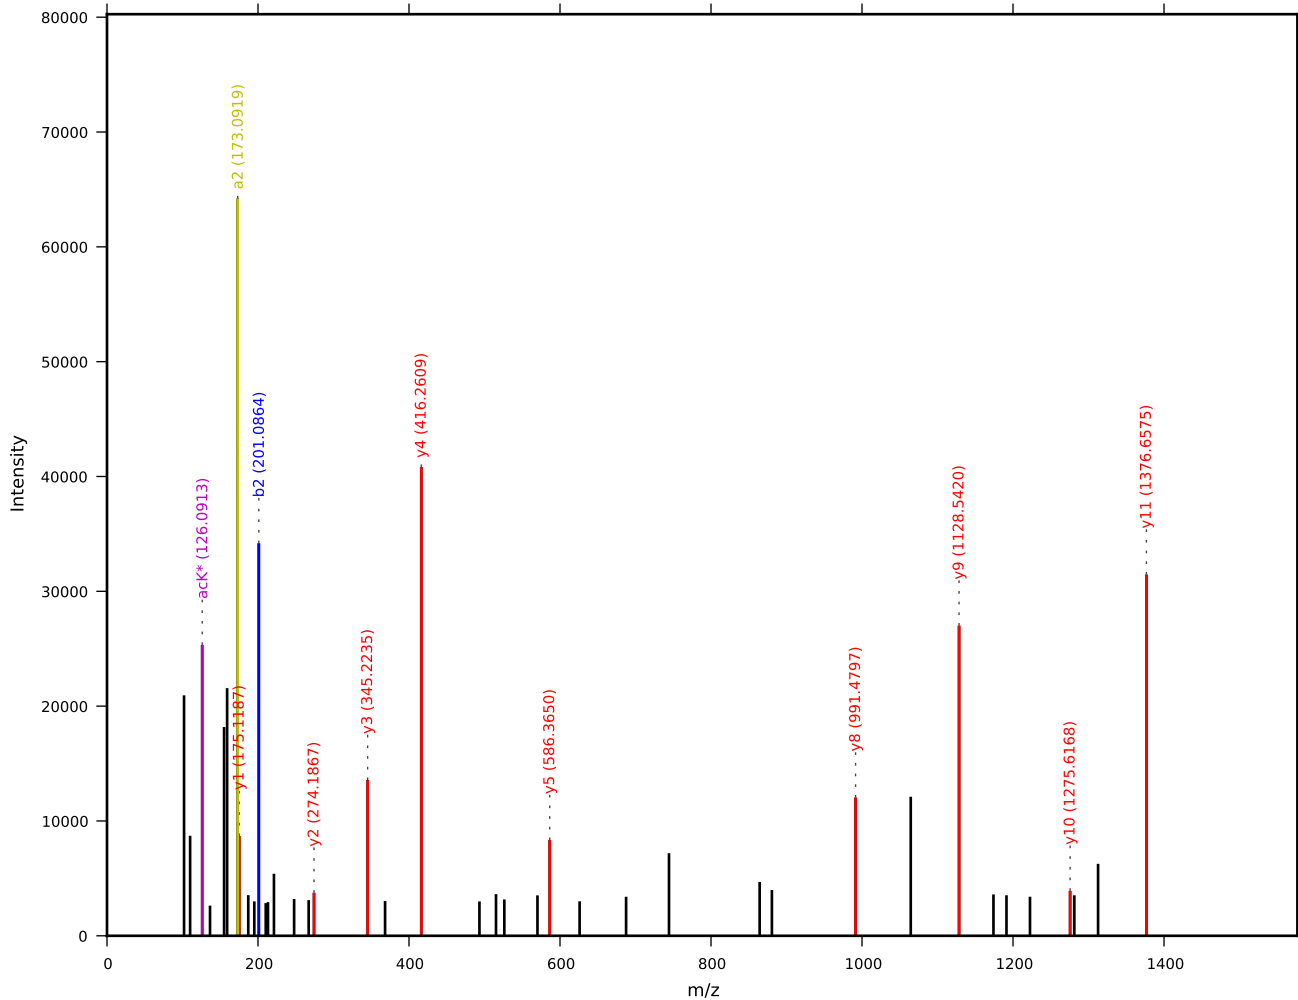

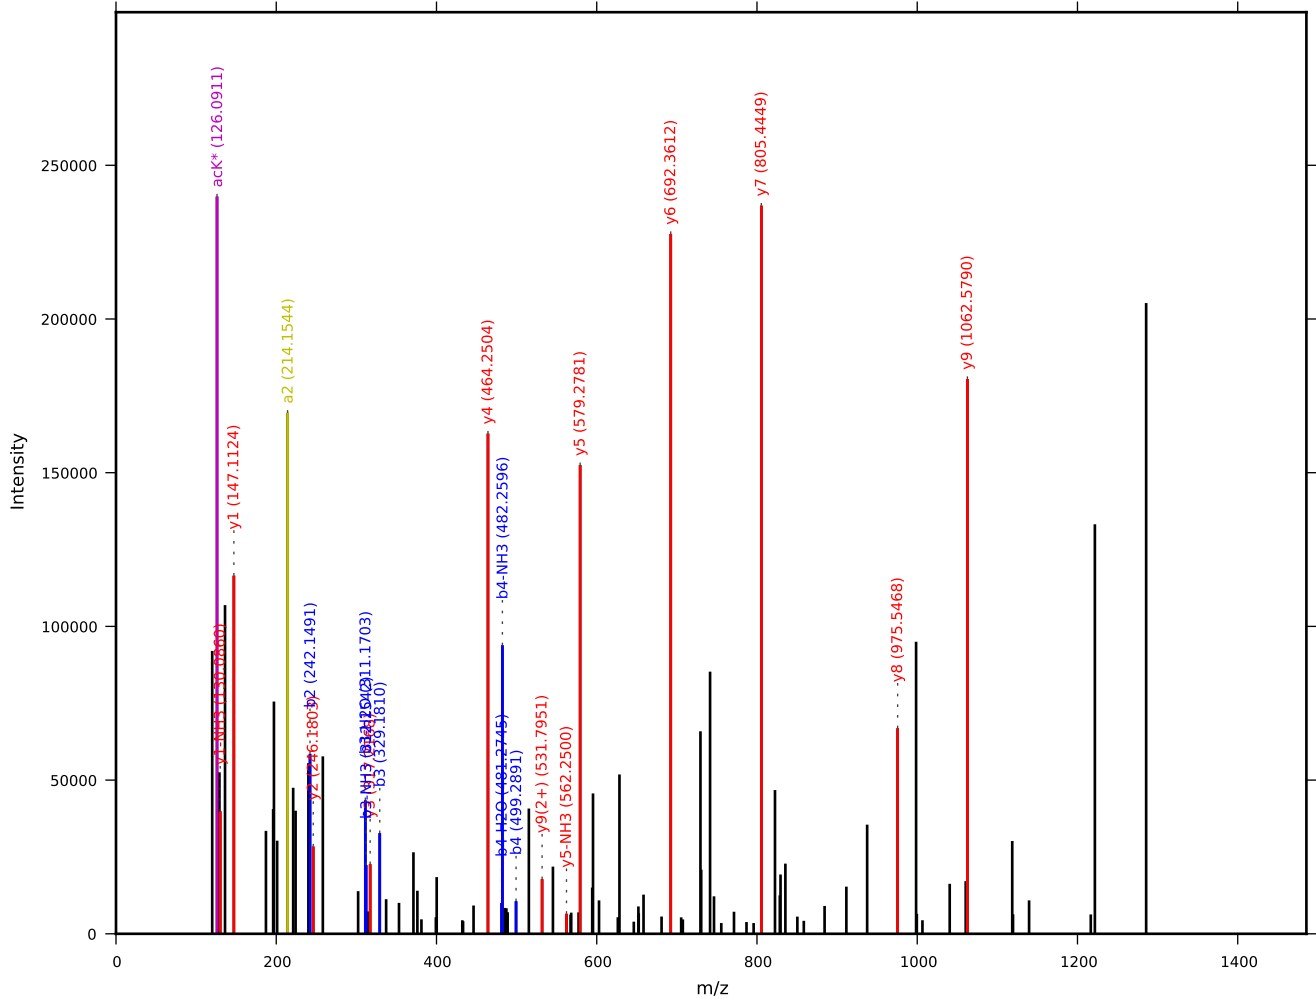

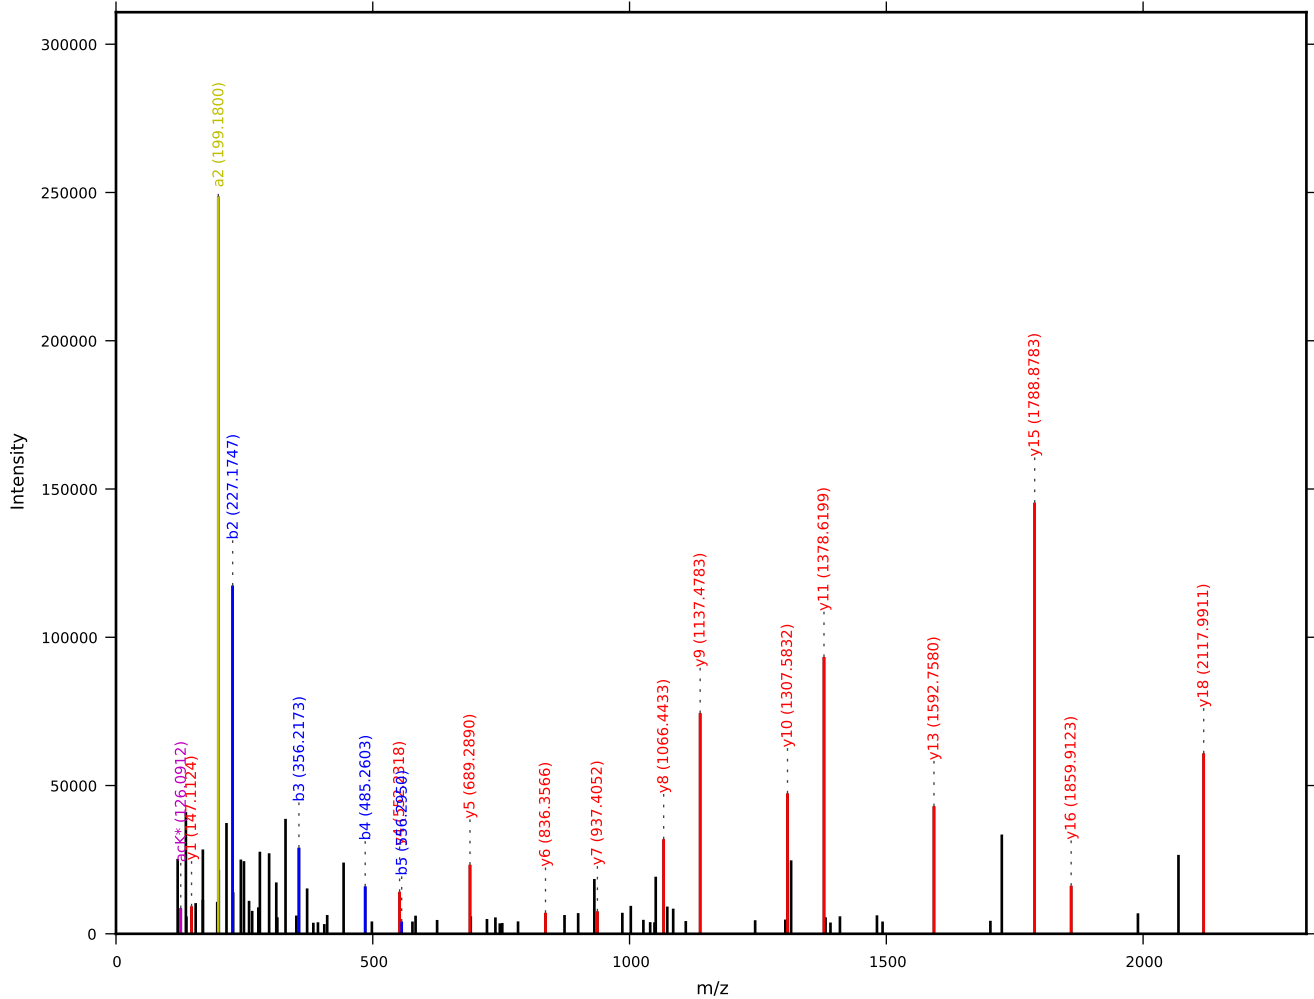



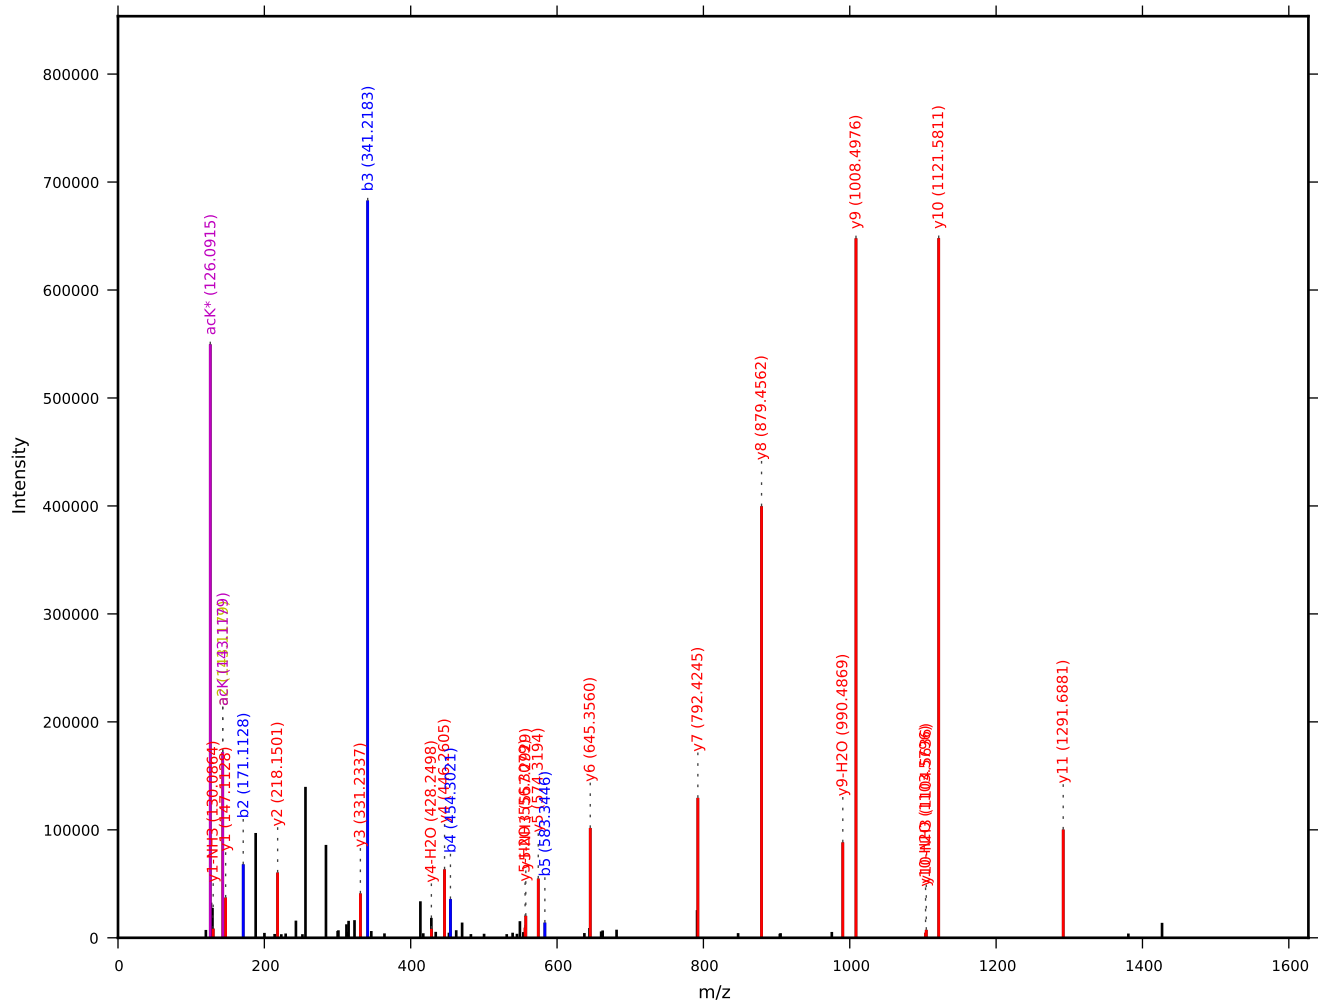

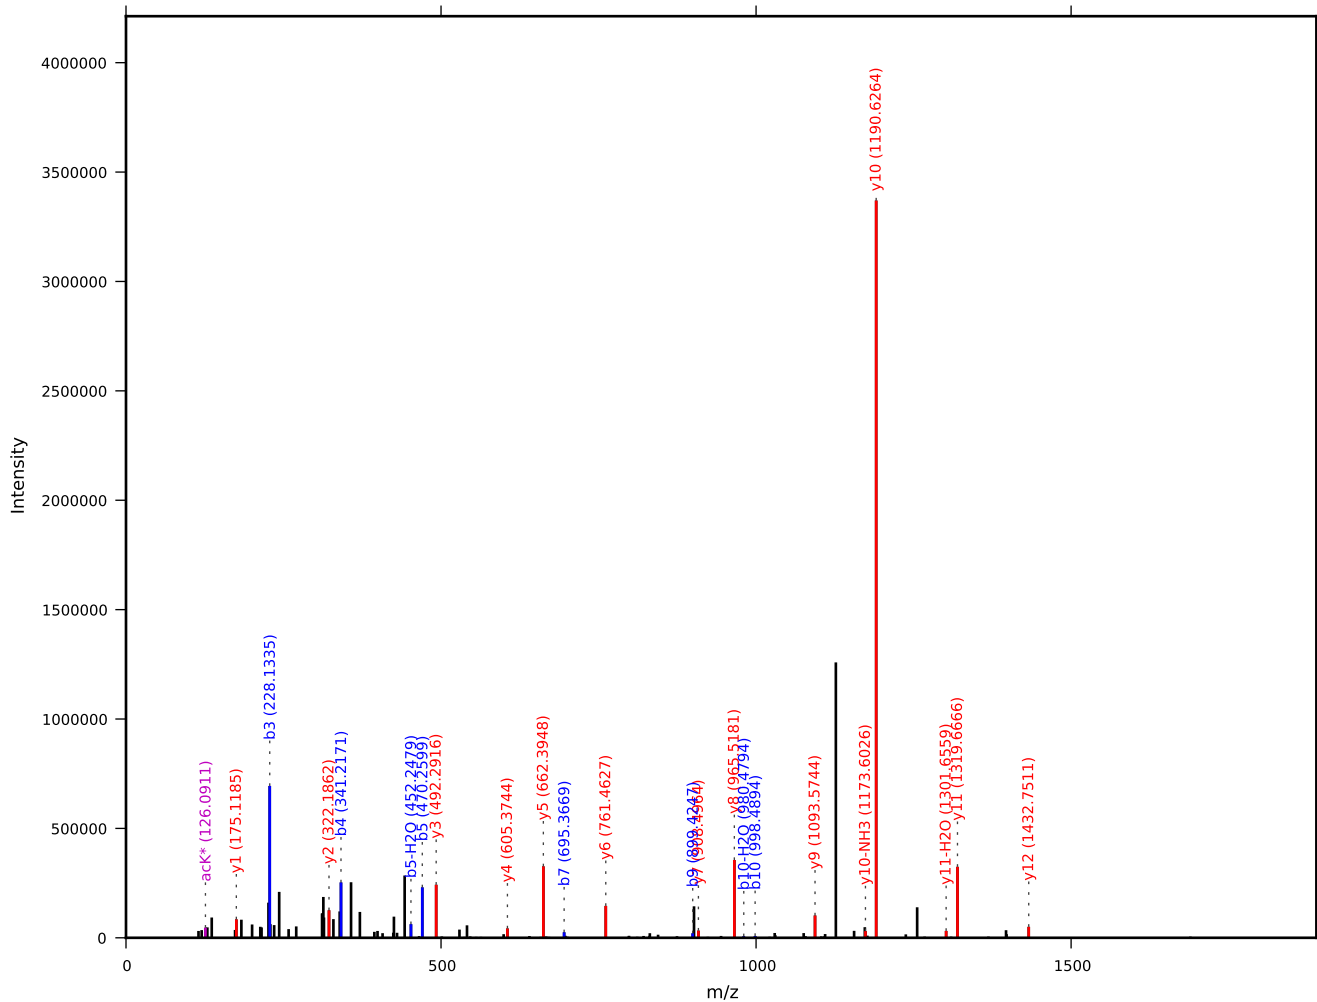

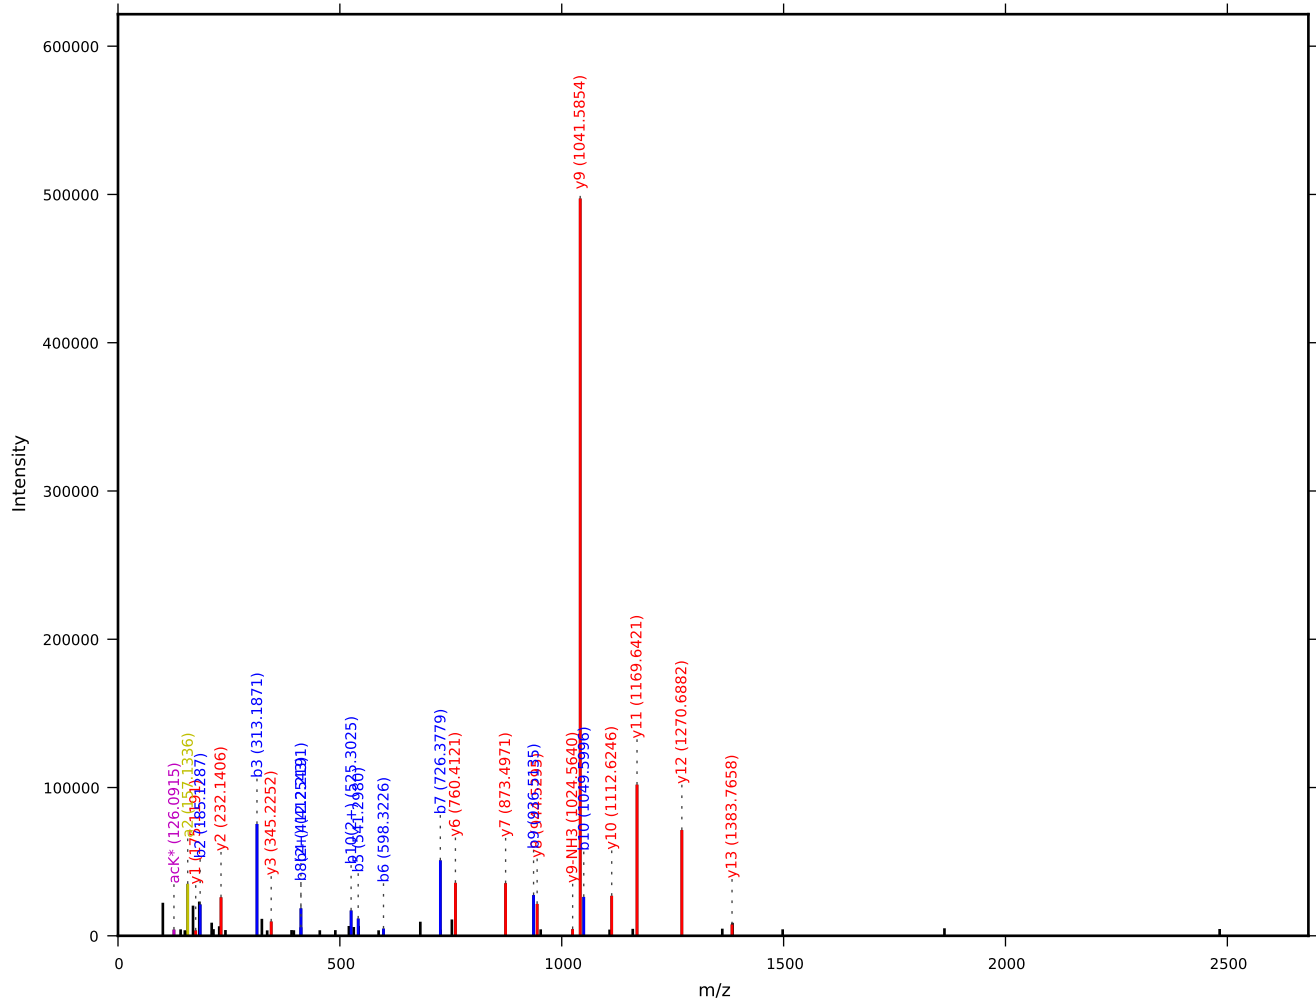

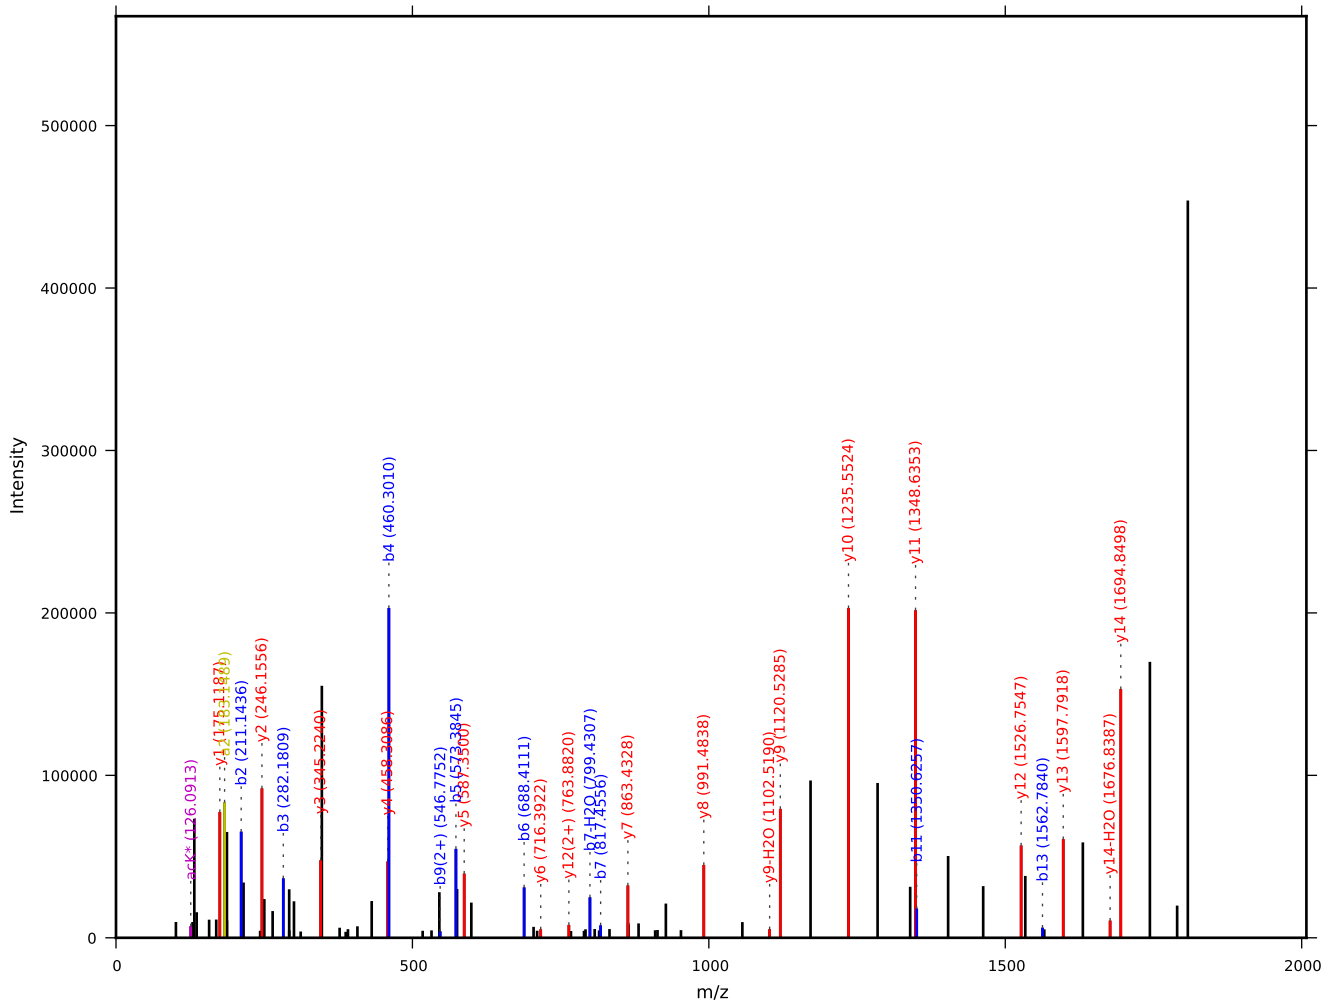

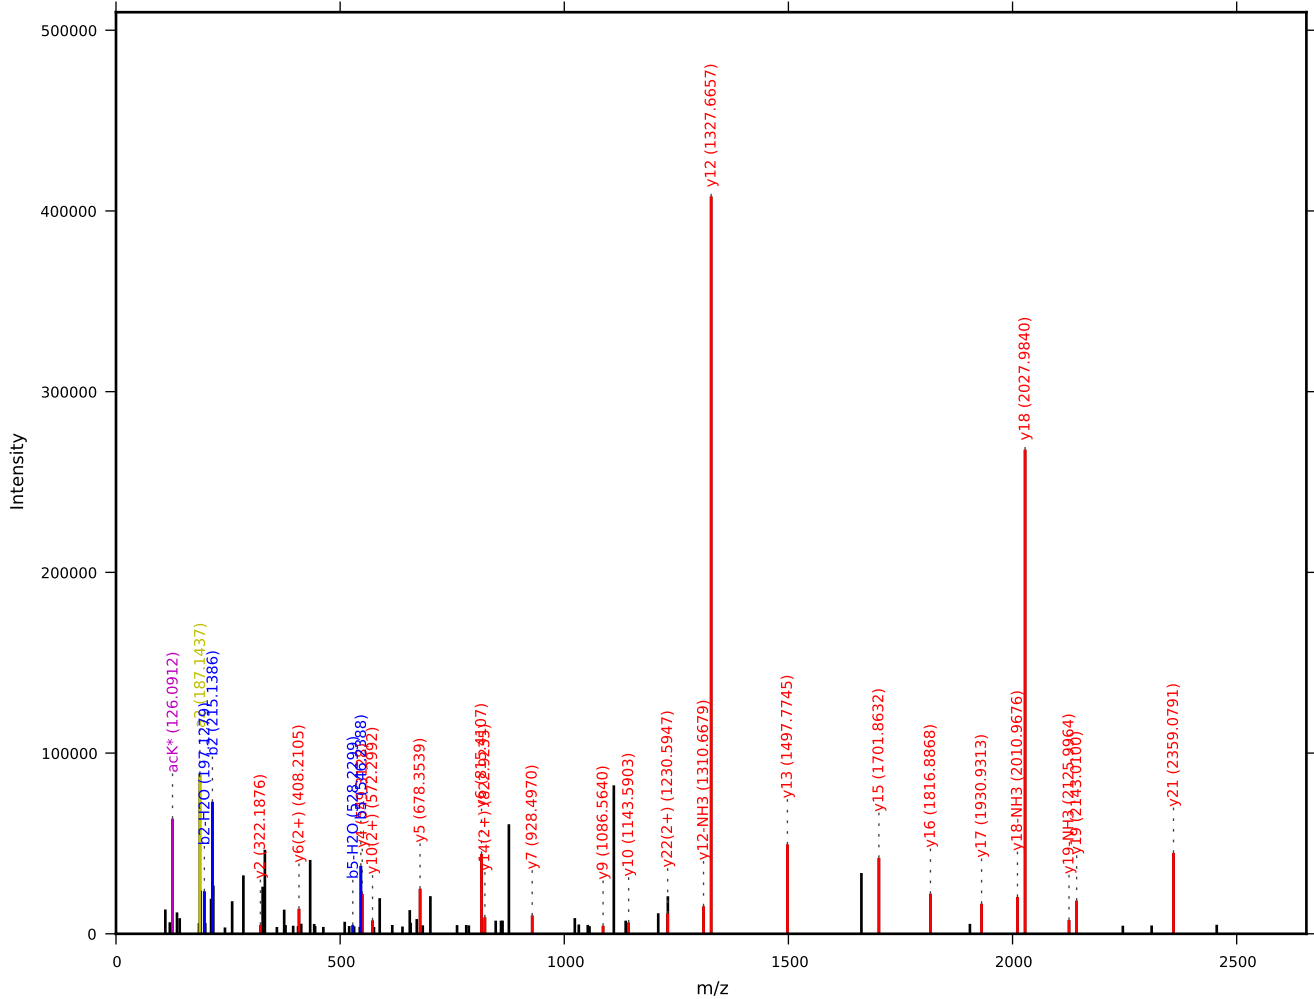

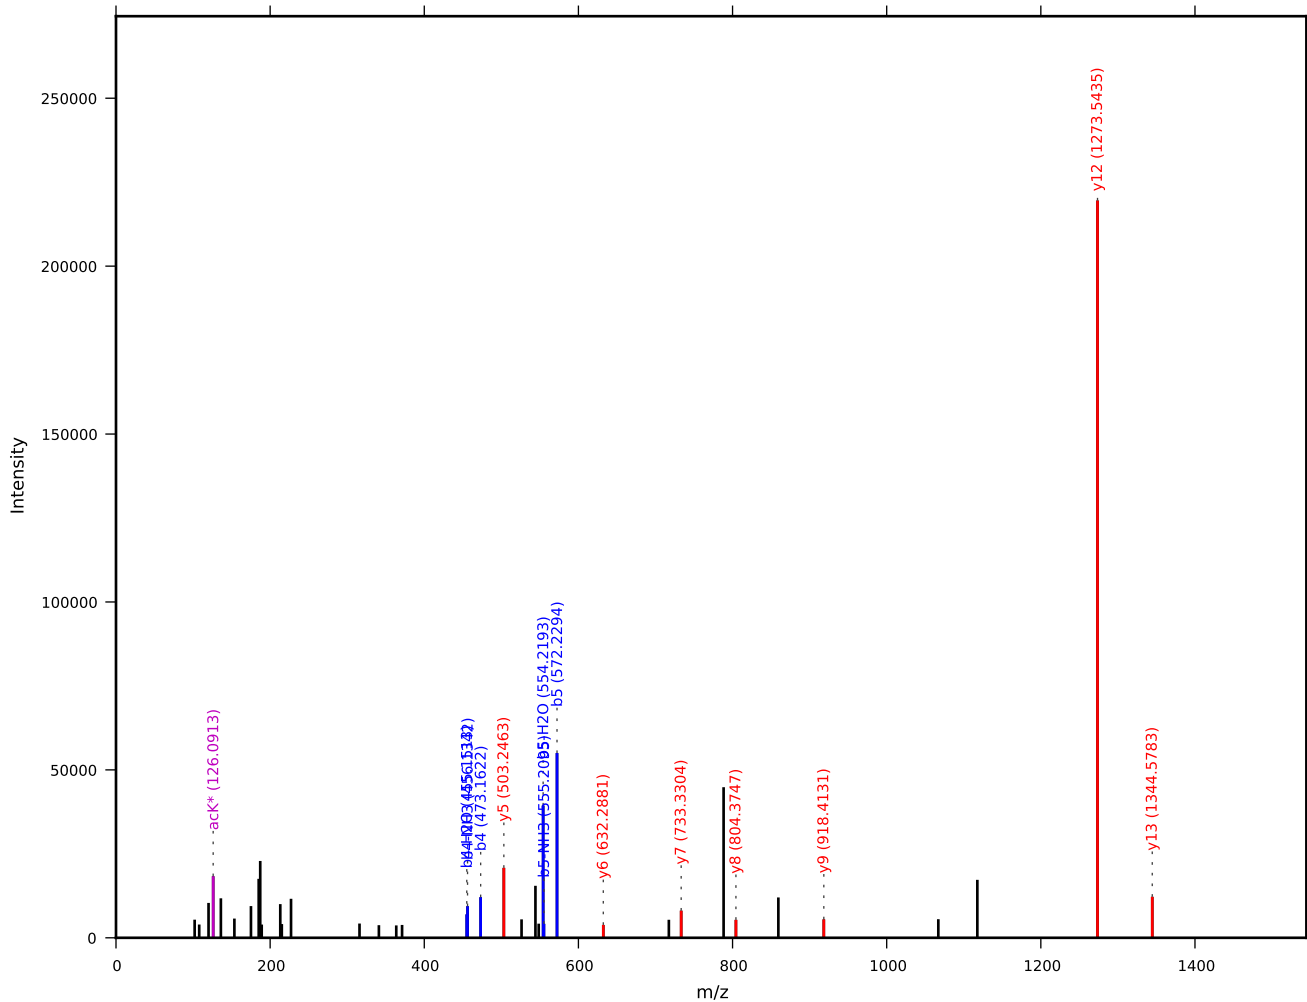

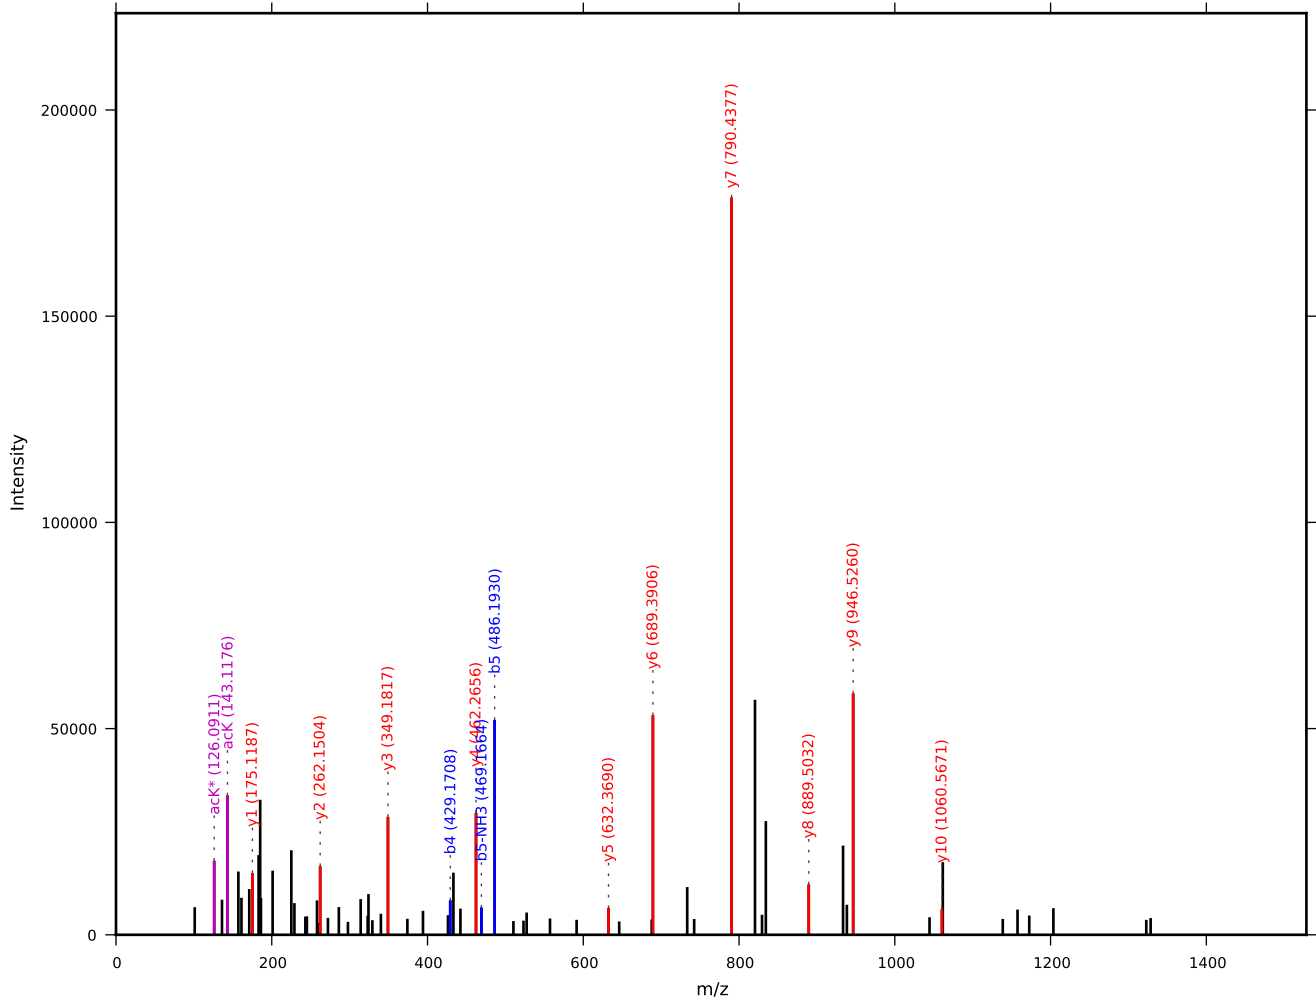

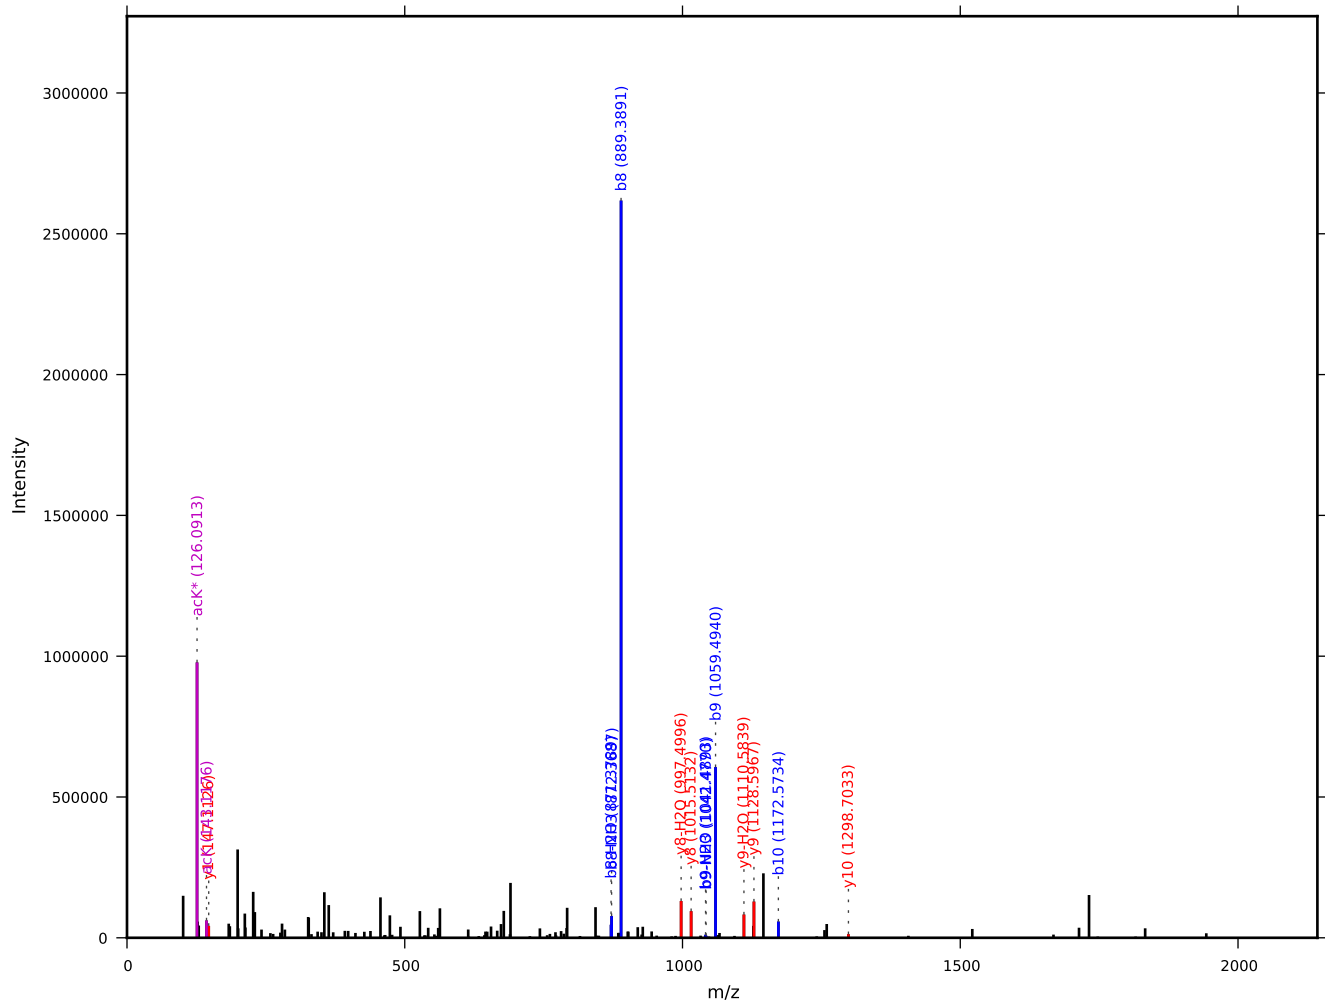



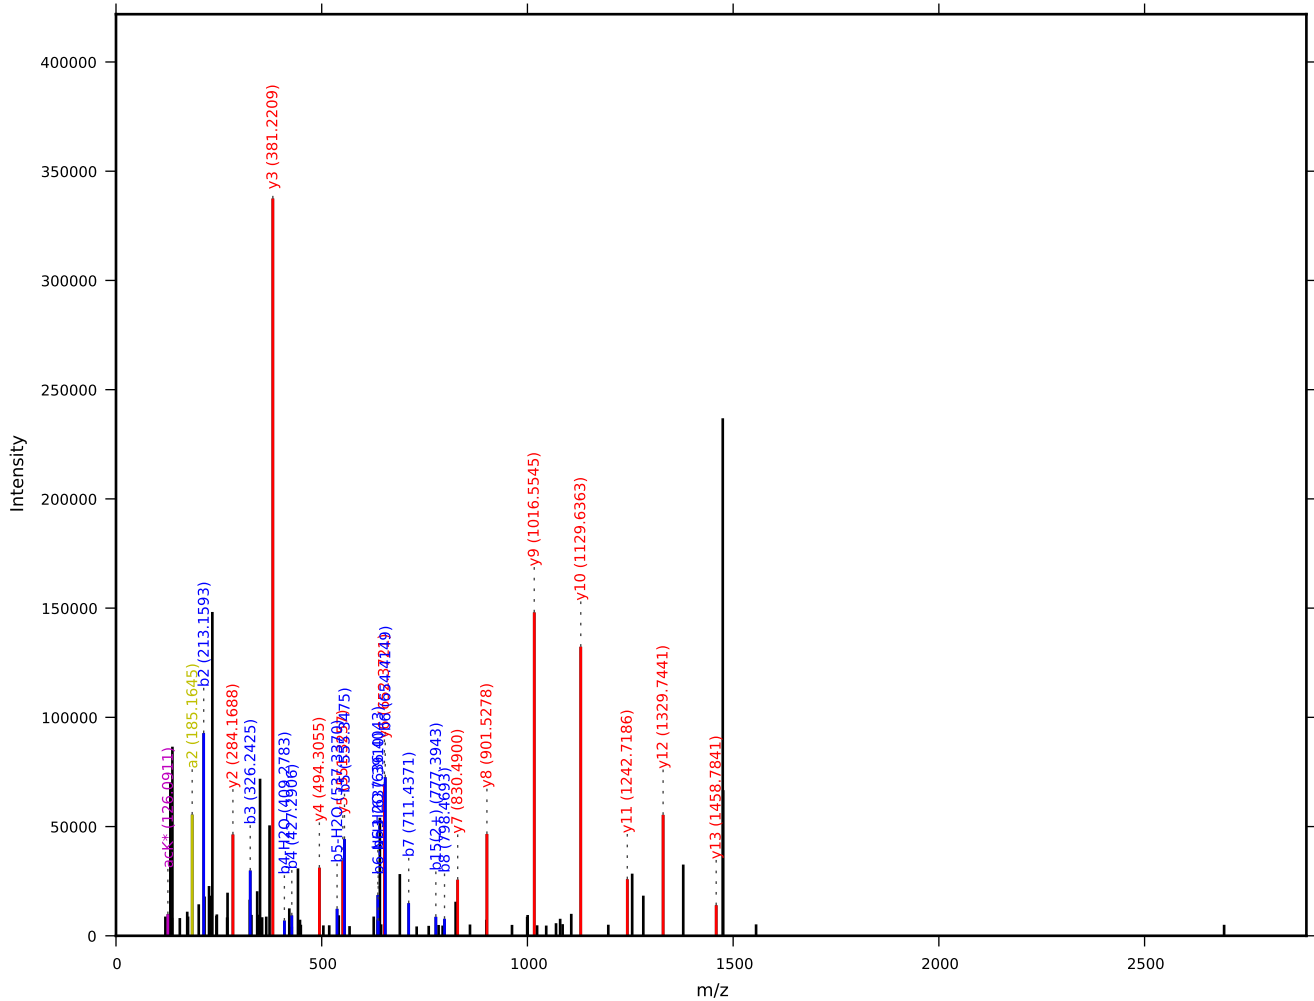

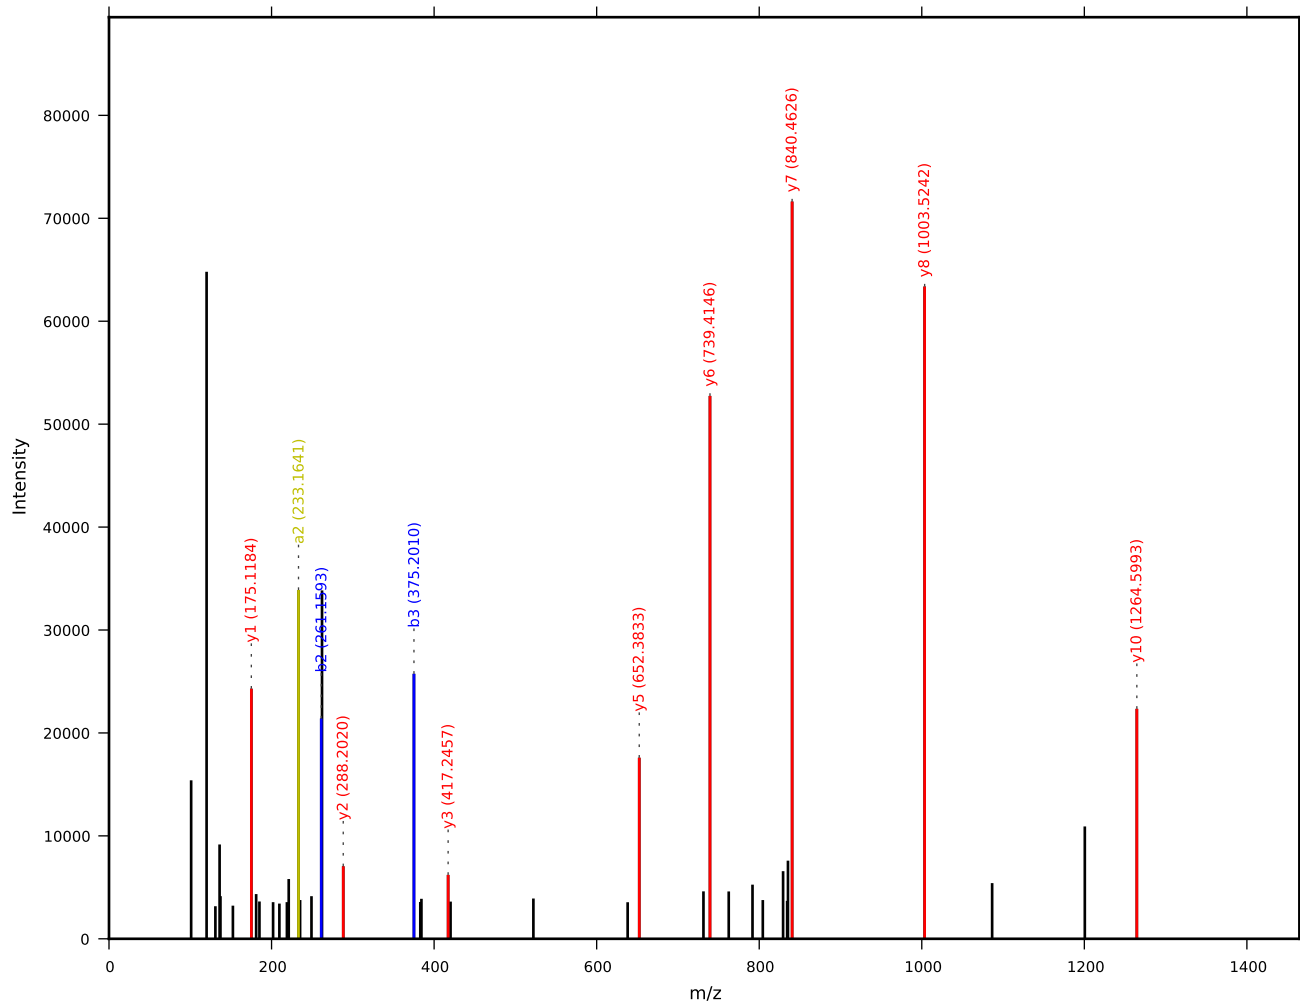

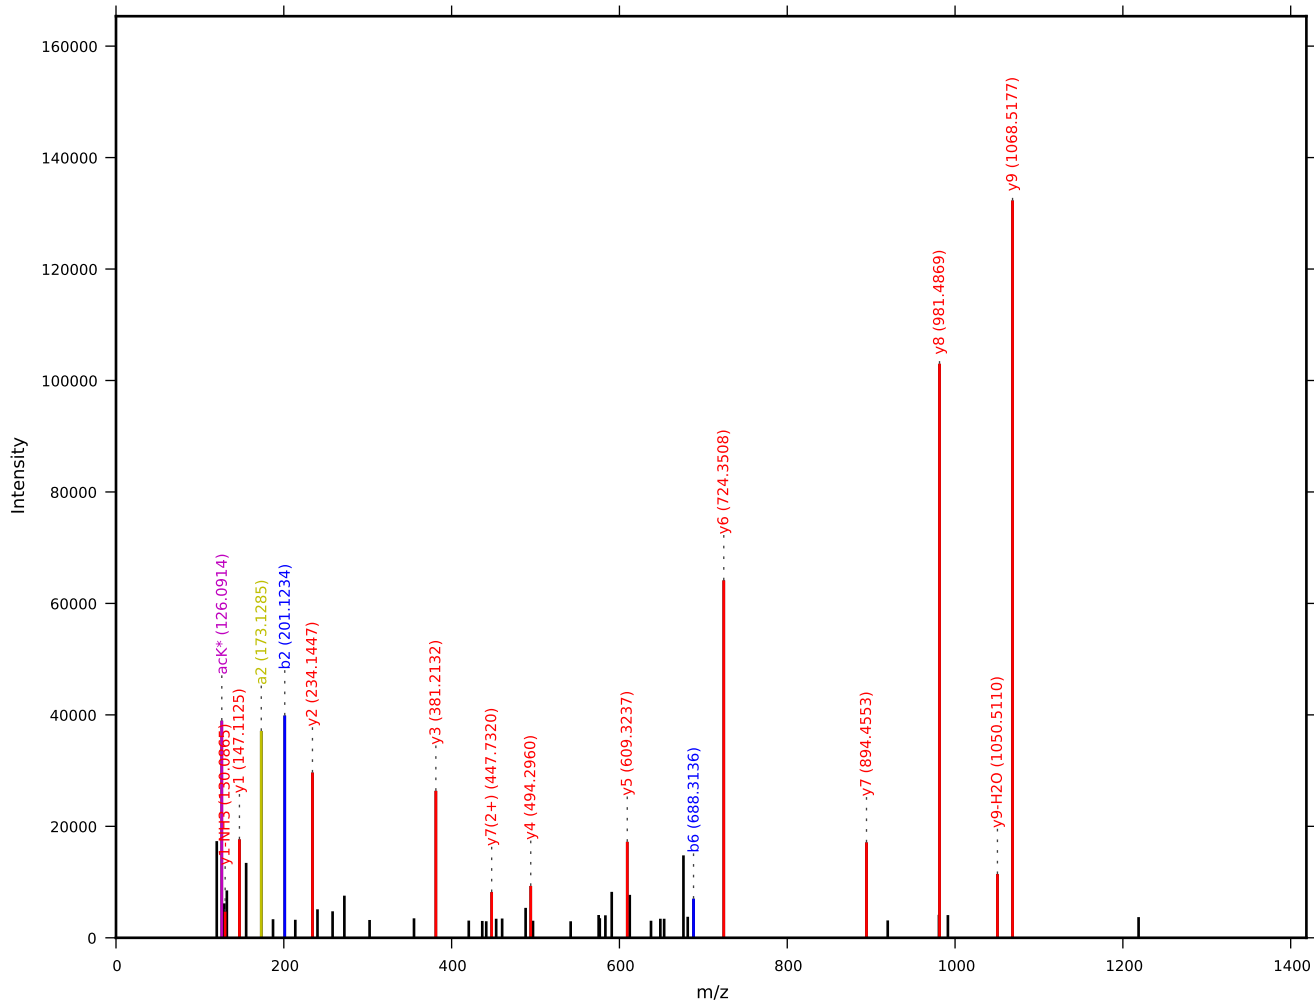

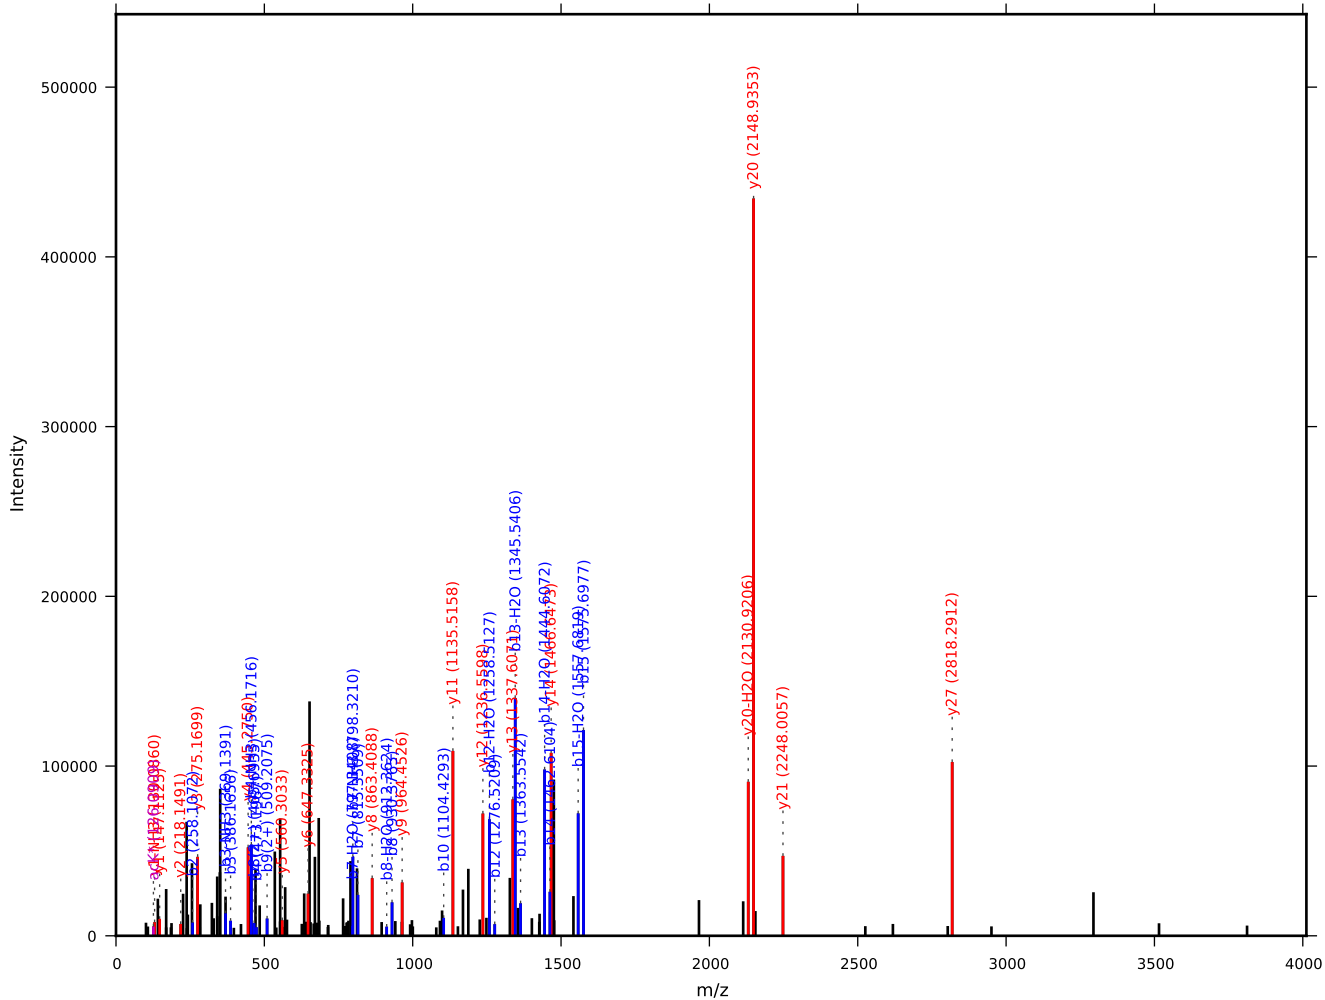

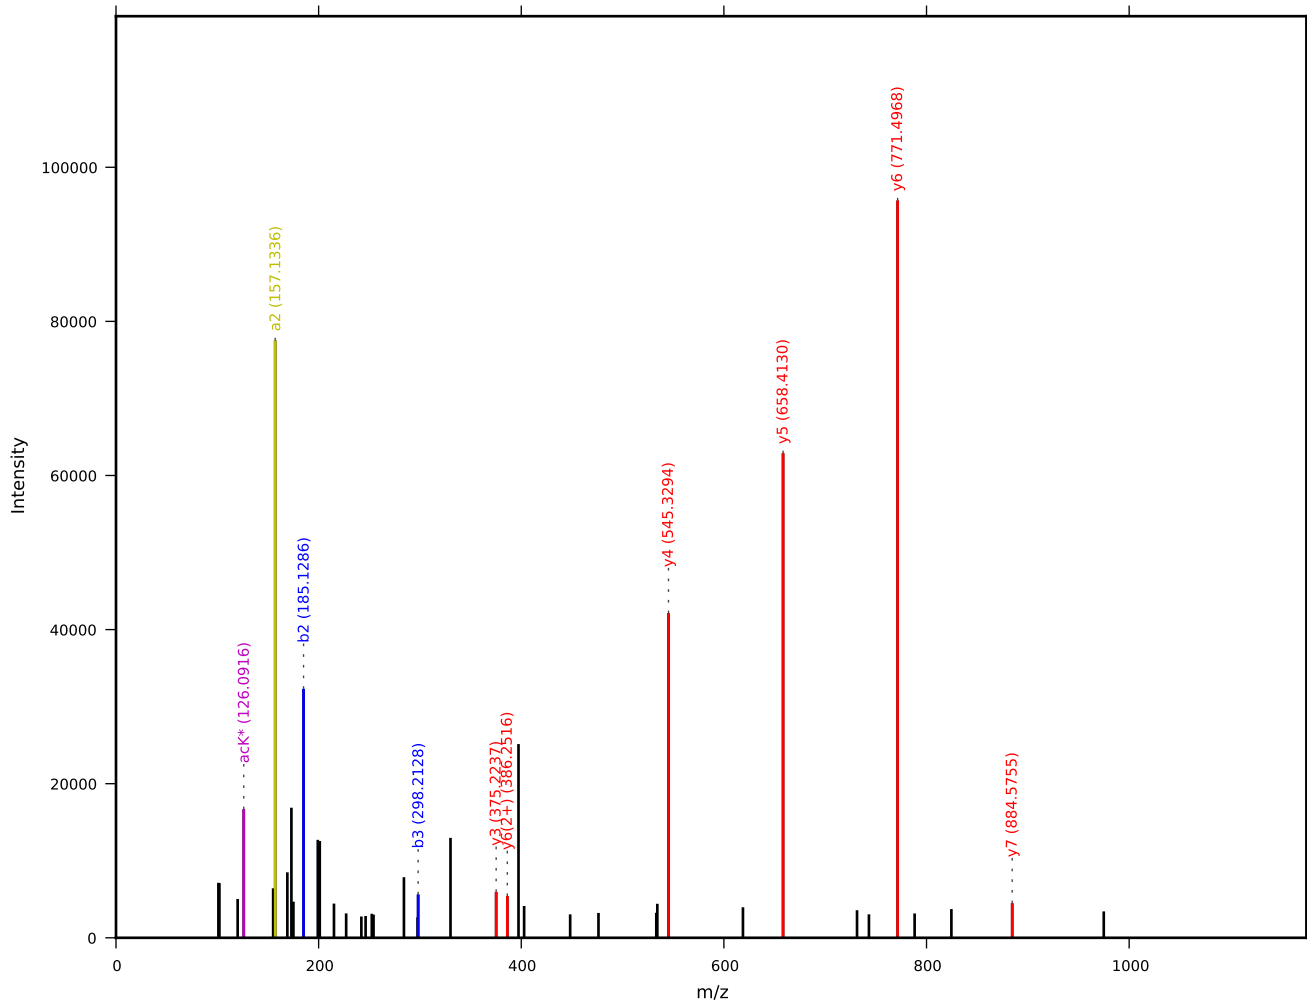

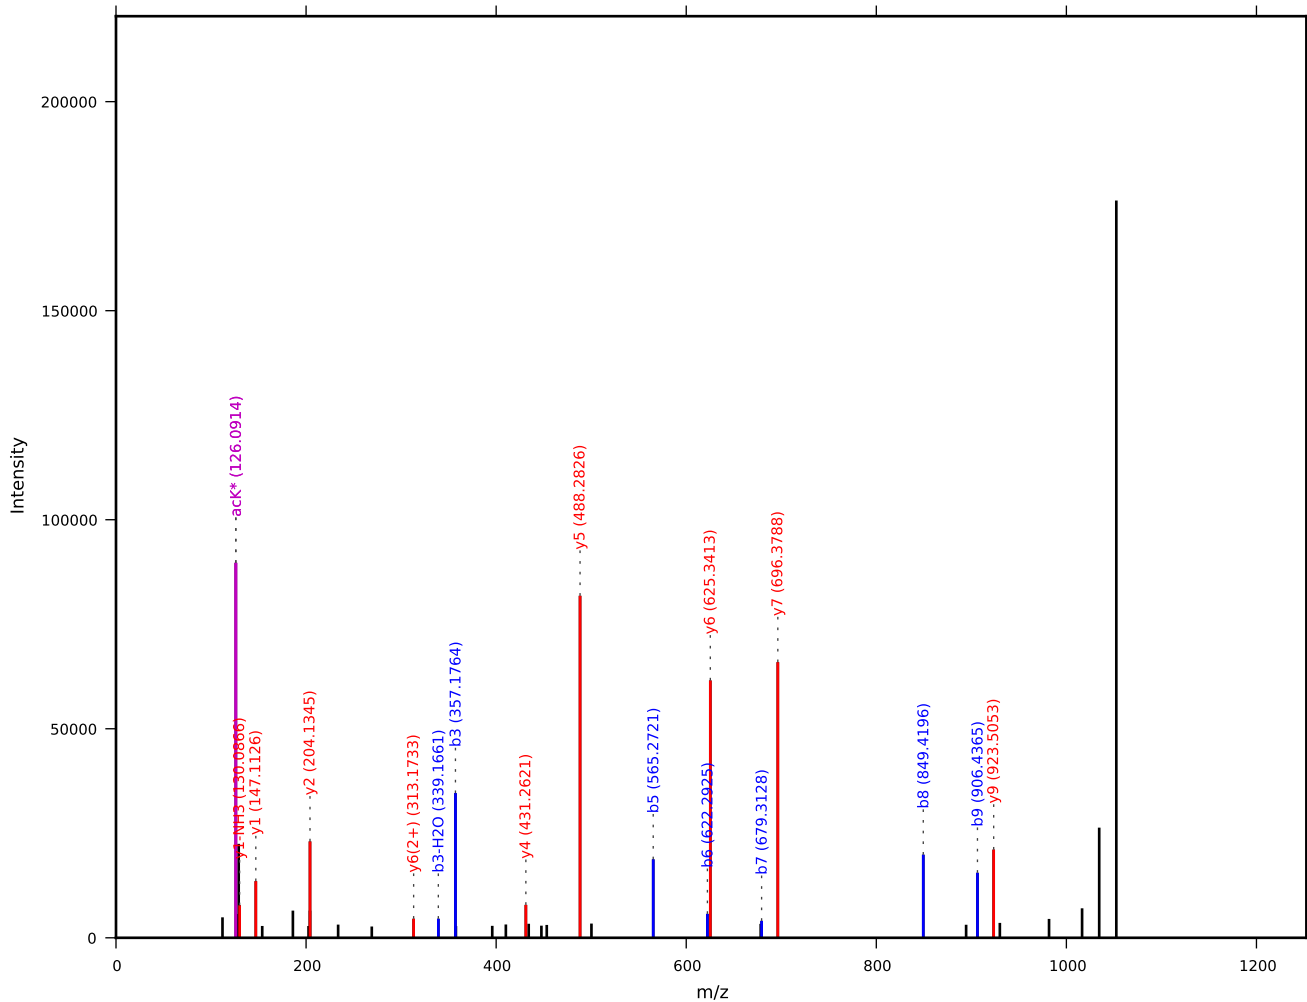



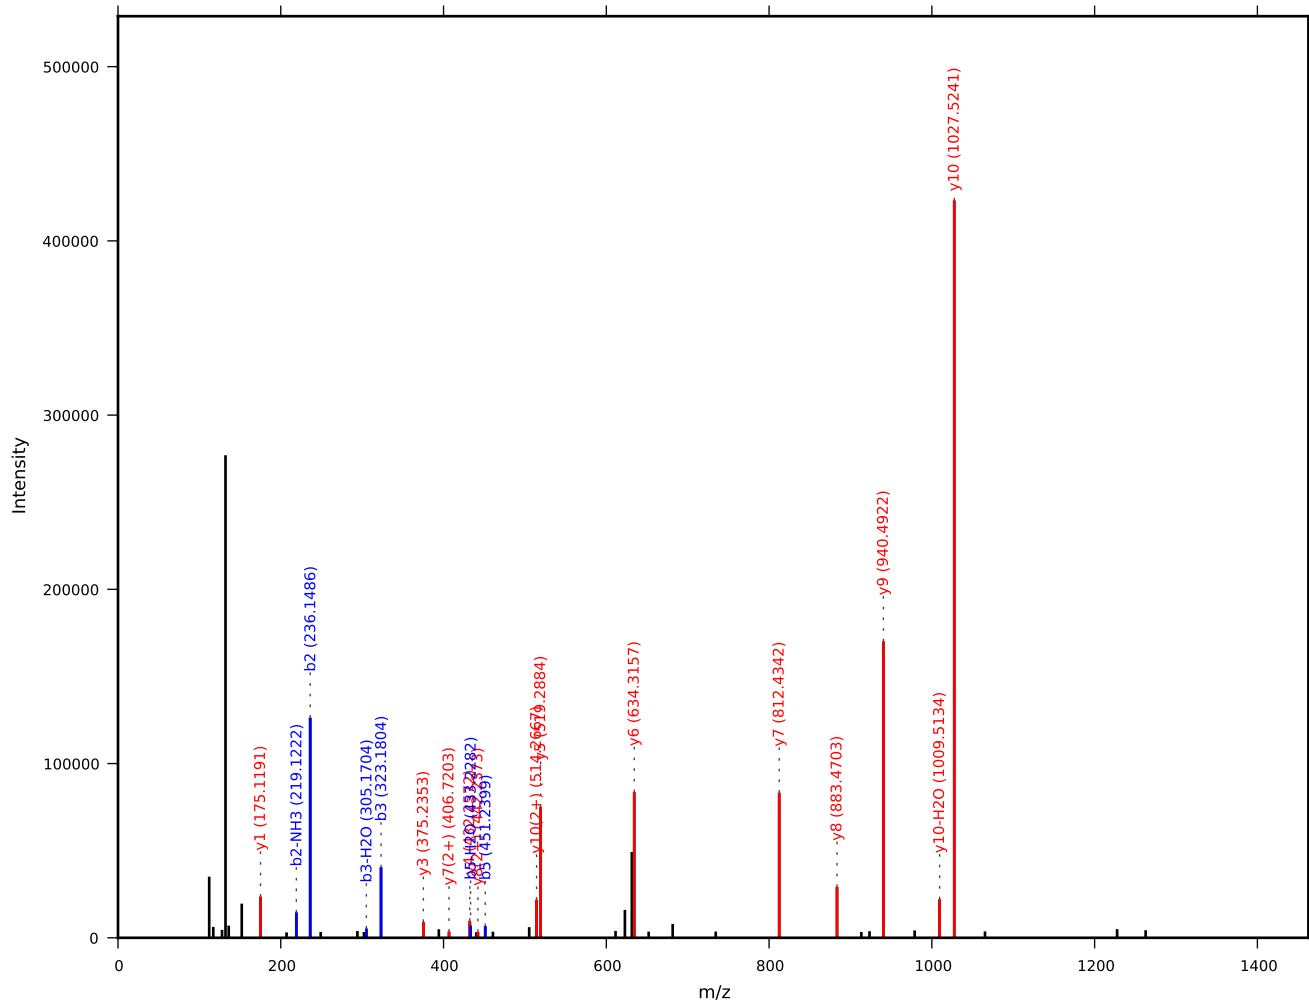



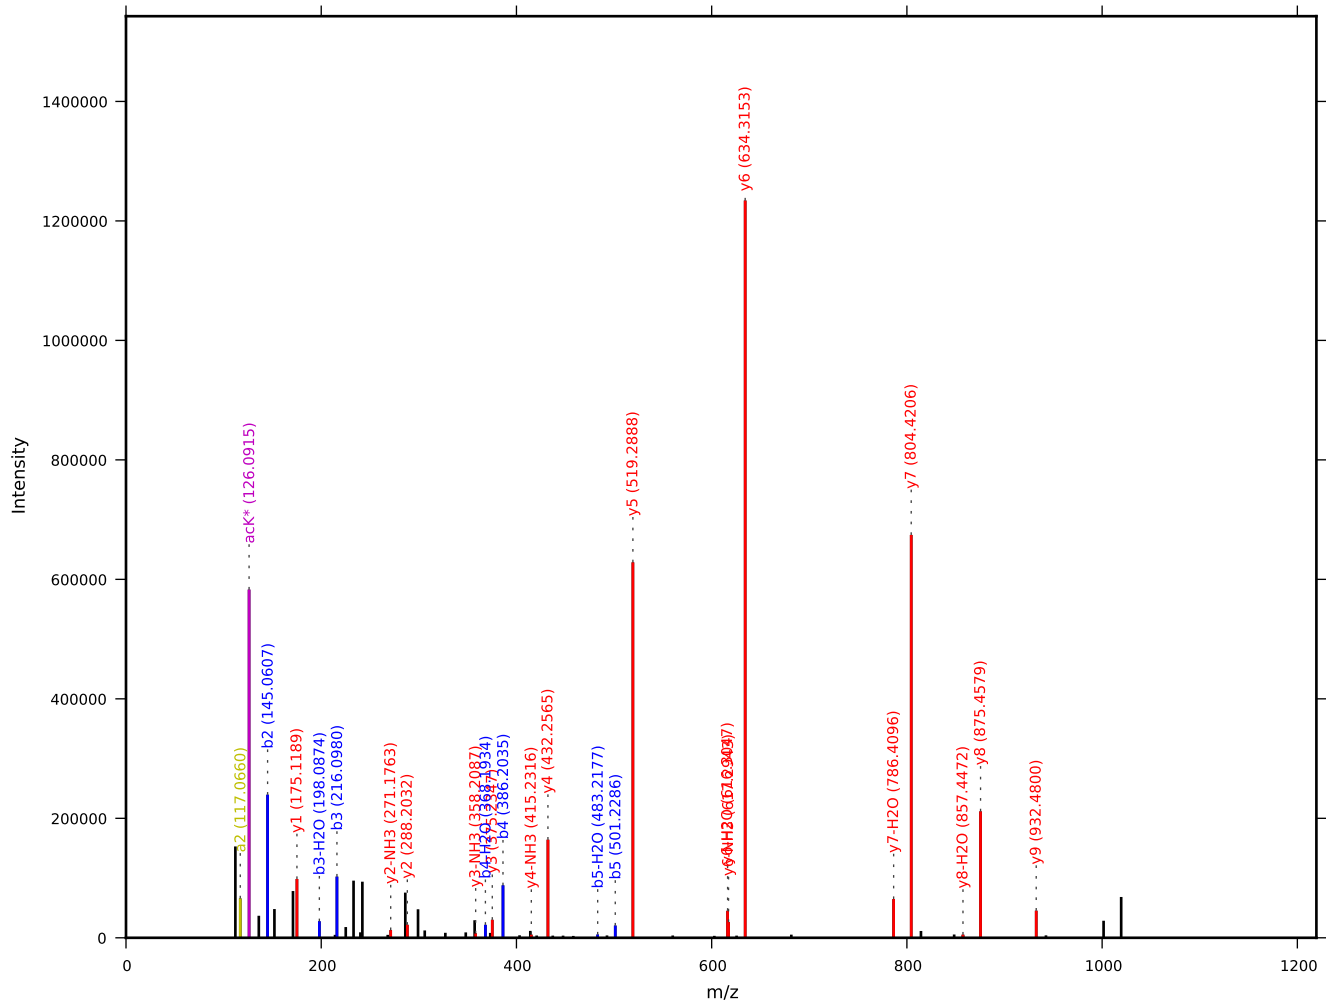

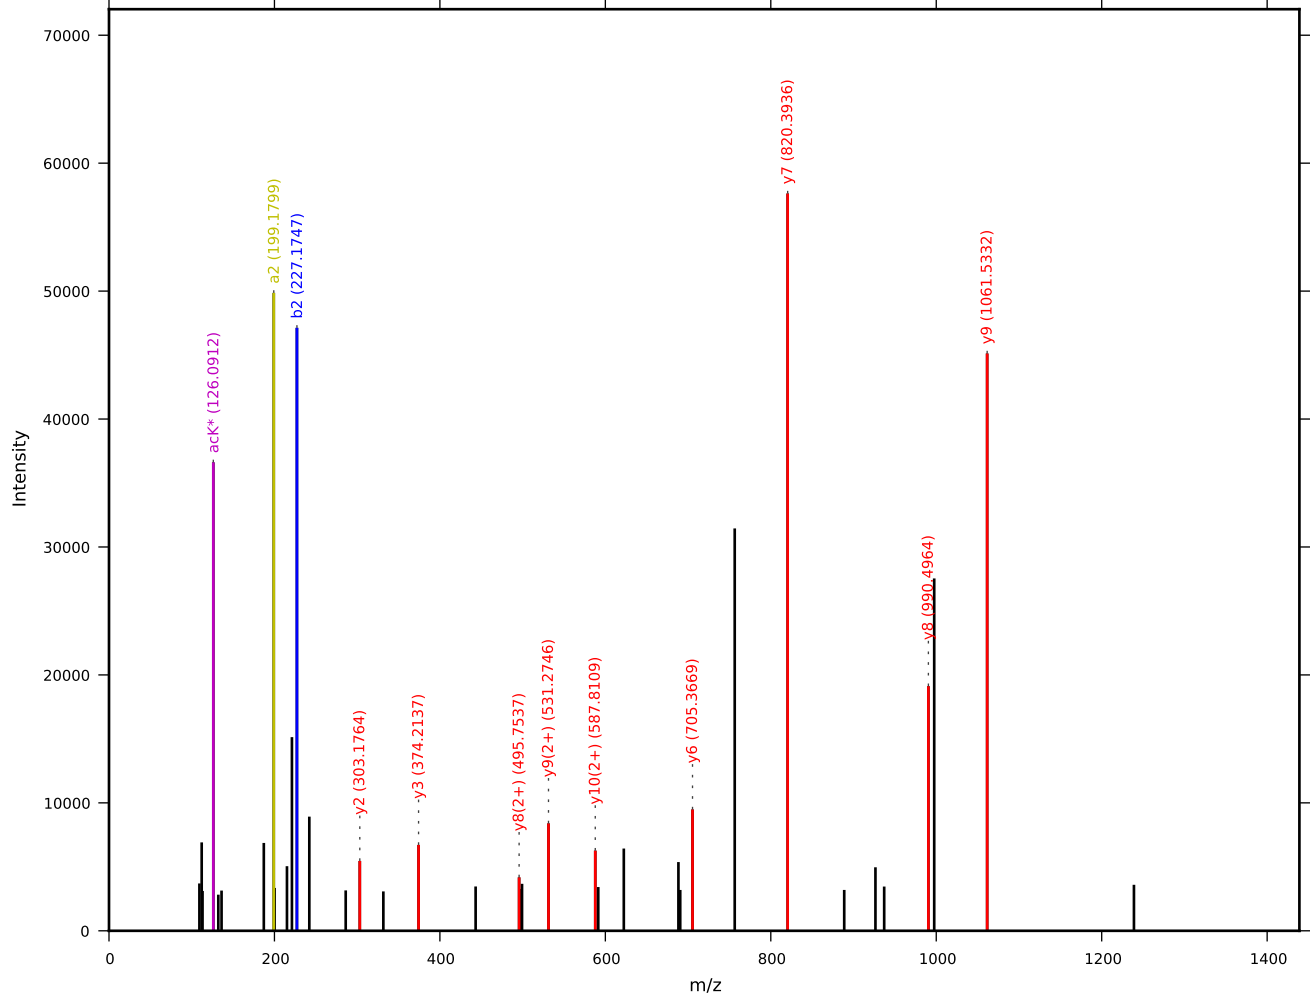

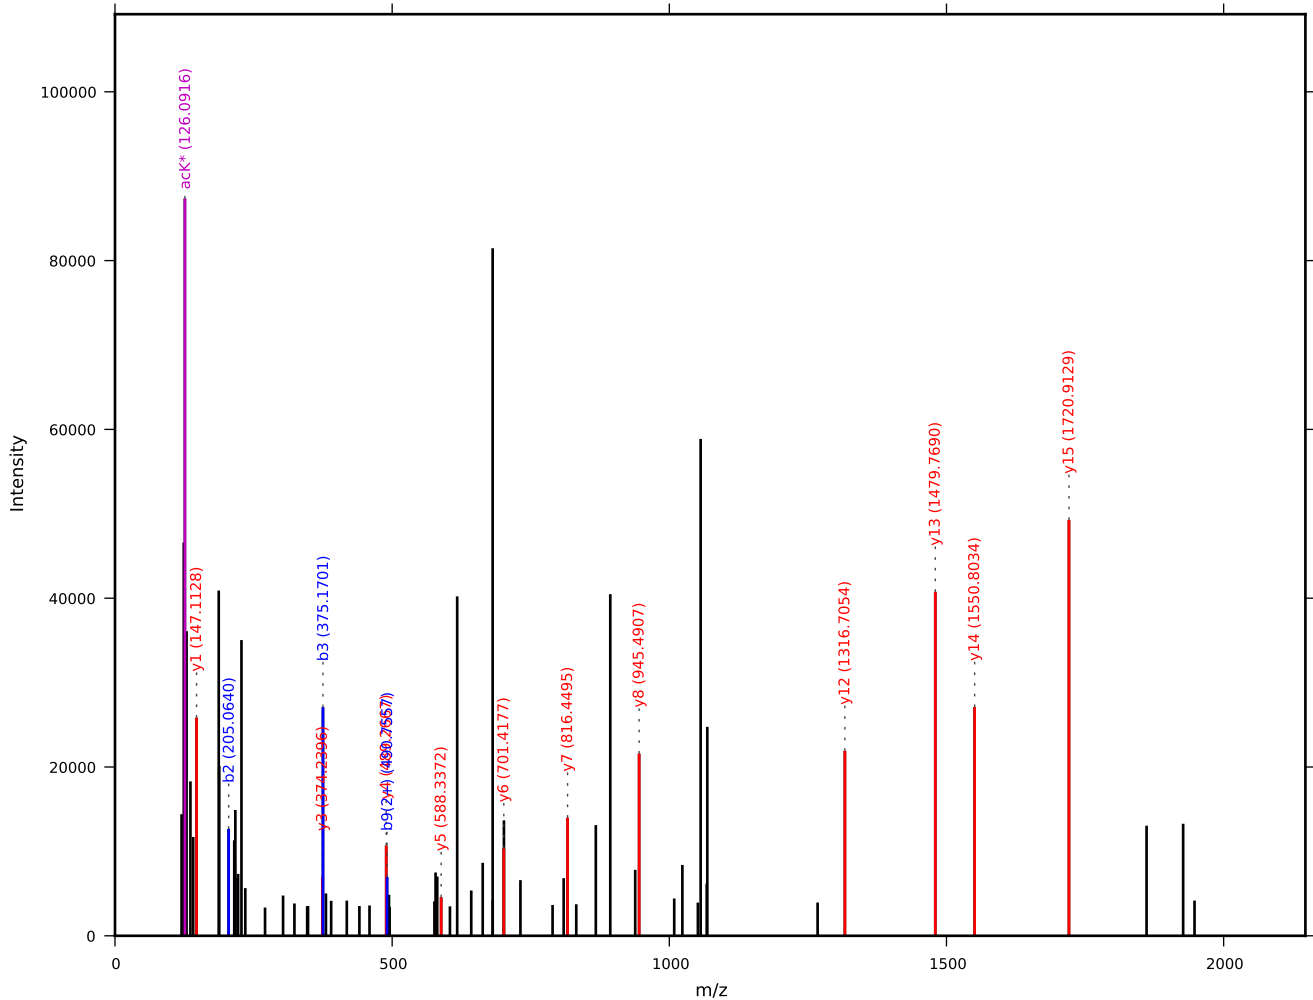

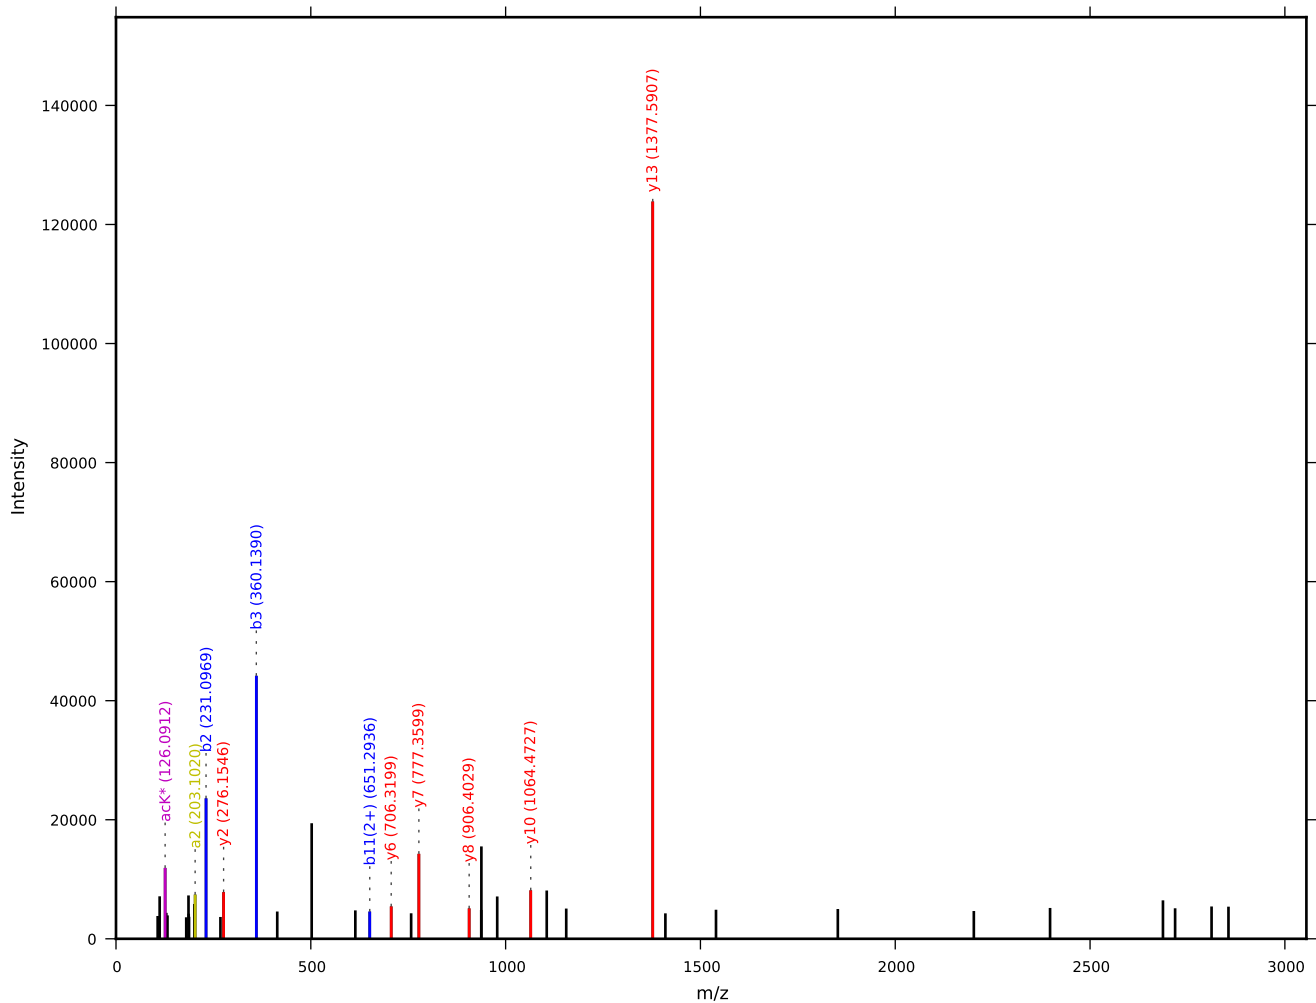

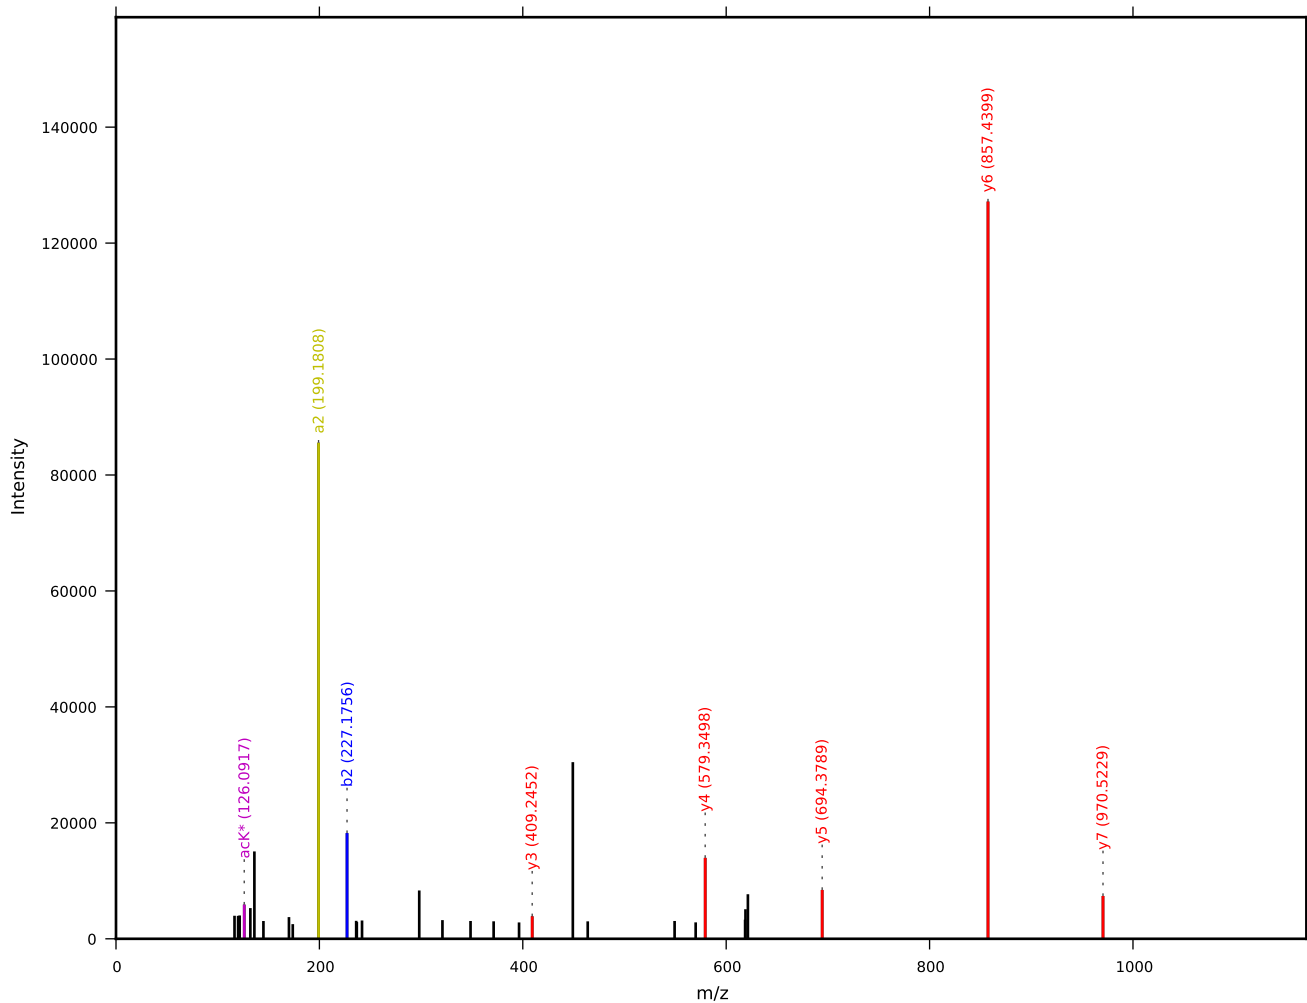

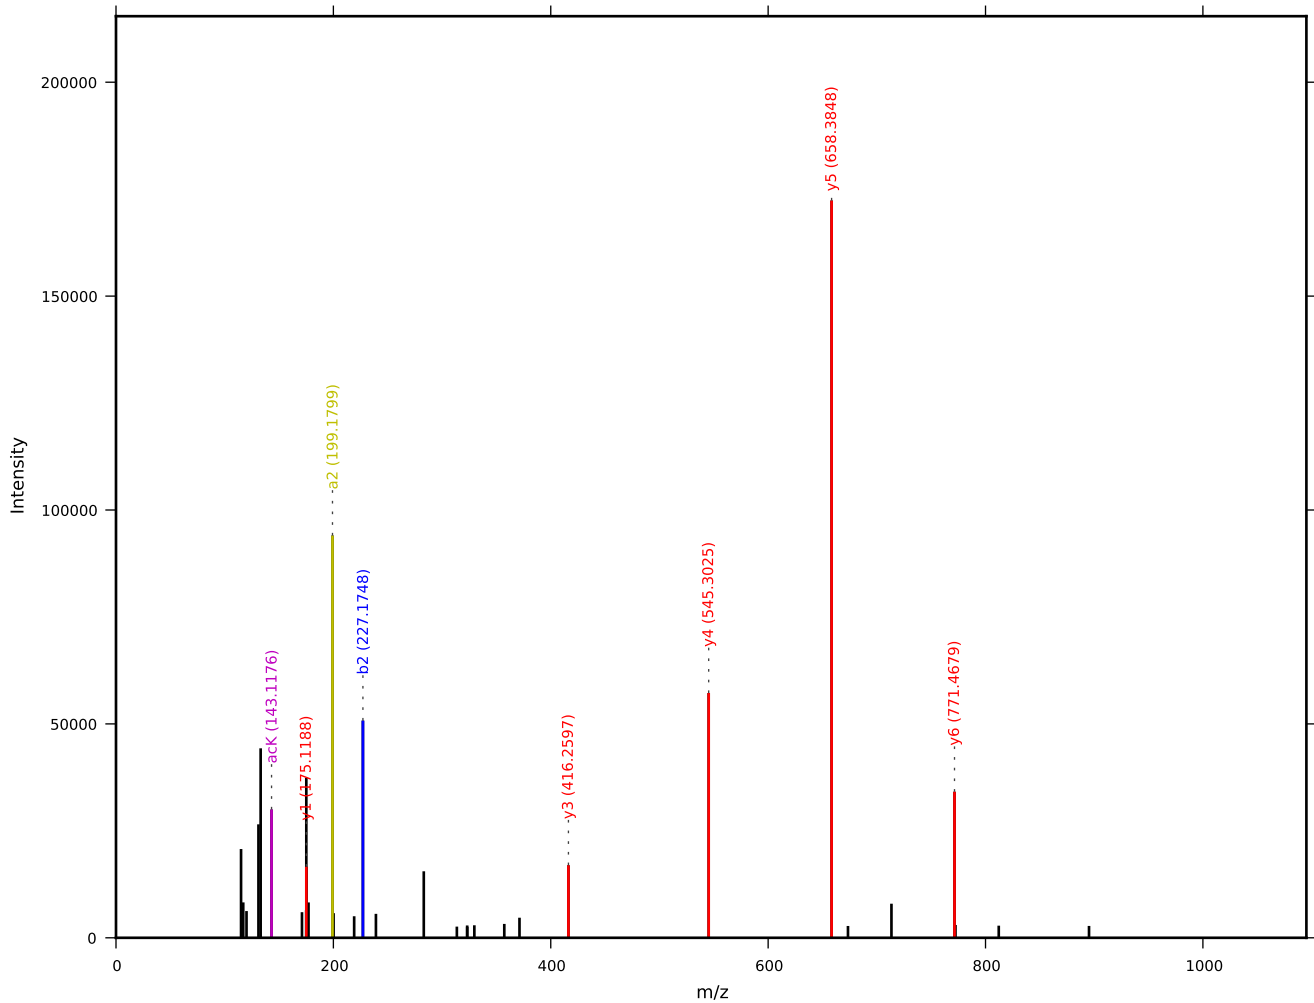

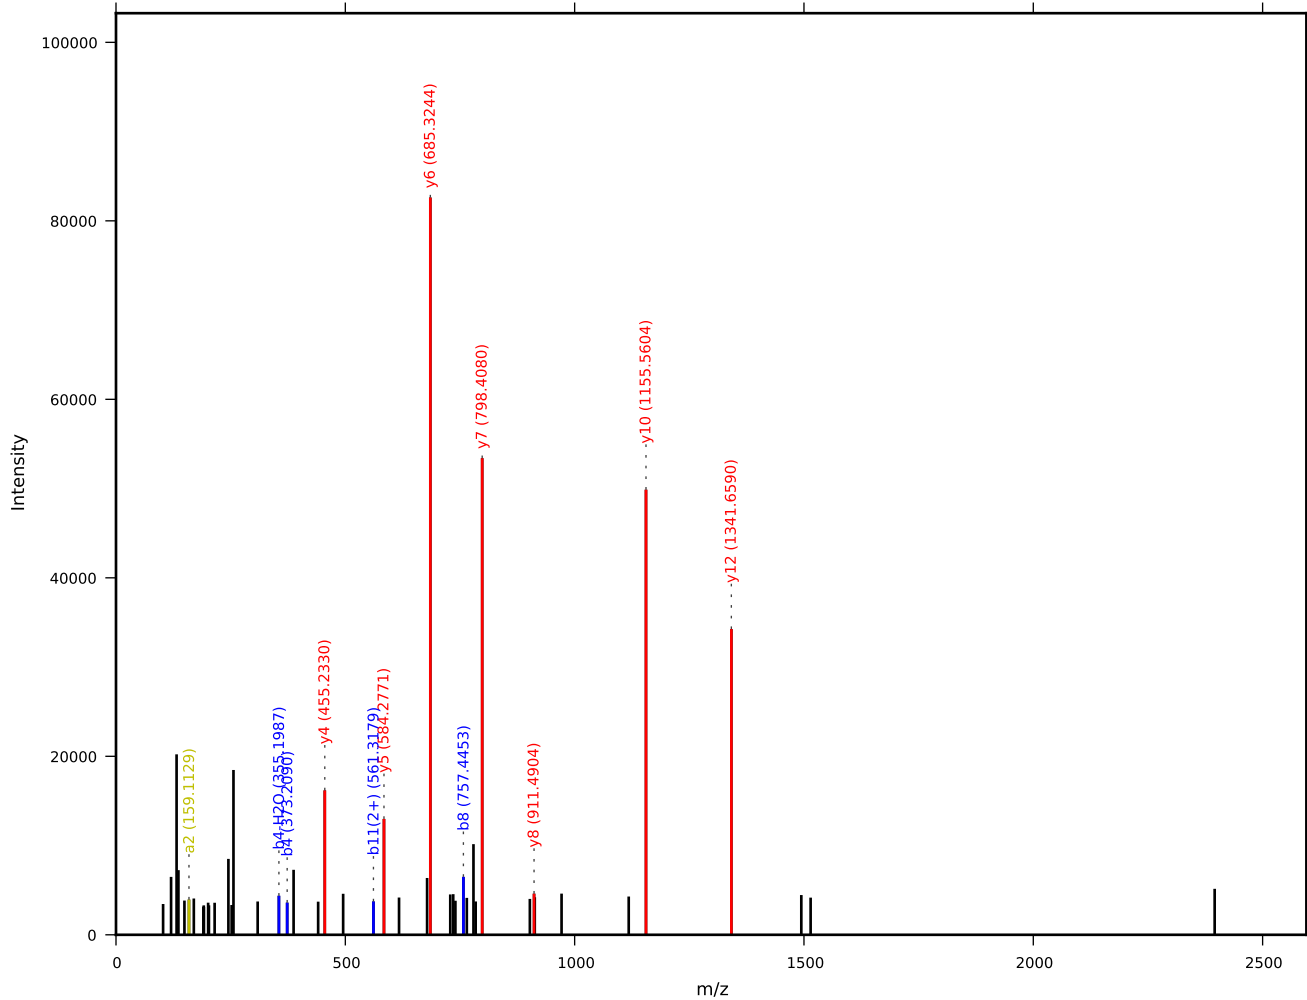

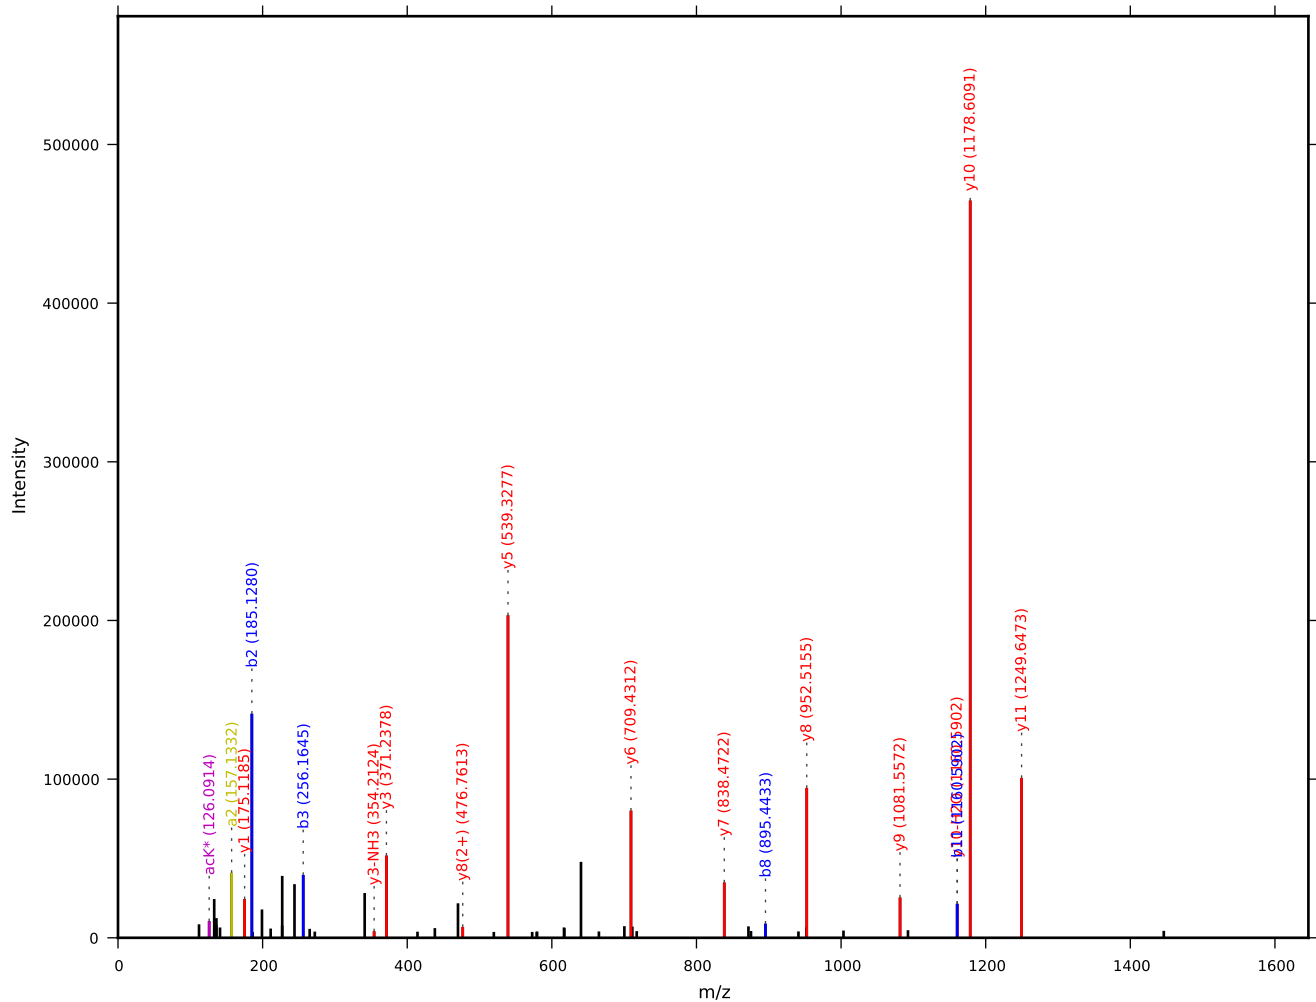



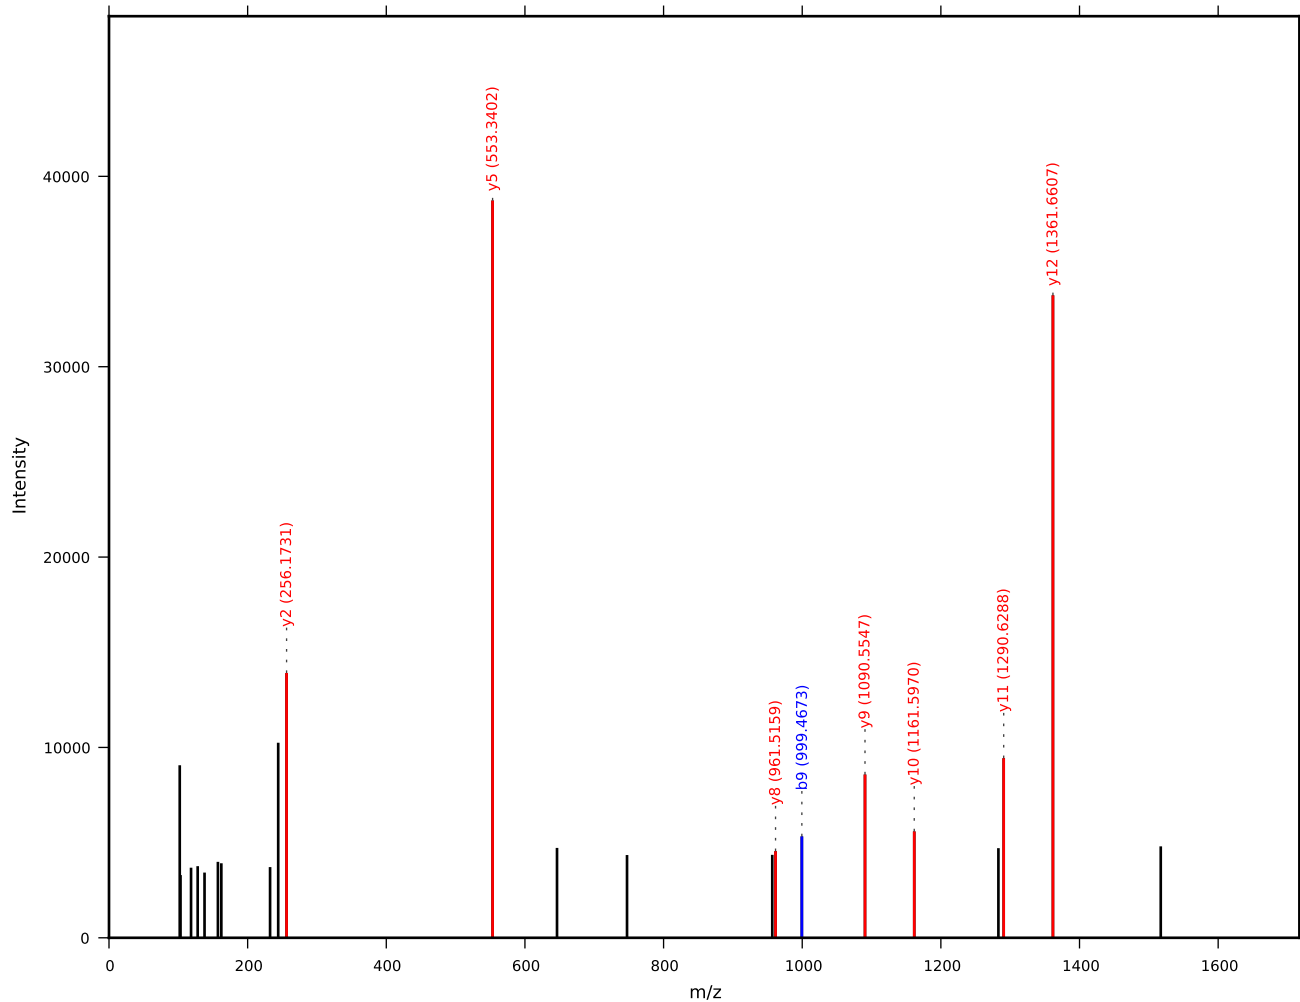

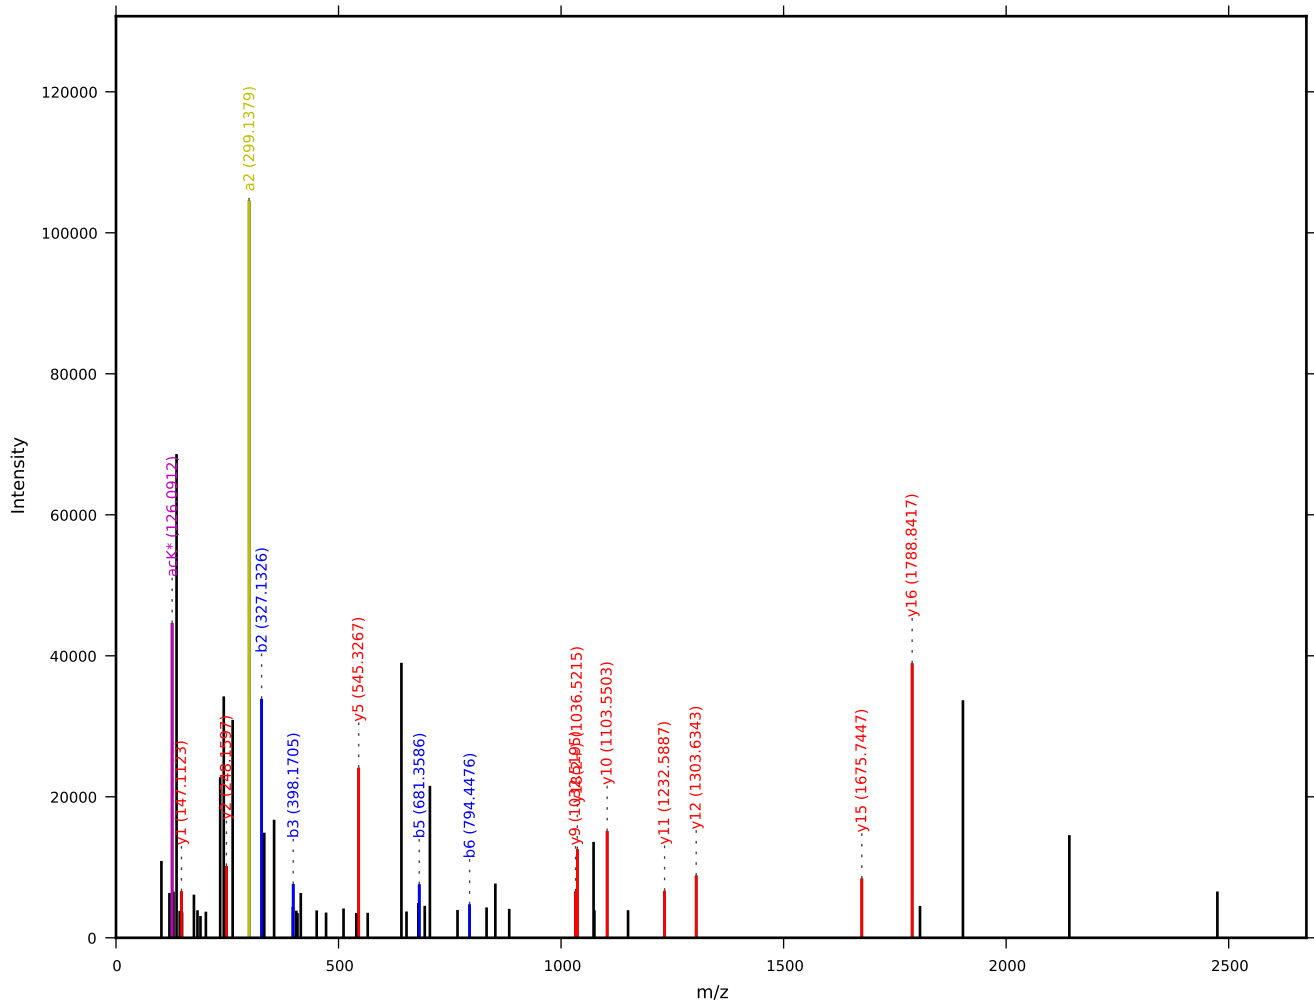

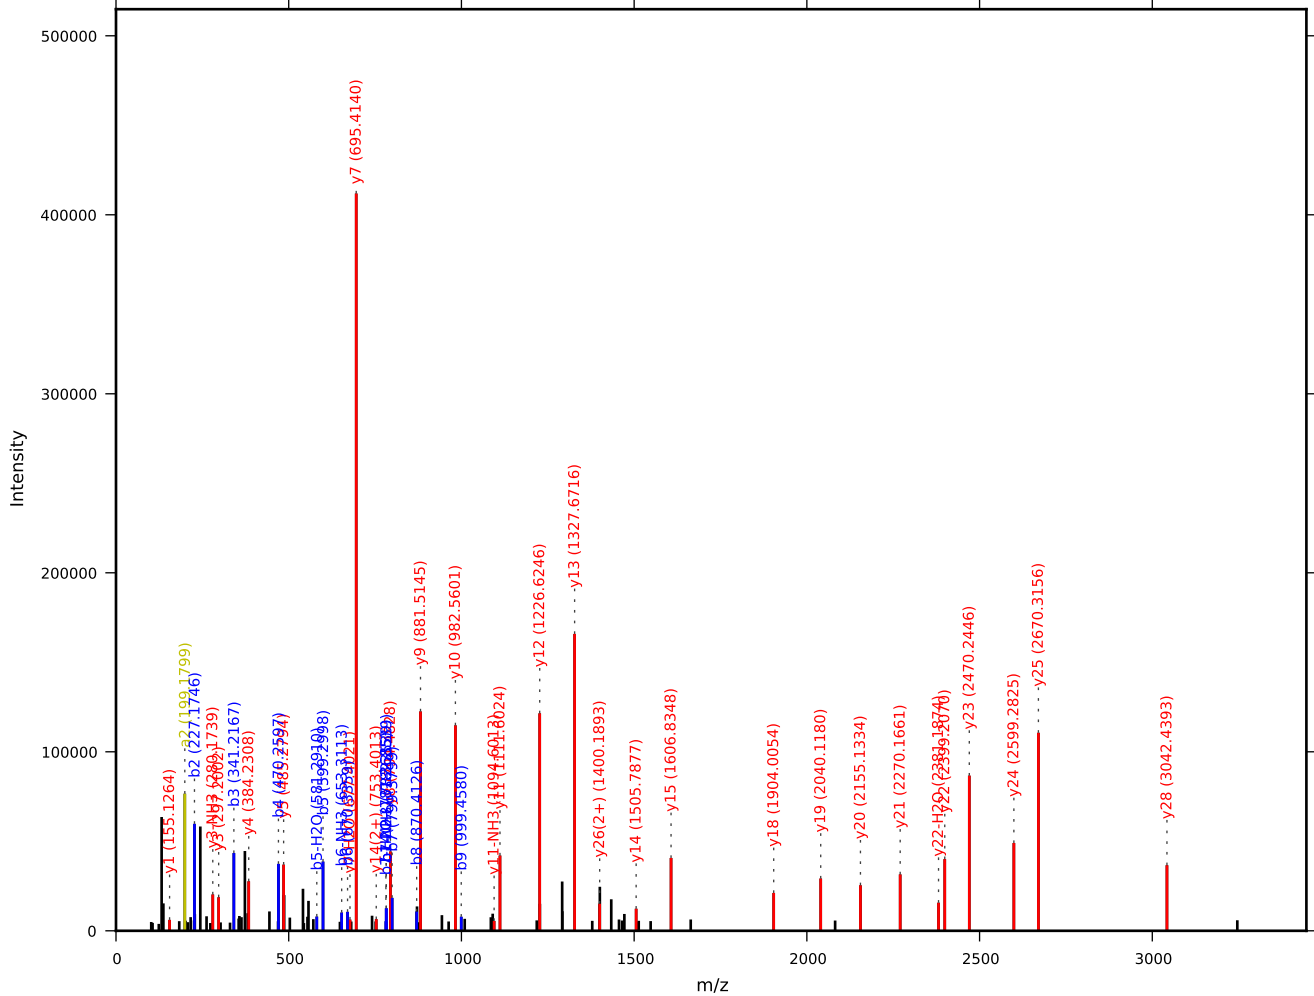

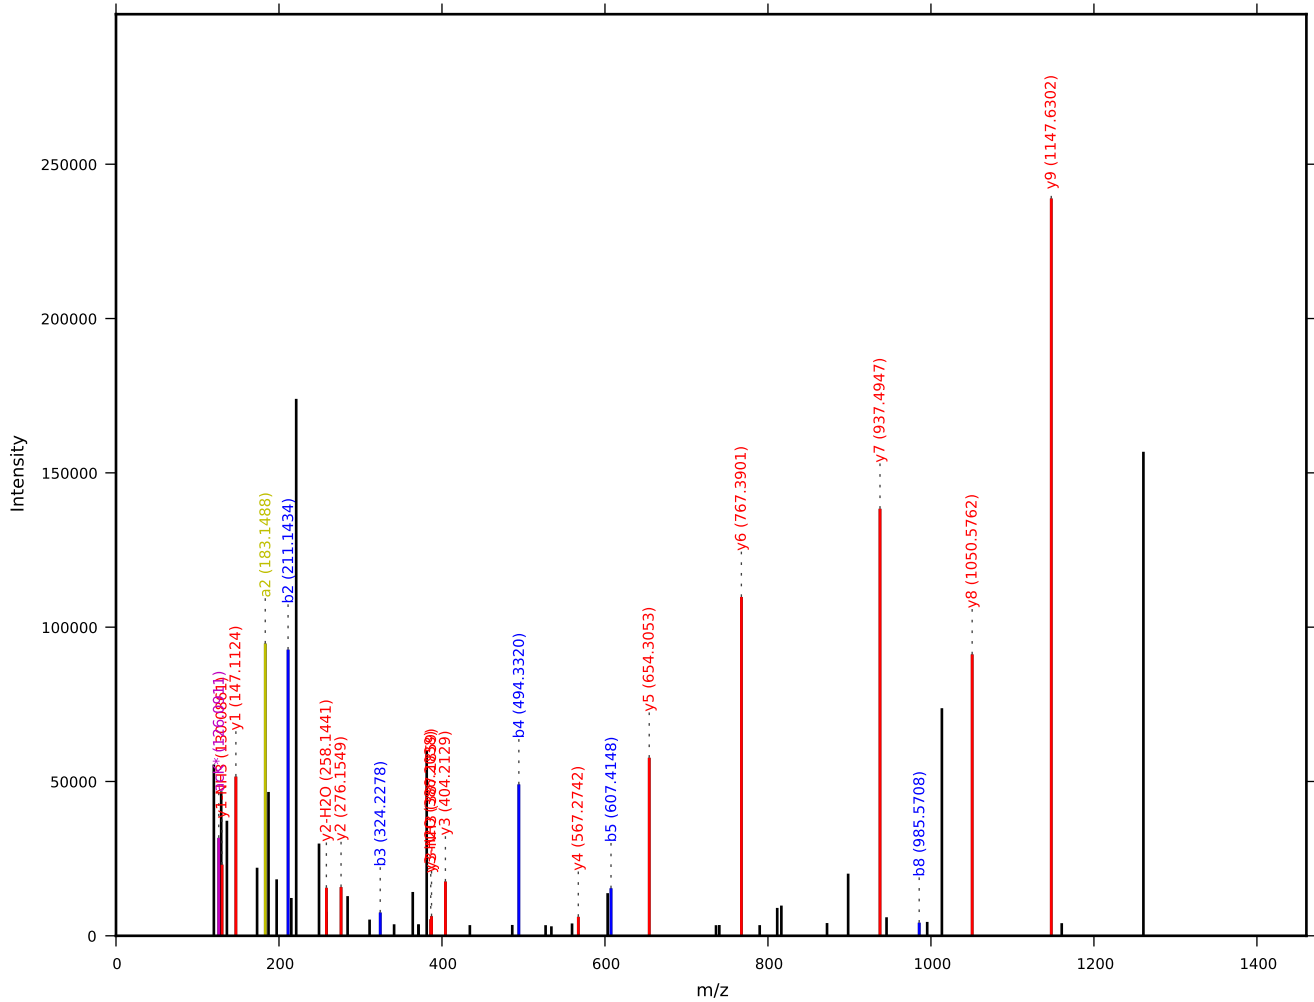

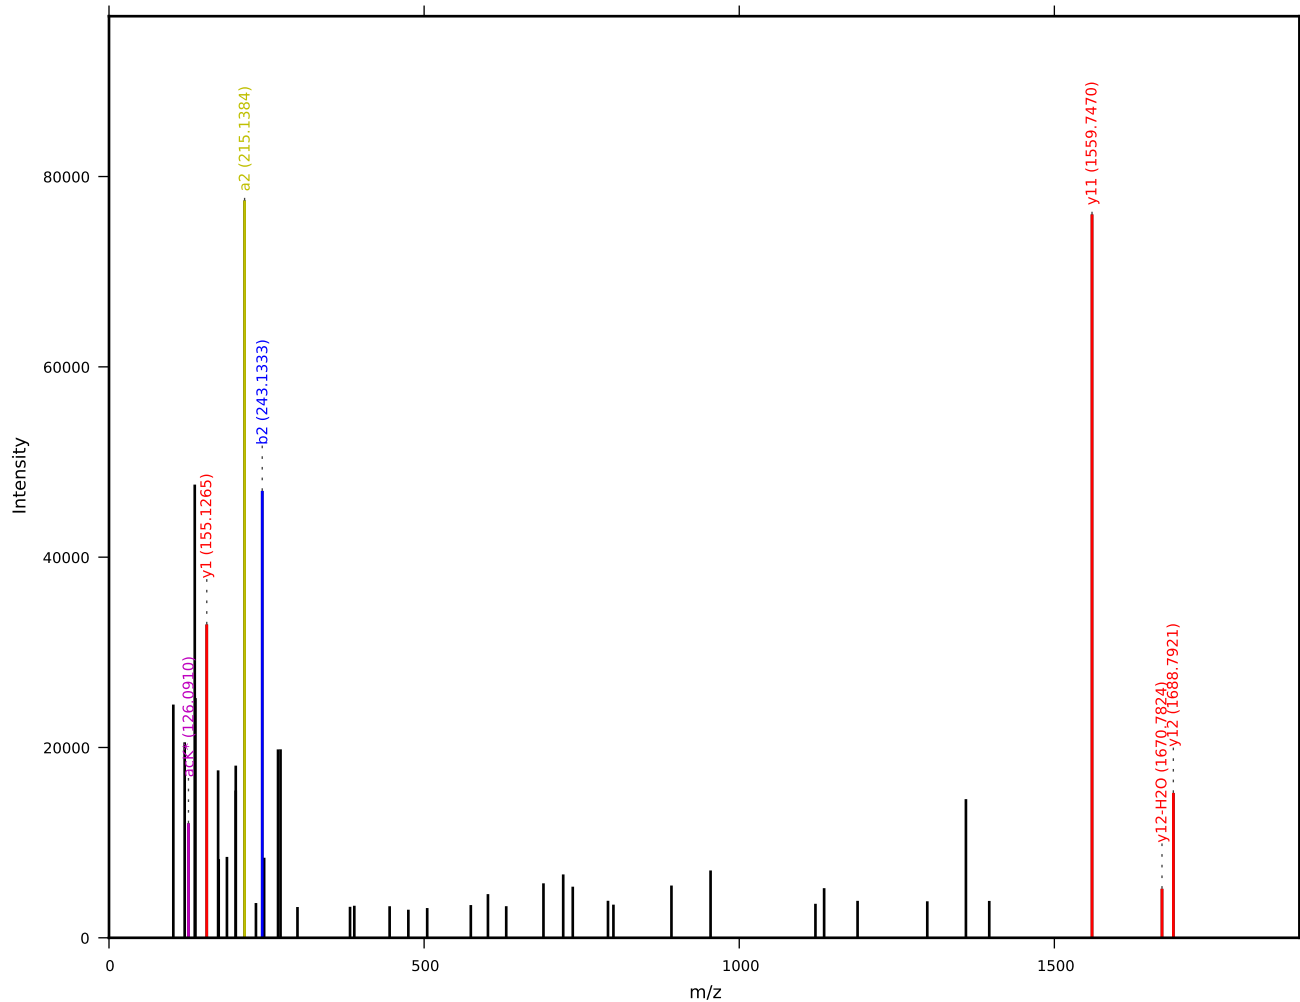

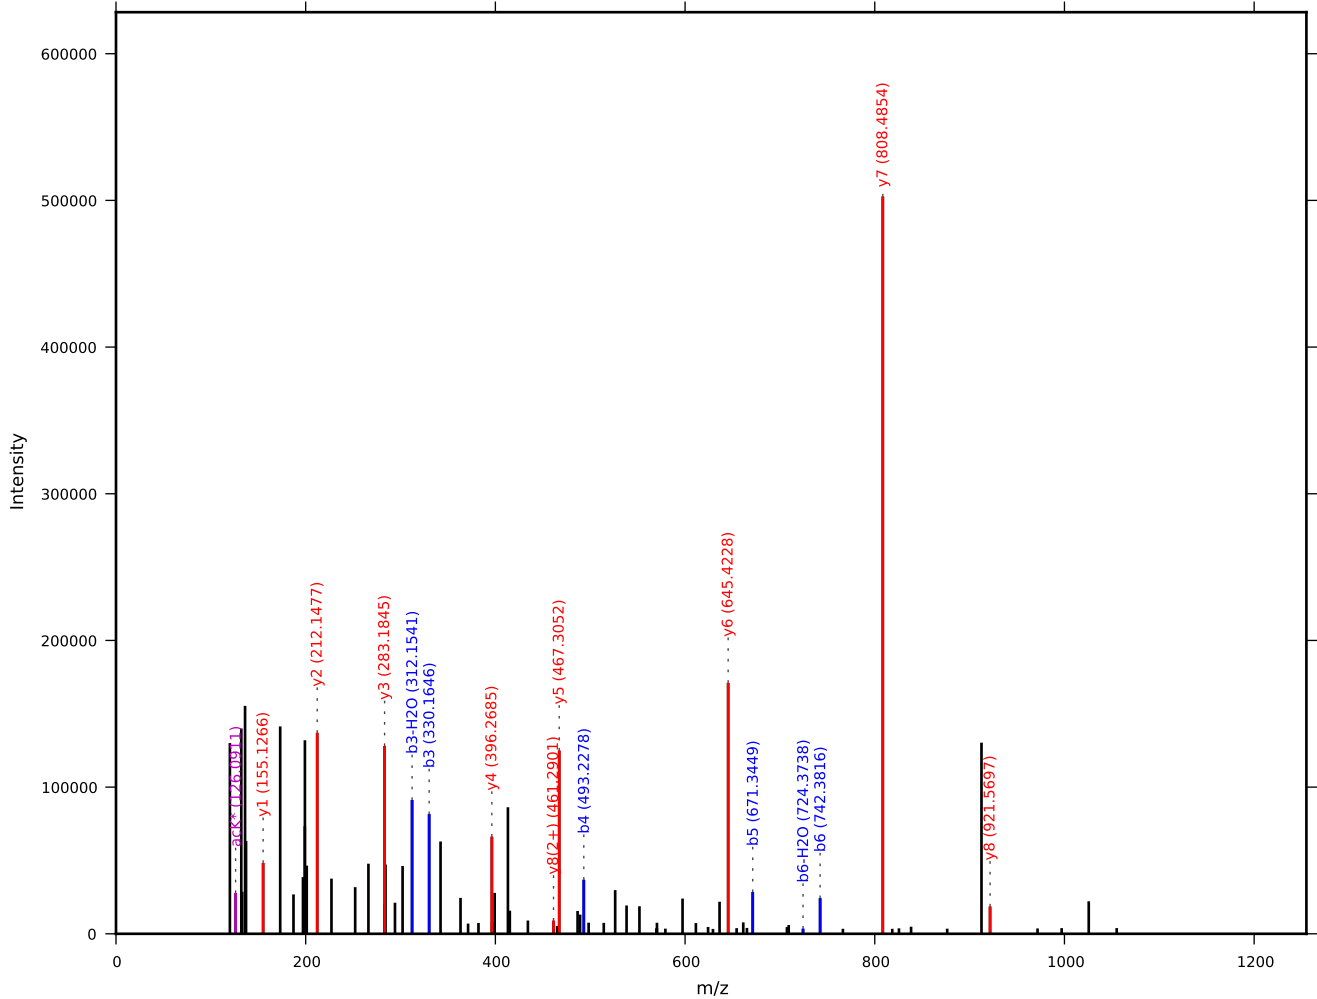

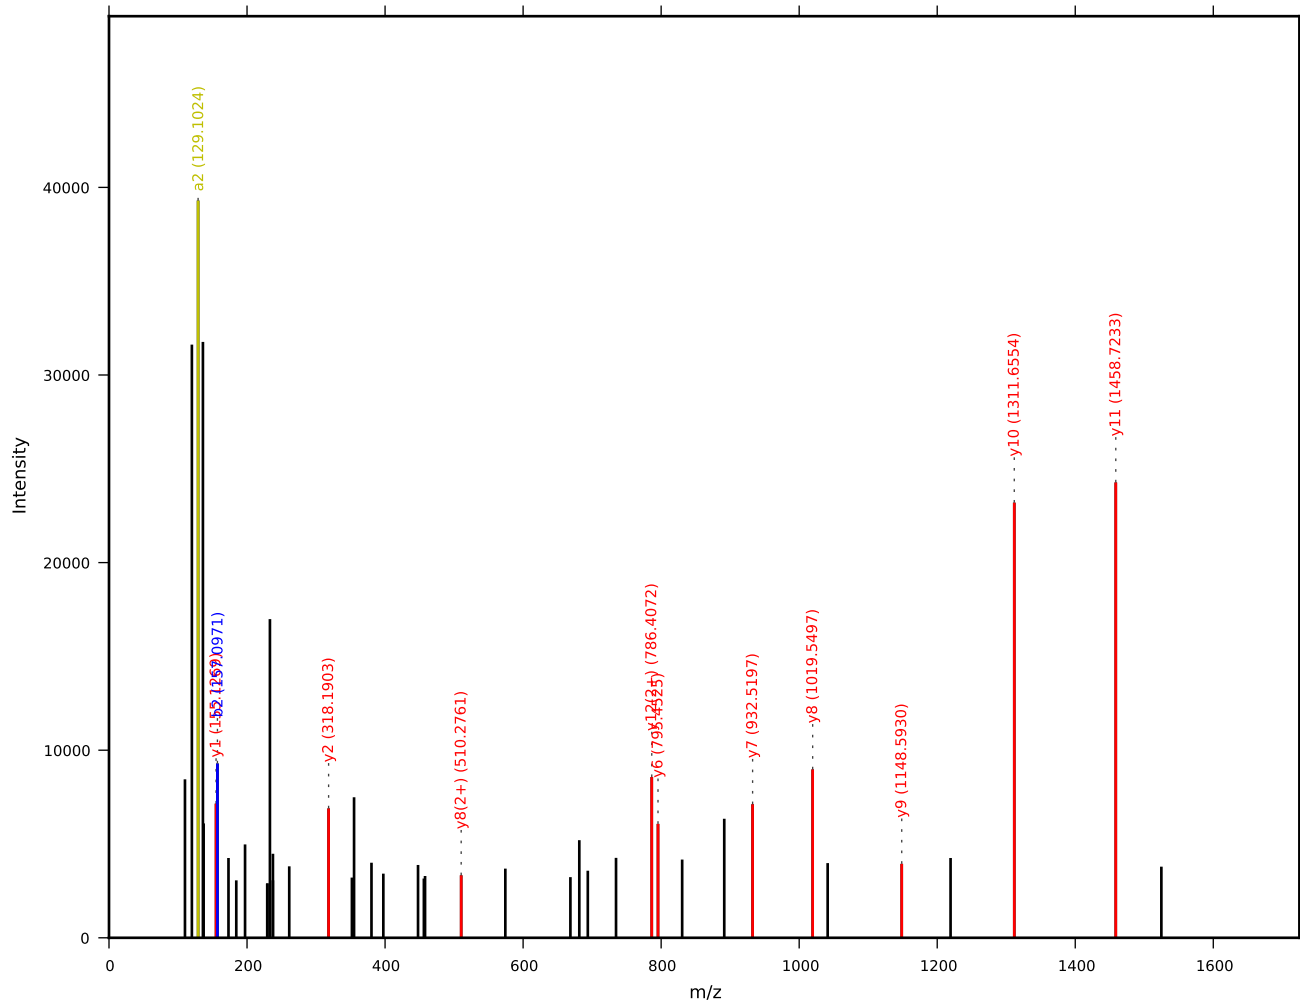

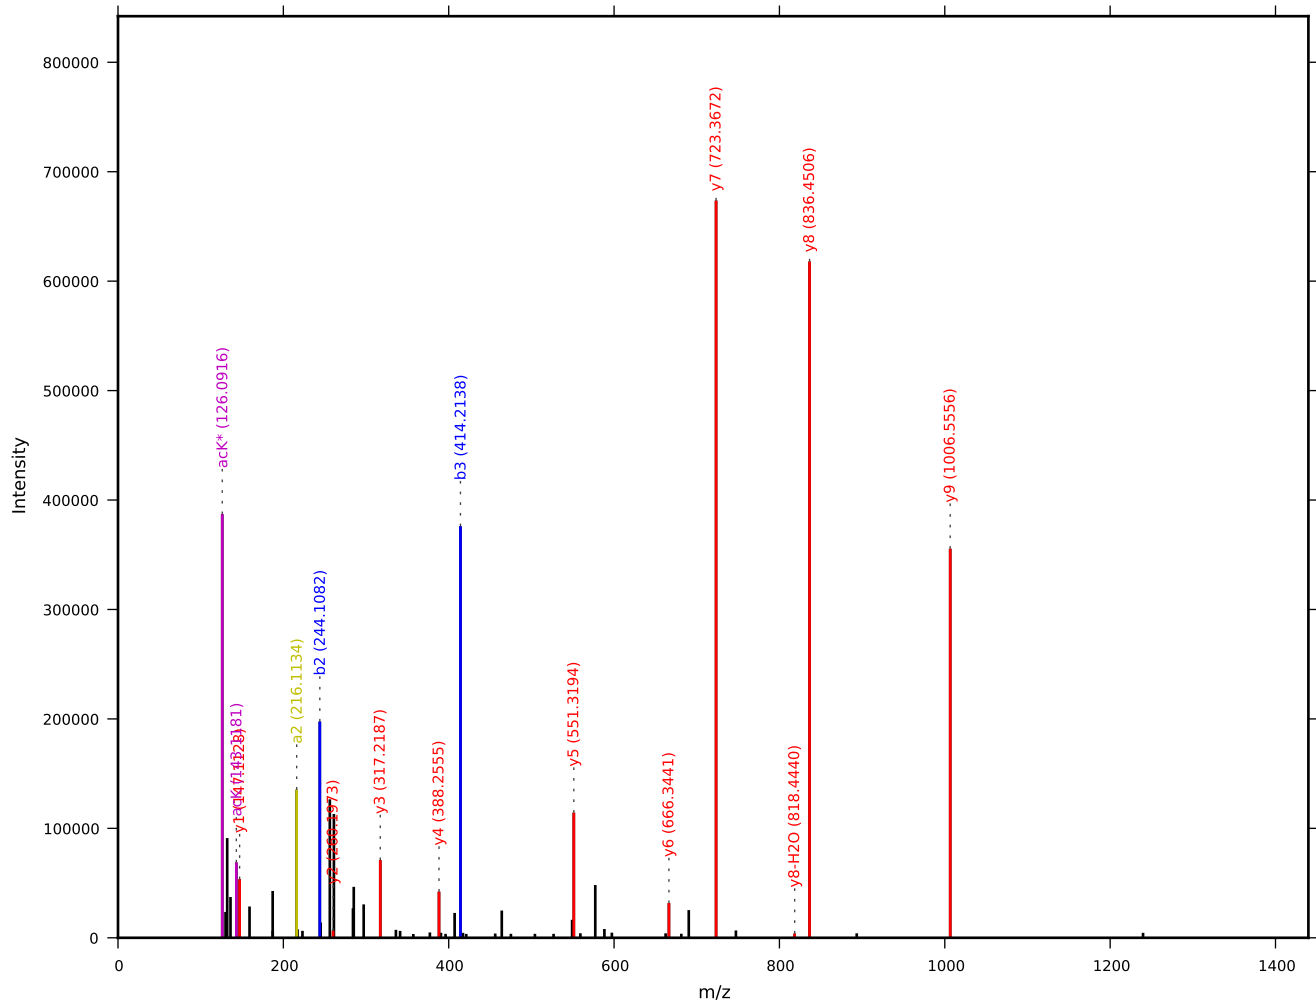



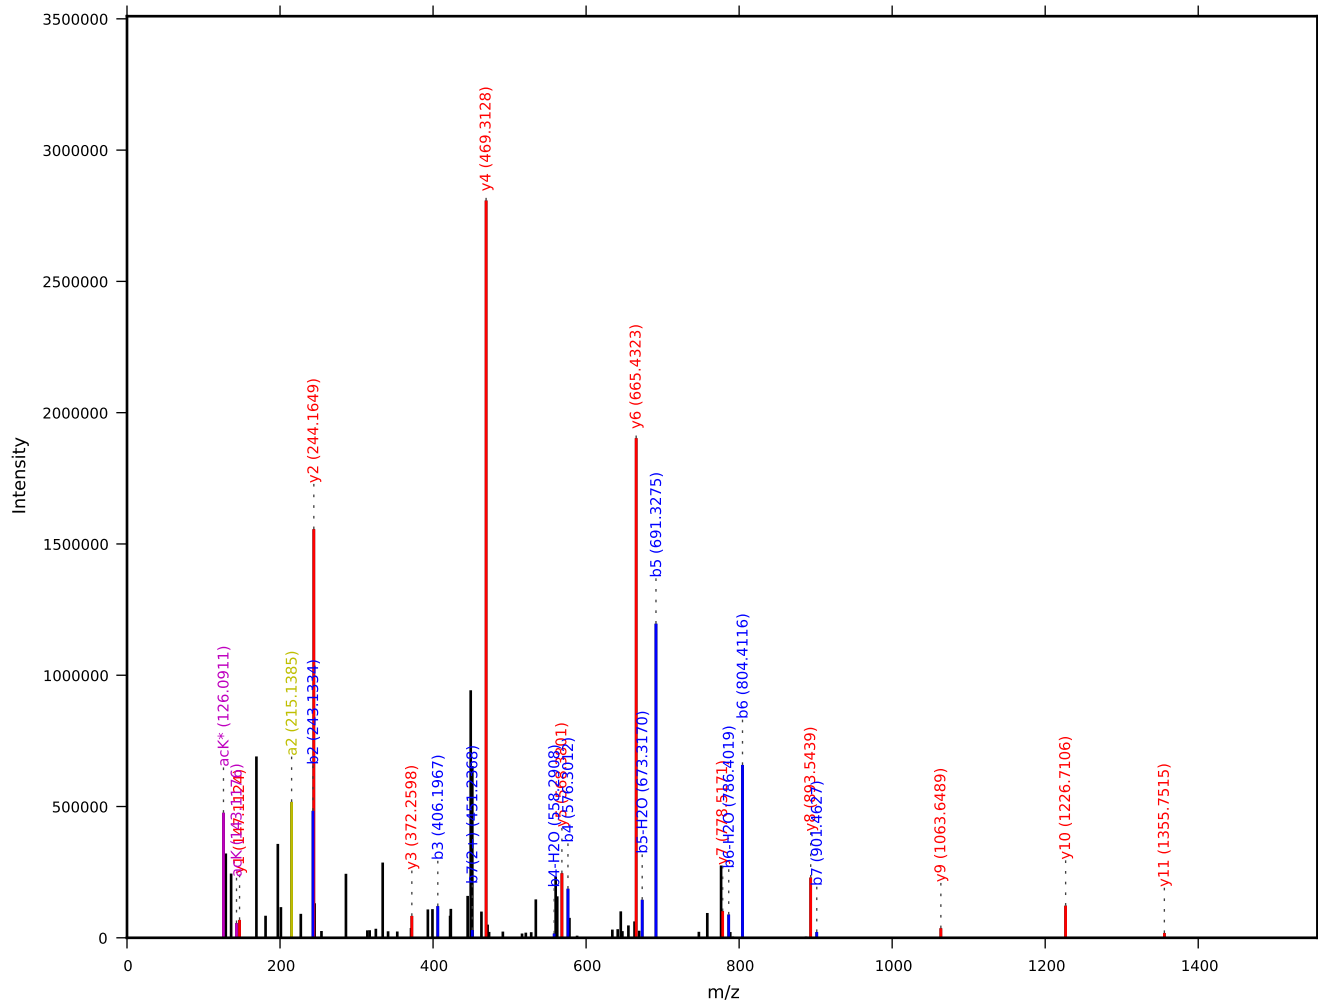

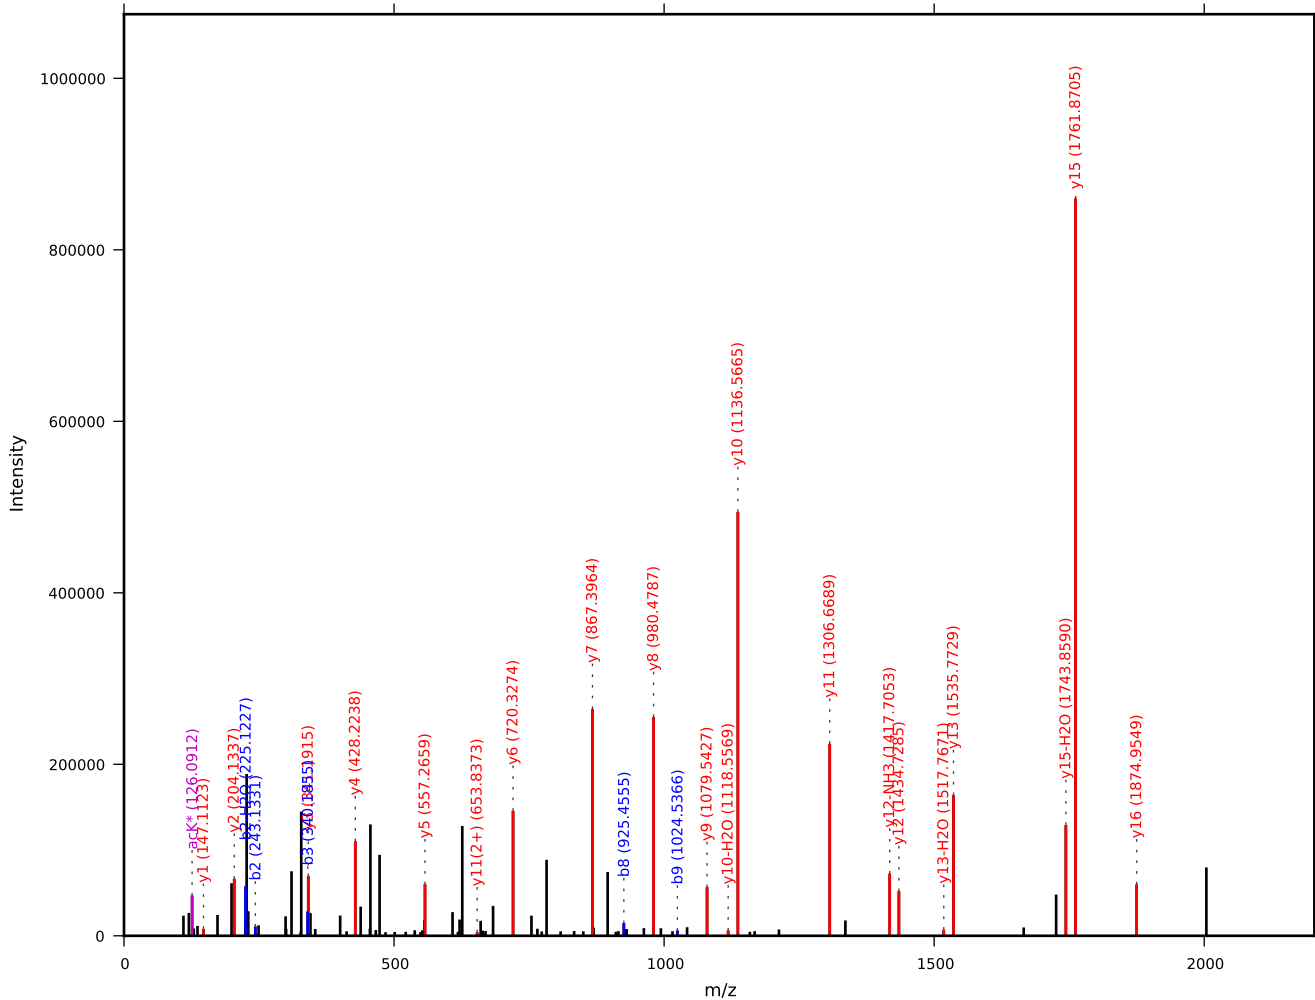

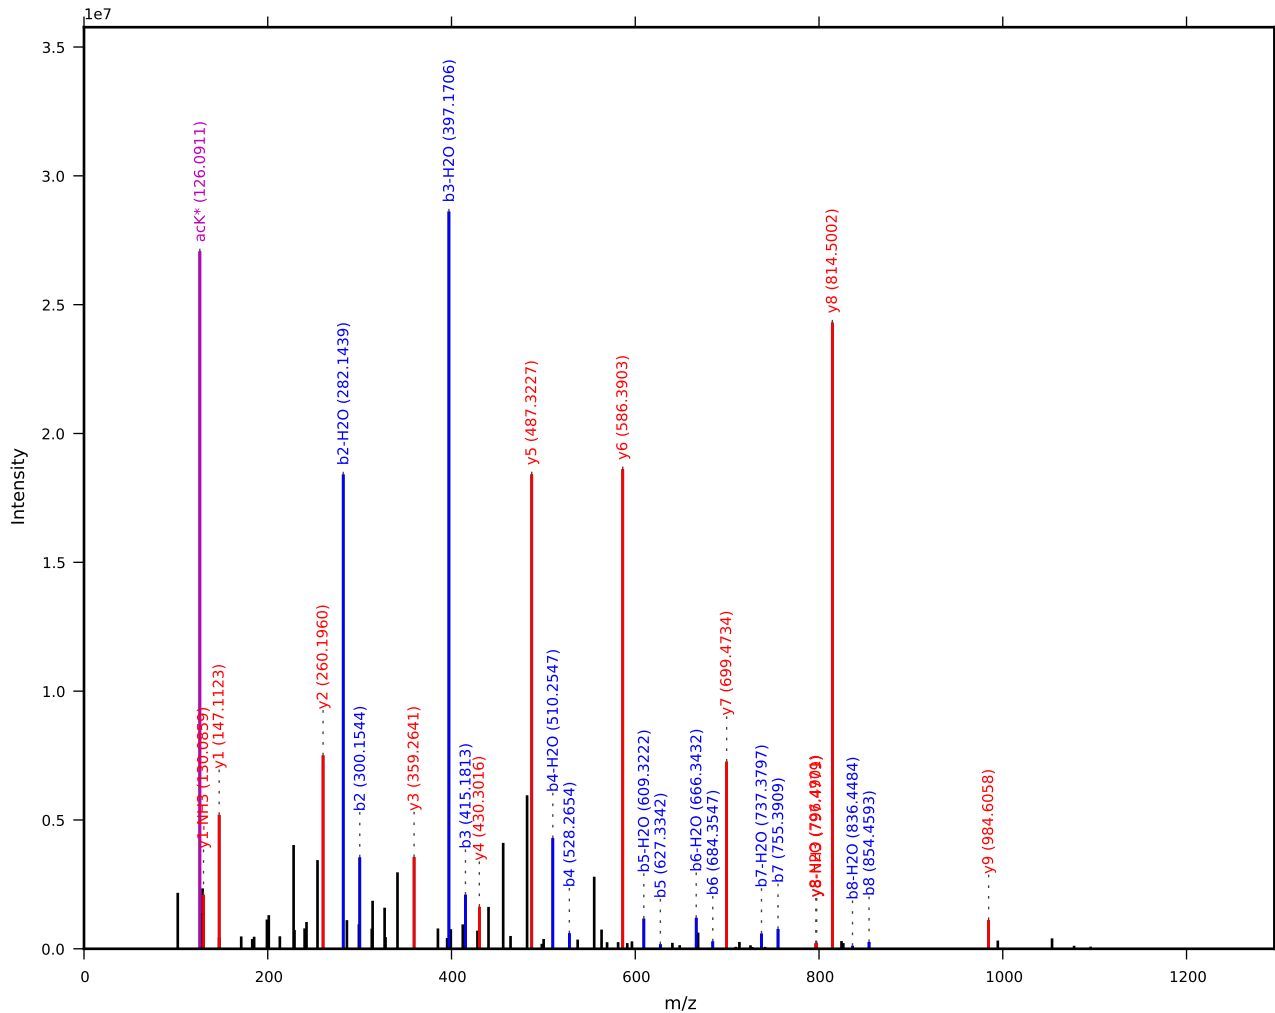

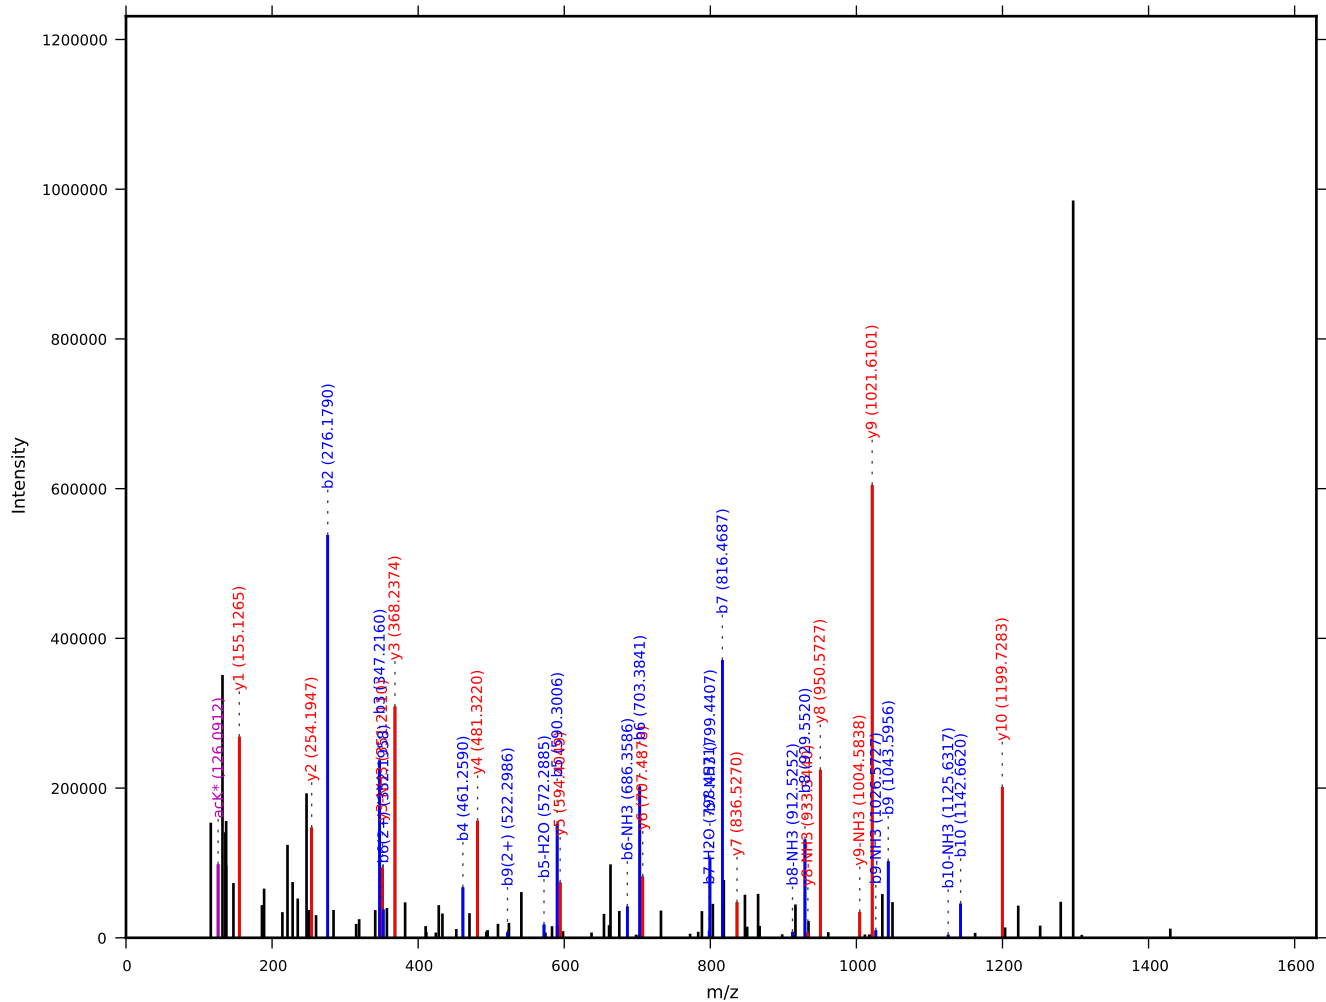

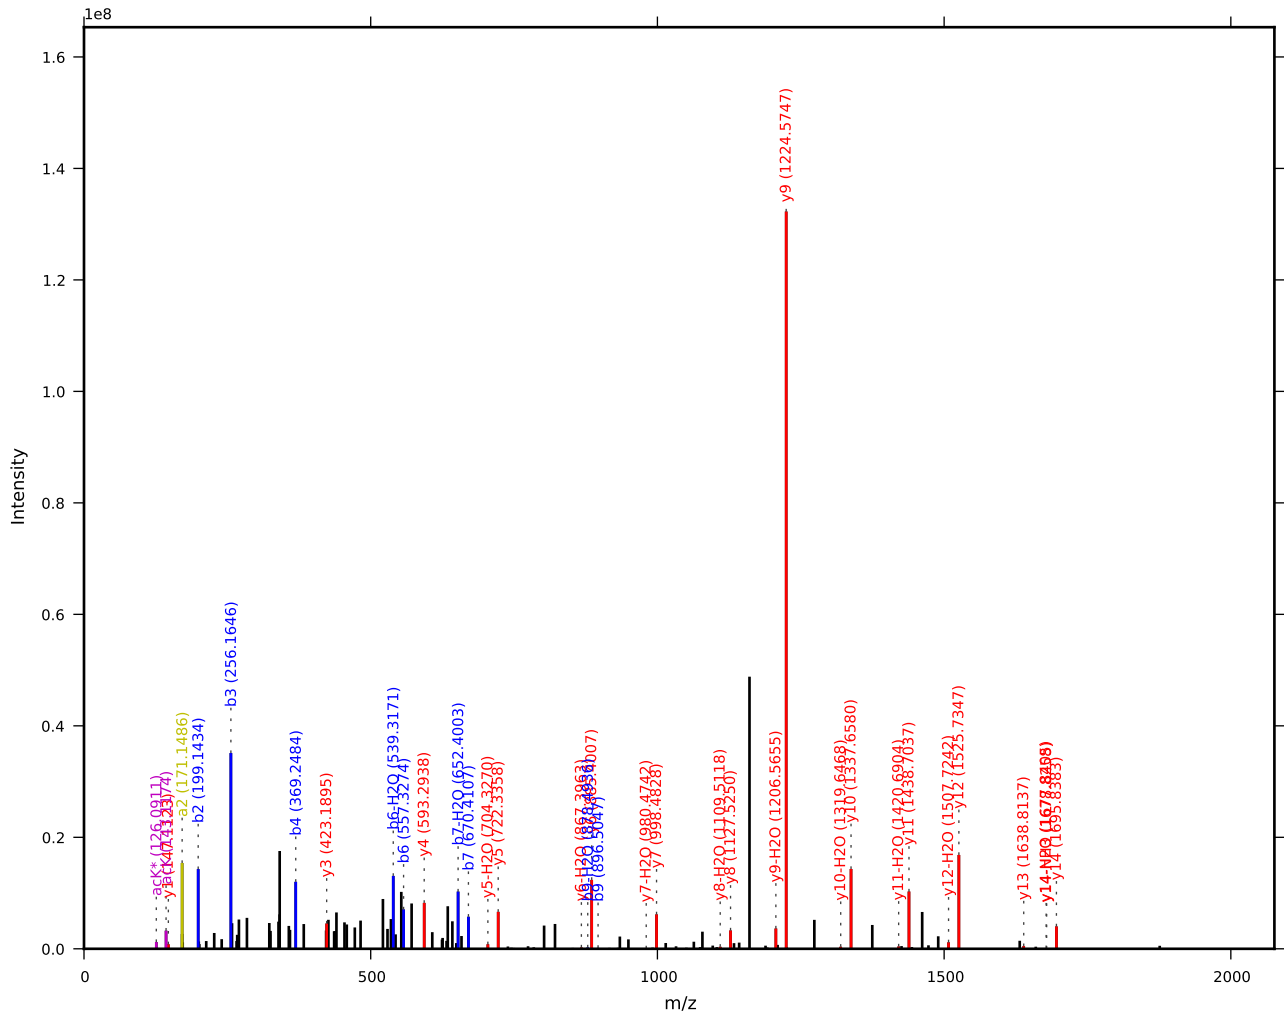

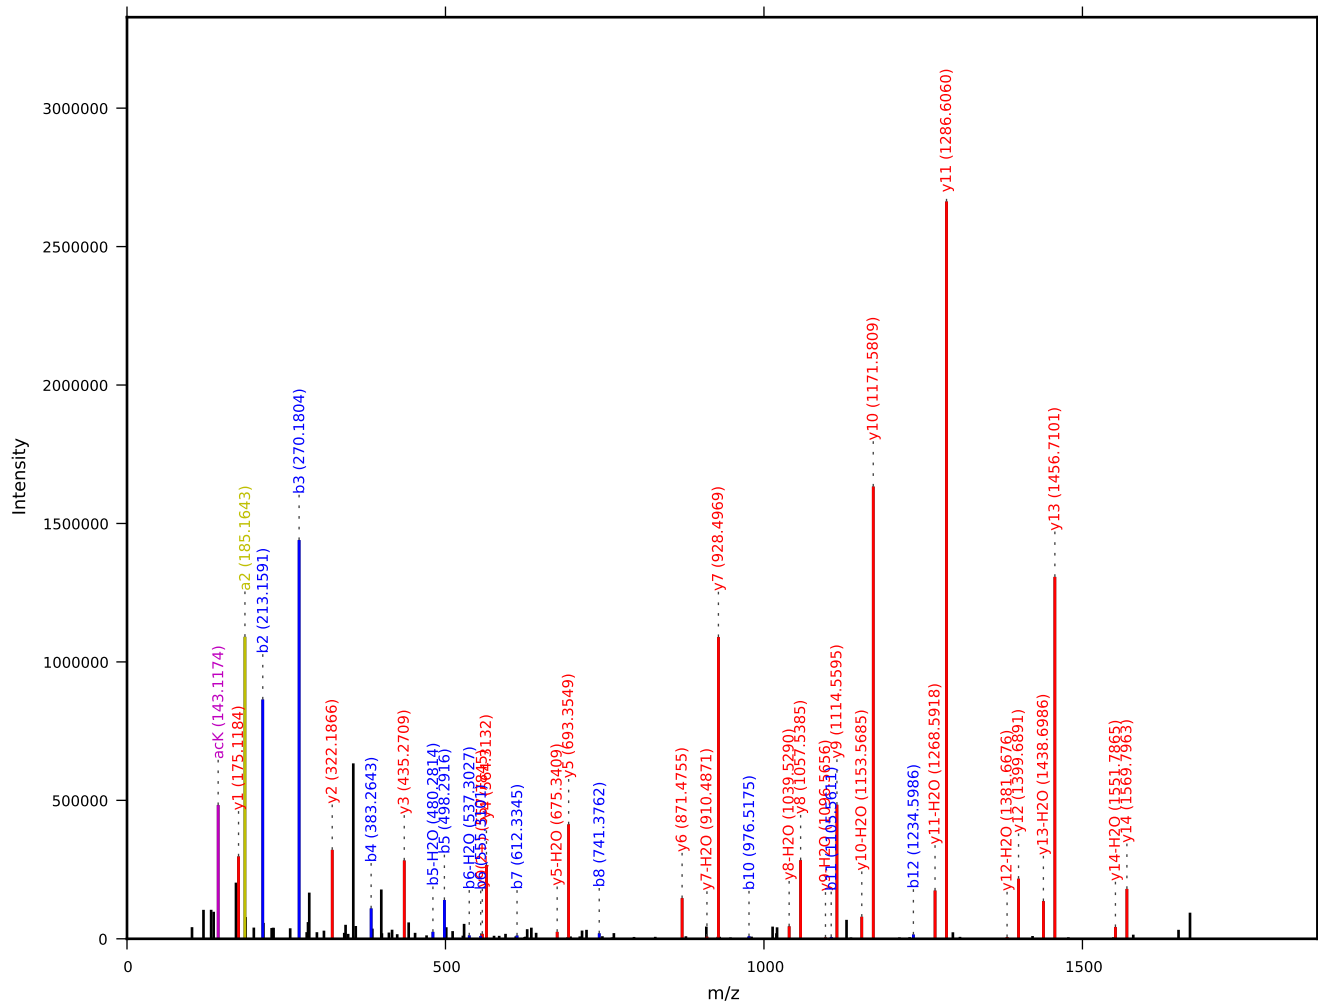

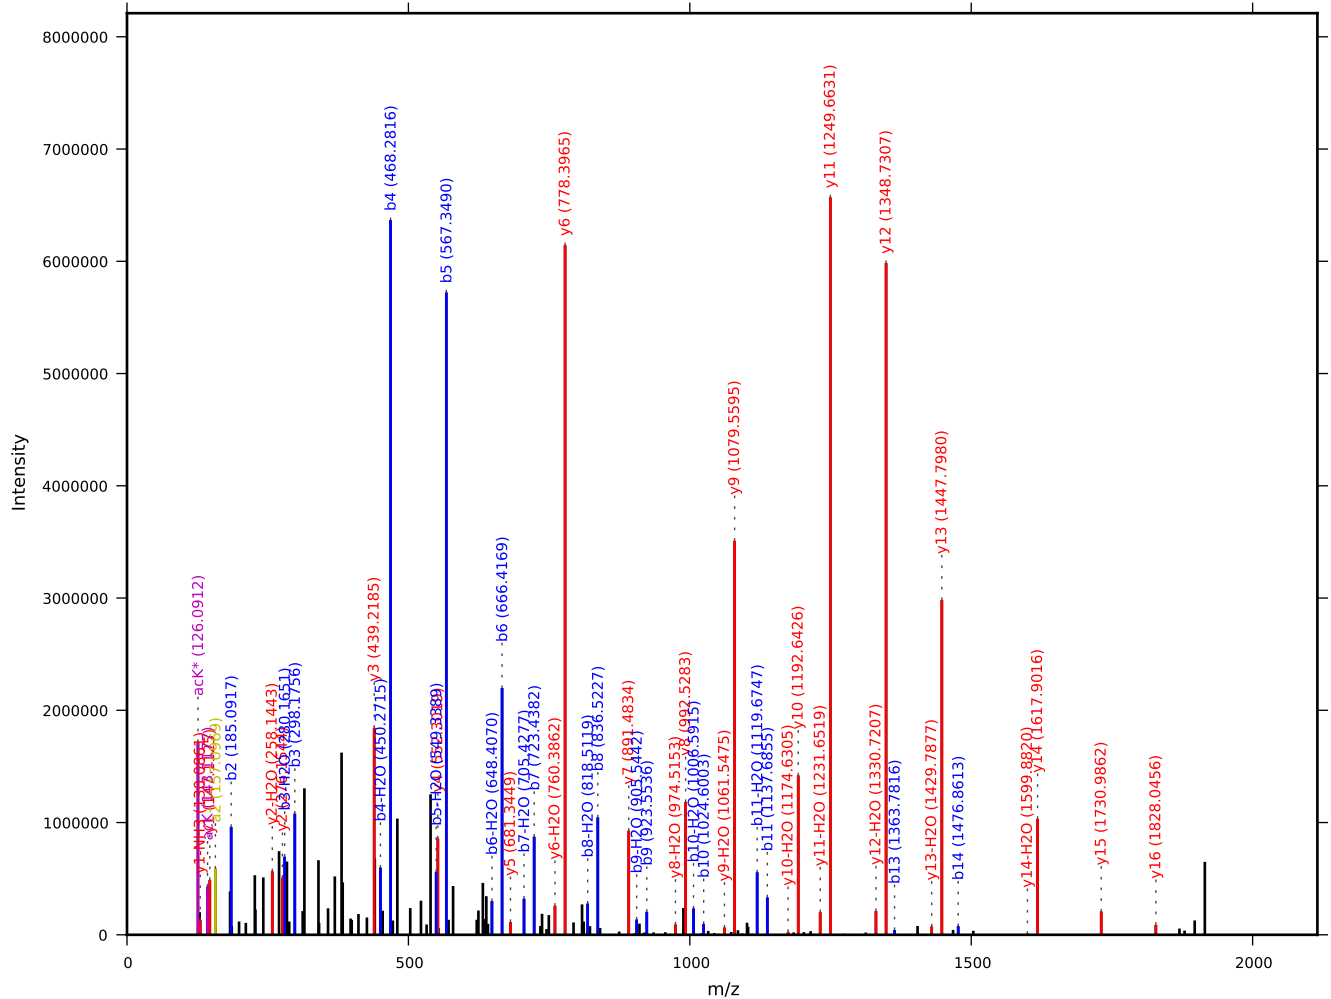

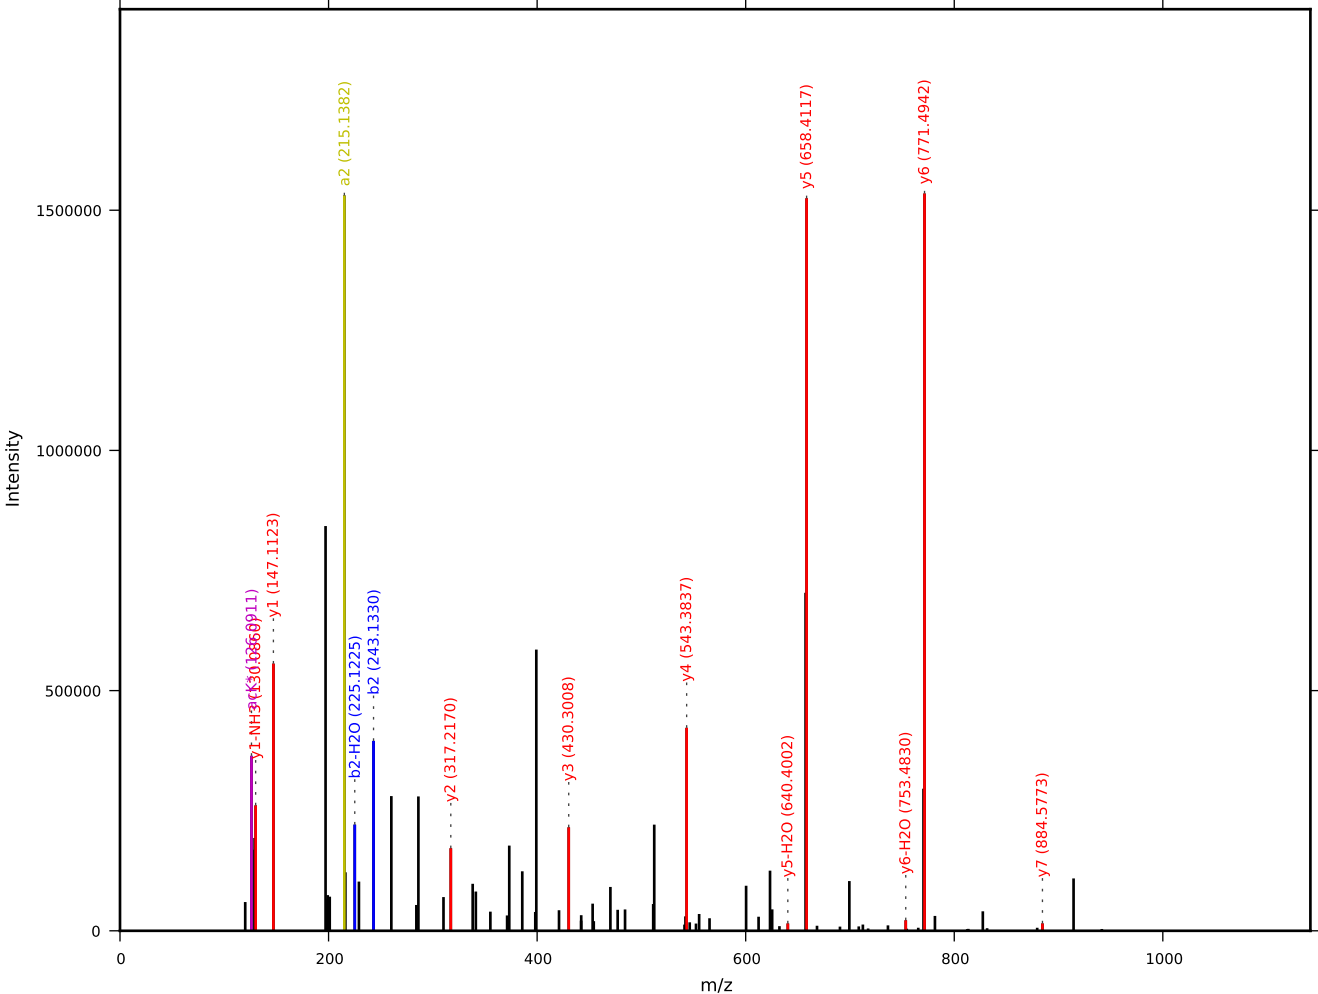



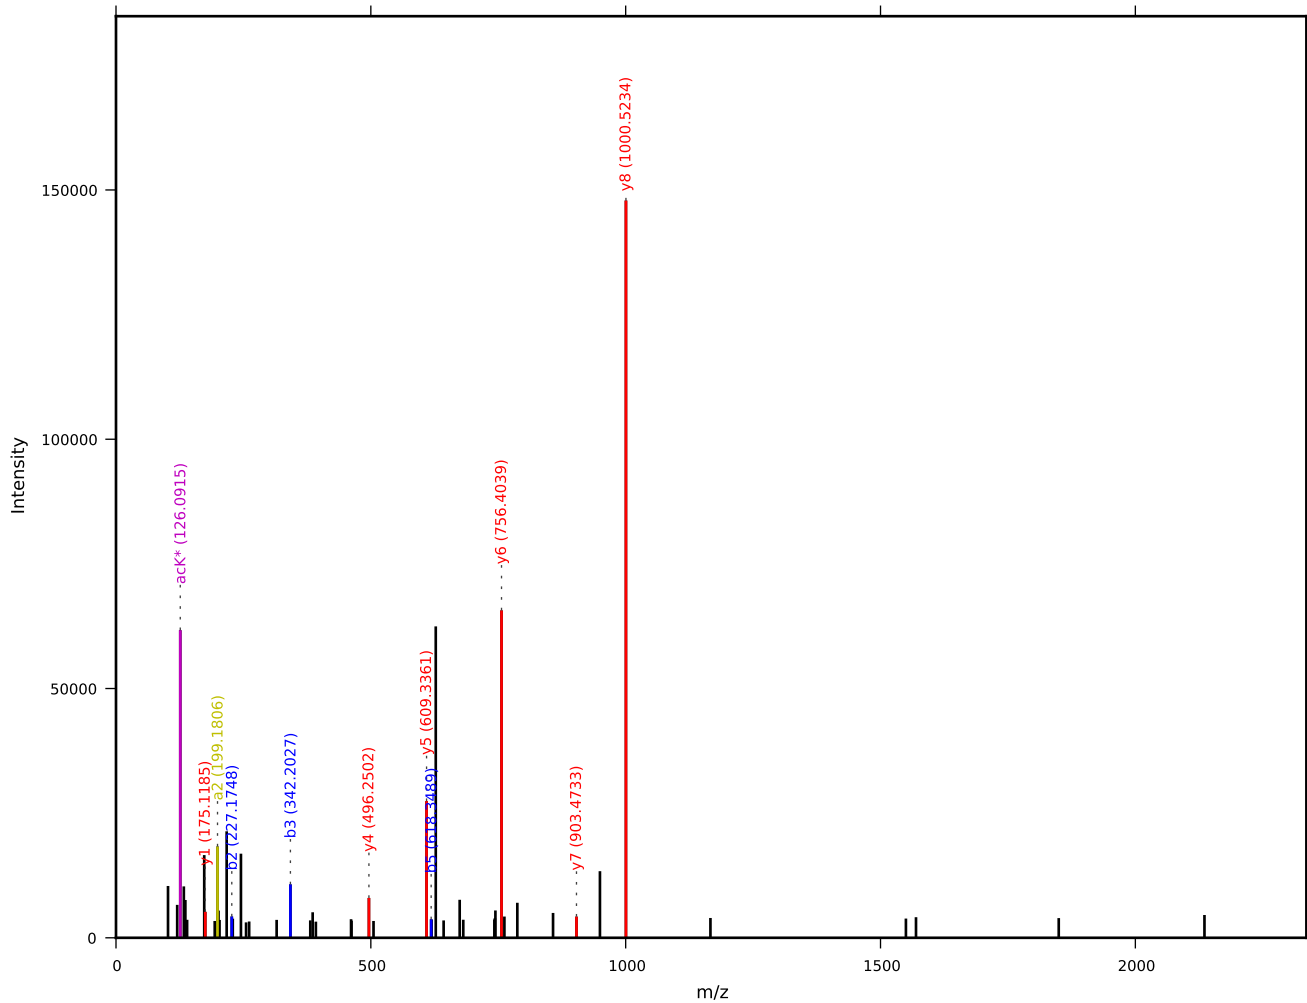

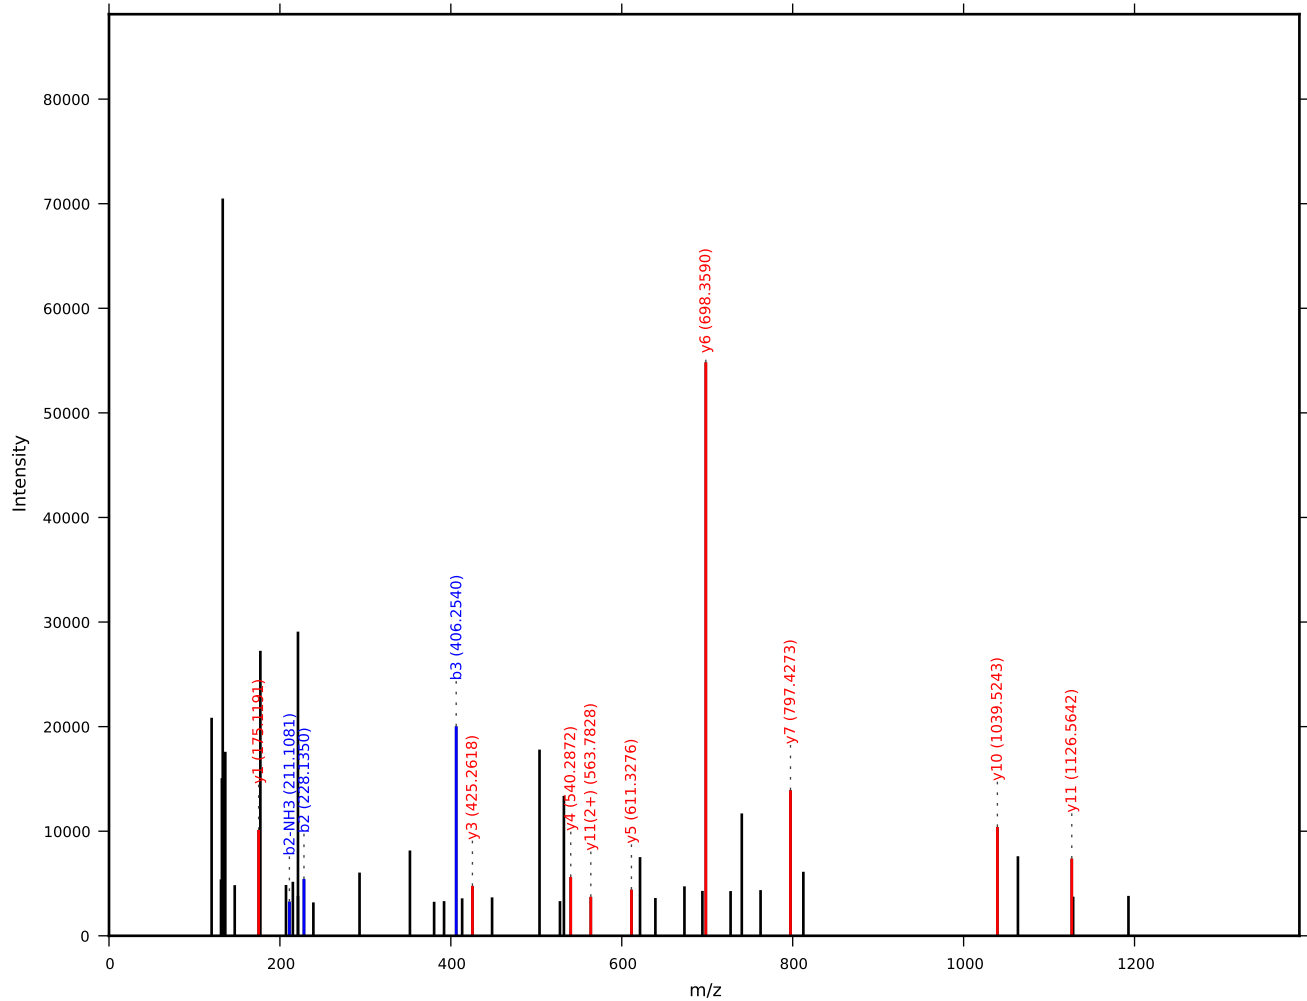

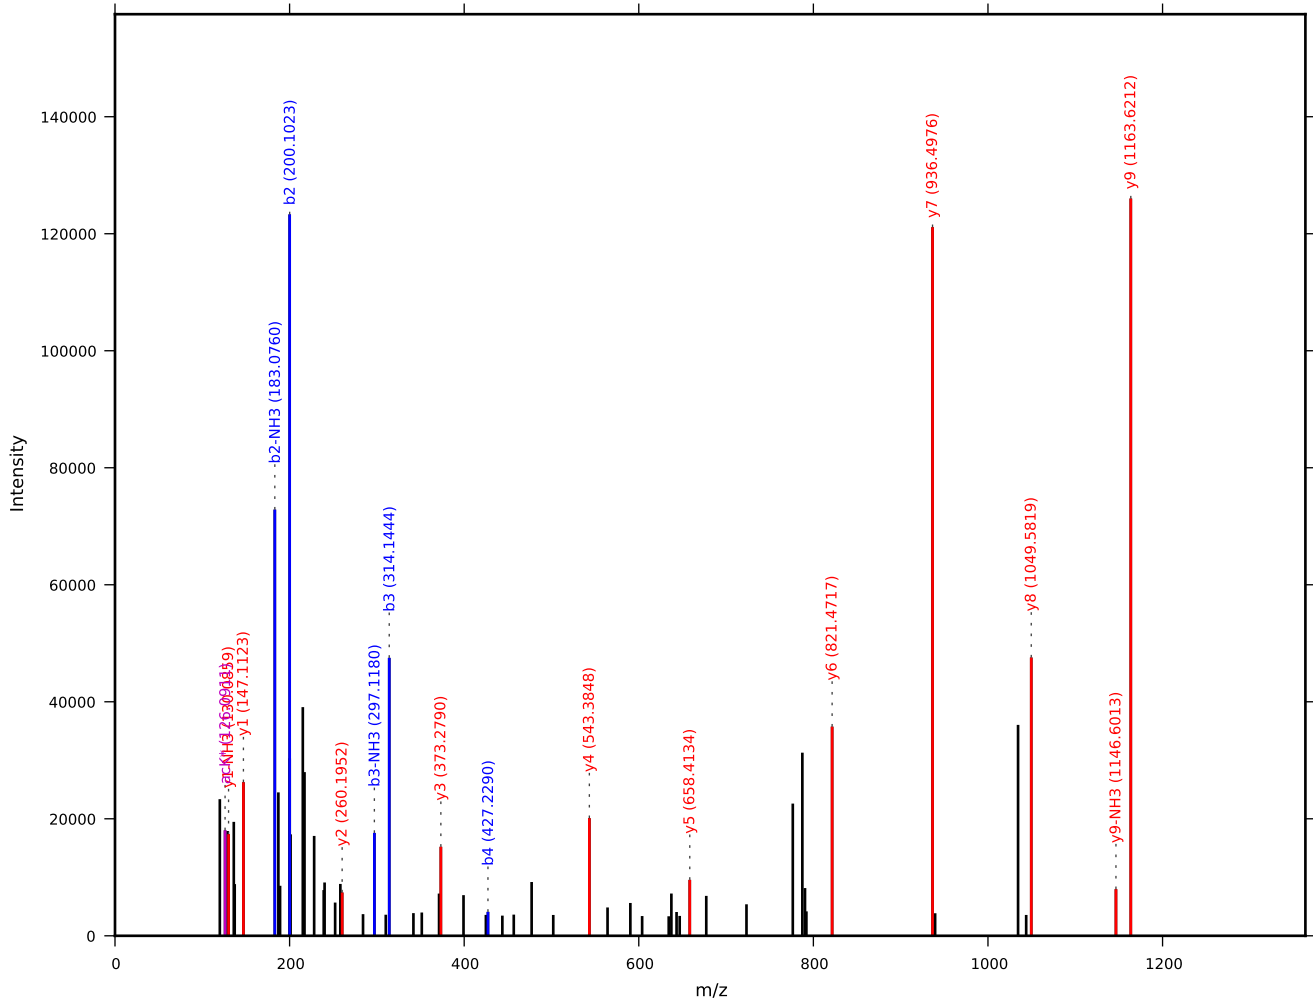

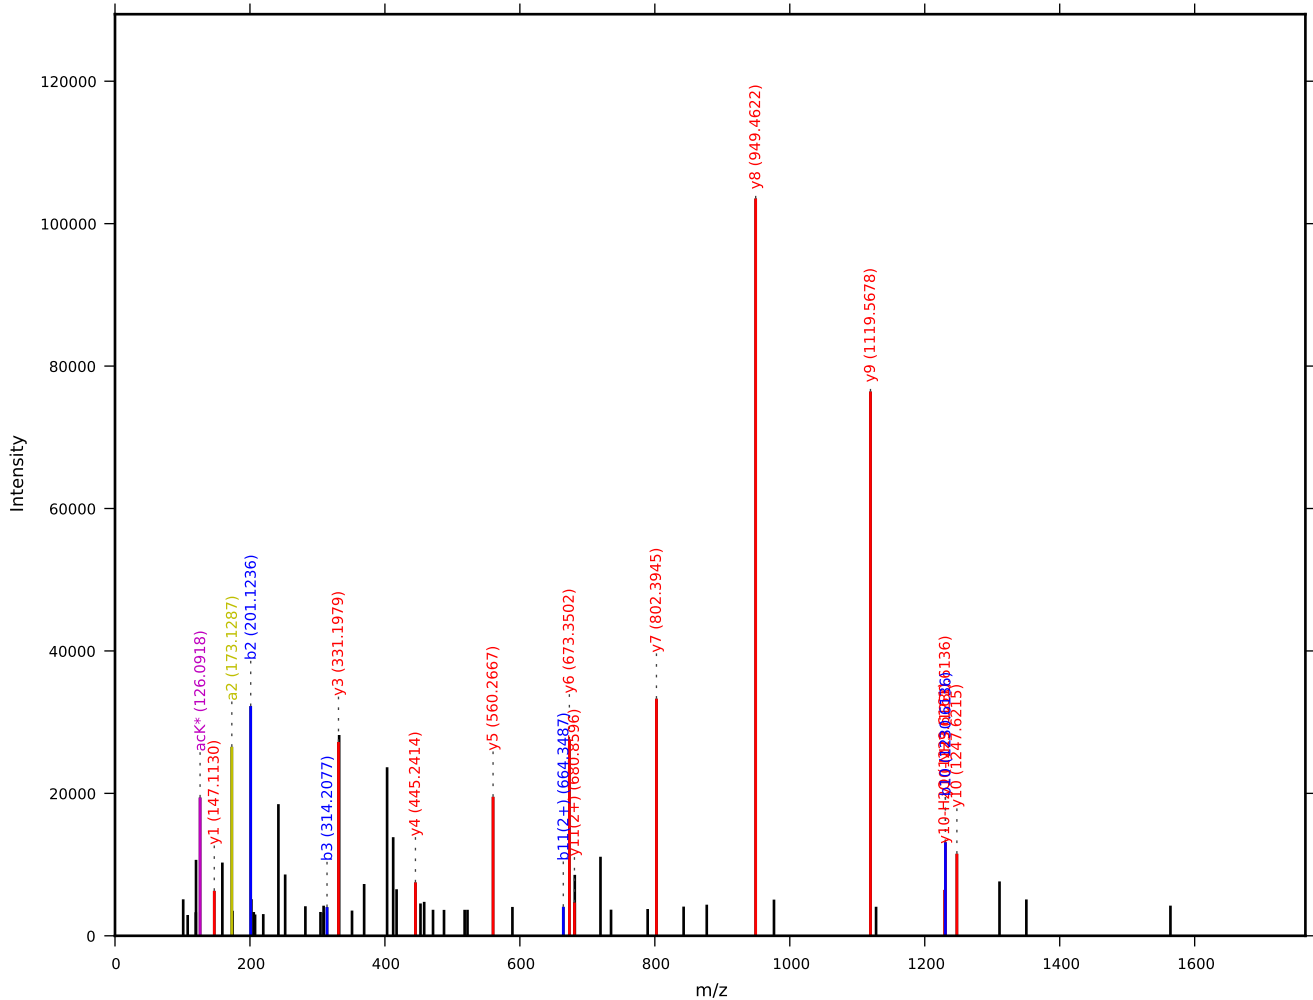

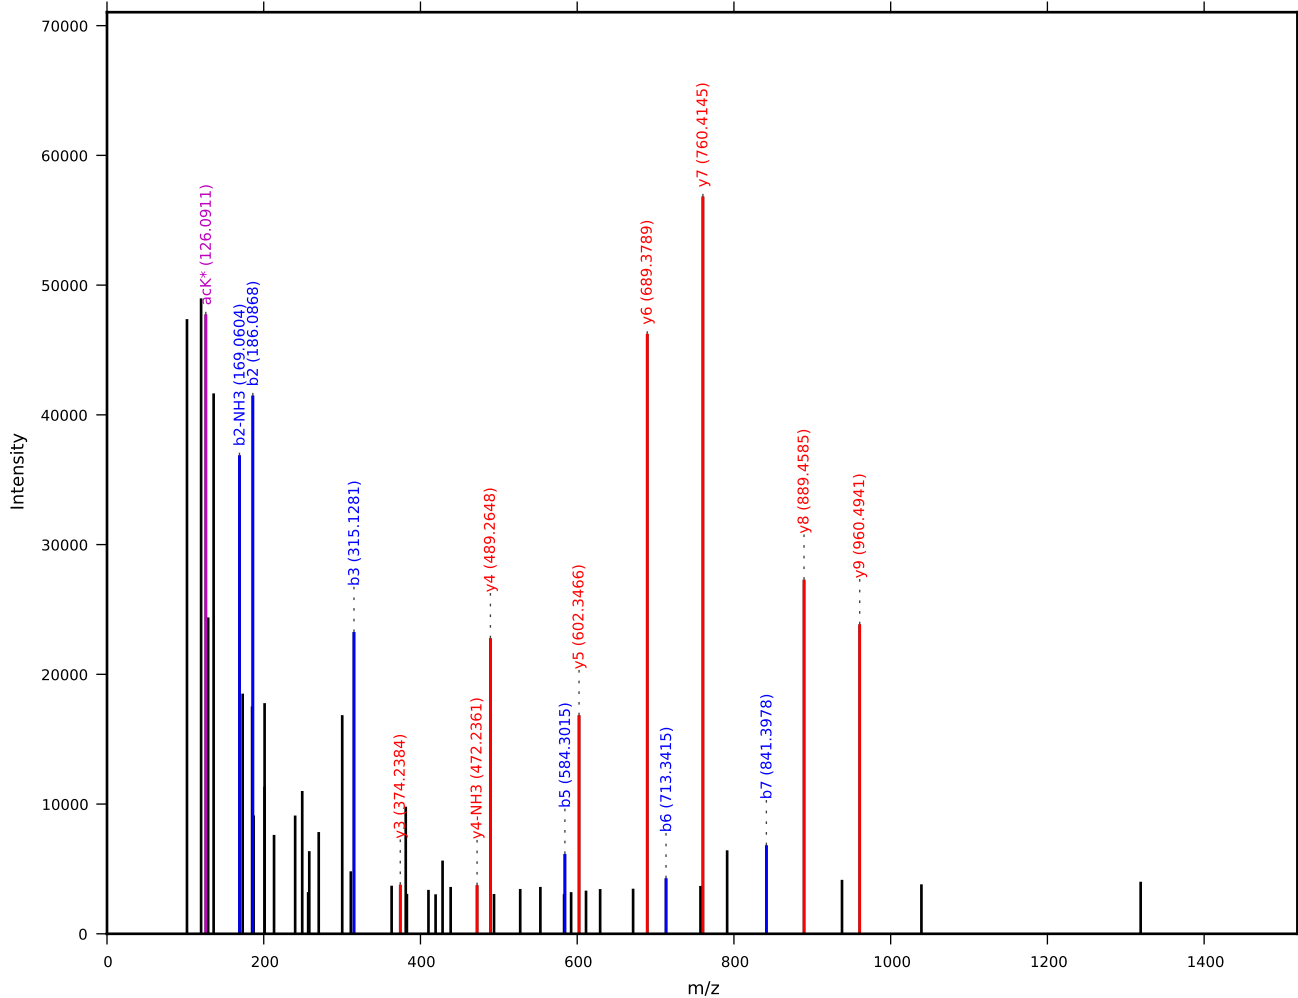

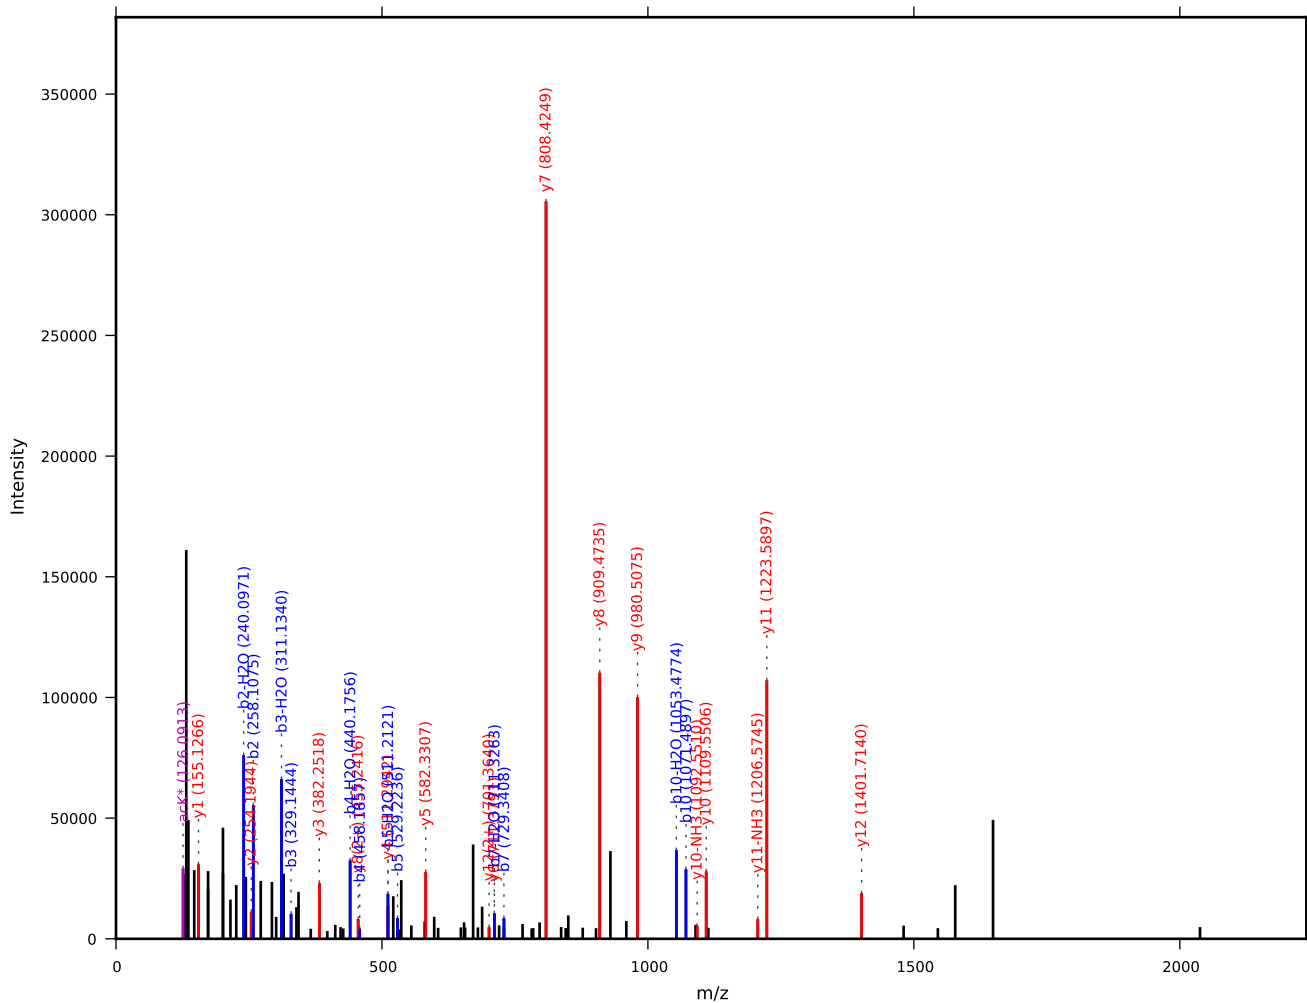

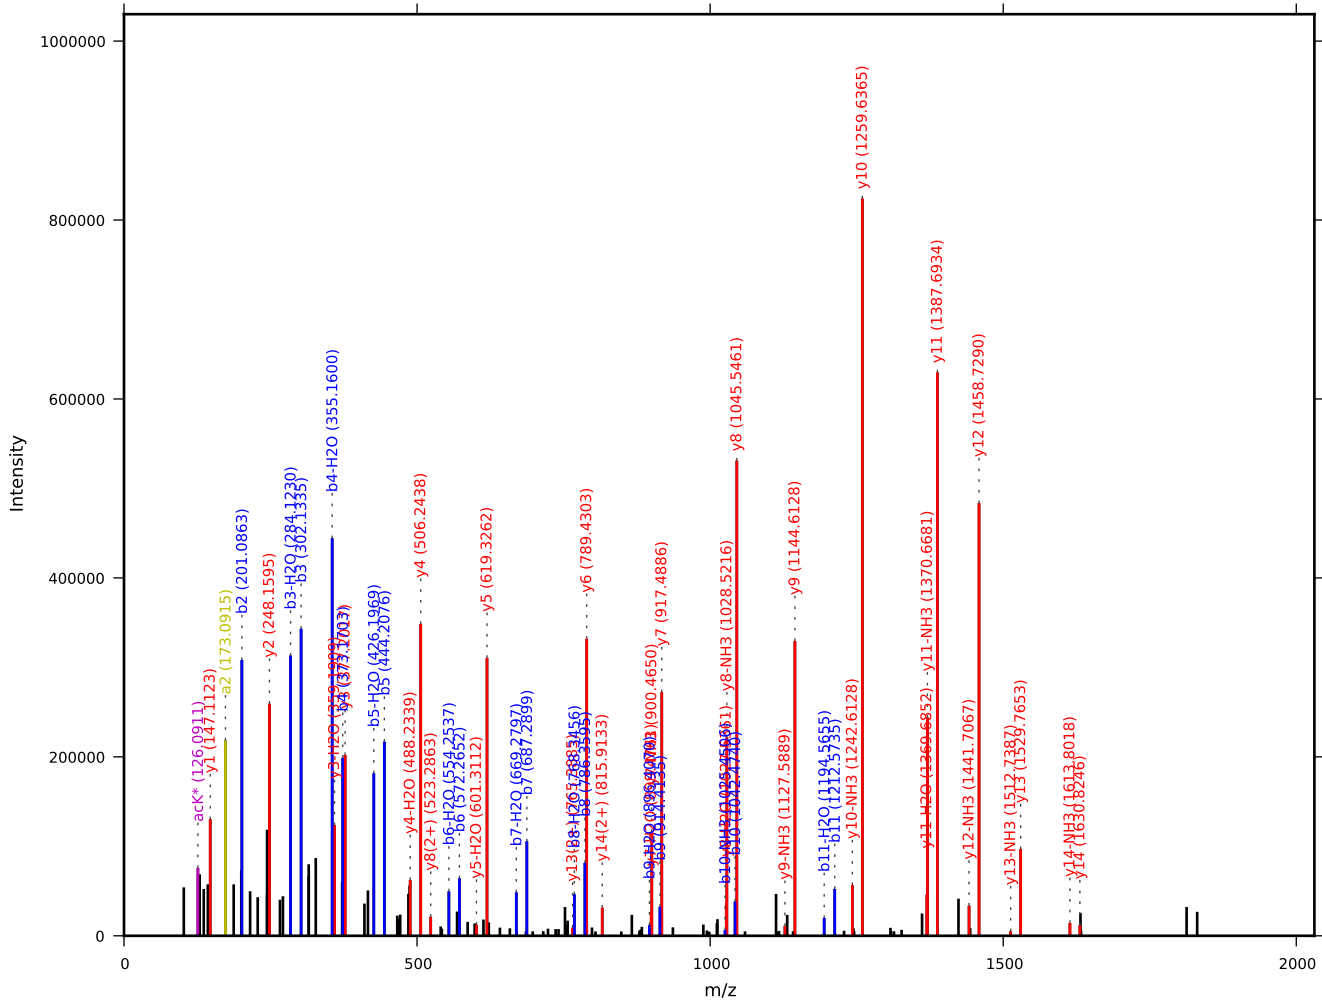

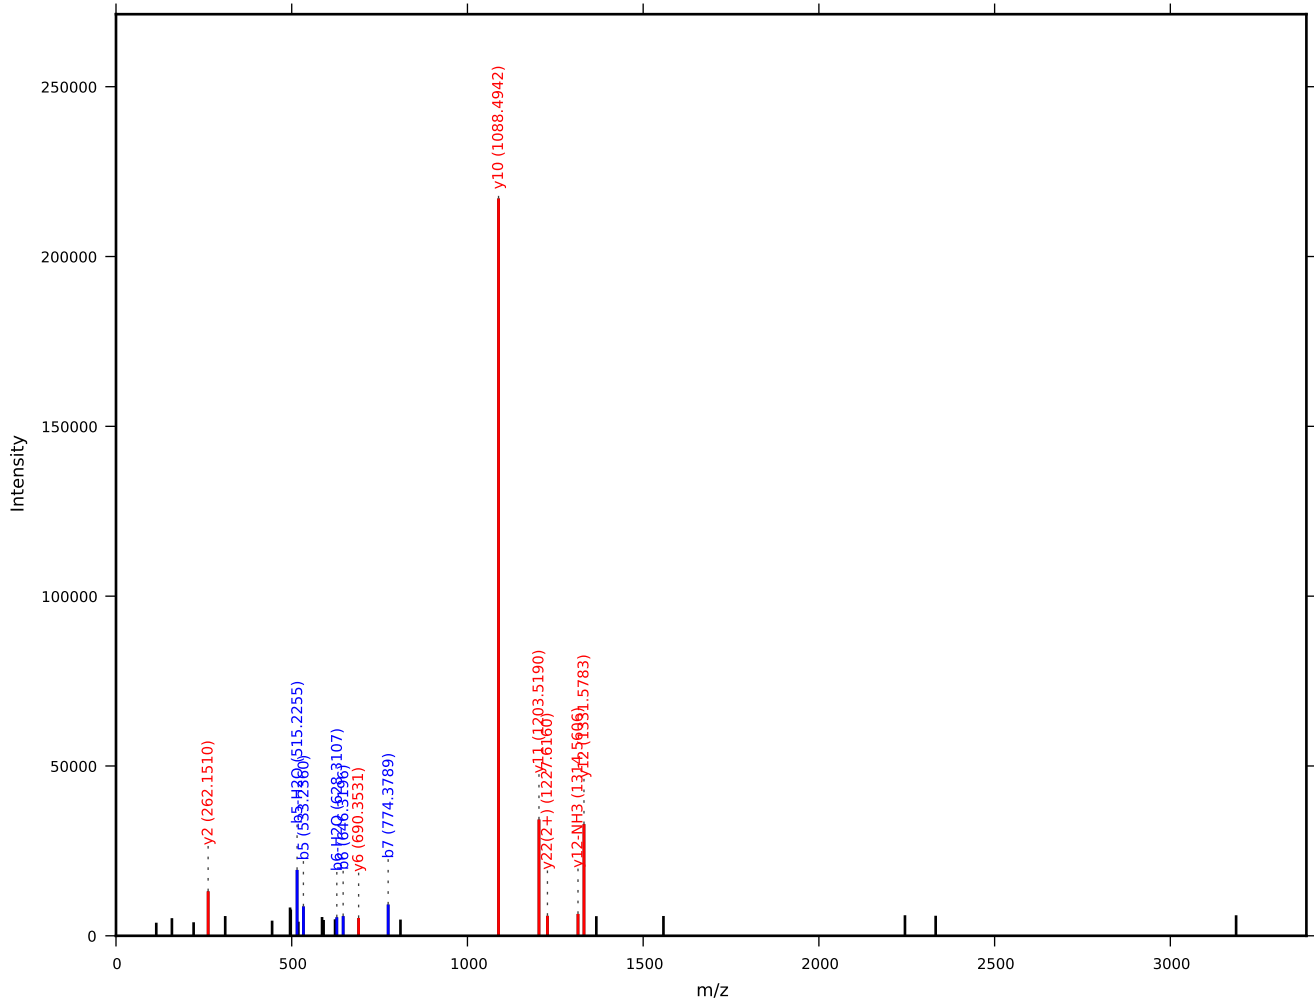



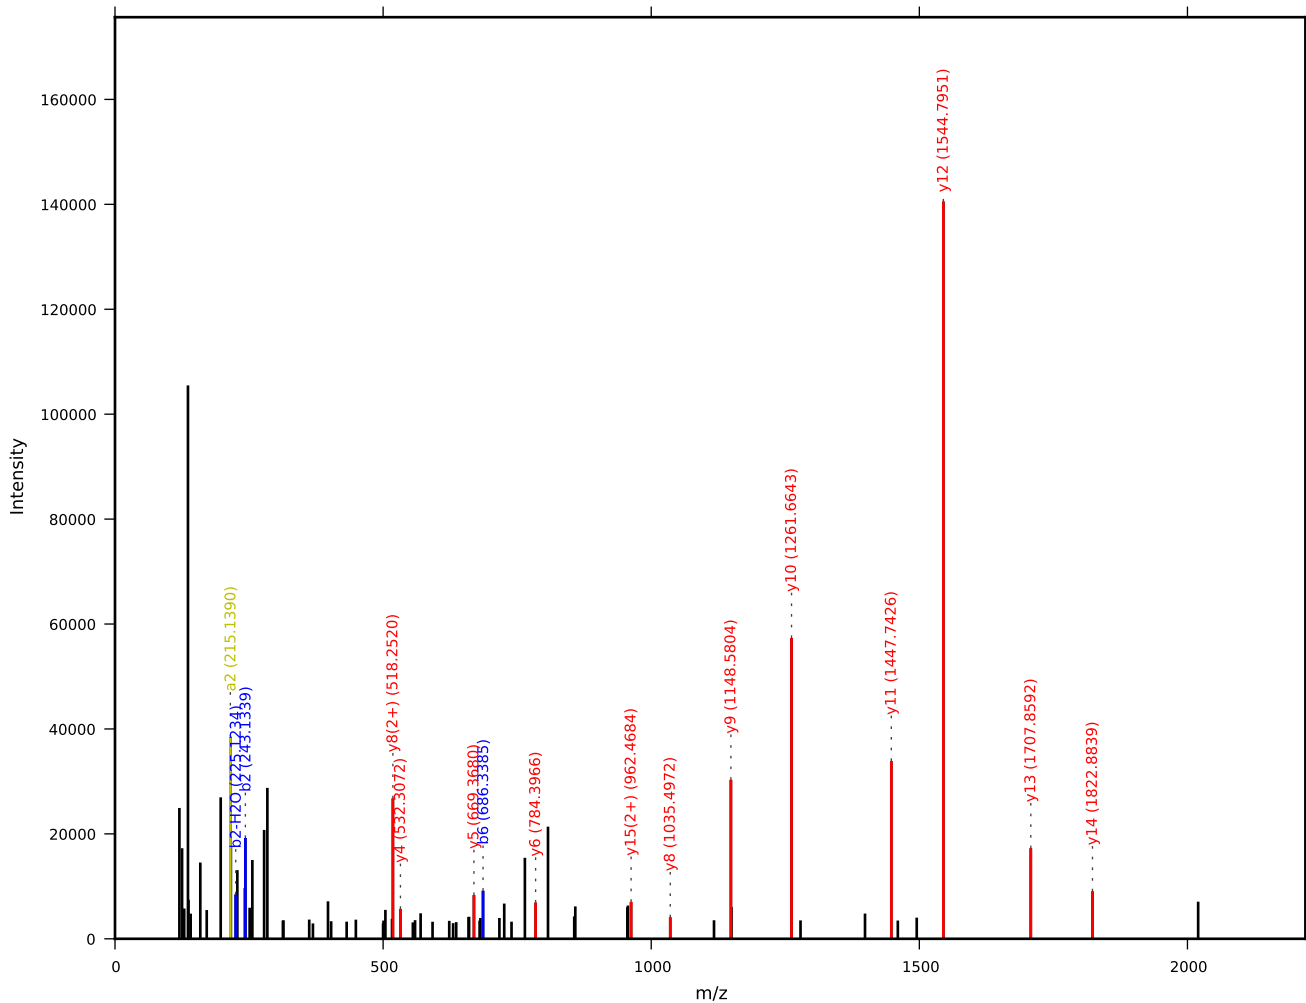

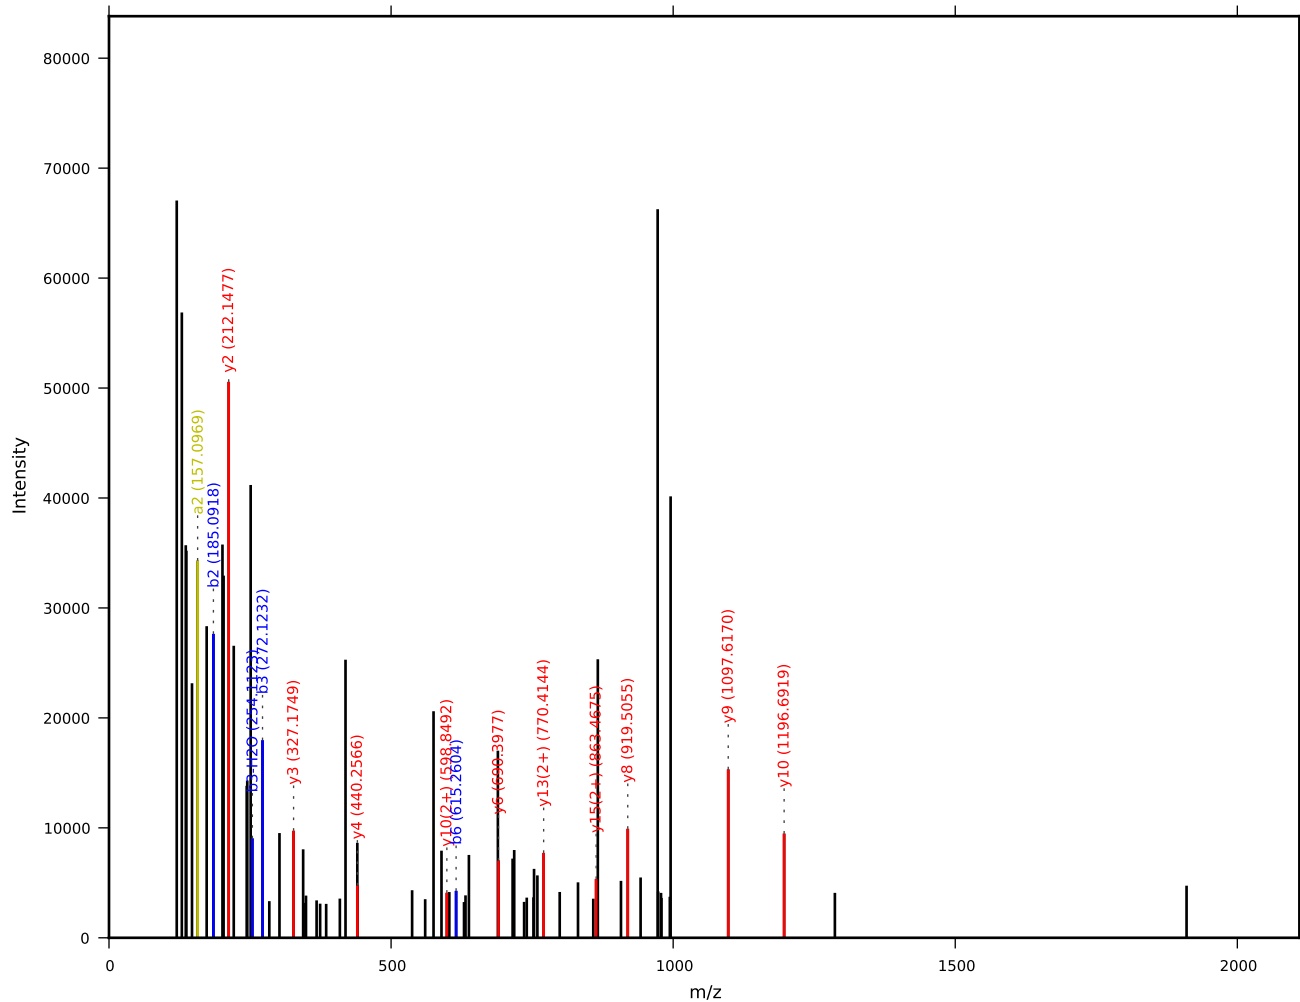

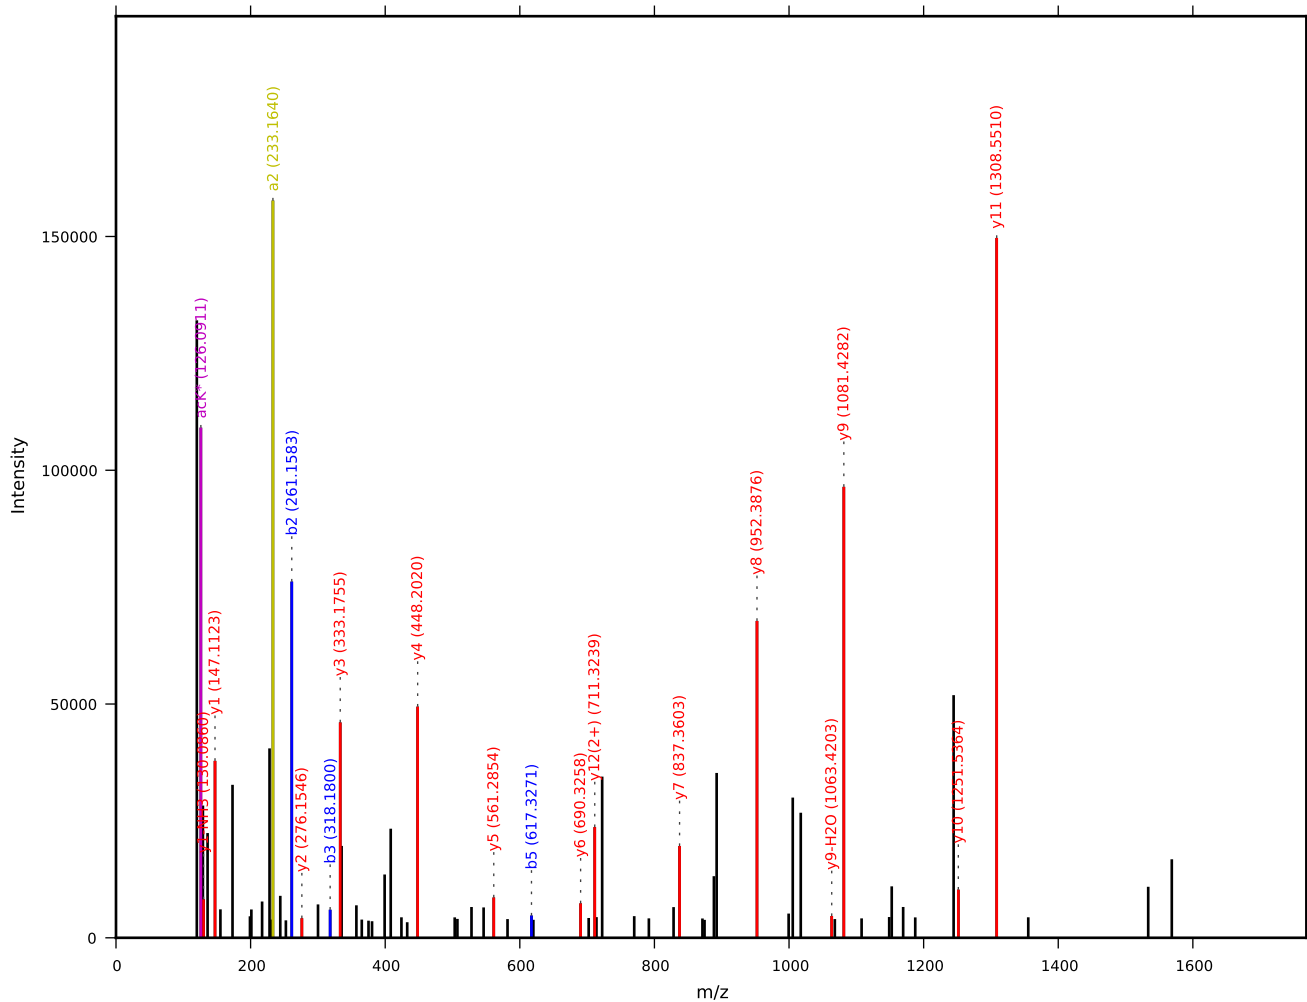

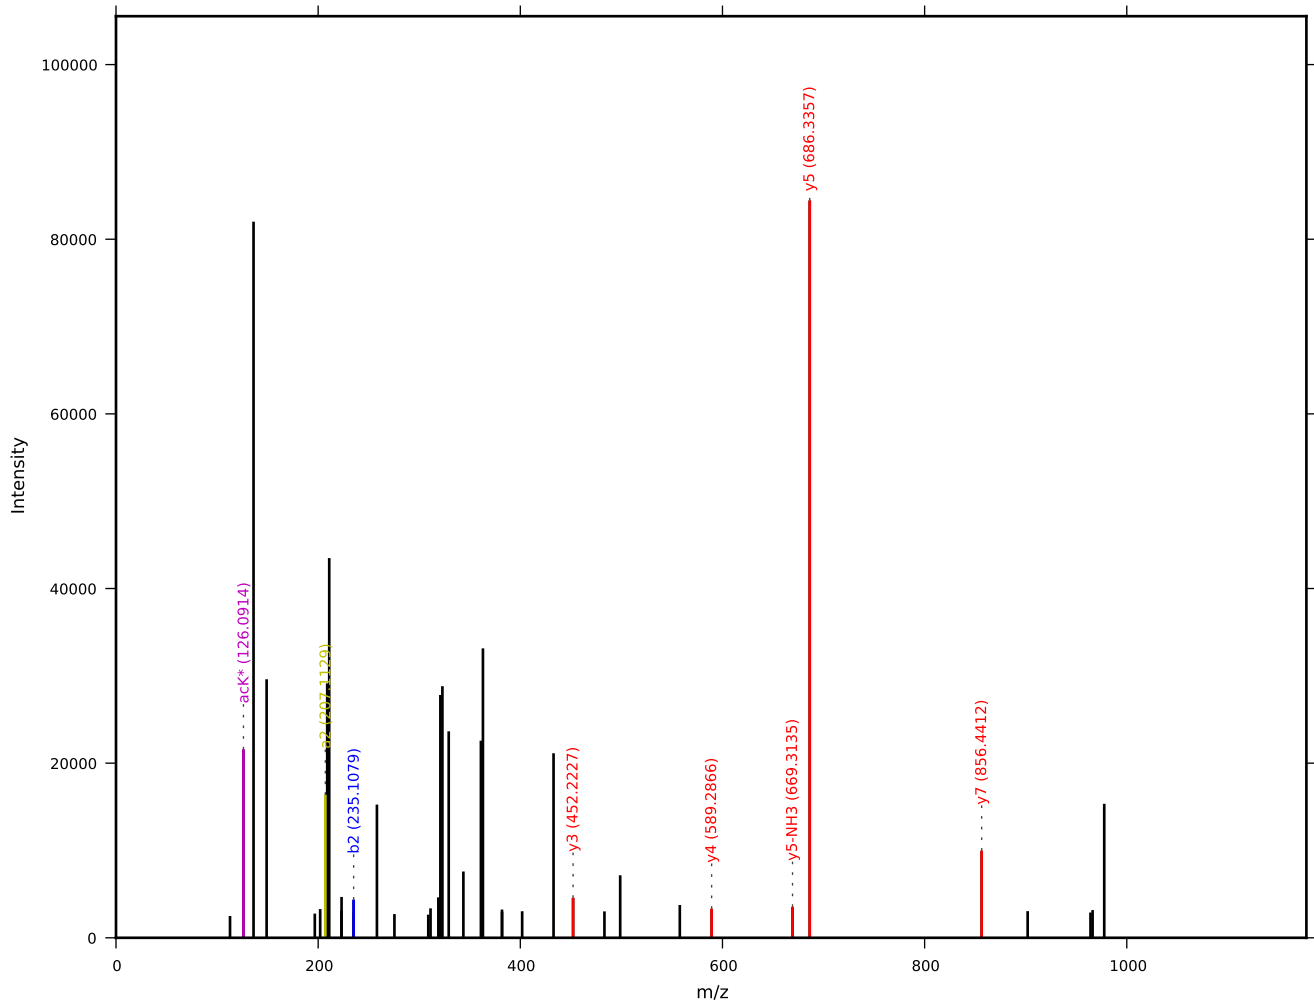

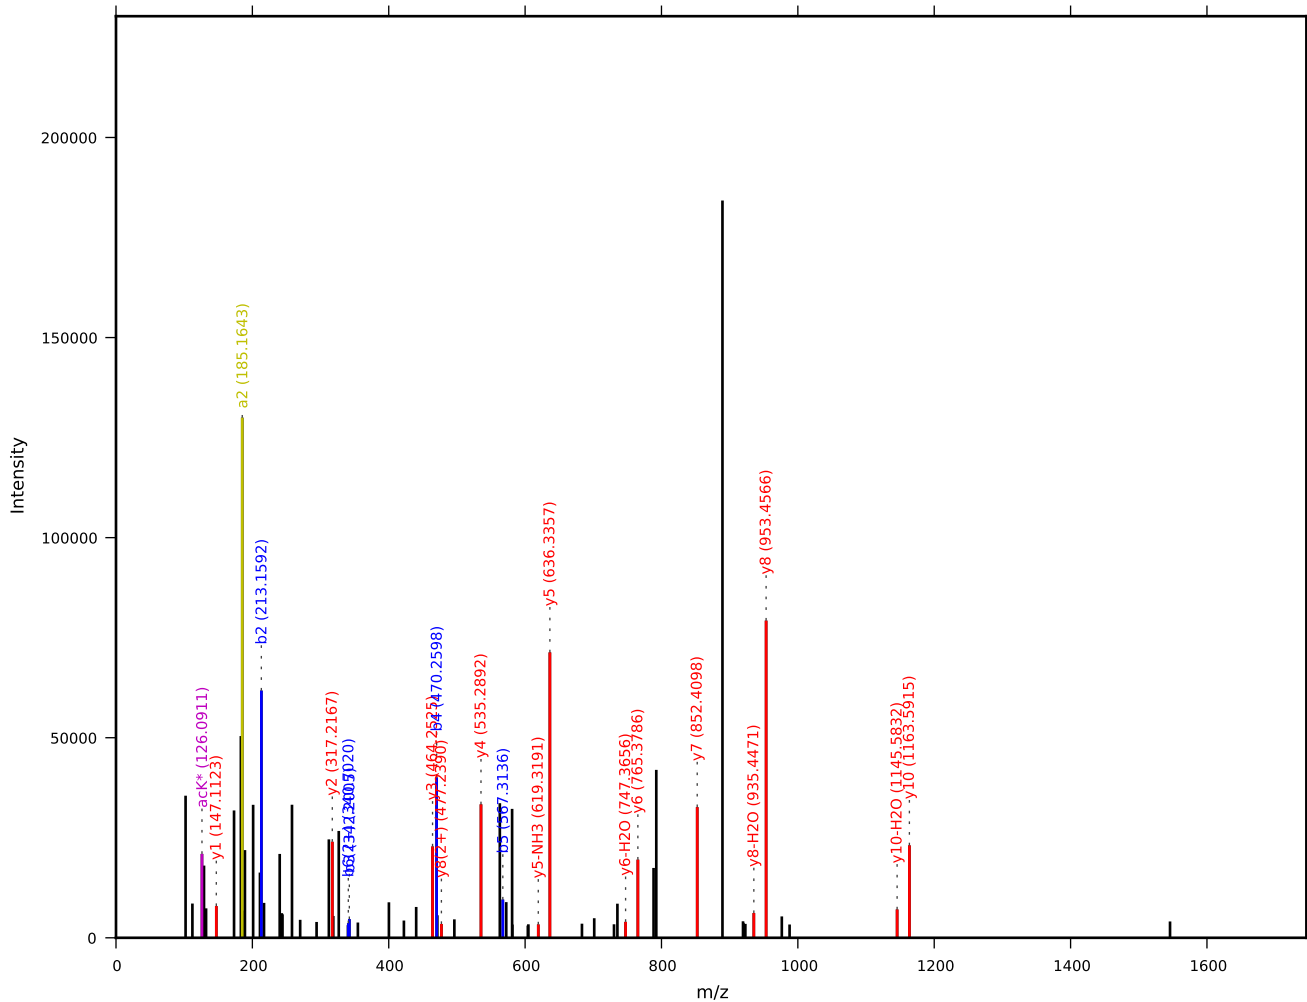

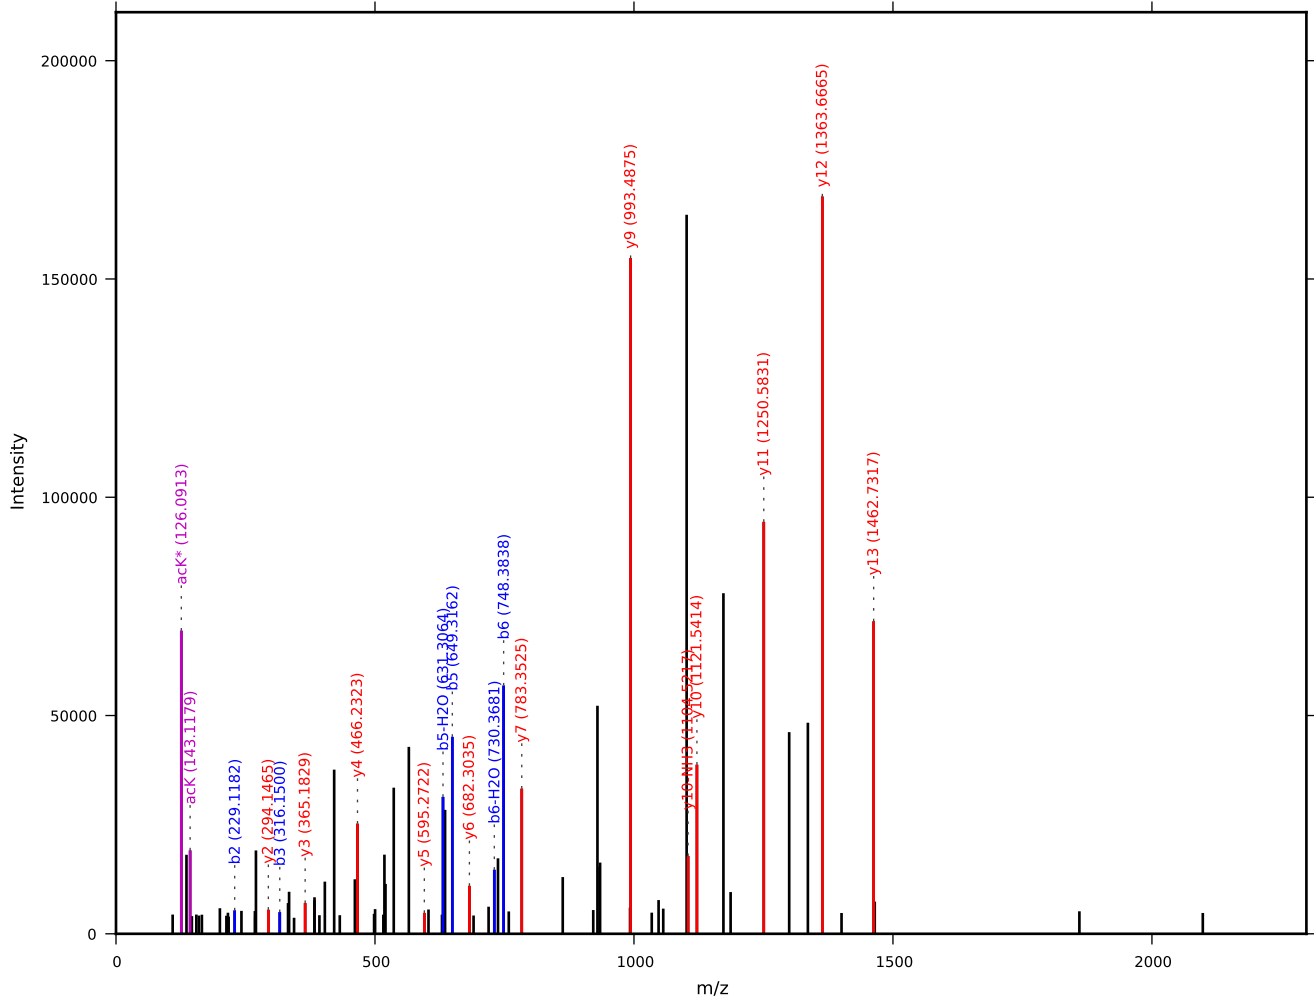

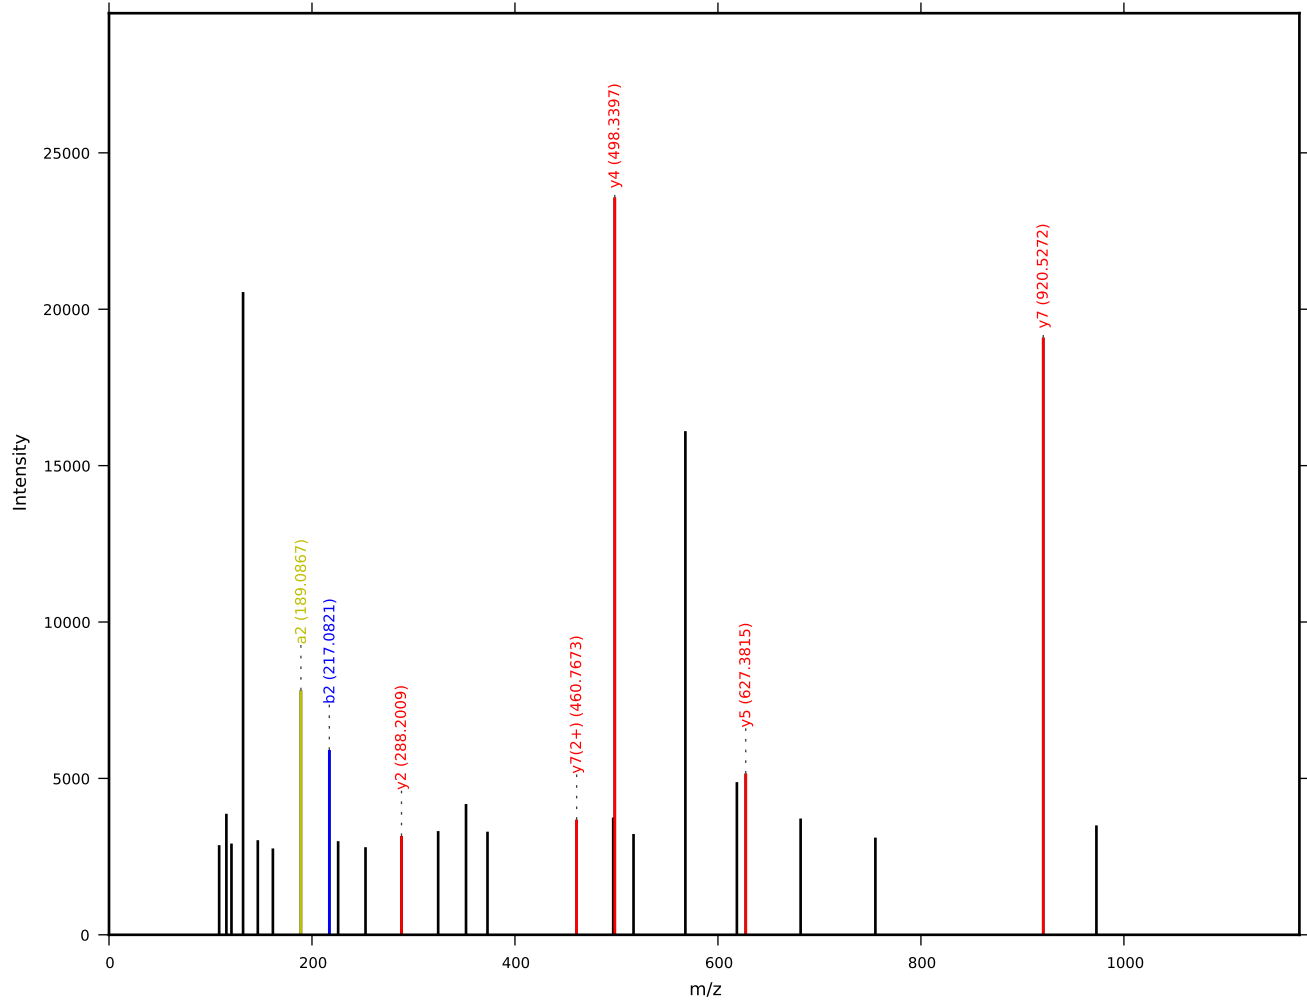

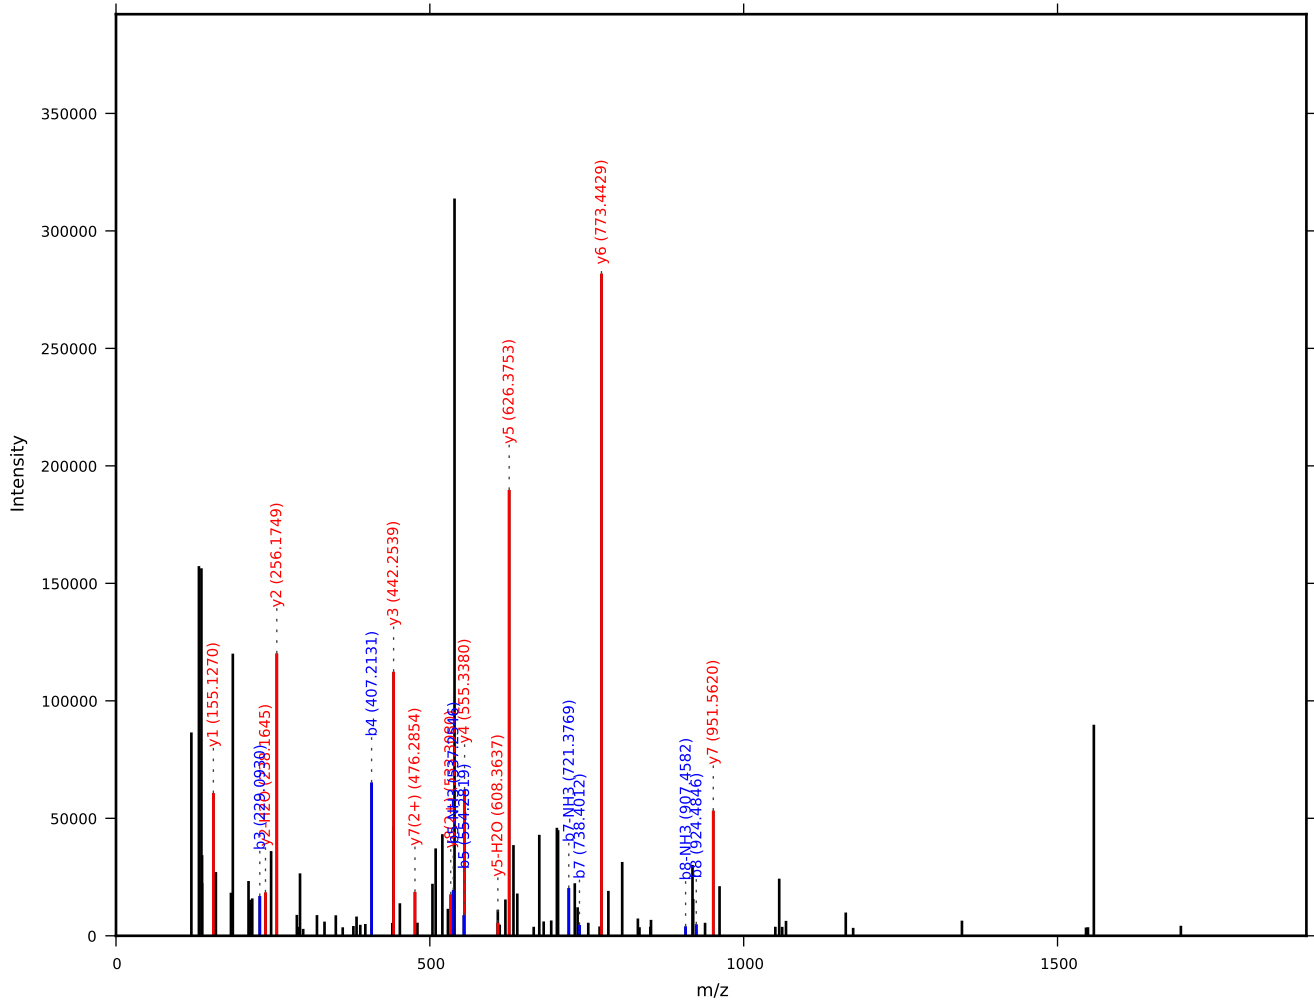



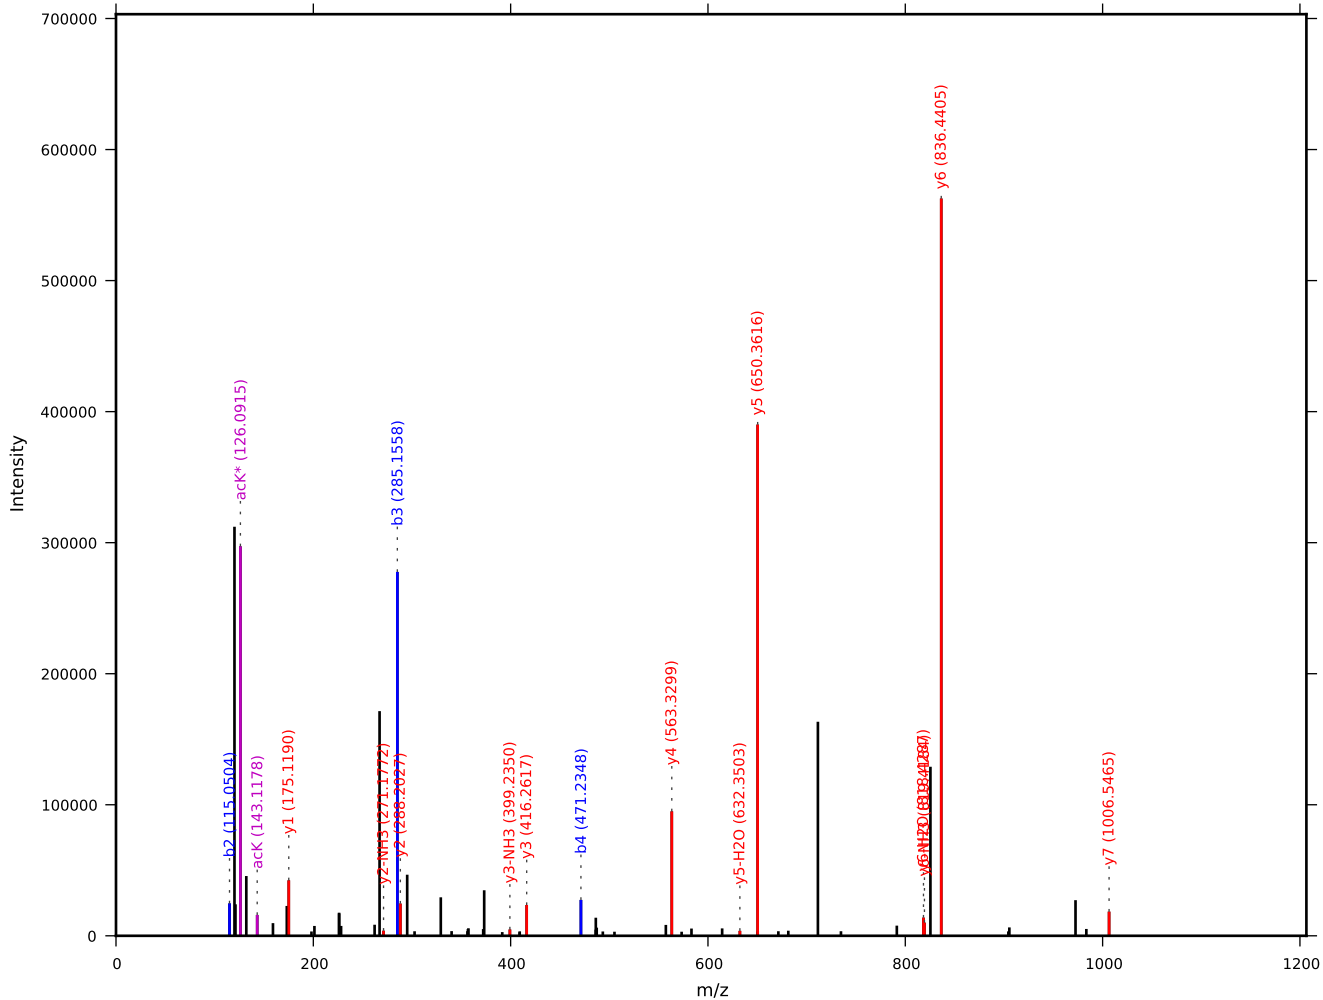

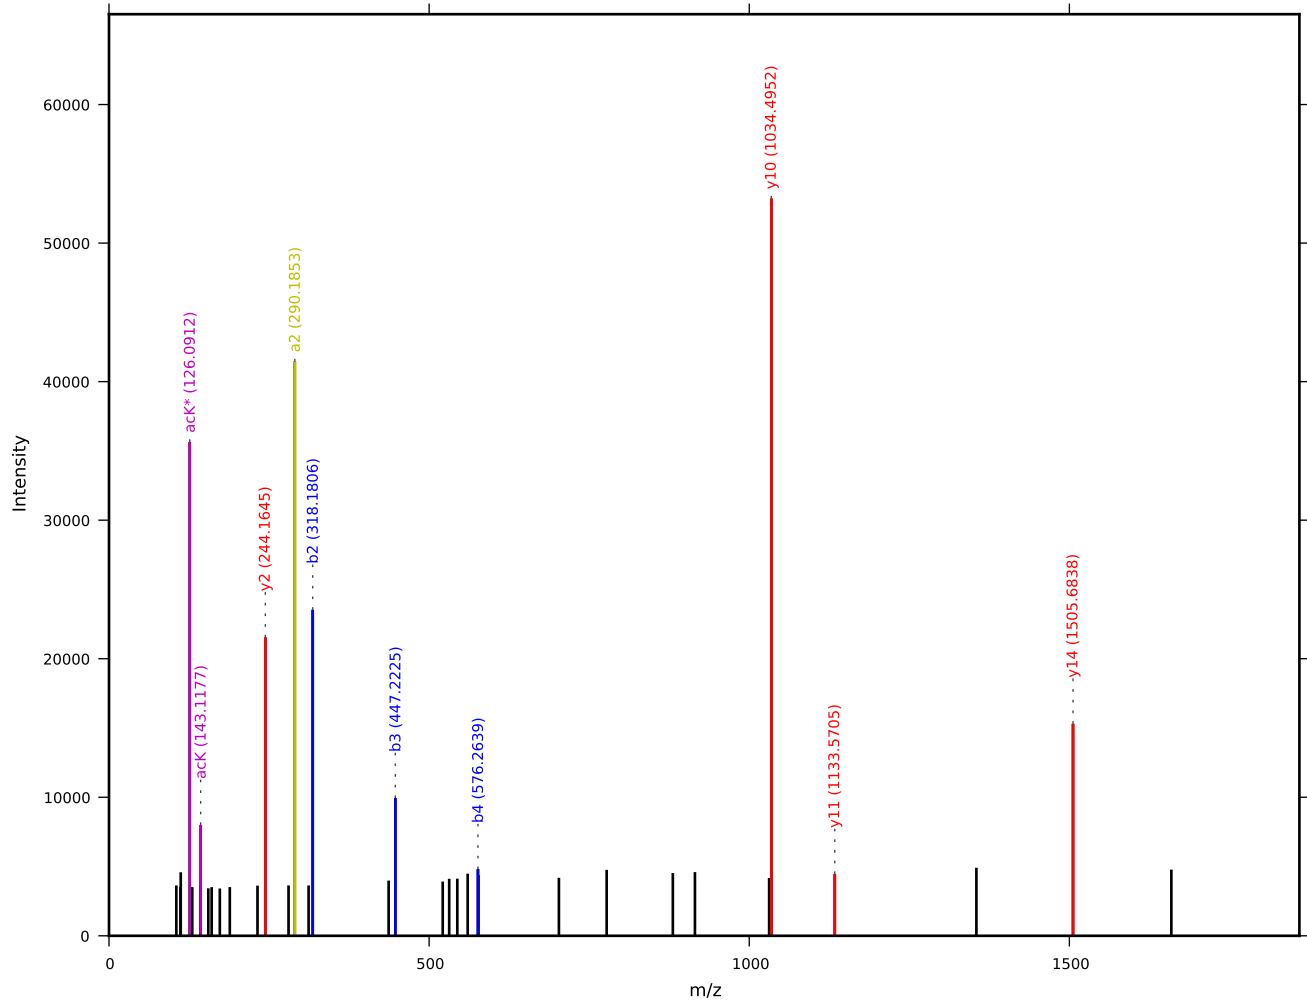

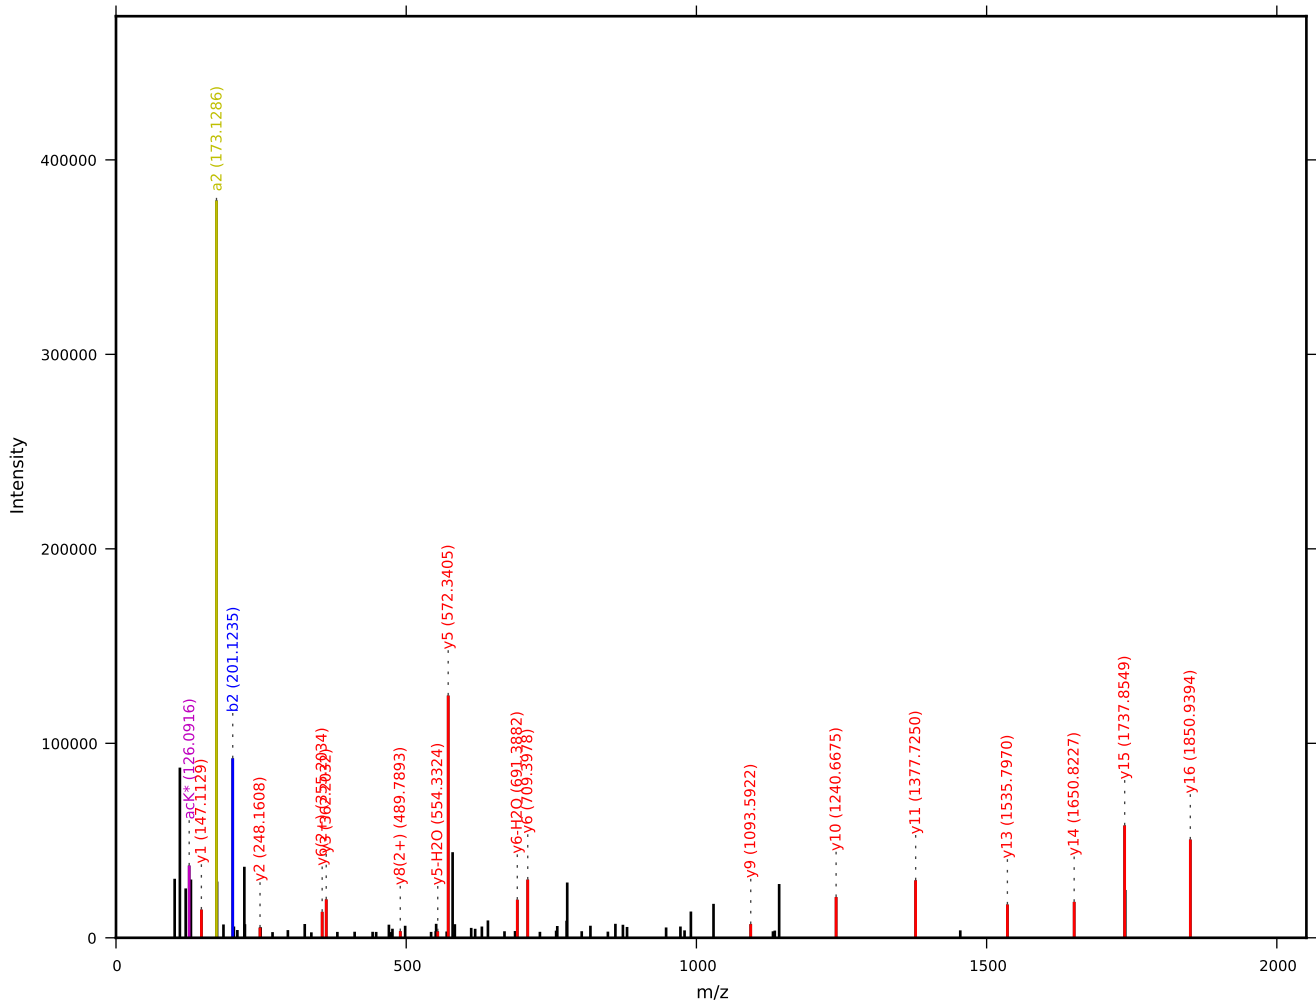

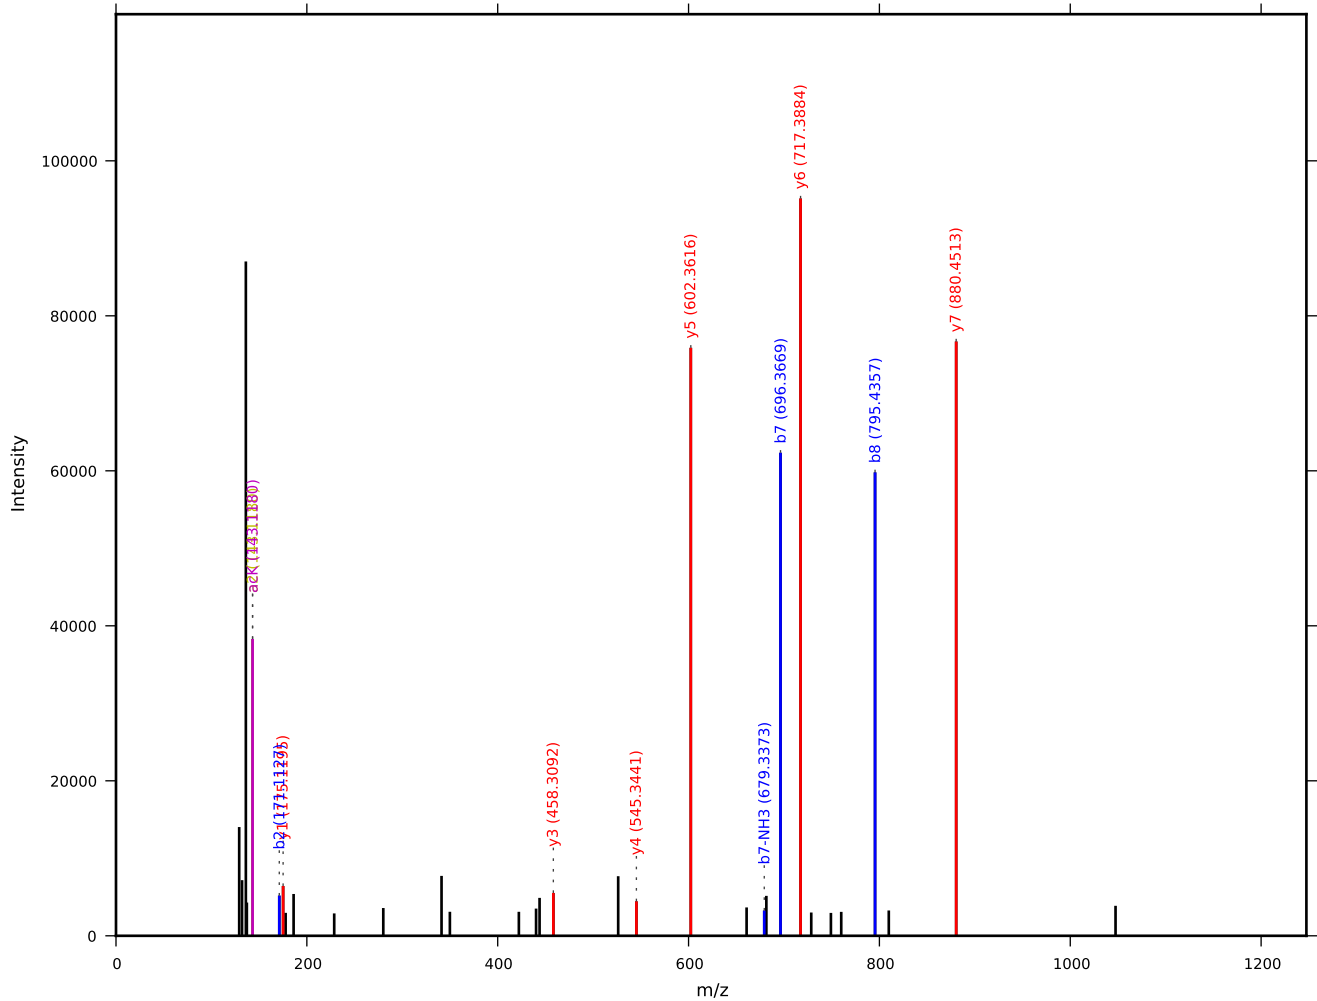

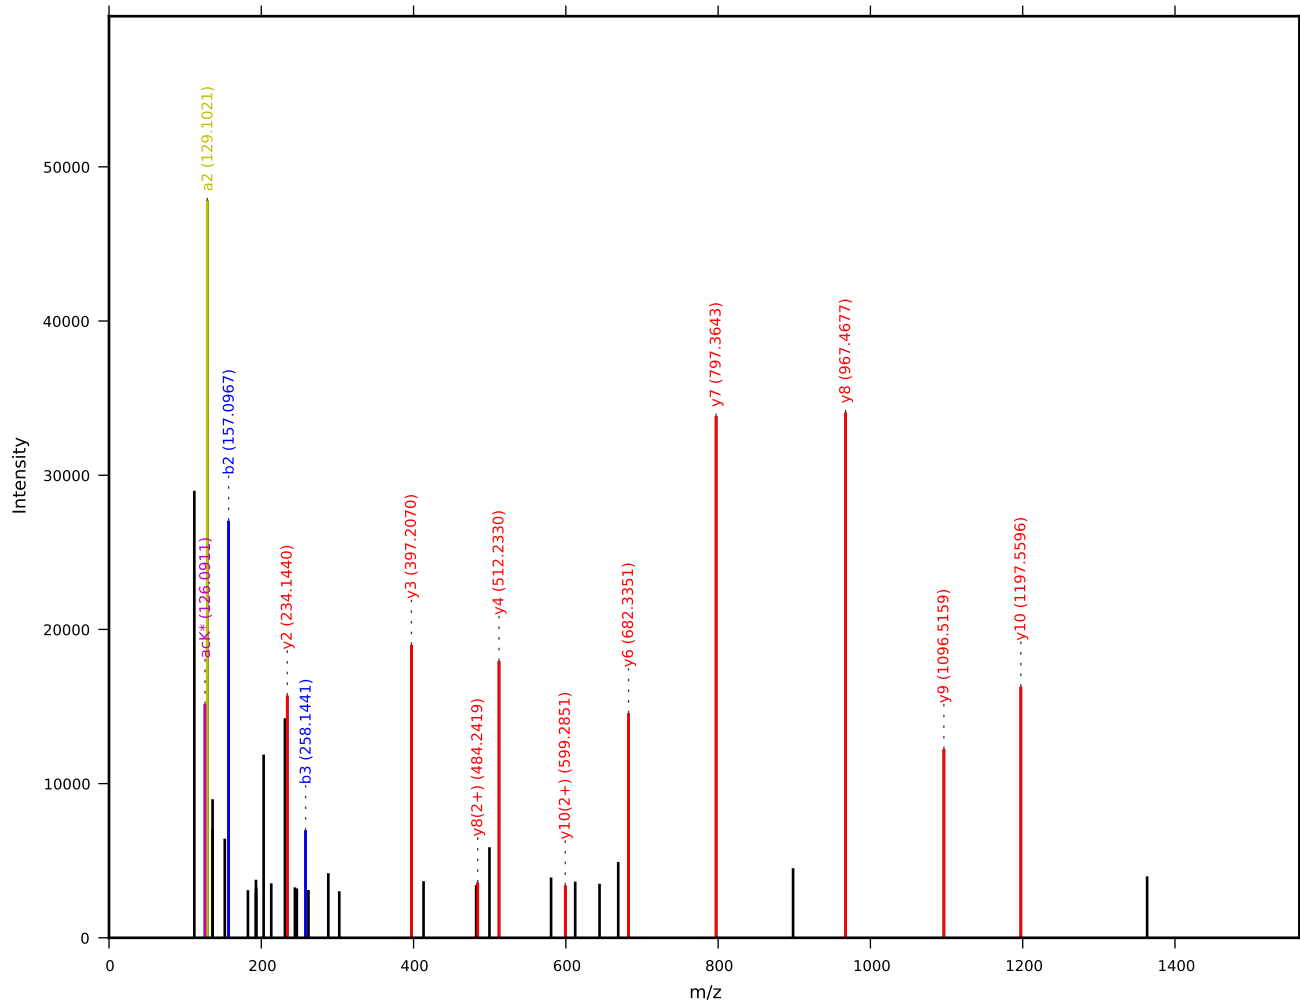

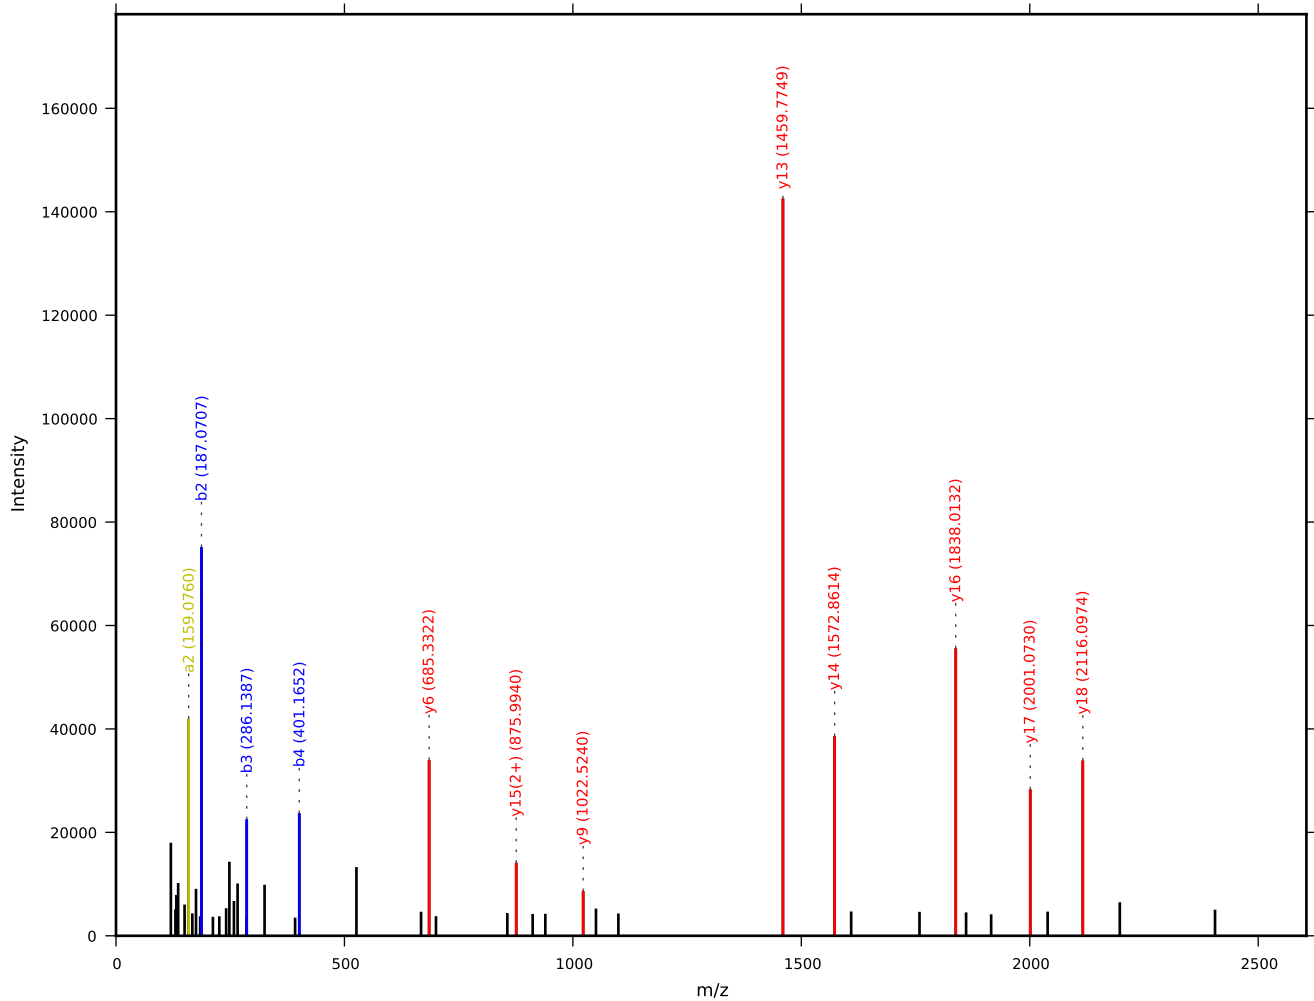

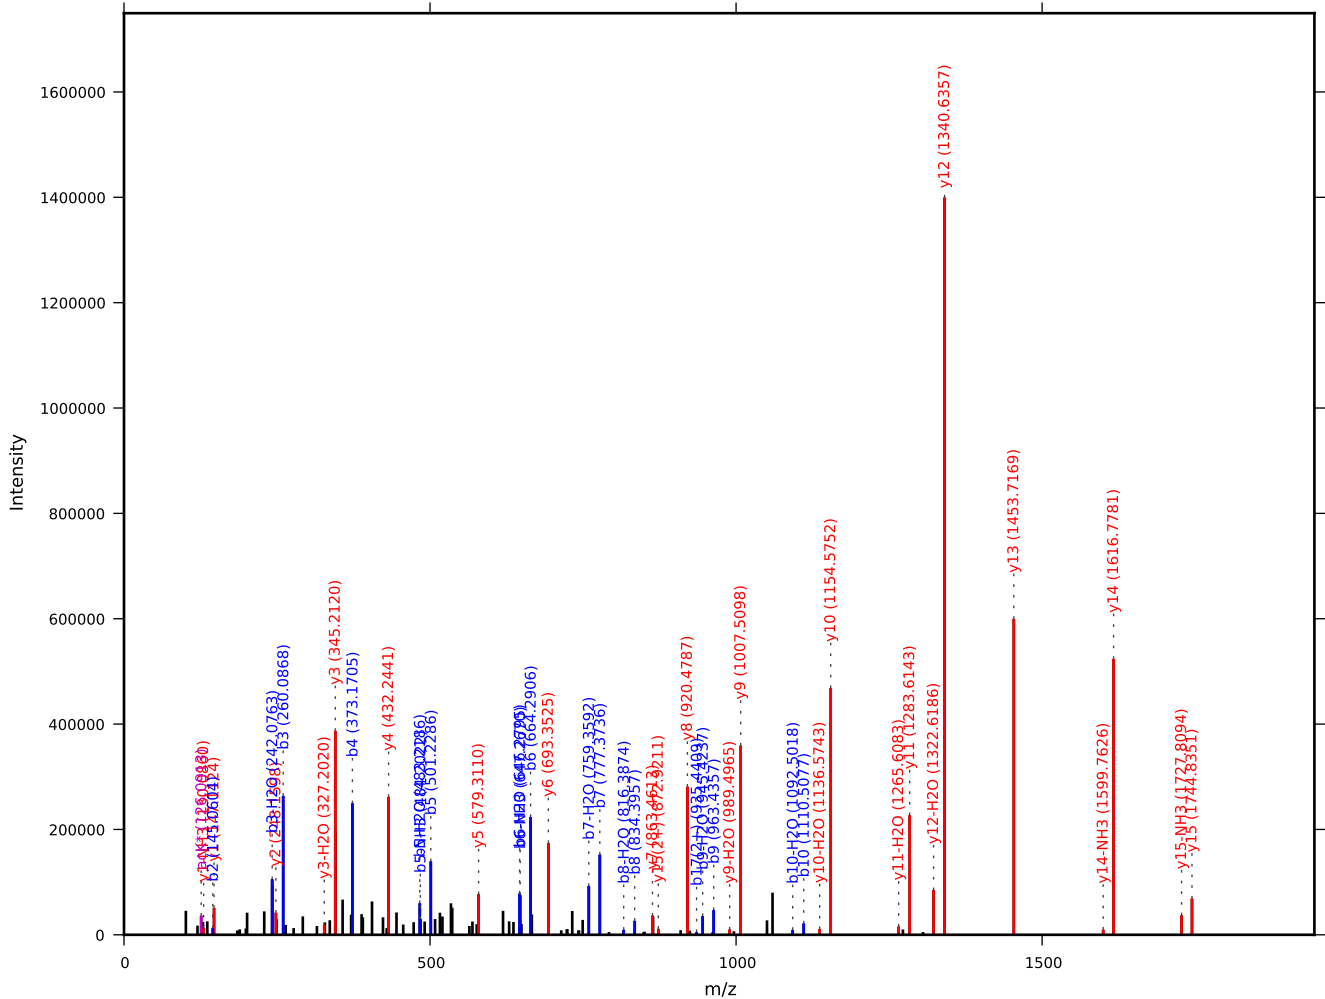

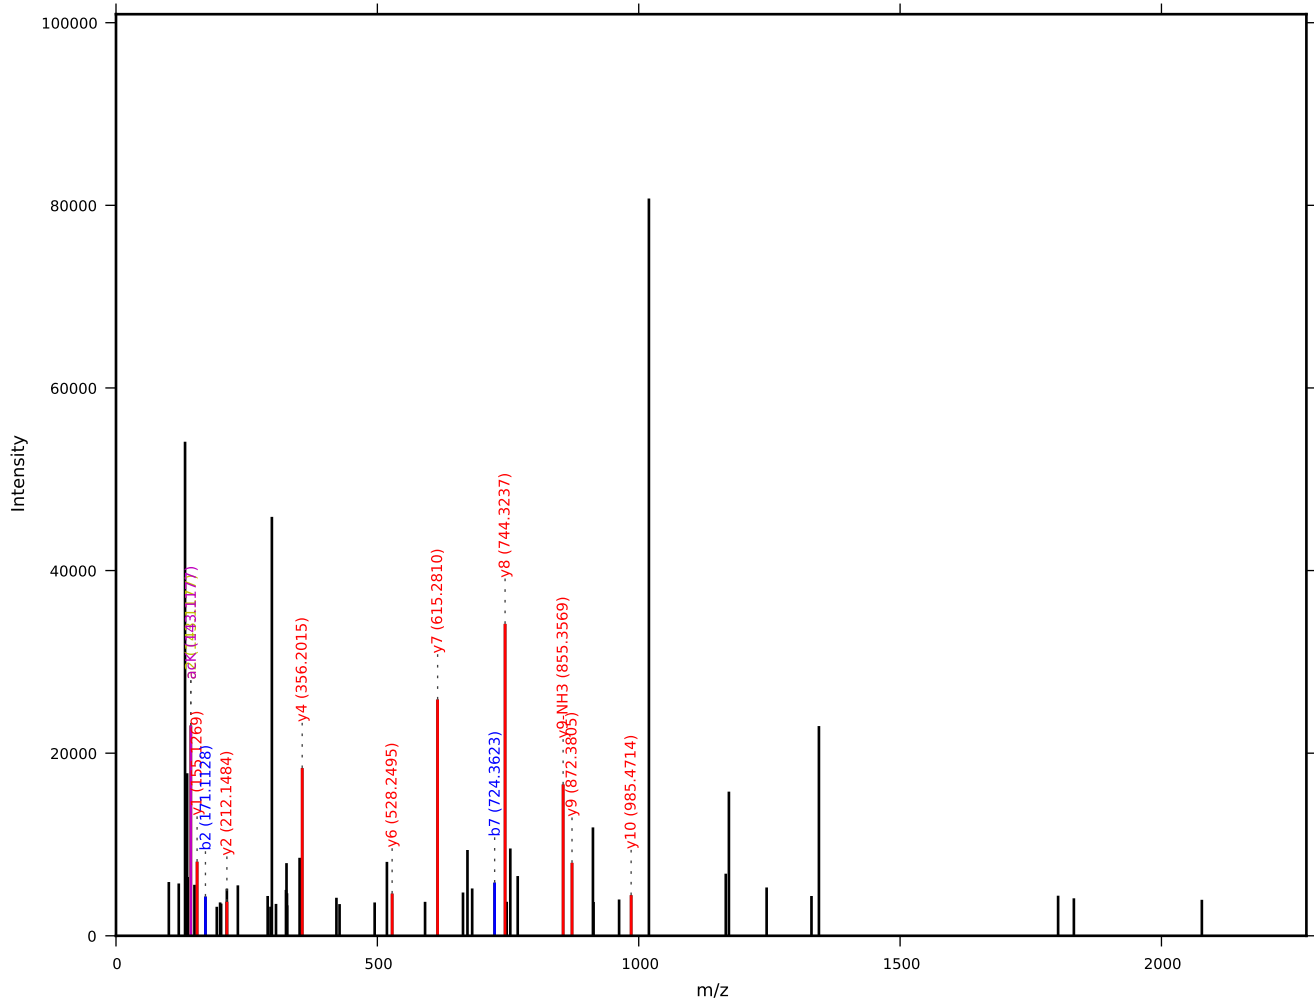



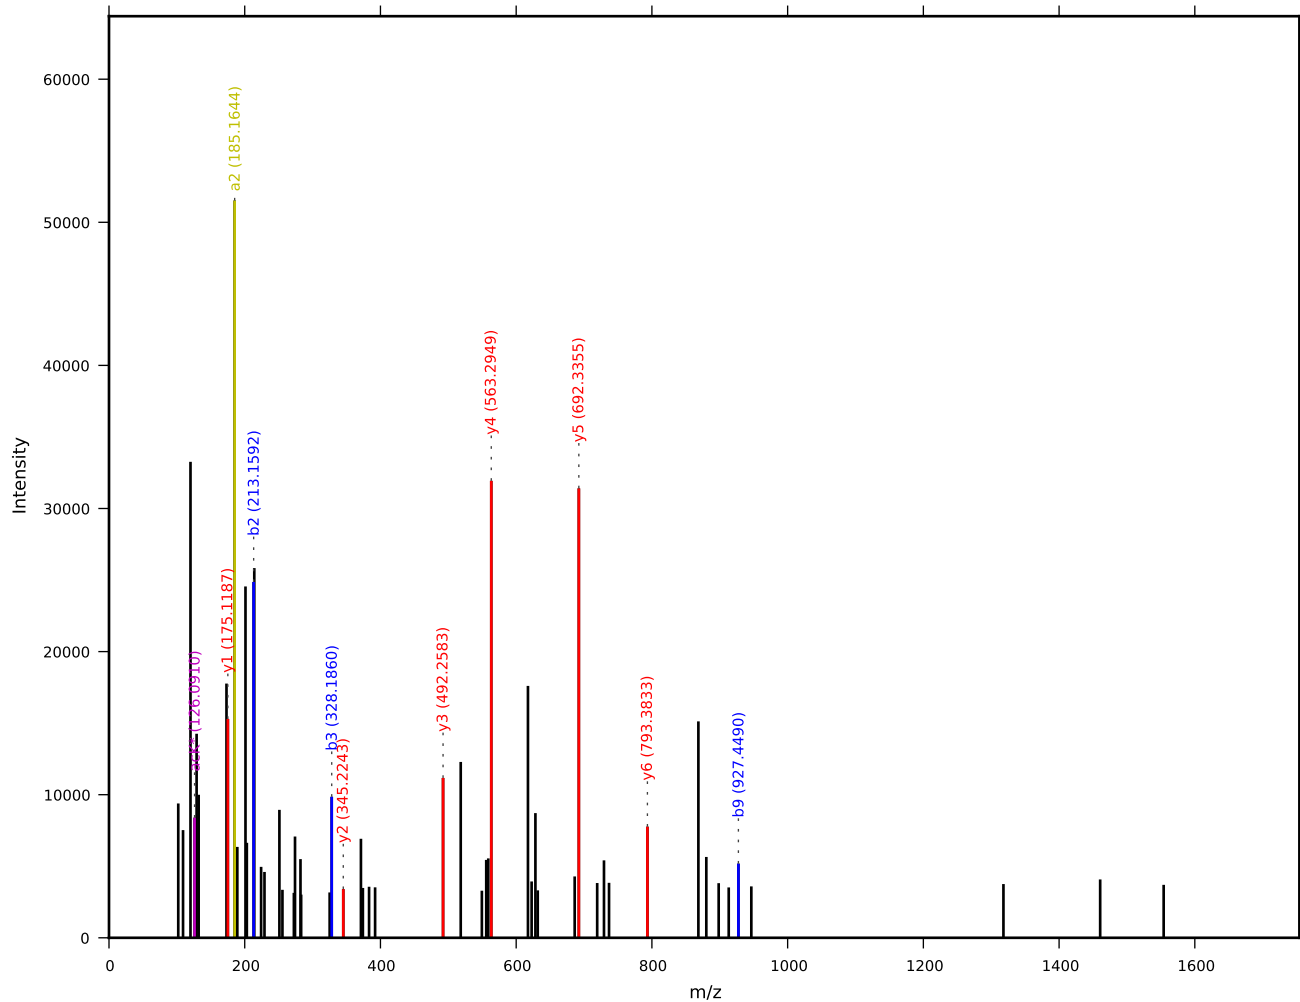

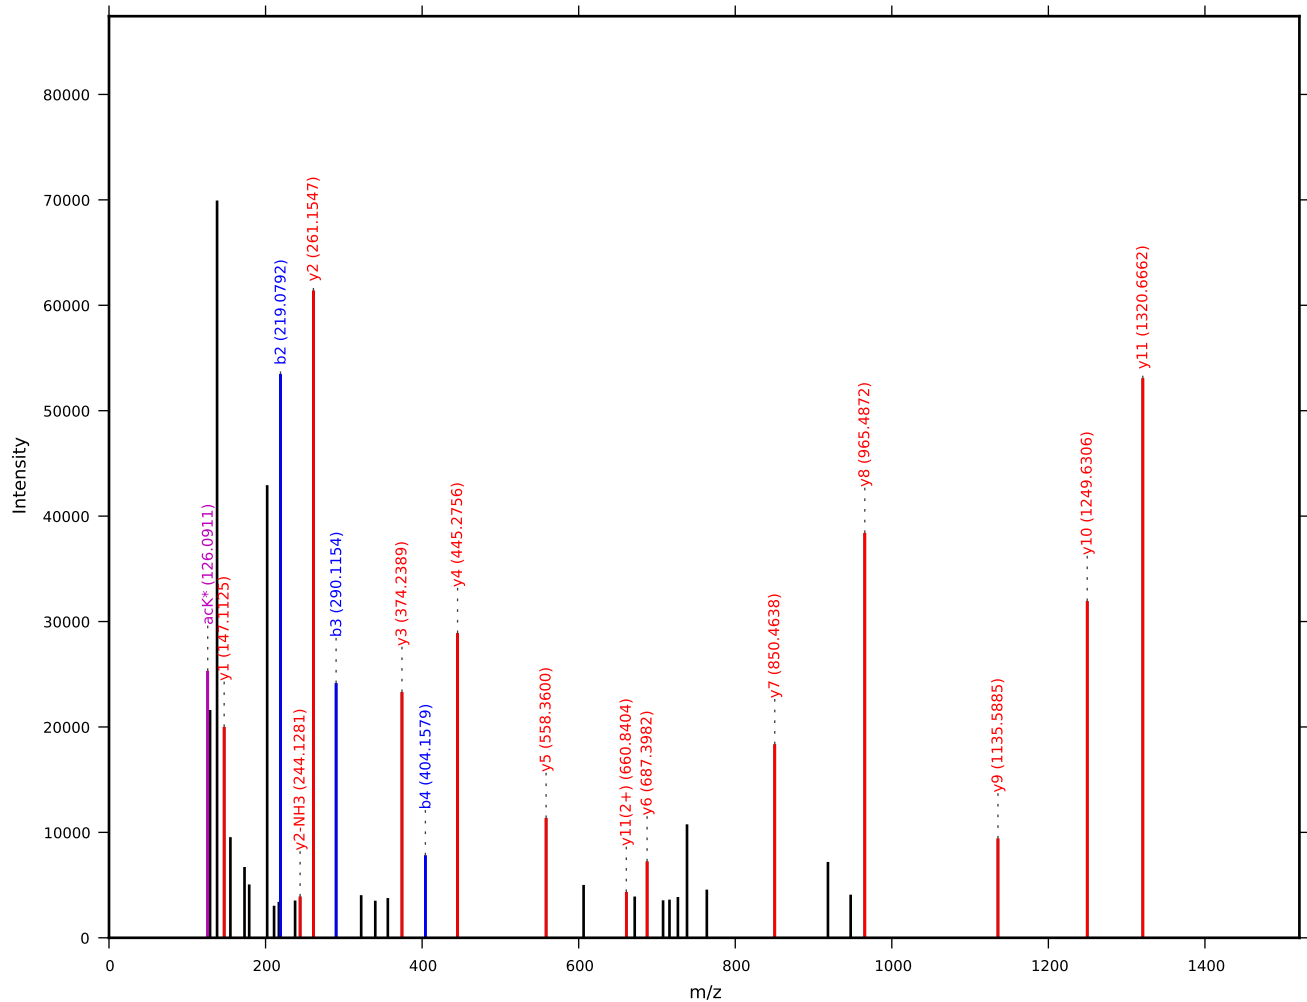

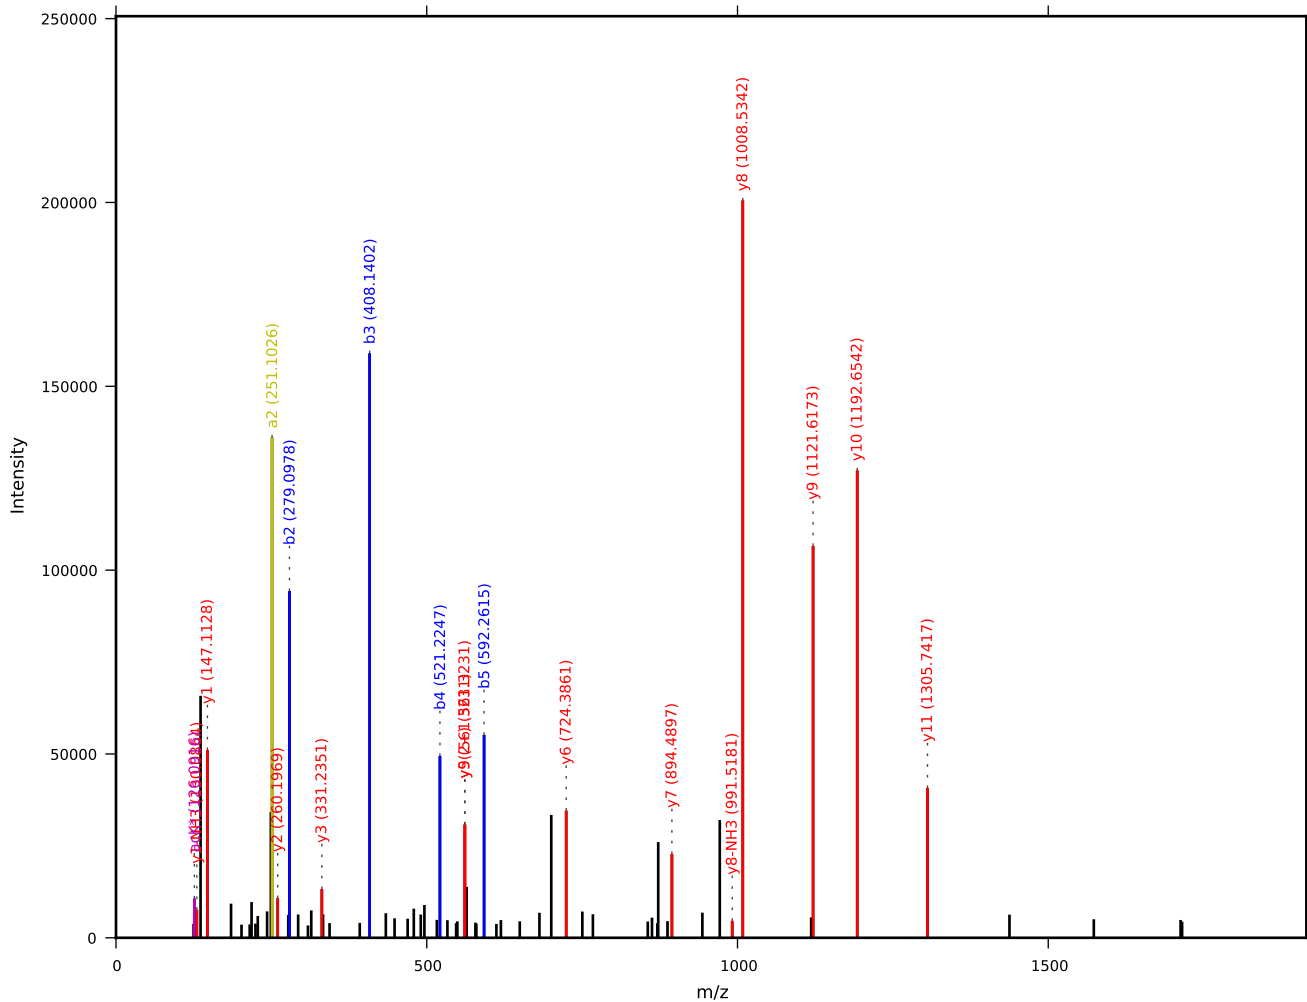

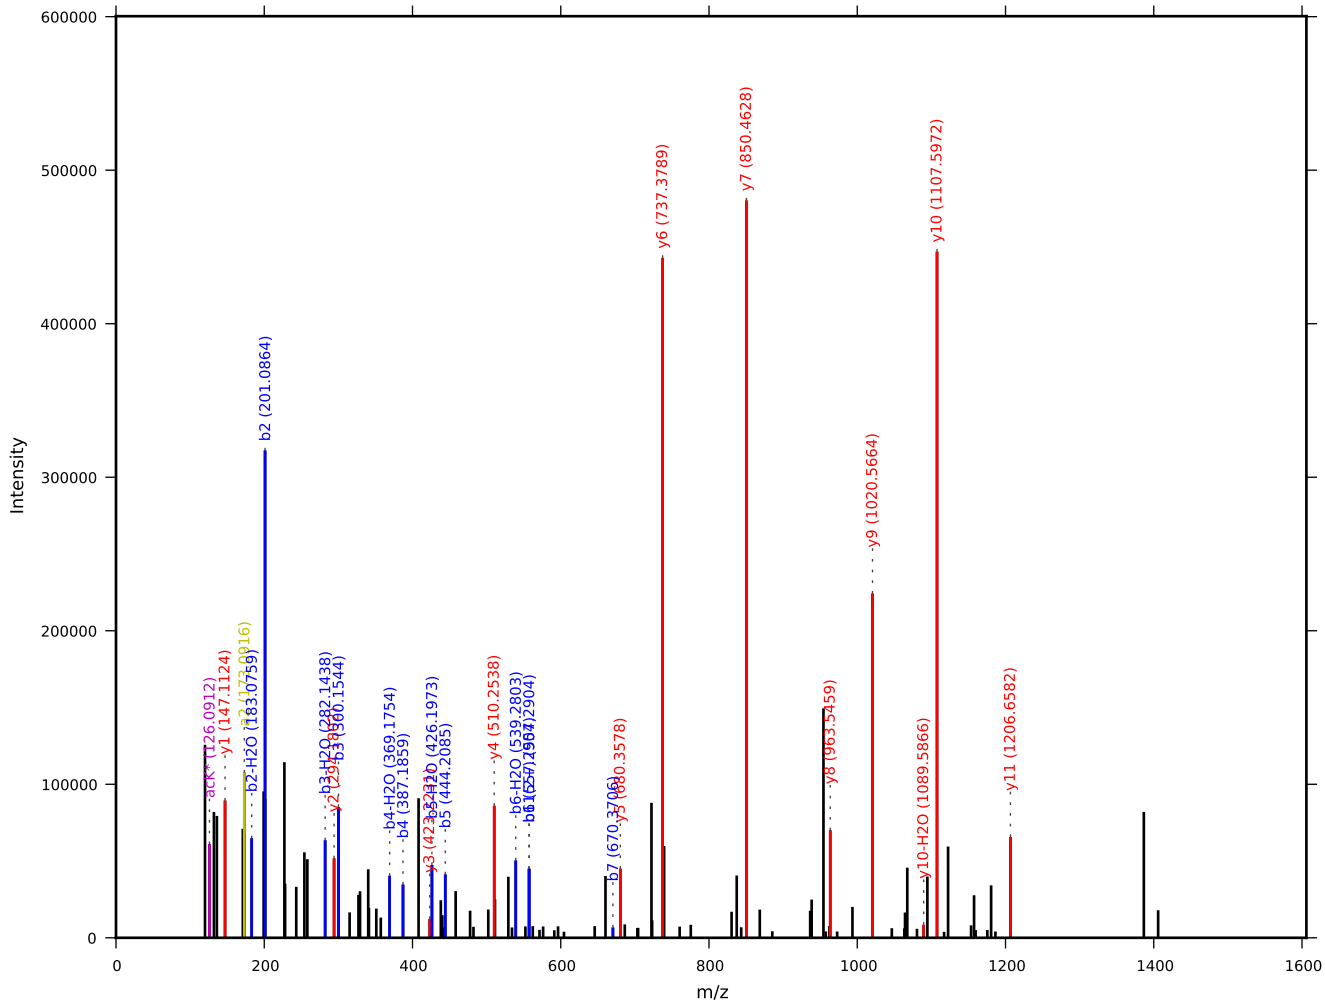

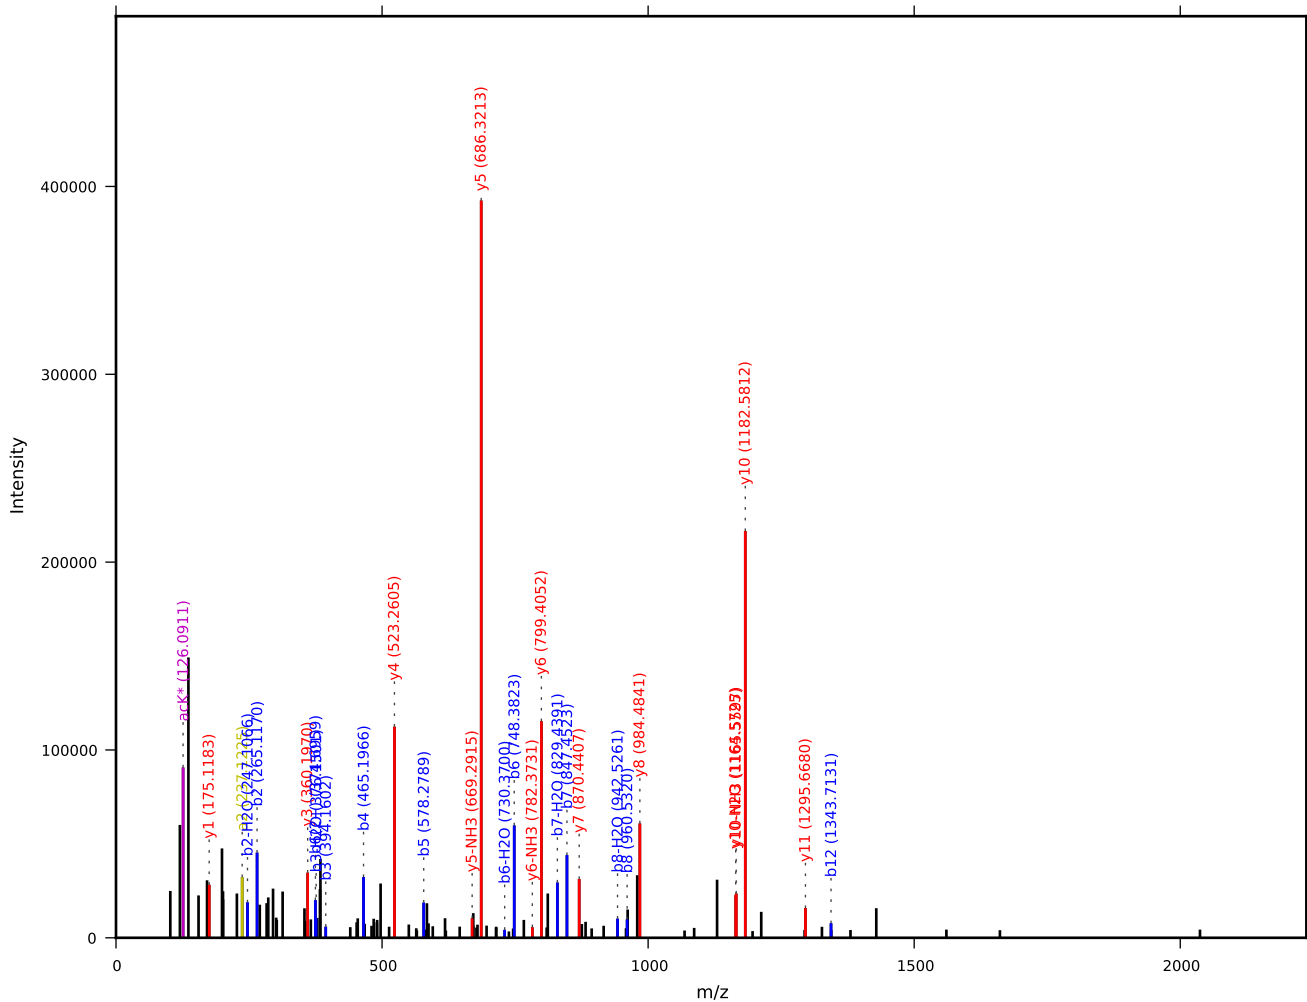

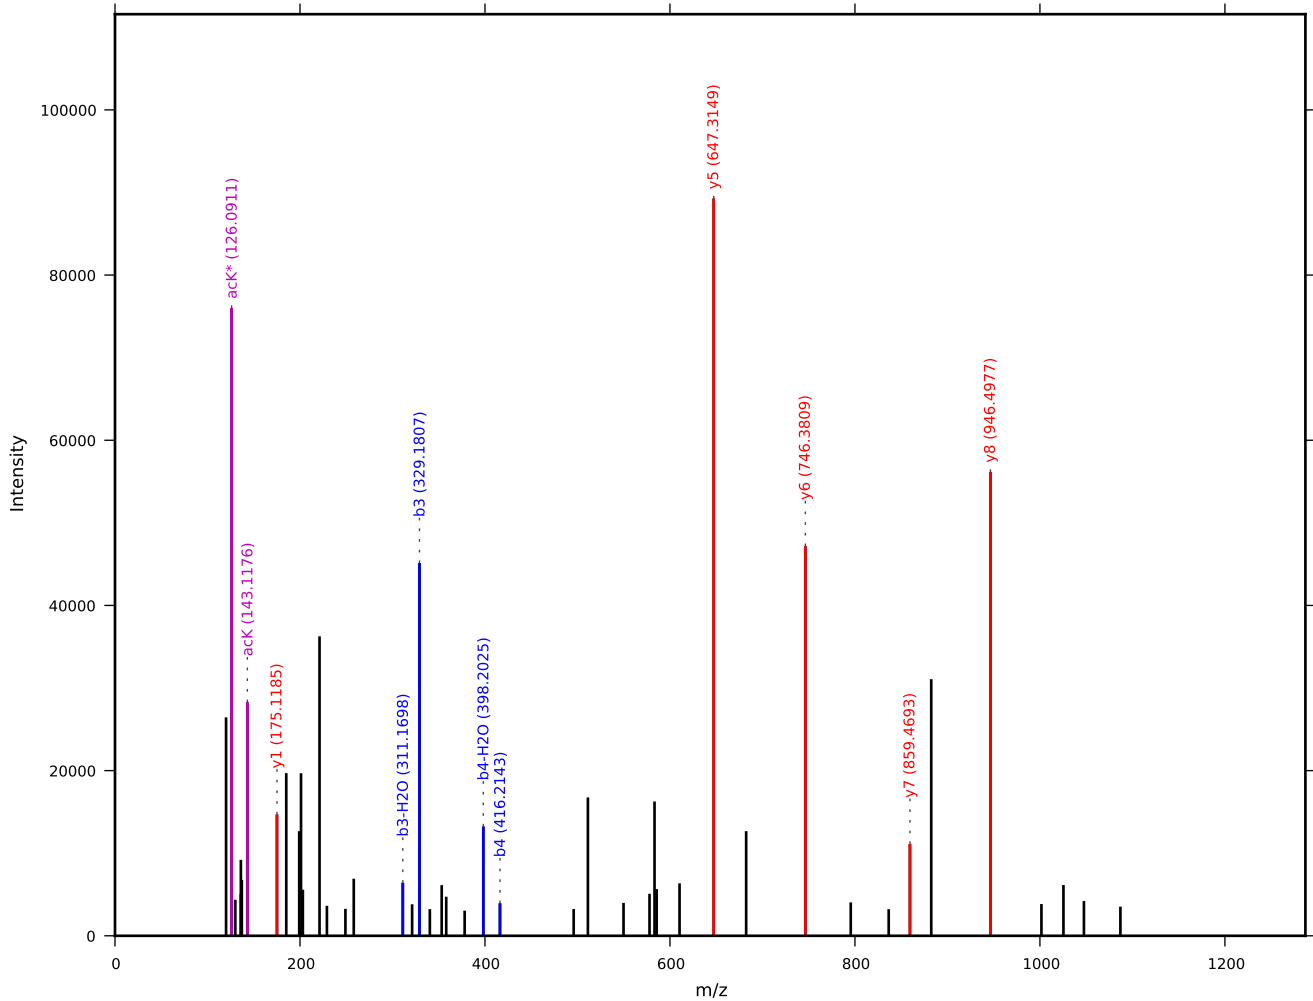

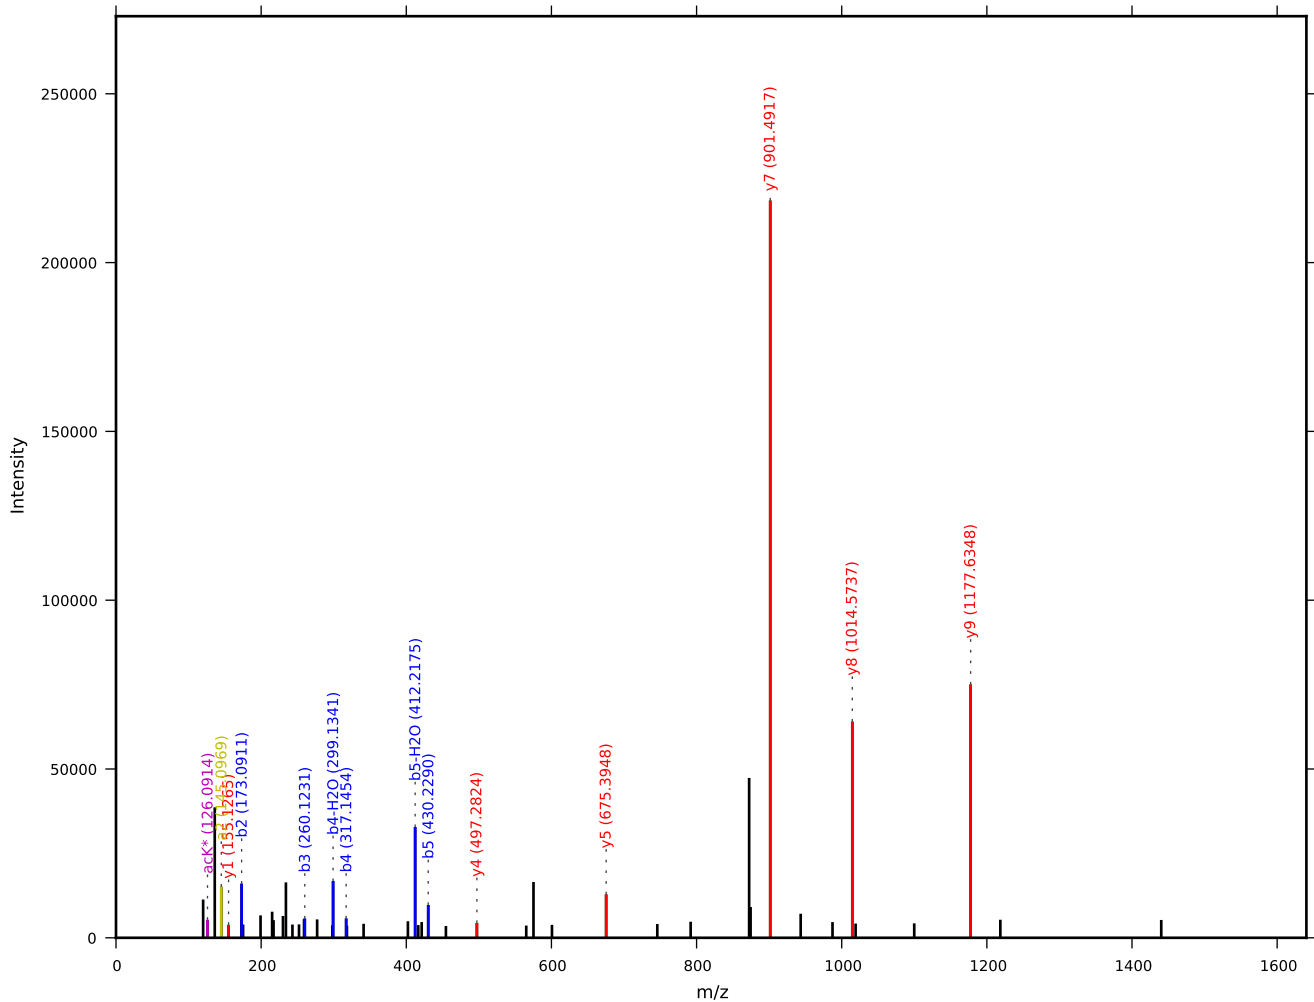

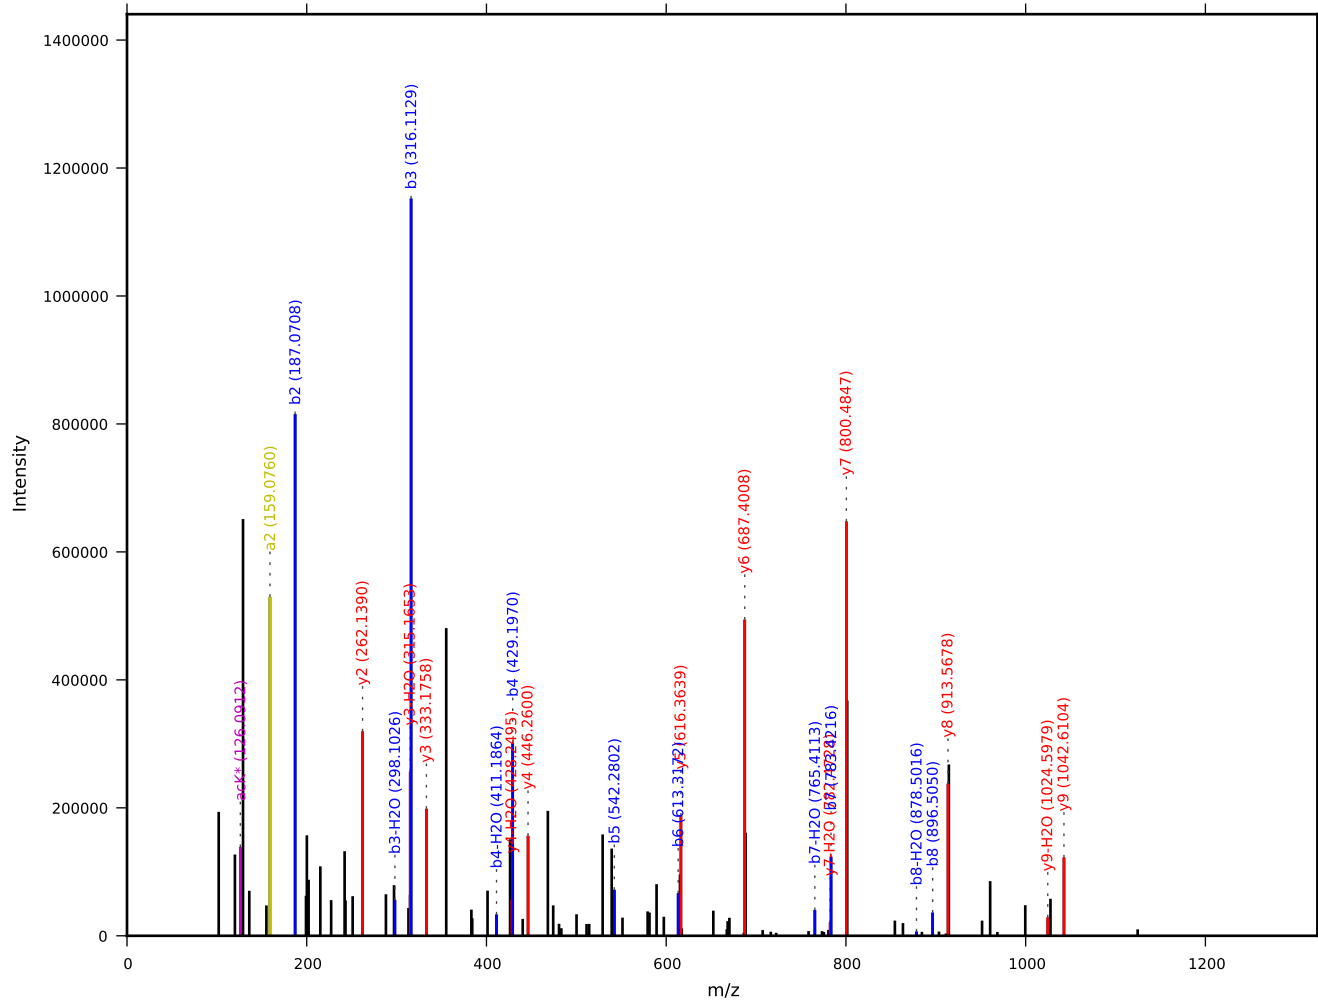



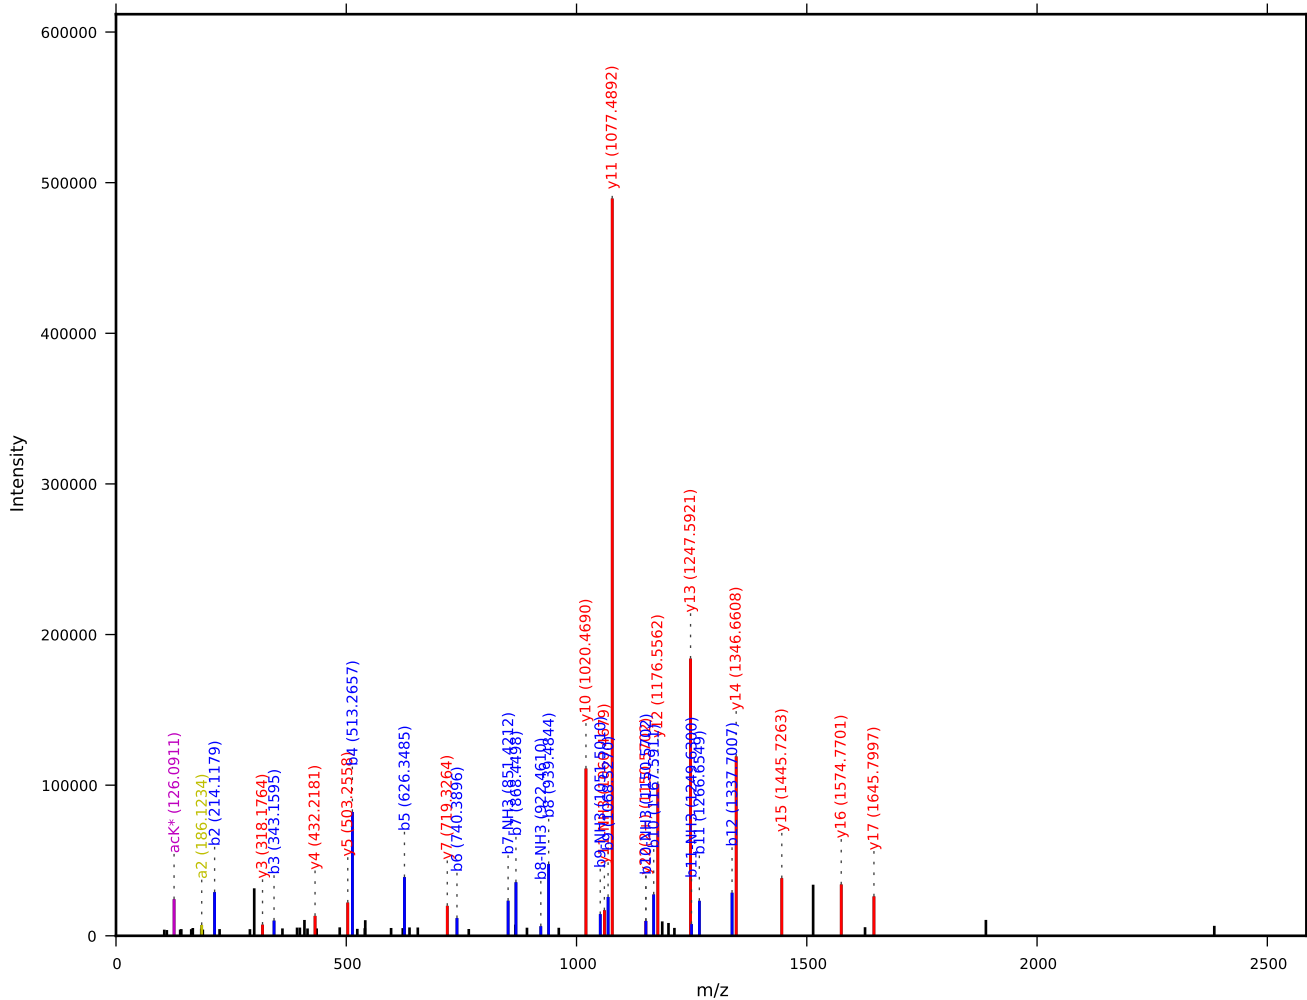

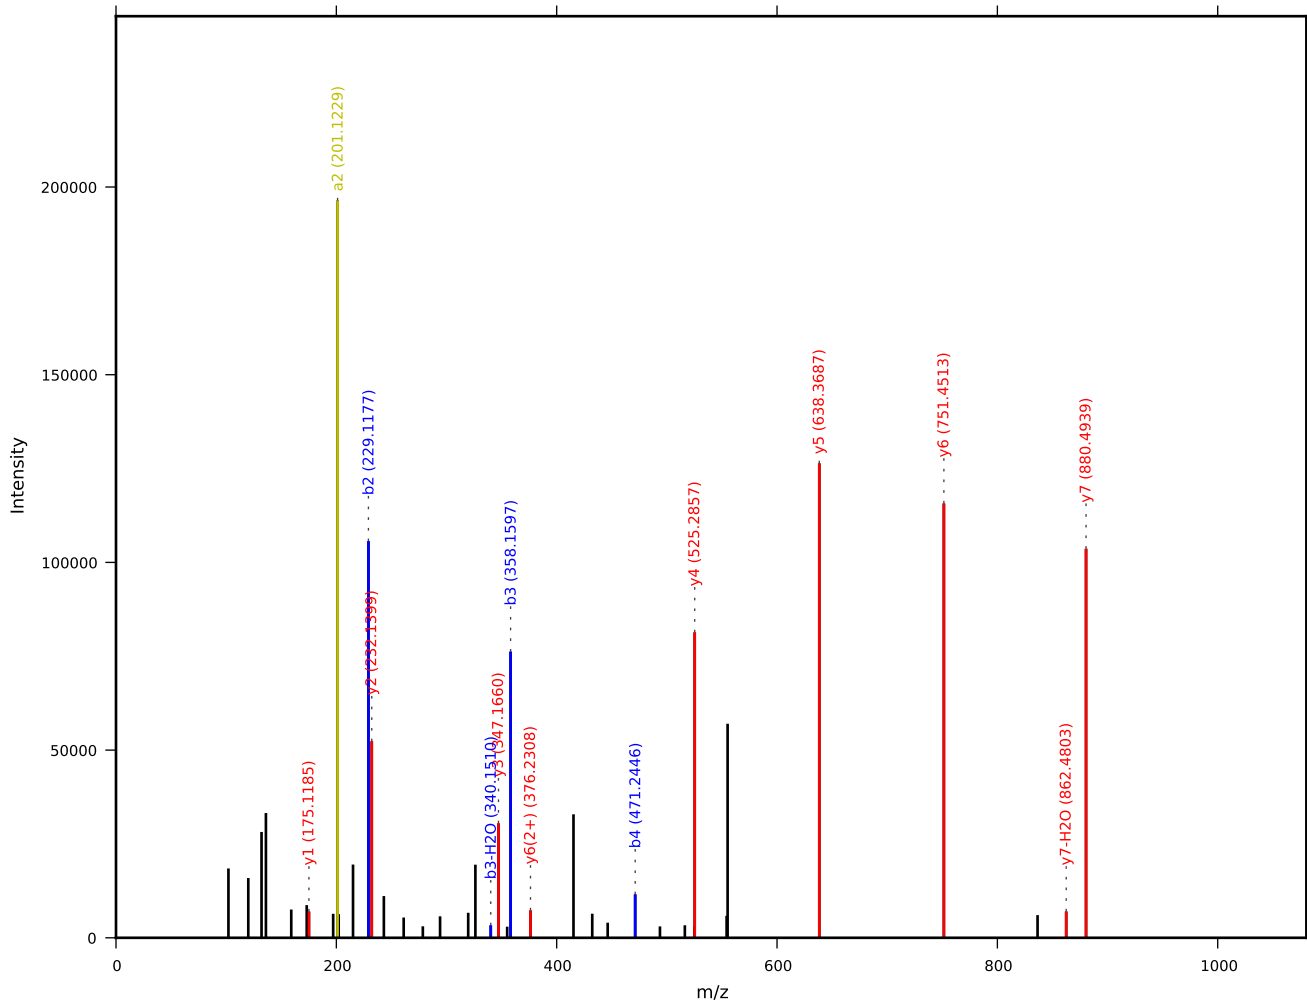

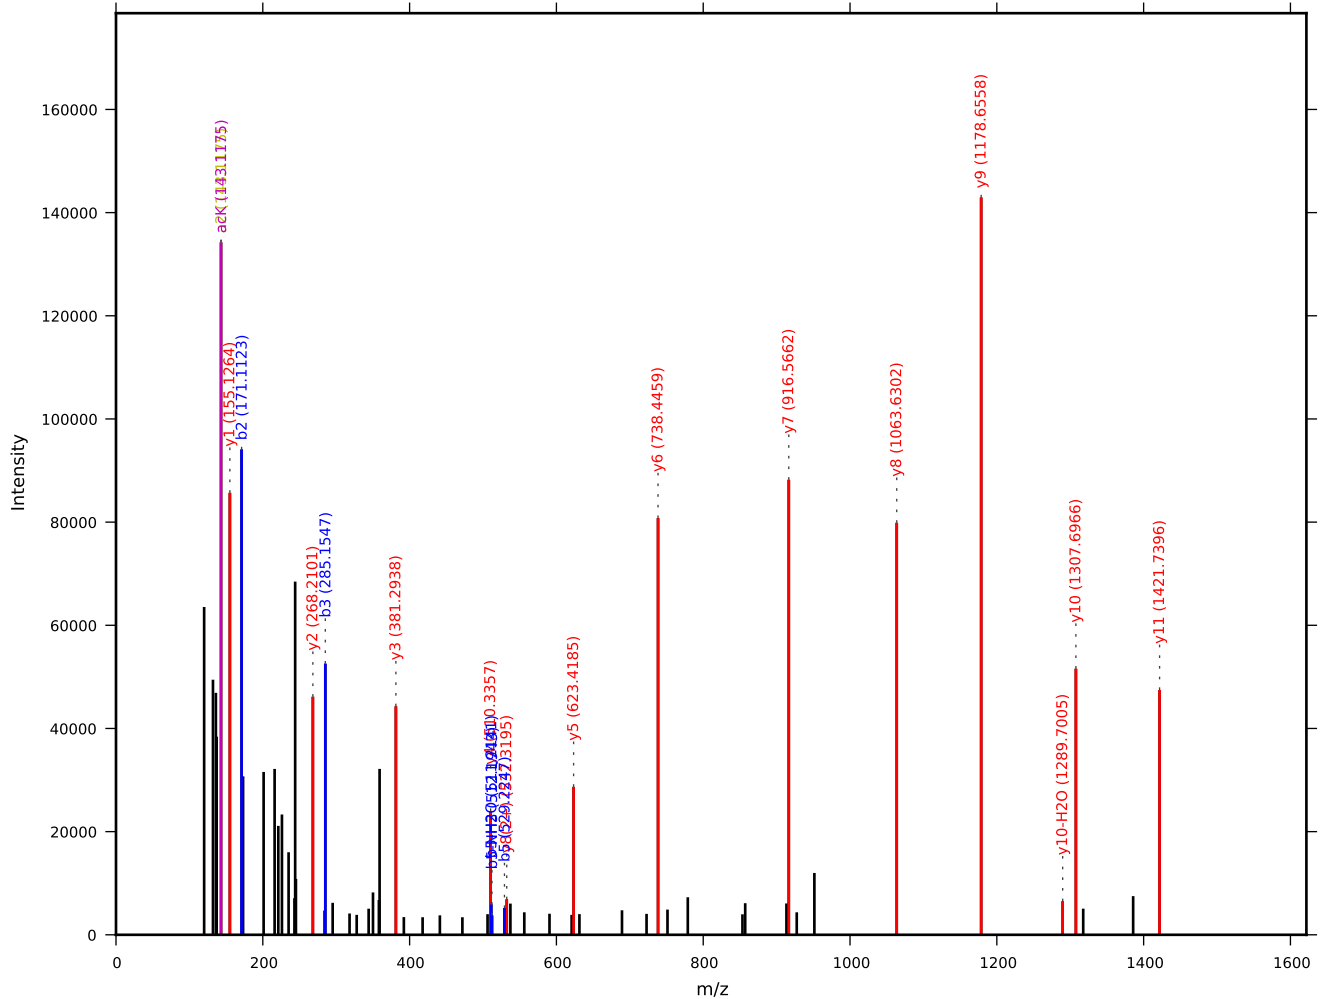

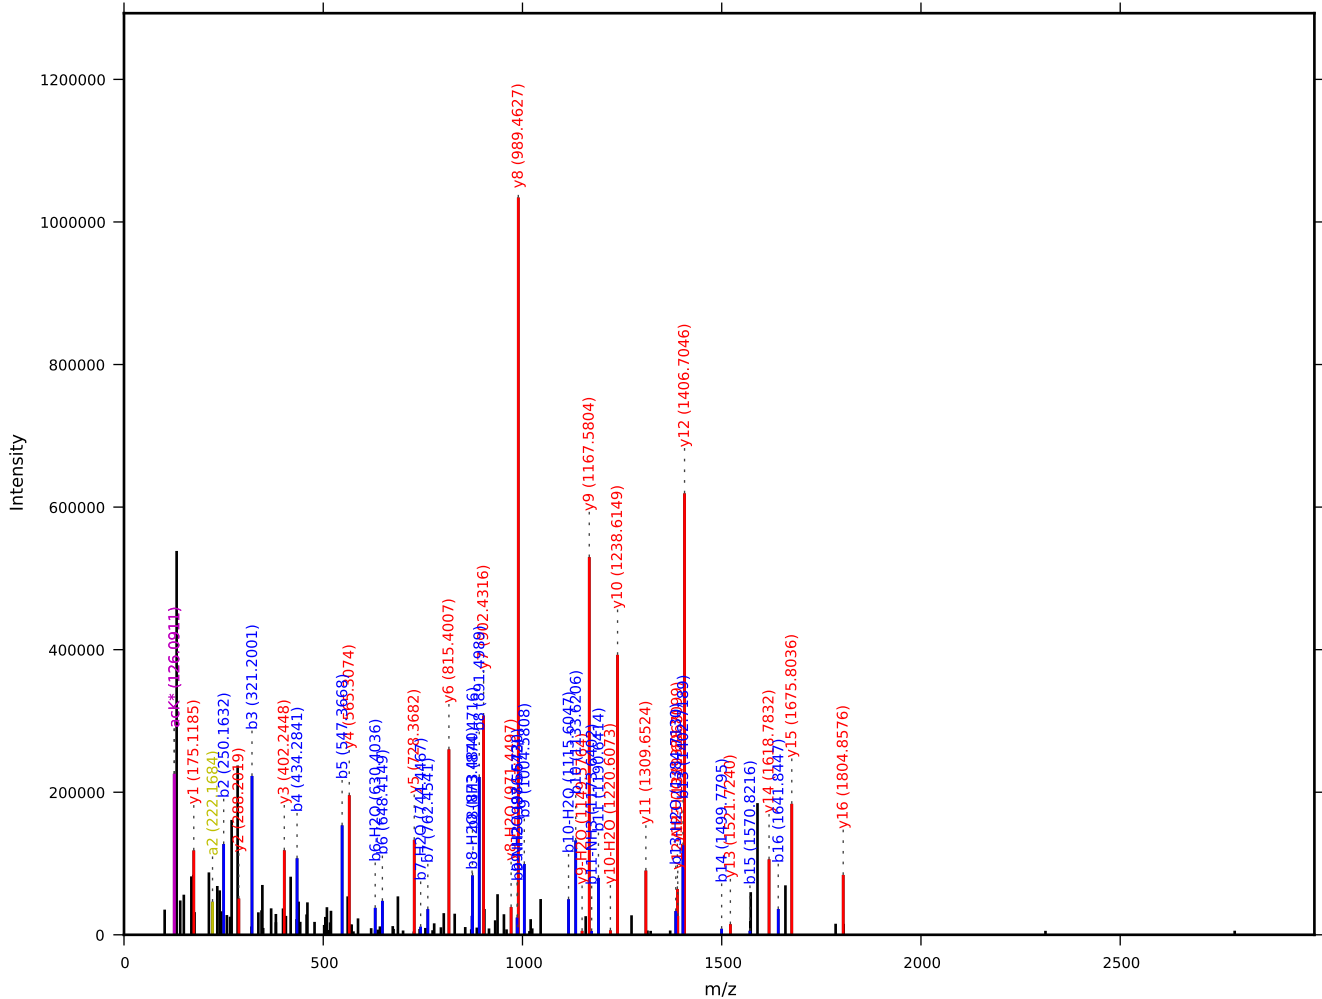



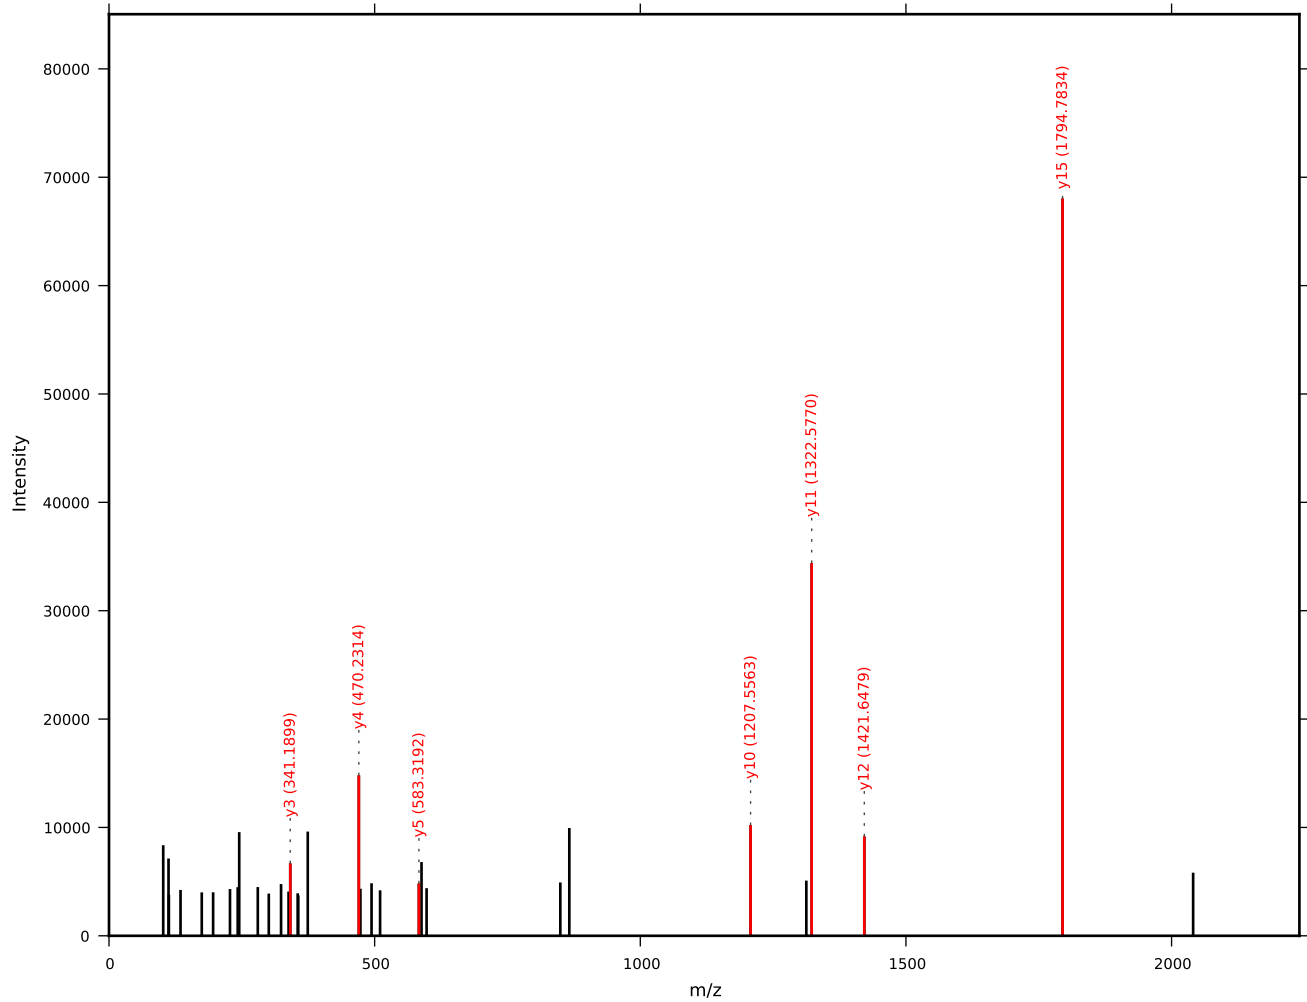

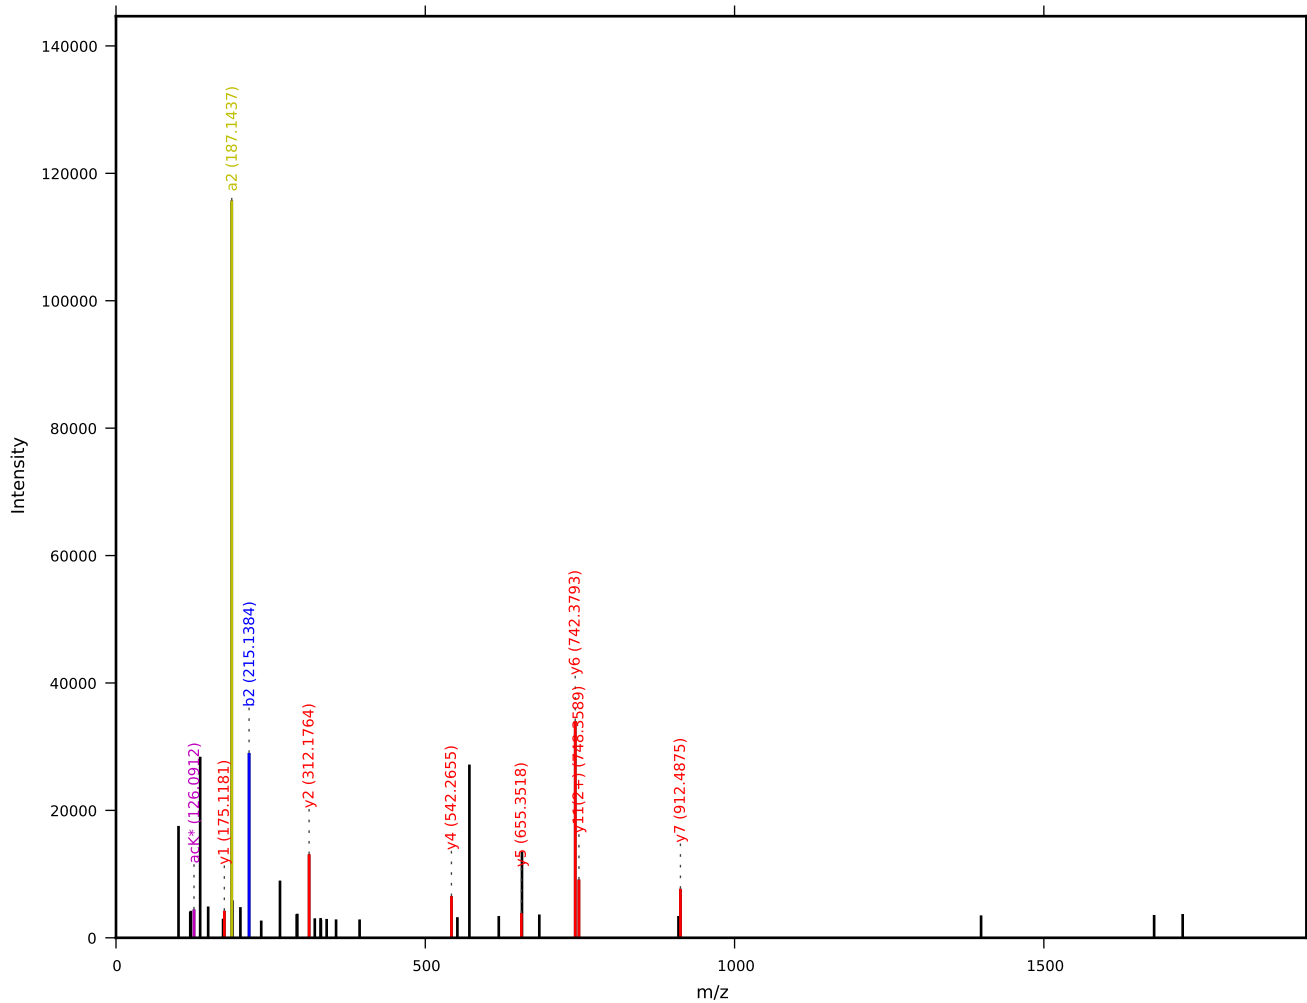

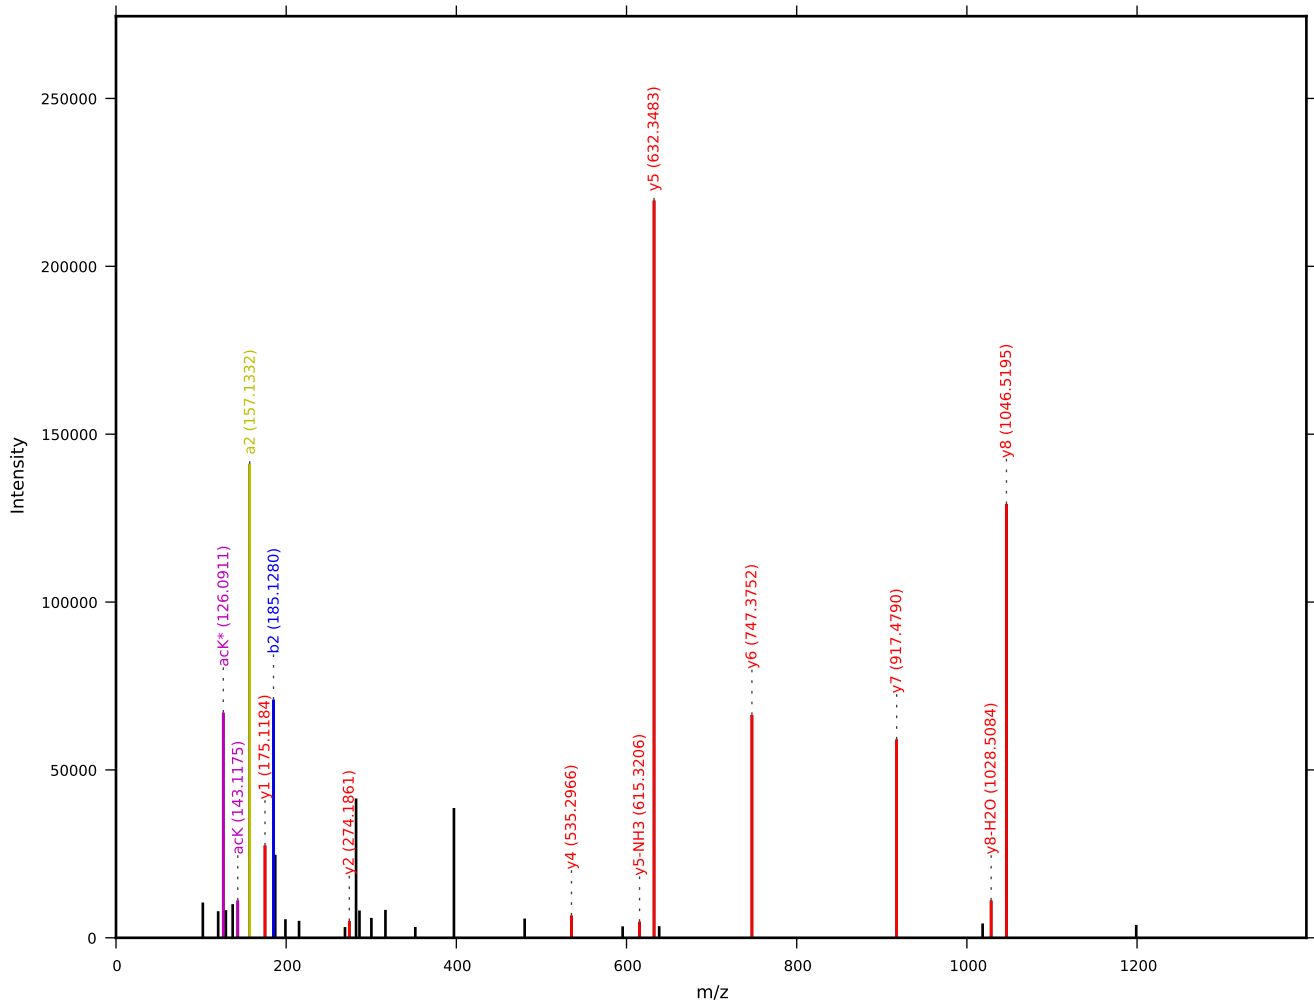



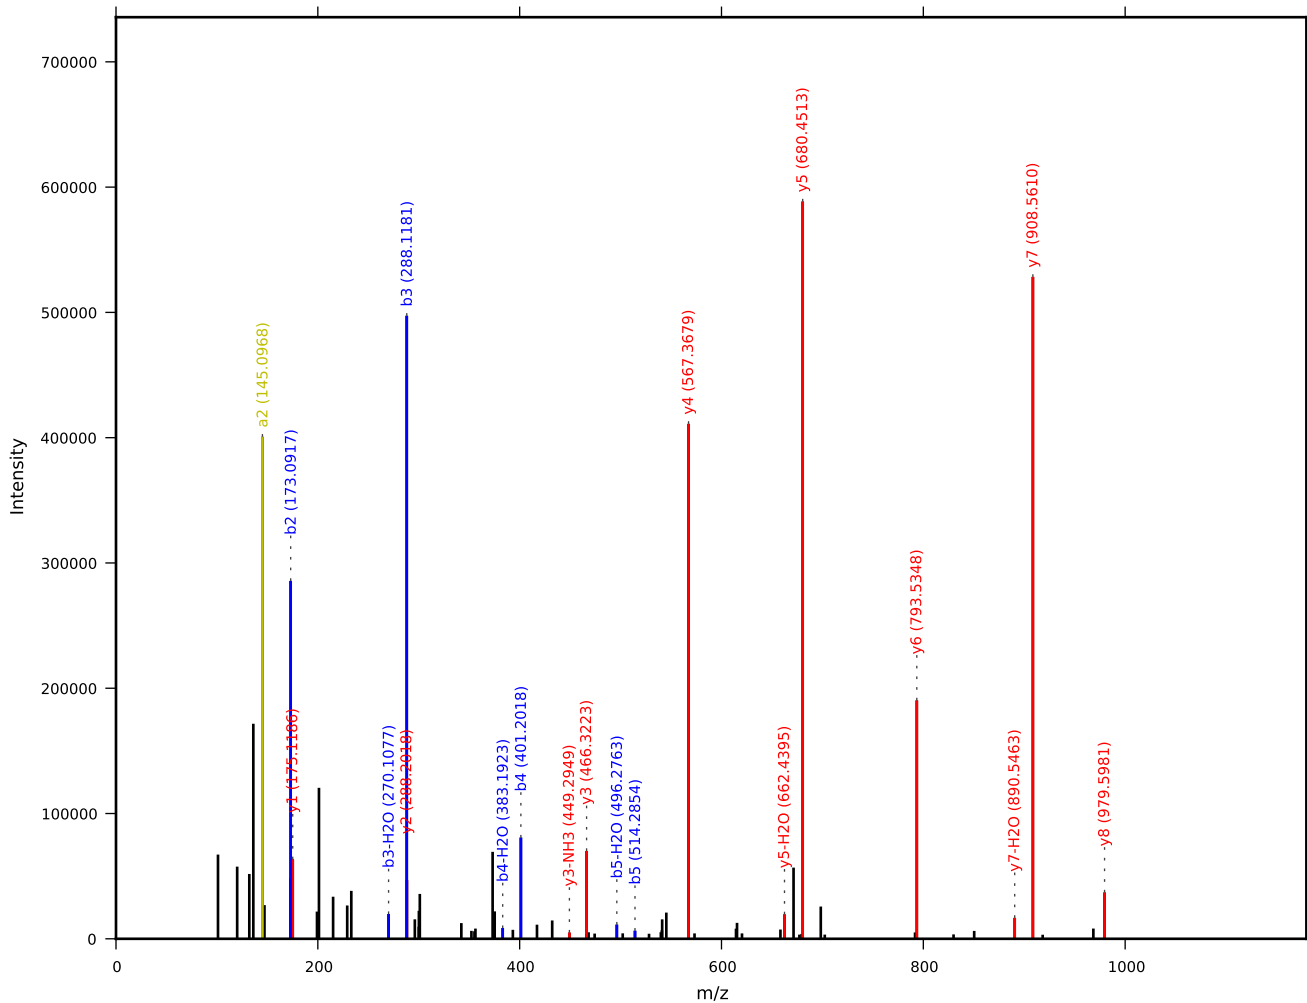

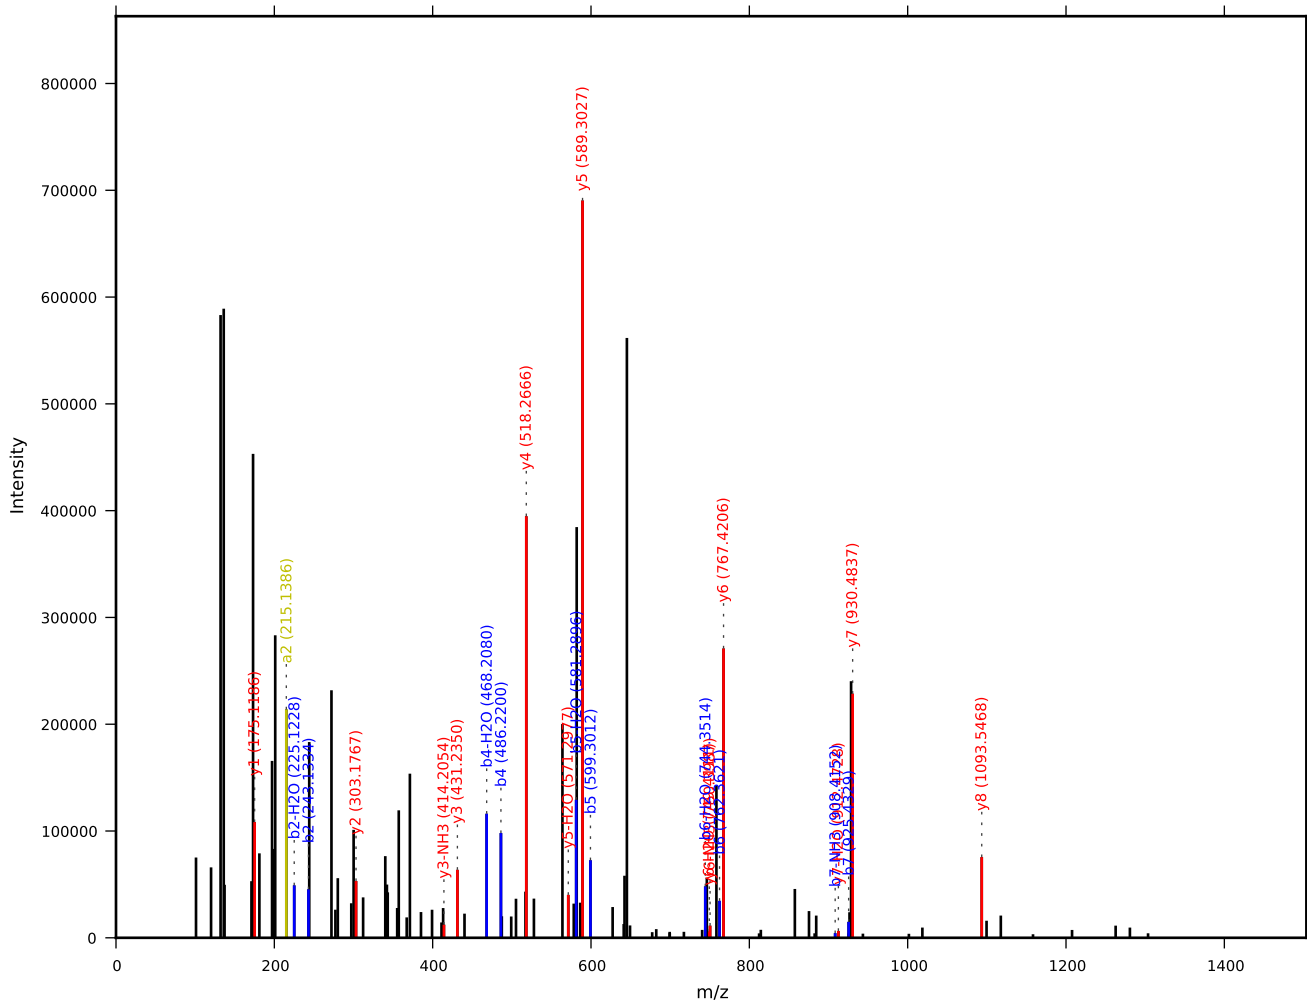

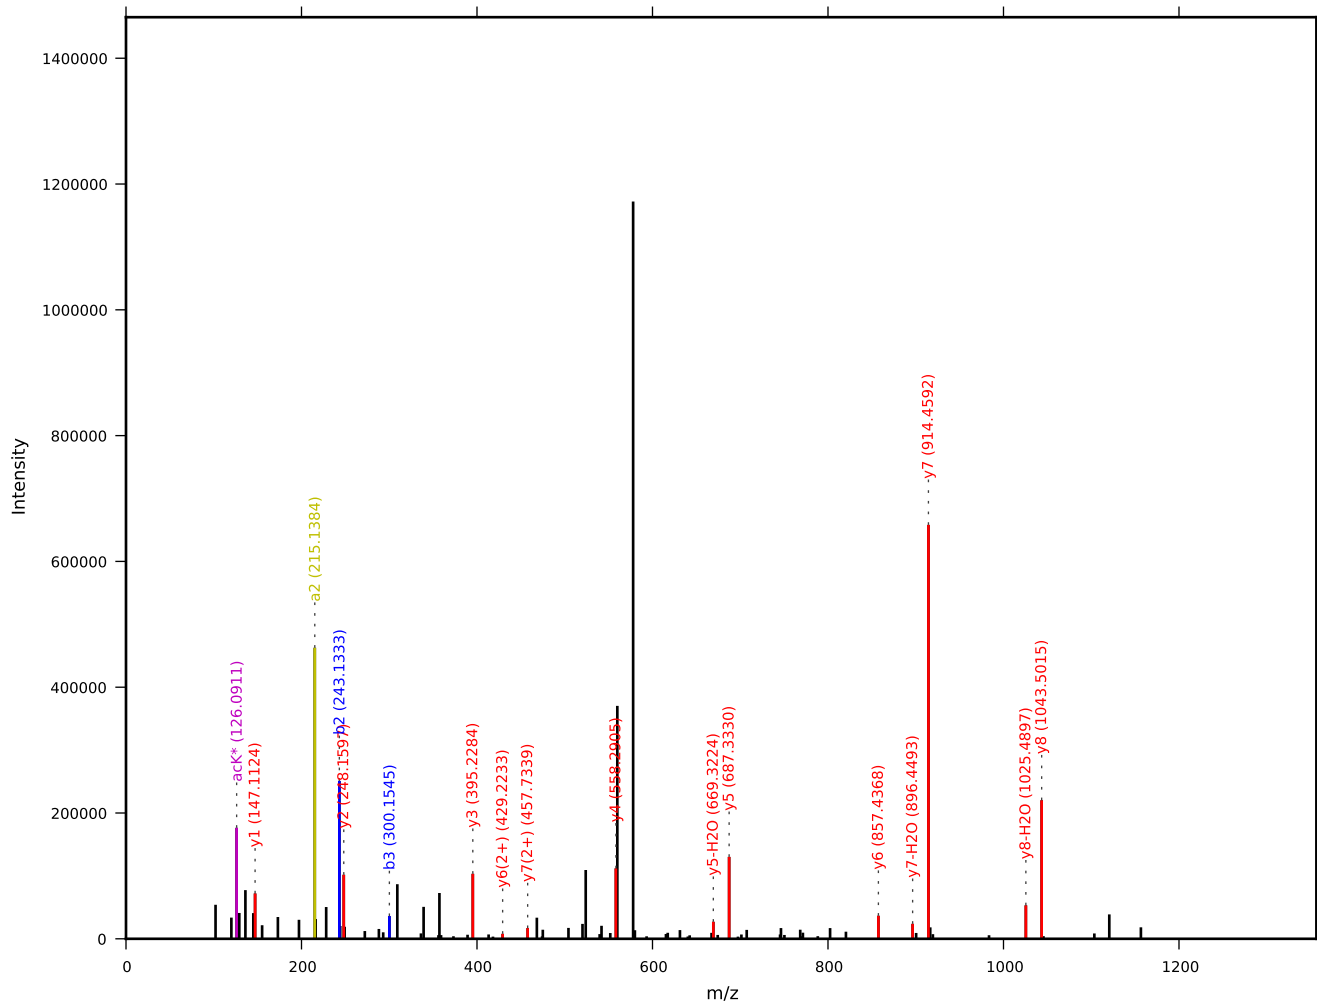

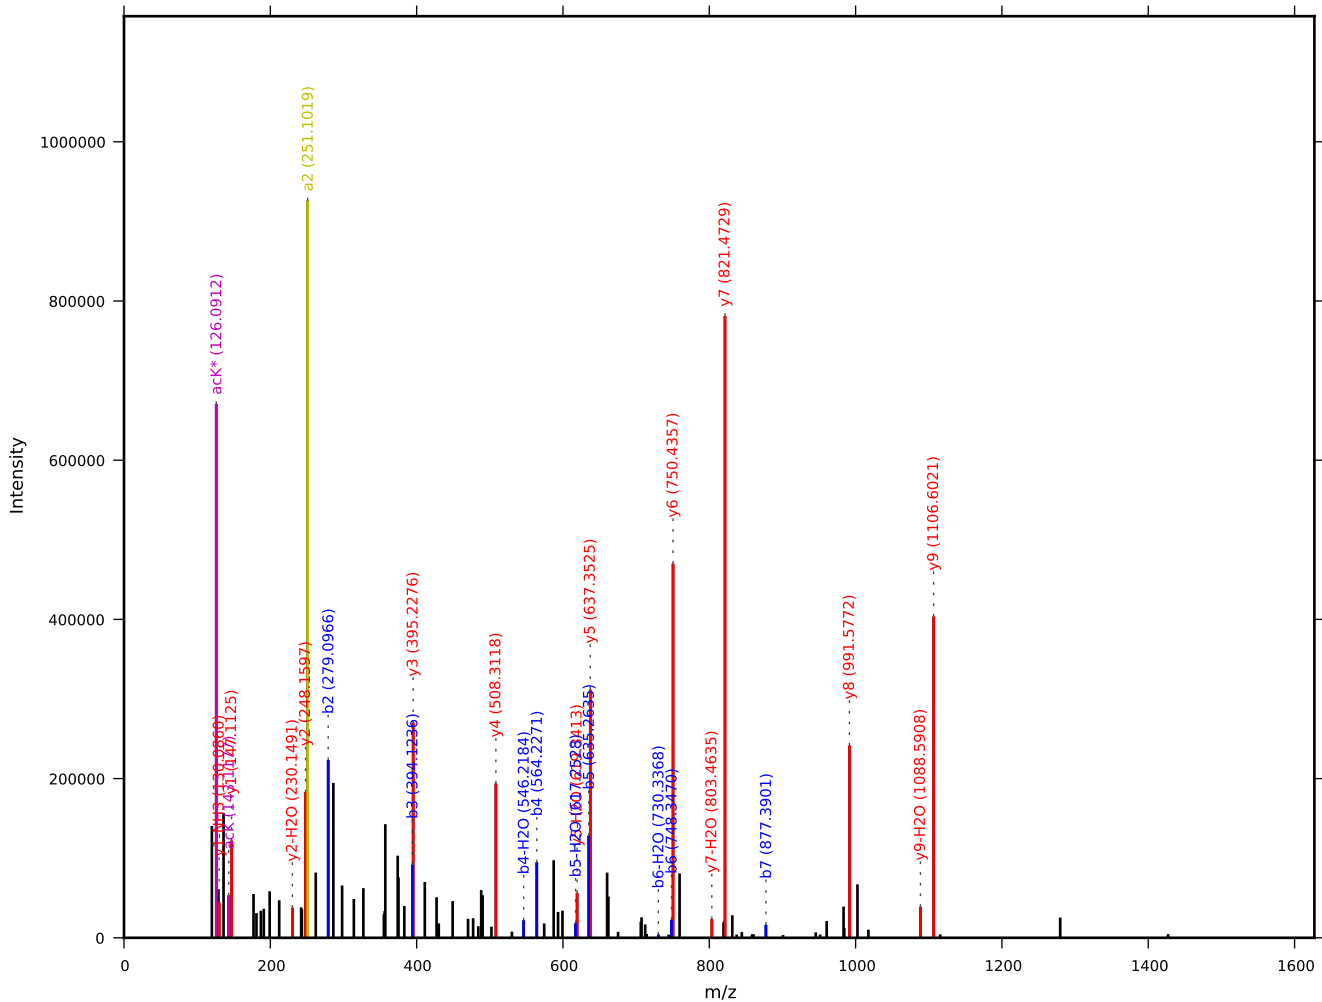

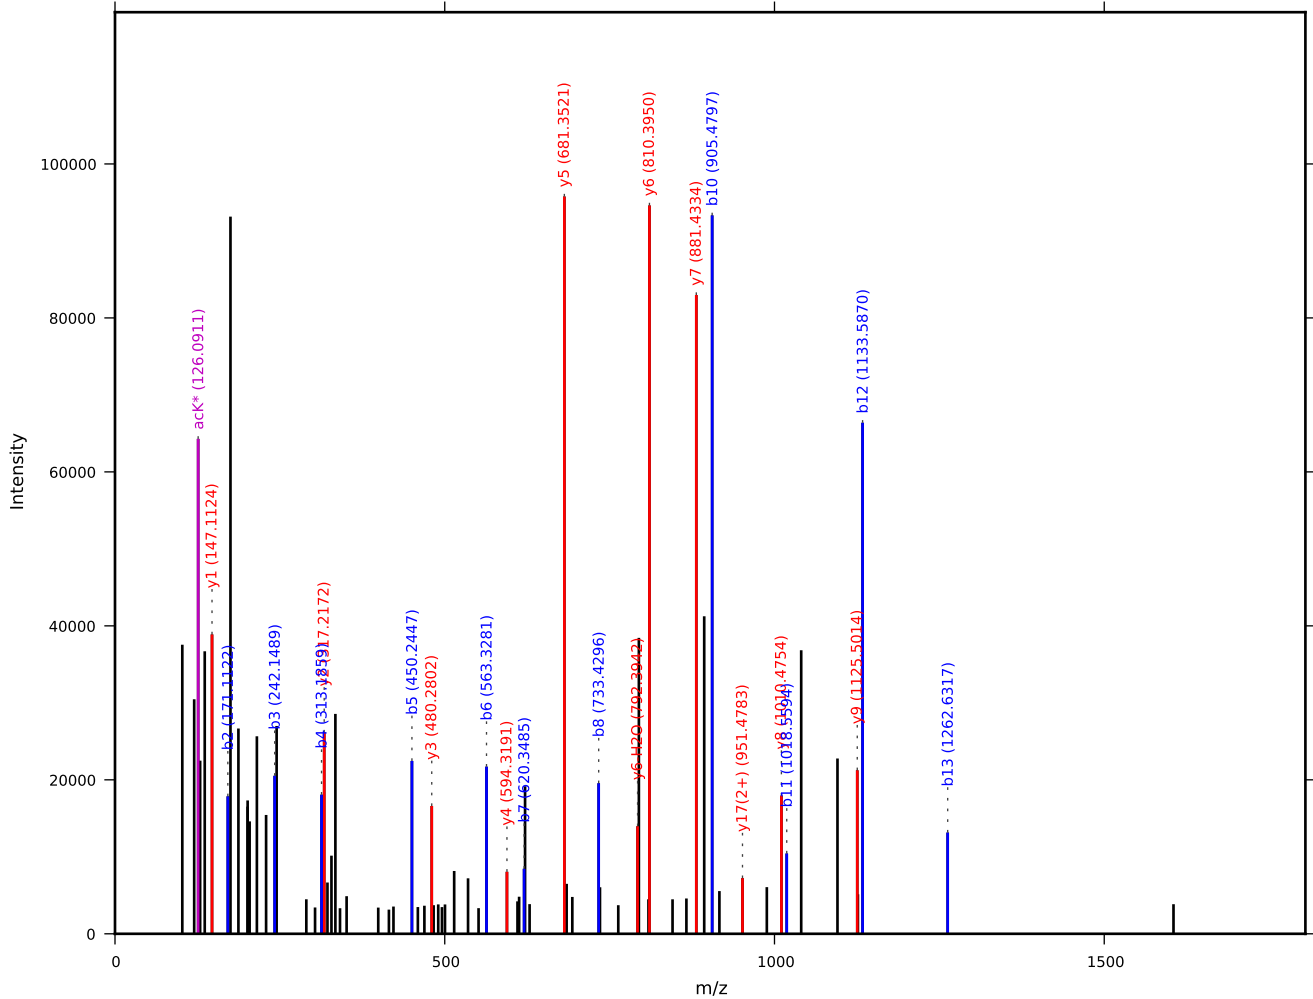

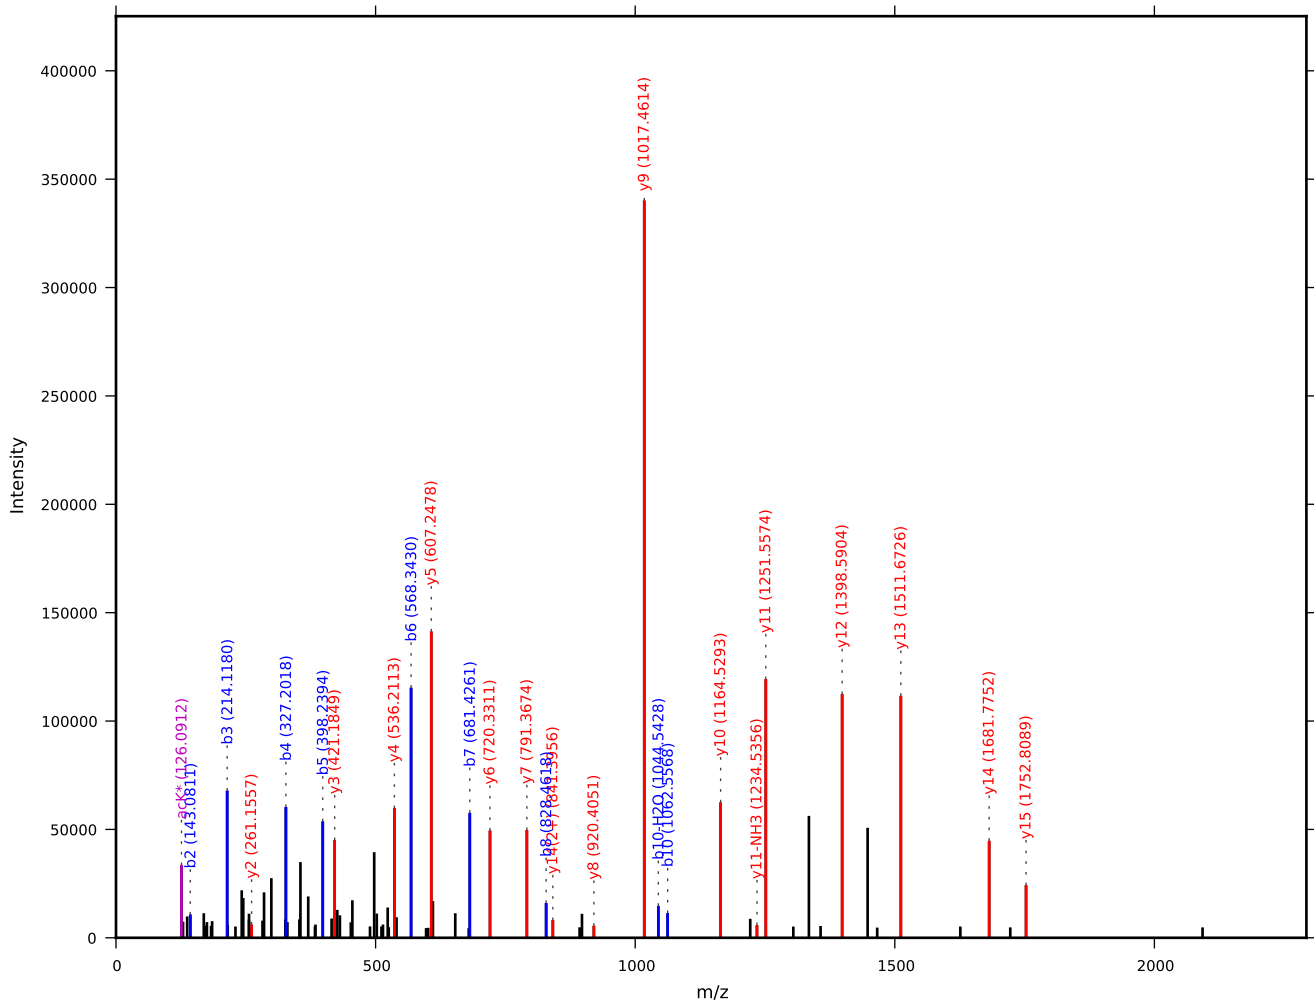

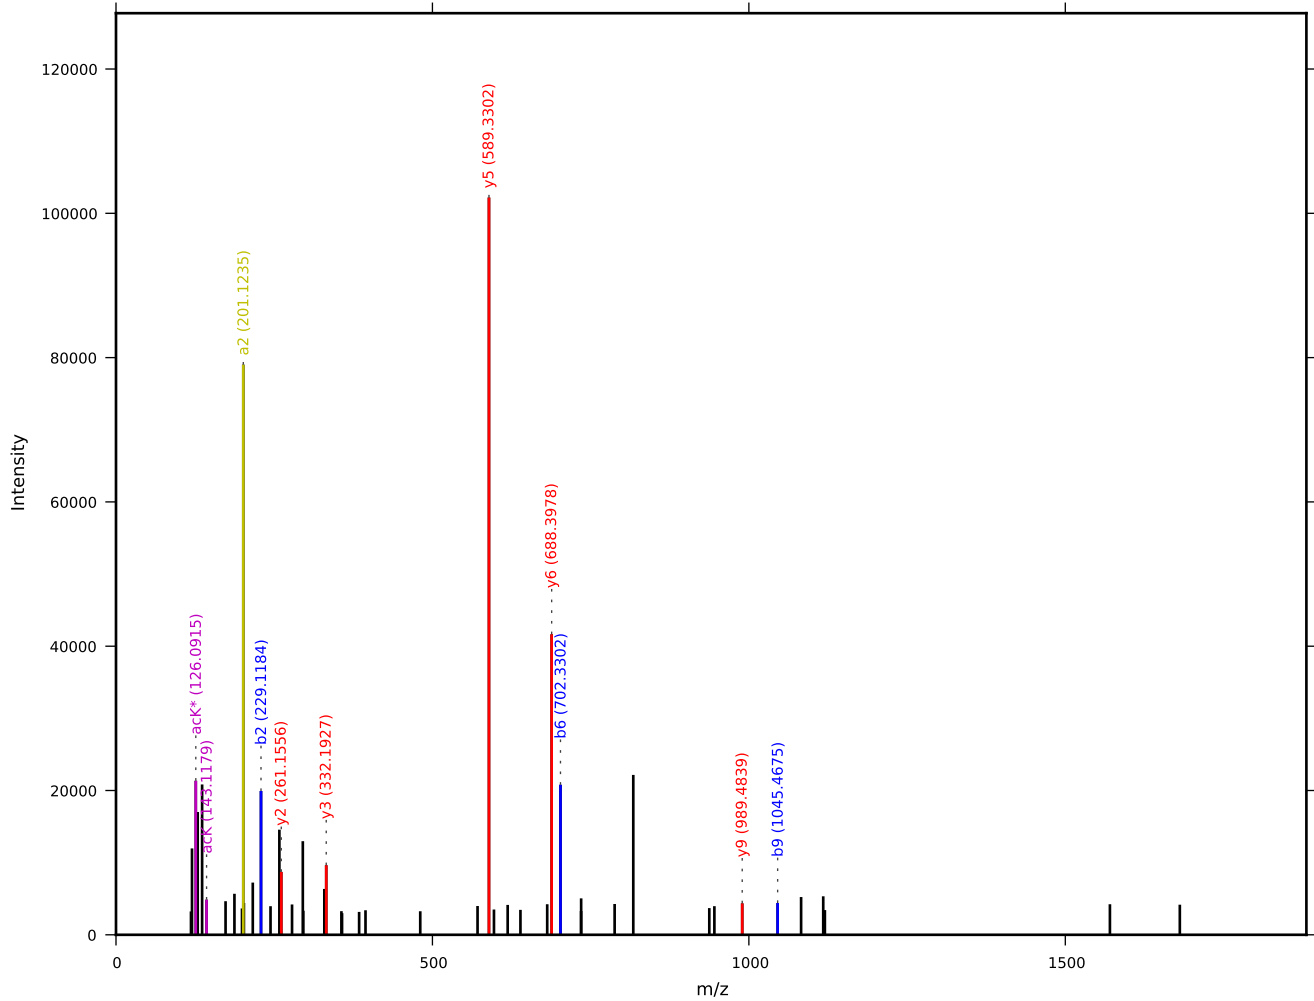

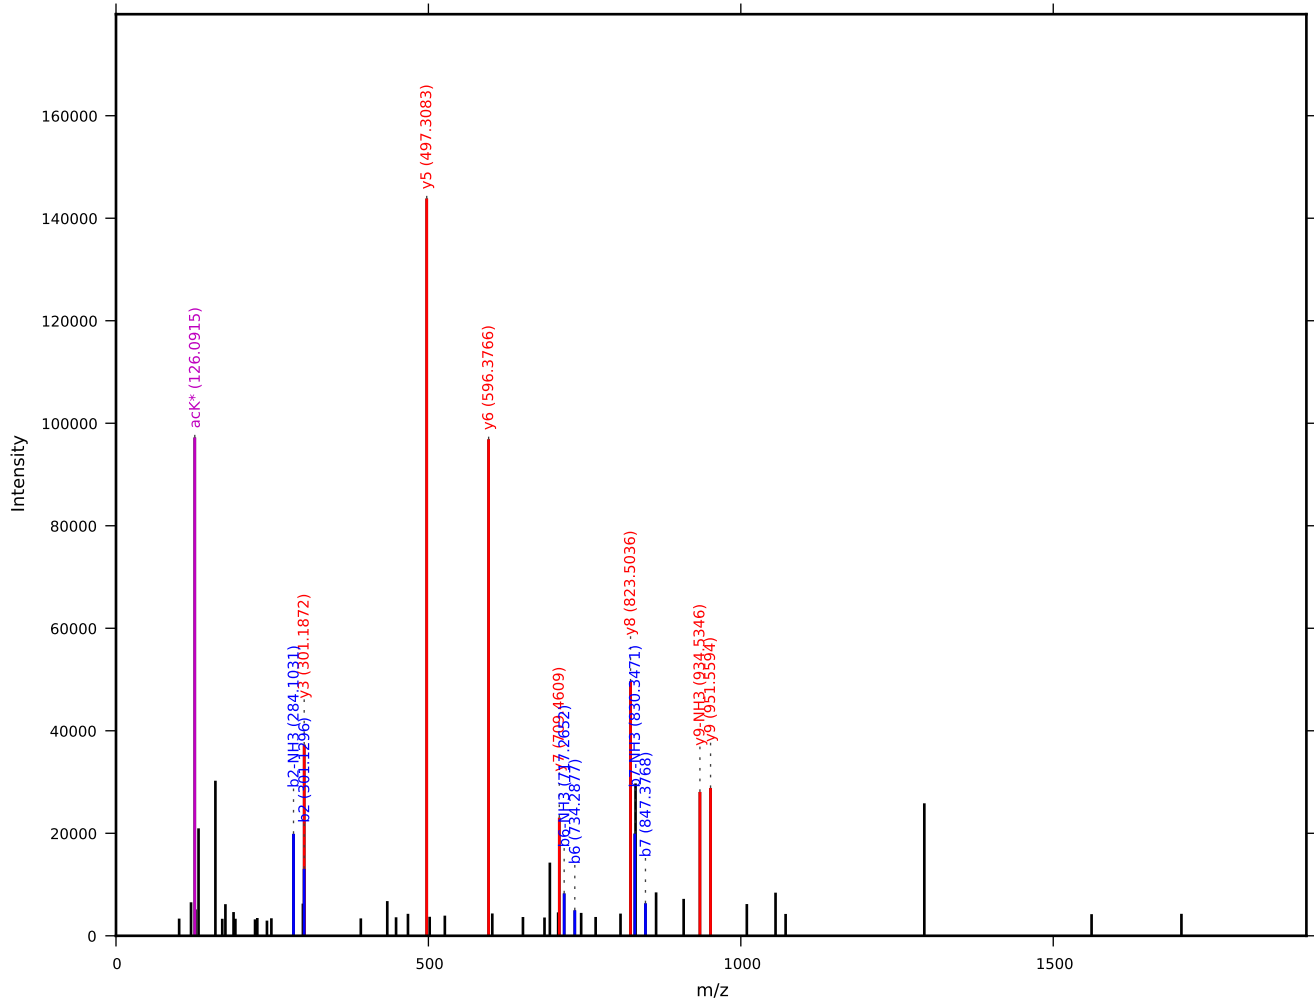



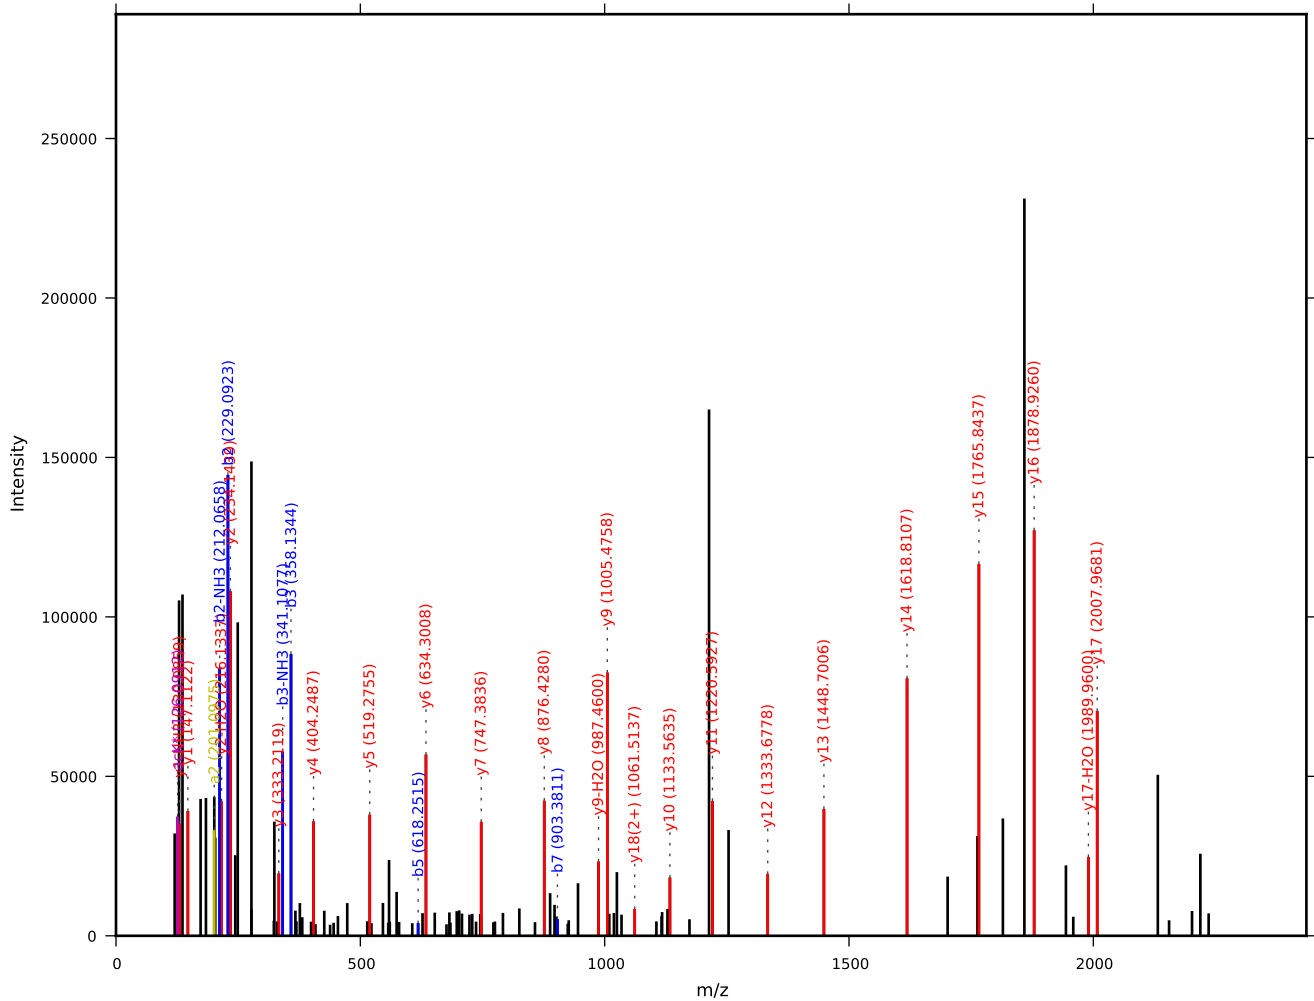

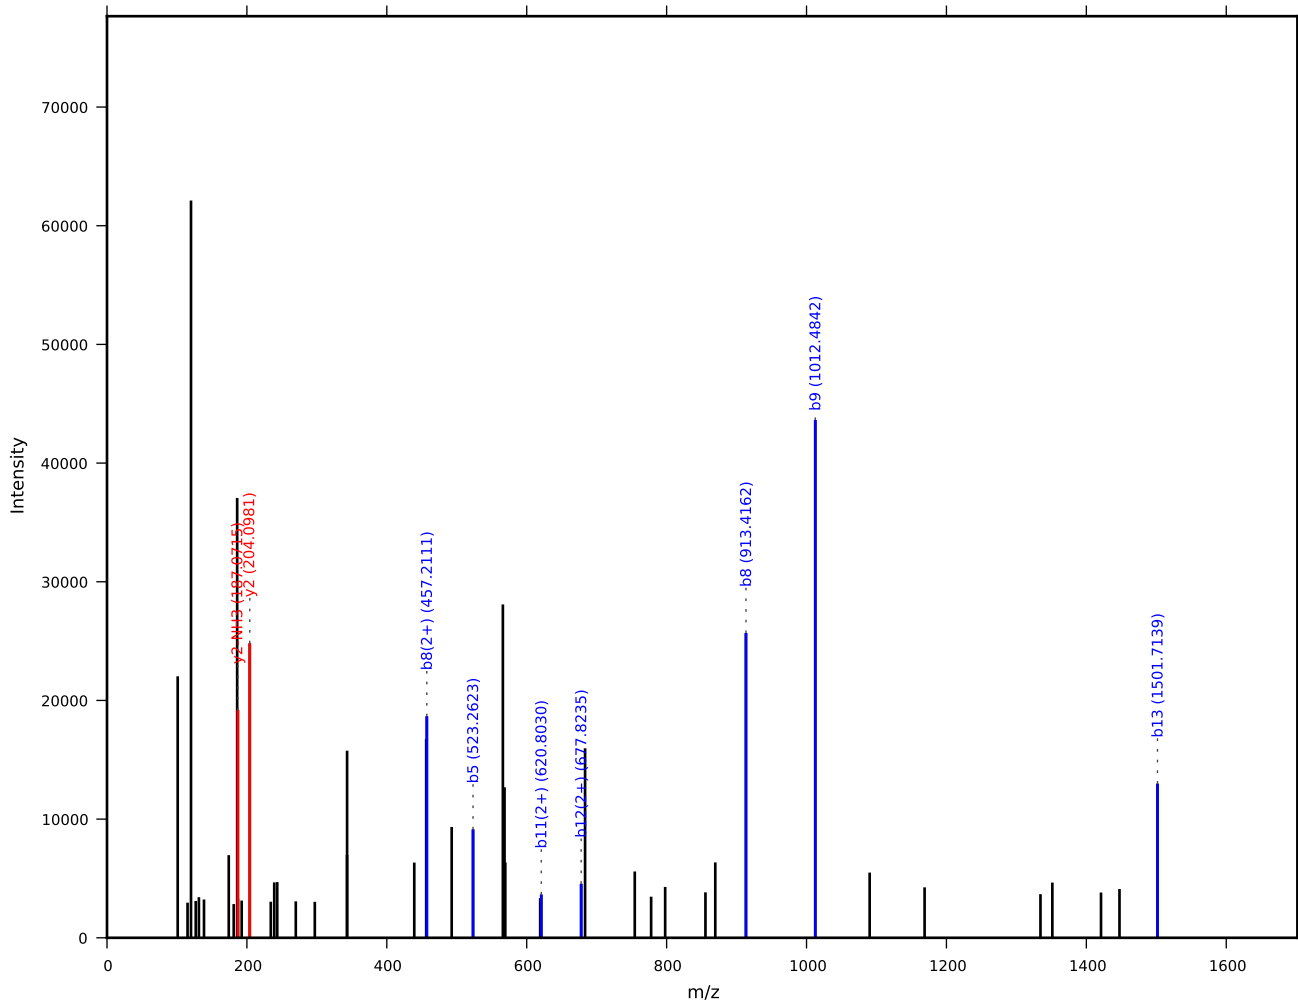

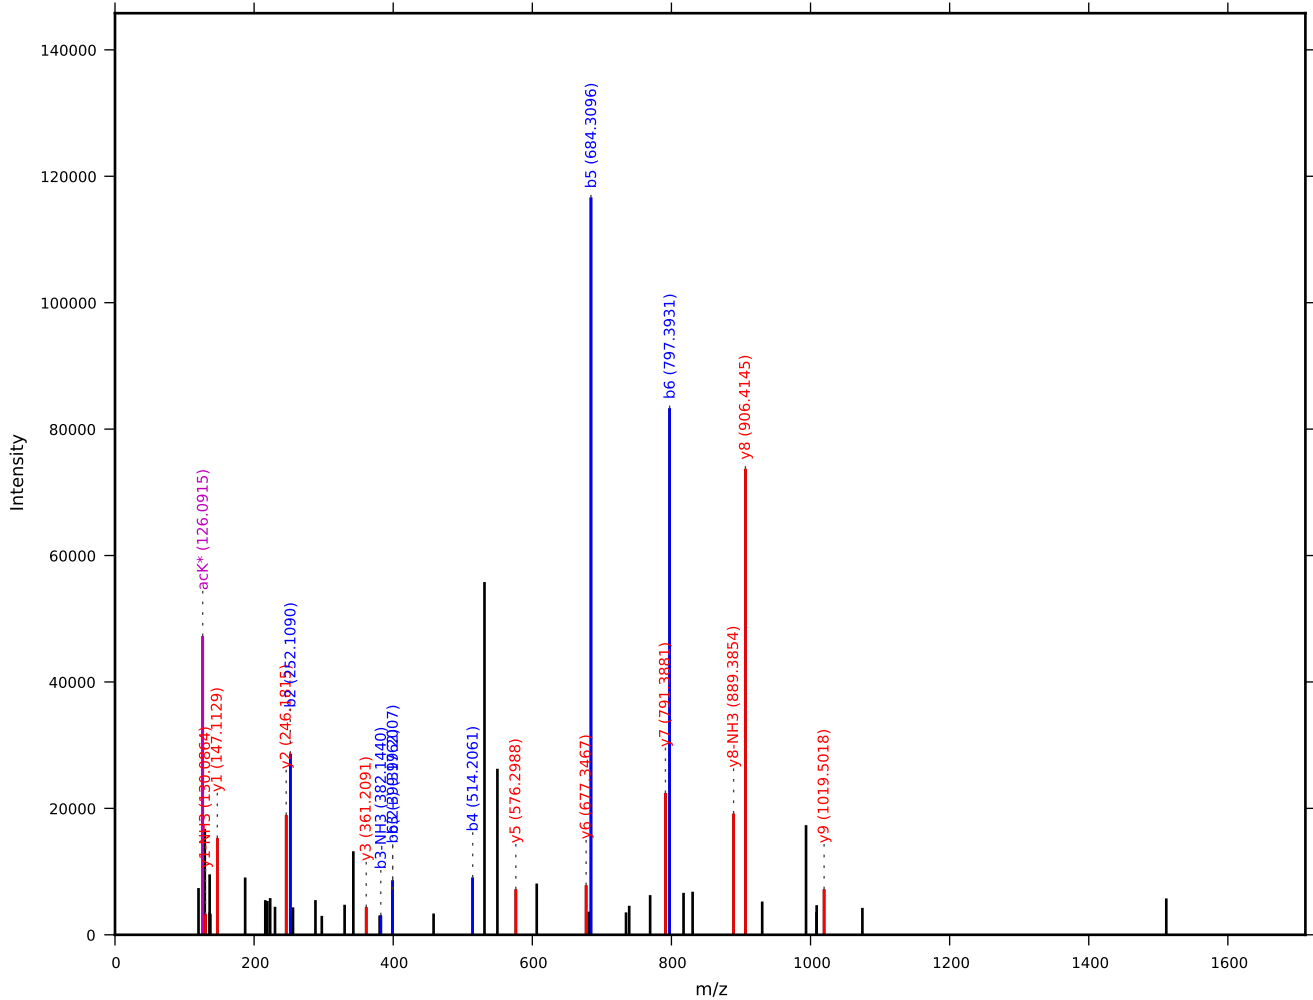

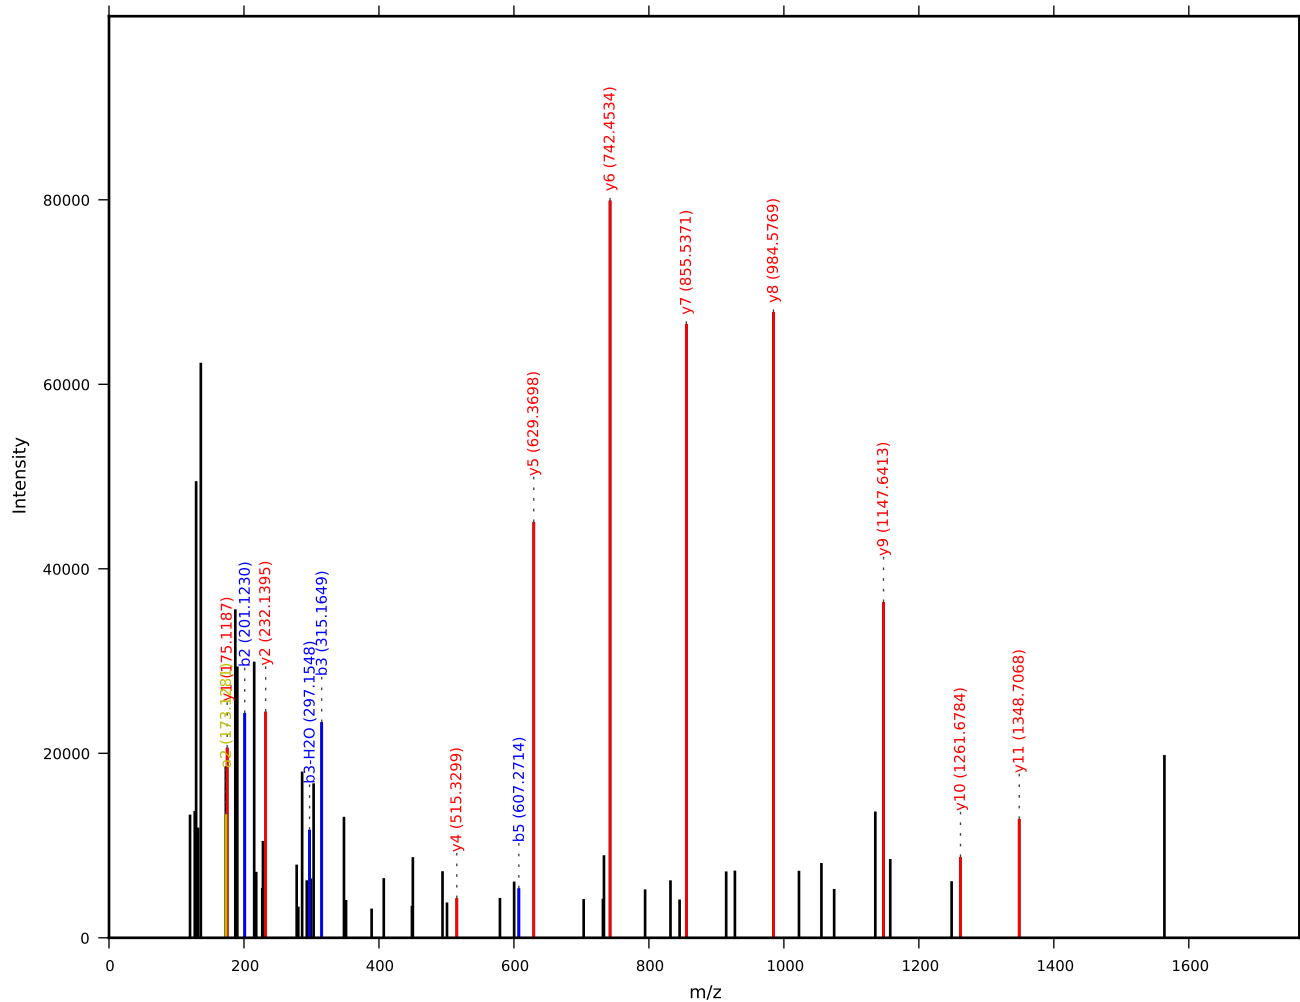

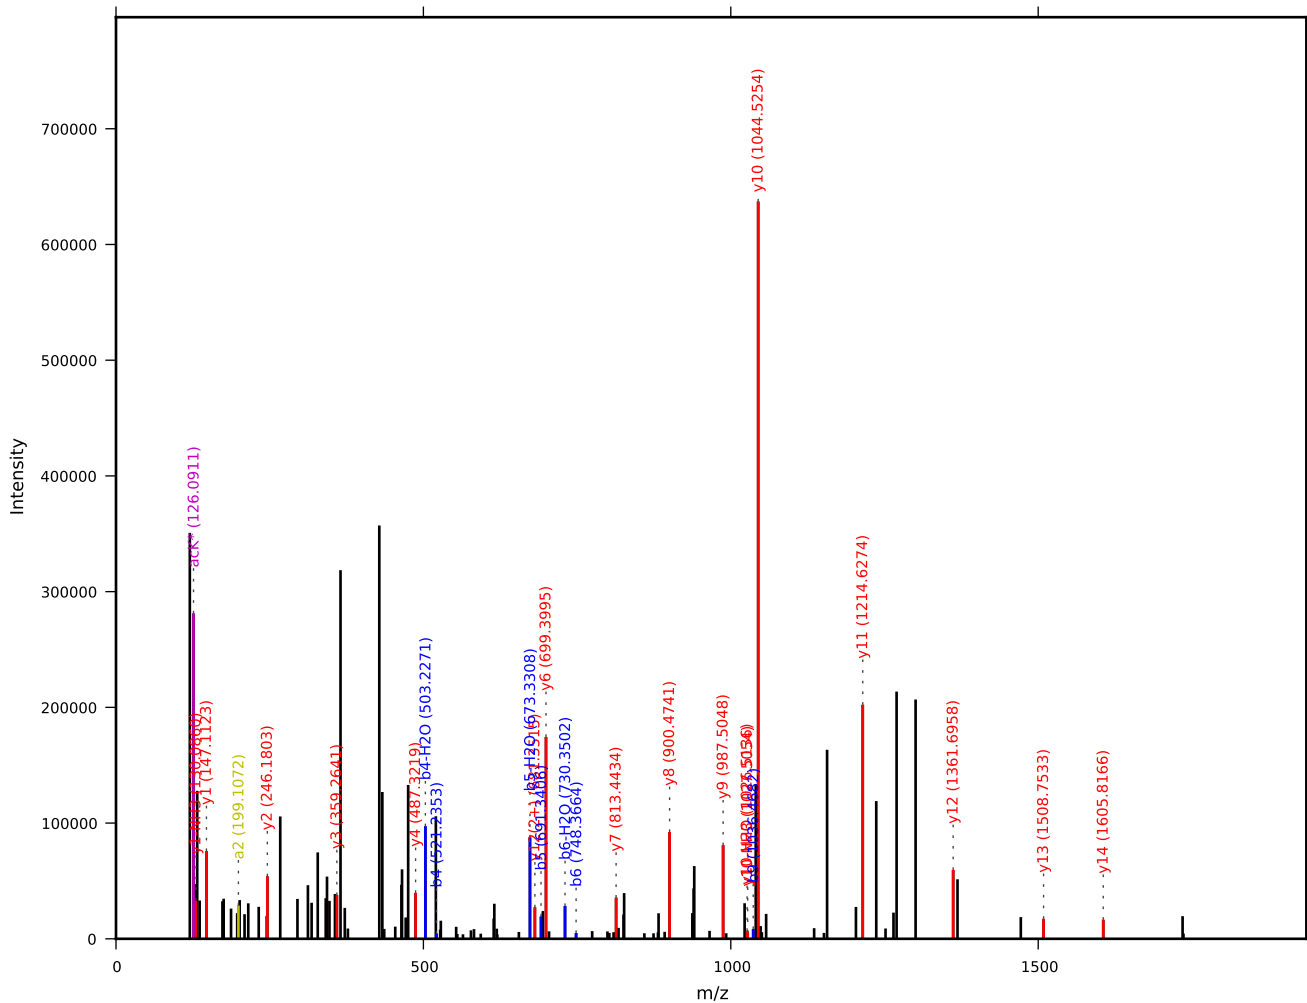

Mass: 1467.8308 Charge: 2 m/z: 734.92268  
Modified Peptide: \_SK(ac)PVALTSFLGYK\_ Score: 48.823 PEP: 0.00082295

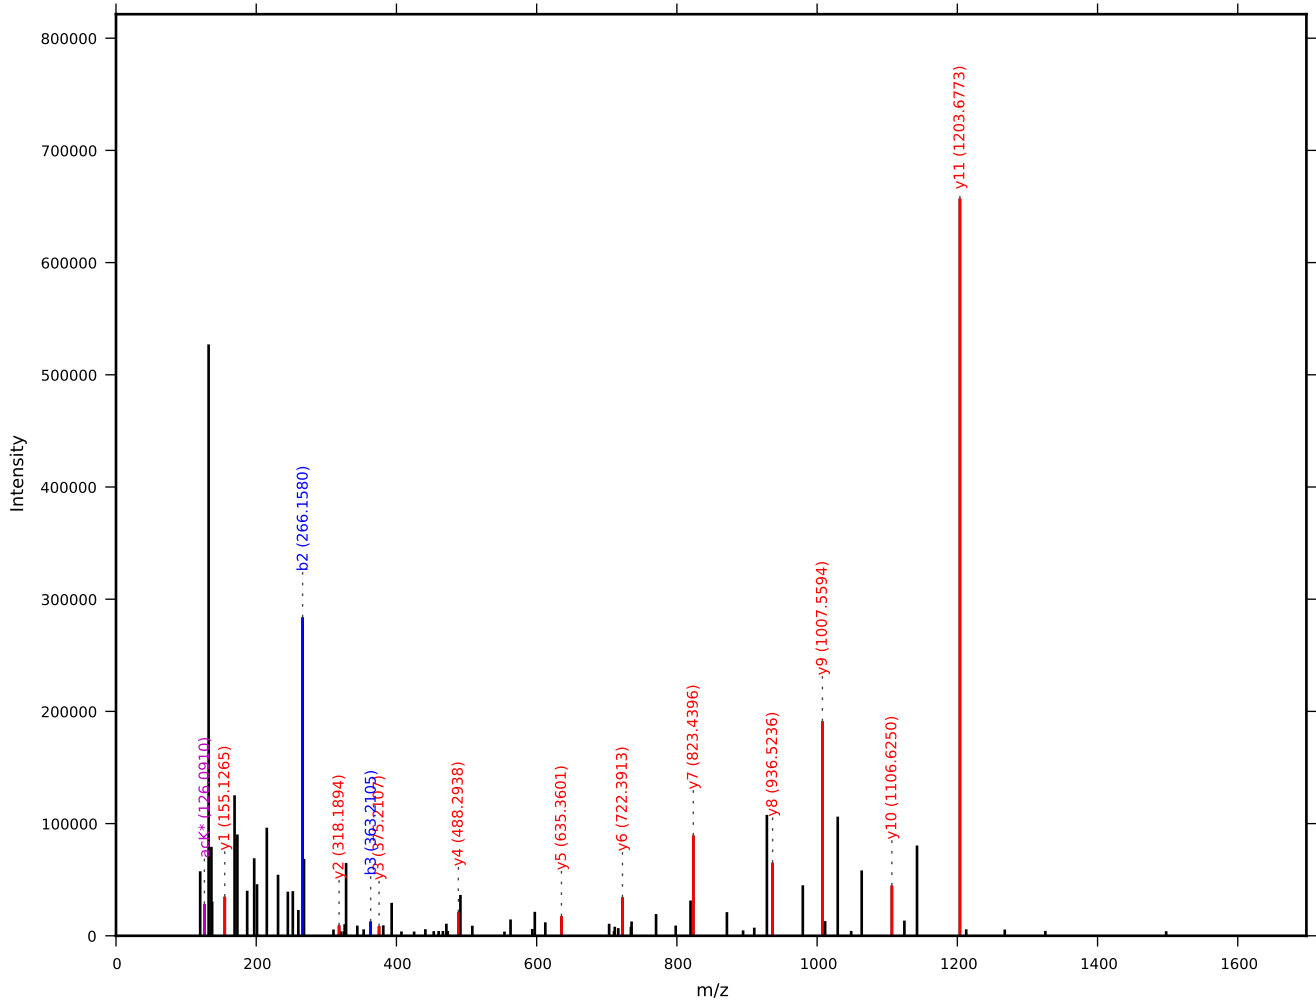

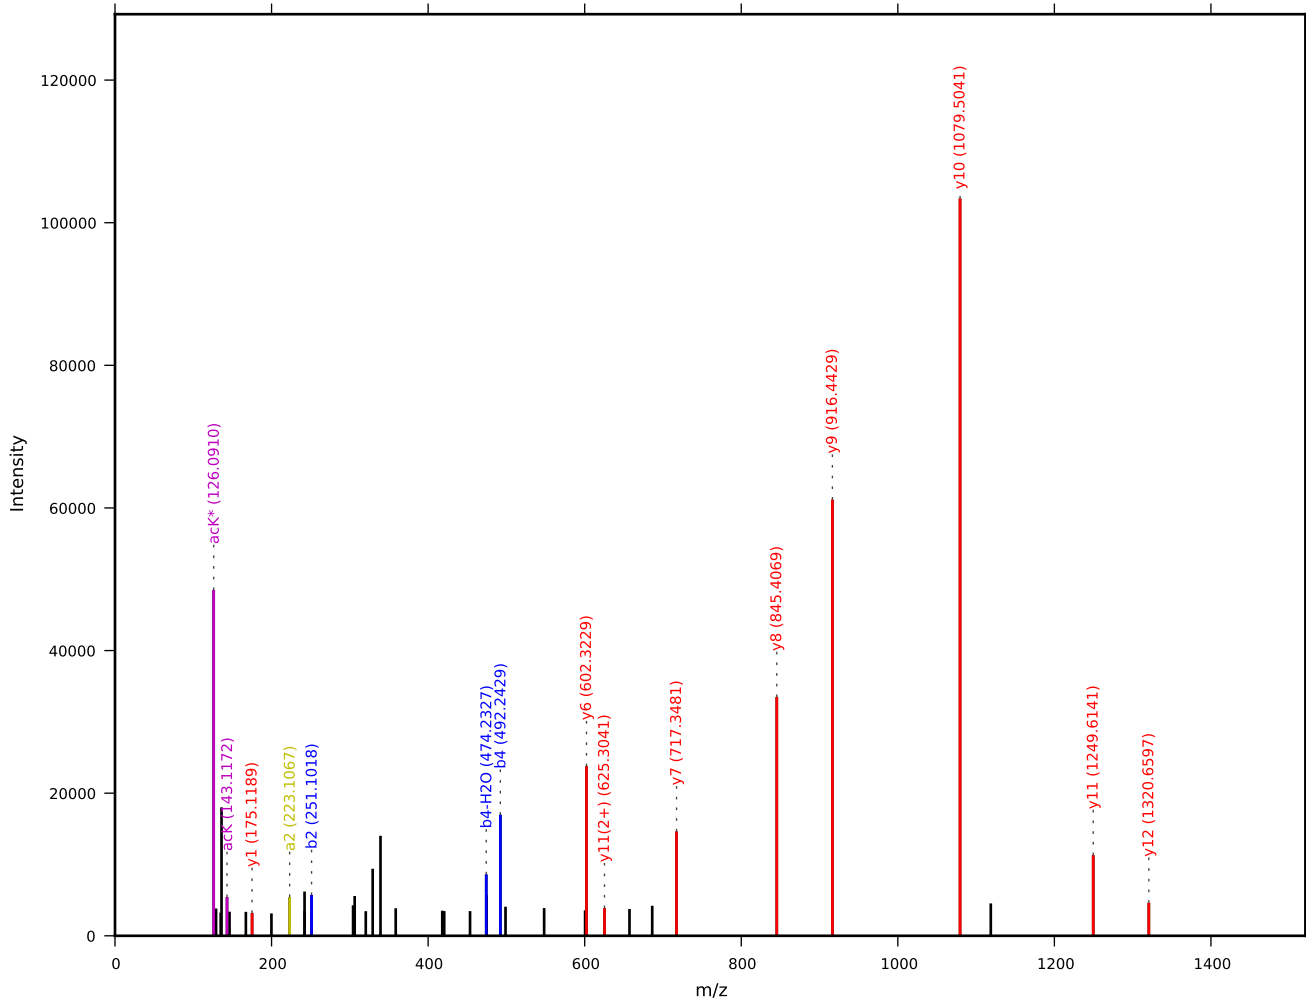

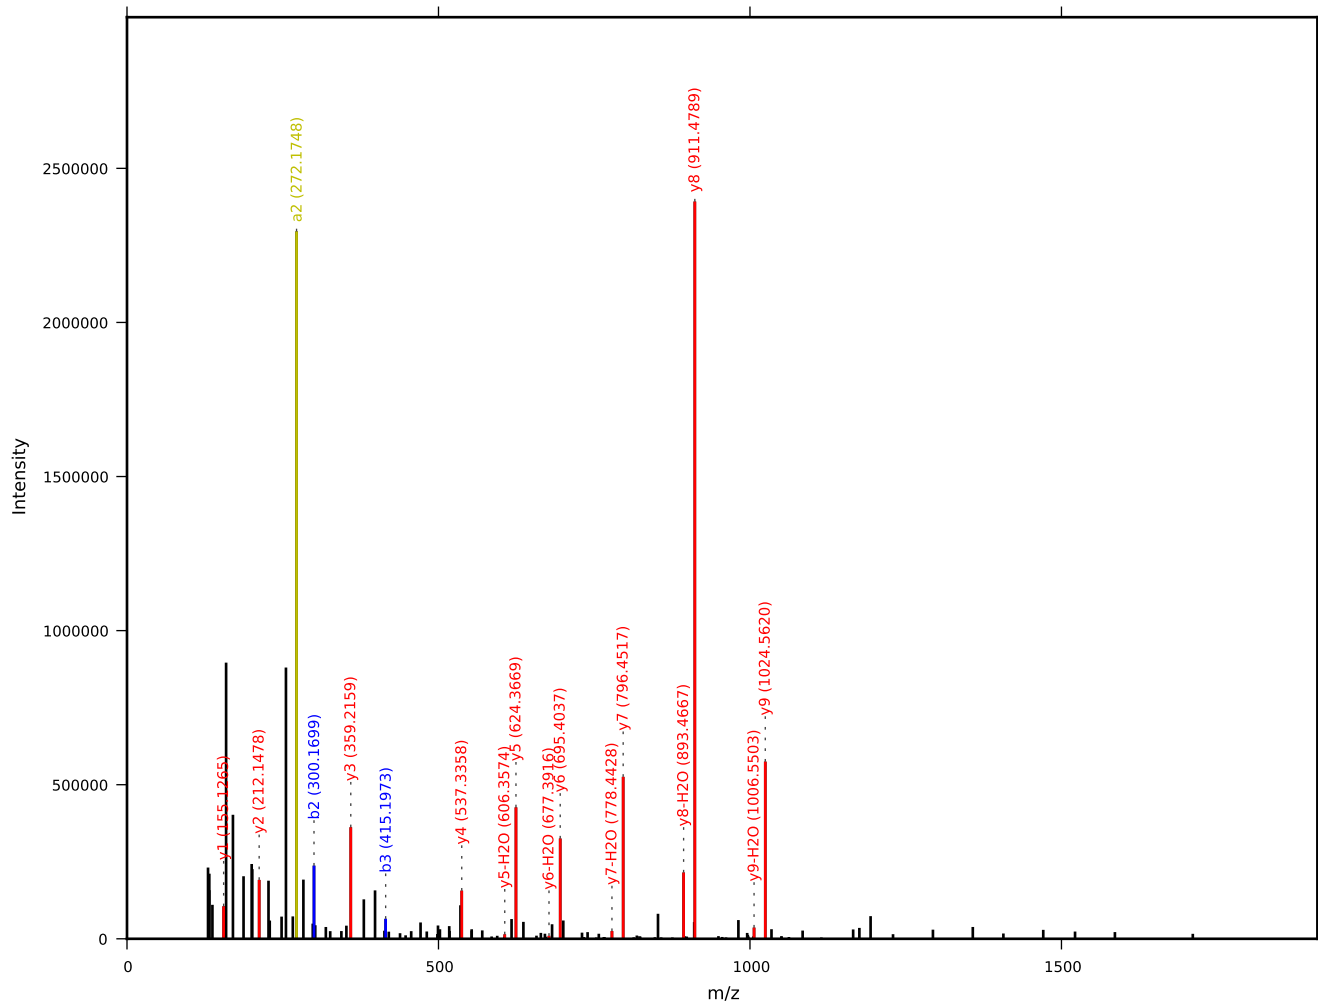



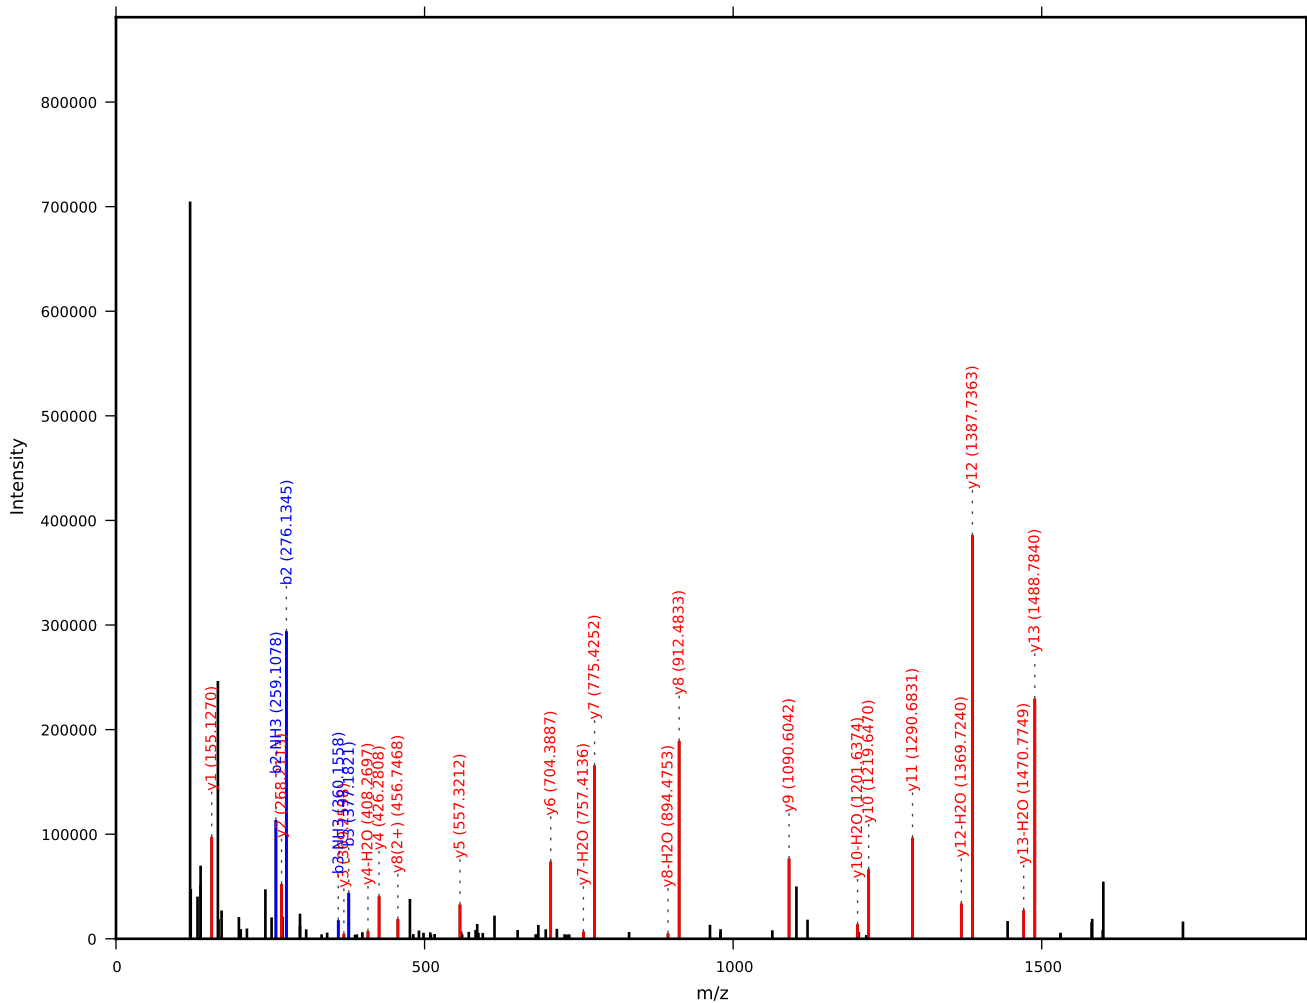

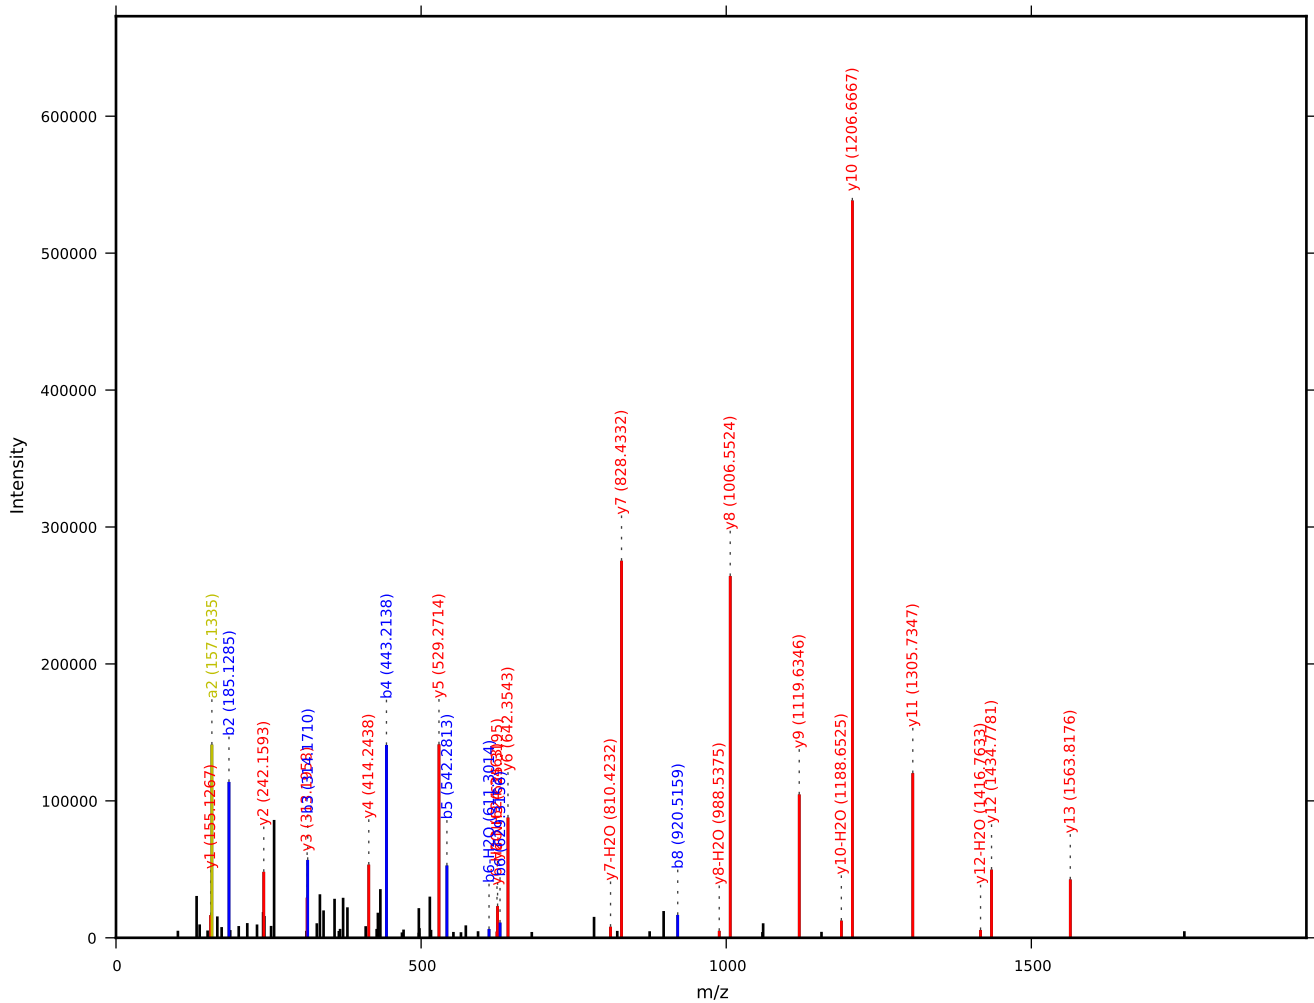

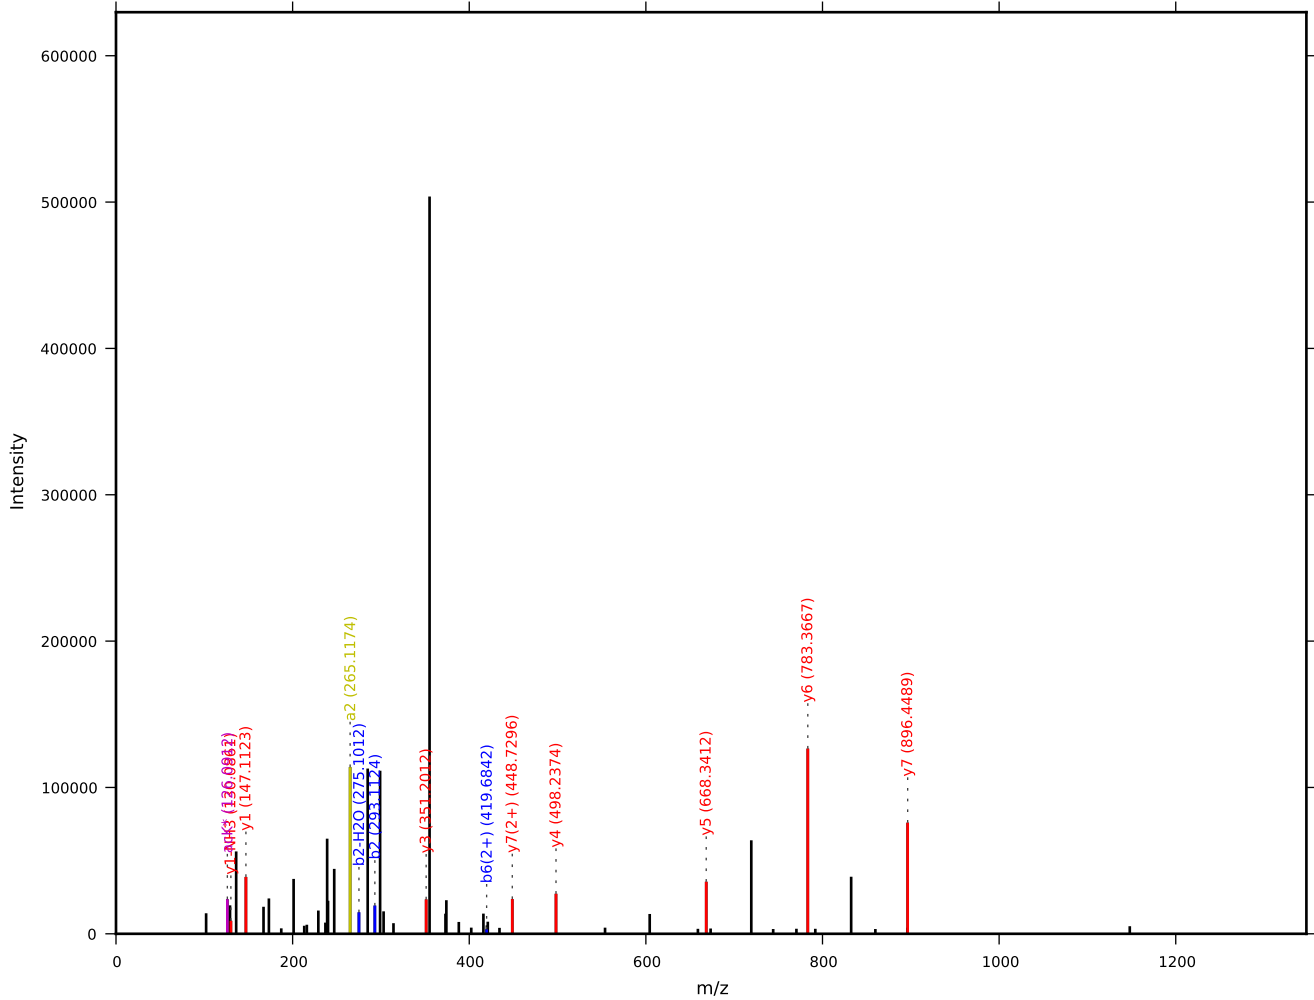

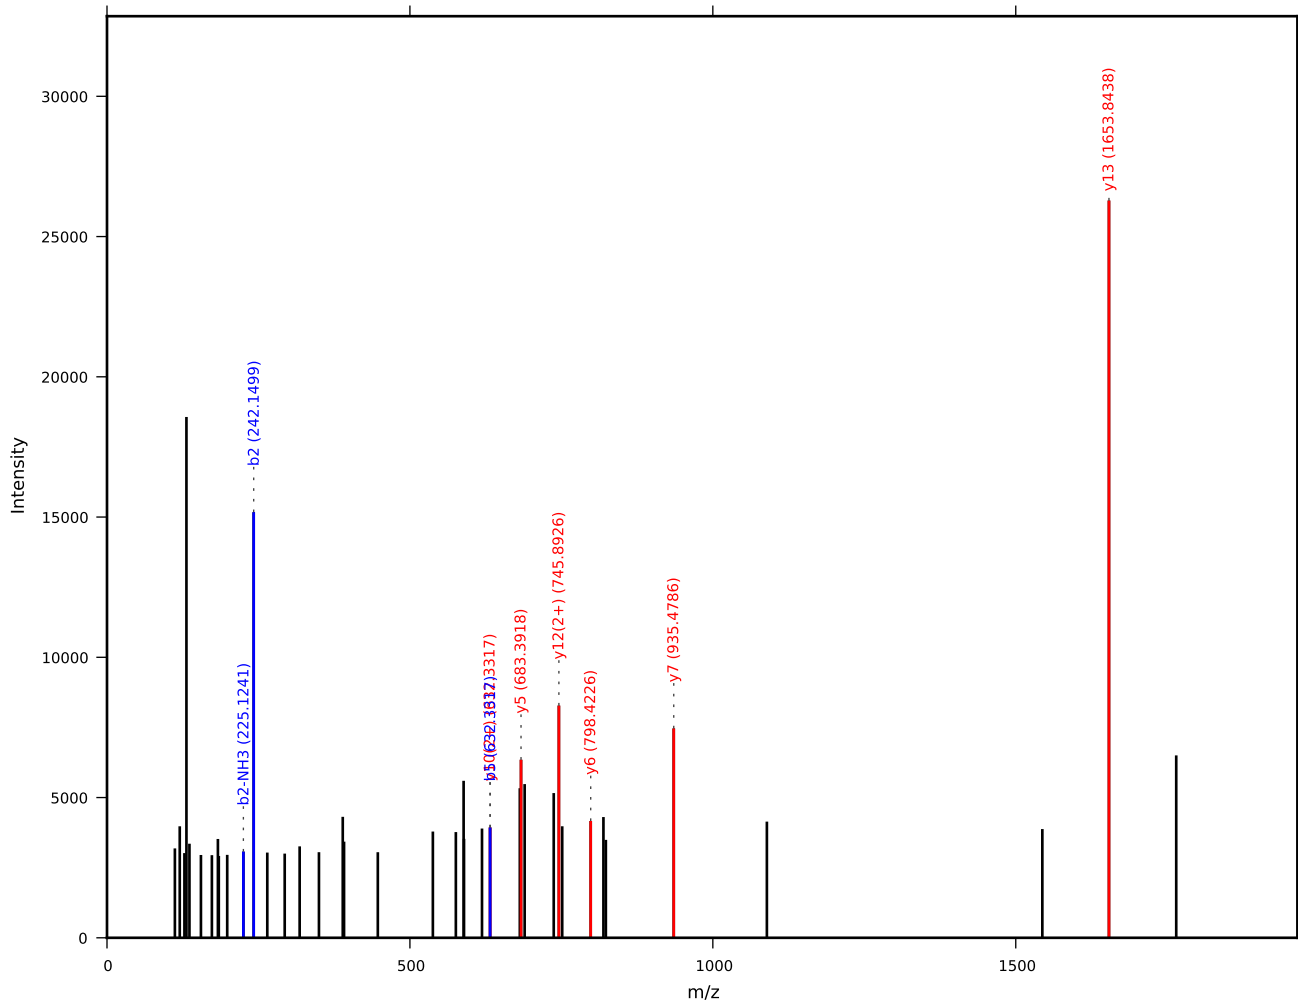

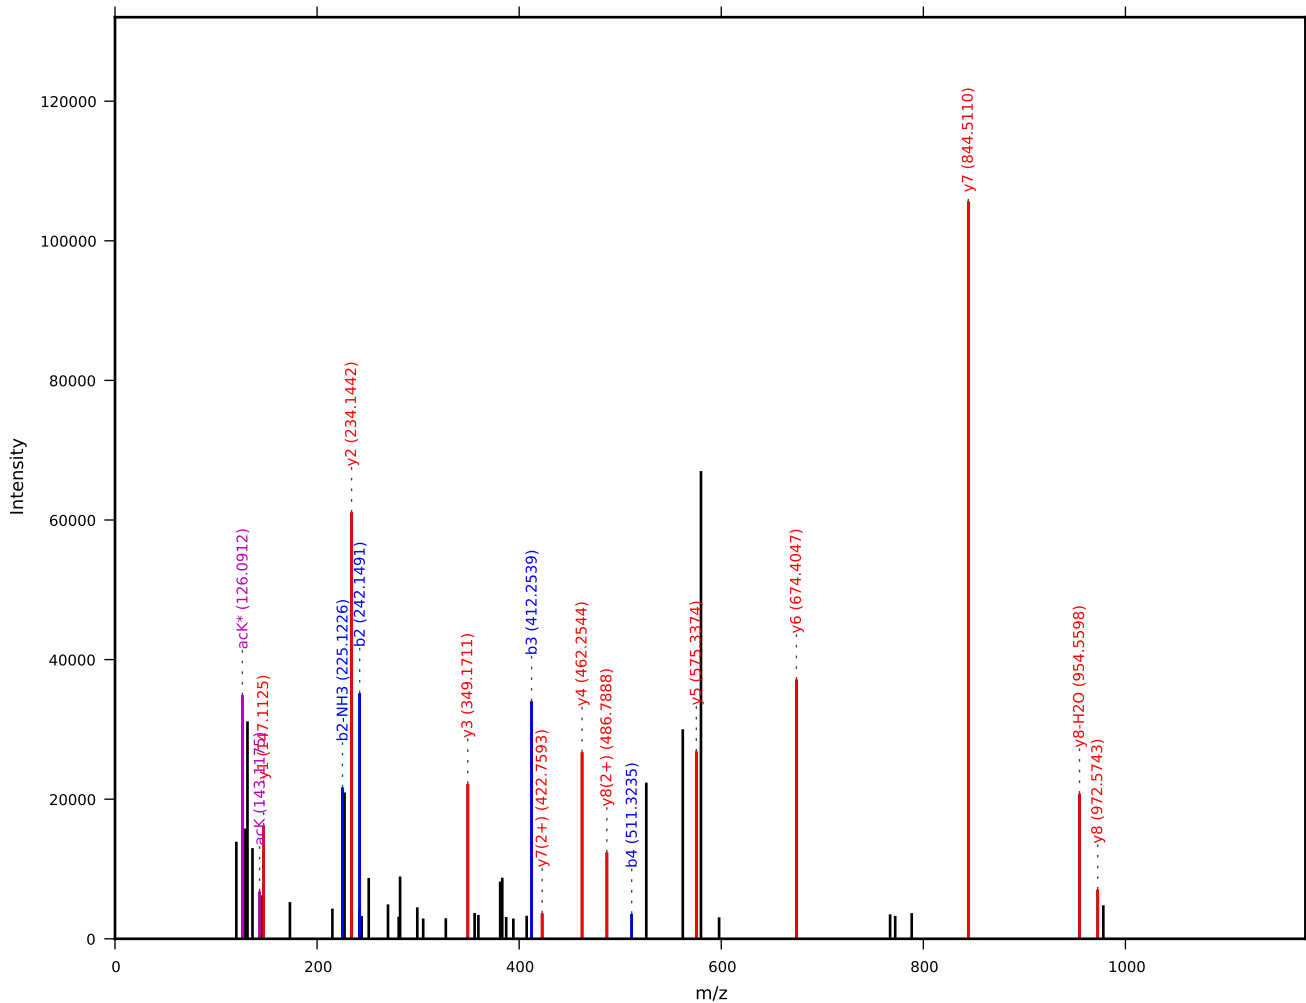

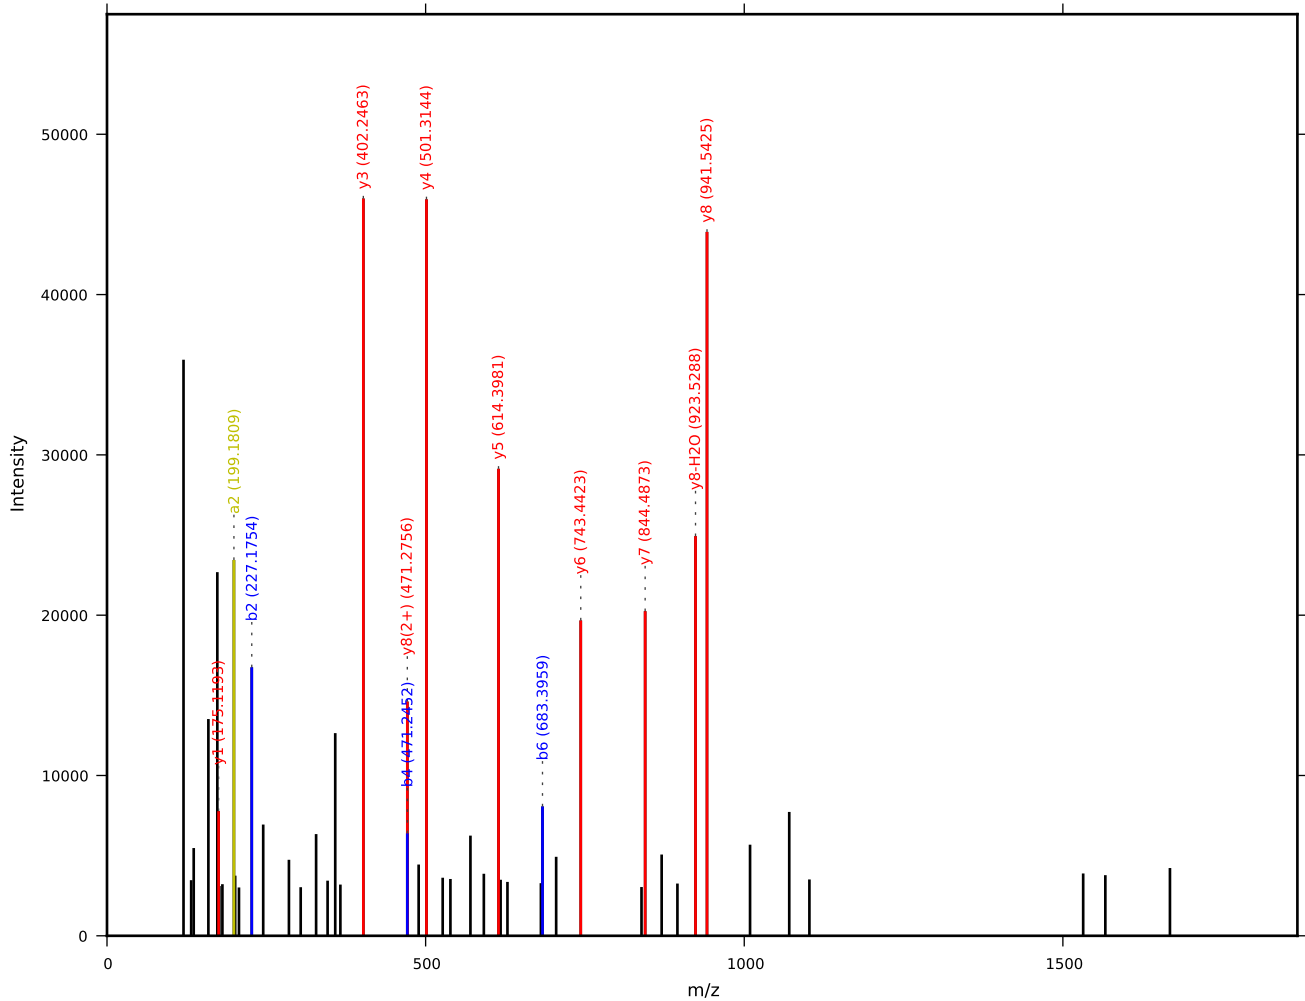

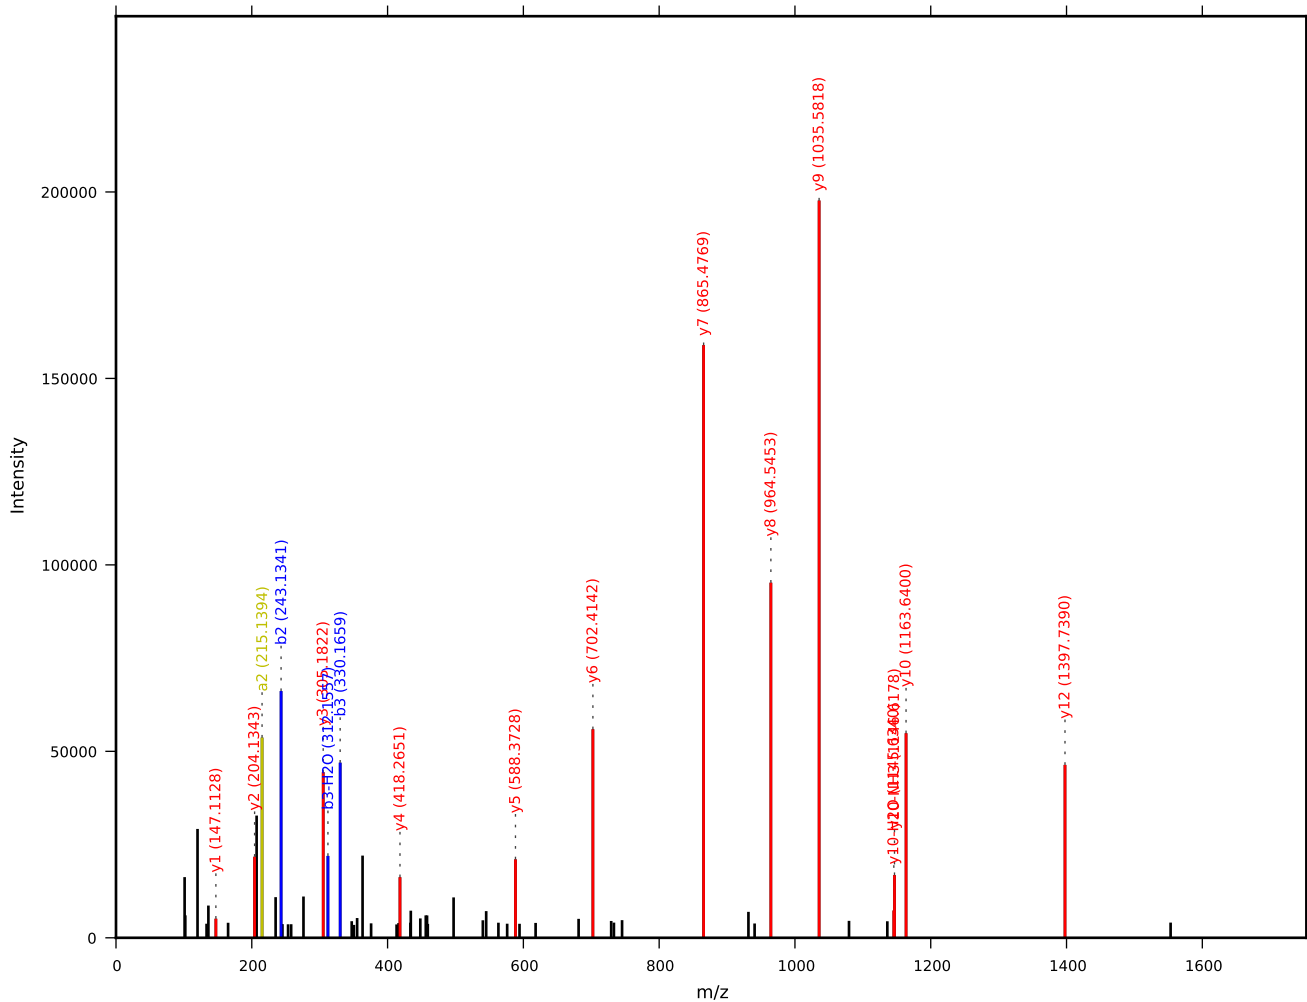

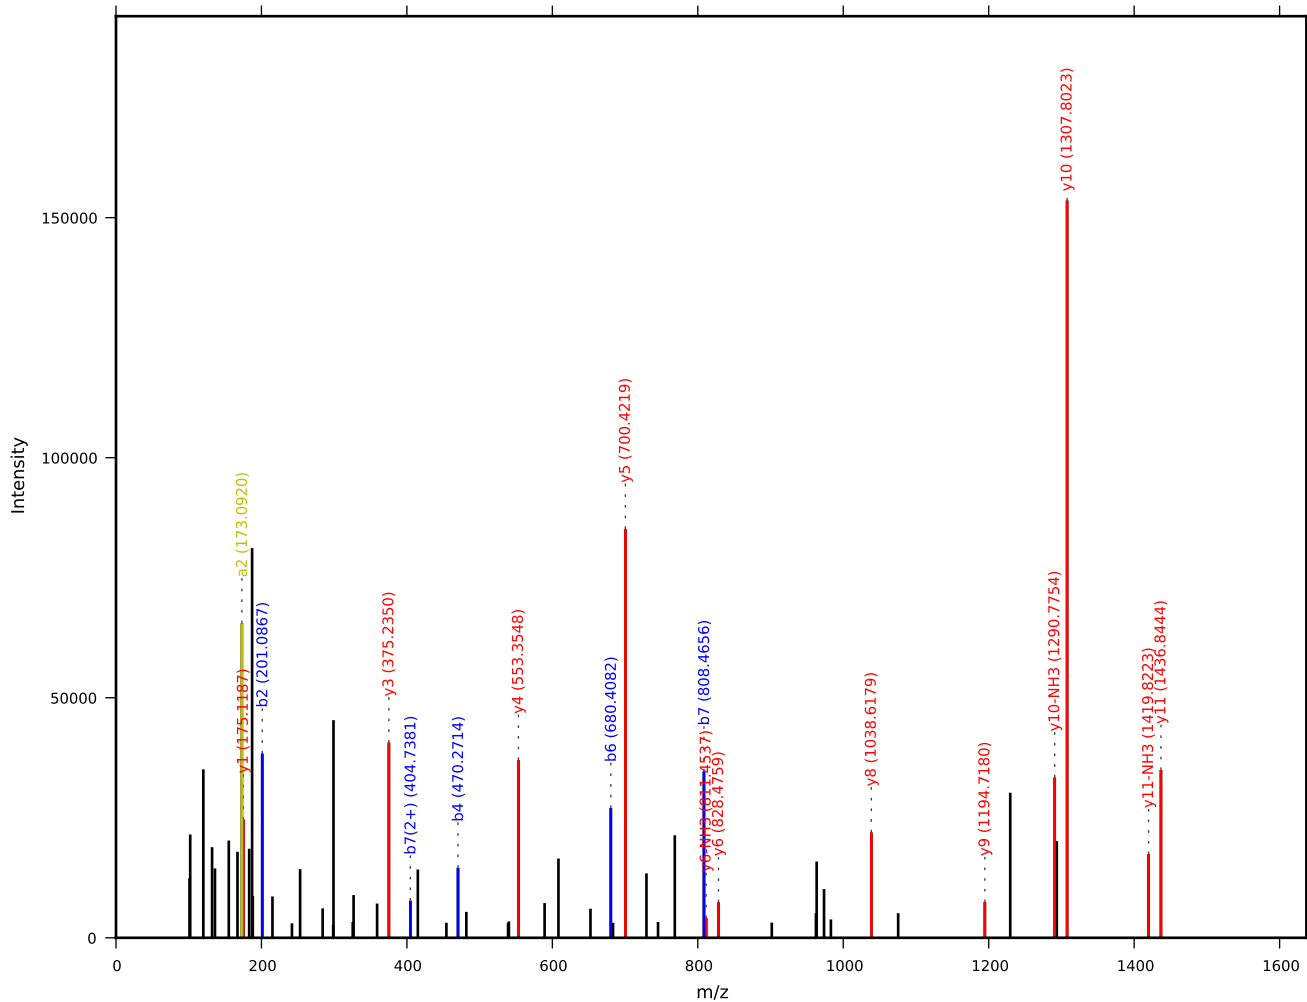



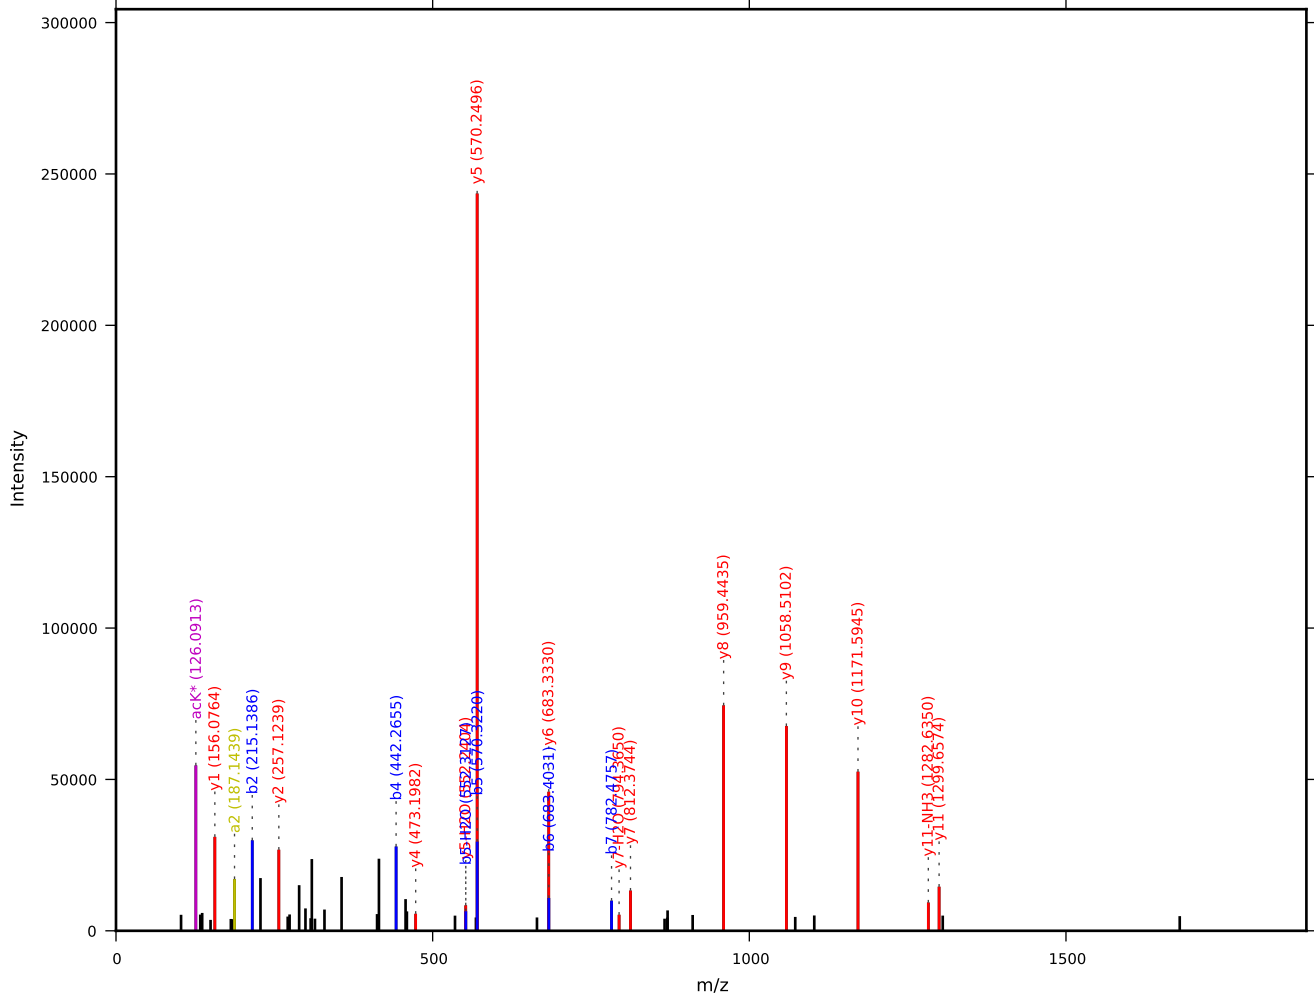

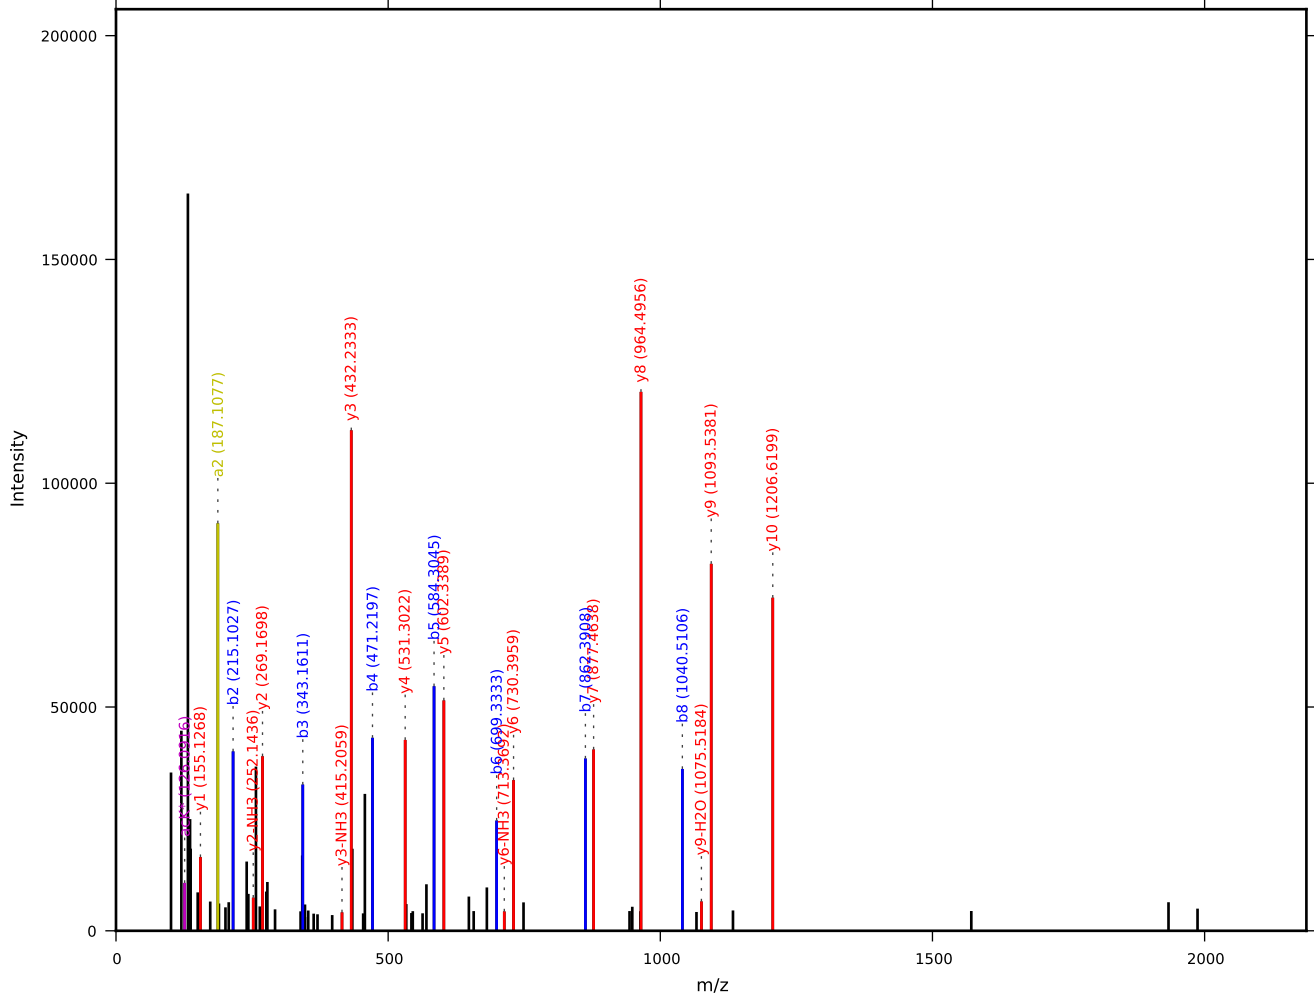

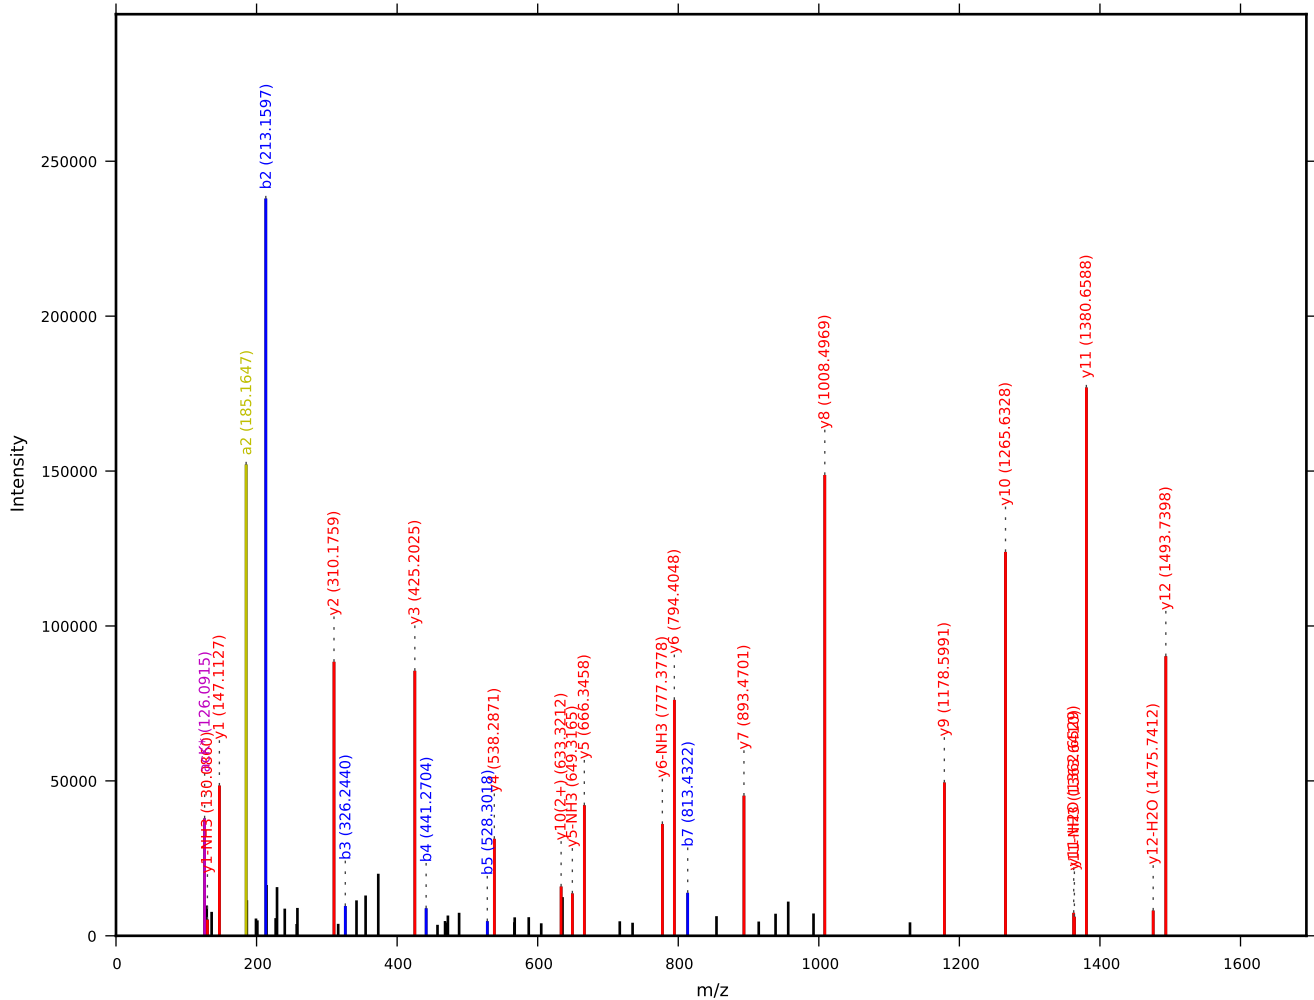

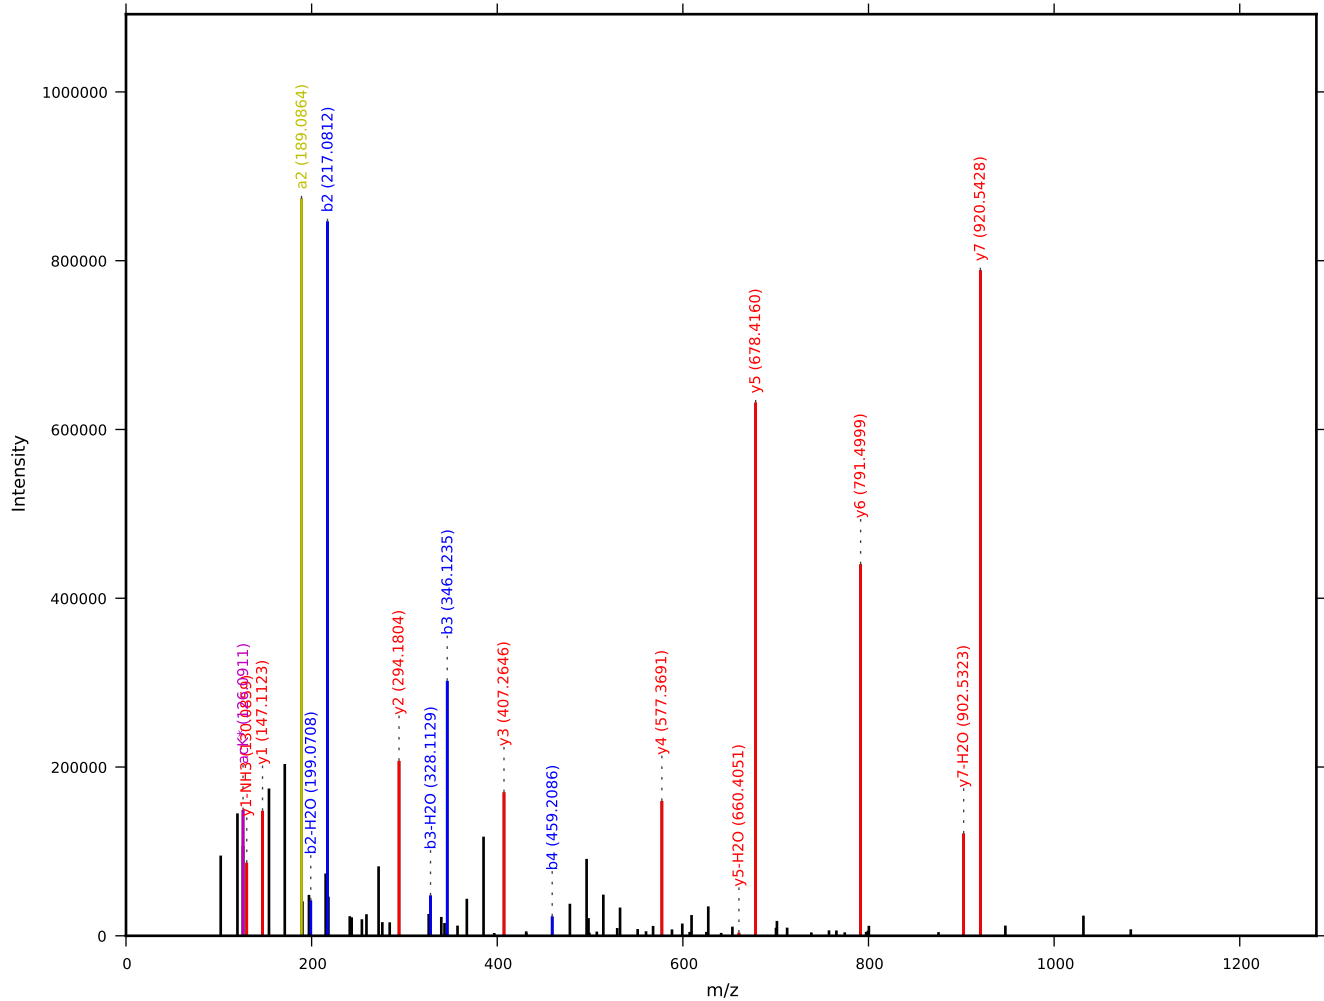

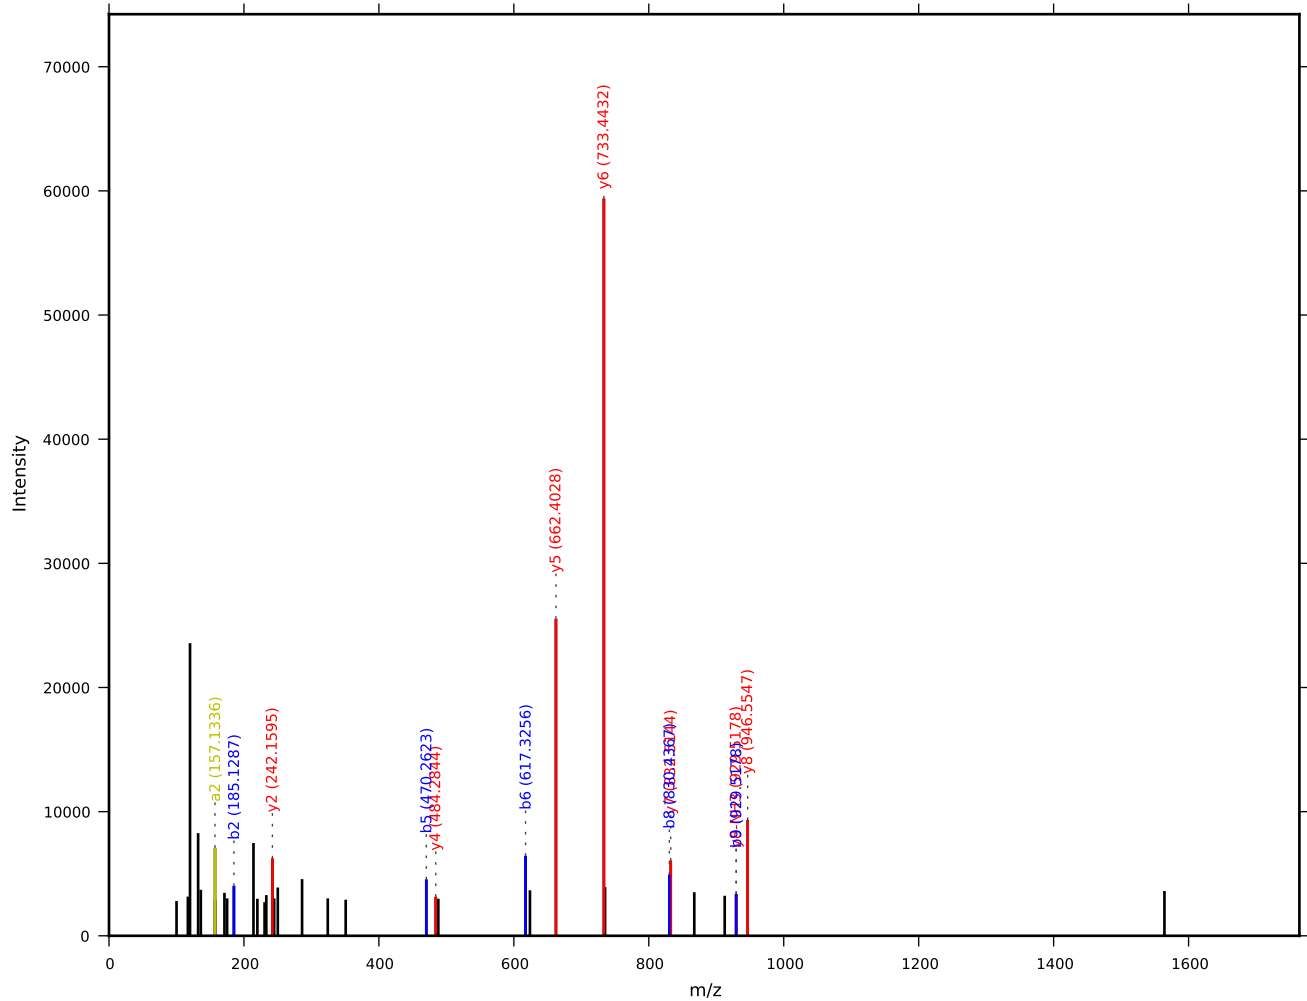

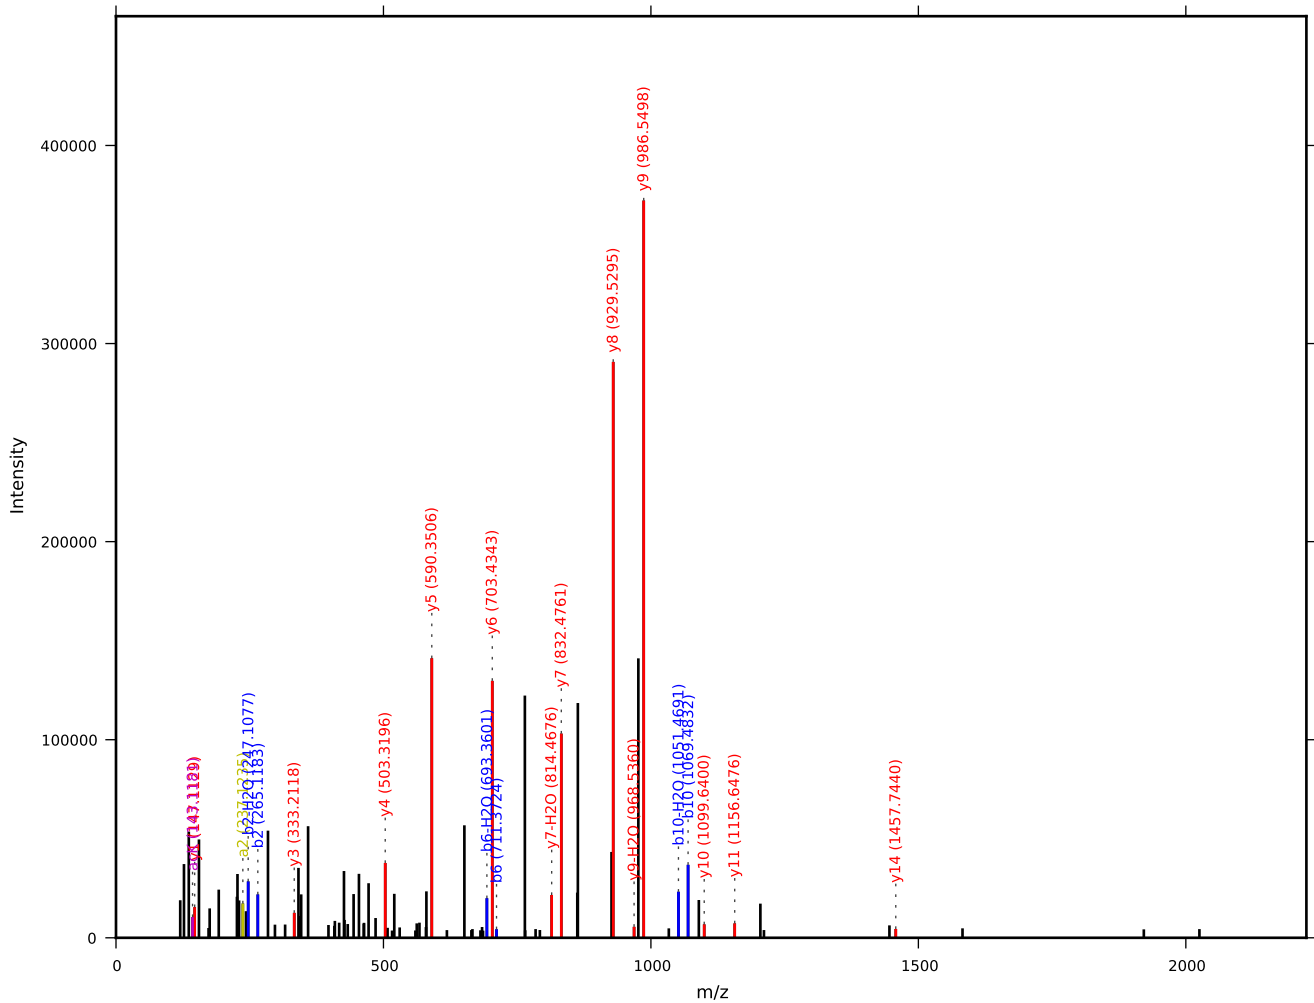

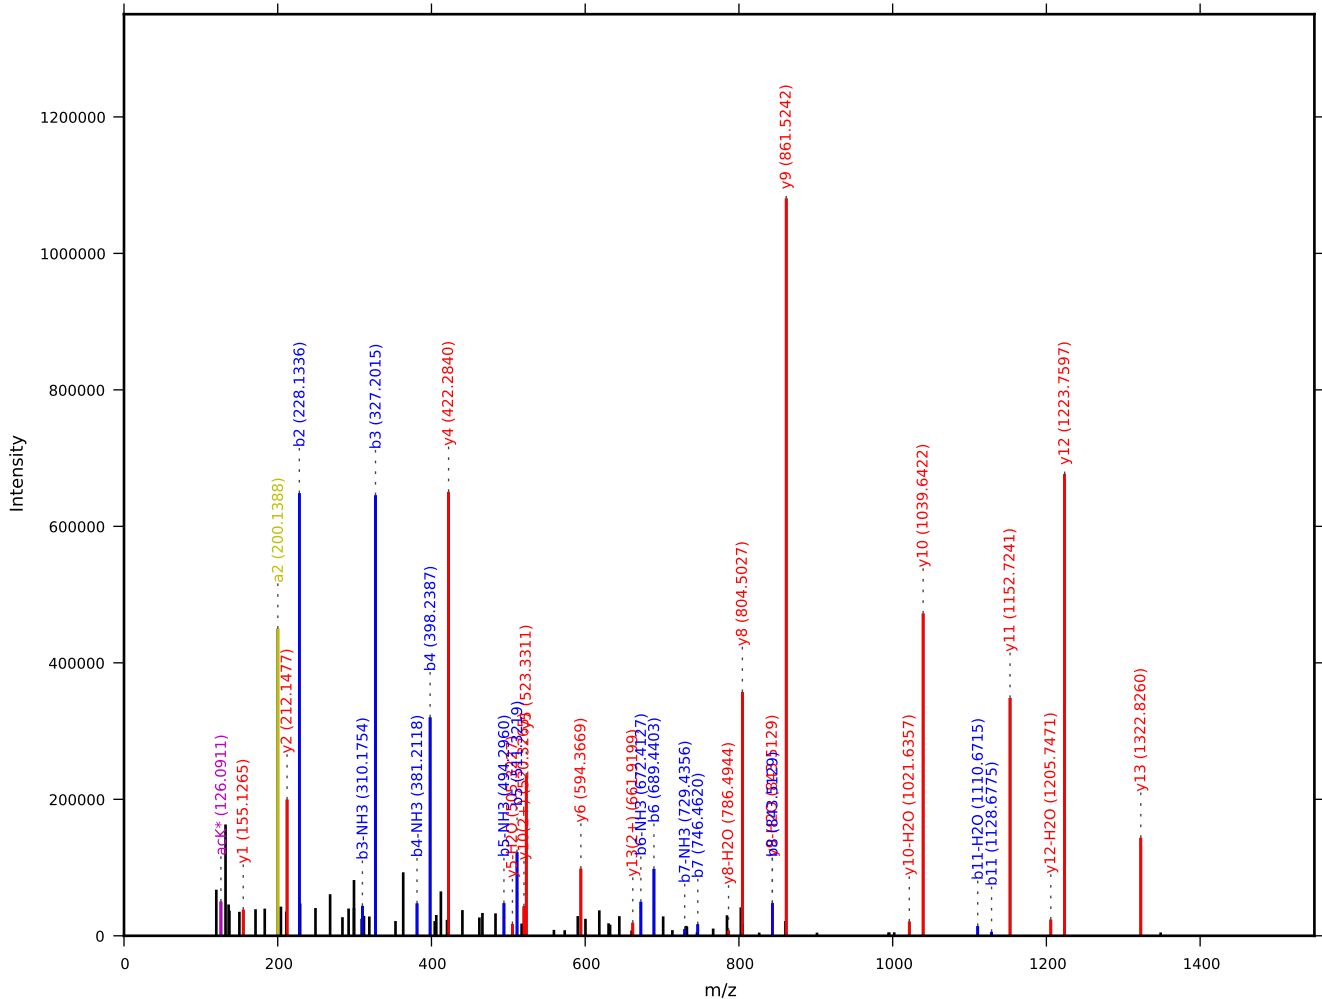

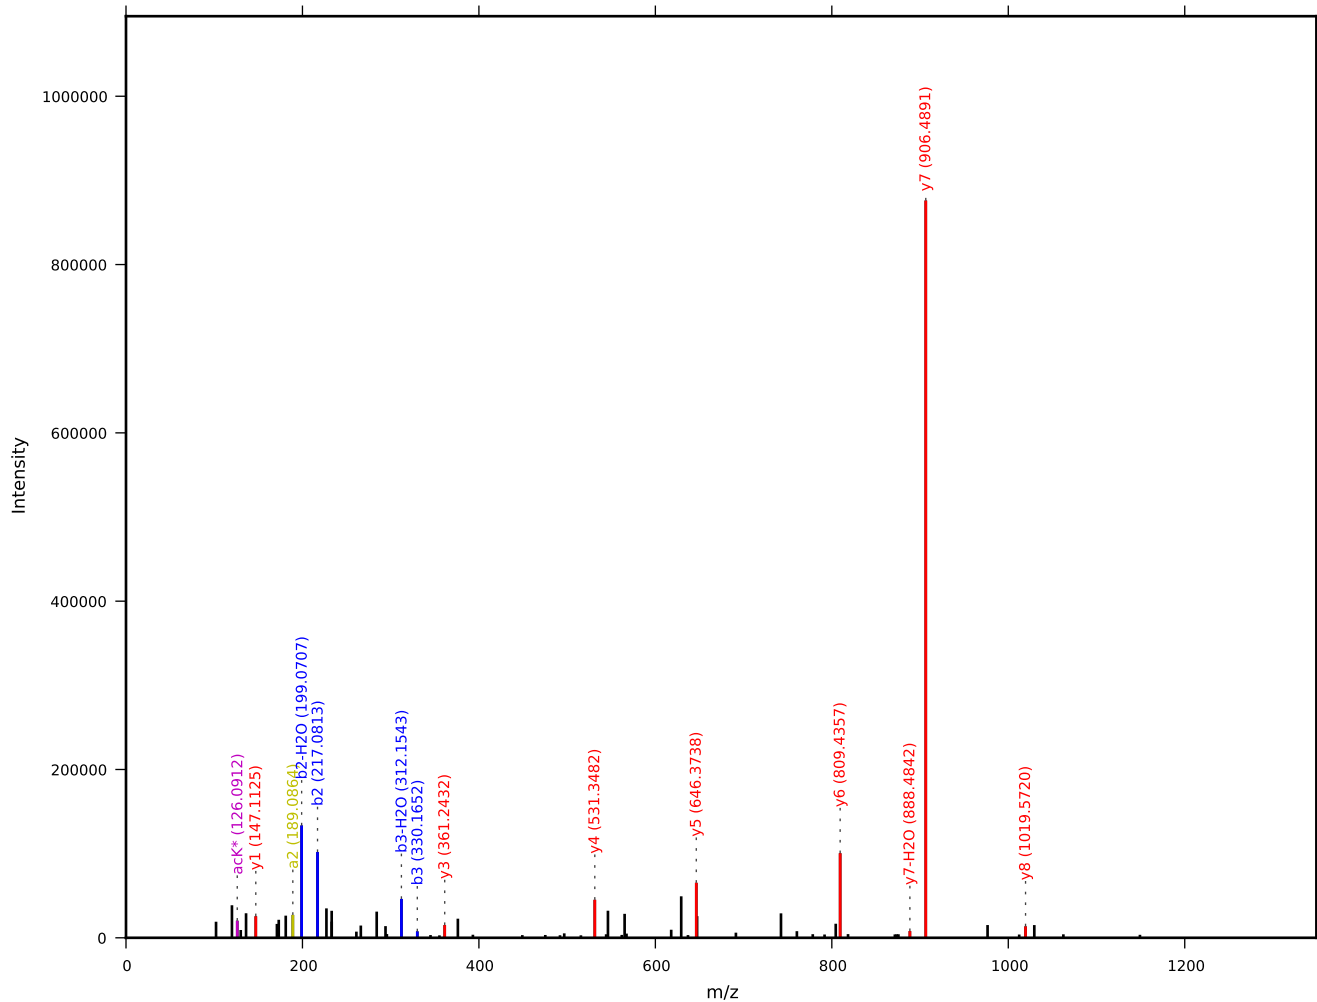



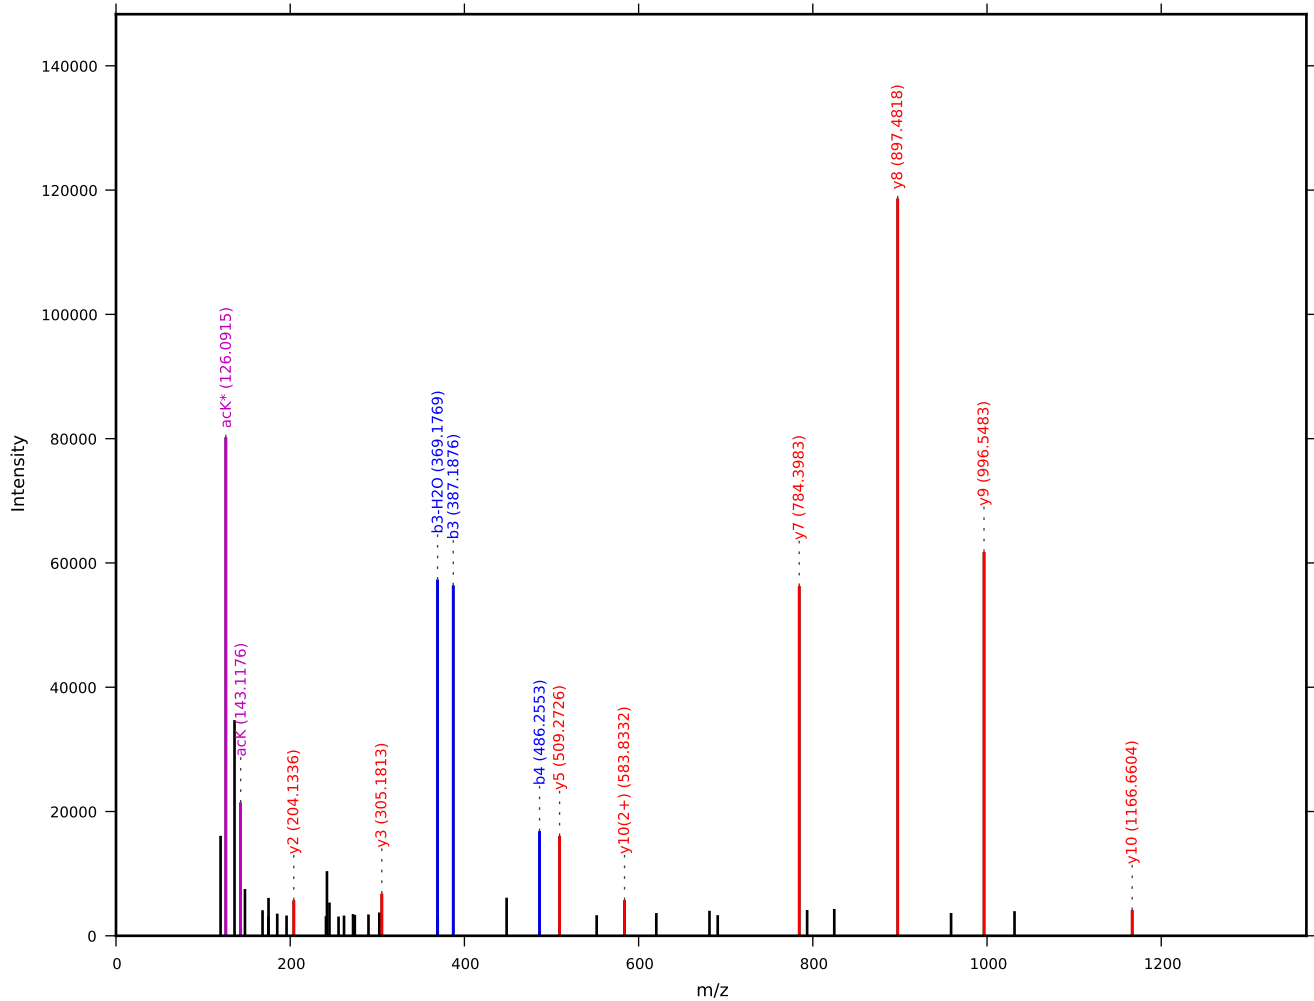

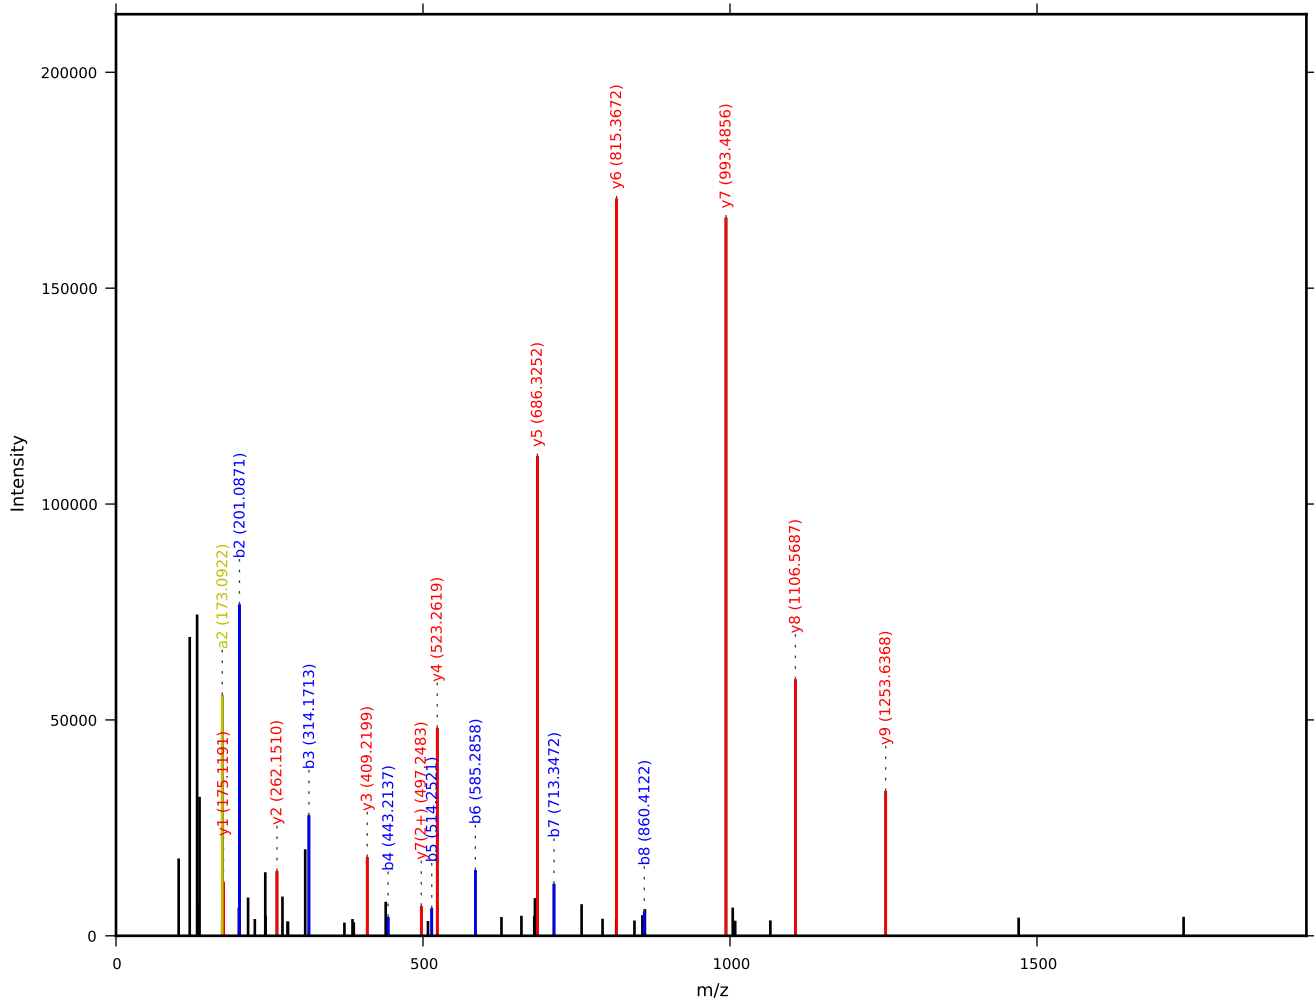

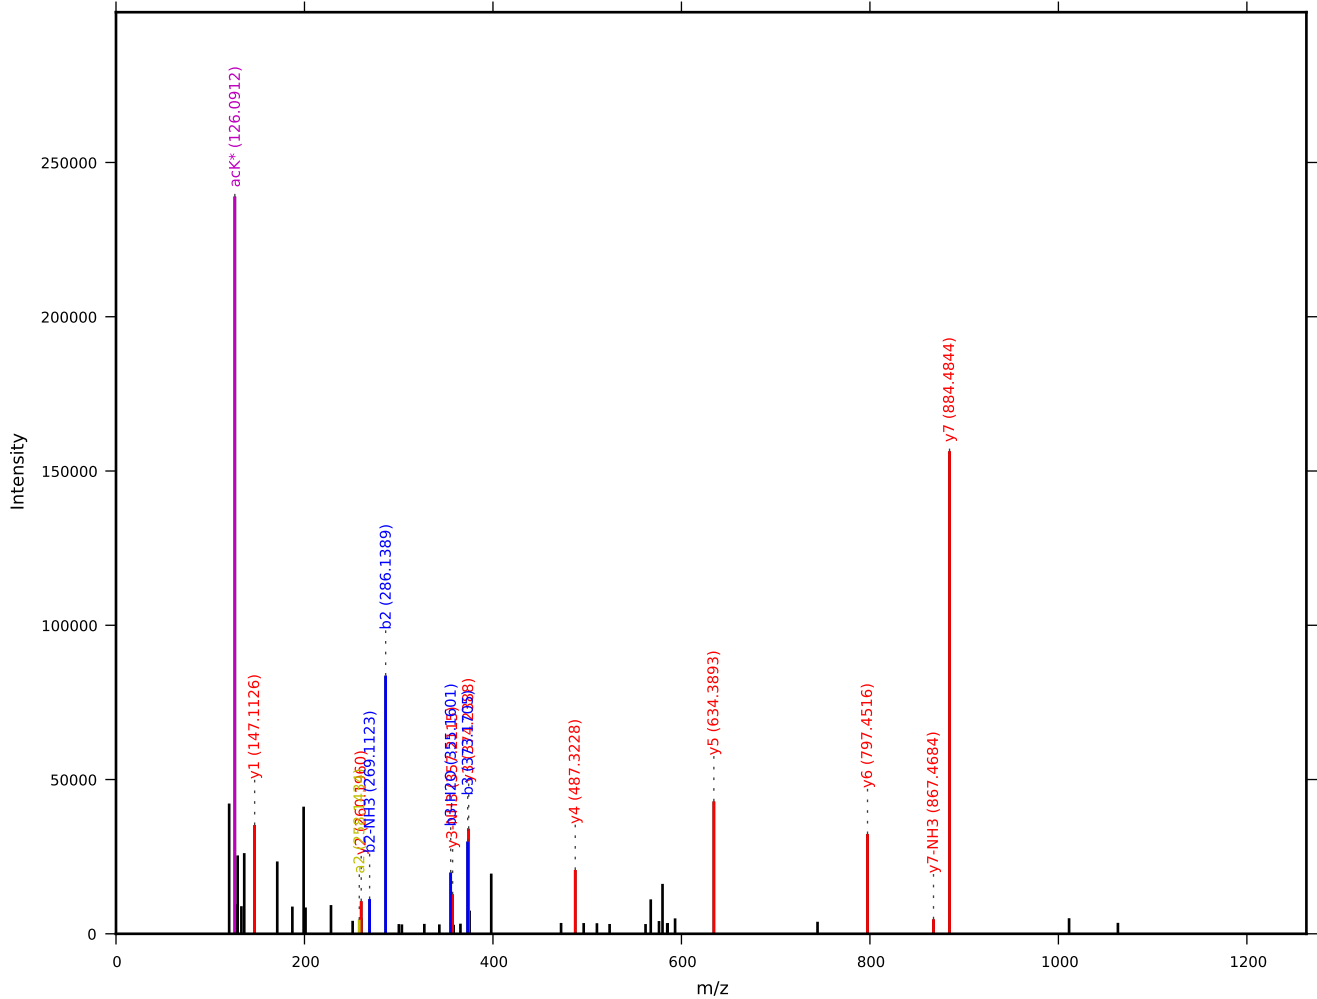

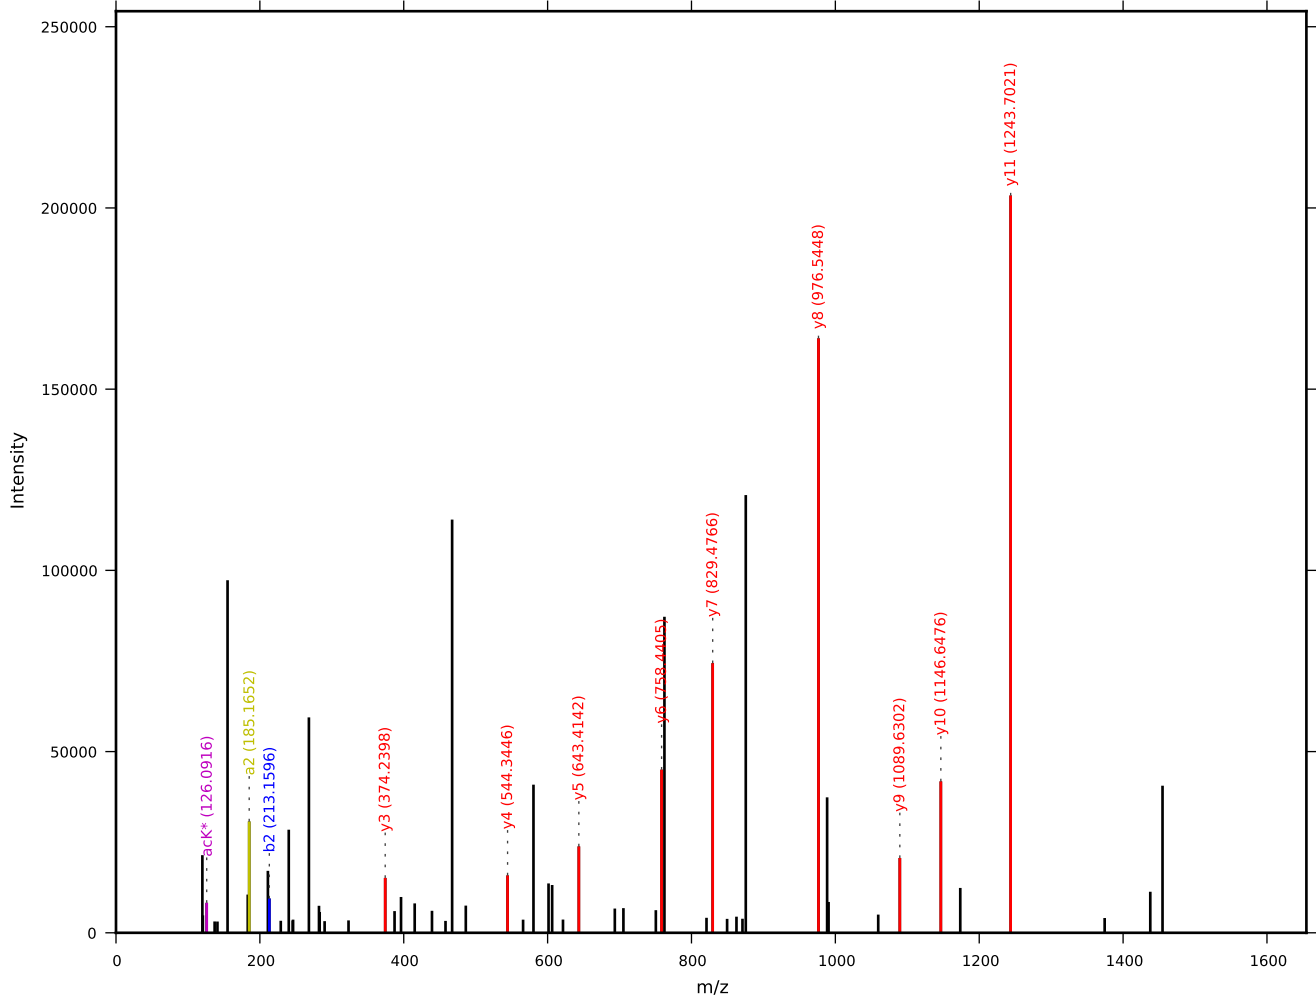

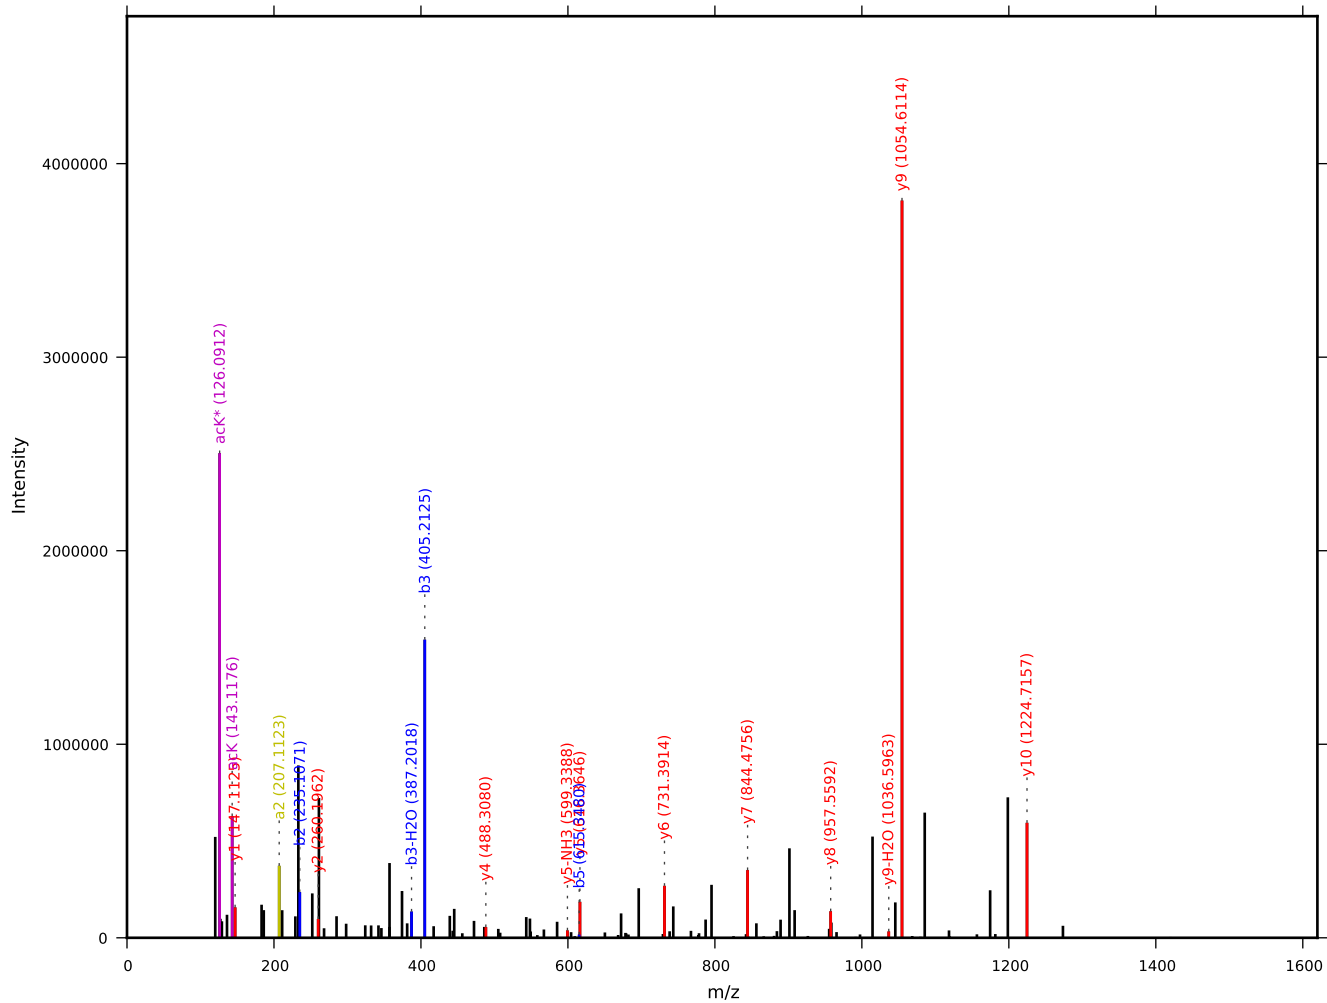

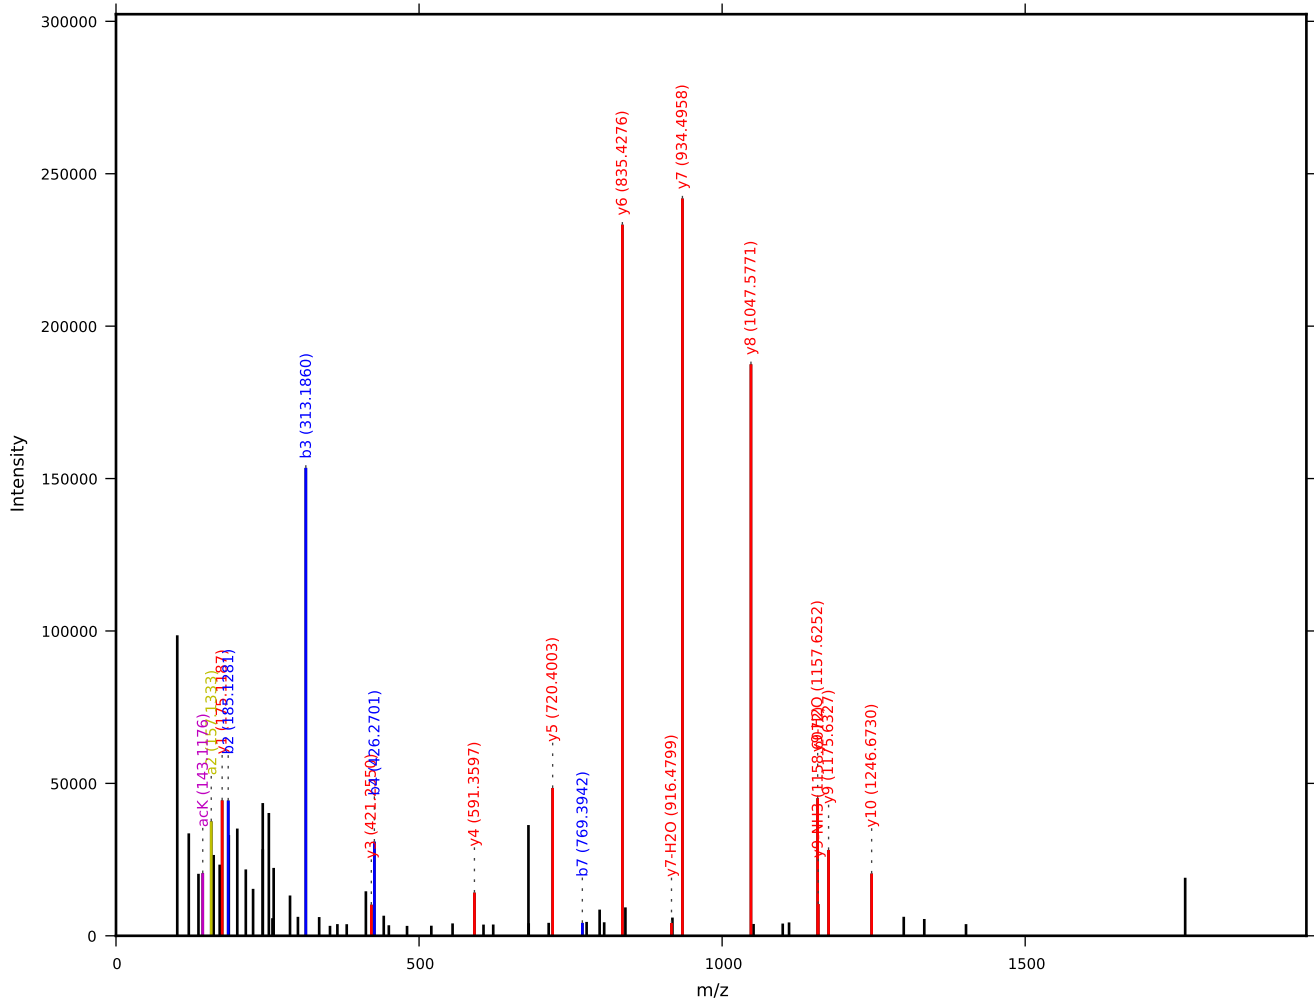

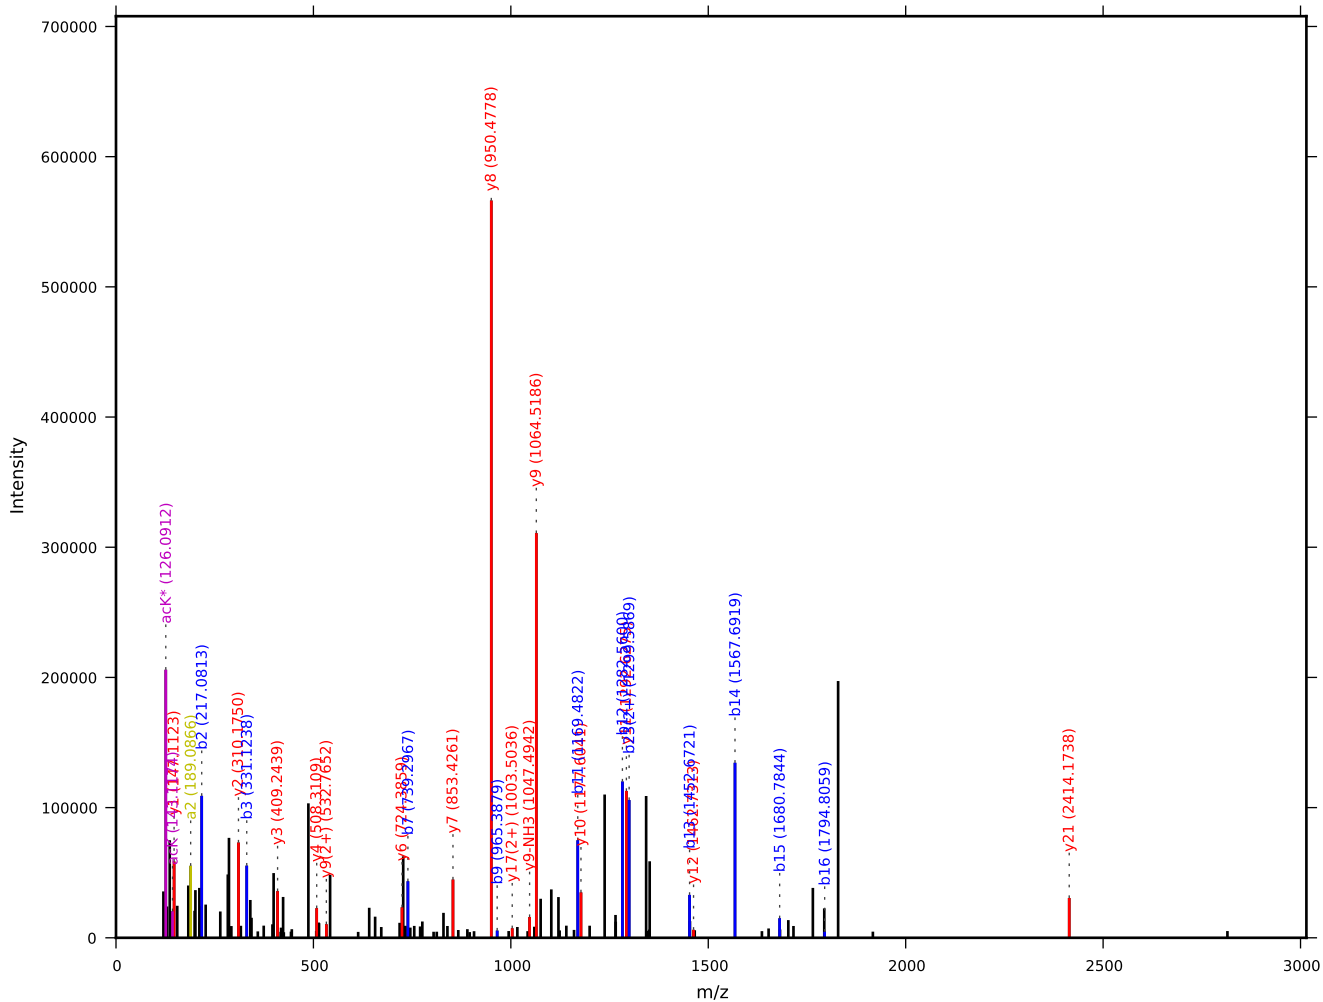

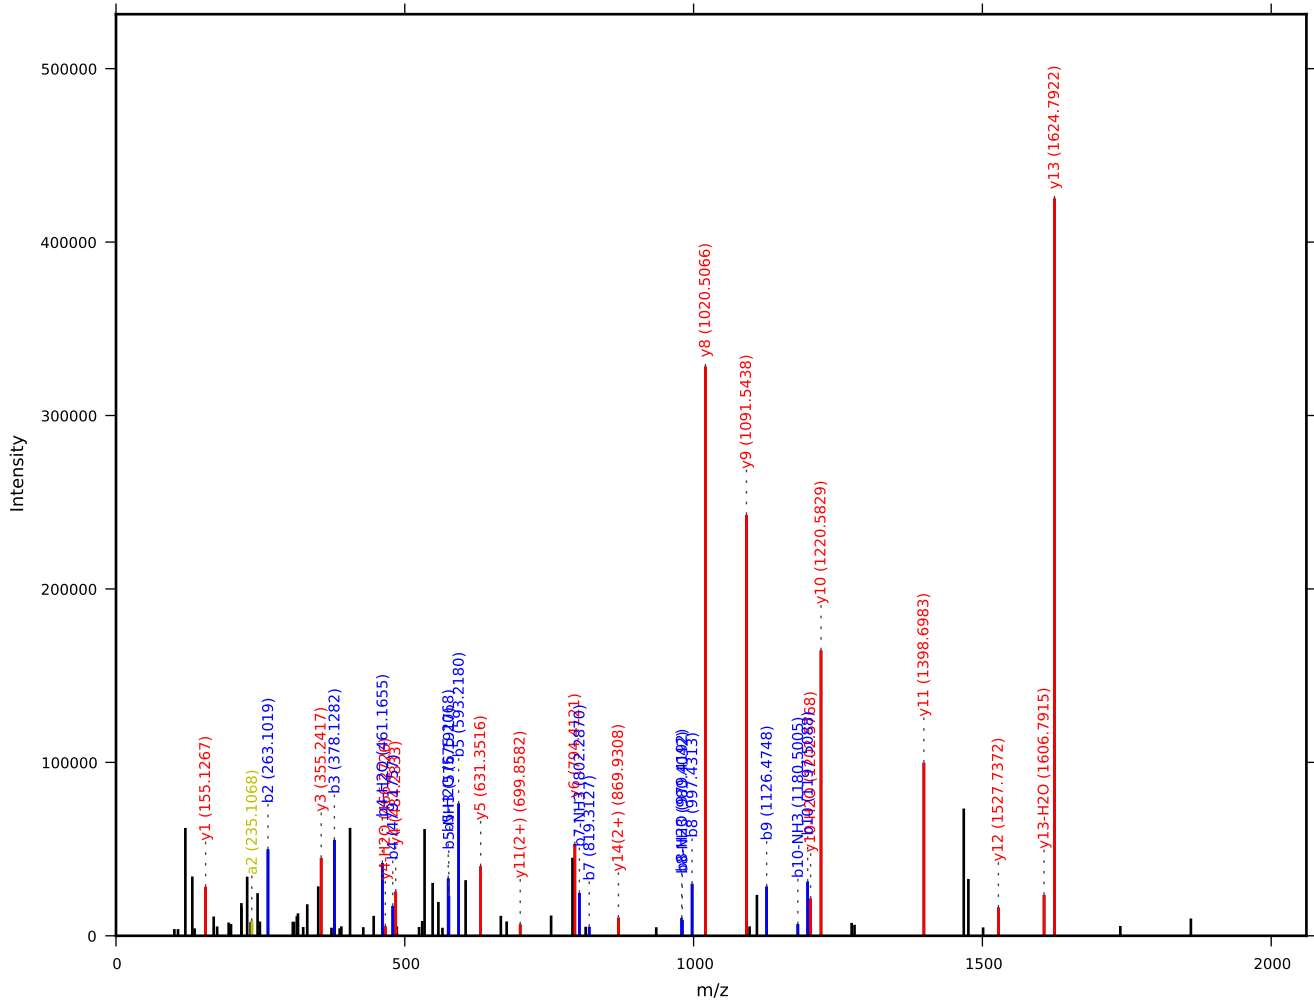



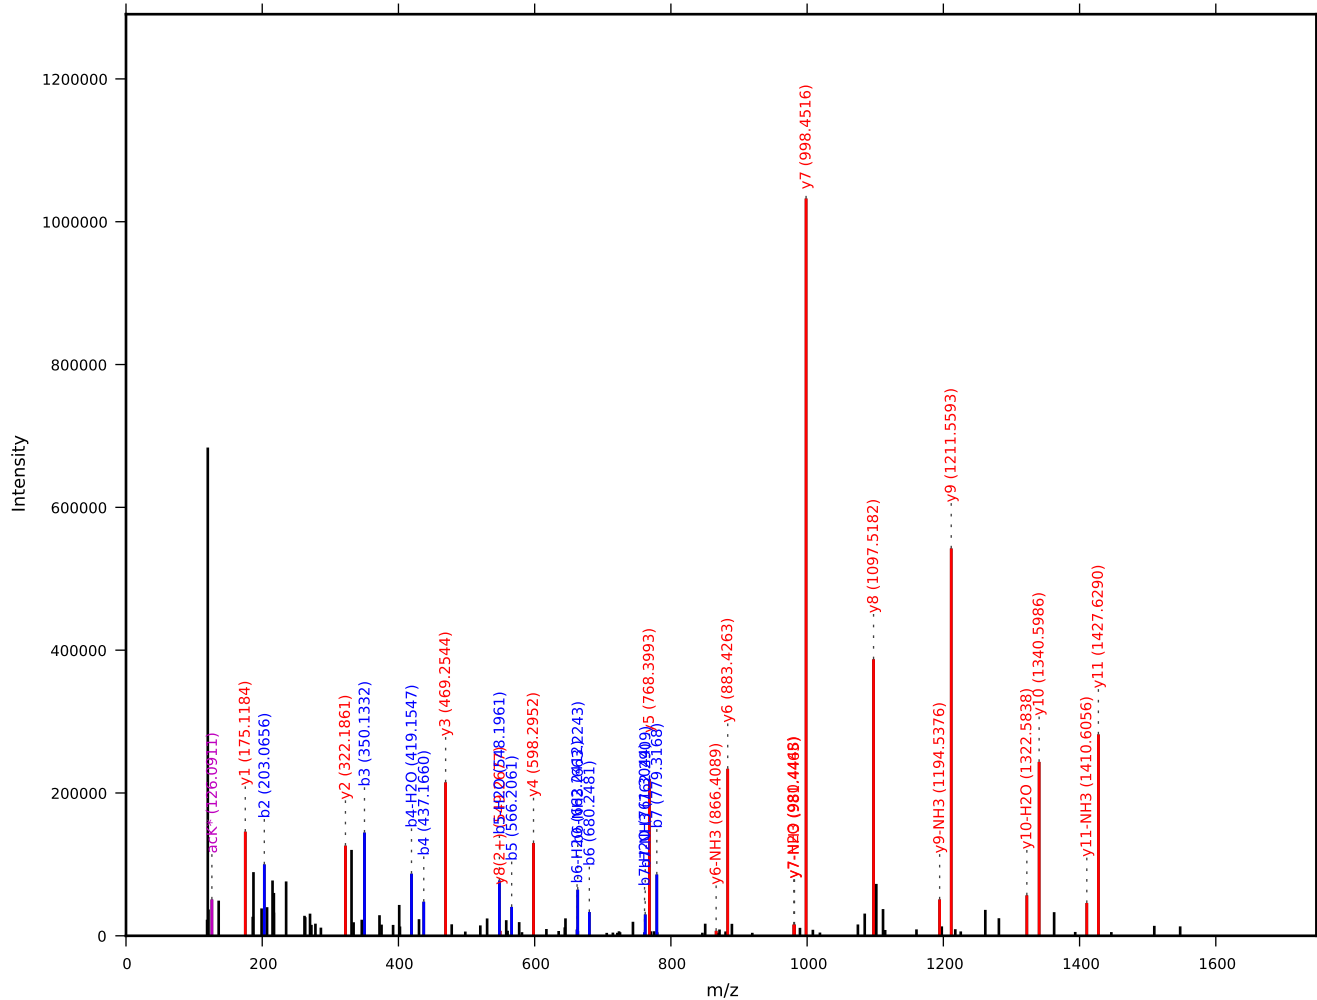

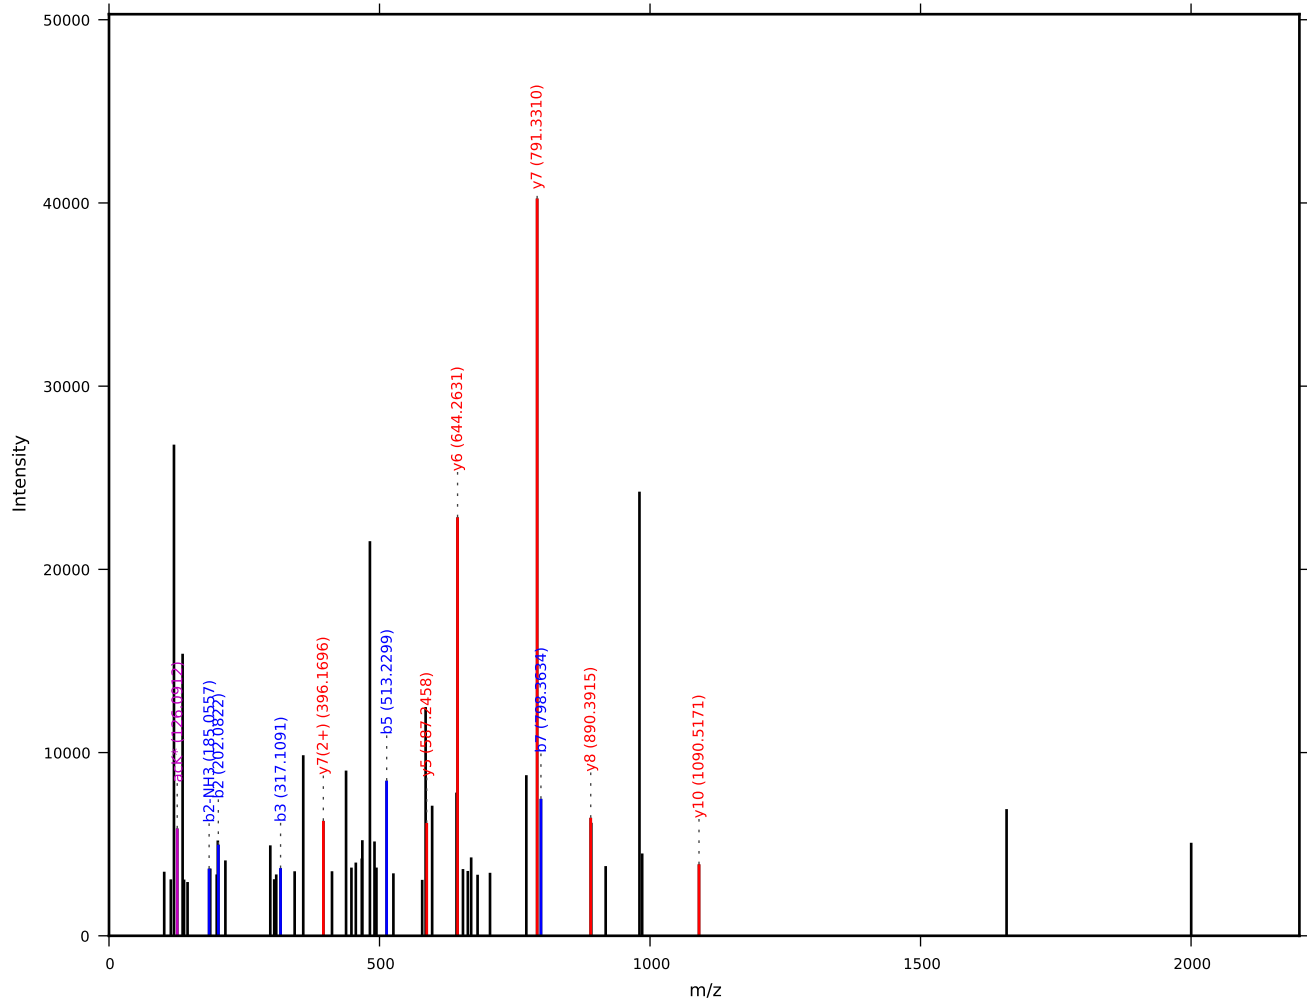

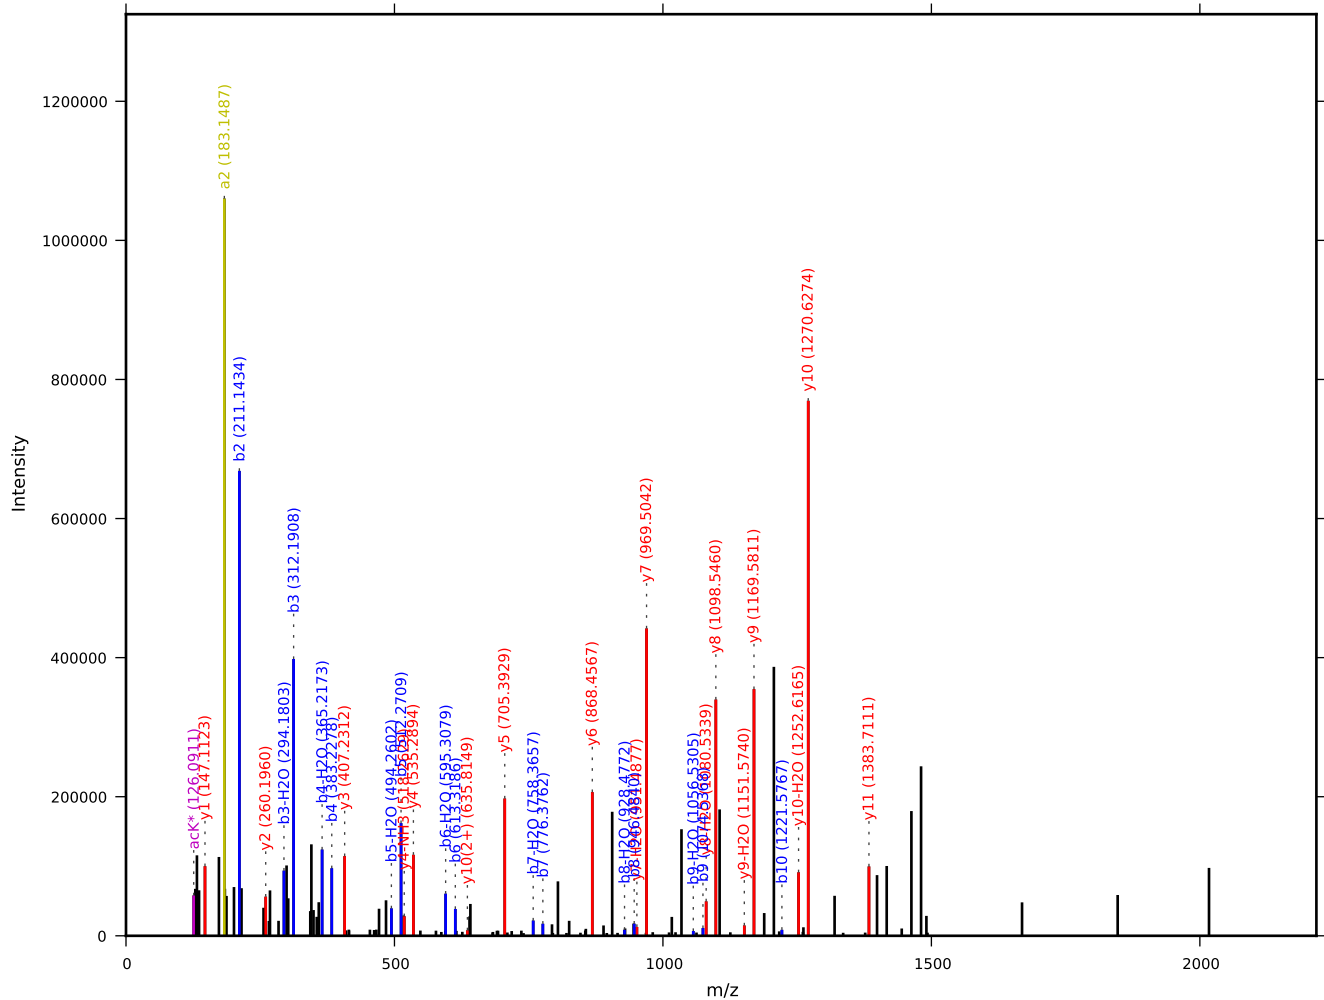

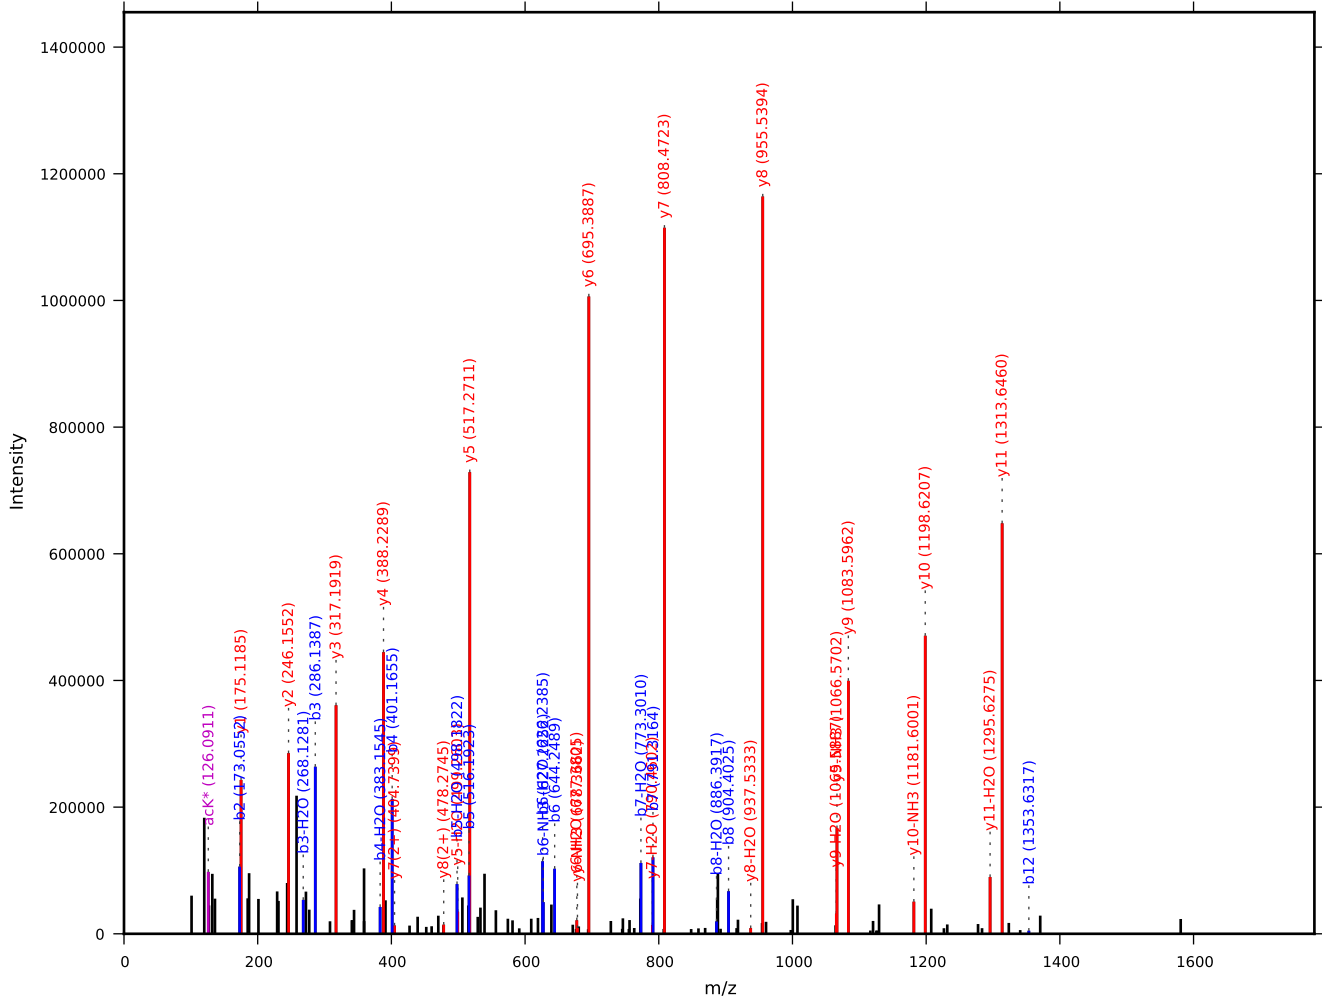

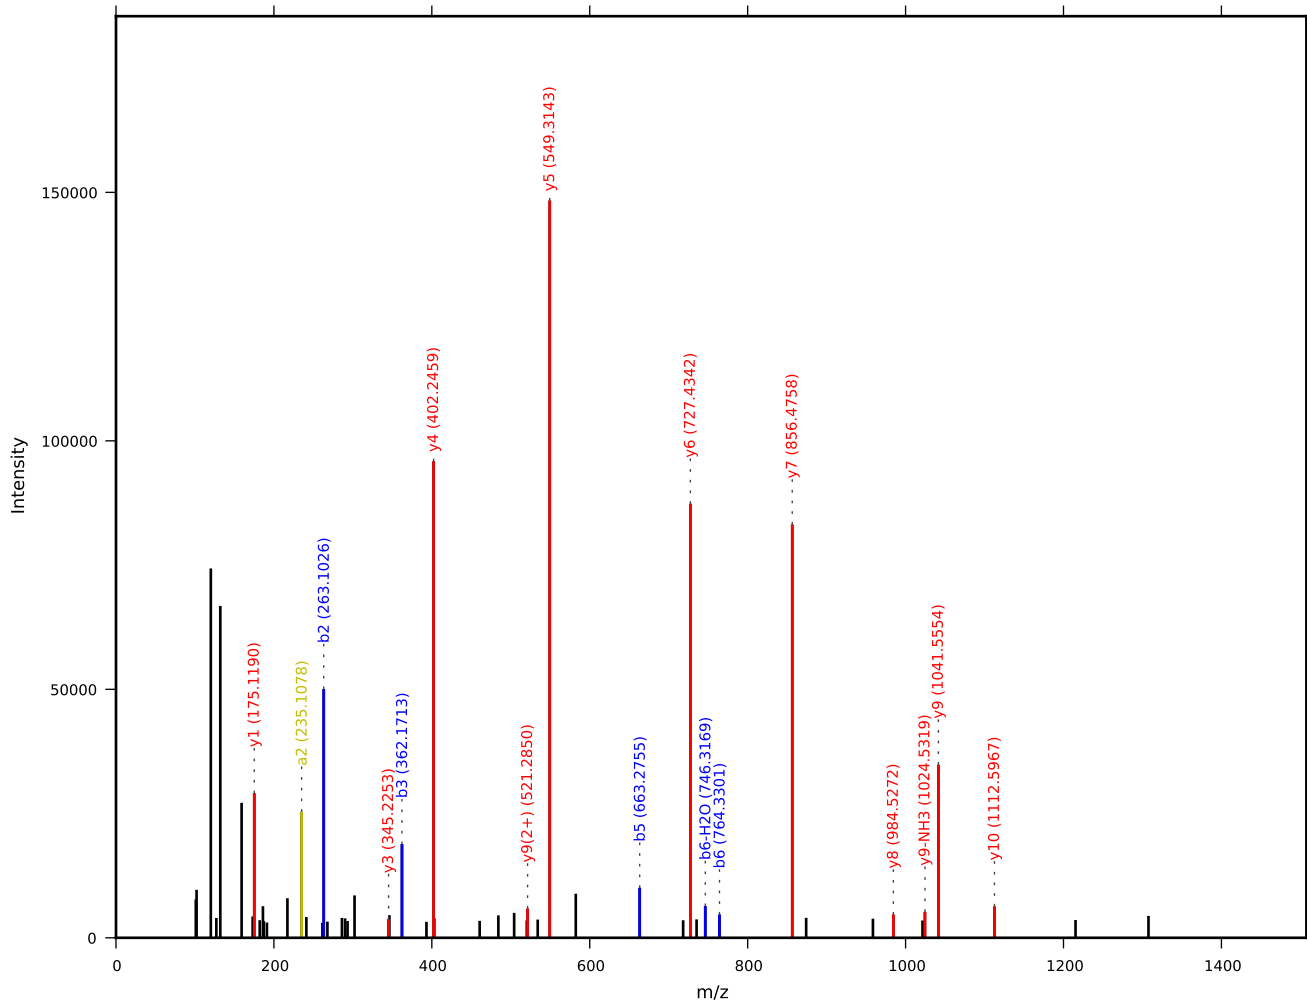

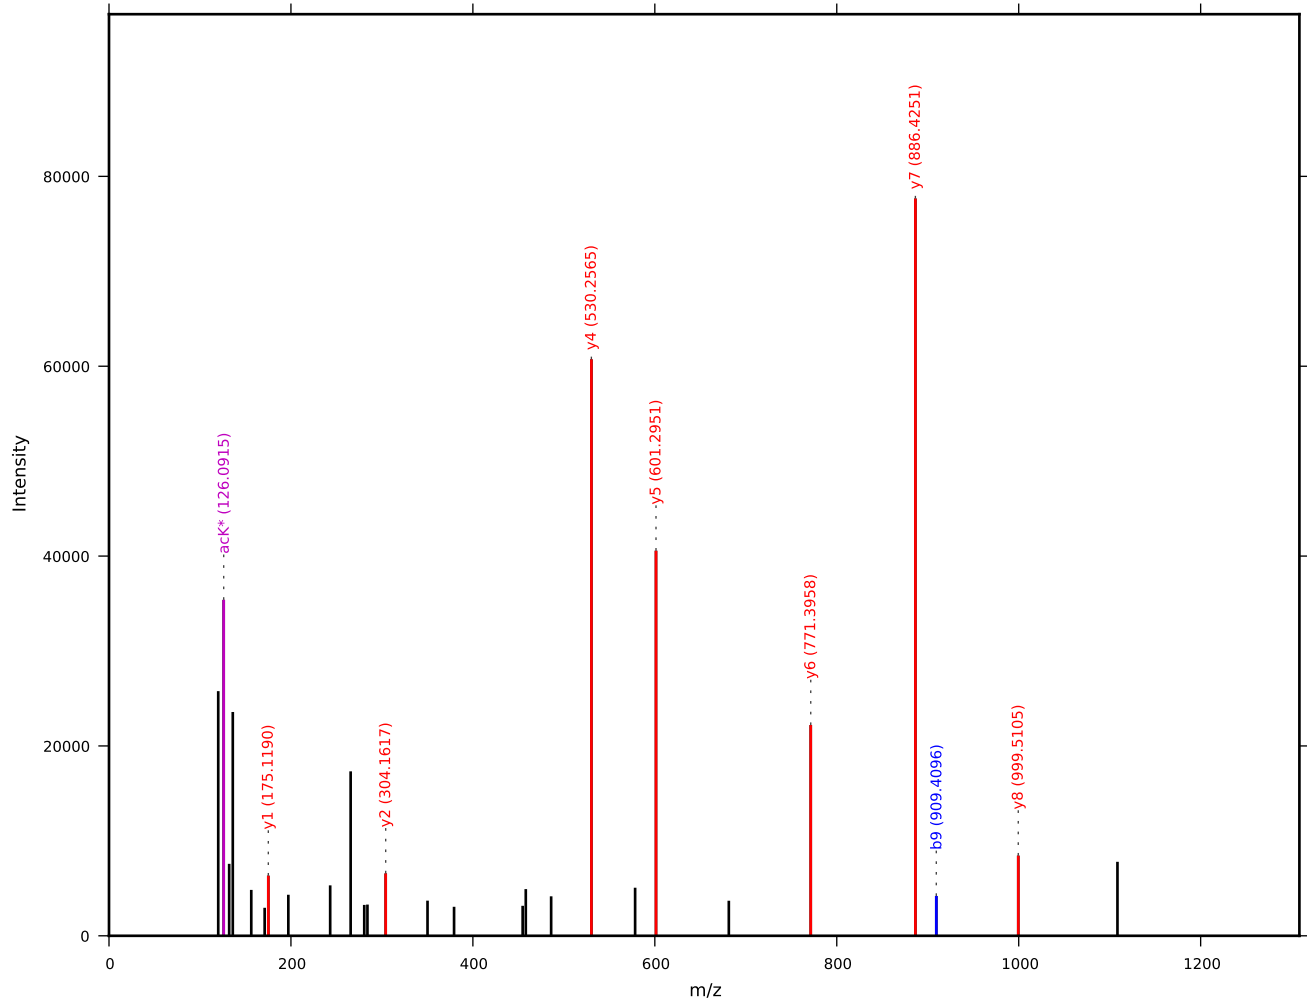

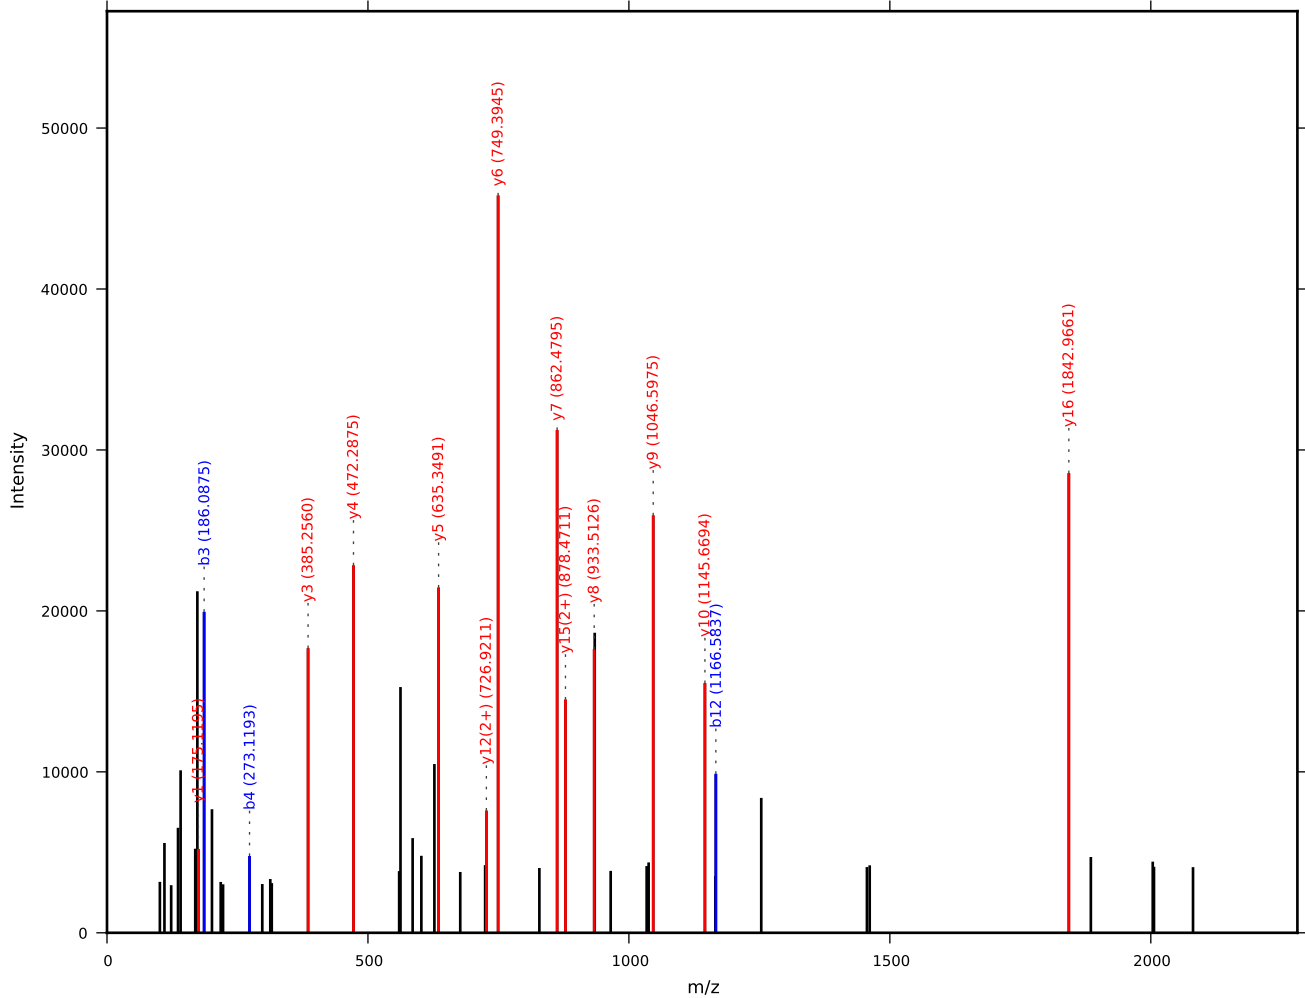

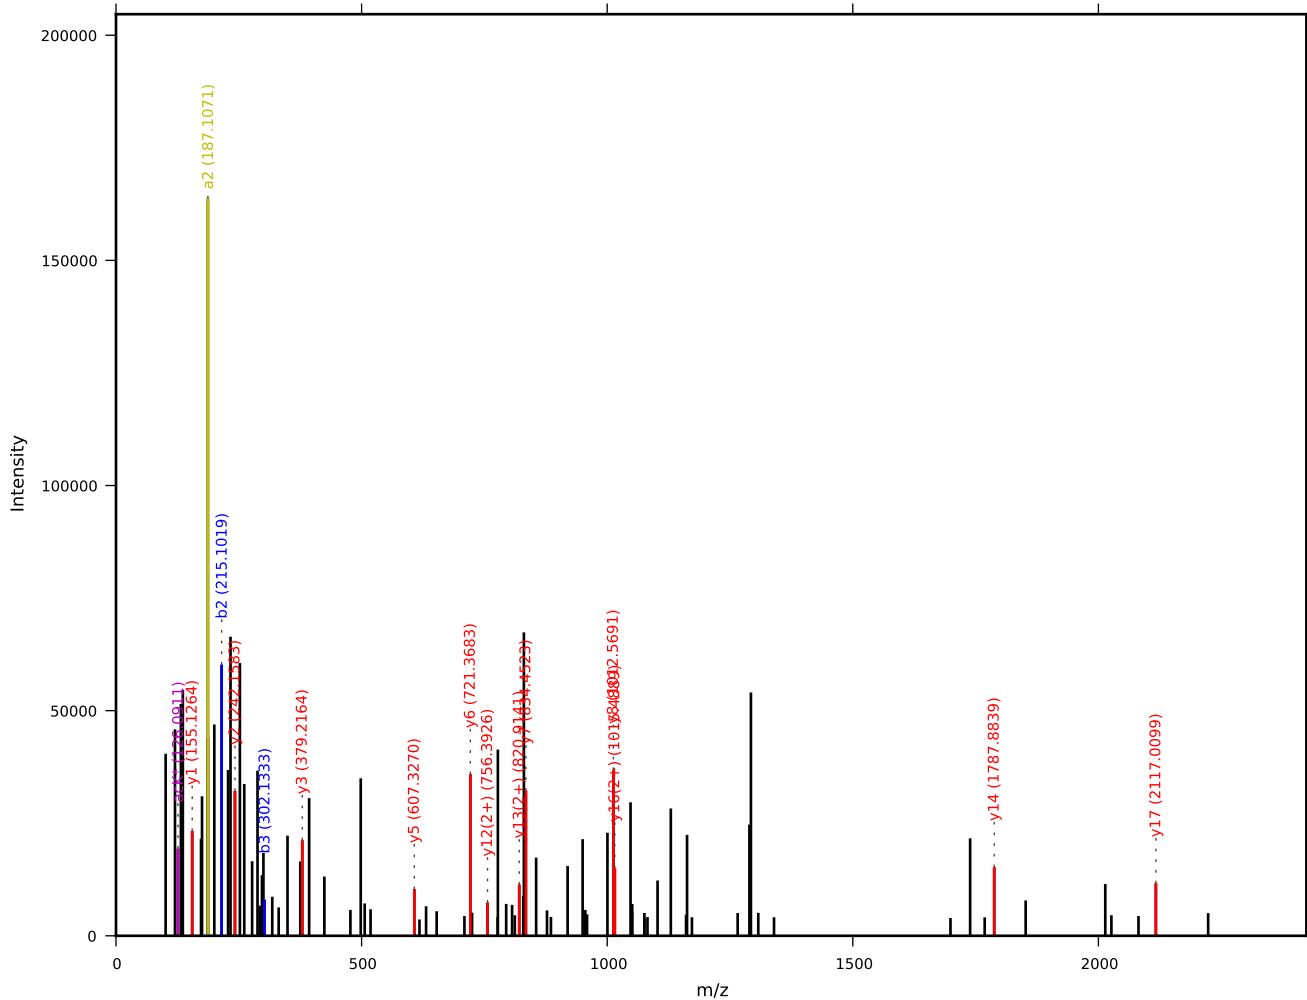



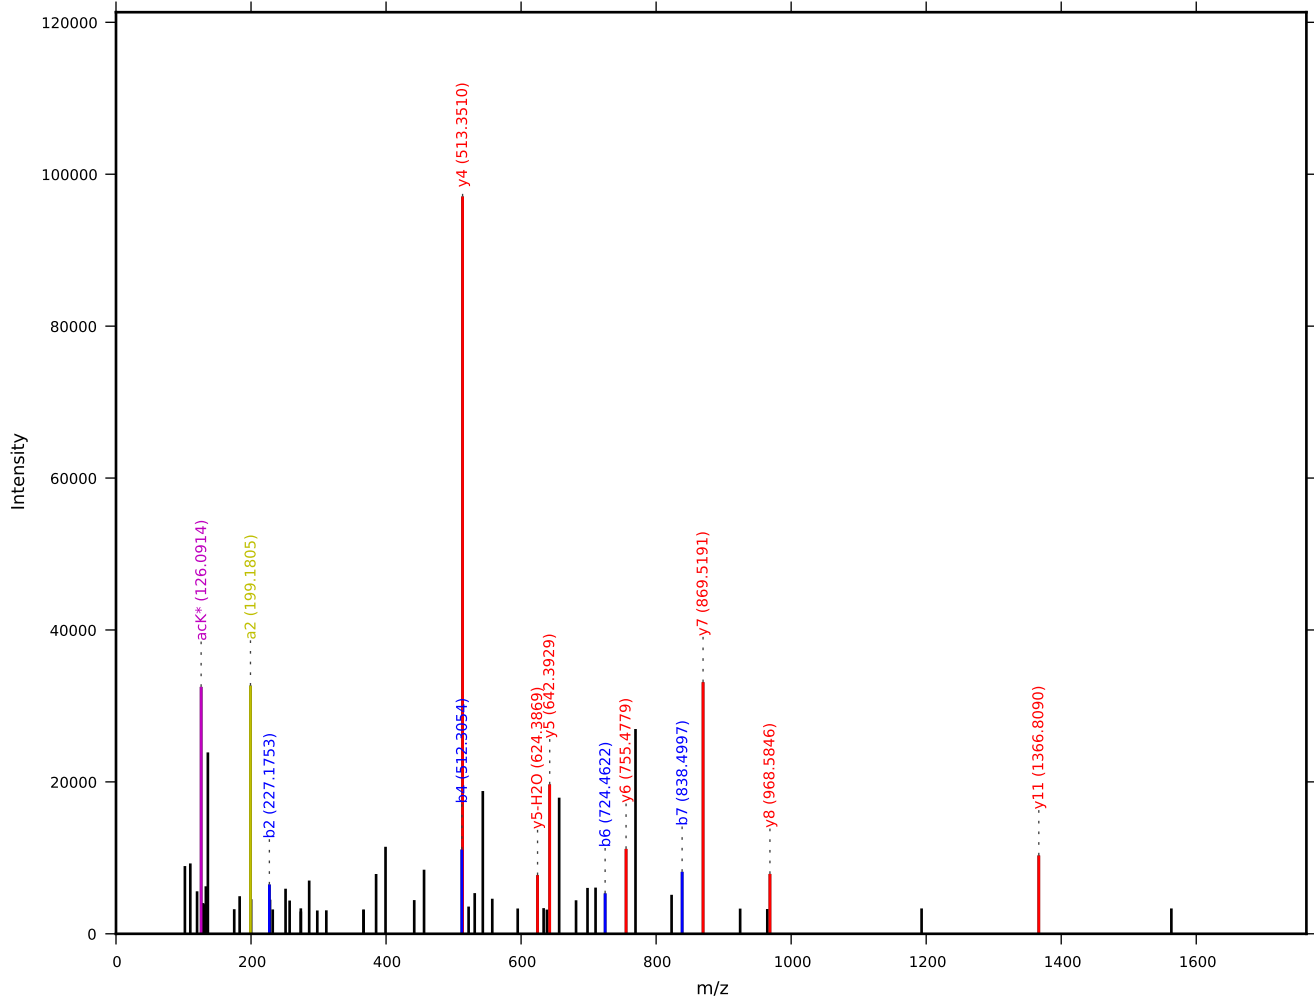

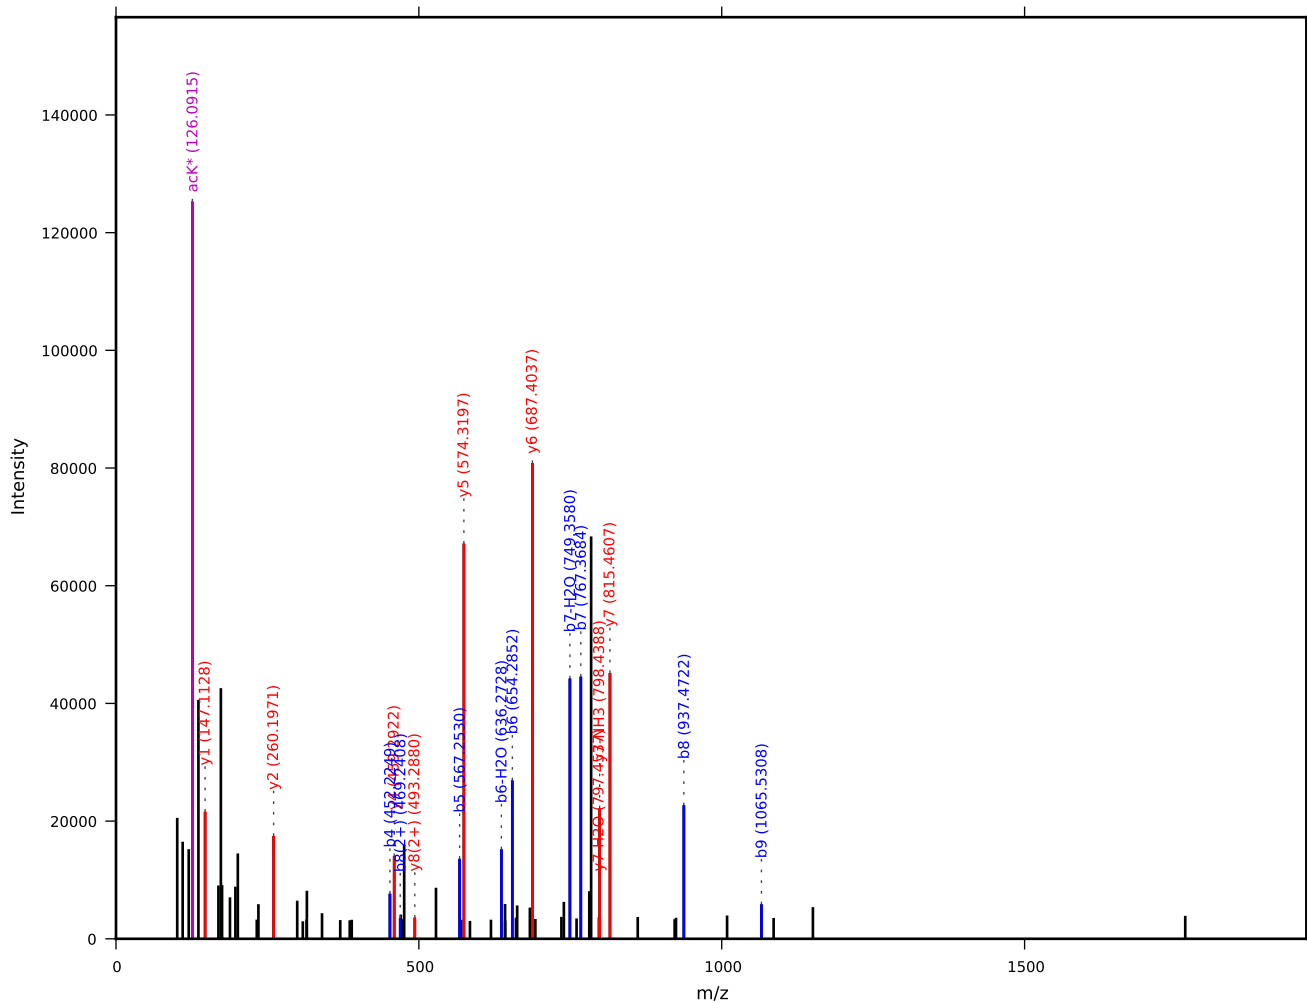

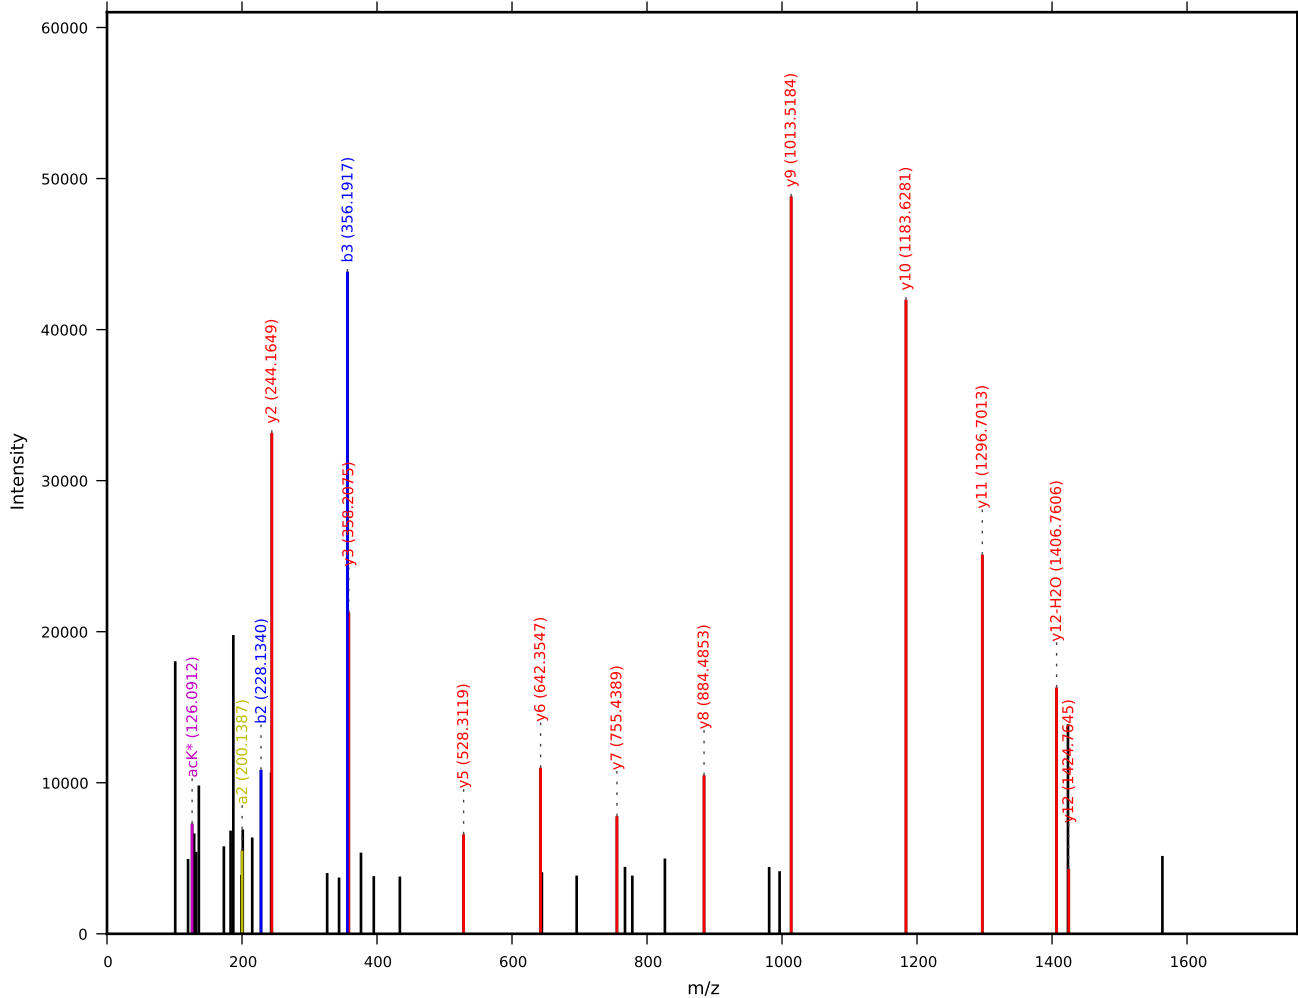

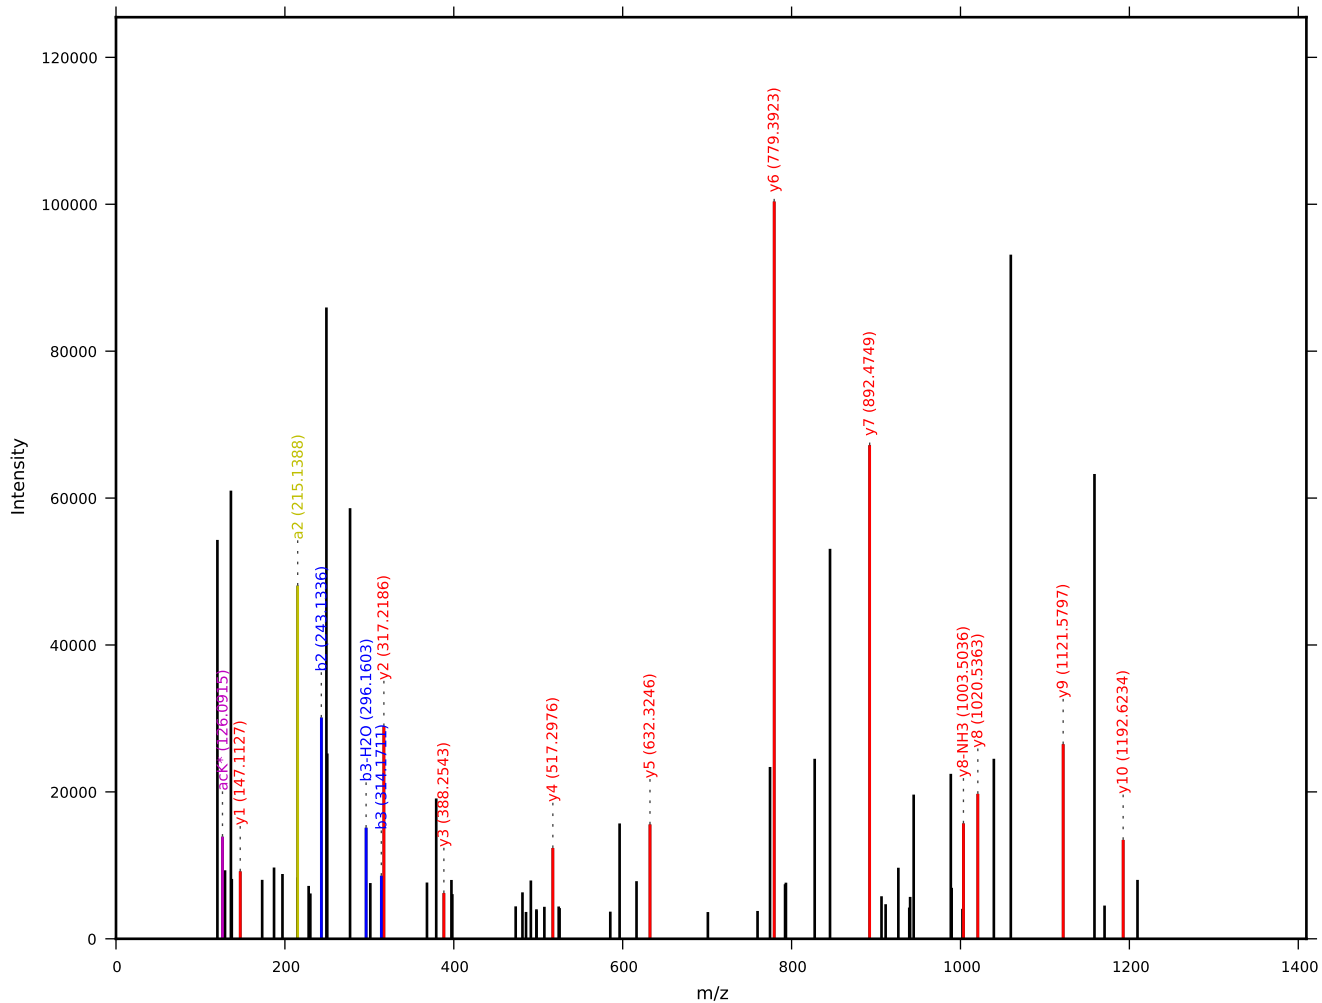

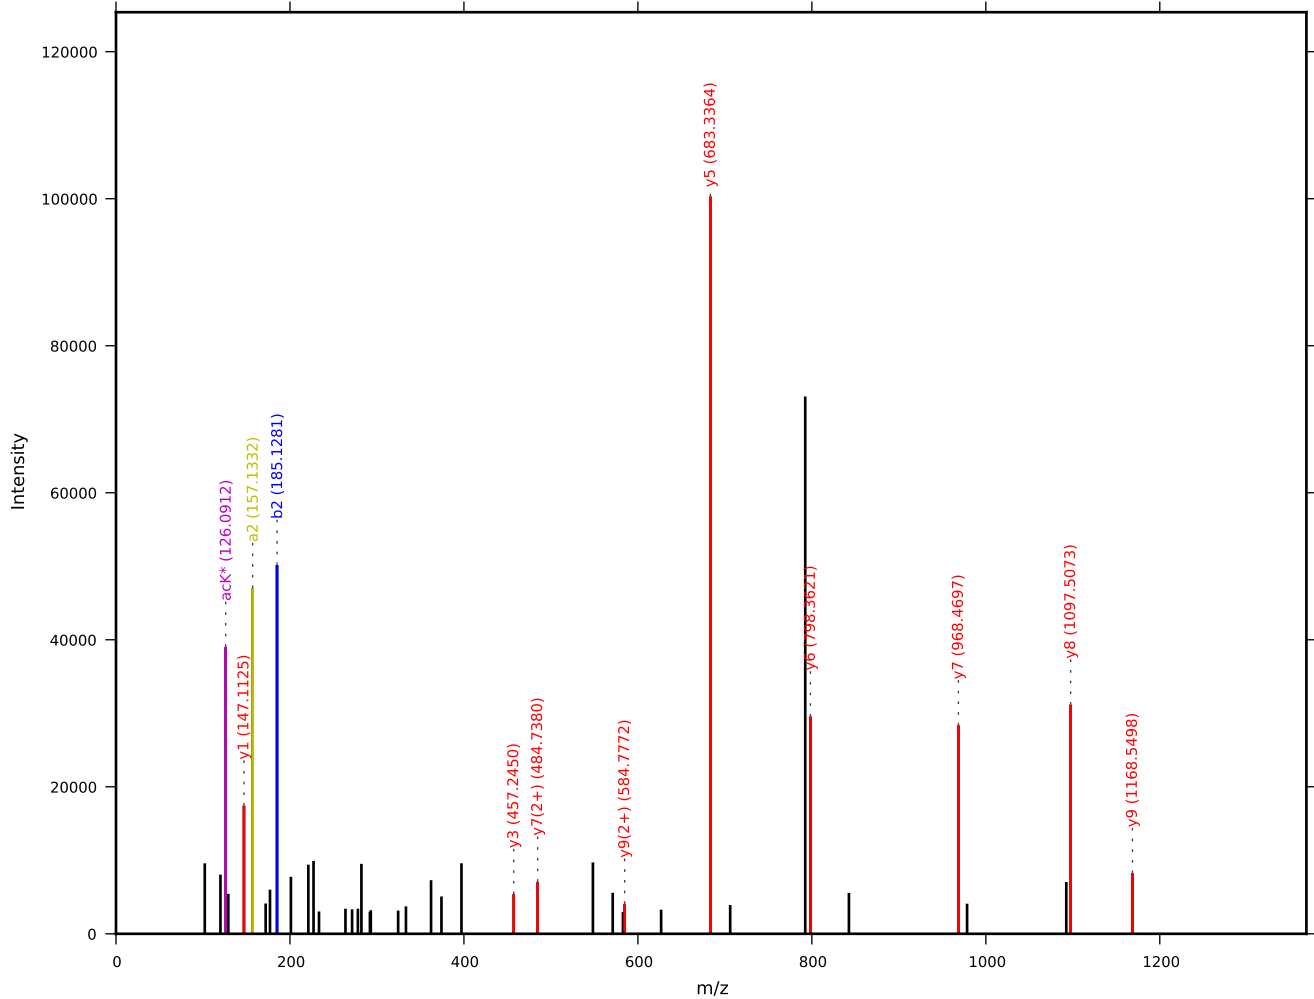

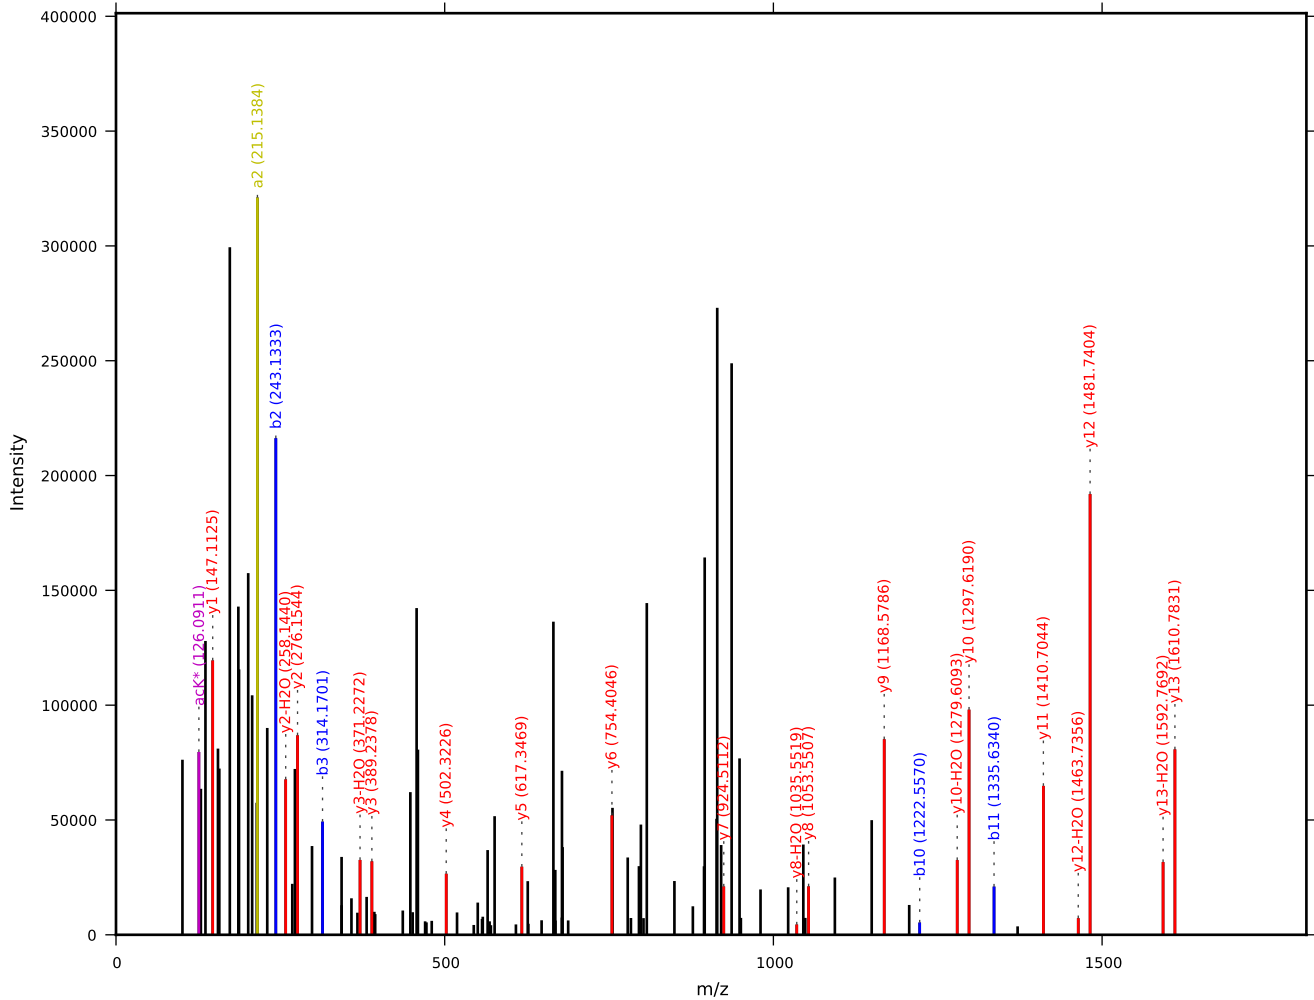

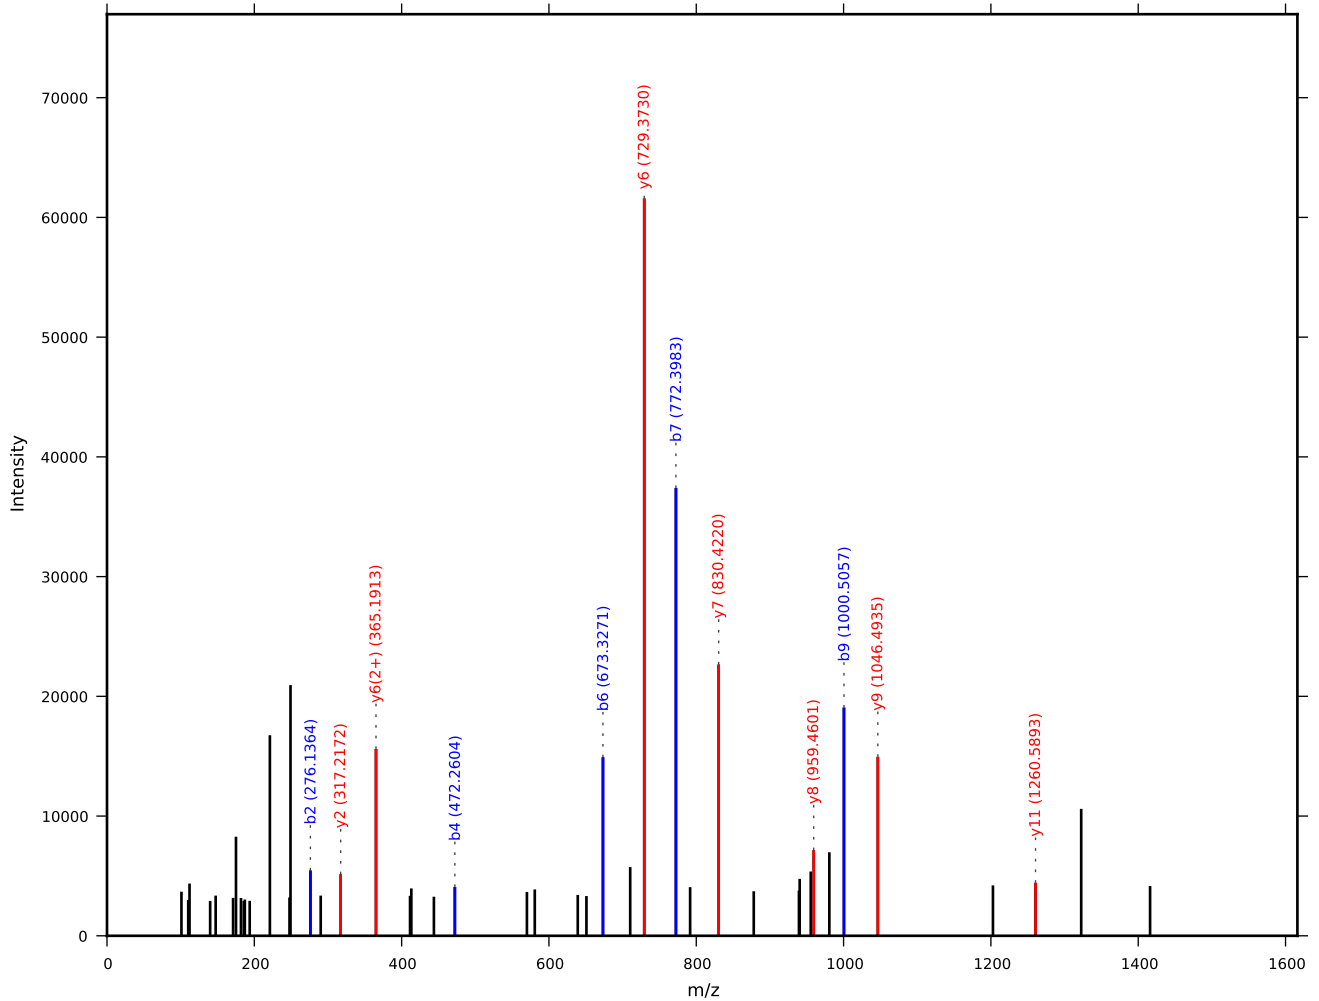

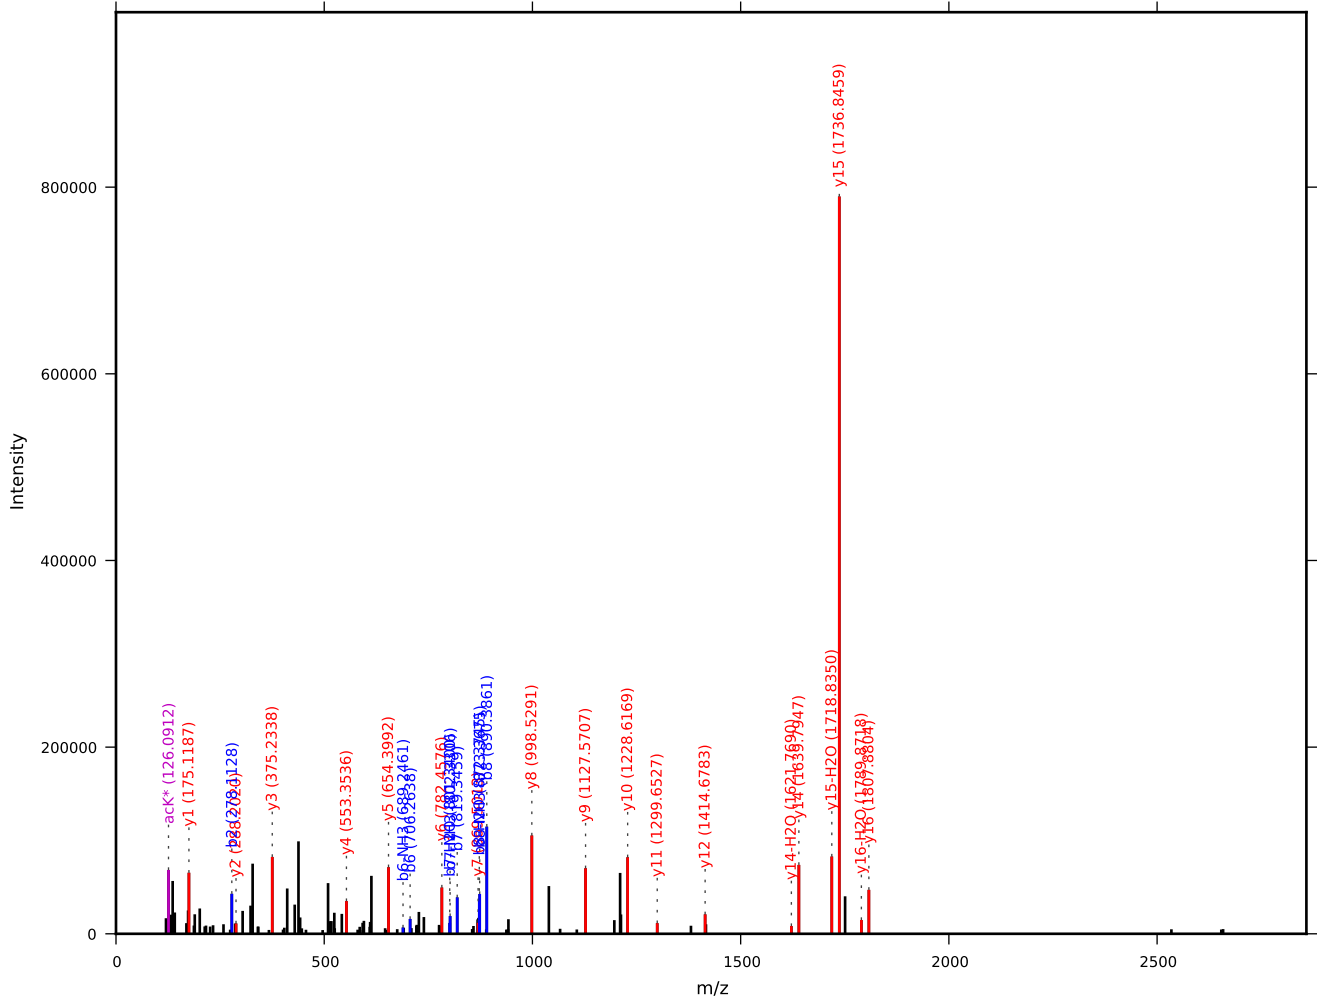



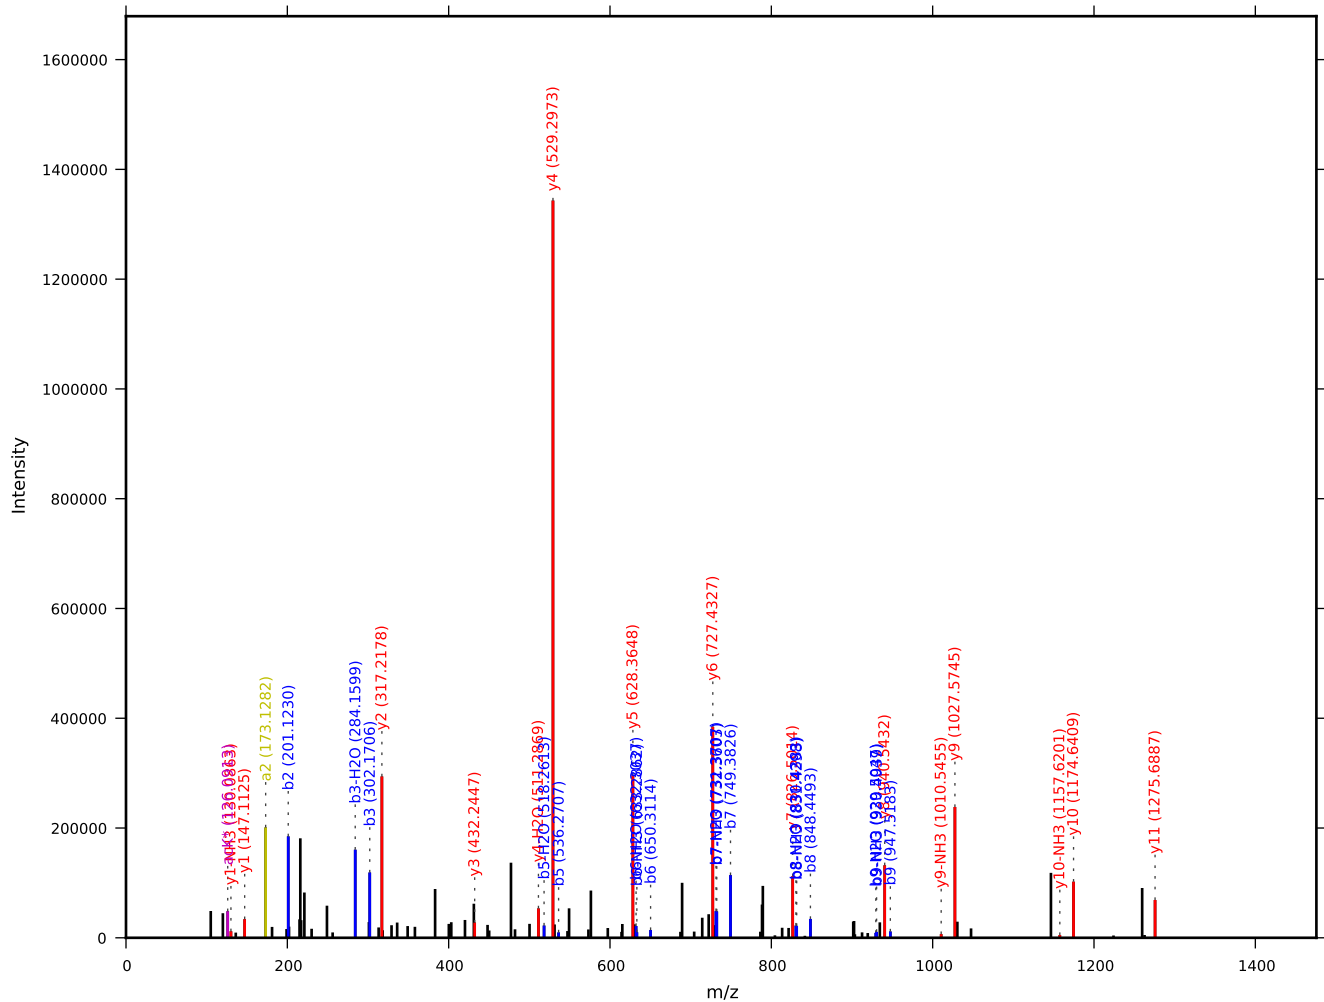

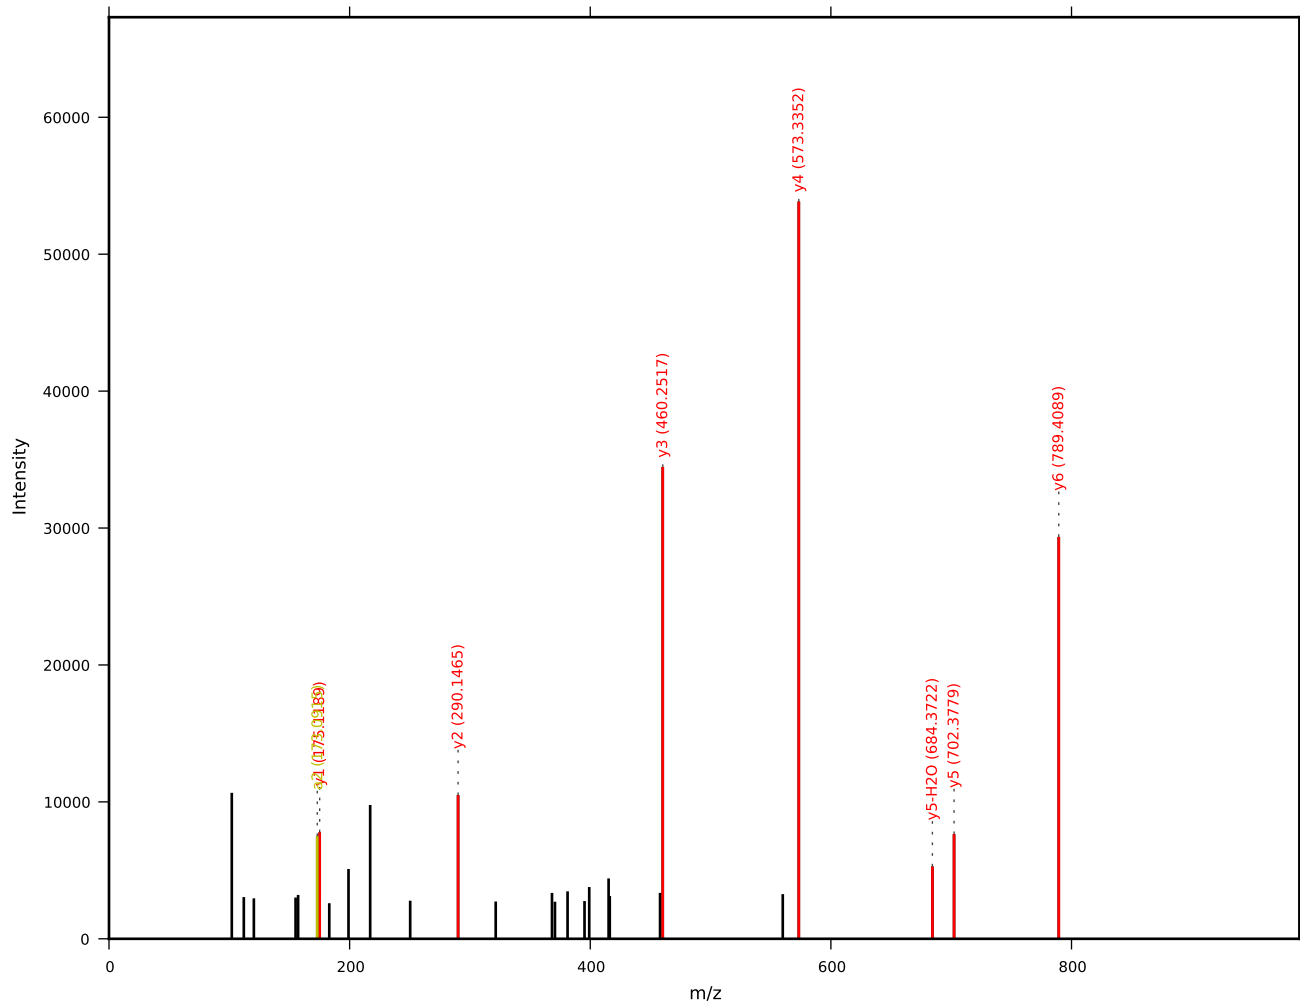

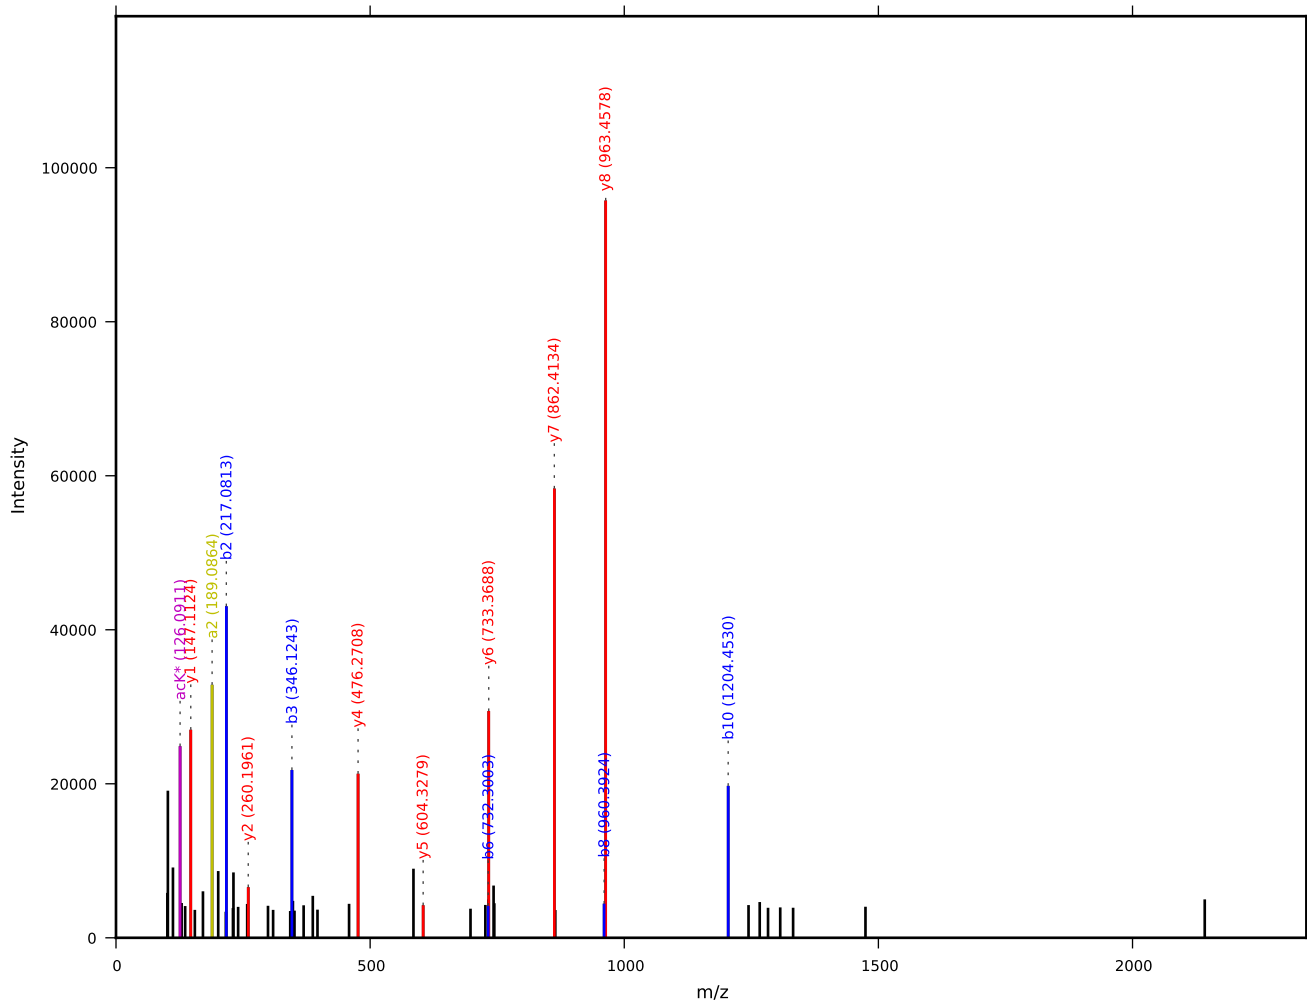

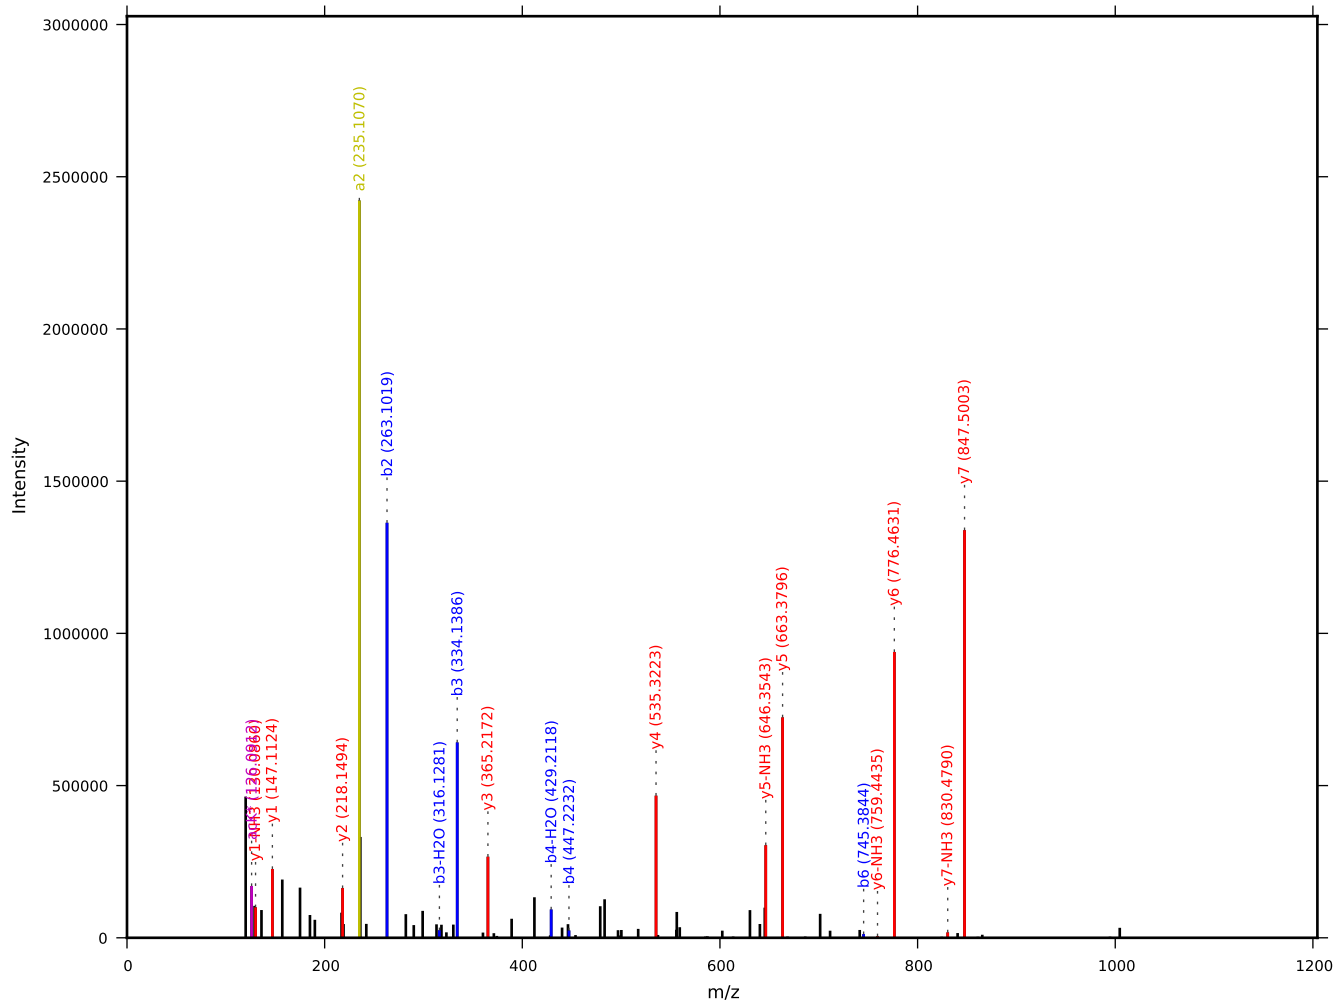

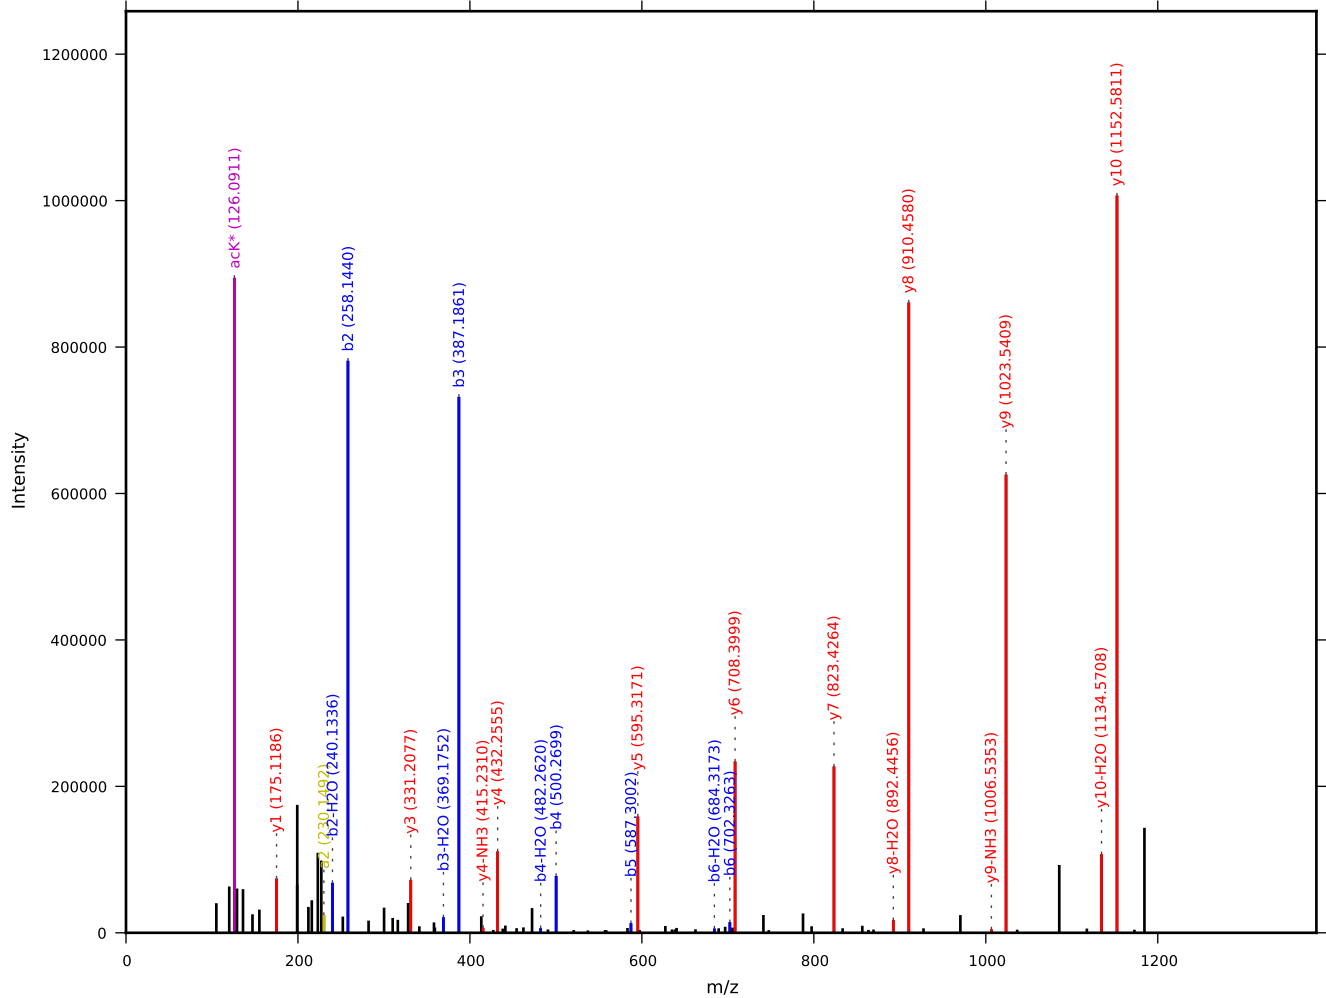

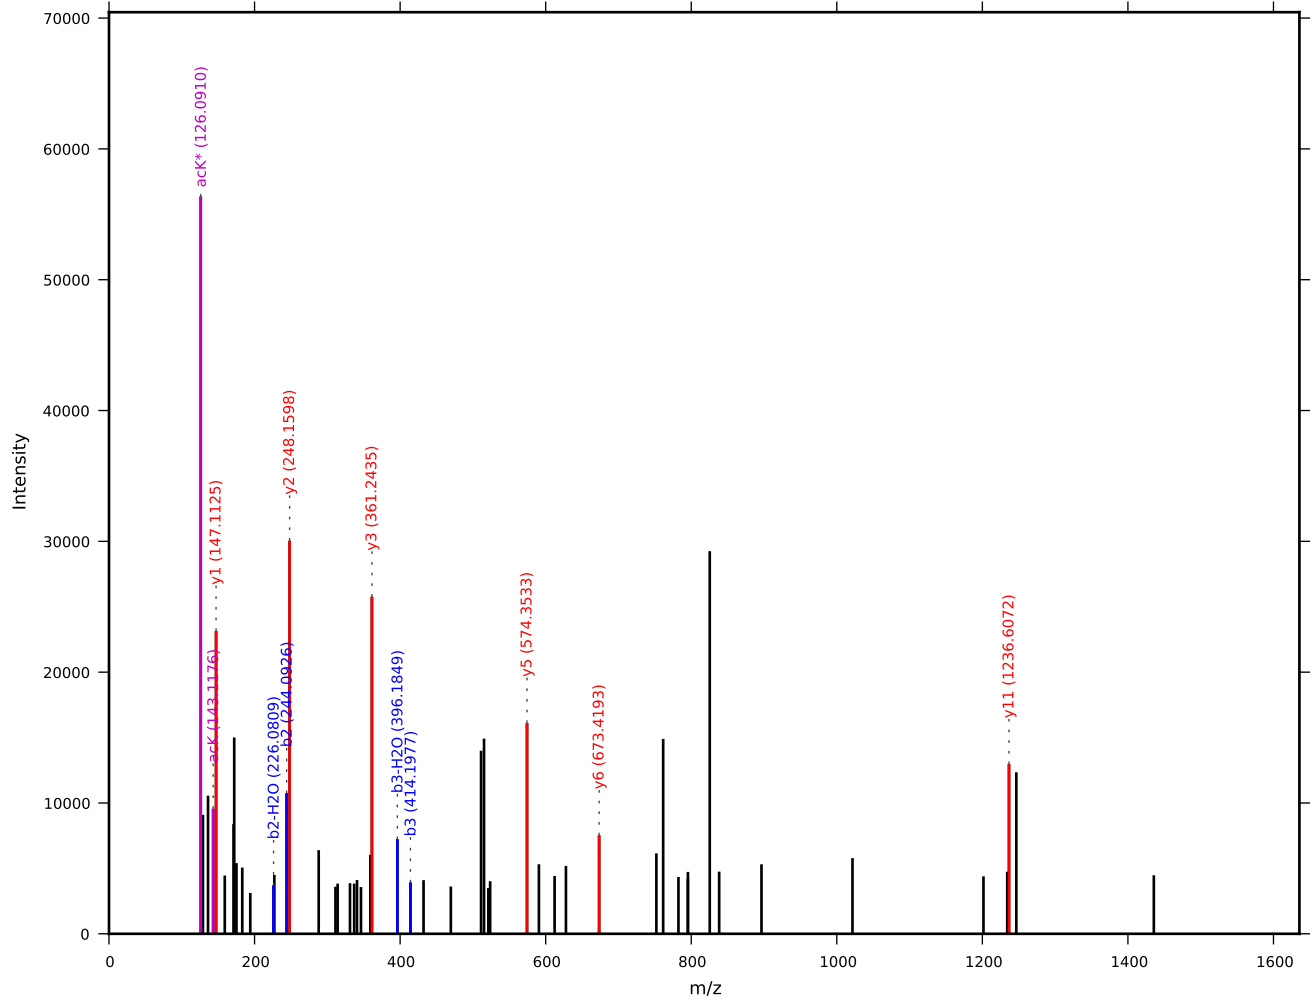

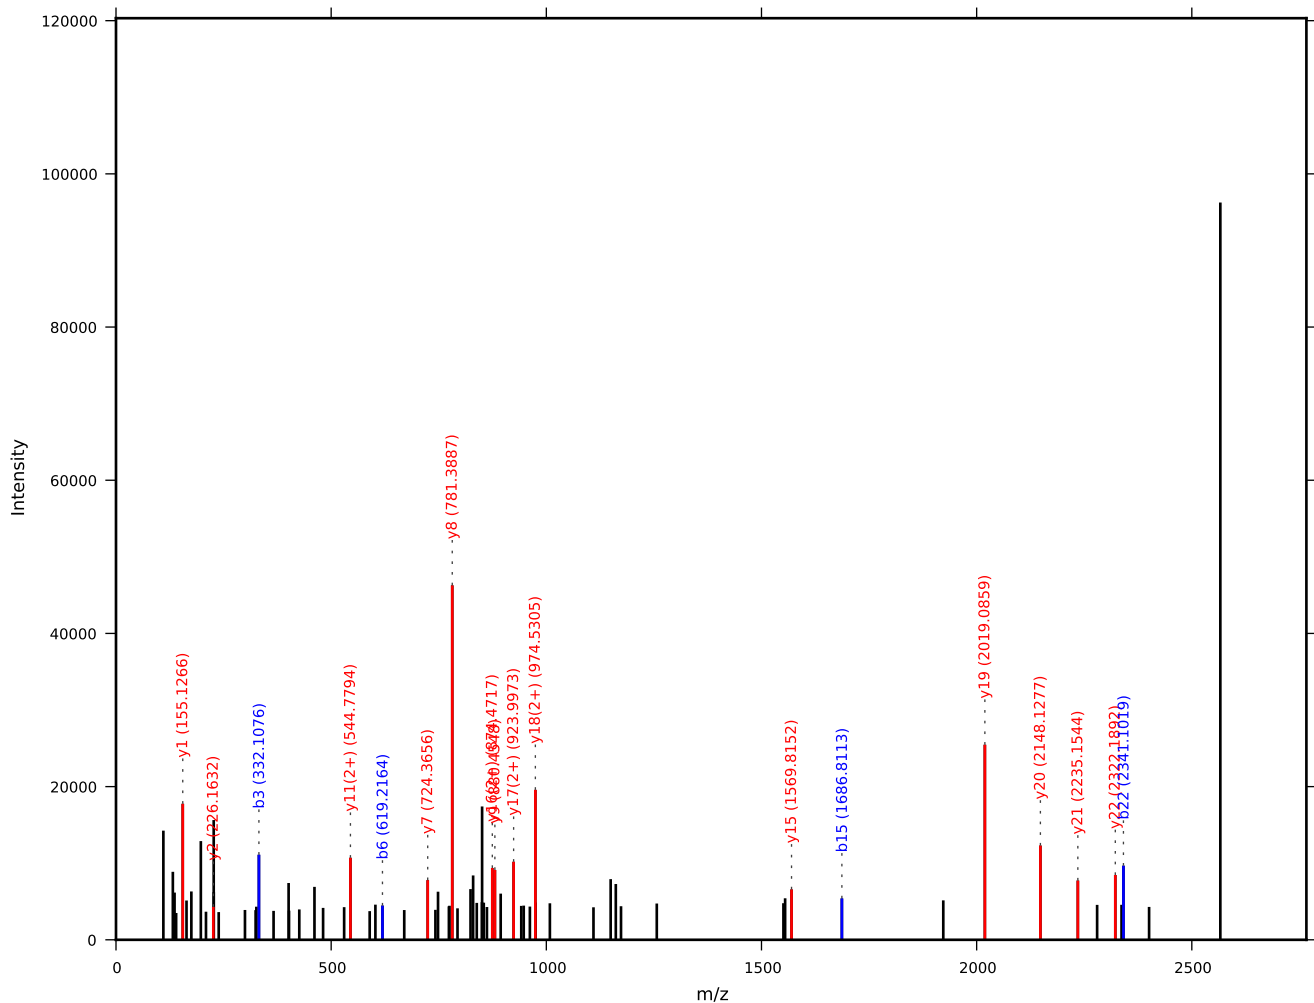

Mass: 1520.7471 Charge: 2 m/z: 761.38082  
Modified Peptide: (ac)SHDGGK(ac)EEPGAIAK(ac)K Score: 148.91 PEP: 1.2362E-30

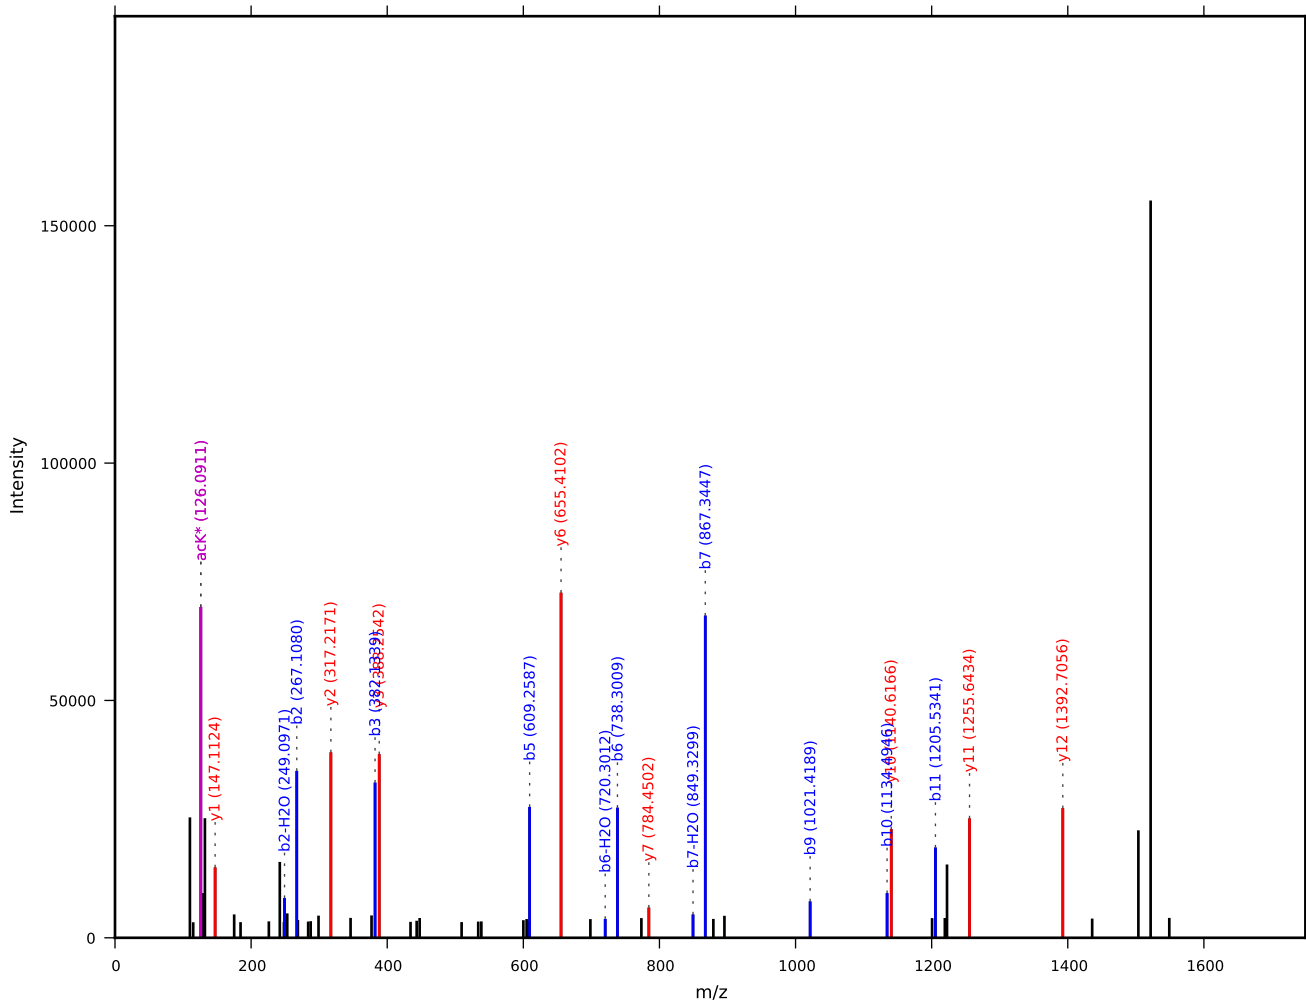



Mass: 1520.7471 Charge: 2 m/z: 761.38082  
Modified Peptide: (ac)SHDGGK(ac)EEPGAIAK(ac)K Score: 148.91 PEP: 1.2362E-30



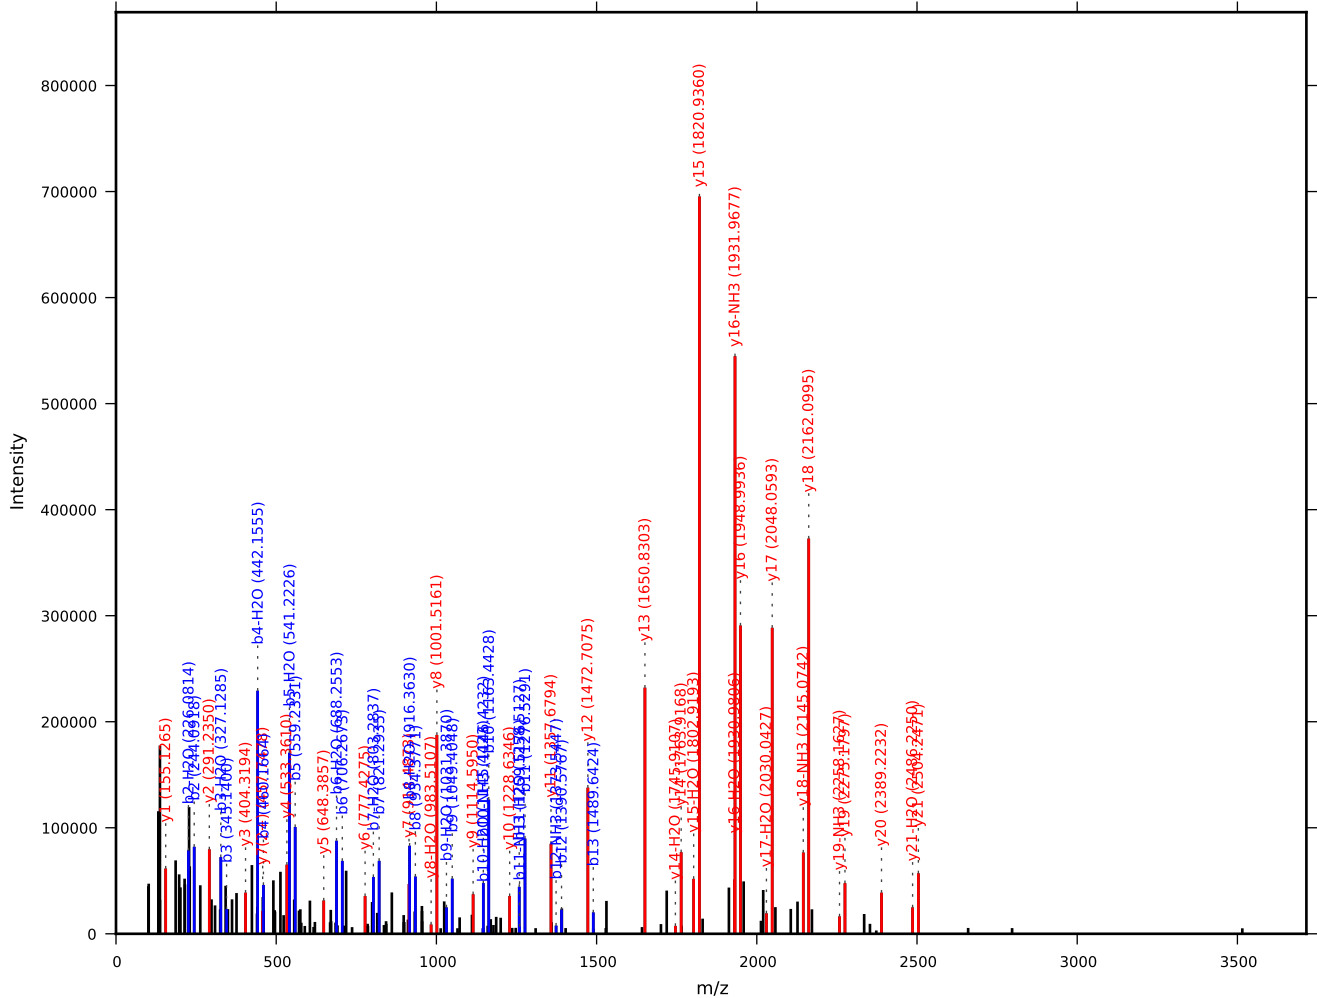

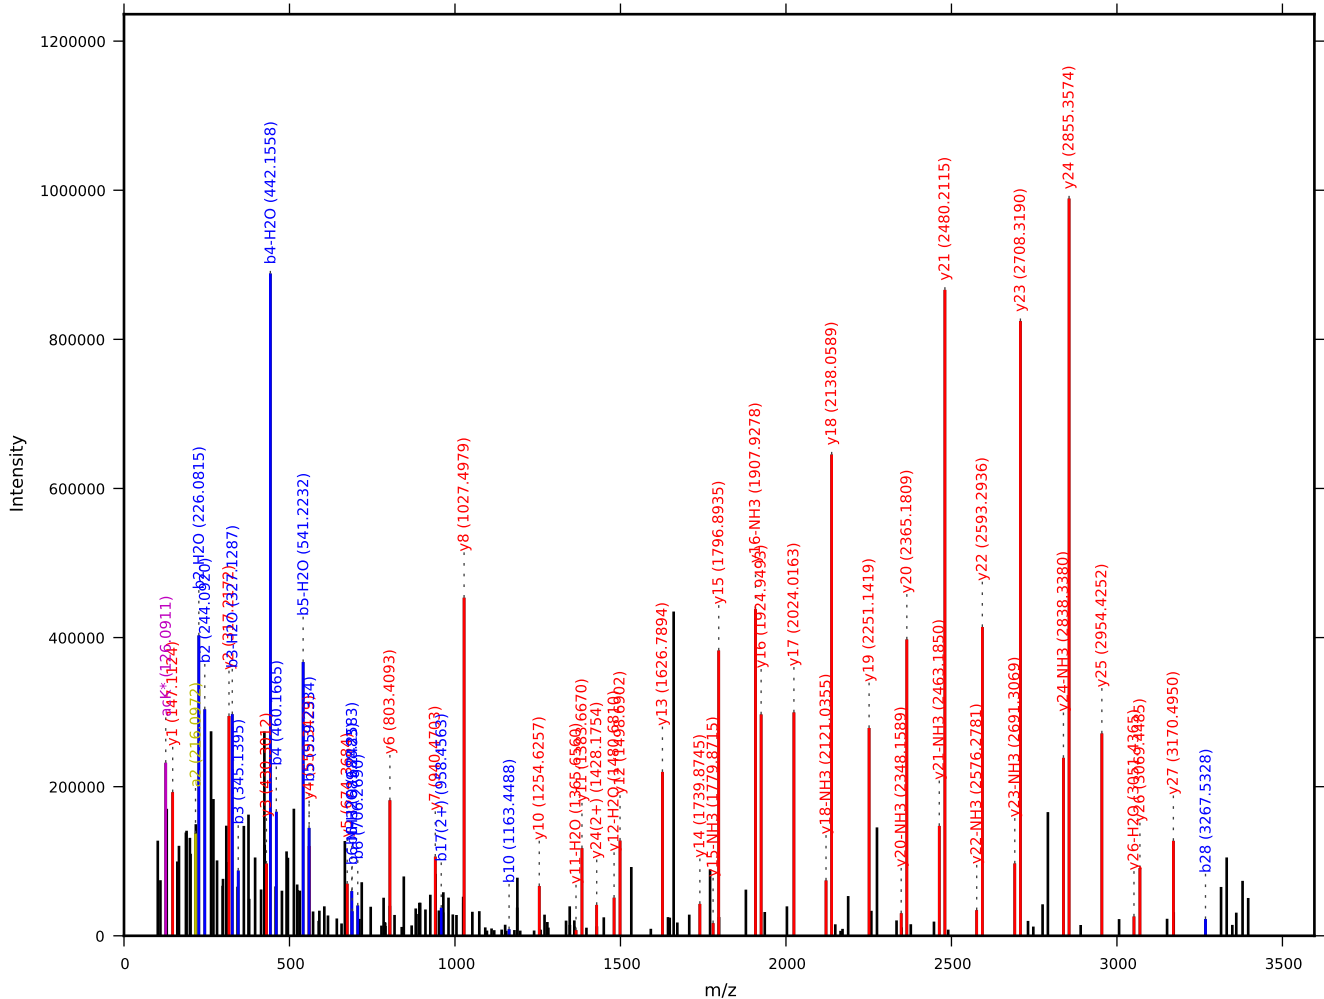

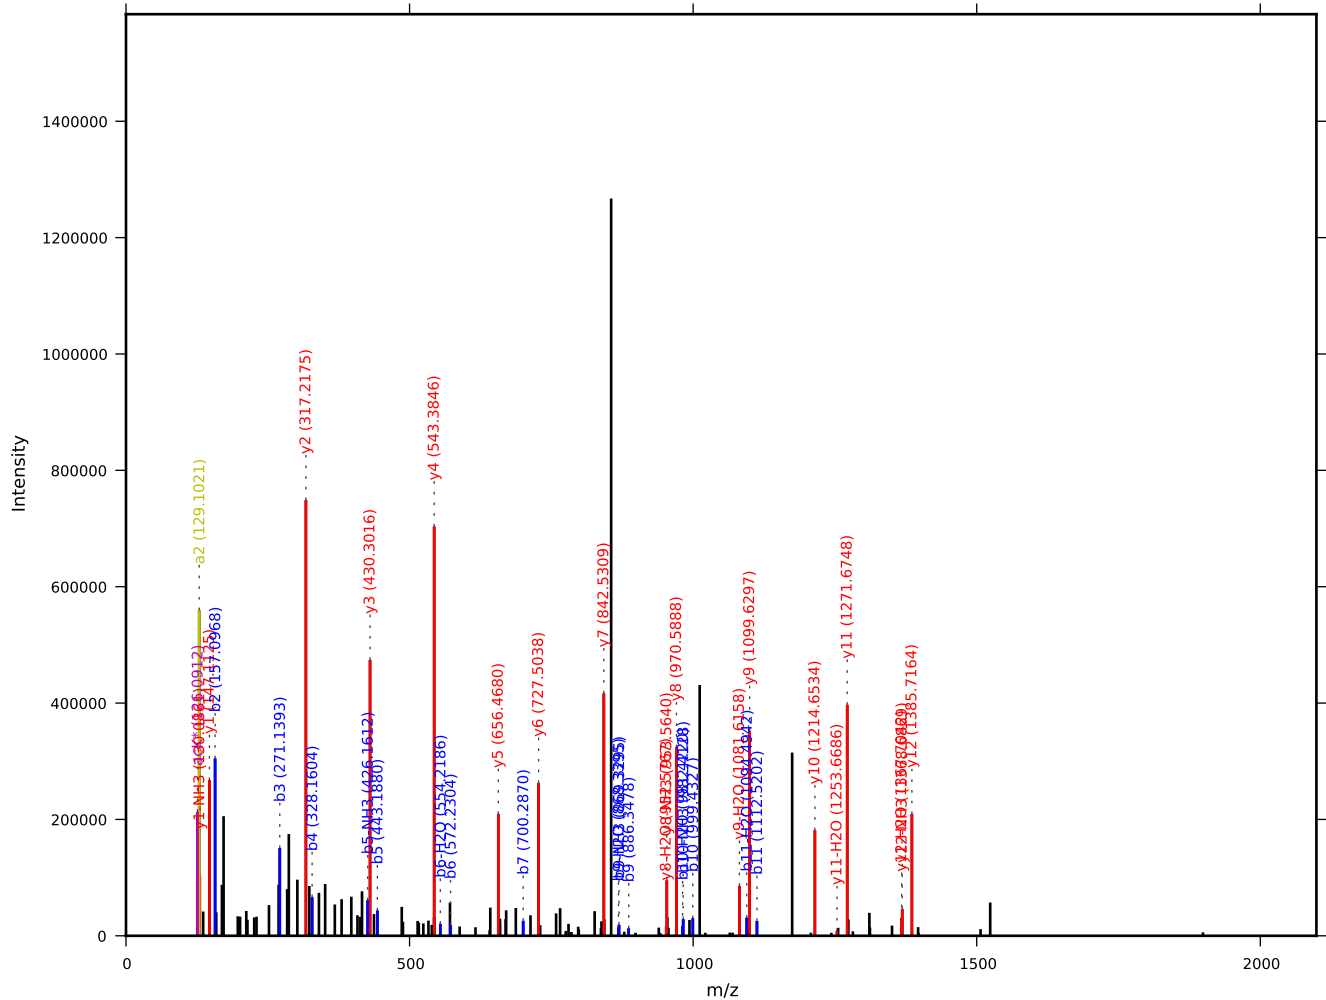

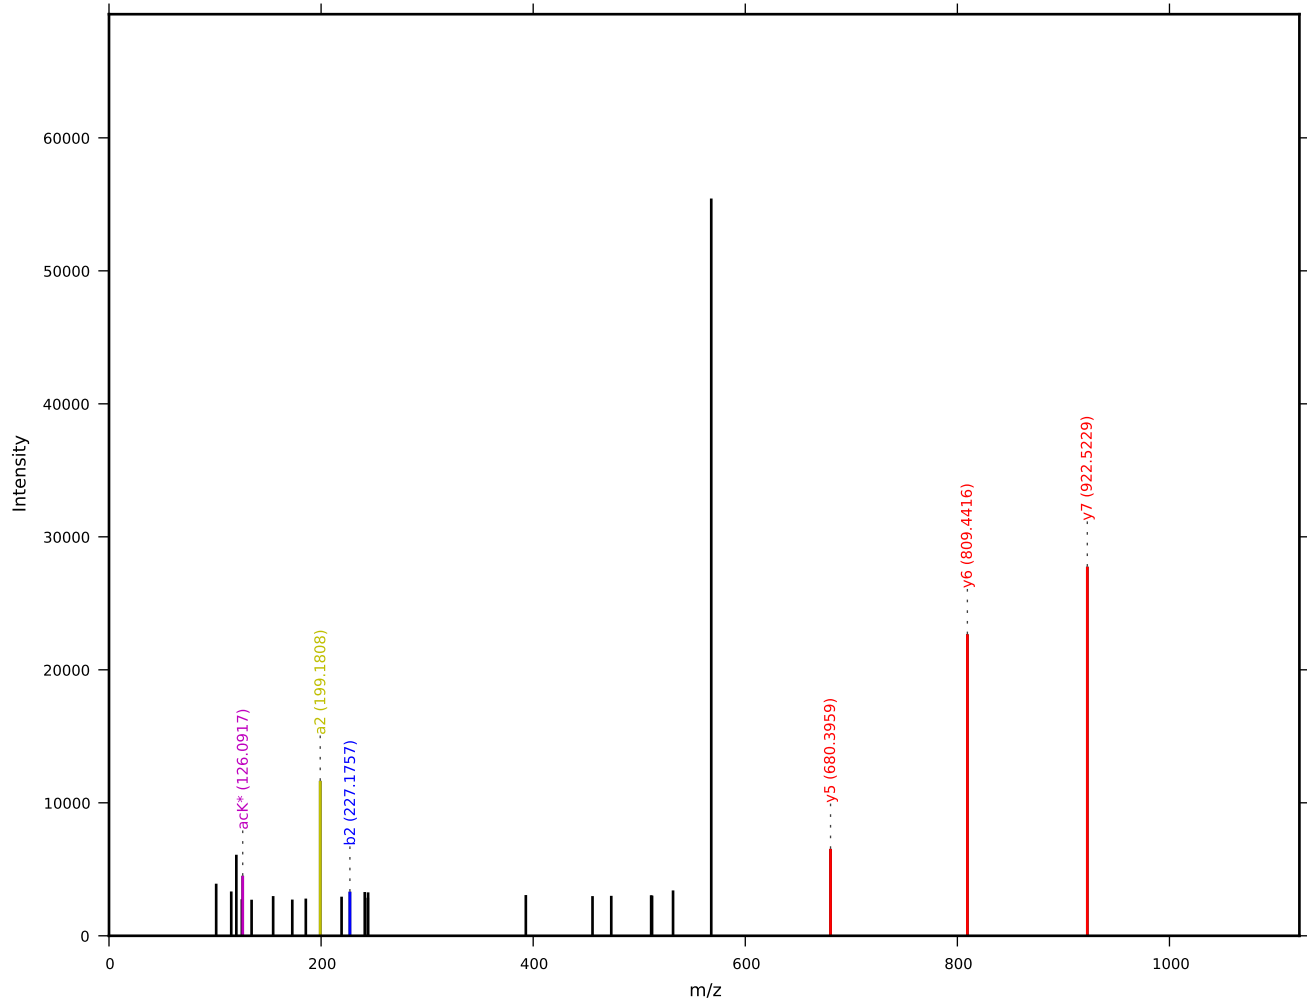

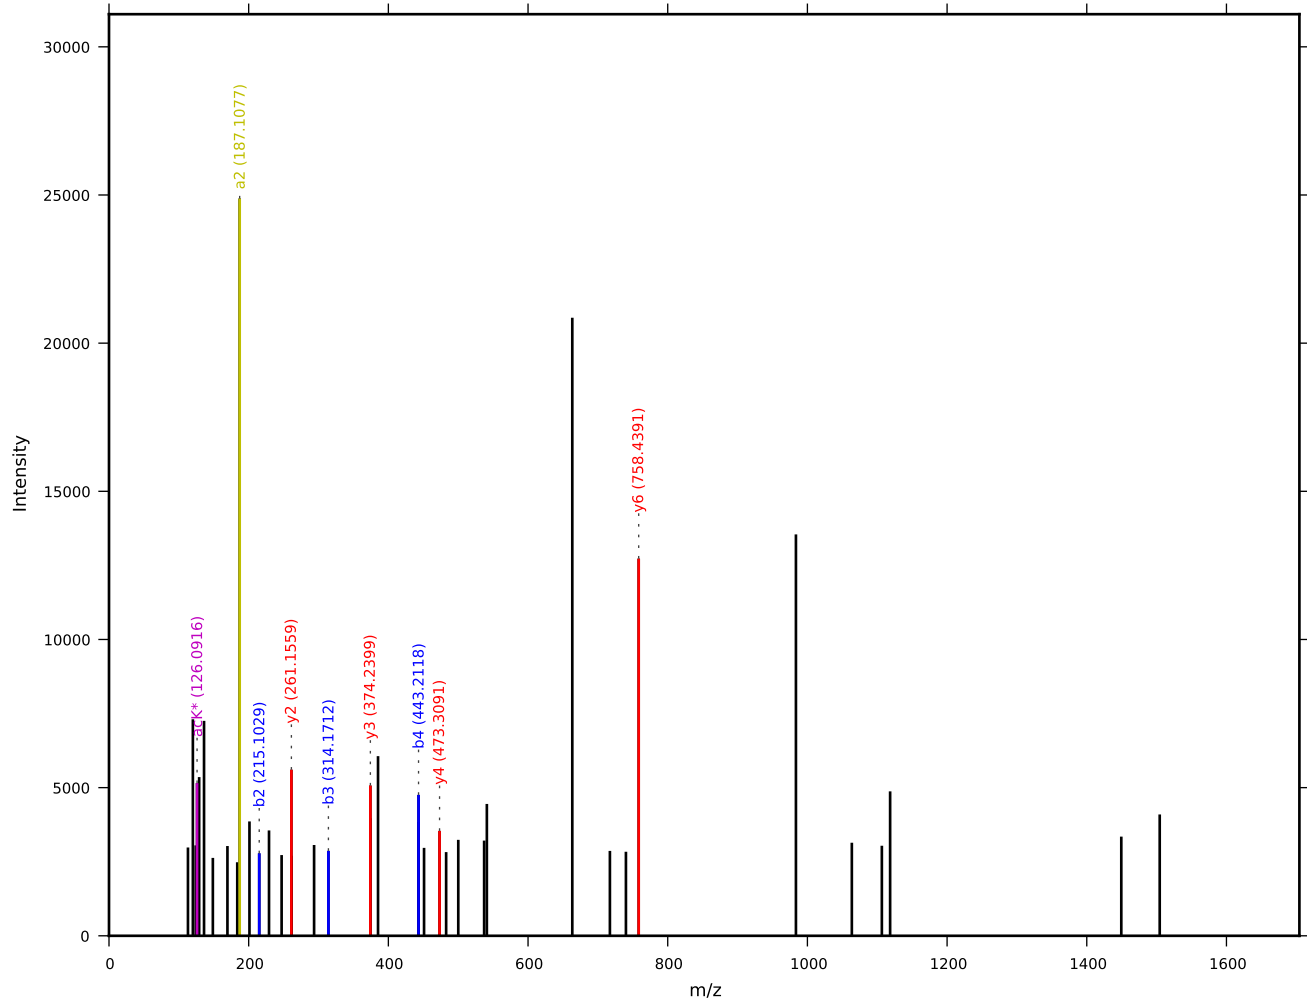

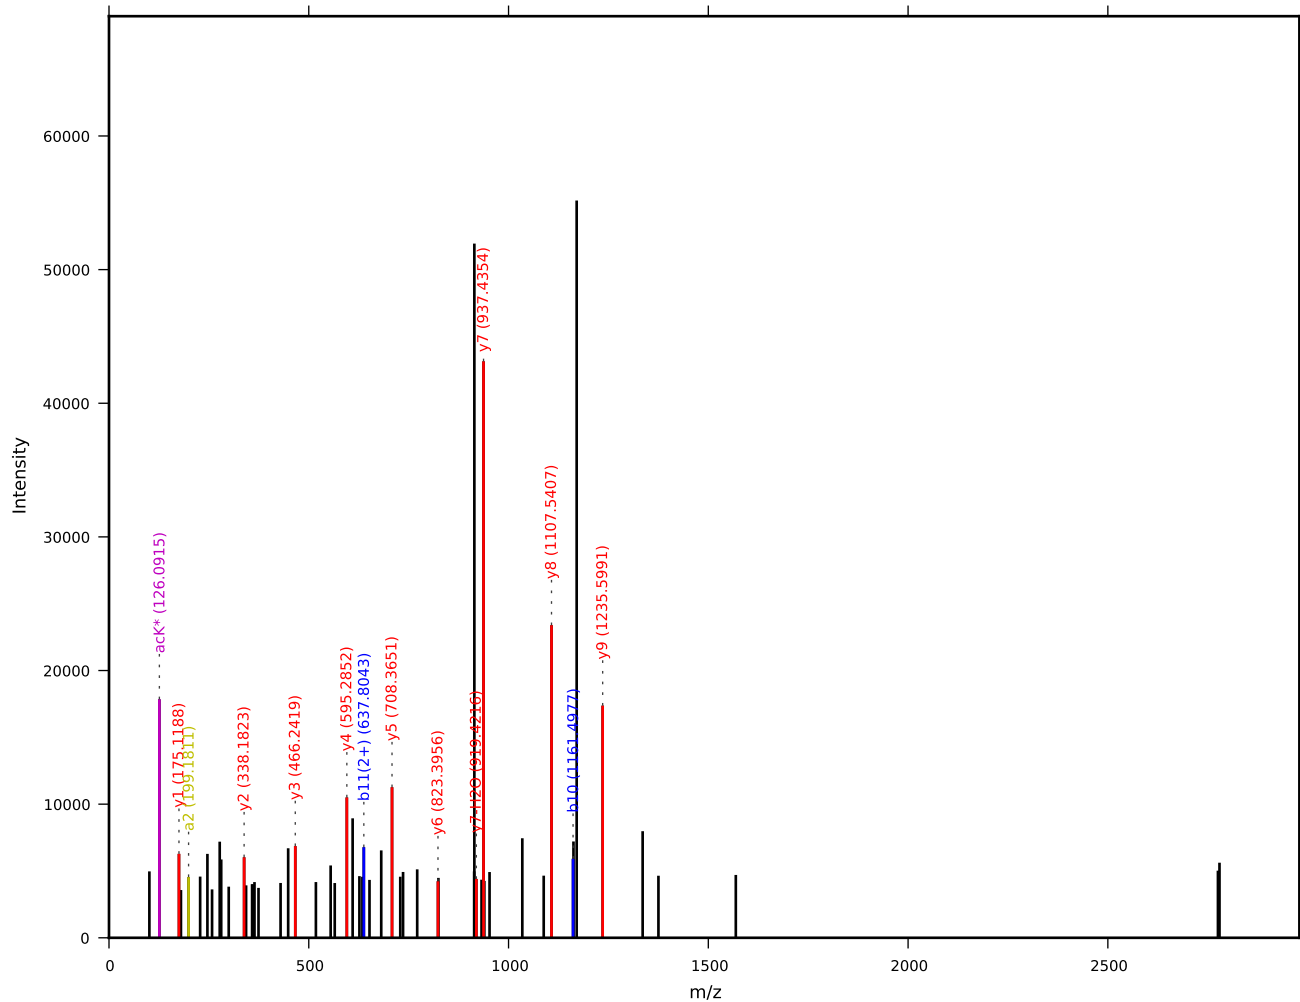

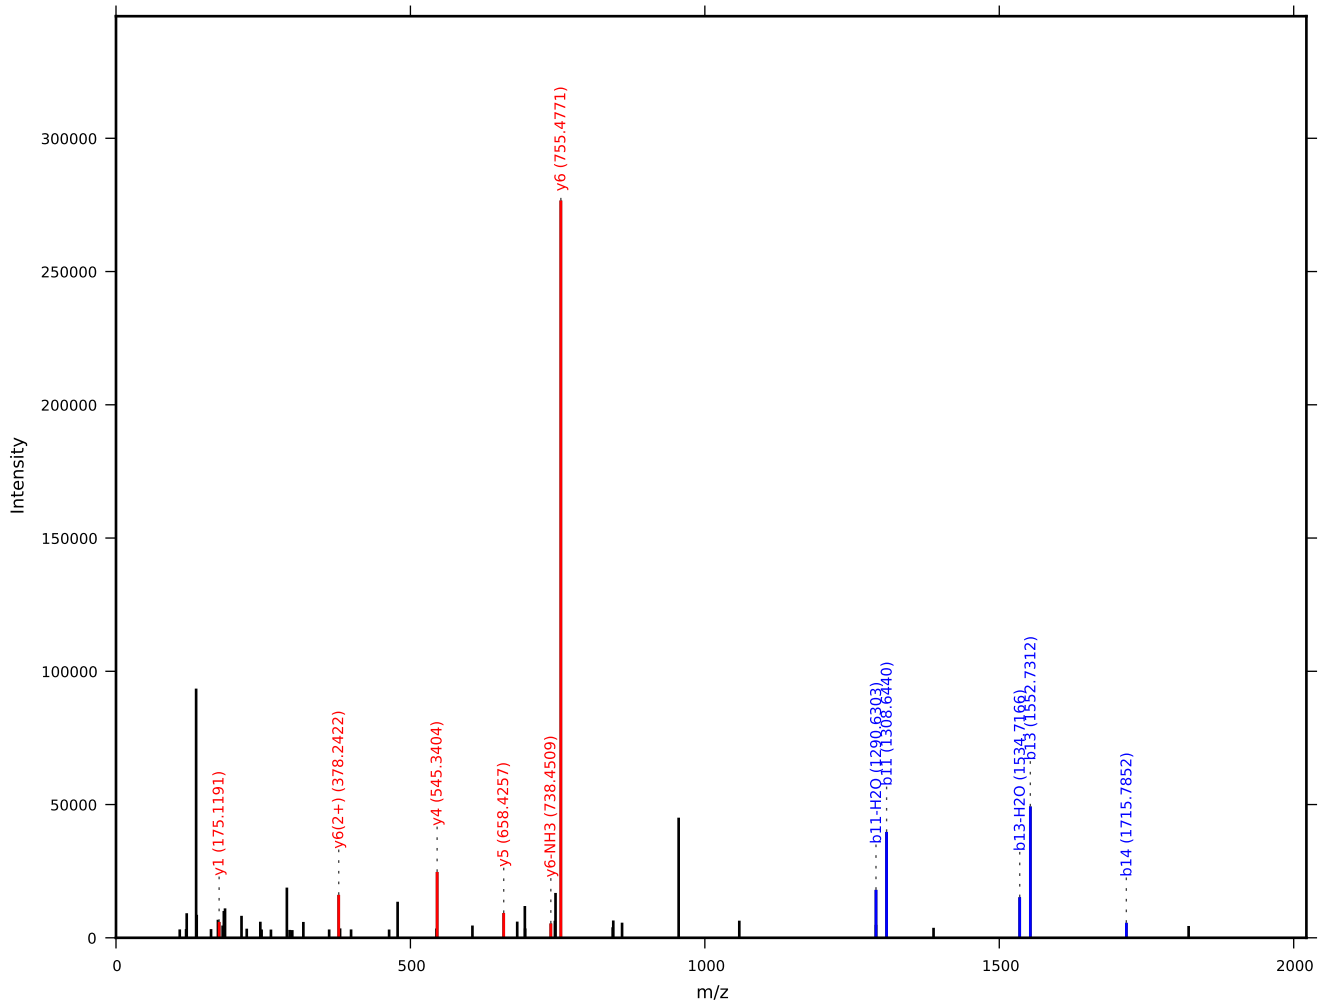



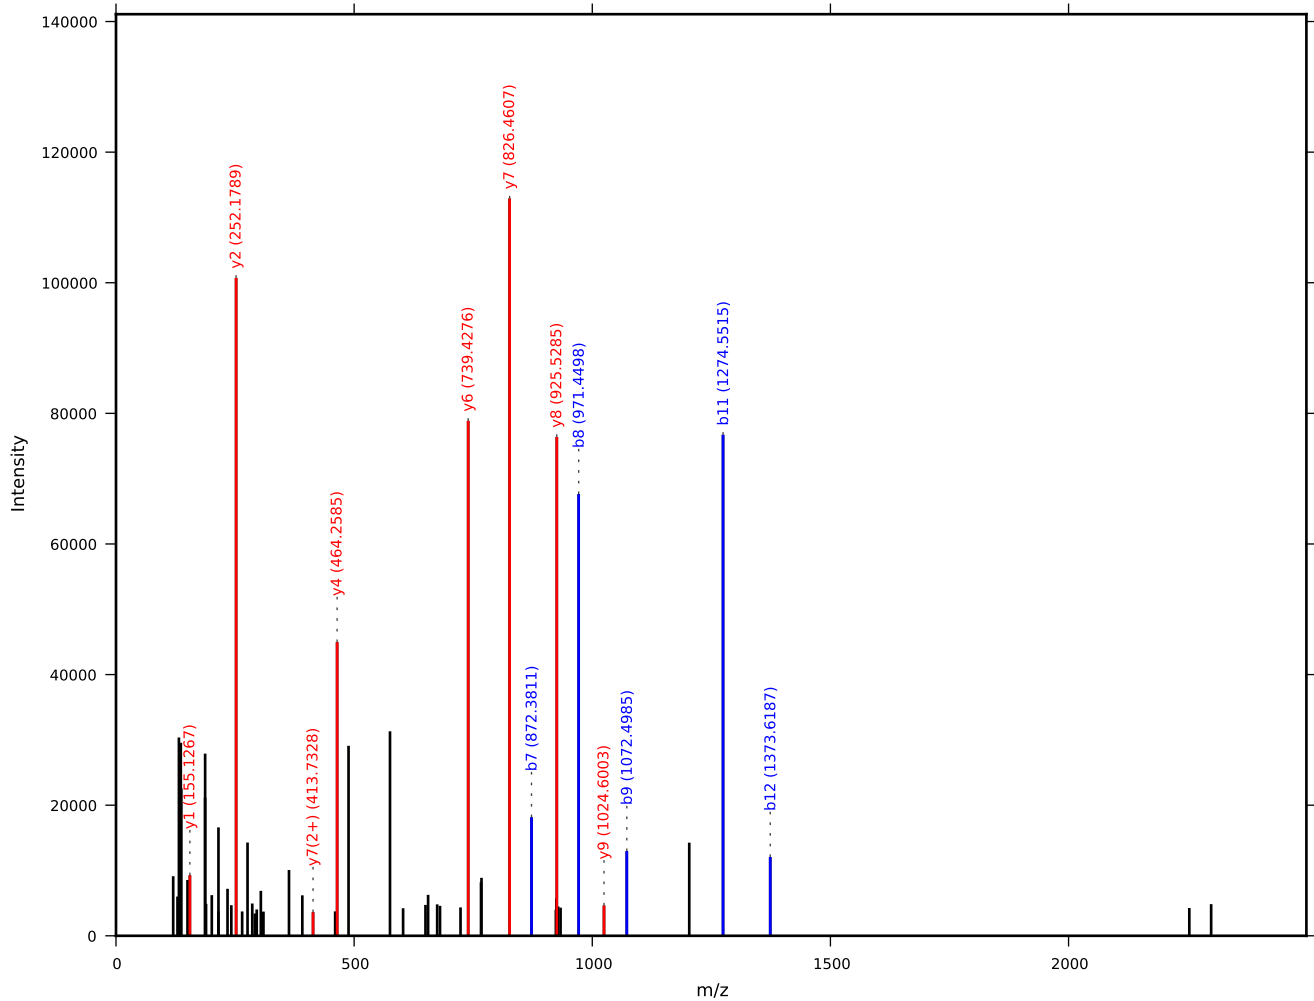

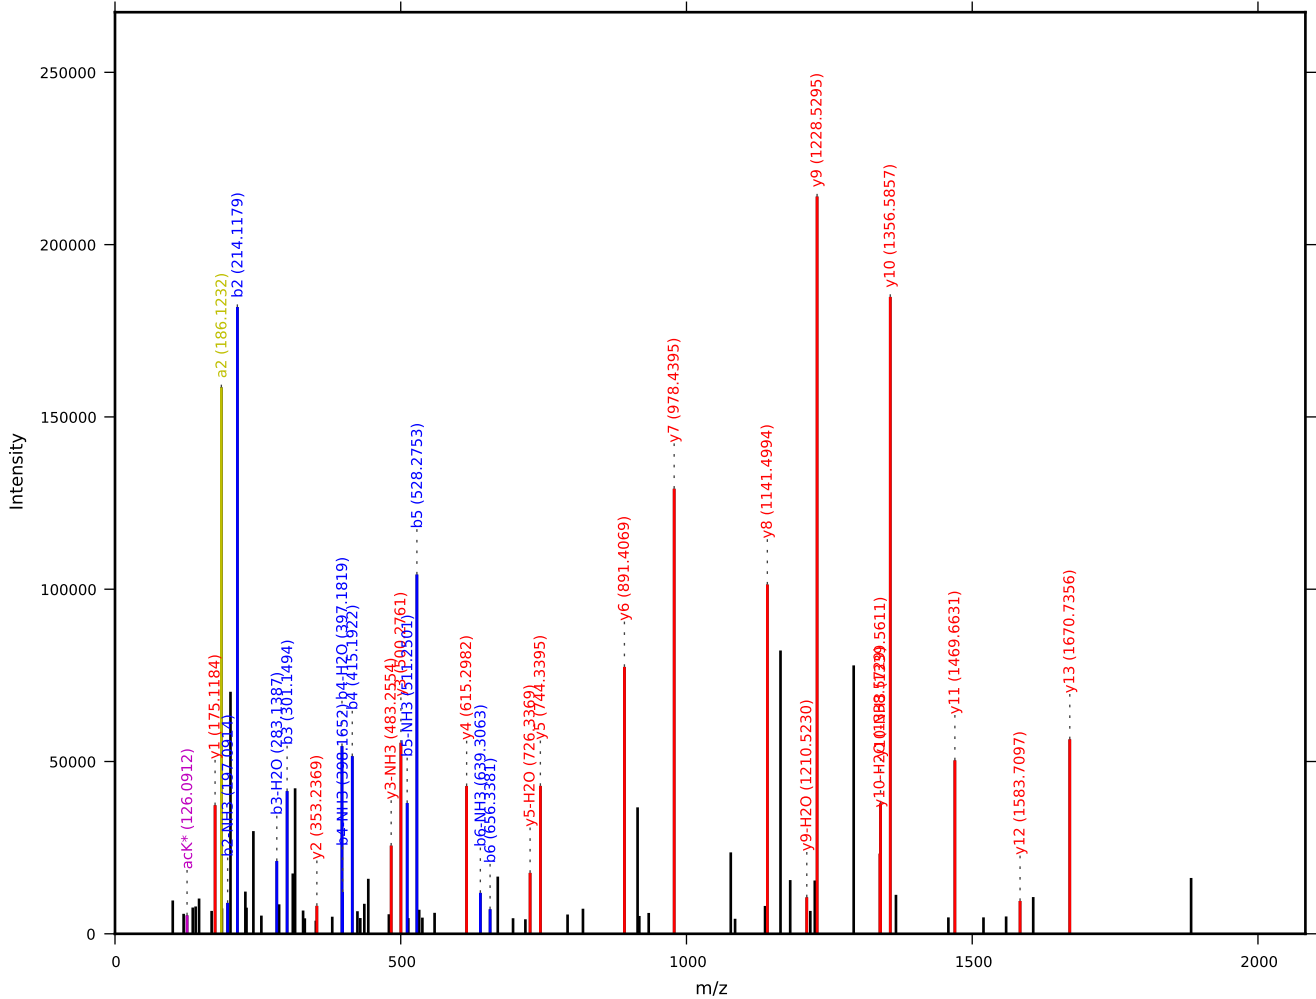

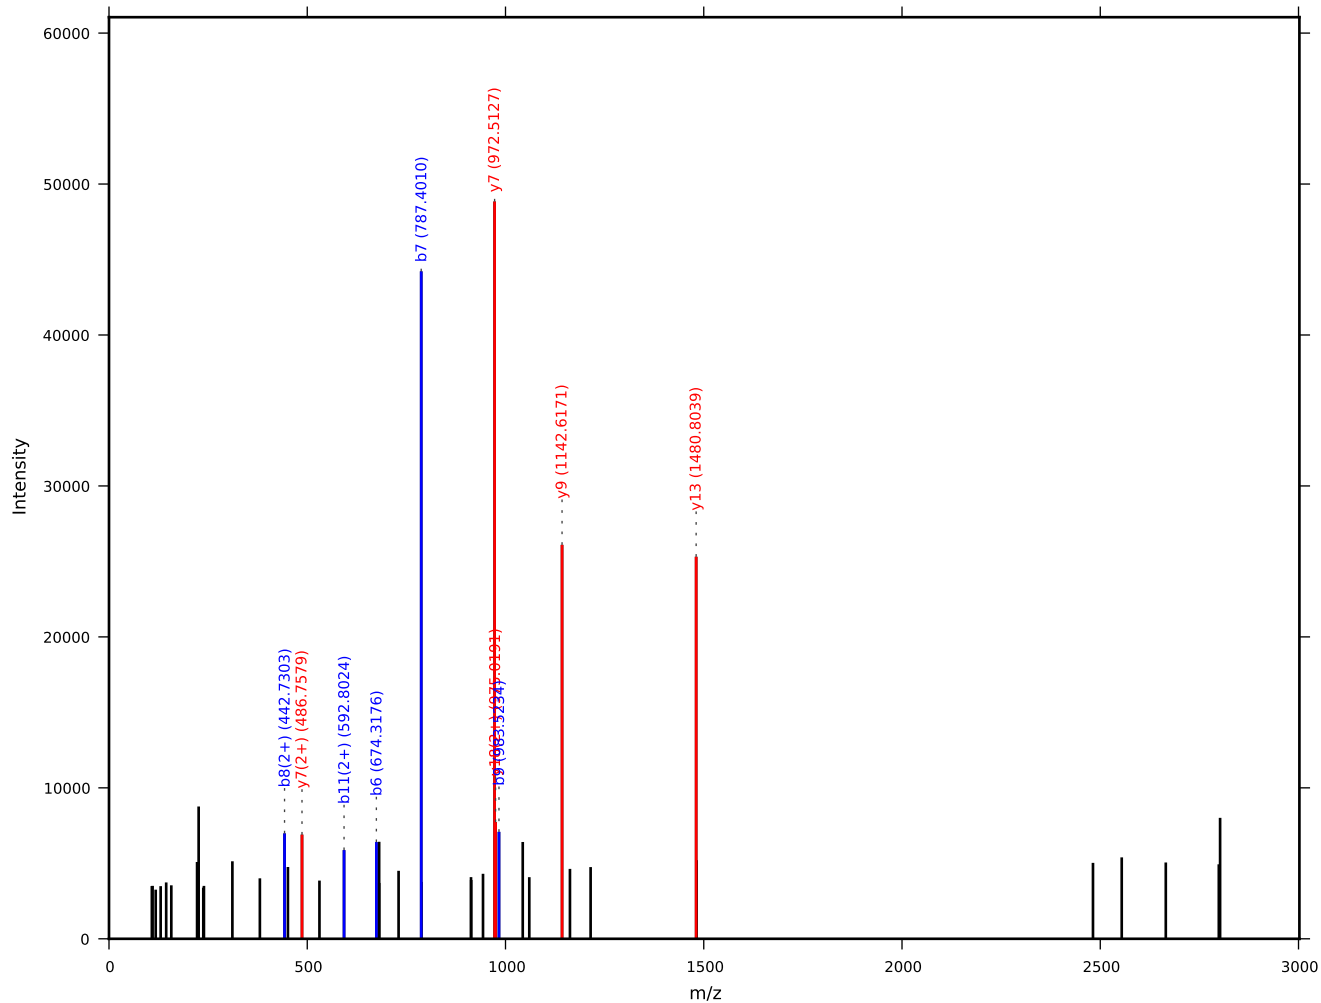

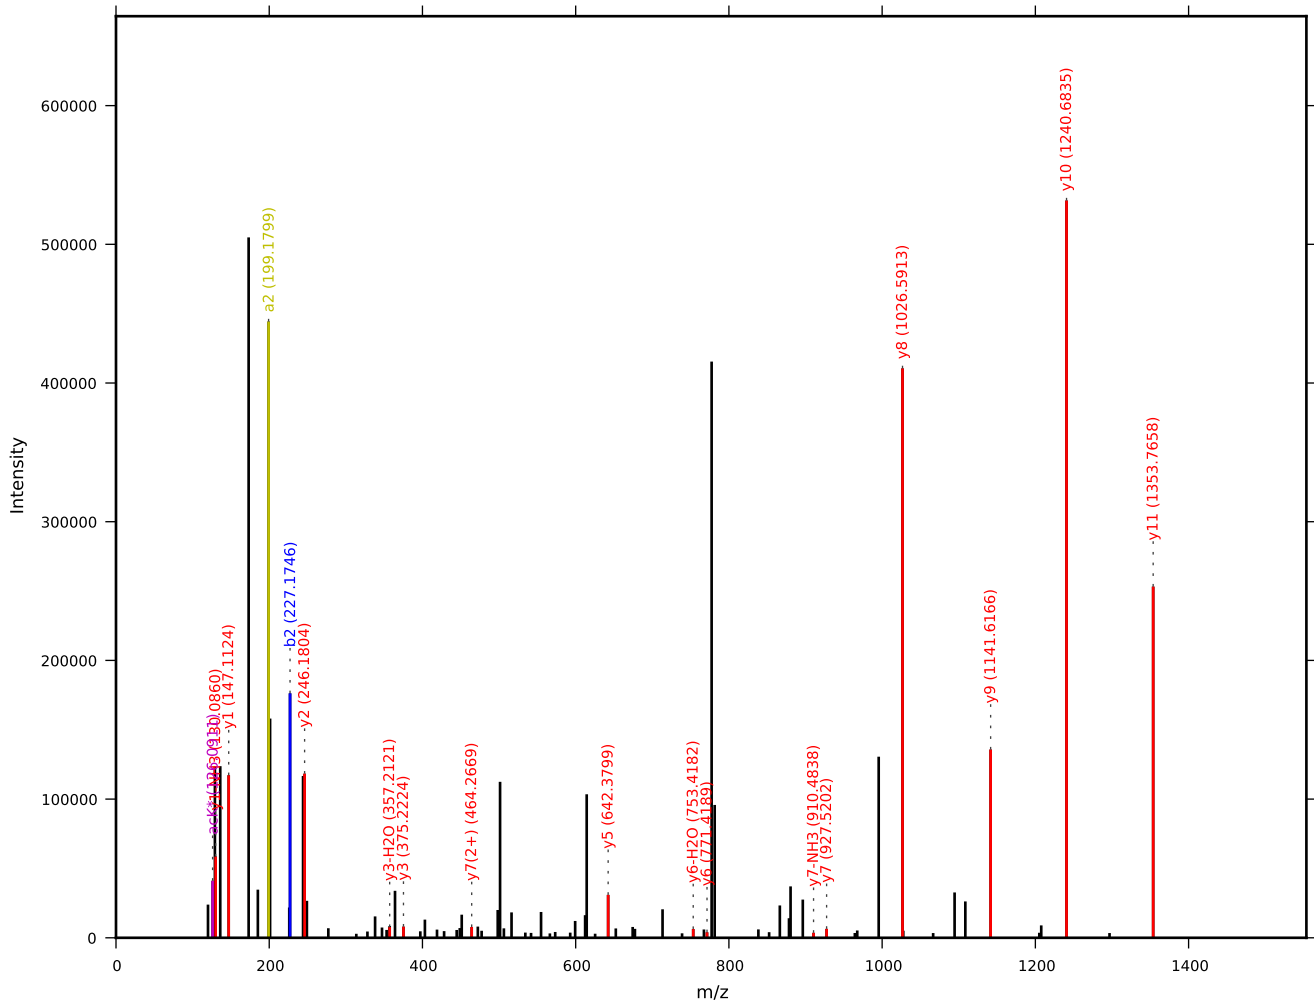

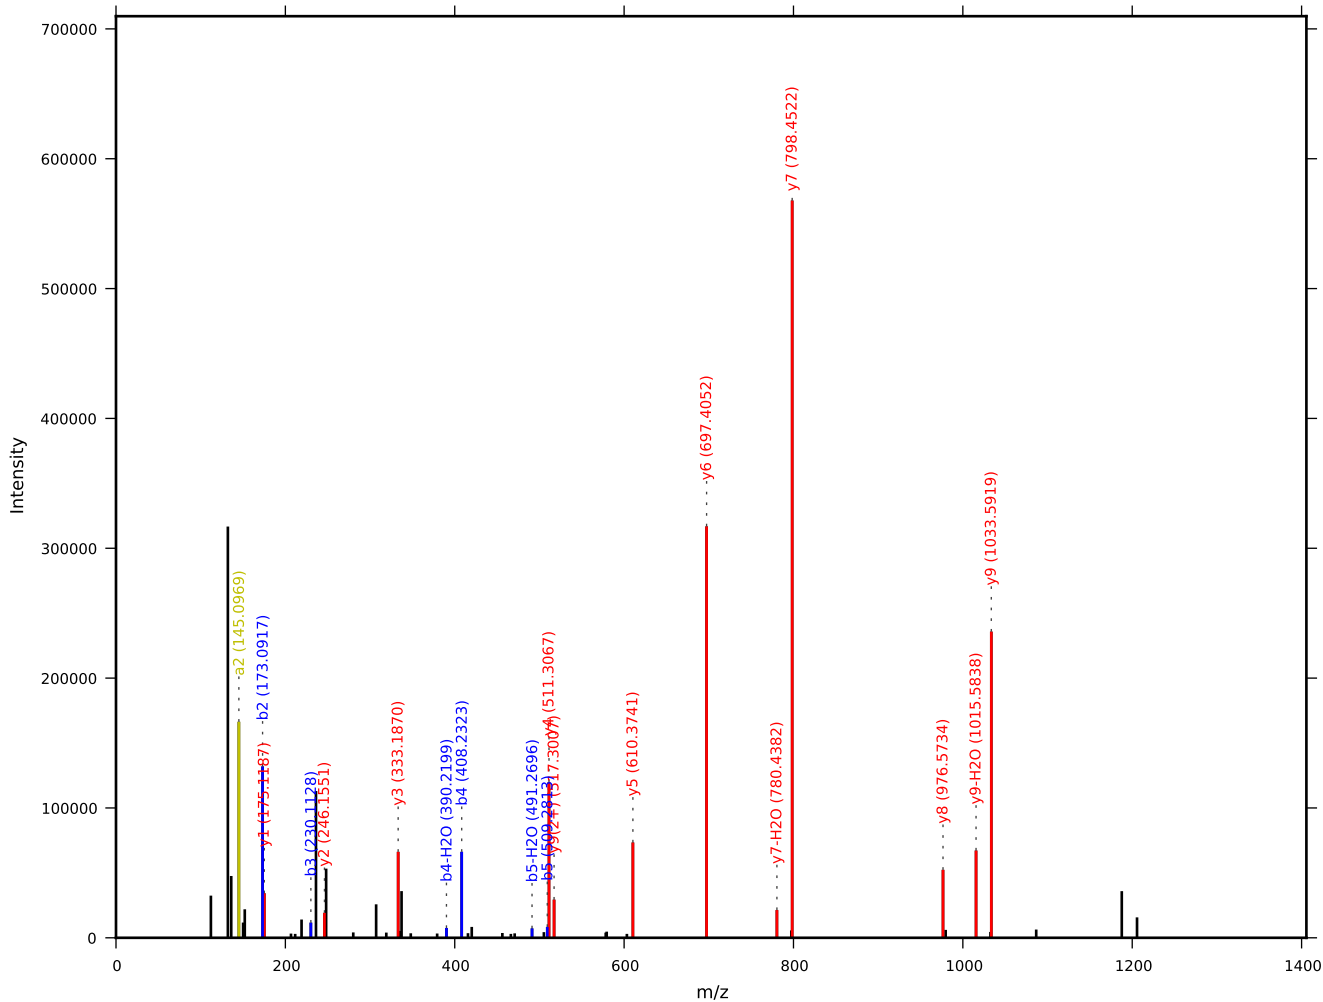



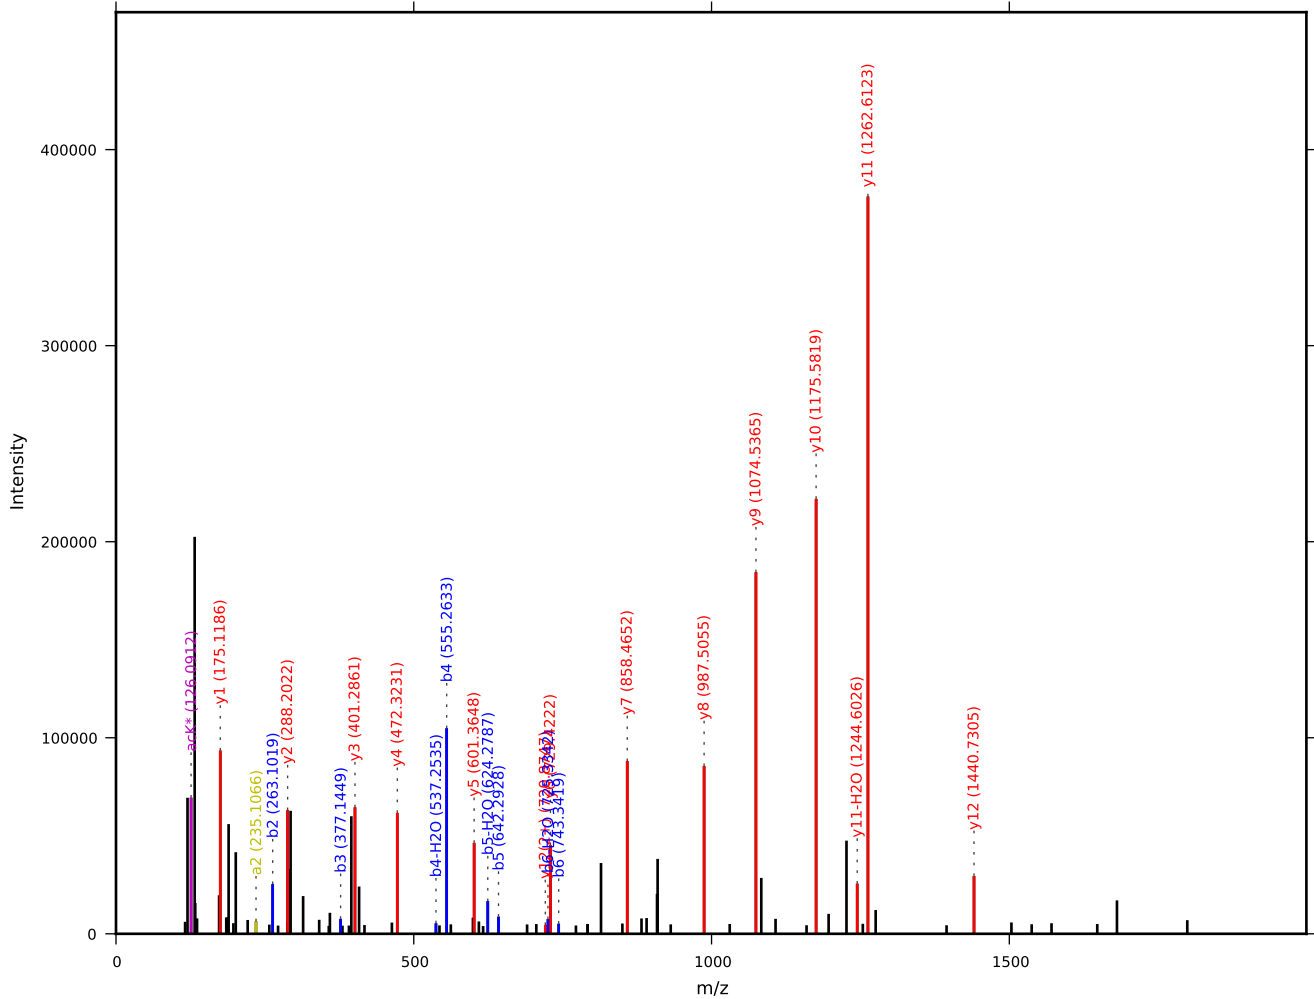

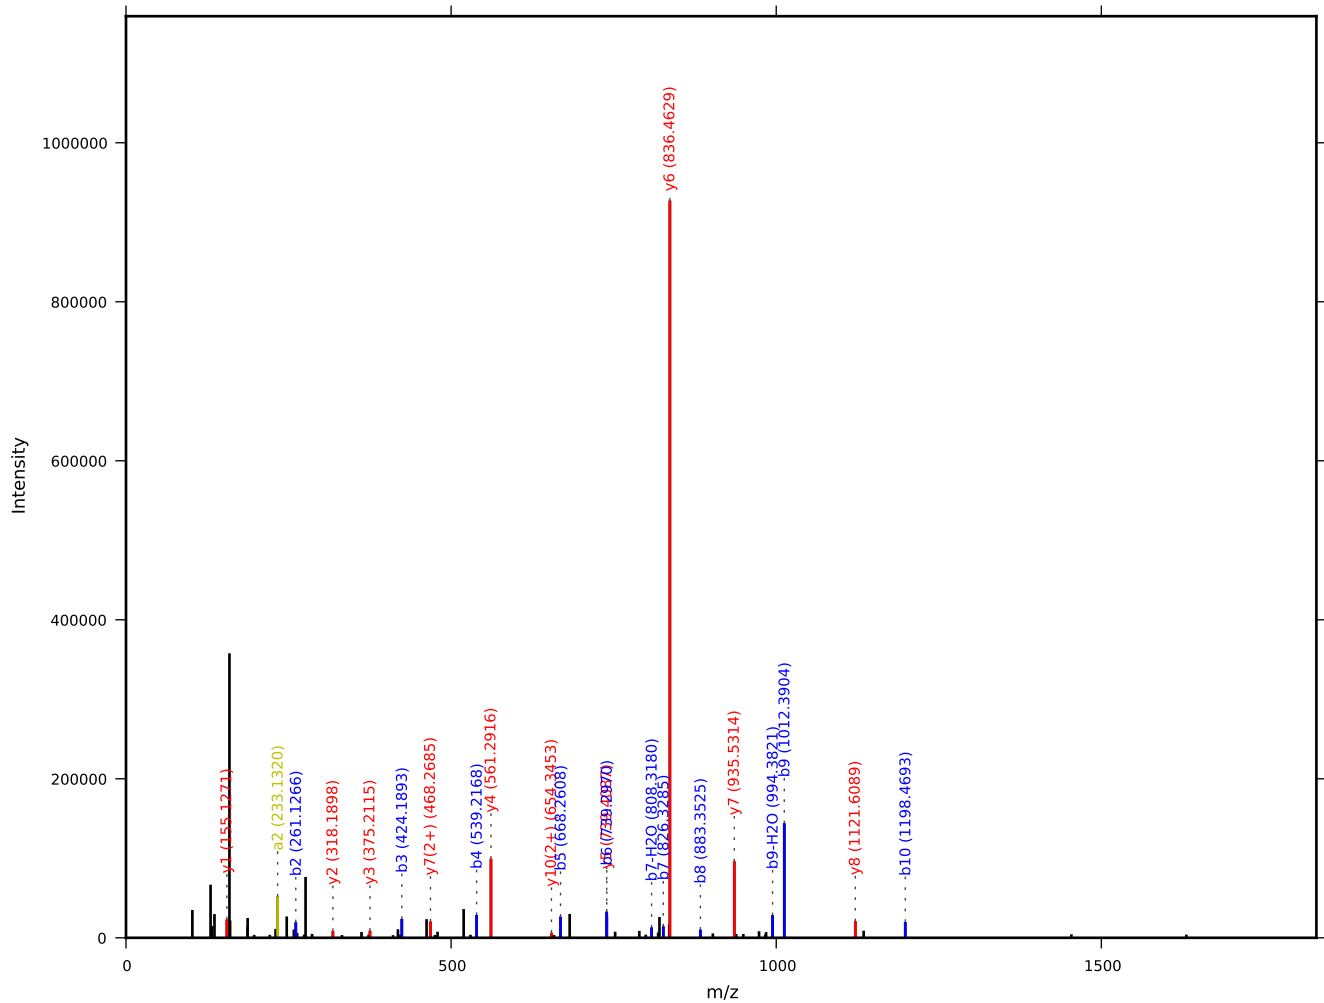



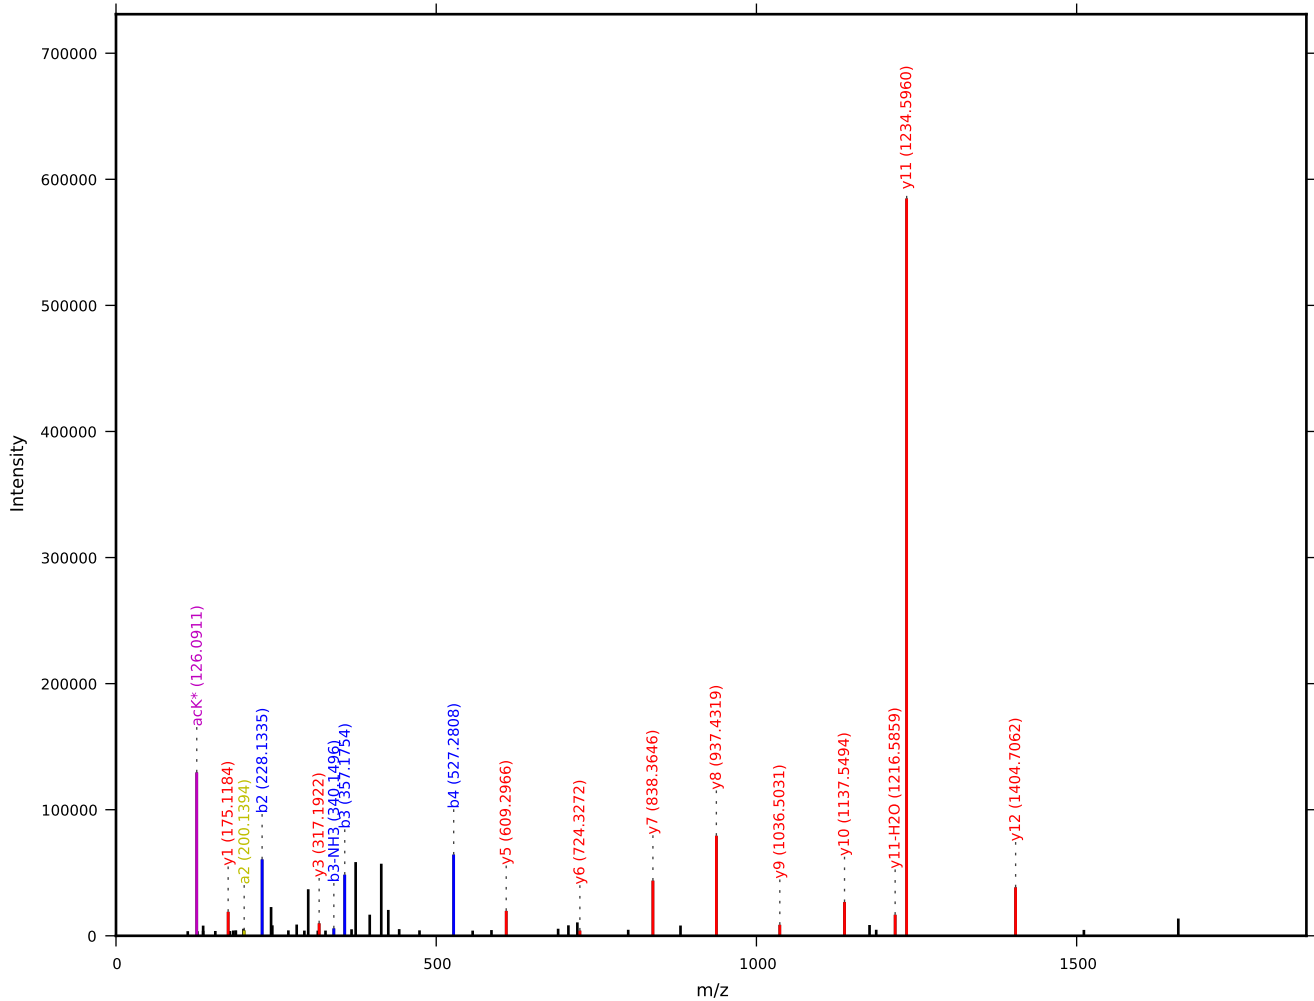

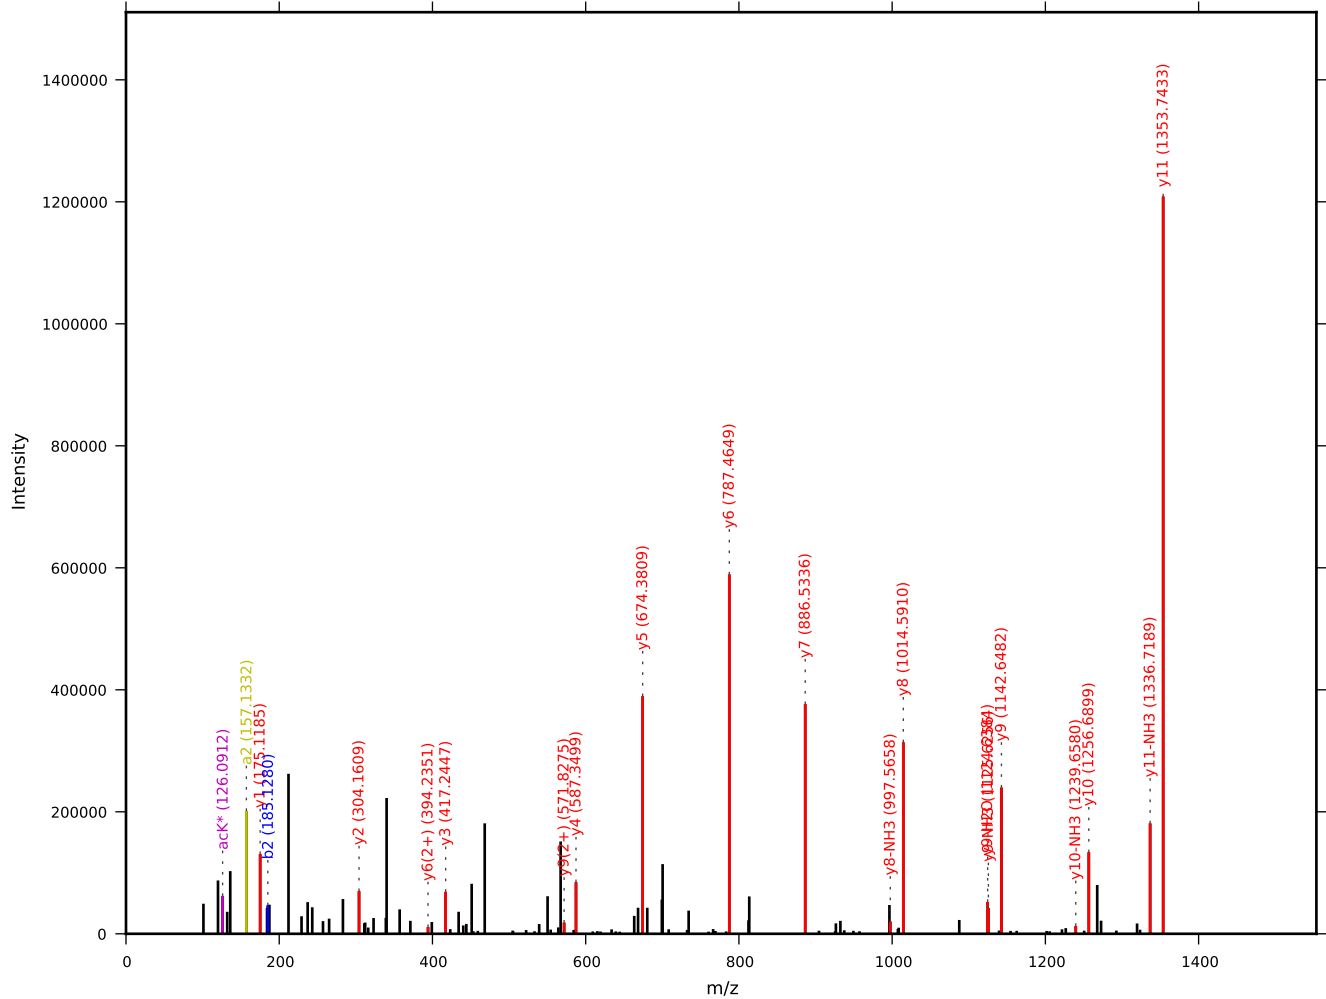

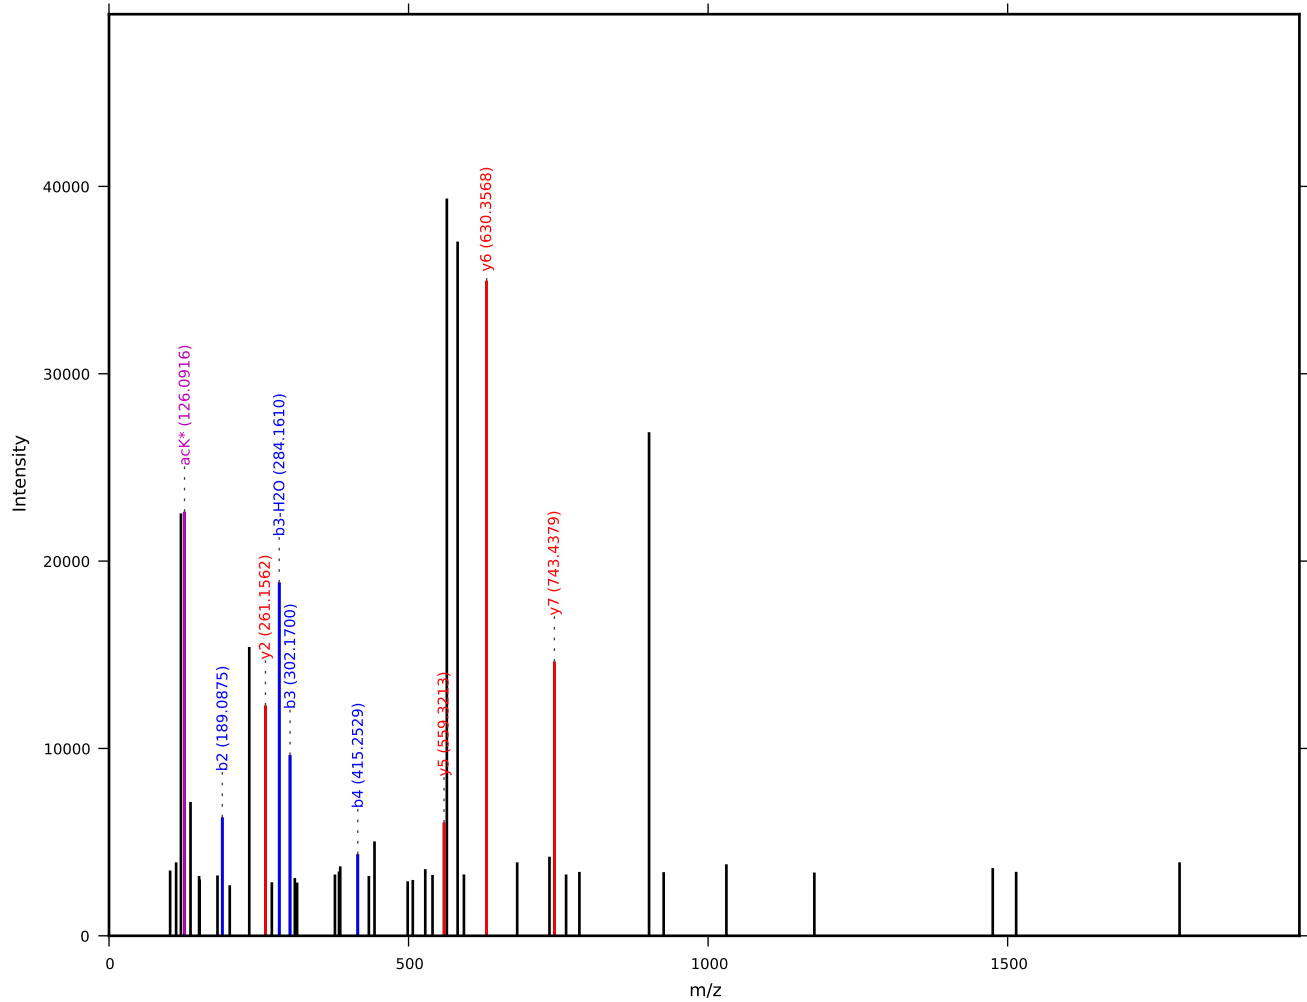

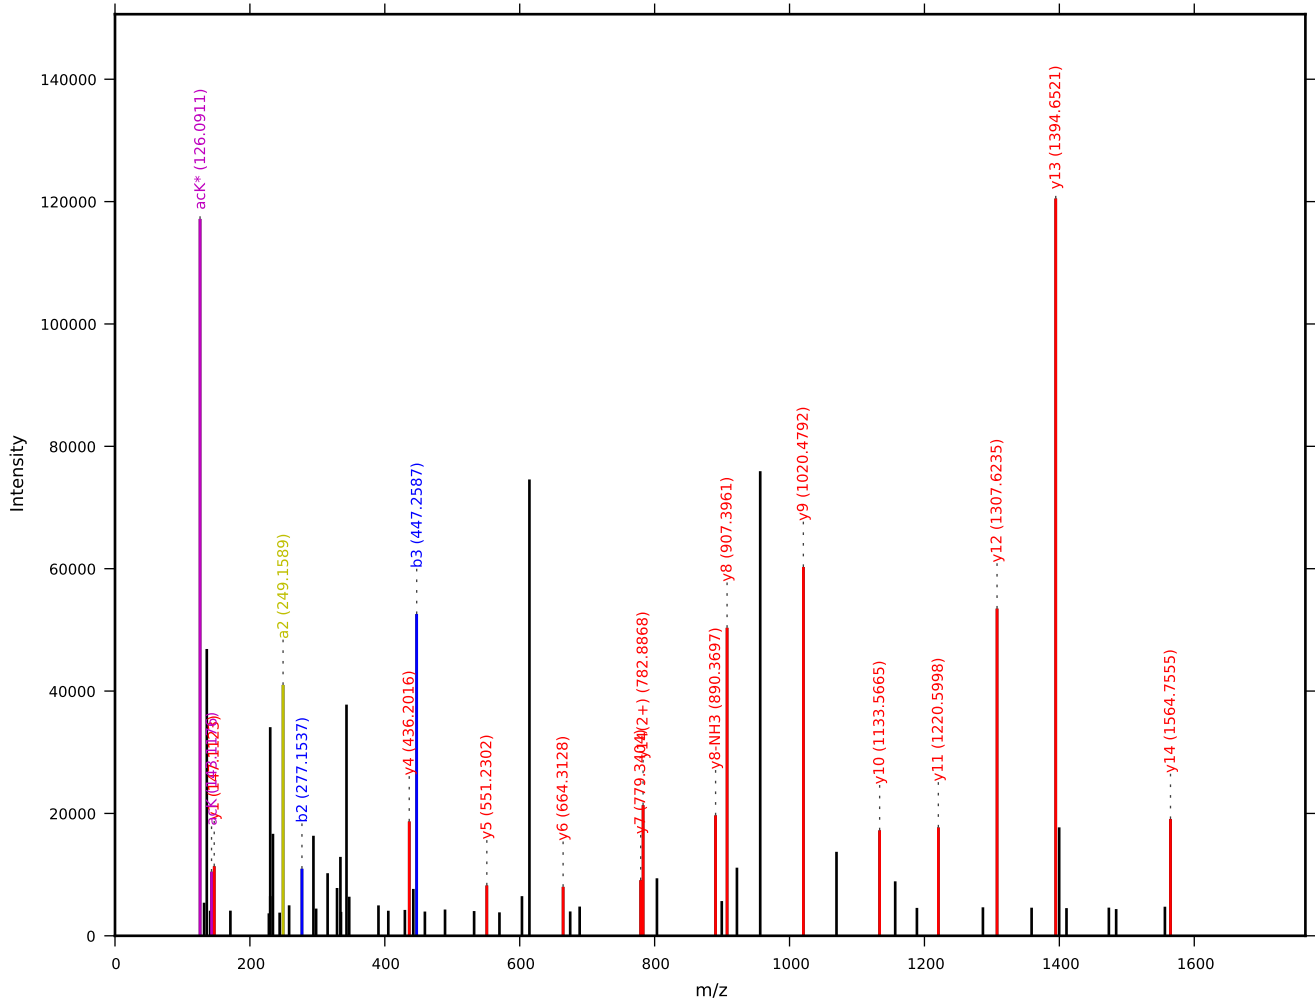

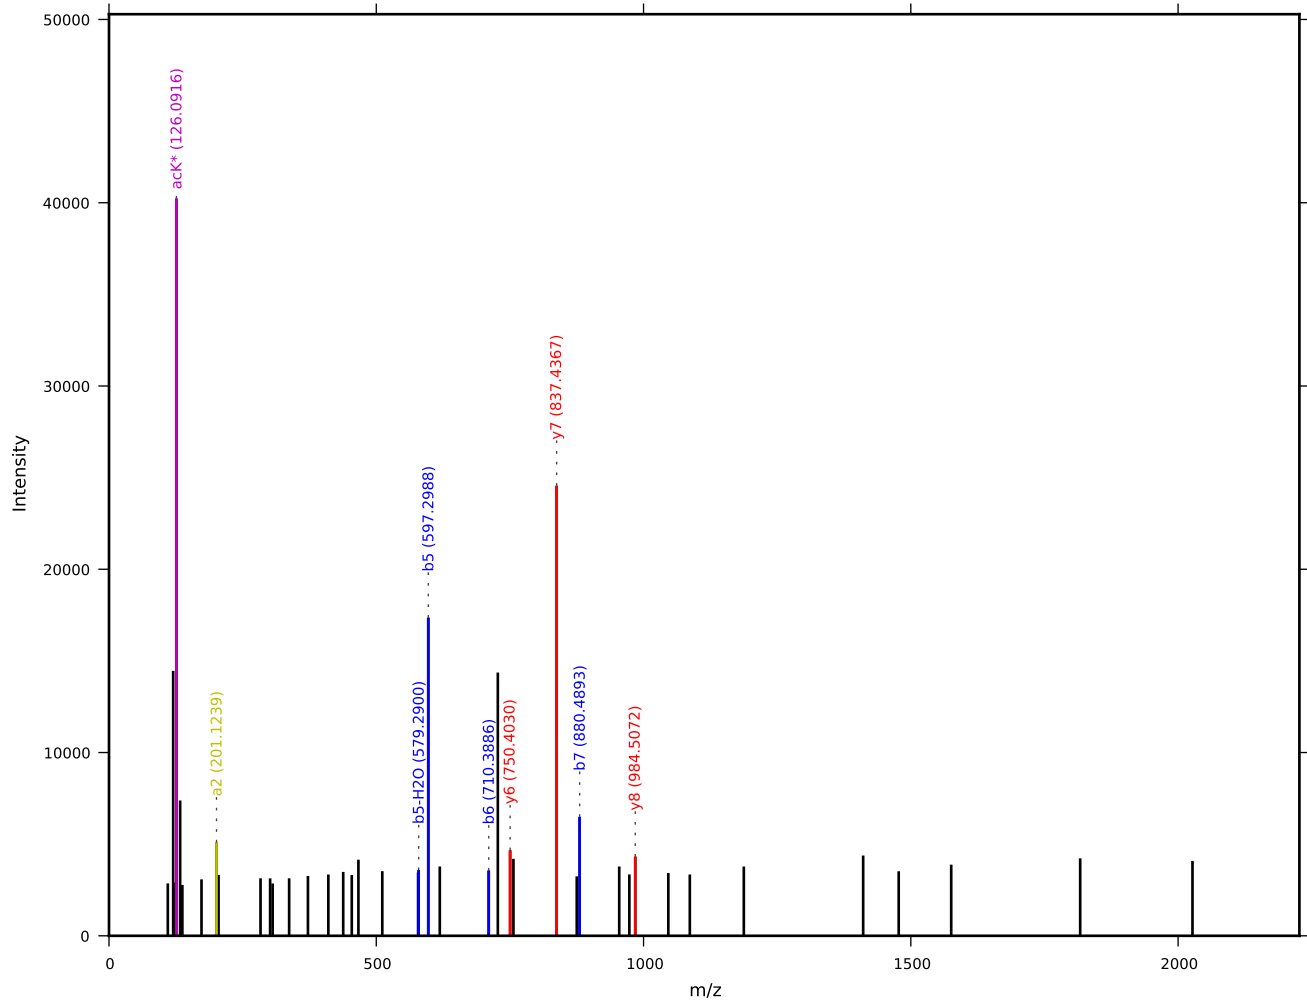

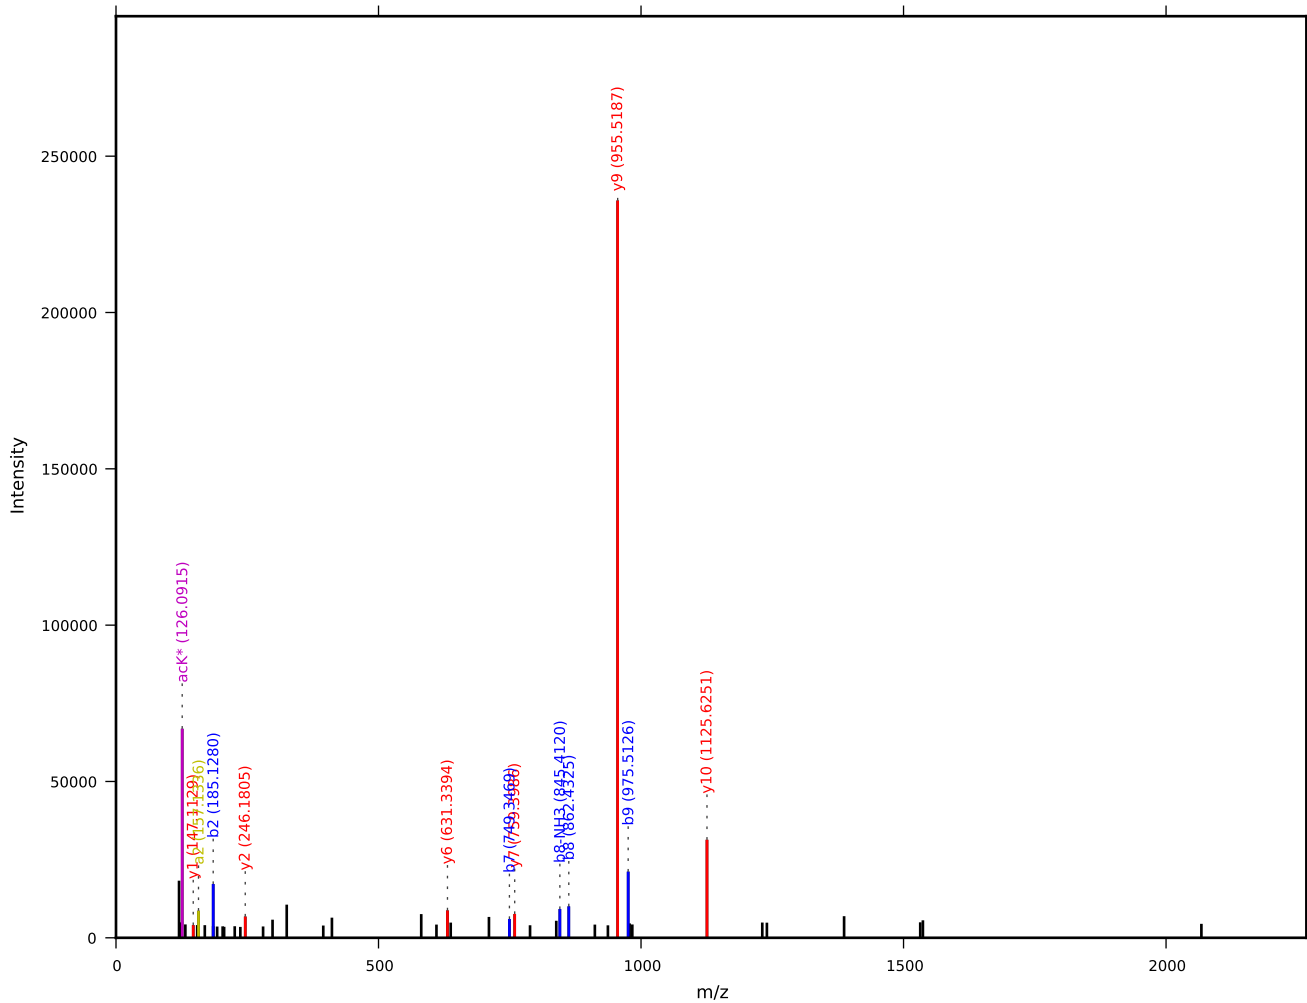

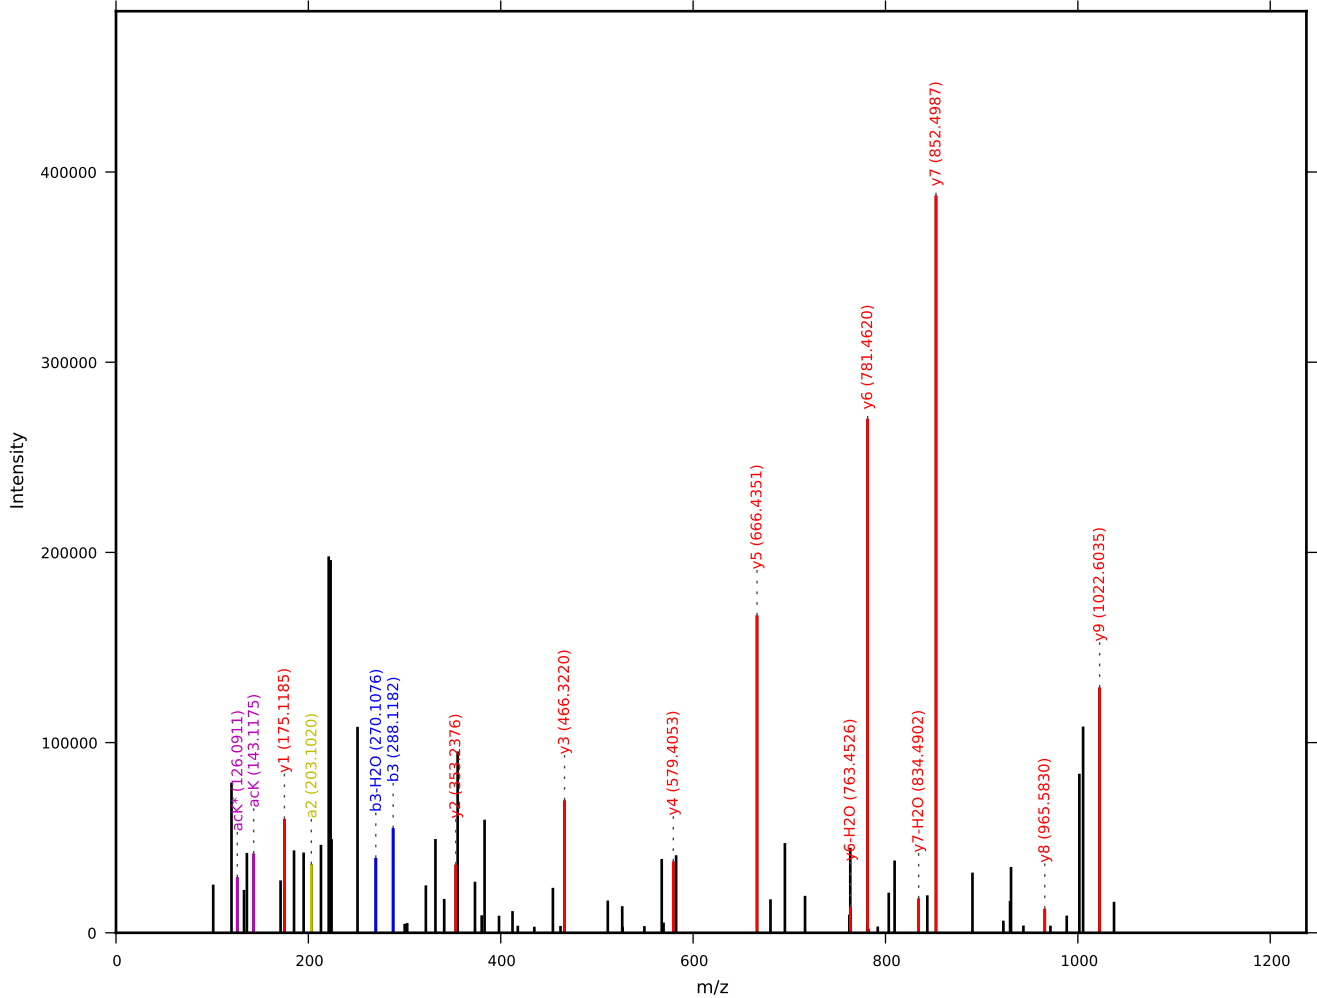

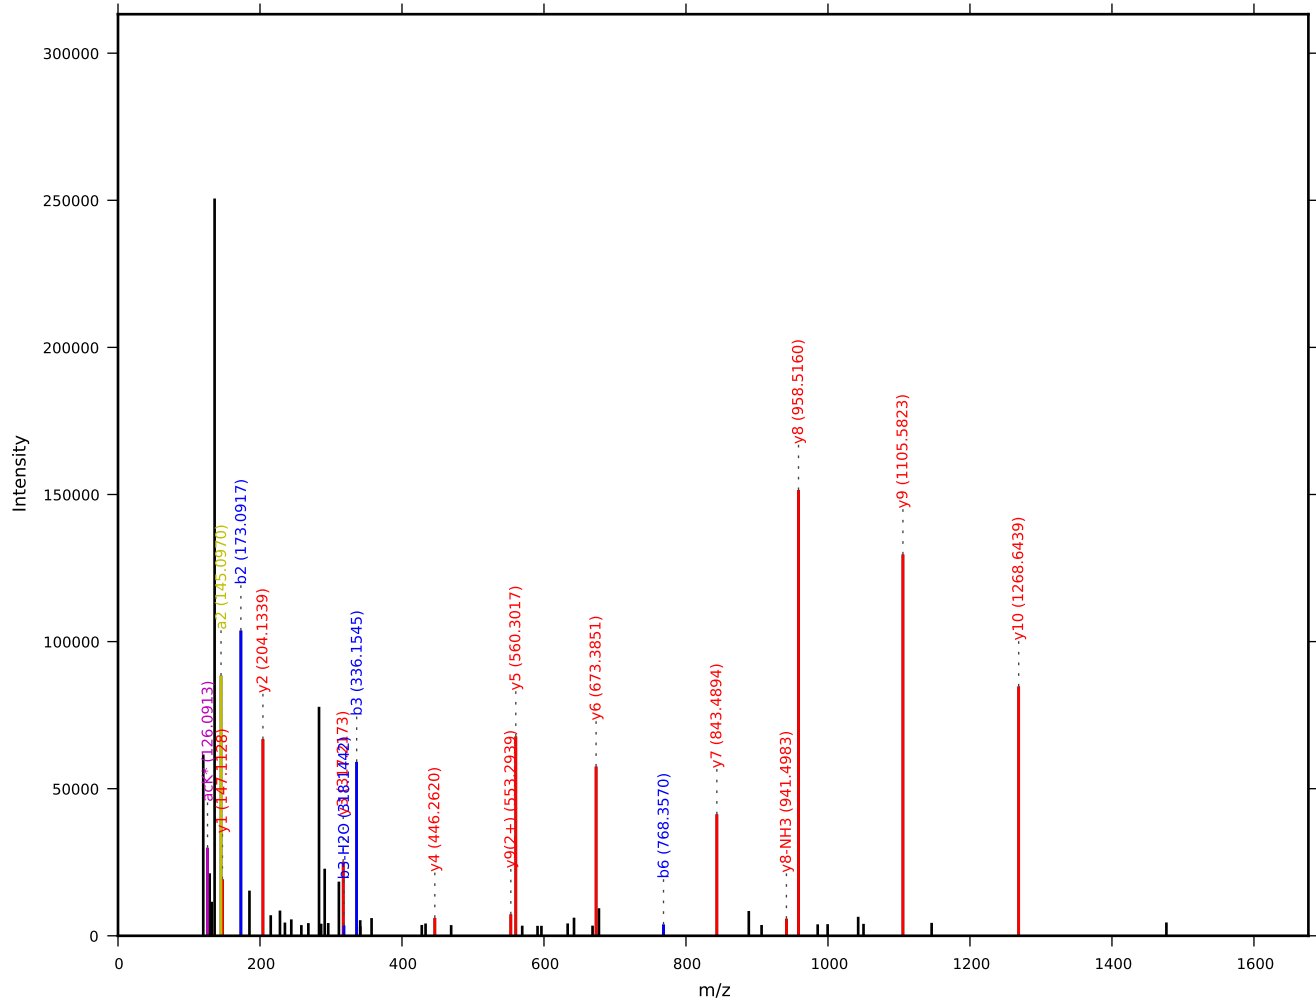



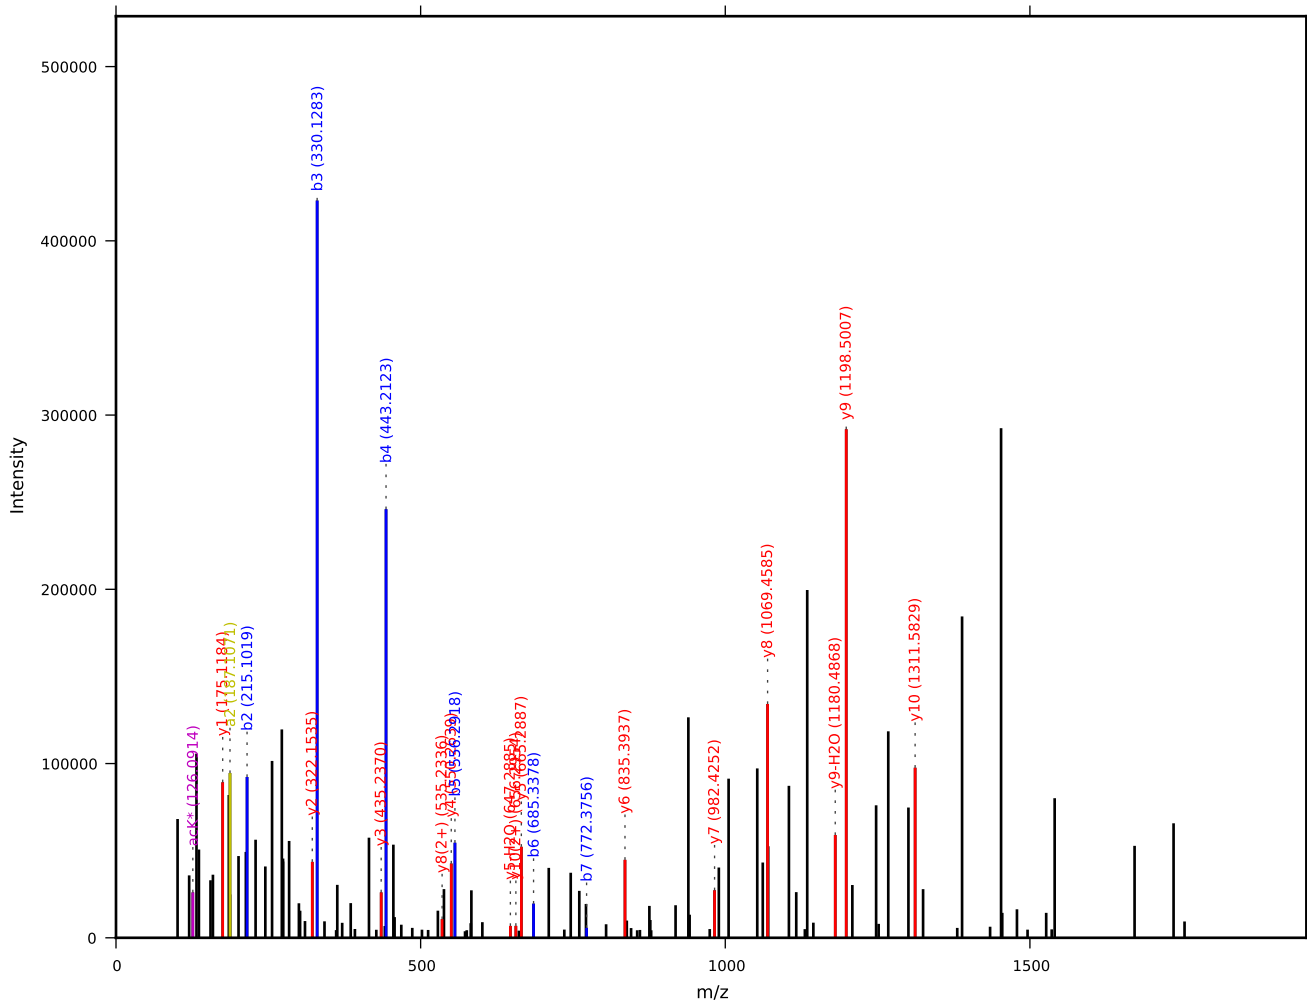

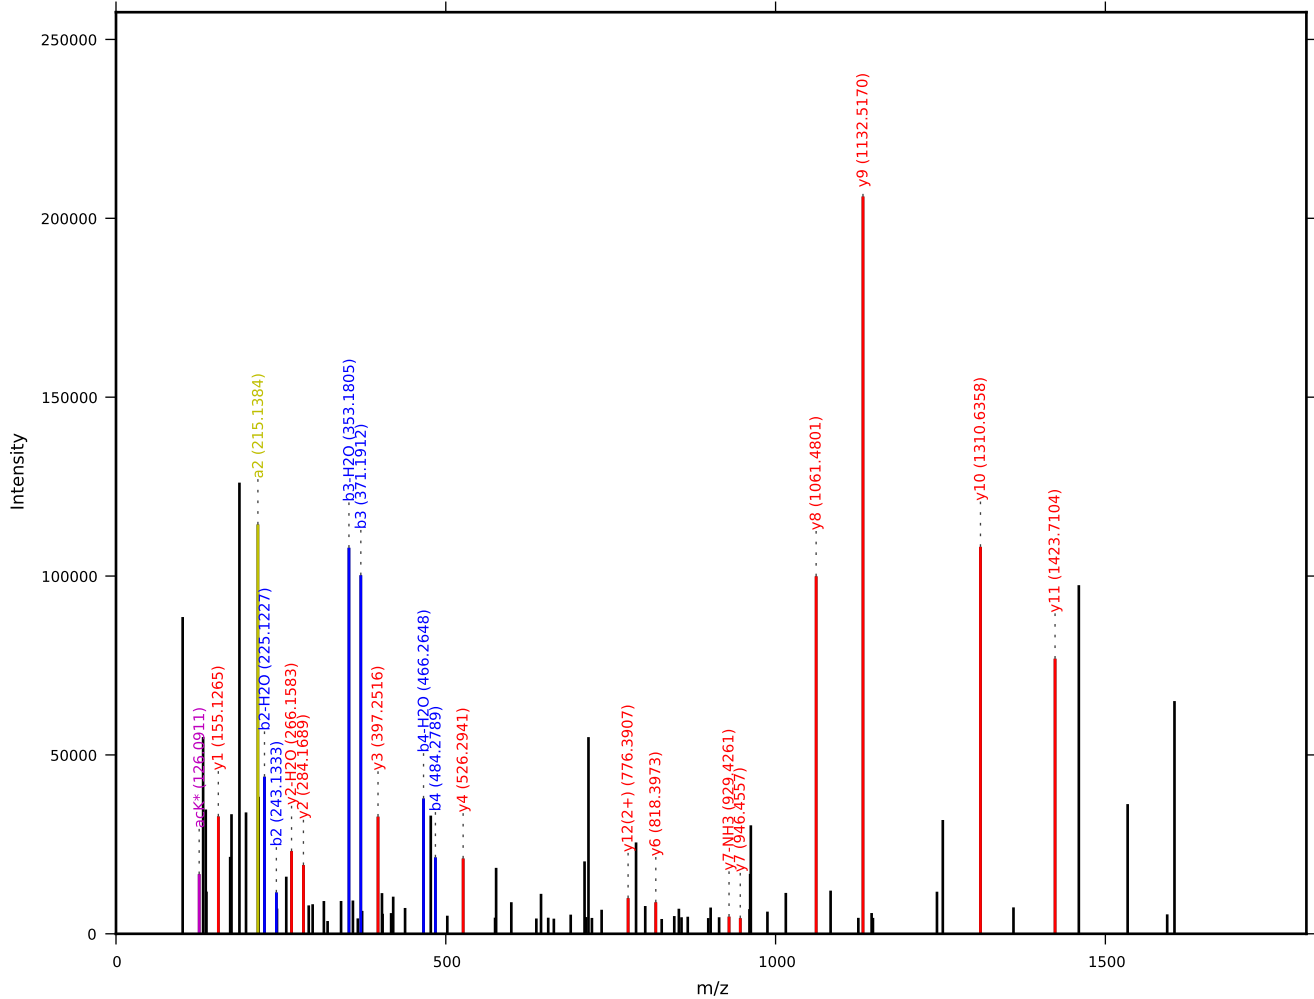

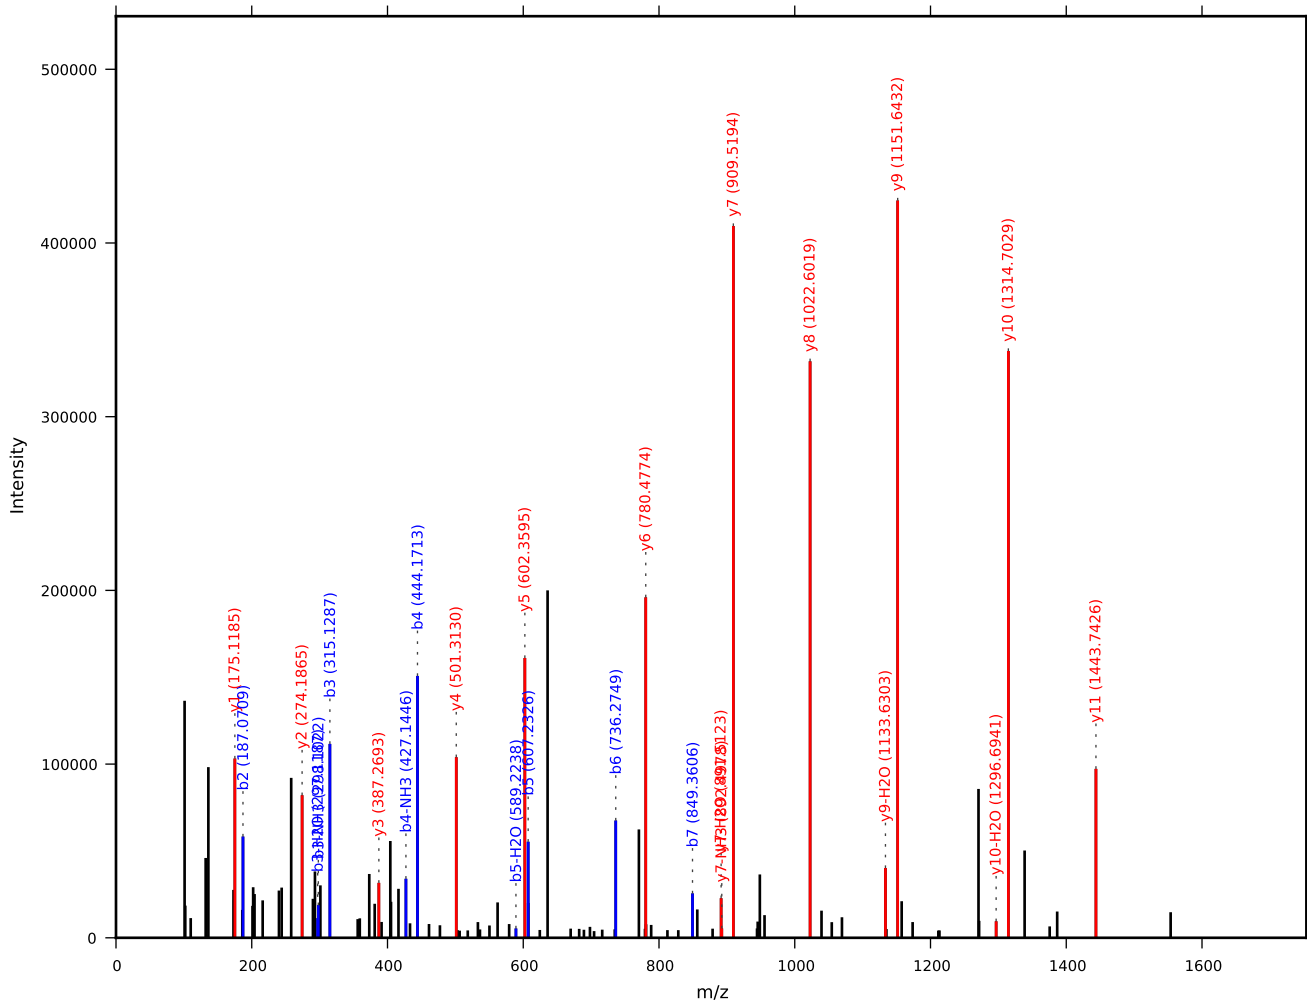

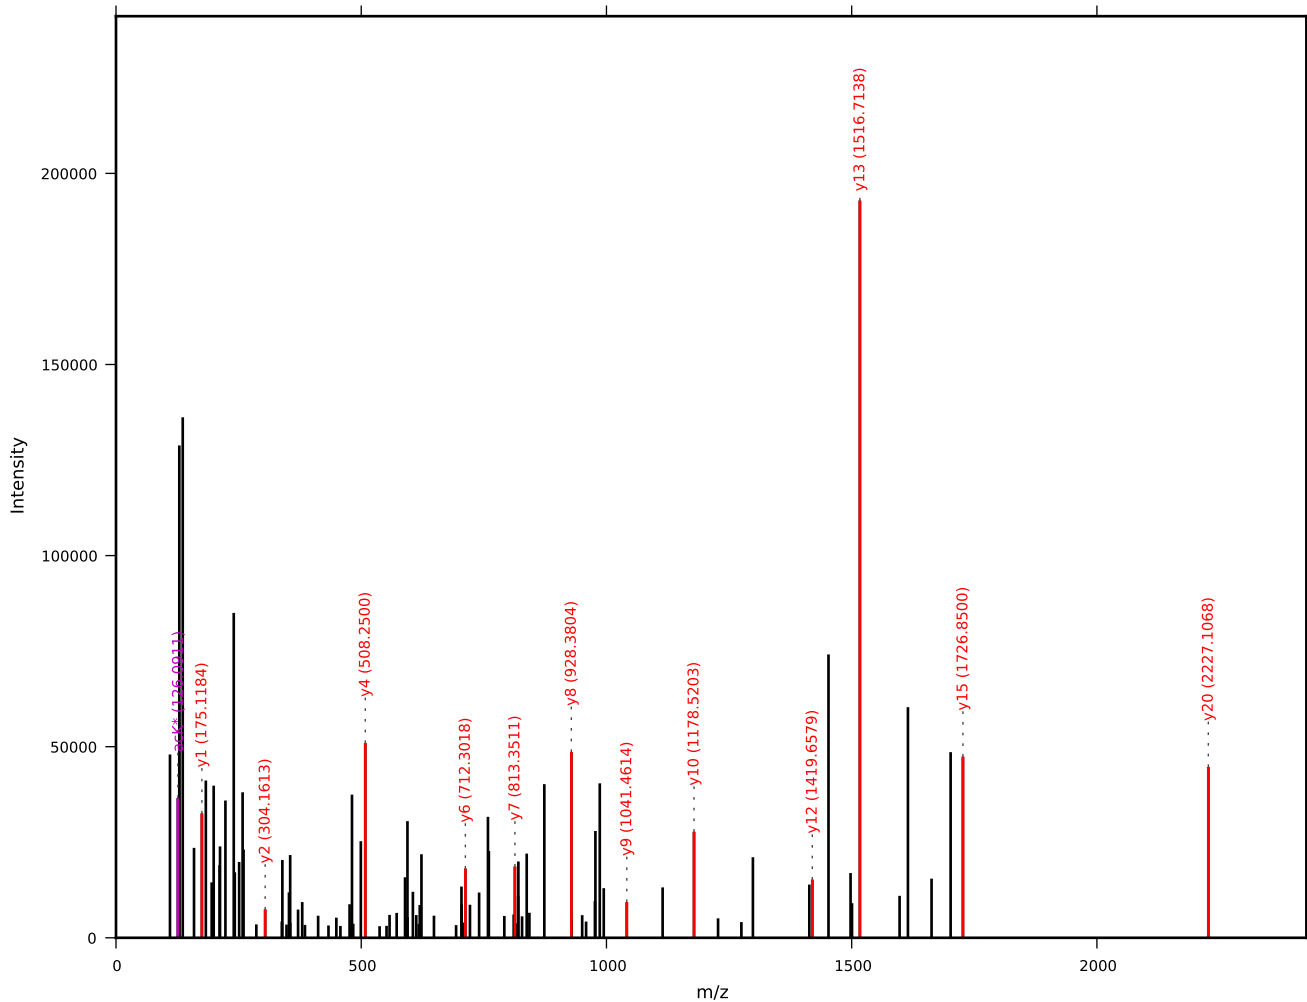

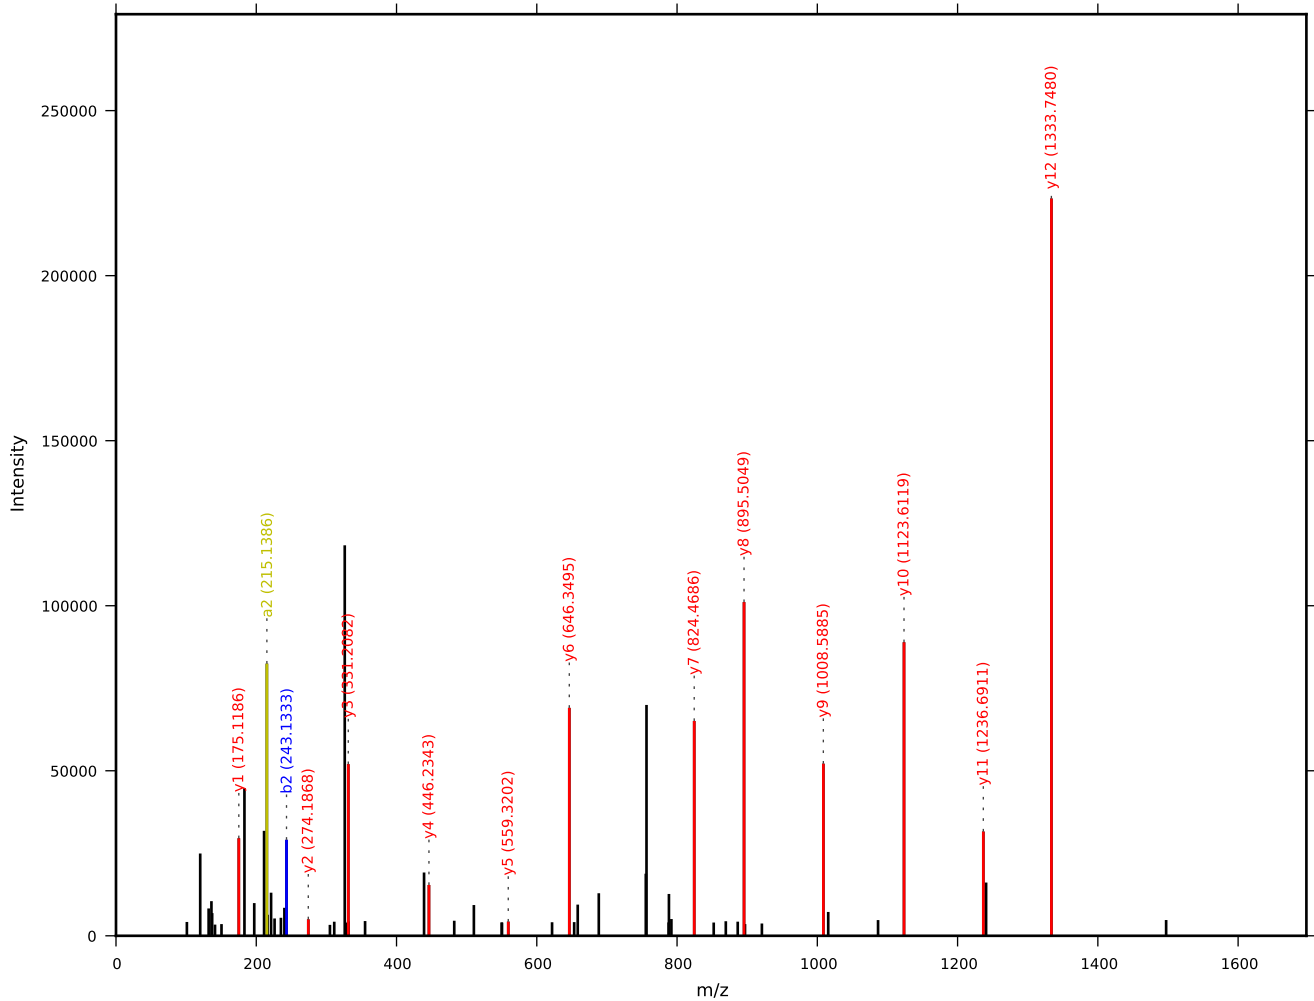

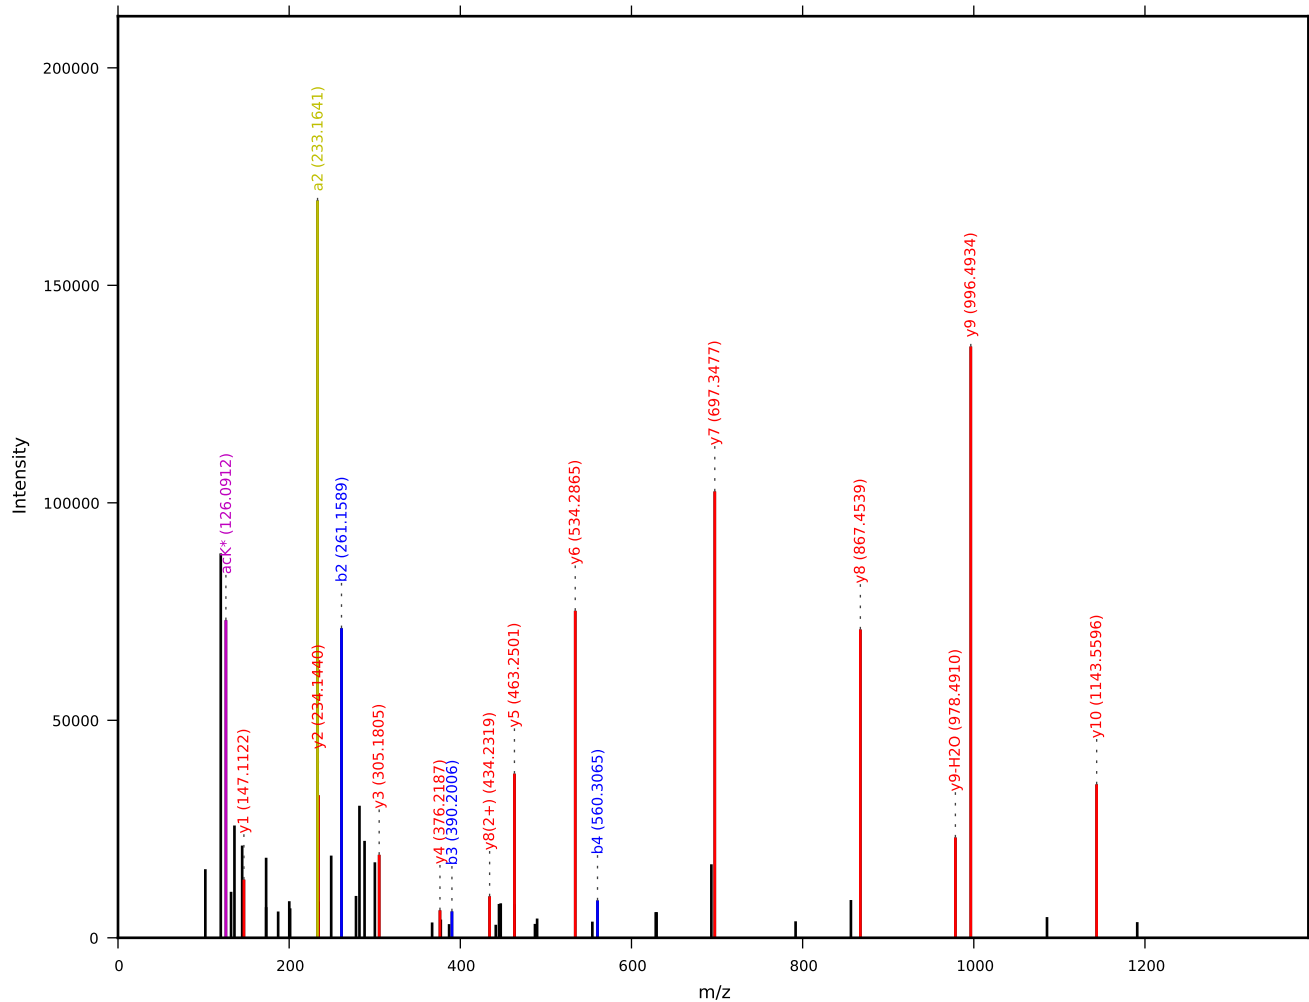

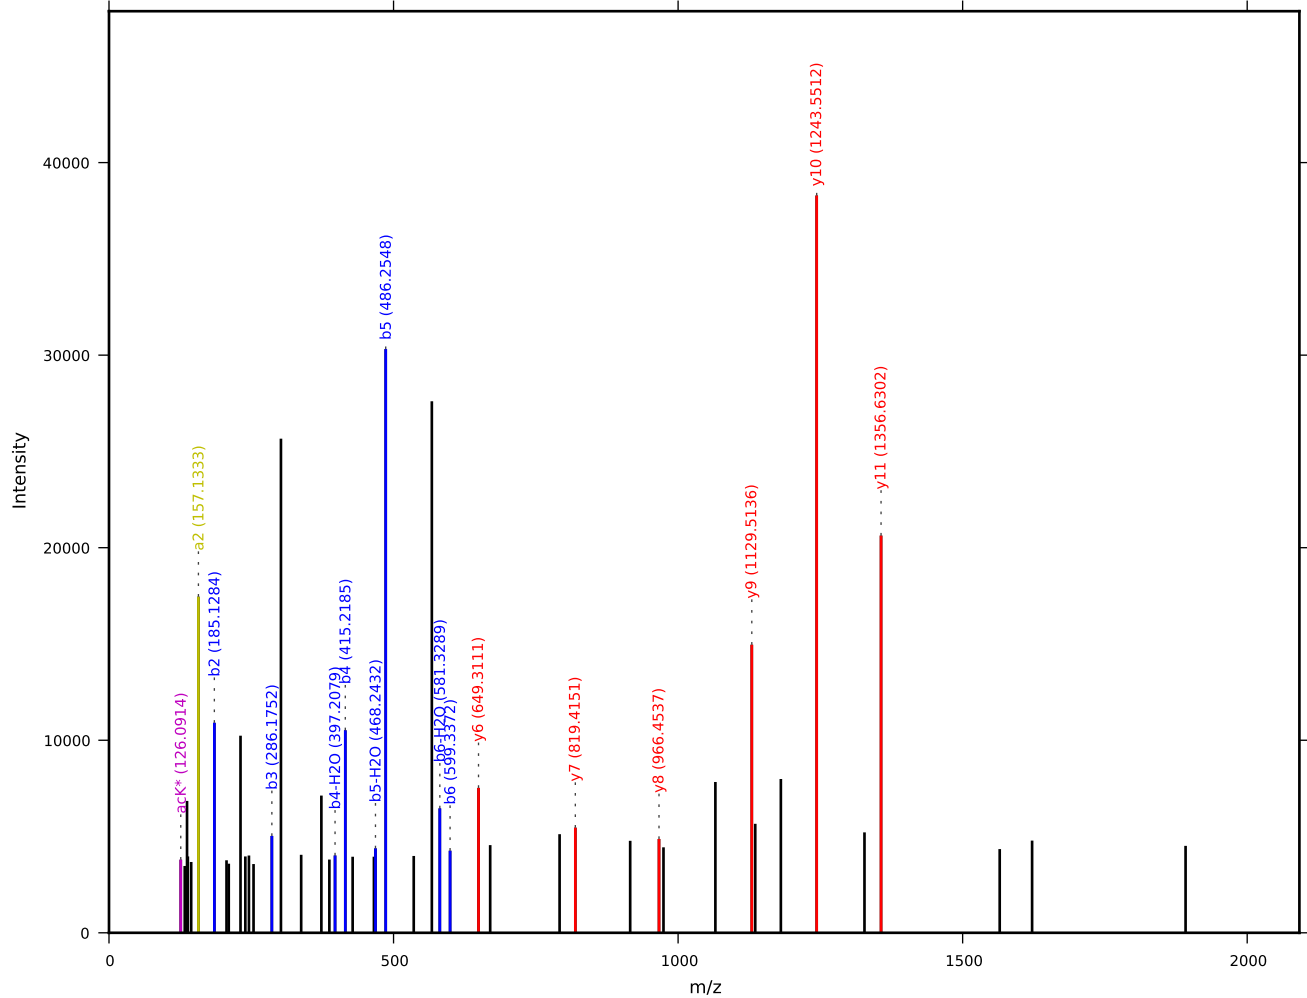

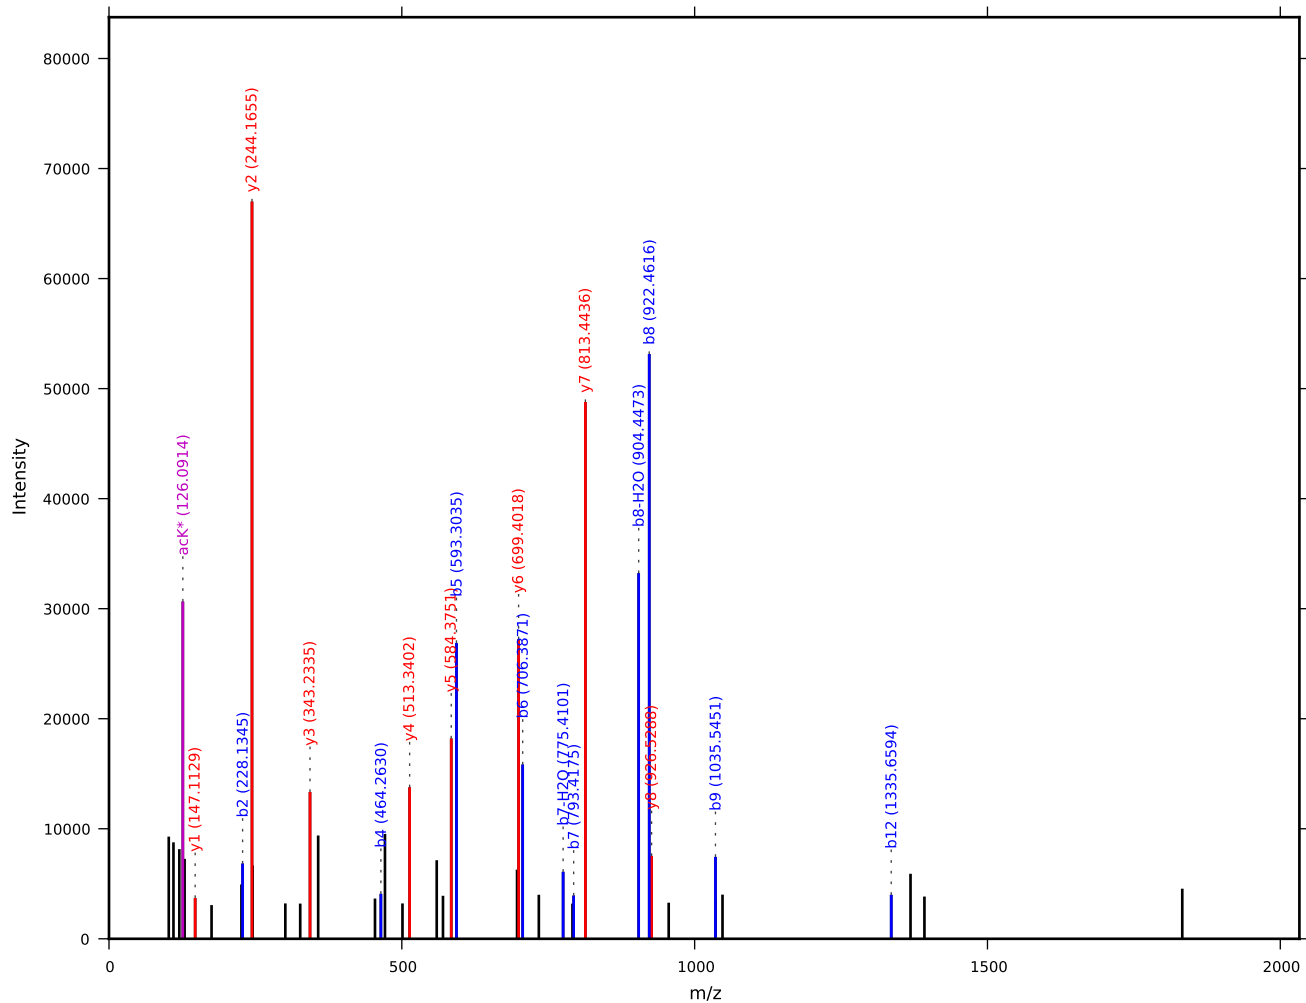



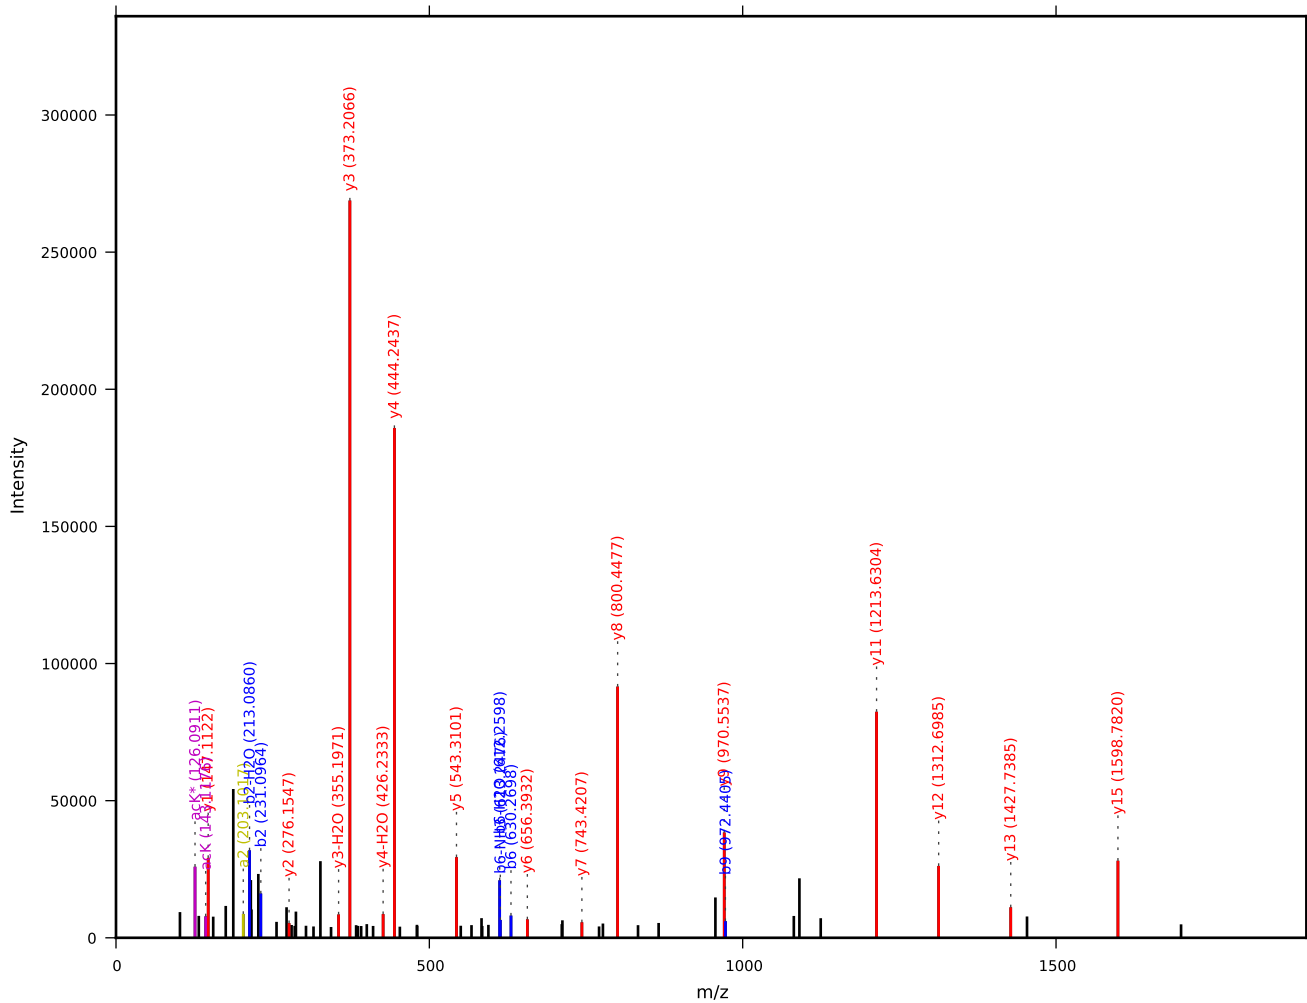

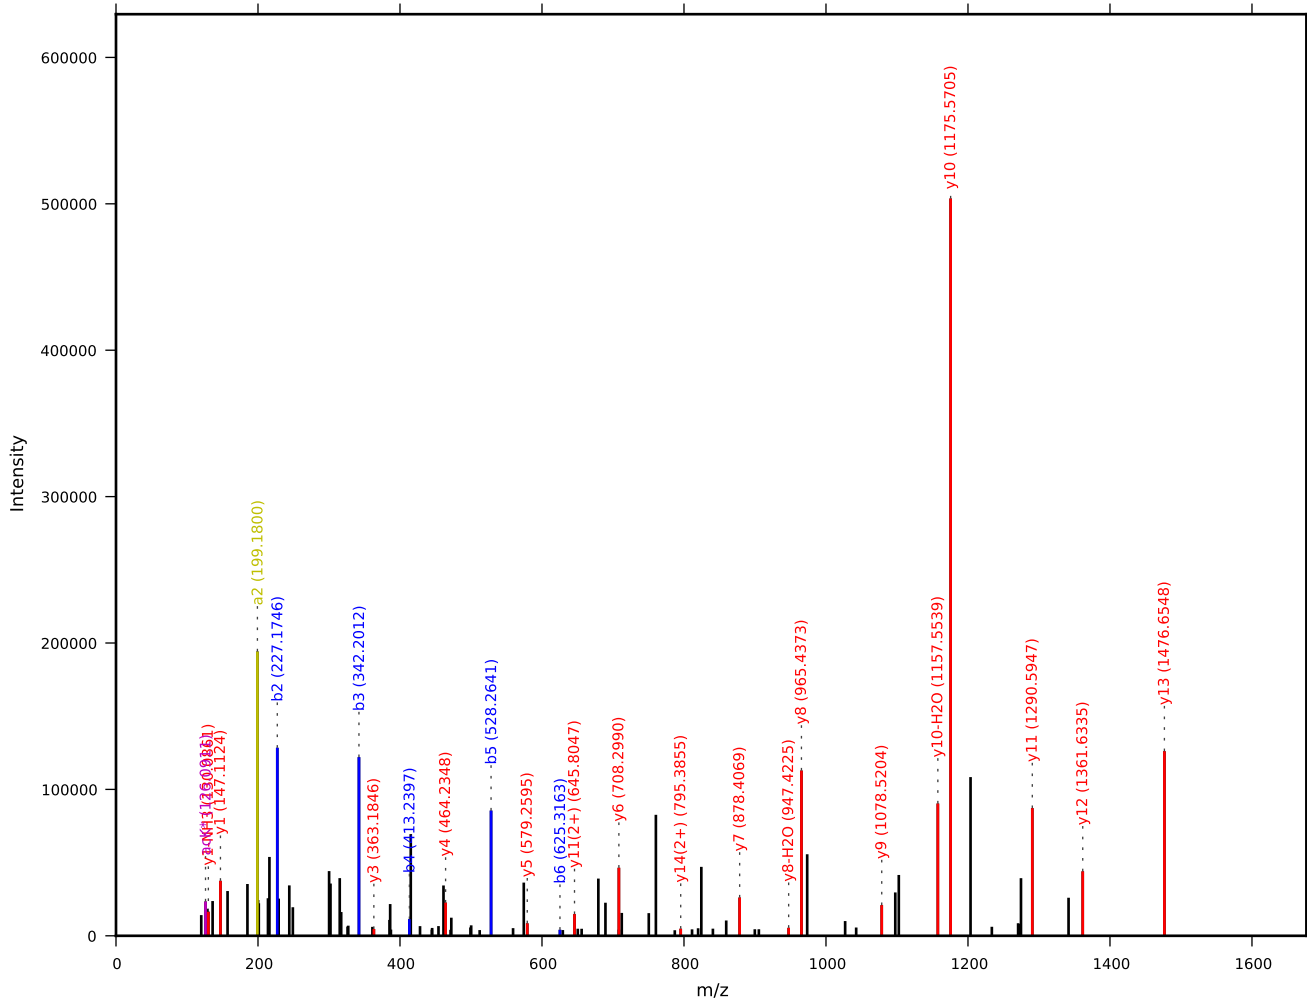

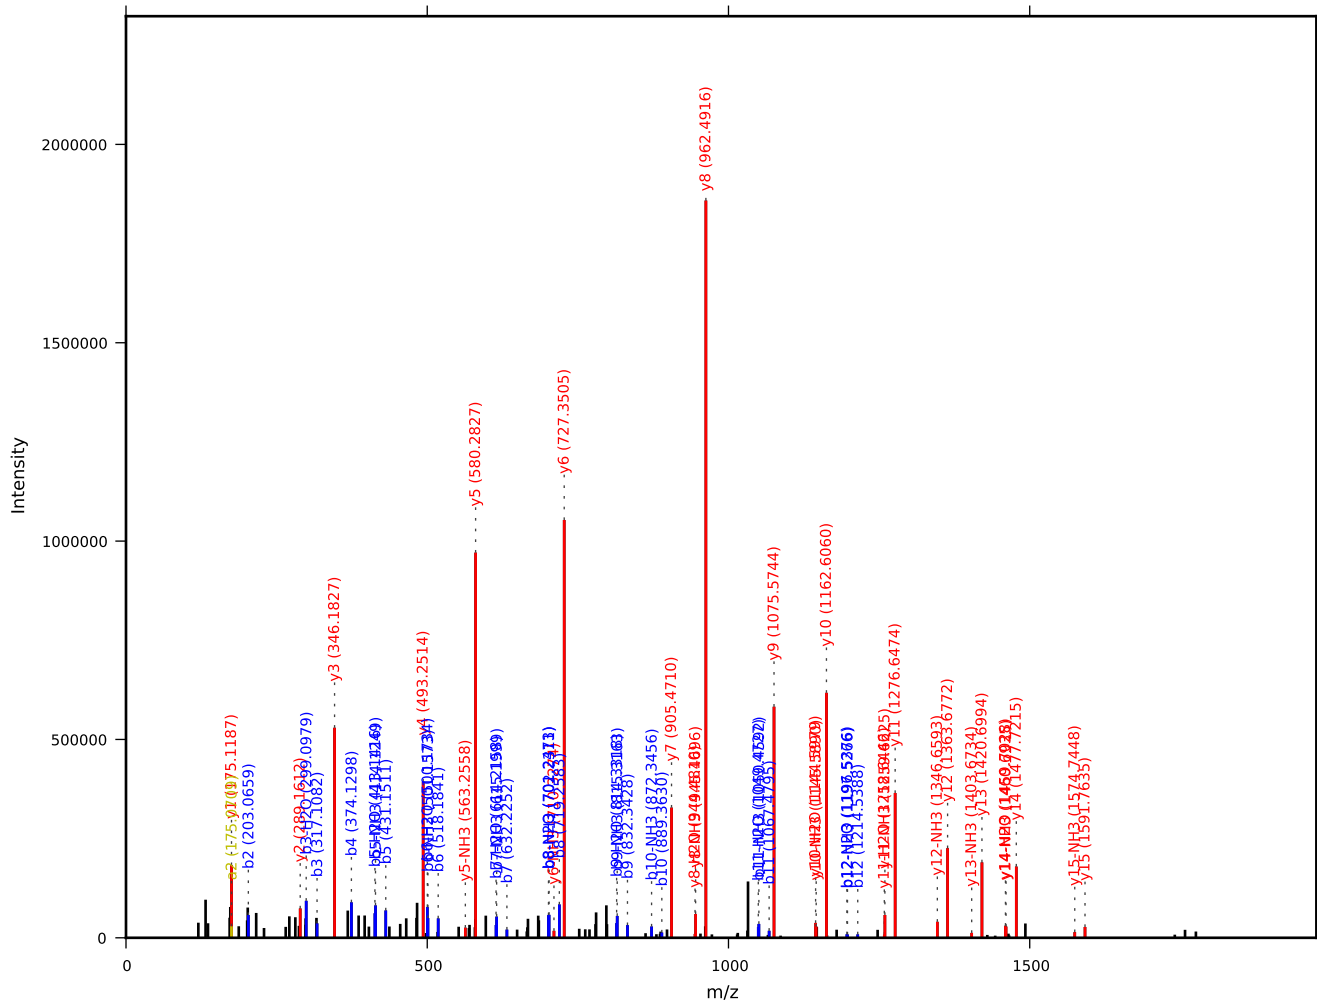

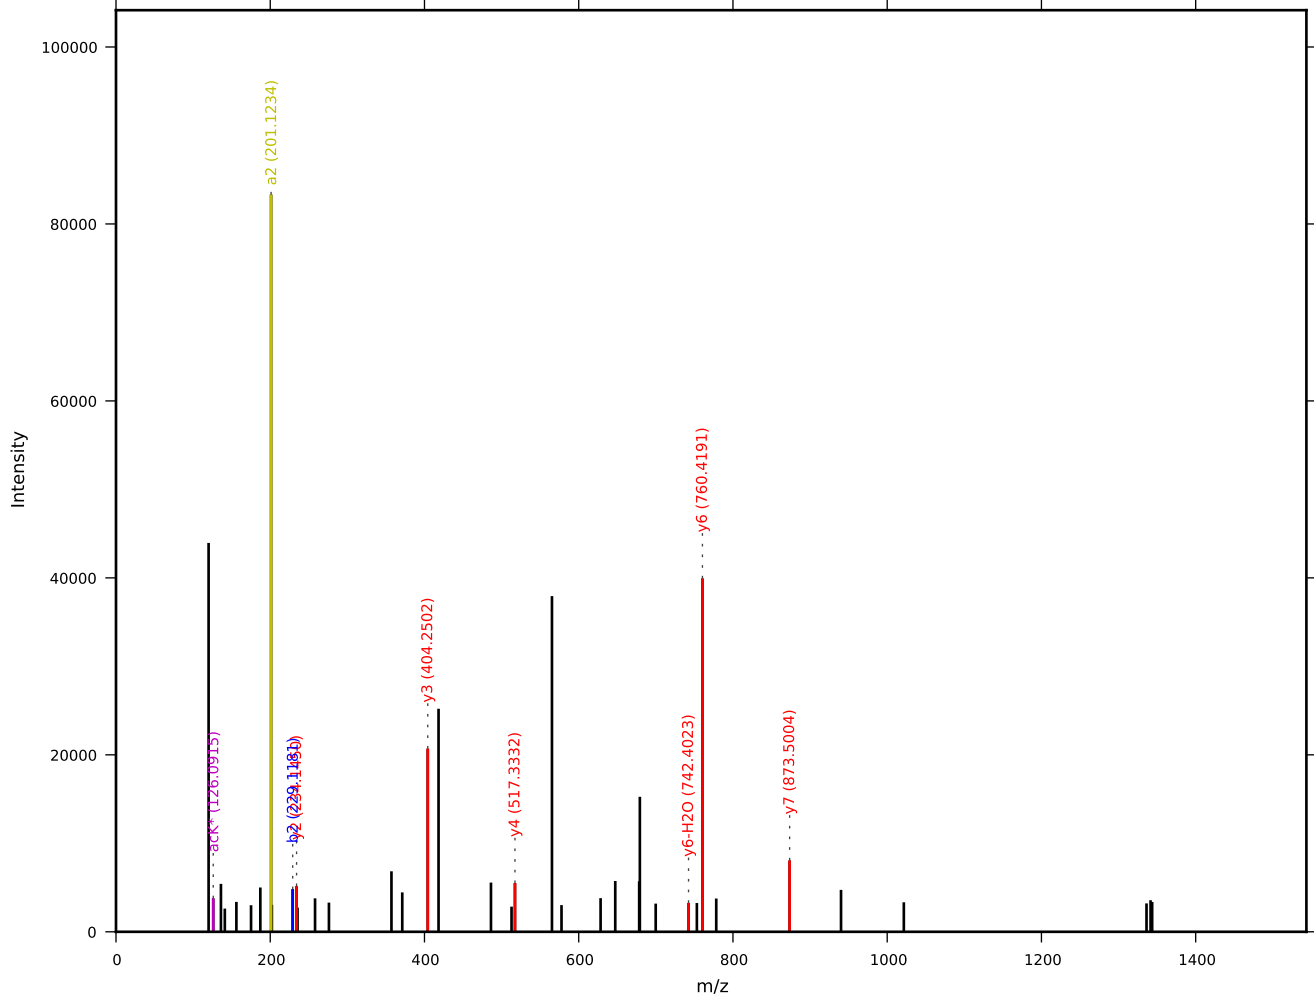

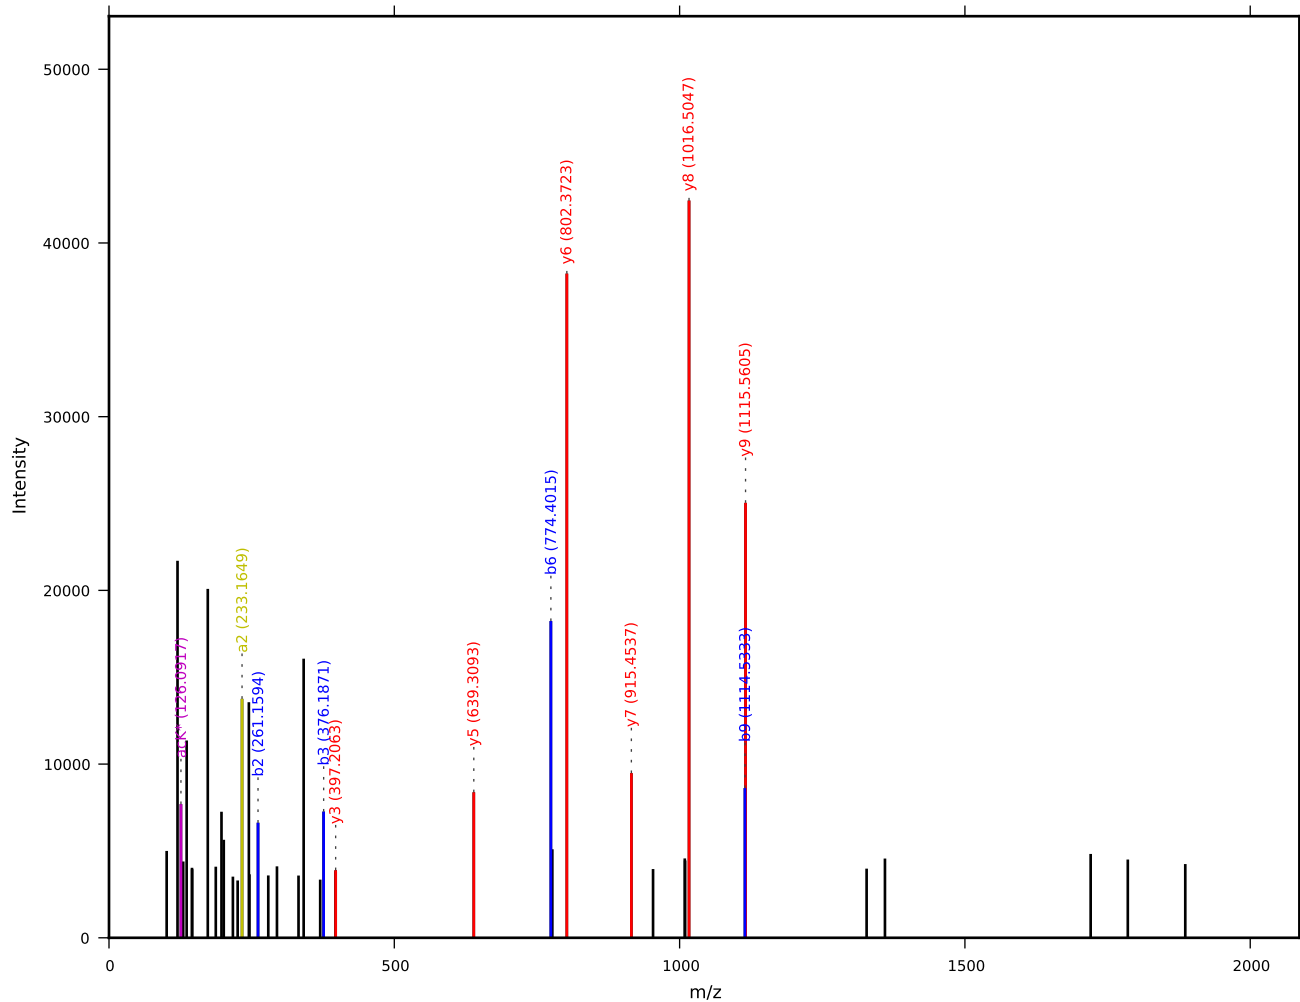

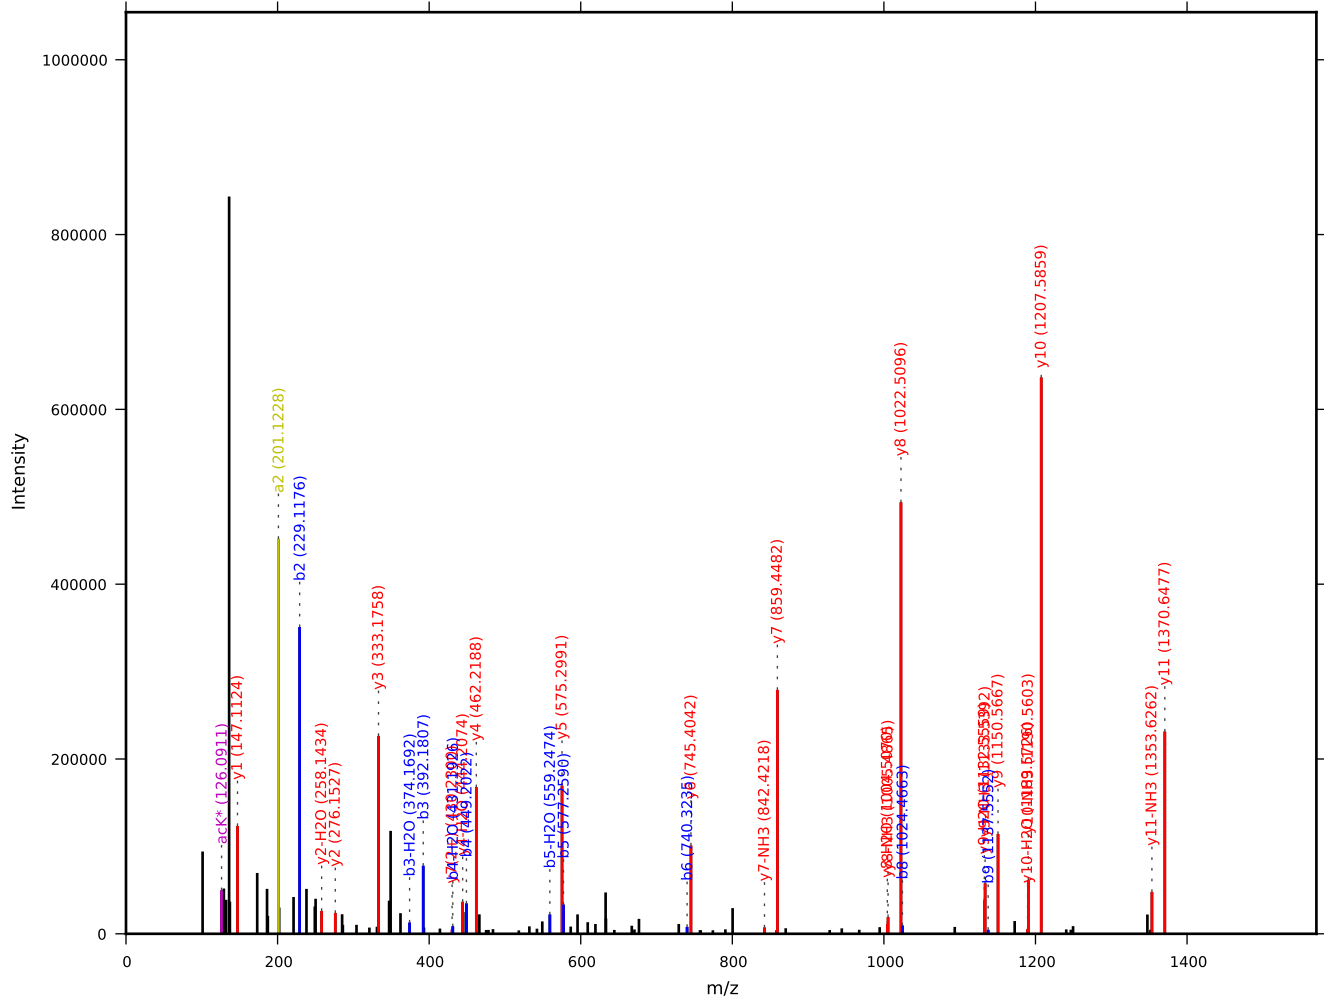

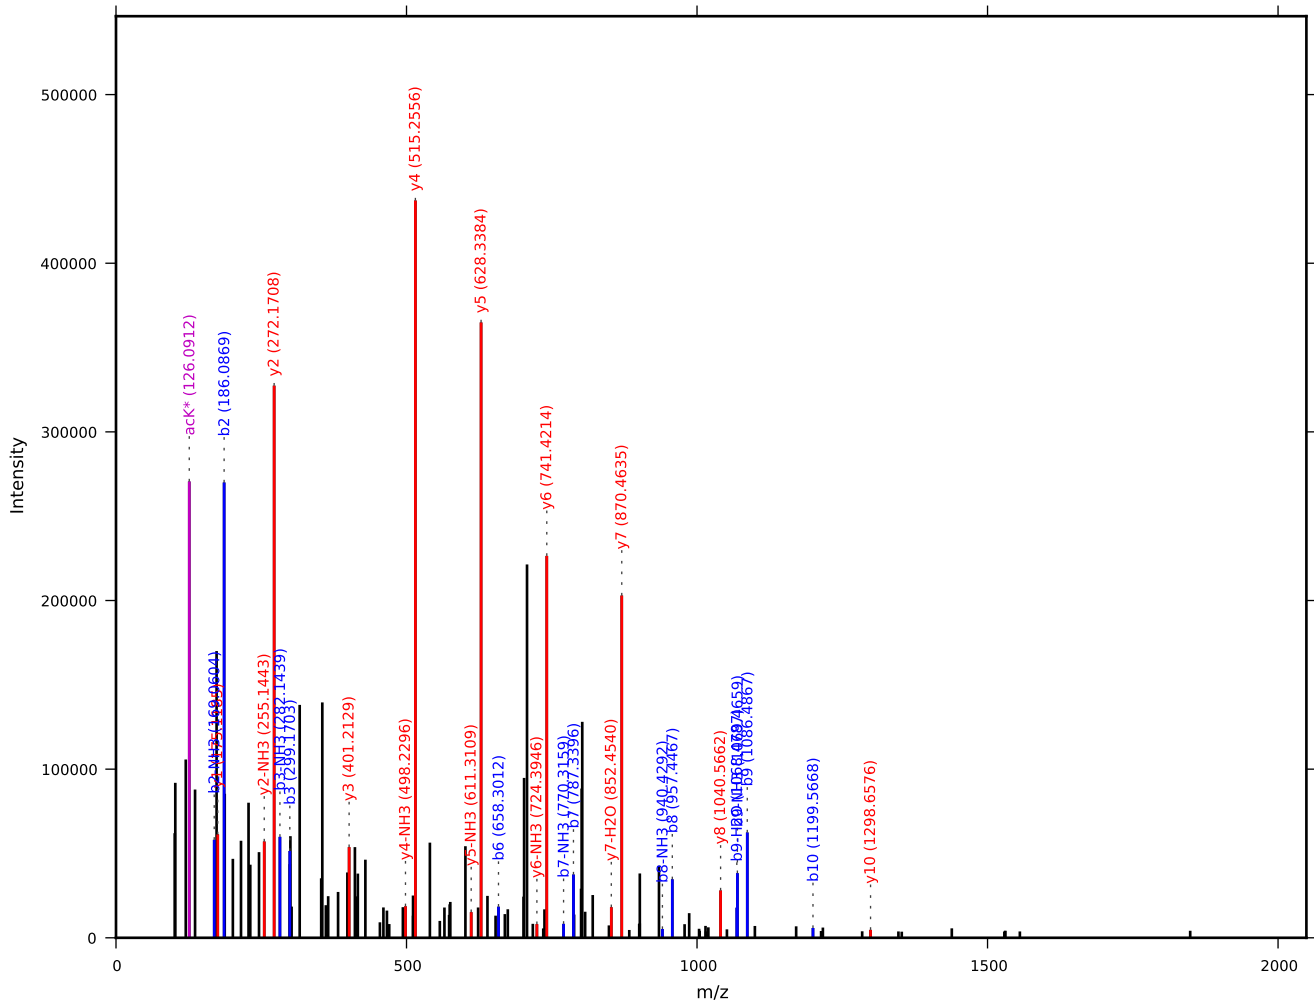

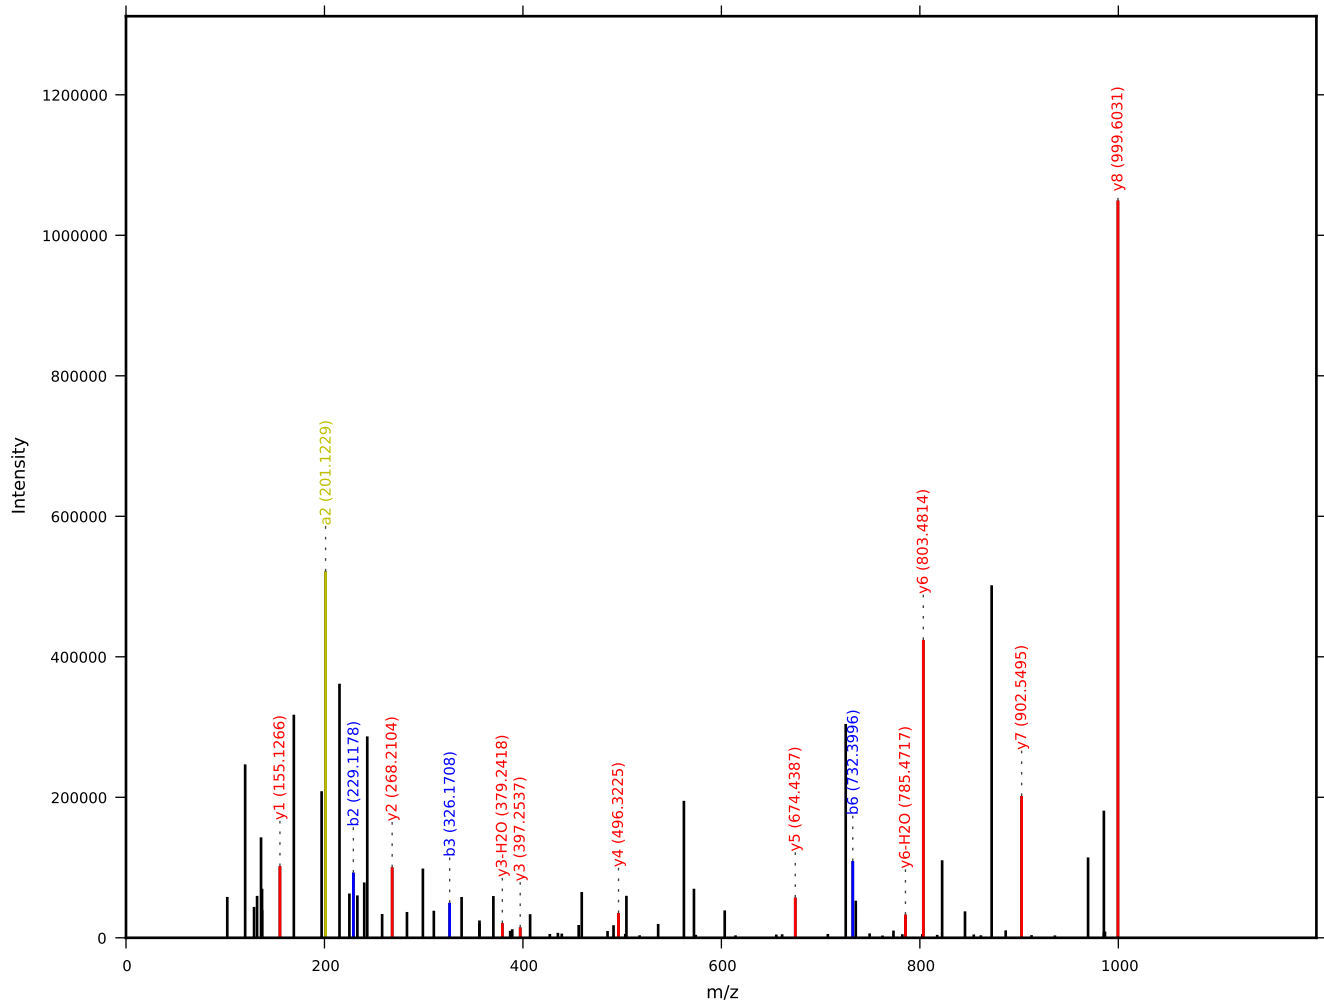



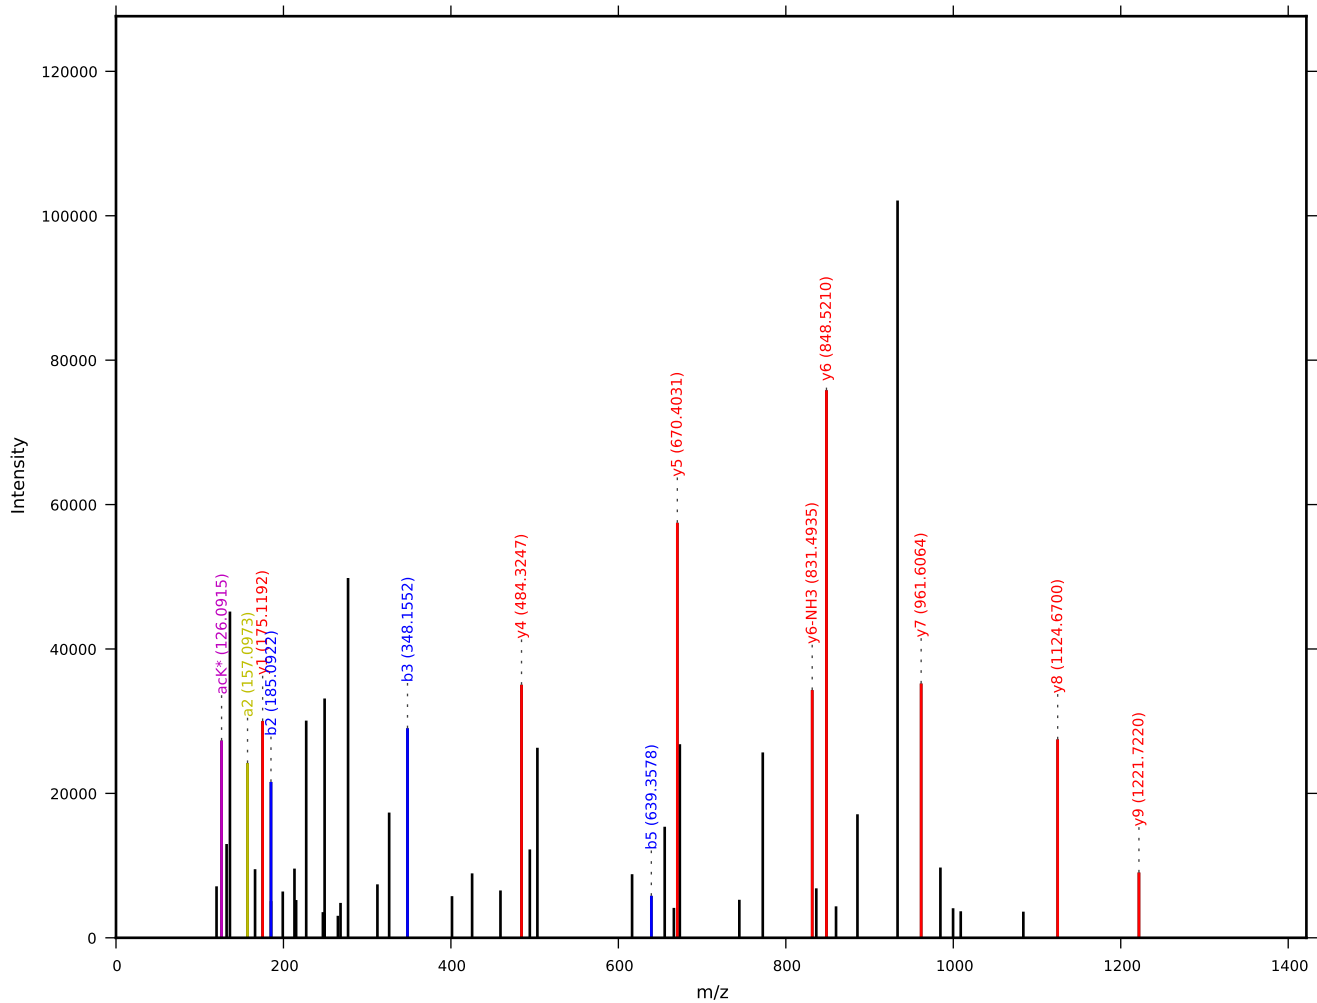

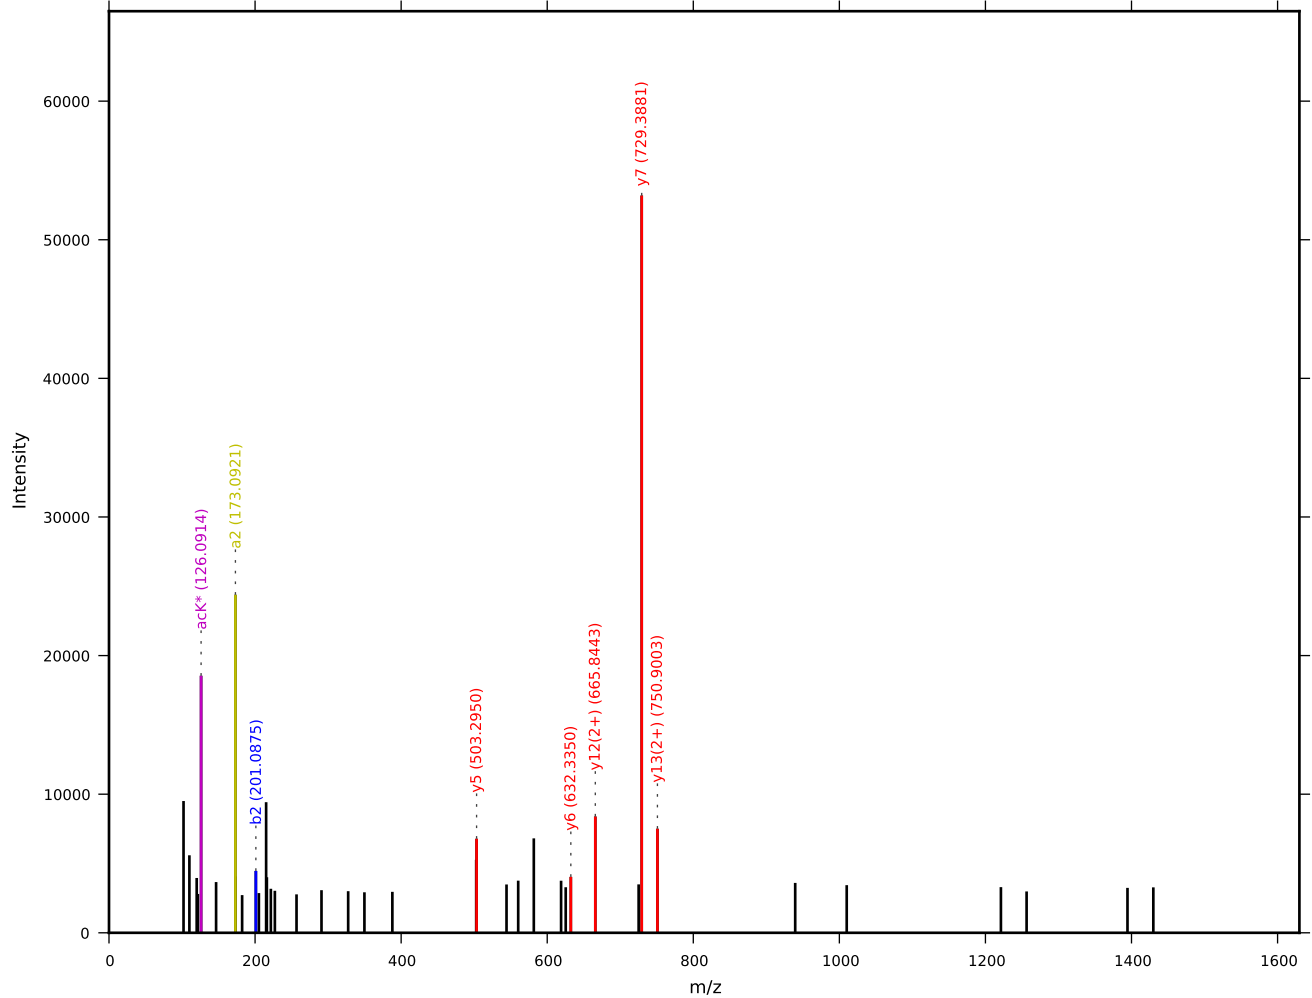

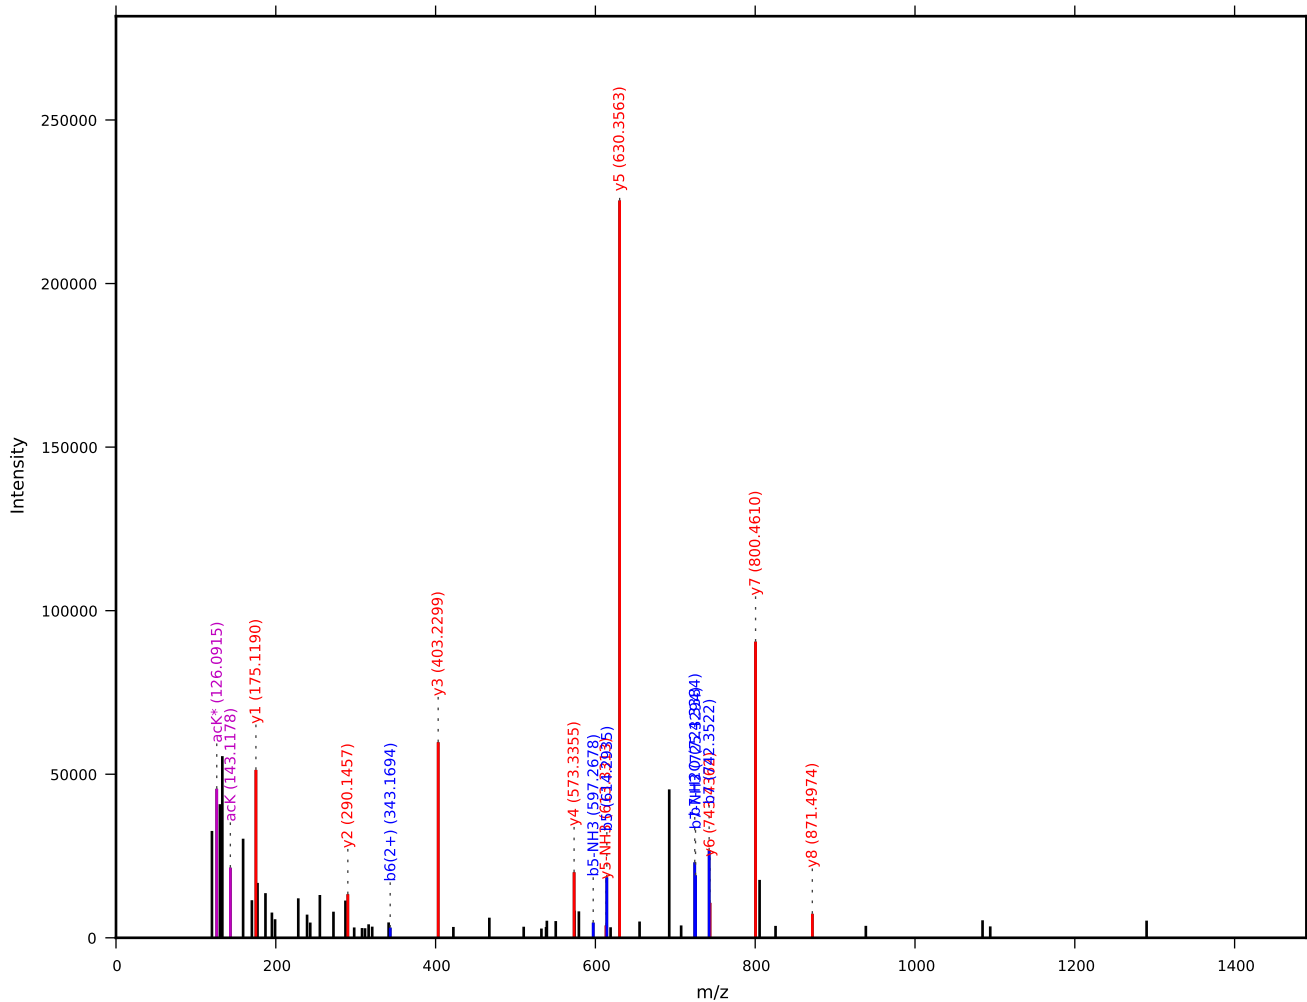

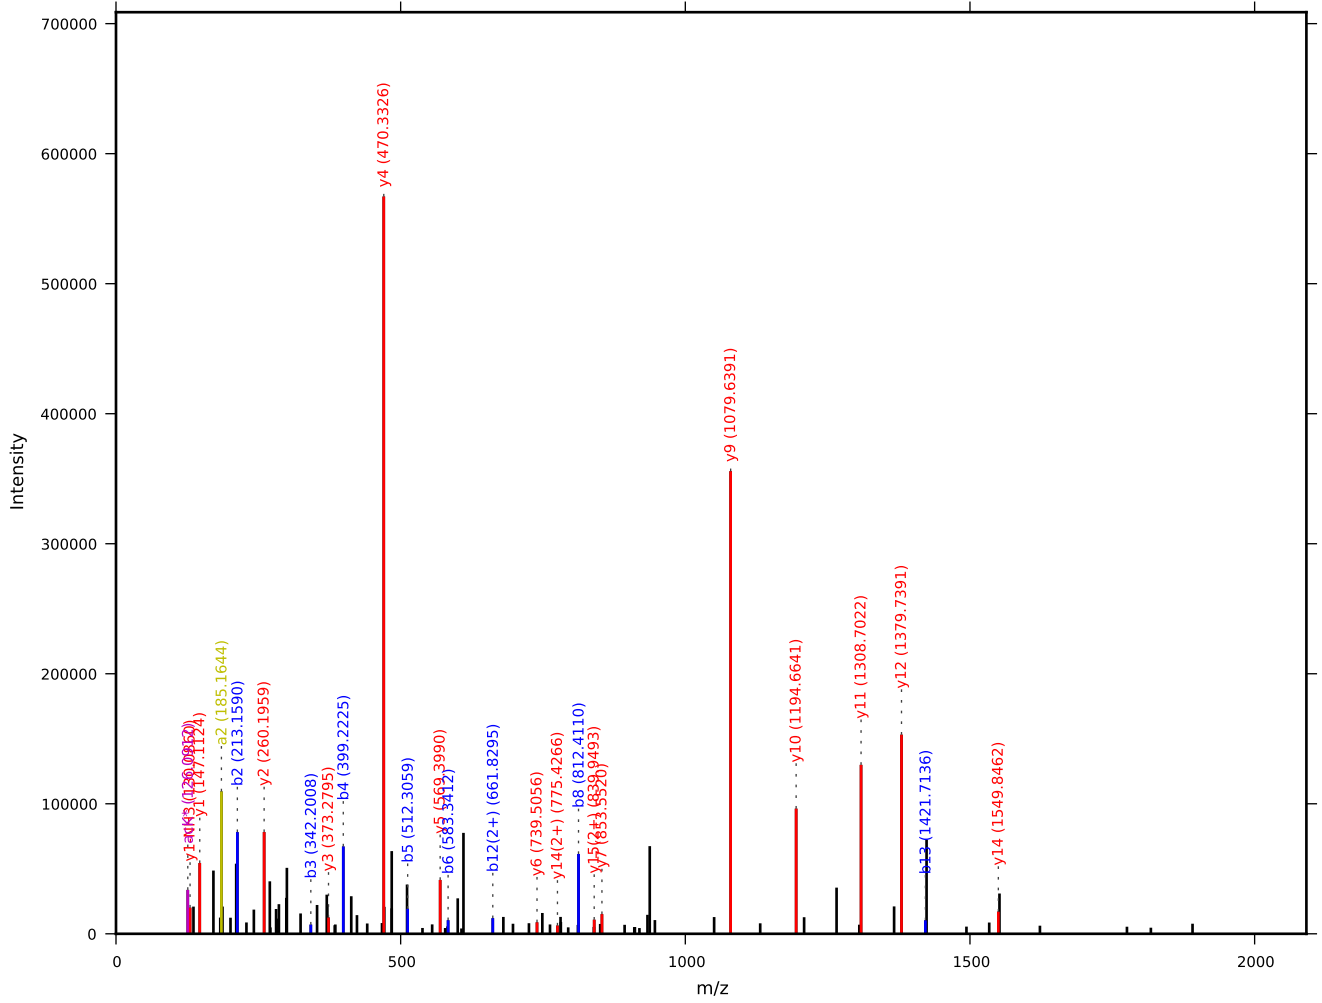

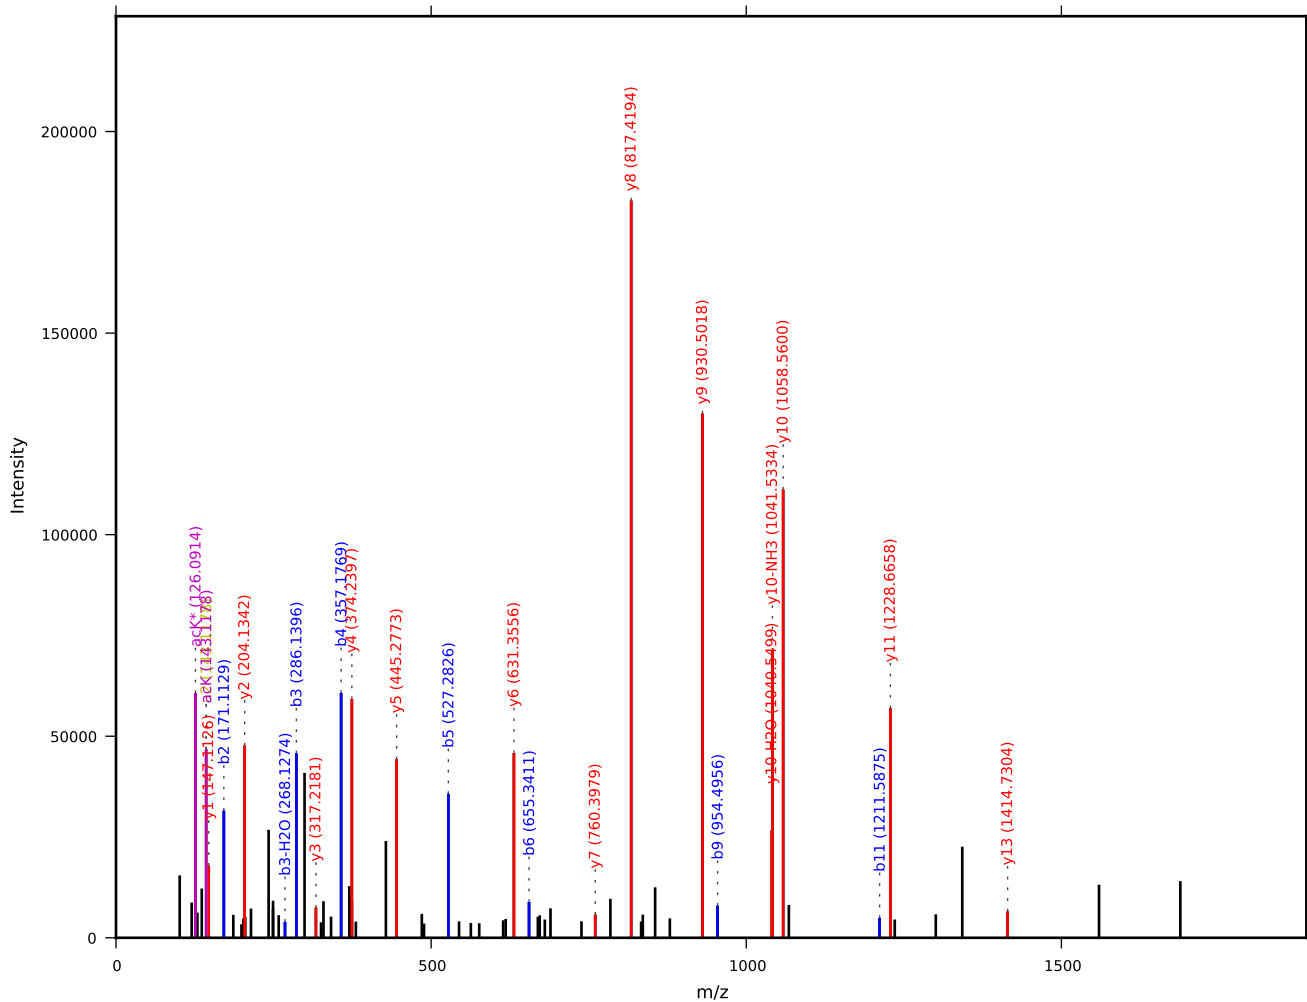

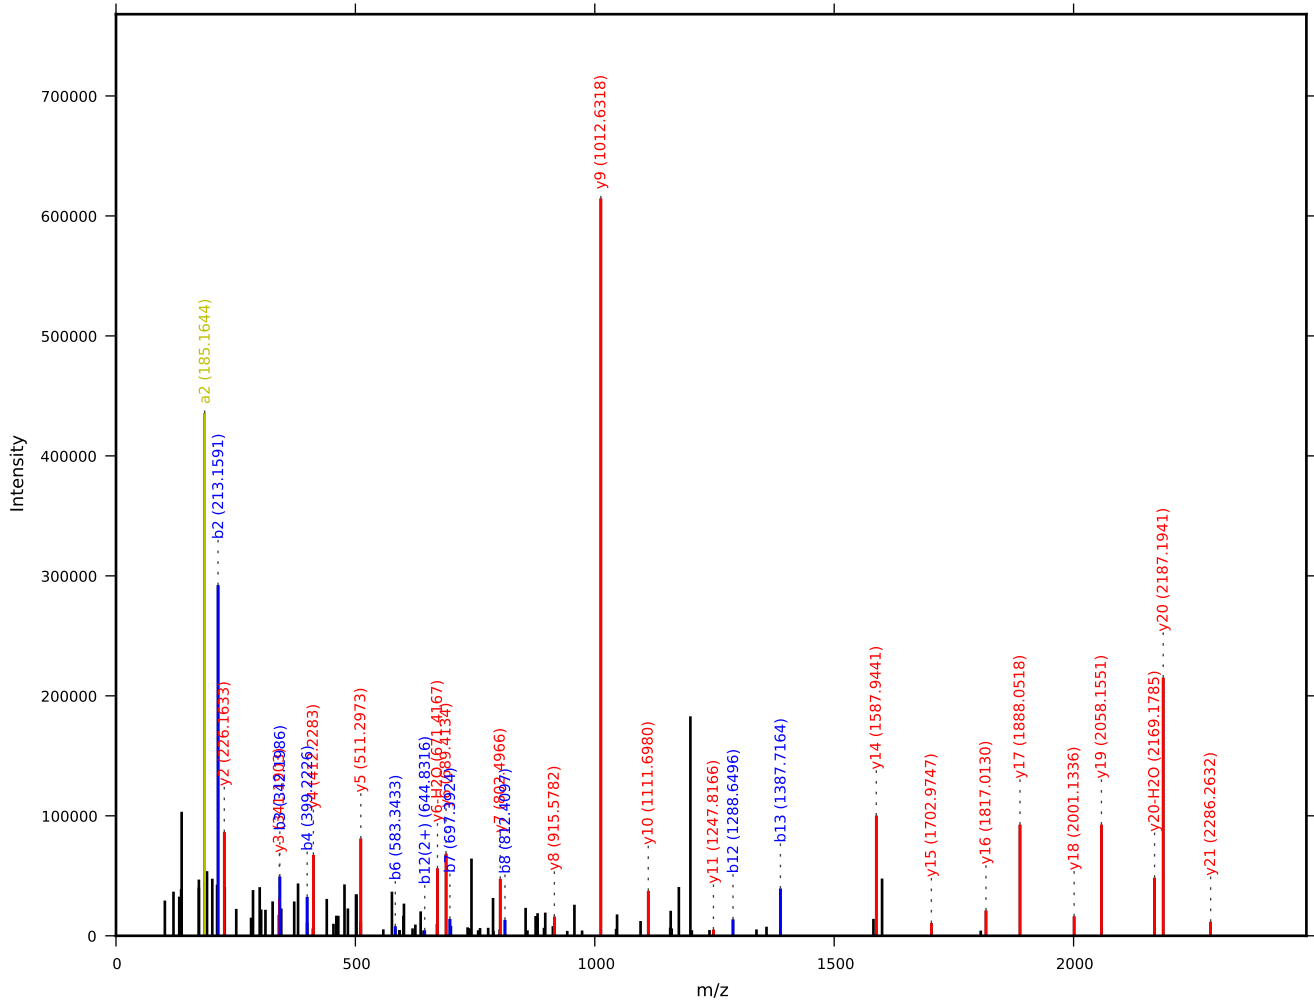

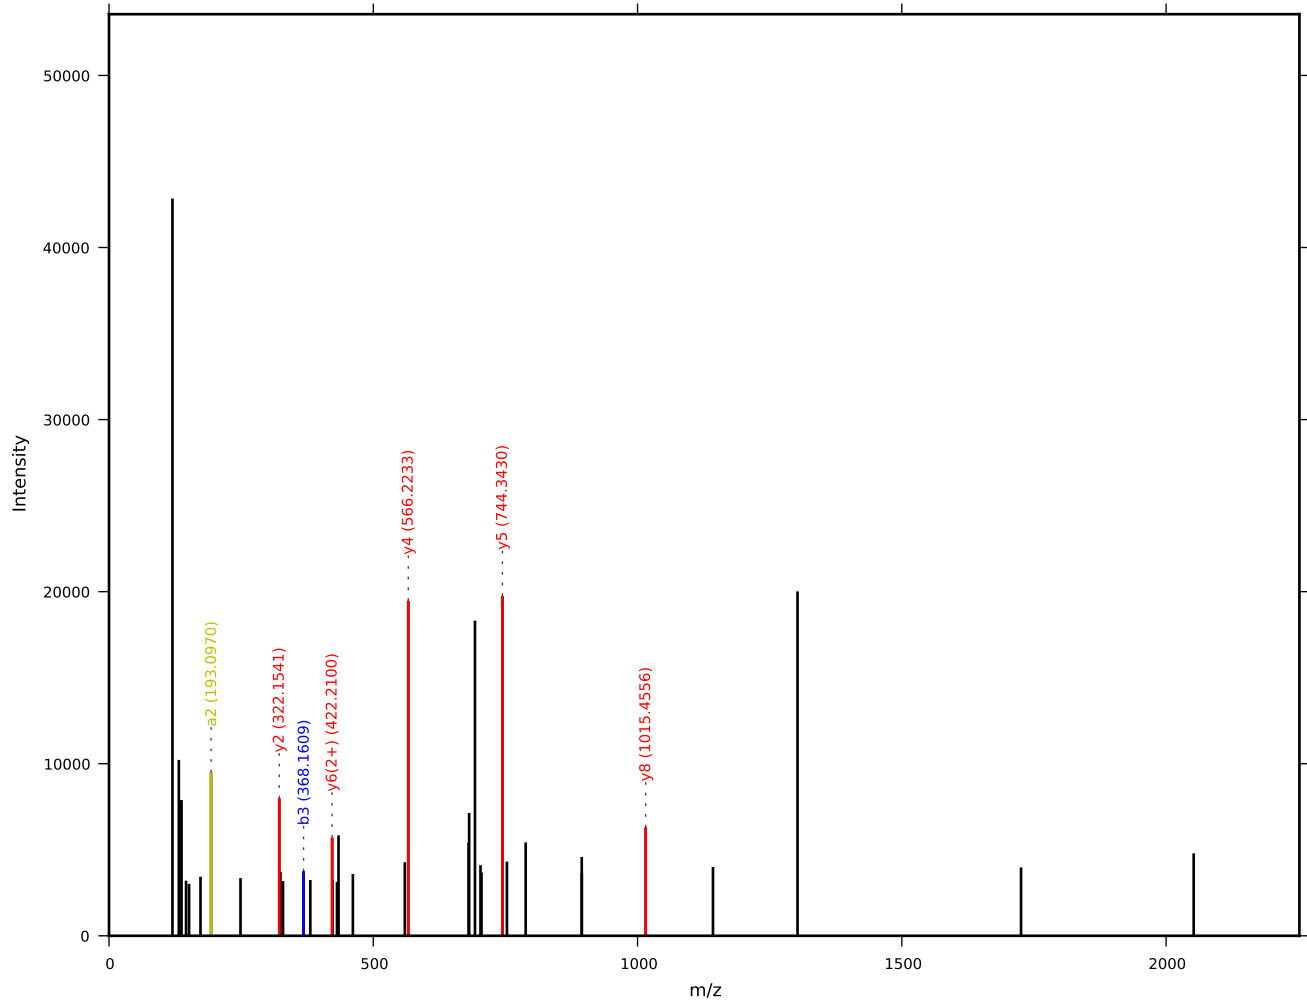

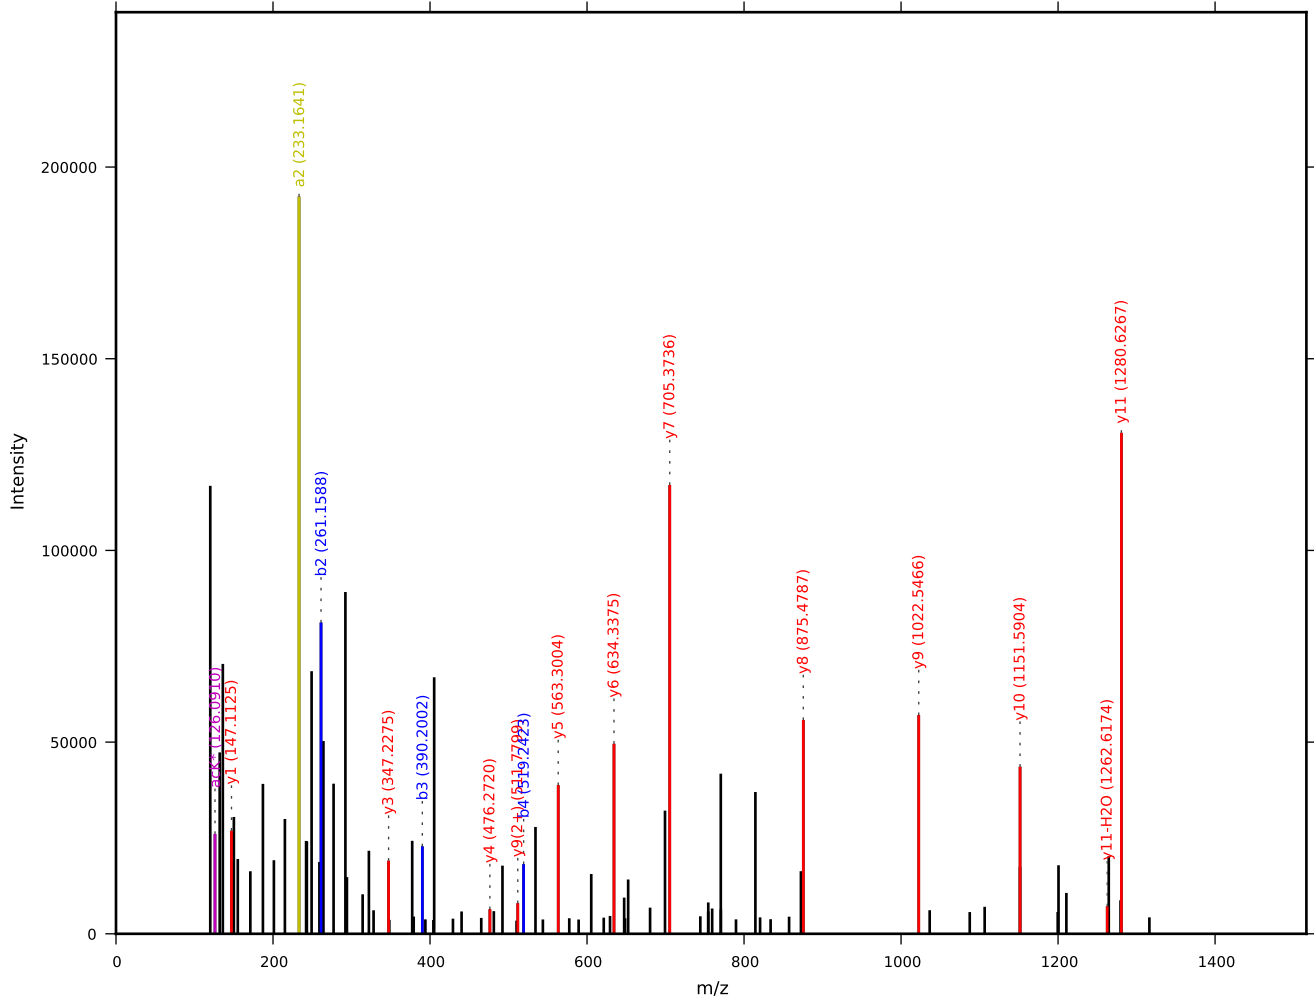



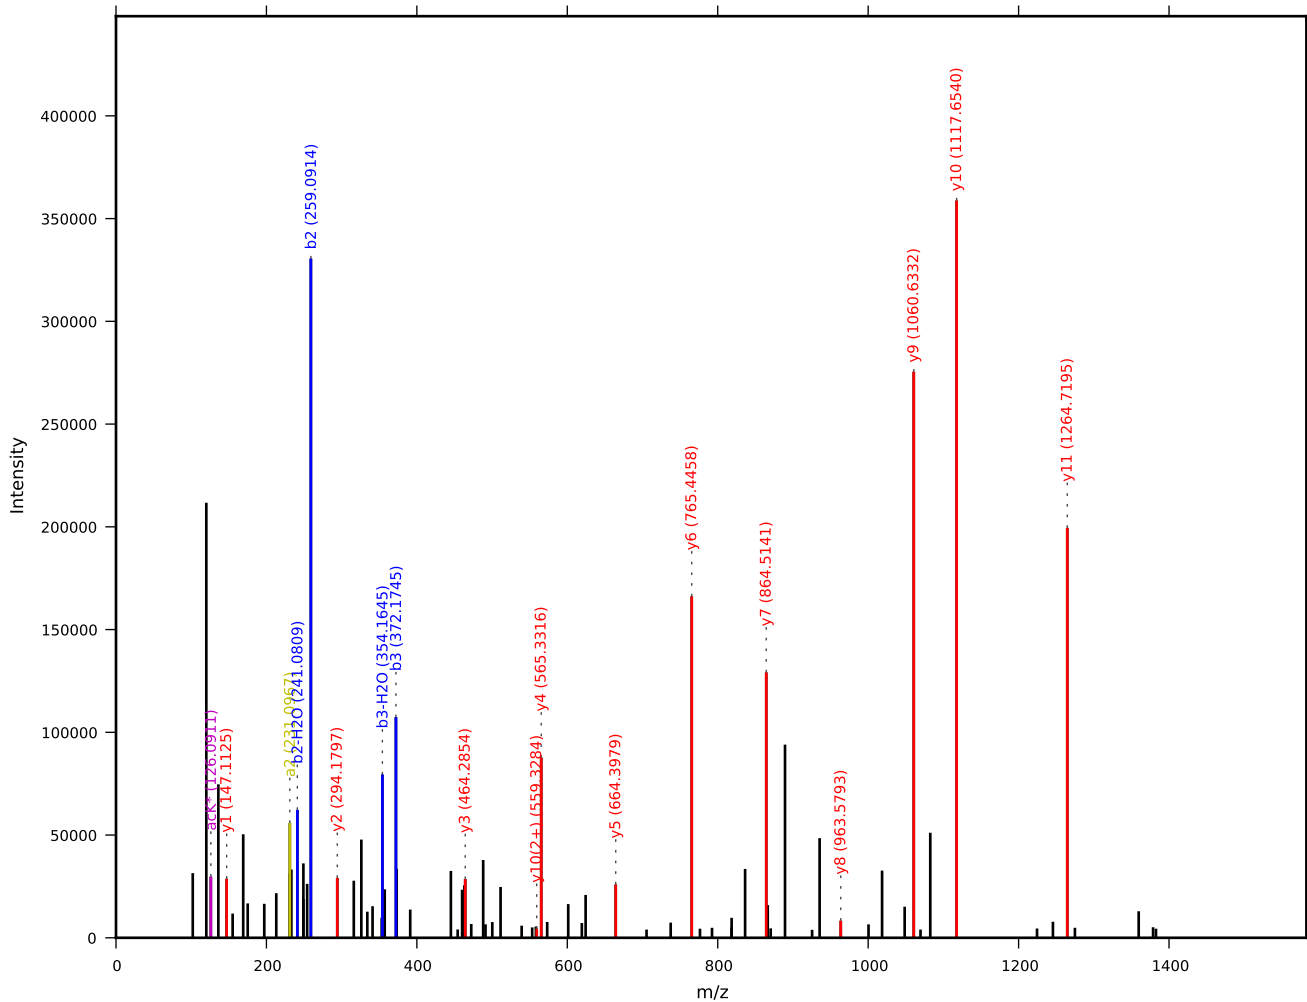

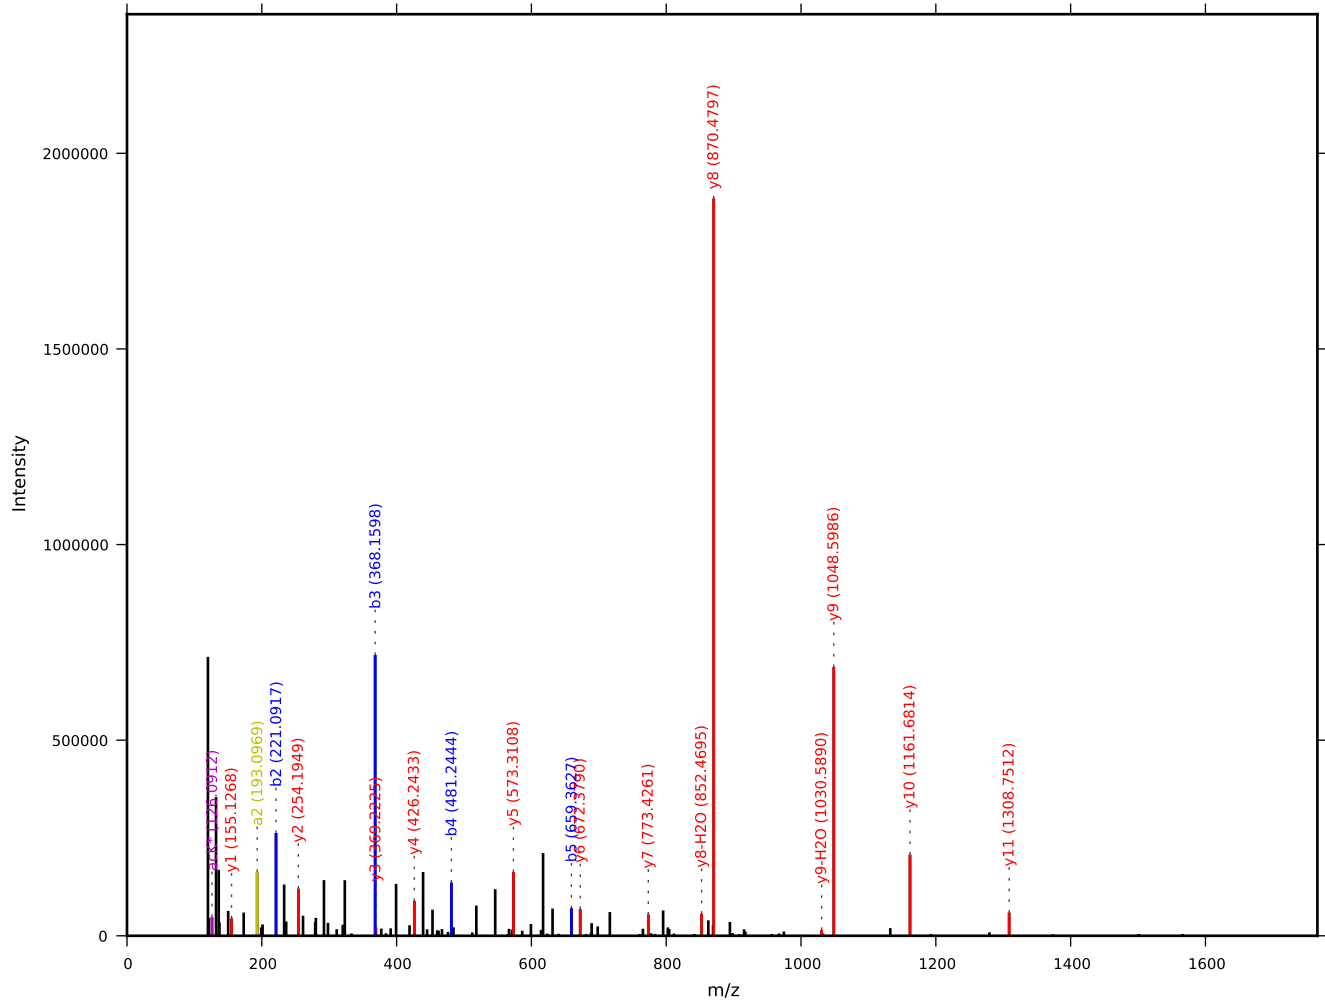

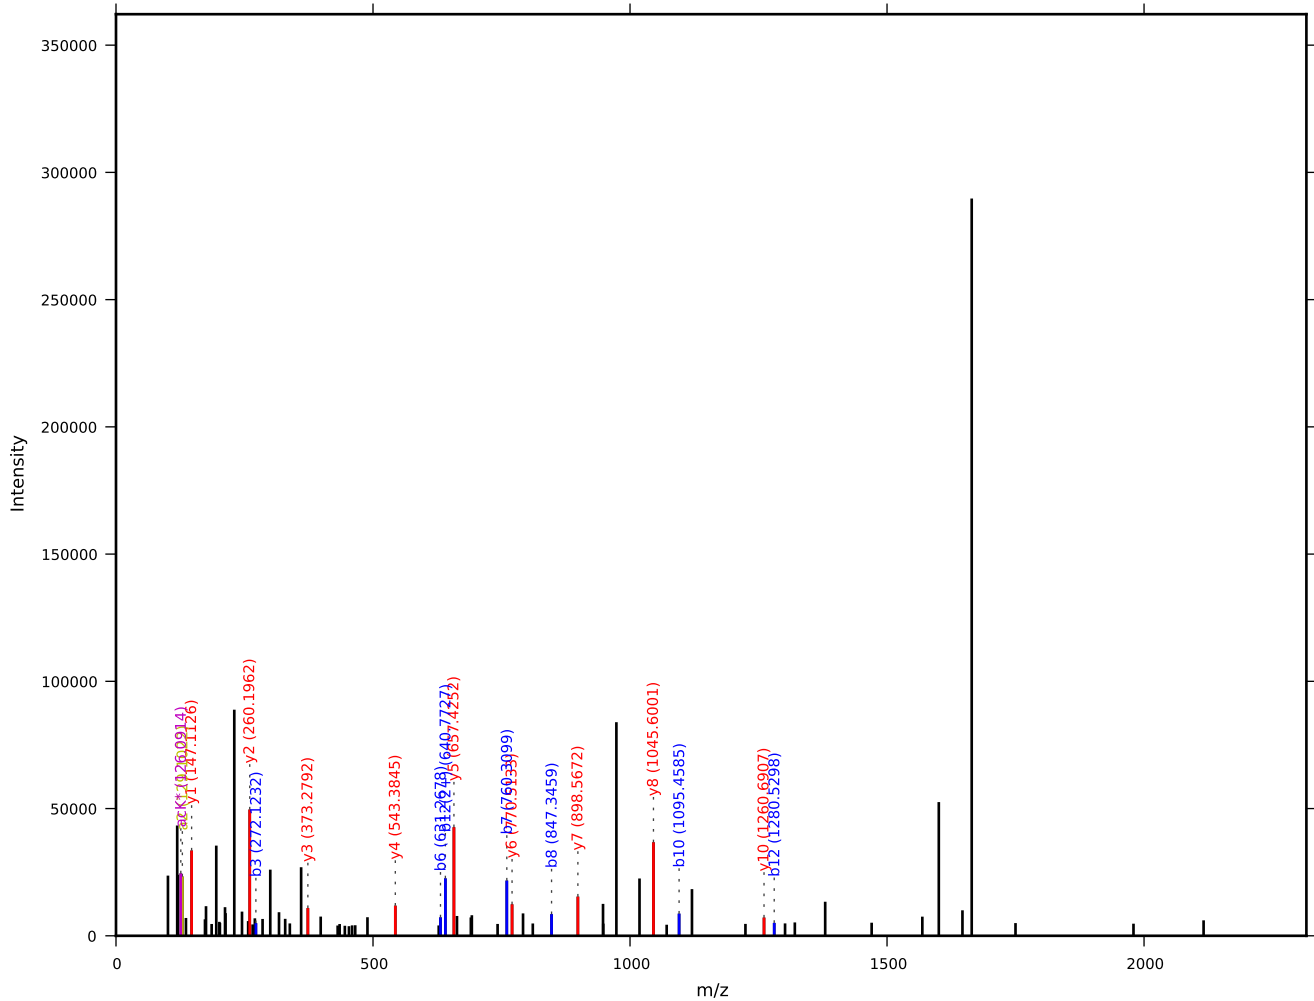

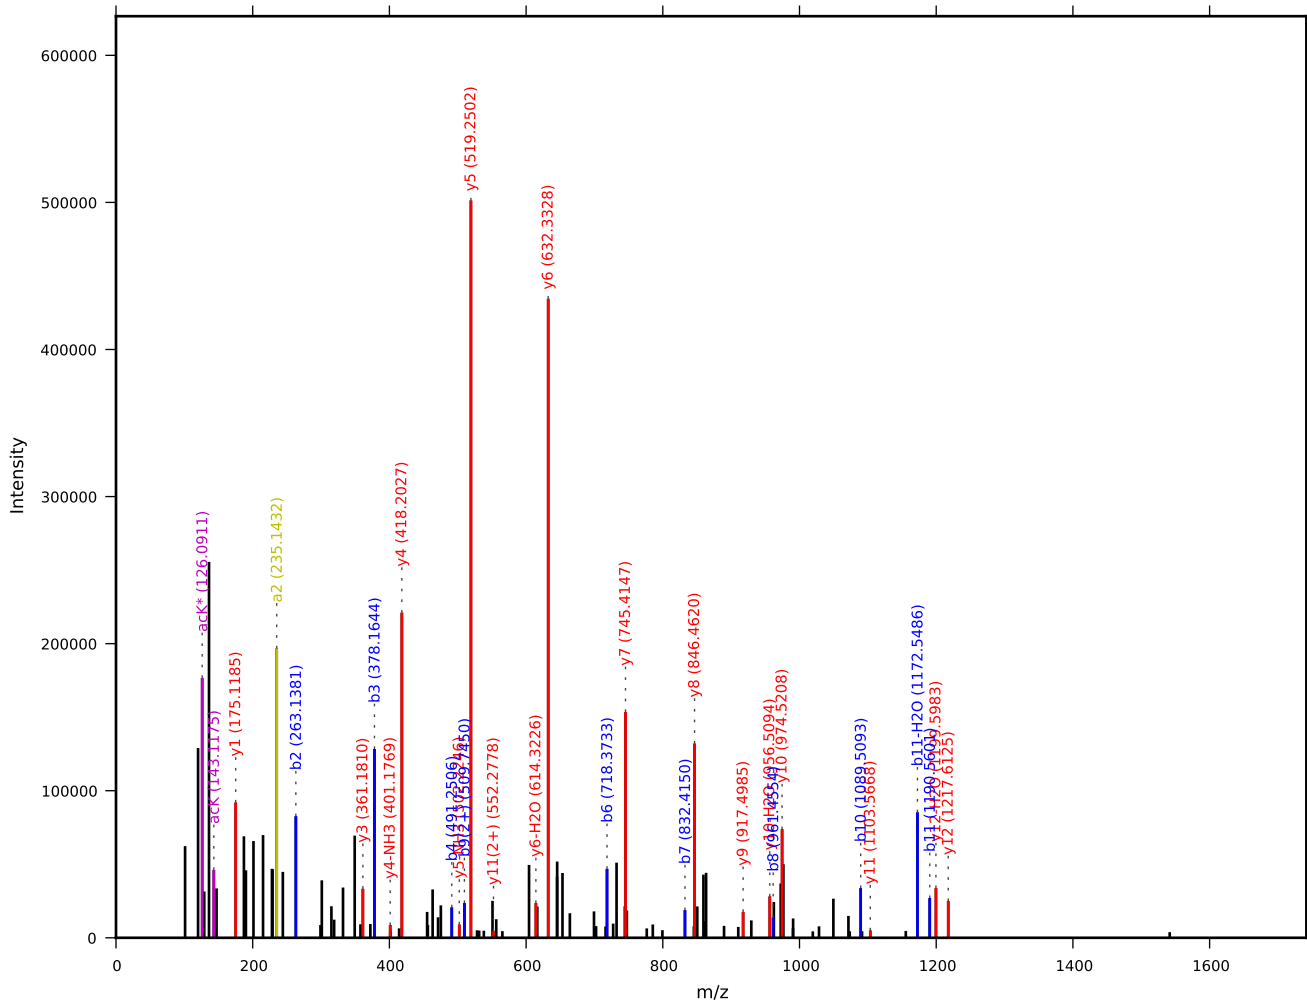

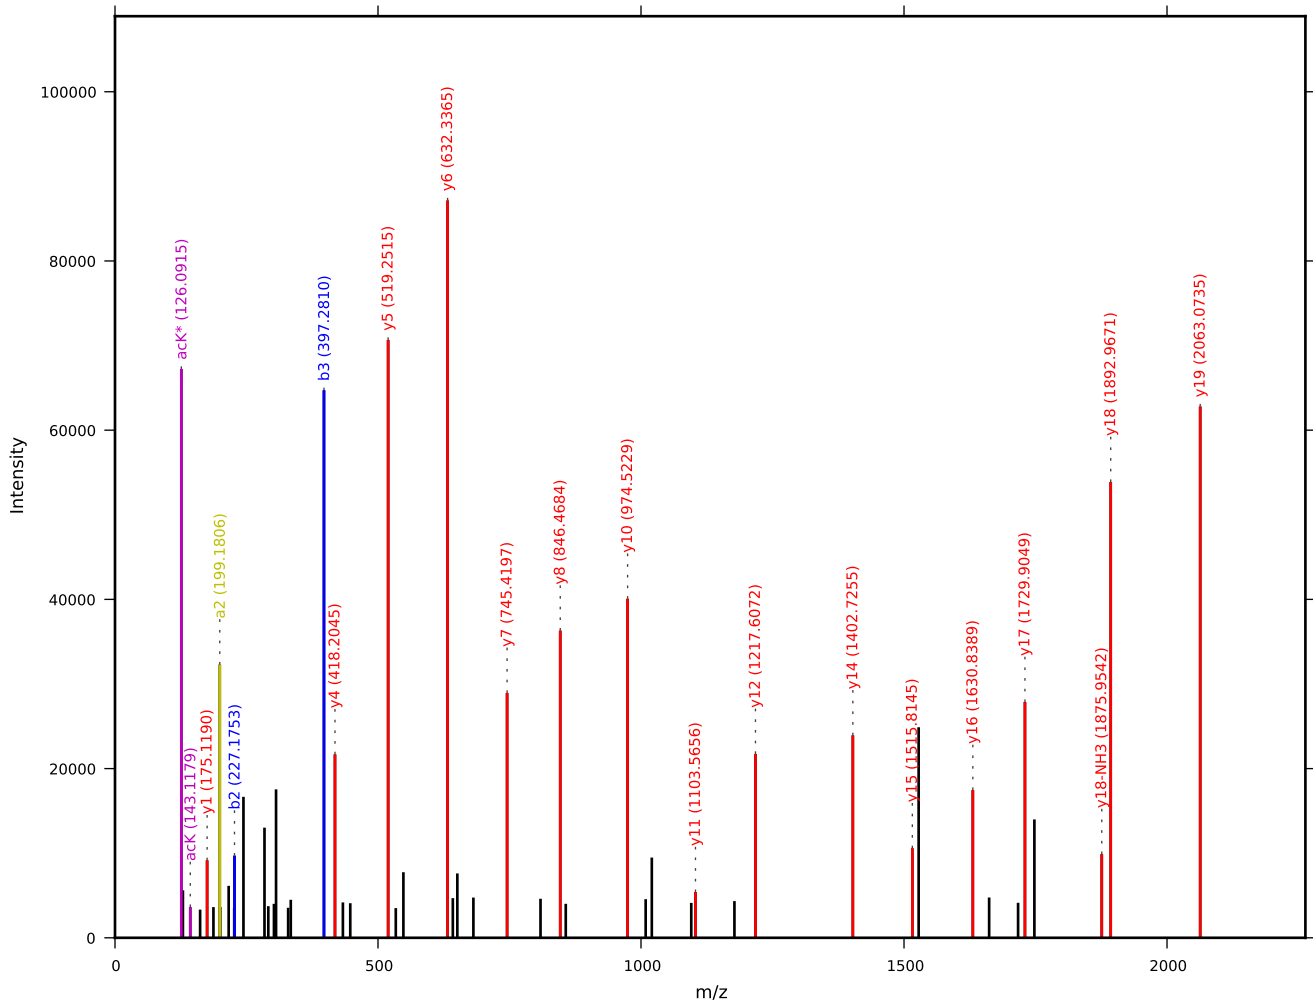

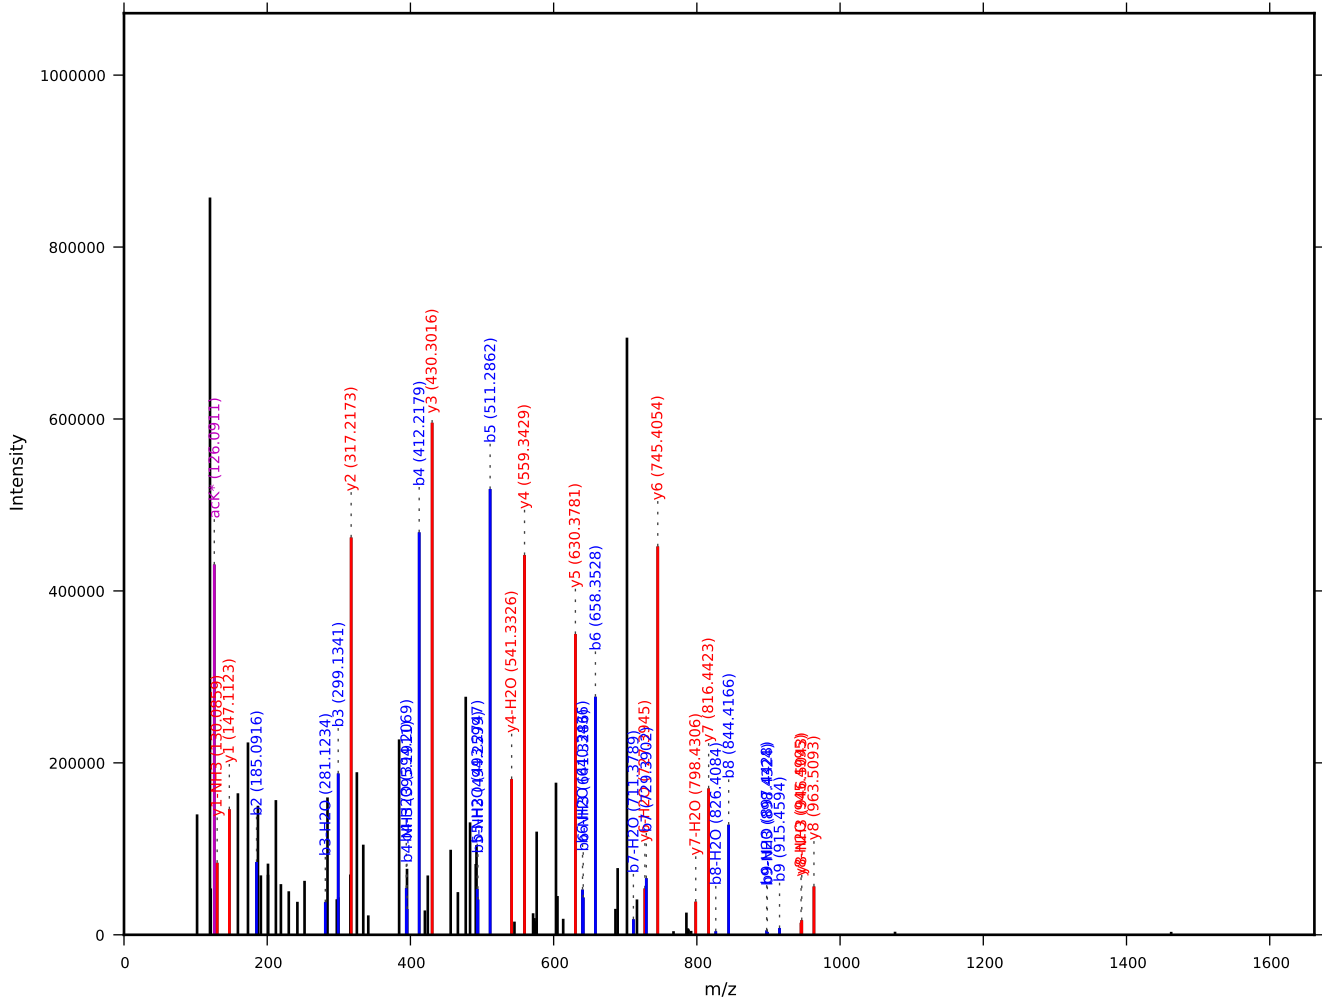

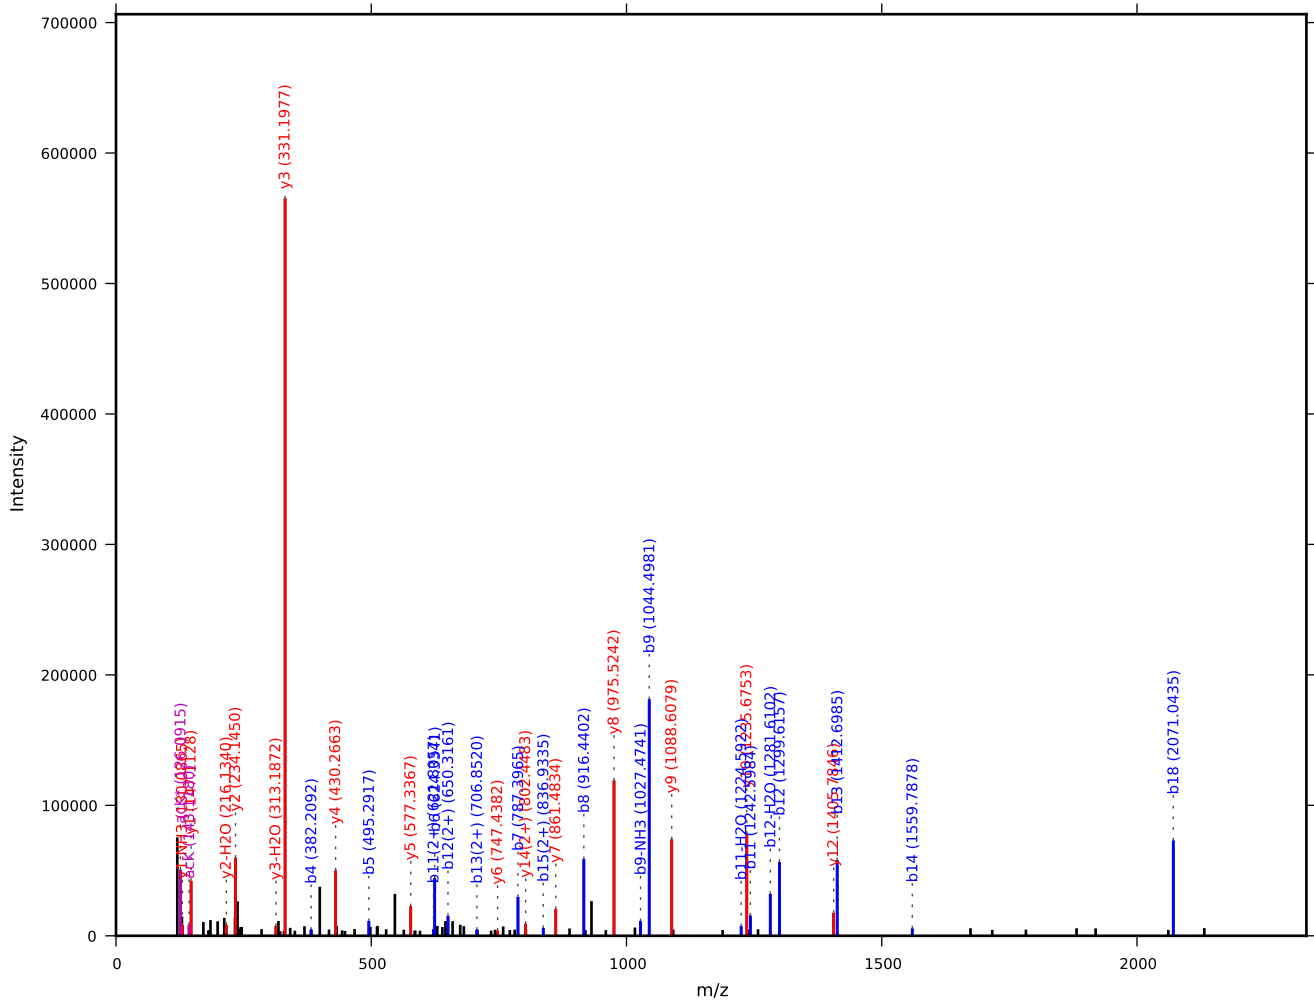

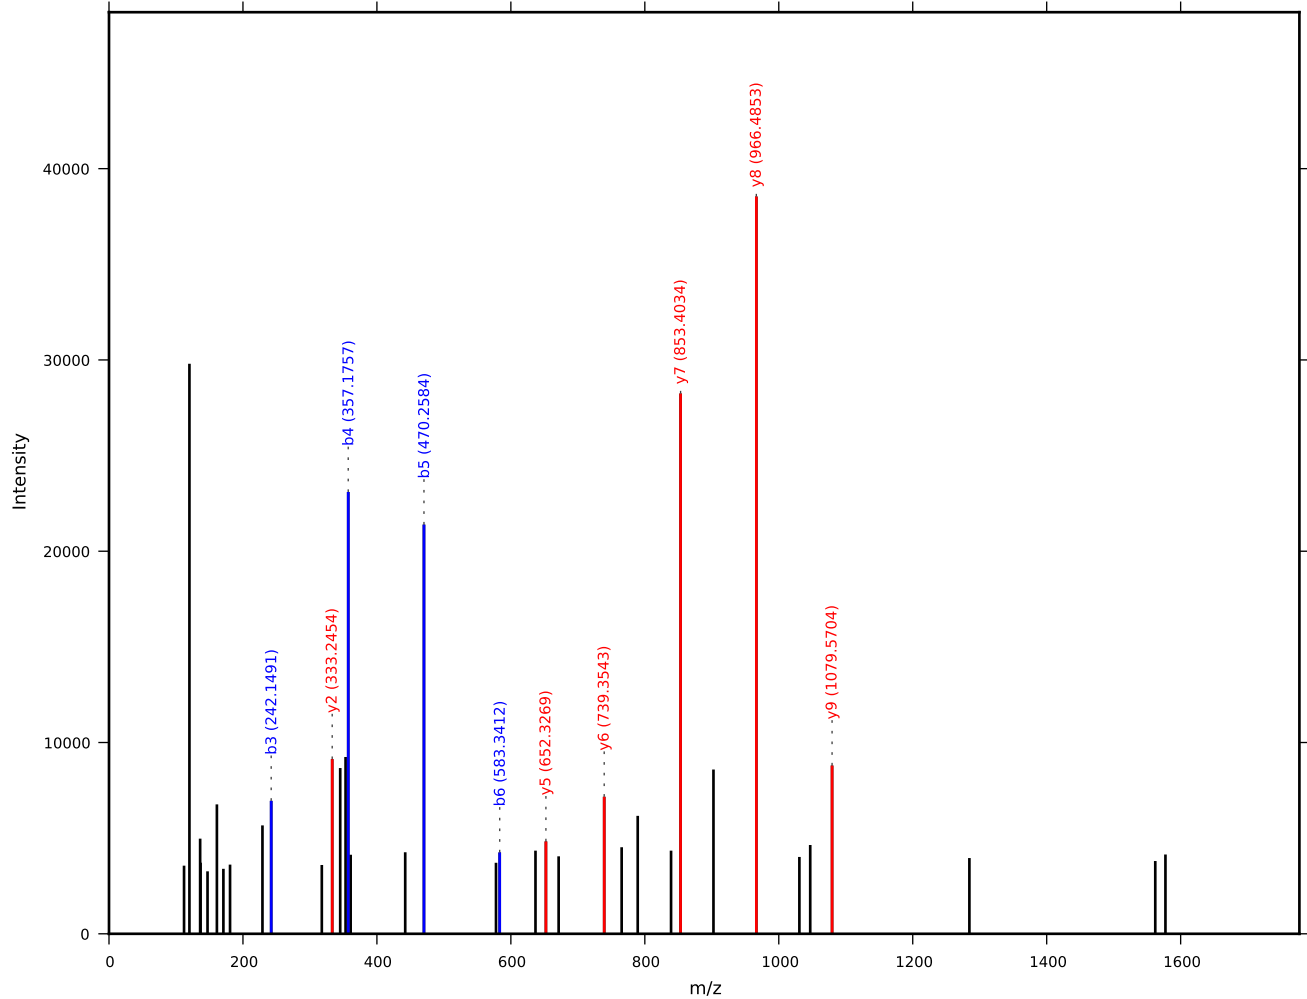



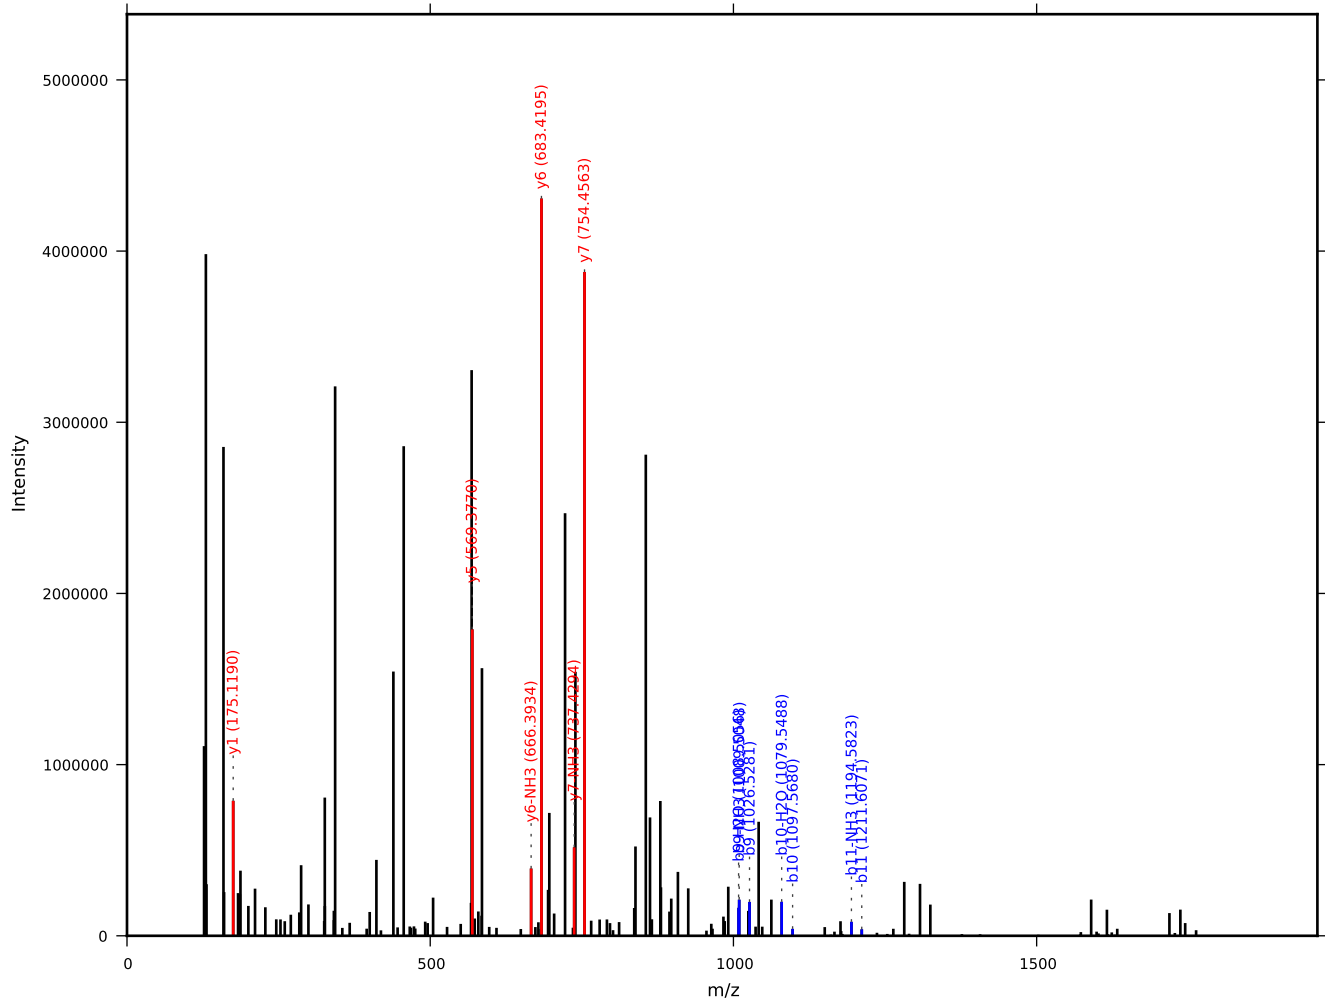

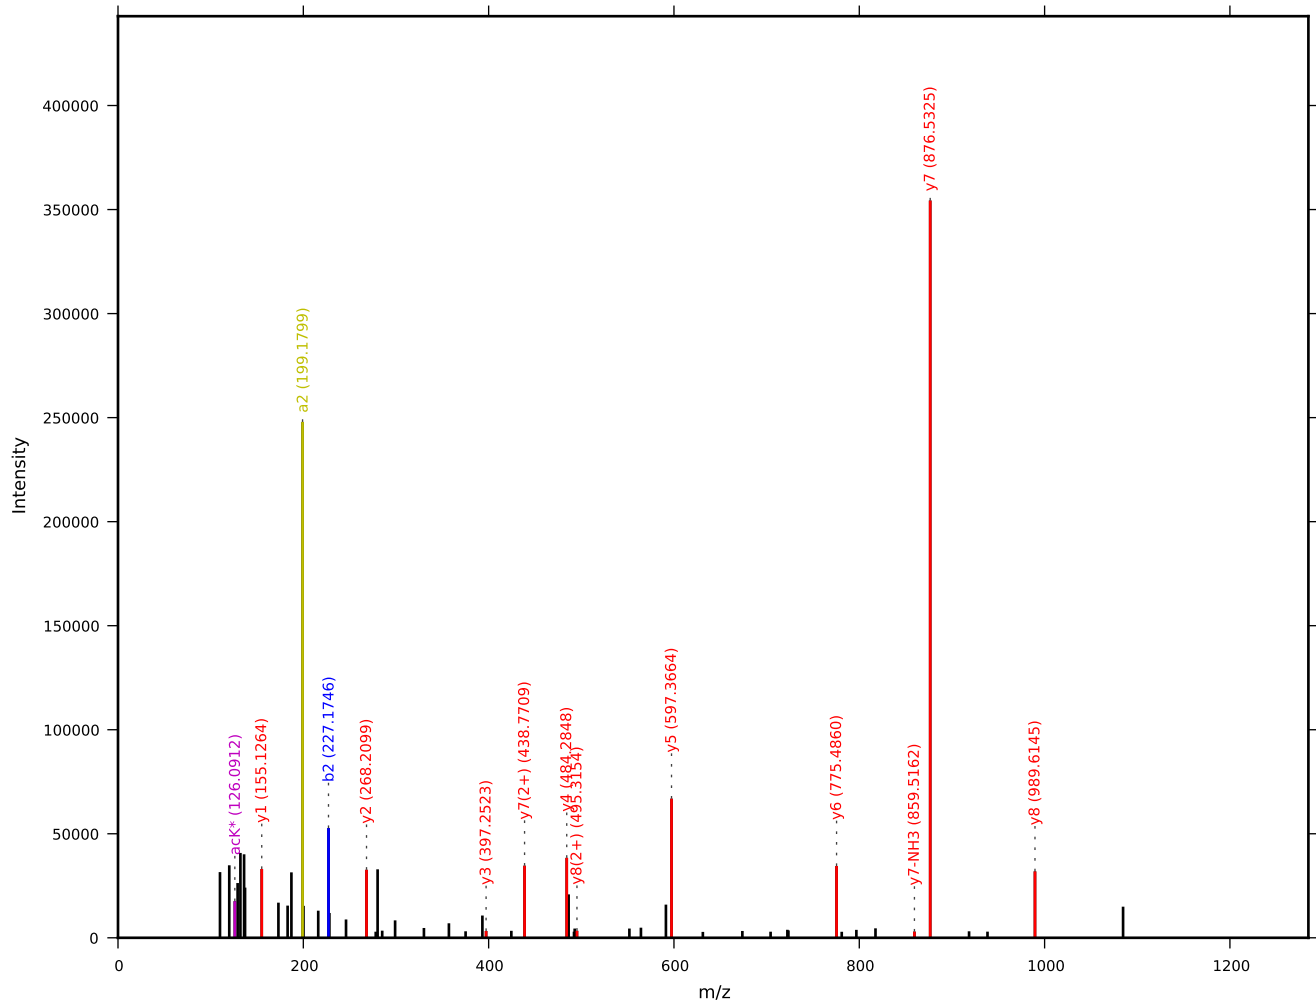

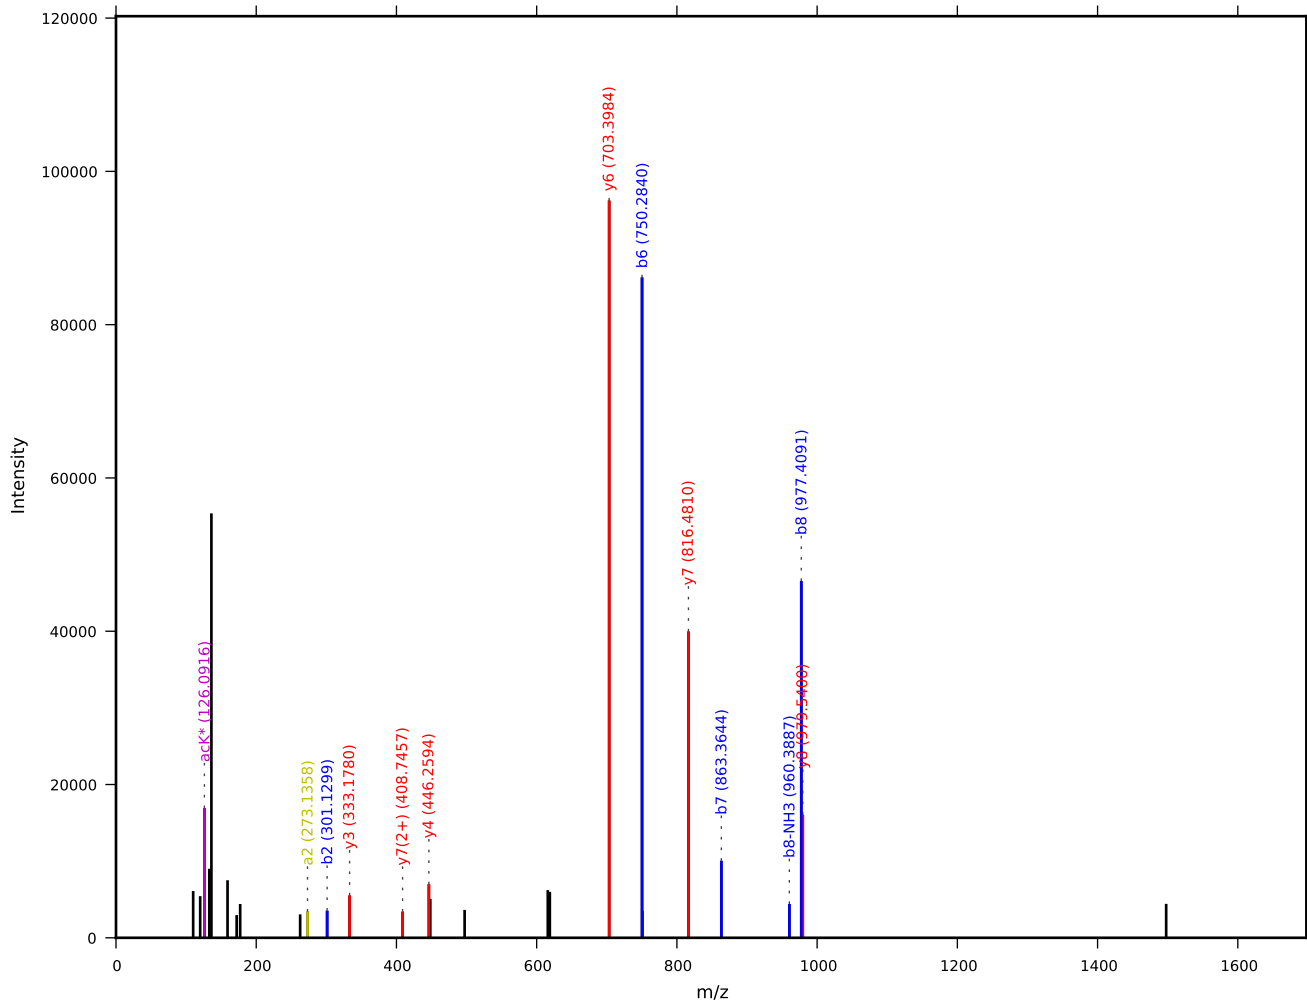

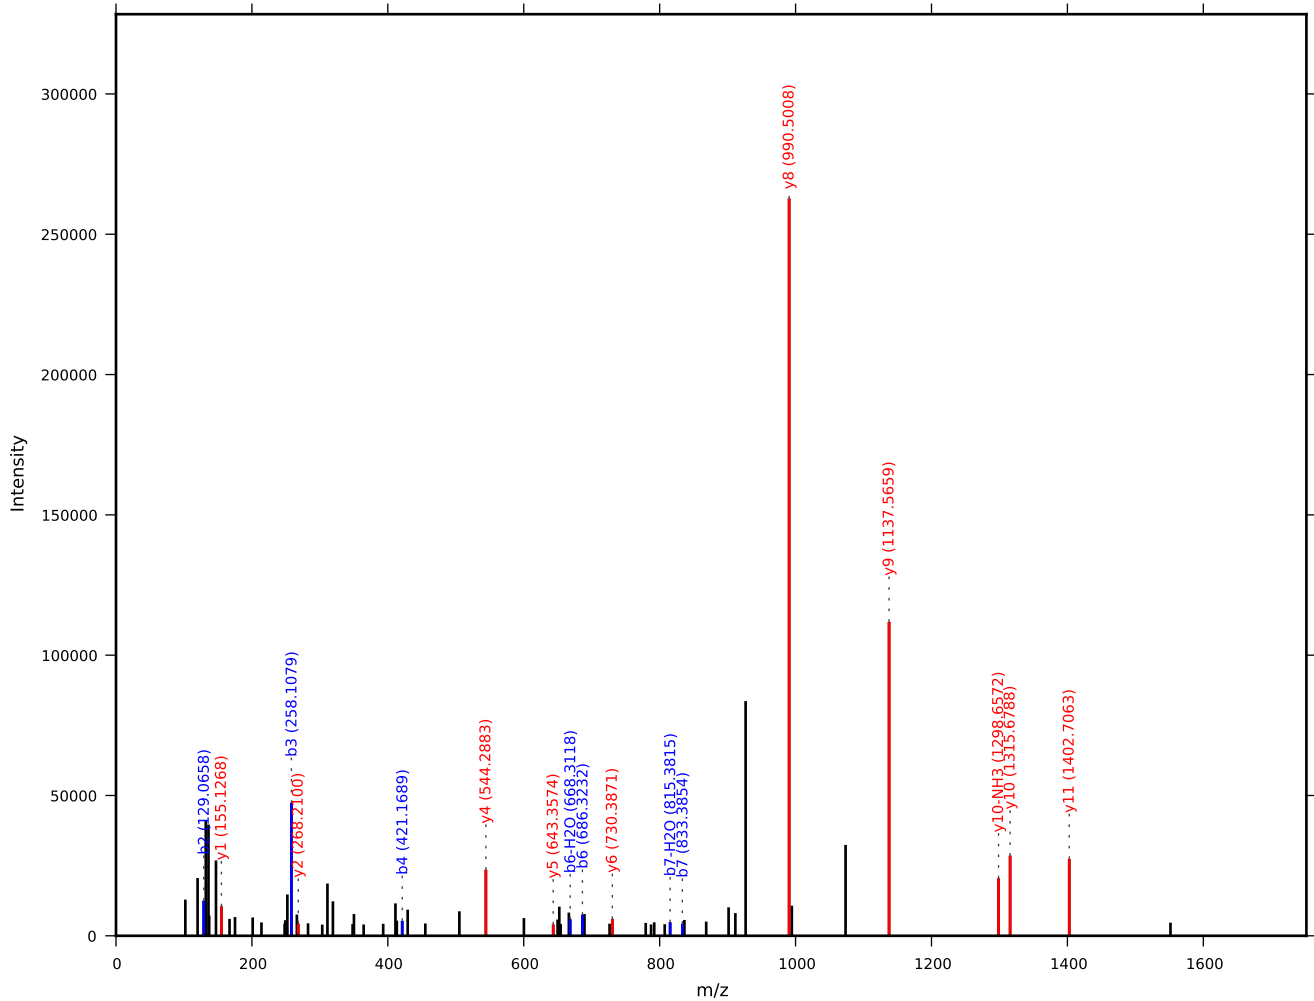

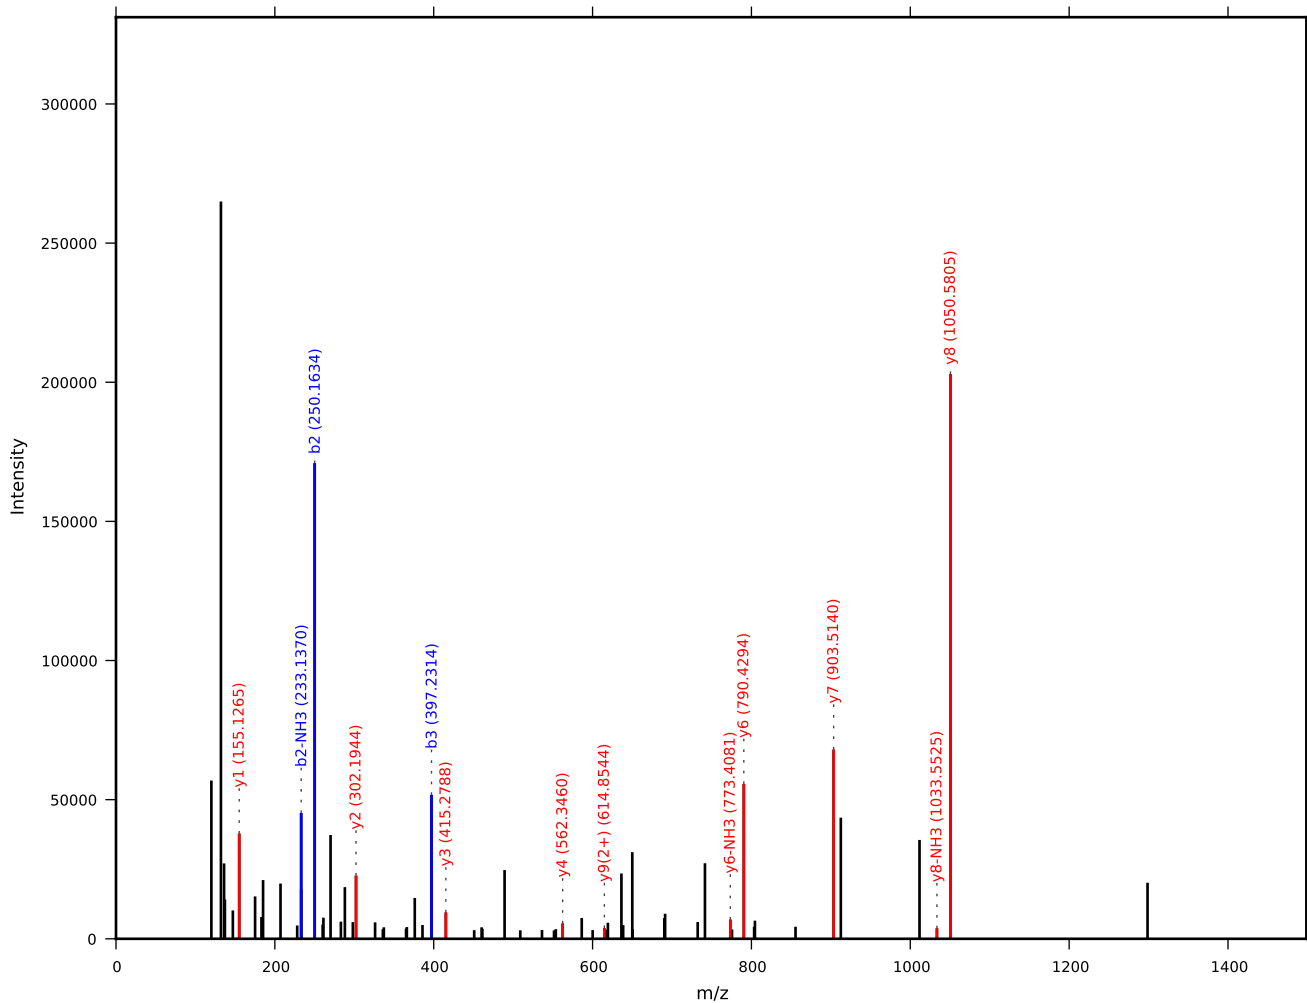

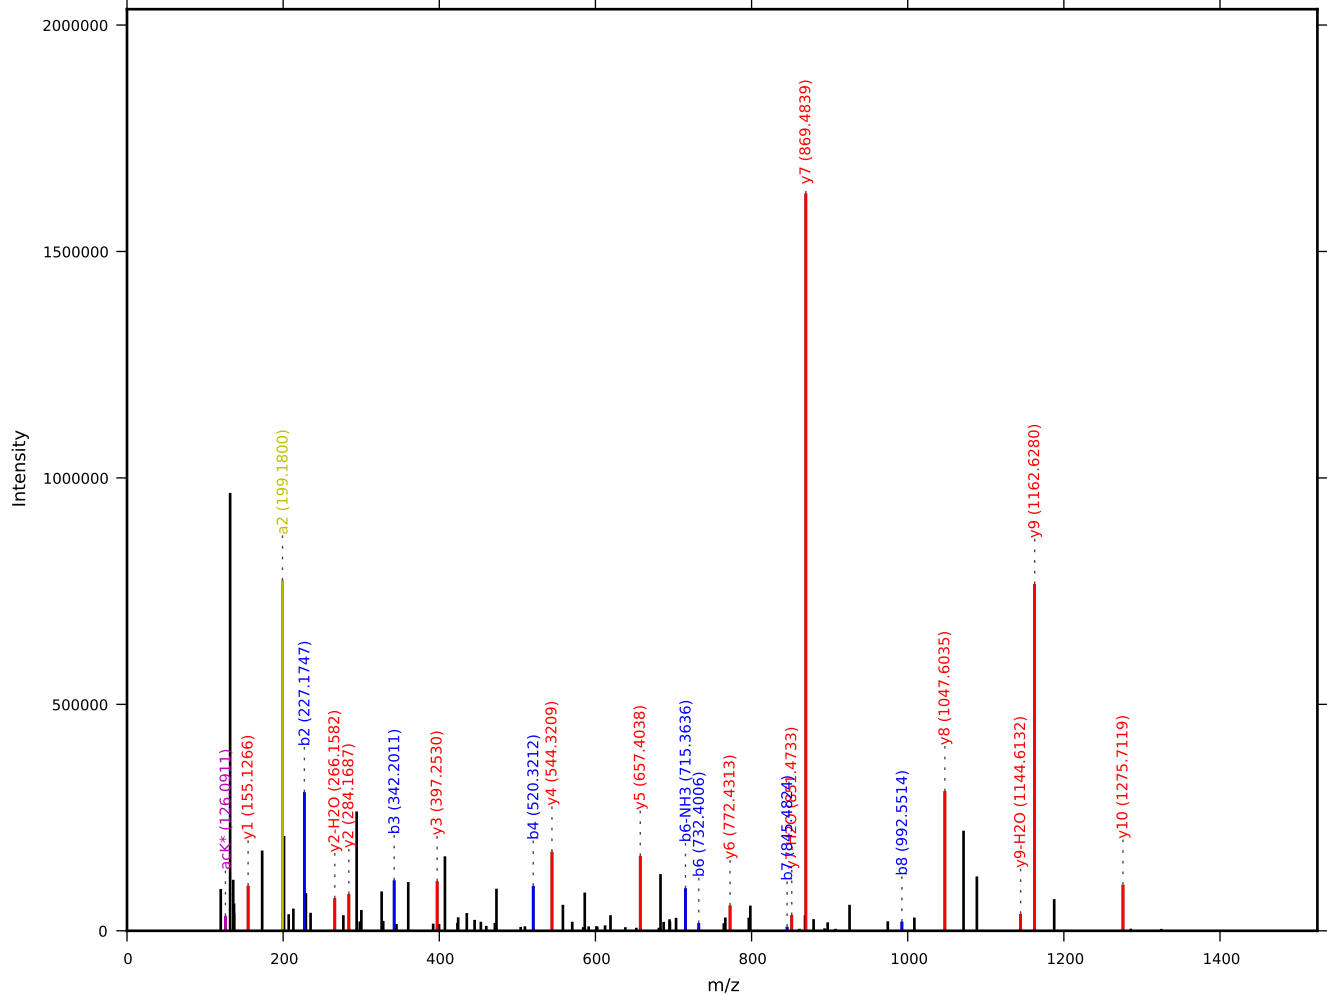

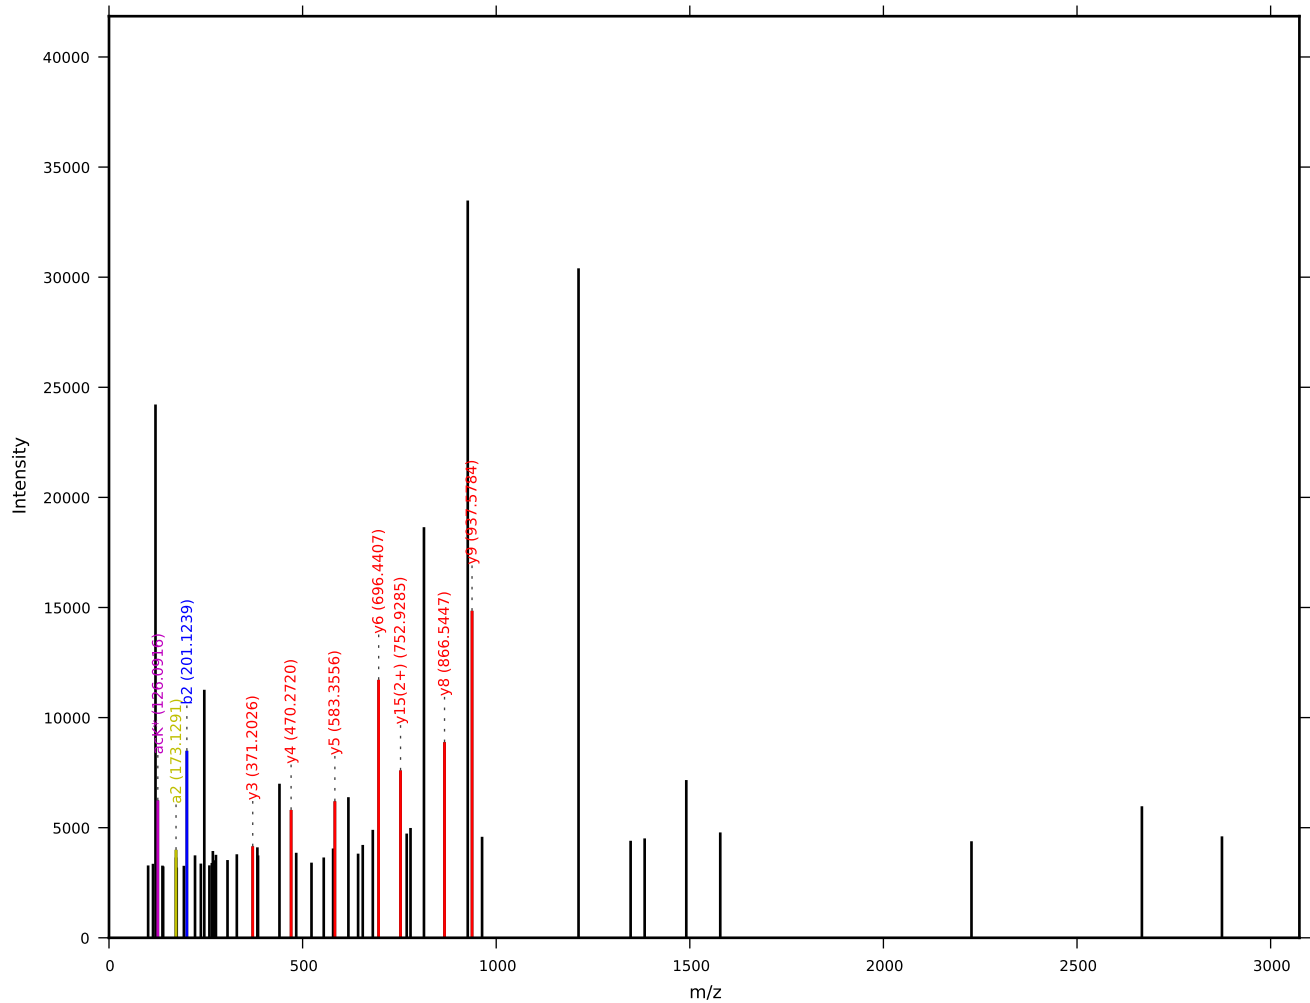

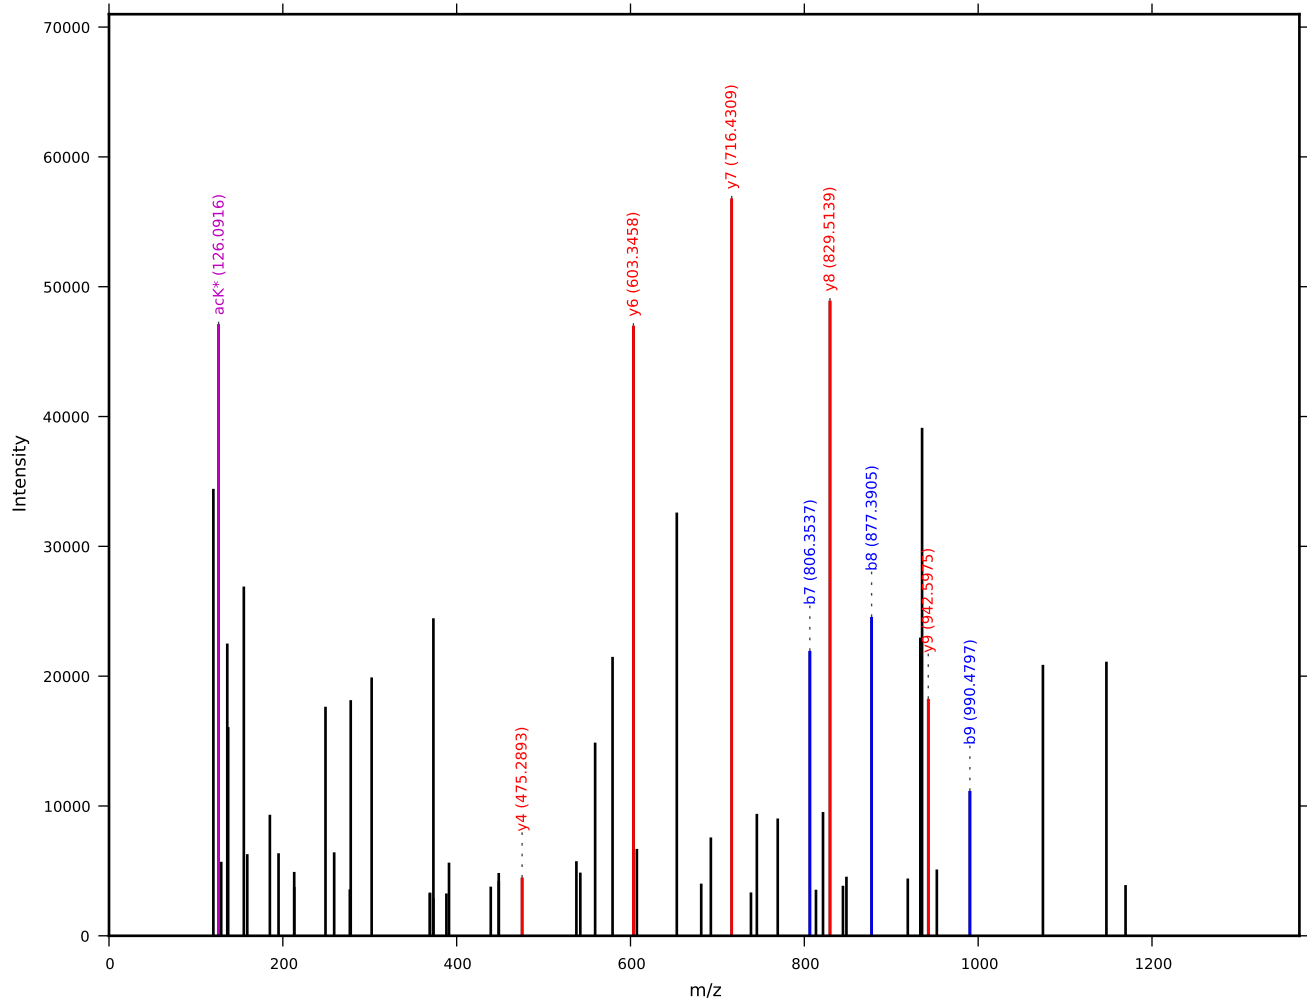



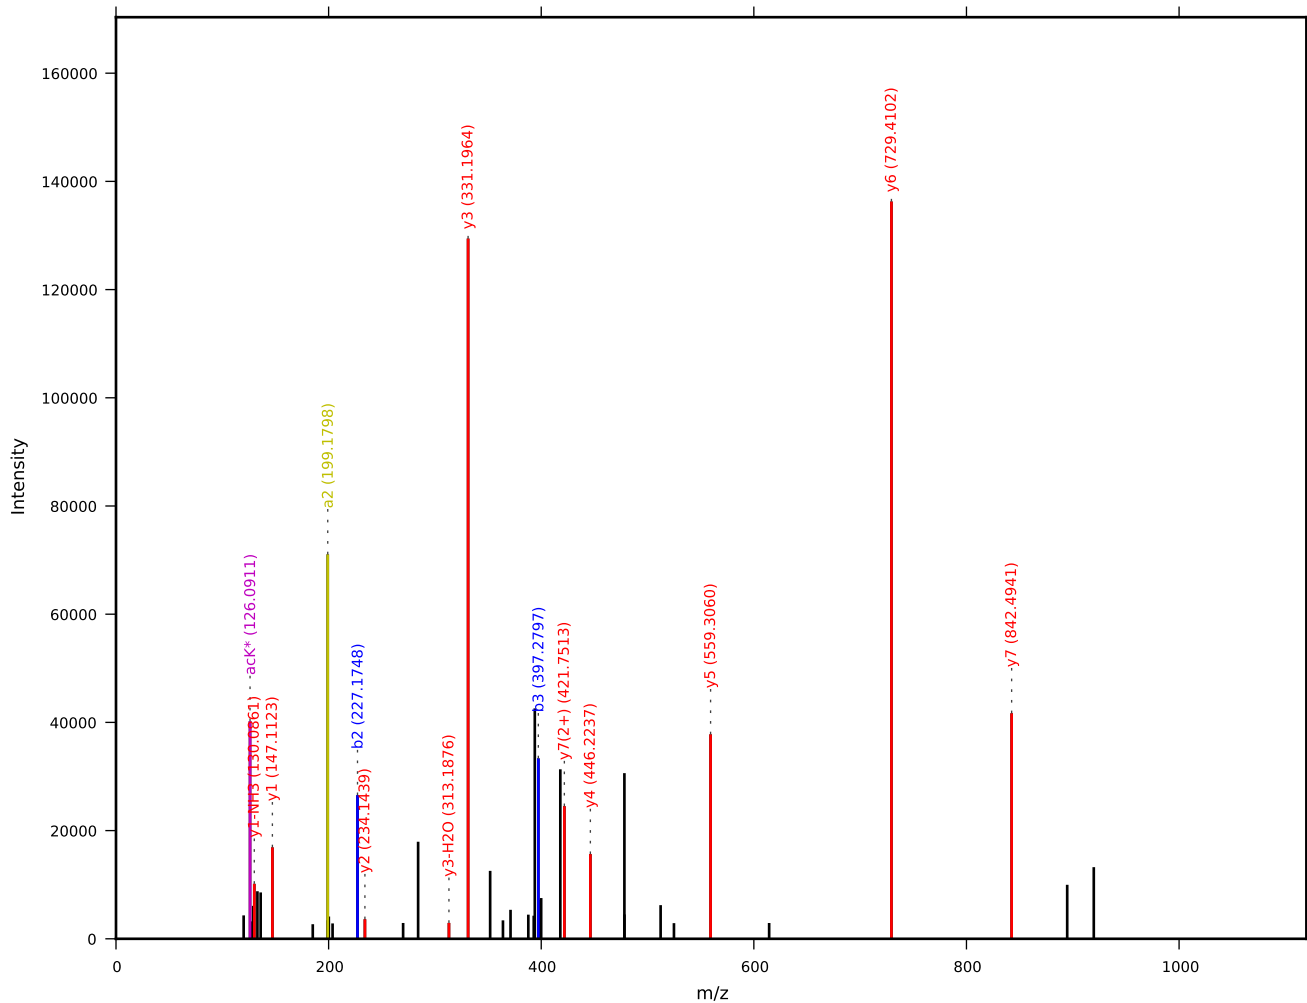

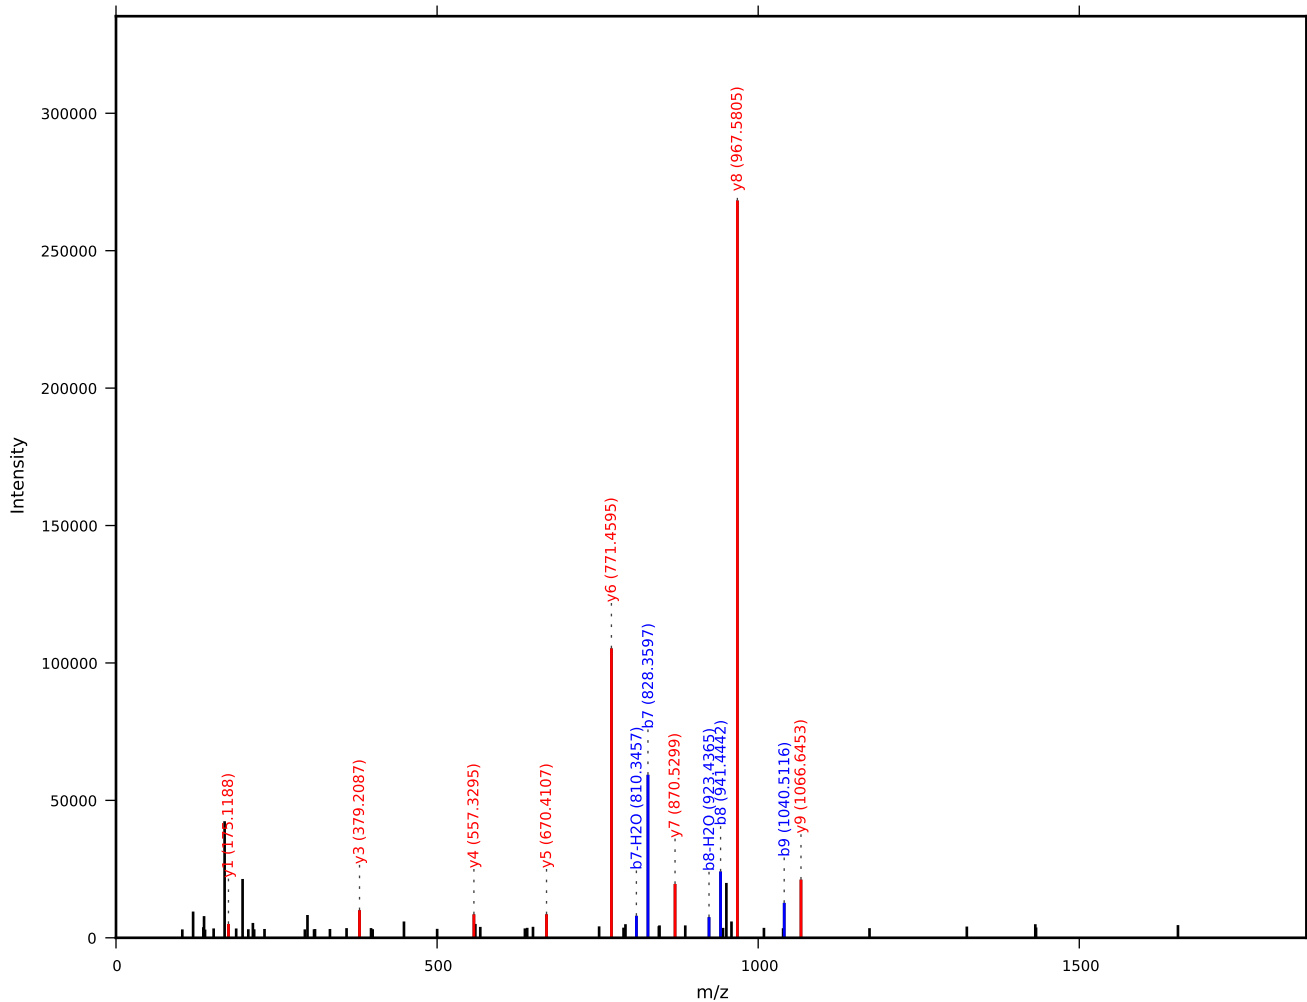

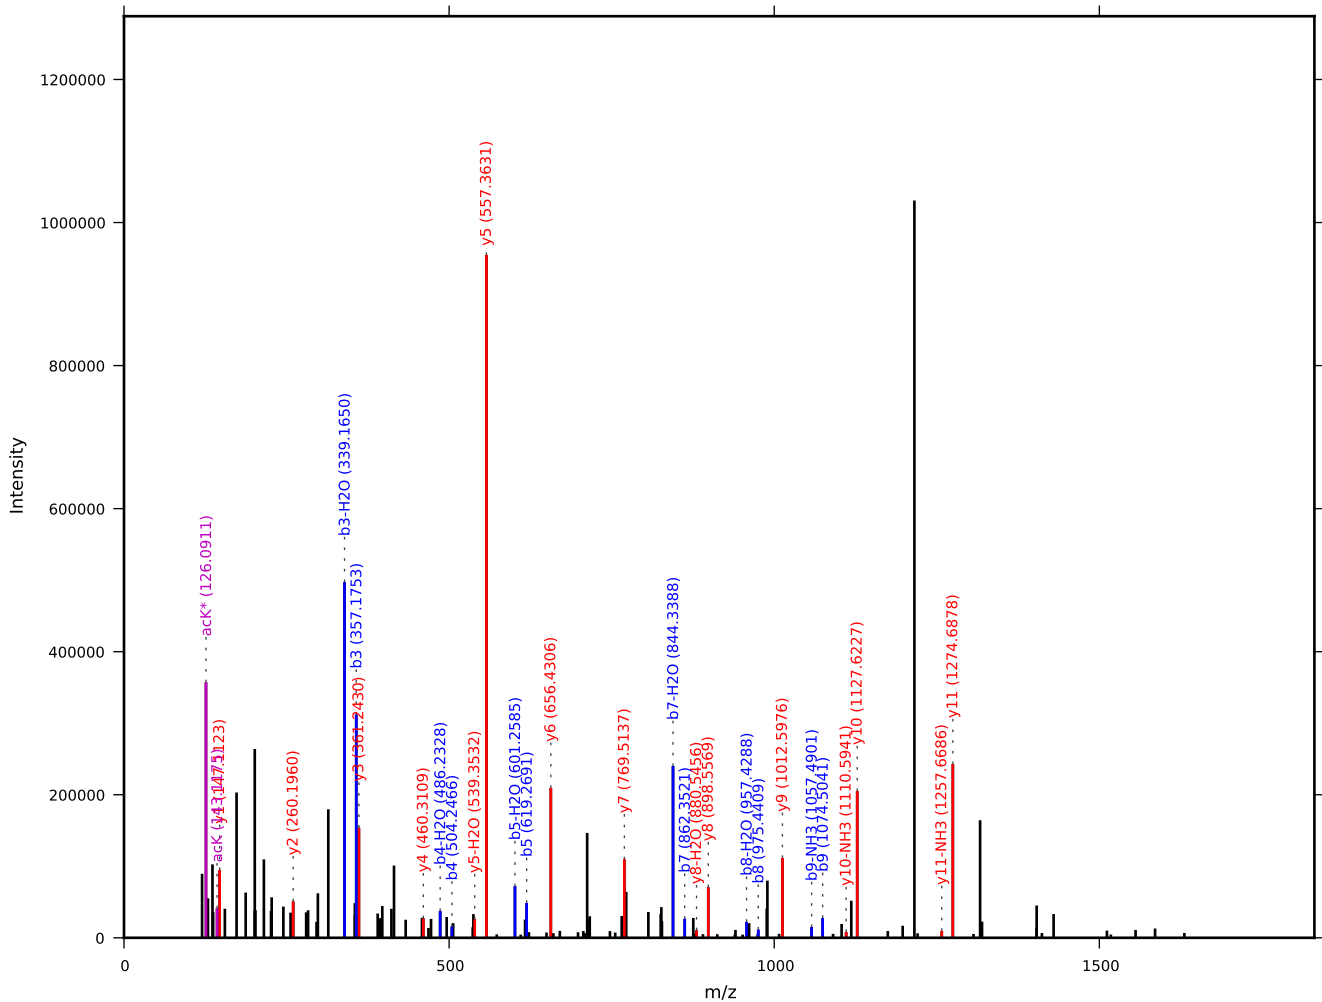

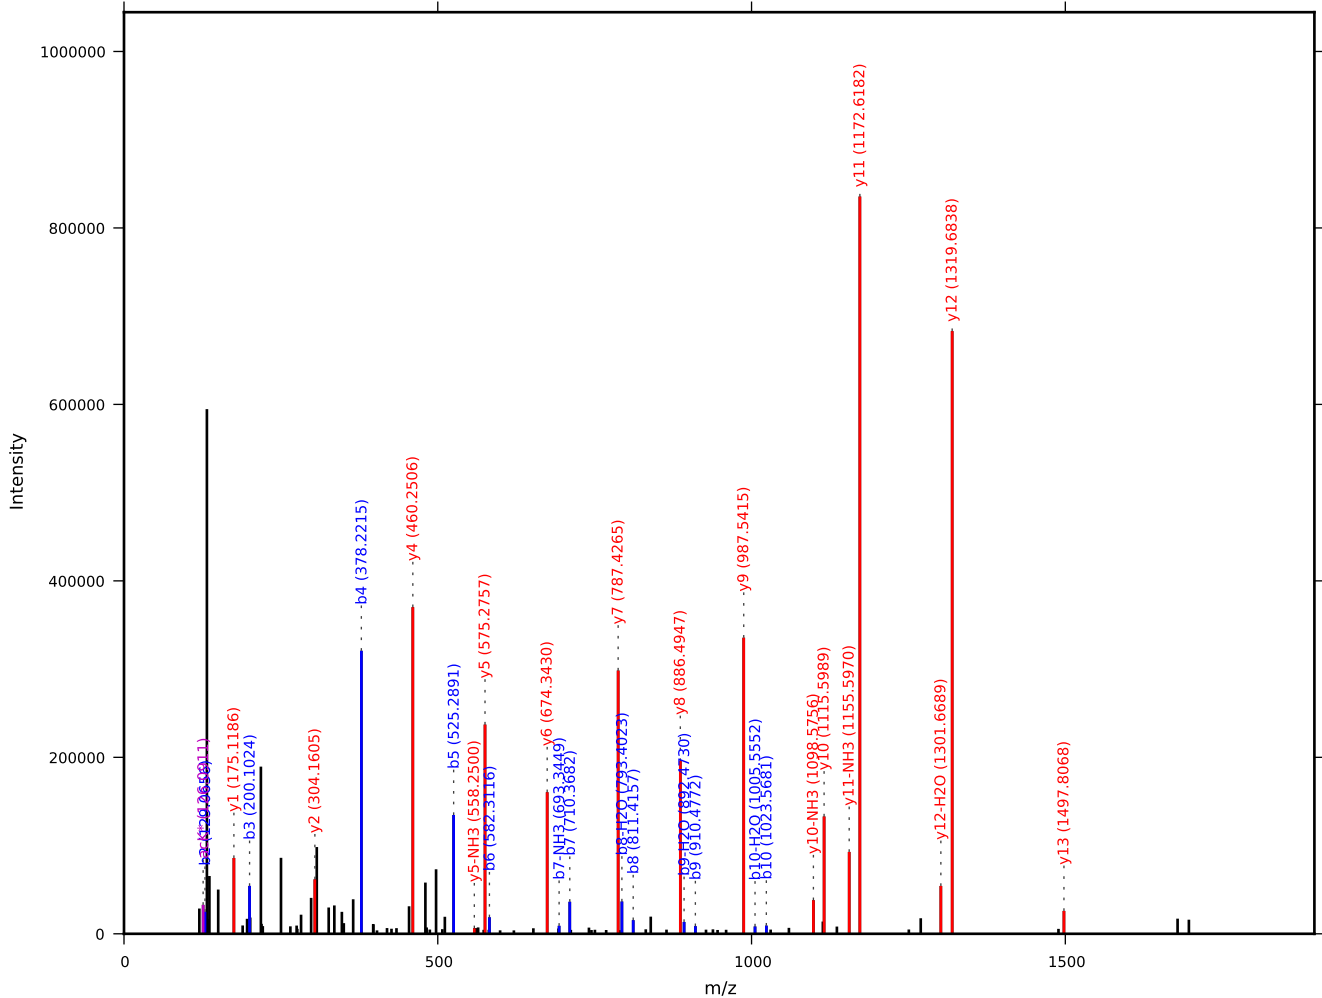

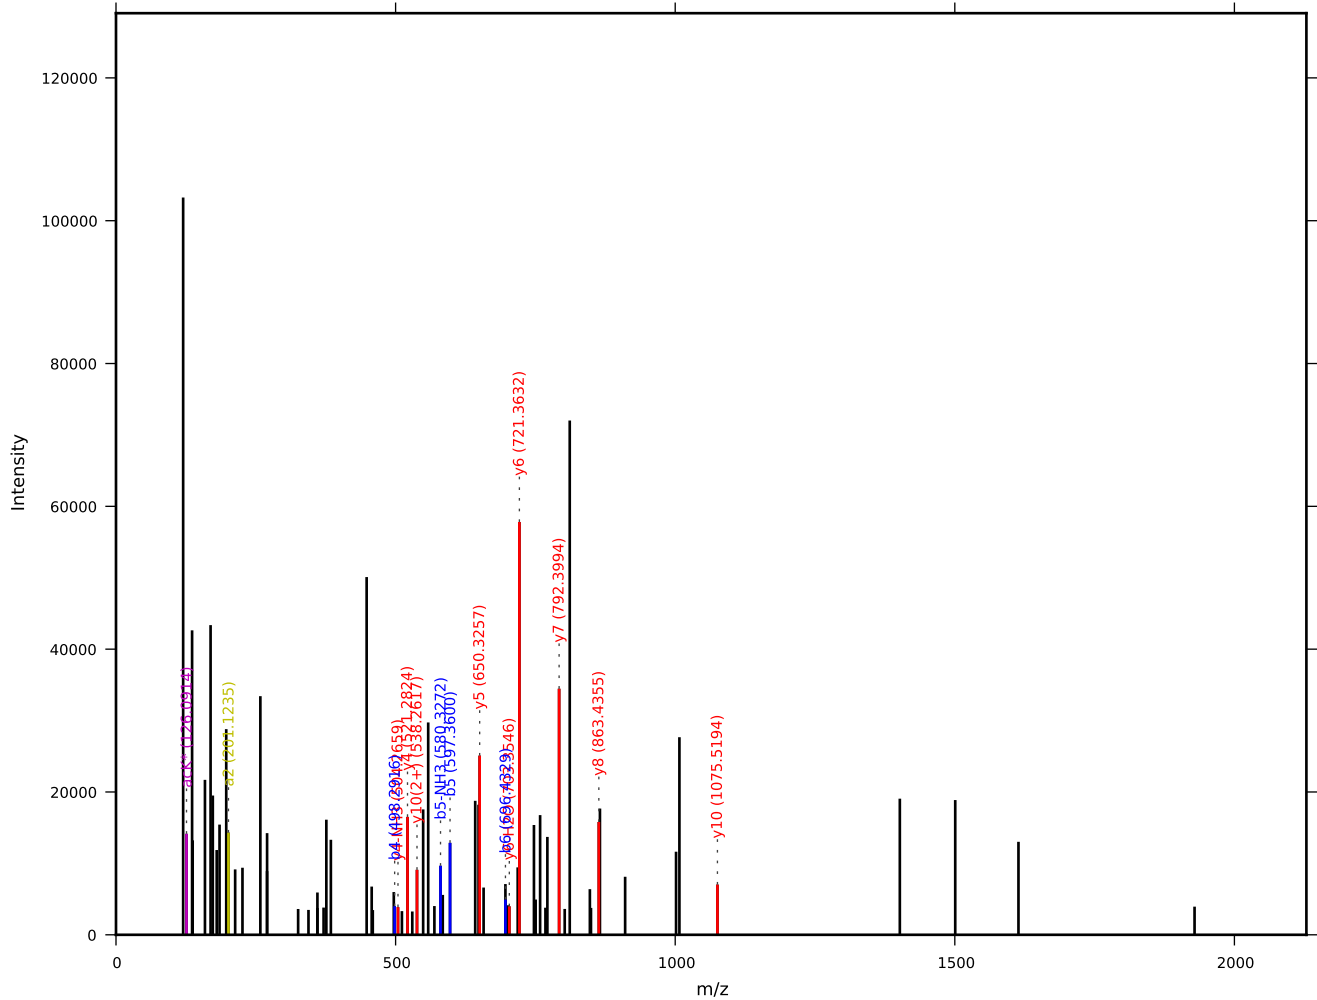

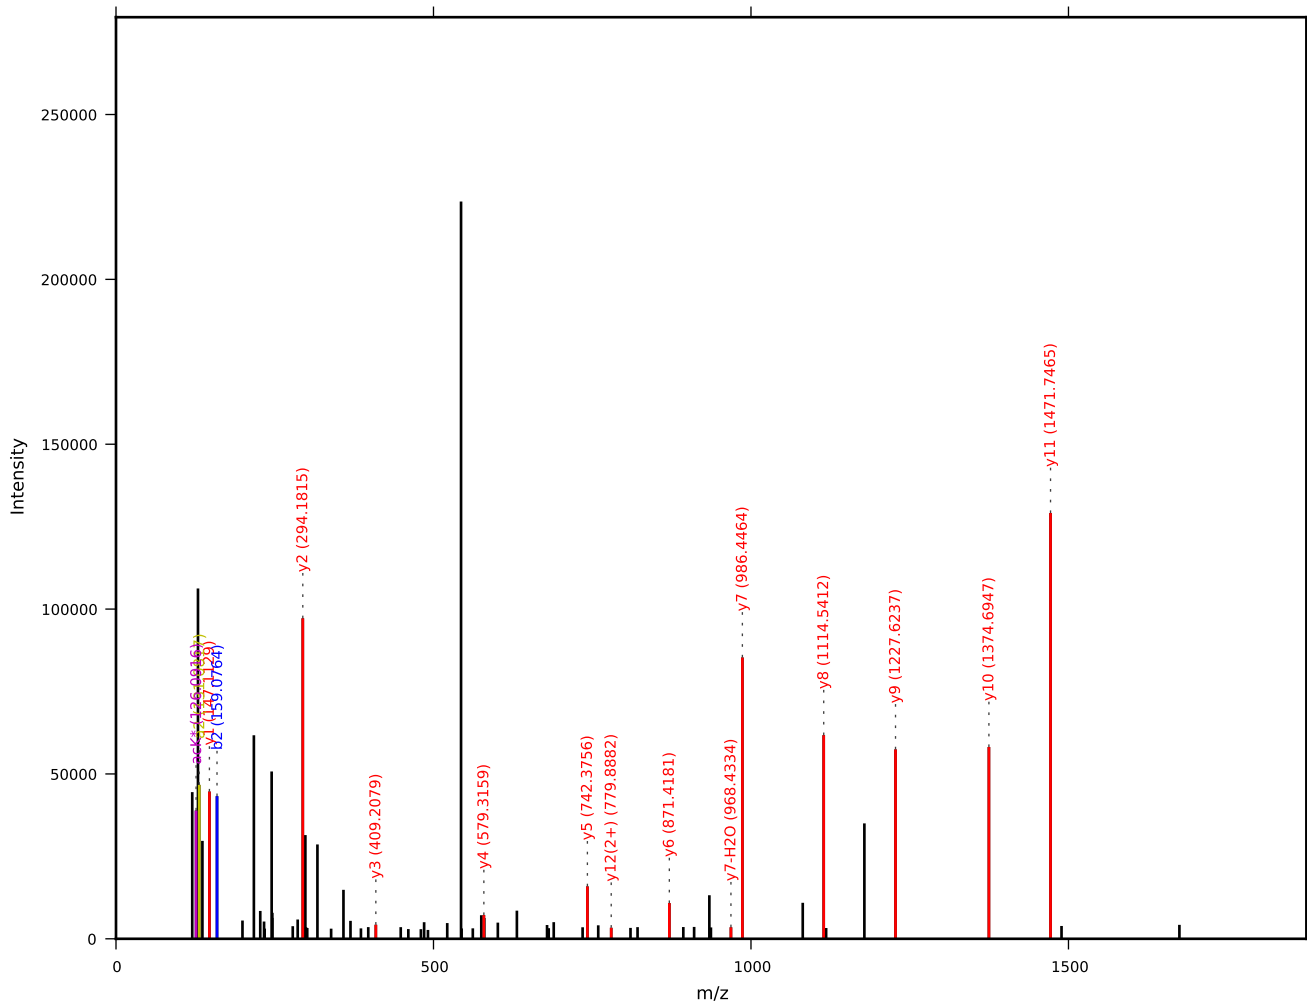

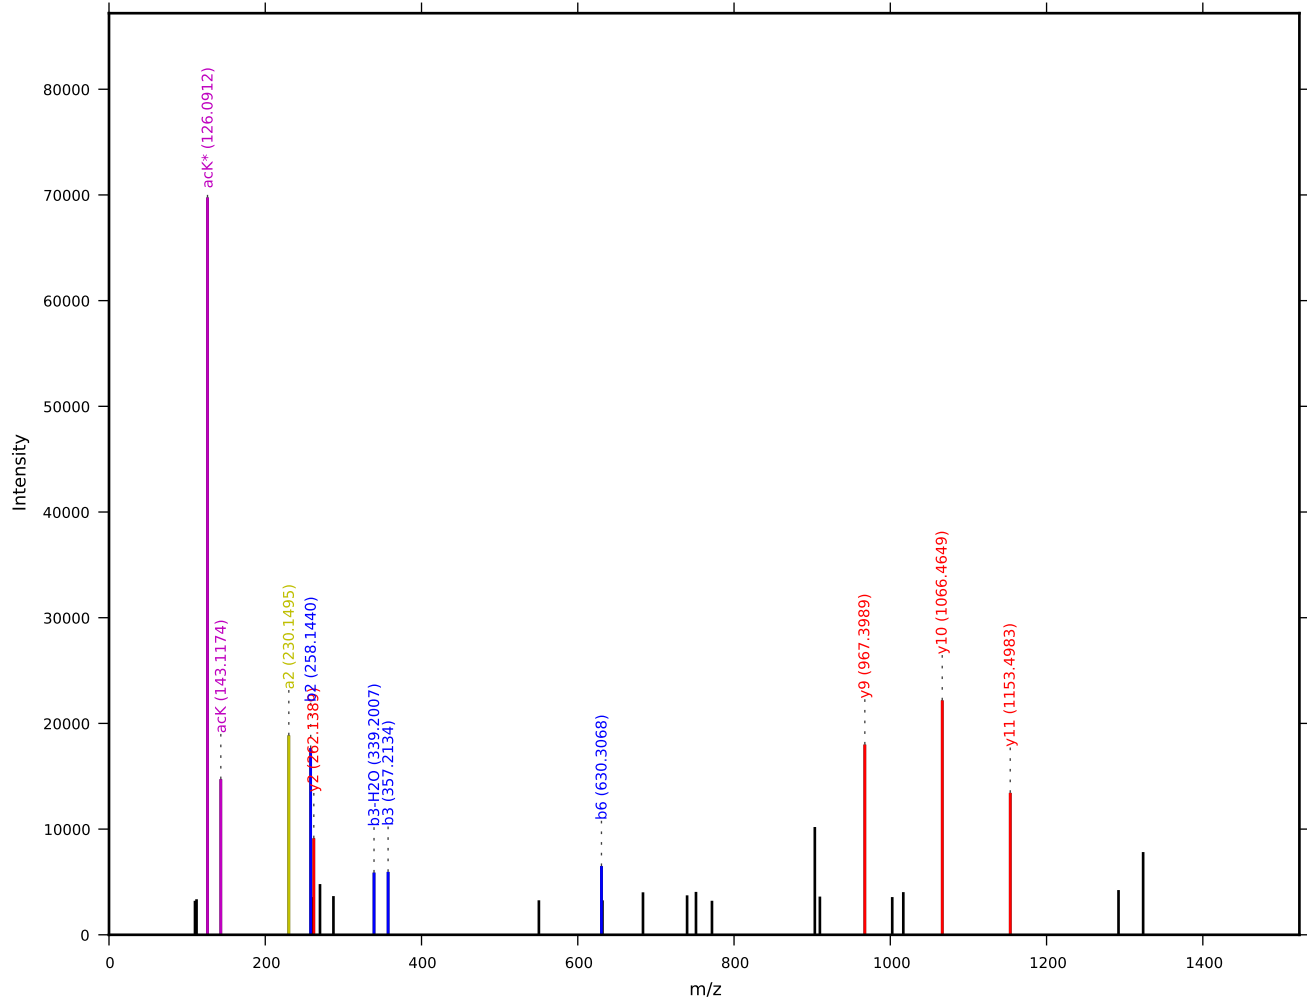

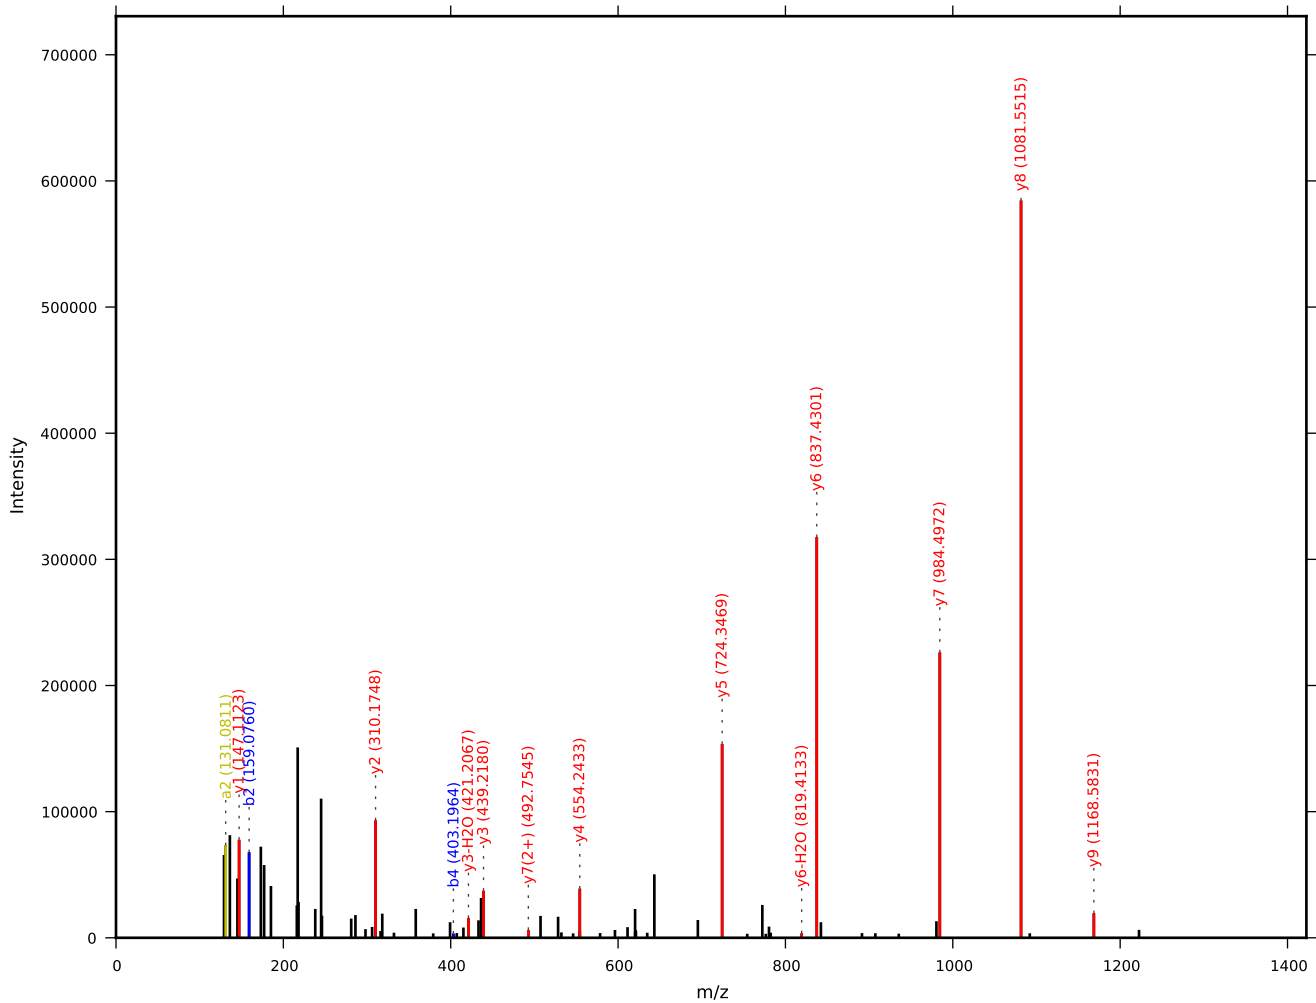



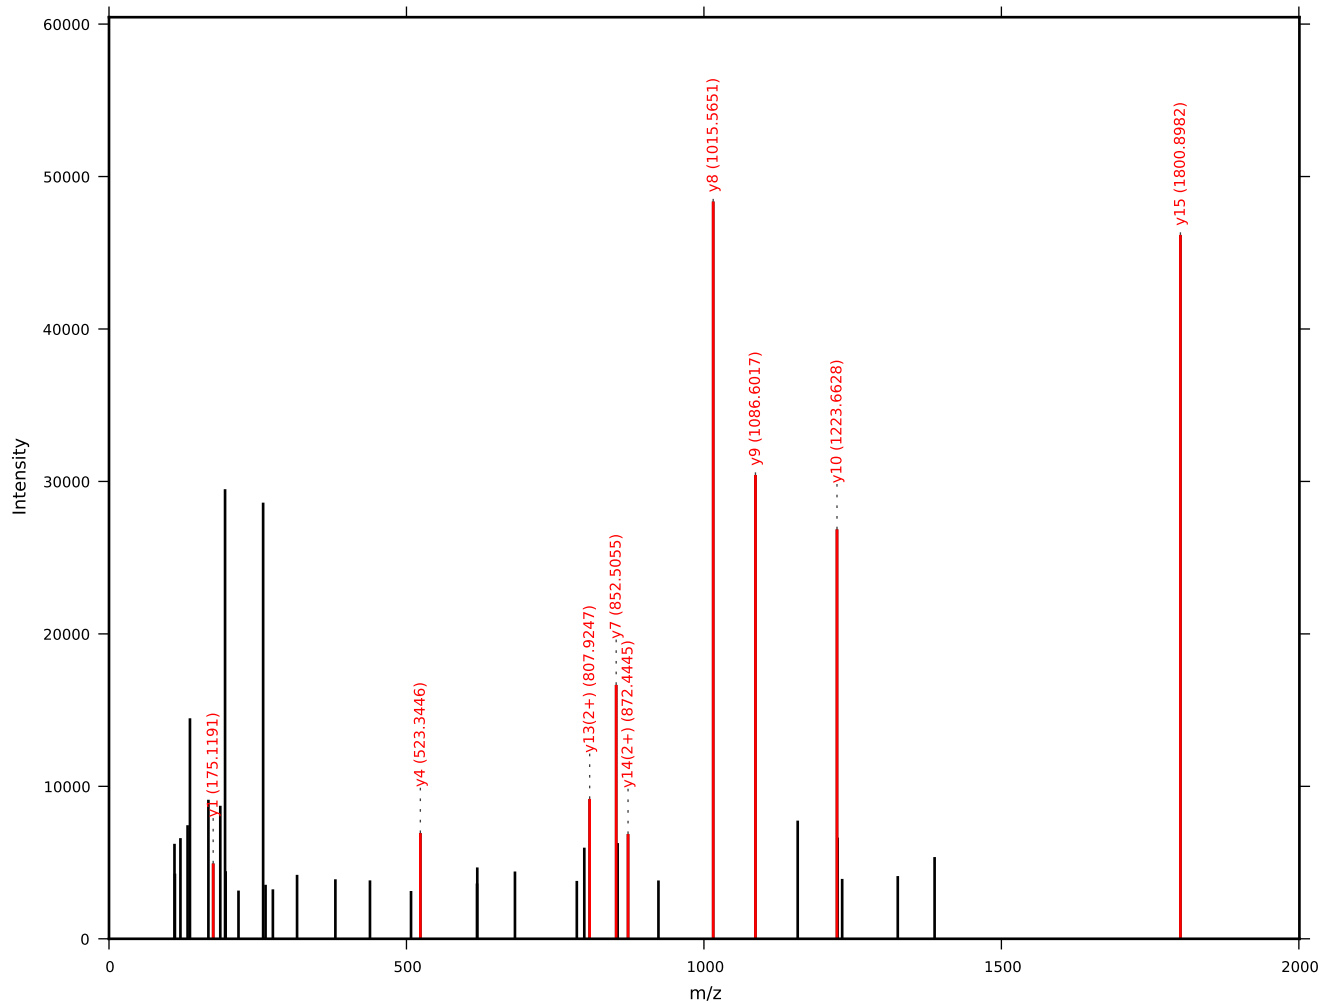

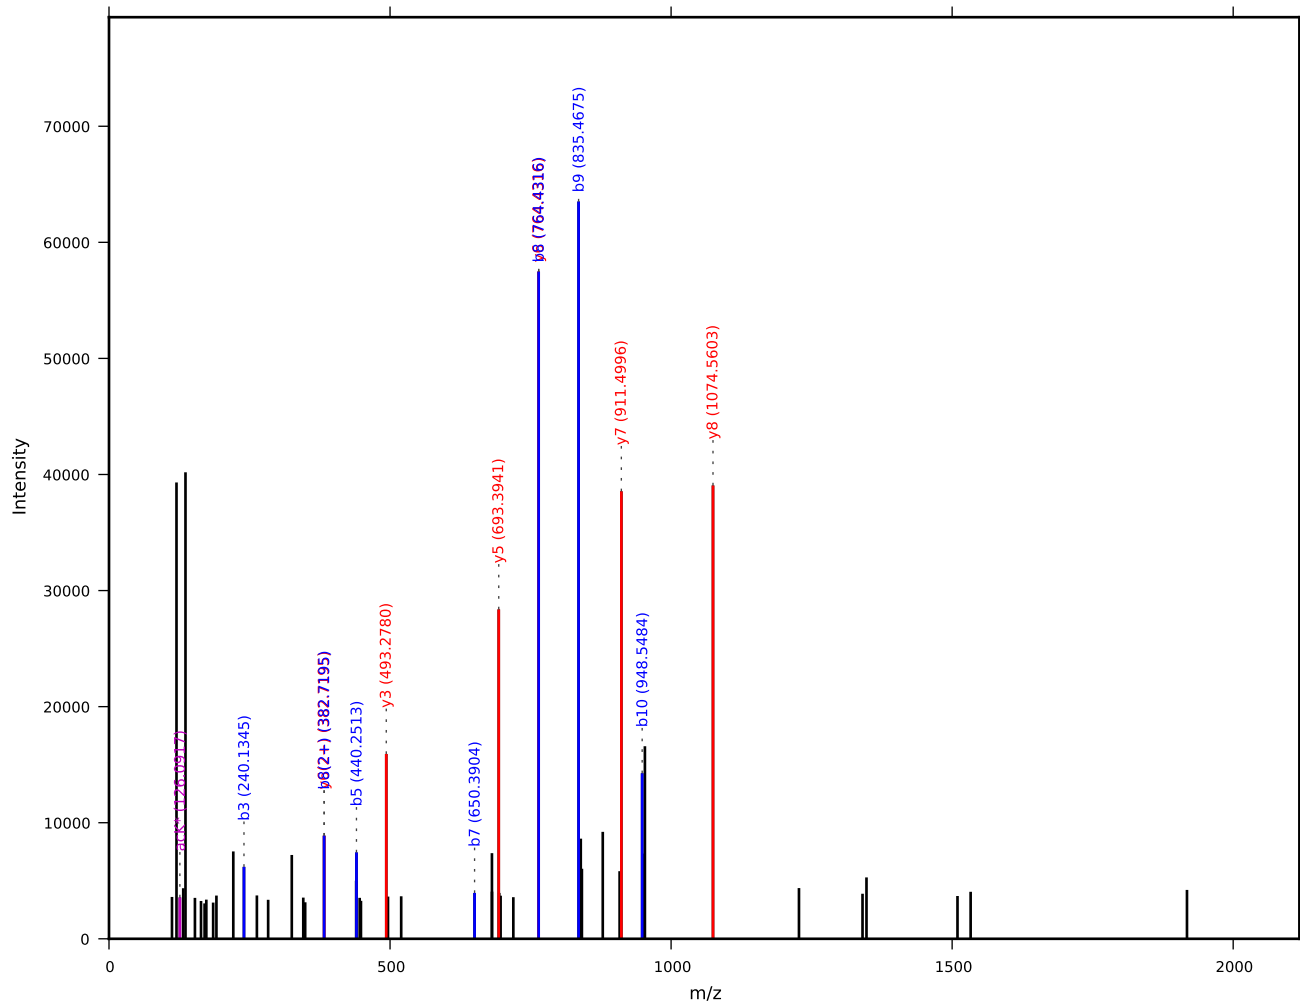

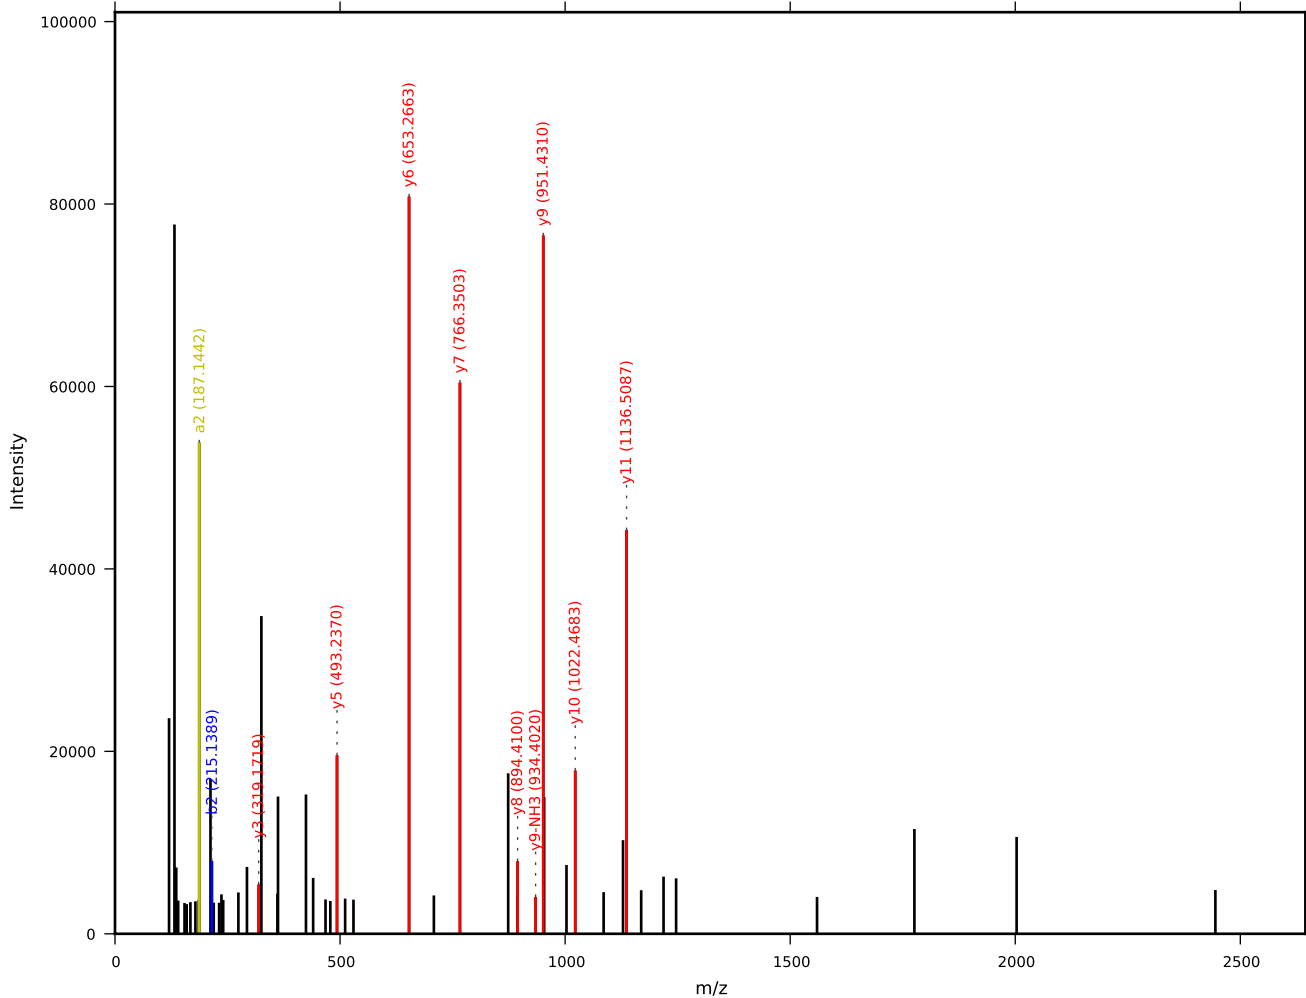

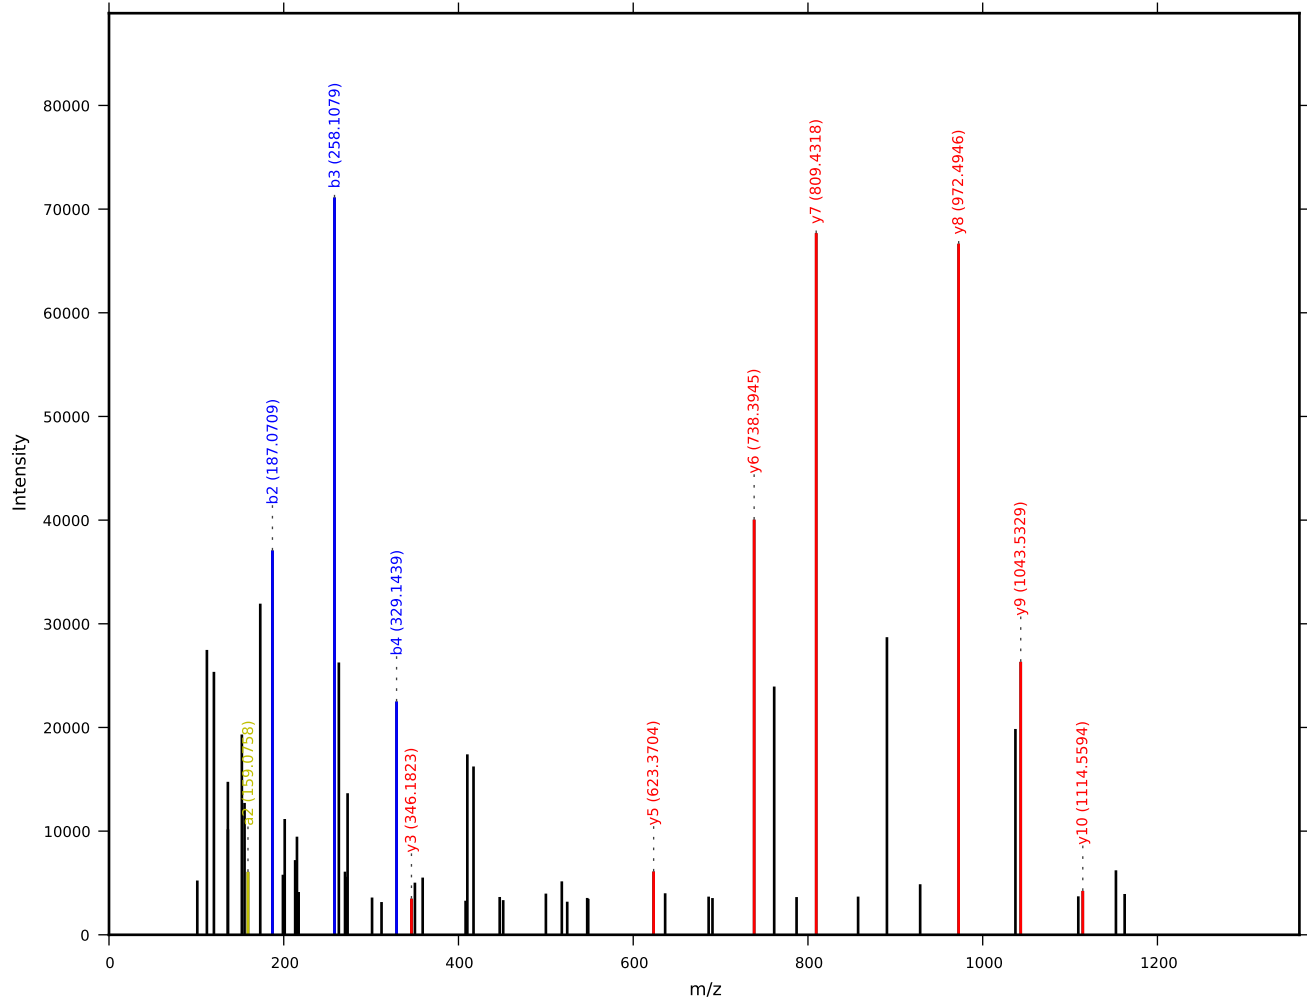

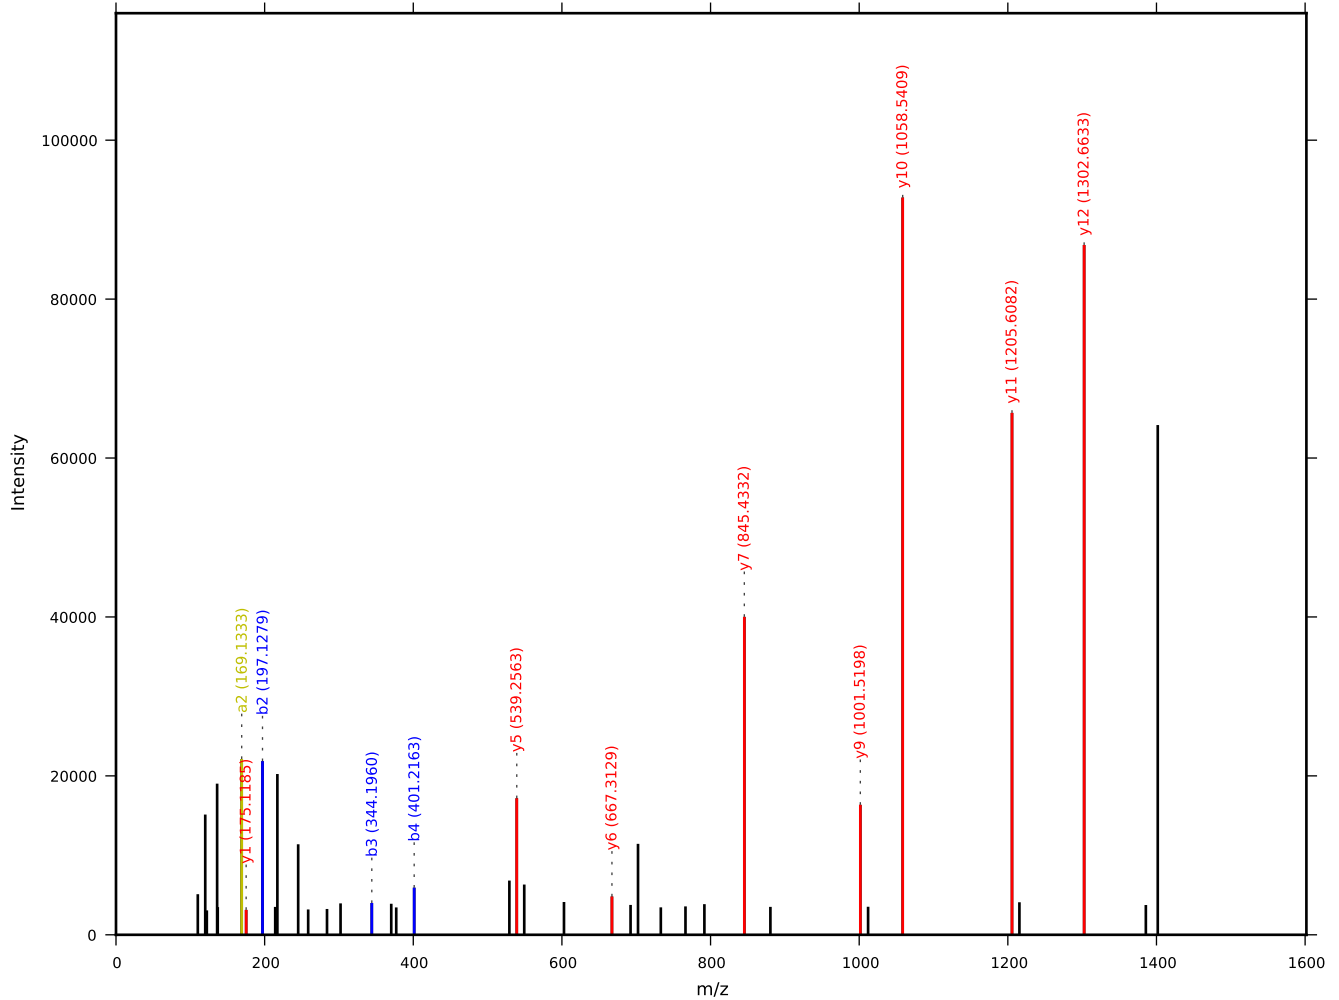

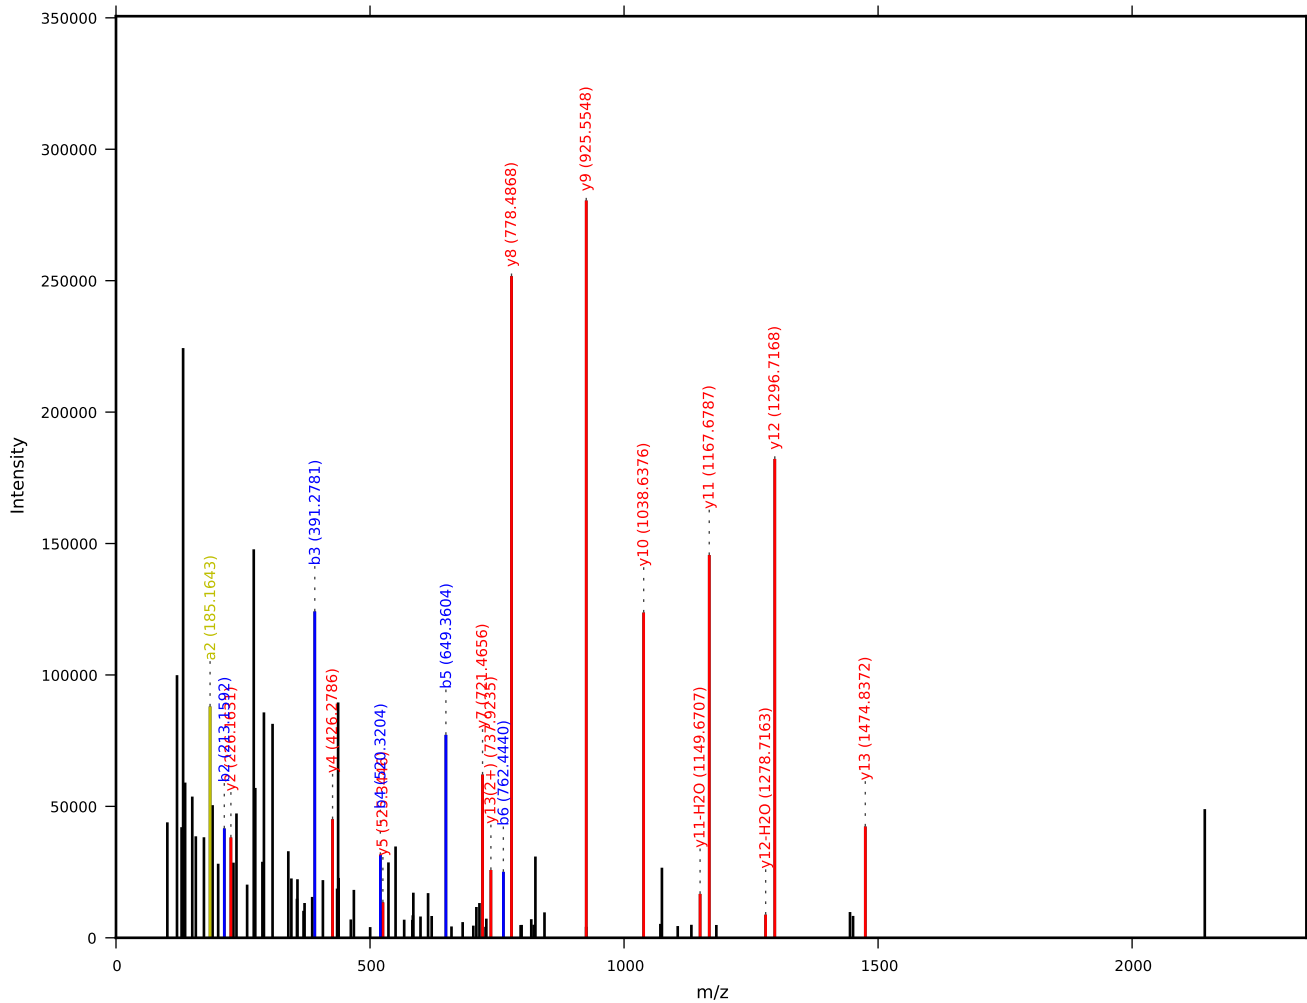

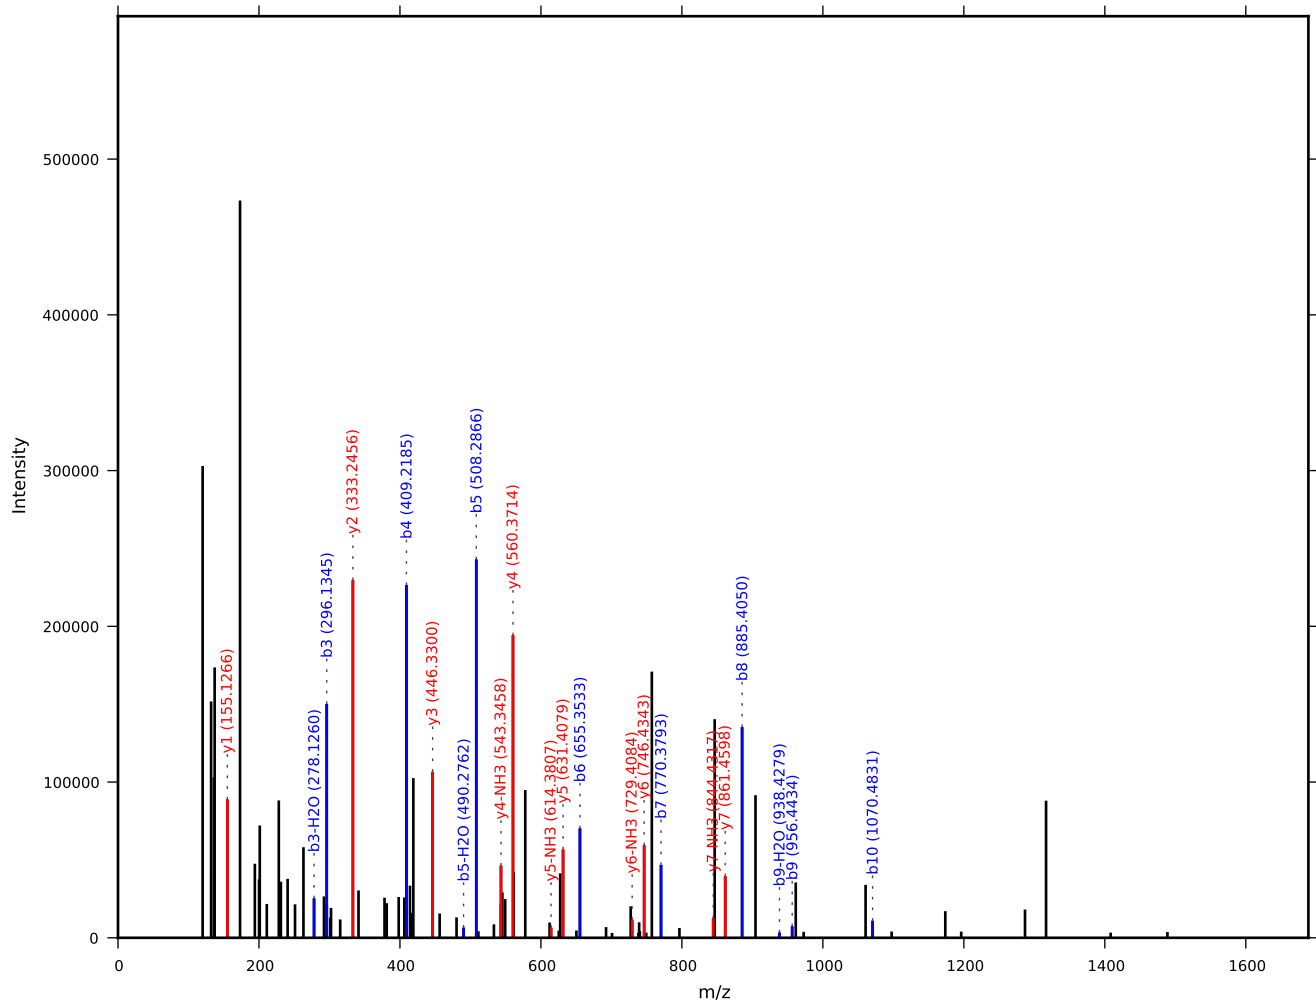

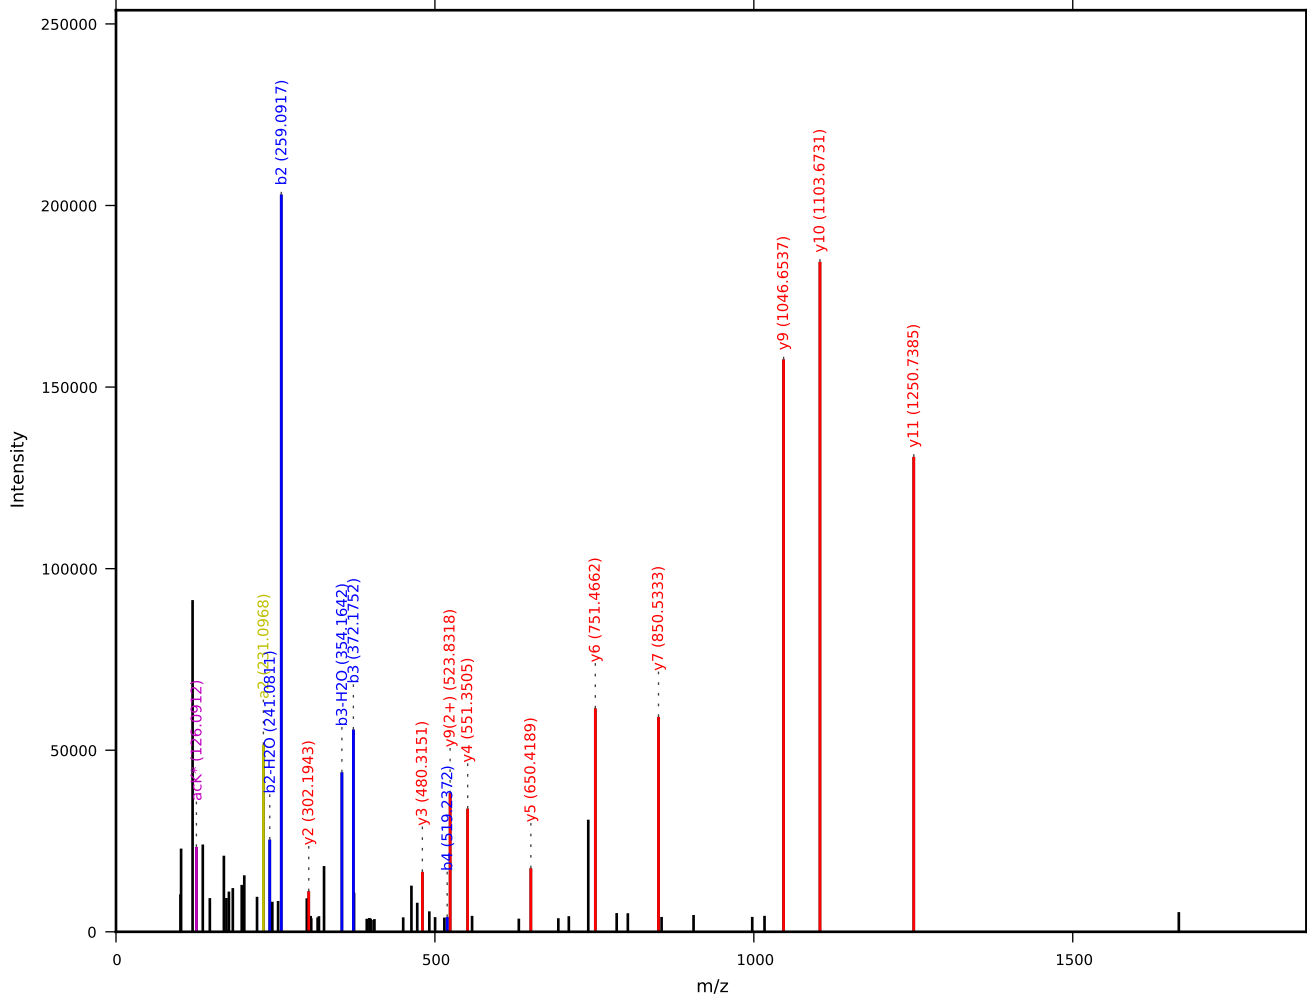



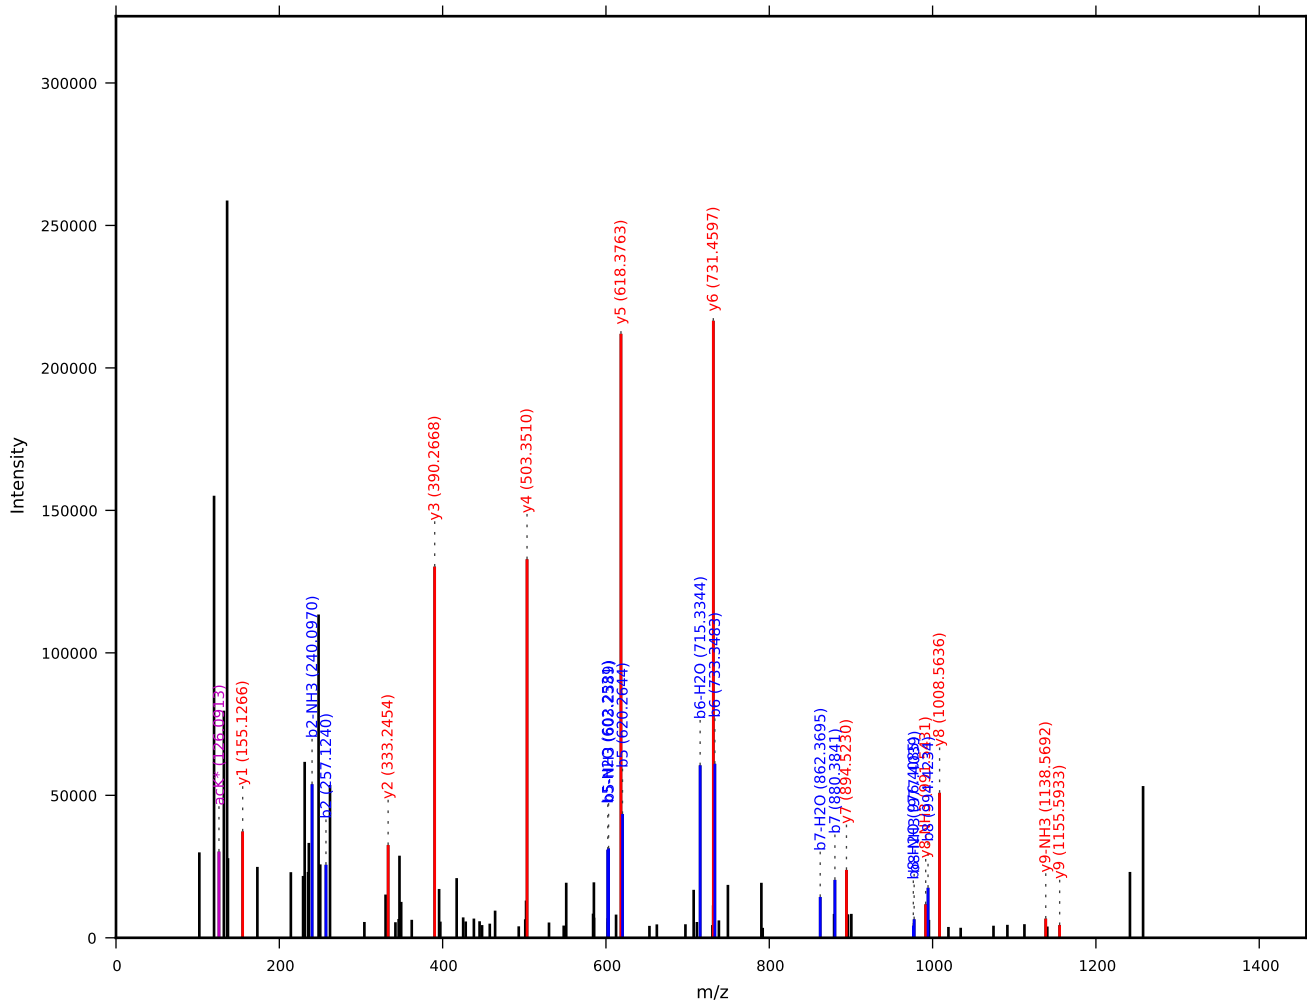

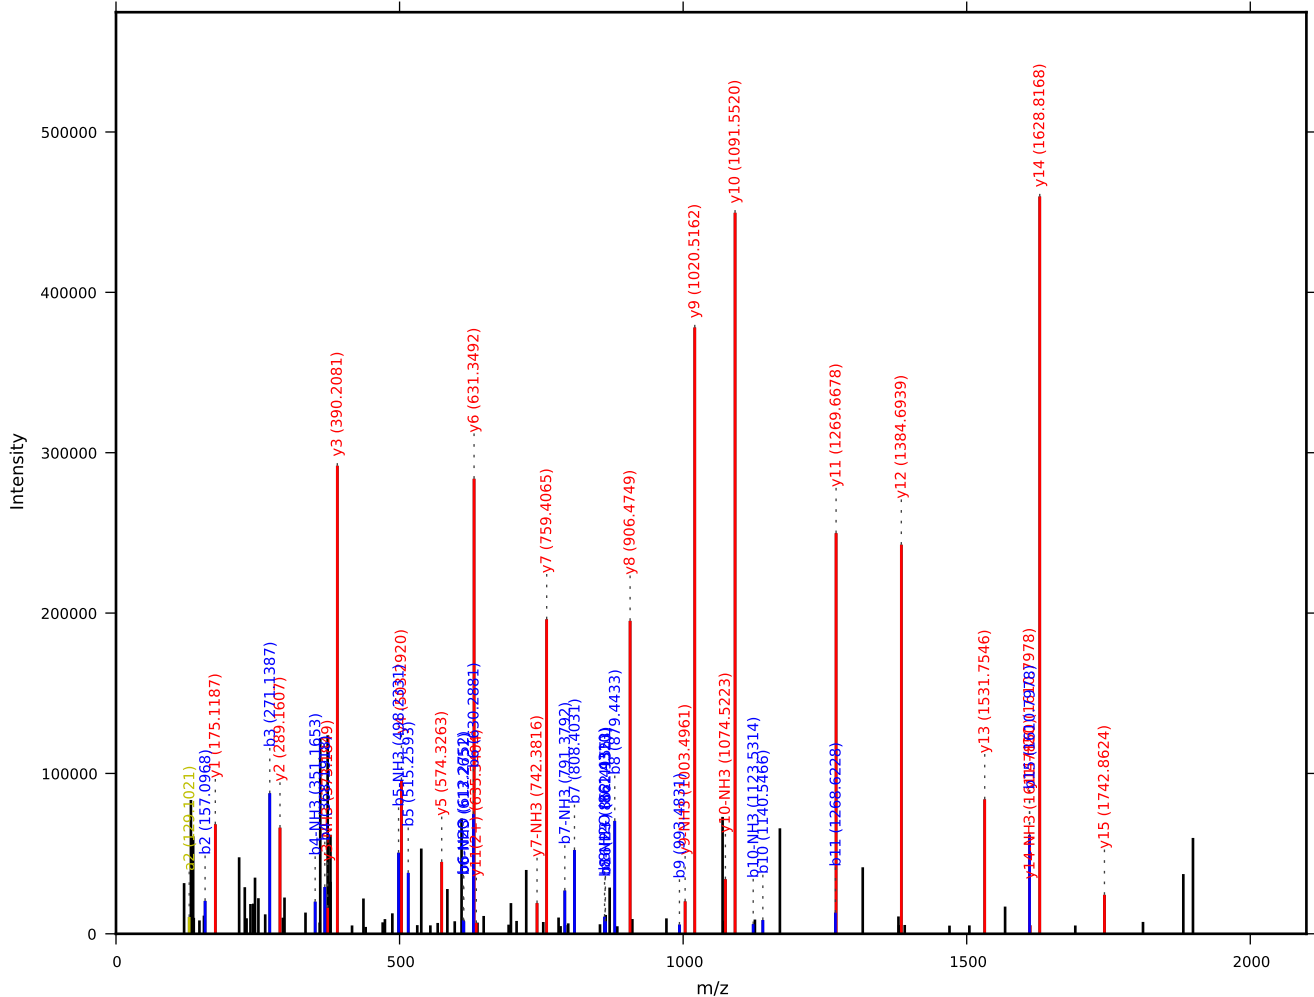

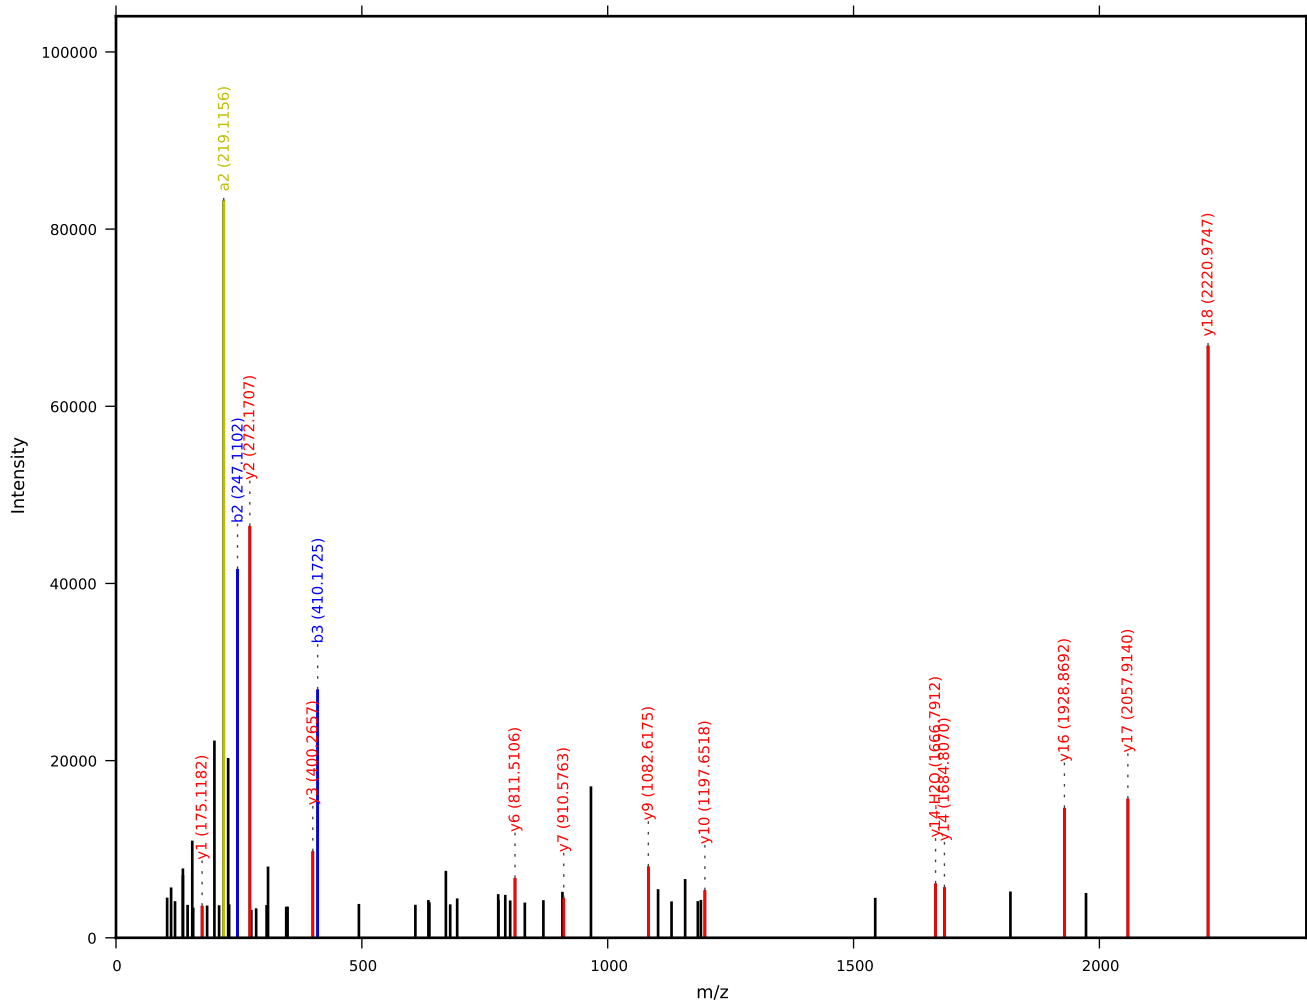

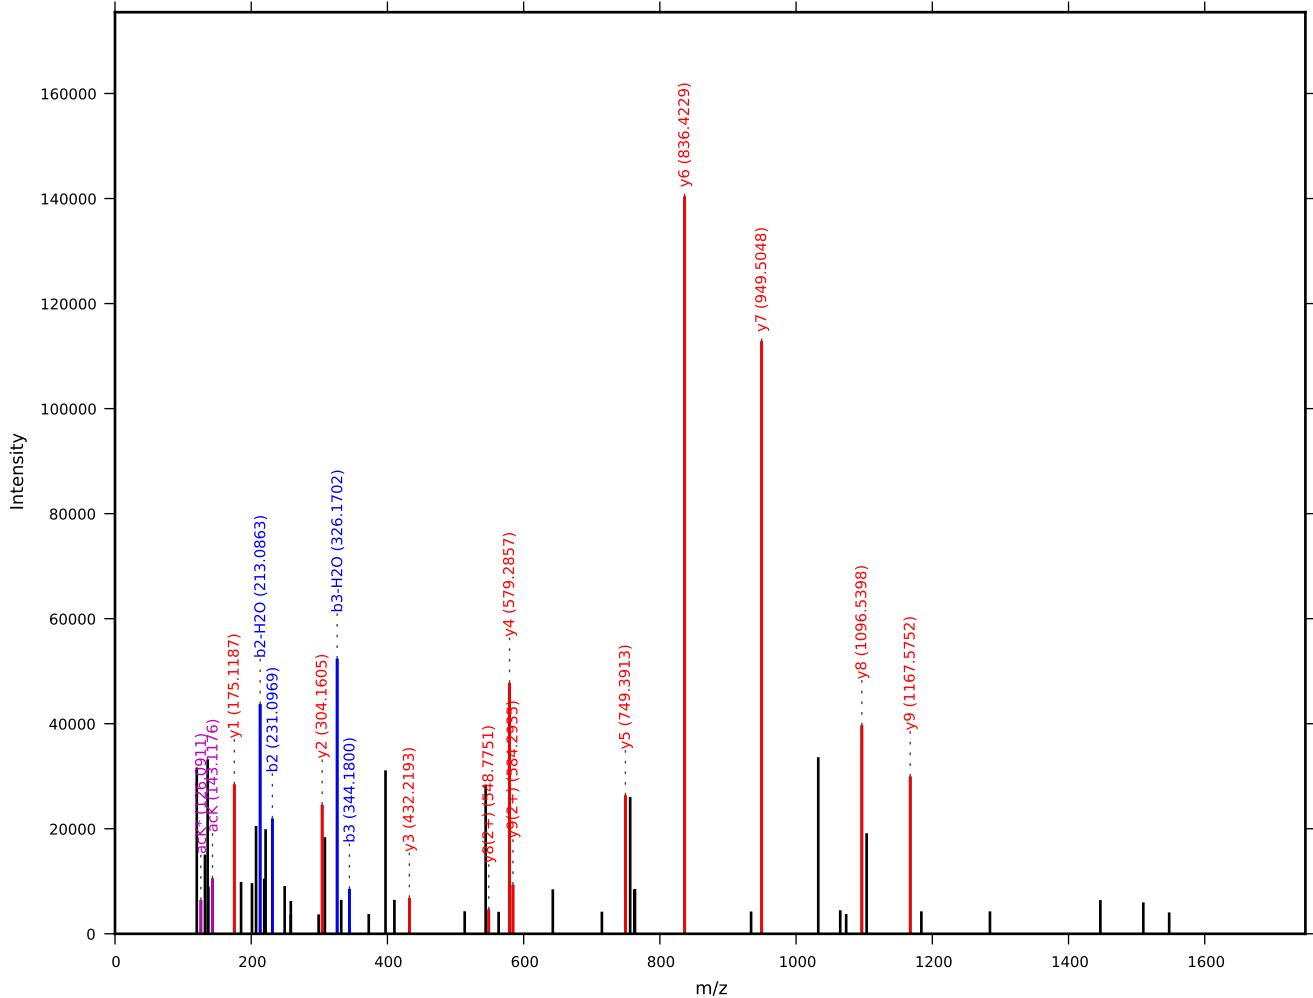

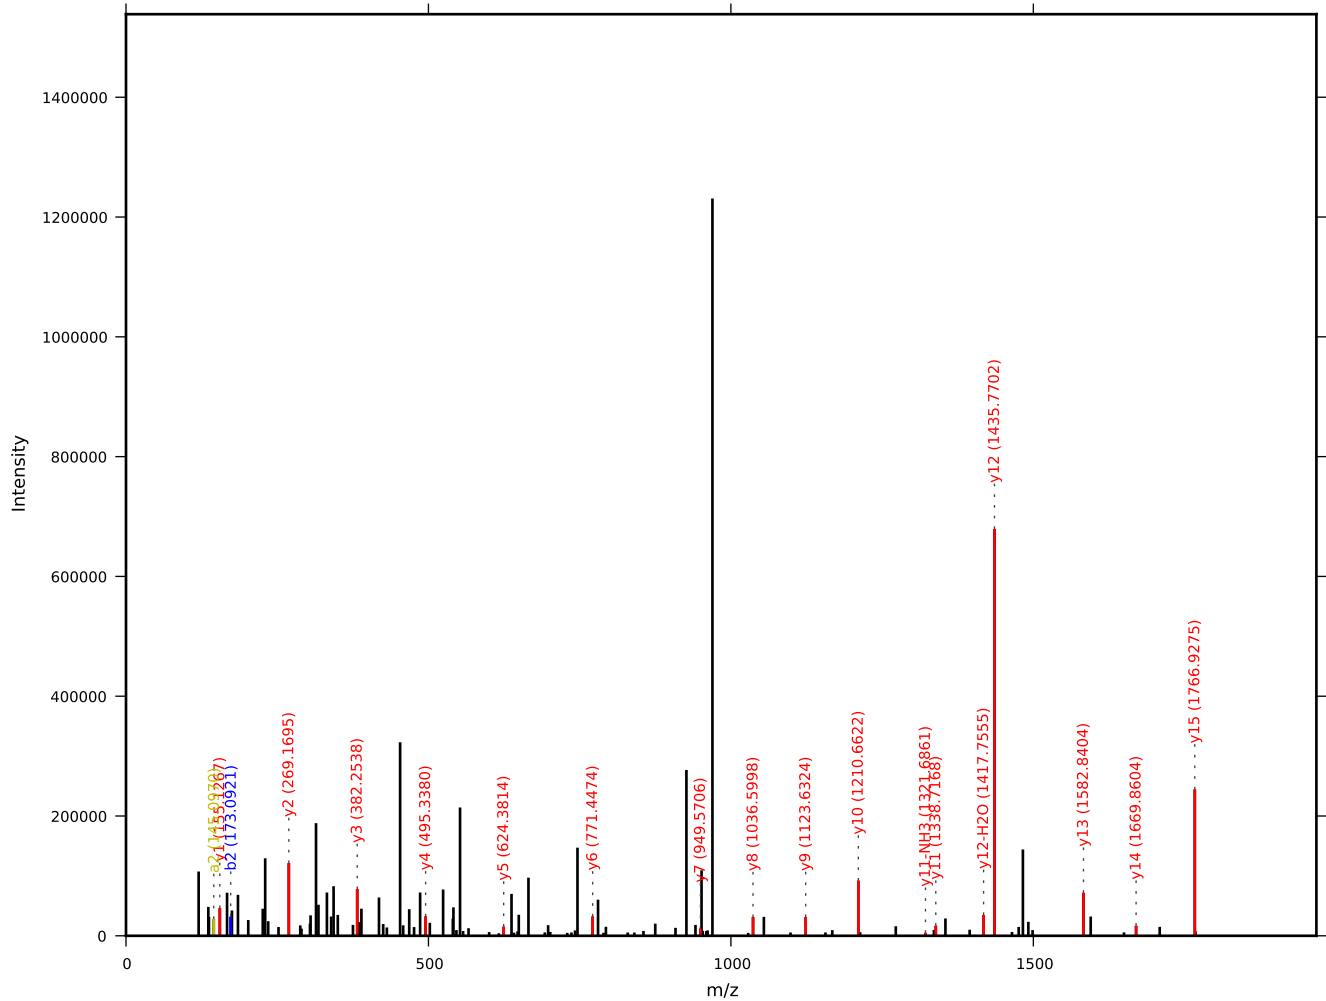

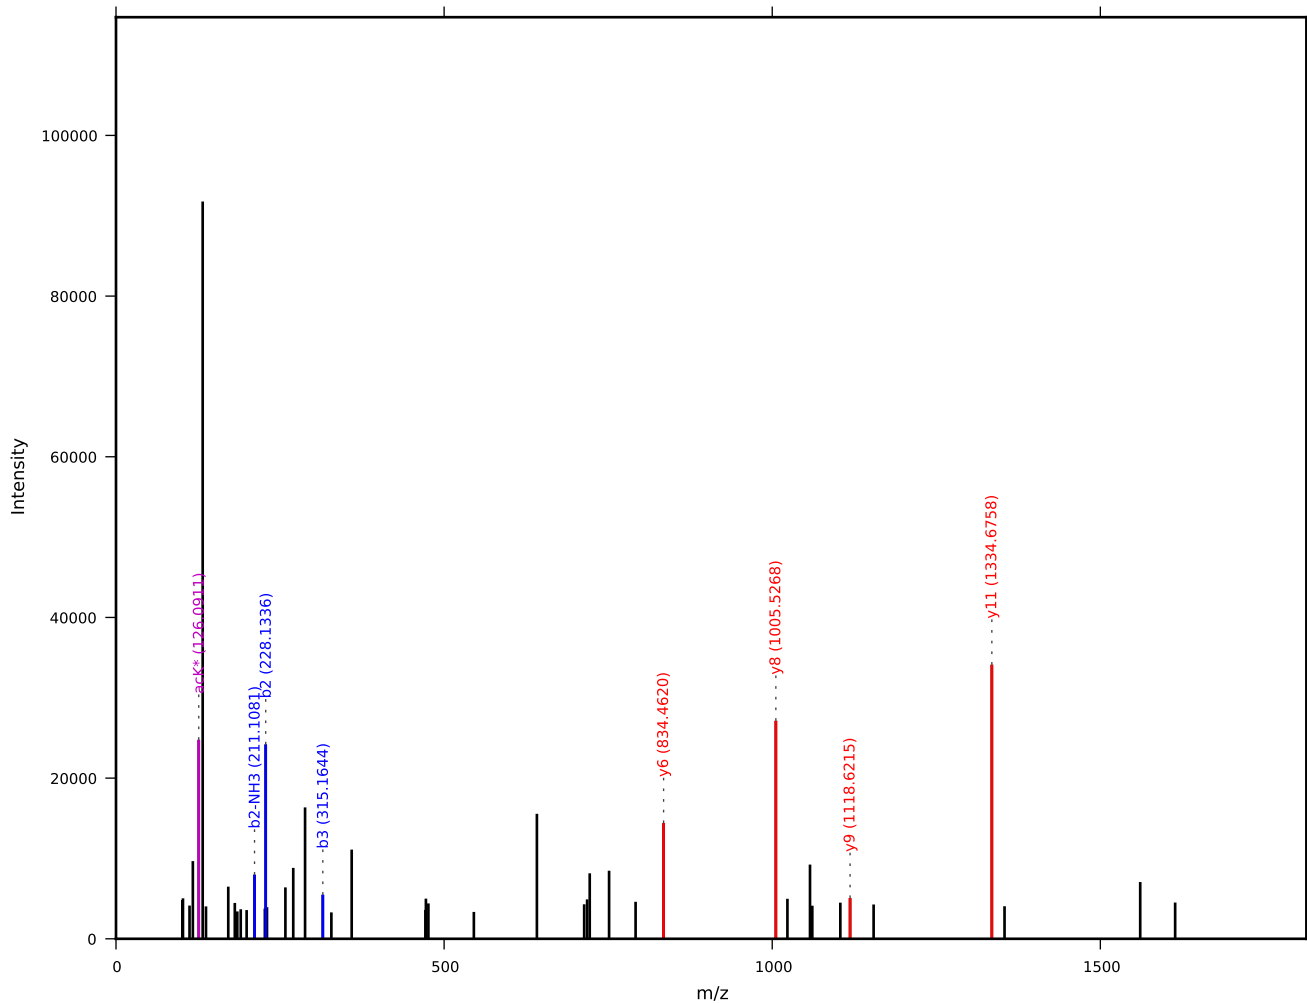

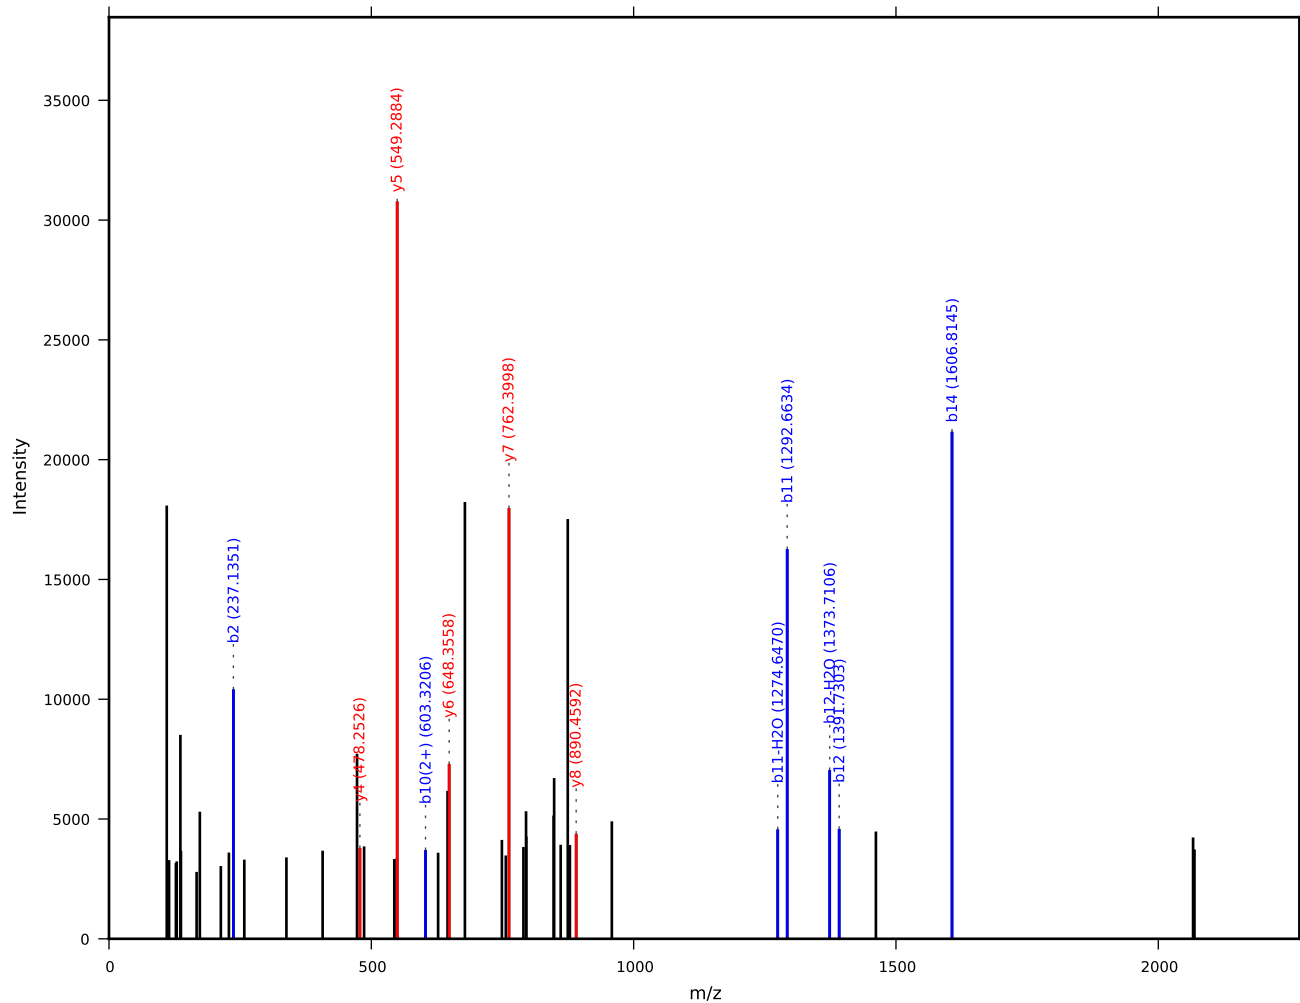

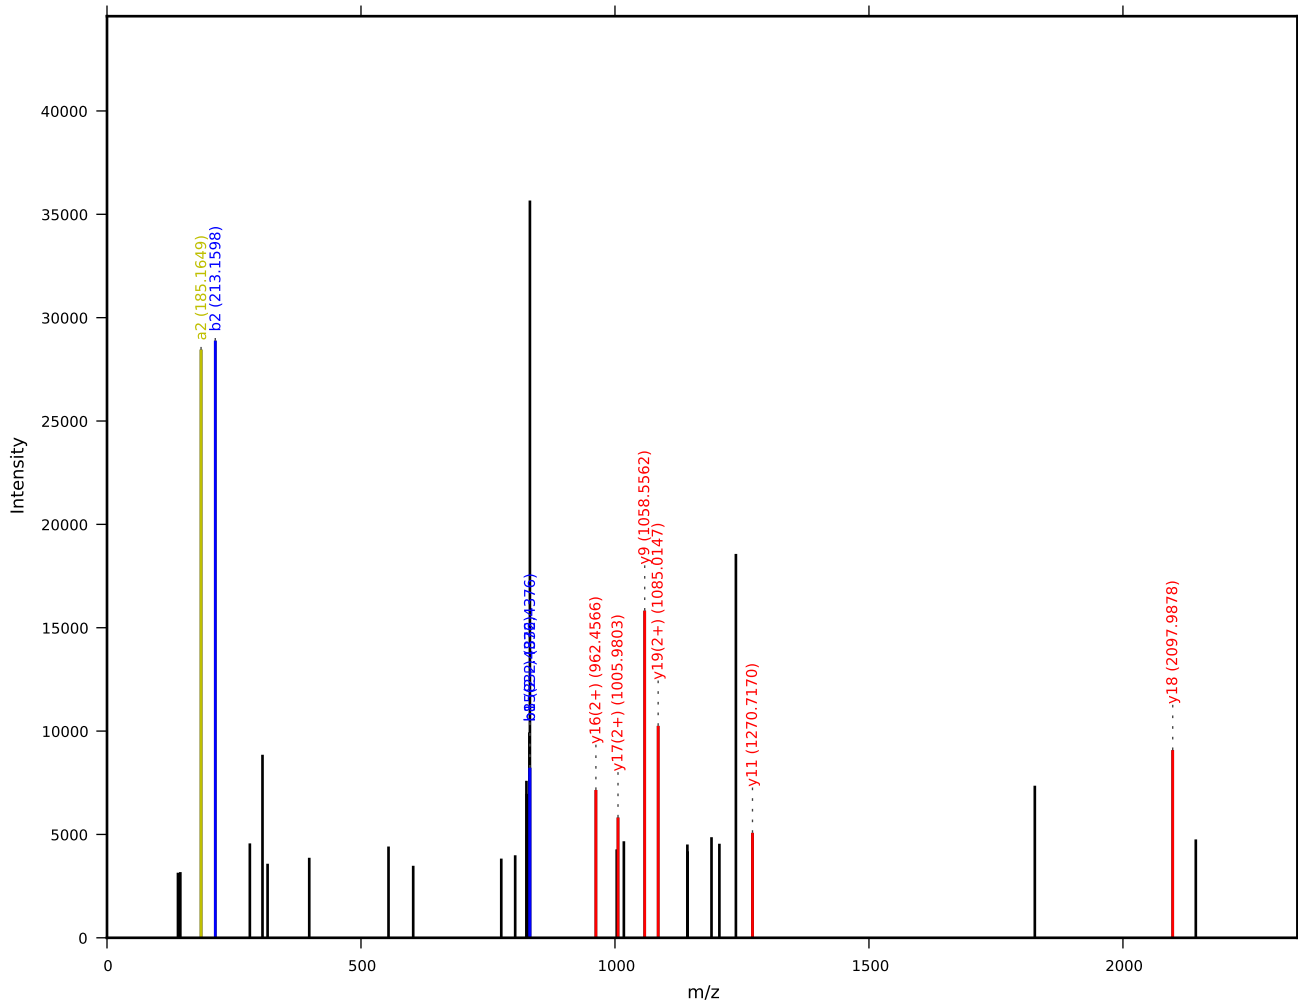



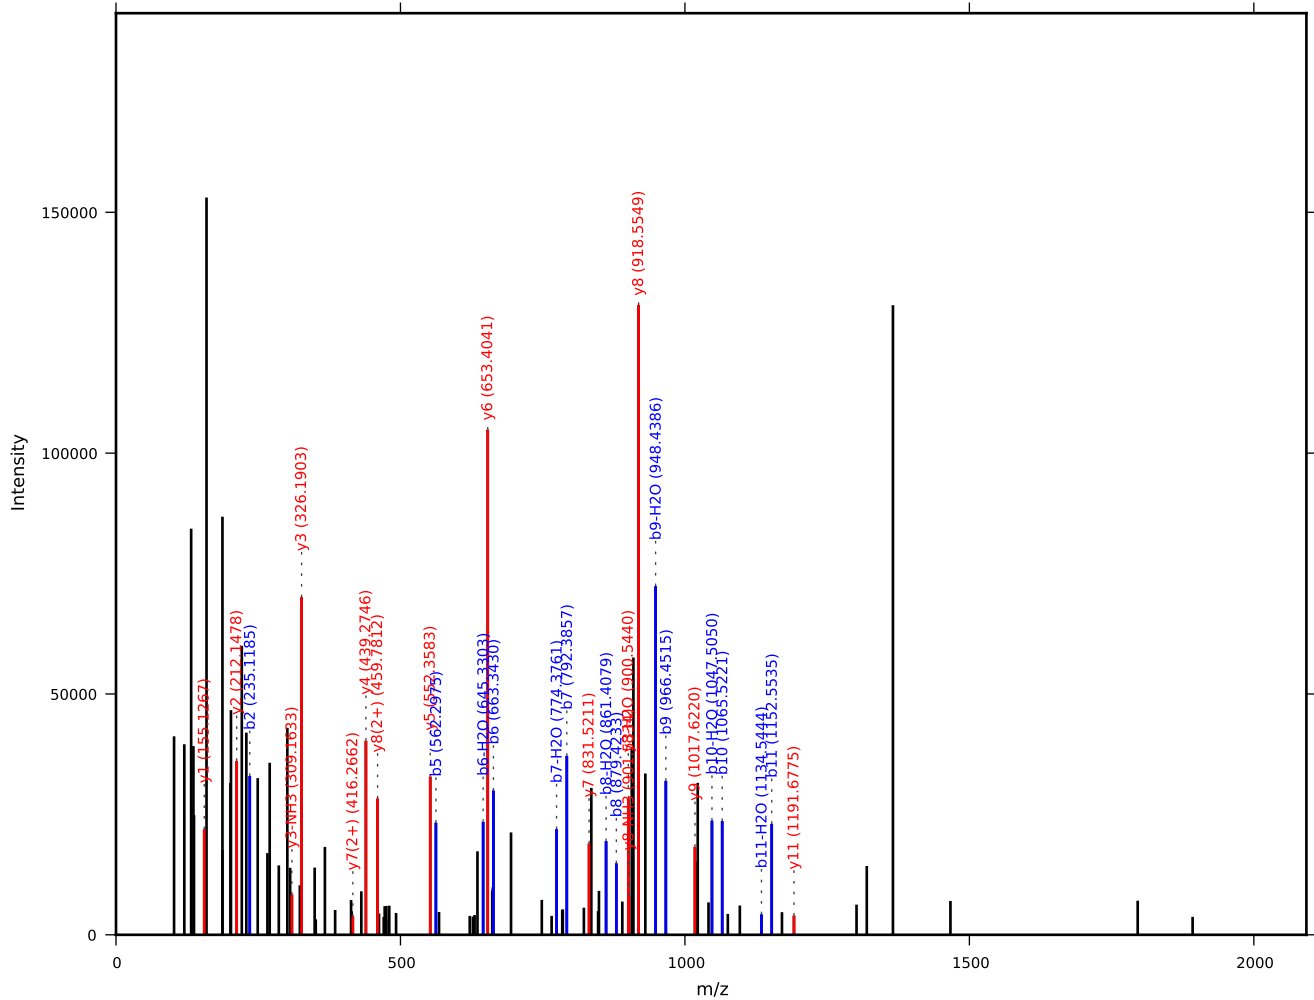

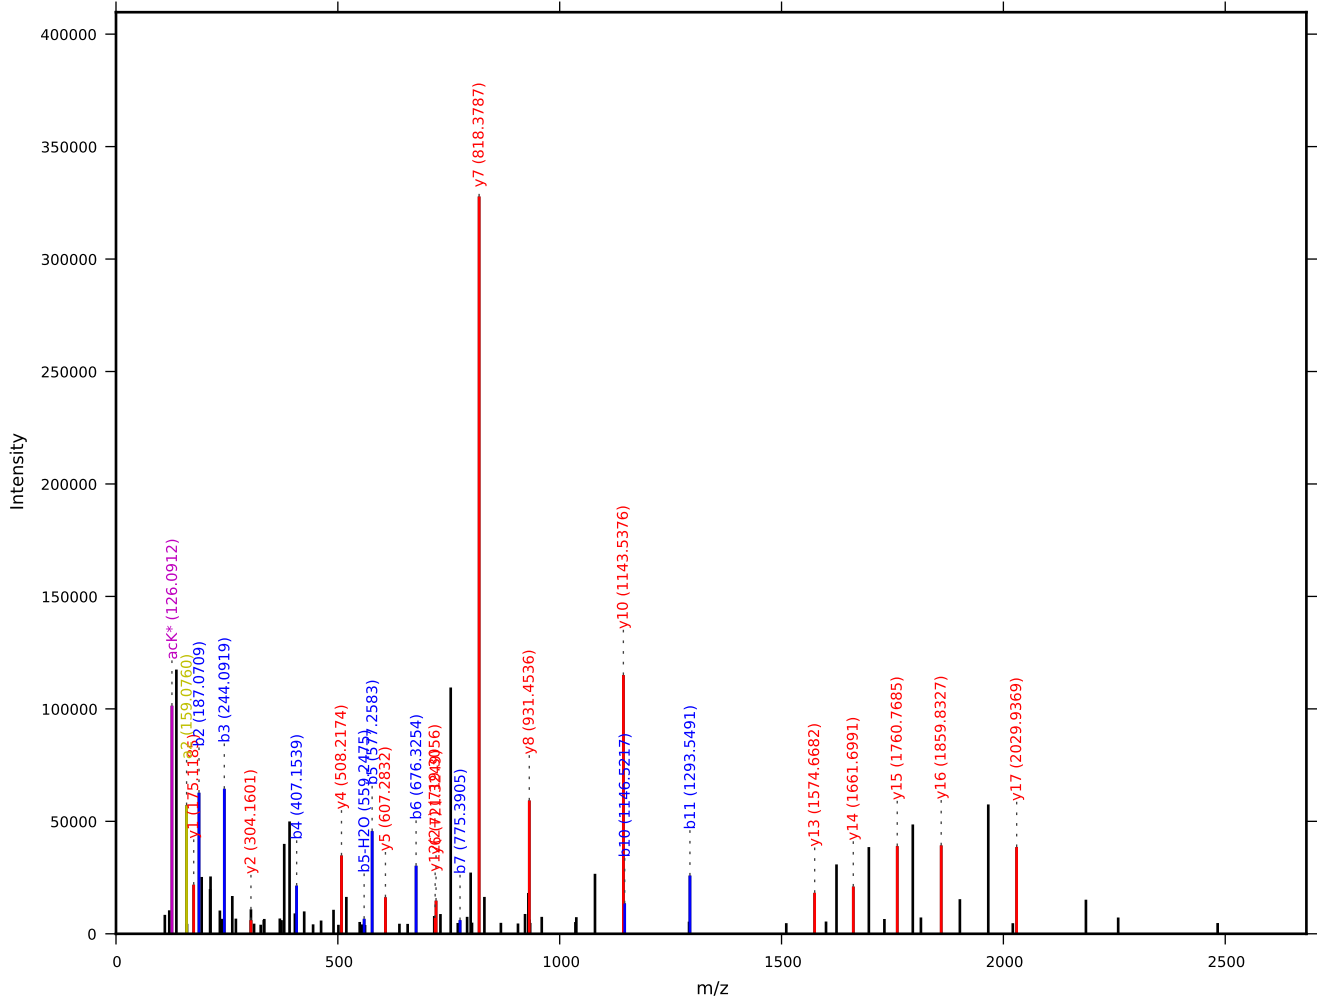

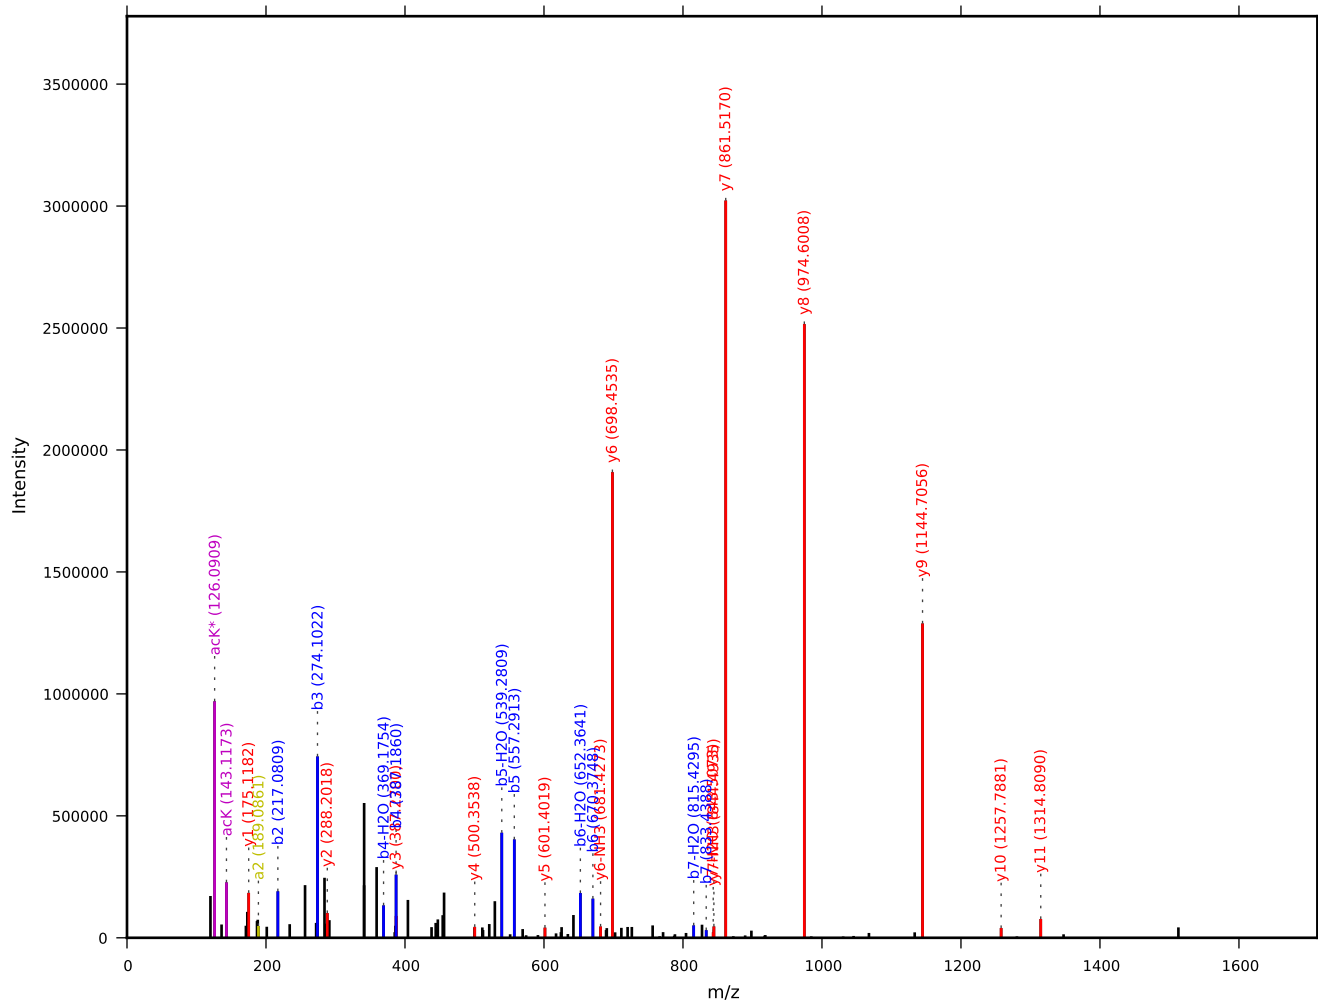

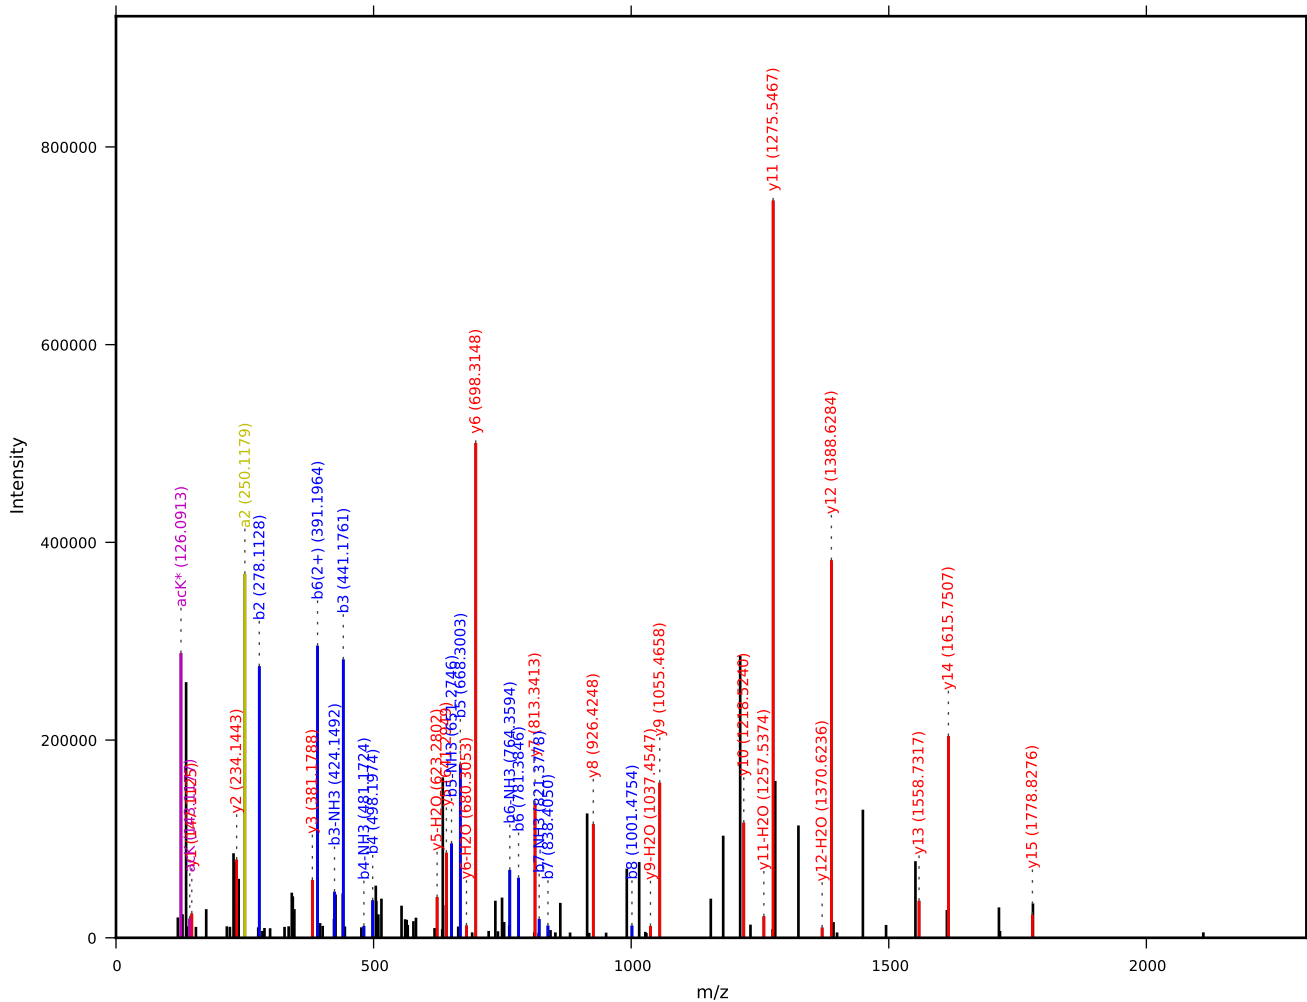

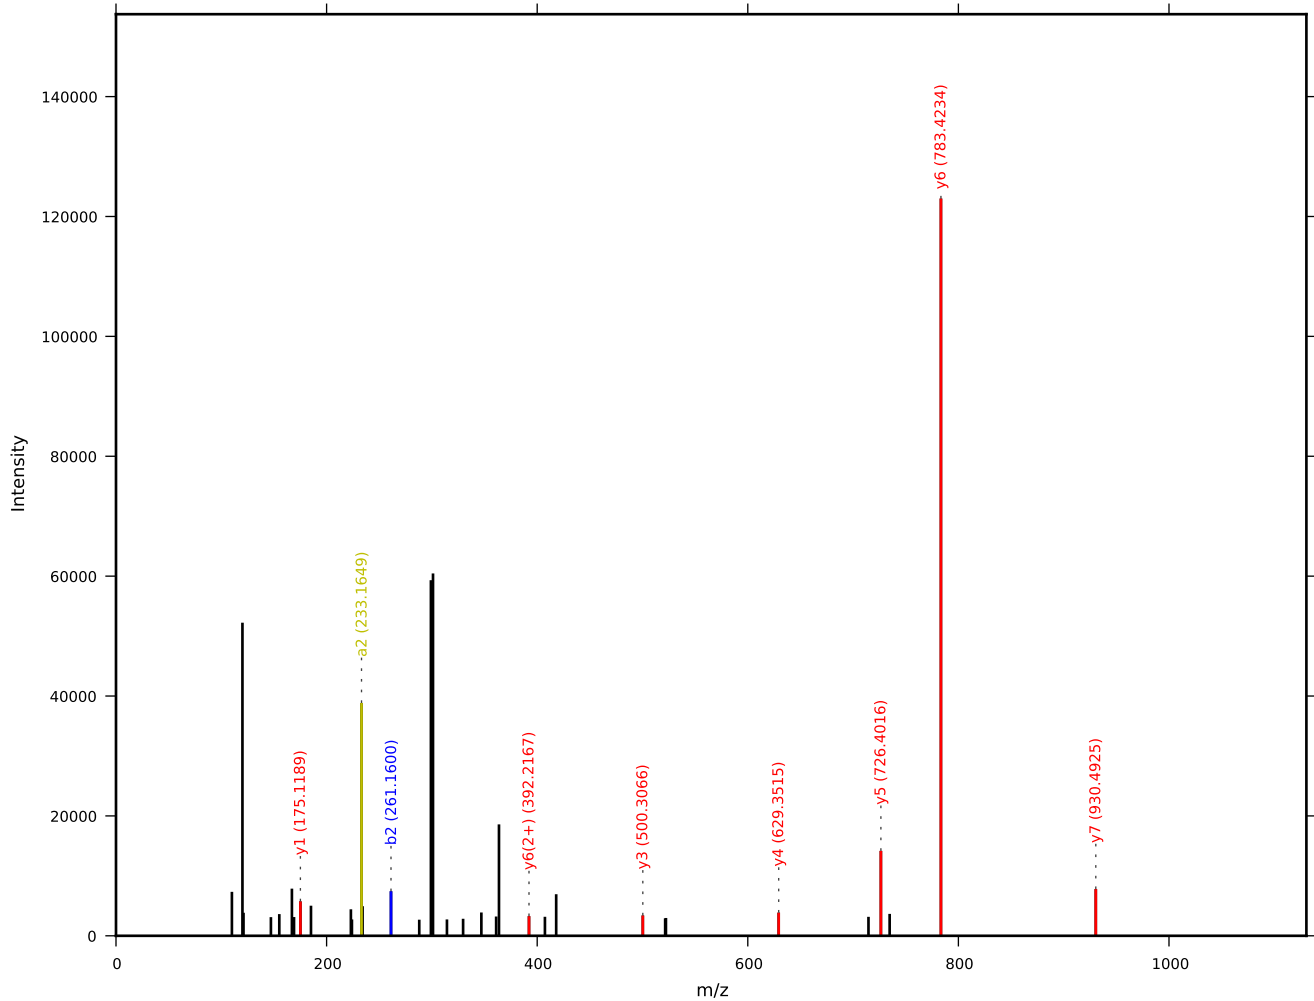

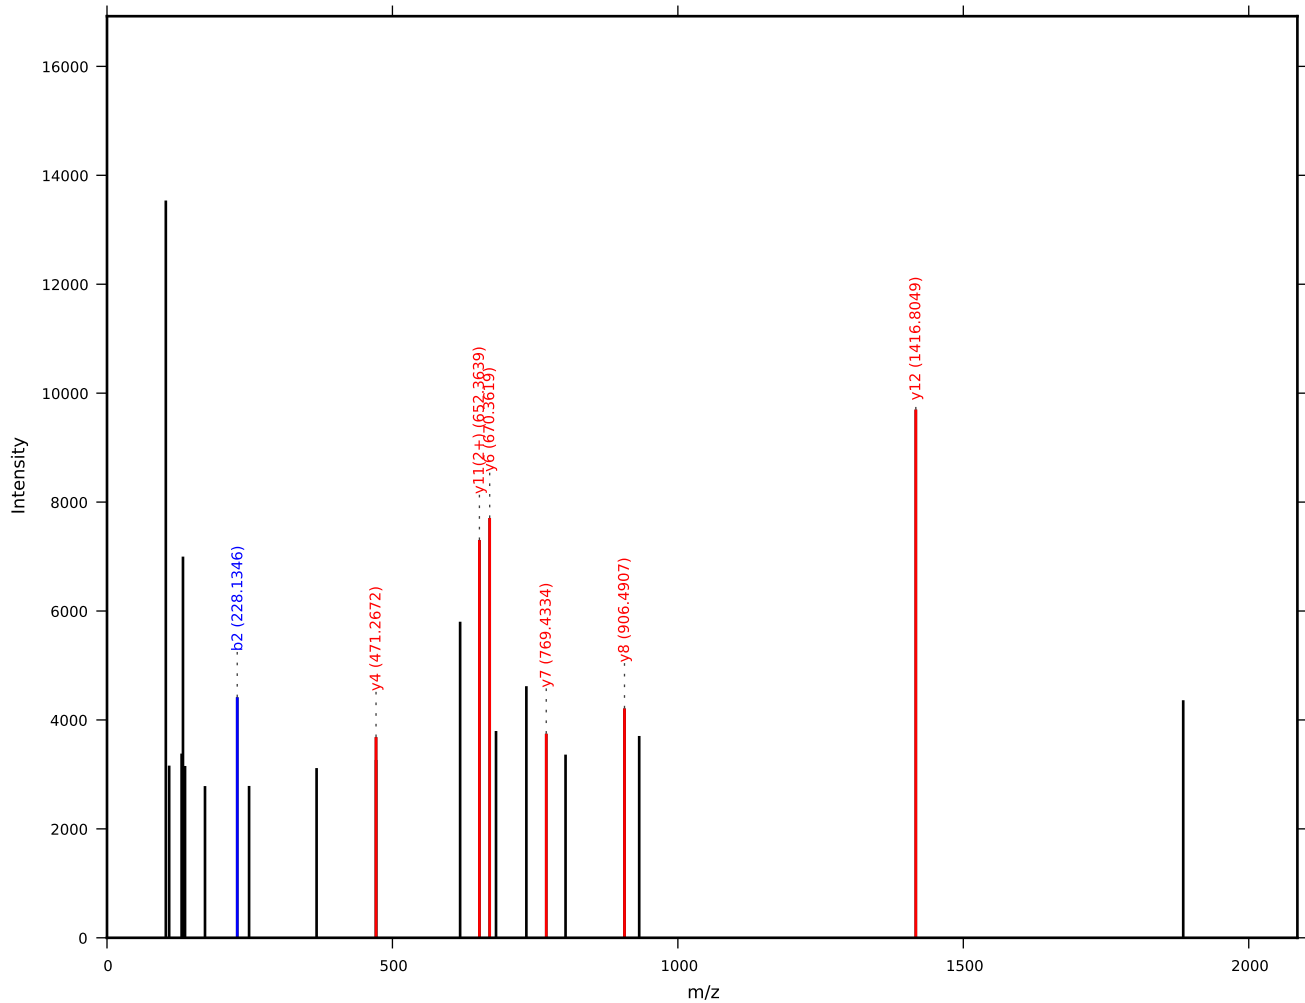

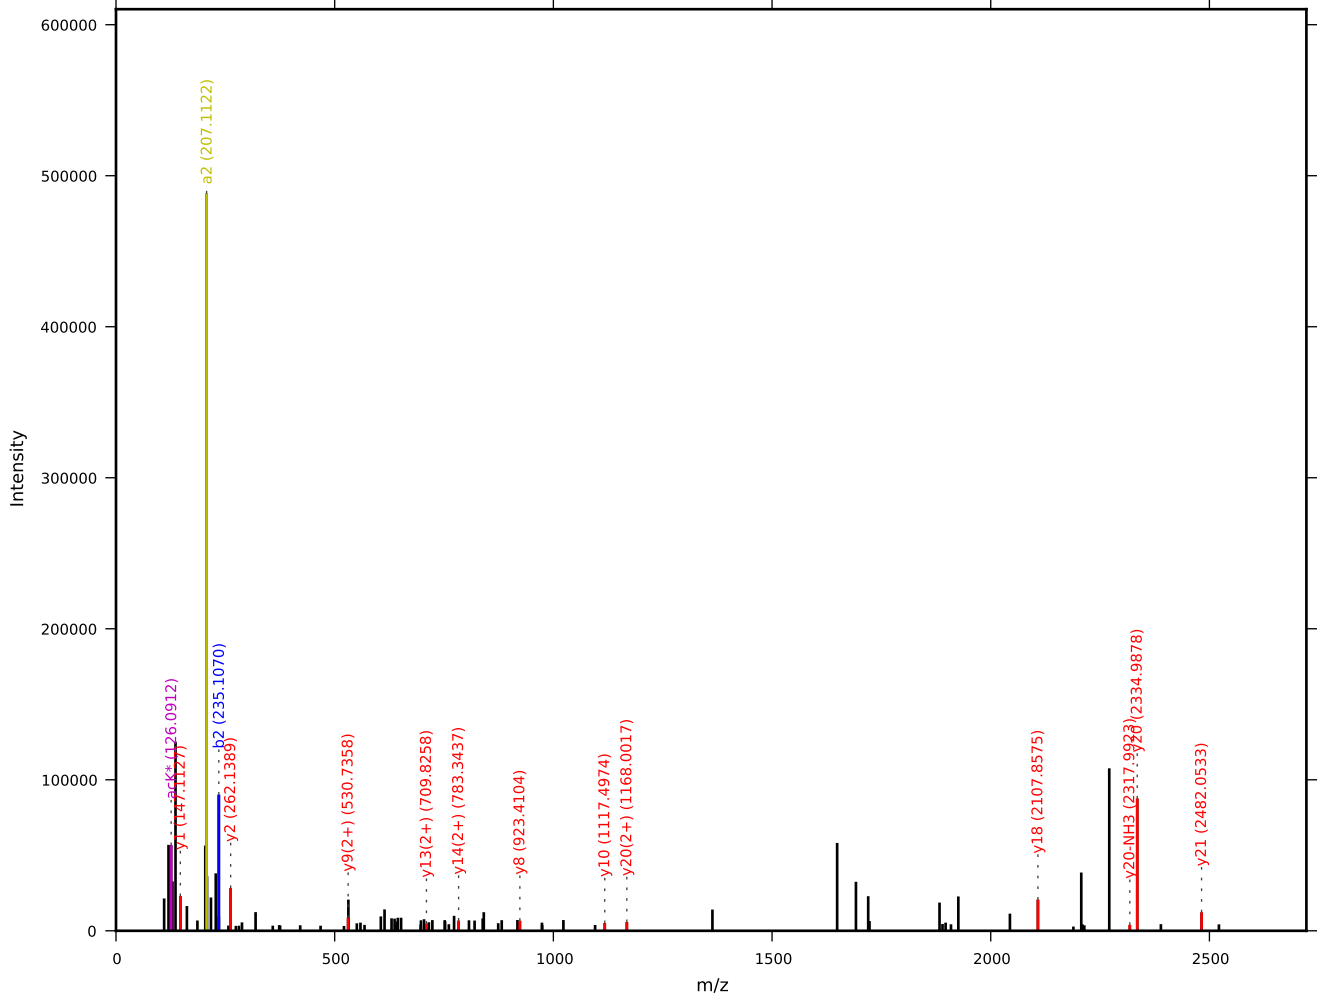

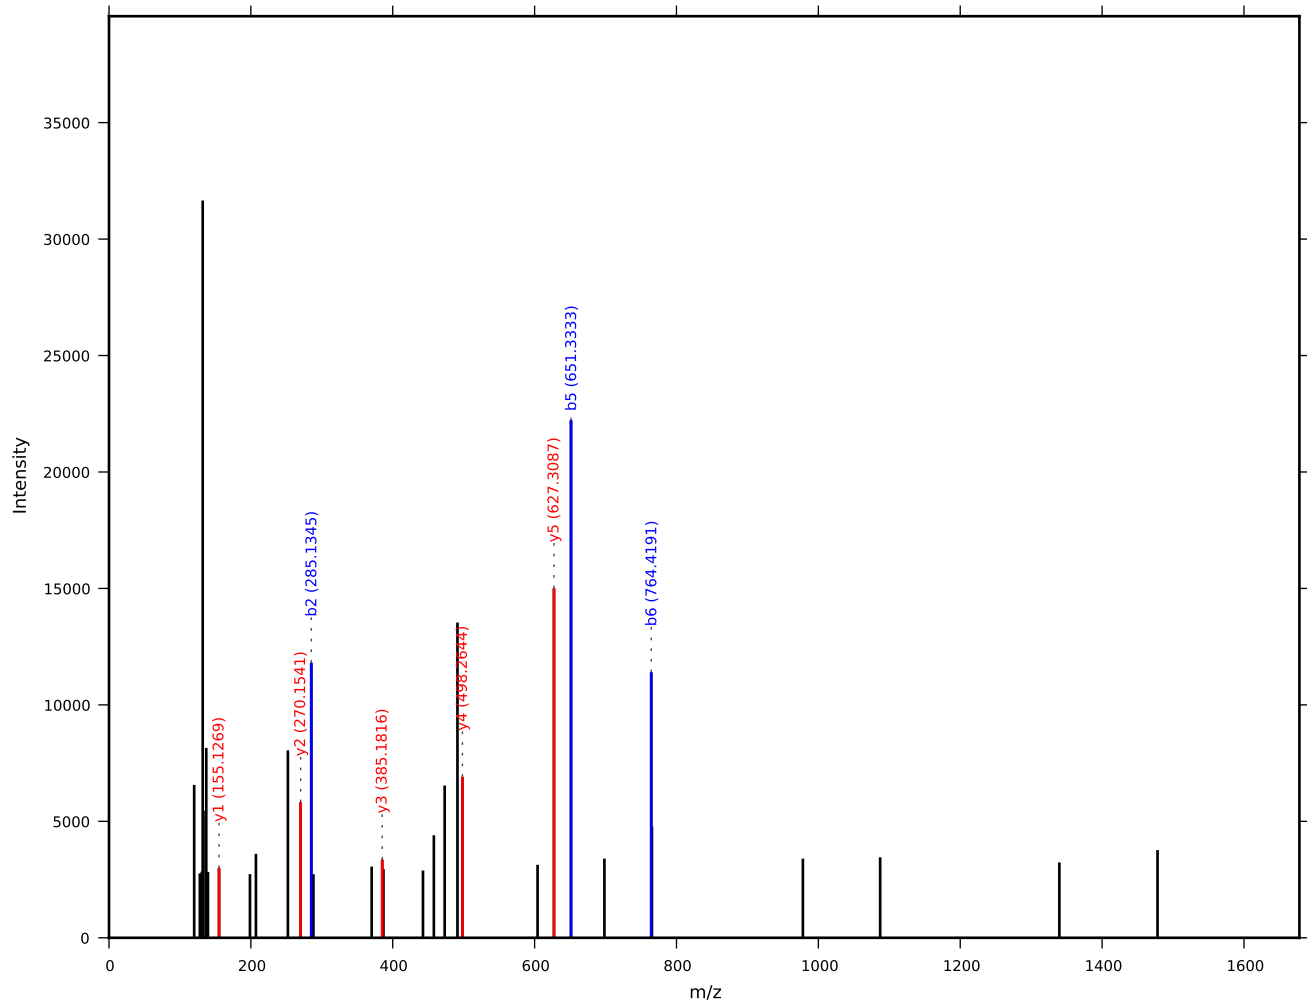



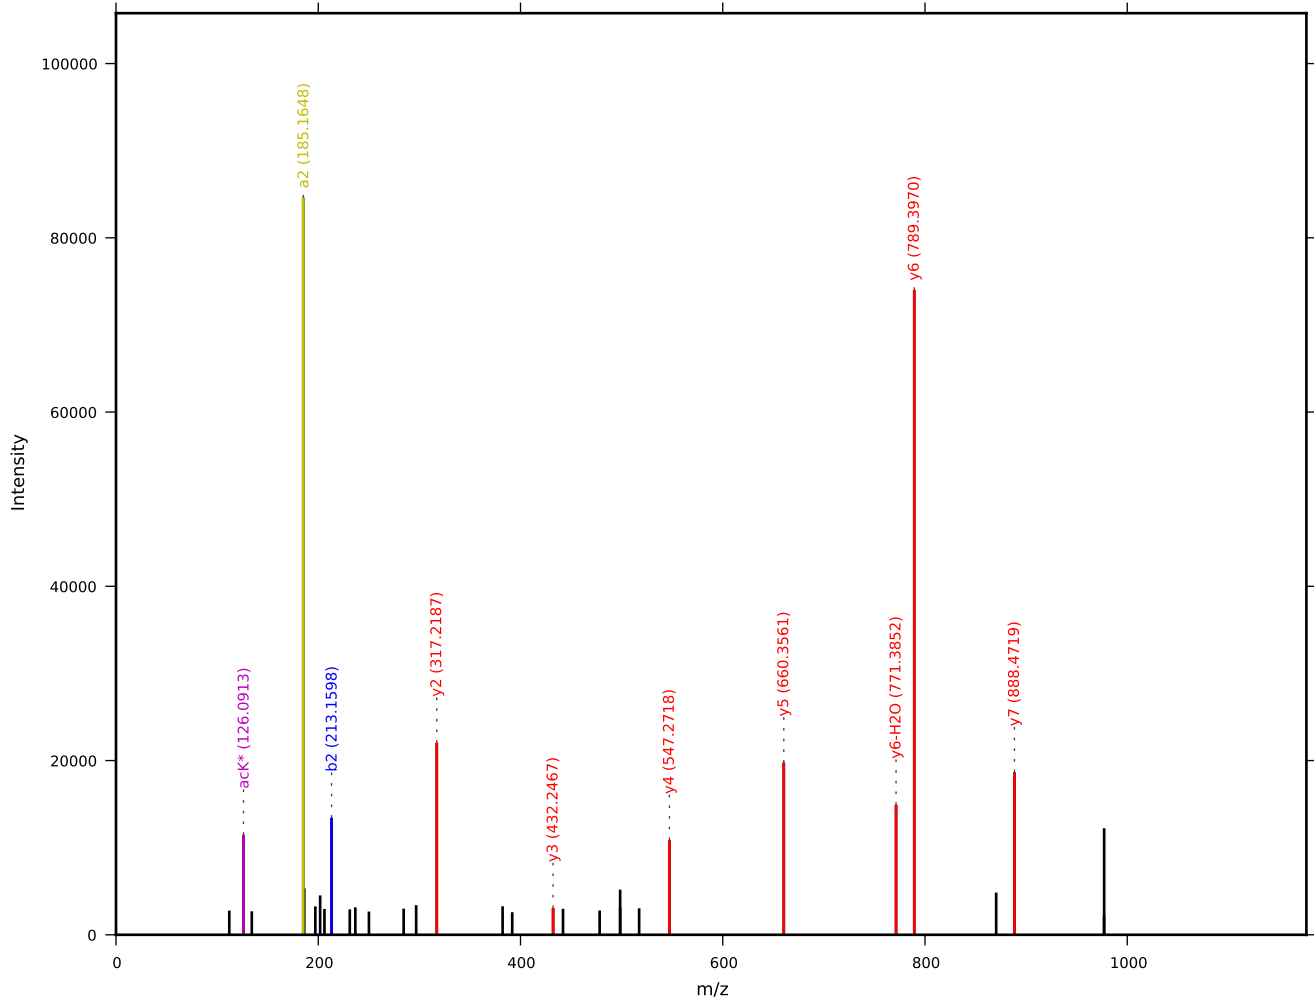

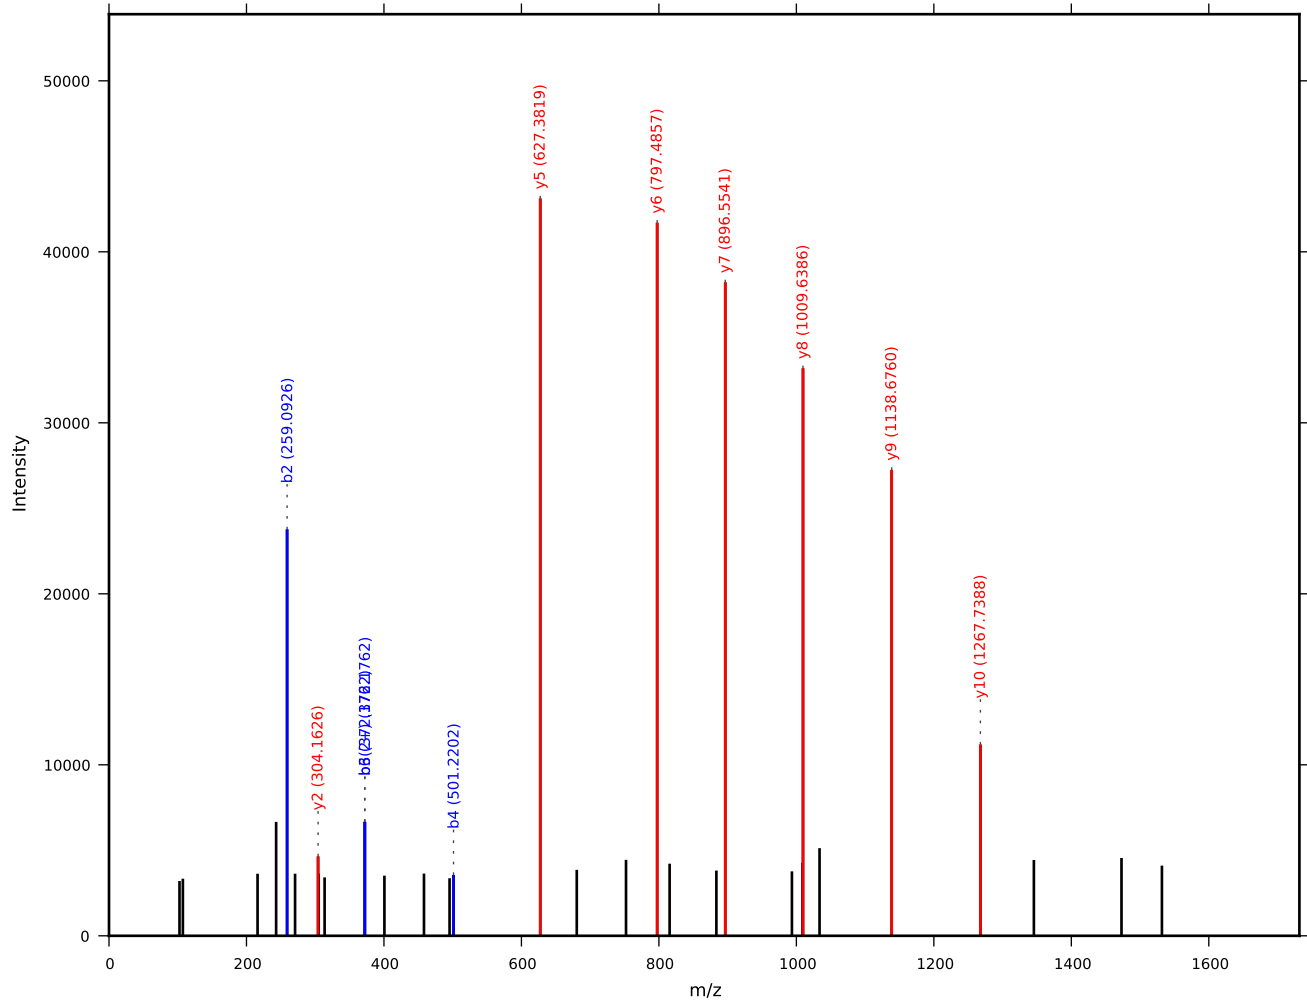

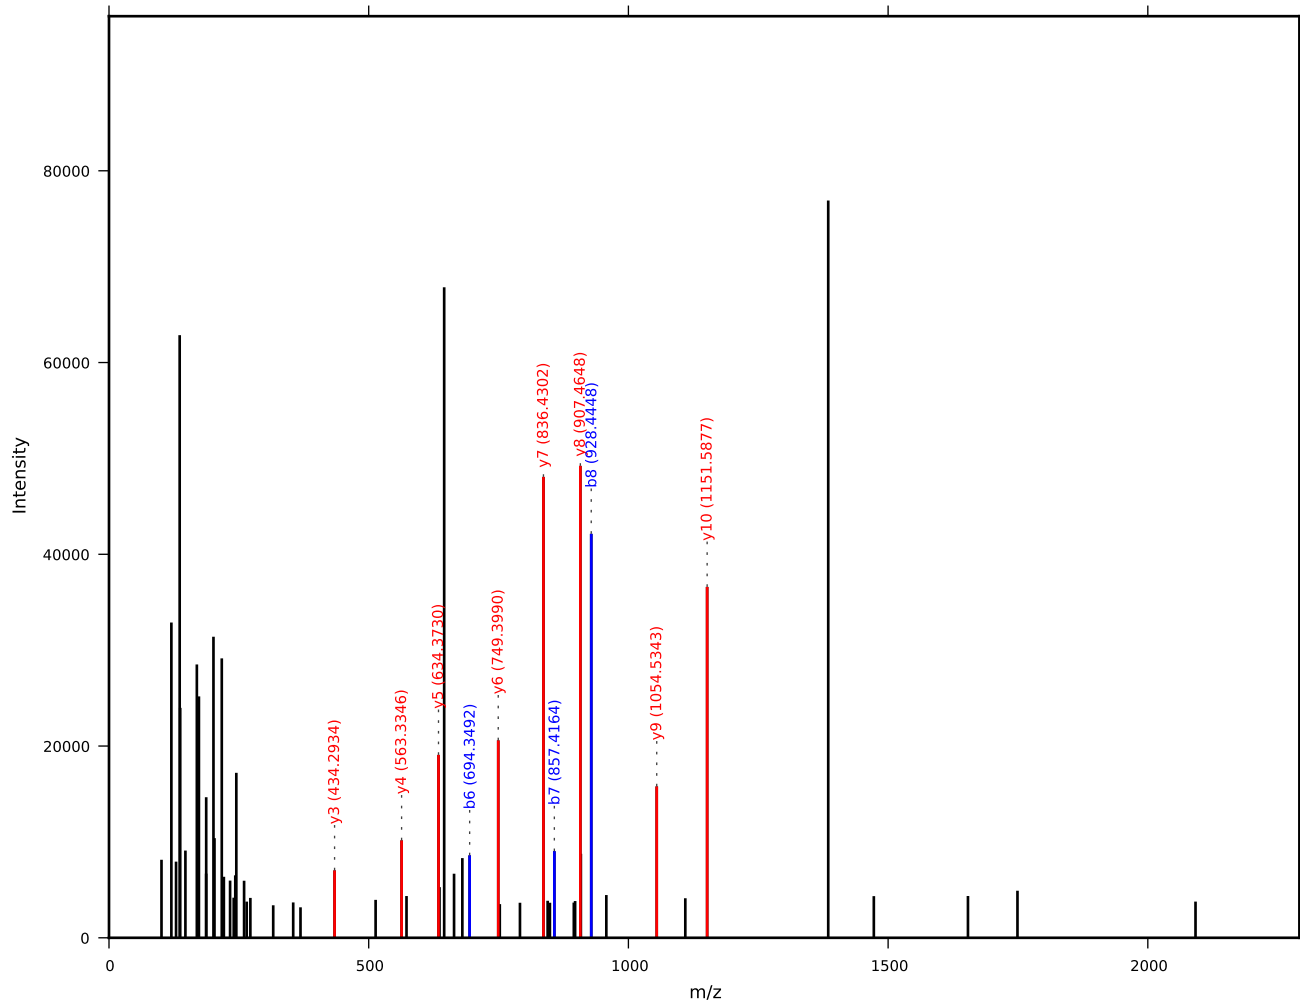

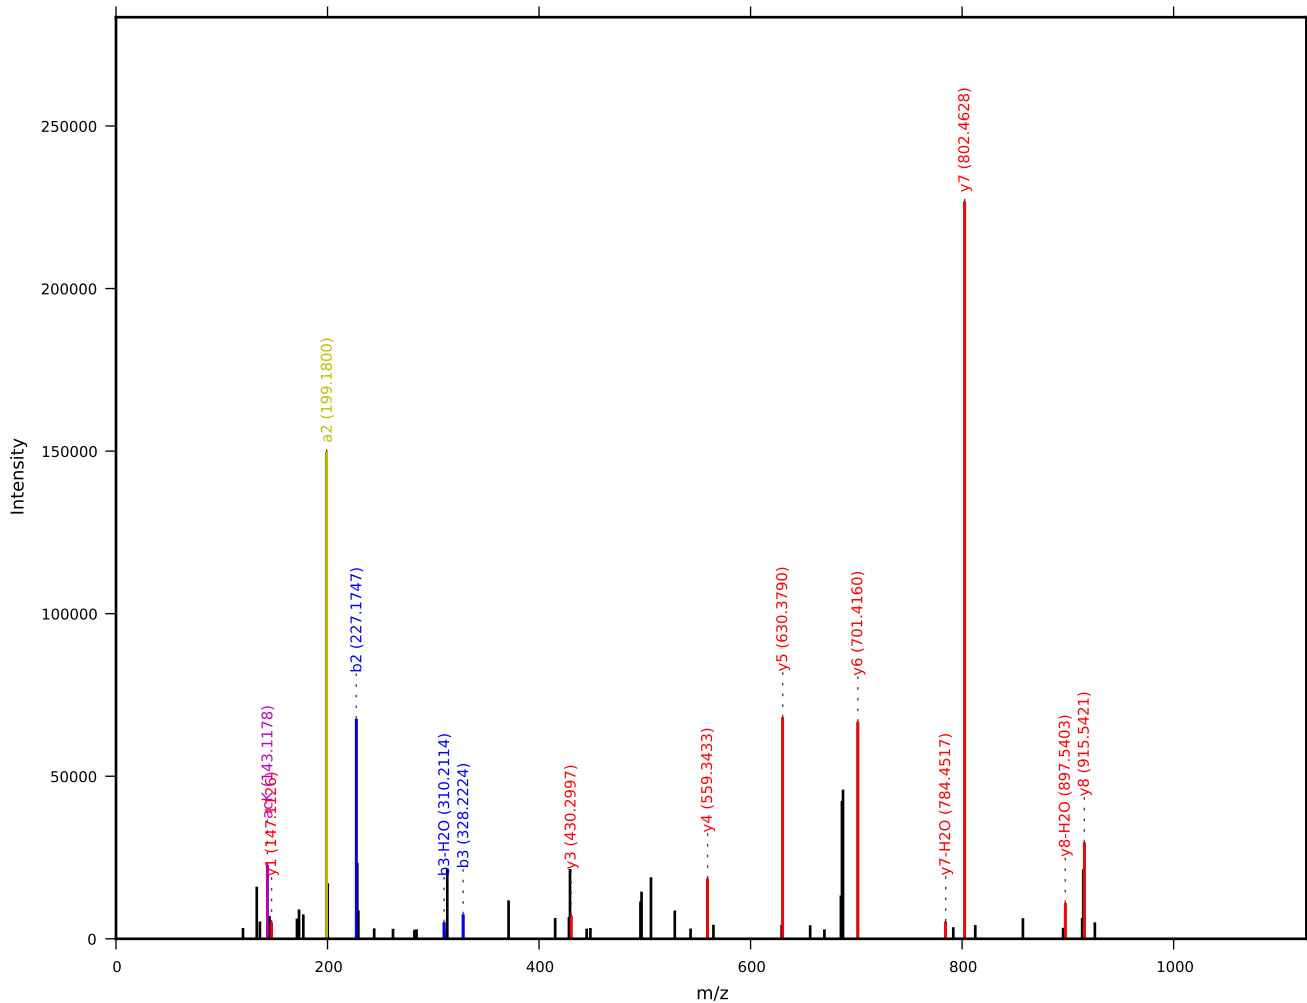

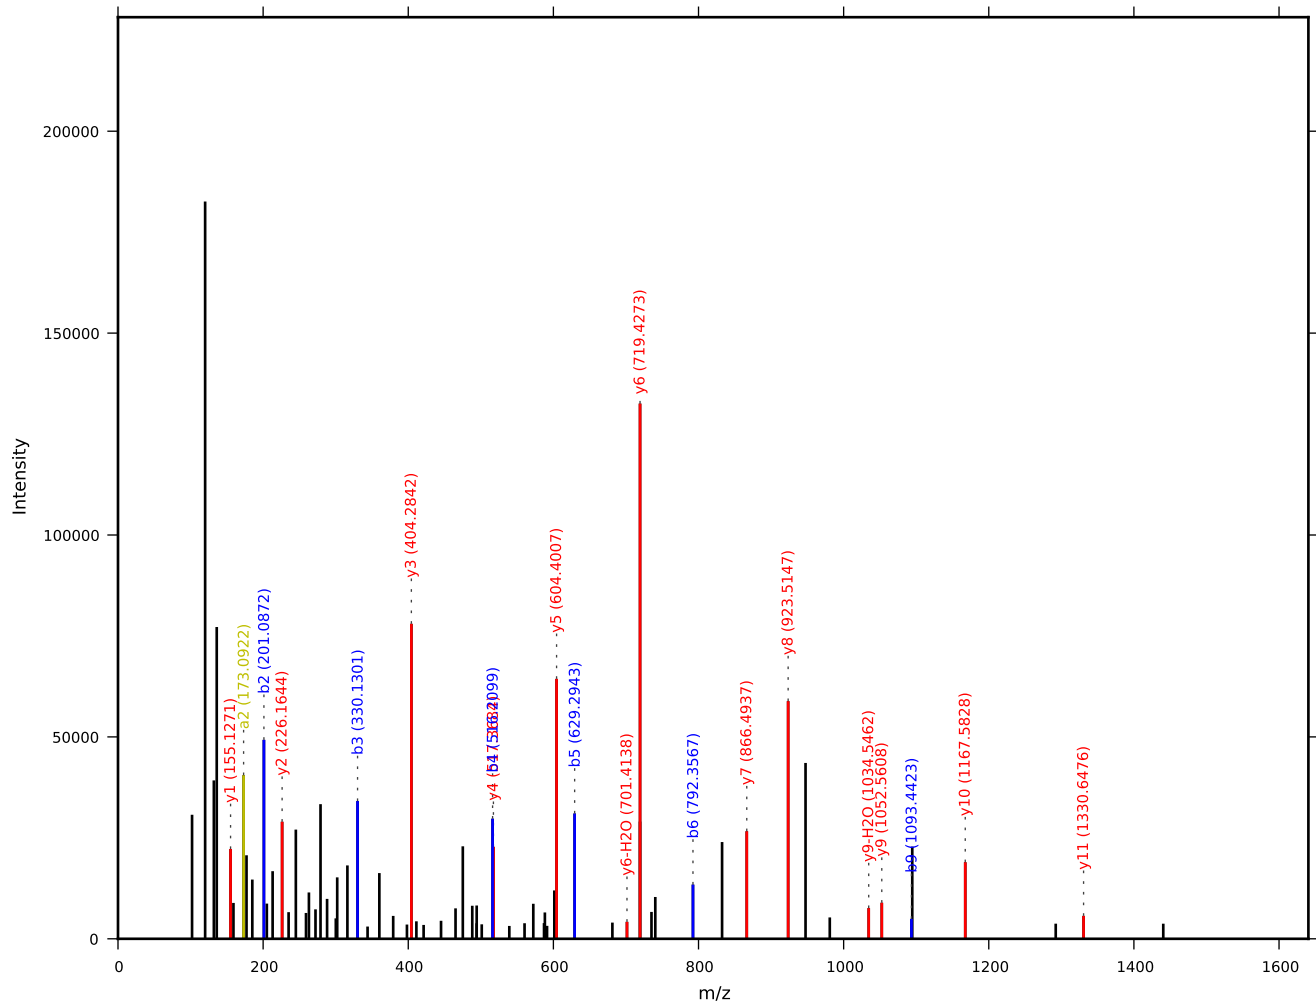

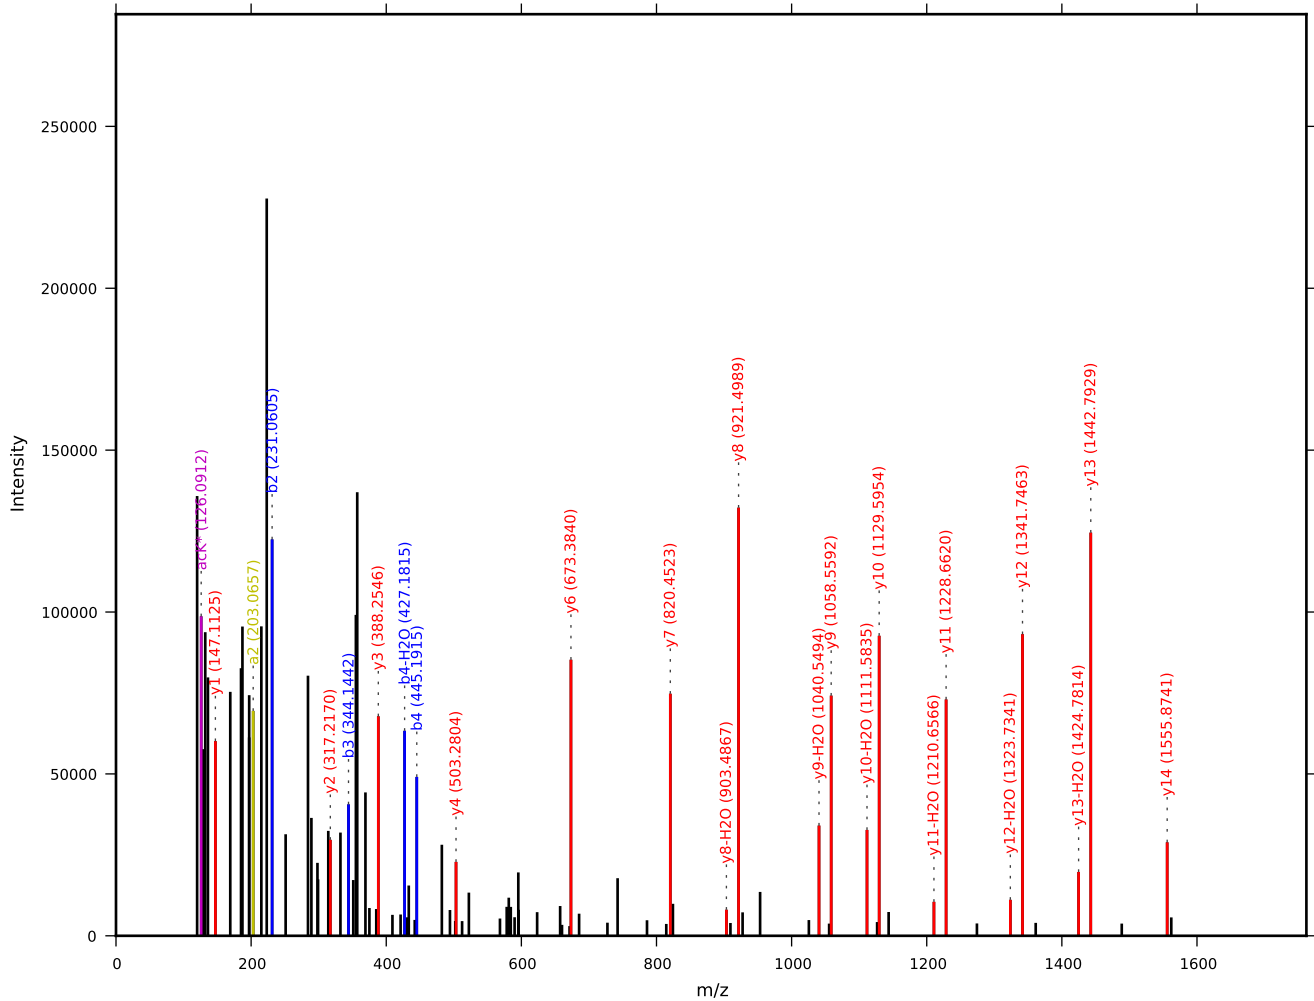

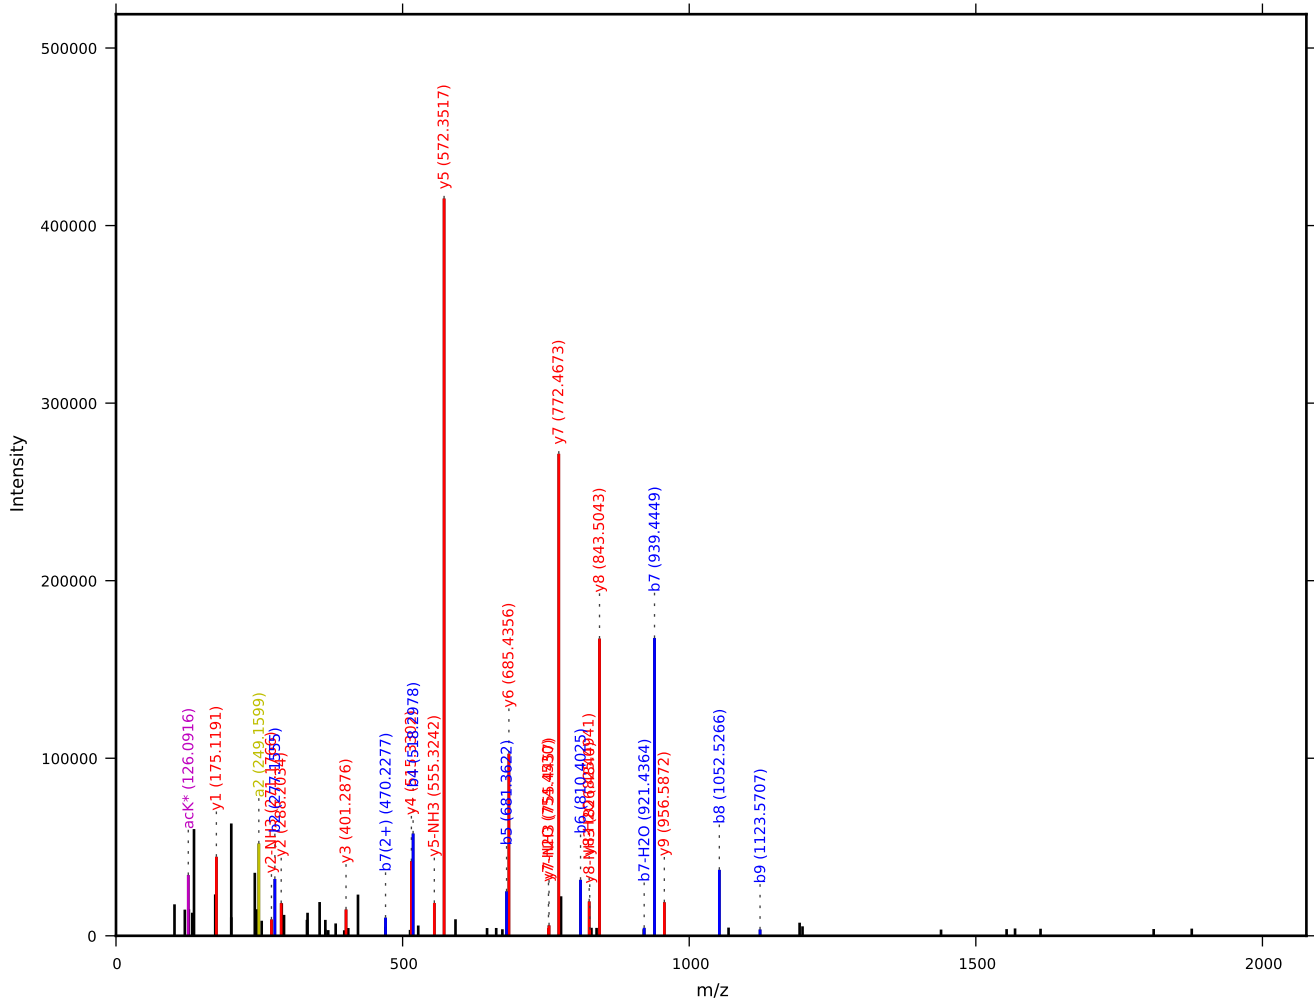

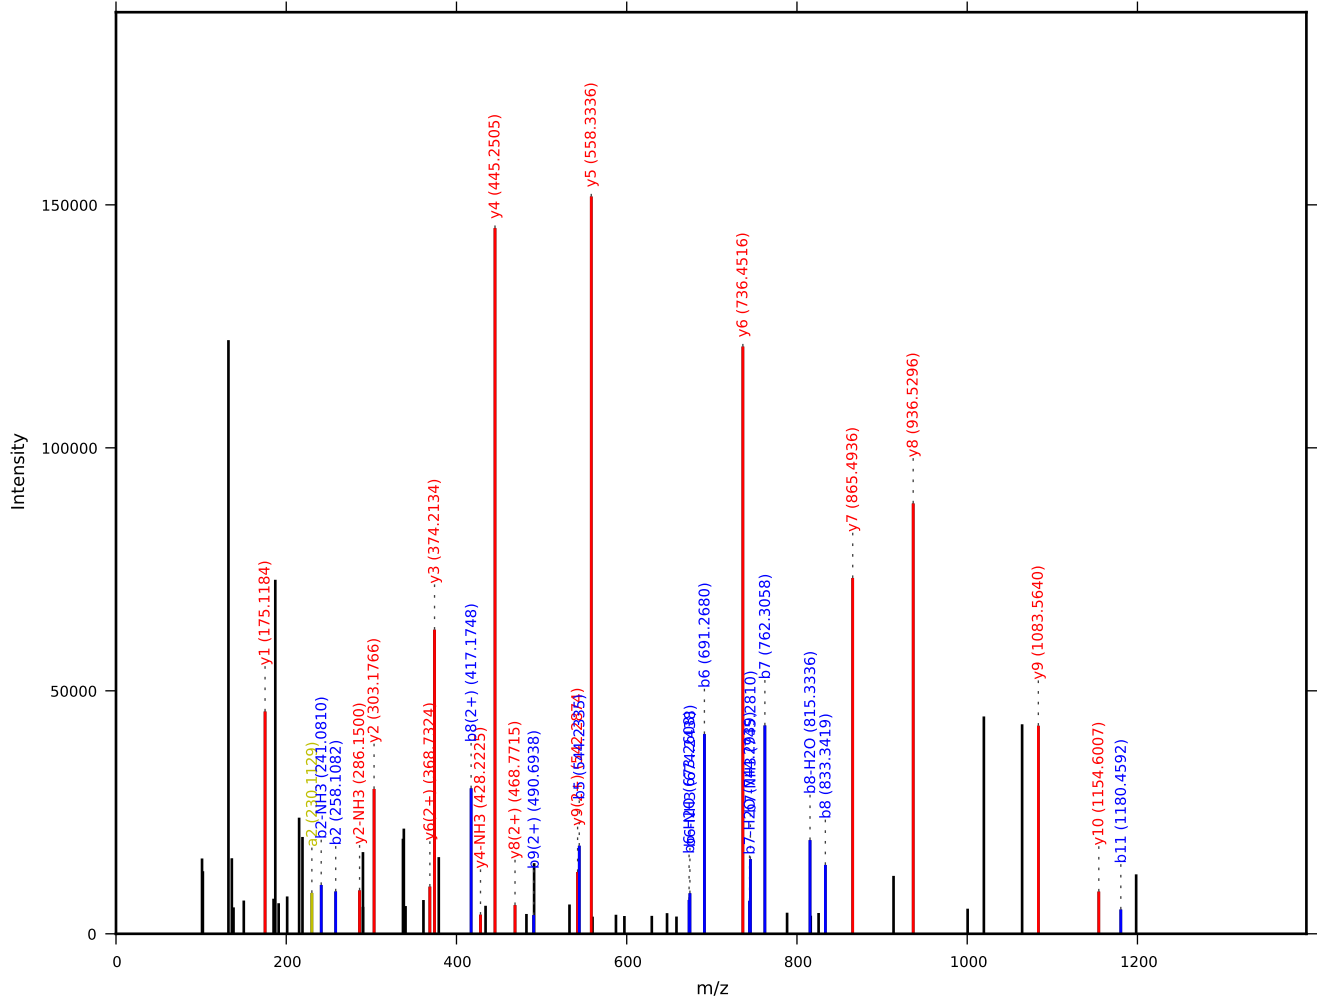



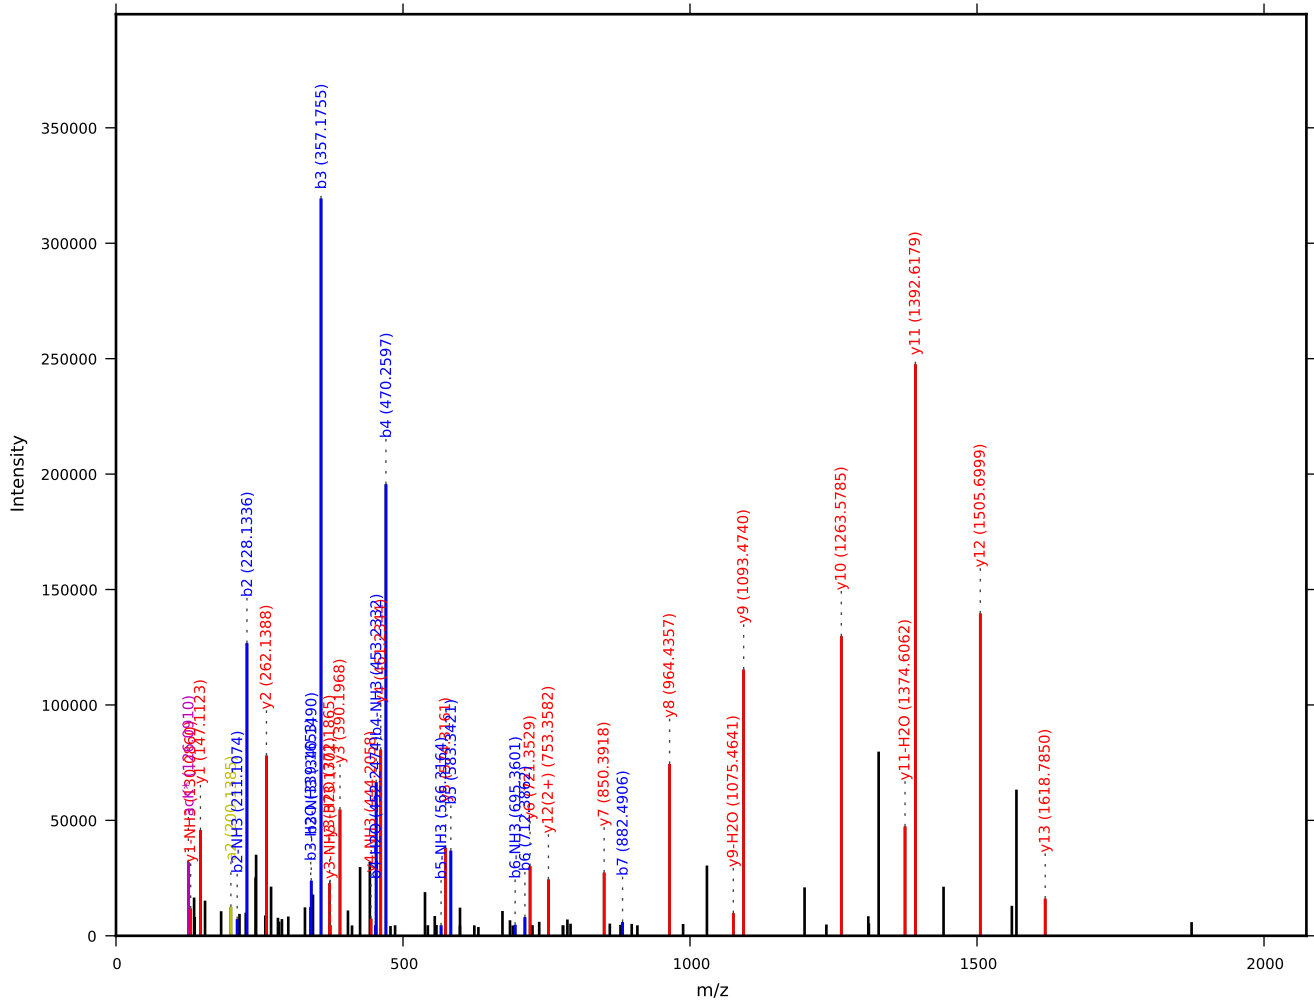

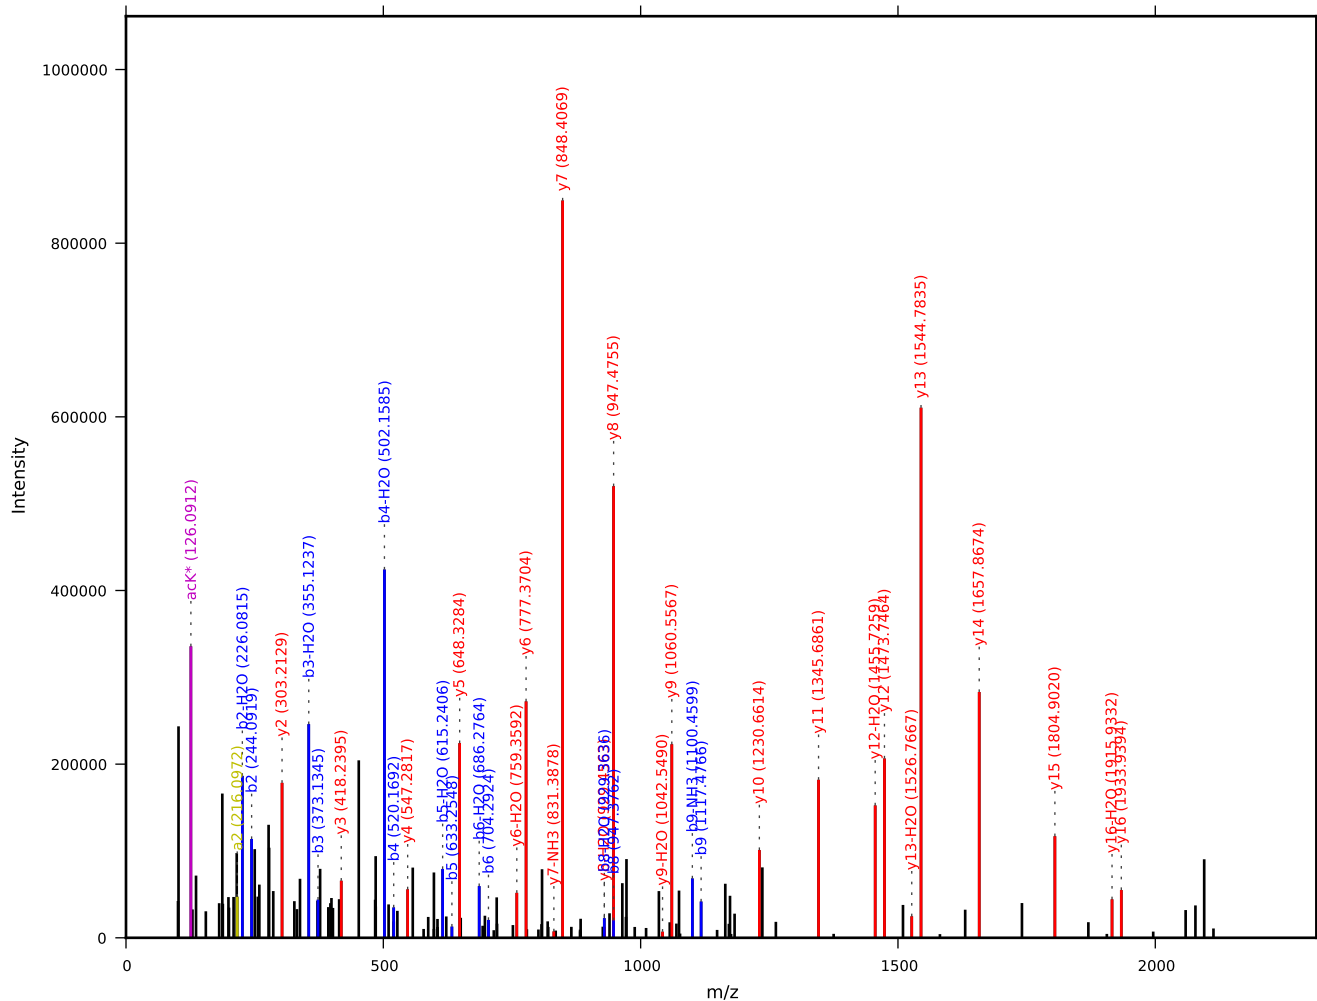

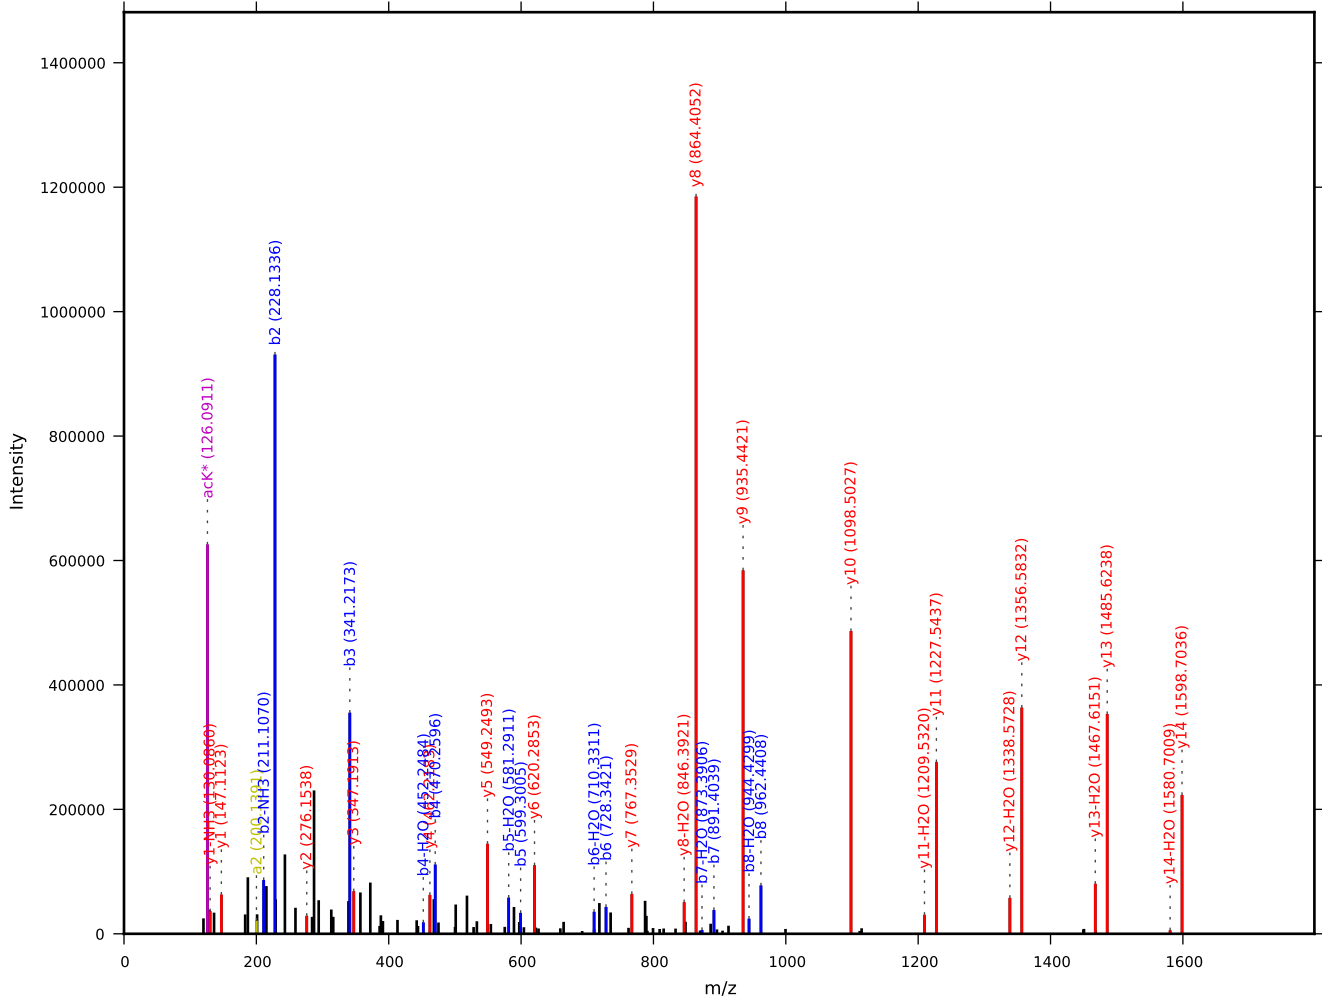

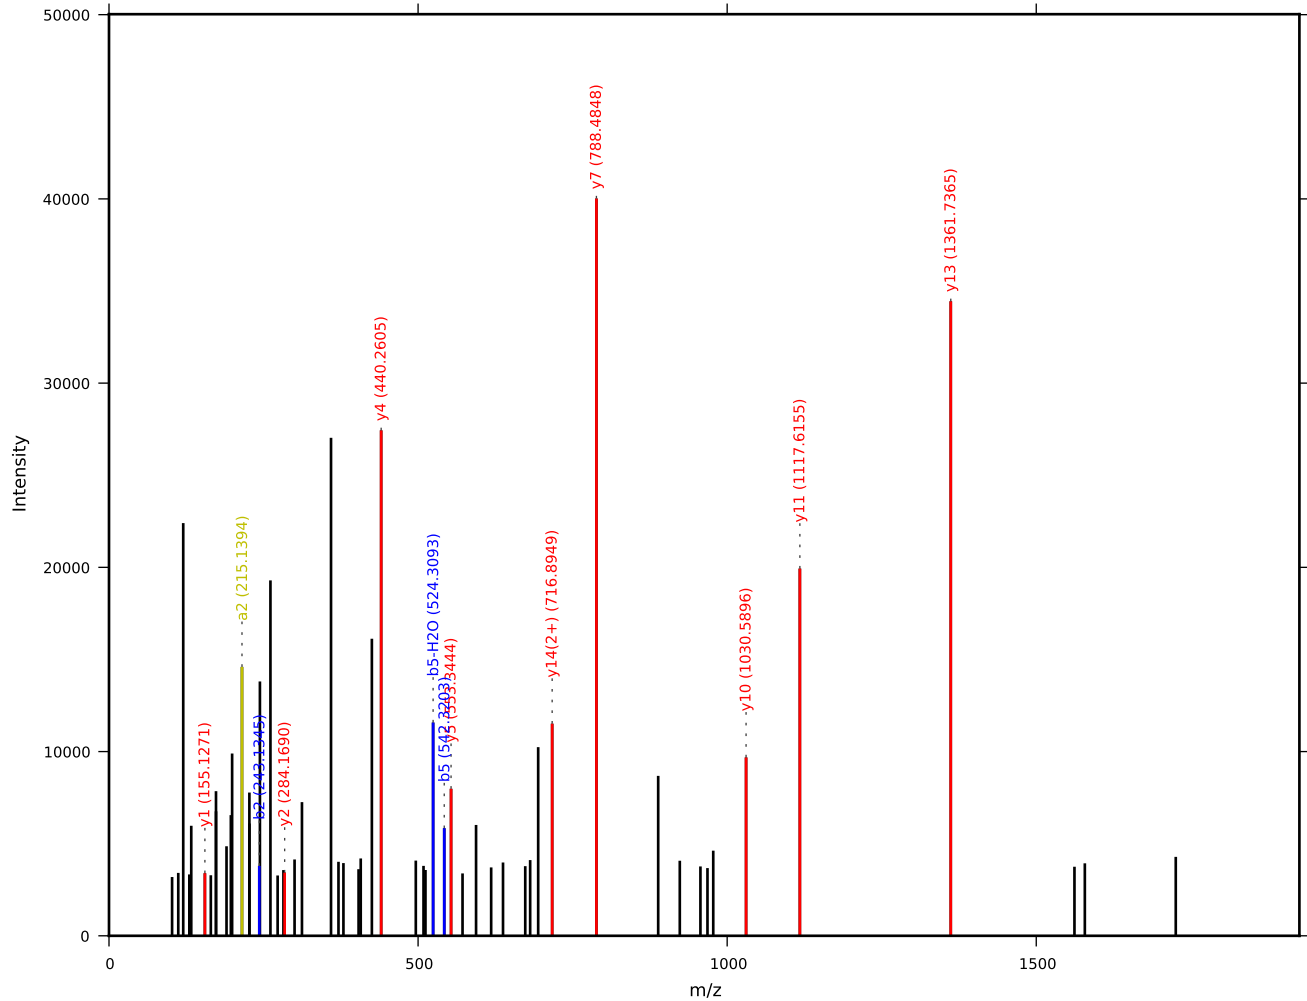

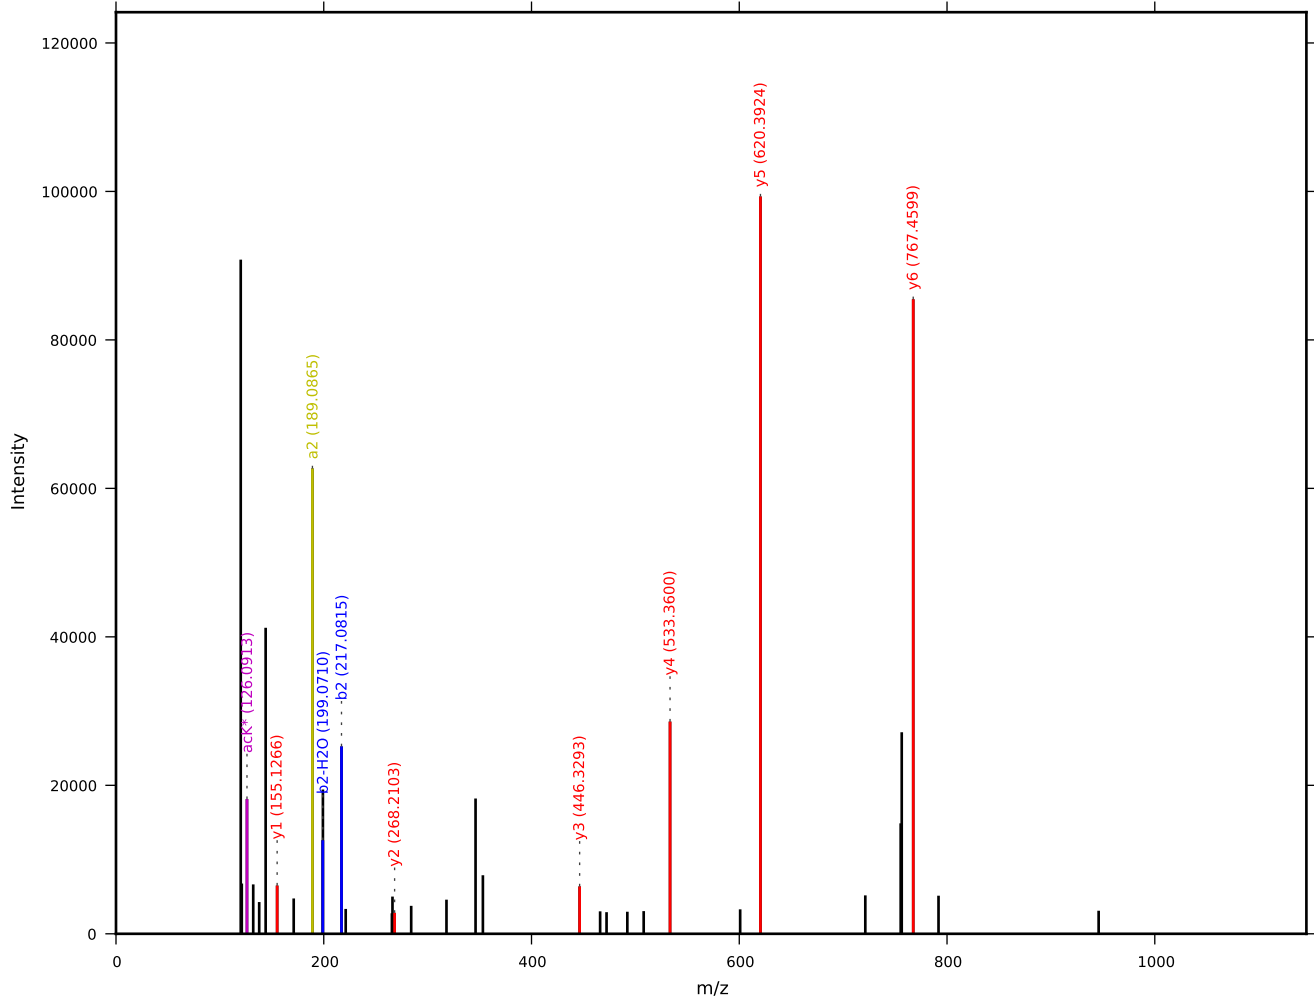

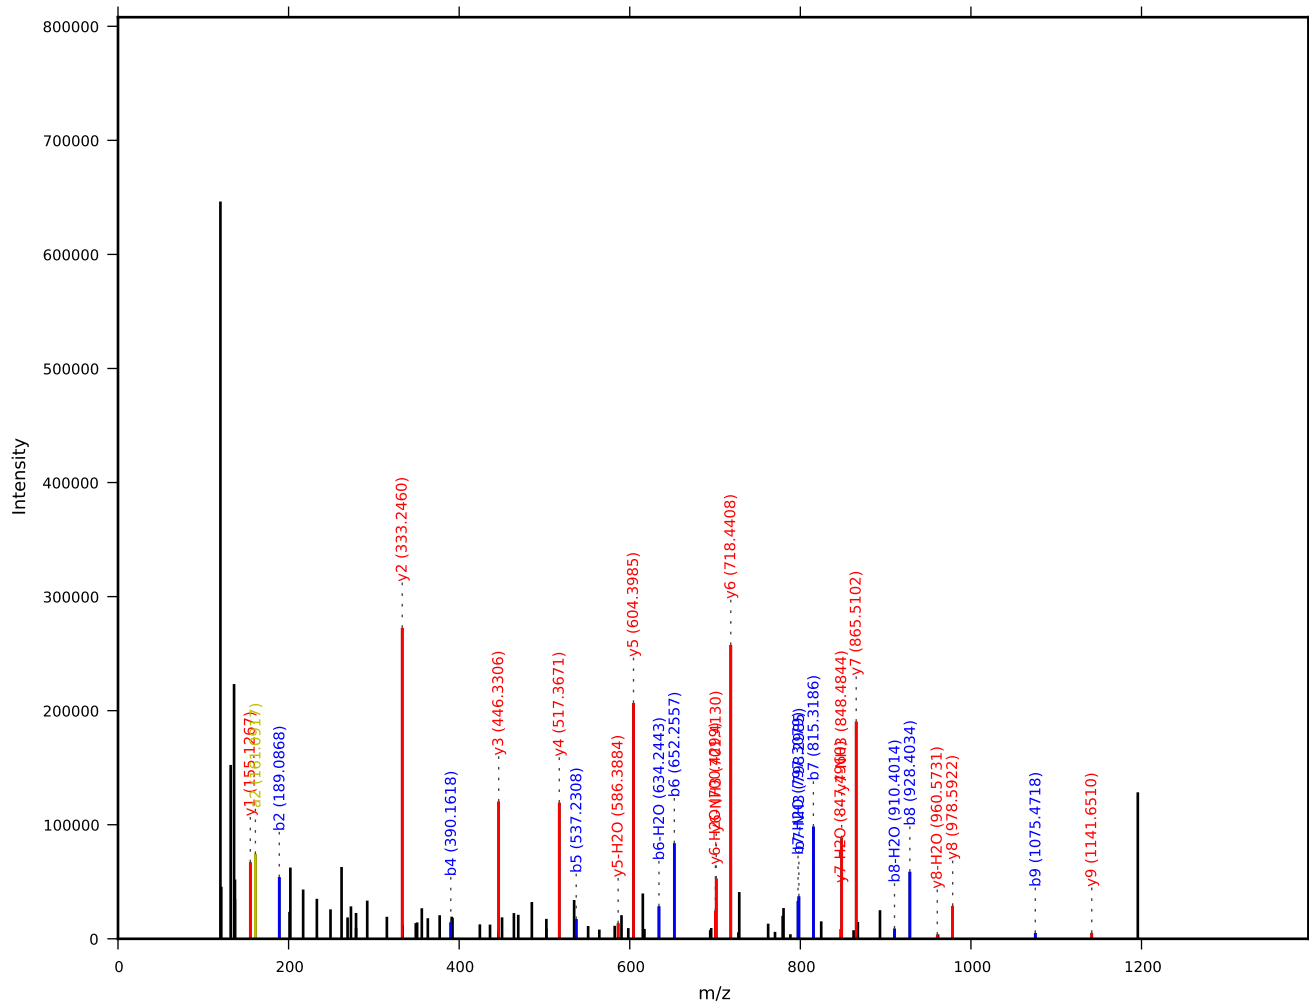

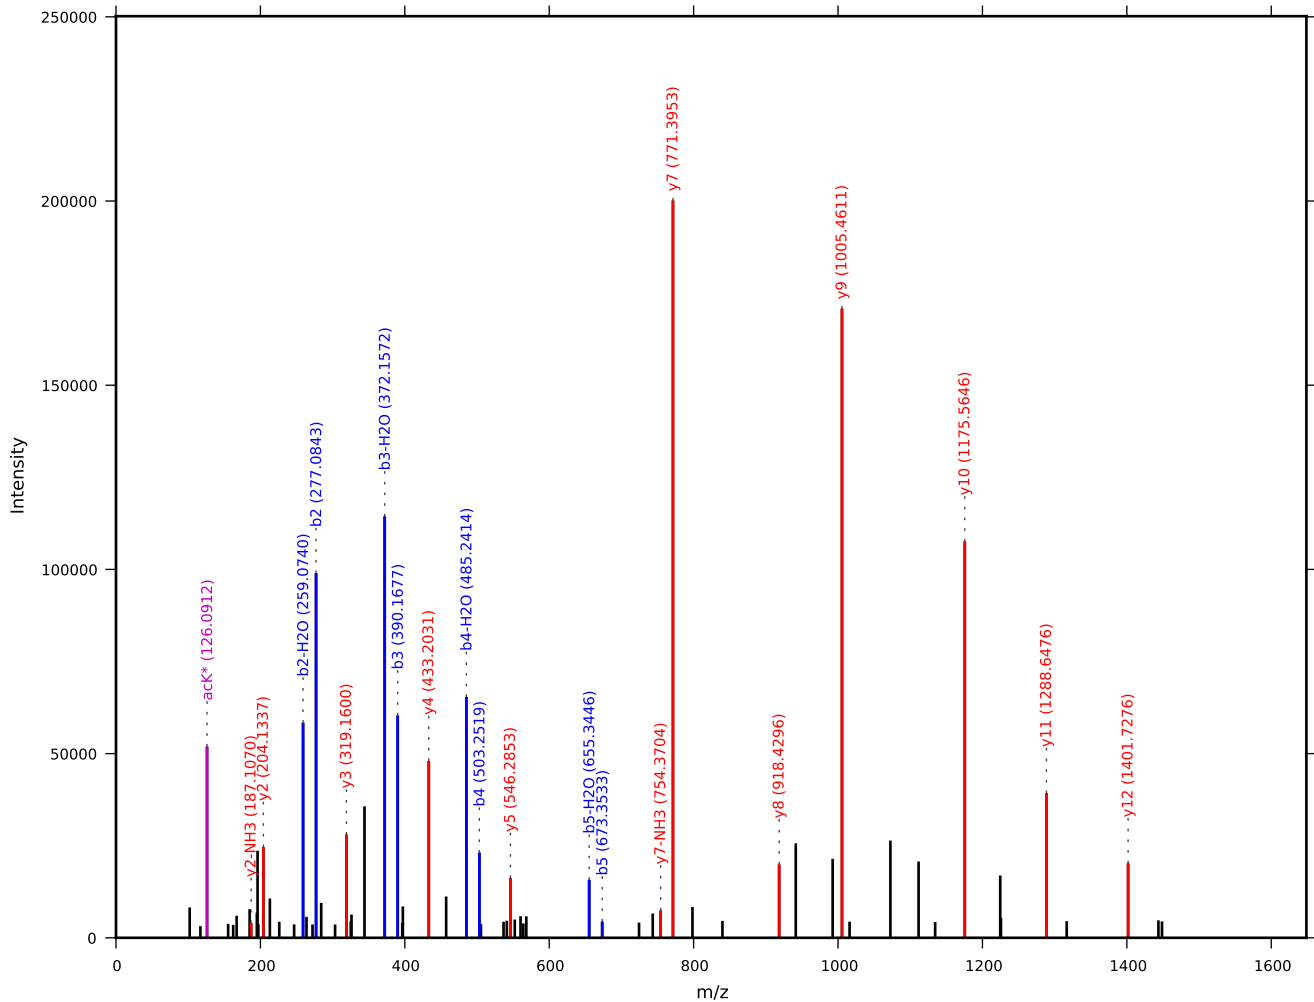

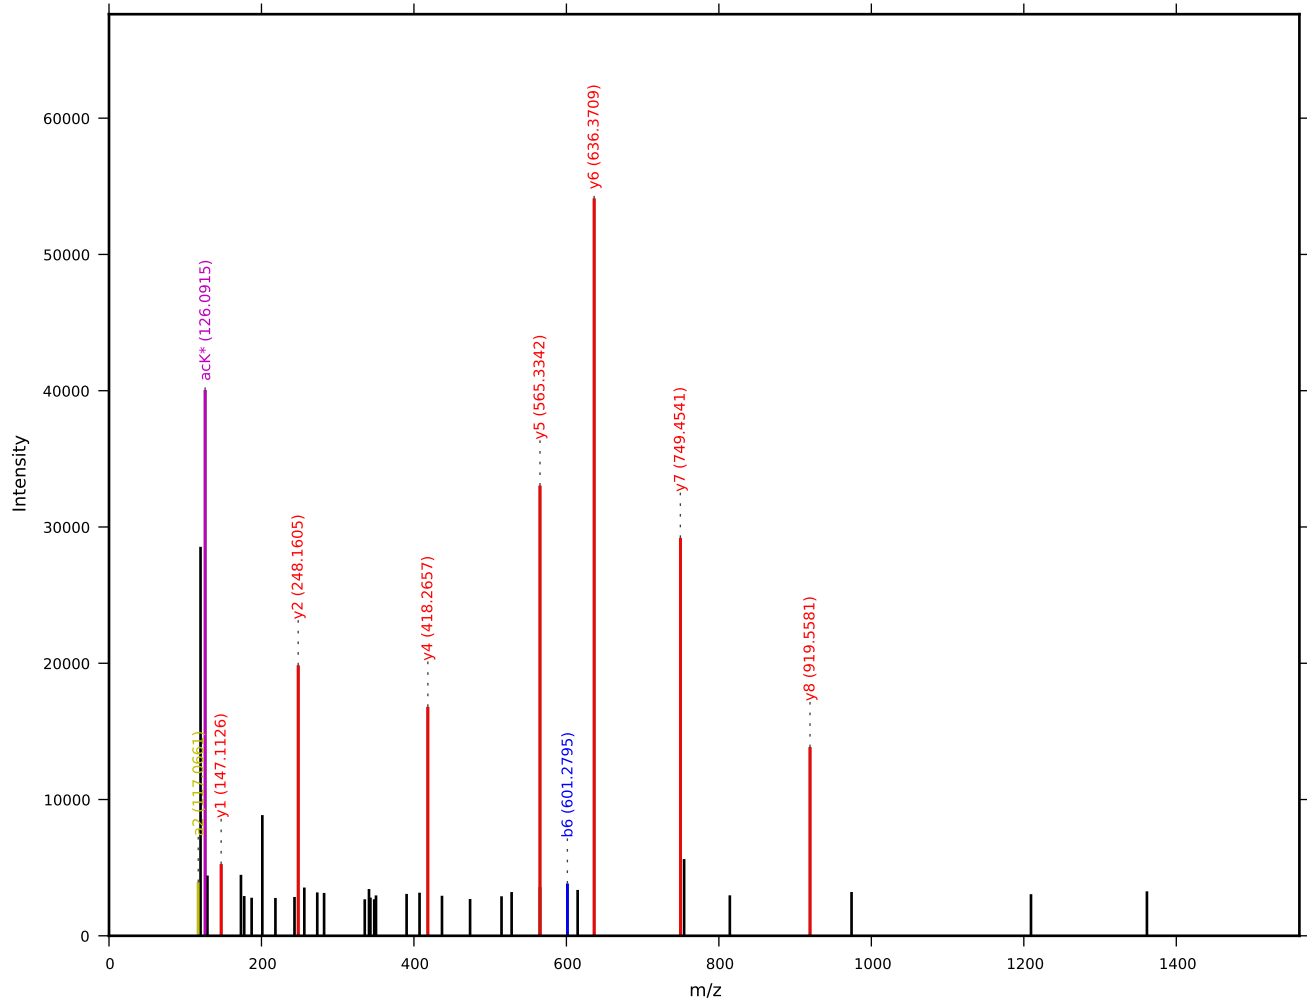



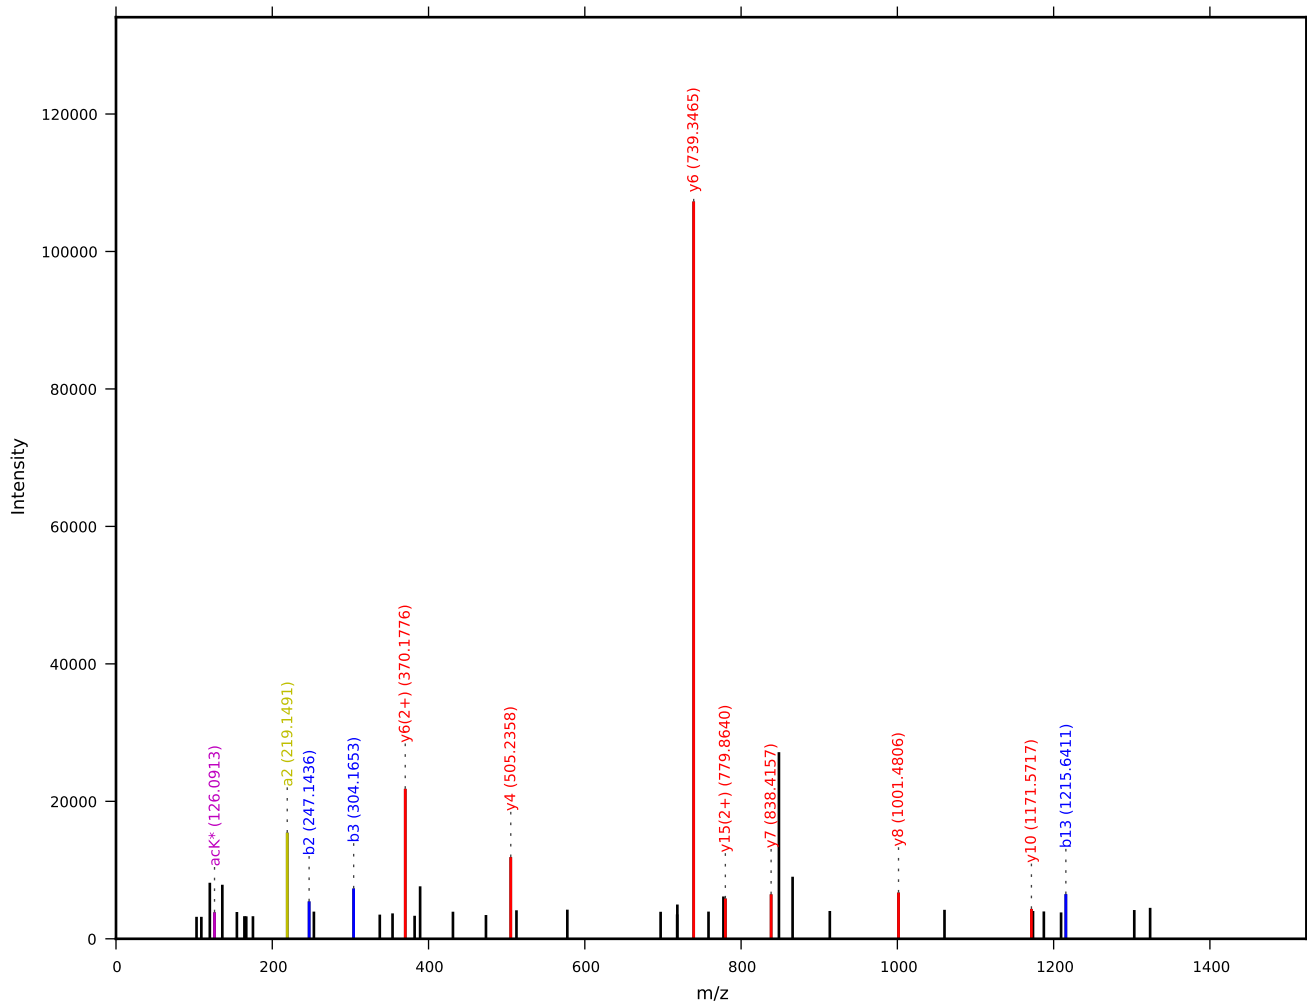

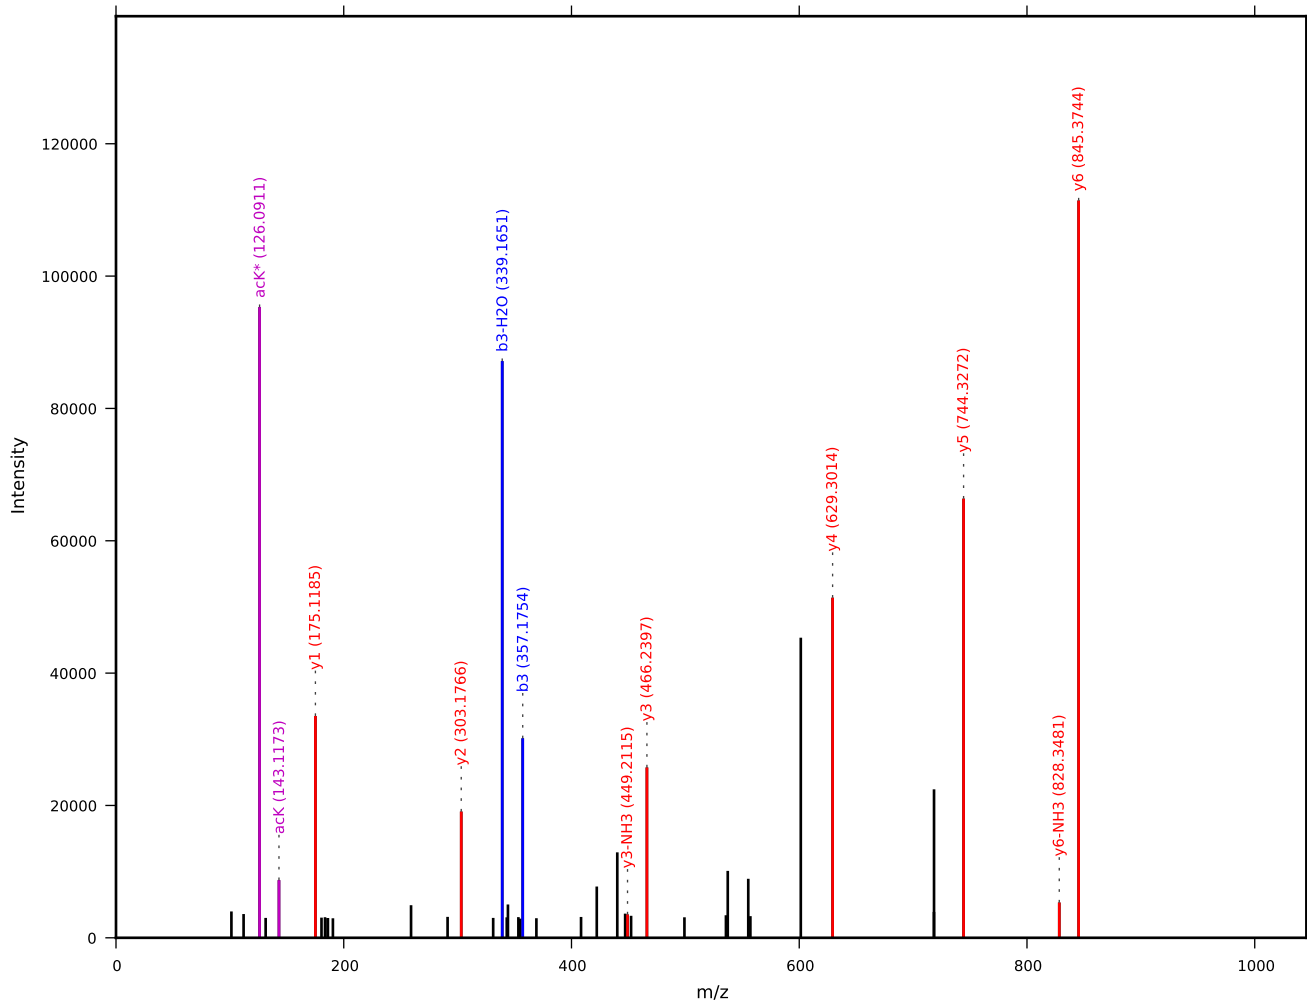

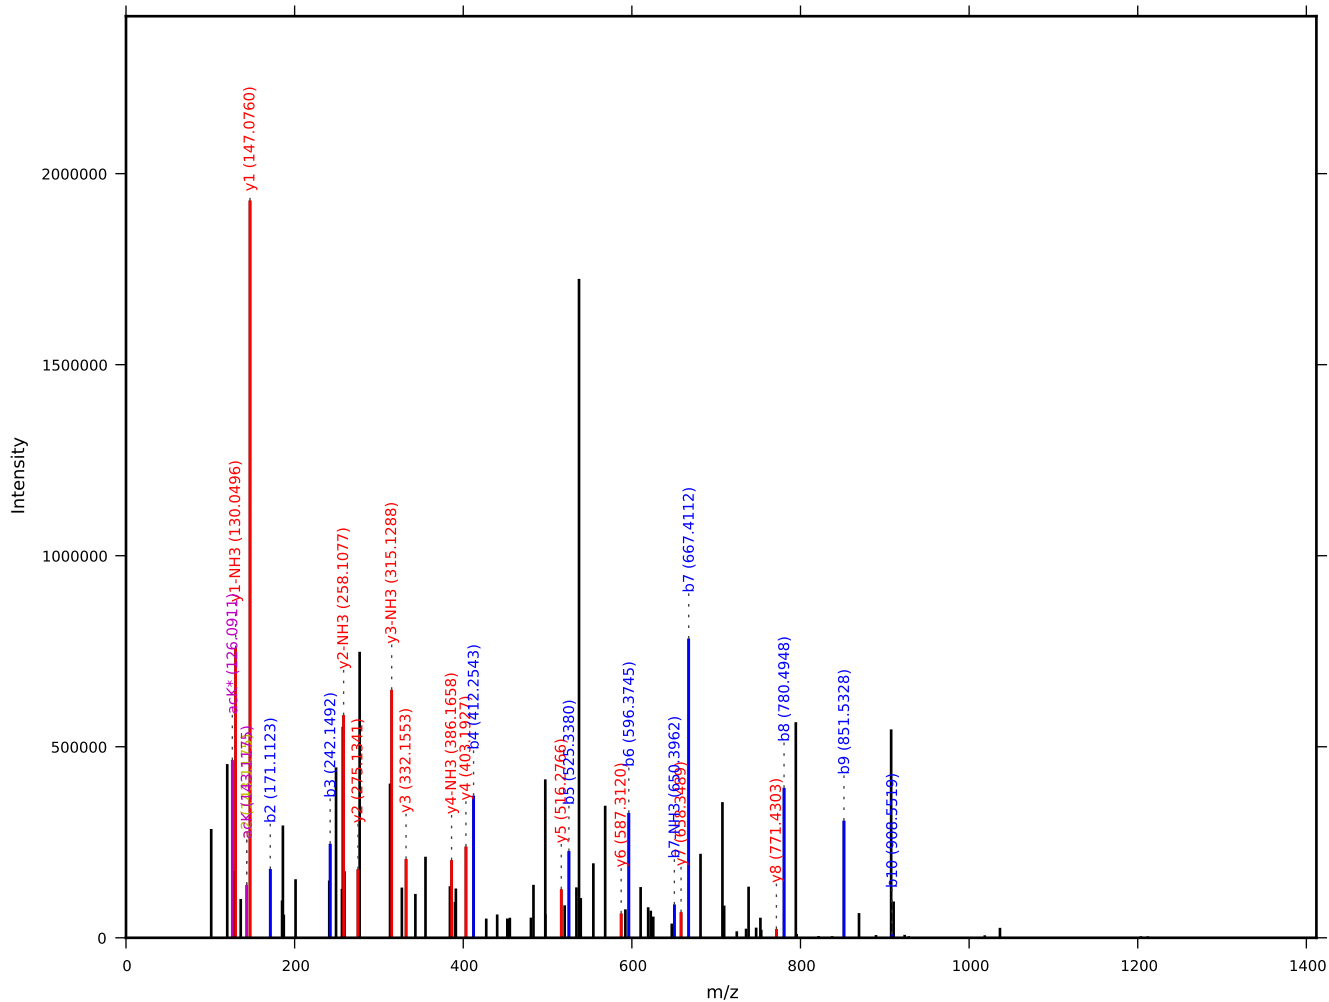

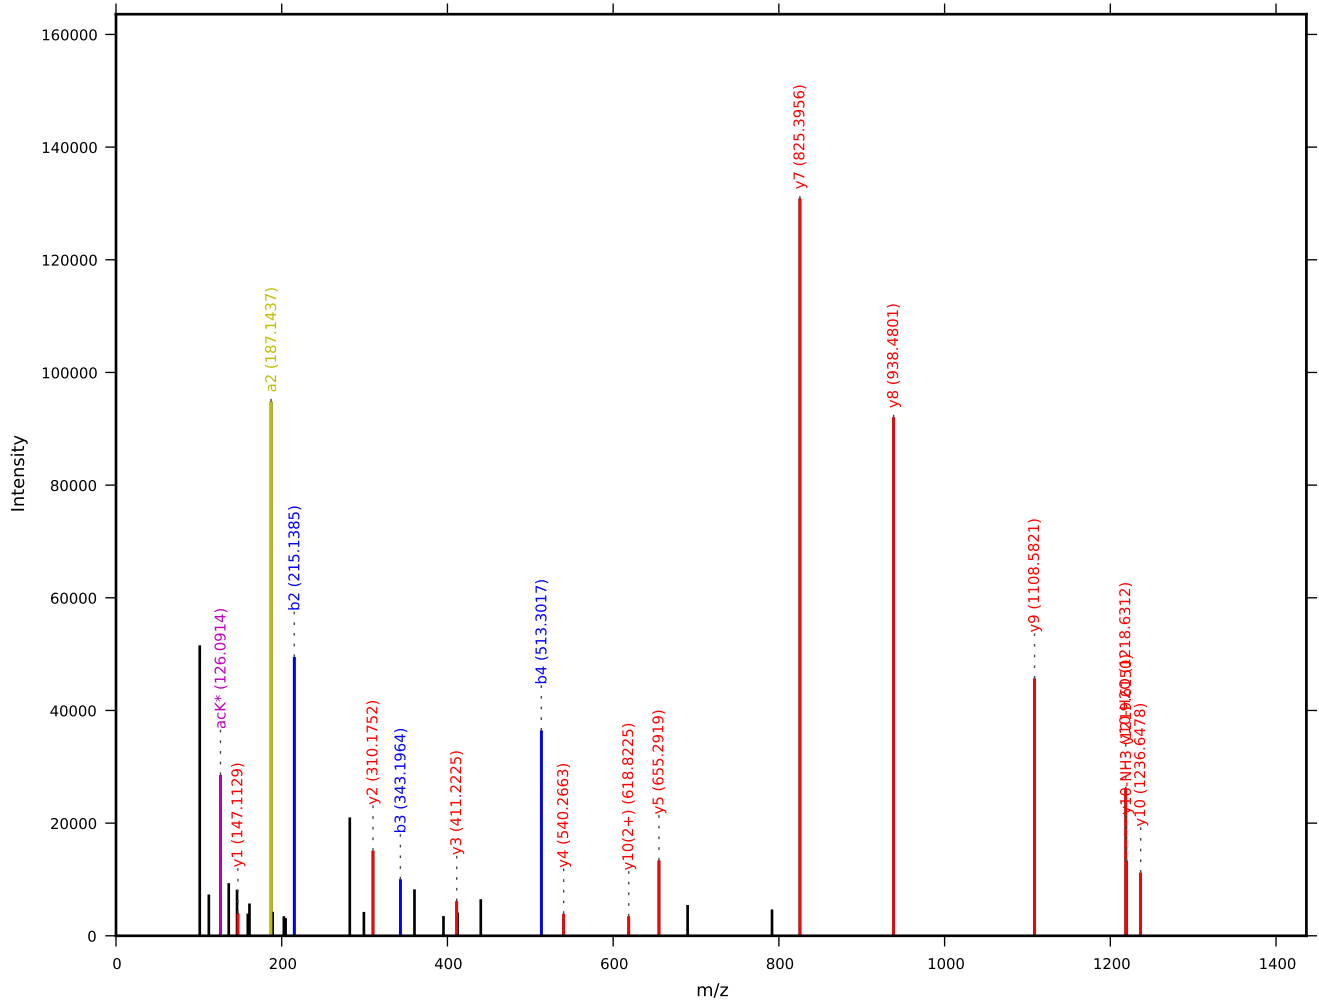

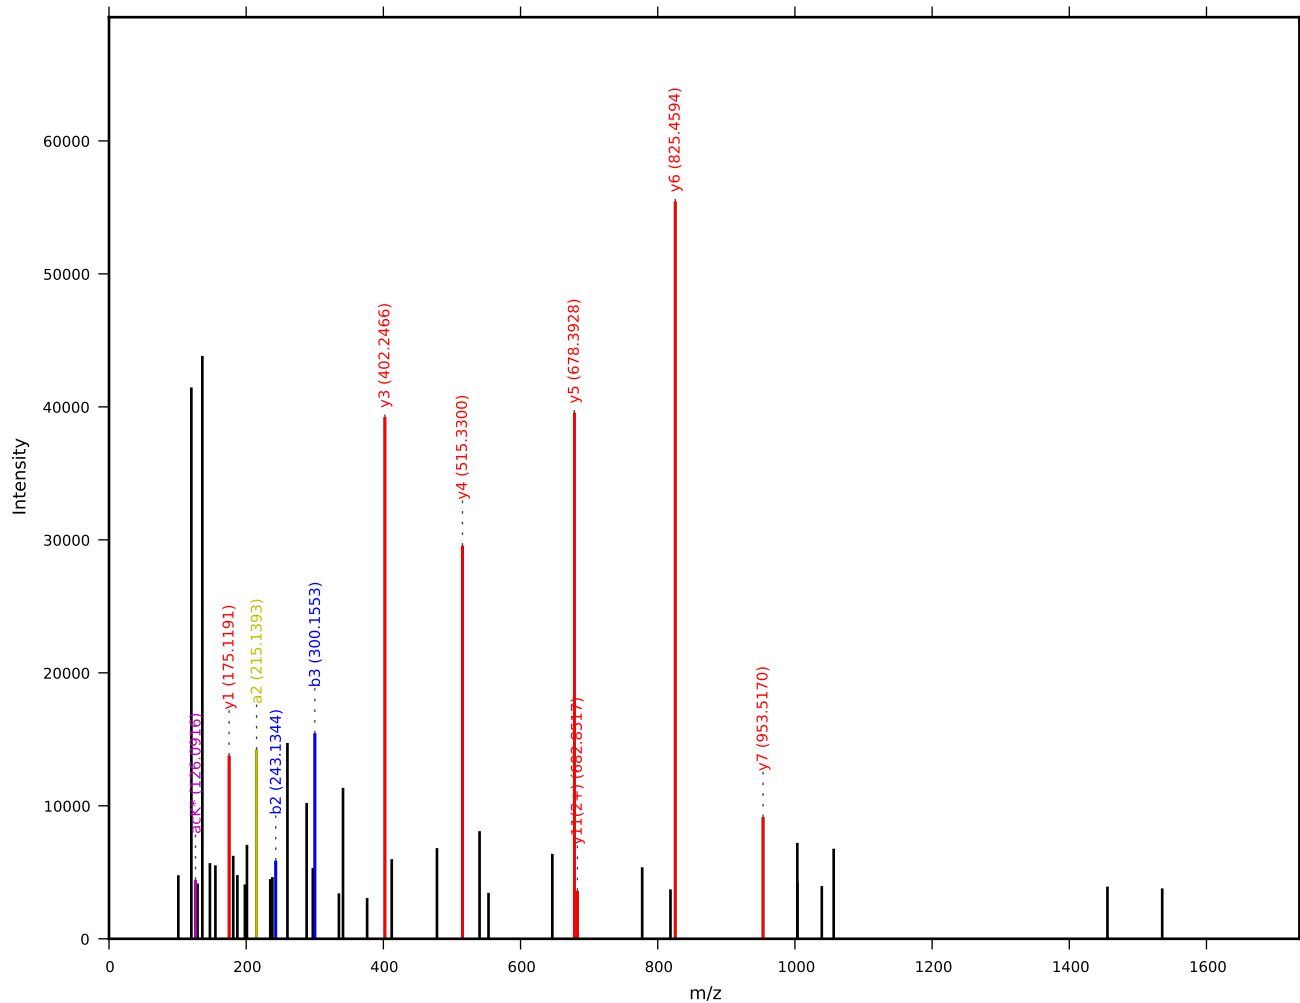

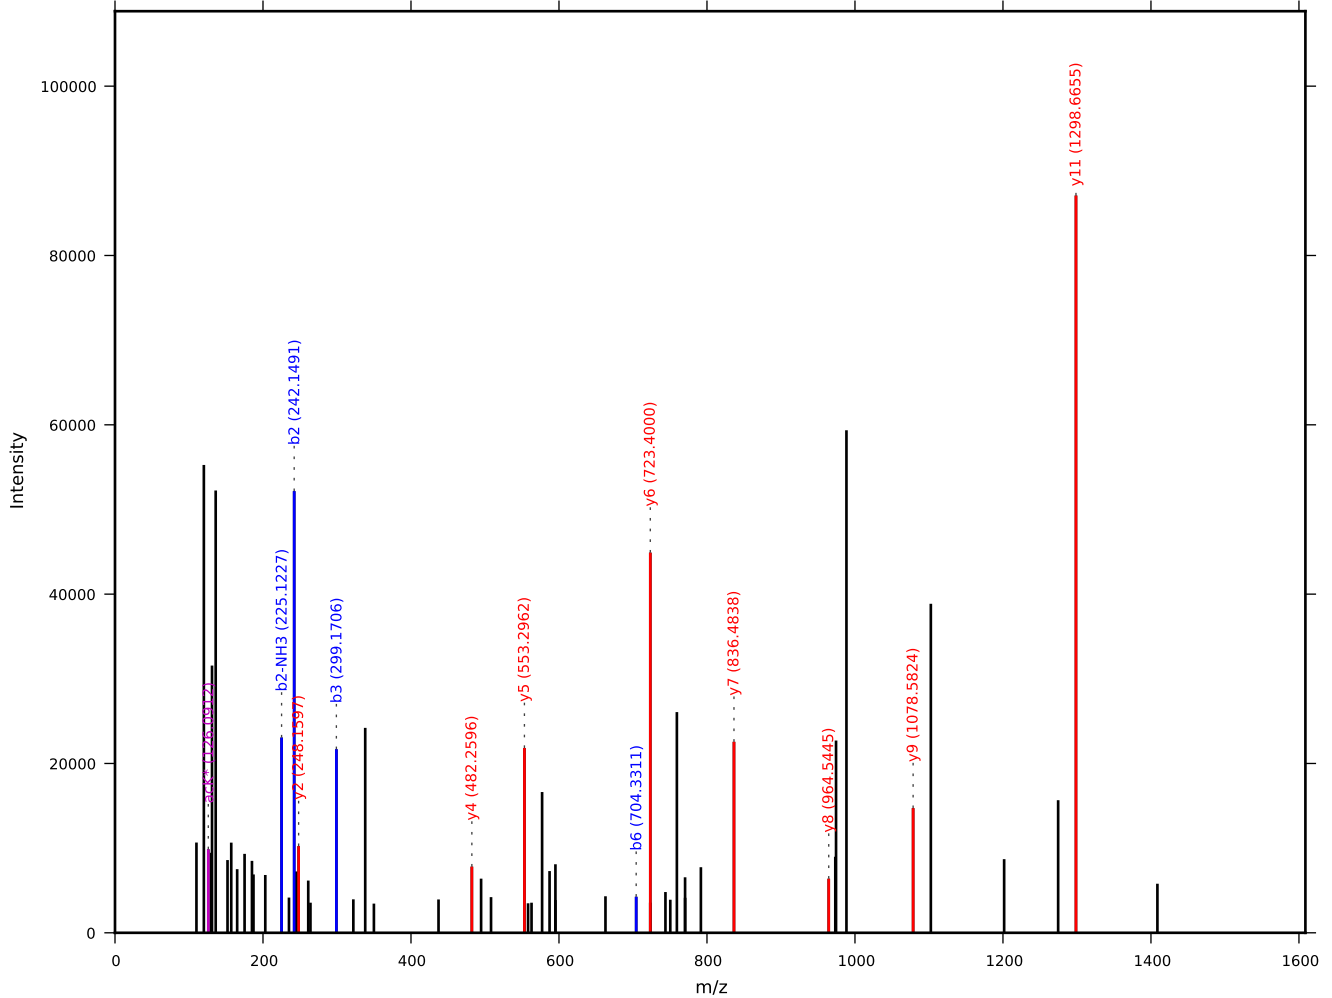

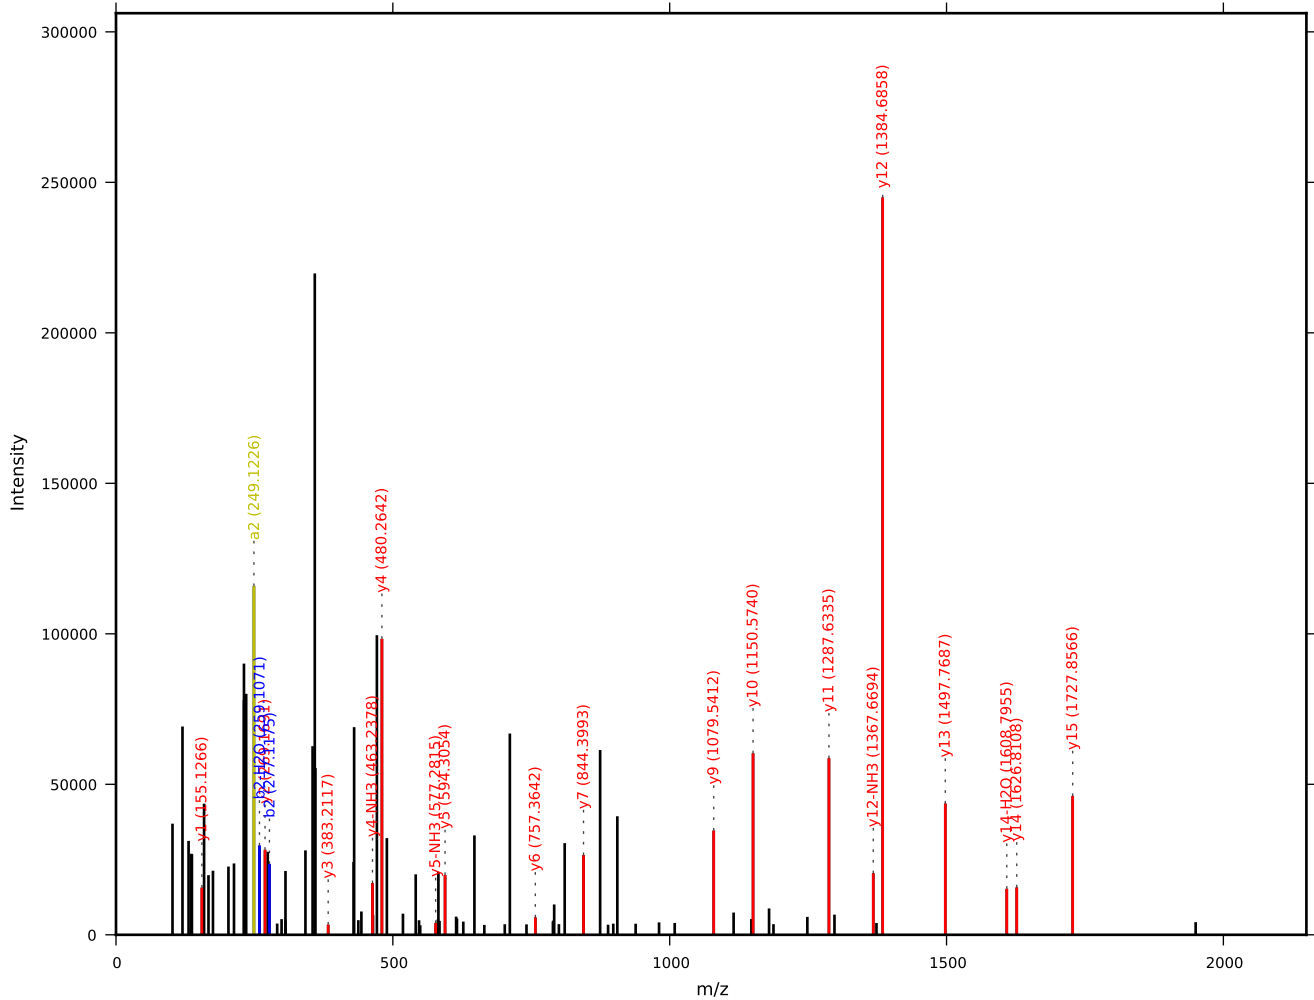

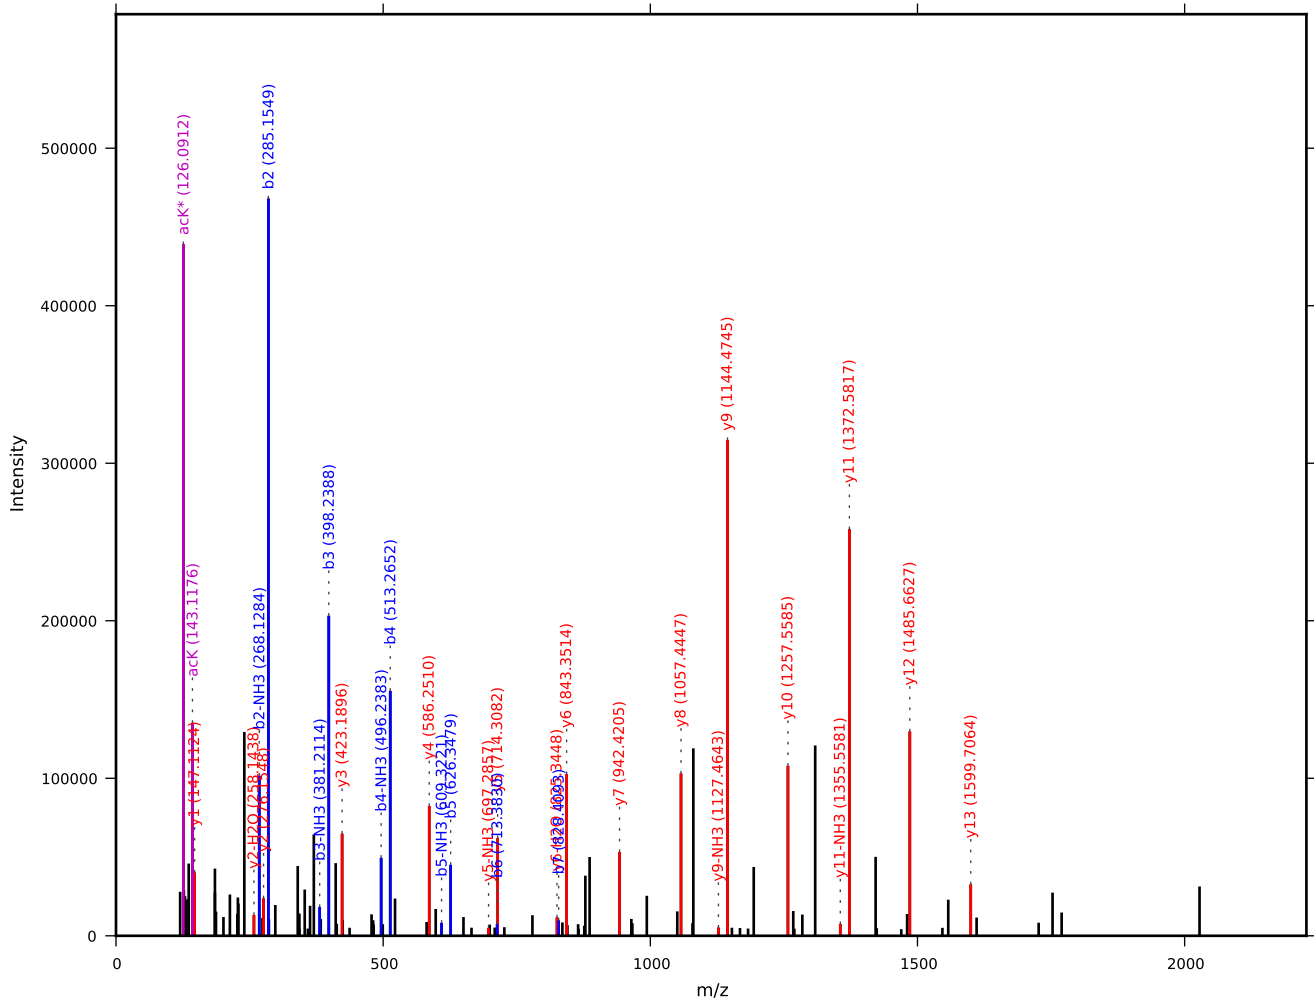



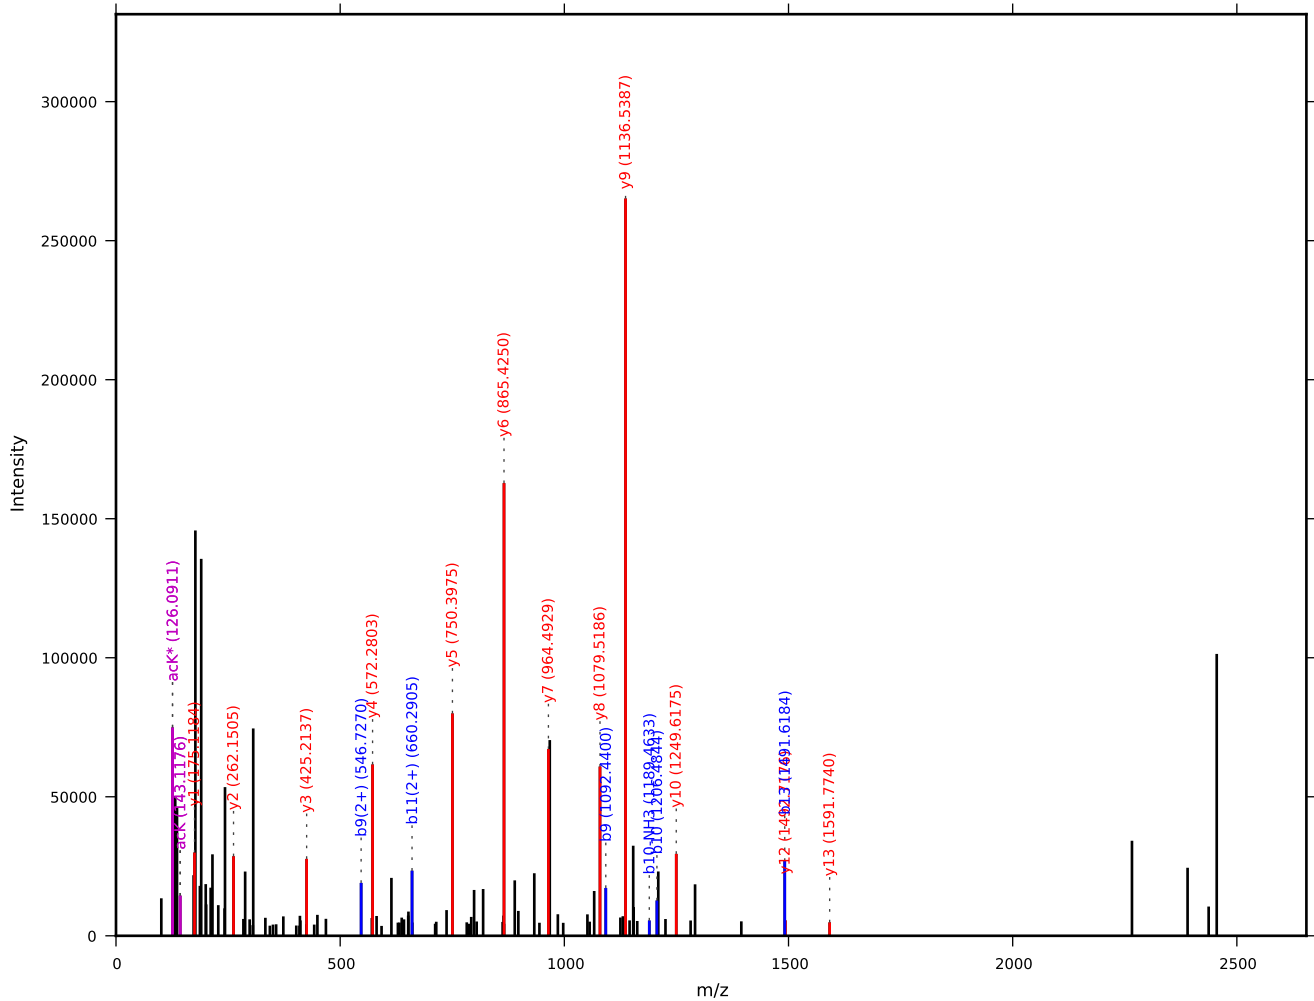



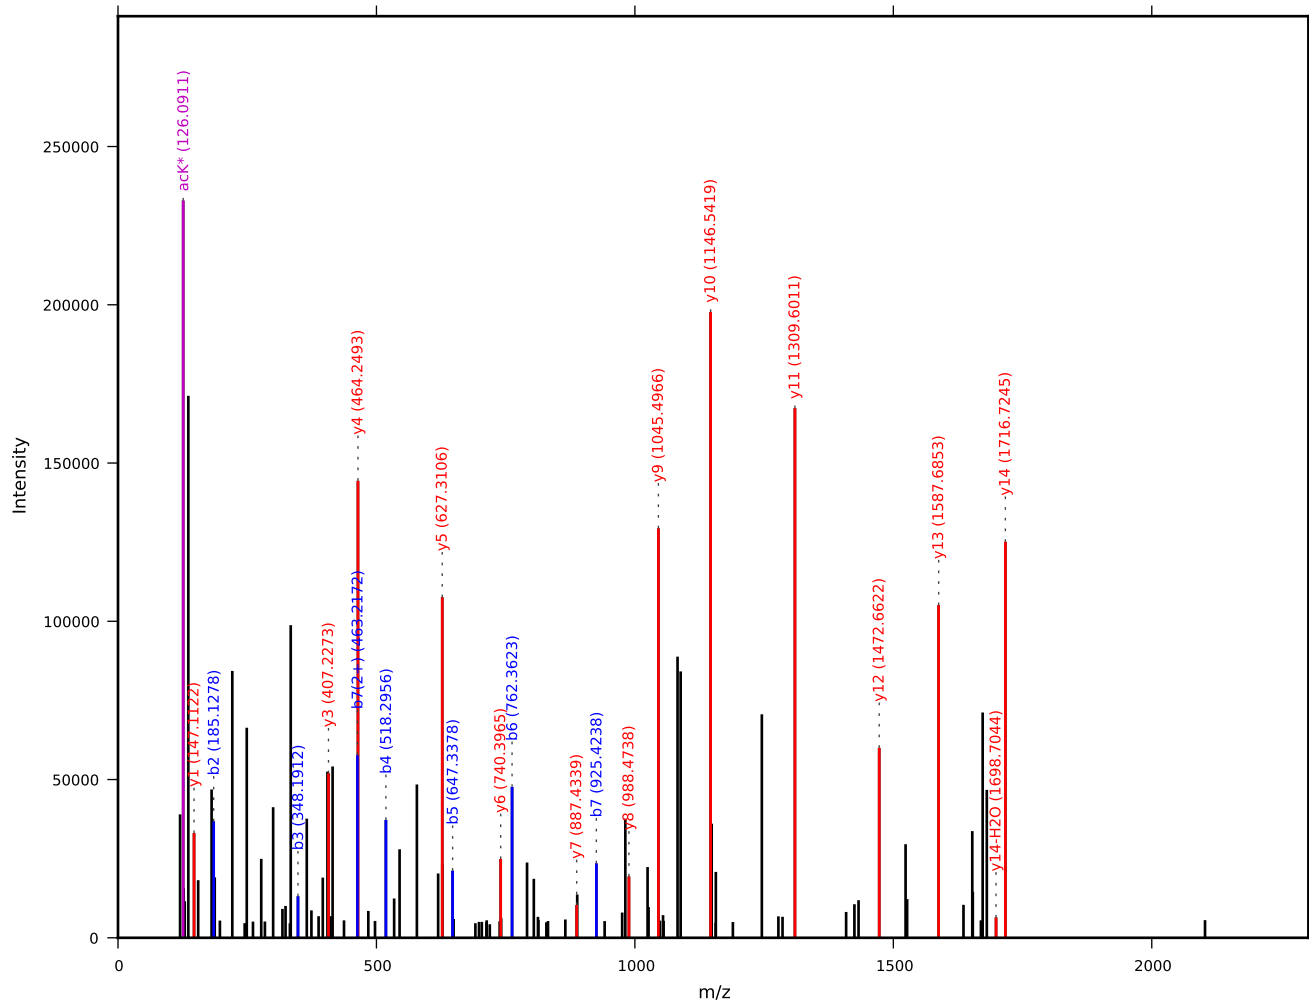

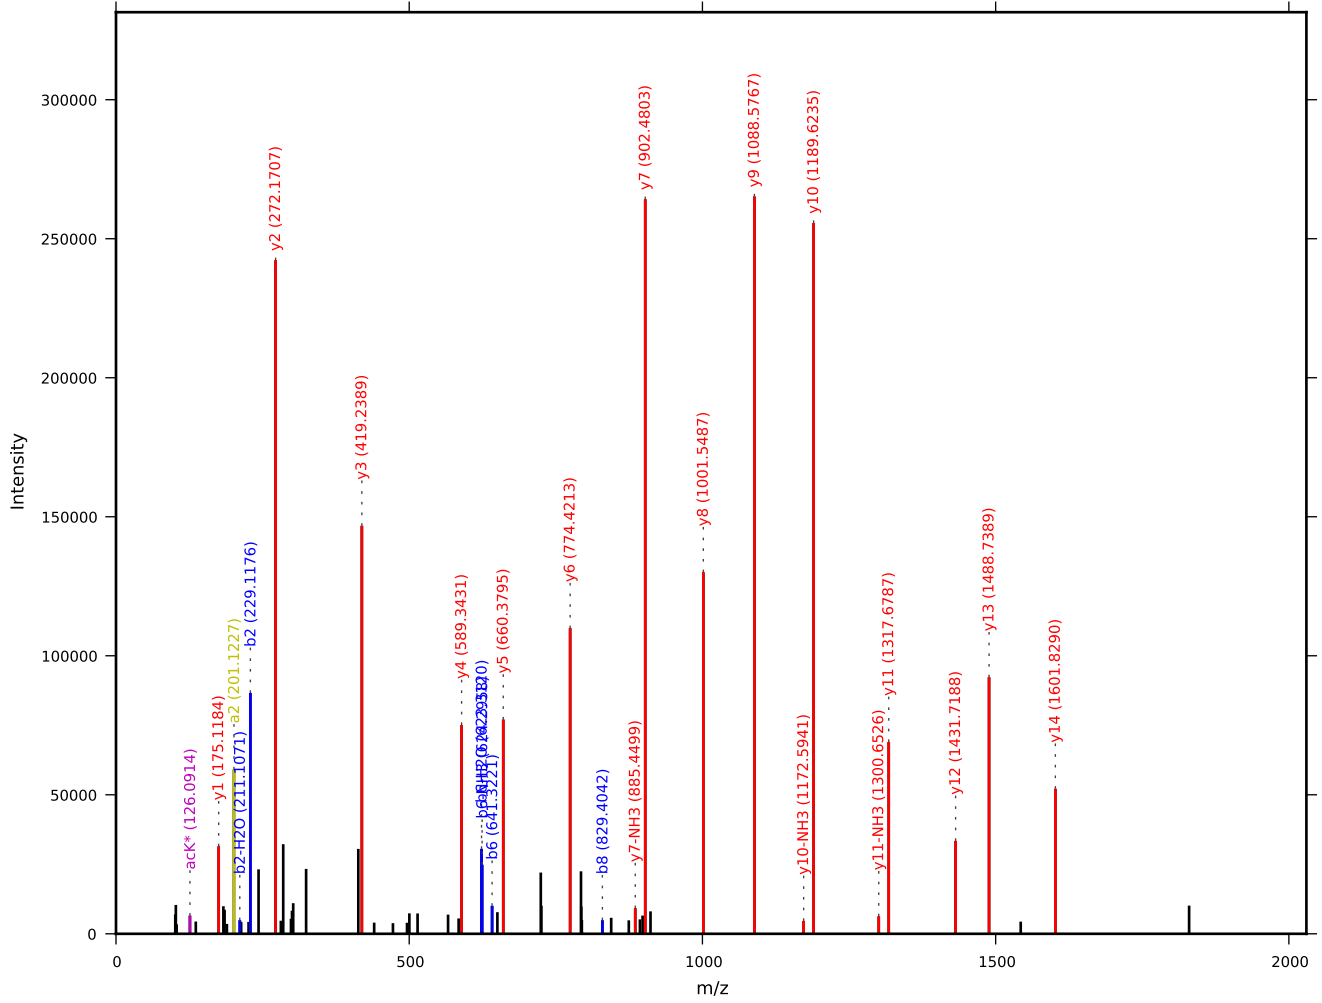

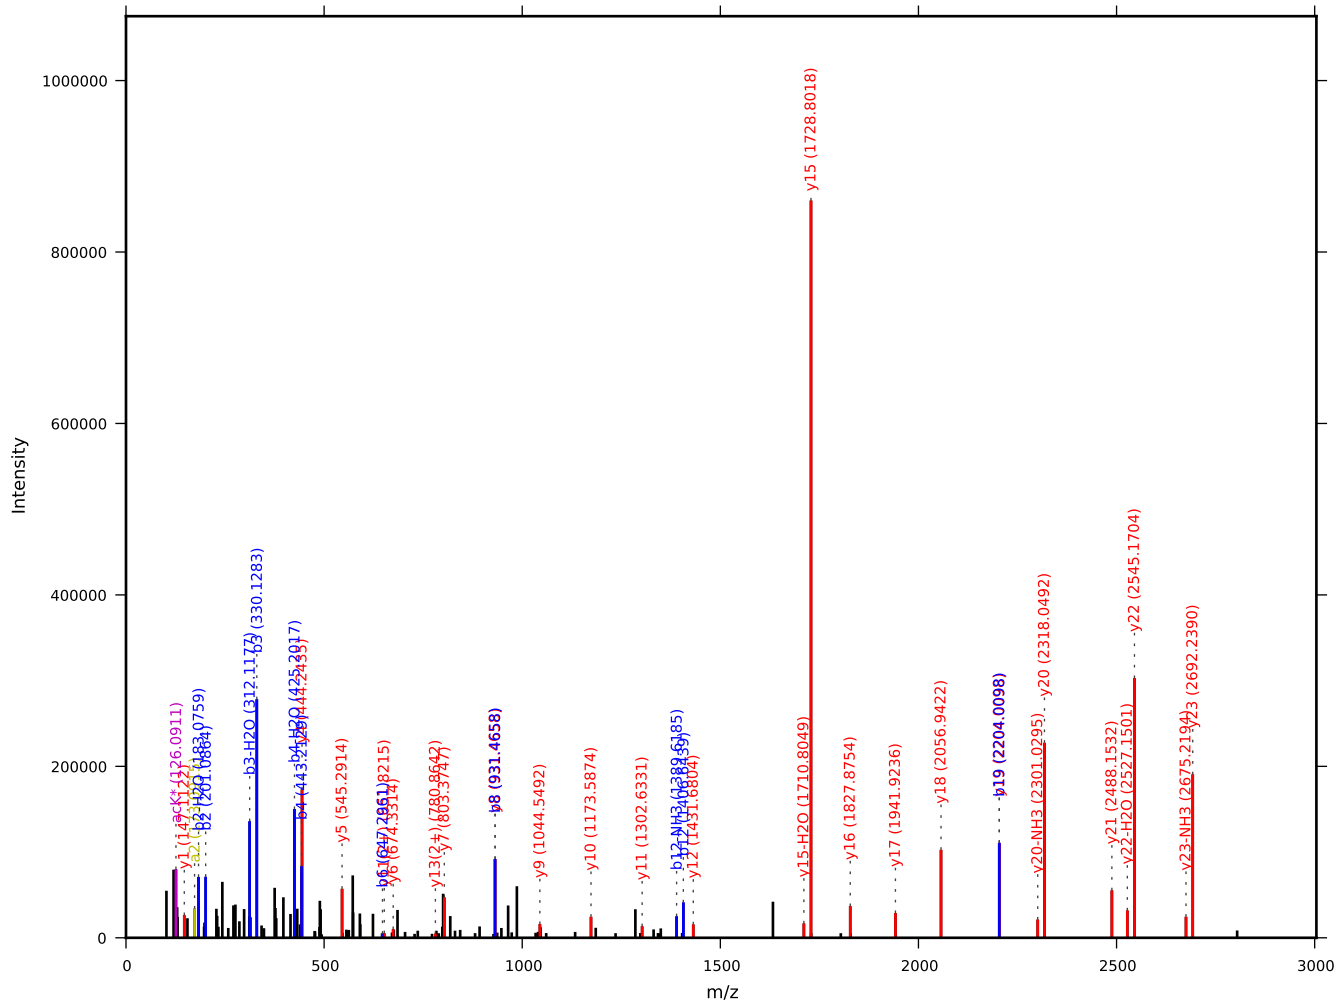

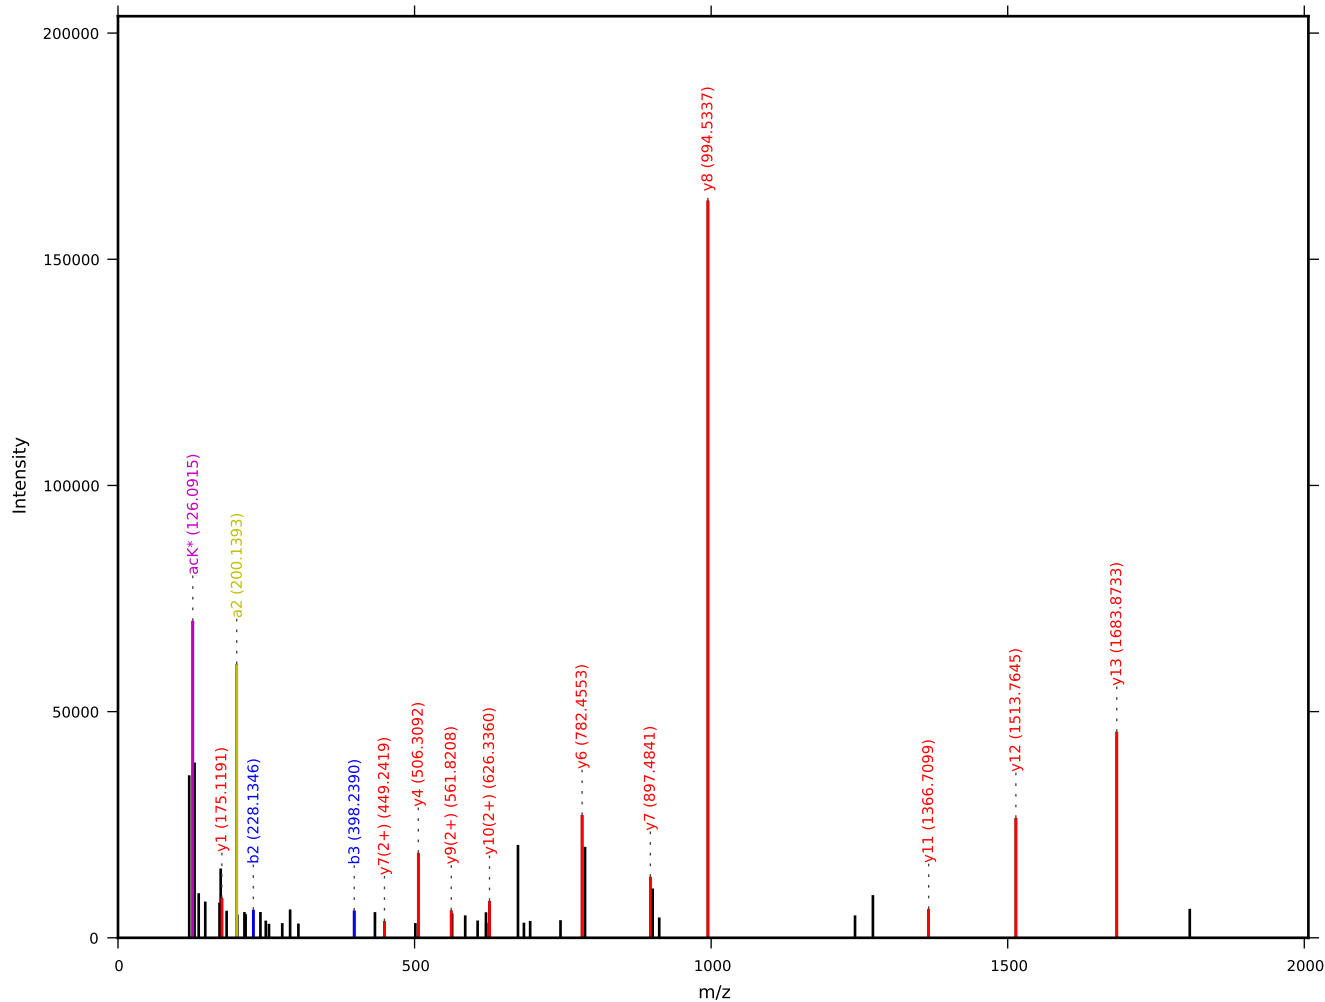

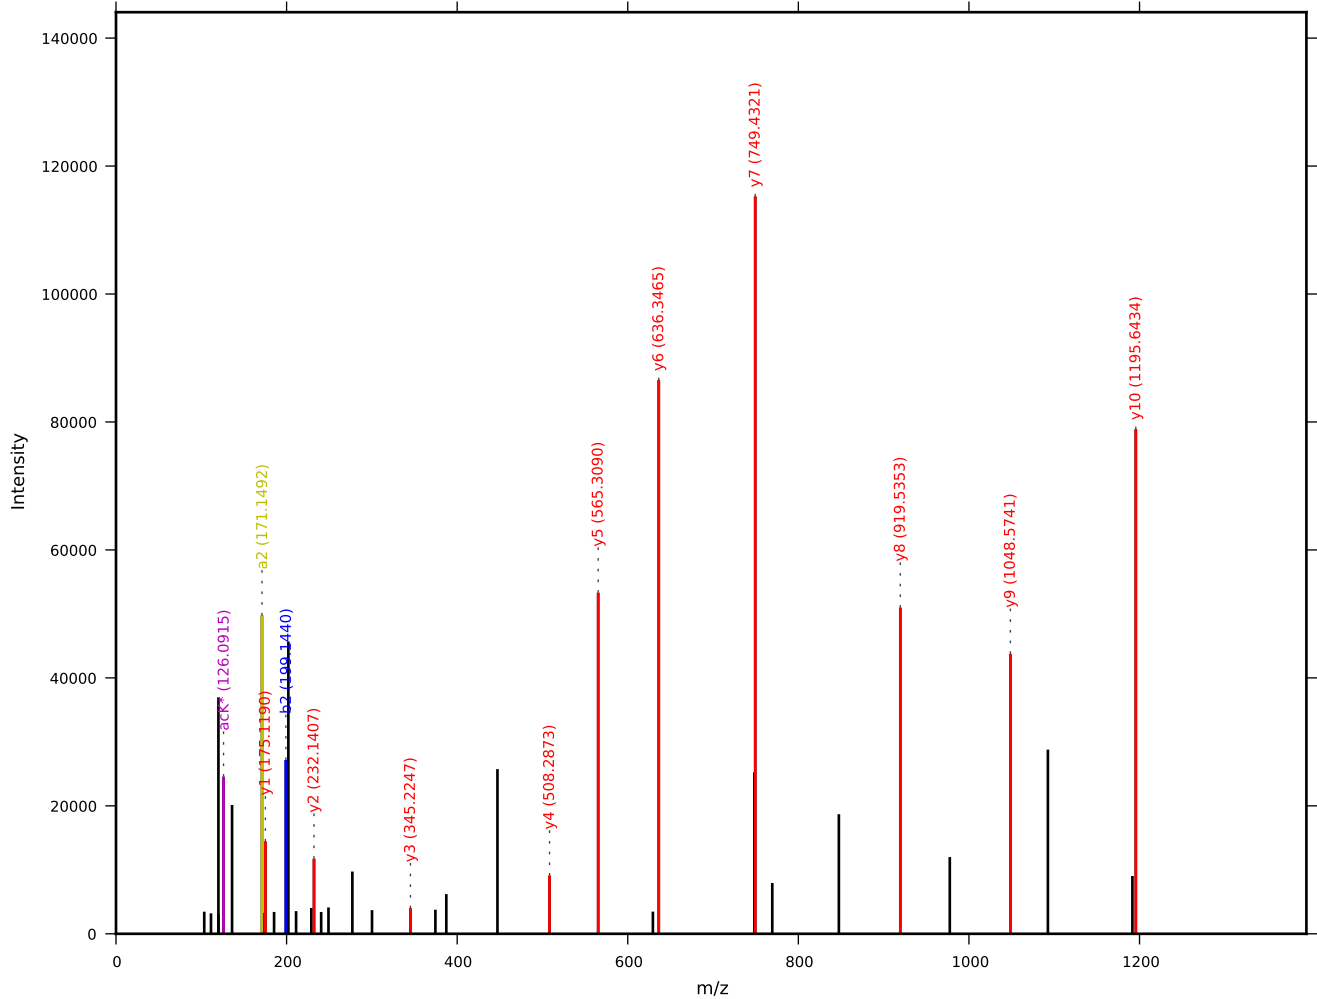

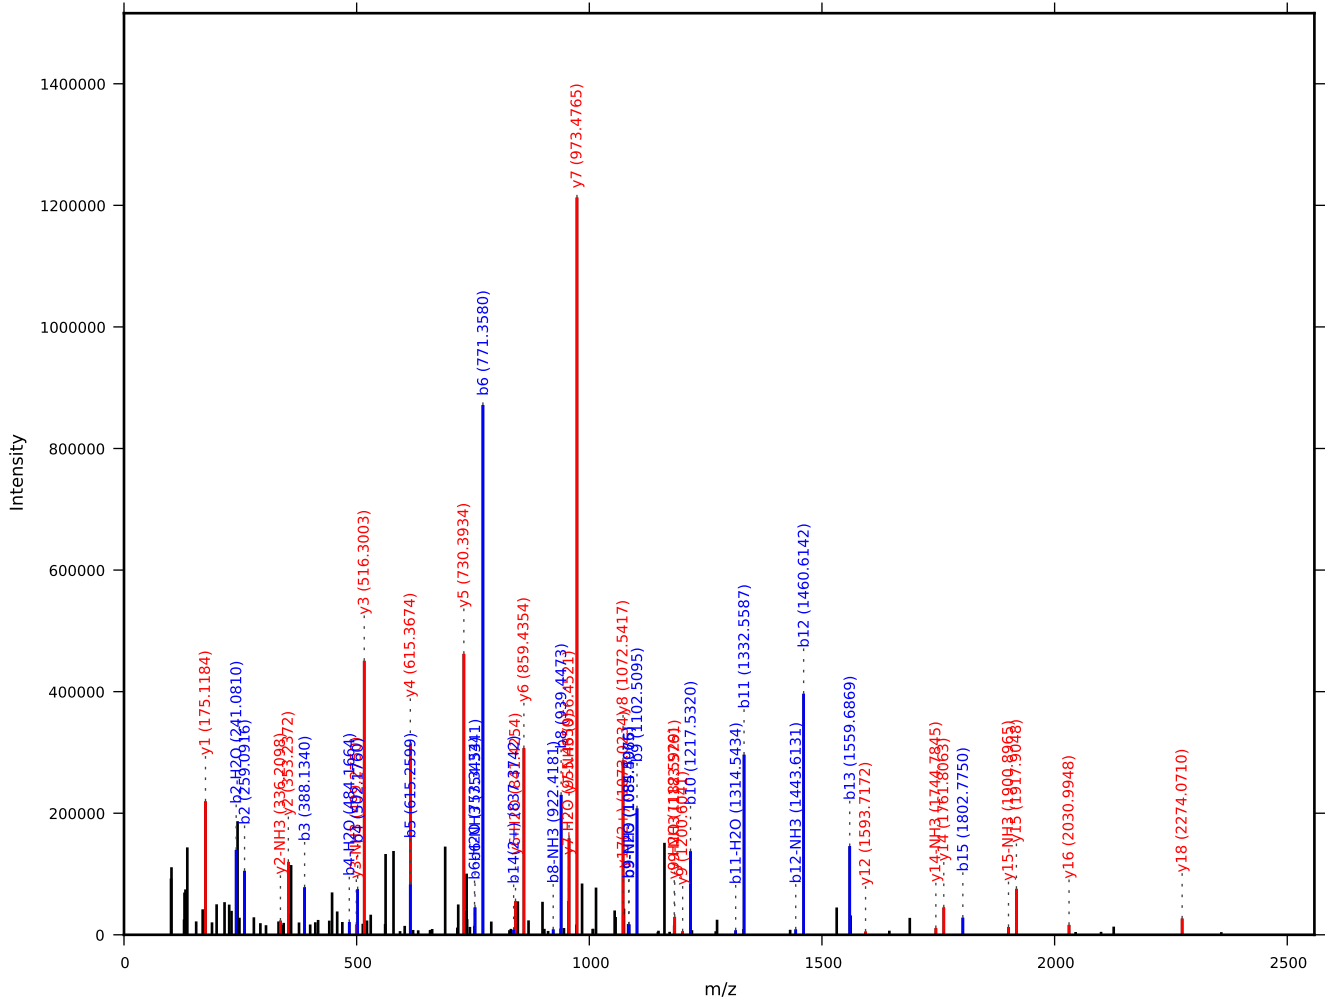



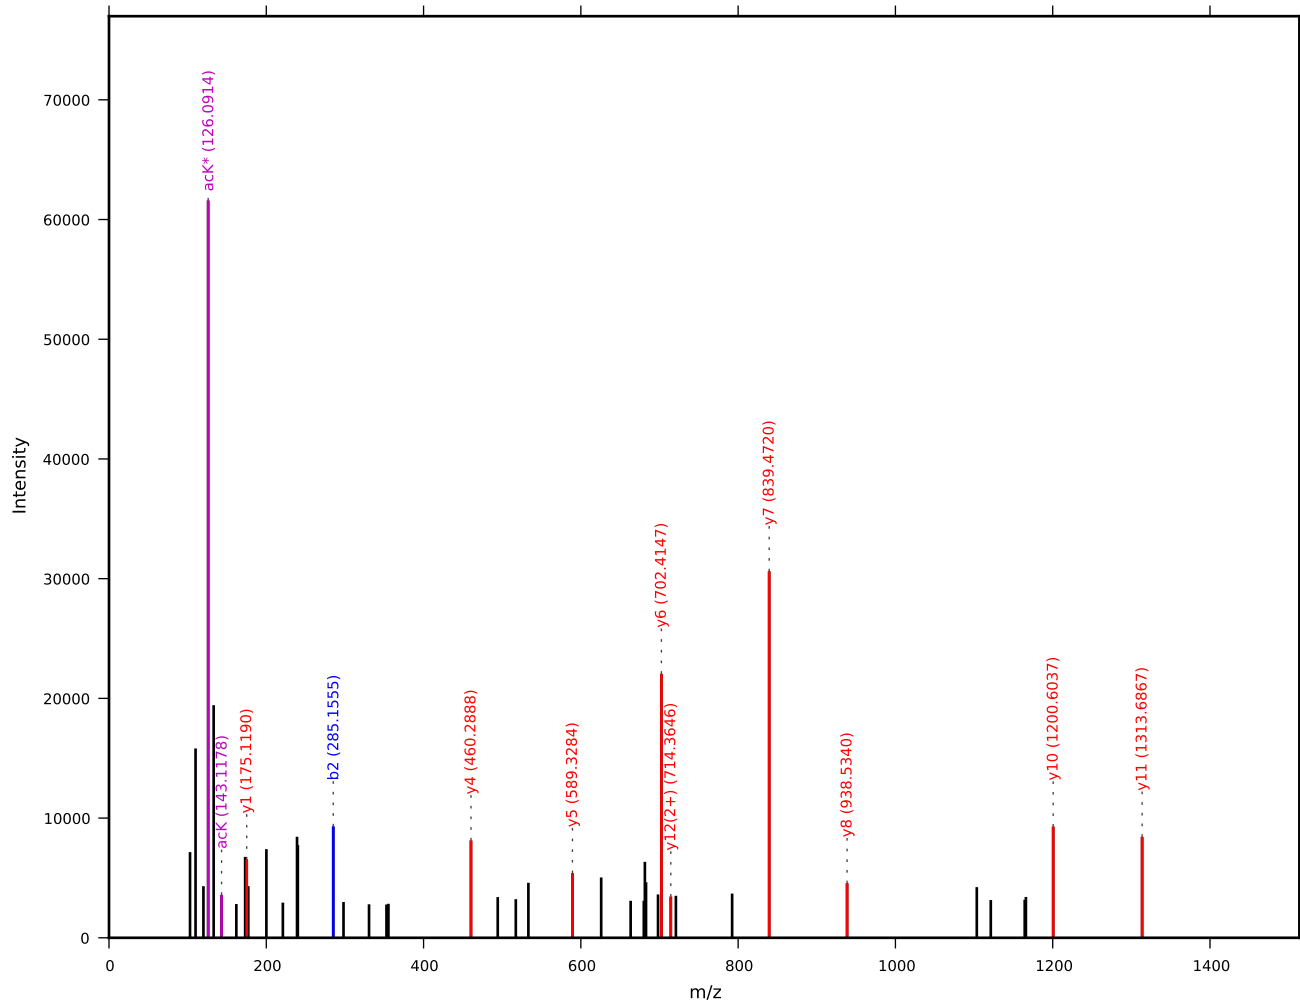

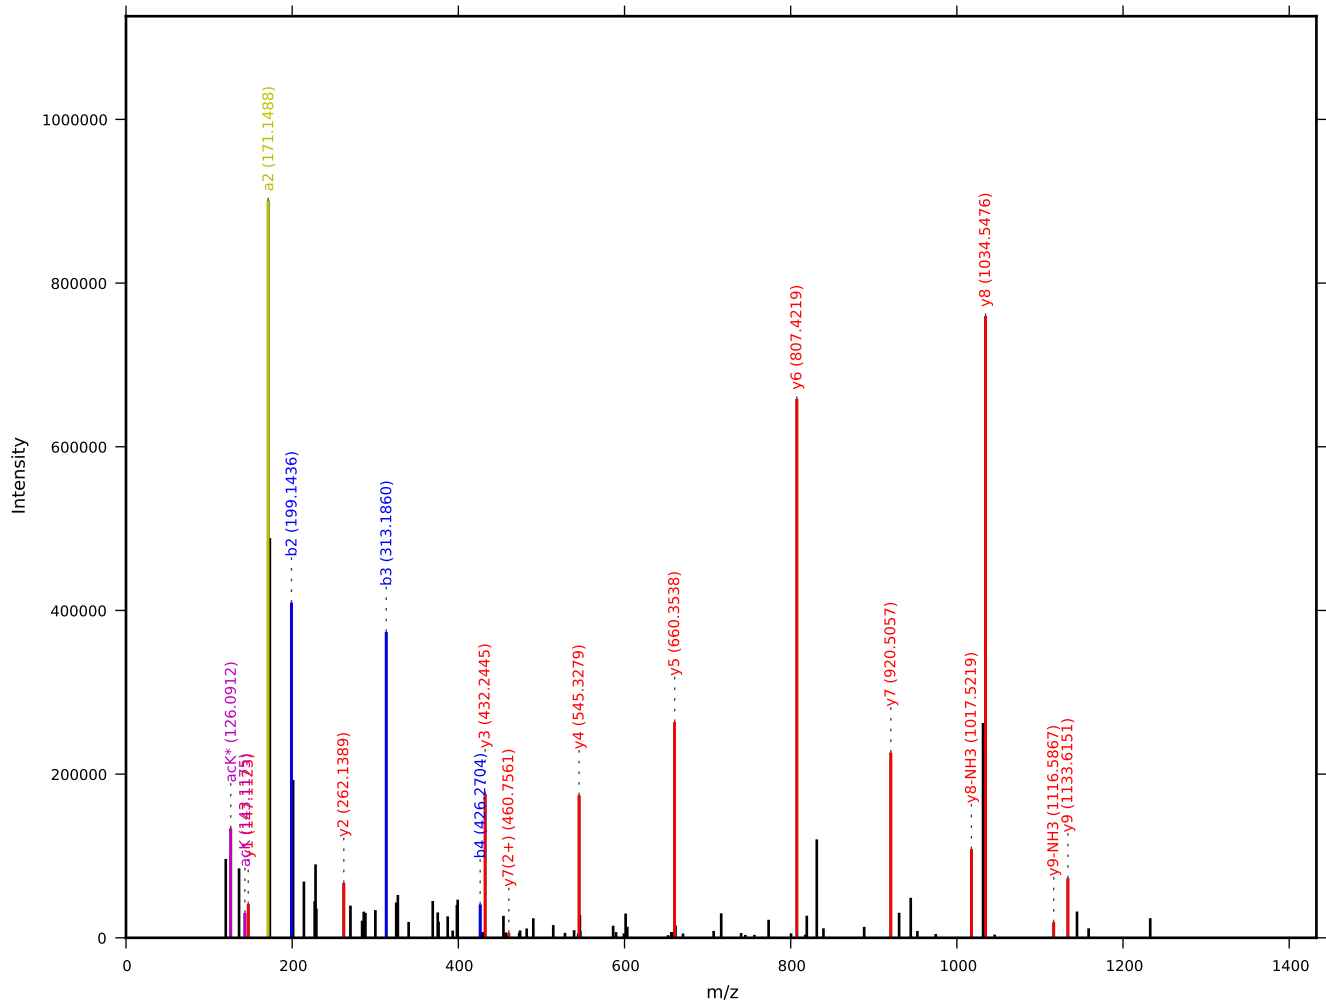

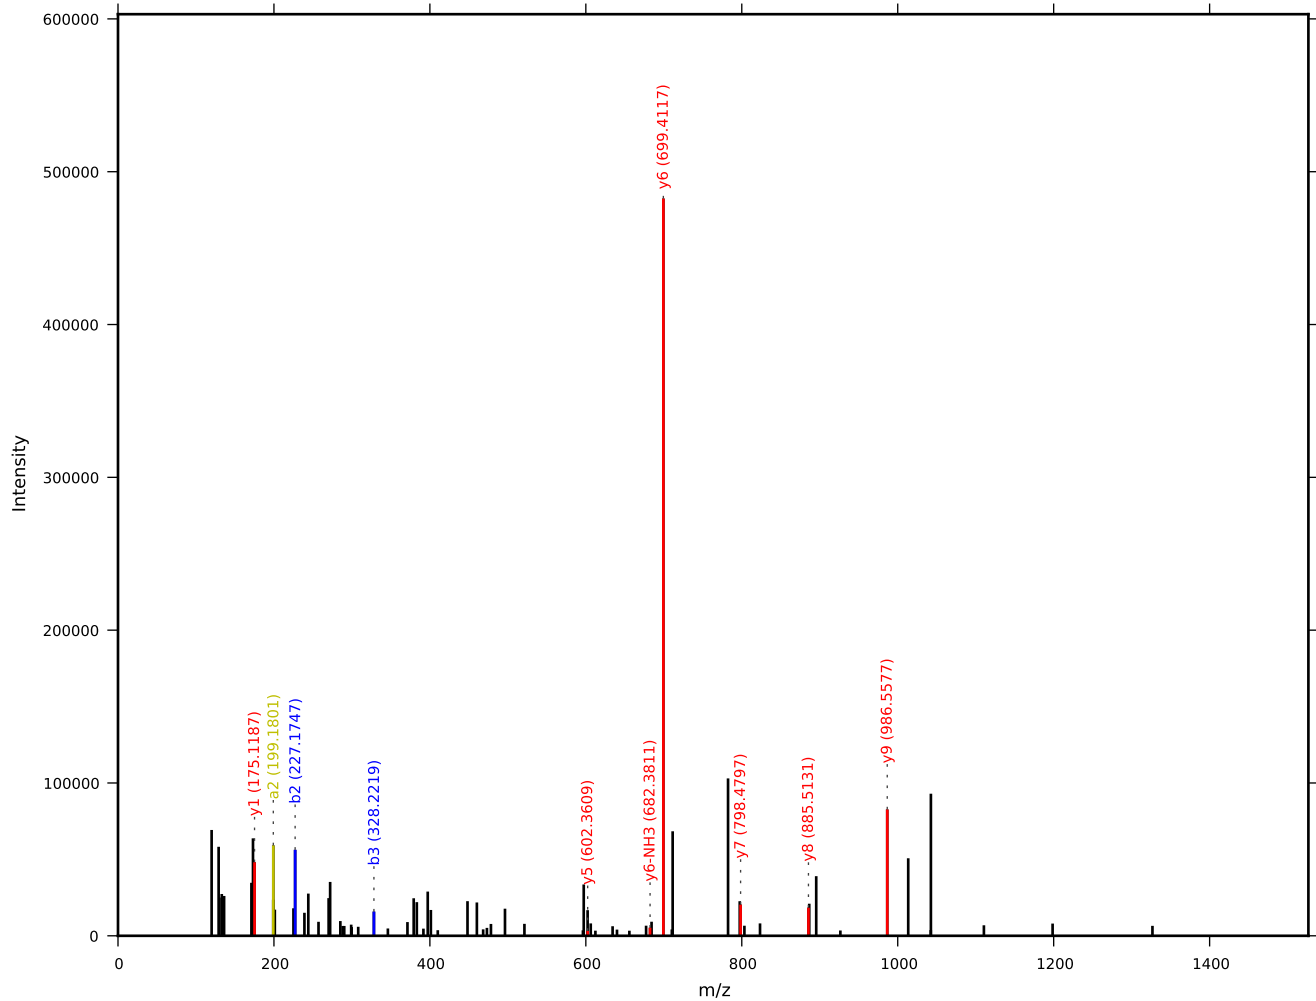

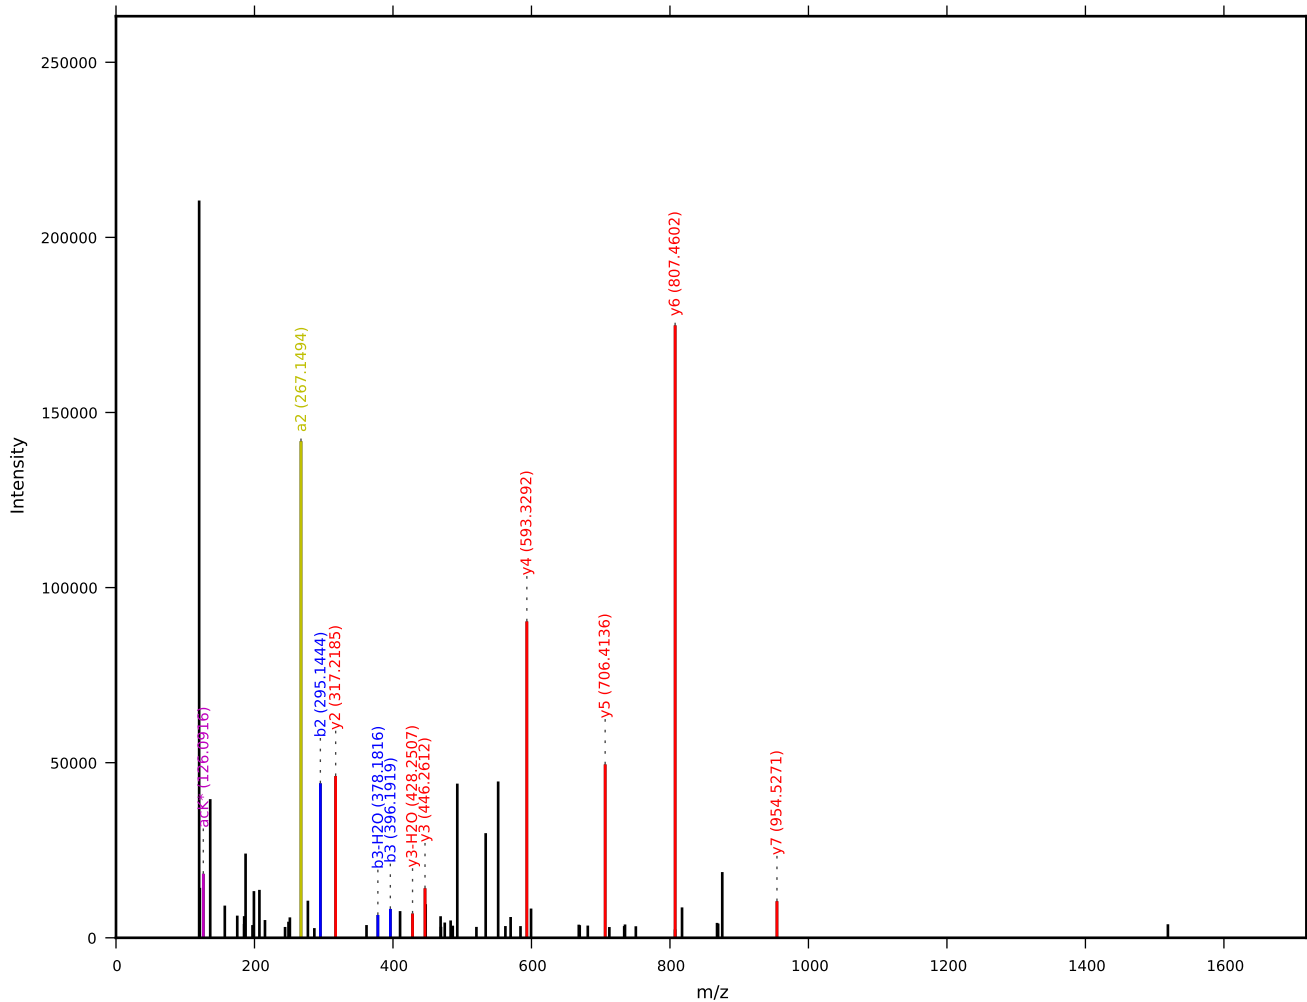

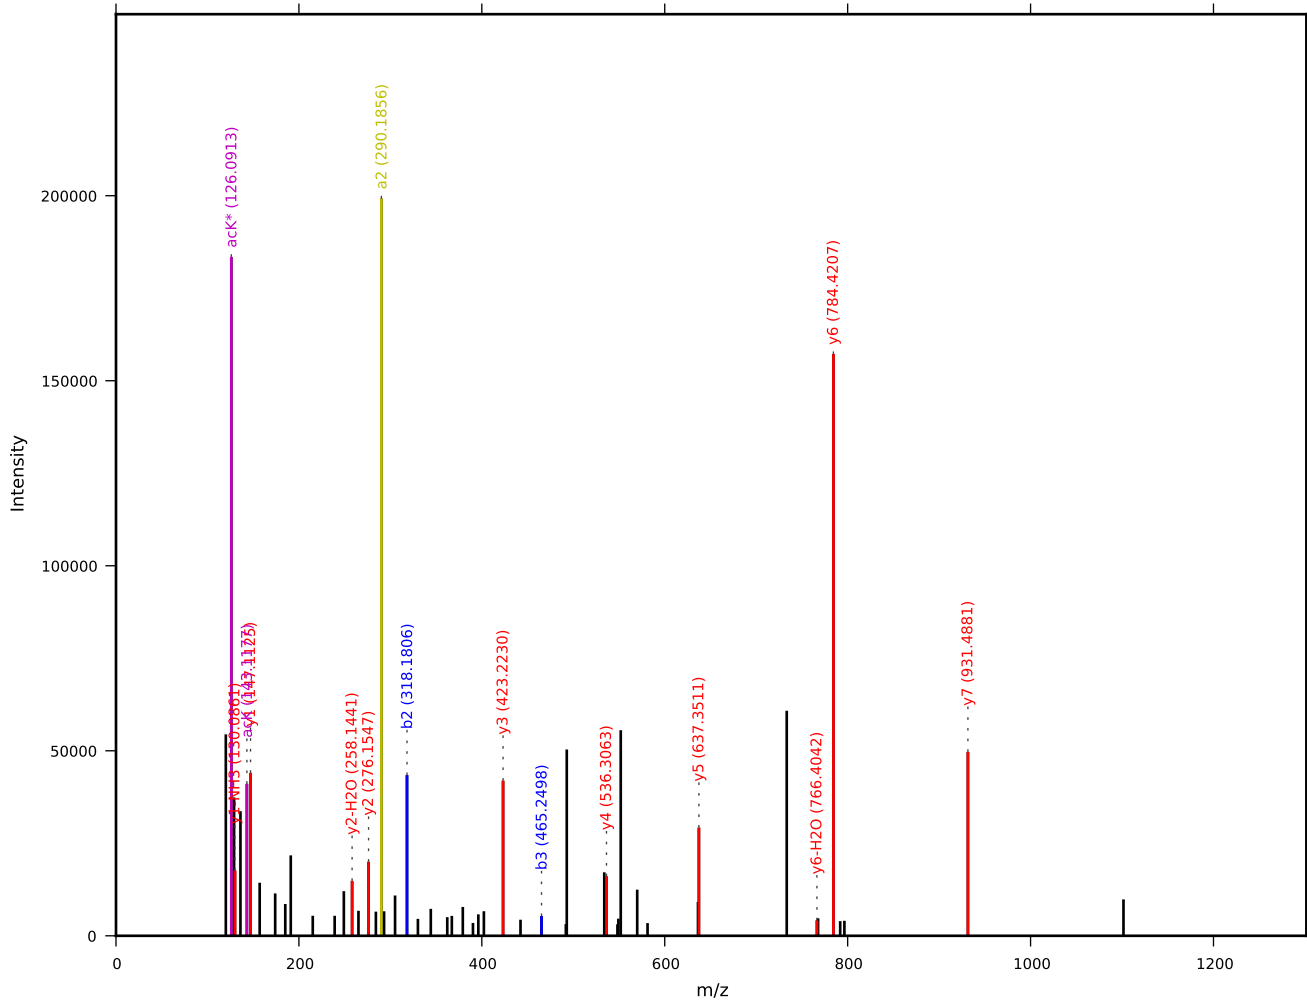

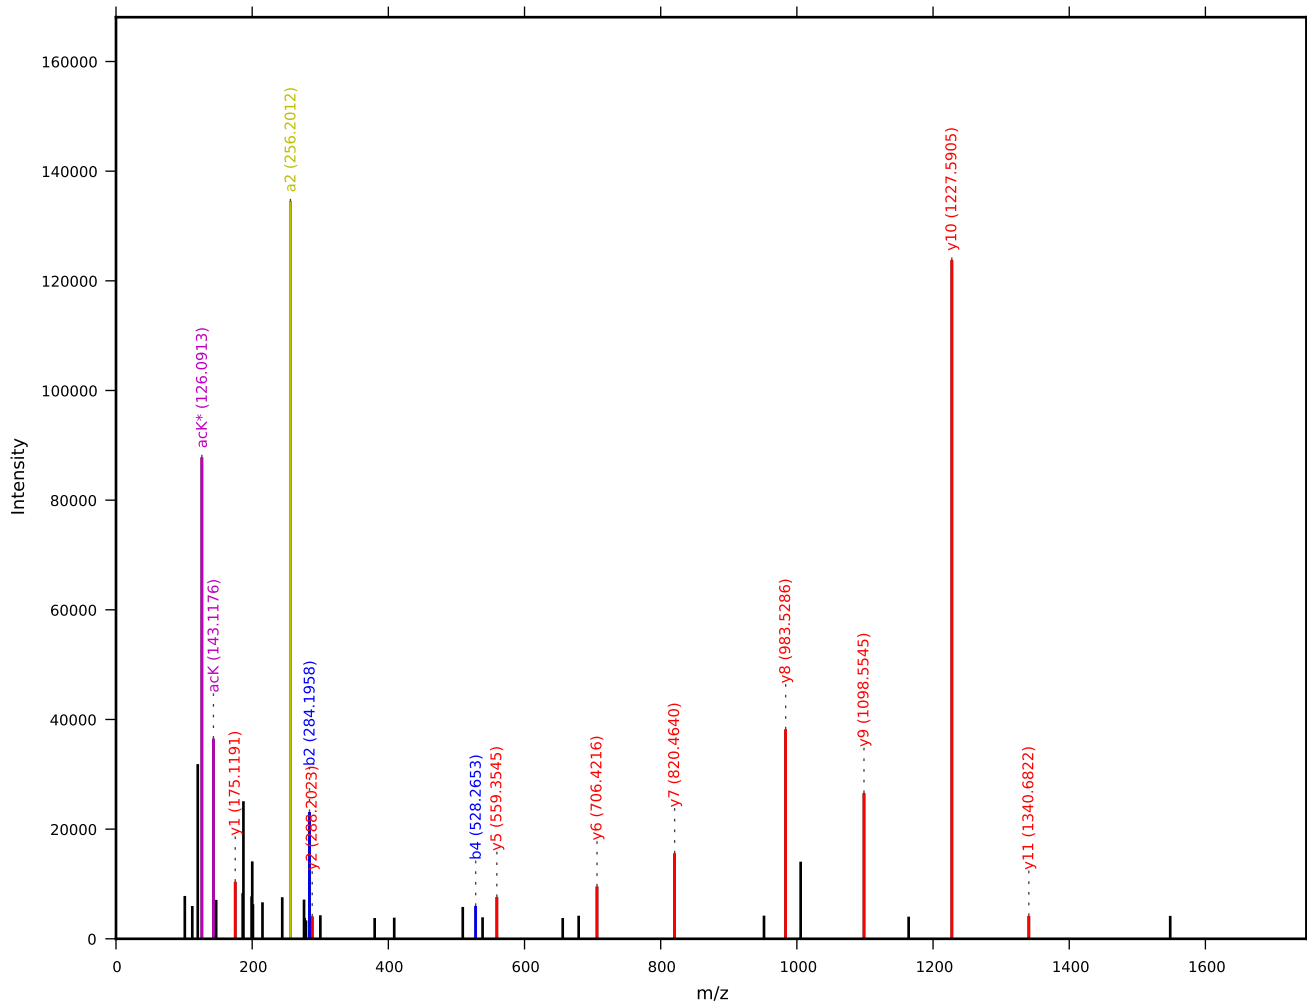

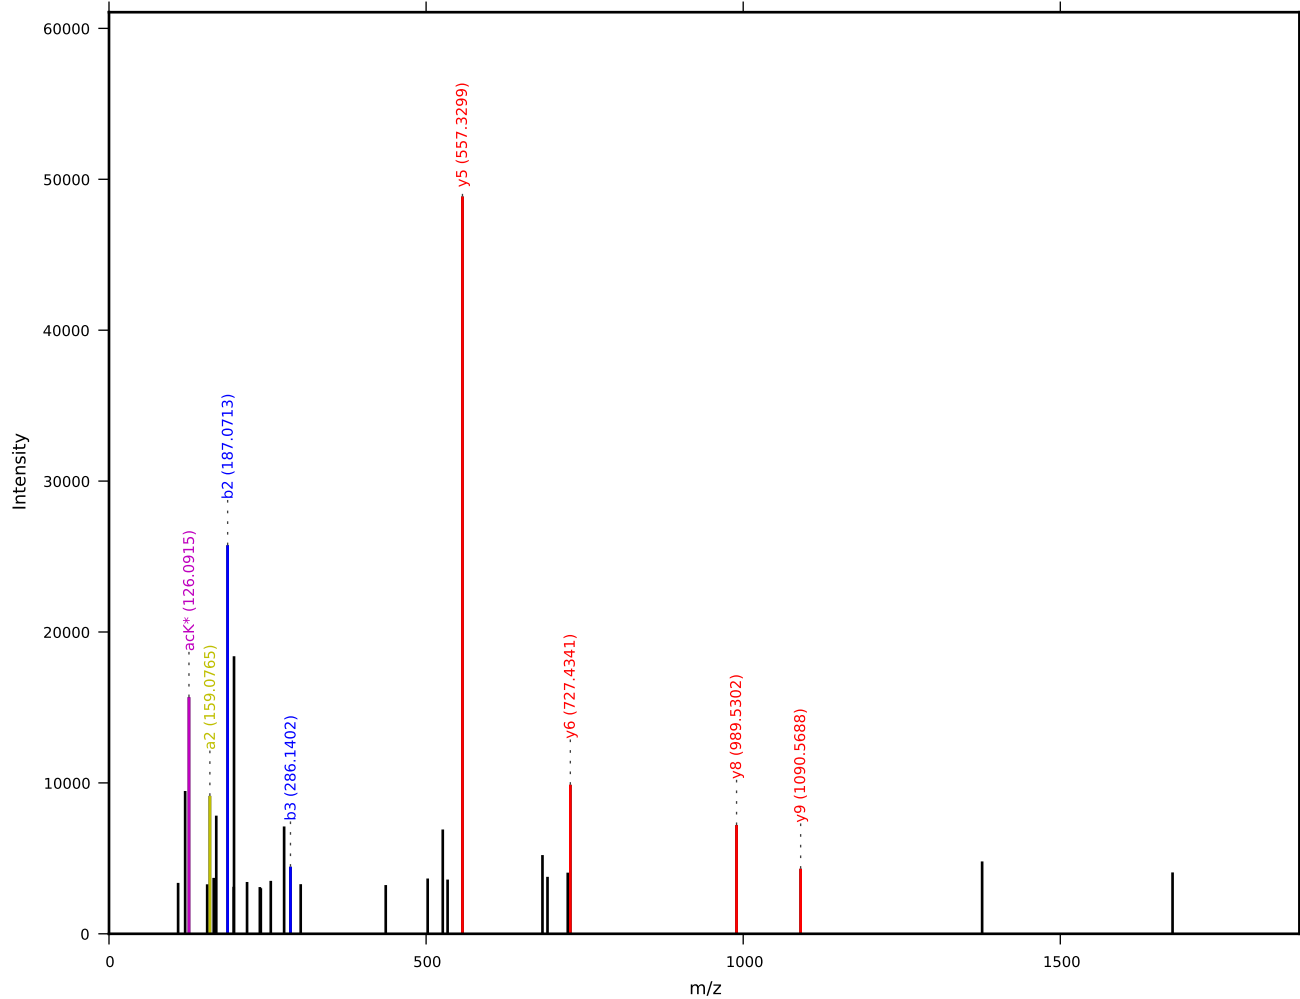

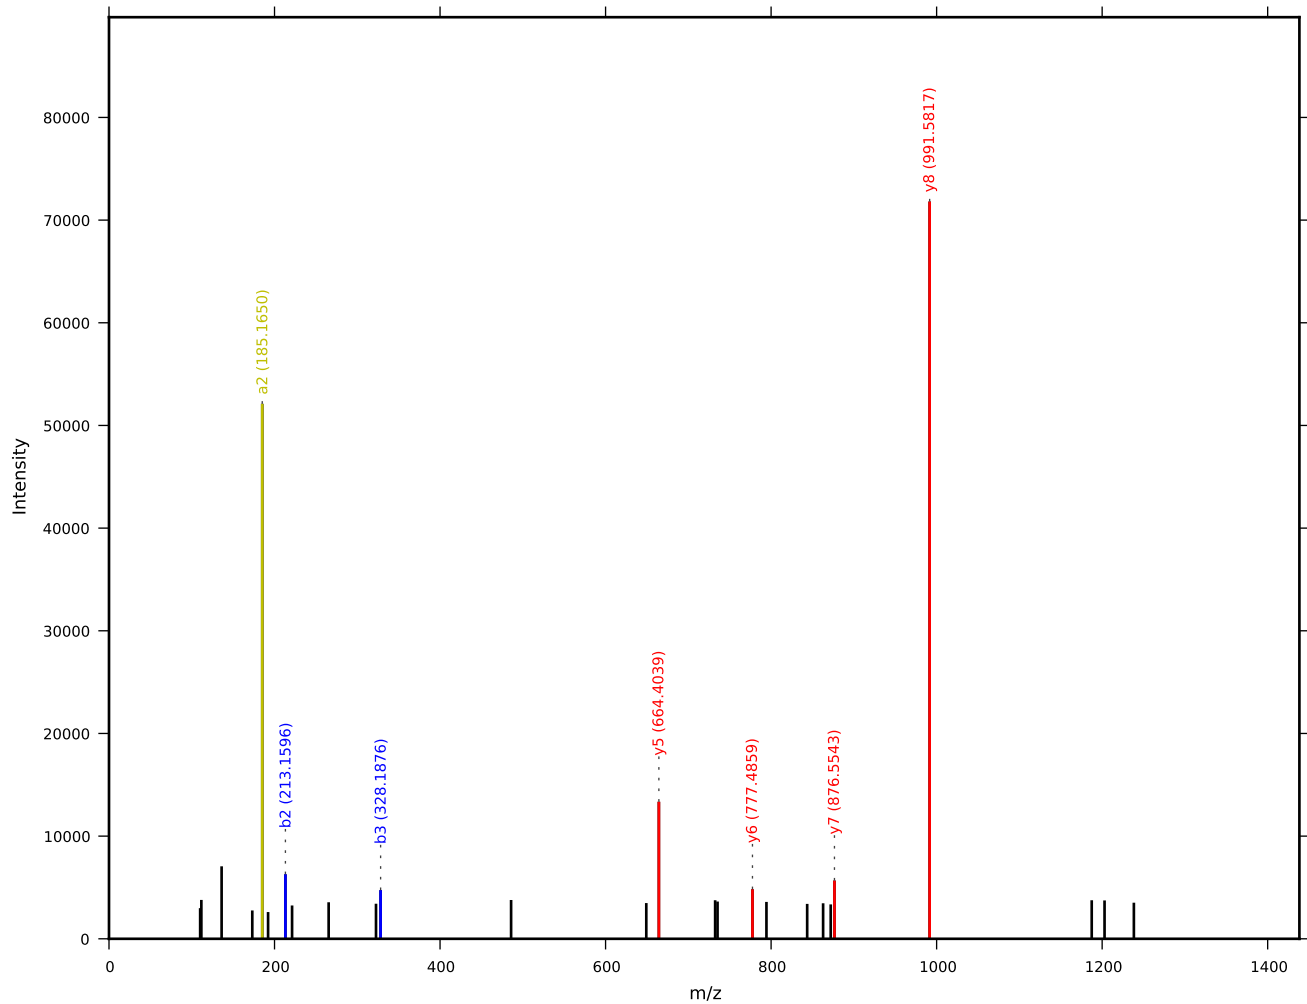



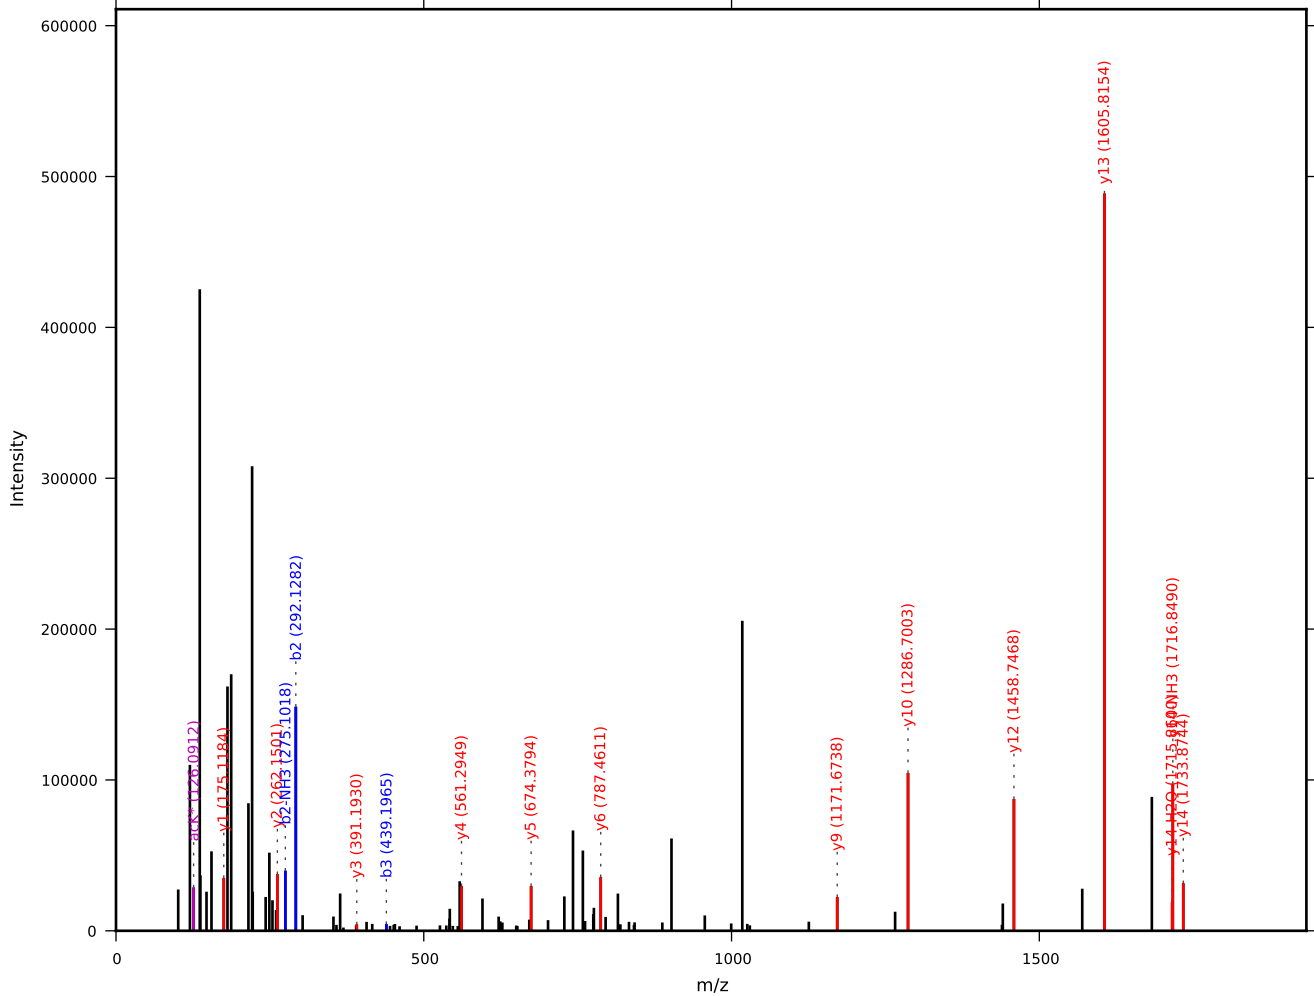

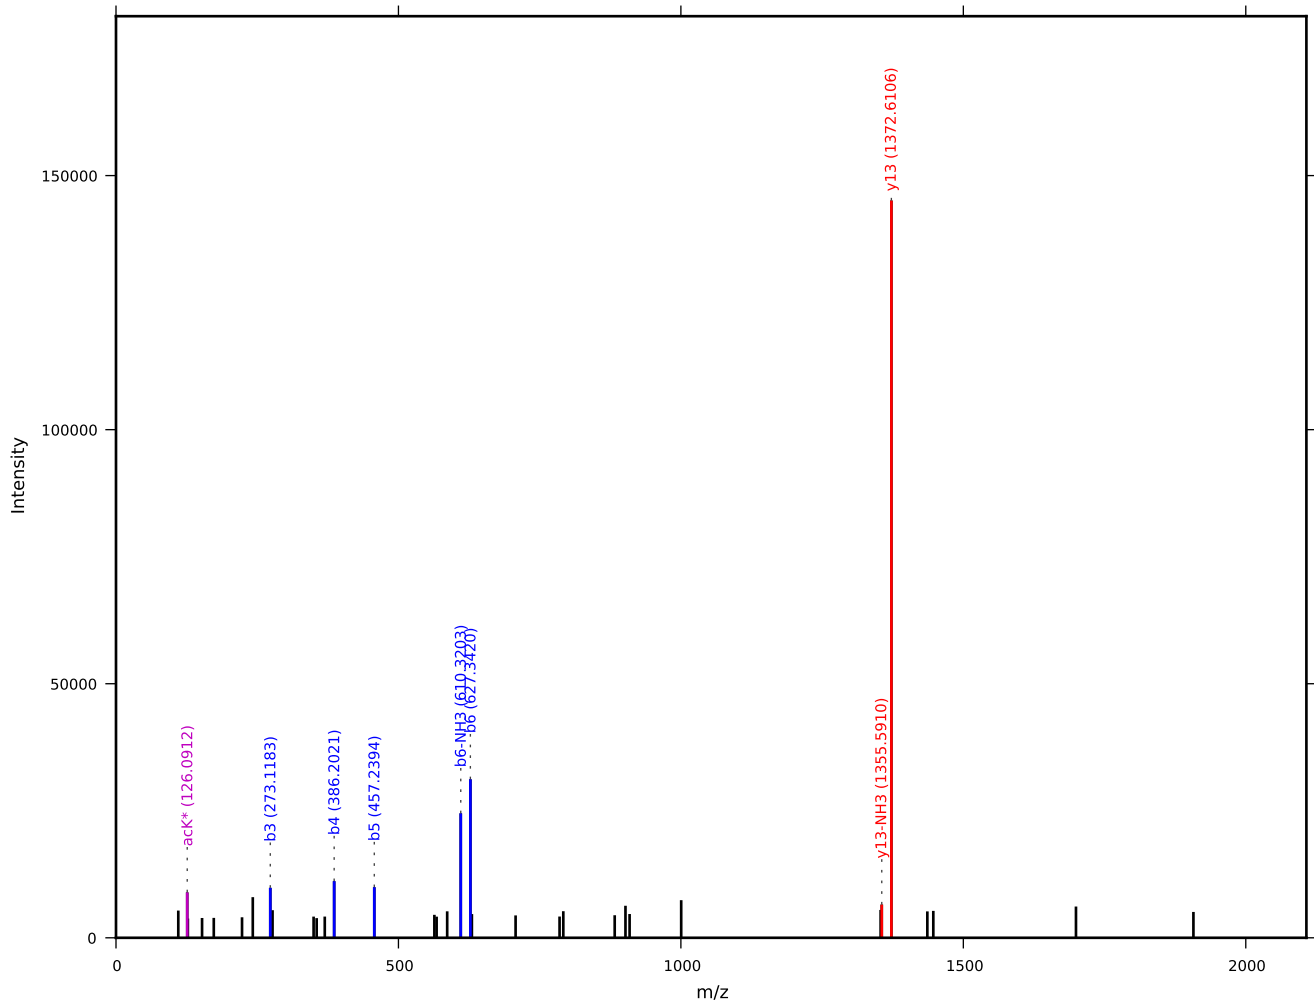

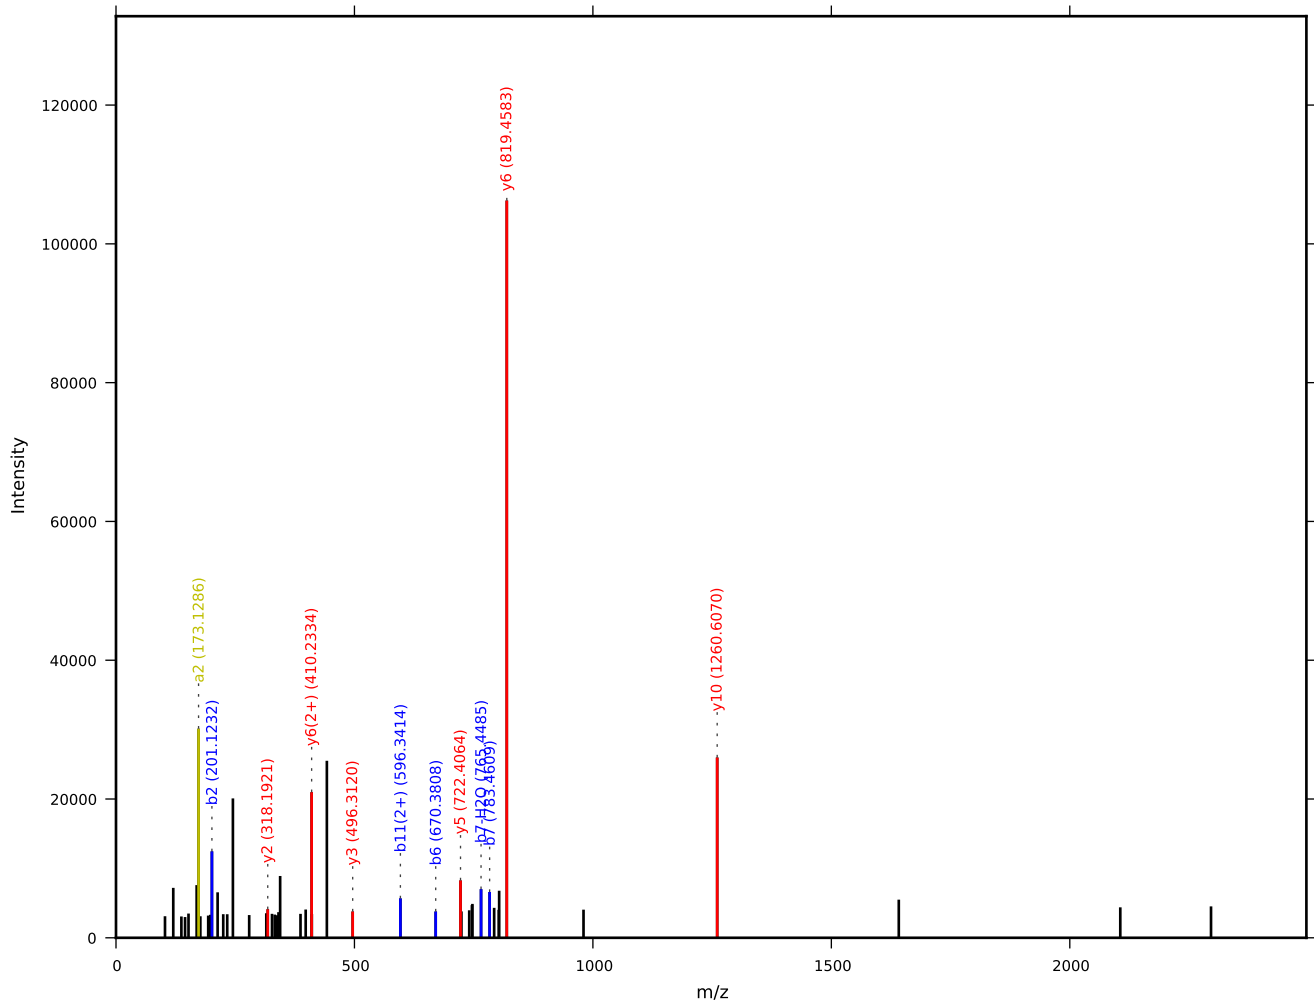

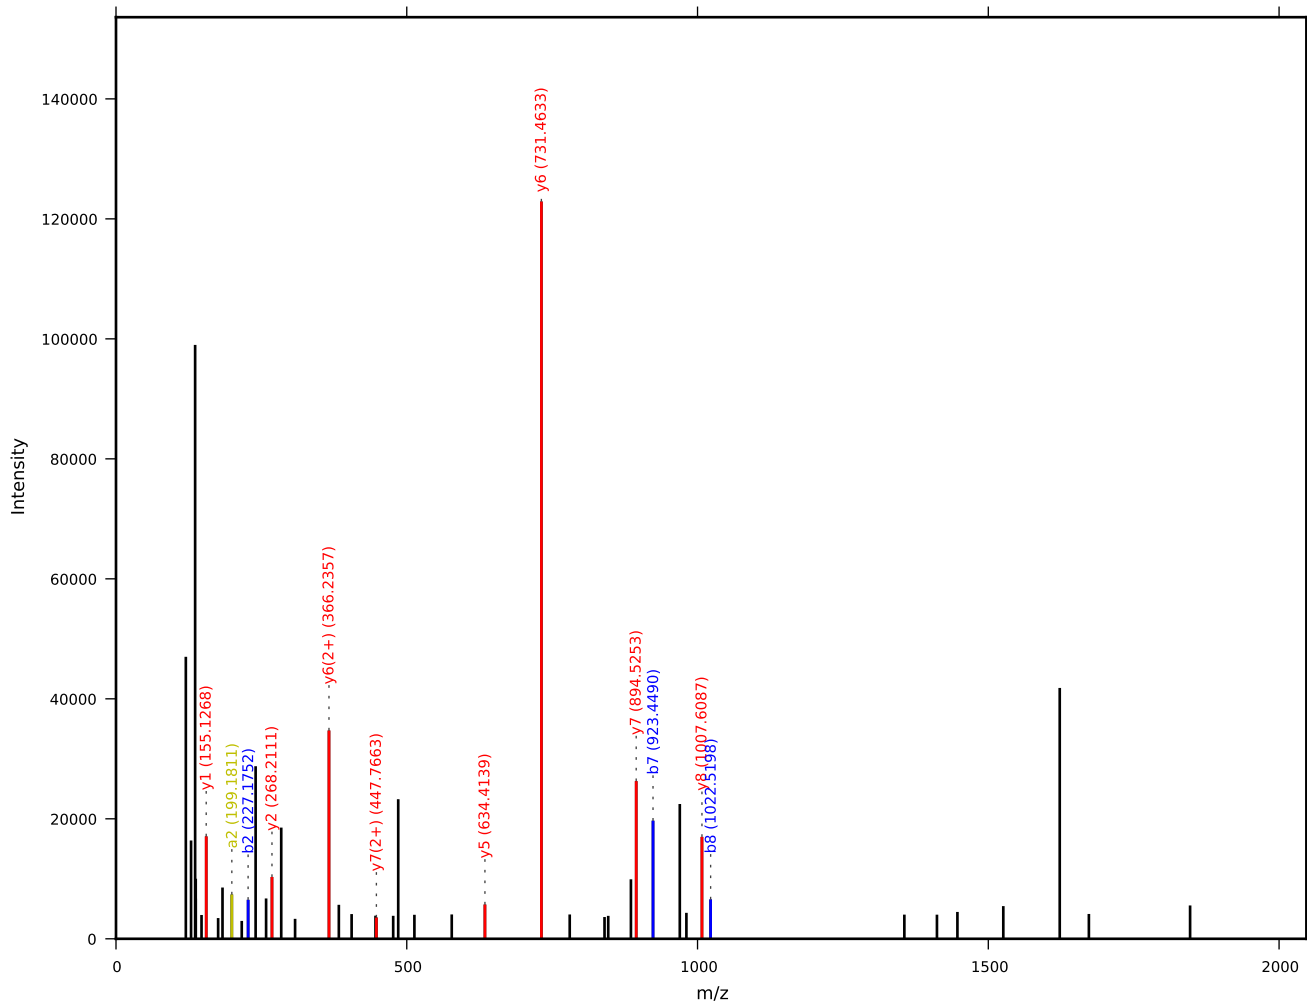

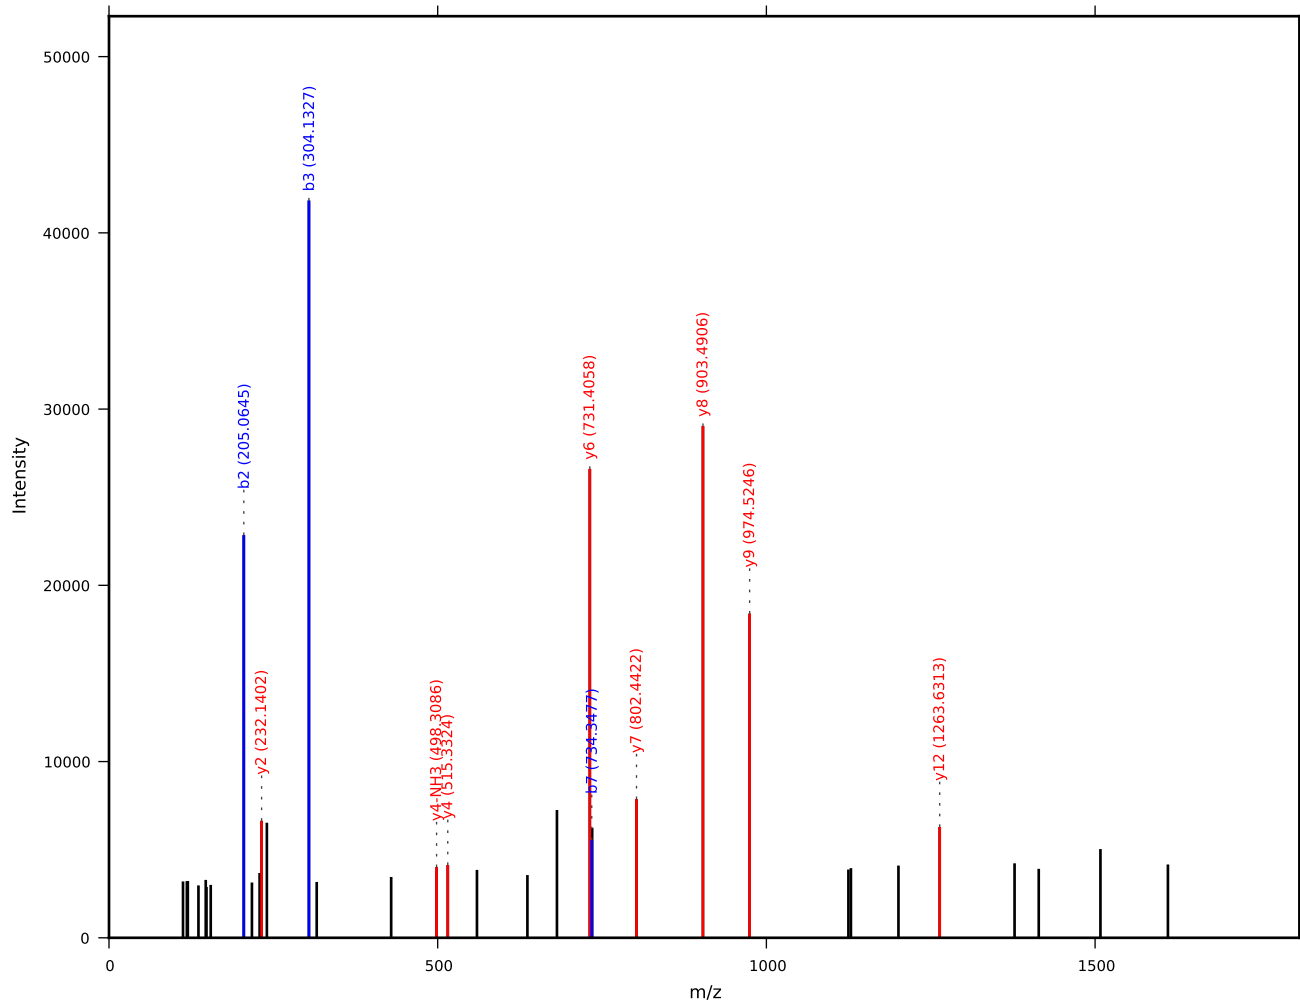

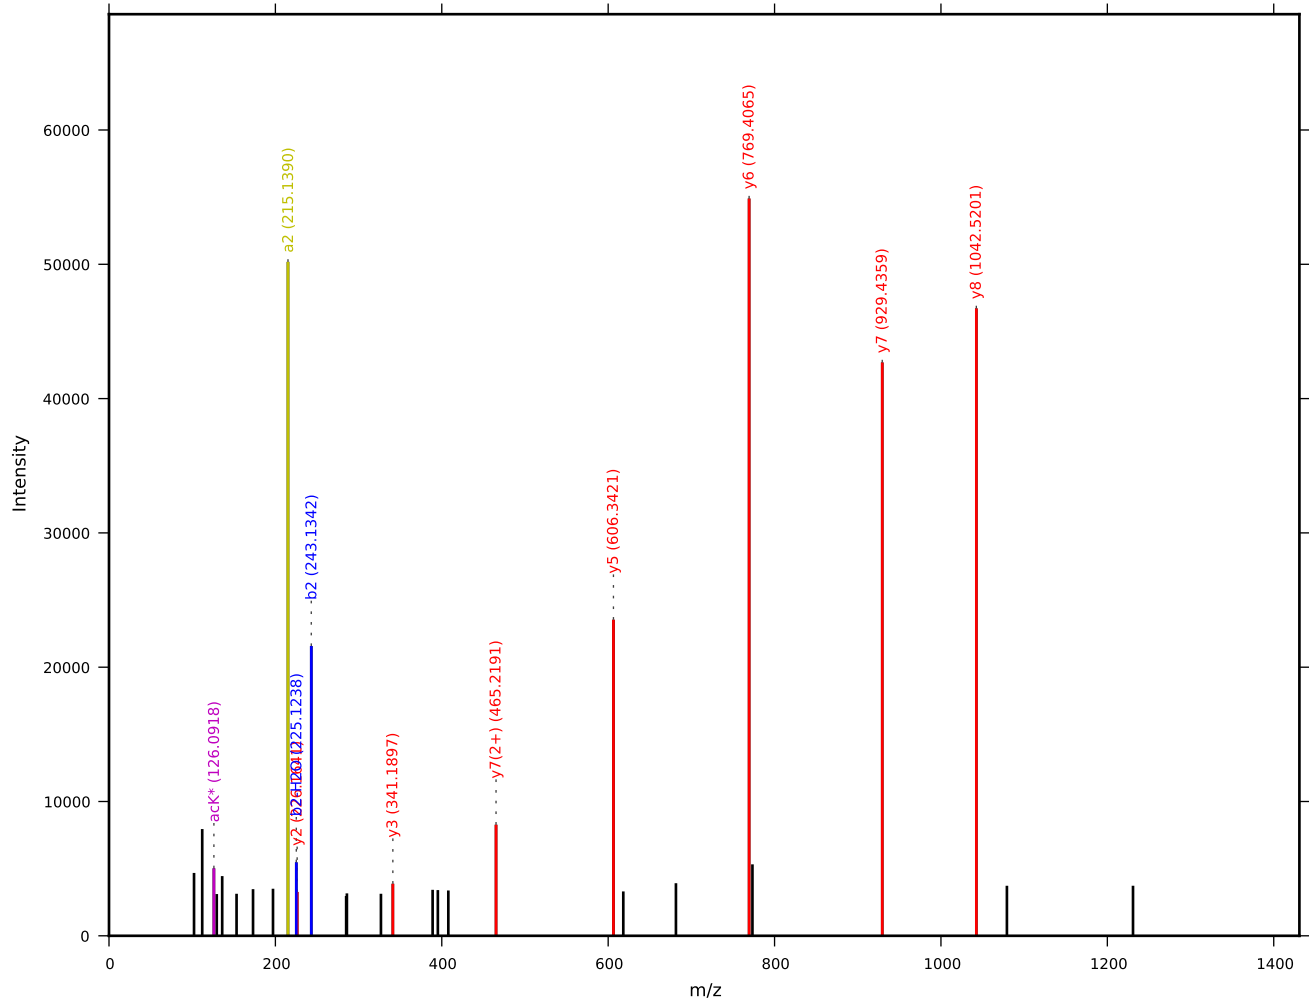

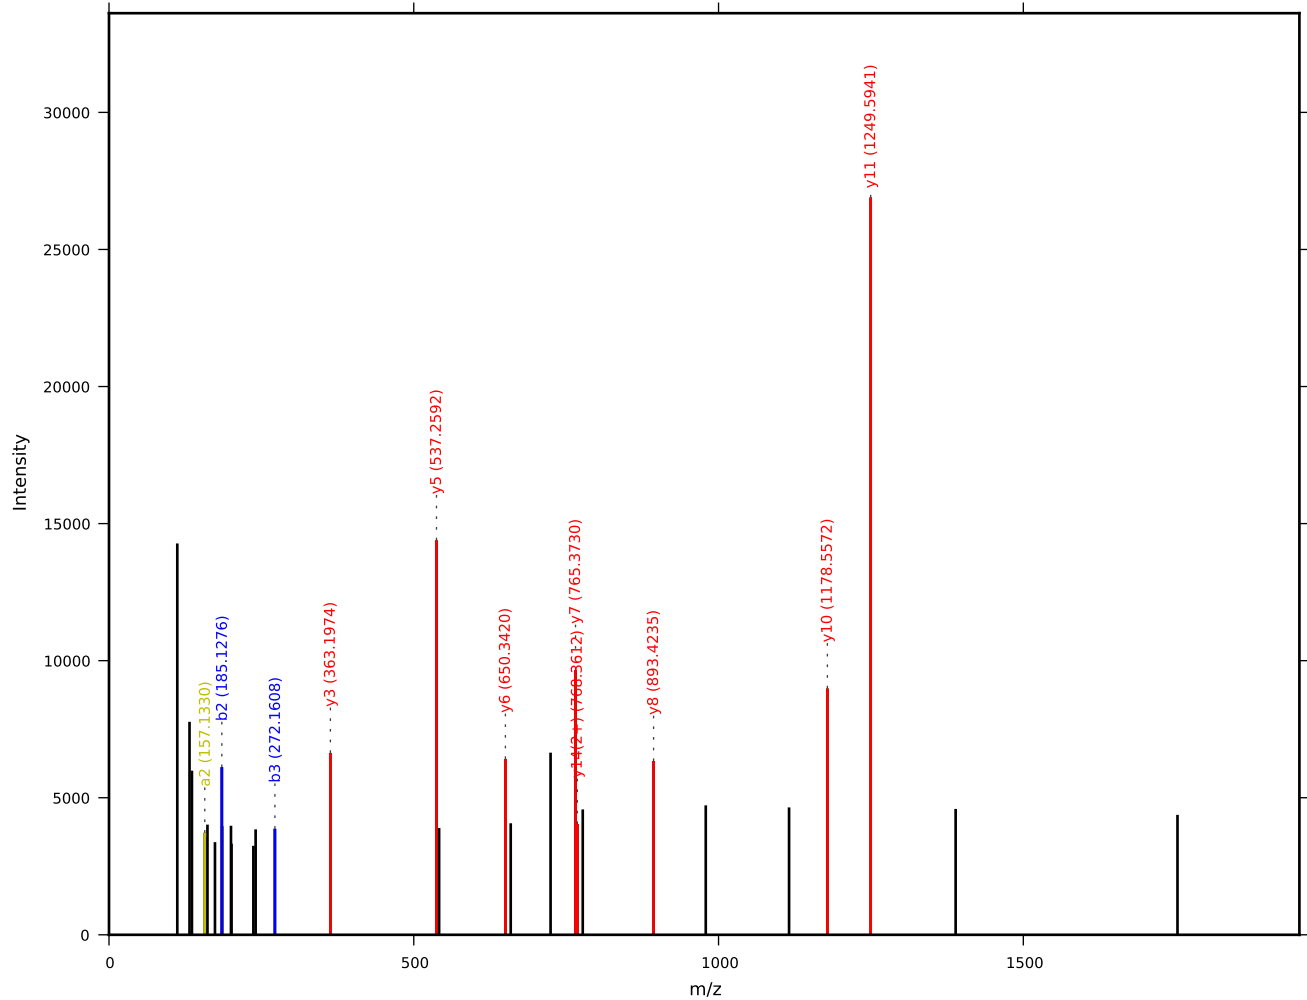

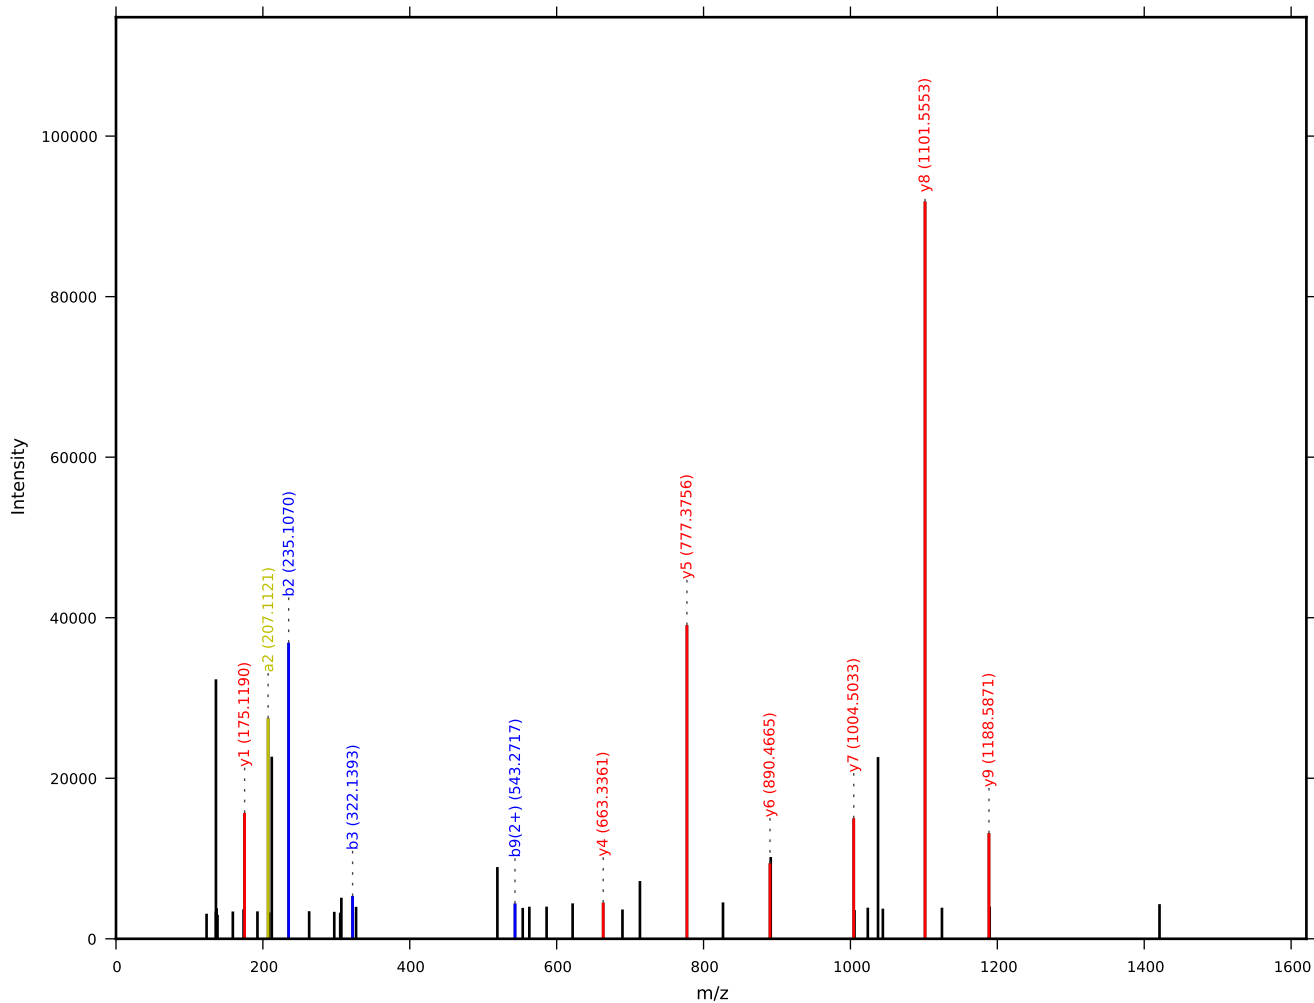



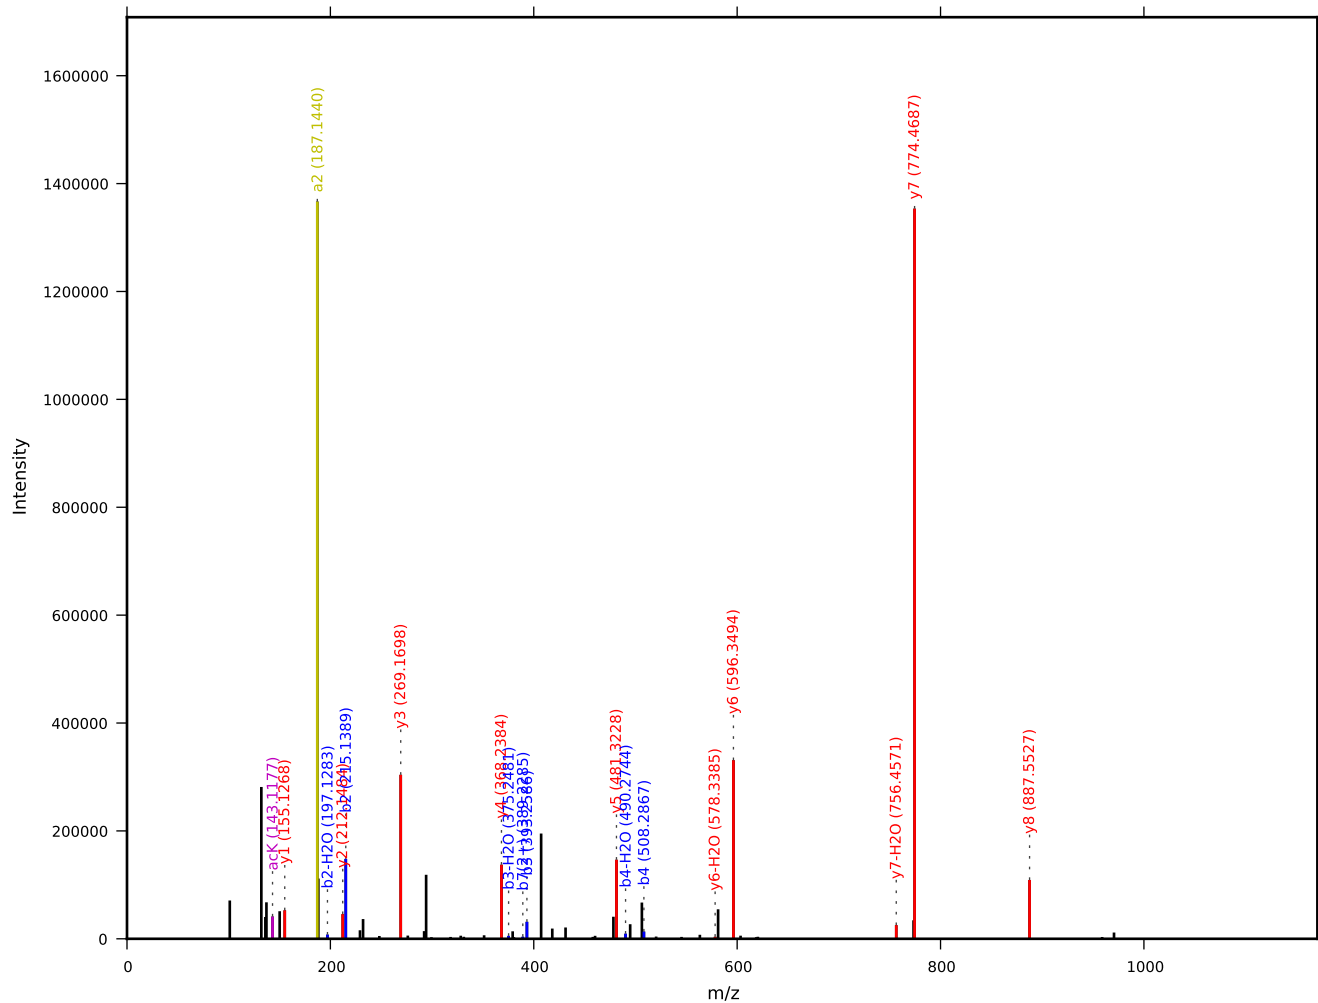

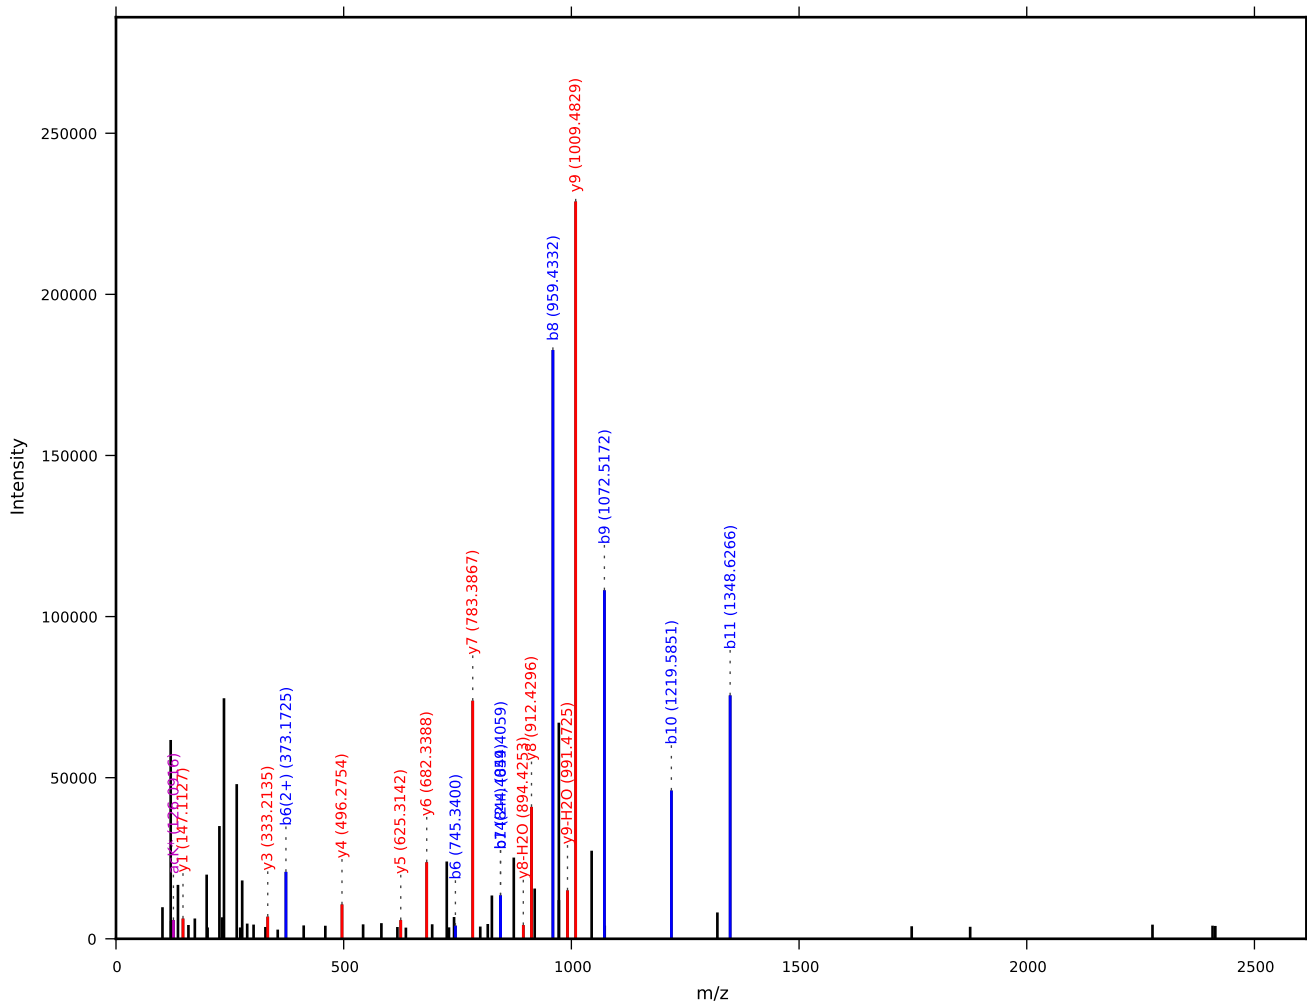

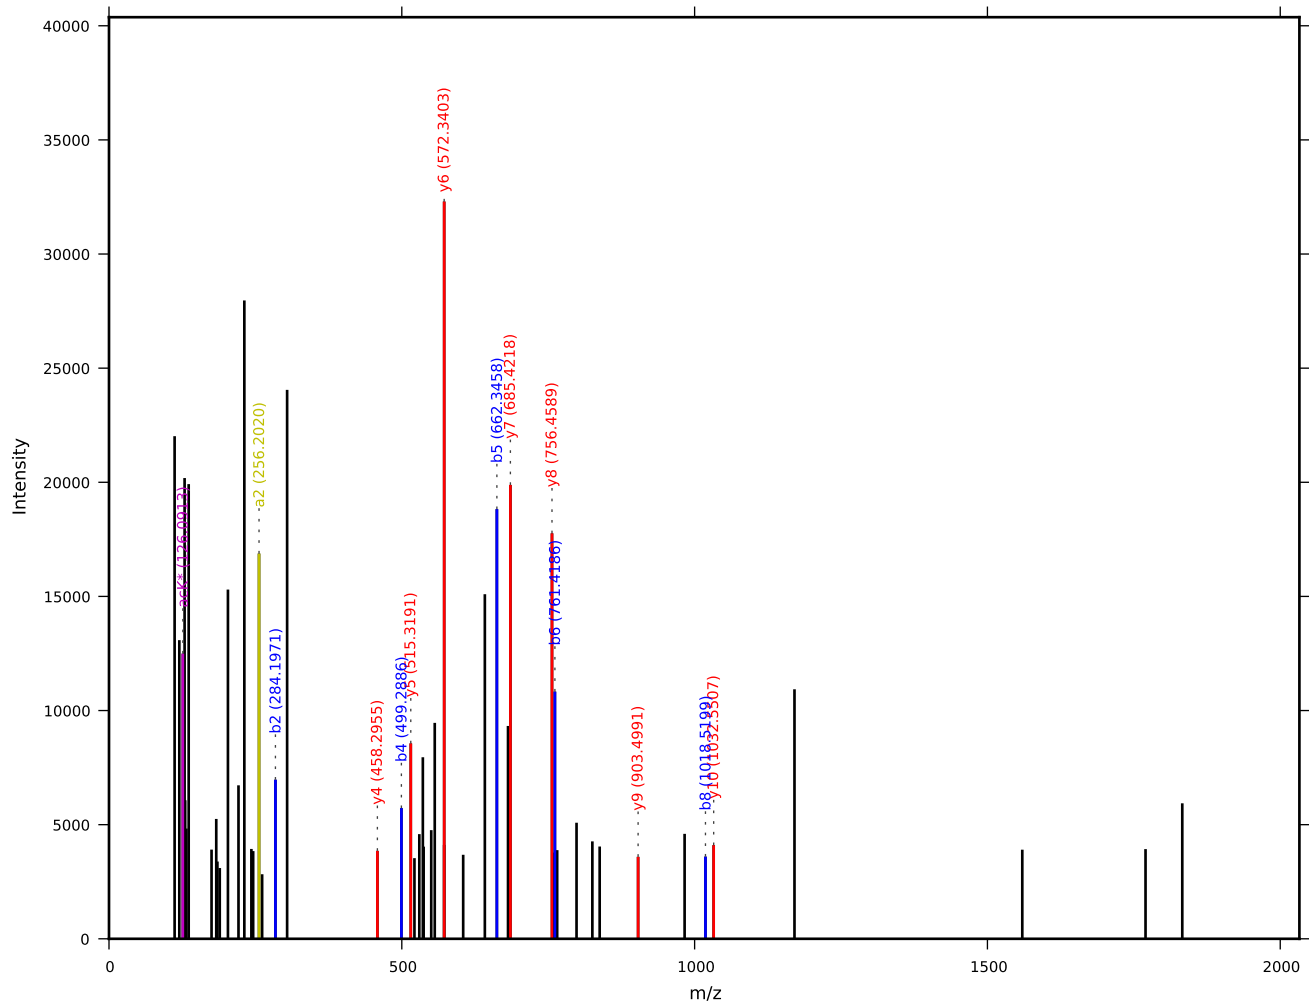

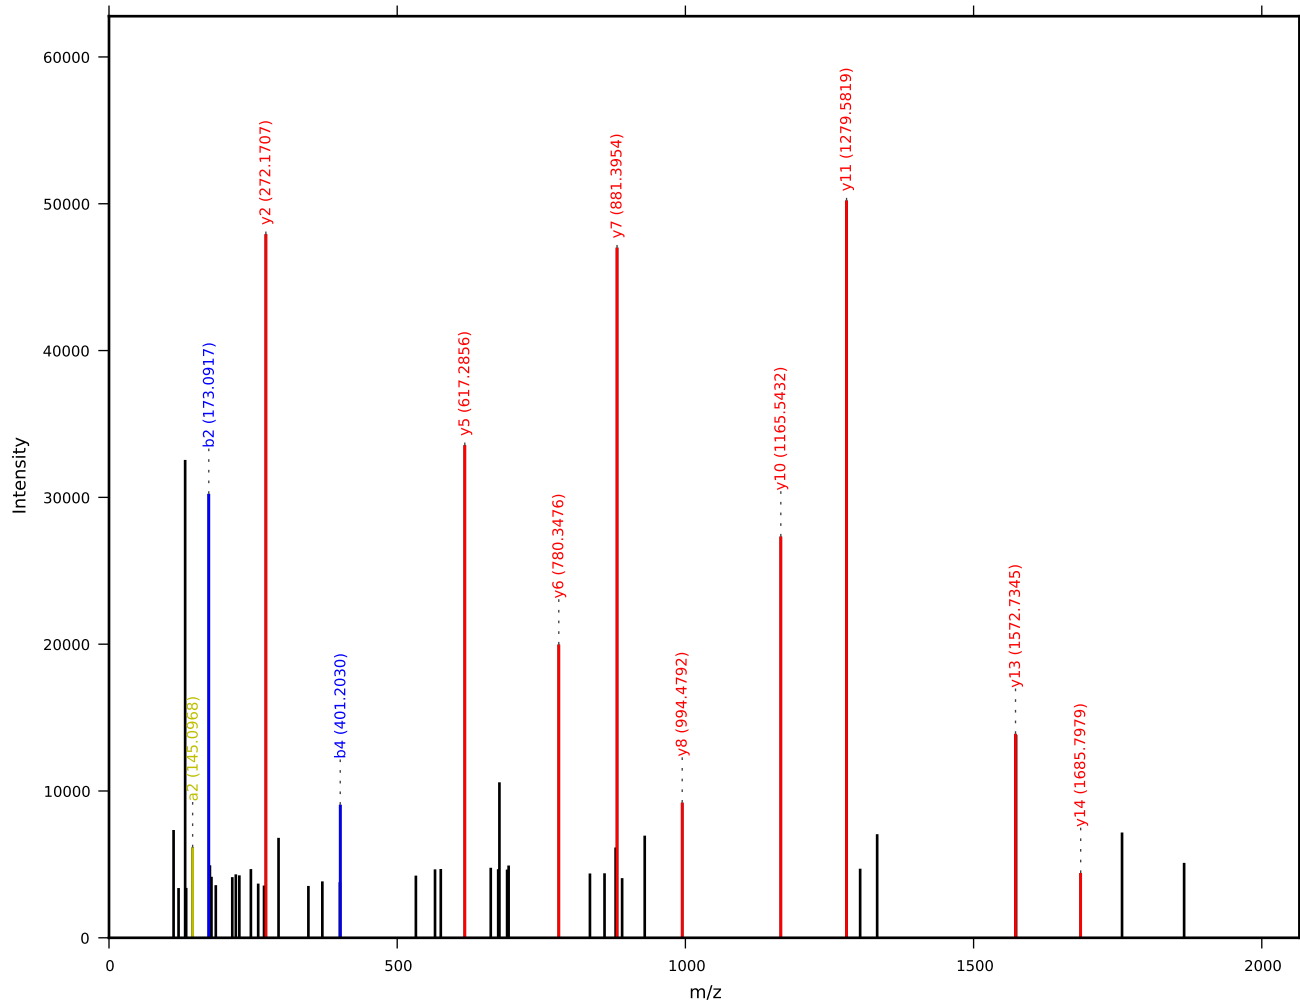

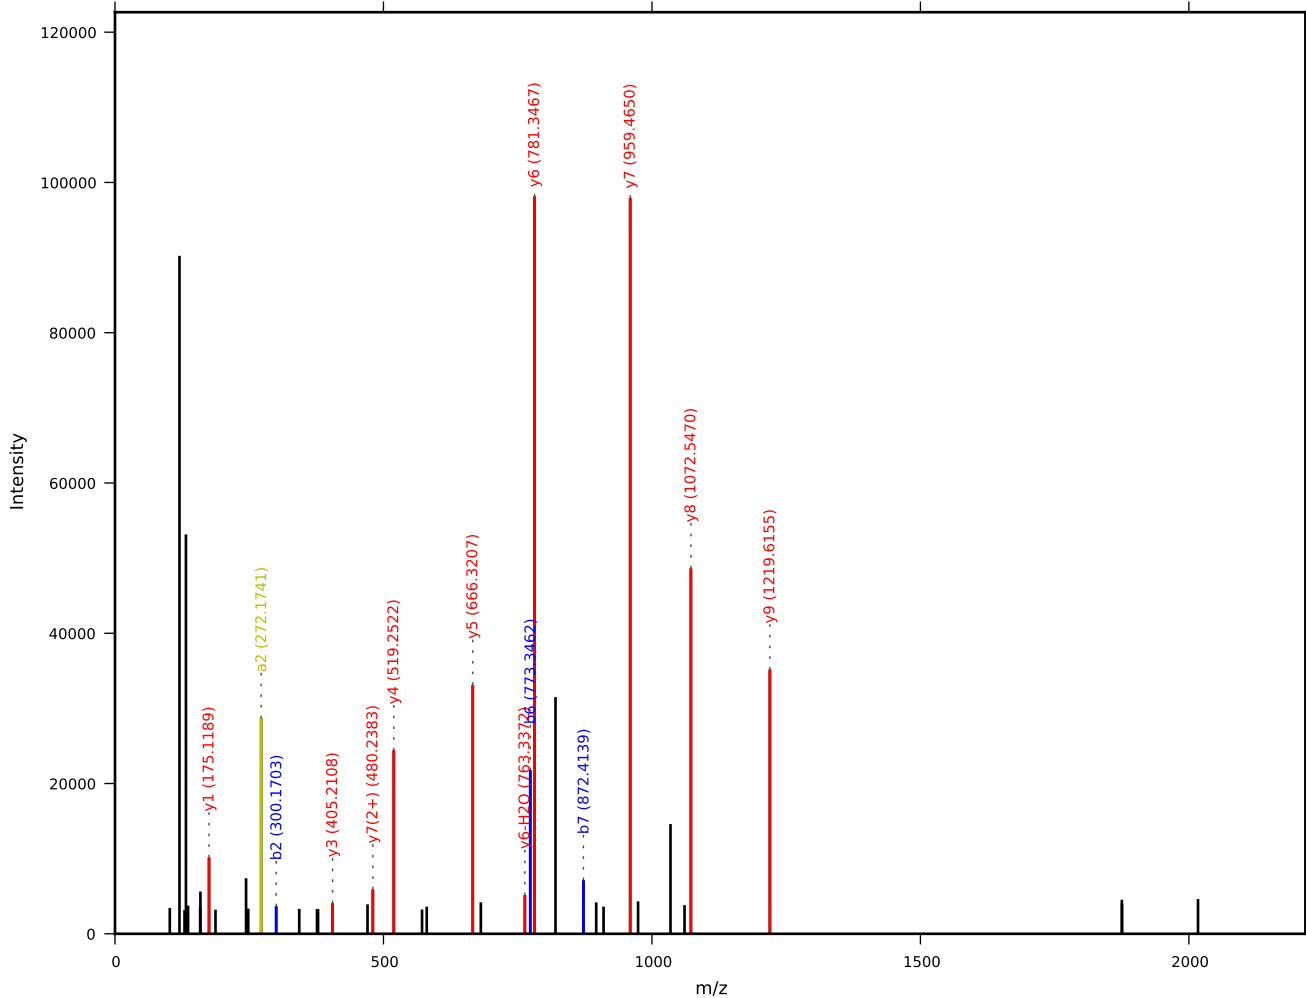

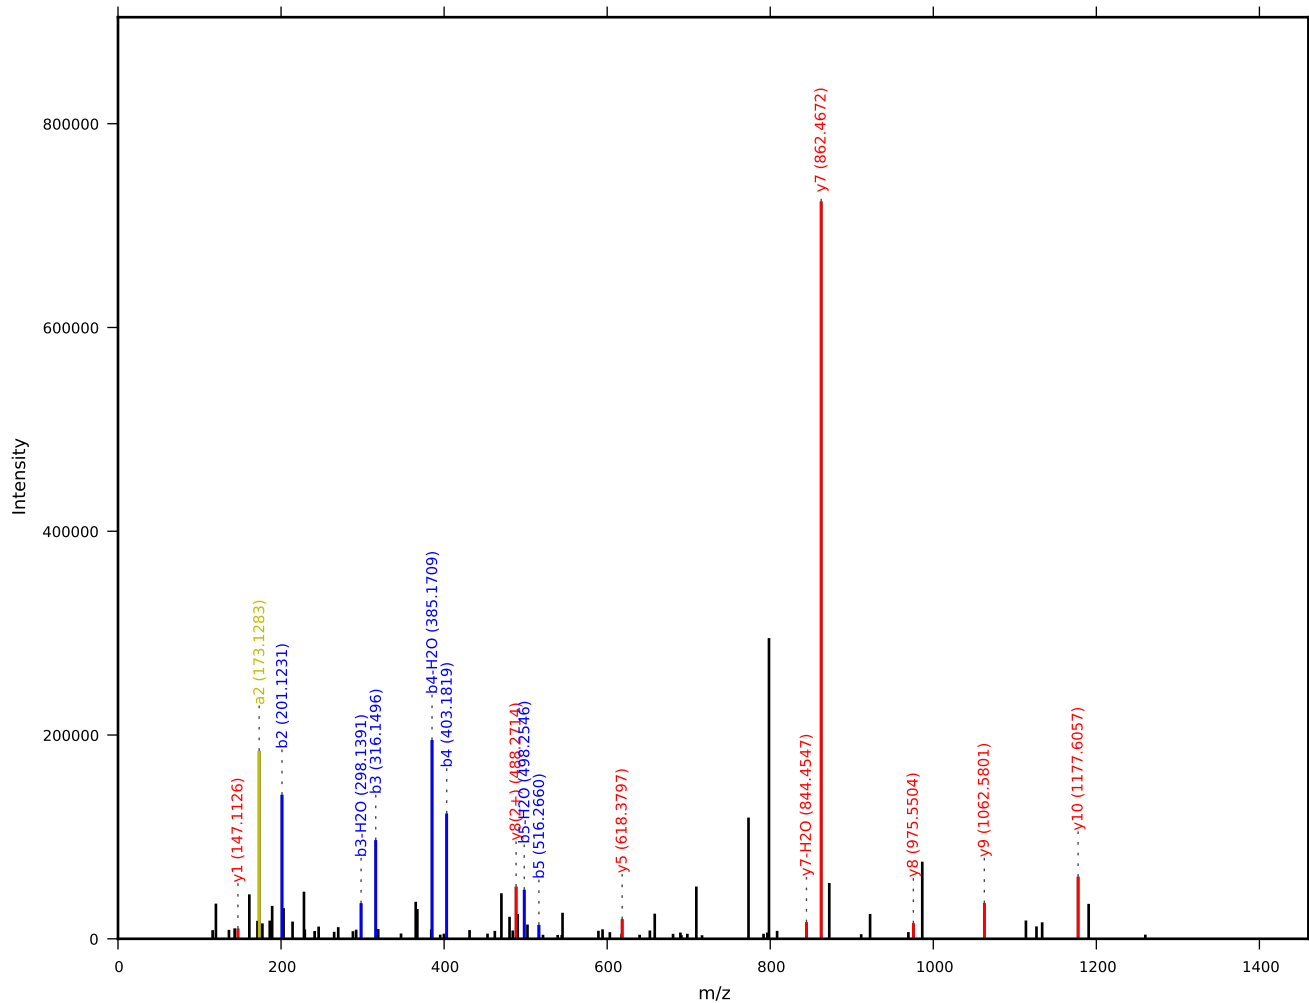

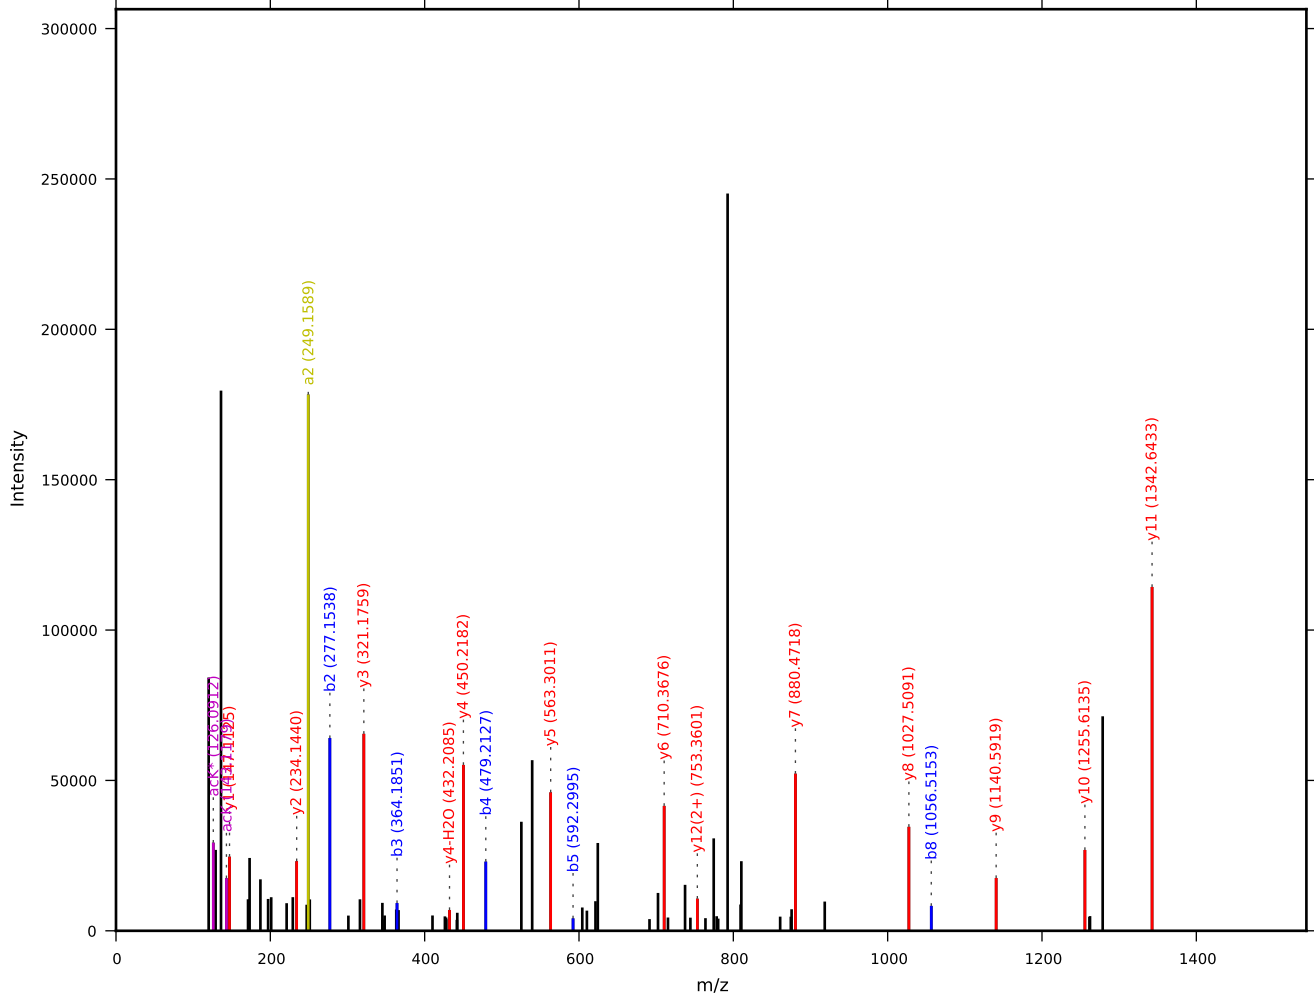

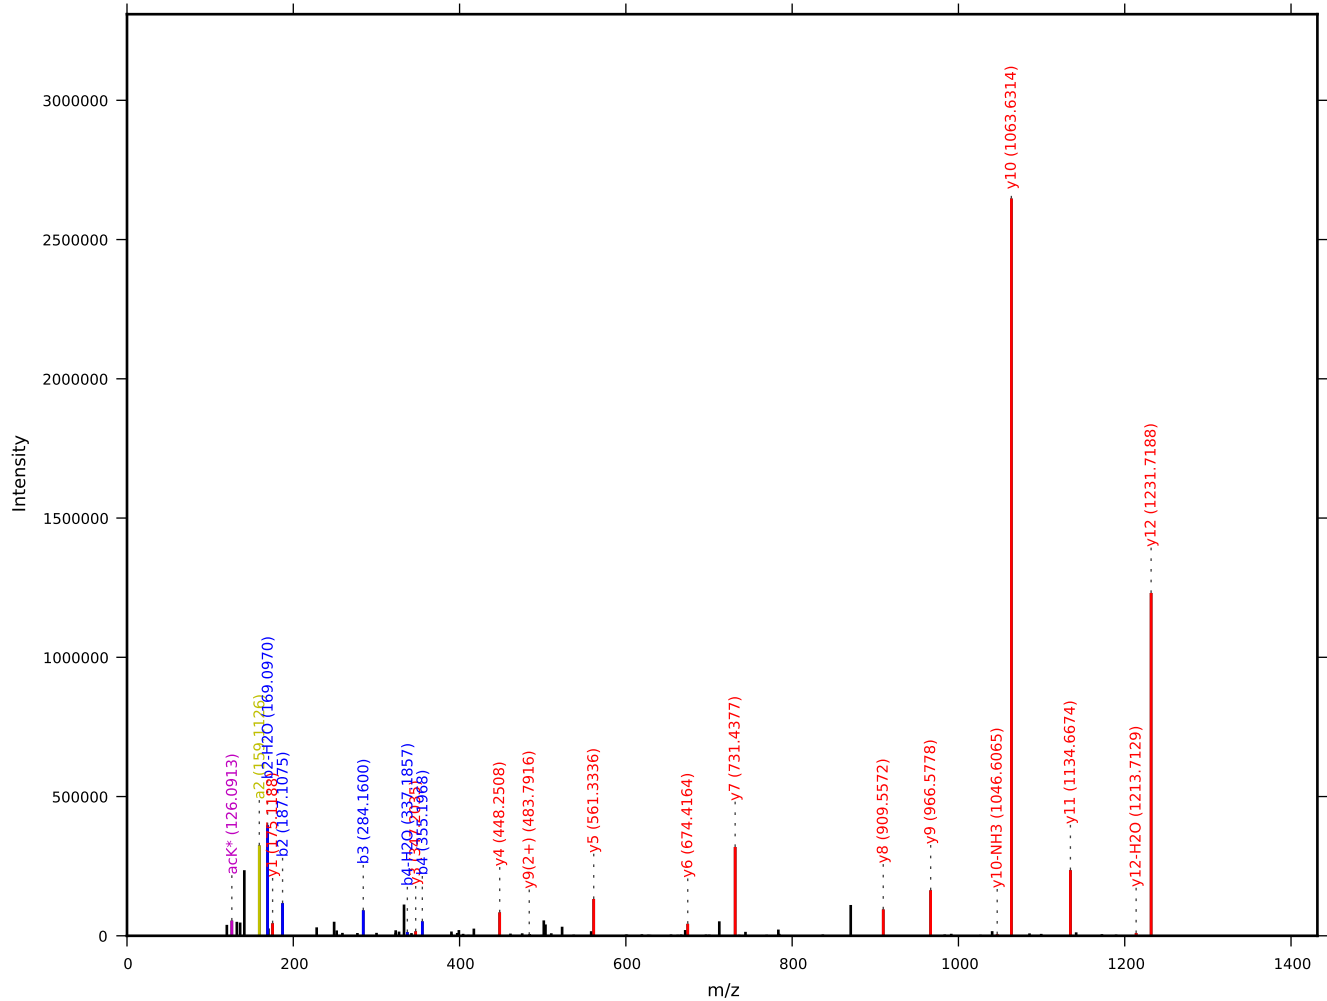



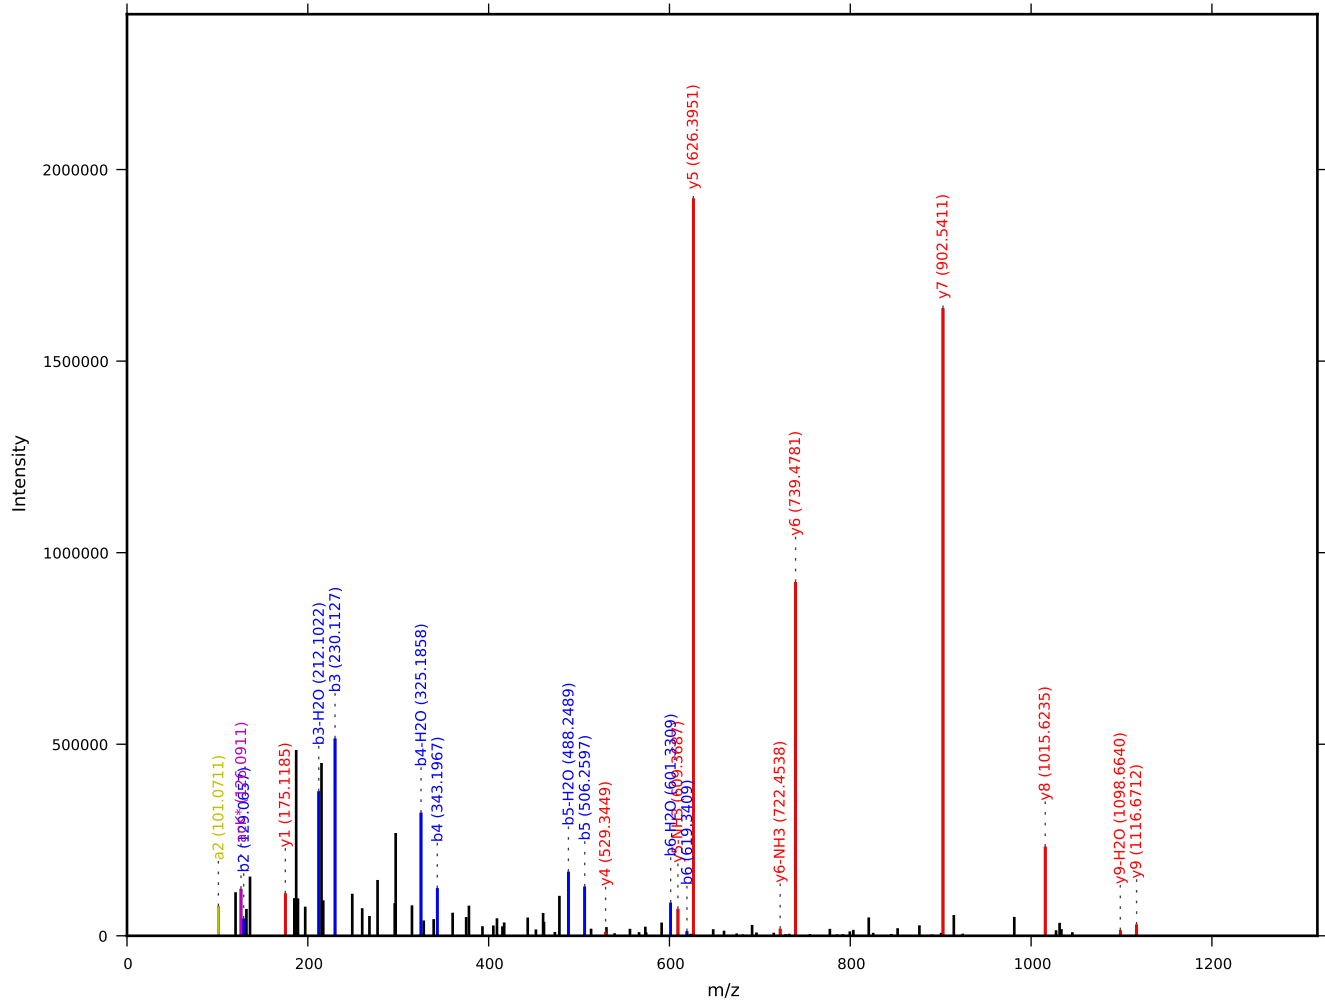

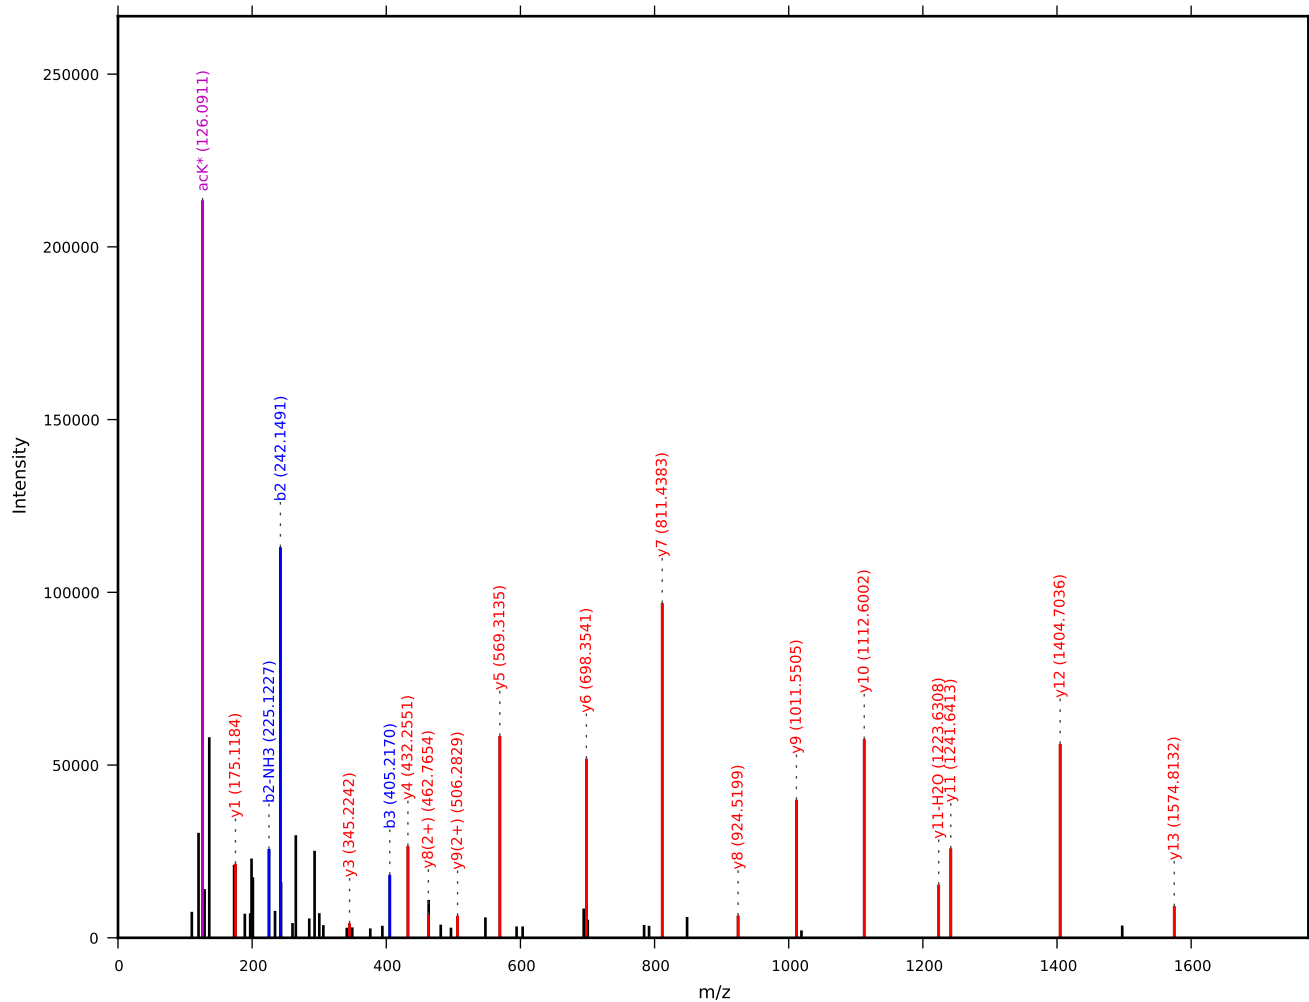

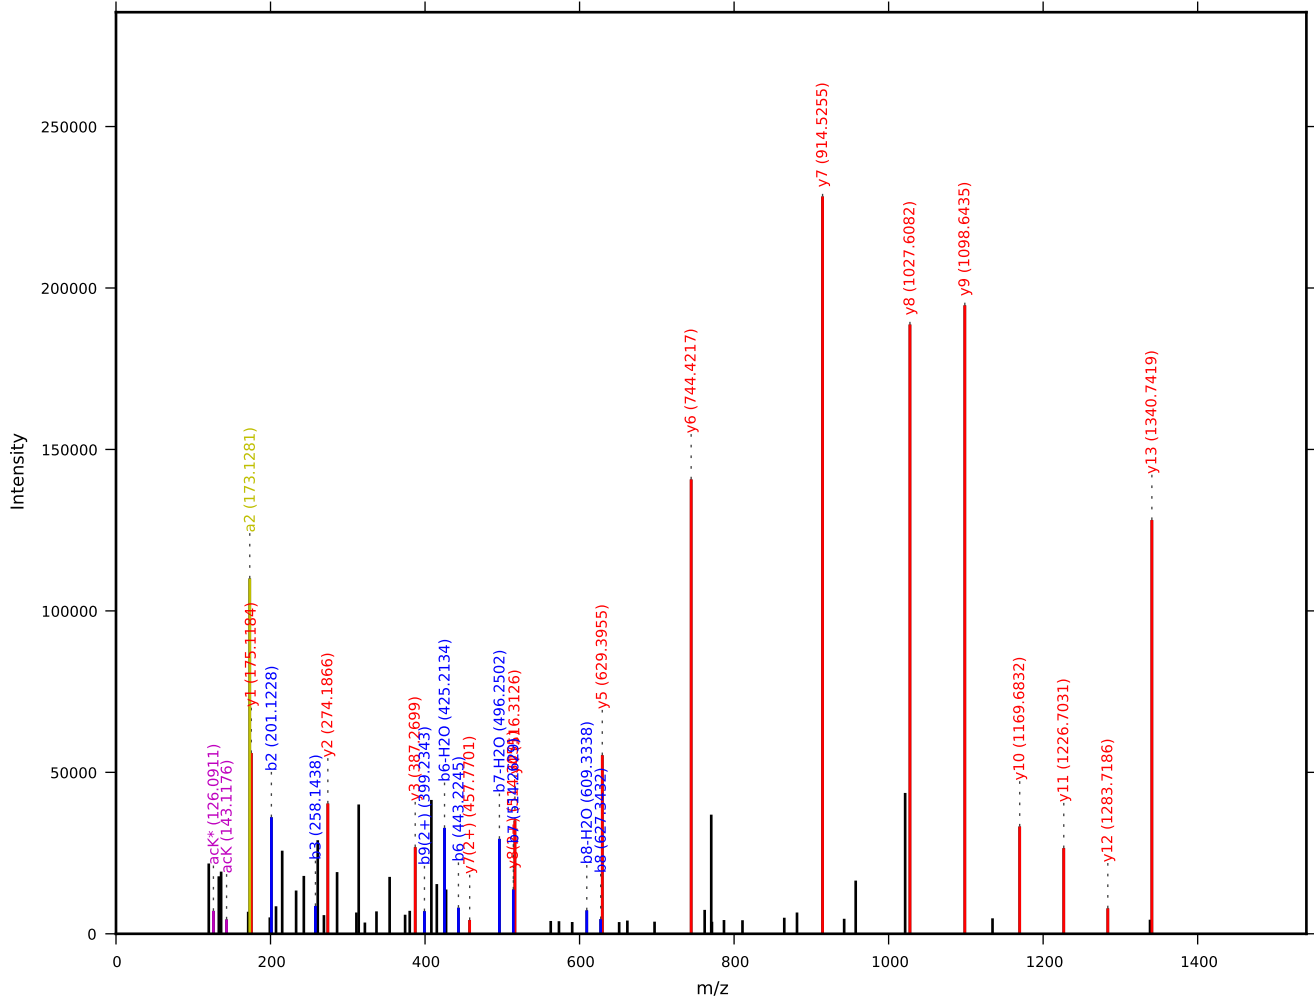

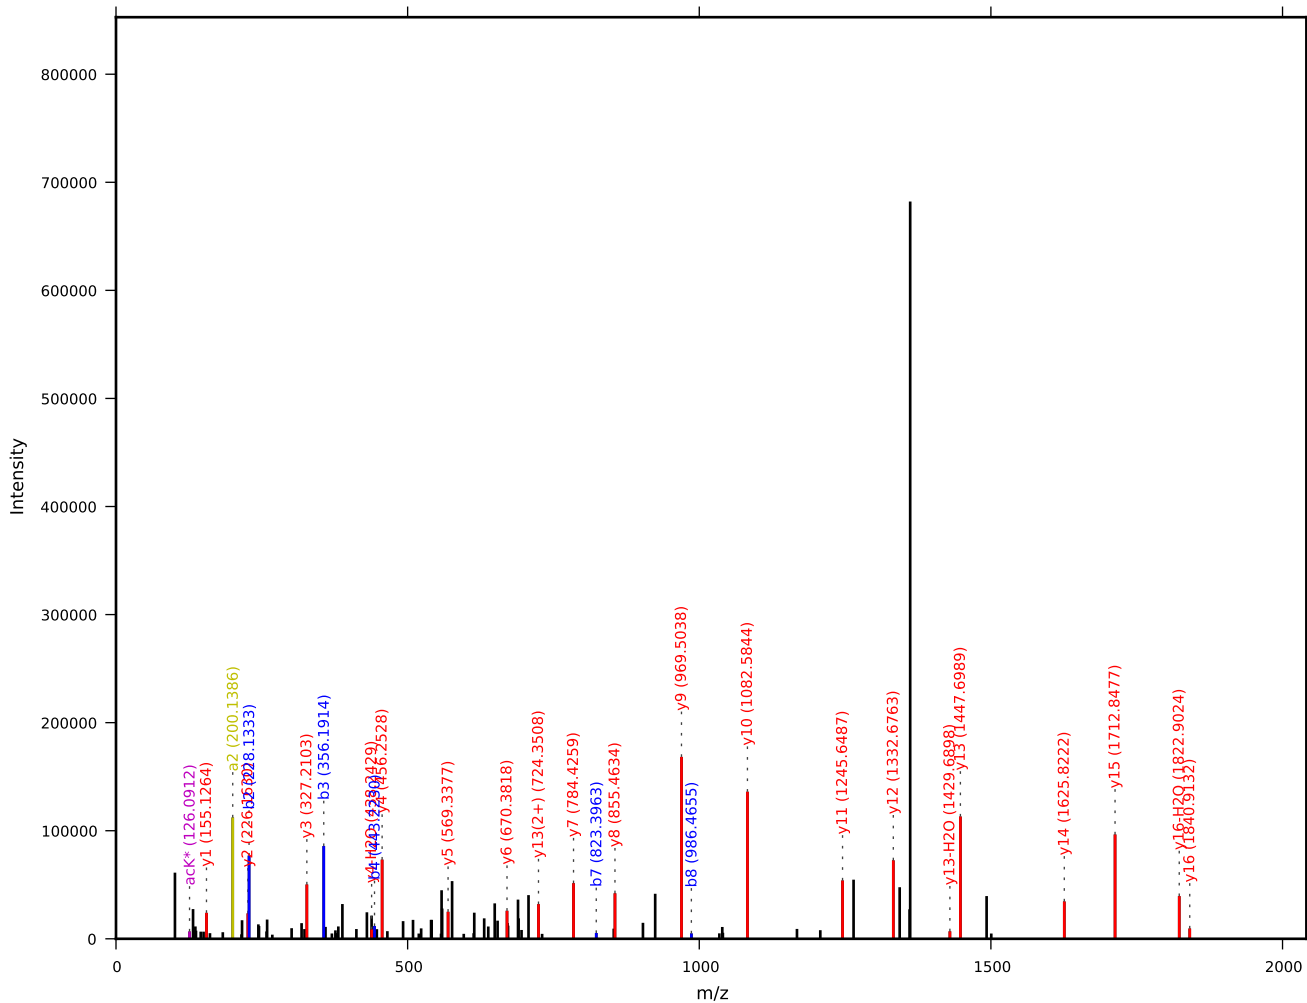

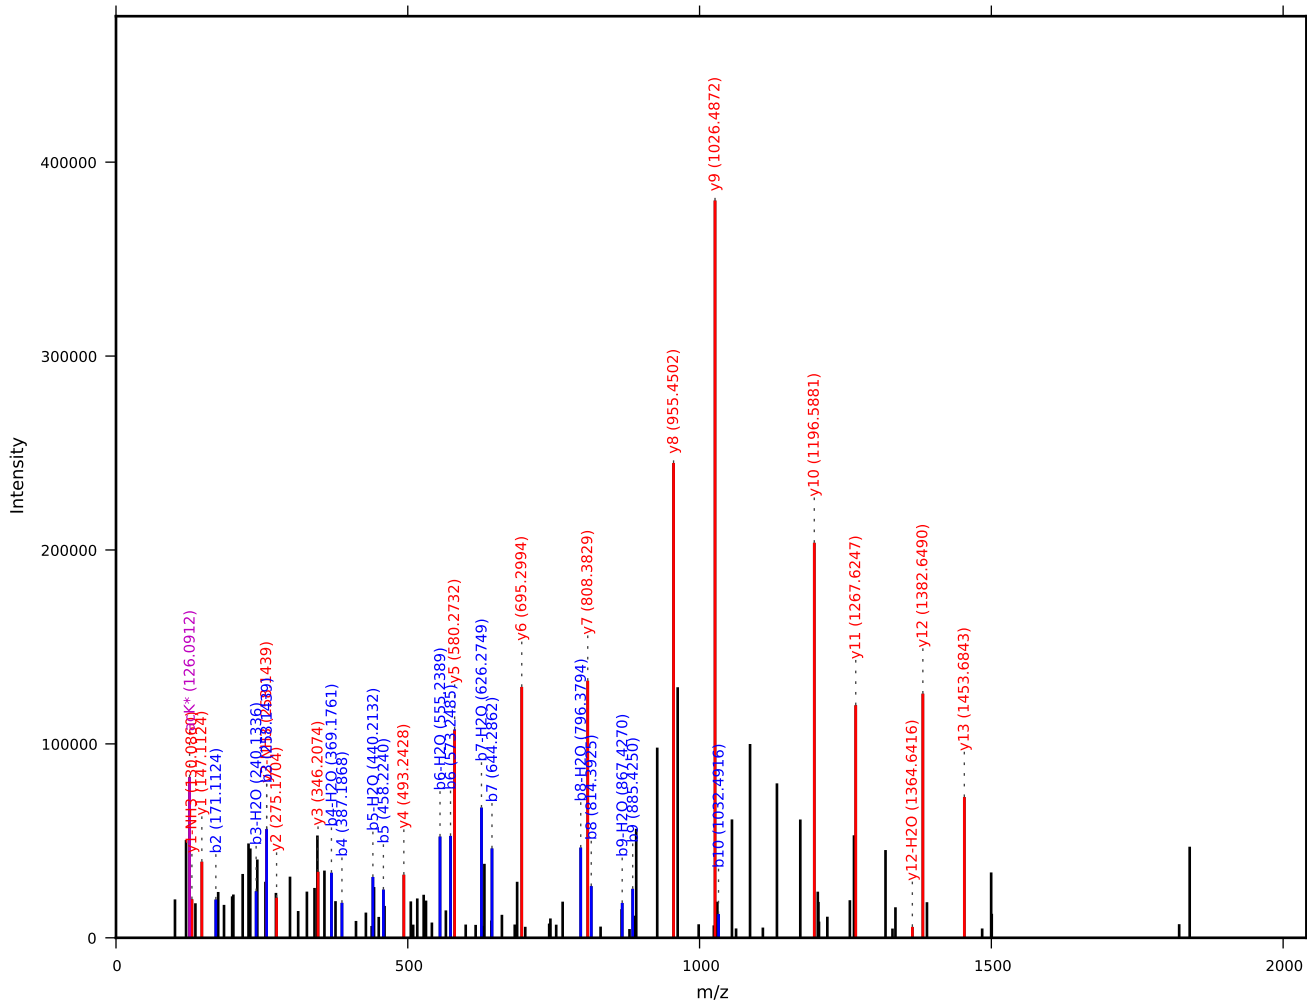

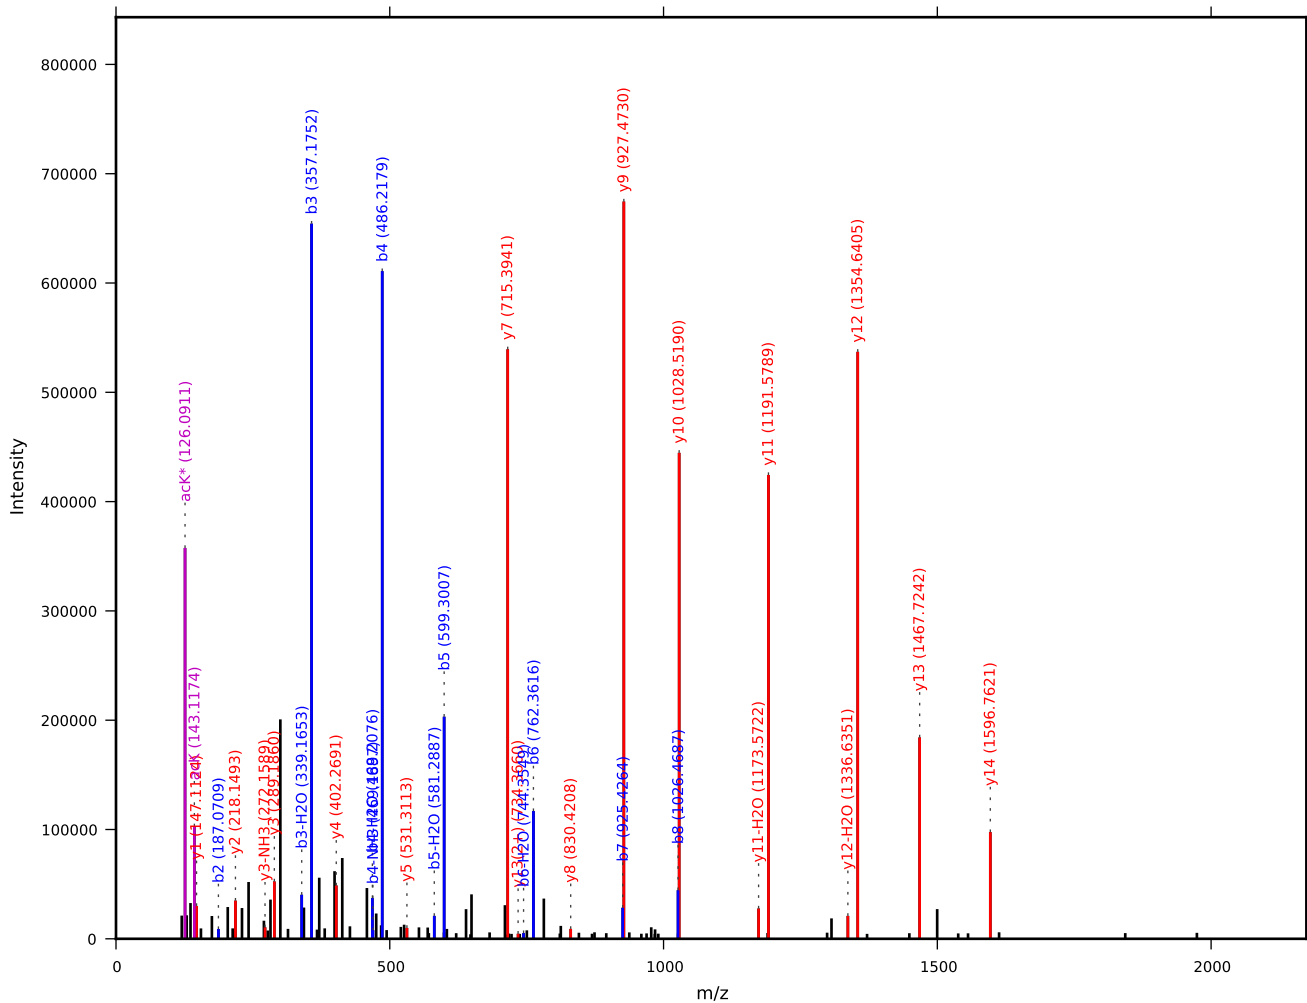

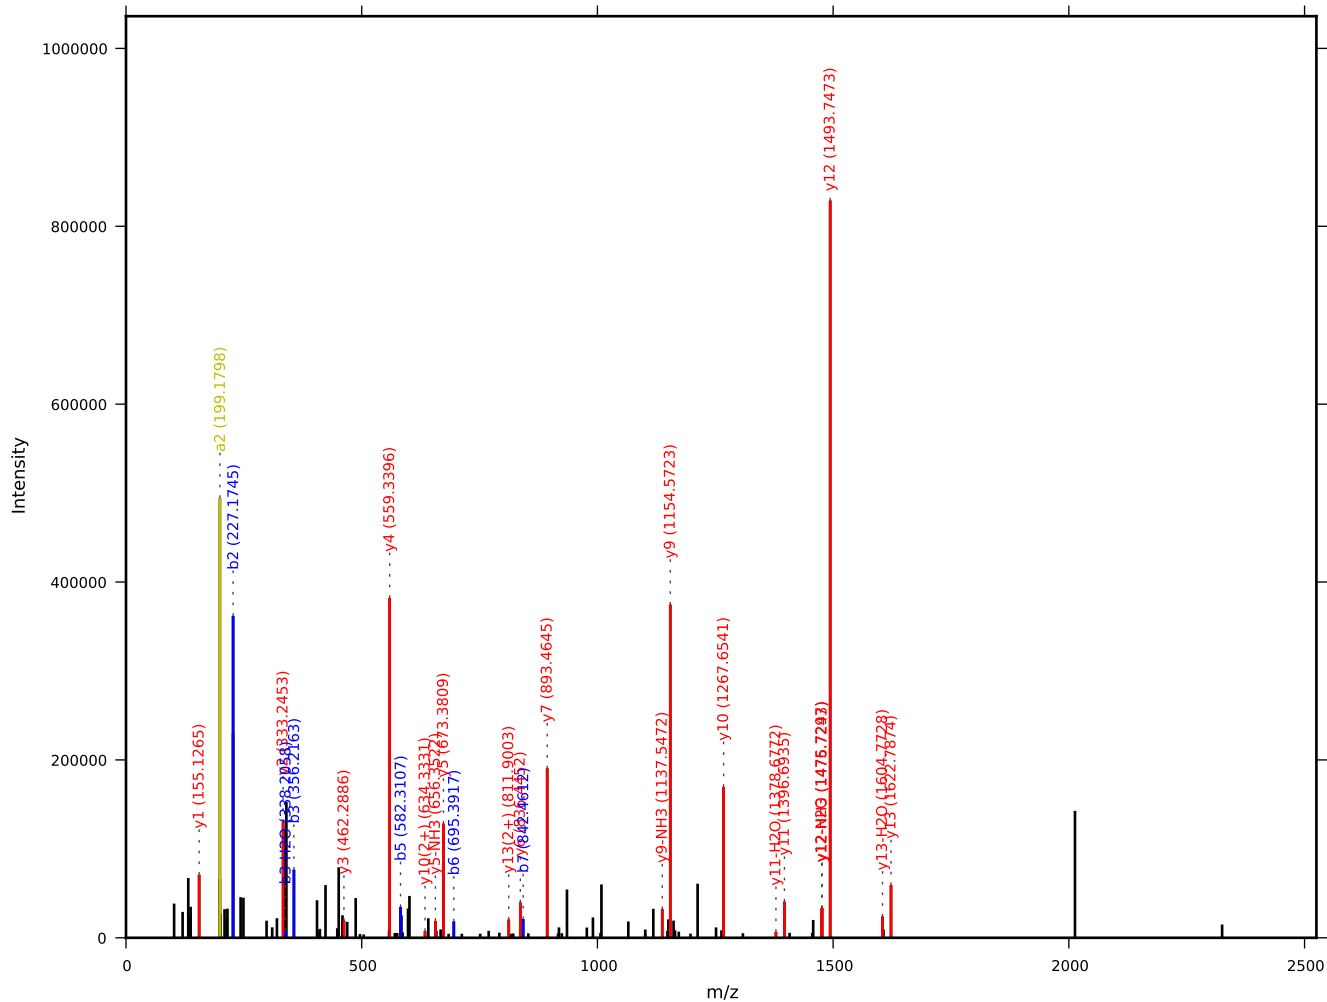

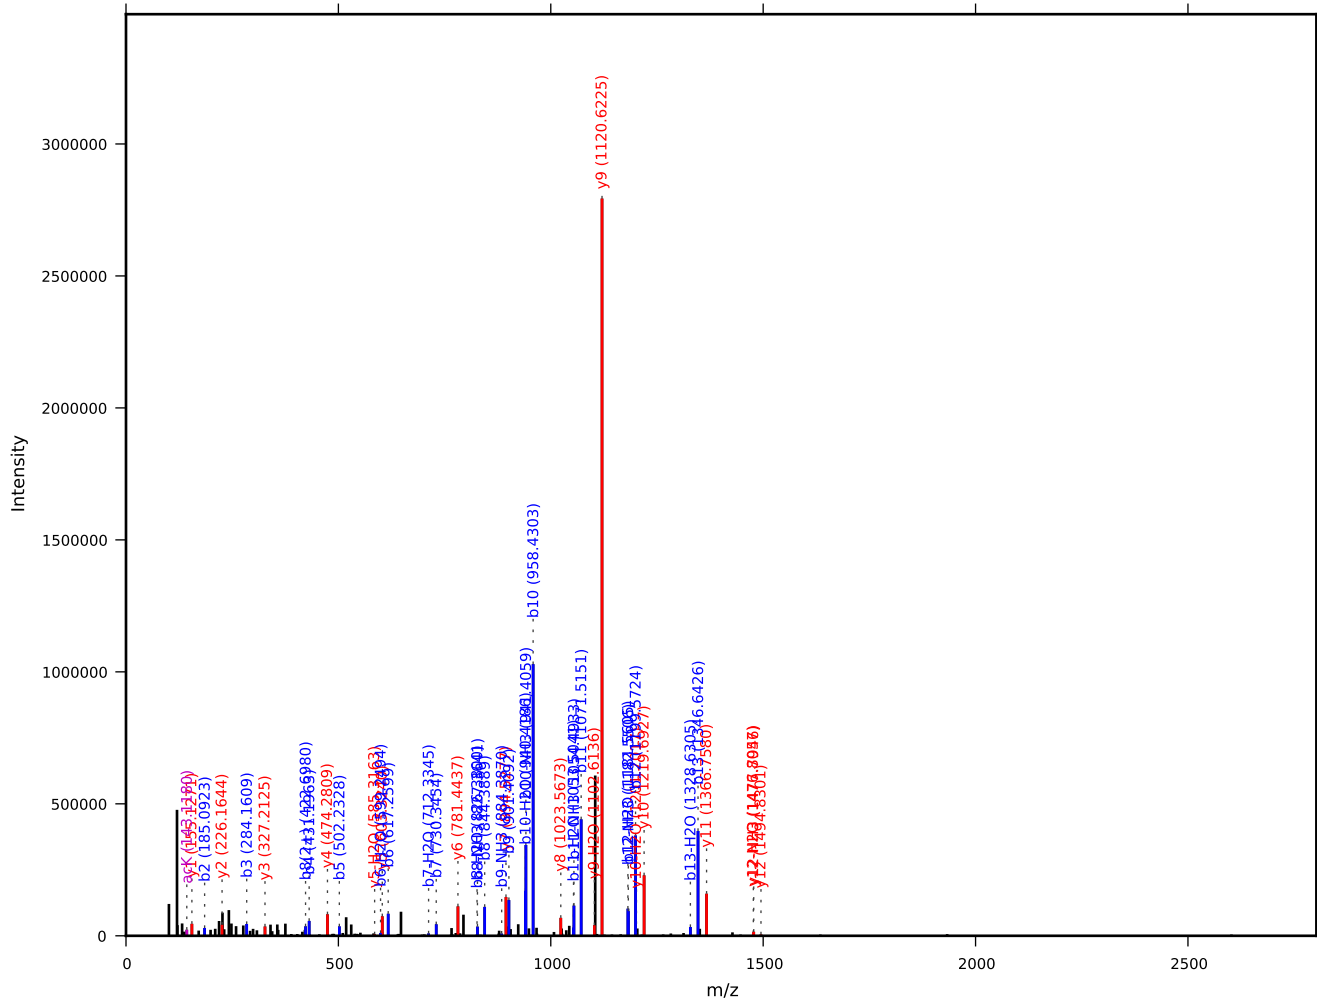



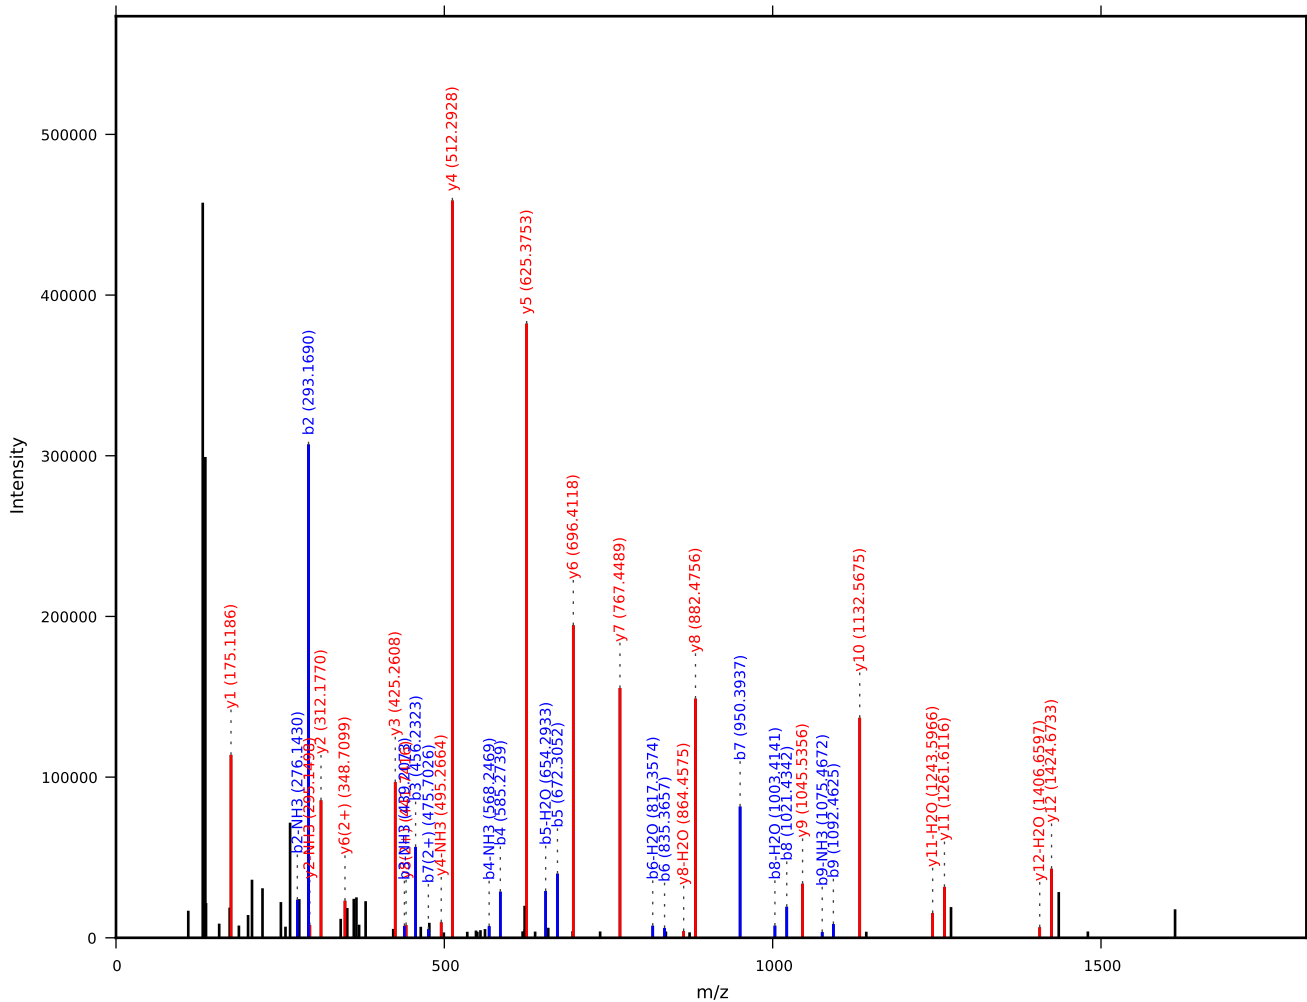

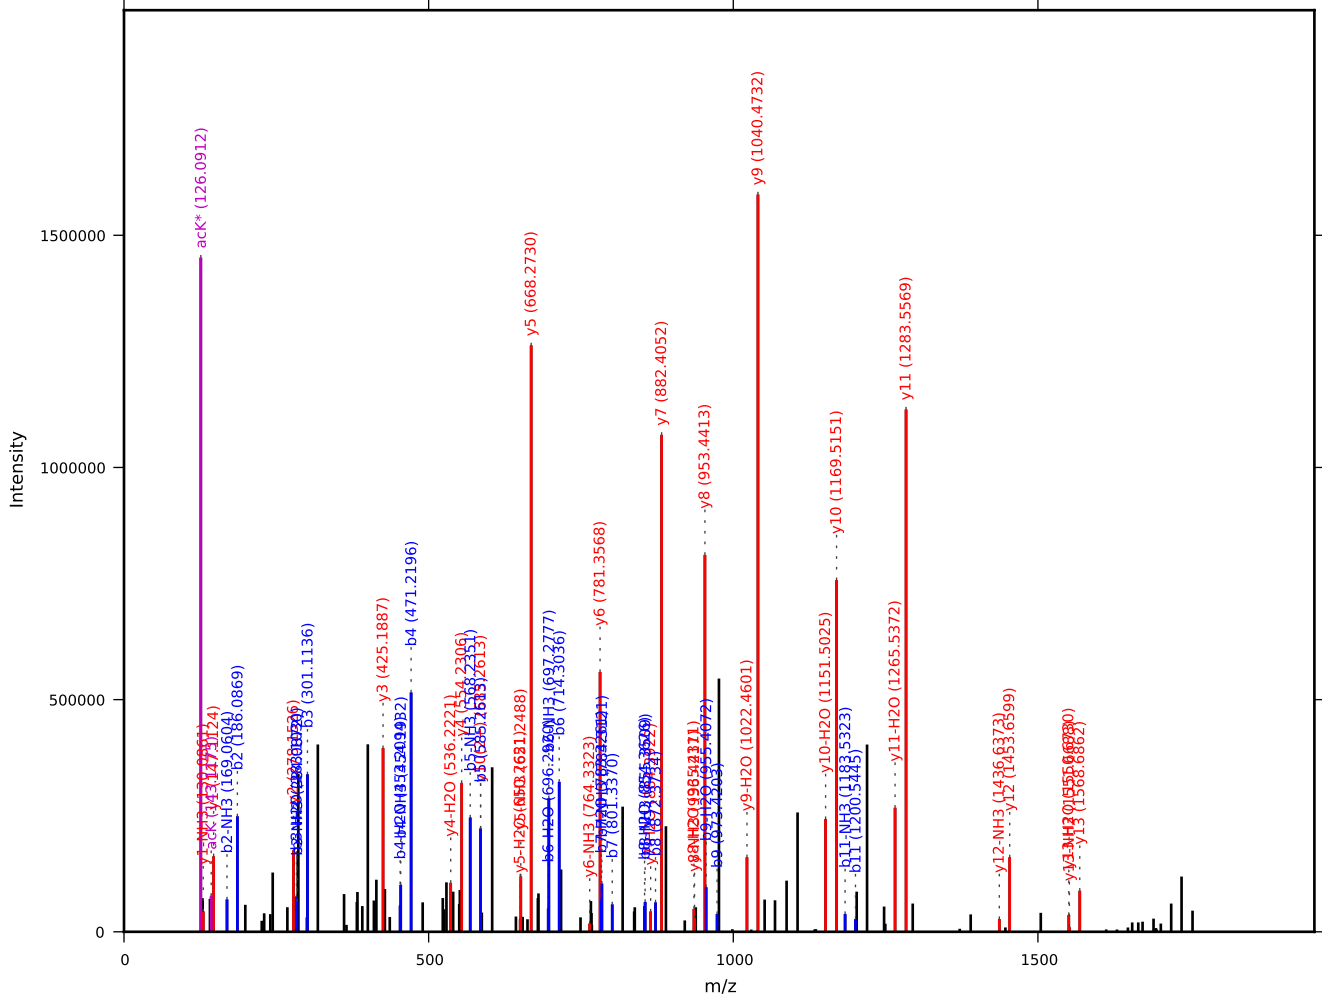



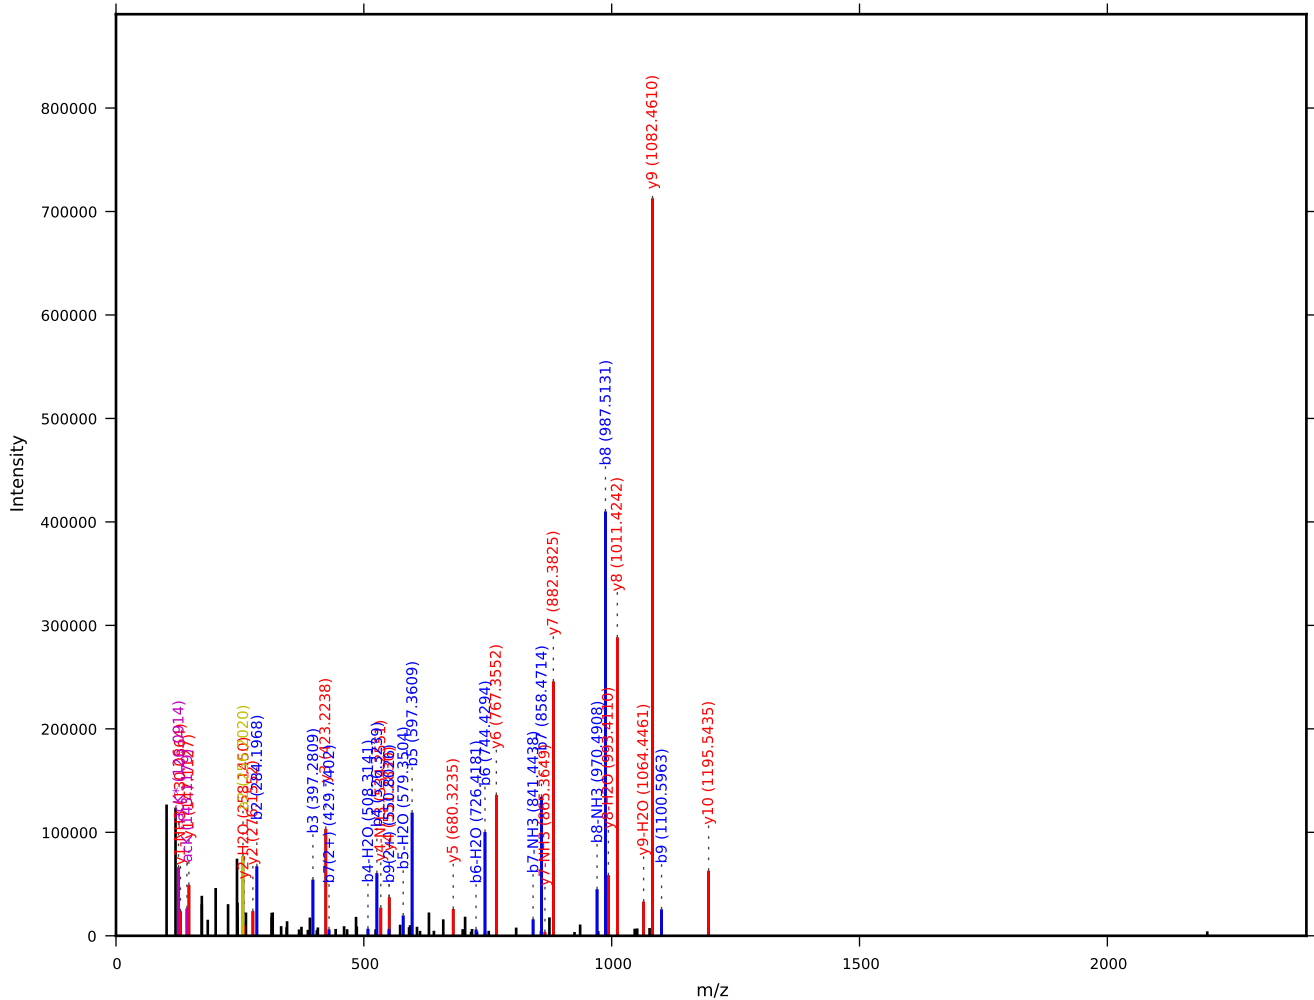

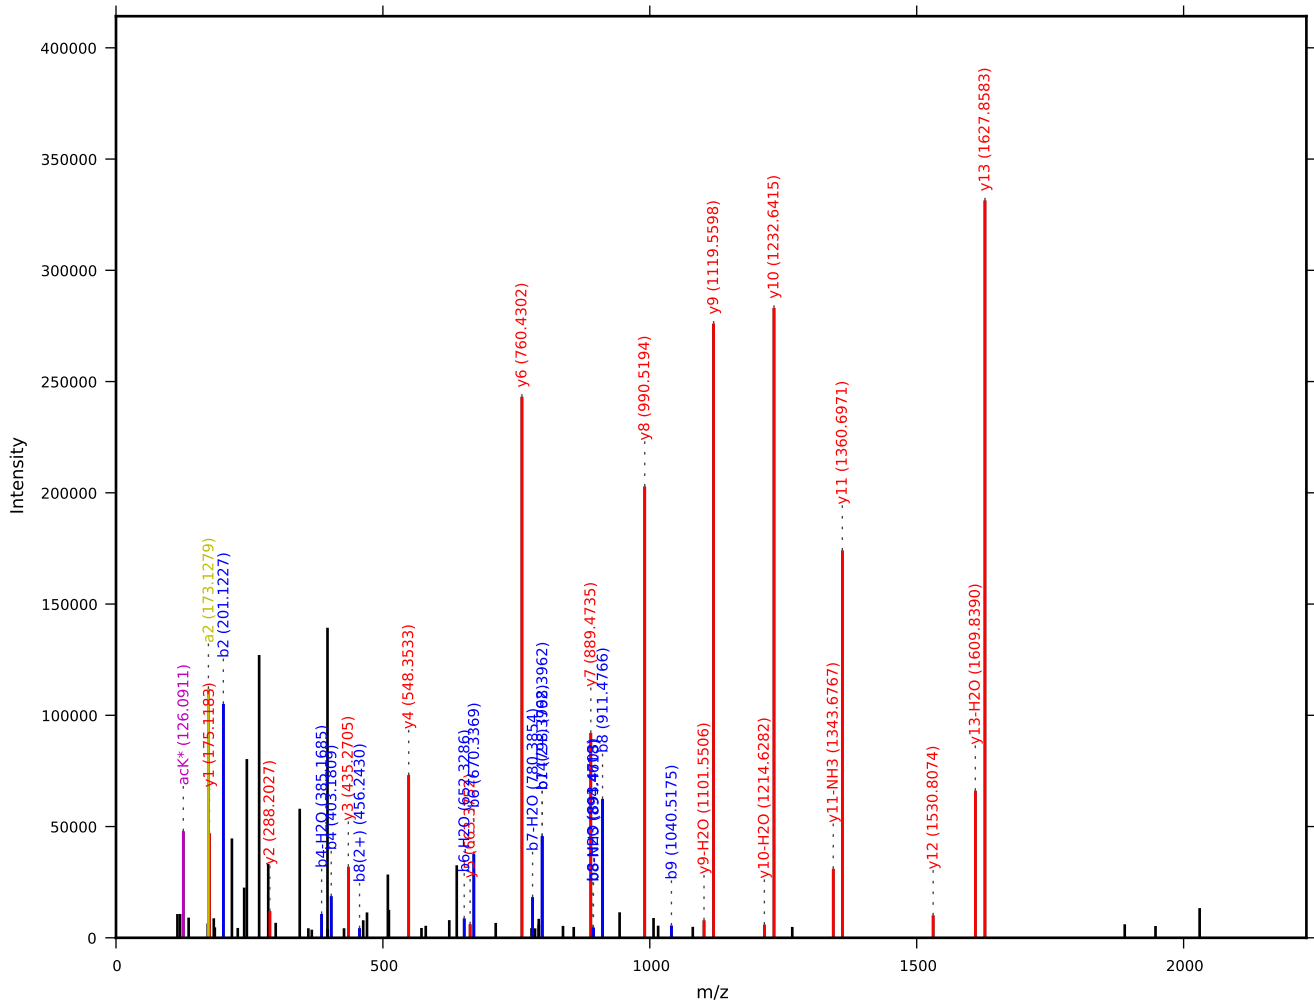

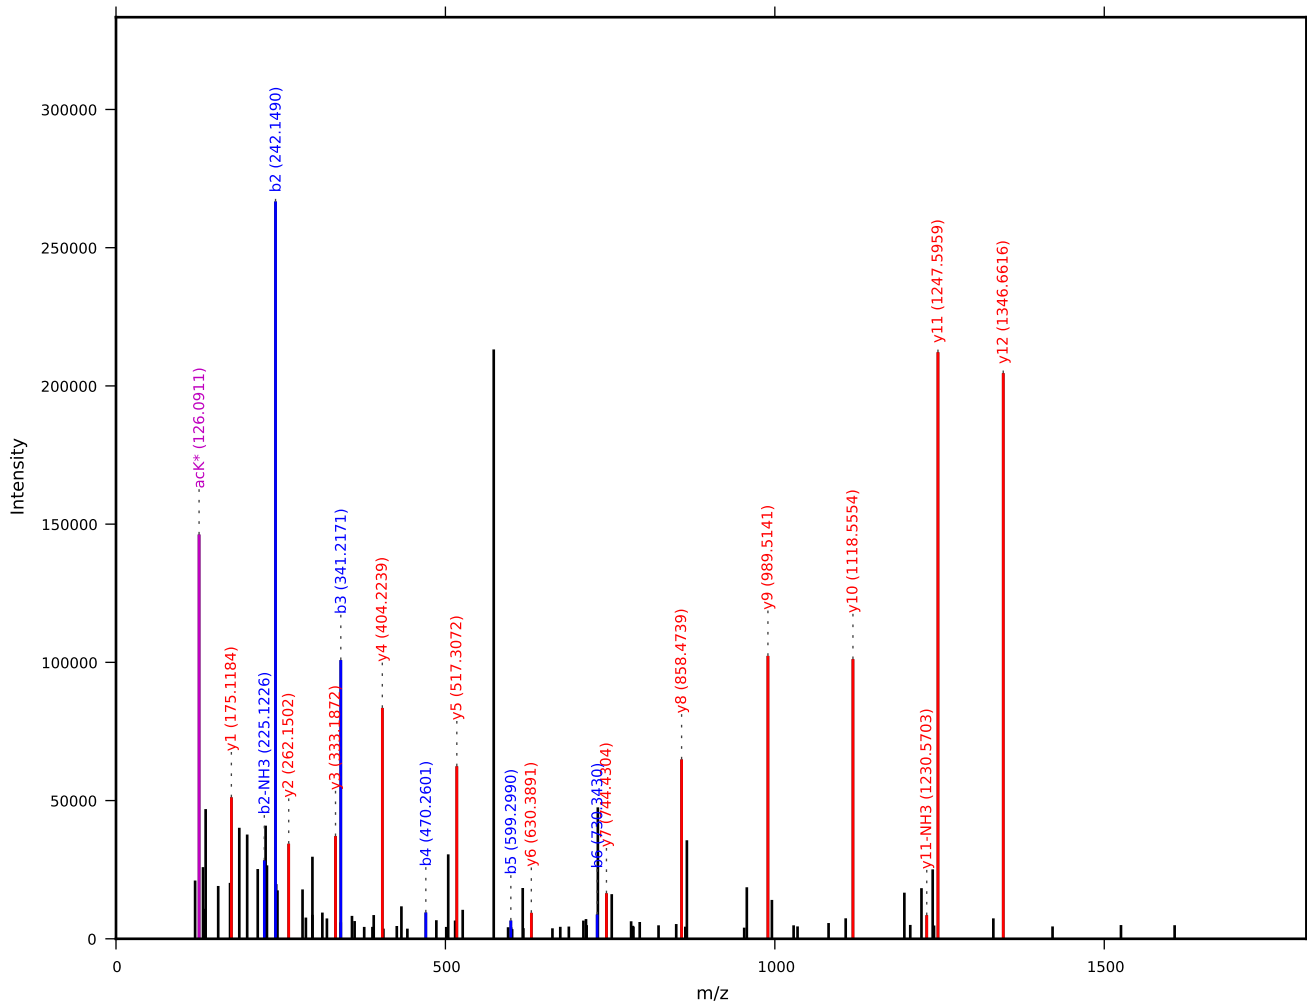

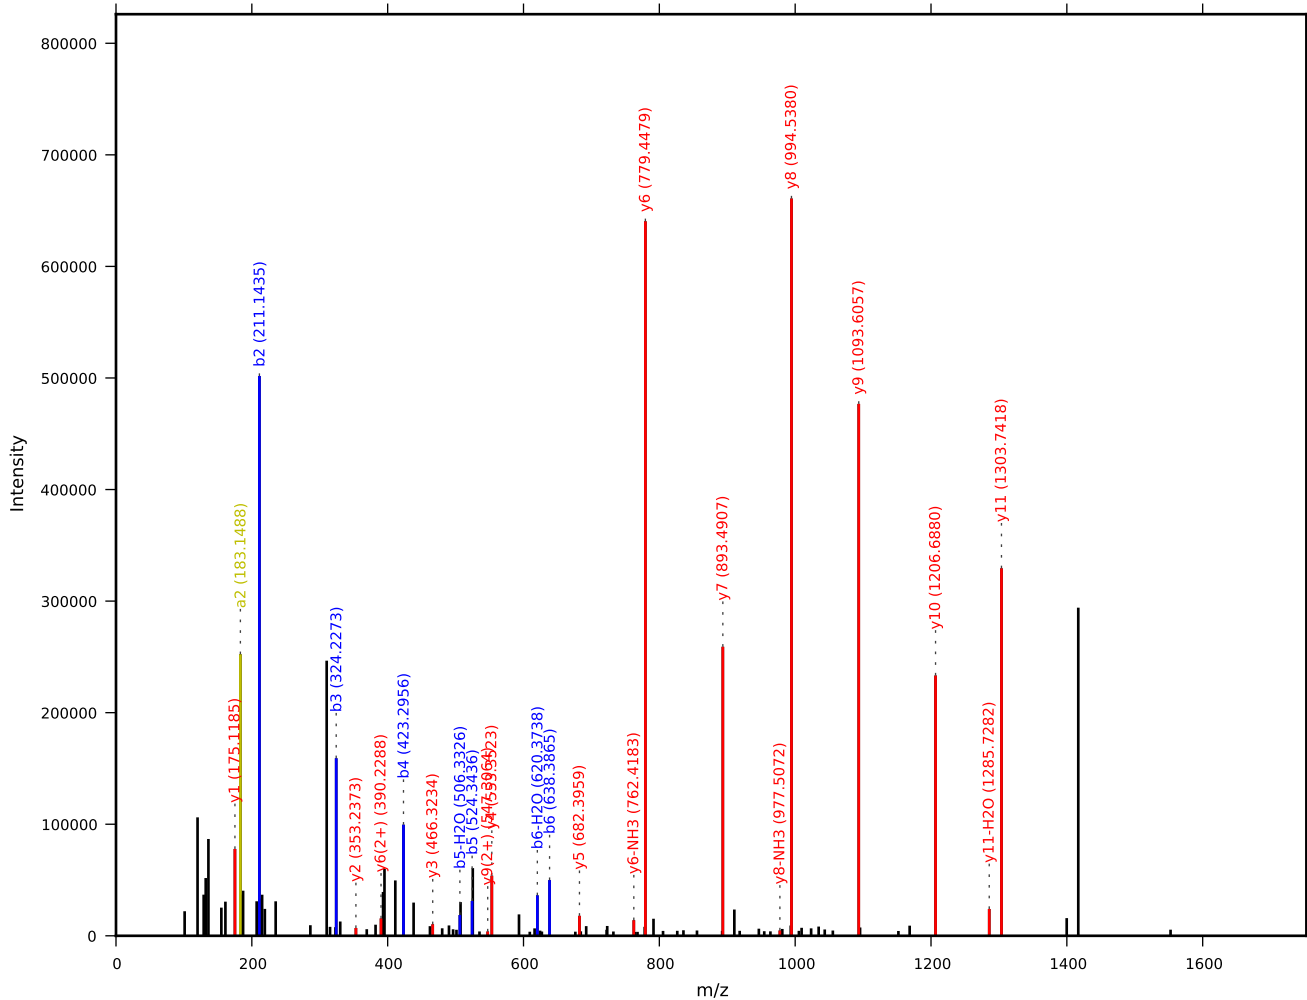

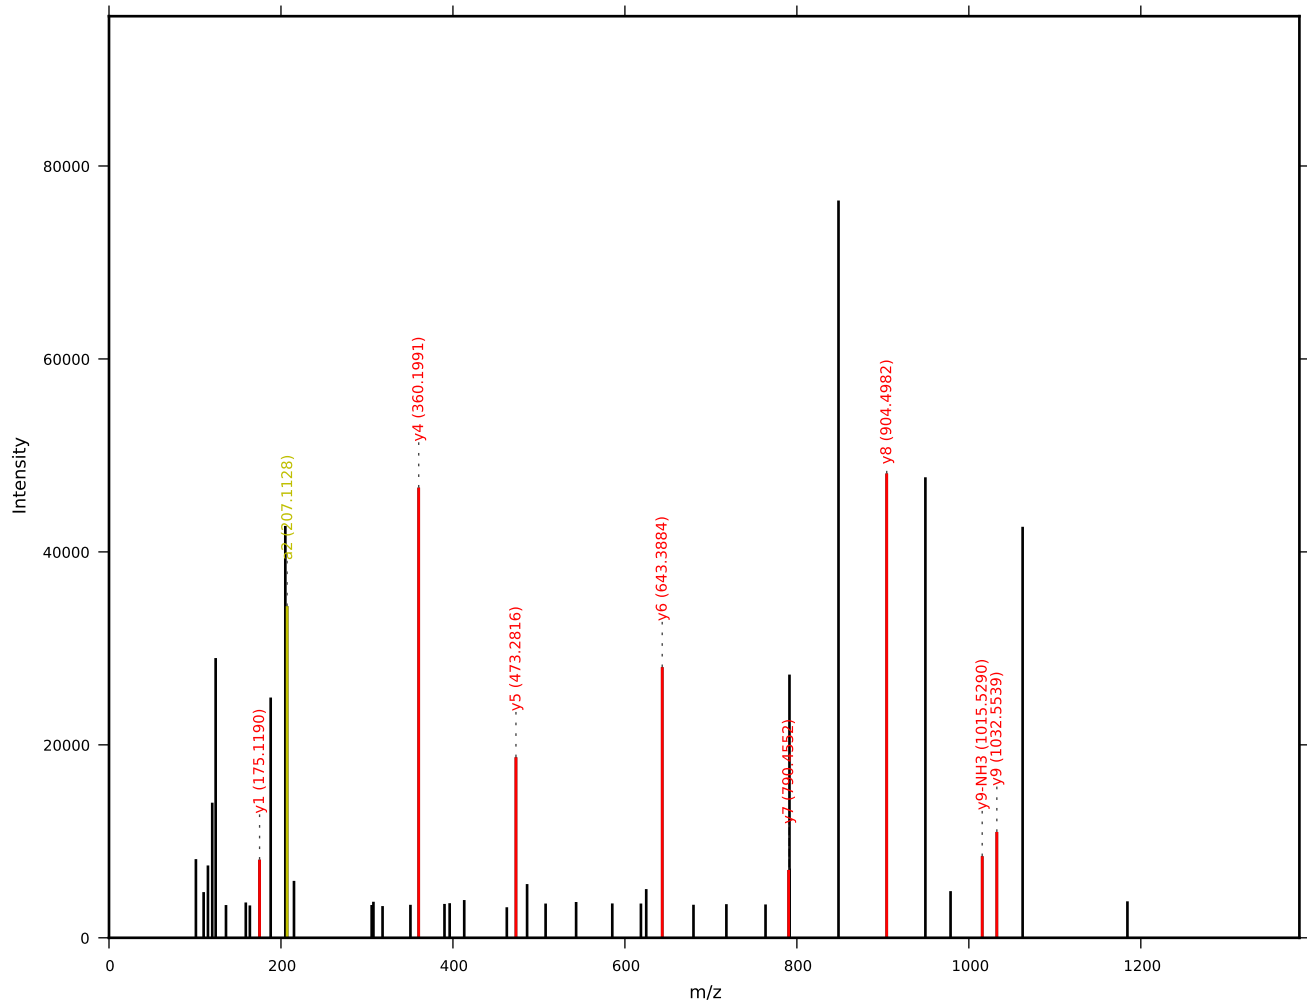



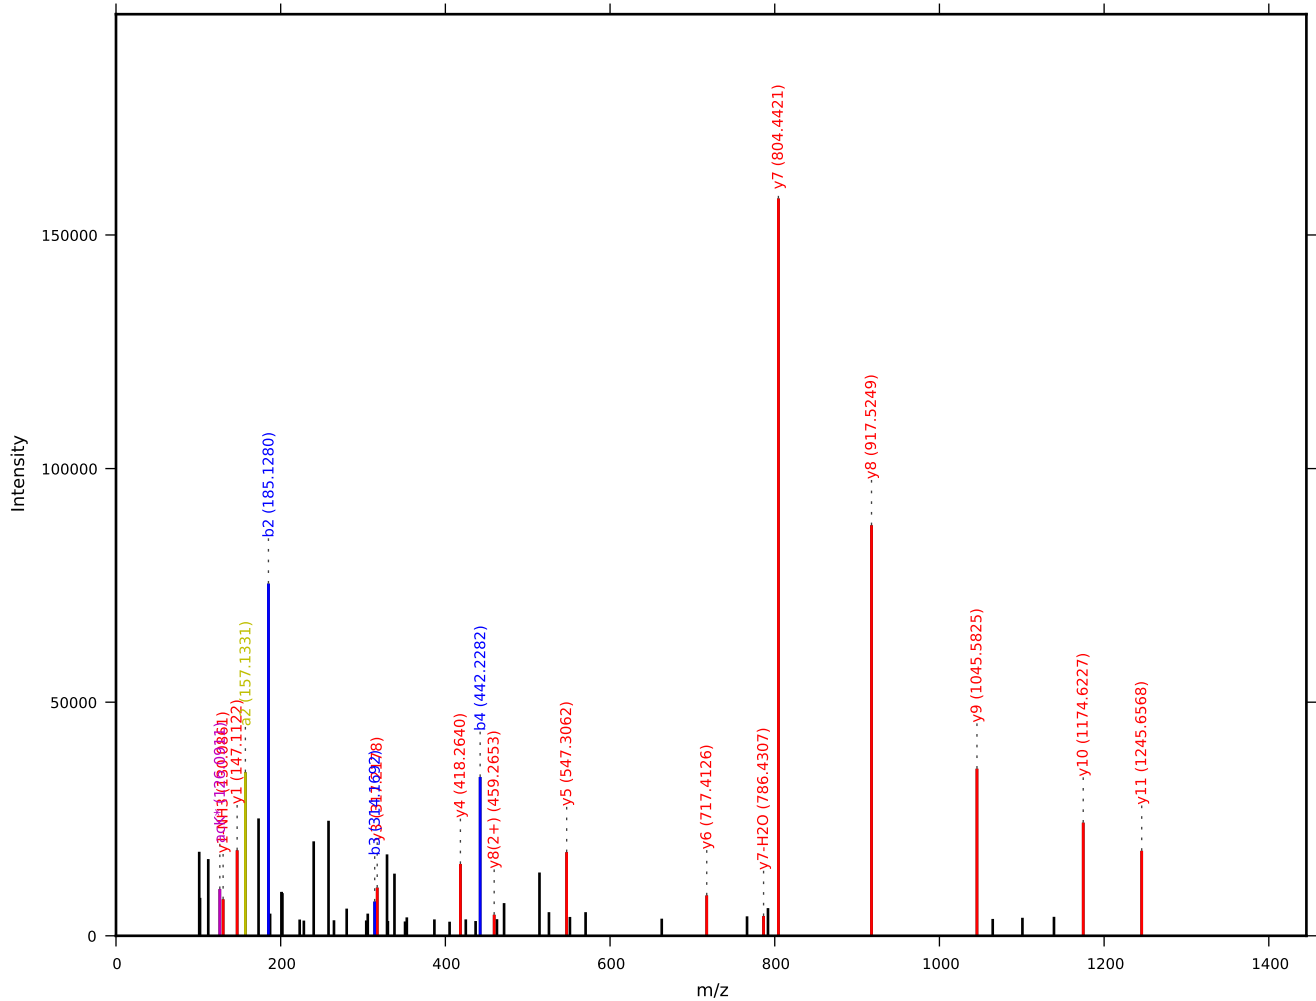

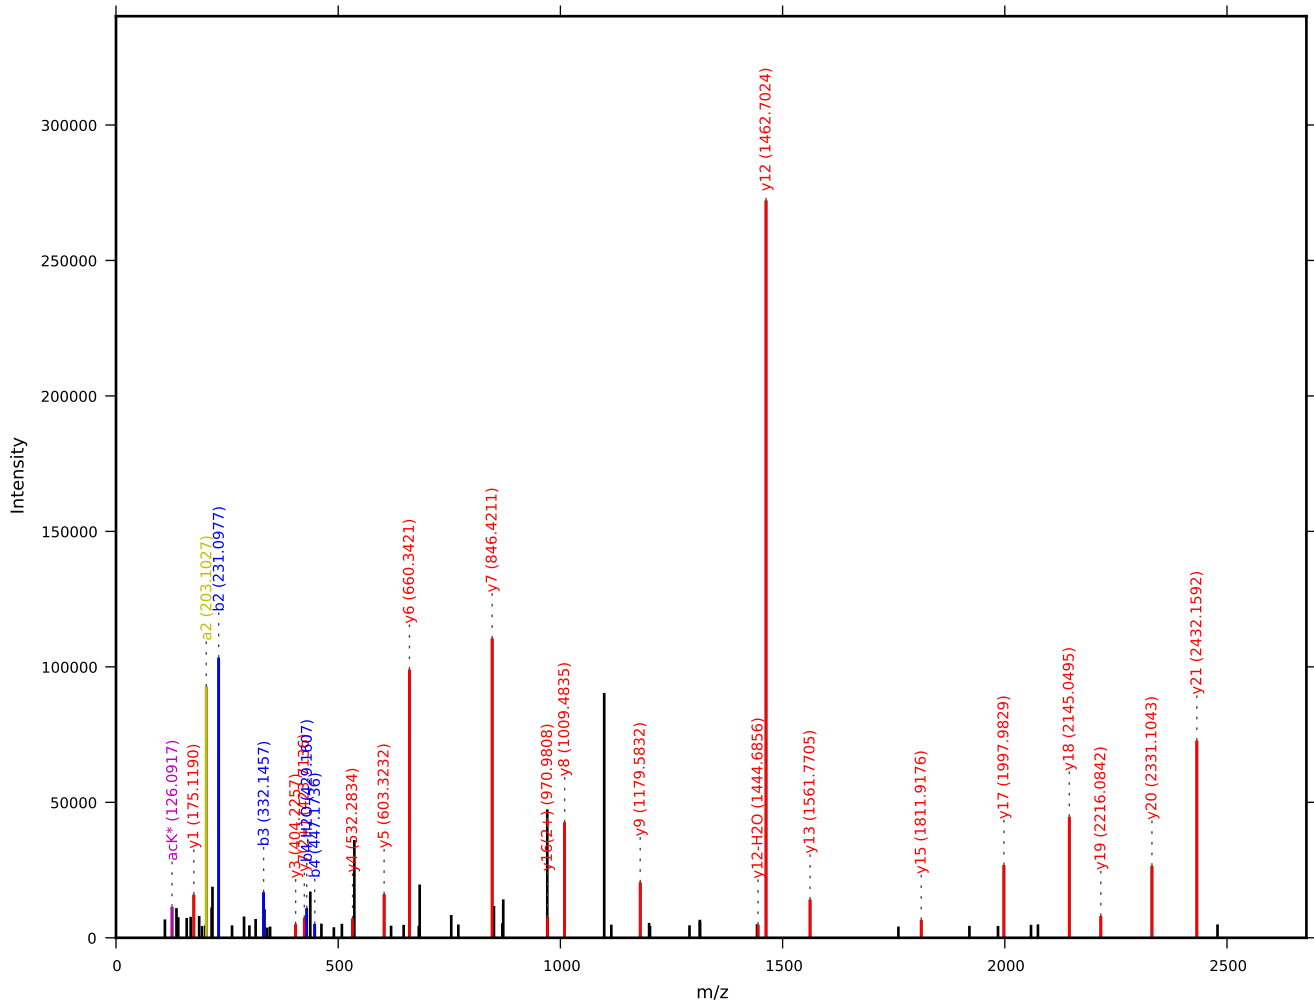

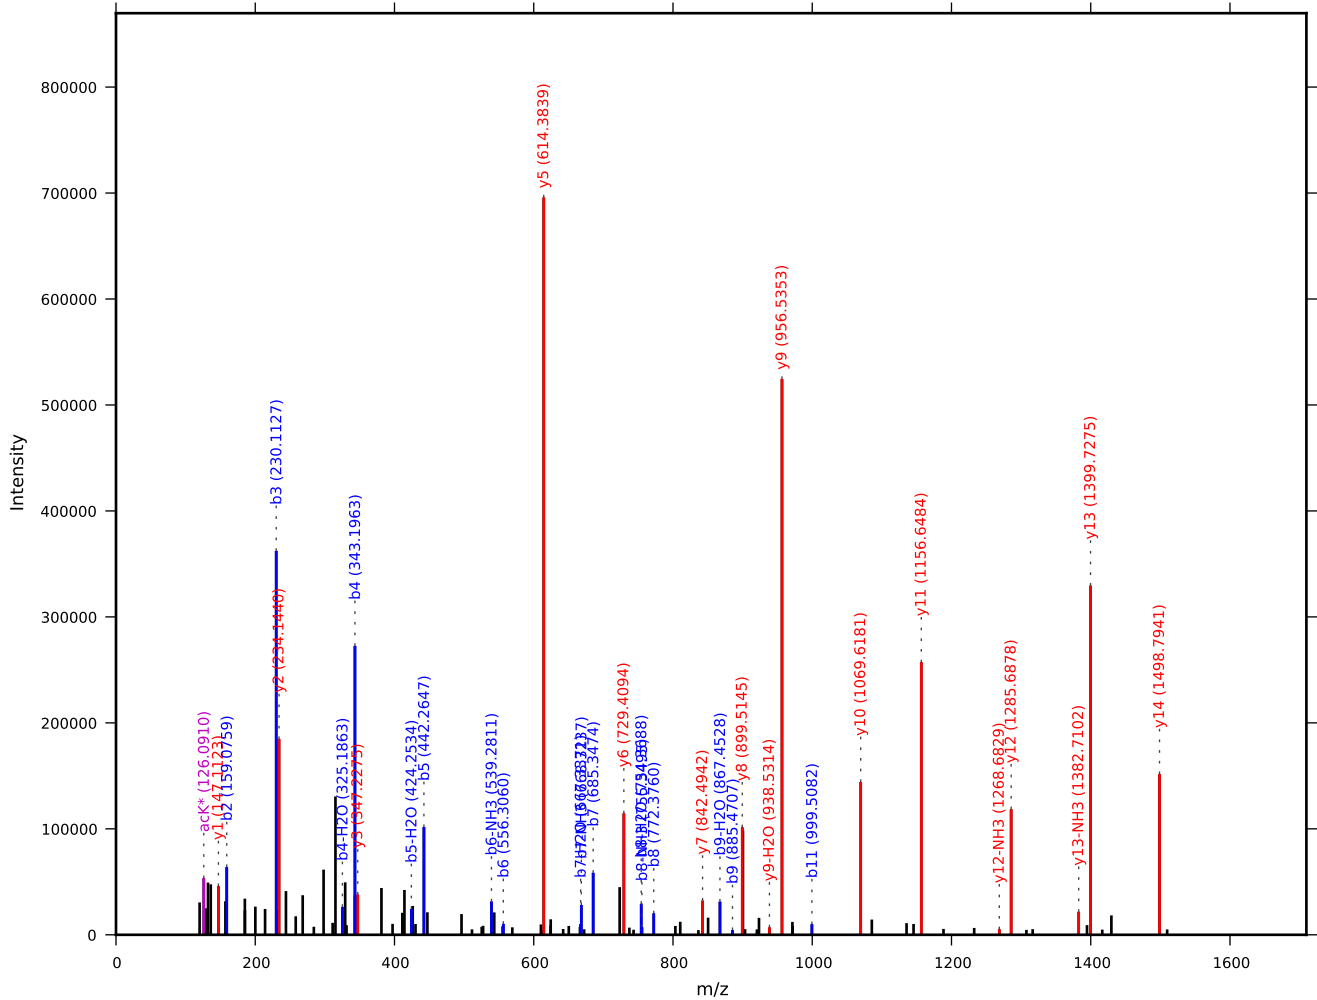

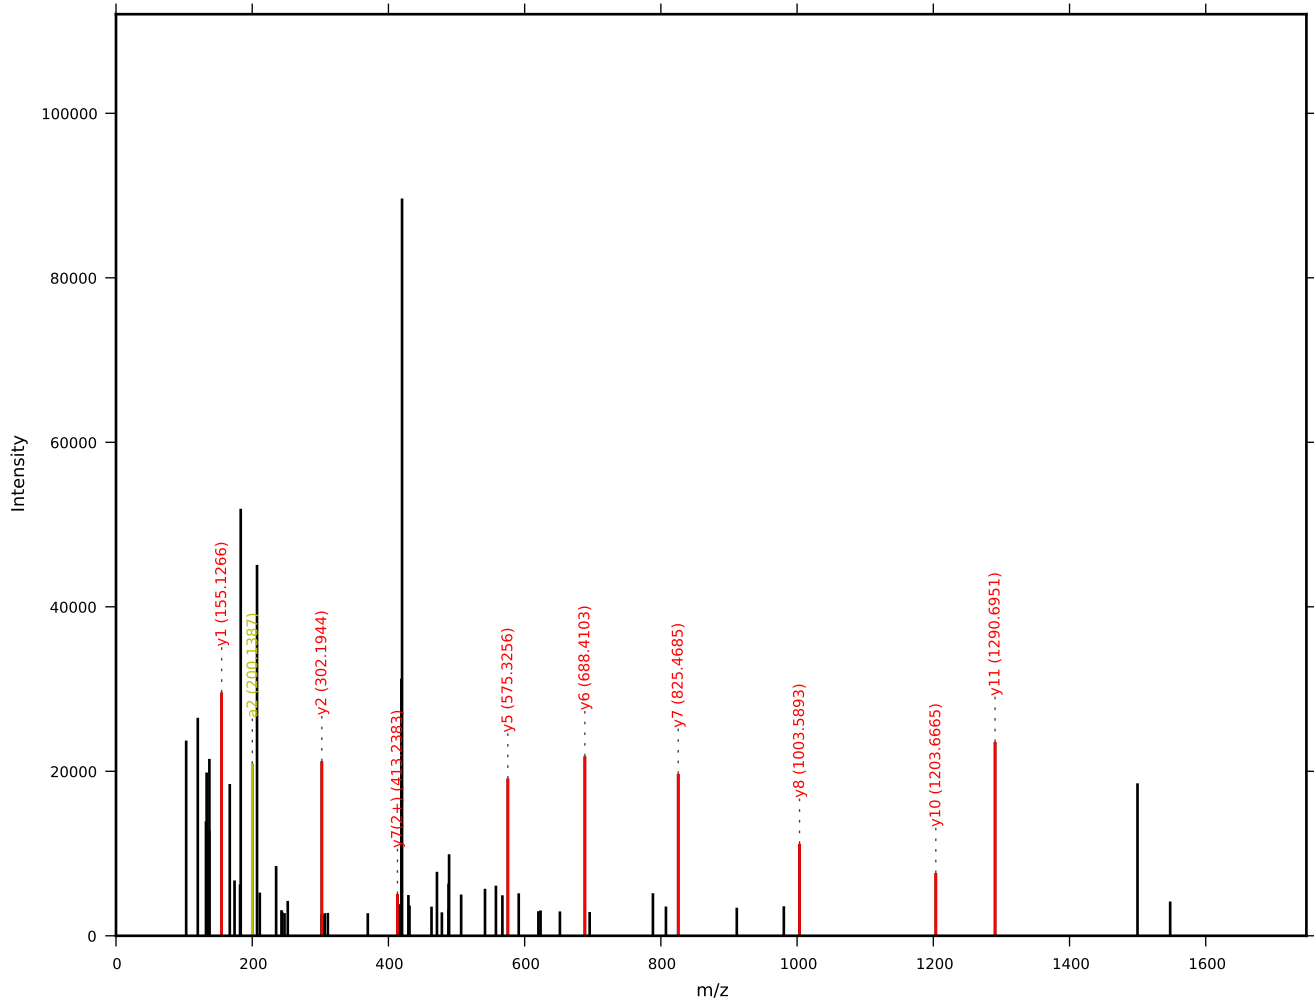

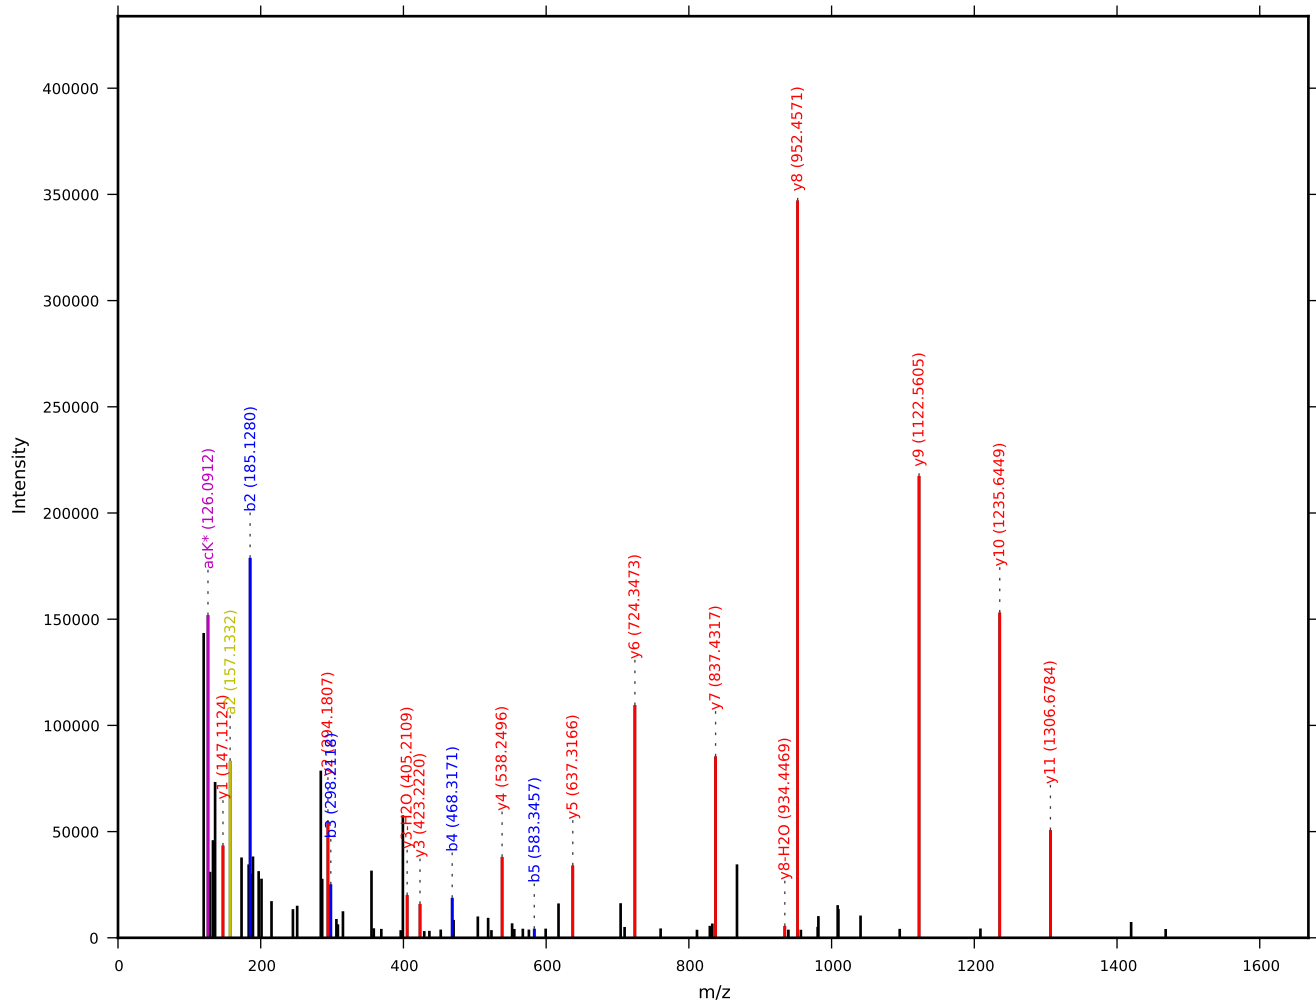

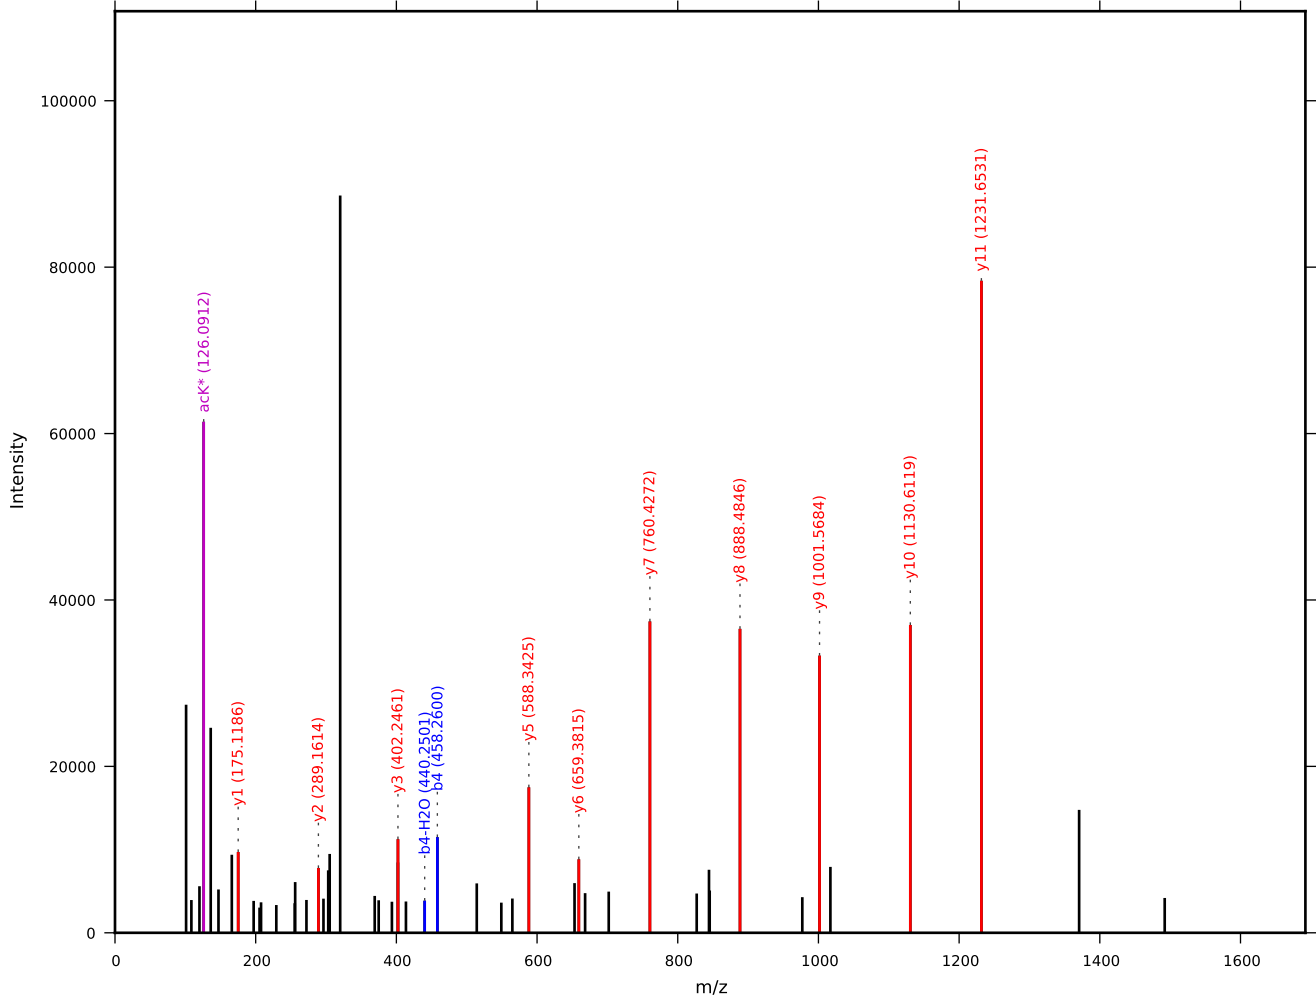

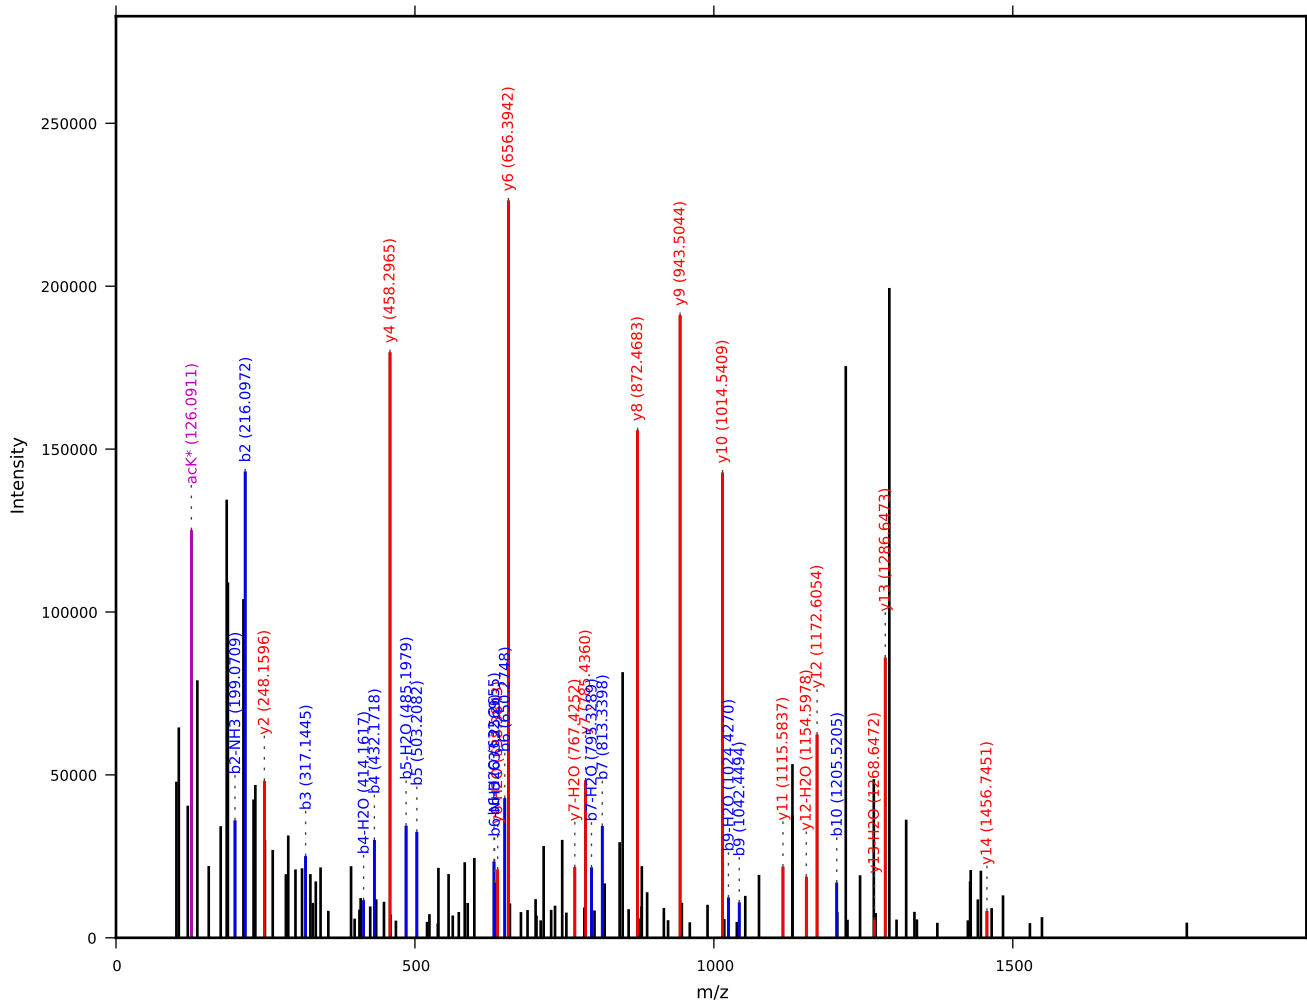

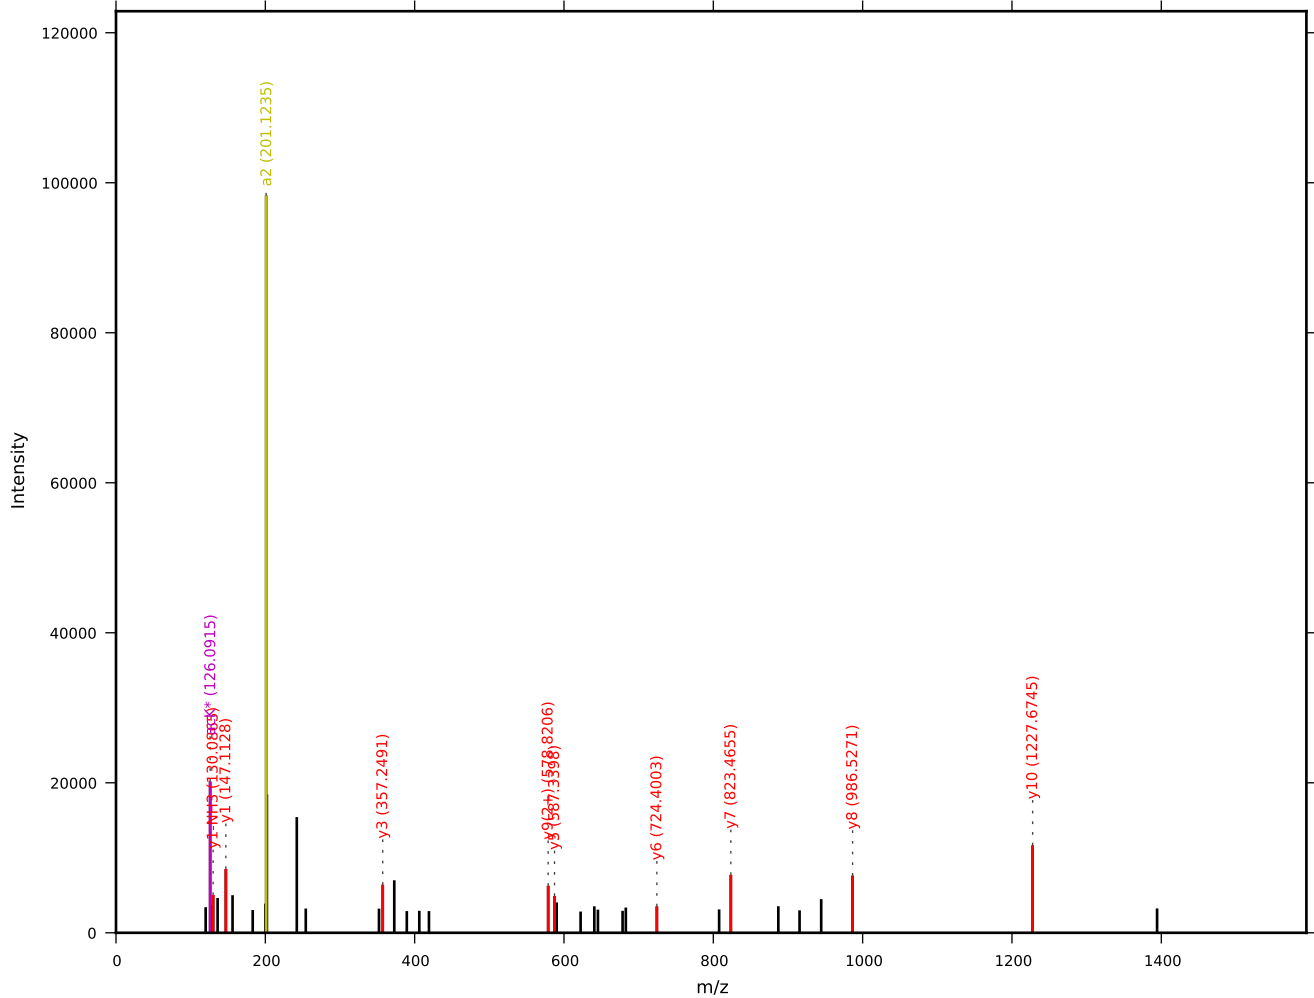



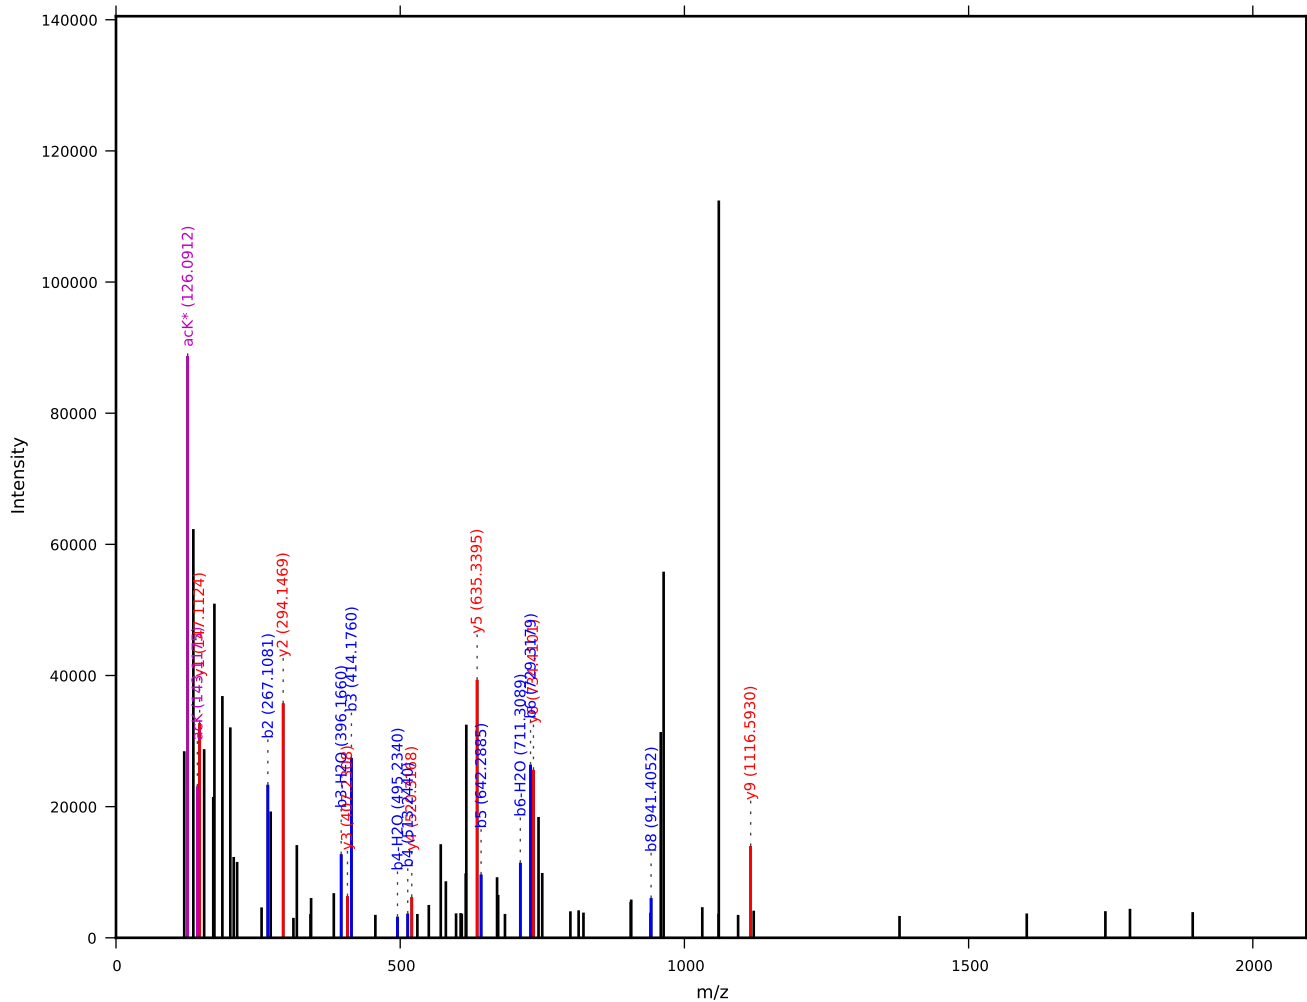

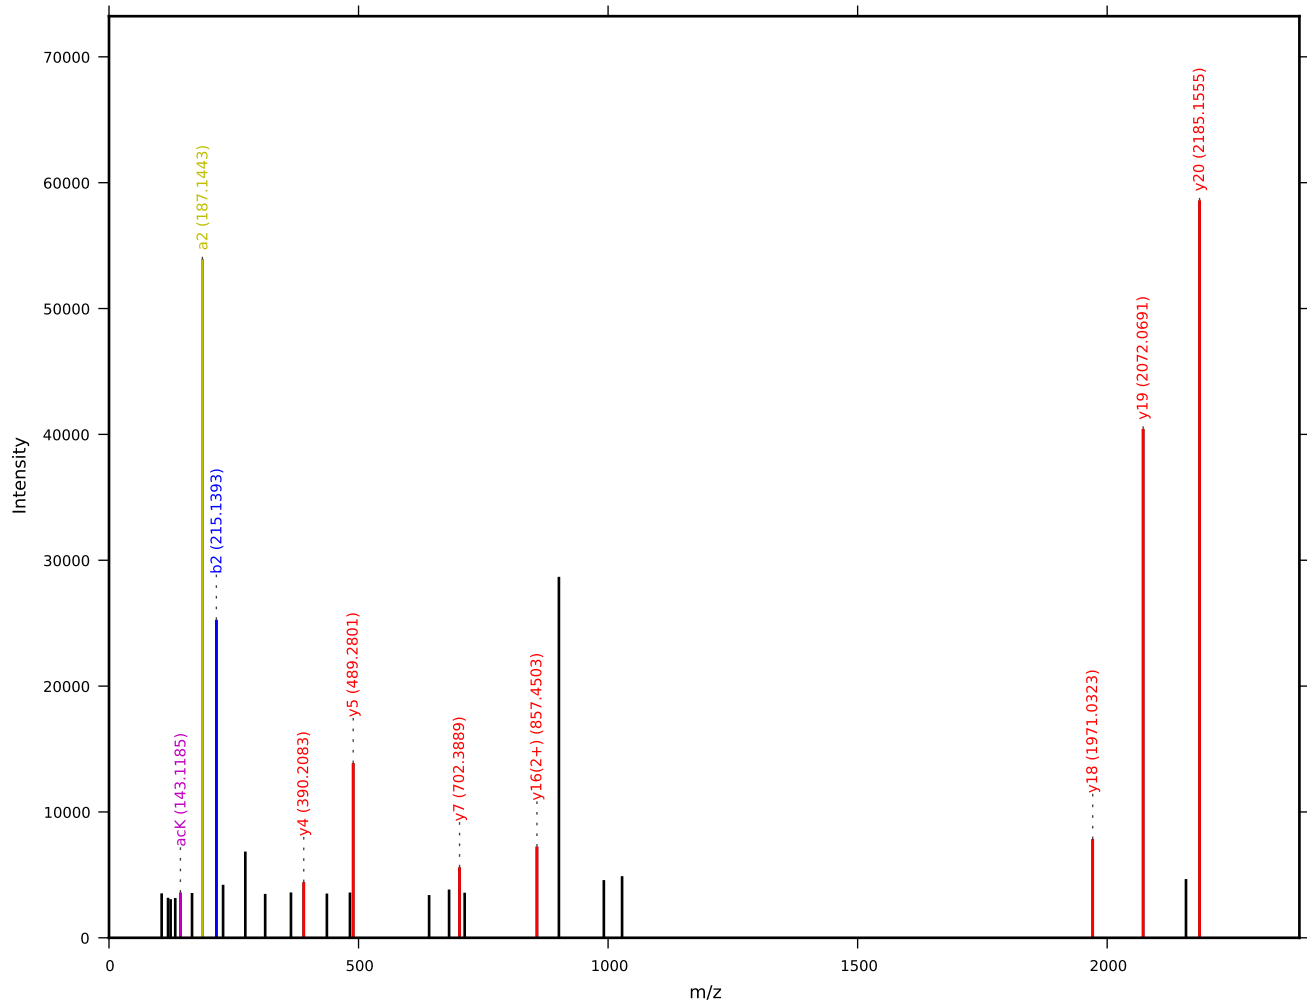

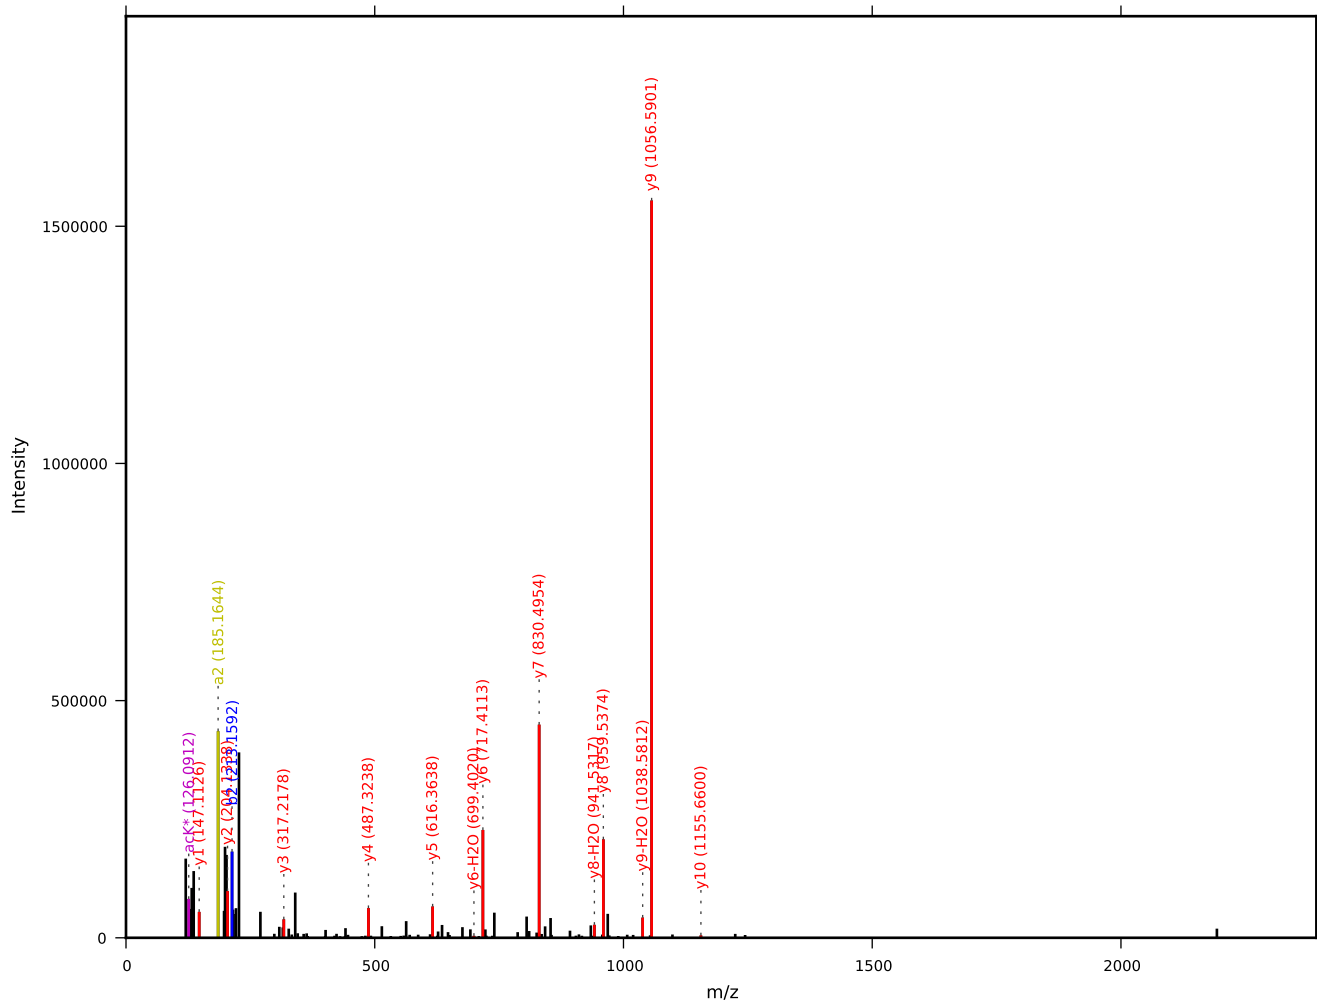

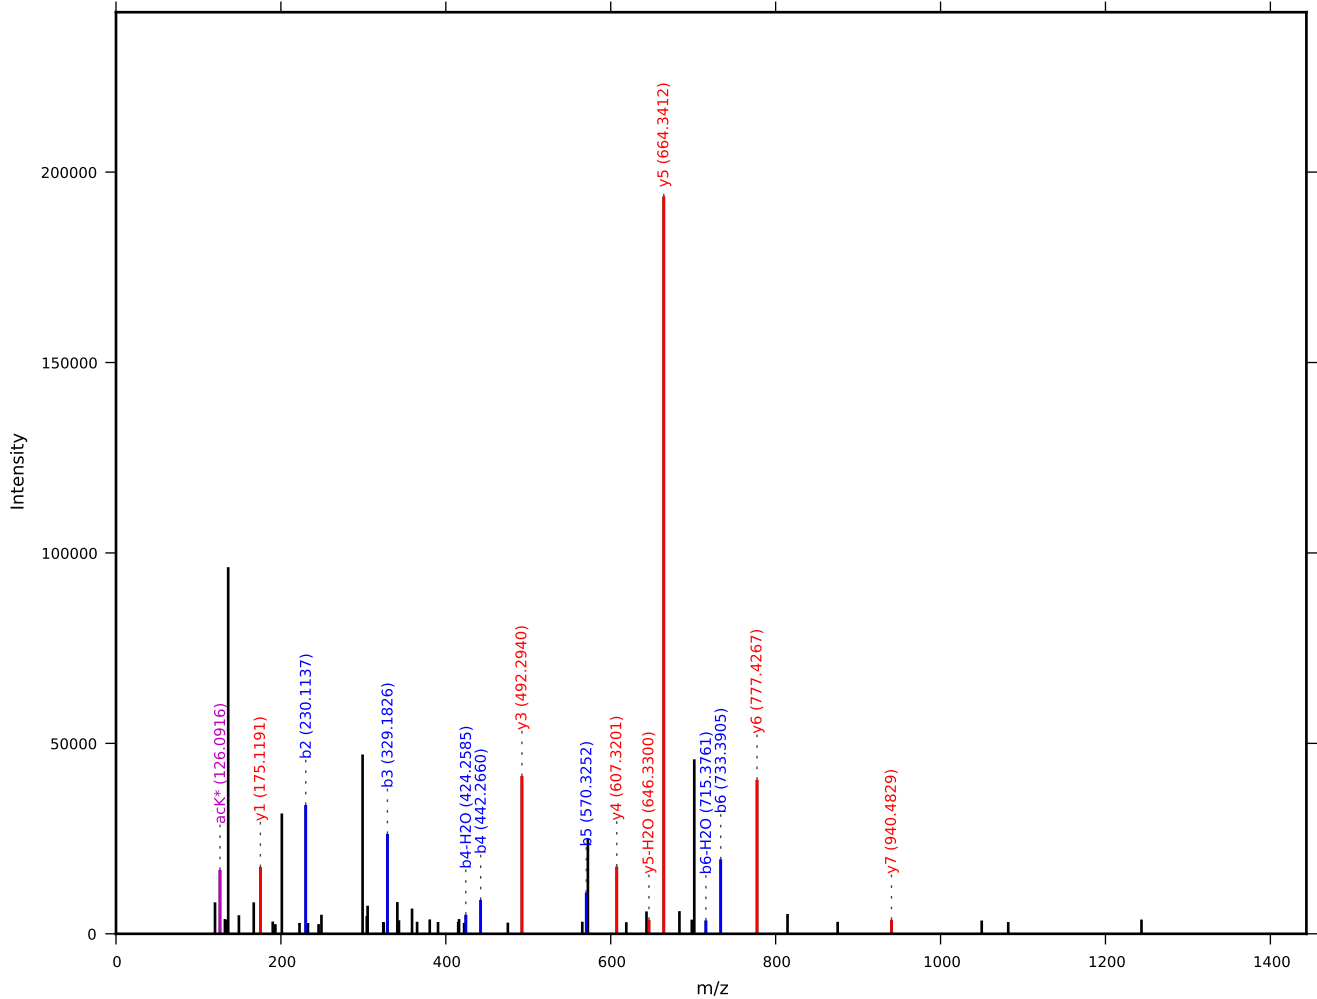

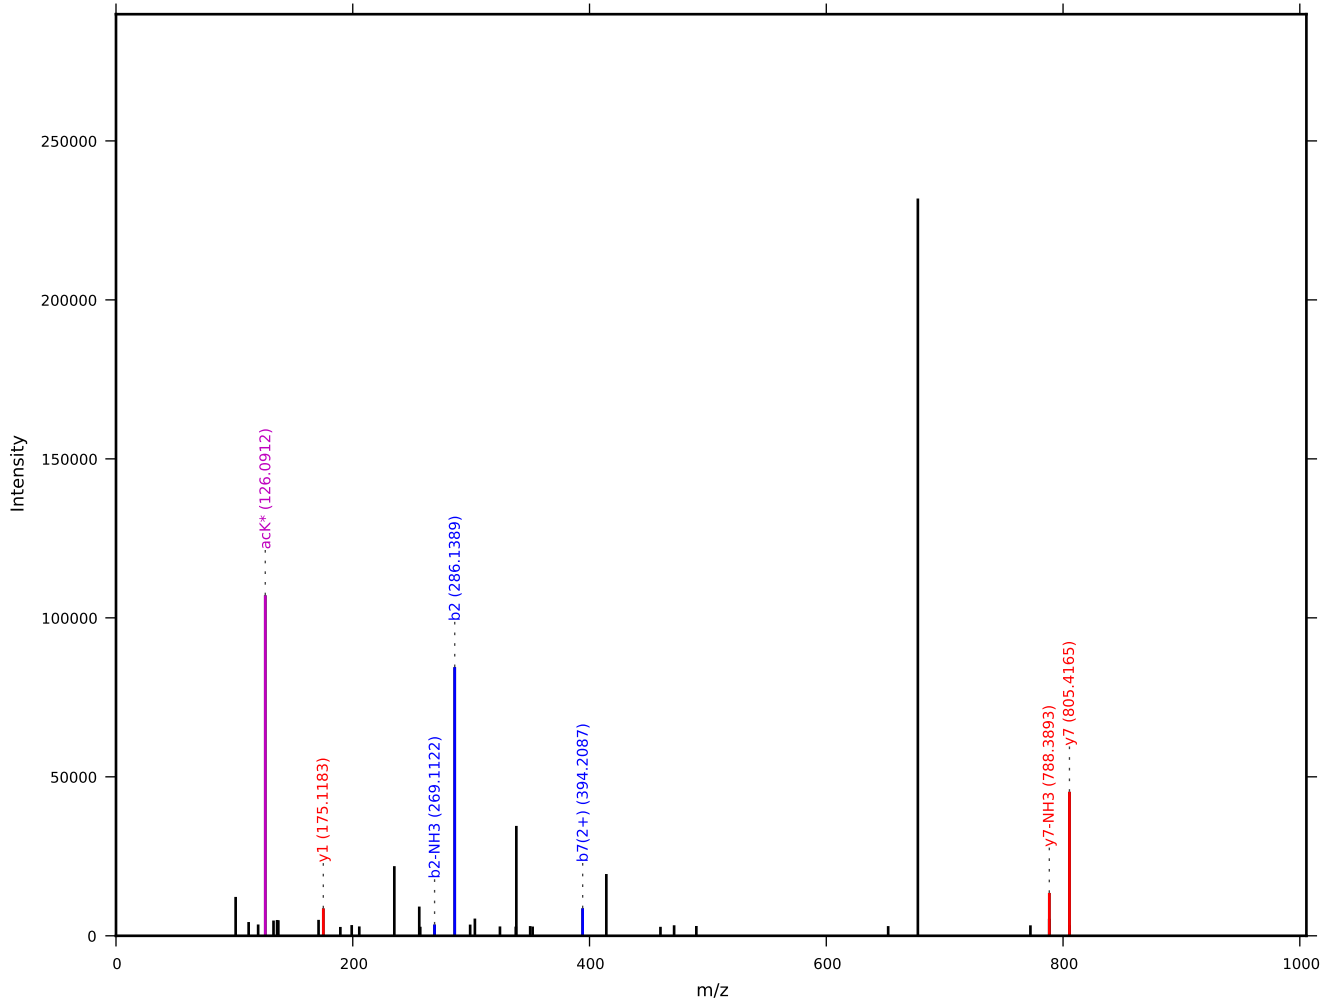

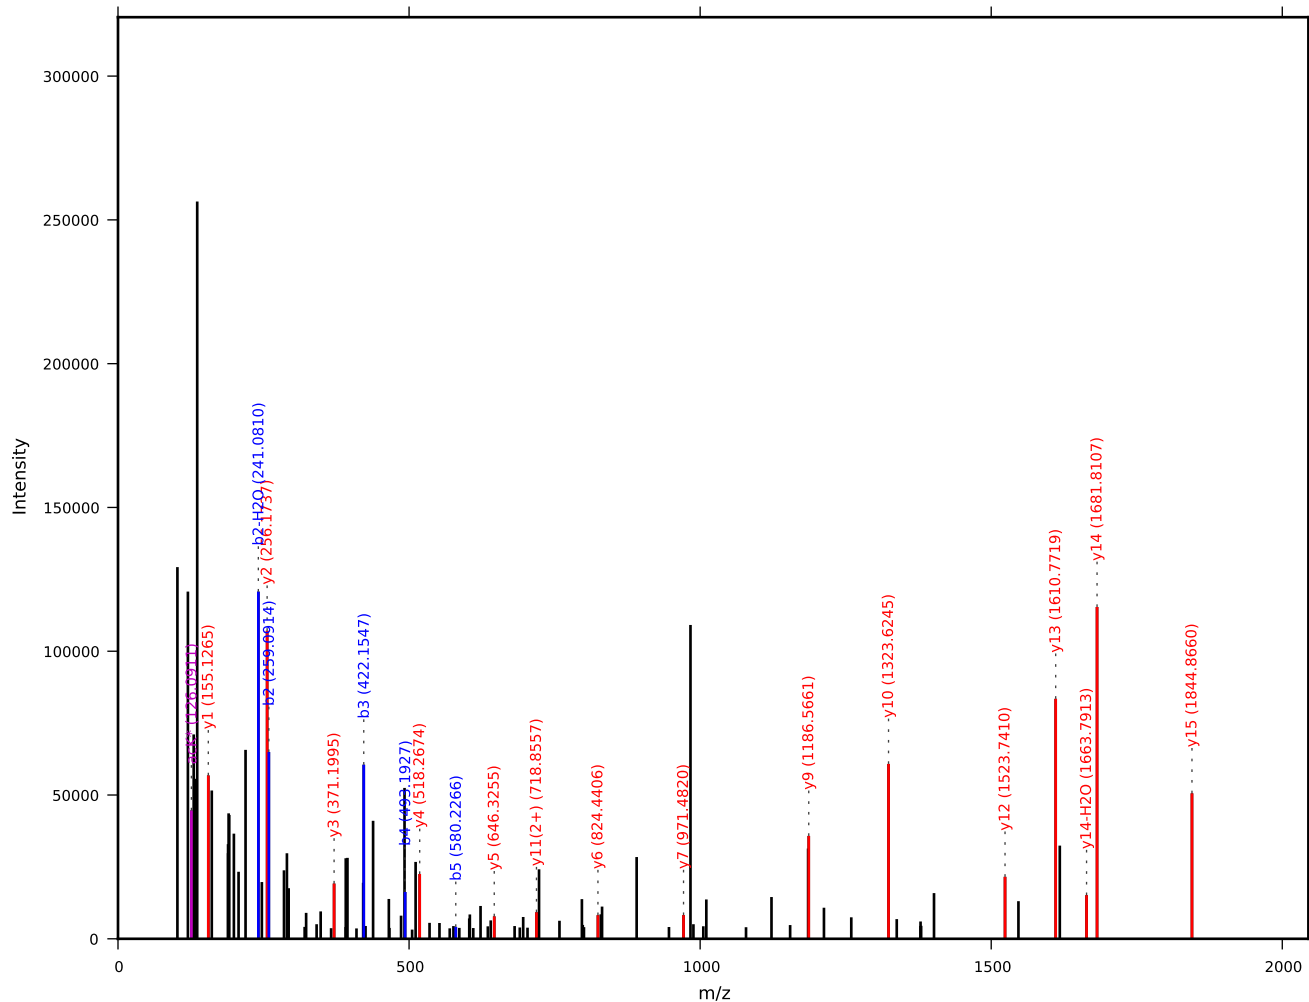

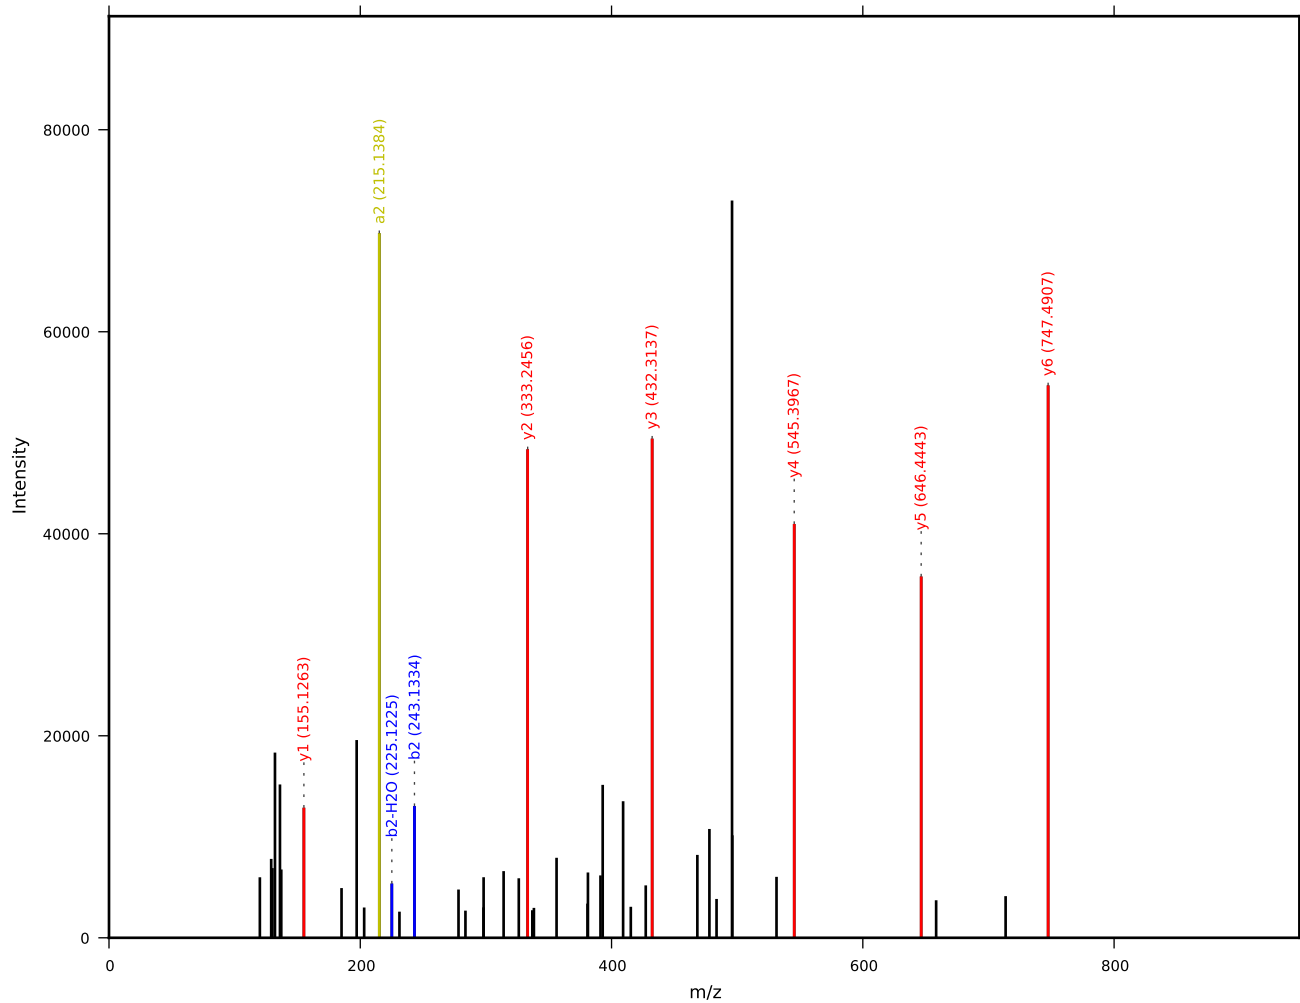

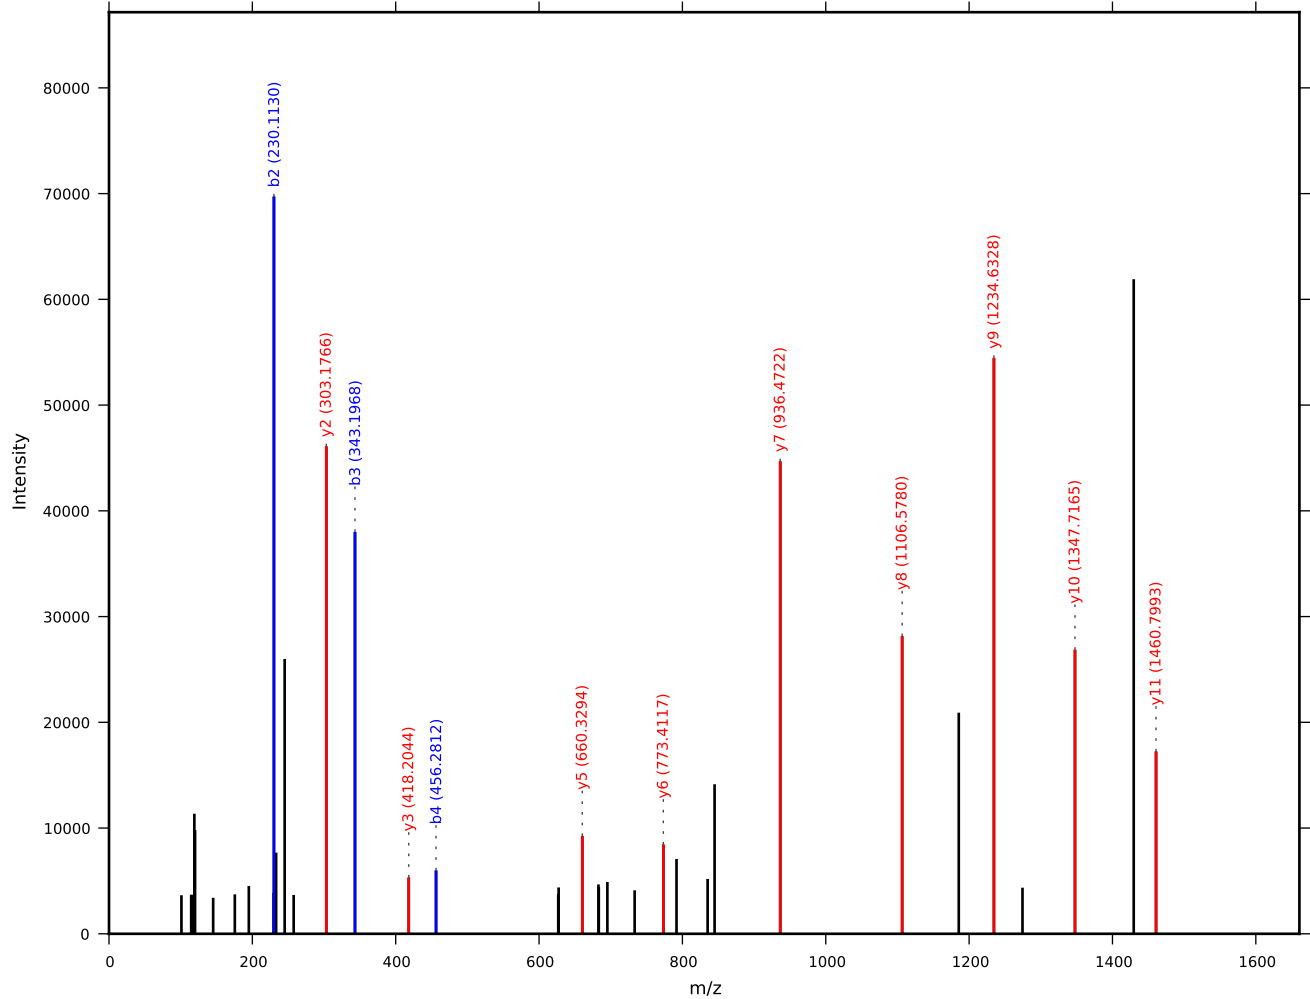



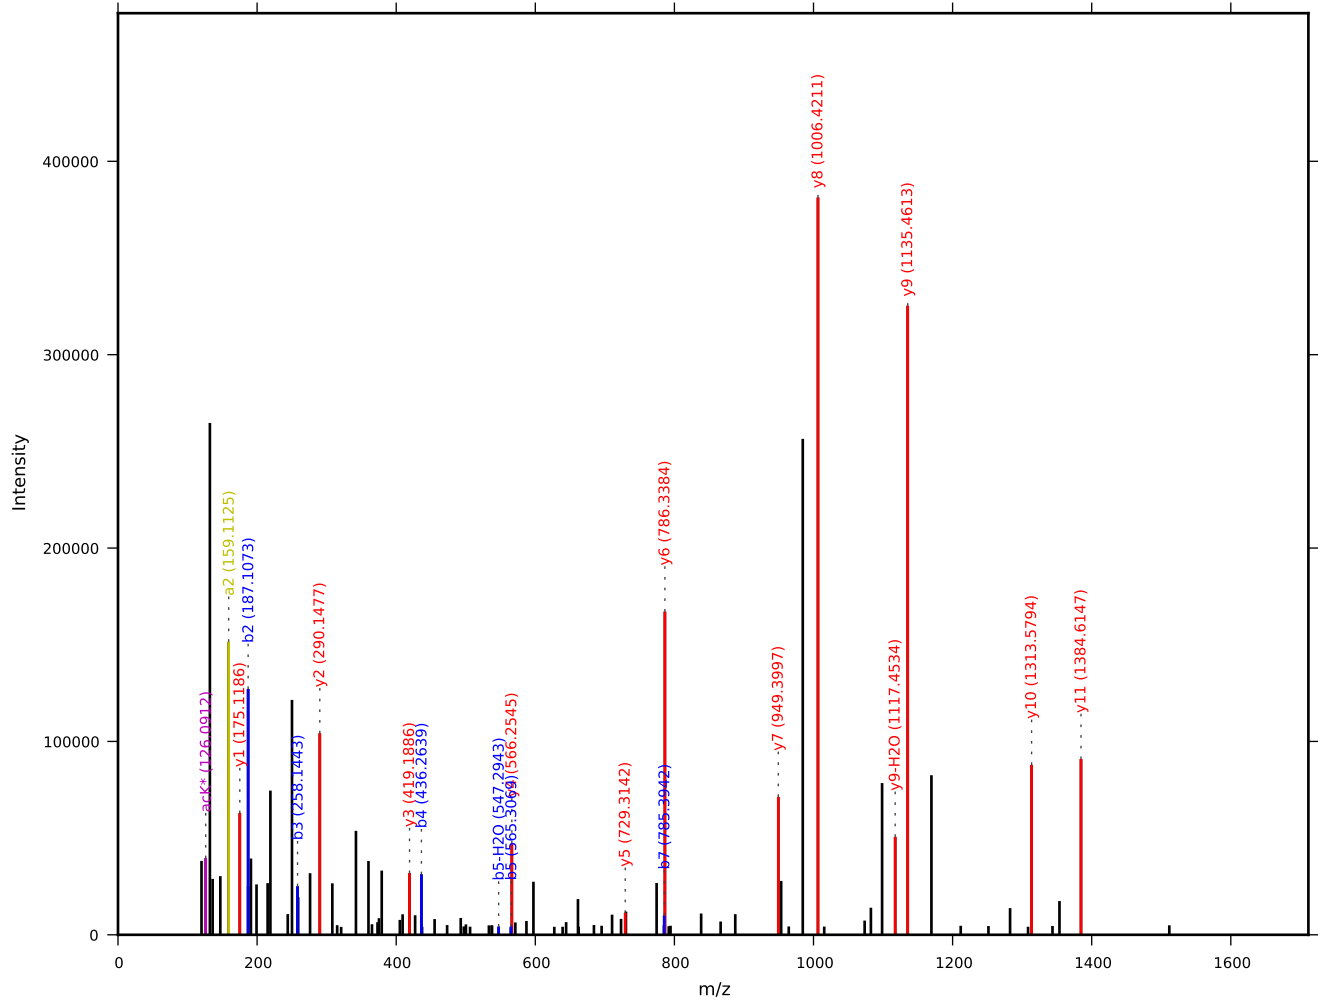

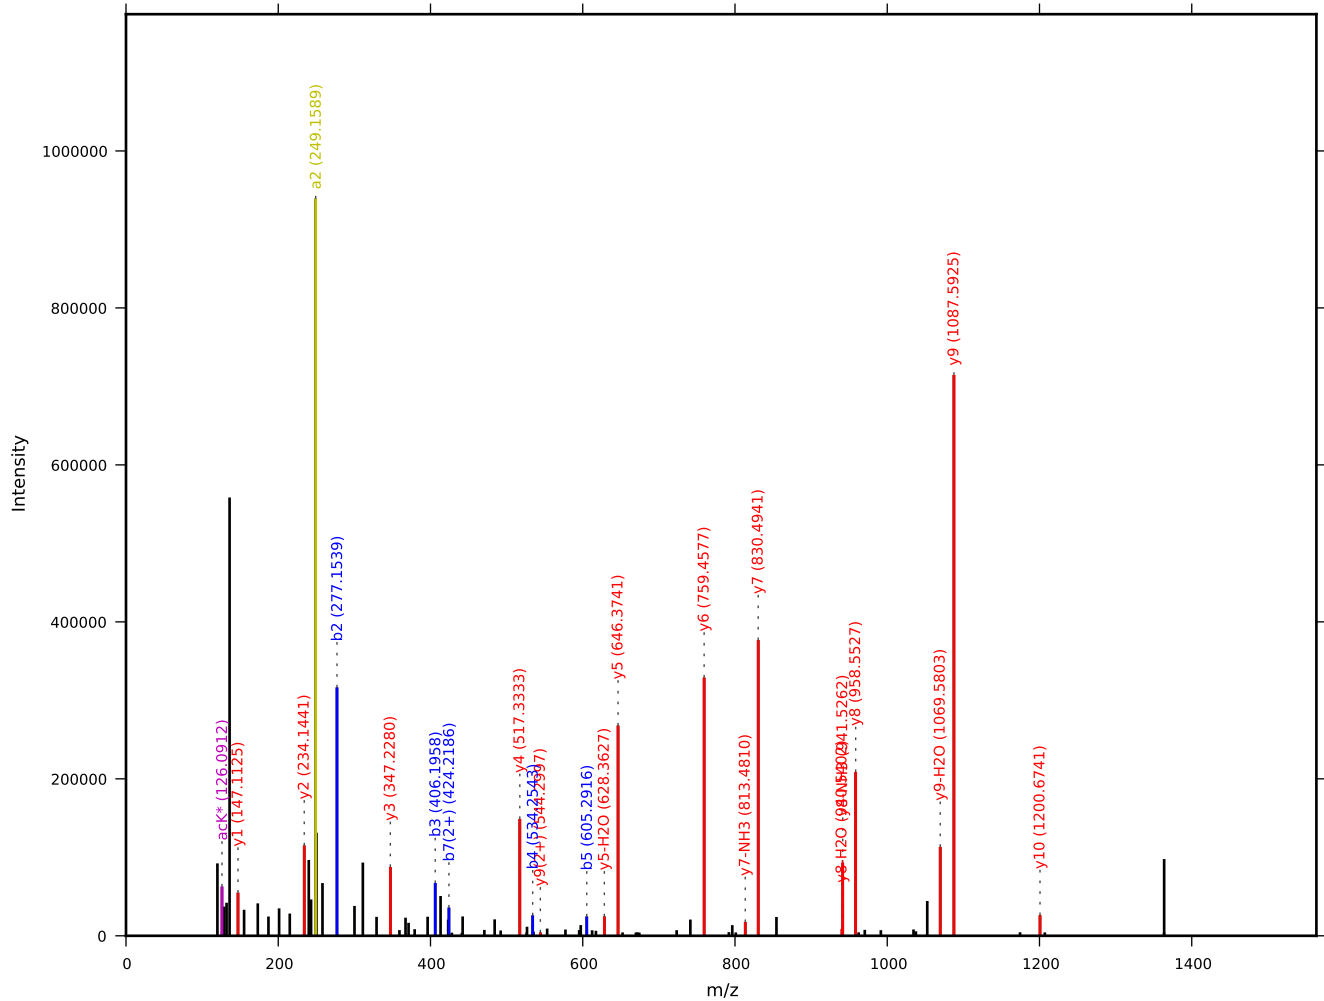

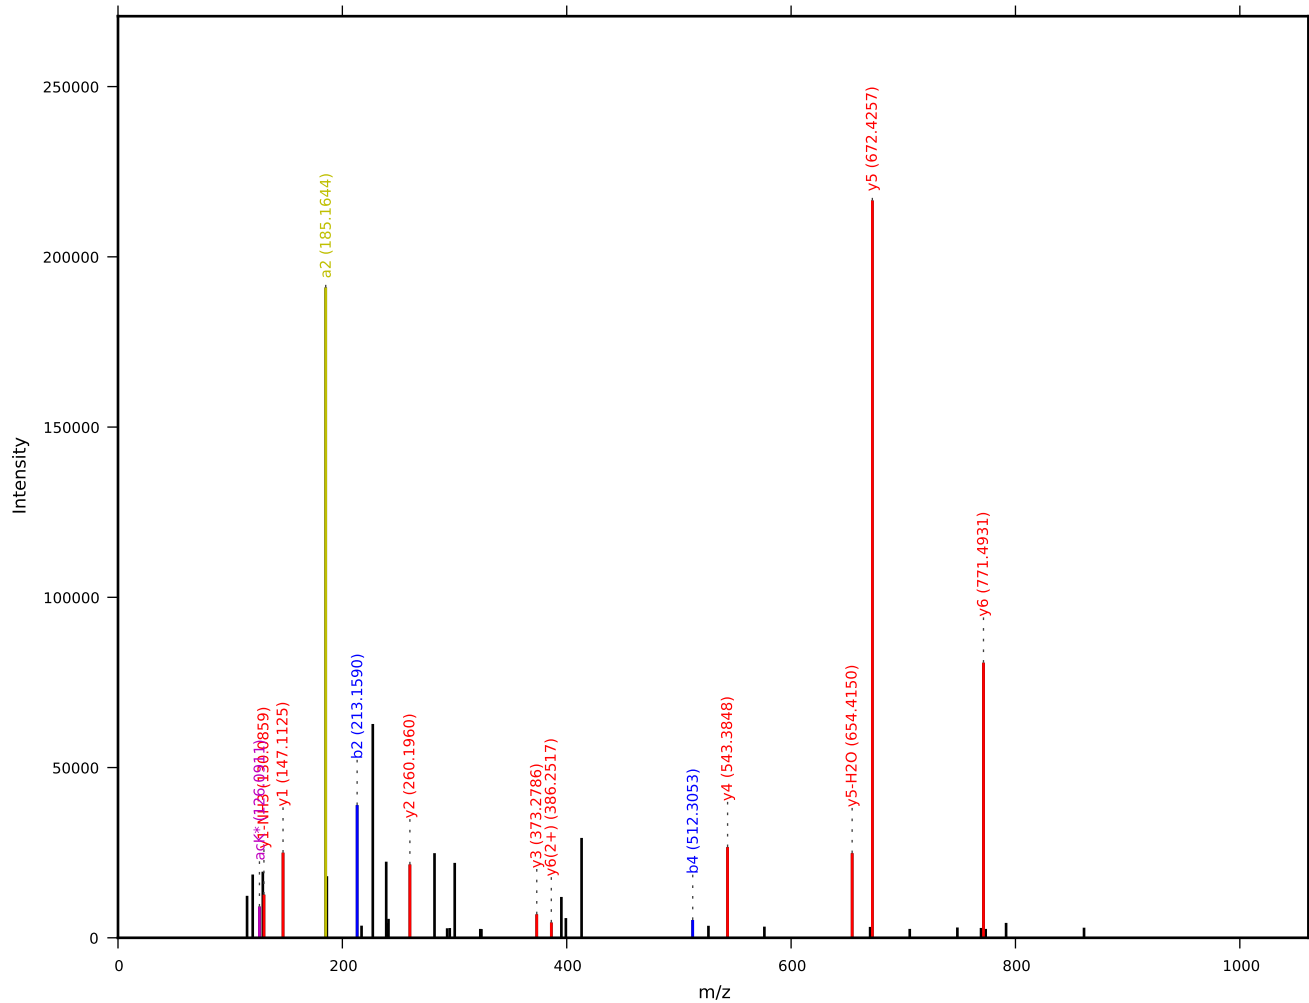

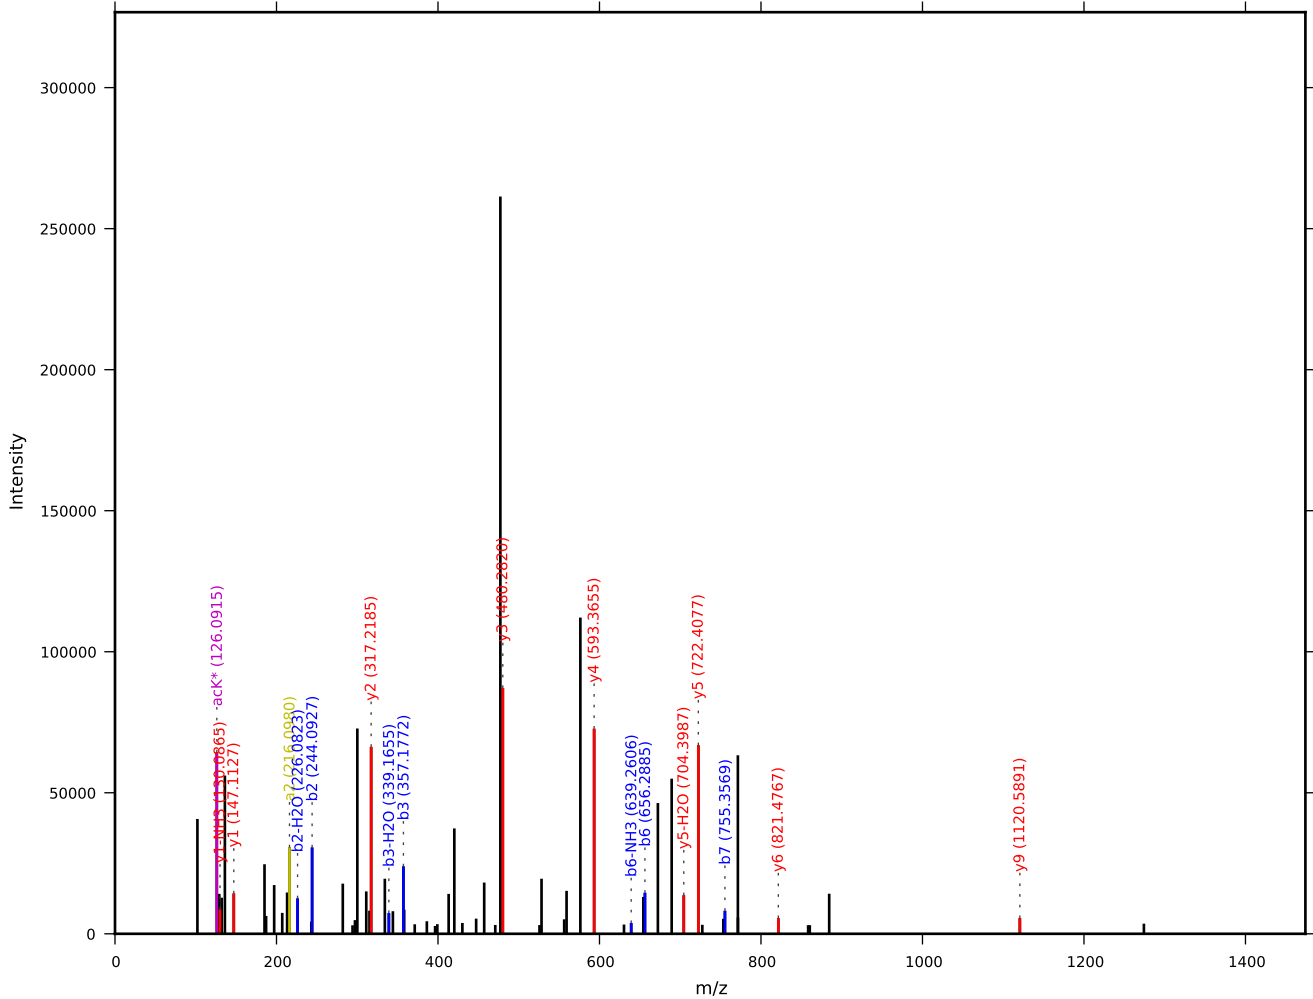

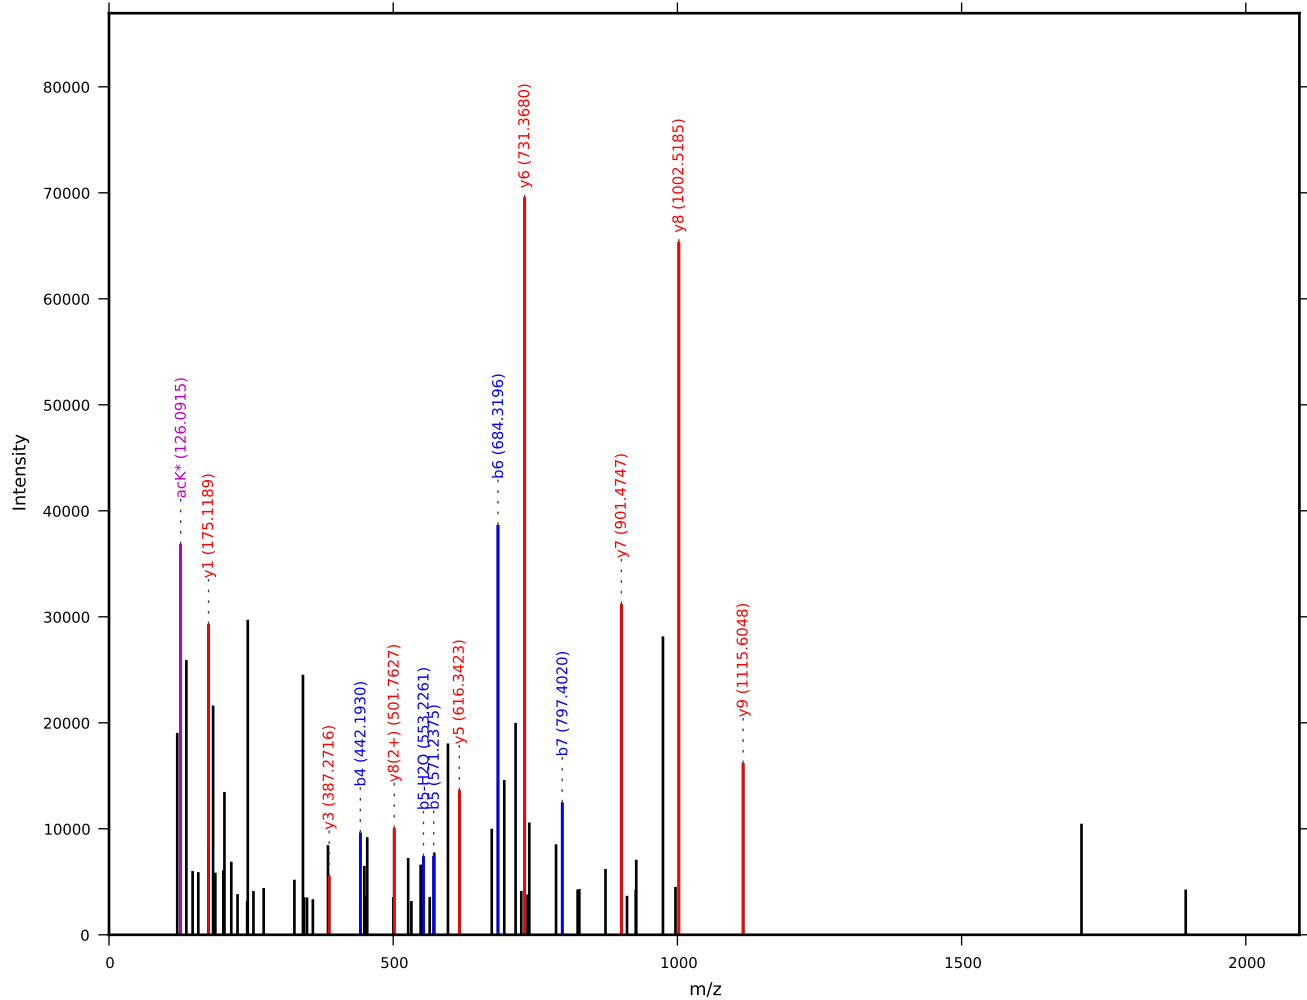

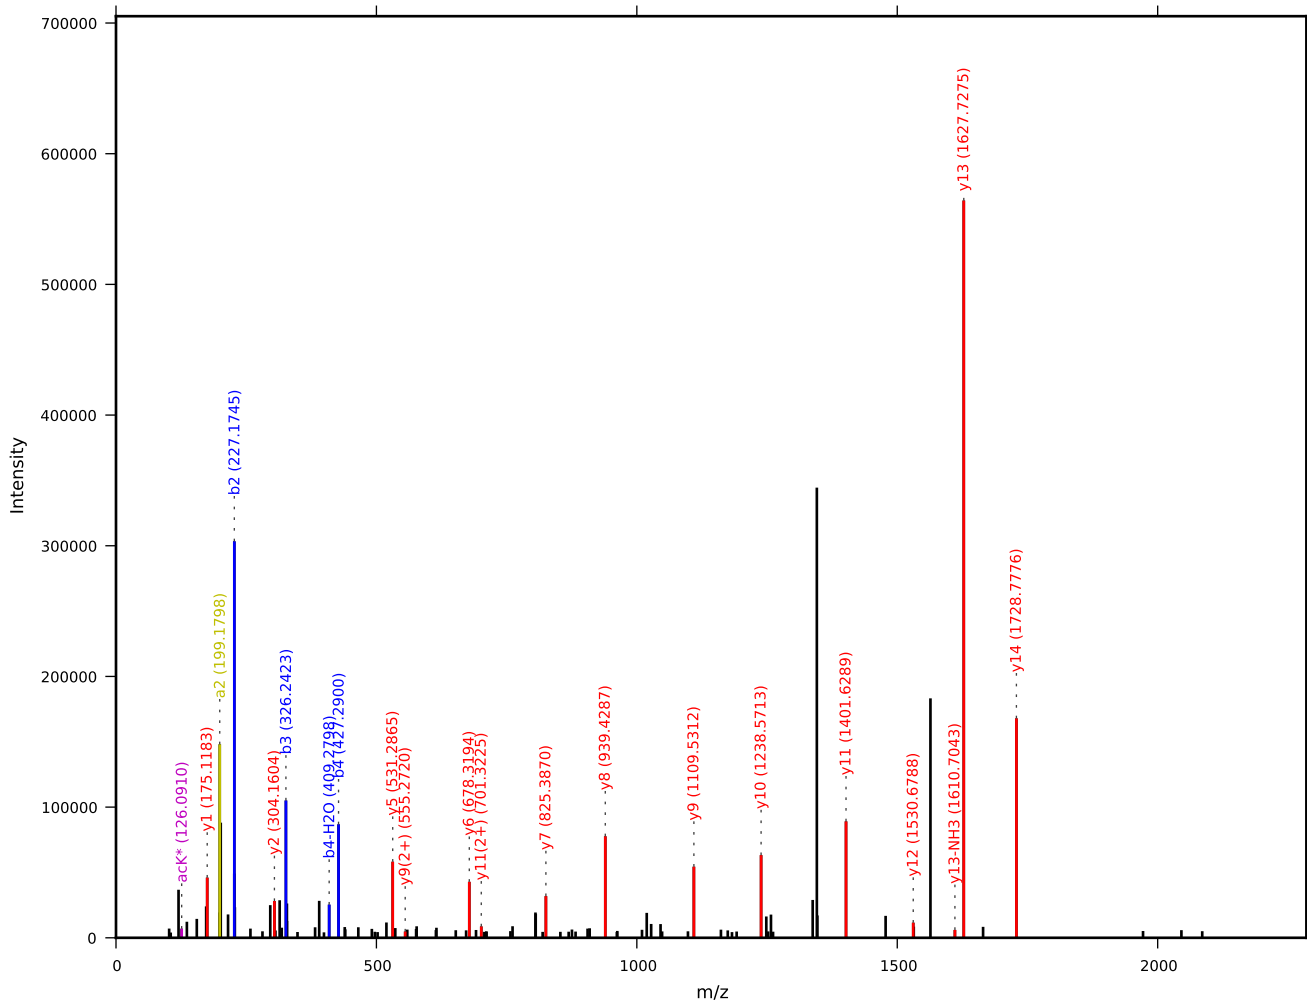

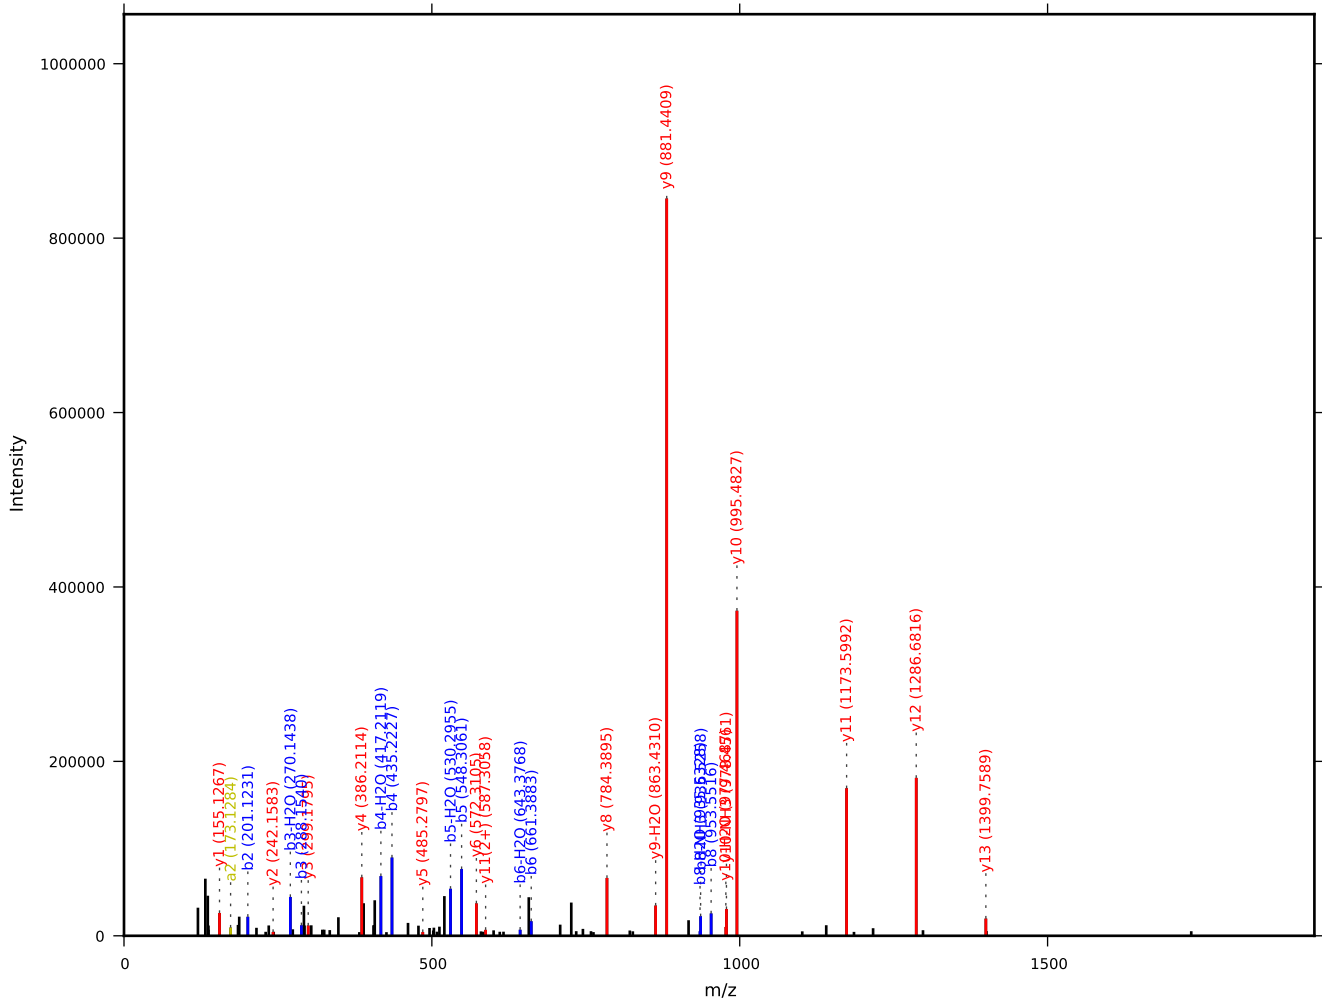

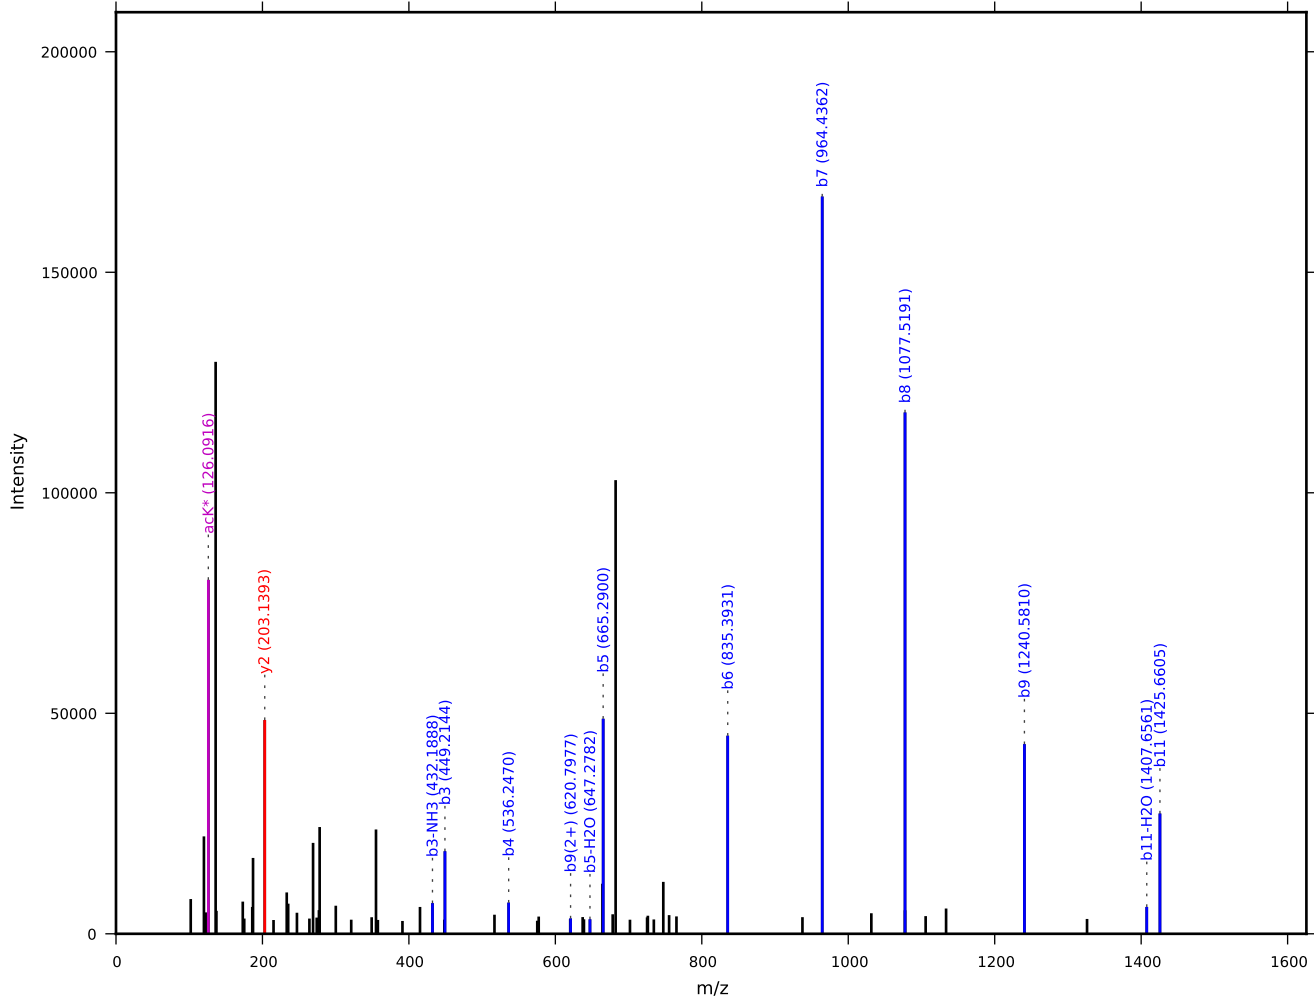



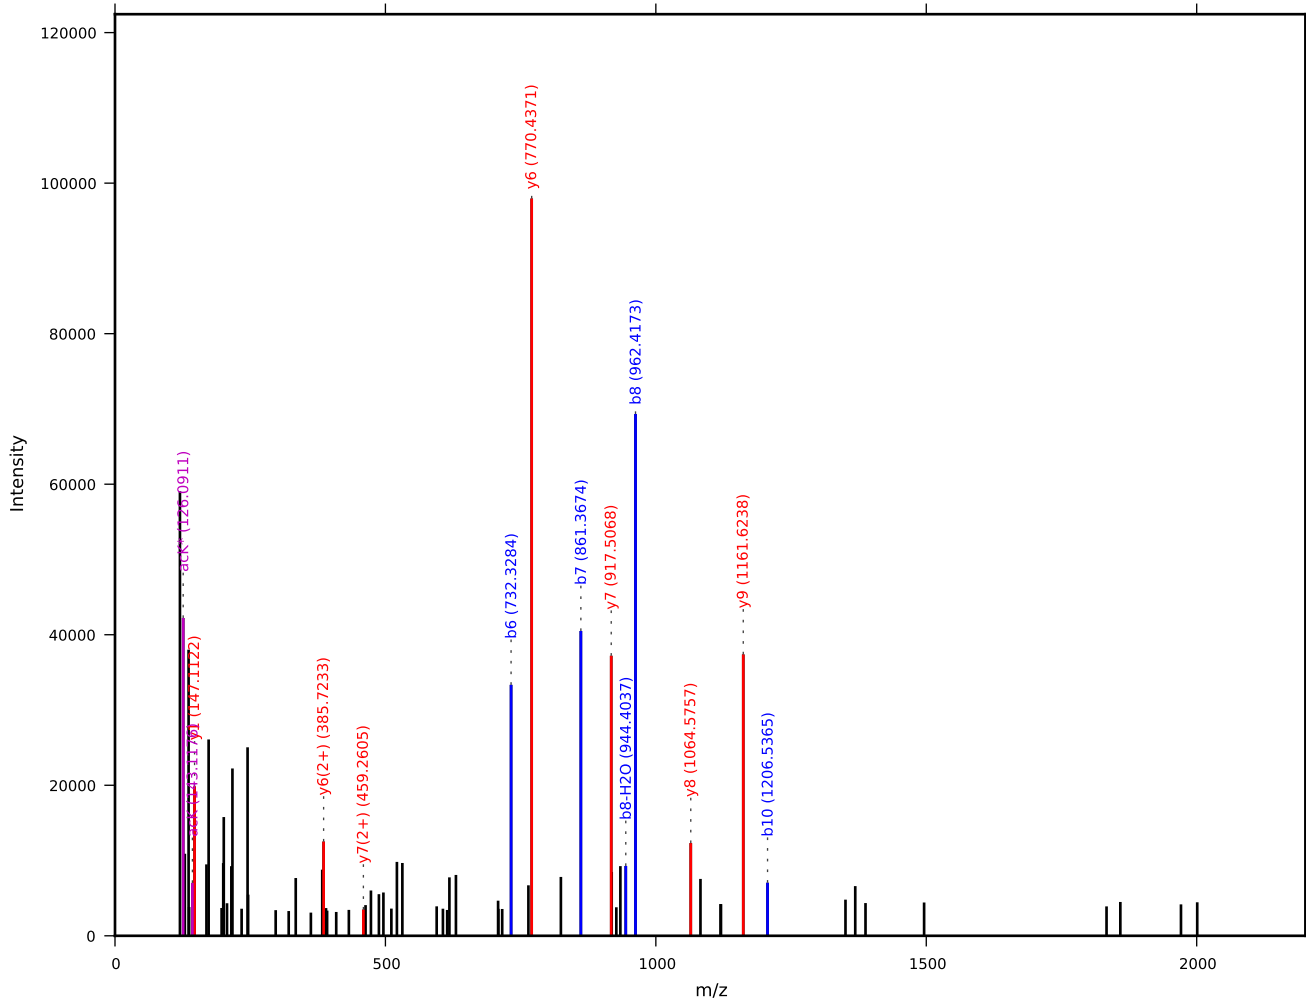

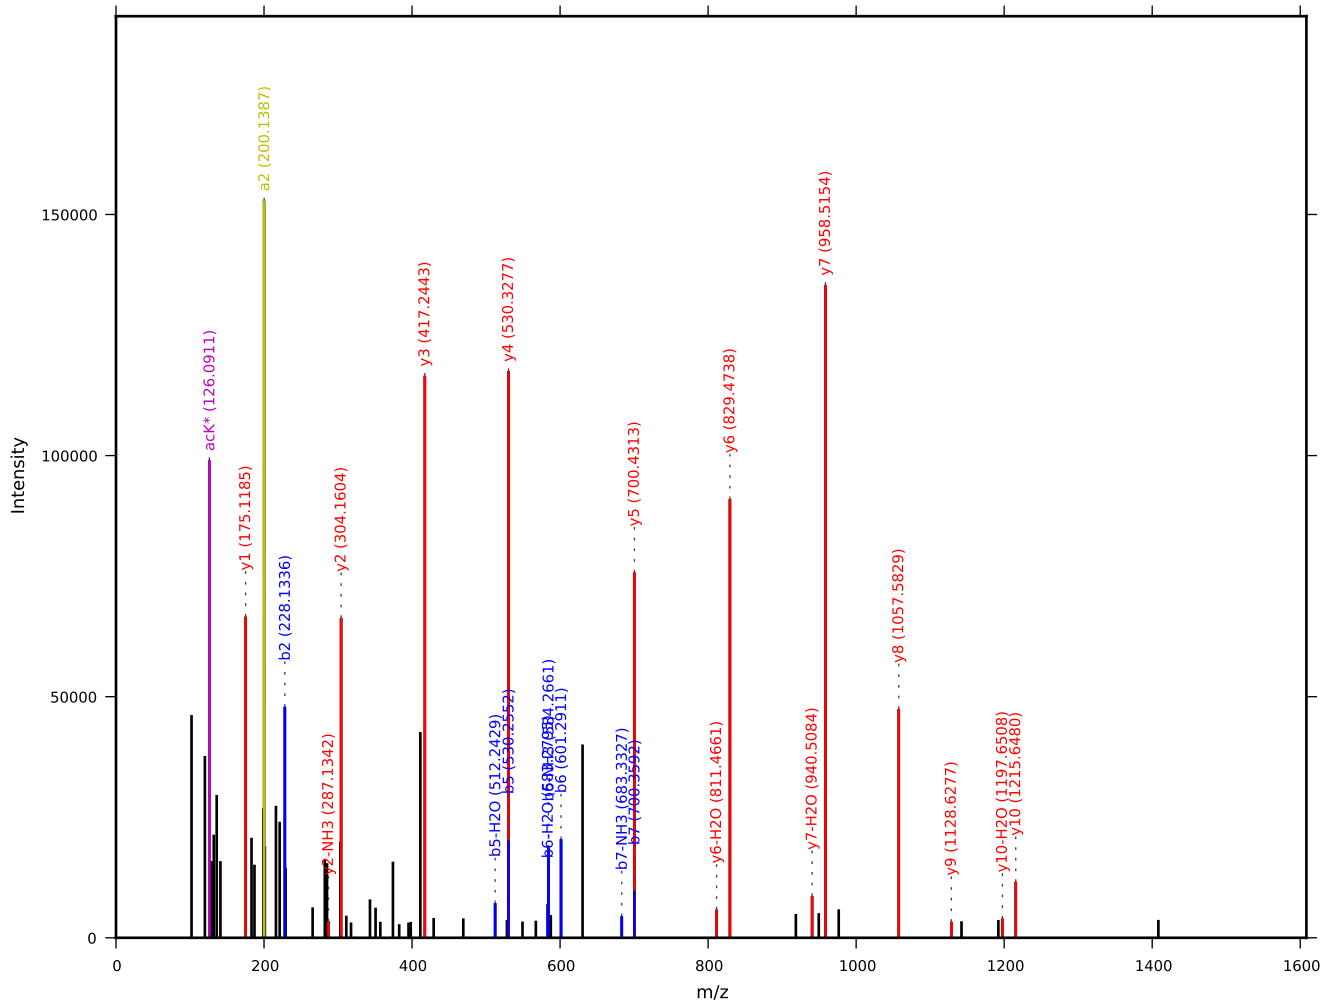

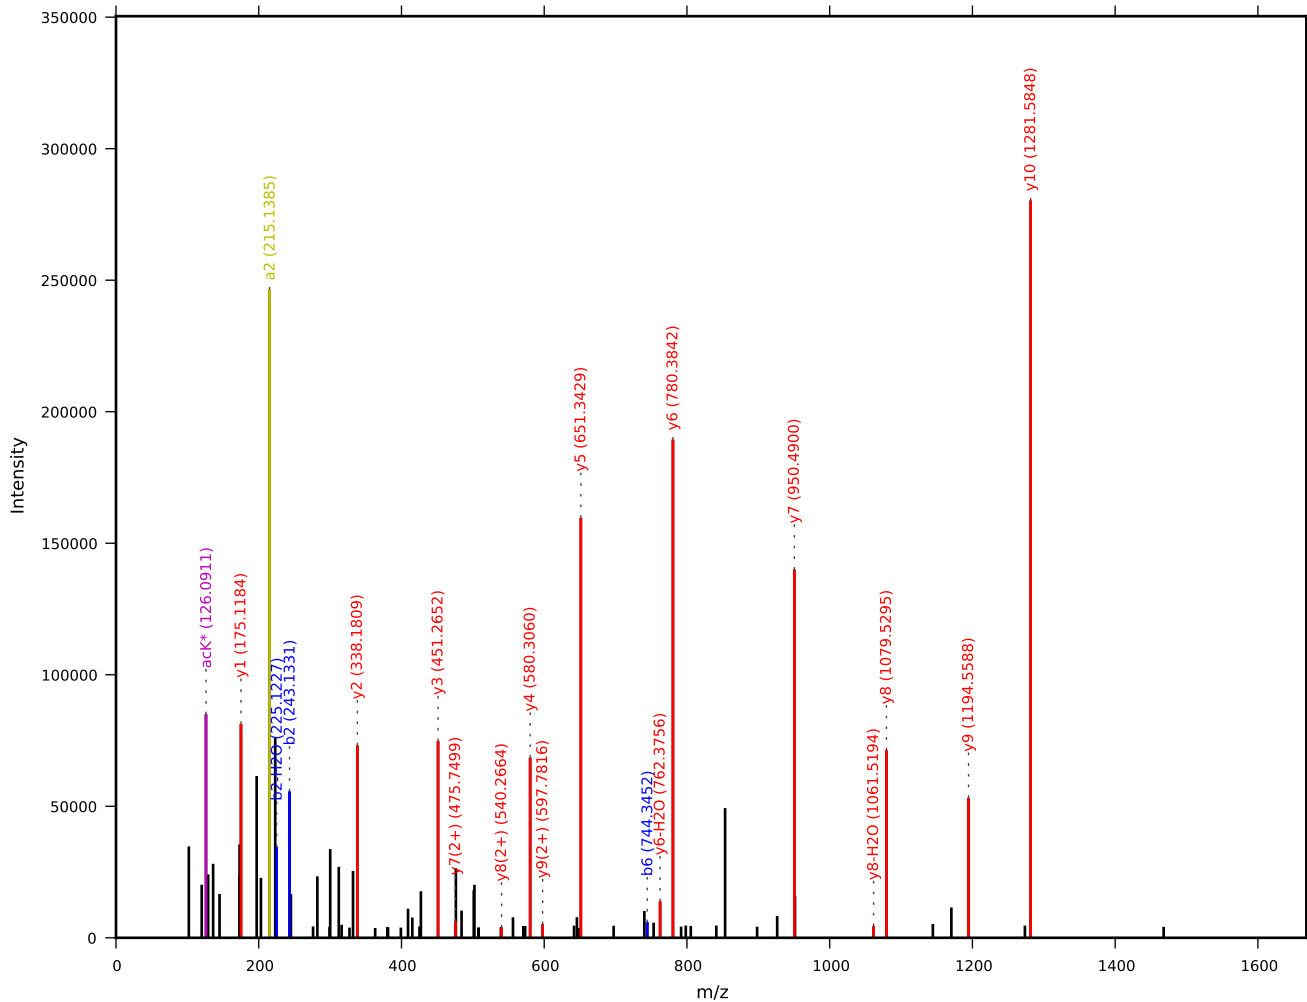

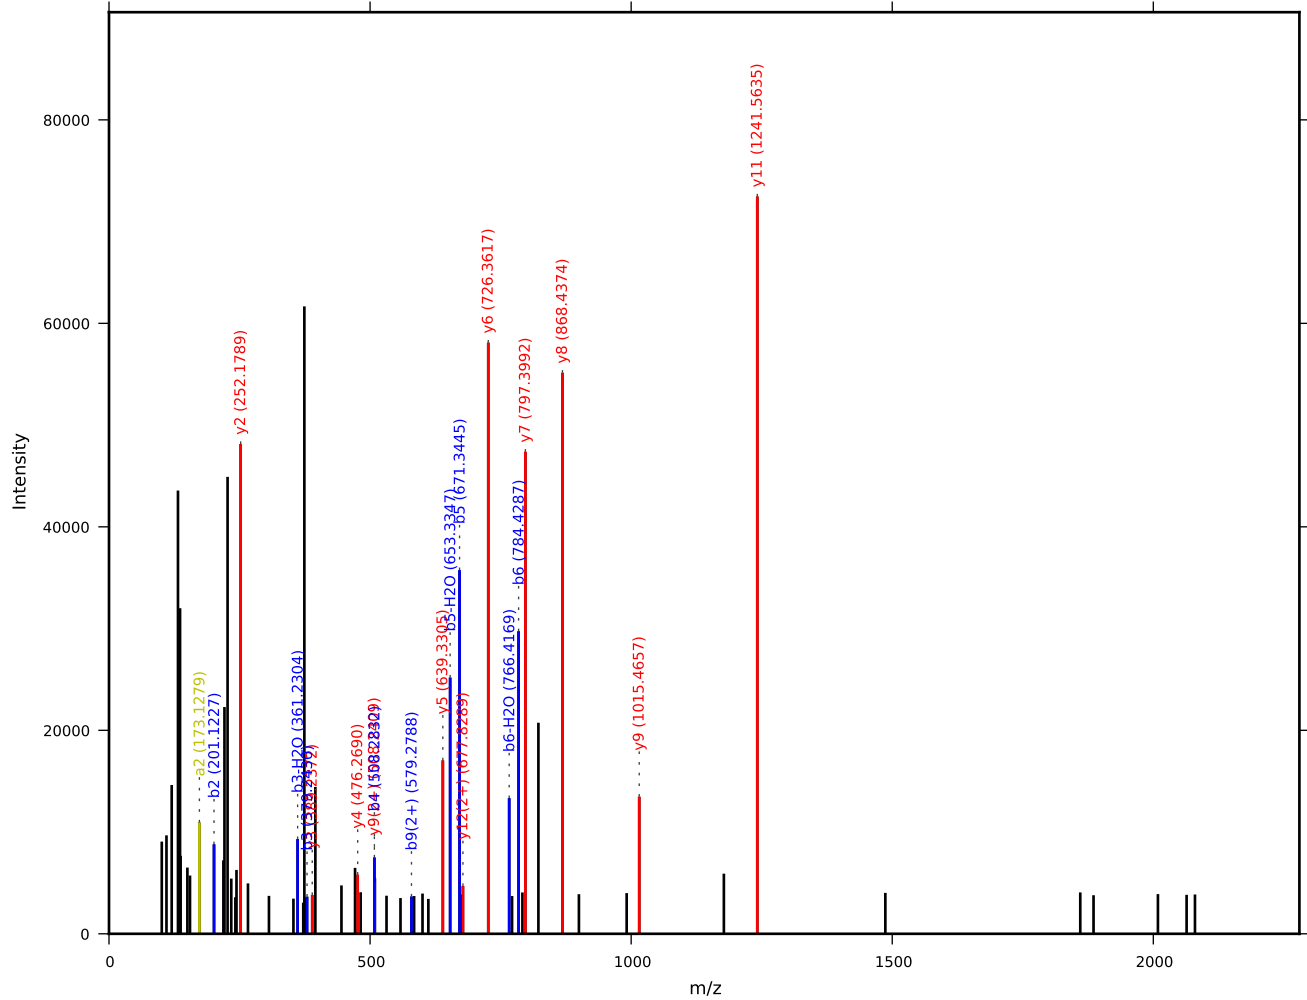

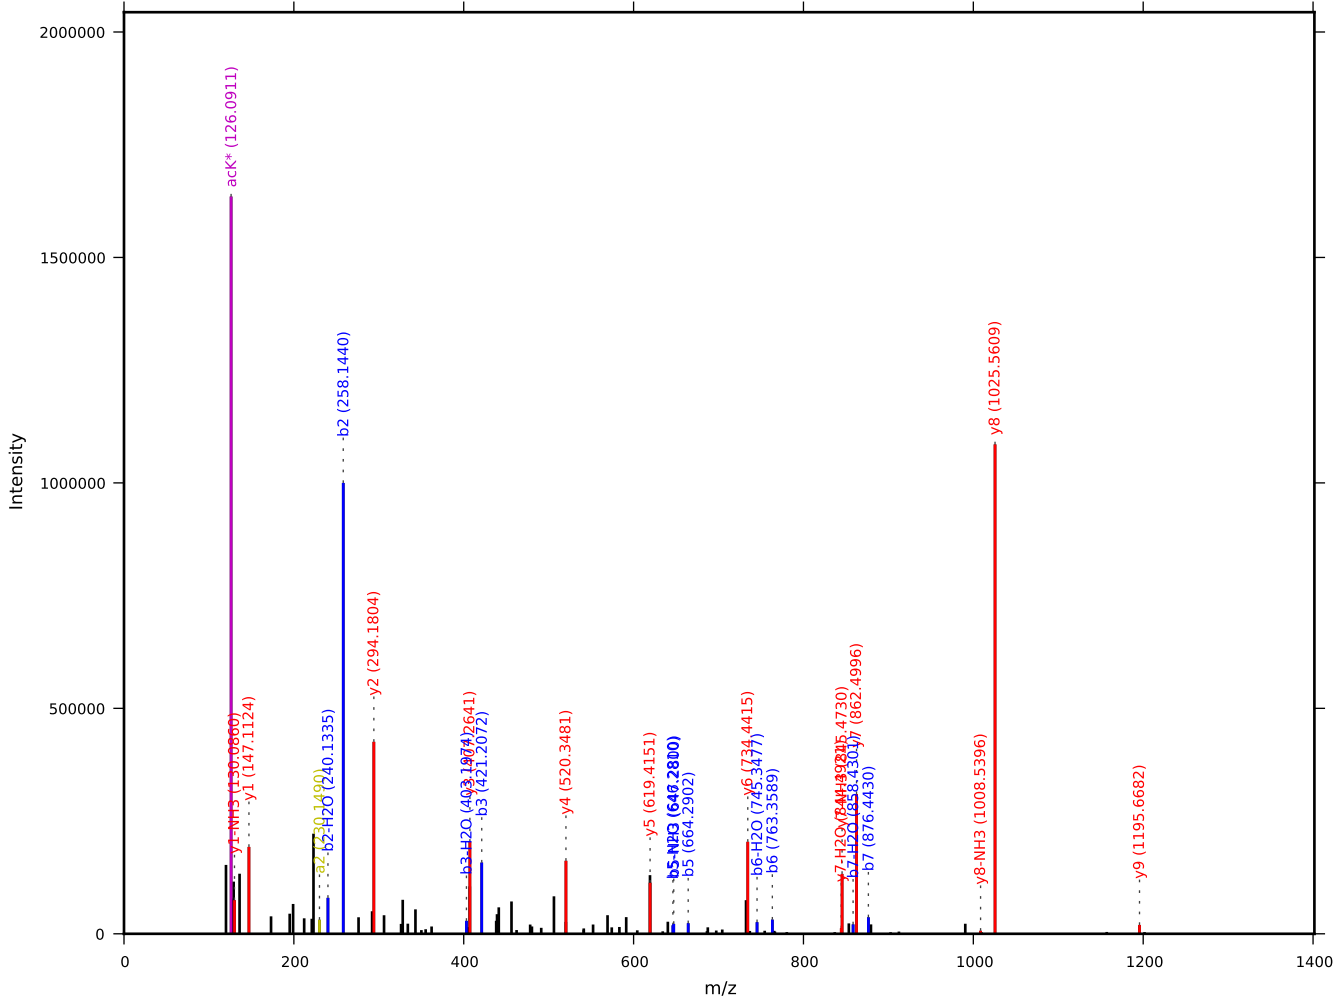

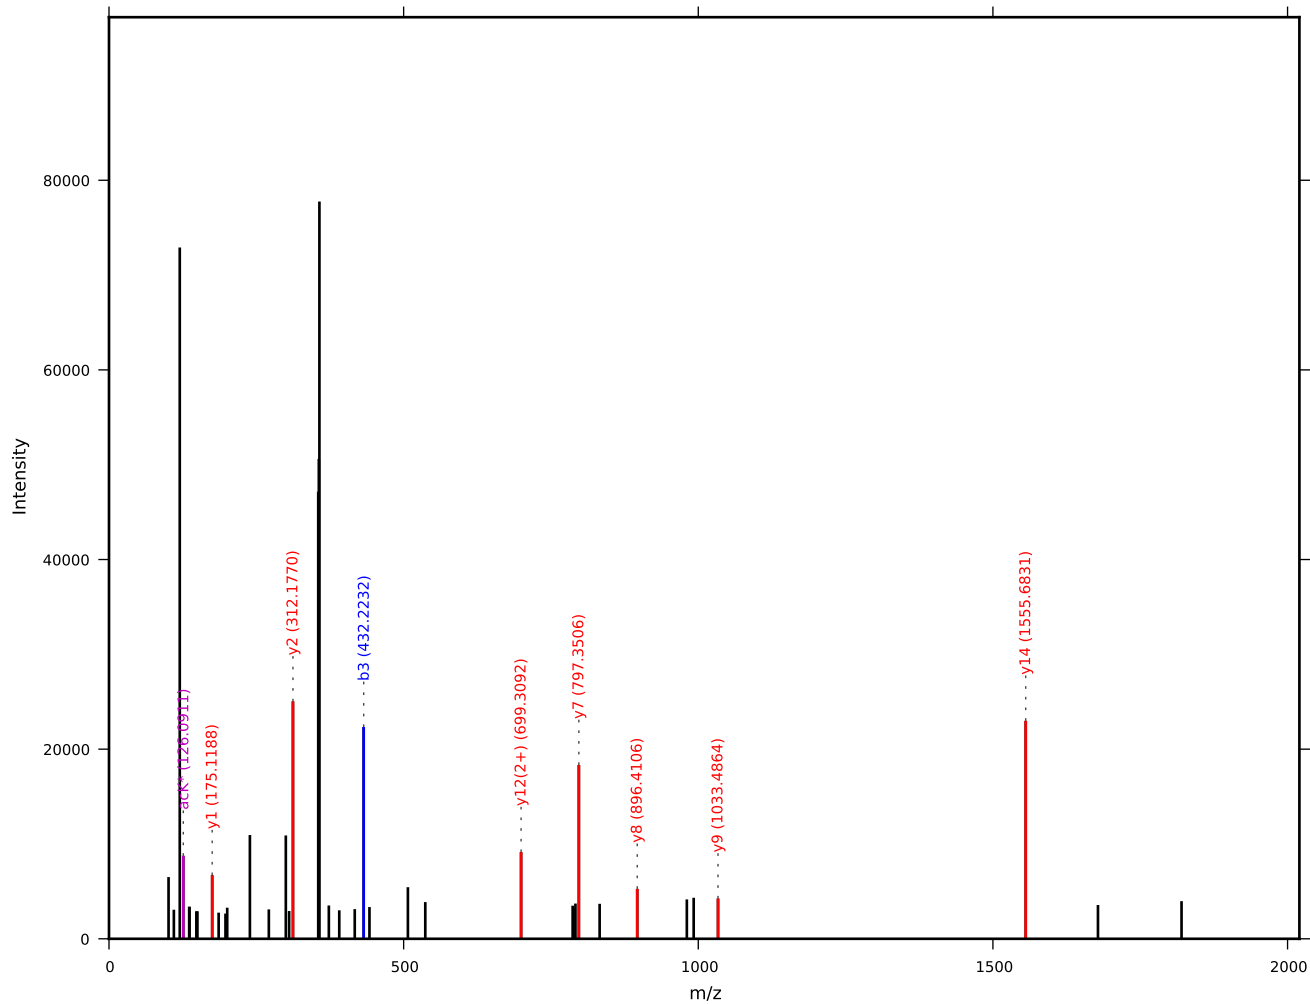

Mass: 1083.5601 Charge: 2 m/z: 542.78731  
Modified Peptide: \_LFSEYQK(ac)K\_ Score: 48.796 PEP: 0.0090143

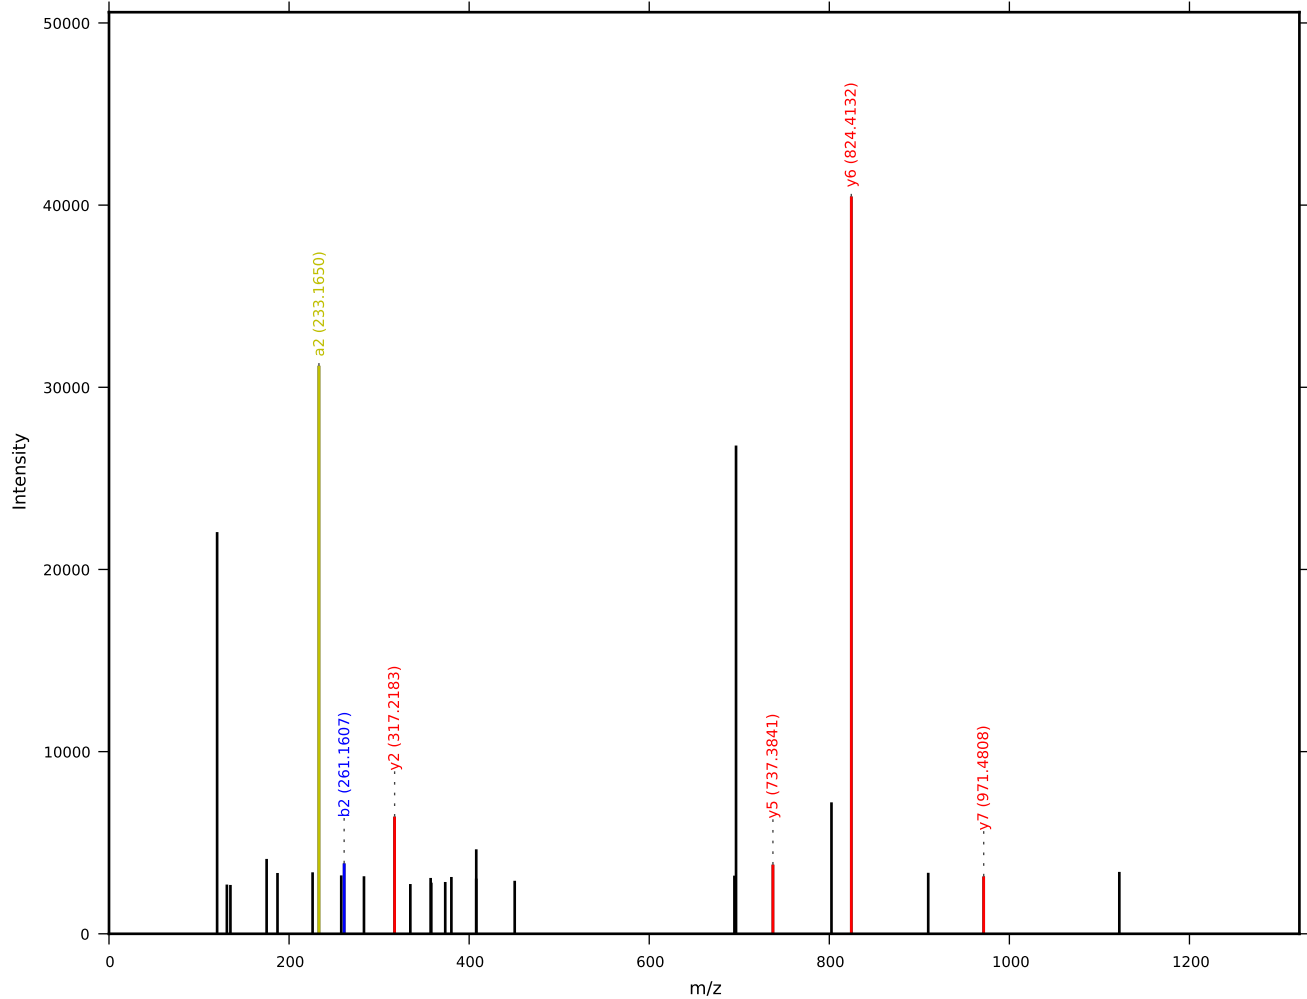

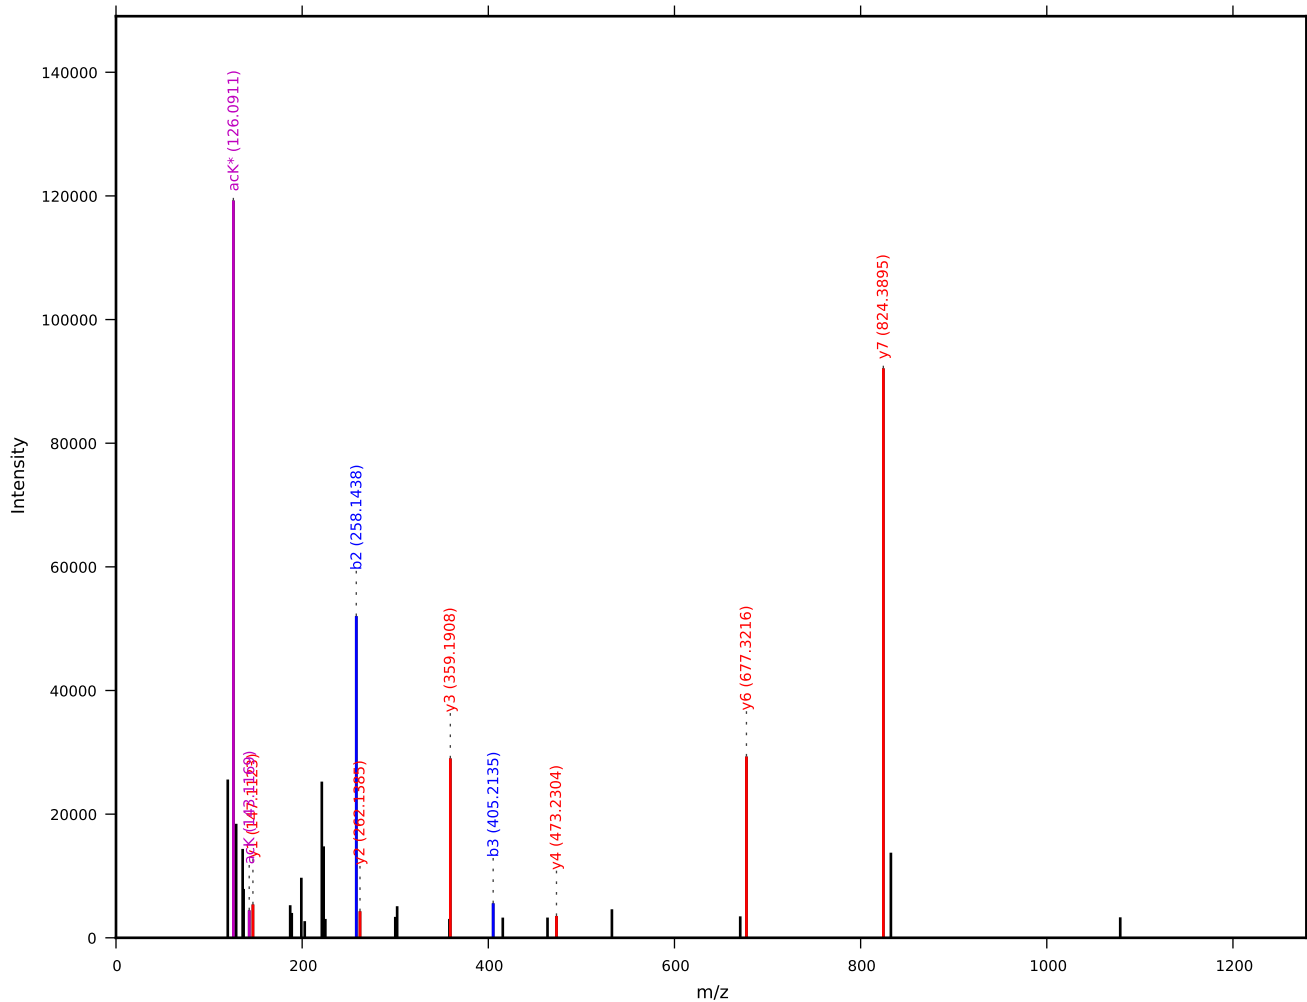



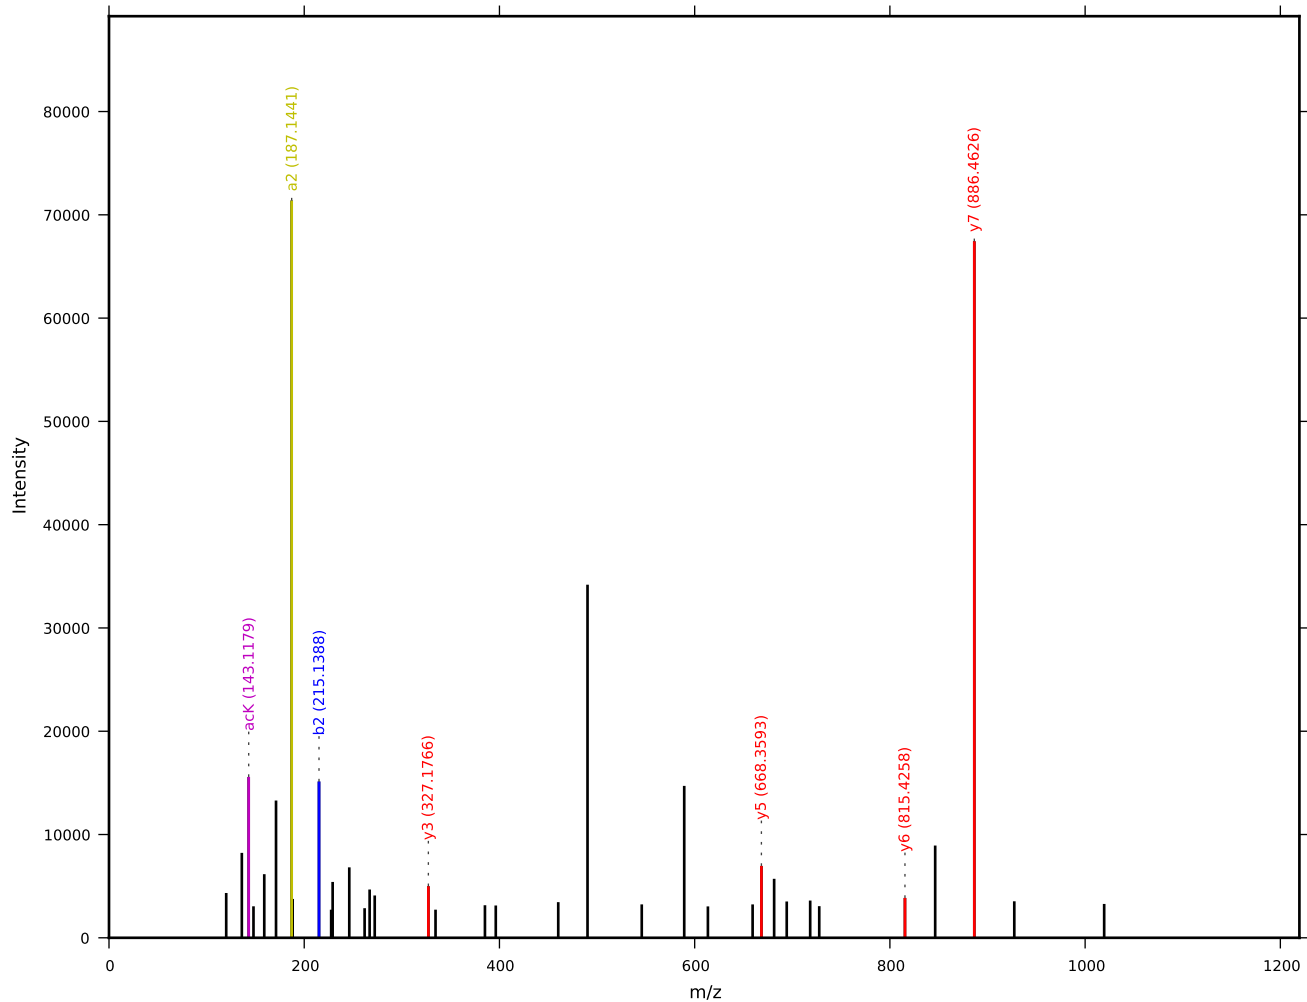

Mass: 1340.7635 Charge: 2 m/z: 671.38901  
Modified Peptide: \_TILK(ac)PGVEANNK\_ Score: 55.452 PEP: 0.00050485

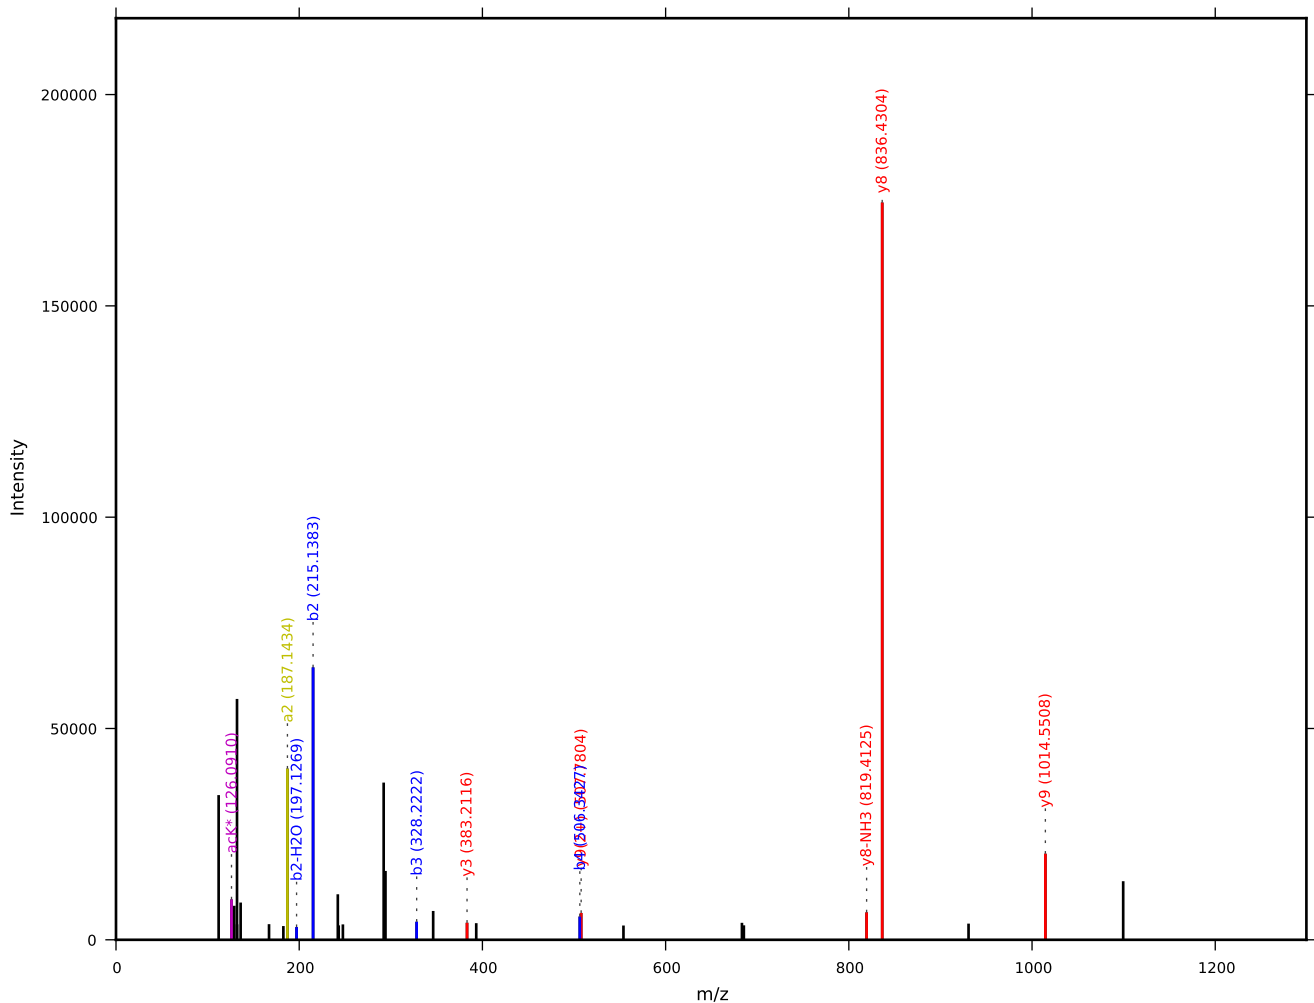

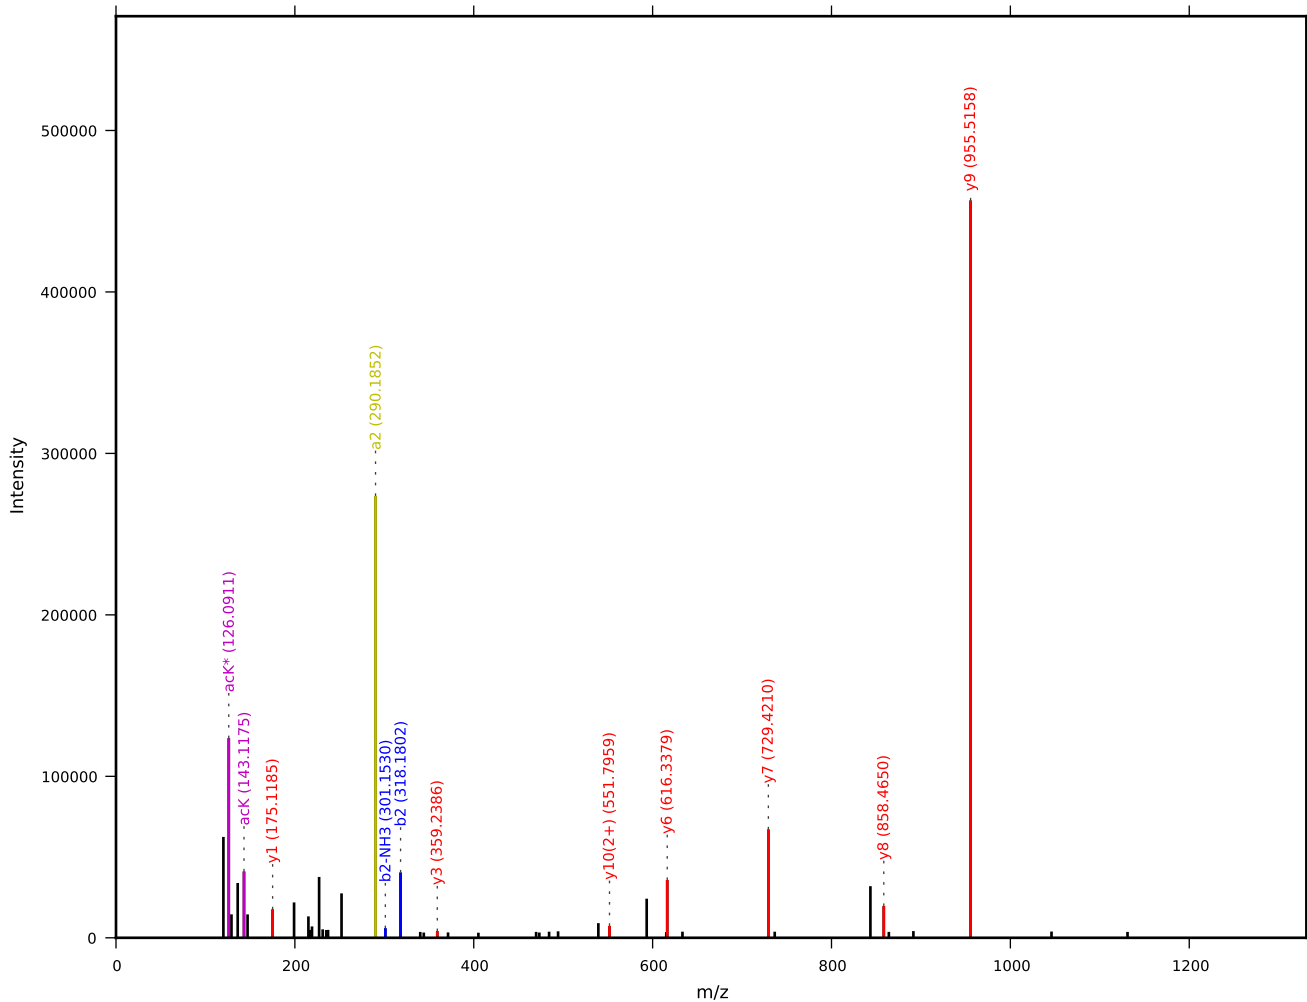

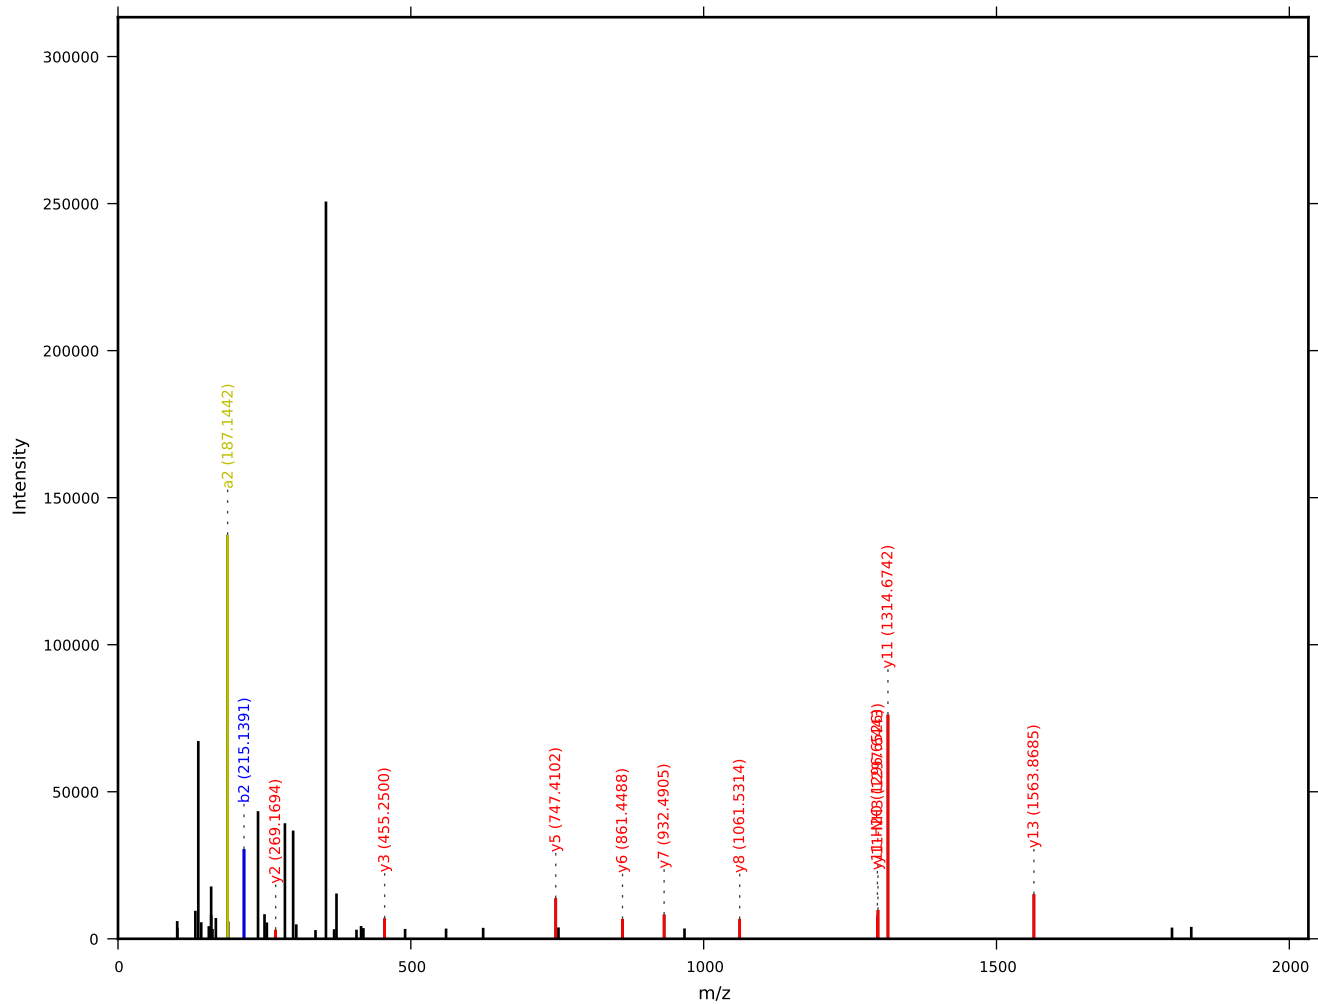

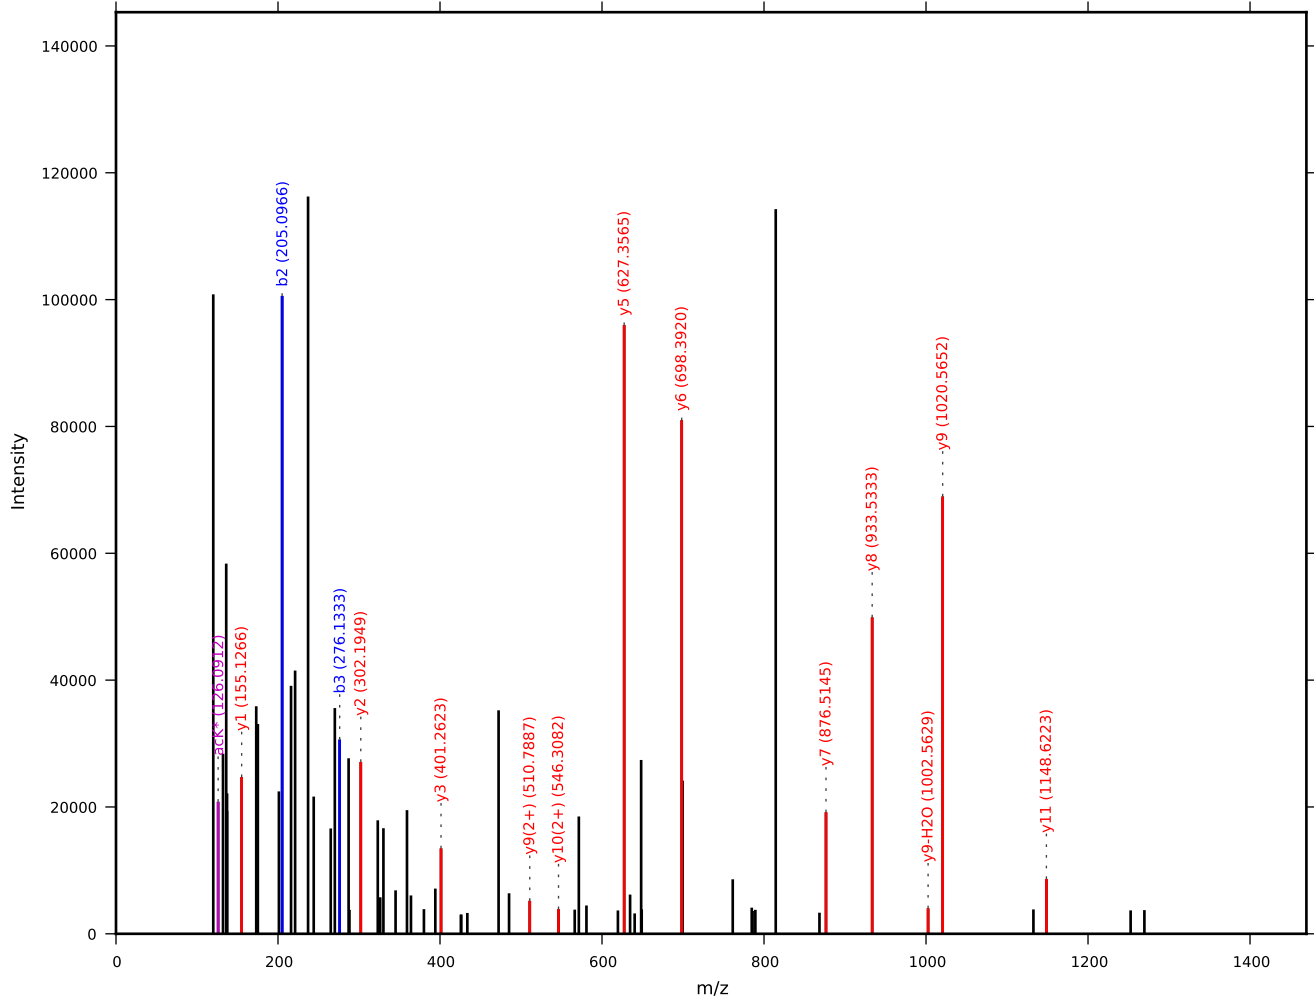

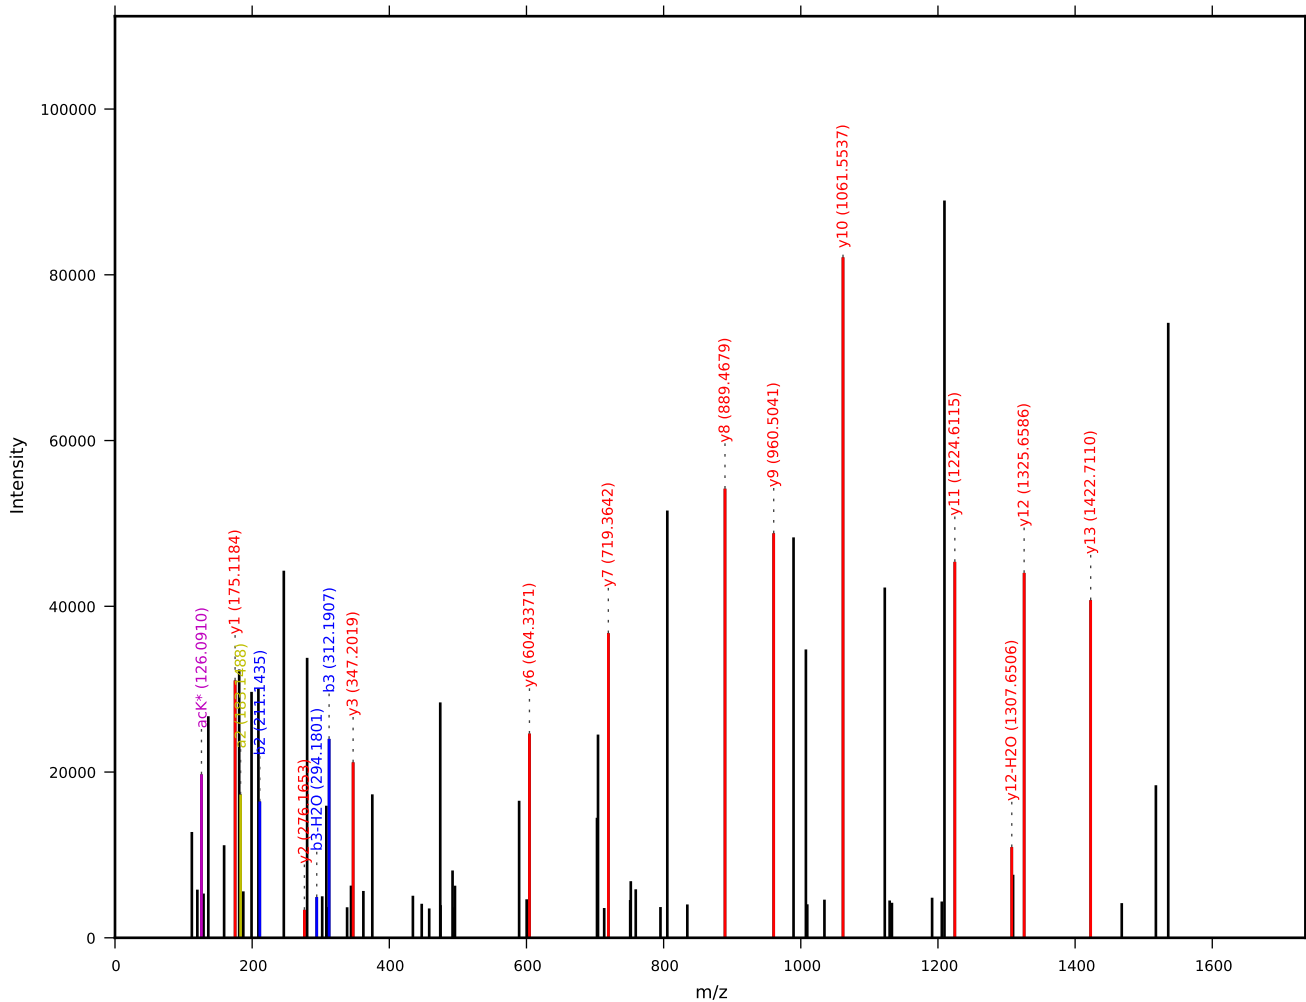

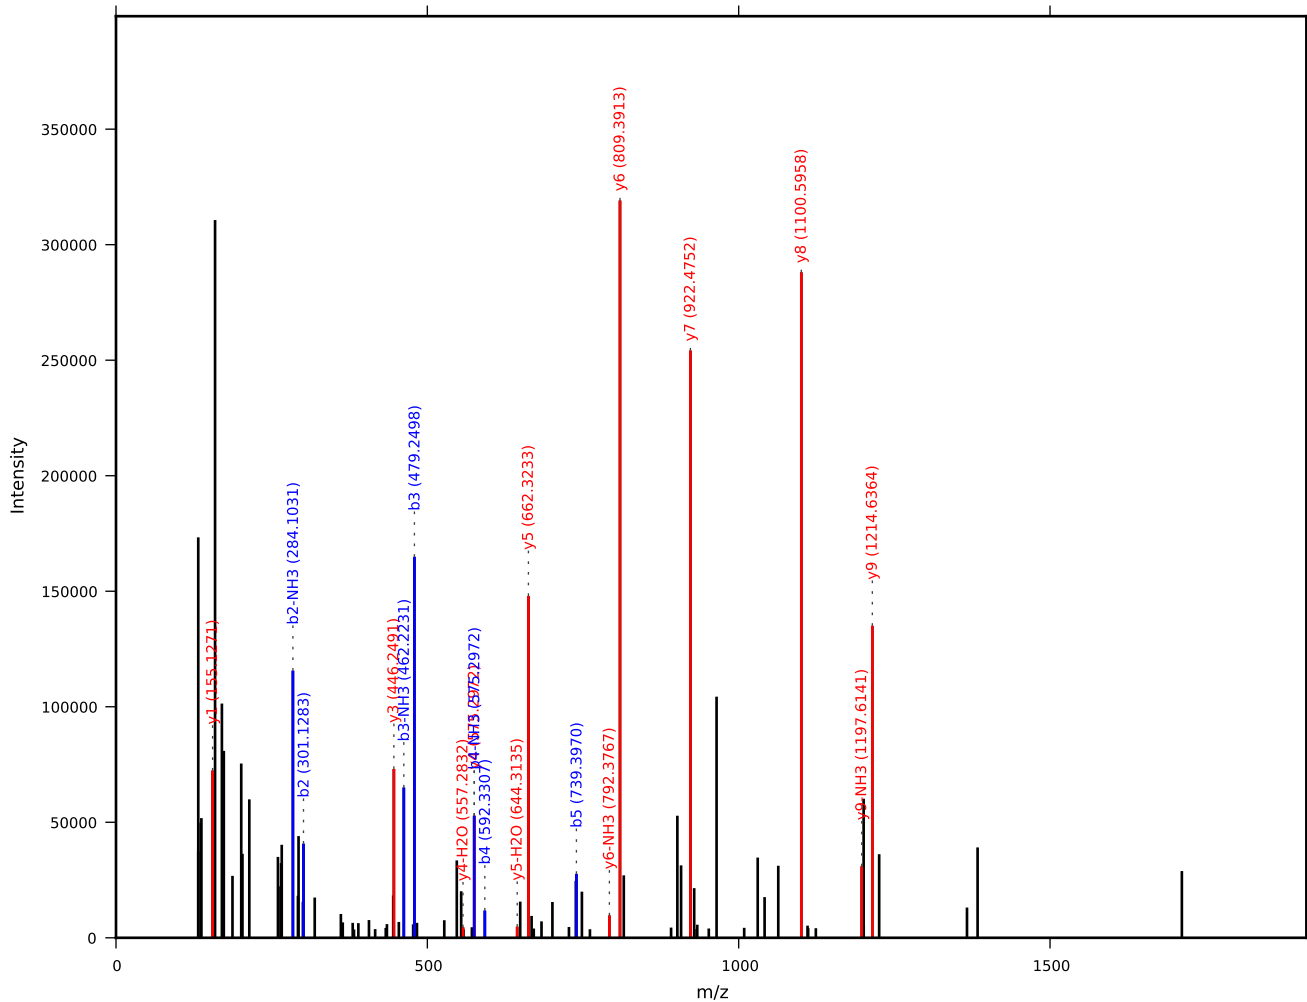

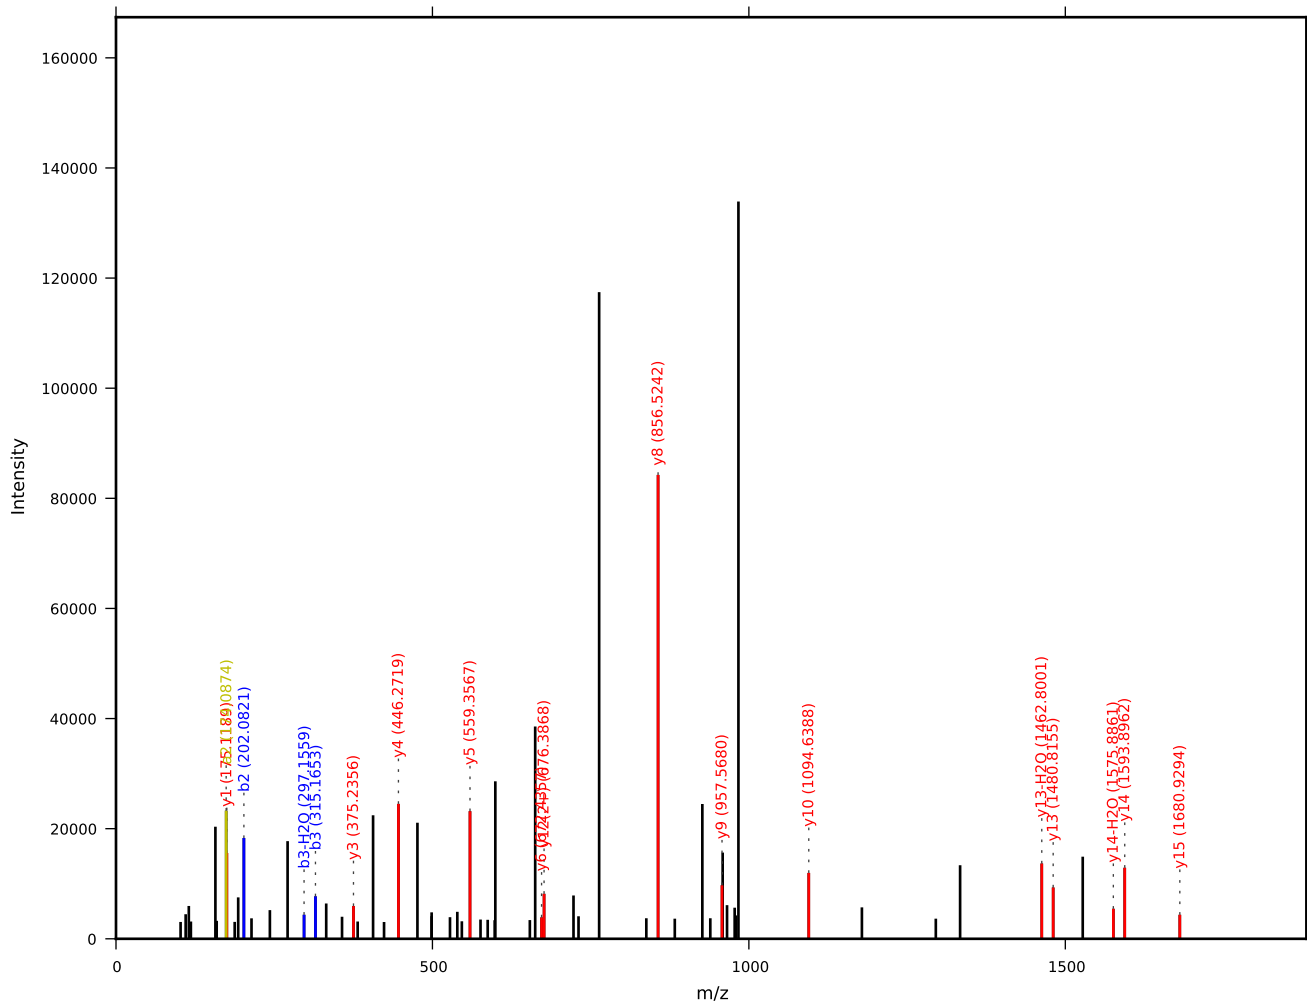



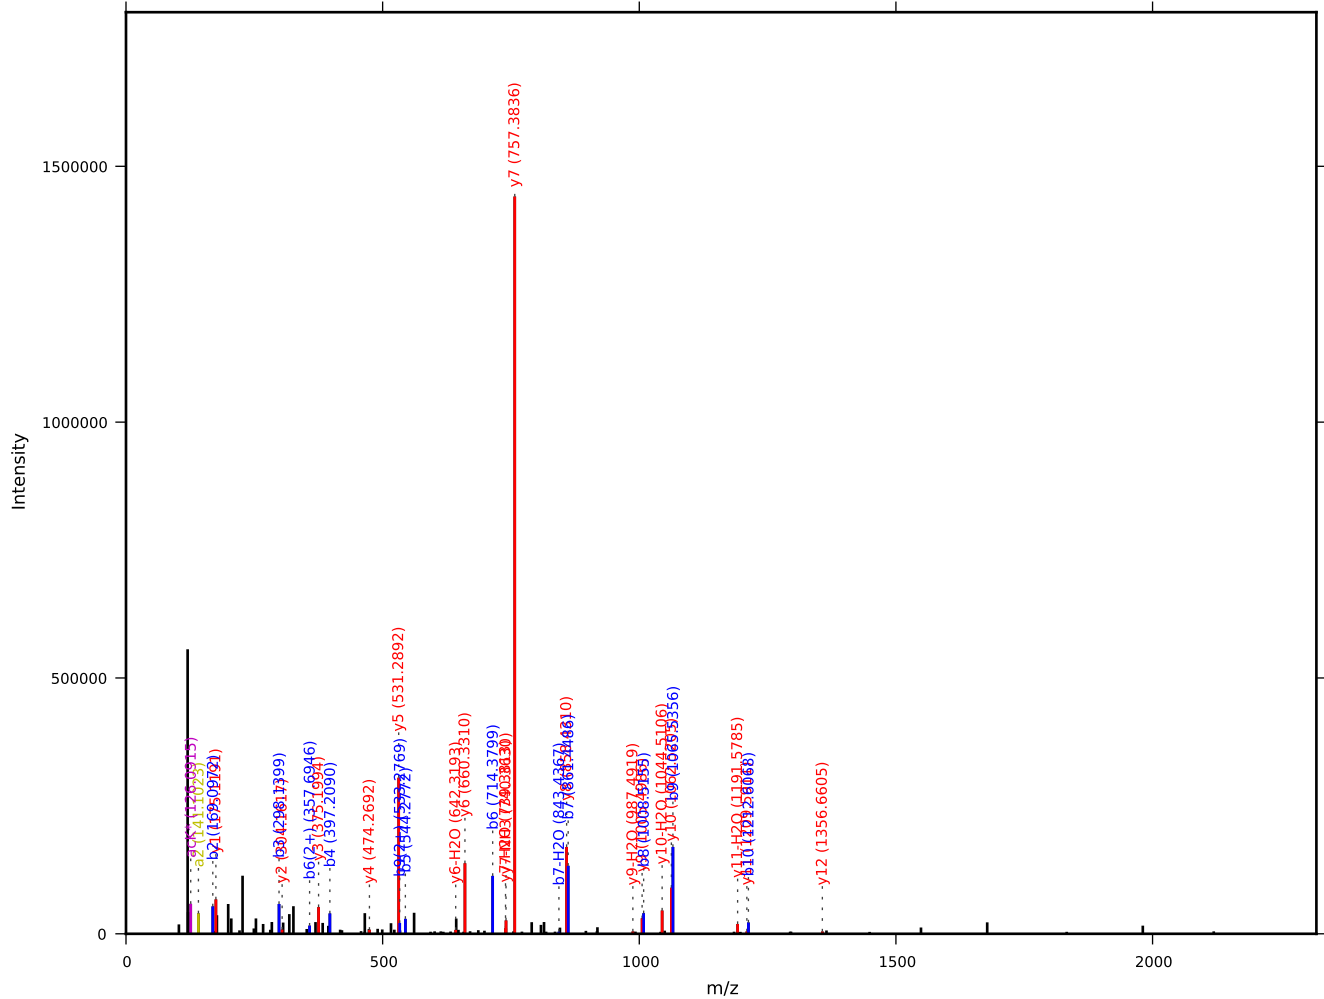

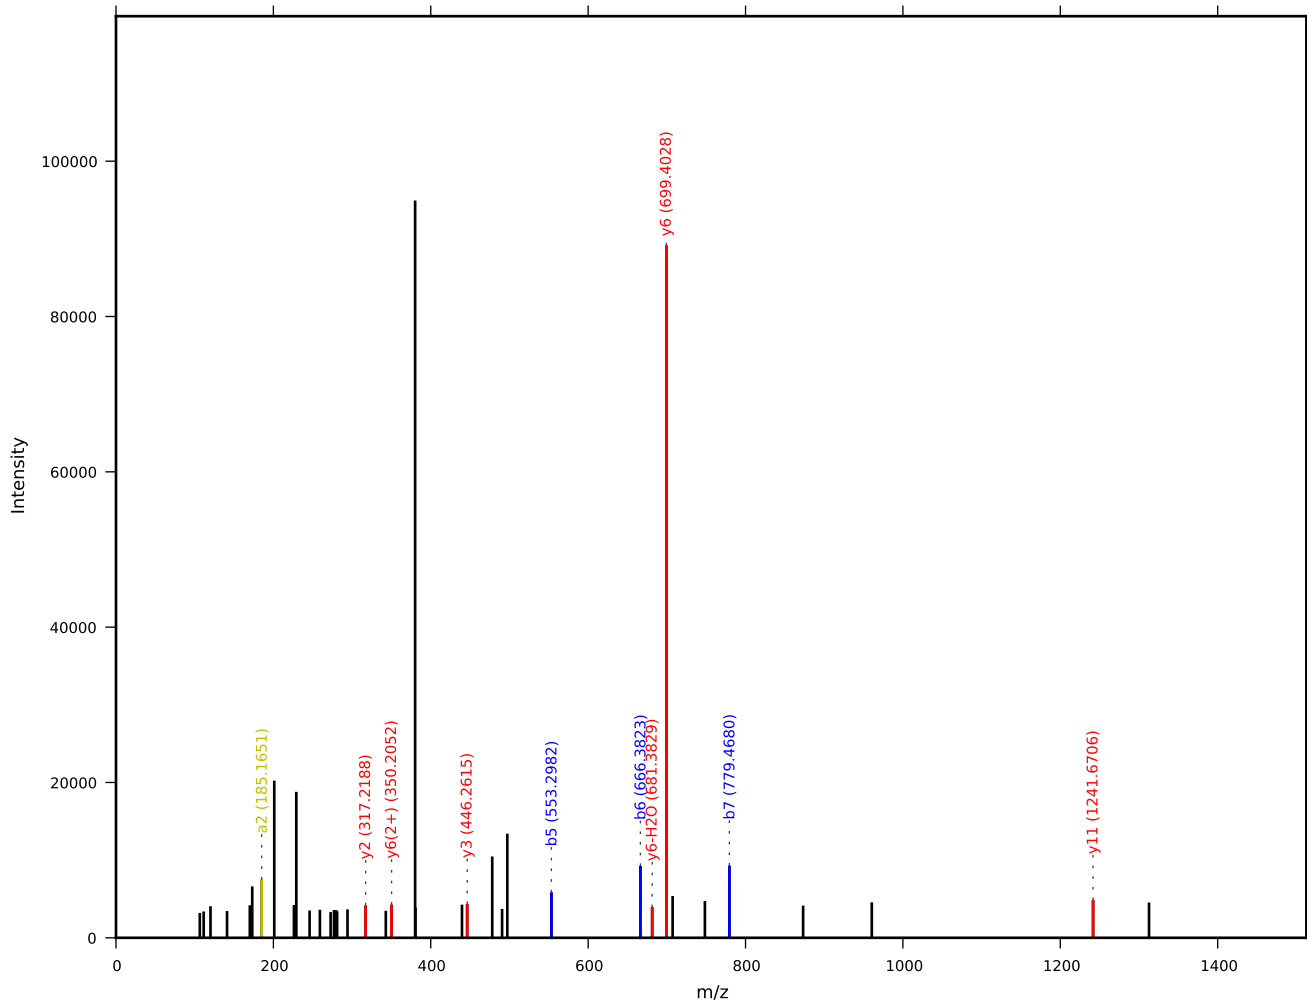

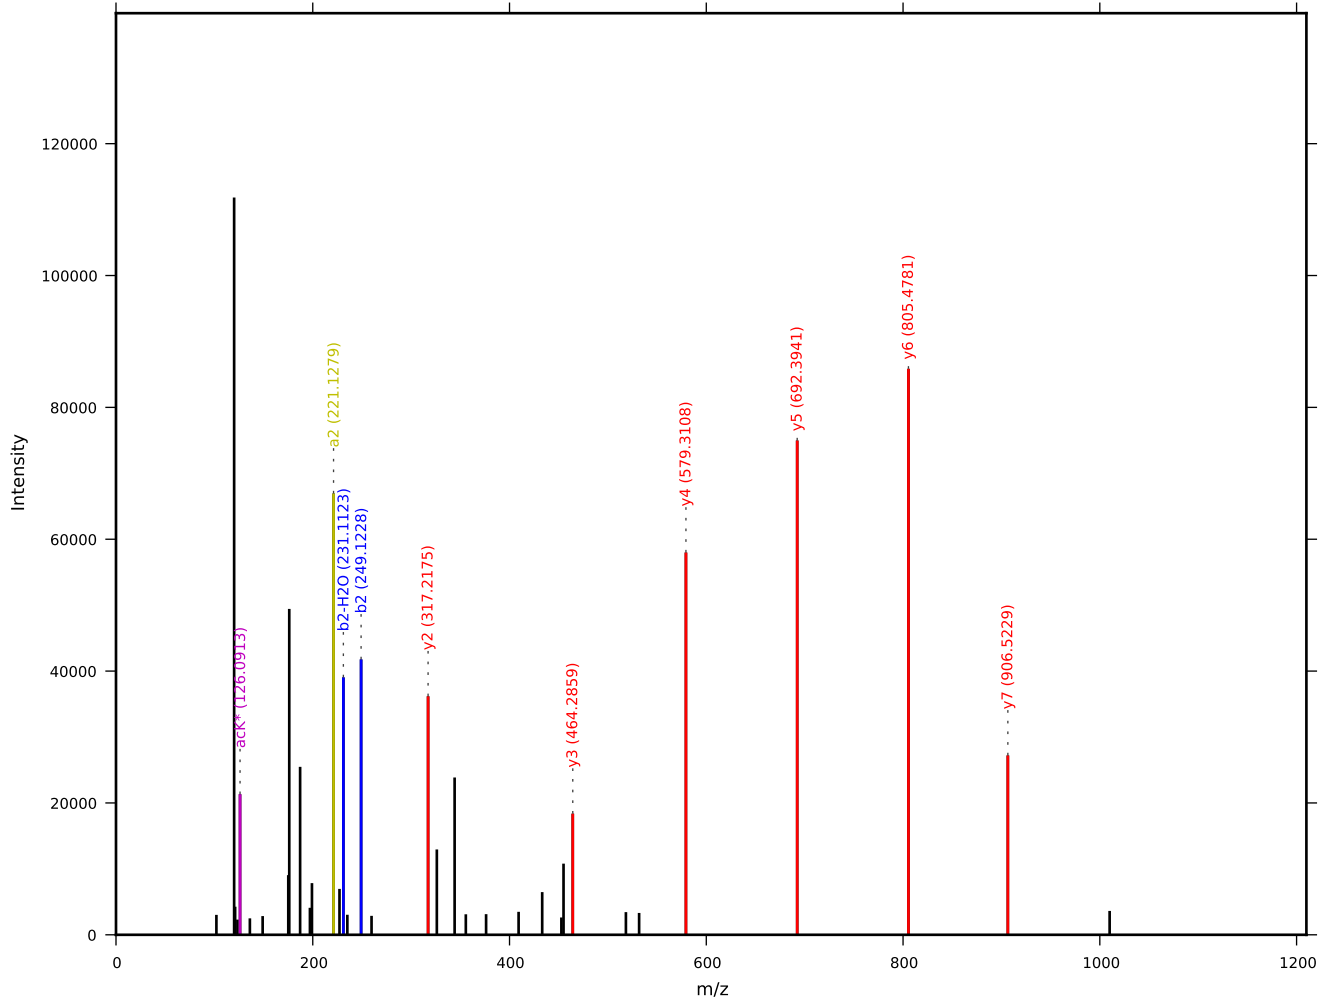

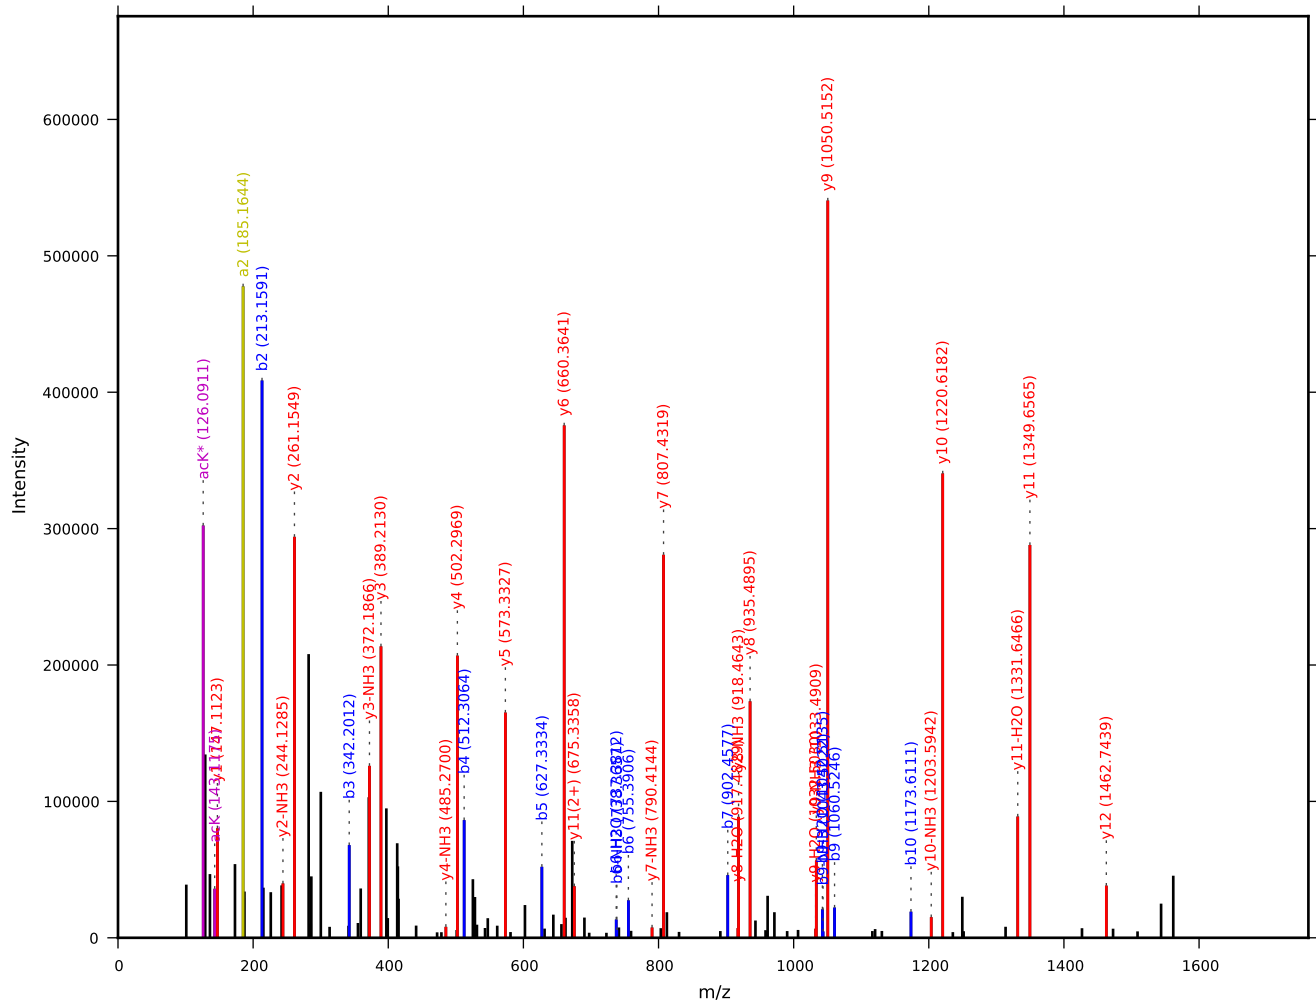

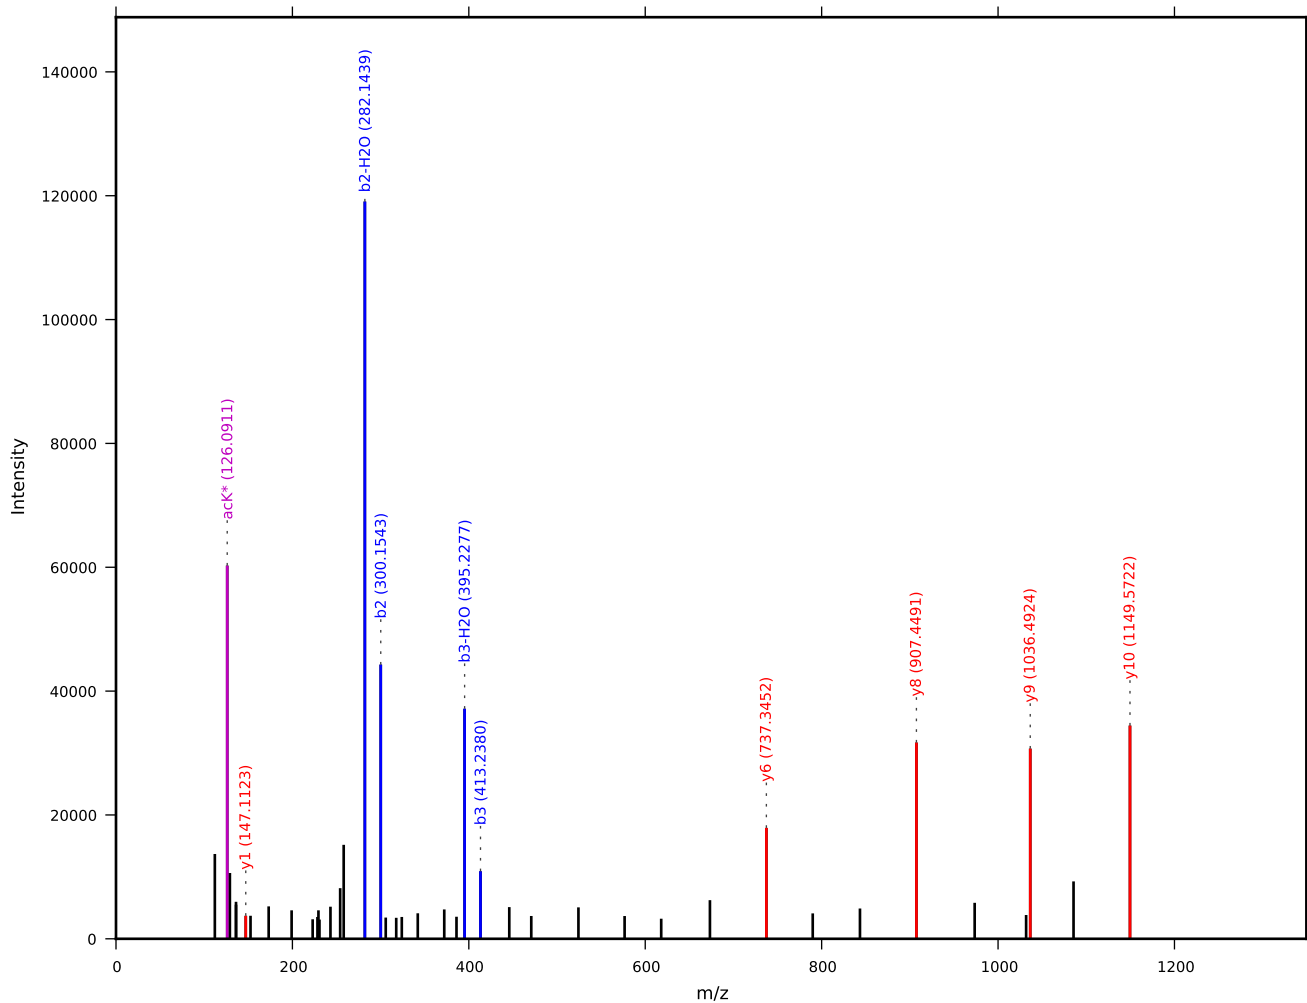

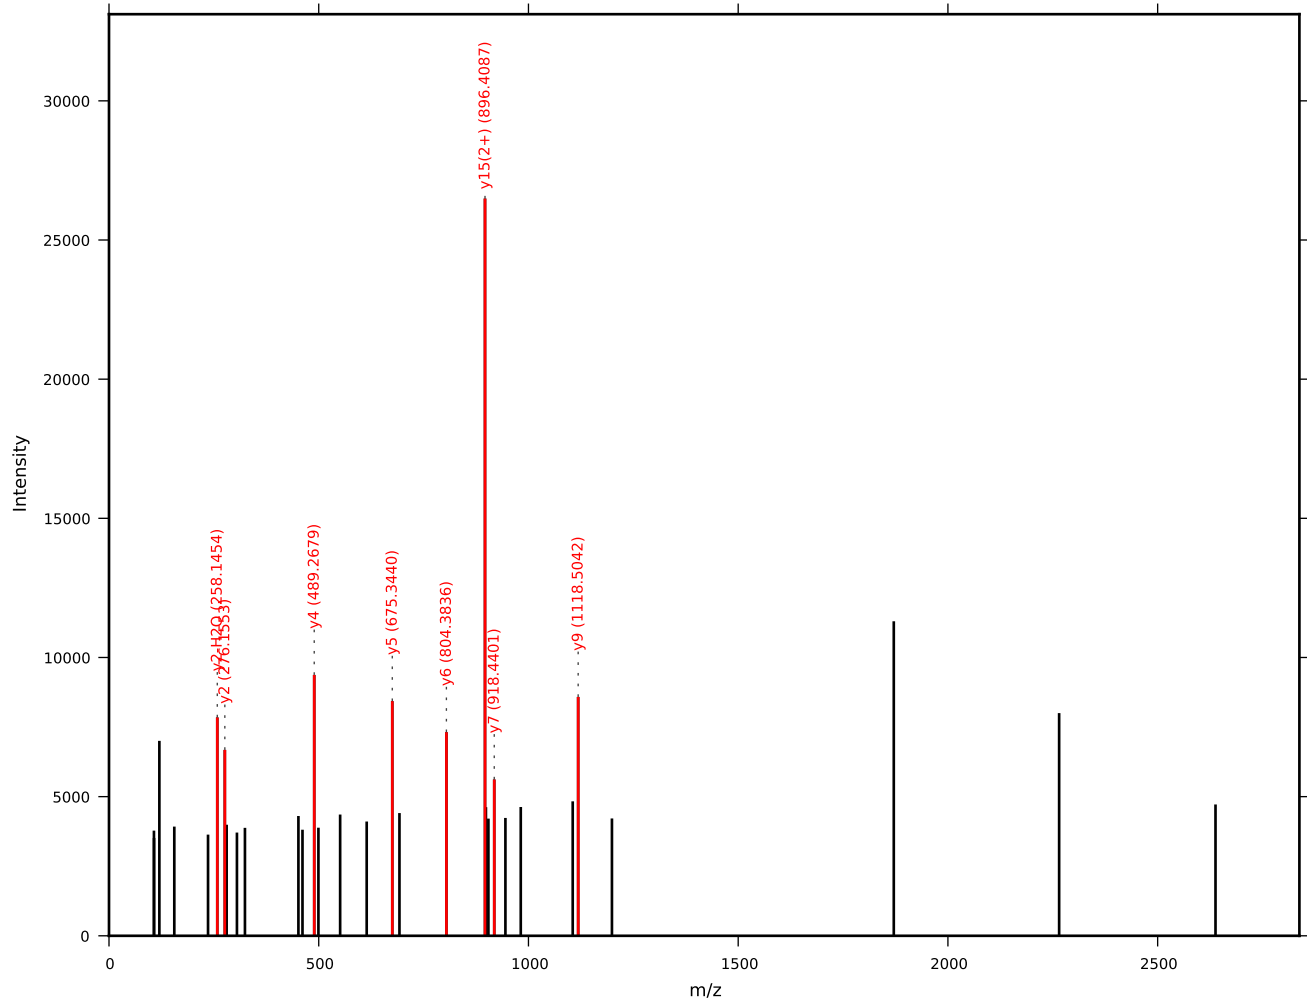

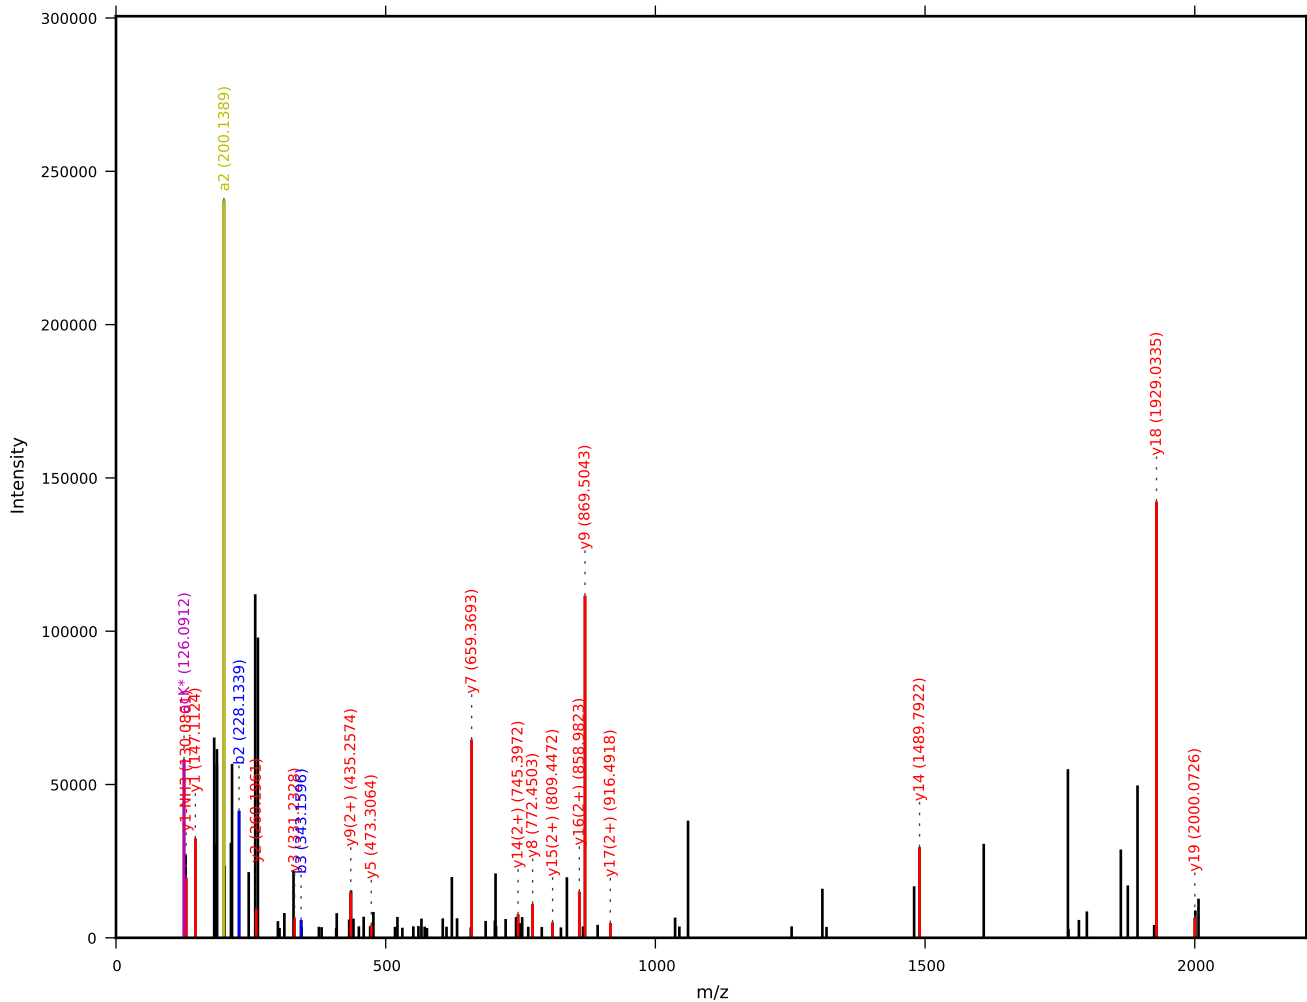

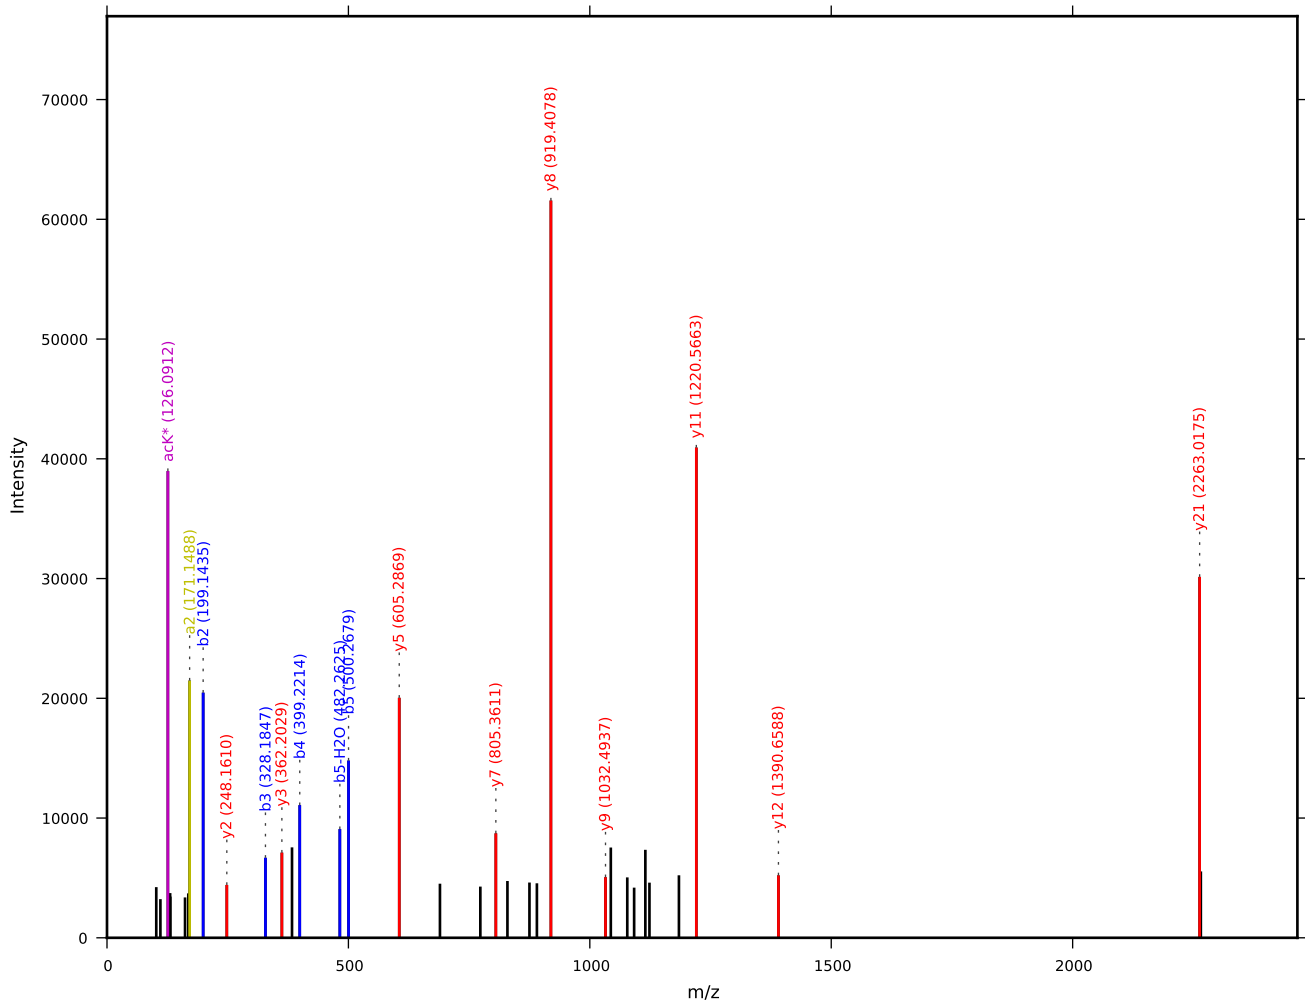



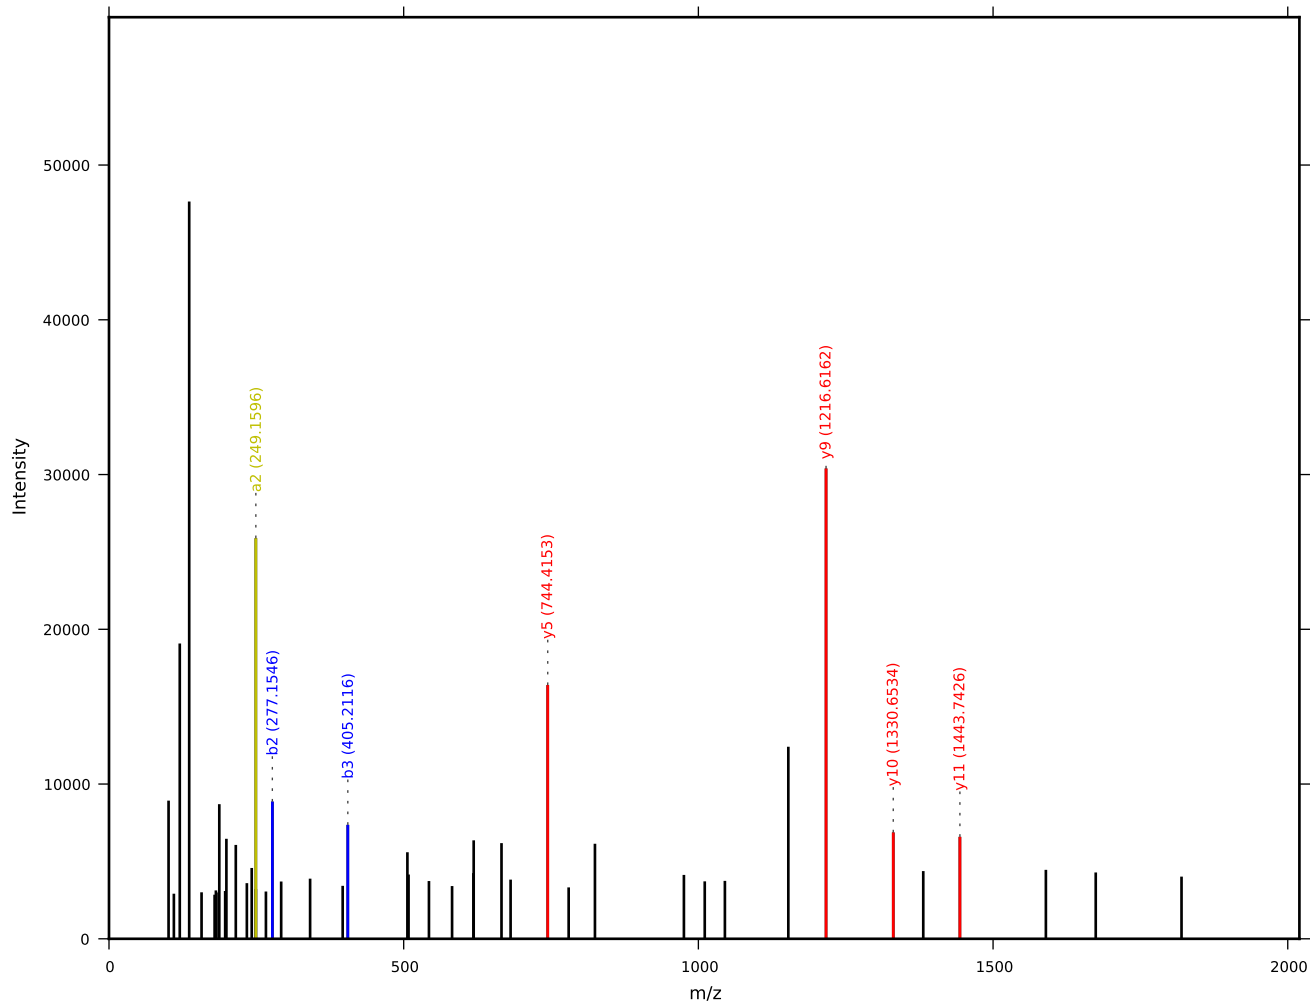

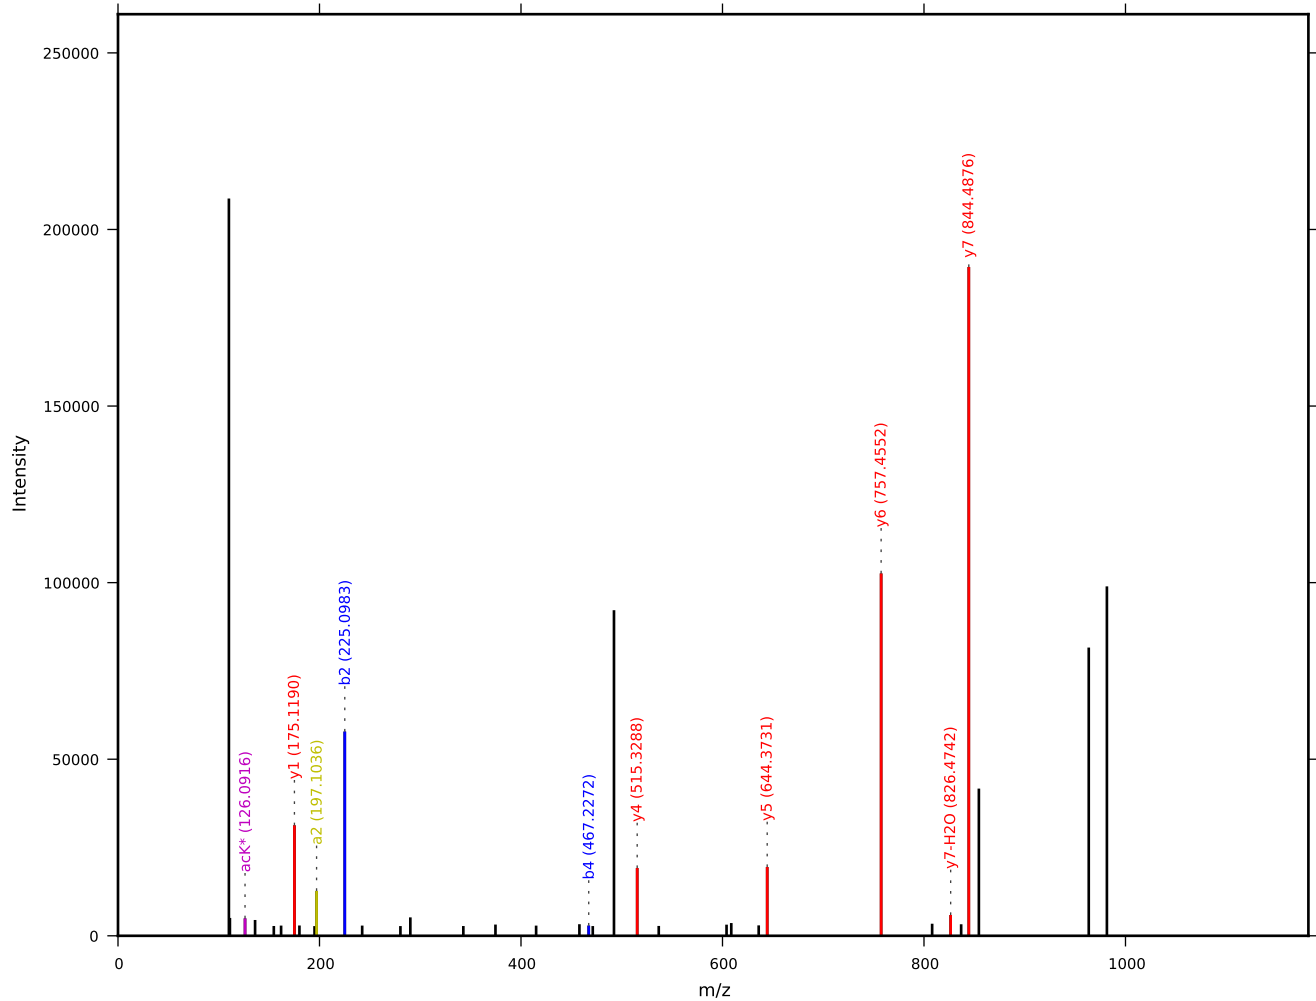

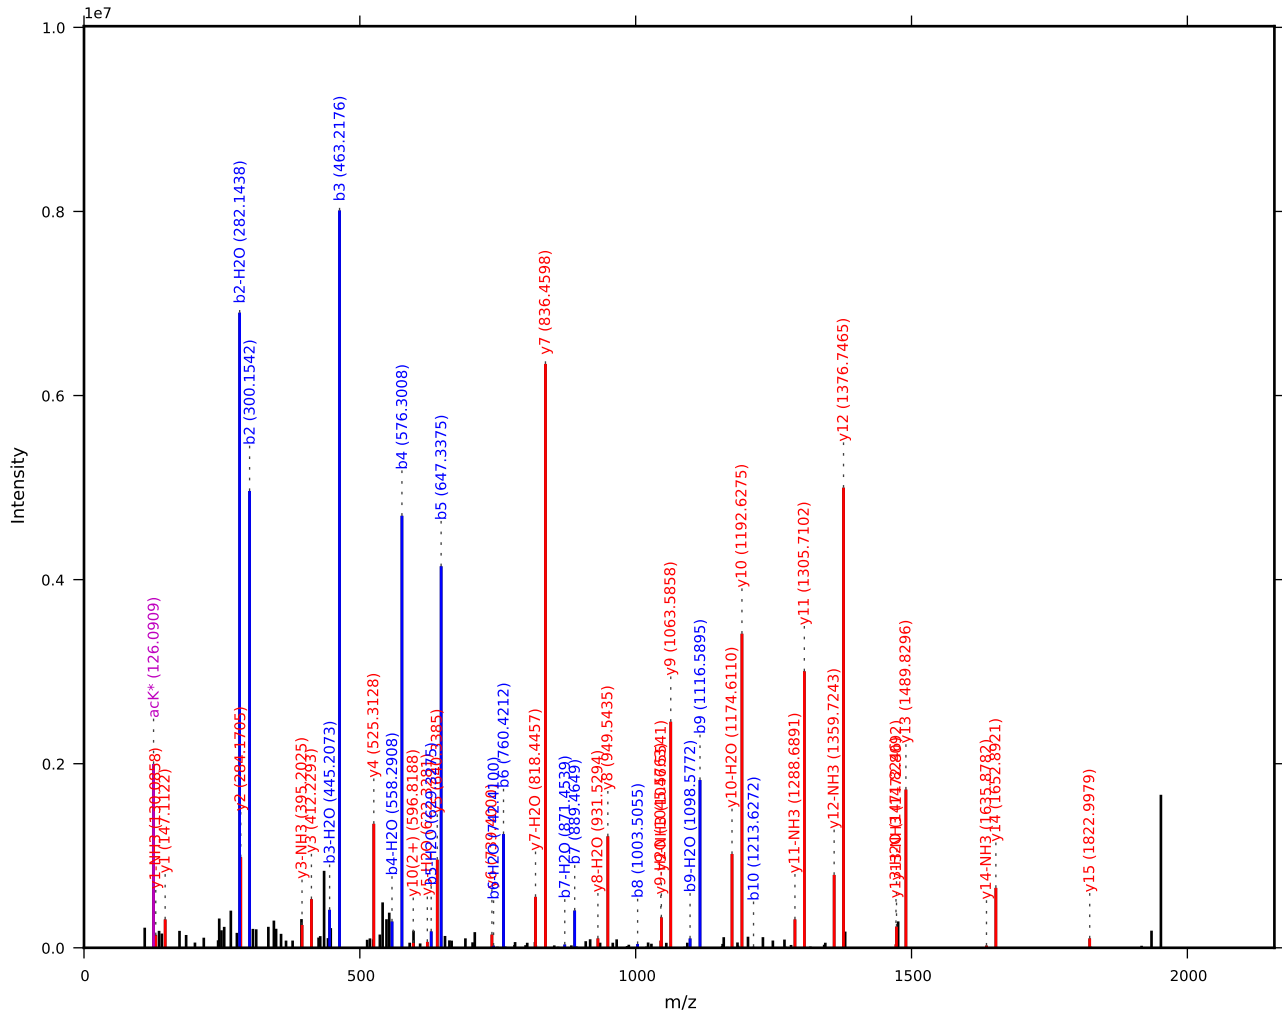

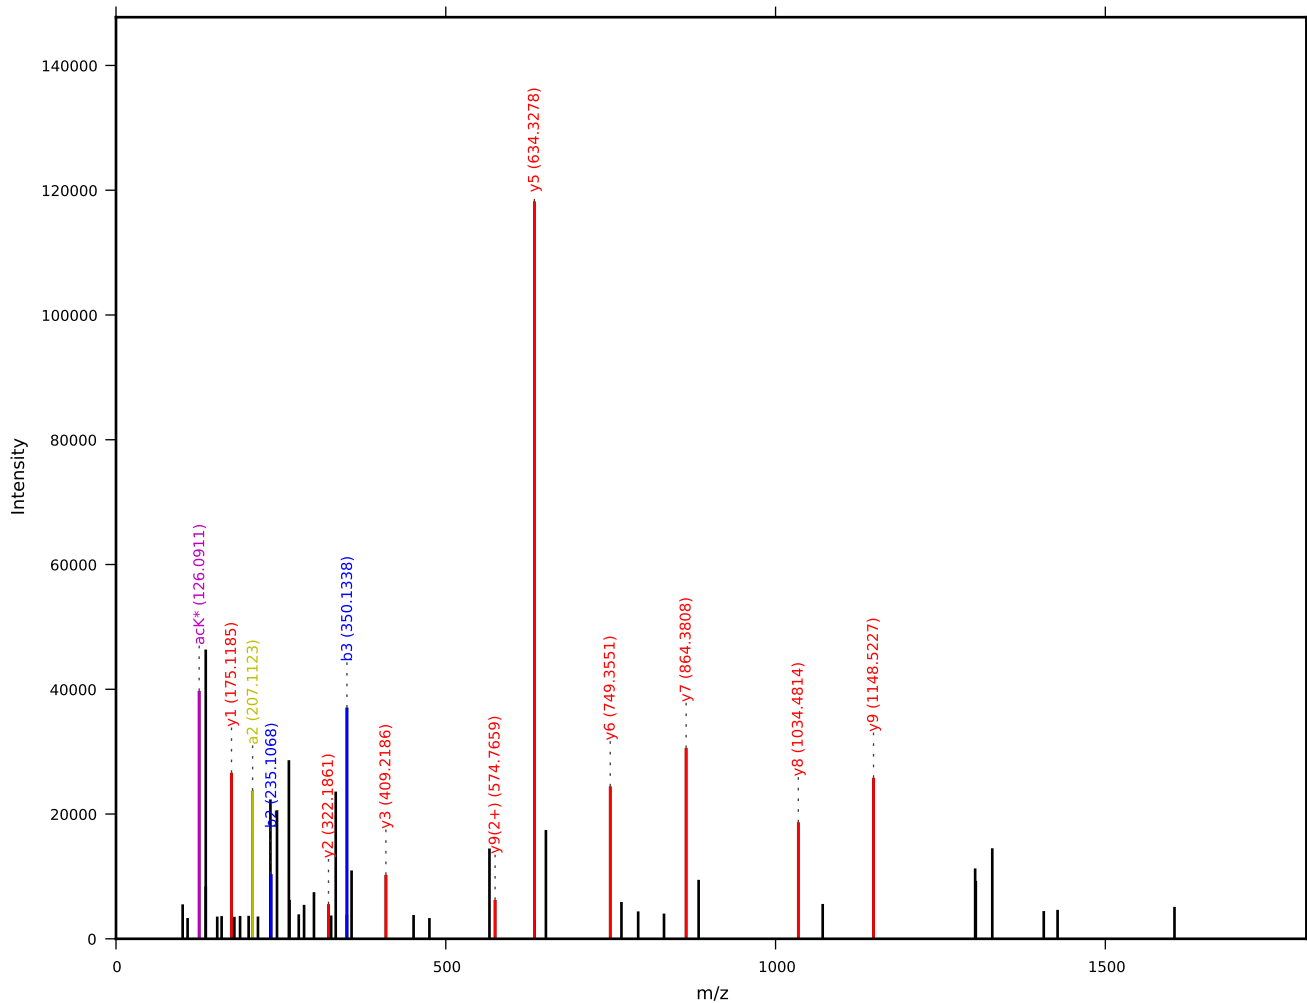

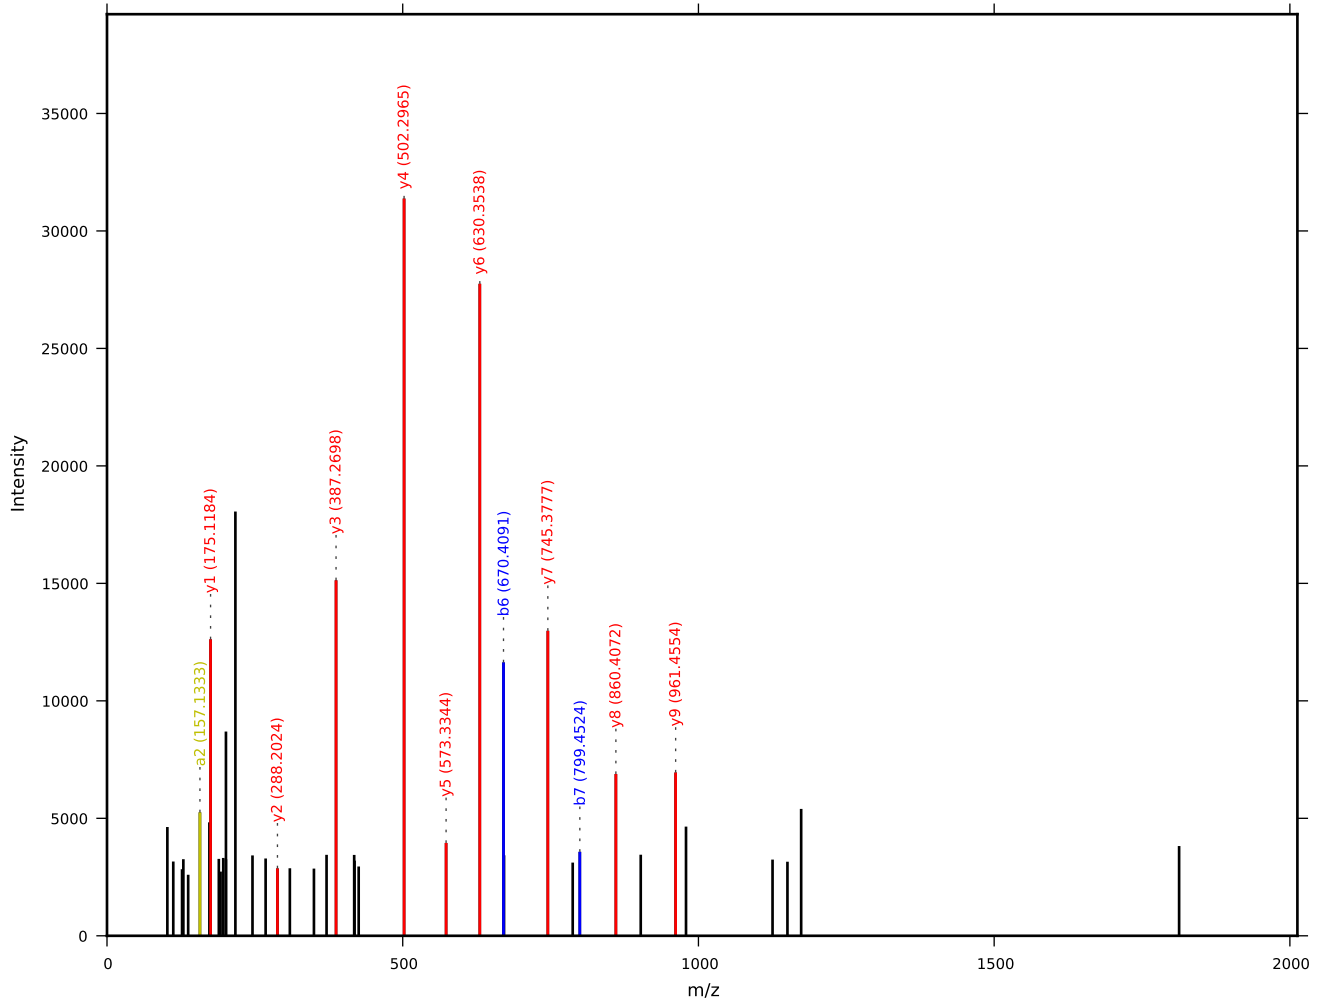

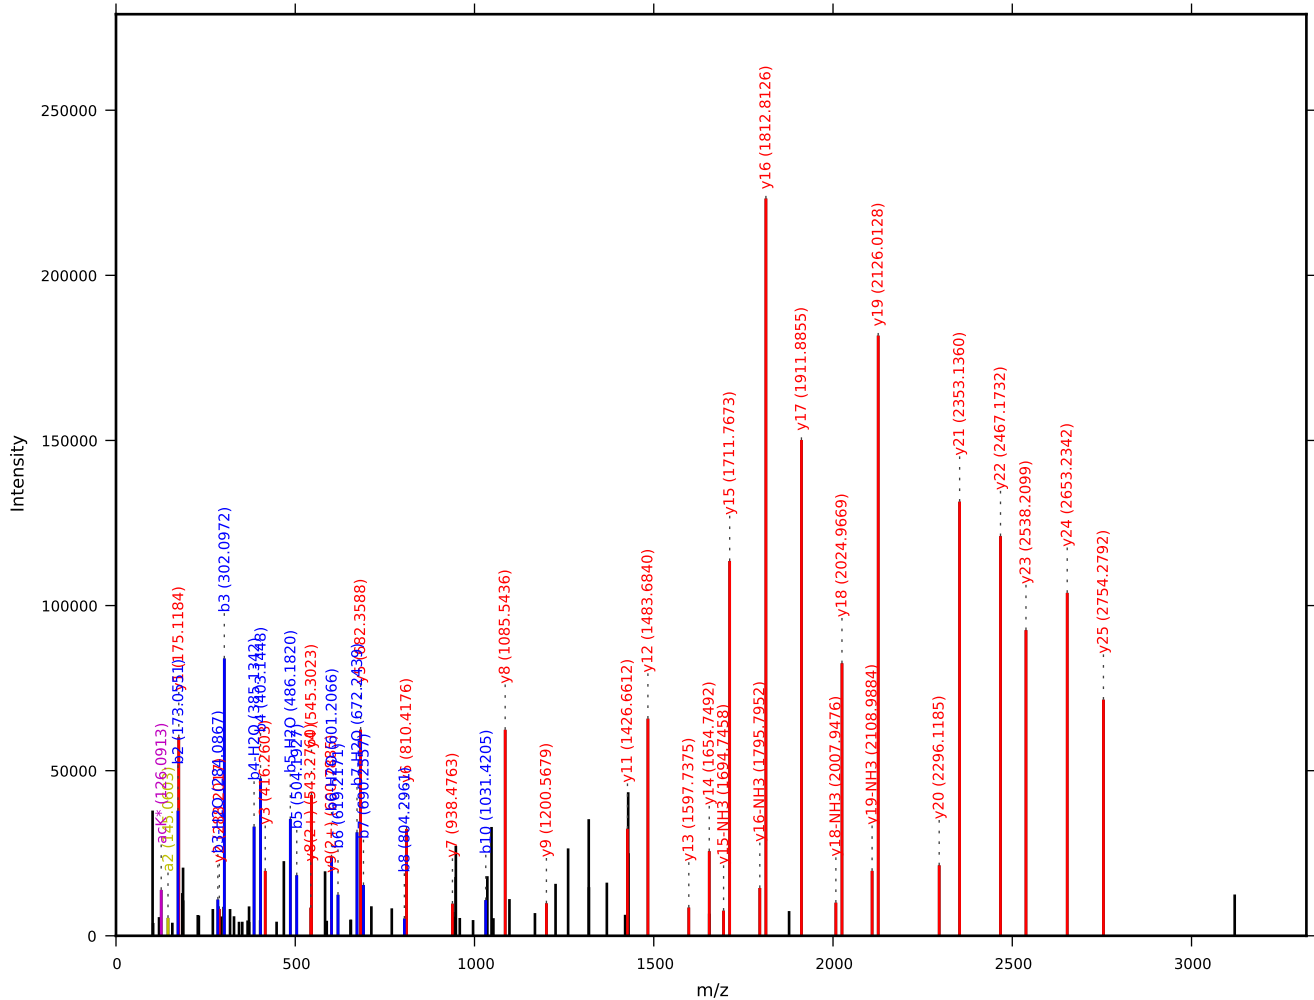

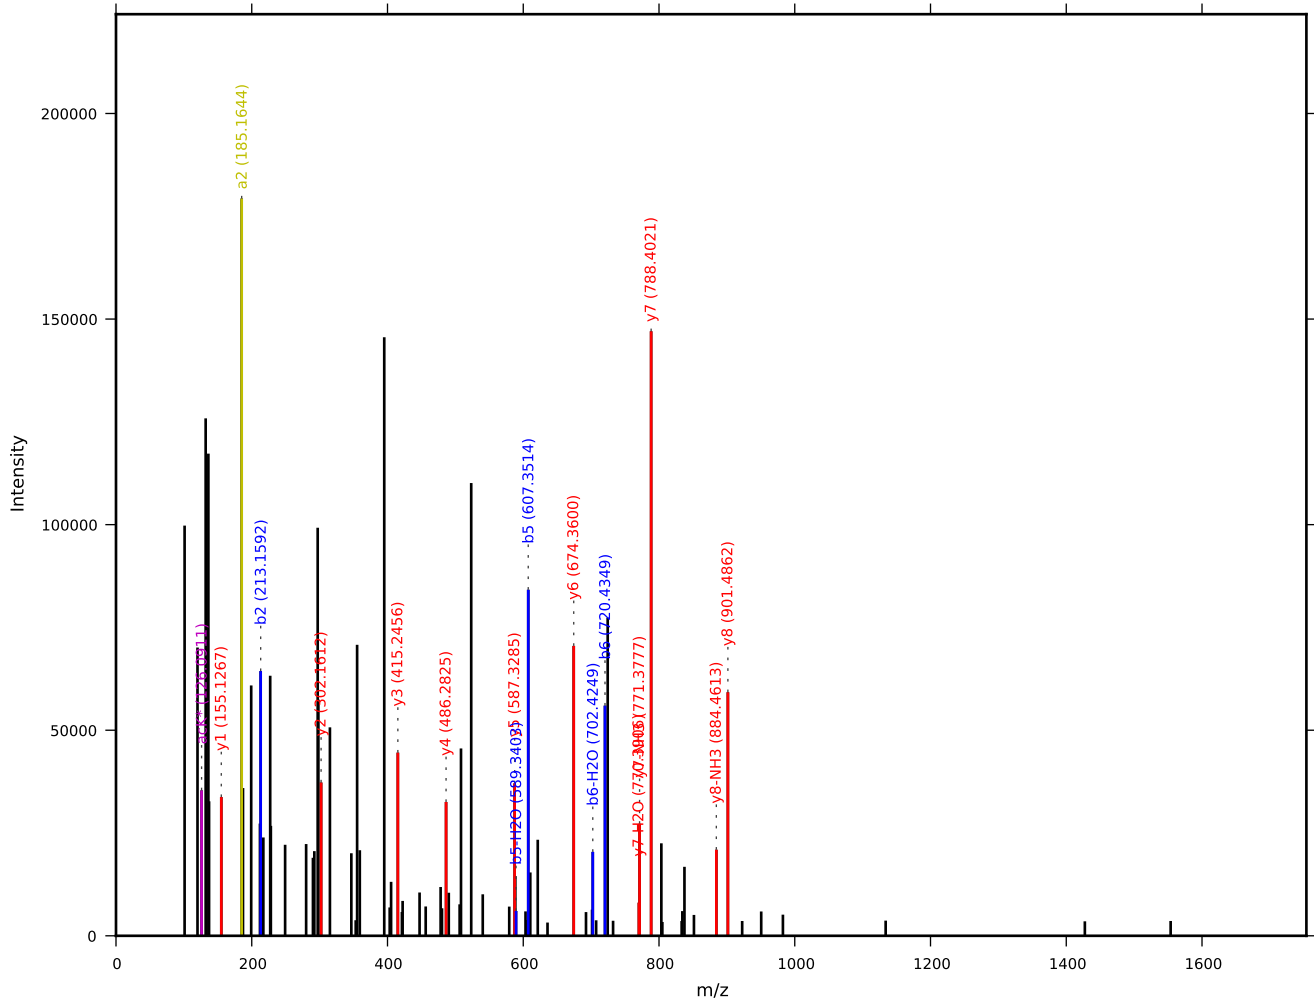

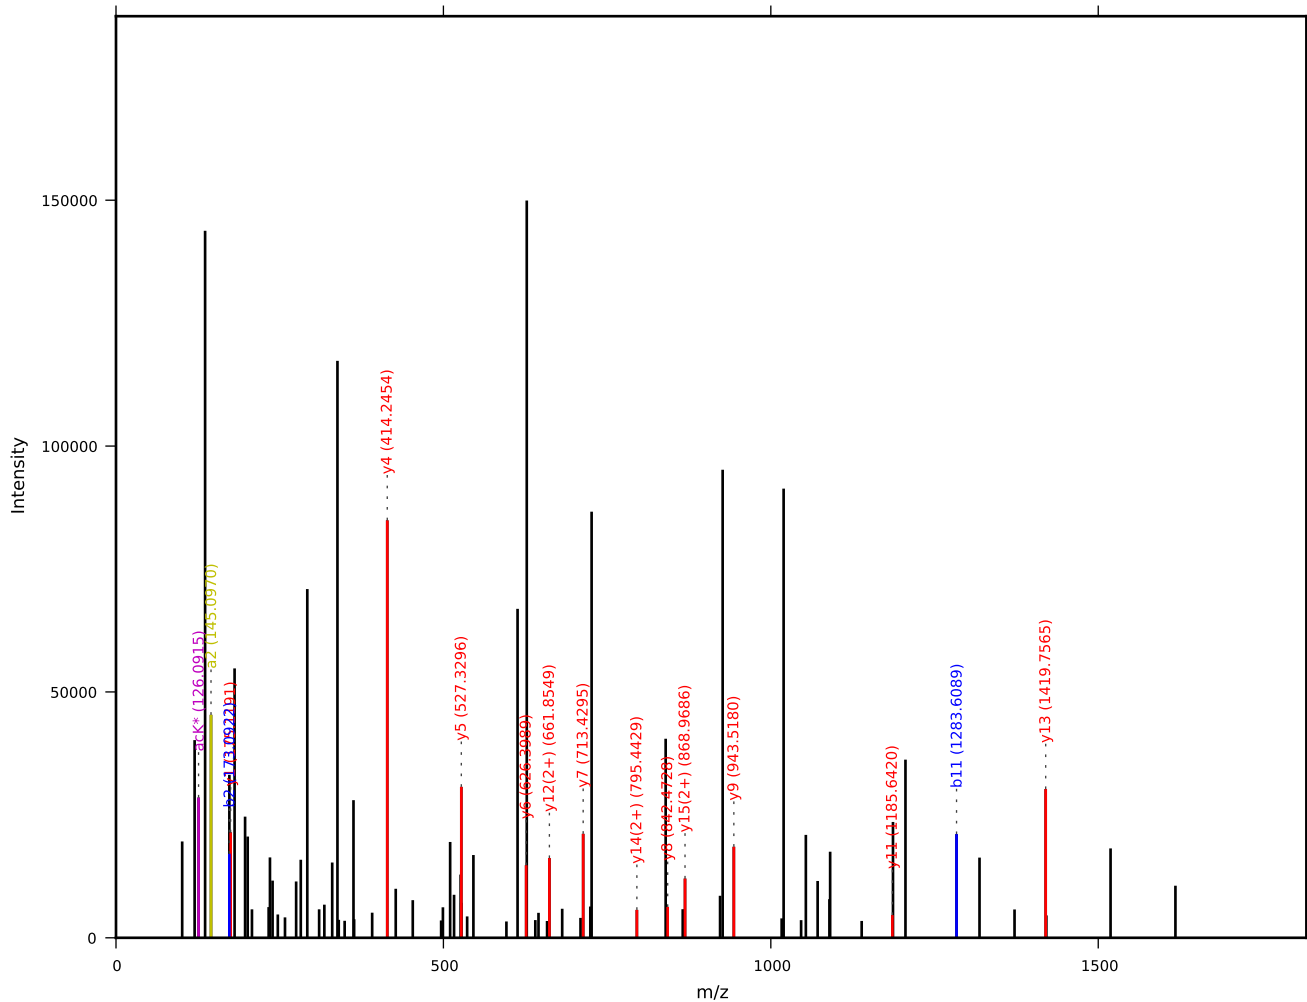



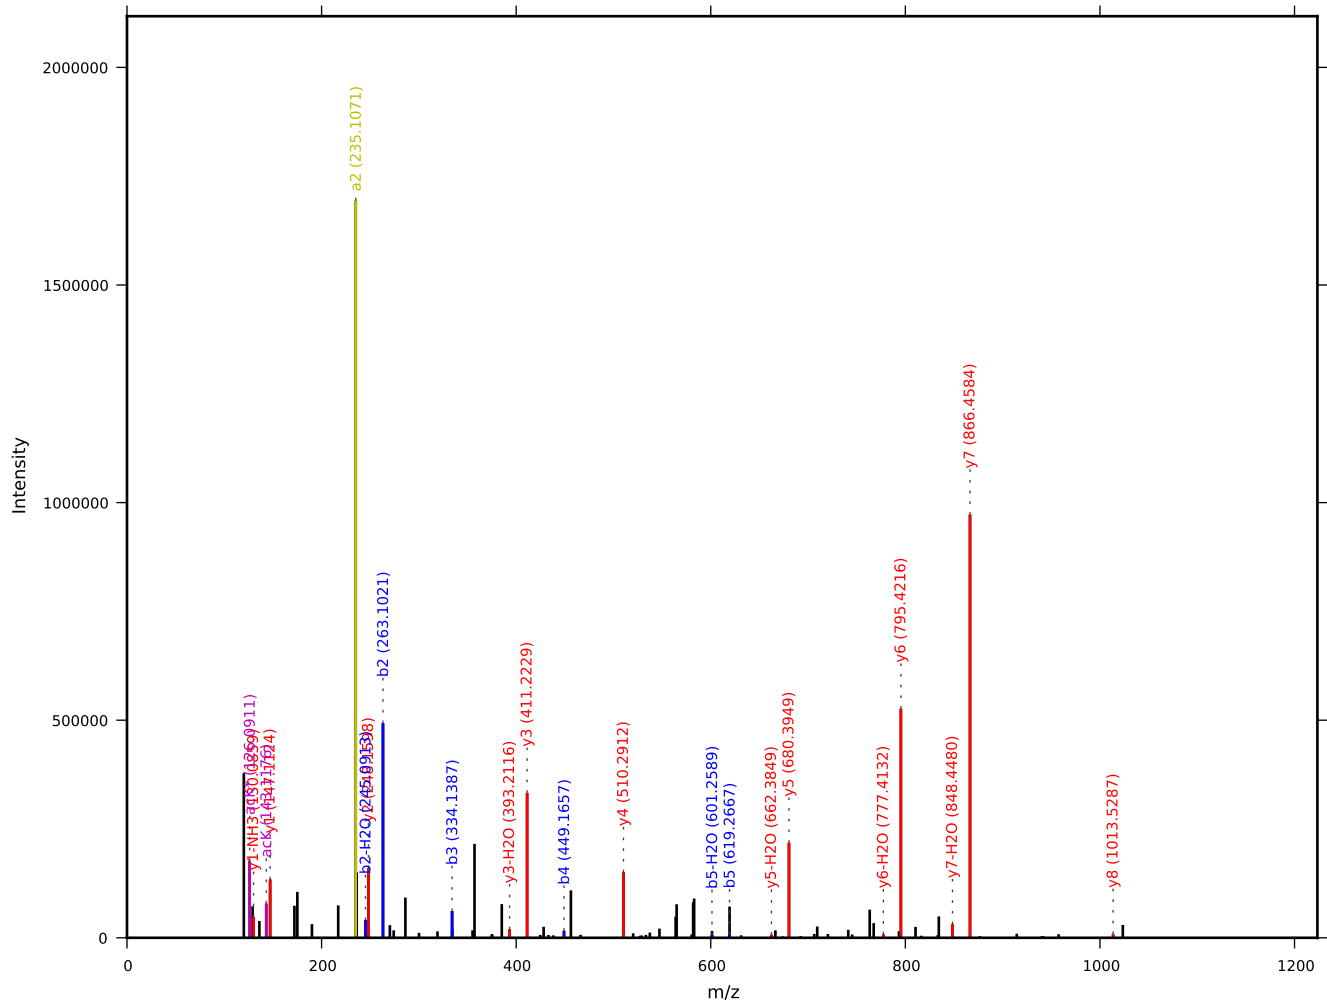

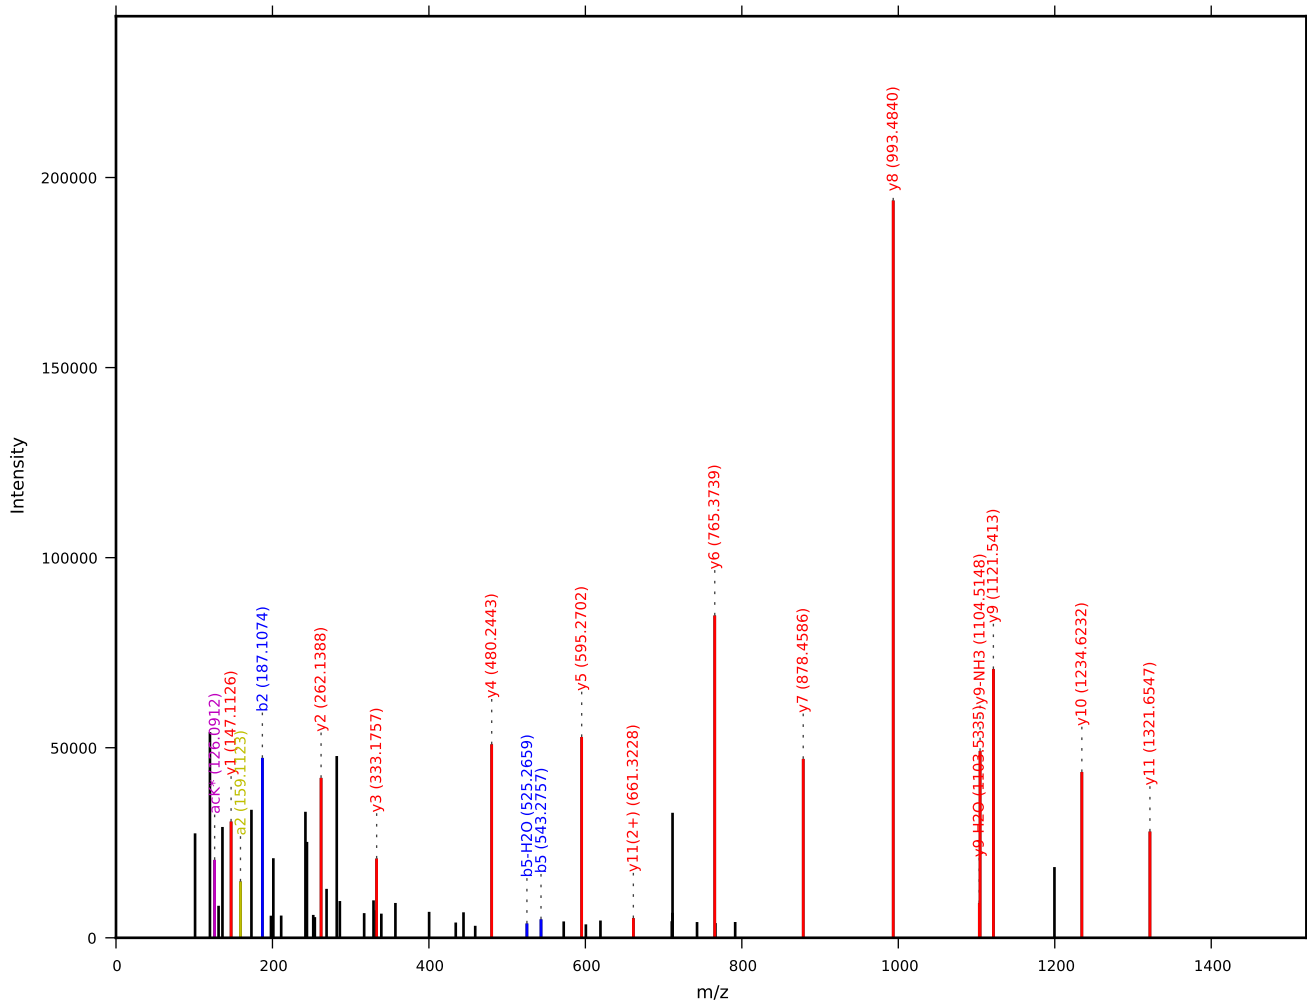

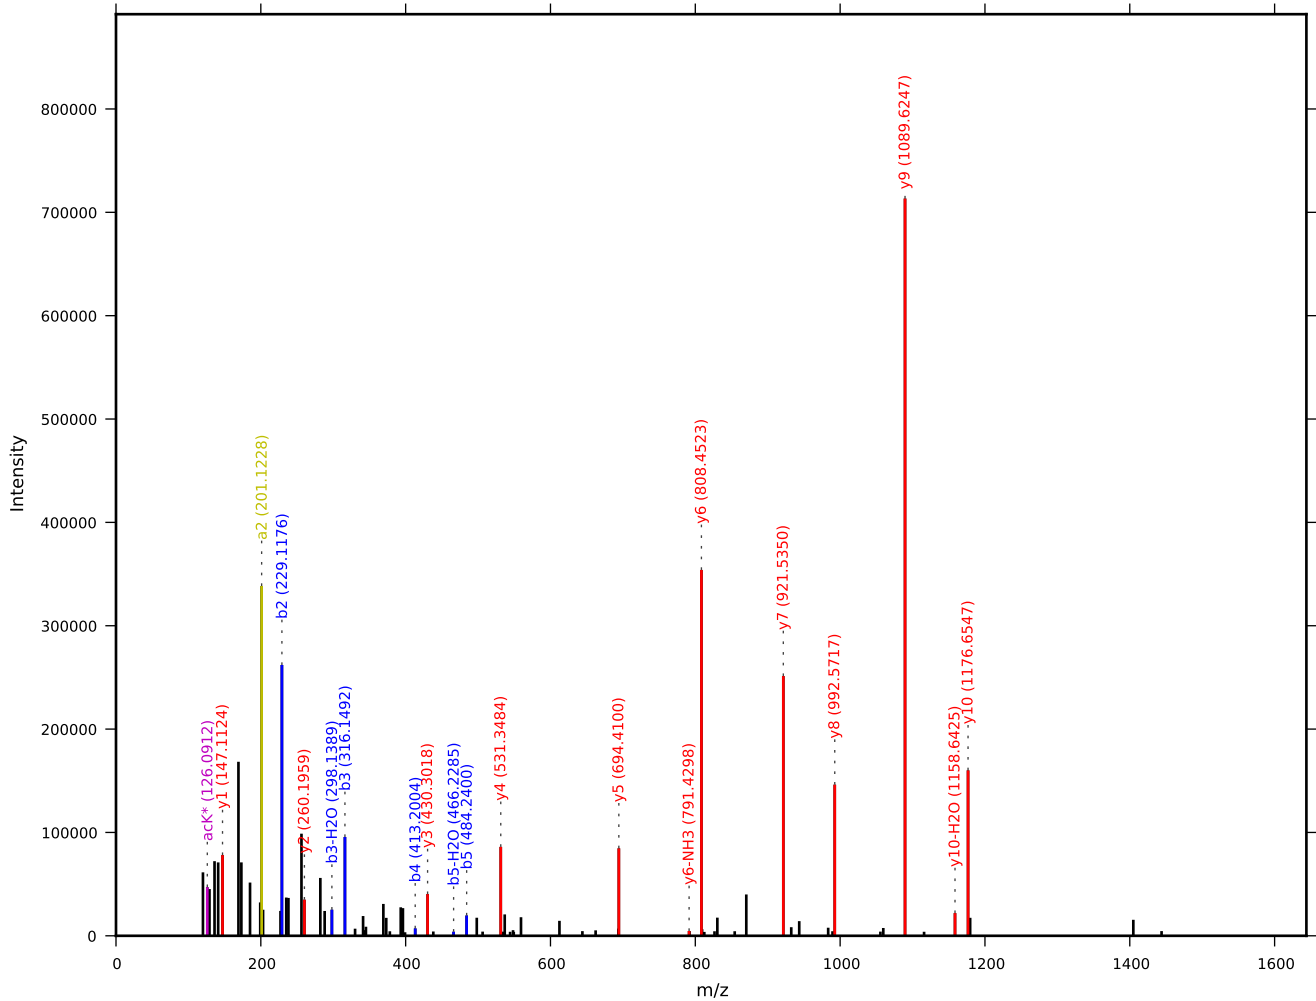

Supplement: supp_M112.017251_mcp.M112.017251-5.pdf [file supp_M112.017251_mcp.M112.017251-5.pdf]
